# Supplementary material for: Shared genetic aetiology of respiratory diseases: a genome-wide multitraits association analysis
Source: PubMed Central journal article supplement — BMJ Open Respir Res. 2024 Jun 4;11(1):e002148. doi: 10.1136/bmjresp-2023-002148 (PMC11163672; doi:10.1136/bmjresp-2023-002148), 2024-06-04
Supplement: bmjresp-2023-002148supp001.pdf [file bmjresp-2023-002148supp001.pdf]

**eTable 1.** Details of GWAS Summary Data Sources

| <b>Diseases</b>                       | <b>Abbreviations</b> | <b>PMID</b> | <b>Year</b> | <b>N_cases</b> | <b>N_total</b> | <b>Ancestry</b> | <b>h<sup>2</sup>(se)<sup>a</sup></b> | <b>Intercept (se)<sup>a</sup></b> |
|---------------------------------------|----------------------|-------------|-------------|----------------|----------------|-----------------|--------------------------------------|-----------------------------------|
| Asthma                                | AST                  | 36777996    | 2022        | 121940         | 1376071        | EUR             | 0.0251 (0.0014)                      | 1.0921 (0.0128)                   |
| Chronic obstructive pulmonary disease | COPD                 | 36777996    | 2022        | 58559          | 995917         | EUR             | 0.0184 (0.0010)                      | 1.0167 (0.0084)                   |
| Idiopathic Pulmonary Fibrosis         | IPF                  | 36777996    | 2022        | 6257           | 953873         | EUR             | 0.0030 (0.0006)                      | 0.9981 (0.0071)                   |
| Lung Cancer                           | LC                   | 28604730    | 2017        | 29266          | 85716          | EUR             | 0.0834 (0.0124)                      | 1.0459 (0.0082)                   |
| Snoring                               | SNO                  | 32060260    | 2020        | 152302         | 408317         | EUR             | 0.0608 (0.0024)                      | 1.0284 (0.0088)                   |

Abbreviations: PMID, PubMed unique identifier; EUR, European; h<sup>2</sup>, heritability; se, standard error.

<sup>a</sup> The heritability and intercept were estimated by univariate LDSC using single-trait GWAS summary statistics.
