# Supplementary material for: Shared genetic aetiology of respiratory diseases: a genome-wide multitraits association analysis
Source: PubMed Central journal article supplement — BMJ Open Respir Res. 2024 Jun 4;11(1):e002148. doi: 10.1136/bmjresp-2023-002148 (PMC11163672; doi:10.1136/bmjresp-2023-002148), 2024-06-04
Supplement: bmjresp-2023-002148supp003.pdf [file bmjresp-2023-002148supp003.pdf]

**eTable 2. GWAS summary data of respiratory diseases at P-value<1.0×10<sup>-8</sup>**

| SNP        | CHR | BP       | A1 | A2 | EAF    | BETA    | SE     | P        | Z       | N       | PHENO  |
|------------|-----|----------|----|----|--------|---------|--------|----------|---------|---------|--------|
| rs78717314 | 1   | 1189594  | T  | C  | 0.0185 | 0.0986  | 0.0181 | 4.74E-08 | 5.4605  | 1290310 | Asthma |
| rs3813201  | 1   | 1215852  | C  | T  | 0.1542 | 0.0386  | 0.0067 | 1.04E-08 | 5.7244  | 1316443 | Asthma |
| rs75972122 | 1   | 1216593  | C  | G  | 0.1540 | 0.0380  | 0.0067 | 1.69E-08 | 5.6416  | 1316443 | Asthma |
| rs11721    | 1   | 1217251  | A  | C  | 0.1046 | 0.0480  | 0.0080 | 1.95E-09 | 6.0022  | 1316443 | Asthma |
| rs12036216 | 1   | 1217733  | A  | G  | 0.1219 | 0.0424  | 0.0074 | 1.23E-08 | 5.6961  | 1316443 | Asthma |
| rs616488   | 1   | 10506158 | G  | A  | 0.3376 | -0.0314 | 0.0050 | 3.41E-10 | -6.2789 | 1376071 | Asthma |
| rs616402   | 1   | 10506215 | T  | C  | 0.3160 | -0.0289 | 0.0051 | 1.38E-08 | -5.6754 | 1376071 | Asthma |
| rs2480785  | 1   | 10509201 | A  | G  | 0.3133 | -0.0296 | 0.0054 | 3.33E-08 | -5.5231 | 1008051 | Asthma |
| rs1411402  | 1   | 10519488 | T  | G  | 0.3156 | -0.0284 | 0.0051 | 2.27E-08 | -5.5900 | 1376071 | Asthma |
| rs2483677  | 1   | 10520834 | T  | C  | 0.3156 | -0.0287 | 0.0051 | 1.58E-08 | -5.6528 | 1376071 | Asthma |
| rs2056417  | 1   | 10521601 | A  | G  | 0.3161 | -0.0285 | 0.0051 | 2.02E-08 | -5.6101 | 1376071 | Asthma |
| rs12741973 | 1   | 10578547 | T  | C  | 0.4381 | -0.0267 | 0.0047 | 1.95E-08 | -5.6161 | 1376071 | Asthma |
| rs3131519  | 1   | 24871194 | C  | G  | 0.1628 | -0.0381 | 0.0065 | 5.30E-09 | -5.8374 | 1316443 | Asthma |
| rs3116869  | 1   | 24871691 | T  | C  | 0.1449 | -0.0412 | 0.0067 | 7.16E-10 | -6.1624 | 1376071 | Asthma |
| rs3131521  | 1   | 24873008 | C  | T  | 0.1618 | -0.0379 | 0.0064 | 3.28E-09 | -5.9168 | 1376071 | Asthma |
| rs3131522  | 1   | 24873231 | G  | T  | 0.1617 | -0.0384 | 0.0064 | 2.03E-09 | -5.9953 | 1376071 | Asthma |
| rs3131523  | 1   | 24874322 | G  | T  | 0.1616 | -0.0379 | 0.0064 | 3.22E-09 | -5.9200 | 1376071 | Asthma |
| rs3116871  | 1   | 24874375 | A  | G  | 0.1616 | -0.0377 | 0.0064 | 4.04E-09 | -5.8825 | 1376071 | Asthma |
| rs3131524  | 1   | 24874523 | C  | G  | 0.1450 | -0.0409 | 0.0067 | 9.19E-10 | -6.1229 | 1376071 | Asthma |
| rs3131525  | 1   | 24874527 | C  | T  | 0.1618 | -0.0376 | 0.0064 | 4.36E-09 | -5.8700 | 1376071 | Asthma |
| rs3131526  | 1   | 24875820 | T  | C  | 0.1565 | -0.0388 | 0.0064 | 1.58E-09 | -6.0362 | 1376071 | Asthma |
| rs3116861  | 1   | 24877668 | G  | A  | 0.1741 | -0.0379 | 0.0063 | 2.10E-09 | -5.9902 | 1316443 | Asthma |
| rs3116863  | 1   | 24878262 | C  | T  | 0.1545 | -0.0408 | 0.0065 | 2.58E-10 | -6.3221 | 1376071 | Asthma |
| rs13340780 | 1   | 24878761 | G  | T  | 0.1545 | -0.0408 | 0.0064 | 2.42E-10 | -6.3320 | 1376071 | Asthma |
| rs2223365  | 1   | 24879913 | C  | T  | 0.1544 | -0.0409 | 0.0065 | 2.32E-10 | -6.3384 | 1376071 | Asthma |
| rs10157238 | 1   | 24881669 | T  | G  | 0.1544 | -0.0409 | 0.0065 | 2.36E-10 | -6.3360 | 1376071 | Asthma |
| rs7542175  | 1   | 24884503 | G  | A  | 0.1545 | -0.0410 | 0.0064 | 1.96E-10 | -6.3641 | 1376071 | Asthma |
| rs11249193 | 1   | 24886555 | C  | T  | 0.1545 | -0.0411 | 0.0064 | 1.92E-10 | -6.3676 | 1376071 | Asthma |
| rs7551358  | 1   | 24887312 | G  | A  | 0.1544 | -0.0412 | 0.0064 | 1.69E-10 | -6.3876 | 1376071 | Asthma |
| rs7551431  | 1   | 24887322 | C  | A  | 0.1543 | -0.0412 | 0.0065 | 1.74E-10 | -6.3824 | 1376071 | Asthma |
| rs10458605 | 1   | 24887793 | G  | A  | 0.1545 | -0.0412 | 0.0065 | 1.72E-10 | -6.3843 | 1376071 | Asthma |
| rs10458606 | 1   | 24887900 | G  | A  | 0.1480 | -0.0434 | 0.0072 | 1.90E-09 | -6.0059 | 1219993 | Asthma |
| rs10903112 | 1   | 24888417 | G  | A  | 0.1545 | -0.0420 | 0.0065 | 7.55E-11 | -6.5092 | 1376071 | Asthma |
| rs7544414  | 1   | 24889141 | A  | G  | 0.1483 | -0.0410 | 0.0066 | 5.18E-10 | -6.2134 | 1376071 | Asthma |
| rs7513064  | 1   | 24889540 | G  | A  | 0.1417 | -0.0416 | 0.0068 | 7.55E-10 | -6.1542 | 1376071 | Asthma |
| rs7513066  | 1   | 24889555 | G  | A  | 0.1418 | -0.0416 | 0.0068 | 7.71E-10 | -6.1508 | 1376071 | Asthma |
| rs10458603 | 1   | 24889674 | A  | T  | 0.1416 | -0.0412 | 0.0068 | 1.07E-09 | -6.0983 | 1376071 | Asthma |
| rs6657823  | 1   | 24890003 | G  | A  | 0.1413 | -0.0418 | 0.0068 | 6.80E-10 | -6.1707 | 1376071 | Asthma |
| rs9438872  | 1   | 24890235 | A  | G  | 0.1412 | -0.0412 | 0.0068 | 1.22E-09 | -6.0771 | 1376071 | Asthma |
| rs7511700  | 1   | 24890513 | T  | C  | 0.1413 | -0.0414 | 0.0068 | 1.01E-09 | -6.1079 | 1376071 | Asthma |
| rs7522223  | 1   | 24891503 | C  | T  | 0.1413 | -0.0415 | 0.0068 | 9.11E-10 | -6.1243 | 1376071 | Asthma |
| rs7519472  | 1   | 24891635 | C  | A  | 0.1413 | -0.0415 | 0.0068 | 8.57E-10 | -6.1341 | 1376071 | Asthma |
| rs9438855  | 1   | 24892639 | G  | A  | 0.1413 | -0.0416 | 0.0068 | 8.30E-10 | -6.1391 | 1376071 | Asthma |
| rs9438856  | 1   | 24894050 | G  | T  | 0.1410 | -0.0415 | 0.0068 | 9.57E-10 | -6.1164 | 1376071 | Asthma |
| rs9438873  | 1   | 24894099 | T  | C  | 0.1418 | -0.0412 | 0.0068 | 1.21E-09 | -6.0788 | 1376071 | Asthma |
| rs13157    | 1   | 24901186 | A  | G  | 0.0490 | -0.0652 | 0.0113 | 7.92E-09 | -5.7702 | 1316443 | Asthma |
| rs7536526  | 1   | 24903640 | T  | C  | 0.0444 | -0.0688 | 0.0119 | 6.89E-09 | -5.7937 | 1316443 | Asthma |
| rs11249200 | 1   | 24904864 | G  | C  | 0.0445 | -0.0696 | 0.0119 | 4.37E-09 | -5.8694 | 1316443 | Asthma |
| rs16830141 | 1   | 24912798 | C  | T  | 0.0446 | -0.0700 | 0.0119 | 3.50E-09 | -5.9064 | 1316443 | Asthma |
| rs1003699  | 1   | 24916085 | T  | C  | 0.0480 | -0.0648 | 0.0113 | 9.04E-09 | -5.7478 | 1376071 | Asthma |
| rs6697340  | 1   | 24918215 | T  | C  | 0.0479 | -0.0666 | 0.0113 | 3.75E-09 | -5.8946 | 1376071 | Asthma |
| rs10794666 | 1   | 24924339 | C  | T  | 0.4536 | -0.0305 | 0.0049 | 4.30E-10 | -6.2428 | 1316443 | Asthma |
| rs1507101  | 1   | 24924835 | G  | A  | 0.4536 | -0.0305 | 0.0049 | 4.45E-10 | -6.2373 | 1316443 | Asthma |
| rs742230   | 1   | 24924933 | G  | A  | 0.4506 | -0.0289 | 0.0048 | 1.47E-09 | -6.0477 | 1376071 | Asthma |
| rs742231   | 1   | 24924965 | G  | A  | 0.4507 | -0.0292 | 0.0048 | 1.05E-09 | -6.1012 | 1376071 | Asthma |
| rs742232   | 1   | 24925215 | T  | C  | 0.4513 | -0.0302 | 0.0049 | 6.77E-10 | -6.1715 | 1316443 | Asthma |
| rs760805   | 1   | 24925432 | A  | T  | 0.4530 | -0.0302 | 0.0049 | 5.96E-10 | -6.1917 | 1316443 | Asthma |
| rs7517302  | 1   | 24927826 | C  | T  | 0.4515 | -0.0300 | 0.0049 | 8.53E-10 | -6.1347 | 1316443 | Asthma |
| rs79784290 | 1   | 24929359 | G  | C  | 0.0517 | -0.0598 | 0.0109 | 4.78E-08 | -5.4593 | 1376071 | Asthma |
| rs71514255 | 1   | 24929953 | G  | A  | 0.4544 | -0.0351 | 0.0059 | 2.10E-09 | -5.9902 | 1068588 | Asthma |
| rs4649037  | 1   | 24931810 | G  | T  | 0.4507 | -0.0308 | 0.0049 | 2.99E-10 | -6.2995 | 1316443 | Asthma |
| rs11249203 | 1   | 24932094 | G  | C  | 0.4501 | -0.0307 | 0.0049 | 3.73E-10 | -6.2651 | 1316443 | Asthma |
| rs61774728 | 1   | 24932376 | G  | C  | 0.4416 | -0.0329 | 0.0057 | 6.13E-09 | -5.8132 | 791420  | Asthma |
| rs3845302  | 1   | 24933393 | C  | G  | 0.4486 | -0.0299 | 0.0049 | 1.08E-09 | -6.0967 | 1316443 | Asthma |
| rs4648883  | 1   | 24934712 | T  | C  | 0.4493 | -0.0306 | 0.0049 | 4.77E-10 | -6.2265 | 1316443 | Asthma |
| rs4648884  | 1   | 24934895 | T  | C  | 0.4495 | -0.0305 | 0.0049 | 5.32E-10 | -6.2094 | 1316443 | Asthma |
| rs10903115 | 1   | 24935205 | A  | G  | 0.4492 | -0.0306 | 0.0049 | 4.86E-10 | -6.2235 | 1316443 | Asthma |
| rs11249204 | 1   | 24935249 | A  | G  | 0.4493 | -0.0305 | 0.0049 | 5.12E-10 | -6.2153 | 1316443 | Asthma |
| rs1005733  | 1   | 24935469 | T  | A  | 0.4515 | -0.0309 | 0.0049 | 3.03E-10 | -6.2974 | 1316443 | Asthma |
| rs1005734  | 1   | 24935531 | C  | A  | 0.4518 | -0.0308 | 0.0049 | 3.82E-10 | -6.2614 | 1316443 | Asthma |
| rs1293202  | 1   | 24937506 | A  | G  | 0.1353 | -0.0460 | 0.0070 | 6.49E-11 | -6.5320 | 1376071 | Asthma |
| rs6681149  | 1   | 31699492 | G  | A  | 0.3374 | -0.0344 | 0.0061 | 1.71E-08 | -5.6392 | 1030443 | Asthma |

|             |   |           |   |   |        |        |        |          |        |         |        |
|-------------|---|-----------|---|---|--------|--------|--------|----------|--------|---------|--------|
| rs114745536 | 1 | 37492738  | C | T | 0.0868 | 0.0483 | 0.0085 | 1.28E-08 | 5.6890 | 1376071 | Asthma |
| rs7534044   | 1 | 37492972  | C | T | 0.0868 | 0.0482 | 0.0085 | 1.35E-08 | 5.6801 | 1376071 | Asthma |
| rs7544462   | 1 | 37497155  | C | A | 0.0868 | 0.0482 | 0.0085 | 1.37E-08 | 5.6776 | 1376071 | Asthma |
| rs11590505  | 1 | 37500173  | A | G | 0.0867 | 0.0477 | 0.0085 | 1.90E-08 | 5.6208 | 1376071 | Asthma |
| rs115947878 | 1 | 37504193  | C | G | 0.0866 | 0.0477 | 0.0085 | 1.99E-08 | 5.6131 | 1376071 | Asthma |
| rs138643189 | 1 | 37504696  | T | C | 0.0869 | 0.0473 | 0.0086 | 3.59E-08 | 5.5101 | 1349938 | Asthma |
| rs114060931 | 1 | 37505832  | A | G | 0.0866 | 0.0477 | 0.0085 | 1.97E-08 | 5.6149 | 1376071 | Asthma |
| rs116446765 | 1 | 37510625  | G | A | 0.0866 | 0.0475 | 0.0085 | 2.35E-08 | 5.5843 | 1376071 | Asthma |
| rs72657774  | 1 | 37511016  | A | G | 0.0866 | 0.0472 | 0.0085 | 2.76E-08 | 5.5563 | 1376071 | Asthma |
| rs72657775  | 1 | 37511177  | A | G | 0.0865 | 0.0474 | 0.0085 | 2.46E-08 | 5.5760 | 1376071 | Asthma |
| rs72657776  | 1 | 37511351  | T | C | 0.0866 | 0.0475 | 0.0085 | 2.29E-08 | 5.5889 | 1376071 | Asthma |
| rs11578962  | 1 | 37512152  | T | G | 0.0866 | 0.0475 | 0.0085 | 2.31E-08 | 5.5874 | 1376071 | Asthma |
| rs72657778  | 1 | 37513398  | C | A | 0.0866 | 0.0478 | 0.0085 | 1.79E-08 | 5.6313 | 1376071 | Asthma |
| rs140274410 | 1 | 37514843  | C | G | 0.0866 | 0.0480 | 0.0085 | 1.64E-08 | 5.6465 | 1376071 | Asthma |
| rs11580453  | 1 | 37520309  | A | G | 0.0865 | 0.0488 | 0.0085 | 9.86E-09 | 5.7330 | 1376071 | Asthma |
| rs72657781  | 1 | 37521050  | C | T | 0.0865 | 0.0488 | 0.0085 | 1.01E-08 | 5.7293 | 1376071 | Asthma |
| rs72657782  | 1 | 37526601  | C | T | 0.0866 | 0.0481 | 0.0085 | 1.54E-08 | 5.6569 | 1376071 | Asthma |
| rs150923562 | 1 | 37526729  | A | T | 0.0866 | 0.0481 | 0.0085 | 1.53E-08 | 5.6578 | 1376071 | Asthma |
| rs11580536  | 1 | 37527859  | C | T | 0.0866 | 0.0481 | 0.0085 | 1.50E-08 | 5.6617 | 1376071 | Asthma |
| rs41267305  | 1 | 37536650  | C | G | 0.0867 | 0.0482 | 0.0085 | 1.38E-08 | 5.6755 | 1376071 | Asthma |
| rs72657787  | 1 | 37544642  | A | G | 0.0865 | 0.0482 | 0.0085 | 1.45E-08 | 5.6680 | 1376071 | Asthma |
| rs72657789  | 1 | 37546185  | C | G | 0.0867 | 0.0486 | 0.0085 | 1.09E-08 | 5.7158 | 1376071 | Asthma |
| rs114584677 | 1 | 37546396  | T | G | 0.0741 | 0.0516 | 0.0091 | 1.42E-08 | 5.6714 | 1376071 | Asthma |
| rs112661831 | 1 | 37546552  | T | C | 0.0867 | 0.0483 | 0.0085 | 1.35E-08 | 5.6801 | 1376071 | Asthma |
| rs114531441 | 1 | 37548222  | A | C | 0.0867 | 0.0480 | 0.0085 | 1.64E-08 | 5.6462 | 1376071 | Asthma |
| rs72657791  | 1 | 37549237  | G | A | 0.0867 | 0.0483 | 0.0085 | 1.33E-08 | 5.6819 | 1376071 | Asthma |
| rs72657792  | 1 | 37550156  | G | A | 0.0867 | 0.0483 | 0.0085 | 1.29E-08 | 5.6877 | 1376071 | Asthma |
| rs149082223 | 1 | 37550988  | G | A | 0.0867 | 0.0482 | 0.0085 | 1.37E-08 | 5.6774 | 1376071 | Asthma |
| rs114294459 | 1 | 37552304  | G | A | 0.0867 | 0.0482 | 0.0085 | 1.40E-08 | 5.6737 | 1376071 | Asthma |
| rs72657795  | 1 | 37557547  | C | T | 0.0868 | 0.0483 | 0.0085 | 1.24E-08 | 5.6937 | 1376071 | Asthma |
| rs11586828  | 1 | 37558221  | A | G | 0.0867 | 0.0485 | 0.0085 | 1.10E-08 | 5.7145 | 1376071 | Asthma |
| rs41267309  | 1 | 37559502  | C | T | 0.0867 | 0.0483 | 0.0085 | 1.24E-08 | 5.6941 | 1376071 | Asthma |
| rs72657799  | 1 | 37560296  | G | A | 0.0867 | 0.0483 | 0.0085 | 1.24E-08 | 5.6946 | 1376071 | Asthma |
| rs11577094  | 1 | 37560999  | T | C | 0.0867 | 0.0484 | 0.0085 | 1.20E-08 | 5.7002 | 1376071 | Asthma |
| rs11585844  | 1 | 37563668  | C | T | 0.0868 | 0.0483 | 0.0085 | 1.28E-08 | 5.6886 | 1376071 | Asthma |
| rs41267315  | 1 | 37565008  | T | C | 0.0867 | 0.0483 | 0.0085 | 1.23E-08 | 5.6954 | 1376071 | Asthma |
| rs11586480  | 1 | 37565504  | A | T | 0.0867 | 0.0484 | 0.0085 | 1.19E-08 | 5.7008 | 1376071 | Asthma |
| rs11586555  | 1 | 37566197  | G | A | 0.0867 | 0.0483 | 0.0085 | 1.24E-08 | 5.6936 | 1376071 | Asthma |
| rs41267319  | 1 | 37566480  | A | C | 0.0867 | 0.0482 | 0.0085 | 1.35E-08 | 5.6800 | 1376071 | Asthma |
| rs41267321  | 1 | 37566563  | A | C | 0.0867 | 0.0482 | 0.0085 | 1.31E-08 | 5.6846 | 1376071 | Asthma |
| rs41307894  | 1 | 37567616  | C | G | 0.0867 | 0.0482 | 0.0085 | 1.33E-08 | 5.6817 | 1376071 | Asthma |
| rs7553487   | 1 | 37570671  | C | A | 0.0867 | 0.0482 | 0.0085 | 1.32E-08 | 5.6839 | 1376071 | Asthma |
| rs72659406  | 1 | 37577247  | G | C | 0.0868 | 0.0486 | 0.0085 | 1.03E-08 | 5.7254 | 1376071 | Asthma |
| rs11590010  | 1 | 37578039  | G | A | 0.0867 | 0.0485 | 0.0085 | 1.13E-08 | 5.7099 | 1376071 | Asthma |
| rs111994840 | 1 | 37579340  | G | A | 0.0867 | 0.0486 | 0.0085 | 1.05E-08 | 5.7223 | 1376071 | Asthma |
| rs11577759  | 1 | 37580426  | A | G | 0.0867 | 0.0485 | 0.0085 | 1.10E-08 | 5.7142 | 1376071 | Asthma |
| rs11591204  | 1 | 37580553  | G | A | 0.0867 | 0.0484 | 0.0085 | 1.14E-08 | 5.7082 | 1376071 | Asthma |
| rs11576892  | 1 | 37580845  | C | T | 0.0868 | 0.0482 | 0.0085 | 1.34E-08 | 5.6816 | 1376071 | Asthma |
| rs112076625 | 1 | 37581461  | G | C | 0.0867 | 0.0484 | 0.0085 | 1.14E-08 | 5.7079 | 1376071 | Asthma |
| rs72659408  | 1 | 37581625  | G | T | 0.0867 | 0.0485 | 0.0085 | 1.09E-08 | 5.7155 | 1376071 | Asthma |
| rs148011938 | 1 | 37581784  | C | T | 0.0867 | 0.0488 | 0.0085 | 9.24E-09 | 5.7441 | 1376071 | Asthma |
| rs141701160 | 1 | 37581790  | A | C | 0.0866 | 0.0486 | 0.0085 | 1.04E-08 | 5.7243 | 1376071 | Asthma |
| rs6671265   | 1 | 37583072  | A | G | 0.0867 | 0.0487 | 0.0085 | 9.41E-09 | 5.7410 | 1376071 | Asthma |
| rs11577559  | 1 | 37585208  | A | G | 0.0867 | 0.0487 | 0.0085 | 9.78E-09 | 5.7345 | 1376071 | Asthma |
| rs11577315  | 1 | 37587109  | G | T | 0.0867 | 0.0487 | 0.0085 | 9.82E-09 | 5.7339 | 1376071 | Asthma |
| rs11582642  | 1 | 37587198  | T | C | 0.0867 | 0.0488 | 0.0085 | 9.14E-09 | 5.7461 | 1376071 | Asthma |
| rs11583122  | 1 | 37587857  | T | C | 0.0867 | 0.0488 | 0.0085 | 9.17E-09 | 5.7454 | 1376071 | Asthma |
| rs36068512  | 1 | 37592996  | C | T | 0.0867 | 0.0488 | 0.0085 | 9.06E-09 | 5.7476 | 1376071 | Asthma |
| rs7514254   | 1 | 37604377  | A | G | 0.0714 | 0.0513 | 0.0093 | 3.11E-08 | 5.5354 | 1376071 | Asthma |
| rs72659417  | 1 | 37609006  | C | T | 0.0714 | 0.0511 | 0.0093 | 3.40E-08 | 5.5194 | 1376071 | Asthma |
| rs72659418  | 1 | 37609038  | G | A | 0.0714 | 0.0512 | 0.0093 | 3.14E-08 | 5.5334 | 1376071 | Asthma |
| rs116834356 | 1 | 37613286  | T | C | 0.0714 | 0.0508 | 0.0093 | 4.30E-08 | 5.4782 | 1376071 | Asthma |
| rs11588571  | 1 | 37614393  | A | C | 0.0714 | 0.0509 | 0.0093 | 4.11E-08 | 5.4859 | 1376071 | Asthma |
| rs45577433  | 1 | 37616709  | C | G | 0.0714 | 0.0511 | 0.0093 | 3.35E-08 | 5.5222 | 1376071 | Asthma |
| rs72659421  | 1 | 37617799  | A | G | 0.0714 | 0.0512 | 0.0093 | 3.21E-08 | 5.5299 | 1376071 | Asthma |
| rs72659424  | 1 | 37618840  | T | A | 0.0715 | 0.0515 | 0.0093 | 2.66E-08 | 5.5625 | 1376071 | Asthma |
| rs146154291 | 1 | 37620546  | G | A | 0.0715 | 0.0514 | 0.0093 | 2.82E-08 | 5.5522 | 1376071 | Asthma |
| rs72659426  | 1 | 37622240  | A | C | 0.0714 | 0.0512 | 0.0093 | 3.23E-08 | 5.5284 | 1376071 | Asthma |
| rs77426698  | 1 | 151935579 | A | G | 0.0386 | 0.0867 | 0.0128 | 1.15E-11 | 6.7862 | 1316443 | Asthma |
| rs61814884  | 1 | 152004360 | G | A | 0.0257 | 0.0899 | 0.0162 | 2.89E-08 | 5.5477 | 1316443 | Asthma |
| rs115288876 | 1 | 152027641 | A | G | 0.0387 | 0.0924 | 0.0121 | 2.86E-14 | 7.6049 | 1376071 | Asthma |
| rs12122629  | 1 | 152101640 | C | A | 0.0395 | 0.0967 | 0.0121 | 1.33E-15 | 7.9913 | 1376071 | Asthma |
| rs151256541 | 1 | 152125297 | A | G | 0.0734 | 0.0504 | 0.0091 | 2.82E-08 | 5.5523 | 1376071 | Asthma |
| rs140371183 | 1 | 152125952 | G | A | 0.0255 | 0.0882 | 0.0161 | 4.51E-08 | 5.4699 | 1316443 | Asthma |

|             |   |           |   |   |        |         |        |          |         |         |        |
|-------------|---|-----------|---|---|--------|---------|--------|----------|---------|---------|--------|
| rs12123821  | 1 | 152206676 | T | C | 0.0412 | 0.0970  | 0.0121 | 8.94E-16 | 8.0409  | 1316443 | Asthma |
| rs12731336  | 1 | 152475622 | A | G | 0.0411 | 0.0913  | 0.0123 | 1.04E-13 | 7.4361  | 1299802 | Asthma |
| rs7529325   | 1 | 152520158 | A | T | 0.0691 | 0.0546  | 0.0095 | 8.24E-09 | 5.7635  | 1359430 | Asthma |
| rs72700982  | 1 | 152568586 | C | T | 0.0492 | 0.0821  | 0.0114 | 7.63E-13 | 7.1678  | 1316443 | Asthma |
| rs72702813  | 1 | 152628378 | T | G | 0.0364 | 0.0944  | 0.0130 | 3.87E-13 | 7.2602  | 1316443 | Asthma |
| rs17667856  | 1 | 152714582 | T | C | 0.0583 | 0.0720  | 0.0107 | 1.63E-11 | 6.7360  | 1316443 | Asthma |
| rs72702900  | 1 | 152799487 | A | T | 0.0361 | 0.0919  | 0.0130 | 1.79E-12 | 7.0501  | 1316443 | Asthma |
| rs17670505  | 1 | 152808046 | C | T | 0.0571 | 0.0681  | 0.0107 | 2.11E-10 | 6.3529  | 1316443 | Asthma |
| rs58548028  | 1 | 154375308 | A | G | 0.1095 | -0.0422 | 0.0076 | 2.49E-08 | -5.5740 | 1376071 | Asthma |
| rs72696301  | 1 | 154383025 | C | G | 0.1091 | -0.0418 | 0.0076 | 3.59E-08 | -5.5099 | 1376071 | Asthma |
| rs72698115  | 1 | 154406893 | C | A | 0.1086 | -0.0420 | 0.0076 | 3.74E-08 | -5.5027 | 1376071 | Asthma |
| rs4845620   | 1 | 154434180 | G | A | 0.3957 | 0.0265  | 0.0049 | 4.92E-08 | 5.4539  | 1376071 | Asthma |
| rs7518199   | 1 | 154434943 | C | A | 0.3957 | 0.0267  | 0.0049 | 4.20E-08 | 5.4823  | 1376071 | Asthma |
| rs7521458   | 1 | 154435237 | C | T | 0.3961 | 0.0268  | 0.0049 | 3.79E-08 | 5.5005  | 1376071 | Asthma |
| rs4233366   | 1 | 161189357 | T | C | 0.2537 | 0.0382  | 0.0054 | 1.27E-12 | 7.0979  | 1376071 | Asthma |
| rs33941127  | 1 | 161198214 | T | C | 0.2001 | 0.0357  | 0.0060 | 2.16E-09 | 5.9853  | 1316443 | Asthma |
| rs57213460  | 1 | 161207847 | G | C | 0.3704 | 0.0281  | 0.0050 | 2.11E-08 | 5.6031  | 1316443 | Asthma |
| rs3924264   | 1 | 161208894 | C | T | 0.3702 | 0.0284  | 0.0050 | 1.54E-08 | 5.6573  | 1316443 | Asthma |
| rs2070901   | 1 | 161215268 | T | G | 0.2560 | 0.0407  | 0.0055 | 1.38E-13 | 7.3981  | 1316443 | Asthma |
| rs2070902   | 1 | 161217875 | T | C | 0.2468 | 0.0406  | 0.0056 | 3.50E-13 | 7.2735  | 1316443 | Asthma |
| rs67857806  | 1 | 161221438 | A | G | 0.2158 | -0.0336 | 0.0058 | 7.19E-09 | -5.7864 | 1376071 | Asthma |
| rs1723023   | 1 | 167435895 | A | G | 0.3898 | -0.0329 | 0.0049 | 2.31E-11 | -6.6849 | 1376071 | Asthma |
| rs1723022   | 1 | 167436181 | T | G | 0.3482 | -0.0354 | 0.0052 | 9.51E-12 | -6.8138 | 1316443 | Asthma |
| rs2462552   | 1 | 167439069 | C | T | 0.4177 | -0.0280 | 0.0050 | 1.86E-08 | -5.6247 | 1316443 | Asthma |
| rs840016    | 1 | 167439433 | T | C | 0.3852 | -0.0330 | 0.0049 | 1.92E-11 | -6.7116 | 1376071 | Asthma |
| rs840015    | 1 | 167439877 | A | G | 0.3766 | -0.0352 | 0.0052 | 1.39E-11 | -6.7594 | 1008051 | Asthma |
| rs864537    | 1 | 167442147 | G | A | 0.3933 | -0.0316 | 0.0049 | 7.63E-11 | -6.5077 | 1376071 | Asthma |
| rs840012    | 1 | 167445635 | T | C | 0.3878 | -0.0373 | 0.0051 | 1.54E-13 | -7.3833 | 1316443 | Asthma |
| rs2949669   | 1 | 167448647 | T | C | 0.3872 | -0.0363 | 0.0049 | 1.87E-13 | -7.3575 | 1376071 | Asthma |
| rs35014055  | 1 | 167449212 | A | G | 0.3874 | -0.0365 | 0.0050 | 3.14E-13 | -7.2886 | 1349938 | Asthma |
| rs34276574  | 1 | 167449231 | T | C | 0.4038 | -0.0367 | 0.0054 | 1.07E-11 | -6.7962 | 1193860 | Asthma |
| rs2988279   | 1 | 167450602 | A | G | 0.4042 | -0.0368 | 0.0049 | 4.19E-14 | -7.5549 | 1376071 | Asthma |
| rs2056625   | 1 | 167451062 | A | G | 0.3871 | -0.0365 | 0.0049 | 1.19E-13 | -7.4184 | 1376071 | Asthma |
| rs2056626   | 1 | 167451188 | G | T | 0.4051 | -0.0364 | 0.0048 | 5.41E-14 | -7.5214 | 1376071 | Asthma |
| rs1773560   | 1 | 167452526 | G | A | 0.4040 | -0.0369 | 0.0049 | 3.56E-14 | -7.5762 | 1376071 | Asthma |
| rs1773561   | 1 | 167452714 | T | C | 0.3871 | -0.0365 | 0.0049 | 1.29E-13 | -7.4077 | 1376071 | Asthma |
| rs3108155   | 1 | 167452820 | G | C | 0.4016 | -0.0341 | 0.0053 | 1.87E-10 | -6.3719 | 1224666 | Asthma |
| rs2949661   | 1 | 167455687 | T | C | 0.3830 | -0.0380 | 0.0049 | 1.38E-14 | -7.6984 | 1376071 | Asthma |
| rs1214598   | 1 | 167457187 | A | G | 0.3702 | -0.0393 | 0.0051 | 1.38E-14 | -7.6986 | 1316443 | Asthma |
| rs1214596   | 1 | 167457933 | A | T | 0.3808 | -0.0379 | 0.0049 | 1.76E-14 | -7.6673 | 1376071 | Asthma |
| rs7523907   | 1 | 167458010 | C | T | 0.4305 | -0.0348 | 0.0050 | 2.28E-12 | -7.0164 | 1316443 | Asthma |
| rs1214595   | 1 | 167458320 | A | G | 0.3807 | -0.0378 | 0.0049 | 2.28E-14 | -7.6335 | 1376071 | Asthma |
| rs10800313  | 1 | 167460748 | T | C | 0.4874 | 0.0311  | 0.0049 | 1.65E-10 | 6.3907  | 1316443 | Asthma |
| rs10918692  | 1 | 167461588 | A | G | 0.4157 | 0.0289  | 0.0049 | 3.88E-09 | 5.8892  | 1316443 | Asthma |
| rs2995089   | 1 | 167461956 | A | G | 0.3810 | -0.0386 | 0.0049 | 6.45E-15 | -7.7949 | 1376071 | Asthma |
| rs2988277   | 1 | 167462115 | T | C | 0.3811 | -0.0386 | 0.0049 | 5.77E-15 | -7.8088 | 1376071 | Asthma |
| rs1723015   | 1 | 167463657 | C | T | 0.4995 | -0.0305 | 0.0049 | 3.87E-10 | -6.2593 | 1316443 | Asthma |
| rs1773542   | 1 | 167463712 | C | T | 0.3903 | -0.0389 | 0.0049 | 2.28E-15 | -7.9249 | 1376071 | Asthma |
| rs1723016   | 1 | 167463819 | C | T | 0.3903 | -0.0391 | 0.0049 | 1.66E-15 | -7.9642 | 1376071 | Asthma |
| rs1723018   | 1 | 167464183 | G | A | 0.3900 | -0.0389 | 0.0049 | 2.40E-15 | -7.9186 | 1376071 | Asthma |
| rs2995091   | 1 | 167465040 | C | T | 0.3802 | -0.0396 | 0.0051 | 5.44E-15 | -7.8163 | 1316443 | Asthma |
| rs2949668   | 1 | 167465484 | C | T | 0.4767 | -0.0337 | 0.0049 | 5.32E-12 | -6.8967 | 1316443 | Asthma |
| rs1617333   | 1 | 167467033 | G | A | 0.3785 | -0.0360 | 0.0054 | 3.53E-11 | -6.6225 | 1224666 | Asthma |
| rs1617988   | 1 | 167467063 | C | T | 0.3784 | -0.0361 | 0.0054 | 3.46E-11 | -6.6255 | 1224666 | Asthma |
| rs4657661   | 1 | 167467083 | C | T | 0.4420 | -0.0310 | 0.0053 | 4.63E-09 | -5.8601 | 1224666 | Asthma |
| rs12036775  | 1 | 167467810 | T | C | 0.4232 | 0.0282  | 0.0049 | 8.84E-09 | 5.7517  | 1316443 | Asthma |
| rs10918695  | 1 | 167468716 | T | C | 0.4238 | 0.0271  | 0.0048 | 1.40E-08 | 5.6735  | 1376071 | Asthma |
| rs10912564  | 1 | 173201479 | T | C | 0.3134 | 0.0293  | 0.0052 | 1.76E-08 | 5.6342  | 1316443 | Asthma |
| rs7555082   | 1 | 198629533 | A | G | 0.1100 | -0.0627 | 0.0079 | 1.34E-15 | -7.9905 | 1316443 | Asthma |
| rs76181804  | 1 | 198632575 | G | A | 0.1100 | -0.0626 | 0.0078 | 1.60E-15 | -7.9693 | 1316443 | Asthma |
| rs75567729  | 1 | 198641406 | G | A | 0.1101 | -0.0586 | 0.0077 | 2.05E-14 | -7.6478 | 1376071 | Asthma |
| rs140015735 | 1 | 198651395 | C | G | 0.0268 | -0.0961 | 0.0149 | 1.29E-10 | -6.4283 | 1376071 | Asthma |
| rs80099993  | 1 | 198653318 | A | G | 0.1100 | -0.0590 | 0.0077 | 1.36E-14 | -7.7003 | 1376071 | Asthma |
| rs17668272  | 1 | 198654713 | T | G | 0.1101 | -0.0588 | 0.0077 | 1.59E-14 | -7.6800 | 1376071 | Asthma |
| rs17668708  | 1 | 198671359 | T | C | 0.1005 | -0.0563 | 0.0080 | 1.42E-12 | -7.0816 | 1376071 | Asthma |
| rs17669032  | 1 | 198684045 | G | A | 0.1005 | -0.0568 | 0.0079 | 8.22E-13 | -7.1575 | 1376071 | Asthma |
| rs4915314   | 1 | 198687113 | T | C | 0.1097 | -0.0540 | 0.0077 | 1.74E-12 | -7.0537 | 1376071 | Asthma |
| rs7410883   | 1 | 198687217 | C | T | 0.1097 | -0.0538 | 0.0077 | 2.15E-12 | -7.0242 | 1376071 | Asthma |
| rs3767745   | 1 | 198688721 | C | T | 0.1097 | -0.0536 | 0.0077 | 2.60E-12 | -6.9979 | 1376071 | Asthma |
| rs2182419   | 1 | 198691014 | A | G | 0.1096 | -0.0538 | 0.0077 | 2.20E-12 | -7.0215 | 1376071 | Asthma |
| rs2296618   | 1 | 198697103 | G | A | 0.1328 | -0.0481 | 0.0071 | 9.34E-12 | -6.8164 | 1376071 | Asthma |
| rs17623914  | 1 | 198701426 | C | T | 0.1029 | -0.0552 | 0.0078 | 1.97E-12 | -7.0365 | 1376071 | Asthma |
| rs76273496  | 1 | 198705436 | C | T | 0.0874 | -0.0668 | 0.0100 | 2.80E-11 | -6.6570 | 1090071 | Asthma |
| rs113752715 | 1 | 198738388 | G | T | 0.0727 | -0.0614 | 0.0091 | 1.86E-11 | -6.7166 | 1376071 | Asthma |

|             |   |           |   |   |        |         |        |          |         |         |        |
|-------------|---|-----------|---|---|--------|---------|--------|----------|---------|---------|--------|
| rs149409109 | 1 | 198752522 | T | A | 0.0231 | -0.0917 | 0.0156 | 3.85E-09 | -5.8906 | 1376071 | Asthma |
| rs17670451  | 1 | 198754608 | A | G | 0.0727 | -0.0616 | 0.0091 | 1.64E-11 | -6.7350 | 1376071 | Asthma |
| rs74137208  | 1 | 198764483 | A | C | 0.0882 | -0.0518 | 0.0083 | 4.29E-10 | -6.2429 | 1376071 | Asthma |
| rs58784699  | 1 | 198765646 | C | T | 0.0882 | -0.0517 | 0.0083 | 4.57E-10 | -6.2331 | 1376071 | Asthma |
| rs12563029  | 1 | 198766278 | T | G | 0.0882 | -0.0520 | 0.0083 | 3.67E-10 | -6.2674 | 1376071 | Asthma |
| rs7418490   | 1 | 198767737 | C | A | 0.0941 | -0.0519 | 0.0094 | 3.27E-08 | -5.5262 | 1090071 | Asthma |
| rs10919572  | 1 | 198769669 | T | G | 0.0891 | -0.0497 | 0.0082 | 1.56E-09 | -6.0383 | 1376071 | Asthma |
| rs16843807  | 1 | 198776593 | C | A | 0.1059 | -0.0465 | 0.0075 | 6.96E-10 | -6.1670 | 1376071 | Asthma |
| rs7538393   | 1 | 198776737 | C | T | 0.1059 | -0.0465 | 0.0075 | 6.96E-10 | -6.1670 | 1376071 | Asthma |
| rs7529585   | 1 | 198777575 | A | G | 0.0878 | -0.0517 | 0.0083 | 5.11E-10 | -6.2158 | 1376071 | Asthma |
| rs58592594  | 1 | 203089348 | T | C | 0.3184 | -0.0352 | 0.0052 | 1.72E-11 | -6.7277 | 1316443 | Asthma |
| rs1038984   | 1 | 203089714 | A | G | 0.3131 | -0.0348 | 0.0053 | 3.64E-11 | -6.6184 | 1316443 | Asthma |
| rs6664108   | 1 | 203090600 | T | C | 0.3181 | -0.0356 | 0.0052 | 1.07E-11 | -6.7971 | 1316443 | Asthma |
| rs2364571   | 1 | 203091416 | G | C | 0.3129 | -0.0379 | 0.0052 | 4.77E-13 | -7.2318 | 1316443 | Asthma |
| rs2886116   | 1 | 203091480 | G | T | 0.3112 | -0.0371 | 0.0053 | 1.57E-12 | -7.0677 | 1316443 | Asthma |
| rs10920563  | 1 | 203093838 | A | G | 0.3178 | -0.0388 | 0.0052 | 1.01E-13 | -7.4399 | 1316443 | Asthma |
| rs34713977  | 1 | 203094028 | A | C | 0.3178 | -0.0388 | 0.0052 | 1.07E-13 | -7.4316 | 1316443 | Asthma |
| rs10920564  | 1 | 203094958 | C | T | 0.3178 | -0.0387 | 0.0052 | 1.14E-13 | -7.4234 | 1316443 | Asthma |
| rs6677740   | 1 | 203096428 | C | A | 0.3176 | -0.0388 | 0.0052 | 9.87E-14 | -7.4426 | 1316443 | Asthma |
| rs6702345   | 1 | 203096601 | A | G | 0.3118 | -0.0385 | 0.0052 | 1.96E-13 | -7.3518 | 1316443 | Asthma |
| rs9660662   | 1 | 203099592 | C | T | 0.3175 | -0.0390 | 0.0052 | 6.06E-14 | -7.5067 | 1316443 | Asthma |
| rs1494490   | 1 | 203105502 | C | G | 0.3173 | -0.0389 | 0.0052 | 6.75E-14 | -7.4927 | 1316443 | Asthma |
| rs2131946   | 1 | 203106289 | C | T | 0.3245 | -0.0372 | 0.0052 | 6.44E-13 | -7.1908 | 1316443 | Asthma |
| rs10920565  | 1 | 203108671 | A | G | 0.3189 | -0.0370 | 0.0052 | 1.15E-12 | -7.1110 | 1316443 | Asthma |
| rs12411260  | 1 | 203109665 | T | A | 0.3158 | -0.0381 | 0.0051 | 6.75E-14 | -7.4926 | 1376071 | Asthma |
| rs1494488   | 1 | 203110447 | G | A | 0.3177 | -0.0383 | 0.0051 | 4.14E-14 | -7.5566 | 1376071 | Asthma |
| rs1494487   | 1 | 203110587 | A | G | 0.3177 | -0.0384 | 0.0051 | 3.72E-14 | -7.5703 | 1376071 | Asthma |
| rs11590405  | 1 | 203111136 | C | T | 0.3182 | -0.0384 | 0.0051 | 3.36E-14 | -7.5837 | 1376071 | Asthma |
| rs10800899  | 1 | 203111997 | A | G | 0.3157 | -0.0380 | 0.0051 | 7.84E-14 | -7.4730 | 1376071 | Asthma |
| rs11582098  | 1 | 203113683 | T | C | 0.3177 | -0.0384 | 0.0051 | 3.41E-14 | -7.5817 | 1376071 | Asthma |
| rs17510253  | 1 | 203114023 | A | G | 0.3157 | -0.0382 | 0.0051 | 6.17E-14 | -7.5046 | 1376071 | Asthma |
| rs12047618  | 1 | 203114880 | T | G | 0.3156 | -0.0383 | 0.0051 | 4.87E-14 | -7.5353 | 1376071 | Asthma |
| rs10920567  | 1 | 203116087 | C | G | 0.3156 | -0.0382 | 0.0051 | 6.16E-14 | -7.5047 | 1376071 | Asthma |
| rs2014975   | 1 | 203117411 | C | T | 0.3180 | -0.0383 | 0.0051 | 4.07E-14 | -7.5589 | 1376071 | Asthma |
| rs722915    | 1 | 203118529 | T | C | 0.3293 | -0.0378 | 0.0050 | 5.20E-14 | -7.5269 | 1376071 | Asthma |
| rs6427990   | 1 | 203119254 | T | G | 0.3293 | -0.0380 | 0.0050 | 4.02E-14 | -7.5603 | 1376071 | Asthma |
| rs6696205   | 1 | 203119486 | A | G | 0.3291 | -0.0381 | 0.0050 | 3.31E-14 | -7.5855 | 1376071 | Asthma |
| rs2201395   | 1 | 203119647 | T | C | 0.3388 | -0.0369 | 0.0050 | 1.43E-13 | -7.3939 | 1376071 | Asthma |
| rs7555556   | 1 | 203121848 | T | C | 0.3287 | -0.0381 | 0.0050 | 3.37E-14 | -7.5832 | 1376071 | Asthma |
| rs903361    | 1 | 203122146 | G | A | 0.3364 | -0.0364 | 0.0050 | 3.11E-13 | -7.2894 | 1376071 | Asthma |
| rs7538512   | 1 | 203122931 | G | A | 0.3293 | -0.0380 | 0.0050 | 3.49E-14 | -7.5788 | 1376071 | Asthma |
| rs12023876  | 1 | 203124073 | T | G | 0.3290 | -0.0382 | 0.0050 | 2.78E-14 | -7.6081 | 1376071 | Asthma |
| rs1494486   | 1 | 203125076 | T | C | 0.3287 | -0.0381 | 0.0050 | 3.30E-14 | -7.5860 | 1376071 | Asthma |
| rs2228079   | 1 | 203129147 | G | T | 0.3288 | -0.0383 | 0.0050 | 2.44E-14 | -7.6250 | 1376071 | Asthma |
| rs10920569  | 1 | 203129327 | C | T | 0.3288 | -0.0385 | 0.0050 | 1.90E-14 | -7.6574 | 1376071 | Asthma |
| rs10920570  | 1 | 203129690 | G | A | 0.3288 | -0.0384 | 0.0050 | 2.21E-14 | -7.6378 | 1376071 | Asthma |
| rs6683383   | 1 | 203131376 | A | T | 0.3288 | -0.0384 | 0.0050 | 2.21E-14 | -7.6377 | 1376071 | Asthma |
| rs3766568   | 1 | 203131901 | A | G | 0.3288 | -0.0383 | 0.0050 | 2.60E-14 | -7.6171 | 1376071 | Asthma |
| rs17464408  | 1 | 203131945 | A | T | 0.3288 | -0.0383 | 0.0050 | 2.63E-14 | -7.6153 | 1376071 | Asthma |
| rs12757387  | 1 | 203133861 | G | T | 0.3385 | -0.0369 | 0.0051 | 5.25E-13 | -7.2186 | 1316443 | Asthma |
| rs4950920   | 1 | 203134258 | G | A | 0.3367 | -0.0368 | 0.0051 | 6.46E-13 | -7.1905 | 1316443 | Asthma |
| rs4950922   | 1 | 203137165 | T | C | 0.3600 | -0.0336 | 0.0049 | 9.30E-12 | -6.8170 | 1376071 | Asthma |
| rs7549561   | 1 | 203137262 | G | A | 0.3532 | -0.0342 | 0.0049 | 4.77E-12 | -6.9121 | 1376071 | Asthma |
| rs10920573  | 1 | 203139380 | T | C | 0.3559 | -0.0333 | 0.0051 | 5.10E-11 | -6.5680 | 1316443 | Asthma |
| rs346835    | 2 | 8298563   | T | C | 0.3420 | -0.0378 | 0.0052 | 2.54E-13 | -7.3170 | 1316443 | Asthma |
| rs10165200  | 2 | 8299499   | A | G | 0.3856 | -0.0277 | 0.0049 | 1.26E-08 | -5.6915 | 1376071 | Asthma |
| rs10204352  | 2 | 8299556   | A | T | 0.3747 | -0.0270 | 0.0049 | 3.72E-08 | -5.5036 | 1376071 | Asthma |
| rs10206877  | 2 | 8299775   | C | T | 0.3758 | -0.0270 | 0.0049 | 3.51E-08 | -5.5138 | 1376071 | Asthma |
| rs10204769  | 2 | 8300184   | G | A | 0.3755 | -0.0269 | 0.0049 | 3.68E-08 | -5.5056 | 1376071 | Asthma |
| rs10207297  | 2 | 8300216   | C | T | 0.3757 | -0.0269 | 0.0049 | 3.54E-08 | -5.5123 | 1376071 | Asthma |
| rs10192685  | 2 | 8300228   | A | C | 0.3754 | -0.0268 | 0.0049 | 3.99E-08 | -5.4913 | 1376071 | Asthma |
| rs10168400  | 2 | 8300257   | A | G | 0.3755 | -0.0269 | 0.0049 | 3.77E-08 | -5.5012 | 1376071 | Asthma |
| rs13386606  | 2 | 8300442   | A | G | 0.3758 | -0.0271 | 0.0049 | 2.88E-08 | -5.5486 | 1376071 | Asthma |
| rs6734135   | 2 | 8300902   | A | T | 0.3758 | -0.0270 | 0.0049 | 3.33E-08 | -5.5234 | 1376071 | Asthma |
| rs6737412   | 2 | 8301354   | C | T | 0.3758 | -0.0270 | 0.0049 | 3.39E-08 | -5.5199 | 1376071 | Asthma |
| rs13416555  | 2 | 8301605   | G | C | 0.3045 | -0.0395 | 0.0052 | 1.90E-14 | -7.6573 | 1376071 | Asthma |
| rs13390333  | 2 | 8301617   | C | G | 0.3757 | -0.0269 | 0.0049 | 3.80E-08 | -5.4997 | 1376071 | Asthma |
| rs10174728  | 2 | 8301922   | A | G | 0.3757 | -0.0271 | 0.0049 | 3.09E-08 | -5.5363 | 1376071 | Asthma |
| rs10174949  | 2 | 8302118   | A | G | 0.3047 | -0.0394 | 0.0052 | 2.13E-14 | -7.6427 | 1376071 | Asthma |
| rs891058    | 2 | 8302417   | A | G | 0.3050 | -0.0392 | 0.0052 | 3.06E-14 | -7.5959 | 1376071 | Asthma |
| rs10178845  | 2 | 8303673   | A | G | 0.3044 | -0.0395 | 0.0052 | 2.13E-14 | -7.6429 | 1376071 | Asthma |
| rs3111414   | 2 | 8303729   | C | G | 0.1993 | 0.0372  | 0.0059 | 3.09E-10 | 6.2940  | 1376071 | Asthma |
| rs367023    | 2 | 8309993   | G | A | 0.3083 | -0.0365 | 0.0052 | 1.59E-12 | -7.0668 | 1376071 | Asthma |
| rs439614    | 2 | 8311349   | T | C | 0.4894 | -0.0262 | 0.0048 | 3.42E-08 | -5.5187 | 1376071 | Asthma |

|            |   |          |   |   |        |         |        |          |         |         |        |
|------------|---|----------|---|---|--------|---------|--------|----------|---------|---------|--------|
| rs13395467 | 2 | 8311368  | G | A | 0.3071 | -0.0378 | 0.0052 | 2.86E-13 | -7.3007 | 1376071 | Asthma |
| rs13398375 | 2 | 8311571  | C | T | 0.2998 | -0.0368 | 0.0053 | 5.62E-12 | -6.8891 | 1316443 | Asthma |
| rs13412757 | 2 | 8317950  | A | G | 0.3686 | -0.0395 | 0.0049 | 1.23E-15 | -8.0014 | 1376071 | Asthma |
| rs3856439  | 2 | 8319274  | T | C | 0.3701 | -0.0419 | 0.0052 | 8.45E-16 | -8.0476 | 1008051 | Asthma |
| rs71387227 | 2 | 8321247  | T | C | 0.3572 | -0.0475 | 0.0077 | 6.92E-10 | -6.1679 | 544513  | Asthma |
| rs10210006 | 2 | 8326356  | G | C | 0.3807 | -0.0379 | 0.0049 | 1.26E-14 | -7.7105 | 1376071 | Asthma |
| rs13412022 | 2 | 8328080  | T | G | 0.3595 | -0.0382 | 0.0050 | 1.60E-14 | -7.6792 | 1376071 | Asthma |
| rs13419662 | 2 | 8330530  | A | G | 0.3149 | -0.0370 | 0.0051 | 4.84E-13 | -7.2296 | 1376071 | Asthma |
| rs7567352  | 2 | 8331106  | T | C | 0.3179 | -0.0372 | 0.0052 | 1.06E-12 | -7.1227 | 1316443 | Asthma |
| rs7595769  | 2 | 8331189  | A | G | 0.3088 | -0.0370 | 0.0051 | 6.53E-13 | -7.1890 | 1376071 | Asthma |
| rs28376924 | 2 | 8332634  | A | C | 0.3095 | -0.0372 | 0.0051 | 4.51E-13 | -7.2393 | 1376071 | Asthma |
| rs28646278 | 2 | 8332712  | A | G | 0.3095 | -0.0372 | 0.0051 | 4.81E-13 | -7.2305 | 1376071 | Asthma |
| rs59808848 | 2 | 8333908  | A | G | 0.3019 | -0.0382 | 0.0052 | 1.66E-13 | -7.3741 | 1376071 | Asthma |
| rs2561999  | 2 | 8333945  | G | A | 0.3357 | -0.0385 | 0.0050 | 2.08E-14 | -7.6458 | 1376071 | Asthma |
| rs7569637  | 2 | 8335055  | T | G | 0.3022 | -0.0378 | 0.0052 | 2.70E-13 | -7.3084 | 1376071 | Asthma |
| rs7572436  | 2 | 8335209  | A | G | 0.3022 | -0.0378 | 0.0052 | 2.91E-13 | -7.2988 | 1376071 | Asthma |
| rs10201122 | 2 | 8336048  | A | G | 0.3099 | -0.0376 | 0.0051 | 2.44E-13 | -7.3221 | 1376071 | Asthma |
| rs2630738  | 2 | 8336917  | C | A | 0.3142 | -0.0368 | 0.0051 | 7.39E-13 | -7.1722 | 1376071 | Asthma |
| rs3102952  | 2 | 8337154  | C | T | 0.3271 | -0.0361 | 0.0051 | 1.39E-12 | -7.0851 | 1376071 | Asthma |
| rs2562003  | 2 | 8337365  | C | T | 0.3270 | -0.0361 | 0.0051 | 1.33E-12 | -7.0911 | 1376071 | Asthma |
| rs13404344 | 2 | 8338203  | T | C | 0.3021 | -0.0377 | 0.0052 | 3.21E-13 | -7.2855 | 1376071 | Asthma |
| rs2562005  | 2 | 8338590  | A | G | 0.3022 | -0.0375 | 0.0052 | 4.28E-13 | -7.2466 | 1376071 | Asthma |
| rs424620   | 2 | 8340604  | T | C | 0.3017 | -0.0377 | 0.0052 | 2.98E-13 | -7.2953 | 1376071 | Asthma |
| rs2931136  | 2 | 8341169  | T | A | 0.3067 | -0.0380 | 0.0052 | 1.86E-13 | -7.3588 | 1376071 | Asthma |
| rs1000309  | 2 | 8346500  | A | G | 0.3119 | -0.0373 | 0.0053 | 1.43E-12 | -7.0808 | 1316443 | Asthma |
| rs9287698  | 2 | 8347166  | T | C | 0.3196 | -0.0374 | 0.0052 | 7.88E-13 | -7.1633 | 1316443 | Asthma |
| rs1807241  | 2 | 8348013  | C | G | 0.3243 | -0.0365 | 0.0052 | 2.38E-12 | -7.0106 | 1316443 | Asthma |
| rs7601045  | 2 | 8351756  | T | A | 0.3531 | -0.0345 | 0.0052 | 2.89E-11 | -6.6521 | 1299802 | Asthma |
| rs13404744 | 2 | 8353870  | C | A | 0.3660 | -0.0340 | 0.0052 | 4.45E-11 | -6.5882 | 1299802 | Asthma |
| rs10199605 | 2 | 8354967  | A | G | 0.3377 | -0.0354 | 0.0052 | 1.55E-11 | -6.7434 | 1299802 | Asthma |
| rs750111   | 2 | 8355932  | A | G | 0.3369 | -0.0350 | 0.0052 | 1.52E-11 | -6.7458 | 1316443 | Asthma |
| rs55894350 | 2 | 8389265  | T | G | 0.2799 | 0.0284  | 0.0052 | 4.66E-08 | 5.4638  | 1376071 | Asthma |
| rs55667335 | 2 | 8389266  | T | G | 0.2798 | 0.0284  | 0.0052 | 4.74E-08 | 5.4610  | 1376071 | Asthma |
| rs751310   | 2 | 15749295 | G | T | 0.4507 | 0.0265  | 0.0048 | 2.98E-08 | 5.5427  | 1376071 | Asthma |
| rs62177761 | 2 | 63199088 | C | T | 0.3004 | 0.0285  | 0.0052 | 3.62E-08 | 5.5085  | 1376071 | Asthma |
| rs62177762 | 2 | 63199618 | C | A | 0.3001 | 0.0283  | 0.0052 | 4.83E-08 | 5.4573  | 1376071 | Asthma |
| rs62177774 | 2 | 63208982 | C | T | 0.3000 | 0.0286  | 0.0052 | 3.39E-08 | 5.5203  | 1376071 | Asthma |
| rs62177783 | 2 | 63223794 | G | T | 0.2968 | 0.0292  | 0.0052 | 1.94E-08 | 5.6170  | 1376071 | Asthma |
| rs62177793 | 2 | 63244257 | C | T | 0.3006 | 0.0292  | 0.0052 | 1.75E-08 | 5.6348  | 1376071 | Asthma |
| rs62177797 | 2 | 63250358 | C | T | 0.3004 | 0.0286  | 0.0052 | 3.39E-08 | 5.5202  | 1376071 | Asthma |
| rs62177820 | 2 | 63253577 | C | A | 0.3003 | 0.0286  | 0.0052 | 3.37E-08 | 5.5212  | 1376071 | Asthma |
| rs62177821 | 2 | 63255011 | G | A | 0.3007 | 0.0294  | 0.0052 | 1.44E-08 | 5.6688  | 1376071 | Asthma |
| rs2951185  | 2 | 63270914 | T | C | 0.2896 | 0.0293  | 0.0053 | 2.48E-08 | 5.5744  | 1376071 | Asthma |
| rs2030188  | 2 | 63282178 | G | C | 0.3001 | 0.0285  | 0.0052 | 3.60E-08 | 5.5092  | 1376071 | Asthma |
| rs2030189  | 2 | 63282222 | T | C | 0.3001 | 0.0285  | 0.0052 | 3.66E-08 | 5.5063  | 1376071 | Asthma |
| rs2030190  | 2 | 63282483 | C | T | 0.3001 | 0.0285  | 0.0052 | 3.99E-08 | 5.4910  | 1376071 | Asthma |
| rs6725694  | 2 | 63283767 | G | C | 0.3000 | 0.0285  | 0.0052 | 3.82E-08 | 5.4992  | 1376071 | Asthma |
| rs10207356 | 2 | 63284880 | T | C | 0.2965 | 0.0290  | 0.0052 | 2.68E-08 | 5.5613  | 1376071 | Asthma |
| rs4671470  | 2 | 63286778 | G | A | 0.3000 | 0.0285  | 0.0052 | 3.99E-08 | 5.4915  | 1376071 | Asthma |
| rs4671471  | 2 | 63286789 | C | T | 0.3001 | 0.0285  | 0.0052 | 3.99E-08 | 5.4911  | 1376071 | Asthma |
| rs11684108 | 2 | 63287152 | G | C | 0.3000 | 0.0284  | 0.0052 | 4.26E-08 | 5.4797  | 1376071 | Asthma |
| rs12713477 | 2 | 63287487 | T | C | 0.3000 | 0.0284  | 0.0052 | 4.37E-08 | 5.4752  | 1376071 | Asthma |
| rs12713478 | 2 | 63299201 | C | T | 0.3000 | 0.0283  | 0.0052 | 4.88E-08 | 5.4558  | 1376071 | Asthma |
| rs6709115  | 2 | 63300724 | T | C | 0.3000 | 0.0283  | 0.0052 | 4.75E-08 | 5.4603  | 1376071 | Asthma |
| rs6714298  | 2 | 63305634 | C | A | 0.3001 | 0.0284  | 0.0052 | 4.42E-08 | 5.4731  | 1376071 | Asthma |
| rs4602212  | 2 | 63306116 | C | A | 0.3002 | 0.0284  | 0.0052 | 4.43E-08 | 5.4726  | 1376071 | Asthma |
| rs4632325  | 2 | 63306203 | A | C | 0.3001 | 0.0283  | 0.0052 | 4.81E-08 | 5.4582  | 1376071 | Asthma |
| rs1517404  | 2 | 63310422 | T | A | 0.3001 | 0.0283  | 0.0052 | 4.74E-08 | 5.4607  | 1376071 | Asthma |
| rs1400688  | 2 | 63311401 | C | T | 0.3001 | 0.0283  | 0.0052 | 4.66E-08 | 5.4639  | 1376071 | Asthma |
| rs1400687  | 2 | 63311631 | A | C | 0.3001 | 0.0284  | 0.0052 | 4.35E-08 | 5.4762  | 1376071 | Asthma |
| rs1517401  | 2 | 63313572 | A | G | 0.3001 | 0.0283  | 0.0052 | 4.75E-08 | 5.4604  | 1376071 | Asthma |
| rs6545988  | 2 | 63315597 | A | C | 0.3001 | 0.0283  | 0.0052 | 4.48E-08 | 5.4709  | 1376071 | Asthma |
| rs6704562  | 2 | 63315816 | A | G | 0.3000 | 0.0282  | 0.0052 | 4.97E-08 | 5.4524  | 1376071 | Asthma |
| rs10201254 | 2 | 63316583 | G | A | 0.3000 | 0.0283  | 0.0052 | 4.64E-08 | 5.4646  | 1376071 | Asthma |
| rs6708627  | 2 | 63316791 | A | G | 0.3000 | 0.0283  | 0.0052 | 4.75E-08 | 5.4605  | 1376071 | Asthma |
| rs6737820  | 2 | 63316909 | G | A | 0.3001 | 0.0283  | 0.0052 | 4.57E-08 | 5.4671  | 1376071 | Asthma |
| rs6545989  | 2 | 63318132 | G | A | 0.3000 | 0.0283  | 0.0052 | 4.83E-08 | 5.4575  | 1376071 | Asthma |
| rs12612773 | 2 | 63319306 | A | G | 0.3000 | 0.0283  | 0.0052 | 4.97E-08 | 5.4524  | 1376071 | Asthma |
| rs4671480  | 2 | 63320353 | T | G | 0.3000 | 0.0283  | 0.0052 | 4.88E-08 | 5.4558  | 1376071 | Asthma |
| rs4671481  | 2 | 63320392 | A | G | 0.3000 | 0.0283  | 0.0052 | 4.67E-08 | 5.4635  | 1376071 | Asthma |
| rs7558922  | 2 | 63321557 | A | G | 0.3000 | 0.0284  | 0.0052 | 4.38E-08 | 5.4747  | 1376071 | Asthma |
| rs7599736  | 2 | 63321721 | T | C | 0.3000 | 0.0284  | 0.0052 | 4.44E-08 | 5.4727  | 1376071 | Asthma |
| rs7559137  | 2 | 63321733 | A | C | 0.3000 | 0.0284  | 0.0052 | 4.32E-08 | 5.4775  | 1376071 | Asthma |
| rs6545991  | 2 | 63321928 | A | G | 0.3000 | 0.0284  | 0.0052 | 4.38E-08 | 5.4750  | 1376071 | Asthma |



|             |   |          |   |   |        |        |        |          |        |         |        |
|-------------|---|----------|---|---|--------|--------|--------|----------|--------|---------|--------|
| rs6755412   | 2 | 63322663 | T | C | 0.3000 | 0.0283 | 0.0052 | 4.50E-08 | 5.4699 | 1376071 | Asthma |
| rs4671482   | 2 | 63323593 | C | A | 0.3001 | 0.0284 | 0.0052 | 4.16E-08 | 5.4838 | 1376071 | Asthma |
| rs6545992   | 2 | 63323948 | C | T | 0.3000 | 0.0284 | 0.0052 | 4.26E-08 | 5.4798 | 1376071 | Asthma |
| rs6705322   | 2 | 63324054 | T | C | 0.3020 | 0.0284 | 0.0052 | 3.84E-08 | 5.4982 | 1376071 | Asthma |
| rs4671483   | 2 | 63325097 | G | T | 0.3000 | 0.0284 | 0.0052 | 4.36E-08 | 5.4757 | 1376071 | Asthma |
| rs10169292  | 2 | 63326100 | G | T | 0.3001 | 0.0285 | 0.0052 | 3.72E-08 | 5.5036 | 1376071 | Asthma |
| rs12992737  | 2 | 63327325 | T | C | 0.3000 | 0.0284 | 0.0052 | 4.29E-08 | 5.4787 | 1376071 | Asthma |
| rs4671484   | 2 | 63327605 | T | C | 0.3000 | 0.0284 | 0.0052 | 4.21E-08 | 5.4818 | 1376071 | Asthma |
| rs4578846   | 2 | 63327724 | T | C | 0.3000 | 0.0283 | 0.0052 | 4.52E-08 | 5.4693 | 1376071 | Asthma |
| rs4671485   | 2 | 63330462 | T | C | 0.3001 | 0.0284 | 0.0052 | 4.19E-08 | 5.4825 | 1376071 | Asthma |
| rs11125965  | 2 | 63333778 | T | C | 0.3000 | 0.0284 | 0.0052 | 4.28E-08 | 5.4788 | 1376071 | Asthma |
| rs11686044  | 2 | 63334197 | T | G | 0.3000 | 0.0283 | 0.0052 | 4.53E-08 | 5.4688 | 1376071 | Asthma |
| rs11691357  | 2 | 63334314 | A | G | 0.3000 | 0.0283 | 0.0052 | 4.59E-08 | 5.4665 | 1376071 | Asthma |
| rs7561802   | 2 | 63334931 | C | T | 0.3001 | 0.0285 | 0.0052 | 3.77E-08 | 5.5013 | 1376071 | Asthma |
| rs6714139   | 2 | 63335460 | G | T | 0.3001 | 0.0285 | 0.0052 | 3.89E-08 | 5.4956 | 1376071 | Asthma |
| rs4353635   | 2 | 63336238 | G | C | 0.3000 | 0.0283 | 0.0052 | 4.72E-08 | 5.4614 | 1376071 | Asthma |
| rs6728844   | 2 | 63337179 | A | G | 0.3001 | 0.0284 | 0.0052 | 4.30E-08 | 5.4783 | 1376071 | Asthma |
| rs7567088   | 2 | 63337766 | T | C | 0.3000 | 0.0284 | 0.0052 | 4.16E-08 | 5.4841 | 1376071 | Asthma |
| rs7582434   | 2 | 63338080 | A | G | 0.3000 | 0.0284 | 0.0052 | 4.13E-08 | 5.4853 | 1376071 | Asthma |
| rs4671487   | 2 | 63339959 | T | G | 0.2999 | 0.0284 | 0.0052 | 4.31E-08 | 5.4776 | 1376071 | Asthma |
| rs4671488   | 2 | 63340379 | C | T | 0.3028 | 0.0286 | 0.0052 | 3.25E-08 | 5.5275 | 1376071 | Asthma |
| rs6744815   | 2 | 63341201 | A | G | 0.3001 | 0.0284 | 0.0052 | 4.42E-08 | 5.4733 | 1376071 | Asthma |
| rs6717060   | 2 | 63341473 | G | A | 0.3025 | 0.0284 | 0.0052 | 4.12E-08 | 5.4856 | 1376071 | Asthma |
| rs10209822  | 2 | 63345312 | T | G | 0.2999 | 0.0286 | 0.0052 | 3.64E-08 | 5.5077 | 1376071 | Asthma |
| rs1517409   | 2 | 63347947 | A | G | 0.3000 | 0.0283 | 0.0052 | 4.95E-08 | 5.4531 | 1376071 | Asthma |
| rs2176418   | 2 | 63348657 | T | C | 0.3001 | 0.0283 | 0.0052 | 4.98E-08 | 5.4522 | 1376071 | Asthma |
| rs1607206   | 2 | 63351641 | G | T | 0.3001 | 0.0283 | 0.0052 | 4.62E-08 | 5.4652 | 1376071 | Asthma |
| rs2421886   | 2 | 63352177 | T | C | 0.3001 | 0.0283 | 0.0052 | 4.71E-08 | 5.4619 | 1376071 | Asthma |
| rs1607207   | 2 | 63353570 | G | A | 0.3002 | 0.0283 | 0.0052 | 4.73E-08 | 5.4613 | 1376071 | Asthma |
| rs11125967  | 2 | 63357657 | A | G | 0.3000 | 0.0285 | 0.0052 | 4.14E-08 | 5.4850 | 1376071 | Asthma |
| rs1829261   | 2 | 63360022 | A | G | 0.3001 | 0.0285 | 0.0052 | 4.04E-08 | 5.4893 | 1376071 | Asthma |
| rs1568175   | 2 | 63362808 | T | C | 0.3000 | 0.0287 | 0.0052 | 3.24E-08 | 5.5281 | 1376071 | Asthma |
| rs2176416   | 2 | 63363120 | A | G | 0.3000 | 0.0287 | 0.0052 | 3.14E-08 | 5.5334 | 1376071 | Asthma |
| rs11883730  | 2 | 63365095 | G | T | 0.3023 | 0.0286 | 0.0052 | 3.30E-08 | 5.5249 | 1376071 | Asthma |
| rs11894445  | 2 | 63365213 | A | G | 0.2999 | 0.0286 | 0.0052 | 3.40E-08 | 5.5194 | 1376071 | Asthma |
| rs1922421   | 2 | 63365657 | G | A | 0.3037 | 0.0287 | 0.0052 | 2.96E-08 | 5.5438 | 1376071 | Asthma |
| rs6546001   | 2 | 63366684 | A | G | 0.3005 | 0.0286 | 0.0052 | 3.55E-08 | 5.5120 | 1376071 | Asthma |
| rs758796    | 2 | 63369973 | T | A | 0.3000 | 0.0287 | 0.0052 | 3.37E-08 | 5.5214 | 1376071 | Asthma |
| rs13011799  | 2 | 63370115 | T | C | 0.3000 | 0.0286 | 0.0052 | 3.41E-08 | 5.5189 | 1376071 | Asthma |
| rs7571697   | 2 | 63370470 | A | G | 0.3000 | 0.0287 | 0.0052 | 3.36E-08 | 5.5216 | 1376071 | Asthma |
| rs10197437  | 2 | 63372953 | A | G | 0.3010 | 0.0314 | 0.0057 | 3.10E-08 | 5.5354 | 1224666 | Asthma |
| rs932172    | 2 | 63375762 | T | C | 0.3001 | 0.0286 | 0.0052 | 3.79E-08 | 5.5004 | 1376071 | Asthma |
| rs932171    | 2 | 63375807 | A | G | 0.3010 | 0.0309 | 0.0053 | 5.74E-09 | 5.8244 | 1316443 | Asthma |
| rs6741817   | 2 | 63375840 | A | G | 0.3008 | 0.0288 | 0.0052 | 2.94E-08 | 5.5451 | 1376071 | Asthma |
| rs4671494   | 2 | 63377863 | C | T | 0.3033 | 0.0302 | 0.0053 | 1.19E-08 | 5.7017 | 1316443 | Asthma |
| rs2292795   | 2 | 63378295 | A | G | 0.3007 | 0.0287 | 0.0052 | 3.32E-08 | 5.5236 | 1376071 | Asthma |
| rs2292794   | 2 | 63378637 | A | G | 0.3001 | 0.0287 | 0.0052 | 3.42E-08 | 5.5186 | 1376071 | Asthma |
| rs908621    | 2 | 63378907 | C | T | 0.3002 | 0.0287 | 0.0052 | 3.20E-08 | 5.5303 | 1376071 | Asthma |
| rs2421887   | 2 | 63379084 | T | C | 0.3003 | 0.0306 | 0.0053 | 8.11E-09 | 5.7661 | 1316443 | Asthma |
| rs2901580   | 2 | 63379139 | C | T | 0.3002 | 0.0287 | 0.0052 | 3.25E-08 | 5.5275 | 1376071 | Asthma |
| rs12618974  | 2 | 63380308 | T | C | 0.3003 | 0.0307 | 0.0053 | 7.58E-09 | 5.7777 | 1316443 | Asthma |
| rs112675040 | 2 | 63388588 | G | T | 0.3029 | 0.0303 | 0.0053 | 1.18E-08 | 5.7028 | 1316443 | Asthma |
| rs9749862   | 2 | 63401409 | C | T | 0.2875 | 0.0332 | 0.0054 | 8.09E-10 | 6.1433 | 1316443 | Asthma |
| rs4671503   | 2 | 63409956 | A | T | 0.2864 | 0.0315 | 0.0053 | 2.62E-09 | 5.9541 | 1376071 | Asthma |
| rs6546004   | 2 | 63412394 | T | C | 0.2865 | 0.0316 | 0.0053 | 2.55E-09 | 5.9584 | 1376071 | Asthma |
| rs4671505   | 2 | 63417168 | G | T | 0.2873 | 0.0320 | 0.0053 | 1.49E-09 | 6.0455 | 1376071 | Asthma |
| rs10170988  | 2 | 63423447 | T | C | 0.2868 | 0.0317 | 0.0053 | 2.04E-09 | 5.9943 | 1376071 | Asthma |
| rs4671508   | 2 | 63427006 | C | T | 0.2862 | 0.0320 | 0.0057 | 1.91E-08 | 5.6204 | 1246149 | Asthma |
| rs2292793   | 2 | 63434146 | A | G | 0.2857 | 0.0319 | 0.0053 | 1.78E-09 | 6.0169 | 1376071 | Asthma |
| rs1356390   | 2 | 63442491 | T | C | 0.2864 | 0.0319 | 0.0053 | 1.60E-09 | 6.0335 | 1376071 | Asthma |
| rs6546005   | 2 | 63444937 | G | A | 0.2863 | 0.0318 | 0.0053 | 1.74E-09 | 6.0203 | 1376071 | Asthma |
| rs6736411   | 2 | 63446926 | G | A | 0.2869 | 0.0321 | 0.0053 | 1.28E-09 | 6.0701 | 1376071 | Asthma |
| rs4255949   | 2 | 63451455 | A | G | 0.2867 | 0.0321 | 0.0058 | 2.40E-08 | 5.5802 | 1224666 | Asthma |
| rs11693047  | 2 | 63453223 | G | C | 0.2868 | 0.0321 | 0.0058 | 2.39E-08 | 5.5812 | 1224666 | Asthma |
| rs4671509   | 2 | 63458870 | G | A | 0.2861 | 0.0322 | 0.0053 | 1.18E-09 | 6.0826 | 1376071 | Asthma |
| rs10171223  | 2 | 63460566 | A | G | 0.2864 | 0.0321 | 0.0053 | 1.24E-09 | 6.0748 | 1376071 | Asthma |
| rs3980466   | 2 | 63462051 | A | G | 0.2862 | 0.0319 | 0.0058 | 2.95E-08 | 5.5443 | 1224666 | Asthma |
| rs7608470   | 2 | 63464344 | T | C | 0.2860 | 0.0322 | 0.0053 | 1.12E-09 | 6.0920 | 1376071 | Asthma |
| rs2084200   | 2 | 63467671 | T | G | 0.2878 | 0.0317 | 0.0053 | 1.96E-09 | 6.0013 | 1376071 | Asthma |
| rs12713494  | 2 | 63471028 | G | T | 0.2900 | 0.0320 | 0.0053 | 1.23E-09 | 6.0766 | 1376071 | Asthma |
| rs2028887   | 2 | 63489089 | A | G | 0.2892 | 0.0297 | 0.0052 | 1.41E-08 | 5.6726 | 1376071 | Asthma |
| rs7563623   | 2 | 63493076 | A | G | 0.2882 | 0.0296 | 0.0052 | 1.62E-08 | 5.6482 | 1376071 | Asthma |
| rs10865337  | 2 | 63493772 | C | T | 0.2877 | 0.0296 | 0.0052 | 1.67E-08 | 5.6430 | 1376071 | Asthma |
| rs10176522  | 2 | 63495299 | T | C | 0.2876 | 0.0296 | 0.0053 | 1.69E-08 | 5.6409 | 1376071 | Asthma |

|            |   |          |   |   |        |        |        |          |        |         |        |
|------------|---|----------|---|---|--------|--------|--------|----------|--------|---------|--------|
| rs6546007  | 2 | 63497661 | C | T | 0.2887 | 0.0299 | 0.0052 | 1.25E-08 | 5.6927 | 1376071 | Asthma |
| rs989527   | 2 | 63499657 | G | T | 0.2889 | 0.0295 | 0.0052 | 1.86E-08 | 5.6243 | 1376071 | Asthma |
| rs1867849  | 2 | 63499798 | C | T | 0.2897 | 0.0296 | 0.0052 | 1.61E-08 | 5.6498 | 1376071 | Asthma |
| rs1446565  | 2 | 63504441 | T | C | 0.2888 | 0.0296 | 0.0052 | 1.62E-08 | 5.6487 | 1376071 | Asthma |
| rs1446564  | 2 | 63504548 | A | G | 0.2889 | 0.0298 | 0.0052 | 1.40E-08 | 5.6731 | 1376071 | Asthma |
| rs10865338 | 2 | 63505375 | A | G | 0.2888 | 0.0296 | 0.0052 | 1.66E-08 | 5.6443 | 1376071 | Asthma |
| rs10168545 | 2 | 63507150 | C | A | 0.2890 | 0.0297 | 0.0052 | 1.43E-08 | 5.6699 | 1376071 | Asthma |
| rs9789351  | 2 | 63513480 | A | G | 0.2889 | 0.0297 | 0.0052 | 1.50E-08 | 5.6611 | 1376071 | Asthma |
| rs7576316  | 2 | 63513988 | G | A | 0.2890 | 0.0298 | 0.0052 | 1.33E-08 | 5.6827 | 1376071 | Asthma |
| rs964903   | 2 | 63514414 | C | T | 0.2889 | 0.0296 | 0.0052 | 1.64E-08 | 5.6459 | 1376071 | Asthma |
| rs1031221  | 2 | 63515676 | T | C | 0.2888 | 0.0297 | 0.0052 | 1.43E-08 | 5.6694 | 1376071 | Asthma |
| rs4671510  | 2 | 63515746 | A | G | 0.2888 | 0.0298 | 0.0052 | 1.38E-08 | 5.6755 | 1376071 | Asthma |
| rs6546009  | 2 | 63518608 | G | C | 0.2889 | 0.0298 | 0.0052 | 1.39E-08 | 5.6741 | 1376071 | Asthma |
| rs11898615 | 2 | 63521150 | C | A | 0.2891 | 0.0298 | 0.0052 | 1.30E-08 | 5.6867 | 1376071 | Asthma |
| rs2421952  | 2 | 63522699 | T | C | 0.2888 | 0.0298 | 0.0052 | 1.29E-08 | 5.6867 | 1376071 | Asthma |
| rs4671512  | 2 | 63525961 | A | G | 0.2816 | 0.0295 | 0.0053 | 2.68E-08 | 5.5613 | 1376071 | Asthma |
| rs4671514  | 2 | 63530819 | C | T | 0.2890 | 0.0299 | 0.0052 | 1.18E-08 | 5.7033 | 1376071 | Asthma |
| rs4671064  | 2 | 63533024 | A | G | 0.2872 | 0.0316 | 0.0057 | 3.73E-08 | 5.5031 | 1224666 | Asthma |
| rs7581630  | 2 | 63533515 | A | G | 0.2873 | 0.0303 | 0.0052 | 7.57E-09 | 5.7778 | 1376071 | Asthma |
| rs7608513  | 2 | 63533558 | G | A | 0.2874 | 0.0303 | 0.0052 | 7.72E-09 | 5.7744 | 1376071 | Asthma |
| rs1023820  | 2 | 63537829 | G | C | 0.2847 | 0.0301 | 0.0053 | 1.02E-08 | 5.7268 | 1376071 | Asthma |
| rs6738190  | 2 | 63540065 | A | G | 0.2846 | 0.0300 | 0.0053 | 1.14E-08 | 5.7089 | 1376071 | Asthma |
| rs12713496 | 2 | 63541333 | T | C | 0.2845 | 0.0300 | 0.0053 | 1.21E-08 | 5.6980 | 1376071 | Asthma |
| rs4671515  | 2 | 63541783 | T | C | 0.2846 | 0.0301 | 0.0053 | 1.12E-08 | 5.7123 | 1376071 | Asthma |
| rs6717031  | 2 | 63547406 | C | T | 0.2847 | 0.0301 | 0.0053 | 1.03E-08 | 5.7263 | 1376071 | Asthma |
| rs2422011  | 2 | 63547855 | A | G | 0.2847 | 0.0300 | 0.0053 | 1.24E-08 | 5.6944 | 1376071 | Asthma |
| rs1867847  | 2 | 63550021 | G | A | 0.2846 | 0.0300 | 0.0053 | 1.15E-08 | 5.7068 | 1376071 | Asthma |
| rs11693909 | 2 | 63550536 | T | C | 0.2841 | 0.0300 | 0.0053 | 1.20E-08 | 5.6993 | 1376071 | Asthma |
| rs2166494  | 2 | 63551494 | T | A | 0.2846 | 0.0300 | 0.0053 | 1.20E-08 | 5.6995 | 1376071 | Asthma |
| rs2121350  | 2 | 63551785 | A | G | 0.2846 | 0.0300 | 0.0053 | 1.16E-08 | 5.7062 | 1376071 | Asthma |
| rs1550860  | 2 | 63552405 | T | C | 0.2847 | 0.0298 | 0.0053 | 1.48E-08 | 5.6634 | 1376071 | Asthma |
| rs2901614  | 2 | 63554954 | A | C | 0.2847 | 0.0299 | 0.0053 | 1.28E-08 | 5.6886 | 1376071 | Asthma |
| rs6546016  | 2 | 63558300 | C | T | 0.2890 | 0.0297 | 0.0052 | 1.52E-08 | 5.6593 | 1376071 | Asthma |
| rs7571325  | 2 | 63558780 | G | A | 0.2890 | 0.0297 | 0.0052 | 1.55E-08 | 5.6562 | 1376071 | Asthma |
| rs6724160  | 2 | 63559289 | G | C | 0.2889 | 0.0297 | 0.0052 | 1.45E-08 | 5.6679 | 1376071 | Asthma |
| rs7577952  | 2 | 63560078 | C | T | 0.2890 | 0.0297 | 0.0052 | 1.55E-08 | 5.6561 | 1376071 | Asthma |
| rs6732791  | 2 | 63561767 | C | A | 0.2890 | 0.0297 | 0.0052 | 1.54E-08 | 5.6575 | 1376071 | Asthma |
| rs6736029  | 2 | 63562036 | G | A | 0.2890 | 0.0298 | 0.0052 | 1.37E-08 | 5.6771 | 1376071 | Asthma |
| rs4671516  | 2 | 63563421 | G | T | 0.2890 | 0.0298 | 0.0052 | 1.40E-08 | 5.6734 | 1376071 | Asthma |
| rs4671065  | 2 | 63563997 | G | A | 0.2890 | 0.0298 | 0.0052 | 1.35E-08 | 5.6792 | 1376071 | Asthma |
| rs7570031  | 2 | 63565131 | A | G | 0.2884 | 0.0297 | 0.0053 | 1.62E-08 | 5.6483 | 1376071 | Asthma |
| rs12990914 | 2 | 63566571 | C | T | 0.2892 | 0.0298 | 0.0052 | 1.33E-08 | 5.6823 | 1376071 | Asthma |
| rs7584404  | 2 | 63567208 | C | T | 0.2892 | 0.0298 | 0.0052 | 1.33E-08 | 5.6821 | 1376071 | Asthma |
| rs6754730  | 2 | 63568758 | T | C | 0.2892 | 0.0299 | 0.0052 | 1.18E-08 | 5.7033 | 1376071 | Asthma |
| rs12105140 | 2 | 63570084 | A | G | 0.2886 | 0.0297 | 0.0053 | 1.60E-08 | 5.6502 | 1376071 | Asthma |
| rs4671517  | 2 | 63570967 | A | G | 0.2886 | 0.0294 | 0.0053 | 2.09E-08 | 5.6047 | 1376071 | Asthma |
| rs4671067  | 2 | 63571033 | C | T | 0.2890 | 0.0295 | 0.0052 | 1.91E-08 | 5.6200 | 1376071 | Asthma |
| rs4671068  | 2 | 63571199 | C | T | 0.2892 | 0.0296 | 0.0052 | 1.71E-08 | 5.6389 | 1376071 | Asthma |
| rs2166497  | 2 | 63573025 | C | T | 0.2891 | 0.0294 | 0.0052 | 2.00E-08 | 5.6124 | 1376071 | Asthma |
| rs7607257  | 2 | 63573526 | C | T | 0.2885 | 0.0294 | 0.0052 | 2.19E-08 | 5.5959 | 1376071 | Asthma |
| rs6706123  | 2 | 63574388 | G | A | 0.2991 | 0.0290 | 0.0052 | 2.99E-08 | 5.5422 | 1376071 | Asthma |
| rs6734648  | 2 | 63574391 | A | G | 0.3734 | 0.0308 | 0.0053 | 5.70E-09 | 5.8254 | 1376071 | Asthma |
| rs68183503 | 2 | 63575754 | C | T | 0.2890 | 0.0293 | 0.0052 | 2.30E-08 | 5.5876 | 1376071 | Asthma |
| rs959195   | 2 | 63576991 | G | A | 0.2890 | 0.0293 | 0.0052 | 2.42E-08 | 5.5787 | 1376071 | Asthma |
| rs2028883  | 2 | 63577397 | G | A | 0.2890 | 0.0293 | 0.0052 | 2.38E-08 | 5.5820 | 1376071 | Asthma |
| rs6708804  | 2 | 63580135 | G | A | 0.2891 | 0.0292 | 0.0052 | 2.61E-08 | 5.5661 | 1376071 | Asthma |
| rs11125977 | 2 | 63582415 | A | G | 0.2890 | 0.0290 | 0.0052 | 3.28E-08 | 5.5258 | 1376071 | Asthma |
| rs11125978 | 2 | 63582468 | C | T | 0.2891 | 0.0291 | 0.0052 | 3.06E-08 | 5.5378 | 1376071 | Asthma |
| rs10865339 | 2 | 63584750 | G | T | 0.2902 | 0.0294 | 0.0052 | 2.00E-08 | 5.6119 | 1376071 | Asthma |
| rs10469944 | 2 | 63589538 | C | G | 0.2899 | 0.0291 | 0.0052 | 2.72E-08 | 5.5585 | 1376071 | Asthma |
| rs10469945 | 2 | 63589642 | T | C | 0.2899 | 0.0291 | 0.0052 | 2.74E-08 | 5.5575 | 1376071 | Asthma |
| rs6546018  | 2 | 63590288 | G | T | 0.2899 | 0.0291 | 0.0052 | 2.89E-08 | 5.5479 | 1376071 | Asthma |
| rs6546019  | 2 | 63590306 | A | G | 0.2899 | 0.0291 | 0.0052 | 2.89E-08 | 5.5482 | 1376071 | Asthma |
| rs1446569  | 2 | 63591180 | C | G | 0.2900 | 0.0292 | 0.0052 | 2.69E-08 | 5.5604 | 1376071 | Asthma |
| rs4671519  | 2 | 63593264 | C | T | 0.2889 | 0.0291 | 0.0052 | 2.98E-08 | 5.5425 | 1376071 | Asthma |
| rs2305157  | 2 | 63595651 | T | C | 0.2883 | 0.0289 | 0.0053 | 3.60E-08 | 5.5097 | 1376071 | Asthma |
| rs4671069  | 2 | 63598270 | C | A | 0.2899 | 0.0291 | 0.0052 | 2.81E-08 | 5.5528 | 1376071 | Asthma |
| rs1255     | 2 | 63598800 | T | C | 0.2898 | 0.0291 | 0.0052 | 2.94E-08 | 5.5452 | 1376071 | Asthma |
| rs7606045  | 2 | 63599394 | T | G | 0.2915 | 0.0291 | 0.0052 | 2.76E-08 | 5.5558 | 1376071 | Asthma |
| rs964880   | 2 | 63599798 | C | A | 0.2898 | 0.0290 | 0.0052 | 3.23E-08 | 5.5287 | 1376071 | Asthma |
| rs2121351  | 2 | 63601227 | G | A | 0.2899 | 0.0293 | 0.0052 | 2.38E-08 | 5.5823 | 1376071 | Asthma |
| rs262470   | 2 | 63603425 | C | T | 0.2901 | 0.0288 | 0.0052 | 3.98E-08 | 5.4918 | 1376071 | Asthma |
| rs2604613  | 2 | 63605642 | G | A | 0.2898 | 0.0288 | 0.0052 | 4.10E-08 | 5.4865 | 1376071 | Asthma |
| rs262472   | 2 | 63606482 | G | A | 0.2898 | 0.0289 | 0.0052 | 3.56E-08 | 5.5116 | 1376071 | Asthma |

|            |   |           |   |   |        |         |        |          |         |         |        |
|------------|---|-----------|---|---|--------|---------|--------|----------|---------|---------|--------|
| rs262473   | 2 | 63606679  | G | T | 0.2899 | 0.0289  | 0.0052 | 3.41E-08 | 5.5191  | 1376071 | Asthma |
| rs262474   | 2 | 63607485  | A | G | 0.2891 | 0.0287  | 0.0052 | 4.83E-08 | 5.4575  | 1376071 | Asthma |
| rs262489   | 2 | 63609133  | G | A | 0.2899 | 0.0288  | 0.0052 | 3.86E-08 | 5.4972  | 1376071 | Asthma |
| rs262490   | 2 | 63610517  | A | G | 0.2890 | 0.0287  | 0.0052 | 4.53E-08 | 5.4688  | 1376071 | Asthma |
| rs262493   | 2 | 63617932  | C | A | 0.2899 | 0.0288  | 0.0052 | 3.99E-08 | 5.4913  | 1376071 | Asthma |
| rs262495   | 2 | 63621473  | G | A | 0.2901 | 0.0294  | 0.0052 | 1.99E-08 | 5.6133  | 1376071 | Asthma |
| rs1082363  | 2 | 63626030  | G | A | 0.2899 | 0.0295  | 0.0052 | 1.90E-08 | 5.6205  | 1376071 | Asthma |
| rs196124   | 2 | 63627004  | A | G | 0.2858 | 0.0297  | 0.0053 | 1.81E-08 | 5.6290  | 1376071 | Asthma |
| rs174485   | 2 | 63630268  | G | A | 0.2858 | 0.0294  | 0.0053 | 2.49E-08 | 5.5738  | 1376071 | Asthma |
| rs190519   | 2 | 63631291  | T | A | 0.2913 | 0.0288  | 0.0052 | 3.84E-08 | 5.4980  | 1376071 | Asthma |
| rs262501   | 2 | 63631523  | G | A | 0.2901 | 0.0292  | 0.0052 | 2.54E-08 | 5.5706  | 1376071 | Asthma |
| rs196125   | 2 | 63632134  | C | T | 0.2900 | 0.0292  | 0.0052 | 2.47E-08 | 5.5752  | 1376071 | Asthma |
| rs262503   | 2 | 63633303  | G | A | 0.2901 | 0.0292  | 0.0052 | 2.60E-08 | 5.5664  | 1376071 | Asthma |
| rs262504   | 2 | 63634101  | C | G | 0.2899 | 0.0291  | 0.0052 | 2.80E-08 | 5.5536  | 1376071 | Asthma |
| rs262505   | 2 | 63634652  | C | T | 0.2893 | 0.0290  | 0.0052 | 3.33E-08 | 5.5231  | 1376071 | Asthma |
| rs262506   | 2 | 63635888  | A | G | 0.2892 | 0.0289  | 0.0052 | 3.66E-08 | 5.5065  | 1376071 | Asthma |
| rs166384   | 2 | 63636496  | G | T | 0.2899 | 0.0292  | 0.0052 | 2.64E-08 | 5.5640  | 1376071 | Asthma |
| rs187801   | 2 | 63640312  | G | T | 0.2890 | 0.0287  | 0.0052 | 4.55E-08 | 5.4680  | 1376071 | Asthma |
| rs185499   | 2 | 63640389  | G | T | 0.2894 | 0.0289  | 0.0052 | 3.68E-08 | 5.5059  | 1376071 | Asthma |
| rs262475   | 2 | 63641911  | A | T | 0.2898 | 0.0293  | 0.0052 | 2.20E-08 | 5.5954  | 1376071 | Asthma |
| rs262476   | 2 | 63643473  | C | T | 0.2898 | 0.0293  | 0.0052 | 2.38E-08 | 5.5821  | 1376071 | Asthma |
| rs262477   | 2 | 63643825  | T | G | 0.2891 | 0.0289  | 0.0052 | 3.78E-08 | 5.5010  | 1376071 | Asthma |
| rs262478   | 2 | 63645252  | T | C | 0.2885 | 0.0289  | 0.0053 | 3.70E-08 | 5.5044  | 1376071 | Asthma |
| rs262479   | 2 | 63645345  | C | T | 0.2891 | 0.0288  | 0.0052 | 4.03E-08 | 5.4895  | 1376071 | Asthma |
| rs262480   | 2 | 63645898  | A | G | 0.2892 | 0.0291  | 0.0052 | 2.97E-08 | 5.5434  | 1376071 | Asthma |
| rs262481   | 2 | 63647358  | A | C | 0.2892 | 0.0291  | 0.0052 | 2.89E-08 | 5.5478  | 1376071 | Asthma |
| rs112194   | 2 | 63649738  | T | G | 0.2891 | 0.0291  | 0.0052 | 2.92E-08 | 5.5459  | 1376071 | Asthma |
| rs262482   | 2 | 63649908  | C | T | 0.2893 | 0.0293  | 0.0052 | 2.49E-08 | 5.5742  | 1376071 | Asthma |
| rs262484   | 2 | 63650881  | A | G | 0.2892 | 0.0292  | 0.0052 | 2.69E-08 | 5.5605  | 1376071 | Asthma |
| rs262485   | 2 | 63651279  | T | G | 0.2892 | 0.0291  | 0.0052 | 2.90E-08 | 5.5473  | 1376071 | Asthma |
| rs262487   | 2 | 63653383  | A | C | 0.2892 | 0.0292  | 0.0052 | 2.73E-08 | 5.5581  | 1376071 | Asthma |
| rs262488   | 2 | 63655045  | C | T | 0.2896 | 0.0293  | 0.0052 | 2.42E-08 | 5.5789  | 1376071 | Asthma |
| rs17007417 | 2 | 71808541  | T | C | 0.1412 | 0.0411  | 0.0069 | 2.12E-09 | 5.9884  | 1376071 | Asthma |
| rs11679843 | 2 | 71811073  | G | A | 0.1245 | 0.0448  | 0.0073 | 9.41E-10 | 6.1191  | 1316443 | Asthma |
| rs11679762 | 2 | 71811089  | C | T | 0.1209 | 0.0459  | 0.0072 | 1.99E-10 | 6.3621  | 1376071 | Asthma |
| rs10178231 | 2 | 71811807  | G | A | 0.1216 | 0.0451  | 0.0074 | 9.05E-10 | 6.1253  | 1316443 | Asthma |
| rs35548551 | 2 | 71812584  | T | G | 0.1169 | 0.0452  | 0.0075 | 1.50E-09 | 6.0443  | 1316443 | Asthma |
| rs10181419 | 2 | 71812705  | G | A | 0.1246 | 0.0447  | 0.0073 | 1.02E-09 | 6.1061  | 1316443 | Asthma |
| rs3981391  | 2 | 71813376  | G | T | 0.1248 | 0.0450  | 0.0073 | 7.66E-10 | 6.1519  | 1316443 | Asthma |
| rs7562979  | 2 | 71817321  | G | C | 0.1183 | 0.0449  | 0.0073 | 7.15E-10 | 6.1626  | 1376071 | Asthma |
| rs6546722  | 2 | 71817658  | C | T | 0.1217 | 0.0442  | 0.0072 | 1.00E-09 | 6.1094  | 1376071 | Asthma |
| rs6546723  | 2 | 71817678  | A | G | 0.1217 | 0.0442  | 0.0072 | 9.56E-10 | 6.1166  | 1376071 | Asthma |
| rs898230   | 2 | 71817978  | G | A | 0.1230 | 0.0440  | 0.0074 | 2.27E-09 | 5.9776  | 1316443 | Asthma |
| rs1037776  | 2 | 71819349  | G | T | 0.1238 | 0.0442  | 0.0073 | 1.70E-09 | 6.0237  | 1316443 | Asthma |
| rs7570930  | 2 | 71819929  | C | T | 0.1238 | 0.0444  | 0.0073 | 1.48E-09 | 6.0461  | 1316443 | Asthma |
| rs956321   | 2 | 71820711  | C | T | 0.1233 | 0.0435  | 0.0074 | 3.22E-09 | 5.9201  | 1316443 | Asthma |
| rs1459269  | 2 | 71823534  | C | T | 0.1233 | 0.0436  | 0.0074 | 3.07E-09 | 5.9277  | 1316443 | Asthma |
| rs7586012  | 2 | 71823902  | C | G | 0.1230 | 0.0442  | 0.0074 | 1.91E-09 | 6.0050  | 1316443 | Asthma |
| rs35668054 | 2 | 71827707  | T | C | 0.0790 | -0.0610 | 0.0090 | 1.15E-11 | -6.7870 | 1359430 | Asthma |
| rs6759774  | 2 | 71827904  | A | G | 0.1129 | 0.0450  | 0.0074 | 1.30E-09 | 6.0679  | 1376071 | Asthma |
| rs10153553 | 2 | 71829644  | T | C | 0.1121 | 0.0452  | 0.0075 | 1.27E-09 | 6.0710  | 1376071 | Asthma |
| rs930931   | 2 | 71830957  | T | C | 0.1122 | 0.0453  | 0.0074 | 1.18E-09 | 6.0831  | 1376071 | Asthma |
| rs1870447  | 2 | 71831041  | A | G | 0.1181 | 0.0451  | 0.0073 | 5.75E-10 | 6.1971  | 1376071 | Asthma |
| rs13430788 | 2 | 71831754  | G | C | 0.1216 | 0.0452  | 0.0072 | 3.86E-10 | 6.2597  | 1376071 | Asthma |
| rs6724915  | 2 | 71836342  | T | G | 0.1133 | 0.0458  | 0.0074 | 5.64E-10 | 6.2001  | 1376071 | Asthma |
| rs6710254  | 2 | 71836749  | C | T | 0.1129 | 0.0452  | 0.0074 | 1.03E-09 | 6.1044  | 1376071 | Asthma |
| rs12713766 | 2 | 71839116  | C | A | 0.1202 | 0.0443  | 0.0072 | 9.22E-10 | 6.1225  | 1376071 | Asthma |
| rs13007748 | 2 | 71840831  | C | T | 0.1209 | 0.0448  | 0.0072 | 5.60E-10 | 6.2014  | 1376071 | Asthma |
| rs13014079 | 2 | 71841335  | C | T | 0.1209 | 0.0447  | 0.0072 | 5.91E-10 | 6.1928  | 1376071 | Asthma |
| rs62147667 | 2 | 71844136  | G | A | 0.1170 | 0.0448  | 0.0073 | 8.20E-10 | 6.1409  | 1376071 | Asthma |
| rs57300461 | 2 | 71845565  | A | G | 0.1170 | 0.0439  | 0.0073 | 1.78E-09 | 6.0164  | 1376071 | Asthma |
| rs13385492 | 2 | 71845807  | A | G | 0.1168 | 0.0433  | 0.0073 | 2.98E-09 | 5.9324  | 1376071 | Asthma |
| rs13427905 | 2 | 71846585  | T | C | 0.1113 | 0.0446  | 0.0074 | 1.86E-09 | 6.0096  | 1376071 | Asthma |
| rs7581051  | 2 | 71848755  | T | C | 0.1121 | 0.0444  | 0.0074 | 2.29E-09 | 5.9755  | 1376071 | Asthma |
| rs11895277 | 2 | 71850830  | C | T | 0.1159 | 0.0443  | 0.0073 | 1.39E-09 | 6.0569  | 1376071 | Asthma |
| rs13022699 | 2 | 101671373 | T | C | 0.0845 | -0.0660 | 0.0113 | 4.92E-09 | -5.8499 | 1065770 | Asthma |
| rs7566896  | 2 | 101776344 | C | T | 0.1076 | -0.0490 | 0.0080 | 7.38E-10 | -6.1577 | 1359430 | Asthma |
| rs4305299  | 2 | 101793528 | A | G | 0.1056 | -0.0498 | 0.0080 | 5.57E-10 | -6.2022 | 1359430 | Asthma |
| rs7601576  | 2 | 101824261 | G | A | 0.1080 | -0.0493 | 0.0078 | 2.97E-10 | -6.3002 | 1376071 | Asthma |
| rs2024035  | 2 | 101915550 | C | T | 0.1044 | -0.0487 | 0.0081 | 1.87E-09 | -6.0093 | 1359430 | Asthma |
| rs74538397 | 2 | 101962555 | T | G | 0.0665 | -0.0689 | 0.0098 | 1.75E-12 | -7.0528 | 1376071 | Asthma |
| rs992153   | 2 | 102093895 | T | C | 0.3989 | 0.0316  | 0.0050 | 2.76E-10 | 6.3119  | 1316443 | Asthma |
| rs933494   | 2 | 102094549 | A | G | 0.4083 | 0.0314  | 0.0049 | 1.05E-10 | 6.4603  | 1376071 | Asthma |
| rs871376   | 2 | 102094712 | C | T | 0.2012 | -0.0399 | 0.0060 | 2.38E-11 | -6.6808 | 1316443 | Asthma |



|            |   |           |   |   |        |         |        |          |          |         |        |
|------------|---|-----------|---|---|--------|---------|--------|----------|----------|---------|--------|
| rs56193008 | 2 | 102095776 | A | G | 0.4098 | 0.0315  | 0.0049 | 8.35E-11 | 6.4941   | 1376071 | Asthma |
| rs13013537 | 2 | 102095958 | T | G | 0.2012 | -0.0402 | 0.0060 | 1.64E-11 | -6.7352  | 1316443 | Asthma |
| rs12991050 | 2 | 102096192 | G | A | 0.2013 | -0.0398 | 0.0060 | 2.45E-11 | -6.6764  | 1316443 | Asthma |
| rs72817889 | 2 | 102097161 | T | C | 0.4076 | 0.0298  | 0.0052 | 1.01E-08 | 5.7286   | 1246149 | Asthma |
| rs11685997 | 2 | 102098080 | T | C | 0.4090 | 0.0317  | 0.0048 | 5.65E-11 | 6.5527   | 1376071 | Asthma |
| rs10490571 | 2 | 102100877 | T | C | 0.4100 | 0.0315  | 0.0048 | 7.28E-11 | 6.5149   | 1376071 | Asthma |
| rs17818195 | 2 | 102101765 | C | T | 0.4094 | 0.0318  | 0.0048 | 5.06E-11 | 6.5691   | 1376071 | Asthma |
| rs72996520 | 2 | 102102644 | T | C | 0.4091 | 0.0316  | 0.0048 | 6.74E-11 | 6.5263   | 1376071 | Asthma |
| rs1019296  | 2 | 102104657 | C | T | 0.4091 | 0.0315  | 0.0048 | 8.21E-11 | 6.4967   | 1376071 | Asthma |
| rs12468203 | 2 | 102104943 | T | A | 0.2018 | -0.0410 | 0.0058 | 2.04E-12 | -7.0317  | 1376071 | Asthma |
| rs12468310 | 2 | 102105218 | T | A | 0.2019 | -0.0407 | 0.0058 | 2.92E-12 | -6.9815  | 1376071 | Asthma |
| rs13388182 | 2 | 102105942 | T | C | 0.4122 | 0.0318  | 0.0048 | 4.50E-11 | 6.5865   | 1376071 | Asthma |
| rs6739281  | 2 | 102106115 | A | G | 0.2019 | -0.0406 | 0.0058 | 3.07E-12 | -6.9744  | 1376071 | Asthma |
| rs13029804 | 2 | 102106557 | C | A | 0.2020 | -0.0407 | 0.0058 | 2.58E-12 | -6.9990  | 1376071 | Asthma |
| rs13006101 | 2 | 102107408 | T | C | 0.2008 | -0.0407 | 0.0060 | 8.92E-12 | -6.8230  | 1316443 | Asthma |
| rs6726402  | 2 | 102108360 | C | G | 0.2019 | -0.0407 | 0.0058 | 2.89E-12 | -6.9828  | 1376071 | Asthma |
| rs17818291 | 2 | 102108478 | A | G | 0.4229 | 0.0319  | 0.0048 | 3.66E-11 | 6.6174   | 1376071 | Asthma |
| rs17767183 | 2 | 102108553 | T | C | 0.4092 | 0.0316  | 0.0048 | 7.18E-11 | 6.5168   | 1376071 | Asthma |
| rs11679849 | 2 | 102109552 | G | A | 0.2019 | -0.0407 | 0.0058 | 2.63E-12 | -6.9962  | 1376071 | Asthma |
| rs11679856 | 2 | 102109599 | G | A | 0.2019 | -0.0408 | 0.0058 | 2.60E-12 | -6.9978  | 1376071 | Asthma |
| rs13014284 | 2 | 102109676 | G | A | 0.2019 | -0.0407 | 0.0058 | 3.01E-12 | -6.9773  | 1376071 | Asthma |
| rs12987095 | 2 | 102109749 | A | G | 0.2014 | -0.0407 | 0.0058 | 3.04E-12 | -6.9758  | 1376071 | Asthma |
| rs12987338 | 2 | 102109891 | A | G | 0.2019 | -0.0407 | 0.0058 | 2.72E-12 | -6.9912  | 1376071 | Asthma |
| rs13019932 | 2 | 102109949 | G | T | 0.2019 | -0.0407 | 0.0058 | 2.80E-12 | -6.9874  | 1376071 | Asthma |
| rs12987741 | 2 | 102110052 | A | G | 0.2018 | -0.0407 | 0.0058 | 2.77E-12 | -6.9892  | 1376071 | Asthma |
| rs12989255 | 2 | 102110095 | T | C | 0.2017 | -0.0408 | 0.0058 | 2.40E-12 | -7.0095  | 1376071 | Asthma |
| rs12989438 | 2 | 102110135 | T | C | 0.2008 | -0.0404 | 0.0058 | 5.07E-12 | -6.9036  | 1376071 | Asthma |
| rs34187313 | 2 | 102110155 | G | T | 0.2005 | -0.0403 | 0.0064 | 2.53E-10 | -6.3253  | 1224666 | Asthma |
| rs13020398 | 2 | 102110177 | C | T | 0.1989 | -0.0404 | 0.0064 | 2.88E-10 | -6.3050  | 1224666 | Asthma |
| rs13020401 | 2 | 102110190 | C | T | 0.1988 | -0.0404 | 0.0064 | 2.86E-10 | -6.3064  | 1224666 | Asthma |
| rs12989632 | 2 | 102110229 | A | C | 0.1986 | -0.0403 | 0.0064 | 3.03E-10 | -6.2974  | 1224666 | Asthma |
| rs13015479 | 2 | 102110235 | G | A | 0.1986 | -0.0403 | 0.0064 | 3.00E-10 | -6.2990  | 1224666 | Asthma |
| rs13020596 | 2 | 102110251 | C | T | 0.1986 | -0.0404 | 0.0064 | 2.88E-10 | -6.3053  | 1224666 | Asthma |
| rs12995470 | 2 | 102110642 | T | C | 0.2019 | -0.0408 | 0.0058 | 2.50E-12 | -7.0033  | 1376071 | Asthma |
| rs12994127 | 2 | 102110729 | T | G | 0.2013 | -0.0407 | 0.0058 | 3.10E-12 | -6.9732  | 1376071 | Asthma |
| rs13026492 | 2 | 102110738 | C | T | 0.2014 | -0.0407 | 0.0058 | 3.20E-12 | -6.9687  | 1376071 | Asthma |
| rs12994561 | 2 | 102110934 | C | G | 0.2019 | -0.0405 | 0.0058 | 3.49E-12 | -6.9564  | 1376071 | Asthma |
| rs35163677 | 2 | 102111196 | A | G | 0.2018 | -0.0409 | 0.0058 | 2.37E-12 | -7.0107  | 1376071 | Asthma |
| rs57570472 | 2 | 102111343 | T | C | 0.2019 | -0.0406 | 0.0058 | 3.16E-12 | -6.9704  | 1376071 | Asthma |
| rs61216908 | 2 | 102111438 | T | C | 0.2014 | -0.0406 | 0.0058 | 3.31E-12 | -6.9638  | 1376071 | Asthma |
| rs1861284  | 2 | 102111544 | T | C | 0.4166 | 0.0316  | 0.0048 | 5.78E-11 | 6.5493   | 1376071 | Asthma |
| rs13000909 | 2 | 102111676 | A | G | 0.2019 | -0.0404 | 0.0058 | 3.94E-12 | -6.9395  | 1376071 | Asthma |
| rs1861283  | 2 | 102112256 | T | C | 0.4165 | 0.0319  | 0.0048 | 4.04E-11 | 6.6024   | 1376071 | Asthma |
| rs874953   | 2 | 102113414 | T | C | 0.2016 | -0.0407 | 0.0058 | 3.11E-12 | -6.9727  | 1376071 | Asthma |
| rs1007027  | 2 | 102115136 | C | A | 0.4188 | 0.0319  | 0.0048 | 3.95E-11 | 6.6058   | 1376071 | Asthma |
| rs1030022  | 2 | 102115909 | G | T | 0.2944 | -0.0411 | 0.0052 | 1.53E-15 | -7.9746  | 1376071 | Asthma |
| rs6704593  | 2 | 102116718 | A | G | 0.4882 | 0.0299  | 0.0048 | 3.20E-10 | 6.2885   | 1376071 | Asthma |
| rs1465325  | 2 | 102118091 | G | A | 0.1748 | -0.0829 | 0.0062 | 4.44E-41 | -13.4230 | 1376071 | Asthma |
| rs1967313  | 2 | 102118975 | G | T | 0.2986 | -0.0376 | 0.0056 | 1.88E-11 | -6.7153  | 1219993 | Asthma |
| rs1465324  | 2 | 102119152 | A | G | 0.1856 | -0.0786 | 0.0060 | 8.68E-39 | -13.0263 | 1376071 | Asthma |
| rs1004548  | 2 | 102119246 | T | A | 0.4881 | 0.0300  | 0.0048 | 2.78E-10 | 6.3103   | 1376071 | Asthma |
| rs4603782  | 2 | 102119349 | A | T | 0.2962 | -0.0409 | 0.0051 | 1.82E-15 | -7.9529  | 1376071 | Asthma |
| rs12328681 | 2 | 102120407 | T | G | 0.1828 | -0.0801 | 0.0061 | 9.11E-40 | -13.1973 | 1376071 | Asthma |
| rs6736803  | 2 | 102120794 | A | G | 0.4880 | 0.0298  | 0.0047 | 3.35E-10 | 6.2816   | 1376071 | Asthma |
| rs72820106 | 2 | 102120802 | G | C | 0.1853 | -0.0788 | 0.0060 | 5.73E-39 | -13.0580 | 1376071 | Asthma |
| rs12712130 | 2 | 102121477 | C | T | 0.2963 | -0.0408 | 0.0051 | 2.07E-15 | -7.9369  | 1376071 | Asthma |
| rs62156384 | 2 | 102121731 | G | A | 0.1856 | -0.0786 | 0.0060 | 8.43E-39 | -13.0283 | 1376071 | Asthma |
| rs6713468  | 2 | 102122085 | T | C | 0.2963 | -0.0407 | 0.0051 | 2.13E-15 | -7.9335  | 1376071 | Asthma |
| rs10172039 | 2 | 102122325 | A | C | 0.1853 | -0.0788 | 0.0060 | 5.77E-39 | -13.0572 | 1376071 | Asthma |
| rs60084385 | 2 | 102122820 | G | T | 0.4880 | 0.0299  | 0.0048 | 3.28E-10 | 6.2849   | 1376071 | Asthma |
| rs62156385 | 2 | 102122987 | A | T | 0.1852 | -0.0786 | 0.0060 | 7.94E-39 | -13.0330 | 1376071 | Asthma |
| rs56793250 | 2 | 102123018 | C | G | 0.1855 | -0.0785 | 0.0060 | 9.70E-39 | -13.0177 | 1376071 | Asthma |
| rs62156387 | 2 | 102123361 | T | C | 0.1749 | -0.0828 | 0.0062 | 5.61E-41 | -13.4054 | 1376071 | Asthma |
| rs12712131 | 2 | 102123771 | C | G | 0.2951 | -0.0397 | 0.0056 | 1.62E-12 | -7.0642  | 1224666 | Asthma |
| rs4851541  | 2 | 102123999 | T | G | 0.4813 | 0.0330  | 0.0050 | 4.53E-11 | 6.5858   | 1008051 | Asthma |
| rs12619281 | 2 | 102124813 | G | A | 0.1856 | -0.0785 | 0.0060 | 8.93E-39 | -13.0241 | 1376071 | Asthma |
| rs12619383 | 2 | 102125258 | G | A | 0.1750 | -0.0828 | 0.0062 | 5.95E-41 | -13.4012 | 1376071 | Asthma |
| rs12620132 | 2 | 102125655 | G | A | 0.1749 | -0.0828 | 0.0062 | 5.13E-41 | -13.4122 | 1376071 | Asthma |
| rs2310185  | 2 | 102125708 | C | T | 0.2962 | -0.0409 | 0.0051 | 1.90E-15 | -7.9475  | 1376071 | Asthma |
| rs13392285 | 2 | 102127878 | A | C | 0.1852 | -0.0789 | 0.0060 | 3.99E-39 | -13.0854 | 1376071 | Asthma |
| rs7588201  | 2 | 102129816 | C | A | 0.2909 | -0.0415 | 0.0052 | 9.32E-16 | -8.0356  | 1376071 | Asthma |
| rs1024794  | 2 | 102130853 | G | A | 0.3842 | 0.0306  | 0.0049 | 4.01E-10 | 6.2539   | 1376071 | Asthma |
| rs55914569 | 2 | 102131624 | A | G | 0.1744 | -0.0829 | 0.0062 | 7.80E-41 | -13.3811 | 1376071 | Asthma |
| rs56336517 | 2 | 102131634 | G | A | 0.1718 | -0.0783 | 0.0068 | 1.99E-30 | -11.4644 | 1219993 | Asthma |

|             |   |           |   |   |        |         |        |          |          |         |        |
|-------------|---|-----------|---|---|--------|---------|--------|----------|----------|---------|--------|
| rs4851544   | 2 | 102132780 | G | A | 0.4827 | 0.0300  | 0.0048 | 2.76E-10 | 6.3115   | 1376071 | Asthma |
| rs4851545   | 2 | 102133060 | C | T | 0.4032 | -0.0452 | 0.0048 | 7.47E-21 | -9.3668  | 1376071 | Asthma |
| rs6707100   | 2 | 102133223 | A | G | 0.2944 | -0.0374 | 0.0056 | 2.81E-11 | -6.6559  | 1219993 | Asthma |
| rs4851546   | 2 | 102133360 | G | C | 0.4827 | 0.0300  | 0.0048 | 2.60E-10 | 6.3207   | 1376071 | Asthma |
| rs13387400  | 2 | 102133560 | A | G | 0.1749 | -0.0829 | 0.0062 | 4.90E-41 | -13.4155 | 1376071 | Asthma |
| rs7590231   | 2 | 102134455 | T | C | 0.2909 | -0.0417 | 0.0052 | 8.22E-16 | -8.0509  | 1376071 | Asthma |
| rs7606726   | 2 | 102134501 | C | T | 0.3012 | -0.0407 | 0.0051 | 2.01E-15 | -7.9406  | 1376071 | Asthma |
| rs13390949  | 2 | 102134598 | C | G | 0.1749 | -0.0832 | 0.0062 | 2.58E-41 | -13.4632 | 1376071 | Asthma |
| rs17026654  | 2 | 102135657 | T | C | 0.4826 | 0.0299  | 0.0048 | 3.07E-10 | 6.2953   | 1376071 | Asthma |
| rs13383301  | 2 | 102135880 | T | A | 0.1749 | -0.0830 | 0.0062 | 3.39E-41 | -13.4429 | 1376071 | Asthma |
| rs9308853   | 2 | 102136457 | A | G | 0.2944 | -0.0378 | 0.0056 | 2.06E-11 | -6.7015  | 1219993 | Asthma |
| rs6706048   | 2 | 102138349 | C | G | 0.2907 | -0.0417 | 0.0052 | 8.69E-16 | -8.0441  | 1376071 | Asthma |
| rs34757365  | 2 | 102141402 | G | A | 0.1763 | -0.0825 | 0.0062 | 8.32E-41 | -13.3762 | 1376071 | Asthma |
| rs35743441  | 2 | 102141492 | A | T | 0.1764 | -0.0827 | 0.0062 | 5.61E-41 | -13.4056 | 1376071 | Asthma |
| rs956730    | 2 | 102141656 | A | G | 0.3019 | -0.0407 | 0.0051 | 2.06E-15 | -7.9378  | 1376071 | Asthma |
| rs2234650   | 2 | 102141867 | T | C | 0.3050 | -0.0444 | 0.0054 | 2.00E-16 | -8.2224  | 1008051 | Asthma |
| rs2234651   | 2 | 102141893 | T | C | 0.1839 | -0.0805 | 0.0061 | 3.66E-40 | -13.2659 | 1376071 | Asthma |
| rs10168222  | 2 | 102142208 | T | A | 0.1858 | -0.0791 | 0.0060 | 3.77E-39 | -13.0898 | 1376071 | Asthma |
| rs12613301  | 2 | 102142921 | T | A | 0.4803 | 0.0299  | 0.0048 | 3.21E-10 | 6.2881   | 1376071 | Asthma |
| rs7580384   | 2 | 102144258 | A | G | 0.4802 | 0.0299  | 0.0047 | 3.23E-10 | 6.2871   | 1376071 | Asthma |
| rs11883987  | 2 | 102144780 | C | T | 0.3937 | -0.0464 | 0.0049 | 1.18E-21 | -9.5600  | 1376071 | Asthma |
| rs4851547   | 2 | 102145307 | A | C | 0.4845 | 0.0301  | 0.0047 | 2.25E-10 | 6.3435   | 1376071 | Asthma |
| rs10187031  | 2 | 102146734 | C | T | 0.1763 | -0.0835 | 0.0062 | 9.47E-42 | -13.5368 | 1376071 | Asthma |
| rs2110727   | 2 | 102147834 | A | G | 0.1758 | -0.0837 | 0.0062 | 7.66E-42 | -13.5526 | 1376071 | Asthma |
| rs4851000   | 2 | 102148557 | C | T | 0.4859 | 0.0303  | 0.0048 | 1.88E-10 | 6.3707   | 1376071 | Asthma |
| rs10208708  | 2 | 102148981 | G | C | 0.1583 | -0.1024 | 0.0101 | 3.29E-24 | -10.1517 | 567828  | Asthma |
| rs10184523  | 2 | 102149040 | A | G | 0.1757 | -0.0840 | 0.0062 | 4.40E-42 | -13.5932 | 1376071 | Asthma |
| rs1558641   | 2 | 102149405 | A | G | 0.1753 | -0.0847 | 0.0062 | 1.39E-42 | -13.6771 | 1376071 | Asthma |
| rs1558640   | 2 | 102149418 | A | G | 0.1757 | -0.0843 | 0.0062 | 2.71E-42 | -13.6286 | 1376071 | Asthma |
| rs35318065  | 2 | 102150172 | A | C | 0.1756 | -0.0843 | 0.0062 | 2.80E-42 | -13.6261 | 1376071 | Asthma |
| rs114301196 | 2 | 102151736 | T | C | 0.0175 | -0.1246 | 0.0186 | 1.92E-11 | -6.7119  | 1299802 | Asthma |
| rs10183869  | 2 | 102152198 | G | A | 0.1760 | -0.0840 | 0.0062 | 4.44E-42 | -13.5923 | 1376071 | Asthma |
| rs10194716  | 2 | 102152229 | A | G | 0.1851 | -0.0796 | 0.0061 | 1.54E-39 | -13.1576 | 1376071 | Asthma |
| rs1978330   | 2 | 102152395 | T | C | 0.4859 | 0.0303  | 0.0048 | 2.03E-10 | 6.3591   | 1376071 | Asthma |
| rs3755292   | 2 | 102152677 | G | T | 0.1851 | -0.0796 | 0.0061 | 1.66E-39 | -13.1518 | 1376071 | Asthma |
| rs3917225   | 2 | 102152842 | G | A | 0.4859 | 0.0304  | 0.0048 | 1.57E-10 | 6.3981   | 1376071 | Asthma |
| rs949963    | 2 | 102153326 | T | C | 0.1851 | -0.0796 | 0.0060 | 1.45E-39 | -13.1623 | 1376071 | Asthma |
| rs2287049   | 2 | 102154278 | G | A | 0.2975 | -0.0412 | 0.0052 | 1.33E-15 | -7.9922  | 1376071 | Asthma |
| rs871656    | 2 | 102154822 | A | T | 0.1851 | -0.0798 | 0.0061 | 1.07E-39 | -13.1852 | 1376071 | Asthma |
| rs871657    | 2 | 102154881 | T | C | 0.1850 | -0.0799 | 0.0061 | 8.89E-40 | -13.1991 | 1376071 | Asthma |
| rs3917238   | 2 | 102156623 | T | C | 0.2993 | -0.0410 | 0.0051 | 1.53E-15 | -7.9746  | 1376071 | Asthma |
| rs2287048   | 2 | 102157539 | T | C | 0.1759 | -0.0845 | 0.0062 | 2.19E-42 | -13.6442 | 1376071 | Asthma |
| rs2287047   | 2 | 102157594 | A | G | 0.2889 | -0.0429 | 0.0052 | 1.23E-16 | -8.2798  | 1376071 | Asthma |
| rs3917243   | 2 | 102158528 | A | G | 0.4788 | 0.0300  | 0.0048 | 2.99E-10 | 6.2993   | 1376071 | Asthma |
| rs3917263   | 2 | 102161904 | C | G | 0.4030 | 0.0371  | 0.0048 | 2.00E-14 | 7.6506   | 1376071 | Asthma |
| rs3917265   | 2 | 102162001 | T | C | 0.4577 | -0.0365 | 0.0047 | 1.33E-14 | -7.7031  | 1376071 | Asthma |
| rs3917267   | 2 | 102162359 | A | G | 0.4173 | 0.0362  | 0.0048 | 5.38E-14 | 7.5225   | 1376071 | Asthma |
| rs3917273   | 2 | 102163259 | T | A | 0.4097 | -0.0410 | 0.0051 | 1.60E-15 | -7.9689  | 1246149 | Asthma |
| rs3917279   | 2 | 102163911 | G | T | 0.2927 | -0.0499 | 0.0052 | 4.16E-22 | -9.6670  | 1376071 | Asthma |
| rs3917285   | 2 | 102164706 | A | T | 0.0962 | -0.1046 | 0.0080 | 1.20E-38 | -13.0021 | 1316443 | Asthma |
| rs3917290   | 2 | 102165619 | T | C | 0.4143 | 0.0364  | 0.0048 | 4.08E-14 | 7.5584   | 1376071 | Asthma |
| rs997049    | 2 | 102165973 | A | T | 0.4147 | 0.0365  | 0.0048 | 3.08E-14 | 7.5948   | 1376071 | Asthma |
| rs2160227   | 2 | 102166895 | T | G | 0.2938 | -0.0489 | 0.0051 | 2.28E-21 | -9.4917  | 1376071 | Asthma |
| rs13020778  | 2 | 102168114 | C | T | 0.4112 | -0.0420 | 0.0048 | 1.53E-18 | -8.7873  | 1376071 | Asthma |
| rs951192    | 2 | 102169394 | C | A | 0.2922 | -0.0504 | 0.0052 | 1.54E-22 | -9.7686  | 1376071 | Asthma |
| rs3917304   | 2 | 102171665 | T | G | 0.2921 | -0.0498 | 0.0052 | 5.08E-22 | -9.6464  | 1376071 | Asthma |
| rs3771200   | 2 | 102172314 | A | G | 0.4150 | 0.0369  | 0.0048 | 1.43E-14 | 7.6938   | 1376071 | Asthma |
| rs3917318   | 2 | 102176300 | G | A | 0.2926 | -0.0498 | 0.0052 | 3.97E-22 | -9.6719  | 1376071 | Asthma |
| rs3917324   | 2 | 102177073 | G | C | 0.3215 | 0.0371  | 0.0052 | 1.36E-12 | 7.0877   | 1316443 | Asthma |
| rs2110726   | 2 | 102177822 | A | G | 0.4026 | 0.0366  | 0.0048 | 3.73E-14 | 7.5703   | 1376071 | Asthma |
| rs7582198   | 2 | 102183374 | G | A | 0.2922 | -0.0501 | 0.0052 | 3.55E-22 | -9.6833  | 1376071 | Asthma |
| rs1030021   | 2 | 102185018 | C | A | 0.2925 | -0.0504 | 0.0053 | 1.34E-21 | -9.5468  | 1316443 | Asthma |
| rs10181869  | 2 | 102185392 | A | C | 0.2923 | -0.0505 | 0.0053 | 1.35E-21 | -9.5461  | 1316443 | Asthma |
| rs10184597  | 2 | 102185795 | T | C | 0.2921 | -0.0503 | 0.0053 | 1.55E-21 | -9.5316  | 1316443 | Asthma |
| rs2241131   | 2 | 102187581 | A | C | 0.3184 | 0.0387  | 0.0053 | 2.03E-13 | 7.3469   | 1316443 | Asthma |
| rs7421586   | 2 | 102189731 | A | C | 0.1264 | 0.0479  | 0.0071 | 1.21E-11 | 6.7790   | 1376071 | Asthma |
| rs3771199   | 2 | 102190153 | G | A | 0.3606 | 0.0306  | 0.0050 | 1.36E-09 | 6.0603   | 1316443 | Asthma |
| rs11688596  | 2 | 102191112 | G | A | 0.3581 | 0.0303  | 0.0049 | 8.32E-10 | 6.1386   | 1376071 | Asthma |
| rs3213734   | 2 | 102192223 | A | G | 0.1264 | 0.0479  | 0.0071 | 1.25E-11 | 6.7742   | 1376071 | Asthma |
| rs7599472   | 2 | 102193074 | G | A | 0.1220 | 0.0569  | 0.0086 | 3.62E-11 | 6.6189   | 1090071 | Asthma |
| rs10166535  | 2 | 102193400 | T | G | 0.1264 | 0.0479  | 0.0071 | 1.23E-11 | 6.7766   | 1376071 | Asthma |
| rs35304226  | 2 | 102194490 | A | G | 0.3580 | 0.0302  | 0.0049 | 9.77E-10 | 6.1130   | 1376071 | Asthma |
| rs56240565  | 2 | 102194802 | C | T | 0.3580 | 0.0303  | 0.0049 | 9.01E-10 | 6.1262   | 1376071 | Asthma |
| rs56160461  | 2 | 102194847 | A | G | 0.3579 | 0.0304  | 0.0049 | 7.89E-10 | 6.1472   | 1376071 | Asthma |

|            |   |           |   |   |        |         |        |          |          |         |        |
|------------|---|-----------|---|---|--------|---------|--------|----------|----------|---------|--------|
| rs12467251 | 2 | 102195734 | T | G | 0.1260 | 0.0512  | 0.0077 | 3.91E-11 | 6.6073   | 1219993 | Asthma |
| rs7560478  | 2 | 102196066 | C | T | 0.1265 | 0.0476  | 0.0071 | 1.54E-11 | 6.7442   | 1376071 | Asthma |
| rs1558646  | 2 | 102196818 | A | G | 0.3582 | 0.0305  | 0.0049 | 6.72E-10 | 6.1725   | 1376071 | Asthma |
| rs1882514  | 2 | 102197346 | G | C | 0.3582 | 0.0305  | 0.0049 | 6.73E-10 | 6.1725   | 1376071 | Asthma |
| rs1882513  | 2 | 102197455 | C | T | 0.3582 | 0.0305  | 0.0049 | 6.52E-10 | 6.1773   | 1376071 | Asthma |
| rs867770   | 2 | 102197915 | A | G | 0.3582 | 0.0305  | 0.0049 | 6.57E-10 | 6.1761   | 1376071 | Asthma |
| rs2310235  | 2 | 102198238 | T | A | 0.3582 | 0.0305  | 0.0049 | 6.74E-10 | 6.1721   | 1376071 | Asthma |
| rs870684   | 2 | 102198482 | C | T | 0.3581 | 0.0306  | 0.0049 | 5.95E-10 | 6.1918   | 1376071 | Asthma |
| rs3771197  | 2 | 102199089 | T | C | 0.3582 | 0.0305  | 0.0049 | 6.80E-10 | 6.1707   | 1376071 | Asthma |
| rs3771196  | 2 | 102199267 | A | T | 0.3581 | 0.0305  | 0.0049 | 6.39E-10 | 6.1805   | 1376071 | Asthma |
| rs3821207  | 2 | 102199313 | C | T | 0.3582 | 0.0304  | 0.0049 | 7.03E-10 | 6.1655   | 1376071 | Asthma |
| rs3771195  | 2 | 102199562 | T | C | 0.3582 | 0.0304  | 0.0049 | 7.02E-10 | 6.1658   | 1376071 | Asthma |
| rs3771194  | 2 | 102199642 | C | T | 0.3580 | 0.0305  | 0.0049 | 6.32E-10 | 6.1822   | 1376071 | Asthma |
| rs3771193  | 2 | 102199672 | T | G | 0.3580 | 0.0305  | 0.0049 | 6.38E-10 | 6.1808   | 1376071 | Asthma |
| rs3771192  | 2 | 102199680 | A | C | 0.3582 | 0.0304  | 0.0049 | 6.93E-10 | 6.1678   | 1376071 | Asthma |
| rs56117350 | 2 | 102200027 | T | C | 0.3582 | 0.0306  | 0.0049 | 5.87E-10 | 6.1940   | 1376071 | Asthma |
| rs12474258 | 2 | 102200235 | C | T | 0.3783 | -0.0533 | 0.0049 | 6.58E-28 | -10.9508 | 1376071 | Asthma |
| rs17026782 | 2 | 102200617 | G | A | 0.2676 | 0.0346  | 0.0055 | 3.44E-10 | 6.2776   | 1316443 | Asthma |
| rs11678651 | 2 | 102200694 | T | G | 0.3582 | 0.0304  | 0.0049 | 7.11E-10 | 6.1636   | 1376071 | Asthma |
| rs3755290  | 2 | 102200986 | C | A | 0.3582 | 0.0304  | 0.0049 | 7.20E-10 | 6.1616   | 1376071 | Asthma |
| rs3821206  | 2 | 102201188 | T | C | 0.1266 | 0.0475  | 0.0071 | 1.60E-11 | 6.7386   | 1376071 | Asthma |
| rs2302624  | 2 | 102201373 | G | A | 0.3601 | 0.0297  | 0.0053 | 1.99E-08 | 5.6130   | 1246149 | Asthma |
| rs2302623  | 2 | 102201494 | T | A | 0.3582 | 0.0304  | 0.0049 | 7.11E-10 | 6.1634   | 1376071 | Asthma |
| rs3755289  | 2 | 102202086 | A | C | 0.3582 | 0.0304  | 0.0049 | 6.93E-10 | 6.1677   | 1376071 | Asthma |
| rs1922302  | 2 | 102202589 | T | G | 0.3782 | -0.0532 | 0.0049 | 7.42E-28 | -10.9402 | 1376071 | Asthma |
| rs1116823  | 2 | 102203810 | T | G | 0.3582 | 0.0304  | 0.0049 | 7.71E-10 | 6.1506   | 1376071 | Asthma |
| rs1960461  | 2 | 102203851 | C | T | 0.3582 | 0.0305  | 0.0049 | 6.89E-10 | 6.1685   | 1376071 | Asthma |
| rs78196355 | 2 | 102204448 | T | C | 0.3580 | 0.0306  | 0.0049 | 6.23E-10 | 6.1844   | 1376071 | Asthma |
| rs76813038 | 2 | 102204556 | G | A | 0.3580 | 0.0305  | 0.0049 | 6.35E-10 | 6.1815   | 1376071 | Asthma |
| rs76842562 | 2 | 102204559 | T | G | 0.3580 | 0.0305  | 0.0049 | 6.26E-10 | 6.1837   | 1376071 | Asthma |
| rs1117797  | 2 | 102204722 | C | T | 0.1266 | 0.0475  | 0.0071 | 1.57E-11 | 6.7417   | 1376071 | Asthma |
| rs76145578 | 2 | 102204816 | G | A | 0.3580 | 0.0305  | 0.0049 | 6.49E-10 | 6.1781   | 1376071 | Asthma |
| rs72820147 | 2 | 102204987 | G | A | 0.3580 | 0.0305  | 0.0049 | 6.44E-10 | 6.1793   | 1376071 | Asthma |
| rs7574448  | 2 | 102205046 | C | T | 0.3580 | 0.0305  | 0.0049 | 6.50E-10 | 6.1778   | 1376071 | Asthma |
| rs7583664  | 2 | 102205087 | T | G | 0.3599 | 0.0298  | 0.0053 | 1.79E-08 | 5.6309   | 1246149 | Asthma |
| rs7558154  | 2 | 102205218 | G | C | 0.3579 | 0.0306  | 0.0049 | 5.94E-10 | 6.1920   | 1376071 | Asthma |
| rs7558268  | 2 | 102205391 | T | C | 0.3579 | 0.0306  | 0.0049 | 5.89E-10 | 6.1935   | 1376071 | Asthma |
| rs74597567 | 2 | 102205658 | C | T | 0.3579 | 0.0306  | 0.0049 | 6.22E-10 | 6.1848   | 1376071 | Asthma |
| rs72820152 | 2 | 102205708 | A | G | 0.3579 | 0.0306  | 0.0049 | 5.87E-10 | 6.1939   | 1376071 | Asthma |
| rs1960510  | 2 | 102205805 | T | C | 0.3782 | -0.0534 | 0.0049 | 5.50E-28 | -10.9672 | 1376071 | Asthma |
| rs79901634 | 2 | 102205854 | A | G | 0.3579 | 0.0306  | 0.0049 | 5.99E-10 | 6.1907   | 1376071 | Asthma |
| rs55935523 | 2 | 102205972 | A | G | 0.3579 | 0.0306  | 0.0049 | 5.93E-10 | 6.1923   | 1376071 | Asthma |
| rs1922299  | 2 | 102206046 | A | T | 0.3579 | 0.0306  | 0.0049 | 6.00E-10 | 6.1903   | 1376071 | Asthma |
| rs1922298  | 2 | 102206159 | C | G | 0.3579 | 0.0306  | 0.0049 | 5.98E-10 | 6.1912   | 1376071 | Asthma |
| rs1922297  | 2 | 102206389 | A | G | 0.3579 | 0.0306  | 0.0049 | 6.02E-10 | 6.1898   | 1376071 | Asthma |
| rs1922296  | 2 | 102206419 | T | C | 0.3579 | 0.0306  | 0.0049 | 6.19E-10 | 6.1857   | 1376071 | Asthma |
| rs4851557  | 2 | 102206464 | A | T | 0.3579 | 0.0306  | 0.0049 | 6.15E-10 | 6.1866   | 1376071 | Asthma |
| rs4851558  | 2 | 102206636 | T | G | 0.3579 | 0.0306  | 0.0049 | 5.99E-10 | 6.1907   | 1376071 | Asthma |
| rs4851559  | 2 | 102206693 | T | C | 0.3580 | 0.0305  | 0.0049 | 6.60E-10 | 6.1755   | 1376071 | Asthma |
| rs2080311  | 2 | 102206716 | T | C | 0.1266 | 0.0475  | 0.0070 | 1.66E-11 | 6.7329   | 1376071 | Asthma |
| rs56112655 | 2 | 102206864 | A | G | 0.3579 | 0.0306  | 0.0049 | 6.17E-10 | 6.1862   | 1376071 | Asthma |
| rs2141865  | 2 | 102207026 | A | C | 0.3579 | 0.0306  | 0.0049 | 5.99E-10 | 6.1907   | 1376071 | Asthma |
| rs2141864  | 2 | 102207038 | C | A | 0.3579 | 0.0306  | 0.0049 | 6.11E-10 | 6.1875   | 1376071 | Asthma |
| rs2178675  | 2 | 102207334 | G | A | 0.3579 | 0.0306  | 0.0049 | 6.22E-10 | 6.1850   | 1376071 | Asthma |
| rs2310236  | 2 | 102207437 | G | A | 0.3579 | 0.0306  | 0.0049 | 5.98E-10 | 6.1910   | 1376071 | Asthma |
| rs2310237  | 2 | 102207608 | A | G | 0.3579 | 0.0306  | 0.0049 | 6.05E-10 | 6.1892   | 1376071 | Asthma |
| rs2310238  | 2 | 102207629 | A | G | 0.3579 | 0.0305  | 0.0049 | 6.32E-10 | 6.1823   | 1376071 | Asthma |
| rs2871457  | 2 | 102207675 | G | T | 0.3580 | 0.0306  | 0.0049 | 6.16E-10 | 6.1864   | 1376071 | Asthma |
| rs2310239  | 2 | 102207741 | A | G | 0.3580 | 0.0305  | 0.0049 | 6.61E-10 | 6.1751   | 1376071 | Asthma |
| rs4471912  | 2 | 102207974 | A | G | 0.3580 | 0.0306  | 0.0049 | 6.15E-10 | 6.1865   | 1376071 | Asthma |
| rs11677606 | 2 | 102208018 | A | T | 0.3579 | 0.0305  | 0.0049 | 6.31E-10 | 6.1824   | 1376071 | Asthma |
| rs6543110  | 2 | 102208094 | T | C | 0.3580 | 0.0305  | 0.0049 | 6.34E-10 | 6.1818   | 1376071 | Asthma |
| rs1465326  | 2 | 102208376 | G | C | 0.3597 | 0.0298  | 0.0053 | 1.82E-08 | 5.6280   | 1246149 | Asthma |
| rs2871458  | 2 | 102208624 | C | T | 0.3580 | 0.0306  | 0.0049 | 6.23E-10 | 6.1847   | 1376071 | Asthma |
| rs7569116  | 2 | 102208647 | C | T | 0.3580 | 0.0305  | 0.0049 | 6.38E-10 | 6.1807   | 1376071 | Asthma |
| rs7566395  | 2 | 102208729 | C | A | 0.3580 | 0.0306  | 0.0049 | 6.30E-10 | 6.1827   | 1376071 | Asthma |
| rs7605715  | 2 | 102208737 | T | C | 0.3580 | 0.0306  | 0.0049 | 6.22E-10 | 6.1848   | 1376071 | Asthma |
| rs17020717 | 2 | 102209679 | T | C | 0.3582 | 0.0307  | 0.0049 | 5.49E-10 | 6.2044   | 1376071 | Asthma |
| rs11673864 | 2 | 102210087 | G | C | 0.3579 | 0.0306  | 0.0049 | 6.21E-10 | 6.1851   | 1376071 | Asthma |
| rs2080310  | 2 | 102210504 | G | A | 0.3579 | 0.0306  | 0.0049 | 6.20E-10 | 6.1853   | 1376071 | Asthma |
| rs1922289  | 2 | 102210783 | T | G | 0.3579 | 0.0305  | 0.0049 | 6.36E-10 | 6.1814   | 1376071 | Asthma |
| rs11686153 | 2 | 102211036 | T | G | 0.3580 | 0.0305  | 0.0049 | 6.46E-10 | 6.1788   | 1376071 | Asthma |
| rs1922290  | 2 | 102212308 | C | G | 0.3580 | 0.0305  | 0.0049 | 6.32E-10 | 6.1823   | 1376071 | Asthma |
| rs1922291  | 2 | 102212357 | A | G | 0.3782 | -0.0533 | 0.0049 | 6.69E-28 | -10.9494 | 1376071 | Asthma |

|            |   |           |   |   |        |         |        |          |          |         |        |
|------------|---|-----------|---|---|--------|---------|--------|----------|----------|---------|--------|
| rs1922292  | 2 | 102212553 | A | C | 0.3664 | 0.0307  | 0.0049 | 3.75E-10 | 6.2644   | 1376071 | Asthma |
| rs34870699 | 2 | 102212941 | T | C | 0.3580 | 0.0305  | 0.0049 | 6.40E-10 | 6.1803   | 1376071 | Asthma |
| rs11678722 | 2 | 102213347 | T | C | 0.3580 | 0.0306  | 0.0049 | 5.89E-10 | 6.1934   | 1376071 | Asthma |
| rs6743219  | 2 | 102215251 | T | C | 0.3781 | -0.0532 | 0.0049 | 8.40E-28 | -10.9288 | 1376071 | Asthma |
| rs35917382 | 2 | 102216605 | T | C | 0.3583 | 0.0304  | 0.0049 | 6.91E-10 | 6.1681   | 1376071 | Asthma |
| rs4851001  | 2 | 102217096 | T | C | 0.3583 | 0.0304  | 0.0049 | 6.74E-10 | 6.1720   | 1376071 | Asthma |
| rs4851560  | 2 | 102217582 | A | G | 0.3584 | 0.0305  | 0.0049 | 6.69E-10 | 6.1734   | 1376071 | Asthma |
| rs4851002  | 2 | 102218508 | T | C | 0.3583 | 0.0304  | 0.0049 | 7.50E-10 | 6.1552   | 1376071 | Asthma |
| rs3815517  | 2 | 102218783 | A | T | 0.3583 | 0.0304  | 0.0049 | 7.30E-10 | 6.1594   | 1376071 | Asthma |
| rs2241130  | 2 | 102219246 | C | T | 0.1266 | 0.0475  | 0.0070 | 1.56E-11 | 6.7423   | 1376071 | Asthma |
| rs1922295  | 2 | 102219351 | T | C | 0.3583 | 0.0303  | 0.0049 | 8.22E-10 | 6.1406   | 1376071 | Asthma |
| rs17026825 | 2 | 102220205 | T | A | 0.1266 | 0.0474  | 0.0070 | 1.61E-11 | 6.7377   | 1376071 | Asthma |
| rs11696062 | 2 | 102220492 | T | C | 0.3583 | 0.0304  | 0.0049 | 7.57E-10 | 6.1536   | 1376071 | Asthma |
| rs917994   | 2 | 102220954 | G | A | 0.3780 | -0.0531 | 0.0049 | 9.39E-28 | -10.9188 | 1376071 | Asthma |
| rs2041753  | 2 | 102221066 | C | A | 0.3584 | 0.0305  | 0.0049 | 6.58E-10 | 6.1759   | 1376071 | Asthma |
| rs2041752  | 2 | 102221231 | T | C | 0.3585 | 0.0304  | 0.0049 | 6.93E-10 | 6.1677   | 1376071 | Asthma |
| rs1024791  | 2 | 102221450 | C | T | 0.1266 | 0.0475  | 0.0070 | 1.56E-11 | 6.7419   | 1376071 | Asthma |
| rs2160226  | 2 | 102221824 | A | G | 0.3585 | 0.0304  | 0.0049 | 7.00E-10 | 6.1661   | 1376071 | Asthma |
| rs11687459 | 2 | 102222231 | A | G | 0.3585 | 0.0304  | 0.0049 | 6.97E-10 | 6.1667   | 1376071 | Asthma |
| rs72820175 | 2 | 102222351 | C | T | 0.3585 | 0.0304  | 0.0049 | 7.11E-10 | 6.1637   | 1376071 | Asthma |
| rs6715919  | 2 | 102222739 | T | C | 0.3585 | 0.0304  | 0.0049 | 7.17E-10 | 6.1622   | 1376071 | Asthma |
| rs6733727  | 2 | 102222759 | C | T | 0.3585 | 0.0304  | 0.0049 | 6.53E-10 | 6.1771   | 1376071 | Asthma |
| rs995515   | 2 | 102222922 | C | T | 0.3585 | 0.0305  | 0.0049 | 6.52E-10 | 6.1773   | 1376071 | Asthma |
| rs995514   | 2 | 102222996 | T | C | 0.3585 | 0.0307  | 0.0049 | 4.67E-10 | 6.2298   | 1376071 | Asthma |
| rs12474373 | 2 | 102222997 | A | G | 0.1266 | 0.0475  | 0.0070 | 1.59E-11 | 6.7395   | 1376071 | Asthma |
| rs1922293  | 2 | 102223295 | C | T | 0.3585 | 0.0303  | 0.0049 | 7.30E-10 | 6.1593   | 1376071 | Asthma |
| rs3755287  | 2 | 102223396 | A | G | 0.1267 | 0.0473  | 0.0070 | 1.83E-11 | 6.7193   | 1376071 | Asthma |
| rs3729564  | 2 | 102223595 | T | C | 0.3586 | 0.0304  | 0.0049 | 6.92E-10 | 6.1677   | 1376071 | Asthma |
| rs3771188  | 2 | 102223888 | C | T | 0.1267 | 0.0474  | 0.0070 | 1.56E-11 | 6.7427   | 1376071 | Asthma |
| rs3771187  | 2 | 102223898 | G | A | 0.4852 | 0.0492  | 0.0047 | 1.71E-25 | 10.4351  | 1376071 | Asthma |
| rs3771186  | 2 | 102223951 | A | G | 0.1267 | 0.0475  | 0.0070 | 1.44E-11 | 6.7537   | 1376071 | Asthma |
| rs3771185  | 2 | 102224047 | C | T | 0.4853 | 0.0492  | 0.0047 | 1.93E-25 | 10.4238  | 1376071 | Asthma |
| rs12472872 | 2 | 102224384 | G | T | 0.4852 | 0.0492  | 0.0047 | 1.72E-25 | 10.4348  | 1376071 | Asthma |
| rs34088260 | 2 | 102224460 | A | G | 0.3586 | 0.0305  | 0.0049 | 6.36E-10 | 6.1813   | 1376071 | Asthma |
| rs12473710 | 2 | 102224519 | C | T | 0.4842 | 0.0497  | 0.0047 | 6.95E-26 | 10.5206  | 1376071 | Asthma |
| rs12472862 | 2 | 102224534 | G | A | 0.4842 | 0.0497  | 0.0047 | 6.90E-26 | 10.5212  | 1376071 | Asthma |
| rs12468673 | 2 | 102224582 | G | C | 0.1254 | 0.0485  | 0.0071 | 8.11E-12 | 6.8366   | 1376071 | Asthma |
| rs12476585 | 2 | 102224685 | C | G | 0.4843 | 0.0498  | 0.0047 | 5.38E-26 | 10.5447  | 1376071 | Asthma |
| rs34778121 | 2 | 102225107 | T | C | 0.4841 | 0.0502  | 0.0047 | 1.99E-26 | 10.6375  | 1376071 | Asthma |
| rs35139442 | 2 | 102225186 | C | T | 0.4840 | 0.0503  | 0.0047 | 1.78E-26 | 10.6479  | 1376071 | Asthma |
| rs17637748 | 2 | 102225255 | G | A | 0.4840 | 0.0503  | 0.0047 | 1.86E-26 | 10.6436  | 1376071 | Asthma |
| rs2310241  | 2 | 102225489 | C | A | 0.4841 | 0.0504  | 0.0047 | 1.35E-26 | 10.6739  | 1376071 | Asthma |
| rs2302621  | 2 | 102225664 | G | T | 0.3755 | -0.0538 | 0.0052 | 6.20E-25 | -10.3123 | 1246149 | Asthma |
| rs2302620  | 2 | 102226007 | C | T | 0.1261 | 0.0494  | 0.0071 | 2.83E-12 | 6.9858   | 1376071 | Asthma |
| rs10198860 | 2 | 102226173 | A | T | 0.1261 | 0.0494  | 0.0071 | 2.87E-12 | 6.9841   | 1376071 | Asthma |
| rs13416449 | 2 | 102226205 | G | A | 0.1261 | 0.0492  | 0.0071 | 3.33E-12 | 6.9631   | 1376071 | Asthma |
| rs3771184  | 2 | 102226492 | A | G | 0.1260 | 0.0490  | 0.0071 | 4.12E-12 | 6.9331   | 1376071 | Asthma |
| rs3755286  | 2 | 102227381 | C | G | 0.1257 | 0.0480  | 0.0071 | 1.24E-11 | 6.7753   | 1376071 | Asthma |
| rs1997502  | 2 | 102227789 | A | G | 0.3246 | -0.0631 | 0.0052 | 2.10E-34 | -12.2319 | 1316443 | Asthma |
| rs3771182  | 2 | 102228167 | C | T | 0.1408 | 0.0437  | 0.0068 | 1.39E-10 | 6.4175   | 1376071 | Asthma |
| rs3771181  | 2 | 102230246 | G | A | 0.1258 | 0.0478  | 0.0071 | 1.53E-11 | 6.7450   | 1376071 | Asthma |
| rs6758443  | 2 | 102231602 | T | G | 0.1857 | 0.0382  | 0.0062 | 7.45E-10 | 6.1561   | 1316443 | Asthma |
| rs6731042  | 2 | 102231796 | A | C | 0.1409 | 0.0424  | 0.0070 | 1.07E-09 | 6.0988   | 1316443 | Asthma |
| rs955754   | 2 | 102232621 | C | T | 0.1858 | 0.0383  | 0.0062 | 6.68E-10 | 6.1736   | 1316443 | Asthma |
| rs34188221 | 2 | 102233665 | T | C | 0.1259 | 0.0457  | 0.0072 | 2.93E-10 | 6.3024   | 1316443 | Asthma |
| rs6709635  | 2 | 102233979 | A | G | 0.1857 | 0.0382  | 0.0062 | 7.53E-10 | 6.1545   | 1316443 | Asthma |
| rs6754556  | 2 | 102234464 | T | A | 0.1858 | 0.0382  | 0.0062 | 7.39E-10 | 6.1574   | 1316443 | Asthma |
| rs2302612  | 2 | 102235248 | C | T | 0.1866 | 0.0382  | 0.0062 | 6.55E-10 | 6.1766   | 1316443 | Asthma |
| rs3755284  | 2 | 102235966 | A | T | 0.1417 | 0.0420  | 0.0069 | 1.43E-09 | 6.0519   | 1316443 | Asthma |
| rs3821205  | 2 | 102236305 | T | C | 0.3947 | 0.0381  | 0.0051 | 8.69E-14 | 7.4595   | 1008051 | Asthma |
| rs10167431 | 2 | 102236342 | T | C | 0.4544 | -0.0552 | 0.0048 | 4.51E-30 | -11.3935 | 1316443 | Asthma |
| rs2287041  | 2 | 102236406 | T | G | 0.1385 | 0.0436  | 0.0070 | 4.75E-10 | 6.2270   | 1316443 | Asthma |
| rs2287040  | 2 | 102236520 | T | C | 0.3620 | 0.0342  | 0.0049 | 3.79E-12 | 6.9448   | 1376071 | Asthma |
| rs7572853  | 2 | 102237323 | A | G | 0.1482 | 0.0406  | 0.0068 | 2.23E-09 | 5.9803   | 1316443 | Asthma |
| rs7572871  | 2 | 102237378 | A | G | 0.1481 | 0.0405  | 0.0068 | 2.40E-09 | 5.9680   | 1316443 | Asthma |
| rs7583215  | 2 | 102237594 | T | C | 0.1481 | 0.0413  | 0.0072 | 9.04E-09 | 5.7478   | 948423  | Asthma |
| rs3755282  | 2 | 102238422 | T | C | 0.3345 | 0.0317  | 0.0052 | 9.37E-10 | 6.1198   | 1316443 | Asthma |
| rs11692230 | 2 | 102238605 | G | A | 0.4207 | 0.0346  | 0.0049 | 2.26E-12 | 7.0171   | 1316443 | Asthma |
| rs72998585 | 2 | 102242030 | T | A | 0.1362 | -0.1124 | 0.0069 | 2.28E-59 | -16.2488 | 1316443 | Asthma |
| rs10178214 | 2 | 102242461 | T | G | 0.1748 | -0.0897 | 0.0063 | 1.06E-46 | -14.3505 | 1316443 | Asthma |
| rs13027294 | 2 | 102243614 | C | G | 0.1747 | -0.0895 | 0.0062 | 1.60E-46 | -14.3216 | 1316443 | Asthma |
| rs1812326  | 2 | 102243951 | T | C | 0.3845 | 0.0342  | 0.0049 | 2.22E-12 | 7.0199   | 1376071 | Asthma |
| rs12468355 | 2 | 102244790 | G | T | 0.3848 | 0.0338  | 0.0049 | 3.27E-12 | 6.9658   | 1376071 | Asthma |
| rs1558626  | 2 | 102245610 | A | T | 0.3848 | 0.0339  | 0.0049 | 3.17E-12 | 6.9701   | 1376071 | Asthma |

|             |   |           |   |   |        |         |        |          |          |         |        |
|-------------|---|-----------|---|---|--------|---------|--------|----------|----------|---------|--------|
| rs1558624   | 2 | 102245773 | G | A | 0.3848 | 0.0339  | 0.0049 | 2.89E-12 | 6.9828   | 1376071 | Asthma |
| rs1558623   | 2 | 102245942 | A | T | 0.3847 | 0.0337  | 0.0049 | 3.84E-12 | 6.9430   | 1376071 | Asthma |
| rs1035131   | 2 | 102246181 | G | T | 0.3848 | 0.0339  | 0.0049 | 2.98E-12 | 6.9786   | 1376071 | Asthma |
| rs56238602  | 2 | 102246635 | T | G | 0.3847 | 0.0338  | 0.0049 | 3.47E-12 | 6.9570   | 1376071 | Asthma |
| rs2110661   | 2 | 102246761 | A | G | 0.3847 | 0.0338  | 0.0049 | 3.41E-12 | 6.9596   | 1376071 | Asthma |
| rs67880537  | 2 | 102247646 | G | A | 0.3847 | 0.0339  | 0.0049 | 3.45E-12 | 6.9580   | 1376071 | Asthma |
| rs17689452  | 2 | 102248221 | G | A | 0.3847 | 0.0338  | 0.0049 | 3.54E-12 | 6.9543   | 1376071 | Asthma |
| rs11677452  | 2 | 102248776 | T | A | 0.1750 | -0.0917 | 0.0061 | 8.41E-51 | -14.9911 | 1376071 | Asthma |
| rs9646944   | 2 | 102249415 | C | G | 0.1750 | -0.0917 | 0.0061 | 6.57E-51 | -15.0074 | 1376071 | Asthma |
| rs10186746  | 2 | 102249917 | A | G | 0.3792 | 0.0342  | 0.0049 | 2.42E-12 | 7.0078   | 1376071 | Asthma |
| rs13406331  | 2 | 102250184 | A | G | 0.1358 | -0.1157 | 0.0068 | 2.69E-65 | -17.0648 | 1376071 | Asthma |
| rs12464251  | 2 | 102250748 | G | C | 0.3809 | 0.0366  | 0.0049 | 5.60E-14 | 7.5171   | 1376071 | Asthma |
| rs56389410  | 2 | 102251203 | T | C | 0.3812 | 0.0364  | 0.0049 | 7.85E-14 | 7.4729   | 1376071 | Asthma |
| rs12470560  | 2 | 102252380 | C | T | 0.4948 | 0.0563  | 0.0047 | 1.56E-32 | 11.8769  | 1376071 | Asthma |
| rs12474199  | 2 | 102252520 | A | G | 0.4948 | 0.0564  | 0.0047 | 1.52E-32 | 11.8790  | 1376071 | Asthma |
| rs1420093   | 2 | 102253998 | C | T | 0.4947 | 0.0562  | 0.0047 | 2.44E-32 | 11.8395  | 1376071 | Asthma |
| rs10200410  | 2 | 102254411 | A | G | 0.4947 | 0.0561  | 0.0047 | 2.88E-32 | 11.8255  | 1376071 | Asthma |
| rs1345302   | 2 | 102256909 | G | A | 0.4946 | 0.0559  | 0.0047 | 4.79E-32 | 11.7828  | 1376071 | Asthma |
| rs13431601  | 2 | 102257253 | A | G | 0.4947 | 0.0561  | 0.0047 | 2.73E-32 | 11.8300  | 1376071 | Asthma |
| rs6719123   | 2 | 102259080 | G | C | 0.1753 | -0.0911 | 0.0061 | 2.93E-50 | -14.9078 | 1376071 | Asthma |
| rs1345301   | 2 | 102259127 | G | A | 0.4946 | 0.0562  | 0.0047 | 2.16E-32 | 11.8498  | 1376071 | Asthma |
| rs11686567  | 2 | 102260149 | G | A | 0.4946 | 0.0561  | 0.0047 | 2.79E-32 | 11.8283  | 1376071 | Asthma |
| rs11691721  | 2 | 102260219 | A | G | 0.4889 | 0.0527  | 0.0053 | 1.66E-23 | 9.9918   | 1193860 | Asthma |
| rs55712331  | 2 | 102260721 | T | G | 0.4946 | 0.0562  | 0.0047 | 2.20E-32 | 11.8481  | 1376071 | Asthma |
| rs2310243   | 2 | 102261100 | G | A | 0.4946 | 0.0561  | 0.0047 | 2.70E-32 | 11.8310  | 1376071 | Asthma |
| rs72820194  | 2 | 102261648 | T | C | 0.1314 | -0.1230 | 0.0069 | 3.46E-71 | -17.8392 | 1376071 | Asthma |
| rs13405355  | 2 | 102261746 | T | C | 0.4946 | 0.0561  | 0.0047 | 2.65E-32 | 11.8326  | 1376071 | Asthma |
| rs12475055  | 2 | 102262431 | C | A | 0.4947 | 0.0560  | 0.0047 | 3.03E-32 | 11.8214  | 1376071 | Asthma |
| rs10189629  | 2 | 102263004 | A | C | 0.1348 | -0.1172 | 0.0068 | 1.26E-66 | -17.2429 | 1376071 | Asthma |
| rs78545931  | 2 | 102265892 | G | A | 0.1686 | -0.0962 | 0.0096 | 1.76E-23 | -9.9856  | 380595  | Asthma |
| rs11692065  | 2 | 102267515 | T | C | 0.1443 | -0.1236 | 0.0071 | 3.76E-68 | -17.4444 | 1008051 | Asthma |
| rs11674302  | 2 | 102270668 | C | T | 0.1345 | -0.1185 | 0.0068 | 7.71E-68 | -17.4038 | 1376071 | Asthma |
| rs17026901  | 2 | 102273926 | C | T | 0.1141 | 0.0565  | 0.0075 | 5.30E-14 | 7.5242   | 1376071 | Asthma |
| rs60227565  | 2 | 102275879 | A | G | 0.1313 | -0.1240 | 0.0069 | 3.59E-72 | -17.9660 | 1376071 | Asthma |
| rs72627435  | 2 | 102281279 | C | T | 0.2171 | 0.0558  | 0.0059 | 4.44E-21 | 9.4216   | 1316443 | Asthma |
| rs72823611  | 2 | 102281422 | C | G | 0.0906 | -0.1184 | 0.0082 | 5.44E-47 | -14.3965 | 1316443 | Asthma |
| rs11690644  | 2 | 102297754 | G | A | 0.1355 | -0.1255 | 0.0068 | 1.73E-75 | -18.3847 | 1376071 | Asthma |
| rs10515922  | 2 | 102298194 | G | A | 0.1003 | 0.0620  | 0.0080 | 6.81E-15 | 7.7881   | 1376071 | Asthma |
| rs13418548  | 2 | 102300779 | T | C | 0.1381 | -0.1239 | 0.0067 | 2.50E-75 | -18.3650 | 1376071 | Asthma |
| rs72823619  | 2 | 102308155 | T | C | 0.1381 | -0.1238 | 0.0067 | 2.86E-75 | -18.3570 | 1376071 | Asthma |
| rs56224165  | 2 | 102308763 | T | A | 0.3127 | 0.0803  | 0.0051 | 6.92E-55 | 15.6034  | 1376071 | Asthma |
| rs72823621  | 2 | 102308975 | T | C | 0.1381 | -0.1238 | 0.0067 | 2.91E-75 | -18.3573 | 1376071 | Asthma |
| rs4851564   | 2 | 102309330 | C | G | 0.3127 | 0.0803  | 0.0051 | 6.82E-55 | 15.6040  | 1376071 | Asthma |
| rs12470864  | 2 | 102309902 | A | G | 0.3856 | 0.0817  | 0.0049 | 3.30E-63 | 16.7820  | 1376071 | Asthma |
| rs12470867  | 2 | 102309906 | A | G | 0.3160 | 0.0786  | 0.0056 | 1.69E-44 | 13.9943  | 1219993 | Asthma |
| rs72823628  | 2 | 102312157 | A | G | 0.1343 | -0.1274 | 0.0076 | 5.07E-63 | -16.7567 | 1193860 | Asthma |
| rs72823632  | 2 | 102315074 | T | C | 0.1389 | -0.1231 | 0.0067 | 7.49E-75 | -18.3062 | 1376071 | Asthma |
| rs72823635  | 2 | 102315152 | C | T | 0.1473 | -0.1310 | 0.0070 | 1.49E-77 | -18.6409 | 1008051 | Asthma |
| rs13020553  | 2 | 102315366 | G | C | 0.3857 | 0.0814  | 0.0049 | 9.23E-63 | 16.7209  | 1376071 | Asthma |
| rs950881    | 2 | 102316052 | T | G | 0.1382 | -0.1234 | 0.0067 | 4.80E-75 | -18.3294 | 1376071 | Asthma |
| rs950880    | 2 | 102316102 | A | C | 0.3858 | 0.0812  | 0.0049 | 1.28E-62 | 16.7017  | 1376071 | Asthma |
| rs10179458  | 2 | 102318514 | T | C | 0.1381 | -0.1237 | 0.0067 | 2.79E-75 | -18.3592 | 1376071 | Asthma |
| rs11693204  | 2 | 102319514 | A | G | 0.3126 | 0.0801  | 0.0051 | 9.90E-55 | 15.5804  | 1376071 | Asthma |
| rs72823641  | 2 | 102319699 | A | T | 0.1371 | -0.1268 | 0.0068 | 2.91E-78 | -18.7289 | 1376071 | Asthma |
| rs10189154  | 2 | 102321084 | T | C | 0.1381 | -0.1239 | 0.0067 | 2.06E-75 | -18.3756 | 1376071 | Asthma |
| rs10189526  | 2 | 102321423 | T | C | 0.1381 | -0.1239 | 0.0067 | 2.07E-75 | -18.3759 | 1376071 | Asthma |
| rs13001325  | 2 | 102322576 | T | C | 0.3856 | 0.0814  | 0.0049 | 7.44E-63 | 16.7338  | 1376071 | Asthma |
| rs11679889  | 2 | 102324549 | A | G | 0.3140 | 0.0810  | 0.0056 | 5.17E-47 | 14.4000  | 1224666 | Asthma |
| rs11679893  | 2 | 102324577 | A | G | 0.1381 | -0.1238 | 0.0067 | 2.27E-75 | -18.3708 | 1376071 | Asthma |
| rs10865050  | 2 | 102324851 | A | G | 0.1381 | -0.1240 | 0.0067 | 1.25E-75 | -18.4021 | 1376071 | Asthma |
| rs12053429  | 2 | 102326325 | T | C | 0.1339 | -0.1245 | 0.0081 | 2.49E-53 | -15.3724 | 1094744 | Asthma |
| rs141508079 | 2 | 102327731 | G | A | 0.2126 | 0.0676  | 0.0064 | 2.74E-26 | 10.6078  | 1224666 | Asthma |
| rs59185885  | 2 | 102327786 | G | T | 0.1368 | -0.1244 | 0.0068 | 4.23E-75 | -18.3369 | 1376071 | Asthma |
| rs58815545  | 2 | 102328136 | T | A | 0.1387 | -0.1205 | 0.0073 | 4.87E-61 | -16.4827 | 1224666 | Asthma |
| rs144641193 | 2 | 102328661 | A | C | 0.1017 | 0.0718  | 0.0081 | 4.90E-19 | 8.9144   | 1376071 | Asthma |
| rs56192435  | 2 | 102330217 | G | A | 0.3126 | 0.0803  | 0.0051 | 5.57E-55 | 15.6170  | 1376071 | Asthma |
| rs1420104   | 2 | 102332010 | A | G | 0.3857 | 0.0815  | 0.0049 | 4.96E-63 | 16.7580  | 1376071 | Asthma |
| rs12479210  | 2 | 102332701 | T | C | 0.3858 | 0.0815  | 0.0049 | 4.63E-63 | 16.7620  | 1376071 | Asthma |
| rs13019081  | 2 | 102334362 | C | A | 0.3851 | 0.0820  | 0.0049 | 1.28E-63 | 16.8379  | 1376071 | Asthma |
| rs17026974  | 2 | 102335900 | A | G | 0.3072 | 0.0798  | 0.0052 | 8.41E-54 | 15.4432  | 1376071 | Asthma |
| rs3771180   | 2 | 102337157 | T | G | 0.1381 | -0.1245 | 0.0067 | 3.00E-76 | -18.4798 | 1376071 | Asthma |
| rs72823646  | 2 | 102337753 | A | G | 0.1381 | -0.1246 | 0.0067 | 2.66E-76 | -18.4862 | 1376071 | Asthma |
| rs13431828  | 2 | 102338193 | T | C | 0.1381 | -0.1246 | 0.0067 | 2.34E-76 | -18.4933 | 1376071 | Asthma |
| rs13408569  | 2 | 102338596 | C | G | 0.1380 | -0.1245 | 0.0067 | 4.04E-76 | -18.4632 | 1376071 | Asthma |



|             |   |           |   |   |        |         |        |          |          |         |        |
|-------------|---|-----------|---|---|--------|---------|--------|----------|----------|---------|--------|
| rs13408661  | 2 | 102338622 | A | G | 0.1381 | -0.1245 | 0.0067 | 3.50E-76 | -18.4720 | 1376071 | Asthma |
| rs1041973   | 2 | 102339008 | A | C | 0.2116 | -0.0769 | 0.0057 | 1.32E-41 | -13.5125 | 1376071 | Asthma |
| rs873022    | 2 | 102339223 | T | G | 0.3070 | 0.0799  | 0.0052 | 5.11E-54 | 15.4751  | 1376071 | Asthma |
| rs3771177   | 2 | 102339400 | T | G | 0.3070 | 0.0799  | 0.0052 | 5.88E-54 | 15.4659  | 1376071 | Asthma |
| rs10173081  | 2 | 102340888 | T | C | 0.1381 | -0.1243 | 0.0067 | 6.09E-76 | -18.4411 | 1376071 | Asthma |
| rs3732129   | 2 | 102341072 | C | T | 0.3070 | 0.0801  | 0.0052 | 2.76E-54 | 15.5145  | 1376071 | Asthma |
| rs1420101   | 2 | 102341256 | T | C | 0.3805 | 0.0810  | 0.0049 | 5.76E-62 | 16.6116  | 1376071 | Asthma |
| rs12905     | 2 | 102343547 | A | G | 0.2987 | 0.0792  | 0.0052 | 2.79E-52 | 15.2153  | 1376071 | Asthma |
| rs3771175   | 2 | 102343750 | A | T | 0.1387 | -0.1237 | 0.0067 | 7.78E-76 | -18.4286 | 1376071 | Asthma |
| rs3821204   | 2 | 102343821 | G | C | 0.2992 | 0.0792  | 0.0052 | 2.65E-52 | 15.2189  | 1376071 | Asthma |
| rs13001714  | 2 | 102344025 | G | A | 0.4013 | 0.0763  | 0.0048 | 2.09E-56 | 15.8252  | 1376071 | Asthma |
| rs12712142  | 2 | 102344124 | A | C | 0.4013 | 0.0763  | 0.0048 | 1.94E-56 | 15.8298  | 1376071 | Asthma |
| rs2160203   | 2 | 102344364 | G | A | 0.2483 | -0.0913 | 0.0054 | 3.37E-63 | -16.7808 | 1376071 | Asthma |
| rs6543119   | 2 | 102346612 | T | A | 0.4021 | 0.0762  | 0.0048 | 1.86E-56 | 15.8326  | 1376071 | Asthma |
| rs13017455  | 2 | 102348282 | T | C | 0.4021 | 0.0762  | 0.0048 | 2.18E-56 | 15.8225  | 1376071 | Asthma |
| rs55927292  | 2 | 102348401 | T | C | 0.3034 | 0.0784  | 0.0052 | 8.25E-52 | 15.1444  | 1376071 | Asthma |
| rs17027006  | 2 | 102348872 | C | G | 0.3032 | 0.0786  | 0.0052 | 4.76E-52 | 15.1805  | 1376071 | Asthma |
| rs12469506  | 2 | 102349411 | T | C | 0.3032 | 0.0785  | 0.0052 | 6.51E-52 | 15.1598  | 1376071 | Asthma |
| rs1921622   | 2 | 102349607 | G | A | 0.4595 | -0.0721 | 0.0047 | 1.66E-52 | -15.2494 | 1376071 | Asthma |
| rs10208293  | 2 | 102349850 | A | G | 0.2768 | -0.0790 | 0.0053 | 1.31E-50 | -14.9615 | 1376071 | Asthma |
| rs10197862  | 2 | 102350089 | G | A | 0.1381 | -0.1238 | 0.0067 | 1.67E-75 | -18.3864 | 1376071 | Asthma |
| rs1861245   | 2 | 102350446 | T | C | 0.3440 | -0.0817 | 0.0081 | 5.12E-24 | -10.1076 | 844071  | Asthma |
| rs13424006  | 2 | 102350776 | C | T | 0.3860 | -0.0745 | 0.0048 | 2.19E-53 | -15.3813 | 1376071 | Asthma |
| rs6751967   | 2 | 102350953 | C | T | 0.3855 | -0.0744 | 0.0048 | 4.12E-53 | -15.3401 | 1376071 | Asthma |
| rs6751977   | 2 | 102350970 | C | T | 0.3855 | -0.0744 | 0.0048 | 3.93E-53 | -15.3431 | 1376071 | Asthma |
| rs6704565   | 2 | 102350971 | A | G | 0.3855 | -0.0744 | 0.0048 | 3.87E-53 | -15.3444 | 1376071 | Asthma |
| rs6749114   | 2 | 102351127 | C | A | 0.3888 | -0.0755 | 0.0052 | 6.52E-48 | -14.5425 | 1246149 | Asthma |
| rs11123923  | 2 | 102351384 | A | C | 0.4023 | 0.0763  | 0.0048 | 1.15E-56 | 15.8625  | 1376071 | Asthma |
| rs6734742   | 2 | 102351397 | T | C | 0.3859 | -0.0744 | 0.0048 | 3.20E-53 | -15.3567 | 1376071 | Asthma |
| rs6752482   | 2 | 102351398 | C | T | 0.3860 | -0.0745 | 0.0048 | 2.38E-53 | -15.3757 | 1376071 | Asthma |
| rs4988955   | 2 | 102351468 | G | A | 0.3860 | -0.0745 | 0.0048 | 2.33E-53 | -15.3771 | 1376071 | Asthma |
| rs4988956   | 2 | 102351547 | A | G | 0.3861 | -0.0745 | 0.0048 | 2.52E-53 | -15.3719 | 1376071 | Asthma |
| rs4988957   | 2 | 102351615 | C | T | 0.3860 | -0.0745 | 0.0048 | 2.12E-53 | -15.3833 | 1376071 | Asthma |
| rs10192036  | 2 | 102351751 | A | C | 0.3859 | -0.0745 | 0.0048 | 1.99E-53 | -15.3874 | 1376071 | Asthma |
| rs10204137  | 2 | 102351752 | G | A | 0.3860 | -0.0746 | 0.0048 | 1.60E-53 | -15.4015 | 1376071 | Asthma |
| rs4988958   | 2 | 102351825 | C | T | 0.3860 | -0.0745 | 0.0048 | 2.26E-53 | -15.3790 | 1376071 | Asthma |
| rs10192157  | 2 | 102351896 | T | C | 0.3860 | -0.0743 | 0.0048 | 5.09E-53 | -15.3264 | 1376071 | Asthma |
| rs10206753  | 2 | 102351902 | C | T | 0.3860 | -0.0745 | 0.0048 | 1.96E-53 | -15.3886 | 1376071 | Asthma |
| rs72823661  | 2 | 102352256 | A | G | 0.3849 | -0.0742 | 0.0049 | 2.16E-51 | -15.0810 | 1349938 | Asthma |
| rs72823663  | 2 | 102352278 | C | G | 0.3849 | -0.0744 | 0.0049 | 6.02E-53 | -15.3155 | 1376071 | Asthma |
| rs67088699  | 2 | 102352291 | T | C | 0.3848 | -0.0743 | 0.0049 | 1.76E-51 | -15.0943 | 1349938 | Asthma |
| rs5010059   | 2 | 102352366 | G | C | 0.3817 | -0.0781 | 0.0067 | 2.57E-31 | -11.6402 | 973993  | Asthma |
| rs191370129 | 2 | 102353126 | C | T | 0.3808 | -0.0828 | 0.0079 | 1.57E-25 | -10.4438 | 778845  | Asthma |
| rs145573519 | 2 | 102353207 | T | A | 0.1262 | -0.1332 | 0.0115 | 2.99E-31 | -11.6274 | 778845  | Asthma |
| rs67723747  | 2 | 102353347 | C | C | 0.3034 | 0.0790  | 0.0052 | 1.82E-52 | 15.2436  | 1376071 | Asthma |
| rs11688559  | 2 | 102353453 | T | C | 0.3860 | -0.0747 | 0.0048 | 1.42E-53 | -15.4094 | 1376071 | Asthma |
| rs11688568  | 2 | 102353489 | T | C | 0.3860 | -0.0746 | 0.0048 | 1.67E-53 | -15.3988 | 1376071 | Asthma |
| rs11688573  | 2 | 102353511 | A | C | 0.3860 | -0.0746 | 0.0048 | 1.89E-53 | -15.3906 | 1376071 | Asthma |
| rs11689730  | 2 | 102353524 | A | C | 0.3861 | -0.0745 | 0.0048 | 2.10E-53 | -15.3838 | 1376071 | Asthma |
| rs11695627  | 2 | 102353645 | G | A | 0.3860 | -0.0746 | 0.0048 | 1.71E-53 | -15.3971 | 1376071 | Asthma |
| rs7558339   | 2 | 102353783 | G | T | 0.3861 | -0.0747 | 0.0048 | 1.39E-53 | -15.4107 | 1376071 | Asthma |
| rs7608638   | 2 | 102353829 | G | A | 0.3889 | -0.0755 | 0.0052 | 6.01E-48 | -14.5480 | 1246149 | Asthma |
| rs4485584   | 2 | 102354290 | C | T | 0.3848 | -0.0743 | 0.0049 | 7.47E-53 | -15.3015 | 1376071 | Asthma |
| rs4485585   | 2 | 102354299 | C | T | 0.3855 | -0.0745 | 0.0048 | 2.81E-53 | -15.3649 | 1376071 | Asthma |
| rs4488681   | 2 | 102354353 | C | T | 0.3846 | -0.0743 | 0.0049 | 7.13E-53 | -15.3045 | 1376071 | Asthma |
| rs4311080   | 2 | 102354356 | G | C | 0.3846 | -0.0743 | 0.0049 | 7.41E-53 | -15.3020 | 1376071 | Asthma |
| rs56386507  | 2 | 102354705 | T | C | 0.3034 | 0.0788  | 0.0052 | 2.34E-52 | 15.2269  | 1376071 | Asthma |
| rs9807989   | 2 | 102354740 | C | T | 0.3261 | -0.0753 | 0.0052 | 2.13E-48 | -14.6188 | 1316443 | Asthma |
| rs9808453   | 2 | 102354846 | A | C | 0.3861 | -0.0746 | 0.0048 | 1.85E-53 | -15.3920 | 1376071 | Asthma |
| rs4851565   | 2 | 102355021 | A | C | 0.3862 | -0.0744 | 0.0048 | 2.89E-53 | -15.3632 | 1376071 | Asthma |
| rs9807962   | 2 | 102355204 | G | A | 0.3861 | -0.0746 | 0.0048 | 1.68E-53 | -15.3984 | 1376071 | Asthma |
| rs4851566   | 2 | 102356339 | C | G | 0.3859 | -0.0742 | 0.0048 | 6.64E-53 | -15.3093 | 1376071 | Asthma |
| rs11678360  | 2 | 102357439 | G | A | 0.3859 | -0.0740 | 0.0048 | 1.35E-52 | -15.2634 | 1376071 | Asthma |
| rs12999364  | 2 | 102357669 | T | C | 0.4021 | 0.0762  | 0.0048 | 2.08E-56 | 15.8256  | 1376071 | Asthma |
| rs56179005  | 2 | 102357868 | A | G | 0.1380 | -0.1234 | 0.0067 | 7.62E-75 | -18.3046 | 1376071 | Asthma |
| rs7603730   | 2 | 102357911 | C | A | 0.3887 | -0.0749 | 0.0052 | 3.63E-47 | -14.4247 | 1246149 | Asthma |
| rs12998521  | 2 | 102357957 | T | G | 0.4021 | 0.0761  | 0.0048 | 2.34E-56 | 15.8178  | 1376071 | Asthma |
| rs10170583  | 2 | 102358304 | A | G | 0.3859 | -0.0739 | 0.0048 | 1.59E-52 | -15.2523 | 1376071 | Asthma |
| rs10173977  | 2 | 102358590 | A | G | 0.3859 | -0.0739 | 0.0048 | 1.55E-52 | -15.2539 | 1376071 | Asthma |
| rs12987977  | 2 | 102358876 | G | T | 0.4022 | 0.0761  | 0.0048 | 2.43E-56 | 15.8153  | 1376071 | Asthma |
| rs10176664  | 2 | 102359712 | A | G | 0.3859 | -0.0740 | 0.0048 | 1.32E-52 | -15.2643 | 1376071 | Asthma |
| rs6543123   | 2 | 102360736 | T | C | 0.3859 | -0.0739 | 0.0048 | 1.59E-52 | -15.2524 | 1376071 | Asthma |
| rs11465563  | 2 | 102360776 | G | A | 0.0312 | 0.1110  | 0.0145 | 2.08E-14 | 7.6460   | 1376071 | Asthma |
| rs11123925  | 2 | 102361051 | A | G | 0.3859 | -0.0739 | 0.0048 | 1.54E-52 | -15.2544 | 1376071 | Asthma |

|            |   |           |   |   |        |         |        |          |          |         |        |
|------------|---|-----------|---|---|--------|---------|--------|----------|----------|---------|--------|
| rs6710885  | 2 | 102361077 | G | A | 0.4023 | 0.0761  | 0.0048 | 2.15E-56 | 15.8233  | 1376071 | Asthma |
| rs10204837 | 2 | 102361270 | A | C | 0.3860 | -0.0739 | 0.0048 | 1.93E-52 | -15.2397 | 1376071 | Asthma |
| rs3755276  | 2 | 102361999 | T | C | 0.3860 | -0.0739 | 0.0048 | 1.77E-52 | -15.2454 | 1376071 | Asthma |
| rs2287037  | 2 | 102362568 | T | C | 0.4022 | 0.0762  | 0.0048 | 2.05E-56 | 15.8264  | 1376071 | Asthma |
| rs9308857  | 2 | 102363164 | A | G | 0.3860 | -0.0739 | 0.0048 | 1.48E-52 | -15.2569 | 1376071 | Asthma |
| rs1420099  | 2 | 102364083 | G | C | 0.3860 | -0.0739 | 0.0048 | 1.64E-52 | -15.2502 | 1376071 | Asthma |
| rs11465576 | 2 | 102364517 | G | A | 0.0697 | 0.0763  | 0.0096 | 1.64E-15 | 7.9661   | 1376071 | Asthma |
| rs10182710 | 2 | 102364846 | G | A | 0.3860 | -0.0739 | 0.0048 | 1.89E-52 | -15.2407 | 1376071 | Asthma |
| rs72823669 | 2 | 102365573 | T | G | 0.1379 | -0.1239 | 0.0067 | 2.23E-75 | -18.3708 | 1376071 | Asthma |
| rs13392100 | 2 | 102365634 | A | C | 0.3860 | -0.0738 | 0.0048 | 2.22E-52 | -15.2304 | 1376071 | Asthma |
| rs4851569  | 2 | 102366787 | A | C | 0.4022 | 0.0760  | 0.0048 | 3.48E-56 | 15.7930  | 1376071 | Asthma |
| rs1420098  | 2 | 102367819 | C | T | 0.4023 | 0.0760  | 0.0048 | 4.45E-56 | 15.7772  | 1376071 | Asthma |
| rs1362348  | 2 | 102368164 | G | C | 0.3859 | -0.0737 | 0.0048 | 3.72E-52 | -15.1968 | 1376071 | Asthma |
| rs1882348  | 2 | 102368211 | A | T | 0.4023 | 0.0760  | 0.0048 | 3.97E-56 | 15.7849  | 1376071 | Asthma |
| rs3771172  | 2 | 102369352 | T | C | 0.3033 | 0.0783  | 0.0052 | 1.29E-51 | 15.1154  | 1376071 | Asthma |
| rs3771171  | 2 | 102369490 | C | T | 0.3033 | 0.0783  | 0.0052 | 1.23E-51 | 15.1181  | 1376071 | Asthma |
| rs2160202  | 2 | 102369694 | A | G | 0.3033 | 0.0783  | 0.0052 | 1.18E-51 | 15.1212  | 1376071 | Asthma |
| rs3771166  | 2 | 102369762 | A | G | 0.3860 | -0.0736 | 0.0048 | 5.02E-52 | -15.1771 | 1376071 | Asthma |
| rs1974675  | 2 | 102369915 | A | G | 0.3859 | -0.0736 | 0.0048 | 5.04E-52 | -15.1770 | 1376071 | Asthma |
| rs6543124  | 2 | 102370999 | A | T | 0.3844 | -0.0733 | 0.0049 | 2.53E-51 | -15.0706 | 1376071 | Asthma |
| rs17027029 | 2 | 102374188 | C | G | 0.1710 | -0.0996 | 0.0062 | 4.48E-58 | -16.0653 | 1376071 | Asthma |
| rs10439410 | 2 | 102374328 | G | T | 0.5135 | 0.0615  | 0.0047 | 7.52E-39 | 13.0372  | 1376071 | Asthma |
| rs6731157  | 2 | 102374731 | C | T | 0.5135 | 0.0614  | 0.0047 | 8.96E-39 | 13.0238  | 1376071 | Asthma |
| rs6745614  | 2 | 102374753 | A | G | 0.5135 | 0.0614  | 0.0047 | 8.42E-39 | 13.0288  | 1376071 | Asthma |
| rs6758936  | 2 | 102374909 | G | A | 0.5132 | 0.0614  | 0.0047 | 7.64E-39 | 13.0361  | 1376071 | Asthma |
| rs3771164  | 2 | 102375326 | T | A | 0.1711 | -0.1003 | 0.0062 | 6.99E-59 | -16.1802 | 1376071 | Asthma |
| rs2270298  | 2 | 102375619 | G | A | 0.3014 | 0.0786  | 0.0052 | 7.98E-52 | 15.1465  | 1376071 | Asthma |
| rs2041739  | 2 | 102377873 | C | T | 0.5145 | 0.0619  | 0.0047 | 2.24E-39 | 13.1290  | 1376071 | Asthma |
| rs17027037 | 2 | 102378424 | G | A | 0.3015 | 0.0785  | 0.0052 | 9.73E-52 | 15.1336  | 1376071 | Asthma |
| rs2080289  | 2 | 102378560 | A | G | 0.3015 | 0.0785  | 0.0052 | 9.78E-52 | 15.1333  | 1376071 | Asthma |
| rs12712144 | 2 | 102379140 | G | C | 0.1709 | -0.0998 | 0.0062 | 2.91E-58 | -16.0917 | 1376071 | Asthma |
| rs10208196 | 2 | 102379885 | G | A | 0.5134 | 0.0614  | 0.0047 | 9.27E-39 | 13.0214  | 1376071 | Asthma |
| rs11683700 | 2 | 102380345 | T | C | 0.3014 | 0.0785  | 0.0052 | 9.24E-52 | 15.1370  | 1376071 | Asthma |
| rs3821203  | 2 | 102380412 | T | C | 0.3015 | 0.0786  | 0.0052 | 8.08E-52 | 15.1459  | 1376071 | Asthma |
| rs72823677 | 2 | 102380591 | T | C | 0.1388 | -0.1245 | 0.0067 | 2.20E-76 | -18.4963 | 1376071 | Asthma |
| rs3771162  | 2 | 102380714 | T | A | 0.3015 | 0.0786  | 0.0052 | 7.50E-52 | 15.1507  | 1376071 | Asthma |
| rs7584093  | 2 | 102381261 | C | T | 0.5133 | 0.0614  | 0.0047 | 9.69E-39 | 13.0179  | 1376071 | Asthma |
| rs11465633 | 2 | 102381273 | T | G | 0.3013 | 0.0786  | 0.0052 | 8.10E-52 | 15.1456  | 1376071 | Asthma |
| rs3213733  | 2 | 102381424 | A | C | 0.1709 | -0.0999 | 0.0062 | 2.23E-58 | -16.1084 | 1376071 | Asthma |
| rs3213732  | 2 | 102381819 | A | G | 0.5135 | 0.0613  | 0.0047 | 1.09E-38 | 13.0090  | 1376071 | Asthma |
| rs10204757 | 2 | 102382514 | A | C | 0.5134 | 0.0613  | 0.0047 | 1.05E-38 | 13.0117  | 1376071 | Asthma |
| rs56258475 | 2 | 102382852 | G | A | 0.3014 | 0.0784  | 0.0052 | 1.21E-51 | 15.1189  | 1376071 | Asthma |
| rs7591246  | 2 | 102382943 | C | A | 0.5135 | 0.0613  | 0.0047 | 1.12E-38 | 13.0064  | 1376071 | Asthma |
| rs6760621  | 2 | 102383492 | T | C | 0.5134 | 0.0614  | 0.0047 | 1.07E-38 | 13.0100  | 1376071 | Asthma |
| rs11465641 | 2 | 102384408 | T | G | 0.5134 | 0.0613  | 0.0047 | 1.07E-38 | 13.0104  | 1376071 | Asthma |
| rs1035130  | 2 | 102384942 | T | C | 0.3014 | 0.0785  | 0.0052 | 9.09E-52 | 15.1379  | 1376071 | Asthma |
| rs2241116  | 2 | 102386805 | A | C | 0.2265 | 0.0647  | 0.0057 | 4.36E-30 | 11.3964  | 1376071 | Asthma |
| rs3771161  | 2 | 102387501 | A | C | 0.1709 | -0.0996 | 0.0062 | 3.47E-58 | -16.0810 | 1376071 | Asthma |
| rs3771159  | 2 | 102388498 | T | C | 0.5134 | 0.0612  | 0.0047 | 1.50E-38 | 12.9843  | 1376071 | Asthma |
| rs11903946 | 2 | 102388870 | A | G | 0.5134 | 0.0612  | 0.0047 | 1.52E-38 | 12.9837  | 1376071 | Asthma |
| rs6706002  | 2 | 102389644 | A | G | 0.5134 | 0.0612  | 0.0047 | 1.64E-38 | 12.9776  | 1376071 | Asthma |
| rs4851570  | 2 | 102389927 | G | A | 0.3015 | 0.0785  | 0.0052 | 1.11E-51 | 15.1247  | 1376071 | Asthma |
| rs6749014  | 2 | 102389988 | C | T | 0.5134 | 0.0612  | 0.0047 | 1.50E-38 | 12.9845  | 1376071 | Asthma |
| rs17027056 | 2 | 102390591 | T | C | 0.0693 | 0.0759  | 0.0096 | 2.84E-15 | 7.8978   | 1376071 | Asthma |
| rs17027060 | 2 | 102391107 | C | T | 0.3015 | 0.0784  | 0.0052 | 1.27E-51 | 15.1164  | 1376071 | Asthma |
| rs12712146 | 2 | 102392254 | C | T | 0.5135 | 0.0612  | 0.0047 | 1.50E-38 | 12.9847  | 1376071 | Asthma |
| rs66919607 | 2 | 102392509 | G | C | 0.3015 | 0.0784  | 0.0052 | 1.21E-51 | 15.1193  | 1376071 | Asthma |
| rs1420097  | 2 | 102392894 | C | G | 0.5134 | 0.0612  | 0.0047 | 1.59E-38 | 12.9803  | 1376071 | Asthma |
| rs11679146 | 2 | 102392952 | G | A | 0.1389 | -0.1249 | 0.0067 | 1.06E-76 | -18.5361 | 1376071 | Asthma |
| rs4851004  | 2 | 102393077 | C | T | 0.5101 | 0.0658  | 0.0050 | 4.80E-40 | 13.2453  | 1008051 | Asthma |
| rs6732138  | 2 | 102393202 | G | A | 0.5135 | 0.0611  | 0.0047 | 1.83E-38 | 12.9693  | 1376071 | Asthma |
| rs3771158  | 2 | 102393434 | G | A | 0.1713 | -0.1001 | 0.0062 | 9.29E-59 | -16.1623 | 1376071 | Asthma |
| rs2287035  | 2 | 102394070 | A | G | 0.3014 | 0.0784  | 0.0052 | 1.45E-51 | 15.1076  | 1376071 | Asthma |
| rs2287034  | 2 | 102394128 | A | C | 0.3014 | 0.0784  | 0.0052 | 1.31E-51 | 15.1138  | 1376071 | Asthma |
| rs1420096  | 2 | 102394452 | C | T | 0.5135 | 0.0612  | 0.0047 | 1.65E-38 | 12.9770  | 1376071 | Asthma |
| rs2287033  | 2 | 102394777 | T | C | 0.5135 | 0.0611  | 0.0047 | 1.81E-38 | 12.9703  | 1376071 | Asthma |
| rs4851005  | 2 | 102395092 | T | C | 0.3943 | 0.0628  | 0.0049 | 3.98E-38 | 12.9095  | 1376071 | Asthma |
| rs17027071 | 2 | 102396214 | T | C | 0.3026 | 0.0774  | 0.0052 | 1.47E-50 | 14.9539  | 1376071 | Asthma |
| rs10174323 | 2 | 102396321 | A | C | 0.1709 | -0.0998 | 0.0062 | 2.11E-58 | -16.1118 | 1376071 | Asthma |
| rs3732127  | 2 | 102397290 | C | G | 0.1713 | -0.1002 | 0.0062 | 8.30E-59 | -16.1700 | 1376071 | Asthma |
| rs3732126  | 2 | 102397502 | C | A | 0.3015 | 0.0784  | 0.0052 | 1.36E-51 | 15.1116  | 1376071 | Asthma |
| rs3732125  | 2 | 102397503 | C | G | 0.3013 | 0.0785  | 0.0052 | 1.11E-51 | 15.1248  | 1376071 | Asthma |
| rs1135354  | 2 | 102397842 | G | T | 0.3016 | 0.0784  | 0.0052 | 1.23E-51 | 15.1179  | 1376071 | Asthma |
| rs1420094  | 2 | 102399227 | C | T | 0.5135 | 0.0611  | 0.0047 | 1.79E-38 | 12.9707  | 1376071 | Asthma |

|            |   |           |   |   |        |         |        |          |          |         |        |
|------------|---|-----------|---|---|--------|---------|--------|----------|----------|---------|--------|
| rs17027087 | 2 | 102399458 | T | C | 0.3016 | 0.0785  | 0.0052 | 9.28E-52 | 15.1365  | 1376071 | Asthma |
| rs6710528  | 2 | 102399682 | C | T | 0.5135 | 0.0611  | 0.0047 | 1.81E-38 | 12.9700  | 1376071 | Asthma |
| rs3732124  | 2 | 102401592 | C | T | 0.5134 | 0.0612  | 0.0047 | 1.45E-38 | 12.9870  | 1376071 | Asthma |
| rs3732123  | 2 | 102401617 | G | C | 0.3007 | 0.0785  | 0.0052 | 1.22E-51 | 15.1188  | 1376071 | Asthma |
| rs12991737 | 2 | 102401668 | A | T | 0.1714 | -0.1007 | 0.0062 | 2.23E-59 | -16.2499 | 1376071 | Asthma |
| rs79739102 | 2 | 102401819 | C | T | 0.0816 | 0.0593  | 0.0089 | 2.27E-11 | 6.6876   | 1376071 | Asthma |
| rs4851571  | 2 | 102402540 | C | T | 0.5135 | 0.0612  | 0.0047 | 1.41E-38 | 12.9888  | 1376071 | Asthma |
| rs4851572  | 2 | 102402571 | G | A | 0.5135 | 0.0612  | 0.0047 | 1.51E-38 | 12.9842  | 1376071 | Asthma |
| rs10202813 | 2 | 102403280 | T | G | 0.1714 | -0.1006 | 0.0062 | 2.78E-59 | -16.2365 | 1376071 | Asthma |
| rs55742125 | 2 | 102403322 | A | G | 0.3007 | 0.0785  | 0.0052 | 1.19E-51 | 15.1204  | 1376071 | Asthma |
| rs1035129  | 2 | 102403325 | T | C | 0.5135 | 0.0612  | 0.0047 | 1.52E-38 | 12.9833  | 1376071 | Asthma |
| rs10197310 | 2 | 102403570 | A | T | 0.1714 | -0.1007 | 0.0062 | 2.33E-59 | -16.2478 | 1376071 | Asthma |
| rs2110662  | 2 | 102403679 | A | T | 0.5135 | 0.0612  | 0.0047 | 1.52E-38 | 12.9836  | 1376071 | Asthma |
| rs7594402  | 2 | 102404807 | A | T | 0.5135 | 0.0612  | 0.0047 | 1.46E-38 | 12.9865  | 1376071 | Asthma |
| rs6710034  | 2 | 102407218 | G | A | 0.5135 | 0.0612  | 0.0047 | 1.50E-38 | 12.9846  | 1376071 | Asthma |
| rs55883125 | 2 | 102407871 | A | G | 0.3008 | 0.0785  | 0.0052 | 1.03E-51 | 15.1297  | 1376071 | Asthma |
| rs7589142  | 2 | 102408200 | T | C | 0.5135 | 0.0612  | 0.0047 | 1.55E-38 | 12.9818  | 1376071 | Asthma |
| rs4851006  | 2 | 102408278 | A | T | 0.3007 | 0.0786  | 0.0052 | 9.19E-52 | 15.1374  | 1376071 | Asthma |
| rs10181785 | 2 | 102408814 | T | C | 0.1714 | -0.1006 | 0.0062 | 2.84E-59 | -16.2354 | 1376071 | Asthma |
| rs12712148 | 2 | 102409087 | A | G | 0.1714 | -0.1006 | 0.0062 | 2.82E-59 | -16.2365 | 1376071 | Asthma |
| rs11687768 | 2 | 102409278 | G | A | 0.1714 | -0.1006 | 0.0062 | 3.01E-59 | -16.2314 | 1376071 | Asthma |
| rs6730702  | 2 | 102410476 | T | C | 0.1714 | -0.1006 | 0.0062 | 2.98E-59 | -16.2332 | 1376071 | Asthma |
| rs6543126  | 2 | 102410644 | G | A | 0.5766 | 0.0614  | 0.0048 | 2.00E-37 | 12.7846  | 1376071 | Asthma |
| rs10203558 | 2 | 102411180 | T | C | 0.5137 | 0.0612  | 0.0047 | 1.65E-38 | 12.9770  | 1376071 | Asthma |
| rs10200952 | 2 | 102411191 | A | C | 0.5137 | 0.0613  | 0.0047 | 1.23E-38 | 12.9993  | 1376071 | Asthma |
| rs7559566  | 2 | 102411581 | G | T | 0.8197 | 0.0660  | 0.0084 | 3.71E-15 | 7.8645   | 781580  | Asthma |
| rs7586983  | 2 | 102411606 | T | C | 0.1714 | -0.1005 | 0.0062 | 3.55E-59 | -16.2219 | 1376071 | Asthma |
| rs6543127  | 2 | 102411841 | A | C | 0.5135 | 0.0613  | 0.0047 | 1.13E-38 | 13.0059  | 1376071 | Asthma |
| rs4851576  | 2 | 102412435 | C | T | 0.5134 | 0.0612  | 0.0047 | 1.34E-38 | 12.9933  | 1376071 | Asthma |
| rs4851577  | 2 | 102412461 | T | C | 0.5134 | 0.0612  | 0.0047 | 1.40E-38 | 12.9896  | 1376071 | Asthma |
| rs4851579  | 2 | 102412524 | G | A | 0.5135 | 0.0613  | 0.0047 | 1.27E-38 | 12.9971  | 1376071 | Asthma |
| rs11693955 | 2 | 102412705 | T | A | 0.3007 | 0.0785  | 0.0052 | 1.04E-51 | 15.1292  | 1376071 | Asthma |
| rs1592459  | 2 | 102415109 | A | G | 0.5135 | 0.0613  | 0.0047 | 1.30E-38 | 12.9952  | 1376071 | Asthma |
| rs1592458  | 2 | 102415289 | A | T | 0.5135 | 0.0613  | 0.0047 | 1.24E-38 | 12.9990  | 1376071 | Asthma |
| rs3755272  | 2 | 102417365 | A | T | 0.2257 | 0.0646  | 0.0057 | 5.97E-30 | 11.3688  | 1376071 | Asthma |
| rs1035125  | 2 | 102417379 | C | A | 0.5064 | 0.0682  | 0.0054 | 7.87E-37 | 12.6776  | 878129  | Asthma |
| rs2160201  | 2 | 102417501 | T | C | 0.5135 | 0.0614  | 0.0047 | 1.01E-38 | 13.0148  | 1376071 | Asthma |
| rs1833174  | 2 | 102418383 | T | A | 0.5134 | 0.0613  | 0.0047 | 1.22E-38 | 13.0004  | 1376071 | Asthma |
| rs1420105  | 2 | 102418659 | T | C | 0.5135 | 0.0613  | 0.0047 | 1.22E-38 | 13.0004  | 1376071 | Asthma |
| rs2293223  | 2 | 102419008 | T | C | 0.1714 | -0.1005 | 0.0062 | 3.18E-59 | -16.2289 | 1376071 | Asthma |
| rs2293224  | 2 | 102419319 | T | C | 0.5135 | 0.0613  | 0.0047 | 1.23E-38 | 12.9995  | 1376071 | Asthma |
| rs2293225  | 2 | 102419429 | T | C | 0.2256 | 0.0647  | 0.0057 | 5.32E-30 | 11.3790  | 1376071 | Asthma |
| rs6743516  | 2 | 102419875 | A | G | 0.5135 | 0.0613  | 0.0047 | 1.11E-38 | 13.0077  | 1376071 | Asthma |
| rs3771156  | 2 | 102420217 | T | C | 0.3007 | 0.0784  | 0.0052 | 1.41E-51 | 15.1092  | 1376071 | Asthma |
| rs1420100  | 2 | 102420542 | C | A | 0.5135 | 0.0614  | 0.0047 | 1.05E-38 | 13.0119  | 1376071 | Asthma |
| rs3771155  | 2 | 102421366 | A | G | 0.5135 | 0.0613  | 0.0047 | 1.22E-38 | 13.0006  | 1376071 | Asthma |
| rs10206291 | 2 | 102422403 | T | C | 0.5135 | 0.0613  | 0.0047 | 1.14E-38 | 13.0054  | 1376071 | Asthma |
| rs885088   | 2 | 102422584 | A | G | 0.5135 | 0.0613  | 0.0047 | 1.16E-38 | 13.0044  | 1376071 | Asthma |
| rs3771154  | 2 | 102422900 | C | T | 0.5135 | 0.0613  | 0.0047 | 1.16E-38 | 13.0039  | 1376071 | Asthma |
| rs2272127  | 2 | 102423413 | G | C | 0.1718 | -0.1008 | 0.0062 | 1.29E-59 | -16.2836 | 1376071 | Asthma |
| rs6759479  | 2 | 102423587 | A | C | 0.5135 | 0.0613  | 0.0047 | 1.15E-38 | 13.0050  | 1376071 | Asthma |
| rs6543133  | 2 | 102423717 | A | T | 0.5135 | 0.0614  | 0.0047 | 1.05E-38 | 13.0115  | 1376071 | Asthma |
| rs9807934  | 2 | 102423722 | G | T | 0.1713 | -0.1007 | 0.0062 | 1.94E-59 | -16.2588 | 1376071 | Asthma |
| rs887972   | 2 | 102424485 | A | G | 0.3188 | 0.0784  | 0.0051 | 2.15E-53 | 15.3825  | 1376071 | Asthma |
| rs887971   | 2 | 102424707 | C | T | 0.3199 | 0.0775  | 0.0051 | 1.82E-52 | 15.2436  | 1376071 | Asthma |
| rs3755266  | 2 | 102426252 | G | A | 0.5158 | 0.0626  | 0.0047 | 2.93E-40 | 13.2822  | 1376071 | Asthma |
| rs34946515 | 2 | 102426860 | T | C | 0.1711 | -0.0999 | 0.0068 | 1.93E-49 | -14.7814 | 1224666 | Asthma |
| rs11678975 | 2 | 102427279 | A | T | 0.3004 | 0.0795  | 0.0052 | 4.13E-53 | 15.3401  | 1376071 | Asthma |
| rs2110659  | 2 | 102427407 | G | A | 0.5158 | 0.0627  | 0.0047 | 2.80E-40 | 13.2857  | 1376071 | Asthma |
| rs7605284  | 2 | 102427715 | T | G | 0.5158 | 0.0626  | 0.0047 | 3.02E-40 | 13.2799  | 1376071 | Asthma |
| rs12712149 | 2 | 102428733 | A | G | 0.5158 | 0.0625  | 0.0047 | 3.74E-40 | 13.2640  | 1376071 | Asthma |
| rs7559845  | 2 | 102429754 | T | G | 0.5158 | 0.0626  | 0.0047 | 3.64E-40 | 13.2662  | 1376071 | Asthma |
| rs66566526 | 2 | 102431342 | T | C | 0.3005 | 0.0795  | 0.0052 | 4.32E-53 | 15.3373  | 1376071 | Asthma |
| rs55978515 | 2 | 102431648 | T | C | 0.0694 | 0.0771  | 0.0096 | 9.52E-16 | 8.0328   | 1376071 | Asthma |
| rs56331791 | 2 | 102431697 | A | G | 0.3003 | 0.0797  | 0.0052 | 3.06E-53 | 15.3594  | 1376071 | Asthma |
| rs6755905  | 2 | 102431747 | C | A | 0.5158 | 0.0626  | 0.0047 | 3.69E-40 | 13.2652  | 1376071 | Asthma |
| rs6756161  | 2 | 102431957 | C | A | 0.5157 | 0.0628  | 0.0047 | 2.09E-40 | 13.3075  | 1376071 | Asthma |
| rs6726985  | 2 | 102432120 | G | A | 0.5158 | 0.0627  | 0.0047 | 2.74E-40 | 13.2873  | 1376071 | Asthma |
| rs2310300  | 2 | 102432614 | A | G | 0.5158 | 0.0626  | 0.0047 | 3.43E-40 | 13.2706  | 1376071 | Asthma |
| rs7581119  | 2 | 102433405 | G | A | 0.5158 | 0.0626  | 0.0047 | 3.40E-40 | 13.2711  | 1376071 | Asthma |
| rs10166330 | 2 | 102433930 | T | C | 0.1709 | -0.1011 | 0.0062 | 8.35E-60 | -16.3097 | 1376071 | Asthma |
| rs2110736  | 2 | 102434395 | C | T | 0.1708 | -0.1011 | 0.0062 | 8.92E-60 | -16.3067 | 1376071 | Asthma |
| rs11681718 | 2 | 102434684 | G | A | 0.3004 | 0.0794  | 0.0052 | 5.93E-53 | 15.3163  | 1376071 | Asthma |
| rs4851582  | 2 | 102435098 | C | T | 0.3005 | 0.0794  | 0.0052 | 6.79E-53 | 15.3078  | 1376071 | Asthma |

|             |   |           |   |   |        |         |        |          |          |         |        |
|-------------|---|-----------|---|---|--------|---------|--------|----------|----------|---------|--------|
| rs3755265   | 2 | 102436356 | C | A | 0.5159 | 0.0627  | 0.0047 | 2.65E-40 | 13.2896  | 1376071 | Asthma |
| rs4479442   | 2 | 102437614 | A | T | 0.5160 | 0.0626  | 0.0047 | 3.00E-40 | 13.2803  | 1376071 | Asthma |
| rs10176820  | 2 | 102437960 | C | T | 0.1710 | -0.1008 | 0.0062 | 2.11E-59 | -16.2537 | 1376071 | Asthma |
| rs2058659   | 2 | 102438096 | G | A | 0.5159 | 0.0626  | 0.0047 | 3.16E-40 | 13.2766  | 1376071 | Asthma |
| rs17027166  | 2 | 102438960 | A | G | 0.3005 | 0.0796  | 0.0052 | 3.85E-53 | 15.3444  | 1376071 | Asthma |
| rs55645612  | 2 | 102439201 | T | C | 0.3005 | 0.0796  | 0.0052 | 3.65E-53 | 15.3480  | 1376071 | Asthma |
| rs56166614  | 2 | 102439636 | G | A | 0.3005 | 0.0796  | 0.0052 | 3.14E-53 | 15.3577  | 1376071 | Asthma |
| rs13021177  | 2 | 102440033 | A | G | 0.5159 | 0.0626  | 0.0047 | 3.45E-40 | 13.2701  | 1376071 | Asthma |
| rs10490204  | 2 | 102440074 | C | A | 0.3004 | 0.0793  | 0.0052 | 8.82E-53 | 15.2906  | 1376071 | Asthma |
| rs17027179  | 2 | 102440699 | T | C | 0.3005 | 0.0796  | 0.0052 | 3.60E-53 | 15.3491  | 1376071 | Asthma |
| rs2075186   | 2 | 102440791 | T | G | 0.1709 | -0.1009 | 0.0062 | 1.52E-59 | -16.2733 | 1376071 | Asthma |
| rs11465702  | 2 | 102441432 | G | A | 0.1393 | -0.1248 | 0.0067 | 4.91E-77 | -18.5777 | 1376071 | Asthma |
| rs1985329   | 2 | 102441748 | C | T | 0.5160 | 0.0628  | 0.0047 | 2.07E-40 | 13.3085  | 1376071 | Asthma |
| rs11123927  | 2 | 102442343 | T | C | 0.3006 | 0.0796  | 0.0052 | 3.86E-53 | 15.3444  | 1376071 | Asthma |
| rs11465705  | 2 | 102442350 | G | T | 0.1709 | -0.1009 | 0.0062 | 1.57E-59 | -16.2710 | 1376071 | Asthma |
| rs10490203  | 2 | 102442777 | G | T | 0.3005 | 0.0795  | 0.0052 | 4.22E-53 | 15.3385  | 1376071 | Asthma |
| rs4851583   | 2 | 102443840 | C | T | 0.3005 | 0.0795  | 0.0052 | 4.20E-53 | 15.3388  | 1376071 | Asthma |
| rs3771150   | 2 | 102444391 | A | G | 0.3004 | 0.0793  | 0.0052 | 9.42E-53 | 15.2864  | 1376071 | Asthma |
| rs11694360  | 2 | 102444687 | A | G | 0.3006 | 0.0795  | 0.0052 | 4.35E-53 | 15.3368  | 1376071 | Asthma |
| rs11123928  | 2 | 102444826 | A | G | 0.3005 | 0.0795  | 0.0052 | 5.25E-53 | 15.3246  | 1376071 | Asthma |
| rs7597017   | 2 | 102445656 | G | A | 0.3006 | 0.0796  | 0.0052 | 4.04E-53 | 15.3414  | 1376071 | Asthma |
| rs4851585   | 2 | 102446294 | A | T | 0.2891 | 0.0847  | 0.0055 | 9.68E-54 | 15.4339  | 1008051 | Asthma |
| rs6734762   | 2 | 102446466 | C | T | 0.5161 | 0.0624  | 0.0047 | 5.60E-40 | 13.2338  | 1376071 | Asthma |
| rs11465721  | 2 | 102446780 | T | G | 0.5159 | 0.0650  | 0.0052 | 1.58E-36 | 12.6227  | 1224666 | Asthma |
| rs11465723  | 2 | 102447060 | A | G | 0.1391 | -0.1247 | 0.0067 | 7.46E-77 | -18.5545 | 1376071 | Asthma |
| rs56044378  | 2 | 102448907 | A | G | 0.3011 | 0.0767  | 0.0057 | 1.71E-41 | 13.4934  | 1219993 | Asthma |
| rs11123929  | 2 | 102450683 | A | G | 0.3006 | 0.0792  | 0.0052 | 1.21E-52 | 15.2701  | 1376071 | Asthma |
| rs11465732  | 2 | 102451363 | T | C | 0.0751 | 0.0772  | 0.0092 | 5.42E-17 | 8.3772   | 1376071 | Asthma |
| rs11465736  | 2 | 102451470 | T | C | 0.1707 | -0.1007 | 0.0062 | 2.84E-59 | -16.2353 | 1376071 | Asthma |
| rs573943987 | 2 | 102453015 | T | G | 0.1273 | -0.1329 | 0.0114 | 2.11E-31 | -11.6573 | 778845  | Asthma |
| rs72825916  | 2 | 102454522 | T | C | 0.1391 | -0.1245 | 0.0067 | 1.19E-76 | -18.5293 | 1376071 | Asthma |
| rs12465829  | 2 | 102455860 | C | T | 0.0695 | 0.0768  | 0.0096 | 1.22E-15 | 8.0024   | 1376071 | Asthma |
| rs56117144  | 2 | 102458191 | C | T | 0.3007 | 0.0791  | 0.0052 | 1.59E-52 | 15.2522  | 1376071 | Asthma |
| rs10169676  | 2 | 102458459 | A | G | 0.1706 | -0.1008 | 0.0062 | 1.91E-59 | -16.2602 | 1376071 | Asthma |
| rs57081652  | 2 | 102458921 | C | G | 0.3005 | 0.0791  | 0.0052 | 1.55E-52 | 15.2539  | 1376071 | Asthma |
| rs60038017  | 2 | 102459541 | C | A | 0.3050 | 0.0743  | 0.0063 | 2.83E-32 | 11.8270  | 1063938 | Asthma |
| rs11690532  | 2 | 102459966 | T | C | 0.1947 | 0.0662  | 0.0060 | 4.81E-28 | 10.9793  | 1376071 | Asthma |
| rs11692335  | 2 | 102461433 | T | C | 0.1707 | -0.1008 | 0.0062 | 1.97E-59 | -16.2579 | 1376071 | Asthma |
| rs17027230  | 2 | 102462870 | T | C | 0.3006 | 0.0794  | 0.0052 | 6.73E-53 | 15.3083  | 1376071 | Asthma |
| rs10210176  | 2 | 102463056 | A | C | 0.1707 | -0.1009 | 0.0062 | 1.85E-59 | -16.2611 | 1376071 | Asthma |
| rs10186052  | 2 | 102463148 | A | G | 0.1707 | -0.1009 | 0.0062 | 1.73E-59 | -16.2657 | 1376071 | Asthma |
| rs36049530  | 2 | 102463528 | C | T | 0.1707 | -0.1008 | 0.0062 | 1.79E-59 | -16.2626 | 1376071 | Asthma |
| rs17027246  | 2 | 102463595 | G | C | 0.1786 | -0.1088 | 0.0065 | 4.88E-63 | -16.7586 | 1008051 | Asthma |
| rs741284    | 2 | 102466864 | C | G | 0.1706 | -0.1007 | 0.0062 | 2.87E-59 | -16.2354 | 1376071 | Asthma |
| rs72825929  | 2 | 102470626 | G | A | 0.1166 | 0.0582  | 0.0074 | 4.13E-15 | 7.8509   | 1376071 | Asthma |
| rs56043441  | 2 | 102470923 | T | C | 0.3042 | 0.0782  | 0.0052 | 1.13E-51 | 15.1235  | 1376071 | Asthma |
| rs10172116  | 2 | 102471113 | T | C | 0.1746 | -0.0971 | 0.0062 | 1.25E-55 | -15.7121 | 1376071 | Asthma |
| rs4140785   | 2 | 102472057 | C | A | 0.3041 | 0.0780  | 0.0052 | 1.87E-51 | 15.0904  | 1376071 | Asthma |
| rs1403552   | 2 | 102472317 | T | C | 0.1707 | -0.1008 | 0.0062 | 1.90E-59 | -16.2602 | 1376071 | Asthma |
| rs4851011   | 2 | 102473219 | T | C | 0.3041 | 0.0780  | 0.0052 | 1.93E-51 | 15.0885  | 1376071 | Asthma |
| rs17027255  | 2 | 102473668 | T | C | 0.3043 | 0.0781  | 0.0052 | 1.20E-51 | 15.1197  | 1376071 | Asthma |
| rs17027258  | 2 | 102475081 | G | A | 0.3044 | 0.0782  | 0.0052 | 1.09E-51 | 15.1260  | 1376071 | Asthma |
| rs13030642  | 2 | 102475126 | A | C | 0.1706 | -0.1008 | 0.0062 | 2.44E-59 | -16.2445 | 1376071 | Asthma |
| rs13030675  | 2 | 102475159 | A | C | 0.1706 | -0.1008 | 0.0062 | 2.77E-59 | -16.2362 | 1376071 | Asthma |
| rs13018263  | 2 | 102475811 | C | T | 0.1996 | -0.0832 | 0.0058 | 3.56E-46 | -14.2661 | 1376071 | Asthma |
| rs1468790   | 2 | 102475982 | G | C | 0.4330 | -0.0624 | 0.0050 | 2.27E-35 | -12.4114 | 1008051 | Asthma |
| rs1468789   | 2 | 102476044 | T | C | 0.2635 | 0.0774  | 0.0055 | 1.11E-45 | 14.1865  | 1376071 | Asthma |
| rs1468788   | 2 | 102476054 | C | T | 0.4148 | -0.0594 | 0.0048 | 2.35E-35 | -12.4088 | 1376071 | Asthma |
| rs35181686  | 2 | 102476125 | G | C | 0.1994 | -0.0834 | 0.0058 | 3.41E-46 | -14.2691 | 1376071 | Asthma |
| rs11692304  | 2 | 102478945 | G | A | 0.4984 | 0.0312  | 0.0050 | 5.52E-10 | 6.2036   | 1008051 | Asthma |
| rs112505882 | 2 | 102493404 | A | G | 0.0665 | -0.1070 | 0.0096 | 1.17E-28 | -11.1056 | 1316443 | Asthma |
| rs4851601   | 2 | 102499802 | A | G | 0.3095 | 0.0300  | 0.0053 | 1.40E-08 | 5.6734   | 1316443 | Asthma |
| rs72825956  | 2 | 102505195 | A | G | 0.0938 | -0.0683 | 0.0082 | 8.14E-17 | -8.3292  | 1316443 | Asthma |
| rs115039395 | 2 | 102545057 | G | C | 0.0254 | 0.0975  | 0.0165 | 3.21E-09 | 5.9203   | 1376071 | Asthma |
| rs13008334  | 2 | 102550572 | G | A | 0.0939 | -0.0771 | 0.0082 | 3.52E-21 | -9.4459  | 1316443 | Asthma |
| rs56147623  | 2 | 102553704 | A | G | 0.0571 | 0.0566  | 0.0103 | 4.29E-08 | 5.4783   | 1316443 | Asthma |
| rs72825990  | 2 | 102562489 | G | A | 0.1052 | -0.0630 | 0.0078 | 9.11E-16 | -8.0383  | 1316443 | Asthma |
| rs2192756   | 2 | 102564071 | C | A | 0.4267 | -0.0365 | 0.0048 | 1.73E-14 | -7.6694  | 1376071 | Asthma |
| rs11681159  | 2 | 102564405 | C | T | 0.3793 | 0.0414  | 0.0049 | 2.66E-17 | 8.4606   | 1376071 | Asthma |
| rs80085654  | 2 | 102564653 | A | T | 0.3759 | 0.0369  | 0.0059 | 3.17E-10 | 6.2902   | 1090071 | Asthma |
| rs12994345  | 2 | 102565319 | A | G | 0.0900 | -0.0794 | 0.0083 | 8.40E-22 | -9.5949  | 1316443 | Asthma |
| rs10186929  | 2 | 102566228 | A | T | 0.4228 | -0.0365 | 0.0048 | 1.82E-14 | -7.6625  | 1376071 | Asthma |
| rs55982910  | 2 | 102575124 | G | A | 0.3787 | 0.0420  | 0.0049 | 9.75E-18 | 8.5770   | 1376071 | Asthma |
| rs55956730  | 2 | 102575358 | A | G | 0.3787 | 0.0421  | 0.0049 | 8.75E-18 | 8.5893   | 1376071 | Asthma |

|            |   |           |   |   |        |         |        |          |          |         |        |
|------------|---|-----------|---|---|--------|---------|--------|----------|----------|---------|--------|
| rs7608337  | 2 | 102576115 | A | G | 0.3865 | 0.0388  | 0.0067 | 6.69E-09 | 5.7985   | 938666  | Asthma |
| rs9973655  | 2 | 102576699 | T | C | 0.3858 | 0.0435  | 0.0049 | 4.75E-19 | 8.9179   | 1376071 | Asthma |
| rs9973883  | 2 | 102576905 | A | T | 0.3858 | 0.0435  | 0.0049 | 4.96E-19 | 8.9133   | 1376071 | Asthma |
| rs74263644 | 2 | 102578099 | G | A | 0.1997 | 0.0595  | 0.0060 | 2.81E-23 | 9.9392   | 1376071 | Asthma |
| rs11695255 | 2 | 102581380 | A | G | 0.3787 | 0.0418  | 0.0049 | 1.39E-17 | 8.5362   | 1376071 | Asthma |
| rs7604866  | 2 | 102582613 | A | T | 0.3857 | 0.0434  | 0.0049 | 5.24E-19 | 8.9072   | 1376071 | Asthma |
| rs11695876 | 2 | 102583890 | A | T | 0.3808 | 0.0413  | 0.0049 | 3.27E-17 | 8.4366   | 1376071 | Asthma |
| rs72825993 | 2 | 102584170 | A | G | 0.0662 | -0.1127 | 0.0100 | 1.59E-29 | -11.2828 | 1008051 | Asthma |
| rs12712161 | 2 | 102584846 | T | G | 0.4146 | -0.0389 | 0.0049 | 1.71E-15 | -7.9609  | 1316443 | Asthma |
| rs66817110 | 2 | 102585399 | T | C | 0.0763 | -0.0924 | 0.0089 | 5.22E-25 | -10.3289 | 1316443 | Asthma |
| rs17825149 | 2 | 102587344 | A | G | 0.3958 | 0.0423  | 0.0048 | 2.33E-18 | 8.7402   | 1376071 | Asthma |
| rs56661848 | 2 | 102587679 | T | C | 0.3959 | 0.0424  | 0.0048 | 1.70E-18 | 8.7759   | 1376071 | Asthma |
| rs7560368  | 2 | 102587945 | A | G | 0.4590 | 0.0452  | 0.0047 | 1.45E-21 | 9.5386   | 1376071 | Asthma |
| rs7588111  | 2 | 102588270 | A | C | 0.4541 | 0.0459  | 0.0047 | 4.22E-22 | 9.6657   | 1376071 | Asthma |
| rs17027517 | 2 | 102588716 | G | A | 0.4589 | 0.0451  | 0.0047 | 1.59E-21 | 9.5287   | 1376071 | Asthma |
| rs7594744  | 2 | 102589609 | T | C | 0.4541 | 0.0459  | 0.0047 | 4.25E-22 | 9.6649   | 1376071 | Asthma |
| rs9308859  | 2 | 102591347 | C | T | 0.3959 | -0.0420 | 0.0049 | 1.34E-17 | -8.5400  | 1316443 | Asthma |
| rs9308860  | 2 | 102591500 | G | C | 0.2418 | -0.0641 | 0.0056 | 2.05E-30 | -11.4618 | 1316443 | Asthma |
| rs7602767  | 2 | 102592081 | A | C | 0.4541 | 0.0458  | 0.0047 | 4.36E-22 | 9.6623   | 1376071 | Asthma |
| rs1861228  | 2 | 102592486 | T | C | 0.3959 | -0.0402 | 0.0048 | 6.09E-17 | -8.3634  | 1376071 | Asthma |
| rs10209131 | 2 | 102593137 | T | C | 0.3960 | -0.0401 | 0.0048 | 7.17E-17 | -8.3442  | 1376071 | Asthma |
| rs7573372  | 2 | 102593671 | G | T | 0.4589 | 0.0450  | 0.0047 | 1.93E-21 | 9.5087   | 1376071 | Asthma |
| rs7573475  | 2 | 102593762 | C | T | 0.4591 | 0.0449  | 0.0047 | 2.59E-21 | 9.4780   | 1376071 | Asthma |
| rs7582956  | 2 | 102593964 | A | G | 0.4589 | 0.0450  | 0.0047 | 2.05E-21 | 9.5024   | 1376071 | Asthma |
| rs12471422 | 2 | 102593978 | A | G | 0.4588 | 0.0449  | 0.0047 | 2.36E-21 | 9.4879   | 1376071 | Asthma |
| rs7557352  | 2 | 102593996 | A | C | 0.4588 | 0.0449  | 0.0047 | 2.44E-21 | 9.4843   | 1376071 | Asthma |
| rs2310313  | 2 | 102594085 | A | G | 0.3959 | -0.0399 | 0.0048 | 9.53E-17 | -8.3106  | 1376071 | Asthma |
| rs17027547 | 2 | 102594983 | T | G | 0.4589 | 0.0450  | 0.0047 | 2.17E-21 | 9.4966   | 1376071 | Asthma |
| rs56290409 | 2 | 102595051 | A | T | 0.4589 | 0.0450  | 0.0047 | 2.15E-21 | 9.4974   | 1376071 | Asthma |
| rs55896286 | 2 | 102595060 | G | C | 0.3978 | 0.0417  | 0.0048 | 6.00E-18 | 8.6324   | 1376071 | Asthma |
| rs2192667  | 2 | 102595737 | A | G | 0.3978 | 0.0418  | 0.0048 | 5.37E-18 | 8.6451   | 1376071 | Asthma |
| rs6543163  | 2 | 102596216 | C | A | 0.4589 | 0.0450  | 0.0047 | 2.09E-21 | 9.5007   | 1376071 | Asthma |
| rs6543164  | 2 | 102596541 | C | T | 0.3999 | 0.0455  | 0.0048 | 4.20E-21 | 9.4277   | 1376071 | Asthma |
| rs6543165  | 2 | 102596545 | C | T | 0.4589 | 0.0451  | 0.0047 | 1.79E-21 | 9.5167   | 1376071 | Asthma |
| rs957404   | 2 | 102596999 | T | C | 0.3978 | 0.0418  | 0.0048 | 5.37E-18 | 8.6452   | 1376071 | Asthma |
| rs17825681 | 2 | 102597422 | T | C | 0.4541 | 0.0458  | 0.0047 | 5.10E-22 | 9.6463   | 1376071 | Asthma |
| rs17027571 | 2 | 102598031 | A | G | 0.4588 | 0.0450  | 0.0047 | 2.35E-21 | 9.4884   | 1376071 | Asthma |
| rs58664169 | 2 | 102598936 | G | A | 0.3978 | 0.0417  | 0.0048 | 5.81E-18 | 8.6362   | 1376071 | Asthma |
| rs11673795 | 2 | 102599476 | T | C | 0.3978 | 0.0417  | 0.0048 | 5.61E-18 | 8.6402   | 1376071 | Asthma |
| rs11679512 | 2 | 102599504 | G | A | 0.4589 | 0.0450  | 0.0047 | 2.01E-21 | 9.5047   | 1376071 | Asthma |
| rs11685729 | 2 | 102599619 | A | G | 0.3959 | 0.0423  | 0.0048 | 2.36E-18 | 8.7389   | 1376071 | Asthma |
| rs2192666  | 2 | 102600072 | C | T | 0.3979 | 0.0416  | 0.0048 | 6.68E-18 | 8.6203   | 1376071 | Asthma |
| rs2192665  | 2 | 102600119 | C | G | 0.4589 | 0.0449  | 0.0047 | 2.56E-21 | 9.4791   | 1376071 | Asthma |
| rs62154727 | 2 | 102601054 | G | T | 0.3959 | 0.0423  | 0.0048 | 2.27E-18 | 8.7429   | 1376071 | Asthma |
| rs78123548 | 2 | 102602406 | T | A | 0.0945 | -0.0637 | 0.0080 | 1.43E-15 | -7.9830  | 1376071 | Asthma |
| rs873625   | 2 | 102602754 | G | A | 0.4035 | 0.0423  | 0.0048 | 1.60E-18 | 8.7823   | 1376071 | Asthma |
| rs759338   | 2 | 102605473 | A | G | 0.4017 | 0.0428  | 0.0048 | 7.30E-19 | 8.8703   | 1376071 | Asthma |
| rs741257   | 2 | 102605752 | C | T | 0.4584 | 0.0448  | 0.0047 | 3.49E-21 | 9.4468   | 1376071 | Asthma |
| rs57303559 | 2 | 102607147 | G | A | 0.4584 | 0.0447  | 0.0047 | 4.06E-21 | 9.4309   | 1376071 | Asthma |
| rs6719553  | 2 | 102608105 | T | C | 0.4536 | 0.0455  | 0.0047 | 9.10E-22 | 9.5865   | 1376071 | Asthma |
| rs6543166  | 2 | 102608750 | C | T | 0.4538 | 0.0454  | 0.0047 | 9.47E-22 | 9.5825   | 1376071 | Asthma |
| rs56180168 | 2 | 102612402 | A | C | 0.4035 | 0.0422  | 0.0048 | 1.76E-18 | 8.7717   | 1376071 | Asthma |
| rs6543167  | 2 | 102612828 | G | T | 0.4584 | 0.0448  | 0.0047 | 3.52E-21 | 9.4459   | 1376071 | Asthma |
| rs13011360 | 2 | 102614929 | T | C | 0.0893 | -0.0785 | 0.0083 | 3.12E-21 | -9.4587  | 1316443 | Asthma |
| rs2058612  | 2 | 102616171 | T | C | 0.4533 | 0.0455  | 0.0047 | 8.41E-22 | 9.5948   | 1376071 | Asthma |
| rs17027626 | 2 | 102616534 | C | T | 0.4581 | 0.0446  | 0.0047 | 4.76E-21 | 9.4145   | 1376071 | Asthma |
| rs56264704 | 2 | 102617128 | C | T | 0.4031 | 0.0420  | 0.0048 | 3.10E-18 | 8.7078   | 1376071 | Asthma |
| rs2110637  | 2 | 102618261 | G | A | 0.4579 | 0.0444  | 0.0047 | 7.43E-21 | 9.3675   | 1376071 | Asthma |
| rs7598839  | 2 | 102619188 | C | G | 0.4532 | 0.0453  | 0.0047 | 1.48E-21 | 9.5367   | 1376071 | Asthma |
| rs2012454  | 2 | 102621172 | C | T | 0.4012 | 0.0424  | 0.0048 | 1.40E-18 | 8.7972   | 1376071 | Asthma |
| rs2215942  | 2 | 102621571 | C | T | 0.4031 | 0.0418  | 0.0048 | 4.04E-18 | 8.6776   | 1376071 | Asthma |
| rs2192664  | 2 | 102621709 | A | G | 0.4534 | 0.0454  | 0.0047 | 1.22E-21 | 9.5565   | 1376071 | Asthma |
| rs1008397  | 2 | 102623529 | A | G | 0.4031 | 0.0419  | 0.0048 | 3.80E-18 | 8.6847   | 1376071 | Asthma |
| rs11886134 | 2 | 102626371 | T | G | 0.5496 | 0.0310  | 0.0052 | 2.08E-09 | 5.9917   | 1224666 | Asthma |
| rs2310315  | 2 | 102629705 | T | A | 0.5463 | 0.0310  | 0.0051 | 1.06E-09 | 6.0996   | 1246149 | Asthma |
| rs2215946  | 2 | 102631452 | G | A | 0.5489 | 0.0302  | 0.0047 | 1.91E-10 | 6.3687   | 1376071 | Asthma |
| rs2041734  | 2 | 102634790 | G | C | 0.5550 | 0.0342  | 0.0049 | 1.82E-12 | 7.0479   | 1316443 | Asthma |
| rs2215945  | 2 | 102635232 | T | C | 0.5539 | 0.0323  | 0.0047 | 1.01E-11 | 6.8049   | 1376071 | Asthma |
| rs17775170 | 2 | 102635468 | A | G | 0.2172 | 0.0580  | 0.0058 | 1.21E-23 | 10.0233  | 1376071 | Asthma |
| rs4851621  | 2 | 102636008 | C | T | 0.5617 | 0.0335  | 0.0047 | 1.79E-12 | 7.0500   | 1376071 | Asthma |
| rs67768228 | 2 | 102636570 | G | A | 0.0893 | -0.0789 | 0.0083 | 2.04E-21 | -9.5028  | 1316443 | Asthma |
| rs12712165 | 2 | 102638223 | T | C | 0.5583 | 0.0339  | 0.0049 | 2.82E-12 | 6.9865   | 1316443 | Asthma |
| rs6717565  | 2 | 102638349 | T | G | 0.5585 | 0.0326  | 0.0047 | 6.70E-12 | 6.8639   | 1376071 | Asthma |
| rs10178118 | 2 | 102639060 | T | C | 0.5583 | 0.0339  | 0.0049 | 2.72E-12 | 6.9917   | 1316443 | Asthma |



|             |   |           |   |   |        |         |        |          |          |         |        |
|-------------|---|-----------|---|---|--------|---------|--------|----------|----------|---------|--------|
| rs10181400  | 2 | 102640088 | T | C | 0.5554 | 0.0324  | 0.0047 | 8.00E-12 | 6.8386   | 1376071 | Asthma |
| rs10184340  | 2 | 102640690 | T | C | 0.5544 | 0.0316  | 0.0047 | 2.63E-11 | 6.6661   | 1376071 | Asthma |
| rs72828033  | 2 | 102661403 | C | G | 0.0764 | -0.0961 | 0.0093 | 3.57E-25 | -10.3653 | 1299802 | Asthma |
| rs72946301  | 2 | 111104261 | A | G | 0.1073 | 0.0714  | 0.0078 | 6.53E-20 | 9.1351   | 1316443 | Asthma |
| rs77004761  | 2 | 111111114 | A | T | 0.1038 | 0.0657  | 0.0092 | 1.16E-12 | 7.1100   | 1090071 | Asthma |
| rs72836344  | 2 | 111117122 | T | G | 0.1121 | 0.0715  | 0.0074 | 7.40E-22 | 9.6080   | 1376071 | Asthma |
| rs72836345  | 2 | 111118962 | C | T | 0.1122 | 0.0713  | 0.0074 | 8.99E-22 | 9.5879   | 1376071 | Asthma |
| rs72836346  | 2 | 111119036 | C | G | 0.0916 | 0.0802  | 0.0084 | 1.76E-21 | 9.5181   | 1316443 | Asthma |
| rs113135335 | 2 | 111130177 | G | T | 0.1123 | 0.0715  | 0.0074 | 6.51E-22 | 9.6212   | 1376071 | Asthma |
| rs72836348  | 2 | 111130466 | A | G | 0.1121 | 0.0718  | 0.0074 | 4.86E-22 | 9.6511   | 1376071 | Asthma |
| rs72836349  | 2 | 111134218 | C | T | 0.1043 | 0.0677  | 0.0092 | 1.70E-13 | 7.3704   | 1090071 | Asthma |
| rs72836352  | 2 | 111137297 | T | C | 0.1119 | 0.0717  | 0.0074 | 5.77E-22 | 9.6336   | 1376071 | Asthma |
| rs17484848  | 2 | 111142983 | C | T | 0.1121 | 0.0715  | 0.0074 | 7.16E-22 | 9.6115   | 1376071 | Asthma |
| rs144569746 | 2 | 111150990 | T | C | 0.1119 | 0.0720  | 0.0074 | 3.78E-22 | 9.6769   | 1376071 | Asthma |
| rs13405741  | 2 | 111155479 | C | T | 0.1058 | 0.0746  | 0.0079 | 2.66E-21 | 9.4752   | 1316443 | Asthma |
| rs72837816  | 2 | 111159291 | C | A | 0.1121 | 0.0719  | 0.0074 | 3.95E-22 | 9.6725   | 1376071 | Asthma |
| rs72837826  | 2 | 111175424 | T | G | 0.1140 | 0.0724  | 0.0074 | 1.26E-22 | 9.7889   | 1376071 | Asthma |
| rs79950062  | 2 | 111183035 | C | T | 0.1326 | 0.0645  | 0.0071 | 1.43E-19 | 9.0500   | 1316443 | Asthma |
| rs67816163  | 2 | 111205733 | G | A | 0.2942 | 0.0297  | 0.0052 | 1.16E-08 | 5.7062   | 1376071 | Asthma |
| rs7600458   | 2 | 111206013 | C | G | 0.2929 | 0.0292  | 0.0052 | 2.06E-08 | 5.6066   | 1376071 | Asthma |
| rs72837843  | 2 | 111207144 | A | G | 0.1216 | 0.0628  | 0.0072 | 3.74E-18 | 8.6867   | 1376071 | Asthma |
| rs56693625  | 2 | 111207578 | A | G | 0.2928 | 0.0293  | 0.0052 | 1.84E-08 | 5.6262   | 1376071 | Asthma |
| rs61358692  | 2 | 111207582 | C | T | 0.2928 | 0.0294  | 0.0052 | 1.70E-08 | 5.6396   | 1376071 | Asthma |
| rs10179596  | 2 | 111212803 | A | G | 0.2929 | 0.0299  | 0.0052 | 1.00E-08 | 5.7309   | 1376071 | Asthma |
| rs6727313   | 2 | 111213963 | A | G | 0.2916 | 0.0292  | 0.0052 | 2.16E-08 | 5.5987   | 1376071 | Asthma |
| rs10178095  | 2 | 111214939 | T | C | 0.2929 | 0.0298  | 0.0052 | 1.08E-08 | 5.7174   | 1376071 | Asthma |
| rs376290829 | 2 | 111216469 | A | C | 0.1130 | 0.0737  | 0.0092 | 1.26E-15 | 7.9989   | 1003385 | Asthma |
| rs7585313   | 2 | 111217626 | G | A | 0.2930 | 0.0299  | 0.0052 | 9.88E-09 | 5.7327   | 1376071 | Asthma |
| rs72837847  | 2 | 111221427 | G | A | 0.1207 | 0.0532  | 0.0079 | 1.66E-11 | 6.7334   | 1219993 | Asthma |
| rs11123421  | 2 | 111227772 | A | G | 0.3031 | 0.0303  | 0.0052 | 4.54E-09 | 5.8634   | 1376071 | Asthma |
| rs2137168   | 2 | 111228932 | T | C | 0.3034 | 0.0292  | 0.0053 | 3.34E-08 | 5.5229   | 1316443 | Asthma |
| rs6749633   | 2 | 111230439 | A | G | 0.2933 | 0.0295  | 0.0052 | 1.29E-08 | 5.6868   | 1376071 | Asthma |
| rs6720394   | 2 | 111231795 | G | T | 0.1204 | 0.0621  | 0.0072 | 7.45E-18 | 8.6077   | 1376071 | Asthma |
| rs72837849  | 2 | 111232281 | C | T | 0.1203 | 0.0622  | 0.0072 | 8.53E-18 | 8.5922   | 1376071 | Asthma |
| rs6716091   | 2 | 111233556 | T | C | 0.2932 | 0.0300  | 0.0052 | 8.78E-09 | 5.7528   | 1376071 | Asthma |
| rs72837850  | 2 | 111234304 | G | A | 0.1203 | 0.0627  | 0.0072 | 4.57E-18 | 8.6636   | 1376071 | Asthma |
| rs66494224  | 2 | 111244737 | C | T | 0.2318 | 0.0315  | 0.0056 | 1.44E-08 | 5.6688   | 1376071 | Asthma |
| rs6747657   | 2 | 111245586 | A | G | 0.2938 | 0.0301  | 0.0052 | 8.01E-09 | 5.7683   | 1376071 | Asthma |
| rs4637127   | 2 | 111249498 | T | C | 0.2215 | 0.0347  | 0.0058 | 1.87E-09 | 6.0092   | 1316443 | Asthma |
| rs12469743  | 2 | 111250366 | G | A | 0.2501 | 0.0334  | 0.0056 | 2.62E-09 | 5.9540   | 1316443 | Asthma |
| rs68155163  | 2 | 111250666 | C | T | 0.2200 | 0.0357  | 0.0058 | 8.48E-10 | 6.1356   | 1316443 | Asthma |
| rs72837868  | 2 | 111252517 | G | A | 0.1210 | 0.0617  | 0.0074 | 8.92E-17 | 8.3183   | 1316443 | Asthma |
| rs62160432  | 2 | 111259568 | A | T | 0.2191 | 0.0356  | 0.0058 | 1.12E-09 | 6.0914   | 1316443 | Asthma |
| rs115636853 | 2 | 111263239 | G | C | 0.1172 | 0.0662  | 0.0082 | 6.05E-16 | 8.0882   | 1186521 | Asthma |
| rs374722324 | 2 | 111265963 | A | G | 0.1147 | 0.0790  | 0.0101 | 4.49E-15 | 7.8406   | 934923  | Asthma |
| rs368013776 | 2 | 111266064 | T | C | 0.1140 | 0.0708  | 0.0092 | 1.64E-14 | 7.6762   | 1003385 | Asthma |
| rs73956806  | 2 | 111266265 | T | C | 0.1212 | 0.0610  | 0.0074 | 1.94E-16 | 8.2256   | 1316443 | Asthma |
| rs185241389 | 2 | 111266728 | T | C | 0.1212 | 0.0633  | 0.0080 | 3.33E-15 | 7.8779   | 1198533 | Asthma |
| rs7571606   | 2 | 145365490 | A | T | 0.4694 | -0.0308 | 0.0052 | 2.74E-09 | -5.9467  | 1219993 | Asthma |
| rs10803511  | 2 | 145365712 | T | C | 0.4704 | -0.0309 | 0.0052 | 2.56E-09 | -5.9576  | 1219993 | Asthma |
| rs6745444   | 2 | 145397803 | A | G | 0.5103 | 0.0282  | 0.0052 | 4.87E-08 | 5.4560   | 1219993 | Asthma |
| rs4664443   | 2 | 162029379 | G | A | 0.3891 | 0.0271  | 0.0049 | 4.58E-08 | 5.4668   | 1316443 | Asthma |
| rs3769684   | 2 | 203720036 | C | T | 0.0515 | -0.0579 | 0.0104 | 2.73E-08 | -5.5581  | 1376071 | Asthma |
| rs55730955  | 2 | 203721233 | A | T | 0.0515 | -0.0580 | 0.0104 | 2.58E-08 | -5.5679  | 1376071 | Asthma |
| rs7574255   | 2 | 227835168 | G | C | 0.2438 | -0.0327 | 0.0057 | 8.64E-09 | -5.7555  | 1316443 | Asthma |
| rs2894644   | 2 | 227836452 | T | A | 0.2443 | -0.0328 | 0.0057 | 7.94E-09 | -5.7698  | 1316443 | Asthma |
| rs7423358   | 2 | 227840005 | T | C | 0.2444 | -0.0330 | 0.0057 | 6.17E-09 | -5.8121  | 1316443 | Asthma |
| rs2135448   | 2 | 227841941 | A | G | 0.2431 | -0.0332 | 0.0057 | 5.57E-09 | -5.8292  | 1316443 | Asthma |
| rs13384448  | 2 | 227843146 | C | T | 0.2451 | -0.0324 | 0.0057 | 1.06E-08 | -5.7207  | 1316443 | Asthma |
| rs6744308   | 2 | 227847100 | T | G | 0.2442 | -0.0315 | 0.0055 | 1.31E-08 | -5.6845  | 1376071 | Asthma |
| rs4487084   | 2 | 227848463 | G | A | 0.2441 | -0.0317 | 0.0055 | 1.01E-08 | -5.7290  | 1376071 | Asthma |
| rs2056566   | 2 | 227848525 | G | A | 0.2437 | -0.0316 | 0.0055 | 1.08E-08 | -5.7181  | 1376071 | Asthma |
| rs4300818   | 2 | 227848539 | G | T | 0.2442 | -0.0317 | 0.0055 | 9.52E-09 | -5.7392  | 1376071 | Asthma |
| rs6436741   | 2 | 227849882 | G | A | 0.2442 | -0.0318 | 0.0055 | 8.60E-09 | -5.7564  | 1376071 | Asthma |
| rs7591163   | 2 | 227850659 | C | T | 0.2436 | -0.0315 | 0.0055 | 1.19E-08 | -5.7013  | 1376071 | Asthma |
| rs10933217  | 2 | 227851510 | T | C | 0.2486 | -0.0326 | 0.0058 | 2.16E-08 | -5.5989  | 1008051 | Asthma |
| rs1039665   | 2 | 227852676 | A | G | 0.2441 | -0.0317 | 0.0055 | 9.53E-09 | -5.7388  | 1376071 | Asthma |
| rs11685995  | 2 | 227857292 | T | C | 0.2441 | -0.0320 | 0.0055 | 7.30E-09 | -5.7838  | 1376071 | Asthma |
| rs11891398  | 2 | 227858641 | C | T | 0.2485 | -0.0325 | 0.0058 | 2.25E-08 | -5.5919  | 1008051 | Asthma |
| rs2396497   | 2 | 227859423 | T | C | 0.2440 | -0.0317 | 0.0055 | 9.75E-09 | -5.7350  | 1376071 | Asthma |
| rs2396499   | 2 | 227859652 | T | C | 0.2441 | -0.0318 | 0.0055 | 8.97E-09 | -5.7493  | 1376071 | Asthma |
| rs940341    | 2 | 227860010 | A | G | 0.2438 | -0.0315 | 0.0055 | 1.24E-08 | -5.6942  | 1376071 | Asthma |
| rs4973380   | 2 | 227860686 | T | A | 0.2441 | -0.0316 | 0.0055 | 1.10E-08 | -5.7144  | 1376071 | Asthma |
| rs6738964   | 2 | 227874419 | G | T | 0.2467 | -0.0327 | 0.0059 | 2.49E-08 | -5.5744  | 1246149 | Asthma |

|             |   |           |   |   |        |         |        |          |          |         |        |
|-------------|---|-----------|---|---|--------|---------|--------|----------|----------|---------|--------|
| rs1721359   | 2 | 227887158 | G | A | 0.2446 | -0.0313 | 0.0055 | 1.49E-08 | -5.6633  | 1376071 | Asthma |
| rs79248835  | 2 | 241734898 | C | A | 0.3372 | -0.0397 | 0.0053 | 1.17E-13 | -7.4197  | 1299802 | Asthma |
| rs80241045  | 2 | 241734936 | G | C | 0.3383 | -0.0402 | 0.0053 | 5.06E-14 | -7.5304  | 1299802 | Asthma |
| rs77940364  | 2 | 241735388 | A | G | 0.3241 | -0.0365 | 0.0054 | 1.14E-11 | -6.7872  | 1299802 | Asthma |
| rs78536152  | 2 | 241736671 | T | G | 0.3176 | -0.0450 | 0.0080 | 1.63E-08 | -5.6468  | 554005  | Asthma |
| rs78341235  | 2 | 241736727 | C | T | 0.3397 | -0.0424 | 0.0057 | 1.02E-13 | -7.4378  | 1221848 | Asthma |
| rs77525052  | 2 | 241737126 | A | G | 0.3386 | -0.0463 | 0.0056 | 2.10E-16 | -8.2163  | 922290  | Asthma |
| rs4675886   | 2 | 241739483 | C | G | 0.3837 | 0.0293  | 0.0053 | 2.93E-08 | 5.5455   | 1299802 | Asthma |
| rs149204343 | 2 | 241739754 | A | G | 0.0545 | -0.0632 | 0.0115 | 4.32E-08 | -5.4776  | 1299802 | Asthma |
| rs60611916  | 2 | 241740604 | C | T | 0.4456 | -0.0424 | 0.0049 | 8.75E-18 | -8.5894  | 1316443 | Asthma |
| rs62191982  | 2 | 241740615 | G | A | 0.4455 | -0.0429 | 0.0049 | 3.54E-18 | -8.6927  | 1316443 | Asthma |
| rs60946542  | 2 | 241740814 | A | G | 0.2287 | -0.0450 | 0.0060 | 5.65E-14 | -7.5161  | 1316443 | Asthma |
| rs4073890   | 2 | 241740951 | G | A | 0.4458 | -0.0532 | 0.0065 | 1.74E-16 | -8.2386  | 662423  | Asthma |
| rs4073889   | 2 | 241741015 | G | A | 0.4497 | -0.0435 | 0.0049 | 1.02E-18 | -8.8327  | 1316443 | Asthma |
| rs62192001  | 2 | 241742173 | A | G | 0.4445 | -0.0435 | 0.0049 | 9.07E-19 | -8.8460  | 1316443 | Asthma |
| rs78147778  | 2 | 241742614 | C | T | 0.2723 | -0.0756 | 0.0056 | 4.04E-42 | -13.5995 | 1316443 | Asthma |
| rs6756399   | 2 | 241743118 | G | A | 0.5063 | -0.0454 | 0.0081 | 2.13E-08 | -5.6011  | 778845  | Asthma |
| rs113611133 | 2 | 241743140 | T | C | 0.3770 | -0.0519 | 0.0069 | 6.88E-14 | -7.4901  | 935848  | Asthma |
| rs62192002  | 2 | 241743429 | C | T | 0.4535 | -0.0459 | 0.0049 | 7.57E-21 | -9.3655  | 1316443 | Asthma |
| rs62192003  | 2 | 241743959 | C | T | 0.4448 | -0.0434 | 0.0049 | 1.03E-18 | -8.8319  | 1316443 | Asthma |
| rs62192004  | 2 | 241744056 | G | A | 0.4449 | -0.0433 | 0.0049 | 1.11E-18 | -8.8238  | 1316443 | Asthma |
| rs62192005  | 2 | 241744107 | T | C | 0.4450 | -0.0432 | 0.0049 | 1.35E-18 | -8.8015  | 1316443 | Asthma |
| rs4366942   | 2 | 241744577 | G | A | 0.4448 | -0.0436 | 0.0049 | 6.15E-19 | -8.8894  | 1316443 | Asthma |
| rs4234097   | 2 | 241744700 | C | T | 0.4448 | -0.0437 | 0.0049 | 5.20E-19 | -8.9081  | 1316443 | Asthma |
| rs62192009  | 2 | 241745159 | A | C | 0.4448 | -0.0437 | 0.0049 | 5.14E-19 | -8.9093  | 1316443 | Asthma |
| rs35532480  | 2 | 241745530 | G | A | 0.4449 | -0.0436 | 0.0049 | 5.36E-19 | -8.9044  | 1316443 | Asthma |
| rs34293993  | 2 | 241745694 | C | T | 0.4449 | -0.0436 | 0.0049 | 5.96E-19 | -8.8928  | 1316443 | Asthma |
| rs62192013  | 2 | 241746756 | C | T | 0.4450 | -0.0440 | 0.0049 | 2.87E-19 | -8.9738  | 1316443 | Asthma |
| rs35070043  | 2 | 241747114 | T | A | 0.4437 | -0.0438 | 0.0049 | 4.03E-19 | -8.9362  | 1316443 | Asthma |
| rs6715894   | 2 | 241747600 | G | A | 0.4538 | -0.0448 | 0.0048 | 6.80E-21 | -9.3767  | 1376071 | Asthma |
| rs6721985   | 2 | 241747739 | C | T | 0.4451 | -0.0427 | 0.0048 | 4.69E-19 | -8.9195  | 1376071 | Asthma |
| rs34647532  | 2 | 241748164 | C | A | 0.4451 | -0.0423 | 0.0048 | 8.64E-19 | -8.8515  | 1376071 | Asthma |
| rs34519321  | 2 | 241748788 | T | C | 0.4445 | -0.0423 | 0.0048 | 8.19E-19 | -8.8575  | 1376071 | Asthma |
| rs34767042  | 2 | 241748877 | T | C | 0.4448 | -0.0423 | 0.0048 | 6.95E-19 | -8.8755  | 1376071 | Asthma |
| rs35386923  | 2 | 241748951 | T | C | 0.4446 | -0.0422 | 0.0048 | 9.42E-19 | -8.8419  | 1376071 | Asthma |
| rs34077392  | 2 | 241749019 | C | T | 0.3793 | -0.0449 | 0.0049 | 4.03E-20 | -9.1873  | 1376071 | Asthma |
| rs78280775  | 2 | 241749257 | T | C | 0.4446 | -0.0423 | 0.0048 | 7.65E-19 | -8.8650  | 1376071 | Asthma |
| rs113047262 | 2 | 241749455 | C | T | 0.4445 | -0.0423 | 0.0048 | 7.60E-19 | -8.8659  | 1376071 | Asthma |
| rs4675883   | 2 | 241749770 | C | T | 0.4458 | -0.0424 | 0.0048 | 7.87E-19 | -8.8618  | 1376071 | Asthma |
| rs4075957   | 2 | 241749848 | A | G | 0.4441 | -0.0423 | 0.0048 | 8.42E-19 | -8.8543  | 1376071 | Asthma |
| rs4675882   | 2 | 241750542 | C | T | 0.4446 | -0.0423 | 0.0048 | 7.45E-19 | -8.8680  | 1376071 | Asthma |
| rs1106639   | 2 | 241751260 | A | G | 0.2738 | -0.0740 | 0.0054 | 2.36E-43 | -13.8056 | 1376071 | Asthma |
| rs141343442 | 2 | 241751355 | C | T | 0.0553 | -0.0770 | 0.0112 | 6.43E-12 | -6.8699  | 1299802 | Asthma |
| rs4073694   | 2 | 241751606 | G | C | 0.3379 | -0.0653 | 0.0050 | 3.17E-38 | -12.9270 | 1376071 | Asthma |
| rs35359354  | 2 | 241752961 | T | C | 0.1074 | -0.0590 | 0.0079 | 1.19E-13 | -7.4180  | 1316443 | Asthma |
| rs35061832  | 2 | 241753075 | C | T | 0.3194 | -0.0604 | 0.0052 | 9.51E-31 | -11.5282 | 1316443 | Asthma |
| rs6761047   | 2 | 241753443 | T | C | 0.2639 | -0.0739 | 0.0057 | 9.36E-39 | -13.0206 | 1290310 | Asthma |
| rs78350525  | 2 | 241753909 | A | G | 0.2619 | -0.0757 | 0.0061 | 8.88E-36 | -12.4861 | 1186521 | Asthma |
| rs77433658  | 2 | 241754006 | T | C | 0.2641 | -0.0747 | 0.0056 | 1.02E-40 | -13.3611 | 1316443 | Asthma |
| rs77062581  | 2 | 241754180 | A | T | 0.2641 | -0.0746 | 0.0056 | 1.31E-40 | -13.3427 | 1316443 | Asthma |
| rs34337830  | 2 | 241754409 | C | T | 0.4417 | -0.0464 | 0.0052 | 3.39E-19 | -8.9552  | 948423  | Asthma |
| rs62192024  | 2 | 241756082 | C | T | 0.3053 | -0.0594 | 0.0054 | 2.49E-28 | -11.0388 | 1316443 | Asthma |
| rs6733823   | 2 | 241756485 | T | C | 0.4976 | 0.0442  | 0.0048 | 1.47E-20 | 9.2953   | 1376071 | Asthma |
| rs35350837  | 2 | 241756914 | A | G | 0.4943 | 0.0463  | 0.0049 | 2.07E-21 | 9.5016   | 1316443 | Asthma |
| rs62192027  | 2 | 241757691 | C | T | 0.1119 | -0.0694 | 0.0078 | 7.65E-19 | -8.8649  | 1316443 | Asthma |
| rs4425108   | 2 | 241758583 | C | G | 0.4476 | 0.0372  | 0.0049 | 3.33E-14 | 7.5848   | 1316443 | Asthma |
| rs34290285  | 2 | 241759225 | A | G | 0.2705 | -0.0828 | 0.0056 | 3.60E-50 | -14.8941 | 1316443 | Asthma |
| rs111792955 | 2 | 241759617 | A | G | 0.1547 | -0.0725 | 0.0069 | 1.31E-25 | -10.4606 | 1316443 | Asthma |
| rs71430382  | 2 | 241759875 | T | C | 0.3832 | -0.0576 | 0.0050 | 1.44E-30 | -11.4926 | 1316443 | Asthma |
| rs71430384  | 2 | 241760637 | T | C | 0.5184 | 0.0428  | 0.0054 | 1.35E-15 | 7.9904   | 1160388 | Asthma |
| rs35350862  | 2 | 241761355 | G | A | 0.1163 | -0.0711 | 0.0075 | 2.37E-21 | -9.4873  | 1376071 | Asthma |
| rs71430385  | 2 | 241761545 | G | A | 0.5053 | 0.0432  | 0.0049 | 6.96E-19 | 8.8757   | 1316443 | Asthma |
| rs34762429  | 2 | 241762000 | T | G | 0.5053 | 0.0430  | 0.0049 | 9.84E-19 | 8.8372   | 1316443 | Asthma |
| rs2002092   | 2 | 241762232 | T | C | 0.1161 | -0.0708 | 0.0075 | 3.74E-21 | -9.4398  | 1376071 | Asthma |
| rs7569717   | 2 | 241762574 | T | C | 0.2664 | -0.0315 | 0.0054 | 5.83E-09 | -5.8216  | 1376071 | Asthma |
| rs4538241   | 2 | 241762598 | T | C | 0.3831 | -0.0575 | 0.0050 | 2.19E-30 | -11.4563 | 1316443 | Asthma |
| rs111543205 | 2 | 241762928 | A | G | 0.1540 | -0.0720 | 0.0069 | 3.56E-25 | -10.3654 | 1316443 | Asthma |
| rs4449174   | 2 | 241763123 | G | C | 0.1162 | -0.0712 | 0.0075 | 2.07E-21 | -9.5016  | 1376071 | Asthma |
| rs62192037  | 2 | 241763397 | A | G | 0.1161 | -0.0710 | 0.0075 | 3.08E-21 | -9.4600  | 1376071 | Asthma |
| rs6740752   | 2 | 241763768 | A | G | 0.5027 | 0.0436  | 0.0049 | 2.75E-19 | 8.9783   | 1316443 | Asthma |
| rs146871826 | 2 | 241763902 | T | C | 0.1160 | -0.0709 | 0.0075 | 3.42E-21 | -9.4489  | 1376071 | Asthma |
| rs6754066   | 2 | 241763948 | A | G | 0.1168 | -0.0692 | 0.0076 | 1.40E-19 | -9.0521  | 1316443 | Asthma |
| rs4443030   | 2 | 241764170 | A | G | 0.2677 | -0.0370 | 0.0061 | 1.22E-09 | -6.0780  | 1160365 | Asthma |
| rs5839764   | 2 | 241764203 | G | C | 0.3799 | -0.0589 | 0.0055 | 1.65E-26 | -10.6552 | 1160365 | Asthma |

|             |   |           |   |   |        |         |        |          |          |         |        |
|-------------|---|-----------|---|---|--------|---------|--------|----------|----------|---------|--------|
| rs77984138  | 2 | 241764522 | A | G | 0.1162 | -0.0702 | 0.0075 | 8.02E-21 | -9.3594  | 1376071 | Asthma |
| rs6747623   | 2 | 241764646 | T | C | 0.5038 | 0.0438  | 0.0049 | 1.98E-19 | 9.0143   | 1316443 | Asthma |
| rs150589057 | 2 | 241765274 | T | C | 0.1582 | -0.0704 | 0.0076 | 2.45E-20 | -9.2405  | 1134232 | Asthma |
| rs6739113   | 2 | 241767541 | T | C | 0.1163 | -0.0659 | 0.0084 | 3.91E-15 | -7.8578  | 1193860 | Asthma |
| rs6756901   | 2 | 241767686 | A | G | 0.5025 | 0.0433  | 0.0049 | 5.27E-19 | 8.9066   | 1316443 | Asthma |
| rs11552660  | 2 | 241768062 | C | T | 0.1542 | -0.0720 | 0.0070 | 4.29E-25 | -10.3475 | 1316443 | Asthma |
| rs4234096   | 2 | 241768418 | C | T | 0.4371 | -0.0513 | 0.0050 | 1.03E-24 | -10.2637 | 1316443 | Asthma |
| rs113372064 | 2 | 241768630 | T | C | 0.1085 | -0.0674 | 0.0079 | 1.38E-17 | -8.5371  | 1376071 | Asthma |
| rs6746151   | 2 | 241768747 | T | C | 0.1182 | -0.0687 | 0.0074 | 2.30E-20 | -9.2472  | 1376071 | Asthma |
| rs35671465  | 2 | 241768770 | G | A | 0.1580 | -0.0711 | 0.0069 | 4.10E-25 | -10.3521 | 1316443 | Asthma |
| rs34211035  | 2 | 241769028 | C | A | 0.1726 | -0.0604 | 0.0067 | 2.61E-19 | -8.9839  | 1316443 | Asthma |
| rs79626458  | 2 | 241769551 | T | C | 0.1184 | -0.0704 | 0.0074 | 3.34E-21 | -9.4515  | 1376071 | Asthma |
| rs6707874   | 2 | 241769948 | G | A | 0.3856 | -0.0582 | 0.0050 | 3.14E-31 | -11.6233 | 1316443 | Asthma |
| rs7599470   | 2 | 241770392 | T | C | 0.3832 | -0.0576 | 0.0050 | 1.74E-30 | -11.4764 | 1316443 | Asthma |
| rs7582582   | 2 | 241770664 | C | T | 0.5024 | 0.0440  | 0.0049 | 1.37E-19 | 9.0548   | 1316443 | Asthma |
| rs7582691   | 2 | 241770782 | T | C | 0.4319 | -0.0464 | 0.0049 | 5.50E-21 | -9.3991  | 1316443 | Asthma |
| rs7608524   | 2 | 241770821 | A | G | 0.3813 | -0.0581 | 0.0050 | 9.27E-31 | -11.5305 | 1316443 | Asthma |
| rs10755057  | 2 | 241771247 | T | G | 0.4971 | 0.0425  | 0.0047 | 2.64E-19 | 8.9828   | 1376071 | Asthma |
| rs10933568  | 2 | 241771520 | G | A | 0.5030 | 0.0460  | 0.0051 | 2.70E-19 | 8.9802   | 948423  | Asthma |
| rs10933569  | 2 | 241771539 | A | G | 0.5012 | 0.0431  | 0.0049 | 7.26E-19 | 8.8708   | 1316443 | Asthma |
| rs12998967  | 2 | 241771812 | G | T | 0.5035 | 0.0419  | 0.0049 | 6.93E-18 | 8.6161   | 1316443 | Asthma |
| rs62192043  | 2 | 241771867 | A | G | 0.2716 | -0.0803 | 0.0056 | 2.94E-47 | -14.4391 | 1316443 | Asthma |
| rs28631456  | 2 | 241771938 | A | G | 0.5032 | 0.0420  | 0.0049 | 5.10E-18 | 8.6511   | 1316443 | Asthma |
| rs28605921  | 2 | 241771949 | A | G | 0.5032 | 0.0422  | 0.0049 | 3.87E-18 | 8.6824   | 1316443 | Asthma |
| rs115046953 | 2 | 241772145 | G | T | 0.5112 | 0.0452  | 0.0062 | 4.40E-13 | 7.2428   | 696825  | Asthma |
| rs13408030  | 2 | 241772159 | T | C | 0.5058 | 0.0415  | 0.0052 | 1.46E-15 | 7.9801   | 1224666 | Asthma |
| rs73010174  | 2 | 241773233 | T | C | 0.1570 | -0.0690 | 0.0069 | 1.57E-23 | -9.9968  | 1316443 | Asthma |
| rs7563672   | 2 | 241773455 | T | G | 0.3832 | -0.0560 | 0.0050 | 5.11E-29 | -11.1801 | 1316443 | Asthma |
| rs12473044  | 2 | 241776643 | A | G | 0.2708 | -0.0349 | 0.0055 | 2.10E-10 | -6.3537  | 1316443 | Asthma |
| rs12469459  | 2 | 241776965 | T | A | 0.2932 | -0.0355 | 0.0054 | 3.37E-11 | -6.6294  | 1316443 | Asthma |
| rs62193061  | 2 | 241788522 | C | T | 0.1675 | -0.0663 | 0.0071 | 6.32E-21 | -9.3845  | 1224666 | Asthma |
| rs62193062  | 2 | 241788594 | G | A | 0.1707 | -0.0690 | 0.0065 | 5.07E-26 | -10.5502 | 1316443 | Asthma |
| rs62193063  | 2 | 241788683 | T | C | 0.1682 | -0.0691 | 0.0066 | 9.34E-26 | -10.4926 | 1316443 | Asthma |
| rs62193064  | 2 | 241788833 | A | G | 0.1682 | -0.0690 | 0.0066 | 1.03E-25 | -10.4838 | 1316443 | Asthma |
| rs62193065  | 2 | 241789202 | A | G | 0.1660 | -0.0692 | 0.0066 | 1.83E-25 | -10.4290 | 1316443 | Asthma |
| rs62193066  | 2 | 241789751 | T | C | 0.1661 | -0.0690 | 0.0066 | 2.40E-25 | -10.4030 | 1316443 | Asthma |
| rs62193067  | 2 | 241790194 | A | C | 0.1677 | -0.0684 | 0.0066 | 2.89E-25 | -10.3852 | 1316443 | Asthma |
| rs62193068  | 2 | 241790918 | A | G | 0.2919 | -0.0361 | 0.0054 | 1.86E-11 | -6.7171  | 1316443 | Asthma |
| rs62193069  | 2 | 241791150 | A | G | 0.1684 | -0.0692 | 0.0066 | 9.49E-26 | -10.4911 | 1316443 | Asthma |
| rs62193070  | 2 | 241791173 | G | A | 0.1684 | -0.0691 | 0.0066 | 9.55E-26 | -10.4906 | 1316443 | Asthma |
| rs62193071  | 2 | 241791174 | A | C | 0.1684 | -0.0692 | 0.0066 | 8.66E-26 | -10.4998 | 1316443 | Asthma |
| rs62193072  | 2 | 241791671 | G | C | 0.1685 | -0.0687 | 0.0066 | 1.83E-25 | -10.4289 | 1316443 | Asthma |
| rs34255800  | 2 | 241792031 | C | G | 0.1620 | -0.0691 | 0.0081 | 1.17E-17 | -8.5562  | 1030443 | Asthma |
| rs62648954  | 2 | 241793577 | G | A | 0.1798 | -0.0614 | 0.0087 | 1.95E-12 | -7.0383  | 873440  | Asthma |
| rs28433874  | 2 | 241794071 | C | T | 0.2328 | -0.0458 | 0.0058 | 3.73E-15 | -7.8639  | 1316443 | Asthma |
| rs62193075  | 2 | 241796426 | G | A | 0.2267 | -0.0459 | 0.0059 | 6.63E-15 | -7.7915  | 1316443 | Asthma |
| rs62193076  | 2 | 241796433 | G | A | 0.2266 | -0.0464 | 0.0059 | 3.17E-15 | -7.8839  | 1316443 | Asthma |
| rs62193077  | 2 | 241796806 | G | A | 0.2311 | -0.0450 | 0.0058 | 1.33E-14 | -7.7034  | 1316443 | Asthma |
| rs35320439  | 2 | 241797926 | C | T | 0.2989 | -0.0325 | 0.0052 | 4.72E-10 | -6.2284  | 1376071 | Asthma |
| rs62193079  | 2 | 241800143 | A | G | 0.1655 | -0.0675 | 0.0067 | 3.87E-24 | -10.1348 | 1316443 | Asthma |
| rs73106178  | 2 | 241800347 | T | G | 0.1576 | -0.0734 | 0.0085 | 8.24E-18 | -8.5963  | 723906  | Asthma |
| rs62193080  | 2 | 241800675 | G | C | 0.1844 | -0.0661 | 0.0064 | 8.47E-25 | -10.2823 | 1316443 | Asthma |
| rs115572130 | 2 | 241800856 | T | C | 0.0945 | -0.0534 | 0.0090 | 3.02E-09 | -5.9306  | 1299802 | Asthma |
| rs744986    | 2 | 241804236 | A | G | 0.3312 | -0.0478 | 0.0055 | 3.51E-18 | -8.6938  | 1299802 | Asthma |
| rs741776    | 2 | 241804528 | T | G | 0.3373 | -0.0496 | 0.0055 | 1.35E-19 | -9.0559  | 1299802 | Asthma |
| rs73014070  | 2 | 241832578 | G | A | 0.2681 | 0.0299  | 0.0054 | 3.36E-08 | 5.5217   | 1376071 | Asthma |
| rs4075279   | 2 | 241839248 | G | C | 0.2687 | 0.0297  | 0.0054 | 4.02E-08 | 5.4900   | 1376071 | Asthma |
| rs67727874  | 2 | 241853695 | C | G | 0.2602 | 0.0300  | 0.0055 | 3.82E-08 | 5.4992   | 1376071 | Asthma |
| rs35399295  | 2 | 241853790 | T | C | 0.2601 | 0.0303  | 0.0054 | 2.71E-08 | 5.5595   | 1376071 | Asthma |
| rs4973636   | 2 | 241979481 | A | G | 0.3849 | -0.0325 | 0.0055 | 3.05E-09 | -5.9288  | 1299802 | Asthma |
| rs143453734 | 3 | 12294833  | A | C | 0.0986 | 0.0430  | 0.0078 | 3.06E-08 | 5.5383   | 1376071 | Asthma |
| rs138316828 | 3 | 12295637  | T | C | 0.0986 | 0.0431  | 0.0078 | 2.79E-08 | 5.5542   | 1376071 | Asthma |
| rs73023314  | 3 | 12296755  | A | C | 0.0986 | 0.0430  | 0.0078 | 2.91E-08 | 5.5469   | 1376071 | Asthma |
| rs58581416  | 3 | 12309807  | C | A | 0.0947 | 0.0434  | 0.0079 | 4.61E-08 | 5.4659   | 1376071 | Asthma |
| rs57052381  | 3 | 12310056  | T | C | 0.0947 | 0.0433  | 0.0079 | 4.97E-08 | 5.4524   | 1376071 | Asthma |
| rs17036281  | 3 | 12312912  | G | T | 0.0947 | 0.0433  | 0.0079 | 4.94E-08 | 5.4536   | 1376071 | Asthma |
| rs78135480  | 3 | 12330706  | A | T | 0.0946 | 0.0433  | 0.0079 | 4.85E-08 | 5.4568   | 1376071 | Asthma |
| rs4858223   | 3 | 20539657  | T | C | 0.3380 | -0.0294 | 0.0050 | 5.43E-09 | -5.8335  | 1376071 | Asthma |
| rs146040170 | 3 | 20547965  | G | C | 0.3427 | -0.0295 | 0.0050 | 3.80E-09 | -5.8928  | 1376071 | Asthma |
| rs4857960   | 3 | 20549385  | C | T | 0.3439 | -0.0288 | 0.0050 | 8.51E-09 | -5.7581  | 1376071 | Asthma |
| rs4857961   | 3 | 20549433  | A | C | 0.3424 | -0.0295 | 0.0050 | 4.00E-09 | -5.8844  | 1376071 | Asthma |
| rs4858226   | 3 | 20549520  | A | G | 0.3424 | -0.0295 | 0.0050 | 3.97E-09 | -5.8856  | 1376071 | Asthma |
| rs73025625  | 3 | 20551389  | T | C | 0.3422 | -0.0290 | 0.0050 | 7.52E-09 | -5.7789  | 1376071 | Asthma |
| rs4292253   | 3 | 20563810  | C | T | 0.3429 | -0.0288 | 0.0050 | 8.84E-09 | -5.7515  | 1376071 | Asthma |

|             |   |          |   |   |        |         |        |          |         |         |        |
|-------------|---|----------|---|---|--------|---------|--------|----------|---------|---------|--------|
| rs62242075  | 3 | 20569003 | A | G | 0.3410 | -0.0295 | 0.0050 | 4.00E-09 | -5.8842 | 1376071 | Asthma |
| rs62242077  | 3 | 20577220 | G | T | 0.3422 | -0.0287 | 0.0050 | 9.70E-09 | -5.7359 | 1376071 | Asthma |
| rs62242105  | 3 | 20588903 | A | G | 0.3316 | -0.0305 | 0.0051 | 1.74E-09 | -6.0207 | 1376071 | Asthma |
| rs62242108  | 3 | 20592945 | A | G | 0.2917 | -0.0328 | 0.0054 | 1.13E-09 | -6.0895 | 1316443 | Asthma |
| rs62242109  | 3 | 20595374 | A | G | 0.2975 | -0.0319 | 0.0053 | 2.52E-09 | -5.9600 | 1316443 | Asthma |
| rs4019656   | 3 | 20631609 | C | A | 0.2815 | -0.0293 | 0.0053 | 2.91E-08 | -5.5467 | 1376071 | Asthma |
| rs62237468  | 3 | 20647599 | C | T | 0.2808 | -0.0297 | 0.0053 | 1.94E-08 | -5.6175 | 1376071 | Asthma |
| rs4857964   | 3 | 20648707 | A | T | 0.2808 | -0.0298 | 0.0053 | 1.62E-08 | -5.6487 | 1376071 | Asthma |
| rs17808771  | 3 | 20650331 | T | A | 0.2811 | -0.0289 | 0.0053 | 4.39E-08 | -5.4744 | 1376071 | Asthma |
| rs7644564   | 3 | 20662190 | G | A | 0.2816 | -0.0288 | 0.0053 | 4.65E-08 | -5.4643 | 1376071 | Asthma |
| rs17809304  | 3 | 20665865 | A | T | 0.2809 | -0.0291 | 0.0053 | 3.61E-08 | -5.5087 | 1376071 | Asthma |
| rs62237495  | 3 | 20666260 | G | C | 0.2818 | -0.0290 | 0.0053 | 3.92E-08 | -5.4946 | 1376071 | Asthma |
| rs1566478   | 3 | 20669127 | C | T | 0.2821 | -0.0290 | 0.0053 | 3.87E-08 | -5.4966 | 1376071 | Asthma |
| rs1566479   | 3 | 20669502 | C | T | 0.2821 | -0.0289 | 0.0053 | 4.10E-08 | -5.4865 | 1376071 | Asthma |
| rs62237497  | 3 | 20672415 | T | C | 0.2823 | -0.0295 | 0.0053 | 2.17E-08 | -5.5982 | 1376071 | Asthma |
| rs4857968   | 3 | 20673088 | A | G | 0.2824 | -0.0294 | 0.0053 | 2.57E-08 | -5.5686 | 1376071 | Asthma |
| rs62237499  | 3 | 20676271 | G | T | 0.2828 | -0.0296 | 0.0053 | 2.09E-08 | -5.6044 | 1376071 | Asthma |
| rs62237500  | 3 | 20677227 | A | C | 0.2749 | -0.0297 | 0.0053 | 2.45E-08 | -5.5766 | 1376071 | Asthma |
| rs62237509  | 3 | 20683463 | A | T | 0.2788 | -0.0292 | 0.0053 | 3.76E-08 | -5.5020 | 1376071 | Asthma |
| rs56286961  | 3 | 20685858 | G | A | 0.2792 | -0.0294 | 0.0053 | 2.90E-08 | -5.5475 | 1376071 | Asthma |
| rs62234961  | 3 | 20686469 | A | G | 0.2791 | -0.0292 | 0.0053 | 3.42E-08 | -5.5186 | 1376071 | Asthma |
| rs62234988  | 3 | 20695381 | C | T | 0.2925 | -0.0295 | 0.0052 | 1.52E-08 | -5.6588 | 1376071 | Asthma |
| rs17809565  | 3 | 20696597 | G | A | 0.2928 | -0.0298 | 0.0052 | 1.07E-08 | -5.7193 | 1376071 | Asthma |
| rs55964255  | 3 | 20700799 | T | C | 0.2933 | -0.0297 | 0.0053 | 2.44E-08 | -5.5774 | 1316443 | Asthma |
| rs62234991  | 3 | 20703004 | A | G | 0.2934 | -0.0302 | 0.0053 | 1.47E-08 | -5.6650 | 1316443 | Asthma |
| rs62234992  | 3 | 20706828 | G | T | 0.2939 | -0.0301 | 0.0053 | 1.65E-08 | -5.6456 | 1316443 | Asthma |
| rs3934505   | 3 | 32973797 | G | C | 0.2903 | 0.0349  | 0.0054 | 8.59E-11 | 6.4899  | 1316443 | Asthma |
| rs12185981  | 3 | 32974432 | A | T | 0.2958 | 0.0354  | 0.0053 | 3.48E-11 | 6.6247  | 1316443 | Asthma |
| rs112867051 | 3 | 32975167 | G | A | 0.2838 | 0.0301  | 0.0052 | 5.30E-09 | 5.8375  | 1316443 | Asthma |
| rs6809680   | 3 | 32977459 | T | C | 0.2785 | 0.0320  | 0.0053 | 1.68E-09 | 6.0260  | 1376071 | Asthma |
| rs6764245   | 3 | 32977882 | A | G | 0.2951 | 0.0361  | 0.0052 | 4.06E-12 | 6.9351  | 1376071 | Asthma |
| rs73057032  | 3 | 32978364 | T | A | 0.2795 | 0.0327  | 0.0054 | 1.60E-09 | 6.0343  | 1316443 | Asthma |
| rs112852633 | 3 | 32981758 | A | G | 0.2746 | 0.0332  | 0.0055 | 1.22E-09 | 6.0777  | 1316443 | Asthma |
| rs7631407   | 3 | 32994726 | C | G | 0.2984 | 0.0327  | 0.0052 | 3.09E-10 | 6.2943  | 1376071 | Asthma |
| rs4678523   | 3 | 32996229 | C | T | 0.3048 | 0.0328  | 0.0052 | 2.11E-10 | 6.3528  | 1376071 | Asthma |
| rs4678524   | 3 | 32996260 | C | A | 0.3048 | 0.0329  | 0.0052 | 1.70E-10 | 6.3863  | 1376071 | Asthma |
| rs4678868   | 3 | 32998250 | A | G | 0.3636 | 0.0276  | 0.0051 | 4.95E-08 | 5.4530  | 1316443 | Asthma |
| rs7618005   | 3 | 33001220 | C | T | 0.5184 | 0.0584  | 0.0087 | 2.23E-11 | 6.6901  | 476051  | Asthma |
| rs7650543   | 3 | 33001221 | T | C | 0.5181 | 0.0585  | 0.0087 | 2.01E-11 | 6.7054  | 476051  | Asthma |
| rs9824218   | 3 | 33002436 | T | C | 0.1609 | -0.0512 | 0.0072 | 1.03E-12 | -7.1270 | 1224666 | Asthma |
| rs9828592   | 3 | 33002847 | C | T | 0.5322 | 0.0446  | 0.0049 | 4.53E-20 | 9.1747  | 1316443 | Asthma |
| rs7646283   | 3 | 33004988 | T | C | 0.3678 | 0.0357  | 0.0049 | 3.05E-13 | 7.2922  | 1376071 | Asthma |
| rs34064757  | 3 | 33005791 | A | G | 0.3677 | 0.0358  | 0.0049 | 2.58E-13 | 7.3145  | 1376071 | Asthma |
| rs35570272  | 3 | 33006170 | T | G | 0.3981 | 0.0409  | 0.0048 | 2.50E-17 | 8.4678  | 1376071 | Asthma |
| rs10154834  | 3 | 33026563 | T | C | 0.5055 | 0.0353  | 0.0047 | 8.26E-14 | 7.4662  | 1376071 | Asthma |
| rs73057087  | 3 | 33026776 | G | A | 0.3723 | 0.0315  | 0.0049 | 1.12E-10 | 6.4499  | 1376071 | Asthma |
| rs58440211  | 3 | 33026825 | C | T | 0.4105 | -0.0267 | 0.0048 | 3.09E-08 | -5.5360 | 1376071 | Asthma |
| rs6776757   | 3 | 33027599 | G | A | 0.5066 | 0.0351  | 0.0047 | 1.24E-13 | 7.4121  | 1376071 | Asthma |
| rs4547648   | 3 | 33038764 | G | A | 0.3712 | 0.0315  | 0.0049 | 1.14E-10 | 6.4467  | 1376071 | Asthma |
| rs4277638   | 3 | 33038864 | A | G | 0.3711 | 0.0316  | 0.0049 | 1.02E-10 | 6.4646  | 1376071 | Asthma |
| rs4274702   | 3 | 33039230 | T | C | 0.3761 | 0.0304  | 0.0054 | 1.90E-08 | 5.6204  | 1193860 | Asthma |
| rs6800001   | 3 | 33039610 | A | G | 0.3712 | 0.0316  | 0.0049 | 9.94E-11 | 6.4679  | 1376071 | Asthma |
| rs6781225   | 3 | 33040724 | A | G | 0.3248 | -0.0314 | 0.0050 | 4.44E-10 | -6.2376 | 1376071 | Asthma |
| rs6805766   | 3 | 33040774 | G | A | 0.3210 | -0.0316 | 0.0051 | 4.17E-10 | -6.2478 | 1376071 | Asthma |
| rs6781531   | 3 | 33040997 | A | G | 0.3249 | -0.0313 | 0.0050 | 4.58E-10 | -6.2329 | 1376071 | Asthma |
| rs4491851   | 3 | 33042493 | G | A | 0.4687 | -0.0391 | 0.0047 | 1.74E-16 | -8.2386 | 1376071 | Asthma |
| rs28752078  | 3 | 33043369 | T | C | 0.3979 | 0.0350  | 0.0048 | 4.07E-13 | 7.2532  | 1376071 | Asthma |
| rs6770682   | 3 | 33073565 | G | A | 0.2538 | -0.0308 | 0.0056 | 3.46E-08 | -5.5167 | 1316443 | Asthma |
| rs4678464   | 3 | 33102399 | G | A | 0.2492 | -0.0301 | 0.0055 | 3.99E-08 | -5.4914 | 1376071 | Asthma |
| rs4441607   | 3 | 33105043 | G | A | 0.2494 | -0.0301 | 0.0055 | 4.17E-08 | -5.4833 | 1376071 | Asthma |
| rs4432682   | 3 | 51152875 | A | G | 0.1101 | 0.0459  | 0.0083 | 2.84E-08 | 5.5512  | 1221848 | Asthma |
| rs6445393   | 3 | 51154767 | C | T | 0.1108 | 0.0412  | 0.0074 | 2.79E-08 | 5.5543  | 1376071 | Asthma |
| rs4328835   | 3 | 51158841 | T | C | 0.1108 | 0.0413  | 0.0074 | 2.55E-08 | 5.5702  | 1376071 | Asthma |
| rs6785558   | 3 | 51161423 | A | G | 0.1107 | 0.0408  | 0.0074 | 3.83E-08 | 5.4986  | 1376071 | Asthma |
| rs6445455   | 3 | 51163181 | T | C | 0.1119 | 0.0409  | 0.0074 | 3.49E-08 | 5.5148  | 1376071 | Asthma |
| rs6777719   | 3 | 51163981 | T | C | 0.1108 | 0.0409  | 0.0074 | 3.65E-08 | 5.5072  | 1376071 | Asthma |
| rs6780575   | 3 | 51164418 | T | C | 0.1108 | 0.0409  | 0.0074 | 3.54E-08 | 5.5125  | 1376071 | Asthma |
| rs4267674   | 3 | 51166459 | G | C | 0.1107 | 0.0407  | 0.0074 | 4.13E-08 | 5.4852  | 1376071 | Asthma |
| rs4927958   | 3 | 51169238 | A | G | 0.1107 | 0.0408  | 0.0074 | 3.92E-08 | 5.4947  | 1376071 | Asthma |
| rs4927959   | 3 | 51169250 | A | G | 0.1107 | 0.0407  | 0.0074 | 4.21E-08 | 5.4817  | 1376071 | Asthma |
| rs4378999   | 3 | 51171215 | T | A | 0.1107 | 0.0407  | 0.0074 | 4.12E-08 | 5.4854  | 1376071 | Asthma |
| rs9867256   | 3 | 51173555 | T | A | 0.1107 | 0.0408  | 0.0074 | 3.94E-08 | 5.4935  | 1376071 | Asthma |
| rs6779658   | 3 | 51174730 | G | A | 0.1107 | 0.0406  | 0.0074 | 4.38E-08 | 5.4747  | 1376071 | Asthma |
| rs4130474   | 3 | 51175417 | A | G | 0.1106 | 0.0408  | 0.0074 | 4.05E-08 | 5.4887  | 1376071 | Asthma |

|            |   |           |   |   |        |         |        |          |         |         |        |
|------------|---|-----------|---|---|--------|---------|--------|----------|---------|---------|--------|
| rs28670710 | 3 | 51175989  | G | A | 0.1107 | 0.0407  | 0.0074 | 4.23E-08 | 5.4812  | 1376071 | Asthma |
| rs4244697  | 3 | 51179010  | G | A | 0.1107 | 0.0406  | 0.0074 | 4.40E-08 | 5.4739  | 1376071 | Asthma |
| rs4927971  | 3 | 51180149  | A | G | 0.1107 | 0.0406  | 0.0074 | 4.53E-08 | 5.4689  | 1376071 | Asthma |
| rs6772664  | 3 | 51182500  | A | G | 0.1108 | 0.0405  | 0.0074 | 4.67E-08 | 5.4634  | 1376071 | Asthma |
| rs6763136  | 3 | 51186213  | C | A | 0.1108 | 0.0405  | 0.0074 | 4.76E-08 | 5.4602  | 1376071 | Asthma |
| rs4927972  | 3 | 51186745  | A | G | 0.1108 | 0.0405  | 0.0074 | 4.68E-08 | 5.4629  | 1376071 | Asthma |
| rs4308313  | 3 | 51187832  | G | A | 0.1107 | 0.0435  | 0.0075 | 7.71E-09 | 5.7747  | 1349938 | Asthma |
| rs4528983  | 3 | 51189198  | G | A | 0.1108 | 0.0405  | 0.0074 | 4.90E-08 | 5.4549  | 1376071 | Asthma |
| rs4367101  | 3 | 51189564  | T | C | 0.1108 | 0.0405  | 0.0074 | 4.80E-08 | 5.4585  | 1376071 | Asthma |
| rs4453876  | 3 | 51191375  | C | T | 0.1108 | 0.0405  | 0.0074 | 4.71E-08 | 5.4620  | 1376071 | Asthma |
| rs17282209 | 3 | 127996353 | C | T | 0.1156 | -0.0416 | 0.0075 | 3.22E-08 | -5.5289 | 1316443 | Asthma |
| rs2955092  | 3 | 128253685 | C | G | 0.1193 | -0.0432 | 0.0078 | 3.19E-08 | -5.5306 | 991410  | Asthma |
| rs2955094  | 3 | 128258080 | A | G | 0.1104 | -0.0408 | 0.0075 | 4.84E-08 | -5.4570 | 1359430 | Asthma |
| rs2955095  | 3 | 128258822 | A | T | 0.1104 | -0.0408 | 0.0075 | 4.94E-08 | -5.4536 | 1359430 | Asthma |
| rs2955096  | 3 | 128259023 | A | G | 0.1103 | -0.0411 | 0.0075 | 4.13E-08 | -5.4854 | 1359430 | Asthma |
| rs2999068  | 3 | 128259135 | T | C | 0.1104 | -0.0408 | 0.0075 | 4.88E-08 | -5.4558 | 1359430 | Asthma |
| rs2955097  | 3 | 128259662 | G | C | 0.1104 | -0.0408 | 0.0075 | 4.90E-08 | -5.4550 | 1359430 | Asthma |
| rs2999067  | 3 | 128259688 | C | A | 0.1104 | -0.0408 | 0.0075 | 4.87E-08 | -5.4561 | 1359430 | Asthma |
| rs2955098  | 3 | 128260658 | T | G | 0.1103 | -0.0410 | 0.0075 | 4.17E-08 | -5.4834 | 1359430 | Asthma |
| rs2955099  | 3 | 128260811 | G | C | 0.1104 | -0.0408 | 0.0075 | 4.86E-08 | -5.4564 | 1359430 | Asthma |
| rs2999066  | 3 | 128261443 | T | C | 0.1104 | -0.0409 | 0.0075 | 4.76E-08 | -5.4599 | 1359430 | Asthma |
| rs2999065  | 3 | 128262595 | A | C | 0.1104 | -0.0410 | 0.0075 | 4.46E-08 | -5.4717 | 1359430 | Asthma |
| rs2811545  | 3 | 128264305 | C | G | 0.1104 | -0.0408 | 0.0075 | 4.83E-08 | -5.4577 | 1359430 | Asthma |
| rs2811542  | 3 | 128264957 | A | C | 0.1104 | -0.0409 | 0.0075 | 4.71E-08 | -5.4617 | 1359430 | Asthma |
| rs2811541  | 3 | 128265591 | C | T | 0.1103 | -0.0409 | 0.0075 | 4.56E-08 | -5.4677 | 1359430 | Asthma |
| rs2811539  | 3 | 128267630 | C | G | 0.1104 | -0.0409 | 0.0075 | 4.70E-08 | -5.4621 | 1359430 | Asthma |
| rs2811400  | 3 | 128269024 | G | A | 0.1103 | -0.0411 | 0.0075 | 4.03E-08 | -5.4896 | 1359430 | Asthma |
| rs2811536  | 3 | 128270076 | A | C | 0.1102 | -0.0412 | 0.0075 | 3.89E-08 | -5.4958 | 1359430 | Asthma |
| rs2811534  | 3 | 128272265 | A | G | 0.1104 | -0.0409 | 0.0075 | 4.83E-08 | -5.4575 | 1359430 | Asthma |
| rs2811414  | 3 | 128272334 | G | C | 0.1103 | -0.0410 | 0.0075 | 4.16E-08 | -5.4840 | 1359430 | Asthma |
| rs2811416  | 3 | 128273095 | T | C | 0.1095 | -0.0417 | 0.0075 | 2.93E-08 | -5.5458 | 1359430 | Asthma |
| rs2811532  | 3 | 128273327 | G | T | 0.1104 | -0.0409 | 0.0075 | 4.55E-08 | -5.4679 | 1359430 | Asthma |
| rs2811531  | 3 | 128273652 | G | C | 0.1104 | -0.0409 | 0.0075 | 4.50E-08 | -5.4702 | 1359430 | Asthma |
| rs2811530  | 3 | 128274323 | A | G | 0.1103 | -0.0411 | 0.0075 | 3.97E-08 | -5.4920 | 1359430 | Asthma |
| rs2955100  | 3 | 128274482 | G | A | 0.1194 | -0.0432 | 0.0078 | 3.15E-08 | -5.5327 | 991410  | Asthma |
| rs2999062  | 3 | 128274763 | A | G | 0.1104 | -0.0409 | 0.0075 | 4.73E-08 | -5.4611 | 1359430 | Asthma |
| rs2999061  | 3 | 128274780 | A | G | 0.1104 | -0.0408 | 0.0075 | 4.92E-08 | -5.4543 | 1359430 | Asthma |
| rs2811528  | 3 | 128275593 | A | G | 0.1103 | -0.0410 | 0.0075 | 4.41E-08 | -5.4738 | 1359430 | Asthma |
| rs2811526  | 3 | 128276875 | A | C | 0.1104 | -0.0413 | 0.0075 | 3.43E-08 | -5.5178 | 1359430 | Asthma |
| rs2811373  | 3 | 128278586 | T | A | 0.1104 | -0.0412 | 0.0075 | 3.69E-08 | -5.5053 | 1359430 | Asthma |
| rs2811381  | 3 | 128279069 | A | G | 0.1098 | -0.0415 | 0.0075 | 2.92E-08 | -5.5462 | 1359430 | Asthma |
| rs2811525  | 3 | 128280587 | T | C | 0.1104 | -0.0413 | 0.0075 | 3.53E-08 | -5.5128 | 1359430 | Asthma |
| rs2811524  | 3 | 128281112 | G | A | 0.1104 | -0.0413 | 0.0075 | 3.31E-08 | -5.5243 | 1359430 | Asthma |
| rs7374952  | 3 | 128282524 | T | C | 0.1105 | -0.0411 | 0.0075 | 3.77E-08 | -5.5014 | 1359430 | Asthma |
| rs7374227  | 3 | 128282672 | G | C | 0.1104 | -0.0414 | 0.0075 | 3.16E-08 | -5.5323 | 1359430 | Asthma |
| rs6765233  | 3 | 128284007 | T | C | 0.1104 | -0.0414 | 0.0075 | 3.22E-08 | -5.5291 | 1359430 | Asthma |
| rs4593050  | 3 | 128285688 | T | C | 0.1104 | -0.0411 | 0.0075 | 4.11E-08 | -5.4861 | 1359430 | Asthma |
| rs6439124  | 3 | 128288623 | A | G | 0.1104 | -0.0412 | 0.0075 | 3.66E-08 | -5.5064 | 1359430 | Asthma |
| rs7373998  | 3 | 128289380 | A | G | 0.1104 | -0.0413 | 0.0075 | 3.50E-08 | -5.5142 | 1359430 | Asthma |
| rs2955101  | 3 | 128290769 | A | G | 0.1104 | -0.0410 | 0.0075 | 4.08E-08 | -5.4875 | 1359430 | Asthma |
| rs2811523  | 3 | 128292554 | A | G | 0.1105 | -0.0403 | 0.0074 | 4.71E-08 | -5.4617 | 1376071 | Asthma |
| rs2811520  | 3 | 128293434 | G | T | 0.1105 | -0.0402 | 0.0074 | 4.86E-08 | -5.4564 | 1376071 | Asthma |
| rs2811519  | 3 | 128294033 | T | G | 0.1106 | -0.0402 | 0.0074 | 4.81E-08 | -5.4583 | 1376071 | Asthma |
| rs2811518  | 3 | 128294802 | G | A | 0.1106 | -0.0403 | 0.0074 | 4.61E-08 | -5.4656 | 1376071 | Asthma |
| rs2811387  | 3 | 128296335 | C | T | 0.1104 | -0.0407 | 0.0074 | 3.41E-08 | -5.5190 | 1376071 | Asthma |
| rs2999036  | 3 | 128301858 | G | C | 0.1068 | -0.0449 | 0.0082 | 3.71E-08 | -5.5043 | 1224666 | Asthma |
| rs1735546  | 3 | 128356555 | G | T | 0.2581 | -0.0296 | 0.0054 | 3.62E-08 | -5.5084 | 1376071 | Asthma |
| rs1702122  | 3 | 128364489 | G | A | 0.2566 | -0.0295 | 0.0054 | 4.43E-08 | -5.4728 | 1376071 | Asthma |
| rs1735538  | 3 | 128373259 | G | A | 0.2564 | -0.0296 | 0.0054 | 3.84E-08 | -5.4981 | 1376071 | Asthma |
| rs1702119  | 3 | 128375650 | C | T | 0.2565 | -0.0295 | 0.0054 | 4.10E-08 | -5.4864 | 1376071 | Asthma |
| rs879394   | 3 | 168992055 | T | G | 0.2496 | 0.0327  | 0.0055 | 2.53E-09 | 5.9598  | 1376071 | Asthma |
| rs13062826 | 3 | 169023846 | A | G | 0.2479 | 0.0307  | 0.0055 | 2.34E-08 | 5.5849  | 1376071 | Asthma |
| rs16853094 | 3 | 169064633 | A | G | 0.2585 | 0.0300  | 0.0054 | 3.15E-08 | 5.5332  | 1376071 | Asthma |
| rs6795291  | 3 | 169094039 | T | A | 0.3751 | 0.0281  | 0.0051 | 3.96E-08 | 5.4924  | 1008051 | Asthma |
| rs17551153 | 3 | 169409648 | T | C | 0.2403 | -0.0338 | 0.0056 | 1.35E-09 | -6.0610 | 1376071 | Asthma |
| rs17485347 | 3 | 169409731 | A | C | 0.2402 | -0.0338 | 0.0056 | 1.30E-09 | -6.0679 | 1376071 | Asthma |
| rs17485501 | 3 | 169412481 | T | C | 0.2404 | -0.0338 | 0.0056 | 1.34E-09 | -6.0630 | 1376071 | Asthma |
| rs56235255 | 3 | 169413773 | A | G | 0.2404 | -0.0338 | 0.0056 | 1.27E-09 | -6.0705 | 1376071 | Asthma |
| rs56195275 | 3 | 169419513 | C | A | 0.2404 | -0.0338 | 0.0056 | 1.25E-09 | -6.0742 | 1376071 | Asthma |
| rs62294335 | 3 | 169423746 | A | T | 0.2404 | -0.0341 | 0.0056 | 9.62E-10 | -6.1154 | 1376071 | Asthma |
| rs62294337 | 3 | 169427204 | T | A | 0.2408 | -0.0342 | 0.0056 | 8.73E-10 | -6.1311 | 1376071 | Asthma |
| rs9637450  | 3 | 169430632 | G | A | 0.2404 | -0.0341 | 0.0056 | 8.96E-10 | -6.1268 | 1376071 | Asthma |
| rs9637451  | 3 | 169430647 | A | C | 0.2404 | -0.0341 | 0.0056 | 9.16E-10 | -6.1235 | 1376071 | Asthma |
| rs73172091 | 3 | 169431042 | A | T | 0.2404 | -0.0340 | 0.0056 | 1.01E-09 | -6.1072 | 1376071 | Asthma |



|             |   |           |   |   |        |         |        |          |         |         |        |
|-------------|---|-----------|---|---|--------|---------|--------|----------|---------|---------|--------|
| rs17486623  | 3 | 169436569 | A | G | 0.2407 | -0.0336 | 0.0056 | 1.72E-09 | -6.0226 | 1376071 | Asthma |
| rs73172092  | 3 | 169437670 | C | T | 0.2407 | -0.0333 | 0.0056 | 2.25E-09 | -5.9784 | 1376071 | Asthma |
| rs12053882  | 3 | 169439420 | C | T | 0.2396 | -0.0333 | 0.0060 | 3.67E-08 | -5.5062 | 1219993 | Asthma |
| rs73172096  | 3 | 169443114 | A | C | 0.2290 | -0.0335 | 0.0057 | 3.54E-09 | -5.9041 | 1376071 | Asthma |
| rs56129308  | 3 | 169445459 | A | G | 0.2285 | -0.0326 | 0.0058 | 2.10E-08 | -5.6035 | 1316443 | Asthma |
| rs17486987  | 3 | 169447040 | T | A | 0.2291 | -0.0338 | 0.0057 | 2.88E-09 | -5.9383 | 1376071 | Asthma |
| rs7626218   | 3 | 177134250 | T | A | 0.3994 | -0.0294 | 0.0050 | 3.26E-09 | -5.9179 | 1316443 | Asthma |
| rs12629247  | 3 | 187914796 | C | G | 0.0389 | 0.0695  | 0.0120 | 7.79E-09 | 5.7730  | 1376071 | Asthma |
| rs519973    | 3 | 187915480 | A | G | 0.3374 | 0.0309  | 0.0051 | 1.31E-09 | 6.0665  | 1316443 | Asthma |
| rs12632743  | 3 | 187916039 | C | T | 0.0389 | 0.0692  | 0.0120 | 8.92E-09 | 5.7500  | 1376071 | Asthma |
| rs1380476   | 3 | 187916055 | T | C | 0.3374 | 0.0309  | 0.0051 | 1.33E-09 | 6.0642  | 1316443 | Asthma |
| rs12638043  | 3 | 187917444 | T | C | 0.3373 | 0.0303  | 0.0055 | 4.38E-08 | 5.4748  | 1198533 | Asthma |
| rs2378351   | 3 | 187918191 | G | A | 0.3375 | 0.0307  | 0.0051 | 1.58E-09 | 6.0365  | 1316443 | Asthma |
| rs491087    | 3 | 187918378 | A | G | 0.3373 | 0.0311  | 0.0050 | 4.09E-10 | 6.2507  | 1376071 | Asthma |
| rs541115    | 3 | 187920304 | A | T | 0.3373 | 0.0311  | 0.0050 | 4.25E-10 | 6.2445  | 1376071 | Asthma |
| rs763342    | 3 | 187921587 | C | A | 0.3376 | 0.0307  | 0.0050 | 6.48E-10 | 6.1784  | 1376071 | Asthma |
| rs78859589  | 3 | 187924621 | C | T | 0.0390 | 0.0695  | 0.0120 | 6.60E-09 | 5.8010  | 1376071 | Asthma |
| rs507595    | 3 | 187924633 | G | A | 0.0391 | 0.0690  | 0.0120 | 8.38E-09 | 5.7605  | 1376071 | Asthma |
| rs2253944   | 3 | 187925558 | G | A | 0.3135 | 0.0297  | 0.0052 | 1.12E-08 | 5.7111  | 1316443 | Asthma |
| rs2679531   | 3 | 187927342 | A | G | 0.0391 | 0.0679  | 0.0120 | 1.40E-08 | 5.6730  | 1376071 | Asthma |
| rs12631112  | 3 | 187928025 | T | G | 0.0390 | 0.0688  | 0.0120 | 9.34E-09 | 5.7422  | 1376071 | Asthma |
| rs12632303  | 3 | 187929257 | T | C | 0.0390 | 0.0690  | 0.0120 | 8.21E-09 | 5.7642  | 1376071 | Asthma |
| rs76348980  | 3 | 187929373 | G | A | 0.0390 | 0.0689  | 0.0120 | 8.64E-09 | 5.7555  | 1376071 | Asthma |
| rs16862729  | 3 | 187934936 | T | A | 0.0390 | 0.0680  | 0.0120 | 1.33E-08 | 5.6825  | 1376071 | Asthma |
| rs79879183  | 3 | 187936551 | C | A | 0.0322 | 0.0750  | 0.0132 | 1.30E-08 | 5.6864  | 1376071 | Asthma |
| rs78772278  | 3 | 187940655 | C | G | 0.0371 | 0.0688  | 0.0124 | 2.63E-08 | 5.5645  | 1376071 | Asthma |
| rs16862738  | 3 | 187943365 | T | C | 0.0376 | 0.0760  | 0.0131 | 6.67E-09 | 5.7990  | 1246149 | Asthma |
| rs541290    | 3 | 187944195 | C | A | 0.0774 | -0.0558 | 0.0099 | 1.47E-08 | -5.6649 | 1186521 | Asthma |
| rs74369881  | 3 | 187945057 | T | C | 0.0371 | 0.0685  | 0.0124 | 2.94E-08 | 5.5449  | 1376071 | Asthma |
| rs78775129  | 3 | 187947204 | T | C | 0.0372 | 0.0681  | 0.0124 | 3.54E-08 | 5.5123  | 1376071 | Asthma |
| rs77689312  | 3 | 187949715 | C | G | 0.0371 | 0.0683  | 0.0124 | 3.32E-08 | 5.5238  | 1376071 | Asthma |
| rs76273372  | 3 | 187949863 | T | C | 0.0373 | 0.0677  | 0.0123 | 4.05E-08 | 5.4887  | 1376071 | Asthma |
| rs75556421  | 3 | 187950609 | G | T | 0.0371 | 0.0685  | 0.0124 | 3.00E-08 | 5.5413  | 1376071 | Asthma |
| rs16862759  | 3 | 187953362 | C | T | 0.0370 | 0.0691  | 0.0124 | 2.43E-08 | 5.5784  | 1376071 | Asthma |
| rs34246060  | 3 | 187953388 | T | C | 0.0371 | 0.0684  | 0.0124 | 3.17E-08 | 5.5317  | 1376071 | Asthma |
| rs79089290  | 3 | 187953598 | T | C | 0.0370 | 0.0690  | 0.0124 | 2.53E-08 | 5.5710  | 1376071 | Asthma |
| rs73051532  | 3 | 187954127 | T | C | 0.0372 | 0.0675  | 0.0124 | 4.74E-08 | 5.4609  | 1376071 | Asthma |
| rs73051534  | 3 | 187954526 | C | T | 0.0372 | 0.0676  | 0.0124 | 4.48E-08 | 5.4709  | 1376071 | Asthma |
| rs73051536  | 3 | 187954938 | C | T | 0.0370 | 0.0692  | 0.0124 | 2.26E-08 | 5.5908  | 1376071 | Asthma |
| rs16862763  | 3 | 187955201 | T | C | 0.0370 | 0.0690  | 0.0124 | 2.58E-08 | 5.5679  | 1376071 | Asthma |
| rs9842232   | 3 | 188362375 | G | C | 0.4357 | 0.0278  | 0.0049 | 1.41E-08 | 5.6719  | 1316443 | Asthma |
| rs4686953   | 3 | 188365131 | C | T | 0.4459 | 0.0423  | 0.0074 | 1.23E-08 | 5.6960  | 544513  | Asthma |
| rs9864554   | 3 | 188366894 | T | G | 0.4332 | 0.0350  | 0.0059 | 2.64E-09 | 5.9525  | 1030443 | Asthma |
| rs9851967   | 3 | 188369840 | T | C | 0.4359 | 0.0298  | 0.0047 | 3.26E-10 | 6.2861  | 1376071 | Asthma |
| rs11715549  | 3 | 188370330 | G | C | 0.4358 | 0.0298  | 0.0048 | 3.58E-10 | 6.2714  | 1376071 | Asthma |
| rs11707807  | 3 | 188370473 | G | A | 0.4361 | 0.0296  | 0.0048 | 4.96E-10 | 6.2205  | 1376071 | Asthma |
| rs11719821  | 3 | 188370530 | C | T | 0.4360 | 0.0298  | 0.0048 | 3.73E-10 | 6.2647  | 1376071 | Asthma |
| rs11715716  | 3 | 188370852 | G | C | 0.4358 | 0.0299  | 0.0048 | 3.34E-10 | 6.2822  | 1376071 | Asthma |
| rs13315917  | 3 | 188371012 | C | A | 0.4357 | 0.0300  | 0.0048 | 3.05E-10 | 6.2964  | 1376071 | Asthma |
| rs13076312  | 3 | 188371466 | T | C | 0.4648 | -0.0291 | 0.0049 | 2.05E-09 | -5.9934 | 1316443 | Asthma |
| rs9877752   | 3 | 188374140 | A | G | 0.4316 | 0.0301  | 0.0048 | 2.61E-10 | 6.3200  | 1376071 | Asthma |
| rs62291440  | 3 | 188374758 | T | G | 0.4330 | 0.0297  | 0.0052 | 1.15E-08 | 5.7068  | 1224666 | Asthma |
| rs146059085 | 3 | 188376160 | C | G | 0.4645 | -0.0289 | 0.0048 | 2.50E-09 | -5.9613 | 1316443 | Asthma |
| rs9866135   | 3 | 188377499 | A | G | 0.4640 | -0.0291 | 0.0049 | 2.06E-09 | -5.9935 | 1316443 | Asthma |
| rs11718576  | 3 | 188378442 | T | C | 0.4353 | 0.0303  | 0.0048 | 1.87E-10 | 6.3714  | 1376071 | Asthma |
| rs2378416   | 3 | 188378669 | A | G | 0.3549 | 0.0336  | 0.0049 | 7.41E-12 | 6.8495  | 1376071 | Asthma |
| rs11709294  | 3 | 188380247 | A | T | 0.4319 | 0.0301  | 0.0048 | 2.85E-10 | 6.3067  | 1376071 | Asthma |
| rs11706429  | 3 | 188381454 | A | G | 0.4321 | 0.0302  | 0.0048 | 2.36E-10 | 6.3362  | 1376071 | Asthma |
| rs1474275   | 3 | 188381632 | T | G | 0.4766 | 0.0306  | 0.0049 | 3.88E-10 | 6.2586  | 1316443 | Asthma |
| rs1915930   | 3 | 188382468 | G | T | 0.4331 | 0.0285  | 0.0049 | 5.14E-09 | 5.8425  | 1316443 | Asthma |
| rs2030518   | 3 | 188383882 | A | G | 0.4986 | 0.0298  | 0.0049 | 7.80E-10 | 6.1489  | 1316443 | Asthma |
| rs2030517   | 3 | 188383915 | A | C | 0.4987 | 0.0298  | 0.0049 | 8.46E-10 | 6.1359  | 1316443 | Asthma |
| rs2030516   | 3 | 188383951 | T | C | 0.4325 | 0.0287  | 0.0049 | 3.94E-09 | 5.8867  | 1316443 | Asthma |
| rs13079741  | 3 | 188384073 | C | G | 0.4693 | -0.0292 | 0.0049 | 1.81E-09 | -6.0139 | 1316443 | Asthma |
| rs13079689  | 3 | 188384324 | A | T | 0.5189 | 0.0423  | 0.0074 | 9.71E-09 | 5.7356  | 544513  | Asthma |
| rs9848000   | 3 | 188384633 | T | A | 0.4997 | 0.0293  | 0.0048 | 1.51E-09 | 6.0430  | 1316443 | Asthma |
| rs9848016   | 3 | 188384645 | T | C | 0.4998 | 0.0293  | 0.0048 | 1.49E-09 | 6.0451  | 1316443 | Asthma |
| rs2889896   | 3 | 188384928 | T | C | 0.4680 | -0.0305 | 0.0047 | 1.07E-10 | -6.4563 | 1376071 | Asthma |
| rs9864529   | 3 | 188387268 | G | A | 0.4640 | 0.0277  | 0.0049 | 1.16E-08 | 5.7057  | 1316443 | Asthma |
| rs4686955   | 3 | 188388591 | G | A | 0.4323 | 0.0301  | 0.0048 | 3.01E-10 | 6.2986  | 1376071 | Asthma |
| rs56046601  | 3 | 188390854 | C | G | 0.4323 | 0.0302  | 0.0048 | 2.66E-10 | 6.3172  | 1376071 | Asthma |
| rs12485704  | 3 | 188391978 | T | C | 0.4689 | -0.0292 | 0.0049 | 1.77E-09 | -6.0178 | 1316443 | Asthma |
| rs7613192   | 3 | 188392045 | C | G | 0.4329 | 0.0299  | 0.0048 | 3.90E-10 | 6.2579  | 1376071 | Asthma |
| rs9834159   | 3 | 188397444 | T | A | 0.4650 | 0.0273  | 0.0049 | 1.84E-08 | 5.6267  | 1316443 | Asthma |

|             |   |           |   |   |        |         |        |          |         |         |        |
|-------------|---|-----------|---|---|--------|---------|--------|----------|---------|---------|--------|
| rs6790260   | 3 | 188399291 | G | C | 0.4635 | 0.0276  | 0.0049 | 1.29E-08 | 5.6869  | 1316443 | Asthma |
| rs6444285   | 3 | 188399998 | C | T | 0.4654 | 0.0273  | 0.0049 | 1.90E-08 | 5.6206  | 1316443 | Asthma |
| rs4686483   | 3 | 188400437 | T | A | 0.4654 | 0.0273  | 0.0049 | 1.93E-08 | 5.6184  | 1316443 | Asthma |
| rs4686484   | 3 | 188400784 | G | A | 0.4654 | 0.0273  | 0.0049 | 1.92E-08 | 5.6192  | 1316443 | Asthma |
| rs6778720   | 3 | 188401089 | G | A | 0.4654 | 0.0273  | 0.0049 | 1.93E-08 | 5.6180  | 1316443 | Asthma |
| rs2030520   | 3 | 188401794 | C | T | 0.4654 | 0.0273  | 0.0049 | 1.89E-08 | 5.6221  | 1316443 | Asthma |
| rs2030519   | 3 | 188402113 | G | A | 0.4654 | 0.0272  | 0.0049 | 2.22E-08 | 5.5937  | 1316443 | Asthma |
| rs12634152  | 3 | 188403231 | C | T | 0.4700 | -0.0292 | 0.0049 | 1.80E-09 | -6.0148 | 1316443 | Asthma |
| rs12639588  | 3 | 188403475 | G | A | 0.4304 | 0.0302  | 0.0048 | 2.49E-10 | 6.3277  | 1376071 | Asthma |
| rs2049218   | 3 | 188405190 | T | C | 0.4302 | 0.0305  | 0.0048 | 1.72E-10 | 6.3844  | 1376071 | Asthma |
| rs1559810   | 3 | 188406566 | A | C | 0.4190 | -0.0273 | 0.0048 | 1.04E-08 | -5.7239 | 1376071 | Asthma |
| rs13093110  | 3 | 188407332 | T | C | 0.4657 | -0.0282 | 0.0049 | 6.56E-09 | -5.8018 | 1316443 | Asthma |
| rs715199    | 3 | 188408748 | A | C | 0.4468 | -0.0353 | 0.0059 | 1.93E-09 | -6.0033 | 1030443 | Asthma |
| rs73192661  | 3 | 188411006 | T | C | 0.4292 | 0.0298  | 0.0049 | 1.26E-09 | 6.0723  | 1316443 | Asthma |
| rs9860547   | 3 | 188411191 | A | G | 0.4292 | 0.0298  | 0.0049 | 1.24E-09 | 6.0757  | 1316443 | Asthma |
| rs6780858   | 3 | 188414322 | G | A | 0.4961 | 0.0307  | 0.0049 | 2.91E-10 | 6.3034  | 1316443 | Asthma |
| rs13098877  | 3 | 188415375 | T | C | 0.4559 | -0.0314 | 0.0049 | 1.29E-10 | -6.4286 | 1316443 | Asthma |
| rs60946162  | 3 | 188415548 | T | C | 0.4373 | 0.0319  | 0.0049 | 8.32E-11 | 6.4947  | 1316443 | Asthma |
| rs6808893   | 3 | 188415651 | C | T | 0.4752 | 0.0306  | 0.0049 | 4.04E-10 | 6.2525  | 1316443 | Asthma |
| rs13099273  | 3 | 188415730 | A | T | 0.4769 | 0.0302  | 0.0050 | 1.50E-09 | 6.0450  | 1290310 | Asthma |
| rs1849916   | 3 | 188614077 | C | G | 0.3818 | -0.0288 | 0.0051 | 1.53E-08 | -5.6581 | 1299802 | Asthma |
| rs1849917   | 3 | 188614231 | A | G | 0.3811 | -0.0284 | 0.0051 | 2.48E-08 | -5.5747 | 1299802 | Asthma |
| rs13316519  | 3 | 188617359 | G | A | 0.3821 | -0.0276 | 0.0050 | 3.37E-08 | -5.5211 | 1316443 | Asthma |
| rs12637833  | 3 | 188619251 | T | C | 0.3839 | -0.0273 | 0.0050 | 4.38E-08 | -5.4747 | 1316443 | Asthma |
| rs12630069  | 3 | 188619479 | C | T | 0.3849 | -0.0272 | 0.0050 | 4.80E-08 | -5.4584 | 1316443 | Asthma |
| rs9877898   | 3 | 188620975 | T | C | 0.3941 | -0.0280 | 0.0048 | 5.82E-09 | -5.8218 | 1376071 | Asthma |
| rs6767553   | 3 | 188623478 | G | A | 0.4310 | 0.0343  | 0.0048 | 9.47E-13 | 7.1379  | 1376071 | Asthma |
| rs2138235   | 3 | 188629305 | T | G | 0.2211 | 0.0339  | 0.0061 | 2.35E-08 | 5.5838  | 1299802 | Asthma |
| rs10937361  | 3 | 188641648 | C | A | 0.4403 | 0.0345  | 0.0049 | 2.51E-12 | 7.0030  | 1316443 | Asthma |
| rs62290008  | 3 | 188680854 | G | C | 0.1682 | -0.0377 | 0.0065 | 6.89E-09 | -5.7935 | 1316443 | Asthma |
| rs113387455 | 3 | 188681188 | A | G | 0.1872 | -0.0360 | 0.0063 | 1.06E-08 | -5.7212 | 1316443 | Asthma |
| rs112174832 | 3 | 188681252 | A | C | 0.1701 | -0.0355 | 0.0065 | 4.10E-08 | -5.4864 | 1316443 | Asthma |
| rs17670280  | 3 | 188682451 | C | G | 0.1809 | -0.0377 | 0.0061 | 8.06E-10 | -6.1438 | 1376071 | Asthma |
| rs56328339  | 3 | 188682769 | T | C | 0.1754 | -0.0406 | 0.0062 | 6.63E-11 | -6.5288 | 1376071 | Asthma |
| rs55661102  | 3 | 188683350 | G | A | 0.1809 | -0.0374 | 0.0061 | 1.13E-09 | -6.0898 | 1376071 | Asthma |
| rs62290011  | 3 | 188683860 | G | C | 0.1831 | -0.0360 | 0.0061 | 3.71E-09 | -5.8969 | 1376071 | Asthma |
| rs17607562  | 3 | 188684574 | A | T | 0.1807 | -0.0374 | 0.0061 | 1.11E-09 | -6.0922 | 1376071 | Asthma |
| rs62290013  | 3 | 188684609 | T | C | 0.1807 | -0.0375 | 0.0061 | 1.02E-09 | -6.1064 | 1376071 | Asthma |
| rs73196739  | 3 | 188684683 | T | C | 0.1812 | -0.0366 | 0.0062 | 3.70E-09 | -5.8970 | 1349938 | Asthma |
| rs78006396  | 3 | 188684684 | G | A | 0.1812 | -0.0366 | 0.0062 | 3.89E-09 | -5.8888 | 1349938 | Asthma |
| rs17607589  | 3 | 188684798 | T | C | 0.1807 | -0.0375 | 0.0061 | 1.03E-09 | -6.1052 | 1376071 | Asthma |
| rs17607619  | 3 | 188685247 | G | A | 0.1808 | -0.0379 | 0.0061 | 5.83E-10 | -6.1948 | 1376071 | Asthma |
| rs11709806  | 3 | 188685785 | T | C | 0.1806 | -0.0378 | 0.0061 | 7.31E-10 | -6.1592 | 1376071 | Asthma |
| rs11713935  | 3 | 188685859 | A | T | 0.1805 | -0.0377 | 0.0061 | 8.18E-10 | -6.1413 | 1376071 | Asthma |
| rs62290016  | 3 | 188686879 | T | G | 0.1828 | -0.0360 | 0.0061 | 3.88E-09 | -5.8890 | 1376071 | Asthma |
| rs56349152  | 3 | 188686881 | G | A | 0.1840 | -0.0359 | 0.0062 | 8.20E-09 | -5.7645 | 1316443 | Asthma |
| rs17670540  | 3 | 188688429 | A | G | 0.2463 | 0.0395  | 0.0055 | 1.02E-12 | 7.1277  | 1376071 | Asthma |
| rs9846214   | 3 | 188695070 | C | T | 0.2474 | 0.0398  | 0.0055 | 6.09E-13 | 7.1986  | 1376071 | Asthma |
| rs9846404   | 3 | 188695209 | A | T | 0.2472 | 0.0397  | 0.0055 | 7.16E-13 | 7.1765  | 1376071 | Asthma |
| rs9864066   | 3 | 188695331 | C | A | 0.2473 | 0.0396  | 0.0055 | 7.41E-13 | 7.1715  | 1376071 | Asthma |
| rs17670865  | 3 | 188695676 | C | G | 0.2218 | 0.0398  | 0.0059 | 1.36E-11 | 6.7626  | 1316443 | Asthma |
| rs6789732   | 3 | 188696538 | C | T | 0.2982 | 0.0397  | 0.0052 | 2.48E-14 | 7.6229  | 1376071 | Asthma |
| rs7631995   | 3 | 188699088 | A | G | 0.2474 | 0.0398  | 0.0055 | 5.27E-13 | 7.2183  | 1376071 | Asthma |
| rs9877192   | 3 | 188708468 | G | A | 0.2475 | 0.0395  | 0.0055 | 7.87E-13 | 7.1635  | 1376071 | Asthma |
| rs9815758   | 3 | 188714166 | C | T | 0.2463 | 0.0394  | 0.0055 | 8.99E-13 | 7.1452  | 1376071 | Asthma |
| rs55884274  | 3 | 188721591 | G | A | 0.2981 | 0.0404  | 0.0052 | 8.37E-15 | 7.7619  | 1376071 | Asthma |
| rs9810196   | 3 | 188722148 | G | C | 0.2982 | 0.0402  | 0.0052 | 1.07E-14 | 7.7307  | 1376071 | Asthma |
| rs9848114   | 3 | 188722388 | G | A | 0.2981 | 0.0402  | 0.0052 | 1.09E-14 | 7.7279  | 1376071 | Asthma |
| rs62291267  | 3 | 188722408 | G | A | 0.2982 | 0.0401  | 0.0052 | 1.17E-14 | 7.7189  | 1376071 | Asthma |
| rs9815874   | 3 | 188723373 | T | C | 0.2806 | 0.0426  | 0.0053 | 7.32E-16 | 8.0649  | 1376071 | Asthma |
| rs17671338  | 3 | 188723553 | A | G | 0.2967 | 0.0402  | 0.0052 | 1.19E-14 | 7.7170  | 1376071 | Asthma |
| rs9290877   | 3 | 188724692 | C | T | 0.2824 | 0.0426  | 0.0053 | 5.88E-16 | 8.0918  | 1376071 | Asthma |
| rs56146114  | 3 | 188726458 | G | A | 0.2971 | 0.0400  | 0.0053 | 5.82E-14 | 7.5121  | 1316443 | Asthma |
| rs62291291  | 3 | 188726676 | G | A | 0.2975 | 0.0403  | 0.0053 | 4.04E-14 | 7.5598  | 1316443 | Asthma |
| rs17671434  | 3 | 188727651 | T | G | 0.2960 | 0.0398  | 0.0053 | 8.25E-14 | 7.4662  | 1316443 | Asthma |
| rs9847345   | 3 | 188727888 | G | A | 0.2960 | 0.0399  | 0.0053 | 7.77E-14 | 7.4741  | 1316443 | Asthma |
| rs7650683   | 3 | 188727995 | C | A | 0.2796 | 0.0425  | 0.0054 | 4.45E-15 | 7.8414  | 1316443 | Asthma |
| rs7640368   | 3 | 188728113 | C | T | 0.2960 | 0.0397  | 0.0053 | 9.25E-14 | 7.4511  | 1316443 | Asthma |
| rs7628937   | 3 | 188728364 | G | C | 0.3013 | 0.0402  | 0.0057 | 1.96E-12 | 7.0375  | 1186521 | Asthma |
| rs62291294  | 3 | 188729039 | G | A | 0.2960 | 0.0396  | 0.0053 | 1.20E-13 | 7.4165  | 1316443 | Asthma |
| rs9857993   | 3 | 188729916 | G | A | 0.2960 | 0.0396  | 0.0053 | 1.21E-13 | 7.4160  | 1316443 | Asthma |
| rs9825149   | 3 | 188730298 | A | G | 0.2960 | 0.0396  | 0.0053 | 1.29E-13 | 7.4077  | 1316443 | Asthma |
| rs9825301   | 3 | 188730411 | T | G | 0.2960 | 0.0395  | 0.0053 | 1.52E-13 | 7.3852  | 1316443 | Asthma |
| rs9825482   | 3 | 188730532 | A | G | 0.2960 | 0.0394  | 0.0053 | 1.63E-13 | 7.3764  | 1316443 | Asthma |

|             |   |           |   |   |        |         |        |          |         |         |        |
|-------------|---|-----------|---|---|--------|---------|--------|----------|---------|---------|--------|
| rs9881900   | 3 | 188739202 | G | A | 0.2616 | 0.0307  | 0.0054 | 1.31E-08 | 5.6843  | 1376071 | Asthma |
| rs9845169   | 3 | 188739467 | T | G | 0.2614 | 0.0307  | 0.0054 | 1.35E-08 | 5.6796  | 1376071 | Asthma |
| rs6801161   | 3 | 188740381 | A | T | 0.2616 | 0.0306  | 0.0054 | 1.48E-08 | 5.6634  | 1376071 | Asthma |
| rs9833602   | 3 | 188744496 | G | A | 0.2616 | 0.0309  | 0.0054 | 1.02E-08 | 5.7276  | 1376071 | Asthma |
| rs9821679   | 3 | 188745655 | C | T | 0.2615 | 0.0308  | 0.0054 | 1.18E-08 | 5.7034  | 1376071 | Asthma |
| rs2030581   | 3 | 193828805 | G | A | 0.3971 | 0.0262  | 0.0048 | 4.85E-08 | 5.4566  | 1376071 | Asthma |
| rs2030580   | 3 | 193829085 | A | G | 0.3969 | 0.0264  | 0.0048 | 3.96E-08 | 5.4928  | 1376071 | Asthma |
| rs2630246   | 3 | 193829842 | A | G | 0.3968 | 0.0264  | 0.0048 | 4.14E-08 | 5.4847  | 1376071 | Asthma |
| rs640265    | 3 | 193830676 | T | C | 0.3967 | 0.0263  | 0.0048 | 4.72E-08 | 5.4615  | 1376071 | Asthma |
| rs1146045   | 3 | 193831619 | C | T | 0.3934 | 0.0279  | 0.0049 | 1.64E-08 | 5.6463  | 1316443 | Asthma |
| rs655045    | 3 | 193831660 | T | C | 0.3933 | 0.0277  | 0.0049 | 1.98E-08 | 5.6140  | 1316443 | Asthma |
| rs6782834   | 3 | 196027293 | G | A | 0.3053 | 0.0296  | 0.0053 | 1.92E-08 | 5.6191  | 1316443 | Asthma |
| rs2086892   | 3 | 196598645 | C | T | 0.2346 | -0.0327 | 0.0059 | 2.71E-08 | -5.5595 | 1316443 | Asthma |
| rs35107793  | 3 | 196623052 | T | C | 0.0863 | -0.0493 | 0.0089 | 2.65E-08 | -5.5630 | 1316443 | Asthma |
| rs7636493   | 3 | 196641059 | A | G | 0.1896 | -0.0395 | 0.0068 | 7.24E-09 | -5.7852 | 1159440 | Asthma |
| rs7636495   | 3 | 196641065 | A | G | 0.1899 | -0.0393 | 0.0063 | 4.30E-10 | -6.2429 | 1316443 | Asthma |
| rs11185551  | 3 | 196641320 | C | G | 0.1901 | -0.0395 | 0.0063 | 3.33E-10 | -6.2828 | 1316443 | Asthma |
| rs2890620   | 4 | 38734929  | C | T | 0.2985 | -0.0331 | 0.0055 | 1.89E-09 | -6.0066 | 1316443 | Asthma |
| rs4072590   | 4 | 38742868  | T | A | 0.2779 | -0.0348 | 0.0056 | 5.63E-10 | -6.2004 | 1316443 | Asthma |
| rs6827784   | 4 | 38744795  | C | T | 0.2779 | -0.0347 | 0.0056 | 5.95E-10 | -6.1916 | 1316443 | Asthma |
| rs6847640   | 4 | 38745467  | T | C | 0.2763 | -0.0344 | 0.0056 | 1.02E-09 | -6.1067 | 1316443 | Asthma |
| rs9761637   | 4 | 38748564  | G | A | 0.3121 | -0.0299 | 0.0054 | 3.57E-08 | -5.5111 | 1316443 | Asthma |
| rs4426787   | 4 | 38749976  | C | A | 0.2773 | -0.0349 | 0.0056 | 5.18E-10 | -6.2137 | 1316443 | Asthma |
| rs4540058   | 4 | 38750073  | A | G | 0.2774 | -0.0350 | 0.0056 | 4.45E-10 | -6.2375 | 1316443 | Asthma |
| rs73234989  | 4 | 38753267  | A | G | 0.1637 | -0.0426 | 0.0067 | 2.04E-10 | -6.3584 | 1376071 | Asthma |
| rs11723816  | 4 | 38755545  | T | C | 0.1946 | -0.0344 | 0.0062 | 3.42E-08 | -5.5184 | 1376071 | Asthma |
| rs11728049  | 4 | 38755547  | G | A | 0.1946 | -0.0343 | 0.0062 | 3.50E-08 | -5.5141 | 1376071 | Asthma |
| rs11724689  | 4 | 38755779  | G | C | 0.1760 | -0.0383 | 0.0066 | 8.38E-09 | -5.7607 | 1008051 | Asthma |
| rs55649498  | 4 | 38755904  | T | C | 0.1949 | -0.0345 | 0.0062 | 2.78E-08 | -5.5547 | 1376071 | Asthma |
| rs6853255   | 4 | 38756620  | T | C | 0.1966 | -0.0339 | 0.0062 | 4.02E-08 | -5.4899 | 1376071 | Asthma |
| rs73234992  | 4 | 38757001  | A | G | 0.1950 | -0.0349 | 0.0062 | 1.82E-08 | -5.6287 | 1376071 | Asthma |
| rs111677487 | 4 | 38757292  | C | T | 0.1630 | -0.0426 | 0.0067 | 2.12E-10 | -6.3524 | 1376071 | Asthma |
| rs73234995  | 4 | 38758717  | T | G | 0.1670 | -0.0432 | 0.0071 | 1.40E-09 | -6.0558 | 1246149 | Asthma |
| rs5016212   | 4 | 38759650  | A | C | 0.1657 | -0.0475 | 0.0068 | 3.71E-12 | -6.9477 | 1316443 | Asthma |
| rs4565087   | 4 | 38761482  | C | T | 0.3444 | -0.0302 | 0.0051 | 4.40E-09 | -5.8687 | 1316443 | Asthma |
| rs4482773   | 4 | 38761511  | G | A | 0.3443 | -0.0300 | 0.0051 | 5.20E-09 | -5.8406 | 1316443 | Asthma |
| rs10013453  | 4 | 38761738  | G | A | 0.2370 | -0.0469 | 0.0059 | 2.78E-15 | -7.9006 | 1316443 | Asthma |
| rs10023850  | 4 | 38762072  | A | G | 0.1684 | -0.0467 | 0.0068 | 6.45E-12 | -6.8693 | 1316443 | Asthma |
| rs10024216  | 4 | 38762491  | A | G | 0.3430 | -0.0299 | 0.0051 | 6.04E-09 | -5.8158 | 1316443 | Asthma |
| rs112133277 | 4 | 38763425  | G | A | 0.1682 | -0.0453 | 0.0068 | 2.91E-11 | -6.6510 | 1316443 | Asthma |
| rs112924608 | 4 | 38763430  | A | G | 0.1678 | -0.0465 | 0.0069 | 2.26E-11 | -6.6881 | 1290310 | Asthma |
| rs10019853  | 4 | 38763670  | C | T | 0.3493 | -0.0308 | 0.0051 | 1.82E-09 | -6.0133 | 1316443 | Asthma |
| rs10017482  | 4 | 38763714  | C | A | 0.3508 | -0.0306 | 0.0051 | 2.38E-09 | -5.9695 | 1316443 | Asthma |
| rs10019951  | 4 | 38763963  | G | A | 0.3493 | -0.0309 | 0.0051 | 1.74E-09 | -6.0208 | 1316443 | Asthma |
| rs10008492  | 4 | 38764099  | T | C | 0.3733 | -0.0359 | 0.0051 | 2.92E-12 | -6.9813 | 1299802 | Asthma |
| rs10020220  | 4 | 38764246  | G | A | 0.3494 | -0.0309 | 0.0051 | 1.72E-09 | -6.0223 | 1316443 | Asthma |
| rs11736207  | 4 | 38764664  | A | G | 0.1693 | -0.0417 | 0.0066 | 2.83E-10 | -6.3080 | 1376071 | Asthma |
| rs11721824  | 4 | 38766128  | A | G | 0.1696 | -0.0423 | 0.0066 | 1.48E-10 | -6.4074 | 1376071 | Asthma |
| rs6531661   | 4 | 38766175  | A | G | 0.3508 | -0.0307 | 0.0051 | 2.02E-09 | -5.9959 | 1316443 | Asthma |
| rs6531662   | 4 | 38766335  | C | T | 0.3586 | -0.0321 | 0.0051 | 3.39E-10 | -6.2797 | 1316443 | Asthma |
| rs4470638   | 4 | 38766447  | T | C | 0.3508 | -0.0306 | 0.0051 | 2.20E-09 | -5.9823 | 1316443 | Asthma |
| rs4458462   | 4 | 38766462  | G | A | 0.3509 | -0.0306 | 0.0051 | 2.23E-09 | -5.9799 | 1316443 | Asthma |
| rs10470854  | 4 | 38766912  | G | A | 0.3508 | -0.0305 | 0.0051 | 2.71E-09 | -5.9485 | 1316443 | Asthma |
| rs28413898  | 4 | 38767048  | G | A | 0.3510 | -0.0305 | 0.0051 | 2.44E-09 | -5.9653 | 1316443 | Asthma |
| rs73235002  | 4 | 38767397  | G | A | 0.1693 | -0.0433 | 0.0067 | 1.21E-10 | -6.4385 | 1349938 | Asthma |
| rs4331786   | 4 | 38767787  | T | C | 0.3508 | -0.0305 | 0.0051 | 2.54E-09 | -5.9588 | 1316443 | Asthma |
| rs6832466   | 4 | 38768922  | G | A | 0.3508 | -0.0305 | 0.0051 | 2.70E-09 | -5.9492 | 1316443 | Asthma |
| rs6837838   | 4 | 38768955  | A | T | 0.3510 | -0.0307 | 0.0051 | 2.12E-09 | -5.9885 | 1316443 | Asthma |
| rs28532329  | 4 | 38769747  | T | C | 0.1956 | -0.0472 | 0.0064 | 1.11E-13 | -7.4272 | 1316443 | Asthma |
| rs10010930  | 4 | 38770324  | T | C | 0.1963 | -0.0431 | 0.0062 | 3.35E-12 | -6.9621 | 1376071 | Asthma |
| rs11735251  | 4 | 38771436  | A | T | 0.1963 | -0.0428 | 0.0062 | 4.25E-12 | -6.9286 | 1376071 | Asthma |
| rs11734337  | 4 | 38771446  | G | A | 0.3503 | -0.0285 | 0.0050 | 1.27E-08 | -5.6902 | 1376071 | Asthma |
| rs11734342  | 4 | 38771488  | G | A | 0.1965 | -0.0431 | 0.0062 | 3.17E-12 | -6.9699 | 1376071 | Asthma |
| rs4504266   | 4 | 38772133  | A | G | 0.1999 | -0.0450 | 0.0066 | 8.92E-12 | -6.8229 | 1246149 | Asthma |
| rs4513579   | 4 | 38772195  | C | T | 0.1965 | -0.0426 | 0.0062 | 5.31E-12 | -6.8970 | 1376071 | Asthma |
| rs4504265   | 4 | 38772244  | T | G | 0.1964 | -0.0430 | 0.0062 | 3.51E-12 | -6.9558 | 1376071 | Asthma |
| rs66735315  | 4 | 38772559  | T | G | 0.2069 | -0.0366 | 0.0066 | 2.55E-08 | -5.5696 | 1219993 | Asthma |
| rs111437368 | 4 | 38772716  | A | G | 0.1963 | -0.0431 | 0.0062 | 3.15E-12 | -6.9711 | 1376071 | Asthma |
| rs11466661  | 4 | 38772861  | T | G | 0.3500 | -0.0286 | 0.0050 | 1.10E-08 | -5.7138 | 1376071 | Asthma |
| rs9715769   | 4 | 38772868  | C | A | 0.1692 | -0.0423 | 0.0066 | 1.52E-10 | -6.4035 | 1376071 | Asthma |
| rs9715841   | 4 | 38772882  | C | T | 0.1958 | -0.0433 | 0.0062 | 2.89E-12 | -6.9830 | 1376071 | Asthma |
| rs10776482  | 4 | 38773164  | G | A | 0.1962 | -0.0431 | 0.0062 | 3.23E-12 | -6.9675 | 1376071 | Asthma |
| rs4129009   | 4 | 38773268  | C | T | 0.1695 | -0.0423 | 0.0066 | 1.38E-10 | -6.4181 | 1376071 | Asthma |
| rs10776483  | 4 | 38773419  | G | A | 0.1963 | -0.0430 | 0.0062 | 3.74E-12 | -6.9465 | 1376071 | Asthma |

|             |   |          |   |   |        |         |        |          |         |         |        |
|-------------|---|----------|---|---|--------|---------|--------|----------|---------|---------|--------|
| rs11096955  | 4 | 38774486 | G | T | 0.3503 | -0.0284 | 0.0050 | 1.39E-08 | -5.6752 | 1376071 | Asthma |
| rs11096956  | 4 | 38774559 | A | C | 0.1962 | -0.0430 | 0.0062 | 3.57E-12 | -6.9532 | 1376071 | Asthma |
| rs11096957  | 4 | 38774870 | G | T | 0.3503 | -0.0282 | 0.0050 | 1.76E-08 | -5.6339 | 1376071 | Asthma |
| rs4274855   | 4 | 38775850 | T | C | 0.1694 | -0.0425 | 0.0066 | 1.11E-10 | -6.4519 | 1376071 | Asthma |
| rs11466645  | 4 | 38776582 | T | A | 0.1694 | -0.0425 | 0.0066 | 1.14E-10 | -6.4478 | 1376071 | Asthma |
| rs11466640  | 4 | 38777282 | A | G | 0.1694 | -0.0425 | 0.0066 | 1.11E-10 | -6.4518 | 1376071 | Asthma |
| rs7694115   | 4 | 38777473 | G | A | 0.3462 | -0.0285 | 0.0050 | 1.38E-08 | -5.6758 | 1376071 | Asthma |
| rs112855872 | 4 | 38777891 | T | C | 0.1695 | -0.0423 | 0.0066 | 1.45E-10 | -6.4107 | 1376071 | Asthma |
| rs11466617  | 4 | 38778850 | C | T | 0.1693 | -0.0428 | 0.0066 | 8.65E-11 | -6.4889 | 1376071 | Asthma |
| rs7653908   | 4 | 38780600 | C | G | 0.1963 | -0.0464 | 0.0064 | 3.46E-13 | -7.2752 | 1316443 | Asthma |
| rs7658893   | 4 | 38780799 | A | G | 0.2235 | -0.0478 | 0.0060 | 2.54E-15 | -7.9117 | 1316443 | Asthma |
| rs11725309  | 4 | 38782227 | C | T | 0.1747 | -0.0467 | 0.0065 | 8.44E-13 | -7.1539 | 1376071 | Asthma |
| rs28393318  | 4 | 38782646 | G | A | 0.2248 | -0.0455 | 0.0059 | 1.26E-14 | -7.7102 | 1376071 | Asthma |
| rs10012017  | 4 | 38783012 | T | G | 0.2249 | -0.0456 | 0.0059 | 1.18E-14 | -7.7187 | 1376071 | Asthma |
| rs10034903  | 4 | 38783057 | G | C | 0.2250 | -0.0452 | 0.0059 | 1.97E-14 | -7.6529 | 1376071 | Asthma |
| rs10004195  | 4 | 38783103 | A | T | 0.2266 | -0.0448 | 0.0059 | 2.41E-14 | -7.6268 | 1376071 | Asthma |
| rs73142654  | 4 | 38784076 | A | T | 0.2250 | -0.0455 | 0.0059 | 1.25E-14 | -7.7110 | 1376071 | Asthma |
| rs7658651   | 4 | 38784381 | C | A | 0.2250 | -0.0455 | 0.0059 | 1.20E-14 | -7.7165 | 1376071 | Asthma |
| rs7664239   | 4 | 38784683 | C | T | 0.2250 | -0.0453 | 0.0059 | 1.62E-14 | -7.6780 | 1376071 | Asthma |
| rs55903115  | 4 | 38784853 | A | C | 0.1747 | -0.0467 | 0.0065 | 8.02E-13 | -7.1608 | 1376071 | Asthma |
| rs73236615  | 4 | 38785248 | T | G | 0.1746 | -0.0471 | 0.0065 | 5.19E-13 | -7.2203 | 1376071 | Asthma |
| rs12233670  | 4 | 38785595 | T | C | 0.2250 | -0.0459 | 0.0059 | 7.13E-15 | -7.7820 | 1376071 | Asthma |
| rs67719080  | 4 | 38785631 | G | A | 0.2019 | -0.0488 | 0.0061 | 2.05E-15 | -7.9384 | 1376071 | Asthma |
| rs6834581   | 4 | 38786613 | C | T | 0.2249 | -0.0458 | 0.0059 | 9.33E-15 | -7.7481 | 1376071 | Asthma |
| rs28690449  | 4 | 38787511 | T | C | 0.2378 | -0.0442 | 0.0063 | 1.74E-12 | -7.0538 | 1219993 | Asthma |
| rs1135430   | 4 | 38787740 | C | T | 0.2248 | -0.0459 | 0.0059 | 7.23E-15 | -7.7804 | 1376071 | Asthma |
| rs11936050  | 4 | 38787903 | T | C | 0.2249 | -0.0460 | 0.0059 | 5.73E-15 | -7.8098 | 1376071 | Asthma |
| rs73236616  | 4 | 38788054 | A | G | 0.1745 | -0.0469 | 0.0065 | 6.04E-13 | -7.1995 | 1376071 | Asthma |
| rs4833093   | 4 | 38788119 | T | G | 0.2246 | -0.0463 | 0.0059 | 4.69E-15 | -7.8350 | 1376071 | Asthma |
| rs6531663   | 4 | 38790719 | C | T | 0.2241 | -0.0487 | 0.0061 | 8.66E-16 | -8.0446 | 1316443 | Asthma |
| rs4543123   | 4 | 38790903 | G | A | 0.2200 | -0.0486 | 0.0061 | 1.74E-15 | -7.9586 | 1316443 | Asthma |
| rs73236617  | 4 | 38792239 | G | C | 0.1745 | -0.0470 | 0.0065 | 5.74E-13 | -7.2064 | 1376071 | Asthma |
| rs73236618  | 4 | 38792420 | C | T | 0.1740 | -0.0464 | 0.0065 | 1.13E-12 | -7.1137 | 1376071 | Asthma |
| rs3924112   | 4 | 38794189 | T | C | 0.1745 | -0.0470 | 0.0065 | 5.65E-13 | -7.2086 | 1376071 | Asthma |
| rs3924113   | 4 | 38794634 | T | G | 0.1664 | -0.0475 | 0.0081 | 4.66E-09 | -5.8589 | 722051  | Asthma |
| rs5743618   | 4 | 38797027 | A | C | 0.2583 | -0.0562 | 0.0059 | 1.43E-21 | -9.5398 | 1299802 | Asthma |
| rs5743614   | 4 | 38797314 | T | C | 0.2301 | -0.0475 | 0.0070 | 1.20E-11 | -6.7800 | 1094744 | Asthma |
| rs4833095   | 4 | 38798089 | C | T | 0.2255 | -0.0491 | 0.0060 | 4.03E-16 | -8.1376 | 1316443 | Asthma |
| rs5743604   | 4 | 38799664 | G | A | 0.2264 | -0.0487 | 0.0061 | 9.55E-16 | -8.0326 | 1316443 | Asthma |
| rs5743596   | 4 | 38800907 | A | G | 0.1509 | -0.0468 | 0.0071 | 3.85E-11 | -6.6098 | 1316443 | Asthma |
| rs5743595   | 4 | 38801023 | G | A | 0.1738 | -0.0467 | 0.0065 | 7.37E-13 | -7.1724 | 1376071 | Asthma |
| rs5743593   | 4 | 38801292 | G | A | 0.1745 | -0.0461 | 0.0065 | 1.22E-12 | -7.1032 | 1376071 | Asthma |
| rs5743592   | 4 | 38801442 | G | A | 0.1745 | -0.0459 | 0.0065 | 1.44E-12 | -7.0803 | 1376071 | Asthma |
| rs5743585   | 4 | 38802025 | C | T | 0.1745 | -0.0460 | 0.0065 | 1.40E-12 | -7.0843 | 1376071 | Asthma |
| rs5743584   | 4 | 38802163 | T | C | 0.1745 | -0.0460 | 0.0065 | 1.38E-12 | -7.0861 | 1376071 | Asthma |
| rs5743580   | 4 | 38802784 | T | C | 0.1745 | -0.0456 | 0.0065 | 2.18E-12 | -7.0227 | 1376071 | Asthma |
| rs5743571   | 4 | 38803868 | T | C | 0.1745 | -0.0453 | 0.0065 | 2.80E-12 | -6.9872 | 1376071 | Asthma |
| rs5743566   | 4 | 38804321 | C | G | 0.1745 | -0.0456 | 0.0065 | 2.09E-12 | -7.0281 | 1376071 | Asthma |
| rs5743565   | 4 | 38804362 | C | T | 0.1746 | -0.0455 | 0.0065 | 2.27E-12 | -7.0167 | 1376071 | Asthma |
| rs5743563   | 4 | 38804398 | G | A | 0.1745 | -0.0458 | 0.0065 | 1.72E-12 | -7.0555 | 1376071 | Asthma |
| rs5743562   | 4 | 38804475 | C | T | 0.1745 | -0.0457 | 0.0065 | 1.93E-12 | -7.0396 | 1376071 | Asthma |
| rs5743560   | 4 | 38804579 | T | G | 0.1746 | -0.0457 | 0.0065 | 1.94E-12 | -7.0383 | 1376071 | Asthma |
| rs56357984  | 4 | 38804841 | A | G | 0.1734 | -0.0455 | 0.0065 | 2.84E-12 | -6.9853 | 1376071 | Asthma |
| rs5743557   | 4 | 38805206 | A | G | 0.1745 | -0.0459 | 0.0065 | 1.59E-12 | -7.0666 | 1376071 | Asthma |
| rs5743556   | 4 | 38805230 | G | A | 0.1745 | -0.0458 | 0.0065 | 1.70E-12 | -7.0569 | 1376071 | Asthma |
| rs45588337  | 4 | 38805707 | G | A | 0.1748 | -0.0454 | 0.0065 | 2.61E-12 | -6.9971 | 1376071 | Asthma |
| rs55830619  | 4 | 38805743 | A | G | 0.1729 | -0.0481 | 0.0081 | 2.94E-09 | -5.9348 | 1064845 | Asthma |
| rs5743551   | 4 | 38806033 | C | T | 0.2264 | -0.0480 | 0.0060 | 1.51E-15 | -7.9759 | 1316443 | Asthma |
| rs67206233  | 4 | 38806232 | C | T | 0.1743 | -0.0450 | 0.0065 | 3.99E-12 | -6.9375 | 1376071 | Asthma |
| rs9306967   | 4 | 38806290 | C | G | 0.2078 | -0.0483 | 0.0062 | 5.44E-15 | -7.8164 | 1316443 | Asthma |
| rs113465719 | 4 | 38806424 | T | A | 0.1743 | -0.0450 | 0.0065 | 4.27E-12 | -6.9280 | 1376071 | Asthma |
| rs112318878 | 4 | 38806468 | T | C | 0.1733 | -0.0448 | 0.0065 | 5.95E-12 | -6.8808 | 1376071 | Asthma |
| rs113558549 | 4 | 38806595 | G | A | 0.1731 | -0.0493 | 0.0073 | 1.51E-11 | -6.7467 | 1198533 | Asthma |
| rs114719937 | 4 | 38806964 | C | G | 0.1776 | -0.0502 | 0.0090 | 2.07E-08 | -5.6060 | 934923  | Asthma |
| rs199704972 | 4 | 38806992 | A | G | 0.1777 | -0.0501 | 0.0089 | 2.17E-08 | -5.5980 | 934923  | Asthma |
| rs4833096   | 4 | 38807011 | C | T | 0.2111 | -0.0486 | 0.0075 | 9.57E-11 | -6.4735 | 1003385 | Asthma |
| rs4833097   | 4 | 38807059 | C | T | 0.2213 | -0.0463 | 0.0068 | 1.16E-11 | -6.7853 | 1133307 | Asthma |
| rs7378375   | 4 | 38807208 | C | T | 0.2084 | -0.0487 | 0.0084 | 6.23E-09 | -5.8105 | 934923  | Asthma |
| rs4833099   | 4 | 38808162 | A | T | 0.1987 | -0.0486 | 0.0071 | 6.32E-12 | -6.8722 | 1133307 | Asthma |
| rs73236625  | 4 | 38808303 | A | G | 0.1737 | -0.0487 | 0.0073 | 1.87E-11 | -6.7156 | 1159440 | Asthma |
| rs200877197 | 4 | 38808494 | G | A | 0.1546 | -0.0561 | 0.0099 | 1.33E-08 | -5.6816 | 1000149 | Asthma |
| rs67837551  | 4 | 38808823 | T | C | 0.1743 | -0.0447 | 0.0065 | 6.16E-12 | -6.8760 | 1376071 | Asthma |
| rs11722788  | 4 | 38809117 | G | C | 0.1743 | -0.0446 | 0.0065 | 6.64E-12 | -6.8653 | 1376071 | Asthma |
| rs11722813  | 4 | 38809148 | T | C | 0.1743 | -0.0446 | 0.0065 | 6.53E-12 | -6.8675 | 1376071 | Asthma |

|             |   |          |   |   |        |         |        |          |         |         |        |
|-------------|---|----------|---|---|--------|---------|--------|----------|---------|---------|--------|
| rs11722889  | 4 | 38809354 | T | C | 0.1744 | -0.0446 | 0.0065 | 6.55E-12 | -6.8672 | 1376071 | Asthma |
| rs11727978  | 4 | 38809430 | A | T | 0.1743 | -0.0446 | 0.0065 | 6.24E-12 | -6.8742 | 1376071 | Asthma |
| rs11722836  | 4 | 38809908 | A | T | 0.1743 | -0.0446 | 0.0065 | 6.63E-12 | -6.8654 | 1376071 | Asthma |
| rs2101521   | 4 | 38809930 | A | G | 0.2088 | -0.0453 | 0.0060 | 5.96E-14 | -7.5088 | 1376071 | Asthma |
| rs11725779  | 4 | 38810047 | A | G | 0.1743 | -0.0446 | 0.0065 | 6.78E-12 | -6.8623 | 1376071 | Asthma |
| rs56289835  | 4 | 38810224 | C | G | 0.1743 | -0.0445 | 0.0065 | 7.00E-12 | -6.8577 | 1376071 | Asthma |
| rs56408159  | 4 | 38810495 | A | T | 0.1743 | -0.0445 | 0.0065 | 7.67E-12 | -6.8446 | 1376071 | Asthma |
| rs6692907   | 4 | 38810916 | G | A | 0.1744 | -0.0442 | 0.0065 | 1.06E-11 | -6.7986 | 1376071 | Asthma |
| rs17616434  | 4 | 38811255 | C | T | 0.2299 | -0.0488 | 0.0060 | 4.62E-16 | -8.1212 | 1316443 | Asthma |
| rs66979032  | 4 | 38813079 | G | A | 0.1779 | -0.0451 | 0.0065 | 2.98E-12 | -6.9785 | 1376071 | Asthma |
| rs4833103   | 4 | 38813881 | C | A | 0.4584 | -0.0285 | 0.0050 | 1.10E-08 | -5.7151 | 1316443 | Asthma |
| rs6815814   | 4 | 38814717 | C | A | 0.2298 | -0.0481 | 0.0060 | 1.17E-15 | -8.0080 | 1316443 | Asthma |
| rs66819621  | 4 | 38817782 | G | A | 0.1782 | -0.0450 | 0.0065 | 3.52E-12 | -6.9553 | 1376071 | Asthma |
| rs67712706  | 4 | 38818995 | G | A | 0.1819 | -0.0484 | 0.0066 | 1.65E-13 | -7.3742 | 1316443 | Asthma |
| rs73236628  | 4 | 38823822 | T | C | 0.1797 | -0.0431 | 0.0064 | 2.18E-11 | -6.6937 | 1376071 | Asthma |
| rs73236629  | 4 | 38823828 | T | G | 0.1787 | -0.0433 | 0.0065 | 2.01E-11 | -6.7051 | 1376071 | Asthma |
| rs5743795   | 4 | 38830874 | T | C | 0.1805 | -0.0428 | 0.0064 | 2.44E-11 | -6.6766 | 1376071 | Asthma |
| rs5743789   | 4 | 38831552 | T | A | 0.1805 | -0.0429 | 0.0064 | 2.34E-11 | -6.6834 | 1376071 | Asthma |
| rs73236633  | 4 | 38837698 | C | T | 0.1795 | -0.0426 | 0.0064 | 3.38E-11 | -6.6292 | 1376071 | Asthma |
| rs6843043   | 4 | 38841515 | G | A | 0.2036 | -0.0415 | 0.0061 | 1.02E-11 | -6.8030 | 1376071 | Asthma |
| rs7673348   | 4 | 38843577 | A | G | 0.2036 | -0.0415 | 0.0061 | 9.98E-12 | -6.8068 | 1376071 | Asthma |
| rs56245262  | 4 | 38843988 | A | T | 0.2007 | -0.0406 | 0.0061 | 3.53E-11 | -6.6226 | 1376071 | Asthma |
| rs56083757  | 4 | 38844724 | G | C | 0.2007 | -0.0406 | 0.0061 | 3.59E-11 | -6.6199 | 1376071 | Asthma |
| rs7669329   | 4 | 38845098 | C | T | 0.2007 | -0.0407 | 0.0061 | 3.40E-11 | -6.6282 | 1376071 | Asthma |
| rs7687447   | 4 | 38845358 | G | C | 0.2024 | -0.0412 | 0.0061 | 1.47E-11 | -6.7509 | 1376071 | Asthma |
| rs55998066  | 4 | 38849964 | C | A | 0.1795 | -0.0426 | 0.0064 | 3.48E-11 | -6.6248 | 1376071 | Asthma |
| rs56060734  | 4 | 38850070 | A | G | 0.1992 | -0.0457 | 0.0068 | 1.44E-11 | -6.7538 | 1224666 | Asthma |
| rs145273408 | 4 | 38850524 | A | G | 0.1795 | -0.0423 | 0.0064 | 4.59E-11 | -6.5837 | 1376071 | Asthma |
| rs74782366  | 4 | 38852562 | C | T | 0.1840 | -0.0513 | 0.0080 | 1.09E-10 | -6.4533 | 1003385 | Asthma |
| rs201225220 | 4 | 38852666 | G | C | 0.1839 | -0.0512 | 0.0079 | 1.19E-10 | -6.4406 | 1003385 | Asthma |
| rs148906978 | 4 | 38852748 | T | C | 0.2031 | -0.0448 | 0.0075 | 2.16E-09 | -5.9850 | 1068611 | Asthma |
| rs55930442  | 4 | 38855069 | A | G | 0.1787 | -0.0418 | 0.0064 | 7.49E-11 | -6.5105 | 1376071 | Asthma |
| rs56054004  | 4 | 38855116 | A | G | 0.1764 | -0.0474 | 0.0073 | 6.81E-11 | -6.5246 | 1198533 | Asthma |
| rs2174284   | 4 | 38857718 | T | C | 0.1793 | -0.0420 | 0.0064 | 6.64E-11 | -6.5285 | 1376071 | Asthma |
| rs3860069   | 4 | 38860500 | C | A | 0.1991 | -0.0442 | 0.0063 | 2.36E-12 | -7.0117 | 1316443 | Asthma |
| rs73236644  | 4 | 38861572 | G | A | 0.1792 | -0.0416 | 0.0064 | 9.86E-11 | -6.4690 | 1376071 | Asthma |
| rs112889978 | 4 | 38862469 | T | C | 0.1904 | -0.0425 | 0.0063 | 1.90E-11 | -6.7138 | 1376071 | Asthma |
| rs17582830  | 4 | 38865806 | G | A | 0.1901 | -0.0419 | 0.0063 | 3.54E-11 | -6.6222 | 1376071 | Asthma |
| rs73236646  | 4 | 38869764 | C | T | 0.1805 | -0.0399 | 0.0064 | 4.76E-10 | -6.2269 | 1376071 | Asthma |
| rs73236649  | 4 | 38871711 | T | C | 0.1777 | -0.0397 | 0.0064 | 6.60E-10 | -6.1756 | 1376071 | Asthma |
| rs11730390  | 4 | 38879793 | C | T | 0.1765 | -0.0411 | 0.0064 | 1.79E-10 | -6.3784 | 1376071 | Asthma |
| rs17582893  | 4 | 38884799 | A | G | 0.1779 | -0.0418 | 0.0064 | 7.63E-11 | -6.5077 | 1376071 | Asthma |
| rs6848423   | 4 | 38886312 | T | C | 0.1834 | -0.0384 | 0.0063 | 1.26E-09 | -6.0724 | 1376071 | Asthma |
| rs6830230   | 4 | 38886373 | G | T | 0.1834 | -0.0383 | 0.0063 | 1.36E-09 | -6.0597 | 1376071 | Asthma |
| rs1106956   | 4 | 38888190 | G | A | 0.1862 | -0.0383 | 0.0063 | 1.12E-09 | -6.0916 | 1376071 | Asthma |
| rs1873195   | 4 | 38889552 | T | C | 0.1808 | -0.0420 | 0.0064 | 4.22E-11 | -6.5962 | 1376071 | Asthma |
| rs2013740   | 4 | 38890116 | G | A | 0.2384 | -0.0391 | 0.0058 | 1.31E-11 | -6.7676 | 1376071 | Asthma |
| rs2002150   | 4 | 38890380 | C | T | 0.2398 | -0.0420 | 0.0065 | 7.75E-11 | -6.5053 | 1198533 | Asthma |
| rs17582921  | 4 | 38891028 | C | T | 0.1804 | -0.0426 | 0.0064 | 2.35E-11 | -6.6822 | 1376071 | Asthma |
| rs6851685   | 4 | 38892222 | T | G | 0.2333 | -0.0392 | 0.0058 | 1.43E-11 | -6.7549 | 1376071 | Asthma |
| rs6835514   | 4 | 38892759 | G | A | 0.2411 | -0.0418 | 0.0059 | 1.29E-12 | -7.0952 | 1316443 | Asthma |
| rs55938245  | 4 | 38904110 | G | T | 0.1846 | -0.0467 | 0.0065 | 9.53E-13 | -7.1371 | 1316443 | Asthma |
| rs11725783  | 4 | 38905330 | T | C | 0.1608 | -0.0487 | 0.0071 | 6.19E-12 | -6.8753 | 948423  | Asthma |
| rs11942410  | 4 | 74730869 | T | C | 0.2333 | -0.0343 | 0.0058 | 2.83E-09 | -5.9410 | 1316443 | Asthma |
| rs7440630   | 4 | 74732224 | A | G | 0.2330 | -0.0338 | 0.0058 | 4.54E-09 | -5.8633 | 1316443 | Asthma |
| rs4299672   | 4 | 74732452 | A | G | 0.2331 | -0.0341 | 0.0058 | 3.48E-09 | -5.9071 | 1316443 | Asthma |
| rs72659187  | 4 | 74735686 | G | C | 0.2335 | -0.0341 | 0.0058 | 2.99E-09 | -5.9322 | 1316443 | Asthma |
| rs62316262  | 4 | 74735736 | G | A | 0.2335 | -0.0339 | 0.0057 | 3.48E-09 | -5.9073 | 1316443 | Asthma |
| rs4535401   | 4 | 74736615 | G | A | 0.2336 | -0.0338 | 0.0057 | 3.94E-09 | -5.8866 | 1316443 | Asthma |
| rs59178205  | 4 | 74737236 | C | T | 0.2335 | -0.0339 | 0.0057 | 3.45E-09 | -5.9087 | 1316443 | Asthma |
| rs62316264  | 4 | 74737314 | G | A | 0.2335 | -0.0339 | 0.0057 | 3.65E-09 | -5.8995 | 1316443 | Asthma |
| rs62316265  | 4 | 74737425 | C | T | 0.2335 | -0.0339 | 0.0057 | 3.65E-09 | -5.8993 | 1316443 | Asthma |
| rs62316266  | 4 | 74737482 | T | C | 0.2335 | -0.0339 | 0.0057 | 3.75E-09 | -5.8947 | 1316443 | Asthma |
| rs62316267  | 4 | 74737825 | T | C | 0.2335 | -0.0339 | 0.0057 | 3.43E-09 | -5.9096 | 1316443 | Asthma |
| rs62316268  | 4 | 74737945 | G | A | 0.2352 | -0.0336 | 0.0061 | 2.98E-08 | -5.5424 | 948423  | Asthma |
| rs62316269  | 4 | 74737947 | A | G | 0.2352 | -0.0336 | 0.0061 | 3.05E-08 | -5.5385 | 948423  | Asthma |
| rs62316270  | 4 | 74738097 | A | G | 0.2334 | -0.0340 | 0.0057 | 3.28E-09 | -5.9172 | 1316443 | Asthma |
| rs62316271  | 4 | 74738378 | G | C | 0.2335 | -0.0340 | 0.0057 | 3.14E-09 | -5.9241 | 1316443 | Asthma |
| rs12503079  | 4 | 74739294 | T | C | 0.2335 | -0.0340 | 0.0057 | 3.30E-09 | -5.9159 | 1316443 | Asthma |
| rs12505535  | 4 | 74739334 | G | T | 0.2335 | -0.0340 | 0.0057 | 3.08E-09 | -5.9272 | 1316443 | Asthma |
| rs57917278  | 4 | 74739726 | A | G | 0.2335 | -0.0339 | 0.0057 | 3.54E-09 | -5.9043 | 1316443 | Asthma |
| rs62316273  | 4 | 74740614 | C | G | 0.2335 | -0.0339 | 0.0057 | 3.40E-09 | -5.9109 | 1316443 | Asthma |
| rs72659189  | 4 | 74740873 | G | A | 0.2345 | -0.0316 | 0.0056 | 1.72E-08 | -5.6379 | 1376071 | Asthma |
| rs62316274  | 4 | 74741108 | T | C | 0.2345 | -0.0317 | 0.0056 | 1.59E-08 | -5.6517 | 1376071 | Asthma |



|             |   |           |   |   |        |         |        |          |         |         |        |
|-------------|---|-----------|---|---|--------|---------|--------|----------|---------|---------|--------|
| rs11946159  | 4 | 74741663  | A | G | 0.2345 | -0.0316 | 0.0056 | 1.61E-08 | -5.6492 | 1376071 | Asthma |
| rs11933389  | 4 | 74741670  | C | A | 0.2345 | -0.0316 | 0.0056 | 1.73E-08 | -5.6370 | 1376071 | Asthma |
| rs4426860   | 4 | 74742697  | C | T | 0.2345 | -0.0317 | 0.0056 | 1.49E-08 | -5.6621 | 1376071 | Asthma |
| rs4345250   | 4 | 74742710  | C | A | 0.2345 | -0.0317 | 0.0056 | 1.47E-08 | -5.6647 | 1376071 | Asthma |
| rs62316275  | 4 | 74742893  | C | T | 0.2345 | -0.0316 | 0.0056 | 1.63E-08 | -5.6470 | 1376071 | Asthma |
| rs4496650   | 4 | 74743745  | T | C | 0.2346 | -0.0316 | 0.0056 | 1.65E-08 | -5.6448 | 1376071 | Asthma |
| rs72659193  | 4 | 74744899  | C | A | 0.2347 | -0.0313 | 0.0056 | 2.22E-08 | -5.5943 | 1376071 | Asthma |
| rs72659195  | 4 | 74744973  | A | G | 0.2346 | -0.0314 | 0.0056 | 1.92E-08 | -5.6188 | 1376071 | Asthma |
| rs72659197  | 4 | 74745192  | T | A | 0.2347 | -0.0315 | 0.0056 | 1.89E-08 | -5.6222 | 1376071 | Asthma |
| rs72659198  | 4 | 74745766  | C | T | 0.2347 | -0.0314 | 0.0056 | 1.99E-08 | -5.6128 | 1376071 | Asthma |
| rs4585380   | 4 | 74748153  | A | G | 0.2360 | -0.0312 | 0.0056 | 2.12E-08 | -5.6017 | 1376071 | Asthma |
| rs62316278  | 4 | 74748514  | T | C | 0.2358 | -0.0314 | 0.0056 | 1.92E-08 | -5.6186 | 1376071 | Asthma |
| rs62316279  | 4 | 74749900  | A | G | 0.2359 | -0.0314 | 0.0056 | 1.95E-08 | -5.6163 | 1376071 | Asthma |
| rs62316280  | 4 | 74750008  | T | A | 0.2358 | -0.0314 | 0.0056 | 2.01E-08 | -5.6112 | 1376071 | Asthma |
| rs35926103  | 4 | 74750496  | G | A | 0.2358 | -0.0314 | 0.0056 | 1.90E-08 | -5.6212 | 1376071 | Asthma |
| rs11938093  | 4 | 74750631  | T | A | 0.2361 | -0.0312 | 0.0056 | 2.18E-08 | -5.5968 | 1376071 | Asthma |
| rs11938276  | 4 | 74751046  | C | A | 0.2358 | -0.0315 | 0.0056 | 1.73E-08 | -5.6373 | 1376071 | Asthma |
| rs62316308  | 4 | 74751127  | A | C | 0.2357 | -0.0314 | 0.0056 | 1.95E-08 | -5.6161 | 1376071 | Asthma |
| rs62316309  | 4 | 74751294  | A | G | 0.2357 | -0.0314 | 0.0056 | 2.00E-08 | -5.6123 | 1376071 | Asthma |
| rs62316310  | 4 | 74751319  | A | G | 0.2357 | -0.0314 | 0.0056 | 1.97E-08 | -5.6144 | 1376071 | Asthma |
| rs62316311  | 4 | 74751362  | A | G | 0.2357 | -0.0315 | 0.0056 | 1.89E-08 | -5.6219 | 1376071 | Asthma |
| rs62316312  | 4 | 74751386  | G | C | 0.2345 | -0.0336 | 0.0057 | 4.85E-09 | -5.8523 | 1316443 | Asthma |
| rs3225200   | 4 | 102225731 | C | A | 0.0543 | 0.0618  | 0.0103 | 1.87E-09 | 6.0093  | 1316443 | Asthma |
| rs35518360  | 4 | 102225733 | T | A | 0.0542 | 0.0619  | 0.0103 | 1.74E-09 | 6.0207  | 1316443 | Asthma |
| rs13107325  | 4 | 102267552 | T | C | 0.0450 | 0.0757  | 0.0109 | 4.53E-12 | 6.9198  | 1316443 | Asthma |
| rs13135092  | 4 | 102276925 | G | A | 0.0526 | 0.0669  | 0.0103 | 8.44E-11 | 6.4924  | 1316443 | Asthma |
| rs34333163  | 4 | 102361960 | G | A | 0.0527 | 0.0593  | 0.0104 | 1.19E-08 | 5.7012  | 1376071 | Asthma |
| rs72669974  | 4 | 105598470 | T | G | 0.0555 | -0.0569 | 0.0104 | 4.96E-08 | -5.4529 | 1376071 | Asthma |
| rs17036027  | 4 | 105635361 | G | C | 0.0546 | -0.0584 | 0.0105 | 2.27E-08 | -5.5900 | 1376071 | Asthma |
| rs17036066  | 4 | 105646060 | G | A | 0.0548 | -0.0594 | 0.0104 | 1.27E-08 | -5.6905 | 1376071 | Asthma |
| rs17036076  | 4 | 105654112 | G | A | 0.0551 | -0.0604 | 0.0104 | 6.40E-09 | -5.8061 | 1376071 | Asthma |
| rs72669992  | 4 | 105657997 | A | G | 0.0550 | -0.0610 | 0.0104 | 4.62E-09 | -5.8604 | 1376071 | Asthma |
| rs76552657  | 4 | 105661885 | C | T | 0.0479 | 0.0748  | 0.0110 | 1.21E-11 | 6.7791  | 1376071 | Asthma |
| rs72669993  | 4 | 105661987 | A | G | 0.0549 | -0.0605 | 0.0104 | 6.59E-09 | -5.8011 | 1376071 | Asthma |
| rs72669995  | 4 | 105664099 | A | C | 0.0549 | -0.0605 | 0.0104 | 6.61E-09 | -5.8006 | 1376071 | Asthma |
| rs72669997  | 4 | 105668625 | C | A | 0.0535 | -0.0626 | 0.0106 | 3.33E-09 | -5.9142 | 1376071 | Asthma |
| rs72669998  | 4 | 105669131 | T | A | 0.0545 | -0.0616 | 0.0112 | 4.36E-08 | -5.4759 | 1246149 | Asthma |
| rs115599607 | 4 | 105669137 | G | T | 0.0536 | -0.0628 | 0.0106 | 2.89E-09 | -5.9376 | 1376071 | Asthma |
| rs17036090  | 4 | 105672417 | C | T | 0.0536 | -0.0625 | 0.0106 | 3.36E-09 | -5.9127 | 1376071 | Asthma |
| rs72670002  | 4 | 105673359 | A | G | 0.0528 | -0.0641 | 0.0106 | 1.69E-09 | -6.0254 | 1376071 | Asthma |
| rs113767110 | 4 | 105678657 | T | C | 0.0562 | -0.0621 | 0.0103 | 1.45E-09 | -6.0496 | 1376071 | Asthma |
| rs11731386  | 4 | 105679181 | C | A | 0.0563 | -0.0619 | 0.0103 | 1.54E-09 | -6.0395 | 1376071 | Asthma |
| rs72671805  | 4 | 105681857 | A | G | 0.0562 | -0.0620 | 0.0103 | 1.47E-09 | -6.0475 | 1376071 | Asthma |
| rs17036105  | 4 | 105682115 | A | G | 0.0560 | -0.0631 | 0.0103 | 8.53E-10 | -6.1349 | 1376071 | Asthma |
| rs35370743  | 4 | 105683033 | G | A | 0.0560 | -0.0631 | 0.0103 | 8.41E-10 | -6.1369 | 1376071 | Asthma |
| rs34072732  | 4 | 105683207 | G | A | 0.0563 | -0.0618 | 0.0103 | 1.69E-09 | -6.0248 | 1376071 | Asthma |
| rs11728044  | 4 | 105683629 | C | G | 0.0562 | -0.0621 | 0.0103 | 1.44E-09 | -6.0511 | 1376071 | Asthma |
| rs72671808  | 4 | 105684563 | C | A | 0.0562 | -0.0620 | 0.0103 | 1.51E-09 | -6.0432 | 1376071 | Asthma |
| rs11726569  | 4 | 105685451 | G | A | 0.0562 | -0.0621 | 0.0103 | 1.44E-09 | -6.0504 | 1376071 | Asthma |
| rs112172458 | 4 | 105689774 | T | C | 0.0560 | -0.0629 | 0.0103 | 9.07E-10 | -6.1251 | 1376071 | Asthma |
| rs72671809  | 4 | 105690380 | C | A | 0.0562 | -0.0616 | 0.0103 | 1.88E-09 | -6.0083 | 1376071 | Asthma |
| rs72671810  | 4 | 105692596 | C | T | 0.0560 | -0.0629 | 0.0103 | 9.30E-10 | -6.1207 | 1376071 | Asthma |
| rs72671811  | 4 | 105694446 | T | C | 0.0562 | -0.0620 | 0.0103 | 1.44E-09 | -6.0506 | 1376071 | Asthma |
| rs112119830 | 4 | 105695935 | A | C | 0.0562 | -0.0622 | 0.0103 | 1.33E-09 | -6.0644 | 1376071 | Asthma |
| rs12374256  | 4 | 105696204 | A | G | 0.0562 | -0.0622 | 0.0103 | 1.32E-09 | -6.0648 | 1376071 | Asthma |
| rs72671815  | 4 | 105697062 | G | A | 0.0562 | -0.0622 | 0.0103 | 1.31E-09 | -6.0666 | 1376071 | Asthma |
| rs11727189  | 4 | 105697983 | T | G | 0.0562 | -0.0622 | 0.0103 | 1.31E-09 | -6.0667 | 1376071 | Asthma |
| rs72671820  | 4 | 105699826 | T | C | 0.0560 | -0.0633 | 0.0103 | 7.48E-10 | -6.1557 | 1376071 | Asthma |
| rs17036120  | 4 | 105700351 | C | G | 0.0563 | -0.0622 | 0.0103 | 1.27E-09 | -6.0708 | 1376071 | Asthma |
| rs17036123  | 4 | 105701033 | C | T | 0.0562 | -0.0623 | 0.0103 | 1.23E-09 | -6.0757 | 1376071 | Asthma |
| rs72671824  | 4 | 105702066 | G | A | 0.0563 | -0.0626 | 0.0103 | 1.03E-09 | -6.1049 | 1376071 | Asthma |
| rs189541631 | 4 | 105702285 | A | G | 0.0562 | -0.0626 | 0.0103 | 1.06E-09 | -6.1006 | 1376071 | Asthma |
| rs17036125  | 4 | 105702517 | T | A | 0.0562 | -0.0623 | 0.0103 | 1.20E-09 | -6.0800 | 1376071 | Asthma |
| rs76419734  | 4 | 105703128 | T | C | 0.0560 | -0.0634 | 0.0103 | 6.92E-10 | -6.1679 | 1376071 | Asthma |
| rs72671826  | 4 | 105703345 | C | T | 0.0560 | -0.0634 | 0.0103 | 6.96E-10 | -6.1670 | 1376071 | Asthma |
| rs17036129  | 4 | 105703372 | T | C | 0.0561 | -0.0630 | 0.0103 | 8.71E-10 | -6.1316 | 1376071 | Asthma |
| rs72671828  | 4 | 105703643 | T | C | 0.0562 | -0.0624 | 0.0103 | 1.14E-09 | -6.0890 | 1376071 | Asthma |
| rs80245547  | 4 | 105707798 | T | C | 0.0562 | -0.0624 | 0.0103 | 1.14E-09 | -6.0882 | 1376071 | Asthma |
| rs11727735  | 4 | 105710713 | G | A | 0.0560 | -0.0630 | 0.0103 | 8.53E-10 | -6.1346 | 1376071 | Asthma |
| rs17036139  | 4 | 105711500 | A | G | 0.0562 | -0.0619 | 0.0103 | 1.57E-09 | -6.0373 | 1376071 | Asthma |
| rs112528936 | 4 | 105711872 | G | A | 0.0563 | -0.0620 | 0.0103 | 1.48E-09 | -6.0466 | 1376071 | Asthma |
| rs72671836  | 4 | 105711888 | A | T | 0.0562 | -0.0621 | 0.0103 | 1.41E-09 | -6.0543 | 1376071 | Asthma |
| rs17036142  | 4 | 105713579 | C | T | 0.0562 | -0.0620 | 0.0103 | 1.47E-09 | -6.0481 | 1376071 | Asthma |
| rs72671837  | 4 | 105714745 | G | A | 0.0562 | -0.0621 | 0.0103 | 1.41E-09 | -6.0541 | 1376071 | Asthma |

|             |   |           |   |   |        |         |        |          |         |         |        |
|-------------|---|-----------|---|---|--------|---------|--------|----------|---------|---------|--------|
| rs114256679 | 4 | 105715441 | G | A | 0.0560 | -0.0630 | 0.0103 | 8.70E-10 | -6.1316 | 1376071 | Asthma |
| rs11724839  | 4 | 105717099 | G | T | 0.0562 | -0.0621 | 0.0103 | 1.37E-09 | -6.0589 | 1376071 | Asthma |
| rs72671840  | 4 | 105717540 | G | A | 0.0562 | -0.0621 | 0.0103 | 1.39E-09 | -6.0571 | 1376071 | Asthma |
| rs111873045 | 4 | 105718555 | G | A | 0.0560 | -0.0632 | 0.0103 | 7.88E-10 | -6.1474 | 1376071 | Asthma |
| rs72671844  | 4 | 105720951 | C | T | 0.0562 | -0.0622 | 0.0103 | 1.34E-09 | -6.0631 | 1376071 | Asthma |
| rs74917833  | 4 | 105722004 | A | G | 0.0562 | -0.0626 | 0.0103 | 1.04E-09 | -6.1030 | 1376071 | Asthma |
| rs72671849  | 4 | 105722661 | A | T | 0.0562 | -0.0621 | 0.0103 | 1.35E-09 | -6.0614 | 1376071 | Asthma |
| rs72671852  | 4 | 105725192 | G | A | 0.0561 | -0.0620 | 0.0103 | 1.58E-09 | -6.0365 | 1376071 | Asthma |
| rs72671853  | 4 | 105725729 | A | G | 0.0562 | -0.0622 | 0.0103 | 1.30E-09 | -6.0672 | 1376071 | Asthma |
| rs72671854  | 4 | 105725866 | G | T | 0.0562 | -0.0621 | 0.0103 | 1.39E-09 | -6.0573 | 1376071 | Asthma |
| rs72671855  | 4 | 105726142 | G | A | 0.0560 | -0.0630 | 0.0103 | 8.69E-10 | -6.1320 | 1376071 | Asthma |
| rs72671856  | 4 | 105726209 | T | C | 0.0562 | -0.0621 | 0.0103 | 1.38E-09 | -6.0584 | 1376071 | Asthma |
| rs72671858  | 4 | 105726522 | T | C | 0.0560 | -0.0632 | 0.0103 | 7.93E-10 | -6.1465 | 1376071 | Asthma |
| rs72671862  | 4 | 105728881 | G | A | 0.0560 | -0.0631 | 0.0103 | 8.21E-10 | -6.1406 | 1376071 | Asthma |
| rs72671863  | 4 | 105728959 | A | G | 0.0560 | -0.0631 | 0.0103 | 8.16E-10 | -6.1418 | 1376071 | Asthma |
| rs11737741  | 4 | 105730094 | G | A | 0.0562 | -0.0621 | 0.0103 | 1.40E-09 | -6.0560 | 1376071 | Asthma |
| rs150189636 | 4 | 105730796 | T | G | 0.0555 | -0.0662 | 0.0113 | 4.88E-09 | -5.8512 | 1224666 | Asthma |
| rs145699169 | 4 | 105730980 | G | A | 0.0560 | -0.0634 | 0.0103 | 6.96E-10 | -6.1667 | 1376071 | Asthma |
| rs75457293  | 4 | 105731627 | G | C | 0.0556 | -0.0625 | 0.0103 | 1.49E-09 | -6.0458 | 1376071 | Asthma |
| rs140302123 | 4 | 105732477 | G | A | 0.0562 | -0.0621 | 0.0103 | 1.43E-09 | -6.0514 | 1376071 | Asthma |
| rs149926116 | 4 | 105732985 | C | T | 0.0560 | -0.0631 | 0.0103 | 8.16E-10 | -6.1420 | 1376071 | Asthma |
| rs151237052 | 4 | 105733687 | A | G | 0.0561 | -0.0633 | 0.0103 | 7.27E-10 | -6.1603 | 1376071 | Asthma |
| rs150242701 | 4 | 105734562 | C | T | 0.0562 | -0.0620 | 0.0103 | 1.46E-09 | -6.0484 | 1376071 | Asthma |
| rs11737335  | 4 | 105734919 | G | A | 0.0562 | -0.0620 | 0.0103 | 1.44E-09 | -6.0512 | 1376071 | Asthma |
| rs72671866  | 4 | 105736501 | G | T | 0.0560 | -0.0630 | 0.0103 | 8.60E-10 | -6.1336 | 1376071 | Asthma |
| rs72671869  | 4 | 105737501 | A | G | 0.0562 | -0.0619 | 0.0103 | 1.53E-09 | -6.0411 | 1376071 | Asthma |
| rs72671870  | 4 | 105738188 | A | C | 0.0560 | -0.0644 | 0.0103 | 3.64E-10 | -6.2684 | 1376071 | Asthma |
| rs72671871  | 4 | 105739167 | G | A | 0.0562 | -0.0619 | 0.0103 | 1.53E-09 | -6.0412 | 1376071 | Asthma |
| rs72671873  | 4 | 105740037 | A | G | 0.0560 | -0.0624 | 0.0103 | 1.26E-09 | -6.0725 | 1376071 | Asthma |
| rs72671874  | 4 | 105740813 | G | A | 0.0562 | -0.0620 | 0.0103 | 1.46E-09 | -6.0490 | 1376071 | Asthma |
| rs72671878  | 4 | 105741535 | C | G | 0.0562 | -0.0621 | 0.0103 | 1.38E-09 | -6.0571 | 1376071 | Asthma |
| rs17036156  | 4 | 105742077 | T | C | 0.0563 | -0.0619 | 0.0102 | 1.54E-09 | -6.0404 | 1376071 | Asthma |
| rs72671879  | 4 | 105742500 | T | C | 0.0563 | -0.0618 | 0.0102 | 1.63E-09 | -6.0311 | 1376071 | Asthma |
| rs72671880  | 4 | 105743267 | C | T | 0.0566 | -0.0638 | 0.0102 | 4.57E-10 | -6.2332 | 1376071 | Asthma |
| rs74568699  | 4 | 105744838 | A | T | 0.0560 | -0.0633 | 0.0103 | 7.49E-10 | -6.1551 | 1376071 | Asthma |
| rs72671881  | 4 | 105745178 | G | C | 0.0562 | -0.0620 | 0.0103 | 1.44E-09 | -6.0505 | 1376071 | Asthma |
| rs10516525  | 4 | 105746868 | C | T | 0.0560 | -0.0631 | 0.0103 | 8.12E-10 | -6.1427 | 1376071 | Asthma |
| rs72671885  | 4 | 105747389 | A | G | 0.0562 | -0.0623 | 0.0103 | 1.23E-09 | -6.0767 | 1376071 | Asthma |
| rs113059617 | 4 | 105748137 | T | C | 0.0560 | -0.0632 | 0.0103 | 7.88E-10 | -6.1473 | 1376071 | Asthma |
| rs111271228 | 4 | 105750316 | T | C | 0.0560 | -0.0632 | 0.0103 | 7.70E-10 | -6.1511 | 1376071 | Asthma |
| rs17036177  | 4 | 105751354 | G | T | 0.0560 | -0.0633 | 0.0103 | 7.18E-10 | -6.1620 | 1376071 | Asthma |
| rs113325481 | 4 | 105753947 | A | G | 0.0572 | -0.0601 | 0.0109 | 3.30E-08 | -5.5252 | 1246149 | Asthma |
| rs11731714  | 4 | 105754789 | T | A | 0.0563 | -0.0624 | 0.0103 | 1.14E-09 | -6.0880 | 1376071 | Asthma |
| rs72671889  | 4 | 105755144 | G | A | 0.0561 | -0.0632 | 0.0103 | 7.39E-10 | -6.1572 | 1376071 | Asthma |
| rs11724884  | 4 | 105756227 | A | G | 0.0563 | -0.0623 | 0.0102 | 1.24E-09 | -6.0748 | 1376071 | Asthma |
| rs11733124  | 4 | 105756384 | T | A | 0.0563 | -0.0622 | 0.0102 | 1.32E-09 | -6.0649 | 1376071 | Asthma |
| rs75156726  | 4 | 105756842 | T | C | 0.0563 | -0.0622 | 0.0102 | 1.28E-09 | -6.0707 | 1376071 | Asthma |
| rs11735527  | 4 | 105758535 | G | A | 0.0563 | -0.0622 | 0.0103 | 1.31E-09 | -6.0666 | 1376071 | Asthma |
| rs11727348  | 4 | 105758691 | A | G | 0.0563 | -0.0622 | 0.0103 | 1.29E-09 | -6.0695 | 1376071 | Asthma |
| rs72671892  | 4 | 105759206 | A | G | 0.0563 | -0.0622 | 0.0103 | 1.31E-09 | -6.0665 | 1376071 | Asthma |
| rs76694233  | 4 | 105759879 | G | A | 0.0561 | -0.0632 | 0.0103 | 7.54E-10 | -6.1542 | 1376071 | Asthma |
| rs35808787  | 4 | 105760022 | G | A | 0.0563 | -0.0622 | 0.0103 | 1.28E-09 | -6.0698 | 1376071 | Asthma |
| rs77988914  | 4 | 105761279 | C | T | 0.0563 | -0.0622 | 0.0103 | 1.30E-09 | -6.0676 | 1376071 | Asthma |
| rs72671895  | 4 | 105764476 | C | T | 0.0562 | -0.0624 | 0.0103 | 1.16E-09 | -6.0850 | 1376071 | Asthma |
| rs72671896  | 4 | 105764668 | A | C | 0.0562 | -0.0624 | 0.0103 | 1.18E-09 | -6.0833 | 1376071 | Asthma |
| rs17036189  | 4 | 105766802 | T | A | 0.0563 | -0.0625 | 0.0103 | 1.08E-09 | -6.0966 | 1376071 | Asthma |
| rs10516526  | 4 | 105767747 | G | A | 0.0563 | -0.0625 | 0.0102 | 1.05E-09 | -6.1012 | 1376071 | Asthma |
| rs140411750 | 4 | 105771316 | C | G | 0.0563 | -0.0624 | 0.0103 | 1.18E-09 | -6.0829 | 1376071 | Asthma |
| rs150400299 | 4 | 105771324 | G | A | 0.0563 | -0.0625 | 0.0102 | 1.07E-09 | -6.0987 | 1376071 | Asthma |
| rs138180122 | 4 | 105771787 | T | C | 0.0563 | -0.0624 | 0.0103 | 1.14E-09 | -6.0882 | 1376071 | Asthma |
| rs142171126 | 4 | 105772965 | T | C | 0.0561 | -0.0635 | 0.0103 | 6.56E-10 | -6.1764 | 1376071 | Asthma |
| rs140946014 | 4 | 105775090 | G | T | 0.0563 | -0.0624 | 0.0103 | 1.14E-09 | -6.0878 | 1376071 | Asthma |
| rs72673803  | 4 | 105775599 | G | A | 0.0563 | -0.0624 | 0.0103 | 1.16E-09 | -6.0854 | 1376071 | Asthma |
| rs113538688 | 4 | 105775620 | C | G | 0.0561 | -0.0635 | 0.0103 | 6.36E-10 | -6.1814 | 1376071 | Asthma |
| rs11735851  | 4 | 105776097 | A | G | 0.0563 | -0.0633 | 0.0103 | 6.84E-10 | -6.1695 | 1376071 | Asthma |
| rs72673805  | 4 | 105779665 | G | C | 0.0563 | -0.0624 | 0.0103 | 1.13E-09 | -6.0904 | 1376071 | Asthma |
| rs11732298  | 4 | 105780522 | T | A | 0.0563 | -0.0623 | 0.0103 | 1.22E-09 | -6.0773 | 1376071 | Asthma |
| rs150252170 | 4 | 105782237 | T | C | 0.0563 | -0.0624 | 0.0103 | 1.16E-09 | -6.0856 | 1376071 | Asthma |
| rs11734568  | 4 | 105782386 | G | A | 0.0563 | -0.0624 | 0.0103 | 1.12E-09 | -6.0921 | 1376071 | Asthma |
| rs11734571  | 4 | 105782400 | G | A | 0.0563 | -0.0625 | 0.0103 | 1.05E-09 | -6.1008 | 1376071 | Asthma |
| rs11733287  | 4 | 105784182 | A | G | 0.0563 | -0.0625 | 0.0103 | 1.09E-09 | -6.0962 | 1376071 | Asthma |
| rs11733225  | 4 | 105784206 | G | C | 0.0561 | -0.0636 | 0.0103 | 6.15E-10 | -6.1868 | 1376071 | Asthma |
| rs72673811  | 4 | 105786140 | C | T | 0.0563 | -0.0625 | 0.0103 | 1.08E-09 | -6.0970 | 1376071 | Asthma |
| rs11736834  | 4 | 105787607 | T | C | 0.0561 | -0.0635 | 0.0103 | 6.49E-10 | -6.1780 | 1376071 | Asthma |

|             |   |           |   |   |        |         |        |          |         |         |        |
|-------------|---|-----------|---|---|--------|---------|--------|----------|---------|---------|--------|
| rs11736859  | 4 | 105787628 | T | C | 0.0563 | -0.0621 | 0.0103 | 1.37E-09 | -6.0596 | 1376071 | Asthma |
| rs17036225  | 4 | 105788935 | G | A | 0.0563 | -0.0624 | 0.0103 | 1.14E-09 | -6.0890 | 1376071 | Asthma |
| rs72673812  | 4 | 105789297 | T | G | 0.0563 | -0.0625 | 0.0103 | 1.12E-09 | -6.0919 | 1376071 | Asthma |
| rs72673813  | 4 | 105789496 | C | T | 0.0561 | -0.0636 | 0.0103 | 6.10E-10 | -6.1879 | 1376071 | Asthma |
| rs112819759 | 4 | 105790259 | A | G | 0.0473 | 0.0827  | 0.0112 | 1.27E-13 | 7.4095  | 1376071 | Asthma |
| rs113114960 | 4 | 105791189 | T | C | 0.0561 | -0.0634 | 0.0103 | 6.78E-10 | -6.1713 | 1376071 | Asthma |
| rs72673817  | 4 | 105792333 | A | G | 0.0563 | -0.0624 | 0.0103 | 1.15E-09 | -6.0877 | 1376071 | Asthma |
| rs17036230  | 4 | 105793991 | A | T | 0.0563 | -0.0624 | 0.0103 | 1.14E-09 | -6.0891 | 1376071 | Asthma |
| rs112543091 | 4 | 105794967 | T | C | 0.0563 | -0.0624 | 0.0103 | 1.17E-09 | -6.0847 | 1376071 | Asthma |
| rs11727745  | 4 | 105795370 | G | T | 0.0563 | -0.0624 | 0.0103 | 1.15E-09 | -6.0866 | 1376071 | Asthma |
| rs11728918  | 4 | 105796382 | G | T | 0.0563 | -0.0624 | 0.0103 | 1.16E-09 | -6.0853 | 1376071 | Asthma |
| rs72673821  | 4 | 105797096 | A | G | 0.0691 | -0.0559 | 0.0093 | 2.12E-09 | -5.9887 | 1349938 | Asthma |
| rs72673822  | 4 | 105798035 | G | A | 0.0561 | -0.0636 | 0.0103 | 6.05E-10 | -6.1891 | 1376071 | Asthma |
| rs72673823  | 4 | 105798816 | T | G | 0.0561 | -0.0635 | 0.0103 | 6.37E-10 | -6.1812 | 1376071 | Asthma |
| rs72673824  | 4 | 105803307 | G | A | 0.0563 | -0.0628 | 0.0103 | 9.41E-10 | -6.1192 | 1376071 | Asthma |
| rs11731938  | 4 | 105803983 | A | T | 0.0561 | -0.0636 | 0.0103 | 6.01E-10 | -6.1900 | 1376071 | Asthma |
| rs111886335 | 4 | 105808759 | G | A | 0.0491 | 0.0808  | 0.0109 | 1.14E-13 | 7.4236  | 1376071 | Asthma |
| rs11097901  | 4 | 105808776 | T | C | 0.0557 | -0.0636 | 0.0103 | 5.72E-10 | -6.1982 | 1376071 | Asthma |
| rs72673828  | 4 | 105809185 | G | C | 0.0557 | -0.0634 | 0.0103 | 6.87E-10 | -6.1691 | 1376071 | Asthma |
| rs11733654  | 4 | 105809553 | A | C | 0.0557 | -0.0633 | 0.0103 | 7.25E-10 | -6.1605 | 1376071 | Asthma |
| rs72673831  | 4 | 105812223 | T | C | 0.0557 | -0.0633 | 0.0103 | 7.26E-10 | -6.1601 | 1376071 | Asthma |
| rs10516527  | 4 | 105813189 | G | A | 0.0557 | -0.0632 | 0.0103 | 7.35E-10 | -6.1582 | 1376071 | Asthma |
| rs116034011 | 4 | 105814465 | T | A | 0.0554 | -0.0646 | 0.0103 | 3.63E-10 | -6.2695 | 1376071 | Asthma |
| rs147632916 | 4 | 105814487 | T | C | 0.0554 | -0.0649 | 0.0103 | 3.18E-10 | -6.2899 | 1376071 | Asthma |
| rs142285263 | 4 | 105814505 | T | C | 0.0552 | -0.0660 | 0.0103 | 1.67E-10 | -6.3889 | 1376071 | Asthma |
| rs11723240  | 4 | 105815779 | C | T | 0.0557 | -0.0632 | 0.0103 | 7.50E-10 | -6.1549 | 1376071 | Asthma |
| rs17036258  | 4 | 105816225 | A | G | 0.0555 | -0.0643 | 0.0103 | 4.30E-10 | -6.2429 | 1376071 | Asthma |
| rs72673832  | 4 | 105817603 | G | A | 0.0555 | -0.0641 | 0.0103 | 4.64E-10 | -6.2308 | 1376071 | Asthma |
| rs72673834  | 4 | 105818217 | A | G | 0.0555 | -0.0642 | 0.0103 | 4.59E-10 | -6.2323 | 1376071 | Asthma |
| rs10516528  | 4 | 105818436 | T | G | 0.0557 | -0.0632 | 0.0103 | 7.67E-10 | -6.1516 | 1376071 | Asthma |
| rs11723639  | 4 | 105820006 | A | G | 0.0555 | -0.0638 | 0.0103 | 5.71E-10 | -6.1983 | 1376071 | Asthma |
| rs17036292  | 4 | 105821059 | C | T | 0.0557 | -0.0639 | 0.0103 | 5.27E-10 | -6.2112 | 1376071 | Asthma |
| rs11726674  | 4 | 105824594 | C | T | 0.0558 | -0.0626 | 0.0103 | 1.06E-09 | -6.0998 | 1376071 | Asthma |
| rs11727500  | 4 | 105824791 | C | T | 0.0558 | -0.0626 | 0.0103 | 1.09E-09 | -6.0958 | 1376071 | Asthma |
| rs11731417  | 4 | 105824855 | G | A | 0.0558 | -0.0626 | 0.0103 | 1.09E-09 | -6.0959 | 1376071 | Asthma |
| rs11723225  | 4 | 105824908 | T | C | 0.0558 | -0.0625 | 0.0103 | 1.13E-09 | -6.0893 | 1376071 | Asthma |
| rs17036308  | 4 | 105828436 | A | T | 0.0569 | -0.0611 | 0.0102 | 1.87E-09 | -6.0088 | 1376071 | Asthma |
| rs17036310  | 4 | 105831183 | G | A | 0.0570 | -0.0607 | 0.0102 | 2.29E-09 | -5.9762 | 1376071 | Asthma |
| rs11732650  | 4 | 105833074 | C | G | 0.0578 | -0.0596 | 0.0108 | 3.30E-08 | -5.5244 | 1246149 | Asthma |
| rs11732629  | 4 | 105833190 | G | C | 0.0568 | -0.0618 | 0.0102 | 1.25E-09 | -6.0745 | 1376071 | Asthma |
| rs79412014  | 4 | 105834287 | A | T | 0.0567 | -0.0618 | 0.0102 | 1.30E-09 | -6.0676 | 1376071 | Asthma |
| rs11728716  | 4 | 105834839 | A | G | 0.0567 | -0.0617 | 0.0102 | 1.32E-09 | -6.0646 | 1376071 | Asthma |
| rs72673853  | 4 | 105835720 | C | T | 0.0569 | -0.0610 | 0.0102 | 1.90E-09 | -6.0058 | 1376071 | Asthma |
| rs72673855  | 4 | 105835832 | G | A | 0.0570 | -0.0603 | 0.0101 | 2.77E-09 | -5.9446 | 1376071 | Asthma |
| rs28767239  | 4 | 105836215 | C | A | 0.0791 | -0.0572 | 0.0096 | 2.81E-09 | -5.9424 | 1376071 | Asthma |
| rs72673858  | 4 | 105836899 | C | T | 0.0569 | -0.0611 | 0.0102 | 1.86E-09 | -6.0097 | 1376071 | Asthma |
| rs17036327  | 4 | 105840259 | G | C | 0.0569 | -0.0609 | 0.0102 | 2.05E-09 | -5.9934 | 1376071 | Asthma |
| rs113786423 | 4 | 105841192 | T | C | 0.0568 | -0.0615 | 0.0102 | 1.52E-09 | -6.0428 | 1376071 | Asthma |
| rs72673860  | 4 | 105841743 | T | C | 0.0576 | -0.0595 | 0.0101 | 3.76E-09 | -5.8942 | 1376071 | Asthma |
| rs7676975   | 4 | 105842654 | T | A | 0.0595 | -0.0577 | 0.0100 | 7.22E-09 | -5.7858 | 1376071 | Asthma |
| rs11733150  | 4 | 105844194 | G | C | 0.0570 | -0.0608 | 0.0102 | 2.21E-09 | -5.9817 | 1376071 | Asthma |
| rs11733223  | 4 | 105844368 | A | C | 0.0569 | -0.0611 | 0.0102 | 1.84E-09 | -6.0108 | 1376071 | Asthma |
| rs10050333  | 4 | 105844656 | A | T | 0.0595 | -0.0577 | 0.0100 | 6.96E-09 | -5.7920 | 1376071 | Asthma |
| rs10050159  | 4 | 105844758 | A | G | 0.0595 | -0.0574 | 0.0100 | 8.54E-09 | -5.7574 | 1376071 | Asthma |
| rs11722225  | 4 | 105845273 | C | T | 0.0570 | -0.0604 | 0.0102 | 2.79E-09 | -5.9438 | 1376071 | Asthma |
| rs11726124  | 4 | 105845339 | G | A | 0.0570 | -0.0604 | 0.0102 | 2.81E-09 | -5.9423 | 1376071 | Asthma |
| rs28488297  | 4 | 105846069 | T | C | 0.0597 | -0.0563 | 0.0099 | 1.57E-08 | -5.6539 | 1376071 | Asthma |
| rs75817507  | 4 | 105846466 | T | C | 0.0570 | -0.0600 | 0.0101 | 3.27E-09 | -5.9177 | 1376071 | Asthma |
| rs150384021 | 4 | 105846929 | G | A | 0.0570 | -0.0600 | 0.0102 | 3.38E-09 | -5.9121 | 1376071 | Asthma |
| rs111248783 | 4 | 105849841 | T | C | 0.0569 | -0.0608 | 0.0102 | 2.26E-09 | -5.9782 | 1376071 | Asthma |
| rs72673866  | 4 | 105849998 | T | A | 0.0569 | -0.0608 | 0.0102 | 2.33E-09 | -5.9732 | 1376071 | Asthma |
| rs11726094  | 4 | 105852230 | T | G | 0.0569 | -0.0609 | 0.0102 | 2.15E-09 | -5.9857 | 1376071 | Asthma |
| rs11730354  | 4 | 105852278 | C | T | 0.0612 | -0.0587 | 0.0099 | 2.67E-09 | -5.9505 | 1376071 | Asthma |
| rs142480398 | 4 | 105854112 | T | C | 0.0569 | -0.0612 | 0.0102 | 1.83E-09 | -6.0123 | 1376071 | Asthma |
| rs146685629 | 4 | 105854868 | C | G | 0.0568 | -0.0613 | 0.0102 | 1.73E-09 | -6.0217 | 1376071 | Asthma |
| rs111652678 | 4 | 105857561 | C | A | 0.0569 | -0.0609 | 0.0102 | 2.19E-09 | -5.9828 | 1376071 | Asthma |
| rs111813903 | 4 | 105858324 | C | A | 0.0570 | -0.0605 | 0.0102 | 2.61E-09 | -5.9545 | 1376071 | Asthma |
| rs112292976 | 4 | 105858628 | T | C | 0.0562 | -0.0633 | 0.0112 | 1.79E-08 | -5.6315 | 1224666 | Asthma |
| rs72673870  | 4 | 105858708 | T | C | 0.0569 | -0.0611 | 0.0102 | 1.86E-09 | -6.0093 | 1376071 | Asthma |
| rs72673872  | 4 | 105858768 | C | T | 0.0569 | -0.0611 | 0.0102 | 1.88E-09 | -6.0081 | 1376071 | Asthma |
| rs72673873  | 4 | 105859144 | A | G | 0.0614 | -0.0584 | 0.0099 | 3.22E-09 | -5.9197 | 1376071 | Asthma |
| rs113881526 | 4 | 105860479 | G | T | 0.0610 | -0.0593 | 0.0099 | 2.19E-09 | -5.9829 | 1376071 | Asthma |
| rs11730365  | 4 | 105861290 | A | G | 0.0613 | -0.0595 | 0.0099 | 1.66E-09 | -6.0280 | 1376071 | Asthma |
| rs138176522 | 4 | 105861772 | A | G | 0.0568 | -0.0619 | 0.0102 | 1.23E-09 | -6.0770 | 1376071 | Asthma |

|             |   |           |   |   |        |         |        |          |         |         |        |
|-------------|---|-----------|---|---|--------|---------|--------|----------|---------|---------|--------|
| rs146367232 | 4 | 105863123 | C | G | 0.0569 | -0.0618 | 0.0102 | 1.31E-09 | -6.0658 | 1376071 | Asthma |
| rs138454167 | 4 | 105863295 | T | C | 0.0568 | -0.0619 | 0.0102 | 1.23E-09 | -6.0763 | 1376071 | Asthma |
| rs191090046 | 4 | 105864115 | C | T | 0.0585 | -0.0652 | 0.0111 | 3.98E-09 | -5.8850 | 1224666 | Asthma |
| rs183974619 | 4 | 105864117 | A | G | 0.0594 | -0.0630 | 0.0110 | 9.22E-09 | -5.7445 | 1224666 | Asthma |
| rs112366756 | 4 | 105864241 | G | A | 0.0620 | -0.0603 | 0.0108 | 2.20E-08 | -5.5960 | 1224666 | Asthma |
| rs139760321 | 4 | 105866186 | C | T | 0.0473 | 0.0815  | 0.0123 | 2.94E-11 | 6.6495  | 1224666 | Asthma |
| rs7660534   | 4 | 105874890 | C | G | 0.0565 | -0.0621 | 0.0102 | 1.31E-09 | -6.0664 | 1376071 | Asthma |
| rs17036341  | 4 | 105875672 | G | C | 0.0564 | -0.0619 | 0.0103 | 1.56E-09 | -6.0379 | 1376071 | Asthma |
| rs10516529  | 4 | 105878159 | G | T | 0.0564 | -0.0620 | 0.0102 | 1.44E-09 | -6.0513 | 1376071 | Asthma |
| rs11730660  | 4 | 105879222 | C | A | 0.0560 | -0.0613 | 0.0103 | 2.67E-09 | -5.9507 | 1376071 | Asthma |
| rs112398395 | 4 | 105880558 | T | C | 0.0560 | -0.0615 | 0.0103 | 2.24E-09 | -5.9796 | 1376071 | Asthma |
| rs185538822 | 4 | 105882525 | C | A | 0.0548 | -0.0640 | 0.0114 | 2.05E-08 | -5.6079 | 1224666 | Asthma |
| rs151317012 | 4 | 105885037 | T | C | 0.0560 | -0.0612 | 0.0103 | 2.76E-09 | -5.9452 | 1376071 | Asthma |
| rs17331332  | 4 | 105886950 | A | G | 0.0558 | -0.0606 | 0.0103 | 4.19E-09 | -5.8766 | 1376071 | Asthma |
| rs58775257  | 4 | 105888826 | A | G | 0.0564 | -0.0620 | 0.0103 | 1.52E-09 | -6.0423 | 1376071 | Asthma |
| rs72673889  | 4 | 105889390 | G | A | 0.0559 | -0.0612 | 0.0103 | 2.85E-09 | -5.9401 | 1376071 | Asthma |
| rs67277942  | 4 | 105892152 | G | A | 0.0565 | -0.0619 | 0.0103 | 1.63E-09 | -6.0308 | 1376071 | Asthma |
| rs72673891  | 4 | 105893145 | G | A | 0.0558 | -0.0614 | 0.0103 | 3.01E-09 | -5.9308 | 1376071 | Asthma |
| rs59462153  | 4 | 105893931 | C | T | 0.0560 | -0.0616 | 0.0106 | 5.15E-09 | -5.8423 | 1316443 | Asthma |
| rs34712979  | 4 | 105897896 | A | G | 0.2540 | 0.0471  | 0.0055 | 1.32E-17 | 8.5423  | 1376071 | Asthma |
| rs6823809   | 4 | 105907638 | C | T | 0.2950 | 0.0389  | 0.0054 | 6.96E-13 | 7.1803  | 1316443 | Asthma |
| rs114723682 | 4 | 106311538 | C | T | 0.0599 | 0.0616  | 0.0102 | 1.85E-09 | 6.0106  | 1316443 | Asthma |
| rs11544777  | 4 | 106325033 | C | G | 0.0682 | 0.0530  | 0.0096 | 2.95E-08 | 5.5443  | 1316443 | Asthma |
| rs10021288  | 4 | 122084379 | A | G | 0.2656 | 0.0302  | 0.0054 | 1.76E-08 | 5.6342  | 1376071 | Asthma |
| rs72684793  | 4 | 122103614 | A | C | 0.3026 | -0.0391 | 0.0051 | 2.36E-14 | -7.6296 | 1376071 | Asthma |
| rs6534338   | 4 | 122105714 | T | C | 0.3124 | 0.0334  | 0.0052 | 1.78E-10 | 6.3789  | 1316443 | Asthma |
| rs10011954  | 4 | 122105774 | T | C | 0.3032 | -0.0395 | 0.0051 | 1.27E-14 | -7.7084 | 1376071 | Asthma |
| rs4833811   | 4 | 122106568 | C | T | 0.2884 | -0.0396 | 0.0052 | 2.06E-14 | -7.6468 | 1376071 | Asthma |
| rs7686651   | 4 | 122107376 | G | A | 0.3131 | -0.0394 | 0.0051 | 9.45E-15 | -7.7466 | 1376071 | Asthma |
| rs7687313   | 4 | 122107464 | T | G | 0.2984 | -0.0393 | 0.0051 | 2.03E-14 | -7.6490 | 1376071 | Asthma |
| rs7687515   | 4 | 122107552 | T | G | 0.3130 | -0.0392 | 0.0051 | 1.17E-14 | -7.7194 | 1376071 | Asthma |
| rs7692155   | 4 | 122107889 | G | A | 0.3130 | -0.0393 | 0.0051 | 1.08E-14 | -7.7290 | 1376071 | Asthma |
| rs114785709 | 4 | 122108432 | T | C | 0.2288 | 0.0367  | 0.0056 | 6.43E-11 | 6.5334  | 1376071 | Asthma |
| rs62323874  | 4 | 122109428 | A | G | 0.0745 | 0.0607  | 0.0088 | 5.70E-12 | 6.8870  | 1376071 | Asthma |
| rs181185012 | 4 | 122110730 | A | G | 0.2891 | -0.0417 | 0.0057 | 1.71E-13 | -7.3698 | 1224666 | Asthma |
| rs200896473 | 4 | 122110762 | T | C | 0.3037 | -0.0405 | 0.0057 | 8.66E-13 | -7.1503 | 1159440 | Asthma |
| rs141154688 | 4 | 122111201 | C | T | 0.0847 | 0.0574  | 0.0093 | 6.41E-10 | 6.1799  | 1224666 | Asthma |
| rs28798992  | 4 | 122111896 | T | G | 0.2992 | -0.0396 | 0.0063 | 4.27E-10 | -6.2436 | 1003385 | Asthma |
| rs28852374  | 4 | 122111934 | T | C | 0.3007 | -0.0382 | 0.0061 | 4.13E-10 | -6.2491 | 1094744 | Asthma |
| rs4576025   | 4 | 122112390 | G | A | 0.2997 | -0.0420 | 0.0056 | 7.42E-14 | -7.4803 | 1224666 | Asthma |
| rs112436398 | 4 | 122114172 | C | G | 0.3111 | -0.0396 | 0.0063 | 3.23E-10 | -6.2872 | 1003385 | Asthma |
| rs113005562 | 4 | 122114410 | A | C | 0.3033 | -0.0412 | 0.0056 | 1.75E-13 | -7.3668 | 1224666 | Asthma |
| rs6114920   | 4 | 122115346 | G | A | 0.2918 | -0.0392 | 0.0064 | 9.14E-10 | -6.1239 | 1003385 | Asthma |
| rs539870576 | 4 | 122115655 | T | C | 0.0718 | 0.0641  | 0.0109 | 3.65E-09 | 5.8993  | 1068611 | Asthma |
| rs6820077   | 4 | 122115765 | C | A | 0.2953 | -0.0388 | 0.0064 | 1.21E-09 | -6.0790 | 1003385 | Asthma |
| rs62323879  | 4 | 122116375 | T | A | 0.0745 | 0.0603  | 0.0088 | 7.78E-12 | 6.8425  | 1376071 | Asthma |
| rs6534340   | 4 | 122116393 | C | A | 0.3131 | -0.0391 | 0.0051 | 1.55E-14 | -7.6835 | 1376071 | Asthma |
| rs62323880  | 4 | 122116922 | A | T | 0.0744 | 0.0604  | 0.0088 | 7.54E-12 | 6.8471  | 1376071 | Asthma |
| rs62323881  | 4 | 122117140 | A | C | 0.0744 | 0.0607  | 0.0088 | 6.07E-12 | 6.8781  | 1376071 | Asthma |
| rs6854531   | 4 | 122117608 | A | T | 0.3108 | -0.0505 | 0.0066 | 1.62E-14 | -7.6779 | 757378  | Asthma |
| rs7689750   | 4 | 122119833 | G | A | 0.2982 | -0.0393 | 0.0051 | 2.29E-14 | -7.6336 | 1376071 | Asthma |
| rs78560100  | 4 | 122120316 | C | G | 0.0743 | 0.0610  | 0.0088 | 4.63E-12 | 6.9166  | 1376071 | Asthma |
| rs4833813   | 4 | 122120699 | T | C | 0.3130 | -0.0390 | 0.0051 | 1.73E-14 | -7.6692 | 1376071 | Asthma |
| rs7656525   | 4 | 122121838 | A | C | 0.3131 | -0.0390 | 0.0051 | 1.83E-14 | -7.6624 | 1376071 | Asthma |
| rs7656549   | 4 | 122121873 | A | C | 0.3130 | -0.0390 | 0.0051 | 1.87E-14 | -7.6595 | 1376071 | Asthma |
| rs7695313   | 4 | 122126286 | T | C | 0.3028 | -0.0408 | 0.0051 | 2.17E-15 | -7.9314 | 1376071 | Asthma |
| rs4618337   | 4 | 122126704 | A | G | 0.3112 | -0.0433 | 0.0052 | 1.15E-16 | -8.2878 | 1316443 | Asthma |
| rs112501534 | 4 | 122127485 | A | G | 0.3112 | -0.0433 | 0.0052 | 1.09E-16 | -8.2943 | 1316443 | Asthma |
| rs17695075  | 4 | 122128596 | C | A | 0.3113 | -0.0433 | 0.0052 | 1.04E-16 | -8.3005 | 1316443 | Asthma |
| rs1526923   | 4 | 122129615 | G | A | 0.3113 | -0.0432 | 0.0052 | 1.26E-16 | -8.2775 | 1316443 | Asthma |
| rs62323884  | 4 | 122129755 | G | T | 0.0755 | 0.0600  | 0.0088 | 6.92E-12 | 6.8593  | 1376071 | Asthma |
| rs76629670  | 4 | 122130530 | T | C | 0.0755 | 0.0600  | 0.0088 | 6.93E-12 | 6.8592  | 1376071 | Asthma |
| rs77936947  | 4 | 122131031 | C | G | 0.0755 | 0.0600  | 0.0088 | 6.80E-12 | 6.8619  | 1376071 | Asthma |
| rs45448396  | 4 | 122132518 | C | A | 0.3030 | -0.0406 | 0.0051 | 2.73E-15 | -7.9029 | 1376071 | Asthma |
| rs62323886  | 4 | 122133116 | T | G | 0.0755 | 0.0600  | 0.0087 | 7.20E-12 | 6.8537  | 1376071 | Asthma |
| rs67448759  | 4 | 122135214 | T | C | 0.3029 | -0.0405 | 0.0051 | 3.11E-15 | -7.8864 | 1376071 | Asthma |
| rs68080203  | 4 | 122135321 | G | A | 0.3108 | -0.0402 | 0.0051 | 3.33E-15 | -7.8777 | 1376071 | Asthma |
| rs62323887  | 4 | 122135777 | G | A | 0.0755 | 0.0598  | 0.0087 | 7.93E-12 | 6.8398  | 1376071 | Asthma |
| rs62323888  | 4 | 122136256 | A | C | 0.0755 | 0.0593  | 0.0088 | 1.20E-11 | 6.7807  | 1376071 | Asthma |
| rs62323889  | 4 | 122139055 | G | A | 0.0748 | 0.0608  | 0.0088 | 4.85E-12 | 6.9098  | 1376071 | Asthma |
| rs62323890  | 4 | 122139100 | T | C | 0.0748 | 0.0607  | 0.0088 | 5.13E-12 | 6.9019  | 1376071 | Asthma |
| rs62323891  | 4 | 122139386 | T | C | 0.0748 | 0.0608  | 0.0088 | 5.02E-12 | 6.9051  | 1376071 | Asthma |
| rs79402978  | 4 | 122140246 | A | G | 0.0748 | 0.0609  | 0.0088 | 4.72E-12 | 6.9138  | 1376071 | Asthma |
| rs75473603  | 4 | 122143427 | G | T | 0.0748 | 0.0606  | 0.0088 | 5.82E-12 | 6.8841  | 1376071 | Asthma |

|             |   |           |   |   |        |         |        |          |         |         |        |
|-------------|---|-----------|---|---|--------|---------|--------|----------|---------|---------|--------|
| rs62323893  | 4 | 122144569 | G | C | 0.0748 | 0.0604  | 0.0088 | 6.99E-12 | 6.8578  | 1376071 | Asthma |
| rs56035021  | 4 | 122146653 | A | G | 0.3401 | 0.0454  | 0.0051 | 3.38E-19 | 8.9558  | 1316443 | Asthma |
| rs7670673   | 4 | 122147243 | G | A | 0.0748 | 0.0603  | 0.0088 | 6.92E-12 | 6.8592  | 1376071 | Asthma |
| rs7696107   | 4 | 122147662 | C | T | 0.0748 | 0.0604  | 0.0088 | 6.48E-12 | 6.8688  | 1376071 | Asthma |
| rs62323894  | 4 | 122148045 | T | C | 0.0748 | 0.0605  | 0.0088 | 6.14E-12 | 6.8765  | 1376071 | Asthma |
| rs62323895  | 4 | 122148214 | A | G | 0.0748 | 0.0604  | 0.0088 | 6.82E-12 | 6.8614  | 1376071 | Asthma |
| rs6835946   | 4 | 122148684 | A | G | 0.3029 | -0.0403 | 0.0051 | 4.00E-15 | -7.8549 | 1376071 | Asthma |
| rs9994851   | 4 | 122149939 | A | G | 0.0828 | 0.0569  | 0.0085 | 1.90E-11 | 6.7137  | 1376071 | Asthma |
| rs7691220   | 4 | 122150453 | A | G | 0.0748 | 0.0601  | 0.0088 | 8.41E-12 | 6.8314  | 1376071 | Asthma |
| rs62323896  | 4 | 122154639 | T | C | 0.0748 | 0.0604  | 0.0088 | 6.37E-12 | 6.8711  | 1376071 | Asthma |
| rs112481526 | 4 | 122154852 | G | A | 0.2775 | 0.0382  | 0.0052 | 3.44E-13 | 7.2756  | 1376071 | Asthma |
| rs72923970  | 4 | 122155206 | A | G | 0.0829 | 0.0567  | 0.0085 | 2.06E-11 | 6.7014  | 1376071 | Asthma |
| rs62323898  | 4 | 122155740 | G | A | 0.3403 | 0.0451  | 0.0051 | 5.65E-19 | 8.8987  | 1316443 | Asthma |
| rs4527505   | 4 | 122156179 | C | G | 0.0828 | 0.0568  | 0.0085 | 2.06E-11 | 6.7020  | 1376071 | Asthma |
| rs62323899  | 4 | 122158285 | G | A | 0.0748 | 0.0603  | 0.0088 | 7.11E-12 | 6.8554  | 1376071 | Asthma |
| rs62323900  | 4 | 122158440 | G | C | 0.0748 | 0.0602  | 0.0088 | 7.91E-12 | 6.8402  | 1376071 | Asthma |
| rs75485001  | 4 | 122158567 | G | A | 0.0748 | 0.0601  | 0.0088 | 8.12E-12 | 6.8363  | 1376071 | Asthma |
| rs62323902  | 4 | 122162117 | G | A | 0.0748 | 0.0601  | 0.0088 | 8.02E-12 | 6.8382  | 1376071 | Asthma |
| rs62323903  | 4 | 122164527 | G | A | 0.0748 | 0.0599  | 0.0088 | 9.85E-12 | 6.8087  | 1376071 | Asthma |
| rs76120566  | 4 | 122166148 | G | C | 0.0746 | 0.0637  | 0.0096 | 3.32E-11 | 6.6318  | 1224666 | Asthma |
| rs62323904  | 4 | 122166342 | C | A | 0.0748 | 0.0639  | 0.0096 | 2.44E-11 | 6.6767  | 1224666 | Asthma |
| rs10857090  | 4 | 122166802 | C | T | 0.3699 | 0.0398  | 0.0053 | 6.04E-14 | 7.5072  | 1224666 | Asthma |
| rs28595460  | 4 | 122166913 | T | C | 0.0829 | 0.0563  | 0.0085 | 2.85E-11 | 6.6540  | 1376071 | Asthma |
| rs62323926  | 4 | 122169894 | A | G | 0.0748 | 0.0601  | 0.0088 | 8.22E-12 | 6.8346  | 1376071 | Asthma |
| rs62323927  | 4 | 122170523 | T | C | 0.0748 | 0.0601  | 0.0088 | 8.45E-12 | 6.8307  | 1376071 | Asthma |
| rs10008533  | 4 | 122172095 | T | A | 0.0854 | 0.0747  | 0.0113 | 3.92E-11 | 6.6072  | 635342  | Asthma |
| rs62323929  | 4 | 122177684 | G | A | 0.0748 | 0.0598  | 0.0088 | 9.88E-12 | 6.8083  | 1376071 | Asthma |
| rs28592642  | 4 | 122177976 | A | G | 0.0830 | 0.0562  | 0.0085 | 3.11E-11 | 6.6413  | 1376071 | Asthma |
| rs4374642   | 4 | 122179956 | C | T | 0.0830 | 0.0563  | 0.0085 | 2.88E-11 | 6.6525  | 1376071 | Asthma |
| rs62323930  | 4 | 122181442 | T | C | 0.0749 | 0.0601  | 0.0088 | 8.21E-12 | 6.8348  | 1376071 | Asthma |
| rs66475540  | 4 | 122181811 | A | G | 0.3028 | -0.0403 | 0.0051 | 3.97E-15 | -7.8560 | 1376071 | Asthma |
| rs112390764 | 4 | 122184466 | A | G | 0.3007 | -0.0427 | 0.0054 | 2.70E-15 | -7.9038 | 1008051 | Asthma |
| rs62323931  | 4 | 122185067 | C | T | 0.0749 | 0.0599  | 0.0088 | 9.40E-12 | 6.8155  | 1376071 | Asthma |
| rs62323932  | 4 | 122187013 | A | G | 0.0748 | 0.0601  | 0.0088 | 8.23E-12 | 6.8345  | 1376071 | Asthma |
| rs67625562  | 4 | 122188180 | C | A | 0.3028 | -0.0403 | 0.0051 | 3.98E-15 | -7.8557 | 1376071 | Asthma |
| rs67659077  | 4 | 122188818 | G | T | 0.3028 | -0.0402 | 0.0051 | 4.54E-15 | -7.8391 | 1376071 | Asthma |
| rs62323933  | 4 | 122188997 | A | G | 0.0748 | 0.0600  | 0.0088 | 8.46E-12 | 6.8305  | 1376071 | Asthma |
| rs68107102  | 4 | 122190199 | A | C | 0.3028 | -0.0402 | 0.0051 | 4.47E-15 | -7.8410 | 1376071 | Asthma |
| rs62323934  | 4 | 122190714 | A | G | 0.0748 | 0.0600  | 0.0088 | 8.66E-12 | 6.8272  | 1376071 | Asthma |
| rs72687029  | 4 | 122192197 | G | A | 0.2318 | 0.0416  | 0.0055 | 5.55E-14 | 7.5182  | 1376071 | Asthma |
| rs67797421  | 4 | 122195022 | T | C | 0.3005 | -0.0375 | 0.0055 | 1.07E-11 | -6.7966 | 1246149 | Asthma |
| rs55969942  | 4 | 122195707 | G | T | 0.3401 | 0.0433  | 0.0049 | 1.99E-18 | 8.7578  | 1376071 | Asthma |
| rs55904957  | 4 | 122195840 | C | T | 0.3401 | 0.0434  | 0.0049 | 1.77E-18 | 8.7711  | 1376071 | Asthma |
| rs62323936  | 4 | 122196574 | C | T | 0.0749 | 0.0601  | 0.0088 | 8.22E-12 | 6.8347  | 1376071 | Asthma |
| rs62323937  | 4 | 122196800 | C | T | 0.0749 | 0.0600  | 0.0088 | 8.39E-12 | 6.8318  | 1376071 | Asthma |
| rs67890920  | 4 | 122202609 | G | A | 0.3028 | -0.0404 | 0.0051 | 3.02E-15 | -7.8901 | 1376071 | Asthma |
| rs62323939  | 4 | 122202994 | A | T | 0.0748 | 0.0598  | 0.0088 | 9.79E-12 | 6.8096  | 1376071 | Asthma |
| rs7671357   | 4 | 122205295 | A | C | 0.3356 | 0.0462  | 0.0053 | 3.79E-18 | 8.6849  | 1246149 | Asthma |
| rs75034409  | 4 | 122207746 | A | T | 0.0749 | 0.0599  | 0.0088 | 9.32E-12 | 6.8166  | 1376071 | Asthma |
| rs7656479   | 4 | 122209731 | G | A | 0.3030 | -0.0404 | 0.0051 | 3.19E-15 | -7.8834 | 1376071 | Asthma |
| rs10023971  | 4 | 122210093 | A | G | 0.0828 | 0.0562  | 0.0085 | 3.09E-11 | 6.6425  | 1376071 | Asthma |
| rs4505848   | 4 | 122211337 | G | A | 0.3402 | 0.0438  | 0.0049 | 7.43E-19 | 8.8682  | 1376071 | Asthma |
| rs7677168   | 4 | 122213003 | A | G | 0.0749 | 0.0601  | 0.0088 | 7.91E-12 | 6.8402  | 1376071 | Asthma |
| rs7676847   | 4 | 122213015 | G | A | 0.3028 | -0.0404 | 0.0051 | 3.02E-15 | -7.8900 | 1376071 | Asthma |
| rs7663164   | 4 | 122216533 | A | G | 0.3027 | -0.0404 | 0.0051 | 3.25E-15 | -7.8808 | 1376071 | Asthma |
| rs7667951   | 4 | 122216851 | G | A | 0.0749 | 0.0599  | 0.0088 | 9.22E-12 | 6.8181  | 1376071 | Asthma |
| rs66909062  | 4 | 122217758 | G | A | 0.3028 | -0.0405 | 0.0051 | 2.82E-15 | -7.8988 | 1376071 | Asthma |
| rs56320994  | 4 | 122218705 | T | A | 0.0830 | 0.0586  | 0.0092 | 2.17E-10 | 6.3491  | 1224666 | Asthma |
| rs45605540  | 4 | 122219899 | C | T | 0.2833 | 0.0379  | 0.0052 | 2.81E-13 | 7.3035  | 1376071 | Asthma |
| rs45613035  | 4 | 122219915 | C | T | 0.0963 | 0.0575  | 0.0079 | 4.25E-13 | 7.2473  | 1376071 | Asthma |
| rs62323942  | 4 | 122222065 | T | C | 0.0830 | 0.0559  | 0.0085 | 3.94E-11 | 6.6063  | 1376071 | Asthma |
| rs62323943  | 4 | 122222203 | A | G | 0.0748 | 0.0599  | 0.0088 | 8.94E-12 | 6.8226  | 1376071 | Asthma |
| rs7658836   | 4 | 122224596 | A | T | 0.3027 | -0.0405 | 0.0051 | 2.93E-15 | -7.8936 | 1376071 | Asthma |
| rs7664452   | 4 | 122225070 | G | T | 0.3402 | 0.0435  | 0.0049 | 1.33E-18 | 8.8031  | 1376071 | Asthma |
| rs62323946  | 4 | 122227999 | T | C | 0.0749 | 0.0601  | 0.0088 | 7.84E-12 | 6.8414  | 1376071 | Asthma |
| rs66987389  | 4 | 122235909 | C | A | 0.3027 | -0.0404 | 0.0051 | 3.26E-15 | -7.8805 | 1376071 | Asthma |
| rs72687036  | 4 | 122236986 | G | A | 0.2257 | 0.0407  | 0.0056 | 2.95E-13 | 7.2969  | 1376071 | Asthma |
| rs6822038   | 4 | 122241687 | A | G | 0.3037 | -0.0399 | 0.0051 | 6.33E-15 | -7.7972 | 1376071 | Asthma |
| rs62323948  | 4 | 122242407 | G | A | 0.0749 | 0.0600  | 0.0088 | 8.71E-12 | 6.8265  | 1376071 | Asthma |
| rs59294813  | 4 | 122243645 | G | A | 0.2739 | -0.0296 | 0.0054 | 4.78E-08 | -5.4593 | 1376071 | Asthma |
| rs6854090   | 4 | 122244258 | A | G | 0.0830 | 0.0560  | 0.0085 | 3.73E-11 | 6.6143  | 1376071 | Asthma |
| rs75906064  | 4 | 122248711 | G | A | 0.0749 | 0.0600  | 0.0088 | 8.42E-12 | 6.8312  | 1376071 | Asthma |
| rs75448874  | 4 | 122251421 | G | C | 0.0749 | 0.0601  | 0.0088 | 8.20E-12 | 6.8351  | 1376071 | Asthma |
| rs45500303  | 4 | 122255411 | T | C | 0.3038 | -0.0398 | 0.0051 | 7.67E-15 | -7.7730 | 1376071 | Asthma |



|             |   |           |   |   |        |         |        |          |         |         |        |
|-------------|---|-----------|---|---|--------|---------|--------|----------|---------|---------|--------|
| rs45495097  | 4 | 122258875 | T | C | 0.0830 | 0.0558  | 0.0085 | 4.21E-11 | 6.5965  | 1376071 | Asthma |
| rs62323952  | 4 | 122260247 | C | T | 0.0727 | 0.0576  | 0.0096 | 1.81E-09 | 6.0144  | 1246149 | Asthma |
| rs6813193   | 4 | 122260748 | C | T | 0.0830 | 0.0560  | 0.0085 | 3.67E-11 | 6.6167  | 1376071 | Asthma |
| rs4288027   | 4 | 122262050 | C | A | 0.0830 | 0.0559  | 0.0085 | 3.76E-11 | 6.6131  | 1376071 | Asthma |
| rs6827756   | 4 | 122263256 | T | C | 0.3683 | 0.0391  | 0.0049 | 9.82E-16 | 8.0290  | 1376071 | Asthma |
| rs45515895  | 4 | 122263672 | A | G | 0.2255 | 0.0405  | 0.0056 | 3.51E-13 | 7.2734  | 1376071 | Asthma |
| rs77574900  | 4 | 122264508 | A | C | 0.0749 | 0.0600  | 0.0088 | 8.70E-12 | 6.8266  | 1376071 | Asthma |
| rs45609335  | 4 | 122265396 | C | G | 0.0455 | -0.0644 | 0.0116 | 2.70E-08 | -5.5596 | 1376071 | Asthma |
| rs45499403  | 4 | 122265439 | A | G | 0.0749 | 0.0600  | 0.0088 | 8.28E-12 | 6.8336  | 1376071 | Asthma |
| rs62323954  | 4 | 122265899 | A | G | 0.0749 | 0.0599  | 0.0088 | 9.33E-12 | 6.8165  | 1376071 | Asthma |
| rs4833246   | 4 | 122267147 | T | C | 0.1113 | -0.0530 | 0.0083 | 2.12E-10 | -6.3524 | 1219993 | Asthma |
| rs13104615  | 4 | 122267294 | G | C | 0.2356 | -0.0384 | 0.0064 | 2.21E-09 | -5.9820 | 878129  | Asthma |
| rs72687044  | 4 | 122267346 | G | A | 0.3396 | 0.0431  | 0.0050 | 7.89E-18 | 8.6012  | 1349938 | Asthma |
| rs77552566  | 4 | 122268794 | C | T | 0.0749 | 0.0600  | 0.0088 | 8.39E-12 | 6.8317  | 1376071 | Asthma |
| rs45574236  | 4 | 122271228 | C | T | 0.3037 | -0.0396 | 0.0051 | 1.02E-14 | -7.7369 | 1376071 | Asthma |
| rs45558836  | 4 | 122272091 | G | A | 0.0749 | 0.0599  | 0.0088 | 9.28E-12 | 6.8172  | 1376071 | Asthma |
| rs13147049  | 4 | 122272715 | A | G | 0.3390 | 0.0425  | 0.0049 | 8.18E-18 | 8.5970  | 1376071 | Asthma |
| rs62323956  | 4 | 122274527 | G | A | 0.0749 | 0.0599  | 0.0088 | 8.90E-12 | 6.8233  | 1376071 | Asthma |
| rs66971362  | 4 | 122275202 | A | G | 0.3034 | -0.0398 | 0.0051 | 8.45E-15 | -7.7608 | 1376071 | Asthma |
| rs62323957  | 4 | 122275427 | T | G | 0.0749 | 0.0595  | 0.0088 | 1.28E-11 | 6.7711  | 1376071 | Asthma |
| rs6534347   | 4 | 122277280 | A | G | 0.3689 | 0.0389  | 0.0049 | 1.14E-15 | 8.0111  | 1376071 | Asthma |
| rs45520839  | 4 | 122281926 | G | A | 0.3038 | -0.0397 | 0.0051 | 9.48E-15 | -7.7460 | 1376071 | Asthma |
| rs62323958  | 4 | 122288204 | A | G | 0.0749 | 0.0598  | 0.0088 | 1.02E-11 | 6.8043  | 1376071 | Asthma |
| rs67676259  | 4 | 122290021 | A | G | 0.3036 | -0.0398 | 0.0051 | 8.40E-15 | -7.7614 | 1376071 | Asthma |
| rs138148985 | 4 | 122290880 | T | A | 0.0705 | 0.0676  | 0.0108 | 4.23E-10 | 6.2450  | 1090071 | Asthma |
| rs68145471  | 4 | 122292314 | G | A | 0.3037 | -0.0398 | 0.0051 | 8.37E-15 | -7.7617 | 1376071 | Asthma |
| rs57773794  | 4 | 122293479 | C | A | 0.0830 | 0.0558  | 0.0085 | 4.28E-11 | 6.5939  | 1376071 | Asthma |
| rs45513095  | 4 | 122293680 | G | A | 0.0749 | 0.0597  | 0.0088 | 1.11E-11 | 6.7913  | 1376071 | Asthma |
| rs45530034  | 4 | 122293825 | T | C | 0.0749 | 0.0598  | 0.0088 | 9.79E-12 | 6.8096  | 1376071 | Asthma |
| rs28854492  | 4 | 122294226 | T | C | 0.3391 | 0.0426  | 0.0049 | 7.34E-18 | 8.6096  | 1376071 | Asthma |
| rs112326870 | 4 | 122296926 | A | G | 0.3021 | -0.0394 | 0.0051 | 1.48E-14 | -7.6891 | 1376071 | Asthma |
| rs62321680  | 4 | 122298996 | C | T | 0.0749 | 0.0598  | 0.0088 | 1.03E-11 | 6.8024  | 1376071 | Asthma |
| rs62321681  | 4 | 122300410 | C | G | 0.0749 | 0.0598  | 0.0088 | 9.82E-12 | 6.8091  | 1376071 | Asthma |
| rs62321683  | 4 | 122301977 | G | A | 0.0749 | 0.0599  | 0.0088 | 9.53E-12 | 6.8135  | 1376071 | Asthma |
| rs7693795   | 4 | 122305228 | C | T | 0.3037 | -0.0396 | 0.0051 | 1.12E-14 | -7.7254 | 1376071 | Asthma |
| rs77037156  | 4 | 122307677 | A | T | 0.0459 | -0.0639 | 0.0115 | 2.86E-08 | -5.5499 | 1376071 | Asthma |
| rs7688384   | 4 | 122307977 | T | C | 0.3216 | -0.0406 | 0.0050 | 8.35E-16 | -8.0489 | 1376071 | Asthma |
| rs7693745   | 4 | 122314428 | G | A | 0.2839 | 0.0373  | 0.0052 | 5.90E-13 | 7.2026  | 1376071 | Asthma |
| rs7694328   | 4 | 122314692 | T | C | 0.3021 | -0.0394 | 0.0051 | 1.67E-14 | -7.6742 | 1376071 | Asthma |
| rs67143487  | 4 | 122316175 | G | A | 0.3001 | -0.0419 | 0.0054 | 9.19E-15 | -7.7501 | 1008051 | Asthma |
| rs4833821   | 4 | 122317514 | C | T | 0.3026 | -0.0389 | 0.0051 | 3.15E-14 | -7.5920 | 1376071 | Asthma |
| rs17005650  | 4 | 122318633 | C | G | 0.3021 | -0.0395 | 0.0051 | 1.44E-14 | -7.6925 | 1376071 | Asthma |
| rs62321685  | 4 | 122319635 | A | G | 0.0655 | 0.0589  | 0.0095 | 5.77E-10 | 6.1966  | 1376071 | Asthma |
| rs62321686  | 4 | 122320580 | A | G | 0.0744 | 0.0587  | 0.0088 | 2.76E-11 | 6.6586  | 1376071 | Asthma |
| rs75198077  | 4 | 122327607 | C | A | 0.0749 | 0.0599  | 0.0088 | 8.66E-12 | 6.8271  | 1376071 | Asthma |
| rs10027161  | 4 | 122329229 | C | A | 0.0746 | 0.0595  | 0.0088 | 1.19E-11 | 6.7819  | 1376071 | Asthma |
| rs62321687  | 4 | 122329498 | A | G | 0.0730 | 0.0665  | 0.0097 | 8.56E-12 | 6.8288  | 1219993 | Asthma |
| rs62321688  | 4 | 122329873 | T | C | 0.0744 | 0.0586  | 0.0088 | 2.97E-11 | 6.6479  | 1376071 | Asthma |
| rs113828759 | 4 | 122333241 | T | C | 0.2373 | -0.0513 | 0.0089 | 6.93E-09 | -5.7927 | 778845  | Asthma |
| rs62321691  | 4 | 122336776 | A | G | 0.0744 | 0.0585  | 0.0088 | 3.13E-11 | 6.6403  | 1376071 | Asthma |
| rs62321692  | 4 | 122340375 | C | A | 0.0749 | 0.0597  | 0.0088 | 1.09E-11 | 6.7942  | 1376071 | Asthma |
| rs62321693  | 4 | 122340493 | C | T | 0.0750 | 0.0595  | 0.0088 | 1.22E-11 | 6.7779  | 1376071 | Asthma |
| rs72621835  | 4 | 122340627 | C | T | 0.3020 | -0.0398 | 0.0051 | 9.41E-15 | -7.7469 | 1376071 | Asthma |
| rs62321694  | 4 | 122341318 | G | C | 0.0749 | 0.0597  | 0.0088 | 1.05E-11 | 6.7994  | 1376071 | Asthma |
| rs45466798  | 4 | 122342516 | T | C | 0.3000 | -0.0397 | 0.0051 | 1.07E-14 | -7.7304 | 1376071 | Asthma |
| rs7699742   | 4 | 122343330 | C | T | 0.3418 | 0.0426  | 0.0049 | 7.11E-18 | 8.6131  | 1376071 | Asthma |
| rs7678898   | 4 | 122345637 | C | T | 0.0749 | 0.0597  | 0.0088 | 1.10E-11 | 6.7924  | 1376071 | Asthma |
| rs62321695  | 4 | 122348349 | G | T | 0.0749 | 0.0596  | 0.0088 | 1.20E-11 | 6.7802  | 1376071 | Asthma |
| rs57048617  | 4 | 122348946 | T | G | 0.3062 | -0.0397 | 0.0051 | 8.59E-15 | -7.7586 | 1376071 | Asthma |
| rs7686937   | 4 | 122350405 | A | G | 0.0743 | 0.0585  | 0.0088 | 3.03E-11 | 6.6451  | 1376071 | Asthma |
| rs7664905   | 4 | 122350440 | C | T | 0.0748 | 0.0597  | 0.0088 | 1.13E-11 | 6.7884  | 1376071 | Asthma |
| rs11722421  | 4 | 122350513 | C | G | 0.3418 | 0.0426  | 0.0049 | 6.35E-18 | 8.6260  | 1376071 | Asthma |
| rs7677679   | 4 | 122354279 | T | A | 0.3026 | -0.0393 | 0.0051 | 1.74E-14 | -7.6683 | 1376071 | Asthma |
| rs62321696  | 4 | 122355806 | A | G | 0.0744 | 0.0584  | 0.0088 | 3.27E-11 | 6.6340  | 1376071 | Asthma |
| rs62321697  | 4 | 122358360 | G | C | 0.0743 | 0.0585  | 0.0088 | 3.24E-11 | 6.6353  | 1376071 | Asthma |
| rs17005690  | 4 | 122358951 | C | A | 0.0830 | 0.0555  | 0.0085 | 5.44E-11 | 6.5585  | 1376071 | Asthma |
| rs62321698  | 4 | 122359548 | C | T | 0.0748 | 0.0597  | 0.0088 | 1.13E-11 | 6.7890  | 1376071 | Asthma |
| rs1127348   | 4 | 122359705 | C | T | 0.2342 | 0.0409  | 0.0055 | 1.67E-13 | 7.3728  | 1376071 | Asthma |
| rs17005693  | 4 | 122360138 | C | T | 0.1168 | -0.0496 | 0.0074 | 1.91E-11 | -6.7128 | 1376071 | Asthma |
| rs7677941   | 4 | 122361599 | T | C | 0.0743 | 0.0587  | 0.0088 | 2.72E-11 | 6.6612  | 1376071 | Asthma |
| rs7678445   | 4 | 122361617 | T | G | 0.0721 | 0.0562  | 0.0096 | 4.75E-09 | 5.8557  | 1246149 | Asthma |
| rs11727369  | 4 | 122365072 | A | G | 0.3689 | 0.0390  | 0.0049 | 1.07E-15 | 8.0186  | 1376071 | Asthma |
| rs56313700  | 4 | 122366418 | A | C | 0.2326 | 0.0407  | 0.0055 | 2.02E-13 | 7.3477  | 1376071 | Asthma |
| rs62321699  | 4 | 122367622 | G | C | 0.0743 | 0.0588  | 0.0088 | 2.60E-11 | 6.6678  | 1376071 | Asthma |

|             |   |           |   |   |        |         |        |          |         |         |        |
|-------------|---|-----------|---|---|--------|---------|--------|----------|---------|---------|--------|
| rs55918453  | 4 | 122368049 | A | G | 0.0744 | 0.0588  | 0.0088 | 2.49E-11 | 6.6737  | 1376071 | Asthma |
| rs113853544 | 4 | 122368995 | A | G | 0.3001 | -0.0401 | 0.0051 | 6.00E-15 | -7.8037 | 1376071 | Asthma |
| rs62321700  | 4 | 122370696 | T | A | 0.0743 | 0.0586  | 0.0088 | 2.96E-11 | 6.6488  | 1376071 | Asthma |
| rs62321701  | 4 | 122373792 | T | C | 0.0743 | 0.0587  | 0.0088 | 2.82E-11 | 6.6557  | 1376071 | Asthma |
| rs67916050  | 4 | 122374628 | G | A | 0.3026 | -0.0396 | 0.0051 | 1.09E-14 | -7.7277 | 1376071 | Asthma |
| rs936607    | 4 | 122379787 | G | A | 0.3093 | -0.0395 | 0.0051 | 9.81E-15 | -7.7416 | 1376071 | Asthma |
| rs79645730  | 4 | 122381831 | C | A | 0.0748 | 0.0585  | 0.0088 | 2.95E-11 | 6.6490  | 1376071 | Asthma |
| rs62321702  | 4 | 122383737 | C | T | 0.0748 | 0.0586  | 0.0088 | 2.69E-11 | 6.6629  | 1376071 | Asthma |
| rs62321703  | 4 | 122384444 | A | G | 0.0748 | 0.0586  | 0.0088 | 2.78E-11 | 6.6576  | 1376071 | Asthma |
| rs72669119  | 4 | 122384786 | A | T | 0.2994 | -0.0403 | 0.0051 | 4.82E-15 | -7.8314 | 1376071 | Asthma |
| rs62321704  | 4 | 122384872 | C | G | 0.0826 | 0.0541  | 0.0085 | 1.80E-10 | 6.3778  | 1376071 | Asthma |
| rs62321705  | 4 | 122385433 | T | C | 0.0748 | 0.0584  | 0.0088 | 3.04E-11 | 6.6445  | 1376071 | Asthma |
| rs112160914 | 4 | 122385853 | G | C | 0.0748 | 0.0583  | 0.0088 | 3.38E-11 | 6.6290  | 1376071 | Asthma |
| rs28819446  | 4 | 122386202 | C | G | 0.0810 | 0.0561  | 0.0102 | 4.32E-08 | 5.4769  | 1090071 | Asthma |
| rs6827824   | 4 | 122387738 | C | G | 0.2977 | -0.0434 | 0.0054 | 1.13E-15 | -8.0115 | 1008051 | Asthma |
| rs11728796  | 4 | 122388747 | G | A | 0.2558 | -0.0327 | 0.0058 | 1.44E-08 | -5.6684 | 1008051 | Asthma |
| rs2127512   | 4 | 122391197 | C | A | 0.0748 | 0.0585  | 0.0088 | 2.81E-11 | 6.6564  | 1376071 | Asthma |
| rs6814233   | 4 | 122392977 | T | G | 0.2988 | -0.0437 | 0.0056 | 8.87E-15 | -7.7544 | 1219993 | Asthma |
| rs2170083   | 4 | 122393011 | T | G | 0.0734 | 0.0660  | 0.0097 | 1.07E-11 | 6.7974  | 1219993 | Asthma |
| rs1383046   | 4 | 122394115 | G | C | 0.2325 | 0.0405  | 0.0055 | 2.25E-13 | 7.3331  | 1376071 | Asthma |
| rs6834379   | 4 | 122394544 | A | G | 0.0749 | 0.0587  | 0.0088 | 2.51E-11 | 6.6728  | 1376071 | Asthma |
| rs4145717   | 4 | 122394921 | T | G | 0.3412 | 0.0431  | 0.0049 | 2.62E-18 | 8.7269  | 1376071 | Asthma |
| rs62321741  | 4 | 122398197 | G | T | 0.0833 | 0.0534  | 0.0084 | 2.54E-10 | 6.3248  | 1376071 | Asthma |
| rs45555239  | 4 | 122398624 | G | A | 0.0830 | 0.0543  | 0.0085 | 1.37E-10 | 6.4192  | 1376071 | Asthma |
| rs62321743  | 4 | 122400190 | G | A | 0.0752 | 0.0592  | 0.0088 | 1.46E-11 | 6.7514  | 1376071 | Asthma |
| rs4416491   | 4 | 122400893 | T | C | 0.2993 | -0.0404 | 0.0051 | 3.98E-15 | -7.8557 | 1376071 | Asthma |
| rs62321744  | 4 | 122403463 | T | A | 0.0748 | 0.0586  | 0.0088 | 2.72E-11 | 6.6612  | 1376071 | Asthma |
| rs62321745  | 4 | 122404605 | G | A | 0.0748 | 0.0586  | 0.0088 | 2.73E-11 | 6.6603  | 1376071 | Asthma |
| rs72669125  | 4 | 122404613 | T | G | 0.2968 | -0.0372 | 0.0055 | 1.84E-11 | -6.7185 | 1246149 | Asthma |
| rs62321746  | 4 | 122405331 | T | C | 0.0748 | 0.0586  | 0.0088 | 2.70E-11 | 6.6623  | 1376071 | Asthma |
| rs17388568  | 4 | 122408207 | A | G | 0.2842 | 0.0344  | 0.0049 | 2.52E-12 | 7.0023  | 1376071 | Asthma |
| rs12499753  | 4 | 122412022 | C | T | 0.3412 | 0.0430  | 0.0049 | 2.97E-18 | 8.7128  | 1376071 | Asthma |
| rs2086346   | 4 | 122412516 | G | A | 0.2993 | -0.0403 | 0.0051 | 4.36E-15 | -7.8442 | 1376071 | Asthma |
| rs1904522   | 4 | 122415763 | A | G | 0.3409 | 0.0433  | 0.0049 | 1.77E-18 | 8.7711  | 1376071 | Asthma |
| rs62321749  | 4 | 122415891 | G | A | 0.0748 | 0.0585  | 0.0088 | 2.77E-11 | 6.6581  | 1376071 | Asthma |
| rs62321750  | 4 | 122416059 | T | C | 0.0748 | 0.0585  | 0.0088 | 3.00E-11 | 6.6467  | 1376071 | Asthma |
| rs7658100   | 4 | 122416218 | A | C | 0.2993 | -0.0404 | 0.0051 | 3.61E-15 | -7.8677 | 1376071 | Asthma |
| rs62321751  | 4 | 122416973 | C | A | 0.0748 | 0.0585  | 0.0088 | 2.92E-11 | 6.6506  | 1376071 | Asthma |
| rs62321752  | 4 | 122417038 | C | T | 0.0748 | 0.0585  | 0.0088 | 2.81E-11 | 6.6561  | 1376071 | Asthma |
| rs45627241  | 4 | 122418185 | G | T | 0.0748 | 0.0586  | 0.0088 | 2.71E-11 | 6.6616  | 1376071 | Asthma |
| rs45501297  | 4 | 122418471 | T | C | 0.0748 | 0.0584  | 0.0088 | 3.01E-11 | 6.6463  | 1376071 | Asthma |
| rs55896948  | 4 | 122420959 | G | T | 0.3409 | 0.0432  | 0.0049 | 2.26E-18 | 8.7436  | 1376071 | Asthma |
| rs1383044   | 4 | 122421169 | G | A | 0.0748 | 0.0586  | 0.0088 | 2.60E-11 | 6.6677  | 1376071 | Asthma |
| rs77943279  | 4 | 122423243 | A | G | 0.0748 | 0.0586  | 0.0088 | 2.78E-11 | 6.6580  | 1376071 | Asthma |
| rs62321756  | 4 | 122423404 | T | A | 0.0748 | 0.0586  | 0.0088 | 2.63E-11 | 6.6662  | 1376071 | Asthma |
| rs62321757  | 4 | 122423523 | T | A | 0.0748 | 0.0586  | 0.0088 | 2.66E-11 | 6.6644  | 1376071 | Asthma |
| rs17005728  | 4 | 122423540 | G | A | 0.2996 | -0.0404 | 0.0051 | 3.68E-15 | -7.8652 | 1376071 | Asthma |
| rs7675731   | 4 | 122423990 | A | G | 0.2995 | -0.0405 | 0.0051 | 3.18E-15 | -7.8836 | 1376071 | Asthma |
| rs7699809   | 4 | 122424007 | A | T | 0.2995 | -0.0405 | 0.0051 | 3.28E-15 | -7.8797 | 1376071 | Asthma |
| rs77279393  | 4 | 122425361 | G | A | 0.1157 | -0.0505 | 0.0074 | 8.79E-12 | -6.8250 | 1376071 | Asthma |
| rs6847129   | 4 | 122426165 | A | G | 0.0830 | 0.0542  | 0.0085 | 1.41E-10 | 6.4147  | 1376071 | Asthma |
| rs6854230   | 4 | 122427247 | A | G | 0.2960 | -0.0404 | 0.0062 | 5.44E-11 | -6.5584 | 1090071 | Asthma |
| rs716501    | 4 | 122430770 | A | G | 0.3361 | 0.0459  | 0.0053 | 5.82E-18 | 8.6361  | 1246149 | Asthma |
| rs13145929  | 4 | 122431046 | G | A | 0.2847 | -0.0332 | 0.0057 | 7.13E-09 | -5.7878 | 1246149 | Asthma |
| rs17454584  | 4 | 122432277 | G | A | 0.2323 | 0.0398  | 0.0055 | 4.12E-13 | 7.2515  | 1376071 | Asthma |
| rs4833826   | 4 | 122432762 | G | A | 0.2996 | -0.0406 | 0.0051 | 2.88E-15 | -7.8961 | 1376071 | Asthma |
| rs62321758  | 4 | 122434693 | A | G | 0.0749 | 0.0590  | 0.0088 | 1.98E-11 | 6.7074  | 1376071 | Asthma |
| rs35914000  | 4 | 122434768 | A | G | 0.2840 | 0.0376  | 0.0052 | 2.99E-13 | 7.2950  | 1376071 | Asthma |
| rs72669139  | 4 | 122436781 | G | A | 0.2996 | -0.0406 | 0.0051 | 2.93E-15 | -7.8939 | 1376071 | Asthma |
| rs72669140  | 4 | 122437204 | C | T | 0.2995 | -0.0404 | 0.0051 | 3.46E-15 | -7.8729 | 1376071 | Asthma |
| rs45506692  | 4 | 122437746 | A | G | 0.0748 | 0.0584  | 0.0088 | 3.05E-11 | 6.6442  | 1376071 | Asthma |
| rs45524132  | 4 | 122437969 | C | A | 0.0748 | 0.0586  | 0.0088 | 2.57E-11 | 6.6691  | 1376071 | Asthma |
| rs62322662  | 4 | 122438414 | G | A | 0.0770 | 0.0587  | 0.0087 | 1.58E-11 | 6.7403  | 1376071 | Asthma |
| rs137967223 | 4 | 122441171 | T | C | 0.0747 | 0.0620  | 0.0096 | 9.65E-11 | 6.4723  | 1224666 | Asthma |
| rs56360035  | 4 | 122441874 | T | A | 0.3410 | 0.0431  | 0.0049 | 2.80E-18 | 8.7191  | 1376071 | Asthma |
| rs56267605  | 4 | 122441954 | C | A | 0.3417 | 0.0434  | 0.0049 | 1.56E-18 | 8.7851  | 1376071 | Asthma |
| rs150671681 | 4 | 122443487 | T | C | 0.2993 | -0.0404 | 0.0051 | 3.76E-15 | -7.8629 | 1376071 | Asthma |
| rs112778595 | 4 | 122443500 | G | C | 0.2993 | -0.0404 | 0.0051 | 3.66E-15 | -7.8662 | 1376071 | Asthma |
| rs56293330  | 4 | 122446734 | A | C | 0.0746 | 0.0595  | 0.0088 | 1.41E-11 | 6.7570  | 1376071 | Asthma |
| rs55909629  | 4 | 122446842 | T | A | 0.0748 | 0.0586  | 0.0088 | 2.63E-11 | 6.6662  | 1376071 | Asthma |
| rs7696011   | 4 | 122448443 | C | T | 0.0737 | 0.0805  | 0.0136 | 3.03E-09 | 5.9302  | 570646  | Asthma |
| rs3136534   | 4 | 122448621 | G | T | 0.3410 | 0.0431  | 0.0049 | 2.62E-18 | 8.7272  | 1376071 | Asthma |
| rs1479923   | 4 | 122449232 | A | G | 0.2996 | -0.0407 | 0.0051 | 2.43E-15 | -7.9171 | 1376071 | Asthma |
| rs56067118  | 4 | 122449518 | A | G | 0.0748 | 0.0586  | 0.0088 | 2.63E-11 | 6.6661  | 1376071 | Asthma |

|             |   |           |   |   |        |         |        |          |         |         |        |
|-------------|---|-----------|---|---|--------|---------|--------|----------|---------|---------|--------|
| rs11575810  | 4 | 122450137 | C | G | 0.0748 | 0.0587  | 0.0088 | 2.54E-11 | 6.6711  | 1376071 | Asthma |
| rs2069772   | 4 | 122451978 | C | T | 0.2850 | 0.0378  | 0.0052 | 3.71E-13 | 7.2659  | 1376071 | Asthma |
| rs2069779   | 4 | 122452742 | A | G | 0.0748 | 0.0587  | 0.0088 | 2.55E-11 | 6.6708  | 1376071 | Asthma |
| rs2069777   | 4 | 122455282 | A | G | 0.0748 | 0.0585  | 0.0088 | 2.79E-11 | 6.6572  | 1376071 | Asthma |
| rs2069763   | 4 | 122456327 | A | C | 0.3407 | 0.0430  | 0.0049 | 3.39E-18 | 8.6976  | 1376071 | Asthma |
| rs2069762   | 4 | 122456825 | C | A | 0.2996 | -0.0406 | 0.0051 | 2.55E-15 | -7.9112 | 1376071 | Asthma |
| rs4833248   | 4 | 122459250 | A | G | 0.2995 | -0.0405 | 0.0051 | 2.99E-15 | -7.8913 | 1376071 | Asthma |
| rs45582533  | 4 | 122459917 | A | C | 0.0748 | 0.0585  | 0.0088 | 2.82E-11 | 6.6554  | 1376071 | Asthma |
| rs56405981  | 4 | 122460552 | T | C | 0.0748 | 0.0587  | 0.0088 | 2.53E-11 | 6.6717  | 1376071 | Asthma |
| rs62322672  | 4 | 122460745 | C | G | 0.0748 | 0.0586  | 0.0088 | 2.63E-11 | 6.6662  | 1376071 | Asthma |
| rs55811827  | 4 | 122461588 | A | G | 0.0749 | 0.0637  | 0.0097 | 5.60E-11 | 6.5540  | 1198533 | Asthma |
| rs113022969 | 4 | 122462249 | T | G | 0.2994 | -0.0406 | 0.0051 | 2.50E-15 | -7.9136 | 1376071 | Asthma |
| rs56292718  | 4 | 122463431 | G | A | 0.0723 | 0.0615  | 0.0108 | 1.32E-08 | 5.6836  | 1068611 | Asthma |
| rs567358802 | 4 | 122463749 | A | G | 0.0775 | 0.0702  | 0.0128 | 3.97E-08 | 5.4925  | 632129  | Asthma |
| rs62322698  | 4 | 122464068 | G | A | 0.0723 | 0.0594  | 0.0106 | 2.19E-08 | 5.5960  | 1094744 | Asthma |
| rs58939053  | 4 | 122464858 | T | C | 0.3412 | 0.0429  | 0.0054 | 1.73E-15 | 7.9595  | 1224666 | Asthma |
| rs45599938  | 4 | 122465565 | A | G | 0.3412 | 0.0431  | 0.0049 | 2.67E-18 | 8.7246  | 1376071 | Asthma |
| rs55954733  | 4 | 122465868 | T | C | 0.0817 | 0.0562  | 0.0086 | 6.80E-11 | 6.5249  | 1349938 | Asthma |
| rs56343854  | 4 | 122465932 | T | C | 0.0748 | 0.0586  | 0.0088 | 2.63E-11 | 6.6661  | 1376071 | Asthma |
| rs45471701  | 4 | 122467184 | A | G | 0.1140 | -0.0500 | 0.0074 | 1.86E-11 | -6.7169 | 1376071 | Asthma |
| rs45567637  | 4 | 122467980 | G | A | 0.0748 | 0.0586  | 0.0088 | 2.75E-11 | 6.6594  | 1376071 | Asthma |
| rs972425    | 4 | 122469975 | A | G | 0.2995 | -0.0406 | 0.0051 | 2.74E-15 | -7.9024 | 1376071 | Asthma |
| rs4833827   | 4 | 122470523 | G | A | 0.2932 | -0.0401 | 0.0062 | 1.03E-10 | -6.4625 | 1090071 | Asthma |
| rs17005786  | 4 | 122471116 | T | C | 0.2995 | -0.0407 | 0.0051 | 2.57E-15 | -7.9103 | 1376071 | Asthma |
| rs45579240  | 4 | 122471990 | C | A | 0.0826 | 0.0547  | 0.0085 | 1.13E-10 | 6.4484  | 1376071 | Asthma |
| rs6848139   | 4 | 122473886 | C | A | 0.0817 | 0.0502  | 0.0092 | 4.02E-08 | 5.4901  | 1246149 | Asthma |
| rs7690352   | 4 | 122473921 | G | A | 0.2995 | -0.0406 | 0.0051 | 2.83E-15 | -7.8981 | 1376071 | Asthma |
| rs45479793  | 4 | 122474781 | T | G | 0.0748 | 0.0585  | 0.0088 | 2.92E-11 | 6.6504  | 1376071 | Asthma |
| rs11098659  | 4 | 122474873 | C | T | 0.3409 | 0.0429  | 0.0049 | 4.10E-18 | 8.6760  | 1376071 | Asthma |
| rs45524535  | 4 | 122474996 | C | T | 0.2995 | -0.0405 | 0.0051 | 2.98E-15 | -7.8917 | 1376071 | Asthma |
| rs45525233  | 4 | 122475721 | T | A | 0.0749 | 0.0584  | 0.0088 | 3.09E-11 | 6.6421  | 1376071 | Asthma |
| rs45454992  | 4 | 122476993 | G | A | 0.2845 | 0.0378  | 0.0052 | 3.54E-13 | 7.2720  | 1376071 | Asthma |
| rs1989195   | 4 | 122477549 | C | T | 0.2995 | -0.0406 | 0.0051 | 2.85E-15 | -7.8976 | 1376071 | Asthma |
| rs6828259   | 4 | 122478218 | A | G | 0.0748 | 0.0587  | 0.0088 | 2.43E-11 | 6.6776  | 1376071 | Asthma |
| rs45475795  | 4 | 122478336 | G | A | 0.0748 | 0.0586  | 0.0088 | 2.64E-11 | 6.6656  | 1376071 | Asthma |
| rs6534349   | 4 | 122481040 | G | A | 0.0830 | 0.0541  | 0.0085 | 1.61E-10 | 6.3943  | 1376071 | Asthma |
| rs45610037  | 4 | 122481853 | A | G | 0.2326 | 0.0398  | 0.0055 | 5.57E-13 | 7.2107  | 1376071 | Asthma |
| rs45463791  | 4 | 122481923 | T | C | 0.2995 | -0.0406 | 0.0051 | 2.96E-15 | -7.8928 | 1376071 | Asthma |
| rs79855058  | 4 | 122486444 | G | A | 0.2990 | -0.0440 | 0.0056 | 5.44E-15 | -7.8162 | 1219993 | Asthma |
| rs6846348   | 4 | 122490733 | A | G | 0.3189 | -0.0420 | 0.0062 | 1.48E-11 | -6.7500 | 1091903 | Asthma |
| rs79000300  | 4 | 122492143 | G | A | 0.1159 | -0.0507 | 0.0074 | 6.77E-12 | -6.8626 | 1376071 | Asthma |
| rs7655514   | 4 | 122493277 | G | A | 0.0830 | 0.0546  | 0.0085 | 1.08E-10 | 6.4552  | 1376071 | Asthma |
| rs62322706  | 4 | 122493770 | T | C | 0.0747 | 0.0620  | 0.0096 | 9.79E-11 | 6.4702  | 1224666 | Asthma |
| rs4438773   | 4 | 122493818 | T | C | 0.1159 | -0.0508 | 0.0074 | 6.46E-12 | -6.8692 | 1376071 | Asthma |
| rs62322708  | 4 | 122495951 | G | A | 0.0747 | 0.0620  | 0.0096 | 9.60E-11 | 6.4732  | 1224666 | Asthma |
| rs144756851 | 4 | 122496339 | A | G | 0.0747 | 0.0620  | 0.0096 | 9.93E-11 | 6.4679  | 1224666 | Asthma |
| rs148505069 | 4 | 122496409 | G | A | 0.3412 | 0.0427  | 0.0049 | 5.59E-18 | 8.6405  | 1376071 | Asthma |
| rs181890268 | 4 | 122496517 | C | T | 0.0747 | 0.0620  | 0.0096 | 9.79E-11 | 6.4702  | 1224666 | Asthma |
| rs62322710  | 4 | 122497115 | T | C | 0.0747 | 0.0620  | 0.0096 | 9.64E-11 | 6.4725  | 1224666 | Asthma |
| rs62322711  | 4 | 122497180 | G | A | 0.3419 | 0.0425  | 0.0054 | 2.94E-15 | 7.8933  | 1224666 | Asthma |
| rs62322712  | 4 | 122498605 | C | G | 0.0723 | 0.0614  | 0.0108 | 1.38E-08 | 5.6760  | 1068611 | Asthma |
| rs4438772   | 4 | 122498940 | A | G | 0.3408 | 0.0429  | 0.0049 | 4.22E-18 | 8.6727  | 1376071 | Asthma |
| rs4833829   | 4 | 122501186 | A | G | 0.2995 | -0.0408 | 0.0051 | 2.28E-15 | -7.9249 | 1376071 | Asthma |
| rs62322713  | 4 | 122501636 | G | A | 0.0747 | 0.0589  | 0.0088 | 2.19E-11 | 6.6930  | 1376071 | Asthma |
| rs62322714  | 4 | 122503759 | A | G | 0.0825 | 0.0550  | 0.0085 | 9.38E-11 | 6.4768  | 1376071 | Asthma |
| rs62322715  | 4 | 122503779 | C | T | 0.0747 | 0.0589  | 0.0088 | 2.15E-11 | 6.6957  | 1376071 | Asthma |
| rs62322716  | 4 | 122504017 | G | A | 0.0747 | 0.0588  | 0.0088 | 2.36E-11 | 6.6816  | 1376071 | Asthma |
| rs62322717  | 4 | 122504356 | C | A | 0.0747 | 0.0589  | 0.0088 | 2.15E-11 | 6.6956  | 1376071 | Asthma |
| rs11725823  | 4 | 122504630 | C | G | 0.3410 | 0.0429  | 0.0049 | 4.50E-18 | 8.6655  | 1376071 | Asthma |
| rs72669153  | 4 | 122507874 | A | G | 0.2324 | 0.0400  | 0.0055 | 3.18E-13 | 7.2866  | 1376071 | Asthma |
| rs79212788  | 4 | 122507983 | A | C | 0.0748 | 0.0590  | 0.0088 | 2.05E-11 | 6.7026  | 1376071 | Asthma |
| rs45562433  | 4 | 122509252 | G | C | 0.0747 | 0.0589  | 0.0088 | 2.23E-11 | 6.6900  | 1376071 | Asthma |
| rs147285098 | 4 | 122510574 | A | G | 0.2984 | -0.0412 | 0.0051 | 1.20E-15 | -8.0048 | 1376071 | Asthma |
| rs72669154  | 4 | 122510843 | T | C | 0.3408 | 0.0428  | 0.0049 | 4.78E-18 | 8.6584  | 1376071 | Asthma |
| rs79552152  | 4 | 122510844 | A | G | 0.0747 | 0.0588  | 0.0088 | 2.32E-11 | 6.6841  | 1376071 | Asthma |
| rs62322719  | 4 | 122513619 | A | G | 0.0825 | 0.0551  | 0.0085 | 9.21E-11 | 6.4794  | 1376071 | Asthma |
| rs62322720  | 4 | 122514410 | T | C | 0.0747 | 0.0589  | 0.0088 | 2.29E-11 | 6.6864  | 1376071 | Asthma |
| rs62322721  | 4 | 122514539 | G | A | 0.0825 | 0.0549  | 0.0085 | 1.06E-10 | 6.4587  | 1376071 | Asthma |
| rs62322722  | 4 | 122514706 | C | G | 0.0747 | 0.0588  | 0.0088 | 2.32E-11 | 6.6846  | 1376071 | Asthma |
| rs6818415   | 4 | 122516859 | G | A | 0.2986 | -0.0412 | 0.0051 | 1.22E-15 | -8.0022 | 1376071 | Asthma |
| rs62322723  | 4 | 122516919 | A | G | 0.0747 | 0.0591  | 0.0088 | 1.93E-11 | 6.7112  | 1376071 | Asthma |
| rs9790783   | 4 | 122517904 | A | G | 0.2970 | -0.0375 | 0.0055 | 1.24E-11 | -6.7761 | 1246149 | Asthma |
| rs9790402   | 4 | 122518128 | G | T | 0.2919 | -0.0496 | 0.0078 | 1.96E-10 | -6.3642 | 570646  | Asthma |
| rs72669155  | 4 | 122518498 | T | C | 0.2995 | -0.0407 | 0.0051 | 2.48E-15 | -7.9148 | 1376071 | Asthma |

|             |   |           |   |   |        |         |        |          |         |         |        |
|-------------|---|-----------|---|---|--------|---------|--------|----------|---------|---------|--------|
| rs62322724  | 4 | 122519114 | G | A | 0.0747 | 0.0590  | 0.0088 | 2.07E-11 | 6.7009  | 1376071 | Asthma |
| rs45591939  | 4 | 122519339 | T | C | 0.0747 | 0.0593  | 0.0088 | 1.67E-11 | 6.7327  | 1376071 | Asthma |
| rs4637417   | 4 | 122519650 | A | C | 0.2970 | -0.0375 | 0.0055 | 1.30E-11 | -6.7682 | 1246149 | Asthma |
| rs62322726  | 4 | 122519839 | T | G | 0.0747 | 0.0590  | 0.0088 | 2.11E-11 | 6.6983  | 1376071 | Asthma |
| rs62322727  | 4 | 122521757 | T | C | 0.0748 | 0.0600  | 0.0089 | 1.66E-11 | 6.7331  | 1349938 | Asthma |
| rs59488637  | 4 | 122522269 | C | T | 0.0819 | 0.0605  | 0.0093 | 9.61E-11 | 6.4730  | 1219993 | Asthma |
| rs62322742  | 4 | 122523967 | G | A | 0.0747 | 0.0588  | 0.0088 | 2.37E-11 | 6.6814  | 1376071 | Asthma |
| rs45522038  | 4 | 122525808 | A | G | 0.0746 | 0.0586  | 0.0088 | 2.80E-11 | 6.6567  | 1376071 | Asthma |
| rs4380538   | 4 | 122527407 | T | C | 0.3408 | 0.0431  | 0.0050 | 3.41E-18 | 8.6969  | 1376071 | Asthma |
| rs62322744  | 4 | 122529774 | A | G | 0.0747 | 0.0587  | 0.0088 | 2.59E-11 | 6.6681  | 1376071 | Asthma |
| rs57278988  | 4 | 122530268 | G | A | 0.0825 | 0.0545  | 0.0085 | 1.40E-10 | 6.4160  | 1376071 | Asthma |
| rs59867199  | 4 | 122531076 | T | C | 0.2840 | 0.0380  | 0.0052 | 2.65E-13 | 7.3111  | 1376071 | Asthma |
| rs62322746  | 4 | 122531444 | C | T | 0.0747 | 0.0586  | 0.0088 | 2.77E-11 | 6.6583  | 1376071 | Asthma |
| rs556380145 | 4 | 122532956 | A | C | 0.0751 | 0.0655  | 0.0106 | 5.52E-10 | 6.2036  | 1064845 | Asthma |
| rs6845028   | 4 | 122533646 | G | A | 0.0832 | 0.0533  | 0.0085 | 2.81E-10 | 6.3087  | 1376071 | Asthma |
| rs62322747  | 4 | 122535302 | G | A | 0.3422 | 0.0430  | 0.0049 | 3.49E-18 | 8.6942  | 1376071 | Asthma |
| rs4833832   | 4 | 122535472 | A | G | 0.2995 | -0.0405 | 0.0051 | 3.69E-15 | -7.8651 | 1376071 | Asthma |
| rs72669161  | 4 | 122537923 | A | G | 0.2995 | -0.0405 | 0.0051 | 3.71E-15 | -7.8645 | 1376071 | Asthma |
| rs72669165  | 4 | 122538960 | C | T | 0.2844 | 0.0374  | 0.0052 | 6.63E-13 | 7.1870  | 1376071 | Asthma |
| rs62322748  | 4 | 122541605 | T | C | 0.0747 | 0.0586  | 0.0088 | 2.99E-11 | 6.6471  | 1376071 | Asthma |
| rs62322750  | 4 | 122543014 | A | G | 0.0747 | 0.0584  | 0.0088 | 3.42E-11 | 6.6271  | 1376071 | Asthma |
| rs72669168  | 4 | 122543793 | G | C | 0.3028 | -0.0412 | 0.0051 | 9.73E-16 | -8.0304 | 1376071 | Asthma |
| rs4833834   | 4 | 122545196 | G | A | 0.1166 | -0.0506 | 0.0075 | 1.92E-11 | -6.7122 | 1316443 | Asthma |
| rs72669169  | 4 | 122545411 | C | T | 0.3033 | -0.0412 | 0.0051 | 1.01E-15 | -8.0251 | 1376071 | Asthma |
| rs45465893  | 4 | 122546239 | G | C | 0.1163 | -0.0513 | 0.0076 | 1.21E-11 | -6.7790 | 1316443 | Asthma |
| rs4833835   | 4 | 122549831 | T | G | 0.3028 | -0.0410 | 0.0051 | 1.38E-15 | -7.9874 | 1376071 | Asthma |
| rs11729811  | 4 | 122550510 | G | A | 0.2848 | 0.0372  | 0.0052 | 7.20E-13 | 7.1755  | 1376071 | Asthma |
| rs78081133  | 4 | 122550601 | A | G | 0.1162 | -0.0505 | 0.0076 | 2.32E-11 | -6.6846 | 1316443 | Asthma |
| rs72669170  | 4 | 122550617 | G | A | 0.3028 | -0.0410 | 0.0051 | 1.30E-15 | -7.9947 | 1376071 | Asthma |
| rs72669172  | 4 | 122551661 | T | C | 0.2844 | 0.0377  | 0.0052 | 3.92E-13 | 7.2583  | 1376071 | Asthma |
| rs4576012   | 4 | 122552677 | G | A | 0.3029 | -0.0410 | 0.0051 | 1.43E-15 | -7.9827 | 1376071 | Asthma |
| rs79944416  | 4 | 122552690 | G | A | 0.0748 | 0.0585  | 0.0088 | 3.13E-11 | 6.6405  | 1376071 | Asthma |
| rs6830814   | 4 | 122554105 | C | G | 0.3028 | -0.0410 | 0.0051 | 1.48E-15 | -7.9789 | 1376071 | Asthma |
| rs45615838  | 4 | 122554769 | A | G | 0.0748 | 0.0588  | 0.0088 | 2.43E-11 | 6.6778  | 1376071 | Asthma |
| rs45485691  | 4 | 122554824 | A | G | 0.2829 | 0.0373  | 0.0052 | 6.77E-13 | 7.1841  | 1376071 | Asthma |
| rs6837165   | 4 | 122555088 | G | A | 0.3029 | -0.0410 | 0.0051 | 1.42E-15 | -7.9836 | 1376071 | Asthma |
| rs62322753  | 4 | 122555587 | A | G | 0.0748 | 0.0586  | 0.0088 | 2.68E-11 | 6.6633  | 1376071 | Asthma |
| rs72669176  | 4 | 122556793 | T | C | 0.3028 | -0.0408 | 0.0051 | 1.96E-15 | -7.9437 | 1376071 | Asthma |
| rs6852535   | 4 | 122557561 | A | G | 0.3029 | -0.0409 | 0.0051 | 1.71E-15 | -7.9607 | 1376071 | Asthma |
| rs139783571 | 4 | 122557972 | A | G | 0.0748 | 0.0587  | 0.0088 | 2.59E-11 | 6.6680  | 1376071 | Asthma |
| rs72669177  | 4 | 122559329 | A | C | 0.2318 | 0.0390  | 0.0055 | 1.01E-12 | 7.1291  | 1376071 | Asthma |
| rs185533402 | 4 | 122560671 | T | C | 0.0747 | 0.0587  | 0.0088 | 2.72E-11 | 6.6610  | 1376071 | Asthma |
| rs141414591 | 4 | 122560720 | A | G | 0.0752 | 0.0582  | 0.0088 | 3.35E-11 | 6.6304  | 1376071 | Asthma |
| rs6829656   | 4 | 122560802 | C | G | 0.3029 | -0.0410 | 0.0051 | 1.37E-15 | -7.9885 | 1376071 | Asthma |
| rs62322754  | 4 | 122560910 | C | T | 0.0747 | 0.0587  | 0.0088 | 2.60E-11 | 6.6677  | 1376071 | Asthma |
| rs75202488  | 4 | 122562261 | G | A | 0.0747 | 0.0585  | 0.0088 | 3.13E-11 | 6.6402  | 1376071 | Asthma |
| rs7670532   | 4 | 122565979 | G | A | 0.3033 | -0.0431 | 0.0052 | 2.12E-16 | -8.2149 | 1316443 | Asthma |
| rs62322756  | 4 | 122566958 | C | T | 0.0747 | 0.0586  | 0.0088 | 2.81E-11 | 6.6561  | 1376071 | Asthma |
| rs62322757  | 4 | 122567876 | A | G | 0.0785 | 0.0613  | 0.0092 | 2.79E-11 | 6.6572  | 1008051 | Asthma |
| rs142455143 | 4 | 122571153 | G | C | 0.0747 | 0.0587  | 0.0088 | 2.74E-11 | 6.6602  | 1376071 | Asthma |
| rs146583707 | 4 | 122571262 | A | T | 0.2852 | 0.0374  | 0.0053 | 1.24E-12 | 7.1006  | 1316443 | Asthma |
| rs62322759  | 4 | 122571350 | A | G | 0.0747 | 0.0586  | 0.0088 | 2.95E-11 | 6.6491  | 1376071 | Asthma |
| rs147718557 | 4 | 122572653 | G | A | 0.3044 | -0.0423 | 0.0056 | 4.21E-14 | -7.5546 | 1224666 | Asthma |
| rs62324160  | 4 | 122574160 | T | C | 0.0747 | 0.0587  | 0.0088 | 2.66E-11 | 6.6644  | 1376071 | Asthma |
| rs113505497 | 4 | 122574623 | A | G | 0.3034 | -0.0429 | 0.0052 | 3.05E-16 | -8.1714 | 1316443 | Asthma |
| rs4833251   | 4 | 122575386 | G | A | 0.3033 | -0.0429 | 0.0052 | 3.26E-16 | -8.1633 | 1316443 | Asthma |
| rs72669180  | 4 | 122575737 | A | G | 0.3033 | -0.0428 | 0.0052 | 3.37E-16 | -8.1594 | 1316443 | Asthma |
| rs17389644  | 4 | 122576542 | A | G | 0.2326 | 0.0360  | 0.0053 | 1.00E-11 | 6.8061  | 1316443 | Asthma |
| rs17005850  | 4 | 122576678 | G | A | 0.3034 | -0.0429 | 0.0053 | 2.94E-16 | -8.1760 | 1316443 | Asthma |
| rs45437792  | 4 | 122577138 | T | G | 0.0747 | 0.0588  | 0.0088 | 2.51E-11 | 6.6728  | 1376071 | Asthma |
| rs62324162  | 4 | 122579323 | C | T | 0.0747 | 0.0588  | 0.0088 | 2.45E-11 | 6.6766  | 1376071 | Asthma |
| rs4833836   | 4 | 122579514 | C | T | 0.3033 | -0.0428 | 0.0052 | 3.33E-16 | -8.1608 | 1316443 | Asthma |
| rs7681161   | 4 | 122579931 | G | A | 0.3033 | -0.0466 | 0.0058 | 7.30E-16 | -8.0655 | 1160365 | Asthma |
| rs72669185  | 4 | 122580853 | T | A | 0.2330 | 0.0398  | 0.0056 | 1.50E-12 | 7.0745  | 1316443 | Asthma |
| rs45483095  | 4 | 122582385 | G | T | 0.0747 | 0.0584  | 0.0088 | 3.32E-11 | 6.6316  | 1376071 | Asthma |
| rs45619536  | 4 | 122582436 | A | G | 0.0747 | 0.0586  | 0.0088 | 3.01E-11 | 6.6459  | 1376071 | Asthma |
| rs62324166  | 4 | 122583709 | T | C | 0.0765 | 0.0536  | 0.0087 | 7.95E-10 | 6.1459  | 1376071 | Asthma |
| rs62324167  | 4 | 122586560 | C | A | 0.0806 | 0.0560  | 0.0091 | 7.54E-10 | 6.1543  | 1008051 | Asthma |
| rs74388271  | 4 | 122587456 | G | A | 0.0768 | 0.0534  | 0.0087 | 8.25E-10 | 6.1400  | 1376071 | Asthma |
| rs58471266  | 4 | 122588654 | C | T | 0.2634 | -0.0325 | 0.0058 | 2.36E-08 | -5.5831 | 1219993 | Asthma |
| rs6842843   | 4 | 122590977 | C | G | 0.0765 | 0.0540  | 0.0087 | 5.50E-10 | 6.2041  | 1376071 | Asthma |
| rs1398555   | 4 | 122597592 | G | T | 0.2681 | -0.0308 | 0.0056 | 3.68E-08 | -5.5055 | 1008051 | Asthma |
| rs62324169  | 4 | 122598446 | G | A | 0.0764 | 0.0539  | 0.0087 | 6.12E-10 | 6.1873  | 1376071 | Asthma |
| rs74985076  | 4 | 122599491 | C | T | 0.0765 | 0.0540  | 0.0087 | 5.76E-10 | 6.1967  | 1376071 | Asthma |

|             |   |           |   |   |        |         |        |          |         |         |        |
|-------------|---|-----------|---|---|--------|---------|--------|----------|---------|---------|--------|
| rs62324170  | 4 | 122600696 | A | G | 0.0765 | 0.0538  | 0.0087 | 6.32E-10 | 6.1824  | 1376071 | Asthma |
| rs62324191  | 4 | 122602677 | T | C | 0.0766 | 0.0536  | 0.0087 | 7.00E-10 | 6.1662  | 1376071 | Asthma |
| rs62324192  | 4 | 122603102 | C | T | 0.0765 | 0.0536  | 0.0087 | 7.05E-10 | 6.1650  | 1376071 | Asthma |
| rs62324193  | 4 | 122603477 | G | A | 0.0765 | 0.0536  | 0.0087 | 7.12E-10 | 6.1634  | 1376071 | Asthma |
| rs62324194  | 4 | 122603511 | T | G | 0.0765 | 0.0536  | 0.0087 | 7.08E-10 | 6.1643  | 1376071 | Asthma |
| rs78541112  | 4 | 122604913 | T | C | 0.0765 | 0.0536  | 0.0087 | 7.24E-10 | 6.1608  | 1376071 | Asthma |
| rs62324195  | 4 | 122608237 | G | T | 0.0826 | 0.0510  | 0.0085 | 1.87E-09 | 6.0090  | 1376071 | Asthma |
| rs62324196  | 4 | 122609822 | A | G | 0.0763 | 0.0538  | 0.0087 | 6.77E-10 | 6.1713  | 1376071 | Asthma |
| rs62324197  | 4 | 122611047 | A | G | 0.0763 | 0.0538  | 0.0087 | 6.56E-10 | 6.1763  | 1376071 | Asthma |
| rs45589038  | 4 | 122611164 | A | G | 0.0763 | 0.0537  | 0.0087 | 7.22E-10 | 6.1613  | 1376071 | Asthma |
| rs17886348  | 4 | 122612665 | T | C | 0.0763 | 0.0539  | 0.0087 | 6.55E-10 | 6.1765  | 1376071 | Asthma |
| rs17879298  | 4 | 122612679 | A | G | 0.0763 | 0.0540  | 0.0087 | 6.19E-10 | 6.1856  | 1376071 | Asthma |
| rs17880969  | 4 | 122620318 | T | C | 0.0763 | 0.0542  | 0.0087 | 5.27E-10 | 6.2108  | 1376071 | Asthma |
| rs10032644  | 4 | 122622919 | T | A | 0.3458 | 0.0345  | 0.0060 | 8.38E-09 | 5.7607  | 1090071 | Asthma |
| rs45441794  | 4 | 122623169 | A | G | 0.0764 | 0.0540  | 0.0087 | 5.70E-10 | 6.1984  | 1376071 | Asthma |
| rs62324201  | 4 | 122623964 | G | A | 0.0764 | 0.0542  | 0.0087 | 5.20E-10 | 6.2130  | 1376071 | Asthma |
| rs62324202  | 4 | 122623992 | C | T | 0.0763 | 0.0544  | 0.0087 | 4.47E-10 | 6.2366  | 1376071 | Asthma |
| rs62324203  | 4 | 122625308 | C | T | 0.0764 | 0.0542  | 0.0087 | 5.20E-10 | 6.2129  | 1376071 | Asthma |
| rs78780360  | 4 | 122625846 | G | A | 0.0764 | 0.0543  | 0.0087 | 4.82E-10 | 6.2249  | 1376071 | Asthma |
| rs4326027   | 4 | 122626117 | T | A | 0.0764 | 0.0543  | 0.0087 | 4.71E-10 | 6.2286  | 1376071 | Asthma |
| rs62324205  | 4 | 122627037 | A | G | 0.0764 | 0.0545  | 0.0087 | 4.26E-10 | 6.2443  | 1376071 | Asthma |
| rs62324206  | 4 | 122627173 | C | T | 0.0764 | 0.0545  | 0.0087 | 4.45E-10 | 6.2375  | 1376071 | Asthma |
| rs149787056 | 4 | 122630867 | A | G | 0.0763 | 0.0545  | 0.0087 | 4.26E-10 | 6.2442  | 1376071 | Asthma |
| rs2893008   | 4 | 122631659 | G | A | 0.0763 | 0.0546  | 0.0087 | 4.03E-10 | 6.2531  | 1376071 | Asthma |
| rs6833795   | 4 | 122632233 | A | G | 0.0764 | 0.0542  | 0.0087 | 5.67E-10 | 6.1995  | 1376071 | Asthma |
| rs76487164  | 4 | 122633829 | A | G | 0.0772 | 0.0538  | 0.0087 | 6.28E-10 | 6.1831  | 1376071 | Asthma |
| rs62324207  | 4 | 122636176 | C | T | 0.0765 | 0.0531  | 0.0087 | 1.24E-09 | 6.0754  | 1376071 | Asthma |
| rs62324208  | 4 | 122636275 | C | T | 0.0765 | 0.0530  | 0.0087 | 1.37E-09 | 6.0591  | 1376071 | Asthma |
| rs62324209  | 4 | 122638056 | G | A | 0.0755 | 0.0497  | 0.0088 | 1.49E-08 | 5.6625  | 1376071 | Asthma |
| rs62324210  | 4 | 122638552 | C | G | 0.0795 | 0.0532  | 0.0092 | 7.18E-09 | 5.7868  | 1008051 | Asthma |
| rs62324211  | 4 | 122639697 | T | C | 0.0772 | 0.0482  | 0.0087 | 3.29E-08 | 5.5250  | 1376071 | Asthma |
| rs62324212  | 4 | 122639784 | A | C | 0.4610 | 0.0302  | 0.0048 | 2.07E-10 | 6.3563  | 1376071 | Asthma |
| rs78908232  | 4 | 122640713 | A | G | 0.0768 | 0.0481  | 0.0088 | 4.15E-08 | 5.4845  | 1376071 | Asthma |
| rs77509350  | 4 | 122640714 | A | G | 0.0767 | 0.0479  | 0.0088 | 4.91E-08 | 5.4546  | 1376071 | Asthma |
| rs62334742  | 4 | 144459481 | A | C | 0.4108 | -0.0305 | 0.0049 | 6.20E-10 | -6.1852 | 1316443 | Asthma |
| rs1505770   | 4 | 144459650 | C | T | 0.4108 | -0.0306 | 0.0049 | 5.68E-10 | -6.1991 | 1316443 | Asthma |
| rs55694701  | 4 | 144461375 | T | C | 0.4101 | -0.0307 | 0.0049 | 5.16E-10 | -6.2141 | 1316443 | Asthma |
| rs56268708  | 4 | 144461380 | G | C | 0.4101 | -0.0307 | 0.0049 | 4.75E-10 | -6.2270 | 1316443 | Asthma |
| rs2130499   | 4 | 144467682 | T | G | 0.4107 | -0.0305 | 0.0049 | 6.18E-10 | -6.1858 | 1316443 | Asthma |
| rs56304346  | 4 | 144476714 | G | A | 0.4158 | -0.0318 | 0.0049 | 9.43E-11 | -6.4759 | 1316443 | Asthma |
| rs35440220  | 4 | 144478680 | C | A | 0.4157 | -0.0318 | 0.0049 | 1.05E-10 | -6.4596 | 1316443 | Asthma |
| rs7666298   | 4 | 144480798 | A | C | 0.4157 | -0.0317 | 0.0049 | 1.12E-10 | -6.4504 | 1316443 | Asthma |
| rs1961266   | 4 | 144483361 | A | G | 0.4159 | -0.0315 | 0.0049 | 1.34E-10 | -6.4231 | 1316443 | Asthma |
| rs1813337   | 4 | 144486570 | A | G | 0.4159 | -0.0315 | 0.0049 | 1.36E-10 | -6.4198 | 1316443 | Asthma |
| rs13142879  | 4 | 144489325 | T | C | 0.4144 | -0.0309 | 0.0048 | 1.25E-10 | -6.4329 | 1376071 | Asthma |
| rs7656246   | 4 | 144491359 | A | C | 0.4143 | -0.0309 | 0.0048 | 1.20E-10 | -6.4399 | 1376071 | Asthma |
| rs973796    | 4 | 144502816 | C | A | 0.4134 | -0.0298 | 0.0048 | 5.13E-10 | -6.2150 | 1376071 | Asthma |
| rs1960493   | 4 | 144504600 | A | G | 0.4135 | -0.0297 | 0.0048 | 5.81E-10 | -6.1956 | 1376071 | Asthma |
| rs35937742  | 4 | 144504697 | C | A | 0.4135 | -0.0297 | 0.0048 | 6.42E-10 | -6.1799 | 1376071 | Asthma |
| rs34265962  | 4 | 144504784 | G | A | 0.4134 | -0.0297 | 0.0048 | 6.55E-10 | -6.1766 | 1376071 | Asthma |
| rs1512283   | 4 | 144509941 | T | C | 0.4144 | -0.0297 | 0.0048 | 5.90E-10 | -6.1931 | 1376071 | Asthma |
| rs1512282   | 4 | 144510345 | G | A | 0.4125 | -0.0284 | 0.0051 | 1.85E-08 | -5.6252 | 1008051 | Asthma |
| rs13142776  | 4 | 144512139 | A | C | 0.4133 | -0.0297 | 0.0048 | 6.50E-10 | -6.1776 | 1376071 | Asthma |
| rs7678427   | 4 | 144512423 | A | C | 0.4133 | -0.0297 | 0.0048 | 6.34E-10 | -6.1820 | 1376071 | Asthma |
| rs1032295   | 4 | 144513432 | G | T | 0.4209 | -0.0329 | 0.0048 | 7.63E-12 | -6.8452 | 1376071 | Asthma |
| rs1032296   | 4 | 144513536 | T | C | 0.3855 | 0.0356  | 0.0050 | 9.68E-13 | 7.1350  | 1316443 | Asthma |
| rs1032297   | 4 | 144513592 | G | A | 0.4443 | -0.0365 | 0.0048 | 2.12E-14 | -7.6433 | 1376071 | Asthma |
| rs1512281   | 4 | 144513749 | G | A | 0.4448 | -0.0372 | 0.0048 | 6.85E-15 | -7.7872 | 1376071 | Asthma |
| rs12504628  | 4 | 144515172 | C | T | 0.4367 | -0.0385 | 0.0048 | 7.12E-16 | -8.0683 | 1376071 | Asthma |
| rs7697189   | 4 | 144515742 | C | G | 0.4365 | -0.0386 | 0.0048 | 7.22E-16 | -8.0666 | 1376071 | Asthma |
| rs7681384   | 4 | 144515862 | T | C | 0.4308 | 0.0330  | 0.0048 | 5.13E-12 | 6.9021  | 1376071 | Asthma |
| rs7698984   | 4 | 144515929 | C | A | 0.4243 | 0.0323  | 0.0048 | 1.46E-11 | 6.7521  | 1376071 | Asthma |
| rs7677035   | 4 | 144516167 | A | G | 0.4240 | 0.0323  | 0.0048 | 1.46E-11 | 6.7516  | 1376071 | Asthma |
| rs4835637   | 4 | 144517875 | A | G | 0.4243 | 0.0321  | 0.0048 | 1.96E-11 | 6.7090  | 1376071 | Asthma |
| rs6829956   | 4 | 144519136 | C | T | 0.4251 | 0.0322  | 0.0048 | 1.57E-11 | 6.7419  | 1376071 | Asthma |
| rs13116999  | 4 | 144521212 | G | A | 0.4251 | 0.0324  | 0.0048 | 1.28E-11 | 6.7714  | 1376071 | Asthma |
| rs13107186  | 4 | 144522887 | A | C | 0.4243 | 0.0324  | 0.0048 | 1.21E-11 | 6.7784  | 1376071 | Asthma |
| rs4619908   | 4 | 144523965 | A | G | 0.4222 | 0.0341  | 0.0054 | 2.71E-10 | 6.3148  | 1133307 | Asthma |
| rs7658614   | 4 | 144524542 | T | A | 0.4215 | 0.0349  | 0.0052 | 2.73E-11 | 6.6604  | 1224666 | Asthma |
| rs138641402 | 4 | 144524627 | T | A | 0.4398 | -0.0412 | 0.0052 | 3.15E-15 | -7.8849 | 1224666 | Asthma |
| rs1512285   | 4 | 144529807 | A | G | 0.4251 | 0.0323  | 0.0048 | 1.49E-11 | 6.7487  | 1376071 | Asthma |
| rs6821114   | 4 | 144531237 | A | G | 0.4198 | 0.0328  | 0.0048 | 8.15E-12 | 6.8359  | 1376071 | Asthma |
| rs6821716   | 4 | 144531551 | A | C | 0.4197 | 0.0330  | 0.0048 | 5.49E-12 | 6.8924  | 1376071 | Asthma |
| rs6843820   | 4 | 144531552 | G | C | 0.4197 | 0.0330  | 0.0048 | 5.38E-12 | 6.8950  | 1376071 | Asthma |



|             |   |           |   |   |        |         |        |          |         |         |        |
|-------------|---|-----------|---|---|--------|---------|--------|----------|---------|---------|--------|
| rs6845536   | 4 | 144531631 | C | T | 0.4265 | 0.0337  | 0.0048 | 1.94E-12 | 7.0387  | 1376071 | Asthma |
| rs1489764   | 4 | 144533076 | T | C | 0.4204 | 0.0335  | 0.0048 | 2.65E-12 | 6.9950  | 1376071 | Asthma |
| rs1489763   | 4 | 144533080 | T | C | 0.4362 | -0.0395 | 0.0048 | 1.46E-16 | -8.2598 | 1376071 | Asthma |
| rs13129662  | 4 | 144533222 | T | C | 0.4362 | -0.0394 | 0.0048 | 1.81E-16 | -8.2344 | 1376071 | Asthma |
| rs1489762   | 4 | 144533812 | C | T | 0.4364 | -0.0395 | 0.0048 | 1.39E-16 | -8.2657 | 1376071 | Asthma |
| rs1489761   | 4 | 144534339 | G | A | 0.4202 | 0.0335  | 0.0048 | 2.68E-12 | 6.9933  | 1376071 | Asthma |
| rs7435469   | 4 | 144534398 | T | C | 0.4362 | -0.0392 | 0.0048 | 2.42E-16 | -8.1992 | 1376071 | Asthma |
| rs7692102   | 4 | 144535989 | A | G | 0.4202 | 0.0334  | 0.0048 | 3.22E-12 | 6.9678  | 1376071 | Asthma |
| rs7674469   | 4 | 144536849 | C | A | 0.4203 | 0.0333  | 0.0048 | 3.92E-12 | 6.9402  | 1376071 | Asthma |
| rs11936476  | 4 | 144537332 | C | T | 0.4359 | -0.0393 | 0.0048 | 2.16E-16 | -8.2128 | 1376071 | Asthma |
| rs13147758  | 4 | 144539078 | G | A | 0.4364 | -0.0393 | 0.0048 | 2.02E-16 | -8.2206 | 1376071 | Asthma |
| rs13148031  | 4 | 144539186 | G | A | 0.4363 | -0.0392 | 0.0048 | 2.44E-16 | -8.1983 | 1376071 | Asthma |
| rs720484    | 4 | 144541212 | A | G | 0.4368 | -0.0391 | 0.0048 | 2.94E-16 | -8.1758 | 1376071 | Asthma |
| rs720485    | 4 | 144541436 | C | A | 0.4362 | -0.0392 | 0.0048 | 2.24E-16 | -8.2082 | 1376071 | Asthma |
| rs6828540   | 4 | 144542079 | A | G | 0.4284 | -0.0393 | 0.0061 | 1.50E-10 | -6.4059 | 726724  | Asthma |
| rs6833979   | 4 | 144542369 | A | G | 0.4395 | -0.0411 | 0.0052 | 4.13E-15 | -7.8509 | 1224666 | Asthma |
| rs6817238   | 4 | 144542381 | C | T | 0.4393 | -0.0410 | 0.0052 | 4.98E-15 | -7.8275 | 1224666 | Asthma |
| rs6835650   | 4 | 144542415 | T | C | 0.4108 | -0.0422 | 0.0067 | 3.94E-10 | -6.2565 | 912533  | Asthma |
| rs6537291   | 4 | 144542922 | A | T | 0.4389 | -0.0392 | 0.0051 | 2.48E-14 | -7.6231 | 1281476 | Asthma |
| rs2130339   | 4 | 144543733 | G | A | 0.4370 | -0.0390 | 0.0048 | 3.40E-16 | -8.1582 | 1376071 | Asthma |
| rs36023701  | 4 | 144544309 | G | C | 0.4364 | -0.0391 | 0.0048 | 2.61E-16 | -8.1898 | 1376071 | Asthma |
| rs6830832   | 4 | 144544339 | G | T | 0.4370 | -0.0390 | 0.0048 | 3.31E-16 | -8.1614 | 1376071 | Asthma |
| rs11938745  | 4 | 144544616 | C | T | 0.4363 | -0.0392 | 0.0048 | 2.25E-16 | -8.2081 | 1376071 | Asthma |
| rs12506874  | 4 | 144546060 | T | A | 0.4367 | -0.0389 | 0.0048 | 3.79E-16 | -8.1449 | 1376071 | Asthma |
| rs7663578   | 4 | 144547639 | G | A | 0.4269 | 0.0337  | 0.0048 | 1.86E-12 | 7.0449  | 1376071 | Asthma |
| rs7663740   | 4 | 144547693 | G | T | 0.4200 | 0.0334  | 0.0048 | 3.03E-12 | 6.9764  | 1376071 | Asthma |
| rs6537292   | 4 | 144548816 | T | G | 0.4366 | -0.0389 | 0.0048 | 3.98E-16 | -8.1391 | 1376071 | Asthma |
| rs6828982   | 4 | 144549452 | T | C | 0.4108 | 0.0313  | 0.0048 | 8.07E-11 | 6.4993  | 1376071 | Asthma |
| rs6829184   | 4 | 144549505 | A | T | 0.4366 | -0.0388 | 0.0048 | 4.82E-16 | -8.1160 | 1376071 | Asthma |
| rs12511230  | 4 | 144550093 | T | A | 0.4126 | -0.0394 | 0.0057 | 5.62E-12 | -6.8892 | 1090071 | Asthma |
| rs6831503   | 4 | 144550793 | G | A | 0.4372 | -0.0387 | 0.0048 | 5.72E-16 | -8.0952 | 1376071 | Asthma |
| rs13107665  | 4 | 144551492 | A | G | 0.4067 | 0.0328  | 0.0053 | 4.89E-10 | 6.2227  | 1224666 | Asthma |
| rs13113445  | 4 | 144551614 | T | G | 0.4108 | 0.0313  | 0.0048 | 8.38E-11 | 6.4935  | 1376071 | Asthma |
| rs1818444   | 4 | 144551799 | A | G | 0.4369 | -0.0386 | 0.0048 | 6.58E-16 | -8.0779 | 1376071 | Asthma |
| rs1828590   | 4 | 144552044 | A | G | 0.4363 | -0.0386 | 0.0048 | 7.41E-16 | -8.0636 | 1376071 | Asthma |
| rs1489760   | 4 | 144553145 | A | G | 0.4365 | -0.0389 | 0.0048 | 3.81E-16 | -8.1444 | 1376071 | Asthma |
| rs1489759   | 4 | 144553321 | G | A | 0.4374 | -0.0385 | 0.0048 | 7.54E-16 | -8.0616 | 1376071 | Asthma |
| rs1813903   | 4 | 144556897 | G | C | 0.4366 | -0.0388 | 0.0048 | 4.66E-16 | -8.1201 | 1376071 | Asthma |
| rs995758    | 4 | 144557049 | T | C | 0.4366 | -0.0388 | 0.0048 | 4.53E-16 | -8.1234 | 1376071 | Asthma |
| rs12509311  | 4 | 144557510 | T | C | 0.4365 | -0.0389 | 0.0048 | 4.19E-16 | -8.1328 | 1376071 | Asthma |
| rs4834988   | 4 | 144557625 | C | A | 0.4108 | 0.0312  | 0.0048 | 9.41E-11 | 6.4762  | 1376071 | Asthma |
| rs11100860  | 4 | 144557987 | G | A | 0.4372 | -0.0386 | 0.0048 | 6.45E-16 | -8.0806 | 1376071 | Asthma |
| rs6537293   | 4 | 144558609 | G | A | 0.4370 | -0.0384 | 0.0048 | 9.68E-16 | -8.0309 | 1376071 | Asthma |
| rs6537294   | 4 | 144558611 | A | C | 0.4367 | -0.0384 | 0.0048 | 8.91E-16 | -8.0410 | 1376071 | Asthma |
| rs6842889   | 4 | 144558728 | C | T | 0.4365 | -0.0388 | 0.0048 | 4.93E-16 | -8.1133 | 1376071 | Asthma |
| rs1828591   | 4 | 144559628 | G | A | 0.4373 | -0.0386 | 0.0048 | 6.43E-16 | -8.0808 | 1376071 | Asthma |
| rs28626624  | 4 | 144561091 | T | C | 0.4365 | -0.0387 | 0.0048 | 5.39E-16 | -8.1023 | 1376071 | Asthma |
| rs1565330   | 4 | 144561395 | T | C | 0.4364 | -0.0388 | 0.0048 | 5.10E-16 | -8.1091 | 1376071 | Asthma |
| rs12510044  | 4 | 144563486 | C | G | 0.4107 | 0.0312  | 0.0048 | 9.66E-11 | 6.4721  | 1376071 | Asthma |
| rs1980056   | 4 | 144563771 | A | C | 0.4365 | -0.0388 | 0.0048 | 5.12E-16 | -8.1085 | 1376071 | Asthma |
| rs1980057   | 4 | 144564586 | T | C | 0.4367 | -0.0387 | 0.0048 | 5.08E-16 | -8.1098 | 1376071 | Asthma |
| rs7655625   | 4 | 144564763 | C | T | 0.4370 | -0.0386 | 0.0048 | 6.55E-16 | -8.0786 | 1376071 | Asthma |
| rs13118928  | 4 | 144565237 | G | A | 0.4368 | -0.0388 | 0.0048 | 4.69E-16 | -8.1193 | 1376071 | Asthma |
| rs6537296   | 4 | 144566782 | G | A | 0.4368 | -0.0386 | 0.0048 | 7.17E-16 | -8.0675 | 1376071 | Asthma |
| rs1542725   | 4 | 144567182 | T | C | 0.4365 | -0.0388 | 0.0048 | 4.89E-16 | -8.1144 | 1376071 | Asthma |
| rs13113591  | 4 | 144567945 | T | C | 0.4359 | -0.0388 | 0.0048 | 5.68E-16 | -8.0962 | 1376071 | Asthma |
| rs13140176  | 4 | 144567946 | G | A | 0.4359 | -0.0387 | 0.0048 | 6.03E-16 | -8.0887 | 1376071 | Asthma |
| rs11940733  | 4 | 144568176 | A | G | 0.4365 | -0.0388 | 0.0048 | 4.57E-16 | -8.1225 | 1376071 | Asthma |
| rs12501071  | 4 | 144569207 | T | C | 0.4438 | -0.0379 | 0.0048 | 2.17E-15 | -7.9315 | 1376071 | Asthma |
| rs1512288   | 4 | 144570129 | A | G | 0.4437 | -0.0379 | 0.0048 | 2.08E-15 | -7.9361 | 1376071 | Asthma |
| rs6817273   | 4 | 144570851 | C | T | 0.4433 | -0.0382 | 0.0048 | 1.33E-15 | -7.9918 | 1376071 | Asthma |
| rs10029430  | 4 | 144577260 | G | A | 0.4108 | 0.0313  | 0.0048 | 7.93E-11 | 6.5018  | 1376071 | Asthma |
| rs6537297   | 4 | 144580877 | C | T | 0.4061 | 0.0301  | 0.0048 | 4.77E-10 | 6.2265  | 1376071 | Asthma |
| rs13141641  | 4 | 144585304 | C | T | 0.4452 | -0.0351 | 0.0048 | 2.26E-13 | -7.3327 | 1376071 | Asthma |
| rs6537298   | 4 | 144585719 | C | T | 0.4004 | 0.0299  | 0.0049 | 6.91E-10 | 6.1681  | 1376071 | Asthma |
| rs7670758   | 4 | 144590723 | A | G | 0.3998 | 0.0299  | 0.0049 | 7.39E-10 | 6.1577  | 1376071 | Asthma |
| rs1542726   | 4 | 144594617 | A | C | 0.3981 | 0.0296  | 0.0050 | 2.97E-09 | 5.9331  | 1316443 | Asthma |
| rs74455974  | 5 | 14572344  | T | A | 0.0741 | 0.0551  | 0.0094 | 4.92E-09 | 5.8498  | 1299802 | Asthma |
| rs148161264 | 5 | 14604412  | G | C | 0.0440 | 0.0658  | 0.0119 | 2.83E-08 | 5.5514  | 1299802 | Asthma |
| rs16903574  | 5 | 14610200  | G | C | 0.0868 | 0.0682  | 0.0087 | 5.00E-15 | 7.8269  | 1299802 | Asthma |
| rs78486128  | 5 | 14690558  | A | G | 0.0721 | 0.0618  | 0.0092 | 1.64E-11 | 6.7346  | 1359430 | Asthma |
| rs77665773  | 5 | 14700894  | T | C | 0.0681 | 0.0647  | 0.0094 | 6.21E-12 | 6.8749  | 1359430 | Asthma |
| rs141858448 | 5 | 14701736  | G | C | 0.0364 | 0.0693  | 0.0126 | 3.60E-08 | 5.5093  | 1359430 | Asthma |
| rs142603438 | 5 | 14701902  | T | G | 0.0365 | 0.0699  | 0.0126 | 2.79E-08 | 5.5544  | 1359430 | Asthma |

|             |   |           |   |   |        |         |        |          |         |         |        |
|-------------|---|-----------|---|---|--------|---------|--------|----------|---------|---------|--------|
| rs144106498 | 5 | 14750563  | A | G | 0.0323 | 0.0733  | 0.0132 | 3.06E-08 | 5.5378  | 1359430 | Asthma |
| rs931555    | 5 | 35803475  | T | C | 0.3627 | -0.0362 | 0.0050 | 2.91E-13 | -7.2984 | 1376071 | Asthma |
| rs13436926  | 5 | 35825071  | T | C | 0.4113 | -0.0355 | 0.0048 | 1.71E-13 | -7.3695 | 1376071 | Asthma |
| rs4869426   | 5 | 35825471  | G | A | 0.4114 | -0.0357 | 0.0048 | 1.32E-13 | -7.4046 | 1376071 | Asthma |
| rs11746643  | 5 | 35833615  | G | A | 0.4074 | -0.0354 | 0.0048 | 2.05E-13 | -7.3455 | 1376071 | Asthma |
| rs12697352  | 5 | 35837132  | A | G | 0.3617 | -0.0379 | 0.0049 | 1.84E-14 | -7.6611 | 1376071 | Asthma |
| rs10075764  | 5 | 35841347  | G | A | 0.3616 | -0.0381 | 0.0049 | 1.35E-14 | -7.7012 | 1376071 | Asthma |
| rs10472984  | 5 | 35843730  | G | C | 0.3617 | -0.0379 | 0.0049 | 1.93E-14 | -7.6550 | 1376071 | Asthma |
| rs1961220   | 5 | 35844023  | A | G | 0.3617 | -0.0378 | 0.0049 | 1.99E-14 | -7.6516 | 1376071 | Asthma |
| rs4594881   | 5 | 35846713  | T | G | 0.3618 | -0.0379 | 0.0049 | 1.75E-14 | -7.6681 | 1376071 | Asthma |
| rs34463936  | 5 | 35850047  | T | C | 0.2983 | -0.0367 | 0.0052 | 1.51E-12 | -7.0733 | 1376071 | Asthma |
| rs6890853   | 5 | 35852209  | A | G | 0.2987 | -0.0365 | 0.0052 | 1.96E-12 | -7.0376 | 1376071 | Asthma |
| rs13188960  | 5 | 35853217  | T | G | 0.2983 | -0.0366 | 0.0052 | 1.73E-12 | -7.0549 | 1376071 | Asthma |
| rs11567694  | 5 | 35857602  | G | A | 0.2934 | -0.0366 | 0.0052 | 2.15E-12 | -7.0240 | 1376071 | Asthma |
| rs10213865  | 5 | 35857748  | C | A | 0.2934 | -0.0366 | 0.0052 | 2.02E-12 | -7.0331 | 1376071 | Asthma |
| rs11567705  | 5 | 35861050  | G | C | 0.2934 | -0.0366 | 0.0052 | 2.00E-12 | -7.0346 | 1376071 | Asthma |
| rs7717955   | 5 | 35862739  | T | C | 0.2934 | -0.0366 | 0.0052 | 2.05E-12 | -7.0312 | 1376071 | Asthma |
| rs6897932   | 5 | 35874473  | T | C | 0.2933 | -0.0370 | 0.0052 | 1.20E-12 | -7.1050 | 1376071 | Asthma |
| rs6881270   | 5 | 35878993  | T | C | 0.2935 | -0.0368 | 0.0052 | 1.58E-12 | -7.0673 | 1376071 | Asthma |
| rs6881706   | 5 | 35879054  | T | G | 0.2935 | -0.0367 | 0.0052 | 1.85E-12 | -7.0455 | 1376071 | Asthma |
| rs11742240  | 5 | 35881274  | T | G | 0.2936 | -0.0369 | 0.0052 | 1.32E-12 | -7.0921 | 1376071 | Asthma |
| rs11742270  | 5 | 35881341  | A | G | 0.2933 | -0.0372 | 0.0052 | 9.86E-13 | -7.1325 | 1376071 | Asthma |
| rs10214237  | 5 | 35883632  | C | T | 0.2969 | -0.0385 | 0.0052 | 1.38E-13 | -7.3985 | 1376071 | Asthma |
| rs10214273  | 5 | 35883884  | G | T | 0.2969 | -0.0385 | 0.0052 | 1.33E-13 | -7.4030 | 1376071 | Asthma |
| rs6871748   | 5 | 35885880  | C | T | 0.2971 | -0.0384 | 0.0052 | 1.68E-13 | -7.3718 | 1376071 | Asthma |
| rs62351974  | 5 | 35891935  | T | C | 0.3145 | -0.0338 | 0.0051 | 4.33E-11 | -6.5923 | 1376071 | Asthma |
| rs62351975  | 5 | 35892188  | C | T | 0.3149 | -0.0340 | 0.0051 | 3.35E-11 | -6.6304 | 1376071 | Asthma |
| rs62351976  | 5 | 35893087  | C | A | 0.3441 | -0.0330 | 0.0056 | 3.70E-09 | -5.8970 | 1159440 | Asthma |
| rs12658443  | 5 | 35893321  | G | C | 0.3144 | -0.0350 | 0.0052 | 2.46E-11 | -6.6758 | 1316443 | Asthma |
| rs12658494  | 5 | 35893397  | T | G | 0.3122 | -0.0342 | 0.0051 | 2.85E-11 | -6.6540 | 1376071 | Asthma |
| rs696734    | 5 | 35928406  | T | A | 0.2951 | -0.0330 | 0.0052 | 2.12E-10 | -6.3525 | 1376071 | Asthma |
| rs7001174   | 5 | 35933101  | A | G | 0.4666 | -0.0282 | 0.0047 | 2.43E-09 | -5.9660 | 1376071 | Asthma |
| rs1664847   | 5 | 35933308  | A | T | 0.2942 | -0.0325 | 0.0052 | 4.10E-10 | -6.2503 | 1376071 | Asthma |
| rs1645172   | 5 | 35933312  | G | A | 0.2941 | -0.0326 | 0.0052 | 3.98E-10 | -6.2549 | 1376071 | Asthma |
| rs7001172   | 5 | 35934055  | C | T | 0.2953 | -0.0323 | 0.0052 | 4.90E-10 | -6.2223 | 1376071 | Asthma |
| rs7001170   | 5 | 35935536  | C | T | 0.2950 | -0.0321 | 0.0052 | 6.42E-10 | -6.1797 | 1376071 | Asthma |
| rs696732    | 5 | 35935928  | T | C | 0.2950 | -0.0321 | 0.0052 | 6.51E-10 | -6.1776 | 1376071 | Asthma |
| rs7001169   | 5 | 35937623  | T | A | 0.4676 | -0.0282 | 0.0047 | 2.32E-09 | -5.9736 | 1376071 | Asthma |
| rs860413    | 5 | 35942940  | C | A | 0.2950 | -0.0322 | 0.0052 | 5.18E-10 | -6.2136 | 1376071 | Asthma |
| rs852239    | 5 | 35943607  | A | G | 0.2949 | -0.0321 | 0.0052 | 5.83E-10 | -6.1950 | 1376071 | Asthma |
| rs860412    | 5 | 35945250  | C | G | 0.2935 | -0.0321 | 0.0052 | 6.38E-10 | -6.1807 | 1376071 | Asthma |
| rs3860790   | 5 | 35947151  | C | G | 0.4520 | -0.0278 | 0.0047 | 4.27E-09 | -5.8733 | 1376071 | Asthma |
| rs1993879   | 5 | 35952038  | T | C | 0.2964 | -0.0301 | 0.0052 | 6.89E-09 | -5.7937 | 1376071 | Asthma |
| rs17313508  | 5 | 35953847  | A | G | 0.2964 | -0.0304 | 0.0052 | 4.79E-09 | -5.8543 | 1376071 | Asthma |
| rs10472268  | 5 | 35955423  | T | C | 0.4505 | -0.0282 | 0.0047 | 2.59E-09 | -5.9559 | 1376071 | Asthma |
| rs768622    | 5 | 35955580  | G | C | 0.4507 | -0.0283 | 0.0047 | 2.39E-09 | -5.9690 | 1376071 | Asthma |
| rs997187    | 5 | 35959082  | A | G | 0.4503 | -0.0280 | 0.0047 | 3.56E-09 | -5.9036 | 1376071 | Asthma |
| rs10040617  | 5 | 35966579  | G | A | 0.2964 | -0.0294 | 0.0052 | 1.45E-08 | -5.6670 | 1376071 | Asthma |
| rs6895627   | 5 | 35974164  | T | C | 0.2962 | -0.0293 | 0.0052 | 1.64E-08 | -5.6467 | 1376071 | Asthma |
| rs4424017   | 5 | 35978616  | C | G | 0.2964 | -0.0294 | 0.0052 | 1.48E-08 | -5.6635 | 1376071 | Asthma |
| rs62352020  | 5 | 35979428  | C | T | 0.2963 | -0.0294 | 0.0052 | 1.40E-08 | -5.6734 | 1376071 | Asthma |
| rs10072204  | 5 | 35979918  | G | A | 0.2893 | -0.0301 | 0.0055 | 3.99E-08 | -5.4911 | 1008051 | Asthma |
| rs10472993  | 5 | 35984337  | C | T | 0.2964 | -0.0294 | 0.0052 | 1.43E-08 | -5.6703 | 1376071 | Asthma |
| rs7272729   | 5 | 35985293  | T | C | 0.2964 | -0.0296 | 0.0052 | 1.17E-08 | -5.7040 | 1376071 | Asthma |
| rs72788430  | 5 | 110464742 | A | G | 0.0876 | 0.0549  | 0.0085 | 1.04E-10 | 6.4604  | 1316443 | Asthma |
| rs72788433  | 5 | 110479214 | A | C | 0.0938 | 0.0552  | 0.0083 | 2.77E-11 | 6.6583  | 1316443 | Asthma |
| rs75898143  | 5 | 110493168 | T | C | 0.0799 | 0.0503  | 0.0089 | 1.64E-08 | 5.6466  | 1316443 | Asthma |
| rs12187577  | 5 | 110495192 | T | G | 0.0875 | 0.0538  | 0.0085 | 2.31E-10 | 6.3389  | 1316443 | Asthma |
| rs144366555 | 5 | 110529293 | C | T | 0.0963 | 0.0451  | 0.0081 | 2.77E-08 | 5.5555  | 1316443 | Asthma |
| rs72771406  | 5 | 110542758 | G | C | 0.0893 | 0.0499  | 0.0082 | 1.13E-09 | 6.0894  | 1376071 | Asthma |
| rs72771412  | 5 | 110547413 | T | C | 0.0874 | 0.0499  | 0.0083 | 1.44E-09 | 6.0505  | 1376071 | Asthma |
| rs7732148   | 5 | 110561515 | G | C | 0.0874 | 0.0508  | 0.0082 | 7.08E-10 | 6.1644  | 1376071 | Asthma |
| rs72771422  | 5 | 110568864 | A | T | 0.1015 | 0.0432  | 0.0078 | 2.70E-08 | 5.5601  | 1376071 | Asthma |
| rs72771424  | 5 | 110570448 | T | A | 0.0878 | 0.0504  | 0.0082 | 8.73E-10 | 6.1311  | 1376071 | Asthma |
| rs4128660   | 5 | 110579399 | G | T | 0.0904 | 0.0479  | 0.0081 | 3.73E-09 | 5.8958  | 1376071 | Asthma |
| rs79076831  | 5 | 110579835 | T | C | 0.0786 | 0.0479  | 0.0087 | 3.66E-08 | 5.5065  | 1376071 | Asthma |
| rs72771433  | 5 | 110583430 | C | T | 0.0902 | 0.0486  | 0.0081 | 2.21E-09 | 5.9818  | 1376071 | Asthma |
| rs72771436  | 5 | 110584235 | C | T | 0.0900 | 0.0486  | 0.0081 | 2.20E-09 | 5.9821  | 1376071 | Asthma |
| rs7272547   | 5 | 110584458 | A | C | 0.1609 | 0.0424  | 0.0067 | 2.18E-10 | 6.3481  | 1246149 | Asthma |
| rs72771440  | 5 | 110585539 | G | C | 0.0901 | 0.0510  | 0.0088 | 8.13E-09 | 5.7658  | 1224666 | Asthma |
| rs60849871  | 5 | 110586752 | T | C | 0.0902 | 0.0492  | 0.0081 | 1.32E-09 | 6.0653  | 1376071 | Asthma |
| rs7721004   | 5 | 110587559 | C | T | 0.1858 | 0.0330  | 0.0059 | 2.59E-08 | 5.5675  | 1376071 | Asthma |
| rs6881177   | 5 | 110589345 | T | C | 0.0896 | 0.0492  | 0.0081 | 1.43E-09 | 6.0525  | 1376071 | Asthma |
| rs72771448  | 5 | 110589753 | G | A | 0.0876 | 0.0504  | 0.0082 | 8.29E-10 | 6.1393  | 1376071 | Asthma |

|             |   |           |   |   |        |        |        |          |        |         |        |
|-------------|---|-----------|---|---|--------|--------|--------|----------|--------|---------|--------|
| rs66995194  | 5 | 110590620 | T | A | 0.0897 | 0.0493 | 0.0081 | 1.33E-09 | 6.0642 | 1376071 | Asthma |
| rs6893497   | 5 | 110591785 | A | C | 0.1851 | 0.0331 | 0.0059 | 2.41E-08 | 5.5798 | 1376071 | Asthma |
| rs72771453  | 5 | 110594064 | G | A | 0.0900 | 0.0485 | 0.0081 | 2.40E-09 | 5.9681 | 1376071 | Asthma |
| rs6875167   | 5 | 110595409 | T | C | 0.1760 | 0.0337 | 0.0060 | 2.36E-08 | 5.5832 | 1376071 | Asthma |
| rs190573070 | 5 | 110596234 | G | A | 0.0896 | 0.0515 | 0.0089 | 6.28E-09 | 5.8090 | 1224666 | Asthma |
| rs139640694 | 5 | 110603053 | G | A | 0.0910 | 0.0478 | 0.0081 | 3.67E-09 | 5.8984 | 1376071 | Asthma |
| rs66732373  | 5 | 110614827 | A | G | 0.0845 | 0.0496 | 0.0084 | 3.52E-09 | 5.9052 | 1376071 | Asthma |
| rs12187994  | 5 | 110615280 | C | A | 0.0843 | 0.0500 | 0.0084 | 2.92E-09 | 5.9359 | 1376071 | Asthma |
| rs12186893  | 5 | 110617282 | A | G | 0.0852 | 0.0509 | 0.0084 | 1.44E-09 | 6.0505 | 1376071 | Asthma |
| rs80060395  | 5 | 110619745 | A | G | 0.0846 | 0.0502 | 0.0084 | 2.41E-09 | 5.9673 | 1376071 | Asthma |
| rs147474189 | 5 | 110620926 | C | G | 0.0875 | 0.0537 | 0.0092 | 6.12E-09 | 5.8135 | 1193860 | Asthma |
| rs7727226   | 5 | 110621024 | A | C | 0.0855 | 0.0556 | 0.0090 | 7.49E-10 | 6.1554 | 1246149 | Asthma |
| rs72771460  | 5 | 110624905 | T | C | 0.0833 | 0.0528 | 0.0085 | 5.40E-10 | 6.2071 | 1376071 | Asthma |
| rs72771461  | 5 | 110625259 | C | T | 0.0858 | 0.0501 | 0.0084 | 2.40E-09 | 5.9682 | 1376071 | Asthma |
| rs61730920  | 5 | 110625288 | G | A | 0.0861 | 0.0499 | 0.0084 | 2.61E-09 | 5.9543 | 1376071 | Asthma |
| rs6886299   | 5 | 110627405 | T | C | 0.1752 | 0.0335 | 0.0060 | 2.90E-08 | 5.5474 | 1376071 | Asthma |
| rs4544868   | 5 | 110628120 | C | T | 0.1718 | 0.0337 | 0.0061 | 3.52E-08 | 5.5134 | 1376071 | Asthma |
| rs7702570   | 5 | 110635424 | A | C | 0.1704 | 0.0337 | 0.0061 | 3.79E-08 | 5.5003 | 1376071 | Asthma |
| rs6868082   | 5 | 110636946 | T | C | 0.0815 | 0.0533 | 0.0085 | 4.45E-10 | 6.2372 | 1376071 | Asthma |
| rs1422495   | 5 | 110638201 | G | T | 0.0859 | 0.0498 | 0.0084 | 2.88E-09 | 5.9383 | 1376071 | Asthma |
| rs1579298   | 5 | 110645621 | T | C | 0.0847 | 0.0501 | 0.0086 | 4.94E-09 | 5.8492 | 1359430 | Asthma |
| rs72773128  | 5 | 110646162 | T | C | 0.0816 | 0.0527 | 0.0085 | 6.74E-10 | 6.1721 | 1376071 | Asthma |
| rs1422488   | 5 | 110648375 | A | G | 0.0845 | 0.0498 | 0.0086 | 5.82E-09 | 5.8219 | 1359430 | Asthma |
| rs72773131  | 5 | 110650083 | T | C | 0.0868 | 0.0501 | 0.0082 | 1.21E-09 | 6.0785 | 1376071 | Asthma |
| rs9326806   | 5 | 110656566 | G | A | 0.1739 | 0.0343 | 0.0061 | 1.68E-08 | 5.6425 | 1376071 | Asthma |
| rs10478019  | 5 | 110656791 | T | C | 0.1728 | 0.0340 | 0.0061 | 2.28E-08 | 5.5897 | 1376071 | Asthma |
| rs6886061   | 5 | 110660766 | A | G | 0.1725 | 0.0338 | 0.0061 | 2.72E-08 | 5.5585 | 1376071 | Asthma |
| rs7730817   | 5 | 110669048 | T | C | 0.0884 | 0.0660 | 0.0107 | 6.54E-10 | 6.1770 | 722051  | Asthma |
| rs7731400   | 5 | 110669188 | T | G | 0.0867 | 0.0500 | 0.0082 | 1.19E-09 | 6.0818 | 1376071 | Asthma |
| rs72773140  | 5 | 110672001 | T | C | 0.0880 | 0.0502 | 0.0082 | 9.08E-10 | 6.1248 | 1376071 | Asthma |
| rs72773143  | 5 | 110675668 | C | A | 0.0886 | 0.0503 | 0.0082 | 8.00E-10 | 6.1449 | 1376071 | Asthma |
| rs673080    | 5 | 110678860 | T | C | 0.0908 | 0.0485 | 0.0082 | 3.70E-09 | 5.8972 | 1359430 | Asthma |
| rs72773148  | 5 | 110682394 | C | A | 0.0878 | 0.0581 | 0.0090 | 1.06E-10 | 6.4577 | 1219993 | Asthma |
| rs72773149  | 5 | 110682996 | A | C | 0.0884 | 0.0507 | 0.0082 | 6.22E-10 | 6.1847 | 1376071 | Asthma |
| rs17132268  | 5 | 110683448 | C | T | 0.0885 | 0.0500 | 0.0082 | 1.00E-09 | 6.1089 | 1376071 | Asthma |
| rs6880860   | 5 | 110684319 | T | A | 0.1744 | 0.0342 | 0.0061 | 1.74E-08 | 5.6358 | 1376071 | Asthma |
| rs17132273  | 5 | 110684684 | C | T | 0.0885 | 0.0501 | 0.0082 | 9.85E-10 | 6.1119 | 1376071 | Asthma |
| rs244408    | 5 | 110686168 | T | C | 0.1751 | 0.0331 | 0.0060 | 4.25E-08 | 5.4801 | 1376071 | Asthma |
| rs6885085   | 5 | 110688572 | A | T | 0.0880 | 0.0498 | 0.0082 | 1.27E-09 | 6.0714 | 1376071 | Asthma |
| rs116044057 | 5 | 110689538 | T | C | 0.0880 | 0.0492 | 0.0082 | 1.94E-09 | 6.0029 | 1376071 | Asthma |
| rs72773160  | 5 | 110689624 | C | G | 0.0886 | 0.0499 | 0.0082 | 1.12E-09 | 6.0916 | 1376071 | Asthma |
| rs149968904 | 5 | 110689772 | C | T | 0.0886 | 0.0501 | 0.0082 | 9.50E-10 | 6.1175 | 1376071 | Asthma |
| rs143746924 | 5 | 110691974 | A | G | 0.0867 | 0.0498 | 0.0082 | 1.38E-09 | 6.0576 | 1376071 | Asthma |
| rs72773163  | 5 | 110692523 | T | C | 0.0867 | 0.0503 | 0.0082 | 9.71E-10 | 6.1141 | 1376071 | Asthma |
| rs143685014 | 5 | 110692917 | G | A | 0.0868 | 0.0499 | 0.0082 | 1.30E-09 | 6.0672 | 1376071 | Asthma |
| rs142594301 | 5 | 110693822 | A | G | 0.0865 | 0.0538 | 0.0090 | 2.00E-09 | 5.9983 | 1224666 | Asthma |
| rs150288382 | 5 | 110695911 | T | C | 0.0868 | 0.0500 | 0.0082 | 1.25E-09 | 6.0740 | 1376071 | Asthma |
| rs145535557 | 5 | 110696488 | G | A | 0.0914 | 0.0565 | 0.0095 | 2.47E-09 | 5.9632 | 856646  | Asthma |
| rs147514693 | 5 | 110697747 | T | G | 0.0880 | 0.0504 | 0.0082 | 8.19E-10 | 6.1412 | 1376071 | Asthma |
| rs2443511   | 5 | 110706424 | T | C | 0.1753 | 0.0342 | 0.0061 | 1.76E-08 | 5.6343 | 1376071 | Asthma |
| rs72773173  | 5 | 110710398 | A | G | 0.0869 | 0.0499 | 0.0082 | 1.29E-09 | 6.0683 | 1376071 | Asthma |
| rs72773175  | 5 | 110710552 | G | A | 0.0869 | 0.0504 | 0.0082 | 9.25E-10 | 6.1218 | 1376071 | Asthma |
| rs67692128  | 5 | 110716343 | C | T | 0.0921 | 0.0502 | 0.0086 | 4.76E-09 | 5.8553 | 1008051 | Asthma |
| rs76858845  | 5 | 110716890 | T | G | 0.0911 | 0.0525 | 0.0086 | 1.11E-09 | 6.0928 | 1008051 | Asthma |
| rs72773177  | 5 | 110717029 | C | A | 0.0892 | 0.0504 | 0.0082 | 6.95E-10 | 6.1673 | 1376071 | Asthma |
| rs72773179  | 5 | 110719305 | T | G | 0.0867 | 0.0515 | 0.0082 | 4.03E-10 | 6.2527 | 1376071 | Asthma |
| rs72773181  | 5 | 110719506 | T | A | 0.0873 | 0.0511 | 0.0082 | 5.16E-10 | 6.2142 | 1376071 | Asthma |
| rs72773183  | 5 | 110721158 | A | G | 0.0871 | 0.0513 | 0.0082 | 4.56E-10 | 6.2337 | 1376071 | Asthma |
| rs72773184  | 5 | 110721496 | C | G | 0.0871 | 0.0513 | 0.0082 | 4.70E-10 | 6.2289 | 1376071 | Asthma |
| rs72773186  | 5 | 110723601 | G | A | 0.0879 | 0.0507 | 0.0082 | 6.26E-10 | 6.1836 | 1376071 | Asthma |
| rs72773187  | 5 | 110723602 | A | C | 0.0877 | 0.0542 | 0.0089 | 1.33E-09 | 6.0638 | 1224666 | Asthma |
| rs10061929  | 5 | 110725553 | T | C | 0.1749 | 0.0340 | 0.0061 | 2.05E-08 | 5.6082 | 1376071 | Asthma |
| rs4389724   | 5 | 110725908 | A | G | 0.1682 | 0.0448 | 0.0068 | 3.30E-11 | 6.6326 | 1219993 | Asthma |
| rs6884547   | 5 | 110727539 | G | A | 0.1747 | 0.0349 | 0.0061 | 9.39E-09 | 5.7413 | 1376071 | Asthma |
| rs3985087   | 5 | 110736955 | A | C | 0.0861 | 0.0585 | 0.0091 | 1.08E-10 | 6.4554 | 1219993 | Asthma |
| rs665063    | 5 | 110739713 | C | A | 0.0918 | 0.0513 | 0.0084 | 1.04E-09 | 6.1036 | 1299802 | Asthma |
| rs12187004  | 5 | 110740651 | G | A | 0.0890 | 0.0499 | 0.0082 | 1.10E-09 | 6.0943 | 1376071 | Asthma |
| rs72773195  | 5 | 110743236 | G | A | 0.0885 | 0.0511 | 0.0082 | 5.18E-10 | 6.2136 | 1376071 | Asthma |
| rs17446534  | 5 | 110743749 | C | T | 0.0873 | 0.0514 | 0.0082 | 4.72E-10 | 6.2281 | 1376071 | Asthma |
| rs72773196  | 5 | 110744311 | C | A | 0.0876 | 0.0496 | 0.0082 | 1.67E-09 | 6.0266 | 1376071 | Asthma |
| rs244923    | 5 | 110744662 | T | C | 0.0907 | 0.0511 | 0.0084 | 1.32E-09 | 6.0649 | 1299802 | Asthma |
| rs6884604   | 5 | 110748453 | C | T | 0.0887 | 0.0495 | 0.0082 | 1.66E-09 | 6.0278 | 1376071 | Asthma |
| rs6873681   | 5 | 110750184 | G | T | 0.0727 | 0.0547 | 0.0097 | 1.96E-08 | 5.6152 | 1219993 | Asthma |
| rs17506794  | 5 | 110769644 | C | T | 0.0720 | 0.0559 | 0.0090 | 4.32E-10 | 6.2420 | 1376071 | Asthma |

|             |   |           |   |   |        |        |        |          |        |         |        |
|-------------|---|-----------|---|---|--------|--------|--------|----------|--------|---------|--------|
| rs17447355  | 5 | 110774554 | C | G | 0.0720 | 0.0559 | 0.0090 | 4.22E-10 | 6.2457 | 1376071 | Asthma |
| rs562327905 | 5 | 110775591 | A | G | 0.0706 | 0.0592 | 0.0108 | 4.64E-08 | 5.4644 | 1029518 | Asthma |
| rs147424607 | 5 | 110782924 | A | G | 0.0718 | 0.0544 | 0.0098 | 2.50E-08 | 5.5735 | 1224666 | Asthma |
| rs9765550   | 5 | 110784007 | A | G | 0.0719 | 0.0559 | 0.0090 | 4.41E-10 | 6.2388 | 1376071 | Asthma |
| rs6875083   | 5 | 110805193 | A | T | 0.1570 | 0.0434 | 0.0079 | 4.27E-08 | 5.4795 | 1042455 | Asthma |
| rs7705653   | 5 | 110807116 | G | A | 0.1597 | 0.0501 | 0.0065 | 1.03E-14 | 7.7353 | 1316443 | Asthma |
| rs3853749   | 5 | 110808831 | T | C | 0.1752 | 0.0461 | 0.0075 | 1.03E-09 | 6.1054 | 1030443 | Asthma |
| rs7716180   | 5 | 110808858 | A | G | 0.1849 | 0.0362 | 0.0061 | 3.44E-09 | 5.9090 | 1316443 | Asthma |
| rs17513503  | 5 | 110810746 | G | C | 0.0766 | 0.0640 | 0.0088 | 3.05E-13 | 7.2921 | 1376071 | Asthma |
| rs76828682  | 5 | 110811903 | C | A | 0.0893 | 0.0488 | 0.0082 | 2.72E-09 | 5.9475 | 1376071 | Asthma |
| rs10057929  | 5 | 110811943 | T | A | 0.1982 | 0.0365 | 0.0060 | 8.76E-10 | 6.1304 | 1316443 | Asthma |
| rs7728912   | 5 | 110812772 | C | T | 0.1608 | 0.0524 | 0.0065 | 4.55E-16 | 8.1230 | 1316443 | Asthma |
| rs7735355   | 5 | 110817596 | C | A | 0.1605 | 0.0516 | 0.0065 | 1.29E-15 | 7.9958 | 1316443 | Asthma |
| rs7735519   | 5 | 110817642 | A | C | 0.1604 | 0.0516 | 0.0065 | 1.33E-15 | 7.9918 | 1316443 | Asthma |
| rs7717615   | 5 | 110817657 | C | T | 0.1878 | 0.0372 | 0.0061 | 9.17E-10 | 6.1232 | 1316443 | Asthma |
| rs3853750   | 5 | 110818610 | C | T | 0.1606 | 0.0518 | 0.0065 | 1.00E-15 | 8.0269 | 1316443 | Asthma |
| rs7723767   | 5 | 110819087 | C | T | 0.1878 | 0.0375 | 0.0061 | 6.45E-10 | 6.1789 | 1316443 | Asthma |
| rs6883714   | 5 | 110820825 | G | A | 0.1945 | 0.0350 | 0.0060 | 5.80E-09 | 5.8224 | 1316443 | Asthma |
| rs10055042  | 5 | 110822781 | A | G | 0.1664 | 0.0488 | 0.0064 | 1.96E-14 | 7.6534 | 1316443 | Asthma |
| rs10054976  | 5 | 110822840 | T | C | 0.1927 | 0.0359 | 0.0060 | 2.43E-09 | 5.9659 | 1316443 | Asthma |
| rs7734635   | 5 | 110823145 | G | A | 0.1665 | 0.0488 | 0.0064 | 1.97E-14 | 7.6527 | 1316443 | Asthma |
| rs3844182   | 5 | 110823895 | C | T | 0.2025 | 0.0370 | 0.0063 | 4.59E-09 | 5.8616 | 948423  | Asthma |
| rs3853751   | 5 | 110824471 | A | G | 0.1928 | 0.0359 | 0.0060 | 2.54E-09 | 5.9587 | 1316443 | Asthma |
| rs3843061   | 5 | 110824693 | T | C | 0.1664 | 0.0485 | 0.0064 | 2.69E-14 | 7.6125 | 1316443 | Asthma |
| rs7712459   | 5 | 110825610 | A | G | 0.1940 | 0.0351 | 0.0060 | 5.28E-09 | 5.8382 | 1316443 | Asthma |
| rs60557452  | 5 | 110825783 | A | T | 0.1678 | 0.0492 | 0.0080 | 9.47E-10 | 6.1181 | 726274  | Asthma |
| rs12517265  | 5 | 110826082 | T | C | 0.1940 | 0.0350 | 0.0060 | 5.60E-09 | 5.8284 | 1316443 | Asthma |
| rs4280918   | 5 | 110826379 | G | T | 0.1665 | 0.0487 | 0.0064 | 2.21E-14 | 7.6378 | 1316443 | Asthma |
| rs4099209   | 5 | 110826563 | G | T | 0.1620 | 0.0565 | 0.0071 | 1.52E-15 | 7.9755 | 1160365 | Asthma |
| rs7717704   | 5 | 110826841 | T | C | 0.2002 | 0.0331 | 0.0059 | 2.71E-08 | 5.5596 | 1316443 | Asthma |
| rs7717713   | 5 | 110826866 | T | C | 0.1927 | 0.0359 | 0.0060 | 2.54E-09 | 5.9588 | 1316443 | Asthma |
| rs7700507   | 5 | 110827091 | C | T | 0.1664 | 0.0485 | 0.0064 | 2.64E-14 | 7.6148 | 1316443 | Asthma |
| rs10073425  | 5 | 110827507 | C | T | 0.1664 | 0.0488 | 0.0064 | 1.87E-14 | 7.6597 | 1316443 | Asthma |
| rs10065671  | 5 | 110827589 | A | G | 0.1664 | 0.0486 | 0.0064 | 2.50E-14 | 7.6217 | 1316443 | Asthma |
| rs28874883  | 5 | 110827608 | C | T | 0.1664 | 0.0486 | 0.0064 | 2.41E-14 | 7.6267 | 1316443 | Asthma |
| rs7710963   | 5 | 110828930 | C | T | 0.1665 | 0.0487 | 0.0064 | 2.14E-14 | 7.6418 | 1316443 | Asthma |
| rs7728612   | 5 | 110828975 | T | C | 0.1665 | 0.0487 | 0.0064 | 2.04E-14 | 7.6479 | 1316443 | Asthma |
| rs7728605   | 5 | 110828992 | G | A | 0.1940 | 0.0351 | 0.0060 | 5.10E-09 | 5.8437 | 1316443 | Asthma |
| rs1592915   | 5 | 110829390 | G | C | 0.1939 | 0.0351 | 0.0060 | 5.12E-09 | 5.8430 | 1316443 | Asthma |
| rs6885792   | 5 | 110829714 | C | T | 0.1665 | 0.0487 | 0.0064 | 2.05E-14 | 7.6476 | 1316443 | Asthma |
| rs6869477   | 5 | 110830296 | G | C | 0.0956 | 0.0439 | 0.0080 | 3.97E-08 | 5.4921 | 1376071 | Asthma |
| rs6869502   | 5 | 110830384 | T | A | 0.1665 | 0.0486 | 0.0064 | 2.44E-14 | 7.6251 | 1316443 | Asthma |
| rs72774831  | 5 | 110832344 | A | C | 0.0818 | 0.0589 | 0.0085 | 4.46E-12 | 6.9218 | 1376071 | Asthma |
| rs12655815  | 5 | 110832819 | A | G | 0.1931 | 0.0352 | 0.0060 | 4.70E-09 | 5.8574 | 1316443 | Asthma |
| rs6868547   | 5 | 110833811 | C | T | 0.1928 | 0.0357 | 0.0060 | 3.08E-09 | 5.9272 | 1316443 | Asthma |
| rs6594475   | 5 | 110835135 | G | A | 0.1941 | 0.0348 | 0.0060 | 6.59E-09 | 5.8011 | 1316443 | Asthma |
| rs6594477   | 5 | 110835221 | C | T | 0.1940 | 0.0349 | 0.0060 | 6.25E-09 | 5.8098 | 1316443 | Asthma |
| rs2081082   | 5 | 110837330 | T | C | 0.1927 | 0.0358 | 0.0060 | 2.72E-09 | 5.9475 | 1316443 | Asthma |
| rs2081083   | 5 | 110837431 | C | T | 0.1928 | 0.0358 | 0.0060 | 2.67E-09 | 5.9504 | 1316443 | Asthma |
| rs6594479   | 5 | 110837900 | T | A | 0.1928 | 0.0357 | 0.0060 | 2.95E-09 | 5.9346 | 1316443 | Asthma |
| rs6594480   | 5 | 110838160 | G | A | 0.1666 | 0.0466 | 0.0062 | 7.09E-14 | 7.4863 | 1376071 | Asthma |
| rs3893710   | 5 | 110838407 | T | C | 0.1939 | 0.0351 | 0.0060 | 4.98E-09 | 5.8478 | 1316443 | Asthma |
| rs6892351   | 5 | 110840096 | T | G | 0.1931 | 0.0339 | 0.0059 | 8.12E-09 | 5.7660 | 1376071 | Asthma |
| rs3851453   | 5 | 110840603 | G | A | 0.1939 | 0.0352 | 0.0060 | 4.40E-09 | 5.8684 | 1316443 | Asthma |
| rs72774897  | 5 | 110841075 | G | T | 0.0954 | 0.0436 | 0.0080 | 4.89E-08 | 5.4551 | 1376071 | Asthma |
| rs1350294   | 5 | 110841582 | A | C | 0.1929 | 0.0339 | 0.0059 | 8.74E-09 | 5.7536 | 1376071 | Asthma |
| rs2416246   | 5 | 110842988 | A | C | 0.1939 | 0.0353 | 0.0060 | 4.14E-09 | 5.8785 | 1316443 | Asthma |
| rs2416247   | 5 | 110843005 | T | G | 0.1944 | 0.0331 | 0.0059 | 1.76E-08 | 5.6338 | 1376071 | Asthma |
| rs2416248   | 5 | 110843107 | G | A | 0.1945 | 0.0332 | 0.0059 | 1.60E-08 | 5.6506 | 1376071 | Asthma |
| rs6890286   | 5 | 110843211 | G | T | 0.0904 | 0.0468 | 0.0082 | 1.01E-08 | 5.7291 | 1376071 | Asthma |
| rs2416249   | 5 | 110844494 | G | A | 0.1941 | 0.0329 | 0.0059 | 2.08E-08 | 5.6049 | 1376071 | Asthma |
| rs1423155   | 5 | 110846194 | G | A | 0.1941 | 0.0331 | 0.0059 | 1.67E-08 | 5.6429 | 1376071 | Asthma |
| rs1870072   | 5 | 110846372 | C | A | 0.0953 | 0.0440 | 0.0080 | 3.76E-08 | 5.5017 | 1376071 | Asthma |
| rs1363800   | 5 | 110846539 | G | A | 0.1942 | 0.0332 | 0.0059 | 1.63E-08 | 5.6470 | 1376071 | Asthma |
| rs72774901  | 5 | 110847021 | A | T | 0.0761 | 0.0638 | 0.0088 | 3.99E-13 | 7.2559 | 1376071 | Asthma |
| rs1118016   | 5 | 110847082 | C | T | 0.1941 | 0.0331 | 0.0059 | 1.71E-08 | 5.6389 | 1376071 | Asthma |
| rs72776704  | 5 | 110847418 | G | A | 0.0899 | 0.0471 | 0.0082 | 9.53E-09 | 5.7389 | 1376071 | Asthma |
| rs10055348  | 5 | 110847490 | A | C | 0.1928 | 0.0341 | 0.0059 | 6.56E-09 | 5.8019 | 1376071 | Asthma |
| rs6594481   | 5 | 110847646 | G | C | 0.1928 | 0.0339 | 0.0059 | 8.69E-09 | 5.7546 | 1376071 | Asthma |
| rs7736241   | 5 | 110848000 | A | G | 0.0900 | 0.0467 | 0.0082 | 1.20E-08 | 5.6995 | 1376071 | Asthma |
| rs7718121   | 5 | 110848041 | C | T | 0.0953 | 0.0444 | 0.0080 | 2.75E-08 | 5.5567 | 1376071 | Asthma |
| rs6594482   | 5 | 110848148 | G | T | 0.1941 | 0.0332 | 0.0059 | 1.62E-08 | 5.6482 | 1376071 | Asthma |
| rs1902607   | 5 | 110848996 | G | A | 0.1942 | 0.0332 | 0.0059 | 1.53E-08 | 5.6578 | 1376071 | Asthma |
| rs12189101  | 5 | 110850116 | A | T | 0.0939 | 0.0587 | 0.0096 | 9.19E-10 | 6.1228 | 1090071 | Asthma |

|             |   |           |   |   |        |        |        |          |        |         |        |
|-------------|---|-----------|---|---|--------|--------|--------|----------|--------|---------|--------|
| rs10900664  | 5 | 110850123 | T | C | 0.1939 | 0.0333 | 0.0059 | 1.51E-08 | 5.6607 | 1376071 | Asthma |
| rs10036968  | 5 | 110851128 | G | A | 0.1941 | 0.0330 | 0.0059 | 1.86E-08 | 5.6245 | 1376071 | Asthma |
| rs12659961  | 5 | 110851305 | C | T | 0.1662 | 0.0466 | 0.0062 | 7.48E-14 | 7.4793 | 1376071 | Asthma |
| rs11241079  | 5 | 110851354 | C | T | 0.1939 | 0.0330 | 0.0059 | 2.05E-08 | 5.6079 | 1376071 | Asthma |
| rs12657787  | 5 | 110851355 | A | G | 0.1661 | 0.0469 | 0.0062 | 5.65E-14 | 7.5160 | 1376071 | Asthma |
| rs1423158   | 5 | 110852555 | T | G | 0.1927 | 0.0342 | 0.0059 | 6.37E-09 | 5.8068 | 1376071 | Asthma |
| rs7707733   | 5 | 110852911 | C | A | 0.1928 | 0.0340 | 0.0059 | 7.38E-09 | 5.7821 | 1376071 | Asthma |
| rs7712464   | 5 | 110853457 | T | C | 0.1927 | 0.0341 | 0.0059 | 6.72E-09 | 5.7976 | 1376071 | Asthma |
| rs7712806   | 5 | 110853772 | G | A | 0.0951 | 0.0525 | 0.0088 | 2.01E-09 | 5.9968 | 1219993 | Asthma |
| rs7733093   | 5 | 110853827 | C | T | 0.1934 | 0.0329 | 0.0059 | 2.27E-08 | 5.5900 | 1376071 | Asthma |
| rs7712947   | 5 | 110853838 | G | A | 0.1933 | 0.0333 | 0.0059 | 1.58E-08 | 5.6528 | 1376071 | Asthma |
| rs7713084   | 5 | 110853844 | T | C | 0.1933 | 0.0333 | 0.0059 | 1.65E-08 | 5.6450 | 1376071 | Asthma |
| rs13357752  | 5 | 110854702 | G | A | 0.1941 | 0.0331 | 0.0059 | 1.73E-08 | 5.6370 | 1376071 | Asthma |
| rs12513476  | 5 | 110855325 | T | C | 0.1941 | 0.0332 | 0.0059 | 1.57E-08 | 5.6543 | 1376071 | Asthma |
| rs56067754  | 5 | 110855423 | G | A | 0.0953 | 0.0444 | 0.0080 | 2.98E-08 | 5.5424 | 1376071 | Asthma |
| rs6883435   | 5 | 110855579 | T | A | 0.1941 | 0.0332 | 0.0059 | 1.55E-08 | 5.6562 | 1376071 | Asthma |
| rs17514103  | 5 | 110855782 | C | T | 0.0953 | 0.0444 | 0.0080 | 2.97E-08 | 5.5429 | 1376071 | Asthma |
| rs17132442  | 5 | 110856423 | A | G | 0.1663 | 0.0470 | 0.0062 | 5.02E-14 | 7.5313 | 1376071 | Asthma |
| rs7729203   | 5 | 110856983 | G | A | 0.1941 | 0.0331 | 0.0059 | 1.75E-08 | 5.6356 | 1376071 | Asthma |
| rs7734638   | 5 | 110858013 | G | A | 0.1940 | 0.0329 | 0.0059 | 2.06E-08 | 5.6065 | 1376071 | Asthma |
| rs4432941   | 5 | 110858032 | T | G | 0.1942 | 0.0330 | 0.0059 | 1.85E-08 | 5.6257 | 1376071 | Asthma |
| rs4377748   | 5 | 110858070 | G | A | 0.1941 | 0.0331 | 0.0059 | 1.79E-08 | 5.6309 | 1376071 | Asthma |
| rs4382205   | 5 | 110858263 | T | A | 0.1941 | 0.0329 | 0.0059 | 2.24E-08 | 5.5925 | 1376071 | Asthma |
| rs4259213   | 5 | 110858278 | G | C | 0.1941 | 0.0329 | 0.0059 | 2.23E-08 | 5.5933 | 1376071 | Asthma |
| rs1423156   | 5 | 110859263 | G | T | 0.1935 | 0.0330 | 0.0059 | 1.95E-08 | 5.6164 | 1376071 | Asthma |
| rs1423157   | 5 | 110859469 | A | C | 0.1921 | 0.0339 | 0.0059 | 9.08E-09 | 5.7470 | 1376071 | Asthma |
| rs10478026  | 5 | 110860768 | C | T | 0.1664 | 0.0470 | 0.0062 | 4.91E-14 | 7.5342 | 1376071 | Asthma |
| rs9326810   | 5 | 110860926 | T | A | 0.1942 | 0.0331 | 0.0059 | 1.91E-08 | 5.6201 | 1376071 | Asthma |
| rs9326811   | 5 | 110860947 | A | C | 0.1942 | 0.0330 | 0.0059 | 1.95E-08 | 5.6162 | 1376071 | Asthma |
| rs7722517   | 5 | 110861222 | G | A | 0.1942 | 0.0331 | 0.0059 | 1.88E-08 | 5.6226 | 1376071 | Asthma |
| rs7709594   | 5 | 110861726 | A | T | 0.1941 | 0.0330 | 0.0059 | 1.95E-08 | 5.6161 | 1376071 | Asthma |
| rs6888588   | 5 | 110862267 | G | A | 0.1942 | 0.0331 | 0.0059 | 1.83E-08 | 5.6275 | 1376071 | Asthma |
| rs6893084   | 5 | 110862375 | T | C | 0.1941 | 0.0333 | 0.0059 | 1.50E-08 | 5.6614 | 1376071 | Asthma |
| rs6893213   | 5 | 110862415 | T | C | 0.0822 | 0.0579 | 0.0086 | 1.30E-11 | 6.7687 | 1376071 | Asthma |
| rs10478027  | 5 | 110863283 | C | T | 0.1906 | 0.0375 | 0.0065 | 7.31E-09 | 5.7836 | 1219993 | Asthma |
| rs1423153   | 5 | 110865875 | G | C | 0.1942 | 0.0330 | 0.0059 | 2.04E-08 | 5.6089 | 1376071 | Asthma |
| rs17514409  | 5 | 110867197 | C | G | 0.0899 | 0.0460 | 0.0082 | 2.26E-08 | 5.5909 | 1376071 | Asthma |
| rs7721895   | 5 | 110867804 | A | G | 0.1952 | 0.0341 | 0.0060 | 1.46E-08 | 5.6659 | 1316443 | Asthma |
| rs6594483   | 5 | 110868809 | A | C | 0.1923 | 0.0360 | 0.0060 | 2.70E-09 | 5.9491 | 1316443 | Asthma |
| rs7726932   | 5 | 110868852 | T | A | 0.1923 | 0.0361 | 0.0060 | 2.31E-09 | 5.9745 | 1316443 | Asthma |
| rs2416250   | 5 | 110868869 | T | C | 0.1923 | 0.0360 | 0.0060 | 2.58E-09 | 5.9564 | 1316443 | Asthma |
| rs1820126   | 5 | 110869086 | A | G | 0.1922 | 0.0361 | 0.0060 | 2.39E-09 | 5.9686 | 1316443 | Asthma |
| rs6868066   | 5 | 110870368 | T | C | 0.1916 | 0.0361 | 0.0061 | 2.52E-09 | 5.9604 | 1316443 | Asthma |
| rs1363797   | 5 | 110872282 | G | A | 0.1938 | 0.0348 | 0.0060 | 7.92E-09 | 5.7702 | 1316443 | Asthma |
| rs885293    | 5 | 110872602 | G | A | 0.1938 | 0.0350 | 0.0060 | 6.05E-09 | 5.8153 | 1316443 | Asthma |
| rs72776721  | 5 | 110873572 | C | G | 0.0762 | 0.0636 | 0.0088 | 5.73E-13 | 7.2066 | 1376071 | Asthma |
| rs11956705  | 5 | 110875346 | T | C | 0.1812 | 0.0487 | 0.0084 | 8.03E-09 | 5.7679 | 935848  | Asthma |
| rs10070903  | 5 | 110875867 | A | C | 0.1917 | 0.0359 | 0.0061 | 2.90E-09 | 5.9374 | 1316443 | Asthma |
| rs4425550   | 5 | 110876051 | C | T | 0.1926 | 0.0357 | 0.0060 | 3.60E-09 | 5.9018 | 1316443 | Asthma |
| rs11241082  | 5 | 110876227 | G | A | 0.1923 | 0.0358 | 0.0061 | 3.34E-09 | 5.9138 | 1316443 | Asthma |
| rs11241083  | 5 | 110876234 | T | C | 0.1914 | 0.0359 | 0.0061 | 3.31E-09 | 5.9152 | 1316443 | Asthma |
| rs72776725  | 5 | 110876430 | A | T | 0.0823 | 0.0568 | 0.0086 | 3.64E-11 | 6.6180 | 1376071 | Asthma |
| rs9784725   | 5 | 110877812 | C | G | 0.1760 | 0.0362 | 0.0063 | 9.03E-09 | 5.7480 | 1316443 | Asthma |
| rs10463615  | 5 | 110888664 | T | C | 0.0759 | 0.0479 | 0.0087 | 3.80E-08 | 5.4997 | 1376071 | Asthma |
| rs8180384   | 5 | 110891089 | G | T | 0.0759 | 0.0478 | 0.0087 | 4.00E-08 | 5.4911 | 1376071 | Asthma |
| rs8180385   | 5 | 110891124 | C | T | 0.0759 | 0.0475 | 0.0087 | 4.87E-08 | 5.4559 | 1376071 | Asthma |
| rs10036704  | 5 | 110893224 | T | C | 0.0758 | 0.0477 | 0.0087 | 4.17E-08 | 5.4837 | 1376071 | Asthma |
| rs731670    | 5 | 110896000 | A | G | 0.0758 | 0.0475 | 0.0087 | 4.65E-08 | 5.4643 | 1376071 | Asthma |
| rs731669    | 5 | 110896067 | A | T | 0.0758 | 0.0475 | 0.0087 | 4.75E-08 | 5.4604 | 1376071 | Asthma |
| rs1423154   | 5 | 110896837 | T | C | 0.0765 | 0.0487 | 0.0086 | 1.72E-08 | 5.6379 | 1376071 | Asthma |
| rs77587804  | 5 | 110899186 | C | G | 0.0340 | 0.0705 | 0.0127 | 2.55E-08 | 5.5702 | 1376071 | Asthma |
| rs7703957   | 5 | 110899799 | T | C | 0.0766 | 0.0494 | 0.0086 | 1.05E-08 | 5.7232 | 1376071 | Asthma |
| rs1862532   | 5 | 110900179 | A | G | 0.0760 | 0.0480 | 0.0087 | 3.30E-08 | 5.5250 | 1376071 | Asthma |
| rs1862530   | 5 | 110900413 | A | C | 0.0759 | 0.0475 | 0.0087 | 4.41E-08 | 5.4735 | 1376071 | Asthma |
| rs10054380  | 5 | 110922954 | T | C | 0.0788 | 0.0475 | 0.0087 | 4.44E-08 | 5.4723 | 1316443 | Asthma |
| rs6594488   | 5 | 110923511 | C | A | 0.0789 | 0.0476 | 0.0087 | 4.14E-08 | 5.4849 | 1316443 | Asthma |
| rs75810954  | 5 | 110966391 | A | C | 0.0300 | 0.0767 | 0.0139 | 3.29E-08 | 5.5251 | 1316443 | Asthma |
| rs79850287  | 5 | 111009295 | G | A | 0.0377 | 0.0703 | 0.0125 | 2.03E-08 | 5.6097 | 1316443 | Asthma |
| rs62375550  | 5 | 111051427 | C | G | 0.0469 | 0.0711 | 0.0117 | 1.37E-09 | 6.0596 | 1299802 | Asthma |
| rs58743367  | 5 | 111052064 | G | T | 0.3093 | 0.0511 | 0.0052 | 2.12E-22 | 9.7358 | 1316443 | Asthma |
| rs12516092  | 5 | 111052976 | C | A | 0.2817 | 0.0496 | 0.0054 | 4.09E-20 | 9.1858 | 1316443 | Asthma |
| rs113705012 | 5 | 111053811 | C | T | 0.2812 | 0.0498 | 0.0054 | 3.09E-20 | 9.2161 | 1316443 | Asthma |
| rs10060511  | 5 | 111054245 | G | A | 0.2833 | 0.0487 | 0.0053 | 1.88E-20 | 9.2691 | 1376071 | Asthma |
| rs62375552  | 5 | 111055198 | A | G | 0.2792 | 0.0493 | 0.0054 | 8.45E-20 | 9.1072 | 1316443 | Asthma |



|             |   |           |   |   |        |         |        |          |          |         |        |
|-------------|---|-----------|---|---|--------|---------|--------|----------|----------|---------|--------|
| rs62375553  | 5 | 111055902 | C | G | 0.2837 | 0.0452  | 0.0059 | 2.29E-14 | 7.6332   | 1160365 | Asthma |
| rs62375554  | 5 | 111056305 | A | G | 0.0411 | 0.0762  | 0.0124 | 8.84E-10 | 6.1291   | 1299802 | Asthma |
| rs990790    | 5 | 111060201 | A | G | 0.4831 | -0.0301 | 0.0049 | 5.82E-10 | -6.1953  | 1316443 | Asthma |
| rs12517104  | 5 | 111062787 | A | T | 0.2616 | 0.0557  | 0.0055 | 6.30E-24 | 10.0870  | 1316443 | Asthma |
| rs991035    | 5 | 111063335 | G | A | 0.4865 | -0.0285 | 0.0047 | 1.69E-09 | -6.0254  | 1376071 | Asthma |
| rs1438670   | 5 | 111064183 | T | C | 0.4860 | -0.0295 | 0.0049 | 1.21E-09 | -6.0792  | 1316443 | Asthma |
| rs764917    | 5 | 111064809 | A | C | 0.4421 | 0.0361  | 0.0049 | 1.53E-13 | 7.3843   | 1316443 | Asthma |
| rs1837253   | 5 | 111066174 | T | C | 0.2706 | -0.0997 | 0.0054 | 2.45E-76 | -18.4910 | 1376071 | Asthma |
| rs10061842  | 5 | 111067157 | A | C | 0.1508 | -0.0619 | 0.0068 | 7.13E-20 | -9.1258  | 1316443 | Asthma |
| rs4304115   | 5 | 111067648 | G | C | 0.1495 | -0.0609 | 0.0068 | 4.01E-19 | -8.9366  | 1316443 | Asthma |
| rs17551370  | 5 | 111068487 | A | G | 0.1494 | -0.0610 | 0.0068 | 3.49E-19 | -8.9519  | 1316443 | Asthma |
| rs10455025  | 5 | 111069301 | C | A | 0.3276 | 0.0778  | 0.0052 | 2.38E-51 | 15.0743  | 1316443 | Asthma |
| rs3806932   | 5 | 111069977 | G | A | 0.4510 | -0.0507 | 0.0047 | 1.09E-26 | -10.6935 | 1376071 | Asthma |
| rs3806933   | 5 | 111071044 | T | C | 0.4490 | -0.0515 | 0.0047 | 1.75E-27 | -10.8623 | 1376071 | Asthma |
| rs1898671   | 5 | 111072304 | T | C | 0.3238 | 0.0785  | 0.0052 | 3.31E-52 | 15.2043  | 1316443 | Asthma |
| rs10062929  | 5 | 111072481 | A | C | 0.1497 | -0.0584 | 0.0066 | 1.34E-18 | -8.8026  | 1376071 | Asthma |
| rs2289278   | 5 | 111073450 | G | C | 0.0644 | -0.0994 | 0.0105 | 3.09E-21 | -9.4595  | 1316443 | Asthma |
| rs11466749  | 5 | 111076887 | G | A | 0.1770 | -0.0525 | 0.0064 | 1.84E-16 | -8.2322  | 1316443 | Asthma |
| rs11466750  | 5 | 111077196 | A | G | 0.1503 | -0.0574 | 0.0066 | 4.28E-18 | -8.6712  | 1376071 | Asthma |
| rs10073816  | 5 | 111077791 | A | G | 0.4500 | -0.0505 | 0.0047 | 2.14E-26 | -10.6311 | 1376071 | Asthma |
| rs11466754  | 5 | 111078033 | G | C | 0.1493 | -0.0577 | 0.0066 | 3.97E-18 | -8.6798  | 1376071 | Asthma |
| rs56390548  | 5 | 111078229 | C | A | 0.1498 | -0.0584 | 0.0066 | 1.44E-18 | -8.7941  | 1376071 | Asthma |
| rs6594497   | 5 | 111080170 | T | A | 0.4500 | -0.0507 | 0.0047 | 1.22E-26 | -10.6834 | 1376071 | Asthma |
| rs17132762  | 5 | 111082177 | A | G | 0.0614 | -0.0984 | 0.0105 | 7.12E-21 | -9.3717  | 1376071 | Asthma |
| rs150431495 | 5 | 111083628 | A | G | 0.0301 | -0.1073 | 0.0150 | 8.19E-13 | -7.1576  | 1376071 | Asthma |
| rs181461000 | 5 | 111085023 | T | C | 0.0485 | -0.1085 | 0.0144 | 4.07E-14 | -7.5582  | 1042455 | Asthma |
| rs201024593 | 5 | 111088134 | A | G | 0.3369 | 0.0814  | 0.0080 | 3.29E-24 | 10.1506  | 778845  | Asthma |
| rs13166760  | 5 | 111088885 | T | C | 0.3784 | -0.0547 | 0.0080 | 7.18E-12 | -6.8541  | 778845  | Asthma |
| rs372027239 | 5 | 111088886 | G | A | 0.3791 | -0.0545 | 0.0080 | 7.93E-12 | -6.8398  | 778845  | Asthma |
| rs368357173 | 5 | 111088917 | G | C | 0.4316 | -0.0533 | 0.0077 | 6.24E-12 | -6.8741  | 778845  | Asthma |
| rs13166897  | 5 | 111088920 | A | C | 0.4248 | -0.0526 | 0.0078 | 1.29E-11 | -6.7704  | 778845  | Asthma |
| rs141405779 | 5 | 111089234 | A | G | 0.1506 | -0.0606 | 0.0072 | 4.29E-17 | -8.4046  | 1224666 | Asthma |
| rs252716    | 5 | 111089365 | C | G | 0.4178 | 0.0651  | 0.0057 | 2.84E-30 | 11.4338  | 1094744 | Asthma |
| rs55905691  | 5 | 111090287 | G | A | 0.1507 | -0.0602 | 0.0072 | 6.14E-17 | -8.3626  | 1224666 | Asthma |
| rs138965792 | 5 | 111090296 | G | C | 0.0405 | -0.0965 | 0.0123 | 4.80E-15 | -7.8323  | 1316443 | Asthma |
| rs142206761 | 5 | 111090309 | C | G | 0.0404 | -0.0966 | 0.0123 | 4.55E-15 | -7.8389  | 1316443 | Asthma |
| rs143944497 | 5 | 111090748 | T | C | 0.0460 | -0.1071 | 0.0130 | 1.96E-16 | -8.2253  | 1224666 | Asthma |
| rs10045577  | 5 | 111090753 | T | C | 0.1442 | -0.0618 | 0.0092 | 1.72E-11 | -6.7281  | 938666  | Asthma |
| rs139671781 | 5 | 111090784 | A | G | 0.0406 | -0.0953 | 0.0131 | 3.28E-13 | -7.2824  | 1224666 | Asthma |
| rs11743867  | 5 | 111091228 | T | A | 0.3145 | -0.0281 | 0.0051 | 2.92E-08 | -5.5462  | 1376071 | Asthma |
| rs10050834  | 5 | 111091630 | T | C | 0.4654 | -0.0541 | 0.0047 | 2.42E-30 | -11.4475 | 1376071 | Asthma |
| rs7723819   | 5 | 111091649 | A | G | 0.4654 | -0.0543 | 0.0047 | 1.62E-30 | -11.4820 | 1376071 | Asthma |
| rs72776797  | 5 | 111092054 | G | A | 0.1958 | -0.0741 | 0.0060 | 5.49E-35 | -12.3406 | 1376071 | Asthma |
| rs79881201  | 5 | 111092097 | T | C | 0.3341 | 0.0772  | 0.0050 | 1.27E-53 | 15.4163  | 1376071 | Asthma |
| rs7729832   | 5 | 111093046 | A | G | 0.1500 | -0.0579 | 0.0066 | 1.96E-18 | -8.7594  | 1376071 | Asthma |
| rs7712015   | 5 | 111093083 | C | T | 0.1500 | -0.0578 | 0.0066 | 2.31E-18 | -8.7410  | 1376071 | Asthma |
| rs1370964   | 5 | 111094257 | G | A | 0.1503 | -0.0570 | 0.0066 | 6.10E-18 | -8.6306  | 1376071 | Asthma |
| rs17623144  | 5 | 111094790 | G | C | 0.3330 | 0.0769  | 0.0050 | 3.61E-53 | 15.3489  | 1376071 | Asthma |
| rs61278374  | 5 | 111095321 | G | A | 0.0430 | -0.0988 | 0.0122 | 5.14E-16 | -8.1079  | 1376071 | Asthma |
| rs56167534  | 5 | 111095853 | C | T | 0.1502 | -0.0571 | 0.0066 | 5.33E-18 | -8.6461  | 1376071 | Asthma |
| rs114442993 | 5 | 111096199 | G | A | 0.0605 | 0.0671  | 0.0103 | 6.99E-11 | 6.5211   | 1376071 | Asthma |
| rs62376782  | 5 | 111096520 | G | A | 0.3175 | -0.0290 | 0.0051 | 1.03E-08 | -5.7251  | 1376071 | Asthma |
| rs149205188 | 5 | 111096578 | A | C | 0.0402 | -0.0996 | 0.0121 | 2.15E-16 | -8.2138  | 1376071 | Asthma |
| rs13185610  | 5 | 111097388 | G | A | 0.3171 | -0.0288 | 0.0051 | 1.32E-08 | -5.6833  | 1376071 | Asthma |
| rs1993465   | 5 | 111097400 | G | A | 0.4686 | -0.0550 | 0.0047 | 2.92E-31 | -11.6294 | 1376071 | Asthma |
| rs13357724  | 5 | 111097625 | T | C | 0.0441 | -0.0848 | 0.0114 | 9.15E-14 | -7.4527  | 1376071 | Asthma |
| rs13357747  | 5 | 111097693 | A | C | 0.1503 | -0.0565 | 0.0066 | 1.11E-17 | -8.5616  | 1376071 | Asthma |
| rs59663729  | 5 | 111098091 | T | G | 0.1504 | -0.0571 | 0.0066 | 5.00E-18 | -8.6534  | 1376071 | Asthma |
| rs7705304   | 5 | 111098563 | G | T | 0.1509 | -0.0570 | 0.0066 | 4.98E-18 | -8.6539  | 1376071 | Asthma |
| rs13153937  | 5 | 111098609 | A | G | 0.3172 | -0.0291 | 0.0051 | 9.04E-09 | -5.7478  | 1376071 | Asthma |
| rs6859041   | 5 | 111099533 | A | G | 0.4606 | -0.0528 | 0.0053 | 1.29E-23 | -10.0167 | 1193860 | Asthma |
| rs17623337  | 5 | 111099720 | A | G | 0.0474 | -0.0906 | 0.0119 | 2.13E-14 | -7.6431  | 1008051 | Asthma |
| rs2416257   | 5 | 111099792 | T | C | 0.1502 | -0.0570 | 0.0066 | 5.49E-18 | -8.6428  | 1376071 | Asthma |
| rs1379299   | 5 | 111099963 | C | T | 0.1501 | -0.0570 | 0.0066 | 5.92E-18 | -8.6341  | 1376071 | Asthma |
| rs1379298   | 5 | 111100028 | C | T | 0.4701 | -0.0556 | 0.0047 | 6.96E-32 | -11.7514 | 1376071 | Asthma |
| rs10038177  | 5 | 111100751 | T | C | 0.4686 | -0.0551 | 0.0047 | 2.06E-31 | -11.6592 | 1376071 | Asthma |
| rs6865932   | 5 | 111101153 | C | G | 0.4682 | -0.0549 | 0.0047 | 3.25E-31 | -11.6202 | 1376071 | Asthma |
| rs4957601   | 5 | 111101822 | C | A | 0.0136 | -0.1134 | 0.0203 | 2.27E-08 | -5.5898  | 1376071 | Asthma |
| rs10045255  | 5 | 111102658 | G | A | 0.4689 | -0.0551 | 0.0047 | 2.31E-31 | -11.6496 | 1376071 | Asthma |
| rs10065045  | 5 | 111103565 | G | C | 0.0441 | -0.0844 | 0.0114 | 1.15E-13 | -7.4223  | 1376071 | Asthma |
| rs11241095  | 5 | 111103810 | G | A | 0.3177 | -0.0287 | 0.0050 | 1.31E-08 | -5.6854  | 1376071 | Asthma |
| rs1379300   | 5 | 111105740 | C | T | 0.4686 | -0.0549 | 0.0047 | 3.29E-31 | -11.6192 | 1376071 | Asthma |
| rs2034897   | 5 | 111105862 | C | T | 0.1504 | -0.0570 | 0.0066 | 6.07E-18 | -8.6312  | 1376071 | Asthma |
| rs10056179  | 5 | 111106438 | G | A | 0.1503 | -0.0570 | 0.0066 | 6.03E-18 | -8.6320  | 1376071 | Asthma |

|             |   |           |   |   |        |         |        |          |          |         |        |
|-------------|---|-----------|---|---|--------|---------|--------|----------|----------|---------|--------|
| rs10043631  | 5 | 111107529 | T | C | 0.4682 | -0.0545 | 0.0047 | 8.79E-31 | -11.5349 | 1376071 | Asthma |
| rs10038058  | 5 | 111107582 | G | A | 0.4683 | -0.0545 | 0.0047 | 9.03E-31 | -11.5327 | 1376071 | Asthma |
| rs1598729   | 5 | 111107986 | G | A | 0.3179 | -0.0287 | 0.0051 | 1.29E-08 | -5.6880  | 1376071 | Asthma |
| rs13178997  | 5 | 111108550 | T | G | 0.4572 | -0.0500 | 0.0052 | 1.09E-21 | -9.5677  | 1159440 | Asthma |
| rs13179305  | 5 | 111108775 | A | G | 0.3170 | -0.0281 | 0.0051 | 2.75E-08 | -5.5566  | 1376071 | Asthma |
| rs10039043  | 5 | 111109210 | G | A | 0.1541 | -0.0555 | 0.0065 | 2.15E-17 | -8.4854  | 1376071 | Asthma |
| rs34962120  | 5 | 111110392 | A | G | 0.3170 | -0.0281 | 0.0051 | 2.68E-08 | -5.5611  | 1376071 | Asthma |
| rs13161853  | 5 | 111111042 | A | C | 0.4546 | -0.0488 | 0.0047 | 6.62E-25 | -10.3060 | 1376071 | Asthma |
| rs12515367  | 5 | 111112154 | G | A | 0.3189 | -0.0305 | 0.0054 | 1.84E-08 | -5.6269  | 1246149 | Asthma |
| rs12521169  | 5 | 111112614 | A | G | 0.3187 | -0.0299 | 0.0051 | 3.08E-09 | -5.9272  | 1376071 | Asthma |
| rs2112541   | 5 | 111113647 | C | T | 0.4554 | -0.0492 | 0.0047 | 2.84E-25 | -10.3871 | 1376071 | Asthma |
| rs10060003  | 5 | 111113658 | G | A | 0.4554 | -0.0492 | 0.0047 | 2.89E-25 | -10.3855 | 1376071 | Asthma |
| rs10055177  | 5 | 111114886 | G | T | 0.4506 | -0.0490 | 0.0051 | 5.28E-22 | -9.6427  | 1246149 | Asthma |
| rs6880351   | 5 | 111115966 | G | C | 0.4551 | -0.0492 | 0.0047 | 2.92E-25 | -10.3842 | 1376071 | Asthma |
| rs6881147   | 5 | 111116238 | C | G | 0.4551 | -0.0491 | 0.0047 | 3.06E-25 | -10.3801 | 1376071 | Asthma |
| rs6884870   | 5 | 111116386 | G | A | 0.3261 | 0.0759  | 0.0050 | 3.24E-51 | 15.0543  | 1376071 | Asthma |
| rs12518884  | 5 | 111116525 | G | A | 0.3622 | -0.0424 | 0.0049 | 3.70E-18 | -8.6877  | 1376071 | Asthma |
| rs10059658  | 5 | 111117117 | C | T | 0.4551 | -0.0491 | 0.0047 | 3.03E-25 | -10.3809 | 1376071 | Asthma |
| rs10051830  | 5 | 111117147 | A | G | 0.4552 | -0.0491 | 0.0047 | 2.93E-25 | -10.3841 | 1376071 | Asthma |
| rs77793850  | 5 | 111117246 | A | G | 0.3265 | 0.0763  | 0.0050 | 8.27E-52 | 15.1443  | 1376071 | Asthma |
| rs17624321  | 5 | 111117378 | G | A | 0.3269 | 0.0761  | 0.0050 | 1.37E-51 | 15.1112  | 1376071 | Asthma |
| rs10491424  | 5 | 111118108 | C | T | 0.3622 | -0.0428 | 0.0049 | 2.26E-18 | -8.7433  | 1376071 | Asthma |
| rs10491423  | 5 | 111118279 | A | C | 0.3184 | -0.0294 | 0.0051 | 5.93E-09 | -5.8188  | 1376071 | Asthma |
| rs17553936  | 5 | 111118983 | G | A | 0.3187 | -0.0294 | 0.0051 | 5.98E-09 | -5.8171  | 1376071 | Asthma |
| rs12522383  | 5 | 111119568 | A | G | 0.3188 | -0.0293 | 0.0050 | 6.27E-09 | -5.8093  | 1376071 | Asthma |
| rs12514810  | 5 | 111119659 | A | T | 0.3181 | -0.0296 | 0.0051 | 4.76E-09 | -5.8554  | 1376071 | Asthma |
| rs7732974   | 5 | 111119683 | C | T | 0.4551 | -0.0492 | 0.0047 | 2.44E-25 | -10.4014 | 1376071 | Asthma |
| rs13186912  | 5 | 111121006 | T | A | 0.3186 | -0.0294 | 0.0051 | 5.99E-09 | -5.8172  | 1376071 | Asthma |
| rs17624673  | 5 | 111121460 | T | C | 0.3273 | 0.0761  | 0.0050 | 1.17E-51 | 15.1216  | 1376071 | Asthma |
| rs60687634  | 5 | 111121831 | T | C | 0.0136 | -0.1107 | 0.0203 | 4.82E-08 | -5.4575  | 1376071 | Asthma |
| rs6594498   | 5 | 111122653 | A | G | 0.4554 | -0.0493 | 0.0047 | 2.45E-25 | -10.4012 | 1376071 | Asthma |
| rs6889889   | 5 | 111122718 | A | G | 0.3271 | 0.0760  | 0.0050 | 1.57E-51 | 15.1018  | 1376071 | Asthma |
| rs113295611 | 5 | 111122907 | G | C | 0.3274 | 0.0757  | 0.0050 | 4.37E-51 | 15.0344  | 1376071 | Asthma |
| rs13359107  | 5 | 111123114 | C | A | 0.1437 | -0.0567 | 0.0081 | 2.04E-12 | -7.0320  | 1090071 | Asthma |
| rs7722241   | 5 | 111125049 | A | T | 0.3622 | -0.0421 | 0.0049 | 7.01E-18 | -8.6148  | 1376071 | Asthma |
| rs7702774   | 5 | 111125153 | T | G | 0.4553 | -0.0487 | 0.0047 | 8.56E-25 | -10.2812 | 1376071 | Asthma |
| rs11241100  | 5 | 111125260 | T | C | 0.3185 | -0.0287 | 0.0051 | 1.38E-08 | -5.6758  | 1376071 | Asthma |
| rs4530809   | 5 | 111126532 | G | A | 0.3622 | -0.0421 | 0.0049 | 6.78E-18 | -8.6186  | 1376071 | Asthma |
| rs1043828   | 5 | 111128310 | C | T | 0.3344 | 0.0755  | 0.0050 | 1.67E-51 | 15.0978  | 1376071 | Asthma |
| rs11948089  | 5 | 111128695 | T | A | 0.1361 | -0.0492 | 0.0069 | 8.63E-13 | -7.1508  | 1376071 | Asthma |
| rs1457113   | 5 | 111131376 | G | A | 0.0429 | -0.0976 | 0.0122 | 9.59E-16 | -8.0322  | 1376071 | Asthma |
| rs6869774   | 5 | 111131388 | G | A | 0.1500 | -0.0573 | 0.0066 | 3.83E-18 | -8.6839  | 1376071 | Asthma |
| rs13178810  | 5 | 111131496 | T | A | 0.3183 | -0.0289 | 0.0051 | 1.06E-08 | -5.7208  | 1376071 | Asthma |
| rs6870356   | 5 | 111131539 | A | G | 0.1438 | -0.0562 | 0.0072 | 8.09E-15 | -7.7662  | 1246149 | Asthma |
| rs1438673   | 5 | 111131801 | T | C | 0.5117 | -0.0691 | 0.0047 | 1.14E-48 | -14.6618 | 1376071 | Asthma |
| rs1438672   | 5 | 111132055 | A | G | 0.4683 | -0.0546 | 0.0047 | 8.27E-31 | -11.5403 | 1376071 | Asthma |
| rs1438671   | 5 | 111132133 | C | T | 0.0431 | -0.0833 | 0.0115 | 4.50E-13 | -7.2397  | 1376071 | Asthma |
| rs7731821   | 5 | 111132220 | A | T | 0.1492 | -0.0562 | 0.0066 | 2.17E-17 | -8.4842  | 1376071 | Asthma |
| rs79211821  | 5 | 111132795 | A | G | 0.0433 | -0.0845 | 0.0115 | 1.75E-13 | -7.3665  | 1376071 | Asthma |
| rs34962275  | 5 | 111133279 | G | A | 0.3382 | 0.0749  | 0.0050 | 5.45E-51 | 15.0197  | 1376071 | Asthma |
| rs6877350   | 5 | 111133281 | C | G | 0.0431 | -0.0833 | 0.0115 | 4.40E-13 | -7.2427  | 1376071 | Asthma |
| rs115700483 | 5 | 111133290 | G | C | 0.0298 | -0.0910 | 0.0147 | 6.57E-10 | -6.1764  | 1376071 | Asthma |
| rs11957838  | 5 | 111133928 | A | T | 0.1499 | -0.0573 | 0.0066 | 4.61E-18 | -8.6627  | 1376071 | Asthma |
| rs114081163 | 5 | 111133934 | C | G | 0.0429 | -0.0851 | 0.0115 | 1.68E-13 | -7.3720  | 1376071 | Asthma |
| rs78730246  | 5 | 111133941 | A | C | 0.0432 | -0.0853 | 0.0115 | 1.13E-13 | -7.4249  | 1376071 | Asthma |
| rs6594499   | 5 | 111134439 | A | C | 0.5119 | -0.0693 | 0.0047 | 1.32E-48 | -14.6516 | 1376071 | Asthma |
| rs13354287  | 5 | 111134532 | G | A | 0.0433 | -0.0839 | 0.0115 | 2.91E-13 | -7.2988  | 1376071 | Asthma |
| rs6594500   | 5 | 111135296 | A | G | 0.3681 | 0.0531  | 0.0049 | 3.79E-27 | 10.7913  | 1376071 | Asthma |
| rs12186767  | 5 | 111135520 | G | A | 0.3244 | 0.0731  | 0.0051 | 2.55E-47 | 14.4486  | 1376071 | Asthma |
| rs72784258  | 5 | 111135917 | C | G | 0.3687 | 0.0486  | 0.0049 | 4.79E-23 | 9.8861   | 1376071 | Asthma |
| rs7714869   | 5 | 111135937 | C | T | 0.1482 | -0.0497 | 0.0067 | 9.59E-14 | -7.4465  | 1376071 | Asthma |
| rs73786772  | 5 | 111136093 | G | C | 0.2932 | 0.0653  | 0.0054 | 3.81E-34 | 12.1835  | 1316443 | Asthma |
| rs11746289  | 5 | 111136098 | T | C | 0.0475 | -0.1022 | 0.0114 | 3.51E-19 | -8.9520  | 1376071 | Asthma |
| rs458818    | 5 | 111136434 | G | A | 0.1792 | -0.0391 | 0.0062 | 3.01E-10 | -6.2981  | 1376071 | Asthma |
| rs1862291   | 5 | 111136481 | G | A | 0.1947 | -0.0680 | 0.0060 | 1.44E-29 | -11.2918 | 1376071 | Asthma |
| rs77192209  | 5 | 111136518 | G | C | 0.2642 | 0.0616  | 0.0054 | 3.12E-30 | 11.4256  | 1376071 | Asthma |
| rs13360071  | 5 | 111136906 | T | C | 0.1510 | -0.0513 | 0.0066 | 9.52E-15 | -7.7455  | 1376071 | Asthma |
| rs466806    | 5 | 111136995 | T | G | 0.3820 | 0.0439  | 0.0049 | 3.68E-19 | 8.9464   | 1376071 | Asthma |
| rs461336    | 5 | 111137000 | A | C | 0.3820 | 0.0438  | 0.0049 | 3.94E-19 | 8.9385   | 1376071 | Asthma |
| rs464275    | 5 | 111137269 | G | C | 0.3819 | 0.0439  | 0.0049 | 3.91E-19 | 8.9395   | 1376071 | Asthma |
| rs11241101  | 5 | 111137356 | T | C | 0.1511 | -0.0512 | 0.0066 | 1.13E-14 | -7.7234  | 1376071 | Asthma |
| rs457541    | 5 | 111137672 | G | C | 0.3821 | 0.0438  | 0.0049 | 4.08E-19 | 8.9347   | 1376071 | Asthma |
| rs417670    | 5 | 111137830 | A | T | 0.3821 | 0.0438  | 0.0049 | 3.84E-19 | 8.9413   | 1376071 | Asthma |
| rs1037684   | 5 | 111138463 | G | A | 0.2534 | -0.0384 | 0.0054 | 1.70E-12 | -7.0575  | 1376071 | Asthma |

|             |   |           |   |   |        |         |        |          |         |         |        |
|-------------|---|-----------|---|---|--------|---------|--------|----------|---------|---------|--------|
| rs390047    | 5 | 111138494 | T | C | 0.2850 | -0.0308 | 0.0052 | 3.76E-09 | -5.8944 | 1376071 | Asthma |
| rs6898145   | 5 | 111142004 | T | G | 0.1407 | -0.0519 | 0.0068 | 3.51E-14 | -7.5781 | 1376071 | Asthma |
| rs252709    | 5 | 111143375 | G | A | 0.3828 | 0.0440  | 0.0049 | 3.04E-19 | 8.9672  | 1376071 | Asthma |
| rs11958561  | 5 | 111143480 | G | C | 0.1466 | -0.0487 | 0.0067 | 4.38E-13 | -7.2434 | 1376071 | Asthma |
| rs252710    | 5 | 111143912 | G | C | 0.3817 | 0.0434  | 0.0050 | 5.84E-18 | 8.6356  | 1316443 | Asthma |
| rs10515419  | 5 | 111146128 | C | A | 0.1125 | 0.0472  | 0.0076 | 4.77E-10 | 6.2265  | 1376071 | Asthma |
| rs2028259   | 5 | 111146362 | A | G | 0.1124 | 0.0471  | 0.0076 | 5.46E-10 | 6.2052  | 1376071 | Asthma |
| rs2028258   | 5 | 111146792 | G | A | 0.1126 | 0.0471  | 0.0076 | 5.18E-10 | 6.2135  | 1376071 | Asthma |
| rs74920379  | 5 | 111148341 | G | C | 0.1155 | 0.0439  | 0.0075 | 4.38E-09 | 5.8691  | 1376071 | Asthma |
| rs17132825  | 5 | 111149751 | T | C | 0.0380 | -0.0806 | 0.0120 | 1.63E-11 | -6.7361 | 1376071 | Asthma |
| rs10052548  | 5 | 111153795 | G | T | 0.0219 | -0.1002 | 0.0162 | 6.72E-10 | -6.1730 | 1376071 | Asthma |
| rs9632451   | 5 | 111154126 | G | A | 0.1153 | 0.0432  | 0.0076 | 1.61E-08 | 5.6497  | 1316443 | Asthma |
| rs17518368  | 5 | 111156283 | C | T | 0.1229 | 0.0418  | 0.0072 | 7.73E-09 | 5.7742  | 1376071 | Asthma |
| rs10478038  | 5 | 111156467 | A | G | 0.1747 | -0.0567 | 0.0063 | 2.04E-19 | -9.0110 | 1376071 | Asthma |
| rs10478039  | 5 | 111156888 | T | C | 0.2618 | -0.0359 | 0.0055 | 7.34E-11 | -6.5136 | 1316443 | Asthma |
| rs17518508  | 5 | 111157902 | T | C | 0.1167 | 0.0448  | 0.0079 | 1.41E-08 | 5.6727  | 1246149 | Asthma |
| rs9326826   | 5 | 111158548 | A | G | 0.2934 | -0.0331 | 0.0052 | 2.05E-10 | -6.3573 | 1376071 | Asthma |
| rs151800    | 5 | 111158584 | C | A | 0.2541 | 0.0344  | 0.0053 | 1.29E-10 | 6.4289  | 1376071 | Asthma |
| rs460501    | 5 | 111159011 | A | G | 0.2531 | 0.0340  | 0.0054 | 2.44E-10 | 6.3305  | 1376071 | Asthma |
| rs56266431  | 5 | 111159676 | C | T | 0.0447 | -0.0774 | 0.0118 | 5.99E-11 | -6.5438 | 1376071 | Asthma |
| rs56289225  | 5 | 111160253 | A | C | 0.0452 | -0.0784 | 0.0117 | 2.49E-11 | -6.6740 | 1376071 | Asthma |
| rs244505    | 5 | 111161247 | G | A | 0.2531 | 0.0345  | 0.0054 | 1.20E-10 | 6.4393  | 1376071 | Asthma |
| rs10058142  | 5 | 111161595 | C | T | 0.2955 | -0.0334 | 0.0052 | 1.23E-10 | -6.4360 | 1376071 | Asthma |
| rs10080189  | 5 | 111161765 | G | C | 0.2962 | -0.0340 | 0.0052 | 5.67E-11 | -6.5522 | 1376071 | Asthma |
| rs165939    | 5 | 111161867 | T | C | 0.2500 | 0.0345  | 0.0054 | 1.39E-10 | 6.4171  | 1376071 | Asthma |
| rs10035919  | 5 | 111162953 | A | G | 0.0220 | -0.0981 | 0.0162 | 1.26E-09 | -6.0729 | 1376071 | Asthma |
| rs17132862  | 5 | 111163274 | A | G | 0.0450 | -0.0776 | 0.0118 | 4.51E-11 | -6.5863 | 1376071 | Asthma |
| rs11953290  | 5 | 111164004 | G | T | 0.2960 | -0.0337 | 0.0052 | 8.29E-11 | -6.4951 | 1376071 | Asthma |
| rs244513    | 5 | 111165289 | T | C | 0.2533 | 0.0336  | 0.0054 | 3.34E-10 | 6.2819  | 1376071 | Asthma |
| rs55774581  | 5 | 111165541 | C | G | 0.0450 | -0.0776 | 0.0118 | 4.63E-11 | -6.5826 | 1376071 | Asthma |
| rs55642564  | 5 | 111165561 | T | C | 0.0450 | -0.0775 | 0.0118 | 4.85E-11 | -6.5753 | 1376071 | Asthma |
| rs244514    | 5 | 111165563 | T | C | 0.2532 | 0.0338  | 0.0054 | 2.89E-10 | 6.3047  | 1376071 | Asthma |
| rs1821907   | 5 | 111165908 | G | A | 0.2948 | -0.0329 | 0.0052 | 2.30E-10 | -6.3402 | 1376071 | Asthma |
| rs72784292  | 5 | 111165911 | T | G | 0.0411 | -0.0814 | 0.0120 | 1.29E-11 | -6.7701 | 1316443 | Asthma |
| rs1428644   | 5 | 111166444 | A | C | 0.2957 | -0.0334 | 0.0052 | 1.09E-10 | -6.4533 | 1376071 | Asthma |
| rs171522    | 5 | 111166494 | T | C | 0.2532 | 0.0337  | 0.0054 | 3.35E-10 | 6.2815  | 1376071 | Asthma |
| rs11959067  | 5 | 111167007 | T | A | 0.2960 | -0.0335 | 0.0052 | 1.00E-10 | -6.4665 | 1376071 | Asthma |
| rs654354    | 5 | 111167603 | A | T | 0.3665 | 0.0459  | 0.0049 | 4.75E-21 | 9.4146  | 1376071 | Asthma |
| rs10040556  | 5 | 111168714 | T | G | 0.1320 | -0.0420 | 0.0070 | 1.97E-09 | -6.0005 | 1376071 | Asthma |
| rs72784300  | 5 | 111169005 | T | C | 0.0412 | -0.0806 | 0.0120 | 1.74E-11 | -6.7263 | 1316443 | Asthma |
| rs464779    | 5 | 111170688 | C | T | 0.2529 | 0.0339  | 0.0054 | 2.56E-10 | 6.3229  | 1376071 | Asthma |
| rs72786004  | 5 | 111170954 | T | A | 0.0452 | -0.0778 | 0.0118 | 3.72E-11 | -6.6151 | 1376071 | Asthma |
| rs10068224  | 5 | 111171591 | G | T | 0.0449 | -0.0766 | 0.0118 | 8.64E-11 | -6.4891 | 1376071 | Asthma |
| rs77060007  | 5 | 111171623 | C | T | 0.1133 | 0.0417  | 0.0075 | 2.51E-08 | 5.5724  | 1376071 | Asthma |
| rs244508    | 5 | 111172962 | C | T | 0.2525 | 0.0340  | 0.0054 | 2.30E-10 | 6.3396  | 1376071 | Asthma |
| rs76637580  | 5 | 111173737 | G | A | 0.1136 | 0.0416  | 0.0075 | 2.55E-08 | 5.5695  | 1376071 | Asthma |
| rs11745014  | 5 | 111174758 | A | C | 0.1320 | -0.0417 | 0.0070 | 2.64E-09 | -5.9529 | 1376071 | Asthma |
| rs244511    | 5 | 111174838 | C | T | 0.2531 | 0.0339  | 0.0054 | 2.68E-10 | 6.3162  | 1376071 | Asthma |
| rs10214391  | 5 | 111177213 | C | T | 0.0762 | -0.0531 | 0.0087 | 1.10E-09 | -6.0941 | 1376071 | Asthma |
| rs244509    | 5 | 111177429 | C | T | 0.2532 | 0.0339  | 0.0054 | 2.63E-10 | 6.3194  | 1376071 | Asthma |
| rs111873341 | 5 | 111177441 | T | C | 0.0331 | -0.0794 | 0.0139 | 1.02E-08 | -5.7268 | 1376071 | Asthma |
| rs466351    | 5 | 111179686 | C | G | 0.2531 | 0.0341  | 0.0054 | 1.99E-10 | 6.3620  | 1376071 | Asthma |
| rs455831    | 5 | 111179812 | T | G | 0.2532 | 0.0339  | 0.0054 | 2.64E-10 | 6.3184  | 1376071 | Asthma |
| rs79984426  | 5 | 111180086 | G | T | 0.1141 | 0.0409  | 0.0075 | 4.26E-08 | 5.4799  | 1376071 | Asthma |
| rs75167721  | 5 | 111180463 | C | T | 0.1139 | 0.0411  | 0.0075 | 3.77E-08 | 5.5015  | 1376071 | Asthma |
| rs694235    | 5 | 111180496 | G | A | 0.2532 | 0.0338  | 0.0054 | 2.77E-10 | 6.3111  | 1376071 | Asthma |
| rs13361478  | 5 | 111184320 | A | G | 0.0445 | -0.0809 | 0.0145 | 2.30E-08 | -5.5874 | 1090071 | Asthma |
| rs72793526  | 5 | 111185441 | T | C | 0.2963 | -0.0349 | 0.0052 | 1.20E-11 | -6.7799 | 1376071 | Asthma |
| rs10056568  | 5 | 111185631 | G | T | 0.0452 | -0.0771 | 0.0118 | 5.56E-11 | -6.5553 | 1376071 | Asthma |
| rs17132905  | 5 | 111185916 | C | T | 0.0763 | -0.0523 | 0.0087 | 1.82E-09 | -6.0132 | 1376071 | Asthma |
| rs28362033  | 5 | 111186069 | T | C | 0.3136 | -0.0369 | 0.0051 | 5.13E-13 | -7.2219 | 1376071 | Asthma |
| rs72793529  | 5 | 111186704 | C | T | 0.1320 | -0.0422 | 0.0070 | 1.73E-09 | -6.0216 | 1376071 | Asthma |
| rs17132909  | 5 | 111187105 | A | G | 0.0453 | -0.0765 | 0.0117 | 7.24E-11 | -6.5153 | 1376071 | Asthma |
| rs32701     | 5 | 111187773 | A | C | 0.3670 | 0.0455  | 0.0049 | 1.09E-20 | 9.3274  | 1376071 | Asthma |
| rs465076    | 5 | 111188160 | G | A | 0.3674 | 0.0454  | 0.0049 | 1.41E-20 | 9.2999  | 1376071 | Asthma |
| rs10477463  | 5 | 111190612 | T | C | 0.0762 | -0.0530 | 0.0087 | 1.18E-09 | -6.0833 | 1376071 | Asthma |
| rs10515424  | 5 | 111191807 | T | G | 0.0763 | -0.0528 | 0.0087 | 1.30E-09 | -6.0677 | 1376071 | Asthma |
| rs73786803  | 5 | 111192282 | C | T | 0.0763 | -0.0528 | 0.0087 | 1.27E-09 | -6.0712 | 1376071 | Asthma |
| rs17132708  | 5 | 111192740 | G | A | 0.0453 | -0.0764 | 0.0117 | 7.88E-11 | -6.5029 | 1376071 | Asthma |
| rs466545    | 5 | 111193345 | T | G | 0.2525 | 0.0338  | 0.0054 | 2.98E-10 | 6.2997  | 1376071 | Asthma |
| rs13359426  | 5 | 111193531 | T | A | 0.0763 | -0.0527 | 0.0087 | 1.38E-09 | -6.0578 | 1376071 | Asthma |
| rs74584830  | 5 | 111193804 | C | A | 0.0564 | 0.0662  | 0.0112 | 2.85E-09 | 5.9397  | 1246149 | Asthma |
| rs455997    | 5 | 111193890 | G | A | 0.2526 | 0.0336  | 0.0054 | 3.96E-10 | 6.2554  | 1376071 | Asthma |
| rs10058509  | 5 | 111195403 | T | C | 0.0932 | -0.0542 | 0.0081 | 2.42E-11 | -6.6784 | 1376071 | Asthma |

|             |   |           |   |   |        |         |        |          |         |         |        |
|-------------|---|-----------|---|---|--------|---------|--------|----------|---------|---------|--------|
| rs72793539  | 5 | 111196171 | G | A | 0.0452 | -0.0754 | 0.0118 | 1.43E-10 | -6.4120 | 1376071 | Asthma |
| rs10515425  | 5 | 111196692 | G | C | 0.0536 | 0.0632  | 0.0107 | 4.01E-09 | 5.8835  | 1376071 | Asthma |
| rs10039056  | 5 | 111197010 | T | C | 0.0761 | -0.0534 | 0.0087 | 9.00E-10 | -6.1263 | 1376071 | Asthma |
| rs10071052  | 5 | 111197895 | A | T | 0.0452 | -0.0753 | 0.0118 | 1.53E-10 | -6.4021 | 1376071 | Asthma |
| rs244517    | 5 | 111198381 | T | G | 0.2963 | -0.0333 | 0.0052 | 1.46E-10 | -6.4100 | 1376071 | Asthma |
| rs10055755  | 5 | 111199331 | A | G | 0.0452 | -0.0755 | 0.0118 | 1.40E-10 | -6.4155 | 1376071 | Asthma |
| rs12518040  | 5 | 111199713 | C | T | 0.2961 | -0.0333 | 0.0052 | 1.50E-10 | -6.4049 | 1376071 | Asthma |
| rs11956918  | 5 | 111199948 | C | A | 0.1797 | -0.0430 | 0.0061 | 2.31E-12 | -7.0143 | 1376071 | Asthma |
| rs11950415  | 5 | 111199950 | T | C | 0.1798 | -0.0426 | 0.0061 | 3.83E-12 | -6.9432 | 1376071 | Asthma |
| rs10477464  | 5 | 111200814 | G | A | 0.1800 | -0.0424 | 0.0061 | 4.26E-12 | -6.9284 | 1376071 | Asthma |
| rs13360546  | 5 | 111200965 | G | A | 0.0452 | -0.0754 | 0.0118 | 1.47E-10 | -6.4082 | 1376071 | Asthma |
| rs13358530  | 5 | 111201097 | C | T | 0.0452 | -0.0754 | 0.0118 | 1.49E-10 | -6.4059 | 1376071 | Asthma |
| rs7704958   | 5 | 111201100 | A | G | 0.2960 | -0.0331 | 0.0052 | 1.75E-10 | -6.3816 | 1376071 | Asthma |
| rs9326830   | 5 | 111201899 | C | G | 0.0452 | -0.0755 | 0.0118 | 1.40E-10 | -6.4157 | 1376071 | Asthma |
| rs244518    | 5 | 111202917 | G | A | 0.2550 | 0.0331  | 0.0054 | 6.15E-10 | 6.1867  | 1376071 | Asthma |
| rs9326831   | 5 | 111203271 | G | A | 0.0760 | -0.0524 | 0.0087 | 1.98E-09 | -5.9997 | 1376071 | Asthma |
| rs1370966   | 5 | 111203651 | A | G | 0.0452 | -0.0755 | 0.0118 | 1.36E-10 | -6.4206 | 1376071 | Asthma |
| rs1370967   | 5 | 111203694 | A | G | 0.0452 | -0.0756 | 0.0118 | 1.32E-10 | -6.4241 | 1376071 | Asthma |
| rs72793543  | 5 | 111204021 | G | T | 0.0452 | -0.0757 | 0.0118 | 1.30E-10 | -6.4274 | 1376071 | Asthma |
| rs153279    | 5 | 111204064 | C | T | 0.2535 | 0.0338  | 0.0054 | 3.15E-10 | 6.2912  | 1376071 | Asthma |
| rs184941    | 5 | 111204194 | T | C | 0.2614 | -0.0339 | 0.0054 | 2.46E-10 | -6.3294 | 1376071 | Asthma |
| rs763439    | 5 | 111204738 | T | C | 0.0452 | -0.0755 | 0.0118 | 1.37E-10 | -6.4190 | 1376071 | Asthma |
| rs75198326  | 5 | 111205554 | A | T | 0.0285 | -0.0835 | 0.0142 | 3.76E-09 | -5.8945 | 1376071 | Asthma |
| rs4400170   | 5 | 111206362 | T | G | 0.2530 | 0.0334  | 0.0054 | 5.43E-10 | 6.2062  | 1376071 | Asthma |
| rs72793552  | 5 | 111207252 | G | T | 0.0453 | -0.0754 | 0.0118 | 1.50E-10 | -6.4058 | 1376071 | Asthma |
| rs72793554  | 5 | 111207531 | T | C | 0.0454 | -0.0760 | 0.0117 | 9.63E-11 | -6.4725 | 1376071 | Asthma |
| rs252859    | 5 | 111208227 | T | C | 0.2533 | 0.0339  | 0.0054 | 2.90E-10 | 6.3042  | 1376071 | Asthma |
| rs252860    | 5 | 111208306 | T | C | 0.2532 | 0.0341  | 0.0054 | 2.12E-10 | 6.3529  | 1376071 | Asthma |
| rs74801801  | 5 | 111208691 | T | G | 0.1144 | 0.0408  | 0.0075 | 4.49E-08 | 5.4704  | 1376071 | Asthma |
| rs72793556  | 5 | 111209912 | G | A | 0.0454 | -0.0760 | 0.0117 | 9.65E-11 | -6.4722 | 1376071 | Asthma |
| rs1870079   | 5 | 111210357 | A | G | 0.2529 | 0.0332  | 0.0054 | 6.07E-10 | 6.1886  | 1376071 | Asthma |
| rs957924    | 5 | 111211720 | A | G | 0.0454 | -0.0761 | 0.0117 | 9.17E-11 | -6.4799 | 1376071 | Asthma |
| rs115558699 | 5 | 111211806 | T | C | 0.0329 | -0.0772 | 0.0139 | 3.03E-08 | -5.5401 | 1376071 | Asthma |
| rs72793561  | 5 | 111211959 | C | T | 0.0456 | -0.0759 | 0.0126 | 1.90E-09 | -6.0063 | 1281476 | Asthma |
| rs10055333  | 5 | 111212178 | A | C | 0.2528 | 0.0336  | 0.0054 | 3.64E-10 | 6.2690  | 1376071 | Asthma |
| rs12515905  | 5 | 111213275 | T | A | 0.1809 | -0.0436 | 0.0061 | 9.73E-13 | -7.1343 | 1376071 | Asthma |
| rs1864119   | 5 | 111214227 | C | T | 0.2529 | 0.0336  | 0.0054 | 4.31E-10 | 6.2424  | 1376071 | Asthma |
| rs10054191  | 5 | 111214385 | C | T | 0.0770 | -0.0549 | 0.0087 | 2.44E-10 | -6.3307 | 1376071 | Asthma |
| rs4957934   | 5 | 111215415 | T | C | 0.2544 | 0.0339  | 0.0054 | 2.99E-10 | 6.2992  | 1376071 | Asthma |
| rs77751155  | 5 | 111219191 | C | T | 0.0284 | -0.0822 | 0.0142 | 6.93E-09 | -5.7927 | 1376071 | Asthma |
| rs6871301   | 5 | 111219969 | G | C | 0.2544 | 0.0337  | 0.0054 | 3.93E-10 | 6.2569  | 1376071 | Asthma |
| rs2162893   | 5 | 111222366 | A | G | 0.3677 | 0.0452  | 0.0049 | 2.10E-20 | 9.2571  | 1376071 | Asthma |
| rs1457114   | 5 | 111223184 | A | G | 0.3885 | 0.0410  | 0.0048 | 2.75E-17 | 8.4566  | 1376071 | Asthma |
| rs62376847  | 5 | 111225009 | G | A | 0.2557 | 0.0323  | 0.0054 | 1.78E-09 | 6.0170  | 1376071 | Asthma |
| rs1551565   | 5 | 111225941 | G | A | 0.2560 | 0.0321  | 0.0054 | 2.05E-09 | 5.9938  | 1376071 | Asthma |
| rs62376848  | 5 | 111226521 | A | G | 0.2561 | 0.0315  | 0.0054 | 3.98E-09 | 5.8852  | 1376071 | Asthma |
| rs62376849  | 5 | 111226632 | T | G | 0.2558 | 0.0319  | 0.0054 | 2.68E-09 | 5.9498  | 1376071 | Asthma |
| rs727923    | 5 | 111226906 | G | A | 0.2559 | 0.0319  | 0.0054 | 2.66E-09 | 5.9516  | 1376071 | Asthma |
| rs62376850  | 5 | 111227556 | T | C | 0.2560 | 0.0319  | 0.0054 | 2.57E-09 | 5.9573  | 1376071 | Asthma |
| rs62376851  | 5 | 111227944 | T | A | 0.2558 | 0.0322  | 0.0054 | 2.02E-09 | 5.9967  | 1376071 | Asthma |
| rs10077974  | 5 | 111228167 | G | A | 0.0761 | -0.0541 | 0.0087 | 6.30E-10 | -6.1828 | 1376071 | Asthma |
| rs72793573  | 5 | 111228575 | A | G | 0.2557 | 0.0326  | 0.0055 | 3.03E-09 | 5.9301  | 1316443 | Asthma |
| rs10057913  | 5 | 111230477 | G | A | 0.1294 | -0.0716 | 0.0072 | 5.00E-23 | -9.8817 | 1316443 | Asthma |
| rs75772970  | 5 | 111230699 | G | A | 0.0214 | -0.0995 | 0.0163 | 9.62E-10 | -6.1156 | 1376071 | Asthma |
| rs10073038  | 5 | 111230823 | T | A | 0.4284 | 0.0367  | 0.0056 | 6.64E-11 | 6.5287  | 818501  | Asthma |
| rs62376852  | 5 | 111230944 | A | G | 0.2743 | 0.0348  | 0.0053 | 3.92E-11 | 6.6071  | 1376071 | Asthma |
| rs62376853  | 5 | 111231841 | G | A | 0.2737 | 0.0340  | 0.0053 | 1.13E-10 | 6.4488  | 1376071 | Asthma |
| rs1457115   | 5 | 111231900 | T | C | 0.4516 | 0.0346  | 0.0048 | 9.24E-13 | 7.1414  | 1316443 | Asthma |
| rs6875225   | 5 | 111233231 | C | T | 0.4580 | -0.0330 | 0.0048 | 3.95E-12 | -6.9389 | 1376071 | Asthma |
| rs17461286  | 5 | 111233524 | A | G | 0.2736 | 0.0339  | 0.0053 | 1.27E-10 | 6.4308  | 1376071 | Asthma |
| rs17461314  | 5 | 111234478 | T | G | 0.2734 | 0.0338  | 0.0053 | 1.45E-10 | 6.4103  | 1376071 | Asthma |
| rs78009289  | 5 | 111235100 | C | A | 0.2722 | 0.0343  | 0.0058 | 2.91E-09 | 5.9368  | 1224666 | Asthma |
| rs80218507  | 5 | 111235101 | T | C | 0.2721 | 0.0343  | 0.0058 | 3.00E-09 | 5.9314  | 1224666 | Asthma |
| rs56050582  | 5 | 111235108 | C | T | 0.2734 | 0.0338  | 0.0053 | 1.47E-10 | 6.4082  | 1376071 | Asthma |
| rs17520975  | 5 | 111237018 | T | C | 0.2729 | 0.0340  | 0.0053 | 1.14E-10 | 6.4468  | 1376071 | Asthma |
| rs55886158  | 5 | 111237073 | G | C | 0.2730 | 0.0324  | 0.0057 | 1.04E-08 | 5.7247  | 1246149 | Asthma |
| rs17521010  | 5 | 111237185 | G | T | 0.2729 | 0.0339  | 0.0053 | 1.31E-10 | 6.4263  | 1376071 | Asthma |
| rs17521024  | 5 | 111237367 | A | G | 0.2742 | 0.0344  | 0.0053 | 6.54E-11 | 6.5309  | 1376071 | Asthma |
| rs62375582  | 5 | 111237589 | A | G | 0.2742 | 0.0346  | 0.0053 | 5.31E-11 | 6.5620  | 1376071 | Asthma |
| rs1469442   | 5 | 111240383 | C | T | 0.4586 | -0.0332 | 0.0047 | 2.31E-12 | -7.0143 | 1376071 | Asthma |
| rs17521129  | 5 | 111241855 | T | C | 0.2763 | 0.0341  | 0.0053 | 8.06E-11 | 6.4994  | 1376071 | Asthma |
| rs57676414  | 5 | 111242294 | C | G | 0.2762 | 0.0343  | 0.0053 | 7.02E-11 | 6.5203  | 1376071 | Asthma |
| rs56858603  | 5 | 111242682 | T | C | 0.2613 | 0.0332  | 0.0055 | 1.56E-09 | 6.0386  | 1316443 | Asthma |
| rs150826583 | 5 | 111243633 | A | T | 0.0278 | -0.1038 | 0.0156 | 2.92E-11 | -6.6506 | 1376071 | Asthma |

|             |   |           |   |   |        |         |        |          |         |         |        |
|-------------|---|-----------|---|---|--------|---------|--------|----------|---------|---------|--------|
| rs72780326  | 5 | 111243658 | C | T | 0.2770 | 0.0348  | 0.0052 | 3.33E-11 | 6.6312  | 1376071 | Asthma |
| rs62375585  | 5 | 111243983 | G | A | 0.2776 | 0.0348  | 0.0052 | 3.48E-11 | 6.6245  | 1376071 | Asthma |
| rs75503445  | 5 | 111245164 | A | C | 0.0889 | -0.0604 | 0.0084 | 5.39E-13 | -7.2151 | 1376071 | Asthma |
| rs138815026 | 5 | 111245296 | G | A | 0.0278 | -0.1038 | 0.0156 | 2.85E-11 | -6.6538 | 1376071 | Asthma |
| rs3898862   | 5 | 111245942 | T | A | 0.4732 | 0.0262  | 0.0048 | 4.10E-08 | 5.4865  | 1376071 | Asthma |
| rs678455    | 5 | 111247138 | T | C | 0.2765 | 0.0341  | 0.0053 | 8.75E-11 | 6.4871  | 1376071 | Asthma |
| rs2434723   | 5 | 111248012 | A | G | 0.2770 | 0.0339  | 0.0053 | 1.06E-10 | 6.4583  | 1376071 | Asthma |
| rs2434722   | 5 | 111248636 | G | A | 0.2770 | 0.0339  | 0.0052 | 1.10E-10 | 6.4528  | 1376071 | Asthma |
| rs712645    | 5 | 111249929 | C | T | 0.4566 | -0.0325 | 0.0047 | 6.35E-12 | -6.8714 | 1376071 | Asthma |
| rs392310    | 5 | 111250942 | G | C | 0.2765 | 0.0339  | 0.0053 | 1.13E-10 | 6.4490  | 1376071 | Asthma |
| rs10478040  | 5 | 111254701 | T | C | 0.0531 | -0.0565 | 0.0101 | 2.47E-08 | -5.5751 | 1376071 | Asthma |
| rs419344    | 5 | 111255525 | G | T | 0.2772 | 0.0347  | 0.0052 | 3.74E-11 | 6.6142  | 1376071 | Asthma |
| rs17132981  | 5 | 111256940 | C | T | 0.0392 | -0.0792 | 0.0139 | 1.30E-08 | -5.6865 | 1246149 | Asthma |
| rs827458    | 5 | 111257312 | C | A | 0.2766 | 0.0340  | 0.0052 | 8.88E-11 | 6.4850  | 1376071 | Asthma |
| rs428275    | 5 | 111258124 | G | C | 0.2839 | 0.0353  | 0.0060 | 3.11E-09 | 5.9258  | 878129  | Asthma |
| rs17132983  | 5 | 111258943 | A | G | 0.0570 | -0.0809 | 0.0108 | 7.42E-14 | -7.4805 | 1376071 | Asthma |
| rs2546990   | 5 | 111260723 | G | T | 0.2794 | 0.0352  | 0.0052 | 1.72E-11 | 6.7281  | 1376071 | Asthma |
| rs1650794   | 5 | 111261684 | G | A | 0.2814 | 0.0344  | 0.0052 | 4.17E-11 | 6.5981  | 1376071 | Asthma |
| rs79908234  | 5 | 111265651 | G | C | 0.0543 | -0.0557 | 0.0100 | 2.31E-08 | -5.5873 | 1376071 | Asthma |
| rs1644496   | 5 | 111266025 | T | A | 0.4757 | 0.0258  | 0.0047 | 4.89E-08 | 5.4551  | 1376071 | Asthma |
| rs1650791   | 5 | 111266306 | A | G | 0.2799 | 0.0346  | 0.0052 | 3.48E-11 | 6.6247  | 1376071 | Asthma |
| rs1650789   | 5 | 111268621 | A | T | 0.4751 | 0.0260  | 0.0047 | 3.58E-08 | 5.5103  | 1376071 | Asthma |
| rs1618689   | 5 | 111270357 | C | G | 0.2642 | 0.0321  | 0.0053 | 1.89E-09 | 6.0068  | 1376071 | Asthma |
| rs10040398  | 5 | 111279802 | C | A | 0.0217 | -0.0997 | 0.0165 | 1.37E-09 | -6.0585 | 1376071 | Asthma |
| rs366982    | 5 | 111287293 | A | T | 0.0954 | 0.0462  | 0.0080 | 7.50E-09 | 5.7793  | 1376071 | Asthma |
| rs1650787   | 5 | 111320752 | T | C | 0.4427 | -0.0284 | 0.0048 | 2.33E-09 | -5.9730 | 1376071 | Asthma |
| rs1625138   | 5 | 111325584 | A | G | 0.4426 | -0.0288 | 0.0048 | 1.36E-09 | -6.0607 | 1376071 | Asthma |
| rs150833394 | 5 | 111328618 | T | C | 0.4447 | -0.0295 | 0.0052 | 1.29E-08 | -5.6878 | 1224666 | Asthma |
| rs2913712   | 5 | 111328752 | C | T | 0.4448 | -0.0295 | 0.0052 | 1.35E-08 | -5.6790 | 1224666 | Asthma |
| rs1650785   | 5 | 111328972 | A | T | 0.4443 | -0.0284 | 0.0048 | 2.36E-09 | -5.9708 | 1376071 | Asthma |
| rs968189    | 5 | 111330156 | G | T | 0.4441 | -0.0280 | 0.0048 | 4.15E-09 | -5.8782 | 1376071 | Asthma |
| rs1644506   | 5 | 111330300 | A | G | 0.4440 | -0.0281 | 0.0048 | 3.60E-09 | -5.9015 | 1376071 | Asthma |
| rs1644505   | 5 | 111330706 | C | T | 0.4439 | -0.0281 | 0.0048 | 3.71E-09 | -5.8967 | 1376071 | Asthma |
| rs2431742   | 5 | 111332541 | C | T | 0.4450 | -0.0280 | 0.0048 | 3.92E-09 | -5.8876 | 1376071 | Asthma |
| rs2560496   | 5 | 111332654 | T | G | 0.4448 | -0.0280 | 0.0048 | 3.87E-09 | -5.8895 | 1376071 | Asthma |
| rs1650782   | 5 | 111333002 | C | A | 0.4447 | -0.0283 | 0.0048 | 2.63E-09 | -5.9531 | 1376071 | Asthma |
| rs1644504   | 5 | 111334120 | C | T | 0.4440 | -0.0283 | 0.0048 | 2.87E-09 | -5.9388 | 1376071 | Asthma |
| rs1644503   | 5 | 111334461 | T | C | 0.4443 | -0.0284 | 0.0048 | 2.57E-09 | -5.9573 | 1376071 | Asthma |
| rs1660933   | 5 | 111335082 | T | C | 0.4443 | -0.0282 | 0.0048 | 3.10E-09 | -5.9264 | 1376071 | Asthma |
| rs1660932   | 5 | 111335465 | G | A | 0.4447 | -0.0283 | 0.0048 | 2.62E-09 | -5.9537 | 1376071 | Asthma |
| rs1660939   | 5 | 111336945 | A | T | 0.4439 | -0.0282 | 0.0048 | 3.08E-09 | -5.9272 | 1376071 | Asthma |
| rs1366178   | 5 | 111393747 | A | C | 0.4346 | -0.0261 | 0.0048 | 4.32E-08 | -5.4772 | 1376071 | Asthma |
| rs76825937  | 5 | 111397902 | C | G | 0.0450 | -0.0752 | 0.0121 | 4.33E-10 | -6.2416 | 1376071 | Asthma |
| rs2115026   | 5 | 111414228 | T | G | 0.4315 | -0.0317 | 0.0049 | 8.75E-11 | -6.4871 | 1316443 | Asthma |
| rs3797746   | 5 | 111423391 | C | T | 0.3964 | -0.0278 | 0.0048 | 8.62E-09 | -5.7560 | 1376071 | Asthma |
| rs10052530  | 5 | 111423839 | G | A | 0.3958 | -0.0277 | 0.0048 | 8.78E-09 | -5.7528 | 1376071 | Asthma |
| rs10069849  | 5 | 111424737 | A | G | 0.3916 | -0.0287 | 0.0048 | 2.90E-09 | -5.9370 | 1376071 | Asthma |
| rs3776938   | 5 | 111425085 | T | C | 0.3885 | 0.0294  | 0.0050 | 3.58E-09 | 5.9025  | 1316443 | Asthma |
| rs4957949   | 5 | 111427911 | A | G | 0.3870 | 0.0291  | 0.0050 | 5.40E-09 | 5.8345  | 1316443 | Asthma |
| rs10045295  | 5 | 111428348 | G | A | 0.3893 | 0.0294  | 0.0050 | 3.45E-09 | 5.9087  | 1316443 | Asthma |
| rs10039731  | 5 | 111428554 | G | A | 0.3912 | -0.0297 | 0.0049 | 1.91E-09 | -6.0053 | 1316443 | Asthma |
| rs12659103  | 5 | 111429646 | T | C | 0.3882 | 0.0293  | 0.0050 | 4.10E-09 | 5.8799  | 1316443 | Asthma |
| rs80333217  | 5 | 111432293 | T | C | 0.0394 | -0.0777 | 0.0137 | 1.53E-08 | -5.6581 | 1299802 | Asthma |
| rs62371280  | 5 | 111432994 | G | A | 0.3909 | -0.0287 | 0.0050 | 7.10E-09 | -5.7884 | 1316443 | Asthma |
| rs6897106   | 5 | 111434090 | C | T | 0.3801 | -0.0288 | 0.0053 | 4.96E-08 | -5.4529 | 948423  | Asthma |
| rs3797743   | 5 | 111436122 | A | G | 0.4247 | -0.0292 | 0.0048 | 9.82E-10 | -6.1124 | 1376071 | Asthma |
| rs759948    | 5 | 111437244 | G | A | 0.3928 | 0.0304  | 0.0052 | 4.92E-09 | 5.8498  | 1246149 | Asthma |
| rs4957951   | 5 | 111437998 | C | A | 0.4067 | 0.0294  | 0.0050 | 3.13E-09 | 5.9248  | 1316443 | Asthma |
| rs250304    | 5 | 119341226 | G | A | 0.3605 | -0.0311 | 0.0050 | 5.76E-10 | -6.1968 | 1316443 | Asthma |
| rs250303    | 5 | 119341398 | G | A | 0.2879 | -0.0316 | 0.0053 | 2.32E-09 | -5.9735 | 1316443 | Asthma |
| rs250299    | 5 | 119344332 | C | A | 0.4278 | 0.0335  | 0.0049 | 1.19E-11 | 6.7819  | 1316443 | Asthma |
| rs250298    | 5 | 119344352 | G | A | 0.4279 | 0.0336  | 0.0049 | 9.93E-12 | 6.8074  | 1316443 | Asthma |
| rs408095    | 5 | 119345955 | C | T | 0.3851 | 0.0302  | 0.0051 | 3.57E-09 | 5.9032  | 1299802 | Asthma |
| rs1112247   | 5 | 119347807 | G | T | 0.4257 | 0.0337  | 0.0049 | 8.25E-12 | 6.8342  | 1316443 | Asthma |
| rs250308    | 5 | 119348602 | T | C | 0.3830 | 0.0310  | 0.0051 | 1.37E-09 | 6.0583  | 1299802 | Asthma |
| rs192225    | 5 | 119350388 | T | A | 0.2862 | -0.0318 | 0.0054 | 3.60E-09 | -5.9015 | 1299802 | Asthma |
| rs6874848   | 5 | 119352420 | T | A | 0.2933 | -0.0326 | 0.0054 | 1.14E-09 | -6.0889 | 1299802 | Asthma |
| rs1155268   | 5 | 119353526 | G | A | 0.2915 | -0.0329 | 0.0054 | 8.42E-10 | -6.1368 | 1299802 | Asthma |
| rs3920174   | 5 | 119354788 | G | A | 0.4253 | 0.0339  | 0.0049 | 6.57E-12 | 6.8667  | 1316443 | Asthma |
| rs3813308   | 5 | 119355086 | G | C | 0.4243 | 0.0346  | 0.0049 | 2.43E-12 | 7.0071  | 1316443 | Asthma |
| rs3813309   | 5 | 119355303 | A | G | 0.2897 | -0.0329 | 0.0054 | 8.75E-10 | -6.1307 | 1299802 | Asthma |
| rs3797339   | 5 | 119355998 | A | C | 0.4240 | 0.0343  | 0.0049 | 3.62E-12 | 6.9514  | 1316443 | Asthma |
| rs1509141   | 5 | 119356523 | G | C | 0.2914 | -0.0333 | 0.0054 | 5.46E-10 | -6.2053 | 1299802 | Asthma |
| rs10477585  | 5 | 119356760 | T | A | 0.4262 | 0.0329  | 0.0049 | 2.48E-11 | 6.6747  | 1316443 | Asthma |



|             |   |           |   |   |        |         |        |          |         |         |        |
|-------------|---|-----------|---|---|--------|---------|--------|----------|---------|---------|--------|
| rs1509142   | 5 | 119356770 | A | G | 0.2903 | -0.0370 | 0.0057 | 1.06E-10 | -6.4579 | 1208025 | Asthma |
| rs6595186   | 5 | 119362154 | A | G | 0.3012 | -0.0328 | 0.0052 | 3.14E-10 | -6.2916 | 1359430 | Asthma |
| rs13155880  | 5 | 119363413 | C | A | 0.4203 | 0.0314  | 0.0049 | 1.38E-10 | 6.4184  | 1359430 | Asthma |
| rs4895369   | 5 | 119364256 | A | G | 0.3039 | -0.0335 | 0.0052 | 1.09E-10 | -6.4534 | 1359430 | Asthma |
| rs32658     | 5 | 119367967 | T | G | 0.4194 | 0.0316  | 0.0049 | 1.09E-10 | 6.4543  | 1359430 | Asthma |
| rs32657     | 5 | 119368166 | T | C | 0.4199 | 0.0314  | 0.0049 | 1.50E-10 | 6.4057  | 1359430 | Asthma |
| rs32655     | 5 | 119368651 | A | G | 0.4199 | 0.0312  | 0.0049 | 1.94E-10 | 6.3657  | 1359430 | Asthma |
| rs32653     | 5 | 119368948 | T | A | 0.4197 | 0.0310  | 0.0049 | 2.64E-10 | 6.3187  | 1359430 | Asthma |
| rs32652     | 5 | 119369850 | T | G | 0.3005 | -0.0323 | 0.0053 | 1.36E-09 | -6.0598 | 1299802 | Asthma |
| rs1105771   | 5 | 119395578 | C | A | 0.4008 | 0.0288  | 0.0049 | 5.41E-09 | 5.8343  | 1359430 | Asthma |
| rs4895371   | 5 | 119404239 | T | C | 0.3992 | 0.0285  | 0.0049 | 4.29E-09 | 5.8725  | 1376071 | Asthma |
| rs4895372   | 5 | 119406081 | C | T | 0.4026 | 0.0276  | 0.0048 | 1.28E-08 | 5.6893  | 1376071 | Asthma |
| rs971891    | 5 | 130237973 | T | C | 0.2852 | -0.0362 | 0.0056 | 9.55E-11 | -6.4740 | 1316443 | Asthma |
| rs35447532  | 5 | 130294532 | A | G | 0.2878 | -0.0375 | 0.0056 | 1.51E-11 | -6.7470 | 1316443 | Asthma |
| rs7356548   | 5 | 130387859 | T | C | 0.3296 | 0.0297  | 0.0051 | 7.63E-09 | 5.7764  | 1316443 | Asthma |
| rs2214462   | 5 | 130394383 | T | C | 0.3307 | 0.0294  | 0.0051 | 1.00E-08 | 5.7303  | 1316443 | Asthma |
| rs2214464   | 5 | 130400317 | G | T | 0.3252 | 0.0285  | 0.0052 | 3.07E-08 | 5.5377  | 1316443 | Asthma |
| rs255578    | 5 | 130402030 | C | G | 0.4288 | 0.0274  | 0.0049 | 2.44E-08 | 5.5777  | 1316443 | Asthma |
| rs10478923  | 5 | 130402339 | C | A | 0.3240 | 0.0285  | 0.0052 | 3.22E-08 | 5.5292  | 1316443 | Asthma |
| rs7710846   | 5 | 130420990 | A | T | 0.3249 | 0.0285  | 0.0052 | 3.18E-08 | 5.5312  | 1316443 | Asthma |
| rs10060906  | 5 | 130421259 | A | T | 0.3249 | 0.0283  | 0.0052 | 3.99E-08 | 5.4912  | 1316443 | Asthma |
| rs2023870   | 5 | 130422959 | A | G | 0.3238 | 0.0284  | 0.0052 | 3.81E-08 | 5.4994  | 1316443 | Asthma |
| rs9285919   | 5 | 130423800 | C | T | 0.3250 | 0.0284  | 0.0051 | 3.66E-08 | 5.5065  | 1316443 | Asthma |
| rs10041166  | 5 | 130432618 | T | C | 0.3248 | 0.0284  | 0.0052 | 3.60E-08 | 5.5093  | 1316443 | Asthma |
| rs35020650  | 5 | 130433236 | C | T | 0.4287 | 0.0276  | 0.0048 | 8.86E-09 | 5.7513  | 1376071 | Asthma |
| rs10037056  | 5 | 130438152 | C | T | 0.3250 | 0.0284  | 0.0052 | 3.72E-08 | 5.5036  | 1316443 | Asthma |
| rs763787    | 5 | 130440872 | T | C | 0.2980 | -0.0422 | 0.0056 | 4.37E-14 | -7.5495 | 1299802 | Asthma |
| rs4835995   | 5 | 130441929 | A | T | 0.3238 | 0.0283  | 0.0052 | 4.14E-08 | 5.4847  | 1316443 | Asthma |
| rs13176262  | 5 | 130448991 | C | T | 0.4292 | 0.0272  | 0.0048 | 1.35E-08 | 5.6802  | 1376071 | Asthma |
| rs7731636   | 5 | 130452367 | C | T | 0.3252 | 0.0291  | 0.0050 | 8.04E-09 | 5.7676  | 1376071 | Asthma |
| rs2214467   | 5 | 130453307 | G | C | 0.3250 | 0.0286  | 0.0050 | 1.36E-08 | 5.6784  | 1376071 | Asthma |
| rs7737775   | 5 | 130453848 | C | T | 0.3250 | 0.0292  | 0.0050 | 6.98E-09 | 5.7914  | 1376071 | Asthma |
| rs6894216   | 5 | 130456441 | C | T | 0.4290 | 0.0273  | 0.0048 | 1.33E-08 | 5.6825  | 1376071 | Asthma |
| rs2189381   | 5 | 130456932 | C | T | 0.3250 | 0.0295  | 0.0050 | 4.68E-09 | 5.8582  | 1376071 | Asthma |
| rs10463875  | 5 | 130461436 | A | G | 0.3238 | 0.0290  | 0.0050 | 9.52E-09 | 5.7391  | 1376071 | Asthma |
| rs4836512   | 5 | 130478019 | G | C | 0.3247 | 0.0287  | 0.0050 | 1.21E-08 | 5.6989  | 1376071 | Asthma |
| rs55975060  | 5 | 130478071 | C | T | 0.3036 | -0.0423 | 0.0055 | 2.20E-14 | -7.6383 | 1299802 | Asthma |
| rs10520079  | 5 | 130484345 | A | G | 0.3067 | -0.0425 | 0.0055 | 1.46E-14 | -7.6908 | 1299802 | Asthma |
| rs6892543   | 5 | 130491651 | G | A | 0.3246 | 0.0289  | 0.0050 | 1.01E-08 | 5.7286  | 1376071 | Asthma |
| rs9918267   | 5 | 130495931 | G | A | 0.4275 | 0.0270  | 0.0048 | 1.82E-08 | 5.6283  | 1376071 | Asthma |
| rs7718097   | 5 | 130514132 | A | G | 0.2950 | 0.0286  | 0.0052 | 3.19E-08 | 5.5309  | 1376071 | Asthma |
| rs1009686   | 5 | 130528001 | C | A | 0.2939 | 0.0291  | 0.0052 | 1.90E-08 | 5.6209  | 1376071 | Asthma |
| rs1029749   | 5 | 130529355 | C | A | 0.3228 | 0.0295  | 0.0051 | 5.21E-09 | 5.8403  | 1376071 | Asthma |
| rs10077003  | 5 | 130538107 | T | G | 0.3772 | 0.0307  | 0.0050 | 8.17E-10 | 6.1417  | 1316443 | Asthma |
| rs4455593   | 5 | 130539379 | G | A | 0.4338 | 0.0272  | 0.0048 | 1.34E-08 | 5.6813  | 1376071 | Asthma |
| rs2215258   | 5 | 130541352 | A | G | 0.4333 | 0.0273  | 0.0048 | 1.24E-08 | 5.6938  | 1376071 | Asthma |
| rs7714592   | 5 | 130557003 | C | T | 0.4345 | 0.0272  | 0.0048 | 1.32E-08 | 5.6836  | 1376071 | Asthma |
| rs7712456   | 5 | 130561596 | G | T | 0.4352 | 0.0272  | 0.0048 | 1.36E-08 | 5.6785  | 1376071 | Asthma |
| rs12654241  | 5 | 130569724 | T | C | 0.4349 | 0.0274  | 0.0048 | 1.06E-08 | 5.7203  | 1376071 | Asthma |
| rs10065536  | 5 | 130572503 | T | C | 0.3921 | 0.0303  | 0.0049 | 4.57E-10 | 6.2333  | 1376071 | Asthma |
| rs11242028  | 5 | 130573638 | T | A | 0.3916 | 0.0306  | 0.0049 | 3.21E-10 | 6.2883  | 1376071 | Asthma |
| rs11242029  | 5 | 130573907 | T | C | 0.3903 | 0.0305  | 0.0049 | 3.89E-10 | 6.2584  | 1376071 | Asthma |
| rs113264677 | 5 | 130581377 | C | A | 0.2977 | -0.0428 | 0.0059 | 4.55E-13 | -7.2381 | 931782  | Asthma |
| rs2418898   | 5 | 130583758 | G | C | 0.3915 | 0.0305  | 0.0049 | 3.65E-10 | 6.2681  | 1376071 | Asthma |
| rs72797733  | 5 | 130590349 | T | C | 0.3028 | -0.0443 | 0.0056 | 1.49E-15 | -7.9776 | 1299802 | Asthma |
| rs4836514   | 5 | 130599984 | C | A | 0.4347 | 0.0274  | 0.0048 | 1.09E-08 | 5.7165  | 1376071 | Asthma |
| rs7448367   | 5 | 130600678 | A | T | 0.4339 | 0.0274  | 0.0048 | 1.10E-08 | 5.7151  | 1376071 | Asthma |
| rs10520083  | 5 | 130604313 | G | C | 0.4340 | 0.0271  | 0.0048 | 1.58E-08 | 5.6528  | 1376071 | Asthma |
| rs10520084  | 5 | 130604401 | C | T | 0.3323 | 0.0293  | 0.0050 | 5.00E-09 | 5.8470  | 1376071 | Asthma |
| rs13355772  | 5 | 130605890 | G | A | 0.3318 | 0.0293  | 0.0050 | 5.51E-09 | 5.8310  | 1376071 | Asthma |
| rs10043791  | 5 | 130606424 | G | C | 0.2955 | 0.0284  | 0.0052 | 3.86E-08 | 5.4970  | 1376071 | Asthma |
| rs36023599  | 5 | 130608578 | G | A | 0.3317 | 0.0294  | 0.0050 | 4.89E-09 | 5.8510  | 1376071 | Asthma |
| rs4260703   | 5 | 130609300 | A | T | 0.3306 | 0.0295  | 0.0050 | 4.61E-09 | 5.8608  | 1376071 | Asthma |
| rs6898586   | 5 | 130610694 | G | C | 0.3317 | 0.0294  | 0.0050 | 4.84E-09 | 5.8526  | 1376071 | Asthma |
| rs6863240   | 5 | 130611326 | G | A | 0.3318 | 0.0295  | 0.0050 | 4.41E-09 | 5.8679  | 1376071 | Asthma |
| rs7720425   | 5 | 130614299 | A | G | 0.3235 | 0.0287  | 0.0051 | 1.40E-08 | 5.6732  | 1376071 | Asthma |
| rs11242030  | 5 | 130619935 | T | C | 0.2932 | 0.0283  | 0.0052 | 4.97E-08 | 5.4524  | 1376071 | Asthma |
| rs114449815 | 5 | 130620225 | C | A | 0.2932 | 0.0284  | 0.0052 | 4.54E-08 | 5.4685  | 1376071 | Asthma |
| rs10463877  | 5 | 130630543 | T | G | 0.2921 | 0.0284  | 0.0052 | 4.37E-08 | 5.4754  | 1376071 | Asthma |
| rs10052838  | 5 | 130634219 | G | A | 0.3306 | 0.0295  | 0.0050 | 4.52E-09 | 5.8639  | 1376071 | Asthma |
| rs72797769  | 5 | 130634476 | T | C | 0.2922 | 0.0285  | 0.0052 | 4.07E-08 | 5.4878  | 1376071 | Asthma |
| rs7733287   | 5 | 130634686 | G | A | 0.3305 | 0.0293  | 0.0050 | 5.70E-09 | 5.8254  | 1376071 | Asthma |
| rs10058741  | 5 | 130636438 | C | A | 0.3313 | 0.0292  | 0.0050 | 5.76E-09 | 5.8236  | 1376071 | Asthma |
| rs1987668   | 5 | 130636577 | G | T | 0.3315 | 0.0294  | 0.0050 | 4.87E-09 | 5.8516  | 1376071 | Asthma |

|            |   |           |   |   |        |         |        |          |         |         |        |
|------------|---|-----------|---|---|--------|---------|--------|----------|---------|---------|--------|
| rs1987667  | 5 | 130636994 | T | C | 0.3313 | 0.0295  | 0.0050 | 4.47E-09 | 5.8655  | 1376071 | Asthma |
| rs6866381  | 5 | 130637263 | G | C | 0.3314 | 0.0293  | 0.0050 | 5.59E-09 | 5.8287  | 1376071 | Asthma |
| rs34316546 | 5 | 130637541 | A | C | 0.2932 | 0.0284  | 0.0052 | 4.50E-08 | 5.4702  | 1376071 | Asthma |
| rs7737013  | 5 | 130638718 | G | T | 0.3316 | 0.0292  | 0.0050 | 6.17E-09 | 5.8120  | 1376071 | Asthma |
| rs10078436 | 5 | 130639130 | C | G | 0.3314 | 0.0291  | 0.0050 | 7.17E-09 | 5.7869  | 1376071 | Asthma |
| rs13186382 | 5 | 130639264 | C | G | 0.3314 | 0.0290  | 0.0050 | 7.49E-09 | 5.7796  | 1376071 | Asthma |
| rs10478931 | 5 | 130640695 | C | T | 0.3318 | 0.0292  | 0.0050 | 5.81E-09 | 5.8220  | 1376071 | Asthma |
| rs4836518  | 5 | 130643455 | G | C | 0.3314 | 0.0292  | 0.0050 | 6.25E-09 | 5.8100  | 1376071 | Asthma |
| rs10037063 | 5 | 130643905 | C | T | 0.3323 | 0.0292  | 0.0050 | 5.77E-09 | 5.8232  | 1376071 | Asthma |
| rs2419065  | 5 | 130646510 | T | G | 0.3306 | 0.0292  | 0.0050 | 5.82E-09 | 5.8221  | 1376071 | Asthma |
| rs1073833  | 5 | 130648392 | A | C | 0.3302 | 0.0293  | 0.0050 | 5.66E-09 | 5.8265  | 1376071 | Asthma |
| rs6867679  | 5 | 130652429 | T | C | 0.3316 | 0.0294  | 0.0050 | 4.65E-09 | 5.8595  | 1376071 | Asthma |
| rs1860249  | 5 | 130655045 | G | A | 0.3133 | 0.0325  | 0.0051 | 1.75E-10 | 6.3821  | 1376071 | Asthma |
| rs1860248  | 5 | 130655725 | C | G | 0.3126 | 0.0323  | 0.0051 | 2.27E-10 | 6.3421  | 1376071 | Asthma |
| rs7731020  | 5 | 130657275 | T | C | 0.3134 | 0.0326  | 0.0051 | 1.56E-10 | 6.3998  | 1376071 | Asthma |
| rs10478932 | 5 | 130659520 | G | T | 0.2364 | 0.0321  | 0.0055 | 6.13E-09 | 5.8134  | 1376071 | Asthma |
| rs17714209 | 5 | 130661503 | C | T | 0.2751 | 0.0318  | 0.0053 | 1.59E-09 | 6.0353  | 1376071 | Asthma |
| rs10463878 | 5 | 130661814 | A | C | 0.2750 | 0.0320  | 0.0053 | 1.31E-09 | 6.0659  | 1376071 | Asthma |
| rs1989089  | 5 | 130665689 | C | T | 0.2783 | 0.0318  | 0.0053 | 1.35E-09 | 6.0612  | 1376071 | Asthma |
| rs2189152  | 5 | 130666099 | T | C | 0.3122 | 0.0326  | 0.0051 | 1.66E-10 | 6.3903  | 1376071 | Asthma |
| rs10063635 | 5 | 130666999 | T | C | 0.3130 | 0.0324  | 0.0051 | 2.06E-10 | 6.3568  | 1376071 | Asthma |
| rs6595954  | 5 | 130670052 | A | G | 0.3128 | 0.0325  | 0.0051 | 1.63E-10 | 6.3923  | 1376071 | Asthma |
| rs2189151  | 5 | 130671713 | C | A | 0.3123 | 0.0327  | 0.0051 | 1.47E-10 | 6.4086  | 1376071 | Asthma |
| rs7716413  | 5 | 130672132 | G | A | 0.3119 | 0.0324  | 0.0051 | 1.95E-10 | 6.3652  | 1376071 | Asthma |
| rs10478935 | 5 | 130680854 | T | C | 0.2364 | 0.0321  | 0.0055 | 5.93E-09 | 5.8187  | 1376071 | Asthma |
| rs4836519  | 5 | 130681594 | C | T | 0.2367 | 0.0322  | 0.0055 | 5.27E-09 | 5.8386  | 1376071 | Asthma |
| rs13154667 | 5 | 130682259 | T | C | 0.4155 | 0.0293  | 0.0048 | 1.21E-09 | 6.0788  | 1376071 | Asthma |
| rs6874070  | 5 | 130683984 | T | C | 0.3126 | 0.0321  | 0.0051 | 3.14E-10 | 6.2917  | 1376071 | Asthma |
| rs9327568  | 5 | 130684397 | A | G | 0.2362 | 0.0314  | 0.0055 | 1.39E-08 | 5.6745  | 1376071 | Asthma |
| rs6866550  | 5 | 130685984 | C | T | 0.2364 | 0.0317  | 0.0055 | 9.14E-09 | 5.7460  | 1376071 | Asthma |
| rs13160230 | 5 | 130686431 | G | A | 0.4169 | 0.0288  | 0.0048 | 2.18E-09 | 5.9837  | 1376071 | Asthma |
| rs4836520  | 5 | 130686721 | G | A | 0.3131 | 0.0322  | 0.0051 | 2.61E-10 | 6.3205  | 1376071 | Asthma |
| rs727962   | 5 | 130690175 | A | G | 0.2363 | 0.0314  | 0.0055 | 1.29E-08 | 5.6869  | 1376071 | Asthma |
| rs2189149  | 5 | 130690789 | T | C | 0.4152 | 0.0289  | 0.0048 | 1.93E-09 | 6.0038  | 1376071 | Asthma |
| rs4836521  | 5 | 130691957 | A | T | 0.2364 | 0.0318  | 0.0055 | 8.33E-09 | 5.7617  | 1376071 | Asthma |
| rs6895063  | 5 | 130692599 | A | G | 0.2760 | 0.0311  | 0.0053 | 3.60E-09 | 5.9018  | 1376071 | Asthma |
| rs1544381  | 5 | 130696053 | C | T | 0.3129 | 0.0321  | 0.0051 | 3.08E-10 | 6.2945  | 1376071 | Asthma |
| rs1544380  | 5 | 130696081 | T | C | 0.3129 | 0.0321  | 0.0051 | 3.03E-10 | 6.2972  | 1376071 | Asthma |
| rs7717344  | 5 | 130696869 | G | A | 0.2363 | 0.0316  | 0.0055 | 1.09E-08 | 5.7166  | 1376071 | Asthma |
| rs79265393 | 5 | 130697256 | T | C | 0.2363 | 0.0315  | 0.0055 | 1.14E-08 | 5.7080  | 1376071 | Asthma |
| rs4836000  | 5 | 130698945 | A | G | 0.3118 | 0.0323  | 0.0051 | 2.49E-10 | 6.3279  | 1376071 | Asthma |
| rs6595956  | 5 | 130702104 | T | A | 0.2363 | 0.0316  | 0.0055 | 1.11E-08 | 5.7139  | 1376071 | Asthma |
| rs4836522  | 5 | 130706080 | T | G | 0.2351 | 0.0327  | 0.0055 | 3.32E-09 | 5.9147  | 1376071 | Asthma |
| rs3981872  | 5 | 130717778 | C | T | 0.2368 | 0.0319  | 0.0055 | 7.11E-09 | 5.7885  | 1376071 | Asthma |
| rs10072314 | 5 | 130718462 | T | A | 0.2368 | 0.0316  | 0.0055 | 1.04E-08 | 5.7245  | 1376071 | Asthma |
| rs10057548 | 5 | 130718536 | A | G | 0.2764 | 0.0314  | 0.0053 | 2.50E-09 | 5.9617  | 1376071 | Asthma |
| rs10056486 | 5 | 130719895 | G | T | 0.2368 | 0.0317  | 0.0055 | 9.53E-09 | 5.7389  | 1376071 | Asthma |
| rs10078677 | 5 | 130720231 | T | C | 0.3123 | 0.0324  | 0.0051 | 1.98E-10 | 6.3627  | 1376071 | Asthma |
| rs28504012 | 5 | 130723569 | A | G | 0.2368 | 0.0317  | 0.0055 | 9.32E-09 | 5.7428  | 1376071 | Asthma |
| rs7701967  | 5 | 130724057 | A | G | 0.3220 | -0.0465 | 0.0054 | 6.52E-18 | -8.6231 | 1316443 | Asthma |
| rs4113916  | 5 | 130726325 | A | G | 0.2368 | 0.0317  | 0.0055 | 9.17E-09 | 5.7454  | 1376071 | Asthma |
| rs78612073 | 5 | 130726563 | C | T | 0.2368 | 0.0317  | 0.0055 | 8.95E-09 | 5.7495  | 1376071 | Asthma |
| rs3844059  | 5 | 130727499 | G | A | 0.3137 | 0.0325  | 0.0051 | 1.58E-10 | 6.3974  | 1376071 | Asthma |
| rs3901274  | 5 | 130727647 | G | A | 0.2369 | 0.0317  | 0.0055 | 8.98E-09 | 5.7490  | 1376071 | Asthma |
| rs13357459 | 5 | 130731798 | G | C | 0.3135 | 0.0326  | 0.0051 | 1.48E-10 | 6.4077  | 1376071 | Asthma |
| rs12519814 | 5 | 130734550 | A | G | 0.2789 | 0.0333  | 0.0058 | 1.06E-08 | 5.7217  | 1198533 | Asthma |
| rs10477719 | 5 | 130738313 | T | C | 0.3165 | 0.0322  | 0.0051 | 2.35E-10 | 6.3362  | 1376071 | Asthma |
| rs4706008  | 5 | 130739645 | T | A | 0.2807 | 0.0312  | 0.0052 | 2.58E-09 | 5.9563  | 1376071 | Asthma |
| rs1895472  | 5 | 130741104 | A | C | 0.2368 | 0.0320  | 0.0055 | 7.09E-09 | 5.7889  | 1376071 | Asthma |
| rs9327570  | 5 | 130742012 | C | G | 0.3155 | 0.0322  | 0.0051 | 2.33E-10 | 6.3380  | 1376071 | Asthma |
| rs10213840 | 5 | 130745221 | C | T | 0.3165 | 0.0327  | 0.0051 | 1.26E-10 | 6.4321  | 1376071 | Asthma |
| rs6891172  | 5 | 130747213 | G | A | 0.3163 | 0.0322  | 0.0051 | 2.32E-10 | 6.3383  | 1376071 | Asthma |
| rs6895466  | 5 | 130747336 | G | A | 0.3167 | 0.0323  | 0.0051 | 1.93E-10 | 6.3672  | 1376071 | Asthma |
| rs1895473  | 5 | 130748776 | A | C | 0.2368 | 0.0316  | 0.0055 | 1.02E-08 | 5.7275  | 1376071 | Asthma |
| rs1895475  | 5 | 130749401 | G | A | 0.3156 | 0.0324  | 0.0051 | 1.83E-10 | 6.3747  | 1376071 | Asthma |
| rs80288757 | 5 | 130752140 | G | A | 0.2369 | 0.0320  | 0.0055 | 6.71E-09 | 5.7979  | 1376071 | Asthma |
| rs12719428 | 5 | 130752525 | A | G | 0.3125 | 0.0326  | 0.0051 | 1.56E-10 | 6.3991  | 1376071 | Asthma |
| rs7716487  | 5 | 130758054 | C | T | 0.3135 | 0.0315  | 0.0056 | 1.40E-08 | 5.6731  | 1224666 | Asthma |
| rs9327571  | 5 | 130759256 | C | T | 0.3165 | 0.0323  | 0.0051 | 2.12E-10 | 6.3527  | 1376071 | Asthma |
| rs12518350 | 5 | 130760567 | G | A | 0.2795 | 0.0312  | 0.0053 | 2.90E-09 | 5.9372  | 1376071 | Asthma |
| rs763495   | 5 | 130761947 | C | T | 0.3132 | 0.0322  | 0.0051 | 2.59E-10 | 6.3215  | 1376071 | Asthma |
| rs17597813 | 5 | 130762304 | A | G | 0.2368 | 0.0318  | 0.0055 | 8.02E-09 | 5.7682  | 1376071 | Asthma |
| rs1862647  | 5 | 130766330 | A | G | 0.3135 | 0.0317  | 0.0051 | 4.82E-10 | 6.2248  | 1376071 | Asthma |
| rs6595960  | 5 | 130767534 | T | A | 0.3148 | 0.0321  | 0.0051 | 2.59E-10 | 6.3216  | 1376071 | Asthma |

|             |   |           |   |   |        |         |        |          |         |         |        |
|-------------|---|-----------|---|---|--------|---------|--------|----------|---------|---------|--------|
| rs2024307   | 5 | 130772667 | C | T | 0.3193 | 0.0322  | 0.0053 | 1.68E-09 | 6.0259  | 1008051 | Asthma |
| rs10043177  | 5 | 130772833 | C | T | 0.3158 | 0.0315  | 0.0051 | 5.49E-10 | 6.2044  | 1376071 | Asthma |
| rs1029926   | 5 | 130775461 | C | T | 0.2995 | 0.0326  | 0.0051 | 2.35E-10 | 6.3369  | 1376071 | Asthma |
| rs6863137   | 5 | 130777256 | G | C | 0.2434 | 0.0308  | 0.0055 | 1.93E-08 | 5.6180  | 1376071 | Asthma |
| rs10044304  | 5 | 130778208 | A | G | 0.2972 | 0.0332  | 0.0052 | 1.15E-10 | 6.4460  | 1376071 | Asthma |
| rs9327573   | 5 | 130781568 | A | G | 0.2972 | 0.0331  | 0.0052 | 1.41E-10 | 6.4150  | 1376071 | Asthma |
| rs2098250   | 5 | 130783243 | A | T | 0.2977 | 0.0332  | 0.0051 | 1.14E-10 | 6.4476  | 1376071 | Asthma |
| rs6877493   | 5 | 130784765 | G | A | 0.2987 | 0.0325  | 0.0056 | 7.46E-09 | 5.7804  | 1224666 | Asthma |
| rs112927277 | 5 | 130786757 | A | G | 0.2986 | 0.0324  | 0.0056 | 7.54E-09 | 5.7784  | 1224666 | Asthma |
| rs11489163  | 5 | 130786964 | T | G | 0.3013 | 0.0323  | 0.0056 | 8.53E-09 | 5.7577  | 1224666 | Asthma |
| rs2110104   | 5 | 130790259 | A | C | 0.2977 | 0.0332  | 0.0052 | 1.09E-10 | 6.4544  | 1376071 | Asthma |
| rs4706017   | 5 | 130792324 | G | C | 0.3006 | 0.0331  | 0.0051 | 1.16E-10 | 6.4439  | 1376071 | Asthma |
| rs4705887   | 5 | 130792844 | G | T | 0.2466 | 0.0303  | 0.0055 | 2.87E-08 | 5.5491  | 1376071 | Asthma |
| rs7724716   | 5 | 130794502 | C | T | 0.3037 | 0.0324  | 0.0051 | 2.50E-10 | 6.3271  | 1376071 | Asthma |
| rs12518294  | 5 | 130797442 | A | G | 0.2434 | 0.0304  | 0.0055 | 2.73E-08 | 5.5579  | 1376071 | Asthma |
| rs12521111  | 5 | 130799836 | G | A | 0.2851 | 0.0298  | 0.0052 | 1.21E-08 | 5.6991  | 1376071 | Asthma |
| rs4705889   | 5 | 130800404 | T | C | 0.3007 | 0.0325  | 0.0051 | 2.51E-10 | 6.3263  | 1376071 | Asthma |
| rs2024309   | 5 | 130802121 | A | G | 0.3056 | 0.0322  | 0.0051 | 3.32E-10 | 6.2832  | 1376071 | Asthma |
| rs75482085  | 5 | 130802312 | C | T | 0.2485 | 0.0298  | 0.0054 | 4.26E-08 | 5.4796  | 1376071 | Asthma |
| rs12652579  | 5 | 130804987 | G | A | 0.2484 | 0.0299  | 0.0054 | 4.13E-08 | 5.4853  | 1376071 | Asthma |
| rs10057047  | 5 | 130811874 | C | A | 0.2991 | 0.0325  | 0.0052 | 2.82E-10 | 6.3086  | 1376071 | Asthma |
| rs10052076  | 5 | 130812684 | C | T | 0.2986 | 0.0324  | 0.0052 | 3.12E-10 | 6.2928  | 1376071 | Asthma |
| rs11948739  | 5 | 130812924 | C | T | 0.2986 | 0.0324  | 0.0052 | 3.32E-10 | 6.2832  | 1376071 | Asthma |
| rs12522275  | 5 | 130813560 | A | G | 0.2985 | 0.0322  | 0.0052 | 3.90E-10 | 6.2580  | 1376071 | Asthma |
| rs11948761  | 5 | 131035277 | T | A | 0.3314 | -0.0467 | 0.0055 | 1.27E-17 | -8.5464 | 1299802 | Asthma |
| rs4705885   | 5 | 131087866 | A | G | 0.3500 | -0.0475 | 0.0054 | 9.89E-19 | -8.8364 | 1299802 | Asthma |
| rs139746351 | 5 | 131133394 | A | G | 0.3532 | -0.0474 | 0.0054 | 1.08E-18 | -8.8268 | 1299802 | Asthma |
| rs11743851  | 5 | 131277907 | C | T | 0.3540 | -0.0478 | 0.0053 | 3.26E-19 | -8.9595 | 1299802 | Asthma |
| rs1030271   | 5 | 131296962 | G | C | 0.3538 | -0.0473 | 0.0053 | 8.97E-19 | -8.8473 | 1299802 | Asthma |
| rs4706020   | 5 | 131338383 | A | G | 0.3527 | -0.0474 | 0.0054 | 9.26E-19 | -8.8437 | 1299802 | Asthma |
| rs141875295 | 5 | 131347723 | A | T | 0.0165 | 0.0972  | 0.0172 | 1.50E-08 | 5.6611  | 1237732 | Asthma |
| rs117734351 | 5 | 131364355 | G | A | 0.0165 | 0.0971  | 0.0172 | 1.53E-08 | 5.6582  | 1237732 | Asthma |
| rs11738827  | 5 | 131381397 | T | C | 0.3512 | -0.0479 | 0.0054 | 4.95E-19 | -8.9133 | 1299802 | Asthma |
| rs146670006 | 5 | 131516469 | A | G | 0.0161 | 0.0948  | 0.0172 | 3.34E-08 | 5.5228  | 1270278 | Asthma |
| rs1910030   | 5 | 131556421 | G | T | 0.4908 | 0.0374  | 0.0058 | 1.14E-10 | 6.4471  | 853828  | Asthma |
| rs11950815  | 5 | 131619794 | A | G | 0.3576 | -0.0463 | 0.0053 | 2.95E-18 | -8.7133 | 1299802 | Asthma |
| rs117173751 | 5 | 131635312 | A | G | 0.0161 | 0.0962  | 0.0172 | 2.06E-08 | 5.6070  | 1270278 | Asthma |
| rs152815    | 5 | 131690525 | A | G | 0.3609 | -0.0459 | 0.0053 | 3.49E-18 | -8.6943 | 1299802 | Asthma |
| rs12523195  | 5 | 131726714 | C | T | 0.3611 | -0.0464 | 0.0053 | 1.16E-18 | -8.8188 | 1299802 | Asthma |
| rs35403253  | 5 | 131745267 | T | C | 0.3599 | -0.0462 | 0.0053 | 1.76E-18 | -8.7719 | 1299802 | Asthma |
| rs34914000  | 5 | 131813257 | C | T | 0.2281 | 0.0349  | 0.0059 | 4.15E-09 | 5.8780  | 1299802 | Asthma |
| rs61256039  | 5 | 131871665 | T | C | 0.2283 | 0.0371  | 0.0063 | 4.02E-09 | 5.8832  | 1208025 | Asthma |
| rs35149731  | 5 | 131912097 | A | G | 0.3601 | -0.0459 | 0.0052 | 1.03E-18 | -8.8323 | 1316443 | Asthma |
| rs17132288  | 5 | 132000412 | T | C | 0.3945 | -0.0412 | 0.0049 | 5.08E-17 | -8.3850 | 1376071 | Asthma |
| rs440970    | 5 | 132000594 | G | T | 0.4445 | 0.0291  | 0.0048 | 9.81E-10 | 6.1125  | 1376071 | Asthma |
| rs422090    | 5 | 132004153 | C | T | 0.4480 | 0.0279  | 0.0048 | 4.68E-09 | 5.8581  | 1376071 | Asthma |
| rs10074490  | 5 | 132004339 | T | C | 0.3873 | -0.0409 | 0.0049 | 1.24E-16 | -8.2791 | 1376071 | Asthma |
| rs449915    | 5 | 132004538 | A | G | 0.4484 | 0.0282  | 0.0048 | 3.48E-09 | 5.9073  | 1376071 | Asthma |
| rs247006    | 5 | 132005684 | C | G | 0.4478 | 0.0281  | 0.0048 | 3.94E-09 | 5.8867  | 1376071 | Asthma |
| rs7714191   | 5 | 132005848 | C | G | 0.3874 | -0.0411 | 0.0049 | 8.73E-17 | -8.3208 | 1376071 | Asthma |
| rs247005    | 5 | 132006405 | T | C | 0.4478 | 0.0280  | 0.0048 | 4.18E-09 | 5.8771  | 1376071 | Asthma |
| rs10040809  | 5 | 132007324 | C | A | 0.3950 | -0.0418 | 0.0049 | 1.92E-17 | -8.4983 | 1376071 | Asthma |
| rs247003    | 5 | 132008699 | G | A | 0.4479 | 0.0281  | 0.0048 | 3.69E-09 | 5.8975  | 1376071 | Asthma |
| rs247002    | 5 | 132009539 | A | G | 0.4480 | 0.0283  | 0.0048 | 2.98E-09 | 5.9326  | 1376071 | Asthma |
| rs247001    | 5 | 132010768 | G | A | 0.4831 | 0.0313  | 0.0049 | 1.21E-10 | 6.4384  | 1316443 | Asthma |
| rs247000    | 5 | 132010948 | T | C | 0.4475 | 0.0286  | 0.0048 | 2.14E-09 | 5.9868  | 1376071 | Asthma |
| rs4705908   | 5 | 132011827 | A | G | 0.3840 | -0.0405 | 0.0052 | 8.49E-15 | -7.7600 | 1008051 | Asthma |
| rs247011    | 5 | 132023921 | A | G | 0.2195 | 0.0321  | 0.0057 | 1.91E-08 | 5.6203  | 1376071 | Asthma |
| rs17674015  | 5 | 132026085 | A | C | 0.3298 | -0.0329 | 0.0051 | 1.41E-10 | -6.4144 | 1376071 | Asthma |
| rs3916443   | 5 | 132033386 | C | T | 0.3309 | -0.0329 | 0.0051 | 1.40E-10 | -6.4159 | 1376071 | Asthma |
| rs1858074   | 5 | 132036306 | G | A | 0.3157 | -0.0392 | 0.0056 | 1.90E-12 | -7.0414 | 1246149 | Asthma |
| rs11739935  | 5 | 132044965 | T | C | 0.3065 | -0.0383 | 0.0052 | 2.73E-13 | -7.3073 | 1376071 | Asthma |
| rs246918    | 5 | 132047766 | A | G | 0.2143 | 0.0339  | 0.0059 | 8.65E-09 | 5.7553  | 1316443 | Asthma |
| rs7716474   | 5 | 132048290 | C | G | 0.3302 | -0.0336 | 0.0051 | 5.47E-11 | -6.5576 | 1376071 | Asthma |
| rs5029422   | 5 | 132054921 | C | G | 0.3049 | -0.0400 | 0.0054 | 8.16E-14 | -7.4678 | 1349938 | Asthma |
| rs4705915   | 5 | 132055765 | T | A | 0.3295 | -0.0342 | 0.0051 | 2.87E-11 | -6.6530 | 1376071 | Asthma |
| rs2069803   | 5 | 132064740 | C | T | 0.3892 | -0.0420 | 0.0049 | 1.46E-17 | -8.5299 | 1376071 | Asthma |
| rs10900804  | 5 | 132066152 | T | C | 0.3891 | -0.0424 | 0.0049 | 6.69E-18 | -8.6199 | 1376071 | Asthma |
| rs168681    | 5 | 132066757 | A | G | 0.4251 | 0.0266  | 0.0048 | 2.89E-08 | 5.5478  | 1376071 | Asthma |
| rs3091338   | 5 | 132067045 | T | C | 0.3882 | -0.0421 | 0.0049 | 1.09E-17 | -8.5637 | 1376071 | Asthma |
| rs721121    | 5 | 132070740 | G | T | 0.3998 | -0.0407 | 0.0049 | 9.36E-17 | -8.3126 | 1376071 | Asthma |
| rs4705916   | 5 | 132071800 | A | C | 0.3910 | -0.0431 | 0.0049 | 2.01E-18 | -8.7569 | 1376071 | Asthma |
| rs2069614   | 5 | 132071908 | C | T | 0.4002 | -0.0411 | 0.0049 | 4.55E-17 | -8.3979 | 1376071 | Asthma |
| rs2069616   | 5 | 132072384 | G | A | 0.4007 | -0.0413 | 0.0049 | 2.95E-17 | -8.4488 | 1376071 | Asthma |

|             |   |           |   |   |        |         |        |          |          |         |        |
|-------------|---|-----------|---|---|--------|---------|--------|----------|----------|---------|--------|
| rs1469149   | 5 | 132073149 | C | A | 0.3759 | -0.0468 | 0.0050 | 3.29E-21 | -9.4531  | 1376071 | Asthma |
| rs743564    | 5 | 132075186 | C | T | 0.3668 | -0.0498 | 0.0050 | 1.62E-23 | -9.9942  | 1376071 | Asthma |
| rs3852206   | 5 | 132079743 | A | G | 0.3667 | -0.0499 | 0.0050 | 1.36E-23 | -10.0110 | 1376071 | Asthma |
| rs25887     | 5 | 132080368 | C | A | 0.4474 | 0.0298  | 0.0048 | 3.89E-10 | 6.2584   | 1376071 | Asthma |
| rs7721882   | 5 | 132083255 | G | A | 0.3921 | -0.0441 | 0.0049 | 3.17E-19 | -8.9629  | 1376071 | Asthma |
| rs3864277   | 5 | 132084556 | A | G | 0.3896 | -0.0436 | 0.0049 | 8.61E-19 | -8.8518  | 1376071 | Asthma |
| rs6898270   | 5 | 132085497 | T | C | 0.3916 | -0.0443 | 0.0049 | 1.96E-19 | -9.0156  | 1376071 | Asthma |
| rs3846728   | 5 | 132100524 | A | G | 0.4277 | -0.0331 | 0.0048 | 5.37E-12 | -6.8956  | 1376071 | Asthma |
| rs10065787  | 5 | 132100793 | T | G | 0.4264 | -0.0323 | 0.0048 | 1.94E-11 | -6.7105  | 1376071 | Asthma |
| rs27437     | 5 | 132101268 | G | A | 0.4457 | -0.0324 | 0.0049 | 4.57E-11 | -6.5843  | 1316443 | Asthma |
| rs11749300  | 5 | 132127143 | C | T | 0.4291 | -0.0341 | 0.0048 | 1.34E-12 | -7.0903  | 1376071 | Asthma |
| rs3843503   | 5 | 132130936 | A | T | 0.4362 | -0.0387 | 0.0060 | 8.34E-11 | -6.4944  | 1030443 | Asthma |
| rs715285    | 5 | 132149690 | G | A | 0.4297 | -0.0340 | 0.0048 | 1.61E-12 | -7.0645  | 1376071 | Asthma |
| rs2897096   | 5 | 132150591 | G | A | 0.4375 | -0.0378 | 0.0067 | 1.81E-08 | -5.6291  | 912533  | Asthma |
| rs145060323 | 5 | 132160441 | C | T | 0.4335 | -0.0321 | 0.0056 | 1.08E-08 | -5.7179  | 856646  | Asthma |
| rs147237535 | 5 | 132160682 | A | C | 0.4298 | -0.0338 | 0.0048 | 2.17E-12 | -7.0229  | 1376071 | Asthma |
| rs35696821  | 5 | 132172324 | T | C | 0.4295 | -0.0338 | 0.0048 | 2.07E-12 | -7.0300  | 1376071 | Asthma |
| rs10478998  | 5 | 132180838 | A | G | 0.4300 | -0.0339 | 0.0048 | 1.80E-12 | -7.0496  | 1376071 | Asthma |
| rs6896703   | 5 | 132185602 | G | C | 0.4299 | -0.0340 | 0.0048 | 1.48E-12 | -7.0766  | 1376071 | Asthma |
| rs10076758  | 5 | 132188606 | G | A | 0.4306 | -0.0341 | 0.0048 | 1.26E-12 | -7.0983  | 1376071 | Asthma |
| rs2278398   | 5 | 132194748 | G | A | 0.4300 | -0.0340 | 0.0048 | 1.47E-12 | -7.0775  | 1376071 | Asthma |
| rs156029    | 5 | 132196941 | A | G | 0.3815 | 0.0273  | 0.0049 | 2.39E-08 | 5.5808   | 1376071 | Asthma |
| rs7701237   | 5 | 132198688 | T | C | 0.4300 | -0.0343 | 0.0048 | 1.01E-12 | -7.1295  | 1376071 | Asthma |
| rs3749756   | 5 | 132198806 | T | C | 0.4299 | -0.0342 | 0.0048 | 1.13E-12 | -7.1132  | 1376071 | Asthma |
| rs3805683   | 5 | 132199432 | G | T | 0.4301 | -0.0344 | 0.0048 | 8.78E-13 | -7.1483  | 1376071 | Asthma |
| rs152049    | 5 | 132200171 | C | T | 0.3910 | 0.0278  | 0.0049 | 1.12E-08 | 5.7109   | 1376071 | Asthma |
| rs4361509   | 5 | 132201060 | A | G | 0.4299 | -0.0342 | 0.0048 | 1.18E-12 | -7.1073  | 1376071 | Asthma |
| rs3805681   | 5 | 132202167 | G | T | 0.4297 | -0.0349 | 0.0049 | 1.24E-12 | -7.1010  | 1316443 | Asthma |
| rs10075459  | 5 | 132205670 | G | C | 0.4301 | -0.0342 | 0.0048 | 1.21E-12 | -7.1046  | 1376071 | Asthma |
| rs10052046  | 5 | 132208773 | T | G | 0.4307 | -0.0343 | 0.0048 | 9.91E-13 | -7.1317  | 1376071 | Asthma |
| rs12653783  | 5 | 132209685 | G | A | 0.4293 | -0.0341 | 0.0048 | 1.48E-12 | -7.0768  | 1376071 | Asthma |
| rs12657965  | 5 | 132209694 | G | C | 0.4293 | -0.0340 | 0.0048 | 1.75E-12 | -7.0529  | 1376071 | Asthma |
| rs3828675   | 5 | 132211175 | A | G | 0.4299 | -0.0344 | 0.0048 | 8.83E-13 | -7.1475  | 1376071 | Asthma |
| rs3792894   | 5 | 132211578 | A | G | 0.4307 | -0.0345 | 0.0048 | 7.36E-13 | -7.1725  | 1376071 | Asthma |
| rs7703009   | 5 | 132216692 | G | C | 0.4291 | -0.0349 | 0.0049 | 1.38E-12 | -7.0864  | 1316443 | Asthma |
| rs2301579   | 5 | 132217647 | A | C | 0.4300 | -0.0349 | 0.0049 | 1.37E-12 | -7.0870  | 1316443 | Asthma |
| rs6596070   | 5 | 132220481 | C | T | 0.4310 | -0.0364 | 0.0049 | 1.95E-13 | -7.3519  | 1316443 | Asthma |
| rs7733502   | 5 | 132220510 | C | A | 0.4308 | -0.0362 | 0.0049 | 2.36E-13 | -7.3268  | 1316443 | Asthma |
| rs4705849   | 5 | 132223506 | A | T | 0.4203 | -0.0517 | 0.0050 | 2.99E-25 | -10.3821 | 1316443 | Asthma |
| rs72793278  | 5 | 132225679 | A | C | 0.4203 | -0.0513 | 0.0050 | 5.77E-25 | -10.3194 | 1316443 | Asthma |
| rs4705926   | 5 | 132226065 | T | C | 0.4203 | -0.0513 | 0.0050 | 5.51E-25 | -10.3237 | 1316443 | Asthma |
| rs72793280  | 5 | 132227207 | T | C | 0.4128 | -0.0503 | 0.0050 | 8.45E-24 | -10.0582 | 1316443 | Asthma |
| rs113823725 | 5 | 132227808 | G | C | 0.4253 | -0.0506 | 0.0057 | 1.00E-18 | -8.8349  | 818501  | Asthma |
| rs157577    | 5 | 132227878 | G | C | 0.2913 | 0.0308  | 0.0053 | 8.10E-09 | 5.7665   | 1316443 | Asthma |
| rs111547866 | 5 | 132228808 | T | C | 0.4134 | -0.0509 | 0.0050 | 2.20E-24 | -10.1898 | 1316443 | Asthma |
| rs112688207 | 5 | 132228943 | T | C | 0.4136 | -0.0507 | 0.0050 | 2.99E-24 | -10.1600 | 1316443 | Asthma |
| rs72793283  | 5 | 132231248 | A | G | 0.4159 | -0.0501 | 0.0049 | 1.01E-24 | -10.2657 | 1376071 | Asthma |
| rs11955347  | 5 | 132232231 | A | G | 0.4162 | -0.0502 | 0.0049 | 6.73E-25 | -10.3044 | 1376071 | Asthma |
| rs9791170   | 5 | 132233934 | T | C | 0.3894 | 0.0289  | 0.0049 | 2.69E-09 | 5.9494   | 1376071 | Asthma |
| rs11741341  | 5 | 132234525 | A | G | 0.3894 | 0.0288  | 0.0049 | 2.96E-09 | 5.9336   | 1376071 | Asthma |
| rs10058655  | 5 | 132235203 | T | A | 0.4162 | -0.0503 | 0.0049 | 5.37E-25 | -10.3262 | 1376071 | Asthma |
| rs10051679  | 5 | 132235238 | T | A | 0.3894 | 0.0289  | 0.0049 | 2.61E-09 | 5.9544   | 1376071 | Asthma |
| rs10036208  | 5 | 132235630 | T | C | 0.3669 | 0.0306  | 0.0049 | 4.55E-10 | 6.2338   | 1376071 | Asthma |
| rs733300    | 5 | 132236550 | A | G | 0.3667 | 0.0308  | 0.0049 | 3.85E-10 | 6.2599   | 1376071 | Asthma |
| rs4535443   | 5 | 132236868 | A | G | 0.3667 | 0.0308  | 0.0049 | 3.44E-10 | 6.2778   | 1376071 | Asthma |
| rs2089855   | 5 | 132237836 | G | A | 0.4156 | -0.0505 | 0.0049 | 3.44E-25 | -10.3686 | 1376071 | Asthma |
| rs12521097  | 5 | 132239645 | A | G | 0.4331 | -0.0493 | 0.0048 | 2.25E-24 | -10.1879 | 1376071 | Asthma |
| rs6863548   | 5 | 132240227 | G | A | 0.4851 | 0.0440  | 0.0048 | 2.35E-20 | 9.2450   | 1376071 | Asthma |
| rs6863213   | 5 | 132240239 | T | C | 0.4155 | -0.0502 | 0.0049 | 6.37E-25 | -10.3096 | 1376071 | Asthma |
| rs11949055  | 5 | 132241044 | C | T | 0.4160 | -0.0505 | 0.0049 | 3.10E-25 | -10.3786 | 1376071 | Asthma |
| rs11952099  | 5 | 132241079 | A | G | 0.4844 | 0.0441  | 0.0048 | 2.23E-20 | 9.2508   | 1376071 | Asthma |
| rs1588263   | 5 | 132241465 | T | C | 0.4844 | 0.0441  | 0.0048 | 2.07E-20 | 9.2589   | 1376071 | Asthma |
| rs2136188   | 5 | 132241821 | C | T | 0.4844 | 0.0441  | 0.0048 | 2.02E-20 | 9.2612   | 1376071 | Asthma |
| rs2136187   | 5 | 132242201 | T | C | 0.4844 | 0.0440  | 0.0048 | 2.33E-20 | 9.2464   | 1376071 | Asthma |
| rs2136186   | 5 | 132242572 | G | A | 0.4844 | 0.0441  | 0.0048 | 1.97E-20 | 9.2641   | 1376071 | Asthma |
| rs4705927   | 5 | 132242915 | C | G | 0.4945 | 0.0453  | 0.0048 | 1.76E-21 | 9.5186   | 1376071 | Asthma |
| rs4705928   | 5 | 132242944 | T | C | 0.4160 | -0.0504 | 0.0049 | 3.53E-25 | -10.3660 | 1376071 | Asthma |
| rs162908    | 5 | 132243262 | T | A | 0.4844 | 0.0441  | 0.0048 | 2.06E-20 | 9.2594   | 1376071 | Asthma |
| rs6890009   | 5 | 132244340 | C | A | 0.4787 | 0.0461  | 0.0051 | 2.07E-19 | 9.0094   | 1246149 | Asthma |
| rs162907    | 5 | 132244459 | G | A | 0.3667 | 0.0311  | 0.0049 | 2.40E-10 | 6.3333   | 1376071 | Asthma |
| rs6871350   | 5 | 132244527 | T | C | 0.4852 | 0.0443  | 0.0048 | 1.49E-20 | 9.2935   | 1376071 | Asthma |
| rs2171247   | 5 | 132244541 | G | T | 0.4850 | 0.0444  | 0.0048 | 1.24E-20 | 9.3132   | 1376071 | Asthma |
| rs28472559  | 5 | 132245918 | G | A | 0.4847 | 0.0442  | 0.0048 | 1.74E-20 | 9.2770   | 1376071 | Asthma |
| rs3844312   | 5 | 132246663 | T | C | 0.4158 | -0.0507 | 0.0049 | 2.19E-25 | -10.4117 | 1376071 | Asthma |

|             |   |           |   |   |        |         |        |          |          |         |        |
|-------------|---|-----------|---|---|--------|---------|--------|----------|----------|---------|--------|
| rs6867282   | 5 | 132247427 | G | C | 0.4845 | 0.0441  | 0.0048 | 1.89E-20 | 9.2686   | 1376071 | Asthma |
| rs371709    | 5 | 132247547 | A | G | 0.3670 | 0.0311  | 0.0049 | 2.51E-10 | 6.3268   | 1376071 | Asthma |
| rs112300250 | 5 | 132247599 | G | A | 0.4846 | 0.0443  | 0.0048 | 1.28E-20 | 9.3094   | 1376071 | Asthma |
| rs4705929   | 5 | 132248485 | G | T | 0.4848 | 0.0442  | 0.0048 | 1.56E-20 | 9.2888   | 1376071 | Asthma |
| rs7701414   | 5 | 132250265 | G | A | 0.4161 | -0.0506 | 0.0049 | 2.27E-25 | -10.4082 | 1376071 | Asthma |
| rs4330455   | 5 | 132250656 | T | C | 0.4849 | 0.0440  | 0.0048 | 2.38E-20 | 9.2439   | 1376071 | Asthma |
| rs3763112   | 5 | 132250787 | A | G | 0.4851 | 0.0439  | 0.0048 | 3.23E-20 | 9.2111   | 1376071 | Asthma |
| rs334902    | 5 | 132250866 | C | G | 0.4848 | 0.0440  | 0.0048 | 2.32E-20 | 9.2463   | 1376071 | Asthma |
| rs4594848   | 5 | 132250905 | A | C | 0.4156 | -0.0505 | 0.0049 | 3.83E-25 | -10.3584 | 1376071 | Asthma |
| rs81598     | 5 | 132252267 | C | G | 0.3673 | 0.0309  | 0.0049 | 3.12E-10 | 6.2929   | 1376071 | Asthma |
| rs7736284   | 5 | 132252458 | T | C | 0.4844 | 0.0442  | 0.0048 | 1.69E-20 | 9.2802   | 1376071 | Asthma |
| rs4705931   | 5 | 132252652 | T | C | 0.4825 | 0.0440  | 0.0048 | 2.60E-20 | 9.2345   | 1376071 | Asthma |
| rs7727038   | 5 | 132254564 | T | C | 0.5199 | -0.0363 | 0.0048 | 2.89E-14 | -7.6032  | 1376071 | Asthma |
| rs17516457  | 5 | 132254694 | C | T | 0.3808 | -0.0552 | 0.0050 | 8.21E-29 | -11.1379 | 1376071 | Asthma |
| rs7727544   | 5 | 132254841 | T | C | 0.5200 | -0.0363 | 0.0048 | 2.72E-14 | -7.6111  | 1376071 | Asthma |
| rs112537099 | 5 | 132256032 | G | C | 0.4187 | -0.0507 | 0.0049 | 1.80E-25 | -10.4303 | 1376071 | Asthma |
| rs7720230   | 5 | 132256712 | G | T | 0.4187 | -0.0507 | 0.0049 | 2.08E-25 | -10.4166 | 1376071 | Asthma |
| rs3900945   | 5 | 132257177 | T | C | 0.3821 | 0.0336  | 0.0049 | 5.11E-12 | 6.9027   | 1376071 | Asthma |
| rs71583465  | 5 | 132258935 | G | C | 0.3827 | 0.0338  | 0.0049 | 4.40E-12 | 6.9237   | 1376071 | Asthma |
| rs162904    | 5 | 132260091 | T | C | 0.3693 | 0.0321  | 0.0049 | 5.79E-11 | 6.5490   | 1376071 | Asthma |
| rs10076701  | 5 | 132260726 | C | T | 0.5196 | -0.0363 | 0.0048 | 2.69E-14 | -7.6123  | 1376071 | Asthma |
| rs7735891   | 5 | 132261312 | T | C | 0.4212 | -0.0522 | 0.0049 | 7.04E-27 | -10.7343 | 1376071 | Asthma |
| rs10463891  | 5 | 132261699 | A | G | 0.3803 | 0.0352  | 0.0049 | 5.58E-13 | 7.2104   | 1376071 | Asthma |
| rs10463892  | 5 | 132263012 | T | C | 0.4687 | 0.0368  | 0.0048 | 1.37E-14 | 7.6988   | 1376071 | Asthma |
| rs55633655  | 5 | 132263063 | T | G | 0.4730 | 0.0362  | 0.0052 | 4.25E-12 | 6.9288   | 1224666 | Asthma |
| rs932019    | 5 | 132263677 | T | C | 0.3803 | 0.0354  | 0.0049 | 4.44E-13 | 7.2415   | 1376071 | Asthma |
| rs4361510   | 5 | 132263954 | C | T | 0.3804 | 0.0354  | 0.0049 | 4.00E-13 | 7.2557   | 1376071 | Asthma |
| rs13357280  | 5 | 132264494 | G | A | 0.4209 | -0.0522 | 0.0049 | 7.08E-27 | -10.7338 | 1376071 | Asthma |
| rs58835386  | 5 | 132264866 | A | G | 0.4688 | 0.0370  | 0.0048 | 1.01E-14 | 7.7382   | 1376071 | Asthma |
| rs61352298  | 5 | 132264896 | G | C | 0.3804 | 0.0355  | 0.0049 | 3.68E-13 | 7.2667   | 1376071 | Asthma |
| rs1979981   | 5 | 132266027 | G | A | 0.3805 | 0.0354  | 0.0049 | 4.16E-13 | 7.2504   | 1376071 | Asthma |
| rs1007602   | 5 | 132266473 | T | C | 0.3803 | 0.0356  | 0.0049 | 3.30E-13 | 7.2817   | 1376071 | Asthma |
| rs4705852   | 5 | 132267114 | A | G | 0.3803 | 0.0356  | 0.0049 | 3.26E-13 | 7.2832   | 1376071 | Asthma |
| rs7736102   | 5 | 132268564 | G | A | 0.4687 | 0.0370  | 0.0048 | 1.04E-14 | 7.7349   | 1376071 | Asthma |
| rs6897575   | 5 | 132268842 | C | T | 0.4687 | 0.0369  | 0.0048 | 1.12E-14 | 7.7252   | 1376071 | Asthma |
| rs270621    | 5 | 132270128 | C | A | 0.3668 | 0.0337  | 0.0049 | 6.67E-12 | 6.8644   | 1376071 | Asthma |
| rs55722650  | 5 | 132271607 | T | C | 0.3833 | -0.0571 | 0.0049 | 7.64E-31 | -11.5471 | 1376071 | Asthma |
| rs10479000  | 5 | 132271709 | C | T | 0.4210 | -0.0522 | 0.0049 | 6.39E-27 | -10.7432 | 1376071 | Asthma |
| rs162894    | 5 | 132276179 | T | G | 0.3689 | 0.0337  | 0.0050 | 1.88E-11 | 6.7149   | 1316443 | Asthma |
| rs157573    | 5 | 132278745 | A | C | 0.2185 | 0.0399  | 0.0059 | 9.77E-12 | 6.8097   | 1316443 | Asthma |
| rs162892    | 5 | 132287557 | A | G | 0.3583 | 0.0334  | 0.0051 | 4.22E-11 | 6.5961   | 1316443 | Asthma |
| rs162891    | 5 | 132287575 | T | C | 0.3700 | 0.0346  | 0.0050 | 5.79E-12 | 6.8845   | 1316443 | Asthma |
| rs7705189   | 5 | 132287665 | G | A | 0.4224 | -0.0525 | 0.0050 | 5.93E-26 | -10.5355 | 1316443 | Asthma |
| rs162890    | 5 | 132287965 | T | C | 0.3733 | 0.0333  | 0.0051 | 5.07E-11 | 6.5689   | 1316443 | Asthma |
| rs112719454 | 5 | 132287991 | G | T | 0.3828 | 0.0354  | 0.0064 | 3.87E-08 | 5.4967   | 661498  | Asthma |
| rs2667736   | 5 | 132288383 | A | G | 0.1605 | 0.0400  | 0.0066 | 1.48E-09 | 6.0461   | 1316443 | Asthma |
| rs2667735   | 5 | 132289683 | A | G | 0.1651 | 0.0353  | 0.0064 | 3.66E-08 | 5.5065   | 1376071 | Asthma |
| rs2087097   | 5 | 132289727 | A | G | 0.2710 | 0.0408  | 0.0054 | 2.71E-14 | 7.6116   | 1376071 | Asthma |
| rs157572    | 5 | 132290419 | C | G | 0.3158 | 0.0400  | 0.0051 | 5.93E-15 | 7.8054   | 1376071 | Asthma |
| rs156109    | 5 | 132290918 | C | T | 0.3272 | 0.0449  | 0.0051 | 9.24E-19 | 8.8439   | 1376071 | Asthma |
| rs162887    | 5 | 132293472 | A | G | 0.3301 | 0.0299  | 0.0052 | 6.98E-09 | 5.7914   | 1316443 | Asthma |
| rs460089    | 5 | 132294079 | C | G | 0.3303 | 0.0303  | 0.0052 | 4.37E-09 | 5.8696   | 1316443 | Asthma |
| rs460271    | 5 | 132294369 | C | G | 0.3303 | 0.0300  | 0.0052 | 5.90E-09 | 5.8193   | 1316443 | Asthma |
| rs35260072  | 5 | 132295159 | C | A | 0.3944 | -0.0606 | 0.0050 | 2.22E-33 | -12.0390 | 1316443 | Asthma |
| rs419291    | 5 | 132297662 | T | C | 0.4040 | 0.0347  | 0.0049 | 2.27E-12 | 7.0166   | 1316443 | Asthma |
| rs270612    | 5 | 132301645 | G | A | 0.3308 | 0.0296  | 0.0052 | 9.15E-09 | 5.7457   | 1316443 | Asthma |
| rs72795121  | 5 | 132302631 | A | T | 0.4324 | -0.0556 | 0.0050 | 3.24E-29 | -11.2205 | 1316443 | Asthma |
| rs6860806   | 5 | 132304843 | A | G | 0.4924 | 0.0469  | 0.0049 | 5.27E-22 | 9.6430   | 1316443 | Asthma |
| rs270613    | 5 | 132304890 | A | G | 0.4139 | 0.0362  | 0.0049 | 2.30E-13 | 7.3303   | 1316443 | Asthma |
| rs270614    | 5 | 132305120 | G | A | 0.3308 | 0.0297  | 0.0051 | 7.72E-09 | 5.7745   | 1316443 | Asthma |
| rs270615    | 5 | 132305880 | G | C | 0.3308 | 0.0298  | 0.0051 | 7.56E-09 | 5.7779   | 1316443 | Asthma |
| rs270608    | 5 | 132312713 | C | T | 0.3376 | 0.0293  | 0.0051 | 1.01E-08 | 5.7295   | 1316443 | Asthma |
| rs270607    | 5 | 132313493 | A | G | 0.3395 | 0.0282  | 0.0051 | 3.17E-08 | 5.5318   | 1316443 | Asthma |
| rs270606    | 5 | 132315174 | A | G | 0.3294 | 0.0295  | 0.0050 | 4.72E-09 | 5.8568   | 1376071 | Asthma |
| rs270605    | 5 | 132316118 | C | T | 0.4126 | 0.0349  | 0.0048 | 4.38E-13 | 7.2435   | 1376071 | Asthma |
| rs11950562  | 5 | 132316836 | C | A | 0.4346 | -0.0561 | 0.0049 | 6.96E-30 | -11.3555 | 1316443 | Asthma |
| rs156322    | 5 | 132318232 | C | T | 0.3295 | 0.0295  | 0.0050 | 4.73E-09 | 5.8565   | 1376071 | Asthma |
| rs270603    | 5 | 132319724 | G | C | 0.3293 | 0.0295  | 0.0050 | 4.65E-09 | 5.8593   | 1376071 | Asthma |
| rs682821    | 5 | 132319847 | T | C | 0.3292 | 0.0293  | 0.0050 | 5.73E-09 | 5.8243   | 1376071 | Asthma |
| rs272842    | 5 | 132320824 | A | G | 0.4124 | 0.0349  | 0.0048 | 4.69E-13 | 7.2339   | 1376071 | Asthma |
| rs270602    | 5 | 132321007 | T | C | 0.4022 | 0.0333  | 0.0048 | 5.02E-12 | 6.9049   | 1376071 | Asthma |
| rs270601    | 5 | 132321304 | T | C | 0.3293 | 0.0294  | 0.0050 | 4.80E-09 | 5.8541   | 1376071 | Asthma |
| rs273917    | 5 | 132323925 | A | G | 0.3294 | 0.0292  | 0.0050 | 6.08E-09 | 5.8144   | 1376071 | Asthma |
| rs273916    | 5 | 132324137 | C | A | 0.3295 | 0.0294  | 0.0050 | 4.84E-09 | 5.8527   | 1376071 | Asthma |



|             |   |           |   |   |        |         |        |          |          |         |        |
|-------------|---|-----------|---|---|--------|---------|--------|----------|----------|---------|--------|
| rs273915    | 5 | 132324426 | G | C | 0.3295 | 0.0294  | 0.0050 | 5.10E-09 | 5.8438   | 1376071 | Asthma |
| rs273914    | 5 | 132324738 | A | T | 0.4126 | 0.0352  | 0.0048 | 2.75E-13 | 7.3063   | 1376071 | Asthma |
| rs273913    | 5 | 132325463 | T | C | 0.4123 | 0.0346  | 0.0048 | 7.01E-13 | 7.1793   | 1376071 | Asthma |
| rs273912    | 5 | 132325656 | G | T | 0.3294 | 0.0293  | 0.0050 | 5.60E-09 | 5.8284   | 1376071 | Asthma |
| rs273911    | 5 | 132325833 | C | G | 0.3294 | 0.0292  | 0.0050 | 6.10E-09 | 5.8142   | 1376071 | Asthma |
| rs272894    | 5 | 132326767 | C | T | 0.4126 | 0.0349  | 0.0048 | 4.58E-13 | 7.2374   | 1376071 | Asthma |
| rs272893    | 5 | 132327369 | T | C | 0.4024 | 0.0332  | 0.0048 | 5.95E-12 | 6.8807   | 1376071 | Asthma |
| rs272892    | 5 | 132328656 | C | T | 0.3294 | 0.0294  | 0.0050 | 5.30E-09 | 5.8375   | 1376071 | Asthma |
| rs272891    | 5 | 132328701 | G | T | 0.3294 | 0.0293  | 0.0050 | 5.56E-09 | 5.8295   | 1376071 | Asthma |
| rs56083751  | 5 | 132328945 | A | T | 0.4483 | -0.0496 | 0.0065 | 3.44E-14 | -7.5805  | 674435  | Asthma |
| rs272889    | 5 | 132329685 | A | G | 0.4024 | 0.0332  | 0.0048 | 5.97E-12 | 6.8805   | 1376071 | Asthma |
| rs272888    | 5 | 132329730 | T | C | 0.3294 | 0.0295  | 0.0050 | 4.71E-09 | 5.8570   | 1376071 | Asthma |
| rs272887    | 5 | 132330020 | A | G | 0.3294 | 0.0294  | 0.0050 | 5.33E-09 | 5.8365   | 1376071 | Asthma |
| rs272886    | 5 | 132330147 | T | C | 0.4125 | 0.0350  | 0.0048 | 3.67E-13 | 7.2672   | 1376071 | Asthma |
| rs273909    | 5 | 132331660 | G | A | 0.1367 | 0.0553  | 0.0069 | 1.02E-15 | 8.0248   | 1376071 | Asthma |
| rs272885    | 5 | 132332043 | A | G | 0.3294 | 0.0294  | 0.0050 | 4.90E-09 | 5.8507   | 1376071 | Asthma |
| rs272884    | 5 | 132332961 | G | C | 0.4126 | 0.0349  | 0.0048 | 4.46E-13 | 7.2409   | 1376071 | Asthma |
| rs272883    | 5 | 132333005 | A | G | 0.3295 | 0.0294  | 0.0050 | 5.06E-09 | 5.8451   | 1376071 | Asthma |
| rs272882    | 5 | 132333468 | G | T | 0.3295 | 0.0295  | 0.0050 | 4.52E-09 | 5.8640   | 1376071 | Asthma |
| rs272881    | 5 | 132333571 | G | A | 0.4126 | 0.0349  | 0.0048 | 4.59E-13 | 7.2370   | 1376071 | Asthma |
| rs149218    | 5 | 132333997 | C | T | 0.4024 | 0.0333  | 0.0048 | 5.58E-12 | 6.8900   | 1376071 | Asthma |
| rs272880    | 5 | 132334485 | C | T | 0.3294 | 0.0292  | 0.0050 | 6.42E-09 | 5.8054   | 1376071 | Asthma |
| rs272879    | 5 | 132334853 | C | G | 0.4126 | 0.0351  | 0.0048 | 3.18E-13 | 7.2865   | 1376071 | Asthma |
| rs272878    | 5 | 132336076 | T | C | 0.3295 | 0.0294  | 0.0050 | 5.03E-09 | 5.8461   | 1376071 | Asthma |
| rs56399423  | 5 | 132336964 | C | T | 0.3959 | -0.0594 | 0.0049 | 7.00E-34 | -12.1337 | 1376071 | Asthma |
| rs272877    | 5 | 132338567 | A | G | 0.3294 | 0.0294  | 0.0050 | 5.11E-09 | 5.8437   | 1376071 | Asthma |
| rs272875    | 5 | 132339195 | T | C | 0.4126 | 0.0350  | 0.0048 | 3.94E-13 | 7.2577   | 1376071 | Asthma |
| rs272874    | 5 | 132339353 | C | T | 0.4024 | 0.0333  | 0.0048 | 5.71E-12 | 6.8867   | 1376071 | Asthma |
| rs1050152   | 5 | 132340627 | T | C | 0.3957 | -0.0598 | 0.0049 | 2.65E-34 | -12.2130 | 1376071 | Asthma |
| rs272871    | 5 | 132340995 | T | G | 0.4024 | 0.0332  | 0.0048 | 6.09E-12 | 6.8775   | 1376071 | Asthma |
| rs11242109  | 5 | 132341354 | T | G | 0.4390 | -0.0564 | 0.0048 | 1.04E-31 | -11.7175 | 1376071 | Asthma |
| rs272870    | 5 | 132341380 | C | T | 0.3294 | 0.0294  | 0.0050 | 5.01E-09 | 5.8470   | 1376071 | Asthma |
| rs10075801  | 5 | 132341949 | G | A | 0.4490 | -0.0518 | 0.0060 | 5.36E-18 | -8.6452  | 1003362 | Asthma |
| rs272869    | 5 | 132342304 | A | G | 0.4024 | 0.0332  | 0.0048 | 6.02E-12 | 6.8793   | 1376071 | Asthma |
| rs4705933   | 5 | 132342719 | G | A | 0.4125 | 0.0348  | 0.0048 | 4.83E-13 | 7.2299   | 1376071 | Asthma |
| rs272868    | 5 | 132345058 | C | G | 0.3295 | 0.0294  | 0.0050 | 5.16E-09 | 5.8419   | 1376071 | Asthma |
| rs272867    | 5 | 132345364 | G | A | 0.4125 | 0.0348  | 0.0048 | 4.85E-13 | 7.2295   | 1376071 | Asthma |
| rs4705934   | 5 | 132345907 | A | G | 0.2193 | -0.0391 | 0.0071 | 3.65E-08 | -5.5070  | 1094744 | Asthma |
| rs272866    | 5 | 132346216 | G | A | 0.4174 | 0.0336  | 0.0054 | 5.31E-10 | 6.2096   | 1133307 | Asthma |
| rs272865    | 5 | 132346233 | T | A | 0.4127 | 0.0343  | 0.0049 | 2.08E-12 | 7.0290   | 1349938 | Asthma |
| rs145721969 | 5 | 132347860 | T | C | 0.1189 | 0.0426  | 0.0074 | 9.15E-09 | 5.7458   | 1376071 | Asthma |
| rs272863    | 5 | 132347959 | G | A | 0.4363 | 0.0325  | 0.0053 | 9.60E-10 | 6.1159   | 1224666 | Asthma |
| rs272862    | 5 | 132348060 | A | C | 0.5503 | -0.0328 | 0.0054 | 8.82E-10 | -6.1294  | 1224666 | Asthma |
| rs166635    | 5 | 132348349 | G | A | 0.3294 | 0.0294  | 0.0050 | 5.11E-09 | 5.8435   | 1376071 | Asthma |
| rs272860    | 5 | 132348482 | C | G | 0.4125 | 0.0348  | 0.0048 | 4.65E-13 | 7.2352   | 1376071 | Asthma |
| rs272859    | 5 | 132348563 | T | C | 0.3295 | 0.0294  | 0.0050 | 5.35E-09 | 5.8359   | 1376071 | Asthma |
| rs272857    | 5 | 132349604 | G | A | 0.4024 | 0.0333  | 0.0048 | 5.29E-12 | 6.8976   | 1376071 | Asthma |
| rs10058074  | 5 | 132350453 | A | G | 0.4336 | -0.0553 | 0.0048 | 2.12E-30 | -11.4589 | 1376071 | Asthma |
| rs272856    | 5 | 132351388 | G | C | 0.3294 | 0.0295  | 0.0050 | 4.68E-09 | 5.8581   | 1376071 | Asthma |
| rs272855    | 5 | 132351482 | C | T | 0.3293 | 0.0294  | 0.0050 | 5.29E-09 | 5.8378   | 1376071 | Asthma |
| rs272854    | 5 | 132352324 | C | T | 0.3293 | 0.0293  | 0.0050 | 5.71E-09 | 5.8252   | 1376071 | Asthma |
| rs169256    | 5 | 132352840 | T | C | 0.3294 | 0.0294  | 0.0050 | 4.89E-09 | 5.8510   | 1376071 | Asthma |
| rs272853    | 5 | 132352868 | A | G | 0.3293 | 0.0294  | 0.0050 | 5.38E-09 | 5.8350   | 1376071 | Asthma |
| rs272852    | 5 | 132353074 | G | A | 0.4125 | 0.0349  | 0.0048 | 4.34E-13 | 7.2446   | 1376071 | Asthma |
| rs272851    | 5 | 132353271 | A | G | 0.3295 | 0.0295  | 0.0050 | 4.28E-09 | 5.8728   | 1376071 | Asthma |
| rs272850    | 5 | 132353430 | A | G | 0.3294 | 0.0295  | 0.0050 | 4.44E-09 | 5.8670   | 1376071 | Asthma |
| rs272849    | 5 | 132354548 | A | G | 0.4027 | 0.0336  | 0.0048 | 3.69E-12 | 6.9485   | 1376071 | Asthma |
| rs273902    | 5 | 132357273 | G | A | 0.4027 | 0.0335  | 0.0048 | 3.77E-12 | 6.9454   | 1376071 | Asthma |
| rs183894    | 5 | 132357364 | T | C | 0.4027 | 0.0335  | 0.0048 | 3.88E-12 | 6.9414   | 1376071 | Asthma |
| rs4705938   | 5 | 132358384 | C | T | 0.4358 | -0.0554 | 0.0048 | 1.69E-30 | -11.4783 | 1376071 | Asthma |
| rs273901    | 5 | 132358667 | G | T | 0.3294 | 0.0295  | 0.0050 | 4.44E-09 | 5.8668   | 1376071 | Asthma |
| rs273900    | 5 | 132358913 | G | A | 0.4125 | 0.0349  | 0.0048 | 4.14E-13 | 7.2508   | 1376071 | Asthma |
| rs273899    | 5 | 132359485 | G | A | 0.3294 | 0.0295  | 0.0050 | 4.39E-09 | 5.8688   | 1376071 | Asthma |
| rs273897    | 5 | 132360638 | C | T | 0.4066 | 0.0330  | 0.0053 | 3.69E-10 | 6.2665   | 1224666 | Asthma |
| rs274546    | 5 | 132364175 | A | G | 0.4026 | 0.0336  | 0.0048 | 3.29E-12 | 6.9649   | 1376071 | Asthma |
| rs200837    | 5 | 132364266 | G | A | 0.3296 | 0.0297  | 0.0050 | 3.34E-09 | 5.9137   | 1376071 | Asthma |
| rs388891    | 5 | 132365102 | C | G | 0.3297 | 0.0297  | 0.0050 | 3.34E-09 | 5.9139   | 1376071 | Asthma |
| rs367805    | 5 | 132365587 | T | C | 0.3382 | 0.0280  | 0.0050 | 2.24E-08 | 5.5925   | 1376071 | Asthma |
| rs1644283   | 5 | 132365903 | A | G | 0.3271 | 0.0295  | 0.0053 | 2.54E-08 | 5.5702   | 1008051 | Asthma |
| rs441969    | 5 | 132366428 | G | A | 0.4060 | 0.0346  | 0.0048 | 8.05E-13 | 7.1601   | 1376071 | Asthma |
| rs2631372   | 5 | 132367886 | C | G | 0.3296 | 0.0298  | 0.0050 | 3.12E-09 | 5.9251   | 1376071 | Asthma |
| rs2631371   | 5 | 132367999 | A | G | 0.3292 | 0.0294  | 0.0050 | 5.04E-09 | 5.8461   | 1376071 | Asthma |
| rs2631370   | 5 | 132368084 | C | T | 0.4125 | 0.0351  | 0.0048 | 3.34E-13 | 7.2798   | 1376071 | Asthma |
| rs2569265   | 5 | 132368827 | C | T | 0.3296 | 0.0298  | 0.0050 | 3.27E-09 | 5.9174   | 1376071 | Asthma |

|            |   |           |   |   |        |         |        |          |          |         |        |
|------------|---|-----------|---|---|--------|---------|--------|----------|----------|---------|--------|
| rs2631369  | 5 | 132369574 | C | G | 0.3309 | 0.0302  | 0.0050 | 1.79E-09 | 6.0154   | 1376071 | Asthma |
| rs2631368  | 5 | 132369605 | G | T | 0.3294 | 0.0299  | 0.0050 | 2.74E-09 | 5.9467   | 1376071 | Asthma |
| rs2631367  | 5 | 132369766 | C | G | 0.4393 | -0.0572 | 0.0048 | 1.93E-32 | -11.8589 | 1376071 | Asthma |
| rs2631365  | 5 | 132370257 | C | T | 0.4125 | 0.0352  | 0.0048 | 2.71E-13 | 7.3083   | 1376071 | Asthma |
| rs2569266  | 5 | 132371099 | C | T | 0.4108 | 0.0361  | 0.0048 | 6.86E-14 | 7.4904   | 1376071 | Asthma |
| rs2631363  | 5 | 132371403 | G | A | 0.4009 | 0.0347  | 0.0048 | 6.97E-13 | 7.1799   | 1376071 | Asthma |
| rs2631362  | 5 | 132371601 | G | A | 0.3287 | 0.0296  | 0.0050 | 4.28E-09 | 5.8729   | 1376071 | Asthma |
| rs2631361  | 5 | 132371688 | A | C | 0.4009 | 0.0347  | 0.0048 | 6.95E-13 | 7.1803   | 1376071 | Asthma |
| rs2631360  | 5 | 132371737 | G | A | 0.4409 | -0.0578 | 0.0048 | 2.95E-33 | -12.0154 | 1376071 | Asthma |
| rs2631359  | 5 | 132372200 | T | C | 0.3287 | 0.0295  | 0.0050 | 4.73E-09 | 5.8562   | 1376071 | Asthma |
| rs10060615 | 5 | 132373185 | C | T | 0.4353 | -0.0567 | 0.0048 | 7.95E-32 | -11.7399 | 1376071 | Asthma |
| rs611084   | 5 | 132374047 | C | A | 0.4009 | 0.0346  | 0.0048 | 7.61E-13 | 7.1681   | 1376071 | Asthma |
| rs610735   | 5 | 132374084 | C | T | 0.4009 | 0.0346  | 0.0048 | 7.50E-13 | 7.1699   | 1376071 | Asthma |
| rs582490   | 5 | 132374403 | A | G | 0.3287 | 0.0294  | 0.0050 | 4.95E-09 | 5.8487   | 1376071 | Asthma |
| rs581968   | 5 | 132374510 | A | G | 0.3287 | 0.0294  | 0.0050 | 4.93E-09 | 5.8495   | 1376071 | Asthma |
| rs200838   | 5 | 132374707 | A | C | 0.4409 | -0.0578 | 0.0048 | 3.19E-33 | -12.0087 | 1376071 | Asthma |
| rs274572   | 5 | 132375225 | G | T | 0.3287 | 0.0295  | 0.0050 | 4.72E-09 | 5.8568   | 1376071 | Asthma |
| rs274571   | 5 | 132376433 | G | A | 0.3287 | 0.0294  | 0.0050 | 5.24E-09 | 5.8395   | 1376071 | Asthma |
| rs274570   | 5 | 132377534 | T | C | 0.3287 | 0.0293  | 0.0050 | 5.52E-09 | 5.8307   | 1376071 | Asthma |
| rs274568   | 5 | 132377886 | T | C | 0.4108 | 0.0359  | 0.0048 | 8.72E-14 | 7.4589   | 1376071 | Asthma |
| rs274567   | 5 | 132378717 | T | C | 0.4009 | 0.0346  | 0.0048 | 8.27E-13 | 7.1568   | 1376071 | Asthma |
| rs274566   | 5 | 132379319 | G | A | 0.4108 | 0.0359  | 0.0048 | 9.38E-14 | 7.4493   | 1376071 | Asthma |
| rs274565   | 5 | 132379576 | C | G | 0.4108 | 0.0359  | 0.0048 | 8.76E-14 | 7.4584   | 1376071 | Asthma |
| rs274564   | 5 | 132379609 | T | C | 0.3287 | 0.0294  | 0.0050 | 5.30E-09 | 5.8374   | 1376071 | Asthma |
| rs2516788  | 5 | 132379873 | C | G | 0.4008 | 0.0344  | 0.0048 | 1.15E-12 | 7.1109   | 1376071 | Asthma |
| rs183898   | 5 | 132381210 | G | C | 0.3287 | 0.0294  | 0.0050 | 5.33E-09 | 5.8364   | 1376071 | Asthma |
| rs17622208 | 5 | 132381358 | A | G | 0.4372 | -0.0567 | 0.0048 | 6.41E-32 | -11.7581 | 1376071 | Asthma |
| rs34741321 | 5 | 132381731 | A | G | 0.1091 | 0.0421  | 0.0077 | 4.21E-08 | 5.4820   | 1376071 | Asthma |
| rs274563   | 5 | 132382167 | A | C | 0.4006 | 0.0342  | 0.0048 | 1.67E-12 | 7.0596   | 1376071 | Asthma |
| rs274561   | 5 | 132383536 | A | C | 0.4008 | 0.0342  | 0.0048 | 1.42E-12 | 7.0821   | 1376071 | Asthma |
| rs274560   | 5 | 132383758 | C | T | 0.4009 | 0.0345  | 0.0048 | 9.76E-13 | 7.1339   | 1376071 | Asthma |
| rs78399358 | 5 | 132384004 | G | C | 0.1091 | 0.0422  | 0.0077 | 3.85E-08 | 5.4978   | 1376071 | Asthma |
| rs274559   | 5 | 132384378 | G | A | 0.4108 | 0.0358  | 0.0048 | 1.07E-13 | 7.4315   | 1376071 | Asthma |
| rs635620   | 5 | 132384571 | G | A | 0.3284 | 0.0295  | 0.0050 | 4.59E-09 | 5.8614   | 1376071 | Asthma |
| rs635619   | 5 | 132384573 | A | G | 0.3284 | 0.0296  | 0.0050 | 4.44E-09 | 5.8668   | 1376071 | Asthma |
| rs274558   | 5 | 132385482 | G | A | 0.4110 | 0.0361  | 0.0048 | 7.12E-14 | 7.4856   | 1376071 | Asthma |
| rs274557   | 5 | 132385512 | C | T | 0.4108 | 0.0359  | 0.0048 | 9.10E-14 | 7.4534   | 1376071 | Asthma |
| rs274556   | 5 | 132386383 | G | A | 0.3287 | 0.0294  | 0.0050 | 5.38E-09 | 5.8350   | 1376071 | Asthma |
| rs274555   | 5 | 132387259 | T | C | 0.4273 | 0.0418  | 0.0053 | 3.38E-15 | 7.8761   | 1186521 | Asthma |
| rs17689550 | 5 | 132387373 | T | C | 0.1384 | 0.0569  | 0.0069 | 1.11E-16 | 8.2927   | 1376071 | Asthma |
| rs2073643  | 5 | 132387596 | T | C | 0.4859 | 0.0446  | 0.0047 | 4.57E-21 | 9.4186   | 1376071 | Asthma |
| rs2073644  | 5 | 132387597 | T | A | 0.4862 | 0.0451  | 0.0047 | 1.70E-21 | 9.5223   | 1376071 | Asthma |
| rs11748193 | 5 | 132389637 | A | T | 0.3705 | -0.0587 | 0.0050 | 2.50E-32 | -11.8376 | 1376071 | Asthma |
| rs11746555 | 5 | 132391341 | A | G | 0.3704 | -0.0588 | 0.0050 | 2.11E-32 | -11.8519 | 1376071 | Asthma |
| rs1045020  | 5 | 132394319 | T | C | 0.1529 | 0.0435  | 0.0066 | 5.27E-11 | 6.5630   | 1376071 | Asthma |
| rs12517950 | 5 | 132395634 | G | A | 0.3705 | -0.0589 | 0.0050 | 1.54E-32 | -11.8778 | 1376071 | Asthma |
| rs11739135 | 5 | 132397705 | C | G | 0.3705 | -0.0590 | 0.0050 | 1.57E-32 | -11.8762 | 1376071 | Asthma |
| rs4705855  | 5 | 132399954 | T | G | 0.1610 | 0.0433  | 0.0065 | 2.44E-11 | 6.6768   | 1376071 | Asthma |
| rs10900806 | 5 | 132406854 | C | T | 0.2437 | 0.0323  | 0.0055 | 4.79E-09 | 5.8543   | 1376071 | Asthma |
| rs6897597  | 5 | 132407773 | T | C | 0.2423 | 0.0315  | 0.0055 | 1.16E-08 | 5.7059   | 1376071 | Asthma |
| rs11242110 | 5 | 132408085 | T | G | 0.4914 | -0.0378 | 0.0049 | 9.78E-15 | -7.7420  | 1316443 | Asthma |
| rs72795177 | 5 | 132413076 | A | G | 0.0949 | -0.0676 | 0.0088 | 2.14E-14 | -7.6419  | 1299802 | Asthma |
| rs10071051 | 5 | 132416928 | A | G | 0.2807 | 0.0498  | 0.0053 | 8.43E-21 | 9.3543   | 1376071 | Asthma |
| rs2079054  | 5 | 132418770 | T | C | 0.2816 | 0.0498  | 0.0053 | 7.44E-21 | 9.3673   | 1376071 | Asthma |
| rs2097731  | 5 | 132419007 | T | C | 0.2815 | 0.0502  | 0.0053 | 4.05E-21 | 9.4312   | 1376071 | Asthma |
| rs2285673  | 5 | 132420277 | T | C | 0.2815 | 0.0503  | 0.0053 | 3.14E-21 | 9.4580   | 1376071 | Asthma |
| rs77335401 | 5 | 132424133 | C | T | 0.1424 | 0.0633  | 0.0068 | 2.30E-20 | 9.2474   | 1376071 | Asthma |
| rs10076733 | 5 | 132425039 | T | G | 0.2520 | 0.0598  | 0.0055 | 1.66E-27 | 10.8668  | 1376071 | Asthma |
| rs11242112 | 5 | 132432196 | T | C | 0.2562 | 0.0597  | 0.0055 | 7.64E-28 | 10.9372  | 1376071 | Asthma |
| rs2158101  | 5 | 132433581 | A | G | 0.2549 | 0.0597  | 0.0055 | 1.29E-27 | 10.8896  | 1376071 | Asthma |
| rs2188962  | 5 | 132435113 | T | C | 0.3918 | -0.0661 | 0.0049 | 2.40E-41 | -13.4682 | 1376071 | Asthma |
| rs28655019 | 5 | 132435189 | A | C | 0.2549 | 0.0597  | 0.0055 | 1.42E-27 | 10.8811  | 1376071 | Asthma |
| rs11741543 | 5 | 132435623 | T | G | 0.2549 | 0.0597  | 0.0055 | 1.40E-27 | 10.8825  | 1376071 | Asthma |
| rs10062371 | 5 | 132442721 | G | A | 0.2557 | 0.0598  | 0.0055 | 9.76E-28 | 10.9152  | 1376071 | Asthma |
| rs17622378 | 5 | 132442760 | G | A | 0.3913 | -0.0651 | 0.0049 | 4.17E-40 | -13.2559 | 1376071 | Asthma |
| rs11743941 | 5 | 132443509 | T | C | 0.2554 | 0.0596  | 0.0055 | 1.42E-27 | 10.8814  | 1376071 | Asthma |
| rs11744116 | 5 | 132444068 | T | C | 0.2554 | 0.0596  | 0.0055 | 1.49E-27 | 10.8766  | 1376071 | Asthma |
| rs4540166  | 5 | 132444165 | T | C | 0.2557 | 0.0598  | 0.0055 | 9.46E-28 | 10.9180  | 1376071 | Asthma |
| rs4371745  | 5 | 132444263 | T | C | 0.2557 | 0.0598  | 0.0055 | 9.26E-28 | 10.9198  | 1376071 | Asthma |
| rs4643947  | 5 | 132445089 | A | G | 0.2557 | 0.0598  | 0.0055 | 9.43E-28 | 10.9183  | 1376071 | Asthma |
| rs1012794  | 5 | 132445989 | C | G | 0.2567 | 0.0590  | 0.0059 | 1.12E-23 | 10.0301  | 1246149 | Asthma |
| rs4235801  | 5 | 132446752 | T | C | 0.2557 | 0.0598  | 0.0055 | 9.42E-28 | 10.9185  | 1376071 | Asthma |
| rs4235802  | 5 | 132447145 | C | A | 0.2557 | 0.0597  | 0.0055 | 1.08E-27 | 10.9064  | 1376071 | Asthma |
| rs7703152  | 5 | 132447521 | C | T | 0.2557 | 0.0598  | 0.0055 | 9.01E-28 | 10.9224  | 1376071 | Asthma |

|             |   |           |   |   |        |         |        |          |          |         |        |
|-------------|---|-----------|---|---|--------|---------|--------|----------|----------|---------|--------|
| rs11747902  | 5 | 132448023 | A | G | 0.2554 | 0.0594  | 0.0055 | 2.01E-27 | 10.8491  | 1376071 | Asthma |
| rs6867325   | 5 | 132448313 | A | G | 0.2569 | 0.0603  | 0.0055 | 2.72E-28 | 11.0307  | 1376071 | Asthma |
| rs12521868  | 5 | 132448701 | T | G | 0.3911 | -0.0648 | 0.0049 | 7.77E-40 | -13.2092 | 1376071 | Asthma |
| rs10036896  | 5 | 132449486 | T | C | 0.2563 | 0.0610  | 0.0055 | 7.42E-29 | 11.1468  | 1376071 | Asthma |
| rs77450473  | 5 | 132449844 | A | G | 0.1437 | 0.0642  | 0.0068 | 4.76E-21 | 9.4143   | 1376071 | Asthma |
| rs12515180  | 5 | 132449992 | T | C | 0.3905 | -0.0649 | 0.0049 | 7.30E-40 | -13.2137 | 1376071 | Asthma |
| rs111280764 | 5 | 132450097 | C | G | 0.2512 | 0.0583  | 0.0061 | 6.94E-22 | 9.6145   | 1219993 | Asthma |
| rs113120136 | 5 | 132450285 | G | A | 0.2570 | 0.0613  | 0.0055 | 3.19E-29 | 11.2215  | 1376071 | Asthma |
| rs11951091  | 5 | 132450903 | A | G | 0.3905 | -0.0649 | 0.0049 | 6.50E-40 | -13.2225 | 1376071 | Asthma |
| rs6866614   | 5 | 132451445 | A | G | 0.3890 | -0.0662 | 0.0049 | 5.50E-41 | -13.4072 | 1376071 | Asthma |
| rs59041913  | 5 | 132452443 | T | C | 0.2587 | 0.0616  | 0.0054 | 1.21E-29 | 11.3071  | 1376071 | Asthma |
| rs7713065   | 5 | 132452642 | A | C | 0.2899 | 0.0646  | 0.0052 | 6.29E-35 | 12.3296  | 1376071 | Asthma |
| rs10069798  | 5 | 132452729 | A | T | 0.2585 | 0.0617  | 0.0054 | 9.80E-30 | 11.3256  | 1376071 | Asthma |
| rs10066308  | 5 | 132454924 | A | G | 0.3351 | 0.0618  | 0.0050 | 1.00E-34 | 12.2919  | 1376071 | Asthma |
| rs4705950   | 5 | 132457594 | T | C | 0.3907 | -0.0656 | 0.0049 | 8.91E-41 | -13.3712 | 1376071 | Asthma |
| rs1023518   | 5 | 132458080 | T | G | 0.2898 | 0.0646  | 0.0052 | 5.56E-35 | 12.3395  | 1376071 | Asthma |
| rs3857440   | 5 | 132458377 | A | G | 0.2897 | 0.0645  | 0.0052 | 6.78E-35 | 12.3234  | 1376071 | Asthma |
| rs10477741  | 5 | 132459618 | G | T | 0.1489 | 0.0620  | 0.0067 | 2.23E-20 | 9.2510   | 1376071 | Asthma |
| rs72797303  | 5 | 132460471 | C | T | 0.3909 | -0.0655 | 0.0049 | 1.33E-40 | -13.3412 | 1376071 | Asthma |
| rs2706396   | 5 | 132461117 | A | C | 0.3912 | -0.0652 | 0.0049 | 2.43E-40 | -13.2962 | 1376071 | Asthma |
| rs11745587  | 5 | 132461230 | A | G | 0.3739 | 0.0597  | 0.0049 | 4.00E-34 | 12.1796  | 1376071 | Asthma |
| rs6894249   | 5 | 132461855 | G | A | 0.4090 | 0.0643  | 0.0048 | 1.54E-40 | 13.3302  | 1376071 | Asthma |
| rs2522051   | 5 | 132461886 | C | T | 0.4940 | 0.0522  | 0.0047 | 4.21E-28 | 10.9914  | 1376071 | Asthma |
| rs2522052   | 5 | 132462795 | C | T | 0.3911 | -0.0652 | 0.0049 | 2.73E-40 | -13.2876 | 1376071 | Asthma |
| rs2706403   | 5 | 132463320 | A | G | 0.3911 | -0.0653 | 0.0049 | 2.28E-40 | -13.3011 | 1376071 | Asthma |
| rs3749833   | 5 | 132463934 | C | T | 0.2895 | 0.0648  | 0.0052 | 3.71E-35 | 12.3719  | 1376071 | Asthma |
| rs11748326  | 5 | 132464267 | T | C | 0.2615 | 0.0607  | 0.0054 | 4.09E-29 | 11.1998  | 1376071 | Asthma |
| rs2706336   | 5 | 132464269 | T | C | 0.3911 | -0.0653 | 0.0049 | 2.28E-40 | -13.3011 | 1376071 | Asthma |
| rs72797306  | 5 | 132465058 | C | G | 0.3910 | -0.0653 | 0.0049 | 2.38E-40 | -13.2977 | 1376071 | Asthma |
| rs58395458  | 5 | 132465283 | A | T | 0.1095 | 0.0435  | 0.0077 | 1.77E-08 | 5.6334   | 1376071 | Asthma |
| rs10077785  | 5 | 132465466 | T | C | 0.2616 | 0.0608  | 0.0054 | 3.59E-29 | 11.2114  | 1376071 | Asthma |
| rs2522057   | 5 | 132466255 | G | C | 0.3911 | -0.0651 | 0.0049 | 3.37E-40 | -13.2719 | 1376071 | Asthma |
| rs17622517  | 5 | 132467845 | C | T | 0.0798 | -0.0656 | 0.0092 | 1.02E-12 | -7.1275  | 1299802 | Asthma |
| rs10067603  | 5 | 132468176 | G | A | 0.2587 | 0.0616  | 0.0054 | 1.14E-29 | 11.3122  | 1376071 | Asthma |
| rs10060626  | 5 | 132468275 | G | T | 0.2394 | 0.0577  | 0.0072 | 1.10E-15 | 8.0157   | 722051  | Asthma |
| rs2248116   | 5 | 132468655 | C | A | 0.3909 | -0.0653 | 0.0049 | 2.30E-40 | -13.3005 | 1376071 | Asthma |
| rs10039559  | 5 | 132468815 | C | T | 0.2587 | 0.0616  | 0.0054 | 1.17E-29 | 11.3098  | 1376071 | Asthma |
| rs3846729   | 5 | 132471076 | C | G | 0.2585 | 0.0615  | 0.0054 | 1.47E-29 | 11.2904  | 1376071 | Asthma |
| rs3846730   | 5 | 132471088 | T | C | 0.2630 | 0.0605  | 0.0054 | 5.33E-29 | 11.1764  | 1376071 | Asthma |
| rs2548992   | 5 | 132472976 | A | G | 0.2868 | 0.0609  | 0.0061 | 2.92E-23 | 9.9354   | 1107787 | Asthma |
| rs2548993   | 5 | 132473177 | G | A | 0.3021 | 0.0624  | 0.0052 | 1.29E-33 | 12.0835  | 1376071 | Asthma |
| rs2057657   | 5 | 132473624 | G | A | 0.2587 | 0.0613  | 0.0054 | 2.17E-29 | 11.2556  | 1376071 | Asthma |
| rs11741255  | 5 | 132475490 | A | G | 0.3883 | -0.0671 | 0.0050 | 2.67E-40 | -13.2894 | 1316443 | Asthma |
| rs13164856  | 5 | 132477512 | C | T | 0.2935 | 0.0521  | 0.0053 | 1.11E-22 | 9.8016   | 1316443 | Asthma |
| rs4705862   | 5 | 132477527 | T | A | 0.4480 | 0.0553  | 0.0048 | 4.16E-31 | 11.5992  | 1376071 | Asthma |
| rs13165038  | 5 | 132477658 | C | T | 0.3276 | 0.0466  | 0.0050 | 2.99E-20 | 9.2193   | 1376071 | Asthma |
| rs7719499   | 5 | 132478399 | G | C | 0.3287 | 0.0432  | 0.0051 | 1.29E-17 | 8.5448   | 1376071 | Asthma |
| rs3846731   | 5 | 132478572 | C | T | 0.3382 | 0.0446  | 0.0050 | 4.69E-19 | 8.9193   | 1376071 | Asthma |
| rs7734334   | 5 | 132479312 | A | C | 0.3355 | 0.0450  | 0.0050 | 2.59E-19 | 8.9850   | 1376071 | Asthma |
| rs7735073   | 5 | 132479665 | A | G | 0.3355 | 0.0451  | 0.0050 | 2.48E-19 | 8.9897   | 1376071 | Asthma |
| rs3846732   | 5 | 132480395 | C | T | 0.3382 | 0.0445  | 0.0050 | 5.54E-19 | 8.9009   | 1376071 | Asthma |
| rs11954400  | 5 | 132480549 | C | T | 0.3383 | 0.0445  | 0.0050 | 5.22E-19 | 8.9075   | 1376071 | Asthma |
| rs10072571  | 5 | 132481019 | C | A | 0.3383 | 0.0445  | 0.0050 | 6.04E-19 | 8.8915   | 1376071 | Asthma |
| rs10065633  | 5 | 132481024 | C | T | 0.3383 | 0.0445  | 0.0050 | 5.46E-19 | 8.9025   | 1376071 | Asthma |
| rs10072700  | 5 | 132481211 | C | A | 0.2792 | 0.0503  | 0.0053 | 1.13E-21 | 9.5647   | 1376071 | Asthma |
| rs11958503  | 5 | 132482083 | G | A | 0.3362 | 0.0451  | 0.0053 | 1.33E-17 | 8.5412   | 1008051 | Asthma |
| rs11952031  | 5 | 132482137 | T | C | 0.3382 | 0.0445  | 0.0050 | 5.18E-19 | 8.9084   | 1376071 | Asthma |
| rs6893937   | 5 | 132482509 | C | T | 0.3379 | 0.0455  | 0.0055 | 8.89E-17 | 8.3187   | 1224666 | Asthma |
| rs6873269   | 5 | 132482862 | A | G | 0.3401 | 0.0382  | 0.0055 | 2.67E-12 | 6.9940   | 1219993 | Asthma |
| rs6873426   | 5 | 132482939 | T | G | 0.3389 | 0.0440  | 0.0050 | 1.23E-18 | 8.8124   | 1376071 | Asthma |
| rs6894655   | 5 | 132482957 | C | T | 0.3389 | 0.0440  | 0.0050 | 1.27E-18 | 8.8083   | 1376071 | Asthma |
| rs839       | 5 | 132483434 | T | C | 0.3389 | 0.0440  | 0.0050 | 1.29E-18 | 8.8064   | 1376071 | Asthma |
| rs2070731   | 5 | 132484106 | C | T | 0.3339 | 0.0464  | 0.0050 | 2.02E-20 | 9.2614   | 1376071 | Asthma |
| rs2070730   | 5 | 132484108 | A | G | 0.3388 | 0.0440  | 0.0050 | 1.24E-18 | 8.8112   | 1376071 | Asthma |
| rs2070729   | 5 | 132484229 | A | C | 0.4597 | 0.0533  | 0.0047 | 3.44E-29 | 11.2150  | 1376071 | Asthma |
| rs7701588   | 5 | 132484278 | C | T | 0.3389 | 0.0440  | 0.0050 | 1.29E-18 | 8.8064   | 1376071 | Asthma |
| rs2070728   | 5 | 132484285 | T | C | 0.3389 | 0.0440  | 0.0050 | 1.41E-18 | 8.7971   | 1376071 | Asthma |
| rs2070727   | 5 | 132484583 | A | C | 0.3389 | 0.0441  | 0.0050 | 1.18E-18 | 8.8169   | 1376071 | Asthma |
| rs10051145  | 5 | 132485132 | G | A | 0.3389 | 0.0440  | 0.0050 | 1.38E-18 | 8.7988   | 1376071 | Asthma |
| rs17622656  | 5 | 132485305 | A | G | 0.3510 | -0.0663 | 0.0051 | 2.32E-39 | -13.1267 | 1376071 | Asthma |
| rs17848418  | 5 | 132485496 | T | C | 0.3390 | 0.0441  | 0.0050 | 1.12E-18 | 8.8220   | 1376071 | Asthma |
| rs10068129  | 5 | 132485554 | A | G | 0.3389 | 0.0441  | 0.0050 | 1.18E-18 | 8.8162   | 1376071 | Asthma |
| rs61175929  | 5 | 132485856 | G | C | 0.3386 | 0.0455  | 0.0056 | 2.73E-16 | 8.1849   | 1198533 | Asthma |
| rs10053046  | 5 | 132485866 | G | A | 0.3352 | 0.0446  | 0.0056 | 1.50E-15 | 7.9773   | 1198533 | Asthma |

|             |   |           |   |   |        |         |        |          |          |         |        |
|-------------|---|-----------|---|---|--------|---------|--------|----------|----------|---------|--------|
| rs2070726   | 5 | 132486046 | A | C | 0.3393 | 0.0433  | 0.0050 | 4.29E-18 | 8.6708   | 1376071 | Asthma |
| rs2070725   | 5 | 132486096 | T | C | 0.3370 | 0.0449  | 0.0053 | 1.79E-17 | 8.5066   | 1008051 | Asthma |
| rs10214312  | 5 | 132486174 | G | T | 0.3399 | 0.0440  | 0.0050 | 1.33E-18 | 8.8034   | 1376071 | Asthma |
| rs9282762   | 5 | 132486363 | C | T | 0.3393 | 0.0434  | 0.0050 | 3.75E-18 | 8.6863   | 1376071 | Asthma |
| rs2070724   | 5 | 132486380 | G | A | 0.3393 | 0.0434  | 0.0050 | 3.72E-18 | 8.6870   | 1376071 | Asthma |
| rs9282763   | 5 | 132486441 | C | T | 0.3399 | 0.0440  | 0.0050 | 1.26E-18 | 8.8092   | 1376071 | Asthma |
| rs9282761   | 5 | 132486532 | C | T | 0.3393 | 0.0434  | 0.0050 | 3.59E-18 | 8.6911   | 1376071 | Asthma |
| rs2070723   | 5 | 132487495 | G | A | 0.3400 | 0.0440  | 0.0050 | 1.28E-18 | 8.8071   | 1376071 | Asthma |
| rs13170412  | 5 | 132487827 | G | A | 0.3350 | 0.0464  | 0.0050 | 2.16E-20 | 9.2543   | 1376071 | Asthma |
| rs10035166  | 5 | 132488235 | C | T | 0.2801 | 0.0498  | 0.0053 | 2.76E-21 | 9.4714   | 1376071 | Asthma |
| rs10213701  | 5 | 132488372 | A | T | 0.3338 | 0.0468  | 0.0054 | 3.56E-18 | 8.6921   | 1246149 | Asthma |
| rs2070722   | 5 | 132488794 | C | A | 0.3401 | 0.0453  | 0.0051 | 7.15E-19 | 8.8725   | 1316443 | Asthma |
| rs2070721   | 5 | 132490150 | G | T | 0.4591 | 0.0542  | 0.0049 | 9.07E-29 | 11.1289  | 1316443 | Asthma |
| rs960757    | 5 | 132490618 | A | G | 0.3343 | 0.0469  | 0.0051 | 6.24E-20 | 9.1401   | 1316443 | Asthma |
| rs10900809  | 5 | 132490630 | A | G | 0.3519 | -0.0654 | 0.0051 | 2.65E-38 | -12.9409 | 1376071 | Asthma |
| rs11242115  | 5 | 132490721 | C | G | 0.3519 | -0.0653 | 0.0051 | 3.30E-38 | -12.9240 | 1376071 | Asthma |
| rs2549009   | 5 | 132491073 | T | C | 0.3347 | 0.0469  | 0.0051 | 6.62E-20 | 9.1337   | 1316443 | Asthma |
| rs2549007   | 5 | 132491183 | T | C | 0.3395 | 0.0447  | 0.0051 | 2.49E-18 | 8.7323   | 1316443 | Asthma |
| rs2706384   | 5 | 132491188 | G | T | 0.3398 | 0.0445  | 0.0051 | 3.51E-18 | 8.6937   | 1316443 | Asthma |
| rs2549006   | 5 | 132491373 | A | G | 0.3346 | 0.0468  | 0.0051 | 7.25E-20 | 9.1239   | 1316443 | Asthma |
| rs2549005   | 5 | 132491499 | T | C | 0.3346 | 0.0468  | 0.0051 | 7.84E-20 | 9.1154   | 1316443 | Asthma |
| rs41525648  | 5 | 132492083 | A | G | 0.4586 | 0.0534  | 0.0049 | 5.96E-28 | 10.9600  | 1316443 | Asthma |
| rs2549004   | 5 | 132492133 | C | G | 0.3387 | 0.0446  | 0.0051 | 2.81E-18 | 8.7188   | 1316443 | Asthma |
| rs2549003   | 5 | 132493605 | G | A | 0.3402 | 0.0452  | 0.0051 | 9.84E-19 | 8.8368   | 1316443 | Asthma |
| rs2549002   | 5 | 132493886 | C | A | 0.3383 | 0.0461  | 0.0055 | 6.30E-17 | 8.3594   | 1186521 | Asthma |
| rs2549001   | 5 | 132494990 | T | C | 0.3334 | 0.0461  | 0.0051 | 2.75E-19 | 8.9783   | 1316443 | Asthma |
| rs2548999   | 5 | 132495366 | G | T | 0.3390 | 0.0444  | 0.0051 | 4.30E-18 | 8.6706   | 1316443 | Asthma |
| rs2706385   | 5 | 132496074 | T | G | 0.3389 | 0.0445  | 0.0051 | 3.68E-18 | 8.6883   | 1316443 | Asthma |
| rs2548998   | 5 | 132496822 | G | A | 0.4572 | 0.0529  | 0.0049 | 2.15E-27 | 10.8434  | 1316443 | Asthma |
| rs2706386   | 5 | 132496995 | C | T | 0.3388 | 0.0439  | 0.0051 | 9.78E-18 | 8.5764   | 1316443 | Asthma |
| rs736801    | 5 | 132497907 | T | C | 0.3520 | -0.0647 | 0.0051 | 1.59E-37 | -12.8022 | 1376071 | Asthma |
| rs2548997   | 5 | 132499703 | G | A | 0.3322 | 0.0467  | 0.0052 | 1.29E-19 | 9.0615   | 1316443 | Asthma |
| rs2548994   | 5 | 132503478 | T | C | 0.3133 | -0.0322 | 0.0053 | 9.68E-10 | -6.1146  | 1316443 | Asthma |
| rs72797327  | 5 | 132507773 | G | A | 0.2551 | -0.0466 | 0.0054 | 1.02E-17 | -8.5714  | 1376071 | Asthma |
| rs55730162  | 5 | 132514164 | A | G | 0.2517 | -0.0454 | 0.0060 | 2.79E-14 | -7.6076  | 1224666 | Asthma |
| rs113723880 | 5 | 132514334 | T | C | 0.2569 | -0.0498 | 0.0077 | 1.10E-10 | -6.4526  | 847307  | Asthma |
| rs11738703  | 5 | 132520324 | T | A | 0.2568 | -0.0462 | 0.0058 | 1.71E-15 | -7.9605  | 1246149 | Asthma |
| rs11745207  | 5 | 132520341 | G | C | 0.2548 | -0.0462 | 0.0054 | 1.73E-17 | -8.5111  | 1376071 | Asthma |
| rs57896917  | 5 | 132523669 | T | A | 0.2550 | -0.0462 | 0.0054 | 1.82E-17 | -8.5047  | 1376071 | Asthma |
| rs6887731   | 5 | 132527908 | G | A | 0.2559 | -0.0459 | 0.0054 | 2.37E-17 | -8.4738  | 1376071 | Asthma |
| rs11739623  | 5 | 132528460 | T | C | 0.2524 | -0.0461 | 0.0054 | 2.67E-17 | -8.4601  | 1376071 | Asthma |
| rs4705959   | 5 | 132530099 | C | T | 0.2523 | -0.0462 | 0.0054 | 2.23E-17 | -8.4814  | 1376071 | Asthma |
| rs138551539 | 5 | 132530827 | A | G | 0.0185 | 0.1145  | 0.0196 | 4.76E-09 | 5.8554   | 1134232 | Asthma |
| rs11242120  | 5 | 132534997 | C | T | 0.3237 | -0.0373 | 0.0051 | 1.84E-13 | -7.3600  | 1376071 | Asthma |
| rs743562    | 5 | 132536691 | T | C | 0.4263 | -0.0270 | 0.0048 | 1.58E-08 | -5.6530  | 1376071 | Asthma |
| rs143012784 | 5 | 132538330 | A | T | 0.0857 | -0.0652 | 0.0091 | 9.32E-13 | -7.1402  | 1299802 | Asthma |
| rs2069812   | 5 | 132544224 | A | G | 0.3023 | -0.0433 | 0.0053 | 3.84E-16 | -8.1435  | 1316443 | Asthma |
| rs2706401   | 5 | 132545913 | C | G | 0.1982 | 0.0660  | 0.0064 | 6.09E-25 | 10.3141  | 1186521 | Asthma |
| rs2522411   | 5 | 132548075 | A | T | 0.2126 | 0.0651  | 0.0058 | 2.84E-29 | 11.2319  | 1316443 | Asthma |
| rs2078392   | 5 | 132549181 | A | G | 0.2095 | 0.0649  | 0.0058 | 8.05E-29 | 11.1396  | 1316443 | Asthma |
| rs2078387   | 5 | 132549202 | C | A | 0.2121 | 0.0656  | 0.0058 | 1.15E-29 | 11.3119  | 1316443 | Asthma |
| rs2078386   | 5 | 132549244 | C | T | 0.2123 | 0.0655  | 0.0058 | 1.42E-29 | 11.2931  | 1316443 | Asthma |
| rs12652920  | 5 | 132549548 | C | G | 0.2073 | 0.0676  | 0.0059 | 7.70E-31 | 11.5464  | 1316443 | Asthma |
| rs1986009   | 5 | 132552294 | A | C | 0.1897 | 0.0778  | 0.0080 | 3.70E-22 | 9.6791   | 662423  | Asthma |
| rs2706334   | 5 | 132554779 | C | T | 0.2127 | 0.0650  | 0.0058 | 2.97E-29 | 11.2279  | 1316443 | Asthma |
| rs10079653  | 5 | 132559819 | G | A | 0.2062 | 0.0586  | 0.0058 | 1.26E-23 | 10.0186  | 1316443 | Asthma |
| rs2706338   | 5 | 132560157 | T | C | 0.2016 | 0.0607  | 0.0059 | 8.37E-25 | 10.2834  | 1316443 | Asthma |
| rs62383710  | 5 | 132564905 | A | G | 0.1976 | 0.0568  | 0.0059 | 1.23E-21 | 9.5553   | 1316443 | Asthma |
| rs2244012   | 5 | 132565533 | G | A | 0.2058 | 0.0640  | 0.0058 | 6.24E-28 | 10.9557  | 1316443 | Asthma |
| rs75245322  | 5 | 132567334 | G | T | 0.0863 | -0.0660 | 0.0090 | 2.28E-13 | -7.3312  | 1299802 | Asthma |
| rs2706345   | 5 | 132568236 | A | G | 0.1839 | 0.0709  | 0.0074 | 5.48E-22 | 9.6388   | 1030443 | Asthma |
| rs2243677   | 5 | 132568554 | C | T | 0.1998 | 0.0575  | 0.0059 | 2.56E-22 | 9.7166   | 1316443 | Asthma |
| rs2706347   | 5 | 132569425 | T | G | 0.1997 | 0.0574  | 0.0059 | 2.70E-22 | 9.7114   | 1316443 | Asthma |
| rs2706348   | 5 | 132570118 | A | G | 0.1998 | 0.0574  | 0.0059 | 2.98E-22 | 9.7013   | 1316443 | Asthma |
| rs2706349   | 5 | 132571068 | A | G | 0.1998 | 0.0574  | 0.0059 | 2.98E-22 | 9.7009   | 1316443 | Asthma |
| rs56668723  | 5 | 132571498 | G | C | 0.1975 | 0.0570  | 0.0059 | 9.44E-22 | 9.5829   | 1316443 | Asthma |
| rs58760622  | 5 | 132572420 | T | A | 0.1956 | 0.0592  | 0.0060 | 3.18E-23 | 9.9269   | 1316443 | Asthma |
| rs62383714  | 5 | 132574103 | A | G | 0.2033 | 0.0637  | 0.0059 | 2.61E-27 | 10.8252  | 1316443 | Asthma |
| rs2522414   | 5 | 132576155 | C | G | 0.2000 | 0.0574  | 0.0059 | 2.91E-22 | 9.7035   | 1316443 | Asthma |
| rs2706353   | 5 | 132577636 | A | G | 0.1998 | 0.0575  | 0.0059 | 2.46E-22 | 9.7209   | 1316443 | Asthma |
| rs17166050  | 5 | 132579521 | A | G | 0.2038 | 0.0638  | 0.0059 | 1.81E-27 | 10.8588  | 1316443 | Asthma |
| rs75639632  | 5 | 132579587 | G | A | 0.0333 | 0.1317  | 0.0129 | 2.35E-24 | 10.1841  | 1316443 | Asthma |
| rs2522403   | 5 | 132579625 | C | T | 0.2061 | 0.0641  | 0.0058 | 5.06E-28 | 10.9748  | 1316443 | Asthma |
| rs2299013   | 5 | 132581226 | C | G | 0.2207 | 0.0657  | 0.0061 | 9.68E-27 | 10.7046  | 948423  | Asthma |

|             |   |           |   |   |        |         |        |          |         |         |        |
|-------------|---|-----------|---|---|--------|---------|--------|----------|---------|---------|--------|
| rs2299012   | 5 | 132581248 | C | A | 0.2091 | 0.0640  | 0.0058 | 4.88E-28 | 10.9779 | 1316443 | Asthma |
| rs2246176   | 5 | 132581658 | G | A | 0.2094 | 0.0639  | 0.0058 | 5.81E-28 | 10.9621 | 1316443 | Asthma |
| rs2252775   | 5 | 132582752 | G | T | 0.2038 | 0.0638  | 0.0059 | 1.71E-27 | 10.8642 | 1316443 | Asthma |
| rs6898898   | 5 | 132584189 | A | T | 0.2059 | 0.0642  | 0.0058 | 4.66E-28 | 10.9822 | 1316443 | Asthma |
| rs62383715  | 5 | 132584538 | A | G | 0.2032 | 0.0638  | 0.0059 | 2.45E-27 | 10.8312 | 1316443 | Asthma |
| rs55982201  | 5 | 132584858 | G | C | 0.1994 | 0.0663  | 0.0065 | 3.00E-24 | 10.1599 | 1160365 | Asthma |
| rs60490216  | 5 | 132586193 | C | T | 0.2075 | 0.0632  | 0.0058 | 3.45E-27 | 10.7997 | 1316443 | Asthma |
| rs56798121  | 5 | 132589482 | C | A | 0.2073 | 0.0629  | 0.0059 | 5.73E-27 | 10.7531 | 1316443 | Asthma |
| rs2706362   | 5 | 132589495 | C | T | 0.2094 | 0.0632  | 0.0058 | 2.03E-27 | 10.8482 | 1316443 | Asthma |
| rs10463893  | 5 | 132592347 | C | T | 0.1978 | 0.0568  | 0.0059 | 1.21E-21 | 9.5570  | 1316443 | Asthma |
| rs2897443   | 5 | 132593902 | T | G | 0.1981 | 0.0567  | 0.0059 | 1.28E-21 | 9.5514  | 1316443 | Asthma |
| rs17622991  | 5 | 132597061 | A | G | 0.2108 | 0.0526  | 0.0058 | 1.73E-19 | 9.0294  | 1316443 | Asthma |
| rs62383750  | 5 | 132597287 | A | T | 0.2104 | 0.0528  | 0.0058 | 1.25E-19 | 9.0645  | 1316443 | Asthma |
| rs2706370   | 5 | 132597324 | C | A | 0.2128 | 0.0528  | 0.0058 | 8.02E-20 | 9.1130  | 1316443 | Asthma |
| rs10463894  | 5 | 132598215 | C | T | 0.1982 | 0.0567  | 0.0059 | 1.31E-21 | 9.5487  | 1316443 | Asthma |
| rs2706372   | 5 | 132599785 | T | C | 0.2150 | 0.0588  | 0.0062 | 2.01E-21 | 9.5046  | 948423  | Asthma |
| rs72797364  | 5 | 132600866 | C | T | 0.0863 | -0.0650 | 0.0089 | 2.56E-13 | -7.3158 | 1316443 | Asthma |
| rs2706374   | 5 | 132602153 | A | T | 0.1821 | 0.0662  | 0.0074 | 3.30E-19 | 8.9582  | 1030443 | Asthma |
| rs12187537  | 5 | 132604212 | G | T | 0.1957 | 0.0594  | 0.0060 | 2.26E-23 | 9.9608  | 1316443 | Asthma |
| rs2522392   | 5 | 132606102 | T | C | 0.2026 | 0.0616  | 0.0069 | 2.57E-19 | 8.9859  | 818501  | Asthma |
| rs11749376  | 5 | 132607996 | G | A | 0.1977 | 0.0571  | 0.0059 | 7.44E-22 | 9.6073  | 1316443 | Asthma |
| rs2522394   | 5 | 132608437 | A | G | 0.2002 | 0.0571  | 0.0059 | 4.28E-22 | 9.6643  | 1316443 | Asthma |
| rs115911400 | 5 | 132610043 | G | A | 0.1887 | 0.0677  | 0.0090 | 6.22E-14 | 7.5033  | 576046  | Asthma |
| rs59568225  | 5 | 132610053 | G | T | 0.1937 | 0.0595  | 0.0072 | 8.46E-17 | 8.3247  | 1068588 | Asthma |
| rs115668177 | 5 | 132611731 | G | T | 0.0310 | 0.1595  | 0.0215 | 1.28E-13 | 7.4080  | 544513  | Asthma |
| rs2245460   | 5 | 132612834 | A | T | 0.2022 | 0.0600  | 0.0069 | 2.43E-18 | 8.7353  | 818501  | Asthma |
| rs10520114  | 5 | 132613199 | G | A | 0.1982 | 0.0566  | 0.0059 | 1.53E-21 | 9.5326  | 1316443 | Asthma |
| rs75765453  | 5 | 132614533 | T | C | 0.0147 | 0.1302  | 0.0189 | 6.39E-12 | 6.8706  | 1376071 | Asthma |
| rs2301713   | 5 | 132616304 | C | T | 0.2054 | 0.0635  | 0.0059 | 2.52E-27 | 10.8288 | 1316443 | Asthma |
| rs6596086   | 5 | 132616530 | C | T | 0.2063 | 0.0634  | 0.0058 | 1.80E-27 | 10.8595 | 1316443 | Asthma |
| rs6894017   | 5 | 132616706 | A | G | 0.2048 | 0.0635  | 0.0059 | 2.56E-27 | 10.8271 | 1316443 | Asthma |
| rs2106984   | 5 | 132617374 | A | T | 0.2062 | 0.0630  | 0.0057 | 3.02E-28 | 11.0213 | 1376071 | Asthma |
| rs7449456   | 5 | 132617735 | T | C | 0.2046 | 0.0636  | 0.0059 | 2.08E-27 | 10.8460 | 1316443 | Asthma |
| rs1772583   | 5 | 132617818 | G | A | 0.2453 | -0.0569 | 0.0057 | 2.21E-23 | -9.9630 | 1316443 | Asthma |
| rs56877785  | 5 | 132619838 | C | A | 0.2151 | 0.0737  | 0.0108 | 1.01E-11 | 6.8057  | 476051  | Asthma |
| rs9687749   | 5 | 132619885 | T | G | 0.2845 | 0.0632  | 0.0098 | 1.15E-10 | 6.4463  | 476051  | Asthma |
| rs10479009  | 5 | 132619905 | G | T | 0.2108 | 0.0686  | 0.0094 | 2.87E-13 | 7.3004  | 844071  | Asthma |
| rs60156285  | 5 | 132620126 | T | C | 0.1930 | 0.0638  | 0.0059 | 1.37E-27 | 10.8839 | 1376071 | Asthma |
| rs6873732   | 5 | 132625375 | T | C | 0.2044 | 0.0652  | 0.0058 | 4.19E-29 | 11.1975 | 1349938 | Asthma |
| rs6874184   | 5 | 132625457 | A | G | 0.2046 | 0.0632  | 0.0057 | 3.25E-28 | 11.0147 | 1376071 | Asthma |
| rs62383757  | 5 | 132626157 | T | C | 0.2036 | 0.0631  | 0.0057 | 4.71E-28 | 10.9811 | 1376071 | Asthma |
| rs62383758  | 5 | 132626278 | T | C | 0.2036 | 0.0630  | 0.0057 | 6.02E-28 | 10.9589 | 1376071 | Asthma |
| rs3798135   | 5 | 132629417 | T | C | 0.2051 | 0.0630  | 0.0057 | 3.62E-28 | 11.0047 | 1376071 | Asthma |
| rs3798134   | 5 | 132629487 | A | G | 0.2053 | 0.0631  | 0.0057 | 2.89E-28 | 11.0253 | 1376071 | Asthma |
| rs561838320 | 5 | 132629914 | T | C | 0.2039 | 0.0635  | 0.0057 | 2.16E-28 | 11.0512 | 1376071 | Asthma |
| rs6873897   | 5 | 132631281 | A | G | 0.2041 | 0.0631  | 0.0057 | 4.45E-28 | 10.9862 | 1376071 | Asthma |
| rs12332204  | 5 | 132631296 | G | T | 0.2050 | 0.0632  | 0.0057 | 2.65E-28 | 11.0330 | 1376071 | Asthma |
| rs10056700  | 5 | 132631790 | C | T | 0.2589 | 0.0622  | 0.0054 | 3.15E-30 | 11.4247 | 1316443 | Asthma |
| rs62385260  | 5 | 132631848 | A | G | 0.2015 | 0.0657  | 0.0058 | 4.15E-30 | 11.4005 | 1376071 | Asthma |
| rs6596087   | 5 | 132632917 | A | G | 0.2050 | 0.0630  | 0.0057 | 4.60E-28 | 10.9832 | 1376071 | Asthma |
| rs6866095   | 5 | 132633253 | C | T | 0.2052 | 0.0647  | 0.0058 | 9.64E-29 | 11.1235 | 1349938 | Asthma |
| rs10052993  | 5 | 132633587 | T | G | 0.1937 | 0.0755  | 0.0091 | 1.54E-16 | 8.2534  | 505420  | Asthma |
| rs6871536   | 5 | 132634182 | C | T | 0.2048 | 0.0632  | 0.0057 | 3.12E-28 | 11.0185 | 1376071 | Asthma |
| rs12653750  | 5 | 132636210 | T | C | 0.2039 | 0.0627  | 0.0057 | 1.08E-27 | 10.9060 | 1376071 | Asthma |
| rs2040703   | 5 | 132636566 | G | C | 0.2065 | 0.0631  | 0.0057 | 2.39E-28 | 11.0424 | 1376071 | Asthma |
| rs2040704   | 5 | 132637485 | G | A | 0.2069 | 0.0624  | 0.0057 | 7.96E-28 | 10.9338 | 1376071 | Asthma |
| rs6872131   | 5 | 132637690 | G | A | 0.2049 | 0.0629  | 0.0057 | 5.04E-28 | 10.9750 | 1376071 | Asthma |
| rs2074369   | 5 | 132637971 | C | T | 0.2065 | 0.0629  | 0.0057 | 3.66E-28 | 11.0038 | 1376071 | Asthma |
| rs7737470   | 5 | 132638371 | A | T | 0.2043 | 0.0628  | 0.0057 | 8.15E-28 | 10.9314 | 1376071 | Asthma |
| rs2240032   | 5 | 132641435 | T | C | 0.2034 | 0.0623  | 0.0058 | 2.67E-27 | 10.8235 | 1376071 | Asthma |
| rs62385261  | 5 | 132646431 | A | T | 0.2047 | 0.0631  | 0.0059 | 6.29E-27 | 10.7444 | 1316443 | Asthma |
| rs60632435  | 5 | 132646823 | A | T | 0.2046 | 0.0633  | 0.0059 | 5.01E-27 | 10.7653 | 1316443 | Asthma |
| rs7700346   | 5 | 132647734 | A | G | 0.1966 | 0.0644  | 0.0060 | 3.21E-27 | 10.8064 | 1316443 | Asthma |
| rs2158177   | 5 | 132648366 | G | A | 0.1951 | 0.0653  | 0.0060 | 9.80E-28 | 10.9147 | 1316443 | Asthma |
| rs60153262  | 5 | 132649143 | T | C | 0.0378 | 0.1225  | 0.0120 | 1.93E-24 | 10.2024 | 1376071 | Asthma |
| rs77143352  | 5 | 132650298 | T | A | 0.1974 | 0.0749  | 0.0088 | 2.10E-17 | 8.4882  | 566903  | Asthma |
| rs72797378  | 5 | 132651233 | T | A | 0.1951 | 0.0652  | 0.0060 | 1.33E-27 | 10.8870 | 1316443 | Asthma |
| rs6596090   | 5 | 132652723 | A | G | 0.2065 | 0.0627  | 0.0058 | 8.61E-27 | 10.7156 | 1316443 | Asthma |
| rs3091307   | 5 | 132653444 | G | A | 0.2066 | 0.0630  | 0.0059 | 5.02E-27 | 10.7652 | 1316443 | Asthma |
| rs3091308   | 5 | 132655340 | A | G | 0.2046 | 0.0610  | 0.0063 | 2.17E-22 | 9.7336  | 1224666 | Asthma |
| rs12188917  | 5 | 132655393 | C | T | 0.2039 | 0.0608  | 0.0063 | 3.14E-22 | 9.6959  | 1224666 | Asthma |
| rs67006560  | 5 | 132655964 | T | C | 0.1892 | 0.0661  | 0.0061 | 9.40E-28 | 10.9185 | 1316443 | Asthma |
| rs115008099 | 5 | 132656189 | T | C | 0.1839 | 0.0704  | 0.0061 | 1.16E-30 | 11.5115 | 1316443 | Asthma |
| rs1881457   | 5 | 132656717 | C | A | 0.1950 | 0.0636  | 0.0060 | 2.26E-26 | 10.6259 | 1316443 | Asthma |



|             |   |           |   |   |        |         |        |          |         |         |        |
|-------------|---|-----------|---|---|--------|---------|--------|----------|---------|---------|--------|
| rs1800925   | 5 | 132657117 | T | C | 0.1899 | 0.0575  | 0.0059 | 2.43E-22 | 9.7219  | 1376071 | Asthma |
| rs1295686   | 5 | 132660151 | T | C | 0.2217 | 0.0736  | 0.0057 | 1.73E-37 | 12.7958 | 1316443 | Asthma |
| rs20541     | 5 | 132660272 | A | G | 0.2190 | 0.0748  | 0.0058 | 2.59E-38 | 12.9427 | 1316443 | Asthma |
| rs1295685   | 5 | 132660753 | A | G | 0.2194 | 0.0746  | 0.0058 | 4.78E-38 | 12.8954 | 1316443 | Asthma |
| rs848       | 5 | 132660808 | A | C | 0.2213 | 0.0743  | 0.0058 | 5.58E-38 | 12.8836 | 1316443 | Asthma |
| rs847       | 5 | 132660977 | T | C | 0.2192 | 0.0744  | 0.0058 | 8.74E-38 | 12.8489 | 1316443 | Asthma |
| rs2069757   | 5 | 132662721 | A | G | 0.0700 | 0.0778  | 0.0089 | 2.47E-18 | 8.7336  | 1376071 | Asthma |
| rs1295683   | 5 | 132663184 | A | G | 0.1302 | 0.0519  | 0.0071 | 3.21E-13 | 7.2851  | 1316443 | Asthma |
| rs2243297   | 5 | 132663479 | A | T | 0.0404 | 0.1231  | 0.0126 | 1.77E-22 | 9.7544  | 1008051 | Asthma |
| rs2243204   | 5 | 132663802 | T | C | 0.0714 | 0.0764  | 0.0090 | 3.13E-17 | 8.4416  | 1316443 | Asthma |
| rs2243208   | 5 | 132665459 | G | A | 0.0764 | 0.0744  | 0.0089 | 5.60E-17 | 8.3735  | 1316443 | Asthma |
| rs2243210   | 5 | 132665694 | A | G | 0.0635 | 0.0729  | 0.0095 | 2.29E-14 | 7.6331  | 1316443 | Asthma |
| rs2243211   | 5 | 132665730 | A | C | 0.0633 | 0.0735  | 0.0096 | 1.54E-14 | 7.6845  | 1316443 | Asthma |
| rs2243217   | 5 | 132666241 | T | A | 0.0628 | 0.0785  | 0.0096 | 3.84E-16 | 8.1434  | 1316443 | Asthma |
| rs2243218   | 5 | 132666332 | A | G | 0.0648 | 0.0741  | 0.0095 | 7.35E-15 | 7.7782  | 1316443 | Asthma |
| rs2243219   | 5 | 132666433 | G | A | 0.0654 | 0.0741  | 0.0095 | 5.75E-15 | 7.8092  | 1316443 | Asthma |
| rs2243221   | 5 | 132667152 | T | C | 0.0640 | 0.0768  | 0.0096 | 9.34E-16 | 8.0352  | 1316443 | Asthma |
| rs2243300   | 5 | 132668394 | T | G | 0.0662 | 0.0728  | 0.0092 | 2.22E-15 | 7.9285  | 1376071 | Asthma |
| rs2243228   | 5 | 132668671 | C | A | 0.0684 | 0.0708  | 0.0093 | 2.57E-14 | 7.6183  | 1316443 | Asthma |
| rs2243302   | 5 | 132668839 | A | G | 0.1007 | -0.0677 | 0.0084 | 8.49E-16 | -8.0470 | 1359430 | Asthma |
| rs762534    | 5 | 132669064 | A | C | 0.0580 | 0.0783  | 0.0101 | 1.01E-14 | 7.7386  | 1316443 | Asthma |
| rs72797396  | 5 | 132672221 | A | T | 0.2905 | -0.0361 | 0.0066 | 4.24E-08 | -5.4807 | 1143724 | Asthma |
| rs2243250   | 5 | 132673462 | T | C | 0.1739 | 0.0497  | 0.0063 | 2.16E-15 | 7.9319  | 1316443 | Asthma |
| rs2070874   | 5 | 132674018 | T | C | 0.1724 | 0.0501  | 0.0063 | 1.95E-15 | 7.9445  | 1316443 | Asthma |
| rs734244    | 5 | 132675034 | T | C | 0.1645 | 0.0490  | 0.0064 | 2.04E-14 | 7.6480  | 1316443 | Asthma |
| rs2227284   | 5 | 132677033 | T | G | 0.2783 | 0.0345  | 0.0054 | 1.68E-10 | 6.3881  | 1316443 | Asthma |
| rs2227282   | 5 | 132677487 | C | G | 0.2778 | 0.0345  | 0.0054 | 1.65E-10 | 6.3913  | 1316443 | Asthma |
| rs2243266   | 5 | 132678097 | A | G | 0.1723 | 0.0504  | 0.0063 | 1.28E-15 | 7.9969  | 1316443 | Asthma |
| rs2243267   | 5 | 132678194 | C | G | 0.1723 | 0.0504  | 0.0063 | 1.36E-15 | 7.9893  | 1316443 | Asthma |
| rs2243268   | 5 | 132678271 | C | A | 0.1720 | 0.0509  | 0.0063 | 7.05E-16 | 8.0697  | 1316443 | Asthma |
| rs2243270   | 5 | 132678417 | G | A | 0.1803 | 0.0506  | 0.0062 | 3.72E-16 | 8.1475  | 1316443 | Asthma |
| rs2243282   | 5 | 132680862 | A | C | 0.1725 | 0.0502  | 0.0063 | 1.68E-15 | 7.9632  | 1316443 | Asthma |
| rs2243284   | 5 | 132681300 | A | G | 0.1829 | 0.0523  | 0.0066 | 1.80E-15 | 7.9544  | 1224666 | Asthma |
| rs2243288   | 5 | 132682252 | G | A | 0.1947 | 0.0493  | 0.0065 | 3.42E-14 | 7.5814  | 948423  | Asthma |
| rs2243289   | 5 | 132682440 | G | A | 0.1722 | 0.0510  | 0.0063 | 6.73E-16 | 8.0755  | 1316443 | Asthma |
| rs2243290   | 5 | 132682477 | A | C | 0.1725 | 0.0505  | 0.0063 | 1.16E-15 | 8.0092  | 1316443 | Asthma |
| rs2243291   | 5 | 132683291 | C | G | 0.1802 | 0.0507  | 0.0062 | 3.49E-16 | 8.1551  | 1316443 | Asthma |
| rs2243293   | 5 | 132684107 | G | A | 0.2705 | 0.0329  | 0.0054 | 1.54E-09 | 6.0405  | 1316443 | Asthma |
| rs2243294   | 5 | 132684123 | G | A | 0.2775 | 0.0342  | 0.0054 | 2.56E-10 | 6.3232  | 1316443 | Asthma |
| rs35081016  | 5 | 132684610 | A | G | 0.2704 | 0.0328  | 0.0054 | 1.65E-09 | 6.0290  | 1316443 | Asthma |
| rs10066660  | 5 | 132685298 | G | A | 0.2780 | 0.0339  | 0.0054 | 3.26E-10 | 6.2860  | 1316443 | Asthma |
| rs10066662  | 5 | 132685304 | G | A | 0.2705 | 0.0328  | 0.0054 | 1.67E-09 | 6.0267  | 1316443 | Asthma |
| rs6885996   | 5 | 132685604 | C | A | 0.2780 | 0.0340  | 0.0054 | 3.10E-10 | 6.2935  | 1316443 | Asthma |
| rs4426908   | 5 | 132687026 | C | G | 0.2780 | 0.0341  | 0.0054 | 2.58E-10 | 6.3222  | 1316443 | Asthma |
| rs10588133  | 5 | 132687280 | T | G | 0.2706 | 0.0328  | 0.0054 | 1.67E-09 | 6.0267  | 1316443 | Asthma |
| rs116018601 | 5 | 132687283 | C | T | 0.0226 | 0.1034  | 0.0163 | 2.52E-10 | 6.3256  | 1359430 | Asthma |
| rs74863864  | 5 | 132687567 | G | A | 0.1736 | 0.0511  | 0.0068 | 4.10E-14 | 7.5579  | 1221848 | Asthma |
| rs6897429   | 5 | 132687571 | C | G | 0.2698 | 0.0326  | 0.0055 | 2.35E-09 | 5.9716  | 1316443 | Asthma |
| rs2406539   | 5 | 132687584 | T | A | 0.2697 | 0.0325  | 0.0055 | 2.59E-09 | 5.9558  | 1316443 | Asthma |
| rs11747814  | 5 | 132688474 | C | T | 0.2711 | 0.0329  | 0.0054 | 1.41E-09 | 6.0544  | 1316443 | Asthma |
| rs11242122  | 5 | 132689016 | C | G | 0.2708 | 0.0327  | 0.0054 | 1.83E-09 | 6.0122  | 1316443 | Asthma |
| rs11242123  | 5 | 132689795 | T | A | 0.1727 | 0.0505  | 0.0063 | 1.30E-15 | 7.9943  | 1316443 | Asthma |
| rs6879672   | 5 | 132690255 | A | G | 0.2626 | 0.0333  | 0.0055 | 1.19E-09 | 6.0822  | 1316443 | Asthma |
| rs1859138   | 5 | 132691357 | G | C | 0.2778 | 0.0346  | 0.0054 | 1.52E-10 | 6.4036  | 1316443 | Asthma |
| rs10068370  | 5 | 132691876 | C | T | 0.2773 | 0.0343  | 0.0054 | 2.11E-10 | 6.3531  | 1316443 | Asthma |
| rs17510339  | 5 | 132693722 | T | C | 0.1565 | 0.0500  | 0.0066 | 3.39E-14 | 7.5826  | 1316443 | Asthma |
| rs11242126  | 5 | 132694722 | A | T | 0.1727 | 0.0508  | 0.0063 | 8.67E-16 | 8.0443  | 1316443 | Asthma |
| rs17690965  | 5 | 132694975 | C | G | 0.2862 | 0.0336  | 0.0054 | 3.39E-10 | 6.2798  | 1316443 | Asthma |
| rs12514976  | 5 | 132696280 | C | T | 0.1724 | 0.0510  | 0.0063 | 6.76E-16 | 8.0747  | 1316443 | Asthma |
| rs2023823   | 5 | 132697114 | A | G | 0.2859 | 0.0338  | 0.0053 | 2.72E-10 | 6.3138  | 1316443 | Asthma |
| rs2237059   | 5 | 132697920 | T | C | 0.1804 | 0.0514  | 0.0062 | 1.35E-16 | 8.2689  | 1316443 | Asthma |
| rs10455052  | 5 | 132698896 | A | C | 0.1664 | 0.0527  | 0.0064 | 1.75E-16 | 8.2381  | 1316443 | Asthma |
| rs10073911  | 5 | 132699707 | C | A | 0.2867 | 0.0335  | 0.0053 | 3.58E-10 | 6.2712  | 1316443 | Asthma |
| rs6865485   | 5 | 132699880 | A | T | 0.2793 | 0.0327  | 0.0054 | 1.27E-09 | 6.0710  | 1316443 | Asthma |
| rs1468215   | 5 | 132700797 | A | T | 0.2794 | 0.0326  | 0.0054 | 1.44E-09 | 6.0505  | 1316443 | Asthma |
| rs3213639   | 5 | 132702507 | C | T | 0.2794 | 0.0325  | 0.0054 | 1.47E-09 | 6.0473  | 1316443 | Asthma |
| rs2285700   | 5 | 132703440 | C | A | 0.2795 | 0.0322  | 0.0054 | 2.28E-09 | 5.9767  | 1316443 | Asthma |
| rs12186803  | 5 | 132704377 | A | G | 0.1727 | 0.0513  | 0.0063 | 3.98E-16 | 8.1393  | 1316443 | Asthma |
| rs10062446  | 5 | 132704682 | T | A | 0.2795 | 0.0327  | 0.0054 | 1.27E-09 | 6.0715  | 1316443 | Asthma |
| rs17166203  | 5 | 132705303 | C | G | 0.1731 | 0.0511  | 0.0063 | 5.24E-16 | 8.1059  | 1316443 | Asthma |
| rs3798132   | 5 | 132705744 | T | C | 0.1805 | 0.0514  | 0.0062 | 1.27E-16 | 8.2767  | 1316443 | Asthma |
| rs3798131   | 5 | 132706315 | C | T | 0.1732 | 0.0511  | 0.0063 | 5.26E-16 | 8.1053  | 1316443 | Asthma |
| rs3798130   | 5 | 132706454 | T | C | 0.1733 | 0.0509  | 0.0063 | 6.27E-16 | 8.0840  | 1316443 | Asthma |
| rs2299011   | 5 | 132706850 | G | C | 0.1732 | 0.0511  | 0.0063 | 5.41E-16 | 8.1019  | 1316443 | Asthma |

|            |   |           |   |   |        |         |        |          |         |         |        |
|------------|---|-----------|---|---|--------|---------|--------|----------|---------|---------|--------|
| rs2299010  | 5 | 132707048 | C | T | 0.1665 | 0.0528  | 0.0064 | 1.50E-16 | 8.2563  | 1316443 | Asthma |
| rs2299007  | 5 | 132707340 | G | A | 0.1666 | 0.0528  | 0.0064 | 1.49E-16 | 8.2574  | 1316443 | Asthma |
| rs17691077 | 5 | 132707659 | C | A | 0.1145 | -0.0574 | 0.0081 | 1.68E-12 | -7.0588 | 1299802 | Asthma |
| rs2237057  | 5 | 132708252 | G | A | 0.2795 | 0.0327  | 0.0054 | 1.30E-09 | 6.0672  | 1316443 | Asthma |
| rs12514685 | 5 | 132710020 | T | C | 0.1638 | 0.0538  | 0.0070 | 1.02E-14 | 7.7363  | 1186521 | Asthma |
| rs10036532 | 5 | 132710123 | G | T | 0.2796 | 0.0325  | 0.0054 | 1.55E-09 | 6.0392  | 1316443 | Asthma |
| rs4705964  | 5 | 132710473 | G | A | 0.2796 | 0.0326  | 0.0054 | 1.45E-09 | 6.0493  | 1316443 | Asthma |
| rs7737031  | 5 | 132710898 | T | C | 0.1727 | 0.0510  | 0.0063 | 6.76E-16 | 8.0748  | 1316443 | Asthma |
| rs11740584 | 5 | 132711097 | G | C | 0.2795 | 0.0328  | 0.0054 | 1.10E-09 | 6.0947  | 1316443 | Asthma |
| rs6864396  | 5 | 132712183 | G | C | 0.2796 | 0.0327  | 0.0054 | 1.31E-09 | 6.0667  | 1316443 | Asthma |
| rs6864565  | 5 | 132712279 | G | A | 0.2796 | 0.0326  | 0.0054 | 1.42E-09 | 6.0537  | 1316443 | Asthma |
| rs2897442  | 5 | 132713335 | C | T | 0.2868 | 0.0335  | 0.0053 | 3.78E-10 | 6.2630  | 1316443 | Asthma |
| rs4425499  | 5 | 132713370 | A | G | 0.2801 | 0.0329  | 0.0054 | 9.65E-10 | 6.1151  | 1316443 | Asthma |
| rs1080001  | 5 | 132713424 | C | T | 0.1728 | 0.0509  | 0.0063 | 6.96E-16 | 8.0712  | 1316443 | Asthma |
| rs4266392  | 5 | 132713563 | G | A | 0.2864 | 0.0337  | 0.0054 | 3.03E-10 | 6.2974  | 1316443 | Asthma |
| rs10477742 | 5 | 132714097 | G | A | 0.2797 | 0.0324  | 0.0054 | 1.66E-09 | 6.0276  | 1316443 | Asthma |
| rs17166215 | 5 | 132715000 | T | C | 0.1798 | 0.0521  | 0.0062 | 5.38E-17 | 8.3781  | 1316443 | Asthma |
| rs4705965  | 5 | 132719435 | G | A | 0.2868 | 0.0336  | 0.0054 | 3.41E-10 | 6.2789  | 1316443 | Asthma |
| rs11242127 | 5 | 132719812 | C | T | 0.2866 | 0.0335  | 0.0054 | 4.04E-10 | 6.2526  | 1316443 | Asthma |
| rs2074529  | 5 | 132720455 | C | A | 0.2863 | 0.0331  | 0.0054 | 6.27E-10 | 6.1836  | 1316443 | Asthma |
| rs2051809  | 5 | 132721182 | A | C | 0.2853 | 0.0341  | 0.0054 | 1.96E-10 | 6.3642  | 1316443 | Asthma |
| rs2299005  | 5 | 132721897 | G | A | 0.1727 | 0.0510  | 0.0063 | 6.94E-16 | 8.0717  | 1316443 | Asthma |
| rs2299004  | 5 | 132722146 | C | T | 0.2865 | 0.0339  | 0.0054 | 2.35E-10 | 6.3364  | 1316443 | Asthma |
| rs2299003  | 5 | 132722604 | C | T | 0.2793 | 0.0332  | 0.0054 | 7.31E-10 | 6.1593  | 1316443 | Asthma |
| rs7734673  | 5 | 132722774 | A | G | 0.2858 | 0.0342  | 0.0054 | 1.77E-10 | 6.3800  | 1316443 | Asthma |
| rs7717027  | 5 | 132722787 | T | C | 0.2856 | 0.0342  | 0.0054 | 1.86E-10 | 6.3723  | 1316443 | Asthma |
| rs6896296  | 5 | 132723006 | A | T | 0.2860 | 0.0341  | 0.0054 | 2.02E-10 | 6.3601  | 1316443 | Asthma |
| rs7735429  | 5 | 132723153 | T | C | 0.1805 | 0.0513  | 0.0062 | 1.55E-16 | 8.2524  | 1316443 | Asthma |
| rs3798129  | 5 | 132727868 | T | A | 0.1808 | 0.0522  | 0.0062 | 4.85E-17 | 8.3904  | 1316443 | Asthma |
| rs2406411  | 5 | 132728609 | C | T | 0.1801 | 0.0518  | 0.0062 | 8.62E-17 | 8.3223  | 1316443 | Asthma |
| rs2406410  | 5 | 132730188 | C | T | 0.1806 | 0.0513  | 0.0062 | 1.73E-16 | 8.2395  | 1316443 | Asthma |
| rs59354656 | 5 | 132730730 | G | C | 0.1806 | 0.0512  | 0.0062 | 1.87E-16 | 8.2303  | 1316443 | Asthma |
| rs10463516 | 5 | 132731784 | G | C | 0.1733 | 0.0510  | 0.0063 | 7.21E-16 | 8.0671  | 1316443 | Asthma |
| rs9784675  | 5 | 132734047 | G | A | 0.1799 | 0.0510  | 0.0062 | 2.96E-16 | 8.1750  | 1316443 | Asthma |
| rs9784600  | 5 | 132734155 | T | G | 0.1796 | 0.0514  | 0.0062 | 1.80E-16 | 8.2347  | 1316443 | Asthma |
| rs7732667  | 5 | 132734641 | G | C | 0.1800 | 0.0508  | 0.0062 | 3.64E-16 | 8.1500  | 1316443 | Asthma |
| rs60168940 | 5 | 132735520 | T | C | 0.1732 | 0.0510  | 0.0063 | 7.77E-16 | 8.0578  | 1316443 | Asthma |
| rs2277066  | 5 | 132737221 | C | G | 0.0941 | 0.0545  | 0.0081 | 1.54E-11 | 6.7439  | 1316443 | Asthma |
| rs2277065  | 5 | 132737310 | G | A | 0.1059 | 0.0550  | 0.0091 | 1.23E-09 | 6.0768  | 830513  | Asthma |
| rs3756753  | 5 | 132737966 | G | C | 0.1091 | 0.0638  | 0.0080 | 1.66E-15 | 7.9647  | 1224666 | Asthma |
| rs3756752  | 5 | 132738181 | T | C | 0.1065 | 0.0614  | 0.0076 | 9.94E-16 | 8.0276  | 1316443 | Asthma |
| rs57586624 | 5 | 132739003 | T | C | 0.1078 | 0.0607  | 0.0076 | 1.35E-15 | 7.9896  | 1316443 | Asthma |
| rs7717322  | 5 | 132739198 | A | G | 0.1078 | 0.0611  | 0.0076 | 9.15E-16 | 8.0377  | 1316443 | Asthma |
| rs7731422  | 5 | 132739961 | C | A | 0.1065 | 0.0618  | 0.0076 | 6.64E-16 | 8.0769  | 1316443 | Asthma |
| rs67280784 | 5 | 132742477 | G | A | 0.1069 | 0.0622  | 0.0076 | 3.68E-16 | 8.1486  | 1316443 | Asthma |
| rs66459561 | 5 | 132743247 | A | C | 0.1076 | 0.0604  | 0.0076 | 2.04E-15 | 7.9388  | 1316443 | Asthma |
| rs67049374 | 5 | 132743502 | G | A | 0.1076 | 0.0603  | 0.0076 | 2.37E-15 | 7.9203  | 1316443 | Asthma |
| rs79757254 | 5 | 132745773 | T | G | 0.0800 | 0.0595  | 0.0088 | 1.10E-11 | 6.7934  | 1299802 | Asthma |
| rs803057   | 5 | 132746205 | G | A | 0.1077 | 0.0609  | 0.0076 | 1.12E-15 | 8.0124  | 1316443 | Asthma |
| rs803056   | 5 | 132747766 | C | G | 0.1077 | 0.0614  | 0.0076 | 7.37E-16 | 8.0642  | 1316443 | Asthma |
| rs72799426 | 5 | 132748537 | G | A | 0.0794 | 0.0557  | 0.0088 | 2.99E-10 | 6.2995  | 1299802 | Asthma |
| rs803055   | 5 | 132749264 | A | G | 0.1108 | 0.0566  | 0.0075 | 6.07E-14 | 7.5064  | 1316443 | Asthma |
| rs803054   | 5 | 132750285 | G | A | 0.1168 | 0.0594  | 0.0079 | 6.96E-14 | 7.4886  | 948423  | Asthma |
| rs708461   | 5 | 132751125 | C | G | 0.1102 | 0.0564  | 0.0076 | 8.34E-14 | 7.4649  | 1316443 | Asthma |
| rs12188656 | 5 | 132755136 | C | T | 0.1409 | 0.0515  | 0.0068 | 2.81E-14 | 7.6070  | 1316443 | Asthma |
| rs256871   | 5 | 132757345 | A | G | 0.1394 | 0.0514  | 0.0068 | 3.88E-14 | 7.5647  | 1316443 | Asthma |
| rs30534    | 5 | 132757957 | C | T | 0.1408 | 0.0514  | 0.0068 | 3.12E-14 | 7.5934  | 1316443 | Asthma |
| rs42403    | 5 | 132758302 | T | C | 0.1394 | 0.0518  | 0.0068 | 2.58E-14 | 7.6180  | 1316443 | Asthma |
| rs30509    | 5 | 132762728 | C | A | 0.1407 | 0.0518  | 0.0068 | 2.11E-14 | 7.6438  | 1316443 | Asthma |
| rs39588    | 5 | 132763443 | G | C | 0.1403 | 0.0515  | 0.0068 | 2.88E-14 | 7.6036  | 1316443 | Asthma |
| rs30508    | 5 | 132763546 | G | A | 0.1403 | 0.0514  | 0.0068 | 3.40E-14 | 7.5822  | 1316443 | Asthma |
| rs30507    | 5 | 132764307 | G | A | 0.1414 | 0.0513  | 0.0068 | 3.24E-14 | 7.5882  | 1316443 | Asthma |
| rs30506    | 5 | 132764780 | C | T | 0.1407 | 0.0519  | 0.0068 | 1.75E-14 | 7.6678  | 1316443 | Asthma |
| rs187681   | 5 | 132766211 | A | G | 0.1363 | 0.0529  | 0.0069 | 1.59E-14 | 7.6802  | 1316443 | Asthma |
| rs256875   | 5 | 132767579 | A | G | 0.1397 | 0.0519  | 0.0068 | 2.19E-14 | 7.6388  | 1316443 | Asthma |
| rs194395   | 5 | 132768464 | T | C | 0.1387 | 0.0522  | 0.0068 | 1.84E-14 | 7.6616  | 1316443 | Asthma |
| rs402959   | 5 | 132771359 | T | G | 0.1397 | 0.0518  | 0.0068 | 2.53E-14 | 7.6204  | 1316443 | Asthma |
| rs39855    | 5 | 132771703 | G | A | 0.1538 | 0.0519  | 0.0071 | 2.20E-13 | 7.3362  | 948423  | Asthma |
| rs30531    | 5 | 132772334 | A | G | 0.1398 | 0.0517  | 0.0068 | 2.76E-14 | 7.6090  | 1316443 | Asthma |
| rs30530    | 5 | 132772649 | G | C | 0.1544 | 0.0518  | 0.0071 | 2.26E-13 | 7.3327  | 948423  | Asthma |
| rs30529    | 5 | 132773793 | G | A | 0.1398 | 0.0517  | 0.0068 | 2.66E-14 | 7.6141  | 1316443 | Asthma |
| rs30528    | 5 | 132773927 | C | T | 0.1398 | 0.0517  | 0.0068 | 2.63E-14 | 7.6153  | 1316443 | Asthma |
| rs30527    | 5 | 132774050 | A | G | 0.1398 | 0.0517  | 0.0068 | 2.77E-14 | 7.6090  | 1316443 | Asthma |
| rs30526    | 5 | 132774274 | C | T | 0.1398 | 0.0517  | 0.0068 | 2.83E-14 | 7.6058  | 1316443 | Asthma |

|            |   |           |   |   |        |         |        |          |         |         |        |
|------------|---|-----------|---|---|--------|---------|--------|----------|---------|---------|--------|
| rs30524    | 5 | 132775238 | C | A | 0.1402 | 0.0516  | 0.0068 | 2.78E-14 | 7.6081  | 1316443 | Asthma |
| rs30523    | 5 | 132775351 | A | G | 0.1402 | 0.0516  | 0.0068 | 2.80E-14 | 7.6072  | 1316443 | Asthma |
| rs30521    | 5 | 132775898 | G | A | 0.1544 | 0.0519  | 0.0071 | 2.07E-13 | 7.3444  | 948423  | Asthma |
| rs30520    | 5 | 132776043 | A | G | 0.1398 | 0.0517  | 0.0068 | 2.80E-14 | 7.6070  | 1316443 | Asthma |
| rs30519    | 5 | 132776297 | C | T | 0.1402 | 0.0518  | 0.0068 | 2.21E-14 | 7.6376  | 1316443 | Asthma |
| rs30518    | 5 | 132776348 | A | G | 0.1403 | 0.0515  | 0.0068 | 3.24E-14 | 7.5885  | 1316443 | Asthma |
| rs30517    | 5 | 132776741 | G | A | 0.1402 | 0.0515  | 0.0068 | 3.30E-14 | 7.5862  | 1316443 | Asthma |
| rs30516    | 5 | 132776868 | T | A | 0.1339 | 0.0515  | 0.0069 | 8.60E-14 | 7.4609  | 1316443 | Asthma |
| rs30515    | 5 | 132777819 | T | G | 0.1397 | 0.0516  | 0.0068 | 3.08E-14 | 7.5951  | 1316443 | Asthma |
| rs42402    | 5 | 132778248 | C | T | 0.1402 | 0.0515  | 0.0068 | 3.17E-14 | 7.5910  | 1316443 | Asthma |
| rs30514    | 5 | 132779155 | T | C | 0.1398 | 0.0515  | 0.0068 | 3.48E-14 | 7.5790  | 1316443 | Asthma |
| rs30513    | 5 | 132779532 | T | C | 0.1398 | 0.0517  | 0.0068 | 2.91E-14 | 7.6021  | 1316443 | Asthma |
| rs30512    | 5 | 132783465 | T | C | 0.1388 | 0.0517  | 0.0068 | 3.35E-14 | 7.5839  | 1316443 | Asthma |
| rs43170    | 5 | 132783561 | G | A | 0.1398 | 0.0518  | 0.0068 | 2.55E-14 | 7.6192  | 1316443 | Asthma |
| rs11746729 | 5 | 132787844 | A | G | 0.4180 | -0.0373 | 0.0053 | 1.72E-12 | -7.0555 | 1299802 | Asthma |
| rs256866   | 5 | 132789134 | C | T | 0.1469 | 0.0534  | 0.0067 | 1.32E-15 | 7.9930  | 1316443 | Asthma |
| rs171770   | 5 | 132792129 | A | C | 0.1461 | 0.0530  | 0.0067 | 2.43E-15 | 7.9173  | 1316443 | Asthma |
| rs809125   | 5 | 132792479 | G | A | 0.2486 | 0.0498  | 0.0056 | 6.65E-19 | 8.8806  | 1316443 | Asthma |
| rs803141   | 5 | 132792526 | T | C | 0.1459 | 0.0534  | 0.0067 | 1.61E-15 | 7.9685  | 1316443 | Asthma |
| rs803140   | 5 | 132792952 | C | G | 0.1394 | 0.0533  | 0.0068 | 5.67E-15 | 7.8110  | 1316443 | Asthma |
| rs803139   | 5 | 132795332 | T | C | 0.2500 | 0.0465  | 0.0056 | 9.53E-17 | 8.3105  | 1316443 | Asthma |
| rs73255054 | 5 | 132796659 | A | C | 0.1282 | 0.0448  | 0.0076 | 4.61E-09 | 5.8606  | 1186521 | Asthma |
| rs803137   | 5 | 132796955 | G | A | 0.2505 | 0.0464  | 0.0056 | 9.28E-17 | 8.3136  | 1316443 | Asthma |
| rs6888726  | 5 | 132799166 | T | C | 0.1335 | 0.0452  | 0.0070 | 8.28E-11 | 6.4954  | 1316443 | Asthma |
| rs66943836 | 5 | 132799996 | T | C | 0.1336 | 0.0452  | 0.0070 | 8.01E-11 | 6.5005  | 1316443 | Asthma |
| rs73255060 | 5 | 132800061 | A | T | 0.1338 | 0.0441  | 0.0070 | 3.91E-10 | 6.2575  | 1290310 | Asthma |
| rs6890114  | 5 | 132800482 | A | T | 0.1388 | 0.0425  | 0.0069 | 6.79E-10 | 6.1710  | 1316443 | Asthma |
| rs4705869  | 5 | 132802437 | T | C | 0.1308 | 0.0424  | 0.0069 | 8.18E-10 | 6.1414  | 1376071 | Asthma |
| rs809123   | 5 | 132802472 | C | T | 0.2948 | 0.0521  | 0.0059 | 1.08E-18 | 8.8270  | 1186521 | Asthma |
| rs252200   | 5 | 142020463 | C | T | 0.3018 | -0.0306 | 0.0052 | 4.75E-09 | -5.8559 | 1376071 | Asthma |
| rs661881   | 5 | 142022279 | A | G | 0.3013 | -0.0308 | 0.0052 | 3.91E-09 | -5.8879 | 1376071 | Asthma |
| rs661880   | 5 | 142022280 | A | C | 0.3012 | -0.0307 | 0.0052 | 4.58E-09 | -5.8617 | 1376071 | Asthma |
| rs164081   | 5 | 142022348 | C | T | 0.3016 | -0.0310 | 0.0052 | 3.27E-09 | -5.9177 | 1376071 | Asthma |
| rs252128   | 5 | 142027432 | C | T | 0.3014 | -0.0309 | 0.0053 | 4.21E-09 | -5.8758 | 1376071 | Asthma |
| rs34954154 | 5 | 142033196 | A | G | 0.3038 | -0.0299 | 0.0054 | 3.62E-08 | -5.5086 | 1316443 | Asthma |
| rs164507   | 5 | 142034379 | C | T | 0.4296 | 0.0295  | 0.0051 | 8.17E-09 | 5.7649  | 1299802 | Asthma |
| rs164506   | 5 | 142034462 | A | G | 0.4228 | 0.0317  | 0.0055 | 8.95E-09 | 5.7496  | 1169880 | Asthma |
| rs9885316  | 5 | 142040155 | G | A | 0.3592 | 0.0298  | 0.0051 | 4.67E-09 | 5.8586  | 1316443 | Asthma |
| rs11747857 | 5 | 142046614 | T | C | 0.3594 | 0.0291  | 0.0051 | 1.01E-08 | 5.7292  | 1316443 | Asthma |
| rs7443311  | 5 | 142054595 | T | C | 0.3738 | 0.0302  | 0.0050 | 1.62E-09 | 6.0316  | 1316443 | Asthma |
| rs11167763 | 5 | 142055901 | A | G | 0.4264 | -0.0363 | 0.0049 | 1.36E-13 | -7.4002 | 1316443 | Asthma |
| rs12656526 | 5 | 142056727 | A | G | 0.4601 | 0.0324  | 0.0049 | 3.26E-11 | 6.6345  | 1316443 | Asthma |
| rs6884380  | 5 | 142058392 | A | G | 0.4264 | -0.0364 | 0.0049 | 1.10E-13 | -7.4283 | 1316443 | Asthma |
| rs6884386  | 5 | 142058403 | A | G | 0.4265 | -0.0365 | 0.0049 | 9.96E-14 | -7.4414 | 1316443 | Asthma |
| rs13153792 | 5 | 142058912 | C | T | 0.4232 | -0.0405 | 0.0059 | 7.35E-12 | -6.8506 | 1030443 | Asthma |
| rs12654522 | 5 | 142066738 | G | A | 0.4870 | 0.0318  | 0.0048 | 5.09E-11 | 6.5683  | 1316443 | Asthma |
| rs17208656 | 5 | 142066946 | C | G | 0.3803 | 0.0313  | 0.0050 | 3.07E-10 | 6.2949  | 1316443 | Asthma |
| rs56372641 | 5 | 142068794 | C | G | 0.3810 | 0.0289  | 0.0049 | 2.79E-09 | 5.9433  | 1376071 | Asthma |
| rs11739614 | 5 | 142072843 | T | C | 0.3819 | 0.0296  | 0.0049 | 1.08E-09 | 6.0978  | 1376071 | Asthma |
| rs13187922 | 5 | 142083096 | T | C | 0.5013 | 0.0360  | 0.0049 | 2.24E-13 | 7.3338  | 1290310 | Asthma |
| rs17287162 | 5 | 142086115 | G | A | 0.3798 | 0.0329  | 0.0050 | 3.34E-11 | 6.6309  | 1316443 | Asthma |
| rs891985   | 5 | 142086501 | C | G | 0.2156 | -0.0402 | 0.0060 | 1.55E-11 | -6.7435 | 1316443 | Asthma |
| rs891986   | 5 | 142086515 | C | G | 0.2156 | -0.0403 | 0.0060 | 1.48E-11 | -6.7495 | 1316443 | Asthma |
| rs12655443 | 5 | 142088291 | C | A | 0.5019 | -0.0336 | 0.0048 | 3.63E-12 | -6.9507 | 1316443 | Asthma |
| rs7720832  | 5 | 142093532 | T | G | 0.2283 | -0.0311 | 0.0057 | 4.62E-08 | -5.4656 | 1376071 | Asthma |
| rs7734160  | 5 | 142093579 | G | T | 0.2282 | -0.0311 | 0.0057 | 4.63E-08 | -5.4650 | 1376071 | Asthma |
| rs13354528 | 5 | 142097204 | C | T | 0.2160 | -0.0360 | 0.0058 | 5.42E-10 | -6.2063 | 1376071 | Asthma |
| rs62384601 | 5 | 142097426 | C | T | 0.2160 | -0.0362 | 0.0058 | 4.73E-10 | -6.2279 | 1376071 | Asthma |
| rs13172894 | 5 | 142097640 | C | A | 0.2159 | -0.0360 | 0.0058 | 5.47E-10 | -6.2050 | 1376071 | Asthma |
| rs11167764 | 5 | 142099500 | A | C | 0.2160 | -0.0362 | 0.0058 | 4.65E-10 | -6.2303 | 1376071 | Asthma |
| rs2338825  | 5 | 142099917 | G | A | 0.2158 | -0.0362 | 0.0058 | 4.62E-10 | -6.2316 | 1376071 | Asthma |
| rs2338824  | 5 | 142100000 | T | G | 0.2085 | -0.0340 | 0.0061 | 3.20E-08 | -5.5304 | 1008051 | Asthma |
| rs10057301 | 5 | 142100268 | T | G | 0.2159 | -0.0362 | 0.0058 | 4.64E-10 | -6.2307 | 1376071 | Asthma |
| rs10057309 | 5 | 142100305 | T | C | 0.2159 | -0.0361 | 0.0058 | 4.97E-10 | -6.2201 | 1376071 | Asthma |
| rs62384603 | 5 | 142100644 | A | C | 0.3661 | 0.0304  | 0.0049 | 4.61E-10 | 6.2320  | 1376071 | Asthma |
| rs7730511  | 5 | 142100853 | T | C | 0.2159 | -0.0361 | 0.0058 | 4.85E-10 | -6.2237 | 1376071 | Asthma |
| rs6580220  | 5 | 142100993 | G | A | 0.2159 | -0.0361 | 0.0058 | 4.88E-10 | -6.2231 | 1376071 | Asthma |
| rs62384625 | 5 | 142102704 | T | C | 0.3616 | 0.0331  | 0.0058 | 1.26E-08 | 5.6914  | 1090071 | Asthma |
| rs12717899 | 5 | 142102776 | G | T | 0.2160 | -0.0362 | 0.0058 | 4.47E-10 | -6.2366 | 1376071 | Asthma |
| rs1835967  | 5 | 142103135 | T | C | 0.3661 | 0.0304  | 0.0049 | 4.52E-10 | 6.2350  | 1376071 | Asthma |
| rs7722567  | 5 | 142103613 | C | T | 0.2227 | -0.0394 | 0.0063 | 3.18E-10 | -6.2895 | 1219993 | Asthma |
| rs7708634  | 5 | 142103722 | T | C | 0.2227 | -0.0394 | 0.0063 | 3.19E-10 | -6.2894 | 1219993 | Asthma |
| rs67483405 | 5 | 142103833 | G | A | 0.2177 | -0.0460 | 0.0074 | 5.07E-10 | -6.2171 | 757378  | Asthma |
| rs6887599  | 5 | 142104784 | G | A | 0.2158 | -0.0360 | 0.0058 | 5.61E-10 | -6.2011 | 1376071 | Asthma |

|            |   |           |   |   |        |         |        |          |         |         |        |
|------------|---|-----------|---|---|--------|---------|--------|----------|---------|---------|--------|
| rs10073131 | 5 | 142105237 | G | A | 0.2160 | -0.0362 | 0.0058 | 4.52E-10 | -6.2350 | 1376071 | Asthma |
| rs891991   | 5 | 142105412 | A | T | 0.2160 | -0.0362 | 0.0058 | 4.77E-10 | -6.2263 | 1376071 | Asthma |
| rs28372841 | 5 | 142108414 | C | T | 0.3779 | 0.0303  | 0.0048 | 3.85E-10 | 6.2599  | 1376071 | Asthma |
| rs3761757  | 5 | 142108654 | A | C | 0.2160 | -0.0365 | 0.0058 | 3.38E-10 | -6.2804 | 1376071 | Asthma |
| rs3761759  | 5 | 142108799 | C | G | 0.3785 | 0.0295  | 0.0052 | 1.28E-08 | 5.6894  | 1246149 | Asthma |
| rs9324865  | 5 | 142109227 | T | C | 0.2160 | -0.0366 | 0.0058 | 2.92E-10 | -6.3027 | 1376071 | Asthma |
| rs55865281 | 5 | 142109242 | A | G | 0.3777 | 0.0304  | 0.0048 | 3.67E-10 | 6.2675  | 1376071 | Asthma |
| rs6580223  | 5 | 142109462 | G | T | 0.3763 | -0.0414 | 0.0049 | 2.26E-17 | -8.4797 | 1376071 | Asthma |
| rs6580224  | 5 | 142109741 | A | G | 0.3763 | -0.0413 | 0.0049 | 2.33E-17 | -8.4760 | 1376071 | Asthma |
| rs6580225  | 5 | 142109816 | G | C | 0.3763 | -0.0414 | 0.0049 | 2.24E-17 | -8.4806 | 1376071 | Asthma |
| rs12653848 | 5 | 142110288 | C | T | 0.3763 | -0.0414 | 0.0049 | 2.22E-17 | -8.4814 | 1376071 | Asthma |
| rs12653866 | 5 | 142110356 | C | T | 0.3763 | -0.0414 | 0.0049 | 2.12E-17 | -8.4870 | 1376071 | Asthma |
| rs12656877 | 5 | 142110526 | T | C | 0.3763 | -0.0414 | 0.0049 | 2.06E-17 | -8.4902 | 1376071 | Asthma |
| rs4912622  | 5 | 142111022 | G | A | 0.3763 | -0.0414 | 0.0049 | 2.02E-17 | -8.4924 | 1376071 | Asthma |
| rs7700687  | 5 | 142112420 | C | T | 0.3764 | -0.0415 | 0.0049 | 1.75E-17 | -8.5095 | 1376071 | Asthma |
| rs72799903 | 5 | 142112496 | A | G | 0.3778 | 0.0303  | 0.0048 | 4.18E-10 | 6.2472  | 1376071 | Asthma |
| rs7705042  | 5 | 142112854 | C | A | 0.3823 | -0.0400 | 0.0058 | 5.14E-12 | -6.9018 | 1090071 | Asthma |
| rs4912804  | 5 | 142114049 | T | C | 0.3763 | -0.0413 | 0.0049 | 2.68E-17 | -8.4599 | 1376071 | Asthma |
| rs4912805  | 5 | 142114120 | A | G | 0.3763 | -0.0413 | 0.0049 | 2.75E-17 | -8.4566 | 1376071 | Asthma |
| rs13184323 | 5 | 142115154 | T | G | 0.3764 | -0.0413 | 0.0049 | 2.55E-17 | -8.4654 | 1376071 | Asthma |
| rs10068717 | 5 | 142115369 | C | T | 0.3764 | -0.0413 | 0.0049 | 2.53E-17 | -8.4665 | 1376071 | Asthma |
| rs10079513 | 5 | 142115527 | T | C | 0.3762 | -0.0417 | 0.0054 | 1.10E-14 | -7.7271 | 1159440 | Asthma |
| rs13188700 | 5 | 142115574 | T | C | 0.3764 | -0.0412 | 0.0049 | 2.94E-17 | -8.4491 | 1376071 | Asthma |
| rs10875596 | 5 | 142116150 | T | C | 0.3764 | -0.0413 | 0.0049 | 2.62E-17 | -8.4621 | 1376071 | Asthma |
| rs12515668 | 5 | 142116525 | G | T | 0.3763 | -0.0413 | 0.0049 | 2.50E-17 | -8.4677 | 1376071 | Asthma |
| rs7712237  | 5 | 142116899 | T | C | 0.3764 | -0.0413 | 0.0049 | 2.59E-17 | -8.4640 | 1376071 | Asthma |
| rs17208670 | 5 | 142117674 | T | C | 0.3664 | 0.0314  | 0.0049 | 1.21E-10 | 6.4383  | 1376071 | Asthma |
| rs9324866  | 5 | 142118085 | A | G | 0.3764 | -0.0412 | 0.0049 | 2.98E-17 | -8.4475 | 1376071 | Asthma |
| rs12657589 | 5 | 142118429 | G | A | 0.3664 | 0.0313  | 0.0049 | 1.33E-10 | 6.4235  | 1376071 | Asthma |
| rs1036209  | 5 | 142119067 | T | A | 0.3764 | -0.0412 | 0.0049 | 3.25E-17 | -8.4372 | 1376071 | Asthma |
| rs1036207  | 5 | 142119476 | A | G | 0.3764 | -0.0412 | 0.0049 | 3.11E-17 | -8.4422 | 1376071 | Asthma |
| rs11745474 | 5 | 142119883 | G | C | 0.3664 | 0.0312  | 0.0049 | 1.45E-10 | 6.4104  | 1376071 | Asthma |
| rs11749731 | 5 | 142120871 | A | C | 0.3762 | -0.0410 | 0.0049 | 4.06E-17 | -8.4112 | 1376071 | Asthma |
| rs11750521 | 5 | 142121139 | T | C | 0.3737 | -0.0404 | 0.0051 | 4.20E-15 | -7.8488 | 1008051 | Asthma |
| rs1835966  | 5 | 142121943 | C | T | 0.3763 | -0.0411 | 0.0049 | 3.67E-17 | -8.4230 | 1376071 | Asthma |
| rs10051379 | 5 | 142122097 | G | T | 0.3036 | -0.0374 | 0.0051 | 3.57E-13 | -7.2710 | 1376071 | Asthma |
| rs1835965  | 5 | 142122206 | G | A | 0.3763 | -0.0411 | 0.0049 | 3.80E-17 | -8.4190 | 1376071 | Asthma |
| rs10463348 | 5 | 142122470 | G | T | 0.3763 | -0.0411 | 0.0049 | 3.68E-17 | -8.4228 | 1376071 | Asthma |
| rs2338823  | 5 | 142123244 | T | C | 0.3731 | -0.0405 | 0.0058 | 2.14E-12 | -7.0249 | 791420  | Asthma |
| rs2338822  | 5 | 142123494 | T | C | 0.3764 | -0.0410 | 0.0049 | 4.18E-17 | -8.4077 | 1376071 | Asthma |
| rs17208684 | 5 | 142124064 | A | C | 0.3664 | 0.0310  | 0.0049 | 1.91E-10 | 6.3683  | 1376071 | Asthma |
| rs6877864  | 5 | 142124274 | A | G | 0.3764 | -0.0411 | 0.0049 | 3.84E-17 | -8.4177 | 1376071 | Asthma |
| rs6882226  | 5 | 142124305 | T | A | 0.3764 | -0.0411 | 0.0049 | 3.83E-17 | -8.4181 | 1376071 | Asthma |
| rs1812942  | 5 | 142124921 | C | G | 0.3664 | 0.0310  | 0.0049 | 1.92E-10 | 6.3674  | 1376071 | Asthma |
| rs1812941  | 5 | 142125056 | G | A | 0.3658 | 0.0307  | 0.0049 | 3.05E-10 | 6.2961  | 1376071 | Asthma |
| rs6883827  | 5 | 142125426 | A | G | 0.3763 | -0.0410 | 0.0049 | 4.74E-17 | -8.3929 | 1376071 | Asthma |
| rs4912623  | 5 | 142125897 | T | A | 0.3764 | -0.0411 | 0.0049 | 3.78E-17 | -8.4193 | 1376071 | Asthma |
| rs7737631  | 5 | 142127050 | T | G | 0.3763 | -0.0410 | 0.0049 | 4.19E-17 | -8.4074 | 1376071 | Asthma |
| rs6874308  | 5 | 142127346 | C | T | 0.3764 | -0.0411 | 0.0049 | 3.60E-17 | -8.4254 | 1376071 | Asthma |
| rs11739961 | 5 | 142128923 | T | G | 0.3763 | -0.0411 | 0.0049 | 3.42E-17 | -8.4313 | 1376071 | Asthma |
| rs56242584 | 5 | 142129084 | C | T | 0.3666 | 0.0314  | 0.0049 | 1.13E-10 | 6.4485  | 1376071 | Asthma |
| rs55976518 | 5 | 142129090 | T | G | 0.3657 | 0.0308  | 0.0049 | 2.69E-10 | 6.3155  | 1376071 | Asthma |
| rs11743029 | 5 | 142129717 | A | G | 0.3036 | -0.0375 | 0.0051 | 3.36E-13 | -7.2793 | 1376071 | Asthma |
| rs56183589 | 5 | 142129816 | A | C | 0.3615 | 0.0339  | 0.0054 | 2.57E-10 | 6.3228  | 1219993 | Asthma |
| rs2338821  | 5 | 142129868 | A | G | 0.3764 | -0.0413 | 0.0049 | 2.73E-17 | -8.4575 | 1376071 | Asthma |
| rs4391200  | 5 | 142129972 | A | G | 0.3764 | -0.0413 | 0.0049 | 2.58E-17 | -8.4641 | 1376071 | Asthma |
| rs10062349 | 5 | 142130032 | G | A | 0.3763 | -0.0413 | 0.0049 | 2.77E-17 | -8.4558 | 1376071 | Asthma |
| rs6860138  | 5 | 142130420 | G | A | 0.3763 | -0.0413 | 0.0049 | 2.67E-17 | -8.4605 | 1376071 | Asthma |
| rs6580228  | 5 | 142130883 | C | T | 0.3763 | -0.0414 | 0.0049 | 2.38E-17 | -8.4737 | 1376071 | Asthma |
| rs6580229  | 5 | 142131189 | A | G | 0.3764 | -0.0415 | 0.0049 | 1.84E-17 | -8.5035 | 1376071 | Asthma |
| rs56025023 | 5 | 142131331 | A | G | 0.3663 | 0.0310  | 0.0049 | 1.97E-10 | 6.3636  | 1376071 | Asthma |
| rs62381975 | 5 | 142133453 | A | G | 0.3035 | -0.0375 | 0.0051 | 3.29E-13 | -7.2819 | 1376071 | Asthma |
| rs6863411  | 5 | 142133639 | A | T | 0.3761 | -0.0412 | 0.0049 | 2.99E-17 | -8.4469 | 1376071 | Asthma |
| rs4385236  | 5 | 142133831 | G | A | 0.3763 | -0.0413 | 0.0049 | 2.61E-17 | -8.4626 | 1376071 | Asthma |
| rs2043280  | 5 | 142134126 | C | G | 0.3763 | -0.0413 | 0.0049 | 2.61E-17 | -8.4628 | 1376071 | Asthma |
| rs7709361  | 5 | 142134289 | T | C | 0.3763 | -0.0413 | 0.0049 | 2.68E-17 | -8.4599 | 1376071 | Asthma |
| rs7705547  | 5 | 142134462 | A | G | 0.3763 | -0.0413 | 0.0049 | 2.59E-17 | -8.4636 | 1376071 | Asthma |
| rs35887942 | 5 | 142134878 | C | T | 0.3744 | 0.0301  | 0.0051 | 4.25E-09 | 5.8741  | 1008051 | Asthma |
| rs10041497 | 5 | 142135017 | T | C | 0.3763 | -0.0413 | 0.0049 | 2.44E-17 | -8.4706 | 1376071 | Asthma |
| rs7733850  | 5 | 142135999 | C | T | 0.3763 | -0.0413 | 0.0049 | 2.54E-17 | -8.4660 | 1376071 | Asthma |
| rs3765011  | 5 | 142138100 | G | C | 0.3765 | -0.0412 | 0.0049 | 3.23E-17 | -8.4381 | 1376071 | Asthma |
| rs12655675 | 5 | 142138539 | C | T | 0.3667 | 0.0315  | 0.0049 | 1.08E-10 | 6.4555  | 1376071 | Asthma |
| rs6881942  | 5 | 142139088 | C | T | 0.4395 | -0.0385 | 0.0047 | 4.81E-16 | -8.1160 | 1376071 | Asthma |
| rs4912807  | 5 | 142139731 | G | C | 0.3763 | -0.0414 | 0.0049 | 2.12E-17 | -8.4873 | 1376071 | Asthma |

|             |   |           |   |   |        |         |        |          |         |         |        |
|-------------|---|-----------|---|---|--------|---------|--------|----------|---------|---------|--------|
| rs62381977  | 5 | 142140041 | A | C | 0.3664 | 0.0312  | 0.0049 | 1.57E-10 | 6.3986  | 1376071 | Asthma |
| rs62381978  | 5 | 142140938 | G | A | 0.3667 | 0.0315  | 0.0049 | 9.66E-11 | 6.4722  | 1376071 | Asthma |
| rs7718955   | 5 | 142141894 | A | G | 0.3763 | -0.0414 | 0.0049 | 2.14E-17 | -8.4861 | 1376071 | Asthma |
| rs62381979  | 5 | 142141930 | A | T | 0.3668 | 0.0315  | 0.0049 | 9.74E-11 | 6.4709  | 1376071 | Asthma |
| rs12655465  | 5 | 142142648 | C | T | 0.3763 | -0.0414 | 0.0049 | 2.11E-17 | -8.4878 | 1376071 | Asthma |
| rs1062158   | 5 | 142143435 | C | T | 0.3766 | -0.0387 | 0.0052 | 1.54E-13 | -7.3837 | 1246149 | Asthma |
| rs10068466  | 5 | 142145047 | T | C | 0.3035 | -0.0376 | 0.0051 | 2.90E-13 | -7.2991 | 1376071 | Asthma |
| rs249643    | 5 | 142145181 | C | G | 0.3763 | -0.0414 | 0.0049 | 2.38E-17 | -8.4735 | 1376071 | Asthma |
| rs249642    | 5 | 142145415 | G | C | 0.3763 | -0.0414 | 0.0049 | 2.26E-17 | -8.4795 | 1376071 | Asthma |
| rs249641    | 5 | 142145740 | A | G | 0.3764 | -0.0414 | 0.0049 | 2.07E-17 | -8.4900 | 1376071 | Asthma |
| rs181826    | 5 | 142146492 | C | A | 0.3764 | -0.0414 | 0.0049 | 2.32E-17 | -8.4765 | 1376071 | Asthma |
| rs166079    | 5 | 142149394 | C | T | 0.3764 | -0.0413 | 0.0049 | 2.83E-17 | -8.4534 | 1376071 | Asthma |
| rs2244989   | 5 | 142150412 | C | G | 0.3667 | 0.0315  | 0.0049 | 1.10E-10 | 6.4521  | 1376071 | Asthma |
| rs413214    | 5 | 142150592 | G | A | 0.3764 | -0.0414 | 0.0049 | 2.44E-17 | -8.4707 | 1376071 | Asthma |
| rs249638    | 5 | 142151131 | G | C | 0.3764 | -0.0413 | 0.0049 | 2.95E-17 | -8.4487 | 1376071 | Asthma |
| rs449454    | 5 | 142153497 | A | G | 0.3764 | -0.0415 | 0.0049 | 2.03E-17 | -8.4920 | 1376071 | Asthma |
| rs8378      | 5 | 142153949 | A | C | 0.3664 | 0.0313  | 0.0049 | 1.39E-10 | 6.4175  | 1376071 | Asthma |
| rs249681    | 5 | 142158452 | G | C | 0.3759 | -0.0450 | 0.0051 | 1.85E-18 | -8.7662 | 1263865 | Asthma |
| rs249680    | 5 | 142158495 | G | A | 0.3664 | 0.0314  | 0.0049 | 1.29E-10 | 6.4283  | 1376071 | Asthma |
| rs1062140   | 5 | 142159304 | C | A | 0.3856 | 0.0298  | 0.0048 | 7.52E-10 | 6.1547  | 1376071 | Asthma |
| rs249678    | 5 | 142159707 | G | C | 0.3855 | 0.0296  | 0.0048 | 9.81E-10 | 6.1126  | 1376071 | Asthma |
| rs249677    | 5 | 142159774 | C | A | 0.3575 | -0.0412 | 0.0050 | 9.59E-17 | -8.3098 | 1376071 | Asthma |
| rs2338819   | 5 | 142160452 | T | C | 0.2845 | -0.0380 | 0.0053 | 5.01E-13 | -7.2251 | 1376071 | Asthma |
| rs2526653   | 5 | 142161754 | G | T | 0.3965 | 0.0309  | 0.0052 | 3.23E-09 | 5.9194  | 948423  | Asthma |
| rs6873747   | 5 | 142162590 | A | T | 0.2852 | -0.0369 | 0.0053 | 2.31E-12 | -7.0146 | 1376071 | Asthma |
| rs12514299  | 5 | 142163144 | G | T | 0.2854 | -0.0371 | 0.0053 | 1.88E-12 | -7.0433 | 1376071 | Asthma |
| rs4502862   | 5 | 142163511 | C | T | 0.2790 | -0.0406 | 0.0065 | 3.91E-10 | -6.2577 | 1064845 | Asthma |
| rs34771376  | 5 | 142163515 | G | A | 0.2790 | -0.0379 | 0.0060 | 2.78E-10 | -6.3107 | 1133307 | Asthma |
| rs4502863   | 5 | 142163519 | C | T | 0.2790 | -0.0377 | 0.0060 | 3.20E-10 | -6.2887 | 1133307 | Asthma |
| rs10074925  | 5 | 142168825 | T | C | 0.2906 | -0.0425 | 0.0063 | 1.59E-11 | -6.7395 | 1125398 | Asthma |
| rs17649451  | 5 | 142169971 | T | C | 0.2813 | -0.0397 | 0.0053 | 6.61E-14 | -7.4954 | 1376071 | Asthma |
| rs3764      | 5 | 142171563 | C | T | 0.2811 | -0.0399 | 0.0053 | 4.62E-14 | -7.5423 | 1376071 | Asthma |
| rs3899510   | 5 | 142171888 | G | A | 0.2812 | -0.0398 | 0.0053 | 5.38E-14 | -7.5225 | 1376071 | Asthma |
| rs11742584  | 5 | 142172745 | G | A | 0.2808 | -0.0398 | 0.0053 | 5.57E-14 | -7.5177 | 1376071 | Asthma |
| rs11745706  | 5 | 142173180 | T | G | 0.2810 | -0.0398 | 0.0053 | 5.71E-14 | -7.5145 | 1376071 | Asthma |
| rs141181529 | 5 | 142173729 | A | G | 0.2809 | -0.0397 | 0.0053 | 6.28E-14 | -7.5023 | 1376071 | Asthma |
| rs6871788   | 5 | 142174669 | C | T | 0.4254 | -0.0266 | 0.0048 | 2.50E-08 | -5.5735 | 1376071 | Asthma |
| rs11948854  | 5 | 142185383 | A | G | 0.1126 | -0.0451 | 0.0081 | 2.54E-08 | -5.5702 | 1316443 | Asthma |
| rs17098224  | 5 | 142187850 | T | G | 0.2790 | -0.0354 | 0.0055 | 8.81E-11 | -6.4861 | 1316443 | Asthma |
| rs2961716   | 5 | 142214925 | A | G | 0.3882 | 0.0304  | 0.0053 | 1.02E-08 | 5.7272  | 1219993 | Asthma |
| rs7730971   | 5 | 148411297 | C | G | 0.4263 | 0.0300  | 0.0050 | 2.52E-09 | 5.9604  | 1299802 | Asthma |
| rs4597955   | 5 | 148467710 | G | A | 0.4102 | 0.0289  | 0.0051 | 1.13E-08 | 5.7102  | 1299802 | Asthma |
| rs57594613  | 5 | 154396097 | A | G | 0.0382 | 0.0686  | 0.0123 | 2.35E-08 | 5.5842  | 1376071 | Asthma |
| rs9350191   | 6 | 19842430  | C | T | 0.1414 | -0.0398 | 0.0069 | 7.38E-09 | -5.7822 | 1359430 | Asthma |
| rs6905736   | 6 | 19843536  | C | A | 0.1415 | -0.0413 | 0.0071 | 6.82E-09 | -5.7954 | 1299802 | Asthma |
| rs2517614   | 6 | 30196178  | A | G | 0.1852 | 0.0394  | 0.0063 | 4.11E-10 | 6.2498  | 1310845 | Asthma |
| rs2523722   | 6 | 30197496  | T | C | 0.1852 | 0.0395  | 0.0063 | 3.65E-10 | 6.2683  | 1310845 | Asthma |
| rs2523721   | 6 | 30198489  | T | C | 0.1886 | 0.0372  | 0.0063 | 2.64E-09 | 5.9524  | 1310845 | Asthma |
| rs2428503   | 6 | 30200058  | T | C | 0.1852 | 0.0392  | 0.0063 | 5.01E-10 | 6.2188  | 1310845 | Asthma |
| rs2517611   | 6 | 30201550  | G | A | 0.1854 | 0.0391  | 0.0063 | 5.49E-10 | 6.2043  | 1310845 | Asthma |
| rs2284166   | 6 | 30201698  | C | T | 0.1886 | 0.0367  | 0.0063 | 4.53E-09 | 5.8638  | 1310845 | Asthma |
| rs2517610   | 6 | 30202503  | G | A | 0.1887 | 0.0369  | 0.0063 | 3.88E-09 | 5.8892  | 1310845 | Asthma |
| rs1117490   | 6 | 30202733  | C | T | 0.1887 | 0.0367  | 0.0063 | 4.32E-09 | 5.8714  | 1310845 | Asthma |
| rs2523716   | 6 | 30202748  | T | C | 0.1876 | 0.0373  | 0.0063 | 2.64E-09 | 5.9524  | 1310845 | Asthma |
| rs1117487   | 6 | 30203193  | G | A | 0.1887 | 0.0366  | 0.0063 | 4.86E-09 | 5.8519  | 1310845 | Asthma |
| rs2523714   | 6 | 30203592  | T | G | 0.1886 | 0.0367  | 0.0063 | 4.42E-09 | 5.8674  | 1310845 | Asthma |
| rs2517608   | 6 | 30203640  | T | C | 0.1874 | 0.0374  | 0.0063 | 2.54E-09 | 5.9590  | 1310845 | Asthma |
| rs2844776   | 6 | 30204050  | C | T | 0.1888 | 0.0368  | 0.0063 | 3.94E-09 | 5.8868  | 1310845 | Asthma |
| rs971570    | 6 | 30204736  | C | A | 0.1875 | 0.0375  | 0.0063 | 2.28E-09 | 5.9762  | 1310845 | Asthma |
| rs2523713   | 6 | 30205553  | A | G | 0.1876 | 0.0375  | 0.0063 | 2.28E-09 | 5.9766  | 1310845 | Asthma |
| rs2021722   | 6 | 30206354  | T | C | 0.1887 | 0.0368  | 0.0063 | 3.87E-09 | 5.8897  | 1310845 | Asthma |
| rs885912    | 6 | 30206856  | A | C | 0.1888 | 0.0371  | 0.0063 | 3.15E-09 | 5.9235  | 1310845 | Asthma |
| rs3129695   | 6 | 30210162  | A | G | 0.1327 | 0.0398  | 0.0073 | 4.95E-08 | 5.4530  | 1284712 | Asthma |
| rs2189373   | 6 | 30255651  | T | C | 0.1738 | 0.0410  | 0.0065 | 2.50E-10 | 6.3270  | 1310845 | Asthma |
| rs3132584   | 6 | 30720650  | T | G | 0.1764 | 0.0372  | 0.0064 | 4.90E-09 | 5.8507  | 1310845 | Asthma |
| rs8233      | 6 | 30725188  | A | G | 0.1940 | 0.0370  | 0.0066 | 2.50E-08 | 5.5731  | 942825  | Asthma |
| rs7781      | 6 | 30725344  | G | A | 0.1759 | 0.0404  | 0.0071 | 1.06E-08 | 5.7205  | 1159440 | Asthma |
| rs3095330   | 6 | 30725856  | G | A | 0.1778 | 0.0357  | 0.0063 | 1.72E-08 | 5.6376  | 1310845 | Asthma |
| rs3095329   | 6 | 30726039  | G | A | 0.1764 | 0.0373  | 0.0064 | 4.26E-09 | 5.8739  | 1310845 | Asthma |
| rs3094128   | 6 | 30726597  | C | T | 0.1685 | 0.0372  | 0.0065 | 9.54E-09 | 5.7388  | 1310845 | Asthma |
| rs3094127   | 6 | 30729670  | G | A | 0.1784 | 0.0353  | 0.0063 | 2.31E-08 | 5.5870  | 1310845 | Asthma |
| rs2284173   | 6 | 30745519  | A | G | 0.1766 | 0.0364  | 0.0064 | 1.03E-08 | 5.7254  | 1310845 | Asthma |
| rs2284174   | 6 | 30745803  | C | T | 0.1734 | 0.0364  | 0.0064 | 1.38E-08 | 5.6762  | 1310845 | Asthma |
| rs9378109   | 6 | 30806697  | A | C | 0.1395 | -0.0412 | 0.0068 | 1.35E-09 | -6.0614 | 1310845 | Asthma |



|             |   |          |   |   |        |         |        |          |         |         |        |
|-------------|---|----------|---|---|--------|---------|--------|----------|---------|---------|--------|
| rs140159913 | 6 | 30918213 | A | G | 0.0193 | -0.1034 | 0.0187 | 3.21E-08 | -5.5295 | 1284712 | Asthma |
| rs7745305   | 6 | 30945698 | C | T | 0.0593 | -0.0556 | 0.0101 | 4.07E-08 | -5.4882 | 1310845 | Asthma |
| rs58893284  | 6 | 30946719 | T | G | 0.1172 | 0.0410  | 0.0075 | 3.71E-08 | 5.5041  | 1310845 | Asthma |
| rs115358464 | 6 | 30963187 | T | C | 0.0190 | -0.1090 | 0.0188 | 7.40E-09 | -5.7817 | 1284712 | Asthma |
| rs41287838  | 6 | 30964144 | G | A | 0.1252 | 0.0409  | 0.0073 | 1.75E-08 | 5.6348  | 1310845 | Asthma |
| rs3095150   | 6 | 30964755 | C | T | 0.3687 | -0.0299 | 0.0051 | 5.89E-09 | -5.8199 | 1251217 | Asthma |
| rs148162476 | 6 | 30968634 | A | G | 0.0196 | -0.1086 | 0.0187 | 6.07E-09 | -5.8151 | 1284712 | Asthma |
| rs34847854  | 6 | 30971460 | C | T | 0.0841 | 0.0563  | 0.0090 | 4.78E-10 | 6.2261  | 1310845 | Asthma |
| rs2530710   | 6 | 30972610 | T | C | 0.2038 | -0.0331 | 0.0061 | 4.80E-08 | -5.4586 | 1310845 | Asthma |
| rs34853064  | 6 | 30977848 | T | A | 0.0840 | 0.0557  | 0.0090 | 7.38E-10 | 6.1577  | 1310845 | Asthma |
| rs35101948  | 6 | 30991640 | T | G | 0.0853 | 0.0553  | 0.0089 | 5.95E-10 | 6.1917  | 1310845 | Asthma |
| rs34503701  | 6 | 30992444 | T | A | 0.0840 | 0.0550  | 0.0090 | 1.14E-09 | 6.0878  | 1310845 | Asthma |
| rs34827119  | 6 | 30994359 | A | C | 0.0853 | 0.0553  | 0.0089 | 5.95E-10 | 6.1919  | 1310845 | Asthma |
| rs114966475 | 6 | 30995823 | C | T | 0.0460 | -0.0678 | 0.0117 | 6.38E-09 | -5.8066 | 1310845 | Asthma |
| rs1632863   | 6 | 31000992 | G | C | 0.1152 | 0.0487  | 0.0085 | 1.08E-08 | 5.7183  | 1159440 | Asthma |
| rs35281047  | 6 | 31001391 | T | C | 0.0854 | 0.0553  | 0.0089 | 5.82E-10 | 6.1953  | 1310845 | Asthma |
| rs1634716   | 6 | 31001977 | A | G | 0.1177 | 0.0421  | 0.0077 | 4.46E-08 | 5.4717  | 1310845 | Asthma |
| rs1634721   | 6 | 31009903 | A | G | 0.1177 | 0.0420  | 0.0077 | 4.64E-08 | 5.4645  | 1310845 | Asthma |
| rs34746900  | 6 | 31011541 | A | C | 0.0854 | 0.0556  | 0.0089 | 4.73E-10 | 6.2280  | 1310845 | Asthma |
| rs1632870   | 6 | 31020210 | T | C | 0.1686 | -0.0406 | 0.0066 | 6.71E-10 | -6.1729 | 1310845 | Asthma |
| rs35768964  | 6 | 31021970 | T | A | 0.0855 | 0.0558  | 0.0089 | 4.22E-10 | 6.2454  | 1310845 | Asthma |
| rs35590025  | 6 | 31024334 | T | G | 0.0854 | 0.0557  | 0.0090 | 5.03E-10 | 6.2183  | 1310845 | Asthma |
| rs1632865   | 6 | 31024947 | C | T | 0.3685 | 0.0362  | 0.0051 | 7.48E-13 | 7.1704  | 1310845 | Asthma |
| rs6908759   | 6 | 31030278 | G | A | 0.1568 | -0.0385 | 0.0068 | 1.50E-08 | -5.6613 | 1310845 | Asthma |
| rs2844670   | 6 | 31037949 | G | A | 0.1716 | -0.0378 | 0.0065 | 5.18E-09 | -5.8413 | 1376071 | Asthma |
| rs2517549   | 6 | 31040821 | A | C | 0.3315 | 0.0359  | 0.0052 | 4.87E-12 | 6.9094  | 1310845 | Asthma |
| rs2517546   | 6 | 31041278 | T | C | 0.1394 | 0.0452  | 0.0071 | 2.46E-10 | 6.3298  | 1310845 | Asthma |
| rs2523901   | 6 | 31041360 | C | T | 0.3394 | 0.0365  | 0.0056 | 8.08E-11 | 6.4991  | 1154767 | Asthma |
| rs2517544   | 6 | 31041731 | G | C | 0.2768 | 0.0522  | 0.0055 | 1.29E-21 | 9.5505  | 1376071 | Asthma |
| rs2508015   | 6 | 31042423 | A | G | 0.3548 | 0.0335  | 0.0051 | 5.92E-11 | 6.5458  | 1310845 | Asthma |
| rs2844644   | 6 | 31048369 | A | G | 0.3964 | 0.0309  | 0.0050 | 6.19E-10 | 6.1855  | 1310845 | Asthma |
| rs3130574   | 6 | 31048773 | G | A | 0.1192 | 0.0423  | 0.0076 | 2.77E-08 | 5.5552  | 1376071 | Asthma |
| rs2251830   | 6 | 31049201 | A | C | 0.3964 | 0.0310  | 0.0050 | 5.51E-10 | 6.2040  | 1310845 | Asthma |
| rs2523866   | 6 | 31049570 | C | T | 0.3929 | 0.0307  | 0.0050 | 9.17E-10 | 6.1232  | 1310845 | Asthma |
| rs2844643   | 6 | 31049776 | A | G | 0.3964 | 0.0309  | 0.0050 | 6.22E-10 | 6.1849  | 1310845 | Asthma |
| rs2523865   | 6 | 31050671 | C | A | 0.3964 | 0.0310  | 0.0050 | 5.48E-10 | 6.2046  | 1310845 | Asthma |
| rs2523864   | 6 | 31050769 | T | C | 0.3964 | 0.0309  | 0.0050 | 6.48E-10 | 6.1784  | 1310845 | Asthma |
| rs3131920   | 6 | 31051131 | G | T | 0.1192 | 0.0423  | 0.0076 | 2.83E-08 | 5.5518  | 1376071 | Asthma |
| rs2523861   | 6 | 31051438 | T | C | 0.3963 | 0.0310  | 0.0050 | 5.93E-10 | 6.1922  | 1310845 | Asthma |
| rs2517530   | 6 | 31051740 | G | A | 0.3964 | 0.0310  | 0.0050 | 6.02E-10 | 6.1899  | 1310845 | Asthma |
| rs2428517   | 6 | 31052375 | C | T | 0.3964 | 0.0311  | 0.0050 | 5.05E-10 | 6.2176  | 1310845 | Asthma |
| rs9262602   | 6 | 31052494 | G | A | 0.1339 | 0.0427  | 0.0071 | 1.36E-09 | 6.0601  | 1310845 | Asthma |
| rs3131788   | 6 | 31057019 | A | G | 0.1201 | 0.0428  | 0.0076 | 1.67E-08 | 5.6427  | 1376071 | Asthma |
| rs2517521   | 6 | 31059559 | A | G | 0.1473 | -0.0498 | 0.0070 | 1.06E-12 | -7.1227 | 1376071 | Asthma |
| rs141759545 | 6 | 31067513 | A | T | 0.0534 | -0.0774 | 0.0137 | 1.56E-08 | -5.6551 | 977229  | Asthma |
| rs3131794   | 6 | 31067614 | T | G | 0.1186 | 0.0491  | 0.0085 | 7.88E-09 | 5.7711  | 1198533 | Asthma |
| rs3094671   | 6 | 31076686 | C | T | 0.1201 | 0.0428  | 0.0076 | 1.71E-08 | 5.6392  | 1376071 | Asthma |
| rs72861369  | 6 | 31077940 | T | C | 0.0848 | -0.0491 | 0.0089 | 3.22E-08 | -5.5289 | 1376071 | Asthma |
| rs3095311   | 6 | 31083898 | G | A | 0.1202 | 0.0427  | 0.0076 | 1.74E-08 | 5.6356  | 1376071 | Asthma |
| rs3130955   | 6 | 31086734 | A | C | 0.3549 | 0.0330  | 0.0051 | 6.69E-11 | 6.5275  | 1310845 | Asthma |
| rs3130544   | 6 | 31090563 | A | C | 0.1196 | 0.0431  | 0.0076 | 1.47E-08 | 5.6648  | 1376071 | Asthma |
| rs3094087   | 6 | 31093784 | C | T | 0.1407 | 0.0458  | 0.0071 | 1.26E-10 | 6.4322  | 1376071 | Asthma |
| rs3130968   | 6 | 31097294 | T | C | 0.1397 | 0.0451  | 0.0071 | 2.57E-10 | 6.3227  | 1376071 | Asthma |
| rs113580416 | 6 | 31097646 | C | T | 0.0849 | -0.0500 | 0.0089 | 1.72E-08 | -5.6376 | 1376071 | Asthma |
| rs2256962   | 6 | 31097843 | A | G | 0.0905 | -0.0483 | 0.0087 | 3.16E-08 | -5.5324 | 1376071 | Asthma |
| rs2517559   | 6 | 31100748 | A | C | 0.1476 | -0.0502 | 0.0070 | 5.97E-13 | -7.2011 | 1376071 | Asthma |
| rs2517542   | 6 | 31103107 | T | G | 0.1765 | -0.0372 | 0.0064 | 6.88E-09 | -5.7938 | 1359430 | Asthma |
| rs72853130  | 6 | 31107362 | G | A | 0.0848 | -0.0495 | 0.0089 | 2.33E-08 | -5.5856 | 1376071 | Asthma |
| rs2233980   | 6 | 31111867 | A | G | 0.1202 | 0.0426  | 0.0076 | 1.93E-08 | 5.6178  | 1376071 | Asthma |
| rs2233976   | 6 | 31112217 | T | C | 0.0848 | -0.0500 | 0.0089 | 1.68E-08 | -5.6421 | 1376071 | Asthma |
| rs3094222   | 6 | 31113657 | G | A | 0.1204 | 0.0421  | 0.0076 | 2.70E-08 | 5.5598  | 1376071 | Asthma |
| rs1265047   | 6 | 31113687 | G | A | 0.3802 | 0.0357  | 0.0050 | 7.80E-13 | 7.1646  | 1376071 | Asthma |
| rs3130976   | 6 | 31114163 | C | T | 0.2275 | 0.0372  | 0.0058 | 2.03E-10 | 6.3587  | 1376071 | Asthma |
| rs3095300   | 6 | 31114699 | T | C | 0.2154 | 0.0433  | 0.0060 | 4.30E-13 | 7.2459  | 1376071 | Asthma |
| rs3132555   | 6 | 31115133 | C | G | 0.2865 | -0.0399 | 0.0054 | 1.07E-13 | -7.4323 | 1376071 | Asthma |
| rs3095298   | 6 | 31115155 | T | C | 0.2210 | 0.0380  | 0.0059 | 1.31E-10 | 6.4255  | 1376071 | Asthma |
| rs3094220   | 6 | 31115210 | G | A | 0.2210 | 0.0380  | 0.0059 | 1.25E-10 | 6.4331  | 1376071 | Asthma |
| rs1042148   | 6 | 31115330 | T | C | 0.2861 | -0.0401 | 0.0054 | 9.41E-14 | -7.4490 | 1376071 | Asthma |
| rs3130981   | 6 | 31116036 | T | C | 0.2860 | -0.0401 | 0.0054 | 9.02E-14 | -7.4546 | 1376071 | Asthma |
| rs3094216   | 6 | 31116271 | G | A | 0.2210 | 0.0379  | 0.0059 | 1.47E-10 | 6.4084  | 1376071 | Asthma |
| rs3130985   | 6 | 31117579 | T | C | 0.1207 | 0.0458  | 0.0077 | 2.26E-09 | 5.9779  | 1349938 | Asthma |
| rs3094210   | 6 | 31119821 | A | G | 0.3825 | 0.0279  | 0.0050 | 2.10E-08 | 5.6038  | 1376071 | Asthma |
| rs2239520   | 6 | 31121145 | A | G | 0.3825 | 0.0281  | 0.0050 | 1.60E-08 | 5.6507  | 1376071 | Asthma |
| rs3094199   | 6 | 31125549 | A | G | 0.2872 | -0.0397 | 0.0054 | 1.50E-13 | -7.3876 | 1376071 | Asthma |

|             |   |          |   |   |        |         |        |          |         |         |        |
|-------------|---|----------|---|---|--------|---------|--------|----------|---------|---------|--------|
| rs3094197   | 6 | 31125708 | A | G | 0.2875 | -0.0395 | 0.0054 | 1.96E-13 | -7.3512 | 1376071 | Asthma |
| rs3130556   | 6 | 31126859 | T | C | 0.3064 | 0.0372  | 0.0056 | 3.03E-11 | 6.6451  | 1008051 | Asthma |
| rs3130557   | 6 | 31126926 | T | C | 0.1206 | 0.0438  | 0.0076 | 7.09E-09 | 5.7887  | 1376071 | Asthma |
| rs9263708   | 6 | 31127493 | C | T | 0.2154 | 0.0433  | 0.0060 | 4.14E-13 | 7.2510  | 1376071 | Asthma |
| rs3131004   | 6 | 31127517 | A | G | 0.4677 | -0.0412 | 0.0048 | 1.60E-17 | -8.5198 | 1376071 | Asthma |
| rs3131005   | 6 | 31128087 | G | A | 0.2867 | -0.0397 | 0.0054 | 1.41E-13 | -7.3957 | 1376071 | Asthma |
| rs113108526 | 6 | 31128165 | A | G | 0.0776 | -0.0571 | 0.0092 | 5.47E-10 | -6.2051 | 1376071 | Asthma |
| rs3130558   | 6 | 31129406 | C | G | 0.2918 | -0.0401 | 0.0054 | 6.51E-14 | -7.4974 | 1376071 | Asthma |
| rs3130560   | 6 | 31129676 | T | G | 0.2958 | -0.0419 | 0.0053 | 3.20E-15 | -7.8831 | 1376071 | Asthma |
| rs3131006   | 6 | 31130357 | T | A | 0.2021 | 0.0451  | 0.0061 | 1.65E-13 | 7.3746  | 1376071 | Asthma |
| rs3131007   | 6 | 31130567 | A | T | 0.4430 | -0.0378 | 0.0051 | 1.94E-13 | -7.3533 | 1008051 | Asthma |
| rs3132541   | 6 | 31130957 | C | A | 0.1206 | 0.0431  | 0.0076 | 1.22E-08 | 5.6965  | 1376071 | Asthma |
| rs3130562   | 6 | 31133197 | C | T | 0.1206 | 0.0431  | 0.0076 | 1.23E-08 | 5.6957  | 1376071 | Asthma |
| rs3130564   | 6 | 31133897 | T | C | 0.2028 | 0.0445  | 0.0061 | 3.04E-13 | 7.2926  | 1376071 | Asthma |
| rs3132568   | 6 | 31134140 | G | A | 0.2072 | 0.0425  | 0.0061 | 3.51E-12 | 6.9556  | 1376071 | Asthma |
| rs111243857 | 6 | 31134596 | T | C | 0.0809 | -0.0606 | 0.0090 | 1.55E-11 | -6.7433 | 1376071 | Asthma |
| rs3130566   | 6 | 31134841 | G | C | 0.1296 | 0.0400  | 0.0073 | 3.51E-08 | 5.5140  | 1376071 | Asthma |
| rs3132566   | 6 | 31135013 | T | G | 0.1296 | 0.0400  | 0.0073 | 3.52E-08 | 5.5133  | 1376071 | Asthma |
| rs3094669   | 6 | 31135418 | G | C | 0.1294 | 0.0396  | 0.0073 | 4.78E-08 | 5.4593  | 1376071 | Asthma |
| rs3131010   | 6 | 31137370 | T | C | 0.1297 | 0.0413  | 0.0073 | 1.90E-08 | 5.6210  | 1349938 | Asthma |
| rs1265097   | 6 | 31138682 | A | C | 0.0918 | -0.0626 | 0.0085 | 1.72E-13 | -7.3693 | 1376071 | Asthma |
| rs1265093   | 6 | 31139410 | A | G | 0.2956 | 0.0371  | 0.0053 | 2.58E-12 | 6.9988  | 1376071 | Asthma |
| rs1966      | 6 | 31139956 | T | C | 0.2196 | 0.0330  | 0.0059 | 1.78E-08 | 5.6324  | 1376071 | Asthma |
| rs1265089   | 6 | 31140830 | A | G | 0.2195 | 0.0330  | 0.0059 | 1.76E-08 | 5.6339  | 1376071 | Asthma |
| rs1265085   | 6 | 31142894 | C | G | 0.2196 | 0.0330  | 0.0059 | 1.74E-08 | 5.6359  | 1376071 | Asthma |
| rs130072    | 6 | 31144707 | T | C | 0.0783 | -0.0562 | 0.0092 | 9.19E-10 | -6.1229 | 1376071 | Asthma |
| rs1265074   | 6 | 31145437 | A | C | 0.2197 | 0.0331  | 0.0059 | 1.59E-08 | 5.6511  | 1376071 | Asthma |
| rs138598988 | 6 | 31147255 | T | C | 0.0783 | -0.0563 | 0.0092 | 8.61E-10 | -6.1333 | 1376071 | Asthma |
| rs1265068   | 6 | 31147934 | T | C | 0.2196 | 0.0330  | 0.0059 | 1.75E-08 | 5.6351  | 1376071 | Asthma |
| rs17197031  | 6 | 31148356 | C | A | 0.0783 | -0.0563 | 0.0092 | 8.63E-10 | -6.1328 | 1376071 | Asthma |
| rs3130497   | 6 | 31148872 | T | C | 0.1502 | -0.0527 | 0.0076 | 3.99E-12 | -6.9376 | 1224666 | Asthma |
| rs112640945 | 6 | 31149896 | T | C | 0.0783 | -0.0561 | 0.0092 | 9.98E-10 | -6.1098 | 1376071 | Asthma |
| rs113932411 | 6 | 31149918 | A | G | 0.0783 | -0.0560 | 0.0092 | 1.06E-09 | -6.0996 | 1376071 | Asthma |
| rs130067    | 6 | 31150734 | G | T | 0.2197 | 0.0332  | 0.0059 | 1.49E-08 | 5.6628  | 1376071 | Asthma |
| rs11540822  | 6 | 31151121 | T | A | 0.0780 | -0.0569 | 0.0092 | 6.11E-10 | -6.1876 | 1376071 | Asthma |
| rs72863043  | 6 | 31151668 | T | C | 0.0783 | -0.0560 | 0.0092 | 1.01E-09 | -6.1081 | 1376071 | Asthma |
| rs72856706  | 6 | 31152952 | T | C | 0.0783 | -0.0560 | 0.0092 | 1.04E-09 | -6.1036 | 1376071 | Asthma |
| rs111837807 | 6 | 31153455 | C | T | 0.0783 | -0.0560 | 0.0092 | 1.04E-09 | -6.1028 | 1376071 | Asthma |
| rs112785163 | 6 | 31153604 | C | G | 0.0783 | -0.0556 | 0.0091 | 1.21E-09 | -6.0793 | 1376071 | Asthma |
| rs143334143 | 6 | 31153649 | A | G | 0.0783 | -0.0559 | 0.0092 | 1.07E-09 | -6.0981 | 1376071 | Asthma |
| rs72856713  | 6 | 31154181 | G | C | 0.0783 | -0.0560 | 0.0092 | 1.01E-09 | -6.1084 | 1376071 | Asthma |
| rs130066    | 6 | 31154538 | C | G | 0.4363 | 0.0292  | 0.0049 | 2.18E-09 | 5.9838  | 1376071 | Asthma |
| rs112279190 | 6 | 31155370 | T | C | 0.0785 | -0.0564 | 0.0092 | 7.44E-10 | -6.1565 | 1376071 | Asthma |
| rs113129896 | 6 | 31155582 | G | C | 0.0667 | -0.0623 | 0.0110 | 1.65E-08 | -5.6452 | 1125398 | Asthma |
| rs72856718  | 6 | 31157480 | A | C | 0.0784 | -0.0559 | 0.0092 | 1.09E-09 | -6.0962 | 1376071 | Asthma |
| rs72856720  | 6 | 31157625 | G | C | 0.0784 | -0.0560 | 0.0092 | 1.02E-09 | -6.1064 | 1376071 | Asthma |
| rs720468    | 6 | 31158216 | G | C | 0.0784 | -0.0561 | 0.0092 | 9.44E-10 | -6.1185 | 1376071 | Asthma |
| rs17197087  | 6 | 31158455 | T | C | 0.0798 | -0.0552 | 0.0091 | 1.11E-09 | -6.0929 | 1376071 | Asthma |
| rs17197101  | 6 | 31158632 | T | G | 0.0798 | -0.0549 | 0.0091 | 1.34E-09 | -6.0622 | 1376071 | Asthma |
| rs17197108  | 6 | 31158920 | A | C | 0.0784 | -0.0559 | 0.0092 | 1.10E-09 | -6.0941 | 1376071 | Asthma |
| rs6905862   | 6 | 31159825 | A | G | 0.4394 | 0.0285  | 0.0049 | 5.82E-09 | 5.8220  | 1376071 | Asthma |
| rs74633760  | 6 | 31159917 | G | A | 0.0784 | -0.0559 | 0.0092 | 1.06E-09 | -6.1005 | 1376071 | Asthma |
| rs72856721  | 6 | 31160023 | T | G | 0.0784 | -0.0558 | 0.0092 | 1.10E-09 | -6.0939 | 1376071 | Asthma |
| rs3130934   | 6 | 31160775 | A | C | 0.3485 | -0.0430 | 0.0054 | 2.84E-15 | -7.8977 | 1246149 | Asthma |
| rs114881571 | 6 | 31160828 | T | C | 0.0784 | -0.0558 | 0.0092 | 1.17E-09 | -6.0847 | 1376071 | Asthma |
| rs7750641   | 6 | 31161533 | T | C | 0.1201 | 0.0432  | 0.0076 | 1.20E-08 | 5.6992  | 1376071 | Asthma |
| rs2073724   | 6 | 31161930 | T | C | 0.0783 | -0.0558 | 0.0092 | 1.12E-09 | -6.0914 | 1376071 | Asthma |
| rs1419881   | 6 | 31162816 | A | G | 0.4661 | 0.0279  | 0.0048 | 8.98E-09 | 5.7488  | 1376071 | Asthma |
| rs17190776  | 6 | 31163088 | A | G | 0.0784 | -0.0559 | 0.0092 | 1.02E-09 | -6.1066 | 1376071 | Asthma |
| rs17190783  | 6 | 31163432 | G | A | 0.0784 | -0.0559 | 0.0092 | 1.01E-09 | -6.1078 | 1376071 | Asthma |
| rs17190798  | 6 | 31163499 | T | A | 0.0784 | -0.0559 | 0.0092 | 1.00E-09 | -6.1088 | 1376071 | Asthma |
| rs17190811  | 6 | 31164060 | T | A | 0.0784 | -0.0559 | 0.0092 | 1.00E-09 | -6.1092 | 1376071 | Asthma |
| rs3130933   | 6 | 31164308 | T | C | 0.1506 | -0.0510 | 0.0069 | 1.95E-13 | -7.3524 | 1376071 | Asthma |
| rs13409     | 6 | 31164363 | A | G | 0.4393 | 0.0284  | 0.0049 | 5.48E-09 | 5.8320  | 1376071 | Asthma |
| rs1061118   | 6 | 31164637 | G | A | 0.3559 | -0.0398 | 0.0055 | 6.00E-13 | -7.2005 | 1224666 | Asthma |
| rs2394882   | 6 | 31164872 | A | C | 0.3542 | -0.0388 | 0.0051 | 1.97E-14 | -7.6529 | 1376071 | Asthma |
| rs17851818  | 6 | 31165179 | C | G | 0.0782 | -0.0570 | 0.0092 | 5.47E-10 | -6.2050 | 1376071 | Asthma |
| rs2106074   | 6 | 31165732 | G | A | 0.3543 | -0.0388 | 0.0051 | 2.26E-14 | -7.6347 | 1376071 | Asthma |
| rs45438402  | 6 | 31165886 | C | T | 0.0784 | -0.0560 | 0.0092 | 9.88E-10 | -6.1114 | 1376071 | Asthma |
| rs72856736  | 6 | 31166093 | A | G | 0.0784 | -0.0562 | 0.0092 | 9.24E-10 | -6.1220 | 1376071 | Asthma |
| rs3130932   | 6 | 31166166 | C | A | 0.3542 | -0.0389 | 0.0051 | 1.82E-14 | -7.6628 | 1376071 | Asthma |
| rs151095308 | 6 | 31166546 | T | C | 0.0784 | -0.0562 | 0.0092 | 9.13E-10 | -6.1240 | 1376071 | Asthma |
| rs72856737  | 6 | 31166848 | G | A | 0.0784 | -0.0562 | 0.0092 | 9.13E-10 | -6.1239 | 1376071 | Asthma |
| rs3130931   | 6 | 31167111 | T | C | 0.3261 | -0.0350 | 0.0052 | 1.63E-11 | -6.7361 | 1376071 | Asthma |

|             |   |          |   |   |        |         |        |          |          |         |        |
|-------------|---|----------|---|---|--------|---------|--------|----------|----------|---------|--------|
| rs3130930   | 6 | 31167395 | T | A | 0.3473 | -0.0428 | 0.0056 | 3.07E-14 | -7.5956  | 1193860 | Asthma |
| rs113542024 | 6 | 31168000 | G | T | 0.0783 | -0.0563 | 0.0092 | 8.54E-10 | -6.1345  | 1376071 | Asthma |
| rs142242725 | 6 | 31168101 | A | G | 0.0783 | -0.0560 | 0.0092 | 9.96E-10 | -6.1101  | 1376071 | Asthma |
| rs141715528 | 6 | 31168431 | T | C | 0.0784 | -0.0560 | 0.0092 | 1.04E-09 | -6.1037  | 1376071 | Asthma |
| rs56071357  | 6 | 31170021 | T | C | 0.1443 | -0.0389 | 0.0069 | 2.02E-08 | -5.6107  | 1359430 | Asthma |
| rs2077010   | 6 | 31170600 | T | C | 0.4369 | 0.0279  | 0.0049 | 1.21E-08 | 5.6976   | 1376071 | Asthma |
| rs885952    | 6 | 31171713 | T | C | 0.4342 | 0.0285  | 0.0049 | 5.65E-09 | 5.8269   | 1376071 | Asthma |
| rs885951    | 6 | 31172314 | A | C | 0.4357 | 0.0296  | 0.0050 | 2.16E-09 | 5.9856   | 1349938 | Asthma |
| rs885950    | 6 | 31172375 | C | A | 0.4382 | 0.0297  | 0.0049 | 1.91E-09 | 6.0057   | 1349938 | Asthma |
| rs885949    | 6 | 31172443 | C | T | 0.1530 | -0.0370 | 0.0067 | 2.77E-08 | -5.5552  | 1376071 | Asthma |
| rs2269712   | 6 | 31173432 | A | G | 0.2666 | -0.0309 | 0.0055 | 1.54E-08 | -5.6573  | 1376071 | Asthma |
| rs2269711   | 6 | 31173835 | A | T | 0.3653 | -0.0403 | 0.0050 | 1.44E-15 | -7.9816  | 1376071 | Asthma |
| rs72856757  | 6 | 31173894 | T | C | 0.0785 | -0.0573 | 0.0092 | 4.12E-10 | -6.2496  | 1376071 | Asthma |
| rs72856758  | 6 | 31174177 | C | T | 0.0786 | -0.0570 | 0.0091 | 4.74E-10 | -6.2274  | 1376071 | Asthma |
| rs3094189   | 6 | 31174193 | C | A | 0.1511 | -0.0519 | 0.0069 | 6.18E-14 | -7.5041  | 1376071 | Asthma |
| rs28360051  | 6 | 31174484 | A | G | 0.0267 | 0.0816  | 0.0150 | 4.86E-08 | 5.4562   | 1310845 | Asthma |
| rs3131018   | 6 | 31175805 | A | C | 0.3643 | -0.0294 | 0.0050 | 5.70E-09 | -5.8254  | 1376071 | Asthma |
| rs139804853 | 6 | 31176685 | A | G | 0.0786 | -0.0571 | 0.0092 | 4.50E-10 | -6.2358  | 1376071 | Asthma |
| rs3134789   | 6 | 31176918 | T | C | 0.1691 | -0.0466 | 0.0066 | 1.35E-12 | -7.0890  | 1376071 | Asthma |
| rs3130506   | 6 | 31177674 | G | A | 0.3643 | -0.0295 | 0.0050 | 5.14E-09 | -5.8425  | 1376071 | Asthma |
| rs887464    | 6 | 31178143 | T | C | 0.4543 | 0.0411  | 0.0049 | 3.38E-17 | 8.4324   | 1376071 | Asthma |
| rs17197276  | 6 | 31178563 | T | C | 0.0785 | -0.0572 | 0.0091 | 3.98E-10 | -6.2549  | 1376071 | Asthma |
| rs3131017   | 6 | 31179304 | C | T | 0.1690 | -0.0469 | 0.0066 | 1.03E-12 | -7.1268  | 1376071 | Asthma |
| rs114773933 | 6 | 31180572 | G | A | 0.0551 | -0.0663 | 0.0115 | 7.35E-09 | -5.7826  | 1376071 | Asthma |
| rs111748703 | 6 | 31181451 | A | G | 0.0739 | -0.0560 | 0.0098 | 1.02E-08 | -5.7277  | 1219993 | Asthma |
| rs1128175   | 6 | 31182658 | A | G | 0.2477 | -0.0571 | 0.0057 | 8.06E-24 | -10.0629 | 1376071 | Asthma |
| rs6913301   | 6 | 31184149 | G | A | 0.3159 | 0.0291  | 0.0052 | 1.71E-08 | 5.6394   | 1376071 | Asthma |
| rs6913648   | 6 | 31184350 | G | A | 0.3190 | 0.0310  | 0.0056 | 3.05E-08 | 5.5384   | 1224666 | Asthma |
| rs113379855 | 6 | 31185771 | T | C | 0.0786 | -0.0571 | 0.0091 | 4.16E-10 | -6.2477  | 1376071 | Asthma |
| rs112434986 | 6 | 31187037 | C | A | 0.0786 | -0.0571 | 0.0091 | 4.12E-10 | -6.2496  | 1376071 | Asthma |
| rs9263844   | 6 | 31187409 | T | C | 0.1361 | -0.0420 | 0.0072 | 4.47E-09 | -5.8657  | 1359430 | Asthma |
| rs9263845   | 6 | 31187882 | A | G | 0.1362 | -0.0420 | 0.0072 | 4.54E-09 | -5.8631  | 1359430 | Asthma |
| rs9263846   | 6 | 31187893 | A | G | 0.1361 | -0.0419 | 0.0072 | 5.00E-09 | -5.8473  | 1359430 | Asthma |
| rs4343960   | 6 | 31188829 | A | C | 0.1690 | -0.0467 | 0.0066 | 1.24E-12 | -7.1014  | 1376071 | Asthma |
| rs150765547 | 6 | 31191804 | A | G | 0.0786 | -0.0572 | 0.0092 | 4.25E-10 | -6.2446  | 1376071 | Asthma |
| rs28749550  | 6 | 31192134 | G | A | 0.1898 | 0.0382  | 0.0069 | 2.83E-08 | 5.5514   | 1219993 | Asthma |
| rs3915965   | 6 | 31192340 | T | C | 0.1091 | -0.0476 | 0.0085 | 2.52E-08 | -5.5719  | 1008051 | Asthma |
| rs28360061  | 6 | 31192354 | A | G | 0.2110 | 0.0458  | 0.0083 | 3.55E-08 | 5.5120   | 912533  | Asthma |
| rs3130460   | 6 | 31192411 | A | G | 0.1688 | -0.0472 | 0.0066 | 8.10E-13 | -7.1594  | 1376071 | Asthma |
| rs3095238   | 6 | 31193433 | T | G | 0.1689 | -0.0468 | 0.0066 | 1.17E-12 | -7.1090  | 1376071 | Asthma |
| rs3095237   | 6 | 31193570 | A | G | 0.1687 | -0.0470 | 0.0066 | 9.36E-13 | -7.1396  | 1376071 | Asthma |
| rs142031128 | 6 | 31196912 | T | C | 0.0785 | -0.0571 | 0.0091 | 4.36E-10 | -6.2407  | 1376071 | Asthma |
| rs3130461   | 6 | 31196923 | G | A | 0.1687 | -0.0472 | 0.0066 | 8.07E-13 | -7.1599  | 1376071 | Asthma |
| rs3094610   | 6 | 31197373 | G | C | 0.1687 | -0.0472 | 0.0066 | 7.60E-13 | -7.1682  | 1376071 | Asthma |
| rs3130462   | 6 | 31197500 | A | G | 0.1689 | -0.0467 | 0.0066 | 1.27E-12 | -7.0973  | 1376071 | Asthma |
| rs3094609   | 6 | 31197789 | T | C | 0.1687 | -0.0472 | 0.0066 | 8.10E-13 | -7.1594  | 1376071 | Asthma |
| rs3130463   | 6 | 31198185 | G | A | 0.1689 | -0.0469 | 0.0066 | 1.05E-12 | -7.1239  | 1376071 | Asthma |
| rs3094608   | 6 | 31198906 | G | A | 0.1688 | -0.0468 | 0.0066 | 1.18E-12 | -7.1079  | 1376071 | Asthma |
| rs3094607   | 6 | 31201762 | A | G | 0.1684 | -0.0470 | 0.0066 | 1.01E-12 | -7.1296  | 1376071 | Asthma |
| rs28362361  | 6 | 31202156 | G | A | 0.1113 | -0.0467 | 0.0085 | 3.64E-08 | -5.5075  | 1008051 | Asthma |
| rs3132511   | 6 | 31202243 | G | C | 0.1685 | -0.0481 | 0.0066 | 3.19E-13 | -7.2862  | 1376071 | Asthma |
| rs73728292  | 6 | 31202289 | G | A | 0.0953 | 0.0452  | 0.0080 | 1.98E-08 | 5.6134   | 1376071 | Asthma |
| rs73728294  | 6 | 31202450 | G | A | 0.0933 | 0.0509  | 0.0081 | 3.60E-10 | 6.2703   | 1376071 | Asthma |
| rs9263875   | 6 | 31203137 | G | A | 0.4066 | 0.0305  | 0.0049 | 3.77E-10 | 6.2635   | 1376071 | Asthma |
| rs3132510   | 6 | 31204374 | C | T | 0.1091 | 0.0483  | 0.0079 | 9.47E-10 | 6.1181   | 1376071 | Asthma |
| rs3130954   | 6 | 31205160 | G | A | 0.1511 | -0.0508 | 0.0069 | 2.46E-13 | -7.3213  | 1376071 | Asthma |
| rs3094606   | 6 | 31205901 | A | G | 0.1684 | -0.0467 | 0.0066 | 1.34E-12 | -7.0903  | 1376071 | Asthma |
| rs3132509   | 6 | 31206744 | T | C | 0.1683 | -0.0467 | 0.0066 | 1.47E-12 | -7.0771  | 1376071 | Asthma |
| rs3132508   | 6 | 31207019 | G | T | 0.1687 | -0.0463 | 0.0066 | 2.18E-12 | -7.0225  | 1376071 | Asthma |
| rs3132507   | 6 | 31207836 | A | C | 0.1685 | -0.0472 | 0.0066 | 8.43E-13 | -7.1541  | 1376071 | Asthma |
| rs1619179   | 6 | 31208169 | C | A | 0.1199 | 0.0451  | 0.0076 | 2.61E-09 | 5.9544   | 1376071 | Asthma |
| rs3887152   | 6 | 31208558 | T | C | 0.3889 | 0.0341  | 0.0049 | 3.56E-12 | 6.9535   | 1376071 | Asthma |
| rs9501519   | 6 | 31209733 | T | C | 0.4750 | 0.0361  | 0.0052 | 3.93E-12 | 6.9399   | 1224666 | Asthma |
| rs9501352   | 6 | 31209742 | A | G | 0.4750 | 0.0361  | 0.0052 | 4.07E-12 | 6.9349   | 1224666 | Asthma |
| rs9501353   | 6 | 31209745 | A | G | 0.4750 | 0.0361  | 0.0052 | 4.07E-12 | 6.9349   | 1224666 | Asthma |
| rs9501520   | 6 | 31209881 | C | T | 0.4721 | 0.0338  | 0.0048 | 1.55E-12 | 7.0701   | 1376071 | Asthma |
| rs9501521   | 6 | 31209963 | G | A | 0.4752 | 0.0363  | 0.0052 | 3.34E-12 | 6.9628   | 1224666 | Asthma |
| rs28744244  | 6 | 31209999 | A | G | 0.4741 | 0.0421  | 0.0060 | 1.85E-12 | 7.0453   | 977229  | Asthma |
| rs28744251  | 6 | 31210097 | T | C | 0.4723 | 0.0341  | 0.0048 | 1.07E-12 | 7.1207   | 1376071 | Asthma |
| rs3130952   | 6 | 31210138 | G | A | 0.1685 | -0.0470 | 0.0066 | 1.03E-12 | -7.1260  | 1376071 | Asthma |
| rs3130512   | 6 | 31210223 | A | G | 0.1685 | -0.0470 | 0.0066 | 9.48E-13 | -7.1379  | 1376071 | Asthma |
| rs17197609  | 6 | 31210413 | T | A | 0.2830 | 0.0479  | 0.0086 | 2.13E-08 | 5.6012   | 778845  | Asthma |
| rs17197630  | 6 | 31210417 | T | C | 0.4737 | 0.0364  | 0.0053 | 6.78E-12 | 6.8624   | 1198533 | Asthma |
| rs17191272  | 6 | 31210421 | C | G | 0.4752 | 0.0364  | 0.0053 | 6.85E-12 | 6.8607   | 1198533 | Asthma |

|            |   |          |   |   |        |         |        |          |         |         |        |
|------------|---|----------|---|---|--------|---------|--------|----------|---------|---------|--------|
| rs17191286 | 6 | 31210434 | A | T | 0.4752 | 0.0362  | 0.0053 | 8.92E-12 | 6.8229  | 1198533 | Asthma |
| rs17191293 | 6 | 31210436 | G | T | 0.4749 | 0.0365  | 0.0052 | 2.51E-12 | 7.0028  | 1224666 | Asthma |
| rs17197637 | 6 | 31210502 | C | T | 0.4722 | 0.0340  | 0.0048 | 1.18E-12 | 7.1077  | 1376071 | Asthma |
| rs17191321 | 6 | 31210671 | A | G | 0.4723 | 0.0341  | 0.0048 | 1.10E-12 | 7.1179  | 1376071 | Asthma |
| rs17191328 | 6 | 31210682 | T | C | 0.4742 | 0.0361  | 0.0052 | 4.47E-12 | 6.9216  | 1224666 | Asthma |
| rs17197665 | 6 | 31210688 | C | A | 0.4723 | 0.0341  | 0.0048 | 1.09E-12 | 7.1188  | 1376071 | Asthma |
| rs17197679 | 6 | 31210738 | T | C | 0.4722 | 0.0341  | 0.0048 | 9.63E-13 | 7.1357  | 1376071 | Asthma |
| rs17197686 | 6 | 31210763 | G | T | 0.0788 | -0.0567 | 0.0091 | 5.59E-10 | -6.2016 | 1376071 | Asthma |
| rs3132504  | 6 | 31210966 | T | G | 0.1685 | -0.0469 | 0.0066 | 1.14E-12 | -7.1121 | 1376071 | Asthma |
| rs3132503  | 6 | 31211229 | A | T | 0.1686 | -0.0467 | 0.0066 | 1.34E-12 | -7.0903 | 1376071 | Asthma |
| rs72863810 | 6 | 31211344 | G | A | 0.0788 | -0.0567 | 0.0091 | 5.55E-10 | -6.2028 | 1376071 | Asthma |
| rs3130466  | 6 | 31212155 | G | C | 0.1685 | -0.0471 | 0.0066 | 8.87E-13 | -7.1470 | 1376071 | Asthma |
| rs72863820 | 6 | 31214905 | A | C | 0.0789 | -0.0569 | 0.0091 | 4.95E-10 | -6.2206 | 1376071 | Asthma |
| rs9263957  | 6 | 31216398 | A | G | 0.1097 | -0.0467 | 0.0085 | 4.11E-08 | -5.4859 | 1008051 | Asthma |
| rs9501089  | 6 | 31218033 | G | T | 0.4723 | 0.0338  | 0.0048 | 1.41E-12 | 7.0836  | 1376071 | Asthma |
| rs3132501  | 6 | 31218200 | T | G | 0.1684 | -0.0471 | 0.0066 | 9.10E-13 | -7.1435 | 1376071 | Asthma |
| rs3130951  | 6 | 31219091 | T | C | 0.1685 | -0.0467 | 0.0066 | 1.32E-12 | -7.0927 | 1376071 | Asthma |
| rs72863826 | 6 | 31219561 | C | G | 0.0789 | -0.0568 | 0.0091 | 5.15E-10 | -6.2143 | 1376071 | Asthma |
| rs3132500  | 6 | 31220834 | T | G | 0.1684 | -0.0473 | 0.0066 | 7.14E-13 | -7.1768 | 1376071 | Asthma |
| rs72863830 | 6 | 31221764 | A | G | 0.0682 | -0.0567 | 0.0101 | 1.85E-08 | -5.6256 | 1193860 | Asthma |
| rs3130950  | 6 | 31222175 | C | G | 0.1685 | -0.0473 | 0.0066 | 7.44E-13 | -7.1710 | 1376071 | Asthma |
| rs3130515  | 6 | 31222345 | T | C | 0.1696 | -0.0512 | 0.0072 | 8.77E-13 | -7.1486 | 1224666 | Asthma |
| rs3130516  | 6 | 31222351 | T | C | 0.1696 | -0.0509 | 0.0072 | 1.11E-12 | -7.1158 | 1224666 | Asthma |
| rs3130468  | 6 | 31223018 | C | G | 0.1685 | -0.0473 | 0.0066 | 6.73E-13 | -7.1847 | 1376071 | Asthma |
| rs3130518  | 6 | 31223932 | T | C | 0.1685 | -0.0474 | 0.0066 | 6.27E-13 | -7.1944 | 1376071 | Asthma |
| rs6904669  | 6 | 31225019 | G | A | 0.4307 | 0.0302  | 0.0048 | 4.11E-10 | 6.2497  | 1376071 | Asthma |
| rs6904670  | 6 | 31225020 | G | A | 0.4307 | 0.0302  | 0.0048 | 4.29E-10 | 6.2430  | 1376071 | Asthma |
| rs4098923  | 6 | 31225979 | A | G | 0.5365 | -0.0415 | 0.0068 | 9.39E-10 | -6.1195 | 973993  | Asthma |
| rs3899686  | 6 | 31226139 | G | A | 0.5264 | -0.0352 | 0.0062 | 1.54E-08 | -5.6571 | 1065770 | Asthma |
| rs1639109  | 6 | 31226806 | A | G | 0.1167 | 0.0503  | 0.0085 | 3.60E-09 | 5.9017  | 1198533 | Asthma |
| rs3095252  | 6 | 31226970 | G | A | 0.1686 | -0.0476 | 0.0066 | 4.92E-13 | -7.2274 | 1376071 | Asthma |
| rs3130520  | 6 | 31227343 | T | C | 0.1725 | -0.0513 | 0.0065 | 3.23E-15 | -7.8819 | 1376071 | Asthma |
| rs3130947  | 6 | 31227588 | G | T | 0.2873 | -0.0299 | 0.0053 | 2.17E-08 | -5.5978 | 1376071 | Asthma |
| rs9264024  | 6 | 31228051 | A | G | 0.1727 | -0.0510 | 0.0065 | 4.56E-15 | -7.8385 | 1376071 | Asthma |
| rs3130469  | 6 | 31228559 | T | A | 0.2874 | -0.0299 | 0.0053 | 2.26E-08 | -5.5908 | 1376071 | Asthma |
| rs1639108  | 6 | 31228777 | C | T | 0.1203 | 0.0469  | 0.0077 | 9.90E-10 | 6.1110  | 1349938 | Asthma |
| rs1793894  | 6 | 31229085 | A | G | 0.1284 | 0.0449  | 0.0073 | 9.35E-10 | 6.1202  | 1376071 | Asthma |
| rs28397289 | 6 | 31229630 | T | C | 0.2175 | 0.0338  | 0.0059 | 9.07E-09 | 5.7473  | 1376071 | Asthma |
| rs3130941  | 6 | 31229737 | C | G | 0.1727 | -0.0511 | 0.0065 | 4.17E-15 | -7.8497 | 1376071 | Asthma |
| rs3134782  | 6 | 31229856 | G | A | 0.1728 | -0.0507 | 0.0065 | 6.40E-15 | -7.7959 | 1376071 | Asthma |
| rs3130472  | 6 | 31230428 | G | A | 0.2874 | -0.0299 | 0.0053 | 2.30E-08 | -5.5881 | 1376071 | Asthma |
| rs3130939  | 6 | 31230730 | A | G | 0.2874 | -0.0299 | 0.0053 | 2.29E-08 | -5.5889 | 1376071 | Asthma |
| rs3130527  | 6 | 31231210 | T | C | 0.2887 | -0.0298 | 0.0053 | 2.33E-08 | -5.5856 | 1376071 | Asthma |
| rs3130528  | 6 | 31231683 | T | C | 0.1687 | -0.0476 | 0.0066 | 4.39E-13 | -7.2431 | 1376071 | Asthma |
| rs7753180  | 6 | 31232477 | C | G | 0.2179 | 0.0343  | 0.0060 | 8.73E-09 | 5.7538  | 1349938 | Asthma |
| rs7767978  | 6 | 31234709 | T | C | 0.2698 | 0.0301  | 0.0054 | 2.99E-08 | 5.5422  | 1376071 | Asthma |
| rs7768019  | 6 | 31234798 | G | C | 0.2711 | 0.0303  | 0.0054 | 2.27E-08 | 5.5905  | 1376071 | Asthma |
| rs3134770  | 6 | 31237209 | T | C | 0.2837 | -0.0340 | 0.0059 | 6.73E-09 | -5.7975 | 1220016 | Asthma |
| rs28397294 | 6 | 31237266 | T | A | 0.1955 | 0.0394  | 0.0068 | 7.32E-09 | 5.7834  | 1219993 | Asthma |
| rs3132499  | 6 | 31240143 | C | T | 0.1685 | -0.0476 | 0.0066 | 5.18E-13 | -7.2206 | 1376071 | Asthma |
| rs3095250  | 6 | 31240563 | C | T | 0.4203 | -0.0306 | 0.0049 | 6.00E-10 | -6.1905 | 1376071 | Asthma |
| rs3130532  | 6 | 31240676 | A | G | 0.1685 | -0.0476 | 0.0066 | 4.95E-13 | -7.2266 | 1376071 | Asthma |
| rs3132497  | 6 | 31240814 | G | T | 0.2185 | -0.0377 | 0.0059 | 1.33E-10 | -6.4240 | 1376071 | Asthma |
| rs3132496  | 6 | 31240833 | G | T | 0.4329 | -0.0299 | 0.0049 | 1.16E-09 | -6.0859 | 1376071 | Asthma |
| rs3130534  | 6 | 31241268 | G | A | 0.4233 | -0.0341 | 0.0053 | 1.28E-10 | -6.4290 | 1219993 | Asthma |
| rs3095249  | 6 | 31241468 | C | T | 0.2184 | -0.0377 | 0.0059 | 1.35E-10 | -6.4214 | 1376071 | Asthma |
| rs3095248  | 6 | 31241511 | T | C | 0.4234 | -0.0330 | 0.0049 | 2.26E-11 | -6.6880 | 1376071 | Asthma |
| rs3095247  | 6 | 31241612 | A | G | 0.4817 | 0.0278  | 0.0048 | 9.94E-09 | 5.7318  | 1376071 | Asthma |
| rs28397301 | 6 | 31241674 | A | C | 0.0271 | 0.0845  | 0.0149 | 1.47E-08 | 5.6647  | 1310845 | Asthma |
| rs3130712  | 6 | 31241733 | C | T | 0.4234 | -0.0331 | 0.0049 | 2.01E-11 | -6.7055 | 1376071 | Asthma |
| rs3130406  | 6 | 31242062 | G | A | 0.4340 | -0.0303 | 0.0049 | 9.06E-10 | -6.1251 | 1376071 | Asthma |
| rs3130535  | 6 | 31242170 | A | T | 0.4189 | -0.0306 | 0.0049 | 6.22E-10 | -6.1847 | 1376071 | Asthma |
| rs3130688  | 6 | 31242439 | C | T | 0.4096 | -0.0338 | 0.0059 | 8.19E-09 | -5.7646 | 1125398 | Asthma |
| rs3134766  | 6 | 31242685 | T | C | 0.4190 | -0.0306 | 0.0049 | 6.06E-10 | -6.1889 | 1376071 | Asthma |
| rs3134765  | 6 | 31242800 | T | C | 0.4373 | -0.0323 | 0.0049 | 4.40E-11 | -6.5902 | 1376071 | Asthma |
| rs3132494  | 6 | 31242914 | A | G | 0.4372 | -0.0324 | 0.0049 | 4.33E-11 | -6.5924 | 1376071 | Asthma |
| rs3134764  | 6 | 31242954 | G | C | 0.4189 | -0.0306 | 0.0049 | 5.88E-10 | -6.1936 | 1376071 | Asthma |
| rs3134763  | 6 | 31242997 | A | C | 0.4233 | -0.0330 | 0.0049 | 2.33E-11 | -6.6836 | 1376071 | Asthma |
| rs3130537  | 6 | 31243019 | A | G | 0.4373 | -0.0323 | 0.0049 | 4.48E-11 | -6.5874 | 1376071 | Asthma |
| rs3130695  | 6 | 31243273 | A | G | 0.2185 | -0.0375 | 0.0059 | 1.69E-10 | -6.3873 | 1376071 | Asthma |
| rs3130697  | 6 | 31243659 | T | C | 0.4372 | -0.0323 | 0.0049 | 4.44E-11 | -6.5886 | 1376071 | Asthma |
| rs2394900  | 6 | 31245834 | C | G | 0.4207 | -0.0316 | 0.0054 | 5.01E-09 | -5.8469 | 1224666 | Asthma |
| rs3130408  | 6 | 31246014 | G | A | 0.2184 | -0.0377 | 0.0059 | 1.34E-10 | -6.4224 | 1376071 | Asthma |
| rs3130409  | 6 | 31246034 | A | G | 0.4387 | 0.0290  | 0.0052 | 3.02E-08 | 5.5405  | 1246149 | Asthma |

|             |   |          |   |   |        |         |        |          |         |         |        |
|-------------|---|----------|---|---|--------|---------|--------|----------|---------|---------|--------|
| rs3095246   | 6 | 31246102 | T | C | 0.1685 | -0.0475 | 0.0066 | 5.31E-13 | -7.2170 | 1376071 | Asthma |
| rs3095244   | 6 | 31246799 | T | C | 0.4189 | -0.0306 | 0.0049 | 6.03E-10 | -6.1897 | 1376071 | Asthma |
| rs3134757   | 6 | 31246806 | A | G | 0.4189 | -0.0306 | 0.0049 | 5.96E-10 | -6.1915 | 1376071 | Asthma |
| rs3130538   | 6 | 31246875 | A | G | 0.4372 | -0.0323 | 0.0049 | 4.50E-11 | -6.5865 | 1376071 | Asthma |
| rs3134756   | 6 | 31247096 | C | T | 0.2184 | -0.0377 | 0.0059 | 1.35E-10 | -6.4218 | 1376071 | Asthma |
| rs2394903   | 6 | 31247228 | T | C | 0.4373 | -0.0323 | 0.0049 | 4.46E-11 | -6.5880 | 1376071 | Asthma |
| rs3130410   | 6 | 31247229 | G | A | 0.4373 | -0.0323 | 0.0049 | 4.47E-11 | -6.5876 | 1376071 | Asthma |
| rs2894188   | 6 | 31247554 | T | C | 0.4189 | -0.0306 | 0.0049 | 6.16E-10 | -6.1864 | 1376071 | Asthma |
| rs3095242   | 6 | 31247779 | T | C | 0.4189 | -0.0306 | 0.0049 | 6.08E-10 | -6.1884 | 1376071 | Asthma |
| rs3095241   | 6 | 31247858 | A | C | 0.4189 | -0.0306 | 0.0049 | 6.12E-10 | -6.1873 | 1376071 | Asthma |
| rs3130411   | 6 | 31248275 | G | A | 0.4189 | -0.0306 | 0.0049 | 6.16E-10 | -6.1863 | 1376071 | Asthma |
| rs3130412   | 6 | 31248485 | G | A | 0.4372 | -0.0324 | 0.0049 | 4.36E-11 | -6.5914 | 1376071 | Asthma |
| rs3130413   | 6 | 31248531 | G | A | 0.4211 | -0.0317 | 0.0054 | 4.23E-09 | -5.8750 | 1224666 | Asthma |
| rs2394905   | 6 | 31248730 | A | C | 0.4372 | -0.0323 | 0.0049 | 4.56E-11 | -6.5847 | 1376071 | Asthma |
| rs2394906   | 6 | 31248781 | A | T | 0.4189 | -0.0306 | 0.0049 | 5.96E-10 | -6.1915 | 1376071 | Asthma |
| rs3130415   | 6 | 31248895 | T | A | 0.1685 | -0.0475 | 0.0066 | 5.61E-13 | -7.2098 | 1376071 | Asthma |
| rs3130416   | 6 | 31249141 | T | A | 0.4189 | -0.0306 | 0.0049 | 5.75E-10 | -6.1973 | 1376071 | Asthma |
| rs3130418   | 6 | 31249626 | T | C | 0.4189 | -0.0306 | 0.0049 | 6.09E-10 | -6.1880 | 1376071 | Asthma |
| rs3134753   | 6 | 31249702 | A | G | 0.1685 | -0.0475 | 0.0066 | 5.27E-13 | -7.2182 | 1376071 | Asthma |
| rs3134752   | 6 | 31249762 | C | G | 0.4290 | -0.0316 | 0.0049 | 1.34E-10 | -6.4225 | 1376071 | Asthma |
| rs3130419   | 6 | 31249964 | T | C | 0.4371 | -0.0322 | 0.0050 | 1.02E-10 | -6.4633 | 1349938 | Asthma |
| rs2894189   | 6 | 31250038 | A | C | 0.4372 | -0.0323 | 0.0049 | 4.46E-11 | -6.5881 | 1376071 | Asthma |
| rs2394907   | 6 | 31250166 | C | T | 0.4398 | -0.0332 | 0.0052 | 1.53E-10 | -6.4024 | 1008051 | Asthma |
| rs2394908   | 6 | 31250196 | C | T | 0.4372 | -0.0323 | 0.0049 | 4.59E-11 | -6.5836 | 1376071 | Asthma |
| rs3130422   | 6 | 31250257 | G | A | 0.1685 | -0.0475 | 0.0066 | 5.52E-13 | -7.2119 | 1376071 | Asthma |
| rs3134750   | 6 | 31250310 | A | G | 0.4188 | -0.0307 | 0.0049 | 5.22E-10 | -6.2123 | 1376071 | Asthma |
| rs3130423   | 6 | 31250431 | A | G | 0.4372 | -0.0325 | 0.0049 | 3.77E-11 | -6.6128 | 1376071 | Asthma |
| rs3130425   | 6 | 31250550 | T | C | 0.4372 | -0.0324 | 0.0049 | 4.11E-11 | -6.6002 | 1376071 | Asthma |
| rs3130426   | 6 | 31250758 | A | C | 0.1685 | -0.0476 | 0.0066 | 5.20E-13 | -7.2199 | 1376071 | Asthma |
| rs3130427   | 6 | 31251207 | A | G | 0.4371 | -0.0325 | 0.0049 | 3.77E-11 | -6.6128 | 1376071 | Asthma |
| rs3130428   | 6 | 31251313 | G | A | 0.1685 | -0.0474 | 0.0066 | 5.88E-13 | -7.2034 | 1376071 | Asthma |
| rs3130430   | 6 | 31251403 | A | C | 0.4292 | -0.0299 | 0.0053 | 2.11E-08 | -5.6030 | 1281476 | Asthma |
| rs3130431   | 6 | 31251565 | A | G | 0.4189 | -0.0306 | 0.0049 | 5.63E-10 | -6.2005 | 1376071 | Asthma |
| rs3130433   | 6 | 31251861 | A | G | 0.2201 | -0.0369 | 0.0058 | 2.38E-10 | -6.3346 | 1376071 | Asthma |
| rs3130434   | 6 | 31252026 | G | C | 0.4360 | -0.0324 | 0.0054 | 2.80E-09 | -5.9429 | 1198533 | Asthma |
| rs3130435   | 6 | 31252028 | G | A | 0.4340 | -0.0314 | 0.0049 | 1.49E-10 | -6.4067 | 1376071 | Asthma |
| rs3130540   | 6 | 31252085 | T | C | 0.4395 | -0.0311 | 0.0049 | 2.80E-10 | -6.3094 | 1376071 | Asthma |
| rs9264179   | 6 | 31252092 | T | C | 0.4400 | -0.0310 | 0.0049 | 3.14E-10 | -6.2917 | 1376071 | Asthma |
| rs9264180   | 6 | 31252125 | C | A | 0.4378 | -0.0297 | 0.0052 | 9.35E-09 | -5.7422 | 1290310 | Asthma |
| rs9264186   | 6 | 31252240 | G | A | 0.4283 | -0.0328 | 0.0050 | 4.55E-11 | -6.5851 | 1349938 | Asthma |
| rs9264187   | 6 | 31252250 | T | C | 0.4301 | -0.0336 | 0.0055 | 7.11E-10 | -6.1635 | 1198533 | Asthma |
| rs9264188   | 6 | 31252332 | C | T | 0.4336 | -0.0312 | 0.0049 | 1.91E-10 | -6.3688 | 1376071 | Asthma |
| rs9264189   | 6 | 31252386 | A | C | 0.2317 | -0.0365 | 0.0057 | 1.41E-10 | -6.4148 | 1376071 | Asthma |
| rs9264190   | 6 | 31252425 | T | C | 0.2190 | -0.0383 | 0.0061 | 3.68E-10 | -6.2671 | 1008051 | Asthma |
| rs9264191   | 6 | 31252455 | G | C | 0.2311 | -0.0413 | 0.0063 | 6.65E-11 | -6.5284 | 1198533 | Asthma |
| rs7449932   | 6 | 31252467 | C | T | 0.2255 | -0.0428 | 0.0063 | 1.12E-11 | -6.7901 | 1224666 | Asthma |
| rs7452529   | 6 | 31252476 | T | A | 0.2255 | -0.0428 | 0.0063 | 1.10E-11 | -6.7924 | 1224666 | Asthma |
| rs3095257   | 6 | 31252541 | G | T | 0.3857 | -0.0358 | 0.0050 | 6.07E-13 | -7.1990 | 1376071 | Asthma |
| rs2394942   | 6 | 31252587 | T | C | 0.2310 | -0.0406 | 0.0062 | 7.04E-11 | -6.5198 | 1224666 | Asthma |
| rs4473905   | 6 | 31252592 | T | C | 0.2201 | -0.0370 | 0.0058 | 2.21E-10 | -6.3464 | 1376071 | Asthma |
| rs2394943   | 6 | 31252611 | T | C | 0.2318 | -0.0366 | 0.0057 | 1.24E-10 | -6.4347 | 1376071 | Asthma |
| rs3134748   | 6 | 31252644 | C | T | 0.1698 | -0.0467 | 0.0065 | 9.84E-13 | -7.1328 | 1376071 | Asthma |
| rs3134747   | 6 | 31252790 | C | T | 0.2257 | -0.0340 | 0.0058 | 3.42E-09 | -5.9101 | 1376071 | Asthma |
| rs3134746   | 6 | 31252975 | C | T | 0.2301 | -0.0370 | 0.0057 | 9.43E-11 | -6.4759 | 1376071 | Asthma |
| rs3130436   | 6 | 31253006 | G | A | 0.2302 | -0.0368 | 0.0057 | 1.11E-10 | -6.4509 | 1376071 | Asthma |
| rs3130438   | 6 | 31253245 | T | C | 0.2206 | -0.0367 | 0.0058 | 2.98E-10 | -6.2998 | 1376071 | Asthma |
| rs2394947   | 6 | 31253619 | A | G | 0.2258 | -0.0340 | 0.0058 | 3.26E-09 | -5.9177 | 1376071 | Asthma |
| rs2394948   | 6 | 31253748 | C | G | 0.3660 | -0.0393 | 0.0050 | 4.21E-15 | -7.8487 | 1376071 | Asthma |
| rs3095256   | 6 | 31253796 | A | G | 0.2101 | -0.0363 | 0.0059 | 9.54E-10 | -6.1169 | 1376071 | Asthma |
| rs3095255   | 6 | 31253804 | A | C | 0.3422 | -0.0332 | 0.0056 | 2.68E-09 | -5.9499 | 1224666 | Asthma |
| rs3095254   | 6 | 31253891 | C | G | 0.3658 | -0.0391 | 0.0050 | 5.77E-15 | -7.8088 | 1376071 | Asthma |
| rs9264218   | 6 | 31254118 | A | T | 0.3234 | -0.0383 | 0.0057 | 2.08E-11 | -6.7003 | 1198533 | Asthma |
| rs9264219   | 6 | 31254137 | C | T | 0.3228 | -0.0391 | 0.0056 | 2.10E-12 | -7.0276 | 1281476 | Asthma |
| rs9264232   | 6 | 31254466 | G | A | 0.2327 | -0.0475 | 0.0078 | 1.04E-09 | -6.1037 | 973993  | Asthma |
| rs75931670  | 6 | 31254584 | T | C | 0.1735 | -0.0473 | 0.0073 | 7.50E-11 | -6.5104 | 1133307 | Asthma |
| rs9264242   | 6 | 31254807 | T | C | 0.1728 | -0.0497 | 0.0077 | 1.27E-10 | -6.4306 | 1130071 | Asthma |
| rs9264262   | 6 | 31255998 | C | T | 0.2404 | -0.0527 | 0.0092 | 8.76E-09 | -5.7532 | 778845  | Asthma |
| rs9264263   | 6 | 31256028 | G | C | 0.2370 | -0.0532 | 0.0092 | 7.26E-09 | -5.7848 | 778845  | Asthma |
| rs9264264   | 6 | 31256046 | G | A | 0.2385 | -0.0550 | 0.0089 | 7.06E-10 | -6.1648 | 844071  | Asthma |
| rs147881789 | 6 | 31256062 | A | T | 0.2299 | -0.0541 | 0.0092 | 4.13E-09 | -5.8791 | 778845  | Asthma |
| rs9264278   | 6 | 31257020 | G | T | 0.2276 | -0.0484 | 0.0079 | 8.21E-10 | -6.1408 | 973993  | Asthma |
| rs145251362 | 6 | 31259018 | G | T | 0.2334 | -0.0576 | 0.0090 | 1.57E-10 | -6.3986 | 844071  | Asthma |
| rs147998247 | 6 | 31259019 | T | G | 0.2334 | -0.0576 | 0.0090 | 1.57E-10 | -6.3987 | 844071  | Asthma |
| rs9264338   | 6 | 31259800 | C | T | 0.2132 | -0.0475 | 0.0086 | 3.82E-08 | -5.4991 | 570646  | Asthma |



|             |   |          |   |   |        |         |        |          |          |         |        |
|-------------|---|----------|---|---|--------|---------|--------|----------|----------|---------|--------|
| rs9264355   | 6 | 31260409 | T | C | 0.1762 | -0.0481 | 0.0071 | 1.24E-11 | -6.7759  | 1224666 | Asthma |
| rs9264392   | 6 | 31261497 | T | C | 0.2366 | -0.0483 | 0.0078 | 5.68E-10 | -6.1992  | 973993  | Asthma |
| rs9264394   | 6 | 31261505 | T | A | 0.2312 | -0.0491 | 0.0079 | 4.34E-10 | -6.2413  | 973993  | Asthma |
| rs9264400   | 6 | 31261636 | C | T | 0.2005 | -0.0431 | 0.0066 | 5.57E-11 | -6.5549  | 1224666 | Asthma |
| rs9264408   | 6 | 31261946 | G | A | 0.2061 | -0.0407 | 0.0065 | 3.32E-10 | -6.2833  | 1224666 | Asthma |
| rs9264413   | 6 | 31262153 | C | T | 0.1990 | -0.0440 | 0.0066 | 2.80E-11 | -6.6566  | 1224666 | Asthma |
| rs9264416   | 6 | 31262265 | G | A | 0.1684 | -0.0476 | 0.0066 | 5.21E-13 | -7.2196  | 1376071 | Asthma |
| rs9264423   | 6 | 31262439 | T | C | 0.1696 | -0.0518 | 0.0072 | 4.42E-13 | -7.2422  | 1224666 | Asthma |
| rs9264442   | 6 | 31263320 | A | G | 0.1777 | -0.0784 | 0.0100 | 3.90E-15 | -7.8580  | 844071  | Asthma |
| rs9264443   | 6 | 31263328 | T | C | 0.2012 | -0.0506 | 0.0080 | 2.10E-10 | -6.3541  | 1000149 | Asthma |
| rs9264445   | 6 | 31263337 | C | T | 0.2302 | -0.0574 | 0.0090 | 1.53E-10 | -6.4029  | 844071  | Asthma |
| rs9264446   | 6 | 31263340 | T | C | 0.2268 | -0.0583 | 0.0090 | 1.09E-10 | -6.4541  | 844071  | Asthma |
| rs9264447   | 6 | 31263353 | A | C | 0.2246 | -0.0530 | 0.0080 | 4.45E-11 | -6.5882  | 912533  | Asthma |
| rs9264448   | 6 | 31263365 | G | A | 0.2265 | -0.0581 | 0.0090 | 1.21E-10 | -6.4379  | 844071  | Asthma |
| rs9264456   | 6 | 31263665 | A | G | 0.1709 | -0.0519 | 0.0072 | 8.49E-13 | -7.1530  | 1198533 | Asthma |
| rs9264458   | 6 | 31263724 | A | G | 0.2273 | -0.0573 | 0.0090 | 1.94E-10 | -6.3663  | 844071  | Asthma |
| rs9264462   | 6 | 31263798 | A | G | 0.2266 | -0.0572 | 0.0090 | 2.13E-10 | -6.3515  | 844071  | Asthma |
| rs9264463   | 6 | 31263814 | C | T | 0.2314 | -0.0471 | 0.0078 | 1.67E-09 | -6.0274  | 973993  | Asthma |
| rs66624704  | 6 | 31264566 | A | C | 0.2308 | -0.0422 | 0.0072 | 5.41E-09 | -5.8341  | 977229  | Asthma |
| rs9264486   | 6 | 31264705 | A | T | 0.1695 | -0.0519 | 0.0072 | 3.90E-13 | -7.2588  | 1224666 | Asthma |
| rs9264533   | 6 | 31266717 | T | C | 0.1990 | -0.0402 | 0.0061 | 3.62E-11 | -6.6191  | 1376071 | Asthma |
| rs9264543   | 6 | 31266889 | G | A | 0.2381 | -0.0423 | 0.0071 | 3.19E-09 | -5.9216  | 1042455 | Asthma |
| rs9264558   | 6 | 31267213 | C | T | 0.2055 | -0.0401 | 0.0066 | 1.33E-09 | -6.0640  | 1159440 | Asthma |
| rs9264560   | 6 | 31267362 | T | C | 0.2237 | -0.0441 | 0.0071 | 4.72E-10 | -6.2283  | 1068588 | Asthma |
| rs9264560   | 6 | 31267477 | G | A | 0.2295 | -0.0439 | 0.0071 | 7.61E-10 | -6.1528  | 1042455 | Asthma |
| rs9264571   | 6 | 31267723 | A | C | 0.2506 | -0.0486 | 0.0076 | 1.74E-10 | -6.3823  | 938666  | Asthma |
| rs1065711   | 6 | 31269076 | G | A | 0.1729 | -0.0472 | 0.0070 | 2.07E-11 | -6.7011  | 1281476 | Asthma |
| rs1049709   | 6 | 31269077 | C | T | 0.1420 | 0.0410  | 0.0070 | 5.17E-09 | 5.8417   | 1349938 | Asthma |
| rs2001181   | 6 | 31269221 | C | T | 0.1765 | -0.0546 | 0.0078 | 2.33E-12 | -7.0129  | 1125398 | Asthma |
| rs9264641   | 6 | 31270600 | G | C | 0.1626 | -0.0598 | 0.0081 | 1.66E-13 | -7.3736  | 1125398 | Asthma |
| rs7383157   | 6 | 31271529 | T | G | 0.1797 | -0.0627 | 0.0088 | 9.38E-13 | -7.1393  | 973993  | Asthma |
| rs1131123   | 6 | 31271601 | G | T | 0.4859 | 0.0375  | 0.0065 | 8.72E-09 | 5.7539   | 973993  | Asthma |
| rs41543814  | 6 | 31271653 | T | C | 0.4390 | 0.0377  | 0.0058 | 8.42E-11 | 6.4930   | 1125398 | Asthma |
| rs28626310  | 6 | 31271672 | G | C | 0.1645 | 0.0437  | 0.0077 | 1.60E-08 | 5.6503   | 1125398 | Asthma |
| rs9264670   | 6 | 31271945 | A | C | 0.2020 | -0.0505 | 0.0083 | 1.45E-09 | -6.0501  | 973993  | Asthma |
| rs28498059  | 6 | 31272576 | A | C | 0.1704 | -0.0489 | 0.0066 | 1.12E-13 | -7.4256  | 1376071 | Asthma |
| rs9264679   | 6 | 31272886 | T | A | 0.1704 | -0.0486 | 0.0066 | 1.54E-13 | -7.3835  | 1376071 | Asthma |
| rs2524086   | 6 | 31273534 | G | A | 0.1588 | 0.0405  | 0.0071 | 1.43E-08 | 5.6699   | 1008051 | Asthma |
| rs6923313   | 6 | 31273593 | C | T | 0.3720 | -0.0295 | 0.0050 | 3.37E-09 | -5.9125  | 1376071 | Asthma |
| rs28367584  | 6 | 31273801 | T | C | 0.0279 | 0.0819  | 0.0145 | 1.80E-08 | 5.6303   | 1310845 | Asthma |
| rs2524084   | 6 | 31273862 | G | A | 0.3648 | 0.0289  | 0.0050 | 9.39E-09 | 5.7414   | 1376071 | Asthma |
| rs2853949   | 6 | 31273887 | A | G | 0.1590 | 0.0417  | 0.0073 | 9.55E-09 | 5.7386   | 981918  | Asthma |
| rs2524082   | 6 | 31273984 | A | T | 0.4412 | -0.0406 | 0.0049 | 1.02E-16 | -8.3020  | 1376071 | Asthma |
| rs3132491   | 6 | 31274495 | C | T | 0.1704 | -0.0489 | 0.0066 | 1.19E-13 | -7.4183  | 1376071 | Asthma |
| rs3132490   | 6 | 31274783 | G | A | 0.1704 | -0.0489 | 0.0066 | 1.19E-13 | -7.4185  | 1376071 | Asthma |
| rs2844616   | 6 | 31274862 | C | T | 0.4125 | 0.0297  | 0.0053 | 2.29E-08 | 5.5884   | 1224666 | Asthma |
| rs2524078   | 6 | 31274872 | G | A | 0.1432 | 0.0403  | 0.0069 | 6.09E-09 | 5.8143   | 1376071 | Asthma |
| rs3132489   | 6 | 31274897 | T | C | 0.5241 | 0.0406  | 0.0053 | 2.42E-14 | 7.6261   | 1224666 | Asthma |
| rs3132488   | 6 | 31274918 | G | T | 0.1760 | -0.0447 | 0.0065 | 4.69E-12 | -6.9146  | 1376071 | Asthma |
| rs6930376   | 6 | 31275040 | T | A | 0.4723 | 0.0425  | 0.0049 | 3.58E-18 | 8.6913   | 1376071 | Asthma |
| rs3130693   | 6 | 31275082 | C | T | 0.4723 | 0.0424  | 0.0049 | 4.18E-18 | 8.6739   | 1376071 | Asthma |
| rs3134744   | 6 | 31275103 | C | T | 0.1704 | -0.0489 | 0.0066 | 1.12E-13 | -7.4256  | 1376071 | Asthma |
| rs3132486   | 6 | 31275393 | A | G | 0.5295 | 0.0400  | 0.0049 | 1.86E-16 | 8.2309   | 1376071 | Asthma |
| rs3130694   | 6 | 31275420 | A | G | 0.1704 | -0.0490 | 0.0066 | 1.01E-13 | -7.4391  | 1376071 | Asthma |
| rs3132484   | 6 | 31275633 | T | G | 0.4759 | 0.0440  | 0.0049 | 2.48E-19 | 8.9899   | 1376071 | Asthma |
| rs3132483   | 6 | 31275637 | A | G | 0.4760 | 0.0440  | 0.0049 | 2.45E-19 | 8.9912   | 1376071 | Asthma |
| rs3132482   | 6 | 31275643 | G | A | 0.3789 | -0.0344 | 0.0050 | 4.00E-12 | -6.9370  | 1376071 | Asthma |
| rs2844614   | 6 | 31275763 | A | G | 0.1442 | 0.0399  | 0.0069 | 5.98E-09 | 5.8173   | 1376071 | Asthma |
| rs2040748   | 6 | 31276008 | T | G | 0.2186 | -0.0391 | 0.0060 | 4.93E-11 | -6.5731  | 1359430 | Asthma |
| rs2844613   | 6 | 31276069 | T | G | 0.1436 | 0.0397  | 0.0069 | 8.21E-09 | 5.7640   | 1376071 | Asthma |
| rs2524075   | 6 | 31276082 | T | C | 0.2267 | 0.0364  | 0.0057 | 1.96E-10 | 6.3647   | 1376071 | Asthma |
| rs3130696   | 6 | 31276107 | A | G | 0.2268 | 0.0363  | 0.0057 | 2.32E-10 | 6.3385   | 1376071 | Asthma |
| rs9264731   | 6 | 31276291 | G | A | 0.1708 | -0.0487 | 0.0066 | 1.40E-13 | -7.3964  | 1376071 | Asthma |
| rs111373731 | 6 | 31276374 | C | T | 0.0987 | -0.0483 | 0.0082 | 3.64E-09 | -5.9000  | 1376071 | Asthma |
| rs9264732   | 6 | 31276404 | C | T | 0.1709 | -0.0488 | 0.0066 | 1.20E-13 | -7.4174  | 1376071 | Asthma |
| rs9264733   | 6 | 31276437 | C | G | 0.2697 | -0.0565 | 0.0055 | 1.37E-24 | -10.2361 | 1376071 | Asthma |
| rs9264734   | 6 | 31276453 | A | C | 0.1722 | -0.0487 | 0.0066 | 1.27E-13 | -7.4091  | 1376071 | Asthma |
| rs9264736   | 6 | 31276470 | A | G | 0.1877 | -0.0508 | 0.0067 | 2.50E-14 | -7.6217  | 1316443 | Asthma |
| rs9264737   | 6 | 31276472 | T | C | 0.1828 | -0.0496 | 0.0067 | 1.14E-13 | -7.4242  | 1316443 | Asthma |
| rs9264738   | 6 | 31276484 | C | A | 0.1742 | -0.0473 | 0.0066 | 5.37E-13 | -7.2156  | 1376071 | Asthma |
| rs111762561 | 6 | 31276521 | G | A | 0.0980 | -0.0475 | 0.0084 | 1.32E-08 | -5.6835  | 1349938 | Asthma |
| rs9264739   | 6 | 31276523 | G | A | 0.1708 | -0.0487 | 0.0066 | 1.30E-13 | -7.4059  | 1376071 | Asthma |
| rs9264740   | 6 | 31276554 | C | T | 0.2694 | -0.0564 | 0.0055 | 1.73E-24 | -10.2130 | 1376071 | Asthma |
| rs112613205 | 6 | 31276659 | G | C | 0.0987 | -0.0485 | 0.0082 | 3.10E-09 | -5.9263  | 1376071 | Asthma |

|             |   |          |   |   |        |         |        |          |         |         |        |
|-------------|---|----------|---|---|--------|---------|--------|----------|---------|---------|--------|
| rs66736379  | 6 | 31276698 | A | G | 0.0987 | -0.0485 | 0.0082 | 3.11E-09 | -5.9258 | 1376071 | Asthma |
| rs67654505  | 6 | 31276794 | C | G | 0.0985 | -0.0483 | 0.0082 | 3.92E-09 | -5.8877 | 1376071 | Asthma |
| rs9264742   | 6 | 31276839 | T | C | 0.1708 | -0.0486 | 0.0066 | 1.45E-13 | -7.3916 | 1376071 | Asthma |
| rs3930575   | 6 | 31276877 | A | G | 0.1708 | -0.0486 | 0.0066 | 1.46E-13 | -7.3912 | 1376071 | Asthma |
| rs2524069   | 6 | 31277012 | T | A | 0.1416 | 0.0390  | 0.0069 | 1.74E-08 | 5.6360  | 1376071 | Asthma |
| rs73392806  | 6 | 31277088 | T | C | 0.0985 | -0.0483 | 0.0082 | 3.79E-09 | -5.8932 | 1376071 | Asthma |
| rs6919908   | 6 | 31277183 | T | C | 0.2205 | -0.0336 | 0.0059 | 1.44E-08 | -5.6683 | 1376071 | Asthma |
| rs116553115 | 6 | 31277184 | A | G | 0.0985 | -0.0483 | 0.0082 | 3.98E-09 | -5.8851 | 1376071 | Asthma |
| rs112466811 | 6 | 31277400 | C | G | 0.0979 | -0.0482 | 0.0082 | 4.84E-09 | -5.8527 | 1376071 | Asthma |
| rs115031819 | 6 | 31277403 | C | T | 0.0979 | -0.0481 | 0.0082 | 5.21E-09 | -5.8404 | 1376071 | Asthma |
| rs114173373 | 6 | 31277405 | G | A | 0.0979 | -0.0481 | 0.0082 | 5.38E-09 | -5.8349 | 1376071 | Asthma |
| rs113744451 | 6 | 31277436 | G | A | 0.0985 | -0.0485 | 0.0082 | 3.22E-09 | -5.9202 | 1376071 | Asthma |
| rs59751510  | 6 | 31277532 | A | C | 0.0987 | -0.0485 | 0.0082 | 3.05E-09 | -5.9289 | 1376071 | Asthma |
| rs61172648  | 6 | 31277699 | A | C | 0.0976 | -0.0492 | 0.0083 | 2.67E-09 | -5.9509 | 1376071 | Asthma |
| rs9264745   | 6 | 31277701 | G | A | 0.1708 | -0.0486 | 0.0066 | 1.46E-13 | -7.3906 | 1376071 | Asthma |
| rs9264746   | 6 | 31277711 | C | T | 0.1721 | -0.0528 | 0.0071 | 1.53E-13 | -7.3851 | 1224666 | Asthma |
| rs9264747   | 6 | 31277712 | A | G | 0.1757 | -0.0616 | 0.0079 | 8.75E-15 | -7.7563 | 1068588 | Asthma |
| rs9264749   | 6 | 31277843 | C | T | 0.1708 | -0.0486 | 0.0066 | 1.52E-13 | -7.3858 | 1376071 | Asthma |
| rs6906846   | 6 | 31277959 | A | G | 0.3192 | -0.0461 | 0.0052 | 1.63E-18 | -8.7804 | 1376071 | Asthma |
| rs2853947   | 6 | 31278019 | T | C | 0.1440 | 0.0396  | 0.0069 | 8.19E-09 | 5.7645  | 1376071 | Asthma |
| rs2524067   | 6 | 31278044 | G | A | 0.1440 | 0.0395  | 0.0069 | 8.86E-09 | 5.7512  | 1376071 | Asthma |
| rs77985136  | 6 | 31278154 | A | T | 0.0987 | -0.0486 | 0.0082 | 2.97E-09 | -5.9331 | 1376071 | Asthma |
| rs72855945  | 6 | 31278238 | T | C | 0.0987 | -0.0484 | 0.0082 | 3.15E-09 | -5.9235 | 1376071 | Asthma |
| rs66689394  | 6 | 31278318 | C | T | 0.0984 | -0.0487 | 0.0082 | 2.89E-09 | -5.9376 | 1376071 | Asthma |
| rs72855946  | 6 | 31278323 | G | A | 0.0984 | -0.0486 | 0.0082 | 3.12E-09 | -5.9250 | 1376071 | Asthma |
| rs73392819  | 6 | 31278342 | C | T | 0.0984 | -0.0486 | 0.0082 | 3.10E-09 | -5.9261 | 1376071 | Asthma |
| rs72855948  | 6 | 31278362 | A | T | 0.0985 | -0.0487 | 0.0082 | 2.93E-09 | -5.9354 | 1376071 | Asthma |
| rs67853874  | 6 | 31278400 | A | G | 0.0986 | -0.0484 | 0.0082 | 3.18E-09 | -5.9220 | 1376071 | Asthma |
| rs113056286 | 6 | 31278476 | C | T | 0.0987 | -0.0484 | 0.0082 | 3.17E-09 | -5.9228 | 1376071 | Asthma |
| rs2524065   | 6 | 31278547 | C | A | 0.1441 | 0.0395  | 0.0069 | 8.41E-09 | 5.7602  | 1376071 | Asthma |
| rs67772234  | 6 | 31278633 | A | G | 0.0987 | -0.0489 | 0.0082 | 2.80E-09 | -5.9431 | 1376071 | Asthma |
| rs111689981 | 6 | 31278673 | C | T | 0.0987 | -0.0489 | 0.0082 | 2.80E-09 | -5.9427 | 1376071 | Asthma |
| rs113475966 | 6 | 31278765 | T | G | 0.0987 | -0.0489 | 0.0082 | 2.86E-09 | -5.9396 | 1376071 | Asthma |
| rs112161056 | 6 | 31278855 | A | G | 0.0987 | -0.0487 | 0.0082 | 2.99E-09 | -5.9319 | 1376071 | Asthma |
| rs112220608 | 6 | 31278891 | G | A | 0.0987 | -0.0489 | 0.0082 | 2.74E-09 | -5.9464 | 1376071 | Asthma |
| rs67394384  | 6 | 31278899 | T | C | 0.0987 | -0.0489 | 0.0082 | 2.86E-09 | -5.9393 | 1376071 | Asthma |
| rs7382297   | 6 | 31279290 | T | G | 0.1707 | -0.0486 | 0.0066 | 1.60E-13 | -7.3790 | 1376071 | Asthma |
| rs4351259   | 6 | 31279331 | A | G | 0.0987 | -0.0484 | 0.0082 | 3.82E-09 | -5.8920 | 1376071 | Asthma |
| rs7382307   | 6 | 31279372 | A | G | 0.1708 | -0.0487 | 0.0066 | 1.34E-13 | -7.4020 | 1376071 | Asthma |
| rs7454812   | 6 | 31279504 | G | T | 0.0987 | -0.0484 | 0.0082 | 3.62E-09 | -5.9008 | 1376071 | Asthma |
| rs2844609   | 6 | 31279613 | A | G | 0.1440 | 0.0395  | 0.0069 | 9.25E-09 | 5.7438  | 1376071 | Asthma |
| rs111496744 | 6 | 31279687 | G | A | 0.0987 | -0.0485 | 0.0082 | 3.60E-09 | -5.9016 | 1376071 | Asthma |
| rs111910807 | 6 | 31279717 | T | C | 0.0987 | -0.0485 | 0.0082 | 3.55E-09 | -5.9039 | 1376071 | Asthma |
| rs2853945   | 6 | 31279959 | C | T | 0.1440 | 0.0396  | 0.0069 | 8.24E-09 | 5.7635  | 1376071 | Asthma |
| rs72855758  | 6 | 31280038 | T | C | 0.1021 | -0.0444 | 0.0081 | 3.61E-08 | -5.5092 | 1376071 | Asthma |
| rs2853942   | 6 | 31280392 | T | C | 0.1440 | 0.0396  | 0.0069 | 8.23E-09 | 5.7637  | 1376071 | Asthma |
| rs17198685  | 6 | 31280871 | T | C | 0.0987 | -0.0482 | 0.0082 | 4.33E-09 | -5.8710 | 1376071 | Asthma |
| rs17198692  | 6 | 31280878 | T | G | 0.0987 | -0.0482 | 0.0082 | 4.12E-09 | -5.8793 | 1376071 | Asthma |
| rs9264761   | 6 | 31281355 | A | T | 0.1707 | -0.0489 | 0.0066 | 1.11E-13 | -7.4268 | 1376071 | Asthma |
| rs9264763   | 6 | 31281419 | A | C | 0.1708 | -0.0488 | 0.0066 | 1.19E-13 | -7.4178 | 1376071 | Asthma |
| rs28752770  | 6 | 31282201 | A | G | 0.0562 | 0.0793  | 0.0122 | 8.76E-11 | 6.4868  | 851973  | Asthma |
| rs28616643  | 6 | 31287874 | T | G | 0.0992 | -0.0484 | 0.0082 | 3.73E-09 | -5.8958 | 1376071 | Asthma |
| rs28577989  | 6 | 31287985 | C | A | 0.0785 | -0.0594 | 0.0092 | 1.32E-10 | -6.4251 | 1376071 | Asthma |
| rs3094682   | 6 | 31296684 | A | C | 0.2046 | -0.0360 | 0.0061 | 4.26E-09 | -5.8736 | 1376071 | Asthma |
| rs4713451   | 6 | 31304804 | C | T | 0.0994 | -0.0478 | 0.0082 | 5.83E-09 | -5.8217 | 1376071 | Asthma |
| rs11634761  | 6 | 31306250 | C | T | 0.5046 | -0.0290 | 0.0048 | 1.35E-09 | -6.0611 | 1376071 | Asthma |
| rs2853915   | 6 | 31307512 | C | A | 0.4109 | 0.0518  | 0.0051 | 5.11E-24 | 10.1076 | 1251217 | Asthma |
| rs9264965   | 6 | 31309716 | C | T | 0.1967 | -0.0467 | 0.0078 | 1.80E-09 | -6.0149 | 1065770 | Asthma |
| rs9264966   | 6 | 31309741 | T | C | 0.1966 | -0.0470 | 0.0078 | 1.44E-09 | -6.0511 | 1065770 | Asthma |
| rs9264969   | 6 | 31310638 | T | C | 0.3414 | -0.0479 | 0.0064 | 8.63E-14 | -7.4604 | 1065770 | Asthma |
| rs9264970   | 6 | 31310672 | A | T | 0.1953 | -0.0470 | 0.0078 | 1.60E-09 | -6.0339 | 1065770 | Asthma |
| rs5028535   | 6 | 31310785 | T | G | 0.1949 | -0.0476 | 0.0078 | 1.03E-09 | -6.1044 | 1065770 | Asthma |
| rs9264980   | 6 | 31312179 | A | T | 0.2032 | -0.0541 | 0.0085 | 2.09E-10 | -6.3549 | 973993  | Asthma |
| rs9264982   | 6 | 31312316 | A | G | 0.2024 | -0.0542 | 0.0085 | 1.99E-10 | -6.3621 | 973993  | Asthma |
| rs9264983   | 6 | 31313454 | A | G | 0.2038 | -0.0539 | 0.0085 | 2.30E-10 | -6.3398 | 973993  | Asthma |
| rs3132478   | 6 | 31314685 | G | A | 0.2873 | -0.0468 | 0.0075 | 5.52E-10 | -6.2037 | 973993  | Asthma |
| rs3094690   | 6 | 31314862 | T | C | 0.2035 | -0.0548 | 0.0085 | 1.17E-10 | -6.4433 | 973993  | Asthma |
| rs9264984   | 6 | 31315447 | G | A | 0.2034 | -0.0551 | 0.0085 | 9.19E-11 | -6.4798 | 973993  | Asthma |
| rs3132477   | 6 | 31316344 | G | A | 0.1997 | -0.0769 | 0.0098 | 4.77E-15 | -7.8328 | 844071  | Asthma |
| rs3132476   | 6 | 31316567 | G | A | 0.2067 | -0.0645 | 0.0087 | 9.80E-14 | -7.4437 | 935848  | Asthma |
| rs9265130   | 6 | 31319979 | A | G | 0.1943 | -0.0696 | 0.0099 | 2.51E-12 | -7.0027 | 778845  | Asthma |
| rs7748141   | 6 | 31321100 | C | T | 0.1133 | 0.0468  | 0.0078 | 1.70E-09 | 6.0245  | 1376071 | Asthma |
| rs9265206   | 6 | 31322137 | A | G | 0.1782 | -0.0453 | 0.0070 | 1.06E-10 | -6.4584 | 1224666 | Asthma |
| rs9265223   | 6 | 31322435 | G | T | 0.1778 | -0.0419 | 0.0064 | 7.50E-11 | -6.5102 | 1376071 | Asthma |

|            |   |          |   |   |        |         |        |          |         |         |        |
|------------|---|----------|---|---|--------|---------|--------|----------|---------|---------|--------|
| rs9265246  | 6 | 31323194 | T | G | 0.1777 | -0.0422 | 0.0064 | 5.64E-11 | -6.5530 | 1376071 | Asthma |
| rs9265259  | 6 | 31323508 | T | C | 0.1582 | -0.0569 | 0.0075 | 2.92E-14 | -7.6019 | 1224666 | Asthma |
| rs9265285  | 6 | 31324380 | T | C | 0.2562 | -0.0683 | 0.0098 | 2.85E-12 | -6.9850 | 778845  | Asthma |
| rs9265332  | 6 | 31326317 | T | C | 0.5356 | 0.0445  | 0.0077 | 6.57E-09 | 5.8018  | 778845  | Asthma |
| rs9265420  | 6 | 31328210 | A | G | 0.1794 | -0.0419 | 0.0064 | 7.46E-11 | -6.5110 | 1376071 | Asthma |
| rs3094685  | 6 | 31328632 | T | G | 0.2125 | -0.0625 | 0.0086 | 3.85E-13 | -7.2607 | 935848  | Asthma |
| rs9265463  | 6 | 31328999 | A | C | 0.4222 | 0.0514  | 0.0081 | 2.22E-10 | 6.3451  | 778845  | Asthma |
| rs9265495  | 6 | 31329696 | A | G | 0.1975 | -0.0630 | 0.0101 | 5.06E-10 | -6.2173 | 778845  | Asthma |
| rs4959015  | 6 | 31329825 | T | G | 0.1836 | -0.0748 | 0.0103 | 4.10E-13 | -7.2522 | 844071  | Asthma |
| rs9265563  | 6 | 31330686 | C | T | 0.1800 | -0.0463 | 0.0071 | 7.87E-11 | -6.5030 | 1198533 | Asthma |
| rs9265638  | 6 | 31332235 | T | C | 0.4976 | 0.0277  | 0.0048 | 9.39E-09 | 5.7413  | 1376071 | Asthma |
| rs9265645  | 6 | 31332420 | A | G | 0.1161 | 0.0432  | 0.0077 | 2.08E-08 | 5.6051  | 1310845 | Asthma |
| rs6902116  | 6 | 31332509 | G | A | 0.3185 | 0.0330  | 0.0057 | 8.93E-09 | 5.7498  | 1159440 | Asthma |
| rs9265648  | 6 | 31332525 | G | A | 0.4332 | -0.0306 | 0.0051 | 1.72E-09 | -6.0223 | 1316443 | Asthma |
| rs9265649  | 6 | 31332538 | C | G | 0.4304 | -0.0317 | 0.0054 | 3.61E-09 | -5.9012 | 1224666 | Asthma |
| rs9265656  | 6 | 31332741 | T | G | 0.1789 | -0.0452 | 0.0070 | 9.73E-11 | -6.4711 | 1224666 | Asthma |
| rs9265676  | 6 | 31333223 | G | T | 0.1794 | -0.0413 | 0.0064 | 1.16E-10 | -6.4442 | 1376071 | Asthma |
| rs9265726  | 6 | 31334391 | A | G | 0.1782 | -0.0418 | 0.0064 | 8.05E-11 | -6.4997 | 1376071 | Asthma |
| rs9265728  | 6 | 31334458 | T | A | 0.1779 | -0.0451 | 0.0070 | 1.33E-10 | -6.4237 | 1224666 | Asthma |
| rs4947307  | 6 | 31334488 | G | A | 0.1055 | 0.0493  | 0.0084 | 5.13E-09 | 5.8430  | 1251217 | Asthma |
| rs9265742  | 6 | 31334748 | A | G | 0.1780 | -0.0422 | 0.0064 | 5.44E-11 | -6.5585 | 1376071 | Asthma |
| rs9500887  | 6 | 31334814 | G | T | 0.0359 | 0.0710  | 0.0126 | 1.73E-08 | 5.6375  | 1310845 | Asthma |
| rs9265745  | 6 | 31334941 | G | A | 0.3446 | 0.0349  | 0.0051 | 1.14E-11 | 6.7872  | 1376071 | Asthma |
| rs9265746  | 6 | 31334947 | A | G | 0.3955 | -0.0292 | 0.0049 | 3.14E-09 | -5.9240 | 1376071 | Asthma |
| rs9265753  | 6 | 31336162 | G | C | 0.1896 | -0.0453 | 0.0068 | 2.96E-11 | -6.6484 | 1224666 | Asthma |
| rs4959060  | 6 | 31336758 | A | G | 0.1851 | -0.0432 | 0.0077 | 1.75E-08 | -5.6351 | 1064845 | Asthma |
| rs9265771  | 6 | 31338190 | C | T | 0.1790 | -0.0447 | 0.0070 | 1.59E-10 | -6.3968 | 1224666 | Asthma |
| rs1625792  | 6 | 31338643 | A | G | 0.1161 | 0.0449  | 0.0077 | 4.53E-09 | 5.8634  | 1376071 | Asthma |
| rs1634753  | 6 | 31338862 | T | C | 0.1190 | 0.0551  | 0.0099 | 2.64E-08 | 5.5640  | 1000149 | Asthma |
| rs9265779  | 6 | 31338884 | T | C | 0.2213 | -0.0480 | 0.0086 | 2.09E-08 | -5.6046 | 908767  | Asthma |
| rs9265782  | 6 | 31339237 | C | T | 0.1871 | -0.0505 | 0.0087 | 7.35E-09 | -5.7828 | 908767  | Asthma |
| rs9265783  | 6 | 31339908 | G | A | 0.1927 | -0.0685 | 0.0098 | 3.09E-12 | -6.9735 | 844071  | Asthma |
| rs9265784  | 6 | 31339973 | C | T | 0.1857 | -0.0531 | 0.0087 | 9.15E-10 | -6.1235 | 973993  | Asthma |
| rs9265785  | 6 | 31340000 | A | G | 0.1847 | -0.0697 | 0.0099 | 2.17E-12 | -7.0232 | 844071  | Asthma |
| rs9265790  | 6 | 31340296 | A | G | 0.1787 | -0.0450 | 0.0070 | 1.27E-10 | -6.4311 | 1224666 | Asthma |
| rs402175   | 6 | 31340940 | A | G | 0.1161 | 0.0447  | 0.0077 | 5.25E-09 | 5.8391  | 1376071 | Asthma |
| rs9265800  | 6 | 31341142 | T | C | 0.1808 | -0.0459 | 0.0071 | 9.77E-11 | -6.4705 | 1198533 | Asthma |
| rs1634776  | 6 | 31341211 | T | C | 0.1181 | 0.0438  | 0.0076 | 9.34E-09 | 5.7424  | 1376071 | Asthma |
| rs34872474 | 6 | 31341480 | G | A | 0.0888 | 0.0471  | 0.0085 | 3.56E-08 | 5.5115  | 1310845 | Asthma |
| rs9265805  | 6 | 31341704 | T | G | 0.1865 | -0.0554 | 0.0087 | 1.80E-10 | -6.3779 | 973993  | Asthma |
| rs3134793  | 6 | 31341783 | C | T | 0.1825 | -0.0453 | 0.0076 | 2.59E-09 | -5.9559 | 1130071 | Asthma |
| rs9265808  | 6 | 31342501 | G | A | 0.1893 | -0.0510 | 0.0086 | 3.57E-09 | -5.9031 | 973993  | Asthma |
| rs9265814  | 6 | 31342846 | G | A | 0.2082 | -0.0698 | 0.0098 | 1.19E-12 | -7.1069 | 778845  | Asthma |
| rs2854013  | 6 | 31343360 | C | T | 0.2133 | -0.0752 | 0.0096 | 6.23E-15 | -7.7992 | 844071  | Asthma |
| rs2854012  | 6 | 31343387 | T | C | 0.2434 | -0.0701 | 0.0094 | 8.69E-14 | -7.4594 | 778845  | Asthma |
| rs9265827  | 6 | 31343541 | G | A | 0.1161 | 0.0480  | 0.0086 | 2.19E-08 | 5.5962  | 1198533 | Asthma |
| rs9265829  | 6 | 31343585 | G | A | 0.1845 | -0.0668 | 0.0088 | 4.00E-14 | -7.5611 | 912533  | Asthma |
| rs9265831  | 6 | 31343672 | A | T | 0.1149 | 0.0482  | 0.0086 | 2.11E-08 | 5.6024  | 1198533 | Asthma |
| rs9265834  | 6 | 31343777 | A | G | 0.1822 | -0.0451 | 0.0076 | 3.11E-09 | -5.9258 | 1130071 | Asthma |
| rs9265835  | 6 | 31343789 | C | G | 0.1821 | -0.0450 | 0.0076 | 3.38E-09 | -5.9119 | 1130071 | Asthma |
| rs9265836  | 6 | 31343878 | A | C | 0.1805 | -0.0447 | 0.0071 | 2.80E-10 | -6.3095 | 1198533 | Asthma |
| rs9265837  | 6 | 31343888 | A | G | 0.1799 | -0.0443 | 0.0070 | 2.36E-10 | -6.3356 | 1224666 | Asthma |
| rs9265840  | 6 | 31344034 | T | G | 0.1782 | -0.0419 | 0.0064 | 7.17E-11 | -6.5170 | 1376071 | Asthma |
| rs9265841  | 6 | 31344046 | G | A | 0.1790 | -0.0449 | 0.0070 | 1.37E-10 | -6.4193 | 1224666 | Asthma |
| rs2394976  | 6 | 31344135 | T | G | 0.1375 | 0.0519  | 0.0071 | 3.57E-13 | 7.2710  | 1376071 | Asthma |
| rs2256747  | 6 | 31344173 | C | T | 0.1160 | 0.0446  | 0.0077 | 5.73E-09 | 5.8245  | 1376071 | Asthma |
| rs28732130 | 6 | 31344224 | G | A | 0.0550 | -0.0879 | 0.0151 | 5.33E-09 | -5.8365 | 873440  | Asthma |
| rs2256750  | 6 | 31344243 | A | G | 0.1162 | 0.0470  | 0.0078 | 1.38E-09 | 6.0582  | 1349938 | Asthma |
| rs2508003  | 6 | 31344267 | G | A | 0.1781 | -0.0419 | 0.0064 | 6.99E-11 | -6.5209 | 1376071 | Asthma |
| rs2844589  | 6 | 31344482 | A | G | 0.1160 | 0.0447  | 0.0077 | 5.57E-09 | 5.8291  | 1376071 | Asthma |
| rs3134792  | 6 | 31344549 | G | T | 0.1160 | 0.0444  | 0.0077 | 6.67E-09 | 5.7991  | 1376071 | Asthma |
| rs2854010  | 6 | 31344715 | G | A | 0.1160 | 0.0448  | 0.0077 | 5.12E-09 | 5.8430  | 1376071 | Asthma |
| rs9265857  | 6 | 31344830 | C | G | 0.1160 | 0.0447  | 0.0077 | 5.28E-09 | 5.8382  | 1376071 | Asthma |
| rs2394978  | 6 | 31344879 | T | C | 0.1160 | 0.0448  | 0.0077 | 4.93E-09 | 5.8496  | 1376071 | Asthma |
| rs4349860  | 6 | 31344944 | C | T | 0.1830 | -0.0451 | 0.0070 | 1.00E-10 | -6.4667 | 1224666 | Asthma |
| rs4374861  | 6 | 31344945 | A | G | 0.1726 | -0.0450 | 0.0072 | 3.36E-10 | -6.2810 | 1224666 | Asthma |
| rs2394980  | 6 | 31345164 | T | C | 0.1160 | 0.0447  | 0.0077 | 5.57E-09 | 5.8293  | 1376071 | Asthma |
| rs2394981  | 6 | 31345252 | T | G | 0.1139 | 0.0479  | 0.0086 | 2.48E-08 | 5.5745  | 1198533 | Asthma |
| rs9265886  | 6 | 31345444 | C | A | 0.1138 | 0.0480  | 0.0086 | 2.30E-08 | 5.5877  | 1198533 | Asthma |
| rs7450349  | 6 | 31345601 | A | G | 0.1609 | -0.0571 | 0.0082 | 2.68E-12 | -6.9937 | 1130071 | Asthma |
| rs2854007  | 6 | 31345809 | G | A | 0.1783 | -0.0447 | 0.0070 | 1.86E-10 | -6.3722 | 1224666 | Asthma |
| rs2854006  | 6 | 31345814 | A | G | 0.1783 | -0.0447 | 0.0070 | 1.86E-10 | -6.3721 | 1224666 | Asthma |
| rs9265908  | 6 | 31345900 | T | C | 0.1161 | 0.0449  | 0.0077 | 4.48E-09 | 5.8654  | 1376071 | Asthma |
| rs9265910  | 6 | 31345945 | T | C | 0.1137 | 0.0480  | 0.0086 | 2.33E-08 | 5.5856  | 1198533 | Asthma |

|             |   |          |   |   |        |         |        |          |         |         |        |
|-------------|---|----------|---|---|--------|---------|--------|----------|---------|---------|--------|
| rs2596526   | 6 | 31345947 | C | T | 0.1791 | -0.0451 | 0.0070 | 1.06E-10 | -6.4578 | 1224666 | Asthma |
| rs2596524   | 6 | 31346129 | A | G | 0.1782 | -0.0421 | 0.0064 | 5.76E-11 | -6.5499 | 1376071 | Asthma |
| rs7453967   | 6 | 31346466 | G | T | 0.1782 | -0.0420 | 0.0064 | 6.18E-11 | -6.5393 | 1376071 | Asthma |
| rs9265929   | 6 | 31346536 | C | T | 0.1785 | -0.0420 | 0.0064 | 6.33E-11 | -6.5357 | 1376071 | Asthma |
| rs9265930   | 6 | 31346570 | A | C | 0.1782 | -0.0420 | 0.0064 | 6.46E-11 | -6.5326 | 1376071 | Asthma |
| rs2508000   | 6 | 31346811 | T | C | 0.1782 | -0.0420 | 0.0064 | 6.10E-11 | -6.5413 | 1376071 | Asthma |
| rs2507998   | 6 | 31346875 | G | A | 0.1160 | 0.0447  | 0.0077 | 5.47E-09 | 5.8320  | 1376071 | Asthma |
| rs9265937   | 6 | 31347161 | T | C | 0.1163 | 0.0451  | 0.0077 | 3.86E-09 | 5.8900  | 1376071 | Asthma |
| rs9265938   | 6 | 31347228 | T | C | 0.1163 | 0.0451  | 0.0077 | 3.81E-09 | 5.8921  | 1376071 | Asthma |
| rs9265939   | 6 | 31347250 | G | A | 0.1164 | 0.0451  | 0.0077 | 3.93E-09 | 5.8871  | 1376071 | Asthma |
| rs9265946   | 6 | 31347361 | A | G | 0.1130 | 0.0548  | 0.0100 | 4.71E-08 | 5.4620  | 1000149 | Asthma |
| rs9265948   | 6 | 31347416 | T | C | 0.1159 | 0.0478  | 0.0078 | 7.65E-10 | 6.1520  | 1349938 | Asthma |
| rs9265949   | 6 | 31347452 | T | C | 0.1139 | 0.0497  | 0.0078 | 2.28E-10 | 6.3415  | 1349938 | Asthma |
| rs9265959   | 6 | 31347648 | T | C | 0.1783 | -0.0419 | 0.0064 | 6.89E-11 | -6.5230 | 1376071 | Asthma |
| rs9265963   | 6 | 31347763 | A | G | 0.1783 | -0.0419 | 0.0064 | 7.23E-11 | -6.5159 | 1376071 | Asthma |
| rs9265964   | 6 | 31347841 | G | A | 0.1160 | 0.0447  | 0.0077 | 5.51E-09 | 5.8309  | 1376071 | Asthma |
| rs9265967   | 6 | 31347872 | T | G | 0.1118 | 0.0479  | 0.0087 | 3.95E-08 | 5.4931  | 1198533 | Asthma |
| rs9265969   | 6 | 31347929 | A | G | 0.1374 | 0.0521  | 0.0071 | 2.95E-13 | 7.2968  | 1376071 | Asthma |
| rs9265971   | 6 | 31348015 | C | T | 0.1159 | 0.0446  | 0.0077 | 5.82E-09 | 5.8217  | 1376071 | Asthma |
| rs9265972   | 6 | 31348028 | C | G | 0.1159 | 0.0446  | 0.0077 | 5.86E-09 | 5.8206  | 1376071 | Asthma |
| rs9265973   | 6 | 31348084 | A | G | 0.1159 | 0.0446  | 0.0077 | 5.78E-09 | 5.8231  | 1376071 | Asthma |
| rs9265974   | 6 | 31348102 | G | T | 0.1159 | 0.0445  | 0.0077 | 6.33E-09 | 5.8079  | 1376071 | Asthma |
| rs9265976   | 6 | 31348156 | G | A | 0.1156 | 0.0444  | 0.0077 | 7.39E-09 | 5.7818  | 1376071 | Asthma |
| rs9265977   | 6 | 31348182 | G | A | 0.2656 | 0.0344  | 0.0056 | 7.40E-10 | 6.1573  | 1376071 | Asthma |
| rs9265978   | 6 | 31348222 | G | A | 0.2657 | 0.0343  | 0.0056 | 8.10E-10 | 6.1430  | 1376071 | Asthma |
| rs9265979   | 6 | 31348267 | T | C | 0.1158 | 0.0448  | 0.0077 | 5.36E-09 | 5.8357  | 1376071 | Asthma |
| rs9265984   | 6 | 31348374 | T | C | 0.2660 | 0.0345  | 0.0056 | 6.37E-10 | 6.1810  | 1376071 | Asthma |
| rs9265985   | 6 | 31348457 | C | A | 0.1159 | 0.0448  | 0.0077 | 5.14E-09 | 5.8425  | 1376071 | Asthma |
| rs9265986   | 6 | 31348504 | T | C | 0.2657 | 0.0344  | 0.0056 | 7.40E-10 | 6.1574  | 1376071 | Asthma |
| rs9265987   | 6 | 31348511 | C | T | 0.2657 | 0.0344  | 0.0056 | 7.23E-10 | 6.1611  | 1376071 | Asthma |
| rs9265990   | 6 | 31348671 | A | T | 0.1151 | 0.0451  | 0.0077 | 4.88E-09 | 5.8513  | 1376071 | Asthma |
| rs2596520   | 6 | 31348704 | T | C | 0.1783 | -0.0420 | 0.0064 | 6.56E-11 | -6.5304 | 1376071 | Asthma |
| rs9265993   | 6 | 31348743 | A | G | 0.1134 | 0.0483  | 0.0086 | 2.08E-08 | 5.6051  | 1198533 | Asthma |
| rs9265994   | 6 | 31348749 | C | T | 0.1108 | 0.0506  | 0.0080 | 2.87E-10 | 6.3056  | 1349938 | Asthma |
| rs2596519   | 6 | 31348786 | T | A | 0.1918 | -0.0554 | 0.0082 | 1.68E-11 | -6.7318 | 873440  | Asthma |
| rs9265998   | 6 | 31348836 | A | G | 0.1159 | 0.0450  | 0.0077 | 4.29E-09 | 5.8727  | 1376071 | Asthma |
| rs9266001   | 6 | 31348918 | A | C | 0.1138 | 0.0499  | 0.0078 | 2.00E-10 | 6.3616  | 1349938 | Asthma |
| rs2596518   | 6 | 31348982 | G | A | 0.1788 | -0.0453 | 0.0071 | 1.83E-10 | -6.3751 | 1198533 | Asthma |
| rs2923008   | 6 | 31349134 | T | G | 0.1136 | 0.0474  | 0.0077 | 9.09E-10 | 6.1246  | 1376071 | Asthma |
| rs3016017   | 6 | 31349286 | G | A | 0.1160 | 0.0447  | 0.0077 | 5.53E-09 | 5.8305  | 1376071 | Asthma |
| rs2923007   | 6 | 31349288 | C | T | 0.1160 | 0.0446  | 0.0077 | 5.59E-09 | 5.8287  | 1376071 | Asthma |
| rs2523620   | 6 | 31349737 | C | A | 0.1786 | -0.0420 | 0.0064 | 6.31E-11 | -6.5363 | 1376071 | Asthma |
| rs2596515   | 6 | 31349842 | A | G | 0.1790 | -0.0452 | 0.0070 | 9.53E-11 | -6.4742 | 1224666 | Asthma |
| rs2596513   | 6 | 31349985 | G | A | 0.1783 | -0.0449 | 0.0070 | 1.49E-10 | -6.4066 | 1224666 | Asthma |
| rs2596511   | 6 | 31350078 | T | A | 0.1783 | -0.0449 | 0.0070 | 1.45E-10 | -6.4109 | 1224666 | Asthma |
| rs2523618   | 6 | 31350526 | C | T | 0.1785 | -0.0421 | 0.0064 | 5.16E-11 | -6.5664 | 1376071 | Asthma |
| rs2596510   | 6 | 31350531 | T | G | 0.1162 | 0.0452  | 0.0076 | 3.50E-09 | 5.9063  | 1376071 | Asthma |
| rs2596508   | 6 | 31350655 | C | T | 0.1161 | 0.0451  | 0.0077 | 3.99E-09 | 5.8845  | 1376071 | Asthma |
| rs2596506   | 6 | 31350776 | T | C | 0.3554 | -0.0275 | 0.0050 | 4.63E-08 | -5.4651 | 1376071 | Asthma |
| rs28380927  | 6 | 31350866 | T | C | 0.0285 | 0.0823  | 0.0145 | 1.33E-08 | 5.6819  | 1310845 | Asthma |
| rs2442728   | 6 | 31351578 | T | G | 0.3853 | 0.0401  | 0.0051 | 2.54E-15 | 7.9114  | 1316443 | Asthma |
| rs4644106   | 6 | 31351809 | C | T | 0.2340 | -0.0392 | 0.0057 | 8.35E-12 | -6.8325 | 1376071 | Asthma |
| rs28380929  | 6 | 31351826 | T | C | 0.0495 | 0.0797  | 0.0123 | 8.86E-11 | 6.4851  | 1159440 | Asthma |
| rs9266070   | 6 | 31351841 | A | T | 0.1422 | 0.0386  | 0.0070 | 3.84E-08 | 5.4981  | 1349938 | Asthma |
| rs2442725   | 6 | 31352119 | T | C | 0.3514 | -0.0281 | 0.0051 | 2.72E-08 | -5.5585 | 1376071 | Asthma |
| rs2442724   | 6 | 31352130 | C | T | 0.1783 | -0.0425 | 0.0064 | 3.89E-11 | -6.6082 | 1376071 | Asthma |
| rs35957957  | 6 | 31352287 | T | C | 0.0882 | 0.0515  | 0.0088 | 4.39E-09 | 5.8688  | 1251217 | Asthma |
| rs112420503 | 6 | 31352320 | A | C | 0.0812 | -0.0565 | 0.0095 | 3.19E-09 | -5.9214 | 1290310 | Asthma |
| rs2442721   | 6 | 31352465 | C | T | 0.3782 | -0.0293 | 0.0050 | 3.76E-09 | -5.8946 | 1376071 | Asthma |
| rs2442719   | 6 | 31352761 | C | T | 0.4716 | -0.0385 | 0.0049 | 2.44E-15 | -7.9165 | 1376071 | Asthma |
| rs2523616   | 6 | 31352785 | T | C | 0.1963 | -0.0524 | 0.0062 | 4.13E-17 | -8.4090 | 1376071 | Asthma |
| rs2596503   | 6 | 31353033 | A | G | 0.2298 | -0.0447 | 0.0060 | 6.14E-14 | -7.5051 | 1376071 | Asthma |
| rs35735140  | 6 | 31353072 | C | T | 0.0742 | 0.0699  | 0.0103 | 1.30E-11 | 6.7687  | 1154767 | Asthma |
| rs2523612   | 6 | 31353346 | G | T | 0.1632 | -0.0496 | 0.0069 | 5.05E-13 | -7.2238 | 1376071 | Asthma |
| rs2596500   | 6 | 31353490 | C | A | 0.1141 | 0.0483  | 0.0077 | 3.91E-10 | 6.2576  | 1376071 | Asthma |
| rs551570796 | 6 | 31353552 | A | G | 0.0765 | -0.0641 | 0.0102 | 3.20E-10 | -6.2887 | 1224666 | Asthma |
| rs116442786 | 6 | 31353559 | A | G | 0.0774 | -0.0669 | 0.0093 | 4.97E-13 | -7.2261 | 1376071 | Asthma |
| rs2844585   | 6 | 31353583 | A | G | 0.1776 | -0.0506 | 0.0065 | 4.32E-15 | -7.8452 | 1376071 | Asthma |
| rs2596499   | 6 | 31353652 | A | T | 0.3194 | 0.0486  | 0.0052 | 8.33E-21 | 9.3555  | 1376071 | Asthma |
| rs72502570  | 6 | 31353702 | G | A | 0.1167 | -0.0632 | 0.0075 | 5.48E-17 | -8.3759 | 1376071 | Asthma |
| rs73406410  | 6 | 31353724 | G | A | 0.1165 | -0.0633 | 0.0075 | 5.26E-17 | -8.3809 | 1376071 | Asthma |
| rs75456009  | 6 | 31353774 | G | A | 0.1358 | -0.0459 | 0.0071 | 1.21E-10 | -6.4377 | 1310845 | Asthma |
| rs114322933 | 6 | 31353800 | T | C | 0.1414 | -0.0424 | 0.0075 | 1.76E-08 | -5.6340 | 1224666 | Asthma |
| rs80296299  | 6 | 31353846 | T | C | 0.1174 | -0.0454 | 0.0082 | 2.81E-08 | -5.5528 | 1281476 | Asthma |

|             |   |          |   |   |        |         |        |          |         |         |        |
|-------------|---|----------|---|---|--------|---------|--------|----------|---------|---------|--------|
| rs1058026   | 6 | 31353908 | C | A | 0.1375 | -0.0505 | 0.0076 | 3.67E-11 | -6.6168 | 1281476 | Asthma |
| rs1057412   | 6 | 31353975 | G | T | 0.1149 | -0.0477 | 0.0083 | 9.47E-09 | -5.7399 | 1281476 | Asthma |
| rs2768      | 6 | 31354079 | G | A | 0.2628 | 0.0423  | 0.0074 | 1.00E-08 | 5.7307  | 995476  | Asthma |
| rs2769      | 6 | 31354105 | A | G | 0.1366 | 0.0538  | 0.0076 | 1.73E-12 | 7.0544  | 1281476 | Asthma |
| rs1056429   | 6 | 31354106 | A | G | 0.1331 | 0.0453  | 0.0076 | 3.15E-09 | 5.9238  | 1216250 | Asthma |
| rs1055348   | 6 | 31354171 | G | T | 0.1137 | -0.0698 | 0.0085 | 2.17E-16 | -8.2126 | 1281476 | Asthma |
| rs1054111   | 6 | 31354249 | A | C | 0.1465 | -0.0566 | 0.0087 | 8.79E-11 | -6.4865 | 757378  | Asthma |
| rs2428496   | 6 | 31354344 | C | T | 0.2442 | -0.0435 | 0.0070 | 4.93E-10 | -6.2212 | 1125398 | Asthma |
| rs2428495   | 6 | 31354398 | C | T | 0.2492 | -0.0474 | 0.0079 | 1.95E-09 | -6.0020 | 973993  | Asthma |
| rs2428494   | 6 | 31354420 | A | T | 0.4484 | 0.0918  | 0.0064 | 2.96E-46 | 14.2788 | 995476  | Asthma |
| rs3819301   | 6 | 31354452 | G | A | 0.1937 | -0.0609 | 0.0093 | 6.51E-11 | -6.5317 | 778845  | Asthma |
| rs17199328  | 6 | 31354618 | G | A | 0.1551 | 0.0586  | 0.0087 | 1.51E-11 | 6.7473  | 757378  | Asthma |
| rs2442718   | 6 | 31354625 | T | C | 0.3389 | 0.0630  | 0.0061 | 5.87E-25 | 10.3176 | 1125398 | Asthma |
| rs2507992   | 6 | 31354682 | C | T | 0.3389 | 0.0631  | 0.0061 | 5.35E-25 | 10.3266 | 1125398 | Asthma |
| rs2442717   | 6 | 31354693 | C | G | 0.2396 | -0.0446 | 0.0070 | 2.38E-10 | -6.3344 | 1125398 | Asthma |
| rs3819294   | 6 | 31354710 | A | G | 0.0882 | 0.0679  | 0.0104 | 7.26E-11 | 6.5151  | 1060172 | Asthma |
| rs2507991   | 6 | 31354736 | A | C | 0.3226 | -0.0446 | 0.0063 | 1.10E-12 | -7.1175 | 1125398 | Asthma |
| rs3819290   | 6 | 31354885 | A | G | 0.1358 | -0.0473 | 0.0081 | 5.23E-09 | -5.8397 | 1125398 | Asthma |
| rs2596498   | 6 | 31354911 | C | T | 0.3391 | 0.0629  | 0.0061 | 6.91E-25 | 10.3018 | 1125398 | Asthma |
| rs3819288   | 6 | 31354917 | C | T | 0.1100 | 0.0645  | 0.0106 | 1.34E-09 | 6.0624  | 908767  | Asthma |
| rs17193012  | 6 | 31354926 | T | C | 0.0900 | 0.0703  | 0.0117 | 2.11E-09 | 5.9893  | 908767  | Asthma |
| rs2596497   | 6 | 31354927 | A | G | 0.2394 | -0.0447 | 0.0070 | 2.29E-10 | -6.3405 | 1125398 | Asthma |
| rs2596496   | 6 | 31355005 | C | G | 0.6681 | 0.0472  | 0.0066 | 1.20E-12 | 7.1059  | 757378  | Asthma |
| rs2523607   | 6 | 31355013 | A | T | 0.1227 | 0.0500  | 0.0088 | 1.52E-08 | 5.6591  | 1125398 | Asthma |
| rs1140546   | 6 | 31355111 | A | G | 0.2721 | -0.0481 | 0.0071 | 9.19E-12 | -6.8186 | 757378  | Asthma |
| rs2854001   | 6 | 31355235 | A | G | 0.2163 | 0.0504  | 0.0070 | 4.58E-13 | 7.2372  | 1125398 | Asthma |
| rs2276448   | 6 | 31355243 | C | T | 0.1356 | -0.0472 | 0.0081 | 6.10E-09 | -5.8140 | 1125398 | Asthma |
| rs17881225  | 6 | 31355288 | C | G | 0.1078 | 0.0610  | 0.0094 | 7.86E-11 | 6.5032  | 1060172 | Asthma |
| rs1050747   | 6 | 31355519 | A | G | 0.2394 | -0.0447 | 0.0070 | 2.23E-10 | -6.3444 | 1125398 | Asthma |
| rs1050723   | 6 | 31355544 | A | G | 0.1464 | 0.0562  | 0.0081 | 5.10E-12 | 6.9027  | 1125398 | Asthma |
| rs2523605   | 6 | 31355632 | T | C | 0.2394 | -0.0447 | 0.0070 | 2.27E-10 | -6.3416 | 1125398 | Asthma |
| rs2596495   | 6 | 31355639 | C | G | 0.1228 | 0.0502  | 0.0088 | 1.36E-08 | 5.6777  | 1125398 | Asthma |
| rs4990036   | 6 | 31355729 | T | C | 0.1228 | 0.0502  | 0.0088 | 1.38E-08 | 5.6756  | 1125398 | Asthma |
| rs12526858  | 6 | 31355944 | C | G | 0.0871 | 0.0715  | 0.0105 | 1.08E-11 | 6.7958  | 1060172 | Asthma |
| rs12528645  | 6 | 31355948 | C | T | 0.0871 | 0.0715  | 0.0105 | 1.07E-11 | 6.7965  | 1060172 | Asthma |
| rs2523604   | 6 | 31355989 | T | C | 0.2394 | -0.0447 | 0.0070 | 2.21E-10 | -6.3459 | 1125398 | Asthma |
| rs2596494   | 6 | 31356061 | C | G | 0.2395 | -0.0448 | 0.0070 | 2.11E-10 | -6.3534 | 1125398 | Asthma |
| rs2596493   | 6 | 31356168 | A | C | 0.2449 | -0.0478 | 0.0079 | 1.81E-09 | -6.0143 | 973993  | Asthma |
| rs1131279   | 6 | 31356181 | T | G | 0.2461 | -0.0474 | 0.0079 | 2.27E-09 | -5.9774 | 973993  | Asthma |
| rs9266141   | 6 | 31356246 | G | C | 0.2249 | 0.0706  | 0.0094 | 7.27E-14 | 7.4829  | 778845  | Asthma |
| rs4999716   | 6 | 31356450 | A | C | 0.1070 | 0.0677  | 0.0110 | 6.62E-10 | 6.1747  | 908767  | Asthma |
| rs4999717   | 6 | 31356571 | T | C | 0.0872 | 0.0714  | 0.0105 | 1.09E-11 | 6.7943  | 1060172 | Asthma |
| rs17881210  | 6 | 31356671 | A | G | 0.0855 | 0.0749  | 0.0106 | 1.92E-12 | 7.0400  | 1060172 | Asthma |
| rs1131212   | 6 | 31356749 | C | G | 0.7406 | 0.0612  | 0.0091 | 1.89E-11 | 6.7145  | 778845  | Asthma |
| rs1050570   | 6 | 31356772 | C | T | 0.4794 | 0.0449  | 0.0067 | 2.79E-11 | 6.6574  | 908767  | Asthma |
| rs1050529   | 6 | 31356838 | T | C | 0.2689 | 0.0413  | 0.0070 | 4.22E-09 | 5.8756  | 1000544 | Asthma |
| rs1050518   | 6 | 31356864 | A | T | 0.3107 | 0.0469  | 0.0073 | 1.07E-10 | 6.4574  | 908767  | Asthma |
| rs1050517   | 6 | 31356866 | C | G | 0.5190 | 0.0499  | 0.0067 | 1.07E-13 | 7.4319  | 908767  | Asthma |
| rs9266184   | 6 | 31356887 | G | T | 0.3333 | 0.0461  | 0.0071 | 9.34E-11 | 6.4773  | 908767  | Asthma |
| rs1050486   | 6 | 31356925 | C | T | 0.4135 | -0.0509 | 0.0071 | 9.02E-13 | -7.1446 | 973993  | Asthma |
| rs147324178 | 6 | 31356965 | T | C | 0.1886 | -0.0796 | 0.0101 | 3.47E-15 | -7.8725 | 844071  | Asthma |
| rs9266193   | 6 | 31357011 | T | C | 0.4582 | -0.0388 | 0.0067 | 6.39E-09 | -5.8062 | 908767  | Asthma |
| rs9266194   | 6 | 31357013 | A | G | 0.4582 | -0.0388 | 0.0067 | 6.32E-09 | -5.8081 | 908767  | Asthma |
| rs9266195   | 6 | 31357043 | T | G | 0.1483 | 0.0598  | 0.0092 | 9.67E-11 | 6.4722  | 908767  | Asthma |
| rs1131161   | 6 | 31357114 | T | C | 0.0895 | 0.0737  | 0.0119 | 5.46E-10 | 6.2050  | 908767  | Asthma |
| rs34437781  | 6 | 31357178 | T | C | 0.0796 | 0.0796  | 0.0120 | 3.02E-11 | 6.6453  | 1000544 | Asthma |
| rs9266210   | 6 | 31357246 | C | T | 0.5374 | 0.0402  | 0.0067 | 1.71E-09 | 6.0231  | 908767  | Asthma |
| rs9266211   | 6 | 31357248 | C | T | 0.5374 | 0.0402  | 0.0067 | 1.71E-09 | 6.0231  | 908767  | Asthma |
| rs2596489   | 6 | 31357251 | A | G | 0.1738 | -0.0824 | 0.0103 | 1.13E-15 | -8.0119 | 844071  | Asthma |
| rs2596488   | 6 | 31357253 | T | C | 0.1810 | -0.0576 | 0.0082 | 2.01E-12 | -7.0341 | 1065770 | Asthma |
| rs34265426  | 6 | 31357907 | A | C | 0.0915 | 0.0637  | 0.0084 | 3.73E-14 | 7.5700  | 1310845 | Asthma |
| rs9266253   | 6 | 31358070 | G | C | 0.1622 | 0.0573  | 0.0072 | 1.92E-15 | 7.9463  | 1198533 | Asthma |
| rs9266258   | 6 | 31358135 | C | T | 0.1398 | 0.0581  | 0.0072 | 5.22E-16 | 8.1062  | 1316443 | Asthma |
| rs9266260   | 6 | 31358143 | T | C | 0.1407 | 0.0595  | 0.0076 | 3.69E-15 | 7.8650  | 1224666 | Asthma |
| rs9266261   | 6 | 31358151 | A | G | 0.1407 | 0.0595  | 0.0076 | 3.57E-15 | 7.8691  | 1224666 | Asthma |
| rs9266263   | 6 | 31358167 | G | A | 0.1718 | 0.0586  | 0.0076 | 1.61E-14 | 7.6784  | 1068588 | Asthma |
| rs9266265   | 6 | 31358173 | G | T | 0.1758 | 0.0628  | 0.0084 | 7.00E-14 | 7.4879  | 938666  | Asthma |
| rs73390205  | 6 | 31358213 | A | C | 0.1266 | -0.0422 | 0.0072 | 4.99E-09 | -5.8477 | 1376071 | Asthma |
| rs9266266   | 6 | 31358234 | T | C | 0.1658 | 0.0531  | 0.0064 | 1.42E-16 | 8.2633  | 1376071 | Asthma |
| rs75546626  | 6 | 31358247 | G | T | 0.1268 | -0.0416 | 0.0072 | 7.64E-09 | -5.7764 | 1376071 | Asthma |
| rs9266269   | 6 | 31358278 | A | G | 0.1658 | 0.0533  | 0.0064 | 1.16E-16 | 8.2871  | 1376071 | Asthma |
| rs9266270   | 6 | 31358295 | A | G | 0.1658 | 0.0533  | 0.0064 | 1.18E-16 | 8.2849  | 1376071 | Asthma |
| rs2853999   | 6 | 31358297 | T | A | 0.1137 | 0.0467  | 0.0077 | 1.56E-09 | 6.0379  | 1376071 | Asthma |
| rs62396273  | 6 | 31358306 | T | C | 0.1527 | -0.0447 | 0.0075 | 2.28E-09 | -5.9768 | 1198533 | Asthma |



|             |   |          |   |   |        |         |        |          |          |         |        |
|-------------|---|----------|---|---|--------|---------|--------|----------|----------|---------|--------|
| rs116583816 | 6 | 31358346 | C | G | 0.1415 | 0.0552  | 0.0069 | 1.42E-15 | 7.9838   | 1376071 | Asthma |
| rs73390208  | 6 | 31358354 | T | C | 0.2796 | -0.0379 | 0.0058 | 5.48E-11 | -6.5572  | 1246149 | Asthma |
| rs35173808  | 6 | 31358371 | A | C | 0.1117 | 0.0679  | 0.0124 | 4.68E-08 | 5.4634   | 778845  | Asthma |
| rs9405085   | 6 | 31358515 | G | A | 0.0915 | 0.0638  | 0.0084 | 3.28E-14 | 7.5867   | 1310845 | Asthma |
| rs2523593   | 6 | 31358926 | C | T | 0.1138 | 0.0466  | 0.0077 | 1.63E-09 | 6.0310   | 1376071 | Asthma |
| rs2394986   | 6 | 31359400 | T | C | 0.0824 | -0.0617 | 0.0100 | 8.25E-10 | -6.1398  | 1198533 | Asthma |
| rs74762609  | 6 | 31359847 | A | G | 0.1271 | -0.0423 | 0.0072 | 4.01E-09 | -5.8836  | 1376071 | Asthma |
| rs9378249   | 6 | 31359924 | G | T | 0.0853 | 0.0636  | 0.0087 | 2.77E-13 | 7.3053   | 1310845 | Asthma |
| rs2596477   | 6 | 31359946 | A | G | 0.1399 | 0.0548  | 0.0070 | 3.15E-15 | 7.8848   | 1376071 | Asthma |
| rs2596478   | 6 | 31360084 | C | T | 0.1589 | -0.0538 | 0.0068 | 2.85E-15 | -7.8972  | 1376071 | Asthma |
| rs2523584   | 6 | 31360113 | G | A | 0.1150 | 0.0448  | 0.0077 | 5.68E-09 | 5.8260   | 1376071 | Asthma |
| rs7749442   | 6 | 31360334 | A | T | 0.0839 | -0.0619 | 0.0088 | 2.34E-12 | -7.0127  | 1376071 | Asthma |
| rs2523580   | 6 | 31360468 | G | A | 0.3299 | 0.0340  | 0.0051 | 2.21E-11 | 6.6918   | 1376071 | Asthma |
| rs9380248   | 6 | 31360698 | T | C | 0.0913 | 0.0637  | 0.0084 | 4.22E-14 | 7.5541   | 1310845 | Asthma |
| rs9366782   | 6 | 31360768 | T | A | 0.0913 | 0.0637  | 0.0084 | 3.90E-14 | 7.5642   | 1310845 | Asthma |
| rs2523577   | 6 | 31360962 | G | A | 0.1399 | 0.0549  | 0.0070 | 2.83E-15 | 7.8982   | 1376071 | Asthma |
| rs7772305   | 6 | 31361109 | G | A | 0.2802 | -0.0319 | 0.0054 | 4.41E-09 | -5.8680  | 1359430 | Asthma |
| rs2523573   | 6 | 31361211 | G | C | 0.1138 | 0.0465  | 0.0077 | 1.80E-09 | 6.0147   | 1376071 | Asthma |
| rs2596544   | 6 | 31361514 | A | T | 0.2066 | 0.0608  | 0.0061 | 1.19E-23 | 10.0244  | 1310845 | Asthma |
| rs2596545   | 6 | 31361597 | C | A | 0.1139 | 0.0465  | 0.0077 | 1.80E-09 | 6.0147   | 1376071 | Asthma |
| rs76518703  | 6 | 31361689 | G | A | 0.0520 | -0.0698 | 0.0126 | 2.77E-08 | -5.5552  | 1221848 | Asthma |
| rs2523572   | 6 | 31361717 | C | T | 0.3671 | -0.0595 | 0.0052 | 1.21E-30 | -11.5077 | 1316443 | Asthma |
| rs9266303   | 6 | 31361832 | T | G | 0.1430 | 0.0408  | 0.0068 | 2.12E-09 | 5.9883   | 1376071 | Asthma |
| rs2596547   | 6 | 31361865 | T | C | 0.1180 | 0.0464  | 0.0083 | 1.92E-08 | 5.6193   | 1219993 | Asthma |
| rs2523571   | 6 | 31361914 | A | T | 0.1151 | 0.0462  | 0.0077 | 1.90E-09 | 6.0059   | 1376071 | Asthma |
| rs2523570   | 6 | 31361957 | T | C | 0.1832 | 0.0542  | 0.0062 | 1.71E-18 | 8.7749   | 1376071 | Asthma |
| rs59727727  | 6 | 31362020 | C | T | 0.1267 | -0.0568 | 0.0074 | 1.53E-14 | -7.6847  | 1359430 | Asthma |
| rs2394988   | 6 | 31362289 | G | A | 0.2357 | -0.0415 | 0.0057 | 5.36E-13 | -7.2158  | 1310845 | Asthma |
| rs2523566   | 6 | 31362322 | T | C | 0.1690 | -0.0492 | 0.0066 | 1.40E-13 | -7.3963  | 1376071 | Asthma |
| rs2250287   | 6 | 31362474 | G | T | 0.1599 | 0.0549  | 0.0066 | 5.53E-17 | 8.3750   | 1376071 | Asthma |
| rs2523564   | 6 | 31362593 | A | G | 0.1599 | 0.0549  | 0.0066 | 5.47E-17 | 8.3761   | 1376071 | Asthma |
| rs2250295   | 6 | 31362634 | A | C | 0.4277 | -0.0543 | 0.0049 | 3.79E-28 | -11.0007 | 1376071 | Asthma |
| rs2596548   | 6 | 31362769 | T | G | 0.1923 | -0.0374 | 0.0063 | 2.19E-09 | -5.9830  | 1376071 | Asthma |
| rs2523561   | 6 | 31362919 | T | C | 0.1599 | 0.0549  | 0.0066 | 5.99E-17 | 8.3654   | 1376071 | Asthma |
| rs2523560   | 6 | 31363067 | C | T | 0.4278 | -0.0542 | 0.0049 | 3.92E-28 | -10.9979 | 1376071 | Asthma |
| rs2596549   | 6 | 31363389 | A | G | 0.1923 | -0.0375 | 0.0063 | 1.91E-09 | -6.0052  | 1376071 | Asthma |
| rs9468982   | 6 | 31363433 | G | T | 0.1102 | -0.0623 | 0.0105 | 2.96E-09 | -5.9339  | 856799  | Asthma |
| rs2523556   | 6 | 31363606 | A | G | 0.1923 | -0.0376 | 0.0063 | 1.89E-09 | -6.0068  | 1376071 | Asthma |
| rs2523555   | 6 | 31363743 | T | C | 0.1935 | -0.0412 | 0.0068 | 1.50E-09 | -6.0448  | 1224666 | Asthma |
| rs4959063   | 6 | 31363921 | T | C | 0.2357 | -0.0409 | 0.0063 | 8.38E-11 | -6.4936  | 1159440 | Asthma |
| rs4959064   | 6 | 31363934 | T | C | 0.2355 | -0.0411 | 0.0057 | 9.08E-13 | -7.1439  | 1310845 | Asthma |
| rs4959065   | 6 | 31363949 | G | A | 0.2355 | -0.0410 | 0.0057 | 1.01E-12 | -7.1289  | 1310845 | Asthma |
| rs57052747  | 6 | 31364095 | A | C | 0.2173 | -0.0445 | 0.0069 | 1.17E-10 | -6.4438  | 1024845 | Asthma |
| rs2523553   | 6 | 31364171 | C | A | 0.1924 | -0.0377 | 0.0063 | 1.73E-09 | -6.0215  | 1376071 | Asthma |
| rs2523551   | 6 | 31364274 | G | A | 0.1599 | 0.0550  | 0.0066 | 4.83E-17 | 8.3908   | 1376071 | Asthma |
| rs2596550   | 6 | 31364301 | T | C | 0.1600 | 0.0550  | 0.0066 | 4.67E-17 | 8.3949   | 1376071 | Asthma |
| rs2523550   | 6 | 31364314 | G | T | 0.1600 | 0.0551  | 0.0066 | 4.42E-17 | 8.4010   | 1376071 | Asthma |
| rs2596551   | 6 | 31364462 | C | A | 0.1599 | 0.0551  | 0.0066 | 4.46E-17 | 8.4000   | 1376071 | Asthma |
| rs9501374   | 6 | 31364555 | T | C | 0.2357 | -0.0413 | 0.0057 | 6.00E-13 | -7.2005  | 1310845 | Asthma |
| rs9501375   | 6 | 31364595 | C | T | 0.2357 | -0.0413 | 0.0057 | 6.17E-13 | -7.1968  | 1310845 | Asthma |
| rs9501376   | 6 | 31364724 | T | C | 0.2357 | -0.0413 | 0.0057 | 6.30E-13 | -7.1938  | 1310845 | Asthma |
| rs2844582   | 6 | 31364749 | T | C | 0.1600 | 0.0551  | 0.0066 | 4.48E-17 | 8.3994   | 1376071 | Asthma |
| rs9295985   | 6 | 31364754 | A | C | 0.2357 | -0.0414 | 0.0057 | 5.90E-13 | -7.2028  | 1310845 | Asthma |
| rs9468983   | 6 | 31364884 | A | G | 0.2357 | -0.0413 | 0.0057 | 6.18E-13 | -7.1966  | 1310845 | Asthma |
| rs2853996   | 6 | 31365138 | T | C | 0.1600 | 0.0550  | 0.0066 | 4.98E-17 | 8.3872   | 1376071 | Asthma |
| rs2523546   | 6 | 31365143 | A | G | 0.1164 | 0.0457  | 0.0076 | 2.16E-09 | 5.9854   | 1376071 | Asthma |
| rs9266363   | 6 | 31365200 | A | G | 0.1931 | -0.0376 | 0.0062 | 1.69E-09 | -6.0252  | 1376071 | Asthma |
| rs9266366   | 6 | 31365255 | T | C | 0.1590 | -0.0584 | 0.0075 | 6.22E-15 | -7.7995  | 1159440 | Asthma |
| rs2853994   | 6 | 31365286 | T | C | 0.1600 | 0.0550  | 0.0066 | 5.09E-17 | 8.3847   | 1376071 | Asthma |
| rs3016015   | 6 | 31365314 | A | G | 0.1923 | -0.0376 | 0.0063 | 1.76E-09 | -6.0184  | 1376071 | Asthma |
| rs2844580   | 6 | 31365526 | C | T | 0.3782 | 0.0421  | 0.0051 | 7.85E-17 | 8.3336   | 1376071 | Asthma |
| rs9501571   | 6 | 31365833 | T | C | 0.1266 | -0.0566 | 0.0074 | 1.76E-14 | -7.6672  | 1359430 | Asthma |
| rs2844579   | 6 | 31365939 | A | G | 0.1599 | 0.0550  | 0.0066 | 4.78E-17 | 8.3921   | 1376071 | Asthma |
| rs9501572   | 6 | 31366043 | G | A | 0.2357 | -0.0412 | 0.0057 | 6.95E-13 | -7.1804  | 1310845 | Asthma |
| rs2523543   | 6 | 31366137 | G | A | 0.1599 | 0.0550  | 0.0066 | 5.24E-17 | 8.3811   | 1376071 | Asthma |
| rs2596574   | 6 | 31366397 | A | G | 0.0602 | 0.0661  | 0.0100 | 3.02E-11 | 6.6456   | 1376071 | Asthma |
| rs2596426   | 6 | 31366487 | T | C | 0.1923 | -0.0376 | 0.0063 | 1.83E-09 | -6.0126  | 1376071 | Asthma |
| rs3873393   | 6 | 31366488 | C | T | 0.1266 | -0.0566 | 0.0074 | 1.74E-14 | -7.6684  | 1359430 | Asthma |
| rs2596427   | 6 | 31366616 | A | T | 0.1923 | -0.0374 | 0.0062 | 2.22E-09 | -5.9809  | 1376071 | Asthma |
| rs2844577   | 6 | 31366645 | C | T | 0.1164 | 0.0457  | 0.0076 | 2.13E-09 | 5.9876   | 1376071 | Asthma |
| rs2844576   | 6 | 31366824 | T | C | 0.1923 | -0.0376 | 0.0063 | 1.84E-09 | -6.0112  | 1376071 | Asthma |
| rs2596428   | 6 | 31366954 | C | G | 0.0601 | 0.0665  | 0.0100 | 2.49E-11 | 6.6743   | 1376071 | Asthma |
| rs2596429   | 6 | 31367044 | A | T | 0.1689 | -0.0493 | 0.0066 | 1.29E-13 | -7.4075  | 1376071 | Asthma |
| rs6457401   | 6 | 31367075 | T | G | 0.2201 | -0.0378 | 0.0060 | 2.24E-10 | -6.3439  | 1294204 | Asthma |

|            |   |          |   |   |        |         |        |          |          |         |        |
|------------|---|----------|---|---|--------|---------|--------|----------|----------|---------|--------|
| rs6457402  | 6 | 31367087 | T | G | 0.2201 | -0.0380 | 0.0060 | 1.90E-10 | -6.3695  | 1294204 | Asthma |
| rs2844575  | 6 | 31367168 | C | T | 0.4547 | 0.0331  | 0.0048 | 5.28E-12 | 6.8979   | 1376071 | Asthma |
| rs7767216  | 6 | 31367319 | A | G | 0.1266 | -0.0567 | 0.0074 | 1.62E-14 | -7.6778  | 1359430 | Asthma |
| rs2523542  | 6 | 31367379 | A | G | 0.1923 | -0.0376 | 0.0063 | 1.85E-09 | -6.0109  | 1376071 | Asthma |
| rs7767142  | 6 | 31367534 | T | A | 0.0752 | -0.0656 | 0.0093 | 1.80E-12 | -7.0495  | 1376071 | Asthma |
| rs4141166  | 6 | 31367546 | C | G | 0.2434 | -0.0433 | 0.0061 | 8.12E-13 | -7.1591  | 942825  | Asthma |
| rs2596430  | 6 | 31367654 | C | T | 0.1164 | 0.0457  | 0.0076 | 2.17E-09 | 5.9846   | 1376071 | Asthma |
| rs2596431  | 6 | 31367730 | T | C | 0.0602 | 0.0665  | 0.0099 | 2.38E-11 | 6.6809   | 1376071 | Asthma |
| rs2523539  | 6 | 31367805 | C | T | 0.0602 | 0.0665  | 0.0100 | 2.28E-11 | 6.6867   | 1376071 | Asthma |
| rs2523538  | 6 | 31367846 | G | A | 0.0602 | 0.0668  | 0.0099 | 1.92E-11 | 6.7119   | 1376071 | Asthma |
| rs61292951 | 6 | 31367926 | C | T | 0.0839 | -0.0674 | 0.0106 | 2.04E-10 | -6.3583  | 878129  | Asthma |
| rs2523537  | 6 | 31367930 | A | G | 0.1794 | -0.0418 | 0.0071 | 4.61E-09 | -5.8608  | 878129  | Asthma |
| rs2922994  | 6 | 31368124 | G | A | 0.1164 | 0.0457  | 0.0076 | 2.16E-09 | 5.9854   | 1376071 | Asthma |
| rs2156874  | 6 | 31368199 | C | G | 0.1139 | 0.0464  | 0.0077 | 1.99E-09 | 5.9990   | 1376071 | Asthma |
| rs2523536  | 6 | 31368223 | G | A | 0.0602 | 0.0664  | 0.0099 | 2.45E-11 | 6.6761   | 1376071 | Asthma |
| rs7743761  | 6 | 31368323 | A | C | 0.2357 | -0.0413 | 0.0057 | 6.62E-13 | -7.1870  | 1310845 | Asthma |
| rs2523535  | 6 | 31368473 | G | A | 0.3785 | 0.0423  | 0.0050 | 5.22E-17 | 8.3817   | 1376071 | Asthma |
| rs2523534  | 6 | 31368572 | A | G | 0.4279 | -0.0538 | 0.0049 | 9.02E-28 | -10.9223 | 1376071 | Asthma |
| rs2844568  | 6 | 31368851 | T | C | 0.0602 | 0.0667  | 0.0099 | 1.97E-11 | 6.7081   | 1376071 | Asthma |
| rs2844567  | 6 | 31368867 | A | G | 0.0615 | 0.0655  | 0.0099 | 3.31E-11 | 6.6323   | 1376071 | Asthma |
| rs2853991  | 6 | 31369035 | A | G | 0.1923 | -0.0375 | 0.0063 | 1.99E-09 | -5.9988  | 1376071 | Asthma |
| rs2253907  | 6 | 31369093 | T | C | 0.5107 | 0.0371  | 0.0049 | 2.75E-14 | 7.6097   | 1376071 | Asthma |
| rs2596433  | 6 | 31369120 | C | G | 0.1923 | -0.0375 | 0.0063 | 2.00E-09 | -5.9978  | 1376071 | Asthma |
| rs17199474 | 6 | 31369183 | A | G | 0.0752 | -0.0651 | 0.0093 | 2.47E-12 | -7.0049  | 1376071 | Asthma |
| rs17193150 | 6 | 31369315 | T | C | 0.0754 | -0.0653 | 0.0093 | 1.98E-12 | -7.0359  | 1376071 | Asthma |
| rs2922995  | 6 | 31369379 | T | C | 0.1905 | -0.0398 | 0.0069 | 7.31E-09 | -5.7836  | 1224666 | Asthma |
| rs2905716  | 6 | 31369390 | A | G | 0.1902 | -0.0397 | 0.0069 | 8.35E-09 | -5.7612  | 1224666 | Asthma |
| rs2853988  | 6 | 31369393 | A | T | 0.5107 | 0.0379  | 0.0053 | 1.15E-12 | 7.1113   | 1224666 | Asthma |
| rs17193178 | 6 | 31369408 | A | C | 0.2310 | -0.0448 | 0.0064 | 1.86E-12 | -7.0443  | 1154790 | Asthma |
| rs2922996  | 6 | 31369430 | C | G | 0.4649 | 0.0394  | 0.0049 | 5.05E-16 | 8.1102   | 1376071 | Asthma |
| rs2853987  | 6 | 31369432 | C | T | 0.0649 | 0.0664  | 0.0104 | 1.64E-10 | 6.3916   | 1008051 | Asthma |
| rs2922997  | 6 | 31369504 | G | A | 0.4276 | -0.0542 | 0.0049 | 4.36E-28 | -10.9879 | 1376071 | Asthma |
| rs13215664 | 6 | 31369534 | C | T | 0.2321 | -0.0452 | 0.0062 | 4.33E-13 | -7.2449  | 1180923 | Asthma |
| rs2922999  | 6 | 31369660 | A | G | 0.1119 | 0.0912  | 0.0125 | 2.58E-13 | 7.3145   | 570646  | Asthma |
| rs4991645  | 6 | 31369681 | C | T | 0.2357 | -0.0413 | 0.0057 | 6.61E-13 | -7.1872  | 1310845 | Asthma |
| rs2523530  | 6 | 31369877 | G | A | 0.0602 | 0.0666  | 0.0099 | 2.12E-11 | 6.6975   | 1376071 | Asthma |
| rs4991646  | 6 | 31369881 | C | A | 0.2125 | -0.0373 | 0.0061 | 7.61E-10 | -6.1529  | 1294204 | Asthma |
| rs4991647  | 6 | 31369894 | A | G | 0.4081 | -0.0525 | 0.0054 | 4.20E-22 | -9.6661  | 1224666 | Asthma |
| rs4991648  | 6 | 31369914 | A | G | 0.4079 | -0.0525 | 0.0054 | 4.34E-22 | -9.6627  | 1224666 | Asthma |
| rs4991649  | 6 | 31369918 | G | A | 0.4080 | -0.0526 | 0.0054 | 4.01E-22 | -9.6708  | 1224666 | Asthma |
| rs9266438  | 6 | 31369983 | C | T | 0.1924 | -0.0375 | 0.0063 | 2.06E-09 | -5.9933  | 1376071 | Asthma |
| rs2523529  | 6 | 31370003 | G | C | 0.0602 | 0.0666  | 0.0099 | 2.12E-11 | 6.6974   | 1376071 | Asthma |
| rs9266439  | 6 | 31370027 | G | A | 0.4077 | -0.0524 | 0.0054 | 5.32E-22 | -9.6419  | 1224666 | Asthma |
| rs9266440  | 6 | 31370038 | T | C | 0.3256 | 0.0370  | 0.0053 | 4.76E-12 | 6.9126   | 1316443 | Asthma |
| rs5006724  | 6 | 31370073 | T | C | 0.4031 | -0.0511 | 0.0050 | 1.03E-24 | -10.2630 | 1376071 | Asthma |
| rs5006725  | 6 | 31370095 | A | G | 0.3979 | -0.0510 | 0.0050 | 1.24E-24 | -10.2459 | 1376071 | Asthma |
| rs9501573  | 6 | 31370276 | T | C | 0.2003 | -0.0388 | 0.0062 | 4.29E-10 | -6.2430  | 1294204 | Asthma |
| rs9266444  | 6 | 31370316 | A | G | 0.3982 | -0.0535 | 0.0055 | 4.70E-22 | -9.6547  | 1198533 | Asthma |
| rs9266445  | 6 | 31370331 | G | C | 0.3981 | -0.0536 | 0.0055 | 4.23E-22 | -9.6654  | 1198533 | Asthma |
| rs9266446  | 6 | 31370349 | C | T | 0.3993 | -0.0510 | 0.0052 | 7.91E-23 | -9.8356  | 1290310 | Asthma |
| rs2844565  | 6 | 31370350 | T | C | 0.0596 | 0.0721  | 0.0112 | 1.19E-10 | 6.4398   | 1198533 | Asthma |
| rs9266447  | 6 | 31370373 | G | A | 0.2493 | -0.0375 | 0.0066 | 1.58E-08 | -5.6525  | 1224666 | Asthma |
| rs9266449  | 6 | 31370382 | T | C | 0.4678 | -0.0518 | 0.0056 | 2.45E-20 | -9.2407  | 1198533 | Asthma |
| rs9266450  | 6 | 31370391 | T | C | 0.1967 | -0.0418 | 0.0067 | 5.37E-10 | -6.2079  | 1224666 | Asthma |
| rs9266451  | 6 | 31370406 | T | C | 0.3985 | -0.0535 | 0.0054 | 7.64E-23 | -9.8390  | 1224666 | Asthma |
| rs9501378  | 6 | 31370431 | T | A | 0.2015 | -0.0380 | 0.0068 | 2.60E-08 | -5.5663  | 1142799 | Asthma |
| rs9266452  | 6 | 31370526 | T | C | 0.3961 | -0.0509 | 0.0050 | 1.72E-24 | -10.2140 | 1376071 | Asthma |
| rs9266453  | 6 | 31370560 | G | A | 0.3962 | -0.0511 | 0.0050 | 1.01E-24 | -10.2651 | 1376071 | Asthma |
| rs9501574  | 6 | 31370569 | C | A | 0.2011 | -0.0380 | 0.0068 | 2.53E-08 | -5.5709  | 1142799 | Asthma |
| rs9266454  | 6 | 31370583 | G | A | 0.3960 | -0.0510 | 0.0050 | 1.23E-24 | -10.2460 | 1376071 | Asthma |
| rs9266455  | 6 | 31370608 | T | C | 0.3961 | -0.0510 | 0.0050 | 1.32E-24 | -10.2400 | 1376071 | Asthma |
| rs9501575  | 6 | 31370802 | A | G | 0.1994 | -0.0400 | 0.0067 | 1.96E-09 | -6.0012  | 1216250 | Asthma |
| rs9266457  | 6 | 31370835 | C | T | 0.1950 | -0.0387 | 0.0062 | 4.33E-10 | -6.2418  | 1376071 | Asthma |
| rs9266458  | 6 | 31370849 | A | G | 0.4049 | 0.0403  | 0.0054 | 1.15E-13 | 7.4227   | 1224666 | Asthma |
| rs9266459  | 6 | 31370868 | G | A | 0.1950 | -0.0386 | 0.0062 | 4.72E-10 | -6.2281  | 1376071 | Asthma |
| rs9266460  | 6 | 31370882 | G | C | 0.3987 | -0.0532 | 0.0054 | 1.27E-22 | -9.7877  | 1224666 | Asthma |
| rs2596434  | 6 | 31370984 | G | A | 0.1950 | -0.0385 | 0.0062 | 4.99E-10 | -6.2195  | 1376071 | Asthma |
| rs2853986  | 6 | 31371067 | C | T | 0.1150 | 0.0465  | 0.0077 | 1.41E-09 | 6.0546   | 1376071 | Asthma |
| rs2523528  | 6 | 31371077 | T | G | 0.5385 | 0.0337  | 0.0053 | 2.95E-10 | 6.3014   | 1224666 | Asthma |
| rs2853984  | 6 | 31371109 | G | A | 0.5386 | 0.0337  | 0.0053 | 2.82E-10 | 6.3085   | 1224666 | Asthma |
| rs9266467  | 6 | 31371134 | T | G | 0.4009 | -0.0524 | 0.0055 | 3.40E-21 | -9.4494  | 1198533 | Asthma |
| rs2596435  | 6 | 31371169 | G | A | 0.4013 | -0.0522 | 0.0054 | 8.82E-22 | -9.5897  | 1224666 | Asthma |
| rs2596436  | 6 | 31371202 | T | C | 0.0672 | 0.0708  | 0.0112 | 2.31E-10 | 6.3395   | 1068588 | Asthma |
| rs9266470  | 6 | 31371265 | A | T | 0.3786 | -0.0551 | 0.0068 | 5.29E-16 | -8.1046  | 609209  | Asthma |

|             |   |          |   |   |        |         |        |          |          |         |        |
|-------------|---|----------|---|---|--------|---------|--------|----------|----------|---------|--------|
| rs41519045  | 6 | 31371309 | G | A | 0.1942 | -0.0456 | 0.0066 | 5.90E-12 | -6.8820  | 1246149 | Asthma |
| rs2442709   | 6 | 31371463 | A | G | 0.4006 | -0.0535 | 0.0054 | 7.87E-23 | -9.8360  | 1224666 | Asthma |
| rs2442710   | 6 | 31371483 | T | G | 0.4004 | -0.0536 | 0.0054 | 6.74E-23 | -9.8516  | 1224666 | Asthma |
| rs2442711   | 6 | 31371484 | T | A | 0.4001 | -0.0536 | 0.0055 | 3.80E-22 | -9.6764  | 1198533 | Asthma |
| rs2507988   | 6 | 31371517 | A | T | 0.1966 | -0.0417 | 0.0067 | 6.44E-10 | -6.1792  | 1224666 | Asthma |
| rs2523527   | 6 | 31371557 | G | T | 0.0608 | 0.0662  | 0.0099 | 2.15E-11 | 6.6957   | 1376071 | Asthma |
| rs9266479   | 6 | 31371643 | T | G | 0.1951 | -0.0386 | 0.0062 | 4.88E-10 | -6.2231  | 1376071 | Asthma |
| rs2844563   | 6 | 31371678 | T | A | 0.0676 | 0.0646  | 0.0100 | 1.23E-10 | 6.4353   | 1219993 | Asthma |
| rs2844561   | 6 | 31371759 | A | G | 0.0587 | 0.0715  | 0.0110 | 8.60E-11 | 6.4900   | 1224666 | Asthma |
| rs2523526   | 6 | 31371760 | G | A | 0.0583 | 0.0728  | 0.0113 | 1.14E-10 | 6.4472   | 1198533 | Asthma |
| rs6924348   | 6 | 31371772 | T | A | 0.2004 | -0.0387 | 0.0062 | 5.02E-10 | -6.2184  | 1294204 | Asthma |
| rs2844560   | 6 | 31371773 | A | G | 0.4596 | -0.0342 | 0.0053 | 1.42E-10 | -6.4138  | 1224666 | Asthma |
| rs6928908   | 6 | 31371836 | T | C | 0.2015 | -0.0388 | 0.0062 | 4.27E-10 | -6.2437  | 1294204 | Asthma |
| rs2923000   | 6 | 31371855 | G | A | 0.3975 | -0.0508 | 0.0050 | 1.94E-24 | -10.2023 | 1376071 | Asthma |
| rs2923001   | 6 | 31371940 | G | A | 0.3975 | -0.0509 | 0.0050 | 1.52E-24 | -10.2256 | 1376071 | Asthma |
| rs2523525   | 6 | 31372067 | G | A | 0.0608 | 0.0659  | 0.0099 | 2.58E-11 | 6.6689   | 1376071 | Asthma |
| rs2596438   | 6 | 31372094 | G | A | 0.1951 | -0.0387 | 0.0062 | 4.38E-10 | -6.2397  | 1376071 | Asthma |
| rs113937848 | 6 | 31372163 | T | A | 0.2049 | -0.0408 | 0.0074 | 2.84E-08 | -5.5511  | 765287  | Asthma |
| rs2523524   | 6 | 31372219 | A | G | 0.1174 | -0.0463 | 0.0076 | 1.01E-09 | 6.1072   | 1376071 | Asthma |
| rs2844559   | 6 | 31372298 | T | C | 0.1176 | 0.0458  | 0.0076 | 1.41E-09 | 6.0546   | 1376071 | Asthma |
| rs2523523   | 6 | 31372336 | G | A | 0.0607 | 0.0666  | 0.0099 | 1.68E-11 | 6.7313   | 1376071 | Asthma |
| rs2596439   | 6 | 31372436 | T | A | 0.3974 | -0.0510 | 0.0050 | 1.39E-24 | -10.2348 | 1376071 | Asthma |
| rs2596440   | 6 | 31372442 | G | A | 0.4003 | -0.0533 | 0.0054 | 1.13E-22 | -9.7996  | 1224666 | Asthma |
| rs2596441   | 6 | 31372448 | G | A | 0.3961 | -0.0510 | 0.0050 | 1.18E-24 | -10.2506 | 1376071 | Asthma |
| rs2523522   | 6 | 31372551 | T | C | 0.3977 | -0.0508 | 0.0050 | 1.68E-24 | -10.2159 | 1376071 | Asthma |
| rs2844558   | 6 | 31372656 | C | T | 0.4588 | -0.0327 | 0.0049 | 1.80E-11 | -6.7215  | 1376071 | Asthma |
| rs4358666   | 6 | 31372700 | A | G | 0.2003 | -0.0389 | 0.0062 | 3.65E-10 | -6.2682  | 1294204 | Asthma |
| rs2523521   | 6 | 31372711 | G | A | 0.4003 | -0.0535 | 0.0054 | 7.47E-23 | -9.8415  | 1224666 | Asthma |
| rs2523520   | 6 | 31372714 | A | G | 0.3976 | -0.0512 | 0.0050 | 7.68E-25 | -10.2917 | 1376071 | Asthma |
| rs2394990   | 6 | 31372782 | C | A | 0.3975 | -0.0510 | 0.0050 | 1.22E-24 | -10.2474 | 1376071 | Asthma |
| rs2263310   | 6 | 31372843 | A | G | 0.1953 | -0.0381 | 0.0062 | 7.91E-10 | -6.1468  | 1376071 | Asthma |
| rs4487624   | 6 | 31372912 | A | G | 0.2003 | -0.0387 | 0.0062 | 5.07E-10 | -6.2169  | 1294204 | Asthma |
| rs2844557   | 6 | 31372914 | C | G | 0.4586 | -0.0331 | 0.0049 | 1.04E-11 | -6.8012  | 1376071 | Asthma |
| rs2263311   | 6 | 31373030 | T | C | 0.0608 | 0.0662  | 0.0099 | 2.08E-11 | 6.7003   | 1376071 | Asthma |
| rs2263321   | 6 | 31373131 | A | G | 0.3143 | 0.0370  | 0.0052 | 8.24E-13 | 7.1572   | 1376071 | Asthma |
| rs2263312   | 6 | 31373137 | C | T | 0.4000 | -0.0535 | 0.0054 | 8.39E-23 | -9.8297  | 1224666 | Asthma |
| rs2394991   | 6 | 31373273 | G | T | 0.0608 | 0.0662  | 0.0099 | 2.08E-11 | 6.7003   | 1376071 | Asthma |
| rs2523518   | 6 | 31373351 | T | G | 0.1950 | -0.0391 | 0.0062 | 2.94E-10 | -6.3022  | 1376071 | Asthma |
| rs6936035   | 6 | 31373379 | G | A | 0.2013 | -0.0379 | 0.0062 | 9.91E-10 | -6.1109  | 1294204 | Asthma |
| rs9266510   | 6 | 31373456 | T | C | 0.3961 | -0.0512 | 0.0050 | 7.86E-25 | -10.2896 | 1376071 | Asthma |
| rs9266511   | 6 | 31373476 | C | T | 0.3973 | -0.0511 | 0.0050 | 1.04E-24 | -10.2626 | 1376071 | Asthma |
| rs9266512   | 6 | 31373483 | A | T | 0.3958 | -0.0581 | 0.0053 | 1.23E-27 | -10.8942 | 1246149 | Asthma |
| rs9266513   | 6 | 31373519 | A | G | 0.1951 | -0.0384 | 0.0062 | 5.58E-10 | -6.2018  | 1376071 | Asthma |
| rs9266514   | 6 | 31373535 | C | T | 0.3975 | -0.0507 | 0.0050 | 1.91E-24 | -10.2035 | 1376071 | Asthma |
| rs2844556   | 6 | 31373580 | A | G | 0.0607 | 0.0655  | 0.0099 | 3.30E-11 | 6.6325   | 1376071 | Asthma |
| rs2844555   | 6 | 31373602 | C | T | 0.4585 | -0.0328 | 0.0049 | 1.57E-11 | -6.7411  | 1376071 | Asthma |
| rs28611443  | 6 | 31373634 | A | C | 0.0763 | -0.0640 | 0.0092 | 3.96E-12 | -6.9386  | 1376071 | Asthma |
| rs9266517   | 6 | 31373693 | A | G | 0.4010 | -0.0540 | 0.0060 | 2.01E-19 | -9.0131  | 1130071 | Asthma |
| rs9266518   | 6 | 31373708 | T | G | 0.2000 | -0.0481 | 0.0074 | 6.73E-11 | -6.5264  | 1068611 | Asthma |
| rs376722249 | 6 | 31373779 | G | A | 0.3722 | -0.0564 | 0.0077 | 1.84E-13 | -7.3600  | 540747  | Asthma |
| rs9266522   | 6 | 31373798 | T | C | 0.3923 | -0.0731 | 0.0079 | 1.22E-20 | -9.3147  | 778845  | Asthma |
| rs9266523   | 6 | 31373801 | A | G | 0.4218 | 0.0605  | 0.0075 | 9.20E-16 | 8.0370   | 844071  | Asthma |
| rs9266524   | 6 | 31373811 | G | A | 0.3923 | -0.0736 | 0.0078 | 2.35E-21 | -9.4881  | 844071  | Asthma |
| rs9266525   | 6 | 31373864 | A | G | 0.3920 | -0.0736 | 0.0078 | 6.70E-21 | -9.3784  | 778845  | Asthma |
| rs9501380   | 6 | 31373879 | A | G | 0.0756 | -0.0668 | 0.0115 | 6.33E-09 | -5.8080  | 1064845 | Asthma |
| rs9266527   | 6 | 31373895 | G | A | 0.5372 | 0.0523  | 0.0076 | 8.32E-12 | 6.8330   | 778845  | Asthma |
| rs9266528   | 6 | 31373908 | A | T | 0.2068 | -0.0637 | 0.0096 | 2.78E-11 | -6.6580  | 778845  | Asthma |
| rs9266529   | 6 | 31373916 | A | G | 0.3927 | -0.0665 | 0.0069 | 2.95E-22 | -9.7022  | 935848  | Asthma |
| rs9266533   | 6 | 31374000 | T | C | 0.2067 | -0.0478 | 0.0084 | 1.26E-08 | -5.6921  | 908767  | Asthma |
| rs9266534   | 6 | 31374046 | T | G | 0.4139 | -0.0735 | 0.0080 | 5.62E-20 | -9.1513  | 778845  | Asthma |
| rs9266535   | 6 | 31374047 | T | A | 0.5862 | 0.0735  | 0.0080 | 5.26E-20 | 9.1586   | 778845  | Asthma |
| rs9266536   | 6 | 31374079 | G | A | 0.4137 | -0.0735 | 0.0080 | 5.53E-20 | -9.1530  | 778845  | Asthma |
| rs2523515   | 6 | 31374110 | A | G | 0.3395 | 0.0471  | 0.0082 | 1.03E-08 | 5.7259   | 778845  | Asthma |
| rs9266538   | 6 | 31374141 | T | C | 0.2374 | -0.0478 | 0.0083 | 7.17E-09 | -5.7869  | 908767  | Asthma |
| rs9266539   | 6 | 31374164 | A | G | 0.2178 | -0.0487 | 0.0082 | 2.80E-09 | -5.9430  | 973993  | Asthma |
| rs9266541   | 6 | 31374233 | C | G | 0.4044 | -0.0581 | 0.0068 | 1.23E-17 | -8.5503  | 973993  | Asthma |
| rs9266542   | 6 | 31374252 | G | T | 0.4048 | -0.0593 | 0.0068 | 3.28E-18 | -8.7013  | 973993  | Asthma |
| rs9266543   | 6 | 31374269 | G | A | 0.4146 | -0.0561 | 0.0068 | 2.62E-16 | -8.1897  | 973993  | Asthma |
| rs9266544   | 6 | 31374275 | G | A | 0.4142 | -0.0560 | 0.0069 | 5.63E-16 | -8.0971  | 908767  | Asthma |
| rs9266546   | 6 | 31374288 | T | C | 0.4153 | -0.0554 | 0.0069 | 1.40E-15 | -7.9854  | 908767  | Asthma |
| rs9266548   | 6 | 31374300 | A | G | 0.4151 | -0.0549 | 0.0069 | 2.37E-15 | -7.9204  | 908767  | Asthma |
| rs2894365   | 6 | 31374322 | G | A | 0.5219 | 0.0514  | 0.0078 | 4.54E-11 | 6.5852   | 778845  | Asthma |
| rs3997901   | 6 | 31374379 | T | G | 0.1970 | -0.0417 | 0.0074 | 1.87E-08 | -5.6233  | 1130071 | Asthma |
| rs5013221   | 6 | 31374401 | C | A | 0.4019 | -0.0583 | 0.0068 | 8.28E-18 | -8.5957  | 973993  | Asthma |

|             |   |          |   |   |        |         |        |          |          |         |        |
|-------------|---|----------|---|---|--------|---------|--------|----------|----------|---------|--------|
| rs3997900   | 6 | 31374428 | T | G | 0.4010 | -0.0565 | 0.0061 | 3.54E-20 | -9.2012  | 1042455 | Asthma |
| rs3873395   | 6 | 31374593 | A | G | 0.4093 | -0.0524 | 0.0054 | 5.22E-22 | -9.6438  | 1224666 | Asthma |
| rs2395492   | 6 | 31374610 | T | C | 0.2138 | -0.0364 | 0.0067 | 4.49E-08 | -5.4706  | 1133307 | Asthma |
| rs3873396   | 6 | 31374611 | G | A | 0.4090 | -0.0521 | 0.0055 | 4.17E-21 | -9.4282  | 1198533 | Asthma |
| rs2395491   | 6 | 31374643 | A | G | 0.2125 | -0.0373 | 0.0061 | 7.64E-10 | -6.1522  | 1294204 | Asthma |
| rs2254549   | 6 | 31374659 | T | C | 0.0602 | 0.0667  | 0.0099 | 1.98E-11 | 6.7074   | 1376071 | Asthma |
| rs2523644   | 6 | 31374707 | C | T | 0.1935 | -0.0372 | 0.0062 | 2.59E-09 | -5.9556  | 1376071 | Asthma |
| rs2254556   | 6 | 31374854 | T | C | 0.1923 | -0.0375 | 0.0063 | 1.98E-09 | -5.9996  | 1376071 | Asthma |
| rs2523643   | 6 | 31374883 | A | G | 0.4052 | -0.0504 | 0.0050 | 3.83E-24 | -10.1358 | 1376071 | Asthma |
| rs2844552   | 6 | 31374964 | A | G | 0.5334 | 0.0324  | 0.0049 | 2.96E-11 | 6.6483   | 1376071 | Asthma |
| rs4446608   | 6 | 31375024 | A | C | 0.2137 | -0.0372 | 0.0061 | 8.44E-10 | -6.1363  | 1294204 | Asthma |
| rs4624908   | 6 | 31375050 | T | G | 0.2137 | -0.0372 | 0.0061 | 8.53E-10 | -6.1348  | 1294204 | Asthma |
| rs13194571  | 6 | 31375183 | A | C | 0.2125 | -0.0373 | 0.0061 | 7.47E-10 | -6.1560  | 1294204 | Asthma |
| rs2507987   | 6 | 31375256 | A | T | 0.4064 | -0.0503 | 0.0050 | 4.41E-24 | -10.1222 | 1376071 | Asthma |
| rs2905721   | 6 | 31375282 | A | G | 0.5556 | -0.0494 | 0.0057 | 4.75E-18 | -8.6592  | 1224666 | Asthma |
| rs2507986   | 6 | 31375303 | C | T | 0.4064 | -0.0503 | 0.0050 | 4.45E-24 | -10.1214 | 1376071 | Asthma |
| rs2507985   | 6 | 31375323 | A | C | 0.4064 | -0.0505 | 0.0050 | 2.81E-24 | -10.1662 | 1376071 | Asthma |
| rs2844550   | 6 | 31375444 | T | C | 0.0602 | 0.0667  | 0.0099 | 1.99E-11 | 6.7065   | 1376071 | Asthma |
| rs6905201   | 6 | 31375450 | G | A | 0.3960 | -0.0521 | 0.0050 | 1.75E-25 | -10.4334 | 1376071 | Asthma |
| rs112522240 | 6 | 31375527 | T | G | 0.3815 | -0.0549 | 0.0077 | 7.72E-13 | -7.1661  | 540747  | Asthma |
| rs4959066   | 6 | 31375570 | G | A | 0.1935 | -0.0373 | 0.0062 | 2.16E-09 | -5.9853  | 1376071 | Asthma |
| rs4959017   | 6 | 31375623 | A | T | 0.1935 | -0.0373 | 0.0062 | 2.36E-09 | -5.9711  | 1376071 | Asthma |
| rs4959018   | 6 | 31375648 | A | G | 0.1923 | -0.0376 | 0.0063 | 1.86E-09 | -6.0099  | 1376071 | Asthma |
| rs5025317   | 6 | 31375792 | T | G | 0.4064 | -0.0503 | 0.0050 | 4.10E-24 | -10.1292 | 1376071 | Asthma |
| rs5025316   | 6 | 31375797 | G | A | 0.4064 | -0.0503 | 0.0050 | 4.13E-24 | -10.1284 | 1376071 | Asthma |
| rs5025315   | 6 | 31375827 | A | G | 0.4064 | -0.0503 | 0.0050 | 4.58E-24 | -10.1186 | 1376071 | Asthma |
| rs4959067   | 6 | 31375925 | C | T | 0.2125 | -0.0373 | 0.0061 | 7.88E-10 | -6.1474  | 1294204 | Asthma |
| rs5025314   | 6 | 31375933 | T | C | 0.4064 | -0.0503 | 0.0050 | 4.40E-24 | -10.1222 | 1376071 | Asthma |
| rs5022119   | 6 | 31376085 | T | A | 0.4064 | -0.0503 | 0.0050 | 4.02E-24 | -10.1310 | 1376071 | Asthma |
| rs2523640   | 6 | 31376142 | A | G | 0.0602 | 0.0664  | 0.0099 | 2.36E-11 | 6.6817   | 1376071 | Asthma |
| rs2844548   | 6 | 31376204 | C | T | 0.0583 | 0.0687  | 0.0112 | 8.46E-10 | 6.1363   | 1159440 | Asthma |
| rs2844547   | 6 | 31376231 | G | T | 0.0601 | 0.0667  | 0.0100 | 2.15E-11 | 6.6956   | 1376071 | Asthma |
| rs2523639   | 6 | 31376321 | T | C | 0.0600 | 0.0668  | 0.0100 | 1.96E-11 | 6.7092   | 1376071 | Asthma |
| rs2523638   | 6 | 31376496 | C | T | 0.5336 | 0.0324  | 0.0049 | 2.92E-11 | 6.6503   | 1376071 | Asthma |
| rs3997982   | 6 | 31376517 | T | A | 0.1935 | -0.0372 | 0.0062 | 2.43E-09 | -5.9660  | 1376071 | Asthma |
| rs3957110   | 6 | 31376571 | T | C | 0.4063 | -0.0502 | 0.0050 | 5.59E-24 | -10.0988 | 1376071 | Asthma |
| rs5022118   | 6 | 31376607 | G | T | 0.4064 | -0.0502 | 0.0050 | 4.93E-24 | -10.1111 | 1376071 | Asthma |
| rs2905719   | 6 | 31376613 | G | A | 0.1165 | 0.0476  | 0.0077 | 7.52E-10 | 6.1547   | 1349938 | Asthma |
| rs3997983   | 6 | 31376694 | G | C | 0.5368 | 0.0303  | 0.0052 | 4.15E-09 | 5.8778   | 1008051 | Asthma |
| rs3957111   | 6 | 31376713 | A | G | 0.0761 | 0.0555  | 0.0089 | 4.90E-10 | 6.2224   | 1376071 | Asthma |
| rs28366075  | 6 | 31376734 | T | G | 0.0602 | 0.0666  | 0.0099 | 2.08E-11 | 6.7003   | 1376071 | Asthma |
| rs28366076  | 6 | 31376794 | G | T | 0.0602 | 0.0665  | 0.0099 | 2.36E-11 | 6.6820   | 1376071 | Asthma |
| rs9266596   | 6 | 31376849 | G | C | 0.1935 | -0.0372 | 0.0062 | 2.59E-09 | -5.9558  | 1376071 | Asthma |
| rs9266600   | 6 | 31377080 | A | C | 0.4730 | 0.0697  | 0.0087 | 1.11E-15 | 8.0139   | 476051  | Asthma |
| rs2523634   | 6 | 31377099 | G | A | 0.5366 | 0.0337  | 0.0060 | 1.88E-08 | 5.6229   | 1042455 | Asthma |
| rs7382258   | 6 | 31377244 | G | A | 0.4065 | -0.0503 | 0.0050 | 4.04E-24 | -10.1304 | 1376071 | Asthma |
| rs7754026   | 6 | 31377287 | T | C | 0.2126 | -0.0373 | 0.0061 | 7.53E-10 | -6.1546  | 1294204 | Asthma |
| rs4959070   | 6 | 31377401 | G | C | 0.1923 | -0.0374 | 0.0063 | 2.15E-09 | -5.9859  | 1376071 | Asthma |
| rs7382304   | 6 | 31377460 | C | G | 0.4065 | -0.0503 | 0.0050 | 3.96E-24 | -10.1326 | 1376071 | Asthma |
| rs2853976   | 6 | 31377493 | T | C | 0.5334 | 0.0324  | 0.0049 | 2.81E-11 | 6.6564   | 1376071 | Asthma |
| rs7775117   | 6 | 31377709 | A | T | 0.2126 | -0.0373 | 0.0061 | 7.92E-10 | -6.1465  | 1294204 | Asthma |
| rs28366078  | 6 | 31377736 | G | T | 0.0602 | 0.0668  | 0.0099 | 1.85E-11 | 6.7174   | 1376071 | Asthma |
| rs28366079  | 6 | 31377746 | T | C | 0.0602 | 0.0669  | 0.0099 | 1.76E-11 | 6.7246   | 1376071 | Asthma |
| rs28366080  | 6 | 31377758 | T | C | 0.0600 | 0.0668  | 0.0100 | 2.04E-11 | 6.7032   | 1376071 | Asthma |
| rs2523633   | 6 | 31377863 | G | C | 0.0602 | 0.0668  | 0.0099 | 1.91E-11 | 6.7126   | 1376071 | Asthma |
| rs2844544   | 6 | 31377951 | T | G | 0.0602 | 0.0668  | 0.0099 | 1.91E-11 | 6.7126   | 1376071 | Asthma |
| rs2507983   | 6 | 31378017 | G | A | 0.4070 | -0.0503 | 0.0050 | 4.52E-24 | -10.1197 | 1376071 | Asthma |
| rs2442743   | 6 | 31378024 | C | A | 0.4070 | -0.0503 | 0.0050 | 4.65E-24 | -10.1167 | 1376071 | Asthma |
| rs2523632   | 6 | 31378067 | A | G | 0.0602 | 0.0667  | 0.0099 | 1.96E-11 | 6.7091   | 1376071 | Asthma |
| rs2442742   | 6 | 31378099 | C | A | 0.4065 | -0.0503 | 0.0050 | 4.30E-24 | -10.1246 | 1376071 | Asthma |
| rs2523631   | 6 | 31378229 | T | C | 0.0602 | 0.0667  | 0.0099 | 2.03E-11 | 6.7041   | 1376071 | Asthma |
| rs2442741   | 6 | 31378302 | T | C | 0.3212 | -0.0551 | 0.0052 | 3.03E-26 | -10.5986 | 1376071 | Asthma |
| rs2523630   | 6 | 31378303 | A | G | 0.0603 | 0.0669  | 0.0099 | 1.70E-11 | 6.7297   | 1376071 | Asthma |
| rs2442740   | 6 | 31378337 | T | C | 0.4066 | -0.0503 | 0.0050 | 4.16E-24 | -10.1278 | 1376071 | Asthma |
| rs9266618   | 6 | 31378389 | C | A | 0.0960 | -0.0583 | 0.0089 | 5.66E-11 | -6.5526  | 1251217 | Asthma |
| rs2507982   | 6 | 31378416 | G | A | 0.1923 | -0.0375 | 0.0063 | 2.08E-09 | -5.9913  | 1376071 | Asthma |
| rs2507981   | 6 | 31378470 | T | A | 0.4065 | -0.0503 | 0.0050 | 4.17E-24 | -10.1276 | 1376071 | Asthma |
| rs2523629   | 6 | 31378472 | T | C | 0.0602 | 0.0667  | 0.0099 | 1.94E-11 | 6.7104   | 1376071 | Asthma |
| rs2523628   | 6 | 31378582 | A | G | 0.0601 | 0.0666  | 0.0100 | 2.16E-11 | 6.6948   | 1376071 | Asthma |
| rs2442738   | 6 | 31378637 | A | G | 0.1936 | -0.0373 | 0.0062 | 2.19E-09 | -5.9834  | 1376071 | Asthma |
| rs4959071   | 6 | 31378659 | C | T | 0.1265 | -0.0566 | 0.0074 | 1.80E-14 | -7.6644  | 1359430 | Asthma |
| rs2523627   | 6 | 31378668 | G | T | 0.3811 | -0.0341 | 0.0050 | 7.45E-12 | -6.8487  | 1376071 | Asthma |
| rs2523626   | 6 | 31378713 | A | G | 0.0602 | 0.0667  | 0.0099 | 1.95E-11 | 6.7095   | 1376071 | Asthma |
| rs4959072   | 6 | 31378777 | C | G | 0.2165 | -0.0428 | 0.0059 | 5.12E-13 | -7.2221  | 1359430 | Asthma |

|            |   |          |   |   |        |         |        |          |         |         |        |
|------------|---|----------|---|---|--------|---------|--------|----------|---------|---------|--------|
| rs2442735  | 6 | 31378876 | G | A | 0.1164 | 0.0457  | 0.0076 | 2.19E-09 | 5.9834  | 1376071 | Asthma |
| rs28366083 | 6 | 31378977 | G | C | 0.0579 | 0.0724  | 0.0111 | 7.40E-11 | 6.5126  | 1224666 | Asthma |
| rs6909549  | 6 | 31378985 | C | T | 0.5211 | 0.0280  | 0.0048 | 7.75E-09 | 5.7739  | 1376071 | Asthma |
| rs9266631  | 6 | 31379121 | A | G | 0.2122 | -0.0522 | 0.0060 | 1.80E-18 | -8.7692 | 1376071 | Asthma |
| rs9266640  | 6 | 31379293 | T | G | 0.1709 | 0.0581  | 0.0063 | 5.07E-20 | 9.1626  | 1310845 | Asthma |
| rs78948882 | 6 | 31379318 | T | C | 0.0751 | -0.0658 | 0.0093 | 1.51E-12 | -7.0733 | 1376071 | Asthma |
| rs9266642  | 6 | 31379424 | T | C | 0.1105 | 0.0473  | 0.0076 | 5.47E-10 | 6.2050  | 1310845 | Asthma |
| rs2523492  | 6 | 31379761 | G | T | 0.4379 | -0.0514 | 0.0057 | 2.54E-19 | -8.9872 | 1198533 | Asthma |
| rs2844541  | 6 | 31379765 | T | A | 0.2989 | -0.0311 | 0.0057 | 4.20E-08 | -5.4823 | 1349938 | Asthma |
| rs2523491  | 6 | 31379769 | C | T | 0.2247 | 0.0423  | 0.0069 | 9.24E-10 | 6.1220  | 1003385 | Asthma |
| rs2244026  | 6 | 31379773 | T | G | 0.2217 | 0.0382  | 0.0064 | 1.91E-09 | 6.0057  | 1133307 | Asthma |
| rs2244027  | 6 | 31379789 | G | A | 0.2263 | 0.0395  | 0.0061 | 9.43E-11 | 6.4760  | 1180923 | Asthma |
| rs76188215 | 6 | 31379806 | T | C | 0.0746 | -0.0644 | 0.0095 | 1.15E-11 | -6.7865 | 1349938 | Asthma |
| rs73394251 | 6 | 31379831 | A | G | 0.1113 | -0.0632 | 0.0078 | 5.29E-16 | -8.1048 | 1376071 | Asthma |
| rs75430636 | 6 | 31379853 | T | C | 0.0751 | -0.0658 | 0.0093 | 1.53E-12 | -7.0722 | 1376071 | Asthma |
| rs2507980  | 6 | 31380100 | A | G | 0.0601 | 0.0669  | 0.0100 | 1.84E-11 | 6.7182  | 1376071 | Asthma |
| rs9266663  | 6 | 31380205 | G | A | 0.1119 | 0.0472  | 0.0083 | 1.07E-08 | 5.7187  | 1159440 | Asthma |
| rs4143332  | 6 | 31380588 | A | G | 0.1163 | 0.0464  | 0.0083 | 2.35E-08 | 5.5839  | 1219993 | Asthma |
| rs4143333  | 6 | 31380742 | G | A | 0.1063 | 0.0465  | 0.0084 | 3.57E-08 | 5.5109  | 1251217 | Asthma |
| rs9266688  | 6 | 31380766 | A | G | 0.1105 | 0.0472  | 0.0076 | 6.03E-10 | 6.1898  | 1310845 | Asthma |
| rs9266701  | 6 | 31381253 | T | G | 0.1105 | 0.0472  | 0.0076 | 5.75E-10 | 6.1971  | 1310845 | Asthma |
| rs9266703  | 6 | 31381343 | A | G | 0.1105 | 0.0474  | 0.0076 | 5.00E-10 | 6.2192  | 1310845 | Asthma |
| rs9295987  | 6 | 31382067 | G | A | 0.0674 | -0.0670 | 0.0098 | 9.13E-12 | -6.8196 | 1376071 | Asthma |
| rs9266722  | 6 | 31382145 | T | C | 0.1119 | 0.0473  | 0.0076 | 4.87E-10 | 6.2231  | 1310845 | Asthma |
| rs2523547  | 6 | 31382377 | T | C | 0.0602 | 0.0668  | 0.0099 | 1.79E-11 | 6.7221  | 1376071 | Asthma |
| rs2596567  | 6 | 31382537 | C | G | 0.0601 | 0.0669  | 0.0100 | 1.85E-11 | 6.7174  | 1376071 | Asthma |
| rs4293988  | 6 | 31382603 | T | G | 0.1118 | 0.0470  | 0.0076 | 6.53E-10 | 6.1772  | 1310845 | Asthma |
| rs9266729  | 6 | 31382686 | G | A | 0.1063 | 0.0478  | 0.0086 | 2.51E-08 | 5.5729  | 1154767 | Asthma |
| rs2523532  | 6 | 31382773 | C | A | 0.1586 | -0.0543 | 0.0068 | 1.70E-15 | -7.9612 | 1376071 | Asthma |
| rs2596566  | 6 | 31383045 | T | G | 0.0602 | 0.0670  | 0.0099 | 1.63E-11 | 6.7362  | 1376071 | Asthma |
| rs2523488  | 6 | 31383078 | T | C | 0.1923 | -0.0374 | 0.0063 | 2.18E-09 | -5.9837 | 1376071 | Asthma |
| rs2523487  | 6 | 31383098 | T | C | 0.1925 | -0.0378 | 0.0063 | 1.55E-09 | -6.0390 | 1376071 | Asthma |
| rs2523486  | 6 | 31383166 | T | C | 0.1924 | -0.0378 | 0.0063 | 1.58E-09 | -6.0361 | 1376071 | Asthma |
| rs2523485  | 6 | 31383258 | T | C | 0.1691 | -0.0494 | 0.0067 | 1.09E-13 | -7.4297 | 1376071 | Asthma |
| rs2523646  | 6 | 31383302 | T | C | 0.0601 | 0.0665  | 0.0099 | 2.40E-11 | 6.6794  | 1376071 | Asthma |
| rs2244490  | 6 | 31383356 | A | C | 0.0599 | 0.0680  | 0.0101 | 2.00E-11 | 6.7064  | 1349938 | Asthma |
| rs2844532  | 6 | 31383398 | C | G | 0.1707 | 0.0586  | 0.0063 | 2.75E-20 | 9.2282  | 1310845 | Asthma |
| rs2523642  | 6 | 31383404 | T | C | 0.0469 | 0.0785  | 0.0121 | 8.79E-11 | 6.4867  | 1290310 | Asthma |
| rs9266747  | 6 | 31383437 | G | A | 0.1945 | -0.0410 | 0.0069 | 3.47E-09 | -5.9080 | 1133307 | Asthma |
| rs9266749  | 6 | 31383536 | T | C | 0.1118 | 0.0475  | 0.0076 | 4.37E-10 | 6.2402  | 1310845 | Asthma |
| rs3130485  | 6 | 31383561 | A | G | 0.1925 | -0.0377 | 0.0063 | 1.73E-09 | -6.0214 | 1376071 | Asthma |
| rs3099849  | 6 | 31383638 | G | A | 0.1926 | -0.0376 | 0.0062 | 1.78E-09 | -6.0167 | 1376071 | Asthma |
| rs9266760  | 6 | 31383815 | C | G | 0.7827 | 0.0566  | 0.0083 | 8.77E-12 | 6.8254  | 847307  | Asthma |
| rs9266761  | 6 | 31383816 | A | G | 0.7667 | -0.0566 | 0.0083 | 8.77E-12 | -6.8254 | 847307  | Asthma |
| rs9266762  | 6 | 31383817 | T | C | 0.7663 | -0.0576 | 0.0082 | 2.70E-12 | -6.9924 | 912533  | Asthma |
| rs3128985  | 6 | 31383831 | C | T | 0.2854 | -0.0497 | 0.0055 | 1.56E-19 | -9.0406 | 1349938 | Asthma |
| rs2507977  | 6 | 31383895 | G | A | 0.1925 | -0.0376 | 0.0063 | 1.84E-09 | -6.0114 | 1376071 | Asthma |
| rs9266766  | 6 | 31383898 | C | G | 0.1104 | 0.0473  | 0.0076 | 5.87E-10 | 6.1938  | 1310845 | Asthma |
| rs2442752  | 6 | 31383987 | C | T | 0.3668 | 0.0311  | 0.0050 | 4.91E-10 | 6.2222  | 1376071 | Asthma |
| rs28752470 | 6 | 31384204 | T | G | 0.0582 | 0.0739  | 0.0114 | 8.47E-11 | 6.4920  | 1198533 | Asthma |
| rs28752471 | 6 | 31384205 | G | A | 0.0581 | 0.0743  | 0.0114 | 7.12E-11 | 6.5183  | 1198533 | Asthma |
| rs28752472 | 6 | 31384208 | T | C | 0.0603 | 0.0678  | 0.0102 | 3.27E-11 | 6.6339  | 1349938 | Asthma |
| rs28752473 | 6 | 31384222 | G | A | 0.0592 | 0.0671  | 0.0101 | 2.94E-11 | 6.6500  | 1376071 | Asthma |
| rs6920323  | 6 | 31384283 | C | T | 0.1571 | -0.0441 | 0.0066 | 2.48E-11 | -6.6743 | 1376071 | Asthma |
| rs28752474 | 6 | 31384296 | C | G | 0.0608 | 0.0657  | 0.0100 | 4.13E-11 | 6.5992  | 1376071 | Asthma |
| rs28752475 | 6 | 31384300 | A | G | 0.0605 | 0.0669  | 0.0102 | 4.52E-11 | 6.5858  | 1349938 | Asthma |
| rs9266772  | 6 | 31384336 | C | T | 0.1748 | 0.0489  | 0.0064 | 1.82E-14 | 7.6631  | 1349938 | Asthma |
| rs2507974  | 6 | 31384372 | T | C | 0.1923 | -0.0377 | 0.0063 | 1.82E-09 | -6.0134 | 1376071 | Asthma |
| rs28366087 | 6 | 31384396 | G | A | 0.0600 | 0.0669  | 0.0100 | 1.92E-11 | 6.7118  | 1376071 | Asthma |
| rs28366088 | 6 | 31384424 | A | G | 0.0602 | 0.0667  | 0.0099 | 1.98E-11 | 6.7078  | 1376071 | Asthma |
| rs28752477 | 6 | 31384478 | G | T | 0.0602 | 0.0667  | 0.0099 | 2.00E-11 | 6.7062  | 1376071 | Asthma |
| rs28752478 | 6 | 31384488 | G | C | 0.0602 | 0.0668  | 0.0099 | 1.85E-11 | 6.7176  | 1376071 | Asthma |
| rs28366089 | 6 | 31384510 | G | A | 0.0602 | 0.0667  | 0.0099 | 1.92E-11 | 6.7117  | 1376071 | Asthma |
| rs28366090 | 6 | 31384551 | T | G | 0.0601 | 0.0668  | 0.0100 | 1.98E-11 | 6.7073  | 1376071 | Asthma |
| rs28752479 | 6 | 31384589 | A | C | 0.0602 | 0.0668  | 0.0099 | 1.86E-11 | 6.7163  | 1376071 | Asthma |
| rs7775759  | 6 | 31384669 | A | G | 0.2877 | -0.0383 | 0.0054 | 1.04E-12 | -7.1245 | 1310845 | Asthma |
| rs28366091 | 6 | 31384682 | T | G | 0.0602 | 0.0670  | 0.0099 | 1.64E-11 | 6.7347  | 1376071 | Asthma |
| rs28366092 | 6 | 31384772 | C | T | 0.0602 | 0.0670  | 0.0099 | 1.63E-11 | 6.7359  | 1376071 | Asthma |
| rs7741091  | 6 | 31384854 | G | A | 0.2877 | -0.0384 | 0.0054 | 9.58E-13 | -7.1364 | 1310845 | Asthma |
| rs28366093 | 6 | 31384897 | A | G | 0.0601 | 0.0669  | 0.0100 | 1.84E-11 | 6.7179  | 1376071 | Asthma |
| rs28366094 | 6 | 31384925 | G | T | 0.0602 | 0.0670  | 0.0099 | 1.59E-11 | 6.7395  | 1376071 | Asthma |
| rs28366095 | 6 | 31384971 | C | T | 0.0601 | 0.0666  | 0.0100 | 2.25E-11 | 6.6891  | 1376071 | Asthma |
| rs28366096 | 6 | 31384999 | G | A | 0.0601 | 0.0667  | 0.0100 | 2.20E-11 | 6.6921  | 1376071 | Asthma |
| rs28366097 | 6 | 31385053 | A | G | 0.0602 | 0.0670  | 0.0099 | 1.61E-11 | 6.7379  | 1376071 | Asthma |



|             |   |          |   |   |        |         |        |          |         |         |        |
|-------------|---|----------|---|---|--------|---------|--------|----------|---------|---------|--------|
| rs28366098  | 6 | 31385067 | A | G | 0.0602 | 0.0671  | 0.0099 | 1.56E-11 | 6.7423  | 1376071 | Asthma |
| rs9266774   | 6 | 31385103 | T | C | 0.1106 | 0.0478  | 0.0076 | 3.56E-10 | 6.2722  | 1310845 | Asthma |
| rs28366099  | 6 | 31385125 | T | C | 0.0602 | 0.0671  | 0.0099 | 1.54E-11 | 6.7445  | 1376071 | Asthma |
| rs2442748   | 6 | 31385196 | G | A | 0.0602 | 0.0671  | 0.0099 | 1.49E-11 | 6.7490  | 1376071 | Asthma |
| rs2428488   | 6 | 31385207 | G | A | 0.0602 | 0.0672  | 0.0099 | 1.40E-11 | 6.7581  | 1376071 | Asthma |
| rs28623422  | 6 | 31385209 | A | G | 0.2400 | -0.0449 | 0.0058 | 1.18E-14 | -7.7183 | 1294204 | Asthma |
| rs2442747   | 6 | 31385256 | T | C | 0.0602 | 0.0672  | 0.0099 | 1.39E-11 | 6.7589  | 1376071 | Asthma |
| rs2428487   | 6 | 31385262 | T | A | 0.0602 | 0.0672  | 0.0099 | 1.39E-11 | 6.7591  | 1376071 | Asthma |
| rs2844531   | 6 | 31385394 | G | A | 0.1140 | 0.0455  | 0.0078 | 4.54E-09 | 5.8632  | 1310845 | Asthma |
| rs28550357  | 6 | 31385546 | A | C | 0.2401 | -0.0448 | 0.0058 | 1.22E-14 | -7.7141 | 1294204 | Asthma |
| rs2596565   | 6 | 31385552 | A | G | 0.1140 | 0.0457  | 0.0078 | 3.92E-09 | 5.8876  | 1310845 | Asthma |
| rs28699031  | 6 | 31385571 | A | G | 0.2401 | -0.0448 | 0.0058 | 1.22E-14 | -7.7141 | 1294204 | Asthma |
| rs28628778  | 6 | 31385610 | C | A | 0.2401 | -0.0449 | 0.0058 | 1.10E-14 | -7.7267 | 1294204 | Asthma |
| rs28670729  | 6 | 31385624 | G | C | 0.2401 | -0.0449 | 0.0058 | 1.14E-14 | -7.7221 | 1294204 | Asthma |
| rs2844530   | 6 | 31385658 | G | C | 0.1140 | 0.0456  | 0.0078 | 4.18E-09 | 5.8771  | 1310845 | Asthma |
| rs6904465   | 6 | 31385675 | T | C | 0.2393 | -0.0450 | 0.0058 | 1.04E-14 | -7.7343 | 1294204 | Asthma |
| rs6927154   | 6 | 31385764 | G | T | 0.2401 | -0.0448 | 0.0058 | 1.24E-14 | -7.7121 | 1294204 | Asthma |
| rs1939365   | 6 | 31386157 | A | G | 0.0601 | 0.0671  | 0.0100 | 1.63E-11 | 6.7356  | 1376071 | Asthma |
| rs6909461   | 6 | 31386173 | C | A | 0.2403 | -0.0449 | 0.0058 | 1.10E-14 | -7.7272 | 1294204 | Asthma |
| rs2523482   | 6 | 31386388 | A | G | 0.0591 | 0.0687  | 0.0101 | 8.01E-12 | 6.8382  | 1376071 | Asthma |
| rs2596563   | 6 | 31386390 | G | C | 0.0591 | 0.0687  | 0.0101 | 8.37E-12 | 6.8320  | 1376071 | Asthma |
| rs6932730   | 6 | 31386405 | C | T | 0.1616 | -0.0592 | 0.0067 | 9.94E-19 | -8.8357 | 1359430 | Asthma |
| rs12524487  | 6 | 31386461 | T | C | 0.0896 | 0.0539  | 0.0084 | 1.69E-10 | 6.3875  | 1310845 | Asthma |
| rs2523481   | 6 | 31386506 | A | C | 0.0600 | 0.0671  | 0.0100 | 1.67E-11 | 6.7325  | 1376071 | Asthma |
| rs68032572  | 6 | 31386510 | T | C | 0.2401 | -0.0449 | 0.0058 | 1.12E-14 | -7.7249 | 1294204 | Asthma |
| rs67575958  | 6 | 31386552 | T | C | 0.2415 | -0.0447 | 0.0058 | 1.27E-14 | -7.7088 | 1294204 | Asthma |
| rs2853972   | 6 | 31386567 | A | G | 0.0601 | 0.0670  | 0.0100 | 1.73E-11 | 6.7270  | 1376071 | Asthma |
| rs66498060  | 6 | 31386611 | A | G | 0.2401 | -0.0449 | 0.0058 | 1.16E-14 | -7.7201 | 1294204 | Asthma |
| rs66496036  | 6 | 31386636 | C | T | 0.2414 | -0.0447 | 0.0058 | 1.30E-14 | -7.7061 | 1294204 | Asthma |
| rs4711268   | 6 | 31386727 | T | C | 0.2413 | -0.0448 | 0.0058 | 1.16E-14 | -7.7207 | 1294204 | Asthma |
| rs13437082  | 6 | 31386783 | T | C | 0.2415 | -0.0448 | 0.0058 | 1.15E-14 | -7.7216 | 1294204 | Asthma |
| rs4711269   | 6 | 31387042 | T | C | 0.2414 | -0.0449 | 0.0058 | 1.02E-14 | -7.7366 | 1294204 | Asthma |
| rs4711270   | 6 | 31387108 | T | C | 0.2400 | -0.0449 | 0.0058 | 1.08E-14 | -7.7298 | 1294204 | Asthma |
| rs13437087  | 6 | 31387120 | A | G | 0.2401 | -0.0449 | 0.0058 | 1.06E-14 | -7.7322 | 1294204 | Asthma |
| rs13437092  | 6 | 31387279 | T | G | 0.2414 | -0.0447 | 0.0058 | 1.33E-14 | -7.7026 | 1294204 | Asthma |
| rs13437088  | 6 | 31387342 | T | C | 0.2414 | -0.0448 | 0.0058 | 1.13E-14 | -7.7236 | 1294204 | Asthma |
| rs13437094  | 6 | 31387467 | A | G | 0.2400 | -0.0449 | 0.0058 | 1.09E-14 | -7.7281 | 1294204 | Asthma |
| rs13437096  | 6 | 31387510 | A | G | 0.2402 | -0.0448 | 0.0058 | 1.24E-14 | -7.7122 | 1294204 | Asthma |
| rs2596560   | 6 | 31387541 | C | T | 0.2276 | 0.0531  | 0.0058 | 5.66E-20 | 9.1508  | 1310845 | Asthma |
| rs67550981  | 6 | 31387697 | G | T | 0.2413 | -0.0447 | 0.0058 | 1.34E-14 | -7.7021 | 1294204 | Asthma |
| rs67211114  | 6 | 31387730 | G | A | 0.2413 | -0.0447 | 0.0058 | 1.31E-14 | -7.7044 | 1294204 | Asthma |
| rs2596558   | 6 | 31387748 | C | T | 0.0602 | 0.0672  | 0.0099 | 1.38E-11 | 6.7596  | 1376071 | Asthma |
| rs73398307  | 6 | 31387876 | A | G | 0.2417 | -0.0454 | 0.0064 | 1.01E-12 | -7.1290 | 1142799 | Asthma |
| rs73398308  | 6 | 31387882 | C | T | 0.2417 | -0.0454 | 0.0064 | 1.01E-12 | -7.1287 | 1142799 | Asthma |
| rs2523480   | 6 | 31387925 | G | C | 0.1586 | -0.0545 | 0.0068 | 1.56E-15 | -7.9721 | 1376071 | Asthma |
| rs113519342 | 6 | 31387941 | C | T | 0.2413 | -0.0447 | 0.0058 | 1.39E-14 | -7.6978 | 1294204 | Asthma |
| rs66499030  | 6 | 31387953 | A | G | 0.2400 | -0.0449 | 0.0058 | 1.08E-14 | -7.7297 | 1294204 | Asthma |
| rs67643039  | 6 | 31388180 | G | A | 0.2417 | -0.0456 | 0.0064 | 8.50E-13 | -7.1527 | 1142799 | Asthma |
| rs74527332  | 6 | 31388269 | C | T | 0.2417 | -0.0456 | 0.0064 | 8.30E-13 | -7.1562 | 1142799 | Asthma |
| rs80204125  | 6 | 31388272 | C | T | 0.2404 | -0.0458 | 0.0064 | 6.93E-13 | -7.1808 | 1142799 | Asthma |
| rs72502575  | 6 | 31388310 | T | C | 0.1593 | -0.0617 | 0.0074 | 9.40E-17 | -8.3122 | 1208025 | Asthma |
| rs116826042 | 6 | 31388426 | C | G | 0.2124 | -0.0643 | 0.0098 | 4.34E-11 | -6.5920 | 778845  | Asthma |
| rs114729316 | 6 | 31388427 | A | G | 0.2124 | -0.0643 | 0.0098 | 4.34E-11 | -6.5920 | 778845  | Asthma |
| rs115634993 | 6 | 31388432 | A | G | 0.2124 | -0.0643 | 0.0098 | 4.32E-11 | -6.5927 | 778845  | Asthma |
| rs2853969   | 6 | 31388797 | A | G | 0.0601 | 0.0671  | 0.0100 | 1.62E-11 | 6.7370  | 1376071 | Asthma |
| rs2905713   | 6 | 31388925 | C | T | 0.0579 | 0.0655  | 0.0102 | 1.30E-10 | 6.4269  | 1376071 | Asthma |
| rs149700517 | 6 | 31389421 | G | T | 0.2514 | -0.0541 | 0.0093 | 6.15E-09 | -5.8126 | 778845  | Asthma |
| rs9266784   | 6 | 31389653 | G | T | 0.1983 | -0.0722 | 0.0098 | 1.40E-13 | -7.3968 | 844071  | Asthma |
| rs17199968  | 6 | 31390434 | G | C | 0.0584 | 0.0628  | 0.0111 | 1.45E-08 | 5.6678  | 1281476 | Asthma |
| rs2923009   | 6 | 31390782 | T | C | 0.2199 | 0.0638  | 0.0081 | 4.22E-15 | 7.8482  | 908767  | Asthma |
| rs9266792   | 6 | 31391399 | G | T | 0.1606 | -0.0554 | 0.0073 | 3.91E-14 | -7.5639 | 1281476 | Asthma |
| rs762460    | 6 | 31391617 | T | C | 0.1672 | 0.0702  | 0.0087 | 6.96E-16 | 8.0712  | 1000149 | Asthma |
| rs9368692   | 6 | 31391672 | A | G | 0.0895 | 0.0540  | 0.0085 | 1.74E-10 | 6.3831  | 1310845 | Asthma |
| rs2395484   | 6 | 31391818 | A | C | 0.2397 | -0.0451 | 0.0058 | 9.60E-15 | -7.7444 | 1294204 | Asthma |
| rs2394993   | 6 | 31391822 | T | C | 0.2397 | -0.0451 | 0.0058 | 9.60E-15 | -7.7446 | 1294204 | Asthma |
| rs9468988   | 6 | 31392158 | G | A | 0.2399 | -0.0452 | 0.0058 | 7.75E-15 | -7.7716 | 1294204 | Asthma |
| rs4077382   | 6 | 31392173 | C | T | 0.2399 | -0.0451 | 0.0058 | 8.61E-15 | -7.7582 | 1294204 | Asthma |
| rs2428482   | 6 | 31392212 | T | C | 0.0602 | 0.0677  | 0.0099 | 9.22E-12 | 6.8182  | 1376071 | Asthma |
| rs4077381   | 6 | 31392244 | G | C | 0.2398 | -0.0453 | 0.0058 | 7.08E-15 | -7.7830 | 1294204 | Asthma |
| rs2596517   | 6 | 31392318 | G | A | 0.1929 | -0.0379 | 0.0062 | 1.29E-09 | -6.0688 | 1376071 | Asthma |
| rs7751505   | 6 | 31392478 | C | A | 0.2400 | -0.0453 | 0.0058 | 6.89E-15 | -7.7865 | 1294204 | Asthma |
| rs7751923   | 6 | 31392480 | T | G | 0.2385 | -0.0505 | 0.0063 | 1.29E-15 | -7.9954 | 1164282 | Asthma |
| rs7771971   | 6 | 31392564 | C | T | 0.2398 | -0.0451 | 0.0058 | 8.76E-15 | -7.7562 | 1294204 | Asthma |
| rs2523477   | 6 | 31392612 | C | T | 0.0606 | 0.0667  | 0.0099 | 1.64E-11 | 6.7347  | 1376071 | Asthma |

|             |   |          |   |   |        |         |        |          |         |         |        |
|-------------|---|----------|---|---|--------|---------|--------|----------|---------|---------|--------|
| rs7751725   | 6 | 31392656 | G | A | 0.2398 | -0.0452 | 0.0058 | 8.25E-15 | -7.7637 | 1294204 | Asthma |
| rs7752021   | 6 | 31392749 | T | C | 0.2397 | -0.0454 | 0.0058 | 6.16E-15 | -7.8007 | 1294204 | Asthma |
| rs2428481   | 6 | 31392886 | T | C | 0.1163 | 0.0564  | 0.0101 | 2.38E-08 | 5.5821  | 847307  | Asthma |
| rs7756426   | 6 | 31392917 | A | G | 0.2285 | -0.0484 | 0.0068 | 1.61E-12 | -7.0648 | 1060172 | Asthma |
| rs7756431   | 6 | 31392925 | A | G | 0.1069 | -0.0535 | 0.0085 | 3.32E-10 | -6.2832 | 1281476 | Asthma |
| rs3134787   | 6 | 31392976 | T | G | 0.1934 | -0.0382 | 0.0063 | 1.48E-09 | -6.0466 | 1349938 | Asthma |
| rs3094590   | 6 | 31393141 | T | C | 0.0599 | 0.0686  | 0.0101 | 1.33E-11 | 6.7658  | 1349938 | Asthma |
| rs34053403  | 6 | 31393169 | T | C | 0.1934 | -0.0385 | 0.0063 | 1.24E-09 | -6.0752 | 1349938 | Asthma |
| rs75098758  | 6 | 31393227 | C | T | 0.2254 | -0.0569 | 0.0077 | 1.36E-13 | -7.4007 | 930250  | Asthma |
| rs113473106 | 6 | 31393281 | G | A | 0.2302 | -0.0438 | 0.0063 | 4.07E-12 | -6.9346 | 1128634 | Asthma |
| rs139644849 | 6 | 31393306 | A | C | 0.0974 | -0.0487 | 0.0087 | 1.84E-08 | -5.6267 | 1193860 | Asthma |
| rs2428479   | 6 | 31393333 | C | A | 0.0654 | 0.0623  | 0.0113 | 3.18E-08 | 5.5313  | 1125398 | Asthma |
| rs113638359 | 6 | 31393350 | G | A | 0.2230 | -0.0644 | 0.0092 | 2.33E-12 | -7.0133 | 778845  | Asthma |
| rs557631553 | 6 | 31393374 | A | G | 0.2252 | -0.0630 | 0.0092 | 5.93E-12 | -6.8813 | 778845  | Asthma |
| rs183494055 | 6 | 31393376 | G | A | 0.2224 | -0.0647 | 0.0092 | 1.98E-12 | -7.0362 | 778845  | Asthma |
| rs574294125 | 6 | 31393397 | T | C | 0.2198 | -0.0637 | 0.0092 | 4.54E-12 | -6.9193 | 778845  | Asthma |
| rs542630771 | 6 | 31393398 | G | T | 0.2198 | -0.0637 | 0.0092 | 4.54E-12 | -6.9193 | 778845  | Asthma |
| rs2428477   | 6 | 31393548 | A | T | 0.0598 | 0.0679  | 0.0101 | 2.01E-11 | 6.7050  | 1349938 | Asthma |
| rs10947206  | 6 | 31393620 | T | A | 0.2399 | -0.0450 | 0.0058 | 1.05E-14 | -7.7325 | 1294204 | Asthma |
| rs2523476   | 6 | 31393647 | T | C | 0.0603 | 0.0675  | 0.0099 | 1.09E-11 | 6.7938  | 1376071 | Asthma |
| rs10947207  | 6 | 31393708 | C | T | 0.2399 | -0.0453 | 0.0058 | 7.10E-15 | -7.7826 | 1294204 | Asthma |
| rs66489555  | 6 | 31393944 | T | C | 0.2398 | -0.0452 | 0.0058 | 8.31E-15 | -7.7628 | 1294204 | Asthma |
| rs10947208  | 6 | 31394060 | G | A | 0.2387 | -0.0498 | 0.0062 | 1.40E-15 | -7.9852 | 1216250 | Asthma |
| rs34411222  | 6 | 31394081 | A | G | 0.2086 | -0.0488 | 0.0064 | 2.78E-14 | -7.6083 | 1216250 | Asthma |
| rs34821683  | 6 | 31394197 | C | T | 0.1610 | -0.0649 | 0.0072 | 1.73E-19 | -9.0293 | 1281476 | Asthma |
| rs35026345  | 6 | 31394210 | T | C | 0.2389 | -0.0494 | 0.0062 | 2.27E-15 | -7.9257 | 1216250 | Asthma |
| rs34464243  | 6 | 31394233 | A | G | 0.2387 | -0.0497 | 0.0062 | 1.65E-15 | -7.9654 | 1216250 | Asthma |
| rs67284927  | 6 | 31394292 | G | T | 0.2399 | -0.0451 | 0.0058 | 9.52E-15 | -7.7455 | 1294204 | Asthma |
| rs66609536  | 6 | 31394343 | A | G | 0.2381 | -0.0447 | 0.0060 | 8.64E-14 | -7.4603 | 1234576 | Asthma |
| rs2428476   | 6 | 31394382 | T | C | 0.0596 | 0.0668  | 0.0100 | 2.60E-11 | 6.6676  | 1376071 | Asthma |
| rs28366116  | 6 | 31394389 | T | C | 0.0594 | 0.0671  | 0.0100 | 2.20E-11 | 6.6921  | 1376071 | Asthma |
| rs1052409   | 6 | 31394430 | C | T | 0.1478 | -0.0908 | 0.0107 | 2.20E-17 | -8.4834 | 844071  | Asthma |
| rs28366120  | 6 | 31394489 | A | G | 0.0581 | 0.0695  | 0.0115 | 1.35E-09 | 6.0618  | 1133307 | Asthma |
| rs28366121  | 6 | 31394494 | A | G | 0.0582 | 0.0700  | 0.0115 | 9.97E-10 | 6.1101  | 1133307 | Asthma |
| rs28366122  | 6 | 31394497 | A | G | 0.0471 | 0.0720  | 0.0124 | 6.57E-09 | 5.8014  | 1225084 | Asthma |
| rs16889524  | 6 | 31394533 | T | C | 0.0602 | 0.0669  | 0.0099 | 1.69E-11 | 6.7303  | 1376071 | Asthma |
| rs1052405   | 6 | 31394557 | C | G | 0.2389 | -0.0461 | 0.0064 | 6.88E-13 | -7.1818 | 1133307 | Asthma |
| rs1052404   | 6 | 31394558 | A | G | 0.2389 | -0.0460 | 0.0064 | 7.31E-13 | -7.1735 | 1133307 | Asthma |
| rs3094587   | 6 | 31394612 | T | C | 0.0637 | 0.0718  | 0.0117 | 7.39E-10 | 6.1575  | 1094744 | Asthma |
| rs72657658  | 6 | 31394613 | A | G | 0.2384 | -0.0506 | 0.0063 | 1.13E-15 | -8.0124 | 1154790 | Asthma |
| rs2523472   | 6 | 31394671 | T | A | 0.0602 | 0.0669  | 0.0099 | 1.64E-11 | 6.7346  | 1376071 | Asthma |
| rs73398351  | 6 | 31394697 | T | C | 0.2386 | -0.0522 | 0.0070 | 6.35E-14 | -7.5007 | 1064845 | Asthma |
| rs72657659  | 6 | 31394720 | C | T | 0.2382 | -0.0520 | 0.0070 | 8.20E-14 | -7.4671 | 1064845 | Asthma |
| rs67015816  | 6 | 31394749 | C | T | 0.2381 | -0.0520 | 0.0070 | 8.85E-14 | -7.4571 | 1064845 | Asthma |
| rs67484745  | 6 | 31394769 | C | G | 0.2225 | -0.0642 | 0.0092 | 3.20E-12 | -6.9687 | 778845  | Asthma |
| rs530851257 | 6 | 31394810 | A | C | 0.2130 | -0.0649 | 0.0096 | 1.64E-11 | -6.7353 | 778845  | Asthma |
| rs144774207 | 6 | 31395048 | C | G | 0.2230 | -0.0641 | 0.0092 | 2.88E-12 | -6.9833 | 778845  | Asthma |
| rs148594605 | 6 | 31395049 | A | G | 0.2230 | -0.0643 | 0.0092 | 2.67E-12 | -6.9942 | 778845  | Asthma |
| rs201889502 | 6 | 31395115 | C | T | 0.2209 | -0.0627 | 0.0093 | 1.44E-11 | -6.7540 | 778845  | Asthma |
| rs2523466   | 6 | 31395249 | T | G | 0.2184 | 0.0560  | 0.0059 | 1.82E-21 | 9.5145  | 1310845 | Asthma |
| rs72867741  | 6 | 31395253 | C | G | 0.2368 | -0.0470 | 0.0065 | 3.54E-13 | -7.2719 | 1133307 | Asthma |
| rs76756158  | 6 | 31395278 | C | T | 0.2202 | -0.0519 | 0.0080 | 1.03E-10 | -6.4628 | 908767  | Asthma |
| rs77500217  | 6 | 31395279 | A | G | 0.2202 | -0.0519 | 0.0080 | 1.03E-10 | -6.4628 | 908767  | Asthma |
| rs77867391  | 6 | 31395289 | T | C | 0.1351 | -0.0731 | 0.0107 | 7.89E-12 | -6.8406 | 778845  | Asthma |
| rs147581729 | 6 | 31395520 | A | G | 0.2216 | -0.0517 | 0.0081 | 1.59E-10 | -6.3965 | 847307  | Asthma |
| rs73400322  | 6 | 31395583 | A | G | 0.2400 | -0.0466 | 0.0064 | 2.97E-13 | -7.2959 | 1142799 | Asthma |
| rs67225062  | 6 | 31395598 | T | C | 0.2399 | -0.0469 | 0.0064 | 2.31E-13 | -7.3294 | 1133307 | Asthma |
| rs67198638  | 6 | 31395635 | G | A | 0.2398 | -0.0454 | 0.0058 | 6.03E-15 | -7.8033 | 1284712 | Asthma |
| rs113209331 | 6 | 31395676 | C | A | 0.2236 | -0.0641 | 0.0092 | 2.84E-12 | -6.9857 | 778845  | Asthma |
| rs2523464   | 6 | 31395712 | A | G | 0.0587 | 0.0627  | 0.0110 | 1.34E-08 | 5.6813  | 1281476 | Asthma |
| rs66674783  | 6 | 31395745 | T | C | 0.2393 | -0.0452 | 0.0058 | 8.79E-15 | -7.7556 | 1284712 | Asthma |
| rs115311791 | 6 | 31395794 | A | G | 0.2389 | -0.0461 | 0.0064 | 6.27E-13 | -7.1945 | 1133307 | Asthma |
| rs115255064 | 6 | 31395798 | G | C | 0.2389 | -0.0460 | 0.0064 | 7.63E-13 | -7.1678 | 1133307 | Asthma |
| rs116704939 | 6 | 31395807 | C | T | 0.2390 | -0.0458 | 0.0064 | 9.29E-13 | -7.1406 | 1133307 | Asthma |
| rs66862067  | 6 | 31395829 | C | G | 0.2397 | -0.0452 | 0.0058 | 7.74E-15 | -7.7717 | 1284712 | Asthma |
| rs80145041  | 6 | 31395911 | G | A | 0.2398 | -0.0457 | 0.0064 | 8.46E-13 | -7.1535 | 1142799 | Asthma |
| rs72657660  | 6 | 31395920 | T | C | 0.2388 | -0.0455 | 0.0058 | 7.08E-15 | -7.7831 | 1284712 | Asthma |
| rs545266030 | 6 | 31395966 | C | A | 0.2371 | -0.0616 | 0.0079 | 4.46E-15 | -7.8413 | 934923  | Asthma |
| rs372378805 | 6 | 31395968 | A | C | 0.2387 | -0.0517 | 0.0070 | 1.15E-13 | -7.4226 | 1064845 | Asthma |
| rs2596484   | 6 | 31396063 | A | G | 0.1943 | -0.0354 | 0.0062 | 1.29E-08 | -5.6877 | 1376071 | Asthma |
| rs72867747  | 6 | 31396168 | G | A | 0.2452 | -0.0452 | 0.0061 | 1.88E-13 | -7.3569 | 926184  | Asthma |
| rs11757660  | 6 | 31396258 | C | T | 0.3139 | -0.0427 | 0.0053 | 4.23E-16 | -8.1318 | 1376071 | Asthma |
| rs28366134  | 6 | 31396306 | A | C | 0.0602 | 0.0672  | 0.0099 | 1.33E-11 | 6.7659  | 1376071 | Asthma |
| rs28366135  | 6 | 31396328 | G | A | 0.0603 | 0.0670  | 0.0099 | 1.46E-11 | 6.7517  | 1376071 | Asthma |

|             |   |          |   |   |        |         |        |          |         |         |        |
|-------------|---|----------|---|---|--------|---------|--------|----------|---------|---------|--------|
| rs28366141  | 6 | 31396580 | A | G | 0.0634 | 0.0662  | 0.0103 | 1.55E-10 | 6.3998  | 1246149 | Asthma |
| rs2905708   | 6 | 31396826 | T | C | 0.0697 | 0.0637  | 0.0094 | 1.27E-11 | 6.7716  | 1376071 | Asthma |
| rs2523462   | 6 | 31396915 | C | G | 0.0602 | 0.0670  | 0.0099 | 1.56E-11 | 6.7423  | 1376071 | Asthma |
| rs2251396   | 6 | 31396930 | A | G | 0.3092 | 0.0625  | 0.0053 | 3.63E-32 | 11.8063 | 1310845 | Asthma |
| rs28530646  | 6 | 31396992 | A | G | 0.2398 | -0.0450 | 0.0058 | 9.84E-15 | -7.7414 | 1294204 | Asthma |
| rs7739560   | 6 | 31397013 | T | C | 0.1627 | -0.0594 | 0.0067 | 5.76E-19 | -8.8966 | 1359430 | Asthma |
| rs2523457   | 6 | 31397930 | A | G | 0.3222 | 0.0646  | 0.0052 | 5.88E-35 | 12.3349 | 1310845 | Asthma |
| rs9394070   | 6 | 31398518 | A | C | 0.0844 | 0.0630  | 0.0087 | 4.65E-13 | 7.2354  | 1310845 | Asthma |
| rs2853967   | 6 | 31398695 | T | C | 0.1605 | -0.0527 | 0.0068 | 8.47E-15 | -7.7604 | 1376071 | Asthma |
| rs2523455   | 6 | 31399300 | A | G | 0.2585 | -0.0358 | 0.0057 | 4.33E-10 | -6.2416 | 1349938 | Asthma |
| rs2523454   | 6 | 31400088 | A | G | 0.3162 | 0.0644  | 0.0053 | 3.28E-34 | 12.1957 | 1310845 | Asthma |
| rs111281598 | 6 | 31400097 | C | T | 0.0548 | -0.0640 | 0.0108 | 3.58E-09 | -5.9022 | 1310845 | Asthma |
| rs2596540   | 6 | 31400105 | A | G | 0.1613 | -0.0510 | 0.0068 | 4.38E-14 | -7.5493 | 1376071 | Asthma |
| rs6930344   | 6 | 31400212 | A | C | 0.1627 | -0.0594 | 0.0067 | 5.70E-19 | -8.8977 | 1359430 | Asthma |
| rs2596539   | 6 | 31400593 | C | T | 0.0602 | 0.0669  | 0.0099 | 1.75E-11 | 6.7256  | 1376071 | Asthma |
| rs6911024   | 6 | 31400674 | C | T | 0.1082 | -0.0488 | 0.0079 | 5.96E-10 | -6.1916 | 1359430 | Asthma |
| rs2844523   | 6 | 31400811 | A | G | 0.0602 | 0.0669  | 0.0099 | 1.70E-11 | 6.7300  | 1376071 | Asthma |
| rs2523451   | 6 | 31401374 | A | G | 0.3222 | 0.0643  | 0.0052 | 1.26E-34 | 12.2736 | 1310845 | Asthma |
| rs6937174   | 6 | 31401408 | A | G | 0.1628 | -0.0594 | 0.0067 | 5.33E-19 | -8.9052 | 1359430 | Asthma |
| rs13220896  | 6 | 31401885 | A | G | 0.0343 | -0.0777 | 0.0135 | 9.12E-09 | -5.7465 | 1310845 | Asthma |
| rs2596537   | 6 | 31402230 | C | A | 0.0602 | 0.0668  | 0.0099 | 1.79E-11 | 6.7223  | 1376071 | Asthma |
| rs3763287   | 6 | 31402552 | A | C | 0.0845 | 0.0633  | 0.0087 | 3.82E-13 | 7.2617  | 1310845 | Asthma |
| rs3763288   | 6 | 31402590 | A | G | 0.0843 | 0.0638  | 0.0087 | 2.74E-13 | 7.3066  | 1310845 | Asthma |
| rs6906175   | 6 | 31403324 | C | G | 0.2399 | -0.0449 | 0.0058 | 1.21E-14 | -7.7155 | 1294204 | Asthma |
| rs2844519   | 6 | 31403653 | T | C | 0.2340 | -0.0436 | 0.0059 | 1.75E-13 | -7.3667 | 1376071 | Asthma |
| rs2252223   | 6 | 31403744 | C | T | 0.0602 | 0.0668  | 0.0099 | 1.82E-11 | 6.7197  | 1376071 | Asthma |
| rs2301747   | 6 | 31403810 | G | C | 0.1270 | -0.0583 | 0.0074 | 3.50E-15 | -7.8717 | 1294204 | Asthma |
| rs2844518   | 6 | 31404792 | T | C | 0.3456 | 0.0658  | 0.0051 | 1.06E-37 | 12.8340 | 1310845 | Asthma |
| rs2596481   | 6 | 31404810 | G | T | 0.2340 | -0.0436 | 0.0059 | 1.67E-13 | -7.3725 | 1376071 | Asthma |
| rs2523450   | 6 | 31404887 | T | C | 0.0610 | 0.0728  | 0.0117 | 4.79E-10 | 6.2257  | 1094744 | Asthma |
| rs2507968   | 6 | 31404941 | G | A | 0.2140 | -0.0428 | 0.0065 | 3.78E-11 | -6.6124 | 1159440 | Asthma |
| rs2442715   | 6 | 31405397 | T | C | 0.3466 | 0.0769  | 0.0061 | 5.99E-37 | 12.6989 | 1029518 | Asthma |
| rs2442714   | 6 | 31405483 | G | C | 0.5811 | 0.0315  | 0.0050 | 3.41E-10 | 6.2789  | 1294204 | Asthma |
| rs9295988   | 6 | 31405941 | G | C | 0.0750 | -0.0665 | 0.0093 | 1.08E-12 | -7.1202 | 1376071 | Asthma |
| rs2263313   | 6 | 31406033 | A | G | 0.0602 | 0.0670  | 0.0099 | 1.59E-11 | 6.7399  | 1376071 | Asthma |
| rs2857281   | 6 | 31406485 | C | A | 0.0602 | 0.0669  | 0.0099 | 1.70E-11 | 6.7297  | 1376071 | Asthma |
| rs12174396  | 6 | 31406802 | G | A | 0.0975 | 0.0640  | 0.0082 | 6.57E-15 | 7.7924  | 1310845 | Asthma |
| rs111972772 | 6 | 31406905 | C | G | 0.0602 | 0.0669  | 0.0099 | 1.76E-11 | 6.7250  | 1376071 | Asthma |
| rs9366783   | 6 | 31407716 | C | G | 0.0975 | 0.0636  | 0.0082 | 1.03E-14 | 7.7358  | 1310845 | Asthma |
| rs114202986 | 6 | 31408140 | C | T | 0.0843 | 0.0629  | 0.0087 | 5.96E-13 | 7.2015  | 1310845 | Asthma |
| rs2523498   | 6 | 31408429 | C | T | 0.0602 | 0.0671  | 0.0099 | 1.55E-11 | 6.7432  | 1376071 | Asthma |
| rs73400361  | 6 | 31408489 | G | A | 0.0548 | -0.0642 | 0.0108 | 3.31E-09 | -5.9155 | 1310845 | Asthma |
| rs112630608 | 6 | 31408660 | C | A | 0.0548 | -0.0635 | 0.0108 | 4.76E-09 | -5.8554 | 1310845 | Asthma |
| rs112968142 | 6 | 31408663 | G | A | 0.0549 | -0.0636 | 0.0108 | 4.53E-09 | -5.8634 | 1310845 | Asthma |
| rs6910087   | 6 | 31409270 | T | C | 0.1096 | -0.0483 | 0.0079 | 8.16E-10 | -6.1417 | 1294204 | Asthma |
| rs2523495   | 6 | 31410201 | T | C | 0.1137 | 0.0455  | 0.0078 | 4.78E-09 | 5.8546  | 1310845 | Asthma |
| rs2853992   | 6 | 31410524 | A | G | 0.0570 | 0.0712  | 0.0101 | 2.09E-12 | 7.0288  | 1376071 | Asthma |
| rs9380254   | 6 | 31410558 | C | G | 0.0764 | 0.0794  | 0.0114 | 3.29E-12 | 6.9648  | 1024845 | Asthma |
| rs1063630   | 6 | 31410581 | G | T | 0.1587 | -0.0550 | 0.0067 | 2.04E-16 | -8.2196 | 1310845 | Asthma |
| rs1063631   | 6 | 31410610 | C | T | 0.2756 | -0.0458 | 0.0055 | 5.84E-17 | -8.3683 | 1310845 | Asthma |
| rs1051786   | 6 | 31410648 | G | A | 0.2756 | -0.0457 | 0.0055 | 6.51E-17 | -8.3554 | 1310845 | Asthma |
| rs17200242  | 6 | 31410873 | A | C | 0.2169 | -0.0374 | 0.0060 | 3.86E-10 | -6.2595 | 1310845 | Asthma |
| rs17200249  | 6 | 31410877 | A | T | 0.2169 | -0.0374 | 0.0060 | 3.80E-10 | -6.2622 | 1310845 | Asthma |
| rs1051792   | 6 | 31411200 | A | G | 0.2756 | -0.0457 | 0.0055 | 6.01E-17 | -8.3650 | 1310845 | Asthma |
| rs1051794   | 6 | 31411332 | A | G | 0.2755 | -0.0454 | 0.0055 | 9.78E-17 | -8.3074 | 1310845 | Asthma |
| rs1131896   | 6 | 31411338 | A | G | 0.2206 | 0.0454  | 0.0057 | 1.31E-15 | 7.9942  | 1310845 | Asthma |
| rs1131897   | 6 | 31411357 | G | C | 0.0570 | 0.0704  | 0.0101 | 3.52E-12 | 6.9552  | 1376071 | Asthma |
| rs3828878   | 6 | 31411600 | G | T | 0.2755 | -0.0459 | 0.0055 | 4.43E-17 | -8.4009 | 1310845 | Asthma |
| rs3828880   | 6 | 31411626 | G | C | 0.2756 | -0.0458 | 0.0055 | 5.37E-17 | -8.3782 | 1310845 | Asthma |
| rs3828881   | 6 | 31411772 | T | A | 0.2733 | -0.0512 | 0.0059 | 5.48E-18 | -8.6428 | 1180923 | Asthma |
| rs3828882   | 6 | 31411843 | A | G | 0.2755 | -0.0459 | 0.0055 | 4.62E-17 | -8.3961 | 1310845 | Asthma |
| rs1051796   | 6 | 31411996 | T | C | 0.2750 | -0.0463 | 0.0055 | 2.91E-17 | -8.4502 | 1310845 | Asthma |
| rs1131898   | 6 | 31412018 | G | A | 0.2770 | -0.0471 | 0.0060 | 2.95E-15 | -7.8929 | 1159440 | Asthma |
| rs1051798   | 6 | 31412030 | T | C | 0.2770 | -0.0471 | 0.0060 | 3.11E-15 | -7.8864 | 1159440 | Asthma |
| rs1051799   | 6 | 31412046 | G | C | 0.2748 | -0.0540 | 0.0066 | 2.46E-16 | -8.1971 | 1029518 | Asthma |
| rs41554412  | 6 | 31412417 | C | T | 0.1232 | -0.0461 | 0.0072 | 1.95E-10 | -6.3649 | 1310845 | Asthma |
| rs61738275  | 6 | 31412421 | T | C | 0.1407 | -0.0552 | 0.0069 | 7.48E-16 | -8.0625 | 1310845 | Asthma |
| rs2853971   | 6 | 31412564 | A | G | 0.1702 | -0.0511 | 0.0067 | 3.32E-14 | -7.5851 | 1310845 | Asthma |
| rs74223475  | 6 | 31412610 | A | G | 0.1388 | -0.0473 | 0.0072 | 4.83E-11 | -6.5761 | 1284712 | Asthma |
| rs6933734   | 6 | 31412810 | A | G | 0.2742 | -0.0490 | 0.0059 | 1.80E-16 | -8.2349 | 1216250 | Asthma |
| rs6933621   | 6 | 31412933 | T | C | 0.2734 | -0.0510 | 0.0059 | 7.18E-18 | -8.6120 | 1180923 | Asthma |
| rs6933939   | 6 | 31412941 | A | G | 0.1395 | -0.0512 | 0.0077 | 3.49E-11 | -6.6242 | 1159440 | Asthma |
| rs6933779   | 6 | 31412955 | T | C | 0.1586 | -0.0547 | 0.0067 | 2.91E-16 | -8.1771 | 1310845 | Asthma |
| rs6934097   | 6 | 31412968 | A | G | 0.1586 | -0.0546 | 0.0067 | 3.46E-16 | -8.1562 | 1310845 | Asthma |

|             |   |          |   |   |        |         |        |          |         |         |        |
|-------------|---|----------|---|---|--------|---------|--------|----------|---------|---------|--------|
| rs6934311   | 6 | 31413077 | T | G | 0.2755 | -0.0460 | 0.0055 | 3.95E-17 | -8.4144 | 1310845 | Asthma |
| rs9357133   | 6 | 31413120 | T | C | 0.0844 | 0.0606  | 0.0087 | 3.59E-12 | 6.9525  | 1310845 | Asthma |
| rs3132467   | 6 | 31413166 | A | G | 0.2769 | -0.0456 | 0.0055 | 7.27E-17 | -8.3424 | 1310845 | Asthma |
| rs6934175   | 6 | 31413173 | T | C | 0.2168 | -0.0375 | 0.0060 | 3.34E-10 | -6.2820 | 1310845 | Asthma |
| rs6934187   | 6 | 31413197 | G | C | 0.2756 | -0.0459 | 0.0055 | 4.63E-17 | -8.3955 | 1310845 | Asthma |
| rs6934403   | 6 | 31413353 | C | A | 0.2754 | -0.0461 | 0.0055 | 3.67E-17 | -8.4231 | 1310845 | Asthma |
| rs9266813   | 6 | 31413544 | G | C | 0.2767 | -0.0524 | 0.0063 | 1.06E-16 | -8.2980 | 812903  | Asthma |
| rs9266814   | 6 | 31413681 | T | C | 0.2551 | -0.0398 | 0.0056 | 1.48E-12 | -7.0764 | 1310845 | Asthma |
| rs9266815   | 6 | 31413736 | G | A | 0.2552 | -0.0394 | 0.0056 | 2.17E-12 | -7.0232 | 1310845 | Asthma |
| rs9266817   | 6 | 31413775 | A | G | 0.2560 | -0.0397 | 0.0056 | 1.43E-12 | -7.0813 | 1310845 | Asthma |
| rs62395263  | 6 | 31413834 | T | C | 0.1046 | 0.0487  | 0.0078 | 5.40E-10 | 6.2070  | 1310845 | Asthma |
| rs7774181   | 6 | 31413897 | A | C | 0.2561 | -0.0395 | 0.0056 | 1.75E-12 | -7.0529 | 1310845 | Asthma |
| rs7756209   | 6 | 31413900 | C | T | 0.2561 | -0.0395 | 0.0056 | 1.75E-12 | -7.0532 | 1310845 | Asthma |
| rs76213228  | 6 | 31413945 | C | T | 0.1392 | -0.0475 | 0.0071 | 1.76E-11 | -6.7246 | 1310845 | Asthma |
| rs7774586   | 6 | 31413956 | A | G | 0.2579 | -0.0405 | 0.0061 | 3.43E-11 | -6.6266 | 1159440 | Asthma |
| rs7774193   | 6 | 31413963 | C | A | 0.2560 | -0.0395 | 0.0056 | 1.77E-12 | -7.0518 | 1310845 | Asthma |
| rs28642901  | 6 | 31414031 | G | A | 0.2560 | -0.0394 | 0.0056 | 1.89E-12 | -7.0426 | 1310845 | Asthma |
| rs28679302  | 6 | 31414037 | C | G | 0.2561 | -0.0395 | 0.0056 | 1.63E-12 | -7.0626 | 1310845 | Asthma |
| rs7756993   | 6 | 31414356 | C | T | 0.2637 | -0.0409 | 0.0065 | 3.50E-10 | -6.2750 | 791420  | Asthma |
| rs7774983   | 6 | 31414359 | T | C | 0.2559 | -0.0396 | 0.0056 | 1.56E-12 | -7.0691 | 1310845 | Asthma |
| rs7775227   | 6 | 31414370 | C | G | 0.2557 | -0.0394 | 0.0056 | 1.92E-12 | -7.0399 | 1310845 | Asthma |
| rs2267643   | 6 | 31414511 | T | C | 0.2580 | -0.0407 | 0.0061 | 2.65E-11 | -6.6648 | 1159440 | Asthma |
| rs9266819   | 6 | 31414565 | G | A | 0.2562 | -0.0396 | 0.0056 | 1.57E-12 | -7.0681 | 1310845 | Asthma |
| rs3134791   | 6 | 31414632 | A | C | 0.1620 | -0.0519 | 0.0068 | 1.66E-14 | -7.6744 | 1310845 | Asthma |
| rs3749949   | 6 | 31414682 | A | G | 0.2561 | -0.0396 | 0.0056 | 1.44E-12 | -7.0801 | 1310845 | Asthma |
| rs9266820   | 6 | 31414727 | T | G | 0.2561 | -0.0395 | 0.0056 | 1.79E-12 | -7.0499 | 1310845 | Asthma |
| rs3749950   | 6 | 31414808 | G | C | 0.2756 | -0.0458 | 0.0055 | 5.10E-17 | -8.3843 | 1310845 | Asthma |
| rs9266822   | 6 | 31414844 | T | C | 0.2561 | -0.0393 | 0.0056 | 2.07E-12 | -7.0296 | 1310845 | Asthma |
| rs9266823   | 6 | 31414913 | G | A | 0.2758 | -0.0459 | 0.0055 | 4.74E-17 | -8.3932 | 1310845 | Asthma |
| rs2853975   | 6 | 31414940 | T | A | 0.2544 | 0.0447  | 0.0056 | 2.03E-15 | 7.9397  | 1310845 | Asthma |
| rs9266824   | 6 | 31414993 | G | A | 0.2756 | -0.0459 | 0.0055 | 4.78E-17 | -8.3920 | 1310845 | Asthma |
| rs9266825   | 6 | 31415105 | A | C | 0.2560 | -0.0394 | 0.0056 | 1.92E-12 | -7.0404 | 1310845 | Asthma |
| rs9266826   | 6 | 31415155 | A | G | 0.2582 | -0.0406 | 0.0061 | 2.87E-11 | -6.6532 | 1159440 | Asthma |
| rs9266827   | 6 | 31415161 | G | A | 0.2582 | -0.0406 | 0.0061 | 2.97E-11 | -6.6482 | 1159440 | Asthma |
| rs9266828   | 6 | 31415165 | C | G | 0.2582 | -0.0406 | 0.0061 | 2.98E-11 | -6.6477 | 1159440 | Asthma |
| rs9266829   | 6 | 31415187 | G | A | 0.2771 | -0.0473 | 0.0060 | 2.52E-15 | -7.9127 | 1159440 | Asthma |
| rs1131904   | 6 | 31415294 | G | A | 0.2558 | -0.0394 | 0.0056 | 2.10E-12 | -7.0276 | 1310845 | Asthma |
| rs9266831   | 6 | 31415306 | A | G | 0.2558 | -0.0394 | 0.0056 | 2.03E-12 | -7.0326 | 1310845 | Asthma |
| rs9266833   | 6 | 31415331 | C | T | 0.2428 | -0.0355 | 0.0061 | 6.37E-09 | -5.8069 | 1154767 | Asthma |
| rs9266835   | 6 | 31415410 | G | A | 0.2561 | -0.0395 | 0.0056 | 1.80E-12 | -7.0491 | 1310845 | Asthma |
| rs112284419 | 6 | 31415462 | C | T | 0.1389 | -0.0471 | 0.0072 | 5.92E-11 | -6.5457 | 1284712 | Asthma |
| rs9266836   | 6 | 31415527 | A | G | 0.2560 | -0.0396 | 0.0056 | 1.55E-12 | -7.0700 | 1310845 | Asthma |
| rs9266837   | 6 | 31415612 | G | A | 0.2571 | -0.0444 | 0.0068 | 5.12E-11 | -6.5672 | 1064845 | Asthma |
| rs9266838   | 6 | 31415614 | G | A | 0.2570 | -0.0443 | 0.0068 | 5.64E-11 | -6.5531 | 1064845 | Asthma |
| rs9266839   | 6 | 31415764 | T | C | 0.2589 | -0.0399 | 0.0061 | 6.64E-11 | -6.5285 | 1159440 | Asthma |
| rs9266840   | 6 | 31415765 | G | T | 0.2558 | -0.0402 | 0.0057 | 1.55E-12 | -7.0700 | 1284712 | Asthma |
| rs9266842   | 6 | 31415972 | C | A | 0.2578 | -0.0406 | 0.0061 | 3.41E-11 | -6.6279 | 1159440 | Asthma |
| rs9266843   | 6 | 31415974 | A | T | 0.2578 | -0.0405 | 0.0061 | 3.44E-11 | -6.6262 | 1159440 | Asthma |
| rs72502586  | 6 | 31416370 | A | T | 0.1392 | -0.0475 | 0.0071 | 1.77E-11 | -6.7235 | 1310845 | Asthma |
| rs9266844   | 6 | 31416554 | C | G | 0.2561 | -0.0395 | 0.0056 | 1.67E-12 | -7.0599 | 1310845 | Asthma |
| rs9468992   | 6 | 31416801 | A | G | 0.1391 | -0.0472 | 0.0071 | 2.40E-11 | -6.6791 | 1310845 | Asthma |
| rs9266845   | 6 | 31417015 | C | T | 0.2558 | -0.0397 | 0.0056 | 1.30E-12 | -7.0947 | 1310845 | Asthma |
| rs9266846   | 6 | 31417112 | G | C | 0.2559 | -0.0400 | 0.0056 | 8.69E-13 | -7.1499 | 1310845 | Asthma |
| rs6457413   | 6 | 31417732 | A | G | 0.2573 | -0.0398 | 0.0056 | 1.16E-12 | -7.1105 | 1310845 | Asthma |
| rs6932392   | 6 | 31418158 | T | C | 0.2559 | -0.0395 | 0.0056 | 1.83E-12 | -7.0472 | 1310845 | Asthma |
| rs9295989   | 6 | 31418223 | C | G | 0.0575 | 0.0705  | 0.0101 | 3.04E-12 | 6.9762  | 1376071 | Asthma |
| rs9295990   | 6 | 31418242 | G | T | 0.0575 | 0.0703  | 0.0101 | 3.45E-12 | 6.9586  | 1376071 | Asthma |
| rs3132472   | 6 | 31418354 | A | G | 0.1139 | 0.0448  | 0.0078 | 7.88E-09 | 5.7710  | 1310845 | Asthma |
| rs77995127  | 6 | 31419088 | A | G | 0.1392 | -0.0475 | 0.0071 | 1.82E-11 | -6.7195 | 1310845 | Asthma |
| rs2516450   | 6 | 31419380 | C | T | 0.1621 | -0.0518 | 0.0068 | 1.97E-14 | -7.6528 | 1310845 | Asthma |
| rs6900894   | 6 | 31419822 | T | C | 0.2561 | -0.0394 | 0.0056 | 2.02E-12 | -7.0331 | 1310845 | Asthma |
| rs2596532   | 6 | 31420094 | C | G | 0.1193 | 0.0414  | 0.0073 | 1.75E-08 | 5.6355  | 1310845 | Asthma |
| rs3880459   | 6 | 31420135 | G | T | 0.0575 | 0.0705  | 0.0101 | 2.95E-12 | 6.9799  | 1376071 | Asthma |
| rs6901288   | 6 | 31420142 | G | A | 0.2561 | -0.0392 | 0.0056 | 2.61E-12 | -6.9974 | 1310845 | Asthma |
| rs2848716   | 6 | 31420190 | C | G | 0.1193 | 0.0414  | 0.0075 | 2.86E-08 | 5.5501  | 1284712 | Asthma |
| rs2596533   | 6 | 31420276 | C | T | 0.1598 | -0.0524 | 0.0068 | 1.81E-14 | -7.6636 | 1310845 | Asthma |
| rs6902067   | 6 | 31420286 | A | G | 0.2562 | -0.0393 | 0.0056 | 2.17E-12 | -7.0234 | 1310845 | Asthma |
| rs9501106   | 6 | 31420332 | A | G | 0.1392 | -0.0472 | 0.0071 | 2.36E-11 | -6.6819 | 1310845 | Asthma |
| rs9283891   | 6 | 31420453 | A | G | 0.2561 | -0.0393 | 0.0056 | 2.30E-12 | -7.0150 | 1310845 | Asthma |
| rs9295991   | 6 | 31420500 | T | C | 0.2561 | -0.0393 | 0.0056 | 2.23E-12 | -7.0195 | 1310845 | Asthma |
| rs9295992   | 6 | 31420529 | G | A | 0.2562 | -0.0394 | 0.0056 | 1.94E-12 | -7.0386 | 1310845 | Asthma |
| rs41284519  | 6 | 31420745 | T | C | 0.0506 | 0.0740  | 0.0109 | 1.01E-11 | 6.8048  | 1376071 | Asthma |
| rs9295993   | 6 | 31420818 | G | A | 0.2562 | -0.0393 | 0.0056 | 2.15E-12 | -7.0244 | 1310845 | Asthma |
| rs75428775  | 6 | 31421236 | C | A | 0.1392 | -0.0472 | 0.0071 | 2.29E-11 | -6.6864 | 1310845 | Asthma |

|             |   |          |   |   |        |         |        |          |         |         |        |
|-------------|---|----------|---|---|--------|---------|--------|----------|---------|---------|--------|
| rs17200379  | 6 | 31421840 | A | G | 0.2561 | -0.0393 | 0.0056 | 2.34E-12 | -7.0123 | 1310845 | Asthma |
| rs17206750  | 6 | 31422032 | C | T | 0.2561 | -0.0391 | 0.0056 | 2.67E-12 | -6.9942 | 1310845 | Asthma |
| rs17200386  | 6 | 31422126 | A | G | 0.1391 | -0.0472 | 0.0071 | 2.47E-11 | -6.6751 | 1310845 | Asthma |
| rs10223421  | 6 | 31422278 | T | G | 0.2563 | -0.0394 | 0.0056 | 1.90E-12 | -7.0414 | 1310845 | Asthma |
| rs10223568  | 6 | 31422426 | C | T | 0.1392 | -0.0469 | 0.0071 | 3.36E-11 | -6.6301 | 1310845 | Asthma |
| rs9259596   | 6 | 31422781 | G | T | 0.2560 | -0.0391 | 0.0056 | 2.82E-12 | -6.9866 | 1310845 | Asthma |
| rs2516447   | 6 | 31422844 | C | T | 0.0575 | 0.0703  | 0.0101 | 3.33E-12 | 6.9635  | 1376071 | Asthma |
| rs56705452  | 6 | 31423814 | A | G | 0.2111 | -0.0338 | 0.0060 | 1.73E-08 | -5.6375 | 1310845 | Asthma |
| rs2394994   | 6 | 31423841 | A | T | 0.2342 | -0.0438 | 0.0059 | 1.37E-13 | -7.3988 | 1310845 | Asthma |
| rs9501107   | 6 | 31424270 | T | G | 0.0689 | -0.0611 | 0.0100 | 8.67E-10 | -6.1322 | 1310845 | Asthma |
| rs9501108   | 6 | 31424281 | C | G | 0.1391 | -0.0474 | 0.0071 | 2.08E-11 | -6.7003 | 1310845 | Asthma |
| rs9501109   | 6 | 31424341 | G | A | 0.1955 | -0.0546 | 0.0061 | 4.00E-19 | -8.9371 | 1310845 | Asthma |
| rs2596468   | 6 | 31424531 | G | A | 0.1048 | 0.0486  | 0.0078 | 5.45E-10 | 6.2056  | 1310845 | Asthma |
| rs2516446   | 6 | 31424707 | G | C | 0.3206 | -0.0421 | 0.0052 | 6.64E-16 | -8.0770 | 1310845 | Asthma |
| rs2596469   | 6 | 31424709 | T | C | 0.3205 | -0.0421 | 0.0052 | 6.62E-16 | -8.0771 | 1310845 | Asthma |
| rs2596470   | 6 | 31424830 | T | A | 0.3403 | -0.0481 | 0.0051 | 5.60E-21 | -9.3972 | 1310845 | Asthma |
| rs79033175  | 6 | 31424962 | G | A | 0.1392 | -0.0472 | 0.0071 | 2.32E-11 | -6.6841 | 1310845 | Asthma |
| rs2516445   | 6 | 31425013 | G | C | 0.0576 | 0.0709  | 0.0101 | 1.92E-12 | 7.0404  | 1376071 | Asthma |
| rs3093959   | 6 | 31425028 | T | C | 0.2839 | -0.0388 | 0.0054 | 1.00E-12 | -7.1303 | 1310845 | Asthma |
| rs2524279   | 6 | 31425129 | G | A | 0.0845 | 0.0615  | 0.0087 | 1.62E-12 | 7.0641  | 1310845 | Asthma |
| rs72848707  | 6 | 31425214 | T | G | 0.1607 | -0.0479 | 0.0077 | 5.15E-10 | -6.2146 | 1024845 | Asthma |
| rs77808671  | 6 | 31425276 | G | A | 0.2280 | -0.0330 | 0.0058 | 1.68E-08 | -5.6426 | 1310845 | Asthma |
| rs4947314   | 6 | 31425597 | G | T | 0.1698 | -0.0479 | 0.0065 | 1.42E-13 | -7.3948 | 1310845 | Asthma |
| rs7451769   | 6 | 31425823 | C | T | 0.2844 | -0.0435 | 0.0054 | 8.54E-16 | -8.0462 | 1310845 | Asthma |
| rs3132091   | 6 | 31425907 | A | G | 0.1621 | -0.0514 | 0.0068 | 3.03E-14 | -7.5971 | 1310845 | Asthma |
| rs3997950   | 6 | 31426083 | A | T | 0.1391 | -0.0471 | 0.0071 | 2.64E-11 | -6.6653 | 1310845 | Asthma |
| rs113912664 | 6 | 31426502 | C | T | 0.1391 | -0.0474 | 0.0071 | 2.05E-11 | -6.7026 | 1310845 | Asthma |
| rs55653675  | 6 | 31426696 | C | T | 0.2841 | -0.0433 | 0.0054 | 1.22E-15 | -8.0021 | 1310845 | Asthma |
| rs55961601  | 6 | 31426730 | G | A | 0.2841 | -0.0435 | 0.0054 | 8.82E-16 | -8.0423 | 1310845 | Asthma |
| rs78187642  | 6 | 31426888 | A | G | 0.1392 | -0.0473 | 0.0071 | 2.18E-11 | -6.6933 | 1310845 | Asthma |
| rs61277166  | 6 | 31426896 | C | A | 0.2845 | -0.0435 | 0.0054 | 8.47E-16 | -8.0471 | 1310845 | Asthma |
| rs2516472   | 6 | 31426923 | G | A | 0.0576 | 0.0710  | 0.0101 | 1.83E-12 | 7.0467  | 1376071 | Asthma |
| rs56967508  | 6 | 31426980 | G | C | 0.2844 | -0.0434 | 0.0054 | 9.60E-16 | -8.0320 | 1310845 | Asthma |
| rs111228867 | 6 | 31426990 | G | A | 0.1392 | -0.0472 | 0.0071 | 2.47E-11 | -6.6750 | 1310845 | Asthma |
| rs77989266  | 6 | 31427048 | A | C | 0.1391 | -0.0472 | 0.0071 | 2.44E-11 | -6.6772 | 1310845 | Asthma |
| rs113069225 | 6 | 31427079 | A | G | 0.1391 | -0.0514 | 0.0079 | 8.99E-11 | -6.4831 | 1133307 | Asthma |
| rs59076819  | 6 | 31427086 | G | T | 0.2846 | -0.0449 | 0.0059 | 3.50E-14 | -7.5782 | 1159440 | Asthma |
| rs60484313  | 6 | 31427092 | G | A | 0.2846 | -0.0448 | 0.0059 | 3.66E-14 | -7.5726 | 1159440 | Asthma |
| rs77198258  | 6 | 31427137 | A | C | 0.1385 | -0.0523 | 0.0077 | 1.14E-11 | -6.7879 | 1216250 | Asthma |
| rs115517808 | 6 | 31427266 | G | C | 0.1221 | -0.0615 | 0.0103 | 2.25E-09 | -5.9787 | 908767  | Asthma |
| rs201610020 | 6 | 31427318 | G | A | 0.2562 | -0.0583 | 0.0090 | 1.10E-10 | -6.4527 | 778845  | Asthma |
| rs143725123 | 6 | 31427369 | G | A | 0.1155 | -0.0779 | 0.0121 | 1.36E-10 | -6.4199 | 778845  | Asthma |
| rs60539855  | 6 | 31427458 | T | A | 0.1405 | -0.0828 | 0.0110 | 4.42E-14 | -7.5481 | 778845  | Asthma |
| rs374074536 | 6 | 31428177 | G | T | 0.4206 | 0.0589  | 0.0090 | 5.43E-11 | 6.5586  | 778845  | Asthma |
| rs72502587  | 6 | 31429854 | A | G | 0.1241 | -0.0519 | 0.0088 | 4.29E-09 | -5.8728 | 1060172 | Asthma |
| rs77449260  | 6 | 31429960 | C | T | 0.1377 | -0.0586 | 0.0087 | 1.51E-11 | -6.7473 | 1064845 | Asthma |
| rs76526894  | 6 | 31429961 | A | G | 0.1377 | -0.0585 | 0.0087 | 1.60E-11 | -6.7387 | 1064845 | Asthma |
| rs79632207  | 6 | 31429985 | C | G | 0.1378 | -0.0585 | 0.0087 | 1.61E-11 | -6.7377 | 1064845 | Asthma |
| rs575839863 | 6 | 31430022 | T | G | 0.1185 | -0.0756 | 0.0123 | 8.84E-10 | -6.1290 | 778845  | Asthma |
| rs543166173 | 6 | 31430023 | A | G | 0.1185 | -0.0756 | 0.0123 | 8.84E-10 | -6.1290 | 778845  | Asthma |
| rs564855804 | 6 | 31430024 | G | A | 0.1181 | -0.0753 | 0.0123 | 9.99E-10 | -6.1096 | 778845  | Asthma |
| rs73402255  | 6 | 31430028 | C | T | 0.1866 | -0.0630 | 0.0077 | 2.57E-16 | -8.1917 | 1064845 | Asthma |
| rs541099144 | 6 | 31430029 | A | G | 0.1339 | -0.0580 | 0.0089 | 7.26E-11 | -6.5151 | 1064845 | Asthma |
| rs68094537  | 6 | 31430051 | C | T | 0.2789 | -0.0442 | 0.0055 | 1.44E-15 | -7.9823 | 1284712 | Asthma |
| rs66676918  | 6 | 31430133 | C | A | 0.2837 | -0.0451 | 0.0060 | 7.84E-14 | -7.4729 | 1133307 | Asthma |
| rs117813801 | 6 | 31430146 | T | G | 0.1390 | -0.0509 | 0.0079 | 1.22E-10 | -6.4365 | 1133307 | Asthma |
| rs143741838 | 6 | 31430156 | T | A | 0.1391 | -0.0509 | 0.0079 | 1.23E-10 | -6.4351 | 1133307 | Asthma |
| rs139063538 | 6 | 31430189 | C | A | 0.1392 | -0.0474 | 0.0071 | 1.97E-11 | -6.7084 | 1310845 | Asthma |
| rs68041688  | 6 | 31430367 | G | A | 0.2826 | -0.0484 | 0.0058 | 1.24E-16 | -8.2795 | 1180923 | Asthma |
| rs77283485  | 6 | 31430449 | C | G | 0.1393 | -0.0473 | 0.0071 | 2.16E-11 | -6.6951 | 1310845 | Asthma |
| rs78765765  | 6 | 31430523 | C | T | 0.1392 | -0.0472 | 0.0071 | 2.37E-11 | -6.6812 | 1310845 | Asthma |
| rs76760132  | 6 | 31430554 | G | C | 0.1582 | -0.0551 | 0.0067 | 2.13E-16 | -8.2148 | 1310845 | Asthma |
| rs9501117   | 6 | 31430814 | G | A | 0.0609 | -0.0626 | 0.0107 | 4.30E-09 | -5.8725 | 1310845 | Asthma |
| rs4090417   | 6 | 31430844 | G | A | 0.1392 | -0.0474 | 0.0071 | 2.02E-11 | -6.7049 | 1310845 | Asthma |
| rs4090416   | 6 | 31430850 | G | A | 0.1392 | -0.0474 | 0.0071 | 2.03E-11 | -6.7038 | 1310845 | Asthma |
| rs4090415   | 6 | 31430864 | A | G | 0.1392 | -0.0473 | 0.0071 | 2.24E-11 | -6.6895 | 1310845 | Asthma |
| rs2524278   | 6 | 31431007 | T | C | 0.1048 | 0.0486  | 0.0078 | 5.49E-10 | 6.2043  | 1310845 | Asthma |
| rs4090413   | 6 | 31431051 | A | G | 0.1392 | -0.0474 | 0.0071 | 1.93E-11 | -6.7111 | 1310845 | Asthma |
| rs9501122   | 6 | 31431130 | G | A | 0.1392 | -0.0474 | 0.0071 | 2.07E-11 | -6.7010 | 1310845 | Asthma |
| rs114921825 | 6 | 31431352 | A | G | 0.1393 | -0.0474 | 0.0071 | 2.05E-11 | -6.7024 | 1310845 | Asthma |
| rs55715051  | 6 | 31431358 | G | T | 0.2842 | -0.0431 | 0.0054 | 1.50E-15 | -7.9769 | 1310845 | Asthma |
| rs111661070 | 6 | 31431368 | G | A | 0.1391 | -0.0474 | 0.0071 | 2.02E-11 | -6.7047 | 1310845 | Asthma |
| rs56165145  | 6 | 31431452 | G | A | 0.2841 | -0.0431 | 0.0054 | 1.53E-15 | -7.9748 | 1310845 | Asthma |
| rs7757839   | 6 | 31431806 | C | T | 0.2842 | -0.0432 | 0.0054 | 1.41E-15 | -7.9847 | 1310845 | Asthma |



|             |   |          |   |   |        |         |        |          |         |         |        |
|-------------|---|----------|---|---|--------|---------|--------|----------|---------|---------|--------|
| rs7775716   | 6 | 31431846 | G | A | 0.2841 | -0.0433 | 0.0054 | 1.25E-15 | -7.9995 | 1310845 | Asthma |
| rs75096753  | 6 | 31431886 | T | G | 0.1391 | -0.0473 | 0.0071 | 2.15E-11 | -6.6958 | 1310845 | Asthma |
| rs79265699  | 6 | 31431888 | C | T | 0.1391 | -0.0474 | 0.0071 | 2.04E-11 | -6.7034 | 1310845 | Asthma |
| rs7738078   | 6 | 31432169 | T | C | 0.2842 | -0.0433 | 0.0054 | 1.24E-15 | -8.0004 | 1310845 | Asthma |
| rs76689057  | 6 | 31432267 | A | G | 0.1392 | -0.0473 | 0.0071 | 2.18E-11 | -6.6935 | 1310845 | Asthma |
| rs74571090  | 6 | 31432379 | T | C | 0.1430 | -0.0451 | 0.0070 | 1.08E-10 | -6.4548 | 1310845 | Asthma |
| rs78879714  | 6 | 31432417 | A | T | 0.1392 | -0.0473 | 0.0071 | 2.18E-11 | -6.6931 | 1310845 | Asthma |
| rs111555522 | 6 | 31432487 | G | C | 0.1392 | -0.0473 | 0.0071 | 2.26E-11 | -6.6879 | 1310845 | Asthma |
| rs2516471   | 6 | 31432515 | A | G | 0.0840 | 0.0608  | 0.0088 | 3.87E-12 | 6.9418  | 1310845 | Asthma |
| rs80339222  | 6 | 31432890 | T | G | 0.1392 | -0.0473 | 0.0071 | 2.24E-11 | -6.6892 | 1310845 | Asthma |
| rs2894212   | 6 | 31432952 | A | G | 0.1392 | -0.0473 | 0.0071 | 2.22E-11 | -6.6907 | 1310845 | Asthma |
| rs4631325   | 6 | 31432960 | A | G | 0.1392 | -0.0474 | 0.0071 | 2.09E-11 | -6.6997 | 1310845 | Asthma |
| rs2394997   | 6 | 31433113 | C | T | 0.2842 | -0.0434 | 0.0054 | 1.02E-15 | -8.0248 | 1310845 | Asthma |
| rs2394998   | 6 | 31433127 | A | G | 0.1392 | -0.0476 | 0.0071 | 1.61E-11 | -6.7373 | 1310845 | Asthma |
| rs2394999   | 6 | 31433158 | G | A | 0.1392 | -0.0476 | 0.0071 | 1.58E-11 | -6.7400 | 1310845 | Asthma |
| rs4346874   | 6 | 31433597 | T | C | 0.1395 | -0.0477 | 0.0071 | 1.44E-11 | -6.7541 | 1310845 | Asthma |
| rs2395002   | 6 | 31433766 | G | A | 0.2843 | -0.0433 | 0.0054 | 1.07E-15 | -8.0186 | 1310845 | Asthma |
| rs4947315   | 6 | 31433890 | T | A | 0.1392 | -0.0473 | 0.0071 | 2.15E-11 | -6.6956 | 1310845 | Asthma |
| rs4947316   | 6 | 31433967 | T | C | 0.1374 | -0.0517 | 0.0077 | 1.79E-11 | -6.7224 | 1180923 | Asthma |
| rs4530889   | 6 | 31434006 | C | T | 0.2841 | -0.0432 | 0.0054 | 1.43E-15 | -7.9829 | 1310845 | Asthma |
| rs4947318   | 6 | 31434107 | T | C | 0.1392 | -0.0473 | 0.0071 | 2.20E-11 | -6.6923 | 1310845 | Asthma |
| rs4947319   | 6 | 31434115 | C | T | 0.2842 | -0.0433 | 0.0054 | 1.23E-15 | -8.0014 | 1310845 | Asthma |
| rs76402325  | 6 | 31434331 | A | C | 0.1392 | -0.0473 | 0.0071 | 2.13E-11 | -6.6967 | 1310845 | Asthma |
| rs2844588   | 6 | 31434351 | A | G | 0.0577 | 0.0707  | 0.0101 | 2.27E-12 | 7.0171  | 1376071 | Asthma |
| rs6934631   | 6 | 31434365 | C | T | 0.2842 | -0.0431 | 0.0054 | 1.64E-15 | -7.9662 | 1310845 | Asthma |
| rs6911878   | 6 | 31434528 | T | A | 0.2842 | -0.0433 | 0.0054 | 1.15E-15 | -8.0100 | 1310845 | Asthma |
| rs3130483   | 6 | 31434579 | A | G | 0.2842 | -0.0390 | 0.0054 | 7.32E-13 | -7.1733 | 1310845 | Asthma |
| rs6912659   | 6 | 31434677 | C | G | 0.2841 | -0.0433 | 0.0054 | 1.13E-15 | -8.0117 | 1310845 | Asthma |
| rs112417988 | 6 | 31434817 | T | C | 0.1391 | -0.0472 | 0.0071 | 2.50E-11 | -6.6733 | 1310845 | Asthma |
| rs76986566  | 6 | 31435247 | C | G | 0.1374 | -0.0514 | 0.0077 | 2.54E-11 | -6.6709 | 1180923 | Asthma |
| rs3093960   | 6 | 31435741 | T | C | 0.1622 | -0.0516 | 0.0068 | 2.26E-14 | -7.6347 | 1310845 | Asthma |
| rs7759214   | 6 | 31435846 | T | C | 0.1392 | -0.0473 | 0.0071 | 2.19E-11 | -6.6926 | 1310845 | Asthma |
| rs7759223   | 6 | 31435912 | G | A | 0.2843 | -0.0435 | 0.0054 | 7.99E-16 | -8.0543 | 1310845 | Asthma |
| rs201798310 | 6 | 31435948 | T | C | 0.0855 | -0.0729 | 0.0128 | 1.21E-08 | -5.6985 | 696825  | Asthma |
| rs3997937   | 6 | 31436014 | T | C | 0.2843 | -0.0435 | 0.0054 | 8.75E-16 | -8.0432 | 1310845 | Asthma |
| rs2516449   | 6 | 31436284 | G | C | 0.2839 | -0.0389 | 0.0054 | 8.94E-13 | -7.1459 | 1310845 | Asthma |
| rs3906280   | 6 | 31436328 | G | T | 0.1392 | -0.0473 | 0.0071 | 2.11E-11 | -6.6986 | 1310845 | Asthma |
| rs56259749  | 6 | 31436706 | G | A | 0.2841 | -0.0436 | 0.0054 | 7.38E-16 | -8.0642 | 1310845 | Asthma |
| rs2844564   | 6 | 31436855 | G | T | 0.0576 | 0.0708  | 0.0101 | 2.11E-12 | 7.0272  | 1376071 | Asthma |
| rs2848709   | 6 | 31436913 | A | G | 0.0982 | 0.0617  | 0.0082 | 4.85E-14 | 7.5360  | 1310845 | Asthma |
| rs9501123   | 6 | 31436929 | C | T | 0.1391 | -0.0471 | 0.0071 | 2.77E-11 | -6.6581 | 1310845 | Asthma |
| rs9501124   | 6 | 31437198 | A | G | 0.1391 | -0.0472 | 0.0071 | 2.40E-11 | -6.6797 | 1310845 | Asthma |
| rs9501125   | 6 | 31437254 | A | G | 0.1392 | -0.0471 | 0.0071 | 2.67E-11 | -6.6639 | 1310845 | Asthma |
| rs9295997   | 6 | 31437330 | T | C | 0.1391 | -0.0472 | 0.0071 | 2.48E-11 | -6.6745 | 1310845 | Asthma |
| rs9501593   | 6 | 31437615 | T | A | 0.1392 | -0.0471 | 0.0071 | 2.73E-11 | -6.6607 | 1310845 | Asthma |
| rs9501594   | 6 | 31437650 | T | C | 0.2841 | -0.0436 | 0.0054 | 7.07E-16 | -8.0691 | 1310845 | Asthma |
| rs9501595   | 6 | 31437827 | T | G | 0.1391 | -0.0472 | 0.0071 | 2.48E-11 | -6.6745 | 1310845 | Asthma |
| rs2596466   | 6 | 31437840 | C | T | 0.0845 | 0.0612  | 0.0087 | 2.17E-12 | 7.0234  | 1310845 | Asthma |
| rs3128981   | 6 | 31437843 | G | A | 0.2544 | 0.0444  | 0.0056 | 3.09E-15 | 7.8873  | 1310845 | Asthma |
| rs79493037  | 6 | 31438048 | G | C | 0.0688 | -0.0608 | 0.0100 | 1.09E-09 | -6.0956 | 1310845 | Asthma |
| rs7742155   | 6 | 31438306 | T | C | 0.2282 | -0.0329 | 0.0058 | 1.91E-08 | -5.6199 | 1310845 | Asthma |
| rs7742519   | 6 | 31438515 | A | C | 0.2844 | -0.0435 | 0.0054 | 8.39E-16 | -8.0482 | 1310845 | Asthma |
| rs2844528   | 6 | 31438748 | T | G | 0.2840 | -0.0388 | 0.0054 | 9.62E-13 | -7.1359 | 1310845 | Asthma |
| rs9469001   | 6 | 31439034 | G | A | 0.1393 | -0.0473 | 0.0071 | 2.25E-11 | -6.6888 | 1310845 | Asthma |
| rs9461707   | 6 | 31439306 | A | T | 0.1393 | -0.0474 | 0.0071 | 1.96E-11 | -6.7087 | 1310845 | Asthma |
| rs3749935   | 6 | 31439343 | T | A | 0.2845 | -0.0434 | 0.0054 | 8.86E-16 | -8.0416 | 1310845 | Asthma |
| rs3749937   | 6 | 31439440 | C | T | 0.2826 | -0.0442 | 0.0054 | 4.33E-16 | -8.1289 | 1310845 | Asthma |
| rs3749939   | 6 | 31439470 | C | T | 0.2840 | -0.0433 | 0.0054 | 1.15E-15 | -8.0099 | 1310845 | Asthma |
| rs7768315   | 6 | 31439622 | C | T | 0.1393 | -0.0474 | 0.0071 | 2.03E-11 | -6.7042 | 1310845 | Asthma |
| rs2524277   | 6 | 31439802 | A | G | 0.0401 | 0.0795  | 0.0122 | 6.29E-11 | 6.5369  | 1376071 | Asthma |
| rs7772549   | 6 | 31439866 | C | T | 0.2845 | -0.0432 | 0.0054 | 1.26E-15 | -7.9984 | 1310845 | Asthma |
| rs2844520   | 6 | 31439981 | T | G | 0.0511 | 0.0734  | 0.0107 | 7.67E-12 | 6.8445  | 1376071 | Asthma |
| rs9469002   | 6 | 31439995 | C | G | 0.1392 | -0.0470 | 0.0071 | 2.89E-11 | -6.6519 | 1310845 | Asthma |
| rs6915220   | 6 | 31440044 | T | A | 0.2845 | -0.0435 | 0.0054 | 7.98E-16 | -8.0544 | 1310845 | Asthma |
| rs9469003   | 6 | 31440051 | C | T | 0.1392 | -0.0471 | 0.0071 | 2.67E-11 | -6.6637 | 1310845 | Asthma |
| rs9469004   | 6 | 31440119 | C | T | 0.1582 | -0.0551 | 0.0067 | 1.90E-16 | -8.2283 | 1310845 | Asthma |
| rs2524276   | 6 | 31440488 | A | C | 0.0507 | 0.0743  | 0.0109 | 7.39E-12 | 6.8499  | 1376071 | Asthma |
| rs3132473   | 6 | 31440552 | A | T | 0.1140 | 0.0454  | 0.0078 | 4.94E-09 | 5.8493  | 1310845 | Asthma |
| rs4598124   | 6 | 31440560 | T | C | 0.1391 | -0.0473 | 0.0071 | 2.30E-11 | -6.6856 | 1310845 | Asthma |
| rs4460244   | 6 | 31440572 | C | T | 0.2845 | -0.0433 | 0.0054 | 1.09E-15 | -8.0158 | 1310845 | Asthma |
| rs4629731   | 6 | 31440739 | G | A | 0.1391 | -0.0473 | 0.0071 | 2.23E-11 | -6.6901 | 1310845 | Asthma |
| rs4460245   | 6 | 31440780 | C | T | 0.2844 | -0.0433 | 0.0054 | 1.07E-15 | -8.0191 | 1310845 | Asthma |
| rs4451178   | 6 | 31440808 | C | G | 0.1392 | -0.0474 | 0.0071 | 2.04E-11 | -6.7031 | 1310845 | Asthma |
| rs9469006   | 6 | 31440939 | A | C | 0.1391 | -0.0474 | 0.0071 | 1.97E-11 | -6.7083 | 1310845 | Asthma |

|             |   |          |   |   |        |         |        |          |          |         |        |
|-------------|---|----------|---|---|--------|---------|--------|----------|----------|---------|--------|
| rs9469007   | 6 | 31441247 | C | T | 0.2844 | -0.0432 | 0.0054 | 1.16E-15 | -8.0083  | 1310845 | Asthma |
| rs9469008   | 6 | 31441325 | G | T | 0.2751 | -0.0458 | 0.0055 | 6.07E-17 | -8.3639  | 1310845 | Asthma |
| rs2516469   | 6 | 31441365 | G | C | 0.1621 | -0.0515 | 0.0068 | 2.46E-14 | -7.6239  | 1310845 | Asthma |
| rs61447909  | 6 | 31441506 | A | G | 0.0871 | -0.0490 | 0.0083 | 3.92E-09 | -5.8877  | 1310845 | Asthma |
| rs4713465   | 6 | 31441751 | T | C | 0.1368 | -0.0492 | 0.0071 | 5.51E-12 | -6.8918  | 1310845 | Asthma |
| rs2844512   | 6 | 31441789 | C | G | 0.4122 | -0.0319 | 0.0050 | 1.23E-10 | -6.4352  | 1310845 | Asthma |
| rs28575156  | 6 | 31442080 | G | A | 0.1396 | -0.0470 | 0.0071 | 2.67E-11 | -6.6639  | 1310845 | Asthma |
| rs73404245  | 6 | 31442550 | A | G | 0.1764 | -0.0476 | 0.0063 | 6.35E-14 | -7.5008  | 1310845 | Asthma |
| rs2844510   | 6 | 31442631 | T | G | 0.1113 | 0.0456  | 0.0076 | 1.76E-09 | 6.0190   | 1376071 | Asthma |
| rs3093958   | 6 | 31442744 | G | A | 0.1133 | 0.0465  | 0.0078 | 2.25E-09 | 5.9787   | 1310845 | Asthma |
| rs6928810   | 6 | 31442747 | T | C | 0.2680 | -0.0365 | 0.0055 | 3.15E-11 | -6.6392  | 1310845 | Asthma |
| rs3899823   | 6 | 31442820 | A | G | 0.1768 | -0.0474 | 0.0063 | 7.45E-14 | -7.4797  | 1310845 | Asthma |
| rs3869129   | 6 | 31442872 | T | C | 0.1768 | -0.0473 | 0.0063 | 8.39E-14 | -7.4641  | 1310845 | Asthma |
| rs3869130   | 6 | 31442974 | T | C | 0.1768 | -0.0473 | 0.0063 | 8.65E-14 | -7.4600  | 1310845 | Asthma |
| rs3869131   | 6 | 31443108 | C | T | 0.1768 | -0.0473 | 0.0063 | 8.49E-14 | -7.4624  | 1310845 | Asthma |
| rs3869132   | 6 | 31443171 | T | C | 0.2679 | -0.0364 | 0.0055 | 3.31E-11 | -6.6323  | 1310845 | Asthma |
| rs9267088   | 6 | 31443436 | A | T | 0.1225 | 0.0425  | 0.0073 | 6.26E-09 | 5.8096   | 1310845 | Asthma |
| rs7769393   | 6 | 31443535 | G | A | 0.2520 | -0.0328 | 0.0056 | 4.78E-09 | -5.8544  | 1310845 | Asthma |
| rs7769403   | 6 | 31443544 | C | A | 0.2374 | -0.0332 | 0.0057 | 7.05E-09 | -5.7896  | 1310845 | Asthma |
| rs7769942   | 6 | 31443600 | A | G | 0.1707 | -0.0488 | 0.0070 | 2.77E-12 | -6.9888  | 1180923 | Asthma |
| rs34259803  | 6 | 31443742 | A | G | 0.1768 | -0.0472 | 0.0063 | 9.65E-14 | -7.4456  | 1310845 | Asthma |
| rs73404265  | 6 | 31443780 | T | C | 0.2374 | -0.0332 | 0.0057 | 6.57E-09 | -5.8016  | 1310845 | Asthma |
| rs2395004   | 6 | 31444736 | C | G | 0.4478 | 0.0613  | 0.0049 | 1.01E-35 | 12.4756  | 1310845 | Asthma |
| rs2395005   | 6 | 31444875 | A | G | 0.4479 | 0.0613  | 0.0049 | 9.07E-36 | 12.4846  | 1310845 | Asthma |
| rs2596465   | 6 | 31445171 | T | C | 0.4763 | -0.0627 | 0.0049 | 4.14E-38 | -12.9063 | 1310845 | Asthma |
| rs2596464   | 6 | 31445184 | C | T | 0.4787 | 0.0560  | 0.0049 | 2.06E-30 | 11.4615  | 1310845 | Asthma |
| rs2516467   | 6 | 31446021 | C | T | 0.0507 | 0.0748  | 0.0108 | 5.33E-12 | 6.8963   | 1376071 | Asthma |
| rs9267092   | 6 | 31446464 | T | G | 0.1140 | 0.0449  | 0.0078 | 7.15E-09 | 5.7872   | 1310845 | Asthma |
| rs9267093   | 6 | 31446485 | T | A | 0.3097 | 0.0310  | 0.0053 | 4.38E-09 | 5.8690   | 1310845 | Asthma |
| rs2516466   | 6 | 31446550 | G | T | 0.5007 | 0.0581  | 0.0049 | 6.69E-33 | 11.9475  | 1310845 | Asthma |
| rs2523696   | 6 | 31446954 | T | C | 0.3771 | 0.0458  | 0.0050 | 1.01E-19 | 9.0883   | 1310845 | Asthma |
| rs2516465   | 6 | 31447129 | T | G | 0.3771 | 0.0458  | 0.0050 | 9.11E-20 | 9.0990   | 1310845 | Asthma |
| rs3880461   | 6 | 31447236 | G | A | 0.0578 | 0.0711  | 0.0101 | 1.66E-12 | 7.0601   | 1376071 | Asthma |
| rs9267103   | 6 | 31447662 | A | G | 0.2028 | 0.0546  | 0.0097 | 2.04E-08 | 5.6090   | 778845  | Asthma |
| rs4458721   | 6 | 31448075 | T | C | 0.1632 | -0.0425 | 0.0071 | 2.71E-09 | -5.9482  | 1159440 | Asthma |
| rs3093957   | 6 | 31448135 | C | G | 0.4990 | -0.0412 | 0.0067 | 8.85E-10 | -6.1289  | 847307  | Asthma |
| rs2266161   | 6 | 31448248 | A | G | 0.1019 | 0.0515  | 0.0080 | 9.36E-11 | 6.4770   | 1310845 | Asthma |
| rs2516464   | 6 | 31448379 | G | A | 0.4807 | 0.0266  | 0.0049 | 4.77E-08 | 5.4599   | 1310845 | Asthma |
| rs9267110   | 6 | 31448583 | C | G | 0.3100 | 0.0307  | 0.0053 | 5.82E-09 | 5.8217   | 1310845 | Asthma |
| rs9267111   | 6 | 31448602 | G | A | 0.3075 | 0.0339  | 0.0058 | 4.71E-09 | 5.8571   | 1159440 | Asthma |
| rs2516463   | 6 | 31448759 | G | A | 0.0576 | 0.0707  | 0.0101 | 2.19E-12 | 7.0219   | 1376071 | Asthma |
| rs2524281   | 6 | 31448922 | C | A | 0.0576 | 0.0709  | 0.0101 | 1.96E-12 | 7.0376   | 1376071 | Asthma |
| rs2524280   | 6 | 31449213 | A | C | 0.0820 | 0.0651  | 0.0088 | 1.83E-13 | 7.3608   | 1310845 | Asthma |
| rs3128982   | 6 | 31449414 | G | A | 0.3098 | 0.0308  | 0.0053 | 5.52E-09 | 5.8309   | 1310845 | Asthma |
| rs9501129   | 6 | 31449619 | C | T | 0.1342 | -0.0398 | 0.0071 | 1.85E-08 | -5.6258  | 1310845 | Asthma |
| rs2516438   | 6 | 31449660 | C | T | 0.0507 | 0.0749  | 0.0108 | 4.94E-12 | 6.9072   | 1376071 | Asthma |
| rs9501130   | 6 | 31449679 | T | G | 0.1248 | -0.0452 | 0.0073 | 6.94E-10 | -6.1674  | 1310845 | Asthma |
| rs3099837   | 6 | 31449686 | A | G | 0.3098 | 0.0308  | 0.0053 | 5.33E-09 | 5.8364   | 1310845 | Asthma |
| rs2596460   | 6 | 31449733 | G | A | 0.0576 | 0.0707  | 0.0101 | 2.13E-12 | 7.0258   | 1376071 | Asthma |
| rs2523695   | 6 | 31449868 | T | G | 0.0576 | 0.0709  | 0.0101 | 1.95E-12 | 7.0377   | 1376071 | Asthma |
| rs2596458   | 6 | 31449870 | T | C | 0.0576 | 0.0709  | 0.0101 | 1.95E-12 | 7.0383   | 1376071 | Asthma |
| rs2523694   | 6 | 31450095 | A | G | 0.4806 | 0.0268  | 0.0049 | 3.49E-08 | 5.5151   | 1310845 | Asthma |
| rs2596457   | 6 | 31450245 | G | A | 0.0576 | 0.0711  | 0.0101 | 1.61E-12 | 7.0650   | 1376071 | Asthma |
| rs3099836   | 6 | 31450293 | C | A | 0.3099 | 0.0307  | 0.0053 | 5.87E-09 | 5.8203   | 1310845 | Asthma |
| rs2596456   | 6 | 31450636 | G | A | 0.4806 | 0.0266  | 0.0049 | 4.21E-08 | 5.4818   | 1310845 | Asthma |
| rs2596455   | 6 | 31450698 | G | A | 0.4806 | 0.0265  | 0.0049 | 4.75E-08 | 5.4605   | 1310845 | Asthma |
| rs3131624   | 6 | 31450785 | T | G | 0.3078 | -0.0323 | 0.0053 | 1.06E-09 | -6.1003  | 1310845 | Asthma |
| rs7450458   | 6 | 31450839 | A | G | 0.0651 | -0.0573 | 0.0103 | 2.64E-08 | -5.5639  | 1310845 | Asthma |
| rs2516461   | 6 | 31450875 | A | T | 0.0576 | 0.0707  | 0.0101 | 2.20E-12 | 7.0209   | 1376071 | Asthma |
| rs2395027   | 6 | 31451215 | T | C | 0.0576 | 0.0708  | 0.0101 | 2.07E-12 | 7.0298   | 1376071 | Asthma |
| rs3130901   | 6 | 31451288 | T | A | 0.3191 | 0.0316  | 0.0052 | 1.56E-09 | 6.0375   | 1310845 | Asthma |
| rs2516458   | 6 | 31451610 | C | T | 0.4806 | 0.0265  | 0.0049 | 4.78E-08 | 5.4594   | 1310845 | Asthma |
| rs2516436   | 6 | 31452100 | G | C | 0.4809 | 0.0271  | 0.0049 | 2.59E-08 | 5.5674   | 1310845 | Asthma |
| rs3130902   | 6 | 31452128 | T | C | 0.3098 | 0.0309  | 0.0053 | 4.70E-09 | 5.8574   | 1310845 | Asthma |
| rs2516456   | 6 | 31452241 | C | T | 0.4807 | 0.0266  | 0.0049 | 4.58E-08 | 5.4670   | 1310845 | Asthma |
| rs2259388   | 6 | 31452508 | C | T | 0.0576 | 0.0706  | 0.0101 | 2.30E-12 | 7.0151   | 1376071 | Asthma |
| rs2516455   | 6 | 31452795 | G | T | 0.3173 | -0.0327 | 0.0052 | 4.71E-10 | -6.2285  | 1310845 | Asthma |
| rs2596556   | 6 | 31452879 | G | C | 0.0560 | 0.0713  | 0.0112 | 1.69E-10 | 6.3875   | 1224666 | Asthma |
| rs2523691   | 6 | 31452910 | A | G | 0.0576 | 0.0705  | 0.0101 | 2.53E-12 | 7.0017   | 1376071 | Asthma |
| rs2523689   | 6 | 31453079 | T | C | 0.0576 | 0.0706  | 0.0101 | 2.39E-12 | 7.0097   | 1376071 | Asthma |
| rs2516454   | 6 | 31453086 | A | T | 0.0576 | 0.0706  | 0.0101 | 2.41E-12 | 7.0084   | 1376071 | Asthma |
| rs2523688   | 6 | 31453134 | T | A | 0.0575 | 0.0703  | 0.0101 | 3.09E-12 | 6.9736   | 1376071 | Asthma |
| rs2263317   | 6 | 31453581 | T | C | 0.0576 | 0.0709  | 0.0101 | 2.00E-12 | 7.0342   | 1376071 | Asthma |
| rs115510922 | 6 | 31453622 | A | C | 0.0609 | -0.0630 | 0.0107 | 3.38E-09 | -5.9123  | 1310845 | Asthma |

|            |   |          |   |   |        |         |        |          |         |         |        |
|------------|---|----------|---|---|--------|---------|--------|----------|---------|---------|--------|
| rs2105957  | 6 | 31453863 | G | C | 0.0949 | 0.0908  | 0.0133 | 7.21E-12 | 6.8536  | 778845  | Asthma |
| rs3099847  | 6 | 31455283 | T | C | 0.0754 | 0.0890  | 0.0143 | 4.29E-10 | 6.2430  | 778845  | Asthma |
| rs3128984  | 6 | 31456751 | G | A | 0.0871 | 0.0944  | 0.0142 | 3.15E-11 | 6.6395  | 778845  | Asthma |
| rs2395028  | 6 | 31456980 | T | C | 0.0576 | 0.0705  | 0.0101 | 2.51E-12 | 7.0024  | 1376071 | Asthma |
| rs2596480  | 6 | 31458208 | T | C | 0.0576 | 0.0701  | 0.0101 | 3.30E-12 | 6.9645  | 1376071 | Asthma |
| rs2523684  | 6 | 31458622 | G | A | 0.0820 | 0.0653  | 0.0088 | 1.62E-13 | 7.3771  | 1310845 | Asthma |
| rs2516452  | 6 | 31459318 | G | A | 0.1177 | 0.0426  | 0.0074 | 7.75E-09 | 5.7738  | 1376071 | Asthma |
| rs79245272 | 6 | 31459412 | T | C | 0.0612 | -0.0631 | 0.0106 | 2.87E-09 | -5.9389 | 1310845 | Asthma |
| rs2254620  | 6 | 31459454 | A | G | 0.0256 | 0.1244  | 0.0153 | 4.53E-16 | 8.1233  | 1310845 | Asthma |
| rs2596471  | 6 | 31461134 | A | G | 0.1887 | -0.0395 | 0.0063 | 4.53E-10 | -6.2347 | 1310845 | Asthma |
| rs3130477  | 6 | 31461143 | C | T | 0.1159 | 0.0478  | 0.0077 | 4.94E-10 | 6.2211  | 1310845 | Asthma |
| rs2596472  | 6 | 31461190 | G | A | 0.2773 | -0.0536 | 0.0055 | 2.09E-22 | -9.7372 | 1310845 | Asthma |
| rs3132089  | 6 | 31462233 | A | G | 0.1138 | 0.0467  | 0.0078 | 1.69E-09 | 6.0252  | 1310845 | Asthma |
| rs3099839  | 6 | 31462288 | T | C | 0.1138 | 0.0467  | 0.0078 | 1.68E-09 | 6.0263  | 1310845 | Asthma |
| rs3094605  | 6 | 31462917 | C | G | 0.1138 | 0.0466  | 0.0078 | 1.80E-09 | 6.0148  | 1310845 | Asthma |
| rs3132090  | 6 | 31462975 | A | G | 0.1138 | 0.0464  | 0.0078 | 2.28E-09 | 5.9766  | 1310845 | Asthma |
| rs2518030  | 6 | 31463305 | A | G | 0.1905 | -0.0408 | 0.0063 | 1.18E-10 | -6.4422 | 1310845 | Asthma |
| rs2255223  | 6 | 31463946 | A | G | 0.0395 | 0.0771  | 0.0123 | 3.37E-10 | 6.2805  | 1376071 | Asthma |
| rs3130907  | 6 | 31464036 | G | A | 0.1138 | 0.0466  | 0.0078 | 1.88E-09 | 6.0083  | 1310845 | Asthma |
| rs3128986  | 6 | 31465916 | C | T | 0.1181 | 0.0506  | 0.0087 | 6.03E-09 | 5.8158  | 1024845 | Asthma |
| rs3131619  | 6 | 31466554 | T | A | 0.1139 | 0.0466  | 0.0078 | 1.90E-09 | 6.0065  | 1310845 | Asthma |
| rs2523679  | 6 | 31466557 | T | C | 0.1014 | 0.0494  | 0.0080 | 6.05E-10 | 6.1890  | 1310845 | Asthma |
| rs3094013  | 6 | 31466589 | A | G | 0.1139 | 0.0467  | 0.0078 | 1.68E-09 | 6.0259  | 1310845 | Asthma |
| rs3094012  | 6 | 31466743 | C | G | 0.1180 | 0.0468  | 0.0076 | 7.00E-10 | 6.1660  | 1310845 | Asthma |
| rs3131618  | 6 | 31466844 | G | A | 0.1132 | 0.0480  | 0.0078 | 7.19E-10 | 6.1619  | 1310845 | Asthma |
| rs2523677  | 6 | 31467024 | T | C | 0.0997 | 0.0474  | 0.0081 | 4.24E-09 | 5.8745  | 1310845 | Asthma |
| rs2523676  | 6 | 31468214 | T | C | 0.1937 | 0.0556  | 0.0063 | 8.54E-19 | 8.8527  | 1251217 | Asthma |
| rs2859448  | 6 | 31468496 | C | T | 0.2685 | -0.0327 | 0.0055 | 3.19E-09 | -5.9216 | 1310845 | Asthma |
| rs2596454  | 6 | 31468535 | A | G | 0.2862 | -0.0309 | 0.0054 | 1.15E-08 | -5.7073 | 1310845 | Asthma |
| rs2518027  | 6 | 31468699 | T | G | 0.3151 | -0.0298 | 0.0052 | 1.32E-08 | -5.6839 | 1310845 | Asthma |
| rs2844508  | 6 | 31468722 | G | C | 0.3497 | -0.0374 | 0.0051 | 3.53E-13 | -7.2722 | 1310845 | Asthma |
| rs2844507  | 6 | 31468804 | T | C | 0.2644 | -0.0337 | 0.0056 | 1.26E-09 | -6.0725 | 1310845 | Asthma |
| rs2244578  | 6 | 31468832 | G | C | 0.2851 | -0.0330 | 0.0054 | 1.06E-09 | -6.0999 | 1310845 | Asthma |
| rs3131617  | 6 | 31468961 | T | A | 0.1147 | 0.0427  | 0.0077 | 3.27E-08 | 5.5263  | 1310845 | Asthma |
| rs2844506  | 6 | 31469013 | T | C | 0.2851 | -0.0332 | 0.0054 | 8.87E-10 | -6.1286 | 1310845 | Asthma |
| rs2596453  | 6 | 31469125 | C | T | 0.2852 | -0.0331 | 0.0054 | 9.79E-10 | -6.1127 | 1310845 | Asthma |
| rs2596452  | 6 | 31469381 | T | G | 0.2851 | -0.0330 | 0.0054 | 1.05E-09 | -6.1012 | 1310845 | Asthma |
| rs2596451  | 6 | 31469418 | A | G | 0.2851 | -0.0330 | 0.0054 | 1.08E-09 | -6.0968 | 1310845 | Asthma |
| rs2523672  | 6 | 31469443 | G | C | 0.2851 | -0.0330 | 0.0054 | 1.06E-09 | -6.1004 | 1310845 | Asthma |
| rs2523671  | 6 | 31469541 | C | T | 0.2851 | -0.0332 | 0.0054 | 8.91E-10 | -6.1277 | 1310845 | Asthma |
| rs2523670  | 6 | 31469715 | C | G | 0.1617 | -0.0504 | 0.0068 | 1.30E-13 | -7.4063 | 1310845 | Asthma |
| rs2523669  | 6 | 31470095 | C | T | 0.3495 | -0.0376 | 0.0051 | 2.40E-13 | -7.3245 | 1310845 | Asthma |
| rs2523668  | 6 | 31470319 | A | C | 0.1590 | 0.0721  | 0.0070 | 1.23E-24 | 10.2462 | 1180923 | Asthma |
| rs2596450  | 6 | 31470466 | G | A | 0.3495 | -0.0375 | 0.0051 | 2.94E-13 | -7.2973 | 1310845 | Asthma |
| rs2596449  | 6 | 31470613 | A | G | 0.2850 | -0.0326 | 0.0054 | 1.60E-09 | -6.0342 | 1310845 | Asthma |
| rs2596448  | 6 | 31470655 | G | A | 0.2642 | -0.0338 | 0.0056 | 1.15E-09 | -6.0874 | 1310845 | Asthma |
| rs2523666  | 6 | 31470817 | C | T | 0.2850 | -0.0328 | 0.0054 | 1.35E-09 | -6.0612 | 1310845 | Asthma |
| rs2844505  | 6 | 31471286 | C | T | 0.2851 | -0.0331 | 0.0054 | 9.33E-10 | -6.1205 | 1310845 | Asthma |
| rs9688839  | 6 | 31471882 | G | A | 0.0620 | -0.0597 | 0.0099 | 1.56E-09 | -6.0376 | 1310845 | Asthma |
| rs2523663  | 6 | 31471963 | G | T | 0.3621 | -0.0406 | 0.0051 | 1.58E-15 | -7.9702 | 1310845 | Asthma |
| rs14597    | 6 | 31472237 | A | C | 0.4114 | 0.0301  | 0.0049 | 1.19E-09 | 6.0816  | 1310845 | Asthma |
| rs2596446  | 6 | 31472418 | G | A | 0.2847 | -0.0333 | 0.0054 | 7.80E-10 | -6.1490 | 1310845 | Asthma |
| rs2516442  | 6 | 31472601 | T | A | 0.2639 | -0.0345 | 0.0056 | 5.63E-10 | -6.2004 | 1310845 | Asthma |
| rs3828889  | 6 | 31472874 | T | C | 0.2845 | -0.0330 | 0.0054 | 1.11E-09 | -6.0927 | 1310845 | Asthma |
| rs3828890  | 6 | 31472892 | G | C | 0.1089 | -0.0457 | 0.0080 | 1.05E-08 | -5.7224 | 1310845 | Asthma |
| rs9267150  | 6 | 31473104 | T | C | 0.1092 | -0.0463 | 0.0080 | 6.17E-09 | -5.8121 | 1310845 | Asthma |
| rs9267153  | 6 | 31474219 | C | T | 0.1093 | -0.0462 | 0.0080 | 6.61E-09 | -5.8007 | 1310845 | Asthma |
| rs6940467  | 6 | 31474360 | G | A | 0.1099 | -0.0465 | 0.0079 | 4.92E-09 | -5.8500 | 1310845 | Asthma |
| rs79501286 | 6 | 31475135 | A | G | 0.0947 | 0.0461  | 0.0082 | 2.30E-08 | 5.5877  | 1310845 | Asthma |
| rs2596443  | 6 | 31475659 | A | G | 0.2873 | -0.0352 | 0.0055 | 1.47E-10 | -6.4088 | 1310845 | Asthma |
| rs2516516  | 6 | 31475793 | T | C | 0.1643 | -0.0530 | 0.0067 | 3.74E-15 | -7.8633 | 1310845 | Asthma |
| rs2523655  | 6 | 31476827 | A | G | 0.1888 | -0.0547 | 0.0064 | 8.77E-18 | -8.5891 | 1310845 | Asthma |
| rs2523654  | 6 | 31477127 | C | G | 0.3395 | 0.0394  | 0.0051 | 1.72E-14 | 7.6700  | 1310845 | Asthma |
| rs2516435  | 6 | 31477157 | A | C | 0.3395 | 0.0394  | 0.0051 | 1.64E-14 | 7.6762  | 1310845 | Asthma |
| rs2516515  | 6 | 31477190 | C | A | 0.3395 | 0.0395  | 0.0051 | 1.54E-14 | 7.6845  | 1310845 | Asthma |
| rs2844502  | 6 | 31477439 | A | G | 0.3396 | 0.0393  | 0.0051 | 1.95E-14 | 7.6538  | 1310845 | Asthma |
| rs17200593 | 6 | 31477699 | A | G | 0.0944 | 0.0464  | 0.0083 | 1.90E-08 | 5.6212  | 1310845 | Asthma |
| rs2248251  | 6 | 31477721 | A | G | 0.3394 | 0.0394  | 0.0051 | 1.70E-14 | 7.6716  | 1310845 | Asthma |
| rs17206973 | 6 | 31477787 | T | C | 0.0944 | 0.0463  | 0.0083 | 2.02E-08 | 5.6106  | 1310845 | Asthma |
| rs2395488  | 6 | 31478132 | G | A | 0.3396 | 0.0393  | 0.0051 | 1.84E-14 | 7.6611  | 1310845 | Asthma |
| rs2395489  | 6 | 31478230 | C | T | 0.3391 | 0.0395  | 0.0051 | 1.51E-14 | 7.6866  | 1310845 | Asthma |
| rs2248351  | 6 | 31478232 | C | A | 0.3380 | 0.0401  | 0.0056 | 1.02E-12 | 7.1273  | 1159440 | Asthma |
| rs2248352  | 6 | 31478241 | G | A | 0.3352 | 0.0405  | 0.0052 | 4.15E-15 | 7.8503  | 1310845 | Asthma |
| rs2905726  | 6 | 31478311 | C | G | 0.3395 | 0.0394  | 0.0051 | 1.59E-14 | 7.6805  | 1310845 | Asthma |

|             |   |          |   |   |        |         |        |          |         |         |        |
|-------------|---|----------|---|---|--------|---------|--------|----------|---------|---------|--------|
| rs2904778   | 6 | 31478312 | G | C | 0.3384 | 0.0402  | 0.0056 | 8.47E-13 | 7.1533  | 1159440 | Asthma |
| rs2904777   | 6 | 31478352 | C | T | 0.3395 | 0.0394  | 0.0051 | 1.57E-14 | 7.6821  | 1310845 | Asthma |
| rs2516425   | 6 | 31478423 | G | A | 0.3394 | 0.0395  | 0.0051 | 1.50E-14 | 7.6879  | 1310845 | Asthma |
| rs2248459   | 6 | 31478933 | G | A | 0.3389 | 0.0393  | 0.0051 | 1.93E-14 | 7.6551  | 1310845 | Asthma |
| rs2243429   | 6 | 31479043 | T | G | 0.3394 | 0.0394  | 0.0051 | 1.68E-14 | 7.6732  | 1310845 | Asthma |
| rs79118723  | 6 | 31479143 | T | C | 0.0408 | -0.1041 | 0.0122 | 1.66E-17 | -8.5155 | 1310845 | Asthma |
| rs2248477   | 6 | 31479228 | G | C | 0.0274 | 0.1213  | 0.0151 | 1.05E-15 | 8.0204  | 1310845 | Asthma |
| rs75303729  | 6 | 31479710 | A | G | 0.0944 | 0.0464  | 0.0083 | 1.95E-08 | 5.6164  | 1310845 | Asthma |
| rs2596536   | 6 | 31480071 | T | C | 0.3395 | 0.0391  | 0.0051 | 2.50E-14 | 7.6217  | 1310845 | Asthma |
| rs2523651   | 6 | 31480377 | A | G | 0.3797 | -0.0376 | 0.0050 | 4.66E-14 | -7.5410 | 1310845 | Asthma |
| rs2516424   | 6 | 31480538 | G | A | 0.3395 | 0.0394  | 0.0051 | 1.68E-14 | 7.6727  | 1310845 | Asthma |
| rs2248613   | 6 | 31480655 | T | G | 0.3394 | 0.0395  | 0.0051 | 1.49E-14 | 7.6885  | 1310845 | Asthma |
| rs2248617   | 6 | 31480756 | T | C | 0.3395 | 0.0394  | 0.0051 | 1.62E-14 | 7.6779  | 1310845 | Asthma |
| rs3099843   | 6 | 31480787 | T | G | 0.1285 | 0.0467  | 0.0080 | 4.55E-09 | 5.8627  | 942825  | Asthma |
| rs3749946   | 6 | 31481085 | A | C | 0.0672 | -0.0917 | 0.0100 | 3.85E-20 | -9.1922 | 1294204 | Asthma |
| rs3099844   | 6 | 31481199 | A | C | 0.1172 | 0.0444  | 0.0076 | 6.10E-09 | 5.8140  | 1310845 | Asthma |
| rs2248709   | 6 | 31481269 | G | A | 0.3395 | 0.0394  | 0.0051 | 1.55E-14 | 7.6835  | 1310845 | Asthma |
| rs2904776   | 6 | 31481304 | G | C | 0.3798 | -0.0375 | 0.0050 | 5.84E-14 | -7.5117 | 1310845 | Asthma |
| rs7757420   | 6 | 31481436 | T | A | 0.0429 | -0.1011 | 0.0134 | 4.15E-14 | -7.5559 | 1024845 | Asthma |
| rs2905722   | 6 | 31481550 | A | G | 0.1620 | -0.0493 | 0.0068 | 3.60E-13 | -7.2698 | 1310845 | Asthma |
| rs2516421   | 6 | 31481745 | T | C | 0.0650 | 0.0647  | 0.0106 | 1.14E-09 | 6.0887  | 1128634 | Asthma |
| rs3130908   | 6 | 31481775 | C | T | 0.1146 | 0.0441  | 0.0077 | 1.13E-08 | 5.7093  | 1310845 | Asthma |
| rs2516420   | 6 | 31481843 | T | C | 0.0619 | 0.0632  | 0.0099 | 1.43E-10 | 6.4124  | 1310845 | Asthma |
| rs3130909   | 6 | 31481933 | C | T | 0.1146 | 0.0440  | 0.0077 | 1.20E-08 | 5.7000  | 1310845 | Asthma |
| rs2516510   | 6 | 31482137 | C | T | 0.3011 | 0.0362  | 0.0053 | 6.90E-12 | 6.8598  | 1310845 | Asthma |
| rs2516508   | 6 | 31482563 | C | T | 0.3012 | 0.0362  | 0.0053 | 6.94E-12 | 6.8590  | 1310845 | Asthma |
| rs112417354 | 6 | 31482790 | A | G | 0.0944 | 0.0470  | 0.0083 | 1.30E-08 | 5.6855  | 1310845 | Asthma |
| rs3131642   | 6 | 31482860 | A | G | 0.1172 | 0.0445  | 0.0076 | 5.72E-09 | 5.8246  | 1310845 | Asthma |
| rs2860233   | 6 | 31482925 | A | G | 0.3012 | 0.0362  | 0.0053 | 7.38E-12 | 6.8500  | 1310845 | Asthma |
| rs2905751   | 6 | 31482961 | C | G | 0.3008 | 0.0368  | 0.0054 | 6.41E-12 | 6.8703  | 1284712 | Asthma |
| rs2395032   | 6 | 31483047 | A | G | 0.2996 | 0.0378  | 0.0064 | 2.92E-09 | 5.9362  | 1060172 | Asthma |
| rs2516507   | 6 | 31483436 | T | C | 0.4158 | -0.0317 | 0.0049 | 1.18E-10 | -6.4423 | 1310845 | Asthma |
| rs2523708   | 6 | 31483502 | T | C | 0.3012 | 0.0359  | 0.0053 | 1.11E-11 | 6.7917  | 1310845 | Asthma |
| rs3132470   | 6 | 31483593 | G | A | 0.1166 | 0.0444  | 0.0076 | 6.16E-09 | 5.8124  | 1310845 | Asthma |
| rs2905747   | 6 | 31483699 | A | G | 0.2400 | -0.0416 | 0.0058 | 1.08E-12 | -7.1200 | 1310845 | Asthma |
| rs2523707   | 6 | 31483755 | G | A | 0.3023 | 0.0368  | 0.0053 | 3.10E-12 | 6.9734  | 1310845 | Asthma |
| rs2523706   | 6 | 31483790 | C | T | 0.3012 | 0.0361  | 0.0053 | 7.78E-12 | 6.8425  | 1310845 | Asthma |
| rs3094011   | 6 | 31484059 | C | T | 0.1172 | 0.0445  | 0.0076 | 5.55E-09 | 5.8297  | 1310845 | Asthma |
| rs2904602   | 6 | 31484070 | A | G | 0.1167 | 0.0541  | 0.0074 | 2.45E-13 | 7.3218  | 1310845 | Asthma |
| rs3094010   | 6 | 31484071 | T | C | 0.1171 | 0.0442  | 0.0076 | 6.88E-09 | 5.7940  | 1310845 | Asthma |
| rs2904601   | 6 | 31484146 | A | T | 0.3012 | 0.0361  | 0.0053 | 7.63E-12 | 6.8453  | 1310845 | Asthma |
| rs3016009   | 6 | 31484184 | T | C | 0.2972 | 0.0436  | 0.0071 | 6.60E-10 | 6.1755  | 873440  | Asthma |
| rs143439747 | 6 | 31484262 | A | G | 0.0541 | -0.1025 | 0.0124 | 1.21E-16 | -8.2822 | 1159440 | Asthma |
| rs28399676  | 6 | 31484263 | G | C | 0.4182 | -0.0307 | 0.0054 | 1.12E-08 | -5.7115 | 1159440 | Asthma |
| rs28698549  | 6 | 31484275 | A | G | 0.4977 | -0.0412 | 0.0053 | 8.95E-15 | -7.7534 | 1159440 | Asthma |
| rs28405701  | 6 | 31484313 | A | G | 0.2860 | 0.0400  | 0.0056 | 8.53E-13 | 7.1523  | 1225084 | Asthma |
| rs28570087  | 6 | 31484387 | C | G | 0.4136 | -0.0321 | 0.0049 | 7.71E-11 | -6.5061 | 1310845 | Asthma |
| rs28432273  | 6 | 31484436 | T | C | 0.4150 | -0.0304 | 0.0054 | 1.63E-08 | -5.6476 | 1159440 | Asthma |
| rs2516506   | 6 | 31484490 | G | C | 0.3011 | 0.0360  | 0.0053 | 9.50E-12 | 6.8140  | 1310845 | Asthma |
| rs2904789   | 6 | 31484655 | C | T | 0.4402 | -0.0340 | 0.0049 | 2.89E-12 | -6.9833 | 1310845 | Asthma |
| rs2516505   | 6 | 31484666 | G | C | 0.3012 | 0.0361  | 0.0053 | 8.04E-12 | 6.8379  | 1310845 | Asthma |
| rs2516504   | 6 | 31484698 | A | C | 0.3013 | 0.0362  | 0.0053 | 6.97E-12 | 6.8582  | 1310845 | Asthma |
| rs2516419   | 6 | 31484896 | T | C | 0.3012 | 0.0361  | 0.0053 | 7.84E-12 | 6.8415  | 1310845 | Asthma |
| rs2904788   | 6 | 31484938 | A | C | 0.4157 | -0.0319 | 0.0049 | 8.42E-11 | -6.4929 | 1310845 | Asthma |
| rs2523701   | 6 | 31485182 | C | T | 0.3011 | 0.0361  | 0.0053 | 8.60E-12 | 6.8283  | 1310845 | Asthma |
| rs2523700   | 6 | 31485252 | C | G | 0.3012 | 0.0360  | 0.0053 | 9.02E-12 | 6.8214  | 1310845 | Asthma |
| rs2905738   | 6 | 31485293 | A | T | 0.4153 | -0.0322 | 0.0049 | 6.25E-11 | -6.5376 | 1310845 | Asthma |
| rs2905737   | 6 | 31485366 | A | G | 0.2942 | 0.0409  | 0.0067 | 8.70E-10 | 6.1317  | 1000544 | Asthma |
| rs2516500   | 6 | 31485863 | T | C | 0.3028 | 0.0354  | 0.0052 | 1.47E-11 | 6.7504  | 1310845 | Asthma |
| rs2428500   | 6 | 31486022 | C | T | 0.4046 | -0.0316 | 0.0050 | 2.89E-10 | -6.3046 | 1284712 | Asthma |
| rs2523699   | 6 | 31486093 | G | A | 0.2817 | 0.0590  | 0.0086 | 8.03E-12 | 6.8381  | 778845  | Asthma |
| rs144596166 | 6 | 31486585 | G | C | 0.0685 | -0.1258 | 0.0160 | 4.31E-15 | -7.8454 | 778845  | Asthma |
| rs564276051 | 6 | 31488483 | T | C | 0.0276 | -0.1402 | 0.0198 | 1.35E-12 | -7.0898 | 1003385 | Asthma |
| rs9267257   | 6 | 31488485 | A | C | 0.1980 | -0.0353 | 0.0063 | 1.74E-08 | -5.6359 | 1310845 | Asthma |
| rs3132469   | 6 | 31488790 | A | G | 0.1581 | -0.0543 | 0.0069 | 2.60E-15 | -7.9088 | 1310845 | Asthma |
| rs113551020 | 6 | 31489063 | C | T | 0.0946 | 0.0468  | 0.0083 | 1.56E-08 | 5.6549  | 1310845 | Asthma |
| rs3130920   | 6 | 31490182 | C | G | 0.1228 | 0.0523  | 0.0080 | 6.20E-11 | 6.5390  | 1159440 | Asthma |
| rs9267293   | 6 | 31490731 | G | C | 0.2000 | -0.0347 | 0.0063 | 2.80E-08 | -5.5537 | 1310845 | Asthma |
| rs2395490   | 6 | 31491216 | A | G | 0.4664 | -0.0314 | 0.0055 | 8.10E-09 | -5.7664 | 1133307 | Asthma |
| rs3130921   | 6 | 31493166 | C | G | 0.3442 | -0.0362 | 0.0051 | 1.24E-12 | -7.1009 | 1310845 | Asthma |
| rs3130922   | 6 | 31493312 | A | G | 0.3440 | -0.0358 | 0.0051 | 2.24E-12 | -7.0190 | 1310845 | Asthma |
| rs2904597   | 6 | 31493355 | G | C | 0.2180 | 0.0402  | 0.0058 | 3.69E-12 | 6.9488  | 1310845 | Asthma |
| rs2507971   | 6 | 31493595 | A | T | 0.4068 | -0.0398 | 0.0050 | 1.11E-15 | -8.0145 | 1310845 | Asthma |
| rs2894221   | 6 | 31493994 | A | T | 0.3894 | 0.0393  | 0.0050 | 3.40E-15 | 7.8753  | 1310845 | Asthma |

|             |   |          |   |   |        |         |        |          |         |         |        |
|-------------|---|----------|---|---|--------|---------|--------|----------|---------|---------|--------|
| rs2395041   | 6 | 31494018 | C | A | 0.3907 | -0.0446 | 0.0051 | 1.68E-18 | -8.7771 | 1284712 | Asthma |
| rs2395042   | 6 | 31494040 | A | C | 0.3009 | -0.0448 | 0.0053 | 3.00E-17 | -8.4466 | 1310845 | Asthma |
| rs2395043   | 6 | 31494189 | T | C | 0.3010 | -0.0445 | 0.0053 | 4.45E-17 | -8.4004 | 1310845 | Asthma |
| rs2395044   | 6 | 31494202 | T | C | 0.4513 | 0.0278  | 0.0049 | 1.42E-08 | 5.6707  | 1310845 | Asthma |
| rs2894222   | 6 | 31494258 | A | G | 0.4514 | 0.0277  | 0.0049 | 1.50E-08 | 5.6613  | 1310845 | Asthma |
| rs3130923   | 6 | 31494358 | A | G | 0.1251 | 0.0470  | 0.0081 | 6.38E-09 | 5.8066  | 942825  | Asthma |
| rs3130924   | 6 | 31494471 | G | T | 0.4246 | 0.0300  | 0.0049 | 1.24E-09 | 6.0757  | 1310845 | Asthma |
| rs3095235   | 6 | 31495393 | G | C | 0.2054 | -0.0344 | 0.0062 | 2.49E-08 | -5.5737 | 1310845 | Asthma |
| rs3130925   | 6 | 31495844 | A | G | 0.2603 | -0.0439 | 0.0057 | 9.28E-15 | -7.7487 | 1310845 | Asthma |
| rs3130926   | 6 | 31495903 | G | A | 0.2539 | -0.0498 | 0.0068 | 1.92E-13 | -7.3540 | 1024845 | Asthma |
| rs2534676   | 6 | 31496252 | C | T | 0.3845 | -0.0282 | 0.0050 | 1.83E-08 | -5.6276 | 1310845 | Asthma |
| rs9469017   | 6 | 31496662 | A | G | 0.0627 | -0.0862 | 0.0120 | 5.71E-13 | -7.2075 | 1024845 | Asthma |
| rs3095234   | 6 | 31496794 | C | T | 0.2603 | -0.0439 | 0.0057 | 9.45E-15 | -7.7464 | 1310845 | Asthma |
| rs3130927   | 6 | 31497215 | A | G | 0.2603 | -0.0440 | 0.0057 | 8.93E-15 | -7.7536 | 1310845 | Asthma |
| rs6922431   | 6 | 31497253 | C | T | 0.0628 | -0.0822 | 0.0099 | 1.36E-16 | -8.2679 | 1310845 | Asthma |
| rs3094005   | 6 | 31497270 | T | G | 0.1143 | 0.0449  | 0.0077 | 6.63E-09 | 5.8000  | 1310845 | Asthma |
| rs2534674   | 6 | 31497326 | T | C | 0.3845 | -0.0283 | 0.0050 | 1.64E-08 | -5.6460 | 1310845 | Asthma |
| rs114861390 | 6 | 31498069 | A | T | 0.0615 | 0.0657  | 0.0108 | 1.09E-09 | 6.0951  | 1159440 | Asthma |
| rs2516497   | 6 | 31498128 | T | G | 0.0623 | 0.0639  | 0.0098 | 7.07E-11 | 6.5192  | 1310845 | Asthma |
| rs3828916   | 6 | 31498138 | G | C | 0.2603 | -0.0439 | 0.0057 | 9.81E-15 | -7.7416 | 1310845 | Asthma |
| rs3093951   | 6 | 31498551 | G | T | 0.2566 | -0.0565 | 0.0079 | 7.51E-13 | -7.1700 | 847307  | Asthma |
| rs3134897   | 6 | 31498770 | T | C | 0.2603 | -0.0439 | 0.0057 | 9.38E-15 | -7.7475 | 1310845 | Asthma |
| rs371143509 | 6 | 31498818 | T | G | 0.0629 | -0.0874 | 0.0137 | 1.64E-10 | -6.3922 | 873440  | Asthma |
| rs28718430  | 6 | 31500282 | T | C | 0.1176 | 0.0630  | 0.0089 | 1.34E-12 | 7.0898  | 1003385 | Asthma |
| rs2534666   | 6 | 31500769 | A | G | 0.3839 | -0.0279 | 0.0050 | 2.61E-08 | -5.5661 | 1310845 | Asthma |
| rs140311576 | 6 | 31501041 | C | T | 0.0261 | -0.1300 | 0.0167 | 8.07E-15 | -7.7664 | 1301353 | Asthma |
| rs3094003   | 6 | 31501474 | C | G | 0.2603 | -0.0441 | 0.0057 | 7.61E-15 | -7.7739 | 1310845 | Asthma |
| rs2855807   | 6 | 31501546 | C | T | 0.3839 | -0.0279 | 0.0050 | 2.76E-08 | -5.5558 | 1310845 | Asthma |
| rs3093955   | 6 | 31501872 | G | T | 0.2603 | -0.0441 | 0.0057 | 7.38E-15 | -7.7778 | 1310845 | Asthma |
| rs3095233   | 6 | 31501997 | G | A | 0.1143 | 0.0446  | 0.0077 | 8.23E-09 | 5.7638  | 1310845 | Asthma |
| rs2534663   | 6 | 31502156 | G | A | 0.3839 | -0.0279 | 0.0050 | 2.69E-08 | -5.5607 | 1310845 | Asthma |
| rs3095231   | 6 | 31502566 | G | A | 0.2603 | -0.0441 | 0.0057 | 7.23E-15 | -7.7805 | 1310845 | Asthma |
| rs2855809   | 6 | 31502575 | T | A | 0.3839 | -0.0279 | 0.0050 | 2.73E-08 | -5.5580 | 1310845 | Asthma |
| rs3095230   | 6 | 31502896 | G | A | 0.2603 | -0.0441 | 0.0057 | 7.15E-15 | -7.7819 | 1310845 | Asthma |
| rs2855810   | 6 | 31503352 | C | A | 0.3839 | -0.0279 | 0.0050 | 2.72E-08 | -5.5587 | 1310845 | Asthma |
| rs3094002   | 6 | 31503445 | A | G | 0.2603 | -0.0441 | 0.0057 | 7.14E-15 | -7.7821 | 1310845 | Asthma |
| rs2534659   | 6 | 31504372 | G | A | 0.3839 | -0.0279 | 0.0050 | 2.80E-08 | -5.5534 | 1310845 | Asthma |
| rs2516426   | 6 | 31504531 | C | T | 0.3839 | -0.0279 | 0.0050 | 2.73E-08 | -5.5583 | 1310845 | Asthma |
| rs2534658   | 6 | 31504567 | G | A | 0.1168 | 0.0618  | 0.0080 | 8.52E-15 | 7.7596  | 1216250 | Asthma |
| rs2855812   | 6 | 31504943 | T | G | 0.2376 | 0.0588  | 0.0057 | 3.87E-25 | 10.3577 | 1310845 | Asthma |
| rs146398018 | 6 | 31505004 | T | C | 0.0260 | -0.1296 | 0.0168 | 1.03E-14 | -7.7346 | 1301353 | Asthma |
| rs3131640   | 6 | 31505085 | A | T | 0.3595 | -0.0563 | 0.0058 | 2.12E-22 | -9.7358 | 1133307 | Asthma |
| rs2534655   | 6 | 31505088 | A | G | 0.5467 | 0.0421  | 0.0060 | 2.52E-12 | 7.0021  | 1064845 | Asthma |
| rs115935870 | 6 | 31505470 | T | C | 0.0260 | -0.1301 | 0.0168 | 8.05E-15 | -7.7667 | 1301353 | Asthma |
| rs3134899   | 6 | 31505509 | C | T | 0.2603 | -0.0440 | 0.0057 | 8.81E-15 | -7.7554 | 1310845 | Asthma |
| rs3131639   | 6 | 31505769 | A | G | 0.2603 | -0.0441 | 0.0057 | 6.97E-15 | -7.7851 | 1310845 | Asthma |
| rs3130616   | 6 | 31505969 | A | G | 0.1143 | 0.0445  | 0.0077 | 8.59E-09 | 5.7565  | 1310845 | Asthma |
| rs2286713   | 6 | 31506067 | T | C | 0.2603 | -0.0442 | 0.0057 | 6.69E-15 | -7.7902 | 1310845 | Asthma |
| rs3134900   | 6 | 31506180 | G | C | 0.1162 | 0.0448  | 0.0077 | 5.18E-09 | 5.8411  | 1310845 | Asthma |
| rs2242955   | 6 | 31506503 | A | G | 0.1214 | 0.0555  | 0.0072 | 1.70E-14 | 7.6713  | 1310845 | Asthma |
| rs3093954   | 6 | 31506672 | T | G | 0.2603 | -0.0441 | 0.0057 | 7.68E-15 | -7.7728 | 1310845 | Asthma |
| rs2844500   | 6 | 31506908 | T | C | 0.1161 | 0.0556  | 0.0074 | 6.50E-14 | 7.4977  | 1310845 | Asthma |
| rs3093953   | 6 | 31506911 | T | G | 0.2603 | -0.0439 | 0.0057 | 9.35E-15 | -7.7478 | 1310845 | Asthma |
| rs41273040  | 6 | 31507279 | A | G | 0.0376 | -0.0793 | 0.0134 | 3.31E-09 | -5.9156 | 1310845 | Asthma |
| rs3131638   | 6 | 31507350 | A | G | 0.2526 | -0.0454 | 0.0057 | 2.36E-15 | -7.9210 | 1310845 | Asthma |
| rs3130615   | 6 | 31507636 | G | A | 0.2873 | -0.0491 | 0.0055 | 2.62E-19 | -8.9836 | 1310845 | Asthma |
| rs3132468   | 6 | 31507709 | C | T | 0.2872 | -0.0491 | 0.0055 | 2.79E-19 | -8.9766 | 1310845 | Asthma |
| rs3093952   | 6 | 31507987 | A | G | 0.2872 | -0.0491 | 0.0055 | 2.76E-19 | -8.9778 | 1310845 | Asthma |
| rs28729827  | 6 | 31508034 | T | C | 0.2872 | -0.0491 | 0.0055 | 2.63E-19 | -8.9831 | 1310845 | Asthma |
| rs3131636   | 6 | 31508317 | A | G | 0.2878 | -0.0490 | 0.0055 | 3.31E-19 | -8.9581 | 1310845 | Asthma |
| rs3131635   | 6 | 31508357 | A | G | 0.2872 | -0.0491 | 0.0055 | 2.41E-19 | -8.9929 | 1310845 | Asthma |
| rs3134891   | 6 | 31508488 | G | A | 0.2527 | -0.0452 | 0.0057 | 3.03E-15 | -7.8898 | 1310845 | Asthma |
| rs3132466   | 6 | 31508562 | C | T | 0.4067 | -0.0505 | 0.0061 | 7.89E-17 | -8.3328 | 1159440 | Asthma |
| rs3134892   | 6 | 31508563 | A | G | 0.2527 | -0.0452 | 0.0057 | 3.03E-15 | -7.8897 | 1310845 | Asthma |
| rs3130614   | 6 | 31508681 | A | T | 0.1118 | 0.0452  | 0.0078 | 7.70E-09 | 5.7748  | 1310845 | Asthma |
| rs3134893   | 6 | 31508737 | C | A | 0.2872 | -0.0492 | 0.0055 | 2.36E-19 | -8.9954 | 1310845 | Asthma |
| rs3134894   | 6 | 31509056 | A | G | 0.2527 | -0.0452 | 0.0057 | 3.05E-15 | -7.8889 | 1310845 | Asthma |
| rs3132465   | 6 | 31509218 | G | T | 0.2527 | -0.0452 | 0.0057 | 3.14E-15 | -7.8850 | 1310845 | Asthma |
| rs3134895   | 6 | 31509245 | C | T | 0.2527 | -0.0452 | 0.0057 | 3.02E-15 | -7.8901 | 1310845 | Asthma |
| rs3131634   | 6 | 31509412 | A | G | 0.2873 | -0.0492 | 0.0055 | 2.28E-19 | -8.9988 | 1310845 | Asthma |
| rs3132464   | 6 | 31509684 | C | T | 0.2527 | -0.0452 | 0.0057 | 3.01E-15 | -7.8906 | 1310845 | Asthma |
| rs1065076   | 6 | 31509904 | A | G | 0.2874 | -0.0493 | 0.0055 | 1.95E-19 | -9.0159 | 1310845 | Asthma |
| rs3132463   | 6 | 31511868 | T | C | 0.2526 | -0.0451 | 0.0057 | 3.32E-15 | -7.8784 | 1310845 | Asthma |
| rs2844497   | 6 | 31512356 | T | C | 0.1161 | 0.0554  | 0.0074 | 7.81E-14 | 7.4734  | 1310845 | Asthma |



|             |   |          |   |   |        |         |        |          |         |         |        |
|-------------|---|----------|---|---|--------|---------|--------|----------|---------|---------|--------|
| rs115707901 | 6 | 31512435 | C | T | 0.0261 | -0.1293 | 0.0167 | 1.16E-14 | -7.7206 | 1301353 | Asthma |
| rs3132462   | 6 | 31512801 | G | T | 0.2873 | -0.0492 | 0.0055 | 2.10E-19 | -9.0078 | 1310845 | Asthma |
| rs3132461   | 6 | 31512891 | G | A | 0.2116 | -0.0382 | 0.0061 | 4.01E-10 | -6.2538 | 1310845 | Asthma |
| rs3132460   | 6 | 31512894 | C | T | 0.2462 | -0.0428 | 0.0058 | 1.11E-13 | -7.4270 | 1310845 | Asthma |
| rs2516404   | 6 | 31512967 | A | G | 0.1161 | 0.0550  | 0.0074 | 1.13E-13 | 7.4243  | 1310845 | Asthma |
| rs3131633   | 6 | 31513146 | A | G | 0.2000 | -0.0349 | 0.0062 | 2.17E-08 | -5.5980 | 1310845 | Asthma |
| rs3132459   | 6 | 31513315 | C | T | 0.2470 | -0.0430 | 0.0058 | 7.79E-14 | -7.4737 | 1310845 | Asthma |
| rs3132458   | 6 | 31513336 | T | C | 0.2125 | -0.0385 | 0.0061 | 2.71E-10 | -6.3146 | 1310845 | Asthma |
| rs3130613   | 6 | 31513758 | C | G | 0.2466 | -0.0431 | 0.0058 | 6.99E-14 | -7.4881 | 1310845 | Asthma |
| rs3130612   | 6 | 31514320 | G | T | 0.1117 | 0.0460  | 0.0078 | 4.37E-09 | 5.8694  | 1310845 | Asthma |
| rs9267445   | 6 | 31515704 | C | G | 0.1143 | 0.0470  | 0.0078 | 2.08E-09 | 5.9913  | 1284712 | Asthma |
| rs3131632   | 6 | 31515975 | A | G | 0.2480 | -0.0423 | 0.0057 | 1.86E-13 | -7.3585 | 1310845 | Asthma |
| rs3094001   | 6 | 31516255 | T | C | 0.2135 | -0.0373 | 0.0061 | 8.83E-10 | -6.1292 | 1310845 | Asthma |
| rs3094000   | 6 | 31516277 | T | C | 0.2480 | -0.0423 | 0.0057 | 1.91E-13 | -7.3552 | 1310845 | Asthma |
| rs2395045   | 6 | 31516740 | C | T | 0.2480 | -0.0421 | 0.0057 | 2.40E-13 | -7.3246 | 1310845 | Asthma |
| rs3093999   | 6 | 31516773 | A | T | 0.2484 | -0.0421 | 0.0057 | 2.46E-13 | -7.3214 | 1310845 | Asthma |
| rs3132457   | 6 | 31516784 | G | A | 0.2480 | -0.0422 | 0.0057 | 2.18E-13 | -7.3377 | 1310845 | Asthma |
| rs3131631   | 6 | 31516906 | G | C | 0.2480 | -0.0420 | 0.0057 | 2.76E-13 | -7.3055 | 1310845 | Asthma |
| rs3868087   | 6 | 31517115 | A | C | 0.2481 | -0.0417 | 0.0057 | 3.78E-13 | -7.2634 | 1310845 | Asthma |
| rs3093998   | 6 | 31517397 | C | A | 0.3602 | -0.0485 | 0.0051 | 1.46E-21 | -9.5379 | 1310845 | Asthma |
| rs3131630   | 6 | 31517577 | G | A | 0.2405 | -0.0387 | 0.0058 | 2.22E-11 | -6.6905 | 1310845 | Asthma |
| rs3132456   | 6 | 31518523 | A | G | 0.2615 | -0.0333 | 0.0056 | 2.81E-09 | -5.9424 | 1310845 | Asthma |
| rs72847209  | 6 | 31519290 | C | T | 0.0668 | -0.0606 | 0.0099 | 1.07E-09 | -6.0988 | 1310845 | Asthma |
| rs3130639   | 6 | 31519543 | A | G | 0.2615 | -0.0333 | 0.0056 | 2.85E-09 | -5.9399 | 1310845 | Asthma |
| rs34451538  | 6 | 31519677 | A | G | 0.0396 | -0.1108 | 0.0133 | 8.90E-17 | -8.3188 | 1310845 | Asthma |
| rs3130638   | 6 | 31519763 | T | C | 0.1930 | -0.0350 | 0.0063 | 3.37E-08 | -5.5211 | 1310845 | Asthma |
| rs3093997   | 6 | 31519803 | T | C | 0.2616 | -0.0359 | 0.0061 | 4.76E-09 | -5.8552 | 1159440 | Asthma |
| rs3132455   | 6 | 31520177 | C | G | 0.3340 | 0.0310  | 0.0052 | 2.13E-09 | 5.9875  | 1310845 | Asthma |
| rs3130637   | 6 | 31520368 | A | G | 0.2615 | -0.0333 | 0.0056 | 2.77E-09 | -5.9447 | 1310845 | Asthma |
| rs3130636   | 6 | 31520414 | A | G | 0.2615 | -0.0334 | 0.0056 | 2.53E-09 | -5.9596 | 1310845 | Asthma |
| rs3093996   | 6 | 31520791 | A | T | 0.2615 | -0.0333 | 0.0056 | 2.72E-09 | -5.9477 | 1310845 | Asthma |
| rs3095228   | 6 | 31520986 | T | C | 0.2616 | -0.0334 | 0.0056 | 2.58E-09 | -5.9561 | 1310845 | Asthma |
| rs77192564  | 6 | 31521162 | T | C | 0.0674 | -0.0604 | 0.0107 | 1.49E-08 | -5.6627 | 1216250 | Asthma |
| rs3093994   | 6 | 31522595 | G | A | 0.2617 | -0.0335 | 0.0056 | 2.16E-09 | -5.9855 | 1310845 | Asthma |
| rs3093993   | 6 | 31522948 | C | A | 0.2611 | -0.0340 | 0.0056 | 1.30E-09 | -6.0677 | 1310845 | Asthma |
| rs3095227   | 6 | 31523223 | A | G | 0.2615 | -0.0333 | 0.0056 | 2.76E-09 | -5.9453 | 1310845 | Asthma |
| rs3093992   | 6 | 31523354 | C | A | 0.2617 | -0.0335 | 0.0056 | 2.28E-09 | -5.9769 | 1310845 | Asthma |
| rs3093991   | 6 | 31523690 | C | A | 0.2616 | -0.0336 | 0.0056 | 2.01E-09 | -5.9968 | 1310845 | Asthma |
| rs3130635   | 6 | 31524227 | T | C | 0.2615 | -0.0333 | 0.0056 | 2.73E-09 | -5.9473 | 1310845 | Asthma |
| rs3095226   | 6 | 31524248 | C | A | 0.2605 | -0.0336 | 0.0056 | 2.05E-09 | -5.9943 | 1310845 | Asthma |
| rs3093989   | 6 | 31524518 | C | T | 0.2701 | -0.0367 | 0.0062 | 4.42E-09 | -5.8678 | 1133307 | Asthma |
| rs3093988   | 6 | 31524676 | A | G | 0.1628 | 0.0411  | 0.0067 | 8.14E-10 | 6.1423  | 1310845 | Asthma |
| rs3093987   | 6 | 31525184 | G | A | 0.3352 | 0.0307  | 0.0052 | 2.95E-09 | 5.9343  | 1310845 | Asthma |
| rs3130634   | 6 | 31525193 | G | T | 0.2614 | -0.0333 | 0.0056 | 2.66E-09 | -5.9517 | 1310845 | Asthma |
| rs2516486   | 6 | 31526425 | G | A | 0.1186 | -0.0473 | 0.0075 | 3.60E-10 | -6.2704 | 1310845 | Asthma |
| rs2734573   | 6 | 31526961 | C | A | 0.4762 | -0.0322 | 0.0049 | 4.58E-11 | -6.5841 | 1310845 | Asthma |
| rs3093982   | 6 | 31529467 | A | G | 0.1929 | -0.0348 | 0.0063 | 4.14E-08 | -5.4849 | 1310845 | Asthma |
| rs114064880 | 6 | 31529533 | A | G | 0.0259 | -0.1296 | 0.0168 | 1.27E-14 | -7.7088 | 1301353 | Asthma |
| rs3130055   | 6 | 31529622 | C | T | 0.2888 | -0.0477 | 0.0055 | 2.07E-18 | -8.7534 | 1310845 | Asthma |
| rs3093977   | 6 | 31532449 | C | A | 0.1928 | -0.0348 | 0.0063 | 4.10E-08 | -5.4863 | 1310845 | Asthma |
| rs1055385   | 6 | 31533771 | A | G | 0.0804 | -0.0642 | 0.0091 | 1.73E-12 | -7.0547 | 1310845 | Asthma |
| rs1055384   | 6 | 31533781 | T | C | 0.1622 | 0.0415  | 0.0067 | 5.46E-10 | 6.2052  | 1310845 | Asthma |
| rs1055388   | 6 | 31533960 | C | T | 0.2886 | -0.0479 | 0.0055 | 1.57E-18 | -8.7845 | 1310845 | Asthma |
| rs2075581   | 6 | 31535926 | T | C | 0.0804 | -0.0643 | 0.0091 | 1.73E-12 | -7.0548 | 1310845 | Asthma |
| rs2075580   | 6 | 31536198 | G | C | 0.2863 | -0.0540 | 0.0058 | 2.59E-20 | -9.2350 | 1180923 | Asthma |
| rs2734583   | 6 | 31537703 | G | A | 0.1145 | 0.0439  | 0.0077 | 1.24E-08 | 5.6942  | 1310845 | Asthma |
| rs9267485   | 6 | 31538013 | G | A | 0.2435 | -0.0382 | 0.0058 | 2.98E-11 | -6.6475 | 1310845 | Asthma |
| rs3093975   | 6 | 31538361 | A | G | 0.1622 | 0.0416  | 0.0067 | 4.62E-10 | 6.2315  | 1310845 | Asthma |
| rs933208    | 6 | 31538871 | G | T | 0.2886 | -0.0480 | 0.0055 | 1.40E-18 | -8.7971 | 1310845 | Asthma |
| rs2071595   | 6 | 31539285 | C | G | 0.0774 | -0.0725 | 0.0101 | 6.96E-13 | -7.1804 | 1180923 | Asthma |
| rs146591430 | 6 | 31539383 | G | A | 0.0260 | -0.1288 | 0.0170 | 3.24E-14 | -7.5885 | 1284712 | Asthma |
| rs2239709   | 6 | 31539670 | T | C | 0.0804 | -0.0643 | 0.0091 | 1.67E-12 | -7.0597 | 1310845 | Asthma |
| rs2523507   | 6 | 31541578 | G | A | 0.2872 | -0.0538 | 0.0058 | 3.30E-20 | -9.2087 | 1180923 | Asthma |
| rs2239525   | 6 | 31541595 | G | A | 0.2894 | -0.0476 | 0.0054 | 2.33E-18 | -8.7399 | 1310845 | Asthma |
| rs2239526   | 6 | 31541655 | G | A | 0.2895 | -0.0477 | 0.0054 | 2.10E-18 | -8.7517 | 1310845 | Asthma |
| rs2523505   | 6 | 31542225 | G | C | 0.0669 | 0.0672  | 0.0094 | 6.99E-13 | 7.1796  | 1310845 | Asthma |
| rs2523504   | 6 | 31543081 | T | C | 0.2895 | -0.0475 | 0.0054 | 2.99E-18 | -8.7119 | 1310845 | Asthma |
| rs68092383  | 6 | 31543928 | G | A | 0.0802 | -0.0636 | 0.0091 | 3.08E-12 | -6.9739 | 1310845 | Asthma |
| rs2071593   | 6 | 31545022 | A | G | 0.0802 | -0.0635 | 0.0091 | 3.49E-12 | -6.9565 | 1310845 | Asthma |
| rs9267488   | 6 | 31546470 | G | A | 0.1140 | 0.0437  | 0.0078 | 1.68E-08 | 5.6422  | 1310845 | Asthma |
| rs3219184   | 6 | 31547363 | G | A | 0.0797 | -0.0603 | 0.0092 | 4.57E-11 | -6.5843 | 1310845 | Asthma |
| rs2071592   | 6 | 31547563 | A | T | 0.3337 | 0.0315  | 0.0055 | 8.44E-09 | 5.7595  | 942825  | Asthma |
| rs2857607   | 6 | 31549471 | T | C | 0.0629 | 0.0644  | 0.0098 | 4.14E-11 | 6.5991  | 1310845 | Asthma |
| rs2844492   | 6 | 31550392 | G | A | 0.0262 | 0.1122  | 0.0176 | 1.73E-10 | 6.3835  | 1128634 | Asthma |

|             |   |          |   |   |        |         |        |          |         |         |        |
|-------------|---|----------|---|---|--------|---------|--------|----------|---------|---------|--------|
| rs34492353  | 6 | 31552881 | A | T | 0.0534 | 0.0960  | 0.0108 | 4.52E-19 | 8.9234  | 1284712 | Asthma |
| rs2857606   | 6 | 31555430 | A | G | 0.1632 | -0.0662 | 0.0083 | 1.27E-15 | -7.9971 | 1003362 | Asthma |
| rs2857605   | 6 | 31557074 | C | T | 0.2308 | -0.0448 | 0.0058 | 1.79E-14 | -7.6651 | 1310845 | Asthma |
| rs3130062   | 6 | 31558135 | C | T | 0.0820 | -0.0542 | 0.0093 | 6.15E-09 | -5.8127 | 1310845 | Asthma |
| rs184070214 | 6 | 31558303 | A | G | 0.0253 | -0.1313 | 0.0170 | 1.01E-14 | -7.7376 | 1301353 | Asthma |
| rs2857603   | 6 | 31561588 | A | G | 0.0398 | 0.0816  | 0.0124 | 4.57E-11 | 6.5841  | 1310845 | Asthma |
| rs150978802 | 6 | 31562639 | A | C | 0.0228 | 0.0893  | 0.0156 | 1.12E-08 | 5.7117  | 1310845 | Asthma |
| rs2857709   | 6 | 31565037 | A | G | 0.1596 | -0.0568 | 0.0068 | 7.74E-17 | -8.3353 | 1310845 | Asthma |
| rs145786943 | 6 | 31566040 | T | C | 0.0255 | -0.1286 | 0.0171 | 4.69E-14 | -7.5403 | 1284712 | Asthma |
| rs2857601   | 6 | 31566203 | A | G | 0.0270 | 0.0871  | 0.0151 | 8.14E-09 | 5.7656  | 1310845 | Asthma |
| rs3093539   | 6 | 31570500 | A | G | 0.0254 | -0.1301 | 0.0169 | 1.19E-14 | -7.7173 | 1301353 | Asthma |
| rs4647195   | 6 | 31573180 | C | T | 0.0256 | -0.1341 | 0.0205 | 6.64E-11 | -6.5284 | 1076813 | Asthma |
| rs1800629   | 6 | 31575254 | A | G | 0.1659 | 0.0382  | 0.0066 | 6.90E-09 | 5.7934  | 1310845 | Asthma |
| rs3093664   | 6 | 31576865 | G | A | 0.0758 | -0.0630 | 0.0094 | 1.77E-11 | -6.7241 | 1310845 | Asthma |
| rs1800628   | 6 | 31579073 | A | G | 0.1116 | 0.0449  | 0.0078 | 9.89E-09 | 5.7326  | 1310845 | Asthma |
| rs116646885 | 6 | 31584319 | A | G | 0.0253 | -0.1284 | 0.0169 | 2.75E-14 | -7.6095 | 1301353 | Asthma |
| rs9469027   | 6 | 31586937 | C | G | 0.0281 | -0.1117 | 0.0157 | 1.22E-12 | -7.1033 | 1310845 | Asthma |
| rs3135041   | 6 | 31587880 | G | A | 0.3175 | 0.0459  | 0.0052 | 1.71E-18 | 8.7748  | 1310845 | Asthma |
| rs3087617   | 6 | 31588879 | T | A | 0.0762 | -0.0664 | 0.0107 | 5.90E-10 | -6.1932 | 1024845 | Asthma |
| rs3130063   | 6 | 31590925 | T | C | 0.1139 | 0.0442  | 0.0078 | 1.23E-08 | 5.6959  | 1310845 | Asthma |
| rs2736192   | 6 | 31591576 | A | G | 0.1574 | -0.0547 | 0.0069 | 2.13E-15 | -7.9337 | 1310845 | Asthma |
| rs11575838  | 6 | 31592788 | T | C | 0.0254 | -0.1292 | 0.0169 | 2.14E-14 | -7.6419 | 1301353 | Asthma |
| rs2857599   | 6 | 31594373 | A | G | 0.1591 | 0.0371  | 0.0067 | 2.67E-08 | 5.5620  | 1251217 | Asthma |
| rs34744948  | 6 | 31594990 | C | G | 0.0649 | -0.0808 | 0.0098 | 2.23E-16 | -8.2088 | 1310845 | Asthma |
| rs71563353  | 6 | 31595147 | T | C | 0.0613 | -0.0920 | 0.0115 | 1.31E-15 | -7.9937 | 1128634 | Asthma |
| rs2857598   | 6 | 31595451 | A | C | 0.1617 | -0.0719 | 0.0083 | 4.98E-18 | -8.6539 | 998712  | Asthma |
| rs2736188   | 6 | 31597871 | A | G | 0.1297 | 0.0403  | 0.0074 | 4.69E-08 | 5.4626  | 1225084 | Asthma |
| rs3130631   | 6 | 31598391 | G | C | 0.1139 | 0.0436  | 0.0080 | 4.52E-08 | 5.4693  | 1251217 | Asthma |
| rs17200810  | 6 | 31598730 | A | G | 0.0372 | -0.1111 | 0.0139 | 1.13E-15 | -8.0117 | 1310845 | Asthma |
| rs2736186   | 6 | 31604556 | A | G | 0.0413 | -0.0766 | 0.0137 | 2.38E-08 | -5.5817 | 1251217 | Asthma |
| rs2857700   | 6 | 31604704 | T | C | 0.1462 | -0.0602 | 0.0071 | 3.92E-17 | -8.4153 | 1310845 | Asthma |
| rs2857594   | 6 | 31604867 | C | G | 0.1602 | -0.0593 | 0.0069 | 5.55E-18 | -8.6415 | 1310845 | Asthma |
| rs2857702   | 6 | 31609506 | C | G | 0.2060 | 0.0410  | 0.0060 | 1.20E-11 | 6.7796  | 1251217 | Asthma |
| rs2857609   | 6 | 31610048 | A | G | 0.1730 | -0.0600 | 0.0066 | 1.29E-19 | -9.0615 | 1310845 | Asthma |
| rs150043706 | 6 | 31610688 | A | G | 0.0212 | 0.0950  | 0.0160 | 2.81E-09 | 5.9422  | 1310845 | Asthma |
| rs2857600   | 6 | 31614510 | T | C | 0.1586 | -0.0592 | 0.0069 | 6.61E-18 | -8.6214 | 1310845 | Asthma |
| rs34451818  | 6 | 31616064 | G | C | 0.0451 | 0.0753  | 0.0116 | 8.17E-11 | 6.4972  | 1310845 | Asthma |
| rs2857597   | 6 | 31617223 | T | A | 0.2716 | -0.0325 | 0.0055 | 3.94E-09 | -5.8866 | 1310845 | Asthma |
| rs2736177   | 6 | 31618317 | C | T | 0.1596 | -0.0588 | 0.0068 | 6.00E-18 | -8.6326 | 1310845 | Asthma |
| rs2736173   | 6 | 31621958 | T | C | 0.0337 | 0.0822  | 0.0136 | 1.40E-09 | 6.0559  | 1310845 | Asthma |
| rs3130068   | 6 | 31622577 | G | A | 0.1736 | -0.0594 | 0.0066 | 2.30E-19 | -8.9980 | 1310845 | Asthma |
| rs3130069   | 6 | 31623441 | G | A | 0.2722 | -0.0322 | 0.0055 | 5.32E-09 | -5.8368 | 1310845 | Asthma |
| rs3130071   | 6 | 31626851 | T | A | 0.1590 | -0.0586 | 0.0069 | 1.51E-17 | -8.5265 | 1310845 | Asthma |
| rs1046080   | 6 | 31628105 | C | A | 0.2724 | -0.0323 | 0.0055 | 4.61E-09 | -5.8607 | 1310845 | Asthma |
| rs3132450   | 6 | 31628361 | G | A | 0.1093 | 0.0467  | 0.0079 | 3.79E-09 | 5.8934  | 1310845 | Asthma |
| rs3130625   | 6 | 31630138 | A | G | 0.1613 | -0.0588 | 0.0068 | 5.82E-18 | -8.6362 | 1310845 | Asthma |
| rs41273264  | 6 | 31632329 | A | C | 0.0244 | -0.1269 | 0.0172 | 1.77E-13 | -7.3652 | 1284712 | Asthma |
| rs2272593   | 6 | 31633567 | T | C | 0.2721 | -0.0321 | 0.0055 | 6.49E-09 | -5.8036 | 1310845 | Asthma |
| rs3132453   | 6 | 31636267 | T | G | 0.0843 | -0.0522 | 0.0091 | 9.30E-09 | -5.7431 | 1310845 | Asthma |
| rs35502919  | 6 | 31636578 | A | C | 0.0452 | 0.0739  | 0.0116 | 1.63E-10 | 6.3924  | 1310845 | Asthma |
| rs7889      | 6 | 31637671 | C | G | 0.4095 | -0.0407 | 0.0050 | 3.30E-16 | -8.1618 | 1310845 | Asthma |
| rs2077537   | 6 | 31638745 | C | G | 0.2110 | -0.0604 | 0.0065 | 1.63E-20 | -9.2842 | 1180923 | Asthma |
| rs115247800 | 6 | 31639036 | G | A | 0.0192 | 0.1064  | 0.0168 | 2.37E-10 | 6.3353  | 1310845 | Asthma |
| rs750332    | 6 | 31639273 | C | T | 0.1902 | -0.0517 | 0.0064 | 4.65E-16 | -8.1204 | 1310845 | Asthma |
| rs1077394   | 6 | 31642607 | C | T | 0.3669 | -0.0365 | 0.0051 | 8.51E-13 | -7.1526 | 1310845 | Asthma |
| rs2395047   | 6 | 31643381 | T | C | 0.2053 | -0.0568 | 0.0062 | 2.93E-20 | -9.2216 | 1310845 | Asthma |
| rs760293    | 6 | 31644000 | T | C | 0.1900 | -0.0514 | 0.0064 | 6.79E-16 | -8.0742 | 1310845 | Asthma |
| rs114919178 | 6 | 31645794 | G | A | 0.0339 | 0.0817  | 0.0135 | 1.51E-09 | 6.0431  | 1310845 | Asthma |
| rs2844464   | 6 | 31646214 | A | G | 0.1901 | -0.0514 | 0.0064 | 6.64E-16 | -8.0769 | 1310845 | Asthma |
| rs2242656   | 6 | 31646325 | C | T | 0.2057 | -0.0566 | 0.0061 | 3.29E-20 | -9.2091 | 1310845 | Asthma |
| rs115470510 | 6 | 31650734 | A | G | 0.0275 | 0.1299  | 0.0152 | 1.51E-17 | 8.5266  | 1310845 | Asthma |
| rs3130050   | 6 | 31650984 | G | A | 0.1616 | -0.0589 | 0.0068 | 4.60E-18 | -8.6630 | 1310845 | Asthma |
| rs3115669   | 6 | 31651247 | T | G | 0.1594 | -0.0588 | 0.0069 | 1.01E-17 | -8.5727 | 1310845 | Asthma |
| rs138039007 | 6 | 31651376 | C | T | 0.0336 | 0.0821  | 0.0136 | 1.45E-09 | 6.0495  | 1310845 | Asthma |
| rs805299    | 6 | 31651875 | A | T | 0.2884 | 0.0290  | 0.0052 | 3.06E-08 | 5.5378  | 1310845 | Asthma |
| rs3117582   | 6 | 31652743 | G | T | 0.1093 | 0.0474  | 0.0079 | 2.22E-09 | 5.9809  | 1310845 | Asthma |
| rs805297    | 6 | 31654829 | A | C | 0.2884 | 0.0287  | 0.0052 | 4.59E-08 | 5.4665  | 1310845 | Asthma |
| rs3117581   | 6 | 31657087 | G | A | 0.1093 | 0.0472  | 0.0079 | 2.48E-09 | 5.9630  | 1310845 | Asthma |
| rs3132449   | 6 | 31658236 | T | C | 0.1095 | 0.0469  | 0.0079 | 3.09E-09 | 5.9270  | 1310845 | Asthma |
| rs3130617   | 6 | 31659746 | C | T | 0.2720 | -0.0317 | 0.0055 | 9.66E-09 | -5.7366 | 1310845 | Asthma |
| rs805262    | 6 | 31660956 | T | C | 0.4507 | 0.0338  | 0.0049 | 3.72E-12 | 6.9474  | 1310845 | Asthma |
| rs76072474  | 6 | 31663557 | G | A | 0.0244 | -0.1280 | 0.0172 | 9.97E-14 | -7.4416 | 1284712 | Asthma |
| rs3117578   | 6 | 31668254 | A | G | 0.1616 | -0.0583 | 0.0068 | 9.43E-18 | -8.5807 | 1310845 | Asthma |
| rs9267531   | 6 | 31668965 | G | A | 0.1093 | 0.0474  | 0.0079 | 2.25E-09 | 5.9790  | 1310845 | Asthma |

|             |   |          |   |   |        |         |        |          |         |         |        |
|-------------|---|----------|---|---|--------|---------|--------|----------|---------|---------|--------|
| rs3131377   | 6 | 31671643 | A | G | 0.1740 | -0.0591 | 0.0066 | 3.25E-19 | -8.9600 | 1310845 | Asthma |
| rs3115668   | 6 | 31673708 | T | C | 0.1740 | -0.0590 | 0.0066 | 3.99E-19 | -8.9374 | 1310845 | Asthma |
| rs3131376   | 6 | 31678906 | A | G | 0.1740 | -0.0590 | 0.0066 | 3.87E-19 | -8.9406 | 1310845 | Asthma |
| rs11575852  | 6 | 31679224 | G | A | 0.0338 | 0.0819  | 0.0135 | 1.42E-09 | 6.0531  | 1310845 | Asthma |
| rs1475865   | 6 | 31689636 | T | C | 0.2717 | -0.0316 | 0.0055 | 1.05E-08 | -5.7219 | 1310845 | Asthma |
| rs186090629 | 6 | 31697462 | A | C | 0.0243 | -0.1280 | 0.0173 | 1.29E-13 | -7.4072 | 1284712 | Asthma |
| rs9267539   | 6 | 31698647 | C | A | 0.1091 | 0.0480  | 0.0079 | 1.35E-09 | 6.0616  | 1310845 | Asthma |
| rs114276434 | 6 | 31701808 | C | T | 0.0336 | -0.0855 | 0.0147 | 5.36E-09 | -5.8357 | 1301353 | Asthma |
| rs9267544   | 6 | 31703780 | A | C | 0.1112 | 0.0485  | 0.0085 | 1.35E-08 | 5.6798  | 1154767 | Asthma |
| rs28366157  | 6 | 31704465 | G | A | 0.0414 | 0.0739  | 0.0120 | 7.52E-10 | 6.1549  | 1310845 | Asthma |
| rs812561    | 6 | 31708864 | T | C | 0.2892 | 0.0328  | 0.0057 | 9.30E-09 | 5.7431  | 1159440 | Asthma |
| rs9267549   | 6 | 31709614 | A | G | 0.1091 | 0.0480  | 0.0079 | 1.47E-09 | 6.0473  | 1310845 | Asthma |
| rs17207370  | 6 | 31710914 | T | C | 0.0335 | 0.0815  | 0.0136 | 2.22E-09 | 5.9808  | 1310845 | Asthma |
| rs805284    | 6 | 31714252 | A | G | 0.0453 | 0.0739  | 0.0115 | 1.43E-10 | 6.4121  | 1310845 | Asthma |
| rs11575850  | 6 | 31714436 | C | G | 0.0195 | 0.1055  | 0.0167 | 2.46E-10 | 6.3293  | 1310845 | Asthma |
| rs3131384   | 6 | 31717877 | G | C | 0.2000 | -0.0596 | 0.0062 | 9.65E-22 | -9.5805 | 1310845 | Asthma |
| rs805293    | 6 | 31720741 | A | T | 0.4388 | 0.0371  | 0.0048 | 1.47E-14 | 7.6904  | 1310845 | Asthma |
| rs11575845  | 6 | 31724609 | G | C | 0.0419 | 0.0762  | 0.0120 | 1.92E-10 | 6.3676  | 1310845 | Asthma |
| rs45565837  | 6 | 31727082 | T | C | 0.0196 | 0.1050  | 0.0166 | 2.76E-10 | 6.3115  | 1310845 | Asthma |
| rs11540321  | 6 | 31727591 | A | G | 0.0515 | 0.0768  | 0.0112 | 7.64E-12 | 6.8452  | 1310845 | Asthma |
| rs9267551   | 6 | 31730180 | C | G | 0.1599 | -0.0575 | 0.0069 | 5.84E-17 | -8.3683 | 1310845 | Asthma |
| rs2272592   | 6 | 31730575 | T | C | 0.1980 | -0.0604 | 0.0062 | 4.27E-22 | -9.6646 | 1310845 | Asthma |
| rs17201046  | 6 | 31731796 | A | G | 0.0344 | -0.0822 | 0.0145 | 1.32E-08 | -5.6842 | 1301353 | Asthma |
| rs3131383   | 6 | 31736517 | T | G | 0.1102 | 0.0469  | 0.0079 | 2.94E-09 | 5.9347  | 1310845 | Asthma |
| rs145269503 | 6 | 31737349 | A | G | 0.0289 | 0.1186  | 0.0149 | 1.71E-15 | 7.9608  | 1310845 | Asthma |
| rs3101018   | 6 | 31738087 | T | C | 0.1101 | 0.0467  | 0.0079 | 3.43E-09 | 5.9098  | 1310845 | Asthma |
| rs3131382   | 6 | 31739953 | T | C | 0.0851 | -0.0529 | 0.0091 | 6.39E-09 | -5.8063 | 1310845 | Asthma |
| rs3131381   | 6 | 31740686 | A | C | 0.1101 | 0.0471  | 0.0079 | 2.67E-09 | 5.9508  | 1310845 | Asthma |
| rs28381348  | 6 | 31741133 | C | T | 0.0518 | 0.0766  | 0.0112 | 7.44E-12 | 6.8488  | 1310845 | Asthma |
| rs3131380   | 6 | 31742001 | G | A | 0.1102 | 0.0471  | 0.0079 | 2.67E-09 | 5.9506  | 1310845 | Asthma |
| rs28745895  | 6 | 31742192 | A | C | 0.0344 | -0.0812 | 0.0145 | 1.90E-08 | -5.6211 | 1301353 | Asthma |
| rs3132445   | 6 | 31744419 | A | G | 0.1101 | 0.0473  | 0.0079 | 2.36E-09 | 5.9710  | 1310845 | Asthma |
| rs3132444   | 6 | 31745788 | T | G | 0.2154 | -0.0901 | 0.0095 | 2.92E-21 | -9.4656 | 778845  | Asthma |
| rs3132443   | 6 | 31746254 | A | G | 0.1101 | 0.0470  | 0.0079 | 2.95E-09 | 5.9344  | 1310845 | Asthma |
| rs3130484   | 6 | 31748105 | C | T | 0.1102 | 0.0469  | 0.0079 | 2.97E-09 | 5.9333  | 1310845 | Asthma |
| rs3117572   | 6 | 31749915 | A | G | 0.2002 | -0.0588 | 0.0062 | 3.33E-21 | -9.4519 | 1310845 | Asthma |
| rs3117573   | 6 | 31750619 | G | C | 0.1101 | 0.0469  | 0.0079 | 3.02E-09 | 5.9306  | 1310845 | Asthma |
| rs3131379   | 6 | 31753256 | A | G | 0.1102 | 0.0469  | 0.0079 | 3.05E-09 | 5.9289  | 1310845 | Asthma |
| rs3130487   | 6 | 31755612 | C | T | 0.1598 | -0.0576 | 0.0069 | 4.90E-17 | -8.3891 | 1310845 | Asthma |
| rs3117574   | 6 | 31757453 | A | G | 0.1102 | 0.0473  | 0.0079 | 2.26E-09 | 5.9780  | 1310845 | Asthma |
| rs3131378   | 6 | 31757508 | G | A | 0.1102 | 0.0470  | 0.0079 | 2.86E-09 | 5.9395  | 1310845 | Asthma |
| rs3117575   | 6 | 31758476 | C | T | 0.1102 | 0.0466  | 0.0079 | 3.82E-09 | 5.8917  | 1310845 | Asthma |
| rs707939    | 6 | 31758911 | A | C | 0.3279 | 0.0378  | 0.0051 | 1.03E-13 | 7.4377  | 1310845 | Asthma |
| rs3117576   | 6 | 31759017 | C | T | 0.1102 | 0.0470  | 0.0079 | 2.94E-09 | 5.9348  | 1310845 | Asthma |
| rs17207524  | 6 | 31759073 | T | G | 0.0418 | 0.0774  | 0.0120 | 1.02E-10 | 6.4643  | 1310845 | Asthma |
| rs3117577   | 6 | 31759697 | G | A | 0.1102 | 0.0469  | 0.0079 | 3.15E-09 | 5.9235  | 1310845 | Asthma |
| rs3115672   | 6 | 31760120 | T | C | 0.1102 | 0.0470  | 0.0079 | 2.88E-09 | 5.9385  | 1310845 | Asthma |
| rs187911831 | 6 | 31765165 | T | C | 0.0323 | -0.0875 | 0.0151 | 6.81E-09 | -5.7956 | 1301353 | Asthma |
| rs113525864 | 6 | 31765409 | C | A | 0.0352 | -0.0786 | 0.0142 | 2.99E-08 | -5.5424 | 1310845 | Asthma |
| rs3101017   | 6 | 31765689 | C | T | 0.1188 | 0.0497  | 0.0083 | 2.08E-09 | 5.9915  | 942825  | Asthma |
| rs34341244  | 6 | 31765982 | A | G | 0.0336 | -0.0880 | 0.0147 | 1.95E-09 | -6.0018 | 1301353 | Asthma |
| rs3115671   | 6 | 31766568 | T | G | 0.1102 | 0.0472  | 0.0079 | 2.44E-09 | 5.9652  | 1310845 | Asthma |
| rs116311752 | 6 | 31769502 | A | G | 0.0197 | 0.1047  | 0.0166 | 3.08E-10 | 6.2949  | 1310845 | Asthma |
| rs3130490   | 6 | 31771343 | T | G | 0.1102 | 0.0474  | 0.0079 | 2.02E-09 | 5.9961  | 1310845 | Asthma |
| rs707930    | 6 | 31773882 | C | T | 0.5379 | -0.0427 | 0.0048 | 6.65E-19 | -8.8807 | 1310845 | Asthma |
| rs6914412   | 6 | 31774465 | C | T | 0.0732 | 0.0535  | 0.0091 | 3.56E-09 | 5.9035  | 1310845 | Asthma |
| rs114936741 | 6 | 31776371 | T | C | 0.0345 | -0.0822 | 0.0144 | 1.24E-08 | -5.6943 | 1301353 | Asthma |
| rs3130491   | 6 | 31777687 | A | G | 0.1070 | 0.0464  | 0.0080 | 7.42E-09 | 5.7811  | 1310845 | Asthma |
| rs915652    | 6 | 31781365 | A | G | 0.1094 | 0.0462  | 0.0079 | 6.16E-09 | 5.8124  | 1310845 | Asthma |
| rs915651    | 6 | 31781407 | A | G | 0.1094 | 0.0456  | 0.0079 | 9.45E-09 | 5.7403  | 1310845 | Asthma |
| rs743399    | 6 | 31782027 | T | C | 0.1969 | -0.0341 | 0.0061 | 2.36E-08 | -5.5836 | 1310845 | Asthma |
| rs142006308 | 6 | 31790014 | A | G | 0.0343 | -0.0825 | 0.0145 | 1.23E-08 | -5.6955 | 1301353 | Asthma |
| rs2607014   | 6 | 31793436 | A | G | 0.1101 | 0.0462  | 0.0079 | 5.29E-09 | 5.8379  | 1310845 | Asthma |
| rs3115670   | 6 | 31794088 | T | C | 0.2076 | -0.0830 | 0.0085 | 2.00E-22 | -9.7419 | 847307  | Asthma |
| rs2607015   | 6 | 31795066 | C | G | 0.4098 | 0.0319  | 0.0049 | 5.33E-11 | 6.5614  | 1310845 | Asthma |
| rs2753960   | 6 | 31795067 | T | G | 0.4098 | 0.0320  | 0.0049 | 4.87E-11 | 6.5748  | 1310845 | Asthma |
| rs534892    | 6 | 31796165 | C | G | 0.0438 | -0.0701 | 0.0122 | 9.08E-09 | -5.7471 | 1310845 | Asthma |
| rs2736425   | 6 | 31798207 | A | G | 0.1101 | 0.0460  | 0.0079 | 6.12E-09 | 5.8136  | 1310845 | Asthma |
| rs2763980   | 6 | 31798883 | T | C | 0.1101 | 0.0461  | 0.0079 | 5.58E-09 | 5.8289  | 1310845 | Asthma |
| rs146752130 | 6 | 31800761 | A | C | 0.0343 | -0.0823 | 0.0145 | 1.35E-08 | -5.6800 | 1301353 | Asthma |
| rs681331    | 6 | 31801022 | C | A | 0.1135 | 0.0501  | 0.0089 | 1.98E-08 | 5.6142  | 1024845 | Asthma |
| rs146717832 | 6 | 31802488 | A | G | 0.0258 | -0.1187 | 0.0166 | 9.29E-13 | -7.1408 | 1301353 | Asthma |
| rs114832009 | 6 | 31803046 | T | C | 0.0272 | 0.0816  | 0.0149 | 4.07E-08 | 5.4880  | 1310845 | Asthma |
| rs1150748   | 6 | 31804139 | C | G | 0.3118 | 0.0362  | 0.0051 | 1.88E-12 | 7.0432  | 1310845 | Asthma |

|             |   |          |   |   |        |         |        |          |          |         |        |
|-------------|---|----------|---|---|--------|---------|--------|----------|----------|---------|--------|
| rs625421    | 6 | 31804316 | A | C | 0.1106 | 0.0495  | 0.0082 | 1.99E-09 | 5.9988   | 1180923 | Asthma |
| rs552412    | 6 | 31809300 | T | C | 0.0437 | -0.0697 | 0.0122 | 1.17E-08 | -5.7043  | 1310845 | Asthma |
| rs553414    | 6 | 31809415 | G | A | 0.1101 | 0.0458  | 0.0079 | 7.07E-09 | 5.7894   | 1310845 | Asthma |
| rs185687383 | 6 | 31809470 | T | C | 0.0261 | -0.1139 | 0.0165 | 4.54E-12 | -6.9193  | 1301353 | Asthma |
| rs2075800   | 6 | 31810169 | T | C | 0.3118 | 0.0364  | 0.0051 | 1.39E-12 | 7.0849   | 1310845 | Asthma |
| rs2227956   | 6 | 31810495 | G | A | 0.1991 | -0.0569 | 0.0062 | 6.46E-20 | -9.1362  | 1310845 | Asthma |
| rs115333512 | 6 | 31812462 | T | C | 0.0543 | 0.0739  | 0.0110 | 1.89E-11 | 6.7142   | 1310845 | Asthma |
| rs481825    | 6 | 31812817 | A | C | 0.0439 | -0.0691 | 0.0122 | 1.42E-08 | -5.6704  | 1310845 | Asthma |
| rs1043620   | 6 | 31815978 | T | C | 0.1581 | -0.0764 | 0.0095 | 1.09E-15 | -8.0164  | 847307  | Asthma |
| rs506770    | 6 | 31817451 | G | C | 0.2546 | -0.0682 | 0.0063 | 6.08E-27 | -10.7476 | 1095162 | Asthma |
| rs2844459   | 6 | 31819095 | G | A | 0.3106 | 0.0354  | 0.0051 | 6.21E-12 | 6.8748   | 1310845 | Asthma |
| rs190263387 | 6 | 31819343 | T | G | 0.0198 | 0.1011  | 0.0167 | 1.43E-09 | 6.0522   | 1310845 | Asthma |
| rs1265947   | 6 | 31819390 | T | C | 0.1116 | 0.0456  | 0.0079 | 7.86E-09 | 5.7714   | 1310845 | Asthma |
| rs116769883 | 6 | 31821428 | T | C | 0.0283 | -0.1088 | 0.0158 | 6.19E-12 | -6.8757  | 1310845 | Asthma |
| rs114691438 | 6 | 31822312 | G | A | 0.0210 | -0.1153 | 0.0175 | 4.73E-11 | -6.5794  | 942825  | Asthma |
| rs35294112  | 6 | 31826666 | C | T | 0.0284 | -0.1081 | 0.0157 | 6.51E-12 | -6.8677  | 1310845 | Asthma |
| rs11576015  | 6 | 31827568 | A | G | 0.0257 | -0.1201 | 0.0166 | 5.43E-13 | -7.2140  | 1301353 | Asthma |
| rs11576013  | 6 | 31827784 | C | G | 0.0297 | -0.1165 | 0.0165 | 1.77E-12 | -7.0515  | 1180923 | Asthma |
| rs189005016 | 6 | 31830677 | A | G | 0.0254 | -0.1174 | 0.0189 | 5.34E-10 | -6.2089  | 1145275 | Asthma |
| rs3115674   | 6 | 31831299 | G | T | 0.1171 | 0.0463  | 0.0081 | 8.89E-09 | 5.7507   | 1180923 | Asthma |
| rs145611070 | 6 | 31832657 | A | C | 0.0283 | -0.1085 | 0.0158 | 6.72E-12 | -6.8637  | 1310845 | Asthma |
| rs61504963  | 6 | 31833255 | A | C | 0.0283 | -0.1085 | 0.0158 | 6.63E-12 | -6.8658  | 1310845 | Asthma |
| rs2736430   | 6 | 31833456 | T | C | 0.3106 | 0.0411  | 0.0057 | 5.73E-13 | 7.2068   | 1133307 | Asthma |
| rs3130476   | 6 | 31834324 | T | C | 0.1101 | 0.0459  | 0.0079 | 6.61E-09 | 5.8005   | 1310845 | Asthma |
| rs17201248  | 6 | 31835353 | T | C | 0.0283 | -0.1086 | 0.0158 | 6.90E-12 | -6.8597  | 1310845 | Asthma |
| rs115487693 | 6 | 31837823 | C | T | 0.0281 | 0.0843  | 0.0146 | 7.77E-09 | 5.7736   | 1310845 | Asthma |
| rs3130478   | 6 | 31838136 | T | C | 0.1102 | 0.0461  | 0.0079 | 5.52E-09 | 5.8307   | 1310845 | Asthma |
| rs115238300 | 6 | 31839371 | G | A | 0.0282 | 0.0843  | 0.0146 | 7.69E-09 | 5.7751   | 1310845 | Asthma |
| rs3130679   | 6 | 31839763 | G | A | 0.1101 | 0.0456  | 0.0079 | 7.94E-09 | 5.7697   | 1310845 | Asthma |
| rs599707    | 6 | 31840659 | T | C | 0.1101 | 0.0454  | 0.0079 | 9.80E-09 | 5.7341   | 1310845 | Asthma |
| rs9267573   | 6 | 31842089 | T | G | 0.0961 | -0.0522 | 0.0091 | 8.43E-09 | -5.7595  | 1251217 | Asthma |
| rs9267574   | 6 | 31842835 | T | C | 0.1104 | 0.0483  | 0.0080 | 1.61E-09 | 6.0334   | 1284712 | Asthma |
| rs9267576   | 6 | 31844261 | T | G | 0.1587 | -0.0560 | 0.0069 | 3.96E-16 | -8.1398  | 1310845 | Asthma |
| rs144527861 | 6 | 31845195 | A | G | 0.0283 | -0.1086 | 0.0158 | 6.53E-12 | -6.8677  | 1310845 | Asthma |
| rs9267577   | 6 | 31845997 | T | C | 0.1974 | -0.0579 | 0.0063 | 2.06E-20 | -9.2589  | 1310845 | Asthma |
| rs7451017   | 6 | 31852882 | T | C | 0.1975 | -0.0583 | 0.0062 | 1.06E-20 | -9.3298  | 1310845 | Asthma |
| rs370025470 | 6 | 31853405 | C | G | 0.0395 | -0.1277 | 0.0168 | 2.79E-14 | -7.6075  | 977229  | Asthma |
| rs554854300 | 6 | 31855226 | A | G | 0.0178 | 0.1814  | 0.0276 | 4.78E-11 | 6.5776   | 778845  | Asthma |
| rs9267649   | 6 | 31857051 | A | G | 0.1976 | -0.0580 | 0.0062 | 1.63E-20 | -9.2841  | 1310845 | Asthma |
| rs2445689   | 6 | 31858376 | A | G | 0.3298 | 0.0406  | 0.0051 | 1.07E-15 | 8.0185   | 1310845 | Asthma |
| rs2507954   | 6 | 31858637 | G | A | 0.3298 | 0.0491  | 0.0061 | 5.23E-16 | 8.1060   | 1024845 | Asthma |
| rs41267082  | 6 | 31862816 | C | A | 0.0392 | -0.1117 | 0.0132 | 2.53E-17 | -8.4661  | 1310845 | Asthma |
| rs515688    | 6 | 31864261 | G | A | 0.1100 | 0.0464  | 0.0079 | 4.73E-09 | 5.8564   | 1310845 | Asthma |
| rs693906    | 6 | 31867387 | C | G | 0.1382 | 0.0435  | 0.0071 | 7.49E-10 | 6.1555   | 1310845 | Asthma |
| rs494620    | 6 | 31870936 | A | G | 0.3851 | 0.0349  | 0.0049 | 1.37E-12 | 7.0876   | 1310845 | Asthma |
| rs9267653   | 6 | 31872638 | T | C | 0.3067 | -0.0507 | 0.0054 | 3.34E-21 | -9.4516  | 1310845 | Asthma |
| rs501942    | 6 | 31872700 | T | C | 0.1097 | 0.0465  | 0.0079 | 4.63E-09 | 5.8600   | 1310845 | Asthma |
| rs614549    | 6 | 31872848 | G | A | 0.3433 | 0.0313  | 0.0050 | 5.14E-10 | 6.2150   | 1310845 | Asthma |
| rs504653    | 6 | 31872989 | G | A | 0.3589 | 0.0347  | 0.0050 | 4.13E-12 | 6.9328   | 1310845 | Asthma |
| rs9267654   | 6 | 31873232 | A | G | 0.1960 | -0.0586 | 0.0063 | 7.91E-21 | -9.3608  | 1310845 | Asthma |
| rs527254    | 6 | 31873864 | A | G | 0.3798 | 0.0391  | 0.0049 | 2.00E-15 | 7.9412   | 1310845 | Asthma |
| rs12661281  | 6 | 31874821 | A | T | 0.1431 | 0.0489  | 0.0069 | 9.34E-13 | 7.1399   | 1310845 | Asthma |
| rs2736428   | 6 | 31876147 | T | C | 0.3154 | 0.0382  | 0.0051 | 8.15E-14 | 7.4679   | 1310845 | Asthma |
| rs116275603 | 6 | 31877221 | A | G | 0.0319 | -0.0850 | 0.0152 | 2.22E-08 | -5.5943  | 1301353 | Asthma |
| rs9267658   | 6 | 31878208 | T | C | 0.1590 | -0.0548 | 0.0069 | 1.49E-15 | -7.9778  | 1310845 | Asthma |
| rs9267659   | 6 | 31878457 | A | G | 0.2358 | -0.0523 | 0.0058 | 1.82E-19 | -9.0237  | 1310845 | Asthma |
| rs116369005 | 6 | 31879641 | C | G | 0.0227 | 0.1047  | 0.0179 | 5.43E-09 | 5.8335   | 1310845 | Asthma |
| rs41267086  | 6 | 31879859 | A | G | 0.0556 | -0.0873 | 0.0110 | 1.57E-15 | -7.9708  | 942825  | Asthma |
| rs41267090  | 6 | 31880663 | T | A | 0.0654 | 0.0838  | 0.0100 | 4.90E-17 | 8.3890   | 1310845 | Asthma |
| rs74434374  | 6 | 31882531 | A | C | 0.0494 | -0.1011 | 0.0117 | 4.82E-18 | -8.6578  | 1310845 | Asthma |
| rs3869145   | 6 | 31883577 | A | G | 0.0399 | -0.1121 | 0.0131 | 1.36E-17 | -8.5386  | 1310845 | Asthma |
| rs2844458   | 6 | 31883692 | A | C | 0.3126 | 0.0406  | 0.0051 | 2.39E-15 | 7.9193   | 1310845 | Asthma |
| rs114387109 | 6 | 31884840 | T | G | 0.0282 | 0.0837  | 0.0146 | 9.78E-09 | 5.7346   | 1310845 | Asthma |
| rs62395848  | 6 | 31891129 | C | G | 0.0363 | -0.0711 | 0.0129 | 3.64E-08 | -5.5073  | 1310845 | Asthma |
| rs2844457   | 6 | 31893364 | T | A | 0.3417 | 0.0278  | 0.0050 | 3.50E-08 | 5.5145   | 1310845 | Asthma |
| rs3130680   | 6 | 31894545 | A | G | 0.3417 | 0.0278  | 0.0050 | 3.44E-08 | 5.5174   | 1310845 | Asthma |
| rs2243873   | 6 | 31895656 | C | A | 0.4583 | -0.0303 | 0.0048 | 3.48E-10 | -6.2757  | 1310845 | Asthma |
| rs115884658 | 6 | 31896761 | A | G | 0.0287 | 0.1278  | 0.0151 | 2.96E-17 | 8.4482   | 1310845 | Asthma |
| rs7887      | 6 | 31896770 | T | G | 0.3418 | 0.0279  | 0.0050 | 3.16E-08 | 5.5323   | 1310845 | Asthma |
| rs2844456   | 6 | 31896897 | C | T | 0.0459 | 0.0817  | 0.0116 | 1.68E-12 | 7.0584   | 1310845 | Asthma |
| rs78852381  | 6 | 31899849 | G | C | 0.0291 | -0.1113 | 0.0157 | 1.44E-12 | -7.0800  | 1310845 | Asthma |
| rs45575537  | 6 | 31901377 | G | C | 0.0271 | 0.0820  | 0.0149 | 3.82E-08 | 5.4991   | 1310845 | Asthma |
| rs558702    | 6 | 31902549 | A | G | 0.1098 | 0.0465  | 0.0079 | 4.30E-09 | 5.8722   | 1310845 | Asthma |
| rs62395849  | 6 | 31903348 | C | G | 0.0363 | -0.0714 | 0.0129 | 3.28E-08 | -5.5254  | 1310845 | Asthma |

|             |   |          |   |   |        |         |        |          |         |         |        |
|-------------|---|----------|---|---|--------|---------|--------|----------|---------|---------|--------|
| rs143928576 | 6 | 31903504 | T | C | 0.0291 | -0.1107 | 0.0157 | 1.82E-12 | -7.0480 | 1310845 | Asthma |
| rs2763982   | 6 | 31904774 | C | G | 0.3428 | 0.0280  | 0.0050 | 2.69E-08 | 5.5603  | 1310845 | Asthma |
| rs2844454   | 6 | 31905515 | T | C | 0.0457 | 0.0794  | 0.0116 | 8.34E-12 | 6.8327  | 1310845 | Asthma |
| rs519417    | 6 | 31910656 | A | G | 0.1099 | 0.0471  | 0.0079 | 2.76E-09 | 5.9455  | 1310845 | Asthma |
| rs3128761   | 6 | 31911381 | A | T | 0.1635 | -0.0519 | 0.0068 | 2.59E-14 | -7.6172 | 1310845 | Asthma |
| rs115104850 | 6 | 31911600 | A | G | 0.0264 | -0.1224 | 0.0166 | 1.76E-13 | -7.3656 | 1301353 | Asthma |
| rs3130681   | 6 | 31912834 | T | C | 0.1675 | -0.0685 | 0.0081 | 2.26E-17 | -8.4798 | 1024845 | Asthma |
| rs3130682   | 6 | 31917046 | T | C | 0.1634 | -0.0515 | 0.0068 | 4.16E-14 | -7.5560 | 1310845 | Asthma |
| rs3130683   | 6 | 31920590 | C | T | 0.1634 | -0.0508 | 0.0068 | 9.12E-14 | -7.4531 | 1310845 | Asthma |
| rs497309    | 6 | 31924707 | C | A | 0.1098 | 0.0469  | 0.0079 | 3.14E-09 | 5.9242  | 1310845 | Asthma |
| rs181063261 | 6 | 31933008 | T | C | 0.0300 | -0.1092 | 0.0170 | 1.25E-10 | -6.4331 | 1159440 | Asthma |
| rs115277907 | 6 | 31933313 | T | G | 0.0291 | 0.1275  | 0.0150 | 1.80E-17 | 8.5066  | 1310845 | Asthma |
| rs78593564  | 6 | 31939051 | A | G | 0.0290 | -0.1071 | 0.0158 | 1.10E-11 | -6.7933 | 1301353 | Asthma |
| rs1265905   | 6 | 31942164 | G | A | 0.1176 | 0.0496  | 0.0083 | 2.71E-09 | 5.9486  | 942825  | Asthma |
| rs1048709   | 6 | 31947158 | A | G | 0.2239 | -0.0461 | 0.0060 | 1.57E-14 | -7.6814 | 1310845 | Asthma |
| rs4151657   | 6 | 31949763 | C | T | 0.3210 | 0.0335  | 0.0051 | 3.79E-11 | 6.6121  | 1310845 | Asthma |
| rs1270942   | 6 | 31951083 | G | A | 0.1099 | 0.0473  | 0.0079 | 2.31E-09 | 5.9742  | 1310845 | Asthma |
| rs2072632   | 6 | 31953698 | A | G | 0.3124 | 0.0349  | 0.0051 | 7.83E-12 | 6.8417  | 1310845 | Asthma |
| rs372313241 | 6 | 31955454 | A | T | 0.0351 | 0.1380  | 0.0213 | 8.45E-11 | 6.4926  | 505420  | Asthma |
| rs80082277  | 6 | 31958071 | C | G | 0.0291 | -0.1052 | 0.0157 | 2.03E-11 | -6.7043 | 1310845 | Asthma |
| rs115003989 | 6 | 31958144 | A | G | 0.0265 | -0.1150 | 0.0165 | 3.22E-12 | -6.9679 | 1301353 | Asthma |
| rs2280774   | 6 | 31960914 | A | G | 0.3104 | 0.0388  | 0.0051 | 3.89E-14 | 7.5647  | 1310845 | Asthma |
| rs2734331   | 6 | 31962574 | G | A | 0.0402 | -0.1039 | 0.0130 | 1.62E-15 | -7.9675 | 1310845 | Asthma |
| rs3911893   | 6 | 31967790 | A | G | 0.0388 | -0.1068 | 0.0132 | 5.66E-16 | -8.0966 | 1310845 | Asthma |
| rs41267118  | 6 | 31971568 | A | G | 0.0280 | -0.1053 | 0.0158 | 2.39E-11 | -6.6798 | 1310845 | Asthma |
| rs389884    | 6 | 31973120 | G | A | 0.1096 | 0.0477  | 0.0079 | 1.79E-09 | 6.0162  | 1310845 | Asthma |
| rs116420479 | 6 | 31973852 | T | C | 0.0274 | -0.1092 | 0.0160 | 9.78E-12 | -6.8097 | 1310845 | Asthma |
| rs187161887 | 6 | 31976068 | T | C | 0.0314 | -0.1206 | 0.0198 | 1.22E-09 | -6.0778 | 934923  | Asthma |
| rs1738434   | 6 | 31976259 | T | G | 0.4011 | 0.0357  | 0.0060 | 2.58E-09 | 5.9563  | 1064845 | Asthma |
| rs2854435   | 6 | 31976598 | A | G | 0.3251 | 0.0506  | 0.0061 | 1.64E-16 | 8.2460  | 1003385 | Asthma |
| rs6905149   | 6 | 31977013 | T | C | 0.0281 | -0.1046 | 0.0157 | 2.94E-11 | -6.6491 | 1310845 | Asthma |
| rs12524149  | 6 | 31977453 | A | C | 0.3419 | 0.0365  | 0.0053 | 6.00E-12 | 6.8797  | 942825  | Asthma |
| rs2734325   | 6 | 31977869 | T | C | 0.3298 | 0.0417  | 0.0051 | 1.50E-16 | 8.2563  | 1310845 | Asthma |
| rs6941112   | 6 | 31978837 | A | G | 0.3005 | 0.0328  | 0.0052 | 2.06E-10 | 6.3571  | 1310845 | Asthma |
| rs77143442  | 6 | 31979197 | C | G | 0.0307 | -0.1304 | 0.0218 | 2.42E-09 | -5.9670 | 847307  | Asthma |
| rs28441225  | 6 | 31980623 | G | T | 0.0280 | -0.1040 | 0.0158 | 4.77E-11 | -6.5781 | 1310845 | Asthma |
| rs28361032  | 6 | 32005239 | G | A | 0.3556 | 0.0792  | 0.0073 | 2.10E-27 | 10.8453 | 870622  | Asthma |
| rs28361033  | 6 | 32006086 | C | T | 0.5684 | -0.0675 | 0.0080 | 3.46E-17 | -8.4298 | 778845  | Asthma |
| rs28615950  | 6 | 32006894 | A | G | 0.0759 | -0.0793 | 0.0144 | 4.02E-08 | -5.4898 | 778845  | Asthma |
| rs149101418 | 6 | 32010221 | T | G | 0.5638 | -0.0543 | 0.0082 | 4.82E-11 | -6.5764 | 778845  | Asthma |
| rs4959021   | 6 | 32013369 | T | C | 0.2113 | -0.0648 | 0.0088 | 1.69E-13 | -7.3715 | 870622  | Asthma |
| rs368431488 | 6 | 32037271 | G | C | 0.0296 | -0.1257 | 0.0184 | 9.17E-12 | -6.8193 | 1029518 | Asthma |
| rs554941446 | 6 | 32038342 | C | A | 0.0262 | -0.1160 | 0.0166 | 2.88E-12 | -6.9839 | 1301353 | Asthma |
| rs6462      | 6 | 32038820 | C | T | 0.2922 | -0.0534 | 0.0061 | 1.87E-18 | -8.7650 | 1133307 | Asthma |
| rs6463      | 6 | 32038844 | C | A | 0.3134 | 0.0417  | 0.0051 | 4.70E-16 | 8.1190  | 1310845 | Asthma |
| rs6449      | 6 | 32038878 | T | C | 0.2804 | 0.0405  | 0.0054 | 8.41E-14 | 7.4639  | 1251217 | Asthma |
| rs79249676  | 6 | 32039014 | A | G | 0.0270 | -0.1142 | 0.0163 | 2.12E-12 | -7.0271 | 1301353 | Asthma |
| rs17421133  | 6 | 32042495 | A | T | 0.3104 | 0.0416  | 0.0052 | 1.36E-15 | 7.9888  | 1284712 | Asthma |
| rs562705617 | 6 | 32042688 | T | C | 0.0317 | 0.1371  | 0.0232 | 3.47E-09 | 5.9078  | 778845  | Asthma |
| rs2075564   | 6 | 32045913 | C | T | 0.2951 | 0.0702  | 0.0083 | 3.97E-17 | 8.4139  | 778845  | Asthma |
| rs433061    | 6 | 32047051 | A | G | 0.1092 | 0.0465  | 0.0079 | 4.74E-09 | 5.8560  | 1310845 | Asthma |
| rs138522604 | 6 | 32048748 | G | T | 0.0129 | 0.1314  | 0.0221 | 2.76E-09 | 5.9451  | 1225084 | Asthma |
| rs2857009   | 6 | 32051969 | C | G | 0.3137 | 0.0421  | 0.0051 | 1.87E-16 | 8.2302  | 1310845 | Asthma |
| rs34562262  | 6 | 32053184 | C | G | 0.0432 | 0.1008  | 0.0120 | 4.39E-17 | 8.4017  | 1310845 | Asthma |
| rs2077116   | 6 | 32054061 | T | A | 0.3137 | 0.0420  | 0.0051 | 2.14E-16 | 8.2138  | 1310845 | Asthma |
| rs9469077   | 6 | 32054075 | G | A | 0.0659 | -0.0554 | 0.0101 | 3.83E-08 | -5.4986 | 942825  | Asthma |
| rs6902493   | 6 | 32055121 | T | C | 0.3137 | 0.0419  | 0.0051 | 2.73E-16 | 8.1848  | 1310845 | Asthma |
| rs1009382   | 6 | 32058330 | C | T | 0.3015 | -0.0534 | 0.0057 | 6.76E-21 | -9.3774 | 942825  | Asthma |
| rs3130285   | 6 | 32058480 | T | C | 0.1598 | -0.0504 | 0.0069 | 2.86E-13 | -7.3007 | 1310845 | Asthma |
| rs1150757   | 6 | 32061428 | A | G | 0.1093 | 0.0467  | 0.0079 | 4.06E-09 | 5.8817  | 1310845 | Asthma |
| rs204887    | 6 | 32061449 | A | G | 0.3176 | -0.0476 | 0.0053 | 2.71E-19 | -8.9801 | 1310845 | Asthma |
| rs2239689   | 6 | 32062507 | A | G | 0.3139 | 0.0416  | 0.0051 | 3.98E-16 | 8.1392  | 1310845 | Asthma |
| rs114188606 | 6 | 32063534 | C | T | 0.0130 | 0.1243  | 0.0214 | 6.06E-09 | 5.8150  | 1284712 | Asthma |
| rs28361052  | 6 | 32064428 | C | G | 0.3139 | 0.0416  | 0.0051 | 4.01E-16 | 8.1383  | 1310845 | Asthma |
| rs204883    | 6 | 32064966 | A | G | 0.3970 | 0.0355  | 0.0049 | 4.04E-13 | 7.2543  | 1310845 | Asthma |
| rs7766862   | 6 | 32065230 | A | G | 0.3139 | 0.0412  | 0.0051 | 8.44E-16 | 8.0477  | 1310845 | Asthma |
| rs3117189   | 6 | 32066167 | A | G | 0.1629 | -0.0539 | 0.0068 | 2.53E-15 | -7.9122 | 1310845 | Asthma |
| rs1150756   | 6 | 32067917 | T | C | 0.1095 | 0.0457  | 0.0079 | 8.10E-09 | 5.7664  | 1310845 | Asthma |
| rs2071295   | 6 | 32070923 | T | C | 0.3135 | 0.0419  | 0.0051 | 2.70E-16 | 8.1862  | 1310845 | Asthma |
| rs3130286   | 6 | 32074545 | T | C | 0.2476 | -0.0506 | 0.0058 | 2.29E-18 | -8.7420 | 1310845 | Asthma |
| rs3130287   | 6 | 32082767 | C | T | 0.1629 | -0.0539 | 0.0068 | 2.57E-15 | -7.9104 | 1310845 | Asthma |
| rs17207951  | 6 | 32082876 | T | C | 0.3136 | 0.0417  | 0.0051 | 3.77E-16 | 8.1460  | 1310845 | Asthma |
| rs61995676  | 6 | 32084667 | T | C | 0.0251 | -0.1160 | 0.0167 | 3.64E-12 | -6.9502 | 1301353 | Asthma |
| rs137893789 | 6 | 32087709 | A | G | 0.0429 | 0.1003  | 0.0121 | 8.97E-17 | 8.3177  | 1310845 | Asthma |



|             |   |          |   |   |        |         |        |          |         |         |        |
|-------------|---|----------|---|---|--------|---------|--------|----------|---------|---------|--------|
| rs17201588  | 6 | 32090195 | A | T | 0.3140 | 0.0414  | 0.0051 | 6.06E-16 | 8.0880  | 1310845 | Asthma |
| rs142674470 | 6 | 32091173 | T | C | 0.0263 | -0.1145 | 0.0165 | 4.36E-12 | -6.9255 | 1301353 | Asthma |
| rs1150753   | 6 | 32092090 | G | A | 0.1093 | 0.0465  | 0.0079 | 4.75E-09 | 5.8558  | 1310845 | Asthma |
| rs2071293   | 6 | 32094910 | A | G | 0.3061 | 0.0437  | 0.0051 | 2.24E-17 | 8.4809  | 1310845 | Asthma |
| rs1150752   | 6 | 32096949 | C | T | 0.1094 | 0.0465  | 0.0079 | 4.73E-09 | 5.8566  | 1310845 | Asthma |
| rs17421624  | 6 | 32098400 | C | T | 0.3066 | 0.0437  | 0.0051 | 2.22E-17 | 8.4817  | 1310845 | Asthma |
| rs3117182   | 6 | 32099042 | T | A | 0.1640 | -0.0524 | 0.0068 | 8.78E-15 | -7.7557 | 1310845 | Asthma |
| rs3096695   | 6 | 32102029 | G | C | 0.1589 | -0.0499 | 0.0069 | 5.20E-13 | -7.2200 | 1310845 | Asthma |
| rs41268896  | 6 | 32102292 | A | G | 0.3145 | 0.0415  | 0.0051 | 5.14E-16 | 8.1081  | 1310845 | Asthma |
| rs41268899  | 6 | 32102297 | A | G | 0.0855 | 0.0523  | 0.0087 | 1.82E-09 | 6.0131  | 1251217 | Asthma |
| rs41268902  | 6 | 32103231 | A | G | 0.0860 | 0.0517  | 0.0087 | 2.63E-09 | 5.9528  | 1251217 | Asthma |
| rs3117181   | 6 | 32103240 | C | G | 0.1620 | -0.0534 | 0.0068 | 5.49E-15 | -7.8152 | 1310845 | Asthma |
| rs4711286   | 6 | 32103860 | C | T | 0.3966 | 0.0356  | 0.0049 | 3.72E-13 | 7.2654  | 1310845 | Asthma |
| rs3134954   | 6 | 32104116 | C | T | 0.1620 | -0.0533 | 0.0068 | 5.50E-15 | -7.8149 | 1310845 | Asthma |
| rs55740958  | 6 | 32105923 | T | C | 0.0789 | -0.0600 | 0.0092 | 7.97E-11 | -6.5011 | 1310845 | Asthma |
| rs2269426   | 6 | 32108722 | A | G | 0.3672 | 0.0333  | 0.0049 | 1.58E-11 | 6.7399  | 1310845 | Asthma |
| rs411337    | 6 | 32109603 | T | C | 0.0805 | -0.0607 | 0.0091 | 2.62E-11 | -6.6668 | 1310845 | Asthma |
| rs3130342   | 6 | 32112369 | A | C | 0.1617 | -0.0522 | 0.0068 | 2.11E-14 | -7.6438 | 1310845 | Asthma |
| rs1269852   | 6 | 32112414 | C | G | 0.1093 | 0.0464  | 0.0079 | 5.04E-09 | 5.8459  | 1310845 | Asthma |
| rs9469084   | 6 | 32112606 | T | C | 0.0806 | -0.0607 | 0.0091 | 2.74E-11 | -6.6599 | 1310845 | Asthma |
| rs8111      | 6 | 32115398 | T | C | 0.2632 | 0.0413  | 0.0059 | 2.19E-12 | 7.0220  | 1154767 | Asthma |
| rs2228628   | 6 | 32121077 | C | G | 0.2823 | 0.0336  | 0.0053 | 1.59E-10 | 6.3966  | 1310845 | Asthma |
| rs204888    | 6 | 32121365 | T | G | 0.0805 | -0.0607 | 0.0091 | 2.69E-11 | -6.6624 | 1310845 | Asthma |
| rs3830076   | 6 | 32128467 | T | C | 0.0785 | 0.0665  | 0.0090 | 1.21E-13 | 7.4156  | 1310845 | Asthma |
| rs41268905  | 6 | 32129834 | A | G | 0.0860 | 0.0527  | 0.0087 | 1.19E-09 | 6.0812  | 1251217 | Asthma |
| rs169494    | 6 | 32130099 | A | G | 0.0804 | -0.0615 | 0.0091 | 1.67E-11 | -6.7327 | 1310845 | Asthma |
| rs9267802   | 6 | 32132040 | G | A | 0.2619 | 0.0504  | 0.0064 | 4.79E-15 | 7.8322  | 1024845 | Asthma |
| rs9267803   | 6 | 32133985 | T | C | 0.2731 | 0.0357  | 0.0053 | 1.65E-11 | 6.7342  | 1310845 | Asthma |
| rs3134963   | 6 | 32134528 | T | C | 0.1609 | -0.0529 | 0.0068 | 1.05E-14 | -7.7331 | 1310845 | Asthma |
| rs71565309  | 6 | 32135890 | A | G | 0.0563 | -0.0625 | 0.0107 | 4.67E-09 | -5.8586 | 1310845 | Asthma |
| rs4713505   | 6 | 32137224 | T | G | 0.2831 | 0.0345  | 0.0052 | 4.62E-11 | 6.5825  | 1310845 | Asthma |
| rs3096698   | 6 | 32139362 | T | C | 0.3767 | -0.0511 | 0.0055 | 8.08E-21 | -9.3587 | 1180923 | Asthma |
| rs3134953   | 6 | 32141388 | G | A | 0.1577 | -0.0494 | 0.0069 | 1.06E-12 | -7.1230 | 1310845 | Asthma |
| rs77619009  | 6 | 32142737 | G | A | 0.0664 | -0.0562 | 0.0102 | 3.69E-08 | -5.5054 | 1310845 | Asthma |
| rs9267806   | 6 | 32143109 | A | G | 0.2728 | 0.0351  | 0.0053 | 4.13E-11 | 6.5994  | 1310845 | Asthma |
| rs3130279   | 6 | 32144849 | A | G | 0.1622 | -0.0539 | 0.0068 | 2.75E-15 | -7.9017 | 1310845 | Asthma |
| rs9267807   | 6 | 32145178 | A | G | 0.1622 | -0.0541 | 0.0068 | 2.10E-15 | -7.9356 | 1310845 | Asthma |
| rs205002    | 6 | 32145535 | A | G | 0.3223 | 0.0355  | 0.0051 | 2.55E-12 | 7.0004  | 1310845 | Asthma |
| rs4713506   | 6 | 32146203 | A | G | 0.2728 | 0.0348  | 0.0053 | 5.69E-11 | 6.5517  | 1310845 | Asthma |
| rs3131283   | 6 | 32152121 | T | C | 0.1577 | -0.0521 | 0.0069 | 5.24E-14 | -7.5258 | 1310845 | Asthma |
| rs1053924   | 6 | 32152938 | T | C | 0.3333 | -0.0360 | 0.0053 | 7.33E-12 | -6.8511 | 1310845 | Asthma |
| rs3134604   | 6 | 32154609 | C | G | 0.1471 | -0.0558 | 0.0071 | 3.33E-15 | -7.8777 | 1310845 | Asthma |
| rs3096694   | 6 | 32156174 | T | C | 0.1432 | -0.0529 | 0.0072 | 2.07E-13 | -7.3444 | 1310845 | Asthma |
| rs10947233  | 6 | 32156647 | T | G | 0.0489 | 0.0716  | 0.0120 | 2.42E-09 | 5.9673  | 942825  | Asthma |
| rs3134603   | 6 | 32158225 | A | G | 0.1493 | -0.0574 | 0.0070 | 3.27E-16 | -8.1629 | 1310845 | Asthma |
| rs3134950   | 6 | 32159700 | C | A | 0.4055 | -0.0429 | 0.0050 | 1.20E-17 | -8.5529 | 1310845 | Asthma |
| rs3130346   | 6 | 32163733 | T | C | 0.1331 | -0.0525 | 0.0076 | 4.98E-12 | -6.9063 | 942825  | Asthma |
| rs3132941   | 6 | 32164195 | C | G | 0.1093 | 0.0456  | 0.0079 | 8.74E-09 | 5.7534  | 1310845 | Asthma |
| rs41268920  | 6 | 32165567 | C | A | 0.0590 | 0.1193  | 0.0158 | 5.01E-14 | 7.5317  | 505420  | Asthma |
| rs140776878 | 6 | 32167051 | T | C | 0.0269 | -0.1160 | 0.0164 | 1.32E-12 | -7.0924 | 1301353 | Asthma |
| rs41268924  | 6 | 32167360 | A | G | 0.0434 | 0.0954  | 0.0119 | 1.25E-15 | 7.9991  | 1310845 | Asthma |
| rs1061808   | 6 | 32168770 | T | G | 0.4041 | -0.0431 | 0.0050 | 8.81E-18 | -8.5885 | 1310845 | Asthma |
| rs3130283   | 6 | 32170768 | A | C | 0.1611 | -0.0556 | 0.0068 | 3.79E-16 | -8.1449 | 1310845 | Asthma |
| rs2269423   | 6 | 32177930 | A | C | 0.4065 | -0.0410 | 0.0050 | 3.02E-16 | -8.1727 | 1310845 | Asthma |
| rs41268928  | 6 | 32179380 | C | G | 0.0469 | 0.0821  | 0.0113 | 4.30E-13 | 7.2455  | 1310845 | Asthma |
| rs3134943   | 6 | 32179984 | T | C | 0.1617 | -0.0514 | 0.0068 | 5.41E-14 | -7.5218 | 1310845 | Asthma |
| rs9391855   | 6 | 32182024 | T | C | 0.0525 | 0.0748  | 0.0107 | 2.41E-12 | 7.0084  | 1310845 | Asthma |
| rs2070600   | 6 | 32183666 | T | C | 0.0527 | 0.0743  | 0.0106 | 2.93E-12 | 6.9808  | 1310845 | Asthma |
| rs1800684   | 6 | 32184217 | A | T | 0.1578 | -0.0522 | 0.0069 | 4.74E-14 | -7.5390 | 1310845 | Asthma |
| rs1004095   | 6 | 32185632 | C | A | 0.3395 | 0.0563  | 0.0070 | 8.17E-16 | 8.0517  | 873440  | Asthma |
| rs41268932  | 6 | 32186934 | G | A | 0.0421 | 0.0973  | 0.0121 | 8.88E-16 | 8.0412  | 1310845 | Asthma |
| rs204993    | 6 | 32187804 | G | A | 0.2558 | 0.0456  | 0.0056 | 3.30E-16 | 8.1621  | 1310845 | Asthma |
| rs2022059   | 6 | 32188712 | C | G | 0.0497 | 0.0673  | 0.0119 | 1.79E-08 | 5.6315  | 942825  | Asthma |
| rs2856437   | 6 | 32189587 | A | G | 0.0469 | 0.0767  | 0.0114 | 1.48E-11 | 6.7498  | 1310845 | Asthma |
| rs204991    | 6 | 32193589 | C | T | 0.1796 | 0.0434  | 0.0063 | 5.12E-12 | 6.9023  | 1310845 | Asthma |
| rs3132940   | 6 | 32193619 | T | G | 0.1581 | -0.0504 | 0.0069 | 3.22E-13 | -7.2849 | 1310845 | Asthma |
| rs204990    | 6 | 32193653 | A | C | 0.1796 | 0.0434  | 0.0063 | 5.26E-12 | 6.8982  | 1310845 | Asthma |
| rs204989    | 6 | 32194075 | A | G | 0.1795 | 0.0436  | 0.0063 | 4.11E-12 | 6.9332  | 1310845 | Asthma |
| rs187570181 | 6 | 32196810 | T | C | 0.0321 | -0.1182 | 0.0155 | 2.89E-14 | -7.6032 | 1301353 | Asthma |
| rs2071278   | 6 | 32197667 | G | A | 0.1427 | 0.0400  | 0.0069 | 5.30E-09 | 5.8374  | 1310845 | Asthma |
| rs9378121   | 6 | 32199736 | T | C | 0.0548 | 0.0619  | 0.0113 | 4.11E-08 | 5.4861  | 1154767 | Asthma |
| rs3134942   | 6 | 32200994 | T | G | 0.1285 | 0.0472  | 0.0072 | 5.72E-11 | 6.5508  | 1310845 | Asthma |
| rs8192574   | 6 | 32201368 | A | G | 0.0431 | 0.1010  | 0.0120 | 2.90E-17 | 8.4510  | 1310845 | Asthma |
| rs1044506   | 6 | 32204288 | T | G | 0.1585 | -0.0498 | 0.0069 | 5.80E-13 | -7.2051 | 1310845 | Asthma |

|             |   |          |   |   |        |         |        |          |         |         |        |
|-------------|---|----------|---|---|--------|---------|--------|----------|---------|---------|--------|
| rs3131296   | 6 | 32205216 | T | C | 0.1286 | 0.0473  | 0.0072 | 5.03E-11 | 6.5702  | 1310845 | Asthma |
| rs200391889 | 6 | 32207638 | A | C | 0.0574 | 0.1150  | 0.0155 | 1.17E-13 | 7.4204  | 778845  | Asthma |
| rs206017    | 6 | 32208434 | G | A | 0.4342 | -0.0343 | 0.0049 | 3.84E-12 | -6.9429 | 1310845 | Asthma |
| rs116753971 | 6 | 32209300 | T | A | 0.0368 | 0.0870  | 0.0136 | 1.52E-10 | 6.4034  | 1310845 | Asthma |
| rs3132956   | 6 | 32211661 | A | G | 0.1288 | 0.0471  | 0.0072 | 6.03E-11 | 6.5430  | 1310845 | Asthma |
| rs16869834  | 6 | 32211932 | G | A | 0.0561 | -0.0672 | 0.0110 | 8.95E-10 | -6.1268 | 1310845 | Asthma |
| rs3131294   | 6 | 32212369 | A | G | 0.1589 | -0.0495 | 0.0069 | 6.37E-13 | -7.1924 | 1310845 | Asthma |
| rs206019    | 6 | 32212464 | T | C | 0.0940 | 0.0489  | 0.0082 | 2.32E-09 | 5.9740  | 1310845 | Asthma |
| rs206016    | 6 | 32213405 | A | G | 0.0940 | 0.0488  | 0.0082 | 2.48E-09 | 5.9627  | 1310845 | Asthma |
| rs206015    | 6 | 32214982 | A | G | 0.0992 | 0.0455  | 0.0079 | 1.07E-08 | 5.7194  | 1310845 | Asthma |
| rs3131290   | 6 | 32215398 | A | G | 0.3760 | 0.0395  | 0.0050 | 2.08E-15 | 7.9364  | 1310845 | Asthma |
| rs3131291   | 6 | 32216289 | T | G | 0.4216 | 0.0303  | 0.0049 | 6.65E-10 | 6.1740  | 1310845 | Asthma |
| rs3134799   | 6 | 32216444 | A | G | 0.4216 | 0.0302  | 0.0049 | 7.09E-10 | 6.1641  | 1310845 | Asthma |
| rs3134797   | 6 | 32218273 | A | G | 0.4215 | 0.0302  | 0.0049 | 7.94E-10 | 6.1461  | 1310845 | Asthma |
| rs3134932   | 6 | 32218370 | A | C | 0.3752 | 0.0394  | 0.0050 | 2.56E-15 | 7.9107  | 1310845 | Asthma |
| rs436388    | 6 | 32218487 | T | C | 0.4245 | -0.0337 | 0.0049 | 8.37E-12 | -6.8321 | 1310845 | Asthma |
| rs444472    | 6 | 32218949 | A | G | 0.4273 | 0.0308  | 0.0049 | 2.84E-10 | 6.3072  | 1310845 | Asthma |
| rs394657    | 6 | 32219246 | G | A | 0.4273 | 0.0309  | 0.0049 | 2.75E-10 | 6.3122  | 1310845 | Asthma |
| rs429853    | 6 | 32219425 | C | T | 0.4440 | 0.0293  | 0.0049 | 1.49E-09 | 6.0459  | 1310845 | Asthma |
| rs1109771   | 6 | 32219828 | A | G | 0.4817 | -0.0286 | 0.0050 | 9.43E-09 | -5.7407 | 1251217 | Asthma |
| rs8192589   | 6 | 32219860 | T | G | 0.1253 | 0.0477  | 0.0073 | 7.95E-11 | 6.5016  | 1310845 | Asthma |
| rs915896    | 6 | 32219944 | T | A | 0.2632 | 0.0306  | 0.0056 | 3.75E-08 | 5.5023  | 1310845 | Asthma |
| rs431722    | 6 | 32219945 | C | T | 0.4356 | -0.0316 | 0.0049 | 1.42E-10 | -6.4137 | 1310845 | Asthma |
| rs422951    | 6 | 32220606 | C | T | 0.4306 | 0.0282  | 0.0049 | 6.98E-09 | 5.7914  | 1310845 | Asthma |
| rs8192587   | 6 | 32220936 | G | C | 0.0293 | -0.0791 | 0.0143 | 3.02E-08 | -5.5403 | 1310845 | Asthma |
| rs3134796   | 6 | 32222144 | G | A | 0.1293 | 0.0463  | 0.0072 | 1.19E-10 | 6.4405  | 1310845 | Asthma |
| rs3132946   | 6 | 32222251 | A | G | 0.1581 | -0.0497 | 0.0069 | 5.66E-13 | -7.2083 | 1310845 | Asthma |
| rs915895    | 6 | 32222440 | C | T | 0.2987 | 0.0291  | 0.0053 | 3.85E-08 | 5.4978  | 1310845 | Asthma |
| rs915894    | 6 | 32222613 | G | T | 0.3478 | 0.0389  | 0.0051 | 2.05E-14 | 7.6472  | 1310845 | Asthma |
| rs443198    | 6 | 32222629 | G | A | 0.3341 | 0.0363  | 0.0052 | 2.31E-12 | 7.0146  | 1310845 | Asthma |
| rs3830041   | 6 | 32223562 | T | C | 0.0707 | -0.0517 | 0.0094 | 3.53E-08 | -5.5131 | 1310845 | Asthma |
| rs391755    | 6 | 32224659 | G | A | 0.0613 | -0.0828 | 0.0101 | 3.02E-16 | -8.1722 | 1310845 | Asthma |
| rs397081    | 6 | 32224840 | C | T | 0.0477 | -0.0931 | 0.0119 | 5.06E-15 | -7.8254 | 1310845 | Asthma |
| rs387071    | 6 | 32225672 | C | T | 0.1846 | -0.0455 | 0.0061 | 1.23E-13 | -7.4136 | 1310845 | Asthma |
| rs479536    | 6 | 32225901 | A | G | 0.0534 | 0.0680  | 0.0108 | 3.57E-10 | 6.2720  | 1310845 | Asthma |
| rs393125    | 6 | 32226122 | A | G | 0.0534 | 0.0680  | 0.0108 | 3.52E-10 | 6.2739  | 1310845 | Asthma |
| rs447903    | 6 | 32226168 | T | G | 0.1848 | -0.0457 | 0.0061 | 9.25E-14 | -7.4511 | 1310845 | Asthma |
| rs377093    | 6 | 32226300 | G | T | 0.1857 | -0.0493 | 0.0068 | 5.74E-13 | -7.2067 | 1133307 | Asthma |
| rs370055    | 6 | 32226482 | C | A | 0.1847 | -0.0456 | 0.0061 | 1.09E-13 | -7.4293 | 1310845 | Asthma |
| rs499691    | 6 | 32226562 | T | C | 0.1847 | -0.0456 | 0.0061 | 1.03E-13 | -7.4374 | 1310845 | Asthma |
| rs3096690   | 6 | 32226853 | C | G | 0.1110 | 0.0489  | 0.0079 | 5.08E-10 | 6.2167  | 1310845 | Asthma |
| rs526945    | 6 | 32227205 | A | T | 0.0534 | 0.0682  | 0.0108 | 3.15E-10 | 6.2913  | 1310845 | Asthma |
| rs479835    | 6 | 32227581 | T | A | 0.0466 | -0.0970 | 0.0121 | 1.18E-15 | -8.0068 | 1310845 | Asthma |
| rs532385    | 6 | 32227582 | A | G | 0.1843 | -0.0455 | 0.0061 | 8.97E-14 | -7.4553 | 1310845 | Asthma |
| rs409687    | 6 | 32227973 | T | C | 0.1667 | -0.0429 | 0.0064 | 2.93E-11 | -6.6502 | 1310845 | Asthma |
| rs9267860   | 6 | 32228864 | A | G | 0.1766 | -0.0534 | 0.0088 | 1.07E-09 | -6.0986 | 908767  | Asthma |
| rs9267862   | 6 | 32228895 | T | C | 0.0592 | -0.1193 | 0.0169 | 1.81E-12 | -7.0479 | 778845  | Asthma |
| rs399950    | 6 | 32229163 | T | C | 0.1771 | -0.0469 | 0.0063 | 7.97E-14 | -7.4707 | 1310845 | Asthma |
| rs495089    | 6 | 32229686 | G | A | 0.1771 | -0.0468 | 0.0063 | 8.93E-14 | -7.4558 | 1310845 | Asthma |
| rs404890    | 6 | 32231090 | A | C | 0.3567 | 0.0319  | 0.0050 | 2.10E-10 | 6.3541  | 1310845 | Asthma |
| rs2849015   | 6 | 32231159 | A | G | 0.3568 | 0.0317  | 0.0050 | 2.57E-10 | 6.3224  | 1310845 | Asthma |
| rs3130297   | 6 | 32231204 | T | C | 0.1111 | 0.0488  | 0.0079 | 5.35E-10 | 6.2085  | 1310845 | Asthma |
| rs438800    | 6 | 32232277 | A | G | 0.0550 | -0.1009 | 0.0109 | 2.67E-20 | -9.2317 | 1310845 | Asthma |
| rs9267877   | 6 | 32233250 | C | T | 0.0550 | -0.1006 | 0.0109 | 3.51E-20 | -9.2015 | 1310845 | Asthma |
| rs9267879   | 6 | 32233430 | T | C | 0.0546 | -0.1008 | 0.0112 | 1.88E-19 | -9.0204 | 1284712 | Asthma |
| rs9267881   | 6 | 32233492 | A | C | 0.0546 | -0.1011 | 0.0112 | 1.50E-19 | -9.0438 | 1284712 | Asthma |
| rs6918888   | 6 | 32233502 | C | G | 0.1417 | 0.0402  | 0.0070 | 1.05E-08 | 5.7228  | 1284712 | Asthma |
| rs9267883   | 6 | 32233514 | T | C | 0.0546 | -0.1010 | 0.0112 | 1.73E-19 | -9.0297 | 1284712 | Asthma |
| rs9267884   | 6 | 32233558 | A | G | 0.0546 | -0.1007 | 0.0112 | 2.07E-19 | -9.0097 | 1284712 | Asthma |
| rs9267885   | 6 | 32233662 | T | C | 0.0550 | -0.1006 | 0.0109 | 3.52E-20 | -9.2025 | 1310845 | Asthma |
| rs443863    | 6 | 32233814 | A | G | 0.0467 | -0.0980 | 0.0121 | 5.27E-16 | -8.1049 | 1310845 | Asthma |
| rs2555467   | 6 | 32234119 | T | A | 0.0606 | -0.0989 | 0.0123 | 1.18E-15 | -8.0070 | 1024845 | Asthma |
| rs9267890   | 6 | 32234309 | T | G | 0.1574 | -0.0499 | 0.0070 | 8.96E-13 | -7.1457 | 1310845 | Asthma |
| rs9267891   | 6 | 32234416 | G | C | 0.0527 | -0.1073 | 0.0125 | 1.03E-17 | -8.5698 | 1133307 | Asthma |
| rs6924656   | 6 | 32234508 | T | C | 0.0541 | -0.1055 | 0.0121 | 3.32E-18 | -8.7000 | 1216250 | Asthma |
| rs62404591  | 6 | 32235143 | C | G | 0.0340 | -0.0880 | 0.0135 | 7.57E-11 | -6.5088 | 1310845 | Asthma |
| rs62404592  | 6 | 32235227 | A | C | 0.0340 | -0.0864 | 0.0135 | 1.61E-10 | -6.3952 | 1310845 | Asthma |
| rs508445    | 6 | 32235570 | A | G | 0.0550 | -0.1006 | 0.0109 | 3.56E-20 | -9.2004 | 1310845 | Asthma |
| rs2395107   | 6 | 32235814 | A | G | 0.3567 | 0.0318  | 0.0050 | 2.54E-10 | 6.3245  | 1310845 | Asthma |
| rs9267901   | 6 | 32235829 | T | C | 0.0550 | -0.1004 | 0.0109 | 4.18E-20 | -9.1832 | 1310845 | Asthma |
| rs3134925   | 6 | 32236880 | A | G | 0.1406 | 0.0409  | 0.0073 | 2.39E-08 | 5.5811  | 1180923 | Asthma |
| rs3134924   | 6 | 32236907 | T | G | 0.1406 | 0.0410  | 0.0073 | 2.27E-08 | 5.5903  | 1180923 | Asthma |
| rs3130303   | 6 | 32238090 | G | A | 0.1418 | 0.0395  | 0.0069 | 1.11E-08 | 5.7125  | 1310845 | Asthma |
| rs6901158   | 6 | 32238165 | T | C | 0.1419 | 0.0388  | 0.0069 | 2.07E-08 | 5.6060  | 1310845 | Asthma |

|             |   |          |   |   |        |         |        |          |         |         |        |
|-------------|---|----------|---|---|--------|---------|--------|----------|---------|---------|--------|
| rs113547322 | 6 | 32238842 | T | G | 0.1670 | -0.0391 | 0.0066 | 3.92E-09 | -5.8875 | 1310845 | Asthma |
| rs62404593  | 6 | 32239210 | T | C | 0.0318 | -0.0879 | 0.0138 | 1.75E-10 | -6.3822 | 1310845 | Asthma |
| rs76827949  | 6 | 32239274 | G | A | 0.0483 | -0.0919 | 0.0117 | 3.44E-15 | -7.8735 | 1310845 | Asthma |
| rs4947255   | 6 | 32239706 | T | C | 0.0483 | -0.0929 | 0.0117 | 1.67E-15 | -7.9637 | 1310845 | Asthma |
| rs17208230  | 6 | 32241066 | A | G | 0.0485 | -0.0919 | 0.0116 | 2.93E-15 | -7.8939 | 1310845 | Asthma |
| rs12529559  | 6 | 32241421 | T | G | 0.0673 | -0.0671 | 0.0104 | 1.03E-10 | -6.4617 | 1310845 | Asthma |
| rs75981033  | 6 | 32241433 | A | G | 0.0485 | -0.0918 | 0.0116 | 3.03E-15 | -7.8898 | 1310845 | Asthma |
| rs143548785 | 6 | 32241535 | T | C | 0.0485 | -0.0917 | 0.0116 | 3.41E-15 | -7.8750 | 1310845 | Asthma |
| rs146341946 | 6 | 32241547 | G | A | 0.0485 | -0.0919 | 0.0116 | 2.92E-15 | -7.8944 | 1310845 | Asthma |
| rs75057504  | 6 | 32242166 | C | T | 0.0580 | -0.0908 | 0.0105 | 4.31E-18 | -8.6702 | 1310845 | Asthma |
| rs3134935   | 6 | 32242578 | C | T | 0.2987 | -0.0791 | 0.0092 | 6.31E-18 | -8.6269 | 778845  | Asthma |
| rs72502602  | 6 | 32242622 | T | G | 0.0381 | -0.0880 | 0.0147 | 2.26E-09 | -5.9777 | 760614  | Asthma |
| rs17201875  | 6 | 32242779 | A | G | 0.0486 | -0.0920 | 0.0116 | 2.53E-15 | -7.9121 | 1310845 | Asthma |
| rs17201882  | 6 | 32242788 | A | G | 0.0486 | -0.0920 | 0.0116 | 2.48E-15 | -7.9149 | 1310845 | Asthma |
| rs12526413  | 6 | 32244834 | C | T | 0.1403 | -0.0405 | 0.0072 | 1.59E-08 | -5.6517 | 1310845 | Asthma |
| rs9267951   | 6 | 32244878 | T | C | 0.2785 | 0.0460  | 0.0054 | 2.23E-17 | 8.4812  | 1310845 | Asthma |
| rs9267952   | 6 | 32244917 | A | G | 0.4428 | 0.0307  | 0.0053 | 6.58E-09 | 5.8014  | 1159440 | Asthma |
| rs9267953   | 6 | 32244922 | T | C | 0.1723 | -0.0473 | 0.0074 | 1.33E-10 | -6.4242 | 1159440 | Asthma |
| rs74223647  | 6 | 32244955 | C | G | 0.0523 | -0.0919 | 0.0111 | 1.24E-16 | -8.2797 | 1310845 | Asthma |
| rs17576984  | 6 | 32245208 | T | C | 0.0982 | -0.0468 | 0.0081 | 8.61E-09 | -5.7562 | 1310845 | Asthma |
| rs9267954   | 6 | 32245275 | T | A | 0.2619 | 0.0388  | 0.0056 | 2.90E-12 | 6.9826  | 1310845 | Asthma |
| rs9267955   | 6 | 32245373 | A | G | 0.1703 | -0.0505 | 0.0068 | 7.33E-14 | -7.4818 | 1310845 | Asthma |
| rs454748    | 6 | 32245433 | A | G | 0.4092 | 0.0277  | 0.0050 | 2.40E-08 | 5.5805  | 1294204 | Asthma |
| rs9267956   | 6 | 32245861 | G | A | 0.3546 | 0.0398  | 0.0050 | 2.34E-15 | 7.9217  | 1310845 | Asthma |
| rs440169    | 6 | 32246011 | A | G | 0.3837 | 0.0311  | 0.0049 | 3.43E-10 | 6.2779  | 1310845 | Asthma |
| rs450124    | 6 | 32246032 | C | T | 0.3891 | 0.0316  | 0.0049 | 1.53E-10 | 6.4027  | 1310845 | Asthma |
| rs453275    | 6 | 32246033 | C | G | 0.3847 | 0.0347  | 0.0054 | 1.25E-10 | 6.4327  | 1159440 | Asthma |
| rs412492    | 6 | 32246054 | T | A | 0.3892 | 0.0316  | 0.0049 | 1.46E-10 | 6.4100  | 1310845 | Asthma |
| rs397379    | 6 | 32246282 | C | G | 0.3898 | 0.0317  | 0.0049 | 1.29E-10 | 6.4287  | 1310845 | Asthma |
| rs547153    | 6 | 32246416 | A | G | 0.3842 | 0.0311  | 0.0049 | 3.16E-10 | 6.2908  | 1310845 | Asthma |
| rs693294    | 6 | 32246654 | G | A | 0.3897 | 0.0317  | 0.0049 | 1.26E-10 | 6.4316  | 1310845 | Asthma |
| rs9267958   | 6 | 32246839 | C | A | 0.3844 | 0.0311  | 0.0049 | 3.06E-10 | 6.2957  | 1310845 | Asthma |
| rs557236    | 6 | 32247218 | A | G | 0.0534 | 0.0651  | 0.0109 | 2.05E-09 | 5.9936  | 1310845 | Asthma |
| rs563412    | 6 | 32247286 | A | G | 0.3899 | 0.0318  | 0.0049 | 1.04E-10 | 6.4611  | 1310845 | Asthma |
| rs405875    | 6 | 32247411 | C | T | 0.3898 | 0.0318  | 0.0049 | 1.06E-10 | 6.4577  | 1310845 | Asthma |
| rs410283    | 6 | 32247421 | T | G | 0.3898 | 0.0318  | 0.0049 | 1.10E-10 | 6.4530  | 1310845 | Asthma |
| rs2515892   | 6 | 32247475 | T | G | 0.3898 | 0.0318  | 0.0049 | 1.10E-10 | 6.4530  | 1310845 | Asthma |
| rs400139    | 6 | 32247515 | A | C | 0.3899 | 0.0319  | 0.0049 | 1.00E-10 | 6.4665  | 1310845 | Asthma |
| rs399897    | 6 | 32247537 | T | C | 0.3896 | 0.0320  | 0.0049 | 8.84E-11 | 6.4857  | 1310845 | Asthma |
| rs3130309   | 6 | 32247695 | A | G | 0.4306 | -0.0283 | 0.0050 | 1.29E-08 | -5.6878 | 1310845 | Asthma |
| rs1559876   | 6 | 32247992 | C | G | 0.3540 | 0.0400  | 0.0050 | 1.73E-15 | 7.9591  | 1310845 | Asthma |
| rs2894239   | 6 | 32248019 | G | T | 0.3842 | 0.0311  | 0.0049 | 3.21E-10 | 6.2884  | 1310845 | Asthma |
| rs2395110   | 6 | 32248099 | A | G | 0.3899 | 0.0319  | 0.0049 | 9.74E-11 | 6.4710  | 1310845 | Asthma |
| rs2395111   | 6 | 32248187 | C | T | 0.3899 | 0.0318  | 0.0049 | 1.17E-10 | 6.4438  | 1310845 | Asthma |
| rs6914780   | 6 | 32248752 | A | T | 0.0712 | -0.0630 | 0.0094 | 2.38E-11 | -6.6807 | 1310845 | Asthma |
| rs3115576   | 6 | 32249073 | A | T | 0.3842 | 0.0311  | 0.0049 | 3.14E-10 | 6.2916  | 1310845 | Asthma |
| rs3115575   | 6 | 32249114 | G | T | 0.3842 | 0.0311  | 0.0049 | 3.20E-10 | 6.2889  | 1310845 | Asthma |
| rs113718114 | 6 | 32249118 | C | T | 0.0318 | -0.0834 | 0.0137 | 1.19E-09 | -6.0822 | 1310845 | Asthma |
| rs3130310   | 6 | 32249134 | G | C | 0.3842 | 0.0311  | 0.0049 | 3.12E-10 | 6.2928  | 1310845 | Asthma |
| rs6457508   | 6 | 32249186 | T | C | 0.3842 | 0.0308  | 0.0049 | 4.97E-10 | 6.2201  | 1310845 | Asthma |
| rs6457509   | 6 | 32249241 | C | G | 0.3840 | 0.0313  | 0.0049 | 2.57E-10 | 6.3229  | 1310845 | Asthma |
| rs6457510   | 6 | 32249269 | T | C | 0.3842 | 0.0311  | 0.0049 | 3.14E-10 | 6.2920  | 1310845 | Asthma |
| rs6936204   | 6 | 32249315 | T | C | 0.3870 | -0.0329 | 0.0051 | 1.00E-10 | -6.4669 | 1310845 | Asthma |
| rs9267971   | 6 | 32249408 | C | T | 0.3842 | 0.0310  | 0.0049 | 3.79E-10 | 6.2627  | 1310845 | Asthma |
| rs9267972   | 6 | 32249455 | A | G | 0.4305 | -0.0283 | 0.0050 | 1.28E-08 | -5.6894 | 1310845 | Asthma |
| rs3130311   | 6 | 32249590 | G | A | 0.3847 | 0.0310  | 0.0049 | 3.76E-10 | 6.2636  | 1310845 | Asthma |
| rs3115574   | 6 | 32249636 | T | C | 0.3893 | -0.0418 | 0.0060 | 3.29E-12 | -6.9648 | 1024845 | Asthma |
| rs3130312   | 6 | 32249659 | G | A | 0.3843 | 0.0311  | 0.0049 | 3.28E-10 | 6.2850  | 1310845 | Asthma |
| rs3130313   | 6 | 32249676 | G | A | 0.3843 | 0.0311  | 0.0049 | 3.26E-10 | 6.2858  | 1310845 | Asthma |
| rs2395112   | 6 | 32249817 | T | C | 0.3793 | 0.0326  | 0.0054 | 1.17E-09 | 6.0850  | 1216250 | Asthma |
| rs2894240   | 6 | 32250069 | A | G | 0.3843 | 0.0310  | 0.0049 | 3.51E-10 | 6.2741  | 1310845 | Asthma |
| rs3115573   | 6 | 32251066 | G | A | 0.3843 | 0.0309  | 0.0049 | 4.02E-10 | 6.2535  | 1310845 | Asthma |
| rs3096701   | 6 | 32251382 | T | C | 0.3844 | 0.0311  | 0.0049 | 3.39E-10 | 6.2801  | 1310845 | Asthma |
| rs9267989   | 6 | 32251543 | T | G | 0.2150 | 0.0844  | 0.0072 | 1.11E-31 | 11.7121 | 998712  | Asthma |
| rs9267992   | 6 | 32252620 | G | A | 0.1703 | -0.0502 | 0.0068 | 1.05E-13 | -7.4341 | 1310845 | Asthma |
| rs3115572   | 6 | 32252707 | C | G | 0.4304 | -0.0279 | 0.0050 | 1.89E-08 | -5.6217 | 1310845 | Asthma |
| rs3130315   | 6 | 32252908 | A | G | 0.3843 | 0.0310  | 0.0049 | 3.84E-10 | 6.2605  | 1310845 | Asthma |
| rs3115571   | 6 | 32253141 | A | G | 0.4305 | -0.0281 | 0.0050 | 1.58E-08 | -5.6523 | 1310845 | Asthma |
| rs3130316   | 6 | 32253451 | T | C | 0.4305 | -0.0280 | 0.0050 | 1.77E-08 | -5.6327 | 1310845 | Asthma |
| rs3130317   | 6 | 32253636 | A | T | 0.3843 | 0.0311  | 0.0049 | 3.34E-10 | 6.2820  | 1310845 | Asthma |
| rs9267995   | 6 | 32253775 | G | A | 0.4608 | -0.0350 | 0.0049 | 1.02E-12 | -7.1278 | 1310845 | Asthma |
| rs3096700   | 6 | 32254005 | A | C | 0.4293 | -0.0316 | 0.0054 | 4.04E-09 | -5.8828 | 1154767 | Asthma |
| rs9267996   | 6 | 32254157 | G | A | 0.3541 | 0.0397  | 0.0050 | 2.53E-15 | 7.9123  | 1310845 | Asthma |
| rs62404604  | 6 | 32254282 | T | G | 0.0318 | -0.0846 | 0.0137 | 7.61E-10 | -6.1528 | 1310845 | Asthma |

|             |   |          |   |   |        |         |        |          |         |         |        |
|-------------|---|----------|---|---|--------|---------|--------|----------|---------|---------|--------|
| rs3115570   | 6 | 32254929 | G | A | 0.3874 | 0.0305  | 0.0049 | 6.73E-10 | 6.1722  | 1310845 | Asthma |
| rs3130320   | 6 | 32255481 | T | C | 0.4025 | -0.0362 | 0.0050 | 5.67E-13 | -7.2083 | 1310845 | Asthma |
| rs9268000   | 6 | 32255754 | C | A | 0.3522 | 0.0481  | 0.0050 | 1.48E-21 | 9.5367  | 1310845 | Asthma |
| rs28895018  | 6 | 32256601 | C | T | 0.0665 | -0.0652 | 0.0097 | 1.60E-11 | -6.7386 | 1310845 | Asthma |
| rs9268005   | 6 | 32256611 | C | A | 0.3517 | -0.0327 | 0.0052 | 2.86E-10 | -6.3061 | 1310845 | Asthma |
| rs62404605  | 6 | 32257564 | T | A | 0.0333 | -0.0834 | 0.0146 | 1.03E-08 | -5.7256 | 1159440 | Asthma |
| rs9268026   | 6 | 32258704 | G | A | 0.1086 | 0.0474  | 0.0079 | 2.30E-09 | 5.9748  | 1310845 | Asthma |
| rs143070514 | 6 | 32259269 | A | G | 0.0546 | -0.1026 | 0.0138 | 1.10E-13 | -7.4282 | 1064845 | Asthma |
| rs9268035   | 6 | 32259711 | G | A | 0.3738 | 0.0482  | 0.0050 | 2.79E-22 | 9.7079  | 1310845 | Asthma |
| rs111750542 | 6 | 32259779 | A | G | 0.0704 | -0.0680 | 0.0101 | 1.99E-11 | -6.7067 | 1310845 | Asthma |
| rs9268043   | 6 | 32261795 | T | C | 0.3552 | -0.0315 | 0.0057 | 2.39E-08 | -5.5813 | 1159440 | Asthma |
| rs9268045   | 6 | 32261878 | T | C | 0.3738 | 0.0480  | 0.0050 | 3.51E-22 | 9.6843  | 1310845 | Asthma |
| rs3132971   | 6 | 32262479 | G | T | 0.1087 | 0.0474  | 0.0079 | 2.31E-09 | 5.9742  | 1310845 | Asthma |
| rs3132972   | 6 | 32262577 | A | G | 0.4092 | -0.0375 | 0.0050 | 7.33E-14 | -7.4819 | 1310845 | Asthma |
| rs4959091   | 6 | 32263237 | A | G | 0.3738 | 0.0481  | 0.0050 | 3.36E-22 | 9.6891  | 1310845 | Asthma |
| rs62402977  | 6 | 32263325 | T | C | 0.0319 | -0.0833 | 0.0137 | 1.23E-09 | -6.0763 | 1310845 | Asthma |
| rs9268072   | 6 | 32264875 | C | G | 0.1948 | -0.0472 | 0.0069 | 8.38E-12 | -6.8320 | 1159440 | Asthma |
| rs2395114   | 6 | 32265770 | G | A | 0.3738 | 0.0481  | 0.0050 | 3.29E-22 | 9.6911  | 1310845 | Asthma |
| rs28366167  | 6 | 32266281 | G | T | 0.0652 | 0.0671  | 0.0113 | 2.81E-09 | 5.9421  | 1024845 | Asthma |
| rs9268081   | 6 | 32266635 | G | A | 0.3519 | -0.0324 | 0.0052 | 3.75E-10 | -6.2641 | 1310845 | Asthma |
| rs9268082   | 6 | 32267176 | T | G | 0.3738 | 0.0479  | 0.0050 | 4.90E-22 | 9.6504  | 1310845 | Asthma |
| rs6913182   | 6 | 32270149 | T | C | 0.1927 | -0.0483 | 0.0064 | 2.90E-14 | -7.6028 | 1310845 | Asthma |
| rs9268086   | 6 | 32270489 | T | C | 0.3739 | 0.0477  | 0.0050 | 6.36E-22 | 9.6236  | 1310845 | Asthma |
| rs6928678   | 6 | 32270503 | G | A | 0.3517 | -0.0325 | 0.0052 | 3.55E-10 | -6.2727 | 1310845 | Asthma |
| rs28366169  | 6 | 32270719 | A | G | 0.0532 | 0.0639  | 0.0109 | 3.96E-09 | 5.8859  | 1310845 | Asthma |
| rs2395115   | 6 | 32271025 | C | T | 0.3738 | 0.0478  | 0.0050 | 5.60E-22 | 9.6365  | 1310845 | Asthma |
| rs2022539   | 6 | 32271781 | C | A | 0.3738 | 0.0478  | 0.0050 | 5.52E-22 | 9.6381  | 1310845 | Asthma |
| rs3115556   | 6 | 32272295 | A | T | 0.1086 | 0.0473  | 0.0079 | 2.40E-09 | 5.9681  | 1310845 | Asthma |
| rs4713515   | 6 | 32273098 | A | G | 0.4712 | -0.0478 | 0.0049 | 1.43E-22 | -9.7758 | 1310845 | Asthma |
| rs113498355 | 6 | 32274192 | C | T | 0.0320 | -0.0834 | 0.0137 | 1.08E-09 | -6.0969 | 1310845 | Asthma |
| rs28732185  | 6 | 32276406 | A | C | 0.0656 | -0.0688 | 0.0118 | 5.53E-09 | -5.8306 | 1060172 | Asthma |
| rs9268103   | 6 | 32277593 | A | G | 0.1924 | -0.0485 | 0.0064 | 2.20E-14 | -7.6385 | 1310845 | Asthma |
| rs9268104   | 6 | 32279142 | A | G | 0.1697 | -0.0498 | 0.0068 | 1.84E-13 | -7.3601 | 1310845 | Asthma |
| rs9268106   | 6 | 32279338 | T | A | 0.1458 | -0.0460 | 0.0073 | 3.03E-10 | -6.2973 | 942825  | Asthma |
| rs9268112   | 6 | 32280213 | A | G | 0.3538 | -0.0333 | 0.0052 | 1.31E-10 | -6.4262 | 1310845 | Asthma |
| rs9268113   | 6 | 32280389 | C | G | 0.3801 | 0.0525  | 0.0055 | 1.73E-21 | 9.5203  | 1128634 | Asthma |
| rs9268115   | 6 | 32280587 | T | C | 0.3768 | 0.0472  | 0.0050 | 1.82E-21 | 9.5149  | 1310845 | Asthma |
| rs9268118   | 6 | 32282210 | T | C | 0.1672 | -0.0491 | 0.0068 | 5.36E-13 | -7.2160 | 1310845 | Asthma |
| rs62402999  | 6 | 32284058 | G | T | 0.0319 | -0.0836 | 0.0137 | 9.70E-10 | -6.1141 | 1310845 | Asthma |
| rs9268123   | 6 | 32284355 | G | A | 0.1086 | 0.0472  | 0.0079 | 2.63E-09 | 5.9533  | 1310845 | Asthma |
| rs7454557   | 6 | 32284497 | G | A | 0.3737 | 0.0478  | 0.0050 | 5.62E-22 | 9.6363  | 1310845 | Asthma |
| rs9268128   | 6 | 32286107 | C | T | 0.3517 | -0.0323 | 0.0052 | 4.38E-10 | -6.2400 | 1310845 | Asthma |
| rs9268129   | 6 | 32286448 | C | G | 0.3797 | 0.0542  | 0.0054 | 1.77E-23 | 9.9853  | 1154767 | Asthma |
| rs28732186  | 6 | 32287640 | A | G | 0.0665 | -0.0653 | 0.0097 | 1.51E-11 | -6.7474 | 1310845 | Asthma |
| rs9268138   | 6 | 32287677 | A | G | 0.1697 | -0.0498 | 0.0068 | 1.77E-13 | -7.3653 | 1310845 | Asthma |
| rs9268141   | 6 | 32288355 | A | G | 0.3698 | 0.0498  | 0.0050 | 1.48E-23 | 10.0032 | 1310845 | Asthma |
| rs9268144   | 6 | 32289422 | C | T | 0.1086 | 0.0472  | 0.0079 | 2.64E-09 | 5.9523  | 1310845 | Asthma |
| rs9268145   | 6 | 32289507 | G | T | 0.2183 | 0.0842  | 0.0059 | 8.94E-46 | 14.2017 | 1310845 | Asthma |
| rs4713518   | 6 | 32289560 | G | A | 0.3738 | 0.0477  | 0.0050 | 6.19E-22 | 9.6264  | 1310845 | Asthma |
| rs926070    | 6 | 32289789 | G | A | 0.3517 | -0.0325 | 0.0052 | 3.46E-10 | -6.2766 | 1310845 | Asthma |
| rs9268148   | 6 | 32291750 | G | A | 0.1924 | -0.0487 | 0.0064 | 1.85E-14 | -7.6603 | 1310845 | Asthma |
| rs482194    | 6 | 32292782 | G | A | 0.3739 | 0.0476  | 0.0050 | 7.61E-22 | 9.6050  | 1310845 | Asthma |
| rs775397    | 6 | 32293475 | G | T | 0.1086 | 0.0472  | 0.0079 | 2.57E-09 | 5.9568  | 1310845 | Asthma |
| rs560505    | 6 | 32293994 | G | A | 0.3703 | 0.0544  | 0.0053 | 2.78E-24 | 10.1672 | 1180923 | Asthma |
| rs146647793 | 6 | 32294163 | C | G | 0.0336 | -0.1215 | 0.0152 | 1.28E-15 | -7.9970 | 1310845 | Asthma |
| rs6457535   | 6 | 32294629 | A | G | 0.1697 | -0.0499 | 0.0068 | 1.54E-13 | -7.3833 | 1310845 | Asthma |
| rs9268149   | 6 | 32295322 | T | C | 0.1940 | -0.0503 | 0.0063 | 1.95E-15 | -7.9446 | 1310845 | Asthma |
| rs9268152   | 6 | 32295886 | T | C | 0.1090 | 0.0489  | 0.0080 | 1.11E-09 | 6.0935  | 1284712 | Asthma |
| rs518374    | 6 | 32297933 | C | A | 0.3742 | 0.0521  | 0.0053 | 1.57E-22 | 9.7661  | 1180923 | Asthma |
| rs114355928 | 6 | 32298104 | T | G | 0.0288 | 0.1166  | 0.0146 | 1.37E-15 | 7.9879  | 1310845 | Asthma |
| rs9268154   | 6 | 32298244 | T | A | 0.1924 | -0.0486 | 0.0064 | 2.02E-14 | -7.6491 | 1310845 | Asthma |
| rs9268155   | 6 | 32298533 | T | C | 0.1924 | -0.0486 | 0.0064 | 2.14E-14 | -7.6418 | 1310845 | Asthma |
| rs6906662   | 6 | 32298729 | A | G | 0.0665 | -0.0654 | 0.0097 | 1.39E-11 | -6.7592 | 1310845 | Asthma |
| rs565571    | 6 | 32298758 | A | G | 0.3701 | 0.0499  | 0.0050 | 1.05E-23 | 10.0372 | 1310845 | Asthma |
| rs537757    | 6 | 32300724 | T | A | 0.3755 | 0.0480  | 0.0049 | 2.16E-22 | 9.7340  | 1310845 | Asthma |
| rs146305655 | 6 | 32301176 | A | G | 0.0459 | -0.0856 | 0.0125 | 6.24E-12 | -6.8740 | 1310845 | Asthma |
| rs533876    | 6 | 32301203 | G | A | 0.3740 | 0.0478  | 0.0050 | 5.33E-22 | 9.6417  | 1310845 | Asthma |
| rs9268157   | 6 | 32301582 | G | T | 0.3514 | -0.0325 | 0.0052 | 3.51E-10 | -6.2746 | 1310845 | Asthma |
| rs9268158   | 6 | 32301680 | T | C | 0.1102 | 0.0519  | 0.0086 | 1.30E-09 | 6.0669  | 1154767 | Asthma |
| rs28366175  | 6 | 32301801 | C | T | 0.0607 | 0.0652  | 0.0109 | 1.98E-09 | 6.0000  | 1154767 | Asthma |
| rs114014905 | 6 | 32302445 | A | C | 0.0336 | -0.1215 | 0.0152 | 1.27E-15 | -7.9978 | 1310845 | Asthma |
| rs477005    | 6 | 32302723 | G | A | 0.3700 | 0.0496  | 0.0050 | 1.84E-23 | 9.9815  | 1310845 | Asthma |
| rs116729028 | 6 | 32304107 | C | T | 0.0318 | -0.0844 | 0.0137 | 7.51E-10 | -6.1549 | 1310845 | Asthma |
| rs522254    | 6 | 32305283 | G | A | 0.2183 | 0.0844  | 0.0059 | 5.77E-46 | 14.2323 | 1310845 | Asthma |

|             |   |          |   |   |        |         |        |          |          |         |        |
|-------------|---|----------|---|---|--------|---------|--------|----------|----------|---------|--------|
| rs544358    | 6 | 32305381 | C | G | 0.3740 | 0.0478  | 0.0050 | 6.04E-22 | 9.6288   | 1310845 | Asthma |
| rs9268177   | 6 | 32307105 | A | C | 0.1087 | 0.0469  | 0.0079 | 3.48E-09 | 5.9074   | 1310845 | Asthma |
| rs9268178   | 6 | 32307844 | T | C | 0.1087 | 0.0472  | 0.0079 | 2.64E-09 | 5.9529   | 1310845 | Asthma |
| rs540926    | 6 | 32308392 | G | A | 0.3781 | 0.0561  | 0.0061 | 6.72E-20 | 9.1319   | 977229  | Asthma |
| rs484302    | 6 | 32308523 | A | G | 0.3591 | 0.0731  | 0.0080 | 4.49E-20 | 9.1757   | 778845  | Asthma |
| rs9268185   | 6 | 32308574 | T | G | 0.2471 | -0.0581 | 0.0101 | 8.50E-09 | -5.7582  | 778845  | Asthma |
| rs1265776   | 6 | 32308725 | G | A | 0.3738 | 0.0476  | 0.0050 | 7.85E-22 | 9.6018   | 1310845 | Asthma |
| rs532534731 | 6 | 32308956 | C | G | 0.0349 | -0.1262 | 0.0201 | 3.25E-10 | -6.2864  | 479287  | Asthma |
| rs113136355 | 6 | 32309732 | C | A | 0.0702 | -0.0679 | 0.0102 | 2.34E-11 | -6.6831  | 1310845 | Asthma |
| rs502626    | 6 | 32310489 | G | A | 0.3738 | 0.0476  | 0.0050 | 7.60E-22 | 9.6052   | 1310845 | Asthma |
| rs9268199   | 6 | 32310858 | G | A | 0.2149 | -0.0674 | 0.0061 | 4.98E-28 | -10.9762 | 1310845 | Asthma |
| rs28732188  | 6 | 32311755 | A | C | 0.0665 | -0.0655 | 0.0097 | 1.31E-11 | -6.7681  | 1310845 | Asthma |
| rs9268205   | 6 | 32312161 | A | G | 0.1924 | -0.0486 | 0.0064 | 2.08E-14 | -7.6458  | 1310845 | Asthma |
| rs9268208   | 6 | 32312814 | C | T | 0.1060 | 0.0515  | 0.0088 | 4.18E-09 | 5.8769   | 1216250 | Asthma |
| rs547261    | 6 | 32314256 | A | G | 0.3742 | 0.0473  | 0.0050 | 1.21E-21 | 9.5570   | 1310845 | Asthma |
| rs2395141   | 6 | 32314291 | G | A | 0.3517 | -0.0319 | 0.0052 | 7.75E-10 | -6.1500  | 1310845 | Asthma |
| rs6910071   | 6 | 32315077 | G | A | 0.2182 | 0.0842  | 0.0059 | 8.00E-46 | 14.2095  | 1310845 | Asthma |
| rs9268219   | 6 | 32316331 | G | T | 0.1043 | 0.0487  | 0.0081 | 1.64E-09 | 6.0303   | 1310845 | Asthma |
| rs495140    | 6 | 32316646 | T | A | 0.3737 | 0.0474  | 0.0050 | 1.33E-21 | 9.5478   | 1310845 | Asthma |
| rs567828    | 6 | 32317173 | A | T | 0.3738 | 0.0473  | 0.0050 | 1.35E-21 | 9.5456   | 1310845 | Asthma |
| rs543928    | 6 | 32317471 | G | A | 0.3867 | -0.0386 | 0.0050 | 1.88E-14 | -7.6585  | 1310845 | Asthma |
| rs6457541   | 6 | 32317571 | G | C | 0.3573 | -0.0304 | 0.0052 | 3.53E-09 | -5.9048  | 1310845 | Asthma |
| rs116667074 | 6 | 32317585 | T | C | 0.1086 | 0.0473  | 0.0079 | 2.46E-09 | 5.9641   | 1310845 | Asthma |
| rs538473    | 6 | 32318102 | A | G | 0.0994 | -0.0470 | 0.0078 | 1.48E-09 | -6.0467  | 1310845 | Asthma |
| rs531094    | 6 | 32318325 | A | T | 0.3746 | 0.0521  | 0.0053 | 1.49E-22 | 9.7717   | 1180923 | Asthma |
| rs28732189  | 6 | 32318673 | G | T | 0.0665 | -0.0657 | 0.0097 | 1.16E-11 | -6.7858  | 1310845 | Asthma |
| rs557539    | 6 | 32318903 | A | G | 0.3793 | 0.0480  | 0.0049 | 2.34E-22 | 9.7259   | 1310845 | Asthma |
| rs2022542   | 6 | 32318908 | G | A | 0.0660 | -0.0679 | 0.0105 | 1.12E-10 | -6.4506  | 1310845 | Asthma |
| rs560324    | 6 | 32319207 | G | T | 0.3792 | 0.0480  | 0.0049 | 2.38E-22 | 9.7239   | 1310845 | Asthma |
| rs2746115   | 6 | 32319552 | T | C | 0.4747 | 0.0574  | 0.0073 | 2.84E-15 | 7.8979   | 870622  | Asthma |
| rs580921    | 6 | 32319719 | G | A | 0.3610 | 0.0523  | 0.0050 | 1.41E-25 | 10.4538  | 1310845 | Asthma |
| rs9268230   | 6 | 32319790 | G | A | 0.3462 | -0.0322 | 0.0052 | 5.82E-10 | -6.1952  | 1310845 | Asthma |
| rs510564    | 6 | 32319835 | C | T | 0.0991 | -0.0567 | 0.0102 | 2.45E-08 | -5.5767  | 661498  | Asthma |
| rs377563450 | 6 | 32320175 | A | C | 0.0509 | -0.1241 | 0.0156 | 1.60E-15 | -7.9693  | 934923  | Asthma |
| rs578122379 | 6 | 32320178 | C | T | 0.0506 | -0.1104 | 0.0141 | 4.89E-15 | -7.8293  | 1003385 | Asthma |
| rs575765    | 6 | 32320264 | C | T | 0.3738 | 0.0474  | 0.0050 | 1.18E-21 | 9.5595   | 1310845 | Asthma |
| rs6920338   | 6 | 32320312 | C | T | 0.1760 | -0.0466 | 0.0066 | 2.24E-12 | -7.0186  | 1310845 | Asthma |
| rs574710    | 6 | 32320413 | C | T | 0.3793 | 0.0480  | 0.0049 | 2.44E-22 | 9.7215   | 1310845 | Asthma |
| rs539703    | 6 | 32320685 | C | A | 0.3694 | 0.0443  | 0.0052 | 3.08E-17 | 8.4436   | 942825  | Asthma |
| rs540639    | 6 | 32320787 | G | T | 0.3793 | 0.0480  | 0.0049 | 2.43E-22 | 9.7223   | 1310845 | Asthma |
| rs542525    | 6 | 32321028 | C | T | 0.3793 | 0.0481  | 0.0049 | 2.30E-22 | 9.7275   | 1310845 | Asthma |
| rs544100    | 6 | 32321155 | A | T | 0.3738 | 0.0474  | 0.0050 | 1.27E-21 | 9.5525   | 1310845 | Asthma |
| rs7751715   | 6 | 32321175 | A | G | 0.1087 | 0.0471  | 0.0079 | 2.80E-09 | 5.9428   | 1310845 | Asthma |
| rs546857    | 6 | 32321463 | T | C | 0.3698 | 0.0494  | 0.0050 | 2.83E-23 | 9.9385   | 1310845 | Asthma |
| rs547077    | 6 | 32321541 | C | T | 0.3793 | 0.0482  | 0.0049 | 1.75E-22 | 9.7552   | 1310845 | Asthma |
| rs9268234   | 6 | 32321613 | A | C | 0.1923 | -0.0486 | 0.0064 | 2.04E-14 | -7.6482  | 1310845 | Asthma |
| rs28366180  | 6 | 32321646 | T | G | 0.0535 | 0.0647  | 0.0108 | 2.34E-09 | 5.9724   | 1310845 | Asthma |
| rs570963    | 6 | 32321817 | G | A | 0.0939 | -0.0521 | 0.0080 | 7.09E-11 | -6.5187  | 1310845 | Asthma |
| rs572730    | 6 | 32321987 | T | C | 0.3737 | 0.0475  | 0.0050 | 1.14E-21 | 9.5630   | 1310845 | Asthma |
| rs72849457  | 6 | 32322031 | A | G | 0.0683 | -0.0677 | 0.0103 | 5.37E-11 | -6.5602  | 1310845 | Asthma |
| rs9268235   | 6 | 32322431 | T | C | 0.1095 | 0.0449  | 0.0079 | 1.04E-08 | 5.7237   | 1310845 | Asthma |
| rs4428543   | 6 | 32322927 | G | A | 0.3552 | -0.0310 | 0.0056 | 4.12E-08 | -5.4856  | 1159440 | Asthma |
| rs487649    | 6 | 32322971 | G | A | 0.3738 | 0.0474  | 0.0050 | 1.26E-21 | 9.5532   | 1310845 | Asthma |
| rs4279480   | 6 | 32323150 | G | T | 0.3517 | -0.0320 | 0.0052 | 6.15E-10 | -6.1865  | 1310845 | Asthma |
| rs485774    | 6 | 32323177 | G | A | 0.3737 | 0.0473  | 0.0050 | 1.40E-21 | 9.5424   | 1310845 | Asthma |
| rs4348357   | 6 | 32323582 | T | G | 0.3514 | -0.0318 | 0.0052 | 8.54E-10 | -6.1344  | 1310845 | Asthma |
| rs742697    | 6 | 32323765 | C | T | 0.3517 | -0.0321 | 0.0052 | 5.61E-10 | -6.2010  | 1310845 | Asthma |
| rs523627    | 6 | 32324060 | T | G | 0.3738 | 0.0474  | 0.0050 | 1.11E-21 | 9.5659   | 1310845 | Asthma |
| rs525607    | 6 | 32324307 | T | C | 0.3793 | 0.0482  | 0.0049 | 1.81E-22 | 9.7518   | 1310845 | Asthma |
| rs74839053  | 6 | 32324794 | A | T | 0.3807 | 0.0617  | 0.0074 | 1.23E-16 | 8.2798   | 505420  | Asthma |
| rs552339    | 6 | 32324938 | A | G | 0.3737 | 0.0475  | 0.0050 | 9.84E-22 | 9.5786   | 1310845 | Asthma |
| rs3132957   | 6 | 32325179 | T | C | 0.3517 | -0.0322 | 0.0052 | 5.36E-10 | -6.2084  | 1310845 | Asthma |
| rs533885    | 6 | 32325375 | G | A | 0.3668 | 0.0495  | 0.0059 | 3.44E-17 | 8.4304   | 753275  | Asthma |
| rs510181    | 6 | 32325657 | C | A | 0.3793 | 0.0481  | 0.0049 | 2.24E-22 | 9.7304   | 1310845 | Asthma |
| rs2077002   | 6 | 32325755 | T | C | 0.3519 | -0.0322 | 0.0052 | 5.03E-10 | -6.2182  | 1310845 | Asthma |
| rs471081    | 6 | 32325821 | T | A | 0.3789 | 0.0483  | 0.0049 | 1.65E-22 | 9.7613   | 1310845 | Asthma |
| rs471964    | 6 | 32325894 | A | G | 0.3666 | 0.0473  | 0.0051 | 2.41E-20 | 9.2425   | 1251217 | Asthma |
| rs504703    | 6 | 32326240 | C | T | 0.3721 | 0.0564  | 0.0059 | 1.21E-21 | 9.5568   | 1029518 | Asthma |
| rs476584    | 6 | 32326415 | A | G | 0.3776 | 0.0512  | 0.0054 | 2.05E-21 | 9.5026   | 1159440 | Asthma |
| rs3129905   | 6 | 32326786 | T | G | 0.3750 | -0.0313 | 0.0052 | 1.54E-09 | -6.0406  | 1310845 | Asthma |
| rs501545    | 6 | 32326789 | A | G | 0.3032 | 0.0447  | 0.0051 | 2.79E-18 | 8.7196   | 1310845 | Asthma |
| rs476885    | 6 | 32326935 | G | A | 0.3739 | 0.0476  | 0.0050 | 8.63E-22 | 9.5921   | 1310845 | Asthma |
| rs62403044  | 6 | 32327055 | T | A | 0.0318 | -0.0835 | 0.0137 | 1.18E-09 | -6.0834  | 1310845 | Asthma |
| rs504203    | 6 | 32327066 | C | T | 0.3757 | 0.0463  | 0.0049 | 6.66E-21 | 9.3789   | 1310845 | Asthma |



|             |   |          |   |   |        |         |        |          |          |         |        |
|-------------|---|----------|---|---|--------|---------|--------|----------|----------|---------|--------|
| rs505274    | 6 | 32327215 | A | G | 0.3739 | 0.0474  | 0.0050 | 1.21E-21 | 9.5570   | 1310845 | Asthma |
| rs508805    | 6 | 32327573 | A | G | 0.3739 | 0.0475  | 0.0050 | 9.29E-22 | 9.5844   | 1310845 | Asthma |
| rs524578    | 6 | 32327580 | A | G | 0.3796 | 0.0483  | 0.0049 | 1.39E-22 | 9.7788   | 1310845 | Asthma |
| rs4424116   | 6 | 32327776 | C | G | 0.3819 | 0.0513  | 0.0054 | 2.27E-21 | 9.4920   | 1154767 | Asthma |
| rs4392743   | 6 | 32327875 | C | T | 0.1086 | 0.0471  | 0.0079 | 2.95E-09 | 5.9342   | 1310845 | Asthma |
| rs6913605   | 6 | 32327917 | G | A | 0.3756 | 0.0500  | 0.0050 | 9.80E-24 | 10.0436  | 1310845 | Asthma |
| rs9501613   | 6 | 32327940 | T | C | 0.0608 | 0.0600  | 0.0101 | 2.74E-09 | 5.9468   | 1310845 | Asthma |
| rs9268249   | 6 | 32327967 | T | A | 0.4834 | -0.0797 | 0.0067 | 2.29E-32 | -11.8448 | 847307  | Asthma |
| rs6457542   | 6 | 32328051 | G | A | 0.3747 | 0.0477  | 0.0050 | 7.49E-22 | 9.6067   | 1310845 | Asthma |
| rs7451330   | 6 | 32328188 | T | C | 0.1709 | -0.0501 | 0.0067 | 1.02E-13 | -7.4388  | 1310845 | Asthma |
| rs6457543   | 6 | 32328252 | G | T | 0.3701 | 0.0494  | 0.0050 | 3.33E-23 | 9.9224   | 1310845 | Asthma |
| rs6457544   | 6 | 32328280 | T | C | 0.3700 | 0.0497  | 0.0050 | 1.59E-23 | 9.9956   | 1310845 | Asthma |
| rs12528615  | 6 | 32328539 | T | C | 0.3739 | 0.0479  | 0.0050 | 4.94E-22 | 9.6494   | 1310845 | Asthma |
| rs10947252  | 6 | 32328598 | A | G | 0.3739 | 0.0478  | 0.0050 | 5.09E-22 | 9.6462   | 1310845 | Asthma |
| rs9469098   | 6 | 32328605 | T | C | 0.1618 | -0.0414 | 0.0067 | 7.24E-10 | -6.1607  | 1310845 | Asthma |
| rs10947253  | 6 | 32328778 | C | G | 0.3739 | 0.0478  | 0.0050 | 5.03E-22 | 9.6475   | 1310845 | Asthma |
| rs9348880   | 6 | 32329003 | T | C | 0.3794 | 0.0486  | 0.0049 | 8.37E-23 | 9.8300   | 1310845 | Asthma |
| rs9348881   | 6 | 32329065 | G | C | 0.3795 | 0.0484  | 0.0049 | 1.28E-22 | 9.7871   | 1310845 | Asthma |
| rs9394086   | 6 | 32329347 | T | A | 0.3738 | 0.0479  | 0.0050 | 4.51E-22 | 9.6589   | 1310845 | Asthma |
| rs9368711   | 6 | 32329379 | C | T | 0.3738 | 0.0479  | 0.0050 | 5.03E-22 | 9.6478   | 1310845 | Asthma |
| rs17208363  | 6 | 32329432 | A | G | 0.0664 | -0.0659 | 0.0097 | 1.04E-11 | -6.8010  | 1310845 | Asthma |
| rs9368712   | 6 | 32329551 | A | G | 0.3738 | 0.0477  | 0.0050 | 7.21E-22 | 9.6106   | 1310845 | Asthma |
| rs9368713   | 6 | 32329560 | C | T | 0.3739 | 0.0479  | 0.0050 | 4.32E-22 | 9.6633   | 1310845 | Asthma |
| rs9368714   | 6 | 32329564 | A | G | 0.3217 | 0.0714  | 0.0051 | 3.66E-44 | 13.9391  | 1310845 | Asthma |
| rs9380289   | 6 | 32329640 | A | G | 0.3739 | 0.0479  | 0.0050 | 4.68E-22 | 9.6550   | 1310845 | Asthma |
| rs75052715  | 6 | 32329883 | G | C | 0.3718 | 0.0506  | 0.0054 | 8.31E-21 | 9.3556   | 1159440 | Asthma |
| rs9296021   | 6 | 32329913 | T | C | 0.3739 | 0.0479  | 0.0050 | 4.81E-22 | 9.6524   | 1310845 | Asthma |
| rs9296022   | 6 | 32330178 | A | G | 0.3739 | 0.0479  | 0.0050 | 4.34E-22 | 9.6629   | 1310845 | Asthma |
| rs9405090   | 6 | 32330595 | G | A | 0.3739 | 0.0478  | 0.0050 | 5.15E-22 | 9.6451   | 1310845 | Asthma |
| rs9296023   | 6 | 32330871 | G | A | 0.3705 | 0.0489  | 0.0054 | 8.91E-20 | 9.1014   | 1216250 | Asthma |
| rs72843213  | 6 | 32331396 | T | G | 0.0661 | -0.0678 | 0.0105 | 1.06E-10 | -6.4578  | 1310845 | Asthma |
| rs742582    | 6 | 32331938 | A | G | 0.3739 | 0.0479  | 0.0050 | 4.95E-22 | 9.6492   | 1310845 | Asthma |
| rs910052    | 6 | 32332096 | T | G | 0.3739 | 0.0480  | 0.0050 | 3.88E-22 | 9.6744   | 1310845 | Asthma |
| rs17605238  | 6 | 32332131 | C | G | 0.1618 | -0.0416 | 0.0067 | 5.82E-10 | -6.1952  | 1310845 | Asthma |
| rs1076712   | 6 | 32332375 | C | T | 0.3787 | -0.0316 | 0.0050 | 2.15E-10 | -6.3500  | 1310845 | Asthma |
| rs1076711   | 6 | 32332597 | G | T | 0.3852 | 0.0581  | 0.0059 | 7.38E-23 | 9.8426   | 1024845 | Asthma |
| rs761190    | 6 | 32332693 | G | T | 0.3740 | 0.0481  | 0.0050 | 3.02E-22 | 9.7000   | 1310845 | Asthma |
| rs28366181  | 6 | 32332786 | A | T | 0.0547 | 0.0633  | 0.0107 | 3.09E-09 | 5.9270   | 1310845 | Asthma |
| rs1474727   | 6 | 32332861 | T | C | 0.3786 | -0.0318 | 0.0050 | 1.72E-10 | -6.3845  | 1310845 | Asthma |
| rs3129960   | 6 | 32333032 | A | G | 0.1872 | -0.0522 | 0.0064 | 5.12E-16 | -8.1088  | 1310845 | Asthma |
| rs11337924  | 6 | 32333047 | T | C | 0.0319 | -0.0828 | 0.0137 | 1.60E-09 | -6.0335  | 1310845 | Asthma |
| rs9394087   | 6 | 32333071 | C | T | 0.3795 | 0.0488  | 0.0049 | 5.30E-23 | 9.8757   | 1310845 | Asthma |
| rs9366793   | 6 | 32333512 | C | T | 0.3795 | 0.0486  | 0.0049 | 8.15E-23 | 9.8326   | 1310845 | Asthma |
| rs9348882   | 6 | 32333545 | T | C | 0.3696 | 0.0448  | 0.0052 | 1.27E-17 | 8.5462   | 942825  | Asthma |
| rs9380290   | 6 | 32333675 | G | C | 0.3795 | 0.0485  | 0.0049 | 8.96E-23 | 9.8229   | 1310845 | Asthma |
| rs9357140   | 6 | 32333737 | A | G | 0.3739 | 0.0480  | 0.0050 | 3.49E-22 | 9.6853   | 1310845 | Asthma |
| rs9391777   | 6 | 32334027 | C | G | 0.3740 | 0.0482  | 0.0050 | 2.68E-22 | 9.7119   | 1310845 | Asthma |
| rs2022536   | 6 | 32334183 | C | A | 0.1618 | -0.0417 | 0.0067 | 5.50E-10 | -6.2042  | 1310845 | Asthma |
| rs1474729   | 6 | 32334268 | C | A | 0.3740 | 0.0481  | 0.0050 | 2.80E-22 | 9.7074   | 1310845 | Asthma |
| rs1474728   | 6 | 32334290 | T | C | 0.3740 | 0.0476  | 0.0050 | 7.98E-22 | 9.6002   | 1310845 | Asthma |
| rs1265757   | 6 | 32334605 | T | C | 0.1087 | 0.0472  | 0.0079 | 2.67E-09 | 5.9508   | 1310845 | Asthma |
| rs9405091   | 6 | 32334762 | G | A | 0.3740 | 0.0482  | 0.0050 | 2.70E-22 | 9.7115   | 1310845 | Asthma |
| rs9378257   | 6 | 32334764 | G | T | 0.3740 | 0.0482  | 0.0050 | 2.73E-22 | 9.7099   | 1310845 | Asthma |
| rs62403046  | 6 | 32334769 | T | C | 0.0291 | -0.0844 | 0.0141 | 2.01E-09 | -5.9967  | 1310845 | Asthma |
| rs9405092   | 6 | 32334951 | G | T | 0.3740 | 0.0482  | 0.0050 | 2.72E-22 | 9.7107   | 1310845 | Asthma |
| rs9405093   | 6 | 32334964 | T | G | 0.3740 | 0.0482  | 0.0050 | 2.71E-22 | 9.7111   | 1310845 | Asthma |
| rs9378258   | 6 | 32334980 | A | G | 0.3740 | 0.0482  | 0.0050 | 2.77E-22 | 9.7088   | 1310845 | Asthma |
| rs10807100  | 6 | 32335291 | A | G | 0.3739 | 0.0480  | 0.0050 | 3.87E-22 | 9.6746   | 1310845 | Asthma |
| rs114475254 | 6 | 32335383 | T | G | 0.0336 | -0.1220 | 0.0152 | 8.58E-16 | -8.0460  | 1310845 | Asthma |
| rs6929776   | 6 | 32335734 | A | G | 0.3795 | 0.0486  | 0.0049 | 7.70E-23 | 9.8382   | 1310845 | Asthma |
| rs1265754   | 6 | 32335915 | A | T | 0.1088 | 0.0476  | 0.0079 | 1.85E-09 | 6.0104   | 1310845 | Asthma |
| rs28361060  | 6 | 32336071 | A | G | 0.2183 | 0.0848  | 0.0059 | 1.97E-46 | 14.3073  | 1310845 | Asthma |
| rs7765585   | 6 | 32336248 | G | A | 0.1618 | -0.0417 | 0.0067 | 5.41E-10 | -6.2067  | 1310845 | Asthma |
| rs6930681   | 6 | 32336254 | A | G | 0.3739 | 0.0480  | 0.0050 | 4.01E-22 | 9.6709   | 1310845 | Asthma |
| rs9366794   | 6 | 32336445 | G | C | 0.3740 | 0.0481  | 0.0050 | 3.04E-22 | 9.6990   | 1310845 | Asthma |
| rs60156503  | 6 | 32336689 | A | T | 0.0318 | -0.0824 | 0.0137 | 1.88E-09 | -6.0078  | 1310845 | Asthma |
| rs12194915  | 6 | 32337252 | A | T | 0.3752 | 0.0476  | 0.0050 | 7.72E-22 | 9.6036   | 1310845 | Asthma |
| rs973037    | 6 | 32337348 | T | C | 0.3740 | 0.0476  | 0.0050 | 8.11E-22 | 9.5985   | 1310845 | Asthma |
| rs2022535   | 6 | 32337365 | T | C | 0.3760 | 0.0476  | 0.0050 | 8.35E-22 | 9.5955   | 1310845 | Asthma |
| rs78546106  | 6 | 32337461 | T | C | 0.0481 | -0.0954 | 0.0117 | 2.97E-16 | -8.1744  | 1310845 | Asthma |
| rs926594    | 6 | 32337593 | G | T | 0.3739 | 0.0479  | 0.0050 | 4.68E-22 | 9.6552   | 1310845 | Asthma |
| rs926593    | 6 | 32337767 | G | A | 0.1087 | 0.0470  | 0.0079 | 3.02E-09 | 5.9306   | 1310845 | Asthma |
| rs926591    | 6 | 32337913 | A | C | 0.3739 | 0.0479  | 0.0050 | 4.52E-22 | 9.6587   | 1310845 | Asthma |
| rs3129900   | 6 | 32338202 | G | T | 0.1870 | -0.0519 | 0.0064 | 7.99E-16 | -8.0544  | 1310845 | Asthma |

|            |   |          |   |   |        |         |        |          |         |         |        |
|------------|---|----------|---|---|--------|---------|--------|----------|---------|---------|--------|
| rs9368715  | 6 | 32338245 | A | G | 0.3740 | 0.0481  | 0.0050 | 3.32E-22 | 9.6901  | 1310845 | Asthma |
| rs9368716  | 6 | 32338313 | A | G | 0.4297 | 0.0583  | 0.0049 | 3.66E-33 | 11.9974 | 1310845 | Asthma |
| rs3817982  | 6 | 32338485 | C | T | 0.3743 | 0.0478  | 0.0050 | 5.11E-22 | 9.6461  | 1310845 | Asthma |
| rs2273019  | 6 | 32338642 | T | C | 0.3845 | -0.0307 | 0.0050 | 7.15E-10 | -6.1627 | 1310845 | Asthma |
| rs28732192 | 6 | 32338703 | T | A | 0.0666 | -0.0655 | 0.0097 | 1.35E-11 | -6.7628 | 1310845 | Asthma |
| rs2022534  | 6 | 32339360 | C | T | 0.3739 | 0.0479  | 0.0050 | 4.21E-22 | 9.6659  | 1310845 | Asthma |
| rs2022533  | 6 | 32339483 | G | T | 0.3795 | 0.0486  | 0.0049 | 7.94E-23 | 9.8352  | 1310845 | Asthma |
| rs1033500  | 6 | 32339605 | A | G | 0.3739 | 0.0477  | 0.0050 | 7.11E-22 | 9.6120  | 1310845 | Asthma |
| rs1033498  | 6 | 32340092 | C | T | 0.3739 | 0.0481  | 0.0050 | 3.83E-22 | 9.6756  | 1310845 | Asthma |
| rs1033497  | 6 | 32340285 | G | A | 0.3739 | 0.0481  | 0.0050 | 3.16E-22 | 9.6954  | 1310845 | Asthma |
| rs2395144  | 6 | 32340568 | G | T | 0.3739 | 0.0481  | 0.0050 | 3.22E-22 | 9.6931  | 1310845 | Asthma |
| rs4469285  | 6 | 32340865 | A | G | 0.3739 | 0.0481  | 0.0050 | 3.14E-22 | 9.6960  | 1310845 | Asthma |
| rs7453102  | 6 | 32340913 | G | A | 0.3739 | 0.0480  | 0.0050 | 3.49E-22 | 9.6851  | 1310845 | Asthma |
| rs2179579  | 6 | 32340957 | G | A | 0.3739 | 0.0481  | 0.0050 | 3.28E-22 | 9.6915  | 1310845 | Asthma |
| rs2179578  | 6 | 32340993 | A | G | 0.3739 | 0.0481  | 0.0050 | 3.27E-22 | 9.6919  | 1310845 | Asthma |
| rs2143468  | 6 | 32341226 | T | A | 0.3739 | 0.0480  | 0.0050 | 3.97E-22 | 9.6720  | 1310845 | Asthma |
| rs2143467  | 6 | 32341519 | G | C | 0.3739 | 0.0481  | 0.0050 | 3.26E-22 | 9.6921  | 1310845 | Asthma |
| rs2143466  | 6 | 32341546 | T | C | 0.3853 | 0.0471  | 0.0049 | 1.39E-21 | 9.5430  | 1310845 | Asthma |
| rs2143465  | 6 | 32341575 | C | T | 0.3739 | 0.0478  | 0.0050 | 5.79E-22 | 9.6332  | 1310845 | Asthma |
| rs2143464  | 6 | 32341657 | C | T | 0.3739 | 0.0481  | 0.0050 | 3.24E-22 | 9.6925  | 1310845 | Asthma |
| rs9268256  | 6 | 32342087 | T | C | 0.3821 | 0.0517  | 0.0054 | 1.10E-21 | 9.5672  | 1154767 | Asthma |
| rs9268257  | 6 | 32342326 | A | G | 0.3740 | 0.0481  | 0.0050 | 3.26E-22 | 9.6921  | 1310845 | Asthma |
| rs3129902  | 6 | 32342417 | A | G | 0.3786 | -0.0318 | 0.0050 | 1.72E-10 | -6.3840 | 1310845 | Asthma |
| rs9268258  | 6 | 32342907 | A | G | 0.3739 | 0.0481  | 0.0050 | 3.25E-22 | 9.6925  | 1310845 | Asthma |
| rs9268259  | 6 | 32343026 | A | G | 0.3739 | 0.0481  | 0.0050 | 3.41E-22 | 9.6875  | 1310845 | Asthma |
| rs3117136  | 6 | 32343034 | C | A | 0.3786 | -0.0318 | 0.0050 | 1.79E-10 | -6.3783 | 1310845 | Asthma |
| rs2849018  | 6 | 32343086 | C | T | 0.1087 | 0.0471  | 0.0079 | 2.86E-09 | 5.9392  | 1310845 | Asthma |
| rs9268260  | 6 | 32343190 | T | C | 0.3739 | 0.0481  | 0.0050 | 3.28E-22 | 9.6915  | 1310845 | Asthma |
| rs9268261  | 6 | 32343209 | G | C | 0.3739 | 0.0481  | 0.0050 | 3.26E-22 | 9.6921  | 1310845 | Asthma |
| rs1555117  | 6 | 32343371 | G | C | 0.3745 | 0.0525  | 0.0053 | 7.91E-23 | 9.8356  | 1180923 | Asthma |
| rs3132954  | 6 | 32343682 | A | G | 0.4268 | -0.0476 | 0.0049 | 2.31E-22 | -9.7269 | 1310845 | Asthma |
| rs74223626 | 6 | 32344057 | C | T | 0.0480 | -0.0957 | 0.0117 | 2.53E-16 | -8.1934 | 1310845 | Asthma |
| rs2395145  | 6 | 32344094 | A | T | 0.3835 | 0.0576  | 0.0059 | 1.40E-22 | 9.7782  | 1024845 | Asthma |
| rs2395146  | 6 | 32344098 | A | T | 0.3821 | 0.0645  | 0.0067 | 7.28E-22 | 9.6096  | 873440  | Asthma |
| rs28732194 | 6 | 32344180 | C | T | 0.0671 | -0.0731 | 0.0105 | 4.06E-12 | -6.9350 | 1159440 | Asthma |
| rs7383143  | 6 | 32344574 | T | C | 0.3786 | -0.0318 | 0.0050 | 1.80E-10 | -6.3773 | 1310845 | Asthma |
| rs2078290  | 6 | 32344878 | A | G | 0.1648 | -0.0422 | 0.0073 | 8.09E-09 | -5.7666 | 1159440 | Asthma |
| rs1555116  | 6 | 32344963 | A | C | 0.3739 | 0.0481  | 0.0050 | 3.12E-22 | 9.6964  | 1310845 | Asthma |
| rs4576282  | 6 | 32345019 | G | A | 0.3739 | 0.0478  | 0.0050 | 5.99E-22 | 9.6296  | 1310845 | Asthma |
| rs9268271  | 6 | 32345106 | T | C | 0.3740 | 0.0480  | 0.0050 | 3.47E-22 | 9.6857  | 1310845 | Asthma |
| rs4959024  | 6 | 32345233 | T | C | 0.3703 | 0.0516  | 0.0055 | 7.95E-21 | 9.3602  | 1133307 | Asthma |
| rs4959092  | 6 | 32345234 | G | T | 0.3703 | 0.0517  | 0.0055 | 7.76E-21 | 9.3628  | 1133307 | Asthma |
| rs4959093  | 6 | 32345320 | C | T | 0.3739 | 0.0480  | 0.0050 | 3.99E-22 | 9.6714  | 1310845 | Asthma |
| rs4959094  | 6 | 32345359 | T | C | 0.3739 | 0.0479  | 0.0050 | 4.28E-22 | 9.6643  | 1310845 | Asthma |
| rs4959025  | 6 | 32345366 | C | A | 0.3739 | 0.0479  | 0.0050 | 4.73E-22 | 9.6540  | 1310845 | Asthma |
| rs4959026  | 6 | 32345684 | T | G | 0.3738 | 0.0480  | 0.0050 | 3.47E-22 | 9.6855  | 1310845 | Asthma |
| rs3117135  | 6 | 32345754 | C | A | 0.3787 | -0.0318 | 0.0050 | 1.73E-10 | -6.3836 | 1310845 | Asthma |
| rs3117134  | 6 | 32345773 | C | T | 0.3787 | -0.0316 | 0.0050 | 2.19E-10 | -6.3476 | 1310845 | Asthma |
| rs78363691 | 6 | 32346377 | C | T | 0.0480 | -0.0957 | 0.0117 | 2.63E-16 | -8.1893 | 1310845 | Asthma |
| rs2395147  | 6 | 32346707 | A | G | 0.3786 | -0.0318 | 0.0050 | 1.72E-10 | -6.3850 | 1310845 | Asthma |
| rs3117131  | 6 | 32346817 | T | C | 0.3738 | -0.0359 | 0.0053 | 1.75E-11 | -6.7256 | 1180923 | Asthma |
| rs4959096  | 6 | 32346899 | A | G | 0.3737 | 0.0479  | 0.0050 | 5.04E-22 | 9.6475  | 1310845 | Asthma |
| rs3117130  | 6 | 32347100 | G | A | 0.3738 | -0.0329 | 0.0050 | 4.53E-11 | -6.5855 | 1310845 | Asthma |
| rs9268283  | 6 | 32347396 | C | T | 0.3739 | 0.0480  | 0.0050 | 4.39E-22 | 9.6615  | 1310845 | Asthma |
| rs9268284  | 6 | 32347439 | A | G | 0.3738 | 0.0479  | 0.0050 | 4.25E-22 | 9.6649  | 1310845 | Asthma |
| rs28366182 | 6 | 32347709 | G | A | 0.0546 | 0.0624  | 0.0107 | 5.27E-09 | 5.8384  | 1310845 | Asthma |
| rs55967581 | 6 | 32347719 | C | T | 0.1618 | -0.0415 | 0.0067 | 6.48E-10 | -6.1781 | 1310845 | Asthma |
| rs910051   | 6 | 32347734 | G | T | 0.1087 | 0.0470  | 0.0079 | 2.96E-09 | 5.9339  | 1310845 | Asthma |
| rs9268285  | 6 | 32347780 | C | T | 0.3738 | 0.0478  | 0.0050 | 5.98E-22 | 9.6301  | 1310845 | Asthma |
| rs9268286  | 6 | 32347816 | G | C | 0.3739 | 0.0480  | 0.0050 | 3.59E-22 | 9.6821  | 1310845 | Asthma |
| rs910050   | 6 | 32347877 | C | G | 0.3786 | -0.0312 | 0.0050 | 3.84E-10 | -6.2605 | 1310845 | Asthma |
| rs3117125  | 6 | 32348239 | T | G | 0.1872 | -0.0521 | 0.0064 | 5.79E-16 | -8.0936 | 1310845 | Asthma |
| rs969893   | 6 | 32348304 | A | C | 0.3787 | -0.0318 | 0.0050 | 1.79E-10 | -6.3779 | 1310845 | Asthma |
| rs969891   | 6 | 32348638 | C | T | 0.3787 | -0.0318 | 0.0050 | 1.75E-10 | -6.3823 | 1310845 | Asthma |
| rs3117122  | 6 | 32348827 | T | C | 0.3786 | -0.0317 | 0.0050 | 1.83E-10 | -6.3754 | 1310845 | Asthma |
| rs3117121  | 6 | 32348838 | G | A | 0.3787 | -0.0318 | 0.0050 | 1.70E-10 | -6.3859 | 1310845 | Asthma |
| rs3117120  | 6 | 32349027 | C | G | 0.3787 | -0.0318 | 0.0050 | 1.66E-10 | -6.3900 | 1310845 | Asthma |
| rs2076542  | 6 | 32349350 | A | G | 0.3739 | 0.0480  | 0.0050 | 3.69E-22 | 9.6795  | 1310845 | Asthma |
| rs28732195 | 6 | 32349354 | G | A | 0.0665 | -0.0658 | 0.0097 | 1.12E-11 | -6.7901 | 1310845 | Asthma |
| rs2076541  | 6 | 32349438 | C | T | 0.3739 | 0.0479  | 0.0050 | 5.27E-22 | 9.6428  | 1310845 | Asthma |
| rs2076540  | 6 | 32349499 | C | T | 0.3698 | 0.0502  | 0.0050 | 7.15E-24 | 10.0747 | 1310845 | Asthma |
| rs2076539  | 6 | 32349690 | C | T | 0.3787 | -0.0318 | 0.0050 | 1.77E-10 | -6.3801 | 1310845 | Asthma |
| rs2076538  | 6 | 32349694 | C | A | 0.3739 | 0.0481  | 0.0050 | 3.27E-22 | 9.6917  | 1310845 | Asthma |
| rs2076537  | 6 | 32349858 | A | G | 0.3787 | -0.0316 | 0.0050 | 2.18E-10 | -6.3483 | 1310845 | Asthma |

|             |   |          |   |   |        |         |        |          |          |         |        |
|-------------|---|----------|---|---|--------|---------|--------|----------|----------|---------|--------|
| rs761189    | 6 | 32350082 | C | T | 0.3787 | -0.0319 | 0.0050 | 1.52E-10 | -6.4030  | 1310845 | Asthma |
| rs761188    | 6 | 32350196 | G | A | 0.3787 | -0.0317 | 0.0050 | 1.99E-10 | -6.3620  | 1310845 | Asthma |
| rs761187    | 6 | 32350259 | G | A | 0.3699 | 0.0498  | 0.0050 | 1.29E-23 | 10.0165  | 1310845 | Asthma |
| rs3117119   | 6 | 32350833 | G | A | 0.1873 | -0.0522 | 0.0064 | 5.55E-16 | -8.0987  | 1310845 | Asthma |
| rs2143463   | 6 | 32350952 | G | A | 0.3739 | 0.0481  | 0.0050 | 3.25E-22 | 9.6925   | 1310845 | Asthma |
| rs62405785  | 6 | 32351412 | T | C | 0.0319 | -0.0834 | 0.0137 | 1.08E-09 | -6.0968  | 1310845 | Asthma |
| rs1265763   | 6 | 32351587 | T | C | 0.2035 | -0.0484 | 0.0061 | 1.40E-15 | -7.9855  | 1310845 | Asthma |
| rs9268301   | 6 | 32351860 | A | G | 0.3219 | 0.0716  | 0.0051 | 1.75E-44 | 13.9916  | 1310845 | Asthma |
| rs3132963   | 6 | 32352376 | G | A | 0.1872 | -0.0520 | 0.0064 | 7.22E-16 | -8.0668  | 1310845 | Asthma |
| rs2022544   | 6 | 32353227 | T | C | 0.1617 | -0.0417 | 0.0067 | 5.78E-10 | -6.1963  | 1310845 | Asthma |
| rs1265762   | 6 | 32353338 | C | A | 0.4454 | -0.0492 | 0.0049 | 1.90E-23 | -9.9781  | 1310845 | Asthma |
| rs3117117   | 6 | 32353495 | C | A | 0.1709 | -0.0504 | 0.0067 | 7.77E-14 | -7.4741  | 1310845 | Asthma |
| rs1265760   | 6 | 32354095 | T | C | 0.4452 | -0.0494 | 0.0049 | 1.28E-23 | -10.0176 | 1310845 | Asthma |
| rs1265759   | 6 | 32354616 | C | T | 0.4453 | -0.0493 | 0.0049 | 1.52E-23 | -10.0006 | 1310845 | Asthma |
| rs1265758   | 6 | 32355752 | A | G | 0.4385 | -0.0476 | 0.0049 | 5.90E-22 | -9.6314  | 1310845 | Asthma |
| rs62404805  | 6 | 32356128 | A | C | 0.0319 | -0.0832 | 0.0137 | 1.25E-09 | -6.0741  | 1310845 | Asthma |
| rs3117115   | 6 | 32356278 | A | C | 0.1696 | -0.0508 | 0.0068 | 5.63E-14 | -7.5163  | 1310845 | Asthma |
| rs2206618   | 6 | 32356767 | G | A | 0.2035 | -0.0482 | 0.0061 | 1.81E-15 | -7.9535  | 1310845 | Asthma |
| rs2223638   | 6 | 32356864 | G | A | 0.2034 | -0.0486 | 0.0061 | 1.00E-15 | -8.0264  | 1310845 | Asthma |
| rs9268302   | 6 | 32357040 | T | C | 0.2034 | -0.0484 | 0.0061 | 1.31E-15 | -7.9935  | 1310845 | Asthma |
| rs6907322   | 6 | 32357168 | A | G | 0.1968 | -0.0468 | 0.0061 | 2.49E-14 | -7.6226  | 1310845 | Asthma |
| rs6907226   | 6 | 32357361 | G | A | 0.2034 | -0.0486 | 0.0061 | 9.99E-16 | -8.0270  | 1310845 | Asthma |
| rs6907757   | 6 | 32357581 | T | C | 0.1617 | -0.0416 | 0.0067 | 6.48E-10 | -6.1782  | 1310845 | Asthma |
| rs6930477   | 6 | 32357622 | C | T | 0.2034 | -0.0486 | 0.0061 | 9.93E-16 | -8.0277  | 1310845 | Asthma |
| rs2395149   | 6 | 32357785 | A | G | 0.1087 | 0.0473  | 0.0079 | 2.35E-09 | 5.9715   | 1310845 | Asthma |
| rs3129908   | 6 | 32357930 | C | A | 0.4386 | -0.0478 | 0.0049 | 4.06E-22 | -9.6698  | 1310845 | Asthma |
| rs3129909   | 6 | 32357933 | G | A | 0.4385 | -0.0477 | 0.0049 | 4.50E-22 | -9.6591  | 1310845 | Asthma |
| rs2395150   | 6 | 32358268 | G | A | 0.4386 | -0.0477 | 0.0049 | 4.47E-22 | -9.6599  | 1310845 | Asthma |
| rs9268303   | 6 | 32358388 | A | G | 0.1968 | -0.0470 | 0.0061 | 1.99E-14 | -7.6511  | 1310845 | Asthma |
| rs6457548   | 6 | 32358463 | G | A | 0.4391 | -0.0485 | 0.0050 | 3.76E-22 | -9.6774  | 1284712 | Asthma |
| rs9268307   | 6 | 32358754 | C | T | 0.3739 | 0.0481  | 0.0050 | 2.90E-22 | 9.7038   | 1310845 | Asthma |
| rs7775581   | 6 | 32358876 | C | T | 0.4453 | -0.0495 | 0.0049 | 1.05E-23 | -10.0373 | 1310845 | Asthma |
| rs6457549   | 6 | 32359067 | G | C | 0.1284 | -0.0628 | 0.0114 | 3.86E-08 | -5.4972  | 778845  | Asthma |
| rs6457550   | 6 | 32359298 | G | C | 0.2055 | -0.0475 | 0.0066 | 6.18E-13 | -7.1964  | 1159440 | Asthma |
| rs6904608   | 6 | 32359950 | C | T | 0.4452 | -0.0496 | 0.0049 | 8.74E-24 | -10.0551 | 1310845 | Asthma |
| rs6904636   | 6 | 32360004 | C | T | 0.4453 | -0.0495 | 0.0049 | 1.07E-23 | -10.0355 | 1310845 | Asthma |
| rs9268314   | 6 | 32360062 | G | A | 0.2035 | -0.0481 | 0.0061 | 2.03E-15 | -7.9393  | 1310845 | Asthma |
| rs9268315   | 6 | 32360192 | T | C | 0.2034 | -0.0483 | 0.0061 | 1.52E-15 | -7.9757  | 1310845 | Asthma |
| rs4389802   | 6 | 32360460 | T | A | 0.2035 | -0.0481 | 0.0061 | 2.20E-15 | -7.9293  | 1310845 | Asthma |
| rs3129910   | 6 | 32360519 | T | C | 0.4453 | -0.0495 | 0.0049 | 1.03E-23 | -10.0389 | 1310845 | Asthma |
| rs3129911   | 6 | 32360626 | C | T | 0.4453 | -0.0496 | 0.0049 | 9.32E-24 | -10.0486 | 1310845 | Asthma |
| rs149013447 | 6 | 32361015 | A | G | 0.0481 | -0.0956 | 0.0117 | 2.61E-16 | -8.1901  | 1310845 | Asthma |
| rs7775978   | 6 | 32361118 | G | A | 0.4453 | -0.0495 | 0.0049 | 9.88E-24 | -10.0428 | 1310845 | Asthma |
| rs7776257   | 6 | 32361187 | T | C | 0.4483 | -0.0487 | 0.0054 | 1.59E-19 | -9.0384  | 1159440 | Asthma |
| rs9268321   | 6 | 32361821 | A | G | 0.1696 | -0.0508 | 0.0068 | 5.63E-14 | -7.5164  | 1310845 | Asthma |
| rs7763071   | 6 | 32361867 | C | T | 0.4453 | -0.0495 | 0.0049 | 1.12E-23 | -10.0308 | 1310845 | Asthma |
| rs9268323   | 6 | 32362244 | A | G | 0.1846 | -0.0505 | 0.0076 | 2.40E-11 | -6.6793  | 977229  | Asthma |
| rs9268324   | 6 | 32362258 | T | C | 0.1838 | -0.0513 | 0.0076 | 1.34E-11 | -6.7643  | 977229  | Asthma |
| rs9268325   | 6 | 32362315 | T | C | 0.1846 | -0.0528 | 0.0068 | 7.21E-15 | -7.7807  | 1128634 | Asthma |
| rs9268326   | 6 | 32362376 | C | T | 0.3737 | 0.0477  | 0.0050 | 6.73E-22 | 9.6176   | 1310845 | Asthma |
| rs9268327   | 6 | 32362387 | G | C | 0.3704 | 0.0505  | 0.0054 | 1.43E-20 | 9.2981   | 1159440 | Asthma |
| rs9268329   | 6 | 32362397 | G | A | 0.3707 | 0.0507  | 0.0054 | 1.12E-20 | 9.3241   | 1159440 | Asthma |
| rs9268330   | 6 | 32362529 | G | A | 0.2035 | -0.0485 | 0.0061 | 1.16E-15 | -8.0083  | 1310845 | Asthma |
| rs28366184  | 6 | 32362574 | G | A | 0.0547 | 0.0633  | 0.0107 | 3.11E-09 | 5.9256   | 1310845 | Asthma |
| rs7744155   | 6 | 32362653 | T | C | 0.2034 | -0.0479 | 0.0061 | 2.91E-15 | -7.8949  | 1310845 | Asthma |
| rs9268333   | 6 | 32362874 | T | C | 0.3739 | 0.0481  | 0.0050 | 3.22E-22 | 9.6935   | 1310845 | Asthma |
| rs6457553   | 6 | 32362918 | G | A | 0.1617 | -0.0416 | 0.0067 | 6.02E-10 | -6.1899  | 1310845 | Asthma |
| rs6415129   | 6 | 32363160 | G | A | 0.2035 | -0.0486 | 0.0061 | 1.05E-15 | -8.0207  | 1310845 | Asthma |
| rs6934200   | 6 | 32363292 | C | T | 0.3739 | 0.0481  | 0.0050 | 3.19E-22 | 9.6943   | 1310845 | Asthma |
| rs2223636   | 6 | 32363432 | A | T | 0.3843 | -0.0308 | 0.0050 | 6.18E-10 | -6.1857  | 1310845 | Asthma |
| rs6912095   | 6 | 32363652 | A | C | 0.3743 | 0.0526  | 0.0053 | 6.40E-23 | 9.8569   | 1180923 | Asthma |
| rs6917075   | 6 | 32364039 | T | C | 0.2035 | -0.0487 | 0.0061 | 9.70E-16 | -8.0307  | 1310845 | Asthma |
| rs9268343   | 6 | 32364047 | G | A | 0.3736 | 0.0481  | 0.0050 | 3.81E-22 | 9.6762   | 1310845 | Asthma |
| rs9268344   | 6 | 32364060 | T | C | 0.3736 | 0.0481  | 0.0050 | 3.61E-22 | 9.6816   | 1310845 | Asthma |
| rs9268345   | 6 | 32364064 | A | G | 0.3736 | 0.0477  | 0.0050 | 6.55E-22 | 9.6204   | 1310845 | Asthma |
| rs9268346   | 6 | 32364150 | G | C | 0.3739 | 0.0481  | 0.0050 | 3.18E-22 | 9.6947   | 1310845 | Asthma |
| rs9268347   | 6 | 32364221 | A | G | 0.2035 | -0.0482 | 0.0061 | 1.78E-15 | -7.9559  | 1310845 | Asthma |
| rs9268350   | 6 | 32364787 | C | T | 0.2035 | -0.0486 | 0.0061 | 1.01E-15 | -8.0261  | 1310845 | Asthma |
| rs3129918   | 6 | 32365013 | C | A | 0.4459 | -0.0501 | 0.0050 | 1.55E-23 | -9.9984  | 1284712 | Asthma |
| rs9268356   | 6 | 32365143 | T | C | 0.2035 | -0.0487 | 0.0061 | 9.84E-16 | -8.0288  | 1310845 | Asthma |
| rs9268357   | 6 | 32365219 | G | C | 0.3739 | 0.0479  | 0.0050 | 4.37E-22 | 9.6621   | 1310845 | Asthma |
| rs3129921   | 6 | 32365316 | A | G | 0.4453 | -0.0492 | 0.0049 | 1.82E-23 | -9.9824  | 1310845 | Asthma |
| rs3129922   | 6 | 32365321 | C | T | 0.4453 | -0.0491 | 0.0049 | 2.42E-23 | -9.9542  | 1310845 | Asthma |
| rs3129923   | 6 | 32365418 | A | G | 0.4453 | -0.0492 | 0.0049 | 2.15E-23 | -9.9657  | 1310845 | Asthma |

|             |   |          |   |   |        |         |        |           |         |         |        |
|-------------|---|----------|---|---|--------|---------|--------|-----------|---------|---------|--------|
| rs9268361   | 6 | 32365466 | A | G | 0.2034 | -0.0482 | 0.0061 | 1.88E-15  | -7.9492 | 1310845 | Asthma |
| rs9268362   | 6 | 32365564 | G | A | 0.2188 | 0.0849  | 0.0059 | 1.38E-46  | 14.3320 | 1310845 | Asthma |
| rs9268363   | 6 | 32365633 | C | A | 0.3739 | 0.0481  | 0.0050 | 3.21E-22  | 9.6933  | 1310845 | Asthma |
| rs9268364   | 6 | 32365648 | T | C | 0.2035 | -0.0486 | 0.0061 | 9.54E-16  | -8.0328 | 1310845 | Asthma |
| rs9268365   | 6 | 32365662 | T | G | 0.2035 | -0.0483 | 0.0061 | 1.45E-15  | -7.9808 | 1310845 | Asthma |
| rs9268367   | 6 | 32365765 | G | A | 0.2035 | -0.0486 | 0.0061 | 1.04E-15  | -8.0226 | 1310845 | Asthma |
| rs3129927   | 6 | 32366050 | C | A | 0.1103 | 0.0514  | 0.0086 | 1.89E-09  | 6.0071  | 1154767 | Asthma |
| rs9268368   | 6 | 32366178 | C | T | 0.3740 | 0.0478  | 0.0050 | 4.92E-22  | 9.6499  | 1310845 | Asthma |
| rs9268369   | 6 | 32366447 | G | C | 0.3739 | 0.0482  | 0.0050 | 3.09E-22  | 9.6978  | 1310845 | Asthma |
| rs9268370   | 6 | 32366481 | T | G | 0.3739 | 0.0482  | 0.0050 | 3.11E-22  | 9.6968  | 1310845 | Asthma |
| rs9268373   | 6 | 32366712 | A | G | 0.3809 | 0.0521  | 0.0055 | 2.60E-21  | 9.4776  | 1128634 | Asthma |
| rs7769717   | 6 | 32366757 | T | C | 0.1743 | -0.0618 | 0.0087 | 1.41E-12  | -7.0830 | 847307  | Asthma |
| rs7770048   | 6 | 32366977 | T | C | 0.1617 | -0.0414 | 0.0067 | 7.24E-10  | -6.1609 | 1310845 | Asthma |
| rs2073048   | 6 | 32367656 | A | G | 0.1617 | -0.0414 | 0.0067 | 7.22E-10  | -6.1611 | 1310845 | Asthma |
| rs9268378   | 6 | 32367851 | T | A | 0.2035 | -0.0486 | 0.0061 | 1.05E-15  | -8.0205 | 1310845 | Asthma |
| rs2073046   | 6 | 32368297 | T | C | 0.3739 | 0.0477  | 0.0050 | 6.29E-22  | 9.6246  | 1310845 | Asthma |
| rs3129934   | 6 | 32368410 | T | C | 0.1872 | -0.0520 | 0.0064 | 6.73E-16  | -8.0755 | 1310845 | Asthma |
| rs115518187 | 6 | 32368522 | G | A | 0.0336 | -0.1224 | 0.0152 | 7.06E-16  | -8.0697 | 1310845 | Asthma |
| rs3129938   | 6 | 32368718 | T | A | 0.1873 | -0.0518 | 0.0064 | 8.84E-16  | -8.0420 | 1310845 | Asthma |
| rs6903816   | 6 | 32368740 | G | A | 0.1844 | -0.0515 | 0.0067 | 1.17E-14  | -7.7190 | 1154767 | Asthma |
| rs9268384   | 6 | 32368809 | G | A | 0.3739 | 0.0477  | 0.0050 | 6.92E-22  | 9.6149  | 1310845 | Asthma |
| rs9268386   | 6 | 32369457 | A | G | 0.3806 | 0.0481  | 0.0058 | 7.99E-17  | 8.3314  | 786747  | Asthma |
| rs9268387   | 6 | 32369590 | G | T | 0.3739 | 0.0483  | 0.0050 | 2.38E-22  | 9.7243  | 1310845 | Asthma |
| rs1967437   | 6 | 32369615 | T | C | 0.2035 | -0.0486 | 0.0061 | 1.01E-15  | -8.0257 | 1310845 | Asthma |
| rs2273017   | 6 | 32369853 | G | A | 0.4100 | -0.0447 | 0.0050 | 3.21E-19  | -8.9613 | 1310845 | Asthma |
| rs9268394   | 6 | 32370609 | C | G | 0.3739 | 0.0479  | 0.0050 | 4.83E-22  | 9.6519  | 1310845 | Asthma |
| rs7763192   | 6 | 32371108 | G | C | 0.1335 | -0.0416 | 0.0072 | 9.43E-09  | -5.7408 | 1310845 | Asthma |
| rs2073044   | 6 | 32371209 | T | C | 0.2493 | 0.0742  | 0.0056 | 2.17E-40  | 13.3047 | 1310845 | Asthma |
| rs2076536   | 6 | 32371571 | C | T | 0.3355 | -0.0510 | 0.0053 | 4.63E-22  | -9.6562 | 1251217 | Asthma |
| rs17202141  | 6 | 32371721 | G | C | 0.0340 | -0.1246 | 0.0150 | 1.18E-16  | -8.2856 | 1310845 | Asthma |
| rs2073045   | 6 | 32371771 | A | G | 0.3542 | 0.0858  | 0.0054 | 6.90E-58  | 16.0383 | 1251217 | Asthma |
| rs2050188   | 6 | 32372120 | C | T | 0.3323 | -0.0370 | 0.0053 | 1.97E-12  | -7.0367 | 1251217 | Asthma |
| rs111625658 | 6 | 32372211 | T | C | 0.1101 | -0.0597 | 0.0083 | 5.33E-13  | -7.2166 | 1310845 | Asthma |
| rs1967688   | 6 | 32372291 | T | C | 0.4875 | 0.0794  | 0.0050 | 5.28E-56  | 15.7667 | 1251217 | Asthma |
| rs1980496   | 6 | 32372293 | T | C | 0.3716 | 0.1089  | 0.0051 | 2.84E-102 | 21.4714 | 1310845 | Asthma |
| rs2281276   | 6 | 32372329 | G | A | 0.4532 | 0.0402  | 0.0051 | 1.88E-15  | 7.9487  | 1251217 | Asthma |
| rs9268399   | 6 | 32372459 | A | G | 0.3392 | 0.0727  | 0.0051 | 2.53E-46  | 14.2899 | 1310845 | Asthma |
| rs62404833  | 6 | 32372816 | C | G | 0.0362 | -0.0744 | 0.0130 | 1.09E-08  | -5.7166 | 1310845 | Asthma |
| rs62404834  | 6 | 32372819 | A | T | 0.0392 | -0.0828 | 0.0124 | 2.34E-11  | -6.6827 | 1310845 | Asthma |
| rs9268400   | 6 | 32372877 | A | G | 0.2635 | 0.1030  | 0.0055 | 4.59E-79  | 18.8267 | 1310845 | Asthma |
| rs3117109   | 6 | 32373094 | T | C | 0.1073 | 0.0488  | 0.0080 | 1.10E-09  | 6.0939  | 1310845 | Asthma |
| rs9378202   | 6 | 32373431 | C | T | 0.1756 | -0.0540 | 0.0066 | 2.90E-16  | -8.1776 | 1376071 | Asthma |
| rs9268401   | 6 | 32373541 | G | A | 0.2645 | 0.1022  | 0.0055 | 5.02E-78  | 18.6997 | 1310845 | Asthma |
| rs9268402   | 6 | 32373576 | G | A | 0.5214 | -0.0399 | 0.0049 | 3.09E-16  | -8.1697 | 1310845 | Asthma |
| rs9391858   | 6 | 32373621 | G | A | 0.1642 | -0.0565 | 0.0068 | 9.43E-17  | -8.3117 | 1376071 | Asthma |
| rs9268403   | 6 | 32373696 | C | T | 0.2636 | 0.1029  | 0.0055 | 4.64E-79  | 18.8262 | 1310845 | Asthma |
| rs9268404   | 6 | 32373942 | T | C | 0.2636 | 0.1029  | 0.0055 | 4.12E-79  | 18.8320 | 1310845 | Asthma |
| rs9268405   | 6 | 32374310 | T | C | 0.2636 | 0.1030  | 0.0055 | 2.79E-79  | 18.8529 | 1310845 | Asthma |
| rs9268406   | 6 | 32374352 | T | C | 0.2636 | 0.1030  | 0.0055 | 2.73E-79  | 18.8544 | 1310845 | Asthma |
| rs9268407   | 6 | 32374389 | C | T | 0.2636 | 0.1030  | 0.0055 | 2.86E-79  | 18.8511 | 1310845 | Asthma |
| rs9268409   | 6 | 32374862 | C | A | 0.2630 | 0.1027  | 0.0055 | 1.54E-78  | 18.7620 | 1310845 | Asthma |
| rs7746327   | 6 | 32374914 | C | A | 0.5210 | -0.0400 | 0.0049 | 2.81E-16  | -8.1814 | 1310845 | Asthma |
| rs3117108   | 6 | 32375045 | C | G | 0.2995 | -0.0326 | 0.0053 | 7.32E-10  | -6.1590 | 1310845 | Asthma |
| rs9268412   | 6 | 32375241 | A | T | 0.2630 | 0.1026  | 0.0055 | 1.67E-78  | 18.7583 | 1310845 | Asthma |
| rs9268413   | 6 | 32375318 | C | T | 0.2630 | 0.1026  | 0.0055 | 1.69E-78  | 18.7569 | 1310845 | Asthma |
| rs2894251   | 6 | 32375459 | G | A | 0.1177 | 0.0445  | 0.0078 | 1.05E-08  | 5.7223  | 1294204 | Asthma |
| rs9268415   | 6 | 32375490 | C | G | 0.2633 | 0.1032  | 0.0055 | 3.14E-77  | 18.6013 | 1294204 | Asthma |
| rs2395151   | 6 | 32375562 | A | G | 0.1177 | 0.0445  | 0.0078 | 1.10E-08  | 5.7149  | 1294204 | Asthma |
| rs9268416   | 6 | 32375607 | G | A | 0.2633 | 0.1032  | 0.0055 | 3.39E-77  | 18.5976 | 1294204 | Asthma |
| rs72843268  | 6 | 32375798 | A | C | 0.1254 | -0.0572 | 0.0078 | 2.68E-13  | -7.3095 | 1294204 | Asthma |
| rs62402697  | 6 | 32375811 | T | C | 0.0363 | -0.0722 | 0.0131 | 3.78E-08  | -5.5009 | 1294204 | Asthma |
| rs9268417   | 6 | 32375839 | G | A | 0.2633 | 0.1031  | 0.0055 | 4.27E-77  | 18.5854 | 1294204 | Asthma |
| rs9268418   | 6 | 32375909 | C | T | 0.2633 | 0.1030  | 0.0055 | 6.04E-77  | 18.5659 | 1294204 | Asthma |
| rs3117105   | 6 | 32375937 | T | C | 0.2992 | -0.0327 | 0.0054 | 1.16E-09  | -6.0851 | 1294204 | Asthma |
| rs114445199 | 6 | 32375938 | A | G | 0.0393 | -0.0800 | 0.0125 | 1.76E-10  | -6.3809 | 1294204 | Asthma |
| rs17208517  | 6 | 32375966 | C | A | 0.1648 | -0.0671 | 0.0068 | 6.81E-23  | -9.8506 | 1294204 | Asthma |
| rs17208524  | 6 | 32375980 | G | A | 0.1254 | -0.0572 | 0.0078 | 2.60E-13  | -7.3136 | 1294204 | Asthma |
| rs9268420   | 6 | 32376019 | T | C | 0.2633 | 0.1037  | 0.0056 | 6.30E-78  | 18.6873 | 1284712 | Asthma |
| rs9268421   | 6 | 32376092 | G | A | 0.2629 | 0.1034  | 0.0056 | 2.50E-77  | 18.6129 | 1294204 | Asthma |
| rs9268422   | 6 | 32376096 | A | G | 0.2629 | 0.1034  | 0.0056 | 2.66E-77  | 18.6110 | 1294204 | Asthma |
| rs9268423   | 6 | 32376105 | T | C | 0.2629 | 0.1034  | 0.0056 | 2.13E-77  | 18.6223 | 1294204 | Asthma |
| rs9268424   | 6 | 32376208 | C | T | 0.2635 | 0.1031  | 0.0055 | 3.65E-77  | 18.5930 | 1294204 | Asthma |
| rs2395152   | 6 | 32376318 | T | G | 0.1254 | -0.0571 | 0.0078 | 2.86E-13  | -7.3007 | 1294204 | Asthma |
| rs9268425   | 6 | 32376599 | T | C | 0.2636 | 0.1029  | 0.0055 | 4.49E-79  | 18.8269 | 1310845 | Asthma |

|             |   |          |   |   |        |         |        |          |          |         |        |
|-------------|---|----------|---|---|--------|---------|--------|----------|----------|---------|--------|
| rs17202204  | 6 | 32376798 | T | G | 0.1250 | -0.0566 | 0.0077 | 2.40E-13 | -7.3242  | 1310845 | Asthma |
| rs9268426   | 6 | 32376954 | G | A | 0.2636 | 0.1029  | 0.0055 | 4.37E-79 | 18.8301  | 1310845 | Asthma |
| rs9268427   | 6 | 32377031 | T | C | 0.2636 | 0.1029  | 0.0055 | 4.61E-79 | 18.8261  | 1310845 | Asthma |
| rs9268428   | 6 | 32377196 | T | G | 0.2636 | 0.1029  | 0.0055 | 4.30E-79 | 18.8298  | 1310845 | Asthma |
| rs9268429   | 6 | 32377275 | G | A | 0.2636 | 0.1028  | 0.0055 | 5.19E-79 | 18.8192  | 1310845 | Asthma |
| rs12528797  | 6 | 32377309 | G | A | 0.1250 | -0.0564 | 0.0077 | 2.95E-13 | -7.2970  | 1310845 | Asthma |
| rs7758215   | 6 | 32377354 | T | G | 0.1643 | -0.0676 | 0.0067 | 9.23E-24 | -10.0495 | 1310845 | Asthma |
| rs7757831   | 6 | 32377406 | G | A | 0.0394 | -0.0829 | 0.0123 | 1.85E-11 | -6.7177  | 1310845 | Asthma |
| rs7758128   | 6 | 32377506 | A | C | 0.0316 | -0.0965 | 0.0175 | 3.46E-08 | -5.5166  | 1024845 | Asthma |
| rs2894252   | 6 | 32377666 | T | G | 0.2615 | 0.1040  | 0.0056 | 6.39E-76 | 18.4384  | 1231185 | Asthma |
| rs9268431   | 6 | 32377737 | G | T | 0.2636 | 0.1029  | 0.0055 | 3.99E-79 | 18.8345  | 1310845 | Asthma |
| rs2894253   | 6 | 32377763 | G | T | 0.1250 | -0.0565 | 0.0077 | 2.73E-13 | -7.3072  | 1310845 | Asthma |
| rs2395153   | 6 | 32377818 | G | C | 0.3887 | 0.0636  | 0.0050 | 1.93E-36 | 12.6073  | 1310845 | Asthma |
| rs9268432   | 6 | 32377890 | G | A | 0.2636 | 0.1029  | 0.0055 | 4.63E-79 | 18.8264  | 1310845 | Asthma |
| rs2894254   | 6 | 32377912 | G | T | 0.1093 | 0.0503  | 0.0080 | 3.51E-10 | 6.2746   | 1294204 | Asthma |
| rs2395154   | 6 | 32377999 | T | C | 0.1250 | -0.0567 | 0.0077 | 2.21E-13 | -7.3355  | 1310845 | Asthma |
| rs9268433   | 6 | 32378114 | G | T | 0.2088 | 0.0999  | 0.0059 | 2.61E-64 | 16.9322  | 1310845 | Asthma |
| rs72843270  | 6 | 32378436 | T | C | 0.1250 | -0.0567 | 0.0077 | 2.18E-13 | -7.3371  | 1310845 | Asthma |
| rs62402699  | 6 | 32378611 | G | A | 0.0392 | -0.0829 | 0.0124 | 2.20E-11 | -6.6919  | 1310845 | Asthma |
| rs9268434   | 6 | 32378675 | T | A | 0.4279 | 0.0475  | 0.0049 | 5.80E-22 | 9.6332   | 1310845 | Asthma |
| rs9268435   | 6 | 32378714 | A | G | 0.3887 | 0.0638  | 0.0051 | 1.58E-36 | 12.6229  | 1310845 | Asthma |
| rs9268436   | 6 | 32378860 | G | A | 0.2636 | 0.1028  | 0.0055 | 5.81E-79 | 18.8139  | 1310845 | Asthma |
| rs9268439   | 6 | 32378924 | A | G | 0.2636 | 0.1028  | 0.0055 | 6.22E-79 | 18.8097  | 1310845 | Asthma |
| rs3129946   | 6 | 32378995 | A | G | 0.2996 | -0.0327 | 0.0053 | 6.54E-10 | -6.1768  | 1310845 | Asthma |
| rs1980495   | 6 | 32379017 | C | A | 0.2637 | 0.1027  | 0.0055 | 8.70E-79 | 18.7928  | 1310845 | Asthma |
| rs142207772 | 6 | 32379040 | T | G | 0.0347 | -0.1142 | 0.0166 | 6.70E-12 | -6.8639  | 1154767 | Asthma |
| rs1980494   | 6 | 32379239 | G | A | 0.2847 | 0.1230  | 0.0072 | 2.68E-65 | 17.0660  | 873440  | Asthma |
| rs8180659   | 6 | 32379503 | T | C | 0.2636 | 0.1028  | 0.0055 | 5.45E-79 | 18.8176  | 1310845 | Asthma |
| rs8180664   | 6 | 32379713 | T | C | 0.2636 | 0.1028  | 0.0055 | 5.02E-79 | 18.8217  | 1310845 | Asthma |
| rs8180673   | 6 | 32379755 | T | C | 0.2636 | 0.1028  | 0.0055 | 5.96E-79 | 18.8126  | 1310845 | Asthma |
| rs8180672   | 6 | 32379756 | G | A | 0.2636 | 0.1028  | 0.0055 | 6.01E-79 | 18.8126  | 1310845 | Asthma |
| rs56673349  | 6 | 32379860 | G | A | 0.0392 | -0.0827 | 0.0124 | 2.48E-11 | -6.6743  | 1310845 | Asthma |
| rs9268446   | 6 | 32379972 | G | A | 0.2636 | 0.1029  | 0.0055 | 4.77E-79 | 18.8249  | 1310845 | Asthma |
| rs148233867 | 6 | 32380015 | C | A | 0.0344 | -0.1164 | 0.0149 | 4.68E-15 | -7.8350  | 1310845 | Asthma |
| rs9268447   | 6 | 32380054 | C | T | 0.2636 | 0.1028  | 0.0055 | 5.77E-79 | 18.8139  | 1310845 | Asthma |
| rs2395155   | 6 | 32380120 | T | C | 0.2636 | 0.1028  | 0.0055 | 6.16E-79 | 18.8103  | 1310845 | Asthma |
| rs2395156   | 6 | 32380321 | A | C | 0.2636 | 0.1028  | 0.0055 | 6.07E-79 | 18.8111  | 1310845 | Asthma |
| rs2395157   | 6 | 32380368 | G | A | 0.2636 | 0.1028  | 0.0055 | 5.21E-79 | 18.8195  | 1310845 | Asthma |
| rs3117104   | 6 | 32380532 | T | A | 0.2996 | -0.0327 | 0.0053 | 6.90E-10 | -6.1683  | 1310845 | Asthma |
| rs9268448   | 6 | 32380686 | G | C | 0.2632 | 0.1029  | 0.0055 | 7.83E-79 | 18.7974  | 1310845 | Asthma |
| rs9268449   | 6 | 32380690 | A | G | 0.2631 | 0.1029  | 0.0055 | 7.77E-79 | 18.7986  | 1310845 | Asthma |
| rs28752484  | 6 | 32380892 | C | T | 0.0548 | 0.0646  | 0.0107 | 1.41E-09 | 6.0540   | 1310845 | Asthma |
| rs9268450   | 6 | 32380913 | A | G | 0.2636 | 0.1029  | 0.0055 | 4.10E-79 | 18.8327  | 1310845 | Asthma |
| rs9268451   | 6 | 32381309 | C | T | 0.2088 | 0.0998  | 0.0059 | 2.72E-64 | 16.9297  | 1310845 | Asthma |
| rs9268452   | 6 | 32381717 | G | A | 0.2636 | 0.1028  | 0.0055 | 5.79E-79 | 18.8147  | 1310845 | Asthma |
| rs3117103   | 6 | 32381780 | T | A | 0.1177 | 0.0442  | 0.0078 | 1.36E-08 | 5.6779   | 1294204 | Asthma |
| rs9268453   | 6 | 32381794 | C | T | 0.2636 | 0.1028  | 0.0055 | 5.43E-79 | 18.8184  | 1310845 | Asthma |
| rs76775942  | 6 | 32381908 | G | A | 0.0881 | -0.0715 | 0.0086 | 1.31E-16 | -8.2727  | 1310845 | Asthma |
| rs9268454   | 6 | 32381934 | G | A | 0.2636 | 0.1028  | 0.0055 | 6.44E-79 | 18.8093  | 1310845 | Asthma |
| rs28366186  | 6 | 32381960 | G | T | 0.0548 | 0.0648  | 0.0107 | 1.24E-09 | 6.0756   | 1310845 | Asthma |
| rs9268455   | 6 | 32381995 | T | C | 0.2088 | 0.0998  | 0.0059 | 2.93E-64 | 16.9253  | 1310845 | Asthma |
| rs9268456   | 6 | 32382169 | A | C | 0.2636 | 0.1028  | 0.0055 | 6.55E-79 | 18.8081  | 1310845 | Asthma |
| rs9268457   | 6 | 32382259 | G | A | 0.2636 | 0.1028  | 0.0055 | 6.03E-79 | 18.8114  | 1310845 | Asthma |
| rs3117102   | 6 | 32382330 | C | T | 0.2995 | -0.0327 | 0.0053 | 6.82E-10 | -6.1702  | 1310845 | Asthma |
| rs9268458   | 6 | 32382607 | A | C | 0.2667 | 0.0989  | 0.0054 | 7.36E-74 | 18.1804  | 1310845 | Asthma |
| rs12527478  | 6 | 32382814 | C | T | 0.1612 | -0.0639 | 0.0068 | 5.08E-21 | -9.4076  | 1310845 | Asthma |
| rs9268459   | 6 | 32382999 | A | G | 0.2636 | 0.1028  | 0.0055 | 6.73E-79 | 18.8059  | 1310845 | Asthma |
| rs4373382   | 6 | 32383091 | C | A | 0.4440 | 0.0433  | 0.0057 | 1.97E-14 | 7.6522   | 812903  | Asthma |
| rs62402701  | 6 | 32383440 | T | A | 0.0362 | -0.0743 | 0.0130 | 1.06E-08 | -5.7208  | 1310845 | Asthma |
| rs9268460   | 6 | 32383506 | C | T | 0.4279 | 0.0474  | 0.0049 | 6.94E-22 | 9.6145   | 1310845 | Asthma |
| rs28362673  | 6 | 32383733 | A | G | 0.0344 | -0.1172 | 0.0149 | 3.00E-15 | -7.8912  | 1310845 | Asthma |
| rs6930777   | 6 | 32383789 | T | C | 0.1251 | -0.0568 | 0.0077 | 1.88E-13 | -7.3573  | 1310845 | Asthma |
| rs9268461   | 6 | 32384124 | A | C | 0.2636 | 0.1028  | 0.0055 | 5.02E-79 | 18.8217  | 1310845 | Asthma |
| rs9268462   | 6 | 32384214 | A | C | 0.2636 | 0.1030  | 0.0055 | 3.49E-79 | 18.8405  | 1310845 | Asthma |
| rs3117101   | 6 | 32384310 | C | G | 0.1725 | -0.0535 | 0.0081 | 4.84E-11 | -6.5758  | 1003385 | Asthma |
| rs3117100   | 6 | 32384443 | A | G | 0.1708 | -0.0544 | 0.0082 | 3.34E-11 | -6.6309  | 1003385 | Asthma |
| rs7767173   | 6 | 32384517 | T | A | 0.1595 | -0.0732 | 0.0074 | 5.53E-23 | -9.8715  | 1180923 | Asthma |
| rs7767483   | 6 | 32384606 | T | C | 0.1666 | -0.0663 | 0.0073 | 1.71E-19 | -9.0306  | 1159440 | Asthma |
| rs537092817 | 6 | 32384903 | A | G | 0.0953 | -0.0749 | 0.0125 | 2.25E-09 | -5.9785  | 778845  | Asthma |
| rs9268467   | 6 | 32384960 | A | C | 0.2352 | -0.0537 | 0.0081 | 4.17E-11 | -6.5978  | 847307  | Asthma |
| rs7454436   | 6 | 32385130 | C | G | 0.0753 | -0.1181 | 0.0157 | 5.36E-14 | -7.5226  | 778845  | Asthma |
| rs9268468   | 6 | 32385389 | A | G | 0.3079 | -0.0419 | 0.0064 | 5.85E-11 | -6.5475  | 1003362 | Asthma |
| rs112897958 | 6 | 32385728 | A | G | 0.1435 | -0.0912 | 0.0112 | 3.23E-16 | -8.1650  | 778845  | Asthma |
| rs62402728  | 6 | 32385843 | T | C | 0.1341 | -0.0895 | 0.0114 | 3.17E-15 | -7.8842  | 778845  | Asthma |



|             |   |          |   |   |        |         |        |          |          |         |        |
|-------------|---|----------|---|---|--------|---------|--------|----------|----------|---------|--------|
| rs182229954 | 6 | 32385958 | T | C | 0.0830 | -0.0836 | 0.0112 | 6.77E-14 | -7.4921  | 1003362 | Asthma |
| rs376892096 | 6 | 32385985 | C | G | 0.1494 | -0.0865 | 0.0108 | 9.91E-16 | -8.0283  | 778845  | Asthma |
| rs4424066   | 6 | 32386651 | G | A | 0.4280 | 0.0473  | 0.0049 | 8.17E-22 | 9.5978   | 1310845 | Asthma |
| rs1555115   | 6 | 32386743 | G | C | 0.1613 | -0.0644 | 0.0068 | 2.47E-21 | -9.4829  | 1310845 | Asthma |
| rs1555114   | 6 | 32386852 | G | A | 0.1643 | -0.0676 | 0.0067 | 9.56E-24 | -10.0461 | 1310845 | Asthma |
| rs3129948   | 6 | 32386867 | C | A | 0.2996 | -0.0323 | 0.0053 | 1.05E-09 | -6.1015  | 1310845 | Asthma |
| rs62402730  | 6 | 32387026 | A | G | 0.0293 | -0.0903 | 0.0162 | 2.37E-08 | -5.5824  | 1154767 | Asthma |
| rs28362674  | 6 | 32387057 | A | G | 0.1643 | -0.0675 | 0.0067 | 1.03E-23 | -10.0391 | 1310845 | Asthma |
| rs17202211  | 6 | 32387111 | G | A | 0.1612 | -0.0642 | 0.0068 | 3.62E-21 | -9.4432  | 1310845 | Asthma |
| rs17202218  | 6 | 32387226 | T | C | 0.1643 | -0.0675 | 0.0067 | 1.11E-23 | -10.0314 | 1310845 | Asthma |
| rs17202225  | 6 | 32387332 | G | A | 0.1612 | -0.0642 | 0.0068 | 3.62E-21 | -9.4432  | 1310845 | Asthma |
| rs17208573  | 6 | 32387508 | G | A | 0.1643 | -0.0676 | 0.0067 | 9.62E-24 | -10.0455 | 1310845 | Asthma |
| rs17208580  | 6 | 32387526 | T | A | 0.1643 | -0.0676 | 0.0067 | 9.58E-24 | -10.0458 | 1310845 | Asthma |
| rs17208587  | 6 | 32387734 | C | T | 0.0881 | -0.0712 | 0.0086 | 1.77E-16 | -8.2366  | 1310845 | Asthma |
| rs113163001 | 6 | 32387819 | G | A | 0.0362 | -0.0743 | 0.0130 | 1.11E-08 | -5.7127  | 1310845 | Asthma |
| rs9268472   | 6 | 32387828 | A | G | 0.4278 | 0.0474  | 0.0049 | 7.46E-22 | 9.6071   | 1310845 | Asthma |
| rs17202232  | 6 | 32387854 | A | T | 0.1612 | -0.0642 | 0.0068 | 3.62E-21 | -9.4430  | 1310845 | Asthma |
| rs17202239  | 6 | 32387900 | G | T | 0.1643 | -0.0676 | 0.0067 | 9.78E-24 | -10.0439 | 1310845 | Asthma |
| rs9268473   | 6 | 32387906 | G | A | 0.4279 | 0.0475  | 0.0049 | 5.52E-22 | 9.6380   | 1310845 | Asthma |
| rs17202252  | 6 | 32387947 | G | T | 0.1612 | -0.0642 | 0.0068 | 3.36E-21 | -9.4508  | 1310845 | Asthma |
| rs17208601  | 6 | 32388031 | A | G | 0.1582 | -0.0679 | 0.0068 | 3.17E-23 | -9.9273  | 1310845 | Asthma |
| rs17208608  | 6 | 32388081 | C | T | 0.1643 | -0.0676 | 0.0067 | 9.84E-24 | -10.0433 | 1310845 | Asthma |
| rs62402731  | 6 | 32388204 | C | T | 0.1612 | -0.0643 | 0.0068 | 3.29E-21 | -9.4532  | 1310845 | Asthma |
| rs62402732  | 6 | 32388320 | G | A | 0.1612 | -0.0641 | 0.0068 | 3.88E-21 | -9.4359  | 1310845 | Asthma |
| rs78312903  | 6 | 32388424 | A | G | 0.0440 | -0.1076 | 0.0124 | 4.35E-18 | -8.6695  | 1310845 | Asthma |
| rs67512154  | 6 | 32388465 | C | G | 0.1612 | -0.0643 | 0.0068 | 2.93E-21 | -9.4653  | 1310845 | Asthma |
| rs72843281  | 6 | 32388495 | C | T | 0.1612 | -0.0641 | 0.0068 | 4.00E-21 | -9.4326  | 1310845 | Asthma |
| rs60219037  | 6 | 32388530 | T | C | 0.1626 | -0.0767 | 0.0073 | 1.31E-25 | -10.4604 | 1180923 | Asthma |
| rs66955287  | 6 | 32388579 | T | C | 0.1612 | -0.0642 | 0.0068 | 3.47E-21 | -9.4476  | 1310845 | Asthma |
| rs62402733  | 6 | 32388663 | G | C | 0.1612 | -0.0643 | 0.0068 | 2.91E-21 | -9.4659  | 1310845 | Asthma |
| rs62402734  | 6 | 32388712 | T | C | 0.1612 | -0.0644 | 0.0068 | 2.76E-21 | -9.4715  | 1310845 | Asthma |
| rs62402735  | 6 | 32388796 | T | C | 0.1612 | -0.0643 | 0.0068 | 3.30E-21 | -9.4527  | 1310845 | Asthma |
| rs62402736  | 6 | 32388890 | T | C | 0.1612 | -0.0642 | 0.0068 | 3.41E-21 | -9.4495  | 1310845 | Asthma |
| rs62402737  | 6 | 32388907 | A | T | 0.0362 | -0.0742 | 0.0130 | 1.11E-08 | -5.7126  | 1310845 | Asthma |
| rs62402738  | 6 | 32388978 | G | A | 0.1643 | -0.0676 | 0.0067 | 9.59E-24 | -10.0456 | 1310845 | Asthma |
| rs72843285  | 6 | 32389052 | A | G | 0.1612 | -0.0643 | 0.0068 | 3.30E-21 | -9.4529  | 1310845 | Asthma |
| rs72843287  | 6 | 32389062 | G | A | 0.1643 | -0.0676 | 0.0067 | 9.47E-24 | -10.0470 | 1310845 | Asthma |
| rs66812458  | 6 | 32389099 | T | C | 0.1612 | -0.0643 | 0.0068 | 3.21E-21 | -9.4558  | 1310845 | Asthma |
| rs67927165  | 6 | 32389140 | A | G | 0.1612 | -0.0642 | 0.0068 | 3.37E-21 | -9.4506  | 1310845 | Asthma |
| rs62402739  | 6 | 32389246 | A | G | 0.1612 | -0.0641 | 0.0068 | 3.79E-21 | -9.4384  | 1310845 | Asthma |
| rs62402740  | 6 | 32389260 | C | G | 0.1613 | -0.0643 | 0.0068 | 2.95E-21 | -9.4644  | 1310845 | Asthma |
| rs17423649  | 6 | 32389356 | T | C | 0.1612 | -0.0642 | 0.0068 | 3.70E-21 | -9.4407  | 1310845 | Asthma |
| rs9268474   | 6 | 32389388 | C | T | 0.2635 | 0.1029  | 0.0055 | 3.91E-79 | 18.8359  | 1310845 | Asthma |
| rs28366190  | 6 | 32389497 | T | C | 0.0549 | 0.0648  | 0.0107 | 1.25E-09 | 6.0742   | 1310845 | Asthma |
| rs17208615  | 6 | 32389556 | G | A | 0.1612 | -0.0640 | 0.0068 | 4.70E-21 | -9.4157  | 1310845 | Asthma |
| rs17208622  | 6 | 32389562 | T | C | 0.1612 | -0.0643 | 0.0068 | 3.11E-21 | -9.4588  | 1310845 | Asthma |
| rs72843289  | 6 | 32389567 | G | T | 0.1642 | -0.0671 | 0.0067 | 1.74E-23 | -9.9871  | 1310845 | Asthma |
| rs17208629  | 6 | 32389620 | T | G | 0.1612 | -0.0644 | 0.0068 | 2.71E-21 | -9.4732  | 1310845 | Asthma |
| rs17202259  | 6 | 32389712 | G | T | 0.1614 | -0.0644 | 0.0068 | 2.33E-21 | -9.4893  | 1310845 | Asthma |
| rs17202266  | 6 | 32389748 | C | G | 0.1612 | -0.0644 | 0.0068 | 2.73E-21 | -9.4724  | 1310845 | Asthma |
| rs17202274  | 6 | 32389752 | C | T | 0.1612 | -0.0644 | 0.0068 | 2.78E-21 | -9.4709  | 1310845 | Asthma |
| rs12529049  | 6 | 32389938 | T | C | 0.1612 | -0.0643 | 0.0068 | 3.01E-21 | -9.4626  | 1310845 | Asthma |
| rs12529106  | 6 | 32390231 | A | G | 0.1643 | -0.0675 | 0.0067 | 1.03E-23 | -10.0390 | 1310845 | Asthma |
| rs12529107  | 6 | 32390234 | A | G | 0.1643 | -0.0675 | 0.0067 | 1.04E-23 | -10.0381 | 1310845 | Asthma |
| rs17208650  | 6 | 32390336 | T | C | 0.1613 | -0.0642 | 0.0068 | 3.44E-21 | -9.4486  | 1310845 | Asthma |
| rs17208657  | 6 | 32390367 | C | T | 0.1643 | -0.0675 | 0.0067 | 1.06E-23 | -10.0360 | 1310845 | Asthma |
| rs12525722  | 6 | 32390386 | G | A | 0.1643 | -0.0674 | 0.0067 | 1.23E-23 | -10.0216 | 1310845 | Asthma |
| rs3129950   | 6 | 32390424 | C | G | 0.1089 | 0.0489  | 0.0079 | 6.74E-10 | 6.1721   | 1310845 | Asthma |
| rs17202302  | 6 | 32390428 | A | G | 0.1613 | -0.0644 | 0.0068 | 2.61E-21 | -9.4775  | 1310845 | Asthma |
| rs17202309  | 6 | 32390436 | C | T | 0.1643 | -0.0676 | 0.0067 | 9.84E-24 | -10.0433 | 1310845 | Asthma |
| rs9268475   | 6 | 32390454 | T | C | 0.2635 | 0.1031  | 0.0055 | 2.17E-79 | 18.8668  | 1310845 | Asthma |
| rs3129951   | 6 | 32390509 | T | C | 0.3493 | -0.0359 | 0.0052 | 7.42E-12 | -6.8493  | 1310845 | Asthma |
| rs17423691  | 6 | 32390568 | A | C | 0.1613 | -0.0643 | 0.0068 | 3.01E-21 | -9.4624  | 1310845 | Asthma |
| rs17423698  | 6 | 32390591 | C | T | 0.1613 | -0.0643 | 0.0068 | 3.05E-21 | -9.4609  | 1310845 | Asthma |
| rs114386417 | 6 | 32390681 | G | T | 0.1639 | -0.0640 | 0.0074 | 5.74E-18 | -8.6377  | 1159440 | Asthma |
| rs115303880 | 6 | 32390682 | T | G | 0.1644 | -0.0677 | 0.0067 | 7.16E-24 | -10.0745 | 1310845 | Asthma |
| rs3117098   | 6 | 32390736 | G | A | 0.2997 | -0.0323 | 0.0053 | 1.07E-09 | -6.0992  | 1310845 | Asthma |
| rs17495592  | 6 | 32390756 | G | A | 0.1648 | -0.0671 | 0.0067 | 1.31E-23 | -10.0149 | 1310845 | Asthma |
| rs62402741  | 6 | 32390951 | A | G | 0.1643 | -0.0676 | 0.0067 | 9.79E-24 | -10.0437 | 1310845 | Asthma |
| rs72847903  | 6 | 32391057 | G | A | 0.1612 | -0.0643 | 0.0068 | 3.11E-21 | -9.4590  | 1310845 | Asthma |
| rs67019312  | 6 | 32391106 | C | T | 0.1612 | -0.0642 | 0.0068 | 3.24E-21 | -9.4548  | 1310845 | Asthma |
| rs9268476   | 6 | 32391165 | A | T | 0.4307 | 0.0462  | 0.0057 | 3.96E-16 | 8.1399   | 786747  | Asthma |
| rs9268477   | 6 | 32391344 | A | G | 0.2632 | 0.1038  | 0.0056 | 5.52E-78 | 18.6937  | 1284712 | Asthma |
| rs1143257   | 6 | 32391356 | A | G | 0.1641 | -0.0674 | 0.0067 | 1.33E-23 | -10.0135 | 1310845 | Asthma |

|             |   |          |   |   |        |         |        |          |          |         |        |
|-------------|---|----------|---|---|--------|---------|--------|----------|----------|---------|--------|
| rs1143258   | 6 | 32391379 | G | A | 0.1647 | -0.0656 | 0.0074 | 6.74E-19 | -8.8791  | 1159440 | Asthma |
| rs62402742  | 6 | 32391386 | A | G | 0.1647 | -0.0658 | 0.0074 | 5.28E-19 | -8.9063  | 1159440 | Asthma |
| rs62402743  | 6 | 32391394 | T | C | 0.1627 | -0.0641 | 0.0074 | 7.78E-18 | -8.6027  | 1159440 | Asthma |
| rs1143259   | 6 | 32391431 | A | G | 0.1660 | -0.0662 | 0.0073 | 2.19E-19 | -9.0035  | 1159440 | Asthma |
| rs1143260   | 6 | 32391450 | G | A | 0.1541 | -0.0626 | 0.0073 | 6.10E-18 | -8.6307  | 1251217 | Asthma |
| rs1143261   | 6 | 32391453 | C | T | 0.1656 | -0.0662 | 0.0074 | 2.55E-19 | -8.9867  | 1159440 | Asthma |
| rs113373443 | 6 | 32391464 | G | A | 0.1631 | -0.0638 | 0.0074 | 9.53E-18 | -8.5794  | 1159440 | Asthma |
| rs62402754  | 6 | 32391612 | A | G | 0.1613 | -0.0645 | 0.0068 | 2.18E-21 | -9.4958  | 1310845 | Asthma |
| rs17495612  | 6 | 32391654 | C | T | 0.1642 | -0.0674 | 0.0067 | 1.20E-23 | -10.0233 | 1310845 | Asthma |
| rs16870123  | 6 | 32391683 | A | G | 0.1627 | -0.0661 | 0.0067 | 1.14E-22 | -9.7990  | 1310845 | Asthma |
| rs200277885 | 6 | 32391736 | G | A | 0.1652 | -0.0664 | 0.0074 | 2.11E-19 | -9.0075  | 1159440 | Asthma |
| rs201057798 | 6 | 32391737 | A | G | 0.1638 | -0.0646 | 0.0075 | 1.06E-17 | -8.5679  | 1133307 | Asthma |
| rs116454630 | 6 | 32391742 | A | T | 0.1734 | -0.0896 | 0.0102 | 1.22E-18 | -8.8129  | 566903  | Asthma |
| rs115690055 | 6 | 32391744 | T | C | 0.1661 | -0.0666 | 0.0075 | 5.86E-19 | -8.8947  | 1133307 | Asthma |
| rs72847907  | 6 | 32391834 | G | A | 0.1665 | -0.0667 | 0.0073 | 1.04E-19 | -9.0845  | 1159440 | Asthma |
| rs17423732  | 6 | 32391840 | C | A | 0.1612 | -0.0643 | 0.0068 | 2.98E-21 | -9.4634  | 1310845 | Asthma |
| rs17495626  | 6 | 32391866 | G | C | 0.1637 | -0.0644 | 0.0074 | 3.63E-18 | -8.6898  | 1159440 | Asthma |
| rs3129952   | 6 | 32391986 | G | C | 0.2997 | -0.0321 | 0.0053 | 1.32E-09 | -6.0646  | 1310845 | Asthma |
| rs16870126  | 6 | 32391988 | G | A | 0.0329 | -0.0903 | 0.0135 | 2.47E-11 | -6.6751  | 1310845 | Asthma |
| rs66721723  | 6 | 32392023 | A | T | 0.1612 | -0.0643 | 0.0068 | 3.02E-21 | -9.4622  | 1310845 | Asthma |
| rs68146269  | 6 | 32392127 | C | T | 0.1642 | -0.0676 | 0.0067 | 9.76E-24 | -10.0441 | 1310845 | Asthma |
| rs576219752 | 6 | 32392150 | T | A | 0.0993 | -0.0963 | 0.0130 | 1.15E-13 | -7.4226  | 566903  | Asthma |
| rs543568979 | 6 | 32392152 | T | A | 0.1637 | -0.0829 | 0.0106 | 4.84E-15 | -7.8310  | 566903  | Asthma |
| rs562246926 | 6 | 32392154 | T | A | 0.1643 | -0.0824 | 0.0106 | 6.88E-15 | -7.7866  | 566903  | Asthma |
| rs75342713  | 6 | 32392160 | A | T | 0.1091 | -0.0788 | 0.0107 | 1.95E-13 | -7.3524  | 635365  | Asthma |
| rs75624717  | 6 | 32392273 | A | G | 0.1611 | -0.0641 | 0.0068 | 4.17E-21 | -9.4283  | 1310845 | Asthma |
| rs78659081  | 6 | 32392283 | C | T | 0.1643 | -0.0676 | 0.0067 | 9.80E-24 | -10.0437 | 1310845 | Asthma |
| rs80301380  | 6 | 32392292 | G | A | 0.1612 | -0.0643 | 0.0068 | 3.04E-21 | -9.4615  | 1310845 | Asthma |
| rs79061952  | 6 | 32392358 | C | T | 0.1647 | -0.0679 | 0.0068 | 2.19E-23 | -9.9640  | 1284712 | Asthma |
| rs77958806  | 6 | 32392359 | A | G | 0.1619 | -0.0646 | 0.0069 | 5.51E-21 | -9.3990  | 1284712 | Asthma |
| rs74612883  | 6 | 32392426 | T | C | 0.1520 | -0.0622 | 0.0083 | 7.35E-14 | -7.4814  | 977229  | Asthma |
| rs77072408  | 6 | 32392431 | T | G | 0.1655 | -0.0648 | 0.0075 | 5.43E-18 | -8.6440  | 1133307 | Asthma |
| rs75476410  | 6 | 32392446 | T | C | 0.1520 | -0.0621 | 0.0083 | 8.67E-14 | -7.4597  | 977229  | Asthma |
| rs9268478   | 6 | 32392481 | A | G | 0.2720 | 0.1080  | 0.0060 | 2.97E-72 | 17.9768  | 1128634 | Asthma |
| rs140928277 | 6 | 32392495 | C | T | 0.1563 | -0.0685 | 0.0090 | 3.34E-14 | -7.5843  | 908767  | Asthma |
| rs17423753  | 6 | 32392564 | A | C | 0.1529 | -0.0659 | 0.0074 | 5.74E-19 | -8.8970  | 1128634 | Asthma |
| rs111682962 | 6 | 32392666 | T | C | 0.1643 | -0.0674 | 0.0067 | 1.30E-23 | -10.0161 | 1310845 | Asthma |
| rs113485731 | 6 | 32392700 | A | T | 0.1612 | -0.0642 | 0.0068 | 3.60E-21 | -9.4436  | 1310845 | Asthma |
| rs67722415  | 6 | 32392755 | G | A | 0.1643 | -0.0675 | 0.0067 | 1.05E-23 | -10.0364 | 1310845 | Asthma |
| rs67725213  | 6 | 32392774 | G | C | 0.1643 | -0.0675 | 0.0067 | 1.05E-23 | -10.0366 | 1310845 | Asthma |
| rs66987263  | 6 | 32392812 | G | A | 0.1612 | -0.0643 | 0.0068 | 3.32E-21 | -9.4522  | 1310845 | Asthma |
| rs72847912  | 6 | 32392864 | G | A | 0.1612 | -0.0643 | 0.0068 | 3.11E-21 | -9.4587  | 1310845 | Asthma |
| rs72847914  | 6 | 32392867 | T | C | 0.1612 | -0.0643 | 0.0068 | 3.29E-21 | -9.4529  | 1310845 | Asthma |
| rs62402755  | 6 | 32392937 | T | C | 0.1612 | -0.0643 | 0.0068 | 3.37E-21 | -9.4505  | 1310845 | Asthma |
| rs3817981   | 6 | 32393168 | C | T | 0.1609 | -0.0644 | 0.0068 | 2.98E-21 | -9.4634  | 1310845 | Asthma |
| rs17202316  | 6 | 32393178 | A | G | 0.1608 | -0.0643 | 0.0068 | 3.93E-21 | -9.4344  | 1310845 | Asthma |
| rs3817978   | 6 | 32393209 | T | C | 0.1639 | -0.0639 | 0.0074 | 6.15E-18 | -8.6298  | 1159440 | Asthma |
| rs3817977   | 6 | 32393210 | G | T | 0.1639 | -0.0640 | 0.0074 | 5.89E-18 | -8.6347  | 1159440 | Asthma |
| rs3817976   | 6 | 32393226 | T | C | 0.1619 | -0.0658 | 0.0070 | 3.28E-21 | -9.4534  | 1251217 | Asthma |
| rs3817974   | 6 | 32393258 | C | T | 0.1643 | -0.0675 | 0.0067 | 1.10E-23 | -10.0323 | 1310845 | Asthma |
| rs17208699  | 6 | 32393303 | G | T | 0.1612 | -0.0641 | 0.0068 | 3.89E-21 | -9.4356  | 1310845 | Asthma |
| rs3817973   | 6 | 32393334 | T | C | 0.4279 | 0.0475  | 0.0049 | 5.23E-22 | 9.6437   | 1310845 | Asthma |
| rs3817972   | 6 | 32393353 | T | C | 0.1612 | -0.0643 | 0.0068 | 3.09E-21 | -9.4596  | 1310845 | Asthma |
| rs17202358  | 6 | 32393446 | T | C | 0.1612 | -0.0642 | 0.0068 | 3.61E-21 | -9.4434  | 1310845 | Asthma |
| rs17202365  | 6 | 32393474 | A | G | 0.1612 | -0.0644 | 0.0068 | 2.62E-21 | -9.4770  | 1310845 | Asthma |
| rs17202372  | 6 | 32393478 | G | A | 0.1612 | -0.0643 | 0.0068 | 3.13E-21 | -9.4583  | 1310845 | Asthma |
| rs3817969   | 6 | 32393611 | T | C | 0.1644 | -0.0679 | 0.0067 | 5.21E-24 | -10.1057 | 1310845 | Asthma |
| rs17208727  | 6 | 32393631 | T | C | 0.1626 | -0.0630 | 0.0074 | 2.54E-17 | -8.4662  | 1159440 | Asthma |
| rs17208734  | 6 | 32393647 | C | T | 0.1611 | -0.0640 | 0.0068 | 4.84E-21 | -9.4125  | 1310845 | Asthma |
| rs17208741  | 6 | 32393668 | C | T | 0.1633 | -0.0637 | 0.0074 | 1.01E-17 | -8.5728  | 1159440 | Asthma |
| rs17202379  | 6 | 32393672 | A | C | 0.1633 | -0.0637 | 0.0074 | 9.87E-18 | -8.5755  | 1159440 | Asthma |
| rs3817967   | 6 | 32393692 | T | C | 0.1497 | -0.0671 | 0.0075 | 4.50E-19 | -8.9240  | 1251217 | Asthma |
| rs17202393  | 6 | 32393708 | A | G | 0.1612 | -0.0642 | 0.0068 | 3.75E-21 | -9.4394  | 1310845 | Asthma |
| rs17202400  | 6 | 32393748 | C | T | 0.1612 | -0.0641 | 0.0068 | 4.07E-21 | -9.4306  | 1310845 | Asthma |
| rs17208748  | 6 | 32393789 | G | A | 0.1612 | -0.0641 | 0.0068 | 3.93E-21 | -9.4345  | 1310845 | Asthma |
| rs17208755  | 6 | 32393806 | A | T | 0.1611 | -0.0641 | 0.0068 | 4.42E-21 | -9.4223  | 1310845 | Asthma |
| rs17208762  | 6 | 32393833 | T | C | 0.1463 | -0.0747 | 0.0094 | 1.43E-15 | -7.9826  | 873440  | Asthma |
| rs17208769  | 6 | 32393835 | C | T | 0.1213 | -0.0814 | 0.0089 | 8.54E-20 | -9.1061  | 1121295 | Asthma |
| rs17202407  | 6 | 32393836 | A | G | 0.1225 | -0.0803 | 0.0088 | 1.06E-19 | -9.0827  | 1121295 | Asthma |
| rs17202414  | 6 | 32393900 | A | G | 0.1639 | -0.0638 | 0.0074 | 6.70E-18 | -8.6201  | 1159440 | Asthma |
| rs17202428  | 6 | 32393917 | A | G | 0.1612 | -0.0641 | 0.0068 | 4.30E-21 | -9.4251  | 1310845 | Asthma |
| rs34940131  | 6 | 32393972 | C | G | 0.1646 | -0.0642 | 0.0075 | 1.28E-17 | -8.5455  | 1133307 | Asthma |
| rs34507608  | 6 | 32393975 | T | C | 0.1646 | -0.0642 | 0.0075 | 1.28E-17 | -8.5453  | 1133307 | Asthma |
| rs35624343  | 6 | 32393985 | A | G | 0.1642 | -0.0675 | 0.0067 | 1.14E-23 | -10.0290 | 1310845 | Asthma |

|             |   |          |   |   |        |         |        |          |          |         |        |
|-------------|---|----------|---|---|--------|---------|--------|----------|----------|---------|--------|
| rs34926345  | 6 | 32394032 | C | T | 0.1631 | -0.0642 | 0.0074 | 5.63E-18 | -8.6398  | 1159440 | Asthma |
| rs41423345  | 6 | 32394064 | C | T | 0.1451 | -0.0698 | 0.0077 | 1.26E-19 | -9.0638  | 1251217 | Asthma |
| rs41323148  | 6 | 32394065 | A | G | 0.1458 | -0.0705 | 0.0077 | 4.42E-20 | -9.1775  | 1251217 | Asthma |
| rs114951345 | 6 | 32394081 | T | C | 0.1638 | -0.0639 | 0.0074 | 6.72E-18 | -8.6196  | 1159440 | Asthma |
| rs114484311 | 6 | 32394082 | G | T | 0.1638 | -0.0638 | 0.0074 | 6.82E-18 | -8.6178  | 1159440 | Asthma |
| rs34525489  | 6 | 32394117 | G | A | 0.1611 | -0.0641 | 0.0068 | 4.32E-21 | -9.4245  | 1310845 | Asthma |
| rs35194487  | 6 | 32394166 | T | C | 0.1642 | -0.0675 | 0.0067 | 1.09E-23 | -10.0336 | 1310845 | Asthma |
| rs35837993  | 6 | 32394176 | G | A | 0.1642 | -0.0675 | 0.0067 | 1.08E-23 | -10.0345 | 1310845 | Asthma |
| rs115880030 | 6 | 32394233 | T | C | 0.1621 | -0.0695 | 0.0068 | 1.61E-24 | -10.2205 | 1310845 | Asthma |
| rs114516436 | 6 | 32394234 | G | A | 0.1646 | -0.0686 | 0.0074 | 2.17E-20 | -9.2537  | 1159440 | Asthma |
| rs72847931  | 6 | 32394243 | T | C | 0.1626 | -0.0693 | 0.0068 | 1.90E-24 | -10.2039 | 1310845 | Asthma |
| rs77542271  | 6 | 32394285 | G | C | 0.0441 | -0.1074 | 0.0124 | 4.30E-18 | -8.6699  | 1310845 | Asthma |
| rs68190545  | 6 | 32394298 | G | A | 0.1630 | -0.0676 | 0.0068 | 1.45E-23 | -10.0047 | 1310845 | Asthma |
| rs72847932  | 6 | 32394308 | T | C | 0.1644 | -0.0661 | 0.0067 | 1.05E-22 | -9.8072  | 1310845 | Asthma |
| rs67124304  | 6 | 32394351 | A | G | 0.1640 | -0.0676 | 0.0067 | 9.94E-24 | -10.0422 | 1310845 | Asthma |
| rs72847934  | 6 | 32394405 | C | T | 0.1642 | -0.0675 | 0.0067 | 1.09E-23 | -10.0330 | 1310845 | Asthma |
| rs67588283  | 6 | 32394440 | G | A | 0.1642 | -0.0674 | 0.0067 | 1.30E-23 | -10.0155 | 1310845 | Asthma |
| rs72847937  | 6 | 32394485 | G | A | 0.1642 | -0.0674 | 0.0067 | 1.31E-23 | -10.0147 | 1310845 | Asthma |
| rs67808421  | 6 | 32394495 | T | A | 0.1612 | -0.0642 | 0.0068 | 3.44E-21 | -9.4484  | 1310845 | Asthma |
| rs72847940  | 6 | 32394612 | A | G | 0.1644 | -0.0676 | 0.0067 | 8.48E-24 | -10.0579 | 1310845 | Asthma |
| rs41407045  | 6 | 32394631 | A | G | 0.1657 | -0.0663 | 0.0074 | 2.32E-19 | -8.9968  | 1159440 | Asthma |
| rs2076534   | 6 | 32394639 | T | G | 0.2309 | -0.0422 | 0.0059 | 6.98E-13 | -7.1799  | 1310845 | Asthma |
| rs41443753  | 6 | 32394656 | A | C | 0.1654 | -0.0651 | 0.0074 | 1.09E-18 | -8.8256  | 1159440 | Asthma |
| rs41499544  | 6 | 32394676 | G | A | 0.1642 | -0.0675 | 0.0067 | 1.18E-23 | -10.0257 | 1310845 | Asthma |
| rs41535850  | 6 | 32394862 | A | G | 0.1642 | -0.0673 | 0.0067 | 1.51E-23 | -10.0009 | 1310845 | Asthma |
| rs41449245  | 6 | 32394892 | G | T | 0.1683 | -0.0810 | 0.0081 | 9.98E-24 | -10.0419 | 753275  | Asthma |
| rs41342846  | 6 | 32394925 | C | T | 0.1634 | -0.0677 | 0.0068 | 1.36E-23 | -10.0114 | 1310845 | Asthma |
| rs41521946  | 6 | 32394926 | T | G | 0.1635 | -0.0669 | 0.0068 | 4.38E-23 | -9.8950  | 1310845 | Asthma |
| rs28362677  | 6 | 32394964 | T | C | 0.1642 | -0.0673 | 0.0067 | 1.37E-23 | -10.0107 | 1310845 | Asthma |
| rs28362678  | 6 | 32394968 | A | G | 0.1642 | -0.0674 | 0.0067 | 1.21E-23 | -10.0232 | 1310845 | Asthma |
| rs17202435  | 6 | 32395055 | A | G | 0.1642 | -0.0674 | 0.0067 | 1.45E-23 | -10.0048 | 1310845 | Asthma |
| rs12528939  | 6 | 32395153 | T | C | 0.1612 | -0.0642 | 0.0068 | 3.41E-21 | -9.4494  | 1310845 | Asthma |
| rs62402756  | 6 | 32395235 | C | T | 0.0331 | -0.0899 | 0.0135 | 2.55E-11 | -6.6701  | 1310845 | Asthma |
| rs2076533   | 6 | 32395750 | T | C | 0.4278 | 0.0476  | 0.0049 | 4.70E-22 | 9.6545   | 1310845 | Asthma |
| rs17202449  | 6 | 32395945 | G | A | 0.0548 | 0.0650  | 0.0107 | 1.07E-09 | 6.0979   | 1310845 | Asthma |
| rs17202456  | 6 | 32395997 | A | G | 0.1612 | -0.0642 | 0.0068 | 3.27E-21 | -9.4538  | 1310845 | Asthma |
| rs2076530   | 6 | 32396039 | C | T | 0.4317 | 0.0461  | 0.0049 | 8.14E-21 | 9.3578   | 1310845 | Asthma |
| rs9268480   | 6 | 32396067 | T | C | 0.2636 | 0.1028  | 0.0055 | 5.89E-79 | 18.8139  | 1310845 | Asthma |
| rs2076529   | 6 | 32396178 | C | T | 0.4280 | 0.0472  | 0.0049 | 9.56E-22 | 9.5816   | 1310845 | Asthma |
| rs28366191  | 6 | 32396413 | G | A | 0.0549 | 0.0652  | 0.0107 | 9.69E-10 | 6.1144   | 1310845 | Asthma |
| rs9268481   | 6 | 32396579 | G | A | 0.2637 | 0.1028  | 0.0055 | 5.08E-79 | 18.8205  | 1310845 | Asthma |
| rs3117139   | 6 | 32396890 | A | G | 0.1669 | -0.0523 | 0.0068 | 1.55E-14 | -7.6832  | 1310845 | Asthma |
| rs67603244  | 6 | 32397207 | G | A | 0.2053 | -0.0627 | 0.0062 | 2.20E-24 | -10.1900 | 1310845 | Asthma |
| rs62402758  | 6 | 32397507 | T | A | 0.2053 | -0.0627 | 0.0062 | 2.26E-24 | -10.1874 | 1310845 | Asthma |
| rs72847948  | 6 | 32397776 | C | T | 0.1244 | -0.0566 | 0.0077 | 2.00E-13 | -7.3489  | 1376071 | Asthma |
| rs3129954   | 6 | 32397803 | A | G | 0.2996 | -0.0321 | 0.0053 | 1.31E-09 | -6.0662  | 1310845 | Asthma |
| rs62402759  | 6 | 32397930 | C | T | 0.2071 | -0.0647 | 0.0061 | 4.07E-26 | -10.5708 | 1310845 | Asthma |
| rs3129955   | 6 | 32398063 | T | C | 0.2996 | -0.0322 | 0.0053 | 1.13E-09 | -6.0897  | 1310845 | Asthma |
| rs62404560  | 6 | 32398119 | G | A | 0.2082 | -0.0654 | 0.0061 | 9.20E-27 | -10.7094 | 1310845 | Asthma |
| rs113669229 | 6 | 32398151 | A | G | 0.2052 | -0.0753 | 0.0075 | 5.10E-24 | -10.1078 | 1029518 | Asthma |
| rs199719181 | 6 | 32398155 | A | C | 0.2135 | -0.0665 | 0.0073 | 4.58E-20 | -9.1734  | 1064845 | Asthma |
| rs4713523   | 6 | 32398194 | A | G | 0.2107 | -0.0670 | 0.0066 | 1.78E-24 | -10.2105 | 1216250 | Asthma |
| rs4713524   | 6 | 32398554 | C | G | 0.2082 | -0.0654 | 0.0061 | 8.92E-27 | -10.7123 | 1310845 | Asthma |
| rs4248166   | 6 | 32398644 | C | T | 0.2022 | -0.0654 | 0.0062 | 3.70E-26 | -10.5797 | 1310845 | Asthma |
| rs4959097   | 6 | 32398848 | C | T | 0.2081 | -0.0653 | 0.0061 | 1.24E-26 | -10.6818 | 1310845 | Asthma |
| rs3117116   | 6 | 32399240 | G | A | 0.1698 | -0.0556 | 0.0067 | 1.54E-16 | -8.2536  | 1310845 | Asthma |
| rs2294884   | 6 | 32399482 | G | T | 0.2053 | -0.0624 | 0.0062 | 3.65E-24 | -10.1406 | 1310845 | Asthma |
| rs2294883   | 6 | 32399674 | A | T | 0.2083 | -0.0657 | 0.0061 | 5.76E-27 | -10.7527 | 1310845 | Asthma |
| rs2294882   | 6 | 32399738 | C | T | 0.2085 | -0.0656 | 0.0061 | 5.60E-27 | -10.7552 | 1310845 | Asthma |
| rs2294881   | 6 | 32399827 | C | T | 0.2069 | -0.0646 | 0.0061 | 5.30E-26 | -10.5460 | 1310845 | Asthma |
| rs116522341 | 6 | 32399920 | G | C | 0.0394 | 0.1229  | 0.0133 | 2.20E-20 | 9.2522   | 1310845 | Asthma |
| rs2294880   | 6 | 32399945 | G | A | 0.2635 | 0.1026  | 0.0055 | 8.96E-79 | 18.7899  | 1310845 | Asthma |
| rs9268482   | 6 | 32400000 | T | A | 0.2637 | 0.1027  | 0.0055 | 7.98E-79 | 18.7962  | 1310845 | Asthma |
| rs2294878   | 6 | 32400018 | T | G | 0.4689 | 0.0427  | 0.0049 | 2.29E-18 | 8.7419   | 1310845 | Asthma |
| rs3817966   | 6 | 32400070 | C | T | 0.2668 | 0.0986  | 0.0054 | 1.80E-73 | 18.1314  | 1310845 | Asthma |
| rs3817965   | 6 | 32400150 | G | A | 0.2084 | -0.0657 | 0.0061 | 5.51E-27 | -10.7567 | 1310845 | Asthma |
| rs3817963   | 6 | 32400310 | C | T | 0.2668 | 0.0987  | 0.0054 | 1.37E-73 | 18.1466  | 1310845 | Asthma |
| rs3817962   | 6 | 32400537 | A | C | 0.2637 | 0.1027  | 0.0055 | 7.36E-79 | 18.8019  | 1310845 | Asthma |
| rs28366192  | 6 | 32400659 | T | A | 0.4716 | 0.0458  | 0.0054 | 3.84E-17 | 8.4176   | 1133307 | Asthma |
| rs3129956   | 6 | 32400685 | A | G | 0.1110 | 0.0552  | 0.0087 | 2.05E-10 | 6.3577   | 1128634 | Asthma |
| rs112748105 | 6 | 32400706 | A | G | 0.1935 | -0.0683 | 0.0083 | 2.25E-16 | -8.2078  | 908767  | Asthma |
| rs9268484   | 6 | 32400736 | T | C | 0.2823 | 0.1385  | 0.0084 | 1.23E-61 | 16.5662  | 778845  | Asthma |
| rs9268485   | 6 | 32400781 | C | T | 0.5023 | -0.0777 | 0.0076 | 1.86E-24 | -10.2061 | 778845  | Asthma |
| rs56357381  | 6 | 32400931 | T | C | 0.0588 | -0.0987 | 0.0164 | 1.75E-09 | -6.0200  | 778845  | Asthma |

|             |   |          |   |   |        |         |        |          |          |         |        |
|-------------|---|----------|---|---|--------|---------|--------|----------|----------|---------|--------|
| rs28366193  | 6 | 32401546 | A | T | 0.0548 | 0.0648  | 0.0107 | 1.22E-09 | 6.0782   | 1310845 | Asthma |
| rs3763304   | 6 | 32401578 | T | C | 0.2053 | -0.0628 | 0.0062 | 2.03E-24 | -10.1974 | 1310845 | Asthma |
| rs41399051  | 6 | 32401824 | C | T | 0.0325 | -0.0910 | 0.0137 | 2.81E-11 | -6.6559  | 1310845 | Asthma |
| rs3763306   | 6 | 32401866 | G | A | 0.2053 | -0.0628 | 0.0062 | 2.02E-24 | -10.1979 | 1310845 | Asthma |
| rs4935352   | 6 | 32402109 | G | A | 0.2053 | -0.0628 | 0.0062 | 2.01E-24 | -10.1989 | 1310845 | Asthma |
| rs12529850  | 6 | 32402570 | T | G | 0.0923 | -0.0500 | 0.0083 | 1.64E-09 | -6.0302  | 1310845 | Asthma |
| rs73400833  | 6 | 32402629 | T | C | 0.0362 | -0.0741 | 0.0130 | 1.17E-08 | -5.7039  | 1310845 | Asthma |
| rs115237266 | 6 | 32402744 | A | G | 0.0956 | -0.0539 | 0.0088 | 1.12E-09 | -6.0920  | 1159440 | Asthma |
| rs115530896 | 6 | 32402745 | G | C | 0.0984 | -0.0573 | 0.0087 | 4.56E-11 | -6.5847  | 1159440 | Asthma |
| rs2076525   | 6 | 32402839 | C | T | 0.2641 | 0.1026  | 0.0055 | 6.31E-79 | 18.8105  | 1310845 | Asthma |
| rs62404561  | 6 | 32402869 | G | A | 0.0955 | -0.0551 | 0.0081 | 1.24E-11 | -6.7758  | 1310845 | Asthma |
| rs2076524   | 6 | 32402907 | G | A | 0.2636 | 0.1028  | 0.0055 | 6.16E-79 | 18.8110  | 1310845 | Asthma |
| rs60036207  | 6 | 32403017 | T | C | 0.0923 | -0.0500 | 0.0083 | 1.58E-09 | -6.0360  | 1310845 | Asthma |
| rs28362680  | 6 | 32403039 | A | G | 0.0955 | -0.0557 | 0.0081 | 7.50E-12 | -6.8479  | 1310845 | Asthma |
| rs2076523   | 6 | 32403058 | C | T | 0.3591 | 0.0649  | 0.0050 | 9.43E-39 | 13.0199  | 1310845 | Asthma |
| rs28362681  | 6 | 32403102 | T | C | 0.0924 | -0.0506 | 0.0083 | 1.02E-09 | -6.1070  | 1310845 | Asthma |
| rs59129682  | 6 | 32403131 | A | T | 0.0923 | -0.0500 | 0.0083 | 1.64E-09 | -6.0303  | 1310845 | Asthma |
| rs60263670  | 6 | 32403198 | T | C | 0.0956 | -0.0538 | 0.0088 | 1.17E-09 | -6.0842  | 1159440 | Asthma |
| rs57116766  | 6 | 32403209 | A | C | 0.0923 | -0.0500 | 0.0083 | 1.61E-09 | -6.0325  | 1310845 | Asthma |
| rs2076522   | 6 | 32403402 | C | G | 0.2714 | 0.1064  | 0.0058 | 2.30E-75 | 18.3698  | 1180923 | Asthma |
| rs2076520   | 6 | 32403492 | T | C | 0.2637 | 0.1027  | 0.0055 | 7.22E-79 | 18.8029  | 1310845 | Asthma |
| rs58110932  | 6 | 32403515 | T | A | 0.0953 | -0.0550 | 0.0081 | 1.31E-11 | -6.7682  | 1310845 | Asthma |
| rs60234039  | 6 | 32403517 | G | C | 0.0953 | -0.0550 | 0.0081 | 1.32E-11 | -6.7667  | 1310845 | Asthma |
| rs59400022  | 6 | 32403595 | A | T | 0.0923 | -0.0682 | 0.0101 | 1.24E-11 | -6.7747  | 1003385 | Asthma |
| rs79445387  | 6 | 32403667 | T | A | 0.0918 | -0.0501 | 0.0083 | 1.68E-09 | -6.0266  | 1310845 | Asthma |
| rs73400843  | 6 | 32403723 | A | G | 0.0359 | -0.0762 | 0.0131 | 5.65E-09 | -5.8266  | 1310845 | Asthma |
| rs113358109 | 6 | 32403751 | A | C | 0.0902 | -0.0497 | 0.0085 | 4.17E-09 | -5.8773  | 1310845 | Asthma |
| rs112894468 | 6 | 32403756 | T | C | 0.0957 | -0.0537 | 0.0088 | 1.29E-09 | -6.0690  | 1159440 | Asthma |
| rs115700874 | 6 | 32403761 | A | C | 0.0848 | -0.0565 | 0.0092 | 9.64E-10 | -6.1153  | 1225084 | Asthma |
| rs116826930 | 6 | 32403762 | A | G | 0.0869 | -0.0542 | 0.0090 | 1.52E-09 | -6.0420  | 1251217 | Asthma |
| rs73400844  | 6 | 32403795 | G | A | 0.0896 | -0.0532 | 0.0087 | 1.15E-09 | -6.0878  | 1251217 | Asthma |
| rs76542357  | 6 | 32403822 | G | C | 0.0895 | -0.0529 | 0.0088 | 1.49E-09 | -6.0453  | 1251217 | Asthma |
| rs78002668  | 6 | 32403827 | A | G | 0.0955 | -0.0536 | 0.0088 | 1.40E-09 | -6.0556  | 1159440 | Asthma |
| rs3793126   | 6 | 32403842 | G | A | 0.2637 | 0.1028  | 0.0055 | 6.41E-79 | 18.8088  | 1310845 | Asthma |
| rs73400847  | 6 | 32403863 | A | G | 0.0953 | -0.0541 | 0.0089 | 1.07E-09 | -6.0990  | 1159440 | Asthma |
| rs78982396  | 6 | 32403875 | A | C | 0.0882 | -0.0537 | 0.0089 | 1.43E-09 | -6.0524  | 1251217 | Asthma |
| rs74389891  | 6 | 32403890 | A | G | 0.0883 | -0.0547 | 0.0089 | 6.75E-10 | -6.1718  | 1251217 | Asthma |
| rs145097304 | 6 | 32403947 | C | T | 0.0934 | -0.0508 | 0.0091 | 2.46E-08 | -5.5761  | 1133307 | Asthma |
| rs145026354 | 6 | 32403950 | G | A | 0.0934 | -0.0508 | 0.0091 | 2.47E-08 | -5.5753  | 1133307 | Asthma |
| rs115020225 | 6 | 32403954 | T | C | 0.0934 | -0.0509 | 0.0091 | 2.36E-08 | -5.5836  | 1133307 | Asthma |
| rs115293482 | 6 | 32403962 | G | T | 0.0961 | -0.0557 | 0.0090 | 4.97E-10 | -6.2199  | 1133307 | Asthma |
| rs74506038  | 6 | 32403966 | G | C | 0.0904 | -0.0551 | 0.0088 | 4.80E-10 | -6.2255  | 1225084 | Asthma |
| rs73400852  | 6 | 32404023 | T | C | 0.0918 | -0.0504 | 0.0083 | 1.46E-09 | -6.0493  | 1310845 | Asthma |
| rs73400855  | 6 | 32404041 | C | G | 0.0917 | -0.0505 | 0.0083 | 1.43E-09 | -6.0522  | 1310845 | Asthma |
| rs114394166 | 6 | 32404063 | T | C | 0.0918 | -0.0504 | 0.0083 | 1.45E-09 | -6.0497  | 1310845 | Asthma |
| rs116109251 | 6 | 32404088 | T | C | 0.0955 | -0.0542 | 0.0089 | 9.52E-10 | -6.1172  | 1159440 | Asthma |
| rs115117407 | 6 | 32404090 | A | G | 0.0922 | -0.0498 | 0.0083 | 1.93E-09 | -6.0035  | 1310845 | Asthma |
| rs116391620 | 6 | 32404121 | T | G | 0.0923 | -0.0499 | 0.0083 | 1.71E-09 | -6.0233  | 1310845 | Asthma |
| rs3793127   | 6 | 32404138 | T | C | 0.2088 | 0.0996  | 0.0059 | 5.82E-64 | 16.8848  | 1310845 | Asthma |
| rs73400859  | 6 | 32404177 | A | G | 0.0923 | -0.0500 | 0.0083 | 1.61E-09 | -6.0325  | 1310845 | Asthma |
| rs73400861  | 6 | 32404210 | A | G | 0.0923 | -0.0500 | 0.0083 | 1.61E-09 | -6.0327  | 1310845 | Asthma |
| rs73400863  | 6 | 32404230 | C | T | 0.0923 | -0.0500 | 0.0083 | 1.62E-09 | -6.0324  | 1310845 | Asthma |
| rs73400865  | 6 | 32404255 | G | A | 0.0923 | -0.0500 | 0.0083 | 1.54E-09 | -6.0405  | 1310845 | Asthma |
| rs73400869  | 6 | 32404335 | G | A | 0.0923 | -0.0500 | 0.0083 | 1.63E-09 | -6.0309  | 1310845 | Asthma |
| rs62404569  | 6 | 32404459 | T | C | 0.0923 | -0.0500 | 0.0083 | 1.63E-09 | -6.0312  | 1310845 | Asthma |
| rs62404570  | 6 | 32404474 | C | T | 0.0923 | -0.0500 | 0.0083 | 1.58E-09 | -6.0359  | 1310845 | Asthma |
| rs62404571  | 6 | 32404544 | T | C | 0.0923 | -0.0501 | 0.0083 | 1.48E-09 | -6.0461  | 1310845 | Asthma |
| rs62404572  | 6 | 32404551 | A | G | 0.0954 | -0.0545 | 0.0089 | 8.06E-10 | -6.1437  | 1159440 | Asthma |
| rs62404573  | 6 | 32404560 | A | G | 0.0954 | -0.0545 | 0.0089 | 8.08E-10 | -6.1434  | 1159440 | Asthma |
| rs62404574  | 6 | 32404576 | G | A | 0.0923 | -0.0500 | 0.0083 | 1.56E-09 | -6.0378  | 1310845 | Asthma |
| rs73400875  | 6 | 32404619 | C | T | 0.0923 | -0.0500 | 0.0083 | 1.62E-09 | -6.0323  | 1310845 | Asthma |
| rs73400877  | 6 | 32404645 | G | C | 0.0923 | -0.0499 | 0.0083 | 1.66E-09 | -6.0279  | 1310845 | Asthma |
| rs28362682  | 6 | 32405086 | T | A | 0.0923 | -0.0498 | 0.0083 | 1.83E-09 | -6.0121  | 1310845 | Asthma |
| rs28362683  | 6 | 32405186 | A | G | 0.0923 | -0.0498 | 0.0083 | 1.82E-09 | -6.0130  | 1310845 | Asthma |
| rs10947260  | 6 | 32405408 | C | T | 0.0924 | -0.0496 | 0.0083 | 2.16E-09 | -5.9849  | 1310845 | Asthma |
| rs10947261  | 6 | 32405455 | T | G | 0.0954 | -0.0551 | 0.0081 | 1.24E-11 | -6.7761  | 1310845 | Asthma |
| rs10947262  | 6 | 32405535 | T | C | 0.0955 | -0.0556 | 0.0081 | 7.72E-12 | -6.8437  | 1310845 | Asthma |
| rs10947263  | 6 | 32405597 | T | C | 0.0955 | -0.0553 | 0.0081 | 1.01E-11 | -6.8052  | 1310845 | Asthma |
| rs3806155   | 6 | 32405601 | T | A | 0.0369 | 0.1280  | 0.0128 | 1.57E-23 | 9.9969   | 1310845 | Asthma |
| rs10947264  | 6 | 32405752 | G | A | 0.0886 | -0.0606 | 0.0104 | 6.23E-09 | -5.8103  | 1003362 | Asthma |
| rs3806156   | 6 | 32405921 | T | G | 0.3591 | 0.0649  | 0.0050 | 9.65E-39 | 13.0180  | 1310845 | Asthma |
| rs3806157   | 6 | 32406024 | G | T | 0.3559 | 0.0680  | 0.0050 | 4.01E-42 | 13.5997  | 1310845 | Asthma |
| rs62404576  | 6 | 32406052 | T | G | 0.0923 | -0.0500 | 0.0083 | 1.60E-09 | -6.0339  | 1310845 | Asthma |
| rs9268491   | 6 | 32406354 | G | C | 0.2633 | 0.1025  | 0.0055 | 1.90E-78 | 18.7509  | 1310845 | Asthma |

|            |   |          |   |   |        |         |        |          |          |         |        |
|------------|---|----------|---|---|--------|---------|--------|----------|----------|---------|--------|
| rs62404577 | 6 | 32406383 | G | A | 0.0869 | -0.0636 | 0.0096 | 3.27E-11 | -6.6341  | 812903  | Asthma |
| rs77331864 | 6 | 32406414 | A | G | 0.0954 | -0.0553 | 0.0081 | 1.04E-11 | -6.8014  | 1310845 | Asthma |
| rs73400890 | 6 | 32406428 | A | G | 0.0955 | -0.0554 | 0.0081 | 9.27E-12 | -6.8176  | 1310845 | Asthma |
| rs73400892 | 6 | 32406485 | A | G | 0.0954 | -0.0553 | 0.0081 | 1.06E-11 | -6.7983  | 1310845 | Asthma |
| rs3763307  | 6 | 32406845 | T | A | 0.2637 | 0.1027  | 0.0055 | 7.43E-79 | 18.8003  | 1310845 | Asthma |
| rs9268492  | 6 | 32407503 | G | C | 0.2842 | 0.0963  | 0.0053 | 6.88E-73 | 18.0576  | 1310845 | Asthma |
| rs9268493  | 6 | 32407553 | A | G | 0.2834 | 0.0959  | 0.0053 | 4.00E-72 | 17.9602  | 1310845 | Asthma |
| rs62404578 | 6 | 32407570 | G | T | 0.0328 | -0.0884 | 0.0136 | 7.71E-11 | -6.5064  | 1310845 | Asthma |
| rs9268494  | 6 | 32407575 | C | A | 0.2864 | 0.0870  | 0.0056 | 1.37E-53 | 15.4117  | 942825  | Asthma |
| rs9268495  | 6 | 32407594 | T | A | 0.2860 | 0.0926  | 0.0053 | 1.77E-67 | 17.3563  | 1310845 | Asthma |
| rs9268496  | 6 | 32407597 | A | G | 0.2860 | 0.0927  | 0.0053 | 1.29E-67 | 17.3746  | 1310845 | Asthma |
| rs9268497  | 6 | 32407647 | A | G | 0.2873 | 0.0925  | 0.0053 | 6.68E-68 | 17.4120  | 1310845 | Asthma |
| rs9268499  | 6 | 32407918 | A | G | 0.2763 | 0.0961  | 0.0054 | 1.22E-71 | 17.8981  | 1310845 | Asthma |
| rs6926737  | 6 | 32407968 | G | A | 0.4940 | -0.0394 | 0.0049 | 1.04E-15 | -8.0227  | 1310845 | Asthma |
| rs3763309  | 6 | 32408196 | A | C | 0.2088 | 0.0994  | 0.0059 | 9.80E-64 | 16.8542  | 1310845 | Asthma |
| rs62404579 | 6 | 32408242 | T | G | 0.0856 | -0.0994 | 0.0089 | 5.53E-29 | -11.1730 | 1310845 | Asthma |
| rs3763311  | 6 | 32408399 | T | C | 0.2731 | 0.1001  | 0.0054 | 5.60E-77 | 18.5699  | 1310845 | Asthma |
| rs3763312  | 6 | 32408571 | A | G | 0.2088 | 0.0996  | 0.0059 | 5.65E-64 | 16.8864  | 1310845 | Asthma |
| rs17208853 | 6 | 32408583 | C | T | 0.1124 | -0.0617 | 0.0081 | 2.37E-14 | -7.6288  | 1376071 | Asthma |
| rs3763313  | 6 | 32408694 | C | A | 0.2061 | -0.0602 | 0.0061 | 7.04E-23 | -9.8473  | 1376071 | Asthma |
| rs3763314  | 6 | 32408841 | C | T | 0.4940 | -0.0395 | 0.0049 | 8.57E-16 | -8.0458  | 1310845 | Asthma |
| rs3763316  | 6 | 32408969 | T | C | 0.2617 | 0.1030  | 0.0055 | 4.27E-79 | 18.8298  | 1310845 | Asthma |
| rs9268501  | 6 | 32409105 | T | G | 0.4859 | -0.0358 | 0.0052 | 5.79E-12 | -6.8848  | 942825  | Asthma |
| rs9268502  | 6 | 32409155 | C | T | 0.4941 | -0.0397 | 0.0049 | 6.11E-16 | -8.0873  | 1310845 | Asthma |
| rs9268503  | 6 | 32409284 | C | T | 0.4941 | -0.0397 | 0.0049 | 6.30E-16 | -8.0833  | 1310845 | Asthma |
| rs9268504  | 6 | 32409339 | C | G | 0.4940 | -0.0398 | 0.0049 | 5.57E-16 | -8.0983  | 1310845 | Asthma |
| rs9268506  | 6 | 32409693 | C | T | 0.4940 | -0.0397 | 0.0049 | 6.24E-16 | -8.0845  | 1310845 | Asthma |
| rs9268507  | 6 | 32409762 | A | G | 0.4940 | -0.0398 | 0.0049 | 5.67E-16 | -8.0961  | 1310845 | Asthma |
| rs9268508  | 6 | 32409811 | T | A | 0.4940 | -0.0397 | 0.0049 | 6.34E-16 | -8.0826  | 1310845 | Asthma |
| rs28732205 | 6 | 32409935 | T | C | 0.2020 | -0.0604 | 0.0073 | 9.06E-17 | -8.3165  | 1003362 | Asthma |
| rs9268513  | 6 | 32411010 | T | C | 0.4940 | -0.0397 | 0.0049 | 6.34E-16 | -8.0825  | 1310845 | Asthma |
| rs5007266  | 6 | 32411057 | T | C | 0.4940 | -0.0397 | 0.0049 | 6.54E-16 | -8.0787  | 1310845 | Asthma |
| rs5007265  | 6 | 32411089 | T | G | 0.4940 | -0.0398 | 0.0049 | 5.20E-16 | -8.1069  | 1310845 | Asthma |
| rs5007264  | 6 | 32411100 | C | T | 0.4940 | -0.0397 | 0.0049 | 6.21E-16 | -8.0851  | 1310845 | Asthma |
| rs9268514  | 6 | 32411168 | A | T | 0.2114 | 0.0986  | 0.0057 | 1.94E-67 | 17.3509  | 1310845 | Asthma |
| rs5007263  | 6 | 32411205 | A | G | 0.4940 | -0.0398 | 0.0049 | 5.47E-16 | -8.1008  | 1310845 | Asthma |
| rs5007262  | 6 | 32411234 | A | G | 0.4940 | -0.0397 | 0.0049 | 6.22E-16 | -8.0850  | 1310845 | Asthma |
| rs5007261  | 6 | 32411254 | G | A | 0.4940 | -0.0397 | 0.0049 | 6.16E-16 | -8.0861  | 1310845 | Asthma |
| rs5007260  | 6 | 32411270 | G | A | 0.4940 | -0.0397 | 0.0049 | 6.15E-16 | -8.0864  | 1310845 | Asthma |
| rs5007259  | 6 | 32411324 | T | C | 0.4940 | -0.0399 | 0.0049 | 4.79E-16 | -8.1167  | 1310845 | Asthma |
| rs5007258  | 6 | 32411462 | A | G | 0.4940 | -0.0398 | 0.0049 | 5.61E-16 | -8.0976  | 1310845 | Asthma |
| rs9268515  | 6 | 32411518 | C | G | 0.1867 | 0.1074  | 0.0069 | 4.88E-55 | 15.6256  | 1154767 | Asthma |
| rs6906730  | 6 | 32411668 | T | C | 0.4940 | -0.0398 | 0.0049 | 5.87E-16 | -8.0918  | 1310845 | Asthma |
| rs9268516  | 6 | 32411712 | T | C | 0.2639 | 0.1029  | 0.0055 | 2.84E-79 | 18.8513  | 1310845 | Asthma |
| rs17208902 | 6 | 32411770 | T | C | 0.2124 | -0.0552 | 0.0061 | 8.22E-20 | -9.1101  | 1376071 | Asthma |
| rs6911383  | 6 | 32411905 | T | C | 0.4940 | -0.0397 | 0.0049 | 5.98E-16 | -8.0897  | 1310845 | Asthma |
| rs6932810  | 6 | 32412413 | G | A | 0.4940 | -0.0398 | 0.0049 | 5.85E-16 | -8.0926  | 1310845 | Asthma |
| rs6932542  | 6 | 32412485 | A | G | 0.4940 | -0.0397 | 0.0049 | 6.32E-16 | -8.0830  | 1310845 | Asthma |
| rs968155   | 6 | 32412938 | C | T | 0.4718 | -0.0273 | 0.0049 | 2.61E-08 | -5.5659  | 1310845 | Asthma |
| rs3129964  | 6 | 32412940 | C | G | 0.2994 | -0.0327 | 0.0053 | 6.63E-10 | -6.1746  | 1310845 | Asthma |
| rs4502931  | 6 | 32413005 | T | A | 0.4944 | -0.0397 | 0.0049 | 6.28E-16 | -8.0837  | 1310845 | Asthma |
| rs968154   | 6 | 32413008 | G | A | 0.4946 | -0.0399 | 0.0049 | 4.82E-16 | -8.1161  | 1310845 | Asthma |
| rs9268518  | 6 | 32413041 | A | G | 0.4946 | -0.0399 | 0.0049 | 4.65E-16 | -8.1202  | 1310845 | Asthma |
| rs9268519  | 6 | 32413049 | G | A | 0.4946 | -0.0400 | 0.0049 | 4.22E-16 | -8.1320  | 1310845 | Asthma |
| rs9268520  | 6 | 32413083 | C | A | 0.4941 | -0.0397 | 0.0049 | 6.55E-16 | -8.0787  | 1310845 | Asthma |
| rs9469108  | 6 | 32413115 | T | C | 0.2083 | -0.0545 | 0.0061 | 5.39E-19 | -8.9038  | 1376071 | Asthma |
| rs6938337  | 6 | 32413264 | C | G | 0.4940 | -0.0397 | 0.0049 | 6.11E-16 | -8.0871  | 1310845 | Asthma |
| rs6918317  | 6 | 32413433 | T | C | 0.4850 | -0.0377 | 0.0049 | 2.06E-14 | -7.6468  | 1310845 | Asthma |
| rs3129966  | 6 | 32413503 | C | G | 0.1090 | 0.0499  | 0.0079 | 3.26E-10 | 6.2859   | 1310845 | Asthma |
| rs75758646 | 6 | 32413505 | C | G | 0.0174 | 0.1041  | 0.0184 | 1.64E-08 | 5.6460   | 1284712 | Asthma |
| rs9268521  | 6 | 32413597 | C | G | 0.2116 | 0.0979  | 0.0059 | 1.88E-62 | 16.6785  | 1310845 | Asthma |
| rs9268522  | 6 | 32413666 | T | A | 0.2115 | 0.0981  | 0.0059 | 1.57E-62 | 16.6890  | 1310845 | Asthma |
| rs7759742  | 6 | 32413959 | T | A | 0.4906 | -0.0397 | 0.0049 | 8.12E-16 | -8.0526  | 1310845 | Asthma |
| rs743862   | 6 | 32414162 | C | T | 0.3560 | -0.0445 | 0.0051 | 2.85E-18 | -8.7173  | 1310845 | Asthma |
| rs9268528  | 6 | 32415331 | G | A | 0.3413 | 0.0765  | 0.0050 | 1.98E-52 | 15.2382  | 1310845 | Asthma |
| rs4959098  | 6 | 32415479 | A | C | 0.3995 | -0.0519 | 0.0051 | 1.70E-24 | -10.2147 | 1310845 | Asthma |
| rs9268542  | 6 | 32416944 | G | A | 0.3442 | 0.0753  | 0.0050 | 4.85E-51 | 15.0273  | 1310845 | Asthma |
| rs9268543  | 6 | 32417024 | T | A | 0.1759 | 0.1156  | 0.0065 | 1.07E-71 | 17.9064  | 1310845 | Asthma |
| rs72847996 | 6 | 32417115 | A | G | 0.1155 | -0.0626 | 0.0080 | 4.77E-15 | -7.8330  | 1376071 | Asthma |
| rs28732208 | 6 | 32417342 | T | C | 0.1619 | -0.0588 | 0.0068 | 6.18E-18 | -8.6291  | 1376071 | Asthma |
| rs9268544  | 6 | 32417676 | A | G | 0.3442 | 0.0754  | 0.0050 | 3.86E-51 | 15.0426  | 1310845 | Asthma |
| rs55890913 | 6 | 32417819 | C | T | 0.1156 | -0.0624 | 0.0080 | 5.75E-15 | -7.8094  | 1376071 | Asthma |
| rs9268545  | 6 | 32417973 | C | T | 0.3442 | 0.0754  | 0.0050 | 3.61E-51 | 15.0471  | 1310845 | Asthma |
| rs62404607 | 6 | 32418411 | G | A | 0.0347 | -0.0898 | 0.0133 | 1.26E-11 | -6.7730  | 1310845 | Asthma |



|             |   |          |   |   |        |         |        |          |          |         |        |
|-------------|---|----------|---|---|--------|---------|--------|----------|----------|---------|--------|
| rs4355646   | 6 | 32418777 | T | C | 0.4037 | 0.0633  | 0.0049 | 1.30E-38 | 12.9954  | 1310845 | Asthma |
| rs28633917  | 6 | 32418794 | A | G | 0.0226 | 0.0937  | 0.0158 | 2.82E-09 | 5.9418   | 1310845 | Asthma |
| rs4335021   | 6 | 32418842 | T | C | 0.3990 | -0.0524 | 0.0051 | 5.86E-25 | -10.3177 | 1310845 | Asthma |
| rs9268556   | 6 | 32419187 | C | T | 0.3442 | 0.0753  | 0.0050 | 4.38E-51 | 15.0342  | 1310845 | Asthma |
| rs3135369   | 6 | 32419444 | A | G | 0.2568 | -0.0309 | 0.0056 | 4.55E-08 | -5.4680  | 1310845 | Asthma |
| rs2395160   | 6 | 32419655 | A | G | 0.1087 | 0.0490  | 0.0079 | 6.62E-10 | 6.1749   | 1310845 | Asthma |
| rs2395163   | 6 | 32420032 | C | T | 0.2068 | 0.1034  | 0.0059 | 2.43E-68 | 17.4691  | 1310845 | Asthma |
| rs2395166   | 6 | 32420498 | C | T | 0.3991 | -0.0523 | 0.0051 | 7.60E-25 | -10.2929 | 1310845 | Asthma |
| rs17209007  | 6 | 32420770 | A | G | 0.0444 | -0.1070 | 0.0124 | 4.78E-18 | -8.6592  | 1310845 | Asthma |
| rs9268557   | 6 | 32421528 | C | T | 0.4621 | 0.0487  | 0.0049 | 4.24E-23 | 9.8981   | 1310845 | Asthma |
| rs12524667  | 6 | 32421557 | T | C | 0.1131 | -0.0627 | 0.0081 | 7.02E-15 | -7.7842  | 1376071 | Asthma |
| rs9268560   | 6 | 32421735 | C | G | 0.5011 | -0.0409 | 0.0049 | 1.12E-16 | -8.2918  | 1310845 | Asthma |
| rs28732209  | 6 | 32421766 | C | A | 0.0689 | -0.0700 | 0.0096 | 2.74E-13 | -7.3067  | 1310845 | Asthma |
| rs4496841   | 6 | 32422220 | C | T | 0.3546 | -0.0318 | 0.0058 | 4.40E-08 | -5.4741  | 1216250 | Asthma |
| rs3135359   | 6 | 32422801 | T | C | 0.2812 | -0.0337 | 0.0055 | 6.93E-10 | -6.1676  | 1310845 | Asthma |
| rs34330585  | 6 | 32422926 | C | G | 0.1270 | -0.0626 | 0.0077 | 3.12E-16 | -8.1686  | 1376071 | Asthma |
| rs146003472 | 6 | 32422974 | C | T | 0.0234 | 0.1558  | 0.0173 | 2.68E-19 | 8.9811   | 1251217 | Asthma |
| rs6923872   | 6 | 32423080 | A | G | 0.1719 | -0.0608 | 0.0067 | 6.09E-20 | -9.1427  | 1376071 | Asthma |
| rs9268568   | 6 | 32423127 | A | G | 0.3319 | 0.0774  | 0.0051 | 5.68E-53 | 15.3193  | 1310845 | Asthma |
| rs112079463 | 6 | 32423568 | T | C | 0.0349 | -0.0866 | 0.0134 | 9.76E-11 | -6.4707  | 1284712 | Asthma |
| rs76568958  | 6 | 32423645 | G | A | 0.0347 | -0.0874 | 0.0133 | 4.62E-11 | -6.5828  | 1310845 | Asthma |
| rs28895026  | 6 | 32423918 | C | T | 0.1962 | -0.0606 | 0.0063 | 4.21E-22 | -9.6659  | 1376071 | Asthma |
| rs34989128  | 6 | 32423995 | A | G | 0.1270 | -0.0631 | 0.0077 | 1.90E-16 | -8.2281  | 1376071 | Asthma |
| rs35875335  | 6 | 32424214 | C | T | 0.1270 | -0.0626 | 0.0077 | 3.19E-16 | -8.1659  | 1376071 | Asthma |
| rs28752486  | 6 | 32424674 | A | T | 0.0521 | 0.0671  | 0.0121 | 3.14E-08 | 5.5335   | 1159440 | Asthma |
| rs2157332   | 6 | 32424884 | T | C | 0.3319 | 0.0776  | 0.0051 | 3.14E-53 | 15.3579  | 1310845 | Asthma |
| rs3135352   | 6 | 32425129 | C | A | 0.1675 | -0.0539 | 0.0068 | 2.06E-15 | -7.9376  | 1310845 | Asthma |
| rs3135350   | 6 | 32425204 | C | T | 0.1674 | -0.0539 | 0.0068 | 1.94E-15 | -7.9448  | 1310845 | Asthma |
| rs3129971   | 6 | 32425458 | G | C | 0.1675 | -0.0538 | 0.0068 | 2.32E-15 | -7.9229  | 1310845 | Asthma |
| rs28366195  | 6 | 32425765 | G | T | 0.0423 | 0.0763  | 0.0123 | 4.74E-10 | 6.2276   | 1310845 | Asthma |
| rs28452472  | 6 | 32426271 | A | G | 0.1088 | -0.0651 | 0.0082 | 2.46E-15 | -7.9159  | 1376071 | Asthma |
| rs35817460  | 6 | 32426345 | T | G | 0.1270 | -0.0633 | 0.0077 | 1.53E-16 | -8.2542  | 1376071 | Asthma |
| rs9391861   | 6 | 32427223 | A | C | 0.0226 | 0.0928  | 0.0158 | 4.07E-09 | 5.8814   | 1310845 | Asthma |
| rs3135344   | 6 | 32427259 | C | T | 0.3382 | -0.0707 | 0.0053 | 4.95E-41 | -13.4148 | 1376071 | Asthma |
| rs75658393  | 6 | 32427740 | C | T | 0.0226 | 0.0941  | 0.0158 | 2.52E-09 | 5.9598   | 1310845 | Asthma |
| rs2187818   | 6 | 32427791 | T | G | 0.3320 | 0.0774  | 0.0050 | 5.56E-53 | 15.3208  | 1310845 | Asthma |
| rs3129843   | 6 | 32427949 | G | A | 0.1086 | 0.0489  | 0.0079 | 7.30E-10 | 6.1593   | 1310845 | Asthma |
| rs3129844   | 6 | 32428058 | G | A | 0.3184 | -0.0422 | 0.0052 | 9.11E-16 | -8.0382  | 1310845 | Asthma |
| rs9268578   | 6 | 32428280 | G | A | 0.3320 | 0.0773  | 0.0050 | 6.04E-53 | 15.3155  | 1310845 | Asthma |
| rs77055720  | 6 | 32428301 | T | C | 0.0349 | -0.0881 | 0.0132 | 2.75E-11 | -6.6595  | 1310845 | Asthma |
| rs3129845   | 6 | 32428500 | G | A | 0.3216 | -0.0406 | 0.0052 | 9.05E-15 | -7.7520  | 1310845 | Asthma |
| rs3135343   | 6 | 32428536 | T | C | 0.3216 | -0.0407 | 0.0052 | 7.06E-15 | -7.7836  | 1310845 | Asthma |
| rs9268579   | 6 | 32428673 | A | G | 0.3317 | 0.0772  | 0.0051 | 8.83E-53 | 15.2906  | 1310845 | Asthma |
| rs3129846   | 6 | 32428698 | G | A | 0.3216 | -0.0407 | 0.0052 | 7.69E-15 | -7.7726  | 1310845 | Asthma |
| rs3129847   | 6 | 32428729 | G | A | 0.3184 | -0.0423 | 0.0052 | 7.96E-16 | -8.0549  | 1310845 | Asthma |
| rs3135342   | 6 | 32428838 | T | G | 0.3184 | -0.0422 | 0.0052 | 9.11E-16 | -8.0385  | 1310845 | Asthma |
| rs9268580   | 6 | 32429128 | C | G | 0.3491 | 0.0809  | 0.0060 | 4.31E-42 | 13.5946  | 753275  | Asthma |
| rs9268581   | 6 | 32429153 | A | G | 0.2090 | 0.1045  | 0.0059 | 3.64E-70 | 17.7073  | 1310845 | Asthma |
| rs9268582   | 6 | 32429187 | T | C | 0.3320 | 0.0773  | 0.0050 | 6.32E-53 | 15.3123  | 1310845 | Asthma |
| rs3129848   | 6 | 32429272 | A | G | 0.3184 | -0.0423 | 0.0052 | 7.55E-16 | -8.0612  | 1310845 | Asthma |
| rs7754570   | 6 | 32429413 | G | C | 0.0387 | -0.0861 | 0.0125 | 5.65E-12 | -6.8881  | 1310845 | Asthma |
| rs9268583   | 6 | 32429489 | G | T | 0.3320 | 0.0774  | 0.0050 | 4.36E-53 | 15.3367  | 1310845 | Asthma |
| rs3129849   | 6 | 32429532 | A | G | 0.2153 | -0.0583 | 0.0061 | 8.74E-22 | -9.5910  | 1310845 | Asthma |
| rs9268585   | 6 | 32429626 | G | T | 0.3320 | 0.0774  | 0.0050 | 5.67E-53 | 15.3194  | 1310845 | Asthma |
| rs17209049  | 6 | 32429903 | A | G | 0.0353 | -0.1181 | 0.0146 | 6.61E-16 | -8.0773  | 1310845 | Asthma |
| rs3129851   | 6 | 32429935 | C | A | 0.3184 | -0.0422 | 0.0052 | 8.59E-16 | -8.0455  | 1310845 | Asthma |
| rs3129852   | 6 | 32430007 | G | A | 0.2153 | -0.0583 | 0.0061 | 8.12E-22 | -9.5986  | 1310845 | Asthma |
| rs9268588   | 6 | 32430017 | G | C | 0.3352 | 0.0783  | 0.0050 | 2.46E-54 | 15.5221  | 1310845 | Asthma |
| rs17202717  | 6 | 32430086 | T | G | 0.1270 | -0.0632 | 0.0077 | 1.56E-16 | -8.2517  | 1376071 | Asthma |
| rs9268589   | 6 | 32430425 | A | G | 0.3352 | 0.0782  | 0.0050 | 2.83E-54 | 15.5132  | 1310845 | Asthma |
| rs7774047   | 6 | 32430786 | A | C | 0.3352 | 0.0783  | 0.0050 | 2.38E-54 | 15.5243  | 1310845 | Asthma |
| rs3129853   | 6 | 32430871 | A | G | 0.3185 | -0.0420 | 0.0052 | 1.17E-15 | -8.0071  | 1310845 | Asthma |
| rs7756262   | 6 | 32430898 | A | T | 0.3351 | 0.0782  | 0.0050 | 4.04E-54 | 15.4903  | 1310845 | Asthma |
| rs3135341   | 6 | 32430971 | C | A | 0.2154 | -0.0583 | 0.0061 | 8.49E-22 | -9.5937  | 1310845 | Asthma |
| rs3129854   | 6 | 32431004 | G | C | 0.3491 | -0.0423 | 0.0056 | 4.53E-14 | -7.5447  | 1159440 | Asthma |
| rs3129855   | 6 | 32431064 | G | A | 0.1102 | 0.0540  | 0.0086 | 3.01E-10 | 6.2985   | 1154767 | Asthma |
| rs3135340   | 6 | 32431095 | G | T | 0.3196 | -0.0458 | 0.0060 | 1.92E-14 | -7.6561  | 812903  | Asthma |
| rs4988822   | 6 | 32431198 | T | C | 0.3186 | -0.0422 | 0.0053 | 1.04E-15 | -8.0215  | 1310845 | Asthma |
| rs4988821   | 6 | 32431245 | G | A | 0.3184 | -0.0422 | 0.0052 | 8.50E-16 | -8.0468  | 1310845 | Asthma |
| rs4348358   | 6 | 32431315 | A | G | 0.3352 | 0.0783  | 0.0050 | 2.49E-54 | 15.5212  | 1310845 | Asthma |
| rs4988820   | 6 | 32431381 | T | C | 0.3185 | -0.0420 | 0.0052 | 1.13E-15 | -8.0125  | 1310845 | Asthma |
| rs4504509   | 6 | 32431382 | T | C | 0.2153 | -0.0583 | 0.0061 | 8.43E-22 | -9.5946  | 1310845 | Asthma |
| rs4321864   | 6 | 32431410 | A | C | 0.3014 | 0.0938  | 0.0052 | 2.80E-73 | 18.1071  | 1310845 | Asthma |
| rs3135339   | 6 | 32431484 | G | C | 0.3184 | -0.0422 | 0.0052 | 8.24E-16 | -8.0507  | 1310845 | Asthma |

|            |   |          |   |   |        |         |        |          |          |         |        |
|------------|---|----------|---|---|--------|---------|--------|----------|----------|---------|--------|
| rs3129856  | 6 | 32431560 | C | T | 0.1086 | 0.0489  | 0.0079 | 7.06E-10 | 6.1649   | 1310845 | Asthma |
| rs3129857  | 6 | 32432008 | G | A | 0.3185 | -0.0422 | 0.0053 | 9.82E-16 | -8.0290  | 1310845 | Asthma |
| rs9268605  | 6 | 32432056 | A | G | 0.3351 | 0.0783  | 0.0050 | 2.08E-54 | 15.5329  | 1310845 | Asthma |
| rs2395172  | 6 | 32432065 | C | T | 0.3185 | -0.0422 | 0.0053 | 1.01E-15 | -8.0263  | 1310845 | Asthma |
| rs9268606  | 6 | 32432293 | A | G | 0.3353 | 0.0782  | 0.0050 | 2.80E-54 | 15.5138  | 1310845 | Asthma |
| rs984778   | 6 | 32432311 | C | T | 0.3464 | -0.0409 | 0.0051 | 1.87E-15 | -7.9498  | 1310845 | Asthma |
| rs3129858  | 6 | 32432743 | A | G | 0.3185 | -0.0419 | 0.0053 | 1.61E-15 | -7.9684  | 1310845 | Asthma |
| rs9268607  | 6 | 32432761 | G | A | 0.3352 | 0.0783  | 0.0050 | 2.55E-54 | 15.5197  | 1310845 | Asthma |
| rs9268608  | 6 | 32433088 | T | C | 0.3352 | 0.0782  | 0.0050 | 2.65E-54 | 15.5175  | 1310845 | Asthma |
| rs3129859  | 6 | 32433162 | C | G | 0.3363 | -0.0367 | 0.0051 | 9.63E-13 | -7.1357  | 1310845 | Asthma |
| rs17496307 | 6 | 32433259 | T | A | 0.1270 | -0.0632 | 0.0077 | 1.49E-16 | -8.2570  | 1376071 | Asthma |
| rs3129860  | 6 | 32433302 | A | G | 0.1706 | -0.0571 | 0.0067 | 1.66E-17 | -8.5152  | 1310845 | Asthma |
| rs3135338  | 6 | 32433440 | C | T | 0.3456 | -0.0407 | 0.0051 | 2.25E-15 | -7.9268  | 1310845 | Asthma |
| rs9268609  | 6 | 32433484 | A | G | 0.3352 | 0.0783  | 0.0050 | 2.59E-54 | 15.5187  | 1310845 | Asthma |
| rs9268610  | 6 | 32433486 | C | T | 0.3352 | 0.0782  | 0.0050 | 2.61E-54 | 15.5181  | 1310845 | Asthma |
| rs3135337  | 6 | 32433757 | T | C | 0.3184 | -0.0422 | 0.0052 | 8.59E-16 | -8.0455  | 1310845 | Asthma |
| rs3135336  | 6 | 32434052 | G | A | 0.3464 | -0.0408 | 0.0051 | 1.98E-15 | -7.9426  | 1310845 | Asthma |
| rs3135335  | 6 | 32434068 | C | G | 0.3464 | -0.0409 | 0.0051 | 1.91E-15 | -7.9471  | 1310845 | Asthma |
| rs1987305  | 6 | 32434219 | T | G | 0.3352 | 0.0782  | 0.0050 | 2.75E-54 | 15.5150  | 1310845 | Asthma |
| rs960736   | 6 | 32434448 | C | T | 0.3352 | 0.0783  | 0.0050 | 2.52E-54 | 15.5206  | 1310845 | Asthma |
| rs7753264  | 6 | 32434663 | G | A | 0.3352 | 0.0782  | 0.0050 | 2.66E-54 | 15.5169  | 1310845 | Asthma |
| rs7773756  | 6 | 32434687 | C | T | 0.3352 | 0.0782  | 0.0050 | 3.24E-54 | 15.5043  | 1310845 | Asthma |
| rs3135334  | 6 | 32434909 | C | T | 0.2153 | -0.0583 | 0.0061 | 8.24E-22 | -9.5971  | 1310845 | Asthma |
| rs9268613  | 6 | 32434915 | T | C | 0.3352 | 0.0782  | 0.0050 | 2.83E-54 | 15.5130  | 1310845 | Asthma |
| rs9268614  | 6 | 32435001 | G | T | 0.2090 | 0.1044  | 0.0059 | 4.35E-70 | 17.6984  | 1310845 | Asthma |
| rs9268615  | 6 | 32435112 | A | G | 0.3389 | 0.0772  | 0.0050 | 3.02E-53 | 15.3603  | 1310845 | Asthma |
| rs3135398  | 6 | 32436157 | T | C | 0.3184 | -0.0422 | 0.0053 | 9.83E-16 | -8.0290  | 1310845 | Asthma |
| rs3135397  | 6 | 32436164 | A | T | 0.3464 | -0.0409 | 0.0051 | 1.80E-15 | -7.9544  | 1310845 | Asthma |
| rs3129864  | 6 | 32436266 | G | A | 0.3184 | -0.0422 | 0.0052 | 8.77E-16 | -8.0431  | 1310845 | Asthma |
| rs3129865  | 6 | 32436271 | G | C | 0.1706 | -0.0571 | 0.0067 | 1.69E-17 | -8.5132  | 1310845 | Asthma |
| rs3129866  | 6 | 32436288 | G | C | 0.3465 | -0.0408 | 0.0051 | 2.13E-15 | -7.9334  | 1310845 | Asthma |
| rs4612206  | 6 | 32436316 | T | C | 0.3351 | 0.0782  | 0.0050 | 3.29E-54 | 15.5036  | 1310845 | Asthma |
| rs5000563  | 6 | 32436358 | G | A | 0.3184 | -0.0422 | 0.0052 | 8.48E-16 | -8.0470  | 1310845 | Asthma |
| rs3135396  | 6 | 32436436 | T | C | 0.3184 | -0.0422 | 0.0052 | 8.57E-16 | -8.0457  | 1310845 | Asthma |
| rs3129867  | 6 | 32436443 | G | C | 0.3220 | -0.0380 | 0.0052 | 4.62E-13 | -7.2361  | 1310845 | Asthma |
| rs62404042 | 6 | 32436499 | A | T | 0.0347 | -0.0874 | 0.0132 | 4.28E-11 | -6.5940  | 1310845 | Asthma |
| rs3129868  | 6 | 32436600 | A | C | 0.1706 | -0.0572 | 0.0067 | 1.53E-17 | -8.5246  | 1310845 | Asthma |
| rs2395173  | 6 | 32437082 | A | G | 0.3464 | -0.0408 | 0.0051 | 1.98E-15 | -7.9425  | 1310845 | Asthma |
| rs2395174  | 6 | 32437101 | G | T | 0.3184 | -0.0421 | 0.0052 | 9.77E-16 | -8.0298  | 1310845 | Asthma |
| rs2395175  | 6 | 32437249 | A | G | 0.1756 | 0.1162  | 0.0065 | 6.66E-72 | 17.9321  | 1310845 | Asthma |
| rs2395176  | 6 | 32437285 | T | G | 0.3184 | -0.0423 | 0.0052 | 7.81E-16 | -8.0573  | 1310845 | Asthma |
| rs2395177  | 6 | 32437299 | C | G | 0.3184 | -0.0422 | 0.0053 | 9.48E-16 | -8.0333  | 1310845 | Asthma |
| rs17606282 | 6 | 32437367 | C | T | 0.0435 | -0.1056 | 0.0125 | 3.63E-17 | -8.4245  | 1310845 | Asthma |
| rs3135395  | 6 | 32437415 | T | G | 0.3464 | -0.0409 | 0.0051 | 1.66E-15 | -7.9642  | 1310845 | Asthma |
| rs2395178  | 6 | 32437585 | G | C | 0.3464 | -0.0409 | 0.0051 | 1.81E-15 | -7.9537  | 1310845 | Asthma |
| rs3129869  | 6 | 32437894 | A | C | 0.3464 | -0.0410 | 0.0051 | 1.53E-15 | -7.9744  | 1310845 | Asthma |
| rs9268627  | 6 | 32438044 | C | T | 0.2090 | 0.1045  | 0.0059 | 3.17E-70 | 17.7159  | 1310845 | Asthma |
| rs3129870  | 6 | 32438323 | T | C | 0.3209 | -0.0453 | 0.0058 | 6.29E-15 | -7.7980  | 1133307 | Asthma |
| rs3129871  | 6 | 32438565 | A | C | 0.3811 | -0.0517 | 0.0050 | 9.01E-25 | -10.2763 | 1310845 | Asthma |
| rs9268632  | 6 | 32438635 | G | C | 0.3182 | -0.0423 | 0.0053 | 9.01E-16 | -8.0395  | 1310845 | Asthma |
| rs9268633  | 6 | 32438696 | A | G | 0.2153 | -0.0583 | 0.0061 | 8.71E-22 | -9.5912  | 1310845 | Asthma |
| rs9268634  | 6 | 32438753 | A | G | 0.3352 | 0.0783  | 0.0050 | 2.56E-54 | 15.5196  | 1310845 | Asthma |
| rs9268635  | 6 | 32438802 | T | C | 0.1675 | -0.0535 | 0.0068 | 3.29E-15 | -7.8794  | 1310845 | Asthma |
| rs3763321  | 6 | 32438927 | T | G | 0.2153 | -0.0582 | 0.0061 | 9.87E-22 | -9.5783  | 1310845 | Asthma |
| rs3763322  | 6 | 32439030 | A | G | 0.3399 | 0.0745  | 0.0056 | 1.61E-40 | 13.3272  | 1128634 | Asthma |
| rs3763323  | 6 | 32439066 | C | T | 0.1826 | -0.0665 | 0.0090 | 1.14E-13 | -7.4239  | 908767  | Asthma |
| rs9268641  | 6 | 32439110 | T | C | 0.3070 | -0.0382 | 0.0059 | 1.07E-10 | -6.4570  | 1128634 | Asthma |
| rs9405035  | 6 | 32439291 | A | G | 0.0227 | 0.0927  | 0.0158 | 4.07E-09 | 5.8812   | 1310845 | Asthma |
| rs3129872  | 6 | 32439376 | T | A | 0.3184 | -0.0417 | 0.0052 | 2.03E-15 | -7.9395  | 1310845 | Asthma |
| rs2395179  | 6 | 32439525 | G | A | 0.3215 | -0.0409 | 0.0052 | 5.84E-15 | -7.8072  | 1310845 | Asthma |
| rs2395180  | 6 | 32439533 | G | T | 0.3215 | -0.0408 | 0.0052 | 6.85E-15 | -7.7872  | 1310845 | Asthma |
| rs2395181  | 6 | 32439627 | C | G | 0.3215 | -0.0408 | 0.0052 | 6.56E-15 | -7.7926  | 1310845 | Asthma |
| rs3129873  | 6 | 32439656 | C | G | 0.3181 | -0.0423 | 0.0053 | 9.00E-16 | -8.0399  | 1310845 | Asthma |
| rs3129874  | 6 | 32439663 | C | T | 0.3182 | -0.0423 | 0.0053 | 9.02E-16 | -8.0394  | 1310845 | Asthma |
| rs3129875  | 6 | 32439691 | C | T | 0.3214 | -0.0408 | 0.0052 | 6.65E-15 | -7.7912  | 1310845 | Asthma |
| rs16822584 | 6 | 32439760 | T | C | 0.0346 | -0.0877 | 0.0133 | 4.28E-11 | -6.5938  | 1310845 | Asthma |
| rs14004    | 6 | 32439932 | A | C | 0.3374 | 0.0732  | 0.0050 | 7.51E-48 | 14.5329  | 1310845 | Asthma |
| rs3129876  | 6 | 32440235 | A | G | 0.3101 | -0.0376 | 0.0058 | 8.69E-11 | -6.4881  | 1154767 | Asthma |
| rs9268644  | 6 | 32440267 | A | C | 0.4801 | -0.0663 | 0.0053 | 1.20E-35 | -12.4622 | 1154767 | Asthma |
| rs3135394  | 6 | 32440720 | G | A | 0.1087 | 0.0487  | 0.0079 | 8.44E-10 | 6.1364   | 1310845 | Asthma |
| rs9268645  | 6 | 32440750 | G | C | 0.3350 | 0.0778  | 0.0050 | 1.00E-53 | 15.4317  | 1310845 | Asthma |
| rs3129877  | 6 | 32440820 | A | G | 0.3176 | -0.0431 | 0.0052 | 2.15E-16 | -8.2132  | 1310845 | Asthma |
| rs3129878  | 6 | 32440958 | C | A | 0.3286 | -0.0472 | 0.0052 | 9.50E-20 | -9.0945  | 1310845 | Asthma |
| rs3129879  | 6 | 32441130 | A | G | 0.3231 | -0.0439 | 0.0052 | 4.37E-17 | -8.4027  | 1310845 | Asthma |

|            |   |          |   |   |        |         |        |          |          |         |        |
|------------|---|----------|---|---|--------|---------|--------|----------|----------|---------|--------|
| rs3129880  | 6 | 32441140 | T | C | 0.2513 | -0.0537 | 0.0057 | 6.59E-21 | -9.3803  | 1310845 | Asthma |
| rs9268652  | 6 | 32441279 | A | G | 0.3430 | -0.0497 | 0.0055 | 1.79E-19 | -9.0258  | 1310845 | Asthma |
| rs9268653  | 6 | 32441281 | T | C | 0.1668 | -0.0534 | 0.0068 | 4.59E-15 | -7.8378  | 1310845 | Asthma |
| rs3135392  | 6 | 32441465 | A | C | 0.4282 | -0.0519 | 0.0049 | 4.77E-26 | -10.5558 | 1310845 | Asthma |
| rs6926374  | 6 | 32441528 | G | A | 0.3929 | 0.0840  | 0.0049 | 1.32E-65 | 17.1071  | 1310845 | Asthma |
| rs3129881  | 6 | 32441707 | T | C | 0.3166 | -0.0429 | 0.0053 | 3.67E-16 | -8.1491  | 1310845 | Asthma |
| rs3129882  | 6 | 32441753 | G | A | 0.4156 | -0.0449 | 0.0049 | 6.50E-20 | -9.1358  | 1310845 | Asthma |
| rs9268657  | 6 | 32441879 | A | G | 0.3318 | 0.0765  | 0.0051 | 6.79E-52 | 15.1572  | 1310845 | Asthma |
| rs17496549 | 6 | 32441931 | T | C | 0.1254 | -0.0655 | 0.0077 | 1.77E-17 | -8.5083  | 1376071 | Asthma |
| rs6931646  | 6 | 32442004 | T | C | 0.3927 | 0.0838  | 0.0049 | 3.15E-65 | 17.0560  | 1310845 | Asthma |
| rs6911419  | 6 | 32442010 | C | T | 0.3927 | 0.0838  | 0.0049 | 3.66E-65 | 17.0472  | 1310845 | Asthma |
| rs6911777  | 6 | 32442219 | C | T | 0.0554 | 0.0688  | 0.0107 | 1.12E-10 | 6.4501   | 1310845 | Asthma |
| rs16822616 | 6 | 32442306 | A | C | 0.1254 | -0.0652 | 0.0077 | 2.30E-17 | -8.4774  | 1376071 | Asthma |
| rs16822618 | 6 | 32442310 | C | T | 0.0554 | 0.0691  | 0.0107 | 9.86E-11 | 6.4688   | 1310845 | Asthma |
| rs3129883  | 6 | 32442360 | T | C | 0.2876 | -0.0581 | 0.0055 | 1.87E-26 | -10.6435 | 1310845 | Asthma |
| rs3129886  | 6 | 32442799 | T | C | 0.2876 | -0.0580 | 0.0055 | 2.12E-26 | -10.6318 | 1310845 | Asthma |
| rs9268658  | 6 | 32442939 | A | G | 0.3927 | 0.0838  | 0.0049 | 3.03E-65 | 17.0582  | 1310845 | Asthma |
| rs9268659  | 6 | 32443164 | T | C | 0.4813 | -0.0581 | 0.0050 | 7.76E-32 | -11.7423 | 1310845 | Asthma |
| rs3135391  | 6 | 32443210 | A | G | 0.1676 | -0.0533 | 0.0068 | 3.87E-15 | -7.8589  | 1310845 | Asthma |
| rs8084     | 6 | 32443258 | A | C | 0.4814 | -0.0581 | 0.0050 | 7.78E-32 | -11.7418 | 1310845 | Asthma |
| rs13218331 | 6 | 32443585 | C | A | 0.1596 | -0.0643 | 0.0069 | 7.15E-21 | -9.3716  | 1376071 | Asthma |
| rs2239804  | 6 | 32443746 | C | T | 0.3927 | 0.0839  | 0.0049 | 2.50E-65 | 17.0696  | 1310845 | Asthma |
| rs7192     | 6 | 32443869 | T | G | 0.4471 | -0.0525 | 0.0050 | 8.40E-26 | -10.5026 | 1310845 | Asthma |
| rs3129888  | 6 | 32443949 | G | A | 0.2416 | -0.0517 | 0.0058 | 5.87E-19 | -8.8944  | 1310845 | Asthma |
| rs2239803  | 6 | 32444056 | T | C | 0.4024 | 0.0811  | 0.0049 | 2.42E-61 | 16.5251  | 1310845 | Asthma |
| rs2239802  | 6 | 32444069 | C | G | 0.2533 | -0.0548 | 0.0057 | 7.06E-22 | -9.6129  | 1310845 | Asthma |
| rs3135390  | 6 | 32444618 | C | A | 0.2473 | -0.0502 | 0.0063 | 1.48E-15 | -7.9788  | 1159440 | Asthma |
| rs4935354  | 6 | 32444621 | C | T | 0.4471 | -0.0525 | 0.0050 | 7.58E-26 | -10.5123 | 1310845 | Asthma |
| rs3177928  | 6 | 32444658 | A | G | 0.1595 | -0.0645 | 0.0069 | 5.62E-21 | -9.3969  | 1376071 | Asthma |
| rs7194     | 6 | 32444703 | G | A | 0.4472 | -0.0521 | 0.0050 | 1.68E-25 | -10.4368 | 1310845 | Asthma |
| rs7195     | 6 | 32444762 | A | G | 0.4468 | -0.0524 | 0.0050 | 9.33E-26 | -10.4927 | 1310845 | Asthma |
| rs7196     | 6 | 32444794 | A | T | 0.2534 | -0.0549 | 0.0057 | 6.66E-22 | -9.6187  | 1310845 | Asthma |
| rs7197     | 6 | 32444803 | T | C | 0.2172 | -0.0503 | 0.0061 | 9.83E-17 | -8.3068  | 1310845 | Asthma |
| rs3135388  | 6 | 32445274 | A | G | 0.1674 | -0.0529 | 0.0068 | 6.16E-15 | -7.8005  | 1310845 | Asthma |
| rs2213586  | 6 | 32445317 | A | G | 0.4519 | -0.0533 | 0.0054 | 6.66E-23 | -9.8528  | 1216250 | Asthma |
| rs62405786 | 6 | 32445360 | A | G | 0.0324 | -0.0873 | 0.0135 | 8.73E-11 | -6.4873  | 1310845 | Asthma |
| rs2213585  | 6 | 32445373 | G | A | 0.4469 | -0.0523 | 0.0050 | 1.16E-25 | -10.4722 | 1310845 | Asthma |
| rs2213584  | 6 | 32445482 | A | G | 0.4471 | -0.0525 | 0.0050 | 7.79E-26 | -10.5097 | 1310845 | Asthma |
| rs2395182  | 6 | 32445540 | G | T | 0.2533 | -0.0548 | 0.0057 | 7.57E-22 | -9.6057  | 1310845 | Asthma |
| rs2227139  | 6 | 32445682 | G | A | 0.4471 | -0.0525 | 0.0050 | 7.34E-26 | -10.5153 | 1310845 | Asthma |
| rs3129889  | 6 | 32445768 | G | A | 0.1674 | -0.0529 | 0.0068 | 6.35E-15 | -7.7968  | 1310845 | Asthma |
| rs3763326  | 6 | 32445780 | C | T | 0.0389 | -0.0850 | 0.0125 | 8.69E-12 | -6.8269  | 1310845 | Asthma |
| rs3763327  | 6 | 32446053 | G | C | 0.4472 | -0.0520 | 0.0050 | 2.11E-25 | -10.4154 | 1310845 | Asthma |
| rs9268668  | 6 | 32446112 | C | A | 0.4373 | -0.0521 | 0.0050 | 2.88E-25 | -10.3855 | 1310845 | Asthma |
| rs28732216 | 6 | 32446201 | A | C | 0.1708 | -0.0630 | 0.0067 | 4.14E-21 | -9.4290  | 1376071 | Asthma |
| rs9268670  | 6 | 32446510 | T | C | 0.4783 | -0.0563 | 0.0050 | 2.12E-29 | -11.2579 | 1310845 | Asthma |
| rs7382085  | 6 | 32446643 | G | A | 0.2536 | -0.0542 | 0.0057 | 2.11E-21 | -9.4993  | 1310845 | Asthma |
| rs9268673  | 6 | 32446656 | T | C | 0.3827 | 0.0875  | 0.0050 | 2.43E-68 | 17.4697  | 1284712 | Asthma |
| rs7383481  | 6 | 32446658 | T | C | 0.1259 | 0.0619  | 0.0098 | 2.24E-10 | 6.3443   | 630692  | Asthma |
| rs7382354  | 6 | 32446862 | G | A | 0.2515 | -0.0637 | 0.0063 | 6.25E-24 | -10.0879 | 1154767 | Asthma |
| rs9268677  | 6 | 32446891 | A | G | 0.3947 | 0.0898  | 0.0054 | 4.52E-63 | 16.7635  | 1154767 | Asthma |
| rs28895027 | 6 | 32447171 | C | T | 0.1596 | -0.0645 | 0.0069 | 5.59E-21 | -9.3975  | 1376071 | Asthma |
| rs3135387  | 6 | 32447332 | T | G | 0.2418 | -0.0511 | 0.0058 | 1.54E-18 | -8.7871  | 1310845 | Asthma |
| rs9469112  | 6 | 32447376 | T | C | 0.1717 | -0.0669 | 0.0066 | 7.64E-24 | -10.0682 | 1376071 | Asthma |
| rs28895028 | 6 | 32447434 | A | G | 0.1599 | -0.0641 | 0.0069 | 9.21E-21 | -9.3447  | 1376071 | Asthma |
| rs9268681  | 6 | 32447609 | A | G | 0.3843 | 0.0869  | 0.0049 | 1.85E-69 | 17.6164  | 1310845 | Asthma |
| rs9268682  | 6 | 32447645 | T | G | 0.3842 | 0.0870  | 0.0049 | 1.40E-69 | 17.6319  | 1310845 | Asthma |
| rs9268684  | 6 | 32447680 | A | G | 0.3826 | 0.0876  | 0.0050 | 1.09E-68 | 17.5155  | 1284712 | Asthma |
| rs9268685  | 6 | 32447687 | T | A | 0.3826 | 0.0876  | 0.0050 | 1.05E-68 | 17.5176  | 1284712 | Asthma |
| rs9268686  | 6 | 32447745 | C | T | 0.4555 | -0.0547 | 0.0050 | 4.20E-28 | -10.9915 | 1310845 | Asthma |
| rs9268687  | 6 | 32447763 | T | G | 0.3843 | 0.0871  | 0.0049 | 7.16E-70 | 17.6699  | 1310845 | Asthma |
| rs2894256  | 6 | 32447808 | A | C | 0.3843 | 0.0871  | 0.0049 | 7.02E-70 | 17.6710  | 1310845 | Asthma |
| rs12525707 | 6 | 32447860 | T | G | 0.1597 | -0.0645 | 0.0069 | 5.74E-21 | -9.3947  | 1376071 | Asthma |
| rs12529078 | 6 | 32447985 | G | A | 0.1597 | -0.0646 | 0.0069 | 4.99E-21 | -9.4094  | 1376071 | Asthma |
| rs13194556 | 6 | 32448028 | C | T | 0.1597 | -0.0645 | 0.0069 | 5.06E-21 | -9.4079  | 1376071 | Asthma |
| rs12529093 | 6 | 32448081 | G | A | 0.1597 | -0.0643 | 0.0069 | 6.79E-21 | -9.3769  | 1376071 | Asthma |
| rs13209234 | 6 | 32448198 | A | G | 0.1597 | -0.0645 | 0.0069 | 5.19E-21 | -9.4053  | 1376071 | Asthma |
| rs28895029 | 6 | 32448205 | C | T | 0.1597 | -0.0645 | 0.0069 | 5.24E-21 | -9.4043  | 1376071 | Asthma |
| rs13209045 | 6 | 32448275 | G | A | 0.1534 | -0.0643 | 0.0072 | 4.65E-19 | -8.9203  | 1219993 | Asthma |
| rs13209059 | 6 | 32448301 | G | A | 0.1596 | -0.0645 | 0.0069 | 5.72E-21 | -9.3950  | 1376071 | Asthma |
| rs28895030 | 6 | 32448384 | A | G | 0.1596 | -0.0644 | 0.0069 | 6.05E-21 | -9.3891  | 1376071 | Asthma |
| rs28895031 | 6 | 32448398 | A | G | 0.1596 | -0.0645 | 0.0069 | 5.35E-21 | -9.4022  | 1376071 | Asthma |
| rs28895032 | 6 | 32448412 | A | T | 0.1596 | -0.0645 | 0.0069 | 5.34E-21 | -9.4022  | 1376071 | Asthma |
| rs3135385  | 6 | 32448589 | A | G | 0.2535 | -0.0542 | 0.0057 | 2.16E-21 | -9.4972  | 1310845 | Asthma |

|            |   |          |   |   |        |         |        |          |          |         |        |
|------------|---|----------|---|---|--------|---------|--------|----------|----------|---------|--------|
| rs28895036 | 6 | 32448689 | A | C | 0.1531 | -0.0784 | 0.0090 | 2.53E-18 | -8.7307  | 973993  | Asthma |
| rs7762488  | 6 | 32448692 | C | G | 0.3790 | 0.0909  | 0.0054 | 1.47E-64 | 16.9656  | 1216250 | Asthma |
| rs28895037 | 6 | 32448702 | T | C | 0.1526 | -0.0787 | 0.0090 | 2.70E-18 | -8.7235  | 973993  | Asthma |
| rs28895038 | 6 | 32448755 | A | T | 0.1616 | -0.0777 | 0.0085 | 4.22E-20 | -9.1822  | 1064845 | Asthma |
| rs28895039 | 6 | 32448757 | C | T | 0.1616 | -0.0777 | 0.0085 | 3.74E-20 | -9.1952  | 1064845 | Asthma |
| rs28895040 | 6 | 32448773 | G | A | 0.1513 | -0.0793 | 0.0091 | 1.91E-18 | -8.7625  | 973993  | Asthma |
| rs28895041 | 6 | 32448796 | G | A | 0.1618 | -0.0771 | 0.0084 | 7.08E-20 | -9.1264  | 1064845 | Asthma |
| rs28895042 | 6 | 32448797 | C | T | 0.1617 | -0.0774 | 0.0084 | 5.21E-20 | -9.1597  | 1064845 | Asthma |
| rs28895045 | 6 | 32448856 | T | C | 0.1522 | -0.0789 | 0.0090 | 2.24E-18 | -8.7445  | 973993  | Asthma |
| rs28895046 | 6 | 32448868 | T | G | 0.1521 | -0.0788 | 0.0090 | 2.39E-18 | -8.7370  | 973993  | Asthma |
| rs28895047 | 6 | 32448889 | T | C | 0.1530 | -0.0785 | 0.0090 | 2.35E-18 | -8.7390  | 973993  | Asthma |
| rs13212922 | 6 | 32448927 | T | C | 0.1547 | -0.0765 | 0.0089 | 1.17E-17 | -8.5555  | 973993  | Asthma |
| rs28895048 | 6 | 32449008 | C | T | 0.1597 | -0.0678 | 0.0076 | 3.26E-19 | -8.9594  | 1224666 | Asthma |
| rs28895049 | 6 | 32449029 | G | A | 0.1598 | -0.0677 | 0.0076 | 3.38E-19 | -8.9557  | 1224666 | Asthma |
| rs9268693  | 6 | 32449049 | T | C | 0.3955 | 0.0901  | 0.0054 | 2.48E-63 | 16.7992  | 1154767 | Asthma |
| rs28895050 | 6 | 32449129 | G | A | 0.1555 | -0.1019 | 0.0119 | 1.02E-17 | -8.5714  | 476051  | Asthma |
| rs72850968 | 6 | 32449208 | A | G | 0.1687 | -0.0862 | 0.0103 | 6.14E-17 | -8.3622  | 778845  | Asthma |
| rs9268730  | 6 | 32449302 | A | G | 0.1543 | -0.0817 | 0.0093 | 1.55E-18 | -8.7861  | 847307  | Asthma |
| rs28895054 | 6 | 32449390 | A | G | 0.1530 | -0.0930 | 0.0103 | 1.69E-19 | -9.0322  | 844071  | Asthma |
| rs28895055 | 6 | 32449408 | G | A | 0.1541 | -0.0939 | 0.0103 | 7.36E-20 | -9.1222  | 844071  | Asthma |
| rs28895056 | 6 | 32449412 | A | G | 0.1541 | -0.0939 | 0.0103 | 7.34E-20 | -9.1226  | 844071  | Asthma |
| rs28895061 | 6 | 32449616 | T | C | 0.1635 | -0.0657 | 0.0071 | 3.33E-20 | -9.2078  | 1193860 | Asthma |
| rs28895062 | 6 | 32449629 | C | T | 0.1537 | -0.0696 | 0.0081 | 1.24E-17 | -8.5493  | 1042455 | Asthma |
| rs28752487 | 6 | 32449656 | T | C | 0.0602 | 0.0725  | 0.0122 | 3.10E-09 | 5.9267   | 1060172 | Asthma |
| rs28895065 | 6 | 32449709 | A | G | 0.1555 | -0.0706 | 0.0083 | 1.19E-17 | -8.5535  | 977229  | Asthma |
| rs28895066 | 6 | 32449745 | C | T | 0.1538 | -0.0692 | 0.0081 | 1.97E-17 | -8.4955  | 1042455 | Asthma |
| rs28895067 | 6 | 32449768 | C | T | 0.1535 | -0.0653 | 0.0073 | 4.80E-19 | -8.9170  | 1193860 | Asthma |
| rs28895068 | 6 | 32449827 | C | T | 0.1608 | -0.0689 | 0.0077 | 2.52E-19 | -8.9877  | 1198533 | Asthma |
| rs28895069 | 6 | 32449828 | A | G | 0.1599 | -0.0657 | 0.0070 | 3.91E-21 | -9.4350  | 1349938 | Asthma |
| rs28895070 | 6 | 32449897 | C | T | 0.1597 | -0.0645 | 0.0069 | 5.70E-21 | -9.3954  | 1376071 | Asthma |
| rs9268759  | 6 | 32449927 | T | C | 0.3843 | 0.0871  | 0.0049 | 6.90E-70 | 17.6719  | 1310845 | Asthma |
| rs28895071 | 6 | 32449938 | A | G | 0.1602 | -0.0674 | 0.0075 | 4.18E-19 | -8.9321  | 1224666 | Asthma |
| rs28895072 | 6 | 32449943 | T | C | 0.1602 | -0.0674 | 0.0075 | 4.08E-19 | -8.9347  | 1224666 | Asthma |
| rs28895073 | 6 | 32449946 | G | A | 0.1602 | -0.0674 | 0.0075 | 4.09E-19 | -8.9346  | 1224666 | Asthma |
| rs28895074 | 6 | 32449989 | C | T | 0.1597 | -0.0645 | 0.0069 | 5.38E-21 | -9.4016  | 1376071 | Asthma |
| rs28895075 | 6 | 32450048 | T | G | 0.1597 | -0.0645 | 0.0069 | 5.40E-21 | -9.4011  | 1376071 | Asthma |
| rs28895076 | 6 | 32450068 | C | T | 0.1597 | -0.0645 | 0.0069 | 5.41E-21 | -9.4008  | 1376071 | Asthma |
| rs28895077 | 6 | 32450100 | G | A | 0.1599 | -0.0672 | 0.0076 | 6.07E-19 | -8.8909  | 1224666 | Asthma |
| rs28895078 | 6 | 32450114 | G | C | 0.1630 | -0.0638 | 0.0073 | 1.54E-18 | -8.7868  | 1008051 | Asthma |
| rs28895079 | 6 | 32450124 | T | C | 0.1597 | -0.0672 | 0.0076 | 6.47E-19 | -8.8837  | 1224666 | Asthma |
| rs28895080 | 6 | 32450155 | T | C | 0.1597 | -0.0644 | 0.0069 | 6.35E-21 | -9.3840  | 1376071 | Asthma |
| rs6937696  | 6 | 32450241 | C | T | 0.3695 | -0.0444 | 0.0052 | 8.11E-18 | -8.5981  | 1310845 | Asthma |
| rs6937545  | 6 | 32450254 | A | C | 0.3695 | -0.0444 | 0.0052 | 7.87E-18 | -8.6015  | 1310845 | Asthma |
| rs28895081 | 6 | 32450290 | T | G | 0.1597 | -0.0646 | 0.0069 | 5.20E-21 | -9.4051  | 1376071 | Asthma |
| rs28895082 | 6 | 32450337 | C | T | 0.1602 | -0.0676 | 0.0075 | 3.25E-19 | -8.9598  | 1224666 | Asthma |
| rs28895083 | 6 | 32450375 | G | C | 0.1602 | -0.0676 | 0.0076 | 3.49E-19 | -8.9519  | 1224666 | Asthma |
| rs9268762  | 6 | 32450380 | T | G | 0.3789 | 0.0914  | 0.0054 | 1.22E-64 | 16.9768  | 1159440 | Asthma |
| rs28895084 | 6 | 32450392 | T | C | 0.1602 | -0.0675 | 0.0075 | 3.79E-19 | -8.9428  | 1224666 | Asthma |
| rs28895085 | 6 | 32450474 | C | T | 0.1597 | -0.0645 | 0.0069 | 5.26E-21 | -9.4039  | 1376071 | Asthma |
| rs28895086 | 6 | 32450523 | C | G | 0.1597 | -0.0645 | 0.0069 | 5.30E-21 | -9.4031  | 1376071 | Asthma |
| rs28895087 | 6 | 32450553 | A | C | 0.1597 | -0.0645 | 0.0069 | 5.35E-21 | -9.4021  | 1376071 | Asthma |
| rs28895088 | 6 | 32450619 | A | C | 0.1597 | -0.0645 | 0.0069 | 5.30E-21 | -9.4030  | 1376071 | Asthma |
| rs9268763  | 6 | 32450639 | T | C | 0.3247 | 0.0812  | 0.0051 | 2.30E-57 | 15.9633  | 1310845 | Asthma |
| rs28895089 | 6 | 32450657 | T | C | 0.1597 | -0.0646 | 0.0069 | 5.08E-21 | -9.4075  | 1376071 | Asthma |
| rs28895090 | 6 | 32450769 | G | A | 0.1597 | -0.0646 | 0.0069 | 4.99E-21 | -9.4094  | 1376071 | Asthma |
| rs9268764  | 6 | 32450784 | C | T | 0.3843 | 0.0872  | 0.0049 | 6.53E-70 | 17.6753  | 1310845 | Asthma |
| rs9268765  | 6 | 32450802 | A | C | 0.4554 | -0.0547 | 0.0050 | 3.94E-28 | -10.9971 | 1310845 | Asthma |
| rs28895091 | 6 | 32450845 | G | T | 0.1597 | -0.0645 | 0.0069 | 5.35E-21 | -9.4020  | 1376071 | Asthma |
| rs28895092 | 6 | 32450872 | A | C | 0.1597 | -0.0645 | 0.0069 | 5.38E-21 | -9.4015  | 1376071 | Asthma |
| rs28895093 | 6 | 32450880 | A | G | 0.1597 | -0.0645 | 0.0069 | 5.38E-21 | -9.4015  | 1376071 | Asthma |
| rs9268766  | 6 | 32450933 | C | A | 0.3695 | -0.0443 | 0.0052 | 8.76E-18 | -8.5891  | 1310845 | Asthma |
| rs28895094 | 6 | 32451066 | T | A | 0.1588 | -0.0683 | 0.0076 | 2.80E-19 | -8.9764  | 1224666 | Asthma |
| rs28895095 | 6 | 32451071 | A | G | 0.1576 | -0.0671 | 0.0072 | 8.40E-21 | -9.3545  | 1316443 | Asthma |
| rs28895096 | 6 | 32451082 | C | G | 0.1445 | -0.0676 | 0.0077 | 1.10E-18 | -8.8248  | 1316443 | Asthma |
| rs13215109 | 6 | 32451103 | C | T | 0.1587 | -0.0683 | 0.0076 | 2.88E-19 | -8.9731  | 1224666 | Asthma |
| rs13198982 | 6 | 32451116 | T | C | 0.1588 | -0.0683 | 0.0076 | 2.76E-19 | -8.9780  | 1224666 | Asthma |
| rs13215138 | 6 | 32451146 | G | T | 0.1595 | -0.0647 | 0.0069 | 5.06E-21 | -9.4078  | 1376071 | Asthma |
| rs13199346 | 6 | 32451209 | T | G | 0.1595 | -0.0645 | 0.0069 | 6.61E-21 | -9.3799  | 1376071 | Asthma |
| rs28752488 | 6 | 32451229 | A | C | 0.0542 | 0.0688  | 0.0109 | 2.72E-10 | 6.3137   | 1310845 | Asthma |
| rs13199014 | 6 | 32451235 | C | A | 0.1594 | -0.0647 | 0.0069 | 5.21E-21 | -9.4049  | 1376071 | Asthma |
| rs9268767  | 6 | 32451245 | C | T | 0.3843 | 0.0871  | 0.0049 | 7.81E-70 | 17.6649  | 1310845 | Asthma |
| rs13199499 | 6 | 32451292 | A | G | 0.1537 | -0.0694 | 0.0082 | 1.66E-17 | -8.5153  | 1042455 | Asthma |
| rs28895099 | 6 | 32451323 | A | G | 0.1537 | -0.0694 | 0.0082 | 1.66E-17 | -8.5156  | 1042455 | Asthma |
| rs13199259 | 6 | 32451340 | T | C | 0.1541 | -0.0654 | 0.0073 | 3.38E-19 | -8.9557  | 1193860 | Asthma |

|             |   |          |   |   |        |         |        |          |          |         |        |
|-------------|---|----------|---|---|--------|---------|--------|----------|----------|---------|--------|
| rs9268768   | 6 | 32451514 | T | C | 0.3843 | 0.0871  | 0.0049 | 7.03E-70 | 17.6710  | 1310845 | Asthma |
| rs13199443  | 6 | 32451535 | G | A | 0.1597 | -0.0647 | 0.0069 | 4.42E-21 | -9.4222  | 1376071 | Asthma |
| rs28895100  | 6 | 32451638 | G | A | 0.1596 | -0.0646 | 0.0069 | 4.90E-21 | -9.4113  | 1376071 | Asthma |
| rs28895101  | 6 | 32451662 | T | C | 0.1597 | -0.0645 | 0.0069 | 5.58E-21 | -9.3977  | 1376071 | Asthma |
| rs28895102  | 6 | 32451670 | A | C | 0.1597 | -0.0646 | 0.0069 | 5.20E-21 | -9.4050  | 1376071 | Asthma |
| rs28895103  | 6 | 32451687 | A | G | 0.1596 | -0.0638 | 0.0069 | 1.42E-20 | -9.2989  | 1376071 | Asthma |
| rs28895104  | 6 | 32451750 | C | T | 0.1597 | -0.0645 | 0.0069 | 5.88E-21 | -9.3920  | 1376071 | Asthma |
| rs6912728   | 6 | 32451770 | T | G | 0.3843 | 0.0872  | 0.0049 | 5.56E-70 | 17.6843  | 1310845 | Asthma |
| rs28895105  | 6 | 32451776 | C | T | 0.1597 | -0.0645 | 0.0069 | 5.32E-21 | -9.4028  | 1376071 | Asthma |
| rs28895106  | 6 | 32451799 | A | G | 0.1597 | -0.0645 | 0.0069 | 5.45E-21 | -9.4003  | 1376071 | Asthma |
| rs111359823 | 6 | 32451896 | C | T | 0.1159 | -0.0641 | 0.0080 | 8.33E-16 | -8.0492  | 1376071 | Asthma |
| rs28895107  | 6 | 32452005 | C | T | 0.1598 | -0.0645 | 0.0069 | 5.50E-21 | -9.3993  | 1376071 | Asthma |
| rs28895108  | 6 | 32452083 | G | T | 0.1597 | -0.0646 | 0.0069 | 5.15E-21 | -9.4061  | 1376071 | Asthma |
| rs28895109  | 6 | 32452103 | C | T | 0.1597 | -0.0645 | 0.0069 | 5.52E-21 | -9.3990  | 1376071 | Asthma |
| rs6457588   | 6 | 32452131 | C | A | 0.3843 | 0.0871  | 0.0049 | 7.37E-70 | 17.6680  | 1310845 | Asthma |
| rs28895110  | 6 | 32452157 | G | C | 0.1603 | -0.0675 | 0.0075 | 3.84E-19 | -8.9415  | 1224666 | Asthma |
| rs3135384   | 6 | 32452182 | A | G | 0.1926 | -0.0412 | 0.0073 | 1.50E-08 | -5.6617  | 1159440 | Asthma |
| rs28895112  | 6 | 32452195 | T | C | 0.1609 | -0.0690 | 0.0077 | 2.25E-19 | -9.0007  | 1198533 | Asthma |
| rs28895113  | 6 | 32452211 | G | C | 0.1603 | -0.0676 | 0.0075 | 3.37E-19 | -8.9560  | 1224666 | Asthma |
| rs28895114  | 6 | 32452294 | C | T | 0.1597 | -0.0645 | 0.0069 | 5.94E-21 | -9.3910  | 1376071 | Asthma |
| rs28895115  | 6 | 32452356 | A | C | 0.1597 | -0.0646 | 0.0069 | 5.15E-21 | -9.4060  | 1376071 | Asthma |
| rs28895116  | 6 | 32452387 | T | G | 0.1597 | -0.0645 | 0.0069 | 5.38E-21 | -9.4016  | 1376071 | Asthma |
| rs7754768   | 6 | 32452402 | C | T | 0.4550 | -0.0550 | 0.0050 | 2.44E-28 | -11.0403 | 1310845 | Asthma |
| rs7775108   | 6 | 32452461 | T | C | 0.4554 | -0.0547 | 0.0050 | 4.04E-28 | -10.9950 | 1310845 | Asthma |
| rs28895117  | 6 | 32452547 | T | G | 0.1596 | -0.0646 | 0.0069 | 5.36E-21 | -9.4019  | 1376071 | Asthma |
| rs9268778   | 6 | 32452595 | T | A | 0.3847 | 0.0868  | 0.0049 | 2.47E-69 | 17.5997  | 1310845 | Asthma |
| rs13204032  | 6 | 32452692 | T | C | 0.1594 | -0.0675 | 0.0076 | 5.39E-19 | -8.9039  | 1224666 | Asthma |
| rs9268780   | 6 | 32452712 | A | G | 0.3788 | 0.0914  | 0.0054 | 1.13E-64 | 16.9811  | 1159440 | Asthma |
| rs9268781   | 6 | 32452720 | T | C | 0.3721 | -0.0467 | 0.0056 | 9.95E-17 | -8.3054  | 1159440 | Asthma |
| rs13204265  | 6 | 32452725 | C | G | 0.1600 | -0.0674 | 0.0076 | 4.60E-19 | -8.9214  | 1224666 | Asthma |
| rs7755283   | 6 | 32452735 | C | T | 0.3721 | -0.0467 | 0.0056 | 9.95E-17 | -8.3054  | 1159440 | Asthma |
| rs13204271  | 6 | 32452748 | A | G | 0.1602 | -0.0675 | 0.0076 | 3.72E-19 | -8.9449  | 1224666 | Asthma |
| rs13207455  | 6 | 32452823 | A | G | 0.1597 | -0.0645 | 0.0069 | 5.40E-21 | -9.4012  | 1376071 | Asthma |
| rs28895118  | 6 | 32452924 | A | G | 0.1534 | -0.0645 | 0.0072 | 3.75E-19 | -8.9440  | 1219993 | Asthma |
| rs9268783   | 6 | 32452938 | T | C | 0.4604 | -0.0581 | 0.0054 | 1.15E-26 | -10.6887 | 1159440 | Asthma |
| rs28895119  | 6 | 32452962 | T | C | 0.1527 | -0.0676 | 0.0080 | 4.05E-17 | -8.4113  | 1068588 | Asthma |
| rs28895120  | 6 | 32452981 | C | T | 0.1537 | -0.0654 | 0.0073 | 3.88E-19 | -8.9404  | 1193860 | Asthma |
| rs9268784   | 6 | 32453015 | A | G | 0.3904 | 0.0955  | 0.0060 | 7.53E-58 | 16.0330  | 1003362 | Asthma |
| rs28895122  | 6 | 32453048 | T | C | 0.1544 | -0.0760 | 0.0092 | 1.79E-16 | -8.2355  | 908767  | Asthma |
| rs28895123  | 6 | 32453051 | C | T | 0.1509 | -0.0801 | 0.0093 | 7.53E-18 | -8.6065  | 908767  | Asthma |
| rs9268786   | 6 | 32453078 | T | C | 0.4659 | -0.0607 | 0.0067 | 1.03E-19 | -9.0853  | 908767  | Asthma |
| rs9268787   | 6 | 32453087 | A | G | 0.4659 | -0.0606 | 0.0067 | 1.17E-19 | -9.0720  | 908767  | Asthma |
| rs9268788   | 6 | 32453089 | T | C | 0.3843 | 0.1041  | 0.0067 | 9.27E-54 | 15.4365  | 908767  | Asthma |
| rs9268789   | 6 | 32453111 | G | A | 0.3842 | 0.1040  | 0.0067 | 1.10E-53 | 15.4259  | 908767  | Asthma |
| rs28895126  | 6 | 32453143 | G | A | 0.1521 | -0.0965 | 0.0108 | 3.17E-19 | -8.9627  | 778845  | Asthma |
| rs28895127  | 6 | 32453148 | C | G | 0.1513 | -0.0971 | 0.0108 | 1.93E-19 | -9.0177  | 778845  | Asthma |
| rs28895128  | 6 | 32453164 | C | T | 0.1471 | -0.0971 | 0.0107 | 1.46E-19 | -9.0472  | 844071  | Asthma |
| rs28895129  | 6 | 32453175 | G | A | 0.1472 | -0.0965 | 0.0107 | 2.25E-19 | -9.0006  | 844071  | Asthma |
| rs9268790   | 6 | 32453233 | A | G | 0.4663 | -0.0590 | 0.0060 | 6.36E-23 | -9.8575  | 1064845 | Asthma |
| rs28895130  | 6 | 32453249 | T | C | 0.1533 | -0.0931 | 0.0103 | 2.18E-19 | -9.0036  | 844071  | Asthma |
| rs9268791   | 6 | 32453296 | T | C | 0.4261 | -0.0512 | 0.0056 | 4.32E-20 | -9.1797  | 1133307 | Asthma |
| rs13208102  | 6 | 32453297 | A | G | 0.1617 | -0.0765 | 0.0083 | 3.14E-20 | -9.2140  | 1190071 | Asthma |
| rs13193730  | 6 | 32453333 | C | T | 0.1536 | -0.0654 | 0.0073 | 4.34E-19 | -8.9279  | 1193860 | Asthma |
| rs13207824  | 6 | 32453352 | G | A | 0.1531 | -0.0642 | 0.0072 | 5.98E-19 | -8.8924  | 1219993 | Asthma |
| rs13208132  | 6 | 32453375 | A | G | 0.1531 | -0.0641 | 0.0072 | 6.76E-19 | -8.8788  | 1219993 | Asthma |
| rs9268792   | 6 | 32453377 | G | A | 0.3844 | 0.0870  | 0.0049 | 1.13E-69 | 17.6440  | 1310845 | Asthma |
| rs28752489  | 6 | 32453407 | A | G | 0.0542 | 0.0693  | 0.0109 | 2.12E-10 | 6.3518   | 1310845 | Asthma |
| rs28895131  | 6 | 32453413 | C | T | 0.1534 | -0.0643 | 0.0072 | 4.52E-19 | -8.9236  | 1219993 | Asthma |
| rs3129895   | 6 | 32453450 | A | G | 0.1708 | -0.0490 | 0.0067 | 3.47E-13 | -7.2748  | 1310845 | Asthma |
| rs28895132  | 6 | 32453494 | A | G | 0.1597 | -0.0646 | 0.0069 | 5.17E-21 | -9.4056  | 1376071 | Asthma |
| rs28895133  | 6 | 32453614 | C | A | 0.1597 | -0.0646 | 0.0069 | 4.92E-21 | -9.4110  | 1376071 | Asthma |
| rs28895134  | 6 | 32453646 | T | C | 0.1597 | -0.0646 | 0.0069 | 5.01E-21 | -9.4088  | 1376071 | Asthma |
| rs28895135  | 6 | 32453665 | G | T | 0.1597 | -0.0646 | 0.0069 | 5.02E-21 | -9.4088  | 1376071 | Asthma |
| rs28895136  | 6 | 32453727 | C | T | 0.1597 | -0.0644 | 0.0069 | 6.87E-21 | -9.3759  | 1376071 | Asthma |
| rs28895137  | 6 | 32453787 | A | G | 0.1598 | -0.0645 | 0.0069 | 5.58E-21 | -9.3976  | 1376071 | Asthma |
| rs28895138  | 6 | 32453849 | A | C | 0.1610 | -0.0686 | 0.0076 | 2.72E-19 | -8.9794  | 1159440 | Asthma |
| rs28895139  | 6 | 32453894 | A | G | 0.1603 | -0.0676 | 0.0076 | 3.35E-19 | -8.9567  | 1224666 | Asthma |
| rs28895140  | 6 | 32453895 | A | G | 0.1603 | -0.0676 | 0.0076 | 3.35E-19 | -8.9567  | 1224666 | Asthma |
| rs28895141  | 6 | 32453912 | A | C | 0.1596 | -0.0679 | 0.0076 | 3.39E-19 | -8.9552  | 1224666 | Asthma |
| rs28895142  | 6 | 32453932 | C | T | 0.1597 | -0.0645 | 0.0069 | 5.55E-21 | -9.3982  | 1376071 | Asthma |
| rs9268798   | 6 | 32453958 | C | T | 0.3842 | 0.0870  | 0.0049 | 1.02E-69 | 17.6498  | 1310845 | Asthma |
| rs28895143  | 6 | 32453962 | G | A | 0.1597 | -0.0645 | 0.0069 | 5.97E-21 | -9.3905  | 1376071 | Asthma |
| rs28895144  | 6 | 32454017 | G | A | 0.1597 | -0.0645 | 0.0069 | 5.76E-21 | -9.3943  | 1376071 | Asthma |
| rs28895145  | 6 | 32454084 | C | T | 0.1597 | -0.0645 | 0.0069 | 5.88E-21 | -9.3920  | 1376071 | Asthma |



|             |   |          |   |   |        |         |        |          |          |         |        |
|-------------|---|----------|---|---|--------|---------|--------|----------|----------|---------|--------|
| rs28895146  | 6 | 32454133 | G | A | 0.1597 | -0.0645 | 0.0069 | 5.63E-21 | -9.3967  | 1376071 | Asthma |
| rs28895147  | 6 | 32454258 | G | A | 0.1601 | -0.0654 | 0.0070 | 5.81E-21 | -9.3934  | 1349938 | Asthma |
| rs28895148  | 6 | 32454264 | A | G | 0.1607 | -0.0690 | 0.0077 | 2.71E-19 | -8.9799  | 1198533 | Asthma |
| rs28895149  | 6 | 32454285 | A | G | 0.1607 | -0.0690 | 0.0077 | 2.85E-19 | -8.9745  | 1198533 | Asthma |
| rs28895153  | 6 | 32454309 | T | C | 0.1596 | -0.0698 | 0.0077 | 1.57E-19 | -9.0396  | 1198533 | Asthma |
| rs3129898   | 6 | 32454348 | G | A | 0.1707 | -0.0490 | 0.0067 | 3.54E-13 | -7.2720  | 1310845 | Asthma |
| rs28895154  | 6 | 32454359 | G | A | 0.1597 | -0.0647 | 0.0069 | 4.72E-21 | -9.4154  | 1376071 | Asthma |
| rs2097441   | 6 | 32454482 | C | A | 0.3843 | 0.0872  | 0.0049 | 5.68E-70 | 17.6829  | 1310845 | Asthma |
| rs13212411  | 6 | 32454528 | T | C | 0.1596 | -0.0648 | 0.0069 | 4.49E-21 | -9.4206  | 1376071 | Asthma |
| rs13212435  | 6 | 32454571 | T | C | 0.1676 | -0.0667 | 0.0067 | 1.88E-23 | -9.9790  | 1376071 | Asthma |
| rs28895155  | 6 | 32454596 | A | G | 0.1597 | -0.0646 | 0.0069 | 5.29E-21 | -9.4032  | 1376071 | Asthma |
| rs28895156  | 6 | 32454642 | A | G | 0.1596 | -0.0645 | 0.0069 | 6.46E-21 | -9.3822  | 1376071 | Asthma |
| rs13212453  | 6 | 32454653 | G | A | 0.1597 | -0.0645 | 0.0069 | 5.86E-21 | -9.3925  | 1376071 | Asthma |
| rs13215827  | 6 | 32454789 | T | C | 0.1597 | -0.0645 | 0.0069 | 6.32E-21 | -9.3844  | 1376071 | Asthma |
| rs28895157  | 6 | 32454900 | G | T | 0.1598 | -0.0645 | 0.0069 | 5.89E-21 | -9.3919  | 1376071 | Asthma |
| rs28895158  | 6 | 32454931 | C | T | 0.1592 | -0.0662 | 0.0070 | 3.22E-21 | -9.4553  | 1349938 | Asthma |
| rs28895159  | 6 | 32454937 | C | T | 0.1609 | -0.0691 | 0.0077 | 2.16E-19 | -9.0048  | 1198533 | Asthma |
| rs28895163  | 6 | 32454952 | T | G | 0.1552 | -0.0966 | 0.0105 | 3.93E-20 | -9.1903  | 778845  | Asthma |
| rs28895165  | 6 | 32454972 | C | T | 0.1604 | -0.0676 | 0.0076 | 3.48E-19 | -8.9523  | 1224666 | Asthma |
| rs28895166  | 6 | 32455056 | T | C | 0.1595 | -0.0643 | 0.0069 | 9.25E-21 | -9.3443  | 1376071 | Asthma |
| rs28895167  | 6 | 32455067 | T | C | 0.1595 | -0.0641 | 0.0069 | 1.13E-20 | -9.3235  | 1376071 | Asthma |
| rs28895168  | 6 | 32455090 | G | A | 0.1595 | -0.0641 | 0.0069 | 1.12E-20 | -9.3238  | 1376071 | Asthma |
| rs28895169  | 6 | 32455143 | G | A | 0.1596 | -0.0642 | 0.0069 | 1.02E-20 | -9.3342  | 1376071 | Asthma |
| rs28895170  | 6 | 32455157 | A | G | 0.1598 | -0.0644 | 0.0069 | 6.89E-21 | -9.3755  | 1376071 | Asthma |
| rs28895171  | 6 | 32455244 | A | G | 0.1598 | -0.0643 | 0.0069 | 7.80E-21 | -9.3624  | 1376071 | Asthma |
| rs28895172  | 6 | 32455281 | G | A | 0.1611 | -0.0706 | 0.0074 | 1.88E-21 | -9.5115  | 1281476 | Asthma |
| rs28895173  | 6 | 32455331 | C | T | 0.1598 | -0.0699 | 0.0074 | 6.34E-21 | -9.3841  | 1281476 | Asthma |
| rs28895174  | 6 | 32455358 | T | C | 0.1606 | -0.0708 | 0.0074 | 1.73E-21 | -9.5204  | 1281476 | Asthma |
| rs28895175  | 6 | 32455375 | T | C | 0.1606 | -0.0707 | 0.0074 | 2.02E-21 | -9.5041  | 1281476 | Asthma |
| rs28895176  | 6 | 32455417 | T | C | 0.1537 | -0.0714 | 0.0079 | 1.75E-19 | -9.0278  | 1125398 | Asthma |
| rs28895177  | 6 | 32455458 | G | C | 0.1600 | -0.0767 | 0.0084 | 6.11E-20 | -9.1424  | 1130071 | Asthma |
| rs28895178  | 6 | 32455459 | T | C | 0.1601 | -0.0766 | 0.0084 | 6.39E-20 | -9.1374  | 1130071 | Asthma |
| rs9268803   | 6 | 32455460 | A | G | 0.3767 | -0.0470 | 0.0062 | 2.70E-14 | -7.6120  | 1064845 | Asthma |
| rs28895179  | 6 | 32455517 | G | C | 0.1535 | -0.0780 | 0.0090 | 3.61E-18 | -8.6907  | 973993  | Asthma |
| rs28895180  | 6 | 32455521 | T | A | 0.1543 | -0.0713 | 0.0079 | 1.29E-19 | -9.0615  | 1125398 | Asthma |
| rs9268804   | 6 | 32455578 | G | C | 0.3280 | 0.0825  | 0.0051 | 9.70E-59 | 16.1596  | 1310845 | Asthma |
| rs9268805   | 6 | 32455622 | G | A | 0.4315 | -0.0651 | 0.0061 | 9.70E-27 | -10.7045 | 977229  | Asthma |
| rs28895181  | 6 | 32455634 | T | C | 0.1536 | -0.0687 | 0.0082 | 4.01E-17 | -8.4125  | 1042455 | Asthma |
| rs28895182  | 6 | 32455658 | T | C | 0.1541 | -0.0932 | 0.0103 | 1.84E-19 | -9.0218  | 844071  | Asthma |
| rs28895183  | 6 | 32455704 | C | T | 0.1534 | -0.0952 | 0.0106 | 3.06E-19 | -8.9668  | 778845  | Asthma |
| rs28895184  | 6 | 32455705 | A | G | 0.1534 | -0.0955 | 0.0106 | 2.52E-19 | -8.9879  | 778845  | Asthma |
| rs28895185  | 6 | 32455730 | T | C | 0.1536 | -0.0957 | 0.0106 | 2.02E-19 | -9.0121  | 778845  | Asthma |
| rs140302846 | 6 | 32455739 | G | C | 0.0449 | -0.1217 | 0.0173 | 1.77E-12 | -7.0517  | 930250  | Asthma |
| rs28895186  | 6 | 32455749 | C | T | 0.1535 | -0.0957 | 0.0106 | 2.02E-19 | -9.0121  | 778845  | Asthma |
| rs13217272  | 6 | 32455763 | T | G | 0.1529 | -0.0932 | 0.0104 | 3.34E-19 | -8.9566  | 844071  | Asthma |
| rs13220311  | 6 | 32455786 | A | G | 0.1536 | -0.0770 | 0.0090 | 1.14E-17 | -8.5588  | 973993  | Asthma |
| rs13220326  | 6 | 32455825 | A | G | 0.1641 | -0.0690 | 0.0090 | 1.46E-14 | -7.6915  | 908767  | Asthma |
| rs9268806   | 6 | 32455832 | A | C | 0.3467 | 0.1083  | 0.0072 | 2.18E-51 | 15.0810  | 847307  | Asthma |
| rs13220234  | 6 | 32455930 | T | C | 0.1603 | -0.0653 | 0.0070 | 6.24E-21 | -9.3859  | 1349938 | Asthma |
| rs13220135  | 6 | 32455931 | G | A | 0.1611 | -0.0707 | 0.0074 | 1.64E-21 | -9.5256  | 1281476 | Asthma |
| rs13220485  | 6 | 32455950 | A | G | 0.1598 | -0.0643 | 0.0069 | 8.44E-21 | -9.3540  | 1376071 | Asthma |
| rs9268807   | 6 | 32456138 | C | G | 0.1706 | -0.0492 | 0.0067 | 2.88E-13 | -7.2997  | 1310845 | Asthma |
| rs13220531  | 6 | 32456156 | T | C | 0.1599 | -0.0643 | 0.0069 | 8.49E-21 | -9.3535  | 1376071 | Asthma |
| rs13206262  | 6 | 32456214 | C | T | 0.1598 | -0.0642 | 0.0069 | 9.27E-21 | -9.3440  | 1376071 | Asthma |
| rs13206273  | 6 | 32456236 | C | T | 0.1599 | -0.0642 | 0.0069 | 1.01E-20 | -9.3354  | 1376071 | Asthma |
| rs13220657  | 6 | 32456254 | T | C | 0.1599 | -0.0642 | 0.0069 | 1.00E-20 | -9.3360  | 1376071 | Asthma |
| rs13220667  | 6 | 32456317 | G | A | 0.1599 | -0.0642 | 0.0069 | 9.41E-21 | -9.3425  | 1376071 | Asthma |
| rs9268808   | 6 | 32456399 | T | G | 0.3843 | 0.0872  | 0.0049 | 6.37E-70 | 17.6765  | 1310845 | Asthma |
| rs9268809   | 6 | 32456488 | C | T | 0.3844 | 0.0872  | 0.0049 | 7.24E-70 | 17.6692  | 1310845 | Asthma |
| rs9268810   | 6 | 32456519 | T | C | 0.3844 | 0.0872  | 0.0049 | 6.73E-70 | 17.6735  | 1310845 | Asthma |
| rs9268811   | 6 | 32456593 | T | G | 0.3834 | 0.0872  | 0.0049 | 1.26E-69 | 17.6379  | 1310845 | Asthma |
| rs28895187  | 6 | 32456603 | A | G | 0.1599 | -0.0642 | 0.0069 | 9.36E-21 | -9.3431  | 1376071 | Asthma |
| rs59803593  | 6 | 32456719 | G | A | 0.0173 | 0.1067  | 0.0187 | 1.11E-08 | 5.7127   | 1284712 | Asthma |
| rs9268812   | 6 | 32456791 | A | G | 0.3702 | -0.0441 | 0.0052 | 1.47E-17 | -8.5293  | 1310845 | Asthma |
| rs28895188  | 6 | 32456797 | A | G | 0.1599 | -0.0641 | 0.0069 | 1.03E-20 | -9.3329  | 1376071 | Asthma |
| rs9268813   | 6 | 32456817 | C | T | 0.1070 | 0.0503  | 0.0080 | 4.24E-10 | 6.2451   | 1310845 | Asthma |
| rs28895189  | 6 | 32456833 | C | T | 0.1599 | -0.0642 | 0.0069 | 9.70E-21 | -9.3393  | 1376071 | Asthma |
| rs9268814   | 6 | 32456839 | G | C | 0.3845 | 0.0871  | 0.0049 | 1.17E-69 | 17.6421  | 1310845 | Asthma |
| rs9268815   | 6 | 32456900 | A | T | 0.4551 | -0.0549 | 0.0050 | 2.73E-28 | -11.0303 | 1310845 | Asthma |
| rs7763262   | 6 | 32457105 | T | C | 0.3693 | -0.0445 | 0.0052 | 6.89E-18 | -8.6168  | 1310845 | Asthma |
| rs28895190  | 6 | 32457118 | A | G | 0.1598 | -0.0642 | 0.0069 | 9.53E-21 | -9.3412  | 1376071 | Asthma |
| rs28895191  | 6 | 32457141 | A | G | 0.1604 | -0.0673 | 0.0076 | 5.67E-19 | -8.8984  | 1224666 | Asthma |
| rs28895192  | 6 | 32457166 | G | A | 0.1355 | -0.0659 | 0.0081 | 6.12E-16 | -8.0870  | 1251217 | Asthma |
| rs28895196  | 6 | 32457204 | G | A | 0.1601 | -0.0684 | 0.0077 | 4.56E-19 | -8.9224  | 1159440 | Asthma |

|             |   |          |   |   |        |         |        |           |          |         |        |
|-------------|---|----------|---|---|--------|---------|--------|-----------|----------|---------|--------|
| rs7763411   | 6 | 32457215 | T | C | 0.1086 | 0.0490  | 0.0080 | 6.92E-10  | 6.1680   | 1310845 | Asthma |
| rs28895197  | 6 | 32457243 | T | C | 0.1585 | -0.0680 | 0.0071 | 1.30E-21  | -9.5494  | 1316443 | Asthma |
| rs28895198  | 6 | 32457267 | C | T | 0.1590 | -0.0681 | 0.0071 | 9.35E-22  | -9.5839  | 1316443 | Asthma |
| rs28895199  | 6 | 32457268 | G | A | 0.1597 | -0.0677 | 0.0076 | 3.98E-19  | -8.9375  | 1224666 | Asthma |
| rs7743662   | 6 | 32457272 | A | G | 0.3846 | 0.0873  | 0.0049 | 5.48E-70  | 17.6848  | 1310845 | Asthma |
| rs28895200  | 6 | 32457297 | A | G | 0.1588 | -0.0646 | 0.0069 | 9.42E-21  | -9.3423  | 1376071 | Asthma |
| rs28895201  | 6 | 32457332 | T | C | 0.1585 | -0.0648 | 0.0069 | 9.25E-21  | -9.3444  | 1376071 | Asthma |
| rs7743415   | 6 | 32457358 | C | T | 0.4600 | -0.0582 | 0.0054 | 9.62E-27  | -10.7052 | 1159440 | Asthma |
| rs13194769  | 6 | 32457370 | A | C | 0.1599 | -0.0673 | 0.0076 | 6.92E-19  | -8.8763  | 1224666 | Asthma |
| rs13194888  | 6 | 32457408 | T | C | 0.1383 | -0.0712 | 0.0082 | 5.28E-18  | -8.6470  | 1225084 | Asthma |
| rs28895202  | 6 | 32457413 | C | T | 0.1611 | -0.0698 | 0.0078 | 3.06E-19  | -8.9665  | 1133307 | Asthma |
| rs28895203  | 6 | 32457414 | A | G | 0.1376 | -0.0710 | 0.0083 | 8.85E-18  | -8.5881  | 1225084 | Asthma |
| rs28895204  | 6 | 32457419 | G | A | 0.1611 | -0.0697 | 0.0078 | 3.16E-19  | -8.9628  | 1133307 | Asthma |
| rs13210879  | 6 | 32457470 | C | T | 0.1596 | -0.0643 | 0.0069 | 1.03E-20  | -9.3328  | 1376071 | Asthma |
| rs28895205  | 6 | 32457527 | G | A | 0.1596 | -0.0645 | 0.0069 | 7.52E-21  | -9.3661  | 1376071 | Asthma |
| rs13194925  | 6 | 32457559 | G | A | 0.1596 | -0.0644 | 0.0069 | 8.69E-21  | -9.3509  | 1376071 | Asthma |
| rs9268820   | 6 | 32457620 | C | A | 0.5636 | -0.0948 | 0.0067 | 5.75E-45  | -14.0708 | 873440  | Asthma |
| rs13195258  | 6 | 32457695 | T | C | 0.1596 | -0.0643 | 0.0069 | 9.10E-21  | -9.3460  | 1376071 | Asthma |
| rs13195262  | 6 | 32457709 | T | C | 0.1605 | -0.0673 | 0.0076 | 5.65E-19  | -8.8987  | 1224666 | Asthma |
| rs7744304   | 6 | 32457710 | G | T | 0.3693 | -0.0448 | 0.0052 | 4.35E-18  | -8.6693  | 1310845 | Asthma |
| rs35302878  | 6 | 32457823 | C | T | 0.1160 | -0.0636 | 0.0080 | 1.50E-15  | -7.9773  | 1376071 | Asthma |
| rs7748310   | 6 | 32457828 | A | G | 0.3845 | 0.0874  | 0.0049 | 3.75E-70  | 17.7065  | 1310845 | Asthma |
| rs13198610  | 6 | 32457895 | T | G | 0.1599 | -0.0643 | 0.0069 | 8.23E-21  | -9.3567  | 1376071 | Asthma |
| rs7748085   | 6 | 32457965 | G | A | 0.3845 | 0.0874  | 0.0049 | 3.64E-70  | 17.7079  | 1310845 | Asthma |
| rs13198543  | 6 | 32458010 | T | C | 0.1597 | -0.0639 | 0.0069 | 1.54E-20  | -9.2905  | 1376071 | Asthma |
| rs13198439  | 6 | 32458046 | G | A | 0.1597 | -0.0639 | 0.0069 | 1.63E-20  | -9.2841  | 1376071 | Asthma |
| rs7748825   | 6 | 32458137 | C | G | 0.3845 | 0.0874  | 0.0049 | 4.33E-70  | 17.6984  | 1310845 | Asthma |
| rs13198784  | 6 | 32458181 | A | C | 0.1598 | -0.0644 | 0.0069 | 7.54E-21  | -9.3658  | 1376071 | Asthma |
| rs13198660  | 6 | 32458187 | G | A | 0.1598 | -0.0645 | 0.0069 | 6.70E-21  | -9.3785  | 1376071 | Asthma |
| rs6457592   | 6 | 32458206 | T | C | 0.5297 | -0.0710 | 0.0048 | 5.77E-49  | -14.7076 | 1310845 | Asthma |
| rs28895207  | 6 | 32458262 | A | G | 0.1599 | -0.0644 | 0.0069 | 7.08E-21  | -9.3726  | 1376071 | Asthma |
| rs28895208  | 6 | 32458272 | G | A | 0.1599 | -0.0646 | 0.0069 | 6.04E-21  | -9.3892  | 1376071 | Asthma |
| rs28895209  | 6 | 32458375 | C | T | 0.1599 | -0.0647 | 0.0069 | 5.40E-21  | -9.4011  | 1376071 | Asthma |
| rs28895210  | 6 | 32458386 | G | A | 0.1598 | -0.0645 | 0.0069 | 6.77E-21  | -9.3773  | 1376071 | Asthma |
| rs28895211  | 6 | 32458411 | T | C | 0.1598 | -0.0646 | 0.0069 | 6.37E-21  | -9.3838  | 1376071 | Asthma |
| rs28895212  | 6 | 32458439 | C | T | 0.1598 | -0.0644 | 0.0069 | 7.87E-21  | -9.3614  | 1376071 | Asthma |
| rs28895213  | 6 | 32458475 | A | G | 0.1599 | -0.0645 | 0.0069 | 6.83E-21  | -9.3764  | 1376071 | Asthma |
| rs28895214  | 6 | 32458503 | A | G | 0.1599 | -0.0646 | 0.0069 | 5.96E-21  | -9.3908  | 1376071 | Asthma |
| rs28895215  | 6 | 32458545 | C | A | 0.1650 | -0.0779 | 0.0091 | 1.65E-17  | -8.5161  | 726724  | Asthma |
| rs7769693   | 6 | 32458681 | T | G | 0.4549 | -0.0551 | 0.0050 | 1.92E-28  | -11.0621 | 1310845 | Asthma |
| rs113041772 | 6 | 32458761 | C | T | 0.1595 | -0.0642 | 0.0069 | 1.20E-20  | -9.3172  | 1376071 | Asthma |
| rs9268828   | 6 | 32458763 | G | A | 0.3847 | 0.0872  | 0.0049 | 8.87E-70  | 17.6579  | 1310845 | Asthma |
| rs79464894  | 6 | 32458764 | T | C | 0.1596 | -0.0642 | 0.0069 | 1.16E-20  | -9.3199  | 1376071 | Asthma |
| rs74732642  | 6 | 32458800 | G | A | 0.1595 | -0.0643 | 0.0069 | 1.03E-20  | -9.3331  | 1376071 | Asthma |
| rs9268829   | 6 | 32458825 | G | A | 0.3847 | 0.0873  | 0.0049 | 6.32E-70  | 17.6769  | 1310845 | Asthma |
| rs28895219  | 6 | 32458933 | C | T | 0.1599 | -0.0643 | 0.0069 | 8.95E-21  | -9.3478  | 1376071 | Asthma |
| rs28895220  | 6 | 32458946 | T | A | 0.1599 | -0.0644 | 0.0069 | 7.66E-21  | -9.3644  | 1376071 | Asthma |
| rs28732217  | 6 | 32459122 | G | A | 0.1599 | -0.0644 | 0.0069 | 7.91E-21  | -9.3608  | 1376071 | Asthma |
| rs28732218  | 6 | 32459158 | C | G | 0.1599 | -0.0642 | 0.0069 | 9.65E-21  | -9.3398  | 1376071 | Asthma |
| rs28732219  | 6 | 32459185 | G | A | 0.1598 | -0.0644 | 0.0069 | 8.14E-21  | -9.3579  | 1376071 | Asthma |
| rs28732220  | 6 | 32459265 | C | T | 0.1594 | -0.0643 | 0.0069 | 1.19E-20  | -9.3179  | 1376071 | Asthma |
| rs28732221  | 6 | 32459296 | C | T | 0.1593 | -0.0644 | 0.0069 | 1.03E-20  | -9.3334  | 1376071 | Asthma |
| rs28732222  | 6 | 32459321 | C | T | 0.1587 | -0.0680 | 0.0071 | 1.26E-21  | -9.5533  | 1316443 | Asthma |
| rs28732223  | 6 | 32459363 | G | C | 0.1588 | -0.0649 | 0.0069 | 6.21E-21  | -9.3863  | 1376071 | Asthma |
| rs28732224  | 6 | 32459393 | T | C | 0.1595 | -0.0646 | 0.0069 | 6.79E-21  | -9.3770  | 1376071 | Asthma |
| rs1548306   | 6 | 32459402 | A | T | 0.3687 | -0.0448 | 0.0053 | 2.99E-17  | -8.4472  | 1251217 | Asthma |
| rs76724891  | 6 | 32459430 | G | C | 0.1161 | -0.0638 | 0.0081 | 3.27E-15  | -7.8802  | 1349938 | Asthma |
| rs28732225  | 6 | 32459533 | C | T | 0.1255 | -0.0719 | 0.0080 | 1.61E-19  | -9.0373  | 1290310 | Asthma |
| rs28732226  | 6 | 32459534 | C | T | 0.1257 | -0.0714 | 0.0079 | 2.60E-19  | -8.9843  | 1290310 | Asthma |
| rs28732229  | 6 | 32459604 | T | G | 0.1595 | -0.0650 | 0.0069 | 3.90E-21  | -9.4352  | 1376071 | Asthma |
| rs28732230  | 6 | 32459657 | A | G | 0.1595 | -0.0648 | 0.0069 | 5.26E-21  | -9.4039  | 1376071 | Asthma |
| rs28732231  | 6 | 32459690 | G | A | 0.1598 | -0.0648 | 0.0069 | 4.48E-21  | -9.4208  | 1376071 | Asthma |
| rs28732232  | 6 | 32459735 | T | C | 0.1587 | -0.0651 | 0.0069 | 4.43E-21  | -9.4218  | 1376071 | Asthma |
| rs13207140  | 6 | 32459827 | C | G | 0.1601 | -0.0645 | 0.0069 | 6.74E-21  | -9.3778  | 1376071 | Asthma |
| rs28732234  | 6 | 32459958 | T | G | 0.1600 | -0.0646 | 0.0069 | 5.91E-21  | -9.3917  | 1376071 | Asthma |
| rs9268831   | 6 | 32459971 | C | T | 0.5462 | -0.0769 | 0.0048 | 2.28E-57  | -15.9640 | 1310845 | Asthma |
| rs9268832   | 6 | 32460012 | T | C | 0.4508 | -0.0545 | 0.0050 | 8.10E-28  | -10.9322 | 1310845 | Asthma |
| rs28732235  | 6 | 32460064 | A | G | 0.1540 | -0.0646 | 0.0070 | 2.46E-20  | -9.2401  | 1376071 | Asthma |
| rs17209105  | 6 | 32460094 | G | A | 0.1599 | -0.0648 | 0.0069 | 4.54E-21  | -9.4193  | 1376071 | Asthma |
| rs17209112  | 6 | 32460117 | C | T | 0.1599 | -0.0648 | 0.0069 | 4.66E-21  | -9.4167  | 1376071 | Asthma |
| rs17209119  | 6 | 32460122 | A | G | 0.1599 | -0.0647 | 0.0069 | 5.00E-21  | -9.4093  | 1376071 | Asthma |
| rs17209126  | 6 | 32460169 | C | A | 0.1597 | -0.0650 | 0.0069 | 4.04E-21  | -9.4315  | 1376071 | Asthma |
| rs17202759  | 6 | 32460225 | G | C | 0.1599 | -0.0647 | 0.0069 | 4.87E-21  | -9.4119  | 1376071 | Asthma |
| rs9268833   | 6 | 32460285 | T | C | 0.2711 | 0.1207  | 0.0054 | 5.03E-111 | 22.3895  | 1310845 | Asthma |

|            |   |          |   |   |        |         |        |           |          |         |        |
|------------|---|----------|---|---|--------|---------|--------|-----------|----------|---------|--------|
| rs17202773 | 6 | 32460301 | C | G | 0.1601 | -0.0648 | 0.0069 | 4.15E-21  | -9.4287  | 1376071 | Asthma |
| rs9268834  | 6 | 32460302 | A | C | 0.2712 | 0.1209  | 0.0054 | 3.33E-111 | 22.4070  | 1310845 | Asthma |
| rs17209133 | 6 | 32460315 | G | C | 0.1601 | -0.0648 | 0.0069 | 4.29E-21  | -9.4253  | 1376071 | Asthma |
| rs9268835  | 6 | 32460338 | A | G | 0.2713 | 0.1207  | 0.0054 | 5.81E-111 | 22.3817  | 1310845 | Asthma |
| rs6923504  | 6 | 32460409 | G | C | 0.2906 | -0.0497 | 0.0053 | 1.24E-20  | -9.3132  | 1310845 | Asthma |
| rs6903608  | 6 | 32460508 | C | T | 0.2906 | -0.0497 | 0.0053 | 1.34E-20  | -9.3052  | 1310845 | Asthma |
| rs9791337  | 6 | 32460723 | T | G | 0.1599 | -0.0647 | 0.0069 | 4.91E-21  | -9.4111  | 1376071 | Asthma |
| rs9268838  | 6 | 32460938 | A | G | 0.2712 | 0.1206  | 0.0054 | 1.11E-110 | 22.3543  | 1310845 | Asthma |
| rs9268839  | 6 | 32460995 | G | A | 0.4292 | 0.0699  | 0.0050 | 1.12E-44  | 14.0237  | 1310845 | Asthma |
| rs9791280  | 6 | 32461217 | C | G | 0.1243 | -0.0653 | 0.0077 | 3.25E-17  | -8.4372  | 1376071 | Asthma |
| rs6919855  | 6 | 32461234 | C | T | 0.2829 | -0.0470 | 0.0057 | 9.39E-17  | -8.3124  | 942825  | Asthma |
| rs72843939 | 6 | 32461300 | C | T | 0.1136 | -0.0639 | 0.0080 | 2.01E-15  | -7.9410  | 1376071 | Asthma |
| rs6940440  | 6 | 32461310 | C | A | 0.2802 | -0.0322 | 0.0055 | 5.36E-09  | -5.8355  | 1310845 | Asthma |
| rs9268845  | 6 | 32461427 | T | C | 0.2755 | -0.0311 | 0.0055 | 2.08E-08  | -5.6053  | 1310845 | Asthma |
| rs9268846  | 6 | 32461468 | G | C | 0.3184 | 0.1006  | 0.0052 | 2.87E-84  | 19.4500  | 1310845 | Asthma |
| rs9268847  | 6 | 32461500 | G | A | 0.2479 | -0.0559 | 0.0056 | 3.27E-23  | -9.9240  | 1310845 | Asthma |
| rs9268848  | 6 | 32461526 | G | A | 0.4911 | -0.0961 | 0.0049 | 9.96E-87  | -19.7390 | 1310845 | Asthma |
| rs9268849  | 6 | 32461550 | T | C | 0.3047 | 0.1061  | 0.0052 | 1.05E-91  | 20.3097  | 1310845 | Asthma |
| rs9268850  | 6 | 32461700 | A | G | 0.2802 | -0.0321 | 0.0055 | 6.06E-09  | -5.8151  | 1310845 | Asthma |
| rs9268851  | 6 | 32461805 | A | G | 0.1660 | -0.0528 | 0.0068 | 8.38E-15  | -7.7617  | 1310845 | Asthma |
| rs9268852  | 6 | 32461817 | A | G | 0.4156 | -0.0705 | 0.0050 | 1.68E-45  | -14.1573 | 1310845 | Asthma |
| rs9268853  | 6 | 32461866 | C | T | 0.3044 | 0.1062  | 0.0052 | 6.07E-92  | 20.3377  | 1310845 | Asthma |
| rs9268854  | 6 | 32461895 | G | A | 0.2801 | -0.0318 | 0.0055 | 7.54E-09  | -5.7786  | 1310845 | Asthma |
| rs9268855  | 6 | 32461898 | A | G | 0.2801 | -0.0318 | 0.0055 | 7.56E-09  | -5.7780  | 1310845 | Asthma |
| rs12527323 | 6 | 32461917 | A | C | 0.1240 | -0.0655 | 0.0077 | 2.59E-17  | -8.4640  | 1376071 | Asthma |
| rs9268857  | 6 | 32461962 | G | A | 0.2801 | -0.0318 | 0.0055 | 7.60E-09  | -5.7771  | 1310845 | Asthma |
| rs9268858  | 6 | 32461981 | C | T | 0.3123 | 0.1090  | 0.0057 | 2.23E-82  | 19.2273  | 1154767 | Asthma |
| rs9268860  | 6 | 32462048 | T | C | 0.3248 | 0.1048  | 0.0062 | 1.57E-64  | 16.9614  | 760614  | Asthma |
| rs9268862  | 6 | 32462390 | C | A | 0.2801 | -0.0320 | 0.0055 | 6.77E-09  | -5.7965  | 1310845 | Asthma |
| rs9268863  | 6 | 32462512 | A | G | 0.4156 | -0.0705 | 0.0050 | 1.90E-45  | -14.1488 | 1310845 | Asthma |
| rs9268864  | 6 | 32462549 | A | T | 0.3043 | 0.1064  | 0.0052 | 3.54E-92  | 20.3631  | 1310845 | Asthma |
| rs13193827 | 6 | 32462560 | A | C | 0.1240 | -0.0654 | 0.0077 | 2.83E-17  | -8.4532  | 1376071 | Asthma |
| rs4428528  | 6 | 32462585 | G | C | 0.2801 | -0.0318 | 0.0055 | 8.18E-09  | -5.7646  | 1310845 | Asthma |
| rs4434496  | 6 | 32462731 | T | C | 0.2801 | -0.0319 | 0.0055 | 6.93E-09  | -5.7926  | 1310845 | Asthma |
| rs4280993  | 6 | 32462827 | A | C | 0.2802 | -0.0319 | 0.0055 | 7.29E-09  | -5.7841  | 1310845 | Asthma |
| rs7766843  | 6 | 32462952 | T | C | 0.2802 | -0.0319 | 0.0055 | 7.19E-09  | -5.7864  | 1310845 | Asthma |
| rs7766854  | 6 | 32462975 | T | C | 0.2802 | -0.0319 | 0.0055 | 7.22E-09  | -5.7859  | 1310845 | Asthma |
| rs7747010  | 6 | 32463023 | G | A | 0.2802 | -0.0319 | 0.0055 | 6.86E-09  | -5.7942  | 1310845 | Asthma |
| rs7747025  | 6 | 32463037 | G | A | 0.2802 | -0.0319 | 0.0055 | 6.87E-09  | -5.7942  | 1310845 | Asthma |
| rs7746751  | 6 | 32463090 | A | G | 0.2802 | -0.0319 | 0.0055 | 6.98E-09  | -5.7913  | 1310845 | Asthma |
| rs7746922  | 6 | 32463198 | A | C | 0.2807 | -0.0323 | 0.0055 | 4.28E-09  | -5.8729  | 1310845 | Asthma |
| rs7747521  | 6 | 32463328 | G | A | 0.2802 | -0.0319 | 0.0055 | 7.43E-09  | -5.7809  | 1310845 | Asthma |
| rs7747529  | 6 | 32463347 | A | G | 0.3042 | 0.1064  | 0.0052 | 3.84E-92  | 20.3585  | 1310845 | Asthma |
| rs7767493  | 6 | 32463352 | T | C | 0.2802 | -0.0321 | 0.0055 | 6.01E-09  | -5.8166  | 1310845 | Asthma |
| rs9268877  | 6 | 32463370 | A | G | 0.4153 | -0.0704 | 0.0050 | 2.16E-45  | -14.1396 | 1310845 | Asthma |
| rs35458464 | 6 | 32463462 | G | A | 0.1240 | -0.0653 | 0.0077 | 3.41E-17  | -8.4316  | 1376071 | Asthma |
| rs9268878  | 6 | 32463515 | A | T | 0.2802 | -0.0319 | 0.0055 | 7.40E-09  | -5.7818  | 1310845 | Asthma |
| rs9268879  | 6 | 32463529 | G | T | 0.2802 | -0.0319 | 0.0055 | 7.39E-09  | -5.7818  | 1310845 | Asthma |
| rs9268880  | 6 | 32463581 | T | G | 0.2911 | -0.0500 | 0.0053 | 7.65E-21  | -9.3644  | 1310845 | Asthma |
| rs9268881  | 6 | 32463829 | T | A | 0.4158 | -0.0704 | 0.0050 | 2.61E-45  | -14.1263 | 1310845 | Asthma |
| rs9268882  | 6 | 32463846 | T | C | 0.2912 | -0.0500 | 0.0053 | 7.75E-21  | -9.3629  | 1310845 | Asthma |
| rs9268883  | 6 | 32463861 | T | A | 0.4159 | -0.0694 | 0.0055 | 4.06E-37  | -12.7296 | 1159440 | Asthma |
| rs9268884  | 6 | 32463863 | A | T | 0.3014 | 0.1121  | 0.0057 | 1.71E-85  | 19.5956  | 1159440 | Asthma |
| rs9268885  | 6 | 32463928 | T | C | 0.2805 | -0.0319 | 0.0055 | 6.85E-09  | -5.7947  | 1310845 | Asthma |
| rs58667488 | 6 | 32464008 | C | A | 0.0226 | 0.0924  | 0.0159 | 5.66E-09  | 5.8263   | 1310845 | Asthma |
| rs9268886  | 6 | 32464051 | A | G | 0.2801 | -0.0319 | 0.0055 | 6.98E-09  | -5.7914  | 1310845 | Asthma |
| rs9268887  | 6 | 32464056 | G | C | 0.2801 | -0.0319 | 0.0055 | 7.50E-09  | -5.7793  | 1310845 | Asthma |
| rs9268888  | 6 | 32464090 | G | T | 0.4157 | -0.0705 | 0.0050 | 1.72E-45  | -14.1559 | 1310845 | Asthma |
| rs9268889  | 6 | 32464109 | G | A | 0.3024 | 0.1116  | 0.0057 | 1.03E-84  | 19.5041  | 1159440 | Asthma |
| rs9268890  | 6 | 32464119 | G | A | 0.2815 | -0.0392 | 0.0060 | 7.77E-11  | -6.5049  | 1159440 | Asthma |
| rs9268893  | 6 | 32464150 | C | T | 0.4572 | -0.0806 | 0.0052 | 1.21E-53  | -15.4199 | 1251217 | Asthma |
| rs9268894  | 6 | 32464177 | G | T | 0.2827 | -0.0391 | 0.0060 | 7.56E-11  | -6.5093  | 1159440 | Asthma |
| rs9268895  | 6 | 32464185 | G | A | 0.2746 | -0.0418 | 0.0062 | 1.19E-11  | -6.7817  | 1159440 | Asthma |
| rs9268896  | 6 | 32464188 | A | G | 0.2750 | -0.0414 | 0.0063 | 3.94E-11  | -6.6061  | 1133307 | Asthma |
| rs9268898  | 6 | 32464202 | T | C | 0.2749 | -0.0414 | 0.0063 | 3.97E-11  | -6.6050  | 1133307 | Asthma |
| rs9268899  | 6 | 32464203 | G | A | 0.2749 | -0.0413 | 0.0063 | 4.28E-11  | -6.5939  | 1133307 | Asthma |
| rs9268902  | 6 | 32464267 | A | C | 0.2806 | -0.0313 | 0.0056 | 2.23E-08  | -5.5934  | 1284712 | Asthma |
| rs9268903  | 6 | 32464268 | C | A | 0.2813 | -0.0387 | 0.0060 | 1.24E-10  | -6.4345  | 1159440 | Asthma |
| rs9268904  | 6 | 32464272 | C | T | 0.2814 | -0.0389 | 0.0060 | 1.05E-10  | -6.4590  | 1159440 | Asthma |
| rs9268905  | 6 | 32464300 | C | G | 0.3041 | 0.1065  | 0.0052 | 2.92E-92  | 20.3730  | 1310845 | Asthma |
| rs9268906  | 6 | 32464404 | G | A | 0.3041 | 0.1065  | 0.0052 | 2.89E-92  | 20.3726  | 1310845 | Asthma |
| rs9268907  | 6 | 32464456 | G | A | 0.2801 | -0.0319 | 0.0055 | 7.24E-09  | -5.7852  | 1310845 | Asthma |
| rs9268908  | 6 | 32464457 | A | G | 0.2827 | -0.0391 | 0.0060 | 7.19E-11  | -6.5167  | 1159440 | Asthma |
| rs9268910  | 6 | 32464594 | G | A | 0.2827 | -0.0391 | 0.0060 | 7.13E-11  | -6.5179  | 1159440 | Asthma |

|             |   |          |   |   |        |         |        |          |          |         |        |
|-------------|---|----------|---|---|--------|---------|--------|----------|----------|---------|--------|
| rs9268911   | 6 | 32464629 | G | A | 0.2801 | -0.0319 | 0.0055 | 7.09E-09 | -5.7888  | 1310845 | Asthma |
| rs78218185  | 6 | 32464723 | A | G | 0.0171 | 0.1087  | 0.0188 | 7.76E-09 | 5.7733   | 1284712 | Asthma |
| rs9268912   | 6 | 32464732 | C | A | 0.4157 | -0.0705 | 0.0050 | 1.73E-45 | -14.1555 | 1310845 | Asthma |
| rs9268913   | 6 | 32464743 | T | C | 0.2801 | -0.0319 | 0.0055 | 6.94E-09 | -5.7923  | 1310845 | Asthma |
| rs9268914   | 6 | 32464779 | C | T | 0.2849 | -0.0508 | 0.0058 | 3.30E-18 | -8.7005  | 1180923 | Asthma |
| rs9268915   | 6 | 32464788 | T | C | 0.2825 | -0.0395 | 0.0060 | 4.75E-11 | -6.5785  | 1159440 | Asthma |
| rs9268919   | 6 | 32464821 | C | T | 0.2825 | -0.0396 | 0.0060 | 4.39E-11 | -6.5902  | 1159440 | Asthma |
| rs9268920   | 6 | 32464838 | G | A | 0.2825 | -0.0395 | 0.0060 | 4.65E-11 | -6.5817  | 1159440 | Asthma |
| rs28377518  | 6 | 32464873 | T | C | 0.1240 | -0.0653 | 0.0077 | 3.25E-17 | -8.4373  | 1376071 | Asthma |
| rs9268922   | 6 | 32464887 | G | T | 0.2798 | -0.0315 | 0.0055 | 1.11E-08 | -5.7126  | 1310845 | Asthma |
| rs9268923   | 6 | 32465058 | T | C | 0.3042 | 0.1062  | 0.0052 | 6.36E-92 | 20.3346  | 1310845 | Asthma |
| rs9268925   | 6 | 32465192 | A | C | 0.1657 | -0.0531 | 0.0068 | 6.49E-15 | -7.7942  | 1310845 | Asthma |
| rs9469120   | 6 | 32465280 | C | A | 0.0504 | -0.0960 | 0.0119 | 8.53E-16 | -8.0460  | 1310845 | Asthma |
| rs9268926   | 6 | 32465290 | G | A | 0.2092 | 0.1216  | 0.0064 | 5.79E-81 | 19.0561  | 942825  | Asthma |
| rs9268927   | 6 | 32465308 | A | T | 0.1660 | -0.0527 | 0.0068 | 8.88E-15 | -7.7543  | 1310845 | Asthma |
| rs113585425 | 6 | 32465348 | C | A | 0.1133 | -0.0640 | 0.0081 | 1.88E-15 | -7.9489  | 1376071 | Asthma |
| rs2395185   | 6 | 32465390 | T | G | 0.3041 | 0.1063  | 0.0052 | 4.47E-92 | 20.3510  | 1310845 | Asthma |
| rs2395186   | 6 | 32465415 | G | C | 0.3024 | 0.1069  | 0.0054 | 2.13E-88 | 19.9325  | 1251217 | Asthma |
| rs2395188   | 6 | 32465479 | C | T | 0.2801 | -0.0319 | 0.0055 | 7.25E-09 | -5.7850  | 1310845 | Asthma |
| rs9268932   | 6 | 32465513 | T | G | 0.4158 | -0.0695 | 0.0056 | 5.66E-36 | -12.5221 | 1133307 | Asthma |
| rs2395189   | 6 | 32465531 | C | A | 0.2852 | -0.0402 | 0.0066 | 1.09E-09 | -6.0959  | 1064845 | Asthma |
| rs2894258   | 6 | 32465535 | G | A | 0.2852 | -0.0402 | 0.0066 | 1.09E-09 | -6.0959  | 1064845 | Asthma |
| rs2395190   | 6 | 32465541 | T | C | 0.2851 | -0.0403 | 0.0066 | 9.65E-10 | -6.1152  | 1064845 | Asthma |
| rs34014061  | 6 | 32465731 | C | T | 0.1249 | -0.0634 | 0.0085 | 9.20E-14 | -7.4519  | 1224666 | Asthma |
| rs9268939   | 6 | 32465761 | T | C | 0.2770 | -0.0458 | 0.0074 | 6.48E-10 | -6.1784  | 934923  | Asthma |
| rs9268940   | 6 | 32465784 | A | G | 0.2767 | -0.0457 | 0.0074 | 6.96E-10 | -6.1669  | 934923  | Asthma |
| rs35385757  | 6 | 32465788 | T | C | 0.1252 | -0.0631 | 0.0085 | 1.22E-13 | -7.4149  | 1224666 | Asthma |
| rs9268944   | 6 | 32465877 | T | C | 0.4244 | -0.0963 | 0.0079 | 2.47E-34 | -12.2186 | 778845  | Asthma |
| rs9268945   | 6 | 32465924 | T | C | 0.3156 | -0.0632 | 0.0073 | 4.77E-18 | -8.6588  | 908767  | Asthma |
| rs9268947   | 6 | 32465964 | A | G | 0.3144 | 0.1213  | 0.0071 | 1.53E-64 | 16.9630  | 908767  | Asthma |
| rs9268948   | 6 | 32465969 | G | T | 0.2869 | -0.0505 | 0.0065 | 9.62E-15 | -7.7441  | 1064845 | Asthma |
| rs9268949   | 6 | 32466021 | T | C | 0.3539 | 0.0875  | 0.0055 | 5.39E-56 | 15.7654  | 1159440 | Asthma |
| rs17209161  | 6 | 32466027 | T | C | 0.1149 | -0.0613 | 0.0088 | 3.71E-12 | -6.9480  | 1224666 | Asthma |
| rs9268951   | 6 | 32466130 | A | G | 0.3515 | 0.0883  | 0.0055 | 4.02E-57 | 15.9286  | 1159440 | Asthma |
| rs9268954   | 6 | 32466234 | A | G | 0.3120 | 0.1173  | 0.0065 | 7.48E-74 | 18.1794  | 977229  | Asthma |
| rs9268960   | 6 | 32466353 | C | T | 0.3024 | 0.1120  | 0.0058 | 2.40E-82 | 19.2232  | 1133307 | Asthma |
| rs9268961   | 6 | 32466358 | A | G | 0.3029 | 0.1121  | 0.0057 | 1.48E-85 | 19.6016  | 1159440 | Asthma |
| rs9268962   | 6 | 32466370 | T | G | 0.2781 | -0.0485 | 0.0074 | 5.42E-11 | -6.5591  | 934923  | Asthma |
| rs9268963   | 6 | 32466372 | T | C | 0.3020 | 0.1121  | 0.0058 | 1.39E-82 | 19.2505  | 1133307 | Asthma |
| rs9268964   | 6 | 32466379 | C | A | 0.2782 | -0.0484 | 0.0074 | 5.40E-11 | -6.5594  | 934923  | Asthma |
| rs9268965   | 6 | 32466463 | A | G | 0.3041 | 0.1065  | 0.0052 | 3.68E-92 | 20.3607  | 1310845 | Asthma |
| rs9268966   | 6 | 32466485 | G | A | 0.2826 | -0.0393 | 0.0060 | 5.93E-11 | -6.5456  | 1159440 | Asthma |
| rs9268967   | 6 | 32466495 | C | T | 0.2829 | -0.0386 | 0.0061 | 2.71E-10 | -6.3144  | 1133307 | Asthma |
| rs9268968   | 6 | 32466496 | A | C | 0.2829 | -0.0386 | 0.0061 | 2.71E-10 | -6.3143  | 1133307 | Asthma |
| rs9268969   | 6 | 32466572 | T | C | 0.3042 | 0.1063  | 0.0052 | 4.93E-92 | 20.3464  | 1310845 | Asthma |
| rs9268970   | 6 | 32466584 | A | C | 0.3041 | 0.1065  | 0.0052 | 3.70E-92 | 20.3607  | 1310845 | Asthma |
| rs17202892  | 6 | 32466702 | A | C | 0.1240 | -0.0653 | 0.0077 | 3.26E-17 | -8.4368  | 1376071 | Asthma |
| rs9268971   | 6 | 32466862 | A | G | 0.2801 | -0.0319 | 0.0055 | 6.99E-09 | -5.7913  | 1310845 | Asthma |
| rs9268972   | 6 | 32466954 | A | T | 0.2801 | -0.0319 | 0.0055 | 7.14E-09 | -5.7877  | 1310845 | Asthma |
| rs9268973   | 6 | 32467001 | C | T | 0.2802 | -0.0319 | 0.0055 | 7.46E-09 | -5.7803  | 1310845 | Asthma |
| rs9268974   | 6 | 32467053 | T | C | 0.2802 | -0.0319 | 0.0055 | 6.86E-09 | -5.7943  | 1310845 | Asthma |
| rs9268975   | 6 | 32467067 | T | A | 0.2802 | -0.0319 | 0.0055 | 6.83E-09 | -5.7951  | 1310845 | Asthma |
| rs9391781   | 6 | 32467073 | C | G | 0.3041 | 0.1065  | 0.0052 | 3.21E-92 | 20.3684  | 1310845 | Asthma |
| rs9268976   | 6 | 32467097 | T | A | 0.2801 | -0.0316 | 0.0055 | 1.04E-08 | -5.7247  | 1310845 | Asthma |
| rs9268977   | 6 | 32467162 | C | T | 0.2802 | -0.0318 | 0.0055 | 7.54E-09 | -5.7783  | 1310845 | Asthma |
| rs9268978   | 6 | 32467201 | A | G | 0.1660 | -0.0528 | 0.0068 | 8.77E-15 | -7.7560  | 1310845 | Asthma |
| rs9268979   | 6 | 32467267 | T | C | 0.4156 | -0.0704 | 0.0050 | 2.31E-45 | -14.1350 | 1310845 | Asthma |
| rs9268980   | 6 | 32467346 | G | A | 0.2802 | -0.0319 | 0.0055 | 7.08E-09 | -5.7889  | 1310845 | Asthma |
| rs9268981   | 6 | 32467354 | T | C | 0.2826 | -0.0391 | 0.0060 | 7.65E-11 | -6.5073  | 1159440 | Asthma |
| rs9268982   | 6 | 32467382 | T | C | 0.2826 | -0.0389 | 0.0060 | 9.75E-11 | -6.4708  | 1159440 | Asthma |
| rs9268983   | 6 | 32467393 | T | C | 0.2801 | -0.0318 | 0.0055 | 7.62E-09 | -5.7767  | 1310845 | Asthma |
| rs35421268  | 6 | 32467419 | T | C | 0.1289 | -0.0690 | 0.0082 | 3.44E-17 | -8.4307  | 1008051 | Asthma |
| rs4947340   | 6 | 32467561 | T | C | 0.3721 | 0.0882  | 0.0055 | 2.04E-57 | 15.9710  | 1128634 | Asthma |
| rs9268988   | 6 | 32467746 | T | C | 0.2836 | -0.0412 | 0.0066 | 4.91E-10 | -6.2218  | 1064845 | Asthma |
| rs28654725  | 6 | 32467765 | G | A | 0.3005 | 0.1161  | 0.0063 | 1.19E-75 | 18.4047  | 1064845 | Asthma |
| rs28895223  | 6 | 32467773 | A | G | 0.3271 | 0.1117  | 0.0068 | 1.70E-60 | 16.4073  | 635365  | Asthma |
| rs28895224  | 6 | 32467779 | G | A | 0.3006 | 0.1161  | 0.0063 | 1.19E-75 | 18.4044  | 1064845 | Asthma |
| rs28895225  | 6 | 32467907 | C | T | 0.3122 | 0.1224  | 0.0071 | 3.48E-66 | 17.1842  | 908767  | Asthma |
| rs28831180  | 6 | 32468144 | G | C | 0.1252 | -0.0638 | 0.0085 | 6.47E-14 | -7.4981  | 1224666 | Asthma |
| rs9269011   | 6 | 32468522 | C | G | 0.5553 | 0.1131  | 0.0079 | 1.82E-46 | 14.3130  | 778845  | Asthma |
| rs9391873   | 6 | 32468573 | G | C | 0.1625 | 0.1945  | 0.0110 | 4.96E-70 | 17.6906  | 778845  | Asthma |
| rs9378210   | 6 | 32468741 | G | T | 0.3268 | 0.1246  | 0.0081 | 1.69E-53 | 15.3977  | 778845  | Asthma |
| rs9269014   | 6 | 32468752 | A | C | 0.4650 | 0.1074  | 0.0079 | 4.19E-42 | 13.5962  | 778845  | Asthma |
| rs9391784   | 6 | 32468768 | C | T | 0.3256 | 0.1245  | 0.0081 | 3.19E-53 | 15.3571  | 778845  | Asthma |

|             |   |          |   |   |        |         |        |          |          |         |        |
|-------------|---|----------|---|---|--------|---------|--------|----------|----------|---------|--------|
| rs9269016   | 6 | 32468893 | G | A | 0.2962 | -0.0412 | 0.0073 | 1.75E-08 | -5.6354  | 934923  | Asthma |
| rs9391874   | 6 | 32468903 | G | A | 0.2960 | 0.1212  | 0.0072 | 8.00E-64 | 16.8662  | 934923  | Asthma |
| rs9391785   | 6 | 32468910 | C | G | 0.2961 | 0.1211  | 0.0072 | 8.54E-64 | 16.8620  | 934923  | Asthma |
| rs28789995  | 6 | 32468956 | C | A | 0.2905 | 0.1229  | 0.0073 | 2.37E-64 | 16.9373  | 934923  | Asthma |
| rs9269017   | 6 | 32469006 | A | G | 0.2478 | -0.0436 | 0.0073 | 1.89E-09 | -6.0074  | 1003385 | Asthma |
| rs9269020   | 6 | 32469157 | G | A | 0.4994 | 0.0756  | 0.0069 | 7.75E-28 | 10.9361  | 934923  | Asthma |
| rs28895234  | 6 | 32469273 | G | A | 0.3116 | 0.1156  | 0.0063 | 8.53E-76 | 18.4227  | 1003385 | Asthma |
| rs9269022   | 6 | 32469292 | A | T | 0.2813 | -0.0469 | 0.0073 | 1.52E-10 | -6.4032  | 934923  | Asthma |
| rs28895235  | 6 | 32469383 | A | T | 0.3118 | 0.1158  | 0.0065 | 1.73E-71 | 17.8794  | 977229  | Asthma |
| rs536107251 | 6 | 32469389 | T | G | 0.0657 | 0.0759  | 0.0136 | 2.31E-08 | 5.5868   | 847307  | Asthma |
| rs28895236  | 6 | 32469446 | T | G | 0.3040 | 0.1212  | 0.0070 | 6.66E-67 | 17.2802  | 934923  | Asthma |
| rs374532386 | 6 | 32469562 | T | C | 0.0482 | 0.1286  | 0.0200 | 1.29E-10 | 6.4286   | 592560  | Asthma |
| rs9269026   | 6 | 32469656 | A | G | 0.2833 | -0.0387 | 0.0061 | 2.35E-10 | -6.3363  | 1133307 | Asthma |
| rs9269027   | 6 | 32469689 | A | T | 0.2801 | -0.0486 | 0.0059 | 1.99E-16 | -8.2229  | 1159440 | Asthma |
| rs9269028   | 6 | 32469754 | C | T | 0.2573 | -0.0471 | 0.0079 | 2.42E-09 | -5.9665  | 934923  | Asthma |
| rs9269029   | 6 | 32469767 | A | C | 0.2639 | -0.0397 | 0.0070 | 1.48E-08 | -5.6640  | 1064845 | Asthma |
| rs9405038   | 6 | 32469837 | T | G | 0.3011 | 0.1121  | 0.0057 | 2.25E-85 | 19.5814  | 1159440 | Asthma |
| rs9269030   | 6 | 32469907 | T | A | 0.2827 | -0.0391 | 0.0060 | 7.70E-11 | -6.5063  | 1159440 | Asthma |
| rs9269031   | 6 | 32469970 | C | T | 0.2827 | -0.0390 | 0.0060 | 8.04E-11 | -6.4998  | 1159440 | Asthma |
| rs191785247 | 6 | 32470036 | A | G | 0.1033 | -0.0593 | 0.0095 | 3.52E-10 | -6.2740  | 1068588 | Asthma |
| rs142996546 | 6 | 32470082 | A | C | 0.2623 | -0.0442 | 0.0077 | 1.04E-08 | -5.7245  | 934923  | Asthma |
| rs9269035   | 6 | 32470135 | T | C | 0.2626 | -0.0440 | 0.0077 | 1.21E-08 | -5.6979  | 934923  | Asthma |
| rs9269036   | 6 | 32470140 | C | T | 0.2626 | -0.0440 | 0.0077 | 1.27E-08 | -5.6895  | 934923  | Asthma |
| rs9269037   | 6 | 32470181 | T | C | 0.2985 | -0.0515 | 0.0060 | 6.97E-18 | -8.6153  | 1133307 | Asthma |
| rs9269039   | 6 | 32470272 | C | A | 0.2786 | -0.0452 | 0.0074 | 9.45E-10 | -6.1184  | 934923  | Asthma |
| rs9269040   | 6 | 32470303 | G | A | 0.2787 | -0.0452 | 0.0074 | 9.59E-10 | -6.1160  | 934923  | Asthma |
| rs9368725   | 6 | 32470382 | T | C | 0.3014 | 0.1120  | 0.0057 | 2.92E-85 | 19.5683  | 1159440 | Asthma |
| rs9269041   | 6 | 32470466 | G | A | 0.3908 | -0.0638 | 0.0055 | 9.47E-31 | -11.5286 | 1159440 | Asthma |
| rs9380306   | 6 | 32470521 | G | A | 0.3041 | 0.1064  | 0.0052 | 4.34E-92 | 20.3531  | 1310845 | Asthma |
| rs9269042   | 6 | 32470610 | C | T | 0.4159 | -0.0695 | 0.0055 | 3.14E-37 | -12.7494 | 1159440 | Asthma |
| rs12524496  | 6 | 32470736 | C | G | 0.1239 | -0.0653 | 0.0077 | 3.34E-17 | -8.4341  | 1376071 | Asthma |
| rs9368726   | 6 | 32470765 | C | T | 0.3042 | 0.1063  | 0.0052 | 4.87E-92 | 20.3476  | 1310845 | Asthma |
| rs12525692  | 6 | 32470769 | T | A | 0.1240 | -0.0653 | 0.0077 | 3.28E-17 | -8.4359  | 1376071 | Asthma |
| rs9269043   | 6 | 32470821 | C | T | 0.2802 | -0.0319 | 0.0055 | 7.24E-09 | -5.7852  | 1310845 | Asthma |
| rs6924760   | 6 | 32470827 | T | A | 0.0504 | -0.0959 | 0.0119 | 9.08E-16 | -8.0385  | 1310845 | Asthma |
| rs9405108   | 6 | 32470871 | T | C | 0.3042 | 0.1064  | 0.0052 | 4.01E-92 | 20.3571  | 1310845 | Asthma |
| rs9269044   | 6 | 32470900 | A | G | 0.2799 | -0.0317 | 0.0055 | 9.16E-09 | -5.7456  | 1310845 | Asthma |
| rs34200087  | 6 | 32470914 | A | G | 0.1239 | -0.0653 | 0.0077 | 3.39E-17 | -8.4322  | 1376071 | Asthma |
| rs9269045   | 6 | 32470938 | C | G | 0.2800 | -0.0319 | 0.0055 | 7.53E-09 | -5.7786  | 1310845 | Asthma |
| rs9269046   | 6 | 32470964 | T | C | 0.2805 | -0.0310 | 0.0056 | 3.05E-08 | -5.5385  | 1284712 | Asthma |
| rs9269047   | 6 | 32471006 | C | G | 0.1660 | -0.0527 | 0.0068 | 9.06E-15 | -7.7517  | 1310845 | Asthma |
| rs9269048   | 6 | 32471015 | T | C | 0.2806 | -0.0314 | 0.0056 | 2.02E-08 | -5.6099  | 1284712 | Asthma |
| rs9391877   | 6 | 32471090 | T | G | 0.3041 | 0.1064  | 0.0052 | 3.94E-92 | 20.3577  | 1310845 | Asthma |
| rs9405109   | 6 | 32471252 | C | T | 0.2958 | 0.1076  | 0.0059 | 2.01E-75 | 18.3771  | 1128634 | Asthma |
| rs7452864   | 6 | 32471300 | T | C | 0.2832 | -0.0479 | 0.0054 | 7.32E-19 | -8.8701  | 1310845 | Asthma |
| rs9405110   | 6 | 32471331 | C | A | 0.3115 | 0.1093  | 0.0058 | 1.10E-79 | 18.9018  | 1128634 | Asthma |
| rs9269054   | 6 | 32471343 | T | C | 0.2926 | -0.0602 | 0.0085 | 1.58E-12 | -7.0675  | 778845  | Asthma |
| rs9269056   | 6 | 32471346 | T | C | 0.2927 | -0.0602 | 0.0085 | 1.66E-12 | -7.0607  | 778845  | Asthma |
| rs9405040   | 6 | 32471616 | C | A | 0.3086 | 0.1121  | 0.0063 | 1.75E-71 | 17.8778  | 1060172 | Asthma |
| rs9391878   | 6 | 32471713 | A | T | 0.2914 | 0.1123  | 0.0064 | 2.12E-69 | 17.6078  | 1060172 | Asthma |
| rs9286789   | 6 | 32471919 | G | T | 0.0504 | -0.0959 | 0.0119 | 8.78E-16 | -8.0428  | 1310845 | Asthma |
| rs5026740   | 6 | 32471976 | A | T | 0.2801 | -0.0319 | 0.0055 | 7.39E-09 | -5.7819  | 1310845 | Asthma |
| rs67209722  | 6 | 32472005 | C | T | 0.1241 | -0.0655 | 0.0077 | 2.66E-17 | -8.4608  | 1376071 | Asthma |
| rs9286790   | 6 | 32472051 | A | G | 0.3045 | 0.1068  | 0.0052 | 1.34E-92 | 20.4109  | 1310845 | Asthma |
| rs5026741   | 6 | 32472088 | G | A | 0.2800 | -0.0319 | 0.0055 | 6.82E-09 | -5.7953  | 1310845 | Asthma |
| rs5026742   | 6 | 32472138 | C | T | 0.2801 | -0.0319 | 0.0055 | 7.29E-09 | -5.7841  | 1310845 | Asthma |
| rs5026743   | 6 | 32472187 | G | T | 0.4097 | -0.0725 | 0.0054 | 1.06E-41 | -13.5287 | 1180923 | Asthma |
| rs35954087  | 6 | 32472272 | T | C | 0.1244 | -0.0660 | 0.0078 | 3.83E-17 | -8.4180  | 1349938 | Asthma |
| rs7453703   | 6 | 32472381 | A | G | 0.4829 | -0.0706 | 0.0062 | 5.15E-30 | -11.3819 | 1064845 | Asthma |
| rs7453649   | 6 | 32472383 | T | C | 0.4161 | -0.0832 | 0.0076 | 5.37E-28 | -10.9693 | 540747  | Asthma |
| rs9269067   | 6 | 32472465 | G | A | 0.3918 | -0.0722 | 0.0062 | 1.98E-31 | -11.6624 | 1064845 | Asthma |
| rs9366801   | 6 | 32472499 | T | C | 0.3164 | 0.1320  | 0.0081 | 1.14E-59 | 16.2921  | 778845  | Asthma |
| rs9269069   | 6 | 32472585 | C | T | 0.4128 | -0.0881 | 0.0066 | 5.17E-41 | -13.4117 | 930250  | Asthma |
| rs9269070   | 6 | 32472674 | G | A | 0.3966 | -0.0696 | 0.0055 | 6.71E-37 | -12.6901 | 1216250 | Asthma |
| rs9269071   | 6 | 32472690 | T | C | 0.4800 | -0.0834 | 0.0067 | 3.16E-35 | -12.3848 | 930250  | Asthma |
| rs17203039  | 6 | 32472710 | C | T | 0.0494 | -0.1106 | 0.0139 | 1.91E-15 | -7.9475  | 1086328 | Asthma |
| rs9269072   | 6 | 32472731 | G | C | 0.3838 | -0.0725 | 0.0062 | 3.85E-31 | -11.6060 | 1064845 | Asthma |
| rs11759730  | 6 | 32472881 | T | G | 0.0455 | -0.1024 | 0.0134 | 1.77E-14 | -7.6663  | 1216250 | Asthma |
| rs9269076   | 6 | 32473028 | C | A | 0.4532 | -0.0877 | 0.0070 | 2.29E-36 | -12.5937 | 870622  | Asthma |
| rs9269077   | 6 | 32473029 | C | T | 0.4627 | -0.0915 | 0.0080 | 3.08E-30 | -11.4267 | 778845  | Asthma |
| rs9269078   | 6 | 32473102 | C | T | 0.4152 | -0.0814 | 0.0059 | 3.40E-43 | -13.7792 | 1060172 | Asthma |
| rs67970757  | 6 | 32473103 | A | G | 0.1244 | -0.0660 | 0.0078 | 3.92E-17 | -8.4154  | 1349938 | Asthma |
| rs9269079   | 6 | 32473133 | T | G | 0.4155 | -0.0815 | 0.0059 | 3.21E-43 | -13.7832 | 1060172 | Asthma |
| rs9269080   | 6 | 32473192 | G | A | 0.4155 | -0.0718 | 0.0060 | 1.00E-32 | -11.9138 | 1064845 | Asthma |



|             |   |          |   |   |        |         |        |          |          |         |        |
|-------------|---|----------|---|---|--------|---------|--------|----------|----------|---------|--------|
| rs9348886   | 6 | 32473231 | T | C | 0.3027 | 0.1088  | 0.0057 | 6.68E-82 | 19.1693  | 1216250 | Asthma |
| rs9461755   | 6 | 32473269 | A | G | 0.0504 | -0.0961 | 0.0119 | 7.84E-16 | -8.0568  | 1310845 | Asthma |
| rs9269081   | 6 | 32473323 | A | C | 0.2831 | -0.0479 | 0.0054 | 6.76E-19 | -8.8787  | 1310845 | Asthma |
| rs13217979  | 6 | 32473349 | T | C | 0.1240 | -0.0653 | 0.0077 | 3.55E-17 | -8.4270  | 1376071 | Asthma |
| rs9461756   | 6 | 32473352 | A | G | 0.0504 | -0.0962 | 0.0119 | 7.15E-16 | -8.0678  | 1310845 | Asthma |
| rs12215261  | 6 | 32473373 | T | C | 0.3027 | 0.1089  | 0.0057 | 6.33E-82 | 19.1725  | 1216250 | Asthma |
| rs9269082   | 6 | 32473401 | A | G | 0.4153 | -0.0831 | 0.0068 | 8.51E-35 | -12.3051 | 908767  | Asthma |
| rs9269083   | 6 | 32473416 | A | G | 0.4182 | -0.0804 | 0.0068 | 1.60E-32 | -11.8750 | 908767  | Asthma |
| rs9269084   | 6 | 32473422 | A | G | 0.4175 | -0.0823 | 0.0061 | 6.66E-41 | -13.3928 | 1000544 | Asthma |
| rs9269085   | 6 | 32473425 | C | G | 0.4243 | -0.0682 | 0.0061 | 4.70E-29 | -11.1875 | 1064845 | Asthma |
| rs9269086   | 6 | 32473491 | G | A | 0.4156 | -0.0716 | 0.0060 | 1.65E-32 | -11.8721 | 1064845 | Asthma |
| rs12215313  | 6 | 32473499 | T | C | 0.3114 | 0.1127  | 0.0063 | 1.71E-72 | 18.0072  | 1060172 | Asthma |
| rs7773030   | 6 | 32473619 | G | A | 0.4828 | -0.0780 | 0.0061 | 1.07E-37 | -12.8332 | 1003362 | Asthma |
| rs7755212   | 6 | 32473631 | C | T | 0.5582 | -0.0780 | 0.0062 | 1.44E-36 | -12.6302 | 1060172 | Asthma |
| rs7773182   | 6 | 32473645 | T | C | 0.4794 | -0.0762 | 0.0069 | 4.21E-28 | -10.9913 | 908767  | Asthma |
| rs7739203   | 6 | 32473778 | A | G | 0.4540 | -0.0795 | 0.0060 | 3.06E-40 | -13.2789 | 1060172 | Asthma |
| rs13191565  | 6 | 32473800 | C | G | 0.1253 | -0.0705 | 0.0084 | 3.44E-17 | -8.4305  | 1281476 | Asthma |
| rs7739357   | 6 | 32473864 | A | G | 0.4460 | -0.0798 | 0.0068 | 1.26E-31 | -11.7010 | 908767  | Asthma |
| rs7739375   | 6 | 32473902 | A | G | 0.4041 | -0.0823 | 0.0062 | 3.77E-40 | -13.2635 | 1000544 | Asthma |
| rs2071805   | 6 | 32473919 | T | C | 0.0530 | -0.1034 | 0.0129 | 9.12E-16 | -8.0383  | 1216250 | Asthma |
| rs34442410  | 6 | 32474309 | G | C | 0.1022 | -0.0746 | 0.0095 | 4.62E-15 | -7.8368  | 1125398 | Asthma |
| rs60545961  | 6 | 32474379 | T | G | 0.0955 | -0.0993 | 0.0137 | 4.14E-13 | -7.2509  | 778845  | Asthma |
| rs6901373   | 6 | 32474380 | C | T | 0.3066 | -0.0487 | 0.0085 | 8.94E-09 | -5.7498  | 778845  | Asthma |
| rs12197312  | 6 | 32474403 | C | T | 0.4369 | 0.1172  | 0.0082 | 1.15E-46 | 14.3452  | 778845  | Asthma |
| rs13192505  | 6 | 32474465 | A | G | 0.1141 | -0.0714 | 0.0090 | 1.56E-15 | -7.9721  | 1125398 | Asthma |
| rs61550563  | 6 | 32474614 | C | A | 0.0548 | -0.1101 | 0.0138 | 1.33E-15 | -7.9925  | 1029518 | Asthma |
| rs35168843  | 6 | 32474631 | A | G | 0.1240 | -0.0654 | 0.0078 | 3.23E-17 | -8.4379  | 1376071 | Asthma |
| rs6901903   | 6 | 32474659 | C | T | 0.2906 | -0.0433 | 0.0060 | 6.01E-13 | -7.2004  | 1159440 | Asthma |
| rs17209754  | 6 | 32474926 | A | G | 0.0497 | -0.1027 | 0.0130 | 3.28E-15 | -7.8797  | 1216250 | Asthma |
| rs9269101   | 6 | 32474934 | C | A | 0.2709 | -0.0436 | 0.0071 | 8.63E-10 | -6.1330  | 661498  | Asthma |
| rs13211921  | 6 | 32475059 | G | T | 0.4373 | 0.0715  | 0.0054 | 2.29E-39 | 13.1277  | 1154790 | Asthma |
| rs17203430  | 6 | 32475254 | T | C | 0.0375 | -0.0966 | 0.0132 | 3.07E-13 | -7.2912  | 942825  | Asthma |
| rs17203444  | 6 | 32475256 | G | C | 0.0389 | -0.0928 | 0.0131 | 1.53E-12 | -7.0722  | 942825  | Asthma |
| rs17209803  | 6 | 32475284 | A | C | 0.0514 | -0.0934 | 0.0118 | 3.13E-15 | -7.8857  | 1310845 | Asthma |
| rs9269106   | 6 | 32475354 | T | C | 0.2802 | -0.0315 | 0.0055 | 1.09E-08 | -5.7162  | 1310845 | Asthma |
| rs9391879   | 6 | 32475395 | T | C | 0.4285 | 0.0700  | 0.0050 | 8.95E-45 | 14.0394  | 1310845 | Asthma |
| rs17203458  | 6 | 32475398 | A | G | 0.0504 | -0.0960 | 0.0119 | 8.45E-16 | -8.0477  | 1310845 | Asthma |
| rs9269107   | 6 | 32475433 | A | G | 0.2802 | -0.0316 | 0.0055 | 1.03E-08 | -5.7256  | 1310845 | Asthma |
| rs9269108   | 6 | 32475446 | A | G | 0.3951 | -0.0503 | 0.0050 | 5.73E-24 | -10.0963 | 1310845 | Asthma |
| rs9269109   | 6 | 32475489 | T | C | 0.3364 | -0.0543 | 0.0056 | 3.19E-22 | -9.6942  | 1159440 | Asthma |
| rs9269110   | 6 | 32475492 | A | C | 0.2913 | -0.0505 | 0.0053 | 3.57E-21 | -9.4445  | 1310845 | Asthma |
| rs9269112   | 6 | 32475591 | G | C | 0.2826 | -0.0392 | 0.0060 | 7.48E-11 | -6.5106  | 1159440 | Asthma |
| rs9269113   | 6 | 32475610 | A | T | 0.2802 | -0.0316 | 0.0055 | 1.04E-08 | -5.7235  | 1310845 | Asthma |
| rs9269114   | 6 | 32475648 | A | G | 0.2903 | -0.0500 | 0.0058 | 1.18E-17 | -8.5547  | 1159440 | Asthma |
| rs9391881   | 6 | 32475655 | G | C | 0.4270 | 0.0754  | 0.0056 | 8.00E-42 | 13.5493  | 1133307 | Asthma |
| rs9269115   | 6 | 32475656 | T | C | 0.2855 | -0.0400 | 0.0066 | 1.37E-09 | -6.0589  | 1064845 | Asthma |
| rs9378264   | 6 | 32475674 | A | G | 0.4286 | 0.0693  | 0.0051 | 1.20E-42 | 13.6879  | 1284712 | Asthma |
| rs9269116   | 6 | 32475681 | T | C | 0.2710 | -0.0427 | 0.0071 | 2.35E-09 | -5.9718  | 696825  | Asthma |
| rs9269118   | 6 | 32475864 | G | A | 0.2881 | -0.0606 | 0.0072 | 2.74E-17 | -8.4572  | 930250  | Asthma |
| rs28895241  | 6 | 32475888 | C | T | 0.5006 | 0.0797  | 0.0079 | 3.45E-24 | 10.1459  | 778845  | Asthma |
| rs28895242  | 6 | 32475889 | C | G | 0.4696 | 0.0735  | 0.0075 | 1.47E-22 | 9.7727   | 479287  | Asthma |
| rs28895247  | 6 | 32476113 | A | T | 0.5157 | 0.0799  | 0.0078 | 2.27E-24 | 10.1868  | 778845  | Asthma |
| rs6457594   | 6 | 32476184 | A | G | 0.3108 | -0.0930 | 0.0086 | 1.77E-27 | -10.8606 | 778845  | Asthma |
| rs28895249  | 6 | 32476244 | T | C | 0.4648 | 0.0761  | 0.0073 | 1.95E-25 | 10.4228  | 505420  | Asthma |
| rs28895250  | 6 | 32476245 | C | T | 0.4962 | 0.0813  | 0.0079 | 7.19E-25 | 10.2981  | 778845  | Asthma |
| rs116353692 | 6 | 32476291 | C | A | 0.0172 | 0.1157  | 0.0208 | 2.67E-08 | 5.5620   | 1156622 | Asthma |
| rs28732242  | 6 | 32476301 | G | A | 0.5317 | -0.0692 | 0.0065 | 2.96E-26 | -10.6006 | 930250  | Asthma |
| rs28732243  | 6 | 32476311 | C | G | 0.4931 | -0.0801 | 0.0079 | 6.23E-24 | -10.0882 | 778845  | Asthma |
| rs28732244  | 6 | 32476319 | T | C | 0.4250 | 0.0762  | 0.0061 | 3.75E-36 | 12.5546  | 1064845 | Asthma |
| rs7770920   | 6 | 32476339 | A | T | 0.0498 | -0.1043 | 0.0131 | 1.59E-15 | -7.9702  | 1216250 | Asthma |
| rs12201153  | 6 | 32476379 | T | C | 0.4413 | -0.1007 | 0.0084 | 8.17E-33 | -11.9311 | 778845  | Asthma |
| rs12194148  | 6 | 32476421 | T | G | 0.4216 | 0.0691  | 0.0054 | 4.34E-37 | 12.7243  | 1216250 | Asthma |
| rs6457596   | 6 | 32476498 | T | C | 0.0499 | -0.1042 | 0.0131 | 1.61E-15 | -7.9688  | 1216250 | Asthma |
| rs12207473  | 6 | 32476553 | C | A | 0.4275 | 0.0692  | 0.0051 | 1.78E-42 | 13.6590  | 1284712 | Asthma |
| rs6457597   | 6 | 32476678 | C | T | 0.2800 | -0.0315 | 0.0055 | 1.17E-08 | -5.7047  | 1310845 | Asthma |
| rs6457598   | 6 | 32476698 | T | C | 0.2832 | -0.0484 | 0.0054 | 3.39E-19 | -8.9551  | 1310845 | Asthma |
| rs34468823  | 6 | 32476716 | T | C | 0.1249 | -0.0632 | 0.0085 | 1.18E-13 | -7.4194  | 1224666 | Asthma |
| rs12195582  | 6 | 32476767 | T | C | 0.4632 | 0.0802  | 0.0061 | 1.99E-39 | 13.1380  | 1029518 | Asthma |
| rs12195589  | 6 | 32476807 | T | C | 0.4268 | 0.0760  | 0.0055 | 5.98E-44 | 13.9043  | 1159440 | Asthma |
| rs7776032   | 6 | 32477119 | C | T | 0.2900 | -0.0501 | 0.0059 | 1.12E-17 | -8.5613  | 1159440 | Asthma |
| rs9469129   | 6 | 32477127 | T | G | 0.0511 | -0.1119 | 0.0146 | 2.22E-14 | -7.6369  | 1064845 | Asthma |
| rs9469130   | 6 | 32477131 | C | G | 0.0507 | -0.0997 | 0.0135 | 1.35E-13 | -7.4007  | 1133307 | Asthma |
| rs28895253  | 6 | 32477133 | A | G | 0.4267 | 0.0756  | 0.0056 | 5.94E-42 | 13.5712  | 1133307 | Asthma |
| rs9269126   | 6 | 32477138 | C | G | 0.3005 | -0.0591 | 0.0064 | 4.29E-20 | -9.1805  | 1003362 | Asthma |

|             |   |          |   |   |        |         |        |          |          |         |        |
|-------------|---|----------|---|---|--------|---------|--------|----------|----------|---------|--------|
| rs7755774   | 6 | 32477155 | G | C | 0.2849 | -0.0587 | 0.0082 | 1.00E-12 | -7.1305  | 540747  | Asthma |
| rs9269130   | 6 | 32477163 | T | G | 0.2966 | -0.0702 | 0.0085 | 1.19E-16 | -8.2846  | 778845  | Asthma |
| rs28895254  | 6 | 32477169 | T | C | 0.4263 | 0.0773  | 0.0061 | 2.31E-37 | 12.7734  | 1064845 | Asthma |
| rs7755901   | 6 | 32477175 | C | T | 0.2810 | -0.0361 | 0.0061 | 4.44E-09 | -5.8669  | 1133307 | Asthma |
| rs7755770   | 6 | 32477191 | A | G | 0.2805 | -0.0310 | 0.0056 | 3.09E-08 | -5.5364  | 1284712 | Asthma |
| rs7755918   | 6 | 32477194 | C | A | 0.2808 | -0.0361 | 0.0061 | 4.19E-09 | -5.8766  | 1133307 | Asthma |
| rs9269135   | 6 | 32477253 | T | C | 0.2913 | -0.0505 | 0.0053 | 3.25E-21 | -9.4543  | 1310845 | Asthma |
| rs28895255  | 6 | 32477302 | T | C | 0.4285 | 0.0699  | 0.0050 | 1.08E-44 | 14.0263  | 1310845 | Asthma |
| rs28895257  | 6 | 32477337 | G | A | 0.4268 | 0.0762  | 0.0055 | 3.46E-44 | 13.9433  | 1159440 | Asthma |
| rs28895258  | 6 | 32477340 | T | C | 0.4268 | 0.0761  | 0.0055 | 3.74E-44 | 13.9378  | 1159440 | Asthma |
| rs9269137   | 6 | 32477370 | C | T | 0.2913 | -0.0509 | 0.0058 | 3.04E-18 | -8.7099  | 1159440 | Asthma |
| rs9269138   | 6 | 32477378 | A | C | 0.2913 | -0.0510 | 0.0058 | 2.81E-18 | -8.7189  | 1159440 | Asthma |
| rs9269139   | 6 | 32477379 | G | A | 0.2913 | -0.0510 | 0.0058 | 2.81E-18 | -8.7189  | 1159440 | Asthma |
| rs28895259  | 6 | 32477481 | G | A | 0.4266 | 0.0760  | 0.0055 | 4.96E-44 | 13.9177  | 1159440 | Asthma |
| rs9269141   | 6 | 32477493 | C | T | 0.2902 | -0.0501 | 0.0058 | 1.05E-17 | -8.5686  | 1159440 | Asthma |
| rs148948227 | 6 | 32477507 | T | G | 0.0510 | -0.0994 | 0.0134 | 1.27E-13 | -7.4092  | 1133307 | Asthma |
| rs28895261  | 6 | 32477529 | A | G | 0.4273 | 0.0755  | 0.0056 | 6.74E-42 | 13.5620  | 1133307 | Asthma |
| rs147716103 | 6 | 32477542 | C | G | 0.1164 | -0.0667 | 0.0097 | 5.52E-12 | -6.8915  | 1130071 | Asthma |
| rs9269142   | 6 | 32477646 | G | A | 0.2902 | -0.0500 | 0.0058 | 1.10E-17 | -8.5631  | 1159440 | Asthma |
| rs73729294  | 6 | 32477670 | A | G | 0.0507 | -0.1018 | 0.0130 | 3.88E-15 | -7.8589  | 1216250 | Asthma |
| rs9269144   | 6 | 32477742 | A | G | 0.3031 | -0.0657 | 0.0085 | 8.04E-15 | -7.7670  | 778845  | Asthma |
| rs9269146   | 6 | 32477753 | G | T | 0.4172 | -0.0612 | 0.0059 | 7.97E-25 | -10.2881 | 1064845 | Asthma |
| rs9405112   | 6 | 32477823 | A | G | 0.3019 | 0.1068  | 0.0055 | 3.84E-85 | 19.5534  | 1225084 | Asthma |
| rs9378212   | 6 | 32477914 | T | C | 0.4800 | 0.0697  | 0.0066 | 1.93E-26 | 10.6404  | 930250  | Asthma |
| rs117810449 | 6 | 32477923 | C | T | 0.0173 | 0.1133  | 0.0200 | 1.55E-08 | 5.6554   | 1216250 | Asthma |
| rs6924676   | 6 | 32477950 | T | C | 0.2773 | -0.0642 | 0.0086 | 7.24E-14 | -7.4834  | 778845  | Asthma |
| rs28895264  | 6 | 32478015 | T | C | 0.4411 | 0.0729  | 0.0066 | 3.24E-28 | 11.0149  | 696825  | Asthma |
| rs28895265  | 6 | 32478016 | G | A | 0.5183 | 0.0765  | 0.0078 | 1.09E-22 | 9.8031   | 778845  | Asthma |
| rs28895266  | 6 | 32478022 | G | A | 0.4214 | 0.0766  | 0.0061 | 1.69E-36 | 12.6173  | 1064845 | Asthma |
| rs28895267  | 6 | 32478139 | T | C | 0.4899 | 0.0847  | 0.0078 | 1.79E-27 | 10.8599  | 778845  | Asthma |
| rs11753780  | 6 | 32478140 | A | G | 0.0482 | -0.1036 | 0.0132 | 3.80E-15 | -7.8616  | 1216250 | Asthma |
| rs17209866  | 6 | 32478215 | A | G | 0.4250 | 0.0768  | 0.0061 | 7.15E-37 | 12.6850  | 1064845 | Asthma |
| rs17209873  | 6 | 32478233 | C | T | 0.5258 | 0.0743  | 0.0080 | 2.09E-20 | 9.2576   | 778845  | Asthma |
| rs17209887  | 6 | 32478274 | C | A | 0.4200 | 0.0719  | 0.0055 | 2.45E-39 | 13.1224  | 1216250 | Asthma |
| rs17203514  | 6 | 32478294 | G | C | 0.4207 | 0.0756  | 0.0061 | 1.23E-35 | 12.4601  | 1064845 | Asthma |
| rs17203521  | 6 | 32478301 | A | C | 0.1246 | -0.0712 | 0.0094 | 3.53E-14 | -7.5774  | 1130071 | Asthma |
| rs6905297   | 6 | 32478323 | C | T | 0.2623 | -0.0672 | 0.0089 | 3.84E-14 | -7.5661  | 778845  | Asthma |
| rs17209907  | 6 | 32478484 | T | C | 0.4092 | 0.1030  | 0.0079 | 1.30E-38 | 12.9955  | 778845  | Asthma |
| rs10947290  | 6 | 32478492 | A | G | 0.0944 | -0.1398 | 0.0143 | 1.72E-22 | -9.7571  | 778845  | Asthma |
| rs17203542  | 6 | 32478501 | G | A | 0.5202 | 0.0816  | 0.0080 | 2.48E-24 | 10.1782  | 778845  | Asthma |
| rs17203549  | 6 | 32478530 | C | T | 0.5382 | 0.0801  | 0.0080 | 1.26E-23 | 10.0190  | 778845  | Asthma |
| rs17203563  | 6 | 32478682 | A | G | 0.4288 | 0.0714  | 0.0059 | 1.70E-33 | 12.0611  | 1086328 | Asthma |
| rs9269157   | 6 | 32478706 | T | C | 0.2806 | -0.0581 | 0.0083 | 2.72E-12 | -6.9915  | 479287  | Asthma |
| rs17209950  | 6 | 32478811 | A | G | 0.3125 | 0.1203  | 0.0069 | 7.29E-68 | 17.4077  | 934923  | Asthma |
| rs17203570  | 6 | 32478897 | T | A | 0.4336 | 0.0865  | 0.0068 | 3.68E-37 | 12.7370  | 934923  | Asthma |
| rs111768304 | 6 | 32478905 | C | T | 0.1128 | -0.0778 | 0.0114 | 9.98E-12 | -6.8066  | 1000149 | Asthma |
| rs9269159   | 6 | 32478914 | G | A | 0.2833 | -0.0673 | 0.0087 | 7.85E-15 | -7.7701  | 778845  | Asthma |
| rs9269160   | 6 | 32478934 | T | C | 0.4237 | -0.0853 | 0.0084 | 5.64E-24 | -10.0980 | 778845  | Asthma |
| rs28952268  | 6 | 32478947 | T | C | 0.4053 | 0.0900  | 0.0071 | 2.61E-37 | 12.7639  | 934923  | Asthma |
| rs9269162   | 6 | 32478960 | A | G | 0.3158 | -0.0665 | 0.0086 | 1.16E-14 | -7.7203  | 778845  | Asthma |
| rs9269163   | 6 | 32479056 | A | G | 0.2750 | -0.0468 | 0.0074 | 2.04E-10 | -6.3583  | 934923  | Asthma |
| rs9269165   | 6 | 32479066 | A | G | 0.2750 | -0.0468 | 0.0074 | 2.02E-10 | -6.3594  | 934923  | Asthma |
| rs17203612  | 6 | 32479076 | T | A | 0.4554 | 0.0841  | 0.0069 | 4.37E-34 | 12.1723  | 934923  | Asthma |
| rs17203619  | 6 | 32479145 | C | T | 0.4379 | 0.0718  | 0.0054 | 1.16E-39 | 13.1787  | 1154790 | Asthma |
| rs17209985  | 6 | 32479183 | C | T | 0.1269 | -0.0816 | 0.0106 | 1.48E-14 | -7.6896  | 1000149 | Asthma |
| rs4640926   | 6 | 32479216 | T | C | 0.1719 | -0.0536 | 0.0082 | 5.46E-11 | -6.5578  | 1003385 | Asthma |
| rs17203626  | 6 | 32479217 | A | G | 0.4383 | 0.0830  | 0.0067 | 7.16E-35 | 12.3190  | 934923  | Asthma |
| rs17203636  | 6 | 32479237 | A | G | 0.4382 | 0.0830  | 0.0067 | 7.98E-35 | 12.3102  | 934923  | Asthma |
| rs9469133   | 6 | 32479304 | G | C | 0.0535 | -0.1018 | 0.0124 | 2.08E-16 | -8.2171  | 1180923 | Asthma |
| rs2395191   | 6 | 32479308 | T | C | 0.3385 | -0.0680 | 0.0062 | 2.20E-28 | -11.0494 | 1029518 | Asthma |
| rs29001652  | 6 | 32479334 | G | A | 0.4366 | 0.0803  | 0.0060 | 2.61E-41 | 13.4622  | 1029518 | Asthma |
| rs9469134   | 6 | 32479342 | T | C | 0.0537 | -0.0996 | 0.0126 | 2.62E-15 | -7.9081  | 1154790 | Asthma |
| rs9461758   | 6 | 32479362 | A | C | 0.0537 | -0.0995 | 0.0126 | 2.87E-15 | -7.8965  | 1154790 | Asthma |
| rs9269172   | 6 | 32479377 | C | G | 0.2842 | -0.0484 | 0.0066 | 1.65E-13 | -7.3744  | 1003385 | Asthma |
| rs29001478  | 6 | 32479385 | A | G | 0.4363 | 0.0799  | 0.0060 | 5.65E-41 | 13.4049  | 1029518 | Asthma |
| rs29001620  | 6 | 32479439 | T | A | 0.4366 | 0.0796  | 0.0061 | 6.61E-39 | 13.0470  | 1003385 | Asthma |
| rs28732246  | 6 | 32479442 | A | G | 0.4365 | 0.0796  | 0.0061 | 7.77E-39 | 13.0348  | 1003385 | Asthma |
| rs29001568  | 6 | 32479564 | A | G | 0.4375 | 0.0725  | 0.0054 | 8.43E-42 | 13.5454  | 1180923 | Asthma |
| rs9269174   | 6 | 32479587 | T | C | 0.2855 | -0.0506 | 0.0058 | 1.57E-18 | -8.7847  | 1180923 | Asthma |
| rs9269175   | 6 | 32479674 | G | A | 0.2855 | -0.0505 | 0.0058 | 1.78E-18 | -8.7706  | 1180923 | Asthma |
| rs28732247  | 6 | 32479697 | G | A | 0.4377 | 0.0725  | 0.0054 | 9.04E-42 | 13.5404  | 1180923 | Asthma |
| rs35007143  | 6 | 32479741 | A | T | 0.4338 | 0.0787  | 0.0061 | 8.23E-38 | 12.8535  | 1003385 | Asthma |
| rs11754562  | 6 | 32479743 | A | G | 0.0535 | -0.1015 | 0.0124 | 2.54E-16 | -8.1933  | 1180923 | Asthma |
| rs9269176   | 6 | 32479768 | T | G | 0.2836 | -0.0493 | 0.0066 | 5.46E-14 | -7.5204  | 1003385 | Asthma |

|             |   |          |   |   |        |         |        |          |          |         |        |
|-------------|---|----------|---|---|--------|---------|--------|----------|----------|---------|--------|
| rs35875942  | 6 | 32479786 | C | T | 0.4339 | 0.0819  | 0.0068 | 1.41E-33 | 12.0765  | 934923  | Asthma |
| rs9269177   | 6 | 32479797 | A | G | 0.2772 | -0.0343 | 0.0060 | 1.17E-08 | -5.7037  | 1154790 | Asthma |
| rs9269178   | 6 | 32479821 | A | G | 0.2801 | -0.0496 | 0.0073 | 7.99E-12 | -6.8387  | 934923  | Asthma |
| rs34207893  | 6 | 32479839 | C | T | 0.4381 | 0.0830  | 0.0067 | 7.76E-35 | 12.3124  | 934923  | Asthma |
| rs2395192   | 6 | 32479867 | C | T | 0.4889 | -0.0747 | 0.0067 | 8.94E-29 | -11.1303 | 934923  | Asthma |
| rs4457186   | 6 | 32479876 | G | A | 0.4381 | 0.0830  | 0.0067 | 7.15E-35 | 12.3189  | 934923  | Asthma |
| rs35372060  | 6 | 32479890 | T | C | 0.3108 | 0.1212  | 0.0069 | 7.85E-69 | 17.5343  | 934923  | Asthma |
| rs2395193   | 6 | 32479932 | G | A | 0.2792 | -0.0439 | 0.0065 | 1.80E-11 | -6.7213  | 1029518 | Asthma |
| rs4994859   | 6 | 32479938 | G | A | 0.4380 | 0.0839  | 0.0077 | 6.71E-28 | 10.9491  | 778845  | Asthma |
| rs4078374   | 6 | 32479963 | A | G | 0.1144 | -0.0855 | 0.0119 | 7.81E-13 | -7.1646  | 778845  | Asthma |
| rs2894261   | 6 | 32479992 | C | T | 0.2808 | -0.0498 | 0.0073 | 7.42E-12 | -6.8492  | 934923  | Asthma |
| rs2894262   | 6 | 32480039 | A | G | 0.2786 | -0.0492 | 0.0073 | 1.55E-11 | -6.7429  | 934923  | Asthma |
| rs4078373   | 6 | 32480055 | A | G | 0.1143 | -0.0845 | 0.0118 | 7.86E-13 | -7.1638  | 844071  | Asthma |
| rs4994855   | 6 | 32480096 | G | A | 0.4384 | 0.0829  | 0.0067 | 8.13E-35 | 12.3087  | 934923  | Asthma |
| rs4994854   | 6 | 32480123 | C | T | 0.4383 | 0.0829  | 0.0067 | 7.65E-35 | 12.3138  | 934923  | Asthma |
| rs187940579 | 6 | 32480317 | A | C | 0.0525 | -0.1242 | 0.0161 | 1.07E-14 | -7.7300  | 934923  | Asthma |
| rs4999342   | 6 | 32480321 | T | C | 0.2745 | -0.0508 | 0.0064 | 3.11E-15 | -7.8864  | 1086328 | Asthma |
| rs4410767   | 6 | 32480352 | C | T | 0.4373 | 0.0730  | 0.0059 | 4.93E-35 | 12.3491  | 1086328 | Asthma |
| rs9378266   | 6 | 32480412 | T | G | 0.4907 | 0.0821  | 0.0078 | 6.66E-26 | 10.5245  | 778845  | Asthma |
| rs9391884   | 6 | 32480542 | C | T | 0.4140 | -0.1037 | 0.0085 | 4.13E-34 | -12.1766 | 778845  | Asthma |
| rs28735118  | 6 | 32480583 | A | T | 0.1245 | -0.0808 | 0.0107 | 4.19E-14 | -7.5548  | 1000149 | Asthma |
| rs9378213   | 6 | 32480621 | G | T | 0.3943 | 0.0664  | 0.0066 | 1.53E-23 | 9.9994   | 930250  | Asthma |
| rs9269190   | 6 | 32480723 | T | C | 0.4039 | -0.0558 | 0.0077 | 4.58E-13 | -7.2374  | 870622  | Asthma |
| rs9391786   | 6 | 32480784 | G | A | 0.3697 | 0.0525  | 0.0074 | 9.58E-13 | 7.1364   | 870622  | Asthma |
| rs7748270   | 6 | 32480822 | C | T | 0.5038 | -0.0496 | 0.0064 | 1.37E-14 | -7.6990  | 930250  | Asthma |
| rs9391787   | 6 | 32480839 | T | C | 0.4947 | -0.0867 | 0.0083 | 2.30E-25 | -10.4073 | 778845  | Asthma |
| rs7748293   | 6 | 32480845 | T | C | 0.2814 | -0.0496 | 0.0064 | 7.78E-15 | -7.7710  | 1086328 | Asthma |
| rs7748472   | 6 | 32480986 | G | A | 0.0454 | -0.1167 | 0.0160 | 3.36E-13 | -7.2790  | 930250  | Asthma |
| rs72846769  | 6 | 32481015 | G | A | 0.2578 | -0.0758 | 0.0108 | 2.65E-12 | -6.9955  | 778845  | Asthma |
| rs71565330  | 6 | 32481185 | A | T | 0.1269 | -0.0812 | 0.0106 | 2.00E-14 | -7.6509  | 1000149 | Asthma |
| rs7749242   | 6 | 32481253 | A | G | 0.2743 | -0.0636 | 0.0086 | 1.58E-13 | -7.3800  | 778845  | Asthma |
| rs7749092   | 6 | 32481273 | T | C | 0.2854 | -0.0614 | 0.0072 | 1.59E-17 | -8.5206  | 930250  | Asthma |
| rs9394098   | 6 | 32481361 | T | C | 0.4388 | 0.0722  | 0.0065 | 9.05E-29 | 11.1293  | 930250  | Asthma |
| rs9394099   | 6 | 32481383 | T | G | 0.4381 | 0.0721  | 0.0054 | 5.53E-40 | 13.2347  | 1154790 | Asthma |
| rs9394101   | 6 | 32481421 | G | A | 0.4452 | 0.0719  | 0.0059 | 4.72E-34 | 12.1659  | 1086328 | Asthma |
| rs5018660   | 6 | 32481516 | G | A | 0.4344 | 0.0845  | 0.0068 | 2.26E-35 | 12.4117  | 934923  | Asthma |
| rs9269201   | 6 | 32481568 | C | T | 0.2780 | -0.0708 | 0.0088 | 7.01E-16 | -8.0705  | 778845  | Asthma |
| rs67505275  | 6 | 32481609 | A | C | 0.1237 | -0.0804 | 0.0109 | 1.25E-13 | -7.4117  | 1000149 | Asthma |
| rs1964995   | 6 | 32481634 | C | T | 0.4312 | 0.0725  | 0.0065 | 8.12E-29 | 11.1389  | 930250  | Asthma |
| rs11752428  | 6 | 32481693 | C | G | 0.0452 | -0.1175 | 0.0143 | 1.94E-16 | -8.2257  | 1086328 | Asthma |
| rs9269202   | 6 | 32481746 | T | C | 0.2742 | -0.0667 | 0.0078 | 1.73E-17 | -8.5105  | 870622  | Asthma |
| rs11757500  | 6 | 32481878 | G | A | 0.0492 | -0.1127 | 0.0141 | 1.51E-15 | -7.9757  | 1086328 | Asthma |
| rs2187822   | 6 | 32481949 | C | A | 0.5220 | 0.0790  | 0.0080 | 7.17E-23 | 9.8455   | 778845  | Asthma |
| rs9269204   | 6 | 32482020 | C | T | 0.2763 | -0.0509 | 0.0064 | 2.83E-15 | -7.8979  | 1086328 | Asthma |
| rs9380309   | 6 | 32482043 | G | A | 0.4303 | 0.0866  | 0.0077 | 4.74E-29 | 11.1866  | 778845  | Asthma |
| rs9269205   | 6 | 32482074 | T | C | 0.2734 | -0.0694 | 0.0089 | 5.48E-15 | -7.8154  | 778845  | Asthma |
| rs7754119   | 6 | 32482081 | C | T | 0.4980 | 0.1029  | 0.0083 | 6.28E-35 | 12.3292  | 778845  | Asthma |
| rs9269207   | 6 | 32482119 | C | T | 0.3190 | -0.0729 | 0.0090 | 3.81E-16 | -8.1444  | 778845  | Asthma |
| rs5020950   | 6 | 32482188 | C | T | 0.3659 | 0.1056  | 0.0081 | 8.26E-39 | 13.0300  | 778845  | Asthma |
| rs5020947   | 6 | 32482256 | T | C | 0.4215 | 0.0854  | 0.0077 | 2.95E-28 | 11.0233  | 778845  | Asthma |
| rs9269210   | 6 | 32482260 | C | T | 0.2580 | -0.0710 | 0.0091 | 4.22E-15 | -7.8482  | 778845  | Asthma |
| rs9269211   | 6 | 32482281 | C | T | 0.3600 | -0.0616 | 0.0085 | 3.20E-13 | -7.2857  | 778845  | Asthma |
| rs5020946   | 6 | 32482312 | T | G | 0.4320 | 0.0741  | 0.0062 | 2.29E-33 | 12.0365  | 1026700 | Asthma |
| rs5020945   | 6 | 32482357 | T | C | 0.3757 | -0.0872 | 0.0087 | 1.01E-23 | -10.0409 | 778845  | Asthma |
| rs5020944   | 6 | 32482363 | G | C | 0.4116 | 0.0817  | 0.0069 | 1.51E-32 | 11.8798  | 934923  | Asthma |
| rs2395196   | 6 | 32482377 | T | A | 0.5012 | 0.1208  | 0.0083 | 7.96E-48 | 14.5284  | 778845  | Asthma |
| rs113653545 | 6 | 32482426 | T | C | 0.1205 | -0.0833 | 0.0109 | 1.68E-14 | -7.6731  | 1000149 | Asthma |
| rs9501641   | 6 | 32482542 | T | C | 0.0537 | -0.1268 | 0.0156 | 4.67E-16 | -8.1195  | 934923  | Asthma |
| rs9269219   | 6 | 32482556 | T | C | 0.3608 | -0.0440 | 0.0080 | 3.68E-08 | -5.5054  | 778845  | Asthma |
| rs112442055 | 6 | 32482684 | A | G | 0.1119 | -0.0820 | 0.0115 | 1.23E-12 | -7.1028  | 1000149 | Asthma |
| rs35957722  | 6 | 32482803 | C | T | 0.3205 | 0.1183  | 0.0072 | 7.92E-61 | 16.4535  | 870622  | Asthma |
| rs34303755  | 6 | 32482836 | C | A | 0.3079 | 0.1329  | 0.0083 | 3.46E-57 | 15.9373  | 778845  | Asthma |
| rs34452456  | 6 | 32482901 | C | T | 0.3314 | 0.0584  | 0.0077 | 2.59E-14 | 7.6177   | 870622  | Asthma |
| rs35979303  | 6 | 32482944 | G | C | 0.6130 | 0.0861  | 0.0083 | 2.54E-25 | 10.3977  | 778845  | Asthma |
| rs9378268   | 6 | 32483138 | A | C | 0.2825 | -0.0848 | 0.0085 | 2.29E-23 | -9.9597  | 778845  | Asthma |
| rs28627501  | 6 | 32483465 | G | A | 0.3108 | 0.0857  | 0.0086 | 2.93E-23 | 9.9349   | 778845  | Asthma |
| rs28438482  | 6 | 32483466 | G | A | 0.3108 | 0.0857  | 0.0086 | 2.93E-23 | 9.9349   | 778845  | Asthma |
| rs79452641  | 6 | 32483511 | C | G | 0.4325 | 0.1157  | 0.0081 | 8.19E-46 | 14.2074  | 778845  | Asthma |
| rs77777792  | 6 | 32483512 | T | A | 0.4325 | 0.1157  | 0.0081 | 8.19E-46 | 14.2074  | 778845  | Asthma |
| rs12191360  | 6 | 32483584 | C | A | 0.3186 | -0.0607 | 0.0071 | 1.77E-17 | -8.5077  | 930250  | Asthma |
| rs28528859  | 6 | 32483618 | A | G | 0.1757 | 0.1822  | 0.0102 | 7.24E-71 | 17.7982  | 778845  | Asthma |
| rs28437337  | 6 | 32483707 | T | C | 0.3024 | 0.1159  | 0.0070 | 1.07E-61 | 16.5739  | 934923  | Asthma |
| rs12660447  | 6 | 32483714 | A | G | 0.3782 | -0.0627 | 0.0085 | 1.50E-13 | -7.3874  | 778845  | Asthma |
| rs13194665  | 6 | 32483749 | G | A | 0.5161 | 0.0776  | 0.0079 | 6.98E-23 | 9.8483   | 778845  | Asthma |

|             |   |          |   |   |        |         |        |          |          |         |        |
|-------------|---|----------|---|---|--------|---------|--------|----------|----------|---------|--------|
| rs13194770  | 6 | 32483793 | T | C | 0.4364 | 0.0741  | 0.0059 | 5.78E-36 | 12.5202  | 1086328 | Asthma |
| rs28619202  | 6 | 32483873 | T | C | 0.3130 | -0.0641 | 0.0070 | 7.79E-20 | -9.1161  | 930250  | Asthma |
| rs71565331  | 6 | 32483916 | C | T | 0.3233 | 0.1199  | 0.0071 | 3.15E-63 | 16.7845  | 870622  | Asthma |
| rs78279385  | 6 | 32483981 | A | G | 0.3225 | 0.1154  | 0.0069 | 7.67E-63 | 16.7314  | 934923  | Asthma |
| rs9269232   | 6 | 32483983 | T | A | 0.3956 | -0.0636 | 0.0079 | 7.32E-16 | -8.0651  | 778845  | Asthma |
| rs9269233   | 6 | 32483985 | A | C | 0.2695 | -0.0654 | 0.0089 | 1.69E-13 | -7.3713  | 778845  | Asthma |
| rs9269234   | 6 | 32484011 | C | G | 0.2255 | -0.0660 | 0.0099 | 2.99E-11 | -6.6472  | 778845  | Asthma |
| rs62405562  | 6 | 32484057 | G | A | 0.4173 | 0.1129  | 0.0082 | 5.04E-43 | 13.7505  | 778845  | Asthma |
| rs2395199   | 6 | 32484072 | G | C | 0.0845 | -0.0862 | 0.0126 | 7.89E-12 | -6.8407  | 930250  | Asthma |
| rs71565333  | 6 | 32484125 | T | C | 0.3040 | 0.1205  | 0.0070 | 1.95E-66 | 17.2181  | 934923  | Asthma |
| rs2395202   | 6 | 32484129 | T | C | 0.2908 | -0.0646 | 0.0086 | 4.59E-14 | -7.5432  | 778845  | Asthma |
| rs71565334  | 6 | 32484170 | T | C | 0.3160 | 0.1314  | 0.0082 | 2.73E-58 | 16.0959  | 778845  | Asthma |
| rs71565335  | 6 | 32484177 | C | T | 0.3076 | 0.1212  | 0.0070 | 1.03E-67 | 17.3882  | 934923  | Asthma |
| rs71565336  | 6 | 32484186 | A | G | 0.3203 | 0.1323  | 0.0081 | 1.99E-59 | 16.2568  | 778845  | Asthma |
| rs1557551   | 6 | 32484413 | G | A | 0.0909 | -0.0760 | 0.0102 | 9.76E-14 | -7.4440  | 1086328 | Asthma |
| rs1557550   | 6 | 32484425 | T | C | 0.0813 | -0.0817 | 0.0118 | 3.66E-12 | -6.9499  | 934923  | Asthma |
| rs62405565  | 6 | 32484504 | G | C | 0.3212 | 0.1325  | 0.0081 | 6.46E-60 | 16.3258  | 778845  | Asthma |
| rs1557549   | 6 | 32484505 | G | A | 0.0892 | -0.1041 | 0.0148 | 1.93E-12 | -7.0393  | 778845  | Asthma |
| rs1557548   | 6 | 32484509 | G | T | 0.0875 | -0.0915 | 0.0126 | 4.62E-13 | -7.2362  | 873440  | Asthma |
| rs538809264 | 6 | 32484569 | C | T | 0.1360 | -0.0897 | 0.0121 | 1.41E-13 | -7.3959  | 566903  | Asthma |
| rs71543453  | 6 | 32484584 | T | C | 0.4364 | 0.0829  | 0.0068 | 2.21E-34 | 12.2279  | 934923  | Asthma |
| rs71565339  | 6 | 32484601 | A | C | 0.1183 | -0.1005 | 0.0136 | 1.29E-13 | -7.4073  | 476051  | Asthma |
| rs71543454  | 6 | 32484622 | A | G | 0.4300 | 0.0837  | 0.0068 | 1.57E-34 | 12.2556  | 934923  | Asthma |
| rs71543455  | 6 | 32484632 | C | G | 0.4248 | 0.0844  | 0.0078 | 2.01E-27 | 10.8492  | 778845  | Asthma |
| rs28599891  | 6 | 32484693 | C | G | 0.3341 | -0.0512 | 0.0070 | 2.43E-13 | -7.3229  | 934923  | Asthma |
| rs71565340  | 6 | 32484729 | T | C | 0.3214 | 0.1172  | 0.0068 | 7.82E-66 | 17.1373  | 930250  | Asthma |
| rs28479879  | 6 | 32484740 | T | C | 0.3960 | -0.1011 | 0.0081 | 5.69E-36 | -12.5210 | 778845  | Asthma |
| rs28368843  | 6 | 32484810 | T | C | 0.1304 | -0.0764 | 0.0091 | 3.04E-17 | -8.4449  | 1151554 | Asthma |
| rs62405566  | 6 | 32485318 | T | C | 0.4251 | 0.0857  | 0.0069 | 3.95E-35 | 12.3668  | 934923  | Asthma |
| rs28662053  | 6 | 32485330 | G | A | 0.4335 | 0.0835  | 0.0068 | 9.07E-35 | 12.2999  | 934923  | Asthma |
| rs67037615  | 6 | 32485386 | C | T | 0.1248 | -0.0781 | 0.0093 | 3.93E-17 | -8.4149  | 1151554 | Asthma |
| rs72849247  | 6 | 32485417 | C | T | 0.1258 | -0.0802 | 0.0107 | 5.23E-14 | -7.5263  | 1000149 | Asthma |
| rs111524667 | 6 | 32485507 | G | C | 0.0505 | -0.1256 | 0.0161 | 6.13E-15 | -7.8017  | 934923  | Asthma |
| rs80151942  | 6 | 32485543 | T | A | 0.1251 | -0.0802 | 0.0107 | 5.94E-14 | -7.5095  | 1000149 | Asthma |
| rs34036879  | 6 | 32485559 | T | G | 0.3194 | 0.1229  | 0.0072 | 4.97E-66 | 17.1640  | 847307  | Asthma |
| rs75259234  | 6 | 32485561 | T | C | 0.4304 | 0.0865  | 0.0078 | 6.74E-29 | 11.1555  | 778845  | Asthma |
| rs62405567  | 6 | 32485595 | A | G | 0.3301 | -0.0832 | 0.0086 | 3.27E-22 | -9.6919  | 778845  | Asthma |
| rs149088066 | 6 | 32485718 | C | T | 0.4371 | 0.0804  | 0.0077 | 3.01E-25 | 10.3814  | 778845  | Asthma |
| rs201574337 | 6 | 32485719 | C | T | 0.4810 | 0.0743  | 0.0078 | 1.71E-21 | 9.5211   | 778845  | Asthma |
| rs77469652  | 6 | 32485755 | C | T | 0.4310 | 0.0838  | 0.0077 | 2.20E-27 | 10.8411  | 778845  | Asthma |
| rs9269235   | 6 | 32485781 | T | G | 0.1932 | -0.0797 | 0.0101 | 2.82E-15 | -7.8985  | 778845  | Asthma |
| rs114060570 | 6 | 32485791 | T | C | 0.1035 | -0.0849 | 0.0125 | 1.09E-11 | -6.7942  | 778845  | Asthma |
| rs9269236   | 6 | 32485802 | C | A | 0.1995 | -0.0818 | 0.0101 | 3.96E-16 | -8.1395  | 778845  | Asthma |
| rs9269237   | 6 | 32485806 | T | C | 0.3758 | -0.0441 | 0.0080 | 3.59E-08 | -5.5099  | 778845  | Asthma |
| rs112221534 | 6 | 32485826 | A | T | 0.2462 | 0.0954  | 0.0091 | 1.19E-25 | 10.4698  | 778845  | Asthma |
| rs79251508  | 6 | 32485855 | G | A | 0.4326 | 0.0859  | 0.0077 | 1.17E-28 | 11.1059  | 778845  | Asthma |
| rs79346779  | 6 | 32485878 | A | G | 0.4340 | 0.0866  | 0.0078 | 6.06E-29 | 11.1648  | 778845  | Asthma |
| rs112112734 | 6 | 32486076 | C | T | 0.4322 | 0.0841  | 0.0078 | 2.20E-27 | 10.8408  | 778845  | Asthma |
| rs111266158 | 6 | 32486105 | A | G | 0.1253 | -0.0825 | 0.0109 | 4.66E-14 | -7.5414  | 934923  | Asthma |
| rs112062732 | 6 | 32486159 | C | T | 0.3589 | 0.0888  | 0.0084 | 2.64E-26 | 10.6114  | 778845  | Asthma |
| rs74508474  | 6 | 32486379 | C | T | 0.3885 | 0.0957  | 0.0083 | 6.49E-31 | 11.5611  | 778845  | Asthma |
| rs72849254  | 6 | 32486423 | T | G | 0.3822 | 0.0831  | 0.0064 | 9.27E-39 | 13.0213  | 1064845 | Asthma |
| rs76731120  | 6 | 32486462 | C | T | 0.3833 | 0.0845  | 0.0064 | 8.38E-40 | 13.2033  | 1064845 | Asthma |
| rs74503228  | 6 | 32486469 | T | C | 0.3807 | 0.0836  | 0.0064 | 7.12E-39 | 13.0415  | 1064845 | Asthma |
| rs79128700  | 6 | 32486498 | C | T | 0.3766 | 0.0810  | 0.0071 | 2.47E-30 | 11.4456  | 908767  | Asthma |
| rs75219938  | 6 | 32486501 | T | C | 0.3766 | 0.0810  | 0.0071 | 2.63E-30 | 11.4402  | 908767  | Asthma |
| rs9269252   | 6 | 32486516 | A | T | 0.4120 | -0.0473 | 0.0061 | 1.08E-14 | -7.7299  | 1064845 | Asthma |
| rs75876220  | 6 | 32486520 | C | A | 0.3835 | 0.0786  | 0.0070 | 2.49E-29 | 11.2436  | 908767  | Asthma |
| rs9269254   | 6 | 32486550 | T | C | 0.4074 | -0.0382 | 0.0070 | 4.20E-08 | -5.4821  | 908767  | Asthma |
| rs78358922  | 6 | 32486583 | A | G | 0.4095 | 0.0799  | 0.0062 | 9.60E-38 | 12.8416  | 1064845 | Asthma |
| rs77115076  | 6 | 32486584 | T | C | 0.4018 | 0.0791  | 0.0070 | 8.58E-30 | 11.3371  | 908767  | Asthma |
| rs9269256   | 6 | 32486624 | A | T | 0.1822 | -0.0552 | 0.0079 | 2.39E-12 | -7.0098  | 1003385 | Asthma |
| rs9269258   | 6 | 32486685 | G | C | 0.1945 | -0.0764 | 0.0100 | 2.03E-14 | -7.6489  | 778845  | Asthma |
| rs9269260   | 6 | 32486689 | A | G | 0.1945 | -0.0764 | 0.0100 | 2.03E-14 | -7.6489  | 778845  | Asthma |
| rs368404259 | 6 | 32486798 | C | A | 0.3578 | 0.0932  | 0.0085 | 3.02E-28 | 11.0210  | 778845  | Asthma |
| rs9269263   | 6 | 32486804 | C | T | 0.1866 | -0.0740 | 0.0090 | 1.49E-16 | -8.2573  | 847307  | Asthma |
| rs9269268   | 6 | 32486890 | T | C | 0.1917 | -0.0764 | 0.0098 | 4.95E-15 | -7.8282  | 804978  | Asthma |
| rs73731419  | 6 | 32486917 | C | T | 0.2378 | -0.0634 | 0.0096 | 3.43E-11 | -6.6269  | 778845  | Asthma |
| rs145704749 | 6 | 32486967 | C | T | 0.3124 | -0.0669 | 0.0089 | 5.13E-14 | -7.5285  | 778845  | Asthma |
| rs148967059 | 6 | 32486978 | A | T | 0.1997 | 0.1651  | 0.0115 | 1.12E-46 | 14.3458  | 463403  | Asthma |
| rs114141268 | 6 | 32487122 | G | C | 0.2407 | -0.0669 | 0.0096 | 2.77E-12 | -6.9888  | 778845  | Asthma |
| rs139465672 | 6 | 32487143 | C | G | 0.2344 | -0.0697 | 0.0096 | 3.60E-13 | -7.2699  | 778845  | Asthma |
| rs75310737  | 6 | 32487216 | C | T | 0.2576 | -0.0576 | 0.0095 | 1.20E-09 | -6.0807  | 778845  | Asthma |
| rs147610934 | 6 | 32487256 | C | T | 0.2796 | -0.0632 | 0.0094 | 1.53E-11 | -6.7453  | 778845  | Asthma |

|             |   |          |   |   |        |         |        |          |          |        |        |
|-------------|---|----------|---|---|--------|---------|--------|----------|----------|--------|--------|
| rs191795965 | 6 | 32487296 | T | C | 0.4709 | -0.0622 | 0.0091 | 7.91E-12 | -6.8400  | 778845 | Asthma |
| rs77497538  | 6 | 32487948 | G | A | 0.3731 | 0.1456  | 0.0104 | 1.17E-44 | 14.0204  | 778845 | Asthma |
| rs77769241  | 6 | 32487965 | T | A | 0.6776 | 0.0450  | 0.0079 | 1.46E-08 | 5.6669   | 908767 | Asthma |
| rs79648921  | 6 | 32488000 | C | T | 0.3084 | -0.0748 | 0.0079 | 3.56E-21 | -9.4447  | 908767 | Asthma |
| rs79563328  | 6 | 32488024 | C | T | 0.2855 | -0.0635 | 0.0093 | 1.07E-11 | -6.7972  | 540747 | Asthma |
| rs78658333  | 6 | 32488033 | G | T | 0.3282 | -0.0741 | 0.0079 | 7.14E-21 | -9.3717  | 908767 | Asthma |
| rs73401342  | 6 | 32488035 | C | A | 0.3158 | -0.0718 | 0.0080 | 3.52E-19 | -8.9512  | 908767 | Asthma |
| rs75044322  | 6 | 32488050 | A | G | 0.2420 | -0.0731 | 0.0092 | 2.41E-15 | -7.9182  | 540747 | Asthma |
| rs75592097  | 6 | 32488051 | T | C | 0.2430 | -0.0721 | 0.0092 | 5.38E-15 | -7.8176  | 540747 | Asthma |
| rs78214806  | 6 | 32488061 | G | A | 0.2426 | -0.0710 | 0.0092 | 1.44E-14 | -7.6924  | 540747 | Asthma |
| rs79781139  | 6 | 32488070 | A | G | 0.2431 | -0.0723 | 0.0092 | 4.83E-15 | -7.8313  | 540747 | Asthma |
| rs75851392  | 6 | 32488082 | C | G | 0.3756 | -0.0807 | 0.0080 | 1.17E-23 | -10.0265 | 908767 | Asthma |
| rs146905608 | 6 | 32488124 | T | C | 0.2848 | -0.0689 | 0.0094 | 2.16E-13 | -7.3386  | 540747 | Asthma |
| rs77764113  | 6 | 32488151 | T | C | 0.2971 | -0.0833 | 0.0094 | 6.05E-19 | -8.8912  | 778845 | Asthma |
| rs78323436  | 6 | 32488175 | T | C | 0.2917 | -0.0724 | 0.0080 | 1.07E-19 | -9.0819  | 908767 | Asthma |
| rs72849262  | 6 | 32488355 | G | T | 0.4242 | -0.0611 | 0.0092 | 2.80E-11 | -6.6565  | 778845 | Asthma |
| rs75699330  | 6 | 32488362 | A | G | 0.4443 | -0.0527 | 0.0079 | 2.00E-11 | -6.7061  | 908767 | Asthma |
| rs79677293  | 6 | 32488379 | C | T | 0.2852 | -0.0679 | 0.0079 | 1.12E-17 | -8.5606  | 908767 | Asthma |
| rs76687830  | 6 | 32488413 | G | C | 0.2725 | -0.0720 | 0.0080 | 2.66E-19 | -8.9820  | 908767 | Asthma |
| rs78819855  | 6 | 32488421 | T | C | 0.2766 | -0.0697 | 0.0080 | 2.34E-18 | -8.7397  | 908767 | Asthma |
| rs72849263  | 6 | 32488462 | G | A | 0.2847 | -0.0694 | 0.0080 | 2.71E-18 | -8.7228  | 908767 | Asthma |
| rs77490899  | 6 | 32488485 | C | G | 0.2850 | -0.0735 | 0.0079 | 1.90E-20 | -9.2679  | 908767 | Asthma |
| rs78253982  | 6 | 32488488 | T | C | 0.2847 | -0.0736 | 0.0079 | 1.77E-20 | -9.2756  | 908767 | Asthma |
| rs75349662  | 6 | 32488510 | A | T | 0.2876 | -0.0750 | 0.0079 | 2.49E-21 | -9.4820  | 908767 | Asthma |
| rs75185583  | 6 | 32488549 | T | G | 0.3147 | -0.0675 | 0.0081 | 5.40E-17 | -8.3777  | 908767 | Asthma |
| rs77512426  | 6 | 32488558 | A | G | 0.3437 | -0.0697 | 0.0080 | 3.32E-18 | -8.7000  | 908767 | Asthma |
| rs78486723  | 6 | 32488562 | G | A | 0.3372 | -0.0709 | 0.0080 | 6.84E-19 | -8.8775  | 908767 | Asthma |
| rs74813816  | 6 | 32488576 | T | G | 0.3154 | -0.0666 | 0.0080 | 1.23E-16 | -8.2798  | 908767 | Asthma |
| rs79911538  | 6 | 32488580 | C | A | 0.3169 | -0.0692 | 0.0080 | 7.98E-18 | -8.5998  | 908767 | Asthma |
| rs76009041  | 6 | 32488587 | T | A | 0.7140 | 0.0515  | 0.0080 | 1.18E-10 | 6.4418   | 908767 | Asthma |
| rs76398050  | 6 | 32488589 | G | C | 0.7143 | 0.0491  | 0.0080 | 8.58E-10 | 6.1337   | 908767 | Asthma |
| rs78391724  | 6 | 32488594 | A | C | 0.3148 | -0.0691 | 0.0080 | 5.89E-18 | -8.6347  | 908767 | Asthma |
| rs111319575 | 6 | 32488668 | G | T | 0.2384 | 0.1155  | 0.0129 | 4.17E-19 | 8.9325   | 497942 | Asthma |
| rs80268126  | 6 | 32488698 | G | C | 0.2407 | 0.1187  | 0.0129 | 3.82E-20 | 9.1927   | 497942 | Asthma |
| rs75814086  | 6 | 32488736 | A | G | 0.2874 | -0.0717 | 0.0079 | 1.68E-19 | -9.0322  | 908767 | Asthma |
| rs74528051  | 6 | 32488776 | A | G | 0.2844 | -0.0696 | 0.0080 | 3.14E-18 | -8.7062  | 908767 | Asthma |
| rs79175537  | 6 | 32488796 | C | T | 0.2795 | -0.0698 | 0.0080 | 1.94E-18 | -8.7607  | 908767 | Asthma |
| rs75103235  | 6 | 32488825 | G | A | 0.2876 | -0.0689 | 0.0079 | 3.86E-18 | -8.6830  | 908767 | Asthma |
| rs75961603  | 6 | 32488910 | G | A | 0.4592 | -0.0984 | 0.0100 | 5.89E-23 | -9.8652  | 778845 | Asthma |
| rs77110097  | 6 | 32488914 | T | C | 0.4592 | -0.0984 | 0.0100 | 5.89E-23 | -9.8652  | 778845 | Asthma |
| rs76263067  | 6 | 32488917 | C | T | 0.4603 | -0.0973 | 0.0100 | 1.52E-22 | -9.7695  | 778845 | Asthma |
| rs78855616  | 6 | 32488954 | G | T | 0.4381 | -0.0787 | 0.0082 | 9.03E-22 | -9.5876  | 908767 | Asthma |
| rs77852709  | 6 | 32488976 | T | C | 0.4521 | -0.0998 | 0.0099 | 6.92E-24 | -10.0780 | 778845 | Asthma |
| rs58265620  | 6 | 32488983 | T | G | 0.2793 | -0.0667 | 0.0080 | 1.12E-16 | -8.2917  | 908767 | Asthma |
| rs78539152  | 6 | 32489013 | C | T | 0.2496 | -0.0711 | 0.0092 | 1.22E-14 | -7.7138  | 540747 | Asthma |
| rs77923331  | 6 | 32489016 | A | G | 0.2462 | -0.0670 | 0.0092 | 4.23E-13 | -7.2479  | 540747 | Asthma |
| rs78999765  | 6 | 32489035 | A | G | 0.2870 | -0.0701 | 0.0079 | 1.03E-18 | -8.8317  | 908767 | Asthma |
| rs79493873  | 6 | 32489042 | G | T | 0.3023 | -0.0717 | 0.0079 | 1.55E-19 | -9.0410  | 908767 | Asthma |
| rs79870380  | 6 | 32489066 | A | G | 0.2848 | -0.0717 | 0.0080 | 2.37E-19 | -8.9947  | 908767 | Asthma |
| rs79963281  | 6 | 32489121 | C | T | 0.2831 | -0.0722 | 0.0080 | 1.48E-19 | -9.0462  | 908767 | Asthma |
| rs74432088  | 6 | 32489122 | A | G | 0.2816 | -0.0677 | 0.0080 | 2.13E-17 | -8.4865  | 908767 | Asthma |
| rs77159790  | 6 | 32489135 | G | A | 0.2804 | -0.0704 | 0.0080 | 1.20E-18 | -8.8146  | 908767 | Asthma |
| rs75077509  | 6 | 32489139 | C | T | 0.2956 | -0.0654 | 0.0080 | 3.05E-16 | -8.1713  | 908767 | Asthma |
| rs76224106  | 6 | 32489151 | C | T | 0.4602 | -0.0935 | 0.0098 | 1.37E-21 | -9.5444  | 778845 | Asthma |
| rs78443865  | 6 | 32489174 | G | A | 0.2599 | -0.0653 | 0.0081 | 6.64E-16 | -8.0770  | 908767 | Asthma |
| rs77213787  | 6 | 32489199 | A | G | 0.2868 | -0.0690 | 0.0079 | 3.69E-18 | -8.6880  | 908767 | Asthma |
| rs76388981  | 6 | 32489236 | A | G | 0.2826 | -0.0664 | 0.0081 | 1.67E-16 | -8.2440  | 908767 | Asthma |
| rs79580861  | 6 | 32489250 | A | T | 0.2988 | -0.0721 | 0.0079 | 9.38E-20 | -9.0960  | 908767 | Asthma |
| rs79299257  | 6 | 32489280 | A | C | 0.2642 | -0.0814 | 0.0095 | 7.33E-18 | -8.6096  | 778845 | Asthma |
| rs79868762  | 6 | 32489321 | C | T | 0.2798 | -0.0708 | 0.0080 | 6.95E-19 | -8.8757  | 908767 | Asthma |
| rs74317846  | 6 | 32489440 | G | A | 0.2755 | -0.0866 | 0.0095 | 5.80E-20 | -9.1479  | 778845 | Asthma |
| rs77561985  | 6 | 32489459 | G | T | 0.2768 | -0.0587 | 0.0093 | 3.27E-10 | -6.2854  | 540747 | Asthma |
| rs79357367  | 6 | 32489465 | C | A | 0.2391 | -0.0683 | 0.0092 | 1.46E-13 | -7.3908  | 540747 | Asthma |
| rs79042439  | 6 | 32489508 | A | G | 0.4072 | -0.0808 | 0.0080 | 1.00E-23 | -10.0412 | 908767 | Asthma |
| rs74745419  | 6 | 32489514 | G | C | 0.3845 | -0.0946 | 0.0095 | 3.66E-23 | -9.9129  | 778845 | Asthma |
| rs113923037 | 6 | 32489538 | A | G | 0.2652 | 0.1278  | 0.0086 | 5.91E-50 | 14.8614  | 908767 | Asthma |
| rs112324351 | 6 | 32489561 | C | A | 0.2761 | 0.1262  | 0.0085 | 1.04E-49 | 14.8225  | 908767 | Asthma |
| rs79235294  | 6 | 32489613 | A | G | 0.3236 | -0.0788 | 0.0079 | 1.74E-23 | -9.9866  | 908767 | Asthma |
| rs76802124  | 6 | 32489619 | T | C | 0.3234 | -0.0753 | 0.0079 | 1.10E-21 | -9.5670  | 908767 | Asthma |
| rs76643418  | 6 | 32489622 | C | T | 0.3216 | -0.0787 | 0.0079 | 1.86E-23 | -9.9802  | 908767 | Asthma |
| rs115490318 | 6 | 32489657 | A | G | 0.6865 | -0.0934 | 0.0123 | 2.44E-14 | -7.6252  | 497942 | Asthma |
| rs77714361  | 6 | 32489673 | G | A | 0.3151 | -0.0768 | 0.0079 | 2.19E-22 | -9.7325  | 908767 | Asthma |
| rs75779249  | 6 | 32489685 | T | C | 0.3245 | -0.0704 | 0.0079 | 7.62E-19 | -8.8653  | 908767 | Asthma |
| rs75280741  | 6 | 32489698 | A | C | 0.2824 | -0.0852 | 0.0094 | 1.07E-19 | -9.0812  | 778845 | Asthma |



|             |   |          |   |   |        |         |        |          |          |        |        |
|-------------|---|----------|---|---|--------|---------|--------|----------|----------|--------|--------|
| rs7256976   | 6 | 32489711 | C | T | 0.2646 | -0.0835 | 0.0094 | 7.35E-19 | -8.8695  | 778845 | Asthma |
| rs76883199  | 6 | 32489762 | C | T | 0.2748 | -0.0704 | 0.0080 | 1.19E-18 | -8.8156  | 908767 | Asthma |
| rs75301863  | 6 | 32489789 | T | C | 0.2727 | -0.0681 | 0.0080 | 1.73E-17 | -8.5107  | 908767 | Asthma |
| rs78543540  | 6 | 32489985 | A | C | 0.4529 | 0.0787  | 0.0115 | 8.37E-12 | 6.8319   | 497942 | Asthma |
| rs79044903  | 6 | 32489994 | A | C | 0.4870 | 0.0903  | 0.0115 | 4.40E-15 | 7.8429   | 497942 | Asthma |
| rs76819034  | 6 | 32490037 | C | T | 0.5024 | 0.1067  | 0.0083 | 4.09E-38 | 12.9078  | 778845 | Asthma |
| rs77964335  | 6 | 32490089 | T | A | 0.2567 | -0.0803 | 0.0095 | 3.34E-17 | -8.4340  | 778845 | Asthma |
| rs74973088  | 6 | 32490097 | T | C | 0.4627 | -0.0873 | 0.0079 | 2.87E-28 | -11.0259 | 778845 | Asthma |
| rs80133970  | 6 | 32490103 | A | G | 0.2475 | -0.0770 | 0.0096 | 7.88E-16 | -8.0560  | 778845 | Asthma |
| rs200296597 | 6 | 32490167 | C | A | 0.4144 | -0.0672 | 0.0092 | 3.33E-13 | -7.2802  | 778845 | Asthma |
| rs59918538  | 6 | 32490212 | T | C | 0.2886 | -0.0920 | 0.0093 | 3.91E-23 | -9.9062  | 778845 | Asthma |
| rs77413079  | 6 | 32490226 | C | A | 0.2853 | -0.0832 | 0.0094 | 1.07E-18 | -8.8280  | 778845 | Asthma |
| rs552839730 | 6 | 32490296 | A | T | 0.2082 | -0.0735 | 0.0098 | 7.29E-14 | -7.4826  | 778845 | Asthma |
| rs78512156  | 6 | 32490391 | C | T | 0.2260 | 0.1044  | 0.0120 | 3.94E-18 | 8.6801   | 550520 | Asthma |
| rs78947187  | 6 | 32490392 | A | G | 0.2670 | 0.1270  | 0.0079 | 2.96E-58 | 16.0908  | 908767 | Asthma |
| rs62405571  | 6 | 32490451 | T | C | 0.2304 | -0.0733 | 0.0096 | 2.39E-14 | -7.6277  | 778845 | Asthma |
| rs57053495  | 6 | 32490500 | T | C | 0.3112 | -0.0814 | 0.0095 | 8.79E-18 | -8.5888  | 778845 | Asthma |
| rs78383232  | 6 | 32490515 | T | C | 0.4424 | -0.0958 | 0.0100 | 8.88E-22 | -9.5891  | 778845 | Asthma |
| rs113301125 | 6 | 32490551 | G | C | 0.5538 | -0.0492 | 0.0081 | 1.53E-09 | -6.0414  | 778845 | Asthma |
| rs113693373 | 6 | 32490992 | T | A | 0.8502 | 0.0674  | 0.0109 | 6.43E-10 | 6.1793   | 540747 | Asthma |
| rs111966786 | 6 | 32491020 | G | T | 0.4404 | -0.0863 | 0.0101 | 1.12E-17 | -8.5609  | 778845 | Asthma |
| rs111458169 | 6 | 32491214 | A | G | 0.3877 | -0.0927 | 0.0097 | 8.53E-22 | -9.5933  | 778845 | Asthma |
| rs75885006  | 6 | 32491606 | G | A | 0.4526 | -0.0810 | 0.0101 | 8.34E-16 | -8.0490  | 778845 | Asthma |
| rs78181233  | 6 | 32491749 | G | A | 0.2863 | -0.0850 | 0.0094 | 1.61E-19 | -9.0370  | 778845 | Asthma |
| rs79893879  | 6 | 32491777 | A | C | 0.2559 | 0.1047  | 0.0126 | 9.65E-17 | 8.3091   | 497942 | Asthma |
| rs71545424  | 6 | 32491849 | C | T | 0.2740 | -0.0751 | 0.0081 | 3.06E-20 | -9.2168  | 908767 | Asthma |
| rs76931568  | 6 | 32491888 | A | G | 0.3093 | 0.1064  | 0.0077 | 6.88E-43 | 13.7276  | 908767 | Asthma |
| rs71545427  | 6 | 32491927 | T | C | 0.2160 | -0.0671 | 0.0085 | 2.01E-15 | -7.9410  | 908767 | Asthma |
| rs79420263  | 6 | 32492026 | C | G | 0.2244 | 0.1127  | 0.0132 | 1.36E-17 | 8.5383   | 497942 | Asthma |
| rs79238108  | 6 | 32492030 | C | T | 0.2120 | -0.0687 | 0.0085 | 6.54E-16 | -8.0788  | 908767 | Asthma |
| rs75262655  | 6 | 32492034 | G | A | 0.2245 | 0.1123  | 0.0132 | 1.67E-17 | 8.5151   | 497942 | Asthma |
| rs75496002  | 6 | 32492078 | C | T | 0.2931 | 0.1145  | 0.0119 | 4.30E-22 | 9.6633   | 497942 | Asthma |
| rs77158649  | 6 | 32492098 | C | T | 0.2847 | 0.1154  | 0.0119 | 2.46E-22 | 9.7212   | 497942 | Asthma |
| rs78091375  | 6 | 32492100 | G | A | 0.2847 | 0.1154  | 0.0119 | 2.46E-22 | 9.7212   | 497942 | Asthma |
| rs74347248  | 6 | 32492101 | T | A | 0.2846 | 0.1154  | 0.0119 | 2.56E-22 | 9.7170   | 497942 | Asthma |
| rs116587947 | 6 | 32492112 | T | C | 0.4168 | -0.0592 | 0.0071 | 5.69E-17 | -8.3715  | 908767 | Asthma |
| rs114146939 | 6 | 32492113 | G | C | 0.4173 | -0.0598 | 0.0071 | 2.87E-17 | -8.4519  | 908767 | Asthma |
| rs74507717  | 6 | 32492140 | G | A | 0.2669 | -0.0537 | 0.0083 | 7.92E-11 | -6.5021  | 908767 | Asthma |
| rs80072299  | 6 | 32492146 | G | A | 0.4175 | 0.1033  | 0.0080 | 2.22E-38 | 12.9546  | 540747 | Asthma |
| rs76782015  | 6 | 32492160 | T | C | 0.2834 | -0.0700 | 0.0095 | 1.35E-13 | -7.4013  | 540747 | Asthma |
| rs76507644  | 6 | 32492225 | A | C | 0.2661 | -0.0798 | 0.0093 | 1.08E-17 | -8.5653  | 540747 | Asthma |
| rs187104995 | 6 | 32492237 | A | C | 0.3130 | -0.0654 | 0.0093 | 2.41E-12 | -7.0082  | 540747 | Asthma |
| rs148630431 | 6 | 32492242 | G | A | 0.2801 | -0.0853 | 0.0094 | 7.70E-20 | -9.1173  | 540747 | Asthma |
| rs144441217 | 6 | 32492248 | G | T | 0.2704 | -0.0801 | 0.0094 | 1.28E-17 | -8.5457  | 540747 | Asthma |
| rs147402766 | 6 | 32492250 | G | A | 0.2736 | -0.0781 | 0.0093 | 5.80E-17 | -8.3694  | 540747 | Asthma |
| rs73401361  | 6 | 32492268 | G | A | 0.3262 | -0.0762 | 0.0080 | 1.77E-21 | -9.5179  | 908767 | Asthma |
| rs77532237  | 6 | 32492273 | T | A | 0.6861 | 0.0766  | 0.0093 | 2.10E-16 | 8.2163   | 778845 | Asthma |
| rs77464688  | 6 | 32492280 | C | T | 0.4636 | -0.0807 | 0.0083 | 3.36E-22 | -9.6890  | 908767 | Asthma |
| rs112985748 | 6 | 32492316 | T | C | 0.4952 | -0.0835 | 0.0087 | 5.16E-22 | -9.6451  | 908767 | Asthma |
| rs111499705 | 6 | 32492339 | A | G | 0.3379 | -0.0856 | 0.0081 | 3.90E-26 | -10.5748 | 908767 | Asthma |
| rs113255123 | 6 | 32492380 | T | C | 0.3269 | -0.0815 | 0.0080 | 1.80E-24 | -10.2092 | 908767 | Asthma |
| rs113079522 | 6 | 32492393 | C | T | 0.3343 | -0.0814 | 0.0080 | 2.17E-24 | -10.1913 | 908767 | Asthma |
| rs77850263  | 6 | 32492455 | A | G | 0.3477 | -0.0799 | 0.0080 | 1.00E-23 | -10.0412 | 908767 | Asthma |
| rs79851609  | 6 | 32492464 | A | C | 0.2722 | -0.0787 | 0.0093 | 2.84E-17 | -8.4529  | 540747 | Asthma |
| rs76749487  | 6 | 32492509 | A | T | 0.3517 | -0.0775 | 0.0079 | 1.46E-22 | -9.7736  | 908767 | Asthma |
| rs77361953  | 6 | 32492518 | T | C | 0.3455 | -0.0805 | 0.0080 | 4.34E-24 | -10.1237 | 908767 | Asthma |
| rs80011694  | 6 | 32492541 | A | G | 0.4655 | -0.0873 | 0.0083 | 9.17E-26 | -10.4944 | 908767 | Asthma |
| rs75013350  | 6 | 32492613 | T | C | 0.2490 | -0.0788 | 0.0095 | 1.39E-16 | -8.2658  | 778845 | Asthma |
| rs74945164  | 6 | 32492670 | A | G | 0.2904 | -0.0712 | 0.0080 | 4.09E-19 | -8.9346  | 908767 | Asthma |
| rs113026095 | 6 | 32492709 | G | A | 0.4539 | 0.1254  | 0.0082 | 2.23E-52 | 15.2304  | 778845 | Asthma |
| rs78767260  | 6 | 32492714 | A | C | 0.3183 | -0.0743 | 0.0079 | 5.49E-21 | -9.3994  | 908767 | Asthma |
| rs80221542  | 6 | 32492735 | T | C | 0.2846 | -0.0845 | 0.0094 | 2.96E-19 | -8.9704  | 778845 | Asthma |
| rs75498325  | 6 | 32492737 | C | T | 0.2846 | -0.0845 | 0.0094 | 2.96E-19 | -8.9704  | 778845 | Asthma |
| rs77089552  | 6 | 32492756 | A | T | 0.3106 | -0.0761 | 0.0079 | 9.11E-22 | -9.5865  | 908767 | Asthma |
| rs77707664  | 6 | 32492764 | G | A | 0.4057 | -0.0933 | 0.0097 | 5.40E-22 | -9.6404  | 778845 | Asthma |
| rs79705649  | 6 | 32492772 | T | G | 0.3439 | -0.0850 | 0.0081 | 4.45E-26 | -10.5624 | 908767 | Asthma |
| rs79487517  | 6 | 32492815 | G | A | 0.2972 | -0.0725 | 0.0080 | 1.03E-19 | -9.0858  | 908767 | Asthma |
| rs75722399  | 6 | 32492838 | G | C | 0.2946 | -0.0715 | 0.0080 | 3.02E-19 | -8.9680  | 908767 | Asthma |
| rs79682288  | 6 | 32492851 | C | T | 0.3493 | -0.0470 | 0.0079 | 2.68E-09 | -5.9502  | 908767 | Asthma |
| rs77207275  | 6 | 32492907 | C | T | 0.2845 | -0.0800 | 0.0094 | 1.52E-17 | -8.5257  | 778845 | Asthma |
| rs564131442 | 6 | 32492921 | G | T | 0.3061 | 0.1278  | 0.0086 | 5.88E-50 | 14.8610  | 908767 | Asthma |
| rs76753608  | 6 | 32492989 | G | T | 0.2306 | -0.0689 | 0.0093 | 1.31E-13 | -7.4054  | 540747 | Asthma |
| rs77078150  | 6 | 32493054 | G | T | 0.5030 | -0.0997 | 0.0089 | 3.43E-29 | -11.2152 | 908767 | Asthma |
| rs113683581 | 6 | 32496262 | G | A | 0.3373 | -0.0614 | 0.0108 | 1.44E-08 | -5.6680  | 540747 | Asthma |

|             |   |          |   |   |        |         |        |          |         |        |        |
|-------------|---|----------|---|---|--------|---------|--------|----------|---------|--------|--------|
| rs73731427  | 6 | 32501129 | T | A | 0.1987 | -0.0635 | 0.0086 | 1.44E-13 | -7.3927 | 908767 | Asthma |
| rs73403121  | 6 | 32501235 | T | C | 0.5666 | -0.0670 | 0.0069 | 2.62E-22 | -9.7141 | 908767 | Asthma |
| rs72849274  | 6 | 32501291 | T | C | 0.4524 | 0.0702  | 0.0070 | 2.04E-23 | 9.9712  | 908767 | Asthma |
| rs72849276  | 6 | 32501298 | C | T | 0.1890 | -0.0662 | 0.0087 | 2.79E-14 | -7.6078 | 908767 | Asthma |
| rs116691706 | 6 | 32501445 | C | T | 0.3756 | -0.0669 | 0.0097 | 6.23E-12 | -6.8742 | 778845 | Asthma |
| rs77693147  | 6 | 32501470 | C | G | 0.1740 | -0.0691 | 0.0098 | 2.11E-12 | -7.0269 | 540747 | Asthma |
| rs73729748  | 6 | 32501535 | C | T | 0.1989 | -0.0669 | 0.0086 | 7.87E-15 | -7.7696 | 908767 | Asthma |
| rs78776915  | 6 | 32501603 | T | C | 0.3529 | 0.0617  | 0.0075 | 1.70E-16 | 8.2417  | 908767 | Asthma |
| rs75140942  | 6 | 32501612 | G | A | 0.2163 | -0.0512 | 0.0084 | 1.27E-09 | -6.0706 | 908767 | Asthma |
| rs77278603  | 6 | 32501644 | A | T | 0.2394 | -0.0636 | 0.0082 | 8.17E-15 | -7.7650 | 908767 | Asthma |
| rs74661798  | 6 | 32501898 | A | T | 0.2250 | 0.0945  | 0.0130 | 3.71E-13 | 7.2656  | 497942 | Asthma |
| rs74533346  | 6 | 32501988 | A | G | 0.2732 | -0.0672 | 0.0080 | 4.90E-17 | -8.3892 | 908767 | Asthma |
| rs74580628  | 6 | 32502016 | T | C | 0.2782 | -0.0701 | 0.0080 | 2.29E-18 | -8.7419 | 908767 | Asthma |
| rs79696067  | 6 | 32502048 | T | A | 0.2914 | -0.0736 | 0.0080 | 3.31E-20 | -9.2086 | 908767 | Asthma |
| rs79601710  | 6 | 32504816 | A | G | 0.2970 | -0.0643 | 0.0081 | 1.83E-15 | -7.9527 | 908767 | Asthma |
| rs75176490  | 6 | 32504827 | C | T | 0.2492 | -0.0776 | 0.0095 | 2.77E-16 | -8.1829 | 778845 | Asthma |
| rs75427248  | 6 | 32504828 | C | T | 0.2970 | -0.0634 | 0.0080 | 2.85E-15 | -7.8974 | 908767 | Asthma |
| rs77021177  | 6 | 32504891 | G | A | 0.3778 | -0.0479 | 0.0071 | 1.88E-11 | -6.7154 | 908767 | Asthma |
| rs76384286  | 6 | 32504948 | C | G | 0.2670 | -0.0667 | 0.0080 | 1.00E-16 | -8.3046 | 908767 | Asthma |
| rs77460382  | 6 | 32504956 | G | A | 0.2898 | -0.0616 | 0.0081 | 3.29E-14 | -7.5862 | 908767 | Asthma |
| rs72849285  | 6 | 32505020 | G | A | 0.3772 | -0.0553 | 0.0081 | 1.10E-11 | -6.7930 | 908767 | Asthma |
| rs80326593  | 6 | 32505050 | T | C | 0.3078 | -0.0719 | 0.0079 | 1.52E-19 | -9.0431 | 908767 | Asthma |
| rs75424998  | 6 | 32505053 | A | G | 0.3031 | -0.0731 | 0.0080 | 5.65E-20 | -9.1508 | 908767 | Asthma |
| rs72849286  | 6 | 32505096 | C | G | 0.2797 | -0.0656 | 0.0080 | 2.47E-16 | -8.1967 | 908767 | Asthma |
| rs77484451  | 6 | 32505116 | C | G | 0.2769 | -0.0683 | 0.0080 | 1.63E-17 | -8.5177 | 908767 | Asthma |
| rs78242887  | 6 | 32505122 | T | A | 0.7240 | 0.0482  | 0.0081 | 2.27E-09 | 5.9772  | 908767 | Asthma |
| rs77096675  | 6 | 32505133 | T | G | 0.2538 | -0.0784 | 0.0095 | 1.20E-16 | -8.2831 | 778845 | Asthma |
| rs75600369  | 6 | 32505154 | T | G | 0.2619 | -0.0814 | 0.0095 | 7.52E-18 | -8.6066 | 778845 | Asthma |
| rs77290417  | 6 | 32505157 | A | G | 0.2616 | -0.0815 | 0.0095 | 6.46E-18 | -8.6242 | 778845 | Asthma |
| rs113299215 | 6 | 32505312 | T | G | 0.4109 | -0.0554 | 0.0091 | 1.30E-09 | -6.0678 | 778845 | Asthma |
| rs116274877 | 6 | 32505322 | C | T | 0.2520 | -0.0791 | 0.0095 | 7.53E-17 | -8.3385 | 778845 | Asthma |
| rs115428791 | 6 | 32505324 | A | G | 0.2520 | -0.0791 | 0.0095 | 7.53E-17 | -8.3385 | 778845 | Asthma |
| rs116758859 | 6 | 32505327 | T | C | 0.2520 | -0.0791 | 0.0095 | 7.53E-17 | -8.3385 | 778845 | Asthma |
| rs114561193 | 6 | 32505343 | T | A | 0.4176 | -0.0519 | 0.0091 | 1.41E-08 | -5.6720 | 778845 | Asthma |
| rs111894799 | 6 | 32505390 | C | T | 0.2501 | -0.0782 | 0.0095 | 1.74E-16 | -8.2385 | 778845 | Asthma |
| rs72849287  | 6 | 32505544 | G | T | 0.2591 | -0.0806 | 0.0095 | 1.53E-17 | -8.5247 | 778845 | Asthma |
| rs113941649 | 6 | 32505602 | C | T | 0.4625 | -0.0937 | 0.0102 | 2.91E-20 | -9.2223 | 778845 | Asthma |
| rs111863034 | 6 | 32505611 | C | T | 0.2563 | -0.0789 | 0.0095 | 8.54E-17 | -8.3235 | 778845 | Asthma |
| rs112707813 | 6 | 32505635 | T | C | 0.3106 | -0.0856 | 0.0094 | 7.20E-20 | -9.1245 | 778845 | Asthma |
| rs73403198  | 6 | 32505642 | T | C | 0.2566 | -0.0799 | 0.0095 | 5.67E-17 | -8.3719 | 778845 | Asthma |
| rs111940905 | 6 | 32505677 | G | A | 0.5335 | 0.0778  | 0.0078 | 2.73E-23 | 9.9422  | 778845 | Asthma |
| rs112740890 | 6 | 32505684 | G | A | 0.5183 | 0.0921  | 0.0081 | 1.04E-29 | 11.3203 | 778845 | Asthma |
| rs112572344 | 6 | 32505718 | G | T | 0.2736 | 0.1373  | 0.0091 | 8.90E-52 | 15.1392 | 778845 | Asthma |
| rs73729750  | 6 | 32505726 | G | A | 0.2508 | -0.0794 | 0.0095 | 6.83E-17 | -8.3499 | 778845 | Asthma |
| rs138002663 | 6 | 32505765 | C | T | 0.2275 | 0.1276  | 0.0160 | 1.29E-15 | 7.9959  | 420598 | Asthma |
| rs113310401 | 6 | 32505777 | A | G | 0.2495 | -0.0781 | 0.0095 | 2.06E-16 | -8.2182 | 778845 | Asthma |
| rs114313885 | 6 | 32505851 | G | T | 0.2561 | -0.0803 | 0.0095 | 2.72E-17 | -8.4581 | 778845 | Asthma |
| rs60993360  | 6 | 32505917 | A | G | 0.3440 | -0.0645 | 0.0110 | 4.96E-09 | -5.8482 | 540747 | Asthma |
| rs77932560  | 6 | 32506055 | C | T | 0.2754 | -0.0843 | 0.0094 | 4.35E-19 | -8.9277 | 778845 | Asthma |
| rs74696032  | 6 | 32506089 | A | T | 0.7365 | 0.0815  | 0.0095 | 6.63E-18 | 8.6212  | 778845 | Asthma |
| rs79747029  | 6 | 32506112 | C | T | 0.2581 | -0.0795 | 0.0095 | 4.44E-17 | -8.4006 | 778845 | Asthma |
| rs79184871  | 6 | 32506195 | A | G | 0.3688 | -0.0672 | 0.0097 | 3.77E-12 | -6.9454 | 778845 | Asthma |
| rs77103549  | 6 | 32506245 | T | C | 0.2503 | -0.0779 | 0.0095 | 2.23E-16 | -8.2088 | 778845 | Asthma |
| rs74930081  | 6 | 32506311 | C | T | 0.2520 | -0.0782 | 0.0095 | 1.52E-16 | -8.2549 | 778845 | Asthma |
| rs76659340  | 6 | 32506313 | G | T | 0.3785 | -0.0635 | 0.0097 | 6.24E-11 | -6.5380 | 778845 | Asthma |
| rs77017079  | 6 | 32506318 | C | T | 0.2518 | -0.0790 | 0.0095 | 7.47E-17 | -8.3394 | 778845 | Asthma |
| rs75800703  | 6 | 32506319 | T | G | 0.2518 | -0.0790 | 0.0095 | 7.51E-17 | -8.3386 | 778845 | Asthma |
| rs149038762 | 6 | 32508171 | A | G | 0.3390 | 0.1071  | 0.0090 | 6.57E-33 | 11.9488 | 540747 | Asthma |
| rs111724472 | 6 | 32510707 | T | G | 0.2595 | -0.0801 | 0.0095 | 2.41E-17 | -8.4723 | 778845 | Asthma |
| rs139753177 | 6 | 32510842 | G | C | 0.6989 | 0.0725  | 0.0096 | 5.28E-14 | 7.5247  | 778845 | Asthma |
| rs113190834 | 6 | 32511057 | G | A | 0.3827 | -0.0897 | 0.0096 | 1.02E-20 | -9.3340 | 778845 | Asthma |
| rs111480903 | 6 | 32511071 | A | G | 0.4179 | 0.1200  | 0.0082 | 4.70E-48 | 14.5650 | 778845 | Asthma |
| rs113296631 | 6 | 32511108 | T | C | 0.4221 | 0.1154  | 0.0082 | 5.21E-45 | 14.0780 | 778845 | Asthma |
| rs150967448 | 6 | 32511128 | G | A | 0.3695 | -0.0888 | 0.0096 | 1.43E-20 | -9.2983 | 778845 | Asthma |
| rs112337463 | 6 | 32511452 | G | T | 0.3883 | 0.1191  | 0.0085 | 4.29E-45 | 14.0919 | 778845 | Asthma |
| rs114227752 | 6 | 32511455 | G | C | 0.2671 | -0.0797 | 0.0095 | 4.05E-17 | -8.4116 | 778845 | Asthma |
| rs534657806 | 6 | 32511613 | G | A | 0.2703 | -0.0561 | 0.0094 | 2.62E-09 | -5.9536 | 778845 | Asthma |
| rs552987547 | 6 | 32511617 | A | G | 0.2703 | -0.0563 | 0.0094 | 2.41E-09 | -5.9678 | 778845 | Asthma |
| rs72508420  | 6 | 32511679 | C | T | 0.2082 | -0.0724 | 0.0098 | 1.32E-13 | -7.4046 | 778845 | Asthma |
| rs112951059 | 6 | 32511757 | C | G | 0.2137 | -0.0764 | 0.0098 | 7.19E-15 | -7.7810 | 778845 | Asthma |
| rs73729754  | 6 | 32511891 | G | A | 0.2045 | -0.0777 | 0.0098 | 3.04E-15 | -7.8892 | 778845 | Asthma |
| rs74428884  | 6 | 32512095 | C | T | 0.2492 | -0.0762 | 0.0095 | 1.21E-15 | -8.0038 | 778845 | Asthma |
| rs76072243  | 6 | 32512101 | C | T | 0.4709 | 0.0918  | 0.0079 | 6.64E-31 | 11.5591 | 778845 | Asthma |
| rs79186433  | 6 | 32512106 | T | C | 0.3156 | 0.1313  | 0.0084 | 5.11E-55 | 15.6226 | 778845 | Asthma |

|             |   |          |   |   |        |         |        |          |          |        |        |
|-------------|---|----------|---|---|--------|---------|--------|----------|----------|--------|--------|
| rs113860707 | 6 | 32512112 | T | A | 0.5271 | 0.0940  | 0.0079 | 2.16E-32 | 11.8496  | 778845 | Asthma |
| rs72849291  | 6 | 32512147 | C | T | 0.2533 | -0.0768 | 0.0095 | 5.94E-16 | -8.0906  | 778845 | Asthma |
| rs139580312 | 6 | 32512484 | A | G | 0.1422 | 0.0967  | 0.0134 | 4.56E-13 | 7.2376   | 778845 | Asthma |
| rs114340096 | 6 | 32512485 | T | C | 0.2538 | -0.0788 | 0.0095 | 8.08E-17 | -8.3299  | 778845 | Asthma |
| rs112918203 | 6 | 32512505 | A | G | 0.2651 | -0.0808 | 0.0094 | 1.13E-17 | -8.5598  | 778845 | Asthma |
| rs112886967 | 6 | 32512508 | C | A | 0.2648 | -0.0806 | 0.0094 | 1.26E-17 | -8.5477  | 778845 | Asthma |
| rs9469151   | 6 | 32512594 | A | G | 0.2544 | -0.0801 | 0.0095 | 4.05E-17 | -8.4116  | 778845 | Asthma |
| rs113201561 | 6 | 32512635 | T | C | 0.4138 | -0.0790 | 0.0140 | 1.75E-08 | -5.6355  | 420598 | Asthma |
| rs72508424  | 6 | 32513813 | G | T | 0.2837 | -0.0852 | 0.0094 | 1.91E-19 | -9.0184  | 778845 | Asthma |
| rs79050133  | 6 | 32513903 | A | G | 0.2781 | -0.0846 | 0.0095 | 3.74E-19 | -8.9443  | 778845 | Asthma |
| rs79982994  | 6 | 32513916 | A | G | 0.4065 | -0.0896 | 0.0098 | 4.09E-20 | -9.1858  | 778845 | Asthma |
| rs115405728 | 6 | 32513972 | C | T | 0.4800 | 0.1101  | 0.0080 | 2.56E-43 | 13.7996  | 778845 | Asthma |
| rs546195473 | 6 | 32514165 | G | A | 0.2888 | -0.0809 | 0.0095 | 1.39E-17 | -8.5356  | 778845 | Asthma |
| rs12665158  | 6 | 32514230 | T | C | 0.3324 | -0.0492 | 0.0088 | 1.99E-08 | -5.6128  | 778845 | Asthma |
| rs73729756  | 6 | 32514243 | G | C | 0.3819 | -0.0524 | 0.0084 | 5.33E-10 | -6.2091  | 778845 | Asthma |
| rs111823263 | 6 | 32514268 | G | T | 0.3558 | -0.0549 | 0.0086 | 1.80E-10 | -6.3772  | 778845 | Asthma |
| rs111251172 | 6 | 32514279 | C | T | 0.2620 | -0.0815 | 0.0095 | 8.32E-18 | -8.5951  | 778845 | Asthma |
| rs148831934 | 6 | 32514290 | G | A | 0.2866 | -0.0819 | 0.0095 | 4.44E-18 | -8.6668  | 778845 | Asthma |
| rs113147593 | 6 | 32514399 | C | A | 0.3024 | -0.0863 | 0.0094 | 2.97E-20 | -9.2201  | 778845 | Asthma |
| rs111874278 | 6 | 32514404 | C | T | 0.3024 | -0.0863 | 0.0094 | 2.93E-20 | -9.2215  | 778845 | Asthma |
| rs113506020 | 6 | 32514484 | T | C | 0.2769 | -0.0822 | 0.0094 | 2.74E-18 | -8.7217  | 778845 | Asthma |
| rs114716760 | 6 | 32514502 | A | G | 0.2622 | -0.0812 | 0.0095 | 9.70E-18 | -8.5774  | 778845 | Asthma |
| rs112709708 | 6 | 32514539 | G | A | 0.2497 | -0.0775 | 0.0096 | 6.67E-16 | -8.0765  | 778845 | Asthma |
| rs200374399 | 6 | 32514558 | T | A | 0.4458 | -0.0853 | 0.0078 | 1.17E-27 | -10.8990 | 778845 | Asthma |
| rs113328361 | 6 | 32514565 | C | T | 0.2417 | -0.0783 | 0.0096 | 4.44E-16 | -8.1258  | 778845 | Asthma |
| rs115284487 | 6 | 32514748 | A | G | 0.3029 | -0.0846 | 0.0094 | 1.86E-19 | -9.0213  | 778845 | Asthma |
| rs113104010 | 6 | 32514767 | G | A | 0.2884 | -0.0847 | 0.0094 | 1.99E-19 | -9.0139  | 778845 | Asthma |
| rs111752517 | 6 | 32514791 | A | C | 0.5549 | -0.0887 | 0.0142 | 3.82E-10 | -6.2613  | 420598 | Asthma |
| rs116292100 | 6 | 32514799 | C | T | 0.4085 | 0.1220  | 0.0084 | 6.75E-48 | 14.5407  | 778845 | Asthma |
| rs112523731 | 6 | 32514821 | T | C | 0.2927 | -0.0868 | 0.0095 | 5.40E-20 | -9.1557  | 778845 | Asthma |
| rs111357164 | 6 | 32514861 | A | C | 0.3968 | 0.1173  | 0.0086 | 4.60E-42 | 13.5903  | 778845 | Asthma |
| rs112281380 | 6 | 32515213 | C | T | 0.3045 | -0.0864 | 0.0094 | 3.68E-20 | -9.1971  | 778845 | Asthma |
| rs112100135 | 6 | 32515247 | A | T | 0.6942 | 0.0875  | 0.0094 | 1.23E-20 | 9.3145   | 778845 | Asthma |
| rs145893158 | 6 | 32515268 | T | C | 0.3087 | -0.0883 | 0.0094 | 5.33E-21 | -9.4024  | 778845 | Asthma |
| rs112388251 | 6 | 32515283 | A | G | 0.3135 | -0.0885 | 0.0094 | 5.25E-21 | -9.4041  | 778845 | Asthma |
| rs79394030  | 6 | 32516848 | T | C | 0.2603 | -0.0804 | 0.0094 | 1.58E-17 | -8.5214  | 778845 | Asthma |
| rs76153169  | 6 | 32516874 | G | A | 0.2553 | -0.0805 | 0.0094 | 1.61E-17 | -8.5193  | 778845 | Asthma |
| rs62405576  | 6 | 32516929 | A | G | 0.2557 | -0.0806 | 0.0094 | 1.42E-17 | -8.5339  | 778845 | Asthma |
| rs62405577  | 6 | 32516952 | T | C | 0.4050 | -0.0818 | 0.0140 | 5.24E-09 | -5.8394  | 420598 | Asthma |
| rs113169828 | 6 | 32516966 | A | T | 0.7398 | 0.0814  | 0.0094 | 6.70E-18 | 8.6199   | 778845 | Asthma |
| rs112749594 | 6 | 32517620 | G | A | 0.4228 | -0.0954 | 0.0095 | 1.45E-23 | -10.0047 | 778845 | Asthma |
| rs115627609 | 6 | 32517802 | T | C | 0.2236 | 0.1071  | 0.0174 | 7.05E-10 | 6.1647   | 420598 | Asthma |
| rs112528767 | 6 | 32517812 | C | T | 0.4703 | 0.1027  | 0.0083 | 5.16E-35 | 12.3457  | 778845 | Asthma |
| rs145132962 | 6 | 32517945 | G | A | 0.3230 | -0.0899 | 0.0093 | 4.51E-22 | -9.6589  | 778845 | Asthma |
| rs552189104 | 6 | 32517967 | T | C | 0.3273 | 0.1352  | 0.0084 | 1.98E-58 | 16.1158  | 778845 | Asthma |
| rs570481252 | 6 | 32517969 | A | G | 0.3388 | 0.1343  | 0.0084 | 1.84E-57 | 15.9777  | 778845 | Asthma |
| rs116822312 | 6 | 32517970 | T | C | 0.3389 | 0.1344  | 0.0084 | 1.49E-57 | 15.9907  | 778845 | Asthma |
| rs552798572 | 6 | 32517998 | C | T | 0.4124 | 0.1292  | 0.0083 | 5.97E-55 | 15.6131  | 778845 | Asthma |
| rs141506183 | 6 | 32517999 | A | G | 0.4124 | 0.1292  | 0.0083 | 6.10E-55 | 15.6108  | 778845 | Asthma |
| rs535667342 | 6 | 32518001 | T | C | 0.4124 | 0.1292  | 0.0083 | 5.97E-55 | 15.6131  | 778845 | Asthma |
| rs113487704 | 6 | 32518013 | A | G | 0.3465 | -0.0885 | 0.0093 | 2.03E-21 | -9.5038  | 778845 | Asthma |
| rs201598673 | 6 | 32518076 | C | T | 0.3537 | -0.0837 | 0.0093 | 2.23E-19 | -9.0012  | 778845 | Asthma |
| rs142640349 | 6 | 32518148 | T | C | 0.3780 | -0.0967 | 0.0095 | 1.69E-24 | -10.2158 | 778845 | Asthma |
| rs200526004 | 6 | 32518282 | T | C | 0.3040 | 0.1287  | 0.0088 | 6.08E-49 | 14.7042  | 778845 | Asthma |
| rs145238941 | 6 | 32518402 | T | C | 0.3157 | -0.0869 | 0.0093 | 1.19E-20 | -9.3179  | 778845 | Asthma |
| rs115328397 | 6 | 32518404 | A | G | 0.3157 | -0.0869 | 0.0093 | 1.17E-20 | -9.3199  | 778845 | Asthma |
| rs113242918 | 6 | 32518425 | G | A | 0.2981 | -0.0822 | 0.0093 | 1.41E-18 | -8.7963  | 778845 | Asthma |
| rs112076887 | 6 | 32518501 | C | A | 0.3047 | -0.0861 | 0.0093 | 3.23E-20 | -9.2110  | 778845 | Asthma |
| rs116603761 | 6 | 32518514 | T | C | 0.3017 | -0.0870 | 0.0093 | 1.39E-20 | -9.3008  | 778845 | Asthma |
| rs114162389 | 6 | 32518515 | G | A | 0.3017 | -0.0870 | 0.0093 | 1.39E-20 | -9.3008  | 778845 | Asthma |
| rs17850459  | 6 | 32518581 | T | C | 0.3120 | -0.0891 | 0.0094 | 1.84E-21 | -9.5136  | 778845 | Asthma |
| rs1136905   | 6 | 32518660 | T | C | 0.3601 | -0.0576 | 0.0089 | 1.09E-10 | -6.4547  | 778845 | Asthma |
| rs139672306 | 6 | 32518670 | G | A | 0.2935 | -0.0845 | 0.0094 | 2.40E-19 | -8.9932  | 778845 | Asthma |
| rs113965088 | 6 | 32518679 | A | G | 0.2798 | -0.0826 | 0.0096 | 5.46E-18 | -8.6433  | 778845 | Asthma |
| rs114548292 | 6 | 32518714 | T | C | 0.2890 | -0.0873 | 0.0094 | 1.26E-20 | -9.3113  | 778845 | Asthma |
| rs115170898 | 6 | 32518716 | G | T | 0.2389 | 0.1051  | 0.0166 | 2.47E-10 | 6.3290   | 420598 | Asthma |
| rs188122191 | 6 | 32518734 | T | G | 0.3391 | -0.0912 | 0.0094 | 3.09E-22 | -9.6974  | 778845 | Asthma |
| rs116721417 | 6 | 32518740 | T | G | 0.3280 | -0.0911 | 0.0094 | 3.43E-22 | -9.6868  | 778845 | Asthma |
| rs73729759  | 6 | 32518936 | A | G | 0.3285 | -0.0530 | 0.0094 | 1.80E-08 | -5.6307  | 778845 | Asthma |
| rs73405151  | 6 | 32518979 | T | G | 0.2202 | -0.0679 | 0.0099 | 5.44E-12 | -6.8935  | 778845 | Asthma |
| rs112771527 | 6 | 32519091 | T | C | 0.2056 | -0.0796 | 0.0099 | 6.83E-16 | -8.0735  | 778845 | Asthma |
| rs76753104  | 6 | 32519149 | C | G | 0.6949 | 0.0566  | 0.0098 | 8.98E-09 | 5.7490   | 778845 | Asthma |
| rs114195502 | 6 | 32519166 | T | G | 0.2628 | -0.0778 | 0.0095 | 3.00E-16 | -8.1733  | 778845 | Asthma |
| rs116576223 | 6 | 32519171 | C | G | 0.2629 | -0.0778 | 0.0095 | 3.04E-16 | -8.1716  | 778845 | Asthma |

|             |   |          |   |   |        |         |        |          |          |         |        |
|-------------|---|----------|---|---|--------|---------|--------|----------|----------|---------|--------|
| rs150596400 | 6 | 32519176 | A | C | 0.2628 | -0.0778 | 0.0095 | 2.98E-16 | -8.1741  | 778845  | Asthma |
| rs114324495 | 6 | 32519193 | A | G | 0.3283 | -0.1083 | 0.0090 | 3.21E-33 | -12.0085 | 778845  | Asthma |
| rs116448083 | 6 | 32519196 | G | A | 0.4802 | 0.1144  | 0.0082 | 3.19E-44 | 13.9489  | 778845  | Asthma |
| rs113188320 | 6 | 32519337 | T | G | 0.2455 | -0.0832 | 0.0095 | 2.32E-18 | -8.7404  | 778845  | Asthma |
| rs77180119  | 6 | 32519613 | T | G | 0.2525 | -0.0820 | 0.0096 | 1.41E-17 | -8.5346  | 778845  | Asthma |
| rs115198947 | 6 | 32519621 | C | T | 0.2636 | -0.0787 | 0.0095 | 1.57E-16 | -8.2512  | 778845  | Asthma |
| rs1136787   | 6 | 32519650 | A | G | 0.4107 | -0.1132 | 0.0086 | 1.24E-39 | -13.1738 | 778845  | Asthma |
| rs567149594 | 6 | 32519662 | G | A | 0.6553 | -0.1068 | 0.0152 | 2.23E-12 | -7.0196  | 420598  | Asthma |
| rs201213928 | 6 | 32519667 | T | G | 0.4340 | -0.1179 | 0.0088 | 1.55E-40 | -13.3300 | 778845  | Asthma |
| rs189049184 | 6 | 32519697 | G | A | 0.2864 | -0.0854 | 0.0094 | 1.55E-19 | -9.0409  | 778845  | Asthma |
| rs112289448 | 6 | 32519707 | T | G | 0.6747 | -0.0905 | 0.0154 | 3.72E-09 | -5.8963  | 420598  | Asthma |
| rs113486815 | 6 | 32519811 | G | A | 0.2395 | -0.0790 | 0.0096 | 2.37E-16 | -8.2020  | 778845  | Asthma |
| rs114481954 | 6 | 32519826 | G | A | 0.2254 | -0.0756 | 0.0097 | 6.76E-15 | -7.7889  | 778845  | Asthma |
| rs115009189 | 6 | 32519828 | T | C | 0.2254 | -0.0756 | 0.0097 | 6.76E-15 | -7.7889  | 778845  | Asthma |
| rs376174259 | 6 | 32519832 | C | T | 0.2254 | -0.0754 | 0.0097 | 7.77E-15 | -7.7713  | 778845  | Asthma |
| rs80011953  | 6 | 32519872 | C | A | 0.2102 | -0.0749 | 0.0098 | 2.35E-14 | -7.6297  | 778845  | Asthma |
| rs72508435  | 6 | 32519885 | G | C | 0.2091 | -0.0761 | 0.0098 | 9.85E-15 | -7.7411  | 778845  | Asthma |
| rs73726163  | 6 | 32519966 | C | T | 0.2149 | -0.0734 | 0.0097 | 4.26E-14 | -7.5527  | 778845  | Asthma |
| rs145437633 | 6 | 32519999 | G | C | 0.6950 | 0.0510  | 0.0090 | 1.39E-08 | 5.6749   | 778845  | Asthma |
| rs532386490 | 6 | 32520049 | A | G | 0.3017 | -0.0856 | 0.0094 | 6.73E-20 | -9.1319  | 778845  | Asthma |
| rs147298529 | 6 | 32520101 | A | G | 0.2724 | -0.0791 | 0.0096 | 1.39E-16 | -8.2654  | 778845  | Asthma |
| rs200439840 | 6 | 32520136 | T | C | 0.2775 | -0.0814 | 0.0095 | 1.06E-17 | -8.5676  | 778845  | Asthma |
| rs114011941 | 6 | 32520201 | T | C | 0.2765 | -0.0820 | 0.0095 | 5.08E-18 | -8.6516  | 778845  | Asthma |
| rs140973961 | 6 | 32520210 | C | G | 0.2838 | -0.0815 | 0.0095 | 6.40E-18 | -8.6251  | 778845  | Asthma |
| rs67588672  | 6 | 32520235 | T | C | 0.2833 | -0.0788 | 0.0096 | 2.72E-16 | -8.1851  | 778845  | Asthma |
| rs113151974 | 6 | 32520260 | T | C | 0.2916 | -0.0841 | 0.0094 | 4.35E-19 | -8.9277  | 778845  | Asthma |
| rs565094428 | 6 | 32520295 | A | T | 0.2836 | -0.0810 | 0.0094 | 6.64E-18 | -8.6210  | 778845  | Asthma |
| rs532278758 | 6 | 32520296 | A | G | 0.2834 | -0.0812 | 0.0094 | 6.18E-18 | -8.6292  | 778845  | Asthma |
| rs149165901 | 6 | 32520301 | G | A | 0.2836 | -0.0810 | 0.0094 | 7.15E-18 | -8.6124  | 778845  | Asthma |
| rs73726165  | 6 | 32520315 | G | T | 0.4446 | -0.0959 | 0.0100 | 5.55E-22 | -9.6374  | 778845  | Asthma |
| rs72508437  | 6 | 32520355 | A | C | 0.2757 | -0.0801 | 0.0096 | 6.70E-17 | -8.3523  | 778845  | Asthma |
| rs116748043 | 6 | 32520385 | A | G | 0.2904 | -0.0834 | 0.0094 | 5.11E-19 | -8.9097  | 778845  | Asthma |
| rs141174036 | 6 | 32520401 | G | A | 0.2932 | -0.0850 | 0.0094 | 1.42E-19 | -9.0510  | 778845  | Asthma |
| rs35838968  | 6 | 32520464 | A | C | 0.3269 | -0.0888 | 0.0094 | 2.71E-21 | -9.4734  | 778845  | Asthma |
| rs73726168  | 6 | 32520467 | T | C | 0.3269 | -0.0888 | 0.0094 | 2.90E-21 | -9.4661  | 778845  | Asthma |
| rs116277159 | 6 | 32520483 | A | G | 0.3760 | -0.0906 | 0.0095 | 1.76E-21 | -9.5182  | 778845  | Asthma |
| rs143363040 | 6 | 32520490 | C | T | 0.4017 | -0.0954 | 0.0096 | 1.67E-23 | -9.9909  | 778845  | Asthma |
| rs112944250 | 6 | 32520712 | A | C | 0.3587 | -0.0935 | 0.0093 | 1.44E-23 | -10.0058 | 778845  | Asthma |
| rs114193109 | 6 | 32520727 | A | G | 0.3402 | -0.0847 | 0.0094 | 2.60E-19 | -8.9844  | 778845  | Asthma |
| rs150773158 | 6 | 32520945 | A | C | 0.4072 | -0.0565 | 0.0098 | 8.04E-09 | -5.7676  | 778845  | Asthma |
| rs191239464 | 6 | 32521068 | A | T | 0.6857 | 0.0864  | 0.0095 | 1.15E-19 | 9.0740   | 778845  | Asthma |
| rs112968327 | 6 | 32521083 | T | C | 0.2378 | -0.0812 | 0.0096 | 3.22E-17 | -8.4384  | 778845  | Asthma |
| rs115260061 | 6 | 32521231 | T | C | 0.3039 | -0.0880 | 0.0095 | 1.71E-20 | -9.2791  | 778845  | Asthma |
| rs35507994  | 6 | 32521340 | A | G | 0.2097 | -0.0826 | 0.0100 | 1.17E-16 | -8.2857  | 778845  | Asthma |
| rs34265294  | 6 | 32521341 | A | G | 0.3783 | -0.0611 | 0.0084 | 3.90E-13 | -7.2591  | 778845  | Asthma |
| rs73726173  | 6 | 32521390 | G | A | 0.2989 | -0.0691 | 0.0091 | 2.30E-14 | -7.6325  | 778845  | Asthma |
| rs116816411 | 6 | 32521425 | G | A | 0.3107 | -0.0677 | 0.0090 | 4.20E-14 | -7.5546  | 778845  | Asthma |
| rs114828939 | 6 | 32521427 | G | A | 0.2161 | -0.0813 | 0.0098 | 9.29E-17 | -8.3134  | 778845  | Asthma |
| rs116819869 | 6 | 32521470 | T | C | 0.2161 | -0.0809 | 0.0099 | 2.34E-16 | -8.2035  | 778845  | Asthma |
| rs112594243 | 6 | 32521477 | A | C | 0.2138 | -0.0822 | 0.0099 | 8.59E-17 | -8.3229  | 778845  | Asthma |
| rs112037641 | 6 | 32521482 | T | C | 0.2138 | -0.0823 | 0.0099 | 7.84E-17 | -8.3336  | 778845  | Asthma |
| rs117090280 | 6 | 32521488 | T | A | 0.4184 | -0.0602 | 0.0082 | 2.54E-13 | -7.3167  | 778845  | Asthma |
| rs112668737 | 6 | 32521568 | A | C | 0.2365 | -0.0832 | 0.0097 | 8.20E-18 | -8.5969  | 778845  | Asthma |
| rs112742095 | 6 | 32521577 | C | T | 0.2189 | -0.0848 | 0.0098 | 4.73E-18 | -8.6596  | 778845  | Asthma |
| rs115030899 | 6 | 32521655 | A | C | 0.2553 | -0.0847 | 0.0095 | 7.41E-19 | -8.8686  | 778845  | Asthma |
| rs146892544 | 6 | 32521733 | G | C | 0.7320 | 0.0666  | 0.0098 | 1.01E-11 | 6.8054   | 778845  | Asthma |
| rs117108573 | 6 | 32521902 | T | C | 0.0486 | 0.1853  | 0.0165 | 2.88E-29 | 11.2308  | 848312  | Asthma |
| rs41559714  | 6 | 32521930 | C | A | 0.1413 | 0.1587  | 0.0124 | 1.24E-37 | 12.8212  | 848312  | Asthma |
| rs1136778   | 6 | 32521934 | G | A | 0.1158 | 0.1257  | 0.0120 | 7.02E-26 | 10.5196  | 1004390 | Asthma |
| rs139616859 | 6 | 32522415 | C | T | 0.3145 | -0.0827 | 0.0095 | 3.00E-18 | -8.7114  | 778845  | Asthma |
| rs144341703 | 6 | 32522427 | A | G | 0.2615 | -0.0824 | 0.0096 | 7.54E-18 | -8.6064  | 778845  | Asthma |
| rs144192785 | 6 | 32522476 | G | C | 0.7507 | 0.0895  | 0.0097 | 3.97E-20 | 9.1888   | 778845  | Asthma |
| rs185320691 | 6 | 32522515 | C | G | 0.0956 | 0.1474  | 0.0134 | 6.05E-28 | 10.9585  | 848312  | Asthma |
| rs200367341 | 6 | 32522519 | A | C | 0.2726 | -0.0762 | 0.0095 | 1.19E-15 | -8.0053  | 778845  | Asthma |
| rs563386323 | 6 | 32522618 | T | C | 0.4058 | -0.1021 | 0.0097 | 5.78E-26 | -10.5381 | 778845  | Asthma |
| rs552302762 | 6 | 32522622 | A | G | 0.4059 | -0.1019 | 0.0097 | 6.59E-26 | -10.5257 | 778845  | Asthma |
| rs114785354 | 6 | 32522631 | G | A | 0.3766 | -0.0968 | 0.0096 | 5.41E-24 | -10.1021 | 778845  | Asthma |
| rs145612808 | 6 | 32522761 | C | T | 0.3694 | -0.0644 | 0.0097 | 3.26E-11 | -6.6346  | 778845  | Asthma |
| rs112967446 | 6 | 32522768 | C | G | 0.7284 | 0.0779  | 0.0095 | 1.74E-16 | 8.2385   | 778845  | Asthma |
| rs113805201 | 6 | 32522772 | G | A | 0.2716 | -0.0779 | 0.0095 | 1.75E-16 | -8.2378  | 778845  | Asthma |
| rs73405196  | 6 | 32522809 | G | A | 0.4258 | -0.0666 | 0.0093 | 1.04E-12 | -7.1246  | 778845  | Asthma |
| rs112438042 | 6 | 32522816 | T | C | 0.3378 | -0.0670 | 0.0096 | 3.37E-12 | -6.9616  | 778845  | Asthma |
| rs115951776 | 6 | 32522824 | G | A | 0.3282 | -0.0672 | 0.0095 | 1.38E-12 | -7.0856  | 778845  | Asthma |
| rs75469638  | 6 | 32522938 | A | C | 0.2042 | -0.0772 | 0.0099 | 6.13E-15 | -7.8012  | 778845  | Asthma |

|             |   |          |   |   |        |         |        |          |          |        |        |
|-------------|---|----------|---|---|--------|---------|--------|----------|----------|--------|--------|
| rs78681324  | 6 | 32522944 | C | T | 0.2030 | -0.0771 | 0.0099 | 6.98E-15 | -7.7849  | 778845 | Asthma |
| rs72508442  | 6 | 32523043 | C | A | 0.2016 | -0.0769 | 0.0099 | 8.26E-15 | -7.7636  | 778845 | Asthma |
| rs529557359 | 6 | 32523071 | G | C | 0.2106 | -0.0762 | 0.0098 | 7.80E-15 | -7.7707  | 778845 | Asthma |
| rs114066419 | 6 | 32523073 | T | C | 0.2226 | -0.0723 | 0.0098 | 1.52E-13 | -7.3858  | 778845 | Asthma |
| rs563226460 | 6 | 32523074 | T | G | 0.5689 | -0.0460 | 0.0082 | 2.19E-08 | -5.5962  | 778845 | Asthma |
| rs142092031 | 6 | 32523265 | A | G | 0.3156 | -0.0772 | 0.0095 | 3.53E-16 | -8.1537  | 778845 | Asthma |
| rs111840744 | 6 | 32523271 | G | T | 0.2983 | -0.0739 | 0.0094 | 5.16E-15 | -7.8229  | 778845 | Asthma |
| rs113698029 | 6 | 32523308 | A | T | 0.7833 | 0.0716  | 0.0097 | 1.65E-13 | 7.3747   | 778845 | Asthma |
| rs76939305  | 6 | 32523330 | G | A | 0.2095 | -0.0755 | 0.0098 | 1.08E-14 | -7.7301  | 778845 | Asthma |
| rs115659386 | 6 | 32523355 | T | A | 0.6751 | 0.0719  | 0.0093 | 1.18E-14 | 7.7178   | 778845 | Asthma |
| rs114730467 | 6 | 32523376 | T | C | 0.2165 | -0.0766 | 0.0097 | 3.27E-15 | -7.8801  | 778845 | Asthma |
| rs112870813 | 6 | 32523422 | A | G | 0.3048 | -0.0880 | 0.0094 | 9.66E-21 | -9.3398  | 778845 | Asthma |
| rs115022955 | 6 | 32523441 | G | T | 0.2984 | -0.0865 | 0.0094 | 5.53E-20 | -9.1531  | 778845 | Asthma |
| rs111906147 | 6 | 32523458 | T | G | 0.2718 | -0.0816 | 0.0095 | 7.40E-18 | -8.6084  | 778845 | Asthma |
| rs114352435 | 6 | 32523480 | A | G | 0.2112 | -0.0762 | 0.0098 | 5.71E-15 | -7.8103  | 778845 | Asthma |
| rs115063919 | 6 | 32523495 | A | G | 0.2071 | -0.0787 | 0.0098 | 9.68E-16 | -8.0309  | 778845 | Asthma |
| rs73726182  | 6 | 32523532 | C | G | 0.7885 | 0.0746  | 0.0097 | 1.68E-14 | 7.6734   | 778845 | Asthma |
| rs72508444  | 6 | 32523610 | G | A | 0.2054 | -0.0770 | 0.0098 | 3.61E-15 | -7.8678  | 778845 | Asthma |
| rs115070082 | 6 | 32523616 | C | A | 0.2342 | -0.0599 | 0.0097 | 5.92E-10 | -6.1926  | 778845 | Asthma |
| rs73726184  | 6 | 32523669 | C | A | 0.2026 | -0.0772 | 0.0098 | 3.24E-15 | -7.8815  | 778845 | Asthma |
| rs115881023 | 6 | 32523676 | G | A | 0.2118 | -0.0742 | 0.0098 | 2.78E-14 | -7.6082  | 778845 | Asthma |
| rs73726187  | 6 | 32523684 | A | G | 0.2096 | -0.0763 | 0.0098 | 5.63E-15 | -7.8120  | 778845 | Asthma |
| rs112931124 | 6 | 32523756 | G | A | 0.2052 | -0.0772 | 0.0097 | 2.13E-15 | -7.9335  | 778845 | Asthma |
| rs112103673 | 6 | 32523882 | T | A | 0.2028 | -0.0773 | 0.0099 | 4.43E-15 | -7.8423  | 778845 | Asthma |
| rs200289570 | 6 | 32523910 | T | G | 0.2261 | 0.1331  | 0.0091 | 2.88E-48 | 14.5984  | 778845 | Asthma |
| rs115359984 | 6 | 32524044 | A | G | 0.2098 | -0.0739 | 0.0097 | 3.05E-14 | -7.5963  | 778845 | Asthma |
| rs116089647 | 6 | 32524123 | G | T | 0.2177 | -0.0706 | 0.0097 | 3.59E-13 | -7.2703  | 778845 | Asthma |
| rs114786900 | 6 | 32524125 | G | A | 0.2177 | -0.0706 | 0.0097 | 3.59E-13 | -7.2703  | 778845 | Asthma |
| rs142408103 | 6 | 32524168 | T | A | 0.2040 | -0.0763 | 0.0099 | 1.07E-14 | -7.7308  | 778845 | Asthma |
| rs145606733 | 6 | 32524182 | G | A | 0.4758 | -0.0687 | 0.0080 | 1.19E-17 | -8.5539  | 778845 | Asthma |
| rs111779823 | 6 | 32524188 | A | C | 0.5747 | -0.0512 | 0.0082 | 3.91E-10 | -6.2576  | 778845 | Asthma |
| rs113934686 | 6 | 32524194 | C | T | 0.1987 | -0.0756 | 0.0100 | 3.66E-14 | -7.5726  | 778845 | Asthma |
| rs113091576 | 6 | 32524209 | C | G | 0.3752 | -0.0745 | 0.0086 | 4.43E-18 | -8.6671  | 778845 | Asthma |
| rs113436343 | 6 | 32524249 | C | G | 0.2641 | 0.1427  | 0.0092 | 8.40E-54 | 15.4433  | 778845 | Asthma |
| rs72508449  | 6 | 32524255 | T | C | 0.2014 | -0.0774 | 0.0099 | 5.72E-15 | -7.8100  | 778845 | Asthma |
| rs116711613 | 6 | 32524264 | A | C | 0.5366 | -0.0509 | 0.0083 | 7.94E-10 | -6.1463  | 778845 | Asthma |
| rs76155697  | 6 | 32524277 | A | C | 0.2007 | -0.0760 | 0.0099 | 1.77E-14 | -7.6661  | 778845 | Asthma |
| rs78398255  | 6 | 32524308 | G | A | 0.2004 | -0.0767 | 0.0099 | 7.17E-15 | -7.7814  | 778845 | Asthma |
| rs115814063 | 6 | 32524316 | T | C | 0.4669 | 0.0564  | 0.0082 | 7.67E-12 | 6.8447   | 778845 | Asthma |
| rs74223623  | 6 | 32524325 | C | T | 0.4574 | 0.0568  | 0.0083 | 7.17E-12 | 6.8543   | 778845 | Asthma |
| rs72508450  | 6 | 32524347 | T | G | 0.2016 | -0.0779 | 0.0099 | 4.53E-15 | -7.8394  | 778845 | Asthma |
| rs78135308  | 6 | 32524369 | G | A | 0.1997 | -0.0797 | 0.0099 | 9.77E-16 | -8.0297  | 778845 | Asthma |
| rs73726192  | 6 | 32524421 | C | T | 0.2069 | -0.0724 | 0.0099 | 2.47E-13 | -7.3206  | 778845 | Asthma |
| rs73726196  | 6 | 32524484 | A | G | 0.2030 | -0.0764 | 0.0099 | 1.22E-14 | -7.7135  | 778845 | Asthma |
| rs75224370  | 6 | 32524543 | G | A | 0.2047 | -0.0759 | 0.0098 | 1.01E-14 | -7.7379  | 778845 | Asthma |
| rs76784864  | 6 | 32524676 | C | T | 0.2028 | -0.0761 | 0.0099 | 1.20E-14 | -7.7164  | 778845 | Asthma |
| rs74655967  | 6 | 32524691 | G | C | 0.2033 | -0.0770 | 0.0099 | 5.62E-15 | -7.8123  | 778845 | Asthma |
| rs73726200  | 6 | 32524815 | A | G | 0.2132 | -0.0754 | 0.0097 | 9.58E-15 | -7.7447  | 778845 | Asthma |
| rs113856962 | 6 | 32525122 | T | C | 0.2698 | -0.0652 | 0.0096 | 9.43E-12 | -6.8150  | 778845 | Asthma |
| rs111911331 | 6 | 32525521 | G | T | 0.1985 | -0.0770 | 0.0095 | 7.08E-16 | -8.0692  | 831423 | Asthma |
| rs113701066 | 6 | 32525650 | C | T | 0.2549 | -0.0746 | 0.0096 | 6.51E-15 | -7.7938  | 778845 | Asthma |
| rs116645073 | 6 | 32525659 | G | A | 0.2532 | -0.0717 | 0.0095 | 5.34E-14 | -7.5234  | 778845 | Asthma |
| rs115791752 | 6 | 32525683 | T | C | 0.2119 | -0.0751 | 0.0098 | 1.75E-14 | -7.6676  | 778845 | Asthma |
| rs112441817 | 6 | 32526200 | G | A | 0.2259 | -0.0743 | 0.0097 | 2.14E-14 | -7.6423  | 778845 | Asthma |
| rs73407285  | 6 | 32526888 | C | T | 0.4467 | -0.0906 | 0.0103 | 1.63E-18 | -8.7807  | 778845 | Asthma |
| rs113454243 | 6 | 32526946 | C | T | 0.4695 | -0.1001 | 0.0104 | 6.15E-22 | -9.6268  | 778845 | Asthma |
| rs539094532 | 6 | 32526978 | A | T | 0.4965 | -0.1089 | 0.0090 | 2.03E-33 | -12.0462 | 778845 | Asthma |
| rs202113035 | 6 | 32527150 | A | G | 0.2524 | -0.0879 | 0.0095 | 2.12E-20 | -9.2560  | 778845 | Asthma |
| rs200248344 | 6 | 32527160 | C | G | 0.2200 | -0.0806 | 0.0097 | 9.16E-17 | -8.3152  | 778845 | Asthma |
| rs533358873 | 6 | 32527212 | C | G | 0.7307 | 0.0777  | 0.0095 | 2.46E-16 | 8.1973   | 778845 | Asthma |
| rs370635202 | 6 | 32528057 | C | G | 0.2292 | 0.1353  | 0.0095 | 4.41E-46 | 14.2514  | 778845 | Asthma |
| rs200330306 | 6 | 32528271 | A | G | 0.3632 | 0.1254  | 0.0082 | 3.38E-53 | 15.3530  | 778845 | Asthma |
| rs67456882  | 6 | 32528403 | G | C | 0.1944 | -0.0759 | 0.0089 | 1.06E-17 | -8.5675  | 847307 | Asthma |
| rs115731929 | 6 | 32528518 | A | T | 0.7581 | 0.0752  | 0.0096 | 3.52E-15 | 7.8709   | 778845 | Asthma |
| rs112498945 | 6 | 32528569 | T | C | 0.2831 | -0.0828 | 0.0094 | 1.73E-18 | -8.7738  | 778845 | Asthma |
| rs114312361 | 6 | 32528899 | G | C | 0.2036 | -0.0767 | 0.0098 | 6.65E-15 | -7.7909  | 778845 | Asthma |
| rs114649104 | 6 | 32528909 | T | C | 0.2031 | -0.0766 | 0.0098 | 7.61E-15 | -7.7739  | 778845 | Asthma |
| rs113962966 | 6 | 32529006 | G | A | 0.2315 | -0.0787 | 0.0098 | 1.13E-15 | -8.0115  | 778845 | Asthma |
| rs113015546 | 6 | 32529017 | T | A | 0.1997 | -0.0737 | 0.0101 | 2.67E-13 | -7.3098  | 778845 | Asthma |
| rs112875478 | 6 | 32529242 | T | G | 0.2476 | -0.0759 | 0.0087 | 2.86E-18 | -8.7167  | 847307 | Asthma |
| rs570057212 | 6 | 32529246 | C | A | 0.4230 | -0.0857 | 0.0100 | 8.97E-18 | -8.5865  | 778845 | Asthma |
| rs537009891 | 6 | 32529251 | C | T | 0.4233 | -0.0856 | 0.0100 | 9.90E-18 | -8.5752  | 778845 | Asthma |
| rs76270534  | 6 | 32529455 | G | C | 0.3695 | 0.1339  | 0.0083 | 5.36E-59 | 16.1963  | 778845 | Asthma |
| rs4484563   | 6 | 32529477 | C | T | 0.2572 | -0.0770 | 0.0095 | 5.65E-16 | -8.0966  | 778845 | Asthma |



|             |   |          |   |   |        |         |        |          |          |         |        |
|-------------|---|----------|---|---|--------|---------|--------|----------|----------|---------|--------|
| rs66512233  | 6 | 32529674 | A | G | 0.2347 | -0.0760 | 0.0097 | 5.22E-15 | -7.8216  | 778845  | Asthma |
| rs67773077  | 6 | 32529751 | G | C | 0.4849 | 0.0819  | 0.0079 | 3.11E-25 | 10.3785  | 778845  | Asthma |
| rs67449961  | 6 | 32529773 | G | C | 0.2143 | -0.0672 | 0.0099 | 1.27E-11 | -6.7716  | 778845  | Asthma |
| rs71549215  | 6 | 32529804 | A | G | 0.1110 | -0.0984 | 0.0126 | 6.09E-15 | -7.8019  | 778845  | Asthma |
| rs67987819  | 6 | 32529878 | A | C | 0.1848 | -0.0673 | 0.0089 | 2.78E-14 | -7.6081  | 908767  | Asthma |
| rs201954564 | 6 | 32530047 | C | A | 0.5418 | -0.0590 | 0.0089 | 3.06E-11 | -6.6435  | 778845  | Asthma |
| rs71549218  | 6 | 32530093 | G | A | 0.1133 | -0.0969 | 0.0128 | 3.02E-14 | -7.5971  | 778845  | Asthma |
| rs71549220  | 6 | 32530140 | A | C | 0.1032 | -0.0834 | 0.0114 | 2.31E-13 | -7.3297  | 908767  | Asthma |
| rs67598791  | 6 | 32530290 | T | C | 0.1942 | -0.0725 | 0.0100 | 3.18E-13 | -7.2867  | 778845  | Asthma |
| rs71549223  | 6 | 32530317 | G | A | 0.1992 | -0.0707 | 0.0100 | 1.68E-12 | -7.0593  | 778845  | Asthma |
| rs62405579  | 6 | 32530357 | C | A | 0.1985 | -0.0743 | 0.0100 | 1.32E-13 | -7.4042  | 778845  | Asthma |
| rs71549224  | 6 | 32530458 | A | C | 0.2269 | -0.0737 | 0.0098 | 5.16E-14 | -7.5279  | 778845  | Asthma |
| rs71549226  | 6 | 32530535 | C | T | 0.1851 | -0.0758 | 0.0101 | 6.80E-14 | -7.4916  | 778845  | Asthma |
| rs111371452 | 6 | 32530980 | C | T | 0.1208 | -0.0907 | 0.0118 | 1.54E-14 | -7.6837  | 778845  | Asthma |
| rs76995658  | 6 | 32531020 | C | T | 0.1917 | -0.0746 | 0.0100 | 7.92E-14 | -7.4716  | 778845  | Asthma |
| rs7771596   | 6 | 32531104 | G | A | 0.2019 | -0.0716 | 0.0099 | 4.76E-13 | -7.2320  | 778845  | Asthma |
| rs78569932  | 6 | 32531108 | T | C | 0.2019 | -0.0716 | 0.0099 | 4.78E-13 | -7.2313  | 778845  | Asthma |
| rs147478643 | 6 | 32531229 | G | A | 0.2754 | -0.0807 | 0.0094 | 1.18E-17 | -8.5547  | 778845  | Asthma |
| rs140006648 | 6 | 32531238 | T | C | 0.2650 | -0.0792 | 0.0094 | 4.77E-17 | -8.3923  | 778845  | Asthma |
| rs111359734 | 6 | 32531256 | A | G | 0.2539 | -0.0789 | 0.0095 | 8.36E-17 | -8.3261  | 778845  | Asthma |
| rs149189956 | 6 | 32531270 | C | T | 0.2525 | -0.0785 | 0.0095 | 1.13E-16 | -8.2899  | 778845  | Asthma |
| rs76792006  | 6 | 32531293 | C | T | 0.3063 | -0.0693 | 0.0079 | 2.22E-18 | -8.7456  | 908767  | Asthma |
| rs79967157  | 6 | 32531297 | T | C | 0.3093 | -0.0691 | 0.0079 | 1.97E-18 | -8.7590  | 908767  | Asthma |
| rs146891442 | 6 | 32531324 | T | C | 0.1242 | -0.0688 | 0.0103 | 1.96E-11 | -6.7087  | 908767  | Asthma |
| rs79187454  | 6 | 32531346 | G | T | 0.2500 | -0.0625 | 0.0082 | 1.81E-14 | -7.6638  | 908767  | Asthma |
| rs77951594  | 6 | 32531351 | A | G | 0.3753 | -0.1013 | 0.0082 | 2.88E-35 | -12.3927 | 778845  | Asthma |
| rs75793795  | 6 | 32531354 | T | C | 0.2489 | -0.0637 | 0.0082 | 6.97E-15 | -7.7850  | 908767  | Asthma |
| rs79662721  | 6 | 32531368 | C | T | 0.2315 | -0.0779 | 0.0097 | 8.26E-16 | -8.0504  | 778845  | Asthma |
| rs78097306  | 6 | 32531371 | T | C | 0.3753 | 0.1330  | 0.0079 | 1.37E-63 | 16.8341  | 778845  | Asthma |
| rs75901433  | 6 | 32531373 | A | G | 0.3898 | -0.0556 | 0.0070 | 2.08E-15 | -7.9365  | 908767  | Asthma |
| rs111596400 | 6 | 32531377 | C | T | 0.2221 | -0.0760 | 0.0097 | 5.46E-15 | -7.8159  | 778845  | Asthma |
| rs150931799 | 6 | 32531407 | T | C | 0.1435 | -0.0737 | 0.0095 | 9.67E-15 | -7.7435  | 908767  | Asthma |
| rs74791653  | 6 | 32531408 | T | C | 0.3790 | 0.1304  | 0.0079 | 2.66E-61 | 16.5187  | 778845  | Asthma |
| rs146130478 | 6 | 32531436 | C | T | 0.3234 | 0.1286  | 0.0084 | 1.71E-52 | 15.2471  | 778845  | Asthma |
| rs78247055  | 6 | 32531437 | A | G | 0.2407 | -0.0764 | 0.0096 | 1.47E-15 | -7.9796  | 778845  | Asthma |
| rs138961230 | 6 | 32531467 | C | A | 0.2482 | -0.0769 | 0.0096 | 1.13E-15 | -8.0122  | 778845  | Asthma |
| rs190614023 | 6 | 32532849 | G | A | 0.2410 | -0.0802 | 0.0098 | 3.56E-16 | -8.1527  | 540747  | Asthma |
| rs11970219  | 6 | 32533148 | C | A | 0.1744 | -0.0581 | 0.0105 | 2.79E-08 | -5.5540  | 778845  | Asthma |
| rs113528607 | 6 | 32533151 | G | T | 0.3182 | 0.1379  | 0.0081 | 2.42E-64 | 16.9364  | 778845  | Asthma |
| rs78745522  | 6 | 32533164 | A | C | 0.1933 | -0.0769 | 0.0100 | 1.17E-14 | -7.7191  | 778845  | Asthma |
| rs115654776 | 6 | 32533238 | T | C | 0.1933 | -0.0767 | 0.0100 | 1.37E-14 | -7.6987  | 778845  | Asthma |
| rs76817401  | 6 | 32533345 | G | T | 0.1969 | -0.0606 | 0.0084 | 5.03E-13 | -7.2244  | 961345  | Asthma |
| rs79076469  | 6 | 32533347 | A | G | 0.1938 | -0.0681 | 0.0087 | 3.88E-15 | -7.8588  | 908767  | Asthma |
| rs76209082  | 6 | 32533350 | C | T | 0.1876 | -0.0669 | 0.0088 | 3.52E-14 | -7.5775  | 908767  | Asthma |
| rs2157337   | 6 | 32533367 | T | C | 0.3266 | -0.0470 | 0.0082 | 8.50E-09 | -5.7581  | 831423  | Asthma |
| rs113972770 | 6 | 32533392 | C | T | 0.1894 | -0.0661 | 0.0088 | 4.64E-14 | -7.5415  | 908767  | Asthma |
| rs71549248  | 6 | 32533419 | C | G | 0.1956 | -0.0677 | 0.0086 | 4.09E-15 | -7.8523  | 908767  | Asthma |
| rs111379218 | 6 | 32533434 | A | G | 0.2418 | -0.0716 | 0.0085 | 2.95E-17 | -8.4488  | 908767  | Asthma |
| rs73727927  | 6 | 32533437 | G | A | 0.3344 | -0.0789 | 0.0082 | 6.03E-22 | -9.6290  | 778845  | Asthma |
| rs112621731 | 6 | 32533468 | G | A | 0.1844 | -0.0559 | 0.0085 | 5.76E-11 | -6.5498  | 908767  | Asthma |
| rs74205903  | 6 | 32533472 | C | T | 0.3669 | -0.0405 | 0.0069 | 4.14E-09 | -5.8787  | 908767  | Asthma |
| rs113399372 | 6 | 32533477 | G | A | 0.1119 | -0.0668 | 0.0103 | 1.02E-10 | -6.4638  | 908767  | Asthma |
| rs77594561  | 6 | 32533496 | G | A | 0.3508 | 0.1283  | 0.0073 | 5.24E-69 | 17.5572  | 961345  | Asthma |
| rs77604461  | 6 | 32533505 | C | T | 0.2744 | 0.1329  | 0.0078 | 4.20E-65 | 17.0388  | 908767  | Asthma |
| rs80029685  | 6 | 32533523 | G | A | 0.1941 | -0.0680 | 0.0086 | 3.14E-15 | -7.8853  | 908767  | Asthma |
| rs72851017  | 6 | 32533575 | C | A | 0.1238 | -0.0691 | 0.0099 | 3.08E-12 | -6.9739  | 908767  | Asthma |
| rs72851018  | 6 | 32533602 | C | A | 0.3710 | 0.0796  | 0.0072 | 1.73E-28 | 11.0712  | 908767  | Asthma |
| rs72851020  | 6 | 32533616 | C | T | 0.1942 | -0.0670 | 0.0086 | 7.66E-15 | -7.7730  | 908767  | Asthma |
| rs72851021  | 6 | 32533618 | T | C | 0.3191 | -0.0837 | 0.0072 | 2.37E-31 | -11.6474 | 908767  | Asthma |
| rs72851022  | 6 | 32533633 | T | C | 0.1239 | -0.0706 | 0.0099 | 9.77E-13 | -7.1337  | 908767  | Asthma |
| rs74738572  | 6 | 32533643 | G | A | 0.1931 | -0.0740 | 0.0099 | 8.28E-14 | -7.4657  | 778845  | Asthma |
| rs35231986  | 6 | 32533678 | T | A | 0.1958 | -0.0692 | 0.0086 | 8.43E-16 | -8.0479  | 908767  | Asthma |
| rs80235432  | 6 | 32533703 | T | C | 0.0988 | -0.0996 | 0.0135 | 1.47E-13 | -7.3900  | 831423  | Asthma |
| rs35321667  | 6 | 32533757 | C | G | 0.3215 | -0.0858 | 0.0072 | 7.51E-33 | -11.9379 | 908767  | Asthma |
| rs71549250  | 6 | 32533771 | G | A | 0.1937 | -0.0685 | 0.0079 | 2.87E-18 | -8.7167  | 977229  | Asthma |
| rs79336734  | 6 | 32533781 | A | G | 0.1224 | -0.0866 | 0.0114 | 3.85E-14 | -7.5658  | 778845  | Asthma |
| rs71549251  | 6 | 32533797 | A | G | 0.1960 | -0.0683 | 0.0086 | 1.93E-15 | -7.9461  | 908767  | Asthma |
| rs79603147  | 6 | 32533828 | T | C | 0.1212 | -0.0856 | 0.0116 | 1.52E-13 | -7.3851  | 778845  | Asthma |
| rs572375245 | 6 | 32533829 | G | A | 0.1236 | -0.0699 | 0.0099 | 2.02E-12 | -7.0330  | 908767  | Asthma |
| rs78628745  | 6 | 32533834 | T | A | 0.1236 | -0.0700 | 0.0099 | 1.83E-12 | -7.0469  | 908767  | Asthma |
| rs71549252  | 6 | 32533836 | C | T | 0.2855 | 0.1341  | 0.0077 | 8.23E-68 | 17.3996  | 908767  | Asthma |
| rs66583884  | 6 | 32533875 | G | A | 0.1929 | -0.0662 | 0.0086 | 1.90E-14 | -7.6574  | 908767  | Asthma |
| rs34481656  | 6 | 32533887 | G | A | 0.2940 | 0.1196  | 0.0065 | 1.53E-75 | 18.3914  | 1064845 | Asthma |
| rs33997707  | 6 | 32533938 | A | G | 0.1226 | -0.0760 | 0.0096 | 2.10E-15 | -7.9353  | 961345  | Asthma |

|             |   |          |   |   |        |         |        |          |          |         |        |
|-------------|---|----------|---|---|--------|---------|--------|----------|----------|---------|--------|
| rs35877117  | 6 | 32533942 | T | C | 0.2437 | 0.1319  | 0.0081 | 5.70E-59 | 16.1918  | 908767  | Asthma |
| rs35635216  | 6 | 32533966 | A | T | 0.2554 | 0.1451  | 0.0092 | 1.62E-56 | 15.8407  | 778845  | Asthma |
| rs28453305  | 6 | 32534065 | G | A | 0.1930 | -0.0663 | 0.0086 | 1.57E-14 | -7.6815  | 908767  | Asthma |
| rs28687254  | 6 | 32534102 | A | T | 0.1201 | -0.0776 | 0.0096 | 7.60E-16 | -8.0605  | 961345  | Asthma |
| rs71549253  | 6 | 32534105 | C | T | 0.2462 | 0.1212  | 0.0069 | 2.14E-69 | 17.6084  | 1064845 | Asthma |
| rs71549254  | 6 | 32534110 | G | A | 0.2463 | 0.1211  | 0.0069 | 2.41E-69 | 17.6019  | 1064845 | Asthma |
| rs72851046  | 6 | 32534180 | G | T | 0.3612 | -0.0392 | 0.0069 | 1.33E-08 | -5.6819  | 908767  | Asthma |
| rs72851047  | 6 | 32534185 | T | G | 0.3617 | -0.0394 | 0.0069 | 1.22E-08 | -5.6969  | 908767  | Asthma |
| rs5016923   | 6 | 32534251 | G | A | 0.3663 | -0.0403 | 0.0069 | 4.45E-09 | -5.8666  | 908767  | Asthma |
| rs74937819  | 6 | 32534260 | A | G | 0.3557 | -0.0408 | 0.0069 | 3.59E-09 | -5.9020  | 908767  | Asthma |
| rs113327791 | 6 | 32534281 | T | G | 0.0694 | -0.0816 | 0.0126 | 9.89E-11 | -6.4687  | 908767  | Asthma |
| rs114987387 | 6 | 32534354 | G | A | 0.3586 | -0.0394 | 0.0069 | 1.28E-08 | -5.6886  | 908767  | Asthma |
| rs72851051  | 6 | 32534428 | C | G | 0.1296 | -0.0872 | 0.0113 | 1.11E-14 | -7.7260  | 778845  | Asthma |
| rs72851052  | 6 | 32534472 | T | C | 0.3468 | -0.0469 | 0.0078 | 2.19E-09 | -5.9829  | 778845  | Asthma |
| rs72851053  | 6 | 32534473 | G | A | 0.3477 | -0.0459 | 0.0078 | 4.91E-09 | -5.8502  | 778845  | Asthma |
| rs75802832  | 6 | 32534518 | C | T | 0.1942 | -0.0737 | 0.0099 | 9.76E-14 | -7.4441  | 778845  | Asthma |
| rs115910196 | 6 | 32534527 | T | C | 0.3462 | -0.0458 | 0.0079 | 6.40E-09 | -5.8060  | 778845  | Asthma |
| rs77218229  | 6 | 32534535 | T | C | 0.1206 | -0.0878 | 0.0115 | 2.09E-14 | -7.6449  | 778845  | Asthma |
| rs78533241  | 6 | 32534540 | G | A | 0.5442 | -0.0847 | 0.0075 | 2.34E-29 | -11.2493 | 778845  | Asthma |
| rs78182729  | 6 | 32534545 | T | C | 0.3329 | 0.1354  | 0.0079 | 9.89E-66 | 17.1235  | 778845  | Asthma |
| rs79881121  | 6 | 32534547 | A | G | 0.4687 | -0.0801 | 0.0075 | 2.23E-26 | -10.6270 | 778845  | Asthma |
| rs75509903  | 6 | 32534560 | A | G | 0.1934 | -0.0738 | 0.0099 | 9.42E-14 | -7.4487  | 778845  | Asthma |
| rs80061995  | 6 | 32534585 | C | A | 0.1947 | -0.0727 | 0.0106 | 7.29E-12 | -6.8520  | 778845  | Asthma |
| rs186027875 | 6 | 32534636 | T | C | 0.1166 | -0.0927 | 0.0118 | 4.83E-15 | -7.8311  | 778845  | Asthma |
| rs75969927  | 6 | 32534639 | C | T | 0.6246 | -0.0757 | 0.0079 | 1.02E-21 | -9.5745  | 778845  | Asthma |
| rs147842453 | 6 | 32534641 | T | C | 0.1166 | -0.0927 | 0.0118 | 4.83E-15 | -7.8311  | 778845  | Asthma |
| rs74816744  | 6 | 32534670 | A | C | 0.2258 | -0.0757 | 0.0097 | 4.45E-15 | -7.8417  | 778845  | Asthma |
| rs79076719  | 6 | 32534678 | C | G | 0.2315 | -0.0778 | 0.0096 | 6.29E-16 | -8.0835  | 778845  | Asthma |
| rs77794095  | 6 | 32534694 | T | C | 0.3960 | 0.1305  | 0.0078 | 3.10E-63 | 16.7859  | 778845  | Asthma |
| rs115879519 | 6 | 32534699 | T | C | 0.1318 | -0.0917 | 0.0115 | 1.25E-15 | -7.9997  | 778845  | Asthma |
| rs114558453 | 6 | 32534709 | C | A | 0.1220 | -0.0871 | 0.0119 | 2.45E-13 | -7.3215  | 778845  | Asthma |
| rs75310651  | 6 | 32534736 | A | C | 0.1943 | -0.0734 | 0.0099 | 1.21E-13 | -7.4159  | 778845  | Asthma |
| rs77697582  | 6 | 32534740 | T | C | 0.3373 | 0.1362  | 0.0079 | 3.30E-66 | 17.1869  | 778845  | Asthma |
| rs75085141  | 6 | 32534745 | T | C | 0.1942 | -0.0729 | 0.0099 | 1.81E-13 | -7.3619  | 778845  | Asthma |
| rs74202712  | 6 | 32534769 | G | A | 0.3485 | -0.0465 | 0.0079 | 3.96E-09 | -5.8858  | 778845  | Asthma |
| rs74211571  | 6 | 32534789 | T | C | 0.3499 | -0.0454 | 0.0079 | 9.68E-09 | -5.7363  | 778845  | Asthma |
| rs112056795 | 6 | 32534790 | A | G | 0.1224 | -0.0862 | 0.0114 | 4.37E-14 | -7.5496  | 778845  | Asthma |
| rs74929336  | 6 | 32534808 | A | G | 0.3282 | 0.1376  | 0.0080 | 1.30E-66 | 17.2416  | 778845  | Asthma |
| rs74894552  | 6 | 32534812 | T | C | 0.5470 | -0.0854 | 0.0076 | 1.93E-29 | -11.2659 | 778845  | Asthma |
| rs76940575  | 6 | 32534813 | C | T | 0.3509 | -0.0456 | 0.0079 | 7.87E-09 | -5.7713  | 778845  | Asthma |
| rs75252378  | 6 | 32534833 | C | T | 0.5475 | -0.0857 | 0.0076 | 1.16E-29 | -11.3109 | 778845  | Asthma |
| rs72508463  | 6 | 32534840 | A | G | 0.1937 | -0.0741 | 0.0099 | 7.35E-14 | -7.4815  | 778845  | Asthma |
| rs74207695  | 6 | 32534854 | C | A | 0.2977 | -0.0488 | 0.0081 | 1.90E-09 | -6.0066  | 778845  | Asthma |
| rs75872455  | 6 | 32534861 | C | G | 0.3315 | 0.1361  | 0.0079 | 2.60E-66 | 17.2015  | 778845  | Asthma |
| rs74719989  | 6 | 32534887 | A | G | 0.3348 | 0.1364  | 0.0079 | 3.14E-67 | 17.3237  | 778845  | Asthma |
| rs377363005 | 6 | 32534925 | C | G | 0.1242 | -0.0872 | 0.0114 | 1.86E-14 | -7.6595  | 778845  | Asthma |
| rs571212590 | 6 | 32534926 | A | G | 0.1115 | -0.0838 | 0.0119 | 1.78E-12 | -7.0502  | 778845  | Asthma |
| rs74635045  | 6 | 32534968 | C | G | 0.3791 | 0.1324  | 0.0078 | 2.68E-65 | 17.0650  | 778845  | Asthma |
| rs182670197 | 6 | 32534983 | T | C | 0.1398 | -0.0883 | 0.0111 | 1.64E-15 | -7.9657  | 778845  | Asthma |
| rs77544868  | 6 | 32534997 | T | C | 0.2263 | -0.0748 | 0.0096 | 8.69E-15 | -7.7572  | 778845  | Asthma |
| rs114337696 | 6 | 32535006 | A | G | 0.1229 | -0.0877 | 0.0114 | 1.58E-14 | -7.6812  | 778845  | Asthma |
| rs550643609 | 6 | 32535017 | A | G | 0.3383 | -0.0470 | 0.0080 | 3.43E-09 | -5.9095  | 778845  | Asthma |
| rs72851055  | 6 | 32535037 | C | G | 0.3452 | -0.0466 | 0.0079 | 4.41E-09 | -5.8682  | 778845  | Asthma |
| rs74867743  | 6 | 32535042 | T | G | 0.3309 | 0.1369  | 0.0079 | 1.92E-66 | 17.2188  | 778845  | Asthma |
| rs79338946  | 6 | 32535045 | T | A | 0.2230 | -0.0871 | 0.0095 | 5.20E-20 | -9.1599  | 778845  | Asthma |
| rs74955625  | 6 | 32535094 | A | G | 0.3568 | 0.1295  | 0.0081 | 1.72E-57 | 15.9821  | 778845  | Asthma |
| rs77572094  | 6 | 32535108 | T | C | 0.3185 | 0.1312  | 0.0081 | 1.60E-58 | 16.1284  | 778845  | Asthma |
| rs75211336  | 6 | 32535157 | G | A | 0.3131 | 0.1279  | 0.0082 | 1.05E-54 | 15.5762  | 778845  | Asthma |
| rs67985229  | 6 | 32535158 | A | G | 0.1223 | -0.0868 | 0.0114 | 2.89E-14 | -7.6030  | 778845  | Asthma |
| rs115885380 | 6 | 32535195 | A | C | 0.3140 | 0.1287  | 0.0082 | 1.81E-55 | 15.6881  | 778845  | Asthma |
| rs116299636 | 6 | 32535197 | C | A | 0.3140 | 0.1287  | 0.0082 | 1.81E-55 | 15.6881  | 778845  | Asthma |
| rs71549270  | 6 | 32535262 | A | G | 0.1944 | -0.0746 | 0.0099 | 4.95E-14 | -7.5333  | 778845  | Asthma |
| rs71549271  | 6 | 32535273 | G | C | 0.1950 | -0.0738 | 0.0099 | 8.37E-14 | -7.4644  | 778845  | Asthma |
| rs111247469 | 6 | 32535294 | T | C | 0.2634 | 0.1372  | 0.0088 | 6.13E-55 | 15.6105  | 778845  | Asthma |
| rs111293660 | 6 | 32535310 | T | C | 0.5381 | -0.0796 | 0.0077 | 3.75E-25 | -10.3604 | 778845  | Asthma |
| rs113045771 | 6 | 32535315 | G | A | 0.5381 | -0.0796 | 0.0077 | 3.85E-25 | -10.3580 | 778845  | Asthma |
| rs111248464 | 6 | 32535348 | T | C | 0.1223 | -0.0872 | 0.0114 | 2.15E-14 | -7.6408  | 778845  | Asthma |
| rs112652539 | 6 | 32535351 | G | A | 0.3217 | -0.0954 | 0.0082 | 2.98E-31 | -11.6279 | 778845  | Asthma |
| rs79350521  | 6 | 32535370 | T | C | 0.3775 | 0.1346  | 0.0082 | 8.51E-61 | 16.4498  | 778845  | Asthma |
| rs71549272  | 6 | 32535377 | A | G | 0.2395 | -0.0743 | 0.0082 | 1.94E-19 | -9.0167  | 847307  | Asthma |
| rs71549273  | 6 | 32535380 | T | C | 0.1222 | -0.0869 | 0.0114 | 2.78E-14 | -7.6084  | 778845  | Asthma |
| rs113096063 | 6 | 32535384 | T | C | 0.3026 | 0.1246  | 0.0071 | 3.68E-69 | 17.5775  | 934923  | Asthma |
| rs113351668 | 6 | 32535390 | A | G | 0.3027 | 0.1245  | 0.0071 | 4.60E-69 | 17.5648  | 934923  | Asthma |
| rs11897614  | 6 | 32535400 | T | C | 0.3026 | 0.1243  | 0.0071 | 7.27E-69 | 17.5380  | 934923  | Asthma |

|             |   |          |   |   |        |         |        |          |          |        |        |
|-------------|---|----------|---|---|--------|---------|--------|----------|----------|--------|--------|
| rs68174286  | 6 | 32535427 | T | C | 0.4411 | 0.0801  | 0.0077 | 1.73E-25 | 10.4340  | 778845 | Asthma |
| rs72851058  | 6 | 32535436 | T | C | 0.1810 | 0.0608  | 0.0103 | 4.10E-09 | 5.8798   | 778845 | Asthma |
| rs67497288  | 6 | 32535444 | A | G | 0.4396 | 0.0793  | 0.0077 | 5.27E-25 | 10.3279  | 778845 | Asthma |
| rs67672162  | 6 | 32535474 | T | C | 0.4413 | 0.0791  | 0.0077 | 6.54E-25 | 10.3072  | 778845 | Asthma |
| rs67870913  | 6 | 32535481 | T | C | 0.4411 | 0.0799  | 0.0077 | 2.30E-25 | 10.4073  | 778845 | Asthma |
| rs78294251  | 6 | 32535559 | A | G | 0.3243 | 0.1340  | 0.0081 | 6.76E-62 | 16.6020  | 778845 | Asthma |
| rs112399994 | 6 | 32535595 | A | G | 0.1225 | -0.0869 | 0.0114 | 2.70E-14 | -7.6124  | 778845 | Asthma |
| rs75658193  | 6 | 32535598 | A | G | 0.3242 | 0.1348  | 0.0081 | 1.28E-62 | 16.7007  | 778845 | Asthma |
| rs78387908  | 6 | 32535614 | A | G | 0.3179 | -0.0961 | 0.0082 | 1.86E-31 | -11.6681 | 778845 | Asthma |
| rs71549275  | 6 | 32535616 | T | C | 0.1220 | -0.0863 | 0.0115 | 5.68E-14 | -7.5153  | 778845 | Asthma |
| rs111792223 | 6 | 32535620 | T | C | 0.1096 | -0.0838 | 0.0120 | 2.90E-12 | -6.9822  | 778845 | Asthma |
| rs79100516  | 6 | 32535675 | T | C | 0.3205 | 0.1351  | 0.0081 | 1.25E-62 | 16.7031  | 778845 | Asthma |
| rs75684124  | 6 | 32535711 | T | C | 0.3358 | 0.1310  | 0.0078 | 5.11E-64 | 16.8922  | 831423 | Asthma |
| rs200864832 | 6 | 32535714 | G | A | 0.1224 | -0.0860 | 0.0114 | 4.80E-14 | -7.5373  | 778845 | Asthma |
| rs114653292 | 6 | 32535739 | G | T | 0.3529 | -0.0456 | 0.0079 | 8.00E-09 | -5.7683  | 778845 | Asthma |
| rs114821537 | 6 | 32535745 | G | C | 0.3521 | -0.0452 | 0.0079 | 1.06E-08 | -5.7202  | 778845 | Asthma |
| rs115296342 | 6 | 32535749 | C | A | 0.3521 | -0.0452 | 0.0079 | 1.08E-08 | -5.7179  | 778845 | Asthma |
| rs556337500 | 6 | 32535754 | A | G | 0.2296 | -0.0855 | 0.0094 | 9.33E-20 | -9.0964  | 778845 | Asthma |
| rs571499647 | 6 | 32535755 | G | A | 0.2296 | -0.0855 | 0.0094 | 9.33E-20 | -9.0964  | 778845 | Asthma |
| rs79293578  | 6 | 32535784 | T | G | 0.2282 | 0.1328  | 0.0088 | 1.58E-51 | 15.1020  | 778845 | Asthma |
| rs115524254 | 6 | 32535788 | C | A | 0.3514 | -0.0432 | 0.0079 | 4.64E-08 | -5.4648  | 778845 | Asthma |
| rs77712892  | 6 | 32535793 | T | C | 0.2002 | -0.0630 | 0.0101 | 4.03E-10 | -6.2529  | 778845 | Asthma |
| rs75744841  | 6 | 32535798 | C | G | 0.2953 | -0.0583 | 0.0097 | 1.52E-09 | -6.0420  | 778845 | Asthma |
| rs77734842  | 6 | 32535864 | A | G | 0.1935 | -0.0729 | 0.0099 | 1.81E-13 | -7.3624  | 778845 | Asthma |
| rs112177836 | 6 | 32535881 | A | C | 0.3160 | 0.1365  | 0.0082 | 3.55E-62 | 16.6411  | 778845 | Asthma |
| rs66485354  | 6 | 32535891 | A | G | 0.1220 | -0.0870 | 0.0114 | 2.45E-14 | -7.6242  | 778845 | Asthma |
| rs80141235  | 6 | 32535912 | A | G | 0.1941 | -0.0733 | 0.0099 | 1.36E-13 | -7.4001  | 778845 | Asthma |
| rs75730517  | 6 | 32535920 | A | G | 0.3186 | 0.1357  | 0.0081 | 2.85E-62 | 16.6536  | 778845 | Asthma |
| rs79591888  | 6 | 32535927 | A | G | 0.3198 | 0.1358  | 0.0081 | 1.37E-62 | 16.6976  | 778845 | Asthma |
| rs116103612 | 6 | 32535939 | A | T | 0.3495 | -0.0444 | 0.0079 | 2.07E-08 | -5.6059  | 778845 | Asthma |
| rs114629945 | 6 | 32535940 | G | A | 0.3495 | -0.0444 | 0.0079 | 2.06E-08 | -5.6068  | 778845 | Asthma |
| rs78987802  | 6 | 32535951 | C | T | 0.5574 | -0.0832 | 0.0076 | 5.99E-28 | -10.9594 | 778845 | Asthma |
| rs80048124  | 6 | 32535952 | T | G | 0.5574 | -0.0832 | 0.0076 | 5.99E-28 | -10.9594 | 778845 | Asthma |
| rs34289950  | 6 | 32535962 | A | G | 0.1999 | -0.0718 | 0.0099 | 3.32E-13 | -7.2809  | 778845 | Asthma |
| rs35874713  | 6 | 32535994 | G | C | 0.2426 | -0.0711 | 0.0085 | 6.19E-17 | -8.3616  | 847307 | Asthma |
| rs78992700  | 6 | 32536029 | A | G | 0.2263 | -0.0607 | 0.0098 | 5.15E-10 | -6.2144  | 778845 | Asthma |
| rs758021100 | 6 | 32536048 | T | C | 0.1973 | -0.0732 | 0.0087 | 4.79E-17 | -8.3916  | 847307 | Asthma |
| rs35000011  | 6 | 32536049 | A | G | 0.1224 | -0.0864 | 0.0114 | 3.69E-14 | -7.5712  | 778845 | Asthma |
| rs80235202  | 6 | 32536054 | G | A | 0.2513 | 0.1237  | 0.0075 | 3.19E-61 | 16.5085  | 934923 | Asthma |
| rs79401736  | 6 | 32536066 | G | A | 0.5634 | -0.0794 | 0.0077 | 5.33E-25 | -10.3268 | 778845 | Asthma |
| rs74185458  | 6 | 32536098 | T | A | 0.2093 | -0.0729 | 0.0095 | 1.78E-14 | -7.6655  | 831423 | Asthma |
| rs74323244  | 6 | 32536144 | C | A | 0.3175 | 0.1376  | 0.0082 | 2.36E-63 | 16.8018  | 778845 | Asthma |
| rs34582150  | 6 | 32536153 | C | T | 0.1911 | -0.0712 | 0.0096 | 1.44E-13 | -7.3923  | 831423 | Asthma |
| rs77048791  | 6 | 32536209 | T | A | 0.3189 | 0.1375  | 0.0082 | 1.21E-63 | 16.8420  | 778845 | Asthma |
| rs67894469  | 6 | 32536238 | A | G | 0.1947 | -0.0702 | 0.0088 | 1.45E-15 | -7.9813  | 847307 | Asthma |
| rs71549276  | 6 | 32536253 | A | G | 0.1940 | -0.0725 | 0.0099 | 2.31E-13 | -7.3296  | 778845 | Asthma |
| rs71549277  | 6 | 32536258 | T | C | 0.3598 | -0.0900 | 0.0093 | 4.79E-22 | -9.6526  | 778845 | Asthma |
| rs114840252 | 6 | 32536294 | T | C | 0.3477 | -0.0462 | 0.0079 | 4.87E-09 | -5.8515  | 778845 | Asthma |
| rs79604868  | 6 | 32536296 | A | G | 0.3484 | -0.0461 | 0.0079 | 5.08E-09 | -5.8444  | 778845 | Asthma |
| rs79364663  | 6 | 32536308 | C | A | 0.3479 | -0.0461 | 0.0079 | 5.08E-09 | -5.8446  | 778845 | Asthma |
| rs75288029  | 6 | 32536309 | C | T | 0.1227 | -0.0860 | 0.0114 | 4.67E-14 | -7.5405  | 778845 | Asthma |
| rs75174683  | 6 | 32536324 | G | A | 0.3487 | -0.0459 | 0.0079 | 5.70E-09 | -5.8254  | 778845 | Asthma |
| rs112815590 | 6 | 32536333 | T | C | 0.3489 | -0.0462 | 0.0079 | 4.55E-09 | -5.8631  | 778845 | Asthma |
| rs67342079  | 6 | 32536356 | G | A | 0.1940 | -0.0743 | 0.0099 | 5.97E-14 | -7.5087  | 778845 | Asthma |
| rs66525318  | 6 | 32536359 | A | C | 0.1241 | -0.0878 | 0.0107 | 2.10E-16 | -8.2159  | 831423 | Asthma |
| rs66514134  | 6 | 32536402 | A | C | 0.1940 | -0.0746 | 0.0099 | 4.75E-14 | -7.5386  | 778845 | Asthma |
| rs67211424  | 6 | 32536453 | G | A | 0.1028 | -0.0838 | 0.0138 | 1.23E-09 | -6.0769  | 778845 | Asthma |
| rs115744566 | 6 | 32536595 | T | G | 0.1928 | -0.0738 | 0.0099 | 1.01E-13 | -7.4394  | 778845 | Asthma |
| rs72851070  | 6 | 32536618 | G | A | 0.1932 | -0.0744 | 0.0099 | 6.26E-14 | -7.5025  | 778845 | Asthma |
| rs111685796 | 6 | 32536676 | G | A | 0.2735 | -0.0937 | 0.0091 | 4.31E-25 | -10.3471 | 778845 | Asthma |
| rs67170736  | 6 | 32536794 | T | C | 0.1905 | -0.0692 | 0.0097 | 1.16E-12 | -7.1107  | 831423 | Asthma |
| rs71549279  | 6 | 32536808 | T | C | 0.1936 | -0.0731 | 0.0099 | 1.53E-13 | -7.3842  | 778845 | Asthma |
| rs67388151  | 6 | 32536923 | T | C | 0.1939 | -0.0738 | 0.0099 | 8.93E-14 | -7.4558  | 778845 | Asthma |
| rs67294117  | 6 | 32536997 | A | G | 0.1170 | -0.0978 | 0.0112 | 1.92E-18 | -8.7623  | 831423 | Asthma |
| rs62405584  | 6 | 32537024 | T | C | 0.1841 | -0.0729 | 0.0100 | 3.41E-13 | -7.2773  | 778845 | Asthma |
| rs67621624  | 6 | 32537046 | G | C | 0.1117 | -0.0931 | 0.0125 | 8.31E-14 | -7.4653  | 778845 | Asthma |
| rs75088009  | 6 | 32537107 | G | A | 0.3527 | -0.0448 | 0.0079 | 1.45E-08 | -5.6670  | 778845 | Asthma |
| rs71549281  | 6 | 32537127 | C | T | 0.1014 | -0.0994 | 0.0137 | 4.57E-13 | -7.2378  | 778845 | Asthma |
| rs71549282  | 6 | 32537129 | T | C | 0.5425 | -0.0861 | 0.0075 | 3.81E-30 | -11.4081 | 778845 | Asthma |
| rs66820750  | 6 | 32537154 | C | G | 0.1016 | -0.0983 | 0.0137 | 7.90E-13 | -7.1626  | 778845 | Asthma |
| rs62405587  | 6 | 32537188 | C | T | 0.1938 | -0.0731 | 0.0099 | 1.46E-13 | -7.3909  | 778845 | Asthma |
| rs73727946  | 6 | 32537190 | C | T | 0.3490 | -0.0450 | 0.0079 | 1.40E-08 | -5.6738  | 778845 | Asthma |
| rs67615325  | 6 | 32537244 | A | C | 0.1124 | -0.0895 | 0.0125 | 7.23E-13 | -7.1751  | 778845 | Asthma |
| rs71549283  | 6 | 32537261 | A | G | 0.3702 | 0.0967  | 0.0083 | 2.21E-31 | 11.6532  | 778845 | Asthma |

|             |   |          |   |   |        |         |        |          |          |        |        |
|-------------|---|----------|---|---|--------|---------|--------|----------|----------|--------|--------|
| rs66948209  | 6 | 32537266 | T | C | 0.2047 | -0.0796 | 0.0098 | 5.55E-16 | -8.0988  | 778845 | Asthma |
| rs78510027  | 6 | 32537298 | G | T | 0.2718 | 0.1560  | 0.0088 | 1.12E-69 | 17.6447  | 778845 | Asthma |
| rs567101199 | 6 | 32537318 | A | G | 0.1204 | -0.0862 | 0.0116 | 1.02E-13 | -7.4376  | 778845 | Asthma |
| rs75518178  | 6 | 32537323 | T | C | 0.4179 | 0.0930  | 0.0079 | 3.01E-32 | 11.8221  | 778845 | Asthma |
| rs68069891  | 6 | 32537343 | G | T | 0.1218 | -0.0859 | 0.0115 | 6.67E-14 | -7.4944  | 778845 | Asthma |
| rs67813643  | 6 | 32537349 | G | T | 0.1916 | -0.0710 | 0.0096 | 1.59E-13 | -7.3795  | 831423 | Asthma |
| rs72508465  | 6 | 32537364 | T | C | 0.3487 | -0.0450 | 0.0079 | 1.36E-08 | -5.6785  | 778845 | Asthma |
| rs72508466  | 6 | 32537389 | G | A | 0.3481 | -0.0463 | 0.0079 | 5.07E-09 | -5.8447  | 778845 | Asthma |
| rs200819822 | 6 | 32537412 | G | T | 0.3480 | -0.0465 | 0.0079 | 4.37E-09 | -5.8695  | 778845 | Asthma |
| rs114327439 | 6 | 32537425 | A | G | 0.3480 | -0.0465 | 0.0079 | 4.12E-09 | -5.8791  | 778845 | Asthma |
| rs75876652  | 6 | 32537447 | T | G | 0.3159 | 0.1386  | 0.0082 | 8.08E-64 | 16.8652  | 778845 | Asthma |
| rs66814015  | 6 | 32537481 | G | A | 0.5584 | -0.0825 | 0.0077 | 6.28E-27 | -10.7447 | 778845 | Asthma |
| rs74498391  | 6 | 32537490 | C | T | 0.3180 | 0.1379  | 0.0082 | 1.02E-63 | 16.8517  | 778845 | Asthma |
| rs79119980  | 6 | 32537495 | T | C | 0.5578 | -0.0817 | 0.0077 | 2.25E-26 | -10.6262 | 778845 | Asthma |
| rs79136305  | 6 | 32537515 | G | A | 0.3189 | 0.1374  | 0.0082 | 2.39E-63 | 16.8010  | 778845 | Asthma |
| rs72508469  | 6 | 32537532 | C | T | 0.3455 | -0.0466 | 0.0079 | 3.94E-09 | -5.8868  | 778845 | Asthma |
| rs75880270  | 6 | 32537543 | T | G | 0.1953 | -0.0726 | 0.0099 | 2.10E-13 | -7.3423  | 778845 | Asthma |
| rs72851096  | 6 | 32537580 | C | A | 0.4486 | -0.0704 | 0.0078 | 1.79E-19 | -9.0254  | 778845 | Asthma |
| rs71549285  | 6 | 32537594 | G | T | 0.4456 | -0.0702 | 0.0078 | 2.12E-19 | -9.0068  | 778845 | Asthma |
| rs71549286  | 6 | 32537609 | C | T | 0.2494 | -0.0761 | 0.0095 | 1.07E-15 | -8.0188  | 778845 | Asthma |
| rs75459649  | 6 | 32537613 | G | A | 0.3923 | 0.1244  | 0.0080 | 2.69E-54 | 15.5169  | 778845 | Asthma |
| rs71534503  | 6 | 32537617 | G | A | 0.2494 | -0.0762 | 0.0095 | 1.03E-15 | -8.0228  | 778845 | Asthma |
| rs71534504  | 6 | 32537656 | C | T | 0.1964 | -0.0728 | 0.0099 | 1.58E-13 | -7.3799  | 778845 | Asthma |
| rs79973795  | 6 | 32537666 | A | G | 0.3786 | -0.1010 | 0.0080 | 2.60E-36 | -12.5838 | 831423 | Asthma |
| rs112796795 | 6 | 32537694 | C | T | 0.3218 | 0.1337  | 0.0081 | 9.53E-61 | 16.4420  | 778845 | Asthma |
| rs72851098  | 6 | 32537700 | C | T | 0.5499 | -0.0822 | 0.0076 | 4.77E-27 | -10.7701 | 778845 | Asthma |
| rs72851099  | 6 | 32537731 | C | T | 0.1940 | -0.0724 | 0.0099 | 2.57E-13 | -7.3153  | 778845 | Asthma |
| rs72851101  | 6 | 32537758 | G | A | 0.1103 | -0.0841 | 0.0119 | 1.70E-12 | -7.0577  | 778845 | Asthma |
| rs68141957  | 6 | 32537774 | A | G | 0.1918 | -0.0707 | 0.0096 | 2.03E-13 | -7.3470  | 831423 | Asthma |
| rs72851102  | 6 | 32537791 | G | A | 0.5532 | -0.0813 | 0.0076 | 1.53E-26 | -10.6621 | 778845 | Asthma |
| rs72853905  | 6 | 32537832 | A | G | 0.1926 | -0.0716 | 0.0088 | 4.03E-16 | -8.1378  | 847307 | Asthma |
| rs72508471  | 6 | 32537863 | G | A | 0.1951 | -0.0737 | 0.0099 | 7.82E-14 | -7.4734  | 778845 | Asthma |
| rs72853908  | 6 | 32537875 | A | T | 0.1952 | -0.0737 | 0.0099 | 8.47E-14 | -7.4628  | 778845 | Asthma |
| rs376217655 | 6 | 32537889 | T | C | 0.3412 | -0.0485 | 0.0080 | 1.14E-09 | -6.0886  | 778845 | Asthma |
| rs79010350  | 6 | 32537891 | G | A | 0.1951 | -0.0734 | 0.0099 | 1.10E-13 | -7.4288  | 778845 | Asthma |
| rs79878723  | 6 | 32537905 | T | C | 0.5382 | -0.0871 | 0.0075 | 6.76E-31 | -11.5576 | 778845 | Asthma |
| rs77931438  | 6 | 32537985 | A | G | 0.3324 | 0.1355  | 0.0079 | 3.25E-65 | 17.0545  | 778845 | Asthma |
| rs28568890  | 6 | 32537990 | G | A | 0.1914 | -0.0739 | 0.0100 | 1.35E-13 | -7.4013  | 778845 | Asthma |
| rs76567100  | 6 | 32538004 | G | A | 0.1955 | -0.0745 | 0.0099 | 4.76E-14 | -7.5384  | 778845 | Asthma |
| rs114034298 | 6 | 32538020 | C | T | 0.3419 | -0.0445 | 0.0080 | 2.15E-08 | -5.5995  | 778845 | Asthma |
| rs72853909  | 6 | 32538021 | A | G | 0.5418 | -0.0837 | 0.0076 | 1.82E-28 | -11.0667 | 778845 | Asthma |
| rs193201719 | 6 | 32538030 | T | C | 0.3415 | -0.0442 | 0.0080 | 2.87E-08 | -5.5490  | 778845 | Asthma |
| rs78485574  | 6 | 32538042 | A | T | 0.1229 | -0.0871 | 0.0114 | 2.36E-14 | -7.6293  | 778845 | Asthma |
| rs79425107  | 6 | 32538053 | T | C | 0.1958 | -0.0744 | 0.0099 | 5.08E-14 | -7.5299  | 778845 | Asthma |
| rs79645566  | 6 | 32538059 | C | T | 0.5372 | -0.0857 | 0.0075 | 6.67E-30 | -11.3593 | 778845 | Asthma |
| rs72853910  | 6 | 32538098 | C | T | 0.2086 | -0.0758 | 0.0098 | 8.52E-15 | -7.7597  | 778845 | Asthma |
| rs74945612  | 6 | 32538124 | C | T | 0.4564 | -0.0963 | 0.0081 | 9.12E-33 | -11.9217 | 778845 | Asthma |
| rs78912960  | 6 | 32538131 | G | A | 0.2491 | -0.0772 | 0.0095 | 4.61E-16 | -8.1213  | 778845 | Asthma |
| rs77375484  | 6 | 32538132 | T | C | 0.2491 | -0.0772 | 0.0095 | 4.61E-16 | -8.1213  | 778845 | Asthma |
| rs142526177 | 6 | 32538167 | G | A | 0.1648 | -0.1088 | 0.0103 | 4.31E-26 | -10.5652 | 778845 | Asthma |
| rs199951365 | 6 | 32538181 | C | T | 0.1385 | -0.0881 | 0.0113 | 6.06E-15 | -7.8029  | 778845 | Asthma |
| rs75657395  | 6 | 32538188 | C | T | 0.2965 | -0.0601 | 0.0090 | 2.93E-11 | -6.6498  | 778845 | Asthma |
| rs201886020 | 6 | 32538198 | G | A | 0.1371 | -0.0889 | 0.0113 | 4.13E-15 | -7.8511  | 778845 | Asthma |
| rs112673371 | 6 | 32538237 | A | T | 0.4114 | -0.0666 | 0.0078 | 9.10E-18 | -8.5848  | 778845 | Asthma |
| rs548623104 | 6 | 32538244 | G | A | 0.3934 | -0.0658 | 0.0078 | 3.15E-17 | -8.4410  | 778845 | Asthma |
| rs563774374 | 6 | 32538245 | T | A | 0.4431 | 0.1486  | 0.0079 | 4.90E-78 | 18.7004  | 778845 | Asthma |
| rs145567338 | 6 | 32538256 | A | T | 0.1308 | -0.0882 | 0.0114 | 1.29E-14 | -7.7067  | 778845 | Asthma |
| rs112692477 | 6 | 32538265 | G | A | 0.3832 | -0.0739 | 0.0081 | 7.20E-20 | -9.1247  | 778845 | Asthma |
| rs376740117 | 6 | 32538304 | T | C | 0.2447 | 0.1166  | 0.0092 | 1.56E-36 | 12.6236  | 778845 | Asthma |
| rs76977906  | 6 | 32538309 | A | G | 0.2933 | -0.0700 | 0.0097 | 4.40E-13 | -7.2426  | 778845 | Asthma |
| rs559804139 | 6 | 32538813 | T | C | 0.2650 | -0.0807 | 0.0095 | 1.45E-17 | -8.5312  | 778845 | Asthma |
| rs113333416 | 6 | 32538850 | C | G | 0.7509 | 0.0757  | 0.0095 | 1.84E-15 | 7.9518   | 778845 | Asthma |
| rs77891198  | 6 | 32538893 | A | C | 0.3939 | 0.1304  | 0.0077 | 1.39E-63 | 16.8343  | 778845 | Asthma |
| rs76612829  | 6 | 32538918 | G | A | 0.2415 | -0.0774 | 0.0095 | 5.24E-16 | -8.1059  | 778845 | Asthma |
| rs75924712  | 6 | 32538984 | A | C | 0.3313 | 0.1342  | 0.0080 | 4.09E-63 | 16.7688  | 778845 | Asthma |
| rs72853912  | 6 | 32538989 | C | T | 0.5380 | -0.0819 | 0.0076 | 3.73E-27 | -10.7926 | 778845 | Asthma |
| rs78273580  | 6 | 32539002 | T | C | 0.3298 | 0.1348  | 0.0080 | 1.30E-63 | 16.8368  | 778845 | Asthma |
| rs75499602  | 6 | 32539017 | T | C | 0.5437 | -0.0814 | 0.0076 | 1.15E-26 | -10.6888 | 778845 | Asthma |
| rs74729326  | 6 | 32539019 | T | C | 0.3277 | 0.1356  | 0.0080 | 7.87E-64 | 16.8673  | 778845 | Asthma |
| rs75953322  | 6 | 32539021 | C | T | 0.5430 | -0.0810 | 0.0076 | 1.64E-26 | -10.6556 | 778845 | Asthma |
| rs141961165 | 6 | 32539022 | T | C | 0.4623 | -0.0771 | 0.0076 | 3.75E-24 | -10.1380 | 778845 | Asthma |
| rs180744865 | 6 | 32539060 | A | C | 0.1237 | -0.0865 | 0.0114 | 3.06E-14 | -7.5960  | 778845 | Asthma |
| rs185263564 | 6 | 32539065 | C | T | 0.1237 | -0.0864 | 0.0114 | 3.22E-14 | -7.5894  | 778845 | Asthma |
| rs74949117  | 6 | 32539069 | T | G | 0.3710 | -0.0671 | 0.0098 | 9.53E-12 | -6.8135  | 778845 | Asthma |

|             |   |          |   |   |        |         |        |          |          |        |        |
|-------------|---|----------|---|---|--------|---------|--------|----------|----------|--------|--------|
| rs182987687 | 6 | 32539093 | C | T | 0.3239 | -0.0450 | 0.0081 | 2.67E-08 | -5.5620  | 778845 | Asthma |
| rs143877943 | 6 | 32539103 | G | C | 0.1227 | -0.0876 | 0.0114 | 1.68E-14 | -7.6731  | 778845 | Asthma |
| rs76133616  | 6 | 32539118 | G | A | 0.5401 | -0.0849 | 0.0076 | 3.55E-29 | -11.2124 | 778845 | Asthma |
| rs116715716 | 6 | 32539133 | T | C | 0.4671 | -0.0796 | 0.0076 | 9.97E-26 | -10.4865 | 778845 | Asthma |
| rs148678549 | 6 | 32539161 | T | C | 0.1224 | -0.0869 | 0.0114 | 2.91E-14 | -7.6024  | 778845 | Asthma |
| rs76539678  | 6 | 32539165 | C | T | 0.1947 | -0.0736 | 0.0099 | 1.03E-13 | -7.4367  | 778845 | Asthma |
| rs79468266  | 6 | 32539205 | A | G | 0.1952 | -0.0746 | 0.0099 | 4.41E-14 | -7.5482  | 778845 | Asthma |
| rs74500484  | 6 | 32539216 | G | A | 0.1952 | -0.0744 | 0.0099 | 5.32E-14 | -7.5238  | 778845 | Asthma |
| rs146568832 | 6 | 32539231 | A | C | 0.1223 | -0.0867 | 0.0114 | 3.26E-14 | -7.5880  | 778845 | Asthma |
| rs76493232  | 6 | 32539270 | T | C | 0.1971 | -0.0740 | 0.0099 | 6.15E-14 | -7.5050  | 778845 | Asthma |
| rs79996892  | 6 | 32539274 | C | G | 0.3229 | -0.0964 | 0.0082 | 8.14E-32 | -11.7380 | 778845 | Asthma |
| rs78668102  | 6 | 32539314 | T | G | 0.3455 | 0.1367  | 0.0079 | 7.89E-68 | 17.4024  | 778845 | Asthma |
| rs148940091 | 6 | 32539324 | C | T | 0.4063 | -0.0876 | 0.0078 | 2.30E-29 | -11.2507 | 778845 | Asthma |
| rs143811457 | 6 | 32539335 | A | G | 0.3565 | 0.1339  | 0.0078 | 1.34E-65 | 17.1061  | 778845 | Asthma |
| rs138574269 | 6 | 32539337 | A | G | 0.3679 | 0.1389  | 0.0079 | 2.38E-69 | 17.6013  | 778845 | Asthma |
| rs113128948 | 6 | 32539352 | T | C | 0.4045 | -0.0941 | 0.0080 | 7.07E-32 | -11.7500 | 778845 | Asthma |
| rs114596863 | 6 | 32539375 | T | A | 0.1416 | -0.0881 | 0.0111 | 1.62E-15 | -7.9679  | 778845 | Asthma |
| rs181471921 | 6 | 32539386 | A | G | 0.4084 | -0.1065 | 0.0081 | 2.07E-39 | -13.1356 | 778845 | Asthma |
| rs115466102 | 6 | 32539391 | C | T | 0.4123 | 0.1261  | 0.0077 | 5.20E-60 | 16.3393  | 778845 | Asthma |
| rs115824930 | 6 | 32539395 | T | C | 0.4084 | -0.1066 | 0.0081 | 1.85E-39 | -13.1443 | 778845 | Asthma |
| rs114278037 | 6 | 32539396 | G | A | 0.4084 | -0.1066 | 0.0081 | 1.85E-39 | -13.1443 | 778845 | Asthma |
| rs200640382 | 6 | 32539422 | T | G | 0.1422 | -0.0878 | 0.0110 | 1.84E-15 | -7.9524  | 778845 | Asthma |
| rs115562562 | 6 | 32539423 | T | C | 0.2454 | -0.0772 | 0.0095 | 5.12E-16 | -8.1087  | 778845 | Asthma |
| rs146797212 | 6 | 32539429 | G | A | 0.4093 | -0.1072 | 0.0081 | 7.45E-40 | -13.2129 | 778845 | Asthma |
| rs528153410 | 6 | 32539434 | G | A | 0.4100 | 0.1265  | 0.0077 | 5.59E-60 | 16.3345  | 778845 | Asthma |
| rs546722932 | 6 | 32539446 | T | C | 0.4090 | 0.1265  | 0.0077 | 5.93E-60 | 16.3310  | 778845 | Asthma |
| rs568551048 | 6 | 32539447 | A | G | 0.4749 | -0.1119 | 0.0080 | 1.78E-44 | -13.9909 | 778845 | Asthma |
| rs77687660  | 6 | 32539449 | G | C | 0.2460 | -0.0776 | 0.0095 | 3.56E-16 | -8.1525  | 778845 | Asthma |
| rs551251088 | 6 | 32539458 | A | C | 0.4075 | 0.1256  | 0.0078 | 6.82E-59 | 16.1809  | 778845 | Asthma |
| rs141684647 | 6 | 32539512 | T | C | 0.4179 | -0.0743 | 0.0077 | 2.86E-22 | -9.7055  | 778845 | Asthma |
| rs150548684 | 6 | 32539516 | T | C | 0.4096 | 0.1267  | 0.0077 | 4.11E-60 | 16.3541  | 778845 | Asthma |
| rs113795374 | 6 | 32539519 | G | T | 0.2473 | -0.0755 | 0.0095 | 1.96E-15 | -7.9437  | 778845 | Asthma |
| rs149253766 | 6 | 32539528 | T | C | 0.4108 | 0.1256  | 0.0077 | 3.56E-59 | 16.2218  | 778845 | Asthma |
| rs112959132 | 6 | 32539533 | T | C | 0.2453 | -0.0755 | 0.0095 | 2.22E-15 | -7.9287  | 778845 | Asthma |
| rs201854374 | 6 | 32539534 | C | T | 0.4079 | -0.1066 | 0.0081 | 1.78E-39 | -13.1461 | 778845 | Asthma |
| rs74867986  | 6 | 32539584 | T | G | 0.1423 | -0.0851 | 0.0110 | 1.31E-14 | -7.7045  | 778845 | Asthma |
| rs76207819  | 6 | 32539588 | G | T | 0.4138 | 0.1263  | 0.0077 | 3.89E-60 | 16.3569  | 778845 | Asthma |
| rs113036651 | 6 | 32539654 | G | A | 0.1367 | -0.0876 | 0.0111 | 3.77E-15 | -7.8621  | 778845 | Asthma |
| rs113319840 | 6 | 32539664 | T | C | 0.3600 | -0.1040 | 0.0081 | 2.10E-37 | -12.7808 | 778845 | Asthma |
| rs111680800 | 6 | 32539675 | A | G | 0.3626 | 0.1322  | 0.0079 | 1.98E-63 | 16.8127  | 778845 | Asthma |
| rs71534505  | 6 | 32539696 | A | G | 0.1257 | -0.0866 | 0.0114 | 2.32E-14 | -7.6319  | 778845 | Asthma |
| rs71534506  | 6 | 32539703 | T | C | 0.1248 | -0.0858 | 0.0114 | 4.62E-14 | -7.5422  | 778845 | Asthma |
| rs112550762 | 6 | 32539737 | A | C | 0.3211 | -0.0961 | 0.0082 | 1.42E-31 | -11.6909 | 778845 | Asthma |
| rs71534508  | 6 | 32539743 | T | A | 0.1234 | -0.0868 | 0.0114 | 2.95E-14 | -7.6002  | 778845 | Asthma |
| rs71534509  | 6 | 32539760 | G | C | 0.1536 | -0.0878 | 0.0109 | 9.08E-16 | -8.0386  | 778845 | Asthma |
| rs114580448 | 6 | 32539761 | T | C | 0.3965 | 0.1258  | 0.0078 | 3.03E-58 | 16.0895  | 778845 | Asthma |
| rs67542250  | 6 | 32539771 | G | A | 0.1952 | -0.0724 | 0.0099 | 2.44E-13 | -7.3221  | 778845 | Asthma |
| rs79601580  | 6 | 32539814 | G | A | 0.3182 | -0.0956 | 0.0082 | 2.57E-31 | -11.6405 | 778845 | Asthma |
| rs76756185  | 6 | 32539844 | T | C | 0.1228 | -0.0871 | 0.0114 | 2.33E-14 | -7.6311  | 778845 | Asthma |
| rs79781489  | 6 | 32539845 | T | C | 0.1446 | -0.0806 | 0.0106 | 2.84E-14 | -7.6057  | 831423 | Asthma |
| rs77077499  | 6 | 32539875 | T | C | 0.3481 | -0.0447 | 0.0079 | 1.78E-08 | -5.6324  | 778845 | Asthma |
| rs76325796  | 6 | 32539876 | A | T | 0.3481 | -0.0447 | 0.0079 | 1.78E-08 | -5.6324  | 778845 | Asthma |
| rs79740987  | 6 | 32539935 | G | C | 0.3495 | -0.0446 | 0.0079 | 1.81E-08 | -5.6292  | 778845 | Asthma |
| rs68009841  | 6 | 32539954 | T | G | 0.3494 | -0.0445 | 0.0079 | 1.97E-08 | -5.6144  | 778845 | Asthma |
| rs67382147  | 6 | 32539975 | T | G | 0.2266 | -0.0654 | 0.0083 | 4.23E-15 | -7.8479  | 899885 | Asthma |
| rs199636459 | 6 | 32539981 | A | G | 0.3486 | -0.0483 | 0.0079 | 1.19E-09 | -6.0823  | 778845 | Asthma |
| rs67322126  | 6 | 32539982 | A | G | 0.2094 | -0.0538 | 0.0097 | 2.86E-08 | -5.5498  | 778845 | Asthma |
| rs36172419  | 6 | 32539989 | A | G | 0.3258 | 0.1370  | 0.0080 | 7.94E-66 | 17.1371  | 778845 | Asthma |
| rs540194362 | 6 | 32539991 | G | A | 0.3455 | -0.0481 | 0.0079 | 1.38E-09 | -6.0579  | 778845 | Asthma |
| rs555383676 | 6 | 32539994 | A | G | 0.3483 | -0.0469 | 0.0080 | 3.84E-09 | -5.8908  | 778845 | Asthma |
| rs66781242  | 6 | 32540035 | G | A | 0.1888 | -0.0727 | 0.0100 | 3.59E-13 | -7.2703  | 778845 | Asthma |
| rs36134912  | 6 | 32540040 | C | T | 0.1219 | -0.0878 | 0.0114 | 1.63E-14 | -7.6767  | 778845 | Asthma |
| rs147668426 | 6 | 32540154 | G | A | 0.3412 | -0.0484 | 0.0080 | 1.18E-09 | -6.0827  | 778845 | Asthma |
| rs571430728 | 6 | 32540161 | T | C | 0.3412 | -0.0484 | 0.0080 | 1.18E-09 | -6.0827  | 778845 | Asthma |
| rs539226504 | 6 | 32540167 | A | G | 0.3408 | -0.0482 | 0.0080 | 1.47E-09 | -6.0475  | 778845 | Asthma |
| rs76902085  | 6 | 32540168 | C | T | 0.3317 | 0.1369  | 0.0079 | 3.20E-67 | 17.3221  | 778845 | Asthma |
| rs140538649 | 6 | 32540169 | T | C | 0.3408 | -0.0482 | 0.0080 | 1.47E-09 | -6.0475  | 778845 | Asthma |
| rs78923832  | 6 | 32540170 | A | G | 0.3315 | 0.1371  | 0.0079 | 2.18E-67 | 17.3439  | 778845 | Asthma |
| rs555706008 | 6 | 32540176 | G | A | 0.3405 | -0.0482 | 0.0080 | 1.45E-09 | -6.0498  | 778845 | Asthma |
| rs71534512  | 6 | 32540215 | G | C | 0.1243 | -0.0875 | 0.0114 | 1.54E-14 | -7.6835  | 778845 | Asthma |
| rs77587106  | 6 | 32540224 | A | G | 0.3395 | 0.1363  | 0.0079 | 4.55E-67 | 17.3023  | 778845 | Asthma |
| rs76342965  | 6 | 32540231 | T | C | 0.3762 | 0.1326  | 0.0078 | 9.28E-65 | 16.9925  | 778845 | Asthma |
| rs78316776  | 6 | 32540235 | T | A | 0.4424 | -0.1136 | 0.0082 | 7.62E-44 | -13.8866 | 778845 | Asthma |
| rs79476956  | 6 | 32540396 | G | A | 0.3328 | 0.1358  | 0.0079 | 3.70E-66 | 17.1815  | 778845 | Asthma |



|             |   |          |   |   |        |         |        |          |          |        |        |
|-------------|---|----------|---|---|--------|---------|--------|----------|----------|--------|--------|
| rs66479855  | 6 | 32540410 | T | C | 0.1953 | -0.0743 | 0.0099 | 5.67E-14 | -7.5156  | 778845 | Asthma |
| rs556173675 | 6 | 32540425 | G | A | 0.3425 | -0.0473 | 0.0080 | 2.63E-09 | -5.9535  | 778845 | Asthma |
| rs67342127  | 6 | 32540427 | T | G | 0.1951 | -0.0736 | 0.0099 | 9.76E-14 | -7.4441  | 778845 | Asthma |
| rs538718414 | 6 | 32540430 | T | C | 0.3426 | -0.0473 | 0.0080 | 2.69E-09 | -5.9497  | 778845 | Asthma |
| rs75387045  | 6 | 32540436 | T | C | 0.3338 | 0.1368  | 0.0079 | 3.20E-67 | 17.3228  | 778845 | Asthma |
| rs72853923  | 6 | 32540445 | G | T | 0.3439 | -0.0474 | 0.0080 | 2.59E-09 | -5.9558  | 778845 | Asthma |
| rs72853924  | 6 | 32540462 | G | A | 0.3455 | -0.0475 | 0.0079 | 2.21E-09 | -5.9813  | 778845 | Asthma |
| rs67695409  | 6 | 32540465 | G | A | 0.1227 | -0.0859 | 0.0114 | 5.16E-14 | -7.5276  | 778845 | Asthma |
| rs115081905 | 6 | 32540499 | T | C | 0.3472 | -0.0477 | 0.0079 | 1.84E-09 | -6.0112  | 778845 | Asthma |
| rs74715621  | 6 | 32540508 | G | A | 0.3472 | -0.0475 | 0.0079 | 2.08E-09 | -5.9917  | 778845 | Asthma |
| rs74999184  | 6 | 32540529 | C | T | 0.3155 | -0.0899 | 0.0073 | 4.63E-35 | -12.3539 | 847307 | Asthma |
| rs72853925  | 6 | 32540553 | G | A | 0.5051 | 0.0486  | 0.0079 | 7.45E-10 | 6.1562   | 778845 | Asthma |
| rs78017592  | 6 | 32540678 | C | T | 0.2581 | 0.1345  | 0.0089 | 6.89E-52 | 15.1560  | 778845 | Asthma |
| rs62405588  | 6 | 32540691 | G | A | 0.3223 | 0.1340  | 0.0081 | 8.02E-61 | 16.4533  | 778845 | Asthma |
| rs67781023  | 6 | 32540735 | A | T | 0.1240 | -0.0874 | 0.0114 | 1.79E-14 | -7.6646  | 778845 | Asthma |
| rs62405589  | 6 | 32540739 | G | T | 0.3407 | 0.1314  | 0.0081 | 7.79E-60 | 16.3144  | 778845 | Asthma |
| rs62405590  | 6 | 32540782 | G | T | 0.2338 | -0.0744 | 0.0086 | 3.46E-18 | -8.6953  | 847307 | Asthma |
| rs67853486  | 6 | 32540787 | C | T | 0.1399 | -0.0876 | 0.0111 | 2.81E-15 | -7.8992  | 778845 | Asthma |
| rs62405591  | 6 | 32540927 | A | G | 0.3114 | 0.1338  | 0.0083 | 1.43E-58 | 16.1362  | 778845 | Asthma |
| rs72853931  | 6 | 32540947 | C | T | 0.1222 | -0.0867 | 0.0114 | 3.31E-14 | -7.5854  | 778845 | Asthma |
| rs67694185  | 6 | 32540977 | A | T | 0.1217 | -0.0891 | 0.0115 | 7.50E-15 | -7.7758  | 778845 | Asthma |
| rs66671169  | 6 | 32541006 | C | T | 0.1164 | -0.0845 | 0.0118 | 6.55E-13 | -7.1887  | 778845 | Asthma |
| rs66881448  | 6 | 32541066 | A | G | 0.1217 | -0.0928 | 0.0110 | 3.25E-17 | -8.4371  | 831423 | Asthma |
| rs67408570  | 6 | 32541097 | C | A | 0.3863 | 0.0764  | 0.0079 | 4.44E-22 | 9.6603   | 778845 | Asthma |
| rs71534519  | 6 | 32541116 | G | A | 0.5455 | -0.0822 | 0.0076 | 2.90E-27 | -10.8156 | 778845 | Asthma |
| rs66466672  | 6 | 32541136 | G | A | 0.5475 | -0.0830 | 0.0076 | 9.91E-28 | -10.9138 | 778845 | Asthma |
| rs67947168  | 6 | 32541145 | T | C | 0.1941 | -0.0731 | 0.0099 | 1.40E-13 | -7.3968  | 778845 | Asthma |
| rs68122208  | 6 | 32541204 | A | G | 0.1940 | -0.0735 | 0.0099 | 1.05E-13 | -7.4347  | 778845 | Asthma |
| rs112360905 | 6 | 32541242 | G | T | 0.2799 | 0.1349  | 0.0085 | 2.88E-57 | 15.9491  | 778845 | Asthma |
| rs111484816 | 6 | 32541257 | G | A | 0.2807 | 0.1350  | 0.0084 | 1.21E-57 | 16.0028  | 778845 | Asthma |
| rs73727962  | 6 | 32541273 | A | G | 0.3176 | -0.0954 | 0.0082 | 3.50E-31 | -11.6139 | 778845 | Asthma |
| rs76722140  | 6 | 32541276 | C | T | 0.3177 | -0.0954 | 0.0082 | 3.50E-31 | -11.6139 | 778845 | Asthma |
| rs66713918  | 6 | 32541402 | T | C | 0.1942 | -0.0728 | 0.0099 | 1.74E-13 | -7.3676  | 778845 | Asthma |
| rs78241440  | 6 | 32541403 | G | A | 0.3156 | -0.0898 | 0.0073 | 5.38E-35 | -12.3422 | 847307 | Asthma |
| rs67111333  | 6 | 32541411 | A | T | 0.1912 | -0.0723 | 0.0088 | 2.14E-16 | -8.2137  | 847307 | Asthma |
| rs66807110  | 6 | 32541458 | G | A | 0.1223 | -0.0865 | 0.0114 | 3.58E-14 | -7.5753  | 778845 | Asthma |
| rs72853943  | 6 | 32541483 | C | T | 0.3153 | -0.0895 | 0.0073 | 9.27E-35 | -12.2981 | 847307 | Asthma |
| rs79207037  | 6 | 32541517 | A | G | 0.3205 | 0.1281  | 0.0072 | 9.32E-72 | 17.9129  | 847307 | Asthma |
| rs114676131 | 6 | 32541540 | A | C | 0.0602 | -0.1253 | 0.0178 | 2.21E-12 | -7.0207  | 778845 | Asthma |
| rs66678933  | 6 | 32541543 | T | C | 0.3604 | -0.0385 | 0.0069 | 2.99E-08 | -5.5418  | 847307 | Asthma |
| rs79957603  | 6 | 32541571 | A | G | 0.3220 | 0.1351  | 0.0081 | 5.52E-63 | 16.7514  | 778845 | Asthma |
| rs28772724  | 6 | 32541580 | T | G | 0.3183 | 0.1385  | 0.0078 | 5.93E-70 | 17.6805  | 831423 | Asthma |
| rs76752213  | 6 | 32541639 | A | T | 0.3199 | 0.1347  | 0.0081 | 3.59E-62 | 16.6393  | 778845 | Asthma |
| rs28776176  | 6 | 32541640 | A | T | 0.1888 | -0.0705 | 0.0086 | 2.78E-16 | -8.1826  | 899885 | Asthma |
| rs74587162  | 6 | 32541678 | C | T | 0.3176 | 0.1349  | 0.0082 | 2.70E-61 | 16.5191  | 778845 | Asthma |
| rs115704383 | 6 | 32541683 | T | C | 0.3560 | -0.0433 | 0.0079 | 4.17E-08 | -5.4834  | 778845 | Asthma |
| rs114246255 | 6 | 32541684 | G | A | 0.3560 | -0.0433 | 0.0079 | 4.17E-08 | -5.4834  | 778845 | Asthma |
| rs72853950  | 6 | 32541695 | T | G | 0.3559 | -0.0434 | 0.0079 | 4.05E-08 | -5.4886  | 778845 | Asthma |
| rs72492306  | 6 | 32541733 | A | T | 0.3565 | -0.0432 | 0.0079 | 4.52E-08 | -5.4692  | 778845 | Asthma |
| rs72492307  | 6 | 32541742 | C | T | 0.3559 | -0.0433 | 0.0079 | 4.29E-08 | -5.4787  | 778845 | Asthma |
| rs113260943 | 6 | 32541773 | T | C | 0.3196 | -0.0948 | 0.0082 | 8.16E-31 | -11.5413 | 778845 | Asthma |
| rs72492308  | 6 | 32541793 | T | C | 0.3184 | -0.0949 | 0.0082 | 6.70E-31 | -11.5584 | 778845 | Asthma |
| rs28819746  | 6 | 32541802 | C | G | 0.3569 | -0.0441 | 0.0076 | 6.49E-09 | -5.8035  | 831423 | Asthma |
| rs68126668  | 6 | 32541826 | A | T | 0.3558 | -0.0432 | 0.0079 | 4.57E-08 | -5.4671  | 778845 | Asthma |
| rs28852767  | 6 | 32541878 | G | C | 0.1216 | -0.0930 | 0.0110 | 2.74E-17 | -8.4569  | 831423 | Asthma |
| rs66521709  | 6 | 32542052 | A | G | 0.3563 | -0.0434 | 0.0076 | 1.12E-08 | -5.7116  | 831423 | Asthma |
| rs79215033  | 6 | 32542081 | G | A | 0.3270 | 0.1339  | 0.0080 | 5.60E-63 | 16.7511  | 778845 | Asthma |
| rs74768610  | 6 | 32542091 | C | T | 0.3268 | 0.1337  | 0.0080 | 8.71E-63 | 16.7249  | 778845 | Asthma |
| rs28844904  | 6 | 32542118 | G | A | 0.1938 | -0.0724 | 0.0099 | 2.41E-13 | -7.3239  | 778845 | Asthma |
| rs78942674  | 6 | 32542120 | T | G | 0.3593 | -0.0394 | 0.0070 | 1.55E-08 | -5.6553  | 847307 | Asthma |
| rs59350153  | 6 | 32542158 | T | C | 0.3238 | 0.1273  | 0.0071 | 1.51E-71 | 17.8867  | 847307 | Asthma |
| rs72492311  | 6 | 32542202 | T | C | 0.3576 | -0.0441 | 0.0076 | 6.84E-09 | -5.7947  | 831423 | Asthma |
| rs28760027  | 6 | 32542208 | A | G | 0.1217 | -0.0926 | 0.0110 | 4.08E-17 | -8.4108  | 831423 | Asthma |
| rs57588792  | 6 | 32542235 | A | G | 0.3236 | 0.1274  | 0.0071 | 1.03E-71 | 17.9074  | 847307 | Asthma |
| rs28889022  | 6 | 32542327 | C | T | 0.1215 | -0.0938 | 0.0110 | 1.67E-17 | -8.5148  | 831423 | Asthma |
| rs115137792 | 6 | 32542337 | C | T | 0.3434 | -0.0454 | 0.0081 | 1.72E-08 | -5.6384  | 778845 | Asthma |
| rs199616440 | 6 | 32542338 | T | A | 0.3433 | -0.0453 | 0.0080 | 1.79E-08 | -5.6310  | 778845 | Asthma |
| rs537977627 | 6 | 32542363 | A | G | 0.3495 | -0.0432 | 0.0079 | 4.79E-08 | -5.4589  | 778845 | Asthma |
| rs71534520  | 6 | 32542369 | G | C | 0.3481 | -0.0435 | 0.0079 | 3.80E-08 | -5.5000  | 778845 | Asthma |
| rs58537387  | 6 | 32542399 | T | A | 0.3232 | 0.1360  | 0.0080 | 2.69E-64 | 16.9306  | 778845 | Asthma |
| rs28762758  | 6 | 32542427 | T | G | 0.1235 | -0.0862 | 0.0114 | 4.31E-14 | -7.5510  | 778845 | Asthma |
| rs60160049  | 6 | 32542431 | T | G | 0.4478 | -0.0978 | 0.0079 | 1.57E-35 | -12.4408 | 778845 | Asthma |
| rs59066278  | 6 | 32542462 | T | C | 0.3216 | -0.0946 | 0.0082 | 1.20E-30 | -11.5083 | 778845 | Asthma |
| rs147266303 | 6 | 32542491 | C | G | 0.3505 | -0.0440 | 0.0079 | 2.66E-08 | -5.5622  | 778845 | Asthma |

|             |   |          |   |   |        |         |        |          |          |        |        |
|-------------|---|----------|---|---|--------|---------|--------|----------|----------|--------|--------|
| rs28838605  | 6 | 32542502 | A | C | 0.5502 | -0.0841 | 0.0076 | 1.39E-28 | -11.0906 | 778845 | Asthma |
| rs28769628  | 6 | 32542504 | A | G | 0.1941 | -0.0728 | 0.0099 | 1.87E-13 | -7.3577  | 778845 | Asthma |
| rs112780153 | 6 | 32542524 | C | A | 0.3504 | -0.0451 | 0.0079 | 1.25E-08 | -5.6922  | 778845 | Asthma |
| rs28736808  | 6 | 32542537 | T | C | 0.1229 | -0.0848 | 0.0114 | 1.14E-13 | -7.4241  | 778845 | Asthma |
| rs112111526 | 6 | 32542540 | A | G | 0.3511 | -0.0450 | 0.0079 | 1.27E-08 | -5.6904  | 778845 | Asthma |
| rs144411837 | 6 | 32542560 | C | T | 0.3511 | -0.0448 | 0.0079 | 1.46E-08 | -5.6666  | 778845 | Asthma |
| rs140120971 | 6 | 32542566 | C | T | 0.3512 | -0.0448 | 0.0079 | 1.43E-08 | -5.6699  | 778845 | Asthma |
| rs143822887 | 6 | 32542567 | A | G | 0.3512 | -0.0448 | 0.0079 | 1.43E-08 | -5.6699  | 778845 | Asthma |
| rs28404276  | 6 | 32542578 | A | G | 0.4782 | -0.0790 | 0.0076 | 1.90E-25 | -10.4254 | 778845 | Asthma |
| rs113220298 | 6 | 32542592 | T | C | 0.3524 | -0.0437 | 0.0079 | 3.17E-08 | -5.5315  | 778845 | Asthma |
| rs28455662  | 6 | 32542616 | A | G | 0.1938 | -0.0735 | 0.0099 | 1.07E-13 | -7.4326  | 778845 | Asthma |
| rs112465099 | 6 | 32542653 | G | A | 0.3513 | -0.0441 | 0.0079 | 2.43E-08 | -5.5780  | 778845 | Asthma |
| rs113623173 | 6 | 32542661 | T | C | 0.3255 | 0.1359  | 0.0080 | 1.81E-64 | 16.9535  | 778845 | Asthma |
| rs80083020  | 6 | 32542662 | C | T | 0.3507 | -0.0442 | 0.0079 | 2.31E-08 | -5.5868  | 778845 | Asthma |
| rs115124923 | 6 | 32542705 | A | C | 0.2276 | 0.1644  | 0.0087 | 9.35E-80 | 18.9104  | 831423 | Asthma |
| rs116209683 | 6 | 32542731 | C | T | 0.3515 | -0.0438 | 0.0079 | 2.99E-08 | -5.5423  | 778845 | Asthma |
| rs74290590  | 6 | 32542762 | C | G | 0.3191 | -0.0941 | 0.0082 | 2.34E-30 | -11.4505 | 778845 | Asthma |
| rs74535936  | 6 | 32542770 | G | A | 0.3533 | -0.0444 | 0.0079 | 1.83E-08 | -5.6276  | 778845 | Asthma |
| rs79005639  | 6 | 32542805 | C | T | 0.3249 | 0.1358  | 0.0080 | 1.66E-64 | 16.9590  | 778845 | Asthma |
| rs76723065  | 6 | 32542814 | G | C | 0.3532 | -0.0443 | 0.0079 | 2.01E-08 | -5.6108  | 778845 | Asthma |
| rs114472333 | 6 | 32542821 | T | G | 0.3530 | -0.0440 | 0.0079 | 2.58E-08 | -5.5675  | 778845 | Asthma |
| rs114015220 | 6 | 32542822 | T | C | 0.3563 | -0.0399 | 0.0069 | 9.12E-09 | -5.7464  | 847307 | Asthma |
| rs200951960 | 6 | 32542823 | G | A | 0.2651 | 0.1381  | 0.0087 | 6.29E-57 | 15.9005  | 778845 | Asthma |
| rs112895453 | 6 | 32542825 | G | T | 0.3253 | 0.1360  | 0.0080 | 1.30E-64 | 16.9725  | 778845 | Asthma |
| rs9378165   | 6 | 32542874 | G | C | 0.3250 | 0.1364  | 0.0080 | 6.10E-65 | 17.0174  | 778845 | Asthma |
| rs72853975  | 6 | 32542925 | A | G | 0.1230 | -0.0847 | 0.0114 | 1.18E-13 | -7.4189  | 778845 | Asthma |
| rs368398419 | 6 | 32542932 | C | T | 0.3429 | -0.0479 | 0.0079 | 1.50E-09 | -6.0449  | 778845 | Asthma |
| rs371989616 | 6 | 32542941 | T | G | 0.3429 | -0.0484 | 0.0079 | 1.04E-09 | -6.1032  | 778845 | Asthma |
| rs138222522 | 6 | 32542956 | T | C | 0.3311 | 0.1367  | 0.0079 | 9.48E-67 | 17.2597  | 778845 | Asthma |
| rs77233532  | 6 | 32542963 | A | G | 0.3229 | -0.0956 | 0.0082 | 2.71E-31 | -11.6360 | 778845 | Asthma |
| rs112628749 | 6 | 32542992 | T | C | 0.3609 | 0.1358  | 0.0079 | 7.33E-67 | 17.2745  | 778845 | Asthma |
| rs113766057 | 6 | 32542995 | A | G | 0.3609 | 0.1358  | 0.0079 | 7.39E-67 | 17.2736  | 778845 | Asthma |
| rs112894757 | 6 | 32543000 | T | C | 0.3609 | 0.1359  | 0.0079 | 6.22E-67 | 17.2834  | 778845 | Asthma |
| rs113220099 | 6 | 32543046 | T | C | 0.3470 | 0.1271  | 0.0081 | 6.19E-56 | 15.7565  | 778845 | Asthma |
| rs71534522  | 6 | 32543050 | T | C | 0.1314 | -0.0875 | 0.0113 | 9.85E-15 | -7.7415  | 778845 | Asthma |
| rs185295622 | 6 | 32543063 | A | G | 0.3651 | 0.1319  | 0.0079 | 3.93E-63 | 16.7716  | 778845 | Asthma |
| rs181435903 | 6 | 32543126 | A | G | 0.3858 | 0.1326  | 0.0078 | 2.18E-64 | 16.9424  | 778845 | Asthma |
| rs186911188 | 6 | 32543128 | G | T | 0.4303 | -0.1119 | 0.0082 | 9.26E-43 | -13.7068 | 778845 | Asthma |
| rs113547679 | 6 | 32543137 | T | C | 0.3797 | 0.1322  | 0.0078 | 6.90E-64 | 16.8749  | 778845 | Asthma |
| rs111989182 | 6 | 32543147 | G | A | 0.3914 | 0.1316  | 0.0078 | 1.54E-63 | 16.8267  | 778845 | Asthma |
| rs71534525  | 6 | 32543169 | T | G | 0.1375 | -0.0833 | 0.0112 | 9.31E-14 | -7.4502  | 778845 | Asthma |
| rs112399032 | 6 | 32543170 | T | C | 0.3840 | -0.1065 | 0.0082 | 6.11E-39 | -13.0524 | 778845 | Asthma |
| rs71534526  | 6 | 32543197 | C | T | 0.3231 | -0.0771 | 0.0081 | 1.32E-21 | -9.5483  | 778845 | Asthma |
| rs544126617 | 6 | 32543199 | A | G | 0.4098 | -0.1062 | 0.0081 | 6.01E-39 | -13.0538 | 778845 | Asthma |
| rs71534527  | 6 | 32543201 | G | A | 0.4176 | -0.0789 | 0.0077 | 1.04E-24 | -10.2625 | 778845 | Asthma |
| rs577174379 | 6 | 32543202 | G | T | 0.4098 | -0.1062 | 0.0081 | 6.01E-39 | -13.0538 | 778845 | Asthma |
| rs140190321 | 6 | 32543231 | T | C | 0.4097 | -0.1058 | 0.0081 | 9.82E-39 | -13.0170 | 778845 | Asthma |
| rs115591310 | 6 | 32543232 | A | G | 0.4072 | 0.1269  | 0.0078 | 1.50E-59 | 16.2751  | 778845 | Asthma |
| rs113049351 | 6 | 32543247 | T | C | 0.3644 | 0.1334  | 0.0079 | 1.21E-64 | 16.9767  | 778845 | Asthma |
| rs72853976  | 6 | 32543249 | T | C | 0.1270 | -0.0855 | 0.0114 | 5.63E-14 | -7.5163  | 778845 | Asthma |
| rs72853977  | 6 | 32543250 | A | G | 0.1270 | -0.0855 | 0.0114 | 5.63E-14 | -7.5163  | 778845 | Asthma |
| rs71534528  | 6 | 32543277 | T | C | 0.1959 | -0.0735 | 0.0099 | 9.68E-14 | -7.4453  | 778845 | Asthma |
| rs71534529  | 6 | 32543282 | A | G | 0.1959 | -0.0735 | 0.0099 | 9.68E-14 | -7.4453  | 778845 | Asthma |
| rs183134414 | 6 | 32543292 | T | G | 0.3261 | -0.0442 | 0.0080 | 3.65E-08 | -5.5072  | 778845 | Asthma |
| rs192994337 | 6 | 32543306 | A | G | 0.3225 | -0.0943 | 0.0082 | 1.65E-30 | -11.4809 | 778845 | Asthma |
| rs111847217 | 6 | 32543354 | G | C | 0.3446 | -0.0461 | 0.0080 | 6.98E-09 | -5.7913  | 778845 | Asthma |
| rs149690859 | 6 | 32543358 | A | G | 0.3257 | 0.1367  | 0.0080 | 9.87E-66 | 17.1236  | 778845 | Asthma |
| rs111632178 | 6 | 32543372 | C | T | 0.3449 | -0.0462 | 0.0080 | 6.15E-09 | -5.8127  | 778845 | Asthma |
| rs112427949 | 6 | 32543387 | T | C | 0.3450 | -0.0459 | 0.0079 | 7.98E-09 | -5.7688  | 778845 | Asthma |
| rs190411898 | 6 | 32543403 | T | C | 0.3266 | 0.1372  | 0.0080 | 3.17E-66 | 17.1898  | 778845 | Asthma |
| rs111896611 | 6 | 32543406 | T | G | 0.3463 | -0.0461 | 0.0079 | 5.94E-09 | -5.8186  | 778845 | Asthma |
| rs71534530  | 6 | 32543434 | A | G | 0.4653 | -0.0799 | 0.0076 | 6.72E-26 | -10.5238 | 778845 | Asthma |
| rs546788946 | 6 | 32543446 | A | G | 0.3287 | 0.1366  | 0.0080 | 8.57E-66 | 17.1314  | 778845 | Asthma |
| rs71534532  | 6 | 32543490 | T | C | 0.1317 | -0.0786 | 0.0113 | 3.01E-12 | -6.9771  | 778845 | Asthma |
| rs71534533  | 6 | 32543495 | G | T | 0.1317 | -0.0786 | 0.0113 | 3.01E-12 | -6.9771  | 778845 | Asthma |
| rs546964381 | 6 | 32543498 | G | C | 0.4459 | -0.0553 | 0.0080 | 6.16E-12 | -6.8759  | 778845 | Asthma |
| rs144415016 | 6 | 32543521 | A | G | 0.3978 | -0.0720 | 0.0081 | 9.49E-19 | -8.8410  | 778845 | Asthma |
| rs71534534  | 6 | 32543522 | T | C | 0.1338 | -0.0756 | 0.0112 | 1.47E-11 | -6.7515  | 778845 | Asthma |
| rs139849303 | 6 | 32543530 | G | C | 0.6161 | 0.0802  | 0.0081 | 6.35E-23 | 9.8577   | 778845 | Asthma |
| rs112780983 | 6 | 32543571 | G | C | 0.5290 | 0.0453  | 0.0080 | 1.43E-08 | 5.6703   | 778845 | Asthma |
| rs72853978  | 6 | 32543579 | C | G | 0.1377 | -0.0730 | 0.0111 | 5.68E-11 | -6.5518  | 778845 | Asthma |
| rs112999094 | 6 | 32543609 | T | C | 0.5327 | 0.0474  | 0.0080 | 2.95E-09 | 5.9344   | 778845 | Asthma |
| rs142592433 | 6 | 32543615 | T | C | 0.5324 | 0.0465  | 0.0080 | 5.86E-09 | 5.8209   | 778845 | Asthma |
| rs11460076  | 6 | 32543638 | G | T | 0.1155 | -0.0680 | 0.0120 | 1.30E-08 | -5.6858  | 778845 | Asthma |

|             |   |          |   |   |        |         |        |          |          |        |        |
|-------------|---|----------|---|---|--------|---------|--------|----------|----------|--------|--------|
| rs113725551 | 6 | 32543643 | G | A | 0.5820 | 0.0561  | 0.0081 | 4.50E-12 | 6.9205   | 778845 | Asthma |
| rs71534536  | 6 | 32543705 | G | A | 0.1371 | -0.0714 | 0.0111 | 1.43E-10 | -6.4128  | 778845 | Asthma |
| rs369885796 | 6 | 32543752 | G | A | 0.5265 | -0.0805 | 0.0087 | 2.36E-20 | -9.2444  | 778845 | Asthma |
| rs111486648 | 6 | 32543791 | C | T | 0.0583 | -0.1229 | 0.0172 | 8.31E-13 | -7.1561  | 848312 | Asthma |
| rs62405593  | 6 | 32543825 | A | G | 0.1914 | -0.0723 | 0.0088 | 2.22E-16 | -8.2095  | 847307 | Asthma |
| rs72853980  | 6 | 32543851 | A | G | 0.1218 | -0.0931 | 0.0110 | 2.73E-17 | -8.4577  | 831423 | Asthma |
| rs79698213  | 6 | 32543868 | T | C | 0.1234 | -0.0850 | 0.0114 | 9.89E-14 | -7.4422  | 778845 | Asthma |
| rs111797109 | 6 | 32543873 | T | C | 0.3264 | 0.1371  | 0.0077 | 8.02E-71 | 17.7926  | 831423 | Asthma |
| rs66559992  | 6 | 32543921 | A | G | 0.1888 | -0.0746 | 0.0092 | 5.83E-16 | -8.0929  | 891051 | Asthma |
| rs28757361  | 6 | 32543941 | A | G | 0.1224 | -0.0852 | 0.0115 | 1.11E-13 | -7.4277  | 778845 | Asthma |
| rs68148149  | 6 | 32543948 | C | A | 0.3580 | -0.0874 | 0.0080 | 1.27E-27 | -10.8908 | 831423 | Asthma |
| rs73727980  | 6 | 32543997 | C | T | 0.3473 | -0.0465 | 0.0079 | 3.36E-09 | -5.9128  | 778845 | Asthma |
| rs73727981  | 6 | 32544014 | C | A | 0.3482 | -0.0465 | 0.0079 | 3.41E-09 | -5.9105  | 778845 | Asthma |
| rs72853983  | 6 | 32544077 | A | G | 0.3414 | -0.0476 | 0.0079 | 1.70E-09 | -6.0238  | 778845 | Asthma |
| rs72853984  | 6 | 32544089 | C | T | 0.2945 | -0.0896 | 0.0074 | 1.90E-33 | -12.0517 | 847307 | Asthma |
| rs113192265 | 6 | 32544107 | C | G | 0.2504 | 0.1389  | 0.0088 | 1.58E-55 | 15.6971  | 778845 | Asthma |
| rs75420369  | 6 | 32544143 | A | C | 0.3000 | 0.1366  | 0.0083 | 4.92E-61 | 16.4817  | 778845 | Asthma |
| rs75141783  | 6 | 32544167 | A | G | 0.3596 | -0.0430 | 0.0079 | 4.35E-08 | -5.4760  | 778845 | Asthma |
| rs28650819  | 6 | 32544193 | C | T | 0.1334 | -0.0807 | 0.0113 | 1.15E-12 | -7.1114  | 778845 | Asthma |
| rs72492319  | 6 | 32544210 | T | C | 0.3542 | -0.0409 | 0.0069 | 3.32E-09 | -5.9151  | 847307 | Asthma |
| rs79202843  | 6 | 32544230 | T | C | 0.1913 | -0.0715 | 0.0088 | 4.65E-16 | -8.1204  | 847307 | Asthma |
| rs77789453  | 6 | 32544236 | C | T | 0.2920 | 0.1367  | 0.0084 | 1.48E-59 | 16.2759  | 778845 | Asthma |
| rs28584364  | 6 | 32544271 | C | T | 0.5240 | 0.0770  | 0.0076 | 3.20E-24 | 10.1533  | 778845 | Asthma |
| rs79508322  | 6 | 32544272 | A | G | 0.3287 | 0.1331  | 0.0080 | 4.23E-62 | 16.6306  | 778845 | Asthma |
| rs28719539  | 6 | 32544297 | A | T | 0.1217 | -0.0855 | 0.0115 | 9.17E-14 | -7.4521  | 778845 | Asthma |
| rs116675816 | 6 | 32544354 | A | T | 0.3450 | -0.0458 | 0.0079 | 6.37E-09 | -5.8068  | 778845 | Asthma |
| rs529580232 | 6 | 32544359 | C | T | 0.3450 | -0.0458 | 0.0079 | 6.40E-09 | -5.8059  | 778845 | Asthma |
| rs551034683 | 6 | 32544361 | A | G | 0.3450 | -0.0458 | 0.0079 | 6.40E-09 | -5.8059  | 778845 | Asthma |
| rs562852671 | 6 | 32544365 | T | A | 0.2191 | -0.0475 | 0.0087 | 4.75E-08 | -5.4603  | 778845 | Asthma |
| rs28495356  | 6 | 32544387 | T | C | 0.1301 | -0.0895 | 0.0108 | 1.26E-16 | -8.2770  | 831423 | Asthma |
| rs112458679 | 6 | 32544390 | G | C | 0.3440 | -0.0464 | 0.0079 | 4.22E-09 | -5.8751  | 778845 | Asthma |
| rs28467173  | 6 | 32544403 | A | T | 0.1944 | -0.0735 | 0.0099 | 1.07E-13 | -7.4322  | 778845 | Asthma |
| rs534064478 | 6 | 32544412 | T | C | 0.3484 | -0.0448 | 0.0079 | 1.35E-08 | -5.6800  | 778845 | Asthma |
| rs546382275 | 6 | 32544413 | G | A | 0.3484 | -0.0448 | 0.0079 | 1.35E-08 | -5.6800  | 778845 | Asthma |
| rs28575083  | 6 | 32544422 | A | C | 0.1235 | -0.0858 | 0.0114 | 5.85E-14 | -7.5114  | 778845 | Asthma |
| rs115303801 | 6 | 32544452 | G | T | 0.3482 | -0.0450 | 0.0079 | 1.18E-08 | -5.7032  | 778845 | Asthma |
| rs111289870 | 6 | 32544492 | C | A | 0.3518 | -0.0455 | 0.0079 | 6.96E-09 | -5.7920  | 778845 | Asthma |
| rs28497315  | 6 | 32544520 | C | T | 0.1248 | -0.0855 | 0.0114 | 6.18E-14 | -7.5041  | 778845 | Asthma |
| rs72853989  | 6 | 32544544 | T | C | 0.3520 | -0.0448 | 0.0079 | 1.27E-08 | -5.6904  | 778845 | Asthma |
| rs67081540  | 6 | 32544582 | C | T | 0.3541 | -0.0442 | 0.0079 | 2.26E-08 | -5.5909  | 778845 | Asthma |
| rs66497315  | 6 | 32544630 | C | T | 0.3520 | -0.0444 | 0.0079 | 1.90E-08 | -5.6211  | 778845 | Asthma |
| rs72492314  | 6 | 32544644 | A | T | 0.3521 | -0.0443 | 0.0079 | 2.02E-08 | -5.6102  | 778845 | Asthma |
| rs201885513 | 6 | 32544682 | C | T | 0.3195 | -0.0950 | 0.0082 | 7.79E-31 | -11.5453 | 778845 | Asthma |
| rs72492315  | 6 | 32544689 | C | T | 0.3515 | -0.0447 | 0.0079 | 1.56E-08 | -5.6552  | 778845 | Asthma |
| rs72492316  | 6 | 32544704 | A | G | 0.1946 | -0.0733 | 0.0099 | 1.23E-13 | -7.4139  | 778845 | Asthma |
| rs80234155  | 6 | 32544706 | C | G | 0.1336 | -0.0749 | 0.0112 | 2.50E-11 | -6.6734  | 778845 | Asthma |
| rs72492318  | 6 | 32544729 | A | G | 0.1946 | -0.0735 | 0.0099 | 1.05E-13 | -7.4351  | 778845 | Asthma |
| rs202207567 | 6 | 32544756 | T | C | 0.2768 | 0.1082  | 0.0085 | 3.69E-37 | 12.7374  | 831423 | Asthma |
| rs66857824  | 6 | 32544762 | C | T | 0.1899 | -0.0735 | 0.0100 | 2.13E-13 | -7.3403  | 778845 | Asthma |
| rs73728000  | 6 | 32544775 | C | T | 0.3194 | -0.0944 | 0.0082 | 1.54E-30 | -11.4866 | 778845 | Asthma |
| rs113522240 | 6 | 32544814 | G | C | 0.3224 | 0.1372  | 0.0081 | 7.53E-65 | 17.0047  | 778845 | Asthma |
| rs66534143  | 6 | 32544824 | C | T | 0.3542 | -0.0434 | 0.0079 | 3.95E-08 | -5.4932  | 778845 | Asthma |
| rs35571839  | 6 | 32544836 | T | C | 0.1126 | -0.0844 | 0.0108 | 4.56E-15 | -7.8383  | 891051 | Asthma |
| rs68109414  | 6 | 32544968 | A | G | 0.1501 | -0.0740 | 0.0109 | 1.27E-11 | -6.7719  | 778845 | Asthma |
| rs113046257 | 6 | 32544976 | T | C | 0.2482 | 0.1332  | 0.0086 | 1.29E-53 | 15.4150  | 778845 | Asthma |
| rs71534539  | 6 | 32544977 | G | A | 0.5524 | 0.0850  | 0.0079 | 5.38E-27 | 10.7589  | 831423 | Asthma |
| rs113085203 | 6 | 32545012 | G | A | 0.2693 | 0.1328  | 0.0085 | 1.25E-55 | 15.7119  | 778845 | Asthma |
| rs116585338 | 6 | 32545035 | G | A | 0.2263 | 0.1344  | 0.0091 | 3.62E-49 | 14.7385  | 778845 | Asthma |
| rs144230348 | 6 | 32545055 | A | G | 0.5522 | 0.0710  | 0.0082 | 5.01E-18 | 8.6532   | 778845 | Asthma |
| rs66696869  | 6 | 32545064 | G | A | 0.1257 | -0.0856 | 0.0118 | 3.13E-13 | -7.2885  | 778845 | Asthma |
| rs572081630 | 6 | 32545105 | T | G | 0.2799 | 0.1352  | 0.0084 | 1.22E-58 | 16.1449  | 778845 | Asthma |
| rs71534540  | 6 | 32545120 | G | A | 0.1233 | -0.0893 | 0.0118 | 3.83E-14 | -7.5665  | 778845 | Asthma |
| rs146825681 | 6 | 32545141 | G | C | 0.1541 | 0.1147  | 0.0182 | 3.22E-10 | 6.2878   | 420598 | Asthma |
| rs67177669  | 6 | 32545265 | A | T | 0.1236 | -0.0853 | 0.0114 | 8.51E-14 | -7.4622  | 778845 | Asthma |
| rs71534541  | 6 | 32545299 | C | T | 0.1862 | -0.0721 | 0.0098 | 1.60E-13 | -7.3788  | 831423 | Asthma |
| rs74394760  | 6 | 32545301 | C | T | 0.3502 | -0.0441 | 0.0079 | 2.31E-08 | -5.5870  | 778845 | Asthma |
| rs67202503  | 6 | 32545325 | C | T | 0.1216 | -0.0926 | 0.0110 | 4.01E-17 | -8.4130  | 831423 | Asthma |
| rs113568276 | 6 | 32545350 | A | G | 0.2784 | 0.1276  | 0.0070 | 9.63E-75 | 18.2916  | 987501 | Asthma |
| rs67499532  | 6 | 32545407 | G | A | 0.4659 | -0.0726 | 0.0077 | 3.63E-21 | -9.4427  | 778845 | Asthma |
| rs78450703  | 6 | 32545439 | T | G | 0.3107 | 0.1268  | 0.0072 | 1.40E-69 | 17.6314  | 908767 | Asthma |
| rs78539884  | 6 | 32545447 | A | G | 0.3212 | 0.1202  | 0.0072 | 1.93E-62 | 16.6768  | 908767 | Asthma |
| rs72844103  | 6 | 32545472 | A | G | 0.1929 | -0.0652 | 0.0086 | 4.41E-14 | -7.5482  | 908767 | Asthma |
| rs72844104  | 6 | 32545473 | C | G | 0.1929 | -0.0652 | 0.0086 | 4.41E-14 | -7.5482  | 908767 | Asthma |
| rs75170544  | 6 | 32545508 | T | C | 0.3107 | 0.1265  | 0.0072 | 1.61E-69 | 17.6237  | 908767 | Asthma |

|             |   |          |   |   |        |         |        |          |          |         |        |
|-------------|---|----------|---|---|--------|---------|--------|----------|----------|---------|--------|
| rs74950807  | 6 | 32545598 | T | C | 0.3606 | -0.0382 | 0.0070 | 4.14E-08 | -5.4849  | 908767  | Asthma |
| rs76818741  | 6 | 32545601 | A | G | 0.3606 | -0.0382 | 0.0070 | 4.16E-08 | -5.4840  | 908767  | Asthma |
| rs67020511  | 6 | 32545638 | C | T | 0.2070 | -0.0683 | 0.0086 | 1.72E-15 | -7.9604  | 908767  | Asthma |
| rs113011827 | 6 | 32545676 | T | C | 0.2536 | 0.1292  | 0.0078 | 1.09E-61 | 16.5730  | 908767  | Asthma |
| rs36088464  | 6 | 32545720 | A | G | 0.3170 | -0.0839 | 0.0072 | 3.64E-31 | -11.6108 | 908767  | Asthma |
| rs34442507  | 6 | 32545754 | T | G | 0.1867 | -0.0642 | 0.0088 | 3.12E-13 | -7.2889  | 908767  | Asthma |
| rs116817148 | 6 | 32545757 | G | A | 0.3682 | -0.0409 | 0.0069 | 3.23E-09 | -5.9194  | 908767  | Asthma |
| rs114353707 | 6 | 32545758 | C | T | 0.3695 | -0.0410 | 0.0069 | 3.19E-09 | -5.9217  | 908767  | Asthma |
| rs35997662  | 6 | 32545798 | G | T | 0.1869 | -0.0648 | 0.0088 | 1.83E-13 | -7.3608  | 908767  | Asthma |
| rs67534237  | 6 | 32545810 | G | C | 0.4378 | 0.0766  | 0.0067 | 1.11E-30 | 11.5152  | 908767  | Asthma |
| rs35301884  | 6 | 32545861 | C | T | 0.3668 | -0.0411 | 0.0069 | 2.73E-09 | -5.9470  | 908767  | Asthma |
| rs67372521  | 6 | 32545865 | A | C | 0.1254 | -0.0657 | 0.0089 | 1.90E-13 | -7.3558  | 977229  | Asthma |
| rs34239075  | 6 | 32545905 | C | T | 0.1134 | -0.0694 | 0.0102 | 1.02E-11 | -6.8037  | 908767  | Asthma |
| rs35350417  | 6 | 32545910 | C | T | 0.1933 | -0.0652 | 0.0086 | 4.20E-14 | -7.5548  | 908767  | Asthma |
| rs79981486  | 6 | 32545914 | G | A | 0.1255 | -0.0704 | 0.0098 | 8.08E-13 | -7.1598  | 908767  | Asthma |
| rs62405598  | 6 | 32545931 | C | T | 0.3103 | 0.1278  | 0.0072 | 8.28E-71 | 17.7915  | 908767  | Asthma |
| rs34791134  | 6 | 32545937 | A | C | 0.1806 | -0.0603 | 0.0082 | 1.65E-13 | -7.3748  | 977229  | Asthma |
| rs34523106  | 6 | 32545947 | C | T | 0.3200 | -0.0829 | 0.0072 | 8.63E-31 | -11.5366 | 908767  | Asthma |
| rs68160647  | 6 | 32545954 | G | A | 0.1253 | -0.0702 | 0.0098 | 9.44E-13 | -7.1384  | 908767  | Asthma |
| rs35687625  | 6 | 32546063 | A | T | 0.3672 | -0.0405 | 0.0069 | 4.49E-09 | -5.8651  | 908767  | Asthma |
| rs67614589  | 6 | 32546080 | A | C | 0.1365 | -0.0842 | 0.0104 | 4.26E-16 | -8.1310  | 934923  | Asthma |
| rs34615209  | 6 | 32546085 | T | G | 0.3671 | -0.0407 | 0.0069 | 3.67E-09 | -5.8983  | 908767  | Asthma |
| rs33998225  | 6 | 32546106 | T | C | 0.1875 | -0.0649 | 0.0088 | 1.61E-13 | -7.3778  | 908767  | Asthma |
| rs62405629  | 6 | 32546108 | T | G | 0.3077 | 0.1281  | 0.0073 | 1.03E-69 | 17.6501  | 908767  | Asthma |
| rs66706092  | 6 | 32546138 | T | C | 0.3672 | -0.0406 | 0.0069 | 4.05E-09 | -5.8821  | 908767  | Asthma |
| rs68048145  | 6 | 32546144 | G | A | 0.1233 | -0.0850 | 0.0114 | 1.03E-13 | -7.4365  | 778845  | Asthma |
| rs72844111  | 6 | 32546161 | C | T | 0.3671 | -0.0403 | 0.0069 | 5.24E-09 | -5.8394  | 908767  | Asthma |
| rs66621330  | 6 | 32546163 | C | A | 0.1358 | -0.0734 | 0.0092 | 1.31E-15 | -7.9937  | 1064845 | Asthma |
| rs62405630  | 6 | 32546165 | T | G | 0.3252 | 0.1373  | 0.0080 | 1.05E-65 | 17.1198  | 778845  | Asthma |
| rs34072909  | 6 | 32546189 | A | T | 0.1916 | -0.0653 | 0.0079 | 1.17E-16 | -8.2858  | 977229  | Asthma |
| rs34673795  | 6 | 32546211 | G | A | 0.3165 | -0.0809 | 0.0066 | 7.89E-35 | -12.3111 | 977229  | Asthma |
| rs73728002  | 6 | 32546216 | A | G | 0.3714 | -0.0389 | 0.0069 | 1.89E-08 | -5.6219  | 908767  | Asthma |
| rs72844114  | 6 | 32546253 | G | C | 0.3201 | -0.0832 | 0.0072 | 5.32E-31 | -11.5781 | 908767  | Asthma |
| rs112587701 | 6 | 32546264 | A | T | 0.2957 | 0.1269  | 0.0071 | 6.86E-72 | 17.9296  | 961345  | Asthma |
| rs112158360 | 6 | 32546273 | G | A | 0.2839 | 0.1213  | 0.0065 | 7.70E-77 | 18.5531  | 1064845 | Asthma |
| rs68142873  | 6 | 32546303 | G | T | 0.1263 | -0.0696 | 0.0098 | 1.41E-12 | -7.0830  | 908767  | Asthma |
| rs68095734  | 6 | 32546355 | T | C | 0.1204 | -0.0879 | 0.0116 | 2.80E-14 | -7.6071  | 778845  | Asthma |
| rs113484779 | 6 | 32546385 | T | A | 0.3021 | 0.1375  | 0.0082 | 1.51E-62 | 16.6918  | 778845  | Asthma |
| rs113961302 | 6 | 32546442 | G | A | 0.3011 | 0.1367  | 0.0083 | 1.60E-61 | 16.5506  | 778845  | Asthma |
| rs67255973  | 6 | 32546471 | A | T | 0.1842 | -0.0756 | 0.0100 | 4.34E-14 | -7.5507  | 778845  | Asthma |
| rs66863443  | 6 | 32546507 | A | T | 0.1882 | -0.0780 | 0.0100 | 5.27E-15 | -7.8203  | 778845  | Asthma |
| rs115729463 | 6 | 32546524 | C | T | 0.2874 | -0.0981 | 0.0084 | 1.42E-31 | -11.6910 | 778845  | Asthma |
| rs77783340  | 6 | 32546536 | T | C | 0.3521 | -0.0452 | 0.0079 | 1.02E-08 | -5.7270  | 778845  | Asthma |
| rs68124732  | 6 | 32546607 | T | C | 0.1930 | -0.0728 | 0.0099 | 1.93E-13 | -7.3536  | 778845  | Asthma |
| rs116432881 | 6 | 32546608 | G | T | 0.2955 | 0.1398  | 0.0084 | 1.55E-62 | 16.6899  | 778845  | Asthma |
| rs115806221 | 6 | 32546624 | G | A | 0.3526 | -0.0449 | 0.0079 | 1.30E-08 | -5.6858  | 778845  | Asthma |
| rs67426377  | 6 | 32546680 | C | T | 0.3135 | -0.0894 | 0.0073 | 3.09E-34 | -12.2005 | 847307  | Asthma |
| rs62405631  | 6 | 32546723 | C | T | 0.3261 | 0.1274  | 0.0071 | 2.64E-72 | 17.9833  | 847307  | Asthma |
| rs72844118  | 6 | 32546762 | T | C | 0.3561 | -0.0409 | 0.0069 | 3.79E-09 | -5.8932  | 847307  | Asthma |
| rs62405633  | 6 | 32546789 | T | C | 0.1952 | -0.0751 | 0.0099 | 2.90E-14 | -7.6027  | 778845  | Asthma |
| rs201795916 | 6 | 32546790 | C | A | 0.3528 | -0.0449 | 0.0079 | 1.29E-08 | -5.6872  | 778845  | Asthma |
| rs73729108  | 6 | 32546830 | C | T | 0.0593 | -0.1221 | 0.0169 | 4.77E-13 | -7.2317  | 848312  | Asthma |
| rs201233318 | 6 | 32546832 | A | G | 0.1206 | -0.0846 | 0.0116 | 2.70E-13 | -7.3084  | 778845  | Asthma |
| rs201802852 | 6 | 32546835 | A | G | 0.0997 | -0.0942 | 0.0133 | 1.30E-12 | -7.0945  | 831423  | Asthma |
| rs73395560  | 6 | 32546894 | C | T | 0.2393 | -0.0761 | 0.0096 | 2.83E-15 | -7.8983  | 778845  | Asthma |
| rs114171624 | 6 | 32546929 | G | A | 0.3531 | -0.0450 | 0.0079 | 1.21E-08 | -5.6984  | 778845  | Asthma |
| rs537206245 | 6 | 32546977 | C | A | 0.3220 | 0.1387  | 0.0081 | 9.64E-66 | 17.1245  | 778845  | Asthma |
| rs116151010 | 6 | 32546986 | G | A | 0.3520 | -0.1008 | 0.0083 | 9.84E-34 | -12.1054 | 778845  | Asthma |
| rs539579029 | 6 | 32546987 | T | A | 0.3375 | 0.1362  | 0.0081 | 9.48E-64 | 16.8556  | 778845  | Asthma |
| rs185234644 | 6 | 32547015 | C | T | 0.2623 | 0.1412  | 0.0088 | 8.31E-58 | 16.0264  | 778845  | Asthma |
| rs114924039 | 6 | 32547017 | C | T | 0.2800 | -0.0970 | 0.0085 | 3.67E-30 | -11.4114 | 778845  | Asthma |
| rs111360871 | 6 | 32547670 | A | G | 0.1117 | -0.0885 | 0.0121 | 3.00E-13 | -7.2943  | 778845  | Asthma |
| rs112915592 | 6 | 32547722 | A | G | 0.1401 | -0.0778 | 0.0116 | 1.67E-11 | -6.7321  | 778845  | Asthma |
| rs141611788 | 6 | 32547739 | A | G | 0.1486 | -0.0717 | 0.0113 | 2.04E-10 | -6.3584  | 778845  | Asthma |
| rs150090932 | 6 | 32547748 | A | T | 0.1401 | -0.0771 | 0.0116 | 2.73E-11 | -6.6608  | 778845  | Asthma |
| rs189586157 | 6 | 32547803 | G | A | 0.1233 | -0.0816 | 0.0118 | 5.63E-12 | -6.8885  | 778845  | Asthma |
| rs138725696 | 6 | 32547824 | A | G | 0.1227 | -0.0807 | 0.0117 | 5.76E-12 | -6.8855  | 778845  | Asthma |
| rs181272027 | 6 | 32547834 | T | C | 0.1145 | -0.0851 | 0.0120 | 1.58E-12 | -7.0672  | 778845  | Asthma |
| rs182896629 | 6 | 32547927 | T | C | 0.1326 | -0.0790 | 0.0117 | 1.66E-11 | -6.7333  | 778845  | Asthma |
| rs141846109 | 6 | 32548042 | A | G | 0.1894 | -0.0721 | 0.0108 | 2.54E-11 | -6.6715  | 778845  | Asthma |
| rs186157157 | 6 | 32548085 | A | G | 0.1894 | -0.0741 | 0.0108 | 6.98E-12 | -6.8581  | 778845  | Asthma |
| rs192023215 | 6 | 32548091 | A | C | 0.1604 | -0.0730 | 0.0114 | 1.30E-10 | -6.4279  | 778845  | Asthma |
| rs112340980 | 6 | 32548108 | C | T | 0.1982 | -0.0711 | 0.0107 | 3.42E-11 | -6.6273  | 778845  | Asthma |
| rs146284345 | 6 | 32548149 | T | C | 0.1882 | -0.0708 | 0.0107 | 4.05E-11 | -6.6023  | 778845  | Asthma |

|             |   |          |   |   |        |         |        |          |          |        |        |
|-------------|---|----------|---|---|--------|---------|--------|----------|----------|--------|--------|
| rs182634429 | 6 | 32548177 | T | C | 0.1911 | -0.0711 | 0.0106 | 1.93E-11 | -6.7109  | 778845 | Asthma |
| rs187197353 | 6 | 32548247 | C | T | 0.1993 | -0.0695 | 0.0105 | 4.06E-11 | -6.6018  | 778845 | Asthma |
| rs191955058 | 6 | 32548294 | C | T | 0.1973 | -0.0700 | 0.0105 | 3.00E-11 | -6.6467  | 778845 | Asthma |
| rs71534580  | 6 | 32548323 | A | G | 0.1929 | -0.0698 | 0.0106 | 4.27E-11 | -6.5944  | 778845 | Asthma |
| rs71534581  | 6 | 32548335 | G | A | 0.1972 | -0.0702 | 0.0106 | 3.08E-11 | -6.6430  | 778845 | Asthma |
| rs71534582  | 6 | 32548384 | G | C | 0.1958 | -0.0694 | 0.0105 | 4.39E-11 | -6.5905  | 778845 | Asthma |
| rs71534583  | 6 | 32548395 | C | T | 0.2003 | -0.0703 | 0.0105 | 2.12E-11 | -6.6976  | 778845 | Asthma |
| rs71534584  | 6 | 32548426 | C | A | 0.2087 | -0.0688 | 0.0103 | 2.92E-11 | -6.6506  | 778845 | Asthma |
| rs71534585  | 6 | 32548438 | C | G | 0.1983 | -0.0721 | 0.0105 | 6.85E-12 | -6.8608  | 778845 | Asthma |
| rs71534586  | 6 | 32548473 | A | G | 0.2040 | -0.0695 | 0.0105 | 2.97E-11 | -6.6477  | 778845 | Asthma |
| rs71534587  | 6 | 32548479 | G | A | 0.2155 | -0.0667 | 0.0104 | 1.21E-10 | -6.4385  | 778845 | Asthma |
| rs549070097 | 6 | 32548505 | G | A | 0.3377 | 0.1320  | 0.0082 | 9.69E-59 | 16.1598  | 778845 | Asthma |
| rs71534588  | 6 | 32548552 | T | C | 0.1466 | -0.0754 | 0.0114 | 3.86E-11 | -6.6094  | 778845 | Asthma |
| rs79138148  | 6 | 32548574 | C | T | 0.3028 | -0.0978 | 0.0084 | 1.69E-31 | -11.6760 | 778845 | Asthma |
| rs77965140  | 6 | 32548600 | T | C | 0.3078 | -0.0598 | 0.0092 | 9.93E-11 | -6.4681  | 778845 | Asthma |
| rs62405635  | 6 | 32548717 | G | T | 0.1816 | -0.0748 | 0.0101 | 1.08E-13 | -7.4303  | 778845 | Asthma |
| rs66653947  | 6 | 32548721 | C | T | 0.2143 | -0.0919 | 0.0108 | 2.17E-17 | -8.4847  | 778845 | Asthma |
| rs62405636  | 6 | 32548749 | G | T | 0.1928 | -0.0727 | 0.0099 | 2.25E-13 | -7.3330  | 778845 | Asthma |
| rs201639066 | 6 | 32548928 | T | C | 0.2994 | 0.1238  | 0.0073 | 2.08E-64 | 16.9454  | 847307 | Asthma |
| rs62405637  | 6 | 32548929 | C | G | 0.2416 | -0.0654 | 0.0097 | 1.42E-11 | -6.7557  | 778845 | Asthma |
| rs62405638  | 6 | 32548938 | T | C | 0.3273 | 0.1369  | 0.0081 | 1.44E-64 | 16.9668  | 778845 | Asthma |
| rs62405639  | 6 | 32548947 | C | T | 0.3278 | 0.1370  | 0.0081 | 1.06E-64 | 16.9847  | 778845 | Asthma |
| rs66769117  | 6 | 32548964 | G | A | 0.1185 | -0.0918 | 0.0118 | 8.18E-15 | -7.7646  | 778845 | Asthma |
| rs71534592  | 6 | 32549000 | T | C | 0.1213 | -0.0888 | 0.0118 | 5.30E-14 | -7.5245  | 778845 | Asthma |
| rs71534593  | 6 | 32549049 | G | A | 0.1184 | -0.0924 | 0.0118 | 5.31E-15 | -7.8191  | 778845 | Asthma |
| rs71534594  | 6 | 32549052 | A | G | 0.1181 | -0.0915 | 0.0118 | 1.16E-14 | -7.7205  | 778845 | Asthma |
| rs111739306 | 6 | 32549071 | T | G | 0.3135 | -0.0968 | 0.0083 | 2.78E-31 | -11.6337 | 778845 | Asthma |
| rs12664542  | 6 | 32549094 | T | G | 0.0573 | -0.1069 | 0.0163 | 6.03E-11 | -6.5430  | 847307 | Asthma |
| rs147317423 | 6 | 32549128 | T | G | 0.3067 | 0.1306  | 0.0084 | 4.34E-54 | 15.4850  | 778845 | Asthma |
| rs71534597  | 6 | 32549135 | A | G | 0.1186 | -0.0912 | 0.0118 | 1.22E-14 | -7.7137  | 778845 | Asthma |
| rs189139309 | 6 | 32549138 | G | T | 0.3075 | 0.1299  | 0.0084 | 1.44E-53 | 15.4087  | 778845 | Asthma |
| rs115707905 | 6 | 32549153 | G | C | 0.3202 | -0.0947 | 0.0083 | 3.19E-30 | -11.4235 | 778845 | Asthma |
| rs116184728 | 6 | 32549158 | T | C | 0.3202 | -0.0947 | 0.0083 | 3.19E-30 | -11.4235 | 778845 | Asthma |
| rs71534598  | 6 | 32549195 | T | C | 0.1901 | -0.0718 | 0.0100 | 7.25E-13 | -7.1747  | 778845 | Asthma |
| rs140571637 | 6 | 32549211 | T | C | 0.4138 | 0.0849  | 0.0079 | 7.94E-27 | 10.7229  | 778845 | Asthma |
| rs111372196 | 6 | 32549218 | A | G | 0.3143 | -0.0966 | 0.0083 | 3.08E-31 | -11.6249 | 778845 | Asthma |
| rs112996372 | 6 | 32549228 | G | A | 0.3146 | -0.0963 | 0.0083 | 4.53E-31 | -11.5919 | 778845 | Asthma |
| rs71534599  | 6 | 32549236 | A | G | 0.1187 | -0.0913 | 0.0118 | 1.02E-14 | -7.7368  | 778845 | Asthma |
| rs138087636 | 6 | 32549254 | T | C | 0.3103 | 0.1400  | 0.0084 | 4.17E-62 | 16.6302  | 778845 | Asthma |
| rs71534600  | 6 | 32549266 | A | G | 0.1186 | -0.0910 | 0.0118 | 1.28E-14 | -7.7075  | 778845 | Asthma |
| rs113586210 | 6 | 32549273 | T | C | 0.3176 | 0.1387  | 0.0083 | 3.28E-63 | 16.7830  | 778845 | Asthma |
| rs71534601  | 6 | 32549274 | A | G | 0.1186 | -0.0910 | 0.0118 | 1.28E-14 | -7.7075  | 778845 | Asthma |
| rs370791576 | 6 | 32549305 | A | G | 0.3253 | 0.1373  | 0.0081 | 1.81E-64 | 16.9532  | 778845 | Asthma |
| rs61362782  | 6 | 32549307 | C | G | 0.1888 | -0.0720 | 0.0100 | 6.27E-13 | -7.1947  | 778845 | Asthma |
| rs71534602  | 6 | 32549339 | C | T | 0.1182 | -0.0912 | 0.0118 | 1.21E-14 | -7.7148  | 778845 | Asthma |
| rs71536503  | 6 | 32549342 | G | T | 0.1931 | -0.0727 | 0.0099 | 2.20E-13 | -7.3362  | 778845 | Asthma |
| rs71536504  | 6 | 32549373 | T | C | 0.1859 | -0.0707 | 0.0101 | 3.06E-12 | -6.9751  | 778845 | Asthma |
| rs77498463  | 6 | 32549421 | T | C | 0.3134 | -0.0972 | 0.0083 | 1.43E-31 | -11.6904 | 778845 | Asthma |
| rs192002545 | 6 | 32549450 | A | G | 0.3147 | 0.1371  | 0.0084 | 2.41E-60 | 16.3853  | 778845 | Asthma |
| rs183870834 | 6 | 32549451 | C | T | 0.3147 | 0.1371  | 0.0084 | 2.41E-60 | 16.3853  | 778845 | Asthma |
| rs530246116 | 6 | 32549467 | C | T | 0.3147 | 0.1369  | 0.0084 | 3.31E-60 | 16.3666  | 778845 | Asthma |
| rs12662650  | 6 | 32549470 | T | C | 0.0331 | -0.1426 | 0.0216 | 3.83E-11 | -6.6107  | 778845 | Asthma |
| rs71536505  | 6 | 32549474 | G | A | 0.2295 | -0.0709 | 0.0097 | 2.42E-13 | -7.3232  | 778845 | Asthma |
| rs67965605  | 6 | 32549516 | T | C | 0.1939 | -0.0732 | 0.0099 | 1.30E-13 | -7.4061  | 778845 | Asthma |
| rs111403760 | 6 | 32549526 | C | A | 0.3158 | 0.1381  | 0.0084 | 2.13E-61 | 16.5328  | 778845 | Asthma |
| rs66499101  | 6 | 32549555 | A | C | 0.4369 | 0.0801  | 0.0078 | 6.18E-25 | 10.3127  | 778845 | Asthma |
| rs67844611  | 6 | 32549559 | G | A | 0.1188 | -0.0914 | 0.0118 | 1.02E-14 | -7.7377  | 778845 | Asthma |
| rs116333937 | 6 | 32549604 | T | C | 0.2959 | 0.1603  | 0.0086 | 7.65E-77 | 18.5537  | 778845 | Asthma |
| rs78055135  | 6 | 32549635 | A | G | 0.3192 | 0.1393  | 0.0082 | 5.20E-64 | 16.8909  | 778845 | Asthma |
| rs115712530 | 6 | 32549637 | A | G | 0.2978 | 0.1591  | 0.0086 | 3.36E-76 | 18.4734  | 778845 | Asthma |
| rs72844133  | 6 | 32549699 | T | A | 0.1067 | -0.0883 | 0.0123 | 8.44E-13 | -7.1539  | 778845 | Asthma |
| rs79268162  | 6 | 32549716 | G | A | 0.3137 | -0.0964 | 0.0083 | 4.21E-31 | -11.5981 | 778845 | Asthma |
| rs78733108  | 6 | 32549734 | G | A | 0.2977 | 0.1425  | 0.0085 | 1.49E-63 | 16.8296  | 778845 | Asthma |
| rs111365964 | 6 | 32549869 | G | T | 0.2657 | 0.1500  | 0.0083 | 5.76E-73 | 18.0667  | 831423 | Asthma |
| rs79890132  | 6 | 32549891 | A | G | 0.3932 | 0.1276  | 0.0082 | 5.59E-54 | 15.4690  | 778845 | Asthma |
| rs71536506  | 6 | 32549902 | A | G | 0.1159 | -0.0937 | 0.0119 | 3.91E-15 | -7.8577  | 778845 | Asthma |
| rs76152078  | 6 | 32549910 | A | G | 0.1050 | -0.0906 | 0.0124 | 3.22E-13 | -7.2854  | 778845 | Asthma |
| rs199882626 | 6 | 32549975 | A | C | 0.3810 | 0.1241  | 0.0083 | 4.56E-51 | 15.0317  | 778845 | Asthma |
| rs201326238 | 6 | 32549977 | T | A | 0.2725 | 0.1377  | 0.0088 | 8.96E-55 | 15.5873  | 778845 | Asthma |
| rs62405642  | 6 | 32549982 | G | A | 0.3187 | -0.0415 | 0.0072 | 8.89E-09 | -5.7508  | 934923 | Asthma |
| rs67778241  | 6 | 32549984 | A | G | 0.1259 | -0.0917 | 0.0108 | 2.24E-17 | -8.4807  | 934923 | Asthma |
| rs114954902 | 6 | 32549991 | A | C | 0.3772 | 0.1246  | 0.0083 | 8.00E-51 | 14.9946  | 778845 | Asthma |
| rs74324877  | 6 | 32550005 | C | G | 0.2987 | 0.1358  | 0.0085 | 7.26E-57 | 15.8916  | 778845 | Asthma |
| rs111757290 | 6 | 32550079 | T | C | 0.2791 | 0.1459  | 0.0089 | 9.85E-61 | 16.4400  | 778845 | Asthma |



|             |   |          |   |   |        |         |        |          |          |        |        |
|-------------|---|----------|---|---|--------|---------|--------|----------|----------|--------|--------|
| rs77495163  | 6 | 32550082 | G | T | 0.4209 | 0.1276  | 0.0082 | 4.54E-55 | 15.6307  | 778845 | Asthma |
| rs113356426 | 6 | 32550101 | T | C | 0.0963 | -0.0869 | 0.0120 | 3.76E-13 | -7.2636  | 831423 | Asthma |
| rs113938016 | 6 | 32550121 | C | T | 0.2799 | 0.1426  | 0.0089 | 4.78E-58 | 16.0611  | 778845 | Asthma |
| rs111899294 | 6 | 32550135 | C | T | 0.2016 | 0.1306  | 0.0098 | 6.63E-41 | 13.3936  | 778845 | Asthma |
| rs116135263 | 6 | 32550136 | A | G | 0.1672 | 0.1306  | 0.0105 | 2.04E-35 | 12.4194  | 778845 | Asthma |
| rs62405644  | 6 | 32550156 | T | C | 0.2179 | -0.0826 | 0.0098 | 4.52E-17 | -8.3986  | 778845 | Asthma |
| rs62405645  | 6 | 32550157 | G | A | 0.3681 | -0.1045 | 0.0083 | 1.90E-36 | -12.6083 | 778845 | Asthma |
| rs75400359  | 6 | 32550213 | A | G | 0.1277 | -0.0949 | 0.0102 | 1.74E-20 | -9.2775  | 987501 | Asthma |
| rs71536508  | 6 | 32550253 | G | A | 0.1307 | -0.0928 | 0.0101 | 5.91E-20 | -9.1463  | 987501 | Asthma |
| rs111409670 | 6 | 32550292 | C | T | 0.2929 | 0.1434  | 0.0086 | 5.31E-62 | 16.6159  | 778845 | Asthma |
| rs71536509  | 6 | 32550294 | T | G | 0.1178 | -0.0923 | 0.0118 | 6.25E-15 | -7.7991  | 778845 | Asthma |
| rs112219021 | 6 | 32550308 | C | T | 0.3424 | -0.0909 | 0.0083 | 1.21E-27 | -10.8960 | 778845 | Asthma |
| rs77993032  | 6 | 32550316 | C | T | 0.3101 | -0.0919 | 0.0074 | 1.93E-35 | -12.4243 | 847307 | Asthma |
| rs112532723 | 6 | 32550374 | G | C | 0.3146 | -0.0966 | 0.0083 | 2.22E-31 | -11.6527 | 778845 | Asthma |
| rs68117616  | 6 | 32550375 | A | C | 0.1193 | -0.0909 | 0.0118 | 1.22E-14 | -7.7136  | 778845 | Asthma |
| rs111631740 | 6 | 32550384 | G | A | 0.3382 | -0.0984 | 0.0082 | 2.23E-33 | -12.0385 | 778845 | Asthma |
| rs74768985  | 6 | 32550398 | C | T | 0.2883 | 0.1584  | 0.0089 | 6.52E-71 | 17.8043  | 778845 | Asthma |
| rs72844134  | 6 | 32550419 | G | A | 0.3124 | -0.0908 | 0.0073 | 3.54E-35 | -12.3756 | 847307 | Asthma |
| rs66931410  | 6 | 32550458 | T | C | 0.5084 | 0.0827  | 0.0084 | 6.62E-23 | 9.8535   | 463403 | Asthma |
| rs113182435 | 6 | 32550459 | A | G | 0.2986 | 0.1423  | 0.0086 | 4.87E-61 | 16.4825  | 778845 | Asthma |
| rs66919410  | 6 | 32550462 | A | C | 0.1191 | -0.0909 | 0.0118 | 1.28E-14 | -7.7086  | 778845 | Asthma |
| rs111693298 | 6 | 32550474 | T | C | 0.3038 | 0.1399  | 0.0086 | 1.02E-59 | 16.2979  | 778845 | Asthma |
| rs551468481 | 6 | 32550481 | G | A | 0.2992 | 0.1427  | 0.0086 | 1.79E-61 | 16.5428  | 778845 | Asthma |
| rs71536510  | 6 | 32550485 | T | C | 0.1938 | -0.0724 | 0.0099 | 2.35E-13 | -7.3274  | 778845 | Asthma |
| rs71536511  | 6 | 32550488 | A | G | 0.1938 | -0.0725 | 0.0099 | 2.31E-13 | -7.3295  | 778845 | Asthma |
| rs71536512  | 6 | 32550503 | G | A | 0.1234 | -0.0907 | 0.0116 | 4.76E-15 | -7.8332  | 778845 | Asthma |
| rs140590517 | 6 | 32550505 | A | G | 0.3200 | 0.1389  | 0.0083 | 2.61E-63 | 16.7960  | 778845 | Asthma |
| rs147613123 | 6 | 32550519 | A | G | 0.3142 | -0.0967 | 0.0083 | 2.63E-31 | -11.6385 | 778845 | Asthma |
| rs113068532 | 6 | 32550524 | G | C | 0.3142 | -0.0967 | 0.0083 | 2.63E-31 | -11.6385 | 778845 | Asthma |
| rs66468365  | 6 | 32550533 | A | G | 0.1893 | -0.0717 | 0.0100 | 8.13E-13 | -7.1589  | 778845 | Asthma |
| rs66482188  | 6 | 32550535 | A | G | 0.1938 | -0.0721 | 0.0099 | 3.17E-13 | -7.2872  | 778845 | Asthma |
| rs73395587  | 6 | 32550562 | T | C | 0.3136 | -0.0962 | 0.0083 | 5.52E-31 | -11.5750 | 778845 | Asthma |
| rs66884109  | 6 | 32550592 | G | A | 0.2591 | -0.0762 | 0.0097 | 4.79E-15 | -7.8322  | 778845 | Asthma |
| rs111485252 | 6 | 32550597 | T | C | 0.3274 | -0.1004 | 0.0083 | 9.03E-34 | -12.1125 | 778845 | Asthma |
| rs138825368 | 6 | 32550598 | A | G | 0.3750 | 0.1305  | 0.0082 | 1.85E-57 | 15.9774  | 778845 | Asthma |
| rs111662020 | 6 | 32550667 | A | G | 0.3140 | -0.0967 | 0.0083 | 2.40E-31 | -11.6460 | 778845 | Asthma |
| rs28595021  | 6 | 32550680 | G | A | 0.1186 | -0.0901 | 0.0118 | 2.26E-14 | -7.6352  | 778845 | Asthma |
| rs115754308 | 6 | 32550689 | T | C | 0.3232 | 0.1386  | 0.0082 | 6.76E-64 | 16.8756  | 778845 | Asthma |
| rs556462626 | 6 | 32550726 | T | C | 0.0591 | -0.1276 | 0.0180 | 1.53E-12 | -7.0715  | 778845 | Asthma |
| rs286135110 | 6 | 32550730 | G | A | 0.5191 | 0.0777  | 0.0077 | 9.34E-24 | 10.0485  | 778845 | Asthma |
| rs72844135  | 6 | 32550769 | T | C | 0.1051 | -0.0887 | 0.0126 | 1.91E-12 | -7.0413  | 778845 | Asthma |
| rs68109409  | 6 | 32550775 | G | A | 0.3124 | -0.0968 | 0.0084 | 6.86E-31 | -11.5564 | 778845 | Asthma |
| rs28524681  | 6 | 32550807 | A | T | 0.1943 | -0.0738 | 0.0099 | 8.04E-14 | -7.4698  | 778845 | Asthma |
| rs200864308 | 6 | 32550834 | G | A | 0.3322 | -0.1028 | 0.0084 | 2.71E-34 | -12.2116 | 778845 | Asthma |
| rs72844137  | 6 | 32550838 | G | T | 0.3125 | -0.0972 | 0.0084 | 4.27E-31 | -11.5969 | 778845 | Asthma |
| rs114776163 | 6 | 32550848 | G | A | 0.3402 | -0.0483 | 0.0072 | 2.62E-11 | -6.6667  | 934923 | Asthma |
| rs286759110 | 6 | 32550851 | T | C | 0.1168 | -0.0929 | 0.0121 | 1.37E-14 | -7.6988  | 778845 | Asthma |
| rs113787446 | 6 | 32550853 | C | A | 0.3400 | -0.0485 | 0.0072 | 1.93E-11 | -6.7115  | 934923 | Asthma |
| rs77506702  | 6 | 32550927 | G | A | 0.3247 | 0.1374  | 0.0082 | 2.33E-62 | 16.6653  | 778845 | Asthma |
| rs67587495  | 6 | 32550951 | A | T | 0.3051 | -0.0988 | 0.0086 | 7.69E-31 | -11.5466 | 778845 | Asthma |
| rs113698180 | 6 | 32551021 | C | T | 0.5369 | -0.1002 | 0.0083 | 1.63E-33 | -12.0639 | 778845 | Asthma |
| rs114370702 | 6 | 32551132 | C | A | 0.0597 | -0.1217 | 0.0169 | 6.69E-13 | -7.1855  | 831423 | Asthma |
| rs76566406  | 6 | 32551136 | T | C | 0.3053 | -0.0904 | 0.0075 | 1.63E-33 | -12.0645 | 847307 | Asthma |
| rs28370413  | 6 | 32551164 | C | T | 0.1169 | -0.0929 | 0.0121 | 1.23E-14 | -7.7130  | 778845 | Asthma |
| rs28653112  | 6 | 32551183 | A | T | 0.3407 | -0.0770 | 0.0085 | 1.98E-19 | -9.0143  | 778845 | Asthma |
| rs113566030 | 6 | 32551223 | C | T | 0.0929 | -0.0912 | 0.0139 | 5.15E-11 | -6.5663  | 778845 | Asthma |
| rs28490179  | 6 | 32551228 | C | T | 0.2022 | -0.0708 | 0.0094 | 6.15E-14 | -7.5048  | 831423 | Asthma |
| rs28417075  | 6 | 32551236 | T | A | 0.0499 | 0.1575  | 0.0162 | 2.23E-22 | 9.7306   | 848312 | Asthma |
| rs74217355  | 6 | 32551241 | A | G | 0.3084 | -0.0959 | 0.0085 | 2.86E-29 | -11.2315 | 778845 | Asthma |
| rs28635588  | 6 | 32551264 | G | A | 0.2324 | -0.0813 | 0.0098 | 1.47E-16 | -8.2592  | 778845 | Asthma |
| rs28435616  | 6 | 32551280 | A | C | 0.1201 | -0.1010 | 0.0111 | 7.21E-20 | -9.1247  | 831423 | Asthma |
| rs76517385  | 6 | 32551290 | A | G | 0.3124 | -0.0924 | 0.0086 | 5.77E-27 | -10.7525 | 778845 | Asthma |
| rs28639433  | 6 | 32551331 | G | C | 0.1770 | -0.0753 | 0.0094 | 8.70E-16 | -8.0439  | 891051 | Asthma |
| rs28570536  | 6 | 32551457 | G | T | 0.0814 | -0.1090 | 0.0150 | 4.33E-13 | -7.2450  | 778845 | Asthma |
| rs68017248  | 6 | 32551485 | A | G | 0.3392 | -0.1040 | 0.0089 | 1.59E-31 | -11.6812 | 778845 | Asthma |
| rs116560019 | 6 | 32551552 | G | A | 0.1035 | -0.0901 | 0.0127 | 1.19E-12 | -7.1069  | 778845 | Asthma |
| rs67000090  | 6 | 32551615 | G | C | 0.1939 | -0.0725 | 0.0099 | 2.26E-13 | -7.3323  | 778845 | Asthma |
| rs73729113  | 6 | 32551663 | T | C | 0.0598 | -0.1286 | 0.0179 | 7.33E-13 | -7.1734  | 778845 | Asthma |
| rs530685722 | 6 | 32551683 | T | A | 0.1062 | -0.0961 | 0.0130 | 1.20E-13 | -7.4164  | 778845 | Asthma |
| rs78040327  | 6 | 32551689 | C | G | 0.1062 | -0.0961 | 0.0130 | 1.20E-13 | -7.4164  | 778845 | Asthma |
| rs71536514  | 6 | 32551715 | C | A | 0.1109 | -0.0941 | 0.0126 | 8.88E-14 | -7.4566  | 778845 | Asthma |
| rs67600647  | 6 | 32551727 | G | A | 0.1940 | -0.0726 | 0.0099 | 2.08E-13 | -7.3434  | 778845 | Asthma |
| rs73729116  | 6 | 32551781 | C | T | 0.3042 | -0.0972 | 0.0086 | 1.11E-29 | -11.3145 | 778845 | Asthma |
| rs73729117  | 6 | 32551823 | A | T | 0.3093 | -0.0971 | 0.0085 | 2.71E-30 | -11.4377 | 778845 | Asthma |

|             |   |          |   |   |        |         |        |          |          |        |        |
|-------------|---|----------|---|---|--------|---------|--------|----------|----------|--------|--------|
| rs72492322  | 6 | 32551851 | G | A | 0.3120 | -0.0680 | 0.0089 | 2.85E-14 | -7.6051  | 778845 | Asthma |
| rs72844151  | 6 | 32551873 | A | G | 0.3120 | -0.0973 | 0.0084 | 3.30E-31 | -11.6190 | 778845 | Asthma |
| rs72492323  | 6 | 32551938 | G | A | 0.5276 | -0.0862 | 0.0090 | 1.50E-21 | -9.5350  | 778845 | Asthma |
| rs71536515  | 6 | 32551966 | A | G | 0.1940 | -0.0731 | 0.0099 | 1.45E-13 | -7.3912  | 778845 | Asthma |
| rs115772619 | 6 | 32551980 | C | T | 0.3584 | -0.0824 | 0.0084 | 1.41E-22 | -9.7772  | 778845 | Asthma |
| rs73729121  | 6 | 32551991 | G | A | 0.1937 | -0.0731 | 0.0099 | 1.46E-13 | -7.3906  | 778845 | Asthma |
| rs115272081 | 6 | 32552005 | A | T | 0.2973 | 0.1401  | 0.0086 | 3.05E-60 | 16.3711  | 778845 | Asthma |
| rs73729123  | 6 | 32552034 | T | A | 0.3700 | -0.0976 | 0.0083 | 6.26E-32 | -11.7602 | 778845 | Asthma |
| rs71536516  | 6 | 32552046 | T | G | 0.1971 | -0.0753 | 0.0099 | 2.40E-14 | -7.6271  | 778845 | Asthma |
| rs71536517  | 6 | 32552051 | T | G | 0.1915 | -0.0717 | 0.0088 | 3.51E-16 | -8.1543  | 847307 | Asthma |
| rs71536518  | 6 | 32552053 | C | T | 0.1170 | -0.0907 | 0.0120 | 5.01E-14 | -7.5317  | 778845 | Asthma |
| rs530790448 | 6 | 32552069 | T | C | 0.3040 | 0.1579  | 0.0086 | 2.07E-75 | 18.3757  | 778845 | Asthma |
| rs202187184 | 6 | 32552071 | C | T | 0.3039 | 0.1579  | 0.0086 | 1.95E-75 | 18.3792  | 778845 | Asthma |
| rs67593050  | 6 | 32552151 | T | A | 0.1169 | -0.0921 | 0.0120 | 2.12E-14 | -7.6434  | 778845 | Asthma |
| rs112956435 | 6 | 32552152 | C | T | 0.3233 | 0.1377  | 0.0083 | 3.70E-62 | 16.6385  | 778845 | Asthma |
| rs112654908 | 6 | 32552191 | C | G | 0.3186 | 0.1375  | 0.0083 | 1.86E-61 | 16.5415  | 778845 | Asthma |
| rs72492324  | 6 | 32552241 | T | C | 0.2215 | -0.0606 | 0.0098 | 5.78E-10 | -6.1963  | 778845 | Asthma |
| rs114031016 | 6 | 32552258 | T | C | 0.2803 | 0.1423  | 0.0083 | 1.36E-65 | 17.1056  | 831423 | Asthma |
| rs111621461 | 6 | 32552273 | T | C | 0.3597 | 0.1326  | 0.0082 | 2.64E-58 | 16.0982  | 778845 | Asthma |
| rs111343297 | 6 | 32552303 | G | A | 0.3256 | 0.1269  | 0.0087 | 1.53E-48 | 14.6413  | 778845 | Asthma |
| rs73729129  | 6 | 32552315 | T | A | 0.4178 | -0.0572 | 0.0083 | 6.60E-12 | -6.8660  | 778845 | Asthma |
| rs68187566  | 6 | 32552383 | T | G | 0.1159 | -0.0931 | 0.0121 | 1.41E-14 | -7.6957  | 778845 | Asthma |
| rs68081880  | 6 | 32552430 | G | A | 0.1167 | -0.0923 | 0.0121 | 1.92E-14 | -7.6554  | 778845 | Asthma |
| rs202015091 | 6 | 32552437 | C | A | 0.3246 | 0.1379  | 0.0083 | 1.99E-62 | 16.6745  | 778845 | Asthma |
| rs114680412 | 6 | 32552471 | A | G | 0.2862 | 0.1245  | 0.0074 | 8.23E-64 | 16.8647  | 934923 | Asthma |
| rs115706291 | 6 | 32552479 | A | G | 0.2857 | 0.1248  | 0.0074 | 5.95E-64 | 16.8830  | 934923 | Asthma |
| rs67503094  | 6 | 32552482 | C | T | 0.1939 | -0.0725 | 0.0099 | 1.93E-13 | -7.3538  | 778845 | Asthma |
| rs116384190 | 6 | 32552560 | G | A | 0.3046 | 0.1245  | 0.0072 | 2.36E-66 | 17.2064  | 934923 | Asthma |
| rs67077728  | 6 | 32552561 | A | G | 0.1893 | -0.0719 | 0.0100 | 6.45E-13 | -7.1904  | 778845 | Asthma |
| rs80044204  | 6 | 32552577 | G | A | 0.1175 | -0.0920 | 0.0120 | 2.00E-14 | -7.6508  | 778845 | Asthma |
| rs114823234 | 6 | 32552578 | C | T | 0.1170 | -0.0919 | 0.0121 | 2.39E-14 | -7.6273  | 778845 | Asthma |
| rs71536520  | 6 | 32552585 | A | G | 0.1944 | -0.0726 | 0.0099 | 1.94E-13 | -7.3528  | 778845 | Asthma |
| rs72492326  | 6 | 32552643 | T | C | 0.3121 | -0.0965 | 0.0084 | 1.21E-30 | -11.5072 | 778845 | Asthma |
| rs113521434 | 6 | 32552683 | T | C | 0.3235 | 0.1376  | 0.0083 | 4.33E-62 | 16.6280  | 778845 | Asthma |
| rs66533540  | 6 | 32552776 | A | G | 0.1166 | -0.0931 | 0.0121 | 1.23E-14 | -7.7129  | 778845 | Asthma |
| rs71536521  | 6 | 32552781 | A | G | 0.1938 | -0.0725 | 0.0099 | 2.04E-13 | -7.3461  | 778845 | Asthma |
| rs71536522  | 6 | 32552806 | A | G | 0.1939 | -0.0720 | 0.0099 | 2.93E-13 | -7.2978  | 778845 | Asthma |
| rs71536523  | 6 | 32552817 | A | G | 0.2014 | -0.0738 | 0.0099 | 8.00E-14 | -7.4703  | 778845 | Asthma |
| rs3828851   | 6 | 32552844 | A | G | 0.3231 | 0.1375  | 0.0083 | 6.32E-62 | 16.6055  | 778845 | Asthma |
| rs72844166  | 6 | 32552855 | G | A | 0.3123 | -0.0970 | 0.0084 | 5.10E-31 | -11.5818 | 778845 | Asthma |
| rs67753867  | 6 | 32552856 | A | G | 0.1166 | -0.0933 | 0.0121 | 1.12E-14 | -7.7249  | 778845 | Asthma |
| rs72844167  | 6 | 32552865 | T | C | 0.3116 | -0.0966 | 0.0084 | 1.09E-30 | -11.5168 | 778845 | Asthma |
| rs3828849   | 6 | 32552887 | A | G | 0.3232 | 0.1375  | 0.0083 | 6.57E-62 | 16.6031  | 778845 | Asthma |
| rs67536864  | 6 | 32552899 | G | A | 0.1166 | -0.0928 | 0.0121 | 1.56E-14 | -7.6822  | 778845 | Asthma |
| rs66935282  | 6 | 32552906 | G | A | 0.1909 | -0.0708 | 0.0088 | 8.37E-16 | -8.0488  | 847307 | Asthma |
| rs66723041  | 6 | 32552930 | G | C | 0.1909 | -0.0708 | 0.0088 | 8.20E-16 | -8.0512  | 847307 | Asthma |
| rs68123256  | 6 | 32552950 | G | C | 0.1997 | -0.0714 | 0.0098 | 3.55E-13 | -7.2717  | 778845 | Asthma |
| rs66758173  | 6 | 32552952 | G | A | 0.1853 | -0.0684 | 0.0090 | 2.43E-14 | -7.6256  | 847307 | Asthma |
| rs67762553  | 6 | 32552987 | C | G | 0.1164 | -0.0924 | 0.0121 | 1.94E-14 | -7.6544  | 778845 | Asthma |
| rs3200830   | 6 | 32552997 | T | C | 0.3181 | 0.1372  | 0.0083 | 3.55E-61 | 16.5017  | 778845 | Asthma |
| rs61615404  | 6 | 32553008 | T | G | 0.1850 | -0.0686 | 0.0090 | 2.12E-14 | -7.6431  | 847307 | Asthma |
| rs66969121  | 6 | 32553018 | C | T | 0.1166 | -0.0918 | 0.0121 | 2.91E-14 | -7.6023  | 778845 | Asthma |
| rs58495148  | 6 | 32553039 | G | C | 0.1856 | -0.0688 | 0.0090 | 1.54E-14 | -7.6838  | 847307 | Asthma |
| rs3828840   | 6 | 32553130 | T | C | 0.3193 | -0.0988 | 0.0080 | 2.11E-35 | -12.4173 | 831423 | Asthma |
| rs111432098 | 6 | 32553163 | G | A | 0.3117 | 0.1385  | 0.0084 | 3.71E-61 | 16.4998  | 778845 | Asthma |
| rs76413308  | 6 | 32553184 | G | A | 0.1912 | -0.0736 | 0.0099 | 1.04E-13 | -7.4354  | 778845 | Asthma |
| rs138026774 | 6 | 32553193 | A | G | 0.0565 | -0.1306 | 0.0175 | 7.76E-14 | -7.4744  | 848312 | Asthma |
| rs112115863 | 6 | 32553210 | G | A | 0.4214 | -0.0870 | 0.0087 | 1.66E-23 | -9.9918  | 778845 | Asthma |
| rs72844177  | 6 | 32553213 | G | C | 0.3061 | -0.0979 | 0.0084 | 4.80E-31 | -11.5870 | 778845 | Asthma |
| rs66686576  | 6 | 32553219 | T | C | 0.1145 | -0.0944 | 0.0122 | 1.11E-14 | -7.7255  | 778845 | Asthma |
| rs111343881 | 6 | 32553245 | C | T | 0.3037 | 0.1371  | 0.0079 | 6.38E-68 | 17.4146  | 831423 | Asthma |
| rs113459411 | 6 | 32553249 | G | T | 0.2937 | 0.1366  | 0.0087 | 9.32E-56 | 15.7308  | 778845 | Asthma |
| rs3828833   | 6 | 32553285 | C | T | 0.1188 | -0.0797 | 0.0105 | 3.85E-14 | -7.5662  | 847307 | Asthma |
| rs72492329  | 6 | 32553359 | A | G | 0.3294 | -0.0423 | 0.0074 | 1.15E-08 | -5.7077  | 934923 | Asthma |
| rs67738935  | 6 | 32553453 | C | T | 0.3075 | 0.0683  | 0.0089 | 1.82E-14 | 7.6631   | 778845 | Asthma |
| rs3828829   | 6 | 32553456 | T | C | 0.1798 | 0.1120  | 0.0119 | 5.62E-21 | 9.3966   | 524098 | Asthma |
| rs3828828   | 6 | 32553466 | C | T | 0.1000 | -0.0846 | 0.0130 | 6.78E-11 | -6.5253  | 778845 | Asthma |
| rs71536525  | 6 | 32553525 | A | G | 0.1938 | -0.0727 | 0.0099 | 1.88E-13 | -7.3573  | 778845 | Asthma |
| rs151027857 | 6 | 32553589 | C | T | 0.2774 | 0.1389  | 0.0090 | 3.20E-54 | 15.5055  | 778845 | Asthma |
| rs113225456 | 6 | 32553629 | T | C | 0.3605 | -0.0423 | 0.0070 | 1.89E-09 | -6.0070  | 934923 | Asthma |
| rs72844187  | 6 | 32553642 | G | C | 0.3609 | -0.0422 | 0.0070 | 2.05E-09 | -5.9937  | 934923 | Asthma |
| rs71536527  | 6 | 32553700 | T | C | 0.1937 | -0.0721 | 0.0099 | 3.31E-13 | -7.2809  | 778845 | Asthma |
| rs71536528  | 6 | 32553707 | G | A | 0.1869 | -0.0731 | 0.0083 | 1.41E-18 | -8.7965  | 959513 | Asthma |
| rs66946815  | 6 | 32553714 | T | C | 0.1167 | -0.0937 | 0.0121 | 8.51E-15 | -7.7594  | 778845 | Asthma |

|             |   |          |   |   |        |         |        |          |          |         |        |
|-------------|---|----------|---|---|--------|---------|--------|----------|----------|---------|--------|
| rs373804788 | 6 | 32553814 | T | C | 0.3149 | 0.1353  | 0.0085 | 1.34E-57 | 15.9971  | 778845  | Asthma |
| rs112080536 | 6 | 32553817 | A | T | 0.3117 | -0.0975 | 0.0084 | 3.10E-31 | -11.6243 | 778845  | Asthma |
| rs370787440 | 6 | 32553819 | G | T | 0.3150 | 0.1352  | 0.0085 | 1.40E-57 | 15.9945  | 778845  | Asthma |
| rs61104187  | 6 | 32553923 | A | G | 0.1239 | -0.1038 | 0.0117 | 8.93E-19 | -8.8480  | 778845  | Asthma |
| rs75287767  | 6 | 32553958 | T | A | 0.3025 | -0.1001 | 0.0084 | 1.85E-32 | -11.8625 | 778845  | Asthma |
| rs66654841  | 6 | 32553964 | T | C | 0.1895 | -0.0747 | 0.0100 | 6.51E-14 | -7.4975  | 778845  | Asthma |
| rs72844190  | 6 | 32554008 | T | G | 0.2962 | -0.0921 | 0.0075 | 1.70E-34 | -12.2492 | 847307  | Asthma |
| rs112323850 | 6 | 32554027 | T | C | 0.5329 | -0.0827 | 0.0088 | 4.70E-21 | -9.4157  | 778845  | Asthma |
| rs71536530  | 6 | 32554193 | G | C | 0.1326 | -0.0911 | 0.0101 | 1.32E-19 | -9.0590  | 987501  | Asthma |
| rs112296425 | 6 | 32554207 | G | A | 0.2380 | 0.1370  | 0.0093 | 4.76E-49 | 14.7208  | 778845  | Asthma |
| rs73397417  | 6 | 32554211 | G | C | 0.3865 | -0.1035 | 0.0085 | 2.21E-34 | -12.2280 | 778845  | Asthma |
| rs115070742 | 6 | 32554276 | C | G | 0.0536 | -0.1216 | 0.0152 | 1.08E-15 | -8.0183  | 1004390 | Asthma |
| rs113695046 | 6 | 32554295 | T | C | 0.2257 | 0.1402  | 0.0097 | 5.09E-47 | 14.4012  | 778845  | Asthma |
| rs35182655  | 6 | 32554310 | T | C | 0.1195 | -0.0942 | 0.0111 | 1.68E-17 | -8.5144  | 831423  | Asthma |
| rs554350950 | 6 | 32554331 | A | G | 0.3809 | 0.1025  | 0.0109 | 5.51E-21 | 9.3995   | 436482  | Asthma |
| rs36192217  | 6 | 32554562 | A | G | 0.2065 | -0.0638 | 0.0098 | 7.37E-11 | -6.5130  | 778845  | Asthma |
| rs36183131  | 6 | 32554624 | G | A | 0.1893 | -0.0749 | 0.0092 | 4.15E-16 | -8.1342  | 891051  | Asthma |
| rs35570280  | 6 | 32554657 | T | G | 0.1867 | -0.0751 | 0.0092 | 4.26E-16 | -8.1309  | 891051  | Asthma |
| rs113453333 | 6 | 32554713 | A | G | 0.3024 | 0.1294  | 0.0087 | 1.05E-49 | 14.8228  | 778845  | Asthma |
| rs35882239  | 6 | 32554799 | A | G | 0.3262 | -0.0774 | 0.0070 | 2.49E-28 | -11.0385 | 961345  | Asthma |
| rs35455030  | 6 | 32554873 | T | C | 0.1929 | -0.0547 | 0.0088 | 4.48E-10 | -6.2362  | 908767  | Asthma |
| rs35373206  | 6 | 32554906 | C | A | 0.2126 | -0.0487 | 0.0085 | 9.95E-09 | -5.7316  | 908767  | Asthma |
| rs72844196  | 6 | 32555066 | C | T | 0.3844 | -0.0617 | 0.0071 | 5.20E-18 | -8.6490  | 908767  | Asthma |
| rs34041546  | 6 | 32555095 | C | T | 0.3894 | -0.0607 | 0.0072 | 2.41E-17 | -8.4721  | 908767  | Asthma |
| rs116525270 | 6 | 32555144 | T | C | 0.3987 | -0.0576 | 0.0071 | 6.98E-16 | -8.0709  | 908767  | Asthma |
| rs201878716 | 6 | 32555204 | G | A | 0.0543 | -0.1028 | 0.0166 | 5.40E-10 | -6.2070  | 908767  | Asthma |
| rs35767951  | 6 | 32555205 | C | T | 0.3338 | -0.0771 | 0.0072 | 1.20E-26 | -10.6847 | 908767  | Asthma |
| rs35058673  | 6 | 32555231 | C | T | 0.1925 | -0.0578 | 0.0088 | 3.88E-11 | -6.6085  | 908767  | Asthma |
| rs72844197  | 6 | 32555243 | T | A | 0.3303 | -0.0793 | 0.0072 | 4.81E-28 | -10.9792 | 908767  | Asthma |
| rs77532645  | 6 | 32555266 | G | C | 0.1339 | -0.0702 | 0.0095 | 1.87E-13 | -7.3578  | 908767  | Asthma |
| rs67463673  | 6 | 32555276 | C | T | 0.1340 | -0.0702 | 0.0095 | 1.89E-13 | -7.3564  | 908767  | Asthma |
| rs116783436 | 6 | 32555302 | T | C | 0.0532 | -0.1042 | 0.0166 | 3.67E-10 | -6.2675  | 908767  | Asthma |
| rs72844202  | 6 | 32555370 | T | G | 0.1434 | -0.0577 | 0.0095 | 1.37E-09 | -6.0591  | 908767  | Asthma |
| rs72845703  | 6 | 32555420 | A | G | 0.1244 | -0.0698 | 0.0099 | 2.29E-12 | -7.0155  | 908767  | Asthma |
| rs75999763  | 6 | 32555429 | G | A | 0.3224 | -0.0786 | 0.0073 | 7.00E-27 | -10.7345 | 908767  | Asthma |
| rs34720636  | 6 | 32555483 | C | T | 0.3216 | -0.0741 | 0.0067 | 1.07E-28 | -11.1139 | 977229  | Asthma |
| rs34118047  | 6 | 32555503 | T | C | 0.1283 | -0.0630 | 0.0099 | 2.29E-10 | -6.3403  | 908767  | Asthma |
| rs77274878  | 6 | 32555571 | A | T | 0.3403 | 0.1314  | 0.0087 | 2.39E-51 | 15.0738  | 778845  | Asthma |
| rs72845707  | 6 | 32555605 | A | G | 0.1236 | -0.0860 | 0.0114 | 5.73E-14 | -7.5143  | 778845  | Asthma |
| rs72492333  | 6 | 32555624 | C | A | 0.2115 | -0.0516 | 0.0085 | 1.33E-09 | -6.0642  | 908767  | Asthma |
| rs116350000 | 6 | 32555641 | G | C | 0.4874 | 0.0468  | 0.0081 | 7.30E-09 | 5.7839   | 778845  | Asthma |
| rs115010858 | 6 | 32555653 | T | A | 0.3500 | -0.0855 | 0.0082 | 1.53E-25 | -10.4459 | 778845  | Asthma |
| rs114758692 | 6 | 32555654 | G | C | 0.3500 | -0.0856 | 0.0082 | 1.51E-25 | -10.4472 | 778845  | Asthma |
| rs34182525  | 6 | 32555661 | G | C | 0.2142 | -0.0509 | 0.0085 | 1.92E-09 | -6.0046  | 908767  | Asthma |
| rs34508462  | 6 | 32555699 | C | T | 0.4914 | 0.0451  | 0.0081 | 2.56E-08 | 5.5690   | 778845  | Asthma |
| rs34668202  | 6 | 32555700 | A | G | 0.3478 | -0.0883 | 0.0082 | 4.06E-27 | -10.7848 | 778845  | Asthma |
| rs113908137 | 6 | 32555723 | G | A | 0.5248 | 0.0458  | 0.0071 | 8.85E-11 | 6.4854   | 908767  | Asthma |
| rs34166207  | 6 | 32555733 | A | G | 0.5144 | 0.0539  | 0.0080 | 1.72E-11 | 6.7280   | 778845  | Asthma |
| rs34849062  | 6 | 32555785 | T | C | 0.1450 | -0.0554 | 0.0095 | 4.99E-09 | -5.8476  | 908767  | Asthma |
| rs111672423 | 6 | 32555804 | A | C | 0.4070 | -0.0567 | 0.0072 | 2.39E-15 | -7.9193  | 908767  | Asthma |
| rs112348509 | 6 | 32555808 | T | C | 0.4344 | -0.0568 | 0.0071 | 1.06E-15 | -8.0193  | 908767  | Asthma |
| rs111786536 | 6 | 32555812 | C | T | 0.5463 | 0.0493  | 0.0070 | 2.45E-12 | 7.0064   | 908767  | Asthma |
| rs77501456  | 6 | 32555850 | G | A | 0.5625 | 0.0550  | 0.0070 | 2.52E-15 | 7.9128   | 961345  | Asthma |
| rs146461239 | 6 | 32555889 | A | G | 0.4692 | -0.0712 | 0.0096 | 1.04E-13 | -7.4352  | 778845  | Asthma |
| rs138724045 | 6 | 32555951 | T | C | 0.5067 | -0.0490 | 0.0082 | 2.29E-09 | -5.9757  | 908767  | Asthma |
| rs71536534  | 6 | 32556075 | C | T | 0.4830 | -0.0445 | 0.0081 | 4.13E-08 | -5.4853  | 908767  | Asthma |
| rs71536535  | 6 | 32556077 | A | G | 0.4831 | -0.0455 | 0.0081 | 2.12E-08 | -5.6017  | 908767  | Asthma |
| rs71536536  | 6 | 32556093 | A | C | 0.4853 | -0.0446 | 0.0081 | 4.17E-08 | -5.4835  | 908767  | Asthma |
| rs71536537  | 6 | 32556100 | C | T | 0.4846 | -0.0467 | 0.0081 | 9.30E-09 | -5.7431  | 908767  | Asthma |
| rs66553215  | 6 | 32556111 | C | T | 0.4491 | -0.0465 | 0.0080 | 7.15E-09 | -5.7873  | 908767  | Asthma |
| rs67924734  | 6 | 32556385 | T | A | 0.2632 | -0.0458 | 0.0082 | 2.80E-08 | -5.5537  | 908767  | Asthma |
| rs71536541  | 6 | 32556624 | A | C | 0.4500 | -0.0662 | 0.0094 | 1.48E-12 | -7.0761  | 778845  | Asthma |
| rs71536542  | 6 | 32556631 | T | C | 0.4835 | -0.0446 | 0.0081 | 3.76E-08 | -5.5016  | 908767  | Asthma |
| rs71536543  | 6 | 32556662 | G | A | 0.4798 | -0.0444 | 0.0081 | 4.43E-08 | -5.4726  | 908767  | Asthma |
| rs189209601 | 6 | 32556784 | A | G | 0.0375 | -0.1417 | 0.0200 | 1.54E-12 | -7.0706  | 778845  | Asthma |
| rs66796422  | 6 | 32556835 | A | G | 0.1972 | -0.0723 | 0.0106 | 8.90E-12 | -6.8233  | 778845  | Asthma |
| rs71536548  | 6 | 32556849 | T | C | 0.3711 | -0.0547 | 0.0097 | 1.69E-08 | -5.6413  | 778845  | Asthma |
| rs67353091  | 6 | 32556907 | A | C | 0.1992 | -0.0707 | 0.0100 | 1.31E-12 | -7.0929  | 778845  | Asthma |
| rs114500718 | 6 | 32556917 | G | T | 0.3187 | -0.0956 | 0.0084 | 6.09E-30 | -11.3673 | 778845  | Asthma |
| rs78025613  | 6 | 32556958 | A | C | 0.3066 | -0.0976 | 0.0084 | 6.25E-31 | -11.5642 | 778845  | Asthma |
| rs77932549  | 6 | 32556959 | G | A | 0.3066 | -0.0976 | 0.0084 | 6.25E-31 | -11.5642 | 778845  | Asthma |
| rs146363280 | 6 | 32556988 | A | T | 0.3493 | -0.0792 | 0.0084 | 3.49E-21 | -9.4469  | 778845  | Asthma |
| rs116258010 | 6 | 32556995 | A | G | 0.3323 | -0.0833 | 0.0084 | 2.71E-23 | -9.9430  | 778845  | Asthma |
| rs115572650 | 6 | 32557001 | T | C | 0.3028 | -0.0978 | 0.0085 | 5.63E-31 | -11.5732 | 778845  | Asthma |

|             |   |          |   |   |        |         |        |          |          |         |        |
|-------------|---|----------|---|---|--------|---------|--------|----------|----------|---------|--------|
| rs114835436 | 6 | 32557012 | A | C | 0.4876 | -0.0854 | 0.0085 | 1.69E-23 | -9.9898  | 778845  | Asthma |
| rs146702867 | 6 | 32557023 | G | A | 0.2698 | 0.1145  | 0.0106 | 2.70E-27 | 10.8224  | 524098  | Asthma |
| rs142518779 | 6 | 32557040 | G | C | 0.4163 | -0.0876 | 0.0085 | 5.34E-25 | -10.3267 | 778845  | Asthma |
| rs201400520 | 6 | 32557206 | C | T | 0.3019 | -0.0976 | 0.0085 | 1.56E-30 | -11.4856 | 778845  | Asthma |
| rs199507577 | 6 | 32557208 | C | T | 0.3019 | -0.0976 | 0.0085 | 1.56E-30 | -11.4856 | 778845  | Asthma |
| rs116575354 | 6 | 32557212 | C | T | 0.2483 | 0.1138  | 0.0109 | 1.38E-25 | 10.4557  | 524098  | Asthma |
| rs113276642 | 6 | 32557223 | G | T | 0.2559 | 0.1138  | 0.0107 | 3.07E-26 | 10.5972  | 524098  | Asthma |
| rs201211315 | 6 | 32557263 | A | G | 0.3161 | -0.0967 | 0.0084 | 5.50E-31 | -11.5752 | 778845  | Asthma |
| rs369257183 | 6 | 32557291 | G | A | 0.3761 | -0.1068 | 0.0083 | 2.96E-38 | -12.9318 | 778845  | Asthma |
| rs114624001 | 6 | 32557306 | A | G | 0.4312 | -0.1157 | 0.0082 | 8.12E-45 | -14.0460 | 778845  | Asthma |
| rs530218062 | 6 | 32557314 | A | T | 0.5025 | -0.1144 | 0.0085 | 1.85E-41 | -13.4873 | 778845  | Asthma |
| rs28615351  | 6 | 32557493 | T | C | 0.3910 | -0.0464 | 0.0082 | 1.56E-08 | -5.6554  | 908767  | Asthma |
| rs28595444  | 6 | 32557543 | C | T | 0.2085 | -0.0588 | 0.0090 | 7.67E-11 | -6.5068  | 908767  | Asthma |
| rs28759071  | 6 | 32557617 | G | A | 0.1775 | -0.0783 | 0.0107 | 3.07E-13 | -7.2910  | 778845  | Asthma |
| rs78896800  | 6 | 32557696 | A | C | 0.4762 | -0.1135 | 0.0085 | 9.28E-41 | -13.3680 | 778845  | Asthma |
| rs28564539  | 6 | 32557764 | C | G | 0.1617 | -0.0640 | 0.0094 | 1.01E-11 | -6.8055  | 908767  | Asthma |
| rs67405590  | 6 | 32557765 | T | C | 0.4764 | -0.0908 | 0.0086 | 2.38E-26 | -10.6210 | 778845  | Asthma |
| rs28708071  | 6 | 32557919 | A | G | 0.2111 | -0.0615 | 0.0090 | 1.05E-11 | -6.7995  | 908767  | Asthma |
| rs71536549  | 6 | 32557955 | C | T | 0.2215 | -0.0601 | 0.0089 | 1.22E-11 | -6.7776  | 908767  | Asthma |
| rs76599963  | 6 | 32557987 | A | C | 0.2117 | -0.0562 | 0.0089 | 3.22E-10 | -6.2877  | 908767  | Asthma |
| rs77527755  | 6 | 32558002 | T | G | 0.2197 | -0.0565 | 0.0089 | 2.11E-10 | -6.3535  | 908767  | Asthma |
| rs59057355  | 6 | 32558084 | G | C | 0.2262 | -0.0495 | 0.0088 | 1.88E-08 | -5.6230  | 908767  | Asthma |
| rs146123957 | 6 | 32558136 | T | C | 0.3864 | -0.0978 | 0.0082 | 1.96E-32 | -11.8579 | 778845  | Asthma |
| rs185112674 | 6 | 32558138 | A | G | 0.3865 | -0.0979 | 0.0083 | 1.84E-32 | -11.8633 | 778845  | Asthma |
| rs114281696 | 6 | 32558148 | G | A | 0.2285 | 0.1252  | 0.0166 | 4.18E-14 | 7.5554   | 420598  | Asthma |
| rs111353892 | 6 | 32558151 | T | A | 0.3598 | -0.0952 | 0.0083 | 1.39E-30 | -11.4954 | 778845  | Asthma |
| rs191239160 | 6 | 32558215 | C | G | 0.3607 | -0.0742 | 0.0083 | 5.56E-19 | -8.9005  | 778845  | Asthma |
| rs566775437 | 6 | 32558216 | A | G | 0.4374 | 0.0614  | 0.0086 | 9.29E-13 | 7.1407   | 778845  | Asthma |
| rs534227738 | 6 | 32558218 | A | G | 0.3180 | -0.0970 | 0.0083 | 9.75E-32 | -11.7227 | 778845  | Asthma |
| rs186648552 | 6 | 32558219 | T | C | 0.3189 | -0.0970 | 0.0083 | 1.21E-31 | -11.7040 | 778845  | Asthma |
| rs57586748  | 6 | 32558291 | T | C | 0.2593 | -0.0736 | 0.0096 | 1.41E-14 | -7.6957  | 778845  | Asthma |
| rs57260669  | 6 | 32558343 | T | C | 0.2128 | -0.0640 | 0.0089 | 6.33E-13 | -7.1932  | 908767  | Asthma |
| rs57817449  | 6 | 32558367 | A | G | 0.2094 | -0.0645 | 0.0090 | 7.01E-13 | -7.1793  | 908767  | Asthma |
| rs58453998  | 6 | 32558479 | A | C | 0.1264 | -0.0889 | 0.0115 | 9.90E-15 | -7.7404  | 778845  | Asthma |
| rs28679786  | 6 | 32558495 | T | C | 0.2002 | -0.0693 | 0.0101 | 5.42E-12 | -6.8944  | 778845  | Asthma |
| rs549069478 | 6 | 32558498 | A | C | 0.3966 | -0.0707 | 0.0086 | 1.92E-16 | -8.2269  | 778845  | Asthma |
| rs114133813 | 6 | 32558523 | T | C | 0.3094 | -0.0897 | 0.0087 | 3.63E-25 | -10.3636 | 778845  | Asthma |
| rs28559730  | 6 | 32558589 | T | C | 0.3846 | 0.0680  | 0.0105 | 8.85E-11 | 6.4851   | 497942  | Asthma |
| rs71536550  | 6 | 32558595 | C | T | 0.1167 | -0.0712 | 0.0101 | 2.11E-12 | -7.0273  | 908767  | Asthma |
| rs28534491  | 6 | 32558619 | A | G | 0.1795 | -0.0701 | 0.0092 | 2.03E-14 | -7.6490  | 847307  | Asthma |
| rs36186608  | 6 | 32558630 | T | A | 0.5824 | 0.0673  | 0.0082 | 3.24E-16 | 8.1641   | 778845  | Asthma |
| rs72492335  | 6 | 32558683 | C | T | 0.5679 | 0.0725  | 0.0082 | 6.86E-19 | 8.8771   | 778845  | Asthma |
| rs572618533 | 6 | 32558712 | C | T | 0.3918 | -0.0975 | 0.0085 | 2.77E-30 | -11.4357 | 778845  | Asthma |
| rs68176300  | 6 | 32558713 | T | G | 0.1790 | -0.0538 | 0.0077 | 3.18E-12 | -6.9693  | 1029518 | Asthma |
| rs35083819  | 6 | 32558749 | A | G | 0.1790 | -0.0529 | 0.0072 | 2.61E-13 | -7.3134  | 1133307 | Asthma |
| rs116218325 | 6 | 32558834 | G | T | 0.2967 | -0.0998 | 0.0085 | 6.34E-32 | -11.7591 | 778845  | Asthma |
| rs201277028 | 6 | 32558835 | T | C | 0.3132 | -0.0824 | 0.0073 | 2.40E-29 | -11.2469 | 908767  | Asthma |
| rs77858388  | 6 | 32558842 | A | G | 0.3741 | -0.0682 | 0.0073 | 1.38E-20 | -9.3018  | 908767  | Asthma |
| rs34195497  | 6 | 32558893 | G | A | 0.1839 | -0.0751 | 0.0093 | 5.56E-16 | -8.0985  | 891051  | Asthma |
| rs72845730  | 6 | 32558954 | A | C | 0.3122 | -0.0737 | 0.0064 | 3.66E-31 | -11.6102 | 1117423 | Asthma |
| rs73726821  | 6 | 32558990 | G | A | 0.4105 | -0.0790 | 0.0083 | 2.08E-21 | -9.5008  | 778845  | Asthma |
| rs36189266  | 6 | 32558991 | G | A | 0.4109 | -0.0791 | 0.0083 | 1.81E-21 | -9.5155  | 778845  | Asthma |
| rs538742897 | 6 | 32558996 | C | T | 0.3833 | -0.0776 | 0.0084 | 3.29E-20 | -9.2089  | 778845  | Asthma |
| rs112628998 | 6 | 32558998 | A | G | 0.1115 | -0.0693 | 0.0103 | 1.57E-11 | -6.7412  | 908767  | Asthma |
| rs28577289  | 6 | 32559061 | A | T | 0.1820 | -0.0542 | 0.0092 | 3.40E-09 | -5.9108  | 908767  | Asthma |
| rs28779783  | 6 | 32559103 | A | G | 0.1752 | -0.0622 | 0.0094 | 3.01E-11 | -6.6461  | 908767  | Asthma |
| rs28592002  | 6 | 32559114 | G | T | 0.1543 | -0.0684 | 0.0110 | 5.07E-10 | -6.2169  | 778845  | Asthma |
| rs112483249 | 6 | 32559147 | A | T | 0.2897 | -0.0904 | 0.0082 | 2.48E-28 | -11.0388 | 540747  | Asthma |
| rs28374500  | 6 | 32559167 | C | T | 0.1877 | -0.0666 | 0.0088 | 3.22E-14 | -7.5894  | 908767  | Asthma |
| rs67062152  | 6 | 32559248 | T | C | 0.2977 | -0.0859 | 0.0073 | 1.38E-31 | -11.6931 | 908767  | Asthma |
| rs28530648  | 6 | 32559302 | C | A | 0.1206 | -0.0794 | 0.0096 | 1.80E-16 | -8.2348  | 961345  | Asthma |
| rs72492336  | 6 | 32559335 | C | T | 0.3030 | -0.0872 | 0.0073 | 1.05E-32 | -11.9099 | 908767  | Asthma |
| rs28490365  | 6 | 32559444 | G | A | 0.2506 | -0.0779 | 0.0096 | 3.79E-16 | -8.1452  | 778845  | Asthma |
| rs28708891  | 6 | 32559458 | G | T | 0.2507 | -0.0771 | 0.0096 | 7.46E-16 | -8.0628  | 778845  | Asthma |
| rs79485855  | 6 | 32559476 | T | G | 0.4568 | -0.1101 | 0.0085 | 1.82E-38 | -12.9697 | 778845  | Asthma |
| rs73726822  | 6 | 32559495 | G | A | 0.3105 | -0.0987 | 0.0083 | 2.79E-32 | -11.8284 | 778845  | Asthma |
| rs28463664  | 6 | 32559518 | C | T | 0.1219 | -0.0756 | 0.0100 | 3.44E-14 | -7.5807  | 908767  | Asthma |
| rs28624072  | 6 | 32559519 | G | A | 0.1823 | -0.0645 | 0.0089 | 5.57E-13 | -7.2106  | 908767  | Asthma |
| rs201624597 | 6 | 32559520 | G | A | 0.3080 | -0.0997 | 0.0084 | 8.20E-33 | -11.9306 | 778845  | Asthma |
| rs72845733  | 6 | 32559528 | A | T | 0.3059 | -0.0926 | 0.0074 | 4.37E-36 | -12.5424 | 847307  | Asthma |
| rs116659316 | 6 | 32559609 | A | G | 0.3557 | -0.0563 | 0.0084 | 2.29E-11 | -6.6860  | 778845  | Asthma |
| rs28398322  | 6 | 32559629 | G | A | 0.1208 | -0.0749 | 0.0100 | 6.86E-14 | -7.4910  | 908767  | Asthma |
| rs112234874 | 6 | 32559662 | G | A | 0.3041 | -0.0924 | 0.0074 | 1.48E-35 | -12.4458 | 847307  | Asthma |
| rs72492339  | 6 | 32559695 | G | A | 0.3668 | -0.0762 | 0.0083 | 5.16E-20 | -9.1605  | 778845  | Asthma |

|             |   |          |   |   |        |         |        |          |          |        |        |
|-------------|---|----------|---|---|--------|---------|--------|----------|----------|--------|--------|
| rs114020553 | 6 | 32559703 | A | G | 0.3670 | -0.0762 | 0.0083 | 5.01E-20 | -9.1638  | 778845 | Asthma |
| rs71536551  | 6 | 32559755 | A | G | 0.2392 | -0.0564 | 0.0086 | 6.59E-11 | -6.5297  | 908767 | Asthma |
| rs28824019  | 6 | 32559908 | A | G | 0.3065 | -0.0576 | 0.0086 | 1.92E-11 | -6.7118  | 908767 | Asthma |
| rs28879813  | 6 | 32560322 | C | T | 0.2205 | -0.0673 | 0.0102 | 5.15E-11 | -6.5667  | 778845 | Asthma |
| rs66777350  | 6 | 32560516 | A | G | 0.2338 | -0.0892 | 0.0098 | 1.06E-19 | -9.0823  | 778845 | Asthma |
| rs67792106  | 6 | 32560546 | G | C | 0.2330 | -0.0899 | 0.0098 | 6.23E-20 | -9.1402  | 778845 | Asthma |
| rs72845743  | 6 | 32560637 | A | G | 0.1823 | -0.0690 | 0.0109 | 2.07E-10 | -6.3564  | 778845 | Asthma |
| rs67751797  | 6 | 32560652 | G | A | 0.2113 | -0.0701 | 0.0105 | 2.39E-11 | -6.6803  | 778845 | Asthma |
| rs28835301  | 6 | 32560793 | G | A | 0.2408 | -0.0857 | 0.0097 | 9.32E-19 | -8.8430  | 778845 | Asthma |
| rs71536559  | 6 | 32561370 | T | G | 0.0399 | -0.1351 | 0.0200 | 1.39E-11 | -6.7584  | 778845 | Asthma |
| rs71536563  | 6 | 32561691 | A | G | 0.0446 | -0.1542 | 0.0190 | 4.39E-16 | -8.1273  | 778845 | Asthma |
| rs68115965  | 6 | 32561892 | C | T | 0.2327 | -0.0890 | 0.0098 | 1.63E-19 | -9.0356  | 778845 | Asthma |
| rs78506734  | 6 | 32561918 | T | C | 0.2324 | -0.0887 | 0.0098 | 1.86E-19 | -9.0211  | 778845 | Asthma |
| rs35153343  | 6 | 32561977 | T | C | 0.1787 | -0.0710 | 0.0109 | 7.28E-11 | -6.5147  | 778845 | Asthma |
| rs34067190  | 6 | 32562029 | T | C | 0.2030 | -0.0867 | 0.0101 | 1.24E-17 | -8.5492  | 778845 | Asthma |
| rs553177248 | 6 | 32562139 | A | T | 0.3819 | -0.0835 | 0.0083 | 1.48E-23 | -10.0026 | 778845 | Asthma |
| rs34231699  | 6 | 32562173 | A | G | 0.1276 | -0.0697 | 0.0115 | 1.49E-09 | -6.0453  | 778845 | Asthma |
| rs72845745  | 6 | 32562184 | T | C | 0.5394 | 0.0566  | 0.0082 | 4.24E-12 | 6.9290   | 778845 | Asthma |
| rs184303918 | 6 | 32562199 | G | C | 0.5429 | 0.0568  | 0.0082 | 3.46E-12 | 6.9578   | 778845 | Asthma |
| rs78085354  | 6 | 32562204 | G | A | 0.5430 | 0.0568  | 0.0082 | 3.39E-12 | 6.9604   | 778845 | Asthma |
| rs112720311 | 6 | 32562218 | A | G | 0.5439 | 0.0570  | 0.0082 | 3.08E-12 | 6.9743   | 778845 | Asthma |
| rs115946871 | 6 | 32562234 | C | T | 0.5438 | 0.0570  | 0.0081 | 2.57E-12 | 6.9994   | 778845 | Asthma |
| rs35556584  | 6 | 32562240 | A | C | 0.1415 | -0.0721 | 0.0111 | 9.68E-11 | -6.4718  | 778845 | Asthma |
| rs35175534  | 6 | 32562252 | C | A | 0.0823 | 0.1438  | 0.0133 | 2.32E-27 | 10.8363  | 848312 | Asthma |
| rs115127109 | 6 | 32562261 | T | C | 0.5464 | 0.0579  | 0.0082 | 1.19E-12 | 7.1068   | 778845 | Asthma |
| rs72845747  | 6 | 32562277 | T | C | 0.5473 | 0.0572  | 0.0081 | 2.18E-12 | 7.0223   | 778845 | Asthma |
| rs72845749  | 6 | 32562304 | T | C | 0.5487 | 0.0581  | 0.0082 | 1.10E-12 | 7.1177   | 778845 | Asthma |
| rs72845750  | 6 | 32562316 | G | T | 0.5488 | 0.0581  | 0.0082 | 1.25E-12 | 7.1003   | 778845 | Asthma |
| rs34322913  | 6 | 32562362 | G | A | 0.1403 | -0.0734 | 0.0112 | 5.60E-11 | -6.5543  | 778845 | Asthma |
| rs80142174  | 6 | 32562367 | G | A | 0.5491 | 0.0585  | 0.0082 | 7.65E-13 | 7.1672   | 778845 | Asthma |
| rs76454806  | 6 | 32562368 | C | T | 0.5491 | 0.0585  | 0.0082 | 7.65E-13 | 7.1672   | 778845 | Asthma |
| rs115469967 | 6 | 32562413 | A | G | 0.5494 | 0.0581  | 0.0082 | 1.34E-12 | 7.0899   | 778845 | Asthma |
| rs77340266  | 6 | 32562423 | A | G | 0.5499 | 0.0581  | 0.0082 | 1.33E-12 | 7.0912   | 778845 | Asthma |
| rs72845752  | 6 | 32562508 | T | C | 0.5502 | 0.0586  | 0.0082 | 8.45E-13 | 7.1536   | 778845 | Asthma |
| rs72845754  | 6 | 32562509 | G | A | 0.5502 | 0.0586  | 0.0082 | 8.45E-13 | 7.1536   | 778845 | Asthma |
| rs74201443  | 6 | 32562544 | G | C | 0.5508 | 0.0590  | 0.0082 | 5.97E-13 | 7.2011   | 778845 | Asthma |
| rs36023847  | 6 | 32562560 | T | C | 0.1408 | -0.0701 | 0.0112 | 3.51E-10 | -6.2743  | 778845 | Asthma |
| rs72845755  | 6 | 32562608 | G | A | 0.5511 | 0.0576  | 0.0082 | 1.90E-12 | 7.0417   | 778845 | Asthma |
| rs527678609 | 6 | 32562658 | A | G | 0.5494 | 0.0580  | 0.0082 | 1.29E-12 | 7.0950   | 778845 | Asthma |
| rs540951197 | 6 | 32562662 | C | G | 0.5494 | 0.0580  | 0.0082 | 1.33E-12 | 7.0916   | 778845 | Asthma |
| rs562335725 | 6 | 32562666 | A | G | 0.5494 | 0.0580  | 0.0082 | 1.33E-12 | 7.0916   | 778845 | Asthma |
| rs115065497 | 6 | 32562689 | C | T | 0.5500 | 0.0578  | 0.0082 | 1.61E-12 | 7.0648   | 778845 | Asthma |
| rs189233809 | 6 | 32562720 | T | A | 0.5501 | 0.0581  | 0.0082 | 1.42E-12 | 7.0825   | 778845 | Asthma |
| rs193053660 | 6 | 32562726 | C | G | 0.5502 | 0.0583  | 0.0082 | 1.08E-12 | 7.1206   | 778845 | Asthma |
| rs566699769 | 6 | 32562728 | A | C | 0.5502 | 0.0583  | 0.0082 | 1.08E-12 | 7.1206   | 778845 | Asthma |
| rs533498287 | 6 | 32562729 | C | T | 0.5502 | 0.0583  | 0.0082 | 1.08E-12 | 7.1206   | 778845 | Asthma |
| rs34763034  | 6 | 32562737 | G | T | 0.1257 | -0.0708 | 0.0116 | 1.10E-09 | -6.0939  | 778845 | Asthma |
| rs72845756  | 6 | 32562768 | C | T | 0.5499 | 0.0582  | 0.0082 | 1.08E-12 | 7.1195   | 778845 | Asthma |
| rs66508957  | 6 | 32562782 | A | C | 0.1395 | -0.0725 | 0.0112 | 1.03E-10 | -6.4628  | 778845 | Asthma |
| rs72845757  | 6 | 32562786 | A | G | 0.5497 | 0.0570  | 0.0082 | 3.89E-12 | 6.9413   | 778845 | Asthma |
| rs66955114  | 6 | 32562795 | T | A | 0.1402 | -0.0706 | 0.0112 | 2.98E-10 | -6.2997  | 778845 | Asthma |
| rs35021449  | 6 | 32562806 | T | C | 0.0612 | 0.1604  | 0.0151 | 2.81E-26 | 10.6050  | 831423 | Asthma |
| rs34619889  | 6 | 32562814 | T | G | 0.1231 | -0.0715 | 0.0117 | 8.84E-10 | -6.1291  | 778845 | Asthma |
| rs112715773 | 6 | 32562831 | C | T | 0.5497 | 0.0581  | 0.0082 | 1.55E-12 | 7.0702   | 778845 | Asthma |
| rs66496668  | 6 | 32562834 | G | A | 0.1406 | -0.0717 | 0.0112 | 1.72E-10 | -6.3841  | 778845 | Asthma |
| rs112236587 | 6 | 32562838 | C | T | 0.5497 | 0.0581  | 0.0082 | 1.55E-12 | 7.0702   | 778845 | Asthma |
| rs112302151 | 6 | 32562851 | T | C | 0.5499 | 0.0579  | 0.0082 | 1.47E-12 | 7.0778   | 778845 | Asthma |
| rs35099826  | 6 | 32562871 | T | G | 0.1269 | -0.0676 | 0.0116 | 5.23E-09 | -5.8397  | 778845 | Asthma |
| rs35988565  | 6 | 32562875 | A | G | 0.1269 | -0.0676 | 0.0116 | 5.23E-09 | -5.8397  | 778845 | Asthma |
| rs71536565  | 6 | 32562880 | T | C | 0.1421 | -0.0705 | 0.0111 | 2.45E-10 | -6.3304  | 778845 | Asthma |
| rs34496504  | 6 | 32562887 | A | G | 0.1263 | -0.0673 | 0.0116 | 5.81E-09 | -5.8221  | 778845 | Asthma |
| rs149581890 | 6 | 32562907 | A | T | 0.5513 | 0.0561  | 0.0082 | 6.00E-12 | 6.8798   | 778845 | Asthma |
| rs148573031 | 6 | 32562914 | A | T | 0.4689 | 0.0767  | 0.0082 | 1.33E-20 | 9.3056   | 778845 | Asthma |
| rs199798245 | 6 | 32562931 | C | T | 0.5500 | 0.0554  | 0.0082 | 1.14E-11 | 6.7875   | 778845 | Asthma |
| rs200856733 | 6 | 32562932 | A | G | 0.5500 | 0.0554  | 0.0082 | 1.14E-11 | 6.7875   | 778845 | Asthma |
| rs572746069 | 6 | 32562936 | C | G | 0.5500 | 0.0554  | 0.0082 | 1.14E-11 | 6.7875   | 778845 | Asthma |
| rs543318785 | 6 | 32562937 | C | T | 0.5500 | 0.0554  | 0.0082 | 1.13E-11 | 6.7884   | 778845 | Asthma |
| rs185436529 | 6 | 32562963 | A | C | 0.5481 | 0.0555  | 0.0082 | 1.06E-11 | 6.7978   | 778845 | Asthma |
| rs532508742 | 6 | 32562972 | C | T | 0.5463 | 0.0561  | 0.0082 | 7.21E-12 | 6.8535   | 778845 | Asthma |
| rs545154111 | 6 | 32562977 | C | T | 0.5463 | 0.0561  | 0.0082 | 7.16E-12 | 6.8544   | 778845 | Asthma |
| rs115774308 | 6 | 32563001 | T | G | 0.5390 | 0.0549  | 0.0082 | 1.71E-11 | 6.7292   | 778845 | Asthma |
| rs66856574  | 6 | 32563038 | G | A | 0.1430 | -0.0700 | 0.0111 | 3.10E-10 | -6.2936  | 778845 | Asthma |
| rs111769716 | 6 | 32563042 | G | C | 0.4318 | -0.0662 | 0.0082 | 5.85E-16 | -8.0923  | 778845 | Asthma |
| rs76666064  | 6 | 32563064 | C | G | 0.4257 | -0.0667 | 0.0082 | 4.19E-16 | -8.1328  | 778845 | Asthma |



|             |   |          |   |   |        |         |        |          |         |        |        |
|-------------|---|----------|---|---|--------|---------|--------|----------|---------|--------|--------|
| rs147315656 | 6 | 32563092 | T | A | 0.4147 | -0.0697 | 0.0082 | 2.63E-17 | -8.4619 | 778845 | Asthma |
| rs576810845 | 6 | 32563114 | T | C | 0.5225 | 0.0524  | 0.0082 | 1.74E-10 | 6.3831  | 778845 | Asthma |
| rs558696616 | 6 | 32563121 | C | T | 0.5270 | 0.0532  | 0.0082 | 8.46E-11 | 6.4923  | 778845 | Asthma |
| rs577240453 | 6 | 32563122 | T | G | 0.5270 | 0.0532  | 0.0082 | 8.46E-11 | 6.4923  | 778845 | Asthma |
| rs151297998 | 6 | 32563127 | C | T | 0.5304 | 0.0534  | 0.0082 | 6.61E-11 | 6.5292  | 778845 | Asthma |
| rs67801561  | 6 | 32563142 | C | T | 0.1432 | -0.0690 | 0.0111 | 5.28E-10 | -6.2107 | 778845 | Asthma |
| rs75503609  | 6 | 32563152 | A | G | 0.5365 | 0.0543  | 0.0082 | 2.96E-11 | 6.6486  | 778845 | Asthma |
| rs140569663 | 6 | 32563167 | A | G | 0.5390 | 0.0556  | 0.0082 | 9.72E-12 | 6.8107  | 778845 | Asthma |
| rs149685121 | 6 | 32563169 | C | T | 0.5390 | 0.0556  | 0.0082 | 9.72E-12 | 6.8107  | 778845 | Asthma |
| rs145520715 | 6 | 32563175 | T | C | 0.5392 | 0.0560  | 0.0082 | 7.48E-12 | 6.8482  | 778845 | Asthma |
| rs148812784 | 6 | 32563177 | C | T | 0.5392 | 0.0560  | 0.0082 | 7.48E-12 | 6.8482  | 778845 | Asthma |
| rs145245177 | 6 | 32563178 | C | G | 0.5392 | 0.0560  | 0.0082 | 7.48E-12 | 6.8482  | 778845 | Asthma |
| rs66694205  | 6 | 32563216 | T | C | 0.1388 | -0.0686 | 0.0113 | 1.11E-09 | -6.0927 | 778845 | Asthma |
| rs111843909 | 6 | 32563266 | T | C | 0.5499 | 0.0563  | 0.0082 | 6.94E-12 | 6.8588  | 778845 | Asthma |
| rs115407919 | 6 | 32563279 | C | A | 0.5499 | 0.0572  | 0.0082 | 3.06E-12 | 6.9749  | 778845 | Asthma |
| rs115278245 | 6 | 32563280 | A | G | 0.5499 | 0.0572  | 0.0082 | 2.99E-12 | 6.9781  | 778845 | Asthma |
| rs570295314 | 6 | 32563297 | G | A | 0.5497 | 0.0574  | 0.0082 | 2.24E-12 | 7.0187  | 778845 | Asthma |
| rs537366043 | 6 | 32563299 | T | A | 0.5497 | 0.0574  | 0.0082 | 2.24E-12 | 7.0187  | 778845 | Asthma |
| rs111948873 | 6 | 32563304 | G | A | 0.5497 | 0.0574  | 0.0082 | 2.24E-12 | 7.0185  | 778845 | Asthma |
| rs113209820 | 6 | 32563311 | T | C | 0.5497 | 0.0565  | 0.0082 | 4.88E-12 | 6.9091  | 778845 | Asthma |
| rs111342306 | 6 | 32563314 | C | T | 0.5497 | 0.0564  | 0.0082 | 5.12E-12 | 6.9023  | 778845 | Asthma |
| rs73726834  | 6 | 32563334 | C | T | 0.5505 | 0.0559  | 0.0082 | 8.50E-12 | 6.8299  | 778845 | Asthma |
| rs78486406  | 6 | 32563340 | A | G | 0.1387 | -0.0710 | 0.0113 | 3.15E-10 | -6.2909 | 778845 | Asthma |
| rs113367712 | 6 | 32563350 | T | C | 0.1240 | -0.0687 | 0.0117 | 3.95E-09 | -5.8865 | 778845 | Asthma |
| rs112310670 | 6 | 32563359 | C | T | 0.5513 | 0.0566  | 0.0082 | 4.64E-12 | 6.9161  | 778845 | Asthma |
| rs112649230 | 6 | 32563363 | G | A | 0.5513 | 0.0565  | 0.0082 | 5.45E-12 | 6.8933  | 778845 | Asthma |
| rs71536568  | 6 | 32563374 | A | G | 0.5669 | 0.0532  | 0.0082 | 9.60E-11 | 6.4731  | 778845 | Asthma |
| rs72845758  | 6 | 32563401 | C | T | 0.5492 | 0.0582  | 0.0081 | 9.11E-13 | 7.1435  | 778845 | Asthma |
| rs72845759  | 6 | 32563405 | G | A | 0.5491 | 0.0582  | 0.0081 | 8.82E-13 | 7.1477  | 778845 | Asthma |
| rs67191615  | 6 | 32563427 | T | G | 0.1398 | -0.0767 | 0.0112 | 8.34E-12 | -6.8323 | 778845 | Asthma |
| rs537686051 | 6 | 32563436 | G | C | 0.5483 | 0.0575  | 0.0082 | 2.13E-12 | 7.0255  | 778845 | Asthma |
| rs552586675 | 6 | 32563438 | G | T | 0.5483 | 0.0575  | 0.0082 | 2.13E-12 | 7.0255  | 778845 | Asthma |
| rs571171259 | 6 | 32563441 | G | A | 0.5483 | 0.0575  | 0.0082 | 2.19E-12 | 7.0221  | 778845 | Asthma |
| rs534655111 | 6 | 32563443 | T | A | 0.5483 | 0.0575  | 0.0082 | 2.19E-12 | 7.0221  | 778845 | Asthma |
| rs199893280 | 6 | 32563449 | C | A | 0.5502 | 0.0558  | 0.0082 | 1.25E-11 | 6.7743  | 778845 | Asthma |
| rs67283303  | 6 | 32563476 | T | C | 0.5501 | 0.0555  | 0.0082 | 1.40E-11 | 6.7585  | 778845 | Asthma |
| rs113528380 | 6 | 32563510 | C | T | 0.1219 | -0.0687 | 0.0119 | 8.72E-09 | -5.7541 | 778845 | Asthma |
| rs113204386 | 6 | 32563562 | G | A | 0.5517 | 0.0560  | 0.0082 | 9.52E-12 | 6.8136  | 778845 | Asthma |
| rs75404103  | 6 | 32563571 | G | T | 0.5504 | 0.0551  | 0.0082 | 1.89E-11 | 6.7144  | 778845 | Asthma |
| rs72845764  | 6 | 32563574 | C | T | 0.1237 | -0.0685 | 0.0117 | 5.03E-09 | -5.8461 | 778845 | Asthma |
| rs72845765  | 6 | 32563585 | C | A | 0.1239 | -0.0680 | 0.0117 | 6.71E-09 | -5.7981 | 778845 | Asthma |
| rs72845768  | 6 | 32563600 | C | T | 0.5513 | 0.0490  | 0.0075 | 8.08E-11 | 6.4991  | 778845 | Asthma |
| rs72492340  | 6 | 32563608 | C | T | 0.5513 | 0.0578  | 0.0082 | 2.08E-12 | 7.0292  | 778845 | Asthma |
| rs67705542  | 6 | 32563620 | C | T | 0.1386 | -0.0709 | 0.0113 | 3.81E-10 | -6.2614 | 778845 | Asthma |
| rs71536571  | 6 | 32563698 | T | A | 0.1368 | -0.0693 | 0.0115 | 1.55E-09 | -6.0393 | 778845 | Asthma |
| rs146417441 | 6 | 32563718 | C | G | 0.1372 | -0.0705 | 0.0115 | 7.80E-10 | -6.1490 | 778845 | Asthma |
| rs71536572  | 6 | 32563748 | T | C | 0.1374 | -0.0703 | 0.0115 | 8.83E-10 | -6.1294 | 778845 | Asthma |
| rs71536573  | 6 | 32563765 | T | C | 0.1375 | -0.0702 | 0.0114 | 8.35E-10 | -6.1379 | 778845 | Asthma |
| rs143553568 | 6 | 32563806 | T | C | 0.2104 | -0.0796 | 0.0101 | 3.21E-15 | -7.8828 | 778845 | Asthma |
| rs146621647 | 6 | 32563825 | T | C | 0.5438 | 0.0533  | 0.0082 | 1.00E-10 | 6.4669  | 778845 | Asthma |
| rs139013960 | 6 | 32563829 | G | C | 0.5455 | 0.0544  | 0.0083 | 4.42E-11 | 6.5893  | 778845 | Asthma |
| rs36024983  | 6 | 32563849 | C | T | 0.1224 | -0.0696 | 0.0119 | 5.23E-09 | -5.8398 | 778845 | Asthma |
| rs72492341  | 6 | 32563859 | G | C | 0.5434 | 0.0529  | 0.0083 | 1.59E-10 | 6.3966  | 778845 | Asthma |
| rs114633631 | 6 | 32563929 | A | C | 0.5376 | 0.0525  | 0.0082 | 1.68E-10 | 6.3882  | 778845 | Asthma |
| rs139796058 | 6 | 32563938 | A | T | 0.5370 | 0.0538  | 0.0082 | 6.07E-11 | 6.5421  | 778845 | Asthma |
| rs556948697 | 6 | 32563952 | C | T | 0.5363 | 0.0526  | 0.0082 | 1.35E-10 | 6.4214  | 778845 | Asthma |
| rs151210153 | 6 | 32563957 | A | G | 0.5380 | 0.0534  | 0.0082 | 7.85E-11 | 6.5035  | 778845 | Asthma |
| rs545853065 | 6 | 32563960 | G | A | 0.5364 | 0.0524  | 0.0082 | 1.59E-10 | 6.3964  | 778845 | Asthma |
| rs563850361 | 6 | 32563967 | G | A | 0.5379 | 0.0539  | 0.0082 | 5.86E-11 | 6.5472  | 778845 | Asthma |
| rs373666709 | 6 | 32563971 | A | G | 0.5379 | 0.0539  | 0.0082 | 6.10E-11 | 6.5413  | 778845 | Asthma |
| rs80011743  | 6 | 32563993 | G | A | 0.5397 | 0.0545  | 0.0082 | 3.44E-11 | 6.6264  | 778845 | Asthma |
| rs78107833  | 6 | 32564030 | T | A | 0.5430 | 0.0545  | 0.0082 | 3.71E-11 | 6.6154  | 778845 | Asthma |
| rs201766754 | 6 | 32564066 | G | A | 0.5407 | 0.0527  | 0.0082 | 1.52E-10 | 6.4034  | 778845 | Asthma |
| rs114418909 | 6 | 32564075 | C | T | 0.5390 | 0.0528  | 0.0082 | 1.44E-10 | 6.4120  | 778845 | Asthma |
| rs116479032 | 6 | 32564076 | A | G | 0.5390 | 0.0528  | 0.0082 | 1.44E-10 | 6.4120  | 778845 | Asthma |
| rs201917227 | 6 | 32564093 | C | A | 0.5349 | 0.0540  | 0.0082 | 5.84E-11 | 6.5479  | 778845 | Asthma |
| rs566973051 | 6 | 32564099 | C | T | 0.5339 | 0.0530  | 0.0082 | 1.32E-10 | 6.4253  | 778845 | Asthma |
| rs142198554 | 6 | 32564110 | T | C | 0.5309 | 0.0524  | 0.0082 | 2.05E-10 | 6.3572  | 778845 | Asthma |
| rs546856170 | 6 | 32564111 | G | A | 0.5307 | 0.0523  | 0.0082 | 2.22E-10 | 6.3451  | 778845 | Asthma |
| rs75019606  | 6 | 32564147 | C | A | 0.5117 | 0.0523  | 0.0083 | 2.36E-10 | 6.3356  | 778845 | Asthma |
| rs35227294  | 6 | 32564171 | C | G | 0.1372 | -0.0678 | 0.0114 | 2.47E-09 | -5.9640 | 778845 | Asthma |
| rs35904912  | 6 | 32564184 | T | C | 0.1574 | -0.0708 | 0.0109 | 9.09E-11 | -6.4815 | 778845 | Asthma |
| rs149705942 | 6 | 32564301 | T | G | 0.4009 | -0.0710 | 0.0082 | 6.62E-18 | -8.6212 | 778845 | Asthma |
| rs34909638  | 6 | 32564312 | A | T | 0.1400 | -0.0720 | 0.0113 | 1.78E-10 | -6.3790 | 778845 | Asthma |

|             |   |          |   |   |        |         |        |          |          |        |        |
|-------------|---|----------|---|---|--------|---------|--------|----------|----------|--------|--------|
| rs111774342 | 6 | 32564335 | C | T | 0.3974 | -0.0704 | 0.0083 | 2.59E-17 | -8.4638  | 778845 | Asthma |
| rs114769669 | 6 | 32564372 | G | T | 0.4065 | -0.0698 | 0.0084 | 7.36E-17 | -8.3412  | 778845 | Asthma |
| rs533614924 | 6 | 32564450 | A | T | 0.3622 | -0.0661 | 0.0085 | 8.67E-15 | -7.7573  | 778845 | Asthma |
| rs371994404 | 6 | 32564540 | A | G | 0.4903 | 0.0455  | 0.0083 | 4.43E-08 | 5.4727   | 778845 | Asthma |
| rs138129967 | 6 | 32564547 | C | G | 0.4139 | -0.0621 | 0.0083 | 7.81E-14 | -7.4736  | 778845 | Asthma |
| rs543107154 | 6 | 32564574 | C | T | 0.5173 | 0.0450  | 0.0082 | 4.57E-08 | 5.4671   | 778845 | Asthma |
| rs561232678 | 6 | 32564575 | A | G | 0.5173 | 0.0450  | 0.0082 | 4.57E-08 | 5.4671   | 778845 | Asthma |
| rs569119670 | 6 | 32564582 | C | T | 0.5175 | 0.0455  | 0.0082 | 3.37E-08 | 5.5212   | 778845 | Asthma |
| rs111768548 | 6 | 32564713 | A | G | 0.1223 | -0.0713 | 0.0118 | 1.67E-09 | -6.0273  | 778845 | Asthma |
| rs113369856 | 6 | 32564731 | G | A | 0.4044 | -0.0651 | 0.0083 | 4.98E-15 | -7.8275  | 778845 | Asthma |
| rs572428148 | 6 | 32564755 | A | C | 0.3997 | -0.0698 | 0.0083 | 3.51E-17 | -8.4281  | 778845 | Asthma |
| rs72845781  | 6 | 32564767 | T | C | 0.1255 | -0.0682 | 0.0118 | 7.68E-09 | -5.7753  | 778845 | Asthma |
| rs116640755 | 6 | 32564779 | G | T | 0.4069 | -0.0688 | 0.0083 | 1.00E-16 | -8.3044  | 778845 | Asthma |
| rs115623335 | 6 | 32564801 | A | G | 0.4052 | -0.0685 | 0.0083 | 1.46E-16 | -8.2601  | 778845 | Asthma |
| rs35747421  | 6 | 32564825 | A | G | 0.1378 | -0.0689 | 0.0115 | 2.12E-09 | -5.9882  | 778845 | Asthma |
| rs72492345  | 6 | 32564838 | T | C | 0.3949 | -0.0681 | 0.0083 | 2.30E-16 | -8.2056  | 778845 | Asthma |
| rs34776348  | 6 | 32564891 | A | T | 0.1374 | -0.0692 | 0.0114 | 1.42E-09 | -6.0533  | 778845 | Asthma |
| rs72845785  | 6 | 32565067 | C | T | 0.1380 | -0.0701 | 0.0114 | 6.71E-10 | -6.1729  | 778845 | Asthma |
| rs66895738  | 6 | 32565086 | G | A | 0.1383 | -0.0694 | 0.0113 | 9.79E-10 | -6.1130  | 778845 | Asthma |
| rs66987583  | 6 | 32565190 | T | G | 0.1268 | -0.0752 | 0.0122 | 6.40E-10 | -6.1805  | 778845 | Asthma |
| rs66773153  | 6 | 32565220 | A | G | 0.1251 | -0.0744 | 0.0120 | 5.89E-10 | -6.1933  | 778845 | Asthma |
| rs74322792  | 6 | 32565254 | A | G | 0.1274 | -0.0738 | 0.0117 | 3.17E-10 | -6.2904  | 778845 | Asthma |
| rs71536583  | 6 | 32565330 | C | T | 0.1369 | -0.0738 | 0.0114 | 9.33E-11 | -6.4775  | 778845 | Asthma |
| rs36042196  | 6 | 32565372 | A | C | 0.1211 | -0.0674 | 0.0120 | 1.74E-08 | -5.6357  | 778845 | Asthma |
| rs75303988  | 6 | 32565386 | T | C | 0.1356 | -0.0692 | 0.0116 | 2.31E-09 | -5.9748  | 778845 | Asthma |
| rs78186478  | 6 | 32565387 | G | A | 0.1356 | -0.0692 | 0.0116 | 2.31E-09 | -5.9748  | 778845 | Asthma |
| rs71536586  | 6 | 32565469 | C | A | 0.1346 | -0.0681 | 0.0116 | 3.93E-09 | -5.8868  | 778845 | Asthma |
| rs2284185   | 6 | 32565494 | G | A | 0.2039 | -0.0834 | 0.0103 | 5.29E-16 | -8.1050  | 778845 | Asthma |
| rs72845792  | 6 | 32565632 | T | C | 0.1252 | -0.0680 | 0.0116 | 5.31E-09 | -5.8372  | 778845 | Asthma |
| rs67404202  | 6 | 32565785 | G | A | 0.1497 | -0.0672 | 0.0111 | 1.38E-09 | -6.0576  | 778845 | Asthma |
| rs11758863  | 6 | 32566222 | T | C | 0.0421 | -0.1588 | 0.0221 | 7.38E-13 | -7.1724  | 778845 | Asthma |
| rs74579911  | 6 | 32566233 | A | G | 0.2642 | -0.0598 | 0.0096 | 5.09E-10 | -6.2164  | 778845 | Asthma |
| rs79433911  | 6 | 32566251 | T | C | 0.2862 | -0.0538 | 0.0096 | 1.81E-08 | -5.6295  | 778845 | Asthma |
| rs374949924 | 6 | 32566454 | G | A | 0.4871 | -0.0807 | 0.0090 | 4.15E-19 | -8.9330  | 778845 | Asthma |
| rs557442991 | 6 | 32566461 | C | T | 0.4259 | -0.0715 | 0.0087 | 1.58E-16 | -8.2503  | 778845 | Asthma |
| rs573056492 | 6 | 32566488 | T | C | 0.4514 | -0.0686 | 0.0086 | 2.19E-15 | -7.9303  | 778845 | Asthma |
| rs540520708 | 6 | 32566489 | G | A | 0.4514 | -0.0685 | 0.0086 | 2.24E-15 | -7.9276  | 778845 | Asthma |
| rs71538503  | 6 | 32566682 | A | G | 0.0978 | -0.0999 | 0.0141 | 1.65E-12 | -7.0611  | 778845 | Asthma |
| rs17209971  | 6 | 32566707 | A | G | 0.1001 | -0.0993 | 0.0138 | 6.61E-13 | -7.1875  | 778845 | Asthma |
| rs62405649  | 6 | 32566714 | G | A | 0.2928 | -0.0986 | 0.0089 | 3.00E-28 | -11.0218 | 778845 | Asthma |
| rs71538505  | 6 | 32566799 | T | C | 0.2223 | -0.0612 | 0.0098 | 3.85E-10 | -6.2598  | 778845 | Asthma |
| rs115022629 | 6 | 32566813 | A | G | 0.3696 | -0.0789 | 0.0084 | 5.25E-21 | -9.4040  | 778845 | Asthma |
| rs77087101  | 6 | 32566828 | A | G | 0.3755 | -0.0749 | 0.0084 | 3.14E-19 | -8.9636  | 778845 | Asthma |
| rs67348726  | 6 | 32566930 | C | T | 0.1364 | -0.0789 | 0.0113 | 3.20E-12 | -6.9688  | 778845 | Asthma |
| rs67920980  | 6 | 32566935 | A | C | 0.2288 | -0.0535 | 0.0096 | 2.70E-08 | -5.5597  | 778845 | Asthma |
| rs187198185 | 6 | 32566965 | C | T | 0.1380 | -0.0749 | 0.0122 | 7.25E-10 | -6.1606  | 778845 | Asthma |
| rs75385969  | 6 | 32566966 | A | G | 0.1377 | -0.0747 | 0.0122 | 8.14E-10 | -6.1421  | 778845 | Asthma |
| rs72845800  | 6 | 32567084 | A | G | 0.1328 | -0.0750 | 0.0117 | 1.40E-10 | -6.4161  | 778845 | Asthma |
| rs114437875 | 6 | 32567166 | C | T | 0.3928 | -0.0736 | 0.0083 | 6.49E-19 | -8.8833  | 778845 | Asthma |
| rs71538509  | 6 | 32567180 | A | G | 0.1334 | -0.0716 | 0.0119 | 1.95E-09 | -6.0022  | 778845 | Asthma |
| rs71538510  | 6 | 32567182 | A | G | 0.2433 | -0.0590 | 0.0096 | 7.28E-10 | -6.1600  | 778845 | Asthma |
| rs66468254  | 6 | 32567257 | C | T | 0.1598 | -0.0735 | 0.0109 | 1.33E-11 | -6.7649  | 778845 | Asthma |
| rs71538513  | 6 | 32567316 | A | T | 0.1456 | -0.0702 | 0.0111 | 2.25E-10 | -6.3438  | 778845 | Asthma |
| rs72847604  | 6 | 32567326 | T | C | 0.1215 | -0.0647 | 0.0118 | 4.75E-08 | -5.4607  | 778845 | Asthma |
| rs112114145 | 6 | 32567411 | A | G | 0.3824 | -0.0729 | 0.0083 | 2.24E-18 | -8.7444  | 778845 | Asthma |
| rs71538516  | 6 | 32567579 | G | A | 0.1980 | -0.0738 | 0.0107 | 5.15E-12 | -6.9015  | 778845 | Asthma |
| rs187773089 | 6 | 32567679 | T | G | 0.1124 | -0.0923 | 0.0122 | 4.50E-14 | -7.5461  | 778845 | Asthma |
| rs71538518  | 6 | 32567701 | T | C | 0.1895 | -0.0721 | 0.0109 | 3.99E-11 | -6.6041  | 778845 | Asthma |
| rs536237965 | 6 | 32567844 | C | T | 0.4105 | -0.0735 | 0.0083 | 7.00E-19 | -8.8750  | 778845 | Asthma |
| rs79019614  | 6 | 32567860 | A | G | 0.1399 | -0.0766 | 0.0111 | 4.82E-12 | -6.9110  | 778845 | Asthma |
| rs569972115 | 6 | 32567861 | G | A | 0.4502 | -0.0655 | 0.0083 | 3.01E-15 | -7.8905  | 778845 | Asthma |
| rs150942987 | 6 | 32568097 | G | A | 0.0979 | -0.0775 | 0.0132 | 4.89E-09 | -5.8510  | 778845 | Asthma |
| rs78655715  | 6 | 32568104 | G | A | 0.0997 | -0.0874 | 0.0129 | 1.49E-11 | -6.7485  | 778845 | Asthma |
| rs111544474 | 6 | 32568117 | T | G | 0.1079 | -0.0744 | 0.0098 | 4.31E-14 | -7.5514  | 983655 | Asthma |
| rs140993369 | 6 | 32568191 | G | A | 0.3624 | -0.0759 | 0.0084 | 1.92E-19 | -9.0180  | 778845 | Asthma |
| rs538439966 | 6 | 32568256 | T | A | 0.6575 | 0.0839  | 0.0084 | 9.56E-24 | 10.0461  | 778845 | Asthma |
| rs553961126 | 6 | 32568257 | A | C | 0.4297 | -0.0647 | 0.0084 | 8.93E-15 | -7.7536  | 778845 | Asthma |
| rs572166536 | 6 | 32568258 | T | C | 0.4298 | -0.0644 | 0.0083 | 1.22E-14 | -7.7137  | 778845 | Asthma |
| rs141563474 | 6 | 32568268 | T | C | 0.4350 | -0.0621 | 0.0084 | 1.12E-13 | -7.4257  | 778845 | Asthma |
| rs190321460 | 6 | 32568288 | G | T | 0.4126 | -0.0704 | 0.0083 | 2.89E-17 | -8.4511  | 778845 | Asthma |
| rs182968054 | 6 | 32568290 | T | C | 0.4126 | -0.0703 | 0.0083 | 3.00E-17 | -8.4465  | 778845 | Asthma |
| rs34982851  | 6 | 32568327 | T | C | 0.1359 | -0.0752 | 0.0113 | 2.82E-11 | -6.6553  | 778845 | Asthma |
| rs377599643 | 6 | 32568330 | C | T | 0.3974 | -0.0732 | 0.0082 | 5.66E-19 | -8.8986  | 778845 | Asthma |
| rs35985055  | 6 | 32568468 | G | C | 0.2257 | -0.0547 | 0.0096 | 1.30E-08 | -5.6861  | 778845 | Asthma |

|             |   |          |   |   |        |         |        |          |          |        |        |
|-------------|---|----------|---|---|--------|---------|--------|----------|----------|--------|--------|
| rs34626925  | 6 | 32568480 | A | G | 0.2274 | -0.0565 | 0.0097 | 4.99E-09 | -5.8475  | 778845 | Asthma |
| rs148167772 | 6 | 32568485 | C | G | 0.1190 | -0.0754 | 0.0118 | 1.97E-10 | -6.3634  | 778845 | Asthma |
| rs34393345  | 6 | 32568520 | C | T | 0.2377 | -0.0539 | 0.0096 | 2.40E-08 | -5.5807  | 778845 | Asthma |
| rs34559116  | 6 | 32568527 | T | A | 0.3919 | -0.0729 | 0.0083 | 1.61E-18 | -8.7816  | 778845 | Asthma |
| rs34714667  | 6 | 32568593 | C | G | 0.2279 | -0.0540 | 0.0098 | 3.62E-08 | -5.5087  | 778845 | Asthma |
| rs112940468 | 6 | 32568612 | G | C | 0.3892 | -0.0718 | 0.0083 | 6.57E-18 | -8.6221  | 778845 | Asthma |
| rs34596578  | 6 | 32568673 | G | A | 0.4118 | -0.0680 | 0.0083 | 3.83E-16 | -8.1437  | 778845 | Asthma |
| rs145319447 | 6 | 32568715 | C | T | 0.4057 | 0.0661  | 0.0088 | 6.87E-14 | 7.4904   | 778845 | Asthma |
| rs147611303 | 6 | 32568720 | A | G | 0.4057 | 0.0661  | 0.0088 | 7.05E-14 | 7.4869   | 778845 | Asthma |
| rs140527559 | 6 | 32568723 | G | A | 0.4056 | 0.0662  | 0.0088 | 6.55E-14 | 7.4965   | 778845 | Asthma |
| rs71538523  | 6 | 32568727 | A | G | 0.5073 | -0.0782 | 0.0088 | 6.38E-19 | -8.8851  | 778845 | Asthma |
| rs71538524  | 6 | 32568815 | G | A | 0.4412 | -0.0664 | 0.0084 | 2.42E-15 | -7.9178  | 778845 | Asthma |
| rs72847612  | 6 | 32568824 | C | G | 0.1317 | -0.0705 | 0.0115 | 7.75E-10 | -6.1500  | 778845 | Asthma |
| rs71538525  | 6 | 32568853 | A | G | 0.3937 | -0.0687 | 0.0083 | 1.08E-16 | -8.2952  | 778845 | Asthma |
| rs552719228 | 6 | 32568859 | A | T | 0.0572 | -0.1206 | 0.0192 | 3.65E-10 | -6.2682  | 778845 | Asthma |
| rs34739062  | 6 | 32568966 | T | G | 0.1129 | -0.0708 | 0.0127 | 2.26E-08 | -5.5913  | 778845 | Asthma |
| rs11806686  | 6 | 32568995 | G | A | 0.1175 | -0.0729 | 0.0122 | 2.04E-09 | -5.9945  | 778845 | Asthma |
| rs115980757 | 6 | 32569137 | C | A | 0.4806 | 0.0490  | 0.0082 | 2.66E-09 | 5.9516   | 778845 | Asthma |
| rs116152468 | 6 | 32569144 | T | C | 0.4942 | 0.0507  | 0.0082 | 6.50E-10 | 6.1779   | 778845 | Asthma |
| rs113813386 | 6 | 32569153 | C | T | 0.2074 | -0.0645 | 0.0099 | 5.91E-11 | -6.5461  | 778845 | Asthma |
| rs72847619  | 6 | 32569163 | G | A | 0.1147 | -0.0797 | 0.0118 | 1.67E-11 | -6.7324  | 778845 | Asthma |
| rs116465569 | 6 | 32569209 | C | T | 0.5911 | 0.0679  | 0.0082 | 1.05E-16 | 8.2985   | 778845 | Asthma |
| rs114170927 | 6 | 32569251 | C | T | 0.3344 | -0.0762 | 0.0085 | 3.90E-19 | -8.9398  | 778845 | Asthma |
| rs114553448 | 6 | 32569362 | A | C | 0.4164 | -0.0796 | 0.0084 | 2.18E-21 | -9.4961  | 778845 | Asthma |
| rs116006560 | 6 | 32569416 | G | A | 0.4650 | -0.0742 | 0.0085 | 2.42E-18 | -8.7357  | 778845 | Asthma |
| rs150720930 | 6 | 32569435 | T | A | 0.6940 | 0.0927  | 0.0085 | 1.26E-27 | 10.8918  | 778845 | Asthma |
| rs113325568 | 6 | 32569449 | C | T | 0.1472 | -0.0701 | 0.0112 | 4.25E-10 | -6.2449  | 778845 | Asthma |
| rs34382945  | 6 | 32569513 | C | T | 0.3122 | -0.0574 | 0.0096 | 2.47E-09 | -5.9632  | 778845 | Asthma |
| rs112925453 | 6 | 32569599 | A | G | 0.3036 | -0.0655 | 0.0095 | 5.50E-12 | -6.8921  | 778845 | Asthma |
| rs113201132 | 6 | 32569670 | A | G | 0.1264 | -0.0910 | 0.0119 | 1.90E-14 | -7.6571  | 778845 | Asthma |
| rs149318044 | 6 | 32569734 | G | C | 0.4559 | -0.0976 | 0.0088 | 7.72E-29 | -11.1433 | 778845 | Asthma |
| rs73726846  | 6 | 32569863 | C | T | 0.3354 | -0.0576 | 0.0096 | 1.76E-09 | -6.0182  | 778845 | Asthma |
| rs111581562 | 6 | 32569907 | T | G | 0.1087 | -0.0918 | 0.0121 | 3.03E-14 | -7.5974  | 778845 | Asthma |
| rs112869991 | 6 | 32569926 | G | A | 0.4100 | -0.0709 | 0.0099 | 7.41E-13 | -7.1717  | 778845 | Asthma |
| rs112463084 | 6 | 32569934 | A | G | 0.2157 | -0.0725 | 0.0097 | 7.96E-14 | -7.4709  | 778845 | Asthma |
| rs190033297 | 6 | 32569945 | A | C | 0.2210 | -0.0627 | 0.0097 | 1.18E-10 | -6.4423  | 778845 | Asthma |
| rs111286052 | 6 | 32569956 | C | T | 0.2110 | -0.0639 | 0.0098 | 6.89E-11 | -6.5230  | 778845 | Asthma |
| rs144817344 | 6 | 32569957 | A | G | 0.1091 | -0.0863 | 0.0120 | 7.64E-13 | -7.1677  | 778845 | Asthma |
| rs6933740   | 6 | 32570027 | T | G | 0.1066 | 0.1132  | 0.0138 | 2.26E-16 | 8.2076   | 848312 | Asthma |
| rs200519021 | 6 | 32570039 | T | C | 0.5501 | -0.1049 | 0.0088 | 4.36E-33 | -11.9835 | 778845 | Asthma |
| rs11752290  | 6 | 32570045 | G | A | 0.3920 | 0.0921  | 0.0089 | 7.58E-25 | 10.2929  | 778845 | Asthma |
| rs113947393 | 6 | 32570173 | C | T | 0.3635 | -0.0764 | 0.0083 | 1.98E-20 | -9.2634  | 778845 | Asthma |
| rs201648725 | 6 | 32570247 | C | T | 0.5209 | 0.0508  | 0.0082 | 6.86E-10 | 6.1694   | 778845 | Asthma |
| rs114451225 | 6 | 32570248 | G | T | 0.5208 | 0.0508  | 0.0082 | 6.47E-10 | 6.1787   | 778845 | Asthma |
| rs72492350  | 6 | 32570311 | T | A | 0.4013 | -0.0728 | 0.0083 | 1.62E-18 | -8.7808  | 778845 | Asthma |
| rs111407018 | 6 | 32570346 | A | G | 0.1075 | -0.0893 | 0.0122 | 2.79E-13 | -7.3042  | 778845 | Asthma |
| rs115176251 | 6 | 32570352 | G | T | 0.3019 | -0.0953 | 0.0085 | 1.66E-29 | -11.2794 | 778845 | Asthma |
| rs6934354   | 6 | 32570367 | C | T | 0.1471 | -0.1022 | 0.0106 | 5.51E-22 | -9.6379  | 853733 | Asthma |
| rs72847626  | 6 | 32570447 | G | T | 0.3888 | 0.0734  | 0.0083 | 1.33E-18 | 8.8034   | 778845 | Asthma |
| rs58942228  | 6 | 32570495 | G | A | 0.1828 | -0.0736 | 0.0103 | 8.51E-13 | -7.1524  | 778845 | Asthma |
| rs113432491 | 6 | 32570512 | T | C | 0.0951 | -0.0873 | 0.0134 | 6.87E-11 | -6.5236  | 778845 | Asthma |
| rs112304198 | 6 | 32570567 | A | G | 0.2328 | -0.0842 | 0.0097 | 2.92E-18 | -8.7144  | 778845 | Asthma |
| rs113432958 | 6 | 32570589 | A | C | 0.4264 | -0.0466 | 0.0081 | 1.04E-08 | -5.7249  | 778845 | Asthma |
| rs75202782  | 6 | 32570642 | A | G | 0.2692 | -0.0955 | 0.0090 | 3.37E-26 | -10.5886 | 778845 | Asthma |
| rs113894541 | 6 | 32570649 | T | C | 0.0899 | -0.0899 | 0.0138 | 7.28E-11 | -6.5145  | 778845 | Asthma |
| rs113416364 | 6 | 32570693 | A | G | 0.0901 | -0.0902 | 0.0138 | 6.67E-11 | -6.5279  | 778845 | Asthma |
| rs72847627  | 6 | 32570735 | A | G | 0.2683 | -0.0840 | 0.0079 | 1.47E-26 | -10.6661 | 908767 | Asthma |
| rs553260480 | 6 | 32570757 | A | G | 0.3098 | 0.0935  | 0.0111 | 3.11E-17 | 8.4430   | 497942 | Asthma |
| rs112795930 | 6 | 32570779 | G | T | 0.1870 | -0.0670 | 0.0088 | 2.67E-14 | -7.6132  | 908767 | Asthma |
| rs116555998 | 6 | 32570813 | T | C | 0.2770 | -0.0836 | 0.0077 | 1.76E-27 | -10.8612 | 908767 | Asthma |
| rs115965987 | 6 | 32570821 | G | A | 0.2757 | -0.0838 | 0.0077 | 1.50E-27 | -10.8762 | 908767 | Asthma |
| rs66820138  | 6 | 32570882 | C | T | 0.2677 | -0.0961 | 0.0091 | 3.52E-26 | -10.5844 | 778845 | Asthma |
| rs112723263 | 6 | 32570941 | T | A | 0.2775 | -0.0920 | 0.0090 | 1.05E-24 | -10.2621 | 778845 | Asthma |
| rs55716134  | 6 | 32570942 | G | A | 0.1949 | -0.0741 | 0.0102 | 3.04E-13 | -7.2922  | 778845 | Asthma |
| rs56210233  | 6 | 32570977 | T | C | 0.0917 | -0.0736 | 0.0117 | 2.73E-10 | -6.3135  | 908767 | Asthma |
| rs55888650  | 6 | 32570979 | G | C | 0.0917 | -0.0736 | 0.0117 | 2.68E-10 | -6.3161  | 908767 | Asthma |
| rs55712910  | 6 | 32571029 | A | G | 0.1847 | -0.0766 | 0.0102 | 6.07E-14 | -7.5066  | 778845 | Asthma |
| rs111976080 | 6 | 32571037 | T | C | 0.3130 | -0.0856 | 0.0077 | 1.70E-28 | -11.0731 | 908767 | Asthma |
| rs56235355  | 6 | 32571104 | C | T | 0.1017 | -0.0759 | 0.0110 | 5.01E-12 | -6.9054  | 908767 | Asthma |
| rs73399473  | 6 | 32571182 | C | G | 0.2702 | -0.0852 | 0.0078 | 1.35E-27 | -10.8858 | 908767 | Asthma |
| rs66859861  | 6 | 32571235 | T | C | 0.3102 | -0.0699 | 0.0070 | 1.84E-23 | -9.9812  | 983655 | Asthma |
| rs9269282   | 6 | 32571562 | A | G | 0.3883 | -0.0700 | 0.0083 | 3.98E-17 | -8.4135  | 778845 | Asthma |
| rs9269283   | 6 | 32571578 | G | T | 0.3866 | -0.0677 | 0.0083 | 3.78E-16 | -8.1455  | 778845 | Asthma |
| rs9269290   | 6 | 32571647 | A | C | 0.3895 | -0.0699 | 0.0083 | 5.90E-17 | -8.3671  | 778845 | Asthma |

|             |   |          |   |   |        |         |        |          |          |         |        |
|-------------|---|----------|---|---|--------|---------|--------|----------|----------|---------|--------|
| rs9269297   | 6 | 32571757 | T | G | 0.2052 | -0.0716 | 0.0099 | 5.06E-13 | -7.2235  | 778845  | Asthma |
| rs9269298   | 6 | 32571759 | G | T | 0.2052 | -0.0716 | 0.0099 | 5.06E-13 | -7.2235  | 778845  | Asthma |
| rs28475573  | 6 | 32571840 | A | G | 0.1424 | -0.0697 | 0.0099 | 1.74E-12 | -7.0543  | 908767  | Asthma |
| rs9269315   | 6 | 32571942 | G | C | 0.4022 | -0.0681 | 0.0084 | 4.57E-16 | -8.1223  | 778845  | Asthma |
| rs9269322   | 6 | 32572147 | C | A | 0.1932 | -0.0648 | 0.0087 | 1.22E-13 | -7.4147  | 908767  | Asthma |
| rs9269329   | 6 | 32572264 | T | C | 0.3130 | -0.0747 | 0.0069 | 1.51E-27 | -10.8755 | 983655  | Asthma |
| rs9269332   | 6 | 32572300 | A | G | 0.2772 | -0.0859 | 0.0087 | 5.49E-23 | -9.8722  | 540747  | Asthma |
| rs9269336   | 6 | 32572508 | G | A | 0.4865 | -0.0558 | 0.0076 | 1.65E-13 | -7.3745  | 853733  | Asthma |
| rs9269339   | 6 | 32572554 | G | A | 0.4331 | -0.0663 | 0.0085 | 4.37E-15 | -7.8437  | 778845  | Asthma |
| rs9269341   | 6 | 32572594 | T | A | 0.7013 | 0.0946  | 0.0086 | 1.97E-28 | 11.0595  | 778845  | Asthma |
| rs9269344   | 6 | 32572618 | A | G | 0.4714 | -0.0685 | 0.0085 | 9.32E-16 | -8.0355  | 778845  | Asthma |
| rs9269345   | 6 | 32572620 | G | A | 0.4713 | -0.0687 | 0.0085 | 7.51E-16 | -8.0620  | 778845  | Asthma |
| rs9269348   | 6 | 32572697 | C | T | 0.4041 | -0.0727 | 0.0082 | 1.15E-18 | -8.8191  | 778845  | Asthma |
| rs9269351   | 6 | 32572774 | G | C | 0.3032 | -0.0928 | 0.0085 | 4.67E-28 | -10.9820 | 778845  | Asthma |
| rs9269352   | 6 | 32572775 | T | C | 0.3032 | -0.0928 | 0.0084 | 4.63E-28 | -10.9827 | 778845  | Asthma |
| rs56315116  | 6 | 32572784 | G | A | 0.1213 | -0.0638 | 0.0101 | 2.39E-10 | -6.3333  | 908767  | Asthma |
| rs9269353   | 6 | 32572791 | C | T | 0.3410 | -0.0803 | 0.0075 | 8.68E-27 | -10.7148 | 908767  | Asthma |
| rs72847639  | 6 | 32572798 | T | C | 0.1264 | -0.0712 | 0.0099 | 6.48E-13 | -7.1900  | 908767  | Asthma |
| rs200623105 | 6 | 32572980 | G | C | 0.6202 | 0.0687  | 0.0084 | 2.54E-16 | 8.1935   | 778845  | Asthma |
| rs9269375   | 6 | 32573106 | A | G | 0.5207 | -0.0843 | 0.0089 | 4.10E-21 | -9.4299  | 778845  | Asthma |
| rs9269376   | 6 | 32573120 | A | T | 0.6921 | 0.0798  | 0.0085 | 1.02E-20 | 9.3336   | 778845  | Asthma |
| rs9269380   | 6 | 32573145 | A | G | 0.3417 | -0.0955 | 0.0083 | 8.20E-31 | -11.5411 | 778845  | Asthma |
| rs9269385   | 6 | 32573259 | C | T | 0.4413 | -0.0575 | 0.0085 | 1.03E-11 | -6.8019  | 778845  | Asthma |
| rs9269389   | 6 | 32573329 | C | T | 0.3372 | -0.0821 | 0.0083 | 6.07E-23 | -9.8623  | 778845  | Asthma |
| rs9269391   | 6 | 32573351 | G | C | 0.3699 | -0.0729 | 0.0083 | 1.16E-18 | -8.8181  | 778845  | Asthma |
| rs56115316  | 6 | 32573426 | T | G | 0.1211 | -0.0746 | 0.0117 | 2.11E-10 | -6.3531  | 778845  | Asthma |
| rs9269394   | 6 | 32573498 | C | T | 0.4108 | -0.0735 | 0.0083 | 9.82E-19 | -8.8371  | 778845  | Asthma |
| rs9269395   | 6 | 32573505 | T | G | 0.4043 | -0.0697 | 0.0083 | 6.59E-17 | -8.3542  | 778845  | Asthma |
| rs9269407   | 6 | 32573599 | T | G | 0.3682 | -0.0759 | 0.0083 | 9.27E-20 | -9.0972  | 778845  | Asthma |
| rs56291733  | 6 | 32573617 | T | C | 0.1167 | -0.0850 | 0.0118 | 6.28E-13 | -7.1943  | 778845  | Asthma |
| rs9269409   | 6 | 32573649 | G | C | 0.3401 | -0.0822 | 0.0083 | 6.27E-23 | -9.8589  | 778845  | Asthma |
| rs9269413   | 6 | 32573681 | C | T | 0.4158 | -0.0651 | 0.0082 | 2.17E-15 | -7.9313  | 778845  | Asthma |
| rs9269419   | 6 | 32573729 | G | A | 0.2153 | -0.0622 | 0.0099 | 3.50E-10 | -6.2750  | 778845  | Asthma |
| rs56331043  | 6 | 32573774 | A | C | 0.1208 | -0.0802 | 0.0117 | 8.31E-12 | -6.8332  | 778845  | Asthma |
| rs9269427   | 6 | 32573804 | T | C | 0.3458 | -0.0797 | 0.0083 | 8.71E-22 | -9.5911  | 778845  | Asthma |
| rs9269431   | 6 | 32573878 | C | A | 0.3405 | -0.0787 | 0.0083 | 2.40E-21 | -9.4862  | 778845  | Asthma |
| rs9269437   | 6 | 32574091 | C | A | 0.1801 | -0.0748 | 0.0091 | 1.43E-16 | -8.2625  | 847307  | Asthma |
| rs9269438   | 6 | 32574104 | C | T | 0.1797 | -0.0544 | 0.0079 | 5.76E-12 | -6.8856  | 1003385 | Asthma |
| rs9269439   | 6 | 32574121 | C | G | 0.2975 | -0.0986 | 0.0085 | 2.71E-31 | -11.6358 | 778845  | Asthma |
| rs9269444   | 6 | 32574197 | C | T | 0.1795 | -0.0547 | 0.0079 | 3.93E-12 | -6.9397  | 1003385 | Asthma |
| rs9269448   | 6 | 32574234 | C | T | 0.1772 | -0.0551 | 0.0079 | 3.19E-12 | -6.9690  | 1003385 | Asthma |
| rs9269450   | 6 | 32574243 | G | A | 0.1863 | -0.0537 | 0.0086 | 3.46E-10 | -6.2764  | 934923  | Asthma |
| rs72847642  | 6 | 32574294 | T | C | 0.1222 | -0.0784 | 0.0117 | 2.01E-11 | -6.7058  | 778845  | Asthma |
| rs9269454   | 6 | 32574309 | A | T | 0.3564 | -0.0647 | 0.0076 | 2.79E-17 | -8.4552  | 778845  | Asthma |
| rs9269461   | 6 | 32574384 | C | T | 0.3792 | -0.0724 | 0.0083 | 2.15E-18 | -8.7491  | 778845  | Asthma |
| rs35657997  | 6 | 32574459 | G | A | 0.0995 | -0.1047 | 0.0130 | 6.43E-16 | -8.0809  | 778845  | Asthma |
| rs9269467   | 6 | 32574513 | A | G | 0.2599 | -0.0626 | 0.0077 | 5.25E-16 | -8.1056  | 1003385 | Asthma |
| rs9269470   | 6 | 32574528 | G | T | 0.5141 | -0.0735 | 0.0090 | 2.78E-16 | -8.1827  | 778845  | Asthma |
| rs9269471   | 6 | 32574545 | A | G | 0.3418 | -0.0803 | 0.0084 | 1.08E-21 | -9.5688  | 778845  | Asthma |
| rs9269476   | 6 | 32574724 | T | A | 0.2960 | -0.0962 | 0.0085 | 6.14E-30 | -11.3665 | 778845  | Asthma |
| rs9269478   | 6 | 32574774 | G | T | 0.3250 | -0.0806 | 0.0074 | 1.73E-27 | -10.8632 | 847307  | Asthma |
| rs9269480   | 6 | 32574791 | T | C | 0.2912 | -0.0923 | 0.0085 | 1.94E-27 | -10.8525 | 778845  | Asthma |
| rs9269481   | 6 | 32574805 | G | A | 0.4450 | -0.0541 | 0.0081 | 2.73E-11 | -6.6603  | 778845  | Asthma |
| rs34451186  | 6 | 32574861 | C | T | 0.1047 | -0.0879 | 0.0105 | 7.04E-17 | -8.3460  | 913361  | Asthma |
| rs9269484   | 6 | 32574934 | C | T | 0.3418 | -0.0781 | 0.0084 | 2.09E-20 | -9.2576  | 778845  | Asthma |
| rs9269485   | 6 | 32574951 | T | G | 0.3480 | -0.0770 | 0.0083 | 1.51E-20 | -9.2921  | 778845  | Asthma |
| rs9269486   | 6 | 32575014 | C | T | 0.2873 | -0.0923 | 0.0085 | 2.01E-27 | -10.8491 | 778845  | Asthma |
| rs9269489   | 6 | 32575055 | T | C | 0.2979 | -0.0961 | 0.0085 | 6.49E-30 | -11.3617 | 778845  | Asthma |
| rs9269491   | 6 | 32575067 | A | C | 0.2934 | -0.0968 | 0.0076 | 1.04E-36 | -12.6557 | 870622  | Asthma |
| rs34087545  | 6 | 32575084 | G | A | 0.1086 | -0.0854 | 0.0127 | 2.05E-11 | -6.7026  | 778845  | Asthma |
| rs36216604  | 6 | 32575142 | G | A | 0.0958 | -0.0965 | 0.0131 | 1.52E-13 | -7.3849  | 778845  | Asthma |
| rs9269492   | 6 | 32575147 | C | G | 0.2763 | -0.0971 | 0.0089 | 5.60E-28 | -10.9655 | 778845  | Asthma |
| rs9269493   | 6 | 32575213 | T | C | 0.4750 | -0.0490 | 0.0082 | 2.47E-09 | -5.9637  | 778845  | Asthma |
| rs9269499   | 6 | 32575314 | C | T | 0.3261 | -0.0797 | 0.0084 | 1.98E-21 | -9.5062  | 778845  | Asthma |
| rs72847651  | 6 | 32575360 | A | G | 0.1157 | -0.0792 | 0.0120 | 4.67E-11 | -6.5810  | 778845  | Asthma |
| rs9269503   | 6 | 32575384 | T | C | 0.2133 | -0.0567 | 0.0100 | 1.31E-08 | -5.6851  | 778845  | Asthma |
| rs9269504   | 6 | 32575385 | T | C | 0.2221 | -0.0577 | 0.0098 | 3.39E-09 | -5.9114  | 778845  | Asthma |
| rs9269505   | 6 | 32575392 | T | C | 0.3516 | -0.0756 | 0.0083 | 9.74E-20 | -9.0918  | 778845  | Asthma |
| rs9269508   | 6 | 32575471 | T | C | 0.5262 | 0.0464  | 0.0082 | 1.63E-08 | 5.6471   | 778845  | Asthma |
| rs9269511   | 6 | 32575521 | C | A | 0.2152 | -0.0599 | 0.0087 | 6.31E-12 | -6.8725  | 847307  | Asthma |
| rs72847652  | 6 | 32575599 | T | C | 0.1102 | -0.0897 | 0.0122 | 2.00E-13 | -7.3485  | 778845  | Asthma |
| rs9269518   | 6 | 32575817 | T | C | 0.2828 | -0.0973 | 0.0088 | 1.10E-28 | -11.1116 | 778845  | Asthma |
| rs9269523   | 6 | 32575870 | C | T | 0.3458 | -0.0811 | 0.0084 | 5.90E-22 | -9.6313  | 778845  | Asthma |
| rs9269525   | 6 | 32575899 | C | T | 0.3620 | -0.0784 | 0.0084 | 7.39E-21 | -9.3680  | 778845  | Asthma |

|             |   |          |   |   |        |         |        |          |          |         |        |
|-------------|---|----------|---|---|--------|---------|--------|----------|----------|---------|--------|
| rs9269527   | 6 | 32575914 | A | G | 0.3461 | -0.0803 | 0.0083 | 2.57E-22 | -9.7162  | 778845  | Asthma |
| rs72847654  | 6 | 32575931 | C | A | 0.1175 | -0.0809 | 0.0117 | 4.39E-12 | -6.9241  | 778845  | Asthma |
| rs9269529   | 6 | 32575956 | T | C | 0.3387 | -0.0802 | 0.0083 | 5.93E-22 | -9.6308  | 778845  | Asthma |
| rs575662827 | 6 | 32576097 | C | T | 0.0953 | 0.1075  | 0.0122 | 1.04E-18 | 8.8306   | 636370  | Asthma |
| rs9269536   | 6 | 32576146 | C | T | 0.4226 | -0.0596 | 0.0084 | 1.04E-12 | -7.1251  | 778845  | Asthma |
| rs9269540   | 6 | 32576225 | C | T | 0.2343 | -0.0563 | 0.0097 | 5.55E-09 | -5.8299  | 778845  | Asthma |
| rs9269541   | 6 | 32576233 | A | T | 0.3795 | -0.0725 | 0.0083 | 1.80E-18 | -8.7691  | 778845  | Asthma |
| rs201778160 | 6 | 32576260 | T | G | 0.1262 | -0.0766 | 0.0116 | 4.47E-11 | -6.5879  | 778845  | Asthma |
| rs9269544   | 6 | 32576352 | G | A | 0.3544 | -0.0769 | 0.0084 | 3.57E-20 | -9.2004  | 778845  | Asthma |
| rs9269545   | 6 | 32576368 | T | C | 0.3115 | -0.0908 | 0.0084 | 3.88E-27 | -10.7890 | 778845  | Asthma |
| rs9269549   | 6 | 32576425 | T | G | 0.3940 | -0.0740 | 0.0083 | 3.17E-19 | -8.9627  | 778845  | Asthma |
| rs9269553   | 6 | 32576510 | C | T | 0.2893 | -0.0968 | 0.0085 | 5.49E-30 | -11.3762 | 778845  | Asthma |
| rs72847660  | 6 | 32576531 | T | C | 0.1177 | -0.0752 | 0.0097 | 1.13E-14 | -7.7241  | 1064845 | Asthma |
| rs9269558   | 6 | 32576574 | A | T | 0.2818 | -0.0978 | 0.0086 | 3.48E-30 | -11.4160 | 778845  | Asthma |
| rs9269562   | 6 | 32576630 | A | G | 0.2745 | -0.0951 | 0.0088 | 5.12E-27 | -10.7636 | 778845  | Asthma |
| rs112438356 | 6 | 32576636 | C | T | 0.0908 | -0.0877 | 0.0137 | 1.32E-10 | -6.4247  | 778845  | Asthma |
| rs112327275 | 6 | 32576647 | C | T | 0.0976 | -0.0889 | 0.0134 | 2.80E-11 | -6.6567  | 778845  | Asthma |
| rs9269564   | 6 | 32576694 | C | A | 0.4046 | -0.1003 | 0.0085 | 6.39E-32 | -11.7586 | 778845  | Asthma |
| rs9269566   | 6 | 32576784 | G | A | 0.2946 | -0.0993 | 0.0085 | 1.26E-31 | -11.7010 | 778845  | Asthma |
| rs9269567   | 6 | 32576795 | A | G | 0.2816 | -0.0972 | 0.0086 | 6.57E-30 | -11.3605 | 778845  | Asthma |
| rs9269568   | 6 | 32576800 | C | T | 0.2814 | -0.0969 | 0.0086 | 1.01E-29 | -11.3228 | 778845  | Asthma |
| rs36216739  | 6 | 32576817 | G | A | 0.1166 | -0.0931 | 0.0119 | 4.34E-15 | -7.8446  | 778845  | Asthma |
| rs34498762  | 6 | 32576841 | C | G | 0.1009 | -0.0886 | 0.0123 | 6.87E-13 | -7.1822  | 778845  | Asthma |
| rs34069484  | 6 | 32576857 | T | G | 0.1077 | -0.0879 | 0.0121 | 4.01E-13 | -7.2554  | 778845  | Asthma |
| rs9269571   | 6 | 32576873 | T | A | 0.1913 | -0.0740 | 0.0100 | 1.63E-13 | -7.3760  | 778845  | Asthma |
| rs9269572   | 6 | 32576904 | G | A | 0.1947 | -0.0745 | 0.0100 | 8.88E-14 | -7.4566  | 778845  | Asthma |
| rs9269573   | 6 | 32576920 | T | A | 0.1880 | -0.0713 | 0.0102 | 2.72E-12 | -6.9919  | 778845  | Asthma |
| rs9269575   | 6 | 32576937 | G | A | 0.4135 | -0.0681 | 0.0083 | 2.23E-16 | -8.2090  | 778845  | Asthma |
| rs9269576   | 6 | 32576947 | A | T | 0.3589 | -0.0756 | 0.0082 | 4.92E-20 | -9.1658  | 778845  | Asthma |
| rs72847665  | 6 | 32576973 | A | G | 0.1243 | -0.0645 | 0.0118 | 4.61E-08 | -5.4658  | 778845  | Asthma |
| rs9269579   | 6 | 32576995 | G | A | 0.3292 | -0.0873 | 0.0084 | 1.88E-25 | -10.4265 | 778845  | Asthma |
| rs9269581   | 6 | 32577008 | G | A | 0.5617 | 0.0524  | 0.0081 | 1.15E-10 | 6.4456   | 778845  | Asthma |
| rs35652190  | 6 | 32577051 | T | A | 0.7253 | 0.0833  | 0.0087 | 1.27E-21 | 9.5522   | 778845  | Asthma |
| rs9269586   | 6 | 32577067 | T | C | 0.3616 | -0.0820 | 0.0083 | 4.49E-23 | -9.8923  | 778845  | Asthma |
| rs9269587   | 6 | 32577103 | C | T | 0.3559 | -0.0783 | 0.0083 | 6.52E-21 | -9.3813  | 778845  | Asthma |
| rs9269588   | 6 | 32577110 | G | C | 0.3625 | -0.0752 | 0.0083 | 8.72E-20 | -9.1038  | 778845  | Asthma |
| rs9269589   | 6 | 32577113 | C | A | 0.3624 | -0.0750 | 0.0083 | 1.05E-19 | -9.0837  | 778845  | Asthma |
| rs35649904  | 6 | 32577310 | G | C | 0.0995 | -0.0886 | 0.0127 | 2.93E-12 | -6.9808  | 778845  | Asthma |
| rs35455405  | 6 | 32577328 | T | C | 0.1081 | -0.0862 | 0.0124 | 3.62E-12 | -6.9511  | 778845  | Asthma |
| rs33978732  | 6 | 32577340 | C | A | 0.1091 | -0.0835 | 0.0123 | 1.33E-11 | -6.7651  | 778845  | Asthma |
| rs9269607   | 6 | 32577391 | G | T | 0.3305 | -0.0786 | 0.0084 | 8.23E-21 | -9.3567  | 778845  | Asthma |
| rs35503184  | 6 | 32577418 | T | C | 0.1036 | -0.0909 | 0.0125 | 3.43E-13 | -7.2764  | 778845  | Asthma |
| rs35502502  | 6 | 32577424 | A | C | 0.1037 | -0.0910 | 0.0125 | 3.24E-13 | -7.2839  | 778845  | Asthma |
| rs9269609   | 6 | 32577434 | T | A | 0.2965 | -0.0945 | 0.0085 | 1.50E-28 | -11.0839 | 778845  | Asthma |
| rs9269610   | 6 | 32577441 | C | T | 0.2979 | -0.0950 | 0.0085 | 7.33E-29 | -11.1479 | 778845  | Asthma |
| rs9269611   | 6 | 32577471 | C | A | 0.2947 | -0.0964 | 0.0085 | 1.36E-29 | -11.2967 | 778845  | Asthma |
| rs35517695  | 6 | 32577608 | A | G | 0.2229 | 0.0842  | 0.0105 | 8.84E-16 | 8.0423   | 447746  | Asthma |
| rs35511257  | 6 | 32577615 | C | G | 0.0496 | 0.1910  | 0.0154 | 2.17E-35 | 12.4150  | 971844  | Asthma |
| rs9269622   | 6 | 32577746 | G | A | 0.2967 | -0.0778 | 0.0074 | 1.07E-25 | -10.4802 | 934923  | Asthma |
| rs9269626   | 6 | 32577784 | T | C | 0.1788 | -0.0525 | 0.0079 | 3.10E-11 | -6.6415  | 1003385 | Asthma |
| rs28579642  | 6 | 32577810 | A | T | 0.1056 | -0.0893 | 0.0121 | 1.71E-13 | -7.3702  | 778845  | Asthma |
| rs9269627   | 6 | 32577827 | C | T | 0.1801 | -0.0546 | 0.0079 | 4.40E-12 | -6.9238  | 1003385 | Asthma |
| rs9269629   | 6 | 32577858 | A | G | 0.4845 | 0.0498  | 0.0083 | 1.72E-09 | 6.0225   | 778845  | Asthma |
| rs9269630   | 6 | 32577867 | T | C | 0.5362 | 0.0596  | 0.0082 | 4.06E-13 | 7.2536   | 778845  | Asthma |
| rs9269634   | 6 | 32577929 | A | T | 0.3488 | -0.0776 | 0.0083 | 6.81E-21 | -9.3766  | 778845  | Asthma |
| rs9269635   | 6 | 32577943 | A | G | 0.4299 | -0.0610 | 0.0082 | 8.30E-14 | -7.4655  | 778845  | Asthma |
| rs9269636   | 6 | 32577995 | A | C | 0.4369 | -0.0561 | 0.0081 | 5.62E-12 | -6.8890  | 778845  | Asthma |
| rs9269640   | 6 | 32578085 | C | T | 0.1770 | -0.0499 | 0.0078 | 1.65E-10 | -6.3907  | 1029518 | Asthma |
| rs28586893  | 6 | 32578135 | C | T | 0.1049 | -0.0879 | 0.0122 | 4.55E-13 | -7.2381  | 778845  | Asthma |
| rs34288859  | 6 | 32578219 | A | C | 0.4479 | -0.0783 | 0.0076 | 8.73E-25 | -10.2795 | 847307  | Asthma |
| rs16870214  | 6 | 32578255 | C | T | 0.1165 | -0.0766 | 0.0118 | 9.39E-11 | -6.4765  | 778845  | Asthma |
| rs9269649   | 6 | 32578290 | C | T | 0.3377 | -0.0790 | 0.0085 | 1.08E-20 | -9.3281  | 778845  | Asthma |
| rs9269651   | 6 | 32578297 | C | T | 0.4298 | -0.0463 | 0.0082 | 1.50E-08 | -5.6616  | 778845  | Asthma |
| rs9269655   | 6 | 32578355 | G | A | 0.3491 | -0.0765 | 0.0083 | 2.98E-20 | -9.2196  | 778845  | Asthma |
| rs16871402  | 6 | 32578414 | G | A | 0.1061 | -0.0877 | 0.0121 | 4.74E-13 | -7.2325  | 778845  | Asthma |
| rs9269656   | 6 | 32578426 | A | G | 0.2906 | -0.0878 | 0.0075 | 8.98E-32 | -11.7296 | 847307  | Asthma |
| rs9269657   | 6 | 32578428 | A | G | 0.2920 | -0.0946 | 0.0085 | 6.11E-29 | -11.1642 | 778845  | Asthma |
| rs9269661   | 6 | 32578482 | C | A | 0.3354 | -0.1098 | 0.0083 | 1.40E-39 | -13.1642 | 778845  | Asthma |
| rs9269668   | 6 | 32578617 | G | C | 0.3440 | -0.0785 | 0.0083 | 2.80E-21 | -9.4698  | 778845  | Asthma |
| rs9269669   | 6 | 32578641 | C | A | 0.3112 | -0.0803 | 0.0084 | 1.04E-21 | -9.5724  | 778845  | Asthma |
| rs9269672   | 6 | 32578656 | C | T | 0.1907 | -0.0629 | 0.0087 | 4.68E-13 | -7.2344  | 873440  | Asthma |
| rs72847685  | 6 | 32578669 | G | A | 0.1140 | -0.0813 | 0.0119 | 6.97E-12 | -6.8586  | 778845  | Asthma |
| rs9269673   | 6 | 32578670 | C | T | 0.3477 | -0.0859 | 0.0082 | 1.74E-25 | -10.4338 | 778845  | Asthma |
| rs9269674   | 6 | 32578708 | A | G | 0.1995 | -0.0630 | 0.0088 | 9.32E-13 | -7.1403  | 847307  | Asthma |



|             |   |          |   |   |        |         |        |          |          |         |        |
|-------------|---|----------|---|---|--------|---------|--------|----------|----------|---------|--------|
| rs9269675   | 6 | 32578738 | C | T | 0.2166 | -0.0635 | 0.0098 | 9.98E-11 | -6.4672  | 778845  | Asthma |
| rs1060270   | 6 | 32578826 | A | G | 0.2210 | -0.0604 | 0.0098 | 6.13E-10 | -6.1872  | 778845  | Asthma |
| rs34981130  | 6 | 32578893 | T | C | 0.1095 | -0.0664 | 0.0104 | 1.43E-10 | -6.4130  | 908767  | Asthma |
| rs113804375 | 6 | 32578926 | G | A | 0.2166 | 0.1127  | 0.0105 | 8.87E-27 | 10.7131  | 480292  | Asthma |
| rs1064707   | 6 | 32578966 | C | T | 0.3344 | -0.0709 | 0.0073 | 1.72E-22 | -9.7568  | 908767  | Asthma |
| rs1064701   | 6 | 32579018 | T | A | 0.3486 | -0.0601 | 0.0067 | 2.07E-19 | -9.0096  | 1000544 | Asthma |
| rs36217730  | 6 | 32579041 | T | C | 0.1118 | -0.0692 | 0.0103 | 1.53E-11 | -6.7453  | 908767  | Asthma |
| rs1064697   | 6 | 32579051 | C | T | 0.2154 | -0.0582 | 0.0086 | 1.49E-11 | -6.7486  | 908767  | Asthma |
| rs36217728  | 6 | 32579055 | A | G | 0.1193 | -0.0802 | 0.0113 | 1.15E-12 | -7.1114  | 540747  | Asthma |
| rs9269693   | 6 | 32579089 | T | C | 0.4100 | -0.0392 | 0.0065 | 1.38E-09 | -6.0583  | 1000544 | Asthma |
| rs35445101  | 6 | 32579102 | G | A | 0.3397 | 0.1307  | 0.0088 | 1.16E-49 | 14.8157  | 447746  | Asthma |
| rs201477797 | 6 | 32579154 | C | T | 0.2375 | 0.1011  | 0.0094 | 6.08E-27 | 10.7481  | 540747  | Asthma |
| rs72847691  | 6 | 32579163 | T | C | 0.1143 | -0.0729 | 0.0119 | 8.68E-10 | -6.1321  | 778845  | Asthma |
| rs9269697   | 6 | 32579176 | G | A | 0.3518 | -0.0766 | 0.0083 | 1.89E-20 | -9.2686  | 778845  | Asthma |
| rs72847693  | 6 | 32579201 | C | A | 0.1187 | -0.0737 | 0.0118 | 3.83E-10 | -6.2608  | 778845  | Asthma |
| rs9269698   | 6 | 32579209 | G | C | 0.2202 | -0.0568 | 0.0098 | 6.14E-09 | -5.8129  | 778845  | Asthma |
| rs9269701   | 6 | 32579276 | A | G | 0.3390 | -0.0791 | 0.0083 | 1.71E-21 | -9.5211  | 778845  | Asthma |
| rs111688692 | 6 | 32579391 | A | G | 0.1205 | -0.0737 | 0.0117 | 3.24E-10 | -6.2868  | 778845  | Asthma |
| rs72847696  | 6 | 32579474 | A | G | 0.1870 | -0.0662 | 0.0108 | 8.17E-10 | -6.1418  | 778845  | Asthma |
| rs9269717   | 6 | 32579526 | T | G | 0.3727 | 0.0660  | 0.0090 | 2.60E-13 | 7.3137   | 778845  | Asthma |
| rs9269720   | 6 | 32579542 | C | T | 0.3737 | 0.0653  | 0.0090 | 4.74E-13 | 7.2325   | 778845  | Asthma |
| rs9269722   | 6 | 32579551 | G | A | 0.3747 | 0.0652  | 0.0090 | 4.88E-13 | 7.2286   | 778845  | Asthma |
| rs9269723   | 6 | 32579559 | C | T | 0.3774 | 0.0633  | 0.0090 | 1.99E-12 | 7.0352   | 778845  | Asthma |
| rs9269725   | 6 | 32579582 | C | T | 0.3631 | 0.0691  | 0.0091 | 3.66E-14 | 7.5725   | 778845  | Asthma |
| rs9269726   | 6 | 32579583 | T | G | 0.3631 | 0.0691  | 0.0091 | 3.66E-14 | 7.5725   | 778845  | Asthma |
| rs9269728   | 6 | 32579608 | T | A | 0.2566 | -0.0764 | 0.0092 | 1.33E-16 | -8.2711  | 778845  | Asthma |
| rs115883159 | 6 | 32579699 | A | G | 0.1925 | -0.0745 | 0.0107 | 3.80E-12 | -6.9442  | 778845  | Asthma |
| rs72847699  | 6 | 32579801 | G | T | 0.1839 | -0.0716 | 0.0108 | 3.90E-11 | -6.6078  | 778845  | Asthma |
| rs141267330 | 6 | 32580277 | G | A | 0.0793 | 0.1900  | 0.0169 | 2.27E-29 | 11.2519  | 463403  | Asthma |
| rs4498414   | 6 | 32580291 | A | T | 0.1070 | -0.0907 | 0.0121 | 5.14E-14 | -7.5285  | 778845  | Asthma |
| rs4448132   | 6 | 32580345 | G | C | 0.1098 | -0.0757 | 0.0091 | 1.31E-16 | -8.2730  | 1060172 | Asthma |
| rs112461335 | 6 | 32580384 | G | A | 0.1083 | -0.0878 | 0.0120 | 2.74E-13 | -7.3067  | 778845  | Asthma |
| rs9269762   | 6 | 32580544 | C | T | 0.1878 | -0.0755 | 0.0101 | 8.20E-14 | -7.4675  | 778845  | Asthma |
| rs28732268  | 6 | 32580575 | G | C | 0.4430 | 0.0846  | 0.0077 | 4.22E-28 | 10.9910  | 778845  | Asthma |
| rs28732275  | 6 | 32580626 | A | G | 0.2827 | 0.1346  | 0.0089 | 1.55E-51 | 15.1026  | 778845  | Asthma |
| rs35104774  | 6 | 32580661 | G | A | 0.1157 | -0.0943 | 0.0118 | 1.01E-15 | -8.0253  | 778845  | Asthma |
| rs3830123   | 6 | 32580869 | T | G | 0.1069 | -0.0749 | 0.0092 | 3.75E-16 | -8.1462  | 1060172 | Asthma |
| rs28732284  | 6 | 32580890 | C | T | 0.2767 | 0.1351  | 0.0085 | 2.88E-57 | 15.9496  | 778845  | Asthma |
| rs9269764   | 6 | 32580904 | T | C | 0.1945 | -0.0637 | 0.0087 | 3.05E-13 | -7.2921  | 908767  | Asthma |
| rs9269766   | 6 | 32580926 | T | C | 0.1841 | -0.0754 | 0.0102 | 1.84E-13 | -7.3599  | 778845  | Asthma |
| rs9269768   | 6 | 32580950 | A | G | 0.1952 | -0.0763 | 0.0101 | 3.87E-14 | -7.5654  | 778845  | Asthma |
| rs9269773   | 6 | 32581009 | T | C | 0.1932 | -0.0734 | 0.0101 | 2.89E-13 | -7.2993  | 778845  | Asthma |
| rs72850215  | 6 | 32581012 | G | A | 0.1042 | -0.0792 | 0.0123 | 1.32E-10 | -6.4252  | 778845  | Asthma |
| rs9269774   | 6 | 32581025 | G | A | 0.2925 | -0.0960 | 0.0085 | 8.67E-30 | -11.3363 | 778845  | Asthma |
| rs28732302  | 6 | 32581078 | C | G | 0.3167 | 0.1369  | 0.0081 | 2.97E-64 | 16.9241  | 778845  | Asthma |
| rs9269779   | 6 | 32581143 | A | G | 0.1885 | -0.0757 | 0.0101 | 6.52E-14 | -7.4969  | 778845  | Asthma |
| rs149717632 | 6 | 32581144 | G | A | 0.1209 | 0.0849  | 0.0106 | 1.02E-15 | 8.0244   | 848312  | Asthma |
| rs9269780   | 6 | 32581155 | A | G | 0.1891 | -0.0752 | 0.0101 | 8.88E-14 | -7.4569  | 778845  | Asthma |
| rs9269781   | 6 | 32581160 | G | A | 0.3743 | -0.0723 | 0.0083 | 4.47E-18 | -8.6662  | 778845  | Asthma |
| rs9269783   | 6 | 32581224 | A | C | 0.3437 | -0.0596 | 0.0084 | 1.53E-12 | -7.0721  | 778845  | Asthma |
| rs35043862  | 6 | 32581362 | T | C | 0.1107 | -0.0904 | 0.0119 | 3.39E-14 | -7.5827  | 778845  | Asthma |
| rs9269793   | 6 | 32581459 | T | G | 0.1846 | -0.0765 | 0.0102 | 5.34E-14 | -7.5235  | 778845  | Asthma |
| rs9269795   | 6 | 32581482 | G | A | 0.1842 | -0.0770 | 0.0088 | 1.81E-18 | -8.7687  | 930250  | Asthma |
| rs9269797   | 6 | 32581507 | G | A | 0.1817 | -0.0798 | 0.0088 | 1.17E-19 | -9.0723  | 930250  | Asthma |
| rs701831    | 6 | 32581624 | T | C | 0.2120 | -0.0550 | 0.0100 | 3.29E-08 | -5.5252  | 778845  | Asthma |
| rs2308759   | 6 | 32581819 | T | C | 0.1765 | -0.0663 | 0.0089 | 9.13E-14 | -7.4530  | 908767  | Asthma |
| rs72850244  | 6 | 32581861 | A | G | 0.1053 | -0.0862 | 0.0121 | 9.49E-13 | -7.1377  | 778845  | Asthma |
| rs9269813   | 6 | 32581904 | G | T | 0.3122 | -0.0914 | 0.0085 | 2.93E-27 | -10.8148 | 778845  | Asthma |
| rs9269815   | 6 | 32581949 | A | C | 0.3009 | -0.0923 | 0.0075 | 1.58E-34 | -12.2551 | 870622  | Asthma |
| rs9269816   | 6 | 32581950 | T | C | 0.2957 | -0.0981 | 0.0085 | 3.71E-31 | -11.6090 | 778845  | Asthma |
| rs9269817   | 6 | 32581969 | A | G | 0.2990 | -0.0955 | 0.0084 | 6.13E-30 | -11.3666 | 778845  | Asthma |
| rs9269819   | 6 | 32582005 | C | T | 0.2960 | -0.0965 | 0.0075 | 7.00E-38 | -12.8659 | 870622  | Asthma |
| rs9269825   | 6 | 32582072 | C | T | 0.2039 | -0.0749 | 0.0099 | 4.19E-14 | -7.5550  | 778845  | Asthma |
| rs9269827   | 6 | 32582089 | C | G | 0.2981 | -0.0949 | 0.0084 | 1.28E-29 | -11.3020 | 778845  | Asthma |
| rs72850247  | 6 | 32582112 | T | C | 0.1087 | -0.0875 | 0.0120 | 2.55E-13 | -7.3162  | 778845  | Asthma |
| rs9269829   | 6 | 32582138 | T | C | 0.2973 | -0.0956 | 0.0084 | 8.40E-30 | -11.3391 | 778845  | Asthma |
| rs35095850  | 6 | 32582158 | G | C | 0.3449 | 0.1190  | 0.0076 | 4.23E-55 | 15.6342  | 562230  | Asthma |
| rs9269830   | 6 | 32582159 | G | A | 0.3308 | -0.0860 | 0.0084 | 1.55E-24 | -10.2240 | 778845  | Asthma |
| rs111498499 | 6 | 32582334 | A | G | 0.1086 | -0.0872 | 0.0120 | 3.81E-13 | -7.2622  | 778845  | Asthma |
| rs28723989  | 6 | 32582339 | T | C | 0.2660 | 0.1309  | 0.0086 | 4.32E-52 | 15.1873  | 778845  | Asthma |
| rs35789108  | 6 | 32582349 | G | C | 0.2523 | 0.1446  | 0.0081 | 1.73E-70 | 17.7497  | 870622  | Asthma |
| rs9269840   | 6 | 32582373 | A | G | 0.2413 | -0.0608 | 0.0099 | 8.33E-10 | -6.1385  | 778845  | Asthma |
| rs34403271  | 6 | 32582443 | C | T | 0.2851 | 0.1351  | 0.0086 | 4.64E-55 | 15.6290  | 778845  | Asthma |
| rs36218421  | 6 | 32582450 | A | C | 0.1075 | -0.0860 | 0.0120 | 8.95E-13 | -7.1460  | 778845  | Asthma |

|             |   |          |   |   |        |         |        |          |          |        |        |
|-------------|---|----------|---|---|--------|---------|--------|----------|----------|--------|--------|
| rs9269846   | 6 | 32582457 | C | G | 0.4709 | -0.1198 | 0.0083 | 7.82E-47 | -14.3709 | 778845 | Asthma |
| rs35971290  | 6 | 32582458 | G | A | 0.2741 | 0.1353  | 0.0086 | 3.40E-56 | 15.7948  | 778845 | Asthma |
| rs72850250  | 6 | 32582475 | A | G | 0.1089 | -0.0870 | 0.0120 | 3.83E-13 | -7.2618  | 778845 | Asthma |
| rs7745797   | 6 | 32582495 | A | G | 0.1988 | -0.0764 | 0.0099 | 1.50E-14 | -7.6876  | 778845 | Asthma |
| rs113891305 | 6 | 32582544 | A | C | 0.1087 | -0.0875 | 0.0120 | 3.23E-13 | -7.2844  | 778845 | Asthma |
| rs9269854   | 6 | 32582554 | T | G | 0.2972 | -0.0953 | 0.0084 | 1.34E-29 | -11.2980 | 778845 | Asthma |
| rs35522883  | 6 | 32582571 | T | G | 0.1089 | -0.0867 | 0.0120 | 4.63E-13 | -7.2359  | 778845 | Asthma |
| rs202127825 | 6 | 32582629 | C | T | 0.1035 | -0.0896 | 0.0121 | 1.62E-13 | -7.3772  | 778845 | Asthma |
| rs9269857   | 6 | 32582630 | G | A | 0.2903 | -0.0927 | 0.0085 | 9.19E-28 | -10.9206 | 778845 | Asthma |
| rs199535050 | 6 | 32582640 | A | G | 0.1035 | -0.0897 | 0.0121 | 1.54E-13 | -7.3837  | 778845 | Asthma |
| rs9269858   | 6 | 32582649 | G | A | 0.2897 | -0.0929 | 0.0076 | 1.77E-34 | -12.2460 | 870622 | Asthma |
| rs9269859   | 6 | 32582662 | A | T | 0.1883 | -0.0754 | 0.0101 | 8.91E-14 | -7.4564  | 778845 | Asthma |
| rs34350660  | 6 | 32582714 | T | C | 0.1016 | -0.0912 | 0.0122 | 9.07E-14 | -7.4536  | 778845 | Asthma |
| rs35259208  | 6 | 32582771 | G | A | 0.1084 | -0.0858 | 0.0120 | 8.40E-13 | -7.1547  | 778845 | Asthma |
| rs28724008  | 6 | 32582773 | G | C | 0.3298 | 0.1176  | 0.0072 | 1.32E-60 | 16.4226  | 870622 | Asthma |
| rs35662241  | 6 | 32582803 | T | C | 0.1034 | -0.0882 | 0.0122 | 4.34E-13 | -7.2444  | 778845 | Asthma |
| rs36218422  | 6 | 32582888 | G | A | 0.1075 | -0.0926 | 0.0120 | 1.49E-14 | -7.6881  | 778845 | Asthma |
| rs9269867   | 6 | 32582906 | G | A | 0.2905 | -0.0972 | 0.0085 | 2.31E-30 | -11.4516 | 778845 | Asthma |
| rs9269868   | 6 | 32582925 | C | A | 0.2034 | -0.0667 | 0.0099 | 1.82E-11 | -6.7194  | 778845 | Asthma |
| rs35129460  | 6 | 32583008 | C | T | 0.1088 | -0.0869 | 0.0120 | 4.38E-13 | -7.2433  | 778845 | Asthma |
| rs72850273  | 6 | 32583039 | A | G | 0.1088 | -0.0869 | 0.0120 | 4.38E-13 | -7.2433  | 778845 | Asthma |
| rs28724031  | 6 | 32583042 | A | C | 0.3101 | 0.1238  | 0.0072 | 3.06E-66 | 17.1920  | 935848 | Asthma |
| rs9269874   | 6 | 32583051 | G | A | 0.3078 | -0.0990 | 0.0084 | 2.46E-32 | -11.8389 | 778845 | Asthma |
| rs9269876   | 6 | 32583083 | T | C | 0.2961 | -0.0973 | 0.0085 | 1.07E-30 | -11.5183 | 778845 | Asthma |
| rs114378717 | 6 | 32583086 | C | T | 0.1091 | -0.0901 | 0.0120 | 5.56E-14 | -7.5178  | 778845 | Asthma |
| rs28724035  | 6 | 32583136 | C | T | 0.1167 | -0.0844 | 0.0118 | 1.02E-12 | -7.1283  | 778845 | Asthma |
| rs9269881   | 6 | 32583141 | C | A | 0.2992 | -0.0983 | 0.0084 | 1.87E-31 | -11.6675 | 778845 | Asthma |
| rs28724036  | 6 | 32583142 | A | G | 0.1168 | -0.0844 | 0.0118 | 1.02E-12 | -7.1283  | 778845 | Asthma |
| rs9269884   | 6 | 32583187 | G | C | 0.5655 | 0.0582  | 0.0085 | 6.32E-12 | 6.8723   | 778845 | Asthma |
| rs9269884   | 6 | 32583192 | A | G | 0.3985 | -0.0853 | 0.0084 | 3.18E-24 | -10.1540 | 778845 | Asthma |
| rs9269888   | 6 | 32583203 | C | T | 0.3986 | -0.0853 | 0.0084 | 2.90E-24 | -10.1630 | 778845 | Asthma |
| rs72850277  | 6 | 32583204 | C | G | 0.1226 | -0.0823 | 0.0117 | 1.67E-12 | -7.0596  | 778845 | Asthma |
| rs34499249  | 6 | 32583234 | C | G | 0.1546 | -0.0710 | 0.0111 | 1.35E-10 | -6.4218  | 778845 | Asthma |
| rs9269892   | 6 | 32583277 | C | T | 0.2411 | -0.0534 | 0.0096 | 2.86E-08 | -5.5501  | 778845 | Asthma |
| rs9269893   | 6 | 32583281 | A | T | 0.7589 | 0.0534  | 0.0096 | 2.86E-08 | 5.5501   | 778845 | Asthma |
| rs9269895   | 6 | 32583291 | C | T | 0.2367 | -0.0569 | 0.0096 | 3.45E-09 | -5.9088  | 778845 | Asthma |
| rs9269897   | 6 | 32583335 | G | A | 0.3576 | -0.0765 | 0.0082 | 1.66E-20 | -9.2821  | 778845 | Asthma |
| rs112025959 | 6 | 32583346 | T | C | 0.1203 | -0.0780 | 0.0117 | 2.44E-11 | -6.6770  | 778845 | Asthma |
| rs9269902   | 6 | 32583420 | C | T | 0.1887 | -0.0753 | 0.0101 | 8.64E-14 | -7.4601  | 778845 | Asthma |
| rs9269905   | 6 | 32583514 | T | C | 0.2993 | -0.0978 | 0.0084 | 2.77E-31 | -11.6339 | 778845 | Asthma |
| rs113505153 | 6 | 32583515 | A | C | 0.1109 | -0.0911 | 0.0119 | 2.16E-14 | -7.6412  | 778845 | Asthma |
| rs550345324 | 6 | 32583530 | G | A | 0.1109 | -0.0911 | 0.0119 | 2.05E-14 | -7.6476  | 778845 | Asthma |
| rs571787506 | 6 | 32583531 | A | G | 0.1109 | -0.0911 | 0.0119 | 2.05E-14 | -7.6476  | 778845 | Asthma |
| rs9269907   | 6 | 32583547 | C | A | 0.6347 | 0.0607  | 0.0084 | 6.66E-13 | 7.1863   | 778845 | Asthma |
| rs9269908   | 6 | 32583552 | G | A | 0.2994 | -0.0981 | 0.0084 | 2.05E-31 | -11.6597 | 778845 | Asthma |
| rs9269909   | 6 | 32583557 | T | C | 0.2994 | -0.0981 | 0.0084 | 2.05E-31 | -11.6597 | 778845 | Asthma |
| rs9269910   | 6 | 32583573 | T | A | 0.2034 | -0.0632 | 0.0091 | 4.04E-12 | -6.9358  | 853733 | Asthma |
| rs9269911   | 6 | 32583605 | A | T | 0.1983 | -0.0680 | 0.0089 | 2.80E-14 | -7.6074  | 870622 | Asthma |
| rs9269912   | 6 | 32583619 | C | T | 0.3006 | -0.0836 | 0.0073 | 4.11E-30 | -11.4015 | 908767 | Asthma |
| rs9269913   | 6 | 32583629 | A | G | 0.3006 | -0.0841 | 0.0073 | 1.88E-30 | -11.4693 | 908767 | Asthma |
| rs9269914   | 6 | 32583639 | G | C | 0.6993 | 0.0838  | 0.0073 | 3.29E-30 | 11.4208  | 908767 | Asthma |
| rs9469177   | 6 | 32583650 | C | T | 0.2840 | -0.0955 | 0.0100 | 1.39E-21 | -9.5425  | 778845 | Asthma |
| rs9269916   | 6 | 32583691 | A | T | 0.7016 | 0.0973  | 0.0084 | 8.15E-31 | 11.5416  | 778845 | Asthma |
| rs9269917   | 6 | 32583692 | G | C | 0.7016 | 0.0973  | 0.0084 | 8.15E-31 | 11.5416  | 778845 | Asthma |
| rs72850279  | 6 | 32583717 | T | C | 0.1094 | -0.0913 | 0.0121 | 4.02E-14 | -7.5604  | 778845 | Asthma |
| rs72850280  | 6 | 32583744 | C | T | 0.1094 | -0.0913 | 0.0121 | 4.06E-14 | -7.5591  | 778845 | Asthma |
| rs9269929   | 6 | 32583903 | T | C | 0.1966 | -0.0724 | 0.0099 | 3.30E-13 | -7.2814  | 778845 | Asthma |
| rs9269931   | 6 | 32583931 | G | C | 0.5844 | 0.0651  | 0.0084 | 7.22E-15 | 7.7805   | 778845 | Asthma |
| rs141975225 | 6 | 32583938 | G | C | 0.2013 | -0.0835 | 0.0109 | 1.89E-14 | -7.6581  | 778845 | Asthma |
| rs9269933   | 6 | 32583943 | C | T | 0.1978 | -0.0731 | 0.0099 | 1.97E-13 | -7.3508  | 778845 | Asthma |
| rs17882603  | 6 | 32584290 | C | T | 0.5694 | -0.0793 | 0.0082 | 6.35E-22 | -9.6236  | 778845 | Asthma |
| rs3175105   | 6 | 32584303 | C | T | 0.1086 | -0.0928 | 0.0123 | 5.07E-14 | -7.5301  | 778845 | Asthma |
| rs9269958   | 6 | 32584366 | C | T | 0.3588 | -0.0743 | 0.0083 | 3.79E-19 | -8.9429  | 778845 | Asthma |
| rs9269959   | 6 | 32584367 | A | C | 0.3588 | -0.0743 | 0.0083 | 3.79E-19 | -8.9429  | 778845 | Asthma |
| rs9269968   | 6 | 32584474 | G | A | 0.4820 | 0.0490  | 0.0082 | 2.68E-09 | 5.9500   | 778845 | Asthma |
| rs534288394 | 6 | 32584685 | T | C | 0.1067 | -0.0842 | 0.0121 | 3.11E-12 | -6.9728  | 778845 | Asthma |
| rs9269986   | 6 | 32584776 | C | T | 0.3019 | -0.0968 | 0.0084 | 6.73E-31 | -11.5579 | 778845 | Asthma |
| rs113342592 | 6 | 32584826 | G | C | 0.1044 | -0.0896 | 0.0124 | 6.04E-13 | -7.1998  | 778845 | Asthma |
| rs28724138  | 6 | 32584840 | G | A | 0.4655 | -0.1262 | 0.0074 | 6.59E-65 | -17.0126 | 870622 | Asthma |
| rs28724139  | 6 | 32584864 | T | C | 0.1270 | -0.0623 | 0.0112 | 2.82E-08 | -5.5522  | 778845 | Asthma |
| rs72850283  | 6 | 32584983 | T | C | 0.1129 | -0.0832 | 0.0119 | 2.81E-12 | -6.9864  | 778845 | Asthma |
| rs74440913  | 6 | 32585082 | C | T | 0.1078 | -0.0847 | 0.0121 | 2.18E-12 | -7.0223  | 778845 | Asthma |
| rs115936732 | 6 | 32585091 | T | C | 0.1078 | -0.0847 | 0.0121 | 2.26E-12 | -7.0176  | 778845 | Asthma |
| rs9270007   | 6 | 32585130 | G | C | 0.1883 | -0.0754 | 0.0101 | 8.42E-14 | -7.4638  | 778845 | Asthma |

|             |   |          |   |   |        |         |        |          |          |        |        |
|-------------|---|----------|---|---|--------|---------|--------|----------|----------|--------|--------|
| rs9270010   | 6 | 32585153 | T | C | 0.2969 | -0.0948 | 0.0084 | 2.79E-29 | -11.2335 | 778845 | Asthma |
| rs72850285  | 6 | 32585188 | T | A | 0.1085 | -0.0858 | 0.0120 | 9.70E-13 | -7.1344  | 778845 | Asthma |
| rs568893929 | 6 | 32585200 | C | T | 0.1085 | -0.0856 | 0.0120 | 1.08E-12 | -7.1198  | 778845 | Asthma |
| rs9270015   | 6 | 32585206 | A | G | 0.1882 | -0.0754 | 0.0101 | 9.28E-14 | -7.4505  | 778845 | Asthma |
| rs9270016   | 6 | 32585226 | T | C | 0.1936 | -0.0769 | 0.0101 | 2.50E-14 | -7.6221  | 778845 | Asthma |
| rs9270018   | 6 | 32585249 | G | A | 0.1882 | -0.0754 | 0.0101 | 9.01E-14 | -7.4547  | 778845 | Asthma |
| rs9270019   | 6 | 32585276 | G | C | 0.1882 | -0.0754 | 0.0101 | 8.74E-14 | -7.4587  | 778845 | Asthma |
| rs113600317 | 6 | 32585348 | T | A | 0.2662 | 0.1227  | 0.0075 | 2.94E-60 | 16.3746  | 935848 | Asthma |
| rs9270022   | 6 | 32585365 | C | T | 0.2297 | -0.0563 | 0.0085 | 4.09E-11 | -6.6007  | 930250 | Asthma |
| rs35982716  | 6 | 32585390 | A | T | 0.1026 | -0.0846 | 0.0122 | 4.53E-12 | -6.9195  | 778845 | Asthma |
| rs35409715  | 6 | 32585393 | T | C | 0.1026 | -0.0846 | 0.0122 | 4.53E-12 | -6.9195  | 778845 | Asthma |
| rs34418535  | 6 | 32585423 | G | A | 0.1084 | -0.0862 | 0.0120 | 8.05E-13 | -7.1601  | 778845 | Asthma |
| rs9270025   | 6 | 32585459 | C | T | 0.1699 | -0.0768 | 0.0104 | 1.30E-13 | -7.4061  | 778845 | Asthma |
| rs9270026   | 6 | 32585485 | A | T | 0.2991 | -0.0944 | 0.0084 | 5.22E-29 | -11.1780 | 778845 | Asthma |
| rs9270027   | 6 | 32585517 | G | A | 0.1808 | -0.0764 | 0.0103 | 9.48E-14 | -7.4482  | 778845 | Asthma |
| rs78846716  | 6 | 32585532 | G | T | 0.1036 | -0.0848 | 0.0122 | 3.11E-12 | -6.9728  | 778845 | Asthma |
| rs9270031   | 6 | 32585563 | T | C | 0.1778 | -0.0753 | 0.0103 | 2.05E-13 | -7.3460  | 778845 | Asthma |
| rs9270035   | 6 | 32585669 | G | A | 0.1881 | -0.0756 | 0.0101 | 7.63E-14 | -7.4770  | 778845 | Asthma |
| rs9270036   | 6 | 32585698 | A | T | 0.1852 | -0.0754 | 0.0102 | 1.15E-13 | -7.4218  | 778845 | Asthma |
| rs9270040   | 6 | 32585731 | A | G | 0.1841 | -0.0768 | 0.0102 | 4.21E-14 | -7.5540  | 778845 | Asthma |
| rs9270041   | 6 | 32585754 | C | G | 0.1836 | -0.0739 | 0.0102 | 3.84E-13 | -7.2609  | 778845 | Asthma |
| rs9270043   | 6 | 32585821 | G | T | 0.1844 | -0.0755 | 0.0102 | 1.10E-13 | -7.4288  | 778845 | Asthma |
| rs113647600 | 6 | 32585849 | A | C | 0.1091 | -0.0862 | 0.0119 | 5.24E-13 | -7.2190  | 778845 | Asthma |
| rs9270046   | 6 | 32585906 | A | C | 0.3639 | -0.0735 | 0.0083 | 7.30E-19 | -8.8703  | 778845 | Asthma |
| rs9270048   | 6 | 32585928 | A | G | 0.1883 | -0.0753 | 0.0101 | 9.58E-14 | -7.4468  | 778845 | Asthma |
| rs34491087  | 6 | 32585929 | C | T | 0.1085 | -0.0863 | 0.0120 | 7.37E-13 | -7.1723  | 778845 | Asthma |
| rs35092298  | 6 | 32585952 | T | C | 0.1081 | -0.0861 | 0.0121 | 8.79E-13 | -7.1485  | 778845 | Asthma |
| rs9270050   | 6 | 32585963 | G | C | 0.1999 | -0.0781 | 0.0090 | 4.31E-18 | -8.6702  | 870622 | Asthma |
| rs9270051   | 6 | 32585974 | T | C | 0.1899 | -0.0713 | 0.0101 | 1.94E-12 | -7.0385  | 778845 | Asthma |
| rs34593373  | 6 | 32586015 | C | T | 0.1032 | -0.0894 | 0.0127 | 2.26E-12 | -7.0176  | 778845 | Asthma |
| rs35577188  | 6 | 32586022 | A | T | 0.1032 | -0.0892 | 0.0127 | 2.68E-12 | -6.9933  | 778845 | Asthma |
| rs35252757  | 6 | 32586024 | A | G | 0.1032 | -0.0892 | 0.0127 | 2.68E-12 | -6.9933  | 778845 | Asthma |
| rs72850287  | 6 | 32586064 | C | A | 0.1081 | -0.0868 | 0.0121 | 6.75E-13 | -7.1847  | 778845 | Asthma |
| rs9270054   | 6 | 32586094 | A | C | 0.2896 | -0.0956 | 0.0085 | 2.57E-29 | -11.2408 | 778845 | Asthma |
| rs111461278 | 6 | 32586154 | G | A | 0.1079 | -0.0782 | 0.0106 | 2.04E-13 | -7.3461  | 847307 | Asthma |
| rs9270062   | 6 | 32586218 | G | A | 0.3076 | -0.0966 | 0.0084 | 1.97E-30 | -11.4654 | 778845 | Asthma |
| rs9270066   | 6 | 32586248 | A | G | 0.3073 | -0.0969 | 0.0084 | 1.26E-30 | -11.5038 | 778845 | Asthma |
| rs113609412 | 6 | 32586270 | A | T | 0.1081 | -0.0871 | 0.0121 | 6.40E-13 | -7.1915  | 778845 | Asthma |
| rs34691324  | 6 | 32586273 | G | A | 0.1081 | -0.0871 | 0.0121 | 6.40E-13 | -7.1915  | 778845 | Asthma |
| rs9270069   | 6 | 32586303 | T | C | 0.2958 | -0.0954 | 0.0085 | 1.92E-29 | -11.2664 | 778845 | Asthma |
| rs527262329 | 6 | 32586306 | T | C | 0.1060 | -0.0869 | 0.0123 | 1.56E-12 | -7.0692  | 778845 | Asthma |
| rs9270070   | 6 | 32586309 | A | G | 0.3329 | -0.0688 | 0.0096 | 7.92E-13 | -7.1626  | 778845 | Asthma |
| rs531446857 | 6 | 32586314 | C | T | 0.1060 | -0.0869 | 0.0123 | 1.56E-12 | -7.0692  | 778845 | Asthma |
| rs9270073   | 6 | 32586346 | G | A | 0.1873 | -0.0754 | 0.0101 | 9.50E-14 | -7.4478  | 778845 | Asthma |
| rs72850289  | 6 | 32586378 | T | A | 0.1073 | -0.0878 | 0.0121 | 4.51E-13 | -7.2393  | 778845 | Asthma |
| rs9270076   | 6 | 32586397 | A | G | 0.1906 | -0.0722 | 0.0101 | 8.73E-13 | -7.1490  | 778845 | Asthma |
| rs9270078   | 6 | 32586402 | A | G | 0.3038 | -0.0892 | 0.0084 | 4.95E-26 | -10.5524 | 778845 | Asthma |
| rs9270079   | 6 | 32586412 | G | C | 0.1878 | -0.0744 | 0.0101 | 2.07E-13 | -7.3443  | 778845 | Asthma |
| rs9270082   | 6 | 32586480 | G | T | 0.2239 | -0.0591 | 0.0099 | 2.43E-09 | -5.9660  | 778845 | Asthma |
| rs113608847 | 6 | 32586507 | G | T | 0.2307 | 0.1609  | 0.0090 | 8.17E-72 | 17.9205  | 848312 | Asthma |
| rs9270088   | 6 | 32586523 | T | C | 0.1852 | -0.0748 | 0.0102 | 1.77E-13 | -7.3649  | 778845 | Asthma |
| rs72850290  | 6 | 32586568 | G | T | 0.1053 | -0.0883 | 0.0122 | 4.58E-13 | -7.2369  | 778845 | Asthma |
| rs9270089   | 6 | 32586574 | T | C | 0.1841 | -0.0772 | 0.0102 | 3.16E-14 | -7.5918  | 778845 | Asthma |
| rs9270090   | 6 | 32586609 | G | T | 0.1819 | -0.0775 | 0.0088 | 1.17E-18 | -8.8172  | 930250 | Asthma |
| rs9270091   | 6 | 32586639 | C | A | 0.2228 | -0.0781 | 0.0100 | 4.64E-15 | -7.8363  | 778845 | Asthma |
| rs9270092   | 6 | 32586643 | T | C | 0.2735 | -0.0736 | 0.0093 | 2.84E-15 | -7.8976  | 778845 | Asthma |
| rs201412310 | 6 | 32586644 | T | G | 0.2373 | -0.0660 | 0.0106 | 5.46E-10 | -6.2052  | 778845 | Asthma |
| rs9270096   | 6 | 32586710 | T | G | 0.1885 | -0.0745 | 0.0101 | 1.79E-13 | -7.3635  | 778845 | Asthma |
| rs72850293  | 6 | 32586727 | G | A | 0.1075 | -0.0877 | 0.0121 | 4.83E-13 | -7.2301  | 778845 | Asthma |
| rs9270097   | 6 | 32586729 | C | A | 0.2956 | -0.0955 | 0.0085 | 1.62E-29 | -11.2814 | 778845 | Asthma |
| rs9270098   | 6 | 32586740 | T | A | 0.7105 | 0.0957  | 0.0085 | 2.23E-29 | 11.2533  | 778845 | Asthma |
| rs9270099   | 6 | 32586763 | A | C | 0.2957 | -0.0956 | 0.0085 | 1.52E-29 | -11.2874 | 778845 | Asthma |
| rs9270101   | 6 | 32586830 | T | C | 0.2113 | -0.0738 | 0.0087 | 1.52E-17 | -8.5255  | 930250 | Asthma |
| rs9270102   | 6 | 32586844 | G | C | 0.2946 | -0.0966 | 0.0085 | 4.22E-30 | -11.3992 | 778845 | Asthma |
| rs72850296  | 6 | 32586942 | C | T | 0.1067 | -0.0884 | 0.0122 | 3.35E-13 | -7.2798  | 778845 | Asthma |
| rs9270105   | 6 | 32586983 | A | G | 0.1882 | -0.0754 | 0.0101 | 9.21E-14 | -7.4516  | 778845 | Asthma |
| rs114856598 | 6 | 32586985 | T | C | 0.1075 | -0.0879 | 0.0121 | 4.19E-13 | -7.2495  | 778845 | Asthma |
| rs9270107   | 6 | 32586997 | A | G | 0.1768 | -0.0761 | 0.0103 | 1.25E-13 | -7.4112  | 778845 | Asthma |
| rs9270111   | 6 | 32587090 | C | A | 0.1834 | -0.0770 | 0.0102 | 3.90E-14 | -7.5648  | 778845 | Asthma |
| rs113520250 | 6 | 32587108 | T | C | 0.3361 | 0.0537  | 0.0087 | 6.85E-10 | 6.1695   | 778845 | Asthma |
| rs146068413 | 6 | 32587125 | A | G | 0.1073 | -0.0873 | 0.0121 | 6.13E-13 | -7.1977  | 778845 | Asthma |
| rs34614226  | 6 | 32587186 | A | T | 0.3023 | 0.1438  | 0.0084 | 7.16E-66 | 17.1429  | 778845 | Asthma |
| rs9270121   | 6 | 32587232 | C | A | 0.3896 | -0.0445 | 0.0080 | 2.45E-08 | -5.5769  | 778845 | Asthma |
| rs9270124   | 6 | 32587263 | C | T | 0.2979 | -0.0955 | 0.0084 | 1.08E-29 | -11.3169 | 778845 | Asthma |

|             |   |          |   |   |        |         |        |          |          |        |        |
|-------------|---|----------|---|---|--------|---------|--------|----------|----------|--------|--------|
| rs9270125   | 6 | 32587272 | A | C | 0.4327 | -0.1082 | 0.0085 | 2.35E-37 | -12.7716 | 778845 | Asthma |
| rs34563311  | 6 | 32587274 | T | C | 0.1466 | -0.0691 | 0.0115 | 1.66E-09 | -6.0284  | 778845 | Asthma |
| rs9270131   | 6 | 32587344 | A | T | 0.8073 | 0.0724  | 0.0101 | 5.92E-13 | 7.2026   | 778845 | Asthma |
| rs35703034  | 6 | 32587347 | C | A | 0.1084 | -0.0873 | 0.0121 | 5.34E-13 | -7.2162  | 778845 | Asthma |
| rs9270139   | 6 | 32587426 | C | T | 0.2472 | -0.0693 | 0.0104 | 3.26E-11 | -6.6347  | 778845 | Asthma |
| rs9270140   | 6 | 32587429 | A | T | 0.2472 | -0.0697 | 0.0105 | 2.59E-11 | -6.6682  | 778845 | Asthma |
| rs9270141   | 6 | 32587440 | T | C | 0.2078 | -0.0680 | 0.0099 | 6.58E-12 | -6.8665  | 778845 | Asthma |
| rs13207809  | 6 | 32587462 | C | G | 0.1216 | 0.1937  | 0.0140 | 9.79E-44 | 13.8688  | 463403 | Asthma |
| rs9270142   | 6 | 32587476 | A | C | 0.1956 | -0.0737 | 0.0101 | 2.43E-13 | -7.3223  | 778845 | Asthma |
| rs72844251  | 6 | 32587519 | G | C | 0.1076 | -0.0867 | 0.0121 | 8.28E-13 | -7.1562  | 778845 | Asthma |
| rs9270148   | 6 | 32587574 | A | C | 0.1926 | -0.0730 | 0.0101 | 4.21E-13 | -7.2486  | 778845 | Asthma |
| rs9270149   | 6 | 32587575 | A | C | 0.1926 | -0.0730 | 0.0101 | 4.21E-13 | -7.2486  | 778845 | Asthma |
| rs9270150   | 6 | 32587580 | T | C | 0.2035 | -0.0860 | 0.0098 | 1.45E-18 | -8.7933  | 778845 | Asthma |
| rs9270158   | 6 | 32587683 | G | A | 0.2863 | -0.0976 | 0.0085 | 2.30E-30 | -11.4519 | 778845 | Asthma |
| rs7741969   | 6 | 32587745 | G | T | 0.0461 | -0.1547 | 0.0200 | 1.07E-14 | -7.7311  | 778845 | Asthma |
| rs9270166   | 6 | 32587856 | G | C | 0.2895 | -0.0943 | 0.0085 | 9.86E-29 | -11.1214 | 778845 | Asthma |
| rs9270168   | 6 | 32587864 | A | T | 0.2926 | -0.0964 | 0.0085 | 6.17E-30 | -11.3662 | 778845 | Asthma |
| rs34977123  | 6 | 32587959 | G | A | 0.1559 | 0.1957  | 0.0109 | 9.05E-72 | 17.9149  | 778845 | Asthma |
| rs28724164  | 6 | 32587985 | C | T | 0.2316 | 0.1183  | 0.0097 | 5.52E-34 | 12.1534  | 778845 | Asthma |
| rs9270180   | 6 | 32588028 | A | G | 0.2927 | -0.0761 | 0.0074 | 7.98E-25 | -10.2881 | 934923 | Asthma |
| rs9270182   | 6 | 32588056 | A | G | 0.2027 | -0.0595 | 0.0101 | 3.67E-09 | -5.8986  | 778845 | Asthma |
| rs28724166  | 6 | 32588081 | T | C | 0.5794 | -0.1316 | 0.0084 | 2.49E-55 | -15.6681 | 778845 | Asthma |
| rs9270187   | 6 | 32588188 | T | G | 0.1702 | -0.0526 | 0.0089 | 2.93E-09 | -5.9356  | 934923 | Asthma |
| rs17203846  | 6 | 32588212 | A | T | 0.2954 | 0.1440  | 0.0085 | 6.56E-65 | 17.0132  | 778845 | Asthma |
| rs6924922   | 6 | 32588225 | T | G | 0.0508 | -0.1442 | 0.0188 | 1.77E-14 | -7.6665  | 778845 | Asthma |
| rs150394154 | 6 | 32588242 | A | G | 0.1229 | -0.0830 | 0.0108 | 1.25E-14 | -7.7116  | 934923 | Asthma |
| rs9270189   | 6 | 32588253 | C | T | 0.1769 | -0.0526 | 0.0088 | 1.97E-09 | -6.0006  | 934923 | Asthma |
| rs9270192   | 6 | 32588379 | A | G | 0.1791 | -0.0728 | 0.0104 | 2.10E-12 | -7.0273  | 778845 | Asthma |
| rs9270193   | 6 | 32588380 | A | G | 0.1788 | -0.0734 | 0.0104 | 1.40E-12 | -7.0842  | 778845 | Asthma |
| rs9270194   | 6 | 32588382 | T | A | 0.7743 | 0.0708  | 0.0099 | 8.29E-13 | 7.1564   | 778845 | Asthma |
| rs9270196   | 6 | 32588423 | T | C | 0.2971 | -0.0940 | 0.0085 | 1.10E-28 | -11.1121 | 778845 | Asthma |
| rs9270197   | 6 | 32588426 | A | C | 0.2961 | -0.0954 | 0.0085 | 1.67E-29 | -11.2787 | 778845 | Asthma |
| rs9270198   | 6 | 32588450 | C | T | 0.2967 | -0.0946 | 0.0084 | 3.93E-29 | -11.2033 | 778845 | Asthma |
| rs9270199   | 6 | 32588461 | A | G | 0.6318 | 0.0961  | 0.0084 | 2.81E-30 | 11.4345  | 778845 | Asthma |
| rs9270202   | 6 | 32588469 | G | A | 0.2966 | -0.0952 | 0.0085 | 2.11E-29 | -11.2581 | 778845 | Asthma |
| rs9270203   | 6 | 32588482 | A | G | 0.2976 | -0.0950 | 0.0084 | 2.50E-29 | -11.2431 | 778845 | Asthma |
| rs72844253  | 6 | 32588486 | G | T | 0.1188 | -0.0820 | 0.0105 | 4.71E-15 | -7.8346  | 870622 | Asthma |
| rs9270204   | 6 | 32588500 | T | A | 0.7004 | 0.0948  | 0.0084 | 2.60E-29 | 11.2399  | 778845 | Asthma |
| rs9270206   | 6 | 32588590 | G | A | 0.2956 | -0.0961 | 0.0085 | 1.34E-29 | -11.2982 | 778845 | Asthma |
| rs9270208   | 6 | 32588625 | G | T | 0.2959 | -0.0955 | 0.0084 | 1.03E-29 | -11.3215 | 778845 | Asthma |
| rs9270209   | 6 | 32588666 | A | G | 0.3040 | -0.0924 | 0.0084 | 6.72E-28 | -10.9491 | 778845 | Asthma |
| rs145244672 | 6 | 32588684 | G | T | 0.1018 | 0.1160  | 0.0128 | 1.68E-19 | 9.0321   | 831423 | Asthma |
| rs9270210   | 6 | 32588698 | T | C | 0.5122 | 0.0544  | 0.0083 | 5.84E-11 | 6.5477   | 778845 | Asthma |
| rs9270211   | 6 | 32588710 | T | C | 0.2964 | -0.0962 | 0.0084 | 4.15E-30 | -11.4007 | 778845 | Asthma |
| rs9270212   | 6 | 32588716 | C | T | 0.3484 | -0.0978 | 0.0083 | 3.21E-32 | -11.8163 | 778845 | Asthma |
| rs9270213   | 6 | 32588717 | A | G | 0.3078 | -0.0949 | 0.0084 | 2.29E-29 | -11.2510 | 778845 | Asthma |
| rs9270215   | 6 | 32588771 | G | T | 0.2977 | -0.0948 | 0.0084 | 1.81E-29 | -11.2715 | 778845 | Asthma |
| rs35331833  | 6 | 32588858 | A | G | 0.3321 | 0.1224  | 0.0084 | 3.96E-48 | 14.5762  | 502602 | Asthma |
| rs9270221   | 6 | 32588865 | C | T | 0.3020 | -0.1012 | 0.0085 | 6.76E-33 | -11.9470 | 778845 | Asthma |
| rs9270223   | 6 | 32588880 | C | T | 0.3260 | -0.0994 | 0.0084 | 4.69E-32 | -11.7845 | 778845 | Asthma |
| rs9270225   | 6 | 32588906 | G | A | 0.2941 | -0.0950 | 0.0084 | 2.21E-29 | -11.2543 | 778845 | Asthma |
| rs9270226   | 6 | 32588912 | G | T | 0.2941 | -0.0951 | 0.0084 | 2.00E-29 | -11.2628 | 778845 | Asthma |
| rs9270227   | 6 | 32588922 | T | C | 0.2898 | -0.0949 | 0.0085 | 3.93E-29 | -11.2032 | 778845 | Asthma |
| rs9270229   | 6 | 32589006 | T | C | 0.1786 | -0.0766 | 0.0103 | 1.12E-13 | -7.4261  | 778845 | Asthma |
| rs9270231   | 6 | 32589011 | A | G | 0.2883 | -0.0958 | 0.0085 | 2.23E-29 | -11.2531 | 778845 | Asthma |
| rs9270232   | 6 | 32589034 | C | T | 0.3014 | -0.0948 | 0.0085 | 3.95E-29 | -11.2026 | 778845 | Asthma |
| rs9270233   | 6 | 32589052 | G | A | 0.2954 | -0.0957 | 0.0085 | 1.20E-29 | -11.3075 | 778845 | Asthma |
| rs9270236   | 6 | 32589110 | C | T | 0.2938 | -0.0960 | 0.0085 | 1.06E-29 | -11.3188 | 778845 | Asthma |
| rs9270237   | 6 | 32589131 | C | A | 0.2935 | -0.0959 | 0.0085 | 1.19E-29 | -11.3084 | 778845 | Asthma |
| rs9270242   | 6 | 32589187 | C | A | 0.2975 | -0.0952 | 0.0084 | 1.38E-29 | -11.2957 | 778845 | Asthma |
| rs9270243   | 6 | 32589188 | T | G | 0.2975 | -0.0952 | 0.0084 | 1.38E-29 | -11.2957 | 778845 | Asthma |
| rs9270244   | 6 | 32589190 | T | G | 0.2975 | -0.0952 | 0.0084 | 1.38E-29 | -11.2957 | 778845 | Asthma |
| rs28357078  | 6 | 32589214 | G | A | 0.4122 | -0.1057 | 0.0084 | 4.96E-36 | -12.5329 | 778845 | Asthma |
| rs9270248   | 6 | 32589216 | A | G | 0.3003 | -0.0976 | 0.0085 | 1.29E-30 | -11.5020 | 778845 | Asthma |
| rs9270249   | 6 | 32589219 | C | A | 0.3003 | -0.0976 | 0.0085 | 1.29E-30 | -11.5020 | 778845 | Asthma |
| rs9270258   | 6 | 32589283 | G | A | 0.2874 | -0.0893 | 0.0075 | 1.04E-32 | -11.9106 | 847307 | Asthma |
| rs9270265   | 6 | 32589350 | A | C | 0.2811 | -0.0932 | 0.0088 | 2.42E-26 | -10.6193 | 778845 | Asthma |
| rs9270270   | 6 | 32589431 | T | C | 0.2678 | -0.0742 | 0.0100 | 9.17E-14 | -7.4524  | 778845 | Asthma |
| rs9270271   | 6 | 32589432 | T | C | 0.3774 | -0.1074 | 0.0086 | 3.32E-36 | -12.5642 | 778845 | Asthma |
| rs9270272   | 6 | 32589436 | G | A | 0.4142 | -0.0875 | 0.0086 | 1.95E-24 | -10.2014 | 778845 | Asthma |
| rs9270278   | 6 | 32589476 | C | G | 0.2957 | -0.0945 | 0.0086 | 4.20E-28 | -10.9915 | 778845 | Asthma |
| rs28366212  | 6 | 32589482 | T | C | 0.4508 | 0.1187  | 0.0082 | 1.18E-47 | 14.5021  | 778845 | Asthma |
| rs9270281   | 6 | 32589490 | A | G | 0.2956 | -0.0943 | 0.0086 | 5.07E-28 | -10.9744 | 778845 | Asthma |
| rs9270299   | 6 | 32589658 | A | C | 0.1789 | -0.0745 | 0.0103 | 5.20E-13 | -7.2200  | 778845 | Asthma |

|             |   |          |   |   |        |         |        |          |          |         |        |
|-------------|---|----------|---|---|--------|---------|--------|----------|----------|---------|--------|
| rs9270303   | 6 | 32589706 | T | C | 0.2769 | -0.0936 | 0.0081 | 4.49E-31 | -11.5926 | 870622  | Asthma |
| rs17211105  | 6 | 32589829 | A | G | 0.4986 | 0.1375  | 0.0082 | 1.98E-62 | 16.6754  | 778845  | Asthma |
| rs9270322   | 6 | 32589999 | C | T | 0.2756 | -0.0980 | 0.0087 | 1.91E-29 | -11.2669 | 778845  | Asthma |
| rs9270323   | 6 | 32590005 | G | A | 0.3336 | -0.0888 | 0.0085 | 8.35E-26 | -10.5033 | 778845  | Asthma |
| rs9270326   | 6 | 32590035 | C | T | 0.3755 | -0.0510 | 0.0085 | 1.55E-09 | -6.0390  | 778845  | Asthma |
| rs9270335   | 6 | 32590136 | A | G | 0.4282 | -0.0591 | 0.0084 | 2.33E-12 | -7.0130  | 778845  | Asthma |
| rs9270340   | 6 | 32590192 | C | T | 0.2930 | -0.0951 | 0.0085 | 3.10E-29 | -11.2244 | 778845  | Asthma |
| rs9270341   | 6 | 32590193 | C | T | 0.2930 | -0.0951 | 0.0085 | 3.10E-29 | -11.2244 | 778845  | Asthma |
| rs36060193  | 6 | 32590208 | T | C | 0.1049 | 0.1467  | 0.0210 | 2.57E-12 | 6.9995   | 437487  | Asthma |
| rs9270357   | 6 | 32590315 | C | T | 0.2992 | -0.0885 | 0.0074 | 1.61E-32 | -11.8745 | 847307  | Asthma |
| rs9270358   | 6 | 32590319 | A | G | 0.2992 | -0.0884 | 0.0074 | 1.75E-32 | -11.8674 | 847307  | Asthma |
| rs9270362   | 6 | 32590358 | T | C | 0.3529 | -0.0766 | 0.0083 | 3.01E-20 | -9.2185  | 778845  | Asthma |
| rs9270366   | 6 | 32590398 | C | T | 0.3206 | -0.0833 | 0.0083 | 1.93E-23 | -9.9765  | 778845  | Asthma |
| rs28357082  | 6 | 32590399 | A | G | 0.1584 | 0.0824  | 0.0110 | 7.81E-14 | 7.4737   | 550231  | Asthma |
| rs9270368   | 6 | 32590405 | C | T | 0.3480 | -0.0613 | 0.0083 | 1.15E-13 | -7.4224  | 778845  | Asthma |
| rs9270369   | 6 | 32590406 | T | G | 0.3680 | -0.0503 | 0.0083 | 1.29E-09 | -6.0690  | 778845  | Asthma |
| rs7757916   | 6 | 32590507 | C | T | 0.0662 | -0.1240 | 0.0171 | 3.63E-13 | -7.2691  | 853733  | Asthma |
| rs9270385   | 6 | 32590537 | T | G | 0.2993 | -0.0993 | 0.0084 | 6.01E-32 | -11.7636 | 778845  | Asthma |
| rs9270413   | 6 | 32590718 | T | C | 0.5287 | 0.0490  | 0.0084 | 6.75E-09 | 5.7971   | 778845  | Asthma |
| rs9270414   | 6 | 32590720 | T | C | 0.5287 | 0.0490  | 0.0084 | 6.71E-09 | 5.7979   | 778845  | Asthma |
| rs9270417   | 6 | 32590769 | T | C | 0.3655 | -0.0773 | 0.0082 | 6.40E-21 | -9.3832  | 778845  | Asthma |
| rs9270418   | 6 | 32590773 | C | T | 0.3655 | -0.0786 | 0.0083 | 2.97E-21 | -9.4639  | 778845  | Asthma |
| rs9270419   | 6 | 32590782 | T | G | 0.3707 | -0.0774 | 0.0083 | 1.12E-20 | -9.3245  | 778845  | Asthma |
| rs9270420   | 6 | 32590792 | C | A | 0.3663 | -0.0664 | 0.0076 | 1.79E-18 | -8.7698  | 778845  | Asthma |
| rs9270421   | 6 | 32590797 | T | A | 0.6337 | 0.0664  | 0.0076 | 1.79E-18 | 8.7698   | 778845  | Asthma |
| rs9270422   | 6 | 32590800 | A | G | 0.3662 | -0.0664 | 0.0076 | 1.69E-18 | -8.7762  | 778845  | Asthma |
| rs9270423   | 6 | 32590803 | A | G | 0.5697 | 0.0499  | 0.0075 | 3.61E-11 | 6.6194   | 778845  | Asthma |
| rs9270424   | 6 | 32590817 | G | C | 0.6340 | 0.0741  | 0.0080 | 1.82E-20 | 9.2724   | 778845  | Asthma |
| rs9270449   | 6 | 32591047 | T | G | 0.3774 | -0.0702 | 0.0083 | 2.70E-17 | -8.4590  | 778845  | Asthma |
| rs9270454   | 6 | 32591085 | G | A | 0.3775 | -0.0532 | 0.0097 | 4.77E-08 | -5.4597  | 778845  | Asthma |
| rs9270456   | 6 | 32591102 | A | G | 0.3729 | -0.0704 | 0.0083 | 1.91E-17 | -8.4994  | 778845  | Asthma |
| rs9270457   | 6 | 32591110 | A | G | 0.3318 | -0.0890 | 0.0083 | 1.21E-26 | -10.6838 | 778845  | Asthma |
| rs9270459   | 6 | 32591128 | A | G | 0.3682 | -0.0740 | 0.0083 | 3.78E-19 | -8.9433  | 778845  | Asthma |
| rs9270468   | 6 | 32591182 | G | A | 0.2963 | -0.0958 | 0.0085 | 9.32E-30 | -11.3301 | 778845  | Asthma |
| rs9270475   | 6 | 32591230 | T | A | 0.1997 | 0.0503  | 0.0083 | 1.35E-09 | 6.0610   | 847307  | Asthma |
| rs77122291  | 6 | 32591242 | A | G | 0.3190 | 0.1183  | 0.0061 | 7.29E-83 | 19.2847  | 1024845 | Asthma |
| rs9270478   | 6 | 32591253 | C | A | 0.2932 | -0.0880 | 0.0073 | 1.28E-33 | -12.0845 | 873440  | Asthma |
| rs9270493   | 6 | 32591333 | C | T | 0.1931 | 0.0370  | 0.0065 | 1.54E-08 | 5.6571   | 1180923 | Asthma |
| rs34788621  | 6 | 32591347 | C | T | 0.2851 | 0.1255  | 0.0073 | 4.57E-66 | 17.1681  | 934923  | Asthma |
| rs34127991  | 6 | 32591354 | A | G | 0.2868 | 0.1202  | 0.0066 | 2.50E-74 | 18.2405  | 1003385 | Asthma |
| rs9270498   | 6 | 32591357 | A | G | 0.2999 | -0.0752 | 0.0067 | 1.32E-29 | -11.2996 | 1003385 | Asthma |
| rs9270502   | 6 | 32591398 | C | T | 0.1986 | -0.0449 | 0.0075 | 2.55E-09 | -5.9584  | 1003362 | Asthma |
| rs561760011 | 6 | 32591400 | C | G | 0.1736 | 0.1450  | 0.0133 | 1.52E-27 | 10.8747  | 436482  | Asthma |
| rs529034563 | 6 | 32591401 | A | G | 0.1736 | 0.1450  | 0.0133 | 1.53E-27 | 10.8740  | 436482  | Asthma |
| rs114335056 | 6 | 32591414 | G | A | 0.1547 | 0.1245  | 0.0083 | 1.53E-50 | 14.9510  | 840392  | Asthma |
| rs75928817  | 6 | 32591435 | G | A | 0.2556 | 0.1069  | 0.0063 | 6.05E-64 | 16.8833  | 1133307 | Asthma |
| rs115879259 | 6 | 32591436 | T | A | 0.1524 | 0.1489  | 0.0074 | 1.94E-90 | 20.1660  | 1202774 | Asthma |
| rs9270505   | 6 | 32591439 | A | G | 0.4289 | -0.0422 | 0.0050 | 4.08E-17 | -8.4106  | 1310845 | Asthma |
| rs114258010 | 6 | 32591507 | G | A | 0.0936 | -0.0864 | 0.0111 | 7.07E-15 | -7.7834  | 977229  | Asthma |
| rs9270511   | 6 | 32591594 | T | C | 0.3300 | -0.0807 | 0.0084 | 1.06E-21 | -9.5707  | 778845  | Asthma |
| rs9270512   | 6 | 32591603 | G | A | 0.3777 | -0.0625 | 0.0083 | 4.35E-14 | -7.5502  | 778845  | Asthma |
| rs9270513   | 6 | 32591623 | T | A | 0.3768 | -0.0619 | 0.0083 | 7.83E-14 | -7.4732  | 778845  | Asthma |
| rs9270514   | 6 | 32591641 | G | A | 0.3783 | -0.0651 | 0.0085 | 2.16E-14 | -7.6409  | 778845  | Asthma |
| rs80163833  | 6 | 32591667 | T | C | 0.1858 | 0.0574  | 0.0083 | 5.40E-12 | 6.8945   | 1000544 | Asthma |
| rs112464499 | 6 | 32591690 | G | A | 0.1130 | -0.0671 | 0.0102 | 5.09E-11 | -6.5683  | 908767  | Asthma |
| rs9270516   | 6 | 32591691 | T | C | 0.3043 | -0.0921 | 0.0084 | 6.30E-28 | -10.9549 | 778845  | Asthma |
| rs9270517   | 6 | 32591695 | T | C | 0.3072 | -0.0799 | 0.0073 | 8.82E-28 | -10.9244 | 908767  | Asthma |
| rs28366256  | 6 | 32591722 | G | A | 0.2937 | 0.1504  | 0.0087 | 1.56E-66 | 17.2304  | 778845  | Asthma |
| rs72844273  | 6 | 32591732 | G | A | 0.1231 | -0.0724 | 0.0095 | 2.66E-14 | -7.6136  | 1064845 | Asthma |
| rs11751601  | 6 | 32591743 | T | C | 0.3904 | 0.0905  | 0.0080 | 7.27E-30 | 11.3517  | 778845  | Asthma |
| rs9270522   | 6 | 32591764 | T | A | 0.2962 | -0.0833 | 0.0060 | 1.73E-43 | -13.8277 | 1128634 | Asthma |
| rs73729333  | 6 | 32591786 | G | A | 0.0564 | -0.1347 | 0.0188 | 8.41E-13 | -7.1542  | 778845  | Asthma |
| rs34958241  | 6 | 32591798 | G | A | 0.1679 | 0.1737  | 0.0091 | 9.94E-81 | 19.0281  | 908767  | Asthma |
| rs9270523   | 6 | 32591807 | T | G | 0.3043 | -0.0723 | 0.0061 | 7.69E-33 | -11.9360 | 1133307 | Asthma |
| rs9270524   | 6 | 32591811 | A | G | 0.4011 | -0.0379 | 0.0069 | 4.65E-08 | -5.4642  | 908767  | Asthma |
| rs112604035 | 6 | 32591866 | A | G | 0.1219 | -0.0788 | 0.0097 | 5.52E-16 | -8.0996  | 1003385 | Asthma |
| rs34784936  | 6 | 32591871 | T | G | 0.1705 | 0.1729  | 0.0091 | 4.77E-81 | 19.0672  | 908767  | Asthma |
| rs9270529   | 6 | 32591881 | T | C | 0.4055 | -0.0457 | 0.0055 | 1.10E-16 | -8.2932  | 1159440 | Asthma |
| rs34434863  | 6 | 32591896 | G | T | 0.2900 | 0.0739  | 0.0061 | 2.50E-33 | 12.0291  | 1133307 | Asthma |
| rs9270530   | 6 | 32591909 | A | G | 0.4049 | -0.0449 | 0.0056 | 1.24E-15 | -8.0004  | 1133307 | Asthma |
| rs9270531   | 6 | 32591918 | T | C | 0.2776 | -0.0976 | 0.0084 | 3.11E-31 | -11.6240 | 497287  | Asthma |
| rs34066151  | 6 | 32591925 | G | A | 0.1680 | 0.1597  | 0.0079 | 1.26E-90 | 20.1871  | 1064845 | Asthma |
| rs28366265  | 6 | 32591931 | A | G | 0.2921 | 0.1214  | 0.0064 | 1.36E-79 | 18.8904  | 1064845 | Asthma |
| rs9270533   | 6 | 32591932 | T | C | 0.4048 | -0.0449 | 0.0056 | 1.27E-15 | -7.9971  | 1133307 | Asthma |



|            |   |          |   |   |        |         |        |          |          |         |        |
|------------|---|----------|---|---|--------|---------|--------|----------|----------|---------|--------|
| rs35299998 | 6 | 32591933 | T | C | 0.1680 | 0.1597  | 0.0079 | 1.26E-90 | 20.1871  | 1064845 | Asthma |
| rs9270534  | 6 | 32591934 | A | G | 0.3011 | -0.0702 | 0.0061 | 5.44E-31 | -11.5764 | 1133307 | Asthma |
| rs9270535  | 6 | 32591937 | A | G | 0.4048 | -0.0449 | 0.0056 | 1.28E-15 | -7.9964  | 1133307 | Asthma |
| rs9270537  | 6 | 32591948 | T | C | 0.3004 | -0.0698 | 0.0060 | 1.12E-31 | -11.7111 | 1159440 | Asthma |
| rs9270538  | 6 | 32591981 | A | C | 0.4026 | -0.0486 | 0.0061 | 1.36E-15 | -7.9893  | 1064845 | Asthma |
| rs9270539  | 6 | 32591987 | T | C | 0.2999 | -0.0754 | 0.0060 | 1.05E-36 | -12.6548 | 1216250 | Asthma |
| rs28366267 | 6 | 32592004 | C | A | 0.2970 | 0.1137  | 0.0059 | 8.76E-83 | 19.2745  | 1156622 | Asthma |
| rs34855541 | 6 | 32592048 | G | A | 0.1746 | 0.1464  | 0.0077 | 3.51E-80 | 18.9620  | 1060172 | Asthma |
| rs9270540  | 6 | 32592071 | C | T | 0.3983 | -0.0424 | 0.0069 | 6.63E-10 | -6.1747  | 908767  | Asthma |
| rs9270541  | 6 | 32592087 | T | G | 0.4011 | -0.0409 | 0.0057 | 4.74E-13 | -7.2325  | 1156622 | Asthma |
| rs28366268 | 6 | 32592097 | G | T | 0.3047 | 0.1287  | 0.0072 | 3.40E-71 | 17.8416  | 908767  | Asthma |
| rs9270542  | 6 | 32592100 | G | A | 0.3032 | -0.0707 | 0.0066 | 3.92E-27 | -10.7882 | 1064845 | Asthma |
| rs9270543  | 6 | 32592104 | A | C | 0.4011 | -0.0494 | 0.0061 | 4.66E-16 | -8.1201  | 1064845 | Asthma |
| rs9270544  | 6 | 32592105 | T | C | 0.4011 | -0.0494 | 0.0061 | 4.40E-16 | -8.1271  | 1064845 | Asthma |
| rs11751673 | 6 | 32592108 | G | C | 0.0627 | -0.1046 | 0.0128 | 3.05E-16 | -8.1716  | 1139733 | Asthma |
| rs35743245 | 6 | 32592127 | T | C | 0.1727 | 0.1572  | 0.0080 | 1.50E-85 | 19.6018  | 977229  | Asthma |
| rs9270545  | 6 | 32592139 | C | T | 0.3303 | -0.0784 | 0.0069 | 1.06E-29 | -11.3186 | 906538  | Asthma |
| rs11756331 | 6 | 32592152 | G | A | 0.0758 | -0.0952 | 0.0108 | 8.78E-19 | -8.8500  | 1133307 | Asthma |
| rs28366270 | 6 | 32592157 | G | A | 0.2964 | 0.1180  | 0.0059 | 1.02E-89 | 20.0834  | 1133307 | Asthma |
| rs56316552 | 6 | 32592159 | C | T | 0.1120 | -0.0739 | 0.0102 | 5.13E-13 | -7.2216  | 908767  | Asthma |
| rs9270547  | 6 | 32592174 | G | A | 0.3948 | -0.0414 | 0.0062 | 2.65E-11 | -6.6647  | 977229  | Asthma |
| rs9270548  | 6 | 32592183 | T | C | 0.3919 | -0.0434 | 0.0069 | 3.12E-10 | -6.2929  | 908767  | Asthma |
| rs73729339 | 6 | 32592240 | A | C | 0.3375 | -0.0441 | 0.0071 | 4.33E-10 | -6.2418  | 908767  | Asthma |
| rs36096565 | 6 | 32592248 | G | A | 0.1968 | 0.1490  | 0.0079 | 2.87E-80 | 18.9732  | 1000544 | Asthma |
| rs35972518 | 6 | 32592249 | G | T | 0.1848 | 0.1651  | 0.0087 | 5.08E-80 | 18.9428  | 908767  | Asthma |
| rs35917796 | 6 | 32592251 | T | C | 0.1847 | 0.1652  | 0.0087 | 4.26E-80 | 18.9524  | 908767  | Asthma |
| rs35380574 | 6 | 32592274 | T | C | 0.1860 | 0.1647  | 0.0087 | 6.15E-80 | 18.9329  | 908767  | Asthma |
| rs56285448 | 6 | 32592290 | C | A | 0.1203 | -0.0743 | 0.0100 | 1.18E-13 | -7.4193  | 908767  | Asthma |
| rs74207277 | 6 | 32592314 | T | G | 0.3326 | -0.0443 | 0.0071 | 4.85E-10 | -6.2237  | 908767  | Asthma |
| rs73729340 | 6 | 32592378 | A | G | 0.3328 | -0.0453 | 0.0071 | 1.87E-10 | -6.3721  | 908767  | Asthma |
| rs28366277 | 6 | 32592400 | T | G | 0.3325 | -0.0844 | 0.0072 | 1.18E-31 | -11.7065 | 908767  | Asthma |
| rs35395738 | 6 | 32592432 | C | T | 0.1938 | 0.1468  | 0.0079 | 2.14E-77 | 18.6219  | 1000544 | Asthma |
| rs28366279 | 6 | 32592445 | C | T | 0.3326 | -0.0845 | 0.0072 | 1.07E-31 | -11.7146 | 908767  | Asthma |
| rs71542413 | 6 | 32592463 | T | C | 0.3325 | -0.0456 | 0.0071 | 1.48E-10 | -6.4079  | 908767  | Asthma |
| rs71542414 | 6 | 32592470 | G | A | 0.3324 | -0.0457 | 0.0071 | 1.32E-10 | -6.4252  | 908767  | Asthma |
| rs28366281 | 6 | 32592489 | T | C | 0.2024 | -0.0616 | 0.0086 | 1.03E-12 | -7.1267  | 908767  | Asthma |
| rs28366283 | 6 | 32592511 | C | A | 0.3432 | 0.1320  | 0.0072 | 1.14E-75 | 18.4082  | 908767  | Asthma |
| rs71542415 | 6 | 32592521 | C | T | 0.3355 | -0.0455 | 0.0071 | 1.39E-10 | -6.4165  | 908767  | Asthma |
| rs34665982 | 6 | 32592529 | C | T | 0.5540 | 0.0618  | 0.0076 | 3.47E-16 | 8.1557   | 540747  | Asthma |
| rs28366284 | 6 | 32592550 | C | T | 0.3386 | -0.0671 | 0.0057 | 4.51E-32 | -11.7879 | 1225084 | Asthma |
| rs36207014 | 6 | 32592555 | A | G | 0.3637 | -0.0513 | 0.0062 | 7.33E-17 | -8.3415  | 1064845 | Asthma |
| rs34539464 | 6 | 32592562 | G | A | 0.3641 | -0.0516 | 0.0061 | 4.55E-17 | -8.3977  | 1064845 | Asthma |
| rs35472547 | 6 | 32592593 | T | G | 0.1830 | 0.1526  | 0.0077 | 1.24E-86 | 19.7280  | 1003362 | Asthma |
| rs34291045 | 6 | 32592608 | T | A | 0.1680 | 0.1635  | 0.0091 | 6.15E-73 | 18.0639  | 916774  | Asthma |
| rs28366286 | 6 | 32592610 | T | C | 0.3335 | -0.0717 | 0.0072 | 2.43E-23 | -9.9538  | 908767  | Asthma |
| rs34939562 | 6 | 32592611 | A | G | 0.1975 | 0.1781  | 0.0096 | 2.27E-76 | 18.4951  | 778845  | Asthma |
| rs28366288 | 6 | 32592655 | T | C | 0.2929 | 0.1174  | 0.0059 | 5.67E-89 | 19.9993  | 1198533 | Asthma |
| rs34924558 | 6 | 32592669 | T | C | 0.1677 | 0.1500  | 0.0073 | 4.20E-95 | 20.6906  | 1133307 | Asthma |
| rs34496598 | 6 | 32592678 | T | C | 0.1678 | 0.1500  | 0.0072 | 4.02E-95 | 20.6930  | 1133307 | Asthma |
| rs28683540 | 6 | 32592686 | A | T | 0.1210 | -0.0681 | 0.0086 | 2.25E-15 | -7.9270  | 1159440 | Asthma |
| rs34415150 | 6 | 32592700 | G | A | 0.1664 | 0.1421  | 0.0068 | 1.19E-95 | 20.7518  | 1225084 | Asthma |
| rs11752229 | 6 | 32592701 | T | C | 0.0758 | -0.0972 | 0.0105 | 2.30E-20 | -9.2476  | 1159440 | Asthma |
| rs9270551  | 6 | 32592724 | G | A | 0.3307 | -0.0463 | 0.0055 | 4.85E-17 | -8.3902  | 1251217 | Asthma |
| rs9270552  | 6 | 32592743 | G | A | 0.3001 | -0.0698 | 0.0060 | 1.17E-31 | -11.7077 | 1159440 | Asthma |
| rs9270553  | 6 | 32592746 | A | G | 0.3001 | -0.0698 | 0.0060 | 1.17E-31 | -11.7077 | 1159440 | Asthma |
| rs9270554  | 6 | 32592769 | C | T | 0.3001 | -0.0699 | 0.0060 | 1.14E-31 | -11.7093 | 1159440 | Asthma |
| rs9270555  | 6 | 32592807 | C | T | 0.4262 | -0.0431 | 0.0055 | 2.86E-15 | -7.8970  | 1159440 | Asthma |
| rs28657884 | 6 | 32592828 | G | C | 0.1210 | -0.0682 | 0.0086 | 2.17E-15 | -7.9314  | 1159440 | Asthma |
| rs9270556  | 6 | 32592829 | A | G | 0.4041 | -0.0468 | 0.0055 | 1.35E-17 | -8.5396  | 1159440 | Asthma |
| rs35118762 | 6 | 32592854 | T | C | 0.1715 | 0.1355  | 0.0064 | 1.25E-98 | 21.0783  | 1310845 | Asthma |
| rs9270557  | 6 | 32592868 | A | G | 0.3001 | -0.0698 | 0.0060 | 1.32E-31 | -11.6969 | 1159440 | Asthma |
| rs9270558  | 6 | 32592890 | A | G | 0.4080 | -0.0454 | 0.0055 | 1.47E-16 | -8.2588  | 1159440 | Asthma |
| rs34928543 | 6 | 32592918 | C | G | 0.1715 | 0.1364  | 0.0065 | 5.28E-97 | 20.9010  | 1284712 | Asthma |
| rs9270559  | 6 | 32592921 | G | T | 0.4148 | -0.0469 | 0.0056 | 3.94E-17 | -8.4148  | 1133307 | Asthma |
| rs28366294 | 6 | 32592938 | A | G | 0.2871 | 0.1174  | 0.0059 | 1.04E-87 | 19.8523  | 1198533 | Asthma |
| rs28366295 | 6 | 32592939 | C | T | 0.2855 | 0.1212  | 0.0064 | 1.64E-79 | 18.8815  | 1130071 | Asthma |
| rs28366296 | 6 | 32592950 | A | C | 0.2868 | 0.1121  | 0.0056 | 2.10E-90 | 20.1626  | 1290310 | Asthma |
| rs6910879  | 6 | 32592962 | G | A | 0.0384 | 0.1383  | 0.0143 | 3.50E-22 | 9.6855   | 1225084 | Asthma |
| rs36083025 | 6 | 32592972 | T | A | 0.1382 | 0.1358  | 0.0082 | 8.99E-62 | 16.5840  | 1156622 | Asthma |
| rs9270562  | 6 | 32592980 | T | G | 0.3929 | -0.0351 | 0.0058 | 1.40E-09 | -6.0551  | 1156622 | Asthma |
| rs9270563  | 6 | 32592987 | T | G | 0.3002 | -0.0697 | 0.0060 | 1.53E-31 | -11.6845 | 1159440 | Asthma |
| rs2760975  | 6 | 32592994 | A | G | 0.1611 | 0.1449  | 0.0077 | 2.35E-78 | 18.7396  | 1156622 | Asthma |
| rs9270564  | 6 | 32592996 | G | A | 0.2963 | -0.0910 | 0.0075 | 2.78E-34 | -12.2092 | 847307  | Asthma |
| rs9270567  | 6 | 32593024 | G | T | 0.4219 | -0.0342 | 0.0056 | 1.15E-09 | -6.0873  | 1133307 | Asthma |

|            |   |          |   |   |        |         |        |          |          |         |        |
|------------|---|----------|---|---|--------|---------|--------|----------|----------|---------|--------|
| rs9270568  | 6 | 32593031 | G | A | 0.3000 | -0.0695 | 0.0060 | 2.41E-31 | -11.6458 | 1159440 | Asthma |
| rs28366297 | 6 | 32593052 | C | G | 0.2752 | 0.1104  | 0.0060 | 3.84E-75 | 18.3412  | 1198533 | Asthma |
| rs2760976  | 6 | 32593062 | T | C | 0.1384 | 0.1352  | 0.0081 | 2.94E-63 | 16.7894  | 1156622 | Asthma |
| rs28366298 | 6 | 32593082 | C | A | 0.2620 | 0.0980  | 0.0056 | 4.48E-68 | 17.4350  | 1316443 | Asthma |
| rs28366299 | 6 | 32593093 | A | T | 0.2643 | 0.1110  | 0.0062 | 1.11E-72 | 18.0312  | 1198533 | Asthma |
| rs28366300 | 6 | 32593098 | T | C | 0.2543 | 0.0962  | 0.0058 | 7.03E-62 | 16.5994  | 1290310 | Asthma |
| rs28366301 | 6 | 32593106 | A | G | 0.2644 | 0.1110  | 0.0062 | 1.16E-72 | 18.0280  | 1198533 | Asthma |
| rs9270569  | 6 | 32593122 | C | T | 0.2999 | -0.0695 | 0.0060 | 2.52E-31 | -11.6422 | 1159440 | Asthma |
| rs28366302 | 6 | 32593157 | C | G | 0.2932 | 0.1124  | 0.0054 | 3.22E-96 | 20.8136  | 1316443 | Asthma |
| rs28366303 | 6 | 32593186 | G | C | 0.2935 | 0.1180  | 0.0057 | 5.16E-94 | 20.5690  | 1224666 | Asthma |
| rs9270570  | 6 | 32593201 | G | A | 0.4041 | -0.0460 | 0.0056 | 1.74E-16 | -8.2389  | 1133307 | Asthma |
| rs28366304 | 6 | 32593204 | G | A | 0.2924 | 0.1179  | 0.0058 | 2.62E-90 | 20.1508  | 1198533 | Asthma |
| rs28366305 | 6 | 32593205 | T | C | 0.2924 | 0.1179  | 0.0058 | 2.62E-90 | 20.1508  | 1198533 | Asthma |
| rs28366306 | 6 | 32593213 | A | G | 0.2913 | 0.1215  | 0.0063 | 5.34E-82 | 19.1803  | 1130071 | Asthma |
| rs28366307 | 6 | 32593218 | C | A | 0.2953 | 0.1205  | 0.0064 | 2.65E-80 | 18.9768  | 1064845 | Asthma |
| rs36206696 | 6 | 32593232 | C | T | 0.1210 | -0.0681 | 0.0086 | 2.21E-15 | -7.9292  | 1159440 | Asthma |
| rs9270572  | 6 | 32593233 | T | G | 0.4119 | -0.0400 | 0.0056 | 1.02E-12 | -7.1277  | 1133307 | Asthma |
| rs9270574  | 6 | 32593251 | T | G | 0.4113 | -0.0417 | 0.0061 | 8.16E-12 | -6.8356  | 1064845 | Asthma |
| rs28366308 | 6 | 32593266 | T | A | 0.2844 | 0.1176  | 0.0064 | 2.47E-74 | 18.2395  | 1130071 | Asthma |
| rs28366309 | 6 | 32593271 | T | G | 0.2861 | 0.1144  | 0.0059 | 7.45E-83 | 19.2825  | 1198533 | Asthma |
| rs9270576  | 6 | 32593291 | T | C | 0.3767 | -0.0371 | 0.0059 | 2.84E-10 | -6.3073  | 1156622 | Asthma |
| rs9270577  | 6 | 32593297 | A | C | 0.3032 | -0.0705 | 0.0066 | 5.78E-27 | -10.7525 | 1064845 | Asthma |
| rs9270578  | 6 | 32593316 | A | G | 0.3924 | -0.0363 | 0.0058 | 3.68E-10 | -6.2669  | 1198533 | Asthma |
| rs9270579  | 6 | 32593321 | A | T | 0.3087 | -0.0724 | 0.0057 | 4.87E-37 | -12.7153 | 1225084 | Asthma |
| rs9270580  | 6 | 32593346 | C | T | 0.4076 | -0.0386 | 0.0057 | 1.04E-11 | -6.8008  | 1156622 | Asthma |
| rs28366310 | 6 | 32593351 | C | A | 0.2763 | 0.1086  | 0.0061 | 9.24E-72 | 17.9143  | 1133307 | Asthma |
| rs28366311 | 6 | 32593360 | G | C | 0.2617 | 0.1064  | 0.0058 | 4.92E-74 | 18.2031  | 1225084 | Asthma |
| rs35074855 | 6 | 32593363 | G | C | 0.1394 | 0.1586  | 0.0085 | 3.41E-78 | 18.7195  | 1117423 | Asthma |
| rs9270581  | 6 | 32593366 | C | T | 0.3009 | -0.0703 | 0.0061 | 5.07E-31 | -11.5821 | 1133307 | Asthma |
| rs28366312 | 6 | 32593398 | C | T | 0.2874 | 0.1131  | 0.0061 | 1.60E-76 | 18.5132  | 1127842 | Asthma |
| rs28366313 | 6 | 32593409 | A | G | 0.2881 | 0.1137  | 0.0060 | 2.91E-80 | 18.9721  | 1160388 | Asthma |
| rs28366314 | 6 | 32593424 | G | A | 0.2794 | 0.1207  | 0.0060 | 4.72E-91 | 20.2361  | 1186521 | Asthma |
| rs28366315 | 6 | 32593430 | T | C | 0.2970 | 0.1140  | 0.0059 | 1.17E-83 | 19.3787  | 1160388 | Asthma |
| rs9270583  | 6 | 32593452 | G | A | 0.4003 | -0.0497 | 0.0060 | 1.09E-16 | -8.2949  | 1029518 | Asthma |
| rs28366316 | 6 | 32593469 | C | T | 0.2970 | 0.1239  | 0.0062 | 2.43E-88 | 19.9260  | 1094744 | Asthma |
| rs9270584  | 6 | 32593500 | C | T | 0.2980 | -0.0779 | 0.0059 | 1.44E-39 | -13.1628 | 1180923 | Asthma |
| rs35525122 | 6 | 32593506 | A | C | 0.1777 | 0.1512  | 0.0075 | 6.43E-91 | 20.2210  | 1029518 | Asthma |
| rs9270585  | 6 | 32593523 | C | T | 0.4784 | 0.0338  | 0.0060 | 1.63E-08 | 5.6471   | 1003385 | Asthma |
| rs9270586  | 6 | 32593525 | G | A | 0.3006 | -0.0751 | 0.0066 | 1.28E-29 | -11.3020 | 1003385 | Asthma |
| rs9270587  | 6 | 32593528 | T | G | 0.2993 | -0.0784 | 0.0059 | 3.29E-40 | -13.2738 | 1180923 | Asthma |
| rs35265698 | 6 | 32593557 | G | C | 0.1783 | 0.1371  | 0.0068 | 1.15E-91 | 20.3062  | 1180923 | Asthma |
| rs35139284 | 6 | 32593593 | T | C | 0.3056 | 0.0758  | 0.0066 | 8.03E-31 | 11.5427  | 1003385 | Asthma |
| rs9270589  | 6 | 32593613 | T | C | 0.3933 | -0.0412 | 0.0057 | 4.06E-13 | -7.2536  | 1095162 | Asthma |
| rs9270590  | 6 | 32593615 | A | G | 0.3917 | -0.0493 | 0.0061 | 8.60E-16 | -8.0453  | 1003385 | Asthma |
| rs7753335  | 6 | 32593627 | C | A | 0.0528 | -0.1044 | 0.0127 | 2.00E-16 | -8.2220  | 1180923 | Asthma |
| rs28366317 | 6 | 32593634 | T | C | 0.3064 | 0.1214  | 0.0062 | 6.51E-86 | 19.6440  | 1029518 | Asthma |
| rs9270591  | 6 | 32593647 | C | T | 0.4780 | 0.0325  | 0.0059 | 2.99E-08 | 5.5421   | 1029518 | Asthma |
| rs9270592  | 6 | 32593652 | T | A | 0.3928 | -0.0497 | 0.0060 | 1.09E-16 | -8.2945  | 1029518 | Asthma |
| rs9270593  | 6 | 32593668 | G | A | 0.3927 | -0.0497 | 0.0060 | 1.03E-16 | -8.3015  | 1029518 | Asthma |
| rs34350244 | 6 | 32593688 | T | C | 0.1798 | 0.1385  | 0.0069 | 4.72E-90 | 20.1224  | 1154790 | Asthma |
| rs35294087 | 6 | 32593689 | G | A | 0.1783 | 0.1384  | 0.0069 | 5.05E-90 | 20.1187  | 1154790 | Asthma |
| rs28366319 | 6 | 32593718 | A | G | 0.3086 | 0.1143  | 0.0056 | 5.54E-93 | 20.4540  | 1180923 | Asthma |
| rs9270594  | 6 | 32593749 | C | A | 0.2998 | -0.0744 | 0.0065 | 3.71E-30 | -11.4104 | 1029518 | Asthma |
| rs34535888 | 6 | 32593750 | C | T | 0.1776 | 0.1530  | 0.0076 | 3.05E-89 | 20.0288  | 1003385 | Asthma |
| rs28366320 | 6 | 32593774 | A | G | 0.4250 | 0.0798  | 0.0060 | 3.07E-40 | 13.2788  | 1029518 | Asthma |
| rs34553045 | 6 | 32593788 | C | T | 0.1693 | 0.1456  | 0.0074 | 7.90E-87 | 19.7507  | 1095162 | Asthma |
| rs76288224 | 6 | 32593789 | G | A | 0.1173 | -0.0941 | 0.0091 | 5.52E-25 | -10.3236 | 1029518 | Asthma |
| rs9270595  | 6 | 32593802 | C | T | 0.4163 | -0.0710 | 0.0067 | 4.17E-26 | -10.5684 | 1003385 | Asthma |
| rs9270597  | 6 | 32593821 | G | T | 0.4072 | -0.0426 | 0.0060 | 1.35E-12 | -7.0892  | 1029518 | Asthma |
| rs28366323 | 6 | 32593832 | G | A | 0.2930 | 0.1179  | 0.0063 | 2.68E-77 | 18.6103  | 1029518 | Asthma |
| rs9270598  | 6 | 32593841 | C | T | 0.4071 | -0.0425 | 0.0060 | 1.51E-12 | -7.0740  | 1029518 | Asthma |
| rs35371668 | 6 | 32593861 | T | C | 0.1705 | 0.1459  | 0.0073 | 9.18E-88 | 19.8595  | 1095162 | Asthma |
| rs9270599  | 6 | 32593879 | G | A | 0.4285 | -0.0462 | 0.0054 | 8.05E-18 | -8.5988  | 1180923 | Asthma |
| rs28366325 | 6 | 32593882 | C | T | 0.2969 | 0.1172  | 0.0064 | 2.02E-74 | 18.2514  | 1003385 | Asthma |
| rs28366327 | 6 | 32593901 | A | G | 0.3067 | 0.1212  | 0.0063 | 2.87E-82 | 19.2138  | 1003385 | Asthma |
| rs34647096 | 6 | 32593904 | A | G | 0.1780 | 0.1379  | 0.0069 | 2.99E-89 | 20.0311  | 1154790 | Asthma |
| rs9270600  | 6 | 32593916 | T | C | 0.1944 | 0.0358  | 0.0065 | 3.04E-08 | 5.5393   | 1180923 | Asthma |
| rs28366328 | 6 | 32593989 | G | A | 0.3087 | 0.1140  | 0.0056 | 1.13E-92 | 20.4183  | 1180923 | Asthma |
| rs9270602  | 6 | 32594017 | C | G | 0.1557 | -0.0602 | 0.0077 | 4.17E-15 | -7.8497  | 878129  | Asthma |
| rs28366329 | 6 | 32594042 | A | G | 0.2876 | 0.1210  | 0.0064 | 2.50E-79 | 18.8587  | 1029518 | Asthma |
| rs28366330 | 6 | 32594069 | C | G | 0.2854 | 0.1221  | 0.0064 | 2.69E-81 | 19.0969  | 1094744 | Asthma |
| rs28366331 | 6 | 32594103 | G | T | 0.2534 | 0.0974  | 0.0063 | 2.41E-53 | 15.3749  | 1160388 | Asthma |
| rs28366332 | 6 | 32594108 | A | C | 0.2787 | 0.1142  | 0.0061 | 2.52E-77 | 18.6121  | 1160388 | Asthma |
| rs28366333 | 6 | 32594110 | C | G | 0.2470 | 0.0990  | 0.0064 | 2.31E-53 | 15.3778  | 1160388 | Asthma |

|             |   |          |   |   |        |         |        |           |          |         |        |
|-------------|---|----------|---|---|--------|---------|--------|-----------|----------|---------|--------|
| rs3998182   | 6 | 32594138 | C | T | 0.2113 | 0.0518  | 0.0071 | 3.05E-13  | 7.2923   | 1029518 | Asthma |
| rs17191234  | 6 | 32596904 | C | A | 0.3873 | 0.0714  | 0.0053 | 4.69E-41  | 13.4190  | 1180923 | Asthma |
| rs28366339  | 6 | 32596948 | G | A | 0.3389 | 0.0713  | 0.0063 | 8.09E-30  | 11.3426  | 1029518 | Asthma |
| rs28366340  | 6 | 32596950 | G | A | 0.3389 | 0.0713  | 0.0063 | 7.90E-30  | 11.3445  | 1029518 | Asthma |
| rs28366341  | 6 | 32597007 | C | G | 0.3869 | 0.0708  | 0.0053 | 2.09E-40  | 13.3076  | 1180923 | Asthma |
| rs28366343  | 6 | 32597026 | C | T | 0.3860 | 0.0752  | 0.0059 | 2.19E-37  | 12.7776  | 1029518 | Asthma |
| rs28366344  | 6 | 32597036 | C | T | 0.3883 | 0.0717  | 0.0053 | 1.76E-41  | 13.4913  | 1180923 | Asthma |
| rs34535358  | 6 | 32597079 | C | T | 0.1207 | -0.0767 | 0.0095 | 9.21E-16  | -8.0370  | 1029518 | Asthma |
| rs9270605   | 6 | 32597084 | A | G | 0.2997 | -0.0744 | 0.0065 | 3.22E-30  | -11.4228 | 1029518 | Asthma |
| rs28366345  | 6 | 32597119 | G | A | 0.3317 | 0.0738  | 0.0072 | 8.97E-25  | 10.2768  | 934923  | Asthma |
| rs28366346  | 6 | 32597121 | G | A | 0.3292 | 0.0726  | 0.0072 | 1.08E-23  | 10.0337  | 934923  | Asthma |
| rs28366347  | 6 | 32597131 | G | A | 0.3291 | 0.0727  | 0.0072 | 9.25E-24  | 10.0494  | 934923  | Asthma |
| rs9270607   | 6 | 32597138 | T | C | 0.2952 | -0.0899 | 0.0075 | 1.87E-33  | -12.0531 | 847307  | Asthma |
| rs28366349  | 6 | 32597139 | T | G | 0.3262 | 0.0925  | 0.0089 | 2.83E-25  | 10.3875  | 778845  | Asthma |
| rs28366350  | 6 | 32597141 | A | T | 0.3288 | 0.0728  | 0.0072 | 7.95E-24  | 10.0643  | 934923  | Asthma |
| rs35372932  | 6 | 32597208 | T | C | 0.0798 | -0.0980 | 0.0100 | 1.03E-22  | -9.8087  | 1180923 | Asthma |
| rs28366351  | 6 | 32597213 | A | G | 0.3886 | 0.0739  | 0.0059 | 1.81E-36  | 12.6121  | 1029518 | Asthma |
| rs28366352  | 6 | 32597216 | C | T | 0.3886 | 0.0739  | 0.0059 | 1.81E-36  | 12.6121  | 1029518 | Asthma |
| rs28366353  | 6 | 32597227 | G | A | 0.3877 | 0.0715  | 0.0053 | 3.07E-41  | 13.4502  | 1180923 | Asthma |
| rs9270608   | 6 | 32597265 | A | G | 0.2998 | -0.0746 | 0.0065 | 2.66E-30  | -11.4391 | 1029518 | Asthma |
| rs28366354  | 6 | 32597267 | G | T | 0.3882 | 0.0729  | 0.0060 | 4.69E-34  | 12.1664  | 1003385 | Asthma |
| rs200433535 | 6 | 32597273 | A | C | 0.0800 | -0.1142 | 0.0126 | 1.70E-19  | -9.0306  | 934923  | Asthma |
| rs9270610   | 6 | 32597276 | C | G | 0.2998 | -0.0746 | 0.0065 | 2.66E-30  | -11.4394 | 1029518 | Asthma |
| rs28366355  | 6 | 32597279 | G | T | 0.3726 | 0.0772  | 0.0064 | 1.14E-33  | 12.0941  | 939084  | Asthma |
| rs28366356  | 6 | 32597314 | T | G | 0.3867 | 0.0728  | 0.0060 | 8.82E-34  | 12.1147  | 1003385 | Asthma |
| rs28366357  | 6 | 32597361 | T | C | 0.3786 | 0.0794  | 0.0066 | 1.69E-33  | 12.0611  | 1000149 | Asthma |
| rs9270615   | 6 | 32597375 | T | A | 0.3006 | -0.0752 | 0.0066 | 1.28E-29  | -11.3021 | 1003385 | Asthma |
| rs28366358  | 6 | 32597387 | G | A | 0.3376 | 0.0882  | 0.0059 | 4.03E-51  | 15.0398  | 1160388 | Asthma |
| rs28366359  | 6 | 32597392 | T | C | 0.2926 | 0.0595  | 0.0063 | 3.42E-21  | 9.4490   | 1160388 | Asthma |
| rs28366360  | 6 | 32597399 | C | G | 0.3733 | 0.0787  | 0.0060 | 9.44E-39  | 13.0199  | 1068611 | Asthma |
| rs72844283  | 6 | 32597412 | T | G | 0.1208 | -0.0771 | 0.0095 | 6.06E-16  | -8.0881  | 1029518 | Asthma |
| rs9270617   | 6 | 32597415 | T | C | 0.3231 | -0.0770 | 0.0065 | 2.33E-32  | -11.8433 | 1029518 | Asthma |
| rs28366361  | 6 | 32597420 | A | G | 0.3691 | 0.0768  | 0.0061 | 2.01E-36  | 12.6041  | 1003385 | Asthma |
| rs2760980   | 6 | 32597424 | A | G | 0.2012 | 0.1465  | 0.0076 | 5.48E-82  | 19.1792  | 1003385 | Asthma |
| rs28366362  | 6 | 32597436 | C | T | 0.3885 | 0.0704  | 0.0054 | 7.56E-39  | 13.0368  | 1154790 | Asthma |
| rs9270619   | 6 | 32597466 | A | G | 0.2997 | -0.0746 | 0.0065 | 2.73E-30  | -11.4372 | 1029518 | Asthma |
| rs9270622   | 6 | 32597552 | C | T | 0.2969 | -0.0786 | 0.0059 | 2.97E-40  | -13.2815 | 1180923 | Asthma |
| rs9270623   | 6 | 32597554 | C | A | 0.1933 | 0.0358  | 0.0064 | 2.06E-08  | 5.6068   | 1180923 | Asthma |
| rs9270624   | 6 | 32597636 | G | C | 0.2970 | -0.0787 | 0.0059 | 2.32E-40  | -13.2998 | 1180923 | Asthma |
| rs199707618 | 6 | 32597660 | A | G | 0.0584 | -0.0993 | 0.0151 | 4.28E-11  | -6.5939  | 1009811 | Asthma |
| rs9270625   | 6 | 32597661 | C | G | 0.3521 | -0.0787 | 0.0072 | 1.80E-27  | -10.8594 | 873440  | Asthma |
| rs9270627   | 6 | 32597670 | T | C | 0.2967 | -0.0879 | 0.0073 | 1.21E-33  | -12.0886 | 873440  | Asthma |
| rs9270628   | 6 | 32597671 | C | T | 0.2977 | -0.0895 | 0.0075 | 3.22E-33  | -12.0081 | 847307  | Asthma |
| rs28366364  | 6 | 32597755 | G | C | 0.3939 | 0.0984  | 0.0078 | 2.79E-36  | 12.5781  | 778845  | Asthma |
| rs28366365  | 6 | 32597783 | C | G | 0.3940 | 0.0982  | 0.0078 | 3.56E-36  | 12.5587  | 778845  | Asthma |
| rs9270633   | 6 | 32597785 | A | G | 0.1869 | -0.0772 | 0.0100 | 1.37E-14  | -7.6997  | 844071  | Asthma |
| rs28366367  | 6 | 32597794 | A | T | 0.3940 | 0.0983  | 0.0078 | 3.59E-36  | 12.5581  | 778845  | Asthma |
| rs28383168  | 6 | 32597811 | C | T | 0.3941 | 0.0981  | 0.0078 | 4.69E-36  | 12.5369  | 778845  | Asthma |
| rs2760983   | 6 | 32597824 | G | A | 0.1823 | 0.1809  | 0.0099 | 3.11E-75  | 18.3536  | 778845  | Asthma |
| rs28383169  | 6 | 32597875 | G | C | 0.4326 | 0.0891  | 0.0077 | 6.06E-31  | 11.5670  | 778845  | Asthma |
| rs9270640   | 6 | 32597885 | G | A | 0.4430 | -0.0734 | 0.0085 | 4.32E-18  | -8.6701  | 778845  | Asthma |
| rs11756095  | 6 | 32597913 | C | T | 0.1190 | -0.0984 | 0.0126 | 5.79E-15  | -7.8084  | 778845  | Asthma |
| rs189570112 | 6 | 32597934 | C | A | 0.1089 | -0.0874 | 0.0120 | 3.58E-13  | -7.2703  | 778845  | Asthma |
| rs9270643   | 6 | 32597944 | T | C | 0.1821 | -0.0768 | 0.0101 | 3.77E-14  | -7.5690  | 844071  | Asthma |
| rs28383170  | 6 | 32597945 | T | G | 0.3402 | 0.0847  | 0.0081 | 6.99E-26  | 10.5200  | 778845  | Asthma |
| rs28383171  | 6 | 32597958 | T | C | 0.3964 | 0.0854  | 0.0069 | 1.42E-35  | 12.4487  | 847307  | Asthma |
| rs9270644   | 6 | 32597968 | G | A | 0.2972 | -0.0955 | 0.0084 | 1.10E-29  | -11.3158 | 778845  | Asthma |
| rs9270646   | 6 | 32598002 | A | C | 0.3013 | -0.0751 | 0.0066 | 1.42E-29  | -11.2931 | 1003385 | Asthma |
| rs11756119  | 6 | 32598015 | C | T | 0.0466 | -0.1259 | 0.0169 | 1.04E-13  | -7.4358  | 1009811 | Asthma |
| rs9270648   | 6 | 32598030 | A | C | 0.3008 | -0.0754 | 0.0066 | 7.35E-30  | -11.3508 | 1003385 | Asthma |
| rs9270650   | 6 | 32598077 | C | T | 0.2969 | -0.0786 | 0.0059 | 2.72E-40  | -13.2881 | 1180923 | Asthma |
| rs9270656   | 6 | 32598234 | C | A | 0.1759 | -0.0609 | 0.0070 | 5.23E-18  | -8.6482  | 1246149 | Asthma |
| rs9270664   | 6 | 32598372 | G | A | 0.4185 | -0.0991 | 0.0054 | 6.67E-75  | -18.3118 | 1180923 | Asthma |
| rs11754183  | 6 | 32598379 | A | G | 0.0764 | -0.0951 | 0.0095 | 1.91E-23  | -9.9776  | 1310845 | Asthma |
| rs11756633  | 6 | 32598380 | A | T | 0.0506 | -0.1025 | 0.0132 | 8.80E-15  | -7.7556  | 1159440 | Asthma |
| rs4343959   | 6 | 32598507 | A | T | 0.1152 | -0.0640 | 0.0089 | 6.27E-13  | -7.1945  | 1159440 | Asthma |
| rs28383173  | 6 | 32598510 | C | G | 0.3911 | 0.0839  | 0.0069 | 9.98E-34  | 12.1047  | 847307  | Asthma |
| rs28383174  | 6 | 32598511 | A | G | 0.3832 | 0.0720  | 0.0060 | 1.09E-32  | 11.9067  | 1003385 | Asthma |
| rs62405651  | 6 | 32598519 | C | T | 0.0698 | -0.1107 | 0.0105 | 5.11E-26  | -10.5498 | 1159440 | Asthma |
| rs9270668   | 6 | 32598531 | A | C | 0.3015 | -0.0692 | 0.0060 | 4.46E-31  | -11.5932 | 1159440 | Asthma |
| rs2760985   | 6 | 32598621 | A | G | 0.1707 | 0.1369  | 0.0064 | 2.87E-100 | 21.2562  | 1310845 | Asthma |
| rs74729707  | 6 | 32598724 | T | C | 0.1224 | -0.0707 | 0.0082 | 7.39E-18  | -8.6086  | 1159440 | Asthma |
| rs9270670   | 6 | 32598756 | A | G | 0.3000 | -0.0698 | 0.0060 | 1.28E-31  | -11.6997 | 1159440 | Asthma |
| rs9270671   | 6 | 32598772 | T | G | 0.3000 | -0.0698 | 0.0060 | 1.35E-31  | -11.6950 | 1159440 | Asthma |

|             |   |          |   |   |        |         |        |          |          |         |        |
|-------------|---|----------|---|---|--------|---------|--------|----------|----------|---------|--------|
| rs9270672   | 6 | 32598780 | G | C | 0.3000 | -0.0698 | 0.0060 | 1.36E-31 | -11.6943 | 1159440 | Asthma |
| rs4329147   | 6 | 32598800 | C | T | 0.1784 | -0.0535 | 0.0071 | 3.68E-14 | -7.5718  | 1224666 | Asthma |
| rs9270674   | 6 | 32598821 | C | A | 0.3001 | -0.0698 | 0.0060 | 1.37E-31 | -11.6937 | 1159440 | Asthma |
| rs2454139   | 6 | 32598858 | C | G | 0.1681 | 0.1500  | 0.0072 | 2.24E-95 | 20.7212  | 1133307 | Asthma |
| rs2647080   | 6 | 32598869 | A | G | 0.3681 | 0.0724  | 0.0060 | 2.25E-33 | 12.0378  | 1064845 | Asthma |
| rs9270677   | 6 | 32598878 | T | C | 0.2905 | -0.0709 | 0.0064 | 2.82E-28 | -11.0276 | 791420  | Asthma |
| rs9270678   | 6 | 32598909 | T | A | 0.3004 | -0.0698 | 0.0060 | 1.38E-31 | -11.6932 | 1159440 | Asthma |
| rs9270679   | 6 | 32598966 | A | G | 0.3000 | -0.0698 | 0.0060 | 1.41E-31 | -11.6918 | 1159440 | Asthma |
| rs9270682   | 6 | 32598995 | G | T | 0.3000 | -0.0698 | 0.0060 | 1.34E-31 | -11.6956 | 1159440 | Asthma |
| rs35820711  | 6 | 32599032 | G | T | 0.0500 | -0.0976 | 0.0121 | 6.46E-16 | -8.0801  | 1310845 | Asthma |
| rs9270687   | 6 | 32599094 | G | A | 0.3000 | -0.0698 | 0.0060 | 1.31E-31 | -11.6980 | 1159440 | Asthma |
| rs71542417  | 6 | 32599115 | G | A | 0.1223 | -0.0709 | 0.0082 | 6.63E-18 | -8.6212  | 1159440 | Asthma |
| rs9270689   | 6 | 32599132 | A | T | 0.3001 | -0.0698 | 0.0060 | 1.29E-31 | -11.6990 | 1159440 | Asthma |
| rs113147629 | 6 | 32599170 | T | C | 0.1212 | -0.0681 | 0.0086 | 2.25E-15 | -7.9267  | 1159440 | Asthma |
| rs9270690   | 6 | 32599171 | G | A | 0.2999 | -0.0697 | 0.0060 | 1.65E-31 | -11.6782 | 1159440 | Asthma |
| rs9270691   | 6 | 32599195 | G | C | 0.2999 | -0.0697 | 0.0060 | 1.61E-31 | -11.6800 | 1159440 | Asthma |
| rs9270692   | 6 | 32599229 | C | T | 0.3000 | -0.0699 | 0.0060 | 1.17E-31 | -11.7073 | 1159440 | Asthma |
| rs9270694   | 6 | 32599247 | C | T | 0.3000 | -0.0698 | 0.0060 | 1.26E-31 | -11.7013 | 1159440 | Asthma |
| rs111665670 | 6 | 32599288 | A | G | 0.1202 | -0.0701 | 0.0079 | 4.84E-19 | -8.9158  | 1310845 | Asthma |
| rs9270695   | 6 | 32599377 | A | C | 0.3016 | -0.0700 | 0.0060 | 1.05E-31 | -11.7167 | 1159440 | Asthma |
| rs687308    | 6 | 32599479 | T | C | 0.1786 | 0.1442  | 0.0074 | 1.18E-84 | 19.4961  | 1086328 | Asthma |
| rs55786530  | 6 | 32599501 | T | A | 0.1216 | -0.0859 | 0.0109 | 2.54E-15 | -7.9117  | 934923  | Asthma |
| rs142264362 | 6 | 32599506 | A | G | 0.0728 | -0.1421 | 0.0128 | 1.41E-28 | -11.0899 | 934923  | Asthma |
| rs9270697   | 6 | 32599519 | G | C | 0.4286 | -0.1016 | 0.0067 | 1.28E-51 | -15.1156 | 934923  | Asthma |
| rs9270698   | 6 | 32599520 | T | C | 0.3031 | -0.0762 | 0.0073 | 2.39E-25 | -10.4035 | 934923  | Asthma |
| rs9270699   | 6 | 32599521 | G | A | 0.3031 | -0.0762 | 0.0073 | 2.39E-25 | -10.4035 | 934923  | Asthma |
| rs9270700   | 6 | 32599529 | C | T | 0.1813 | -0.0524 | 0.0086 | 1.27E-09 | -6.0706  | 934923  | Asthma |
| rs9689000   | 6 | 32599531 | G | C | 0.0816 | -0.1309 | 0.0122 | 5.70E-27 | -10.7534 | 934923  | Asthma |
| rs9270703   | 6 | 32599549 | A | G | 0.2049 | -0.0477 | 0.0087 | 3.65E-08 | -5.5072  | 1000149 | Asthma |
| rs9270704   | 6 | 32599553 | T | C | 0.4076 | -0.0575 | 0.0073 | 4.22E-15 | -7.8483  | 934923  | Asthma |
| rs9270705   | 6 | 32599560 | C | T | 0.3037 | -0.0757 | 0.0073 | 4.15E-25 | -10.3510 | 934923  | Asthma |
| rs9270706   | 6 | 32599572 | G | A | 0.2809 | -0.0761 | 0.0075 | 5.96E-24 | -10.0924 | 934923  | Asthma |
| rs9270707   | 6 | 32599574 | A | G | 0.1766 | -0.0529 | 0.0088 | 1.64E-09 | -6.0300  | 934923  | Asthma |
| rs9270708   | 6 | 32599576 | A | G | 0.2983 | -0.0755 | 0.0073 | 9.19E-25 | -10.2745 | 934923  | Asthma |
| rs9270709   | 6 | 32599579 | A | G | 0.3115 | -0.0751 | 0.0073 | 5.96E-25 | -10.3162 | 934923  | Asthma |
| rs9270710   | 6 | 32599591 | C | G | 0.2466 | -0.0569 | 0.0077 | 1.34E-13 | -7.4022  | 934923  | Asthma |
| rs9380313   | 6 | 32599596 | G | A | 0.0803 | 0.0922  | 0.0160 | 7.93E-09 | 5.7699   | 934923  | Asthma |
| rs9270711   | 6 | 32599598 | A | G | 0.3038 | -0.0759 | 0.0073 | 3.13E-25 | -10.3779 | 934923  | Asthma |
| rs10947310  | 6 | 32599602 | G | A | 0.1013 | -0.1085 | 0.0134 | 5.95E-16 | -8.0904  | 853733  | Asthma |
| rs9270712   | 6 | 32599603 | T | C | 0.2976 | -0.0954 | 0.0084 | 1.12E-29 | -11.3136 | 778845  | Asthma |
| rs9270713   | 6 | 32599604 | G | A | 0.3407 | -0.0815 | 0.0072 | 2.06E-29 | -11.2604 | 934923  | Asthma |
| rs150373264 | 6 | 32599607 | G | A | 0.0528 | -0.1165 | 0.0148 | 3.20E-15 | -7.8827  | 1026700 | Asthma |
| rs9270714   | 6 | 32599711 | A | T | 0.3275 | -0.0588 | 0.0066 | 5.61E-19 | -8.8996  | 1029518 | Asthma |
| rs9270715   | 6 | 32599714 | G | T | 0.1794 | -0.0556 | 0.0077 | 5.48E-13 | -7.2128  | 1094744 | Asthma |
| rs9270716   | 6 | 32599725 | A | T | 0.3096 | -0.0592 | 0.0066 | 2.30E-19 | -8.9978  | 1029518 | Asthma |
| rs9270717   | 6 | 32599729 | C | G | 0.1780 | -0.0560 | 0.0077 | 3.68E-13 | -7.2669  | 1094744 | Asthma |
| rs590999    | 6 | 32599731 | A | G | 0.2581 | 0.0432  | 0.0064 | 1.83E-11 | 6.7191   | 1154790 | Asthma |
| rs112481371 | 6 | 32599774 | G | A | 0.0787 | -0.1138 | 0.0100 | 6.08E-30 | -11.3666 | 1180923 | Asthma |
| rs9270719   | 6 | 32599809 | A | C | 0.2997 | -0.0745 | 0.0065 | 3.09E-30 | -11.4264 | 1029518 | Asthma |
| rs9689836   | 6 | 32599826 | T | A | 0.1170 | -0.0825 | 0.0094 | 1.80E-18 | -8.7693  | 1024845 | Asthma |
| rs9270720   | 6 | 32599850 | T | C | 0.2989 | -0.0745 | 0.0065 | 2.88E-30 | -11.4324 | 1029518 | Asthma |
| rs9689437   | 6 | 32599873 | C | T | 0.1240 | -0.0772 | 0.0089 | 5.18E-18 | -8.6494  | 1029518 | Asthma |
| rs62405652  | 6 | 32600007 | C | A | 0.0788 | -0.1141 | 0.0100 | 4.17E-30 | -11.4007 | 1180923 | Asthma |
| rs592362    | 6 | 32600018 | G | A | 0.2097 | 0.0422  | 0.0064 | 5.97E-11 | 6.5445   | 1121295 | Asthma |
| rs9270723   | 6 | 32600021 | G | T | 0.2997 | -0.0745 | 0.0065 | 3.07E-30 | -11.4269 | 1029518 | Asthma |
| rs9270724   | 6 | 32600043 | A | T | 0.2996 | -0.0746 | 0.0065 | 2.76E-30 | -11.4359 | 1029518 | Asthma |
| rs4341046   | 6 | 32600103 | C | T | 0.2997 | -0.0747 | 0.0065 | 2.24E-30 | -11.4542 | 1029518 | Asthma |
| rs28752490  | 6 | 32600120 | A | G | 0.3705 | 0.0666  | 0.0054 | 2.68E-35 | 12.3981  | 1180923 | Asthma |
| rs3998183   | 6 | 32600169 | T | C | 0.2078 | 0.0388  | 0.0069 | 2.36E-08 | 5.5834   | 1029518 | Asthma |
| rs9270727   | 6 | 32600177 | T | C | 0.3021 | -0.0731 | 0.0065 | 3.59E-29 | -11.2112 | 1029518 | Asthma |
| rs9270729   | 6 | 32600183 | G | A | 0.3021 | -0.0731 | 0.0065 | 3.59E-29 | -11.2112 | 1029518 | Asthma |
| rs9270732   | 6 | 32600241 | C | T | 0.3000 | -0.0746 | 0.0065 | 2.47E-30 | -11.4458 | 1029518 | Asthma |
| rs9270734   | 6 | 32600308 | T | C | 0.3034 | -0.0772 | 0.0073 | 5.45E-26 | -10.5433 | 934923  | Asthma |
| rs112493725 | 6 | 32600313 | C | T | 0.1162 | -0.0897 | 0.0117 | 1.46E-14 | -7.6917  | 778845  | Asthma |
| rs9270735   | 6 | 32600319 | T | C | 0.3032 | -0.0769 | 0.0073 | 8.09E-26 | -10.5062 | 934923  | Asthma |
| rs9270736   | 6 | 32600320 | G | A | 0.3032 | -0.0768 | 0.0073 | 9.57E-26 | -10.4904 | 934923  | Asthma |
| rs9270737   | 6 | 32600330 | A | G | 0.3070 | -0.0746 | 0.0073 | 1.69E-24 | -10.2158 | 934923  | Asthma |
| rs566147002 | 6 | 32600339 | T | C | 0.0386 | -0.1310 | 0.0189 | 4.41E-12 | -6.9231  | 934923  | Asthma |
| rs9270738   | 6 | 32600341 | T | C | 0.3037 | -0.0766 | 0.0073 | 1.26E-25 | -10.4641 | 934923  | Asthma |
| rs28752492  | 6 | 32600361 | A | G | 0.3678 | 0.0703  | 0.0067 | 1.02E-25 | 10.4840  | 934923  | Asthma |
| rs7450706   | 6 | 32600362 | T | C | 0.0588 | -0.0948 | 0.0134 | 1.42E-12 | -7.0826  | 1086328 | Asthma |
| rs35117964  | 6 | 32600369 | G | A | 0.1769 | 0.1487  | 0.0078 | 2.05E-80 | 18.9897  | 1026700 | Asthma |
| rs28752493  | 6 | 32600388 | C | G | 0.3818 | 0.0865  | 0.0079 | 3.30E-28 | 11.0131  | 778845  | Asthma |
| rs9270740   | 6 | 32600416 | A | C | 0.2976 | -0.0962 | 0.0084 | 3.99E-30 | -11.4041 | 778845  | Asthma |

|            |   |          |   |   |        |         |        |          |          |         |        |
|------------|---|----------|---|---|--------|---------|--------|----------|----------|---------|--------|
| rs9270741  | 6 | 32600418 | C | T | 0.2976 | -0.0962 | 0.0084 | 3.99E-30 | -11.4041 | 778845  | Asthma |
| rs9270742  | 6 | 32600423 | G | C | 0.2964 | -0.0968 | 0.0085 | 4.49E-30 | -11.3937 | 778845  | Asthma |
| rs28752494 | 6 | 32600463 | A | G | 0.3818 | 0.0865  | 0.0079 | 3.37E-28 | 11.0114  | 778845  | Asthma |
| rs9270743  | 6 | 32600465 | A | G | 0.4184 | -0.0741 | 0.0078 | 1.59E-21 | -9.5288  | 778845  | Asthma |
| rs9270744  | 6 | 32600474 | C | T | 0.2969 | -0.0970 | 0.0085 | 2.84E-30 | -11.4337 | 778845  | Asthma |
| rs9270747  | 6 | 32600515 | A | G | 0.3691 | 0.0720  | 0.0080 | 2.46E-19 | 8.9905   | 778845  | Asthma |
| rs9270748  | 6 | 32600522 | A | G | 0.2981 | -0.0965 | 0.0084 | 2.38E-30 | -11.4488 | 778845  | Asthma |
| rs28752495 | 6 | 32600538 | T | C | 0.3819 | 0.0865  | 0.0079 | 3.39E-28 | 11.0108  | 778845  | Asthma |
| rs9270749  | 6 | 32600539 | A | G | 0.2972 | -0.0958 | 0.0084 | 8.00E-30 | -11.3434 | 778845  | Asthma |
| rs28752496 | 6 | 32600544 | C | T | 0.3823 | 0.0864  | 0.0079 | 3.61E-28 | 11.0052  | 778845  | Asthma |
| rs34117221 | 6 | 32600547 | G | A | 0.1804 | 0.1836  | 0.0100 | 2.27E-75 | 18.3702  | 778845  | Asthma |
| rs9270752  | 6 | 32600649 | T | C | 0.2046 | 0.0523  | 0.0082 | 1.71E-10 | 6.3855   | 870622  | Asthma |
| rs9270753  | 6 | 32600652 | C | T | 0.2949 | -0.0894 | 0.0075 | 3.90E-33 | -11.9923 | 847307  | Asthma |
| rs34331363 | 6 | 32600662 | T | C | 0.1771 | 0.1855  | 0.0102 | 2.35E-74 | 18.2440  | 778845  | Asthma |
| rs35226637 | 6 | 32600671 | A | G | 0.1778 | 0.1858  | 0.0102 | 1.20E-74 | 18.2804  | 778845  | Asthma |
| rs9270754  | 6 | 32600694 | G | A | 0.2948 | -0.0895 | 0.0075 | 3.77E-33 | -11.9951 | 847307  | Asthma |
| rs28752497 | 6 | 32600704 | A | T | 0.3651 | 0.0701  | 0.0067 | 2.43E-25 | 10.4019  | 934923  | Asthma |
| rs9270755  | 6 | 32600745 | G | A | 0.2970 | -0.0956 | 0.0084 | 1.07E-29 | -11.3177 | 778845  | Asthma |
| rs9270756  | 6 | 32600761 | A | G | 0.2971 | -0.0956 | 0.0084 | 1.07E-29 | -11.3180 | 778845  | Asthma |
| rs11754550 | 6 | 32600801 | C | T | 0.0593 | -0.1280 | 0.0178 | 6.74E-13 | -7.1848  | 778845  | Asthma |
| rs9270757  | 6 | 32600818 | T | C | 0.2973 | -0.0954 | 0.0084 | 1.23E-29 | -11.3057 | 778845  | Asthma |
| rs9270758  | 6 | 32600819 | G | A | 0.2973 | -0.0954 | 0.0084 | 1.23E-29 | -11.3057 | 778845  | Asthma |
| rs11752186 | 6 | 32600895 | A | G | 0.0819 | -0.0990 | 0.0113 | 2.53E-18 | -8.7310  | 998712  | Asthma |
| rs11752154 | 6 | 32600901 | A | C | 0.0765 | -0.1228 | 0.0148 | 1.34E-16 | -8.2704  | 870622  | Asthma |
| rs9270759  | 6 | 32600904 | C | T | 0.2975 | -0.0958 | 0.0084 | 5.79E-30 | -11.3715 | 778845  | Asthma |
| rs9270760  | 6 | 32600905 | A | G | 0.2975 | -0.0958 | 0.0084 | 5.79E-30 | -11.3715 | 778845  | Asthma |
| rs9270761  | 6 | 32600908 | T | C | 0.2299 | 0.0803  | 0.0086 | 1.23E-20 | 9.3139   | 870622  | Asthma |
| rs9270762  | 6 | 32600909 | A | G | 0.2972 | -0.0956 | 0.0084 | 9.39E-30 | -11.3294 | 778845  | Asthma |
| rs9270763  | 6 | 32600918 | C | T | 0.2975 | -0.0958 | 0.0084 | 6.39E-30 | -11.3630 | 778845  | Asthma |
| rs9270764  | 6 | 32600924 | C | T | 0.2975 | -0.0958 | 0.0084 | 6.39E-30 | -11.3630 | 778845  | Asthma |
| rs9270765  | 6 | 32600963 | G | T | 0.2972 | -0.0960 | 0.0084 | 5.90E-30 | -11.3699 | 778845  | Asthma |
| rs9270766  | 6 | 32600986 | G | A | 0.2971 | -0.0960 | 0.0084 | 6.12E-30 | -11.3668 | 778845  | Asthma |
| rs28752500 | 6 | 32600992 | T | G | 0.3786 | 0.0848  | 0.0079 | 7.35E-27 | 10.7302  | 778845  | Asthma |
| rs9270767  | 6 | 32600993 | T | C | 0.2972 | -0.0960 | 0.0084 | 6.04E-30 | -11.3678 | 778845  | Asthma |
| rs35653258 | 6 | 32601006 | A | C | 0.1771 | 0.1851  | 0.0102 | 4.69E-74 | 18.2050  | 778845  | Asthma |
| rs9270768  | 6 | 32601028 | T | C | 0.2971 | -0.0956 | 0.0084 | 9.59E-30 | -11.3276 | 778845  | Asthma |
| rs10947314 | 6 | 32601029 | A | G | 0.1187 | -0.0992 | 0.0127 | 4.77E-15 | -7.8329  | 778845  | Asthma |
| rs10947315 | 6 | 32601160 | C | T | 0.1223 | -0.0774 | 0.0090 | 6.25E-18 | -8.6279  | 1029518 | Asthma |
| rs28752501 | 6 | 32601218 | A | G | 0.3692 | 0.0677  | 0.0061 | 7.24E-29 | 11.1490  | 1003385 | Asthma |
| rs9270774  | 6 | 32601235 | G | C | 0.2961 | -0.0901 | 0.0075 | 1.20E-33 | -12.0898 | 847307  | Asthma |
| rs9270775  | 6 | 32601248 | C | T | 0.2962 | -0.0903 | 0.0075 | 9.52E-34 | -12.1086 | 847307  | Asthma |
| rs9270776  | 6 | 32601250 | G | A | 0.2962 | -0.0903 | 0.0075 | 9.68E-34 | -12.1071 | 847307  | Asthma |
| rs9270777  | 6 | 32601261 | T | A | 0.2961 | -0.0902 | 0.0075 | 1.17E-33 | -12.0918 | 847307  | Asthma |
| rs9270778  | 6 | 32601273 | A | G | 0.2971 | -0.0956 | 0.0084 | 1.09E-29 | -11.3165 | 778845  | Asthma |
| rs9270780  | 6 | 32601331 | C | T | 0.2972 | -0.0956 | 0.0084 | 1.05E-29 | -11.3198 | 778845  | Asthma |
| rs9270784  | 6 | 32601380 | C | T | 0.2976 | -0.0955 | 0.0084 | 1.15E-29 | -11.3118 | 778845  | Asthma |
| rs9270785  | 6 | 32601381 | T | C | 0.2976 | -0.0955 | 0.0084 | 1.15E-29 | -11.3118 | 778845  | Asthma |
| rs28752504 | 6 | 32601385 | C | T | 0.4763 | 0.0788  | 0.0079 | 3.15E-23 | 9.9278   | 778845  | Asthma |
| rs9270786  | 6 | 32601387 | C | T | 0.3426 | -0.0955 | 0.0084 | 4.69E-30 | -11.3902 | 778845  | Asthma |
| rs9270788  | 6 | 32601428 | G | A | 0.2979 | -0.0951 | 0.0084 | 1.94E-29 | -11.2658 | 778845  | Asthma |
| rs9270790  | 6 | 32601453 | G | A | 0.1983 | -0.0723 | 0.0101 | 6.33E-13 | -7.1934  | 778845  | Asthma |
| rs9270791  | 6 | 32601455 | C | T | 0.3106 | -0.0937 | 0.0084 | 1.14E-28 | -11.1085 | 778845  | Asthma |
| rs9270792  | 6 | 32601456 | A | G | 0.3106 | -0.0937 | 0.0084 | 1.14E-28 | -11.1085 | 778845  | Asthma |
| rs9270794  | 6 | 32601483 | T | C | 0.3032 | -0.0965 | 0.0084 | 2.78E-30 | -11.4356 | 778845  | Asthma |
| rs9270795  | 6 | 32601486 | C | T | 0.3047 | -0.0974 | 0.0084 | 7.51E-31 | -11.5485 | 778845  | Asthma |
| rs9270797  | 6 | 32601520 | A | G | 0.4164 | -0.1214 | 0.0079 | 9.98E-54 | -15.4318 | 778845  | Asthma |
| rs9270800  | 6 | 32601558 | T | C | 0.2973 | -0.0959 | 0.0084 | 7.27E-30 | -11.3517 | 778845  | Asthma |
| rs2647059  | 6 | 32601585 | C | G | 0.1812 | 0.1818  | 0.0099 | 8.70E-75 | 18.2969  | 778845  | Asthma |
| rs9270801  | 6 | 32601610 | A | G | 0.2973 | -0.0960 | 0.0084 | 6.35E-30 | -11.3636 | 778845  | Asthma |
| rs9270802  | 6 | 32601615 | T | C | 0.2973 | -0.0960 | 0.0084 | 6.35E-30 | -11.3636 | 778845  | Asthma |
| rs9270804  | 6 | 32601645 | A | T | 0.2973 | -0.0960 | 0.0084 | 6.16E-30 | -11.3663 | 778845  | Asthma |
| rs28864514 | 6 | 32601654 | G | A | 0.1159 | -0.0899 | 0.0117 | 1.44E-14 | -7.6932  | 778845  | Asthma |
| rs11752754 | 6 | 32601723 | T | C | 0.0837 | -0.1023 | 0.0109 | 4.40E-21 | -9.4222  | 1024845 | Asthma |
| rs28510673 | 6 | 32601729 | T | G | 0.1099 | -0.0784 | 0.0093 | 3.37E-17 | -8.4329  | 998712  | Asthma |
| rs28567460 | 6 | 32601736 | C | G | 0.1198 | -0.0771 | 0.0086 | 2.49E-19 | -8.9893  | 1180923 | Asthma |
| rs9270805  | 6 | 32601779 | T | A | 0.2967 | -0.0786 | 0.0059 | 2.74E-40 | -13.2875 | 1180923 | Asthma |
| rs9270806  | 6 | 32601786 | T | C | 0.4027 | -0.0427 | 0.0060 | 8.05E-13 | -7.1602  | 1029518 | Asthma |
| rs9270807  | 6 | 32601795 | A | G | 0.4027 | -0.0427 | 0.0060 | 8.45E-13 | -7.1537  | 1029518 | Asthma |
| rs9270808  | 6 | 32601830 | G | C | 0.2996 | -0.0745 | 0.0065 | 3.32E-30 | -11.4199 | 1029518 | Asthma |
| rs9270809  | 6 | 32601831 | G | A | 0.2971 | -0.0791 | 0.0059 | 7.91E-41 | -13.3801 | 1180923 | Asthma |
| rs11757382 | 6 | 32601860 | C | A | 0.1911 | -0.1045 | 0.0068 | 4.98E-53 | -15.3278 | 1180923 | Asthma |
| rs9270810  | 6 | 32601882 | T | C | 0.2997 | -0.0744 | 0.0065 | 3.64E-30 | -11.4120 | 1029518 | Asthma |
| rs28605404 | 6 | 32601910 | G | A | 0.1199 | -0.0773 | 0.0086 | 1.86E-19 | -9.0215  | 1180923 | Asthma |
| rs477515   | 6 | 32601914 | A | G | 0.2991 | 0.1101  | 0.0058 | 2.47E-80 | 18.9809  | 1121295 | Asthma |



|             |   |          |   |   |        |         |        |          |          |         |        |
|-------------|---|----------|---|---|--------|---------|--------|----------|----------|---------|--------|
| rs6938928   | 6 | 32601934 | C | T | 0.1732 | -0.1054 | 0.0077 | 1.10E-42 | -13.6946 | 1095162 | Asthma |
| rs6938929   | 6 | 32601935 | A | T | 0.1947 | -0.1113 | 0.0077 | 6.51E-48 | -14.5423 | 1003385 | Asthma |
| rs9270811   | 6 | 32601944 | A | G | 0.2996 | -0.0745 | 0.0065 | 3.12E-30 | -11.4254 | 1029518 | Asthma |
| rs476775    | 6 | 32601945 | T | G | 0.4022 | -0.0423 | 0.0061 | 3.92E-12 | -6.9403  | 1003385 | Asthma |
| rs9270813   | 6 | 32602013 | C | T | 0.2967 | -0.0786 | 0.0059 | 2.85E-40 | -13.2843 | 1180923 | Asthma |
| rs476602    | 6 | 32602015 | C | T | 0.4030 | -0.0427 | 0.0060 | 8.31E-13 | -7.1560  | 1029518 | Asthma |
| rs72847585  | 6 | 32602025 | A | C | 0.1090 | -0.0756 | 0.0103 | 2.18E-13 | -7.3373  | 873440  | Asthma |
| rs622137    | 6 | 32602075 | A | G | 0.2957 | 0.1170  | 0.0063 | 7.10E-77 | 18.5579  | 1029518 | Asthma |
| rs9270815   | 6 | 32602082 | A | G | 0.1779 | -0.0561 | 0.0077 | 3.53E-13 | -7.2726  | 1094744 | Asthma |
| rs9270816   | 6 | 32602102 | T | G | 0.2967 | -0.0786 | 0.0059 | 2.92E-40 | -13.2826 | 1180923 | Asthma |
| rs9270817   | 6 | 32602134 | A | G | 0.2968 | -0.0785 | 0.0059 | 3.19E-40 | -13.2760 | 1180923 | Asthma |
| rs116067873 | 6 | 32602176 | T | C | 0.0729 | -0.1417 | 0.0128 | 1.74E-28 | -11.0712 | 934923  | Asthma |
| rs9270819   | 6 | 32602195 | T | C | 0.3219 | -0.0785 | 0.0067 | 1.66E-31 | -11.6775 | 1026700 | Asthma |
| rs9270820   | 6 | 32602220 | C | A | 0.3005 | -0.0752 | 0.0067 | 1.27E-29 | -11.3033 | 1003385 | Asthma |
| rs535476317 | 6 | 32602242 | A | G | 0.5036 | 0.1128  | 0.0081 | 4.08E-44 | 13.9314  | 778845  | Asthma |
| rs9270822   | 6 | 32602248 | C | T | 0.3446 | -0.0640 | 0.0073 | 1.15E-18 | -8.8195  | 934923  | Asthma |
| rs9270823   | 6 | 32602274 | C | G | 0.3007 | -0.0753 | 0.0067 | 1.02E-29 | -11.3221 | 1003385 | Asthma |
| rs9270824   | 6 | 32602278 | T | G | 0.3172 | -0.0721 | 0.0062 | 7.41E-31 | -11.5498 | 1062616 | Asthma |
| rs9270826   | 6 | 32602305 | G | T | 0.3007 | -0.0753 | 0.0067 | 1.01E-29 | -11.3234 | 1003385 | Asthma |
| rs9270827   | 6 | 32602355 | C | A | 0.2998 | -0.0746 | 0.0065 | 2.41E-30 | -11.4479 | 1029518 | Asthma |
| rs9270828   | 6 | 32602367 | T | C | 0.2998 | -0.0746 | 0.0065 | 2.42E-30 | -11.4474 | 1029518 | Asthma |
| rs2516052   | 6 | 32602370 | G | A | 0.2950 | 0.1179  | 0.0064 | 3.55E-76 | 18.4704  | 1068611 | Asthma |
| rs2454137   | 6 | 32602372 | G | A | 0.2075 | 0.0386  | 0.0069 | 2.64E-08 | 5.5636   | 1029518 | Asthma |
| rs72847586  | 6 | 32602395 | C | T | 0.1206 | -0.0767 | 0.0095 | 9.16E-16 | -8.0376  | 1029518 | Asthma |
| rs9270830   | 6 | 32602404 | G | A | 0.2996 | -0.0745 | 0.0065 | 2.98E-30 | -11.4296 | 1029518 | Asthma |
| rs2516051   | 6 | 32602407 | T | C | 0.2934 | 0.1114  | 0.0058 | 6.54E-82 | 19.1705  | 1186521 | Asthma |
| rs72847588  | 6 | 32602439 | A | G | 0.1206 | -0.0767 | 0.0095 | 9.57E-16 | -8.0323  | 1029518 | Asthma |
| rs9270831   | 6 | 32602444 | G | A | 0.2996 | -0.0745 | 0.0065 | 3.21E-30 | -11.4229 | 1029518 | Asthma |
| rs9270832   | 6 | 32602451 | T | C | 0.2996 | -0.0745 | 0.0065 | 3.21E-30 | -11.4229 | 1029518 | Asthma |
| rs9270833   | 6 | 32602461 | T | C | 0.2996 | -0.0745 | 0.0065 | 3.22E-30 | -11.4227 | 1029518 | Asthma |
| rs9270834   | 6 | 32602489 | C | A | 0.2997 | -0.0745 | 0.0065 | 3.07E-30 | -11.4268 | 1029518 | Asthma |
| rs9270835   | 6 | 32602504 | G | A | 0.2997 | -0.0745 | 0.0065 | 3.05E-30 | -11.4275 | 1029518 | Asthma |
| rs34039593  | 6 | 32602534 | G | T | 0.1781 | 0.1439  | 0.0074 | 2.69E-84 | 19.4542  | 1086328 | Asthma |
| rs9270836   | 6 | 32602548 | A | G | 0.2972 | -0.0786 | 0.0059 | 2.84E-40 | -13.2846 | 1180923 | Asthma |
| rs2516050   | 6 | 32602575 | A | G | 0.4004 | -0.0369 | 0.0062 | 2.13E-09 | -5.9876  | 1026700 | Asthma |
| rs9270839   | 6 | 32602598 | A | C | 0.2999 | -0.0771 | 0.0061 | 5.85E-37 | -12.7008 | 1121295 | Asthma |
| rs9270840   | 6 | 32602600 | C | T | 0.3006 | -0.0753 | 0.0067 | 1.13E-29 | -11.3134 | 1003385 | Asthma |
| rs2516049   | 6 | 32602623 | C | T | 0.2492 | 0.0942  | 0.0070 | 7.28E-41 | 13.3861  | 1026700 | Asthma |
| rs2454138   | 6 | 32602624 | A | G | 0.2567 | 0.0915  | 0.0063 | 9.83E-48 | 14.5144  | 1095162 | Asthma |
| rs2647062   | 6 | 32602640 | C | A | 0.1719 | 0.1552  | 0.0079 | 5.77E-87 | 19.7664  | 1003385 | Asthma |
| rs9270841   | 6 | 32602641 | T | G | 0.2996 | -0.0745 | 0.0065 | 2.91E-30 | -11.4316 | 1029518 | Asthma |
| rs9270842   | 6 | 32602684 | C | T | 0.2972 | -0.0782 | 0.0059 | 7.25E-40 | -13.2144 | 1180923 | Asthma |
| rs9270843   | 6 | 32602701 | A | G | 0.3001 | -0.0743 | 0.0065 | 4.12E-30 | -11.4014 | 1029518 | Asthma |
| rs72847591  | 6 | 32602717 | T | C | 0.1201 | -0.0769 | 0.0086 | 2.69E-19 | -8.9807  | 1180923 | Asthma |
| rs9270844   | 6 | 32602773 | T | G | 0.2970 | -0.0784 | 0.0059 | 3.89E-40 | -13.2612 | 1180923 | Asthma |
| rs9270845   | 6 | 32602794 | T | C | 0.3005 | -0.0769 | 0.0061 | 7.36E-37 | -12.6828 | 1121295 | Asthma |
| rs558721    | 6 | 32602796 | T | C | 0.1759 | 0.1539  | 0.0077 | 1.85E-88 | 19.9389  | 1003385 | Asthma |
| rs9270846   | 6 | 32602800 | A | T | 0.2996 | -0.0745 | 0.0065 | 3.11E-30 | -11.4259 | 1029518 | Asthma |
| rs9270847   | 6 | 32602825 | G | T | 0.2989 | -0.0783 | 0.0059 | 3.59E-40 | -13.2671 | 1180923 | Asthma |
| rs9270848   | 6 | 32602832 | C | T | 0.2989 | -0.0781 | 0.0059 | 4.98E-40 | -13.2427 | 1180923 | Asthma |
| rs9270849   | 6 | 32602872 | C | T | 0.2998 | -0.0745 | 0.0065 | 3.04E-30 | -11.4277 | 1029518 | Asthma |
| rs9270850   | 6 | 32602940 | G | A | 0.2968 | -0.0786 | 0.0059 | 2.90E-40 | -13.2832 | 1180923 | Asthma |
| rs9270851   | 6 | 32602999 | C | T | 0.2995 | -0.0744 | 0.0065 | 3.93E-30 | -11.4053 | 1029518 | Asthma |
| rs9270852   | 6 | 32603020 | G | A | 0.2995 | -0.0790 | 0.0060 | 1.14E-39 | -13.1804 | 1154790 | Asthma |
| rs9270853   | 6 | 32603023 | G | A | 0.2995 | -0.0744 | 0.0065 | 3.69E-30 | -11.4109 | 1029518 | Asthma |
| rs9270854   | 6 | 32603032 | A | G | 0.2995 | -0.0744 | 0.0065 | 4.04E-30 | -11.4031 | 1029518 | Asthma |
| rs678770    | 6 | 32603040 | A | T | 0.2002 | 0.0408  | 0.0066 | 7.06E-10 | 6.1648   | 1121295 | Asthma |
| rs9270856   | 6 | 32603062 | A | G | 0.3030 | -0.0764 | 0.0061 | 1.83E-36 | -12.6114 | 1121295 | Asthma |
| rs9270857   | 6 | 32603072 | G | A | 0.2996 | -0.0744 | 0.0065 | 3.56E-30 | -11.4141 | 1029518 | Asthma |
| rs9270858   | 6 | 32603082 | C | T | 0.2996 | -0.0745 | 0.0065 | 3.41E-30 | -11.4176 | 1029518 | Asthma |
| rs556025    | 6 | 32603103 | T | C | 0.3022 | 0.1104  | 0.0064 | 1.00E-66 | 17.2563  | 1026700 | Asthma |
| rs9270859   | 6 | 32603117 | T | C | 0.2968 | -0.0786 | 0.0059 | 2.80E-40 | -13.2856 | 1180923 | Asthma |
| rs679242    | 6 | 32603181 | T | G | 0.1759 | 0.1521  | 0.0076 | 4.38E-90 | 20.1254  | 1029518 | Asthma |
| rs679243    | 6 | 32603182 | T | C | 0.4019 | -0.0421 | 0.0061 | 5.20E-12 | -6.9001  | 1003385 | Asthma |
| rs9270864   | 6 | 32603224 | T | C | 0.2997 | -0.0746 | 0.0065 | 2.73E-30 | -11.4372 | 1029518 | Asthma |
| rs9270865   | 6 | 32603234 | G | C | 0.2968 | -0.0788 | 0.0059 | 1.96E-40 | -13.3125 | 1180923 | Asthma |
| rs9270866   | 6 | 32603266 | G | A | 0.2973 | -0.0787 | 0.0059 | 2.04E-40 | -13.3096 | 1180923 | Asthma |
| rs680061    | 6 | 32603321 | G | A | 0.4009 | -0.0413 | 0.0061 | 1.50E-11 | -6.7479  | 1003385 | Asthma |
| rs2760990   | 6 | 32603333 | A | G | 0.1761 | 0.1537  | 0.0077 | 3.74E-88 | 19.9044  | 1003385 | Asthma |
| rs28383179  | 6 | 32603339 | A | T | 0.2993 | 0.1227  | 0.0071 | 1.72E-67 | 17.3584  | 934923  | Asthma |
| rs28383180  | 6 | 32603341 | C | A | 0.2992 | 0.1226  | 0.0071 | 2.06E-67 | 17.3471  | 934923  | Asthma |
| rs2647066   | 6 | 32603345 | T | C | 0.1777 | 0.1378  | 0.0069 | 2.85E-89 | 20.0328  | 1154790 | Asthma |
| rs9270873   | 6 | 32603424 | G | A | 0.2997 | -0.0744 | 0.0065 | 3.58E-30 | -11.4134 | 1029518 | Asthma |
| rs9270874   | 6 | 32603450 | G | A | 0.2968 | -0.0787 | 0.0059 | 2.44E-40 | -13.2960 | 1180923 | Asthma |

|             |   |          |   |   |        |         |        |           |          |         |        |
|-------------|---|----------|---|---|--------|---------|--------|-----------|----------|---------|--------|
| rs28409699  | 6 | 32603518 | T | C | 0.1206 | -0.0787 | 0.0088 | 4.58E-19  | -8.9221  | 1121295 | Asthma |
| rs9270875   | 6 | 32603533 | A | G | 0.3021 | -0.0772 | 0.0066 | 3.50E-31  | -11.6139 | 1003385 | Asthma |
| rs9270876   | 6 | 32603537 | A | T | 0.3987 | -0.0448 | 0.0068 | 3.84E-11  | -6.6101  | 934923  | Asthma |
| rs9270877   | 6 | 32603541 | G | A | 0.3986 | -0.0448 | 0.0068 | 3.80E-11  | -6.6118  | 934923  | Asthma |
| rs9270878   | 6 | 32603543 | A | G | 0.3986 | -0.0448 | 0.0068 | 3.60E-11  | -6.6197  | 934923  | Asthma |
| rs199917364 | 6 | 32603572 | G | T | 0.3587 | -0.1060 | 0.0084 | 7.11E-37  | -12.6850 | 778845  | Asthma |
| rs561026852 | 6 | 32603574 | G | A | 0.3587 | -0.1060 | 0.0084 | 7.11E-37  | -12.6850 | 778845  | Asthma |
| rs9270879   | 6 | 32603870 | C | A | 0.2976 | -0.0964 | 0.0084 | 3.37E-30  | -11.4187 | 778845  | Asthma |
| rs9270880   | 6 | 32603882 | G | T | 0.1884 | -0.0757 | 0.0101 | 7.09E-14  | -7.4862  | 778845  | Asthma |
| rs9270881   | 6 | 32603913 | C | T | 0.2953 | -0.0900 | 0.0075 | 1.47E-33  | -12.0728 | 847307  | Asthma |
| rs9270882   | 6 | 32603928 | G | C | 0.3036 | -0.0774 | 0.0073 | 3.57E-26  | -10.5830 | 934923  | Asthma |
| rs9270884   | 6 | 32603957 | G | T | 0.4243 | -0.0393 | 0.0068 | 8.41E-09  | -5.7599  | 934923  | Asthma |
| rs9270885   | 6 | 32603994 | G | A | 0.3044 | -0.0790 | 0.0073 | 3.87E-27  | -10.7892 | 934923  | Asthma |
| rs9270887   | 6 | 32604012 | C | A | 0.3047 | -0.0794 | 0.0073 | 2.20E-27  | -10.8412 | 934923  | Asthma |
| rs4478449   | 6 | 32604024 | A | G | 0.1813 | -0.0525 | 0.0086 | 1.10E-09  | -6.0945  | 934923  | Asthma |
| rs28383182  | 6 | 32604034 | A | G | 0.2712 | 0.1282  | 0.0074 | 1.62E-66  | 17.2292  | 934923  | Asthma |
| rs9270895   | 6 | 32604096 | C | T | 0.3813 | -0.0440 | 0.0068 | 1.26E-10  | -6.4317  | 994154  | Asthma |
| rs9270896   | 6 | 32604099 | A | G | 0.3946 | -0.0701 | 0.0069 | 1.72E-24  | -10.2137 | 994154  | Asthma |
| rs9270897   | 6 | 32604113 | G | A | 0.3045 | -0.0792 | 0.0073 | 2.88E-27  | -10.8162 | 934923  | Asthma |
| rs4566915   | 6 | 32604114 | A | G | 0.1233 | -0.0903 | 0.0108 | 8.02E-17  | -8.3306  | 934923  | Asthma |
| rs9270898   | 6 | 32604126 | T | C | 0.3448 | -0.0743 | 0.0067 | 2.84E-28  | -11.0268 | 994154  | Asthma |
| rs9270900   | 6 | 32604155 | A | G | 0.3045 | -0.0781 | 0.0073 | 1.40E-26  | -10.6707 | 934923  | Asthma |
| rs9270901   | 6 | 32604156 | C | A | 0.3045 | -0.0781 | 0.0073 | 1.40E-26  | -10.6707 | 934923  | Asthma |
| rs17425622  | 6 | 32604184 | C | T | 0.1776 | 0.1387  | 0.0069 | 7.37E-90  | 20.1009  | 1154790 | Asthma |
| rs9270902   | 6 | 32604185 | A | G | 0.2974 | -0.0786 | 0.0059 | 9.12E-41  | -13.3695 | 1180923 | Asthma |
| rs526784    | 6 | 32604253 | A | T | 0.2911 | 0.1187  | 0.0063 | 6.66E-79  | 18.8070  | 1094744 | Asthma |
| rs585305    | 6 | 32604271 | T | G | 0.2943 | 0.1108  | 0.0059 | 4.40E-78  | 18.7062  | 1160388 | Asthma |
| rs9270904   | 6 | 32604283 | T | C | 0.3000 | -0.0748 | 0.0065 | 1.81E-30  | -11.4728 | 1029518 | Asthma |
| rs9270905   | 6 | 32604299 | G | A | 0.3007 | -0.0755 | 0.0066 | 7.12E-30  | -11.3535 | 1003385 | Asthma |
| rs9270906   | 6 | 32604302 | T | C | 0.3007 | -0.0755 | 0.0066 | 7.09E-30  | -11.3539 | 1003385 | Asthma |
| rs9270907   | 6 | 32604305 | C | T | 0.3066 | -0.0747 | 0.0061 | 2.17E-34  | -12.2294 | 1095162 | Asthma |
| rs34102154  | 6 | 32604329 | A | G | 0.1914 | -0.1041 | 0.0068 | 3.88E-53  | -15.3445 | 1180923 | Asthma |
| rs585669    | 6 | 32604336 | G | A | 0.5087 | -0.0307 | 0.0052 | 2.78E-09  | -5.9441  | 1180923 | Asthma |
| rs9270908   | 6 | 32604371 | G | A | 0.2977 | -0.0783 | 0.0059 | 1.83E-40  | -13.3176 | 1180923 | Asthma |
| rs4382332   | 6 | 32604378 | C | T | 0.1200 | -0.0761 | 0.0085 | 3.79E-19  | -8.9429  | 1180923 | Asthma |
| rs9270909   | 6 | 32604402 | A | G | 0.2982 | -0.0775 | 0.0059 | 8.80E-40  | -13.1997 | 1180923 | Asthma |
| rs9270911   | 6 | 32604425 | C | T | 0.4921 | -0.1281 | 0.0053 | 6.15E-128 | -24.0630 | 1220016 | Asthma |
| rs9270912   | 6 | 32604447 | A | G | 0.2996 | -0.0745 | 0.0065 | 3.53E-30  | -11.4149 | 1029518 | Asthma |
| rs9270913   | 6 | 32604452 | A | G | 0.2996 | -0.0745 | 0.0065 | 3.52E-30  | -11.4149 | 1029518 | Asthma |
| rs28582842  | 6 | 32604457 | A | G | 0.1208 | -0.0786 | 0.0098 | 7.98E-16  | -8.0546  | 1003385 | Asthma |
| rs9270914   | 6 | 32604472 | A | T | 0.3008 | -0.0753 | 0.0067 | 1.16E-29  | -11.3111 | 1003385 | Asthma |
| rs28707773  | 6 | 32604501 | A | C | 0.1418 | -0.0670 | 0.0087 | 1.05E-14  | -7.7330  | 1095162 | Asthma |
| rs9270917   | 6 | 32604517 | G | T | 0.1800 | -0.0545 | 0.0079 | 4.87E-12  | -6.9093  | 1003385 | Asthma |
| rs9270918   | 6 | 32604525 | G | A | 0.3010 | -0.0754 | 0.0067 | 9.10E-30  | -11.3320 | 1003385 | Asthma |
| rs9270919   | 6 | 32604528 | G | T | 0.2895 | -0.0781 | 0.0073 | 1.35E-26  | -10.6739 | 635365  | Asthma |
| rs586610    | 6 | 32604534 | C | T | 0.2748 | 0.1137  | 0.0061 | 2.01E-76  | 18.5014  | 1095162 | Asthma |
| rs9270920   | 6 | 32604545 | C | T | 0.3002 | -0.0748 | 0.0065 | 1.85E-30  | -11.4710 | 1029518 | Asthma |
| rs9270921   | 6 | 32604549 | C | T | 0.2991 | -0.0784 | 0.0059 | 1.32E-40  | -13.3419 | 1180923 | Asthma |
| rs9270922   | 6 | 32604611 | T | C | 0.2969 | -0.0781 | 0.0059 | 3.10E-40  | -13.2782 | 1180923 | Asthma |
| rs9270923   | 6 | 32604628 | C | T | 0.1549 | -0.0522 | 0.0088 | 2.60E-09  | -5.9554  | 635365  | Asthma |
| rs9270924   | 6 | 32604631 | G | A | 0.2895 | -0.0780 | 0.0073 | 1.57E-26  | -10.6600 | 635365  | Asthma |
| rs9270925   | 6 | 32604656 | A | G | 0.3005 | -0.0753 | 0.0067 | 1.18E-29  | -11.3096 | 1003385 | Asthma |
| rs9270926   | 6 | 32604658 | C | A | 0.3051 | -0.0784 | 0.0061 | 2.34E-38  | -12.9504 | 1122244 | Asthma |
| rs9270927   | 6 | 32604674 | A | G | 0.2995 | -0.0743 | 0.0065 | 4.60E-30  | -11.3916 | 1029518 | Asthma |
| rs9270928   | 6 | 32604684 | G | T | 0.1784 | -0.0604 | 0.0070 | 4.89E-18  | -8.6560  | 1246149 | Asthma |
| rs9270931   | 6 | 32604770 | A | T | 0.2967 | -0.0784 | 0.0059 | 1.39E-40  | -13.3380 | 1180923 | Asthma |
| rs77102498  | 6 | 32604806 | G | A | 0.3004 | -0.0752 | 0.0067 | 1.39E-29  | -11.2950 | 1003385 | Asthma |
| rs9270933   | 6 | 32604882 | C | G | 0.2995 | -0.0744 | 0.0065 | 3.85E-30  | -11.4072 | 1029518 | Asthma |
| rs9270934   | 6 | 32604918 | G | C | 0.2969 | -0.0783 | 0.0059 | 1.88E-40  | -13.3158 | 1180923 | Asthma |
| rs9270935   | 6 | 32604924 | A | G | 0.2970 | -0.0782 | 0.0059 | 2.57E-40  | -13.2920 | 1180923 | Asthma |
| rs28638783  | 6 | 32604960 | A | G | 0.1199 | -0.0762 | 0.0085 | 3.48E-19  | -8.9522  | 1180923 | Asthma |
| rs9270937   | 6 | 32604980 | A | G | 0.2975 | -0.0791 | 0.0060 | 5.73E-40  | -13.2320 | 1154790 | Asthma |
| rs9270939   | 6 | 32605029 | G | A | 0.2995 | -0.0744 | 0.0065 | 3.99E-30  | -11.4040 | 1029518 | Asthma |
| rs9270940   | 6 | 32605073 | A | G | 0.3004 | -0.0752 | 0.0067 | 1.43E-29  | -11.2927 | 1003385 | Asthma |
| rs574170    | 6 | 32605127 | A | T | 0.3698 | 0.0674  | 0.0061 | 1.22E-28  | 11.1025  | 1003385 | Asthma |
| rs9270944   | 6 | 32605134 | A | G | 0.2996 | -0.0744 | 0.0065 | 3.78E-30  | -11.4088 | 1029518 | Asthma |
| rs72850016  | 6 | 32605163 | G | A | 0.1206 | -0.0766 | 0.0095 | 9.75E-16  | -8.0300  | 1029518 | Asthma |
| rs9270945   | 6 | 32605171 | A | C | 0.2996 | -0.0745 | 0.0065 | 3.20E-30  | -11.4235 | 1029518 | Asthma |
| rs9270946   | 6 | 32605175 | G | A | 0.2996 | -0.0745 | 0.0065 | 3.19E-30  | -11.4235 | 1029518 | Asthma |
| rs9270947   | 6 | 32605184 | G | C | 0.2996 | -0.0745 | 0.0065 | 3.31E-30  | -11.4204 | 1029518 | Asthma |
| rs9270948   | 6 | 32605195 | C | T | 0.2996 | -0.0745 | 0.0065 | 3.42E-30  | -11.4175 | 1029518 | Asthma |
| rs9270949   | 6 | 32605198 | T | C | 0.3353 | -0.0906 | 0.0059 | 8.57E-53  | -15.2925 | 1121295 | Asthma |
| rs9270950   | 6 | 32605250 | T | A | 0.2996 | -0.0745 | 0.0065 | 3.54E-30  | -11.4144 | 1029518 | Asthma |
| rs9270951   | 6 | 32605262 | C | T | 0.3005 | -0.0752 | 0.0067 | 1.27E-29  | -11.3029 | 1003385 | Asthma |

|             |   |          |   |   |        |         |        |           |          |         |        |
|-------------|---|----------|---|---|--------|---------|--------|-----------|----------|---------|--------|
| rs9270952   | 6 | 32605263 | A | G | 0.2996 | -0.0745 | 0.0065 | 3.56E-30  | -11.4140 | 1029518 | Asthma |
| rs9270953   | 6 | 32605268 | C | T | 0.2996 | -0.0744 | 0.0065 | 4.00E-30  | -11.4038 | 1029518 | Asthma |
| rs9270954   | 6 | 32605281 | C | T | 0.2996 | -0.0745 | 0.0065 | 3.56E-30  | -11.4140 | 1029518 | Asthma |
| rs9270955   | 6 | 32605390 | G | A | 0.3043 | -0.0695 | 0.0066 | 3.23E-26  | -10.5925 | 1064845 | Asthma |
| rs9270956   | 6 | 32605393 | T | C | 0.3043 | -0.0695 | 0.0066 | 3.23E-26  | -10.5925 | 1064845 | Asthma |
| rs601006    | 6 | 32605396 | A | G | 0.3601 | 0.0669  | 0.0060 | 1.69E-28  | 11.0733  | 1064845 | Asthma |
| rs601020    | 6 | 32605402 | A | G | 0.2515 | 0.0736  | 0.0067 | 5.30E-28  | 10.9705  | 1064845 | Asthma |
| rs601148    | 6 | 32605488 | T | G | 0.1785 | 0.1490  | 0.0076 | 1.70E-84  | 19.4770  | 1064845 | Asthma |
| rs9270959   | 6 | 32605490 | G | A | 0.2958 | -0.0702 | 0.0066 | 2.78E-26  | -10.6066 | 1064845 | Asthma |
| rs9270960   | 6 | 32605511 | T | C | 0.3028 | -0.0706 | 0.0066 | 6.23E-27  | -10.7454 | 1064845 | Asthma |
| rs9270961   | 6 | 32605512 | G | A | 0.3007 | -0.0702 | 0.0061 | 6.81E-31  | -11.5568 | 1133307 | Asthma |
| rs601481    | 6 | 32605516 | C | G | 0.3611 | 0.0677  | 0.0060 | 3.18E-29  | 11.2219  | 1064845 | Asthma |
| rs36022997  | 6 | 32605584 | C | A | 0.1202 | -0.0692 | 0.0078 | 8.47E-19  | -8.8536  | 1310845 | Asthma |
| rs601945    | 6 | 32605638 | G | A | 0.1705 | 0.1369  | 0.0064 | 3.47E-100 | 21.2482  | 1310845 | Asthma |
| rs9270962   | 6 | 32605657 | C | T | 0.2987 | -0.0707 | 0.0059 | 1.27E-32  | -11.8940 | 1224666 | Asthma |
| rs9270963   | 6 | 32605664 | A | C | 0.2995 | -0.0712 | 0.0060 | 4.95E-32  | -11.7799 | 1198533 | Asthma |
| rs9270964   | 6 | 32605665 | T | A | 0.2987 | -0.0707 | 0.0059 | 1.26E-32  | -11.8946 | 1224666 | Asthma |
| rs9270965   | 6 | 32605694 | A | G | 0.3583 | -0.0369 | 0.0057 | 1.09E-10  | -6.4538  | 1159440 | Asthma |
| rs9270967   | 6 | 32605766 | C | T | 0.2999 | -0.0697 | 0.0060 | 1.84E-31  | -11.6690 | 1159440 | Asthma |
| rs9270968   | 6 | 32605777 | C | T | 0.2999 | -0.0697 | 0.0060 | 1.80E-31  | -11.6708 | 1159440 | Asthma |
| rs9270969   | 6 | 32605783 | A | G | 0.2999 | -0.0697 | 0.0060 | 1.81E-31  | -11.6704 | 1159440 | Asthma |
| rs602457    | 6 | 32605785 | C | T | 0.1635 | 0.1333  | 0.0069 | 5.37E-83  | 19.2999  | 1225084 | Asthma |
| rs9270970   | 6 | 32605797 | C | T | 0.2980 | -0.0739 | 0.0055 | 1.10E-41  | -13.5257 | 1310845 | Asthma |
| rs9270971   | 6 | 32605821 | T | C | 0.2962 | -0.0748 | 0.0054 | 7.14E-43  | -13.7256 | 1376071 | Asthma |
| rs9270972   | 6 | 32605844 | C | T | 0.2986 | -0.0707 | 0.0059 | 1.50E-32  | -11.8803 | 1224666 | Asthma |
| rs139991161 | 6 | 32605933 | T | C | 0.0138 | 0.1746  | 0.0256 | 9.78E-12  | 6.8097   | 986721  | Asthma |
| rs9270974   | 6 | 32605936 | C | A | 0.2991 | -0.0706 | 0.0059 | 1.58E-32  | -11.8757 | 1224666 | Asthma |
| rs9270977   | 6 | 32605971 | A | G | 0.2983 | -0.0765 | 0.0059 | 1.41E-38  | -12.9896 | 1281476 | Asthma |
| rs9270978   | 6 | 32605977 | T | A | 0.2980 | -0.0759 | 0.0065 | 1.57E-31  | -11.6822 | 1094744 | Asthma |
| rs146733600 | 6 | 32605983 | T | C | 0.0142 | 0.1493  | 0.0226 | 4.11E-11  | 6.6005   | 1133307 | Asthma |
| rs9270979   | 6 | 32606003 | A | G | 0.2962 | -0.0749 | 0.0054 | 5.85E-43  | -13.7399 | 1376071 | Asthma |
| rs614348    | 6 | 32606100 | C | T | 0.3624 | 0.0641  | 0.0051 | 8.49E-36  | 12.4896  | 1251217 | Asthma |
| rs72850021  | 6 | 32606118 | G | A | 0.1202 | -0.0692 | 0.0078 | 8.52E-19  | -8.8531  | 1310845 | Asthma |
| rs9270980   | 6 | 32606132 | C | A | 0.1800 | -0.0537 | 0.0071 | 2.67E-14  | -7.6134  | 1224666 | Asthma |
| rs9270981   | 6 | 32606155 | A | G | 0.2985 | -0.0707 | 0.0059 | 1.26E-32  | -11.8950 | 1224666 | Asthma |
| rs543713    | 6 | 32606157 | T | C | 0.3617 | 0.0653  | 0.0056 | 1.04E-31  | 11.7169  | 1133307 | Asthma |
| rs9270983   | 6 | 32606196 | T | C | 0.2985 | -0.0708 | 0.0059 | 1.08E-32  | -11.9080 | 1224666 | Asthma |
| rs9270984   | 6 | 32606214 | T | G | 0.1776 | -0.0577 | 0.0066 | 1.86E-18  | -8.7656  | 1349938 | Asthma |
| rs9270985   | 6 | 32606250 | T | C | 0.2962 | -0.0749 | 0.0054 | 5.72E-43  | -13.7416 | 1376071 | Asthma |
| rs35488182  | 6 | 32606271 | A | G | 0.1202 | -0.0692 | 0.0078 | 8.69E-19  | -8.8509  | 1310845 | Asthma |
| rs9270986   | 6 | 32606283 | A | C | 0.1764 | -0.0583 | 0.0065 | 3.37E-19  | -8.9558  | 1376071 | Asthma |
| rs34107399  | 6 | 32606331 | A | G | 0.0266 | -0.0816 | 0.0145 | 1.99E-08  | -5.6129  | 1376071 | Asthma |
| rs9270987   | 6 | 32606350 | T | C | 0.2985 | -0.0707 | 0.0059 | 1.25E-32  | -11.8958 | 1224666 | Asthma |
| rs9270988   | 6 | 32606353 | A | G | 0.2961 | -0.0749 | 0.0054 | 5.10E-43  | -13.7498 | 1376071 | Asthma |
| rs34242956  | 6 | 32606355 | A | G | 0.0837 | -0.1051 | 0.0106 | 3.04E-23  | -9.9310  | 1064845 | Asthma |
| rs112500757 | 6 | 32606409 | T | C | 0.1210 | -0.0676 | 0.0086 | 3.60E-15  | -7.8681  | 1159440 | Asthma |
| rs9270991   | 6 | 32606423 | G | C | 0.3008 | -0.0702 | 0.0061 | 6.27E-31  | -11.5640 | 1133307 | Asthma |
| rs9270992   | 6 | 32606425 | C | T | 0.3008 | -0.0702 | 0.0061 | 6.27E-31  | -11.5640 | 1133307 | Asthma |
| rs59108952  | 6 | 32606467 | T | C | 0.1203 | -0.0693 | 0.0078 | 7.41E-19  | -8.8686  | 1310845 | Asthma |
| rs9270994   | 6 | 32606473 | T | C | 0.1787 | -0.0532 | 0.0071 | 4.72E-14  | -7.5393  | 1224666 | Asthma |
| rs2760994   | 6 | 32606531 | C | T | 0.4088 | -0.0507 | 0.0050 | 4.83E-24  | -10.1132 | 1310845 | Asthma |
| rs35752949  | 6 | 32606552 | T | C | 0.1202 | -0.0693 | 0.0078 | 7.57E-19  | -8.8662  | 1310845 | Asthma |
| rs2647074   | 6 | 32606583 | T | C | 0.3136 | -0.0582 | 0.0058 | 6.32E-24  | -10.0869 | 1159440 | Asthma |
| rs9270997   | 6 | 32606597 | G | A | 0.2624 | -0.0474 | 0.0070 | 1.28E-11  | -6.7715  | 1224666 | Asthma |
| rs9270998   | 6 | 32606602 | A | G | 0.3067 | -0.0695 | 0.0059 | 1.12E-31  | -11.7111 | 1224666 | Asthma |
| rs9270999   | 6 | 32606661 | G | A | 0.2961 | -0.0749 | 0.0054 | 5.21E-43  | -13.7485 | 1376071 | Asthma |
| rs61670843  | 6 | 32606676 | T | C | 0.1114 | -0.0677 | 0.0082 | 1.69E-16  | -8.2425  | 1154767 | Asthma |
| rs617058    | 6 | 32606702 | T | G | 0.2158 | 0.0424  | 0.0072 | 3.20E-09  | 5.9211   | 1000544 | Asthma |
| rs9271001   | 6 | 32606716 | A | C | 0.3013 | -0.0718 | 0.0065 | 4.34E-28  | -10.9886 | 1130071 | Asthma |
| rs9271002   | 6 | 32606720 | T | C | 0.3013 | -0.0718 | 0.0065 | 4.34E-28  | -10.9884 | 1130071 | Asthma |
| rs9271003   | 6 | 32606750 | T | C | 0.3012 | -0.0706 | 0.0061 | 2.79E-31  | -11.6333 | 1133307 | Asthma |
| rs28383200  | 6 | 32606763 | A | G | 0.3032 | -0.0711 | 0.0066 | 2.48E-27  | -10.8299 | 1064845 | Asthma |
| rs113315602 | 6 | 32606798 | C | A | 0.0437 | 0.1294  | 0.0143 | 1.38E-19  | 9.0540   | 1060172 | Asthma |
| rs9271004   | 6 | 32606802 | G | A | 0.2987 | -0.0831 | 0.0073 | 9.85E-30  | -11.3251 | 908767  | Asthma |
| rs9271005   | 6 | 32606809 | A | C | 0.2989 | -0.0833 | 0.0073 | 7.30E-30  | -11.3513 | 908767  | Asthma |
| rs9271006   | 6 | 32606825 | T | C | 0.3117 | -0.0910 | 0.0068 | 9.48E-41  | -13.3666 | 967998  | Asthma |
| rs617578    | 6 | 32606826 | A | G | 0.1365 | 0.1288  | 0.0081 | 1.79E-57  | 15.9788  | 1156622 | Asthma |
| rs61161997  | 6 | 32606837 | C | A | 0.1113 | -0.0732 | 0.0103 | 9.59E-13  | -7.1359  | 908767  | Asthma |
| rs9271007   | 6 | 32606847 | A | G | 0.3036 | -0.0713 | 0.0066 | 1.84E-27  | -10.8571 | 1064845 | Asthma |
| rs9271008   | 6 | 32606851 | G | A | 0.3034 | -0.0714 | 0.0066 | 1.62E-27  | -10.8689 | 1064845 | Asthma |
| rs60216782  | 6 | 32606866 | G | C | 0.1205 | -0.0806 | 0.0112 | 7.67E-13  | -7.1667  | 540747  | Asthma |
| rs9271009   | 6 | 32606872 | C | A | 0.3041 | -0.0716 | 0.0066 | 1.34E-27  | -10.8861 | 1064845 | Asthma |
| rs9271010   | 6 | 32606875 | T | C | 0.3072 | -0.0717 | 0.0066 | 1.21E-27  | -10.8958 | 1064845 | Asthma |
| rs9271011   | 6 | 32606899 | A | G | 0.2980 | -0.0833 | 0.0073 | 7.54E-30  | -11.3485 | 908767  | Asthma |

|             |   |          |   |   |        |         |        |          |          |         |        |
|-------------|---|----------|---|---|--------|---------|--------|----------|----------|---------|--------|
| rs9271012   | 6 | 32606919 | A | G | 0.2983 | -0.0832 | 0.0073 | 8.62E-30 | -11.3368 | 908767  | Asthma |
| rs9271013   | 6 | 32606926 | G | C | 0.3021 | -0.0827 | 0.0067 | 1.64E-35 | -12.4372 | 1000544 | Asthma |
| rs515185    | 6 | 32606965 | A | T | 0.1751 | 0.1676  | 0.0088 | 8.18E-81 | 19.0389  | 908767  | Asthma |
| rs9271016   | 6 | 32606990 | C | T | 0.2986 | -0.0839 | 0.0073 | 2.32E-30 | -11.4513 | 908767  | Asthma |
| rs9271018   | 6 | 32607030 | T | C | 0.2983 | -0.0838 | 0.0073 | 3.16E-30 | -11.4245 | 908767  | Asthma |
| rs9271020   | 6 | 32607063 | T | G | 0.3031 | -0.0706 | 0.0066 | 6.07E-27 | -10.7478 | 1064845 | Asthma |
| rs9271021   | 6 | 32607086 | G | A | 0.3029 | -0.0705 | 0.0066 | 6.40E-27 | -10.7430 | 1064845 | Asthma |
| rs7760841   | 6 | 32607091 | T | C | 0.1624 | 0.1489  | 0.0075 | 6.50E-88 | 19.8764  | 1156622 | Asthma |
| rs28383201  | 6 | 32607092 | G | C | 0.3466 | 0.0599  | 0.0062 | 2.49E-22 | 9.7195   | 1064845 | Asthma |
| rs9271022   | 6 | 32607104 | A | G | 0.3009 | -0.0703 | 0.0061 | 4.69E-31 | -11.5890 | 1133307 | Asthma |
| rs9271023   | 6 | 32607118 | T | C | 0.3030 | -0.0709 | 0.0066 | 3.55E-27 | -10.7972 | 1064845 | Asthma |
| rs7770010   | 6 | 32607119 | A | G | 0.1702 | 0.1575  | 0.0077 | 8.13E-92 | 20.3231  | 1064845 | Asthma |
| rs7749043   | 6 | 32607175 | T | C | 0.1910 | -0.0430 | 0.0074 | 5.43E-09 | -5.8334  | 1064845 | Asthma |
| rs9271024   | 6 | 32607177 | T | C | 0.3007 | -0.0701 | 0.0061 | 6.99E-31 | -11.5546 | 1133307 | Asthma |
| rs145945003 | 6 | 32607179 | G | A | 0.0503 | -0.0989 | 0.0136 | 3.02E-13 | -7.2933  | 1133307 | Asthma |
| rs139957660 | 6 | 32607206 | A | G | 0.0682 | -0.1063 | 0.0108 | 4.94E-23 | -9.8828  | 1216250 | Asthma |
| rs9271025   | 6 | 32607213 | T | C | 0.2484 | -0.0583 | 0.0086 | 1.00E-11 | -6.8062  | 973993  | Asthma |
| rs9271026   | 6 | 32607217 | T | C | 0.3946 | -0.0700 | 0.0066 | 2.92E-26 | -10.6019 | 1064845 | Asthma |
| rs13193606  | 6 | 32607267 | T | C | 0.3836 | 0.0860  | 0.0078 | 2.87E-28 | 11.0259  | 778845  | Asthma |
| rs9271027   | 6 | 32607270 | G | A | 0.2971 | -0.0832 | 0.0074 | 1.60E-29 | -11.2826 | 908767  | Asthma |
| rs9271028   | 6 | 32607272 | A | G | 0.2971 | -0.0832 | 0.0074 | 1.55E-29 | -11.2856 | 908767  | Asthma |
| rs9271029   | 6 | 32607300 | A | G | 0.3035 | -0.0828 | 0.0073 | 1.45E-29 | -11.2915 | 908767  | Asthma |
| rs13193700  | 6 | 32607301 | T | C | 0.4729 | 0.0731  | 0.0069 | 2.23E-26 | 10.6271  | 908767  | Asthma |
| rs9271030   | 6 | 32607306 | C | T | 0.3067 | -0.0834 | 0.0074 | 1.28E-29 | -11.3024 | 908767  | Asthma |
| rs9271031   | 6 | 32607310 | C | A | 0.3066 | -0.0833 | 0.0074 | 1.46E-29 | -11.2906 | 908767  | Asthma |
| rs7761182   | 6 | 32607322 | T | G | 0.1736 | 0.1689  | 0.0088 | 1.15E-81 | 19.1404  | 908767  | Asthma |
| rs111914578 | 6 | 32607338 | C | A | 0.1089 | -0.0875 | 0.0120 | 3.30E-13 | -7.2813  | 778845  | Asthma |
| rs72850029  | 6 | 32607445 | T | G | 0.1081 | -0.0883 | 0.0121 | 2.33E-13 | -7.3281  | 778845  | Asthma |
| rs34113780  | 6 | 32607481 | G | A | 0.1206 | -0.0704 | 0.0079 | 6.97E-19 | -8.8754  | 1284712 | Asthma |
| rs9271049   | 6 | 32607488 | T | C | 0.3001 | -0.0698 | 0.0060 | 1.24E-31 | -11.7023 | 1159440 | Asthma |
| rs9271050   | 6 | 32607498 | G | A | 0.3000 | -0.0697 | 0.0060 | 1.60E-31 | -11.6808 | 1159440 | Asthma |
| rs9271051   | 6 | 32607513 | T | C | 0.2999 | -0.0697 | 0.0060 | 1.69E-31 | -11.6760 | 1159440 | Asthma |
| rs9271052   | 6 | 32607532 | T | C | 0.2999 | -0.0696 | 0.0060 | 1.99E-31 | -11.6623 | 1159440 | Asthma |
| rs9271053   | 6 | 32607542 | C | T | 0.2999 | -0.0696 | 0.0060 | 2.06E-31 | -11.6594 | 1159440 | Asthma |
| rs9271055   | 6 | 32607592 | G | T | 0.1766 | -0.0584 | 0.0065 | 2.97E-19 | -8.9699  | 1376071 | Asthma |
| rs9271056   | 6 | 32607601 | T | C | 0.1784 | -0.0533 | 0.0071 | 4.30E-14 | -7.5516  | 1224666 | Asthma |
| rs9271058   | 6 | 32607629 | A | T | 0.2988 | -0.0708 | 0.0059 | 1.06E-32 | -11.9093 | 1224666 | Asthma |
| rs113742050 | 6 | 32607655 | T | C | 0.0576 | 0.1183  | 0.0110 | 7.85E-27 | 10.7235  | 1310845 | Asthma |
| rs9271060   | 6 | 32607736 | C | G | 0.2990 | -0.0707 | 0.0059 | 1.21E-32 | -11.8979 | 1224666 | Asthma |
| rs4713555   | 6 | 32607747 | T | G | 0.2870 | -0.0496 | 0.0058 | 9.66E-18 | -8.5781  | 1216250 | Asthma |
| rs9271061   | 6 | 32607767 | A | T | 0.1773 | -0.0578 | 0.0066 | 1.71E-18 | -8.7750  | 1349938 | Asthma |
| rs9271062   | 6 | 32607798 | T | A | 0.1787 | -0.0579 | 0.0066 | 1.41E-18 | -8.7963  | 1349938 | Asthma |
| rs9271063   | 6 | 32607807 | A | G | 0.3013 | -0.0712 | 0.0060 | 4.70E-32 | -11.7843 | 1198533 | Asthma |
| rs9271064   | 6 | 32607824 | A | G | 0.3036 | -0.0719 | 0.0065 | 3.47E-28 | -11.0087 | 1130071 | Asthma |
| rs116454087 | 6 | 32607825 | G | T | 0.0806 | -0.1129 | 0.0111 | 1.97E-24 | -10.2005 | 1064845 | Asthma |
| rs9271065   | 6 | 32607842 | C | G | 0.1684 | -0.0483 | 0.0073 | 4.49E-11 | -6.5871  | 1224666 | Asthma |
| rs9271066   | 6 | 32607854 | A | G | 0.3003 | -0.0757 | 0.0055 | 9.21E-43 | -13.7070 | 1349938 | Asthma |
| rs3021304   | 6 | 32607881 | C | G | 0.4595 | -0.0286 | 0.0050 | 1.41E-08 | -5.6727  | 1225084 | Asthma |
| rs9271068   | 6 | 32607897 | C | G | 0.2981 | -0.0752 | 0.0055 | 3.14E-42 | -13.6179 | 1349938 | Asthma |
| rs9271069   | 6 | 32607923 | A | G | 0.1686 | -0.0571 | 0.0067 | 1.43E-17 | -8.5323  | 1376071 | Asthma |
| rs9271072   | 6 | 32607972 | C | T | 0.2986 | -0.0705 | 0.0059 | 1.87E-32 | -11.8620 | 1224666 | Asthma |
| rs9271073   | 6 | 32608026 | G | T | 0.2963 | -0.0745 | 0.0054 | 1.31E-42 | -13.6818 | 1376071 | Asthma |
| rs36233212  | 6 | 32608043 | C | T | 0.1295 | -0.0735 | 0.0082 | 3.78E-19 | -8.9432  | 942825  | Asthma |
| rs9271075   | 6 | 32608075 | A | G | 0.2985 | -0.0707 | 0.0059 | 1.22E-32 | -11.8977 | 1224666 | Asthma |
| rs9271076   | 6 | 32608096 | G | A | 0.2961 | -0.0748 | 0.0054 | 5.94E-43 | -13.7387 | 1376071 | Asthma |
| rs643889    | 6 | 32608141 | T | A | 0.3623 | 0.0640  | 0.0051 | 1.00E-35 | 12.4767  | 1251217 | Asthma |
| rs9271077   | 6 | 32608148 | G | A | 0.2985 | -0.0707 | 0.0059 | 1.26E-32 | -11.8950 | 1224666 | Asthma |
| rs9271078   | 6 | 32608153 | C | T | 0.2961 | -0.0749 | 0.0054 | 4.70E-43 | -13.7558 | 1376071 | Asthma |
| rs482205    | 6 | 32608232 | G | T | 0.3621 | 0.0642  | 0.0051 | 7.17E-36 | 12.5032  | 1251217 | Asthma |
| rs482162    | 6 | 32608242 | C | T | 0.3621 | 0.0643  | 0.0051 | 5.50E-36 | 12.5243  | 1251217 | Asthma |
| rs35305251  | 6 | 32608260 | C | G | 0.1209 | -0.0681 | 0.0086 | 2.31E-15 | -7.9232  | 1159440 | Asthma |
| rs9271079   | 6 | 32608275 | G | C | 0.3009 | -0.0709 | 0.0059 | 7.27E-33 | -11.9405 | 1224666 | Asthma |
| rs482044    | 6 | 32608287 | C | G | 0.3823 | 0.0522  | 0.0052 | 5.64E-24 | 10.0979  | 1225084 | Asthma |
| rs9271080   | 6 | 32608299 | C | T | 0.1795 | -0.0535 | 0.0071 | 3.44E-14 | -7.5806  | 1224666 | Asthma |
| rs9271082   | 6 | 32608309 | T | C | 0.1855 | -0.0550 | 0.0066 | 8.23E-17 | -8.3278  | 1316443 | Asthma |
| rs9271083   | 6 | 32608325 | T | C | 0.3016 | -0.0711 | 0.0059 | 5.11E-33 | -11.9699 | 1224666 | Asthma |
| rs481139    | 6 | 32608368 | A | C | 0.3468 | 0.0718  | 0.0053 | 4.58E-42 | 13.5902  | 1251217 | Asthma |
| rs9271085   | 6 | 32608375 | T | C | 0.1802 | -0.0536 | 0.0071 | 2.93E-14 | -7.6013  | 1224666 | Asthma |
| rs9271086   | 6 | 32608388 | T | A | 0.3024 | -0.0768 | 0.0066 | 3.76E-31 | -11.6078 | 1068611 | Asthma |
| rs9271087   | 6 | 32608393 | C | A | 0.3024 | -0.0768 | 0.0066 | 3.75E-31 | -11.6080 | 1068611 | Asthma |
| rs9271088   | 6 | 32608398 | A | C | 0.3024 | -0.0768 | 0.0066 | 3.44E-31 | -11.6154 | 1068611 | Asthma |
| rs9271089   | 6 | 32608400 | T | G | 0.3008 | -0.0800 | 0.0059 | 2.26E-41 | -13.4729 | 1220016 | Asthma |
| rs9271090   | 6 | 32608470 | T | C | 0.2954 | -0.0795 | 0.0059 | 4.89E-42 | -13.5854 | 1246149 | Asthma |
| rs34811813  | 6 | 32608488 | T | G | 0.1089 | -0.0777 | 0.0106 | 2.16E-13 | -7.3384  | 847307  | Asthma |

|             |   |          |   |   |        |         |        |          |          |         |        |
|-------------|---|----------|---|---|--------|---------|--------|----------|----------|---------|--------|
| rs9271091   | 6 | 32608498 | G | T | 0.2995 | -0.0743 | 0.0065 | 4.41E-30 | -11.3956 | 1029518 | Asthma |
| rs77632534  | 6 | 32608506 | A | G | 0.1086 | -0.0835 | 0.0116 | 6.98E-13 | -7.1799  | 804978  | Asthma |
| rs9271092   | 6 | 32608519 | A | G | 0.2954 | -0.0795 | 0.0059 | 5.09E-42 | -13.5823 | 1246149 | Asthma |
| rs36202959  | 6 | 32608547 | G | C | 0.1199 | -0.0762 | 0.0085 | 3.13E-19 | -8.9640  | 1180923 | Asthma |
| rs9271093   | 6 | 32608564 | G | A | 0.1781 | -0.0560 | 0.0077 | 3.46E-13 | -7.2750  | 1094744 | Asthma |
| rs9271094   | 6 | 32608570 | G | C | 0.2982 | -0.0757 | 0.0065 | 2.11E-31 | -11.6570 | 1094744 | Asthma |
| rs35515288  | 6 | 32608579 | C | T | 0.1099 | -0.0753 | 0.0090 | 7.37E-17 | -8.3408  | 1024845 | Asthma |
| rs36202958  | 6 | 32608591 | T | C | 0.1098 | -0.0753 | 0.0090 | 7.19E-17 | -8.3439  | 1024845 | Asthma |
| rs9271096   | 6 | 32608649 | A | G | 0.3005 | -0.0791 | 0.0058 | 8.36E-42 | -13.5462 | 1246149 | Asthma |
| rs9271097   | 6 | 32608662 | C | G | 0.3008 | -0.0767 | 0.0066 | 4.32E-31 | -11.5960 | 1068611 | Asthma |
| rs9271098   | 6 | 32608663 | T | G | 0.3000 | -0.0759 | 0.0065 | 1.19E-31 | -11.7061 | 1094744 | Asthma |
| rs9271100   | 6 | 32608701 | T | C | 0.2965 | -0.0795 | 0.0059 | 5.18E-42 | -13.5812 | 1246149 | Asthma |
| rs9271101   | 6 | 32608716 | C | T | 0.2859 | -0.0823 | 0.0063 | 4.55E-39 | -13.0755 | 878129  | Asthma |
| rs9271103   | 6 | 32608763 | T | C | 0.3019 | -0.0771 | 0.0065 | 1.38E-32 | -11.8873 | 1094744 | Asthma |
| rs9271104   | 6 | 32608784 | G | A | 0.3006 | -0.0756 | 0.0065 | 4.32E-31 | -11.5961 | 1029518 | Asthma |
| rs9271105   | 6 | 32608800 | T | G | 0.2996 | -0.0744 | 0.0065 | 3.85E-30 | -11.4072 | 1029518 | Asthma |
| rs646984    | 6 | 32608815 | C | A | 0.4021 | 0.0620  | 0.0054 | 1.41E-30 | 11.4944  | 1186521 | Asthma |
| rs9271106   | 6 | 32608818 | G | A | 0.2938 | -0.0879 | 0.0073 | 1.49E-33 | -12.0716 | 873440  | Asthma |
| rs9271107   | 6 | 32608827 | A | T | 0.2938 | -0.0879 | 0.0073 | 1.43E-33 | -12.0748 | 873440  | Asthma |
| rs647035    | 6 | 32608849 | A | G | 0.3977 | 0.0647  | 0.0055 | 1.91E-32 | 11.8598  | 1121295 | Asthma |
| rs9271108   | 6 | 32608856 | G | A | 0.2943 | -0.0898 | 0.0064 | 4.25E-45 | -14.0922 | 1090071 | Asthma |
| rs9271109   | 6 | 32608910 | T | C | 0.2951 | -0.0885 | 0.0064 | 2.19E-43 | -13.8109 | 1024845 | Asthma |
| rs9271111   | 6 | 32608922 | G | A | 0.2952 | -0.0894 | 0.0073 | 1.15E-34 | -12.2809 | 873440  | Asthma |
| rs9271112   | 6 | 32608940 | T | C | 0.3822 | -0.0799 | 0.0068 | 3.68E-32 | -11.8050 | 932671  | Asthma |
| rs9271115   | 6 | 32608954 | C | G | 0.4156 | -0.0733 | 0.0066 | 2.52E-28 | -11.0376 | 965217  | Asthma |
| rs9271116   | 6 | 32608987 | T | G | 0.2065 | -0.0669 | 0.0069 | 2.84E-22 | -9.7061  | 1186521 | Asthma |
| rs9271117   | 6 | 32609018 | C | T | 0.3012 | -0.0942 | 0.0077 | 1.74E-34 | -12.2471 | 838076  | Asthma |
| rs9271118   | 6 | 32609019 | A | G | 0.2969 | -0.0956 | 0.0084 | 1.08E-29 | -11.3168 | 778845  | Asthma |
| rs9271119   | 6 | 32609032 | G | A | 0.4223 | -0.0891 | 0.0085 | 1.74E-25 | -10.4338 | 778845  | Asthma |
| rs72850042  | 6 | 32609034 | T | C | 0.1089 | -0.0880 | 0.0120 | 2.46E-13 | -7.3209  | 778845  | Asthma |
| rs9271120   | 6 | 32609039 | A | G | 0.3069 | -0.0956 | 0.0085 | 1.17E-29 | -11.3102 | 778845  | Asthma |
| rs9271121   | 6 | 32609041 | G | A | 0.3069 | -0.0956 | 0.0085 | 1.17E-29 | -11.3102 | 778845  | Asthma |
| rs9271122   | 6 | 32609044 | G | A | 0.3069 | -0.0956 | 0.0085 | 1.17E-29 | -11.3102 | 778845  | Asthma |
| rs9271123   | 6 | 32609061 | C | T | 0.2971 | -0.0957 | 0.0084 | 9.71E-30 | -11.3265 | 778845  | Asthma |
| rs9271124   | 6 | 32609069 | C | T | 0.1897 | -0.0775 | 0.0100 | 9.81E-15 | -7.7416  | 844071  | Asthma |
| rs9271125   | 6 | 32609088 | G | A | 0.1897 | -0.0775 | 0.0100 | 9.88E-15 | -7.7405  | 844071  | Asthma |
| rs9271126   | 6 | 32609096 | G | T | 0.1897 | -0.0775 | 0.0100 | 9.89E-15 | -7.7404  | 844071  | Asthma |
| rs9271127   | 6 | 32609110 | C | T | 0.2972 | -0.0955 | 0.0084 | 1.18E-29 | -11.3094 | 778845  | Asthma |
| rs9271128   | 6 | 32609111 | A | G | 0.2969 | -0.0955 | 0.0084 | 1.32E-29 | -11.2997 | 778845  | Asthma |
| rs9271129   | 6 | 32609112 | A | T | 0.7031 | 0.0955  | 0.0084 | 1.32E-29 | 11.2997  | 778845  | Asthma |
| rs9271130   | 6 | 32609117 | A | T | 0.5824 | 0.0753  | 0.0077 | 1.77E-22 | 9.7544   | 778845  | Asthma |
| rs9271132   | 6 | 32609185 | T | C | 0.2996 | -0.0933 | 0.0085 | 2.83E-28 | -11.0271 | 778845  | Asthma |
| rs9271133   | 6 | 32609186 | G | A | 0.2996 | -0.0933 | 0.0085 | 2.83E-28 | -11.0271 | 778845  | Asthma |
| rs9271135   | 6 | 32609225 | A | T | 0.7031 | 0.0955  | 0.0085 | 1.29E-29 | 11.3018  | 778845  | Asthma |
| rs9271136   | 6 | 32609234 | A | G | 0.2957 | -0.0973 | 0.0084 | 3.81E-31 | -11.6067 | 844071  | Asthma |
| rs188053776 | 6 | 32609237 | T | C | 0.0717 | -0.1401 | 0.0160 | 2.16E-18 | -8.7488  | 778845  | Asthma |
| rs9271138   | 6 | 32609248 | G | T | 0.1891 | -0.0893 | 0.0132 | 1.12E-11 | -6.7906  | 476051  | Asthma |
| rs659244    | 6 | 32609256 | C | T | 0.4187 | 0.0824  | 0.0077 | 1.17E-26 | 10.6868  | 778845  | Asthma |
| rs9271139   | 6 | 32609261 | T | C | 0.2957 | -0.0973 | 0.0084 | 3.67E-31 | -11.6100 | 844071  | Asthma |
| rs562289    | 6 | 32609269 | T | C | 0.2429 | 0.1196  | 0.0089 | 9.12E-41 | 13.3695  | 778845  | Asthma |
| rs9271140   | 6 | 32609306 | C | T | 0.3420 | -0.0966 | 0.0084 | 1.26E-30 | -11.5042 | 778845  | Asthma |
| rs9271141   | 6 | 32609307 | T | C | 0.3420 | -0.0966 | 0.0084 | 1.26E-30 | -11.5042 | 778845  | Asthma |
| rs34328493  | 6 | 32609333 | T | A | 0.6330 | 0.0666  | 0.0088 | 4.33E-14 | 7.5508   | 844071  | Asthma |
| rs9271143   | 6 | 32609388 | T | C | 0.2937 | -0.0806 | 0.0065 | 2.45E-35 | -12.4053 | 1068588 | Asthma |
| rs9271144   | 6 | 32609443 | G | A | 0.2916 | -0.0836 | 0.0059 | 3.37E-46 | -14.2699 | 1219993 | Asthma |
| rs560530    | 6 | 32609445 | A | G | 0.2141 | 0.1089  | 0.0059 | 6.67E-75 | 18.3125  | 1284712 | Asthma |
| rs542179215 | 6 | 32609446 | T | G | 0.0505 | -0.1033 | 0.0132 | 6.03E-15 | -7.8034  | 1159440 | Asthma |
| rs9271145   | 6 | 32609447 | C | G | 0.2916 | -0.0836 | 0.0059 | 3.83E-46 | -14.2611 | 1219993 | Asthma |
| rs35899011  | 6 | 32609468 | T | C | 0.1204 | -0.0704 | 0.0079 | 7.00E-19 | -8.8750  | 1284712 | Asthma |
| rs9271146   | 6 | 32609505 | A | C | 0.2930 | -0.0723 | 0.0055 | 6.47E-40 | -13.2229 | 1376071 | Asthma |
| rs660895    | 6 | 32609603 | G | A | 0.2151 | 0.1078  | 0.0058 | 8.01E-76 | 18.4266  | 1310845 | Asthma |
| rs9271147   | 6 | 32609608 | T | C | 0.1732 | -0.0549 | 0.0066 | 7.00E-17 | -8.3470  | 1376071 | Asthma |
| rs36233210  | 6 | 32609640 | G | T | 0.1202 | -0.0693 | 0.0078 | 7.29E-19 | -8.8705  | 1310845 | Asthma |
| rs9271149   | 6 | 32609678 | A | G | 0.2987 | -0.0707 | 0.0059 | 1.28E-32 | -11.8935 | 1224666 | Asthma |
| rs9271150   | 6 | 32609693 | T | G | 0.2993 | -0.0708 | 0.0059 | 1.05E-32 | -11.9104 | 1224666 | Asthma |
| rs661330    | 6 | 32609695 | C | T | 0.1839 | 0.0964  | 0.0066 | 5.43E-49 | 14.7115  | 1225084 | Asthma |
| rs9271151   | 6 | 32609697 | T | G | 0.3000 | -0.0713 | 0.0060 | 3.80E-32 | -11.8022 | 1198533 | Asthma |
| rs536810    | 6 | 32609720 | T | C | 0.4056 | 0.0570  | 0.0049 | 8.67E-31 | 11.5361  | 1349938 | Asthma |
| rs9271152   | 6 | 32609754 | T | G | 0.1777 | -0.0580 | 0.0065 | 4.77E-19 | -8.9176  | 1376071 | Asthma |
| rs9271153   | 6 | 32609772 | A | T | 0.2993 | -0.0708 | 0.0059 | 9.44E-33 | -11.9189 | 1224666 | Asthma |
| rs9271154   | 6 | 32609786 | G | C | 0.4079 | -0.0432 | 0.0072 | 1.55E-09 | -6.0391  | 847307  | Asthma |
| rs9271155   | 6 | 32609809 | G | A | 0.1781 | -0.0578 | 0.0065 | 5.49E-19 | -8.9019  | 1376071 | Asthma |
| rs9271156   | 6 | 32609813 | G | A | 0.3000 | -0.0713 | 0.0060 | 3.78E-32 | -11.8026 | 1198533 | Asthma |
| rs36097962  | 6 | 32609819 | T | C | 0.1208 | -0.0681 | 0.0086 | 2.40E-15 | -7.9188  | 1159440 | Asthma |



|             |   |          |   |   |        |         |        |          |          |         |        |
|-------------|---|----------|---|---|--------|---------|--------|----------|----------|---------|--------|
| rs535852    | 6 | 32609827 | T | C | 0.4078 | 0.0595  | 0.0053 | 2.67E-29 | 11.2374  | 1224666 | Asthma |
| rs36233208  | 6 | 32609829 | T | G | 0.1209 | -0.0680 | 0.0086 | 2.59E-15 | -7.9093  | 1159440 | Asthma |
| rs546092009 | 6 | 32609862 | G | T | 0.1217 | -0.0738 | 0.0095 | 9.38E-15 | -7.7475  | 1064845 | Asthma |
| rs563907452 | 6 | 32609863 | G | C | 0.1217 | -0.0738 | 0.0095 | 9.38E-15 | -7.7475  | 1064845 | Asthma |
| rs539936344 | 6 | 32609866 | A | T | 0.1087 | -0.0871 | 0.0120 | 4.36E-13 | -7.2441  | 778845  | Asthma |
| rs9271159   | 6 | 32609868 | C | T | 0.1735 | -0.0761 | 0.0097 | 3.61E-15 | -7.8677  | 479287  | Asthma |
| rs9271160   | 6 | 32609869 | A | G | 0.2075 | -0.0591 | 0.0075 | 4.16E-15 | -7.8500  | 1029518 | Asthma |
| rs35406945  | 6 | 32609918 | C | A | 0.1215 | -0.0720 | 0.0093 | 1.08E-14 | -7.7295  | 1090978 | Asthma |
| rs9271161   | 6 | 32609936 | T | C | 0.1783 | -0.0533 | 0.0071 | 4.37E-14 | -7.5495  | 1224666 | Asthma |
| rs9271162   | 6 | 32609938 | G | T | 0.2979 | -0.0749 | 0.0055 | 5.95E-42 | -13.5711 | 1349938 | Asthma |
| rs9271163   | 6 | 32609956 | C | T | 0.2970 | -0.0746 | 0.0054 | 8.21E-43 | -13.7155 | 1376071 | Asthma |
| rs9271164   | 6 | 32610007 | C | T | 0.2995 | -0.0751 | 0.0055 | 3.03E-42 | -13.6203 | 1349938 | Asthma |
| rs9271166   | 6 | 32610034 | C | T | 0.3004 | -0.0710 | 0.0059 | 7.27E-33 | -11.9406 | 1224666 | Asthma |
| rs56245106  | 6 | 32610069 | C | T | 0.1114 | -0.0678 | 0.0082 | 1.52E-16 | -8.2548  | 1154767 | Asthma |
| rs9271168   | 6 | 32610077 | G | A | 0.2997 | -0.0708 | 0.0059 | 9.80E-33 | -11.9157 | 1224666 | Asthma |
| rs9271170   | 6 | 32610112 | T | C | 0.2961 | -0.0748 | 0.0054 | 5.81E-43 | -13.7406 | 1376071 | Asthma |
| rs73728204  | 6 | 32610126 | C | A | 0.0501 | -0.0964 | 0.0120 | 8.33E-16 | -8.0492  | 1310845 | Asthma |
| rs9271171   | 6 | 32610130 | C | T | 0.2985 | -0.0707 | 0.0059 | 1.25E-32 | -11.8956 | 1224666 | Asthma |
| rs532965    | 6 | 32610196 | G | T | 0.1712 | 0.1356  | 0.0064 | 2.98E-99 | 21.1468  | 1310845 | Asthma |
| rs9271172   | 6 | 32610198 | C | T | 0.2961 | -0.0748 | 0.0054 | 5.18E-43 | -13.7487 | 1376071 | Asthma |
| rs9271173   | 6 | 32610204 | A | G | 0.2961 | -0.0748 | 0.0054 | 5.20E-43 | -13.7485 | 1376071 | Asthma |
| rs9271174   | 6 | 32610263 | C | G | 0.2961 | -0.0748 | 0.0054 | 5.96E-43 | -13.7387 | 1376071 | Asthma |
| rs532098    | 6 | 32610275 | A | G | 0.4575 | 0.0404  | 0.0048 | 6.51E-17 | 8.3556   | 1310845 | Asthma |
| rs36233206  | 6 | 32610282 | G | C | 0.0501 | -0.0967 | 0.0120 | 6.86E-16 | -8.0732  | 1310845 | Asthma |
| rs674313    | 6 | 32610305 | T | C | 0.2289 | 0.0338  | 0.0057 | 2.41E-09 | 5.9671   | 1310845 | Asthma |
| rs9271176   | 6 | 32610350 | A | G | 0.3668 | -0.0968 | 0.0051 | 1.09E-80 | -19.0234 | 1376071 | Asthma |
| rs9271178   | 6 | 32610414 | C | T | 0.2967 | -0.0749 | 0.0054 | 4.64E-43 | -13.7567 | 1376071 | Asthma |
| rs9271179   | 6 | 32610419 | G | A | 0.2991 | -0.0707 | 0.0059 | 1.14E-32 | -11.9030 | 1224666 | Asthma |
| rs55703642  | 6 | 32610421 | C | T | 0.1209 | -0.0681 | 0.0086 | 2.34E-15 | -7.9219  | 1159440 | Asthma |
| rs9271180   | 6 | 32610432 | C | T | 0.3096 | -0.0705 | 0.0059 | 3.97E-33 | -11.9908 | 1224666 | Asthma |
| rs2858863   | 6 | 32610501 | T | C | 0.2035 | 0.0371  | 0.0062 | 1.92E-09 | 6.0048   | 1251217 | Asthma |
| rs9271184   | 6 | 32610508 | A | C | 0.1835 | -0.0545 | 0.0066 | 1.80E-16 | -8.2349  | 1316443 | Asthma |
| rs9271185   | 6 | 32610509 | G | A | 0.3002 | -0.0712 | 0.0060 | 4.38E-32 | -11.7901 | 1198533 | Asthma |
| rs9271186   | 6 | 32610520 | A | G | 0.2995 | -0.0708 | 0.0059 | 1.09E-32 | -11.9071 | 1224666 | Asthma |
| rs17211342  | 6 | 32610546 | G | A | 0.4590 | 0.0405  | 0.0053 | 1.53E-14 | 7.6851   | 1159440 | Asthma |
| rs17204995  | 6 | 32610551 | A | G | 0.4590 | 0.0405  | 0.0053 | 1.54E-14 | 7.6846   | 1159440 | Asthma |
| rs17205002  | 6 | 32610569 | G | A | 0.1209 | -0.0681 | 0.0086 | 2.39E-15 | -7.9193  | 1159440 | Asthma |
| rs9271189   | 6 | 32610580 | C | T | 0.2984 | -0.0707 | 0.0059 | 1.25E-32 | -11.8954 | 1224666 | Asthma |
| rs17211356  | 6 | 32610649 | G | A | 0.1202 | -0.0693 | 0.0078 | 7.49E-19 | -8.8673  | 1310845 | Asthma |
| rs9271191   | 6 | 32610672 | T | C | 0.1764 | -0.0583 | 0.0065 | 3.28E-19 | -8.9591  | 1376071 | Asthma |
| rs5021726   | 6 | 32610704 | C | T | 0.4574 | 0.0404  | 0.0048 | 5.74E-17 | 8.3705   | 1310845 | Asthma |
| rs9271192   | 6 | 32610753 | C | A | 0.2962 | -0.0748 | 0.0054 | 5.06E-43 | -13.7506 | 1376071 | Asthma |
| rs9271193   | 6 | 32610789 | T | C | 0.2962 | -0.0750 | 0.0054 | 3.62E-43 | -13.7748 | 1376071 | Asthma |
| rs3997868   | 6 | 32610813 | G | A | 0.2143 | 0.1093  | 0.0059 | 1.04E-77 | 18.6595  | 1310845 | Asthma |
| rs9271194   | 6 | 32610835 | T | G | 0.2962 | -0.0801 | 0.0059 | 1.61E-42 | -13.6664 | 1246149 | Asthma |
| rs4636067   | 6 | 32610844 | T | G | 0.1209 | -0.0681 | 0.0086 | 2.33E-15 | -7.9224  | 1159440 | Asthma |
| rs5021727   | 6 | 32610856 | G | A | 0.4602 | 0.0390  | 0.0054 | 3.61E-13 | 7.2695   | 1133307 | Asthma |
| rs9271198   | 6 | 32610949 | G | A | 0.2961 | -0.0749 | 0.0054 | 4.73E-43 | -13.7555 | 1376071 | Asthma |
| rs9271199   | 6 | 32610958 | A | G | 0.2979 | -0.0703 | 0.0060 | 3.55E-32 | -11.8080 | 1224666 | Asthma |
| rs9271200   | 6 | 32610979 | C | T | 0.2961 | -0.0749 | 0.0054 | 4.68E-43 | -13.7560 | 1376071 | Asthma |
| rs9271201   | 6 | 32611041 | C | A | 0.2961 | -0.0749 | 0.0054 | 4.65E-43 | -13.7565 | 1376071 | Asthma |
| rs9271202   | 6 | 32611060 | A | C | 0.2961 | -0.0749 | 0.0054 | 4.88E-43 | -13.7531 | 1376071 | Asthma |
| rs9271203   | 6 | 32611108 | T | C | 0.1763 | -0.0583 | 0.0065 | 2.91E-19 | -8.9720  | 1376071 | Asthma |
| rs9271205   | 6 | 32611164 | G | A | 0.2961 | -0.0747 | 0.0054 | 7.99E-43 | -13.7173 | 1376071 | Asthma |
| rs502803    | 6 | 32611181 | A | G | 0.4577 | 0.0397  | 0.0049 | 5.70E-16 | 8.0955   | 1284712 | Asthma |
| rs9271209   | 6 | 32611258 | G | A | 0.2917 | -0.0832 | 0.0059 | 1.03E-45 | -14.1918 | 1219993 | Asthma |
| rs9271210   | 6 | 32611293 | C | T | 0.2944 | -0.0816 | 0.0066 | 7.96E-35 | -12.3103 | 1042455 | Asthma |
| rs72850056  | 6 | 32611300 | A | G | 0.1209 | -0.0681 | 0.0086 | 2.36E-15 | -7.9209  | 1159440 | Asthma |
| rs9271211   | 6 | 32611301 | C | T | 0.2944 | -0.0816 | 0.0066 | 7.97E-35 | -12.3103 | 1042455 | Asthma |
| rs9271212   | 6 | 32611302 | A | G | 0.2962 | -0.0845 | 0.0073 | 4.64E-31 | -11.5899 | 973993  | Asthma |
| rs9271213   | 6 | 32611434 | G | C | 0.2988 | -0.0706 | 0.0059 | 1.49E-32 | -11.8807 | 1224666 | Asthma |
| rs140012631 | 6 | 32611557 | T | C | 0.1118 | -0.0723 | 0.0102 | 1.69E-12 | -7.0574  | 908767  | Asthma |
| rs9271219   | 6 | 32611577 | C | T | 0.2991 | -0.0840 | 0.0073 | 2.59E-30 | -11.4416 | 908767  | Asthma |
| rs9271220   | 6 | 32611578 | A | G | 0.2991 | -0.0840 | 0.0073 | 2.25E-30 | -11.4539 | 908767  | Asthma |
| rs9271221   | 6 | 32611586 | G | T | 0.2991 | -0.0839 | 0.0073 | 2.59E-30 | -11.4414 | 908767  | Asthma |
| rs9271222   | 6 | 32611588 | C | T | 0.1783 | -0.0633 | 0.0090 | 2.66E-12 | -6.9948  | 908767  | Asthma |
| rs9271223   | 6 | 32611595 | T | C | 0.2986 | -0.0836 | 0.0073 | 4.59E-30 | -11.3919 | 908767  | Asthma |
| rs9271225   | 6 | 32611643 | C | A | 0.3020 | -0.0720 | 0.0065 | 2.92E-28 | -11.0244 | 1130071 | Asthma |
| rs9271227   | 6 | 32611703 | A | G | 0.3032 | -0.0766 | 0.0073 | 1.41E-25 | -10.4534 | 934923  | Asthma |
| rs9271228   | 6 | 32611704 | A | G | 0.3032 | -0.0766 | 0.0073 | 1.27E-25 | -10.4636 | 934923  | Asthma |
| rs9271229   | 6 | 32611738 | A | T | 0.3026 | -0.0719 | 0.0065 | 3.43E-28 | -11.0098 | 1130071 | Asthma |
| rs9271230   | 6 | 32611742 | C | T | 0.3022 | -0.0719 | 0.0065 | 3.55E-28 | -11.0066 | 1130071 | Asthma |
| rs9271231   | 6 | 32611743 | T | C | 0.2970 | -0.0846 | 0.0073 | 4.21E-31 | -11.5983 | 973993  | Asthma |
| rs9271233   | 6 | 32611756 | C | T | 0.2970 | -0.0954 | 0.0085 | 1.43E-29 | -11.2923 | 778845  | Asthma |

|             |   |          |   |   |        |         |        |           |          |         |        |
|-------------|---|----------|---|---|--------|---------|--------|-----------|----------|---------|--------|
| rs9271234   | 6 | 32611772 | G | A | 0.3016 | -0.0717 | 0.0065 | 5.00E-28  | -10.9758 | 1130071 | Asthma |
| rs28752509  | 6 | 32611846 | T | C | 0.4596 | 0.0392  | 0.0054 | 2.85E-13  | 7.3012   | 1133307 | Asthma |
| rs28752510  | 6 | 32611849 | A | G | 0.4595 | 0.0391  | 0.0054 | 3.09E-13  | 7.2905   | 1133307 | Asthma |
| rs6917729   | 6 | 32611866 | A | T | 0.1708 | 0.1479  | 0.0072 | 7.62E-95  | 20.6621  | 1133307 | Asthma |
| rs9271236   | 6 | 32611868 | C | T | 0.2975 | -0.0704 | 0.0060 | 3.12E-32  | -11.8188 | 1224666 | Asthma |
| rs13191862  | 6 | 32611876 | G | A | 0.4596 | 0.0391  | 0.0054 | 3.09E-13  | 7.2906   | 1133307 | Asthma |
| rs13191975  | 6 | 32611894 | T | C | 0.4593 | 0.0399  | 0.0053 | 3.78E-14  | 7.5682   | 1159440 | Asthma |
| rs13207945  | 6 | 32611931 | C | T | 0.4574 | 0.0403  | 0.0048 | 7.37E-17  | 8.3409   | 1310845 | Asthma |
| rs13208027  | 6 | 32611966 | A | T | 0.4573 | 0.0403  | 0.0048 | 7.51E-17  | 8.3386   | 1310845 | Asthma |
| rs9271239   | 6 | 32611992 | T | C | 0.2983 | -0.0708 | 0.0060 | 1.18E-32  | -11.9004 | 1224666 | Asthma |
| rs12523808  | 6 | 32611998 | T | A | 0.4575 | 0.0403  | 0.0048 | 6.69E-17  | 8.3524   | 1310845 | Asthma |
| rs9271240   | 6 | 32612056 | T | C | 0.2989 | -0.0713 | 0.0061 | 4.77E-32  | -11.7831 | 1198533 | Asthma |
| rs9271241   | 6 | 32612093 | G | A | 0.2992 | -0.0711 | 0.0060 | 6.71E-32  | -11.7543 | 1198533 | Asthma |
| rs113529606 | 6 | 32612127 | T | C | 0.1215 | -0.0864 | 0.0109 | 1.88E-15  | -7.9491  | 934923  | Asthma |
| rs9271242   | 6 | 32612163 | T | C | 0.2961 | -0.0748 | 0.0054 | 5.37E-43  | -13.7461 | 1376071 | Asthma |
| rs9271243   | 6 | 32612174 | C | T | 0.2985 | -0.0708 | 0.0059 | 1.16E-32  | -11.9015 | 1224666 | Asthma |
| rs116714077 | 6 | 32612242 | T | C | 0.0501 | -0.0964 | 0.0120 | 8.20E-16  | -8.0509  | 1310845 | Asthma |
| rs115035141 | 6 | 32612255 | T | C | 0.0501 | -0.0967 | 0.0120 | 6.62E-16  | -8.0773  | 1310845 | Asthma |
| rs9271246   | 6 | 32612307 | A | G | 0.2961 | -0.0748 | 0.0054 | 6.02E-43  | -13.7380 | 1376071 | Asthma |
| rs9271247   | 6 | 32612335 | A | G | 0.2961 | -0.0748 | 0.0054 | 5.97E-43  | -13.7386 | 1376071 | Asthma |
| rs3104419   | 6 | 32612359 | T | C | 0.4575 | 0.0403  | 0.0048 | 6.66E-17  | 8.3530   | 1310845 | Asthma |
| rs9271248   | 6 | 32612380 | C | T | 0.2981 | -0.0708 | 0.0060 | 1.13E-32  | -11.9041 | 1224666 | Asthma |
| rs9271250   | 6 | 32612457 | G | T | 0.2893 | -0.0721 | 0.0064 | 2.58E-29  | -11.2405 | 856466  | Asthma |
| rs9271251   | 6 | 32612464 | C | A | 0.2981 | -0.0708 | 0.0060 | 1.15E-32  | -11.9028 | 1224666 | Asthma |
| rs80343249  | 6 | 32612491 | A | G | 0.0501 | -0.0966 | 0.0120 | 7.14E-16  | -8.0682  | 1310845 | Asthma |
| rs9271252   | 6 | 32612511 | C | G | 0.2962 | -0.0748 | 0.0054 | 5.57E-43  | -13.7435 | 1376071 | Asthma |
| rs2858861   | 6 | 32612554 | T | C | 0.4584 | 0.0404  | 0.0048 | 6.32E-17  | 8.3591   | 1310845 | Asthma |
| rs72850065  | 6 | 32612566 | A | C | 0.1055 | -0.0615 | 0.0095 | 9.62E-11  | -6.4727  | 1003362 | Asthma |
| rs9271255   | 6 | 32612580 | C | T | 0.2961 | -0.0747 | 0.0054 | 7.84E-43  | -13.7188 | 1376071 | Asthma |
| rs2858860   | 6 | 32612589 | T | G | 0.4592 | 0.0396  | 0.0054 | 1.53E-13  | 7.3842   | 1133307 | Asthma |
| rs9271256   | 6 | 32612634 | A | G | 0.1763 | -0.0583 | 0.0065 | 2.95E-19  | -8.9705  | 1376071 | Asthma |
| rs9271257   | 6 | 32612667 | G | A | 0.2986 | -0.0712 | 0.0061 | 6.12E-32  | -11.7622 | 1198533 | Asthma |
| rs9271258   | 6 | 32612669 | G | A | 0.2986 | -0.0712 | 0.0061 | 5.73E-32  | -11.7676 | 1198533 | Asthma |
| rs72850069  | 6 | 32612677 | G | T | 0.1207 | -0.0678 | 0.0086 | 3.29E-15  | -7.8796  | 1159440 | Asthma |
| rs3997871   | 6 | 32612679 | G | A | 0.2961 | -0.0748 | 0.0054 | 5.99E-43  | -13.7385 | 1376071 | Asthma |
| rs9271260   | 6 | 32612730 | A | C | 0.2961 | -0.0748 | 0.0054 | 5.54E-43  | -13.7438 | 1376071 | Asthma |
| rs3997872   | 6 | 32612840 | A | T | 0.1706 | 0.1369  | 0.0064 | 1.43E-100 | 21.2887  | 1310845 | Asthma |
| rs2395515   | 6 | 32612860 | C | T | 0.1763 | -0.0582 | 0.0065 | 3.34E-19  | -8.9570  | 1376071 | Asthma |
| rs113195871 | 6 | 32612863 | A | T | 0.1202 | -0.0692 | 0.0078 | 8.43E-19  | -8.8543  | 1310845 | Asthma |
| rs2395516   | 6 | 32612880 | C | T | 0.3363 | 0.0340  | 0.0051 | 3.57E-11  | 6.6210   | 1310845 | Asthma |
| rs3997873   | 6 | 32612946 | G | T | 0.1680 | -0.0567 | 0.0067 | 2.42E-17  | -8.4715  | 1376071 | Asthma |
| rs3997874   | 6 | 32612964 | A | G | 0.2961 | -0.0748 | 0.0054 | 5.80E-43  | -13.7404 | 1376071 | Asthma |
| rs2894378   | 6 | 32613103 | G | A | 0.2977 | -0.0706 | 0.0060 | 2.02E-32  | -11.8554 | 1224666 | Asthma |
| rs2894379   | 6 | 32613134 | C | T | 0.2867 | 0.0722  | 0.0067 | 3.30E-27  | 10.8038  | 977229  | Asthma |
| rs3129747   | 6 | 32613231 | C | T | 0.3404 | 0.0381  | 0.0057 | 2.38E-11  | 6.6807   | 1133307 | Asthma |
| rs3129748   | 6 | 32613238 | A | T | 0.3398 | 0.0381  | 0.0056 | 1.09E-11  | 6.7941   | 1159440 | Asthma |
| rs3104418   | 6 | 32613244 | A | G | 0.3404 | 0.0382  | 0.0057 | 2.35E-11  | 6.6828   | 1133307 | Asthma |
| rs3104417   | 6 | 32613245 | A | T | 0.3427 | 0.0413  | 0.0062 | 2.06E-11  | 6.7019   | 1064845 | Asthma |
| rs35759989  | 6 | 32613319 | C | T | 0.0501 | -0.0969 | 0.0120 | 5.72E-16  | -8.0950  | 1310845 | Asthma |
| rs75765164  | 6 | 32613380 | A | G | 0.0265 | -0.0811 | 0.0145 | 2.52E-08  | -5.5718  | 1376071 | Asthma |
| rs34471348  | 6 | 32613398 | C | T | 0.1202 | -0.0692 | 0.0078 | 8.29E-19  | -8.8561  | 1310845 | Asthma |
| rs9271286   | 6 | 32613444 | A | G | 0.3662 | 0.0301  | 0.0050 | 2.02E-09  | 5.9961   | 1310845 | Asthma |
| rs56838463  | 6 | 32613448 | C | A | 0.1209 | -0.0680 | 0.0086 | 2.52E-15  | -7.9123  | 1159440 | Asthma |
| rs9271287   | 6 | 32613476 | G | A | 0.3654 | 0.0298  | 0.0050 | 3.00E-09  | 5.9318   | 1310845 | Asthma |
| rs9271289   | 6 | 32613528 | T | C | 0.3658 | 0.0301  | 0.0050 | 2.02E-09  | 5.9963   | 1310845 | Asthma |
| rs3129749   | 6 | 32613556 | G | A | 0.1763 | -0.0584 | 0.0065 | 2.81E-19  | -8.9757  | 1376071 | Asthma |
| rs9271292   | 6 | 32613573 | C | T | 0.3664 | 0.0302  | 0.0050 | 1.72E-09  | 6.0228   | 1310845 | Asthma |
| rs35421715  | 6 | 32613679 | G | A | 0.1209 | -0.0680 | 0.0086 | 2.55E-15  | -7.9110  | 1159440 | Asthma |
| rs9271295   | 6 | 32613690 | C | T | 0.3644 | 0.0297  | 0.0050 | 3.45E-09  | 5.9084   | 1310845 | Asthma |
| rs55660658  | 6 | 32613723 | G | A | 0.1209 | -0.0680 | 0.0086 | 2.56E-15  | -7.9106  | 1159440 | Asthma |
| rs3104416   | 6 | 32613725 | C | T | 0.2991 | -0.0708 | 0.0060 | 1.28E-32  | -11.8934 | 1224666 | Asthma |
| rs3129750   | 6 | 32613738 | G | A | 0.1763 | -0.0583 | 0.0065 | 3.23E-19  | -8.9605  | 1376071 | Asthma |
| rs73728237  | 6 | 32613851 | T | C | 0.0502 | -0.0968 | 0.0120 | 5.90E-16  | -8.0917  | 1310845 | Asthma |
| rs62406297  | 6 | 32613873 | A | G | 0.0730 | -0.1122 | 0.0103 | 1.74E-27  | -10.8630 | 1159440 | Asthma |
| rs55873471  | 6 | 32613935 | G | A | 0.1204 | -0.0703 | 0.0079 | 8.16E-19  | -8.8578  | 1284712 | Asthma |
| rs2894275   | 6 | 32613977 | G | T | 0.3759 | 0.0308  | 0.0054 | 1.21E-08  | 5.6981   | 1154767 | Asthma |
| rs574802061 | 6 | 32613984 | T | A | 0.1087 | -0.0871 | 0.0120 | 4.35E-13  | -7.2441  | 778845  | Asthma |
| rs2395223   | 6 | 32614001 | T | C | 0.3749 | 0.0317  | 0.0055 | 8.68E-09  | 5.7547   | 1128634 | Asthma |
| rs1966001   | 6 | 32614005 | C | T | 0.1782 | -0.0535 | 0.0071 | 3.50E-14  | -7.5784  | 1224666 | Asthma |
| rs4530903   | 6 | 32614112 | T | C | 0.1192 | -0.0694 | 0.0079 | 9.73E-19  | -8.8383  | 1310845 | Asthma |
| rs4404800   | 6 | 32614136 | G | A | 0.1304 | -0.0745 | 0.0084 | 1.12E-18  | -8.8220  | 883197  | Asthma |
| rs522308    | 6 | 32614145 | T | C | 0.2913 | 0.1073  | 0.0054 | 3.57E-87  | 19.7909  | 1316443 | Asthma |
| rs34704034  | 6 | 32614152 | G | A | 0.0501 | -0.0967 | 0.0120 | 6.50E-16  | -8.0795  | 1310845 | Asthma |
| rs521539    | 6 | 32614196 | A | G | 0.2151 | 0.1076  | 0.0058 | 1.40E-75  | 18.3973  | 1310845 | Asthma |

|             |   |          |   |   |        |         |        |           |          |         |        |
|-------------|---|----------|---|---|--------|---------|--------|-----------|----------|---------|--------|
| rs521512    | 6 | 32614205 | C | T | 0.3664 | 0.0302  | 0.0050 | 1.73E-09  | 6.0212   | 1310845 | Asthma |
| rs56361357  | 6 | 32614219 | A | C | 0.0501 | -0.0971 | 0.0120 | 5.11E-16  | -8.1087  | 1310845 | Asthma |
| rs642093    | 6 | 32614298 | A | G | 0.2181 | 0.0370  | 0.0059 | 3.46E-10  | 6.2766   | 1251217 | Asthma |
| rs3129751   | 6 | 32614412 | C | A | 0.1706 | 0.1368  | 0.0064 | 1.47E-100 | 21.2881  | 1310845 | Asthma |
| rs2858859   | 6 | 32614498 | A | G | 0.3664 | 0.0302  | 0.0050 | 1.68E-09  | 6.0262   | 1310845 | Asthma |
| rs4504507   | 6 | 32614511 | T | C | 0.1202 | -0.0692 | 0.0078 | 8.18E-19  | -8.8575  | 1310845 | Asthma |
| rs73728240  | 6 | 32614543 | T | A | 0.0501 | -0.0969 | 0.0120 | 5.66E-16  | -8.0965  | 1310845 | Asthma |
| rs5004276   | 6 | 32614555 | A | G | 0.3663 | 0.0302  | 0.0050 | 1.65E-09  | 6.0294   | 1310845 | Asthma |
| rs5004277   | 6 | 32614577 | T | C | 0.3661 | 0.0304  | 0.0050 | 1.44E-09  | 6.0516   | 1310845 | Asthma |
| rs28614783  | 6 | 32614657 | T | C | 0.0501 | -0.0965 | 0.0120 | 7.55E-16  | -8.0617  | 1310845 | Asthma |
| rs7451962   | 6 | 32614658 | A | G | 0.3664 | 0.0302  | 0.0050 | 1.71E-09  | 6.0234   | 1310845 | Asthma |
| rs28507026  | 6 | 32614708 | G | A | 0.1714 | -0.0833 | 0.0074 | 3.89E-29  | -11.2041 | 1159440 | Asthma |
| rs28380113  | 6 | 32614715 | T | C | 0.1209 | -0.0680 | 0.0086 | 2.58E-15  | -7.9096  | 1159440 | Asthma |
| rs62406298  | 6 | 32614764 | G | A | 0.0712 | -0.1094 | 0.0096 | 3.43E-30  | -11.4169 | 1310845 | Asthma |
| rs62406299  | 6 | 32614781 | C | G | 0.0712 | -0.1091 | 0.0096 | 5.36E-30  | -11.3781 | 1310845 | Asthma |
| rs3104415   | 6 | 32614800 | C | A | 0.3445 | 0.0553  | 0.0056 | 8.08E-23  | 9.8334   | 1216250 | Asthma |
| rs34656207  | 6 | 32614824 | T | C | 0.3842 | 0.0369  | 0.0057 | 1.22E-10  | 6.4365   | 1156622 | Asthma |
| rs35186928  | 6 | 32614827 | A | G | 0.3966 | 0.0426  | 0.0061 | 2.55E-12  | 7.0003   | 1064845 | Asthma |
| rs3104414   | 6 | 32614835 | A | G | 0.3445 | 0.0597  | 0.0058 | 5.43E-25  | 10.3251  | 1133307 | Asthma |
| rs3104413   | 6 | 32614873 | G | C | 0.1713 | 0.1368  | 0.0065 | 5.95E-98  | 21.0054  | 1284712 | Asthma |
| rs9271331   | 6 | 32614895 | T | C | 0.3646 | 0.0307  | 0.0051 | 1.75E-09  | 6.0190   | 1284712 | Asthma |
| rs149902168 | 6 | 32614984 | C | A | 0.0362 | -0.1143 | 0.0149 | 1.94E-14  | -7.6548  | 1251217 | Asthma |
| rs62406300  | 6 | 32614995 | A | G | 0.0712 | -0.1091 | 0.0096 | 5.47E-30  | -11.3762 | 1310845 | Asthma |
| rs62406301  | 6 | 32615030 | C | A | 0.0711 | -0.1085 | 0.0096 | 1.45E-29  | -11.2911 | 1310845 | Asthma |
| rs9271336   | 6 | 32615100 | A | G | 0.3735 | 0.0324  | 0.0055 | 4.28E-09  | 5.8731   | 1159440 | Asthma |
| rs9271337   | 6 | 32615104 | T | C | 0.3735 | 0.0324  | 0.0055 | 4.30E-09  | 5.8721   | 1159440 | Asthma |
| rs9271338   | 6 | 32615108 | G | T | 0.3735 | 0.0324  | 0.0055 | 4.28E-09  | 5.8731   | 1159440 | Asthma |
| rs9271339   | 6 | 32615114 | C | T | 0.3735 | 0.0324  | 0.0055 | 4.30E-09  | 5.8723   | 1159440 | Asthma |
| rs201424733 | 6 | 32615162 | T | G | 0.0379 | -0.1122 | 0.0165 | 1.07E-11  | -6.7967  | 635365  | Asthma |
| rs112627226 | 6 | 32615192 | C | T | 0.1146 | -0.0668 | 0.0083 | 7.95E-16  | -8.0550  | 1251217 | Asthma |
| rs112270441 | 6 | 32615203 | T | C | 0.1202 | -0.0692 | 0.0078 | 8.60E-19  | -8.8519  | 1310845 | Asthma |
| rs6917212   | 6 | 32615228 | G | C | 0.3745 | 0.0273  | 0.0050 | 4.85E-08  | 5.4567   | 1310845 | Asthma |
| rs3129753   | 6 | 32615250 | C | G | 0.1697 | 0.1495  | 0.0072 | 3.13E-96  | 20.8152  | 1133307 | Asthma |
| rs6605556   | 6 | 32615322 | G | A | 0.1684 | 0.1362  | 0.0065 | 1.43E-97  | 20.9627  | 1310845 | Asthma |
| rs9271342   | 6 | 32615345 | C | G | 0.2185 | 0.0374  | 0.0059 | 2.22E-10  | 6.3451   | 1251217 | Asthma |
| rs4959105   | 6 | 32615369 | T | C | 0.3473 | 0.0339  | 0.0056 | 1.11E-09  | 6.0933   | 1159440 | Asthma |
| rs113979555 | 6 | 32615411 | A | G | 0.1202 | -0.0690 | 0.0078 | 1.08E-18  | -8.8266  | 1310845 | Asthma |
| rs6941393   | 6 | 32615423 | A | G | 0.2160 | 0.1151  | 0.0064 | 7.13E-73  | 18.0561  | 1159440 | Asthma |
| rs6941395   | 6 | 32615429 | A | G | 0.1697 | 0.1480  | 0.0070 | 8.19E-98  | 20.9890  | 1159440 | Asthma |
| rs6931277   | 6 | 32615580 | T | A | 0.1712 | 0.1355  | 0.0064 | 4.08E-99  | 21.1312  | 1310845 | Asthma |
| rs7760731   | 6 | 32615624 | A | C | 0.2182 | 0.0373  | 0.0059 | 2.59E-10  | 6.3214   | 1251217 | Asthma |
| rs111553658 | 6 | 32615640 | T | C | 0.1202 | -0.0693 | 0.0078 | 7.87E-19  | -8.8618  | 1310845 | Asthma |
| rs9271346   | 6 | 32615691 | C | T | 0.1956 | -0.0594 | 0.0068 | 2.53E-18  | -8.7310  | 1224666 | Asthma |
| rs6941972   | 6 | 32615752 | A | G | 0.1965 | 0.1140  | 0.0065 | 1.93E-68  | 17.4838  | 1225084 | Asthma |
| rs9271347   | 6 | 32615766 | A | G | 0.1684 | -0.0563 | 0.0067 | 3.60E-17  | -8.4254  | 1376071 | Asthma |
| rs115625939 | 6 | 32615807 | G | A | 0.1313 | -0.1131 | 0.0081 | 1.47E-44  | -14.0040 | 1159440 | Asthma |
| rs113676242 | 6 | 32615942 | G | C | 0.0712 | -0.1093 | 0.0096 | 4.22E-30  | -11.3991 | 1310845 | Asthma |
| rs113468765 | 6 | 32615972 | T | G | 0.0713 | -0.1111 | 0.0097 | 2.93E-30  | -11.4309 | 1284712 | Asthma |
| rs113711404 | 6 | 32615980 | A | G | 0.1202 | -0.0692 | 0.0078 | 7.88E-19  | -8.8617  | 1310845 | Asthma |
| rs77015620  | 6 | 32616006 | G | A | 0.0502 | -0.0962 | 0.0120 | 8.64E-16  | -8.0451  | 1310845 | Asthma |
| rs1846190   | 6 | 32616036 | A | G | 0.3005 | 0.0384  | 0.0054 | 8.46E-13  | 7.1534   | 1284712 | Asthma |
| rs1281935   | 6 | 32616043 | T | G | 0.0701 | 0.1505  | 0.0102 | 4.58E-49  | 14.7227  | 1251217 | Asthma |
| rs113568421 | 6 | 32616069 | A | G | 0.1209 | -0.0681 | 0.0086 | 2.37E-15  | -7.9203  | 1159440 | Asthma |
| rs9271351   | 6 | 32616083 | C | G | 0.1681 | -0.0566 | 0.0067 | 2.45E-17  | -8.4701  | 1376071 | Asthma |
| rs33964890  | 6 | 32616142 | C | T | 0.2967 | 0.0558  | 0.0057 | 2.94E-22  | 9.7027   | 1159440 | Asthma |
| rs33915496  | 6 | 32616202 | G | A | 0.3473 | 0.0337  | 0.0056 | 1.31E-09  | 6.0663   | 1159440 | Asthma |
| rs9271353   | 6 | 32616237 | T | C | 0.1680 | -0.0567 | 0.0067 | 2.18E-17  | -8.4838  | 1376071 | Asthma |
| rs34541031  | 6 | 32616283 | G | A | 0.1210 | -0.0684 | 0.0086 | 1.73E-15  | -7.9596  | 1159440 | Asthma |
| rs9271354   | 6 | 32616289 | C | T | 0.1683 | -0.0567 | 0.0067 | 1.99E-17  | -8.4943  | 1376071 | Asthma |
| rs73730369  | 6 | 32616356 | C | T | 0.0501 | -0.0963 | 0.0120 | 9.26E-16  | -8.0364  | 1310845 | Asthma |
| rs6930731   | 6 | 32616460 | T | C | 0.0265 | -0.0811 | 0.0145 | 2.42E-08  | -5.5789  | 1376071 | Asthma |
| rs36014219  | 6 | 32616517 | T | C | 0.1217 | -0.0737 | 0.0095 | 1.03E-14  | -7.7356  | 1064845 | Asthma |
| rs35540199  | 6 | 32616529 | T | A | 0.1217 | -0.0737 | 0.0095 | 1.03E-14  | -7.7352  | 1064845 | Asthma |
| rs33932178  | 6 | 32616536 | G | C | 0.3476 | 0.0346  | 0.0057 | 9.76E-10  | 6.1132   | 1133307 | Asthma |
| rs34694416  | 6 | 32616594 | T | C | 0.1204 | -0.0703 | 0.0079 | 7.84E-19  | -8.8623  | 1284712 | Asthma |
| rs1281934   | 6 | 32616605 | G | A | 0.0495 | 0.1527  | 0.0129 | 2.64E-32  | 11.8330  | 1216250 | Asthma |
| rs73730372  | 6 | 32616804 | T | C | 0.1293 | -0.1076 | 0.0074 | 8.68E-48  | -14.5224 | 1310845 | Asthma |
| rs3129757   | 6 | 32616832 | A | C | 0.1680 | -0.0567 | 0.0067 | 2.32E-17  | -8.4762  | 1376071 | Asthma |
| rs3129758   | 6 | 32616848 | A | G | 0.4164 | -0.1089 | 0.0050 | 8.42E-107 | -21.9505 | 1376071 | Asthma |
| rs28587541  | 6 | 32616875 | G | A | 0.1202 | -0.0692 | 0.0078 | 8.16E-19  | -8.8578  | 1310845 | Asthma |
| rs62406302  | 6 | 32616885 | G | T | 0.0712 | -0.1092 | 0.0096 | 4.93E-30  | -11.3857 | 1310845 | Asthma |
| rs510205    | 6 | 32616916 | G | C | 0.2128 | 0.1079  | 0.0059 | 1.70E-75  | 18.3868  | 1310845 | Asthma |
| rs73730375  | 6 | 32616931 | G | A | 0.0501 | -0.0961 | 0.0120 | 9.42E-16  | -8.0344  | 1310845 | Asthma |
| rs28752520  | 6 | 32616962 | C | T | 0.2496 | -0.0558 | 0.0061 | 9.24E-20  | -9.0975  | 1159440 | Asthma |

|             |   |          |   |   |        |         |        |           |          |         |        |
|-------------|---|----------|---|---|--------|---------|--------|-----------|----------|---------|--------|
| rs113177970 | 6 | 32616972 | T | C | 0.0712 | -0.1091 | 0.0096 | 5.14E-30  | -11.3818 | 1310845 | Asthma |
| rs28833508  | 6 | 32617017 | C | T | 0.1202 | -0.0692 | 0.0078 | 8.20E-19  | -8.8573  | 1310845 | Asthma |
| rs111290278 | 6 | 32617086 | A | C | 0.0726 | -0.1118 | 0.0104 | 3.97E-27  | -10.7871 | 1159440 | Asthma |
| rs114701564 | 6 | 32617098 | A | G | 0.0721 | -0.1121 | 0.0104 | 4.81E-27  | -10.7685 | 1159440 | Asthma |
| rs73730377  | 6 | 32617103 | G | A | 0.1289 | -0.1082 | 0.0074 | 5.01E-48  | -14.5600 | 1310845 | Asthma |
| rs113232664 | 6 | 32617124 | G | A | 0.0698 | -0.1086 | 0.0106 | 1.36E-24  | -10.2366 | 1159440 | Asthma |
| rs28752526  | 6 | 32617141 | G | A | 0.3357 | 0.0970  | 0.0055 | 2.61E-69  | 17.5966  | 1224666 | Asthma |
| rs34278657  | 6 | 32617149 | G | A | 0.0531 | -0.0997 | 0.0149 | 2.16E-11  | -6.9948  | 977229  | Asthma |
| rs28819755  | 6 | 32617155 | A | G | 0.1112 | -0.0757 | 0.0098 | 1.33E-14  | -7.7032  | 1029518 | Asthma |
| rs685810    | 6 | 32617175 | G | A | 0.3266 | 0.0947  | 0.0053 | 1.32E-71  | 17.8936  | 1290310 | Asthma |
| rs73730378  | 6 | 32617192 | G | A | 0.0502 | -0.0926 | 0.0122 | 2.54E-14  | -7.6204  | 1284712 | Asthma |
| rs113016235 | 6 | 32617200 | G | T | 0.1294 | -0.1069 | 0.0075 | 9.29E-46  | -14.1997 | 1284712 | Asthma |
| rs28872589  | 6 | 32617212 | C | T | 0.1199 | -0.0760 | 0.0085 | 3.82E-19  | -8.9420  | 1180923 | Asthma |
| rs28833271  | 6 | 32617268 | T | C | 0.1208 | -0.0680 | 0.0086 | 2.70E-15  | -7.9042  | 1159440 | Asthma |
| rs28752534  | 6 | 32617291 | C | T | 0.3455 | -0.0834 | 0.0058 | 8.54E-47  | -14.3653 | 1133307 | Asthma |
| rs113243185 | 6 | 32617294 | C | G | 0.1315 | -0.1129 | 0.0081 | 2.06E-44  | -13.9797 | 1159440 | Asthma |
| rs2856724   | 6 | 32617384 | G | A | 0.2355 | 0.0528  | 0.0090 | 4.17E-09  | 5.8772   | 778845  | Asthma |
| rs3129759   | 6 | 32617386 | G | A | 0.4538 | -0.1460 | 0.0078 | 1.78E-78  | -18.7542 | 844071  | Asthma |
| rs13213821  | 6 | 32617422 | G | A | 0.2884 | -0.1343 | 0.0086 | 1.51E-54  | -15.5541 | 844071  | Asthma |
| rs138203449 | 6 | 32617462 | G | A | 0.1092 | -0.0879 | 0.0120 | 2.50E-13  | -7.3189  | 778845  | Asthma |
| rs560847937 | 6 | 32617496 | G | C | 0.1066 | -0.0899 | 0.0121 | 1.09E-13  | -7.4300  | 778845  | Asthma |
| rs531321194 | 6 | 32617500 | C | A | 0.1349 | -0.0831 | 0.0117 | 1.35E-12  | -7.0889  | 778845  | Asthma |
| rs62406303  | 6 | 32617517 | G | T | 0.2339 | -0.1326 | 0.0093 | 2.52E-46  | -14.2902 | 778845  | Asthma |
| rs62406304  | 6 | 32617521 | T | C | 0.0727 | -0.1430 | 0.0160 | 4.50E-19  | -8.9238  | 778845  | Asthma |
| rs533989183 | 6 | 32617586 | G | C | 0.1082 | -0.0869 | 0.0120 | 5.29E-13  | -7.2179  | 778845  | Asthma |
| rs62406305  | 6 | 32617594 | A | G | 0.1401 | -0.1414 | 0.0120 | 5.30E-32  | -11.7737 | 778845  | Asthma |
| rs186611699 | 6 | 32617603 | C | T | 0.1092 | -0.0880 | 0.0120 | 2.44E-13  | -7.3223  | 778845  | Asthma |
| rs13217434  | 6 | 32617611 | C | G | 0.2882 | -0.1328 | 0.0087 | 2.51E-52  | -15.2224 | 778845  | Asthma |
| rs147389652 | 6 | 32617663 | T | C | 0.0438 | -0.1086 | 0.0193 | 1.73E-08  | -5.6374  | 870622  | Asthma |
| rs76984893  | 6 | 32617679 | C | A | 0.0631 | -0.0991 | 0.0151 | 5.45E-11  | -6.5581  | 870622  | Asthma |
| rs76509496  | 6 | 32617725 | T | C | 0.0534 | -0.1023 | 0.0124 | 1.90E-16  | -8.2281  | 1180923 | Asthma |
| rs3129761   | 6 | 32617727 | C | G | 0.4363 | 0.1135  | 0.0054 | 1.45E-98  | 21.0708  | 1186521 | Asthma |
| rs62406306  | 6 | 32617743 | A | T | 0.0699 | -0.1267 | 0.0105 | 1.45E-33  | -12.0739 | 1180923 | Asthma |
| rs114609017 | 6 | 32617855 | A | G | 0.0443 | -0.1143 | 0.0138 | 1.03E-16  | -8.3015  | 1180923 | Asthma |
| rs75483390  | 6 | 32617972 | A | G | 0.0531 | -0.1026 | 0.0125 | 1.86E-16  | -8.2309  | 1180923 | Asthma |
| rs3129762   | 6 | 32617978 | T | A | 0.1689 | -0.0602 | 0.0072 | 4.15E-17  | -8.4085  | 1246149 | Asthma |
| rs61523045  | 6 | 32617985 | G | A | 0.1199 | -0.0760 | 0.0085 | 3.99E-19  | -8.9371  | 1180923 | Asthma |
| rs34032759  | 6 | 32617998 | A | G | 0.1199 | -0.0761 | 0.0085 | 3.71E-19  | -8.9452  | 1180923 | Asthma |
| rs34692256  | 6 | 32618028 | G | A | 0.0699 | -0.1268 | 0.0105 | 1.38E-33  | -12.0775 | 1180923 | Asthma |
| rs3104412   | 6 | 32618190 | G | A | 0.4323 | 0.1114  | 0.0052 | 1.74E-101 | 21.3872  | 1246149 | Asthma |
| rs57425824  | 6 | 32618234 | T | C | 0.1142 | -0.0738 | 0.0091 | 4.95E-16  | -8.1128  | 1121295 | Asthma |
| rs3135005   | 6 | 32618242 | A | G | 0.1689 | -0.0602 | 0.0072 | 4.08E-17  | -8.4105  | 1246149 | Asthma |
| rs35040284  | 6 | 32618291 | C | T | 0.1197 | -0.0757 | 0.0085 | 5.68E-19  | -8.8982  | 1180923 | Asthma |
| rs35637654  | 6 | 32618364 | A | C | 0.1199 | -0.0761 | 0.0085 | 3.57E-19  | -8.9495  | 1180923 | Asthma |
| rs11759846  | 6 | 32618445 | A | G | 0.0600 | -0.0944 | 0.0114 | 1.05E-16  | -8.2982  | 1180923 | Asthma |
| rs11751024  | 6 | 32618459 | A | C | 0.3977 | -0.0831 | 0.0053 | 2.15E-54  | -15.5309 | 1246149 | Asthma |
| rs28383282  | 6 | 32618598 | T | C | 0.2070 | -0.0570 | 0.0088 | 1.15E-10  | -6.4462  | 934923  | Asthma |
| rs11755689  | 6 | 32618599 | G | A | 0.3631 | -0.1177 | 0.0070 | 3.91E-63  | -16.7719 | 1000149 | Asthma |
| rs11755694  | 6 | 32618631 | T | A | 0.0557 | -0.1202 | 0.0155 | 7.61E-15  | -7.7741  | 934923  | Asthma |
| rs62404063  | 6 | 32618642 | A | C | 0.0739 | -0.1401 | 0.0127 | 3.76E-28  | -11.0013 | 934923  | Asthma |
| rs3135004   | 6 | 32618643 | A | G | 0.3201 | -0.0764 | 0.0083 | 2.67E-20  | -9.2315  | 844071  | Asthma |
| rs11751052  | 6 | 32618650 | T | C | 0.0560 | -0.1215 | 0.0154 | 3.49E-15  | -7.8716  | 934923  | Asthma |
| rs11751053  | 6 | 32618654 | T | C | 0.0560 | -0.1215 | 0.0154 | 3.49E-15  | -7.8716  | 934923  | Asthma |
| rs61617278  | 6 | 32618701 | C | G | 0.1093 | -0.0870 | 0.0120 | 4.27E-13  | -7.2465  | 778845  | Asthma |
| rs1281933   | 6 | 32618730 | T | C | 0.0727 | -0.1256 | 0.0113 | 1.60E-28  | -11.0781 | 1086328 | Asthma |
| rs28383298  | 6 | 32618796 | T | C | 0.0691 | -0.1434 | 0.0164 | 2.22E-18  | -8.7453  | 778845  | Asthma |
| rs35805541  | 6 | 32618898 | C | T | 0.0532 | -0.1021 | 0.0124 | 2.24E-16  | -8.2084  | 1180923 | Asthma |
| rs9271363   | 6 | 32618955 | G | C | 0.2118 | -0.0542 | 0.0065 | 6.47E-17  | -8.3564  | 1246149 | Asthma |
| rs35150023  | 6 | 32618977 | A | T | 0.1200 | -0.0759 | 0.0085 | 4.45E-19  | -8.9250  | 1180923 | Asthma |
| rs9271364   | 6 | 32619010 | G | A | 0.4773 | 0.0843  | 0.0052 | 4.17E-59  | 16.2116  | 1246149 | Asthma |
| rs9271365   | 6 | 32619017 | G | T | 0.3904 | 0.1175  | 0.0053 | 5.83E-110 | 22.2797  | 1246149 | Asthma |
| rs34053446  | 6 | 32619032 | G | A | 0.1201 | -0.0776 | 0.0087 | 3.32E-19  | -8.9575  | 1154790 | Asthma |
| rs13191810  | 6 | 32619054 | T | C | 0.2959 | -0.0448 | 0.0058 | 1.70E-14  | -7.6717  | 1180923 | Asthma |
| rs9271366   | 6 | 32619077 | G | A | 0.1688 | -0.0603 | 0.0072 | 3.58E-17  | -8.4260  | 1246149 | Asthma |
| rs9271367   | 6 | 32619131 | G | A | 0.3302 | -0.0758 | 0.0057 | 7.26E-41  | -13.3866 | 1246149 | Asthma |
| rs13207893  | 6 | 32619145 | C | T | 0.0959 | -0.0871 | 0.0090 | 2.90E-22  | -9.7039  | 1180923 | Asthma |
| rs9271368   | 6 | 32619157 | G | A | 0.3515 | -0.1151 | 0.0076 | 8.11E-52  | -15.1452 | 505420  | Asthma |
| rs607929    | 6 | 32619221 | C | G | 0.5521 | 0.0421  | 0.0059 | 6.79E-13  | 7.1838   | 1068611 | Asthma |
| rs557011    | 6 | 32619236 | T | C | 0.3629 | 0.0347  | 0.0060 | 6.62E-09  | 5.8002   | 1029518 | Asthma |
| rs9271374   | 6 | 32619264 | G | A | 0.2317 | -0.0764 | 0.0070 | 1.80E-27  | -10.8597 | 1094744 | Asthma |
| rs28464365  | 6 | 32619273 | C | T | 0.0600 | -0.0960 | 0.0114 | 3.42E-17  | -8.4310  | 1180923 | Asthma |
| rs34822594  | 6 | 32619285 | C | T | 0.1201 | -0.0762 | 0.0085 | 3.10E-19  | -8.9650  | 1180923 | Asthma |
| rs9271375   | 6 | 32619290 | A | G | 0.4505 | 0.0768  | 0.0052 | 6.30E-49  | 14.7016  | 1246149 | Asthma |
| rs28383312  | 6 | 32619313 | T | C | 0.3797 | 0.0720  | 0.0053 | 3.90E-42  | 13.6020  | 1246149 | Asthma |

|             |   |          |   |   |        |         |        |           |          |         |        |
|-------------|---|----------|---|---|--------|---------|--------|-----------|----------|---------|--------|
| rs9271376   | 6 | 32619336 | G | A | 0.3057 | -0.1055 | 0.0064 | 2.97E-60  | -16.3725 | 1094744 | Asthma |
| rs28383313  | 6 | 32619340 | G | C | 0.3151 | 0.1196  | 0.0061 | 7.54E-85  | 19.5198  | 1094744 | Asthma |
| rs28688825  | 6 | 32619380 | G | A | 0.1475 | -0.1097 | 0.0070 | 3.18E-55  | -15.6522 | 1310845 | Asthma |
| rs28533694  | 6 | 32619458 | T | C | 0.3288 | -0.1002 | 0.0052 | 2.14E-82  | -19.2284 | 1376071 | Asthma |
| rs111294540 | 6 | 32619582 | A | C | 0.0719 | -0.1117 | 0.0103 | 2.88E-27  | -10.8161 | 1216250 | Asthma |
| rs9271382   | 6 | 32619598 | G | A | 0.4339 | -0.0944 | 0.0060 | 5.41E-56  | -15.7651 | 1130071 | Asthma |
| rs9271383   | 6 | 32619614 | C | T | 0.5067 | -0.1223 | 0.0059 | 2.18E-96  | -20.8320 | 1130071 | Asthma |
| rs9271385   | 6 | 32619632 | A | G | 0.3862 | -0.0938 | 0.0061 | 6.12E-53  | -15.3145 | 1130071 | Asthma |
| rs9271387   | 6 | 32619647 | C | T | 0.4940 | -0.1314 | 0.0067 | 4.51E-86  | -19.6631 | 973993  | Asthma |
| rs190231509 | 6 | 32619648 | T | C | 0.0715 | -0.1034 | 0.0134 | 1.02E-14  | -7.7370  | 908767  | Asthma |
| rs9271389   | 6 | 32619654 | T | C | 0.4342 | -0.0939 | 0.0061 | 2.68E-54  | -15.5167 | 1064845 | Asthma |
| rs9271390   | 6 | 32619663 | A | G | 0.3815 | -0.0791 | 0.0062 | 8.32E-38  | -12.8525 | 1130071 | Asthma |
| rs9271391   | 6 | 32619665 | G | A | 0.3816 | -0.0791 | 0.0062 | 6.95E-38  | -12.8664 | 1130071 | Asthma |
| rs9271393   | 6 | 32619680 | G | C | 0.3820 | -0.0851 | 0.0069 | 1.52E-34  | -12.2583 | 934923  | Asthma |
| rs9271394   | 6 | 32619703 | T | A | 0.3125 | 0.1395  | 0.0081 | 1.88E-66  | 17.2194  | 844071  | Asthma |
| rs544537666 | 6 | 32619717 | G | A | 0.0671 | -0.1414 | 0.0165 | 1.23E-17  | -8.5504  | 778845  | Asthma |
| rs36232627  | 6 | 32619722 | C | A | 0.0697 | -0.0999 | 0.0135 | 1.43E-13  | -7.3933  | 908767  | Asthma |
| rs36232626  | 6 | 32619723 | T | G | 0.0693 | -0.1008 | 0.0136 | 1.07E-13  | -7.4323  | 908767  | Asthma |
| rs36232625  | 6 | 32619730 | T | A | 0.0690 | -0.1425 | 0.0164 | 3.09E-18  | -8.7079  | 778845  | Asthma |
| rs9271398   | 6 | 32619731 | C | T | 0.3173 | 0.1401  | 0.0082 | 4.28E-66  | 17.1719  | 778845  | Asthma |
| rs9271399   | 6 | 32619733 | C | T | 0.4253 | -0.1231 | 0.0077 | 7.26E-57  | -15.8918 | 844071  | Asthma |
| rs9271400   | 6 | 32619743 | T | G | 0.3044 | 0.1309  | 0.0072 | 4.27E-74  | 18.2100  | 973993  | Asthma |
| rs9271403   | 6 | 32619759 | G | A | 0.3679 | 0.0746  | 0.0055 | 2.78E-41  | 13.4576  | 1198533 | Asthma |
| rs80195381  | 6 | 32619763 | T | A | 0.0507 | -0.0988 | 0.0135 | 2.19E-13  | -7.3364  | 1133307 | Asthma |
| rs9271404   | 6 | 32619776 | A | T | 0.3682 | 0.0750  | 0.0054 | 2.45E-43  | 13.8029  | 1224666 | Asthma |
| rs9271406   | 6 | 32619811 | A | G | 0.5268 | -0.0648 | 0.0049 | 6.36E-40  | -13.2244 | 1376071 | Asthma |
| rs34116693  | 6 | 32619826 | T | C | 0.0712 | -0.1095 | 0.0096 | 3.14E-30  | -11.4249 | 1310845 | Asthma |
| rs9271408   | 6 | 32619836 | T | C | 0.2981 | 0.1177  | 0.0057 | 6.05E-94  | 20.5621  | 1224666 | Asthma |
| rs36232342  | 6 | 32619841 | C | T | 0.0712 | -0.1089 | 0.0096 | 7.16E-30  | -11.3528 | 1310845 | Asthma |
| rs9271409   | 6 | 32619851 | C | G | 0.2985 | 0.1178  | 0.0057 | 2.90E-94  | 20.5968  | 1224666 | Asthma |
| rs35168703  | 6 | 32619875 | T | A | 0.0725 | -0.1121 | 0.0104 | 3.16E-27  | -10.8079 | 1159440 | Asthma |
| rs9271411   | 6 | 32619884 | A | G | 0.3012 | 0.1117  | 0.0052 | 1.52E-101 | 21.3934  | 1376071 | Asthma |
| rs35390996  | 6 | 32619886 | A | G | 0.0712 | -0.1092 | 0.0096 | 4.79E-30  | -11.3883 | 1310845 | Asthma |
| rs28718904  | 6 | 32619910 | G | A | 0.1749 | -0.0612 | 0.0073 | 4.06E-17  | -8.4112  | 1198533 | Asthma |
| rs28589559  | 6 | 32619939 | T | G | 0.1724 | -0.0613 | 0.0067 | 3.77E-20  | -9.1943  | 1349938 | Asthma |
| rs28707527  | 6 | 32619940 | A | G | 0.1749 | -0.0614 | 0.0073 | 3.34E-17  | -8.4341  | 1198533 | Asthma |
| rs9271413   | 6 | 32619991 | G | A | 0.1680 | -0.0568 | 0.0067 | 1.91E-17  | -8.4994  | 1376071 | Asthma |
| rs9271414   | 6 | 32620005 | C | T | 0.3771 | -0.0809 | 0.0052 | 2.68E-55  | -15.6639 | 1349938 | Asthma |
| rs9271415   | 6 | 32620009 | C | T | 0.3801 | -0.0771 | 0.0056 | 9.84E-44  | -13.8685 | 1224666 | Asthma |
| rs116300229 | 6 | 32620031 | A | G | 0.0671 | -0.1093 | 0.0101 | 1.75E-27  | -10.8617 | 1310845 | Asthma |
| rs9271416   | 6 | 32620035 | A | G | 0.3006 | 0.1162  | 0.0057 | 6.32E-92  | 20.3352  | 1224666 | Asthma |
| rs9271418   | 6 | 32620055 | A | G | 0.3460 | -0.0693 | 0.0057 | 1.21E-33  | -12.0890 | 1159440 | Asthma |
| rs71542419  | 6 | 32620058 | A | C | 0.1055 | -0.0955 | 0.0097 | 1.06E-22  | -9.8059  | 1003362 | Asthma |
| rs9271419   | 6 | 32620069 | T | C | 0.4188 | 0.0593  | 0.0064 | 1.60E-20  | 9.2861   | 700591  | Asthma |
| rs9271420   | 6 | 32620075 | A | G | 0.4512 | -0.1019 | 0.0054 | 3.44E-80  | -18.9631 | 1224666 | Asthma |
| rs9271421   | 6 | 32620082 | T | C | 0.1678 | -0.0484 | 0.0073 | 3.79E-11  | -6.6122  | 1224666 | Asthma |
| rs9271422   | 6 | 32620083 | G | A | 0.3459 | -0.0713 | 0.0058 | 8.57E-35  | -12.3045 | 1198533 | Asthma |
| rs34976781  | 6 | 32620092 | G | A | 0.1063 | -0.1016 | 0.0088 | 5.58E-31  | -11.5737 | 1133307 | Asthma |
| rs9271423   | 6 | 32620120 | G | T | 0.1680 | -0.0568 | 0.0067 | 1.97E-17  | -8.4953  | 1376071 | Asthma |
| rs1281931   | 6 | 32620189 | C | T | 0.0707 | 0.1503  | 0.0102 | 2.54E-49  | 14.7627  | 1251217 | Asthma |
| rs80257164  | 6 | 32620190 | A | C | 0.0712 | -0.1091 | 0.0096 | 4.88E-30  | -11.3865 | 1310845 | Asthma |
| rs9271426   | 6 | 32620196 | A | G | 0.2995 | 0.1164  | 0.0057 | 3.36E-92  | 20.3652  | 1224666 | Asthma |
| rs34405843  | 6 | 32620217 | G | A | 0.1051 | -0.0981 | 0.0087 | 1.47E-29  | -11.2902 | 1159440 | Asthma |
| rs9271430   | 6 | 32620225 | C | T | 0.2998 | 0.1164  | 0.0057 | 2.87E-92  | 20.3737  | 1224666 | Asthma |
| rs570977502 | 6 | 32620226 | G | A | 0.0797 | -0.0867 | 0.0110 | 2.94E-15  | -7.8935  | 900020  | Asthma |
| rs34304006  | 6 | 32620230 | C | T | 0.1002 | -0.0912 | 0.0082 | 7.32E-29  | -11.1481 | 1310845 | Asthma |
| rs9271431   | 6 | 32620254 | A | G | 0.4032 | 0.0631  | 0.0054 | 2.59E-31  | 11.6398  | 1198533 | Asthma |
| rs9271432   | 6 | 32620279 | T | C | 0.2908 | 0.1200  | 0.0064 | 3.65E-78  | 18.7159  | 1130071 | Asthma |
| rs9271433   | 6 | 32620280 | G | A | 0.2909 | 0.1203  | 0.0064 | 1.74E-78  | 18.7549  | 1130071 | Asthma |
| rs9271434   | 6 | 32620281 | A | G | 0.3596 | 0.0770  | 0.0060 | 4.23E-37  | 12.7263  | 1130071 | Asthma |
| rs9271435   | 6 | 32620292 | T | C | 0.3954 | 0.0616  | 0.0055 | 2.78E-29  | 11.2337  | 1198533 | Asthma |
| rs116762473 | 6 | 32620299 | A | C | 0.0800 | -0.0879 | 0.0112 | 4.07E-15  | -7.8528  | 873887  | Asthma |
| rs200991817 | 6 | 32620327 | T | C | 0.0644 | -0.1285 | 0.0145 | 7.26E-19  | -8.8709  | 930250  | Asthma |
| rs9271436   | 6 | 32620333 | C | A | 0.3484 | -0.1114 | 0.0078 | 1.34E-46  | -14.3335 | 544513  | Asthma |
| rs9271438   | 6 | 32620416 | G | A | 0.2864 | 0.1108  | 0.0059 | 5.71E-78  | 18.6927  | 1198533 | Asthma |
| rs115076650 | 6 | 32620438 | G | A | 0.0713 | -0.1089 | 0.0096 | 6.58E-30  | -11.3606 | 1310845 | Asthma |
| rs9271440   | 6 | 32620463 | C | T | 0.3817 | -0.0784 | 0.0057 | 8.94E-44  | -13.8753 | 1198533 | Asthma |
| rs9271441   | 6 | 32620468 | T | C | 0.4529 | -0.1040 | 0.0055 | 1.05E-80  | -19.0252 | 1198533 | Asthma |
| rs9271442   | 6 | 32620483 | A | T | 0.3559 | 0.0680  | 0.0061 | 2.98E-29  | 11.2277  | 1130071 | Asthma |
| rs9271443   | 6 | 32620486 | C | A | 0.2007 | 0.0519  | 0.0080 | 8.91E-11  | 6.4845   | 1000149 | Asthma |
| rs9271444   | 6 | 32620504 | A | G | 0.3834 | -0.0788 | 0.0061 | 5.50E-38  | -12.8846 | 1130071 | Asthma |
| rs9271445   | 6 | 32620522 | T | A | 0.3544 | 0.0787  | 0.0070 | 2.50E-29  | 11.2434  | 973993  | Asthma |
| rs9271446   | 6 | 32620567 | A | G | 0.4120 | -0.1062 | 0.0069 | 1.78E-53  | -15.3950 | 912533  | Asthma |
| rs9271447   | 6 | 32620580 | A | G | 0.3521 | 0.0770  | 0.0064 | 1.98E-33  | 12.0483  | 1042455 | Asthma |



|             |   |          |   |   |        |         |        |           |          |         |        |
|-------------|---|----------|---|---|--------|---------|--------|-----------|----------|---------|--------|
| rs9271448   | 6 | 32620591 | A | G | 0.3512 | 0.0779  | 0.0064 | 4.60E-34  | 12.1680  | 1042455 | Asthma |
| rs9271452   | 6 | 32620608 | A | T | 0.3180 | 0.0981  | 0.0066 | 2.16E-50  | 14.9283  | 977229  | Asthma |
| rs9271453   | 6 | 32620639 | A | T | 0.3471 | -0.0703 | 0.0057 | 6.47E-35  | -12.3272 | 1224666 | Asthma |
| rs9271454   | 6 | 32620645 | T | C | 0.3514 | 0.0784  | 0.0064 | 3.28E-34  | 12.1956  | 1042455 | Asthma |
| rs9271455   | 6 | 32620646 | G | T | 0.3504 | 0.0770  | 0.0065 | 1.10E-32  | 11.9060  | 977229  | Asthma |
| rs9271456   | 6 | 32620658 | T | C | 0.3517 | 0.0793  | 0.0063 | 1.47E-36  | 12.6286  | 1068588 | Asthma |
| rs9271457   | 6 | 32620669 | C | T | 0.3802 | -0.0768 | 0.0056 | 3.27E-43  | -13.7818 | 1224666 | Asthma |
| rs9271458   | 6 | 32620676 | A | C | 0.3533 | 0.0786  | 0.0063 | 3.41E-36  | 12.5621  | 1068588 | Asthma |
| rs115632345 | 6 | 32620703 | T | A | 0.0690 | -0.1007 | 0.0108 | 1.22E-20  | -9.3152  | 1154767 | Asthma |
| rs9271461   | 6 | 32620723 | A | G | 0.3700 | 0.0860  | 0.0061 | 1.60E-45  | 14.1610  | 1068588 | Asthma |
| rs9271463   | 6 | 32620758 | A | T | 0.3814 | -0.0772 | 0.0056 | 7.86E-44  | -13.8847 | 1224666 | Asthma |
| rs9271464   | 6 | 32620767 | T | A | 0.2935 | 0.1200  | 0.0058 | 3.29E-96  | 20.8130  | 1224666 | Asthma |
| rs9271465   | 6 | 32620777 | T | C | 0.2935 | 0.1200  | 0.0058 | 3.50E-96  | 20.8099  | 1224666 | Asthma |
| rs9271466   | 6 | 32620829 | C | G | 0.1780 | -0.0537 | 0.0071 | 2.78E-14  | -7.6084  | 1224666 | Asthma |
| rs9271467   | 6 | 32620836 | T | C | 0.3812 | -0.0774 | 0.0056 | 5.42E-44  | -13.9111 | 1224666 | Asthma |
| rs9271468   | 6 | 32620839 | G | A | 0.3812 | -0.0774 | 0.0056 | 5.49E-44  | -13.9102 | 1224666 | Asthma |
| rs9271469   | 6 | 32620853 | C | T | 0.2979 | 0.1113  | 0.0052 | 3.17E-100 | 21.2521  | 1376071 | Asthma |
| rs9271470   | 6 | 32620885 | T | C | 0.3012 | 0.1118  | 0.0052 | 1.22E-101 | 21.4046  | 1376071 | Asthma |
| rs9271472   | 6 | 32620923 | T | C | 0.2972 | 0.1173  | 0.0057 | 4.37E-93  | 20.4661  | 1224666 | Asthma |
| rs9271474   | 6 | 32620930 | A | G | 0.2970 | 0.1173  | 0.0057 | 3.94E-93  | 20.4712  | 1224666 | Asthma |
| rs76815088  | 6 | 32620936 | C | T | 0.0712 | -0.1090 | 0.0096 | 5.69E-30  | -11.3731 | 1310845 | Asthma |
| rs9271475   | 6 | 32621031 | A | T | 0.3883 | -0.0840 | 0.0052 | 5.69E-58  | -16.0503 | 1316443 | Asthma |
| rs9271477   | 6 | 32621038 | C | T | 0.3804 | -0.0773 | 0.0056 | 5.94E-44  | -13.9046 | 1224666 | Asthma |
| rs144591706 | 6 | 32621042 | T | C | 0.0739 | -0.1141 | 0.0112 | 3.04E-24  | -10.1585 | 1064845 | Asthma |
| rs9271478   | 6 | 32621044 | A | G | 0.3804 | -0.0773 | 0.0056 | 5.98E-44  | -13.9041 | 1224666 | Asthma |
| rs561763188 | 6 | 32621051 | C | A | 0.0708 | -0.1142 | 0.0114 | 9.24E-24  | -10.0493 | 1064845 | Asthma |
| rs9271479   | 6 | 32621053 | G | A | 0.3804 | -0.0773 | 0.0056 | 5.18E-44  | -13.9142 | 1224666 | Asthma |
| rs9271480   | 6 | 32621054 | A | G | 0.2989 | 0.1178  | 0.0058 | 2.40E-91  | 20.2702  | 1198533 | Asthma |
| rs114014117 | 6 | 32621065 | G | A | 0.0659 | -0.1083 | 0.0102 | 3.12E-26  | -10.5961 | 1310845 | Asthma |
| rs9271481   | 6 | 32621100 | A | G | 0.1682 | -0.0567 | 0.0067 | 2.11E-17  | -8.4878  | 1376071 | Asthma |
| rs9271482   | 6 | 32621103 | C | T | 0.3812 | -0.0784 | 0.0056 | 7.89E-44  | -13.8843 | 1198533 | Asthma |
| rs9271483   | 6 | 32621105 | G | T | 0.3776 | -0.0810 | 0.0052 | 1.87E-55  | -15.6867 | 1349938 | Asthma |
| rs28699237  | 6 | 32621162 | T | A | 0.0265 | -0.0812 | 0.0145 | 2.29E-08  | -5.5889  | 1376071 | Asthma |
| rs9271485   | 6 | 32621176 | G | A | 0.3010 | 0.1118  | 0.0052 | 1.47E-101 | 21.3962  | 1376071 | Asthma |
| rs9271486   | 6 | 32621203 | T | C | 0.2976 | 0.1178  | 0.0058 | 6.28E-91  | 20.2212  | 1198533 | Asthma |
| rs9271487   | 6 | 32621208 | G | T | 0.3767 | -0.0798 | 0.0051 | 1.79E-55  | -15.6892 | 1376071 | Asthma |
| rs9271488   | 6 | 32621223 | T | G | 0.3010 | 0.1116  | 0.0053 | 1.71E-98  | 21.0641  | 1349938 | Asthma |
| rs9271490   | 6 | 32621283 | A | G | 0.3802 | -0.0772 | 0.0056 | 6.45E-44  | -13.8987 | 1224666 | Asthma |
| rs28535317  | 6 | 32621288 | G | A | 0.1146 | -0.0667 | 0.0083 | 8.63E-16  | -8.0450  | 1251217 | Asthma |
| rs34846487  | 6 | 32621324 | G | T | 0.0265 | -0.0812 | 0.0145 | 2.26E-08  | -5.5906  | 1376071 | Asthma |
| rs9271492   | 6 | 32621345 | C | A | 0.3489 | -0.0367 | 0.0051 | 8.05E-13  | -7.1603  | 1376071 | Asthma |
| rs9271493   | 6 | 32621381 | A | G | 0.3764 | -0.0798 | 0.0051 | 2.17E-55  | -15.6769 | 1376071 | Asthma |
| rs34645399  | 6 | 32621392 | G | A | 0.0713 | -0.1089 | 0.0096 | 6.38E-30  | -11.3629 | 1310845 | Asthma |
| rs34104805  | 6 | 32621440 | T | A | 0.0763 | -0.0936 | 0.0094 | 3.56E-23  | -9.9156  | 1310845 | Asthma |
| rs9271494   | 6 | 32621463 | C | A | 0.1797 | 0.1845  | 0.0100 | 5.12E-76  | 18.4513  | 778845  | Asthma |
| rs9271495   | 6 | 32621465 | C | T | 0.3676 | -0.0967 | 0.0070 | 1.37E-43  | -13.8447 | 912533  | Asthma |
| rs9271496   | 6 | 32621467 | C | T | 0.3861 | -0.0774 | 0.0062 | 1.98E-35  | -12.4224 | 1042455 | Asthma |
| rs9271497   | 6 | 32621468 | T | A | 0.2814 | 0.1182  | 0.0067 | 6.14E-70  | 17.6790  | 1068611 | Asthma |
| rs35597309  | 6 | 32621489 | A | G | 0.0266 | -0.0806 | 0.0145 | 2.82E-08  | -5.5521  | 1376071 | Asthma |
| rs9271498   | 6 | 32621505 | A | G | 0.2644 | 0.0958  | 0.0054 | 2.25E-69  | 17.6050  | 1376071 | Asthma |
| rs9271499   | 6 | 32621514 | T | C | 0.4111 | 0.0562  | 0.0054 | 1.09E-25  | 10.4779  | 1224666 | Asthma |
| rs9271500   | 6 | 32621523 | T | C | 0.4454 | 0.0450  | 0.0054 | 8.32E-17  | 8.3266   | 1198533 | Asthma |
| rs9271501   | 6 | 32621524 | G | A | 0.4454 | 0.0450  | 0.0054 | 8.23E-17  | 8.3278   | 1198533 | Asthma |
| rs9271502   | 6 | 32621528 | A | G | 0.3858 | 0.0489  | 0.0054 | 9.61E-20  | 9.0931   | 1257764 | Asthma |
| rs9271503   | 6 | 32621549 | A | C | 0.2870 | 0.1117  | 0.0054 | 1.96E-93  | 20.5052  | 1316443 | Asthma |
| rs9271504   | 6 | 32621591 | A | C | 0.2929 | 0.1200  | 0.0058 | 1.92E-96  | 20.8393  | 1224666 | Asthma |
| rs144081603 | 6 | 32621597 | C | T | 0.0680 | -0.1115 | 0.0101 | 3.38E-28  | -11.0107 | 1284712 | Asthma |
| rs9271505   | 6 | 32621598 | T | G | 0.3827 | -0.0775 | 0.0056 | 3.29E-44  | -13.9468 | 1224666 | Asthma |
| rs9271506   | 6 | 32621603 | C | T | 0.3827 | -0.0775 | 0.0056 | 3.31E-44  | -13.9464 | 1224666 | Asthma |
| rs9271507   | 6 | 32621617 | C | A | 0.3827 | -0.0775 | 0.0056 | 3.35E-44  | -13.9457 | 1224666 | Asthma |
| rs9271508   | 6 | 32621633 | T | C | 0.3213 | -0.0359 | 0.0058 | 4.96E-10  | -6.2204  | 1159440 | Asthma |
| rs9271509   | 6 | 32621638 | A | G | 0.1868 | 0.1456  | 0.0068 | 2.13E-102 | 21.4858  | 1159440 | Asthma |
| rs112401673 | 6 | 32621639 | T | C | 0.0725 | -0.1119 | 0.0104 | 4.04E-27  | -10.7856 | 1159440 | Asthma |
| rs9271510   | 6 | 32621690 | T | C | 0.3789 | -0.0759 | 0.0056 | 2.28E-42  | -13.6410 | 1224666 | Asthma |
| rs9271511   | 6 | 32621706 | A | G | 0.3012 | 0.1118  | 0.0052 | 1.02E-101 | 21.4117  | 1376071 | Asthma |
| rs35990832  | 6 | 32621718 | A | G | 0.0265 | -0.0811 | 0.0145 | 2.41E-08  | -5.5800  | 1376071 | Asthma |
| rs9271512   | 6 | 32621733 | A | G | 0.3802 | -0.0772 | 0.0056 | 6.65E-44  | -13.8964 | 1224666 | Asthma |
| rs114785125 | 6 | 32621743 | G | A | 0.0725 | -0.1118 | 0.0104 | 5.21E-27  | -10.7617 | 1159440 | Asthma |
| rs9271513   | 6 | 32621746 | C | G | 0.2248 | -0.0502 | 0.0064 | 4.77E-15  | -7.8330  | 1224666 | Asthma |
| rs112447098 | 6 | 32621767 | A | C | 0.0724 | -0.1073 | 0.0095 | 2.15E-29  | -11.2569 | 1310845 | Asthma |
| rs9271514   | 6 | 32621836 | A | G | 0.3765 | -0.0797 | 0.0051 | 2.74E-55  | -15.6622 | 1376071 | Asthma |
| rs9271515   | 6 | 32621868 | A | G | 0.3764 | -0.0798 | 0.0051 | 2.29E-55  | -15.6737 | 1376071 | Asthma |
| rs9271516   | 6 | 32621891 | A | C | 0.2982 | 0.1180  | 0.0057 | 1.07E-94  | 20.6458  | 1224666 | Asthma |
| rs77875016  | 6 | 32621923 | T | C | 0.0265 | -0.0813 | 0.0145 | 2.22E-08  | -5.5940  | 1376071 | Asthma |

|             |   |          |   |   |        |         |        |           |          |         |        |
|-------------|---|----------|---|---|--------|---------|--------|-----------|----------|---------|--------|
| rs9271517   | 6 | 32621963 | G | A | 0.2923 | 0.1190  | 0.0059 | 1.11E-91  | 20.3076  | 1198533 | Asthma |
| rs9271518   | 6 | 32621968 | C | T | 0.3856 | -0.0780 | 0.0057 | 4.06E-43  | -13.7663 | 1198533 | Asthma |
| rs9271519   | 6 | 32621974 | C | T | 0.2930 | 0.1188  | 0.0058 | 8.43E-95  | 20.6569  | 1224666 | Asthma |
| rs9271520   | 6 | 32621994 | G | A | 0.2988 | 0.1120  | 0.0052 | 7.90E-102 | 21.4242  | 1376071 | Asthma |
| rs28595756  | 6 | 32621995 | C | T | 0.1462 | -0.0741 | 0.0082 | 1.07E-19  | -9.0815  | 1003362 | Asthma |
| rs9271521   | 6 | 32622006 | T | C | 0.2998 | 0.1239  | 0.0064 | 2.06E-84  | 19.4681  | 1068588 | Asthma |
| rs34135912  | 6 | 32622016 | A | G | 0.0690 | -0.1006 | 0.1018 | 1.24E-20  | -9.3132  | 1154767 | Asthma |
| rs9271523   | 6 | 32622029 | G | A | 0.3004 | 0.1239  | 0.0064 | 2.15E-84  | 19.4650  | 1068588 | Asthma |
| rs9271525   | 6 | 32622065 | G | A | 0.1983 | -0.0732 | 0.0070 | 1.27E-25  | -10.4633 | 1219993 | Asthma |
| rs9271529   | 6 | 32622160 | G | A | 0.2220 | -0.0703 | 0.0083 | 2.98E-17  | -8.4472  | 912533  | Asthma |
| rs9271530   | 6 | 32622161 | A | G | 0.6234 | -0.0972 | 0.0070 | 5.04E-44  | -13.9163 | 912533  | Asthma |
| rs9271531   | 6 | 32622162 | A | C | 0.6234 | -0.0972 | 0.0070 | 4.93E-44  | -13.9179 | 912533  | Asthma |
| rs9271532   | 6 | 32622168 | C | T | 0.2966 | 0.1184  | 0.0058 | 3.23E-91  | 20.2546  | 1198533 | Asthma |
| rs9271533   | 6 | 32622175 | T | G | 0.3223 | -0.0338 | 0.0059 | 8.79E-09  | -5.7525  | 1133307 | Asthma |
| rs9271534   | 6 | 32622176 | C | A | 0.3843 | -0.0789 | 0.0057 | 3.47E-44  | -13.9430 | 1198533 | Asthma |
| rs9271535   | 6 | 32622182 | T | C | 0.2651 | -0.0374 | 0.0060 | 5.85E-10  | -6.1944  | 1251217 | Asthma |
| rs9271536   | 6 | 32622201 | A | T | 0.2325 | -0.0506 | 0.0064 | 2.21E-15  | -7.9291  | 1224666 | Asthma |
| rs9271537   | 6 | 32622205 | T | C | 0.3863 | -0.0351 | 0.0055 | 1.48E-10  | -6.4074  | 1198533 | Asthma |
| rs9271540   | 6 | 32622252 | C | T | 0.2969 | 0.1166  | 0.0059 | 2.99E-88  | 19.9156  | 1133307 | Asthma |
| rs9271542   | 6 | 32622314 | G | T | 0.3011 | 0.1117  | 0.0053 | 1.22E-98  | 21.0804  | 1349938 | Asthma |
| rs9271543   | 6 | 32622320 | A | T | 0.3801 | -0.0772 | 0.0056 | 6.78E-44  | -13.8950 | 1224666 | Asthma |
| rs9271544   | 6 | 32622343 | A | C | 0.3012 | 0.1117  | 0.0052 | 1.44E-101 | 21.3972  | 1376071 | Asthma |
| rs9271546   | 6 | 32622377 | T | C | 0.4983 | -0.0490 | 0.0054 | 5.84E-20  | -9.1472  | 1224666 | Asthma |
| rs9271547   | 6 | 32622382 | C | A | 0.4983 | -0.0491 | 0.0054 | 4.94E-20  | -9.1653  | 1224666 | Asthma |
| rs35025478  | 6 | 32622385 | G | A | 0.0713 | -0.1093 | 0.0096 | 4.04E-30  | -11.4025 | 1310845 | Asthma |
| rs35786457  | 6 | 32622388 | A | G | 0.0713 | -0.1093 | 0.0096 | 4.11E-30  | -11.4011 | 1310845 | Asthma |
| rs35142753  | 6 | 32622406 | T | G | 0.1561 | -0.0740 | 0.0070 | 2.79E-26  | -10.6062 | 1349938 | Asthma |
| rs34810547  | 6 | 32622407 | T | C | 0.1557 | -0.0744 | 0.0077 | 5.79E-22  | -9.6333  | 1198533 | Asthma |
| rs35947801  | 6 | 32622410 | A | T | 0.0713 | -0.1092 | 0.0096 | 4.36E-30  | -11.3966 | 1310845 | Asthma |
| rs9271548   | 6 | 32622457 | A | T | 0.3764 | -0.0798 | 0.0051 | 2.05E-55  | -15.6808 | 1376071 | Asthma |
| rs9271549   | 6 | 32622471 | C | T | 0.3012 | 0.1118  | 0.0052 | 1.02E-101 | 21.4123  | 1376071 | Asthma |
| rs9271551   | 6 | 32622521 | A | G | 0.3563 | -0.0921 | 0.0079 | 4.76E-31  | -11.5877 | 479287  | Asthma |
| rs9271553   | 6 | 32622522 | T | C | 0.3870 | -0.0729 | 0.0061 | 1.29E-32  | -11.8929 | 765287  | Asthma |
| rs9271554   | 6 | 32622540 | G | A | 0.2689 | 0.1156  | 0.0066 | 1.89E-69  | 17.6150  | 1130071 | Asthma |
| rs9271555   | 6 | 32622542 | T | G | 0.3894 | -0.0721 | 0.0056 | 1.70E-38  | -12.9748 | 1224666 | Asthma |
| rs9271556   | 6 | 32622547 | T | G | 0.3901 | -0.0732 | 0.0057 | 2.08E-38  | -12.9592 | 1198533 | Asthma |
| rs9271557   | 6 | 32622554 | T | C | 0.3796 | -0.0795 | 0.0051 | 4.58E-55  | -15.6296 | 1376071 | Asthma |
| rs9271560   | 6 | 32622604 | A | A | 0.2896 | 0.1246  | 0.0064 | 4.25E-85  | 19.5484  | 1130071 | Asthma |
| rs9271561   | 6 | 32622616 | G | T | 0.2893 | 0.1246  | 0.0064 | 8.11E-85  | 19.5162  | 1130071 | Asthma |
| rs9271563   | 6 | 32622651 | C | T | 0.2926 | 0.1124  | 0.0053 | 3.15E-98  | 21.0342  | 1349938 | Asthma |
| rs9271564   | 6 | 32622659 | T | C | 0.2849 | 0.1243  | 0.0064 | 3.56E-83  | 19.3208  | 1130071 | Asthma |
| rs9271565   | 6 | 32622660 | G | A | 0.2849 | 0.1243  | 0.0064 | 3.56E-83  | 19.3208  | 1130071 | Asthma |
| rs9271566   | 6 | 32622666 | G | A | 0.4109 | 0.0546  | 0.0055 | 1.73E-23  | 9.9872   | 1198533 | Asthma |
| rs113705304 | 6 | 32622676 | G | C | 0.1236 | -0.1157 | 0.0084 | 4.47E-43  | -13.7590 | 1159440 | Asthma |
| rs9271568   | 6 | 32622686 | A | G | 0.2793 | 0.1101  | 0.0056 | 6.65E-86  | 19.6433  | 1290310 | Asthma |
| rs2105899   | 6 | 32622696 | T | C | 0.2245 | -0.0501 | 0.0064 | 5.32E-15  | -7.8191  | 1224666 | Asthma |
| rs9271571   | 6 | 32622706 | T | C | 0.2976 | 0.1181  | 0.0058 | 2.44E-91  | 20.2689  | 1198533 | Asthma |
| rs2105898   | 6 | 32622721 | T | G | 0.2245 | -0.0500 | 0.0064 | 5.72E-15  | -7.8100  | 1224666 | Asthma |
| rs35407883  | 6 | 32622752 | G | A | 0.0265 | -0.0812 | 0.0145 | 2.28E-08  | -5.5894  | 1376071 | Asthma |
| rs9271574   | 6 | 32622813 | G | T | 0.3012 | 0.1117  | 0.0052 | 1.59E-101 | 21.3922  | 1376071 | Asthma |
| rs570194309 | 6 | 32622825 | C | T | 0.2975 | 0.1166  | 0.0058 | 1.24E-88  | 19.9596  | 1133307 | Asthma |
| rs9271576   | 6 | 32622835 | C | T | 0.3004 | 0.1114  | 0.0052 | 8.24E-101 | 21.3156  | 1376071 | Asthma |
| rs34043628  | 6 | 32622842 | C | T | 0.0737 | -0.1102 | 0.0103 | 1.06E-26  | -10.6969 | 1159440 | Asthma |
| rs2395225   | 6 | 32622847 | C | T | 0.2964 | -0.0330 | 0.0058 | 1.34E-08  | -5.6811  | 1224666 | Asthma |
| rs9271578   | 6 | 32622858 | T | A | 0.4533 | 0.0678  | 0.0054 | 4.01E-36  | 12.5493  | 1224666 | Asthma |
| rs9271579   | 6 | 32622860 | A | T | 0.1879 | 0.1456  | 0.0067 | 3.30E-103 | 21.5722  | 1159440 | Asthma |
| rs35700251  | 6 | 32622862 | T | C | 0.0730 | -0.1123 | 0.0103 | 1.51E-27  | -10.8754 | 1159440 | Asthma |
| rs9271580   | 6 | 32622864 | G | T | 0.1885 | 0.1456  | 0.0067 | 9.66E-104 | 21.6290  | 1159440 | Asthma |
| rs34342308  | 6 | 32622888 | G | A | 0.1559 | -0.0730 | 0.0069 | 2.56E-26  | -10.6143 | 1376071 | Asthma |
| rs35826015  | 6 | 32622892 | A | T | 0.1202 | -0.0690 | 0.0078 | 1.01E-18  | -8.8343  | 1310845 | Asthma |
| rs34629405  | 6 | 32622919 | T | C | 0.1560 | -0.0734 | 0.0069 | 1.45E-26  | -10.6669 | 1376071 | Asthma |
| rs17533090  | 6 | 32622945 | T | G | 0.1561 | -0.0730 | 0.0069 | 2.12E-26  | -10.6319 | 1376071 | Asthma |
| rs35062987  | 6 | 32622958 | T | C | 0.2059 | -0.0853 | 0.0062 | 2.50E-43  | -13.8014 | 1376071 | Asthma |
| rs34831921  | 6 | 32622991 | A | C | 0.1213 | -0.1110 | 0.0077 | 9.26E-47  | -14.3591 | 1310845 | Asthma |
| rs9271582   | 6 | 32622997 | C | T | 0.2979 | 0.1176  | 0.0057 | 6.42E-94  | 20.5582  | 1224666 | Asthma |
| rs35236701  | 6 | 32623001 | T | C | 0.0707 | -0.1031 | 0.0119 | 4.48E-18  | -8.6653  | 1003362 | Asthma |
| rs9271583   | 6 | 32623003 | C | T | 0.2964 | 0.1166  | 0.0058 | 3.35E-91  | 20.2526  | 1159440 | Asthma |
| rs17533167  | 6 | 32623067 | C | G | 0.1202 | -0.0687 | 0.0078 | 1.48E-18  | -8.7910  | 1310845 | Asthma |
| rs9271584   | 6 | 32623093 | C | T | 0.3012 | 0.1117  | 0.0052 | 1.28E-101 | 21.4024  | 1376071 | Asthma |
| rs9271585   | 6 | 32623102 | A | C | 0.3012 | 0.1117  | 0.0052 | 1.27E-101 | 21.4016  | 1376071 | Asthma |
| rs9271586   | 6 | 32623122 | T | G | 0.4573 | 0.0617  | 0.0049 | 4.97E-36  | 12.5324  | 1376071 | Asthma |
| rs9271587   | 6 | 32623139 | G | A | 0.4548 | 0.0679  | 0.0054 | 2.44E-36  | 12.5885  | 1224666 | Asthma |
| rs9271588   | 6 | 32623176 | C | T | 0.4574 | 0.0617  | 0.0049 | 5.02E-36  | 12.5316  | 1376071 | Asthma |
| rs35399661  | 6 | 32623213 | C | T | 0.1561 | -0.0730 | 0.0069 | 2.32E-26  | -10.6235 | 1376071 | Asthma |

|             |   |          |   |   |        |         |        |           |          |         |        |
|-------------|---|----------|---|---|--------|---------|--------|-----------|----------|---------|--------|
| rs34136716  | 6 | 32623224 | G | A | 0.0502 | -0.0974 | 0.0120 | 4.20E-16  | -8.1327  | 1310845 | Asthma |
| rs17599077  | 6 | 32623281 | C | A | 0.1202 | -0.0690 | 0.0078 | 1.03E-18  | -8.8317  | 1310845 | Asthma |
| rs35014460  | 6 | 32623329 | C | T | 0.1561 | -0.0732 | 0.0069 | 1.66E-26  | -10.6543 | 1376071 | Asthma |
| rs9271589   | 6 | 32623351 | A | G | 0.3034 | 0.1117  | 0.0052 | 8.89E-102 | 21.4191  | 1376071 | Asthma |
| rs35424967  | 6 | 32623352 | A | G | 0.1556 | -0.0731 | 0.0076 | 4.72E-22  | -9.6541  | 1224666 | Asthma |
| rs9271591   | 6 | 32623364 | A | G | 0.4543 | 0.0680  | 0.0054 | 2.05E-36  | 12.6024  | 1224666 | Asthma |
| rs9271592   | 6 | 32623396 | T | C | 0.3009 | 0.1117  | 0.0052 | 1.67E-101 | 21.3900  | 1376071 | Asthma |
| rs34455295  | 6 | 32623406 | A | G | 0.1556 | -0.0731 | 0.0076 | 5.06E-22  | -9.6471  | 1224666 | Asthma |
| rs9271594   | 6 | 32623436 | G | A | 0.1703 | 0.1471  | 0.0070 | 2.42E-97  | 20.9372  | 1159440 | Asthma |
| rs34898108  | 6 | 32623445 | G | A | 0.0506 | -0.1035 | 0.0132 | 4.55E-15  | -7.8385  | 1159440 | Asthma |
| rs35407265  | 6 | 32623449 | G | A | 0.1236 | -0.1161 | 0.0084 | 2.45E-43  | -13.8028 | 1159440 | Asthma |
| rs35627435  | 6 | 32623450 | G | C | 0.1558 | -0.0733 | 0.0076 | 3.92E-22  | -9.6734  | 1224666 | Asthma |
| rs35316732  | 6 | 32623455 | T | C | 0.1236 | -0.1161 | 0.0084 | 2.47E-43  | -13.8028 | 1159440 | Asthma |
| rs9271595   | 6 | 32623458 | G | A | 0.2987 | 0.1180  | 0.0057 | 9.46E-95  | 20.6510  | 1224666 | Asthma |
| rs9271596   | 6 | 32623460 | G | A | 0.2987 | 0.1180  | 0.0057 | 9.47E-95  | 20.6513  | 1224666 | Asthma |
| rs34376179  | 6 | 32623461 | G | A | 0.1206 | -0.1138 | 0.0086 | 2.44E-40  | -13.2965 | 1159440 | Asthma |
| rs34967069  | 6 | 32623471 | T | C | 0.1345 | -0.0902 | 0.0095 | 2.05E-21  | -9.5023  | 840392  | Asthma |
| rs35326082  | 6 | 32623503 | C | T | 0.0445 | -0.1001 | 0.0137 | 3.10E-13  | -7.2898  | 1251217 | Asthma |
| rs9271597   | 6 | 32623514 | A | T | 0.4210 | 0.0543  | 0.0053 | 1.80E-24  | 10.2092  | 1224666 | Asthma |
| rs3129764   | 6 | 32623523 | G | A | 0.2258 | -0.0490 | 0.0064 | 1.71E-14  | -7.6708  | 1224666 | Asthma |
| rs72844082  | 6 | 32623533 | G | A | 0.1459 | -0.0733 | 0.0083 | 1.33E-18  | -8.8031  | 977229  | Asthma |
| rs9271600   | 6 | 32623555 | G | T | 0.4210 | 0.0542  | 0.0053 | 1.88E-24  | 10.2053  | 1224666 | Asthma |
| rs9271601   | 6 | 32623560 | T | A | 0.4210 | 0.0543  | 0.0053 | 1.76E-24  | 10.2114  | 1224666 | Asthma |
| rs34682574  | 6 | 32623593 | G | C | 0.1555 | -0.0733 | 0.0076 | 4.38E-22  | -9.6617  | 1224666 | Asthma |
| rs9271602   | 6 | 32623606 | G | T | 0.3529 | 0.1120  | 0.0054 | 2.30E-94  | 20.6078  | 1224666 | Asthma |
| rs34185260  | 6 | 32623611 | G | A | 0.1554 | -0.0732 | 0.0076 | 5.02E-22  | -9.6479  | 1224666 | Asthma |
| rs34694997  | 6 | 32623639 | C | T | 0.1553 | -0.0732 | 0.0076 | 4.79E-22  | -9.6527  | 1224666 | Asthma |
| rs34915133  | 6 | 32623645 | G | A | 0.1237 | -0.1163 | 0.0084 | 1.66E-43  | -13.8311 | 1159440 | Asthma |
| rs3129765   | 6 | 32623651 | A | G | 0.2477 | -0.0478 | 0.0059 | 4.16E-16  | -8.1337  | 1376071 | Asthma |
| rs202219366 | 6 | 32623652 | A | C | 0.1559 | -0.0740 | 0.0078 | 1.37E-21  | -9.5441  | 1133307 | Asthma |
| rs9271604   | 6 | 32623653 | G | A | 0.3065 | 0.1141  | 0.0061 | 2.59E-78  | 18.7338  | 856646  | Asthma |
| rs34394532  | 6 | 32623655 | T | G | 0.1555 | -0.0742 | 0.0078 | 1.34E-21  | -9.5469  | 1133307 | Asthma |
| rs9271605   | 6 | 32623671 | A | G | 0.2997 | 0.1120  | 0.0054 | 4.19E-97  | 20.9119  | 1316443 | Asthma |
| rs112396255 | 6 | 32623692 | G | A | 0.1560 | -0.0731 | 0.0069 | 1.95E-26  | -10.6399 | 1376071 | Asthma |
| rs112953812 | 6 | 32623723 | A | G | 0.0712 | -0.1091 | 0.0096 | 5.36E-30  | -11.3784 | 1310845 | Asthma |
| rs9271607   | 6 | 32623789 | G | A | 0.3011 | 0.1118  | 0.0052 | 1.18E-101 | 21.4065  | 1376071 | Asthma |
| rs73728618  | 6 | 32623790 | A | T | 0.1213 | -0.1110 | 0.0077 | 9.19E-47  | -14.3600 | 1310845 | Asthma |
| rs9271608   | 6 | 32623811 | G | A | 0.1711 | 0.1358  | 0.0064 | 3.65E-99  | 21.1375  | 1310845 | Asthma |
| rs9271609   | 6 | 32623820 | C | T | 0.3001 | 0.1172  | 0.0057 | 9.62E-94  | 20.5393  | 1224666 | Asthma |
| rs73728619  | 6 | 32623852 | T | C | 0.0501 | -0.0963 | 0.0120 | 8.63E-16  | -8.0448  | 1310845 | Asthma |
| rs35001273  | 6 | 32623887 | A | G | 0.1234 | -0.1156 | 0.0084 | 7.47E-43  | -13.7225 | 1159440 | Asthma |
| rs9271615   | 6 | 32623909 | G | A | 0.4759 | -0.0656 | 0.0054 | 3.86E-34  | -12.1824 | 1133307 | Asthma |
| rs201769738 | 6 | 32623910 | A | G | 0.1256 | -0.1126 | 0.0107 | 8.08E-26  | -10.5067 | 908767  | Asthma |
| rs556499677 | 6 | 32623918 | G | T | 0.0736 | -0.1131 | 0.0113 | 9.26E-24  | -10.0489 | 1064845 | Asthma |
| rs114076271 | 6 | 32623940 | A | G | 0.0712 | -0.1092 | 0.0096 | 4.68E-30  | -11.3905 | 1310845 | Asthma |
| rs4959030   | 6 | 32623974 | A | G | 0.1654 | -0.0517 | 0.0067 | 1.73E-14  | -7.6695  | 1376071 | Asthma |
| rs9271618   | 6 | 32623975 | A | G | 0.3198 | -0.0375 | 0.0057 | 6.83E-11  | -6.5242  | 1224666 | Asthma |
| rs35900428  | 6 | 32623978 | A | G | 0.1201 | -0.0691 | 0.0078 | 1.08E-18  | -8.8265  | 1310845 | Asthma |
| rs34286957  | 6 | 32623998 | G | A | 0.1556 | -0.0732 | 0.0076 | 4.54E-22  | -9.6581  | 1224666 | Asthma |
| rs9271620   | 6 | 32624000 | T | G | 0.4548 | 0.0679  | 0.0054 | 2.24E-36  | 12.5956  | 1224666 | Asthma |
| rs34106969  | 6 | 32624057 | T | G | 0.1481 | -0.0586 | 0.0090 | 7.92E-11  | -6.5021  | 873887  | Asthma |
| rs35775572  | 6 | 32624059 | G | A | 0.1460 | -0.0764 | 0.0080 | 1.16E-21  | -9.5617  | 1133307 | Asthma |
| rs35294739  | 6 | 32624061 | A | G | 0.1572 | -0.0737 | 0.0077 | 1.84E-21  | -9.5140  | 1133307 | Asthma |
| rs567420456 | 6 | 32624065 | C | T | 0.1465 | -0.0838 | 0.0094 | 3.73E-19  | -8.9446  | 847307  | Asthma |
| rs35230514  | 6 | 32624084 | C | T | 0.1559 | -0.0727 | 0.0076 | 1.18E-21  | -9.5595  | 1159440 | Asthma |
| rs34135512  | 6 | 32624099 | A | G | 0.1454 | -0.0755 | 0.0078 | 3.75E-22  | -9.6778  | 1224666 | Asthma |
| rs34412149  | 6 | 32624115 | G | A | 0.0712 | -0.1096 | 0.0096 | 2.98E-30  | -11.4288 | 1310845 | Asthma |
| rs9271623   | 6 | 32624137 | C | G | 0.3228 | -0.0380 | 0.0058 | 3.79E-11  | -6.6120  | 1224666 | Asthma |
| rs9271624   | 6 | 32624144 | T | G | 0.2959 | 0.1200  | 0.0058 | 1.16E-96  | 20.8627  | 1224666 | Asthma |
| rs4959108   | 6 | 32624145 | G | A | 0.1706 | -0.0499 | 0.0072 | 5.03E-12  | -6.9047  | 1224666 | Asthma |
| rs112123216 | 6 | 32624176 | C | T | 0.1557 | -0.0724 | 0.0076 | 1.86E-21  | -9.5124  | 1159440 | Asthma |
| rs9271628   | 6 | 32624194 | G | T | 0.2556 | 0.1194  | 0.0059 | 7.91E-91  | 20.2109  | 1224666 | Asthma |
| rs9271629   | 6 | 32624199 | C | A | 0.2600 | -0.0399 | 0.0063 | 3.20E-10  | -6.2888  | 1224666 | Asthma |
| rs115897208 | 6 | 32624203 | C | T | 0.1558 | -0.0724 | 0.0076 | 1.92E-21  | -9.5093  | 1159440 | Asthma |
| rs9271630   | 6 | 32624212 | G | T | 0.3229 | -0.0384 | 0.0058 | 2.58E-11  | -6.6690  | 1224666 | Asthma |
| rs111463918 | 6 | 32624214 | T | G | 0.1557 | -0.0724 | 0.0076 | 1.83E-21  | -9.5144  | 1159440 | Asthma |
| rs9271631   | 6 | 32624219 | A | G | 0.2255 | -0.0489 | 0.0064 | 1.93E-14  | -7.6550  | 1224666 | Asthma |
| rs1281947   | 6 | 32624232 | G | A | 0.1767 | 0.1532  | 0.0075 | 1.33E-92  | 20.4114  | 1029518 | Asthma |
| rs111834435 | 6 | 32624263 | C | T | 0.1120 | -0.0666 | 0.0091 | 2.75E-13  | -7.3061  | 1003362 | Asthma |
| rs34640328  | 6 | 32624274 | G | C | 0.1547 | -0.0753 | 0.0078 | 2.94E-22  | -9.7025  | 1198533 | Asthma |
| rs35867827  | 6 | 32624291 | C | T | 0.1213 | -0.1108 | 0.0077 | 1.41E-46  | -14.3302 | 1310845 | Asthma |
| rs36231348  | 6 | 32624306 | A | G | 0.1547 | -0.0753 | 0.0078 | 3.19E-22  | -9.6942  | 1198533 | Asthma |
| rs116359969 | 6 | 32624333 | G | A | 0.1529 | -0.0760 | 0.0078 | 3.36E-22  | -9.6888  | 1198533 | Asthma |
| rs9271634   | 6 | 32624335 | A | G | 0.2319 | -0.0481 | 0.0064 | 4.32E-14  | -7.5511  | 1224666 | Asthma |

|             |   |          |   |   |        |         |        |           |          |         |        |
|-------------|---|----------|---|---|--------|---------|--------|-----------|----------|---------|--------|
| rs9271635   | 6 | 32624339 | C | G | 0.2329 | -0.0490 | 0.0065 | 3.51E-14  | -7.5779  | 1198533 | Asthma |
| rs9271637   | 6 | 32624347 | G | A | 0.2951 | 0.1186  | 0.0059 | 3.65E-91  | 20.2483  | 1198533 | Asthma |
| rs9271638   | 6 | 32624365 | C | T | 0.3860 | -0.0775 | 0.0057 | 1.36E-42  | -13.6791 | 1198533 | Asthma |
| rs9271639   | 6 | 32624366 | A | G | 0.2303 | -0.0479 | 0.0064 | 5.72E-14  | -7.5144  | 1224666 | Asthma |
| rs532216409 | 6 | 32624375 | G | A | 0.0932 | -0.1597 | 0.0135 | 4.15E-32  | -11.7951 | 778845  | Asthma |
| rs559411160 | 6 | 32624389 | T | A | 0.3169 | 0.0718  | 0.0084 | 1.96E-17  | 8.4964   | 626134  | Asthma |
| rs9271640   | 6 | 32624423 | T | C | 0.2229 | -0.0517 | 0.0059 | 1.96E-18  | -8.7599  | 1376071 | Asthma |
| rs9271641   | 6 | 32624432 | A | G | 0.2227 | -0.0523 | 0.0059 | 8.45E-19  | -8.8539  | 1376071 | Asthma |
| rs9271643   | 6 | 32624452 | A | G | 0.2983 | 0.1179  | 0.0057 | 9.53E-95  | 20.6510  | 1224666 | Asthma |
| rs34947241  | 6 | 32624462 | C | T | 0.1560 | -0.0731 | 0.0069 | 2.15E-26  | -10.6307 | 1376071 | Asthma |
| rs34411532  | 6 | 32624517 | A | G | 0.1560 | -0.0726 | 0.0069 | 3.89E-26  | -10.5750 | 1376071 | Asthma |
| rs35224566  | 6 | 32624536 | C | T | 0.1207 | -0.1117 | 0.0078 | 1.08E-46  | -14.3494 | 1310845 | Asthma |
| rs9271644   | 6 | 32624560 | A | G | 0.3098 | 0.1151  | 0.0059 | 1.50E-83  | 19.3665  | 1134232 | Asthma |
| rs9271645   | 6 | 32624568 | C | G | 0.2378 | -0.0612 | 0.0072 | 2.50E-17  | -8.4679  | 1042455 | Asthma |
| rs9271648   | 6 | 32624581 | T | C | 0.4376 | -0.0734 | 0.0068 | 2.89E-27  | -10.8162 | 973993  | Asthma |
| rs9271650   | 6 | 32624606 | T | C | 0.2617 | -0.0567 | 0.0080 | 1.41E-12  | -7.0827  | 908767  | Asthma |
| rs9271653   | 6 | 32624779 | C | A | 0.4001 | -0.0781 | 0.0073 | 2.28E-26  | -10.6250 | 973993  | Asthma |
| rs9271655   | 6 | 32624790 | G | A | 0.2404 | -0.0616 | 0.0072 | 1.33E-17  | -8.5412  | 1042455 | Asthma |
| rs9271658   | 6 | 32624811 | T | C | 0.2439 | -0.0623 | 0.0072 | 4.36E-18  | -8.6690  | 1042455 | Asthma |
| rs9271660   | 6 | 32624825 | G | T | 0.3078 | 0.1226  | 0.0064 | 8.95E-81  | 19.0345  | 1042455 | Asthma |
| rs9271661   | 6 | 32624828 | A | T | 0.3109 | 0.1148  | 0.0057 | 9.07E-91  | 20.2045  | 1219993 | Asthma |
| rs9271663   | 6 | 32624859 | A | G | 0.4686 | -0.0666 | 0.0059 | 1.00E-29  | -11.3237 | 1068588 | Asthma |
| rs116259801 | 6 | 32624872 | G | T | 0.1336 | -0.0731 | 0.0083 | 1.37E-18  | -8.8001  | 1069006 | Asthma |
| rs115362421 | 6 | 32624873 | G | T | 0.1473 | -0.0754 | 0.0083 | 7.86E-20  | -9.1151  | 977229  | Asthma |
| rs9271664   | 6 | 32624879 | T | C | 0.2261 | -0.0488 | 0.0064 | 2.22E-14  | -7.6372  | 1224666 | Asthma |
| rs9271665   | 6 | 32624899 | G | A | 0.3934 | -0.0856 | 0.0071 | 8.21E-34  | -12.1206 | 635365  | Asthma |
| rs9271667   | 6 | 32624933 | C | T | 0.3215 | -0.0297 | 0.0054 | 3.03E-08  | -5.5397  | 1316443 | Asthma |
| rs114683059 | 6 | 32625013 | A | G | 0.0556 | -0.0916 | 0.0119 | 1.50E-14  | -7.6874  | 1310845 | Asthma |
| rs566952760 | 6 | 32625016 | T | C | 0.0665 | -0.1076 | 0.0103 | 2.13E-25  | -10.4143 | 1284712 | Asthma |
| rs28383322  | 6 | 32625019 | T | C | 0.2147 | -0.0421 | 0.0059 | 1.13E-12  | -7.1136  | 1310845 | Asthma |
| rs9271673   | 6 | 32625056 | C | G | 0.2226 | -0.0523 | 0.0059 | 8.12E-19  | -8.8582  | 1376071 | Asthma |
| rs35343577  | 6 | 32625066 | T | G | 0.1545 | -0.0794 | 0.0085 | 1.29E-20  | -9.3087  | 1064845 | Asthma |
| rs9271674   | 6 | 32625068 | C | T | 0.2993 | 0.1175  | 0.0058 | 6.06E-91  | 20.2228  | 1198533 | Asthma |
| rs9271675   | 6 | 32625085 | C | T | 0.2982 | 0.1212  | 0.0063 | 9.90E-83  | 19.2677  | 1130071 | Asthma |
| rs9271676   | 6 | 32625091 | C | T | 0.2931 | 0.1154  | 0.0059 | 1.19E-85  | 19.6133  | 1221848 | Asthma |
| rs9271677   | 6 | 32625121 | A | G | 0.2832 | 0.1110  | 0.0074 | 7.74E-51  | 14.9971  | 697750  | Asthma |
| rs9271682   | 6 | 32625146 | G | A | 0.3065 | 0.1285  | 0.0071 | 2.77E-72  | 17.9799  | 973993  | Asthma |
| rs9271683   | 6 | 32625173 | C | T | 0.2277 | -0.0497 | 0.0065 | 1.49E-14  | -7.6883  | 1198533 | Asthma |
| rs9271684   | 6 | 32625176 | T | C | 0.3306 | -0.0357 | 0.0056 | 1.98E-10  | -6.3628  | 1225084 | Asthma |
| rs9271685   | 6 | 32625193 | C | T | 0.3007 | 0.1212  | 0.0063 | 1.14E-82  | 19.2607  | 1130071 | Asthma |
| rs9271686   | 6 | 32625196 | T | C | 0.2280 | -0.0497 | 0.0064 | 6.33E-15  | -7.7973  | 1224666 | Asthma |
| rs9271687   | 6 | 32625208 | A | G | 0.1863 | -0.0575 | 0.0066 | 2.54E-18  | -8.7303  | 1376071 | Asthma |
| rs9271688   | 6 | 32625215 | G | A | 0.3195 | -0.0358 | 0.0059 | 1.10E-09  | -6.0937  | 1133307 | Asthma |
| rs9271689   | 6 | 32625222 | C | G | 0.2781 | -0.0567 | 0.0064 | 1.00E-18  | -8.8352  | 1198533 | Asthma |
| rs9271691   | 6 | 32625229 | G | A | 0.4690 | -0.0658 | 0.0054 | 1.47E-34  | -12.2611 | 1198533 | Asthma |
| rs9271692   | 6 | 32625233 | A | C | 0.4575 | -0.0578 | 0.0052 | 7.38E-29  | -11.1473 | 1257764 | Asthma |
| rs9271693   | 6 | 32625256 | T | C | 0.3027 | 0.1117  | 0.0052 | 1.15E-101 | 21.4072  | 1376071 | Asthma |
| rs78390183  | 6 | 32625263 | T | C | 0.0712 | -0.1108 | 0.0098 | 6.61E-30  | -11.3599 | 1284712 | Asthma |
| rs9271694   | 6 | 32625274 | C | T | 0.3179 | -0.0362 | 0.0059 | 6.45E-10  | -6.1790  | 1198533 | Asthma |
| rs9271695   | 6 | 32625303 | A | G | 0.2327 | -0.0522 | 0.0059 | 7.54E-19  | -8.8665  | 1376071 | Asthma |
| rs9271697   | 6 | 32625318 | G | A | 0.2260 | -0.0485 | 0.0064 | 2.97E-14  | -7.5996  | 1224666 | Asthma |
| rs116673414 | 6 | 32625320 | G | T | 0.1528 | -0.0721 | 0.0070 | 8.84E-25  | -10.2781 | 1310845 | Asthma |
| rs35675538  | 6 | 32625350 | T | C | 0.1532 | -0.0721 | 0.0070 | 6.44E-25  | -10.3086 | 1310845 | Asthma |
| rs35508382  | 6 | 32625367 | G | A | 0.1236 | -0.1161 | 0.0084 | 2.30E-43  | -13.8072 | 1159440 | Asthma |
| rs4587163   | 6 | 32625390 | T | C | 0.3671 | 0.0941  | 0.0061 | 1.79E-54  | 15.5426  | 1068611 | Asthma |
| rs9271699   | 6 | 32625402 | G | A | 0.4668 | -0.0645 | 0.0053 | 3.82E-34  | -12.1833 | 1186521 | Asthma |
| rs114736668 | 6 | 32625413 | T | C | 0.1519 | -0.0806 | 0.0086 | 6.49E-21  | -9.3818  | 1029518 | Asthma |
| rs9271700   | 6 | 32625421 | G | C | 0.2219 | -0.0666 | 0.0081 | 1.71E-16  | -8.2411  | 938666  | Asthma |
| rs9271702   | 6 | 32625443 | T | G | 0.2250 | -0.0515 | 0.0069 | 1.24E-13  | -7.4130  | 1094744 | Asthma |
| rs34720986  | 6 | 32625493 | C | G | 0.1230 | -0.1249 | 0.0085 | 4.11E-49  | -14.7302 | 1154790 | Asthma |
| rs9271703   | 6 | 32625503 | T | C | 0.3114 | -0.0423 | 0.0063 | 1.39E-11  | -6.7586  | 1094744 | Asthma |
| rs34232333  | 6 | 32625514 | T | A | 0.1552 | -0.0815 | 0.0086 | 4.02E-21  | -9.4320  | 1003385 | Asthma |
| rs35121814  | 6 | 32625515 | T | C | 0.1552 | -0.0815 | 0.0086 | 4.09E-21  | -9.4302  | 1003385 | Asthma |
| rs560607175 | 6 | 32625539 | A | C | 0.1065 | -0.1215 | 0.0099 | 8.14E-35  | -12.3085 | 1095162 | Asthma |
| rs9271704   | 6 | 32625540 | G | T | 0.3071 | -0.0396 | 0.0063 | 3.18E-10  | -6.2895  | 1094744 | Asthma |
| rs9271705   | 6 | 32625544 | T | G | 0.3064 | -0.0381 | 0.0064 | 3.18E-09  | -5.9222  | 1068611 | Asthma |
| rs9271707   | 6 | 32625579 | T | C | 0.4741 | -0.0674 | 0.0053 | 4.39E-37  | -12.7234 | 1186521 | Asthma |
| rs112891288 | 6 | 32625591 | A | G | 0.1552 | -0.0798 | 0.0084 | 2.90E-21  | -9.4662  | 1029518 | Asthma |
| rs9271710   | 6 | 32625644 | G | A | 0.2962 | -0.0881 | 0.0072 | 1.18E-34  | -12.2787 | 1000149 | Asthma |
| rs112025116 | 6 | 32625646 | T | C | 0.1132 | -0.0883 | 0.0108 | 3.33E-16  | -8.1607  | 934923  | Asthma |
| rs9271711   | 6 | 32625653 | T | A | 0.4473 | -0.0792 | 0.0077 | 1.35E-24  | -10.2372 | 778845  | Asthma |
| rs9271712   | 6 | 32625655 | A | G | 0.4851 | -0.0804 | 0.0077 | 1.44E-25  | -10.4518 | 778845  | Asthma |
| rs9271714   | 6 | 32625657 | G | T | 0.4473 | -0.0792 | 0.0077 | 1.35E-24  | -10.2372 | 778845  | Asthma |
| rs9271715   | 6 | 32625664 | T | C | 0.4473 | -0.0791 | 0.0077 | 1.38E-24  | -10.2351 | 778845  | Asthma |

|             |   |          |   |   |        |         |        |          |          |         |        |
|-------------|---|----------|---|---|--------|---------|--------|----------|----------|---------|--------|
| rs9271716   | 6 | 32625665 | G | A | 0.4473 | -0.0791 | 0.0077 | 1.38E-24 | -10.2351 | 778845  | Asthma |
| rs9271717   | 6 | 32625676 | G | A | 0.4518 | -0.0764 | 0.0064 | 1.58E-32 | -11.8758 | 1000149 | Asthma |
| rs9271718   | 6 | 32625688 | T | A | 0.3231 | 0.1247  | 0.0068 | 1.98E-74 | 18.2521  | 1000149 | Asthma |
| rs9271719   | 6 | 32625702 | C | T | 0.2264 | -0.0524 | 0.0071 | 1.44E-13 | -7.3923  | 1068611 | Asthma |
| rs9271720   | 6 | 32625730 | A | G | 0.4550 | -0.0669 | 0.0060 | 9.80E-29 | -11.1220 | 1059380 | Asthma |
| rs9271721   | 6 | 32625742 | G | A | 0.2256 | -0.0518 | 0.0071 | 2.34E-13 | -7.3276  | 1068611 | Asthma |
| rs9271722   | 6 | 32625745 | G | C | 0.3251 | 0.1388  | 0.0080 | 5.02E-68 | 17.4285  | 844071  | Asthma |
| rs116176187 | 6 | 32625760 | G | A | 0.1554 | -0.0824 | 0.0086 | 1.57E-21 | -9.5299  | 1003385 | Asthma |
| rs9271724   | 6 | 32625775 | C | A | 0.3093 | -0.0454 | 0.0071 | 2.09E-10 | -6.3547  | 934923  | Asthma |
| rs9271726   | 6 | 32625789 | G | T | 0.1991 | 0.1807  | 0.0095 | 8.76E-81 | 19.0346  | 778845  | Asthma |
| rs9271730   | 6 | 32625831 | G | A | 0.4566 | -0.0916 | 0.0071 | 6.36E-38 | -12.8734 | 912533  | Asthma |
| rs9271731   | 6 | 32625835 | A | G | 0.2335 | -0.0700 | 0.0073 | 1.18E-21 | -9.5598  | 1030443 | Asthma |
| rs562122363 | 6 | 32625840 | C | T | 0.1850 | -0.0761 | 0.0114 | 2.79E-11 | -6.6572  | 934923  | Asthma |
| rs9271732   | 6 | 32625850 | G | A | 0.2797 | -0.0863 | 0.0077 | 5.54E-29 | -11.1730 | 912533  | Asthma |
| rs9271733   | 6 | 32625856 | A | G | 0.3100 | -0.0380 | 0.0065 | 4.30E-09 | -5.8724  | 1003385 | Asthma |
| rs9271735   | 6 | 32625872 | A | G | 0.3286 | 0.1274  | 0.0069 | 4.07E-76 | 18.4640  | 938666  | Asthma |
| rs9271736   | 6 | 32625911 | A | T | 0.3313 | 0.1363  | 0.0080 | 5.49E-65 | 17.0232  | 844071  | Asthma |
| rs527458562 | 6 | 32625912 | A | C | 0.1359 | -0.1016 | 0.0113 | 3.56E-19 | -8.9497  | 778845  | Asthma |
| rs9271737   | 6 | 32625913 | T | C | 0.5341 | -0.0770 | 0.0076 | 6.66E-24 | -10.0816 | 844071  | Asthma |
| rs9271741   | 6 | 32625957 | T | C | 0.3437 | 0.1181  | 0.0084 | 1.50E-44 | 14.0032  | 778845  | Asthma |
| rs9271751   | 6 | 32626080 | A | G | 0.3699 | 0.1141  | 0.0083 | 1.28E-42 | 13.6837  | 778845  | Asthma |
| rs9271752   | 6 | 32626091 | C | T | 0.3910 | 0.1131  | 0.0083 | 4.12E-42 | 13.5978  | 778845  | Asthma |
| rs9271753   | 6 | 32626124 | C | T | 0.4242 | 0.1158  | 0.0081 | 2.85E-46 | 14.2820  | 778845  | Asthma |
| rs9271754   | 6 | 32626136 | G | C | 0.4304 | 0.1157  | 0.0081 | 3.17E-46 | 14.2746  | 778845  | Asthma |
| rs9271755   | 6 | 32626149 | C | T | 0.4354 | 0.1149  | 0.0080 | 1.78E-46 | 14.3138  | 778845  | Asthma |
| rs9271757   | 6 | 32626192 | A | G | 0.4404 | 0.1156  | 0.0080 | 4.53E-47 | 14.4098  | 778845  | Asthma |
| rs9271758   | 6 | 32626220 | A | G | 0.5437 | 0.1091  | 0.0083 | 6.99E-40 | 13.2171  | 778845  | Asthma |
| rs9271761   | 6 | 32626245 | A | C | 0.3779 | 0.1179  | 0.0090 | 7.78E-39 | 13.0342  | 476051  | Asthma |
| rs9271762   | 6 | 32626251 | G | T | 0.3203 | 0.1387  | 0.0080 | 3.80E-67 | 17.3117  | 844071  | Asthma |
| rs28383323  | 6 | 32626262 | A | G | 0.2641 | -0.0499 | 0.0077 | 7.77E-11 | -6.5049  | 1000149 | Asthma |
| rs9271763   | 6 | 32626284 | G | A | 0.4623 | 0.0722  | 0.0060 | 4.70E-33 | 11.9767  | 1068611 | Asthma |
| rs72848204  | 6 | 32626296 | T | G | 0.3146 | -0.0322 | 0.0058 | 2.67E-08 | -5.5620  | 1186521 | Asthma |
| rs74291249  | 6 | 32626321 | A | G | 0.1932 | 0.0369  | 0.0064 | 9.93E-09 | 5.7319   | 1246149 | Asthma |
| rs34518860  | 6 | 32626326 | A | G | 0.1230 | -0.1244 | 0.0083 | 1.35E-50 | -14.9598 | 1180923 | Asthma |
| rs9271764   | 6 | 32626382 | A | G | 0.3175 | 0.1301  | 0.0069 | 1.19E-79 | 18.8979  | 938666  | Asthma |
| rs112585234 | 6 | 32626385 | G | A | 0.1551 | -0.0820 | 0.0086 | 2.46E-21 | -9.4836  | 1003385 | Asthma |
| rs9271765   | 6 | 32626389 | G | A | 0.2643 | 0.1278  | 0.0072 | 1.65E-69 | 17.6228  | 873440  | Asthma |
| rs9271767   | 6 | 32626399 | T | G | 0.3175 | 0.1301  | 0.0069 | 1.17E-79 | 18.8984  | 938666  | Asthma |
| rs35130701  | 6 | 32626422 | G | A | 0.3124 | -0.0421 | 0.0062 | 1.55E-11 | -6.7435  | 1094744 | Asthma |
| rs9271769   | 6 | 32626440 | T | G | 0.3146 | 0.1196  | 0.0061 | 1.84E-85 | 19.5916  | 1090071 | Asthma |
| rs9271770   | 6 | 32626471 | G | A | 0.2220 | -0.0539 | 0.0064 | 2.25E-17 | -8.4802  | 1246149 | Asthma |
| rs9271771   | 6 | 32626497 | T | C | 0.2222 | -0.0540 | 0.0063 | 1.68E-17 | -8.5140  | 1246149 | Asthma |
| rs75237145  | 6 | 32626518 | T | G | 0.4618 | -0.0649 | 0.0054 | 4.97E-33 | -11.9723 | 1160388 | Asthma |
| rs9271773   | 6 | 32626527 | C | T | 0.3137 | 0.1208  | 0.0061 | 9.30E-87 | 19.7418  | 1094744 | Asthma |
| rs9271774   | 6 | 32626532 | A | C | 0.2239 | -0.0505 | 0.0069 | 3.45E-13 | -7.2755  | 1094744 | Asthma |
| rs9271775   | 6 | 32626551 | C | T | 0.2149 | -0.0562 | 0.0065 | 3.11E-18 | -8.7076  | 1246149 | Asthma |
| rs9271776   | 6 | 32626564 | C | T | 0.3171 | 0.1139  | 0.0058 | 8.61E-86 | 19.6295  | 1160388 | Asthma |
| rs114741460 | 6 | 32626607 | T | C | 0.0298 | -0.1153 | 0.0180 | 1.62E-10 | -6.3936  | 965217  | Asthma |
| rs568805507 | 6 | 32626611 | T | C | 0.1191 | -0.1295 | 0.0116 | 5.33E-29 | -11.1758 | 847307  | Asthma |
| rs535840294 | 6 | 32626617 | G | A | 0.1204 | -0.1421 | 0.0134 | 2.67E-26 | -10.6102 | 778845  | Asthma |
| rs116093550 | 6 | 32626618 | G | T | 0.4503 | -0.0698 | 0.0067 | 2.80E-25 | -10.3886 | 912533  | Asthma |
| rs116361489 | 6 | 32626619 | T | G | 0.4388 | -0.0579 | 0.0060 | 2.93E-22 | -9.7030  | 1068611 | Asthma |
| rs3104393   | 6 | 32626626 | T | C | 0.3259 | 0.1284  | 0.0071 | 5.52E-74 | 18.1970  | 912533  | Asthma |
| rs3104392   | 6 | 32626648 | C | T | 0.1738 | -0.0546 | 0.0079 | 6.46E-12 | -6.8692  | 1068611 | Asthma |
| rs3129766   | 6 | 32626664 | G | A | 0.3468 | 0.1122  | 0.0064 | 3.37E-68 | 17.4519  | 1004310 | Asthma |
| rs111634228 | 6 | 32626675 | G | T | 0.4535 | -0.0799 | 0.0077 | 2.57E-25 | -10.3966 | 778845  | Asthma |
| rs111477174 | 6 | 32626680 | G | A | 0.3985 | -0.0550 | 0.0077 | 7.29E-13 | -7.1738  | 838076  | Asthma |
| rs9271780   | 6 | 32626758 | C | T | 0.4399 | -0.0812 | 0.0077 | 7.01E-26 | -10.5198 | 844071  | Asthma |
| rs9271781   | 6 | 32626770 | A | G | 0.4434 | -0.0712 | 0.0068 | 8.71E-26 | -10.4991 | 912533  | Asthma |
| rs9271782   | 6 | 32626785 | A | G | 0.4404 | -0.0705 | 0.0068 | 3.90E-25 | -10.3568 | 912533  | Asthma |
| rs114372127 | 6 | 32626800 | G | A | 0.1340 | -0.1066 | 0.0116 | 4.08E-20 | -9.1859  | 778845  | Asthma |
| rs113708822 | 6 | 32626909 | A | G | 0.1443 | -0.0840 | 0.0089 | 6.01E-21 | -9.3898  | 1029518 | Asthma |
| rs9271784   | 6 | 32626927 | A | T | 0.4331 | -0.0546 | 0.0057 | 1.67E-21 | -9.5240  | 1062616 | Asthma |
| rs9271786   | 6 | 32626932 | T | A | 0.4540 | -0.0682 | 0.0059 | 1.28E-30 | -11.5025 | 1003385 | Asthma |
| rs9271787   | 6 | 32626941 | C | T | 0.4550 | -0.0704 | 0.0058 | 2.10E-34 | -12.2322 | 1094744 | Asthma |
| rs9271788   | 6 | 32626957 | G | A | 0.4604 | -0.0668 | 0.0054 | 5.59E-35 | -12.3388 | 1153975 | Asthma |
| rs9271789   | 6 | 32626991 | A | G | 0.4594 | -0.0715 | 0.0057 | 8.94E-36 | -12.4857 | 1094744 | Asthma |
| rs9271791   | 6 | 32627033 | A | G | 0.4662 | -0.0713 | 0.0058 | 4.04E-35 | -12.3650 | 1029518 | Asthma |
| rs9271794   | 6 | 32627078 | A | G | 0.4665 | -0.0710 | 0.0059 | 9.24E-34 | -12.1110 | 1003385 | Asthma |
| rs72848212  | 6 | 32627121 | T | C | 0.4668 | -0.0708 | 0.0059 | 1.35E-33 | -12.0802 | 1003385 | Asthma |
| rs3104391   | 6 | 32627124 | T | C | 0.1722 | -0.0598 | 0.0071 | 4.29E-17 | -8.4046  | 1246149 | Asthma |
| rs9271823   | 6 | 32627138 | G | A | 0.4677 | -0.0715 | 0.0057 | 1.33E-35 | -12.4543 | 1029518 | Asthma |
| rs9271824   | 6 | 32627139 | G | A | 0.4626 | -0.0650 | 0.0055 | 2.73E-32 | -11.8299 | 1088749 | Asthma |
| rs9271842   | 6 | 32627176 | A | C | 0.4274 | -0.0558 | 0.0058 | 1.09E-21 | -9.5679  | 1062616 | Asthma |



|             |   |          |   |   |        |         |        |          |          |         |        |
|-------------|---|----------|---|---|--------|---------|--------|----------|----------|---------|--------|
| rs9271843   | 6 | 32627180 | T | G | 0.4611 | -0.0706 | 0.0059 | 3.59E-33 | -11.9991 | 1003385 | Asthma |
| rs9271846   | 6 | 32627203 | A | T | 0.4589 | -0.0704 | 0.0059 | 6.68E-33 | -11.9477 | 1003385 | Asthma |
| rs9271847   | 6 | 32627216 | G | A | 0.4589 | -0.0706 | 0.0059 | 4.69E-33 | -11.9770 | 1003385 | Asthma |
| rs9271848   | 6 | 32627250 | G | A | 0.4601 | -0.0650 | 0.0055 | 4.44E-32 | -11.7890 | 1127842 | Asthma |
| rs3104390   | 6 | 32627254 | A | T | 0.1981 | -0.0499 | 0.0076 | 6.07E-11 | -6.5420  | 726724  | Asthma |
| rs34217071  | 6 | 32627265 | T | G | 0.1285 | -0.0728 | 0.0083 | 1.35E-18 | -8.8016  | 1180923 | Asthma |
| rs9271850   | 6 | 32627283 | G | A | 0.3104 | -0.0321 | 0.0058 | 3.34E-08 | -5.5225  | 1186521 | Asthma |
| rs3129768   | 6 | 32627306 | G | T | 0.2203 | -0.0547 | 0.0063 | 6.48E-18 | -8.6238  | 1246149 | Asthma |
| rs3104389   | 6 | 32627320 | A | C | 0.3147 | 0.1186  | 0.0063 | 9.32E-80 | 18.9102  | 1091926 | Asthma |
| rs9271853   | 6 | 32627340 | T | C | 0.3333 | 0.1112  | 0.0064 | 5.89E-67 | 17.2876  | 1004310 | Asthma |
| rs9271854   | 6 | 32627341 | A | G | 0.4535 | -0.0719 | 0.0067 | 5.93E-27 | -10.7500 | 912533  | Asthma |
| rs9271855   | 6 | 32627342 | C | T | 0.4536 | -0.0719 | 0.0067 | 5.48E-27 | -10.7571 | 912533  | Asthma |
| rs9271856   | 6 | 32627343 | A | G | 0.4538 | -0.0719 | 0.0067 | 5.65E-27 | -10.7543 | 912533  | Asthma |
| rs9271857   | 6 | 32627370 | T | C | 0.4472 | -0.0595 | 0.0061 | 3.37E-22 | -9.6887  | 997897  | Asthma |
| rs116603725 | 6 | 32627445 | T | C | 0.1491 | -0.0809 | 0.0087 | 1.73E-20 | -9.2779  | 1029518 | Asthma |
| rs9271858   | 6 | 32627446 | G | A | 0.4596 | -0.0633 | 0.0059 | 1.22E-26 | -10.6831 | 1030443 | Asthma |
| rs9271859   | 6 | 32627454 | G | T | 0.4593 | -0.0635 | 0.0059 | 9.92E-27 | -10.7023 | 1030443 | Asthma |
| rs9271861   | 6 | 32627510 | T | C | 0.4093 | -0.0763 | 0.0079 | 3.54E-22 | -9.6836  | 778845  | Asthma |
| rs9271862   | 6 | 32627556 | C | A | 0.4361 | -0.0747 | 0.0079 | 3.65E-21 | -9.4422  | 778845  | Asthma |
| rs9271863   | 6 | 32627557 | A | G | 0.4392 | -0.0771 | 0.0079 | 1.21E-22 | -9.7930  | 778845  | Asthma |
| rs9271651   | 6 | 32627568 | A | G | 0.4195 | -0.0731 | 0.0078 | 7.52E-21 | -9.3662  | 844071  | Asthma |
| rs186316293 | 6 | 32627575 | C | T | 0.0948 | -0.0953 | 0.0137 | 3.16E-12 | -6.9705  | 778845  | Asthma |
| rs9271865   | 6 | 32627583 | T | G | 0.3598 | -0.0699 | 0.0081 | 7.52E-18 | -8.6068  | 778845  | Asthma |
| rs9271866   | 6 | 32627590 | T | C | 0.3087 | -0.0729 | 0.0084 | 4.91E-18 | -8.6553  | 778845  | Asthma |
| rs9271867   | 6 | 32627591 | G | A | 0.3087 | -0.0729 | 0.0084 | 4.86E-18 | -8.6567  | 778845  | Asthma |
| rs9271874   | 6 | 32627647 | T | C | 0.1865 | -0.0750 | 0.0100 | 5.74E-14 | -7.5140  | 844071  | Asthma |
| rs6926251   | 6 | 32627652 | T | C | 0.2289 | -0.0689 | 0.0093 | 1.14E-13 | -7.4234  | 844071  | Asthma |
| rs9271876   | 6 | 32627671 | G | A | 0.4488 | -0.0773 | 0.0077 | 1.65E-23 | -9.9921  | 778845  | Asthma |
| rs9271877   | 6 | 32627692 | C | T | 0.4506 | -0.0777 | 0.0077 | 9.34E-24 | -10.0485 | 778845  | Asthma |
| rs9271878   | 6 | 32627697 | C | T | 0.4506 | -0.0776 | 0.0077 | 1.05E-23 | -10.0369 | 778845  | Asthma |
| rs9271879   | 6 | 32627712 | T | C | 0.4507 | -0.0776 | 0.0077 | 1.01E-23 | -10.0410 | 778845  | Asthma |
| rs147159133 | 6 | 32627753 | C | T | 0.1545 | -0.0917 | 0.0097 | 3.04E-21 | -9.4612  | 934923  | Asthma |
| rs9271880   | 6 | 32627819 | C | G | 0.3112 | -0.0401 | 0.0063 | 2.02E-10 | -6.3596  | 1029518 | Asthma |
| rs9271881   | 6 | 32627827 | A | G | 0.4470 | -0.0708 | 0.0068 | 1.23E-25 | -10.4668 | 912533  | Asthma |
| rs9271882   | 6 | 32627828 | T | C | 0.4485 | -0.0719 | 0.0066 | 9.48E-28 | -10.9177 | 938666  | Asthma |
| rs9271883   | 6 | 32627833 | A | G | 0.4486 | -0.0718 | 0.0066 | 1.18E-27 | -10.8981 | 938666  | Asthma |
| rs9271884   | 6 | 32627851 | C | T | 0.4491 | -0.0703 | 0.0068 | 2.44E-25 | -10.4014 | 912533  | Asthma |
| rs9271885   | 6 | 32627852 | T | C | 0.4491 | -0.0703 | 0.0068 | 2.43E-25 | -10.4020 | 912533  | Asthma |
| rs9271886   | 6 | 32627856 | T | C | 0.4491 | -0.0704 | 0.0068 | 2.37E-25 | -10.4043 | 912533  | Asthma |
| rs114383657 | 6 | 32627859 | G | T | 0.1406 | -0.0857 | 0.0081 | 3.92E-26 | -10.5742 | 1154790 | Asthma |
| rs77029856  | 6 | 32627928 | C | T | 0.1552 | -0.0799 | 0.0084 | 2.79E-21 | -9.4702  | 1029518 | Asthma |
| rs9271888   | 6 | 32627955 | C | T | 0.4673 | -0.0719 | 0.0057 | 1.31E-36 | -12.6372 | 1094744 | Asthma |
| rs9271889   | 6 | 32627970 | A | G | 0.4706 | -0.0635 | 0.0051 | 4.82E-35 | -12.3507 | 1246149 | Asthma |
| rs9271890   | 6 | 32628002 | A | C | 0.4657 | -0.0718 | 0.0057 | 1.77E-36 | -12.6139 | 1094744 | Asthma |
| rs9271891   | 6 | 32628006 | T | G | 0.4672 | -0.0644 | 0.0053 | 4.90E-34 | -12.1630 | 1186521 | Asthma |
| rs9271892   | 6 | 32628036 | C | G | 0.4659 | -0.0718 | 0.0057 | 2.02E-36 | -12.6035 | 1094744 | Asthma |
| rs35879651  | 6 | 32628080 | T | C | 0.0691 | -0.1270 | 0.0106 | 5.02E-33 | -11.9708 | 1180923 | Asthma |
| rs9271894   | 6 | 32628097 | T | C | 0.3143 | -0.0321 | 0.0058 | 2.69E-08 | -5.5604  | 1186521 | Asthma |
| rs9271897   | 6 | 32628177 | A | G | 0.4698 | -0.0647 | 0.0053 | 1.67E-34 | -12.2506 | 1186521 | Asthma |
| rs9271898   | 6 | 32628195 | A | G | 0.4672 | -0.0720 | 0.0057 | 1.12E-36 | -12.6500 | 1094744 | Asthma |
| rs9271899   | 6 | 32628230 | G | A | 0.4674 | -0.0722 | 0.0057 | 7.26E-37 | -12.6840 | 1094744 | Asthma |
| rs9271900   | 6 | 32628236 | G | A | 0.3123 | -0.0423 | 0.0063 | 1.35E-11 | -6.7631  | 1094744 | Asthma |
| rs9271901   | 6 | 32628250 | T | C | 0.4673 | -0.0722 | 0.0057 | 7.11E-37 | -12.6856 | 1094744 | Asthma |
| rs9271906   | 6 | 32628271 | A | G | 0.4673 | -0.0722 | 0.0057 | 7.35E-37 | -12.6831 | 1094744 | Asthma |
| rs9271907   | 6 | 32628346 | T | C | 0.4659 | -0.0713 | 0.0057 | 6.63E-36 | -12.5093 | 1094744 | Asthma |
| rs9271908   | 6 | 32628354 | T | C | 0.4659 | -0.0713 | 0.0057 | 6.62E-36 | -12.5097 | 1094744 | Asthma |
| rs9271909   | 6 | 32628400 | T | A | 0.4648 | -0.0713 | 0.0057 | 9.05E-36 | -12.4845 | 1094744 | Asthma |
| rs9271910   | 6 | 32628406 | C | T | 0.4648 | -0.0712 | 0.0057 | 1.01E-35 | -12.4761 | 1094744 | Asthma |
| rs2133036   | 6 | 32628426 | T | C | 0.1784 | 0.1508  | 0.0075 | 2.32E-90 | 20.1575  | 1029518 | Asthma |
| rs9271912   | 6 | 32628430 | T | C | 0.4655 | -0.0713 | 0.0057 | 7.65E-36 | -12.4980 | 1094744 | Asthma |
| rs9271913   | 6 | 32628445 | A | T | 0.4655 | -0.0713 | 0.0057 | 7.35E-36 | -12.5012 | 1094744 | Asthma |
| rs9271914   | 6 | 32628461 | C | T | 0.4656 | -0.0713 | 0.0057 | 7.84E-36 | -12.4961 | 1094744 | Asthma |
| rs9271915   | 6 | 32628517 | C | T | 0.4670 | -0.0721 | 0.0057 | 1.07E-36 | -12.6537 | 1094744 | Asthma |
| rs2036202   | 6 | 32628532 | C | T | 0.2235 | -0.0508 | 0.0070 | 2.67E-13 | -7.3103  | 1094744 | Asthma |
| rs13193645  | 6 | 32628547 | G | T | 0.1415 | -0.0812 | 0.0078 | 4.57E-25 | -10.3415 | 1246149 | Asthma |
| rs9271917   | 6 | 32628559 | G | T | 0.4668 | -0.0729 | 0.0057 | 1.73E-37 | -12.7960 | 1094744 | Asthma |
| rs9271918   | 6 | 32628575 | T | C | 0.4661 | -0.0721 | 0.0057 | 1.09E-36 | -12.6521 | 1094744 | Asthma |
| rs73728888  | 6 | 32628593 | T | C | 0.0532 | -0.1016 | 0.0125 | 3.73E-16 | -8.1475  | 1180923 | Asthma |
| rs13207836  | 6 | 32628597 | G | A | 0.1540 | -0.0793 | 0.0076 | 1.14E-25 | -10.4742 | 1180923 | Asthma |
| rs9271919   | 6 | 32628646 | G | A | 0.4663 | -0.0643 | 0.0053 | 8.00E-34 | -12.1229 | 1186521 | Asthma |
| rs202092176 | 6 | 32628652 | T | C | 0.1112 | -0.1166 | 0.0110 | 4.66E-26 | -10.5579 | 939084  | Asthma |
| rs9271920   | 6 | 32628653 | G | T | 0.4514 | -0.0718 | 0.0058 | 2.90E-35 | -12.3916 | 1094744 | Asthma |
| rs9271921   | 6 | 32628654 | G | C | 0.4501 | -0.0709 | 0.0059 | 3.73E-33 | -11.9958 | 1068611 | Asthma |
| rs9271922   | 6 | 32628667 | A | G | 0.4590 | -0.0714 | 0.0057 | 1.26E-35 | -12.4582 | 1094744 | Asthma |

|             |   |          |   |   |        |         |        |          |          |         |        |
|-------------|---|----------|---|---|--------|---------|--------|----------|----------|---------|--------|
| rs72848222  | 6 | 32628690 | A | C | 0.1179 | -0.0781 | 0.0098 | 1.23E-15 | -8.0014  | 1029518 | Asthma |
| rs2133035   | 6 | 32628698 | A | C | 0.3117 | 0.1276  | 0.0069 | 3.18E-77 | 18.6005  | 1000149 | Asthma |
| rs116489113 | 6 | 32628719 | G | A | 0.0676 | -0.1349 | 0.0116 | 3.08E-31 | -11.6247 | 1086328 | Asthma |
| rs9271924   | 6 | 32628721 | A | G | 0.4014 | -0.0708 | 0.0096 | 2.05E-13 | -7.3457  | 589324  | Asthma |
| rs114420104 | 6 | 32628756 | T | G | 0.1112 | -0.0892 | 0.0101 | 1.42E-18 | -8.7961  | 995476  | Asthma |
| rs9271927   | 6 | 32628870 | C | T | 0.4649 | -0.0643 | 0.0053 | 8.25E-34 | -12.1203 | 1186521 | Asthma |
| rs9271928   | 6 | 32628871 | A | G | 0.4633 | -0.0711 | 0.0058 | 4.02E-34 | -12.1790 | 1068611 | Asthma |
| rs9271929   | 6 | 32628873 | C | A | 0.4542 | -0.0705 | 0.0058 | 1.78E-33 | -12.0571 | 1068611 | Asthma |
| rs9271930   | 6 | 32628900 | G | A | 0.4672 | -0.0720 | 0.0057 | 1.61E-36 | -12.6214 | 1094744 | Asthma |
| rs9271932   | 6 | 32628937 | C | T | 0.4670 | -0.0720 | 0.0057 | 1.25E-36 | -12.6412 | 1094744 | Asthma |
| rs9271933   | 6 | 32628940 | A | T | 0.4670 | -0.0720 | 0.0057 | 1.27E-36 | -12.6401 | 1094744 | Asthma |
| rs9271934   | 6 | 32628996 | T | A | 0.4700 | -0.0649 | 0.0053 | 9.99E-35 | -12.2921 | 1186521 | Asthma |
| rs9271935   | 6 | 32629054 | C | T | 0.4693 | -0.0722 | 0.0057 | 1.26E-36 | -12.6404 | 1094744 | Asthma |
| rs73728889  | 6 | 32629079 | G | C | 0.1263 | -0.1343 | 0.0094 | 1.04E-46 | -14.3513 | 1003385 | Asthma |
| rs541843223 | 6 | 32629100 | T | C | 0.0725 | -0.1420 | 0.0128 | 1.99E-28 | -11.0587 | 934923  | Asthma |
| rs114786106 | 6 | 32629101 | G | A | 0.0986 | -0.1152 | 0.0098 | 6.22E-32 | -11.7612 | 1154790 | Asthma |
| rs116098252 | 6 | 32629113 | C | T | 0.0702 | -0.1381 | 0.0120 | 7.06E-31 | -11.5537 | 1003385 | Asthma |
| rs6929028   | 6 | 32629141 | T | C | 0.1466 | -0.0834 | 0.0086 | 2.74E-22 | -9.7097  | 1094744 | Asthma |
| rs9271939   | 6 | 32629144 | C | T | 0.4655 | -0.0709 | 0.0057 | 1.76E-35 | -12.4318 | 1094744 | Asthma |
| rs3104386   | 6 | 32629160 | G | T | 0.1779 | -0.0544 | 0.0077 | 1.32E-12 | -7.0920  | 1094744 | Asthma |
| rs6929398   | 6 | 32629189 | G | A | 0.1926 | 0.0373  | 0.0064 | 6.90E-09 | 5.7933   | 1246149 | Asthma |
| rs115826298 | 6 | 32629208 | A | G | 0.0696 | -0.1276 | 0.0106 | 1.32E-33 | -12.0807 | 1180923 | Asthma |
| rs6929057   | 6 | 32629228 | C | A | 0.2812 | -0.1204 | 0.0066 | 1.35E-74 | -18.2729 | 1094744 | Asthma |
| rs3129769   | 6 | 32629245 | A | G | 0.1772 | 0.1516  | 0.0075 | 6.18E-91 | 20.2222  | 1029518 | Asthma |
| rs9271945   | 6 | 32629257 | A | G | 0.4699 | -0.0650 | 0.0053 | 7.76E-35 | -12.3125 | 1186521 | Asthma |
| rs13211653  | 6 | 32629311 | G | A | 0.1349 | -0.0855 | 0.0096 | 7.70E-19 | -8.8642  | 847307  | Asthma |
| rs9271948   | 6 | 32629328 | A | C | 0.4646 | -0.0699 | 0.0057 | 1.65E-34 | -12.2517 | 1094744 | Asthma |
| rs9271951   | 6 | 32629395 | A | G | 0.4618 | -0.0759 | 0.0064 | 1.47E-32 | -11.8821 | 1000149 | Asthma |
| rs13211904  | 6 | 32629419 | T | C | 0.1463 | -0.0842 | 0.0093 | 1.35E-19 | -9.0566  | 912533  | Asthma |
| rs3129771   | 6 | 32629425 | G | C | 0.1939 | -0.0531 | 0.0083 | 1.67E-10 | -6.3886  | 1000149 | Asthma |
| rs9271954   | 6 | 32629439 | C | T | 0.4583 | -0.0718 | 0.0067 | 4.85E-27 | -10.7684 | 912533  | Asthma |
| rs72848230  | 6 | 32629451 | A | G | 0.1556 | -0.0826 | 0.0086 | 6.21E-22 | -9.6261  | 1068611 | Asthma |
| rs9271955   | 6 | 32629504 | A | G | 0.4605 | -0.0730 | 0.0065 | 2.41E-29 | -11.2464 | 938666  | Asthma |
| rs9271956   | 6 | 32629536 | T | C | 0.1826 | -0.0510 | 0.0076 | 2.50E-11 | -6.6734  | 1094744 | Asthma |
| rs9271957   | 6 | 32629558 | C | T | 0.4590 | -0.0721 | 0.0067 | 3.21E-27 | -10.8066 | 912533  | Asthma |
| rs9271959   | 6 | 32629600 | C | T | 0.4517 | -0.0792 | 0.0076 | 1.84E-25 | -10.4287 | 844071  | Asthma |
| rs1281944   | 6 | 32629602 | C | T | 0.0895 | 0.1799  | 0.0117 | 1.88E-53 | 15.3913  | 934923  | Asthma |
| rs9271960   | 6 | 32629608 | T | C | 0.4517 | -0.0793 | 0.0076 | 1.75E-25 | -10.4332 | 844071  | Asthma |
| rs544268559 | 6 | 32629619 | G | A | 0.0989 | -0.1210 | 0.0143 | 2.25E-17 | -8.4801  | 870622  | Asthma |
| rs9271961   | 6 | 32629635 | A | G | 0.4462 | -0.0783 | 0.0077 | 1.69E-24 | -10.2156 | 844071  | Asthma |
| rs9271962   | 6 | 32629657 | C | T | 0.4496 | -0.0802 | 0.0077 | 3.48E-25 | -10.3678 | 778845  | Asthma |
| rs140145058 | 6 | 32629658 | G | A | 0.1292 | -0.0959 | 0.0113 | 2.49E-17 | -8.4682  | 844071  | Asthma |
| rs9271963   | 6 | 32629676 | A | G | 0.4447 | -0.0794 | 0.0078 | 1.57E-24 | -10.2229 | 778845  | Asthma |
| rs9271964   | 6 | 32629687 | C | T | 0.4426 | -0.0788 | 0.0078 | 5.57E-24 | -10.0992 | 778845  | Asthma |
| rs9271966   | 6 | 32629730 | T | C | 0.4358 | -0.0800 | 0.0078 | 1.50E-24 | -10.2268 | 778845  | Asthma |
| rs3104385   | 6 | 32629761 | G | C | 0.5391 | -0.0623 | 0.0079 | 2.31E-15 | -7.9237  | 844071  | Asthma |
| rs4959111   | 6 | 32629943 | C | T | 0.1133 | -0.0867 | 0.0118 | 2.25E-13 | -7.3334  | 778845  | Asthma |
| rs2395517   | 6 | 32630015 | A | T | 0.1883 | -0.0736 | 0.0099 | 9.75E-14 | -7.4442  | 844071  | Asthma |
| rs2395518   | 6 | 32630035 | C | T | 0.1842 | 0.1810  | 0.0098 | 1.32E-76 | 18.5241  | 778845  | Asthma |
| rs9271999   | 6 | 32630055 | G | T | 0.4538 | -0.0801 | 0.0077 | 1.92E-25 | -10.4241 | 778845  | Asthma |
| rs9272000   | 6 | 32630057 | T | C | 0.4538 | -0.0801 | 0.0077 | 1.92E-25 | -10.4241 | 778845  | Asthma |
| rs9272001   | 6 | 32630124 | G | A | 0.4525 | -0.0810 | 0.0076 | 1.90E-26 | -10.6420 | 844071  | Asthma |
| rs114122909 | 6 | 32630127 | G | A | 0.1075 | -0.0900 | 0.0122 | 1.44E-13 | -7.3923  | 844071  | Asthma |
| rs11754858  | 6 | 32630137 | A | G | 0.0586 | -0.1173 | 0.0154 | 2.48E-14 | -7.6228  | 873440  | Asthma |
| rs9272002   | 6 | 32630147 | G | A | 0.3943 | -0.0579 | 0.0077 | 7.18E-14 | -7.4846  | 844071  | Asthma |
| rs9272003   | 6 | 32630163 | G | A | 0.3943 | -0.0579 | 0.0077 | 7.10E-14 | -7.4861  | 844071  | Asthma |
| rs9272004   | 6 | 32630187 | A | G | 0.4487 | -0.0812 | 0.0077 | 3.06E-26 | -10.5976 | 844071  | Asthma |
| rs9272005   | 6 | 32630215 | G | A | 0.4486 | -0.0813 | 0.0077 | 2.77E-26 | -10.6067 | 844071  | Asthma |
| rs9272006   | 6 | 32630216 | T | C | 0.4486 | -0.0813 | 0.0077 | 2.77E-26 | -10.6067 | 844071  | Asthma |
| rs146668528 | 6 | 32630251 | T | C | 0.0798 | -0.1071 | 0.0132 | 4.87E-16 | -8.1149  | 710470  | Asthma |
| rs9272007   | 6 | 32630261 | T | C | 0.4576 | -0.0719 | 0.0067 | 4.87E-27 | -10.7682 | 912533  | Asthma |
| rs9272008   | 6 | 32630265 | A | G | 0.4644 | -0.0711 | 0.0058 | 2.85E-34 | -12.2070 | 1068611 | Asthma |
| rs9272009   | 6 | 32630286 | T | C | 0.4649 | -0.0710 | 0.0058 | 2.83E-34 | -12.2076 | 1068611 | Asthma |
| rs2395519   | 6 | 32630290 | C | A | 0.1788 | 0.1526  | 0.0076 | 3.90E-89 | 20.0176  | 1003385 | Asthma |
| rs1281943   | 6 | 32630313 | C | T | 0.0619 | 0.1567  | 0.0129 | 3.55E-34 | 12.1892  | 965217  | Asthma |
| rs9272012   | 6 | 32630379 | A | G | 0.4574 | -0.0699 | 0.0058 | 6.06E-34 | -12.1455 | 1094744 | Asthma |
| rs139089699 | 6 | 32630403 | A | G | 0.0709 | -0.1348 | 0.0116 | 3.94E-31 | -11.6037 | 1029518 | Asthma |
| rs9272013   | 6 | 32630447 | T | C | 0.4672 | -0.0719 | 0.0057 | 1.18E-36 | -12.6455 | 1094744 | Asthma |
| rs11965021  | 6 | 32630484 | T | C | 0.1601 | -0.0592 | 0.0082 | 7.25E-13 | -7.1746  | 1094744 | Asthma |
| rs11970000  | 6 | 32630514 | G | A | 0.2704 | -0.1219 | 0.0067 | 1.50E-74 | -18.2683 | 1094744 | Asthma |
| rs9272015   | 6 | 32630522 | A | G | 0.4667 | -0.0717 | 0.0057 | 2.05E-36 | -12.6023 | 1094744 | Asthma |
| rs9272016   | 6 | 32630569 | T | C | 0.4669 | -0.0719 | 0.0057 | 1.28E-36 | -12.6399 | 1094744 | Asthma |
| rs115527034 | 6 | 32630579 | C | T | 0.0699 | -0.1270 | 0.0105 | 1.18E-33 | -12.0906 | 1180923 | Asthma |
| rs112313206 | 6 | 32630628 | T | C | 0.4604 | -0.0770 | 0.0064 | 3.14E-33 | -12.0102 | 1000149 | Asthma |

|             |   |          |   |   |        |         |        |          |          |         |        |
|-------------|---|----------|---|---|--------|---------|--------|----------|----------|---------|--------|
| rs7771138   | 6 | 32630642 | A | G | 0.2680 | -0.1343 | 0.0076 | 1.92E-69 | -17.6141 | 1000149 | Asthma |
| rs7770879   | 6 | 32630646 | A | C | 0.2563 | -0.1403 | 0.0090 | 7.03E-55 | -15.6026 | 844071  | Asthma |
| rs9272018   | 6 | 32630683 | T | C | 0.1820 | -0.0526 | 0.0085 | 6.01E-10 | -6.1902  | 1000149 | Asthma |
| rs148437409 | 6 | 32630702 | C | T | 0.4473 | -0.0795 | 0.0077 | 2.74E-25 | -10.3906 | 844071  | Asthma |
| rs558095162 | 6 | 32630727 | T | C | 0.4178 | -0.0806 | 0.0078 | 2.57E-25 | -10.3967 | 844071  | Asthma |
| rs9272021   | 6 | 32630738 | G | A | 0.2013 | 0.1787  | 0.0095 | 4.86E-79 | 18.8237  | 778845  | Asthma |
| rs9272022   | 6 | 32630752 | G | A | 0.4518 | -0.0811 | 0.0076 | 1.89E-26 | -10.6423 | 844071  | Asthma |
| rs146848763 | 6 | 32630765 | A | G | 0.0529 | -0.1124 | 0.0140 | 8.06E-16 | -8.0536  | 1086328 | Asthma |
| rs9272023   | 6 | 32630781 | C | G | 0.4934 | 0.0809  | 0.0064 | 2.23E-36 | 12.5957  | 1000149 | Asthma |
| rs9272024   | 6 | 32630782 | A | G | 0.1812 | -0.0525 | 0.0085 | 6.67E-10 | -6.1736  | 1000149 | Asthma |
| rs9272025   | 6 | 32630804 | A | C | 0.3099 | 0.1224  | 0.0062 | 1.58E-85 | 19.5990  | 1068611 | Asthma |
| rs192408808 | 6 | 32630840 | C | G | 0.0546 | -0.1130 | 0.0138 | 3.17E-16 | -8.1666  | 1029518 | Asthma |
| rs9272026   | 6 | 32630841 | G | A | 0.4670 | -0.0719 | 0.0057 | 1.23E-36 | -12.6426 | 1094744 | Asthma |
| rs9272027   | 6 | 32630845 | G | C | 0.4670 | -0.0719 | 0.0057 | 1.23E-36 | -12.6428 | 1094744 | Asthma |
| rs151002495 | 6 | 32630903 | A | G | 0.0699 | -0.1272 | 0.0105 | 1.03E-33 | -12.1024 | 1180923 | Asthma |
| rs9272028   | 6 | 32630929 | T | C | 0.4669 | -0.0719 | 0.0057 | 1.40E-36 | -12.6325 | 1094744 | Asthma |
| rs9272029   | 6 | 32630930 | G | C | 0.4669 | -0.0719 | 0.0057 | 1.40E-36 | -12.6325 | 1094744 | Asthma |
| rs114354029 | 6 | 32630987 | G | C | 0.4709 | -0.0703 | 0.0063 | 7.42E-29 | -11.1469 | 700591  | Asthma |
| rs9272031   | 6 | 32631002 | C | T | 0.4583 | -0.0777 | 0.0064 | 5.80E-34 | -12.1493 | 1000149 | Asthma |
| rs9272032   | 6 | 32631005 | G | C | 0.4582 | -0.0776 | 0.0064 | 7.38E-34 | -12.1293 | 1000149 | Asthma |
| rs3104383   | 6 | 32631007 | G | C | 0.1800 | -0.0547 | 0.0078 | 2.14E-12 | -7.0252  | 1068611 | Asthma |
| rs7758269   | 6 | 32631035 | C | T | 0.2589 | -0.0520 | 0.0074 | 1.85E-12 | -7.0457  | 1000149 | Asthma |
| rs9272035   | 6 | 32631037 | T | C | 0.4178 | -0.0775 | 0.0066 | 3.15E-32 | -11.8180 | 1000149 | Asthma |
| rs536856134 | 6 | 32631050 | C | T | 0.0555 | -0.1222 | 0.0155 | 2.98E-15 | -7.8914  | 934923  | Asthma |
| rs9272036   | 6 | 32631064 | G | A | 0.4948 | 0.0814  | 0.0064 | 3.78E-37 | 12.7350  | 1000149 | Asthma |
| rs9272037   | 6 | 32631067 | C | G | 0.4596 | -0.0777 | 0.0064 | 7.74E-34 | -12.1256 | 1000149 | Asthma |
| rs3104381   | 6 | 32631077 | A | G | 0.1782 | 0.1525  | 0.0076 | 6.84E-89 | 19.9895  | 1003385 | Asthma |
| rs9272040   | 6 | 32631126 | A | G | 0.4939 | 0.0820  | 0.0064 | 9.36E-38 | 12.8436  | 1000149 | Asthma |
| rs9272041   | 6 | 32631129 | G | A | 0.4939 | 0.0820  | 0.0064 | 1.11E-37 | 12.8304  | 1000149 | Asthma |
| rs9272042   | 6 | 32631140 | A | C | 0.4927 | 0.0763  | 0.0058 | 3.80E-39 | 13.0891  | 1068611 | Asthma |
| rs9272043   | 6 | 32631169 | T | G | 0.4933 | 0.0762  | 0.0058 | 5.40E-39 | 13.0624  | 1068611 | Asthma |
| rs9272044   | 6 | 32631194 | A | C | 0.4622 | -0.0718 | 0.0058 | 6.23E-35 | -12.3303 | 1068611 | Asthma |
| rs9272045   | 6 | 32631229 | C | T | 0.4934 | 0.0761  | 0.0058 | 7.37E-39 | 13.0387  | 1068611 | Asthma |
| rs7758465   | 6 | 32631254 | A | T | 0.1881 | 0.0357  | 0.0065 | 4.00E-08 | 5.4907   | 1246149 | Asthma |
| rs3104380   | 6 | 32631265 | G | T | 0.1813 | -0.0538 | 0.0078 | 4.09E-12 | -6.9339  | 1068611 | Asthma |
| rs9272049   | 6 | 32631268 | G | T | 0.4061 | -0.0694 | 0.0058 | 7.77E-33 | -11.9350 | 1094744 | Asthma |
| rs9272050   | 6 | 32631294 | G | A | 0.4236 | 0.0652  | 0.0058 | 2.13E-29 | 11.2576  | 1094744 | Asthma |
| rs3104379   | 6 | 32631337 | G | T | 0.1789 | -0.0546 | 0.0076 | 9.19E-13 | -7.1420  | 1094744 | Asthma |
| rs76434237  | 6 | 32631354 | A | G | 0.0533 | -0.1023 | 0.0124 | 1.98E-16 | -8.2236  | 1180923 | Asthma |
| rs3104378   | 6 | 32631386 | T | C | 0.1791 | 0.1498  | 0.0075 | 1.08E-89 | 20.0818  | 1029518 | Asthma |
| rs9272054   | 6 | 32631387 | A | C | 0.4604 | -0.0726 | 0.0057 | 5.52E-37 | -12.7054 | 1094744 | Asthma |
| rs9272055   | 6 | 32631399 | A | T | 0.4597 | -0.0727 | 0.0057 | 4.82E-37 | -12.7160 | 1094744 | Asthma |
| rs9272056   | 6 | 32631403 | G | A | 0.4964 | 0.0765  | 0.0058 | 3.00E-39 | 13.1070  | 1068611 | Asthma |
| rs9272057   | 6 | 32631413 | T | A | 0.4956 | 0.0765  | 0.0057 | 8.73E-41 | 13.3727  | 1094744 | Asthma |
| rs73728894  | 6 | 32631435 | C | T | 0.0530 | -0.1038 | 0.0125 | 1.26E-16 | -8.2779  | 1180923 | Asthma |
| rs9272059   | 6 | 32631446 | C | T | 0.4654 | -0.0645 | 0.0052 | 7.66E-35 | -12.3134 | 1213603 | Asthma |
| rs9272061   | 6 | 32631473 | A | G | 0.4644 | -0.0723 | 0.0057 | 6.72E-37 | -12.6899 | 1094744 | Asthma |
| rs9272062   | 6 | 32631488 | G | A | 0.4908 | 0.0762  | 0.0057 | 1.10E-40 | 13.3557  | 1094744 | Asthma |
| rs35779452  | 6 | 32631495 | G | A | 0.2691 | -0.1180 | 0.0061 | 1.48E-83 | -19.3666 | 1220016 | Asthma |
| rs9272063   | 6 | 32631526 | T | C | 0.2015 | 0.0356  | 0.0063 | 1.63E-08 | 5.6474   | 1246149 | Asthma |
| rs34061722  | 6 | 32631560 | T | C | 0.2691 | -0.1181 | 0.0061 | 9.63E-84 | -19.3886 | 1220016 | Asthma |
| rs9272064   | 6 | 32631561 | T | C | 0.4704 | -0.0636 | 0.0051 | 4.02E-35 | -12.3654 | 1246149 | Asthma |
| rs9272066   | 6 | 32631597 | A | C | 0.2014 | 0.0355  | 0.0063 | 1.79E-08 | 5.6311   | 1246149 | Asthma |
| rs9272067   | 6 | 32631624 | A | C | 0.4642 | -0.0628 | 0.0057 | 4.58E-28 | -10.9837 | 1090071 | Asthma |
| rs183994601 | 6 | 32631628 | A | G | 0.1204 | -0.0794 | 0.0097 | 2.84E-16 | -8.1798  | 1068611 | Asthma |
| rs9272069   | 6 | 32631648 | A | T | 0.2050 | 0.0377  | 0.0068 | 3.49E-08 | 5.5148   | 1090071 | Asthma |
| rs35360625  | 6 | 32631658 | C | G | 0.2614 | -0.1233 | 0.0075 | 1.86E-60 | -16.4016 | 938666  | Asthma |
| rs9272070   | 6 | 32631708 | T | G | 0.5021 | 0.0632  | 0.0058 | 1.74E-27 | 10.8624  | 1063938 | Asthma |
| rs9272071   | 6 | 32631710 | C | G | 0.4012 | -0.0528 | 0.0068 | 5.59E-15 | -7.8129  | 912533  | Asthma |
| rs9272072   | 6 | 32631786 | G | A | 0.4483 | -0.0774 | 0.0077 | 1.70E-23 | -9.9894  | 778845  | Asthma |
| rs9272073   | 6 | 32631793 | T | C | 0.4480 | -0.0775 | 0.0078 | 1.60E-23 | -9.9950  | 778845  | Asthma |
| rs9272074   | 6 | 32631794 | G | A | 0.4835 | -0.0782 | 0.0077 | 3.59E-24 | -10.1422 | 778845  | Asthma |
| rs9272075   | 6 | 32631816 | G | A | 0.4440 | -0.0776 | 0.0078 | 2.22E-23 | -9.9629  | 778845  | Asthma |
| rs147857322 | 6 | 32631824 | A | G | 0.2835 | -0.1304 | 0.0089 | 6.74E-49 | -14.6967 | 778845  | Asthma |
| rs9272079   | 6 | 32631855 | T | C | 0.3026 | -0.0773 | 0.0084 | 3.49E-20 | -9.2028  | 778845  | Asthma |
| rs9272080   | 6 | 32631856 | G | A | 0.3026 | -0.0773 | 0.0084 | 3.48E-20 | -9.2029  | 778845  | Asthma |
| rs9272081   | 6 | 32631878 | C | T | 0.2720 | -0.0709 | 0.0086 | 1.69E-16 | -8.2420  | 844071  | Asthma |
| rs9272085   | 6 | 32631908 | C | T | 0.2814 | -0.0744 | 0.0087 | 7.97E-18 | -8.6000  | 778845  | Asthma |
| rs3104377   | 6 | 32631912 | C | G | 0.2621 | -0.0834 | 0.0096 | 2.81E-18 | -8.7188  | 778845  | Asthma |
| rs9272090   | 6 | 32631959 | C | T | 0.2897 | -0.0756 | 0.0086 | 1.05E-18 | -8.8295  | 778845  | Asthma |
| rs9272091   | 6 | 32631968 | C | G | 0.3193 | -0.0738 | 0.0083 | 9.93E-19 | -8.8360  | 778845  | Asthma |
| rs9272094   | 6 | 32632004 | C | T | 0.4693 | -0.0766 | 0.0078 | 1.12E-22 | -9.8002  | 778845  | Asthma |
| rs9272095   | 6 | 32632005 | A | G | 0.4309 | -0.0751 | 0.0079 | 1.80E-21 | -9.5158  | 778845  | Asthma |
| rs9272096   | 6 | 32632007 | C | T | 0.4693 | -0.0766 | 0.0078 | 1.12E-22 | -9.8002  | 778845  | Asthma |

|             |   |          |   |   |        |         |        |          |          |         |        |
|-------------|---|----------|---|---|--------|---------|--------|----------|----------|---------|--------|
| rs9272099   | 6 | 32632036 | G | T | 0.4464 | -0.0795 | 0.0077 | 3.48E-25 | -10.3676 | 844071  | Asthma |
| rs9272102   | 6 | 32632053 | C | T | 0.4446 | -0.0796 | 0.0077 | 2.90E-25 | -10.3850 | 844071  | Asthma |
| rs538930644 | 6 | 32632054 | A | G | 0.0620 | -0.1278 | 0.0177 | 4.52E-13 | -7.2387  | 778845  | Asthma |
| rs11751908  | 6 | 32632085 | G | T | 0.2571 | -0.1243 | 0.0078 | 7.57E-57 | -15.8884 | 912533  | Asthma |
| rs9272103   | 6 | 32632119 | T | C | 0.4638 | -0.0641 | 0.0059 | 1.90E-27 | -10.8545 | 1030443 | Asthma |
| rs9272104   | 6 | 32632141 | T | C | 0.5072 | 0.0734  | 0.0065 | 1.67E-29 | 11.2788  | 938666  | Asthma |
| rs9272105   | 6 | 32632222 | G | A | 0.4871 | 0.0669  | 0.0051 | 1.53E-38 | 12.9831  | 1246149 | Asthma |
| rs3104376   | 6 | 32632226 | T | C | 0.2463 | -0.0912 | 0.0062 | 1.06E-49 | -14.8216 | 1246149 | Asthma |
| rs35585151  | 6 | 32632269 | A | G | 0.3150 | -0.1151 | 0.0063 | 1.09E-73 | -18.1583 | 1094744 | Asthma |
| rs35242582  | 6 | 32632280 | G | A | 0.2664 | -0.1201 | 0.0062 | 1.01E-82 | -19.2669 | 1186521 | Asthma |
| rs34180045  | 6 | 32632289 | G | T | 0.2696 | -0.1228 | 0.0068 | 1.75E-72 | -18.0055 | 1068611 | Asthma |
| rs34107231  | 6 | 32632297 | G | A | 0.2692 | -0.1215 | 0.0067 | 6.63E-74 | -18.1862 | 1094744 | Asthma |
| rs35635298  | 6 | 32632302 | C | T | 0.2692 | -0.1215 | 0.0067 | 8.07E-74 | -18.1749 | 1094744 | Asthma |
| rs35744886  | 6 | 32632307 | T | A | 0.2698 | -0.1227 | 0.0068 | 2.67E-72 | -17.9821 | 1068611 | Asthma |
| rs35828545  | 6 | 32632322 | C | T | 0.2699 | -0.1228 | 0.0068 | 1.81E-72 | -18.0035 | 1068611 | Asthma |
| rs3104375   | 6 | 32632324 | C | G | 0.1780 | 0.1370  | 0.0068 | 1.86E-91 | 20.2813  | 1180923 | Asthma |
| rs35426875  | 6 | 32632358 | C | T | 0.2702 | -0.1229 | 0.0068 | 9.43E-73 | -18.0404 | 1068611 | Asthma |
| rs34700194  | 6 | 32632365 | T | C | 0.0532 | -0.1035 | 0.0124 | 9.06E-17 | -8.3170  | 1180923 | Asthma |
| rs35656734  | 6 | 32632376 | T | C | 0.3113 | -0.1107 | 0.0057 | 2.14E-83 | -19.3472 | 1246149 | Asthma |
| rs34927613  | 6 | 32632434 | A | G | 0.2692 | -0.1228 | 0.0068 | 3.63E-72 | -17.9657 | 1068611 | Asthma |
| rs9272108   | 6 | 32632451 | C | T | 0.4699 | -0.0650 | 0.0053 | 8.81E-35 | -12.3022 | 1186521 | Asthma |
| rs13211123  | 6 | 32632472 | C | A | 0.2690 | -0.1234 | 0.0068 | 9.00E-73 | -18.0431 | 1068611 | Asthma |
| rs9272109   | 6 | 32632476 | T | G | 0.4671 | -0.0636 | 0.0053 | 3.39E-33 | -12.0036 | 1186521 | Asthma |
| rs9272110   | 6 | 32632510 | C | T | 0.4643 | -0.0705 | 0.0058 | 7.60E-34 | -12.1271 | 1068611 | Asthma |
| rs9272113   | 6 | 32632514 | C | T | 0.4643 | -0.0705 | 0.0058 | 7.11E-34 | -12.1324 | 1068611 | Asthma |
| rs9272114   | 6 | 32632540 | T | C | 0.4870 | 0.0667  | 0.0052 | 2.39E-38 | 12.9485  | 1246149 | Asthma |
| rs3104373   | 6 | 32632598 | T | C | 0.1664 | -0.0548 | 0.0072 | 2.93E-14 | -7.6014  | 1246149 | Asthma |
| rs9272116   | 6 | 32632627 | T | C | 0.4869 | 0.0664  | 0.0052 | 5.00E-38 | 12.8919  | 1246149 | Asthma |
| rs9272117   | 6 | 32632634 | T | C | 0.4706 | -0.0634 | 0.0051 | 5.99E-35 | -12.3334 | 1246149 | Asthma |
| rs9272118   | 6 | 32632671 | C | T | 0.4872 | 0.0665  | 0.0052 | 4.08E-38 | 12.9077  | 1246149 | Asthma |
| rs9272119   | 6 | 32632693 | C | T | 0.4681 | -0.0724 | 0.0057 | 4.30E-37 | -12.7250 | 1094744 | Asthma |
| rs115883274 | 6 | 32632696 | C | G | 0.0686 | -0.1324 | 0.0139 | 1.39E-21 | -9.5430  | 873440  | Asthma |
| rs9272120   | 6 | 32632724 | G | A | 0.4703 | -0.0633 | 0.0051 | 7.86E-35 | -12.3113 | 1246149 | Asthma |
| rs13211628  | 6 | 32632771 | G | C | 0.2142 | -0.1158 | 0.0074 | 2.88E-55 | -15.6590 | 1068611 | Asthma |
| rs13211632  | 6 | 32632778 | T | C | 0.1778 | -0.1085 | 0.0078 | 1.64E-43 | -13.8320 | 1160388 | Asthma |
| rs9272121   | 6 | 32632779 | C | G | 0.4637 | -0.0721 | 0.0057 | 1.34E-36 | -12.6359 | 1094744 | Asthma |
| rs9272122   | 6 | 32632785 | C | T | 0.4247 | 0.0646  | 0.0058 | 7.68E-29 | 11.1438  | 1094744 | Asthma |
| rs9272124   | 6 | 32632804 | A | G | 0.4582 | -0.0702 | 0.0058 | 2.76E-33 | -12.0209 | 1068611 | Asthma |
| rs9272125   | 6 | 32632807 | T | G | 0.4967 | 0.0748  | 0.0058 | 1.73E-37 | 12.7960  | 1068611 | Asthma |
| rs13214992  | 6 | 32632808 | A | G | 0.0659 | -0.1172 | 0.0143 | 2.45E-16 | -8.1978  | 934923  | Asthma |
| rs9272126   | 6 | 32632812 | G | C | 0.4967 | 0.0748  | 0.0058 | 1.70E-37 | 12.7972  | 1068611 | Asthma |
| rs9272127   | 6 | 32632818 | T | C | 0.4968 | 0.0749  | 0.0058 | 1.55E-37 | 12.8045  | 1068611 | Asthma |
| rs9272128   | 6 | 32632824 | A | C | 0.4569 | -0.0768 | 0.0064 | 3.93E-33 | -11.9919 | 1000149 | Asthma |
| rs9272129   | 6 | 32632825 | T | C | 0.4512 | -0.0683 | 0.0060 | 1.37E-29 | -11.2961 | 1059380 | Asthma |
| rs148418496 | 6 | 32632830 | A | C | 0.0708 | -0.1423 | 0.0131 | 1.36E-27 | -10.8845 | 934923  | Asthma |
| rs9272130   | 6 | 32632861 | G | A | 0.4697 | -0.0638 | 0.0051 | 2.18E-35 | -12.4144 | 1246149 | Asthma |
| rs9272131   | 6 | 32632894 | T | C | 0.0959 | 0.1272  | 0.0093 | 8.56E-43 | 13.7128  | 1121295 | Asthma |
| rs9272132   | 6 | 32632900 | A | G | 0.4884 | 0.0758  | 0.0057 | 2.39E-40 | 13.2977  | 1094744 | Asthma |
| rs9272134   | 6 | 32632928 | G | C | 0.4650 | -0.0705 | 0.0058 | 6.33E-34 | -12.1419 | 1068611 | Asthma |
| rs9272135   | 6 | 32632946 | A | G | 0.4634 | -0.0703 | 0.0058 | 1.45E-33 | -12.0741 | 1068611 | Asthma |
| rs9272136   | 6 | 32632953 | T | C | 0.4635 | -0.0704 | 0.0058 | 1.25E-33 | -12.0866 | 1068611 | Asthma |
| rs9272137   | 6 | 32632961 | C | A | 0.4634 | -0.0703 | 0.0058 | 1.48E-33 | -12.0723 | 1068611 | Asthma |
| rs9272138   | 6 | 32632980 | A | G | 0.4636 | -0.0704 | 0.0058 | 1.29E-33 | -12.0839 | 1068611 | Asthma |
| rs9272141   | 6 | 32633020 | A | C | 0.4623 | -0.0701 | 0.0058 | 2.53E-33 | -12.0284 | 1068611 | Asthma |
| rs9272142   | 6 | 32633023 | G | C | 0.4922 | 0.0749  | 0.0058 | 1.08E-37 | 12.8325  | 1068611 | Asthma |
| rs9272143   | 6 | 32633026 | C | T | 0.4682 | -0.0632 | 0.0052 | 1.24E-33 | -12.0871 | 1220016 | Asthma |
| rs9272146   | 6 | 32633137 | C | T | 0.4636 | -0.0637 | 0.0059 | 4.47E-27 | -10.7759 | 1030443 | Asthma |
| rs34153292  | 6 | 32633140 | T | G | 0.0560 | -0.1047 | 0.0135 | 1.11E-14 | -7.7263  | 1024845 | Asthma |
| rs200678104 | 6 | 32633198 | G | T | 0.1224 | -0.1234 | 0.0149 | 1.34E-16 | -8.2703  | 778845  | Asthma |
| rs9272147   | 6 | 32633199 | G | A | 0.4841 | -0.0759 | 0.0064 | 3.00E-32 | -11.8222 | 1000149 | Asthma |
| rs9272148   | 6 | 32633203 | C | G | 0.3449 | -0.0818 | 0.0081 | 3.10E-24 | -10.1564 | 844071  | Asthma |
| rs3104372   | 6 | 32633206 | T | C | 0.2094 | 0.1514  | 0.0083 | 5.21E-74 | 18.1993  | 847307  | Asthma |
| rs9272150   | 6 | 32633223 | A | T | 0.4138 | -0.0732 | 0.0078 | 4.64E-21 | -9.4172  | 844071  | Asthma |
| rs9272151   | 6 | 32633228 | G | A | 0.4138 | -0.0732 | 0.0078 | 4.75E-21 | -9.4145  | 844071  | Asthma |
| rs9272152   | 6 | 32633230 | A | G | 0.4138 | -0.0732 | 0.0078 | 4.72E-21 | -9.4153  | 844071  | Asthma |
| rs9272153   | 6 | 32633241 | C | T | 0.4169 | -0.0729 | 0.0077 | 4.03E-21 | -9.4319  | 844071  | Asthma |
| rs9272154   | 6 | 32633242 | A | G | 0.3363 | -0.0740 | 0.0081 | 7.63E-20 | -9.1183  | 844071  | Asthma |
| rs9272155   | 6 | 32633266 | T | C | 0.5416 | 0.0745  | 0.0077 | 3.35E-22 | 9.6892   | 778845  | Asthma |
| rs13215345  | 6 | 32633290 | T | C | 0.1351 | -0.1059 | 0.0111 | 2.01E-21 | -9.5047  | 844071  | Asthma |
| rs9272156   | 6 | 32633304 | C | T | 0.4205 | -0.0729 | 0.0077 | 1.98E-21 | -9.5058  | 844071  | Asthma |
| rs1826962   | 6 | 32633306 | C | T | 0.2123 | 0.1679  | 0.0093 | 1.88E-72 | 18.0022  | 778845  | Asthma |
| rs9272158   | 6 | 32633345 | A | G | 0.4183 | -0.0724 | 0.0077 | 6.41E-21 | -9.3829  | 844071  | Asthma |
| rs9272159   | 6 | 32633352 | A | T | 0.1910 | -0.0744 | 0.0100 | 9.19E-14 | -7.4521  | 844071  | Asthma |
| rs9272160   | 6 | 32633353 | G | A | 0.5451 | 0.0725  | 0.0076 | 2.52E-21 | 9.4810   | 844071  | Asthma |

|             |   |          |   |   |        |         |        |          |          |         |        |
|-------------|---|----------|---|---|--------|---------|--------|----------|----------|---------|--------|
| rs9272161   | 6 | 32633362 | G | A | 0.4139 | -0.0720 | 0.0078 | 2.13E-20 | -9.2556  | 844071  | Asthma |
| rs9272162   | 6 | 32633363 | A | G | 0.4139 | -0.0719 | 0.0078 | 2.16E-20 | -9.2542  | 844071  | Asthma |
| rs9272163   | 6 | 32633369 | T | C | 0.4141 | -0.0716 | 0.0078 | 3.41E-20 | -9.2051  | 844071  | Asthma |
| rs13215699  | 6 | 32633376 | A | G | 0.1984 | -0.1367 | 0.0100 | 3.65E-42 | -13.6064 | 844071  | Asthma |
| rs9272164   | 6 | 32633377 | A | C | 0.5474 | 0.0728  | 0.0077 | 2.33E-21 | 9.4893   | 844071  | Asthma |
| rs9272165   | 6 | 32633393 | C | G | 0.4152 | -0.0716 | 0.0078 | 2.43E-20 | -9.2415  | 844071  | Asthma |
| rs114549185 | 6 | 32633427 | G | C | 0.0410 | -0.1634 | 0.0234 | 2.88E-12 | -6.9835  | 476051  | Asthma |
| rs9272166   | 6 | 32633432 | C | T | 0.4069 | -0.0730 | 0.0077 | 3.02E-21 | -9.4620  | 844071  | Asthma |
| rs9272167   | 6 | 32633435 | G | A | 0.5967 | 0.0690  | 0.0079 | 2.82E-18 | 8.7185   | 778845  | Asthma |
| rs9272170   | 6 | 32633466 | C | G | 0.5451 | 0.0735  | 0.0076 | 4.05E-22 | 9.6699   | 844071  | Asthma |
| rs9272171   | 6 | 32633472 | G | A | 0.4171 | -0.0726 | 0.0077 | 3.39E-21 | -9.4498  | 844071  | Asthma |
| rs9272172   | 6 | 32633483 | G | C | 0.5450 | 0.0733  | 0.0076 | 5.85E-22 | 9.6321   | 844071  | Asthma |
| rs558837594 | 6 | 32633493 | T | C | 0.0282 | -0.1075 | 0.0197 | 4.50E-08 | -5.4700  | 912533  | Asthma |
| rs114651315 | 6 | 32633501 | T | C | 0.1987 | -0.1241 | 0.0098 | 5.11E-37 | -12.7115 | 844071  | Asthma |
| rs72848251  | 6 | 32633511 | A | G | 0.2021 | -0.1199 | 0.0086 | 8.92E-44 | -13.8751 | 935848  | Asthma |
| rs9272174   | 6 | 32633530 | T | C | 0.4206 | -0.0725 | 0.0077 | 3.42E-21 | -9.4490  | 844071  | Asthma |
| rs2002777   | 6 | 32633555 | G | A | 0.4148 | 0.0715  | 0.0077 | 2.31E-20 | 9.2469   | 844071  | Asthma |
| rs72848254  | 6 | 32633598 | G | A | 0.2008 | -0.1249 | 0.0097 | 8.15E-38 | -12.8540 | 844071  | Asthma |
| rs114250738 | 6 | 32633665 | G | A | 0.1285 | -0.0930 | 0.0099 | 5.29E-21 | -9.4033  | 995476  | Asthma |
| rs73728598  | 6 | 32633670 | G | A | 0.1941 | -0.1239 | 0.0098 | 5.93E-37 | -12.7001 | 844071  | Asthma |
| rs9272179   | 6 | 32633674 | T | C | 0.5559 | 0.0729  | 0.0076 | 1.23E-21 | 9.5557   | 844071  | Asthma |
| rs9272180   | 6 | 32633684 | C | T | 0.5397 | 0.0748  | 0.0076 | 5.52E-23 | 9.8717   | 844071  | Asthma |
| rs72848256  | 6 | 32633754 | G | A | 0.2079 | -0.1300 | 0.0095 | 2.22E-42 | -13.6434 | 844071  | Asthma |
| rs114441380 | 6 | 32633756 | T | A | 0.1431 | -0.1001 | 0.0095 | 5.27E-26 | -10.5467 | 912533  | Asthma |
| rs9272183   | 6 | 32633827 | C | T | 0.5417 | 0.0749  | 0.0076 | 4.40E-23 | 9.8944   | 844071  | Asthma |
| rs9272185   | 6 | 32633843 | G | A | 0.5417 | 0.0739  | 0.0076 | 1.65E-22 | 9.7615   | 844071  | Asthma |
| rs9272186   | 6 | 32633858 | C | T | 0.5420 | 0.0739  | 0.0076 | 1.81E-22 | 9.7517   | 844071  | Asthma |
| rs2002779   | 6 | 32633907 | T | G | 0.1827 | -0.0626 | 0.0069 | 1.15E-19 | -9.0737  | 1246149 | Asthma |
| rs114803358 | 6 | 32633931 | A | G | 0.2538 | -0.1253 | 0.0079 | 4.68E-57 | -15.9196 | 912533  | Asthma |
| rs115566240 | 6 | 32633941 | T | C | 0.2701 | -0.1223 | 0.0077 | 3.05E-57 | -15.9462 | 912533  | Asthma |
| rs114567049 | 6 | 32633942 | A | G | 0.2573 | -0.1244 | 0.0079 | 3.69E-56 | -15.7897 | 912533  | Asthma |
| rs9272193   | 6 | 32634008 | T | G | 0.5330 | 0.0831  | 0.0076 | 6.00E-28 | 10.9592  | 844071  | Asthma |
| rs72848261  | 6 | 32634013 | C | G | 0.2575 | -0.1426 | 0.0091 | 9.20E-56 | -15.7320 | 844071  | Asthma |
| rs114020256 | 6 | 32634020 | A | G | 0.2657 | -0.1423 | 0.0090 | 6.79E-57 | -15.8955 | 844071  | Asthma |
| rs147841808 | 6 | 32634030 | G | C | 0.1278 | -0.1023 | 0.0114 | 3.44E-19 | -8.9537  | 844071  | Asthma |
| rs9272194   | 6 | 32634048 | G | A | 0.4607 | -0.0840 | 0.0076 | 4.40E-28 | -10.9872 | 844071  | Asthma |
| rs9272195   | 6 | 32634053 | G | A | 0.4545 | -0.0801 | 0.0078 | 5.43E-25 | -10.3249 | 778845  | Asthma |
| rs112216801 | 6 | 32634061 | A | C | 0.2533 | -0.1428 | 0.0092 | 7.46E-54 | -15.4504 | 844071  | Asthma |
| rs151005270 | 6 | 32634097 | T | C | 0.2690 | -0.1377 | 0.0092 | 3.52E-50 | -14.8960 | 778845  | Asthma |
| rs9272201   | 6 | 32634098 | G | A | 0.4042 | -0.0832 | 0.0078 | 8.69E-27 | -10.7147 | 844071  | Asthma |
| rs113861133 | 6 | 32634134 | C | A | 0.2512 | -0.1390 | 0.0094 | 3.24E-49 | -14.7463 | 778845  | Asthma |
| rs116630455 | 6 | 32634169 | C | T | 0.2503 | -0.1413 | 0.0092 | 4.51E-53 | -15.3344 | 844071  | Asthma |
| rs9272207   | 6 | 32634189 | T | C | 0.6002 | 0.0808  | 0.0078 | 2.88E-25 | 10.3859  | 844071  | Asthma |
| rs371225543 | 6 | 32634191 | T | C | 0.2598 | -0.1414 | 0.0092 | 9.56E-54 | -15.4347 | 844071  | Asthma |
| rs183271060 | 6 | 32634213 | T | C | 0.0634 | -0.1112 | 0.0172 | 1.11E-10 | -6.4512  | 778845  | Asthma |
| rs79428469  | 6 | 32634257 | C | T | 0.2542 | -0.1436 | 0.0090 | 1.71E-57 | -15.9818 | 844071  | Asthma |
| rs72848263  | 6 | 32634288 | C | T | 0.2556 | -0.1285 | 0.0078 | 1.16E-60 | -16.4309 | 912533  | Asthma |
| rs36173887  | 6 | 32634309 | G | A | 0.1174 | -0.0819 | 0.0086 | 1.07E-21 | -9.5695  | 1246149 | Asthma |
| rs9272214   | 6 | 32634319 | G | A | 0.5087 | 0.0760  | 0.0065 | 1.17E-31 | 11.7074  | 938666  | Asthma |
| rs9272215   | 6 | 32634328 | T | G | 0.2096 | 0.0374  | 0.0067 | 2.89E-08 | 5.5483   | 1090071 | Asthma |
| rs34145408  | 6 | 32634347 | T | C | 0.2673 | -0.1246 | 0.0067 | 4.88E-77 | -18.5780 | 1094744 | Asthma |
| rs3104371   | 6 | 32634360 | G | C | 0.1968 | 0.1504  | 0.0071 | 1.10E-98 | 21.0852  | 1094744 | Asthma |
| rs17211454  | 6 | 32634402 | A | G | 0.2682 | -0.1250 | 0.0069 | 4.47E-73 | -18.0812 | 1003385 | Asthma |
| rs17205114  | 6 | 32634419 | G | T | 0.2669 | -0.1245 | 0.0067 | 7.19E-77 | -18.5572 | 1094744 | Asthma |
| rs17205128  | 6 | 32634440 | G | C | 0.2653 | -0.1246 | 0.0067 | 1.90E-76 | -18.5037 | 1094744 | Asthma |
| rs17205135  | 6 | 32634445 | G | A | 0.2652 | -0.1246 | 0.0067 | 2.08E-76 | -18.5002 | 1094744 | Asthma |
| rs9272218   | 6 | 32634461 | C | T | 0.4868 | 0.0665  | 0.0051 | 3.47E-38 | 12.9200  | 1246149 | Asthma |
| rs183736834 | 6 | 32634531 | C | T | 0.0544 | -0.1132 | 0.0138 | 2.64E-16 | -8.1890  | 1029518 | Asthma |
| rs9272221   | 6 | 32634557 | C | A | 0.5420 | 0.0665  | 0.0054 | 1.99E-35 | 12.4218  | 1186521 | Asthma |
| rs3104370   | 6 | 32634564 | G | A | 0.2273 | -0.0598 | 0.0075 | 1.48E-15 | -7.9783  | 1094744 | Asthma |
| rs9272226   | 6 | 32634619 | C | T | 0.3753 | 0.0596  | 0.0053 | 2.72E-29 | 11.2360  | 1246149 | Asthma |
| rs17211510  | 6 | 32634653 | A | C | 0.2668 | -0.1192 | 0.0060 | 2.21E-87 | -19.8141 | 1246149 | Asthma |
| rs3104369   | 6 | 32634705 | T | C | 0.2887 | -0.0854 | 0.0058 | 1.22E-48 | -14.6569 | 1246149 | Asthma |
| rs17205170  | 6 | 32634706 | T | G | 0.1978 | -0.1019 | 0.0078 | 2.61E-39 | -13.1175 | 1068611 | Asthma |
| rs17205177  | 6 | 32634741 | G | A | 0.2666 | -0.1193 | 0.0060 | 1.60E-87 | -19.8317 | 1246149 | Asthma |
| rs17205184  | 6 | 32634774 | A | G | 0.2152 | -0.1142 | 0.0072 | 1.29E-56 | -15.8560 | 1094744 | Asthma |
| rs17205191  | 6 | 32634779 | A | G | 0.3006 | -0.1201 | 0.0064 | 8.71E-79 | -18.7926 | 1094744 | Asthma |
| rs9272229   | 6 | 32634791 | C | T | 0.4899 | 0.0767  | 0.0057 | 1.12E-41 | 13.5248  | 1094744 | Asthma |
| rs9272230   | 6 | 32634825 | A | C | 0.2042 | 0.0367  | 0.0063 | 4.66E-09 | 5.8587   | 1246149 | Asthma |
| rs17211545  | 6 | 32634831 | C | T | 0.2691 | -0.1246 | 0.0067 | 1.16E-77 | -18.6549 | 1094744 | Asthma |
| rs9272231   | 6 | 32634840 | C | T | 0.4867 | 0.0788  | 0.0057 | 2.16E-43 | 13.8119  | 1094744 | Asthma |
| rs9272232   | 6 | 32634853 | C | T | 0.4898 | 0.0768  | 0.0057 | 2.79E-41 | 13.4573  | 1094744 | Asthma |
| rs17211580  | 6 | 32634977 | A | G | 0.2673 | -0.1201 | 0.0061 | 9.43E-86 | -19.6251 | 1220016 | Asthma |
| rs9272239   | 6 | 32635001 | A | G | 0.4885 | 0.0763  | 0.0057 | 7.41E-41 | 13.3849  | 1094744 | Asthma |



|             |   |          |   |   |        |         |        |           |          |         |        |
|-------------|---|----------|---|---|--------|---------|--------|-----------|----------|---------|--------|
| rs9272242   | 6 | 32635013 | T | C | 0.4885 | 0.0763  | 0.0057 | 7.02E-41  | 13.3888  | 1094744 | Asthma |
| rs17211601  | 6 | 32635040 | G | T | 0.2693 | -0.1247 | 0.0067 | 9.07E-78  | -18.6672 | 1094744 | Asthma |
| rs28533091  | 6 | 32635087 | A | T | 0.2692 | -0.1247 | 0.0067 | 1.01E-77  | -18.6613 | 1094744 | Asthma |
| rs9272245   | 6 | 32635095 | C | G | 0.3778 | 0.0726  | 0.0059 | 1.17E-34  | 12.2792  | 1094744 | Asthma |
| rs17211657  | 6 | 32635246 | A | T | 0.1179 | -0.0826 | 0.0096 | 7.38E-18  | -8.6088  | 1094744 | Asthma |
| rs28694749  | 6 | 32635252 | C | T | 0.2692 | -0.1246 | 0.0067 | 1.01E-77  | -18.6612 | 1094744 | Asthma |
| rs9272254   | 6 | 32635321 | C | T | 0.4874 | 0.0670  | 0.0052 | 1.26E-38  | 12.9975  | 1246149 | Asthma |
| rs28848172  | 6 | 32635500 | T | G | 0.0532 | -0.1037 | 0.0124 | 7.81E-17  | -8.3341  | 1180923 | Asthma |
| rs62404084  | 6 | 32635544 | T | C | 0.2137 | -0.1102 | 0.0065 | 8.74E-65  | -16.9957 | 1246149 | Asthma |
| rs28407322  | 6 | 32635578 | C | T | 0.2667 | -0.1194 | 0.0060 | 1.48E-87  | -19.8348 | 1246149 | Asthma |
| rs115878164 | 6 | 32635628 | T | C | 0.0718 | -0.1344 | 0.0115 | 1.82E-31  | -11.6704 | 1029518 | Asthma |
| rs9272265   | 6 | 32635635 | C | T | 0.5349 | 0.0742  | 0.0058 | 2.58E-37  | 12.7648  | 1029518 | Asthma |
| rs9272266   | 6 | 32635639 | A | G | 0.1752 | -0.1310 | 0.0082 | 4.52E-57  | -15.9213 | 873440  | Asthma |
| rs3104367   | 6 | 32635710 | T | C | 0.4487 | -0.1271 | 0.0058 | 5.51E-106 | -21.8651 | 1094744 | Asthma |
| rs28675927  | 6 | 32635711 | G | A | 0.2670 | -0.1193 | 0.0060 | 1.67E-87  | -19.8291 | 1246149 | Asthma |
| rs116029711 | 6 | 32635787 | C | T | 0.1134 | -0.0746 | 0.0089 | 4.87E-17  | -8.3899  | 1090071 | Asthma |
| rs1391373   | 6 | 32635883 | C | T | 0.3732 | 0.0568  | 0.0062 | 5.82E-20  | 9.1477   | 1068611 | Asthma |
| rs9272290   | 6 | 32635936 | T | C | 0.5286 | -0.1580 | 0.0077 | 1.42E-92  | -20.4083 | 844071  | Asthma |
| rs116235343 | 6 | 32635957 | T | C | 0.1104 | -0.0807 | 0.0103 | 3.76E-15  | -7.8623  | 938666  | Asthma |
| rs9272293   | 6 | 32635965 | A | G | 0.4814 | -0.1300 | 0.0059 | 3.97E-106 | -21.8810 | 1063938 | Asthma |
| rs9272294   | 6 | 32635983 | T | C | 0.2219 | 0.0442  | 0.0070 | 2.50E-10  | 6.3274   | 792368  | Asthma |
| rs1391371   | 6 | 32636021 | T | A | 0.1969 | 0.1385  | 0.0065 | 2.10E-101 | 21.3786  | 1246149 | Asthma |
| rs3129774   | 6 | 32636048 | T | C | 0.4220 | 0.0869  | 0.0055 | 1.44E-55  | 15.7033  | 1160388 | Asthma |
| rs36226286  | 6 | 32636119 | C | T | 0.0543 | -0.1120 | 0.0138 | 5.67E-16  | -8.0964  | 1029518 | Asthma |
| rs9272309   | 6 | 32636159 | G | A | 0.3072 | 0.0426  | 0.0062 | 5.01E-12  | 6.9052   | 1151554 | Asthma |
| rs28666575  | 6 | 32636167 | T | G | 0.1184 | -0.0844 | 0.0098 | 8.34E-18  | -8.5948  | 1068611 | Asthma |
| rs28693734  | 6 | 32636172 | G | A | 0.1190 | -0.0808 | 0.0087 | 1.41E-20  | -9.2992  | 1220016 | Asthma |
| rs9272311   | 6 | 32636176 | A | G | 0.1977 | 0.0384  | 0.0066 | 6.69E-09  | 5.7987   | 1160388 | Asthma |
| rs3104364   | 6 | 32636191 | A | G | 0.4492 | -0.1264 | 0.0058 | 6.97E-105 | -21.7494 | 1094744 | Asthma |
| rs3104363   | 6 | 32636223 | G | T | 0.4491 | -0.1268 | 0.0058 | 2.53E-105 | -21.7969 | 1094744 | Asthma |
| rs28637452  | 6 | 32636261 | C | A | 0.1062 | -0.0903 | 0.0117 | 1.16E-14  | -7.7205  | 870204  | Asthma |
| rs9272316   | 6 | 32636273 | T | A | 0.2231 | 0.1128  | 0.0102 | 2.06E-28  | 11.0549  | 567828  | Asthma |
| rs28523606  | 6 | 32636278 | G | A | 0.1064 | -0.0846 | 0.0107 | 2.04E-15  | -7.9388  | 912533  | Asthma |
| rs9272318   | 6 | 32636282 | G | A | 0.3632 | 0.1390  | 0.0090 | 2.33E-53  | 15.3772  | 476051  | Asthma |
| rs9272319   | 6 | 32636331 | C | T | 0.3091 | 0.1153  | 0.0058 | 2.47E-88  | 19.9247  | 1160388 | Asthma |
| rs9272320   | 6 | 32636347 | A | G | 0.5042 | 0.1308  | 0.0059 | 3.25E-108 | 22.0987  | 1068611 | Asthma |
| rs9272323   | 6 | 32636374 | T | C | 0.3117 | 0.1269  | 0.0069 | 1.58E-76  | 18.5147  | 1000149 | Asthma |
| rs9272324   | 6 | 32636375 | G | A | 0.4142 | 0.1191  | 0.0065 | 2.02E-74  | 18.2512  | 1000149 | Asthma |
| rs55697600  | 6 | 32636389 | G | A | 0.0554 | -0.1207 | 0.0155 | 6.04E-15  | -7.8032  | 934923  | Asthma |
| rs9272328   | 6 | 32636419 | T | C | 0.1813 | -0.0522 | 0.0085 | 7.78E-10  | -6.1493  | 1000149 | Asthma |
| rs9272330   | 6 | 32636436 | C | A | 0.4000 | -0.1163 | 0.0067 | 5.04E-68  | -17.4277 | 1000149 | Asthma |
| rs9272335   | 6 | 32636482 | T | C | 0.3180 | 0.1241  | 0.0062 | 1.68E-88  | 19.9450  | 1068611 | Asthma |
| rs9272336   | 6 | 32636487 | G | T | 0.1799 | -0.0546 | 0.0078 | 2.26E-12  | -7.0174  | 1068611 | Asthma |
| rs9272339   | 6 | 32636497 | A | G | 0.3344 | -0.1157 | 0.0070 | 1.39E-61  | -16.5591 | 1000149 | Asthma |
| rs28445533  | 6 | 32636547 | T | G | 0.1064 | -0.0939 | 0.0121 | 6.76E-15  | -7.7886  | 844071  | Asthma |
| rs9272346   | 6 | 32636595 | G | A | 0.4398 | -0.1348 | 0.0058 | 8.37E-120 | -23.2731 | 1090071 | Asthma |
| rs62404085  | 6 | 32636607 | A | G | 0.0701 | -0.1258 | 0.0105 | 6.14E-33  | -11.9542 | 1180923 | Asthma |
| rs9272347   | 6 | 32636617 | C | T | 0.3156 | 0.1235  | 0.0061 | 1.46E-91  | 20.2932  | 1094744 | Asthma |
| rs9272349   | 6 | 32636625 | G | A | 0.1792 | -0.0545 | 0.0076 | 9.78E-13  | -7.1335  | 1094744 | Asthma |
| rs9272350   | 6 | 32636633 | T | A | 0.4501 | -0.1271 | 0.0058 | 6.28E-106 | -21.8602 | 1094744 | Asthma |
| rs9272352   | 6 | 32636677 | G | C | 0.2468 | 0.0406  | 0.0074 | 4.16E-08  | 5.4838   | 938666  | Asthma |
| rs9272353   | 6 | 32636679 | C | G | 0.1872 | 0.1463  | 0.0074 | 4.78E-88  | 19.8923  | 1094744 | Asthma |
| rs9272354   | 6 | 32636708 | G | A | 0.2456 | 0.0434  | 0.0076 | 1.18E-08  | 5.7032   | 912533  | Asthma |
| rs9272355   | 6 | 32636738 | G | C | 0.4512 | -0.1279 | 0.0059 | 3.90E-103 | -21.5646 | 1068611 | Asthma |
| rs9272357   | 6 | 32636745 | C | A | 0.4512 | -0.1279 | 0.0059 | 4.15E-103 | -21.5620 | 1068611 | Asthma |
| rs9272358   | 6 | 32636761 | A | G | 0.3371 | 0.1079  | 0.0068 | 2.14E-57  | 15.9684  | 1000149 | Asthma |
| rs9272359   | 6 | 32636767 | T | C | 0.3656 | 0.0450  | 0.0069 | 6.07E-11  | 6.5421   | 912533  | Asthma |
| rs6933289   | 6 | 32636774 | T | C | 0.1399 | 0.0647  | 0.0094 | 7.10E-12  | 6.8555   | 912533  | Asthma |
| rs9272362   | 6 | 32636787 | T | C | 0.3357 | 0.1256  | 0.0081 | 2.44E-54  | 15.5221  | 844071  | Asthma |
| rs9272363   | 6 | 32636808 | T | A | 0.1884 | 0.1776  | 0.0099 | 7.29E-72  | 17.9263  | 844071  | Asthma |
| rs9272364   | 6 | 32636822 | A | G | 0.3203 | 0.0846  | 0.0082 | 3.02E-25  | 10.3812  | 778845  | Asthma |
| rs9272365   | 6 | 32636844 | C | T | 0.3394 | 0.1367  | 0.0079 | 3.01E-67  | 17.3259  | 844071  | Asthma |
| rs9272366   | 6 | 32636845 | A | G | 0.3364 | 0.1386  | 0.0079 | 3.03E-69  | 17.5885  | 844071  | Asthma |
| rs9272367   | 6 | 32636848 | T | C | 0.1813 | -0.0707 | 0.0101 | 2.45E-12  | -7.0061  | 844071  | Asthma |
| rs9272368   | 6 | 32636865 | G | A | 0.3286 | 0.1398  | 0.0079 | 7.46E-70  | 17.6679  | 844071  | Asthma |
| rs9272370   | 6 | 32636867 | A | G | 0.3286 | 0.1398  | 0.0079 | 7.49E-70  | 17.6679  | 844071  | Asthma |
| rs62404086  | 6 | 32636883 | T | C | 0.0697 | -0.1426 | 0.0163 | 1.80E-18  | -8.7691  | 778845  | Asthma |
| rs9272376   | 6 | 32636920 | T | C | 0.5355 | 0.1509  | 0.0078 | 1.92E-83  | 19.3533  | 778845  | Asthma |
| rs9272377   | 6 | 32636922 | T | C | 0.5355 | 0.1509  | 0.0078 | 1.92E-83  | 19.3533  | 778845  | Asthma |
| rs9272378   | 6 | 32636941 | G | A | 0.3322 | 0.1415  | 0.0079 | 9.33E-72  | 17.9136  | 844071  | Asthma |
| rs9272379   | 6 | 32636950 | T | C | 0.4970 | -0.1568 | 0.0077 | 1.76E-91  | -20.2841 | 844071  | Asthma |
| rs9272380   | 6 | 32636955 | A | G | 0.3749 | 0.1374  | 0.0078 | 1.51E-69  | 17.6280  | 844071  | Asthma |
| rs9272381   | 6 | 32636965 | C | G | 0.2064 | 0.1770  | 0.0093 | 3.64E-80  | 18.9604  | 778845  | Asthma |
| rs6938008   | 6 | 32636966 | C | T | 0.3806 | 0.1371  | 0.0077 | 2.04E-70  | 17.7400  | 844071  | Asthma |

|             |   |          |   |   |        |         |        |           |          |         |        |
|-------------|---|----------|---|---|--------|---------|--------|-----------|----------|---------|--------|
| rs9272383   | 6 | 32636972 | T | C | 0.4739 | -0.0847 | 0.0075 | 2.74E-29  | -11.2350 | 844071  | Asthma |
| rs9272385   | 6 | 32636986 | C | T | 0.2082 | 0.1791  | 0.0092 | 1.55E-83  | 19.3643  | 844071  | Asthma |
| rs9272387   | 6 | 32636999 | G | C | 0.5703 | 0.0948  | 0.0077 | 3.94E-35  | 12.3671  | 844071  | Asthma |
| rs9272389   | 6 | 32637016 | T | C | 0.4591 | -0.1525 | 0.0077 | 4.50E-88  | -19.8956 | 844071  | Asthma |
| rs9272390   | 6 | 32637018 | T | C | 0.2316 | 0.1703  | 0.0091 | 6.79E-79  | 18.8059  | 844071  | Asthma |
| rs9272393   | 6 | 32637049 | T | A | 0.5696 | 0.0823  | 0.0077 | 7.25E-27  | 10.7313  | 844071  | Asthma |
| rs34773972  | 6 | 32637062 | A | T | 0.0595 | -0.1285 | 0.0177 | 4.27E-13  | -7.2467  | 778845  | Asthma |
| rs56004070  | 6 | 32637081 | A | G | 0.1071 | -0.0937 | 0.0120 | 7.27E-15  | -7.7796  | 844071  | Asthma |
| rs111590907 | 6 | 32637088 | T | C | 0.0703 | -0.1415 | 0.0161 | 1.75E-18  | -8.7725  | 778845  | Asthma |
| rs9272407   | 6 | 32637154 | A | C | 0.3303 | 0.1401  | 0.0079 | 3.86E-70  | 17.7043  | 844071  | Asthma |
| rs9272408   | 6 | 32637186 | G | A | 0.2181 | 0.0545  | 0.0091 | 2.21E-09  | 5.9816   | 567828  | Asthma |
| rs28441428  | 6 | 32637190 | G | T | 0.1154 | -0.1124 | 0.0137 | 2.35E-16  | -8.2027  | 476051  | Asthma |
| rs9272410   | 6 | 32637192 | A | G | 0.1985 | -0.0727 | 0.0098 | 1.39E-13  | -7.3972  | 844071  | Asthma |
| rs9272411   | 6 | 32637203 | T | C | 0.4503 | -0.1528 | 0.0077 | 1.48E-88  | -19.9509 | 844071  | Asthma |
| rs9272413   | 6 | 32637210 | C | T | 0.2307 | 0.0541  | 0.0091 | 2.79E-09  | 5.9437   | 567828  | Asthma |
| rs9272414   | 6 | 32637217 | T | A | 0.2411 | 0.0516  | 0.0089 | 5.80E-09  | 5.8223   | 567828  | Asthma |
| rs9272416   | 6 | 32637266 | C | T | 0.4486 | -0.1520 | 0.0077 | 7.65E-88  | -19.8685 | 844071  | Asthma |
| rs9272417   | 6 | 32637301 | G | A | 0.1895 | 0.1485  | 0.0082 | 1.57E-73  | 18.1395  | 930250  | Asthma |
| rs9272420   | 6 | 32637324 | G | A | 0.3258 | 0.1396  | 0.0079 | 1.32E-69  | 17.6351  | 844071  | Asthma |
| rs9272422   | 6 | 32637355 | C | T | 0.2359 | 0.1640  | 0.0090 | 6.32E-75  | 18.3151  | 844071  | Asthma |
| rs9272425   | 6 | 32637401 | C | T | 0.2063 | 0.1794  | 0.0093 | 1.03E-83  | 19.3855  | 844071  | Asthma |
| rs9272426   | 6 | 32637412 | G | A | 0.4323 | 0.1165  | 0.0059 | 1.51E-87  | 19.8348  | 1125398 | Asthma |
| rs3187964   | 6 | 32637430 | C | G | 0.5667 | 0.0841  | 0.0067 | 1.60E-36  | 12.6218  | 973993  | Asthma |
| rs1047989   | 6 | 32637480 | C | A | 0.4792 | -0.1272 | 0.0058 | 5.54E-106 | -21.8650 | 1125398 | Asthma |
| rs1130034   | 6 | 32637497 | T | C | 0.4533 | -0.1276 | 0.0059 | 4.88E-105 | -21.7654 | 1125398 | Asthma |
| rs1129735   | 6 | 32637518 | T | C | 0.3223 | 0.1071  | 0.0064 | 1.52E-63  | 16.8288  | 1065770 | Asthma |
| rs9272435   | 6 | 32637559 | A | G | 0.3106 | 0.1291  | 0.0071 | 1.68E-74  | 18.2612  | 973993  | Asthma |
| rs9272441   | 6 | 32637603 | T | G | 0.4664 | -0.1438 | 0.0068 | 1.78E-98  | -21.0610 | 935848  | Asthma |
| rs9272442   | 6 | 32637623 | C | T | 0.4482 | -0.1518 | 0.0076 | 1.23E-87  | -19.8444 | 844071  | Asthma |
| rs9272443   | 6 | 32637641 | A | G | 0.3279 | 0.1401  | 0.0079 | 2.74E-70  | 17.7239  | 844071  | Asthma |
| rs9272444   | 6 | 32637642 | C | G | 0.3279 | 0.1401  | 0.0079 | 2.71E-70  | 17.7241  | 844071  | Asthma |
| rs7751376   | 6 | 32637660 | C | G | 0.5520 | 0.0892  | 0.0068 | 8.20E-39  | 13.0305  | 935848  | Asthma |
| rs9272451   | 6 | 32637724 | G | C | 0.3766 | 0.0939  | 0.0066 | 2.62E-46  | 14.2873  | 995476  | Asthma |
| rs2213287   | 6 | 32637731 | T | G | 0.3841 | 0.1042  | 0.0078 | 8.33E-41  | 13.3766  | 778845  | Asthma |
| rs9272454   | 6 | 32637748 | C | T | 0.3864 | -0.1271 | 0.0066 | 4.15E-82  | -19.1944 | 995476  | Asthma |
| rs9272456   | 6 | 32637778 | A | T | 0.1503 | 0.1783  | 0.0101 | 3.50E-69  | 17.5794  | 844071  | Asthma |
| rs9272458   | 6 | 32637781 | G | A | 0.1893 | -0.0755 | 0.0085 | 5.72E-19  | -8.8973  | 995476  | Asthma |
| rs9272460   | 6 | 32637806 | G | A | 0.3633 | 0.0682  | 0.0078 | 3.22E-18  | 8.7033   | 844071  | Asthma |
| rs9272461   | 6 | 32637832 | A | G | 0.1967 | 0.1541  | 0.0081 | 2.46E-81  | 19.1012  | 995476  | Asthma |
| rs9272462   | 6 | 32637843 | A | G | 0.2028 | 0.0442  | 0.0077 | 9.04E-09  | 5.7479   | 995476  | Asthma |
| rs9272463   | 6 | 32637869 | G | T | 0.3242 | 0.1398  | 0.0079 | 1.27E-69  | 17.6370  | 844071  | Asthma |
| rs9272466   | 6 | 32637919 | T | G | 0.2031 | 0.1798  | 0.0093 | 4.16E-83  | 19.3135  | 844071  | Asthma |
| rs111541957 | 6 | 32637922 | A | G | 0.1063 | -0.0941 | 0.0121 | 6.03E-15  | -7.8035  | 844071  | Asthma |
| rs9272467   | 6 | 32637928 | G | T | 0.4474 | -0.1515 | 0.0076 | 1.81E-87  | -19.8254 | 844071  | Asthma |
| rs9272468   | 6 | 32637931 | G | A | 0.4474 | -0.1515 | 0.0076 | 1.80E-87  | -19.8249 | 844071  | Asthma |
| rs9272469   | 6 | 32637936 | C | A | 0.2012 | 0.0927  | 0.0088 | 5.10E-26  | 10.5496  | 935848  | Asthma |
| rs9272472   | 6 | 32637947 | G | A | 0.3252 | 0.1413  | 0.0079 | 4.09E-71  | 17.8308  | 844071  | Asthma |
| rs9272473   | 6 | 32637961 | G | A | 0.4475 | -0.1514 | 0.0076 | 2.28E-87  | -19.8133 | 844071  | Asthma |
| rs9272474   | 6 | 32637977 | T | A | 0.5600 | 0.0796  | 0.0076 | 2.18E-25  | 10.4125  | 844071  | Asthma |
| rs9272476   | 6 | 32637982 | T | A | 0.5599 | 0.0799  | 0.0076 | 1.40E-25  | 10.4544  | 844071  | Asthma |
| rs34481484  | 6 | 32638084 | G | A | 0.0679 | -0.1268 | 0.0137 | 2.39E-20  | -9.2431  | 930250  | Asthma |
| rs9272482   | 6 | 32638143 | G | A | 0.4468 | -0.1513 | 0.0076 | 2.66E-87  | -19.8058 | 844071  | Asthma |
| rs9272484   | 6 | 32638166 | G | A | 0.4468 | -0.1513 | 0.0076 | 2.66E-87  | -19.8060 | 844071  | Asthma |
| rs115444659 | 6 | 32638173 | T | C | 0.0699 | -0.1429 | 0.0162 | 9.39E-19  | -8.8419  | 778845  | Asthma |
| rs9272485   | 6 | 32638195 | G | A | 0.3250 | 0.1406  | 0.0079 | 4.91E-70  | 17.6915  | 844071  | Asthma |
| rs9272488   | 6 | 32638228 | A | G | 0.4480 | -0.1516 | 0.0077 | 2.36E-87  | -19.8113 | 844071  | Asthma |
| rs9272491   | 6 | 32638269 | A | C | 0.4479 | -0.1516 | 0.0077 | 2.03E-87  | -19.8196 | 844071  | Asthma |
| rs9272492   | 6 | 32638275 | G | T | 0.3332 | 0.1221  | 0.0067 | 2.71E-74  | 18.2352  | 995476  | Asthma |
| rs9272494   | 6 | 32638308 | A | T | 0.5605 | 0.0799  | 0.0076 | 1.51E-25  | 10.4469  | 844071  | Asthma |
| rs9272497   | 6 | 32638399 | A | T | 0.5428 | 0.0473  | 0.0067 | 1.24E-12  | 7.1013   | 973993  | Asthma |
| rs9272498   | 6 | 32638440 | A | G | 0.3119 | 0.1311  | 0.0071 | 2.67E-76  | 18.4866  | 973993  | Asthma |
| rs9272502   | 6 | 32638467 | T | C | 0.4715 | 0.1602  | 0.0078 | 1.33E-93  | 20.5233  | 844071  | Asthma |
| rs9272503   | 6 | 32638509 | C | A | 0.3310 | 0.1414  | 0.0079 | 3.53E-71  | 17.8395  | 844071  | Asthma |
| rs77547678  | 6 | 32638522 | G | T | 0.0574 | -0.1156 | 0.0158 | 2.95E-13  | -7.2973  | 908767  | Asthma |
| rs9272505   | 6 | 32638537 | T | C | 0.4216 | 0.1221  | 0.0066 | 1.89E-75  | 18.3802  | 973993  | Asthma |
| rs9272506   | 6 | 32638538 | G | A | 0.4216 | 0.1221  | 0.0066 | 1.88E-75  | 18.3805  | 973993  | Asthma |
| rs9272507   | 6 | 32638547 | T | C | 0.4590 | -0.1291 | 0.0067 | 1.10E-83  | -19.3817 | 973993  | Asthma |
| rs9272508   | 6 | 32638548 | A | G | 0.5265 | 0.1322  | 0.0067 | 1.64E-87  | 19.8299  | 973993  | Asthma |
| rs9272509   | 6 | 32638580 | C | A | 0.4474 | -0.1291 | 0.0067 | 1.73E-83  | -19.3592 | 973993  | Asthma |
| rs9272510   | 6 | 32638590 | G | C | 0.3136 | 0.1306  | 0.0071 | 1.05E-75  | 18.4118  | 973993  | Asthma |
| rs74801991  | 6 | 32638599 | C | T | 0.0536 | -0.1137 | 0.0166 | 7.91E-12  | -6.8400  | 908767  | Asthma |
| rs9272513   | 6 | 32638603 | T | G | 0.4470 | -0.1290 | 0.0067 | 1.84E-83  | -19.3556 | 973993  | Asthma |
| rs9272514   | 6 | 32638608 | T | C | 0.3137 | 0.1308  | 0.0071 | 6.82E-76  | 18.4361  | 973993  | Asthma |
| rs9272515   | 6 | 32638629 | G | A | 0.3664 | -0.1052 | 0.0070 | 9.93E-52  | -15.1327 | 973993  | Asthma |

|             |   |          |   |   |        |         |        |          |          |         |        |
|-------------|---|----------|---|---|--------|---------|--------|----------|----------|---------|--------|
| rs4530904   | 6 | 32638667 | G | A | 0.1800 | -0.0644 | 0.0089 | 4.11E-13 | -7.2520  | 973993  | Asthma |
| rs9272522   | 6 | 32638713 | A | G | 0.3927 | 0.1194  | 0.0094 | 6.88E-37 | 12.6886  | 476051  | Asthma |
| rs9272525   | 6 | 32638782 | A | C | 0.5853 | 0.1688  | 0.0090 | 1.72E-78 | 18.7565  | 476051  | Asthma |
| rs373801706 | 6 | 32638783 | G | A | 0.0958 | -0.1156 | 0.0148 | 5.63E-15 | -7.8120  | 778845  | Asthma |
| rs9272526   | 6 | 32638792 | A | G | 0.2399 | 0.0644  | 0.0091 | 1.36E-12 | 7.0882   | 778845  | Asthma |
| rs199705602 | 6 | 32638807 | G | A | 0.3693 | 0.1338  | 0.0080 | 7.06E-63 | 16.7363  | 778845  | Asthma |
| rs41268938  | 6 | 32638839 | T | A | 0.1979 | 0.1688  | 0.0084 | 2.81E-90 | 20.1483  | 973993  | Asthma |
| rs9272528   | 6 | 32638840 | G | C | 0.4136 | -0.0582 | 0.0067 | 5.30E-18 | -8.6469  | 973993  | Asthma |
| rs28383356  | 6 | 32638869 | C | T | 0.3394 | 0.1248  | 0.0070 | 1.78E-71 | 17.8770  | 973993  | Asthma |
| rs28375776  | 6 | 32638881 | G | C | 0.1573 | -0.1135 | 0.0095 | 1.43E-32 | -11.8842 | 973993  | Asthma |
| rs9272533   | 6 | 32638888 | C | T | 0.3891 | -0.1128 | 0.0069 | 3.10E-60 | -16.3709 | 973993  | Asthma |
| rs34701372  | 6 | 32638899 | C | T | 0.0734 | -0.1003 | 0.0132 | 3.64E-14 | -7.5735  | 908767  | Asthma |
| rs142530081 | 6 | 32638905 | G | C | 0.0538 | -0.1130 | 0.0166 | 9.36E-12 | -6.8157  | 908767  | Asthma |
| rs36223157  | 6 | 32638914 | G | T | 0.0538 | -0.1130 | 0.0166 | 9.35E-12 | -6.8157  | 908767  | Asthma |
| rs28435909  | 6 | 32638918 | C | T | 0.0946 | -0.1035 | 0.0102 | 2.66E-24 | -10.1711 | 1125398 | Asthma |
| rs28636516  | 6 | 32638924 | G | A | 0.1608 | -0.1186 | 0.0093 | 2.57E-37 | -12.7651 | 973993  | Asthma |
| rs28383357  | 6 | 32638955 | A | G | 0.3100 | 0.1284  | 0.0072 | 1.66E-71 | 17.8805  | 908767  | Asthma |
| rs74379225  | 6 | 32638965 | G | A | 0.0717 | -0.0956 | 0.0118 | 5.79E-16 | -8.0937  | 1060172 | Asthma |
| rs28437906  | 6 | 32639016 | C | T | 0.1381 | -0.0994 | 0.0109 | 5.97E-20 | -9.1448  | 844071  | Asthma |
| rs28383359  | 6 | 32639017 | T | C | 0.4476 | -0.1282 | 0.0078 | 3.81E-60 | -16.3588 | 844071  | Asthma |
| rs9272538   | 6 | 32639032 | C | T | 0.5325 | 0.1522  | 0.0076 | 2.13E-88 | 19.9322  | 844071  | Asthma |
| rs9272539   | 6 | 32639042 | A | G | 0.4263 | 0.1425  | 0.0076 | 3.43E-79 | 18.8421  | 844071  | Asthma |
| rs9272540   | 6 | 32639057 | C | A | 0.5478 | 0.1521  | 0.0076 | 1.87E-88 | 19.9389  | 844071  | Asthma |
| rs28383361  | 6 | 32639069 | A | G | 0.3093 | 0.1306  | 0.0071 | 1.34E-75 | 18.3994  | 973993  | Asthma |
| rs28383362  | 6 | 32639087 | C | T | 0.3091 | 0.1305  | 0.0071 | 2.05E-75 | 18.3756  | 973993  | Asthma |
| rs28383363  | 6 | 32639091 | C | T | 0.3090 | 0.1305  | 0.0071 | 2.07E-75 | 18.3753  | 973993  | Asthma |
| rs9272544   | 6 | 32639101 | G | A | 0.4871 | 0.0792  | 0.0066 | 9.31E-33 | 11.9199  | 973993  | Asthma |
| rs9272546   | 6 | 32639164 | T | C | 0.3761 | -0.1074 | 0.0060 | 7.09E-71 | -17.8004 | 1125398 | Asthma |
| rs28383365  | 6 | 32639165 | A | G | 0.3092 | 0.1304  | 0.0071 | 1.32E-75 | 18.3996  | 973993  | Asthma |
| rs9272547   | 6 | 32639172 | T | C | 0.3760 | -0.1083 | 0.0069 | 4.33E-56 | -15.7797 | 973993  | Asthma |
| rs78702533  | 6 | 32639183 | T | A | 0.0717 | -0.1039 | 0.0133 | 6.55E-15 | -7.7929  | 908767  | Asthma |
| rs41268940  | 6 | 32639210 | G | T | 0.2035 | 0.1835  | 0.0093 | 8.71E-86 | 19.6291  | 844071  | Asthma |
| rs9272553   | 6 | 32639231 | T | G | 0.5409 | 0.1263  | 0.0062 | 1.15E-91 | 20.3061  | 1033224 | Asthma |
| rs79772777  | 6 | 32639240 | A | T | 0.0677 | -0.1035 | 0.0136 | 2.67E-14 | -7.6134  | 908767  | Asthma |
| rs28802989  | 6 | 32639242 | G | C | 0.1445 | -0.0883 | 0.0091 | 3.24E-22 | -9.6926  | 973993  | Asthma |
| rs28383367  | 6 | 32639254 | T | G | 0.3064 | 0.1301  | 0.0071 | 3.26E-75 | 18.3508  | 973993  | Asthma |
| rs9272555   | 6 | 32639265 | A | G | 0.5506 | 0.1288  | 0.0066 | 1.09E-83 | 19.3817  | 973993  | Asthma |
| rs9272556   | 6 | 32639269 | T | A | 0.4552 | -0.0472 | 0.0066 | 1.22E-12 | -7.1034  | 973993  | Asthma |
| rs28383368  | 6 | 32639270 | G | T | 0.3059 | 0.1297  | 0.0071 | 9.72E-75 | 18.2917  | 973993  | Asthma |
| rs41268942  | 6 | 32639349 | G | A | 0.1906 | 0.1704  | 0.0084 | 2.15E-90 | 20.1607  | 973993  | Asthma |
| rs9272561   | 6 | 32639364 | G | A | 0.3776 | -0.1084 | 0.0069 | 5.14E-56 | -15.7680 | 973993  | Asthma |
| rs9272562   | 6 | 32639374 | A | G | 0.4836 | -0.0931 | 0.0069 | 4.53E-42 | -13.5911 | 973993  | Asthma |
| rs28383370  | 6 | 32639375 | C | G | 0.3193 | 0.1399  | 0.0080 | 2.55E-69 | 17.5974  | 844071  | Asthma |
| rs28383371  | 6 | 32639377 | T | C | 0.3192 | 0.1399  | 0.0080 | 2.60E-69 | 17.5972  | 844071  | Asthma |
| rs9272563   | 6 | 32639381 | C | T | 0.5480 | 0.1295  | 0.0067 | 3.09E-84 | 19.4469  | 973993  | Asthma |
| rs9272565   | 6 | 32639392 | G | A | 0.5320 | 0.1295  | 0.0067 | 1.34E-83 | 19.3711  | 973993  | Asthma |
| rs28383372  | 6 | 32639397 | T | C | 0.3850 | 0.1160  | 0.0068 | 2.27E-64 | 16.9407  | 973993  | Asthma |
| rs28383373  | 6 | 32639416 | C | T | 0.3477 | 0.1161  | 0.0077 | 1.58E-51 | 15.1011  | 605973  | Asthma |
| rs9272567   | 6 | 32639423 | C | T | 0.5912 | 0.1329  | 0.0074 | 2.45E-71 | 17.8594  | 605973  | Asthma |
| rs28383375  | 6 | 32639426 | A | G | 0.3150 | 0.1261  | 0.0079 | 6.97E-57 | 15.8941  | 605973  | Asthma |
| rs9272568   | 6 | 32639432 | G | A | 0.5913 | 0.1329  | 0.0074 | 2.44E-71 | 17.8598  | 605973  | Asthma |
| rs79298326  | 6 | 32639444 | G | C | 0.0732 | -0.1026 | 0.0133 | 1.01E-14 | -7.7382  | 908767  | Asthma |
| rs80217639  | 6 | 32639447 | T | C | 0.0732 | -0.1026 | 0.0133 | 1.01E-14 | -7.7382  | 908767  | Asthma |
| rs9272569   | 6 | 32639448 | T | G | 0.2870 | 0.0528  | 0.0078 | 1.03E-11 | 6.8030   | 697750  | Asthma |
| rs28383377  | 6 | 32639450 | G | A | 0.3132 | 0.1259  | 0.0080 | 2.52E-56 | 15.8136  | 605973  | Asthma |
| rs28383378  | 6 | 32639462 | A | C | 0.3329 | 0.1387  | 0.0081 | 2.45E-66 | 17.2052  | 778845  | Asthma |
| rs28383379  | 6 | 32639465 | A | G | 0.3238 | 0.1258  | 0.0071 | 1.28E-69 | 17.6365  | 908767  | Asthma |
| rs9272571   | 6 | 32639474 | C | T | 0.3870 | -0.1079 | 0.0069 | 1.23E-55 | -15.7135 | 973993  | Asthma |
| rs28383380  | 6 | 32639476 | A | C | 0.3048 | 0.1302  | 0.0071 | 1.57E-74 | 18.2656  | 973993  | Asthma |
| rs76867035  | 6 | 32639493 | G | A | 0.0717 | -0.1041 | 0.0133 | 5.69E-15 | -7.8108  | 908767  | Asthma |
| rs9272574   | 6 | 32639504 | A | G | 0.5506 | 0.1288  | 0.0067 | 1.34E-83 | 19.3724  | 973993  | Asthma |
| rs28383381  | 6 | 32639511 | A | G | 0.3036 | 0.1293  | 0.0071 | 1.17E-73 | 18.1551  | 973993  | Asthma |
| rs28383382  | 6 | 32639543 | C | A | 0.3025 | 0.1294  | 0.0071 | 1.15E-73 | 18.1555  | 973993  | Asthma |
| rs17426565  | 6 | 32639579 | A | G | 0.1085 | -0.0778 | 0.0091 | 1.12E-17 | -8.5605  | 1125398 | Asthma |
| rs28383383  | 6 | 32639591 | C | T | 0.2565 | 0.0949  | 0.0070 | 3.11E-42 | 13.6185  | 1065770 | Asthma |
| rs35248896  | 6 | 32639593 | T | C | 0.1855 | 0.1725  | 0.0086 | 8.21E-90 | 20.0948  | 973993  | Asthma |
| rs9272578   | 6 | 32639612 | T | C | 0.4496 | -0.1290 | 0.0067 | 1.02E-83 | -19.3864 | 973993  | Asthma |
| rs63749607  | 6 | 32639629 | G | A | 0.0718 | -0.1041 | 0.0133 | 5.78E-15 | -7.8086  | 908767  | Asthma |
| rs9272581   | 6 | 32639634 | G | A | 0.4503 | -0.1290 | 0.0067 | 9.41E-84 | -19.3901 | 973993  | Asthma |
| rs28383384  | 6 | 32639637 | A | C | 0.2996 | 0.1291  | 0.0072 | 8.97E-73 | 18.0433  | 973993  | Asthma |
| rs28383385  | 6 | 32639639 | A | G | 0.2995 | 0.1291  | 0.0072 | 8.94E-73 | 18.0427  | 973993  | Asthma |
| rs9272583   | 6 | 32639676 | C | T | 0.5008 | -0.1179 | 0.0063 | 1.23E-77 | -18.6509 | 1033224 | Asthma |
| rs9272584   | 6 | 32639693 | T | A | 0.4341 | -0.0745 | 0.0067 | 5.01E-29 | -11.1818 | 973993  | Asthma |
| rs9272586   | 6 | 32639715 | C | G | 0.4334 | -0.0749 | 0.0067 | 3.11E-29 | -11.2242 | 973993  | Asthma |

|             |   |          |   |   |        |         |        |           |          |         |        |
|-------------|---|----------|---|---|--------|---------|--------|-----------|----------|---------|--------|
| rs9272587   | 6 | 32639733 | A | G | 0.5761 | 0.1670  | 0.0091 | 9.03E-76  | 18.4207  | 476051  | Asthma |
| rs9272588   | 6 | 32639739 | C | T | 0.3480 | 0.0927  | 0.0069 | 1.00E-40  | 13.3625  | 973993  | Asthma |
| rs9272589   | 6 | 32639747 | C | T | 0.5777 | 0.1666  | 0.0091 | 1.76E-75  | 18.3837  | 476051  | Asthma |
| rs116150265 | 6 | 32639749 | C | T | 0.5777 | 0.1666  | 0.0091 | 1.77E-75  | 18.3837  | 476051  | Asthma |
| rs9272593   | 6 | 32639781 | G | A | 0.4866 | 0.1340  | 0.0068 | 1.91E-86  | 19.7059  | 973993  | Asthma |
| rs9272594   | 6 | 32639784 | T | C | 0.4886 | 0.1343  | 0.0068 | 5.89E-87  | 19.7651  | 973993  | Asthma |
| rs28383386  | 6 | 32639790 | A | G | 0.3396 | 0.1408  | 0.0080 | 5.02E-70  | 17.6905  | 844071  | Asthma |
| rs28383387  | 6 | 32639798 | T | C | 0.3454 | 0.1389  | 0.0080 | 1.55E-67  | 17.3638  | 778845  | Asthma |
| rs9279900   | 6 | 32639806 | T | C | 0.4882 | 0.1331  | 0.0068 | 1.03E-84  | 19.5029  | 908767  | Asthma |
| rs28383389  | 6 | 32639819 | A | G | 0.3136 | 0.1311  | 0.0072 | 6.92E-74  | 18.1836  | 973993  | Asthma |
| rs9272597   | 6 | 32639828 | G | A | 0.4978 | 0.1337  | 0.0068 | 3.03E-87  | 19.7992  | 973993  | Asthma |
| rs9272598   | 6 | 32639834 | T | G | 0.3955 | 0.0953  | 0.0093 | 1.23E-24  | 10.2464  | 632635  | Asthma |
| rs41269944  | 6 | 32639850 | T | C | 0.1839 | 0.1756  | 0.0087 | 5.58E-90  | 20.1136  | 973993  | Asthma |
| rs9272599   | 6 | 32639861 | G | A | 0.5221 | 0.1307  | 0.0067 | 2.92E-84  | 19.4498  | 973993  | Asthma |
| rs9272601   | 6 | 32639875 | T | A | 0.4309 | 0.0525  | 0.0087 | 1.72E-09  | 6.0227   | 654945  | Asthma |
| rs28383390  | 6 | 32639880 | C | G | 0.1970 | 0.0562  | 0.0091 | 6.17E-10  | 6.1860   | 908767  | Asthma |
| rs28383391  | 6 | 32639882 | T | C | 0.2439 | 0.1128  | 0.0076 | 7.90E-50  | 14.8410  | 1065770 | Asthma |
| rs28383392  | 6 | 32639883 | G | A | 0.2695 | 0.1183  | 0.0097 | 6.47E-34  | 12.1398  | 654945  | Asthma |
| rs9272602   | 6 | 32639889 | A | G | 0.4667 | 0.1152  | 0.0064 | 7.06E-72  | 17.9279  | 1033224 | Asthma |
| rs28383395  | 6 | 32639936 | T | C | 0.3183 | 0.1284  | 0.0071 | 1.03E-72  | 18.0359  | 973993  | Asthma |
| rs28383396  | 6 | 32639937 | G | A | 0.3186 | 0.1284  | 0.0071 | 8.57E-73  | 18.0451  | 973993  | Asthma |
| rs9272604   | 6 | 32639945 | A | G | 0.2716 | 0.0418  | 0.0075 | 2.46E-08  | 5.5760   | 697750  | Asthma |
| rs9272606   | 6 | 32639952 | C | T | 0.3803 | -0.1085 | 0.0069 | 4.76E-56  | -15.7734 | 973993  | Asthma |
| rs9272607   | 6 | 32639958 | G | A | 0.5004 | -0.1236 | 0.0064 | 5.54E-83  | -19.2987 | 1033224 | Asthma |
| rs9272609   | 6 | 32639973 | T | C | 0.4497 | -0.1287 | 0.0066 | 1.12E-83  | -19.3810 | 973993  | Asthma |
| rs9272611   | 6 | 32640003 | C | T | 0.4487 | -0.1285 | 0.0066 | 1.45E-83  | -19.3668 | 973993  | Asthma |
| rs28383397  | 6 | 32640043 | T | G | 0.2874 | 0.1217  | 0.0073 | 2.87E-62  | 16.6528  | 973993  | Asthma |
| rs28383398  | 6 | 32640051 | T | G | 0.2872 | 0.1218  | 0.0073 | 2.78E-62  | 16.6550  | 973993  | Asthma |
| rs9272613   | 6 | 32640052 | A | G | 0.4546 | -0.1236 | 0.0058 | 3.59E-100 | -21.2459 | 1125398 | Asthma |
| rs41269945  | 6 | 32640076 | T | A | 0.1815 | 0.1505  | 0.0076 | 1.10E-86  | 19.7343  | 1125398 | Asthma |
| rs9272614   | 6 | 32640082 | C | T | 0.4481 | -0.1285 | 0.0066 | 1.05E-83  | -19.3839 | 973993  | Asthma |
| rs36221399  | 6 | 32640084 | T | A | 0.0717 | -0.1043 | 0.0133 | 5.11E-15  | -7.8235  | 908767  | Asthma |
| rs9272616   | 6 | 32640113 | G | C | 0.2270 | 0.0436  | 0.0078 | 2.16E-08  | 5.5988   | 973993  | Asthma |
| rs9272617   | 6 | 32640149 | T | G | 0.3926 | -0.1176 | 0.0067 | 1.02E-69  | -17.6501 | 995476  | Asthma |
| rs28383400  | 6 | 32640173 | A | G | 0.3191 | 0.1118  | 0.0071 | 6.14E-56  | 15.7576  | 973993  | Asthma |
| rs28383401  | 6 | 32640196 | A | G | 0.2906 | 0.1217  | 0.0073 | 3.61E-62  | 16.6389  | 973993  | Asthma |
| rs28383402  | 6 | 32640208 | G | A | 0.2906 | 0.1216  | 0.0073 | 4.08E-62  | 16.6325  | 973993  | Asthma |
| rs9272622   | 6 | 32640209 | G | C | 0.6216 | 0.1089  | 0.0069 | 1.65E-56  | 15.8398  | 973993  | Asthma |
| rs9272625   | 6 | 32640237 | T | C | 0.4500 | -0.1254 | 0.0058 | 4.59E-102 | -21.4496 | 1125398 | Asthma |
| rs28383403  | 6 | 32640258 | C | T | 0.2895 | 0.1208  | 0.0073 | 2.77E-61  | 16.5169  | 973993  | Asthma |
| rs9272627   | 6 | 32640283 | A | G | 0.1888 | -0.0671 | 0.0086 | 7.24E-15  | -7.7802  | 973993  | Asthma |
| rs17426593  | 6 | 32640300 | C | T | 0.1858 | 0.1483  | 0.0076 | 9.65E-86  | 19.6243  | 1125398 | Asthma |
| rs9272628   | 6 | 32640316 | T | C | 0.4476 | -0.1285 | 0.0066 | 8.25E-84  | -19.3960 | 973993  | Asthma |
| rs9272629   | 6 | 32640319 | G | T | 0.4475 | -0.1254 | 0.0058 | 2.18E-102 | -21.4849 | 1125398 | Asthma |
| rs28383405  | 6 | 32640331 | T | C | 0.3044 | 0.1293  | 0.0071 | 1.97E-74  | 18.2530  | 973993  | Asthma |
| rs9272633   | 6 | 32640404 | A | G | 0.3463 | -0.1111 | 0.0079 | 1.85E-45  | -14.1513 | 540747  | Asthma |
| rs9272634   | 6 | 32640407 | A | T | 0.5674 | 0.0849  | 0.0066 | 1.74E-37  | 12.7955  | 973993  | Asthma |
| rs28383407  | 6 | 32640410 | T | C | 0.3022 | 0.1286  | 0.0071 | 9.67E-73  | 18.0391  | 973993  | Asthma |
| rs9272637   | 6 | 32640436 | G | A | 0.4531 | -0.1524 | 0.0076 | 7.54E-89  | -19.9840 | 844071  | Asthma |
| rs28383408  | 6 | 32640474 | G | C | 0.2996 | 0.1170  | 0.0063 | 9.31E-77  | 18.5424  | 1125398 | Asthma |
| rs41269955  | 6 | 32640492 | A | G | 0.1733 | 0.1599  | 0.0083 | 1.47E-83  | 19.3667  | 1065770 | Asthma |
| rs73729513  | 6 | 32640499 | G | A | 0.0600 | -0.1013 | 0.0154 | 4.70E-11  | -6.5802  | 908767  | Asthma |
| rs28383409  | 6 | 32640502 | G | T | 0.4137 | 0.1655  | 0.0083 | 3.41E-89  | 20.0235  | 778845  | Asthma |
| rs28383410  | 6 | 32640512 | A | G | 0.3031 | 0.1281  | 0.0071 | 3.57E-72  | 17.9670  | 973993  | Asthma |
| rs9272642   | 6 | 32640526 | C | T | 0.5505 | 0.1290  | 0.0066 | 8.06E-84  | 19.3974  | 973993  | Asthma |
| rs9272643   | 6 | 32640527 | A | G | 0.5505 | 0.1290  | 0.0066 | 8.30E-84  | 19.3960  | 973993  | Asthma |
| rs28383411  | 6 | 32640531 | C | T | 0.3020 | 0.1280  | 0.0071 | 5.81E-72  | 17.9393  | 973993  | Asthma |
| rs9272644   | 6 | 32640545 | T | C | 0.1900 | -0.0755 | 0.0099 | 2.19E-14  | -7.6391  | 844071  | Asthma |
| rs9272645   | 6 | 32640554 | G | C | 0.4145 | -0.0793 | 0.0076 | 3.04E-25  | -10.3805 | 844071  | Asthma |
| rs36220784  | 6 | 32640573 | A | G | 0.0615 | -0.1164 | 0.0154 | 3.52E-14  | -7.5773  | 540747  | Asthma |
| rs28383413  | 6 | 32640640 | A | G | 0.3055 | 0.1177  | 0.0062 | 1.44E-79  | 18.8877  | 1125398 | Asthma |
| rs34430979  | 6 | 32640648 | A | C | 0.0707 | -0.1024 | 0.0135 | 3.55E-14  | -7.5768  | 908767  | Asthma |
| rs35686990  | 6 | 32640658 | C | T | 0.0536 | -0.1136 | 0.0166 | 7.53E-12  | -6.8471  | 908767  | Asthma |
| rs28383414  | 6 | 32640690 | A | G | 0.2895 | 0.1165  | 0.0082 | 3.60E-46  | 14.2656  | 605973  | Asthma |
| rs28383415  | 6 | 32640696 | A | G | 0.2983 | 0.1181  | 0.0063 | 5.45E-78  | 18.6948  | 1125398 | Asthma |
| rs34141382  | 6 | 32640701 | C | T | 0.1743 | 0.1570  | 0.0081 | 5.63E-83  | 19.2982  | 1065770 | Asthma |
| rs28383416  | 6 | 32640706 | C | T | 0.2689 | 0.1113  | 0.0076 | 2.21E-48  | 14.6158  | 973993  | Asthma |
| rs9272647   | 6 | 32640731 | A | T | 0.5648 | 0.0833  | 0.0067 | 5.13E-36  | 12.5299  | 973993  | Asthma |
| rs28383418  | 6 | 32640760 | C | A | 0.2858 | 0.1200  | 0.0074 | 1.26E-59  | 16.2849  | 973993  | Asthma |
| rs28383419  | 6 | 32640845 | A | G | 0.2892 | 0.1195  | 0.0073 | 9.22E-60  | 16.3048  | 973993  | Asthma |
| rs9272656   | 6 | 32640852 | A | G | 0.4483 | -0.1289 | 0.0066 | 8.37E-84  | -19.3951 | 973993  | Asthma |
| rs9272658   | 6 | 32640881 | A | G | 0.2667 | 0.0551  | 0.0085 | 9.72E-11  | 6.4712   | 605973  | Asthma |
| rs9272659   | 6 | 32640884 | C | T | 0.2975 | 0.0489  | 0.0082 | 2.35E-09  | 5.9714   | 605973  | Asthma |
| rs9272660   | 6 | 32640890 | G | A | 0.2975 | 0.0488  | 0.0082 | 2.42E-09  | 5.9671   | 605973  | Asthma |

|             |   |          |   |   |        |         |        |          |          |         |        |
|-------------|---|----------|---|---|--------|---------|--------|----------|----------|---------|--------|
| rs9272661   | 6 | 32640903 | C | T | 0.4506 | -0.1292 | 0.0067 | 5.89E-84 | -19.4146 | 973993  | Asthma |
| rs9272662   | 6 | 32640904 | A | G | 0.3799 | -0.1098 | 0.0069 | 3.69E-57 | -15.9341 | 973993  | Asthma |
| rs9272663   | 6 | 32640927 | G | A | 0.3013 | 0.0485  | 0.0081 | 2.68E-09 | 5.9500   | 605973  | Asthma |
| rs28383420  | 6 | 32640930 | C | T | 0.2863 | 0.1204  | 0.0074 | 4.15E-60 | 16.3531  | 973993  | Asthma |
| rs9272664   | 6 | 32640933 | C | T | 0.4508 | -0.1290 | 0.0067 | 1.06E-83 | -19.3843 | 973993  | Asthma |
| rs9272665   | 6 | 32640944 | A | G | 0.2415 | 0.0537  | 0.0078 | 5.53E-12 | 6.8913   | 973993  | Asthma |
| rs9272666   | 6 | 32640960 | T | C | 0.4174 | -0.0945 | 0.0069 | 3.73E-42 | -13.6052 | 908767  | Asthma |
| rs28383423  | 6 | 32640975 | T | C | 0.2647 | 0.1229  | 0.0077 | 5.04E-57 | 15.9144  | 973993  | Asthma |
| rs28383424  | 6 | 32640979 | G | A | 0.2647 | 0.1229  | 0.0077 | 5.04E-57 | 15.9142  | 973993  | Asthma |
| rs9272667   | 6 | 32640983 | C | T | 0.2845 | 0.0448  | 0.0074 | 1.40E-09 | 6.0552   | 973993  | Asthma |
| rs28383425  | 6 | 32640984 | C | A | 0.2647 | 0.1230  | 0.0077 | 4.53E-57 | 15.9211  | 973993  | Asthma |
| rs9272668   | 6 | 32640986 | A | G | 0.2845 | 0.0448  | 0.0074 | 1.44E-09 | 6.0513   | 973993  | Asthma |
| rs4452681   | 6 | 32640993 | T | C | 0.1349 | -0.0835 | 0.0095 | 1.05E-18 | -8.8300  | 973993  | Asthma |
| rs28383427  | 6 | 32641015 | T | A | 0.2780 | 0.1216  | 0.0075 | 1.39E-58 | 16.1376  | 973993  | Asthma |
| rs9272669   | 6 | 32641039 | G | A | 0.2371 | 0.0522  | 0.0078 | 2.47E-11 | 6.6751   | 973993  | Asthma |
| rs9272670   | 6 | 32641043 | C | T | 0.4531 | -0.1279 | 0.0067 | 6.37E-82 | -19.1721 | 973993  | Asthma |
| rs28383429  | 6 | 32641067 | G | A | 0.2758 | 0.1187  | 0.0075 | 8.65E-56 | 15.7354  | 973993  | Asthma |
| rs9272672   | 6 | 32641072 | C | T | 0.2738 | 0.0441  | 0.0074 | 2.95E-09 | 5.9344   | 973993  | Asthma |
| rs75046941  | 6 | 32641078 | G | A | 0.0708 | -0.1023 | 0.0135 | 3.61E-14 | -7.5740  | 908767  | Asthma |
| rs28383431  | 6 | 32641079 | C | T | 0.2739 | 0.1171  | 0.0076 | 3.25E-54 | 15.5038  | 973993  | Asthma |
| rs28383432  | 6 | 32641103 | A | G | 0.3161 | 0.1058  | 0.0072 | 8.63E-49 | 14.6804  | 973993  | Asthma |
| rs9272674   | 6 | 32641108 | T | C | 0.2566 | 0.0618  | 0.0087 | 1.56E-12 | 7.0689   | 844071  | Asthma |
| rs36151380  | 6 | 32641109 | C | T | 0.1920 | 0.1492  | 0.0137 | 1.11E-27 | 10.9038  | 525023  | Asthma |
| rs28383433  | 6 | 32641110 | G | A | 0.2862 | 0.1263  | 0.0086 | 2.55E-49 | 14.7623  | 844071  | Asthma |
| rs9272675   | 6 | 32641111 | G | T | 0.4568 | -0.1501 | 0.0077 | 2.17E-84 | -19.4653 | 844071  | Asthma |
| rs9272678   | 6 | 32641138 | C | T | 0.3950 | 0.0830  | 0.0086 | 4.06E-22 | 9.6697   | 654945  | Asthma |
| rs28383434  | 6 | 32641148 | T | C | 0.2849 | 0.1198  | 0.0074 | 3.86E-59 | 16.2161  | 973993  | Asthma |
| rs75503615  | 6 | 32641157 | T | A | 0.0748 | -0.1073 | 0.0130 | 1.67E-16 | -8.2436  | 908767  | Asthma |
| rs78824971  | 6 | 32641169 | A | G | 0.0749 | -0.1073 | 0.0130 | 1.57E-16 | -8.2512  | 908767  | Asthma |
| rs9272682   | 6 | 32641176 | T | C | 0.2720 | 0.0549  | 0.0085 | 8.82E-11 | 6.4858   | 605973  | Asthma |
| rs78496075  | 6 | 32641190 | G | A | 0.0740 | -0.1018 | 0.0115 | 8.36E-19 | -8.8555  | 1060172 | Asthma |
| rs28383435  | 6 | 32641195 | T | G | 0.2842 | 0.1219  | 0.0074 | 4.46E-61 | 16.4888  | 973993  | Asthma |
| rs75174795  | 6 | 32641200 | G | A | 0.0738 | -0.1441 | 0.0157 | 4.66E-20 | -9.1719  | 778845  | Asthma |
| rs115508098 | 6 | 32641204 | G | A | 0.5055 | 0.1363  | 0.0080 | 7.28E-65 | 17.0072  | 778845  | Asthma |
| rs34763586  | 6 | 32641221 | C | T | 0.1808 | 0.1497  | 0.0077 | 3.25E-85 | 19.5615  | 1125398 | Asthma |
| rs34130005  | 6 | 32641232 | G | T | 0.0536 | -0.1136 | 0.0166 | 7.32E-12 | -6.8511  | 908767  | Asthma |
| rs28383439  | 6 | 32641265 | A | C | 0.3030 | 0.1294  | 0.0071 | 3.00E-74 | 18.2292  | 973993  | Asthma |
| rs34857804  | 6 | 32641270 | T | C | 0.0536 | -0.1136 | 0.0166 | 7.32E-12 | -6.8511  | 908767  | Asthma |
| rs28654242  | 6 | 32641284 | A | T | 0.1066 | -0.0779 | 0.0104 | 5.18E-14 | -7.5272  | 973993  | Asthma |
| rs1129740   | 6 | 32641328 | G | A | 0.4511 | -0.1226 | 0.0058 | 3.44E-98 | -21.0308 | 1125398 | Asthma |
| rs3205916   | 6 | 32641329 | C | T | 0.2670 | 0.1062  | 0.0069 | 6.18E-54 | 15.4630  | 1065770 | Asthma |
| rs1071630   | 6 | 32641349 | T | C | 0.4654 | -0.1145 | 0.0058 | 4.77E-86 | -19.6593 | 1125398 | Asthma |
| rs1129753   | 6 | 32641353 | T | C | 0.1713 | 0.1801  | 0.0091 | 6.14E-87 | 19.7634  | 973993  | Asthma |
| rs1048027   | 6 | 32641392 | C | T | 0.3362 | 0.1181  | 0.0070 | 1.15E-64 | 16.9796  | 973993  | Asthma |
| rs1142323   | 6 | 32641415 | G | A | 0.3137 | 0.0714  | 0.0065 | 8.39E-28 | 10.9290  | 1065770 | Asthma |
| rs36219699  | 6 | 32641418 | A | G | 0.0752 | -0.1064 | 0.0130 | 2.59E-16 | -8.1914  | 908767  | Asthma |
| rs1142328   | 6 | 32641439 | G | T | 0.4967 | -0.1203 | 0.0068 | 1.42E-70 | -17.7605 | 973993  | Asthma |
| rs3208105   | 6 | 32641445 | A | T | 0.6677 | 0.1187  | 0.0081 | 5.41E-49 | 14.7123  | 778845  | Asthma |
| rs12722069  | 6 | 32641454 | G | A | 0.3088 | 0.1212  | 0.0082 | 9.59E-50 | 14.8289  | 540747  | Asthma |
| rs4193      | 6 | 32641459 | G | A | 0.4970 | -0.1165 | 0.0068 | 3.62E-65 | -17.0475 | 908767  | Asthma |
| rs9272702   | 6 | 32641476 | A | G | 0.5350 | 0.1290  | 0.0067 | 7.42E-82 | 19.1641  | 973993  | Asthma |
| rs1142331   | 6 | 32641477 | T | G | 0.5350 | 0.1290  | 0.0067 | 6.23E-82 | 19.1733  | 973993  | Asthma |
| rs1142332   | 6 | 32641478 | T | G | 0.5350 | 0.1290  | 0.0067 | 6.20E-82 | 19.1733  | 973993  | Asthma |
| rs1129808   | 6 | 32641535 | A | C | 0.4501 | -0.1287 | 0.0066 | 1.05E-83 | -19.3848 | 973993  | Asthma |
| rs9272712   | 6 | 32641564 | T | C | 0.5476 | 0.1289  | 0.0066 | 7.71E-84 | 19.4003  | 973993  | Asthma |
| rs28383453  | 6 | 32641581 | T | C | 0.2656 | 0.1130  | 0.0097 | 2.55E-31 | 11.6408  | 654945  | Asthma |
| rs28383454  | 6 | 32641593 | T | G | 0.5149 | 0.1589  | 0.0079 | 3.48E-90 | 20.1366  | 778845  | Asthma |
| rs4467816   | 6 | 32641594 | C | T | 0.4856 | -0.1084 | 0.0089 | 7.24E-34 | -12.1313 | 844071  | Asthma |
| rs9272718   | 6 | 32641602 | C | T | 0.3751 | -0.1064 | 0.0069 | 9.84E-54 | -15.4330 | 973993  | Asthma |
| rs28383455  | 6 | 32641603 | T | C | 0.3034 | 0.1269  | 0.0072 | 2.45E-69 | 17.6006  | 908767  | Asthma |
| rs9272719   | 6 | 32641610 | A | G | 0.5434 | 0.1276  | 0.0067 | 2.04E-81 | 19.1115  | 973993  | Asthma |
| rs9272720   | 6 | 32641612 | T | G | 0.5444 | 0.1280  | 0.0067 | 3.77E-82 | 19.1984  | 973993  | Asthma |
| rs4457200   | 6 | 32641648 | G | C | 0.0540 | -0.1136 | 0.0166 | 6.74E-12 | -6.8632  | 908767  | Asthma |
| rs28383456  | 6 | 32641676 | T | C | 0.1912 | 0.0899  | 0.0086 | 1.92E-25 | 10.4246  | 1065770 | Asthma |
| rs28383457  | 6 | 32641679 | T | C | 0.3018 | 0.1292  | 0.0071 | 8.44E-74 | 18.1735  | 973993  | Asthma |
| rs35874654  | 6 | 32641702 | A | C | 0.1870 | 0.1703  | 0.0085 | 1.32E-89 | 20.0705  | 973993  | Asthma |
| rs9272725   | 6 | 32641736 | G | T | 0.4460 | -0.1285 | 0.0066 | 1.92E-83 | -19.3533 | 973993  | Asthma |
| rs34719927  | 6 | 32641737 | C | T | 0.4461 | -0.1285 | 0.0066 | 1.62E-83 | -19.3619 | 973993  | Asthma |
| rs34965214  | 6 | 32641768 | T | C | 0.1853 | 0.1473  | 0.0075 | 5.04E-85 | 19.5399  | 1125398 | Asthma |
| rs28383460  | 6 | 32641809 | G | A | 0.3200 | 0.1390  | 0.0079 | 5.12E-69 | 17.5584  | 844071  | Asthma |
| rs28383462  | 6 | 32641842 | T | C | 0.1760 | 0.0918  | 0.0101 | 8.82E-20 | 9.1025   | 778845  | Asthma |
| rs9272730   | 6 | 32641857 | G | A | 0.3205 | 0.1372  | 0.0081 | 5.92E-65 | 17.0187  | 778845  | Asthma |
| rs9272731   | 6 | 32641868 | C | T | 0.3205 | 0.1373  | 0.0081 | 5.06E-65 | 17.0286  | 778845  | Asthma |
| rs9272732   | 6 | 32641870 | G | T | 0.2605 | 0.1315  | 0.0087 | 4.03E-52 | 15.1916  | 848312  | Asthma |



|             |   |          |   |   |        |         |        |           |          |         |        |
|-------------|---|----------|---|---|--------|---------|--------|-----------|----------|---------|--------|
| rs9272733   | 6 | 32641875 | A | T | 0.3320 | 0.1435  | 0.0082 | 4.99E-69  | 17.5599  | 778845  | Asthma |
| rs9272734   | 6 | 32641877 | A | G | 0.3320 | 0.1435  | 0.0082 | 4.99E-69  | 17.5599  | 778845  | Asthma |
| rs9272735   | 6 | 32641878 | G | T | 0.3320 | 0.1435  | 0.0082 | 4.99E-69  | 17.5599  | 778845  | Asthma |
| rs9272736   | 6 | 32641894 | A | G | 0.3252 | 0.1379  | 0.0081 | 1.90E-65  | 17.0860  | 778845  | Asthma |
| rs9272737   | 6 | 32641896 | A | G | 0.2868 | 0.1261  | 0.0076 | 1.94E-62  | 16.6766  | 935848  | Asthma |
| rs9272742   | 6 | 32641945 | T | C | 0.1899 | 0.1694  | 0.0085 | 4.45E-89  | 20.0106  | 973993  | Asthma |
| rs9272744   | 6 | 32641969 | T | C | 0.3051 | 0.1175  | 0.0065 | 5.87E-74  | 18.1935  | 1065770 | Asthma |
| rs707951    | 6 | 32642036 | T | C | 0.3608 | -0.1045 | 0.0061 | 5.36E-66  | -17.1588 | 1125398 | Asthma |
| rs1048173   | 6 | 32642078 | C | A | 0.3207 | 0.1371  | 0.0081 | 1.34E-64  | 16.9713  | 778845  | Asthma |
| rs707950    | 6 | 32642096 | G | C | 0.6224 | 0.1214  | 0.0080 | 5.63E-52  | 15.1695  | 778845  | Asthma |
| rs41547417  | 6 | 32642097 | G | T | 0.0748 | -0.1069 | 0.0130 | 1.99E-16  | -8.2227  | 908767  | Asthma |
| rs7990      | 6 | 32642188 | A | C | 0.1022 | 0.1727  | 0.0112 | 2.26E-53  | 15.3793  | 908767  | Asthma |
| rs2308890   | 6 | 32642231 | T | C | 0.3212 | 0.1249  | 0.0078 | 4.35E-57  | 15.9235  | 605973  | Asthma |
| rs9272756   | 6 | 32642270 | T | C | 0.4461 | -0.1285 | 0.0066 | 1.36E-83  | -19.3704 | 973993  | Asthma |
| rs34843907  | 6 | 32642282 | T | G | 0.4430 | -0.1266 | 0.0058 | 4.39E-104 | -21.6654 | 1125398 | Asthma |
| rs35975014  | 6 | 32642298 | G | A | 0.0735 | -0.1033 | 0.0115 | 2.98E-19  | -8.9695  | 1060172 | Asthma |
| rs34826728  | 6 | 32642332 | A | C | 0.4460 | -0.1289 | 0.0066 | 4.47E-84  | -19.4273 | 973993  | Asthma |
| rs75076975  | 6 | 32642357 | A | G | 0.3064 | 0.1287  | 0.0071 | 3.91E-74  | 18.2150  | 973993  | Asthma |
| rs397843773 | 6 | 32642394 | T | A | 0.3108 | 0.1280  | 0.0071 | 1.28E-73  | 18.1505  | 973993  | Asthma |
| rs79351547  | 6 | 32642419 | A | G | 0.3085 | 0.1279  | 0.0071 | 2.35E-73  | 18.1163  | 973993  | Asthma |
| rs116022266 | 6 | 32642424 | A | T | 0.3086 | 0.1279  | 0.0071 | 2.02E-73  | 18.1255  | 973993  | Asthma |
| rs114816840 | 6 | 32642437 | C | T | 0.4413 | 0.1209  | 0.0068 | 5.24E-70  | 17.6870  | 973993  | Asthma |
| rs116613962 | 6 | 32642443 | G | A | 0.4409 | 0.1211  | 0.0068 | 3.77E-70  | 17.7063  | 973993  | Asthma |
| rs9272774   | 6 | 32642478 | A | G | 0.3061 | 0.1287  | 0.0071 | 9.63E-74  | 18.1651  | 973993  | Asthma |
| rs9272775   | 6 | 32642480 | C | T | 0.3133 | 0.1239  | 0.0070 | 1.30E-69  | 17.6366  | 973993  | Asthma |
| rs9272776   | 6 | 32642493 | T | C | 0.3738 | -0.1066 | 0.0069 | 7.72E-54  | -15.4487 | 973993  | Asthma |
| rs78712211  | 6 | 32642523 | T | C | 0.0736 | -0.1037 | 0.0115 | 2.54E-19  | -8.9867  | 1060172 | Asthma |
| rs77179964  | 6 | 32642536 | G | C | 0.0747 | -0.1073 | 0.0130 | 1.77E-16  | -8.2363  | 908767  | Asthma |
| rs9272785   | 6 | 32642624 | A | G | 0.1837 | 0.1533  | 0.0079 | 2.45E-83  | 19.3410  | 1065770 | Asthma |
| rs3188543   | 6 | 32642626 | A | C | 0.3040 | 0.1193  | 0.0065 | 3.36E-75  | 18.3489  | 1065770 | Asthma |
| rs1048372   | 6 | 32642659 | T | C | 0.4295 | -0.0804 | 0.0067 | 2.82E-33  | -12.0191 | 973993  | Asthma |
| rs9260      | 6 | 32642684 | A | G | 0.2349 | -0.0824 | 0.0071 | 3.57E-31  | -11.6123 | 1125398 | Asthma |
| rs1048414   | 6 | 32642701 | G | C | 0.3040 | 0.1272  | 0.0072 | 5.98E-70  | 17.6794  | 908767  | Asthma |
| rs1048419   | 6 | 32642704 | C | T | 0.3040 | 0.1272  | 0.0072 | 5.98E-70  | 17.6794  | 908767  | Asthma |
| rs1130116   | 6 | 32642758 | A | C | 0.3730 | -0.1037 | 0.0070 | 7.49E-50  | -14.8449 | 908767  | Asthma |
| rs3188642   | 6 | 32642776 | A | G | 0.3163 | 0.1374  | 0.0082 | 1.62E-63  | 16.8238  | 778845  | Asthma |
| rs28400568  | 6 | 32642780 | A | G | 0.0992 | 0.1237  | 0.0129 | 9.74E-22  | 9.5794   | 831423  | Asthma |
| rs9272798   | 6 | 32642797 | C | T | 0.5552 | -0.1164 | 0.0071 | 3.45E-61  | -16.5034 | 908767  | Asthma |
| rs9272799   | 6 | 32642799 | G | T | 0.5552 | -0.1164 | 0.0071 | 4.03E-61  | -16.4947 | 908767  | Asthma |
| rs9272800   | 6 | 32642804 | C | G | 0.6696 | 0.1083  | 0.0071 | 3.40E-53  | 15.3522  | 908767  | Asthma |
| rs9272801   | 6 | 32642807 | T | C | 0.5553 | -0.1163 | 0.0071 | 4.20E-61  | -16.4914 | 908767  | Asthma |
| rs36027005  | 6 | 32642866 | T | G | 0.0750 | -0.1074 | 0.0130 | 1.42E-16  | -8.2629  | 908767  | Asthma |
| rs35444025  | 6 | 32642911 | C | G | 0.0750 | -0.1072 | 0.0130 | 1.60E-16  | -8.2491  | 908767  | Asthma |
| rs9272843   | 6 | 32642912 | G | C | 0.1267 | -0.1006 | 0.0111 | 1.69E-19  | -9.0318  | 844071  | Asthma |
| rs62404094  | 6 | 32642919 | A | G | 0.0750 | -0.1075 | 0.0130 | 1.35E-16  | -8.2699  | 908767  | Asthma |
| rs9272851   | 6 | 32642927 | T | C | 0.3829 | -0.0877 | 0.0071 | 8.86E-35  | -12.3018 | 973993  | Asthma |
| rs9272865   | 6 | 32642959 | A | G | 0.3136 | 0.1428  | 0.0080 | 9.54E-71  | 17.7836  | 844071  | Asthma |
| rs9272871   | 6 | 32642970 | C | G | 0.2988 | 0.1318  | 0.0072 | 2.93E-75  | 18.3567  | 973993  | Asthma |
| rs7708      | 6 | 32642972 | A | G | 0.0797 | -0.1019 | 0.0127 | 8.74E-16  | -8.0429  | 908767  | Asthma |
| rs28371168  | 6 | 32642974 | G | A | 0.2989 | 0.1315  | 0.0072 | 5.07E-75  | 18.3274  | 973993  | Asthma |
| rs8227      | 6 | 32642980 | A | G | 0.3200 | -0.1037 | 0.0073 | 5.35E-46  | -14.2381 | 973993  | Asthma |
| rs7600      | 6 | 32642992 | A | C | 0.3197 | -0.1036 | 0.0073 | 6.15E-46  | -14.2278 | 973993  | Asthma |
| rs9272896   | 6 | 32643029 | C | T | 0.2869 | 0.1333  | 0.0074 | 1.92E-72  | 18.0002  | 973993  | Asthma |
| rs9272899   | 6 | 32643032 | T | C | 0.2856 | 0.1351  | 0.0074 | 8.96E-74  | 18.1698  | 973993  | Asthma |
| rs28371169  | 6 | 32643042 | G | C | 0.2876 | 0.1330  | 0.0074 | 1.55E-72  | 18.0121  | 973993  | Asthma |
| rs7142      | 6 | 32643048 | A | G | 0.3770 | -0.1059 | 0.0069 | 5.72E-53  | -15.3186 | 973993  | Asthma |
| rs9272905   | 6 | 32643059 | T | C | 0.2900 | 0.1308  | 0.0083 | 4.76E-56  | 15.7729  | 605973  | Asthma |
| rs9272913   | 6 | 32643083 | T | G | 0.2905 | 0.1310  | 0.0083 | 2.70E-56  | 15.8094  | 605973  | Asthma |
| rs9272914   | 6 | 32643086 | G | A | 0.2905 | 0.1310  | 0.0083 | 2.70E-56  | 15.8092  | 605973  | Asthma |
| rs7143      | 6 | 32643110 | T | C | 0.1476 | -0.0762 | 0.0093 | 2.23E-16  | -8.2093  | 973993  | Asthma |
| rs9272917   | 6 | 32643115 | G | A | 0.5857 | 0.1336  | 0.0075 | 2.22E-71  | 17.8651  | 605973  | Asthma |
| rs9272918   | 6 | 32643116 | A | C | 0.5859 | 0.1335  | 0.0075 | 2.76E-71  | 17.8531  | 605973  | Asthma |
| rs1142429   | 6 | 32643131 | T | C | 0.2976 | 0.0774  | 0.0078 | 1.88E-23  | 9.9795   | 697750  | Asthma |
| rs3667      | 6 | 32643157 | G | A | 0.2258 | 0.0780  | 0.0083 | 3.85E-21  | 9.4367   | 697750  | Asthma |
| rs1130151   | 6 | 32643158 | G | A | 0.5866 | 0.1336  | 0.0075 | 1.77E-71  | 17.8776  | 605973  | Asthma |
| rs1130152   | 6 | 32643169 | T | A | 0.5989 | 0.1305  | 0.0076 | 1.53E-66  | 17.2312  | 540747  | Asthma |
| rs1130153   | 6 | 32643170 | C | A | 0.0533 | -0.0981 | 0.0149 | 4.94E-11  | -6.5729  | 977229  | Asthma |
| rs1130155   | 6 | 32643174 | G | C | 0.5991 | 0.1305  | 0.0076 | 1.58E-66  | 17.2302  | 540747  | Asthma |
| rs1130156   | 6 | 32643191 | G | A | 0.3138 | 0.1283  | 0.0080 | 3.58E-58  | 16.0791  | 605973  | Asthma |
| rs1130158   | 6 | 32643195 | A | G | 0.5467 | 0.1288  | 0.0067 | 6.24E-83  | 19.2921  | 973993  | Asthma |
| rs1130161   | 6 | 32643217 | A | C | 0.2401 | 0.0859  | 0.0076 | 9.71E-30  | 11.3265  | 1065770 | Asthma |
| rs1130162   | 6 | 32643220 | G | C | 0.2590 | 0.1124  | 0.0073 | 3.90E-53  | 15.3438  | 1065770 | Asthma |
| rs1048726   | 6 | 32643235 | T | A | 0.5480 | 0.1282  | 0.0067 | 1.99E-82  | 19.2321  | 973993  | Asthma |
| rs1065036   | 6 | 32643252 | C | T | 0.5482 | 0.1281  | 0.0067 | 2.61E-82  | 19.2178  | 973993  | Asthma |

|             |   |          |   |   |        |         |        |           |          |         |        |
|-------------|---|----------|---|---|--------|---------|--------|-----------|----------|---------|--------|
| rs1064985   | 6 | 32643257 | A | T | 0.2806 | 0.1212  | 0.0075 | 3.92E-59  | 16.2153  | 973993  | Asthma |
| rs28376734  | 6 | 32643277 | C | T | 0.1353 | -0.0851 | 0.0094 | 1.91E-19  | -9.0185  | 973993  | Asthma |
| rs9272938   | 6 | 32643279 | T | C | 0.1505 | 0.1699  | 0.0112 | 4.04E-52  | 15.1918  | 540747  | Asthma |
| rs707947    | 6 | 32643291 | G | A | 0.2128 | 0.0773  | 0.0080 | 2.57E-22  | 9.7164   | 1065770 | Asthma |
| rs9272940   | 6 | 32643304 | C | A | 0.2797 | 0.1213  | 0.0076 | 5.02E-58  | 16.0581  | 973993  | Asthma |
| rs9272943   | 6 | 32643315 | G | T | 0.5432 | 0.1523  | 0.0077 | 4.91E-88  | 19.8911  | 844071  | Asthma |
| rs36216730  | 6 | 32643317 | T | A | 0.0751 | -0.1055 | 0.0130 | 4.66E-16  | -8.1202  | 908767  | Asthma |
| rs707946    | 6 | 32643321 | T | G | 0.1665 | 0.1450  | 0.0107 | 7.35E-42  | 13.5561  | 540747  | Asthma |
| rs28538060  | 6 | 32643322 | T | G | 0.1353 | -0.0843 | 0.0094 | 4.03E-19  | -8.9363  | 973993  | Asthma |
| rs540435913 | 6 | 32643323 | A | G | 0.2355 | 0.0602  | 0.0098 | 8.89E-10  | 6.1283   | 605973  | Asthma |
| rs9272948   | 6 | 32643330 | C | T | 0.5466 | 0.1272  | 0.0067 | 6.42E-81  | 19.0507  | 973993  | Asthma |
| rs9272950   | 6 | 32643340 | G | T | 0.5470 | 0.1271  | 0.0067 | 5.22E-81  | 19.0620  | 973993  | Asthma |
| rs62404112  | 6 | 32643345 | C | T | 0.0751 | -0.1056 | 0.0130 | 4.52E-16  | -8.1242  | 908767  | Asthma |
| rs9272951   | 6 | 32643348 | C | A | 0.2977 | 0.1294  | 0.0073 | 1.02E-70  | 17.7790  | 973993  | Asthma |
| rs9272955   | 6 | 32643368 | A | T | 0.2984 | 0.1301  | 0.0073 | 5.56E-72  | 17.9415  | 973993  | Asthma |
| rs9272957   | 6 | 32643375 | A | G | 0.2983 | 0.1302  | 0.0073 | 4.97E-72  | 17.9480  | 973993  | Asthma |
| rs9272958   | 6 | 32643393 | A | C | 0.5507 | 0.1224  | 0.0060 | 1.98E-91  | 20.2792  | 1042455 | Asthma |
| rs1064993   | 6 | 32643404 | A | G | 0.2976 | 0.1297  | 0.0073 | 1.98E-71  | 17.8718  | 973993  | Asthma |
| rs36216571  | 6 | 32643438 | T | C | 0.0762 | -0.1147 | 0.0101 | 6.04E-30  | -11.3680 | 1159440 | Asthma |
| rs9272962   | 6 | 32643452 | T | G | 0.5485 | 0.1164  | 0.0054 | 6.98E-102 | 21.4309  | 1198533 | Asthma |
| rs1065043   | 6 | 32643457 | T | C | 0.2672 | 0.1136  | 0.0061 | 5.87E-77  | 18.5680  | 1198533 | Asthma |
| rs1065044   | 6 | 32643466 | T | C | 0.2671 | 0.1136  | 0.0061 | 6.28E-77  | 18.5635  | 1198533 | Asthma |
| rs1065045   | 6 | 32643478 | T | C | 0.2810 | 0.0361  | 0.0065 | 3.41E-08  | 5.5187   | 1130071 | Asthma |
| rs1065047   | 6 | 32643483 | G | A | 0.2645 | 0.1172  | 0.0067 | 6.96E-69  | 17.5404  | 1130071 | Asthma |
| rs1065048   | 6 | 32643488 | T | C | 0.2671 | 0.1136  | 0.0061 | 5.98E-77  | 18.5659  | 1198533 | Asthma |
| rs1065049   | 6 | 32643498 | A | C | 0.2812 | 0.0360  | 0.0065 | 3.61E-08  | 5.5090   | 1130071 | Asthma |
| rs9272969   | 6 | 32643512 | G | A | 0.5466 | 0.1189  | 0.0059 | 3.18E-91  | 20.2563  | 1130071 | Asthma |
| rs45512899  | 6 | 32643522 | T | A | 0.0767 | -0.1153 | 0.0110 | 1.52E-25  | -10.4469 | 1064845 | Asthma |
| rs9272970   | 6 | 32643524 | T | C | 0.2666 | 0.1177  | 0.0067 | 7.91E-70  | 17.6648  | 1130071 | Asthma |
| rs9272971   | 6 | 32643525 | C | G | 0.5465 | 0.1190  | 0.0059 | 2.09E-91  | 20.2761  | 1130071 | Asthma |
| rs9272973   | 6 | 32643535 | T | G | 0.2666 | 0.1178  | 0.0067 | 7.15E-70  | 17.6695  | 1130071 | Asthma |
| rs9272974   | 6 | 32643538 | T | C | 0.5464 | 0.1190  | 0.0059 | 2.25E-91  | 20.2716  | 1130071 | Asthma |
| rs9272975   | 6 | 32643544 | A | T | 0.3185 | 0.0409  | 0.0070 | 5.25E-09  | 5.8389   | 762051  | Asthma |
| rs9272976   | 6 | 32643564 | A | G | 0.5462 | 0.1184  | 0.0059 | 1.42E-90  | 20.1810  | 1130071 | Asthma |
| rs9272978   | 6 | 32643568 | A | C | 0.3216 | 0.0433  | 0.0070 | 5.94E-10  | 6.1920   | 762051  | Asthma |
| rs9272980   | 6 | 32643580 | T | C | 0.2681 | 0.1240  | 0.0077 | 2.98E-58  | 16.0909  | 973993  | Asthma |
| rs9272981   | 6 | 32643596 | A | G | 0.5502 | 0.1288  | 0.0066 | 1.08E-83  | 19.3826  | 973993  | Asthma |
| rs9272983   | 6 | 32643615 | T | C | 0.2946 | 0.1313  | 0.0085 | 3.04E-54  | 15.5091  | 844071  | Asthma |
| rs9272984   | 6 | 32643616 | G | A | 0.2946 | 0.1313  | 0.0085 | 3.04E-54  | 15.5091  | 844071  | Asthma |
| rs9272985   | 6 | 32643624 | G | A | 0.2597 | 0.0468  | 0.0077 | 1.01E-09  | 6.1079   | 973993  | Asthma |
| rs9272988   | 6 | 32643629 | G | A | 0.2613 | 0.0444  | 0.0076 | 5.23E-09  | 5.8395   | 973993  | Asthma |
| rs9272989   | 6 | 32643641 | C | A | 0.2845 | 0.1212  | 0.0074 | 1.31E-59  | 16.2825  | 973993  | Asthma |
| rs9272990   | 6 | 32643650 | A | T | 0.2794 | 0.1152  | 0.0065 | 1.19E-69  | 17.6412  | 1130071 | Asthma |
| rs7757696   | 6 | 32643673 | G | T | 0.4471 | -0.1234 | 0.0060 | 4.23E-93  | -20.4667 | 1042455 | Asthma |
| rs9272995   | 6 | 32643689 | G | A | 0.2821 | 0.1134  | 0.0065 | 1.68E-67  | 17.3590  | 1064845 | Asthma |
| rs9272998   | 6 | 32643697 | A | G | 0.2743 | 0.1068  | 0.0062 | 3.73E-66  | 17.1807  | 1221848 | Asthma |
| rs9273002   | 6 | 32643736 | G | A | 0.2879 | 0.1155  | 0.0083 | 2.35E-44  | 13.9708  | 605973  | Asthma |
| rs9273007   | 6 | 32643760 | T | C | 0.2794 | 0.1068  | 0.0054 | 1.56E-85  | 19.6003  | 1349938 | Asthma |
| rs9273008   | 6 | 32643795 | A | T | 0.2843 | 0.1083  | 0.0053 | 1.16E-91  | 20.3045  | 1376071 | Asthma |
| rs9273009   | 6 | 32643802 | G | A | 0.2845 | 0.1127  | 0.0058 | 2.28E-83  | 19.3448  | 1224666 | Asthma |
| rs5002178   | 6 | 32643813 | G | A | 0.3698 | -0.0926 | 0.0052 | 2.84E-71  | -17.8510 | 1349938 | Asthma |
| rs9273013   | 6 | 32643872 | C | T | 0.4489 | -0.1163 | 0.0054 | 1.10E-101 | -21.4083 | 1198533 | Asthma |
| rs9273014   | 6 | 32643873 | A | G | 0.3006 | 0.1181  | 0.0058 | 2.64E-92  | 20.3776  | 1198533 | Asthma |
| rs36214506  | 6 | 32643932 | C | T | 0.0761 | -0.1147 | 0.0101 | 6.17E-30  | -11.3666 | 1159440 | Asthma |
| rs9273020   | 6 | 32643946 | T | G | 0.5486 | 0.1163  | 0.0054 | 1.80E-101 | 21.3869  | 1198533 | Asthma |
| rs9273021   | 6 | 32643948 | G | A | 0.5486 | 0.1163  | 0.0054 | 1.89E-101 | 21.3833  | 1198533 | Asthma |
| rs9273022   | 6 | 32643960 | C | T | 0.2889 | 0.1217  | 0.0074 | 2.52E-61  | 16.5226  | 973993  | Asthma |
| rs9273023   | 6 | 32643979 | G | C | 0.2956 | 0.0359  | 0.0064 | 2.10E-08  | 5.6038   | 830513  | Asthma |
| rs36214159  | 6 | 32643982 | G | T | 0.0761 | -0.1161 | 0.0103 | 1.50E-29  | -11.2887 | 1133307 | Asthma |
| rs9273025   | 6 | 32643983 | T | G | 0.2830 | 0.1128  | 0.0065 | 4.23E-68  | 17.4377  | 1130071 | Asthma |
| rs9273026   | 6 | 32643992 | C | G | 0.2884 | 0.1181  | 0.0074 | 1.41E-57  | 15.9939  | 973993  | Asthma |
| rs36214155  | 6 | 32644001 | C | T | 0.1128 | -0.0648 | 0.0091 | 8.46E-13  | -7.1535  | 1068588 | Asthma |
| rs9273027   | 6 | 32644006 | G | A | 0.5442 | 0.1198  | 0.0059 | 2.76E-92  | 20.3764  | 1130071 | Asthma |
| rs9273028   | 6 | 32644015 | G | A | 0.3139 | 0.0715  | 0.0084 | 1.46E-17  | 8.5302   | 544513  | Asthma |
| rs9273029   | 6 | 32644018 | A | G | 0.3052 | 0.0472  | 0.0072 | 7.21E-11  | 6.5162   | 674435  | Asthma |
| rs9273030   | 6 | 32644028 | A | T | 0.5840 | 0.1189  | 0.0065 | 3.44E-75  | 18.3470  | 696825  | Asthma |
| rs9273031   | 6 | 32644072 | C | A | 0.2795 | 0.1107  | 0.0066 | 4.54E-64  | 16.8992  | 1064845 | Asthma |
| rs9273032   | 6 | 32644083 | A | G | 0.1680 | -0.0469 | 0.0073 | 1.29E-10  | -6.4282  | 1224666 | Asthma |
| rs9273033   | 6 | 32644096 | C | T | 0.5487 | 0.1163  | 0.0054 | 9.58E-102 | 21.4152  | 1198533 | Asthma |
| rs9273034   | 6 | 32644097 | T | G | 0.5487 | 0.1163  | 0.0054 | 9.59E-102 | 21.4152  | 1198533 | Asthma |
| rs9273035   | 6 | 32644109 | A | G | 0.2689 | 0.0359  | 0.0066 | 4.28E-08  | 5.4788   | 1130071 | Asthma |
| rs9273036   | 6 | 32644121 | G | A | 0.2786 | 0.1094  | 0.0060 | 1.54E-74  | 18.2667  | 1198533 | Asthma |
| rs9273037   | 6 | 32644135 | A | G | 0.2698 | 0.0332  | 0.0060 | 3.91E-08  | 5.4949   | 1198533 | Asthma |
| rs9273038   | 6 | 32644154 | A | T | 0.4510 | -0.1166 | 0.0054 | 4.74E-102 | -21.4479 | 1198533 | Asthma |

|             |   |          |   |   |        |         |        |           |          |         |        |
|-------------|---|----------|---|---|--------|---------|--------|-----------|----------|---------|--------|
| rs9273039   | 6 | 32644174 | T | C | 0.2698 | 0.0335  | 0.0061 | 3.14E-08  | 5.5333   | 1198533 | Asthma |
| rs9273040   | 6 | 32644181 | G | C | 0.2766 | 0.1119  | 0.0065 | 8.99E-66  | 17.1293  | 1130071 | Asthma |
| rs9273041   | 6 | 32644186 | A | T | 0.2699 | 0.0335  | 0.0061 | 3.16E-08  | 5.5326   | 1198533 | Asthma |
| rs9273042   | 6 | 32644187 | T | C | 0.2552 | 0.1058  | 0.0078 | 1.23E-41  | 13.5174  | 811023  | Asthma |
| rs9273043   | 6 | 32644191 | G | T | 0.4512 | -0.1165 | 0.0054 | 9.95E-102 | -21.4147 | 1198533 | Asthma |
| rs9273044   | 6 | 32644194 | C | G | 0.2717 | 0.1127  | 0.0063 | 7.72E-71  | 17.7952  | 1221848 | Asthma |
| rs9273045   | 6 | 32644205 | C | A | 0.2418 | 0.0918  | 0.0064 | 5.69E-46  | 14.2332  | 1221848 | Asthma |
| rs9273046   | 6 | 32644226 | T | C | 0.5488 | 0.1164  | 0.0054 | 8.15E-102 | 21.4228  | 1198533 | Asthma |
| rs9273047   | 6 | 32644229 | T | C | 0.2713 | 0.0340  | 0.0061 | 2.01E-08  | 5.6108   | 1198533 | Asthma |
| rs9273048   | 6 | 32644231 | C | T | 0.2774 | 0.1096  | 0.0060 | 3.58E-74  | 18.2204  | 1198533 | Asthma |
| rs9273049   | 6 | 32644257 | T | C | 0.4243 | 0.1023  | 0.0068 | 8.56E-52  | 15.1413  | 971764  | Asthma |
| rs9273050   | 6 | 32644258 | G | A | 0.4135 | 0.1322  | 0.0078 | 8.17E-65  | 17.0008  | 844071  | Asthma |
| rs9273051   | 6 | 32644260 | A | G | 0.2062 | 0.0556  | 0.0076 | 3.40E-13  | 7.2775   | 792368  | Asthma |
| rs9273052   | 6 | 32644264 | G | A | 0.2765 | 0.1099  | 0.0060 | 2.70E-74  | 18.2346  | 1198533 | Asthma |
| rs9273053   | 6 | 32644273 | T | A | 0.5490 | 0.1159  | 0.0053 | 2.69E-104 | 21.6872  | 1224666 | Asthma |
| rs9273054   | 6 | 32644302 | C | T | 0.2936 | 0.0368  | 0.0059 | 4.37E-10  | 6.2401   | 1224666 | Asthma |
| rs9273055   | 6 | 32644311 | T | G | 0.2937 | 0.0367  | 0.0059 | 4.73E-10  | 6.2276   | 1224666 | Asthma |
| rs78846394  | 6 | 32644319 | G | A | 0.0760 | -0.1148 | 0.0101 | 6.31E-30  | -11.3642 | 1159440 | Asthma |
| rs9273056   | 6 | 32644320 | T | G | 0.4518 | -0.1161 | 0.0054 | 2.15E-104 | -21.6970 | 1224666 | Asthma |
| rs9273057   | 6 | 32644327 | T | C | 0.2525 | 0.1044  | 0.0070 | 1.17E-49  | 14.8149  | 879485  | Asthma |
| rs9273059   | 6 | 32644334 | A | G | 0.2400 | 0.0984  | 0.0060 | 6.61E-61  | 16.4643  | 1290310 | Asthma |
| rs9273060   | 6 | 32644337 | G | A | 0.4156 | 0.0807  | 0.0071 | 2.46E-30  | 11.4462  | 723906  | Asthma |
| rs9273062   | 6 | 32644384 | A | C | 0.2490 | 0.0995  | 0.0063 | 5.47E-57  | 15.9094  | 1186521 | Asthma |
| rs9273063   | 6 | 32644389 | T | C | 0.2716 | 0.1244  | 0.0065 | 7.43E-82  | 19.1643  | 1094744 | Asthma |
| rs9273065   | 6 | 32644428 | G | T | 0.5480 | 0.1165  | 0.0054 | 1.21E-101 | 21.4043  | 1198533 | Asthma |
| rs9273066   | 6 | 32644431 | A | G | 0.5480 | 0.1166  | 0.0054 | 1.14E-101 | 21.4078  | 1198533 | Asthma |
| rs9273067   | 6 | 32644436 | C | A | 0.2300 | -0.0670 | 0.0066 | 4.50E-24  | -10.1201 | 1198533 | Asthma |
| rs9273068   | 6 | 32644437 | A | T | 0.2755 | 0.0509  | 0.0062 | 1.26E-16  | 8.2771   | 1221848 | Asthma |
| rs9273069   | 6 | 32644456 | T | C | 0.5488 | 0.1158  | 0.0053 | 5.13E-104 | 21.6582  | 1224666 | Asthma |
| rs9273070   | 6 | 32644464 | T | A | 0.2647 | 0.1201  | 0.0061 | 1.76E-85  | 19.5936  | 1198533 | Asthma |
| rs9273071   | 6 | 32644474 | G | T | 0.2562 | 0.1069  | 0.0059 | 2.83E-73  | 18.1062  | 1290310 | Asthma |
| rs9273073   | 6 | 32644502 | C | T | 0.2770 | 0.1166  | 0.0058 | 2.22E-89  | 20.0451  | 1290310 | Asthma |
| rs9273074   | 6 | 32644510 | G | A | 0.5459 | 0.1165  | 0.0055 | 2.48E-101 | 21.3718  | 1198533 | Asthma |
| rs9273075   | 6 | 32644511 | G | A | 0.5458 | 0.1165  | 0.0055 | 2.72E-101 | 21.3665  | 1198533 | Asthma |
| rs9273076   | 6 | 32644524 | T | C | 0.1684 | -0.0469 | 0.0073 | 1.27E-10  | -6.4307  | 1224666 | Asthma |
| rs9273078   | 6 | 32644532 | A | T | 0.5066 | 0.0936  | 0.0063 | 2.36E-50  | 14.9224  | 873072  | Asthma |
| rs9273079   | 6 | 32644549 | T | C | 0.2776 | 0.1125  | 0.0083 | 6.23E-42  | 13.5676  | 690861  | Asthma |
| rs9273081   | 6 | 32644559 | A | G | 0.5148 | 0.1150  | 0.0053 | 1.14E-104 | 21.7267  | 1257764 | Asthma |
| rs9273082   | 6 | 32644562 | T | C | 0.5008 | 0.1087  | 0.0054 | 2.32E-91  | 20.2716  | 1257764 | Asthma |
| rs9273083   | 6 | 32644566 | C | T | 0.5029 | 0.0987  | 0.0053 | 1.32E-78  | 18.7704  | 1257764 | Asthma |
| rs9273084   | 6 | 32644619 | C | T | 0.5248 | 0.1129  | 0.0051 | 3.32E-110 | 22.3038  | 1316443 | Asthma |
| rs6927022   | 6 | 32644620 | G | A | 0.4468 | 0.1096  | 0.0050 | 9.55E-105 | 21.7360  | 1316443 | Asthma |
| rs9273086   | 6 | 32644633 | T | C | 0.5566 | 0.1228  | 0.0059 | 1.12E-96  | 20.8648  | 1068588 | Asthma |
| rs62404117  | 6 | 32644640 | A | G | 0.0715 | -0.1089 | 0.0096 | 1.04E-29  | -11.3206 | 1310845 | Asthma |
| rs200930495 | 6 | 32644683 | A | G | 0.2529 | 0.0975  | 0.0070 | 1.42E-43  | 13.8422  | 1065770 | Asthma |
| rs9273088   | 6 | 32644711 | C | A | 0.5496 | 0.1263  | 0.0061 | 1.96E-96  | 20.8373  | 1065770 | Asthma |
| rs9273093   | 6 | 32644737 | A | G | 0.2387 | 0.1292  | 0.0090 | 1.22E-46  | 14.3406  | 605973  | Asthma |
| rs62404118  | 6 | 32644745 | C | G | 0.0816 | -0.1042 | 0.0127 | 2.56E-16  | -8.1920  | 908767  | Asthma |
| rs9273096   | 6 | 32644763 | C | G | 0.4751 | 0.1165  | 0.0069 | 2.16E-64  | 16.9437  | 908767  | Asthma |
| rs9273097   | 6 | 32644771 | G | A | 0.3143 | 0.0487  | 0.0073 | 2.13E-11  | 6.6971   | 973993  | Asthma |
| rs9273098   | 6 | 32644779 | G | C | 0.4867 | 0.1182  | 0.0068 | 1.73E-68  | 17.4888  | 973993  | Asthma |
| rs9273100   | 6 | 32644782 | G | T | 0.4866 | 0.1183  | 0.0068 | 1.32E-68  | 17.5048  | 973993  | Asthma |
| rs9273101   | 6 | 32644787 | A | G | 0.4866 | 0.1184  | 0.0068 | 9.35E-69  | 17.5241  | 973993  | Asthma |
| rs9273102   | 6 | 32644789 | C | T | 0.2430 | 0.1262  | 0.0091 | 1.52E-43  | 13.8367  | 540747  | Asthma |
| rs9273103   | 6 | 32644799 | C | G | 0.2365 | 0.1292  | 0.0091 | 4.02E-46  | 14.2572  | 605973  | Asthma |
| rs9273104   | 6 | 32644818 | T | C | 0.2354 | 0.1302  | 0.0091 | 1.71E-46  | 14.3179  | 605973  | Asthma |
| rs9273105   | 6 | 32644824 | A | G | 0.4739 | 0.0892  | 0.0064 | 1.36E-44  | 14.0097  | 1033224 | Asthma |
| rs9273106   | 6 | 32644827 | A | G | 0.1782 | -0.0619 | 0.0090 | 4.73E-12  | -6.9134  | 973993  | Asthma |
| rs9273107   | 6 | 32644843 | G | A | 0.1729 | 0.0974  | 0.0149 | 6.59E-11  | 6.5295   | 199389  | Asthma |
| rs9273108   | 6 | 32644849 | T | C | 0.2412 | 0.1284  | 0.0091 | 7.76E-45  | 14.0500  | 540747  | Asthma |
| rs9273109   | 6 | 32644850 | G | A | 0.3494 | 0.0705  | 0.0066 | 1.53E-26  | 10.6623  | 1065770 | Asthma |
| rs9273110   | 6 | 32644856 | C | G | 0.2412 | 0.1285  | 0.0091 | 7.00E-45  | 14.0566  | 540747  | Asthma |
| rs9273112   | 6 | 32644871 | T | A | 0.5476 | 0.1291  | 0.0067 | 5.74E-83  | 19.2967  | 973993  | Asthma |
| rs9273113   | 6 | 32644878 | G | A | 0.4776 | 0.0889  | 0.0086 | 4.05E-25  | 10.3532  | 654945  | Asthma |
| rs9273114   | 6 | 32644887 | G | C | 0.5476 | 0.1293  | 0.0067 | 3.67E-83  | 19.3206  | 973993  | Asthma |
| rs9273115   | 6 | 32644895 | A | C | 0.5475 | 0.1293  | 0.0067 | 3.81E-83  | 19.3173  | 973993  | Asthma |
| rs9273116   | 6 | 32644909 | A | G | 0.3760 | 0.0518  | 0.0064 | 8.15E-16  | 8.0519   | 1130071 | Asthma |
| rs9273117   | 6 | 32644911 | G | A | 0.5359 | 0.1304  | 0.0068 | 1.28E-82  | 19.2558  | 973993  | Asthma |
| rs9273118   | 6 | 32644914 | G | A | 0.5445 | 0.1297  | 0.0067 | 3.89E-83  | 19.3159  | 973993  | Asthma |
| rs9273119   | 6 | 32644922 | A | T | 0.4694 | 0.1165  | 0.0068 | 4.07E-65  | 17.0411  | 973993  | Asthma |
| rs9273120   | 6 | 32644924 | T | G | 0.3196 | 0.0377  | 0.0064 | 4.11E-09  | 5.8797   | 1130071 | Asthma |
| rs9273121   | 6 | 32644948 | T | C | 0.5438 | 0.1292  | 0.0067 | 6.48E-83  | 19.2900  | 973993  | Asthma |
| rs9273122   | 6 | 32644949 | G | A | 0.5440 | 0.1293  | 0.0067 | 4.88E-83  | 19.3046  | 973993  | Asthma |
| rs9273123   | 6 | 32644956 | A | G | 0.4766 | 0.0978  | 0.0091 | 4.19E-27  | 10.7820  | 622399  | Asthma |

|            |   |          |   |   |        |         |        |           |          |         |        |
|------------|---|----------|---|---|--------|---------|--------|-----------|----------|---------|--------|
| rs9273124  | 6 | 32644975 | G | A | 0.4690 | 0.1183  | 0.0068 | 1.26E-67  | 17.3754  | 973993  | Asthma |
| rs9273125  | 6 | 32644977 | G | A | 0.4691 | 0.1183  | 0.0068 | 1.25E-67  | 17.3760  | 973993  | Asthma |
| rs9273126  | 6 | 32644984 | T | C | 0.2936 | 0.0515  | 0.0074 | 3.27E-12  | 6.9657   | 973993  | Asthma |
| rs9273127  | 6 | 32644985 | A | C | 0.2496 | 0.1182  | 0.0089 | 2.29E-40  | 13.3012  | 605973  | Asthma |
| rs9273128  | 6 | 32644992 | C | G | 0.2507 | 0.1176  | 0.0089 | 3.94E-40  | 13.2604  | 605973  | Asthma |
| rs9273129  | 6 | 32644997 | A | T | 0.2507 | 0.1176  | 0.0089 | 3.94E-40  | 13.2603  | 605973  | Asthma |
| rs9273130  | 6 | 32644998 | A | G | 0.2507 | 0.1176  | 0.0089 | 3.94E-40  | 13.2601  | 605973  | Asthma |
| rs9273132  | 6 | 32645023 | G | T | 0.5449 | 0.1305  | 0.0067 | 4.70E-85  | 19.5435  | 973993  | Asthma |
| rs9273133  | 6 | 32645024 | C | G | 0.2498 | 0.1182  | 0.0089 | 2.16E-40  | 13.3059  | 605973  | Asthma |
| rs9273134  | 6 | 32645030 | T | C | 0.5454 | 0.1302  | 0.0067 | 1.04E-84  | 19.5027  | 973993  | Asthma |
| rs9273135  | 6 | 32645039 | G | A | 0.5456 | 0.1303  | 0.0067 | 7.76E-85  | 19.5176  | 973993  | Asthma |
| rs9273136  | 6 | 32645046 | C | T | 0.5462 | 0.1305  | 0.0067 | 5.03E-85  | 19.5402  | 973993  | Asthma |
| rs9273137  | 6 | 32645050 | A | G | 0.5462 | 0.1305  | 0.0067 | 5.02E-85  | 19.5402  | 973993  | Asthma |
| rs9273138  | 6 | 32645066 | T | G | 0.1940 | 0.0790  | 0.0088 | 4.25E-19  | 8.9302   | 697750  | Asthma |
| rs9273139  | 6 | 32645083 | G | A | 0.5487 | 0.1301  | 0.0067 | 3.36E-84  | 19.4431  | 973993  | Asthma |
| rs9273140  | 6 | 32645091 | C | T | 0.5497 | 0.1298  | 0.0067 | 4.18E-84  | 19.4314  | 973993  | Asthma |
| rs9273141  | 6 | 32645106 | G | A | 0.5496 | 0.1299  | 0.0067 | 3.71E-84  | 19.4379  | 973993  | Asthma |
| rs9273142  | 6 | 32645109 | C | T | 0.5525 | 0.1244  | 0.0061 | 6.94E-94  | 20.5553  | 1042455 | Asthma |
| rs9273143  | 6 | 32645122 | G | T | 0.5560 | 0.1228  | 0.0061 | 1.28E-89  | 20.0733  | 977229  | Asthma |
| rs62404119 | 6 | 32645128 | A | T | 0.0722 | -0.1344 | 0.0115 | 1.32E-31  | -11.6964 | 1029518 | Asthma |
| rs9273144  | 6 | 32645138 | C | T | 0.2471 | 0.0981  | 0.0072 | 6.25E-42  | 13.5674  | 1065770 | Asthma |
| rs62404120 | 6 | 32645185 | C | T | 0.0761 | -0.1148 | 0.0101 | 5.24E-30  | -11.3804 | 1159440 | Asthma |
| rs9273146  | 6 | 32645202 | A | T | 0.4498 | -0.1165 | 0.0054 | 8.83E-102 | -21.4186 | 1198533 | Asthma |
| rs9273147  | 6 | 32645204 | A | G | 0.4498 | -0.1165 | 0.0054 | 8.23E-102 | -21.4223 | 1198533 | Asthma |
| rs9273148  | 6 | 32645205 | A | T | 0.2733 | 0.1228  | 0.0060 | 5.96E-93  | 20.4495  | 1198533 | Asthma |
| rs9273149  | 6 | 32645210 | A | G | 0.2825 | 0.1179  | 0.0060 | 1.34E-86  | 19.7241  | 1198533 | Asthma |
| rs9273154  | 6 | 32645251 | A | G | 0.2650 | 0.1209  | 0.0067 | 6.31E-73  | 18.0619  | 1130071 | Asthma |
| rs9273155  | 6 | 32645265 | C | A | 0.2649 | 0.1209  | 0.0067 | 6.32E-73  | 18.0619  | 1130071 | Asthma |
| rs9273156  | 6 | 32645273 | A | G | 0.5504 | 0.1165  | 0.0054 | 9.61E-102 | 21.4153  | 1198533 | Asthma |
| rs9273157  | 6 | 32645275 | G | C | 0.2693 | 0.1281  | 0.0075 | 1.23E-65  | 17.1105  | 1000149 | Asthma |
| rs9273158  | 6 | 32645285 | C | G | 0.5502 | 0.1163  | 0.0054 | 2.04E-101 | 21.3808  | 1198533 | Asthma |
| rs9273160  | 6 | 32645327 | G | T | 0.5450 | 0.1530  | 0.0076 | 4.02E-89  | 20.0162  | 844071  | Asthma |
| rs9273161  | 6 | 32645329 | T | G | 0.2711 | 0.0619  | 0.0087 | 1.16E-12  | 7.1097   | 844071  | Asthma |
| rs9273162  | 6 | 32645330 | T | G | 0.2711 | 0.0619  | 0.0087 | 1.16E-12  | 7.1098   | 844071  | Asthma |
| rs9273163  | 6 | 32645337 | T | G | 0.5447 | 0.1192  | 0.0059 | 1.58E-91  | 20.2907  | 1130071 | Asthma |
| rs9273165  | 6 | 32645347 | G | C | 0.0614 | -0.1639 | 0.0146 | 3.08E-29  | -11.2252 | 566903  | Asthma |
| rs9273166  | 6 | 32645369 | G | A | 0.5489 | 0.1292  | 0.0067 | 5.40E-84  | 19.4186  | 973993  | Asthma |
| rs9273167  | 6 | 32645386 | A | C | 0.4970 | 0.0995  | 0.0063 | 1.28E-56  | 15.8558  | 1033224 | Asthma |
| rs9273168  | 6 | 32645396 | C | T | 0.5487 | 0.1292  | 0.0067 | 5.83E-84  | 19.4151  | 973993  | Asthma |
| rs9273170  | 6 | 32645400 | G | A | 0.5487 | 0.1292  | 0.0067 | 5.82E-84  | 19.4151  | 973993  | Asthma |
| rs9273172  | 6 | 32645447 | A | C | 0.4465 | -0.1236 | 0.0060 | 3.07E-93  | -20.4829 | 1042455 | Asthma |
| rs9273174  | 6 | 32645460 | G | A | 0.2885 | 0.1288  | 0.0074 | 1.06E-67  | 17.3854  | 973993  | Asthma |
| rs9273176  | 6 | 32645523 | A | G | 0.5500 | 0.1290  | 0.0067 | 3.37E-83  | 19.3238  | 973993  | Asthma |
| rs9273179  | 6 | 32645528 | G | A | 0.5500 | 0.1290  | 0.0067 | 3.00E-83  | 19.3297  | 973993  | Asthma |
| rs9273184  | 6 | 32645545 | A | G | 0.2690 | 0.0635  | 0.0070 | 7.99E-20  | 9.1134   | 1065770 | Asthma |
| rs9273185  | 6 | 32645563 | G | A | 0.5484 | 0.1294  | 0.0067 | 2.48E-83  | 19.3402  | 973993  | Asthma |
| rs62404121 | 6 | 32645572 | A | G | 0.0816 | -0.0916 | 0.0125 | 1.86E-13  | -7.3582  | 908767  | Asthma |
| rs28633411 | 6 | 32645585 | A | G | 0.0541 | -0.1091 | 0.0165 | 3.74E-11  | -6.6139  | 908767  | Asthma |
| rs9273186  | 6 | 32645595 | T | A | 0.3080 | 0.0463  | 0.0083 | 2.06E-08  | 5.6070   | 605973  | Asthma |
| rs9273187  | 6 | 32645599 | T | C | 0.2639 | 0.1271  | 0.0090 | 2.41E-45  | 14.1319  | 605973  | Asthma |
| rs9273188  | 6 | 32645607 | T | C | 0.5377 | 0.1262  | 0.0068 | 5.14E-78  | 18.6974  | 973993  | Asthma |
| rs9273190  | 6 | 32645641 | A | T | 0.3951 | -0.1077 | 0.0087 | 4.97E-35  | -12.3485 | 540747  | Asthma |
| rs9273191  | 6 | 32645647 | T | C | 0.4871 | 0.1548  | 0.0085 | 1.43E-74  | 18.2705  | 605973  | Asthma |
| rs9273192  | 6 | 32645660 | G | A | 0.5064 | -0.0886 | 0.0073 | 5.68E-34  | -12.1508 | 973993  | Asthma |
| rs9273209  | 6 | 32645833 | T | C | 0.4407 | 0.1356  | 0.0079 | 1.65E-65  | 17.0946  | 844071  | Asthma |
| rs9273213  | 6 | 32645919 | A | T | 0.3075 | -0.1028 | 0.0075 | 1.60E-42  | -13.6673 | 973993  | Asthma |
| rs9273214  | 6 | 32645926 | T | C | 0.4331 | 0.1105  | 0.0071 | 4.41E-55  | 15.6314  | 912533  | Asthma |
| rs9273215  | 6 | 32645935 | A | G | 0.4813 | 0.1531  | 0.0077 | 2.49E-88  | 19.9245  | 665204  | Asthma |
| rs9273218  | 6 | 32645979 | A | C | 0.5118 | 0.1355  | 0.0071 | 1.10E-81  | 19.1428  | 674435  | Asthma |
| rs9273220  | 6 | 32645982 | T | C | 0.4823 | 0.1554  | 0.0085 | 1.42E-74  | 18.2707  | 605973  | Asthma |
| rs9273224  | 6 | 32646027 | T | A | 0.3881 | -0.0876 | 0.0064 | 1.69E-42  | -13.6628 | 1068588 | Asthma |
| rs9273225  | 6 | 32646040 | G | A | 0.5051 | 0.1292  | 0.0063 | 1.50E-94  | 20.6289  | 1068588 | Asthma |
| rs9273226  | 6 | 32646047 | T | C | 0.4608 | 0.1103  | 0.0060 | 8.20E-75  | 18.3004  | 1127819 | Asthma |
| rs9273229  | 6 | 32646137 | C | A | 0.3120 | 0.0544  | 0.0074 | 2.56E-13  | 7.3156   | 908767  | Asthma |
| rs9273230  | 6 | 32646153 | A | T | 0.5471 | 0.1296  | 0.0067 | 5.76E-84  | 19.4154  | 973993  | Asthma |
| rs9273231  | 6 | 32646160 | A | C | 0.5466 | 0.1295  | 0.0067 | 8.82E-84  | 19.3936  | 973993  | Asthma |
| rs9273232  | 6 | 32646167 | T | A | 0.5449 | 0.1297  | 0.0067 | 4.11E-84  | 19.4332  | 973993  | Asthma |
| rs9273234  | 6 | 32646177 | G | A | 0.6000 | 0.1315  | 0.0076 | 1.14E-67  | 17.3815  | 540747  | Asthma |
| rs9273235  | 6 | 32646180 | A | T | 0.6000 | 0.1315  | 0.0076 | 1.14E-67  | 17.3815  | 540747  | Asthma |
| rs9273236  | 6 | 32646196 | C | G | 0.5375 | 0.1291  | 0.0067 | 4.16E-83  | 19.3132  | 973993  | Asthma |
| rs9273237  | 6 | 32646199 | T | C | 0.3986 | 0.0922  | 0.0067 | 4.78E-43  | 13.7546  | 1065770 | Asthma |
| rs9273238  | 6 | 32646220 | G | A | 0.2582 | 0.0384  | 0.0069 | 3.07E-08  | 5.5377   | 1065770 | Asthma |
| rs9273240  | 6 | 32646223 | T | C | 0.5500 | 0.1290  | 0.0066 | 7.15E-84  | 19.4037  | 973993  | Asthma |
| rs9273241  | 6 | 32646248 | T | C | 0.5540 | 0.1237  | 0.0060 | 7.13E-94  | 20.5539  | 1042455 | Asthma |

|             |   |          |   |   |        |         |        |           |          |         |        |
|-------------|---|----------|---|---|--------|---------|--------|-----------|----------|---------|--------|
| rs34276369  | 6 | 32646260 | T | C | 0.2881 | 0.1121  | 0.0056 | 2.23E-90  | 20.1590  | 1290310 | Asthma |
| rs9273242   | 6 | 32646303 | C | T | 0.5547 | 0.1210  | 0.0055 | 3.41E-108 | 22.0972  | 1160365 | Asthma |
| rs9273243   | 6 | 32646314 | A | G | 0.5559 | 0.1226  | 0.0059 | 2.98E-96  | 20.8173  | 1068588 | Asthma |
| rs9273244   | 6 | 32646331 | G | A | 0.5559 | 0.1226  | 0.0059 | 2.53E-96  | 20.8255  | 1068588 | Asthma |
| rs9273245   | 6 | 32646333 | A | G | 0.5550 | 0.1235  | 0.0060 | 9.55E-94  | 20.5390  | 1042455 | Asthma |
| rs114430970 | 6 | 32646381 | A | G | 0.1555 | 0.1594  | 0.0147 | 1.75E-27  | 10.8621  | 567409  | Asthma |
| rs9273247   | 6 | 32646389 | C | T | 0.4989 | 0.1320  | 0.0073 | 2.09E-73  | 18.1225  | 908767  | Asthma |
| rs9273248   | 6 | 32646390 | C | T | 0.5104 | 0.1227  | 0.0071 | 8.80E-67  | 17.2642  | 908767  | Asthma |
| rs9273249   | 6 | 32646391 | A | G | 0.5051 | 0.1323  | 0.0072 | 2.17E-75  | 18.3728  | 908767  | Asthma |
| rs9273250   | 6 | 32646403 | T | C | 0.4980 | 0.1393  | 0.0072 | 2.00E-84  | 19.4689  | 973993  | Asthma |
| rs9273251   | 6 | 32646416 | G | A | 0.4982 | 0.1354  | 0.0071 | 1.76E-80  | 18.9990  | 973993  | Asthma |
| rs9273253   | 6 | 32646430 | G | T | 0.4191 | 0.1413  | 0.0075 | 1.63E-79  | 18.8810  | 908767  | Asthma |
| rs9273255   | 6 | 32646451 | G | A | 0.4481 | 0.1484  | 0.0075 | 2.03E-87  | 19.8197  | 973993  | Asthma |
| rs9273257   | 6 | 32646463 | G | A | 0.4955 | 0.1444  | 0.0085 | 2.48E-65  | 17.0701  | 540747  | Asthma |
| rs9273258   | 6 | 32646491 | G | A | 0.4055 | 0.0870  | 0.0076 | 4.33E-30  | 11.3969  | 908767  | Asthma |
| rs9273259   | 6 | 32646492 | G | T | 0.4938 | 0.1503  | 0.0085 | 1.68E-69  | 17.6222  | 540747  | Asthma |
| rs9273260   | 6 | 32646493 | G | A | 0.4957 | 0.1443  | 0.0085 | 2.38E-65  | 17.0729  | 540747  | Asthma |
| rs564014805 | 6 | 32646500 | A | T | 0.2149 | 0.1329  | 0.0119 | 5.67E-29  | 11.1714  | 476051  | Asthma |
| rs9273261   | 6 | 32646507 | G | A | 0.5976 | 0.1674  | 0.0089 | 6.21E-79  | 18.8099  | 476051  | Asthma |
| rs9273264   | 6 | 32646526 | G | A | 0.4805 | 0.1548  | 0.0085 | 3.09E-74  | 18.2281  | 605973  | Asthma |
| rs9273265   | 6 | 32646541 | G | A | 0.3676 | -0.0534 | 0.0078 | 8.15E-12  | -6.8358  | 973993  | Asthma |
| rs9273267   | 6 | 32646553 | C | T | 0.4758 | 0.1577  | 0.0088 | 1.02E-71  | 17.9082  | 540747  | Asthma |
| rs9273268   | 6 | 32646557 | C | T | 0.1836 | 0.0963  | 0.0158 | 1.02E-09  | 6.1057   | 286925  | Asthma |
| rs9273269   | 6 | 32646566 | A | G | 0.4863 | 0.1550  | 0.0086 | 2.92E-72  | 17.9775  | 540747  | Asthma |
| rs9273270   | 6 | 32646584 | C | T | 0.3722 | -0.0497 | 0.0079 | 3.33E-10  | -6.2824  | 908767  | Asthma |
| rs9273271   | 6 | 32646605 | C | A | 0.4990 | 0.1437  | 0.0084 | 1.53E-65  | 17.0982  | 540747  | Asthma |
| rs9273273   | 6 | 32646615 | T | G | 0.4904 | 0.1472  | 0.0086 | 3.36E-66  | 17.1861  | 540747  | Asthma |
| rs9273274   | 6 | 32646628 | T | C | 0.4958 | 0.1482  | 0.0085 | 4.13E-68  | 17.4400  | 540747  | Asthma |
| rs9273275   | 6 | 32646630 | G | A | 0.5083 | 0.1372  | 0.0083 | 8.42E-62  | 16.5893  | 540747  | Asthma |
| rs9273277   | 6 | 32646637 | A | T | 0.3251 | -0.1443 | 0.0085 | 4.97E-64  | -16.8944 | 540747  | Asthma |
| rs9273278   | 6 | 32646638 | C | T | 0.5065 | 0.1397  | 0.0083 | 3.15E-63  | 16.7850  | 540747  | Asthma |
| rs72852237  | 6 | 32646642 | A | C | 0.1577 | -0.0518 | 0.0094 | 4.17E-08  | -5.4836  | 908767  | Asthma |
| rs9273279   | 6 | 32646649 | T | C | 0.4898 | 0.1506  | 0.0086 | 9.75E-69  | 17.5221  | 540747  | Asthma |
| rs9273286   | 6 | 32646717 | A | G | 0.5796 | 0.1022  | 0.0071 | 1.06E-46  | 14.3507  | 973993  | Asthma |
| rs9273287   | 6 | 32646718 | G | A | 0.4906 | 0.1358  | 0.0074 | 1.60E-75  | 18.3887  | 908767  | Asthma |
| rs9273288   | 6 | 32646734 | A | T | 0.3888 | -0.0736 | 0.0073 | 6.87E-24  | -10.0786 | 973993  | Asthma |
| rs9273289   | 6 | 32646757 | A | T | 0.2562 | 0.0867  | 0.0091 | 1.51E-21  | 9.5342   | 844071  | Asthma |
| rs9273290   | 6 | 32646775 | T | C | 0.4342 | 0.0989  | 0.0088 | 1.80E-29  | 11.2723  | 654945  | Asthma |
| rs9273291   | 6 | 32646778 | C | T | 0.5215 | 0.1342  | 0.0068 | 2.77E-87  | 19.8031  | 973993  | Asthma |
| rs78568738  | 6 | 32646796 | C | T | 0.0803 | -0.1006 | 0.0127 | 2.17E-15  | -7.9308  | 908767  | Asthma |
| rs9273294   | 6 | 32646798 | A | C | 0.5260 | 0.1324  | 0.0068 | 2.21E-85  | 19.5819  | 973993  | Asthma |
| rs17843563  | 6 | 32646928 | G | T | 0.5479 | 0.1292  | 0.0067 | 1.30E-83  | 19.3725  | 973993  | Asthma |
| rs17612475  | 6 | 32646929 | A | G | 0.5479 | 0.1292  | 0.0067 | 1.30E-83  | 19.3740  | 973993  | Asthma |
| rs17612482  | 6 | 32646949 | T | C | 0.5514 | 0.1239  | 0.0060 | 1.99E-93  | 20.5031  | 1042455 | Asthma |
| rs17612489  | 6 | 32646972 | A | T | 0.4991 | 0.0927  | 0.0063 | 9.80E-49  | 14.6717  | 879485  | Asthma |
| rs17612496  | 6 | 32646975 | G | T | 0.5461 | 0.1163  | 0.0055 | 4.56E-101 | 21.3422  | 1198533 | Asthma |
| rs79139281  | 6 | 32646991 | C | T | 0.0743 | -0.1089 | 0.0118 | 3.01E-20  | -9.2183  | 977229  | Asthma |
| rs17843564  | 6 | 32647065 | G | A | 0.5485 | 0.1160  | 0.0053 | 2.69E-104 | 21.6870  | 1224666 | Asthma |
| rs17843565  | 6 | 32647070 | G | A | 0.5476 | 0.1164  | 0.0054 | 1.29E-101 | 21.4011  | 1198533 | Asthma |
| rs62404122  | 6 | 32647080 | C | G | 0.0761 | -0.1147 | 0.0101 | 6.07E-30  | -11.3676 | 1159440 | Asthma |
| rs28606662  | 6 | 32647087 | G | C | 0.1448 | -0.0788 | 0.0079 | 1.06E-23  | -10.0358 | 1224666 | Asthma |
| rs17843567  | 6 | 32647089 | G | A | 0.5471 | 0.1163  | 0.0054 | 1.29E-104 | 21.7222  | 1224666 | Asthma |
| rs17612503  | 6 | 32647095 | G | C | 0.1690 | -0.0477 | 0.0073 | 6.57E-11  | -6.5303  | 1224666 | Asthma |
| rs17612510  | 6 | 32647106 | T | C | 0.5262 | 0.1204  | 0.0057 | 5.27E-99  | 21.1192  | 1127819 | Asthma |
| rs28375404  | 6 | 32647140 | T | C | 0.0587 | -0.0865 | 0.0136 | 1.91E-10  | -6.3686  | 1046696 | Asthma |
| rs17612518  | 6 | 32647150 | T | G | 0.4526 | 0.0939  | 0.0091 | 3.77E-25  | 10.3600  | 654945  | Asthma |
| rs17843568  | 6 | 32647164 | T | G | 0.5430 | 0.1263  | 0.0068 | 9.31E-77  | 18.5421  | 908767  | Asthma |
| rs17843569  | 6 | 32647166 | C | G | 0.1914 | -0.0601 | 0.0086 | 3.62E-12  | -6.9512  | 973993  | Asthma |
| rs17843570  | 6 | 32647169 | G | T | 0.5428 | 0.1263  | 0.0068 | 1.05E-76  | 18.5361  | 908767  | Asthma |
| rs28453802  | 6 | 32647332 | T | G | 0.2202 | -0.0484 | 0.0084 | 1.03E-08  | -5.7253  | 908767  | Asthma |
| rs550204266 | 6 | 32647491 | C | T | 0.4447 | 0.1435  | 0.0076 | 6.92E-79  | 18.8045  | 973993  | Asthma |
| rs17612533  | 6 | 32647530 | G | A | 0.5433 | 0.1292  | 0.0067 | 9.57E-82  | 19.1502  | 973993  | Asthma |
| rs17612541  | 6 | 32647531 | T | C | 0.5433 | 0.1292  | 0.0067 | 9.27E-82  | 19.1519  | 973993  | Asthma |
| rs78337030  | 6 | 32647533 | G | A | 0.0805 | -0.1052 | 0.0115 | 3.96E-20  | -9.1895  | 977229  | Asthma |
| rs17612548  | 6 | 32647535 | A | G | 0.5357 | 0.1259  | 0.0061 | 5.45E-94  | 20.5667  | 1065770 | Asthma |
| rs17612555  | 6 | 32647589 | G | A | 0.4464 | -0.1161 | 0.0053 | 8.46E-105 | -21.7408 | 1224666 | Asthma |
| rs17843573  | 6 | 32647623 | C | T | 0.4468 | -0.1158 | 0.0050 | 9.17E-118 | -23.0697 | 1316443 | Asthma |
| rs7745002   | 6 | 32647644 | G | A | 0.4540 | 0.1121  | 0.0050 | 1.04E-109 | 22.2529  | 1316443 | Asthma |
| rs17843575  | 6 | 32647650 | T | C | 0.5435 | 0.1142  | 0.0050 | 1.51E-114 | 22.7486  | 1316443 | Asthma |
| rs17843576  | 6 | 32647654 | A | G | 0.5517 | 0.1158  | 0.0053 | 9.01E-105 | 21.7372  | 1224666 | Asthma |
| rs17612562  | 6 | 32647669 | G | T | 0.4973 | 0.0911  | 0.0062 | 1.37E-48  | 14.6490  | 905618  | Asthma |
| rs28479464  | 6 | 32647680 | C | T | 0.2212 | -0.1028 | 0.0065 | 1.65E-56  | -15.8396 | 1224666 | Asthma |
| rs17612576  | 6 | 32647681 | A | G | 0.5424 | 0.1163  | 0.0052 | 2.67E-112 | 22.5195  | 1283897 | Asthma |
| rs17612583  | 6 | 32647693 | A | G | 0.4930 | 0.1086  | 0.0053 | 5.97E-95  | 20.6738  | 1316443 | Asthma |



|             |   |          |   |   |        |         |        |           |          |         |        |
|-------------|---|----------|---|---|--------|---------|--------|-----------|----------|---------|--------|
| rs17843577  | 6 | 32647733 | C | T | 0.4528 | -0.1142 | 0.0050 | 3.90E-114 | -22.7062 | 1316443 | Asthma |
| rs17843578  | 6 | 32647743 | G | A | 0.4474 | -0.1160 | 0.0053 | 6.85E-105 | -21.7497 | 1224666 | Asthma |
| rs17843580  | 6 | 32647774 | A | G | 0.4518 | -0.1184 | 0.0052 | 2.28E-115 | -22.8298 | 1257764 | Asthma |
| rs17612590  | 6 | 32647801 | A | G | 0.5321 | 0.1137  | 0.0052 | 6.95E-105 | 21.7489  | 1257764 | Asthma |
| rs17612597  | 6 | 32647805 | C | A | 0.5490 | 0.1167  | 0.0054 | 4.14E-102 | 21.4537  | 1198533 | Asthma |
| rs17612604  | 6 | 32647820 | C | A | 0.5490 | 0.1167  | 0.0054 | 4.03E-102 | 21.4559  | 1198533 | Asthma |
| rs17612610  | 6 | 32647834 | T | A | 0.5484 | 0.1165  | 0.0054 | 6.55E-102 | 21.4334  | 1198533 | Asthma |
| rs17612617  | 6 | 32647836 | T | G | 0.5484 | 0.1165  | 0.0054 | 7.18E-102 | 21.4290  | 1198533 | Asthma |
| rs17843581  | 6 | 32647861 | C | A | 0.5487 | 0.1166  | 0.0054 | 4.83E-102 | 21.4467  | 1198533 | Asthma |
| rs17843582  | 6 | 32647874 | A | G | 0.5484 | 0.1165  | 0.0054 | 6.00E-102 | 21.4367  | 1198533 | Asthma |
| rs17843583  | 6 | 32647875 | C | A | 0.5376 | 0.1253  | 0.0057 | 6.28E-109 | 22.1731  | 1127842 | Asthma |
| rs17843584  | 6 | 32647891 | G | T | 0.4506 | -0.1167 | 0.0054 | 4.70E-102 | -21.4490 | 1198533 | Asthma |
| rs17612625  | 6 | 32647925 | A | C | 0.4457 | -0.1158 | 0.0050 | 8.42E-118 | -23.0734 | 1316443 | Asthma |
| rs17612633  | 6 | 32647933 | G | C | 0.4457 | -0.1159 | 0.0050 | 7.00E-118 | -23.0817 | 1316443 | Asthma |
| rs28394498  | 6 | 32647961 | T | A | 0.1433 | -0.0792 | 0.0079 | 6.26E-24  | -10.0877 | 1224666 | Asthma |
| rs17612640  | 6 | 32647977 | G | A | 0.4462 | -0.1159 | 0.0053 | 1.37E-104 | -21.7182 | 1224666 | Asthma |
| rs17843586  | 6 | 32648024 | G | A | 0.5494 | 0.1178  | 0.0059 | 2.89E-87  | 19.8023  | 1064845 | Asthma |
| rs17843587  | 6 | 32648025 | T | C | 0.5494 | 0.1178  | 0.0059 | 2.90E-87  | 19.8023  | 1064845 | Asthma |
| rs17843588  | 6 | 32648030 | G | A | 0.5494 | 0.1177  | 0.0059 | 3.33E-87  | 19.7939  | 1064845 | Asthma |
| rs17612654  | 6 | 32648036 | T | C | 0.5510 | 0.1516  | 0.0078 | 4.13E-84  | 19.4317  | 778845  | Asthma |
| rs17612661  | 6 | 32648037 | G | A | 0.5510 | 0.1516  | 0.0078 | 4.13E-84  | 19.4317  | 778845  | Asthma |
| rs17612669  | 6 | 32648039 | A | G | 0.4860 | 0.1355  | 0.0078 | 3.06E-68  | 17.4574  | 934923  | Asthma |
| rs17612676  | 6 | 32648064 | A | C | 0.5466 | 0.1327  | 0.0066 | 2.22E-89  | 20.0450  | 934923  | Asthma |
| rs17843589  | 6 | 32648066 | A | T | 0.5466 | 0.1327  | 0.0066 | 2.22E-89  | 20.0450  | 934923  | Asthma |
| rs17843590  | 6 | 32648073 | G | A | 0.5281 | 0.1537  | 0.0078 | 7.62E-86  | 19.6360  | 778845  | Asthma |
| rs17843591  | 6 | 32648079 | C | T | 0.5512 | 0.1517  | 0.0078 | 3.15E-84  | 19.4466  | 778845  | Asthma |
| rs17843592  | 6 | 32648086 | G | A | 0.5511 | 0.1516  | 0.0078 | 4.30E-84  | 19.4296  | 778845  | Asthma |
| rs17612683  | 6 | 32648100 | G | A | 0.5510 | 0.1517  | 0.0078 | 3.17E-84  | 19.4460  | 778845  | Asthma |
| rs9368731   | 6 | 32648126 | G | A | 0.2484 | 0.1307  | 0.0095 | 1.72E-43  | 13.8289  | 778845  | Asthma |
| rs17612690  | 6 | 32648141 | C | A | 0.5496 | 0.1517  | 0.0078 | 3.80E-84  | 19.4371  | 778845  | Asthma |
| rs17612697  | 6 | 32648142 | A | G | 0.5496 | 0.1517  | 0.0078 | 3.80E-84  | 19.4371  | 778845  | Asthma |
| rs17612704  | 6 | 32648144 | T | G | 0.4201 | 0.1027  | 0.0082 | 8.52E-36  | 12.4894  | 778845  | Asthma |
| rs17612712  | 6 | 32648168 | T | A | 0.4319 | 0.1438  | 0.0074 | 1.20E-83  | 19.3776  | 903302  | Asthma |
| rs17843593  | 6 | 32648173 | C | T | 0.4229 | 0.1102  | 0.0125 | 1.23E-18  | 8.8116   | 502713  | Asthma |
| rs17843594  | 6 | 32648175 | C | T | 0.5394 | 0.1490  | 0.0078 | 3.63E-81  | 19.0815  | 778845  | Asthma |
| rs62404123  | 6 | 32648186 | G | A | 0.0842 | -0.0943 | 0.0125 | 5.10E-14  | -7.5294  | 908767  | Asthma |
| rs17843595  | 6 | 32648194 | A | T | 0.3471 | -0.1027 | 0.0080 | 9.78E-38  | -12.8402 | 778845  | Asthma |
| rs17843596  | 6 | 32648195 | A | T | 0.3471 | -0.1026 | 0.0080 | 1.01E-37  | -12.8370 | 778845  | Asthma |
| rs17612719  | 6 | 32648213 | C | T | 0.3944 | 0.1582  | 0.0084 | 8.79E-79  | 18.7925  | 778845  | Asthma |
| rs17612727  | 6 | 32648226 | T | G | 0.3847 | 0.1608  | 0.0085 | 8.90E-80  | 18.9131  | 778845  | Asthma |
| rs17612734  | 6 | 32648227 | G | A | 0.3847 | 0.1608  | 0.0085 | 8.80E-80  | 18.9142  | 778845  | Asthma |
| rs62404124  | 6 | 32648297 | A | T | 0.1220 | -0.0613 | 0.0112 | 4.77E-08  | -5.4597  | 908767  | Asthma |
| rs553276313 | 6 | 32648735 | A | C | 0.3194 | 0.1208  | 0.0178 | 1.02E-11  | 6.8039   | 157003  | Asthma |
| rs72852243  | 6 | 32649330 | A | G | 0.1526 | -0.0535 | 0.0096 | 2.77E-08  | -5.5553  | 908767  | Asthma |
| rs139100794 | 6 | 32649471 | G | A | 0.2048 | -0.0575 | 0.0086 | 2.25E-11  | -6.6891  | 973993  | Asthma |
| rs79088780  | 6 | 32649735 | T | C | 0.4234 | -0.0493 | 0.0073 | 1.13E-11  | -6.7893  | 908767  | Asthma |
| rs140538749 | 6 | 32649766 | G | C | 0.1521 | -0.0594 | 0.0095 | 4.26E-10  | -6.2443  | 908767  | Asthma |
| rs28798705  | 6 | 32650032 | A | G | 0.5155 | 0.0827  | 0.0074 | 7.59E-29  | 11.1448  | 973993  | Asthma |
| rs28811643  | 6 | 32650815 | A | G | 0.1026 | 0.0986  | 0.0115 | 1.11E-17  | 8.5618   | 908767  | Asthma |
| rs145380601 | 6 | 32651121 | G | C | 0.1780 | 0.0924  | 0.0110 | 5.44E-17  | 8.3770   | 540747  | Asthma |
| rs9501404   | 6 | 32651307 | A | G | 0.2453 | -0.0556 | 0.0088 | 2.53E-10  | -6.3249  | 908767  | Asthma |
| rs534331448 | 6 | 32651312 | C | T | 0.0728 | 0.1271  | 0.0185 | 6.68E-12  | 6.8642   | 525023  | Asthma |
| rs545686632 | 6 | 32651370 | A | G | 0.2749 | 0.1216  | 0.0196 | 5.93E-10  | 6.1921   | 157003  | Asthma |
| rs529480034 | 6 | 32651452 | T | C | 0.2994 | 0.1168  | 0.0188 | 5.75E-10  | 6.1974   | 157003  | Asthma |
| rs572019305 | 6 | 32651678 | C | A | 0.4265 | 0.1284  | 0.0087 | 2.70E-49  | 14.7584  | 535282  | Asthma |
| rs55651120  | 6 | 32652058 | T | C | 0.1633 | -0.0519 | 0.0093 | 2.80E-08  | -5.5537  | 908767  | Asthma |
| rs17843600  | 6 | 32652371 | G | T | 0.5115 | 0.1537  | 0.0077 | 4.14E-88  | 19.8987  | 844071  | Asthma |
| rs73729588  | 6 | 32652378 | T | C | 0.0581 | -0.0948 | 0.0157 | 1.56E-09  | -6.0383  | 908767  | Asthma |
| rs17612748  | 6 | 32652397 | G | A | 0.4992 | 0.1437  | 0.0071 | 3.72E-90  | 20.1336  | 973993  | Asthma |
| rs9368732   | 6 | 32652407 | A | G | 0.3077 | 0.0957  | 0.0085 | 3.66E-29  | 11.2095  | 844071  | Asthma |
| rs41269974  | 6 | 32652425 | A | G | 0.1596 | 0.1386  | 0.0110 | 3.62E-36  | 12.5575  | 631630  | Asthma |
| rs9394104   | 6 | 32652426 | G | A | 0.3491 | 0.0820  | 0.0074 | 2.16E-28  | 11.0514  | 973993  | Asthma |
| rs9394105   | 6 | 32652429 | T | C | 0.3485 | 0.0827  | 0.0074 | 8.98E-29  | 11.1299  | 973993  | Asthma |
| rs9368733   | 6 | 32652451 | A | G | 0.2262 | 0.0970  | 0.0085 | 3.92E-30  | 11.4057  | 973993  | Asthma |
| rs9394106   | 6 | 32652455 | G | A | 0.3819 | 0.0615  | 0.0063 | 1.01E-22  | 9.8104   | 1042455 | Asthma |
| rs17843603  | 6 | 32652464 | A | G | 0.5529 | 0.1224  | 0.0059 | 6.49E-96  | 20.7799  | 1068588 | Asthma |
| rs9348889   | 6 | 32652478 | C | T | 0.2585 | 0.1118  | 0.0062 | 3.12E-72  | 17.9736  | 1198533 | Asthma |
| rs9348890   | 6 | 32652479 | C | G | 0.2553 | 0.1148  | 0.0068 | 1.38E-63  | 16.8332  | 1130071 | Asthma |
| rs17843604  | 6 | 32652506 | C | T | 0.4958 | -0.1200 | 0.0052 | 9.67E-120 | -23.2659 | 1257764 | Asthma |
| rs12527758  | 6 | 32652509 | C | T | 0.5015 | 0.1176  | 0.0051 | 7.82E-118 | 23.0777  | 1283897 | Asthma |
| rs17612781  | 6 | 32652534 | C | T | 0.5521 | 0.1155  | 0.0050 | 9.15E-118 | 23.0714  | 1316443 | Asthma |
| rs17612788  | 6 | 32652567 | A | G | 0.5497 | 0.1168  | 0.0051 | 1.68E-116 | 22.9443  | 1290310 | Asthma |
| rs17612802  | 6 | 32652582 | T | C | 0.5435 | 0.1304  | 0.0060 | 2.58E-106 | 21.9005  | 1091926 | Asthma |
| rs17843605  | 6 | 32652614 | T | G | 0.5480 | 0.1181  | 0.0059 | 1.44E-90  | 20.1808  | 1130071 | Asthma |

|            |   |          |   |   |        |         |        |           |          |         |        |
|------------|---|----------|---|---|--------|---------|--------|-----------|----------|---------|--------|
| rs17843606 | 6 | 32652622 | T | G | 0.5475 | 0.1176  | 0.0059 | 7.37E-90  | 20.1005  | 1130071 | Asthma |
| rs28622088 | 6 | 32652639 | T | C | 0.0504 | -0.1095 | 0.0147 | 9.16E-14  | -7.4527  | 1064845 | Asthma |
| rs2856713  | 6 | 32652645 | T | G | 0.4031 | 0.0868  | 0.0059 | 2.65E-48  | 14.6039  | 1130071 | Asthma |
| rs17843607 | 6 | 32652658 | A | G | 0.5507 | 0.1287  | 0.0066 | 9.36E-84  | 19.3896  | 973993  | Asthma |
| rs17843608 | 6 | 32652677 | C | A | 0.4889 | 0.1025  | 0.0063 | 8.48E-59  | 16.1678  | 1033224 | Asthma |
| rs17612809 | 6 | 32652682 | T | C | 0.5500 | 0.1287  | 0.0066 | 1.40E-83  | 19.3695  | 973993  | Asthma |
| rs17612816 | 6 | 32652692 | G | T | 0.4481 | 0.0947  | 0.0066 | 4.98E-47  | 14.4026  | 1033224 | Asthma |
| rs2858878  | 6 | 32652710 | G | T | 0.4011 | 0.0879  | 0.0060 | 4.24E-49  | 14.7284  | 1130071 | Asthma |
| rs2646993  | 6 | 32652712 | T | G | 0.2779 | 0.0489  | 0.0074 | 5.08E-11  | 6.5687   | 973993  | Asthma |
| rs17612831 | 6 | 32652730 | T | A | 0.5441 | 0.1194  | 0.0059 | 2.75E-91  | 20.2627  | 1130071 | Asthma |
| rs17843609 | 6 | 32652736 | C | T | 0.5442 | 0.1192  | 0.0059 | 5.08E-91  | 20.2321  | 1130071 | Asthma |
| rs17843610 | 6 | 32652752 | C | T | 0.5480 | 0.1174  | 0.0059 | 5.39E-87  | 19.7693  | 1064845 | Asthma |
| rs17843611 | 6 | 32652754 | C | T | 0.5451 | 0.1324  | 0.0066 | 5.57E-89  | 20.0000  | 934923  | Asthma |
| rs17843612 | 6 | 32652759 | A | C | 0.4862 | 0.1127  | 0.0057 | 8.78E-86  | 19.6292  | 1221848 | Asthma |
| rs17612838 | 6 | 32652761 | C | G | 0.5484 | 0.1175  | 0.0059 | 3.71E-87  | 19.7884  | 1064845 | Asthma |
| rs17612845 | 6 | 32652764 | A | G | 0.5942 | 0.1046  | 0.0060 | 9.27E-68  | 17.3931  | 1130071 | Asthma |
| rs2858877  | 6 | 32652772 | A | C | 0.1775 | 0.1422  | 0.0078 | 4.13E-75  | 18.3378  | 1151554 | Asthma |
| rs17612852 | 6 | 32652795 | G | A | 0.3040 | -0.0950 | 0.0056 | 5.05E-64  | -16.8930 | 1290310 | Asthma |
| rs17612858 | 6 | 32652845 | A | T | 0.4477 | -0.1167 | 0.0050 | 1.45E-119 | -23.2496 | 1316443 | Asthma |
| rs17843613 | 6 | 32652881 | T | C | 0.5444 | 0.1187  | 0.0059 | 1.34E-88  | 19.9556  | 1064845 | Asthma |
| rs17843614 | 6 | 32652884 | G | T | 0.5023 | 0.1012  | 0.0056 | 1.89E-73  | 18.1281  | 1189302 | Asthma |
| rs17843615 | 6 | 32652886 | C | T | 0.5422 | 0.1203  | 0.0059 | 4.80E-93  | 20.4605  | 1130071 | Asthma |
| rs17843616 | 6 | 32652890 | C | T | 0.5422 | 0.1203  | 0.0059 | 4.64E-93  | 20.4636  | 1130071 | Asthma |
| rs17612865 | 6 | 32652946 | T | G | 0.5487 | 0.1285  | 0.0067 | 4.10E-83  | 19.3146  | 973993  | Asthma |
| rs17612872 | 6 | 32652949 | C | T | 0.5487 | 0.1285  | 0.0067 | 4.09E-83  | 19.3146  | 973993  | Asthma |
| rs17612878 | 6 | 32652956 | T | G | 0.5495 | 0.1284  | 0.0066 | 3.88E-83  | 19.3165  | 973993  | Asthma |
| rs17612887 | 6 | 32652962 | T | C | 0.5472 | 0.1517  | 0.0076 | 3.61E-88  | 19.9061  | 844071  | Asthma |
| rs9380317  | 6 | 32652963 | T | C | 0.3411 | 0.0812  | 0.0081 | 6.69E-24  | 10.0811  | 632129  | Asthma |
| rs9368734  | 6 | 32652964 | C | A | 0.1755 | 0.1516  | 0.0126 | 2.51E-33  | 12.0286  | 476051  | Asthma |
| rs17843618 | 6 | 32652966 | T | A | 0.5496 | 0.1288  | 0.0066 | 1.35E-83  | 19.3707  | 973993  | Asthma |
| rs77062257 | 6 | 32652987 | T | A | 0.1474 | 0.0705  | 0.0074 | 2.22E-21  | 9.4941   | 1225084 | Asthma |
| rs17843619 | 6 | 32652998 | A | C | 0.5446 | 0.1463  | 0.0070 | 2.69E-97  | 20.9327  | 903302  | Asthma |
| rs17843620 | 6 | 32653023 | G | A | 0.4149 | 0.1198  | 0.0071 | 1.78E-63  | 16.8183  | 935848  | Asthma |
| rs17843621 | 6 | 32653050 | T | C | 0.5526 | 0.1240  | 0.0060 | 5.64E-94  | 20.5654  | 1042455 | Asthma |
| rs75150448 | 6 | 32653054 | A | G | 0.0760 | -0.1114 | 0.0128 | 3.91E-18  | -8.6810  | 973993  | Asthma |
| rs17612893 | 6 | 32653059 | T | A | 0.5456 | 0.1293  | 0.0067 | 2.54E-83  | 19.3384  | 973993  | Asthma |
| rs17612900 | 6 | 32653061 | C | G | 0.4619 | 0.0778  | 0.0066 | 5.09E-32  | 11.7775  | 1065770 | Asthma |
| rs17612907 | 6 | 32653075 | A | G | 0.4698 | 0.1186  | 0.0059 | 4.37E-89  | 20.0121  | 1134232 | Asthma |
| rs17843624 | 6 | 32653108 | T | A | 0.5540 | 0.1237  | 0.0060 | 5.79E-94  | 20.5634  | 1042455 | Asthma |
| rs17843625 | 6 | 32653132 | G | A | 0.4612 | 0.1247  | 0.0060 | 5.87E-95  | 20.6740  | 1042455 | Asthma |
| rs17612928 | 6 | 32653199 | G | A | 0.5424 | 0.1256  | 0.0061 | 1.65E-94  | 20.6242  | 1065770 | Asthma |
| rs17612935 | 6 | 32653215 | G | A | 0.5424 | 0.1269  | 0.0068 | 1.34E-77  | 18.6472  | 908767  | Asthma |
| rs17612942 | 6 | 32653222 | A | G | 0.2676 | -0.0867 | 0.0078 | 1.45E-28  | -11.0872 | 908767  | Asthma |
| rs17843626 | 6 | 32653236 | A | G | 0.4453 | 0.1345  | 0.0070 | 2.20E-82  | 19.2264  | 908767  | Asthma |
| rs9366803  | 6 | 32653355 | C | T | 0.2684 | 0.1434  | 0.0245 | 5.18E-09  | 5.8412   | 59231   | Asthma |
| rs28685766 | 6 | 32653661 | G | A | 0.1210 | -0.0729 | 0.0090 | 7.03E-16  | -8.0700  | 1042455 | Asthma |
| rs28590669 | 6 | 32653666 | G | A | 0.1298 | -0.1091 | 0.0095 | 1.44E-30  | -11.4922 | 1042455 | Asthma |
| rs28704178 | 6 | 32653706 | A | G | 0.1280 | -0.1100 | 0.0095 | 9.90E-31  | -11.5250 | 1042455 | Asthma |
| rs17613153 | 6 | 32653728 | G | A | 0.5455 | 0.1528  | 0.0076 | 7.22E-89  | 19.9869  | 844071  | Asthma |
| rs17613167 | 6 | 32653736 | T | A | 0.4425 | -0.0577 | 0.0068 | 2.08E-17  | -8.4895  | 908767  | Asthma |
| rs17613174 | 6 | 32653738 | A | T | 0.4430 | -0.0576 | 0.0068 | 2.10E-17  | -8.4881  | 908767  | Asthma |
| rs17843661 | 6 | 32653749 | C | G | 0.4435 | -0.0506 | 0.0067 | 4.07E-14  | -7.5588  | 973993  | Asthma |
| rs17843662 | 6 | 32653752 | A | C | 0.5392 | 0.1289  | 0.0067 | 1.71E-82  | 19.2402  | 973993  | Asthma |
| rs17613181 | 6 | 32653773 | G | A | 0.5381 | 0.1287  | 0.0067 | 9.10E-83  | 19.2723  | 973993  | Asthma |
| rs17843671 | 6 | 32653905 | T | C | 0.5920 | 0.1340  | 0.0076 | 1.99E-69  | 17.6124  | 540747  | Asthma |
| rs17613243 | 6 | 32653906 | G | A | 0.5916 | 0.1338  | 0.0076 | 2.85E-69  | 17.5913  | 540747  | Asthma |
| rs17613250 | 6 | 32653922 | C | A | 0.5938 | 0.1334  | 0.0076 | 5.23E-69  | 17.5568  | 540747  | Asthma |
| rs17613257 | 6 | 32653949 | T | C | 0.5969 | 0.1320  | 0.0076 | 7.22E-68  | 17.4073  | 540747  | Asthma |
| rs17613264 | 6 | 32653950 | G | A | 0.5969 | 0.1320  | 0.0076 | 7.22E-68  | 17.4073  | 540747  | Asthma |
| rs17843676 | 6 | 32653982 | G | C | 0.4369 | -0.0856 | 0.0066 | 5.09E-38  | -12.8906 | 973993  | Asthma |
| rs17613271 | 6 | 32654001 | G | A | 0.5500 | 0.1296  | 0.0066 | 9.51E-85  | 19.5072  | 973993  | Asthma |
| rs17613278 | 6 | 32654033 | G | T | 0.5498 | 0.1290  | 0.0066 | 5.98E-84  | 19.4129  | 973993  | Asthma |
| rs17613285 | 6 | 32654051 | A | G | 0.5474 | 0.1297  | 0.0067 | 2.16E-84  | 19.4659  | 973993  | Asthma |
| rs17613292 | 6 | 32654084 | A | G | 0.4780 | 0.0912  | 0.0085 | 1.19E-26  | 10.6858  | 654945  | Asthma |
| rs17843679 | 6 | 32654111 | G | A | 0.5460 | 0.1274  | 0.0068 | 1.43E-78  | 18.7665  | 908767  | Asthma |
| rs17843680 | 6 | 32654116 | G | A | 0.5373 | 0.1296  | 0.0067 | 1.95E-82  | 19.2336  | 973993  | Asthma |
| rs17613299 | 6 | 32654124 | G | C | 0.4363 | -0.0819 | 0.0068 | 1.59E-33  | -12.0662 | 908767  | Asthma |
| rs17613305 | 6 | 32654131 | C | T | 0.5419 | 0.1511  | 0.0078 | 6.30E-84  | 19.4104  | 778845  | Asthma |
| rs17613312 | 6 | 32654134 | A | G | 0.5320 | 0.1536  | 0.0077 | 2.91E-88  | 19.9162  | 844071  | Asthma |
| rs17843683 | 6 | 32654170 | C | G | 0.5461 | 0.1506  | 0.0078 | 1.91E-83  | 19.3531  | 778845  | Asthma |
| rs17843684 | 6 | 32654171 | A | G | 0.5461 | 0.1506  | 0.0078 | 1.91E-83  | 19.3531  | 778845  | Asthma |
| rs17613326 | 6 | 32654172 | C | G | 0.4305 | -0.0909 | 0.0078 | 1.62E-31  | -11.6796 | 778845  | Asthma |
| rs17613347 | 6 | 32654203 | T | C | 0.1801 | -0.0648 | 0.0088 | 2.12E-13  | -7.3408  | 973993  | Asthma |
| rs28886951 | 6 | 32654258 | T | C | 0.1271 | -0.1167 | 0.0105 | 1.30E-28  | -11.0962 | 973993  | Asthma |

|             |   |          |   |   |        |         |        |           |          |         |        |
|-------------|---|----------|---|---|--------|---------|--------|-----------|----------|---------|--------|
| rs17843688  | 6 | 32654259 | A | G | 0.1822 | -0.0613 | 0.0088 | 2.91E-12  | -6.9821  | 973993  | Asthma |
| rs17843689  | 6 | 32654270 | T | C | 0.1777 | -0.0628 | 0.0089 | 1.72E-12  | -7.0556  | 973993  | Asthma |
| rs17613367  | 6 | 32654286 | G | A | 0.3345 | -0.0873 | 0.0071 | 2.16E-34  | -12.2296 | 908767  | Asthma |
| rs17843692  | 6 | 32654326 | G | A | 0.4556 | 0.1010  | 0.0065 | 4.31E-54  | 15.4861  | 1065770 | Asthma |
| rs28819191  | 6 | 32654333 | A | G | 0.0529 | -0.1138 | 0.0166 | 7.77E-12  | -6.8428  | 908767  | Asthma |
| rs17843693  | 6 | 32654345 | A | G | 0.3049 | 0.0808  | 0.0094 | 6.60E-18  | 8.6218   | 654945  | Asthma |
| rs17613381  | 6 | 32654353 | T | C | 0.4858 | 0.0949  | 0.0085 | 2.97E-29  | 11.2281  | 654945  | Asthma |
| rs28842820  | 6 | 32654372 | T | C | 0.1186 | -0.0809 | 0.0100 | 5.66E-16  | -8.0964  | 973993  | Asthma |
| rs35932914  | 6 | 32654373 | A | G | 0.1244 | -0.1130 | 0.0096 | 5.18E-32  | -11.7759 | 1042455 | Asthma |
| rs17613395  | 6 | 32654390 | A | T | 0.5367 | 0.1143  | 0.0068 | 1.15E-63  | 16.8453  | 908767  | Asthma |
| rs17843694  | 6 | 32654396 | C | T | 0.5366 | 0.1142  | 0.0068 | 1.21E-63  | 16.8419  | 908767  | Asthma |
| rs17843696  | 6 | 32654401 | G | A | 0.5366 | 0.1142  | 0.0068 | 1.21E-63  | 16.8419  | 908767  | Asthma |
| rs17613410  | 6 | 32654409 | C | T | 0.5366 | 0.1143  | 0.0068 | 1.05E-63  | 16.8492  | 908767  | Asthma |
| rs17613417  | 6 | 32654413 | G | A | 0.5329 | 0.1165  | 0.0067 | 8.14E-68  | 17.4012  | 973993  | Asthma |
| rs17613424  | 6 | 32654418 | T | G | 0.5329 | 0.1165  | 0.0067 | 8.20E-68  | 17.3997  | 973993  | Asthma |
| rs17613431  | 6 | 32654426 | T | G | 0.5330 | 0.1165  | 0.0067 | 8.13E-68  | 17.4014  | 973993  | Asthma |
| rs12055579  | 6 | 32654428 | C | T | 0.2794 | 0.0581  | 0.0076 | 2.99E-14  | 7.5990   | 973993  | Asthma |
| rs17843699  | 6 | 32654461 | G | A | 0.4635 | 0.0989  | 0.0065 | 5.86E-53  | 15.3172  | 1065770 | Asthma |
| rs17843701  | 6 | 32654479 | T | G | 0.4822 | 0.1082  | 0.0063 | 1.07E-66  | 17.2527  | 1065770 | Asthma |
| rs17613437  | 6 | 32654505 | C | T | 0.4485 | 0.0958  | 0.0065 | 4.84E-49  | 14.7194  | 1033224 | Asthma |
| rs17613465  | 6 | 32654582 | A | G | 0.2005 | -0.0542 | 0.0086 | 2.61E-10  | -6.3203  | 973993  | Asthma |
| rs17843708  | 6 | 32654619 | A | T | 0.3479 | 0.0964  | 0.0082 | 2.98E-32  | 11.8227  | 605973  | Asthma |
| rs17843709  | 6 | 32654632 | G | T | 0.3464 | 0.0958  | 0.0082 | 9.41E-32  | 11.7258  | 605973  | Asthma |
| rs117804693 | 6 | 32654844 | T | C | 0.1671 | 0.0849  | 0.0110 | 1.33E-14  | 7.7032   | 605973  | Asthma |
| rs28664894  | 6 | 32654920 | A | C | 0.1482 | 0.0564  | 0.0094 | 1.84E-09  | 6.0112   | 973993  | Asthma |
| rs9273305   | 6 | 32655150 | C | T | 0.4196 | 0.1309  | 0.0080 | 2.58E-60  | 16.3822  | 778845  | Asthma |
| rs9273306   | 6 | 32655151 | A | G | 0.5501 | 0.1508  | 0.0078 | 1.11E-83  | 19.3813  | 778845  | Asthma |
| rs9273307   | 6 | 32655152 | C | T | 0.5501 | 0.1508  | 0.0078 | 1.11E-83  | 19.3813  | 778845  | Asthma |
| rs9273309   | 6 | 32655172 | G | T | 0.5527 | 0.1270  | 0.0067 | 5.68E-79  | 18.8149  | 908767  | Asthma |
| rs9273310   | 6 | 32655177 | A | G | 0.4202 | 0.0686  | 0.0111 | 5.27E-10  | 6.2109   | 497942  | Asthma |
| rs9273311   | 6 | 32655190 | A | G | 0.5540 | 0.1235  | 0.0060 | 1.44E-93  | 20.5189  | 1042455 | Asthma |
| rs9273312   | 6 | 32655196 | T | C | 0.5511 | 0.1285  | 0.0066 | 1.16E-83  | 19.3782  | 973993  | Asthma |
| rs9273313   | 6 | 32655202 | C | T | 0.5506 | 0.1282  | 0.0066 | 3.03E-83  | 19.3292  | 973993  | Asthma |
| rs9273314   | 6 | 32655209 | C | T | 0.5421 | 0.1265  | 0.0068 | 7.90E-78  | 18.6750  | 908767  | Asthma |
| rs9273315   | 6 | 32655213 | T | C | 0.5542 | 0.1235  | 0.0060 | 1.16E-93  | 20.5293  | 1042455 | Asthma |
| rs9273317   | 6 | 32655226 | C | T | 0.5528 | 0.1270  | 0.0067 | 4.08E-79  | 18.8331  | 908767  | Asthma |
| rs9273318   | 6 | 32655227 | C | T | 0.5528 | 0.1270  | 0.0067 | 4.08E-79  | 18.8331  | 908767  | Asthma |
| rs9273319   | 6 | 32655273 | T | C | 0.5345 | 0.1328  | 0.0065 | 7.92E-92  | 20.3242  | 1000149 | Asthma |
| rs9273320   | 6 | 32655295 | G | A | 0.5522 | 0.1160  | 0.0054 | 1.39E-101 | 21.3984  | 1198533 | Asthma |
| rs9273321   | 6 | 32655319 | G | A | 0.5521 | 0.1161  | 0.0054 | 9.34E-102 | 21.4164  | 1198533 | Asthma |
| rs9273324   | 6 | 32655379 | T | C | 0.4512 | 0.1033  | 0.0065 | 2.77E-57  | 15.9514  | 765287  | Asthma |
| rs9273326   | 6 | 32655442 | T | C | 0.4432 | -0.1165 | 0.0049 | 1.18E-125 | -23.8437 | 1376071 | Asthma |
| rs9273328   | 6 | 32655456 | G | A | 0.4466 | -0.1156 | 0.0053 | 1.81E-104 | -21.7059 | 1224666 | Asthma |
| rs9273329   | 6 | 32655465 | G | A | 0.4433 | -0.1166 | 0.0049 | 9.18E-126 | -23.8529 | 1376071 | Asthma |
| rs9273330   | 6 | 32655523 | T | C | 0.5483 | 0.1169  | 0.0052 | 7.79E-113 | 22.5749  | 1257764 | Asthma |
| rs9273331   | 6 | 32655530 | T | C | 0.5509 | 0.1163  | 0.0054 | 2.81E-102 | 21.4734  | 1198533 | Asthma |
| rs9273332   | 6 | 32655540 | T | A | 0.5507 | 0.1164  | 0.0054 | 2.71E-102 | 21.4736  | 1198533 | Asthma |
| rs9273333   | 6 | 32655548 | C | T | 0.5504 | 0.1164  | 0.0054 | 3.29E-102 | 21.4647  | 1198533 | Asthma |
| rs9273335   | 6 | 32655571 | G | A | 0.5043 | 0.0990  | 0.0056 | 1.27E-69  | 17.6375  | 1189302 | Asthma |
| rs28374650  | 6 | 32655590 | T | C | 0.2819 | -0.1332 | 0.0074 | 3.98E-73  | -18.0873 | 1000149 | Asthma |
| rs9273337   | 6 | 32655600 | T | C | 0.5110 | 0.1199  | 0.0059 | 1.29E-91  | 20.2994  | 1130071 | Asthma |
| rs9273338   | 6 | 32655616 | T | A | 0.4820 | 0.0965  | 0.0057 | 1.11E-64  | 16.9821  | 1189302 | Asthma |
| rs9273339   | 6 | 32655653 | A | G | 0.5388 | 0.1210  | 0.0056 | 1.03E-102 | 21.5191  | 1189302 | Asthma |
| rs9273343   | 6 | 32655668 | C | T | 0.5450 | 0.1192  | 0.0059 | 1.59E-91  | 20.2900  | 1130071 | Asthma |
| rs9273344   | 6 | 32655681 | C | T | 0.4479 | 0.0884  | 0.0071 | 2.82E-35  | 12.3940  | 811023  | Asthma |
| rs727939    | 6 | 32655686 | G | A | 0.4095 | 0.0907  | 0.0060 | 1.62E-51  | 15.1001  | 1130071 | Asthma |
| rs9273346   | 6 | 32655698 | G | C | 0.5435 | 0.1189  | 0.0059 | 1.19E-90  | 20.1912  | 1130071 | Asthma |
| rs9273348   | 6 | 32655710 | G | T | 0.4430 | 0.1186  | 0.0066 | 1.06E-71  | 17.9060  | 1065770 | Asthma |
| rs73732214  | 6 | 32655751 | A | G | 0.2104 | -0.0723 | 0.0089 | 4.64E-16  | -8.1205  | 973993  | Asthma |
| rs55986091  | 6 | 32655936 | A | G | 0.2008 | -0.0719 | 0.0095 | 4.22E-14  | -7.5539  | 973993  | Asthma |
| rs28532217  | 6 | 32656110 | T | C | 0.1682 | -0.0620 | 0.0092 | 1.43E-11  | -6.7551  | 973993  | Asthma |
| rs28474755  | 6 | 32656142 | T | C | 0.1671 | -0.0589 | 0.0091 | 9.59E-11  | -6.4733  | 973993  | Asthma |
| rs4637681   | 6 | 32656151 | T | C | 0.4405 | 0.0494  | 0.0071 | 3.79E-12  | 6.9450   | 973993  | Asthma |
| rs55866704  | 6 | 32656224 | T | A | 0.2089 | -0.0727 | 0.0093 | 4.72E-15  | -7.8341  | 973993  | Asthma |
| rs28791817  | 6 | 32656239 | T | A | 0.1773 | -0.0531 | 0.0088 | 1.33E-09  | -6.0641  | 973993  | Asthma |
| rs533155786 | 6 | 32656261 | T | C | 0.2965 | 0.1156  | 0.0181 | 1.62E-10  | 6.3935   | 157003  | Asthma |
| rs184252375 | 6 | 32656351 | T | C | 0.2898 | 0.1366  | 0.0193 | 1.44E-12  | 7.0799   | 157003  | Asthma |
| rs567302488 | 6 | 32656600 | A | G | 0.3612 | 0.1326  | 0.0090 | 7.73E-49  | 14.6878  | 502602  | Asthma |
| rs74824383  | 6 | 32656954 | G | A | 0.5312 | 0.1242  | 0.0063 | 3.68E-87  | 19.7890  | 1033224 | Asthma |
| rs35983205  | 6 | 32657052 | C | T | 0.5509 | 0.1237  | 0.0060 | 2.87E-93  | 20.4857  | 1042455 | Asthma |
| rs113663338 | 6 | 32657070 | T | G | 0.5191 | 0.1202  | 0.0057 | 1.68E-99  | 21.1725  | 1134232 | Asthma |
| rs4548048   | 6 | 32657245 | T | C | 0.1891 | -0.0711 | 0.0095 | 5.21E-14  | -7.5266  | 973993  | Asthma |
| rs547454879 | 6 | 32657547 | G | A | 0.2615 | 0.1508  | 0.0098 | 6.57E-54  | 15.4587  | 502602  | Asthma |
| rs536421612 | 6 | 32657592 | A | G | 0.2134 | 0.1303  | 0.0225 | 7.35E-09  | 5.7825   | 91777   | Asthma |

|             |   |          |   |   |        |         |        |           |          |         |        |
|-------------|---|----------|---|---|--------|---------|--------|-----------|----------|---------|--------|
| rs34046799  | 6 | 32657665 | A | C | 0.1256 | -0.1400 | 0.0122 | 1.07E-30  | -11.5185 | 844071  | Asthma |
| rs140248787 | 6 | 32657717 | T | C | 0.0622 | -0.0996 | 0.0150 | 3.24E-11  | -6.6353  | 908767  | Asthma |
| rs9273350   | 6 | 32658108 | C | G | 0.5548 | 0.0473  | 0.0067 | 1.52E-12  | 7.0730   | 973993  | Asthma |
| rs9273351   | 6 | 32658129 | T | C | 0.4565 | -0.1303 | 0.0067 | 7.17E-85  | -19.5220 | 973993  | Asthma |
| rs9273352   | 6 | 32658151 | G | T | 0.4532 | -0.1293 | 0.0067 | 3.37E-84  | -19.4432 | 973993  | Asthma |
| rs9273354   | 6 | 32658175 | C | G | 0.4961 | -0.1156 | 0.0060 | 3.38E-82  | -19.2048 | 1065770 | Asthma |
| rs9273355   | 6 | 32658183 | A | G | 0.4478 | -0.1236 | 0.0060 | 1.17E-93  | -20.5291 | 1042455 | Asthma |
| rs2858856   | 6 | 32658190 | A | C | 0.2292 | 0.0760  | 0.0076 | 1.12E-23  | 10.0304  | 973993  | Asthma |
| rs2858855   | 6 | 32658211 | T | C | 0.2187 | 0.0697  | 0.0069 | 4.39E-24  | 10.1226  | 1130071 | Asthma |
| rs9273356   | 6 | 32658212 | A | G | 0.4453 | -0.1233 | 0.0060 | 3.22E-93  | -20.4797 | 1042455 | Asthma |
| rs28442287  | 6 | 32658230 | T | C | 0.1240 | -0.1175 | 0.0083 | 3.13E-45  | -14.1141 | 1224666 | Asthma |
| rs6905282   | 6 | 32658238 | A | C | 0.3927 | 0.0647  | 0.0051 | 5.61E-37  | 12.7041  | 1290310 | Asthma |
| rs9273358   | 6 | 32658242 | T | C | 0.3906 | 0.0629  | 0.0054 | 5.63E-31  | 11.5733  | 1198533 | Asthma |
| rs6905775   | 6 | 32658244 | A | G | 0.1604 | 0.0934  | 0.0065 | 3.06E-47  | 14.4362  | 1376071 | Asthma |
| rs17211699  | 6 | 32658260 | T | G | 0.0761 | 0.0529  | 0.0089 | 2.90E-09  | 5.9373   | 1349938 | Asthma |
| rs28545281  | 6 | 32658274 | C | G | 0.1281 | -0.0746 | 0.0085 | 1.83E-18  | -8.7671  | 1198533 | Asthma |
| rs28633132  | 6 | 32658276 | T | A | 0.1273 | -0.0752 | 0.0077 | 2.12E-22  | -9.7358  | 1349938 | Asthma |
| rs7744001   | 6 | 32658309 | A | G | 0.3010 | 0.0497  | 0.0055 | 8.51E-20  | 9.1065   | 1008051 | Asthma |
| rs28584179  | 6 | 32658342 | T | C | 0.1216 | -0.1124 | 0.0077 | 1.03E-48  | -14.6681 | 1376071 | Asthma |
| rs7744020   | 6 | 32658353 | A | G | 0.2765 | 0.0538  | 0.0052 | 8.67E-25  | 10.2800  | 1376071 | Asthma |
| rs17211713  | 6 | 32658402 | C | T | 0.0763 | 0.0541  | 0.0088 | 7.30E-10  | 6.1593   | 1376071 | Asthma |
| rs6928482   | 6 | 32658472 | C | T | 0.4369 | 0.0963  | 0.0048 | 3.35E-90  | 20.1392  | 1376071 | Asthma |
| rs9273363   | 6 | 32658495 | A | C | 0.2804 | 0.0838  | 0.0054 | 3.31E-55  | 15.6504  | 1376071 | Asthma |
| rs9273364   | 6 | 32658525 | G | T | 0.2805 | 0.0840  | 0.0054 | 1.92E-55  | 15.6850  | 1376071 | Asthma |
| rs6906021   | 6 | 32658534 | C | T | 0.4102 | 0.0583  | 0.0049 | 4.48E-33  | 11.9810  | 1376071 | Asthma |
| rs17211741  | 6 | 32658569 | A | G | 0.0772 | 0.0552  | 0.0087 | 2.41E-10  | 6.3326   | 1376071 | Asthma |
| rs28407950  | 6 | 32658571 | T | C | 0.2787 | -0.1096 | 0.0055 | 1.10E-87  | -19.8508 | 1349938 | Asthma |
| rs114360309 | 6 | 32658600 | A | G | 0.1130 | -0.0690 | 0.0090 | 2.25E-14  | -7.6354  | 1198533 | Asthma |
| rs9273366   | 6 | 32658605 | T | G | 0.1580 | 0.0924  | 0.0072 | 4.08E-38  | 12.9075  | 1219993 | Asthma |
| rs34983241  | 6 | 32658620 | T | C | 0.2791 | -0.1122 | 0.0061 | 3.50E-76  | -18.4713 | 1198533 | Asthma |
| rs34004019  | 6 | 32658626 | G | A | 0.2616 | -0.1114 | 0.0060 | 2.10E-77  | -18.6220 | 1290310 | Asthma |
| rs28515515  | 6 | 32658655 | T | A | 0.2793 | -0.1117 | 0.0061 | 1.31E-75  | -18.3995 | 1198533 | Asthma |
| rs9273367   | 6 | 32658661 | T | A | 0.2820 | 0.0839  | 0.0059 | 1.18E-46  | 14.3431  | 1224666 | Asthma |
| rs28414666  | 6 | 32658674 | A | G | 0.2484 | -0.1049 | 0.0057 | 9.95E-75  | -18.2896 | 1376071 | Asthma |
| rs9273368   | 6 | 32658698 | A | G | 0.2804 | 0.0839  | 0.0054 | 2.71E-55  | 15.6631  | 1376071 | Asthma |
| rs9273370   | 6 | 32658715 | G | A | 0.4578 | -0.0970 | 0.0054 | 2.50E-73  | -18.1135 | 1224666 | Asthma |
| rs113422598 | 6 | 32658731 | T | C | 0.0769 | 0.0548  | 0.0089 | 6.53E-10  | 6.1769   | 1349938 | Asthma |
| rs28672722  | 6 | 32658760 | T | G | 0.2618 | -0.1073 | 0.0056 | 5.46E-82  | -19.1806 | 1376071 | Asthma |
| rs9273371   | 6 | 32658788 | T | C | 0.2389 | 0.0463  | 0.0062 | 8.31E-14  | 7.4652   | 1193860 | Asthma |
| rs28539606  | 6 | 32658797 | G | A | 0.1365 | -0.0743 | 0.0083 | 3.42E-19  | -8.9543  | 1068588 | Asthma |
| rs9273372   | 6 | 32658813 | C | G | 0.4476 | -0.1160 | 0.0054 | 1.30E-101 | -21.4009 | 1198533 | Asthma |
| rs9273373   | 6 | 32658824 | A | G | 0.4478 | -0.1161 | 0.0054 | 7.35E-102 | -21.4270 | 1198533 | Asthma |
| rs9273374   | 6 | 32658837 | A | G | 0.4476 | -0.1161 | 0.0054 | 7.27E-102 | -21.4280 | 1198533 | Asthma |
| rs79638487  | 6 | 32658887 | A | C | 0.0765 | 0.0545  | 0.0089 | 8.79E-10  | 6.1300   | 1349938 | Asthma |
| rs35779483  | 6 | 32658925 | G | A | 0.2766 | 0.0545  | 0.0052 | 1.97E-25  | 10.4217  | 1376071 | Asthma |
| rs34386495  | 6 | 32658953 | T | C | 0.1976 | -0.0520 | 0.0068 | 1.40E-14  | -7.6964  | 1198533 | Asthma |
| rs28718232  | 6 | 32658973 | G | A | 0.2487 | -0.1049 | 0.0057 | 8.09E-75  | -18.3007 | 1376071 | Asthma |
| rs9273375   | 6 | 32659009 | G | C | 0.1876 | -0.0564 | 0.0076 | 7.81E-14  | -7.4734  | 1130071 | Asthma |
| rs9273376   | 6 | 32659024 | C | T | 0.4506 | -0.1189 | 0.0059 | 2.13E-91  | -20.2753 | 1130071 | Asthma |
| rs78556970  | 6 | 32659088 | A | C | 0.4665 | -0.1503 | 0.0078 | 2.82E-82  | -19.2145 | 778845  | Asthma |
| rs9273379   | 6 | 32659104 | G | C | 0.2946 | 0.1083  | 0.0087 | 8.61E-36  | 12.4889  | 567828  | Asthma |
| rs28731358  | 6 | 32659106 | C | G | 0.2505 | -0.1595 | 0.0101 | 2.22E-56  | -15.8209 | 476051  | Asthma |
| rs67110942  | 6 | 32659108 | C | G | 0.1332 | -0.0878 | 0.0107 | 2.36E-16  | -8.2022  | 605973  | Asthma |
| rs9273380   | 6 | 32659118 | G | A | 0.4566 | -0.1180 | 0.0059 | 3.53E-90  | -20.1362 | 1130071 | Asthma |
| rs4713571   | 6 | 32659122 | T | G | 0.2219 | 0.0883  | 0.0078 | 8.67E-30  | 11.3364  | 935848  | Asthma |
| rs36206058  | 6 | 32659143 | C | G | 0.4596 | -0.1184 | 0.0059 | 1.03E-90  | -20.1976 | 1130071 | Asthma |
| rs9273382   | 6 | 32659148 | A | G | 0.4599 | -0.1181 | 0.0059 | 2.74E-90  | -20.1498 | 1130071 | Asthma |
| rs4713572   | 6 | 32659175 | C | T | 0.2987 | 0.1012  | 0.0072 | 5.47E-45  | 14.0746  | 973993  | Asthma |
| rs9273384   | 6 | 32659177 | A | G | 0.1757 | -0.0463 | 0.0079 | 4.25E-09  | -5.8742  | 1130071 | Asthma |
| rs28414125  | 6 | 32659198 | C | A | 0.1413 | -0.1120 | 0.0089 | 2.94E-36  | -12.5734 | 1042455 | Asthma |
| rs9273386   | 6 | 32659200 | C | T | 0.5154 | 0.1274  | 0.0060 | 1.34E-99  | 21.1846  | 1042455 | Asthma |
| rs9273390   | 6 | 32659265 | C | G | 0.2012 | 0.0952  | 0.0100 | 2.09E-21  | 9.5011   | 778845  | Asthma |
| rs9273391   | 6 | 32659266 | G | A | 0.1886 | 0.1029  | 0.0102 | 8.00E-24  | 10.0636  | 844071  | Asthma |
| rs28579922  | 6 | 32659267 | A | G | 0.0985 | -0.1564 | 0.0108 | 1.78E-47  | -14.4731 | 1000149 | Asthma |
| rs9273392   | 6 | 32659269 | A | C | 0.1857 | 0.1079  | 0.0108 | 1.37E-23  | 10.0102  | 681101  | Asthma |
| rs9273393   | 6 | 32659273 | A | G | 0.1929 | 0.0974  | 0.0088 | 2.94E-28  | 11.0237  | 811023  | Asthma |
| rs28592859  | 6 | 32659295 | A | G | 0.1291 | -0.0795 | 0.0092 | 7.25E-18  | -8.6108  | 1130071 | Asthma |
| rs9273394   | 6 | 32659305 | A | G | 0.3238 | -0.0992 | 0.0064 | 1.51E-54  | -15.5536 | 1130071 | Asthma |
| rs9273395   | 6 | 32659317 | T | C | 0.3263 | 0.1042  | 0.0061 | 5.29E-65  | 17.0252  | 1130071 | Asthma |
| rs9273396   | 6 | 32659328 | A | T | 0.5430 | 0.1189  | 0.0059 | 1.50E-90  | 20.1792  | 1130071 | Asthma |
| rs9273397   | 6 | 32659332 | G | A | 0.5429 | 0.1189  | 0.0059 | 1.66E-90  | 20.1735  | 1130071 | Asthma |
| rs9273398   | 6 | 32659338 | T | G | 0.5430 | 0.1190  | 0.0059 | 9.04E-91  | 20.2037  | 1130071 | Asthma |
| rs9273399   | 6 | 32659340 | A | C | 0.5394 | 0.1339  | 0.0065 | 4.24E-93  | 20.4676  | 1000149 | Asthma |
| rs9273400   | 6 | 32659351 | T | C | 0.4712 | 0.1223  | 0.0057 | 2.85E-102 | 21.4716  | 1189302 | Asthma |

|             |   |          |   |   |        |         |        |           |          |         |        |
|-------------|---|----------|---|---|--------|---------|--------|-----------|----------|---------|--------|
| rs9273401   | 6 | 32659352 | G | A | 0.1096 | 0.1413  | 0.0092 | 3.47E-53  | 15.3518  | 1130071 | Asthma |
| rs4713576   | 6 | 32659353 | C | T | 0.2137 | 0.0531  | 0.0070 | 2.37E-14  | 7.6285   | 1130071 | Asthma |
| rs9273402   | 6 | 32659378 | A | G | 0.4754 | 0.0635  | 0.0064 | 2.64E-23  | 9.9452   | 696825  | Asthma |
| rs9273403   | 6 | 32659382 | T | A | 0.4316 | 0.0682  | 0.0066 | 3.12E-25  | 10.3782  | 934923  | Asthma |
| rs9273404   | 6 | 32659383 | G | A | 0.4731 | 0.1317  | 0.0064 | 3.82E-95  | 20.6950  | 1059380 | Asthma |
| rs9273405   | 6 | 32659398 | C | A | 0.5415 | 0.1193  | 0.0059 | 7.86E-91  | 20.2105  | 1130071 | Asthma |
| rs9273406   | 6 | 32659403 | C | G | 0.5417 | 0.1193  | 0.0059 | 5.96E-91  | 20.2248  | 1130071 | Asthma |
| rs28451423  | 6 | 32659415 | A | T | 0.1512 | -0.0917 | 0.0096 | 1.24E-21  | -9.5547  | 1000149 | Asthma |
| rs9273407   | 6 | 32659434 | C | T | 0.5433 | 0.1194  | 0.0059 | 2.61E-91  | 20.2645  | 1130071 | Asthma |
| rs9273408   | 6 | 32659444 | G | A | 0.1867 | 0.0980  | 0.0070 | 6.97E-45  | 14.0572  | 1221848 | Asthma |
| rs9273409   | 6 | 32659458 | C | T | 0.4565 | -0.1194 | 0.0059 | 2.16E-91  | -20.2738 | 1130071 | Asthma |
| rs9273410   | 6 | 32659473 | A | C | 0.4468 | 0.1022  | 0.0057 | 2.47E-72  | 17.9865  | 1189302 | Asthma |
| rs9273411   | 6 | 32659483 | A | G | 0.3910 | 0.0700  | 0.0060 | 1.02E-31  | 11.7187  | 1130071 | Asthma |
| rs9273412   | 6 | 32659486 | T | C | 0.4566 | -0.1191 | 0.0059 | 5.80E-91  | -20.2259 | 1130071 | Asthma |
| rs9273413   | 6 | 32659515 | A | G | 0.4559 | -0.1193 | 0.0059 | 2.66E-91  | -20.2634 | 1130071 | Asthma |
| rs9273414   | 6 | 32659522 | A | T | 0.4559 | -0.1192 | 0.0059 | 2.74E-91  | -20.2631 | 1130071 | Asthma |
| rs9273415   | 6 | 32659533 | C | T | 0.5084 | -0.0947 | 0.0057 | 2.63E-62  | -16.6583 | 1189302 | Asthma |
| rs9273416   | 6 | 32659544 | T | G | 0.4552 | -0.1193 | 0.0059 | 2.23E-91  | -20.2725 | 1130071 | Asthma |
| rs9273417   | 6 | 32659575 | A | G | 0.5119 | -0.0888 | 0.0070 | 1.75E-36  | -12.6151 | 811023  | Asthma |
| rs9273418   | 6 | 32659585 | A | C | 0.4568 | -0.1194 | 0.0059 | 2.46E-91  | -20.2686 | 1130071 | Asthma |
| rs9273419   | 6 | 32659588 | T | C | 0.5184 | -0.0944 | 0.0072 | 8.63E-40  | -13.2013 | 811023  | Asthma |
| rs1130457   | 6 | 32659590 | T | C | 0.3027 | -0.0972 | 0.0065 | 4.63E-50  | -14.8771 | 1130071 | Asthma |
| rs1130456   | 6 | 32659602 | T | C | 0.2988 | -0.0954 | 0.0061 | 1.10E-55  | -15.7200 | 1198533 | Asthma |
| rs12918     | 6 | 32659609 | T | C | 0.3043 | 0.0609  | 0.0061 | 2.38E-23  | 9.9557   | 1221848 | Asthma |
| rs9273423   | 6 | 32659613 | T | C | 0.3008 | -0.1060 | 0.0067 | 6.97E-57  | -15.8941 | 1068611 | Asthma |
| rs9273424   | 6 | 32659617 | C | T | 0.5348 | -0.0985 | 0.0084 | 8.51E-32  | -11.7341 | 681101  | Asthma |
| rs9273425   | 6 | 32659619 | C | T | 0.4568 | -0.1192 | 0.0059 | 5.98E-91  | -20.2237 | 1130071 | Asthma |
| rs9273426   | 6 | 32659657 | A | C | 0.5093 | -0.0865 | 0.0070 | 5.38E-35  | -12.3419 | 811023  | Asthma |
| rs9273427   | 6 | 32659664 | A | C | 0.4552 | -0.1193 | 0.0059 | 1.59E-91  | -20.2899 | 1130071 | Asthma |
| rs1056318   | 6 | 32659673 | A | G | 0.3944 | 0.0727  | 0.0060 | 6.15E-34  | 12.1444  | 1130071 | Asthma |
| rs9273429   | 6 | 32659679 | G | A | 0.3436 | -0.0946 | 0.0063 | 2.68E-51  | -15.0668 | 1130071 | Asthma |
| rs9273430   | 6 | 32659683 | T | G | 0.4545 | -0.1194 | 0.0059 | 7.76E-92  | -20.3249 | 1130071 | Asthma |
| rs1064173   | 6 | 32659703 | A | G | 0.2774 | 0.0877  | 0.0077 | 1.07E-29  | 11.3180  | 697750  | Asthma |
| rs9273432   | 6 | 32659708 | T | C | 0.5144 | -0.0786 | 0.0081 | 3.38E-22  | -9.6885  | 443003  | Asthma |
| rs9273433   | 6 | 32659712 | A | G | 0.4153 | -0.1193 | 0.0065 | 7.73E-76  | -18.4291 | 696825  | Asthma |
| rs1056316   | 6 | 32659717 | C | T | 0.1971 | 0.0641  | 0.0078 | 1.86E-16  | 8.2305   | 696825  | Asthma |
| rs1056315   | 6 | 32659738 | A | C | 0.3202 | 0.0832  | 0.0079 | 1.01E-25  | 10.4850  | 605973  | Asthma |
| rs9273436   | 6 | 32659740 | G | T | 0.4973 | 0.0998  | 0.0057 | 1.50E-69  | 17.6281  | 1189302 | Asthma |
| rs9273438   | 6 | 32659746 | G | A | 0.5437 | 0.1526  | 0.0077 | 2.01E-88  | 19.9357  | 844071  | Asthma |
| rs1130451   | 6 | 32659750 | A | C | 0.1444 | -0.0851 | 0.0091 | 1.07E-20  | -9.3287  | 973993  | Asthma |
| rs28724234  | 6 | 32659758 | T | G | 0.5747 | 0.1207  | 0.0064 | 2.71E-79  | 18.8540  | 762051  | Asthma |
| rs9273440   | 6 | 32659784 | T | C | 0.2993 | -0.0880 | 0.0057 | 6.77E-54  | -15.4571 | 1290310 | Asthma |
| rs9273441   | 6 | 32659796 | C | G | 0.4498 | -0.1163 | 0.0054 | 4.23E-102 | -21.4540 | 1198533 | Asthma |
| rs9273442   | 6 | 32659805 | T | G | 0.2918 | -0.0932 | 0.0060 | 1.13E-54  | -15.5719 | 1224666 | Asthma |
| rs9273443   | 6 | 32659823 | G | T | 0.4495 | -0.1161 | 0.0054 | 7.87E-102 | -21.4240 | 1198533 | Asthma |
| rs1130446   | 6 | 32659840 | T | C | 0.1436 | -0.0838 | 0.0087 | 5.32E-22  | -9.6419  | 1130071 | Asthma |
| rs34153824  | 6 | 32659850 | T | C | 0.1522 | -0.0817 | 0.0084 | 2.54E-22  | -9.7172  | 1130071 | Asthma |
| rs9273444   | 6 | 32659858 | T | G | 0.4468 | -0.1155 | 0.0053 | 3.65E-104 | -21.6745 | 1224666 | Asthma |
| rs9273445   | 6 | 32659869 | A | G | 0.4468 | -0.1154 | 0.0053 | 4.61E-104 | -21.6636 | 1224666 | Asthma |
| rs6689      | 6 | 32659923 | G | A | 0.2031 | -0.0898 | 0.0063 | 1.09E-46  | -14.3489 | 1349938 | Asthma |
| rs1063355   | 6 | 32659937 | T | G | 0.4430 | -0.1166 | 0.0049 | 6.00E-126 | -23.8717 | 1376071 | Asthma |
| rs1049225   | 6 | 32659970 | A | G | 0.2862 | -0.0933 | 0.0055 | 5.54E-64  | -16.8877 | 1376071 | Asthma |
| rs1049222   | 6 | 32659975 | C | T | 0.1527 | -0.0789 | 0.0077 | 1.10E-24  | -10.2570 | 1198533 | Asthma |
| rs1049219   | 6 | 32659986 | T | A | 0.1526 | -0.0790 | 0.0077 | 1.00E-24  | -10.2660 | 1198533 | Asthma |
| rs1049213   | 6 | 32659996 | A | G | 0.3117 | -0.0863 | 0.0056 | 1.15E-53  | -15.4228 | 1290310 | Asthma |
| rs1766      | 6 | 32660018 | G | A | 0.4465 | 0.0625  | 0.0059 | 2.37E-26  | 10.6215  | 1130071 | Asthma |
| rs1071641   | 6 | 32660021 | T | C | 0.1533 | -0.0814 | 0.0084 | 4.17E-22  | -9.6669  | 1130071 | Asthma |
| rs9273453   | 6 | 32660035 | G | C | 0.1360 | 0.0531  | 0.0094 | 1.81E-08  | 5.6297   | 1065770 | Asthma |
| rs115749644 | 6 | 32660041 | A | C | 0.1396 | 0.0941  | 0.0079 | 1.20E-32  | 11.8986  | 1221848 | Asthma |
| rs9273455   | 6 | 32660053 | T | C | 0.1936 | 0.0569  | 0.0085 | 1.75E-11  | 6.7256   | 908767  | Asthma |
| rs1770      | 6 | 32660056 | G | A | 0.3313 | 0.0823  | 0.0091 | 2.08E-19  | 9.0088   | 654945  | Asthma |
| rs3210176   | 6 | 32660073 | C | T | 0.3501 | 0.1019  | 0.0070 | 2.43E-48  | 14.6105  | 973993  | Asthma |
| rs1130420   | 6 | 32660075 | A | G | 0.3706 | 0.0878  | 0.0068 | 2.43E-38  | 12.9473  | 973993  | Asthma |
| rs1071639   | 6 | 32660105 | T | C | 0.1413 | -0.0847 | 0.0091 | 1.90E-20  | -9.2677  | 973993  | Asthma |
| rs1063349   | 6 | 32660129 | T | C | 0.4425 | -0.1265 | 0.0058 | 2.00E-104 | -21.7011 | 1125398 | Asthma |
| rs1063348   | 6 | 32660146 | A | G | 0.4439 | -0.1266 | 0.0058 | 1.54E-104 | -21.7140 | 1125398 | Asthma |
| rs9273463   | 6 | 32660157 | A | G | 0.1996 | 0.0606  | 0.0074 | 4.05E-16  | 8.1372   | 1065770 | Asthma |
| rs36205178  | 6 | 32660161 | T | C | 0.1614 | 0.0722  | 0.0086 | 4.95E-17  | 8.3877   | 973993  | Asthma |
| rs1063347   | 6 | 32660179 | C | G | 0.3078 | -0.1032 | 0.0074 | 2.97E-44  | -13.9541 | 973993  | Asthma |
| rs7656      | 6 | 32660181 | T | C | 0.1911 | -0.0546 | 0.0081 | 1.65E-11  | -6.7343  | 1065770 | Asthma |
| rs1063346   | 6 | 32660190 | A | G | 0.4511 | -0.1290 | 0.0067 | 9.00E-84  | -19.3915 | 973993  | Asthma |
| rs3204428   | 6 | 32660192 | C | T | 0.4511 | -0.1290 | 0.0067 | 8.67E-84  | -19.3933 | 973993  | Asthma |
| rs1063345   | 6 | 32660199 | G | A | 0.5372 | -0.0997 | 0.0065 | 8.68E-54  | -15.4410 | 1033224 | Asthma |
| rs1049178   | 6 | 32660211 | G | A | 0.1680 | -0.0684 | 0.0082 | 5.62E-17  | -8.3729  | 1065770 | Asthma |



|             |   |          |   |   |        |         |        |           |          |         |        |
|-------------|---|----------|---|---|--------|---------|--------|-----------|----------|---------|--------|
| rs1049177   | 6 | 32660214 | T | C | 0.1430 | -0.0844 | 0.0091 | 2.68E-20  | -9.2311  | 973993  | Asthma |
| rs1063343   | 6 | 32660215 | T | C | 0.4994 | -0.1034 | 0.0063 | 1.07E-60  | -16.4352 | 1033224 | Asthma |
| rs1049175   | 6 | 32660224 | C | T | 0.1429 | -0.0844 | 0.0091 | 2.56E-20  | -9.2361  | 973993  | Asthma |
| rs9273471   | 6 | 32660253 | A | G | 0.3413 | 0.0838  | 0.0090 | 8.52E-21  | 9.3531   | 654945  | Asthma |
| rs9273472   | 6 | 32660268 | C | G | 0.3134 | -0.1021 | 0.0073 | 5.16E-44  | -13.9151 | 973993  | Asthma |
| rs281864453 | 6 | 32660288 | C | G | 0.4460 | -0.1271 | 0.0067 | 2.39E-81  | -19.1022 | 973993  | Asthma |
| rs9273477   | 6 | 32660302 | A | C | 0.2035 | 0.0709  | 0.0071 | 9.12E-24  | 10.0506  | 1130071 | Asthma |
| rs9273479   | 6 | 32660316 | T | C | 0.4453 | -0.1269 | 0.0066 | 2.12E-81  | -19.1083 | 973993  | Asthma |
| rs28703037  | 6 | 32660321 | C | G | 0.0498 | -0.0973 | 0.0136 | 7.15E-13  | -7.1766  | 1133307 | Asthma |
| rs9273480   | 6 | 32660326 | T | C | 0.1994 | 0.0594  | 0.0076 | 5.94E-15  | 7.8053   | 1065770 | Asthma |
| rs9273481   | 6 | 32660345 | C | G | 0.3086 | 0.0770  | 0.0058 | 4.51E-40  | 13.2500  | 1198533 | Asthma |
| rs9273482   | 6 | 32660350 | T | C | 0.4450 | -0.1235 | 0.0060 | 1.45E-93  | -20.5183 | 1042455 | Asthma |
| rs9273483   | 6 | 32660361 | G | A | 0.4481 | -0.1285 | 0.0066 | 1.94E-83  | -19.3534 | 973993  | Asthma |
| rs2647082   | 6 | 32660369 | A | G | 0.2735 | 0.0762  | 0.0073 | 1.59E-25  | 10.4424  | 973993  | Asthma |
| rs9273487   | 6 | 32660372 | G | A | 0.1836 | 0.0739  | 0.0072 | 1.00E-24  | 10.2660  | 1130071 | Asthma |
| rs9273488   | 6 | 32660382 | G | C | 0.1927 | 0.0759  | 0.0083 | 8.16E-20  | 9.1111   | 973993  | Asthma |
| rs9273489   | 6 | 32660412 | G | A | 0.1404 | 0.1056  | 0.0095 | 7.85E-29  | 11.1417  | 973993  | Asthma |
| rs28396311  | 6 | 32660413 | C | T | 0.1419 | -0.0840 | 0.0089 | 3.46E-21  | -9.4479  | 1000126 | Asthma |
| rs9273490   | 6 | 32660416 | A | G | 0.3570 | 0.1027  | 0.0077 | 2.79E-40  | 13.2866  | 844071  | Asthma |
| rs9273491   | 6 | 32660444 | A | G | 0.1409 | 0.1056  | 0.0095 | 7.44E-29  | 11.1461  | 973993  | Asthma |
| rs9273492   | 6 | 32660452 | A | G | 0.1968 | 0.0691  | 0.0084 | 1.42E-16  | 8.2629   | 908767  | Asthma |
| rs9273493   | 6 | 32660470 | T | C | 0.4420 | -0.1265 | 0.0058 | 2.00E-104 | -21.7009 | 1125398 | Asthma |
| rs9273494   | 6 | 32660479 | T | G | 0.1992 | 0.0572  | 0.0082 | 2.74E-12  | 6.9903   | 973993  | Asthma |
| rs41270875  | 6 | 32660495 | G | A | 0.1688 | 0.0705  | 0.0078 | 1.85E-19  | 9.0216   | 1065770 | Asthma |
| rs9273495   | 6 | 32660496 | A | G | 0.3924 | 0.0885  | 0.0067 | 1.35E-39  | 13.1676  | 973993  | Asthma |
| rs9273496   | 6 | 32660506 | A | G | 0.1930 | 0.0764  | 0.0083 | 3.91E-20  | 9.1905   | 973993  | Asthma |
| rs9273497   | 6 | 32660520 | T | C | 0.4500 | -0.1246 | 0.0061 | 5.47E-94  | -20.5667 | 1065770 | Asthma |
| rs9273498   | 6 | 32660524 | T | A | 0.3017 | -0.1019 | 0.0074 | 6.24E-43  | -13.7353 | 973993  | Asthma |
| rs9273500   | 6 | 32660565 | T | C | 0.2428 | -0.0868 | 0.0070 | 1.24E-35  | -12.4594 | 1125398 | Asthma |
| rs9273501   | 6 | 32660584 | A | T | 0.3511 | 0.1119  | 0.0078 | 2.92E-46  | 14.2804  | 844071  | Asthma |
| rs9273502   | 6 | 32660612 | C | A | 0.1896 | 0.0753  | 0.0077 | 1.70E-22  | 9.7583   | 1065770 | Asthma |
| rs9273503   | 6 | 32660613 | T | G | 0.1933 | 0.0761  | 0.0083 | 4.67E-20  | 9.1714   | 973993  | Asthma |
| rs9273504   | 6 | 32660630 | C | T | 0.1972 | 0.0534  | 0.0062 | 4.31E-18  | 8.6704   | 1349938 | Asthma |
| rs9273505   | 6 | 32660643 | T | C | 0.3550 | 0.0912  | 0.0060 | 1.56E-52  | 15.2536  | 1125398 | Asthma |
| rs2854275   | 6 | 32660651 | A | C | 0.1200 | 0.0451  | 0.0081 | 3.15E-08  | 5.5331   | 1281476 | Asthma |
| rs9273507   | 6 | 32660655 | G | A | 0.3472 | 0.0749  | 0.0056 | 1.64E-40  | 13.3256  | 1198533 | Asthma |
| rs9273508   | 6 | 32660662 | A | G | 0.3950 | 0.0899  | 0.0059 | 1.38E-52  | 15.2614  | 1125398 | Asthma |
| rs35254656  | 6 | 32660695 | G | A | 0.1566 | 0.0829  | 0.0086 | 3.23E-22  | 9.6929   | 995476  | Asthma |
| rs9273509   | 6 | 32660696 | T | C | 0.4469 | -0.1499 | 0.0076 | 6.95E-87  | -19.7574 | 844071  | Asthma |
| rs9273513   | 6 | 32660729 | A | C | 0.1958 | 0.0768  | 0.0083 | 1.30E-20  | 9.3082   | 973993  | Asthma |
| rs9273514   | 6 | 32660761 | G | T | 0.4486 | -0.1283 | 0.0066 | 2.13E-83  | -19.3473 | 973993  | Asthma |
| rs34736308  | 6 | 32660766 | C | T | 0.1180 | -0.0804 | 0.0100 | 7.96E-16  | -8.0547  | 973993  | Asthma |
| rs9273519   | 6 | 32660781 | A | G | 0.1991 | 0.0558  | 0.0083 | 1.63E-11  | 6.7359   | 908767  | Asthma |
| rs281875165 | 6 | 32660782 | C | T | 0.1986 | 0.0572  | 0.0082 | 2.95E-12  | 6.9802   | 973993  | Asthma |
| rs9273523   | 6 | 32660794 | T | C | 0.1649 | 0.0927  | 0.0099 | 1.02E-20  | 9.3341   | 935848  | Asthma |
| rs9273524   | 6 | 32660818 | T | C | 0.4419 | -0.1268 | 0.0058 | 6.06E-105 | -21.7561 | 1125398 | Asthma |
| rs41270883  | 6 | 32660820 | T | C | 0.1654 | 0.0730  | 0.0077 | 4.43E-21  | 9.4221   | 1042455 | Asthma |
| rs9273525   | 6 | 32660828 | C | T | 0.1742 | 0.0656  | 0.0097 | 1.37E-11  | 6.7615   | 540747  | Asthma |
| rs201049473 | 6 | 32660829 | A | C | 0.0349 | -0.0976 | 0.0179 | 4.64E-08  | -5.4647  | 609209  | Asthma |
| rs9273526   | 6 | 32660840 | C | A | 0.1927 | 0.0762  | 0.0073 | 1.60E-25  | 10.4418  | 1125398 | Asthma |
| rs9273527   | 6 | 32660844 | C | T | 0.3617 | 0.0860  | 0.0068 | 6.32E-37  | 12.6948  | 973993  | Asthma |
| rs9273528   | 6 | 32660856 | C | T | 0.1925 | 0.0761  | 0.0073 | 2.03E-25  | 10.4190  | 1125398 | Asthma |
| rs28688207  | 6 | 32660883 | C | T | 0.0195 | -0.1023 | 0.0164 | 4.40E-10  | -6.2392  | 1349938 | Asthma |
| rs9273529   | 6 | 32660921 | T | C | 0.2034 | 0.0600  | 0.0071 | 4.06E-17  | 8.4111   | 1125398 | Asthma |
| rs9273531   | 6 | 32660935 | T | C | 0.1066 | 0.1298  | 0.0087 | 4.77E-50  | 14.8756  | 1193860 | Asthma |
| rs41270887  | 6 | 32660945 | T | A | 0.1588 | 0.0725  | 0.0086 | 4.65E-17  | 8.3952   | 973993  | Asthma |
| rs9273534   | 6 | 32660974 | C | T | 0.4451 | -0.1275 | 0.0066 | 1.58E-82  | -19.2439 | 973993  | Asthma |
| rs9273535   | 6 | 32660983 | A | C | 0.1941 | 0.0763  | 0.0083 | 6.45E-20  | 9.1364   | 973993  | Asthma |
| rs9273536   | 6 | 32660987 | T | C | 0.2128 | 0.0895  | 0.0071 | 1.64E-36  | 12.6198  | 1156622 | Asthma |
| rs9273537   | 6 | 32660988 | T | C | 0.4085 | 0.1056  | 0.0068 | 3.37E-54  | 15.5024  | 973993  | Asthma |
| rs2854273   | 6 | 32660999 | C | A | 0.4461 | -0.1275 | 0.0066 | 3.00E-82  | -19.2109 | 973993  | Asthma |
| rs9273539   | 6 | 32661002 | T | G | 0.2048 | 0.0680  | 0.0075 | 7.47E-20  | 9.1206   | 1064845 | Asthma |
| rs3020628   | 6 | 32661007 | C | A | 0.4462 | -0.1275 | 0.0066 | 3.30E-82  | -19.2056 | 973993  | Asthma |
| rs9273541   | 6 | 32661010 | T | C | 0.1946 | 0.0764  | 0.0084 | 6.71E-20  | 9.1321   | 973993  | Asthma |
| rs9273542   | 6 | 32661035 | T | C | 0.2043 | 0.0695  | 0.0074 | 6.74E-21  | 9.3777   | 1130071 | Asthma |
| rs9273543   | 6 | 32661040 | A | G | 0.1469 | 0.0897  | 0.0130 | 5.36E-12  | 6.8955   | 572830  | Asthma |
| rs68081734  | 6 | 32661051 | C | T | 0.1423 | -0.0855 | 0.0091 | 7.33E-21  | -9.3689  | 973993  | Asthma |
| rs9273544   | 6 | 32661056 | A | G | 0.4446 | -0.1259 | 0.0068 | 1.56E-77  | -18.6389 | 908767  | Asthma |
| rs3020625   | 6 | 32661058 | A | C | 0.4446 | -0.1260 | 0.0068 | 1.39E-77  | -18.6452 | 908767  | Asthma |
| rs9273546   | 6 | 32661064 | A | G | 0.3245 | -0.0961 | 0.0075 | 2.87E-37  | -12.7564 | 908767  | Asthma |
| rs73729445  | 6 | 32661066 | T | C | 0.0505 | -0.1063 | 0.0147 | 5.00E-13  | -7.2259  | 1064845 | Asthma |
| rs9273547   | 6 | 32661067 | T | C | 0.4498 | -0.1252 | 0.0068 | 1.86E-76  | -18.5058 | 908767  | Asthma |
| rs9273548   | 6 | 32661068 | A | G | 0.3445 | 0.0662  | 0.0090 | 1.49E-13  | 7.3883   | 654945  | Asthma |
| rs9273549   | 6 | 32661096 | T | C | 0.2330 | 0.0946  | 0.0080 | 4.91E-32  | 11.7807  | 973993  | Asthma |

|             |   |          |   |   |        |         |        |           |          |         |        |
|-------------|---|----------|---|---|--------|---------|--------|-----------|----------|---------|--------|
| rs9273550   | 6 | 32661113 | A | G | 0.3149 | 0.0778  | 0.0073 | 1.06E-26  | 10.6961  | 973993  | Asthma |
| rs9273551   | 6 | 32661136 | T | G | 0.1717 | 0.0739  | 0.0107 | 5.47E-12  | 6.8932   | 844071  | Asthma |
| rs9273552   | 6 | 32661139 | A | G | 0.1887 | 0.0759  | 0.0120 | 2.22E-10  | 6.3454   | 567409  | Asthma |
| rs9273554   | 6 | 32661164 | C | G | 0.1912 | 0.0719  | 0.0110 | 6.20E-11  | 6.5387   | 654945  | Asthma |
| rs9273555   | 6 | 32661167 | G | C | 0.3098 | 0.0774  | 0.0073 | 5.70E-26  | 10.5392  | 973993  | Asthma |
| rs9273556   | 6 | 32661176 | G | C | 0.4524 | -0.0467 | 0.0067 | 2.30E-12  | -7.0149  | 973993  | Asthma |
| rs2515895   | 6 | 32661183 | C | T | 0.2384 | 0.0946  | 0.0080 | 3.38E-32  | 11.8121  | 973993  | Asthma |
| rs9273558   | 6 | 32661188 | G | A | 0.2533 | 0.0828  | 0.0077 | 1.05E-26  | 10.6976  | 973993  | Asthma |
| rs9273559   | 6 | 32661190 | T | C | 0.5401 | 0.1282  | 0.0067 | 1.17E-82  | 19.2607  | 973993  | Asthma |
| rs9273560   | 6 | 32661219 | A | C | 0.5402 | 0.1271  | 0.0067 | 1.58E-80  | 19.0039  | 973993  | Asthma |
| rs9273561   | 6 | 32661221 | C | T | 0.2287 | 0.0989  | 0.0083 | 8.17E-33  | 11.9310  | 908767  | Asthma |
| rs281864337 | 6 | 32661245 | T | C | 0.3198 | -0.0696 | 0.0085 | 3.16E-16  | -8.1672  | 844071  | Asthma |
| rs73729446  | 6 | 32661255 | G | C | 0.0641 | -0.0799 | 0.0144 | 2.64E-08  | -5.5637  | 908767  | Asthma |
| rs28724237  | 6 | 32661269 | C | T | 0.3258 | 0.0833  | 0.0073 | 2.66E-30  | 11.4395  | 908767  | Asthma |
| rs9273584   | 6 | 32661287 | T | A | 0.5548 | 0.1250  | 0.0068 | 1.85E-76  | 18.5063  | 908767  | Asthma |
| rs28724238  | 6 | 32661289 | C | T | 0.1661 | 0.0746  | 0.0087 | 6.56E-18  | 8.6223   | 1065770 | Asthma |
| rs9273595   | 6 | 32661314 | G | C | 0.2095 | 0.0639  | 0.0074 | 4.53E-18  | 8.6646   | 1065770 | Asthma |
| rs9273608   | 6 | 32661333 | T | C | 0.3410 | 0.0947  | 0.0069 | 2.04E-42  | 13.6491  | 973993  | Asthma |
| rs1130432   | 6 | 32661352 | C | T | 0.1453 | -0.0852 | 0.0080 | 1.13E-26  | -10.6903 | 1125398 | Asthma |
| rs1140343   | 6 | 32661360 | T | G | 0.4451 | -0.1268 | 0.0058 | 5.58E-105 | -21.7603 | 1125398 | Asthma |
| rs1140342   | 6 | 32661364 | T | C | 0.5056 | 0.1030  | 0.0067 | 1.28E-52  | 15.2671  | 973993  | Asthma |
| rs3210168   | 6 | 32661369 | A | G | 0.3062 | 0.0751  | 0.0068 | 3.76E-28  | 11.0016  | 1033224 | Asthma |
| rs1130431   | 6 | 32661378 | A | C | 0.1391 | -0.0967 | 0.0107 | 1.30E-19  | -9.0604  | 844071  | Asthma |
| rs1130430   | 6 | 32661384 | G | A | 0.5543 | 0.1261  | 0.0066 | 8.91E-81  | 19.0334  | 973993  | Asthma |
| rs1049163   | 6 | 32661416 | T | C | 0.4842 | 0.0965  | 0.0070 | 7.28E-43  | 13.7240  | 908767  | Asthma |
| rs9273660   | 6 | 32661450 | T | C | 0.2227 | 0.0823  | 0.0090 | 4.74E-20  | 9.1697   | 778845  | Asthma |
| rs9273668   | 6 | 32661460 | G | A | 0.2685 | 0.0877  | 0.0087 | 4.75E-24  | 10.1147  | 778845  | Asthma |
| rs559673115 | 6 | 32661462 | G | A | 0.5069 | 0.1196  | 0.0068 | 1.33E-69  | 17.6342  | 908767  | Asthma |
| rs3828786   | 6 | 32661482 | C | T | 0.0895 | 0.1442  | 0.0122 | 1.92E-32  | 11.8599  | 973993  | Asthma |
| rs9273685   | 6 | 32661492 | T | C | 0.1763 | 0.0649  | 0.0089 | 2.74E-13  | 7.3065   | 973993  | Asthma |
| rs9273695   | 6 | 32661504 | T | C | 0.2169 | 0.0734  | 0.0080 | 6.77E-20  | 9.1312   | 973993  | Asthma |
| rs9273696   | 6 | 32661505 | T | A | 0.2169 | 0.0734  | 0.0080 | 6.78E-20  | 9.1312   | 973993  | Asthma |
| rs9273698   | 6 | 32661512 | A | C | 0.2233 | 0.0826  | 0.0088 | 8.10E-21  | 9.3583   | 844071  | Asthma |
| rs9273704   | 6 | 32661520 | T | C | 0.4336 | -0.1459 | 0.0077 | 7.98E-81  | -19.0400 | 844071  | Asthma |
| rs9273710   | 6 | 32661537 | A | G | 0.5487 | 0.1508  | 0.0076 | 8.55E-88  | 19.8633  | 844071  | Asthma |
| rs9273713   | 6 | 32661543 | A | G | 0.3104 | -0.1236 | 0.0085 | 6.19E-48  | -14.5460 | 844071  | Asthma |
| rs28724240  | 6 | 32661551 | A | G | 0.1854 | 0.1052  | 0.0154 | 9.64E-12  | 6.8116   | 525023  | Asthma |
| rs28724241  | 6 | 32661553 | T | C | 0.1910 | 0.0840  | 0.0097 | 5.88E-18  | 8.6348   | 844071  | Asthma |
| rs28724242  | 6 | 32661554 | G | A | 0.3061 | 0.1119  | 0.0078 | 3.80E-47  | 14.4214  | 935848  | Asthma |
| rs9273723   | 6 | 32661569 | C | T | 0.1494 | -0.0954 | 0.0105 | 9.03E-20  | -9.1002  | 844071  | Asthma |
| rs28724243  | 6 | 32661570 | C | T | 0.3048 | 0.1213  | 0.0076 | 2.37E-57  | 15.9607  | 935848  | Asthma |
| rs71542428  | 6 | 32661608 | A | C | 0.1487 | -0.0933 | 0.0105 | 6.08E-19  | -8.8903  | 844071  | Asthma |
| rs28724245  | 6 | 32661623 | G | A | 0.3476 | 0.1211  | 0.0091 | 4.81E-40  | 13.2452  | 476051  | Asthma |
| rs72844321  | 6 | 32661631 | G | A | 0.1486 | -0.0935 | 0.0105 | 5.51E-19  | -8.9018  | 844071  | Asthma |
| rs9273754   | 6 | 32661632 | A | G | 0.3105 | -0.1243 | 0.0085 | 2.23E-48  | -14.6157 | 844071  | Asthma |
| rs9273757   | 6 | 32661640 | C | G | 0.1932 | 0.0680  | 0.0094 | 5.43E-13  | 7.2141   | 844071  | Asthma |
| rs28724246  | 6 | 32661645 | C | T | 0.1726 | 0.0834  | 0.0115 | 4.23E-13  | 7.2479   | 476051  | Asthma |
| rs9273767   | 6 | 32661655 | A | G | 0.4628 | -0.1524 | 0.0076 | 2.12E-88  | -19.9330 | 844071  | Asthma |
| rs9273772   | 6 | 32661661 | T | C | 0.4630 | -0.1525 | 0.0076 | 2.12E-88  | -19.9323 | 844071  | Asthma |
| rs9273777   | 6 | 32661666 | T | C | 0.3109 | -0.1243 | 0.0085 | 2.10E-48  | -14.6192 | 844071  | Asthma |
| rs9273781   | 6 | 32661670 | A | G | 0.3106 | -0.1242 | 0.0085 | 2.54E-48  | -14.6072 | 844071  | Asthma |
| rs41270899  | 6 | 32661673 | G | A | 0.1742 | 0.1076  | 0.0115 | 8.13E-21  | 9.3584   | 476051  | Asthma |
| rs9273786   | 6 | 32661685 | A | C | 0.2071 | 0.0623  | 0.0091 | 8.02E-12  | 6.8383   | 778845  | Asthma |
| rs9273794   | 6 | 32661705 | A | G | 0.1406 | -0.1003 | 0.0106 | 3.20E-21  | -9.4559  | 844071  | Asthma |
| rs9273800   | 6 | 32661719 | G | T | 0.4506 | -0.1512 | 0.0076 | 2.46E-88  | -19.9249 | 844071  | Asthma |
| rs41270903  | 6 | 32661720 | G | A | 0.1626 | 0.0908  | 0.0091 | 2.78E-23  | 9.9403   | 935848  | Asthma |
| rs9273803   | 6 | 32661727 | T | C | 0.2034 | 0.0644  | 0.0090 | 9.94E-13  | 7.1313   | 844071  | Asthma |
| rs66967821  | 6 | 32661729 | G | C | 0.1379 | -0.0984 | 0.0107 | 3.49E-20  | -9.2023  | 844071  | Asthma |
| rs28724249  | 6 | 32661732 | C | A | 0.3448 | 0.1140  | 0.0079 | 1.32E-47  | 14.4937  | 844071  | Asthma |
| rs9273807   | 6 | 32661737 | A | T | 0.2047 | 0.0585  | 0.0080 | 1.96E-13  | 7.3513   | 912533  | Asthma |
| rs9273817   | 6 | 32661752 | T | C | 0.3246 | -0.1214 | 0.0085 | 3.26E-46  | -14.2723 | 844071  | Asthma |
| rs28724250  | 6 | 32661753 | T | C | 0.1949 | 0.0762  | 0.0098 | 6.25E-15  | 7.7989   | 778845  | Asthma |
| rs9273818   | 6 | 32661754 | G | A | 0.1926 | 0.0800  | 0.0098 | 4.12E-16  | 8.1350   | 778845  | Asthma |
| rs28724251  | 6 | 32661758 | A | C | 0.3042 | 0.1148  | 0.0081 | 5.95E-46  | 14.2308  | 844071  | Asthma |
| rs9273821   | 6 | 32661766 | C | T | 0.1988 | 0.0804  | 0.0094 | 1.24E-17  | 8.5490   | 844071  | Asthma |
| rs79603908  | 6 | 32661768 | C | T | 0.0543 | -0.1188 | 0.0156 | 2.75E-14  | -7.6090  | 934923  | Asthma |
| rs28724252  | 6 | 32661772 | A | G | 0.1931 | 0.0828  | 0.0081 | 2.18E-24  | 10.1907  | 995476  | Asthma |
| rs9273841   | 6 | 32661805 | C | T | 0.2960 | -0.1062 | 0.0066 | 1.99E-57  | -15.9725 | 1068611 | Asthma |
| rs41270907  | 6 | 32661836 | G | C | 0.1458 | 0.0829  | 0.0089 | 1.62E-20  | 9.2851   | 1000149 | Asthma |
| rs41270911  | 6 | 32661841 | A | G | 0.1459 | 0.0830  | 0.0089 | 1.47E-20  | 9.2951   | 1000149 | Asthma |
| rs9273866   | 6 | 32661862 | C | T | 0.1955 | 0.0768  | 0.0084 | 4.95E-20  | 9.1650   | 912533  | Asthma |
| rs9273873   | 6 | 32661873 | C | T | 0.1951 | 0.0579  | 0.0073 | 2.29E-15  | 7.9246   | 1091926 | Asthma |
| rs2854272   | 6 | 32661903 | G | A | 0.3626 | 0.0907  | 0.0062 | 4.75E-49  | 14.7205  | 1004310 | Asthma |
| rs41270915  | 6 | 32661915 | T | G | 0.1601 | 0.0713  | 0.0086 | 1.18E-16  | 8.2852   | 973993  | Asthma |

|             |   |          |   |   |        |         |        |          |          |         |        |
|-------------|---|----------|---|---|--------|---------|--------|----------|----------|---------|--------|
| rs9273902   | 6 | 32661939 | C | T | 0.1999 | 0.0536  | 0.0074 | 3.51E-13 | 7.2731   | 1042455 | Asthma |
| rs36233043  | 6 | 32661941 | A | G | 0.1527 | -0.0788 | 0.0077 | 1.21E-24 | -10.2481 | 1198533 | Asthma |
| rs9273912   | 6 | 32661960 | T | C | 0.1536 | -0.0801 | 0.0070 | 1.13E-30 | -11.5136 | 1349938 | Asthma |
| rs1130399   | 6 | 32661978 | A | G | 0.2035 | 0.0709  | 0.0064 | 7.68E-29 | 11.1439  | 1281476 | Asthma |
| rs1130398   | 6 | 32661987 | T | C | 0.3555 | 0.0914  | 0.0060 | 4.45E-53 | 15.3352  | 1125398 | Asthma |
| rs1049092   | 6 | 32662025 | A | G | 0.4434 | -0.1269 | 0.0066 | 1.86E-81 | -19.1155 | 973993  | Asthma |
| rs701564    | 6 | 32662032 | T | C | 0.1595 | 0.0579  | 0.0069 | 7.18E-17 | 8.3440   | 1281476 | Asthma |
| rs1049133   | 6 | 32662070 | A | G | 0.3019 | -0.1019 | 0.0074 | 7.02E-43 | -13.7262 | 973993  | Asthma |
| rs1049130   | 6 | 32662082 | A | G | 0.5009 | -0.0436 | 0.0065 | 2.77E-11 | -6.6586  | 973993  | Asthma |
| rs1049088   | 6 | 32662091 | G | A | 0.1375 | -0.0982 | 0.0107 | 4.16E-20 | -9.1838  | 844071  | Asthma |
| rs1049087   | 6 | 32662112 | A | G | 0.3965 | 0.0862  | 0.0067 | 4.05E-38 | 12.9082  | 973993  | Asthma |
| rs1063323   | 6 | 32662114 | T | C | 0.3536 | 0.0908  | 0.0060 | 4.07E-52 | 15.1907  | 1125398 | Asthma |
| rs1049086   | 6 | 32662127 | A | G | 0.4444 | -0.1255 | 0.0068 | 4.79E-77 | -18.5786 | 908767  | Asthma |
| rs2647032   | 6 | 32662128 | C | T | 0.0799 | 0.0561  | 0.0102 | 4.13E-08 | 5.4851   | 1125398 | Asthma |
| rs41544112  | 6 | 32662143 | T | C | 0.0580 | -0.1254 | 0.0180 | 3.05E-12 | -6.9754  | 778845  | Asthma |
| rs1049107   | 6 | 32662159 | T | C | 0.1410 | -0.0947 | 0.0090 | 4.08E-26 | -10.5705 | 995476  | Asthma |
| rs1063321   | 6 | 32662178 | T | C | 0.3484 | 0.1138  | 0.0078 | 6.64E-48 | 14.5418  | 844071  | Asthma |
| rs1049100   | 6 | 32662186 | T | C | 0.1380 | -0.0972 | 0.0107 | 1.01E-19 | -9.0888  | 844071  | Asthma |
| rs68027833  | 6 | 32662251 | A | G | 0.1550 | -0.0763 | 0.0089 | 8.94E-18 | -8.5868  | 973993  | Asthma |
| rs9274038   | 6 | 32662270 | G | A | 0.2564 | 0.1076  | 0.0088 | 3.23E-34 | 12.1967  | 778845  | Asthma |
| rs9274045   | 6 | 32662278 | C | T | 0.1468 | -0.0935 | 0.0107 | 2.77E-18 | -8.7207  | 778845  | Asthma |
| rs71542429  | 6 | 32662289 | C | T | 0.1609 | -0.0763 | 0.0089 | 7.60E-18 | -8.6054  | 973993  | Asthma |
| rs71542430  | 6 | 32662310 | C | T | 0.1557 | -0.0909 | 0.0104 | 2.09E-18 | -8.7524  | 844071  | Asthma |
| rs28724258  | 6 | 32662316 | T | G | 0.2404 | 0.0947  | 0.0093 | 1.82E-24 | 10.2085  | 844071  | Asthma |
| rs9274062   | 6 | 32662317 | G | A | 0.3599 | 0.1266  | 0.0074 | 2.15E-66 | 17.2123  | 935848  | Asthma |
| rs9274065   | 6 | 32662322 | T | G | 0.2402 | 0.0946  | 0.0093 | 2.14E-24 | 10.1926  | 844071  | Asthma |
| rs9274084   | 6 | 32662362 | G | C | 0.2526 | -0.1065 | 0.0090 | 5.34E-32 | -11.7732 | 844071  | Asthma |
| rs9274094   | 6 | 32662378 | A | G | 0.3541 | 0.1166  | 0.0079 | 1.67E-49 | 14.7912  | 844071  | Asthma |
| rs41270921  | 6 | 32662392 | C | T | 0.1760 | 0.1104  | 0.0117 | 2.87E-21 | 9.4674   | 476051  | Asthma |
| rs9274106   | 6 | 32662399 | T | A | 0.6194 | 0.0897  | 0.0075 | 6.79E-33 | 11.9463  | 973993  | Asthma |
| rs9274107   | 6 | 32662401 | A | G | 0.1885 | 0.0662  | 0.0104 | 1.64E-10 | 6.3920   | 540747  | Asthma |
| rs9274112   | 6 | 32662417 | T | C | 0.3653 | -0.0928 | 0.0076 | 1.30E-34 | -12.2709 | 973993  | Asthma |
| rs9274114   | 6 | 32662424 | C | T | 0.1733 | 0.0641  | 0.0091 | 1.68E-12 | 7.0587   | 973993  | Asthma |
| rs9274115   | 6 | 32662428 | T | C | 0.3744 | -0.1020 | 0.0078 | 3.38E-39 | -13.0977 | 973993  | Asthma |
| rs4360168   | 6 | 32662436 | T | C | 0.3141 | -0.0797 | 0.0079 | 3.45E-24 | -10.1460 | 973993  | Asthma |
| rs71542437  | 6 | 32662446 | T | G | 0.1376 | -0.0869 | 0.0095 | 4.77E-20 | -9.1691  | 973993  | Asthma |
| rs9274129   | 6 | 32662453 | C | T | 0.3592 | 0.1201  | 0.0080 | 2.52E-51 | 15.0712  | 844071  | Asthma |
| rs9274130   | 6 | 32662455 | A | G | 0.1895 | 0.0675  | 0.0096 | 2.17E-12 | 7.0232   | 844071  | Asthma |
| rs9274131   | 6 | 32662459 | A | G | 0.1367 | -0.0860 | 0.0095 | 1.45E-19 | -9.0486  | 973993  | Asthma |
| rs28724260  | 6 | 32662463 | G | A | 0.3592 | 0.1201  | 0.0080 | 2.53E-51 | 15.0711  | 844071  | Asthma |
| rs9274134   | 6 | 32662465 | C | T | 0.1899 | 0.0671  | 0.0096 | 2.88E-12 | 6.9834   | 844071  | Asthma |
| rs9274150   | 6 | 32662499 | G | T | 0.3593 | 0.1201  | 0.0080 | 1.99E-51 | 15.0863  | 844071  | Asthma |
| rs9274152   | 6 | 32662501 | C | T | 0.1970 | 0.1037  | 0.0114 | 7.44E-20 | 9.1214   | 476051  | Asthma |
| rs9274155   | 6 | 32662511 | C | T | 0.1832 | 0.0835  | 0.0112 | 8.38E-14 | 7.4639   | 476051  | Asthma |
| rs142420626 | 6 | 32662526 | C | A | 0.1827 | 0.0797  | 0.0114 | 2.78E-12 | 6.9881   | 476051  | Asthma |
| rs281863918 | 6 | 32662585 | C | G | 0.5034 | -0.0347 | 0.0062 | 2.03E-08 | -5.6091  | 977229  | Asthma |
| rs281863891 | 6 | 32662617 | C | T | 0.1855 | 0.1031  | 0.0109 | 2.01E-21 | 9.5042   | 540747  | Asthma |
| rs281863884 | 6 | 32662624 | T | C | 0.5512 | 0.1512  | 0.0078 | 7.29E-84 | 19.4034  | 778845  | Asthma |
| rs281863882 | 6 | 32662626 | G | A | 0.1451 | -0.0839 | 0.0092 | 8.51E-20 | -9.1065  | 908767  | Asthma |
| rs281863879 | 6 | 32662630 | G | A | 0.5181 | 0.1412  | 0.0080 | 1.41E-69 | 17.6316  | 605973  | Asthma |
| rs281863860 | 6 | 32662650 | C | T | 0.1628 | 0.0765  | 0.0102 | 7.36E-14 | 7.4810   | 605973  | Asthma |
| rs281863827 | 6 | 32662701 | G | A | 0.1161 | 0.1329  | 0.0117 | 6.77E-30 | 11.3584  | 605973  | Asthma |
| rs281863770 | 6 | 32662780 | G | A | 0.4470 | -0.1270 | 0.0067 | 5.18E-79 | -18.8206 | 908767  | Asthma |
| rs281863750 | 6 | 32662810 | T | C | 0.1418 | -0.0843 | 0.0092 | 3.21E-20 | -9.2116  | 973993  | Asthma |
| rs281863739 | 6 | 32662833 | A | C | 0.3726 | 0.0931  | 0.0059 | 2.54E-55 | 15.6671  | 1130071 | Asthma |
| rs281863735 | 6 | 32662842 | G | A | 0.4475 | -0.1286 | 0.0066 | 1.15E-83 | -19.3790 | 973993  | Asthma |
| rs281863734 | 6 | 32662843 | T | C | 0.1914 | 0.0756  | 0.0073 | 7.23E-25 | 10.2975  | 1125398 | Asthma |
| rs281863724 | 6 | 32662857 | G | A | 0.1531 | -0.0816 | 0.0084 | 3.09E-22 | -9.6975  | 1130071 | Asthma |
| rs281863689 | 6 | 32662907 | T | C | 0.3532 | 0.0974  | 0.0069 | 2.13E-45 | 14.1407  | 973993  | Asthma |
| rs281863686 | 6 | 32662912 | C | T | 0.2996 | 0.0985  | 0.0070 | 2.49E-45 | 14.1298  | 1065770 | Asthma |
| rs281863683 | 6 | 32662915 | A | G | 0.1564 | 0.0869  | 0.0090 | 3.39E-22 | 9.6880   | 1000149 | Asthma |
| rs281863676 | 6 | 32662924 | T | C | 0.3638 | 0.1002  | 0.0069 | 4.12E-48 | 14.5736  | 973993  | Asthma |
| rs281863670 | 6 | 32662931 | G | A | 0.3045 | -0.1022 | 0.0074 | 3.47E-43 | -13.7780 | 973993  | Asthma |
| rs281863661 | 6 | 32662943 | T | C | 0.3688 | 0.0957  | 0.0069 | 2.75E-43 | 13.7945  | 908767  | Asthma |
| rs281863638 | 6 | 32662973 | A | G | 0.1749 | 0.0763  | 0.0095 | 1.30E-15 | 7.9942   | 605973  | Asthma |
| rs281863631 | 6 | 32662984 | T | C | 0.5517 | 0.1272  | 0.0067 | 4.27E-81 | 19.0730  | 973993  | Asthma |
| rs281863614 | 6 | 32663011 | A | C | 0.3670 | 0.0929  | 0.0070 | 8.38E-40 | 13.2035  | 973993  | Asthma |
| rs281863610 | 6 | 32663017 | G | A | 0.5485 | 0.1293  | 0.0067 | 7.99E-84 | 19.3990  | 973993  | Asthma |
| rs281863608 | 6 | 32663020 | A | G | 0.1449 | -0.0796 | 0.0083 | 7.11E-22 | -9.6122  | 1042455 | Asthma |
| rs281863589 | 6 | 32663052 | G | A | 0.1402 | -0.0833 | 0.0094 | 6.05E-19 | -8.8912  | 973993  | Asthma |
| rs281863582 | 6 | 32663059 | A | G | 0.1355 | -0.0976 | 0.0111 | 1.68E-18 | -8.7775  | 844071  | Asthma |
| rs281863581 | 6 | 32663060 | T | G | 0.1099 | -0.0941 | 0.0122 | 1.44E-14 | -7.6929  | 844071  | Asthma |
| rs281863522 | 6 | 32663143 | C | A | 0.3411 | 0.0833  | 0.0061 | 5.62E-42 | 13.5752  | 1130071 | Asthma |
| rs281863514 | 6 | 32663153 | G | C | 0.2958 | -0.0948 | 0.0061 | 9.31E-55 | -15.5842 | 1198533 | Asthma |

|             |   |          |   |   |        |         |        |          |          |         |        |
|-------------|---|----------|---|---|--------|---------|--------|----------|----------|---------|--------|
| rs281863504 | 6 | 32663167 | A | G | 0.1531 | -0.0783 | 0.0078 | 8.99E-24 | -10.0521 | 1198533 | Asthma |
| rs281863503 | 6 | 32663168 | T | C | 0.1352 | 0.0756  | 0.0114 | 3.60E-11 | 6.6196   | 844071  | Asthma |
| rs281863499 | 6 | 32663172 | G | A | 0.1524 | -0.0813 | 0.0085 | 1.80E-21 | -9.5161  | 1130071 | Asthma |
| rs281863486 | 6 | 32663190 | C | A | 0.2957 | -0.0939 | 0.0061 | 9.04E-54 | -15.4384 | 1198533 | Asthma |
| rs281863485 | 6 | 32663191 | C | A | 0.3332 | 0.0890  | 0.0071 | 1.09E-35 | 12.4698  | 973993  | Asthma |
| rs281863464 | 6 | 32663222 | T | A | 0.1533 | -0.0787 | 0.0078 | 4.79E-24 | -10.1139 | 1198533 | Asthma |
| rs281863463 | 6 | 32663223 | C | T | 0.1534 | 0.0965  | 0.0086 | 2.67E-29 | 11.2373  | 762051  | Asthma |
| rs281863439 | 6 | 32663252 | C | T | 0.0498 | -0.1021 | 0.0133 | 1.80E-14 | -7.6640  | 1159440 | Asthma |
| rs281863430 | 6 | 32663262 | A | G | 0.2943 | -0.0942 | 0.0061 | 4.28E-54 | -15.4867 | 1198533 | Asthma |
| rs281863426 | 6 | 32663266 | C | T | 0.2053 | 0.0791  | 0.0078 | 6.85E-24 | 10.0787  | 1000149 | Asthma |
| rs281863425 | 6 | 32663267 | A | G | 0.2053 | 0.0791  | 0.0078 | 6.87E-24 | 10.0786  | 1000149 | Asthma |
| rs281863414 | 6 | 32663281 | G | A | 0.2022 | 0.0712  | 0.0066 | 5.24E-27 | 10.7613  | 1198533 | Asthma |
| rs281863401 | 6 | 32663298 | C | T | 0.3449 | 0.0826  | 0.0061 | 6.70E-42 | 13.5624  | 1130071 | Asthma |
| rs281863398 | 6 | 32663302 | A | G | 0.1518 | -0.0825 | 0.0085 | 4.23E-22 | -9.6654  | 1130071 | Asthma |
| rs281863382 | 6 | 32663327 | G | A | 0.1518 | -0.0823 | 0.0085 | 4.99E-22 | -9.6486  | 1130071 | Asthma |
| rs281863378 | 6 | 32663332 | T | A | 0.1966 | 0.0537  | 0.0086 | 3.48E-10 | 6.2755   | 696825  | Asthma |
| rs281863375 | 6 | 32663336 | C | T | 0.2991 | -0.0968 | 0.0065 | 1.90E-49 | -14.7826 | 1130071 | Asthma |
| rs281863371 | 6 | 32663342 | G | A | 0.1591 | 0.0767  | 0.0083 | 2.17E-20 | 9.2539   | 1091926 | Asthma |
| rs281863362 | 6 | 32663356 | T | C | 0.3049 | 0.0756  | 0.0060 | 2.94E-36 | 12.5738  | 1221848 | Asthma |
| rs281863357 | 6 | 32663365 | G | A | 0.3005 | 0.1211  | 0.0084 | 1.44E-46 | 14.3292  | 844071  | Asthma |
| rs281863349 | 6 | 32663375 | A | G | 0.3136 | 0.1204  | 0.0084 | 1.83E-46 | 14.3119  | 778845  | Asthma |
| rs281863331 | 6 | 32663401 | A | G | 0.3067 | 0.1209  | 0.0085 | 3.24E-46 | 14.2732  | 778845  | Asthma |
| rs281875044 | 6 | 32663444 | G | A | 0.1511 | -0.0911 | 0.0109 | 8.15E-17 | -8.3293  | 778845  | Asthma |
| rs281875029 | 6 | 32663460 | A | G | 0.2284 | 0.0968  | 0.0098 | 5.62E-23 | 9.8700   | 567828  | Asthma |
| rs281875010 | 6 | 32663484 | T | C | 0.5170 | 0.1521  | 0.0078 | 1.07E-85 | 19.6192  | 844071  | Asthma |
| rs281875006 | 6 | 32663488 | T | C | 0.2793 | 0.0964  | 0.0121 | 1.95E-15 | 7.9439   | 525203  | Asthma |
| rs281875005 | 6 | 32663489 | G | A | 0.5170 | 0.1520  | 0.0078 | 1.28E-85 | 19.6099  | 844071  | Asthma |
| rs281874998 | 6 | 32663496 | T | A | 0.3161 | 0.1183  | 0.0082 | 2.62E-47 | 14.4471  | 844071  | Asthma |
| rs281874984 | 6 | 32663511 | A | G | 0.1827 | -0.0744 | 0.0107 | 3.83E-12 | -6.9436  | 778845  | Asthma |
| rs281874982 | 6 | 32663514 | C | G | 0.1827 | -0.0745 | 0.0107 | 3.51E-12 | -6.9556  | 778845  | Asthma |
| rs281874979 | 6 | 32663518 | A | G | 0.3148 | 0.1105  | 0.0095 | 2.04E-31 | 11.6603  | 535282  | Asthma |
| rs281874974 | 6 | 32663523 | G | A | 0.1616 | 0.0925  | 0.0103 | 2.54E-19 | 8.9872   | 778845  | Asthma |
| rs281874968 | 6 | 32663531 | A | G | 0.1581 | 0.0826  | 0.0100 | 1.61E-16 | 8.2483   | 935848  | Asthma |
| rs281874967 | 6 | 32663532 | G | T | 0.1349 | -0.1002 | 0.0112 | 3.40E-19 | -8.9552  | 778845  | Asthma |
| rs281874965 | 6 | 32663534 | T | G | 0.1349 | -0.1002 | 0.0112 | 3.40E-19 | -8.9552  | 778845  | Asthma |
| rs281874963 | 6 | 32663536 | A | G | 0.1377 | -0.1021 | 0.0111 | 3.07E-20 | -9.2167  | 778845  | Asthma |
| rs281874937 | 6 | 32663568 | C | A | 0.3327 | 0.1014  | 0.0082 | 8.69E-35 | 12.3033  | 844071  | Asthma |
| rs281874911 | 6 | 32663598 | C | A | 0.1513 | -0.0861 | 0.0087 | 4.41E-23 | -9.8943  | 1003385 | Asthma |
| rs281874906 | 6 | 32663604 | T | C | 0.3369 | 0.0986  | 0.0083 | 2.82E-32 | 11.8275  | 778845  | Asthma |
| rs281874846 | 6 | 32663620 | C | A | 0.1391 | -0.0898 | 0.0095 | 3.38E-21 | -9.4501  | 847307  | Asthma |
| rs281874821 | 6 | 32663649 | A | G | 0.2113 | 0.0631  | 0.0084 | 5.63E-14 | 7.5166   | 636290  | Asthma |
| rs281874819 | 6 | 32663651 | C | T | 0.3545 | 0.1074  | 0.0070 | 1.49E-53 | 15.4053  | 912533  | Asthma |
| rs281874818 | 6 | 32663653 | G | A | 0.3002 | -0.1055 | 0.0065 | 8.02E-59 | -16.1708 | 1094744 | Asthma |
| rs281874809 | 6 | 32663669 | G | A | 0.1388 | -0.0895 | 0.0095 | 4.61E-21 | -9.4177  | 847307  | Asthma |
| rs281874807 | 6 | 32663671 | G | A | 0.3937 | 0.0850  | 0.0060 | 4.52E-46 | 14.2496  | 1068611 | Asthma |
| rs281874806 | 6 | 32663672 | C | T | 0.1388 | -0.0895 | 0.0095 | 4.61E-21 | -9.4178  | 847307  | Asthma |
| rs281863317 | 6 | 32663679 | T | G | 0.1392 | -0.0999 | 0.0109 | 4.12E-20 | -9.1851  | 778845  | Asthma |
| rs281863304 | 6 | 32663696 | T | C | 0.1934 | 0.0772  | 0.0084 | 3.04E-20 | 9.2176   | 873440  | Asthma |
| rs281863293 | 6 | 32663713 | A | G | 0.1694 | 0.0703  | 0.0095 | 1.75E-13 | 7.3670   | 935848  | Asthma |
| rs281863287 | 6 | 32663719 | A | C | 0.5420 | 0.1337  | 0.0065 | 1.91E-93 | 20.5068  | 1000149 | Asthma |
| rs281863284 | 6 | 32663722 | A | G | 0.5420 | 0.1337  | 0.0065 | 1.90E-93 | 20.5068  | 1000149 | Asthma |
| rs281863283 | 6 | 32663723 | T | A | 0.1351 | 0.0822  | 0.0086 | 1.56E-21 | 9.5309   | 1091926 | Asthma |
| rs281863271 | 6 | 32663736 | A | G | 0.1505 | 0.0742  | 0.0078 | 1.36E-21 | 9.5451   | 1151554 | Asthma |
| rs281863226 | 6 | 32663786 | T | G | 0.3036 | -0.1125 | 0.0073 | 3.39E-54 | -15.5014 | 1000149 | Asthma |
| rs281863219 | 6 | 32663793 | A | G | 0.2034 | 0.0725  | 0.0065 | 2.74E-29 | 11.2353  | 1220016 | Asthma |
| rs281863194 | 6 | 32663823 | T | C | 0.1333 | -0.0987 | 0.0112 | 1.58E-18 | -8.7837  | 778845  | Asthma |
| rs281863177 | 6 | 32663843 | T | C | 0.5497 | 0.1501  | 0.0078 | 1.25E-82 | 19.2564  | 778845  | Asthma |
| rs281863167 | 6 | 32663855 | A | C | 0.5498 | 0.1500  | 0.0078 | 1.36E-82 | 19.2523  | 778845  | Asthma |
| rs281863148 | 6 | 32663875 | A | T | 0.3138 | -0.1245 | 0.0087 | 1.09E-46 | -14.3483 | 778845  | Asthma |
| rs281863143 | 6 | 32663880 | T | C | 0.3138 | -0.1246 | 0.0087 | 9.77E-47 | -14.3564 | 778845  | Asthma |
| rs281863130 | 6 | 32663894 | G | T | 0.1353 | -0.0984 | 0.0111 | 9.07E-19 | -8.8462  | 778845  | Asthma |
| rs66861400  | 6 | 32663924 | G | A | 0.1316 | -0.0984 | 0.0113 | 3.02E-18 | -8.7108  | 778845  | Asthma |
| rs72844386  | 6 | 32664000 | T | A | 0.1405 | -0.0945 | 0.0110 | 1.07E-17 | -8.5665  | 778845  | Asthma |
| rs9274284   | 6 | 32664006 | G | A | 0.3469 | -0.1198 | 0.0084 | 6.37E-46 | -14.2255 | 844071  | Asthma |
| rs281862690 | 6 | 32664039 | T | A | 0.2919 | -0.0953 | 0.0090 | 5.09E-26 | -10.5498 | 778845  | Asthma |
| rs115227911 | 6 | 32664054 | C | T | 0.1398 | -0.0934 | 0.0111 | 3.68E-17 | -8.4228  | 778845  | Asthma |
| rs9274295   | 6 | 32664089 | A | G | 0.4770 | -0.1039 | 0.0090 | 6.99E-31 | -11.5544 | 778845  | Asthma |
| rs66727344  | 6 | 32664169 | A | T | 0.1666 | -0.0832 | 0.0107 | 7.25E-15 | -7.7799  | 778845  | Asthma |
| rs71542457  | 6 | 32664183 | A | G | 0.1750 | -0.0823 | 0.0106 | 7.18E-15 | -7.7814  | 778845  | Asthma |
| rs71542458  | 6 | 32664207 | C | T | 0.1806 | -0.0771 | 0.0104 | 1.45E-13 | -7.3912  | 778845  | Asthma |
| rs9274304   | 6 | 32664209 | G | A | 0.4993 | -0.1046 | 0.0091 | 1.01E-30 | -11.5237 | 778845  | Asthma |
| rs71542459  | 6 | 32664217 | A | G | 0.1800 | -0.0769 | 0.0104 | 1.69E-13 | -7.3712  | 778845  | Asthma |
| rs281862518 | 6 | 32664234 | G | A | 0.4946 | -0.0999 | 0.0091 | 6.03E-28 | -10.9588 | 778845  | Asthma |
| rs71542460  | 6 | 32664245 | G | A | 0.2026 | -0.0721 | 0.0097 | 1.10E-13 | -7.4283  | 778845  | Asthma |

|             |   |          |   |   |        |         |        |          |          |         |        |
|-------------|---|----------|---|---|--------|---------|--------|----------|----------|---------|--------|
| rs4538746   | 6 | 32664336 | C | T | 0.3794 | -0.0782 | 0.0091 | 7.92E-18 | -8.6008  | 778845  | Asthma |
| rs281874787 | 6 | 32664388 | A | G | 0.4791 | -0.1024 | 0.0090 | 6.48E-30 | -11.3613 | 778845  | Asthma |
| rs141127771 | 6 | 32664423 | A | G | 0.0558 | 0.1364  | 0.0207 | 4.62E-11 | 6.5830   | 525023  | Asthma |
| rs9274323   | 6 | 32664428 | T | C | 0.1803 | -0.0734 | 0.0107 | 7.81E-12 | -6.8421  | 778845  | Asthma |
| rs281862352 | 6 | 32664430 | A | G | 0.4793 | -0.1038 | 0.0090 | 5.95E-31 | -11.5688 | 778845  | Asthma |
| rs9274326   | 6 | 32664460 | C | T | 0.4872 | -0.0969 | 0.0087 | 5.05E-29 | -11.1810 | 778845  | Asthma |
| rs9274336   | 6 | 32664510 | G | A | 0.4478 | 0.1207  | 0.0084 | 3.45E-47 | 14.4281  | 778845  | Asthma |
| rs9274339   | 6 | 32664542 | A | G | 0.4026 | 0.1216  | 0.0086 | 6.07E-45 | 14.0664  | 778845  | Asthma |
| rs148957557 | 6 | 32664555 | A | G | 0.1794 | -0.0797 | 0.0106 | 5.34E-14 | -7.5233  | 778845  | Asthma |
| rs143732234 | 6 | 32664558 | A | G | 0.1794 | -0.0797 | 0.0106 | 5.34E-14 | -7.5233  | 778845  | Asthma |
| rs571388666 | 6 | 32664563 | A | G | 0.1794 | -0.0797 | 0.0106 | 5.61E-14 | -7.5170  | 778845  | Asthma |
| rs281862258 | 6 | 32664567 | C | G | 0.1794 | -0.0797 | 0.0106 | 5.61E-14 | -7.5170  | 778845  | Asthma |
| rs281862257 | 6 | 32664568 | C | G | 0.1794 | -0.0797 | 0.0106 | 5.61E-14 | -7.5170  | 778845  | Asthma |
| rs67842782  | 6 | 32664609 | T | C | 0.1612 | -0.0850 | 0.0107 | 1.81E-15 | -7.9539  | 778845  | Asthma |
| rs71542463  | 6 | 32664636 | A | C | 0.1591 | -0.0904 | 0.0108 | 4.41E-17 | -8.4015  | 778845  | Asthma |
| rs71542464  | 6 | 32664639 | T | C | 0.1591 | -0.0904 | 0.0108 | 4.41E-17 | -8.4015  | 778845  | Asthma |
| rs9274351   | 6 | 32664648 | A | T | 0.2007 | 0.0720  | 0.0100 | 7.51E-13 | 7.1698   | 567828  | Asthma |
| rs9274352   | 6 | 32664656 | G | C | 0.1923 | 0.0898  | 0.0113 | 1.61E-15 | 7.9682   | 476051  | Asthma |
| rs9274369   | 6 | 32664746 | A | G | 0.4417 | -0.0628 | 0.0081 | 8.49E-15 | -7.7600  | 908767  | Asthma |
| rs9274370   | 6 | 32664750 | A | C | 0.1502 | -0.0910 | 0.0111 | 1.89E-16 | -8.2283  | 778845  | Asthma |
| rs71542465  | 6 | 32664752 | A | G | 0.1502 | -0.0910 | 0.0111 | 1.89E-16 | -8.2283  | 778845  | Asthma |
| rs28746795  | 6 | 32664757 | T | C | 0.4625 | -0.0750 | 0.0094 | 2.09E-15 | -7.9356  | 778845  | Asthma |
| rs74199853  | 6 | 32664765 | C | G | 0.1590 | -0.0757 | 0.0092 | 2.01E-16 | -8.2216  | 908767  | Asthma |
| rs28746797  | 6 | 32664767 | A | G | 0.1930 | 0.0912  | 0.0113 | 5.98E-16 | 8.0900   | 476051  | Asthma |
| rs73729452  | 6 | 32664770 | C | G | 0.0718 | -0.0910 | 0.0149 | 1.10E-09 | -6.0948  | 908767  | Asthma |
| rs9274371   | 6 | 32664776 | G | A | 0.5718 | 0.1314  | 0.0077 | 5.53E-65 | 17.0231  | 540747  | Asthma |
| rs9274372   | 6 | 32664778 | A | G | 0.5623 | 0.1352  | 0.0076 | 3.25E-70 | 17.7142  | 605973  | Asthma |
| rs41263826  | 6 | 32664780 | C | A | 0.1977 | 0.0752  | 0.0097 | 9.18E-15 | 7.7502   | 540747  | Asthma |
| rs28746798  | 6 | 32664781 | C | G | 0.1773 | 0.0853  | 0.0100 | 1.17E-17 | 8.5562   | 605973  | Asthma |
| rs1140322   | 6 | 32664801 | G | T | 0.5686 | 0.1339  | 0.0077 | 2.24E-67 | 17.3425  | 540747  | Asthma |
| rs1140321   | 6 | 32664804 | G | T | 0.5685 | 0.1336  | 0.0077 | 4.53E-67 | 17.3017  | 540747  | Asthma |
| rs1130397   | 6 | 32664810 | G | A | 0.2165 | -0.0918 | 0.0083 | 2.20E-28 | -11.0498 | 908767  | Asthma |
| rs1140320   | 6 | 32664812 | G | A | 0.5709 | 0.1336  | 0.0077 | 3.78E-67 | 17.3126  | 540747  | Asthma |
| rs1140319   | 6 | 32664815 | G | C | 0.4193 | -0.1004 | 0.0077 | 8.40E-39 | -13.0282 | 540747  | Asthma |
| rs1140318   | 6 | 32664816 | T | C | 0.5711 | 0.1335  | 0.0077 | 3.32E-67 | 17.3198  | 540747  | Asthma |
| rs17412833  | 6 | 32664821 | T | A | 0.1925 | -0.0962 | 0.0085 | 1.48E-29 | -11.2895 | 908767  | Asthma |
| rs1130390   | 6 | 32664870 | C | T | 0.1650 | -0.0804 | 0.0090 | 4.81E-19 | -8.9165  | 908767  | Asthma |
| rs1130386   | 6 | 32664873 | C | T | 0.4501 | -0.1138 | 0.0068 | 3.01E-62 | -16.6506 | 908767  | Asthma |
| rs1049074   | 6 | 32664934 | T | C | 0.1209 | -0.0793 | 0.0101 | 3.11E-15 | -7.8860  | 908767  | Asthma |
| rs3210148   | 6 | 32664937 | G | C | 0.2634 | -0.0853 | 0.0078 | 5.30E-28 | -10.9704 | 973993  | Asthma |
| rs1049073   | 6 | 32664940 | A | G | 0.2261 | 0.0621  | 0.0079 | 4.01E-15 | 7.8547   | 973993  | Asthma |
| rs1049083   | 6 | 32664947 | T | C | 0.1868 | 0.0770  | 0.0084 | 6.61E-20 | 9.1339   | 973993  | Asthma |
| rs1049082   | 6 | 32664967 | T | C | 0.3394 | 0.1077  | 0.0071 | 7.06E-52 | 15.1547  | 973993  | Asthma |
| rs1063318   | 6 | 32664968 | A | G | 0.2185 | -0.0484 | 0.0076 | 2.40E-10 | -6.3331  | 1065770 | Asthma |
| rs1049068   | 6 | 32665000 | T | C | 0.1325 | -0.1151 | 0.0104 | 2.00E-28 | -11.0580 | 973993  | Asthma |
| rs1140310   | 6 | 32665006 | C | A | 0.1739 | -0.0777 | 0.0085 | 9.33E-20 | -9.0965  | 973993  | Asthma |
| rs1130368   | 6 | 32665041 | G | T | 0.1398 | -0.0855 | 0.0093 | 5.95E-20 | -9.1454  | 908767  | Asthma |
| rs1130375   | 6 | 32665043 | G | C | 0.1655 | 0.0614  | 0.0077 | 2.38E-15 | 7.9199   | 1065770 | Asthma |
| rs9274407   | 6 | 32665055 | A | T | 0.2108 | -0.0609 | 0.0076 | 1.30E-15 | -7.9951  | 1065770 | Asthma |
| rs9274408   | 6 | 32665073 | A | G | 0.2553 | 0.0730  | 0.0090 | 3.77E-16 | 8.1459   | 540747  | Asthma |
| rs74186130  | 6 | 32665082 | G | C | 0.1354 | -0.1004 | 0.0111 | 2.10E-19 | -9.0079  | 778845  | Asthma |
| rs281862007 | 6 | 32665117 | C | G | 0.1346 | -0.1001 | 0.0112 | 3.09E-19 | -8.9655  | 778845  | Asthma |
| rs74188963  | 6 | 32665138 | A | C | 0.1353 | -0.1019 | 0.0111 | 4.40E-20 | -9.1773  | 778845  | Asthma |
| rs9274419   | 6 | 32665191 | C | G | 0.3481 | 0.1020  | 0.0079 | 3.11E-38 | 12.9289  | 844071  | Asthma |
| rs74203503  | 6 | 32665196 | C | T | 0.1355 | -0.1013 | 0.0111 | 6.07E-20 | -9.1431  | 778845  | Asthma |
| rs9274420   | 6 | 32665197 | G | C | 0.3479 | 0.1023  | 0.0079 | 1.97E-38 | 12.9629  | 844071  | Asthma |
| rs28746802  | 6 | 32665203 | T | C | 0.1985 | 0.0882  | 0.0096 | 4.58E-20 | 9.1736   | 844071  | Asthma |
| rs28746803  | 6 | 32665206 | T | G | 0.1985 | 0.0882  | 0.0096 | 4.54E-20 | 9.1745   | 844071  | Asthma |
| rs28746804  | 6 | 32665212 | G | T | 0.1985 | 0.0882  | 0.0096 | 4.55E-20 | 9.1743   | 844071  | Asthma |
| rs41263828  | 6 | 32665218 | G | C | 0.1744 | 0.0967  | 0.0091 | 2.00E-26 | 10.6374  | 935848  | Asthma |
| rs533608307 | 6 | 32665246 | T | C | 0.3122 | -0.1221 | 0.0087 | 5.97E-45 | -14.0676 | 778845  | Asthma |
| rs9274428   | 6 | 32665264 | T | C | 0.3194 | -0.1258 | 0.0085 | 8.74E-50 | -14.8343 | 844071  | Asthma |
| rs28746807  | 6 | 32665308 | G | T | 0.1618 | 0.0909  | 0.0111 | 2.20E-16 | 8.2111   | 567828  | Asthma |
| rs67613268  | 6 | 32665314 | A | T | 0.1402 | -0.0995 | 0.0109 | 4.93E-20 | -9.1656  | 778845  | Asthma |
| rs41263830  | 6 | 32665349 | G | A | 0.1511 | 0.0959  | 0.0102 | 6.57E-21 | 9.3800   | 844071  | Asthma |
| rs28746808  | 6 | 32665353 | A | G | 0.1513 | 0.0844  | 0.0112 | 4.47E-14 | 7.5467   | 567828  | Asthma |
| rs9274436   | 6 | 32665354 | C | G | 0.3177 | -0.1249 | 0.0085 | 5.27E-49 | -14.7141 | 844071  | Asthma |
| rs67303455  | 6 | 32665376 | G | A | 0.1459 | -0.0916 | 0.0108 | 1.72E-17 | -8.5113  | 778845  | Asthma |
| rs28746809  | 6 | 32665382 | C | T | 0.1345 | 0.0863  | 0.0120 | 7.64E-13 | 7.1678   | 567828  | Asthma |
| rs9274438   | 6 | 32665404 | T | C | 0.4566 | -0.1519 | 0.0076 | 1.95E-88 | -19.9365 | 844071  | Asthma |
| rs28746810  | 6 | 32665408 | T | G | 0.1174 | 0.0782  | 0.0131 | 2.44E-09 | 5.9657   | 567828  | Asthma |
| rs9274440   | 6 | 32665419 | G | A | 0.3605 | 0.1116  | 0.0072 | 1.78E-54 | 15.5433  | 935848  | Asthma |
| rs9274442   | 6 | 32665454 | C | G | 0.2159 | 0.0575  | 0.0088 | 5.96E-11 | 6.5449   | 870622  | Asthma |
| rs9274443   | 6 | 32665462 | C | G | 0.4150 | -0.0744 | 0.0111 | 2.35E-11 | -6.6820  | 525023  | Asthma |



|             |   |          |   |   |        |         |        |           |          |         |        |
|-------------|---|----------|---|---|--------|---------|--------|-----------|----------|---------|--------|
| rs116485144 | 6 | 32665472 | C | A | 0.1727 | -0.0777 | 0.0107 | 3.33E-13  | -7.2800  | 778845  | Asthma |
| rs114868939 | 6 | 32665493 | T | C | 0.1340 | -0.1002 | 0.0113 | 5.43E-19  | -8.9036  | 778845  | Asthma |
| rs9274447   | 6 | 32665505 | C | T | 0.2812 | 0.1487  | 0.0184 | 7.49E-16  | 8.0622   | 157003  | Asthma |
| rs28746817  | 6 | 32665510 | T | C | 0.2273 | 0.1135  | 0.0199 | 1.17E-08  | 5.7047   | 157003  | Asthma |
| rs28746818  | 6 | 32665530 | C | G | 0.1748 | 0.0819  | 0.0117 | 2.87E-12  | 6.9842   | 476051  | Asthma |
| rs28746819  | 6 | 32665543 | C | T | 0.1745 | 0.0815  | 0.0117 | 3.34E-12  | 6.9630   | 476051  | Asthma |
| rs9274450   | 6 | 32665557 | A | G | 0.3175 | -0.1257 | 0.0085 | 1.95E-49  | -14.7809 | 844071  | Asthma |
| rs76141774  | 6 | 32665564 | A | C | 0.0702 | -0.1477 | 0.0162 | 6.27E-20  | -9.1395  | 844071  | Asthma |
| rs67311368  | 6 | 32665574 | A | T | 0.1372 | -0.0990 | 0.0109 | 1.47E-19  | -9.0465  | 778845  | Asthma |
| rs9274453   | 6 | 32665592 | A | C | 0.4462 | 0.1445  | 0.0079 | 4.99E-75  | 18.3279  | 844071  | Asthma |
| rs9274454   | 6 | 32665594 | G | T | 0.2266 | 0.0632  | 0.0097 | 5.74E-11  | 6.5504   | 778845  | Asthma |
| rs28746823  | 6 | 32665596 | T | C | 0.1338 | 0.1440  | 0.0123 | 7.38E-32  | 11.7457  | 567828  | Asthma |
| rs9274455   | 6 | 32665598 | G | A | 0.3478 | 0.1078  | 0.0079 | 3.27E-42  | 13.6147  | 844071  | Asthma |
| rs281861581 | 6 | 32665603 | A | G | 0.5424 | 0.1511  | 0.0077 | 7.25E-86  | 19.6390  | 844071  | Asthma |
| rs9274457   | 6 | 32665615 | G | C | 0.3523 | 0.1032  | 0.0080 | 1.65E-38  | 12.9773  | 778845  | Asthma |
| rs28746824  | 6 | 32665621 | C | T | 0.1960 | 0.0785  | 0.0085 | 2.99E-20  | 9.2192   | 912533  | Asthma |
| rs9274459   | 6 | 32665632 | A | T | 0.5444 | 0.1519  | 0.0077 | 1.06E-87  | 19.8526  | 844071  | Asthma |
| rs77247372  | 6 | 32665638 | T | C | 0.1357 | -0.0980 | 0.0108 | 9.59E-20  | -9.0937  | 844071  | Asthma |
| rs41263832  | 6 | 32665639 | G | A | 0.1698 | 0.1068  | 0.0116 | 2.34E-20  | 9.2459   | 476051  | Asthma |
| rs9274461   | 6 | 32665648 | C | T | 0.3459 | 0.1032  | 0.0079 | 2.21E-39  | 13.1301  | 844071  | Asthma |
| rs72844390  | 6 | 32665659 | T | C | 0.1380 | -0.0893 | 0.0094 | 1.64E-21  | -9.5258  | 912533  | Asthma |
| rs62404143  | 6 | 32665690 | G | A | 0.0747 | -0.1466 | 0.0157 | 7.74E-21  | -9.3633  | 844071  | Asthma |
| rs28746825  | 6 | 32665695 | G | A | 0.1964 | 0.0847  | 0.0096 | 7.24E-19  | 8.8711   | 844071  | Asthma |
| rs77596642  | 6 | 32665706 | T | C | 0.1320 | -0.0989 | 0.0110 | 2.96E-19  | -8.9705  | 844071  | Asthma |
| rs9274464   | 6 | 32665712 | T | C | 0.3184 | -0.1267 | 0.0085 | 2.88E-50  | -14.9095 | 844071  | Asthma |
| rs9274465   | 6 | 32665713 | C | T | 0.1992 | 0.0635  | 0.0091 | 3.33E-12  | 6.9632   | 844071  | Asthma |
| rs77020460  | 6 | 32665717 | C | G | 0.1332 | -0.1008 | 0.0112 | 2.26E-19  | -9.0002  | 778845  | Asthma |
| rs112017333 | 6 | 32665724 | G | A | 0.1486 | -0.0922 | 0.0099 | 1.63E-20  | -9.2840  | 934923  | Asthma |
| rs35273588  | 6 | 32665725 | C | T | 0.1527 | 0.0971  | 0.0103 | 3.98E-21  | 9.4330   | 778845  | Asthma |
| rs35915063  | 6 | 32665742 | G | A | 0.1527 | 0.0971  | 0.0103 | 3.98E-21  | 9.4330   | 778845  | Asthma |
| rs34230758  | 6 | 32665781 | G | A | 0.1321 | -0.0962 | 0.0099 | 2.03E-22  | -9.7401  | 935848  | Asthma |
| rs281861394 | 6 | 32665831 | G | C | 0.1853 | 0.0764  | 0.0092 | 9.92E-17  | 8.3058   | 566903  | Asthma |
| rs9274470   | 6 | 32665840 | G | A | 0.4503 | -0.1504 | 0.0078 | 2.98E-83  | -19.3307 | 778845  | Asthma |
| rs66481651  | 6 | 32665853 | T | C | 0.1358 | -0.0975 | 0.0108 | 1.53E-19  | -9.0425  | 844071  | Asthma |
| rs9274471   | 6 | 32665855 | G | A | 0.3502 | 0.1063  | 0.0079 | 2.17E-41  | 13.4752  | 844071  | Asthma |
| rs28746827  | 6 | 32665859 | A | G | 0.1940 | 0.0861  | 0.0097 | 6.46E-19  | 8.8838   | 844071  | Asthma |
| rs281861363 | 6 | 32665861 | A | G | 0.0918 | 0.1556  | 0.0159 | 1.02E-22  | 9.8103   | 463403  | Asthma |
| rs9274473   | 6 | 32665899 | C | T | 0.5096 | -0.0503 | 0.0077 | 7.50E-11  | -6.5103  | 844071  | Asthma |
| rs9274474   | 6 | 32665906 | T | C | 0.1593 | 0.0639  | 0.0099 | 9.83E-11  | 6.4696   | 778845  | Asthma |
| rs9274477   | 6 | 32665936 | G | A | 0.3507 | 0.1068  | 0.0079 | 6.69E-42  | 13.5623  | 844071  | Asthma |
| rs9274478   | 6 | 32665967 | C | T | 0.3931 | -0.1073 | 0.0074 | 1.44E-47  | -14.4887 | 1000149 | Asthma |
| rs28746829  | 6 | 32665990 | T | G | 0.2058 | 0.0761  | 0.0078 | 2.27E-22  | 9.7290   | 1000149 | Asthma |
| rs28746830  | 6 | 32666004 | T | C | 0.2058 | 0.0761  | 0.0078 | 2.39E-22  | 9.7239   | 1000149 | Asthma |
| rs9274484   | 6 | 32666041 | G | C | 0.3471 | 0.1025  | 0.0079 | 2.51E-38  | 12.9449  | 844071  | Asthma |
| rs114494855 | 6 | 32666058 | T | A | 0.0968 | -0.1116 | 0.0119 | 8.47E-21  | -9.3532  | 778845  | Asthma |
| rs41264352  | 6 | 32666059 | C | A | 0.1499 | 0.0967  | 0.0105 | 3.62E-20  | 9.1989   | 778845  | Asthma |
| rs9274488   | 6 | 32666075 | A | G | 0.4318 | -0.1176 | 0.0119 | 3.99E-23  | -9.9040  | 492477  | Asthma |
| rs28534808  | 6 | 32666078 | A | G | 0.0579 | -0.1244 | 0.0180 | 5.35E-12  | -6.8960  | 778845  | Asthma |
| rs9274490   | 6 | 32666102 | G | A | 0.2487 | 0.0634  | 0.0100 | 2.76E-10  | 6.3114   | 476051  | Asthma |
| rs113028711 | 6 | 32666118 | A | G | 0.1334 | -0.0996 | 0.0109 | 7.62E-20  | -9.1186  | 844071  | Asthma |
| rs28746834  | 6 | 32666122 | C | T | 0.1999 | 0.0829  | 0.0095 | 3.12E-18  | 8.7069   | 844071  | Asthma |
| rs9274497   | 6 | 32666151 | A | G | 0.2003 | 0.0631  | 0.0091 | 3.37E-12  | 6.9613   | 844071  | Asthma |
| rs114003122 | 6 | 32666157 | T | C | 0.1478 | -0.0923 | 0.0097 | 1.53E-21  | -9.5329  | 1000149 | Asthma |
| rs116617461 | 6 | 32666158 | G | T | 0.1482 | -0.0920 | 0.0097 | 1.71E-21  | -9.5211  | 1000149 | Asthma |
| rs9274498   | 6 | 32666164 | G | A | 0.2064 | 0.0598  | 0.0090 | 2.57E-11  | 6.6694   | 844071  | Asthma |
| rs35353422  | 6 | 32666171 | A | C | 0.1474 | 0.0789  | 0.0081 | 1.23E-22  | 9.7908   | 1068611 | Asthma |
| rs28746835  | 6 | 32666182 | C | T | 0.2079 | 0.0750  | 0.0070 | 3.87E-27  | 10.7892  | 1094744 | Asthma |
| rs35567463  | 6 | 32666193 | A | C | 0.1507 | -0.0852 | 0.0085 | 2.18E-23  | -9.9644  | 1068611 | Asthma |
| rs3830060   | 6 | 32666194 | G | A | 0.1663 | 0.0995  | 0.0076 | 2.93E-39  | 13.1090  | 1094744 | Asthma |
| rs3830059   | 6 | 32666230 | G | A | 0.1915 | 0.0783  | 0.0073 | 5.83E-27  | 10.7516  | 1090071 | Asthma |
| rs3830058   | 6 | 32666233 | G | A | 0.2894 | -0.1026 | 0.0059 | 2.71E-67  | -17.3324 | 1246149 | Asthma |
| rs9274500   | 6 | 32666247 | A | T | 0.3683 | 0.0899  | 0.0059 | 1.01E-51  | 15.1309  | 1063938 | Asthma |
| rs9274501   | 6 | 32666255 | A | G | 0.4486 | -0.1276 | 0.0059 | 2.72E-103 | -21.5805 | 1068611 | Asthma |
| rs28746838  | 6 | 32666280 | T | C | 0.2054 | 0.0732  | 0.0076 | 3.30E-22  | 9.6907   | 726724  | Asthma |
| rs72844397  | 6 | 32666296 | A | G | 0.1503 | -0.0852 | 0.0086 | 2.74E-23  | -9.9418  | 1068611 | Asthma |
| rs2854260   | 6 | 32666297 | T | C | 0.1432 | 0.0824  | 0.0091 | 1.25E-19  | 9.0651   | 1000149 | Asthma |
| rs28746839  | 6 | 32666313 | C | T | 0.1629 | 0.0672  | 0.0080 | 6.22E-17  | 8.3609   | 792368  | Asthma |
| rs28746840  | 6 | 32666314 | C | G | 0.2039 | 0.0737  | 0.0087 | 3.00E-17  | 8.4464   | 632129  | Asthma |
| rs28746841  | 6 | 32666317 | C | T | 0.1919 | 0.0643  | 0.0100 | 1.12E-10  | 6.4492   | 381543  | Asthma |
| rs28746842  | 6 | 32666321 | G | C | 0.1988 | 0.0717  | 0.0118 | 1.10E-09  | 6.0935   | 313081  | Asthma |
| rs9274504   | 6 | 32666334 | T | C | 0.3756 | 0.0950  | 0.0076 | 2.92E-36  | 12.5746  | 632129  | Asthma |
| rs68082907  | 6 | 32666341 | G | A | 0.1494 | -0.0915 | 0.0096 | 1.44E-21  | -9.5392  | 1000149 | Asthma |
| rs9274505   | 6 | 32666349 | A | G | 0.1984 | 0.0658  | 0.0086 | 2.11E-14  | 7.6439   | 723906  | Asthma |
| rs28746843  | 6 | 32666360 | C | A | 0.2209 | 0.0786  | 0.0094 | 6.31E-17  | 8.3593   | 681101  | Asthma |

|             |   |          |   |   |        |         |        |           |          |         |        |
|-------------|---|----------|---|---|--------|---------|--------|-----------|----------|---------|--------|
| rs28746844  | 6 | 32666362 | T | C | 0.2114 | 0.0718  | 0.0068 | 7.96E-26  | 10.5077  | 1160388 | Asthma |
| rs9274506   | 6 | 32666364 | T | C | 0.5577 | -0.1317 | 0.0067 | 1.19E-85  | -19.6135 | 1000149 | Asthma |
| rs28746845  | 6 | 32666373 | C | A | 0.2102 | 0.0742  | 0.0071 | 1.65E-25  | 10.4386  | 1068611 | Asthma |
| rs9274507   | 6 | 32666375 | G | A | 0.2982 | -0.1064 | 0.0067 | 1.70E-57  | -15.9828 | 1068611 | Asthma |
| rs41316196  | 6 | 32666387 | A | G | 0.1644 | 0.0664  | 0.0085 | 4.20E-15  | 7.8488   | 762051  | Asthma |
| rs41316200  | 6 | 32666406 | T | C | 0.1519 | 0.0664  | 0.0082 | 5.09E-16  | 8.1094   | 1065770 | Asthma |
| rs9274510   | 6 | 32666407 | A | G | 0.5097 | -0.1131 | 0.0055 | 2.83E-92  | -20.3751 | 1198533 | Asthma |
| rs67955939  | 6 | 32666411 | C | T | 0.1104 | -0.0819 | 0.0086 | 2.78E-21  | -9.4706  | 1042455 | Asthma |
| rs68033958  | 6 | 32666449 | A | G | 0.1557 | -0.0805 | 0.0075 | 3.69E-27  | -10.7936 | 1224666 | Asthma |
| rs34297496  | 6 | 32666452 | T | C | 0.1575 | 0.0613  | 0.0065 | 4.49E-21  | 9.4205   | 1349938 | Asthma |
| rs9274514   | 6 | 32666466 | A | G | 0.1973 | 0.0526  | 0.0061 | 1.03E-17  | 8.5705   | 1349938 | Asthma |
| rs28746846  | 6 | 32666484 | T | C | 0.2047 | 0.0687  | 0.0065 | 6.80E-26  | 10.5226  | 1198533 | Asthma |
| rs28746847  | 6 | 32666485 | G | T | 0.2047 | 0.0688  | 0.0065 | 6.65E-26  | 10.5245  | 1198533 | Asthma |
| rs66957194  | 6 | 32666486 | T | G | 0.1515 | -0.0806 | 0.0084 | 7.95E-22  | -9.6005  | 1130071 | Asthma |
| rs72844399  | 6 | 32666487 | T | C | 0.1521 | -0.0830 | 0.0077 | 4.17E-27  | -10.7824 | 1221848 | Asthma |
| rs1130373   | 6 | 32666524 | C | T | 0.1960 | 0.0851  | 0.0095 | 3.73E-19  | 8.9445   | 844071  | Asthma |
| rs1049061   | 6 | 32666526 | A | G | 0.1520 | -0.0814 | 0.0084 | 3.62E-22  | -9.6814  | 1130071 | Asthma |
| rs1049059   | 6 | 32666536 | G | C | 0.1545 | -0.0833 | 0.0077 | 2.05E-27  | -10.8474 | 1221848 | Asthma |
| rs3891176   | 6 | 32666541 | A | C | 0.1886 | 0.0511  | 0.0065 | 2.48E-15  | 7.9146   | 1290310 | Asthma |
| rs3189152   | 6 | 32666564 | G | A | 0.3447 | 0.0733  | 0.0053 | 8.23E-44  | 13.8811  | 1290310 | Asthma |
| rs1049057   | 6 | 32666573 | T | C | 0.4476 | -0.1178 | 0.0059 | 5.96E-90  | -20.1103 | 1130071 | Asthma |
| rs1049072   | 6 | 32666578 | A | G | 0.2018 | 0.0719  | 0.0064 | 2.49E-29  | 11.2437  | 1281476 | Asthma |
| rs1049056   | 6 | 32666592 | A | C | 0.1526 | -0.0812 | 0.0075 | 1.51E-27  | -10.8753 | 1281476 | Asthma |
| rs9274522   | 6 | 32666596 | T | C | 0.3469 | 0.0739  | 0.0056 | 1.30E-39  | 13.1703  | 1198533 | Asthma |
| rs1049055   | 6 | 32666610 | C | T | 0.2875 | -0.0937 | 0.0056 | 2.53E-63  | -16.7979 | 1349938 | Asthma |
| rs1049053   | 6 | 32666628 | C | T | 0.4139 | -0.0729 | 0.0064 | 2.81E-30  | -11.4347 | 1004310 | Asthma |
| rs1049070   | 6 | 32666648 | T | C | 0.2059 | 0.0686  | 0.0065 | 6.52E-26  | 10.5265  | 1198533 | Asthma |
| rs67147537  | 6 | 32666649 | A | G | 0.1532 | -0.0788 | 0.0069 | 7.36E-30  | -11.3507 | 1349938 | Asthma |
| rs3891175   | 6 | 32666690 | T | C | 0.1952 | 0.0525  | 0.0063 | 8.54E-17  | 8.3236   | 1290310 | Asthma |
| rs9274526   | 6 | 32666708 | A | C | 0.3442 | -0.0862 | 0.0060 | 7.65E-47  | -14.3729 | 1224666 | Asthma |
| rs9274527   | 6 | 32666713 | T | C | 0.3499 | 0.0720  | 0.0056 | 8.49E-38  | 12.8509  | 1198533 | Asthma |
| rs71542466  | 6 | 32666728 | G | C | 0.1309 | -0.0825 | 0.0080 | 1.20E-24  | -10.2486 | 1133307 | Asthma |
| rs28746851  | 6 | 32666729 | T | C | 0.1797 | 0.0603  | 0.0068 | 4.17E-19  | 8.9323   | 1133307 | Asthma |
| rs9274528   | 6 | 32666731 | C | T | 0.3236 | -0.0920 | 0.0061 | 7.04E-52  | -15.1548 | 1159440 | Asthma |
| rs9274529   | 6 | 32666737 | A | G | 0.4421 | -0.1222 | 0.0059 | 1.38E-95  | -20.7446 | 1068588 | Asthma |
| rs11568831  | 6 | 32666768 | A | C | 0.1950 | 0.0733  | 0.0075 | 2.02E-22  | 9.7408   | 1042455 | Asthma |
| rs11568830  | 6 | 32666779 | A | G | 0.1959 | 0.0781  | 0.0083 | 3.45E-21  | 9.4480   | 973993  | Asthma |
| rs28746852  | 6 | 32666816 | C | G | 0.2064 | 0.0732  | 0.0070 | 2.41E-25  | 10.4025  | 1130071 | Asthma |
| rs9274535   | 6 | 32666843 | T | C | 0.2983 | -0.0968 | 0.0066 | 2.24E-49  | -14.7715 | 1130071 | Asthma |
| rs9274536   | 6 | 32666857 | C | T | 0.4520 | -0.1186 | 0.0059 | 2.76E-90  | -20.1492 | 1130071 | Asthma |
| rs28746853  | 6 | 32666869 | C | T | 0.2050 | 0.0779  | 0.0068 | 1.66E-30  | 11.4803  | 1221848 | Asthma |
| rs9274537   | 6 | 32666878 | G | A | 0.4520 | -0.1187 | 0.0059 | 1.90E-90  | -20.1665 | 1130071 | Asthma |
| rs9274538   | 6 | 32666884 | G | A | 0.3371 | 0.0757  | 0.0062 | 1.47E-34  | 12.2612  | 1130071 | Asthma |
| rs9274540   | 6 | 32666899 | C | T | 0.5547 | -0.1294 | 0.0070 | 4.79E-76  | -18.4540 | 973993  | Asthma |
| rs71542467  | 6 | 32666900 | A | G | 0.1428 | -0.0836 | 0.0091 | 3.50E-20  | -9.2024  | 973993  | Asthma |
| rs71542468  | 6 | 32666904 | T | G | 0.1428 | -0.0836 | 0.0091 | 3.50E-20  | -9.2024  | 973993  | Asthma |
| rs9274543   | 6 | 32666918 | G | A | 0.4668 | -0.1291 | 0.0067 | 7.94E-83  | -19.2802 | 973993  | Asthma |
| rs9274544   | 6 | 32666922 | G | A | 0.4667 | -0.1291 | 0.0067 | 7.54E-83  | -19.2832 | 973993  | Asthma |
| rs9274545   | 6 | 32666925 | A | C | 0.4613 | -0.1270 | 0.0068 | 1.05E-78  | -18.7823 | 908767  | Asthma |
| rs72844401  | 6 | 32666940 | A | G | 0.1420 | -0.0826 | 0.0091 | 1.21E-19  | -9.0679  | 973993  | Asthma |
| rs9274546   | 6 | 32666959 | C | T | 0.4527 | -0.1289 | 0.0067 | 4.46E-83  | -19.3089 | 973993  | Asthma |
| rs28746854  | 6 | 32666978 | T | C | 0.1934 | 0.0772  | 0.0083 | 2.31E-20  | 9.2469   | 973993  | Asthma |
| rs28746855  | 6 | 32666979 | G | A | 0.1937 | 0.0770  | 0.0083 | 2.95E-20  | 9.2209   | 973993  | Asthma |
| rs41316204  | 6 | 32666988 | C | T | 0.1835 | 0.0771  | 0.0087 | 7.95E-19  | 8.8607   | 697750  | Asthma |
| rs9274548   | 6 | 32667008 | G | A | 0.5528 | 0.1270  | 0.0067 | 3.62E-79  | 18.8385  | 908767  | Asthma |
| rs9274549   | 6 | 32667009 | G | A | 0.5528 | 0.1270  | 0.0067 | 3.62E-79  | 18.8385  | 908767  | Asthma |
| rs9274550   | 6 | 32667018 | A | G | 0.5066 | 0.1198  | 0.0065 | 9.34E-77  | 18.5420  | 1033224 | Asthma |
| rs9274551   | 6 | 32667057 | T | C | 0.5513 | 0.1274  | 0.0067 | 6.48E-81  | 19.0509  | 973993  | Asthma |
| rs9274552   | 6 | 32667061 | C | A | 0.5460 | 0.1290  | 0.0067 | 4.84E-83  | 19.3049  | 973993  | Asthma |
| rs9274554   | 6 | 32667093 | G | A | 0.5415 | 0.1193  | 0.0059 | 6.14E-91  | 20.2228  | 1130071 | Asthma |
| rs9274555   | 6 | 32667105 | T | C | 0.5471 | 0.1181  | 0.0059 | 4.40E-89  | 20.0115  | 1130071 | Asthma |
| rs9274556   | 6 | 32667106 | T | C | 0.5471 | 0.1181  | 0.0059 | 4.41E-89  | 20.0119  | 1130071 | Asthma |
| rs9274557   | 6 | 32667110 | T | G | 0.5471 | 0.1181  | 0.0059 | 4.11E-89  | 20.0153  | 1130071 | Asthma |
| rs9274558   | 6 | 32667113 | A | G | 0.3368 | 0.0760  | 0.0062 | 8.33E-35  | 12.3069  | 1130071 | Asthma |
| rs281860696 | 6 | 32667116 | A | G | 0.1498 | 0.0670  | 0.0079 | 2.15E-17  | 8.4854   | 1130071 | Asthma |
| rs41316208  | 6 | 32667122 | G | A | 0.1501 | 0.0669  | 0.0079 | 2.09E-17  | 8.4888   | 1130071 | Asthma |
| rs4279477   | 6 | 32667124 | G | T | 0.1528 | -0.0776 | 0.0077 | 5.50E-24  | -10.1005 | 1198533 | Asthma |
| rs4403294   | 6 | 32667145 | A | G | 0.2930 | -0.0936 | 0.0060 | 9.60E-55  | -15.5825 | 1224666 | Asthma |
| rs4988889   | 6 | 32667175 | T | G | 0.1982 | 0.0559  | 0.0065 | 8.24E-18  | 8.5961   | 1220016 | Asthma |
| rs62404144  | 6 | 32667213 | T | G | 0.0755 | -0.1146 | 0.0102 | 2.04E-29  | -11.2617 | 1224666 | Asthma |
| rs9274562   | 6 | 32667223 | A | G | 0.4461 | -0.1141 | 0.0054 | 1.25E-100 | -21.2947 | 1224666 | Asthma |
| rs28746859  | 6 | 32667230 | A | G | 0.1828 | 0.0733  | 0.0071 | 2.67E-25  | 10.3929  | 1221848 | Asthma |
| rs9274563   | 6 | 32667234 | A | G | 0.3474 | 0.0723  | 0.0055 | 2.91E-39  | 13.1093  | 1224666 | Asthma |
| rs28746860  | 6 | 32667256 | G | T | 0.2071 | 0.0934  | 0.0068 | 1.08E-42  | 13.6959  | 1221848 | Asthma |

|            |   |          |   |   |        |         |        |           |          |         |        |
|------------|---|----------|---|---|--------|---------|--------|-----------|----------|---------|--------|
| rs9274564  | 6 | 32667271 | G | A | 0.4460 | -0.1144 | 0.0054 | 3.44E-101 | -21.3564 | 1224666 | Asthma |
| rs9274565  | 6 | 32667290 | A | T | 0.5495 | 0.1163  | 0.0054 | 9.49E-102 | 21.4167  | 1198533 | Asthma |
| rs9274567  | 6 | 32667304 | G | A | 0.3462 | 0.0749  | 0.0056 | 2.07E-40  | 13.3084  | 1198533 | Asthma |
| rs4311549  | 6 | 32667314 | T | G | 0.2925 | -0.0939 | 0.0060 | 4.00E-55  | -15.6381 | 1224666 | Asthma |
| rs28746861 | 6 | 32667343 | A | G | 0.2032 | 0.0681  | 0.0065 | 2.21E-25  | 10.4111  | 1198533 | Asthma |
| rs4492227  | 6 | 32667387 | T | C | 0.5073 | -0.0391 | 0.0065 | 1.79E-09  | -6.0159  | 1000149 | Asthma |
| rs9274571  | 6 | 32667393 | T | C | 0.3432 | 0.0857  | 0.0061 | 2.46E-44  | 13.9674  | 1068611 | Asthma |
| rs28746863 | 6 | 32667395 | T | C | 0.2038 | 0.0730  | 0.0070 | 2.30E-25  | 10.4071  | 1094744 | Asthma |
| rs4988888  | 6 | 32667420 | C | T | 0.1943 | 0.0527  | 0.0073 | 3.94E-13  | 7.2577   | 1068611 | Asthma |
| rs9274573  | 6 | 32667428 | C | T | 0.4485 | -0.1254 | 0.0058 | 3.12E-103 | -21.5748 | 1094744 | Asthma |
| rs9274574  | 6 | 32667442 | A | G | 0.2940 | 0.0829  | 0.0062 | 1.37E-40  | 13.3393  | 1094744 | Asthma |
| rs9274575  | 6 | 32667449 | T | G | 0.5011 | -0.1257 | 0.0059 | 2.70E-101 | -21.3676 | 1094744 | Asthma |
| rs28746864 | 6 | 32667453 | A | G | 0.2061 | 0.0716  | 0.0071 | 6.60E-24  | 10.0824  | 1068611 | Asthma |
| rs28746865 | 6 | 32667471 | T | A | 0.2064 | 0.0716  | 0.0071 | 5.89E-24  | 10.0938  | 1068611 | Asthma |
| rs9274576  | 6 | 32667486 | C | T | 0.3442 | 0.0811  | 0.0060 | 7.36E-42  | 13.5556  | 1094744 | Asthma |
| rs28746866 | 6 | 32667489 | G | T | 0.2080 | 0.0757  | 0.0077 | 8.12E-23  | 9.8329   | 1000149 | Asthma |
| rs9274577  | 6 | 32667492 | C | T | 0.3443 | 0.0811  | 0.0060 | 6.78E-42  | 13.5615  | 1094744 | Asthma |
| rs28746867 | 6 | 32667516 | G | C | 0.1933 | 0.0795  | 0.0081 | 8.92E-23  | 9.8235   | 995476  | Asthma |
| rs9274579  | 6 | 32667535 | A | G | 0.2422 | -0.1113 | 0.0084 | 3.56E-40  | -13.2683 | 566903  | Asthma |
| rs9274580  | 6 | 32667568 | A | G | 0.5506 | 0.1515  | 0.0076 | 5.92E-88  | 19.8811  | 844071  | Asthma |
| rs9274581  | 6 | 32667570 | C | A | 0.5517 | 0.1507  | 0.0078 | 2.49E-83  | 19.3401  | 778845  | Asthma |
| rs9274582  | 6 | 32667571 | C | T | 0.5517 | 0.1507  | 0.0078 | 2.49E-83  | 19.3401  | 778845  | Asthma |
| rs9274583  | 6 | 32667584 | A | G | 0.5521 | 0.1499  | 0.0078 | 1.52E-82  | 19.2463  | 778845  | Asthma |
| rs9274584  | 6 | 32667588 | A | G | 0.5521 | 0.1499  | 0.0078 | 1.52E-82  | 19.2463  | 778845  | Asthma |
| rs9274585  | 6 | 32667589 | T | C | 0.4839 | 0.1294  | 0.0077 | 9.73E-63  | 16.7173  | 778845  | Asthma |
| rs9274586  | 6 | 32667598 | C | T | 0.3836 | 0.1196  | 0.0080 | 6.63E-51  | 15.0070  | 778845  | Asthma |
| rs9274587  | 6 | 32667600 | A | C | 0.4519 | 0.1417  | 0.0080 | 1.42E-69  | 17.6315  | 778845  | Asthma |
| rs9274588  | 6 | 32667602 | A | T | 0.3836 | 0.1196  | 0.0080 | 6.63E-51  | 15.0070  | 778845  | Asthma |
| rs9274589  | 6 | 32667608 | G | A | 0.3836 | 0.1196  | 0.0080 | 6.47E-51  | 15.0083  | 778845  | Asthma |
| rs4516984  | 6 | 32667617 | A | G | 0.3090 | -0.1228 | 0.0087 | 5.44E-45  | -14.0750 | 778845  | Asthma |
| rs9274592  | 6 | 32667623 | C | G | 0.4473 | -0.1512 | 0.0076 | 1.60E-87  | -19.8305 | 844071  | Asthma |
| rs9274594  | 6 | 32667658 | C | T | 0.4479 | -0.1506 | 0.0076 | 3.20E-87  | -19.7970 | 844071  | Asthma |
| rs9274595  | 6 | 32667673 | G | A | 0.4544 | -0.1511 | 0.0076 | 8.10E-88  | -19.8659 | 844071  | Asthma |
| rs9274596  | 6 | 32667690 | G | T | 0.4798 | -0.1481 | 0.0076 | 7.57E-84  | -19.4009 | 844071  | Asthma |
| rs4604305  | 6 | 32667704 | G | C | 0.1387 | -0.0959 | 0.0106 | 1.97E-19  | -9.0153  | 844071  | Asthma |
| rs4377824  | 6 | 32667714 | T | C | 0.3217 | -0.1212 | 0.0084 | 9.61E-47  | -14.3575 | 844071  | Asthma |
| rs4473904  | 6 | 32667813 | G | A | 0.1477 | -0.0872 | 0.0105 | 7.71E-17  | -8.3356  | 844071  | Asthma |
| rs9274600  | 6 | 32667815 | G | A | 0.4117 | 0.1220  | 0.0077 | 3.86E-57  | 15.9310  | 844071  | Asthma |
| rs4516985  | 6 | 32667855 | A | G | 0.3476 | -0.1095 | 0.0075 | 1.18E-48  | -14.6586 | 912533  | Asthma |
| rs9274606  | 6 | 32667910 | C | T | 0.3632 | 0.0919  | 0.0066 | 6.65E-44  | 13.8965  | 938666  | Asthma |
| rs9274607  | 6 | 32667936 | T | C | 0.4436 | -0.1381 | 0.0065 | 7.21E-99  | -21.1047 | 938666  | Asthma |
| rs3828787  | 6 | 32667966 | C | T | 0.1919 | 0.0789  | 0.0083 | 1.52E-21  | 9.5334   | 938666  | Asthma |
| rs3828788  | 6 | 32667972 | G | A | 0.1920 | 0.0790  | 0.0083 | 1.41E-21  | 9.5415   | 938666  | Asthma |
| rs3828789  | 6 | 32667977 | G | T | 0.4443 | -0.1254 | 0.0052 | 1.42E-126 | -23.9325 | 1246149 | Asthma |
| rs3828790  | 6 | 32668032 | T | C | 0.4436 | -0.1255 | 0.0052 | 1.40E-126 | -23.9318 | 1246149 | Asthma |
| rs3828791  | 6 | 32668036 | A | G | 0.4482 | -0.1265 | 0.0058 | 1.46E-105 | -21.8206 | 1094744 | Asthma |
| rs3828792  | 6 | 32668051 | C | G | 0.2064 | 0.0738  | 0.0069 | 2.38E-26  | 10.6212  | 1094744 | Asthma |
| rs3828793  | 6 | 32668106 | T | C | 0.1506 | -0.0843 | 0.0076 | 1.38E-28  | -11.0917 | 1220016 | Asthma |
| rs2647025  | 6 | 32668172 | A | G | 0.2814 | 0.0796  | 0.0056 | 1.08E-45  | 14.1886  | 1246149 | Asthma |
| rs9274619  | 6 | 32668177 | A | G | 0.1061 | 0.1360  | 0.0092 | 2.27E-49  | 14.7702  | 1094744 | Asthma |
| rs9274620  | 6 | 32668188 | T | G | 0.3437 | 0.0832  | 0.0061 | 4.02E-42  | 13.5997  | 1068611 | Asthma |
| rs3828796  | 6 | 32668197 | G | A | 0.2033 | 0.0741  | 0.0063 | 1.26E-31  | 11.7012  | 1246149 | Asthma |
| rs9274622  | 6 | 32668213 | C | T | 0.3488 | 0.0817  | 0.0055 | 5.28E-50  | 14.8684  | 1220016 | Asthma |
| rs9274623  | 6 | 32668221 | T | G | 0.1924 | 0.0558  | 0.0068 | 2.52E-16  | 8.1945   | 1160388 | Asthma |
| rs9274624  | 6 | 32668244 | A | G | 0.3818 | 0.0873  | 0.0066 | 4.42E-40  | 13.2516  | 700591  | Asthma |
| rs3828798  | 6 | 32668261 | A | T | 0.4837 | -0.1248 | 0.0060 | 1.25E-97  | -20.9700 | 1068611 | Asthma |
| rs9274626  | 6 | 32668263 | T | C | 0.3283 | -0.0762 | 0.0060 | 2.01E-37  | -12.7844 | 1160388 | Asthma |
| rs9274627  | 6 | 32668264 | T | G | 0.3832 | 0.0916  | 0.0067 | 1.28E-42  | 13.6831  | 1000149 | Asthma |
| rs3828799  | 6 | 32668285 | C | G | 0.2109 | 0.0683  | 0.0070 | 2.48E-22  | 9.7201   | 1068611 | Asthma |
| rs3828800  | 6 | 32668286 | A | G | 0.2029 | 0.0698  | 0.0065 | 8.24E-27  | 10.7194  | 1220016 | Asthma |
| rs3828801  | 6 | 32668294 | T | G | 0.2109 | 0.0683  | 0.0070 | 2.48E-22  | 9.7198   | 1068611 | Asthma |
| rs3828802  | 6 | 32668296 | A | G | 0.5139 | -0.0380 | 0.0065 | 4.39E-09  | -5.8688  | 1000149 | Asthma |
| rs3828805  | 6 | 32668343 | T | C | 0.3523 | -0.0765 | 0.0061 | 3.51E-36  | -12.5599 | 1160388 | Asthma |
| rs9274634  | 6 | 32668346 | C | A | 0.3354 | 0.0875  | 0.0068 | 7.94E-38  | 12.8561  | 1000149 | Asthma |
| rs3828806  | 6 | 32668353 | C | T | 0.4535 | -0.1328 | 0.0065 | 4.33E-92  | -20.3542 | 1000149 | Asthma |
| rs3828807  | 6 | 32668354 | G | C | 0.4535 | -0.1328 | 0.0065 | 4.33E-92  | -20.3542 | 1000149 | Asthma |
| rs9274637  | 6 | 32668360 | A | G | 0.3001 | -0.1064 | 0.0066 | 5.60E-58  | -16.0518 | 1068611 | Asthma |
| rs3828808  | 6 | 32668361 | G | A | 0.2095 | 0.0756  | 0.0077 | 8.61E-23  | 9.8271   | 1000149 | Asthma |
| rs9274639  | 6 | 32668369 | T | C | 0.3218 | -0.1092 | 0.0064 | 9.38E-65  | -16.9929 | 1068611 | Asthma |
| rs9274640  | 6 | 32668377 | G | C | 0.2112 | 0.0687  | 0.0070 | 1.96E-22  | 9.7439   | 1068611 | Asthma |
| rs3828809  | 6 | 32668395 | T | C | 0.2131 | 0.0686  | 0.0070 | 1.85E-22  | 9.7498   | 1068611 | Asthma |
| rs9274645  | 6 | 32668413 | A | G | 0.3389 | 0.0842  | 0.0062 | 1.67E-42  | 13.6640  | 1068611 | Asthma |
| rs9274646  | 6 | 32668433 | C | A | 0.2552 | 0.0552  | 0.0092 | 1.74E-09  | 6.0201   | 681101  | Asthma |
| rs9274647  | 6 | 32668434 | T | G | 0.2574 | 0.0575  | 0.0092 | 3.48E-10  | 6.2758   | 681101  | Asthma |

|            |   |          |   |   |        |         |        |           |          |         |        |
|------------|---|----------|---|---|--------|---------|--------|-----------|----------|---------|--------|
| rs9274648  | 6 | 32668438 | A | G | 0.3310 | 0.0884  | 0.0069 | 5.41E-38  | 12.8859  | 1000149 | Asthma |
| rs9274649  | 6 | 32668440 | A | G | 0.2136 | 0.0690  | 0.0070 | 8.13E-23  | 9.8328   | 1068611 | Asthma |
| rs9274650  | 6 | 32668441 | C | T | 0.3310 | 0.0884  | 0.0069 | 5.41E-38  | 12.8859  | 1000149 | Asthma |
| rs3828811  | 6 | 32668444 | T | G | 0.4536 | -0.1335 | 0.0065 | 5.76E-93  | -20.4519 | 1000149 | Asthma |
| rs9274652  | 6 | 32668458 | T | C | 0.3416 | 0.0836  | 0.0061 | 2.29E-42  | 13.6408  | 1068611 | Asthma |
| rs9274653  | 6 | 32668477 | C | T | 0.3418 | 0.0835  | 0.0061 | 2.59E-42  | 13.6321  | 1068611 | Asthma |
| rs35476892 | 6 | 32668486 | A | T | 0.1272 | -0.0813 | 0.0092 | 1.33E-18  | -8.8032  | 1094744 | Asthma |
| rs9274654  | 6 | 32668503 | T | G | 0.2072 | 0.0718  | 0.0071 | 2.43E-24  | 10.1803  | 1068611 | Asthma |
| rs9274655  | 6 | 32668512 | C | T | 0.2038 | 0.0724  | 0.0064 | 1.70E-29  | 11.2772  | 1220016 | Asthma |
| rs9274656  | 6 | 32668574 | C | T | 0.2063 | 0.0693  | 0.0063 | 2.75E-28  | 11.0297  | 1246149 | Asthma |
| rs2856698  | 6 | 32668599 | G | C | 0.2748 | 0.0671  | 0.0057 | 6.05E-32  | 11.7632  | 1246149 | Asthma |
| rs34984116 | 6 | 32668615 | A | T | 0.1263 | -0.0799 | 0.0083 | 3.96E-22  | -9.6722  | 1246149 | Asthma |
| rs35800511 | 6 | 32668656 | G | A | 0.0275 | -0.0889 | 0.0142 | 4.04E-10  | -6.2523  | 1246149 | Asthma |
| rs9274660  | 6 | 32668657 | A | G | 0.4438 | -0.1258 | 0.0052 | 3.27E-127 | -23.9935 | 1246149 | Asthma |
| rs9274661  | 6 | 32668666 | C | A | 0.1981 | 0.0719  | 0.0068 | 2.23E-26  | 10.6270  | 878129  | Asthma |
| rs9274662  | 6 | 32668717 | T | C | 0.4234 | -0.1216 | 0.0060 | 8.17E-91  | -20.2083 | 1068611 | Asthma |
| rs9461792  | 6 | 32668718 | A | G | 0.2195 | 0.0836  | 0.0076 | 7.66E-28  | 10.9371  | 1000149 | Asthma |
| rs9469211  | 6 | 32668737 | G | A | 0.2142 | 0.0813  | 0.0078 | 1.12E-25  | 10.4752  | 1000149 | Asthma |
| rs9461793  | 6 | 32668741 | C | A | 0.2138 | 0.0812  | 0.0078 | 1.33E-25  | 10.4590  | 1000149 | Asthma |
| rs9274663  | 6 | 32668744 | A | G | 0.1279 | 0.1080  | 0.0085 | 7.23E-37  | 12.6844  | 1068611 | Asthma |
| rs9274664  | 6 | 32668751 | G | A | 0.4359 | 0.0691  | 0.0065 | 1.49E-26  | 10.6647  | 1000149 | Asthma |
| rs9274665  | 6 | 32668761 | C | T | 0.3383 | 0.0860  | 0.0068 | 1.60E-36  | 12.6217  | 1000149 | Asthma |
| rs9274669  | 6 | 32668814 | A | G | 0.4452 | -0.1331 | 0.0065 | 1.32E-92  | -20.4121 | 1000149 | Asthma |
| rs9274672  | 6 | 32668831 | C | G | 0.3034 | 0.0975  | 0.0076 | 2.67E-37  | 12.7621  | 934923  | Asthma |
| rs9274673  | 6 | 32668832 | A | T | 0.3560 | 0.1018  | 0.0079 | 7.26E-38  | 12.8632  | 778845  | Asthma |
| rs9274674  | 6 | 32668833 | A | C | 0.2996 | 0.0933  | 0.0083 | 1.57E-29  | 11.2844  | 778845  | Asthma |
| rs9274675  | 6 | 32668836 | C | T | 0.3384 | 0.0870  | 0.0069 | 2.07E-36  | 12.6017  | 934923  | Asthma |
| rs9274676  | 6 | 32668838 | A | G | 0.3384 | 0.0870  | 0.0069 | 1.98E-36  | 12.6052  | 934923  | Asthma |
| rs9469214  | 6 | 32668846 | T | C | 0.2435 | 0.0843  | 0.0084 | 6.05E-24  | 10.0911  | 632129  | Asthma |
| rs17205409 | 6 | 32668863 | C | T | 0.2747 | 0.0990  | 0.0097 | 2.46E-24  | 10.1790  | 476051  | Asthma |
| rs17205416 | 6 | 32668864 | A | G | 0.2747 | 0.0990  | 0.0097 | 2.47E-24  | 10.1788  | 476051  | Asthma |
| rs9274679  | 6 | 32668876 | C | T | 0.4291 | 0.1092  | 0.0064 | 3.10E-66  | 17.1915  | 1000149 | Asthma |
| rs28371205 | 6 | 32668916 | C | T | 0.2191 | 0.0826  | 0.0076 | 2.61E-27  | 10.8252  | 1000149 | Asthma |
| rs28371206 | 6 | 32668919 | A | G | 0.2192 | 0.0828  | 0.0076 | 2.14E-27  | 10.8434  | 1000149 | Asthma |
| rs28371207 | 6 | 32668924 | G | A | 0.1817 | 0.0825  | 0.0077 | 8.02E-27  | 10.7221  | 1091926 | Asthma |
| rs3135000  | 6 | 32668956 | A | G | 0.3839 | 0.0745  | 0.0059 | 5.52E-36  | 12.5238  | 1063938 | Asthma |
| rs2858302  | 6 | 32668979 | C | T | 0.3399 | 0.0701  | 0.0055 | 1.31E-36  | 12.6377  | 1220016 | Asthma |
| rs3134998  | 6 | 32668980 | T | C | 0.4304 | -0.1159 | 0.0053 | 1.72E-104 | -21.7084 | 1246149 | Asthma |
| rs9274683  | 6 | 32669003 | A | G | 0.4377 | 0.1018  | 0.0051 | 1.93E-87  | 19.8216  | 1246149 | Asthma |
| rs9274684  | 6 | 32669008 | T | C | 0.4360 | 0.1048  | 0.0057 | 2.11E-76  | 18.4988  | 1094744 | Asthma |
| rs9274685  | 6 | 32669067 | C | T | 0.4383 | 0.1018  | 0.0051 | 1.81E-87  | 19.8248  | 1246149 | Asthma |
| rs3134996  | 6 | 32669089 | A | T | 0.4164 | -0.1178 | 0.0053 | 3.03E-108 | -22.1024 | 1246149 | Asthma |
| rs9274687  | 6 | 32669105 | T | C | 0.4350 | 0.1050  | 0.0058 | 1.23E-73  | 18.1529  | 1068611 | Asthma |
| rs9274688  | 6 | 32669123 | T | C | 0.2839 | 0.0807  | 0.0069 | 1.34E-31  | 11.6960  | 1000149 | Asthma |
| rs9274689  | 6 | 32669153 | C | T | 0.4158 | 0.1023  | 0.0054 | 3.87E-80  | 18.9575  | 1186521 | Asthma |
| rs9274690  | 6 | 32669163 | C | A | 0.4303 | 0.1052  | 0.0057 | 4.77E-76  | 18.4554  | 1094744 | Asthma |
| rs9274691  | 6 | 32669180 | C | T | 0.4234 | 0.1048  | 0.0059 | 1.29E-71  | 17.8957  | 1068611 | Asthma |
| rs9274692  | 6 | 32669181 | A | T | 0.4234 | 0.1048  | 0.0059 | 1.26E-71  | 17.8957  | 1068611 | Asthma |
| rs17211818 | 6 | 32669186 | A | C | 0.1412 | 0.0807  | 0.0082 | 1.03E-22  | 9.8095   | 1068611 | Asthma |
| rs9274693  | 6 | 32669195 | T | C | 0.4281 | 0.1047  | 0.0057 | 3.78E-75  | 18.3432  | 1094744 | Asthma |
| rs1626993  | 6 | 32669214 | T | A | 0.3544 | 0.0959  | 0.0060 | 5.45E-58  | 16.0531  | 1068611 | Asthma |
| rs9274695  | 6 | 32669220 | T | C | 0.3157 | 0.1054  | 0.0060 | 2.87E-68  | 17.4609  | 1094744 | Asthma |
| rs9274696  | 6 | 32669230 | C | G | 0.4342 | 0.1048  | 0.0057 | 1.99E-76  | 18.5014  | 1094744 | Asthma |
| rs1694133  | 6 | 32669238 | T | C | 0.2256 | 0.0793  | 0.0068 | 3.07E-31  | 11.6252  | 1068611 | Asthma |
| rs9274697  | 6 | 32669239 | G | A | 0.4397 | 0.0998  | 0.0051 | 1.96E-85  | 19.5880  | 1246149 | Asthma |
| rs9274698  | 6 | 32669318 | C | A | 0.4384 | 0.1017  | 0.0051 | 3.07E-87  | 19.7987  | 1246149 | Asthma |
| rs9274699  | 6 | 32669319 | A | G | 0.2833 | 0.0792  | 0.0062 | 1.60E-37  | 12.8018  | 1094744 | Asthma |
| rs17211861 | 6 | 32669344 | A | G | 0.1527 | 0.0714  | 0.0071 | 9.11E-24  | 10.0508  | 1220016 | Asthma |
| rs17211868 | 6 | 32669358 | G | C | 0.1502 | 0.0744  | 0.0080 | 1.14E-20  | 9.3225   | 1068611 | Asthma |
| rs17205521 | 6 | 32669361 | A | C | 0.1493 | 0.0691  | 0.0077 | 4.80E-19  | 8.9168   | 1151554 | Asthma |
| rs9274700  | 6 | 32669403 | G | A | 0.2837 | 0.0786  | 0.0059 | 3.15E-40  | 13.2769  | 1160388 | Asthma |
| rs9274702  | 6 | 32669407 | A | C | 0.4297 | 0.1044  | 0.0058 | 2.01E-72  | 17.9985  | 1068611 | Asthma |
| rs9274704  | 6 | 32669436 | G | A | 0.2842 | 0.0777  | 0.0063 | 1.13E-34  | 12.2823  | 1068611 | Asthma |
| rs17211902 | 6 | 32669438 | C | T | 0.1420 | 0.0807  | 0.0091 | 5.34E-19  | 8.9049   | 1000149 | Asthma |
| rs9274705  | 6 | 32669468 | A | G | 0.4295 | 0.1049  | 0.0058 | 9.32E-73  | 18.0411  | 1068611 | Asthma |
| rs17205563 | 6 | 32669484 | C | T | 0.1420 | 0.0810  | 0.0091 | 4.88E-19  | 8.9151   | 1000149 | Asthma |
| rs9274706  | 6 | 32669488 | G | A | 0.2764 | 0.0865  | 0.0085 | 2.72E-24  | 10.1691  | 778845  | Asthma |
| rs9274707  | 6 | 32669489 | G | A | 0.4332 | 0.1134  | 0.0068 | 4.78E-63  | 16.7608  | 847307  | Asthma |
| rs9274708  | 6 | 32669490 | A | G | 0.3784 | 0.1094  | 0.0065 | 1.48E-63  | 16.8290  | 1003385 | Asthma |
| rs9274709  | 6 | 32669498 | G | A | 0.2836 | 0.0782  | 0.0063 | 5.56E-35  | 12.3394  | 1068611 | Asthma |
| rs9274710  | 6 | 32669510 | G | C | 0.4008 | 0.1019  | 0.0059 | 1.38E-67  | 17.3700  | 1068611 | Asthma |
| rs9274711  | 6 | 32669512 | T | A | 0.2567 | 0.0753  | 0.0065 | 2.01E-31  | 11.6613  | 1068611 | Asthma |
| rs9274712  | 6 | 32669521 | T | C | 0.2909 | 0.0760  | 0.0063 | 1.10E-33  | 12.0969  | 1068611 | Asthma |
| rs17211951 | 6 | 32669538 | A | C | 0.1482 | 0.0883  | 0.0101 | 1.97E-18  | 8.7590   | 632129  | Asthma |

|            |   |          |   |   |        |         |        |           |          |         |        |
|------------|---|----------|---|---|--------|---------|--------|-----------|----------|---------|--------|
| rs17211958 | 6 | 32669539 | G | A | 0.1510 | 0.0846  | 0.0100 | 2.46E-17  | 8.4698   | 632129  | Asthma |
| rs17205605 | 6 | 32669550 | T | C | 0.1520 | 0.0848  | 0.0099 | 1.51E-17  | 8.5264   | 632129  | Asthma |
| rs17205612 | 6 | 32669556 | T | C | 0.1474 | 0.0763  | 0.0089 | 1.12E-17  | 8.5607   | 1000149 | Asthma |
| rs9274713  | 6 | 32669564 | T | C | 0.4372 | 0.1024  | 0.0057 | 2.65E-72  | 17.9836  | 1094744 | Asthma |
| rs17211965 | 6 | 32669578 | G | C | 0.1524 | 0.0691  | 0.0079 | 2.11E-18  | 8.7514   | 1068611 | Asthma |
| rs9274715  | 6 | 32669614 | A | G | 0.4205 | 0.1056  | 0.0059 | 8.75E-73  | 18.0450  | 1068611 | Asthma |
| rs17211993 | 6 | 32669617 | G | A | 0.1542 | 0.0876  | 0.0102 | 1.00E-17  | 8.5734   | 844071  | Asthma |
| rs9274716  | 6 | 32669627 | A | G | 0.2461 | 0.0737  | 0.0091 | 4.40E-16  | 8.1271   | 381543  | Asthma |
| rs17205640 | 6 | 32669636 | A | T | 0.3090 | 0.0546  | 0.0062 | 1.69E-18  | 8.7759   | 1068611 | Asthma |
| rs17205647 | 6 | 32669641 | A | G | 0.3077 | 0.0550  | 0.0063 | 2.28E-18  | 8.7427   | 1091926 | Asthma |
| rs9274717  | 6 | 32669677 | A | C | 0.4123 | 0.1062  | 0.0055 | 9.15E-84  | 19.3910  | 1160388 | Asthma |
| rs9274718  | 6 | 32669692 | C | T | 0.3771 | 0.1291  | 0.0072 | 2.14E-72  | 17.9948  | 935848  | Asthma |
| rs9274719  | 6 | 32669693 | C | T | 0.4273 | 0.1156  | 0.0067 | 9.09E-67  | 17.2615  | 912533  | Asthma |
| rs9274720  | 6 | 32669702 | A | G | 0.4272 | 0.1050  | 0.0058 | 1.16E-72  | 18.0294  | 1068611 | Asthma |
| rs3997832  | 6 | 32669720 | C | T | 0.3769 | 0.1111  | 0.0059 | 5.01E-78  | 18.6987  | 1068611 | Asthma |
| rs28746878 | 6 | 32669738 | C | G | 0.0665 | 0.0944  | 0.0125 | 4.34E-14  | 7.5506   | 1026700 | Asthma |
| rs9274722  | 6 | 32669750 | A | T | 0.3272 | 0.1150  | 0.0075 | 7.78E-53  | 15.2985  | 847307  | Asthma |
| rs9274724  | 6 | 32669754 | G | A | 0.3116 | 0.1109  | 0.0066 | 7.52E-63  | 16.7331  | 1003385 | Asthma |
| rs28371212 | 6 | 32669761 | A | G | 0.2951 | 0.0444  | 0.0064 | 4.35E-12  | 6.9253   | 1068611 | Asthma |
| rs9274725  | 6 | 32669796 | T | C | 0.4344 | 0.1040  | 0.0052 | 3.75E-88  | 19.9043  | 1220016 | Asthma |
| rs9274726  | 6 | 32669816 | G | C | 0.4385 | 0.1020  | 0.0051 | 1.37E-87  | 19.8393  | 1246149 | Asthma |
| rs3134994  | 6 | 32669903 | T | C | 0.2898 | -0.1031 | 0.0059 | 4.25E-68  | -17.4371 | 1246149 | Asthma |
| rs9274727  | 6 | 32669919 | G | T | 0.2874 | 0.0763  | 0.0062 | 3.50E-35  | 12.3766  | 1094744 | Asthma |
| rs1694129  | 6 | 32669966 | T | G | 0.0782 | 0.0569  | 0.0093 | 7.70E-10  | 6.1511   | 1246149 | Asthma |
| rs34400217 | 6 | 32669973 | T | C | 0.1531 | 0.0698  | 0.0078 | 2.28E-19  | 8.9990   | 1094744 | Asthma |
| rs35744187 | 6 | 32669979 | A | G | 0.1608 | 0.0641  | 0.0075 | 2.10E-17  | 8.4881   | 1094744 | Asthma |
| rs9274728  | 6 | 32669995 | G | A | 0.2811 | 0.0799  | 0.0056 | 1.25E-45  | 14.1784  | 1246149 | Asthma |
| rs3134993  | 6 | 32670001 | G | A | 0.4445 | -0.1252 | 0.0058 | 1.37E-102 | -21.5067 | 1094744 | Asthma |
| rs9274730  | 6 | 32670040 | A | G | 0.3678 | 0.1069  | 0.0060 | 3.81E-71  | 17.8346  | 1068611 | Asthma |
| rs35135261 | 6 | 32670045 | T | C | 0.2031 | 0.1077  | 0.0098 | 6.43E-28  | 10.9528  | 844071  | Asthma |
| rs9274731  | 6 | 32670046 | G | A | 0.4193 | 0.1179  | 0.0068 | 6.65E-68  | 17.4121  | 912533  | Asthma |
| rs35195457 | 6 | 32670056 | A | G | 0.1215 | 0.0470  | 0.0079 | 2.79E-09  | 5.9437   | 1220016 | Asthma |
| rs9274733  | 6 | 32670097 | T | C | 0.4383 | 0.1033  | 0.0057 | 9.75E-74  | 18.1652  | 1094744 | Asthma |
| rs9274734  | 6 | 32670110 | C | T | 0.3690 | 0.0855  | 0.0056 | 4.75E-52  | 15.1806  | 1186521 | Asthma |
| rs9274735  | 6 | 32670119 | A | G | 0.2677 | 0.0711  | 0.0065 | 9.36E-28  | 10.9189  | 1068611 | Asthma |
| rs9274736  | 6 | 32670128 | C | T | 0.4185 | 0.0992  | 0.0059 | 3.11E-64  | 16.9218  | 1068611 | Asthma |
| rs9274737  | 6 | 32670130 | C | T | 0.2676 | 0.0711  | 0.0065 | 8.87E-28  | 10.9240  | 1068611 | Asthma |
| rs9274738  | 6 | 32670132 | C | A | 0.4185 | 0.0992  | 0.0059 | 3.11E-64  | 16.9219  | 1068611 | Asthma |
| rs35402595 | 6 | 32670135 | C | A | 0.1508 | 0.0758  | 0.0079 | 1.42E-21  | 9.5404   | 1068611 | Asthma |
| rs9274739  | 6 | 32670163 | T | A | 0.2830 | 0.0791  | 0.0062 | 3.27E-37  | 12.7463  | 1094744 | Asthma |
| rs9274740  | 6 | 32670191 | T | A | 0.4370 | 0.1050  | 0.0057 | 4.05E-76  | 18.4644  | 1094744 | Asthma |
| rs9274741  | 6 | 32670217 | T | C | 0.5373 | -0.0923 | 0.0051 | 2.92E-72  | -17.9776 | 1246149 | Asthma |
| rs9274742  | 6 | 32670260 | C | T | 0.2341 | 0.0877  | 0.0066 | 8.52E-41  | 13.3745  | 1094744 | Asthma |
| rs9274743  | 6 | 32670265 | G | A | 0.4371 | 0.1048  | 0.0057 | 4.37E-76  | 18.4594  | 1094744 | Asthma |
| rs9274744  | 6 | 32670277 | A | G | 0.4348 | 0.1047  | 0.0058 | 5.34E-73  | 18.0712  | 1068611 | Asthma |
| rs9274745  | 6 | 32670281 | C | T | 0.5431 | -0.0967 | 0.0058 | 1.08E-62  | -16.7115 | 1068611 | Asthma |
| rs9274746  | 6 | 32670283 | A | G | 0.4348 | 0.1047  | 0.0058 | 5.05E-73  | 18.0752  | 1068611 | Asthma |
| rs13194117 | 6 | 32670288 | C | G | 0.1279 | -0.0809 | 0.0092 | 1.86E-18  | -8.7654  | 1094744 | Asthma |
| rs9274747  | 6 | 32670294 | A | C | 0.1119 | 0.1379  | 0.0091 | 1.36E-51  | 15.1122  | 1068611 | Asthma |
| rs9274748  | 6 | 32670309 | A | G | 0.4206 | 0.1098  | 0.0064 | 4.37E-66  | 17.1706  | 1000149 | Asthma |
| rs9274749  | 6 | 32670317 | A | G | 0.4181 | 0.1084  | 0.0064 | 8.16E-64  | 16.8645  | 1000149 | Asthma |
| rs9274750  | 6 | 32670337 | C | T | 0.2373 | 0.0928  | 0.0073 | 7.31E-37  | 12.6834  | 1000149 | Asthma |
| rs9274751  | 6 | 32670361 | C | T | 0.4235 | 0.1090  | 0.0064 | 1.57E-64  | 16.9616  | 1000149 | Asthma |
| rs28746880 | 6 | 32670369 | A | G | 0.1848 | 0.0621  | 0.0082 | 4.51E-14  | 7.5453   | 1000149 | Asthma |
| rs28746881 | 6 | 32670376 | T | G | 0.1849 | 0.0622  | 0.0082 | 3.96E-14  | 7.5622   | 1000149 | Asthma |
| rs9274752  | 6 | 32670386 | A | T | 0.4231 | 0.1091  | 0.0064 | 1.08E-64  | 16.9842  | 1000149 | Asthma |
| rs28746882 | 6 | 32670398 | A | G | 0.1849 | 0.0620  | 0.0082 | 4.57E-14  | 7.5437   | 1000149 | Asthma |
| rs9274753  | 6 | 32670399 | T | C | 0.4232 | 0.1090  | 0.0064 | 1.56E-64  | 16.9622  | 1000149 | Asthma |
| rs11751495 | 6 | 32670422 | G | C | 0.0444 | -0.1197 | 0.0152 | 3.07E-15  | -7.8876  | 1086328 | Asthma |
| rs9274754  | 6 | 32670484 | C | T | 0.4234 | 0.1084  | 0.0064 | 5.51E-64  | 16.8878  | 1000149 | Asthma |
| rs9274755  | 6 | 32670485 | A | G | 0.4235 | 0.1086  | 0.0064 | 3.50E-64  | 16.9143  | 1000149 | Asthma |
| rs9274756  | 6 | 32670492 | T | A | 0.4234 | 0.1087  | 0.0064 | 2.79E-64  | 16.9280  | 1000149 | Asthma |
| rs9274757  | 6 | 32670503 | C | A | 0.2369 | 0.0930  | 0.0073 | 6.04E-37  | 12.6983  | 1000149 | Asthma |
| rs9274758  | 6 | 32670513 | G | A | 0.4235 | 0.1084  | 0.0064 | 5.50E-64  | 16.8884  | 1000149 | Asthma |
| rs9274759  | 6 | 32670538 | A | G | 0.4323 | 0.1032  | 0.0056 | 9.38E-75  | 18.2936  | 1151554 | Asthma |
| rs9274760  | 6 | 32670571 | G | A | 0.4236 | 0.1081  | 0.0064 | 1.25E-63  | 16.8396  | 1000149 | Asthma |
| rs9274761  | 6 | 32670594 | G | A | 0.2341 | 0.0911  | 0.0065 | 3.61E-44  | 13.9402  | 1151554 | Asthma |
| rs28746883 | 6 | 32670615 | T | C | 0.1856 | 0.0610  | 0.0082 | 1.00E-13  | 7.4404   | 1000149 | Asthma |
| rs28746884 | 6 | 32670618 | T | A | 0.1856 | 0.0613  | 0.0082 | 7.80E-14  | 7.4736   | 1000149 | Asthma |
| rs9274762  | 6 | 32670634 | G | C | 0.2374 | 0.0927  | 0.0073 | 9.05E-37  | 12.6667  | 1000149 | Asthma |
| rs9274763  | 6 | 32670650 | T | A | 0.4236 | 0.1084  | 0.0064 | 5.07E-64  | 16.8925  | 1000149 | Asthma |
| rs9274764  | 6 | 32670713 | G | A | 0.4322 | 0.1032  | 0.0056 | 9.66E-75  | 18.2922  | 1151554 | Asthma |
| rs9274765  | 6 | 32670733 | T | G | 0.2369 | 0.0932  | 0.0073 | 4.31E-37  | 12.7247  | 1000149 | Asthma |
| rs9274766  | 6 | 32670735 | A | G | 0.2370 | 0.0934  | 0.0073 | 2.96E-37  | 12.7540  | 1000149 | Asthma |



|             |   |          |   |   |        |         |        |          |          |         |        |
|-------------|---|----------|---|---|--------|---------|--------|----------|----------|---------|--------|
| rs9274767   | 6 | 32670764 | G | C | 0.2372 | 0.0931  | 0.0073 | 5.23E-37 | 12.7096  | 1000149 | Asthma |
| rs9274768   | 6 | 32670767 | C | T | 0.2372 | 0.0931  | 0.0073 | 5.24E-37 | 12.7096  | 1000149 | Asthma |
| rs9274769   | 6 | 32670770 | C | T | 0.3896 | 0.1086  | 0.0065 | 2.25E-62 | 16.6674  | 1000149 | Asthma |
| rs9274771   | 6 | 32670804 | C | T | 0.4223 | 0.1072  | 0.0064 | 2.18E-62 | 16.6695  | 1000149 | Asthma |
| rs9274772   | 6 | 32670806 | C | A | 0.4222 | 0.1072  | 0.0064 | 2.02E-62 | 16.6742  | 1000149 | Asthma |
| rs28891369  | 6 | 32670825 | T | C | 0.1918 | 0.0684  | 0.0095 | 6.18E-13 | 7.1965   | 844071  | Asthma |
| rs9274773   | 6 | 32670843 | G | A | 0.4221 | 0.1071  | 0.0064 | 2.67E-62 | 16.6576  | 1000149 | Asthma |
| rs9274774   | 6 | 32670853 | G | A | 0.4222 | 0.1069  | 0.0064 | 4.49E-62 | 16.6257  | 1000149 | Asthma |
| rs9274775   | 6 | 32670866 | G | C | 0.2375 | 0.0929  | 0.0073 | 7.19E-37 | 12.6847  | 1000149 | Asthma |
| rs9274777   | 6 | 32670909 | G | T | 0.3212 | 0.1089  | 0.0082 | 1.03E-40 | 13.3599  | 844071  | Asthma |
| rs9274778   | 6 | 32670917 | A | G | 0.4169 | 0.1073  | 0.0065 | 3.65E-62 | 16.6380  | 1000149 | Asthma |
| rs28891371  | 6 | 32670936 | T | C | 0.1858 | 0.0685  | 0.0099 | 4.39E-12 | 6.9241   | 778845  | Asthma |
| rs9274779   | 6 | 32670949 | A | C | 0.2528 | 0.1028  | 0.0101 | 3.67E-24 | 10.1400  | 476051  | Asthma |
| rs28891372  | 6 | 32670950 | A | G | 0.1858 | 0.0685  | 0.0099 | 4.35E-12 | 6.9254   | 778845  | Asthma |
| rs9274780   | 6 | 32670964 | G | A | 0.2380 | 0.1093  | 0.0088 | 1.58E-35 | 12.4407  | 844071  | Asthma |
| rs28891373  | 6 | 32670967 | A | G | 0.1881 | 0.0687  | 0.0097 | 1.70E-12 | 7.0569   | 778845  | Asthma |
| rs28891374  | 6 | 32670973 | G | T | 0.1880 | 0.0689  | 0.0097 | 1.49E-12 | 7.0754   | 778845  | Asthma |
| rs3134992   | 6 | 32671006 | T | C | 0.3152 | -0.1270 | 0.0085 | 2.82E-50 | -14.9109 | 844071  | Asthma |
| rs28891376  | 6 | 32671011 | C | T | 0.1879 | 0.0684  | 0.0097 | 2.04E-12 | 7.0316   | 778845  | Asthma |
| rs9274782   | 6 | 32671018 | C | G | 0.2345 | 0.1082  | 0.0088 | 6.22E-35 | 12.3305  | 844071  | Asthma |
| rs9274783   | 6 | 32671039 | G | A | 0.3369 | 0.1095  | 0.0081 | 3.65E-42 | 13.6064  | 844071  | Asthma |
| rs28746885  | 6 | 32671094 | G | A | 0.1894 | 0.0707  | 0.0096 | 1.62E-13 | 7.3767   | 844071  | Asthma |
| rs9274784   | 6 | 32671101 | G | A | 0.2335 | 0.1060  | 0.0088 | 1.59E-33 | 12.0668  | 844071  | Asthma |
| rs28891377  | 6 | 32671111 | C | A | 0.1898 | 0.0700  | 0.0096 | 2.60E-13 | 7.3138   | 844071  | Asthma |
| rs28891378  | 6 | 32671117 | T | A | 0.1898 | 0.0701  | 0.0096 | 2.56E-13 | 7.3157   | 844071  | Asthma |
| rs9274785   | 6 | 32671130 | C | A | 0.2334 | 0.1058  | 0.0088 | 2.15E-33 | 12.0417  | 844071  | Asthma |
| rs9274787   | 6 | 32671251 | A | G | 0.2371 | 0.0933  | 0.0073 | 3.30E-37 | 12.7456  | 1000149 | Asthma |
| rs9274788   | 6 | 32671259 | C | T | 0.2370 | 0.0931  | 0.0073 | 5.28E-37 | 12.7091  | 1000149 | Asthma |
| rs6910047   | 6 | 32671294 | T | C | 0.1301 | -0.0908 | 0.0104 | 3.04E-18 | -8.7099  | 1000149 | Asthma |
| rs28746886  | 6 | 32671306 | C | G | 0.1820 | 0.0600  | 0.0083 | 3.90E-13 | 7.2589   | 1000149 | Asthma |
| rs28746887  | 6 | 32671319 | T | C | 0.1818 | 0.0601  | 0.0083 | 4.09E-13 | 7.2527   | 1000149 | Asthma |
| rs28891379  | 6 | 32671330 | C | T | 0.1817 | 0.0601  | 0.0083 | 3.90E-13 | 7.2590   | 1000149 | Asthma |
| rs9274789   | 6 | 32671366 | C | G | 0.3131 | 0.1073  | 0.0084 | 2.53E-37 | 12.7663  | 844071  | Asthma |
| rs372276684 | 6 | 32671371 | G | T | 0.1957 | 0.0643  | 0.0092 | 3.63E-12 | 6.9510   | 566903  | Asthma |
| rs9274790   | 6 | 32671378 | G | A | 0.4221 | 0.1078  | 0.0064 | 5.81E-63 | 16.7488  | 1000149 | Asthma |
| rs9274791   | 6 | 32671386 | T | C | 0.2338 | 0.0915  | 0.0065 | 1.51E-44 | 14.0021  | 1151554 | Asthma |
| rs28891381  | 6 | 32671402 | A | T | 0.1813 | 0.0608  | 0.0083 | 3.11E-13 | 7.2894   | 1000149 | Asthma |
| rs9274792   | 6 | 32671447 | C | A | 0.4241 | 0.1243  | 0.0076 | 7.20E-60 | 16.3197  | 844071  | Asthma |
| rs9274793   | 6 | 32671470 | C | T | 0.2307 | 0.1080  | 0.0088 | 2.25E-34 | 12.2261  | 844071  | Asthma |
| rs9274794   | 6 | 32671487 | G | T | 0.4235 | 0.1238  | 0.0076 | 2.85E-59 | 16.2351  | 844071  | Asthma |
| rs112453089 | 6 | 32671493 | G | T | 0.4235 | 0.1238  | 0.0076 | 2.84E-59 | 16.2351  | 844071  | Asthma |
| rs6910687   | 6 | 32671510 | A | G | 0.1166 | -0.0959 | 0.0116 | 1.31E-16 | -8.2725  | 844071  | Asthma |
| rs368228691 | 6 | 32671535 | A | C | 0.1865 | 0.0627  | 0.0100 | 3.03E-10 | 6.2974   | 778845  | Asthma |
| rs372519354 | 6 | 32671538 | T | A | 0.1865 | 0.0627  | 0.0100 | 3.01E-10 | 6.2981   | 778845  | Asthma |
| rs111937677 | 6 | 32671539 | G | A | 0.4189 | 0.1216  | 0.0077 | 3.36E-56 | 15.7949  | 844071  | Asthma |
| rs138762484 | 6 | 32671545 | T | A | 0.1864 | 0.0628  | 0.0100 | 2.87E-10 | 6.3055   | 778845  | Asthma |
| rs144949632 | 6 | 32671554 | A | C | 0.2325 | 0.1118  | 0.0089 | 2.21E-36 | 12.5960  | 844071  | Asthma |
| rs148651202 | 6 | 32671555 | T | C | 0.2325 | 0.1118  | 0.0089 | 2.21E-36 | 12.5959  | 844071  | Asthma |
| rs112819910 | 6 | 32671567 | T | G | 0.2325 | 0.1117  | 0.0089 | 2.80E-36 | 12.5774  | 844071  | Asthma |
| rs111289085 | 6 | 32671582 | T | G | 0.1872 | 0.0676  | 0.0097 | 2.69E-12 | 6.9929   | 844071  | Asthma |
| rs6914573   | 6 | 32671591 | T | A | 0.4350 | 0.1170  | 0.0076 | 1.43E-53 | 15.4085  | 844071  | Asthma |
| rs112248469 | 6 | 32671606 | G | A | 0.1895 | 0.0687  | 0.0095 | 6.06E-13 | 7.1992   | 844071  | Asthma |
| rs141881212 | 6 | 32671610 | G | A | 0.2128 | 0.1022  | 0.0093 | 8.09E-28 | 10.9324  | 844071  | Asthma |
| rs111983899 | 6 | 32671612 | T | C | 0.4033 | 0.1148  | 0.0078 | 1.23E-49 | 14.8112  | 844071  | Asthma |
| rs139025169 | 6 | 32671613 | A | C | 0.2128 | 0.1022  | 0.0093 | 8.16E-28 | 10.9313  | 844071  | Asthma |
| rs113374318 | 6 | 32671638 | A | G | 0.4057 | 0.1143  | 0.0078 | 3.43E-49 | 14.7427  | 844071  | Asthma |
| rs9274805   | 6 | 32671652 | T | G | 0.4059 | 0.1137  | 0.0077 | 8.07E-49 | 14.6843  | 844071  | Asthma |
| rs9274806   | 6 | 32671664 | G | A | 0.4057 | 0.1139  | 0.0077 | 5.30E-49 | 14.7137  | 844071  | Asthma |
| rs143008902 | 6 | 32671670 | A | C | 0.1927 | 0.0681  | 0.0096 | 1.25E-12 | 7.0996   | 778845  | Asthma |
| rs199884023 | 6 | 32671672 | A | G | 0.4057 | 0.1139  | 0.0077 | 5.08E-49 | 14.7166  | 844071  | Asthma |
| rs201341530 | 6 | 32671679 | C | T | 0.2295 | 0.1086  | 0.0089 | 1.49E-34 | 12.2600  | 844071  | Asthma |
| rs202086737 | 6 | 32671682 | G | A | 0.2295 | 0.1086  | 0.0089 | 1.50E-34 | 12.2588  | 844071  | Asthma |
| rs144328416 | 6 | 32671687 | T | C | 0.1928 | 0.0679  | 0.0096 | 1.49E-12 | 7.0754   | 778845  | Asthma |
| rs148777223 | 6 | 32671688 | G | A | 0.1928 | 0.0679  | 0.0096 | 1.49E-12 | 7.0754   | 778845  | Asthma |
| rs9274811   | 6 | 32671734 | T | C | 0.2306 | 0.1089  | 0.0088 | 5.64E-35 | 12.3388  | 844071  | Asthma |
| rs28891390  | 6 | 32671768 | T | C | 0.1924 | 0.0675  | 0.0095 | 1.19E-12 | 7.1061   | 844071  | Asthma |
| rs9274812   | 6 | 32671796 | T | C | 0.2283 | 0.1075  | 0.0089 | 1.50E-33 | 12.0712  | 844071  | Asthma |
| rs28891391  | 6 | 32671800 | T | C | 0.1850 | 0.0585  | 0.0082 | 1.27E-12 | 7.0971   | 1000149 | Asthma |
| rs1794493   | 6 | 32671801 | G | A | 0.3883 | 0.1289  | 0.0077 | 2.27E-62 | 16.6671  | 844071  | Asthma |
| rs28891392  | 6 | 32671833 | G | C | 0.1924 | 0.0687  | 0.0095 | 5.45E-13 | 7.2136   | 844071  | Asthma |
| rs9274815   | 6 | 32671843 | G | A | 0.3787 | 0.1067  | 0.0096 | 6.20E-29 | 11.1626  | 476051  | Asthma |
| rs9274816   | 6 | 32671844 | A | G | 0.2044 | 0.1128  | 0.0113 | 2.75E-23 | 9.9418   | 476051  | Asthma |
| rs9274817   | 6 | 32671846 | T | C | 0.2112 | 0.1174  | 0.0095 | 8.39E-35 | 12.3060  | 844071  | Asthma |
| rs9274818   | 6 | 32671847 | G | A | 0.2128 | 0.1164  | 0.0095 | 1.20E-34 | 12.2780  | 844071  | Asthma |

|             |   |          |   |   |        |         |        |          |          |         |        |
|-------------|---|----------|---|---|--------|---------|--------|----------|----------|---------|--------|
| rs9274819   | 6 | 32671869 | C | T | 0.2131 | 0.1156  | 0.0095 | 3.30E-34 | 12.1949  | 844071  | Asthma |
| rs9274821   | 6 | 32671893 | G | T | 0.2139 | 0.1179  | 0.0094 | 7.96E-36 | 12.4943  | 844071  | Asthma |
| rs28891393  | 6 | 32671906 | G | T | 0.1937 | 0.0727  | 0.0095 | 2.15E-14 | 7.6414   | 844071  | Asthma |
| rs9274823   | 6 | 32671918 | T | G | 0.2130 | 0.1196  | 0.0095 | 1.24E-36 | 12.6416  | 844071  | Asthma |
| rs9274824   | 6 | 32671925 | T | C | 0.4081 | 0.1288  | 0.0078 | 1.25E-61 | 16.5646  | 844071  | Asthma |
| rs9274825   | 6 | 32671933 | C | T | 0.2237 | 0.1112  | 0.0091 | 1.79E-34 | 12.2447  | 844071  | Asthma |
| rs9274826   | 6 | 32671948 | A | G | 0.2241 | 0.1116  | 0.0091 | 8.26E-35 | 12.3079  | 844071  | Asthma |
| rs9274827   | 6 | 32671949 | T | C | 0.2240 | 0.1113  | 0.0091 | 1.14E-34 | 12.2816  | 844071  | Asthma |
| rs9274828   | 6 | 32671960 | G | A | 0.4190 | 0.1264  | 0.0077 | 4.50E-61 | 16.4877  | 844071  | Asthma |
| rs28891396  | 6 | 32671963 | A | G | 0.1901 | 0.0690  | 0.0095 | 4.80E-13 | 7.2308   | 844071  | Asthma |
| rs28891397  | 6 | 32672000 | A | C | 0.1922 | 0.0680  | 0.0095 | 8.93E-13 | 7.1461   | 844071  | Asthma |
| rs9274830   | 6 | 32672059 | A | C | 0.1137 | 0.1471  | 0.0099 | 1.23E-49 | 14.8122  | 1000149 | Asthma |
| rs28891398  | 6 | 32672080 | A | G | 0.1848 | 0.0581  | 0.0082 | 1.75E-12 | 7.0530   | 1000149 | Asthma |
| rs9274832   | 6 | 32672098 | T | G | 0.2280 | 0.0979  | 0.0075 | 1.21E-38 | 13.0009  | 1000149 | Asthma |
| rs28891399  | 6 | 32672099 | C | G | 0.1923 | 0.0669  | 0.0095 | 1.91E-12 | 7.0408   | 844071  | Asthma |
| rs9274833   | 6 | 32672108 | T | G | 0.2277 | 0.0981  | 0.0075 | 1.15E-38 | 13.0045  | 1000149 | Asthma |
| rs9274834   | 6 | 32672118 | G | A | 0.4132 | 0.1088  | 0.0065 | 6.01E-63 | 16.7462  | 1000149 | Asthma |
| rs41316211  | 6 | 32672132 | C | T | 0.1319 | 0.1056  | 0.0110 | 1.22E-21 | 9.5565   | 844071  | Asthma |
| rs9274835   | 6 | 32672154 | T | G | 0.1148 | 0.1427  | 0.0099 | 4.70E-47 | 14.4069  | 1000149 | Asthma |
| rs9274836   | 6 | 32672179 | A | G | 0.4131 | 0.1088  | 0.0065 | 5.96E-63 | 16.7470  | 1000149 | Asthma |
| rs9274837   | 6 | 32672195 | T | C | 0.1133 | 0.1475  | 0.0099 | 7.90E-50 | 14.8418  | 1000149 | Asthma |
| rs9274838   | 6 | 32672196 | G | A | 0.2276 | 0.0978  | 0.0075 | 1.46E-38 | 12.9863  | 1000149 | Asthma |
| rs9274839   | 6 | 32672238 | G | A | 0.4218 | 0.1074  | 0.0064 | 1.35E-62 | 16.6980  | 1000149 | Asthma |
| rs113198605 | 6 | 32672243 | T | G | 0.1302 | -0.0907 | 0.0104 | 3.10E-18 | -8.7075  | 1000149 | Asthma |
| rs9274840   | 6 | 32672258 | T | C | 0.2368 | 0.0938  | 0.0073 | 1.57E-37 | 12.8034  | 1000149 | Asthma |
| rs9274841   | 6 | 32672282 | A | C | 0.2368 | 0.0935  | 0.0073 | 2.76E-37 | 12.7594  | 1000149 | Asthma |
| rs28891400  | 6 | 32672297 | T | C | 0.1801 | 0.0588  | 0.0084 | 3.19E-12 | 6.9692   | 934923  | Asthma |
| rs28891401  | 6 | 32672298 | G | A | 0.1881 | 0.0670  | 0.0097 | 5.71E-12 | 6.8868   | 778845  | Asthma |
| rs9274842   | 6 | 32672318 | A | T | 0.2293 | 0.1084  | 0.0088 | 1.47E-34 | 12.2612  | 844071  | Asthma |
| rs9274843   | 6 | 32672319 | G | A | 0.4145 | 0.1236  | 0.0077 | 1.14E-58 | 16.1496  | 844071  | Asthma |
| rs9274845   | 6 | 32672357 | T | C | 0.3611 | 0.1104  | 0.0080 | 1.46E-43 | 13.8401  | 844071  | Asthma |
| rs9274846   | 6 | 32672365 | T | C | 0.3462 | 0.1126  | 0.0081 | 2.10E-44 | 13.9786  | 844071  | Asthma |
| rs9274847   | 6 | 32672366 | G | A | 0.2548 | 0.1085  | 0.0087 | 2.26E-35 | 12.4116  | 844071  | Asthma |
| rs9274848   | 6 | 32672372 | G | C | 0.3736 | 0.1112  | 0.0079 | 1.59E-44 | 13.9983  | 844071  | Asthma |
| rs9274849   | 6 | 32672380 | T | A | 0.3747 | 0.1107  | 0.0079 | 3.23E-44 | 13.9486  | 844071  | Asthma |
| rs2395232   | 6 | 32672440 | A | G | 0.2631 | -0.0817 | 0.0068 | 2.28E-33 | -12.0369 | 1130071 | Asthma |
| rs28891403  | 6 | 32672480 | C | A | 0.1812 | 0.0523  | 0.0075 | 3.32E-12 | 6.9635   | 1130071 | Asthma |
| rs28891404  | 6 | 32672491 | A | G | 0.1816 | 0.0528  | 0.0075 | 1.87E-12 | 7.0442   | 1130071 | Asthma |
| rs28891405  | 6 | 32672511 | T | C | 0.1816 | 0.0523  | 0.0075 | 2.84E-12 | 6.9857   | 1130071 | Asthma |
| rs9274852   | 6 | 32672512 | A | G | 0.2508 | 0.0730  | 0.0065 | 3.87E-29 | 11.2048  | 1130071 | Asthma |
| rs28891406  | 6 | 32672559 | A | G | 0.1946 | 0.0515  | 0.0065 | 2.14E-15 | 7.9332   | 1281476 | Asthma |
| rs28891407  | 6 | 32672582 | T | C | 0.1831 | 0.0522  | 0.0075 | 2.68E-12 | 6.9937   | 1130071 | Asthma |
| rs28891408  | 6 | 32672605 | A | G | 0.1831 | 0.0525  | 0.0075 | 2.04E-12 | 7.0318   | 1130071 | Asthma |
| rs28891409  | 6 | 32672624 | G | A | 0.1896 | 0.0578  | 0.0084 | 4.87E-12 | 6.9094   | 973993  | Asthma |
| rs9274853   | 6 | 32672643 | A | G | 0.4190 | 0.0957  | 0.0058 | 1.32E-60 | 16.4226  | 1130071 | Asthma |
| rs28891410  | 6 | 32672647 | G | T | 0.1894 | 0.0580  | 0.0084 | 4.20E-12 | 6.9304   | 973993  | Asthma |
| rs9274854   | 6 | 32672696 | T | C | 0.2273 | 0.0871  | 0.0068 | 1.50E-37 | 12.8071  | 1130071 | Asthma |
| rs9274855   | 6 | 32672717 | A | G | 0.4104 | 0.0970  | 0.0059 | 4.54E-61 | 16.4870  | 1130071 | Asthma |
| rs28891411  | 6 | 32672732 | A | G | 0.1816 | 0.0525  | 0.0075 | 2.40E-12 | 7.0093   | 1130071 | Asthma |
| rs28891412  | 6 | 32672761 | T | C | 0.1784 | 0.0518  | 0.0075 | 6.44E-12 | 6.8696   | 1130071 | Asthma |
| rs9274856   | 6 | 32672762 | T | C | 0.2195 | 0.0993  | 0.0080 | 1.98E-35 | 12.4223  | 973993  | Asthma |
| rs9274857   | 6 | 32672765 | G | C | 0.4055 | 0.0978  | 0.0059 | 1.31E-61 | 16.5620  | 1130071 | Asthma |
| rs9274858   | 6 | 32672769 | A | C | 0.2195 | 0.0992  | 0.0080 | 2.29E-35 | 12.4105  | 973993  | Asthma |
| rs9274860   | 6 | 32672779 | A | G | 0.2191 | 0.0993  | 0.0080 | 2.19E-35 | 12.4140  | 973993  | Asthma |
| rs9274861   | 6 | 32672815 | G | C | 0.4155 | 0.1060  | 0.0067 | 2.05E-56 | 15.8265  | 973993  | Asthma |
| rs28891414  | 6 | 32672816 | T | C | 0.1794 | 0.0518  | 0.0075 | 5.83E-12 | 6.8839   | 1130071 | Asthma |
| rs9274862   | 6 | 32672818 | T | C | 0.2294 | 0.0946  | 0.0078 | 2.83E-34 | 12.2076  | 973993  | Asthma |
| rs9274863   | 6 | 32672834 | C | G | 0.2298 | 0.0945  | 0.0077 | 2.39E-34 | 12.2215  | 973993  | Asthma |
| rs9274864   | 6 | 32672869 | G | A | 0.4184 | 0.1055  | 0.0067 | 3.79E-56 | 15.7873  | 973993  | Asthma |
| rs9274865   | 6 | 32672894 | T | C | 0.4168 | 0.0964  | 0.0058 | 3.28E-61 | 16.5066  | 1130071 | Asthma |
| rs28891415  | 6 | 32672914 | C | G | 0.1909 | 0.0669  | 0.0097 | 4.65E-12 | 6.9158   | 778845  | Asthma |
| rs28891416  | 6 | 32672915 | T | C | 0.1909 | 0.0668  | 0.0097 | 5.03E-12 | 6.9047   | 778845  | Asthma |
| rs1694127   | 6 | 32672916 | A | G | 0.3959 | -0.0852 | 0.0078 | 9.26E-28 | -10.9199 | 844071  | Asthma |
| rs9274867   | 6 | 32672968 | A | G | 0.4035 | 0.0981  | 0.0068 | 1.41E-47 | 14.4897  | 973993  | Asthma |
| rs9274868   | 6 | 32672975 | G | A | 0.2148 | 0.0865  | 0.0080 | 5.98E-27 | 10.7492  | 973993  | Asthma |
| rs9274869   | 6 | 32672982 | T | C | 0.4036 | 0.0974  | 0.0068 | 5.58E-47 | 14.3947  | 973993  | Asthma |
| rs3134988   | 6 | 32672995 | G | A | 0.4322 | -0.1242 | 0.0068 | 2.41E-75 | -18.3670 | 973993  | Asthma |
| rs9274871   | 6 | 32673015 | G | A | 0.4006 | 0.1068  | 0.0068 | 4.89E-55 | 15.6261  | 973993  | Asthma |
| rs9274872   | 6 | 32673016 | G | A | 0.4005 | 0.1063  | 0.0068 | 1.28E-54 | 15.5643  | 973993  | Asthma |
| rs9274873   | 6 | 32673041 | C | A | 0.3799 | 0.0921  | 0.0070 | 1.83E-39 | 13.1444  | 973993  | Asthma |
| rs9274874   | 6 | 32673072 | T | A | 0.2222 | 0.0976  | 0.0080 | 3.05E-34 | 12.2016  | 973993  | Asthma |
| rs9274875   | 6 | 32673086 | G | A | 0.3840 | 0.0926  | 0.0070 | 3.58E-40 | 13.2673  | 973993  | Asthma |
| rs9274876   | 6 | 32673087 | G | A | 0.2219 | 0.0975  | 0.0080 | 4.73E-34 | 12.1657  | 973993  | Asthma |
| rs9274877   | 6 | 32673100 | G | A | 0.3994 | 0.1052  | 0.0069 | 5.70E-53 | 15.3191  | 973993  | Asthma |

|            |   |          |   |   |        |         |        |          |          |         |        |
|------------|---|----------|---|---|--------|---------|--------|----------|----------|---------|--------|
| rs9274878  | 6 | 32673112 | G | C | 0.4078 | 0.1058  | 0.0068 | 5.70E-55 | 15.6152  | 973993  | Asthma |
| rs9274879  | 6 | 32673141 | G | C | 0.2336 | 0.1133  | 0.0089 | 2.36E-37 | 12.7723  | 844071  | Asthma |
| rs28891422 | 6 | 32673159 | C | A | 0.1845 | 0.0597  | 0.0086 | 4.23E-12 | 6.9291   | 908767  | Asthma |
| rs28891423 | 6 | 32673193 | A | G | 0.1802 | 0.0544  | 0.0088 | 6.28E-10 | 6.1832   | 908767  | Asthma |
| rs28891424 | 6 | 32673207 | G | A | 0.1806 | 0.0540  | 0.0088 | 7.82E-10 | 6.1487   | 908767  | Asthma |
| rs9274880  | 6 | 32673234 | G | A | 0.4110 | 0.1030  | 0.0067 | 1.44E-52 | 15.2594  | 973993  | Asthma |
| rs9274881  | 6 | 32673288 | C | A | 0.4012 | 0.1253  | 0.0080 | 8.02E-55 | 15.5940  | 778845  | Asthma |
| rs9274882  | 6 | 32673289 | T | C | 0.2264 | 0.1180  | 0.0094 | 7.17E-36 | 12.5036  | 778845  | Asthma |
| rs9274883  | 6 | 32673295 | T | C | 0.4006 | 0.1255  | 0.0080 | 5.68E-55 | 15.6162  | 778845  | Asthma |
| rs9274884  | 6 | 32673301 | C | T | 0.2239 | 0.1191  | 0.0095 | 6.47E-36 | 12.5114  | 778845  | Asthma |
| rs9274885  | 6 | 32673304 | C | C | 0.2239 | 0.1191  | 0.0095 | 6.47E-36 | 12.5114  | 778845  | Asthma |
| rs9274886  | 6 | 32673309 | C | T | 0.3987 | 0.1255  | 0.0081 | 1.26E-54 | 15.5646  | 778845  | Asthma |
| rs9274887  | 6 | 32673312 | G | A | 0.3987 | 0.1255  | 0.0081 | 1.26E-54 | 15.5646  | 778845  | Asthma |
| rs62404145 | 6 | 32673401 | T | A | 0.1009 | -0.0725 | 0.0118 | 9.39E-10 | -6.1197  | 973993  | Asthma |
| rs60600164 | 6 | 32673454 | C | T | 0.1211 | -0.0749 | 0.0103 | 2.89E-13 | -7.2998  | 908767  | Asthma |
| rs57548500 | 6 | 32673461 | A | C | 0.1132 | -0.1004 | 0.0123 | 3.29E-16 | -8.1625  | 778845  | Asthma |
| rs9274921  | 6 | 32673564 | T | C | 0.1635 | 0.0978  | 0.0108 | 9.47E-20 | 9.0953   | 778845  | Asthma |
| rs9274928  | 6 | 32673707 | T | C | 0.2175 | 0.1099  | 0.0101 | 1.12E-27 | 10.9030  | 778845  | Asthma |
| rs9274929  | 6 | 32673710 | C | T | 0.3054 | 0.1057  | 0.0087 | 9.26E-34 | 12.1109  | 778845  | Asthma |
| rs9274930  | 6 | 32673728 | C | T | 0.3137 | 0.1075  | 0.0086 | 1.92E-35 | 12.4241  | 778845  | Asthma |
| rs9274931  | 6 | 32673729 | A | G | 0.3137 | 0.1075  | 0.0086 | 1.92E-35 | 12.4241  | 778845  | Asthma |
| rs9274932  | 6 | 32673732 | G | T | 0.3138 | 0.1074  | 0.0086 | 1.97E-35 | 12.4230  | 778845  | Asthma |
| rs9274933  | 6 | 32673736 | C | T | 0.3134 | 0.1111  | 0.0085 | 3.92E-39 | 13.0864  | 844071  | Asthma |
| rs9274934  | 6 | 32673752 | T | C | 0.3410 | 0.1055  | 0.0086 | 6.49E-35 | 12.3270  | 778845  | Asthma |
| rs9274935  | 6 | 32673803 | C | T | 0.3892 | 0.1086  | 0.0081 | 9.30E-41 | 13.3676  | 844071  | Asthma |
| rs9274936  | 6 | 32673848 | T | C | 0.2210 | 0.0921  | 0.0073 | 1.21E-36 | 12.6438  | 1042455 | Asthma |
| rs9274937  | 6 | 32673854 | A | G | 0.4000 | 0.0909  | 0.0062 | 2.92E-48 | 14.5973  | 1042455 | Asthma |
| rs9274938  | 6 | 32673896 | C | T | 0.2231 | 0.1000  | 0.0077 | 1.30E-38 | 12.9948  | 1000149 | Asthma |
| rs9274939  | 6 | 32673974 | A | G | 0.1956 | 0.1161  | 0.0102 | 5.41E-30 | 11.3773  | 844071  | Asthma |
| rs9274940  | 6 | 32673977 | G | A | 0.0901 | 0.1664  | 0.0145 | 2.27E-30 | 11.4533  | 778845  | Asthma |
| rs9274943  | 6 | 32674007 | T | C | 0.3878 | 0.0908  | 0.0071 | 1.01E-37 | 12.8372  | 973993  | Asthma |
| rs9274944  | 6 | 32674009 | A | G | 0.3876 | 0.0905  | 0.0071 | 1.73E-37 | 12.7956  | 973993  | Asthma |
| rs9274945  | 6 | 32674019 | C | T | 0.2088 | 0.1462  | 0.0173 | 2.85E-17 | 8.4527   | 433246  | Asthma |
| rs41316227 | 6 | 32674044 | C | T | 0.1488 | 0.0649  | 0.0094 | 4.95E-12 | 6.9071   | 908767  | Asthma |
| rs9274946  | 6 | 32674051 | G | A | 0.3704 | 0.0883  | 0.0072 | 3.63E-34 | 12.1874  | 908767  | Asthma |
| rs9274949  | 6 | 32674078 | G | A | 0.3386 | 0.0958  | 0.0087 | 4.57E-28 | 10.9838  | 540747  | Asthma |
| rs28891454 | 6 | 32674117 | G | A | 0.2017 | 0.0666  | 0.0098 | 1.05E-11 | 6.8000   | 540747  | Asthma |
| rs28891455 | 6 | 32674121 | C | T | 0.2071 | 0.0640  | 0.0096 | 2.93E-11 | 6.6500   | 540747  | Asthma |
| rs9274957  | 6 | 32674137 | C | T | 0.3990 | 0.1128  | 0.0080 | 6.59E-45 | 14.0613  | 778845  | Asthma |
| rs9274958  | 6 | 32674138 | G | A | 0.1940 | 0.1094  | 0.0103 | 1.40E-26 | 10.6699  | 778845  | Asthma |
| rs9274959  | 6 | 32674139 | C | T | 0.1809 | 0.0986  | 0.0094 | 1.60E-25 | 10.4419  | 908767  | Asthma |
| rs9274960  | 6 | 32674140 | A | G | 0.1940 | 0.1094  | 0.0103 | 1.40E-26 | 10.6699  | 778845  | Asthma |
| rs28891456 | 6 | 32674142 | C | T | 0.2041 | 0.0525  | 0.0083 | 2.86E-10 | 6.3062   | 908767  | Asthma |
| rs9274962  | 6 | 32674159 | A | G | 0.3988 | 0.0923  | 0.0070 | 1.20E-39 | 13.1765  | 908767  | Asthma |
| rs9274963  | 6 | 32674165 | C | T | 0.1884 | 0.0908  | 0.0091 | 2.41E-23 | 9.9547   | 908767  | Asthma |
| rs28891458 | 6 | 32674186 | T | C | 0.2070 | 0.0659  | 0.0094 | 2.11E-12 | 7.0270   | 778845  | Asthma |
| rs9274964  | 6 | 32674195 | T | C | 0.2157 | 0.1131  | 0.0095 | 2.12E-32 | 11.8513  | 778845  | Asthma |
| rs9274965  | 6 | 32674207 | A | T | 0.2169 | 0.1189  | 0.0093 | 4.78E-37 | 12.7167  | 844071  | Asthma |
| rs28891459 | 6 | 32674224 | T | A | 0.2137 | 0.0485  | 0.0080 | 1.25E-09 | 6.0732   | 908767  | Asthma |
| rs28891460 | 6 | 32674239 | G | T | 0.2132 | 0.0490  | 0.0080 | 9.20E-10 | 6.1226   | 908767  | Asthma |
| rs9274966  | 6 | 32674242 | A | G | 0.2181 | 0.0984  | 0.0080 | 1.54E-34 | 12.2572  | 973993  | Asthma |
| rs9274967  | 6 | 32674253 | C | T | 0.4294 | 0.1007  | 0.0068 | 8.39E-50 | 14.8373  | 908767  | Asthma |
| rs3134987  | 6 | 32674273 | A | T | 0.3033 | -0.1025 | 0.0074 | 3.52E-43 | -13.7770 | 973993  | Asthma |
| rs9274969  | 6 | 32674296 | T | G | 0.4166 | 0.0993  | 0.0068 | 1.93E-48 | 14.6255  | 973993  | Asthma |
| rs9274970  | 6 | 32674318 | T | C | 0.2091 | 0.0990  | 0.0083 | 4.58E-33 | 11.9790  | 973993  | Asthma |
| rs28891463 | 6 | 32674320 | T | C | 0.1989 | 0.0509  | 0.0077 | 3.11E-11 | 6.6413   | 1000544 | Asthma |
| rs28891464 | 6 | 32674324 | A | T | 0.2119 | 0.0449  | 0.0080 | 2.31E-08 | 5.5868   | 908767  | Asthma |
| rs28891465 | 6 | 32674332 | C | T | 0.2127 | 0.0446  | 0.0080 | 2.67E-08 | 5.5617   | 908767  | Asthma |
| rs9274972  | 6 | 32674349 | T | C | 0.2075 | 0.0981  | 0.0083 | 1.33E-32 | 11.8899  | 973993  | Asthma |
| rs9274973  | 6 | 32674370 | A | G | 0.5714 | -0.1020 | 0.0067 | 5.79E-53 | -15.3185 | 973993  | Asthma |
| rs9274974  | 6 | 32674375 | A | T | 0.5714 | -0.1020 | 0.0067 | 5.02E-53 | -15.3267 | 973993  | Asthma |
| rs9274975  | 6 | 32674410 | G | T | 0.2236 | 0.0912  | 0.0068 | 1.56E-40 | 13.3292  | 1125398 | Asthma |
| rs9274976  | 6 | 32674443 | A | G | 0.2147 | 0.0979  | 0.0080 | 4.86E-34 | 12.1635  | 973993  | Asthma |
| rs9274977  | 6 | 32674470 | A | G | 0.5805 | -0.0896 | 0.0058 | 5.01E-53 | -15.3275 | 1130071 | Asthma |
| rs9274978  | 6 | 32674500 | C | T | 0.4240 | 0.0883  | 0.0054 | 4.94E-60 | 16.3422  | 1198533 | Asthma |
| rs9274979  | 6 | 32674503 | T | C | 0.1995 | 0.0926  | 0.0085 | 6.12E-28 | 10.9575  | 973993  | Asthma |
| rs9274980  | 6 | 32674513 | T | G | 0.4237 | 0.0883  | 0.0054 | 6.34E-60 | 16.3268  | 1198533 | Asthma |
| rs28891467 | 6 | 32674530 | A | G | 0.2173 | 0.0470  | 0.0064 | 1.67E-13 | 7.3727   | 1133307 | Asthma |
| rs28891468 | 6 | 32674542 | T | C | 0.2157 | 0.0442  | 0.0068 | 7.34E-11 | 6.5135   | 1090978 | Asthma |
| rs9274982  | 6 | 32674558 | A | G | 0.1799 | 0.0972  | 0.0084 | 4.61E-31 | 11.5905  | 1065770 | Asthma |
| rs9274983  | 6 | 32674560 | C | T | 0.1842 | 0.0995  | 0.0083 | 2.22E-33 | 12.0388  | 1065770 | Asthma |
| rs41316231 | 6 | 32674599 | T | A | 0.1600 | 0.0707  | 0.0088 | 9.04E-16 | 8.0392   | 908767  | Asthma |
| rs9274984  | 6 | 32674601 | C | T | 0.2061 | 0.0998  | 0.0082 | 5.56E-34 | 12.1526  | 973993  | Asthma |
| rs9274985  | 6 | 32674602 | A | G | 0.2061 | 0.0998  | 0.0082 | 5.56E-34 | 12.1525  | 973993  | Asthma |

|             |   |          |   |   |        |         |        |          |          |         |        |
|-------------|---|----------|---|---|--------|---------|--------|----------|----------|---------|--------|
| rs9274986   | 6 | 32674609 | A | G | 0.4267 | 0.1029  | 0.0067 | 2.43E-53 | 15.3751  | 973993  | Asthma |
| rs28891469  | 6 | 32674617 | G | T | 0.2204 | 0.0491  | 0.0079 | 4.06E-10 | 6.2516   | 908767  | Asthma |
| rs9274987   | 6 | 32674628 | T | G | 0.4452 | 0.1015  | 0.0075 | 3.33E-42 | 13.6132  | 605973  | Asthma |
| rs9274988   | 6 | 32674629 | T | G | 0.4451 | 0.1014  | 0.0075 | 4.36E-42 | 13.5938  | 605973  | Asthma |
| rs9274989   | 6 | 32674647 | A | C | 0.2079 | 0.0994  | 0.0082 | 8.71E-34 | 12.1159  | 973993  | Asthma |
| rs28891470  | 6 | 32674677 | T | C | 0.2133 | 0.0457  | 0.0070 | 6.17E-11 | 6.5395   | 1064845 | Asthma |
| rs9280073   | 6 | 32674692 | T | C | 0.3845 | 0.1155  | 0.0081 | 3.80E-46 | 14.2617  | 844071  | Asthma |
| rs28891471  | 6 | 32674696 | G | T | 0.2290 | 0.0497  | 0.0075 | 3.51E-11 | 6.6232   | 696825  | Asthma |
| rs28891472  | 6 | 32674738 | C | T | 0.2174 | 0.0470  | 0.0064 | 1.72E-13 | 7.3692   | 1133307 | Asthma |
| rs28891473  | 6 | 32674748 | T | G | 0.2174 | 0.0471  | 0.0064 | 1.62E-13 | 7.3771   | 1133307 | Asthma |
| rs28891474  | 6 | 32674788 | T | G | 0.2161 | 0.0471  | 0.0064 | 1.74E-13 | 7.3677   | 1133307 | Asthma |
| rs28891475  | 6 | 32674793 | C | T | 0.2170 | 0.0453  | 0.0063 | 4.60E-13 | 7.2365   | 1159440 | Asthma |
| rs9274992   | 6 | 32674800 | G | A | 0.2257 | 0.0858  | 0.0068 | 7.43E-37 | 12.6821  | 1130071 | Asthma |
| rs9274993   | 6 | 32674805 | A | G | 0.2256 | 0.0860  | 0.0068 | 6.13E-37 | 12.6972  | 1130071 | Asthma |
| rs28891476  | 6 | 32674807 | A | T | 0.2161 | 0.0470  | 0.0064 | 1.82E-13 | 7.3615   | 1133307 | Asthma |
| rs28891477  | 6 | 32674826 | C | A | 0.2129 | 0.0460  | 0.0070 | 4.28E-11 | 6.5940   | 1064845 | Asthma |
| rs28891478  | 6 | 32674828 | G | A | 0.2129 | 0.0459  | 0.0070 | 4.55E-11 | 6.5851   | 1064845 | Asthma |
| rs9274995   | 6 | 32674838 | T | C | 0.4384 | 0.1015  | 0.0066 | 2.08E-53 | 15.3844  | 973993  | Asthma |
| rs9274996   | 6 | 32674864 | C | T | 0.5615 | -0.1013 | 0.0066 | 2.86E-53 | -15.3634 | 973993  | Asthma |
| rs9274997   | 6 | 32674896 | C | T | 0.5623 | -0.1015 | 0.0066 | 2.66E-53 | -15.3689 | 973993  | Asthma |
| rs62404146  | 6 | 32674902 | C | A | 0.0747 | -0.1072 | 0.0131 | 2.54E-16 | -8.1937  | 973993  | Asthma |
| rs9274999   | 6 | 32674932 | G | A | 0.5717 | -0.1028 | 0.0067 | 1.29E-53 | -15.4154 | 973993  | Asthma |
| rs9275000   | 6 | 32674942 | T | C | 0.1813 | 0.0955  | 0.0083 | 7.32E-31 | 11.5508  | 1065770 | Asthma |
| rs9275001   | 6 | 32674961 | T | C | 0.4275 | 0.1030  | 0.0067 | 1.28E-53 | 15.4156  | 973993  | Asthma |
| rs28891479  | 6 | 32674973 | A | G | 0.2130 | 0.0455  | 0.0070 | 6.36E-11 | 6.5349   | 1064845 | Asthma |
| rs9275002   | 6 | 32674984 | A | T | 0.2169 | 0.0892  | 0.0069 | 1.02E-37 | 12.8367  | 1130071 | Asthma |
| rs9275003   | 6 | 32674992 | C | T | 0.2170 | 0.0892  | 0.0069 | 7.12E-38 | 12.8647  | 1130071 | Asthma |
| rs9275004   | 6 | 32675062 | G | C | 0.2265 | 0.0824  | 0.0062 | 1.25E-40 | 13.3457  | 1224666 | Asthma |
| rs28891480  | 6 | 32675066 | G | C | 0.2175 | 0.0446  | 0.0062 | 9.11E-13 | 7.1434   | 1159440 | Asthma |
| rs1694122   | 6 | 32675068 | G | A | 0.1834 | 0.1051  | 0.0067 | 5.78E-56 | 15.7603  | 1224666 | Asthma |
| rs9275006   | 6 | 32675075 | T | C | 0.2280 | 0.0815  | 0.0061 | 2.81E-40 | 13.2855  | 1224666 | Asthma |
| rs28891481  | 6 | 32675122 | A | T | 0.2138 | 0.0454  | 0.0069 | 6.41E-11 | 6.5338   | 1064845 | Asthma |
| rs28891482  | 6 | 32675129 | A | T | 0.2138 | 0.0454  | 0.0069 | 6.41E-11 | 6.5338   | 1064845 | Asthma |
| rs9275007   | 6 | 32675144 | T | A | 0.5610 | -0.0945 | 0.0058 | 3.01E-60 | -16.3725 | 1130071 | Asthma |
| rs13215364  | 6 | 32675161 | A | G | 0.1277 | -0.0790 | 0.0093 | 2.87E-17 | -8.4518  | 1130071 | Asthma |
| rs9275008   | 6 | 32675167 | T | C | 0.5601 | -0.1017 | 0.0066 | 2.02E-53 | -15.3866 | 973993  | Asthma |
| rs9275009   | 6 | 32675181 | A | G | 0.2143 | 0.0948  | 0.0081 | 6.93E-32 | 11.7516  | 973993  | Asthma |
| rs9275010   | 6 | 32675189 | T | C | 0.4322 | 0.1020  | 0.0067 | 1.19E-52 | 15.2713  | 973993  | Asthma |
| rs9275011   | 6 | 32675192 | T | C | 0.4322 | 0.1020  | 0.0067 | 1.19E-52 | 15.2710  | 973993  | Asthma |
| rs3129776   | 6 | 32675204 | C | T | 0.2550 | -0.0833 | 0.0068 | 2.53E-34 | -12.2168 | 1130071 | Asthma |
| rs9275013   | 6 | 32675234 | C | T | 0.4329 | 0.1018  | 0.0067 | 1.17E-52 | 15.2715  | 973993  | Asthma |
| rs9275014   | 6 | 32675246 | A | G | 0.4327 | 0.1020  | 0.0067 | 7.43E-53 | 15.3014  | 973993  | Asthma |
| rs9275015   | 6 | 32675331 | A | G | 0.2635 | 0.0912  | 0.0071 | 3.80E-38 | 12.9131  | 1065770 | Asthma |
| rs9275016   | 6 | 32675332 | G | T | 0.2492 | 0.0988  | 0.0078 | 2.57E-36 | 12.5844  | 908767  | Asthma |
| rs9275017   | 6 | 32675353 | T | C | 0.2610 | 0.1002  | 0.0077 | 4.24E-39 | 13.0815  | 973993  | Asthma |
| rs9275018   | 6 | 32675362 | T | C | 0.2627 | 0.0996  | 0.0076 | 8.06E-39 | 13.0319  | 973993  | Asthma |
| rs9275019   | 6 | 32675389 | T | C | 0.2607 | 0.1005  | 0.0078 | 2.58E-38 | 12.9425  | 973993  | Asthma |
| rs9275020   | 6 | 32675407 | T | C | 0.2615 | 0.1009  | 0.0078 | 1.11E-38 | 13.0080  | 973993  | Asthma |
| rs9275021   | 6 | 32675443 | A | T | 0.2596 | 0.1012  | 0.0078 | 1.14E-38 | 13.0053  | 973993  | Asthma |
| rs9275022   | 6 | 32675474 | G | A | 0.2495 | 0.1036  | 0.0080 | 2.28E-38 | 12.9525  | 973993  | Asthma |
| rs9275023   | 6 | 32675499 | T | C | 0.2427 | 0.1247  | 0.0094 | 1.47E-40 | 13.3336  | 844071  | Asthma |
| rs9275024   | 6 | 32675504 | A | T | 0.2427 | 0.1247  | 0.0094 | 1.48E-40 | 13.3336  | 844071  | Asthma |
| rs9275031   | 6 | 32675643 | A | G | 0.2534 | 0.1134  | 0.0092 | 6.45E-35 | 12.3274  | 778845  | Asthma |
| rs28755186  | 6 | 32675702 | C | T | 0.2173 | 0.1088  | 0.0093 | 1.17E-31 | 11.7076  | 844071  | Asthma |
| rs28755187  | 6 | 32675739 | A | G | 0.2526 | 0.1015  | 0.0079 | 1.14E-37 | 12.8287  | 973993  | Asthma |
| rs28755188  | 6 | 32675771 | C | T | 0.2658 | 0.0994  | 0.0076 | 5.23E-39 | 13.0648  | 973993  | Asthma |
| rs28755189  | 6 | 32675775 | C | G | 0.2660 | 0.0992  | 0.0076 | 6.29E-39 | 13.0508  | 973993  | Asthma |
| rs28755190  | 6 | 32675806 | C | T | 0.2780 | 0.1029  | 0.0076 | 1.66E-41 | 13.4951  | 973993  | Asthma |
| rs28755191  | 6 | 32675807 | G | A | 0.2691 | 0.0996  | 0.0076 | 1.95E-39 | 13.1397  | 973993  | Asthma |
| rs28755192  | 6 | 32675910 | T | G | 0.2707 | 0.0989  | 0.0076 | 4.10E-39 | 13.0833  | 973993  | Asthma |
| rs28755193  | 6 | 32675927 | C | T | 0.2710 | 0.0991  | 0.0076 | 2.48E-39 | 13.1215  | 973993  | Asthma |
| rs6908032   | 6 | 32675962 | A | G | 0.1638 | -0.0658 | 0.0082 | 1.44E-15 | -7.9824  | 1065770 | Asthma |
| rs113898828 | 6 | 32675978 | T | C | 0.2693 | 0.0994  | 0.0076 | 1.71E-39 | 13.1497  | 973993  | Asthma |
| rs114642759 | 6 | 32675989 | T | A | 0.2690 | 0.0998  | 0.0076 | 8.48E-40 | 13.2025  | 973993  | Asthma |
| rs141967600 | 6 | 32676047 | T | G | 0.2460 | 0.0973  | 0.0081 | 1.46E-33 | 12.0732  | 973993  | Asthma |
| rs9275032   | 6 | 32676062 | T | C | 0.3506 | -0.0967 | 0.0073 | 1.28E-39 | -13.1719 | 973993  | Asthma |
| rs114557541 | 6 | 32676067 | T | C | 0.2462 | 0.0973  | 0.0081 | 1.53E-33 | 12.0697  | 973993  | Asthma |
| rs116493570 | 6 | 32676083 | T | C | 0.2470 | 0.0971  | 0.0081 | 1.64E-33 | 12.0638  | 973993  | Asthma |
| rs140232909 | 6 | 32676106 | A | G | 0.2605 | 0.1042  | 0.0078 | 4.41E-41 | 13.4237  | 973993  | Asthma |
| rs28755202  | 6 | 32676117 | G | T | 0.2604 | 0.1044  | 0.0078 | 3.29E-41 | 13.4450  | 973993  | Asthma |
| rs28755203  | 6 | 32676170 | G | T | 0.2705 | 0.1002  | 0.0076 | 3.72E-40 | 13.2642  | 973993  | Asthma |
| rs28755204  | 6 | 32676176 | T | A | 0.2656 | 0.0946  | 0.0069 | 4.27E-43 | 13.7627  | 1065770 | Asthma |
| rs28755206  | 6 | 32676233 | G | T | 0.2004 | 0.0962  | 0.0082 | 6.90E-32 | 11.7521  | 973993  | Asthma |
| rs28755208  | 6 | 32676259 | C | T | 0.2492 | 0.0895  | 0.0080 | 2.81E-29 | 11.2330  | 908767  | Asthma |

|             |   |          |   |   |        |         |        |          |          |         |        |
|-------------|---|----------|---|---|--------|---------|--------|----------|----------|---------|--------|
| rs28755209  | 6 | 32676272 | T | A | 0.2532 | 0.0929  | 0.0078 | 2.01E-32 | 11.8556  | 973993  | Asthma |
| rs28755212  | 6 | 32676317 | C | T | 0.2644 | 0.0930  | 0.0110 | 2.37E-17 | 8.4739   | 563168  | Asthma |
| rs28755213  | 6 | 32676322 | G | T | 0.2612 | 0.1344  | 0.0156 | 6.39E-18 | 8.6252   | 433246  | Asthma |
| rs28755214  | 6 | 32676334 | C | T | 0.2648 | 0.0938  | 0.0110 | 1.13E-17 | 8.5601   | 563168  | Asthma |
| rs28755215  | 6 | 32676351 | G | A | 0.2661 | 0.0935  | 0.0110 | 1.33E-17 | 8.5407   | 563168  | Asthma |
| rs28755216  | 6 | 32676358 | A | G | 0.2650 | 0.0935  | 0.0110 | 1.43E-17 | 8.5329   | 563168  | Asthma |
| rs28755217  | 6 | 32676382 | C | T | 0.2560 | 0.1020  | 0.0079 | 4.79E-38 | 12.8958  | 973993  | Asthma |
| rs28755218  | 6 | 32676413 | T | C | 0.2565 | 0.1022  | 0.0079 | 2.90E-38 | 12.9334  | 973993  | Asthma |
| rs28755219  | 6 | 32676449 | C | T | 0.2551 | 0.1013  | 0.0079 | 1.11E-37 | 12.8298  | 973993  | Asthma |
| rs28755220  | 6 | 32676461 | C | T | 0.2553 | 0.1005  | 0.0079 | 4.25E-37 | 12.7263  | 973993  | Asthma |
| rs28755221  | 6 | 32676462 | A | G | 0.2554 | 0.1006  | 0.0079 | 4.02E-37 | 12.7302  | 973993  | Asthma |
| rs28755222  | 6 | 32676487 | C | A | 0.2522 | 0.1018  | 0.0080 | 1.68E-37 | 12.7981  | 973993  | Asthma |
| rs28755223  | 6 | 32676499 | A | T | 0.2513 | 0.1010  | 0.0080 | 7.43E-37 | 12.6825  | 973993  | Asthma |
| rs28755224  | 6 | 32676508 | T | G | 0.2576 | 0.0997  | 0.0078 | 4.81E-37 | 12.7161  | 973993  | Asthma |
| rs28755225  | 6 | 32676513 | T | C | 0.2602 | 0.0983  | 0.0078 | 2.23E-36 | 12.5956  | 973993  | Asthma |
| rs28755226  | 6 | 32676520 | G | C | 0.2553 | 0.0979  | 0.0080 | 1.11E-34 | 12.2837  | 908767  | Asthma |
| rs28755227  | 6 | 32676522 | C | T | 0.2574 | 0.0952  | 0.0079 | 3.31E-33 | 12.0059  | 908767  | Asthma |
| rs28755228  | 6 | 32676523 | A | C | 0.2573 | 0.0954  | 0.0079 | 2.68E-33 | 12.0234  | 908767  | Asthma |
| rs28755229  | 6 | 32676528 | A | G | 0.2610 | 0.0990  | 0.0078 | 3.79E-37 | 12.7349  | 973993  | Asthma |
| rs28755230  | 6 | 32676551 | G | A | 0.2548 | 0.1209  | 0.0090 | 9.21E-41 | 13.3685  | 844071  | Asthma |
| rs28755231  | 6 | 32676560 | G | A | 0.2539 | 0.1209  | 0.0091 | 1.02E-40 | 13.3613  | 844071  | Asthma |
| rs28755233  | 6 | 32676573 | C | T | 0.2562 | 0.1036  | 0.0078 | 4.03E-40 | 13.2586  | 973993  | Asthma |
| rs56249455  | 6 | 32676601 | A | T | 0.1225 | 0.1506  | 0.0104 | 9.73E-48 | 14.5148  | 973993  | Asthma |
| rs9275033   | 6 | 32676611 | A | G | 0.2992 | -0.0831 | 0.0076 | 8.16E-28 | -10.9315 | 973993  | Asthma |
| rs28755234  | 6 | 32676614 | T | G | 0.2507 | 0.1037  | 0.0079 | 4.39E-39 | 13.0783  | 973993  | Asthma |
| rs28755235  | 6 | 32676646 | T | C | 0.2516 | 0.1047  | 0.0079 | 4.59E-40 | 13.2485  | 973993  | Asthma |
| rs28755236  | 6 | 32676651 | G | A | 0.2516 | 0.1047  | 0.0079 | 4.73E-40 | 13.2458  | 973993  | Asthma |
| rs28755239  | 6 | 32676686 | C | T | 0.2604 | 0.1039  | 0.0078 | 1.05E-40 | 13.3586  | 973993  | Asthma |
| rs3134986   | 6 | 32676776 | T | C | 0.2019 | 0.0760  | 0.0078 | 2.29E-22 | 9.7278   | 1065770 | Asthma |
| rs28755240  | 6 | 32676785 | A | G | 0.2591 | 0.1056  | 0.0078 | 1.16E-41 | 13.5218  | 973993  | Asthma |
| rs28755242  | 6 | 32676800 | G | A | 0.2606 | 0.1050  | 0.0078 | 1.46E-41 | 13.5059  | 973993  | Asthma |
| rs28755243  | 6 | 32676817 | A | G | 0.2604 | 0.1041  | 0.0078 | 6.38E-41 | 13.3962  | 973993  | Asthma |
| rs28755244  | 6 | 32676854 | A | G | 0.2607 | 0.1057  | 0.0078 | 4.33E-42 | 13.5938  | 973993  | Asthma |
| rs28755245  | 6 | 32676881 | T | G | 0.2611 | 0.1061  | 0.0078 | 1.99E-42 | 13.6510  | 973993  | Asthma |
| rs28755246  | 6 | 32676893 | C | G | 0.2612 | 0.1056  | 0.0078 | 4.29E-42 | 13.5956  | 973993  | Asthma |
| rs28755247  | 6 | 32676903 | T | C | 0.2616 | 0.1052  | 0.0078 | 8.82E-42 | 13.5423  | 973993  | Asthma |
| rs28755249  | 6 | 32676924 | A | G | 0.2704 | 0.1002  | 0.0076 | 5.04E-40 | 13.2411  | 973993  | Asthma |
| rs28755250  | 6 | 32676978 | G | A | 0.2706 | 0.0999  | 0.0076 | 7.95E-40 | 13.2075  | 973993  | Asthma |
| rs28755251  | 6 | 32676998 | T | C | 0.2706 | 0.1003  | 0.0076 | 4.31E-40 | 13.2529  | 973993  | Asthma |
| rs28755252  | 6 | 32677029 | G | C | 0.2707 | 0.1001  | 0.0076 | 5.41E-40 | 13.2358  | 973993  | Asthma |
| rs28755253  | 6 | 32677092 | T | A | 0.2697 | 0.0998  | 0.0076 | 1.16E-39 | 13.1790  | 973993  | Asthma |
| rs28755254  | 6 | 32677101 | C | T | 0.2698 | 0.0998  | 0.0076 | 1.05E-39 | 13.1862  | 973993  | Asthma |
| rs28755255  | 6 | 32677138 | G | A | 0.2533 | 0.1212  | 0.0092 | 2.68E-39 | 13.1154  | 778845  | Asthma |
| rs28755256  | 6 | 32677142 | G | A | 0.2533 | 0.1212  | 0.0092 | 2.68E-39 | 13.1154  | 778845  | Asthma |
| rs28755257  | 6 | 32677176 | T | A | 0.2552 | 0.1035  | 0.0079 | 7.37E-39 | 13.0389  | 908767  | Asthma |
| rs28755258  | 6 | 32677181 | C | T | 0.2556 | 0.1030  | 0.0079 | 1.80E-38 | 12.9707  | 908767  | Asthma |
| rs28755259  | 6 | 32677206 | A | G | 0.2591 | 0.1056  | 0.0078 | 7.26E-42 | 13.5564  | 973993  | Asthma |
| rs3134984   | 6 | 32677252 | A | T | 0.1591 | 0.0789  | 0.0094 | 6.00E-17 | 8.3653   | 973993  | Asthma |
| rs28755260  | 6 | 32677296 | C | T | 0.2606 | 0.0963  | 0.0078 | 3.15E-35 | 12.3849  | 908767  | Asthma |
| rs28755261  | 6 | 32677298 | G | C | 0.2607 | 0.0965  | 0.0078 | 2.15E-35 | 12.4156  | 908767  | Asthma |
| rs28755262  | 6 | 32677311 | T | C | 0.2606 | 0.0953  | 0.0078 | 1.09E-34 | 12.2852  | 908767  | Asthma |
| rs28755263  | 6 | 32677332 | A | C | 0.2567 | 0.0937  | 0.0078 | 2.39E-33 | 12.0327  | 908767  | Asthma |
| rs28755264  | 6 | 32677354 | G | C | 0.2479 | 0.0976  | 0.0079 | 5.63E-35 | 12.3384  | 908767  | Asthma |
| rs28755265  | 6 | 32677367 | A | C | 0.2367 | 0.0995  | 0.0081 | 8.63E-35 | 12.3039  | 908767  | Asthma |
| rs9275036   | 6 | 32677542 | T | C | 0.5070 | -0.0759 | 0.0083 | 4.52E-20 | -9.1750  | 844071  | Asthma |
| rs28755266  | 6 | 32677655 | T | C | 0.2442 | 0.1272  | 0.0092 | 1.16E-43 | 13.8567  | 844071  | Asthma |
| rs28755267  | 6 | 32677669 | C | T | 0.2430 | 0.1229  | 0.0094 | 2.44E-39 | 13.1232  | 778845  | Asthma |
| rs28755268  | 6 | 32677692 | A | C | 0.2523 | 0.1072  | 0.0079 | 6.67E-42 | 13.5620  | 973993  | Asthma |
| rs28755270  | 6 | 32677712 | A | G | 0.2551 | 0.1071  | 0.0079 | 4.52E-42 | 13.5908  | 973993  | Asthma |
| rs28755271  | 6 | 32677720 | T | C | 0.2557 | 0.1076  | 0.0079 | 1.78E-42 | 13.6595  | 973993  | Asthma |
| rs28755272  | 6 | 32677752 | C | T | 0.2659 | 0.0984  | 0.0077 | 2.44E-37 | 12.7691  | 908767  | Asthma |
| rs56051108  | 6 | 32677753 | A | G | 0.1275 | 0.1521  | 0.0103 | 1.71E-49 | 14.7895  | 973993  | Asthma |
| rs28755273  | 6 | 32677757 | A | G | 0.2683 | 0.1015  | 0.0076 | 8.27E-41 | 13.3766  | 973993  | Asthma |
| rs28755276  | 6 | 32677801 | C | T | 0.2691 | 0.1002  | 0.0076 | 6.32E-40 | 13.2253  | 973993  | Asthma |
| rs28755277  | 6 | 32677821 | T | C | 0.2693 | 0.1001  | 0.0076 | 7.98E-40 | 13.2072  | 973993  | Asthma |
| rs28755278  | 6 | 32677822 | G | A | 0.2692 | 0.1000  | 0.0076 | 9.19E-40 | 13.1969  | 973993  | Asthma |
| rs28755279  | 6 | 32677849 | C | A | 0.2692 | 0.1004  | 0.0076 | 4.85E-40 | 13.2445  | 973993  | Asthma |
| rs28755280  | 6 | 32677883 | A | T | 0.2682 | 0.1007  | 0.0076 | 3.97E-40 | 13.2601  | 973993  | Asthma |
| rs114954038 | 6 | 32677916 | T | C | 0.2673 | 0.1008  | 0.0076 | 7.28E-40 | 13.2137  | 973993  | Asthma |
| rs115932399 | 6 | 32677918 | T | G | 0.2680 | 0.1007  | 0.0076 | 8.15E-40 | 13.2061  | 973993  | Asthma |
| rs201805319 | 6 | 32677960 | G | A | 0.2668 | 0.1007  | 0.0076 | 8.54E-40 | 13.2024  | 973993  | Asthma |
| rs199945715 | 6 | 32677967 | T | C | 0.2671 | 0.1010  | 0.0076 | 4.55E-40 | 13.2496  | 973993  | Asthma |
| rs116005148 | 6 | 32677989 | A | G | 0.2676 | 0.0964  | 0.0070 | 1.56E-43 | 13.8355  | 1065770 | Asthma |
| rs202178406 | 6 | 32677993 | G | C | 0.2666 | 0.1009  | 0.0076 | 5.05E-40 | 13.2417  | 973993  | Asthma |



|             |   |          |   |   |        |         |        |          |          |         |        |
|-------------|---|----------|---|---|--------|---------|--------|----------|----------|---------|--------|
| rs112838245 | 6 | 32678043 | G | C | 0.2672 | 0.1011  | 0.0076 | 2.66E-40 | 13.2894  | 973993  | Asthma |
| rs113838733 | 6 | 32678048 | C | T | 0.2673 | 0.1012  | 0.0076 | 2.35E-40 | 13.2992  | 973993  | Asthma |
| rs28755290  | 6 | 32678094 | C | G | 0.2682 | 0.0996  | 0.0076 | 2.54E-39 | 13.1198  | 973993  | Asthma |
| rs28755291  | 6 | 32678129 | G | A | 0.2937 | 0.0930  | 0.0067 | 2.97E-43 | 13.7889  | 1065770 | Asthma |
| rs28755292  | 6 | 32678197 | A | G | 0.2694 | 0.0989  | 0.0076 | 5.29E-39 | 13.0640  | 973993  | Asthma |
| rs28755293  | 6 | 32678233 | T | C | 0.2688 | 0.0999  | 0.0076 | 1.30E-39 | 13.1701  | 973993  | Asthma |
| rs28755294  | 6 | 32678270 | C | T | 0.2586 | 0.1031  | 0.0078 | 3.45E-40 | 13.2703  | 973993  | Asthma |
| rs28755295  | 6 | 32678277 | A | G | 0.2576 | 0.1034  | 0.0078 | 2.98E-40 | 13.2816  | 973993  | Asthma |
| rs28371213  | 6 | 32678282 | G | A | 0.2419 | 0.0957  | 0.0081 | 5.25E-32 | 11.7750  | 973993  | Asthma |
| rs28371214  | 6 | 32678284 | G | A | 0.2418 | 0.0955  | 0.0081 | 7.26E-32 | 11.7477  | 973993  | Asthma |
| rs28755296  | 6 | 32678308 | G | A | 0.2465 | 0.0923  | 0.0080 | 1.51E-30 | 11.4884  | 908767  | Asthma |
| rs28755297  | 6 | 32678310 | G | A | 0.2478 | 0.0959  | 0.0079 | 1.37E-33 | 12.0785  | 973993  | Asthma |
| rs28755298  | 6 | 32678317 | T | G | 0.2460 | 0.0922  | 0.0080 | 2.01E-30 | 11.4637  | 908767  | Asthma |
| rs28755299  | 6 | 32678330 | A | G | 0.2416 | 0.1071  | 0.0094 | 5.09E-30 | 11.3831  | 778845  | Asthma |
| rs28755300  | 6 | 32678355 | A | T | 0.2573 | 0.1154  | 0.0091 | 5.33E-37 | 12.7077  | 778845  | Asthma |
| rs28755301  | 6 | 32678357 | A | T | 0.2572 | 0.1154  | 0.0091 | 5.33E-37 | 12.7077  | 778845  | Asthma |
| rs28755302  | 6 | 32678366 | G | A | 0.2566 | 0.1157  | 0.0091 | 3.88E-37 | 12.7329  | 778845  | Asthma |
| rs28755303  | 6 | 32678368 | G | A | 0.2566 | 0.1157  | 0.0091 | 3.88E-37 | 12.7329  | 778845  | Asthma |
| rs3129777   | 6 | 32678407 | A | C | 0.1614 | 0.0805  | 0.0094 | 1.39E-17 | 8.5357   | 973993  | Asthma |
| rs28755304  | 6 | 32678416 | T | C | 0.2873 | 0.1345  | 0.0077 | 4.05E-68 | 17.4407  | 935848  | Asthma |
| rs28755305  | 6 | 32678455 | G | C | 0.2363 | 0.1079  | 0.0097 | 7.78E-29 | 11.1430  | 778845  | Asthma |
| rs28755306  | 6 | 32678461 | T | C | 0.2367 | 0.1064  | 0.0097 | 3.73E-28 | 11.0025  | 778845  | Asthma |
| rs28755307  | 6 | 32678464 | A | T | 0.2360 | 0.1067  | 0.0097 | 2.84E-28 | 11.0270  | 778845  | Asthma |
| rs3129778   | 6 | 32678475 | T | C | 0.2366 | 0.1073  | 0.0097 | 1.35E-28 | 11.0935  | 778845  | Asthma |
| rs28755308  | 6 | 32678497 | C | T | 0.2512 | 0.1414  | 0.0160 | 1.14E-18 | 8.8208   | 433246  | Asthma |
| rs28755309  | 6 | 32678502 | G | A | 0.2510 | 0.1414  | 0.0160 | 1.16E-18 | 8.8183   | 433246  | Asthma |
| rs28755310  | 6 | 32678527 | T | C | 0.2414 | 0.1029  | 0.0082 | 4.17E-36 | 12.5467  | 908767  | Asthma |
| rs28755311  | 6 | 32678532 | C | T | 0.2411 | 0.1026  | 0.0082 | 6.64E-36 | 12.5098  | 908767  | Asthma |
| rs28755312  | 6 | 32678565 | T | G | 0.2365 | 0.1181  | 0.0094 | 6.52E-36 | 12.5109  | 778845  | Asthma |
| rs28755313  | 6 | 32678566 | G | A | 0.2365 | 0.1181  | 0.0094 | 6.52E-36 | 12.5109  | 778845  | Asthma |
| rs28755318  | 6 | 32678639 | T | C | 0.2144 | 0.1215  | 0.0097 | 3.52E-36 | 12.5596  | 778845  | Asthma |
| rs28755319  | 6 | 32678668 | C | A | 0.2340 | 0.0891  | 0.0105 | 1.95E-17 | 8.4969   | 589719  | Asthma |
| rs28755320  | 6 | 32678672 | C | T | 0.2357 | 0.1099  | 0.0082 | 4.62E-41 | 13.4203  | 973993  | Asthma |
| rs28755321  | 6 | 32678674 | T | C | 0.2357 | 0.1099  | 0.0082 | 4.62E-41 | 13.4203  | 973993  | Asthma |
| rs28755322  | 6 | 32678678 | A | G | 0.2432 | 0.1089  | 0.0080 | 4.93E-42 | 13.5846  | 973993  | Asthma |
| rs28755323  | 6 | 32678692 | A | C | 0.2484 | 0.1059  | 0.0080 | 2.59E-40 | 13.2913  | 973993  | Asthma |
| rs28755324  | 6 | 32678717 | T | C | 0.2531 | 0.1056  | 0.0079 | 8.34E-41 | 13.3765  | 973993  | Asthma |
| rs28755325  | 6 | 32678744 | A | G | 0.2542 | 0.1052  | 0.0079 | 1.11E-40 | 13.3543  | 973993  | Asthma |
| rs28755326  | 6 | 32678811 | A | G | 0.2495 | 0.0912  | 0.0079 | 7.50E-31 | 11.5485  | 973993  | Asthma |
| rs28755327  | 6 | 32678827 | A | G | 0.2494 | 0.0905  | 0.0079 | 3.13E-30 | 11.4252  | 973993  | Asthma |
| rs28755328  | 6 | 32678839 | C | T | 0.2505 | 0.0899  | 0.0079 | 3.95E-30 | 11.4051  | 973993  | Asthma |
| rs28755329  | 6 | 32678840 | A | G | 0.2512 | 0.0897  | 0.0079 | 4.70E-30 | 11.3898  | 973993  | Asthma |
| rs28755330  | 6 | 32678860 | A | G | 0.2456 | 0.0908  | 0.0079 | 2.87E-30 | 11.4327  | 973993  | Asthma |
| rs28755331  | 6 | 32678870 | A | G | 0.2458 | 0.0910  | 0.0079 | 1.94E-30 | 11.4664  | 973993  | Asthma |
| rs28755332  | 6 | 32678871 | T | G | 0.2458 | 0.0910  | 0.0079 | 1.94E-30 | 11.4664  | 973993  | Asthma |
| rs28755333  | 6 | 32678914 | G | C | 0.2653 | 0.0990  | 0.0076 | 2.20E-38 | 12.9551  | 973993  | Asthma |
| rs28755334  | 6 | 32678982 | G | A | 0.2649 | 0.0994  | 0.0076 | 1.23E-38 | 12.9996  | 973993  | Asthma |
| rs28755335  | 6 | 32678986 | T | C | 0.2646 | 0.0992  | 0.0077 | 1.77E-38 | 12.9717  | 973993  | Asthma |
| rs28755336  | 6 | 32679021 | A | C | 0.2574 | 0.0935  | 0.0112 | 5.99E-17 | 8.3652   | 563168  | Asthma |
| rs28755337  | 6 | 32679022 | C | T | 0.2575 | 0.0938  | 0.0112 | 4.87E-17 | 8.3899   | 563168  | Asthma |
| rs28755338  | 6 | 32679027 | T | C | 0.2412 | 0.0956  | 0.0081 | 5.01E-32 | 11.7790  | 973993  | Asthma |
| rs28755339  | 6 | 32679040 | G | A | 0.2564 | 0.1013  | 0.0078 | 3.57E-38 | 12.9175  | 973993  | Asthma |
| rs28755340  | 6 | 32679053 | G | T | 0.2563 | 0.1011  | 0.0079 | 6.94E-38 | 12.8671  | 973993  | Asthma |
| rs28755341  | 6 | 32679060 | C | G | 0.2561 | 0.1011  | 0.0079 | 7.49E-38 | 12.8613  | 973993  | Asthma |
| rs3134983   | 6 | 32679061 | T | C | 0.1693 | 0.0859  | 0.0094 | 6.77E-20 | 9.1312   | 973993  | Asthma |
| rs28755342  | 6 | 32679084 | T | C | 0.2562 | 0.1007  | 0.0079 | 1.39E-37 | 12.8131  | 973993  | Asthma |
| rs28755343  | 6 | 32679089 | A | C | 0.2566 | 0.0999  | 0.0078 | 3.52E-37 | 12.7406  | 973993  | Asthma |
| rs3134982   | 6 | 32679107 | T | C | 0.3526 | -0.0964 | 0.0073 | 2.03E-39 | -13.1366 | 973993  | Asthma |
| rs3134981   | 6 | 32679123 | A | G | 0.3520 | -0.0964 | 0.0073 | 1.83E-39 | -13.1447 | 973993  | Asthma |
| rs28755344  | 6 | 32679127 | C | T | 0.2552 | 0.1001  | 0.0078 | 2.36E-37 | 12.7719  | 973993  | Asthma |
| rs3129779   | 6 | 32679150 | G | A | 0.1688 | 0.0851  | 0.0094 | 1.43E-19 | 9.0503   | 973993  | Asthma |
| rs28755345  | 6 | 32679153 | C | A | 0.2542 | 0.1004  | 0.0079 | 2.41E-37 | 12.7706  | 973993  | Asthma |
| rs28755346  | 6 | 32679163 | T | G | 0.2546 | 0.1010  | 0.0078 | 4.90E-38 | 12.8929  | 973993  | Asthma |
| rs28755347  | 6 | 32679178 | T | G | 0.2346 | 0.1208  | 0.0091 | 3.28E-40 | 13.2739  | 778845  | Asthma |
| rs56347793  | 6 | 32679186 | T | C | 0.1203 | 0.1524  | 0.0105 | 8.48E-48 | 14.5248  | 973993  | Asthma |
| rs28755349  | 6 | 32679201 | C | A | 0.2626 | 0.1002  | 0.0077 | 5.09E-39 | 13.0672  | 973993  | Asthma |
| rs28755350  | 6 | 32679220 | G | A | 0.2538 | 0.1049  | 0.0079 | 1.70E-40 | 13.3237  | 973993  | Asthma |
| rs28755351  | 6 | 32679235 | G | A | 0.2320 | 0.1118  | 0.0085 | 3.60E-39 | 13.0936  | 973993  | Asthma |
| rs28755352  | 6 | 32679250 | T | G | 0.2291 | 0.1123  | 0.0086 | 6.01E-39 | 13.0546  | 973993  | Asthma |
| rs28755353  | 6 | 32679263 | A | T | 0.2337 | 0.1100  | 0.0085 | 1.68E-38 | 12.9757  | 973993  | Asthma |
| rs28755354  | 6 | 32679268 | T | C | 0.2283 | 0.1148  | 0.0087 | 3.81E-40 | 13.2623  | 973993  | Asthma |
| rs28755356  | 6 | 32679282 | G | A | 0.2530 | 0.1226  | 0.0093 | 1.15E-39 | 13.1801  | 778845  | Asthma |
| rs28755357  | 6 | 32679284 | C | T | 0.2493 | 0.1260  | 0.0092 | 2.32E-42 | 13.6400  | 844071  | Asthma |
| rs28755358  | 6 | 32679285 | A | G | 0.2523 | 0.1391  | 0.0162 | 8.04E-18 | 8.5993   | 433246  | Asthma |

|            |   |          |   |   |        |         |        |          |          |         |        |
|------------|---|----------|---|---|--------|---------|--------|----------|----------|---------|--------|
| rs28755359 | 6 | 32679287 | T | C | 0.2522 | 0.1390  | 0.0162 | 8.05E-18 | 8.5986   | 433246  | Asthma |
| rs28755360 | 6 | 32679322 | C | T | 0.2459 | 0.1045  | 0.0081 | 2.69E-38 | 12.9394  | 973993  | Asthma |
| rs28755361 | 6 | 32679336 | G | A | 0.2461 | 0.1045  | 0.0081 | 2.95E-38 | 12.9322  | 973993  | Asthma |
| rs28755362 | 6 | 32679342 | C | T | 0.2459 | 0.1043  | 0.0081 | 3.97E-38 | 12.9095  | 973993  | Asthma |
| rs28755363 | 6 | 32679343 | T | G | 0.2459 | 0.1044  | 0.0081 | 3.52E-38 | 12.9192  | 973993  | Asthma |
| rs28755364 | 6 | 32679356 | T | C | 0.2464 | 0.1029  | 0.0081 | 2.55E-37 | 12.7662  | 973993  | Asthma |
| rs28755365 | 6 | 32679373 | C | T | 0.2563 | 0.0996  | 0.0078 | 6.63E-37 | 12.6911  | 973993  | Asthma |
| rs55722612 | 6 | 32679381 | G | A | 0.1210 | 0.1470  | 0.0106 | 4.94E-44 | 13.9182  | 908767  | Asthma |
| rs28755366 | 6 | 32679410 | T | C | 0.2569 | 0.0996  | 0.0078 | 3.02E-37 | 12.7525  | 973993  | Asthma |
| rs28755367 | 6 | 32679438 | A | G | 0.2628 | 0.0994  | 0.0077 | 1.35E-38 | 12.9926  | 973993  | Asthma |
| rs28755368 | 6 | 32679503 | C | G | 0.2629 | 0.0988  | 0.0076 | 3.75E-38 | 12.9141  | 973993  | Asthma |
| rs28755369 | 6 | 32679536 | G | A | 0.2643 | 0.0988  | 0.0076 | 2.90E-38 | 12.9340  | 973993  | Asthma |
| rs28755370 | 6 | 32679576 | G | A | 0.2616 | 0.0980  | 0.0077 | 3.02E-37 | 12.7524  | 973993  | Asthma |
| rs28755371 | 6 | 32679580 | C | T | 0.2622 | 0.0981  | 0.0077 | 2.48E-37 | 12.7679  | 973993  | Asthma |
| rs56151658 | 6 | 32679602 | A | C | 0.1189 | 0.1504  | 0.0107 | 6.67E-45 | 14.0611  | 908767  | Asthma |
| rs28755372 | 6 | 32679606 | A | C | 0.2345 | 0.0990  | 0.0093 | 1.13E-26 | 10.6901  | 605973  | Asthma |
| rs28755373 | 6 | 32679611 | A | G | 0.2436 | 0.1059  | 0.0081 | 3.84E-39 | 13.0883  | 973993  | Asthma |
| rs28755374 | 6 | 32679627 | T | C | 0.2415 | 0.1082  | 0.0081 | 1.79E-40 | 13.3190  | 973993  | Asthma |
| rs28755375 | 6 | 32679634 | C | G | 0.2415 | 0.1083  | 0.0081 | 1.67E-40 | 13.3246  | 973993  | Asthma |
| rs28755376 | 6 | 32679635 | A | G | 0.2410 | 0.1084  | 0.0081 | 1.35E-40 | 13.3403  | 973993  | Asthma |
| rs55765078 | 6 | 32679656 | C | T | 0.1208 | 0.1496  | 0.0106 | 1.44E-45 | 14.1678  | 908767  | Asthma |
| rs28371215 | 6 | 32679699 | G | T | 0.2371 | 0.1006  | 0.0082 | 1.46E-34 | 12.2606  | 973993  | Asthma |
| rs28371216 | 6 | 32679714 | C | T | 0.2372 | 0.0996  | 0.0082 | 7.26E-34 | 12.1307  | 973993  | Asthma |
| rs28371217 | 6 | 32679718 | A | G | 0.2372 | 0.0991  | 0.0082 | 1.39E-33 | 12.0778  | 973993  | Asthma |
| rs28371218 | 6 | 32679731 | C | T | 0.2391 | 0.0989  | 0.0082 | 9.06E-34 | 12.1126  | 973993  | Asthma |
| rs28371219 | 6 | 32679733 | A | T | 0.2390 | 0.0986  | 0.0082 | 1.36E-33 | 12.0794  | 973993  | Asthma |
| rs28371220 | 6 | 32679769 | A | G | 0.2482 | 0.0923  | 0.0079 | 1.46E-31 | 11.6886  | 973993  | Asthma |
| rs28371221 | 6 | 32679779 | C | G | 0.2487 | 0.0923  | 0.0079 | 1.46E-31 | 11.6887  | 973993  | Asthma |
| rs28371222 | 6 | 32679834 | T | C | 0.2605 | 0.1011  | 0.0077 | 7.01E-40 | 13.2175  | 973993  | Asthma |
| rs28371223 | 6 | 32679840 | G | A | 0.2617 | 0.1014  | 0.0076 | 3.41E-40 | 13.2713  | 973993  | Asthma |
| rs28371224 | 6 | 32679851 | A | G | 0.2604 | 0.1009  | 0.0077 | 1.57E-39 | 13.1554  | 973993  | Asthma |
| rs28371225 | 6 | 32679863 | A | C | 0.2600 | 0.1005  | 0.0077 | 3.36E-39 | 13.0985  | 973993  | Asthma |
| rs28371226 | 6 | 32679888 | T | C | 0.2588 | 0.1012  | 0.0077 | 2.84E-39 | 13.1114  | 973993  | Asthma |
| rs28371227 | 6 | 32679889 | G | A | 0.2556 | 0.1048  | 0.0078 | 1.39E-41 | 13.5090  | 973993  | Asthma |
| rs28371228 | 6 | 32679921 | A | G | 0.2580 | 0.1012  | 0.0077 | 3.46E-39 | 13.0967  | 973993  | Asthma |
| rs3129780  | 6 | 32679924 | T | A | 0.3900 | -0.0808 | 0.0066 | 1.82E-34 | -12.2436 | 1065770 | Asthma |
| rs28371229 | 6 | 32679951 | C | G | 0.2539 | 0.0944  | 0.0112 | 3.62E-17 | 8.4250   | 563168  | Asthma |
| rs28371230 | 6 | 32679952 | C | T | 0.2540 | 0.0942  | 0.0112 | 4.31E-17 | 8.4046   | 563168  | Asthma |
| rs28371231 | 6 | 32679958 | A | G | 0.2531 | 0.0943  | 0.0112 | 4.15E-17 | 8.4083   | 563168  | Asthma |
| rs28371235 | 6 | 32680009 | G | A | 0.2519 | 0.0945  | 0.0112 | 4.32E-17 | 8.4038   | 563168  | Asthma |
| rs28371236 | 6 | 32680026 | G | T | 0.2531 | 0.0934  | 0.0112 | 8.55E-17 | 8.3235   | 563168  | Asthma |
| rs28371237 | 6 | 32680039 | G | T | 0.2532 | 0.0906  | 0.0112 | 7.18E-16 | 8.0675   | 563168  | Asthma |
| rs1694116  | 6 | 32680062 | A | G | 0.1891 | 0.1156  | 0.0127 | 1.18E-19 | 9.0704   | 497942  | Asthma |
| rs28371238 | 6 | 32680069 | C | T | 0.2521 | 0.0939  | 0.0113 | 6.93E-17 | 8.3484   | 563168  | Asthma |
| rs28371239 | 6 | 32680077 | C | G | 0.2524 | 0.0934  | 0.0112 | 9.12E-17 | 8.3156   | 563168  | Asthma |
| rs28371241 | 6 | 32680129 | G | A | 0.2597 | 0.0999  | 0.0077 | 7.05E-39 | 13.0422  | 973993  | Asthma |
| rs28371242 | 6 | 32680158 | G | C | 0.2591 | 0.1005  | 0.0077 | 5.35E-39 | 13.0635  | 973993  | Asthma |
| rs28371243 | 6 | 32680169 | C | G | 0.2569 | 0.1002  | 0.0077 | 1.48E-38 | 12.9861  | 973993  | Asthma |
| rs28371245 | 6 | 32680205 | C | T | 0.3220 | 0.1138  | 0.0073 | 2.32E-54 | 15.5254  | 973993  | Asthma |
| rs28371246 | 6 | 32680218 | C | T | 0.3233 | 0.1126  | 0.0073 | 2.02E-53 | 15.3859  | 973993  | Asthma |
| rs28371247 | 6 | 32680226 | C | G | 0.2046 | 0.1093  | 0.0088 | 3.12E-35 | 12.3858  | 908767  | Asthma |
| rs28371250 | 6 | 32680262 | T | C | 0.3388 | 0.0855  | 0.0074 | 1.35E-30 | 11.4978  | 908767  | Asthma |
| rs28746890 | 6 | 32680264 | C | T | 0.2634 | 0.0733  | 0.0096 | 2.13E-14 | 7.6424   | 778845  | Asthma |
| rs9275043  | 6 | 32680284 | C | T | 0.3775 | 0.0995  | 0.0071 | 3.36E-44 | 13.9454  | 973993  | Asthma |
| rs9275046  | 6 | 32680303 | C | T | 0.3845 | 0.0968  | 0.0070 | 4.59E-43 | 13.7576  | 973993  | Asthma |
| rs9275047  | 6 | 32680307 | G | A | 0.3848 | 0.0969  | 0.0070 | 2.87E-43 | 13.7913  | 973993  | Asthma |
| rs28746891 | 6 | 32680335 | G | A | 0.2186 | 0.0509  | 0.0079 | 1.20E-10 | 6.4397   | 908767  | Asthma |
| rs28746892 | 6 | 32680358 | T | C | 0.2194 | 0.0499  | 0.0079 | 2.63E-10 | 6.3194   | 908767  | Asthma |
| rs28746893 | 6 | 32680359 | G | A | 0.2194 | 0.0499  | 0.0079 | 2.63E-10 | 6.3194   | 908767  | Asthma |
| rs9275051  | 6 | 32680376 | C | T | 0.3026 | 0.0780  | 0.0076 | 6.03E-25 | 10.3151  | 723407  | Asthma |
| rs9275052  | 6 | 32680379 | G | A | 0.5771 | -0.0661 | 0.0065 | 2.26E-24 | -10.1875 | 1004310 | Asthma |
| rs28746894 | 6 | 32680396 | T | C | 0.2078 | 0.0544  | 0.0071 | 2.08E-14 | 7.6453   | 1003385 | Asthma |
| rs9275054  | 6 | 32680431 | G | A | 0.4209 | 0.1143  | 0.0068 | 5.50E-63 | 16.7522  | 912533  | Asthma |
| rs9275055  | 6 | 32680443 | C | T | 0.4142 | 0.1251  | 0.0078 | 4.88E-58 | 16.0603  | 844071  | Asthma |
| rs28746895 | 6 | 32680444 | T | C | 0.2092 | 0.0550  | 0.0071 | 6.94E-15 | 7.7856   | 1003385 | Asthma |
| rs28746896 | 6 | 32680466 | A | G | 0.2152 | 0.0550  | 0.0071 | 9.15E-15 | 7.7505   | 1026700 | Asthma |
| rs9275057  | 6 | 32680476 | G | T | 0.4166 | 0.1245  | 0.0078 | 5.07E-58 | 16.0578  | 844071  | Asthma |
| rs9275059  | 6 | 32680521 | A | T | 0.4168 | 0.1245  | 0.0077 | 4.61E-58 | 16.0629  | 844071  | Asthma |
| rs9275062  | 6 | 32680560 | C | T | 0.4192 | 0.1247  | 0.0077 | 1.21E-58 | 16.1465  | 844071  | Asthma |
| rs9275064  | 6 | 32680604 | T | C | 0.2220 | 0.0938  | 0.0076 | 4.61E-35 | 12.3545  | 1000149 | Asthma |
| rs28746897 | 6 | 32680619 | G | A | 0.2070 | 0.0581  | 0.0079 | 1.42E-13 | 7.3949   | 934923  | Asthma |
| rs9275066  | 6 | 32680627 | T | C | 0.2230 | 0.0932  | 0.0075 | 3.75E-35 | 12.3709  | 1000149 | Asthma |
| rs9275067  | 6 | 32680637 | C | G | 0.2228 | 0.0930  | 0.0075 | 6.35E-35 | 12.3287  | 1000149 | Asthma |
| rs9275068  | 6 | 32680641 | C | T | 0.1821 | 0.1191  | 0.0083 | 5.53E-47 | 14.3957  | 934923  | Asthma |

|             |   |          |   |   |        |         |        |          |          |         |        |
|-------------|---|----------|---|---|--------|---------|--------|----------|----------|---------|--------|
| rs9275069   | 6 | 32680660 | G | A | 0.4371 | 0.1026  | 0.0058 | 2.79E-69 | 17.5938  | 1068611 | Asthma |
| rs9275070   | 6 | 32680672 | T | C | 0.4388 | 0.1019  | 0.0057 | 4.94E-71 | 17.8205  | 1094744 | Asthma |
| rs9275071   | 6 | 32680713 | G | A | 0.5709 | -0.1001 | 0.0054 | 4.30E-77 | -18.5845 | 1186521 | Asthma |
| rs3129781   | 6 | 32680723 | G | T | 0.1676 | -0.0521 | 0.0075 | 2.83E-12 | -6.9860  | 1186521 | Asthma |
| rs9275072   | 6 | 32680725 | T | C | 0.2031 | 0.0840  | 0.0086 | 1.62E-22 | 9.7631   | 749563  | Asthma |
| rs9275073   | 6 | 32680736 | C | G | 0.5400 | -0.1013 | 0.0062 | 4.36E-60 | -16.3491 | 726724  | Asthma |
| rs9275075   | 6 | 32680773 | A | G | 0.2035 | 0.0840  | 0.0086 | 1.12E-22 | 9.8009   | 749563  | Asthma |
| rs9275076   | 6 | 32680776 | G | C | 0.2053 | 0.0844  | 0.0085 | 4.49E-23 | 9.8925   | 749563  | Asthma |
| rs9275077   | 6 | 32680788 | C | T | 0.2270 | 0.0860  | 0.0068 | 5.92E-37 | 12.7001  | 1068611 | Asthma |
| rs9275078   | 6 | 32680815 | A | C | 0.5598 | -0.1017 | 0.0057 | 3.63E-71 | -17.8364 | 1094744 | Asthma |
| rs9275079   | 6 | 32680837 | C | A | 0.2277 | 0.0872  | 0.0066 | 1.56E-39 | 13.1567  | 1094744 | Asthma |
| rs9275080   | 6 | 32680850 | T | C | 0.2278 | 0.0871  | 0.0066 | 1.96E-39 | 13.1395  | 1094744 | Asthma |
| rs13203456  | 6 | 32680858 | C | T | 0.1276 | -0.0809 | 0.0093 | 2.17E-18 | -8.7484  | 1094744 | Asthma |
| rs28746899  | 6 | 32680869 | A | G | 0.2100 | 0.0527  | 0.0069 | 2.27E-14 | 7.6342   | 1029518 | Asthma |
| rs28746900  | 6 | 32680875 | G | A | 0.2099 | 0.0527  | 0.0069 | 2.23E-14 | 7.6367   | 1029518 | Asthma |
| rs9275081   | 6 | 32680892 | C | T | 0.5582 | -0.1017 | 0.0057 | 2.38E-71 | -17.8612 | 1094744 | Asthma |
| rs28746901  | 6 | 32680904 | T | A | 0.2087 | 0.0527  | 0.0069 | 1.66E-14 | 7.6748   | 1094744 | Asthma |
| rs9275082   | 6 | 32680907 | A | C | 0.5588 | -0.1019 | 0.0057 | 1.10E-71 | -17.9042 | 1094744 | Asthma |
| rs9275083   | 6 | 32680917 | C | T | 0.2325 | 0.0877  | 0.0066 | 1.52E-40 | 13.3316  | 1094744 | Asthma |
| rs28746902  | 6 | 32680936 | A | C | 0.2064 | 0.0552  | 0.0071 | 4.94E-15 | 7.8284   | 1068611 | Asthma |
| rs3129782   | 6 | 32680942 | G | A | 0.3224 | -0.0761 | 0.0058 | 5.44E-40 | -13.2360 | 1246149 | Asthma |
| rs9275084   | 6 | 32680945 | A | G | 0.5597 | -0.1021 | 0.0057 | 5.58E-72 | -17.9412 | 1094744 | Asthma |
| rs9275085   | 6 | 32680958 | G | A | 0.5595 | -0.1021 | 0.0057 | 5.33E-72 | -17.9436 | 1094744 | Asthma |
| rs28746903  | 6 | 32680991 | T | C | 0.2088 | 0.0530  | 0.0069 | 1.77E-14 | 7.6665   | 1029518 | Asthma |
| rs28746904  | 6 | 32680996 | C | T | 0.2136 | 0.0513  | 0.0062 | 9.74E-17 | 8.3080   | 1180923 | Asthma |
| rs9275086   | 6 | 32681032 | A | G | 0.5541 | -0.0993 | 0.0051 | 5.10E-83 | -19.3026 | 1246149 | Asthma |
| rs28746905  | 6 | 32681065 | T | C | 0.2141 | 0.0508  | 0.0062 | 1.82E-16 | 8.2335   | 1180923 | Asthma |
| rs28746906  | 6 | 32681086 | A | G | 0.2141 | 0.0508  | 0.0062 | 1.79E-16 | 8.2355   | 1180923 | Asthma |
| rs9275087   | 6 | 32681116 | T | C | 0.5539 | -0.0994 | 0.0051 | 3.83E-83 | -19.3173 | 1246149 | Asthma |
| rs9275088   | 6 | 32681154 | T | A | 0.5555 | -0.0996 | 0.0051 | 1.79E-83 | -19.3568 | 1246149 | Asthma |
| rs28746907  | 6 | 32681160 | A | T | 0.2073 | 0.0534  | 0.0069 | 9.37E-15 | 7.7475   | 1094744 | Asthma |
| rs9275089   | 6 | 32681170 | A | T | 0.5598 | -0.1022 | 0.0057 | 4.17E-72 | -17.9579 | 1094744 | Asthma |
| rs28746908  | 6 | 32681186 | A | C | 0.2073 | 0.0536  | 0.0069 | 7.40E-15 | 7.7774   | 1094744 | Asthma |
| rs9275090   | 6 | 32681194 | G | T | 0.2330 | 0.0877  | 0.0066 | 1.32E-40 | 13.3418  | 1094744 | Asthma |
| rs9275091   | 6 | 32681195 | C | T | 0.5599 | -0.1022 | 0.0057 | 3.81E-72 | -17.9637 | 1094744 | Asthma |
| rs28746909  | 6 | 32681198 | A | G | 0.2073 | 0.0535  | 0.0069 | 8.11E-15 | 7.7659   | 1094744 | Asthma |
| rs9275092   | 6 | 32681210 | T | C | 0.1106 | 0.1321  | 0.0081 | 8.77E-60 | 16.3069  | 1246149 | Asthma |
| rs9275093   | 6 | 32681270 | T | C | 0.2327 | 0.0878  | 0.0066 | 1.04E-40 | 13.3597  | 1094744 | Asthma |
| rs9275094   | 6 | 32681285 | C | T | 0.2327 | 0.0877  | 0.0066 | 1.22E-40 | 13.3480  | 1094744 | Asthma |
| rs9275095   | 6 | 32681311 | G | C | 0.1105 | 0.1326  | 0.0081 | 6.48E-60 | 16.3259  | 1246149 | Asthma |
| rs9275096   | 6 | 32681319 | T | C | 0.2423 | 0.0809  | 0.0071 | 2.53E-30 | 11.4436  | 726724  | Asthma |
| rs9275097   | 6 | 32681349 | G | A | 0.1103 | 0.1323  | 0.0081 | 1.53E-59 | 16.2723  | 1246149 | Asthma |
| rs28746910  | 6 | 32681350 | G | A | 0.2141 | 0.0508  | 0.0062 | 1.96E-16 | 8.2244   | 1180923 | Asthma |
| rs9275098   | 6 | 32681384 | T | C | 0.1076 | 0.1282  | 0.0077 | 2.55E-62 | 16.6606  | 1376071 | Asthma |
| rs184948264 | 6 | 32681421 | A | G | 0.0349 | -0.1204 | 0.0162 | 1.21E-13 | -7.4158  | 1159440 | Asthma |
| rs28746911  | 6 | 32681423 | C | T | 0.2168 | 0.0457  | 0.0063 | 2.64E-13 | 7.3115   | 1159440 | Asthma |
| rs28891483  | 6 | 32681477 | T | C | 0.2094 | 0.0530  | 0.0069 | 1.70E-14 | 7.6718   | 1029518 | Asthma |
| rs28891484  | 6 | 32681484 | A | T | 0.2169 | 0.0454  | 0.0062 | 3.70E-13 | 7.2662   | 1159440 | Asthma |
| rs28891485  | 6 | 32681497 | T | G | 0.2200 | 0.0448  | 0.0057 | 3.33E-15 | 7.8780   | 1310845 | Asthma |
| rs9275100   | 6 | 32681531 | G | A | 0.2295 | 0.0810  | 0.0056 | 1.53E-47 | 14.4838  | 1376071 | Asthma |
| rs9275101   | 6 | 32681578 | G | A | 0.5527 | -0.0927 | 0.0052 | 1.56E-70 | -17.7556 | 1224666 | Asthma |
| rs9275102   | 6 | 32681584 | G | A | 0.5527 | -0.0927 | 0.0052 | 1.49E-70 | -17.7582 | 1224666 | Asthma |
| rs9275103   | 6 | 32681609 | T | C | 0.5527 | -0.0927 | 0.0052 | 1.50E-70 | -17.7579 | 1224666 | Asthma |
| rs9275104   | 6 | 32681611 | C | T | 0.2299 | 0.0814  | 0.0061 | 6.22E-41 | 13.3979  | 1224666 | Asthma |
| rs28891486  | 6 | 32681631 | T | A | 0.2176 | 0.0464  | 0.0062 | 9.57E-14 | 7.4468   | 1159440 | Asthma |
| rs9275105   | 6 | 32681639 | C | T | 0.5528 | -0.0929 | 0.0052 | 9.53E-71 | -17.7833 | 1224666 | Asthma |
| rs28746912  | 6 | 32681674 | G | A | 0.2200 | 0.0449  | 0.0057 | 3.18E-15 | 7.8837   | 1310845 | Asthma |
| rs9275106   | 6 | 32681698 | T | C | 0.5535 | -0.0926 | 0.0052 | 3.60E-70 | -17.7085 | 1224666 | Asthma |
| rs9275107   | 6 | 32681731 | G | A | 0.2296 | 0.0810  | 0.0056 | 1.30E-47 | 14.4953  | 1376071 | Asthma |
| rs28746913  | 6 | 32681740 | A | G | 0.2176 | 0.0464  | 0.0062 | 9.46E-14 | 7.4483   | 1159440 | Asthma |
| rs28746914  | 6 | 32681759 | C | T | 0.2176 | 0.0464  | 0.0062 | 9.66E-14 | 7.4454   | 1159440 | Asthma |
| rs28746915  | 6 | 32681766 | A | G | 0.2344 | 0.0492  | 0.0066 | 8.05E-14 | 7.4694   | 791420  | Asthma |
| rs28746916  | 6 | 32681802 | A | G | 0.2200 | 0.0449  | 0.0057 | 3.30E-15 | 7.8791   | 1310845 | Asthma |
| rs9275108   | 6 | 32681832 | A | G | 0.2296 | 0.0810  | 0.0056 | 1.36E-47 | 14.4920  | 1376071 | Asthma |
| rs9275109   | 6 | 32681899 | G | T | 0.4075 | -0.0610 | 0.0050 | 9.17E-34 | -12.1115 | 1376071 | Asthma |
| rs9275110   | 6 | 32681946 | C | T | 0.2295 | 0.0809  | 0.0056 | 1.64E-47 | 14.4793  | 1376071 | Asthma |
| rs9275111   | 6 | 32681958 | T | G | 0.2295 | 0.0810  | 0.0056 | 1.51E-47 | 14.4850  | 1376071 | Asthma |
| rs28746918  | 6 | 32681992 | T | A | 0.2172 | 0.0468  | 0.0062 | 6.59E-14 | 7.4958   | 1159440 | Asthma |
| rs9275112   | 6 | 32681996 | G | A | 0.5510 | -0.0916 | 0.0048 | 3.20E-81 | -19.0878 | 1376071 | Asthma |
| rs28746919  | 6 | 32682029 | A | G | 0.2175 | 0.0464  | 0.0062 | 1.03E-13 | 7.4368   | 1159440 | Asthma |
| rs28746920  | 6 | 32682036 | A | G | 0.2175 | 0.0464  | 0.0062 | 1.03E-13 | 7.4368   | 1159440 | Asthma |
| rs9275113   | 6 | 32682048 | G | A | 0.2299 | 0.0815  | 0.0061 | 5.43E-41 | 13.4080  | 1224666 | Asthma |
| rs28746921  | 6 | 32682054 | A | G | 0.2175 | 0.0467  | 0.0062 | 6.93E-14 | 7.4891   | 1159440 | Asthma |
| rs28746922  | 6 | 32682067 | G | A | 0.2175 | 0.0465  | 0.0062 | 8.50E-14 | 7.4625   | 1159440 | Asthma |

|             |   |          |   |   |        |         |        |          |          |         |        |
|-------------|---|----------|---|---|--------|---------|--------|----------|----------|---------|--------|
| rs28746923  | 6 | 32682072 | G | A | 0.2175 | 0.0465  | 0.0062 | 8.48E-14 | 7.4627   | 1159440 | Asthma |
| rs28746924  | 6 | 32682077 | A | G | 0.2199 | 0.0449  | 0.0057 | 3.11E-15 | 7.8863   | 1310845 | Asthma |
| rs9275114   | 6 | 32682120 | G | A | 0.5548 | -0.0915 | 0.0053 | 1.16E-65 | -17.1142 | 1133307 | Asthma |
| rs28746925  | 6 | 32682155 | G | A | 0.2176 | 0.0465  | 0.0062 | 8.43E-14 | 7.4635   | 1159440 | Asthma |
| rs9275115   | 6 | 32682164 | C | T | 0.2292 | 0.0814  | 0.0061 | 1.11E-40 | 13.3552  | 1224666 | Asthma |
| rs115716393 | 6 | 32682168 | A | G | 0.0345 | -0.1176 | 0.0148 | 2.08E-15 | -7.9366  | 1310845 | Asthma |
| rs9275116   | 6 | 32682175 | T | C | 0.5528 | -0.0928 | 0.0052 | 1.05E-70 | -17.7781 | 1224666 | Asthma |
| rs9275117   | 6 | 32682188 | T | C | 0.2289 | 0.0806  | 0.0062 | 1.27E-38 | 12.9970  | 1198533 | Asthma |
| rs9275118   | 6 | 32682219 | A | G | 0.5555 | -0.0926 | 0.0053 | 7.03E-68 | -17.4092 | 1198533 | Asthma |
| rs28746926  | 6 | 32682249 | C | G | 0.2140 | 0.0476  | 0.0069 | 6.26E-12 | 6.8736   | 1064845 | Asthma |
| rs28746927  | 6 | 32682252 | T | C | 0.2140 | 0.0476  | 0.0069 | 6.29E-12 | 6.8729   | 1064845 | Asthma |
| rs9275119   | 6 | 32682254 | G | A | 0.5546 | -0.0933 | 0.0053 | 5.22E-69 | -17.5575 | 1198533 | Asthma |
| rs28746928  | 6 | 32682283 | G | T | 0.2167 | 0.0482  | 0.0064 | 3.30E-14 | 7.5861   | 1133307 | Asthma |
| rs28746929  | 6 | 32682291 | G | A | 0.2167 | 0.0482  | 0.0064 | 3.15E-14 | 7.5920   | 1133307 | Asthma |
| rs28746930  | 6 | 32682297 | A | G | 0.2167 | 0.0482  | 0.0064 | 3.18E-14 | 7.5910   | 1133307 | Asthma |
| rs117317274 | 6 | 32682382 | T | C | 0.0431 | -0.1155 | 0.0140 | 1.74E-16 | -8.2392  | 1180923 | Asthma |
| rs3134979   | 6 | 32682401 | A | T | 0.2950 | -0.1053 | 0.0065 | 1.92E-58 | -16.1175 | 1094744 | Asthma |
| rs9275121   | 6 | 32682408 | G | A | 0.2323 | 0.0861  | 0.0060 | 2.57E-47 | 14.4485  | 1246149 | Asthma |
| rs28746931  | 6 | 32682417 | G | A | 0.2132 | 0.0527  | 0.0063 | 5.58E-17 | 8.3738   | 1154790 | Asthma |
| rs28746932  | 6 | 32682440 | A | T | 0.2141 | 0.0507  | 0.0062 | 2.07E-16 | 8.2178   | 1180923 | Asthma |
| rs9275122   | 6 | 32682456 | C | T | 0.2322 | 0.0861  | 0.0060 | 2.95E-47 | 14.4388  | 1246149 | Asthma |
| rs9275123   | 6 | 32682479 | G | T | 0.5539 | -0.0993 | 0.0051 | 6.21E-83 | -19.2926 | 1246149 | Asthma |
| rs2516006   | 6 | 32682491 | C | T | 0.1917 | 0.1062  | 0.0065 | 9.07E-60 | 16.3052  | 1022016 | Asthma |
| rs9275125   | 6 | 32682516 | A | T | 0.5539 | -0.0994 | 0.0051 | 4.81E-83 | -19.3057 | 1246149 | Asthma |
| rs9275126   | 6 | 32682530 | A | T | 0.5575 | -0.1027 | 0.0057 | 9.28E-73 | -18.0406 | 1094744 | Asthma |
| rs28891487  | 6 | 32682535 | T | C | 0.2106 | 0.0541  | 0.0069 | 3.70E-15 | 7.8647   | 1029518 | Asthma |
| rs9275127   | 6 | 32682537 | T | G | 0.2321 | 0.0879  | 0.0066 | 1.25E-40 | 13.3461  | 1094744 | Asthma |
| rs28891488  | 6 | 32682568 | T | C | 0.2106 | 0.0541  | 0.0069 | 3.75E-15 | 7.8631   | 1029518 | Asthma |
| rs28891489  | 6 | 32682585 | C | T | 0.2260 | 0.0422  | 0.0067 | 2.40E-10 | 6.3337   | 1094744 | Asthma |
| rs41316235  | 6 | 32682625 | C | T | 0.1510 | 0.0766  | 0.0078 | 1.36E-22 | 9.7813   | 1029518 | Asthma |
| rs9275130   | 6 | 32682632 | T | C | 0.5564 | -0.1026 | 0.0057 | 6.29E-73 | -18.0617 | 1094744 | Asthma |
| rs28746933  | 6 | 32682634 | G | A | 0.2106 | 0.0542  | 0.0069 | 3.44E-15 | 7.8741   | 1029518 | Asthma |
| rs28746934  | 6 | 32682659 | C | T | 0.2105 | 0.0541  | 0.0069 | 3.78E-15 | 7.8621   | 1029518 | Asthma |
| rs9275131   | 6 | 32682690 | C | T | 0.5538 | -0.0993 | 0.0051 | 5.49E-83 | -19.2989 | 1246149 | Asthma |
| rs9275132   | 6 | 32682723 | A | G | 0.2324 | 0.0862  | 0.0060 | 1.91E-47 | 14.4690  | 1246149 | Asthma |
| rs17205696  | 6 | 32682810 | T | C | 0.2134 | 0.0508  | 0.0068 | 1.17E-13 | 7.4201   | 1029518 | Asthma |
| rs9275133   | 6 | 32682811 | A | G | 0.5538 | -0.0993 | 0.0051 | 5.48E-83 | -19.2989 | 1246149 | Asthma |
| rs9275134   | 6 | 32682835 | G | C | 0.2336 | 0.0850  | 0.0059 | 1.03E-46 | 14.3523  | 1246149 | Asthma |
| rs17212062  | 6 | 32682871 | G | A | 0.2140 | 0.0505  | 0.0062 | 2.63E-16 | 8.1892   | 1180923 | Asthma |
| rs17212069  | 6 | 32682890 | G | C | 0.2106 | 0.0541  | 0.0069 | 3.47E-15 | 7.8725   | 1029518 | Asthma |
| rs17212076  | 6 | 32682947 | G | A | 0.2105 | 0.0541  | 0.0069 | 3.81E-15 | 7.8609   | 1029518 | Asthma |
| rs9275135   | 6 | 32682959 | T | C | 0.5575 | -0.1027 | 0.0057 | 4.91E-73 | -18.0764 | 1094744 | Asthma |
| rs17205717  | 6 | 32682969 | C | T | 0.2105 | 0.0541  | 0.0069 | 3.82E-15 | 7.8609   | 1029518 | Asthma |
| rs9275136   | 6 | 32682980 | C | T | 0.5670 | -0.0995 | 0.0052 | 1.14E-82 | -19.2609 | 1246149 | Asthma |
| rs17205738  | 6 | 32682985 | G | T | 0.1897 | 0.0496  | 0.0063 | 4.62E-15 | 7.8366   | 1180923 | Asthma |
| rs17212090  | 6 | 32683032 | T | C | 0.2141 | 0.0505  | 0.0062 | 2.91E-16 | 8.1771   | 1180923 | Asthma |
| rs9275137   | 6 | 32683103 | C | G | 0.2332 | 0.0877  | 0.0066 | 1.01E-40 | 13.3619  | 1094744 | Asthma |
| rs17212104  | 6 | 32683106 | G | T | 0.2102 | 0.0539  | 0.0069 | 4.86E-15 | 7.8303   | 1029518 | Asthma |
| rs3998180   | 6 | 32683120 | A | C | 0.1263 | -0.0799 | 0.0083 | 4.35E-22 | -9.6626  | 1246149 | Asthma |
| rs17205747  | 6 | 32683134 | T | A | 0.2095 | 0.0551  | 0.0069 | 1.37E-15 | 7.9883   | 1029518 | Asthma |
| rs17205754  | 6 | 32683153 | C | A | 0.2111 | 0.0529  | 0.0063 | 6.26E-17 | 8.3602   | 1154790 | Asthma |
| rs17205761  | 6 | 32683157 | A | G | 0.2095 | 0.0551  | 0.0069 | 1.37E-15 | 7.9881   | 1029518 | Asthma |
| rs17205768  | 6 | 32683160 | C | T | 0.2104 | 0.0531  | 0.0063 | 5.66E-17 | 8.3722   | 1154790 | Asthma |
| rs9275138   | 6 | 32683181 | A | G | 0.5585 | -0.1028 | 0.0057 | 3.36E-73 | -18.0975 | 1094744 | Asthma |
| rs9275139   | 6 | 32683228 | C | A | 0.5559 | -0.0998 | 0.0051 | 1.11E-83 | -19.3814 | 1246149 | Asthma |
| rs17212132  | 6 | 32683231 | A | T | 0.2104 | 0.0541  | 0.0069 | 3.91E-15 | 7.8580   | 1029518 | Asthma |
| rs9275140   | 6 | 32683241 | A | G | 0.2341 | 0.0865  | 0.0060 | 1.02E-47 | 14.5117  | 1246149 | Asthma |
| rs17205782  | 6 | 32683274 | T | C | 0.2055 | 0.0580  | 0.0079 | 1.52E-13 | 7.3858   | 934923  | Asthma |
| rs17205788  | 6 | 32683279 | A | C | 0.1955 | 0.0566  | 0.0074 | 2.40E-14 | 7.6274   | 1026700 | Asthma |
| rs17205795  | 6 | 32683289 | T | C | 0.2054 | 0.0580  | 0.0079 | 1.50E-13 | 7.3875   | 934923  | Asthma |
| rs17205802  | 6 | 32683295 | G | T | 0.2054 | 0.0580  | 0.0079 | 1.45E-13 | 7.3917   | 934923  | Asthma |
| rs17212153  | 6 | 32683315 | T | G | 0.2054 | 0.0582  | 0.0078 | 1.25E-13 | 7.4112   | 934923  | Asthma |
| rs17212160  | 6 | 32683320 | G | T | 0.2054 | 0.0582  | 0.0078 | 1.25E-13 | 7.4112   | 934923  | Asthma |
| rs9275141   | 6 | 32683340 | T | G | 0.5668 | -0.1039 | 0.0057 | 7.10E-75 | -18.3079 | 1151554 | Asthma |
| rs17205809  | 6 | 32683358 | A | G | 0.1958 | 0.0558  | 0.0074 | 5.36E-14 | 7.5228   | 1026700 | Asthma |
| rs17205823  | 6 | 32683391 | T | G | 0.2004 | 0.0550  | 0.0071 | 8.85E-15 | 7.7547   | 1086328 | Asthma |
| rs17205830  | 6 | 32683403 | C | T | 0.2034 | 0.0580  | 0.0079 | 2.12E-13 | 7.3412   | 934923  | Asthma |
| rs9275143   | 6 | 32683415 | A | T | 0.5625 | -0.1034 | 0.0058 | 6.52E-71 | -17.8043 | 1068611 | Asthma |
| rs17212188  | 6 | 32683439 | A | G | 0.2055 | 0.0584  | 0.0078 | 9.62E-14 | 7.4460   | 934923  | Asthma |
| rs9275144   | 6 | 32683441 | A | T | 0.2348 | 0.0863  | 0.0060 | 1.37E-47 | 14.4919  | 1246149 | Asthma |
| rs17205837  | 6 | 32683445 | C | T | 0.2055 | 0.0584  | 0.0078 | 9.87E-14 | 7.4427   | 934923  | Asthma |
| rs17205844  | 6 | 32683477 | G | C | 0.2131 | 0.0525  | 0.0063 | 7.24E-17 | 8.3430   | 1154790 | Asthma |
| rs17205851  | 6 | 32683488 | C | T | 0.2140 | 0.0505  | 0.0062 | 2.69E-16 | 8.1866   | 1180923 | Asthma |
| rs17205858  | 6 | 32683520 | C | T | 0.2140 | 0.0505  | 0.0062 | 2.85E-16 | 8.1798   | 1180923 | Asthma |

|            |   |          |   |   |        |         |        |          |          |         |        |
|------------|---|----------|---|---|--------|---------|--------|----------|----------|---------|--------|
| rs9275145  | 6 | 32683586 | C | T | 0.5539 | -0.0994 | 0.0051 | 4.43E-83 | -19.3098 | 1246149 | Asthma |
| rs28746936 | 6 | 32683616 | A | G | 0.2105 | 0.0542  | 0.0069 | 3.51E-15 | 7.8712   | 1029518 | Asthma |
| rs28746937 | 6 | 32683624 | T | C | 0.2105 | 0.0542  | 0.0069 | 3.52E-15 | 7.8710   | 1029518 | Asthma |
| rs28746939 | 6 | 32683639 | C | T | 0.2252 | 0.0620  | 0.0076 | 2.60E-16 | 8.1904   | 635365  | Asthma |
| rs9275146  | 6 | 32683718 | G | T | 0.5570 | -0.1026 | 0.0057 | 9.34E-73 | -18.0408 | 1094744 | Asthma |
| rs17212216 | 6 | 32683732 | C | T | 0.2098 | 0.0537  | 0.0069 | 6.37E-15 | 7.7964   | 1029518 | Asthma |
| rs17212223 | 6 | 32683763 | T | C | 0.1572 | 0.0701  | 0.0070 | 1.39E-23 | 10.0093  | 1180923 | Asthma |
| rs9275147  | 6 | 32683780 | T | C | 0.2345 | 0.0880  | 0.0066 | 5.50E-41 | 13.4071  | 1094744 | Asthma |
| rs17205872 | 6 | 32683781 | A | G | 0.2097 | 0.0538  | 0.0069 | 5.98E-15 | 7.8044   | 1029518 | Asthma |
| rs17205886 | 6 | 32683801 | A | G | 0.2084 | 0.0564  | 0.0071 | 1.39E-15 | 7.9861   | 1003385 | Asthma |
| rs9275148  | 6 | 32683808 | C | T | 0.4433 | 0.0998  | 0.0051 | 1.01E-83 | 19.3863  | 1246149 | Asthma |
| rs17212230 | 6 | 32683811 | A | G | 0.2098 | 0.0536  | 0.0069 | 7.35E-15 | 7.7783   | 1029518 | Asthma |
| rs9275149  | 6 | 32683839 | T | C | 0.2336 | 0.0863  | 0.0060 | 1.93E-47 | 14.4681  | 1246149 | Asthma |
| rs9275150  | 6 | 32683840 | G | A | 0.2339 | 0.0864  | 0.0060 | 1.30E-47 | 14.4952  | 1246149 | Asthma |
| rs17212251 | 6 | 32683852 | C | G | 0.2251 | 0.0583  | 0.0074 | 3.11E-15 | 7.8864   | 661498  | Asthma |
| rs17205907 | 6 | 32683872 | G | A | 0.2098 | 0.0537  | 0.0069 | 7.04E-15 | 7.7838   | 1029518 | Asthma |
| rs17205914 | 6 | 32683903 | G | A | 0.2090 | 0.0534  | 0.0069 | 1.16E-14 | 7.7202   | 1029518 | Asthma |
| rs17205921 | 6 | 32683908 | T | C | 0.2090 | 0.0534  | 0.0069 | 1.24E-14 | 7.7115   | 1029518 | Asthma |
| rs17212258 | 6 | 32683913 | T | G | 0.2090 | 0.0534  | 0.0069 | 1.16E-14 | 7.7199   | 1029518 | Asthma |
| rs17212265 | 6 | 32683917 | T | C | 0.2129 | 0.0504  | 0.0062 | 4.30E-16 | 8.1298   | 1180923 | Asthma |
| rs7750477  | 6 | 32683930 | G | C | 0.2343 | 0.0878  | 0.0066 | 7.59E-41 | 13.3832  | 1094744 | Asthma |
| rs17212279 | 6 | 32683936 | G | A | 0.2105 | 0.0542  | 0.0069 | 3.60E-15 | 7.8680   | 1029518 | Asthma |
| rs17205928 | 6 | 32683960 | G | A | 0.2105 | 0.0541  | 0.0069 | 3.79E-15 | 7.8615   | 1029518 | Asthma |
| rs3021062  | 6 | 32683964 | T | C | 0.2325 | 0.0861  | 0.0060 | 2.55E-47 | 14.4488  | 1246149 | Asthma |
| rs17205942 | 6 | 32684021 | T | C | 0.2105 | 0.0541  | 0.0069 | 3.73E-15 | 7.8637   | 1029518 | Asthma |
| rs17205949 | 6 | 32684039 | A | C | 0.2105 | 0.0541  | 0.0069 | 3.75E-15 | 7.8631   | 1029518 | Asthma |
| rs17212286 | 6 | 32684042 | A | G | 0.2105 | 0.0541  | 0.0069 | 3.60E-15 | 7.8682   | 1029518 | Asthma |
| rs3021061  | 6 | 32684062 | G | C | 0.2324 | 0.0860  | 0.0060 | 3.20E-47 | 14.4331  | 1246149 | Asthma |
| rs3021060  | 6 | 32684069 | C | G | 0.2324 | 0.0860  | 0.0060 | 3.40E-47 | 14.4290  | 1246149 | Asthma |
| rs2856696  | 6 | 32684091 | T | A | 0.0785 | 0.0579  | 0.0092 | 3.75E-10 | 6.2642   | 1246149 | Asthma |
| rs2856695  | 6 | 32684117 | A | G | 0.5537 | -0.0992 | 0.0052 | 1.10E-82 | -19.2626 | 1246149 | Asthma |
| rs6457614  | 6 | 32684123 | G | T | 0.1263 | -0.0804 | 0.0083 | 2.66E-22 | -9.7127  | 1246149 | Asthma |
| rs17205977 | 6 | 32684150 | C | T | 0.2100 | 0.0537  | 0.0069 | 6.65E-15 | 7.7910   | 1029518 | Asthma |
| rs9275151  | 6 | 32684159 | T | C | 0.1097 | 0.1415  | 0.0105 | 1.55E-41 | 13.5012  | 873440  | Asthma |
| rs6457615  | 6 | 32684187 | C | T | 0.1263 | -0.0803 | 0.0083 | 3.00E-22 | -9.7006  | 1246149 | Asthma |
| rs1694114  | 6 | 32684201 | A | G | 0.2478 | 0.0364  | 0.0065 | 2.47E-08 | 5.5750   | 1029518 | Asthma |
| rs17212329 | 6 | 32684228 | T | C | 0.2100 | 0.0536  | 0.0069 | 7.23E-15 | 7.7804   | 1029518 | Asthma |
| rs17212336 | 6 | 32684249 | A | C | 0.2141 | 0.0506  | 0.0062 | 2.32E-16 | 8.2041   | 1180923 | Asthma |
| rs17205998 | 6 | 32684273 | G | A | 0.2141 | 0.0507  | 0.0062 | 2.10E-16 | 8.2160   | 1180923 | Asthma |
| rs17206005 | 6 | 32684292 | G | A | 0.2141 | 0.0508  | 0.0062 | 1.95E-16 | 8.2253   | 1180923 | Asthma |
| rs17206012 | 6 | 32684300 | C | A | 0.2141 | 0.0507  | 0.0062 | 2.06E-16 | 8.2188   | 1180923 | Asthma |
| rs17212343 | 6 | 32684370 | G | A | 0.2141 | 0.0507  | 0.0062 | 2.18E-16 | 8.2116   | 1180923 | Asthma |
| rs17212350 | 6 | 32684396 | G | A | 0.2061 | 0.0568  | 0.0070 | 6.27E-16 | 8.0839   | 1068611 | Asthma |
| rs17212357 | 6 | 32684397 | T | C | 0.2091 | 0.0569  | 0.0071 | 6.66E-16 | 8.0767   | 1003385 | Asthma |
| rs17212364 | 6 | 32684399 | G | C | 0.2119 | 0.0526  | 0.0063 | 7.74E-17 | 8.3351   | 1154790 | Asthma |
| rs9275152  | 6 | 32684419 | C | T | 0.1061 | 0.1372  | 0.0084 | 1.69E-60 | 16.4078  | 1246149 | Asthma |
| rs17206035 | 6 | 32684447 | C | T | 0.1929 | 0.0456  | 0.0074 | 7.35E-10 | 6.1585   | 1003385 | Asthma |
| rs17206042 | 6 | 32684467 | A | G | 0.2088 | 0.0530  | 0.0069 | 1.12E-14 | 7.7248   | 1086328 | Asthma |
| rs17212371 | 6 | 32684482 | A | G | 0.2088 | 0.0527  | 0.0069 | 1.51E-14 | 7.6870   | 1086328 | Asthma |
| rs3104361  | 6 | 32684501 | T | C | 0.4897 | -0.0621 | 0.0066 | 7.61E-21 | -9.3648  | 934923  | Asthma |
| rs2856694  | 6 | 32684504 | C | T | 0.1390 | 0.0650  | 0.0095 | 7.26E-12 | 6.8524   | 873440  | Asthma |
| rs3134976  | 6 | 32684528 | A | C | 0.2905 | -0.1033 | 0.0059 | 3.10E-68 | -17.4560 | 1246149 | Asthma |
| rs17206049 | 6 | 32684559 | A | G | 0.2115 | 0.0531  | 0.0063 | 4.16E-17 | 8.4083   | 1154790 | Asthma |
| rs3021059  | 6 | 32684567 | T | C | 0.2343 | 0.0869  | 0.0060 | 3.13E-48 | 14.5928  | 1246149 | Asthma |
| rs3021058  | 6 | 32684582 | A | C | 0.5621 | -0.1005 | 0.0053 | 2.22E-81 | -19.1072 | 1220016 | Asthma |
| rs17206070 | 6 | 32684584 | C | T | 0.2056 | 0.0526  | 0.0069 | 3.59E-14 | 7.5750   | 1086328 | Asthma |
| rs3021057  | 6 | 32684586 | T | C | 0.4402 | 0.1003  | 0.0052 | 1.20E-81 | 19.1397  | 1220016 | Asthma |
| rs17212420 | 6 | 32684623 | T | C | 0.2088 | 0.0526  | 0.0069 | 1.72E-14 | 7.6703   | 1086328 | Asthma |
| rs17212427 | 6 | 32684648 | C | T | 0.2041 | 0.0569  | 0.0079 | 4.93E-13 | 7.2273   | 934923  | Asthma |
| rs9275154  | 6 | 32684658 | T | C | 0.4428 | 0.1001  | 0.0052 | 1.11E-81 | 19.1430  | 1220016 | Asthma |
| rs17206084 | 6 | 32684684 | T | C | 0.2009 | 0.0573  | 0.0080 | 6.97E-13 | 7.1801   | 934923  | Asthma |
| rs9275155  | 6 | 32684707 | A | T | 0.4230 | 0.0955  | 0.0059 | 3.95E-59 | 16.2152  | 1068611 | Asthma |
| rs9275156  | 6 | 32684709 | C | T | 0.2339 | 0.0868  | 0.0060 | 5.00E-48 | 14.5605  | 1246149 | Asthma |
| rs17212455 | 6 | 32684749 | A | G | 0.1182 | 0.0586  | 0.0104 | 1.76E-08 | 5.6345   | 934923  | Asthma |
| rs9275157  | 6 | 32684775 | A | G | 0.2365 | 0.0876  | 0.0066 | 1.09E-40 | 13.3564  | 1094744 | Asthma |
| rs28746941 | 6 | 32684776 | C | G | 0.2005 | 0.0526  | 0.0073 | 4.06E-13 | 7.2535   | 1003385 | Asthma |
| rs28746942 | 6 | 32684779 | A | G | 0.2004 | 0.0526  | 0.0073 | 4.14E-13 | 7.2509   | 1003385 | Asthma |
| rs3134975  | 6 | 32684804 | T | C | 0.2914 | -0.1031 | 0.0059 | 4.89E-68 | -17.4302 | 1246149 | Asthma |
| rs9275158  | 6 | 32684805 | A | G | 0.3349 | 0.0982  | 0.0061 | 2.40E-57 | 15.9606  | 1068611 | Asthma |
| rs9275159  | 6 | 32684830 | T | C | 0.2349 | 0.0878  | 0.0066 | 8.31E-41 | 13.3763  | 1094744 | Asthma |
| rs9275160  | 6 | 32684843 | A | G | 0.3208 | 0.0990  | 0.0054 | 3.70E-74 | 18.2182  | 1246149 | Asthma |
| rs9275161  | 6 | 32684859 | C | T | 0.4214 | 0.0920  | 0.0058 | 4.54E-57 | 15.9209  | 1094744 | Asthma |
| rs9275162  | 6 | 32684910 | T | C | 0.5555 | -0.0997 | 0.0051 | 1.25E-83 | -19.3755 | 1246149 | Asthma |
| rs28746946 | 6 | 32684938 | A | T | 0.2129 | 0.0532  | 0.0063 | 2.99E-17 | 8.4471   | 1154790 | Asthma |



|             |   |          |   |   |        |         |        |          |          |         |        |
|-------------|---|----------|---|---|--------|---------|--------|----------|----------|---------|--------|
| rs28746947  | 6 | 32684970 | A | T | 0.2089 | 0.0572  | 0.0071 | 4.75E-16 | 8.1177   | 1003385 | Asthma |
| rs28746948  | 6 | 32684986 | G | A | 0.2115 | 0.0524  | 0.0063 | 1.01E-16 | 8.3042   | 1154790 | Asthma |
| rs28746949  | 6 | 32684997 | A | G | 0.2088 | 0.0572  | 0.0071 | 4.78E-16 | 8.1168   | 1003385 | Asthma |
| rs28746950  | 6 | 32685008 | A | T | 0.2081 | 0.0538  | 0.0064 | 3.35E-17 | 8.4338   | 1154790 | Asthma |
| rs28746951  | 6 | 32685018 | A | G | 0.2076 | 0.0522  | 0.0064 | 3.15E-16 | 8.1673   | 1154790 | Asthma |
| rs28746952  | 6 | 32685021 | G | T | 0.2030 | 0.0545  | 0.0065 | 4.60E-17 | 8.3965   | 1154790 | Asthma |
| rs28746953  | 6 | 32685046 | G | A | 0.2078 | 0.0524  | 0.0063 | 8.25E-17 | 8.3277   | 1180923 | Asthma |
| rs28746954  | 6 | 32685049 | C | A | 0.2118 | 0.0499  | 0.0062 | 9.23E-16 | 8.0367   | 1180923 | Asthma |
| rs28746955  | 6 | 32685081 | C | A | 0.2030 | 0.0507  | 0.0064 | 1.86E-15 | 7.9500   | 1180923 | Asthma |
| rs28746956  | 6 | 32685100 | G | T | 0.2113 | 0.0496  | 0.0062 | 1.51E-15 | 7.9765   | 1180923 | Asthma |
| rs9275163   | 6 | 32685103 | C | A | 0.1125 | 0.1392  | 0.0089 | 7.73E-55 | 15.5964  | 1094744 | Asthma |
| rs28746957  | 6 | 32685116 | C | T | 0.1902 | 0.0405  | 0.0073 | 2.55E-08 | 5.5701   | 1029518 | Asthma |
| rs28746958  | 6 | 32685136 | C | G | 0.1885 | 0.0432  | 0.0075 | 7.81E-09 | 5.7725   | 1003385 | Asthma |
| rs28746959  | 6 | 32685137 | A | G | 0.1885 | 0.0432  | 0.0075 | 7.98E-09 | 5.7687   | 1003385 | Asthma |
| rs9275164   | 6 | 32685152 | C | T | 0.2364 | 0.0875  | 0.0066 | 1.30E-40 | 13.3429  | 1094744 | Asthma |
| rs28746960  | 6 | 32685161 | G | A | 0.2095 | 0.0549  | 0.0069 | 1.72E-15 | 7.9600   | 1029518 | Asthma |
| rs9275165   | 6 | 32685179 | G | A | 0.2342 | 0.0877  | 0.0066 | 1.21E-40 | 13.3483  | 1094744 | Asthma |
| rs9275166   | 6 | 32685186 | C | T | 0.2342 | 0.0877  | 0.0066 | 1.24E-40 | 13.3469  | 1094744 | Asthma |
| rs28746961  | 6 | 32685191 | G | A | 0.2095 | 0.0549  | 0.0069 | 1.81E-15 | 7.9537   | 1029518 | Asthma |
| rs28746962  | 6 | 32685202 | A | C | 0.2141 | 0.0509  | 0.0062 | 1.59E-16 | 8.2498   | 1180923 | Asthma |
| rs28371251  | 6 | 32685241 | C | T | 0.2954 | 0.0594  | 0.0056 | 1.64E-26 | 10.6554  | 1246149 | Asthma |
| rs116746348 | 6 | 32685285 | C | A | 0.0367 | -0.1047 | 0.0160 | 6.66E-11 | -6.5282  | 1111803 | Asthma |
| rs4947342   | 6 | 32685293 | A | G | 0.2323 | 0.0861  | 0.0060 | 2.93E-47 | 14.4393  | 1246149 | Asthma |
| rs28746963  | 6 | 32685302 | T | C | 0.2104 | 0.0544  | 0.0069 | 2.69E-15 | 7.9044   | 1029518 | Asthma |
| rs28746964  | 6 | 32685306 | G | C | 0.2139 | 0.0508  | 0.0062 | 2.01E-16 | 8.2212   | 1180923 | Asthma |
| rs28746965  | 6 | 32685359 | G | A | 0.2062 | 0.0549  | 0.0063 | 2.06E-18 | 8.7540   | 1180923 | Asthma |
| rs28746966  | 6 | 32685368 | C | A | 0.2141 | 0.0509  | 0.0062 | 1.66E-16 | 8.2446   | 1180923 | Asthma |
| rs28746967  | 6 | 32685454 | C | T | 0.2140 | 0.0509  | 0.0062 | 1.52E-16 | 8.2553   | 1180923 | Asthma |
| rs28746968  | 6 | 32685470 | T | C | 0.2128 | 0.0503  | 0.0062 | 4.36E-16 | 8.1284   | 1180923 | Asthma |
| rs28746969  | 6 | 32685471 | G | A | 0.2092 | 0.0549  | 0.0069 | 1.72E-15 | 7.9600   | 1029518 | Asthma |
| rs28746970  | 6 | 32685482 | C | T | 0.2092 | 0.0549  | 0.0069 | 1.85E-15 | 7.9510   | 1029518 | Asthma |
| rs9275167   | 6 | 32685486 | G | A | 0.1107 | 0.1318  | 0.0081 | 1.39E-59 | 16.2787  | 1246149 | Asthma |
| rs28746971  | 6 | 32685495 | A | G | 0.2105 | 0.0544  | 0.0069 | 2.73E-15 | 7.9025   | 1029518 | Asthma |
| rs2856693   | 6 | 32685506 | C | T | 0.5538 | -0.0995 | 0.0051 | 3.69E-83 | -19.3195 | 1246149 | Asthma |
| rs2856692   | 6 | 32685608 | G | T | 0.2323 | 0.0860  | 0.0060 | 3.60E-47 | 14.4250  | 1246149 | Asthma |
| rs28746972  | 6 | 32685629 | G | A | 0.2093 | 0.0543  | 0.0069 | 3.81E-15 | 7.8609   | 1029518 | Asthma |
| rs2856691   | 6 | 32685658 | A | G | 0.2320 | 0.0853  | 0.0061 | 5.81E-45 | 14.0699  | 1220016 | Asthma |
| rs28746973  | 6 | 32685665 | A | T | 0.2084 | 0.0569  | 0.0071 | 7.84E-16 | 8.0568   | 1003385 | Asthma |
| rs28746974  | 6 | 32685666 | A | G | 0.2130 | 0.0530  | 0.0063 | 3.82E-17 | 8.4185   | 1154790 | Asthma |
| rs28746976  | 6 | 32685759 | A | C | 0.2134 | 0.0572  | 0.0077 | 9.39E-14 | 7.4493   | 930250  | Asthma |
| rs28746977  | 6 | 32685781 | T | C | 0.2074 | 0.0527  | 0.0064 | 1.45E-16 | 8.2604   | 1154790 | Asthma |
| rs12526612  | 6 | 32685821 | A | G | 0.1164 | -0.0895 | 0.0098 | 9.68E-20 | -9.0925  | 995476  | Asthma |
| rs12528368  | 6 | 32685866 | C | T | 0.1164 | -0.0809 | 0.0088 | 4.02E-20 | -9.1876  | 1090071 | Asthma |
| rs28746979  | 6 | 32685871 | A | C | 0.2114 | 0.0601  | 0.0080 | 6.23E-14 | 7.5031   | 847307  | Asthma |
| rs28746980  | 6 | 32685874 | A | G | 0.2153 | 0.0552  | 0.0070 | 2.03E-15 | 7.9397   | 998712  | Asthma |
| rs9275168   | 6 | 32685899 | T | C | 0.5458 | -0.0969 | 0.0058 | 8.66E-63 | -16.7247 | 1068611 | Asthma |
| rs28746981  | 6 | 32685900 | T | G | 0.2099 | 0.0543  | 0.0071 | 2.39E-14 | 7.6275   | 998712  | Asthma |
| rs28746982  | 6 | 32685926 | A | G | 0.2189 | 0.0534  | 0.0068 | 3.22E-15 | 7.8821   | 1024845 | Asthma |
| rs9275169   | 6 | 32685944 | T | A | 0.5377 | -0.0924 | 0.0051 | 4.34E-72 | -17.9558 | 1246149 | Asthma |
| rs9275170   | 6 | 32685949 | G | A | 0.5419 | -0.0964 | 0.0057 | 1.42E-64 | -16.9678 | 1094744 | Asthma |
| rs28746983  | 6 | 32685983 | T | C | 0.2155 | 0.0622  | 0.0080 | 5.03E-15 | 7.8262   | 847307  | Asthma |
| rs28746984  | 6 | 32686042 | A | C | 0.2159 | 0.0592  | 0.0077 | 1.99E-14 | 7.6514   | 873440  | Asthma |
| rs28746989  | 6 | 32686096 | T | C | 0.2076 | 0.0548  | 0.0069 | 3.09E-15 | 7.8870   | 1029518 | Asthma |
| rs35326979  | 6 | 32686140 | G | A | 0.2122 | 0.0631  | 0.0088 | 6.76E-13 | 7.1842   | 566903  | Asthma |
| rs28746992  | 6 | 32686142 | G | A | 0.2123 | 0.0526  | 0.0063 | 6.62E-17 | 8.3536   | 1154790 | Asthma |
| rs9275171   | 6 | 32686195 | G | A | 0.2492 | 0.0729  | 0.0058 | 4.14E-36 | 12.5469  | 1246149 | Asthma |
| rs9275172   | 6 | 32686220 | A | G | 0.5371 | -0.0925 | 0.0051 | 3.28E-72 | -17.9713 | 1246149 | Asthma |
| rs28746993  | 6 | 32686253 | C | G | 0.2131 | 0.0529  | 0.0063 | 3.71E-17 | 8.4218   | 1154790 | Asthma |
| rs9275173   | 6 | 32686260 | T | A | 0.5371 | -0.0924 | 0.0051 | 4.22E-72 | -17.9570 | 1246149 | Asthma |
| rs28746994  | 6 | 32686317 | A | C | 0.2105 | 0.0649  | 0.0092 | 1.73E-12 | 7.0549   | 778845  | Asthma |
| rs28746995  | 6 | 32686339 | A | T | 0.2132 | 0.0621  | 0.0080 | 9.25E-15 | 7.7491   | 847307  | Asthma |
| rs9275175   | 6 | 32686370 | A | G | 0.2487 | 0.0721  | 0.0059 | 3.32E-34 | 12.1948  | 1220016 | Asthma |
| rs9275176   | 6 | 32686380 | G | A | 0.2467 | 0.0835  | 0.0072 | 6.34E-31 | 11.5630  | 1000149 | Asthma |
| rs9275177   | 6 | 32686397 | C | T | 0.5447 | -0.0975 | 0.0058 | 2.45E-63 | -16.7998 | 1068611 | Asthma |
| rs9275178   | 6 | 32686404 | G | A | 0.5447 | -0.0974 | 0.0058 | 3.15E-63 | -16.7850 | 1068611 | Asthma |
| rs3134970   | 6 | 32686425 | T | C | 0.3003 | -0.1120 | 0.0073 | 2.34E-53 | -15.3776 | 1000149 | Asthma |
| rs28746996  | 6 | 32686437 | C | T | 0.2019 | 0.0562  | 0.0080 | 1.53E-12 | 7.0714   | 934923  | Asthma |
| rs28746997  | 6 | 32686448 | T | C | 0.2019 | 0.0563  | 0.0080 | 1.47E-12 | 7.0769   | 934923  | Asthma |
| rs28746998  | 6 | 32686469 | T | G | 0.2016 | 0.0563  | 0.0080 | 1.55E-12 | 7.0696   | 934923  | Asthma |
| rs28746999  | 6 | 32686481 | A | G | 0.2041 | 0.0587  | 0.0079 | 9.09E-14 | 7.4536   | 934923  | Asthma |
| rs13217350  | 6 | 32686495 | A | C | 0.1157 | -0.0828 | 0.0100 | 1.48E-16 | -8.2583  | 938666  | Asthma |
| rs9275179   | 6 | 32686498 | G | A | 0.2343 | 0.0866  | 0.0067 | 4.18E-38 | 12.9059  | 1068611 | Asthma |
| rs9275180   | 6 | 32686501 | T | C | 0.4407 | 0.1043  | 0.0058 | 3.68E-72 | 17.9647  | 1068611 | Asthma |
| rs28747000  | 6 | 32686503 | A | T | 0.2027 | 0.0606  | 0.0079 | 1.94E-14 | 7.6546   | 934923  | Asthma |

|             |   |          |   |   |        |         |        |          |          |         |        |
|-------------|---|----------|---|---|--------|---------|--------|----------|----------|---------|--------|
| rs28747001  | 6 | 32686507 | G | A | 0.2027 | 0.0606  | 0.0079 | 1.94E-14 | 7.6546   | 934923  | Asthma |
| rs28747003  | 6 | 32686545 | C | T | 0.2093 | 0.0569  | 0.0070 | 6.32E-16 | 8.0829   | 1003385 | Asthma |
| rs9275181   | 6 | 32686548 | G | A | 0.2328 | 0.0871  | 0.0067 | 1.40E-38 | 12.9897  | 1068611 | Asthma |
| rs28747004  | 6 | 32686602 | A | T | 0.2107 | 0.0544  | 0.0069 | 2.56E-15 | 7.9108   | 1029518 | Asthma |
| rs9275182   | 6 | 32686613 | T | C | 0.2324 | 0.0859  | 0.0060 | 4.09E-47 | 14.4162  | 1246149 | Asthma |
| rs28747005  | 6 | 32686624 | G | C | 0.2107 | 0.0544  | 0.0069 | 2.61E-15 | 7.9085   | 1029518 | Asthma |
| rs28747006  | 6 | 32686676 | T | A | 0.2106 | 0.0544  | 0.0069 | 2.51E-15 | 7.9133   | 1029518 | Asthma |
| rs28747007  | 6 | 32686698 | A | T | 0.2106 | 0.0544  | 0.0069 | 2.57E-15 | 7.9101   | 1029518 | Asthma |
| rs9275183   | 6 | 32686725 | G | A | 0.1507 | 0.0930  | 0.0071 | 4.18E-39 | 13.0820  | 1246149 | Asthma |
| rs28747008  | 6 | 32686753 | T | C | 0.2061 | 0.0563  | 0.0071 | 2.78E-15 | 7.9007   | 1003385 | Asthma |
| rs28747009  | 6 | 32686754 | A | G | 0.2060 | 0.0564  | 0.0071 | 2.44E-15 | 7.9167   | 1003385 | Asthma |
| rs2856690   | 6 | 32686759 | T | A | 0.5624 | -0.1026 | 0.0057 | 2.66E-72 | -17.9827 | 1094744 | Asthma |
| rs2856689   | 6 | 32686774 | A | G | 0.5627 | -0.1026 | 0.0057 | 2.41E-72 | -17.9879 | 1094744 | Asthma |
| rs28747011  | 6 | 32686777 | G | A | 0.2061 | 0.0562  | 0.0071 | 3.12E-15 | 7.8859   | 1003385 | Asthma |
| rs28747012  | 6 | 32686781 | C | T | 0.2117 | 0.0526  | 0.0063 | 7.90E-17 | 8.3326   | 1154790 | Asthma |
| rs28747013  | 6 | 32686819 | A | G | 0.2140 | 0.0508  | 0.0062 | 1.86E-16 | 8.2307   | 1180923 | Asthma |
| rs2856688   | 6 | 32686863 | T | G | 0.2324 | 0.0860  | 0.0060 | 3.48E-47 | 14.4276  | 1246149 | Asthma |
| rs28747014  | 6 | 32686881 | C | T | 0.2140 | 0.0510  | 0.0062 | 1.35E-16 | 8.2691   | 1180923 | Asthma |
| rs28747015  | 6 | 32686896 | T | C | 0.2140 | 0.0510  | 0.0062 | 1.32E-16 | 8.2715   | 1180923 | Asthma |
| rs28747016  | 6 | 32686929 | A | G | 0.2057 | 0.0582  | 0.0078 | 1.12E-13 | 7.4265   | 934923  | Asthma |
| rs9275184   | 6 | 32686937 | C | T | 0.1109 | 0.1315  | 0.0081 | 1.85E-59 | 16.2622  | 1246149 | Asthma |
| rs28747017  | 6 | 32686946 | G | C | 0.2038 | 0.0571  | 0.0079 | 4.74E-13 | 7.2325   | 934923  | Asthma |
| rs28747018  | 6 | 32686962 | C | T | 0.2038 | 0.0571  | 0.0079 | 4.77E-13 | 7.2318   | 934923  | Asthma |
| rs28747020  | 6 | 32686983 | C | T | 0.2038 | 0.0572  | 0.0079 | 4.38E-13 | 7.2433   | 934923  | Asthma |
| rs28747021  | 6 | 32686995 | G | A | 0.2038 | 0.0572  | 0.0079 | 4.34E-13 | 7.2447   | 934923  | Asthma |
| rs28747022  | 6 | 32687008 | A | G | 0.2038 | 0.0572  | 0.0079 | 4.27E-13 | 7.2468   | 934923  | Asthma |
| rs28747023  | 6 | 32687030 | A | G | 0.2233 | 0.0414  | 0.0062 | 2.46E-11 | 6.6757   | 1154790 | Asthma |
| rs2856687   | 6 | 32687045 | T | C | 0.4320 | -0.0781 | 0.0060 | 3.30E-39 | -13.0998 | 1094744 | Asthma |
| rs28747024  | 6 | 32687053 | A | G | 0.2071 | 0.0565  | 0.0071 | 1.73E-15 | 7.9598   | 1003385 | Asthma |
| rs28747025  | 6 | 32687054 | C | G | 0.2070 | 0.0567  | 0.0071 | 1.37E-15 | 7.9884   | 1003385 | Asthma |
| rs28747026  | 6 | 32687083 | G | A | 0.2100 | 0.0550  | 0.0069 | 1.47E-15 | 7.9793   | 1029518 | Asthma |
| rs2856686   | 6 | 32687092 | T | C | 0.5601 | -0.1035 | 0.0057 | 6.15E-74 | -18.1904 | 1094744 | Asthma |
| rs28747028  | 6 | 32687212 | T | C | 0.2140 | 0.0510  | 0.0062 | 1.41E-16 | 8.2638   | 1180923 | Asthma |
| rs2856685   | 6 | 32687295 | A | T | 0.5605 | -0.1032 | 0.0057 | 1.55E-73 | -18.1393 | 1094744 | Asthma |
| rs2856684   | 6 | 32687318 | T | C | 0.5605 | -0.1032 | 0.0057 | 1.51E-73 | -18.1417 | 1094744 | Asthma |
| rs28747029  | 6 | 32687319 | A | G | 0.2097 | 0.0547  | 0.0069 | 2.22E-15 | 7.9285   | 1029518 | Asthma |
| rs28747030  | 6 | 32687327 | A | T | 0.2130 | 0.0507  | 0.0062 | 2.76E-16 | 8.1835   | 1180923 | Asthma |
| rs28747031  | 6 | 32687348 | A | T | 0.2140 | 0.0510  | 0.0062 | 1.40E-16 | 8.2643   | 1180923 | Asthma |
| rs28747032  | 6 | 32687403 | C | T | 0.2140 | 0.0510  | 0.0062 | 1.37E-16 | 8.2670   | 1180923 | Asthma |
| rs28747033  | 6 | 32687436 | C | T | 0.2140 | 0.0510  | 0.0062 | 1.32E-16 | 8.2719   | 1180923 | Asthma |
| rs2856683   | 6 | 32687441 | G | T | 0.2324 | 0.0859  | 0.0060 | 3.67E-47 | 14.4236  | 1246149 | Asthma |
| rs28747034  | 6 | 32687480 | T | C | 0.2140 | 0.0510  | 0.0062 | 1.36E-16 | 8.2680   | 1180923 | Asthma |
| rs9275185   | 6 | 32687528 | T | G | 0.1100 | 0.1433  | 0.0103 | 5.93E-44 | 13.9055  | 938666  | Asthma |
| rs28747035  | 6 | 32687539 | C | A | 0.2427 | 0.0652  | 0.0084 | 9.29E-15 | 7.7486   | 505420  | Asthma |
| rs28747037  | 6 | 32687559 | C | T | 0.1977 | 0.0581  | 0.0070 | 1.68E-16 | 8.2431   | 1029518 | Asthma |
| rs28747038  | 6 | 32687591 | A | C | 0.2286 | 0.0542  | 0.0065 | 8.31E-17 | 8.3268   | 812903  | Asthma |
| rs28747043  | 6 | 32687731 | G | A | 0.2127 | 0.0503  | 0.0062 | 4.66E-16 | 8.1200   | 1180923 | Asthma |
| rs28747044  | 6 | 32687739 | C | T | 0.2084 | 0.0540  | 0.0069 | 7.45E-15 | 7.7767   | 1029518 | Asthma |
| rs28747045  | 6 | 32687760 | C | T | 0.2143 | 0.0584  | 0.0078 | 7.28E-14 | 7.4827   | 873440  | Asthma |
| rs28747046  | 6 | 32687762 | G | A | 0.2143 | 0.0584  | 0.0078 | 7.28E-14 | 7.4827   | 873440  | Asthma |
| rs13194877  | 6 | 32687771 | A | G | 0.1267 | -0.0802 | 0.0083 | 2.96E-22 | -9.7018  | 1246149 | Asthma |
| rs28747047  | 6 | 32687801 | T | C | 0.2190 | 0.0525  | 0.0068 | 8.92E-15 | 7.7538   | 1024845 | Asthma |
| rs28747048  | 6 | 32687807 | T | C | 0.2052 | 0.0546  | 0.0070 | 8.21E-15 | 7.7644   | 1029518 | Asthma |
| rs2856679   | 6 | 32687838 | C | A | 0.5611 | -0.1032 | 0.0057 | 5.15E-73 | -18.0734 | 1094744 | Asthma |
| rs28747049  | 6 | 32687882 | C | A | 0.2152 | 0.0584  | 0.0077 | 4.77E-14 | 7.5381   | 873440  | Asthma |
| rs28747050  | 6 | 32687897 | C | T | 0.2151 | 0.0584  | 0.0077 | 4.94E-14 | 7.5335   | 873440  | Asthma |
| rs28747051  | 6 | 32687909 | T | G | 0.2146 | 0.0581  | 0.0078 | 7.50E-14 | 7.4788   | 873440  | Asthma |
| rs28747052  | 6 | 32687926 | T | C | 0.2146 | 0.0580  | 0.0078 | 7.83E-14 | 7.4732   | 873440  | Asthma |
| rs3129783   | 6 | 32687953 | A | G | 0.5133 | -0.0464 | 0.0065 | 9.63E-13 | -7.1356  | 938666  | Asthma |
| rs2856678   | 6 | 32688053 | A | T | 0.2432 | 0.1152  | 0.0088 | 8.63E-39 | 13.0265  | 844071  | Asthma |
| rs3021056   | 6 | 32688144 | T | C | 0.2320 | 0.1090  | 0.0089 | 3.76E-34 | 12.1848  | 844071  | Asthma |
| rs341171523 | 6 | 32688177 | G | A | 0.2020 | 0.0580  | 0.0096 | 1.82E-09 | 6.0127   | 778845  | Asthma |
| rs2935909   | 6 | 32688185 | G | T | 0.2327 | 0.0962  | 0.0079 | 1.92E-34 | 12.2392  | 912533  | Asthma |
| rs9275187   | 6 | 32688261 | C | T | 0.3904 | 0.1189  | 0.0070 | 4.41E-64 | 16.9008  | 935848  | Asthma |
| rs9275188   | 6 | 32688359 | T | C | 0.4267 | 0.1228  | 0.0077 | 1.02E-57 | 16.0137  | 844071  | Asthma |
| rs9275189   | 6 | 32688360 | G | A | 0.4267 | 0.1228  | 0.0077 | 1.03E-57 | 16.0133  | 844071  | Asthma |
| rs9275190   | 6 | 32688451 | G | A | 0.4170 | 0.0986  | 0.0068 | 4.11E-48 | 14.5740  | 973993  | Asthma |
| rs9275191   | 6 | 32688458 | C | T | 0.4127 | 0.0980  | 0.0068 | 3.31E-47 | 14.4310  | 973993  | Asthma |
| rs13195522  | 6 | 32688476 | A | C | 0.1214 | -0.0776 | 0.0099 | 4.73E-15 | -7.8339  | 973993  | Asthma |
| rs9275192   | 6 | 32688528 | A | G | 0.2489 | 0.0991  | 0.0077 | 4.68E-38 | 12.8970  | 973993  | Asthma |
| rs9275193   | 6 | 32688529 | A | C | 0.2490 | 0.0992  | 0.0077 | 4.12E-38 | 12.9067  | 973993  | Asthma |
| rs9275194   | 6 | 32688557 | C | T | 0.3466 | 0.1099  | 0.0080 | 1.22E-42 | 13.6864  | 844071  | Asthma |
| rs13198578  | 6 | 32688575 | T | C | 0.1294 | -0.0801 | 0.0097 | 1.72E-16 | -8.2404  | 973993  | Asthma |
| rs9275195   | 6 | 32688628 | C | T | 0.3901 | 0.0940  | 0.0070 | 1.28E-40 | 13.3445  | 908767  | Asthma |

|            |   |          |   |   |        |         |        |          |          |         |        |
|------------|---|----------|---|---|--------|---------|--------|----------|----------|---------|--------|
| rs9275196  | 6 | 32688629 | A | G | 0.3882 | 0.0974  | 0.0070 | 2.52E-44 | 13.9657  | 973993  | Asthma |
| rs28747056 | 6 | 32688767 | G | A | 0.2197 | 0.0524  | 0.0068 | 9.04E-15 | 7.7519   | 1024845 | Asthma |
| rs28747057 | 6 | 32688776 | T | C | 0.2117 | 0.0653  | 0.0091 | 9.31E-13 | 7.1403   | 778845  | Asthma |
| rs28747058 | 6 | 32688777 | G | A | 0.2117 | 0.0653  | 0.0091 | 9.31E-13 | 7.1403   | 778845  | Asthma |
| rs28747059 | 6 | 32688781 | G | A | 0.2165 | 0.0548  | 0.0070 | 3.53E-15 | 7.8707   | 998712  | Asthma |
| rs3129784  | 6 | 32688831 | T | G | 0.4422 | 0.0907  | 0.0053 | 9.39E-67 | 17.2601  | 1224666 | Asthma |
| rs28747060 | 6 | 32688837 | T | C | 0.2103 | 0.0439  | 0.0065 | 1.31E-11 | 6.7674   | 1133307 | Asthma |
| rs28747061 | 6 | 32688876 | T | C | 0.2141 | 0.0452  | 0.0063 | 7.63E-13 | 7.1677   | 1159440 | Asthma |
| rs28747062 | 6 | 32688884 | C | T | 0.2141 | 0.0453  | 0.0063 | 7.03E-13 | 7.1788   | 1159440 | Asthma |
| rs28747063 | 6 | 32688891 | C | T | 0.2141 | 0.0453  | 0.0063 | 7.15E-13 | 7.1766   | 1159440 | Asthma |
| rs9275199  | 6 | 32688903 | T | C | 0.4454 | 0.0978  | 0.0058 | 7.02E-63 | 16.7372  | 1068588 | Asthma |
| rs3104362  | 6 | 32688920 | G | T | 0.2255 | 0.0864  | 0.0069 | 1.81E-36 | 12.6124  | 1068588 | Asthma |
| rs9275201  | 6 | 32688946 | A | G | 0.1070 | 0.1316  | 0.0084 | 4.55E-55 | 15.6301  | 1224666 | Asthma |
| rs3129785  | 6 | 32688947 | T | C | 0.2287 | 0.0806  | 0.0061 | 7.90E-40 | 13.2079  | 1224666 | Asthma |
| rs28747064 | 6 | 32688993 | G | A | 0.2175 | 0.0464  | 0.0062 | 9.93E-14 | 7.4418   | 1159440 | Asthma |
| rs28747065 | 6 | 32689029 | C | T | 0.2138 | 0.0473  | 0.0069 | 8.34E-12 | 6.8325   | 1064845 | Asthma |
| rs2856677  | 6 | 32689038 | T | C | 0.2303 | 0.0817  | 0.0061 | 3.81E-41 | 13.4341  | 1224666 | Asthma |
| rs28747066 | 6 | 32689040 | A | G | 0.2138 | 0.0473  | 0.0069 | 8.13E-12 | 6.8363   | 1064845 | Asthma |
| rs28747067 | 6 | 32689055 | T | C | 0.2139 | 0.0474  | 0.0069 | 7.47E-12 | 6.8483   | 1064845 | Asthma |
| rs2856676  | 6 | 32689056 | G | A | 0.5546 | -0.0931 | 0.0053 | 1.01E-68 | -17.5200 | 1198533 | Asthma |
| rs9275202  | 6 | 32689092 | A | G | 0.5545 | -0.0935 | 0.0053 | 3.64E-69 | -17.5780 | 1198533 | Asthma |
| rs28772268 | 6 | 32689095 | A | G | 0.2135 | 0.0482  | 0.0069 | 3.51E-12 | 6.9554   | 1064845 | Asthma |
| rs28772269 | 6 | 32689101 | C | A | 0.2301 | 0.0520  | 0.0074 | 2.56E-12 | 7.0000   | 696825  | Asthma |
| rs28772270 | 6 | 32689104 | T | C | 0.2135 | 0.0482  | 0.0069 | 3.53E-12 | 6.9547   | 1064845 | Asthma |
| rs2647000  | 6 | 32689113 | T | C | 0.5532 | -0.0932 | 0.0052 | 4.71E-71 | -17.8226 | 1224666 | Asthma |
| rs28772271 | 6 | 32689124 | C | T | 0.2162 | 0.0486  | 0.0064 | 2.04E-14 | 7.6484   | 1133307 | Asthma |
| rs9275203  | 6 | 32689170 | A | G | 0.1080 | 0.1276  | 0.0077 | 2.44E-62 | 16.6634  | 1376071 | Asthma |
| rs9391891  | 6 | 32689198 | A | C | 0.2199 | 0.0448  | 0.0057 | 3.59E-15 | 7.8687   | 1310845 | Asthma |
| rs28772272 | 6 | 32689203 | T | C | 0.2106 | 0.0540  | 0.0069 | 3.90E-15 | 7.8582   | 1029518 | Asthma |
| rs9378274  | 6 | 32689206 | A | T | 0.2199 | 0.0448  | 0.0057 | 3.35E-15 | 7.8770   | 1310845 | Asthma |
| rs9405042  | 6 | 32689243 | G | C | 0.2199 | 0.0447  | 0.0057 | 3.75E-15 | 7.8630   | 1310845 | Asthma |
| rs35282906 | 6 | 32689424 | A | T | 0.1266 | -0.0733 | 0.0076 | 5.68E-22 | -9.6351  | 1376071 | Asthma |
| rs4570006  | 6 | 32689480 | T | G | 0.2199 | 0.0448  | 0.0057 | 3.46E-15 | 7.8731   | 1310845 | Asthma |
| rs3129714  | 6 | 32689502 | A | G | 0.3391 | 0.0438  | 0.0055 | 1.17E-15 | 8.0081   | 1159440 | Asthma |
| rs4538747  | 6 | 32689557 | A | T | 0.2199 | 0.0448  | 0.0057 | 3.45E-15 | 7.8734   | 1310845 | Asthma |
| rs4538748  | 6 | 32689728 | C | T | 0.3376 | 0.0450  | 0.0054 | 8.92E-17 | 8.3183   | 1281476 | Asthma |
| rs4642516  | 6 | 32689766 | G | T | 0.5507 | -0.0913 | 0.0048 | 1.09E-80 | -19.0235 | 1376071 | Asthma |
| rs9275205  | 6 | 32689783 | C | T | 0.1876 | 0.1015  | 0.0060 | 2.12E-63 | 16.8088  | 1376071 | Asthma |
| rs9275206  | 6 | 32689788 | G | A | 0.1094 | 0.1383  | 0.0090 | 9.69E-53 | 15.2843  | 1094744 | Asthma |
| rs28437335 | 6 | 32689867 | C | T | 0.2168 | 0.0481  | 0.0064 | 3.50E-14 | 7.5785   | 1133307 | Asthma |
| rs9405119  | 6 | 32689904 | G | A | 0.2199 | 0.0449  | 0.0057 | 2.78E-15 | 7.9002   | 1310845 | Asthma |
| rs9275207  | 6 | 32689933 | G | A | 0.1080 | 0.1276  | 0.0077 | 2.14E-62 | 16.6706  | 1376071 | Asthma |
| rs9275208  | 6 | 32689945 | A | G | 0.3734 | 0.1021  | 0.0055 | 1.46E-77 | 18.6424  | 1133307 | Asthma |
| rs9275210  | 6 | 32690040 | T | C | 0.4058 | 0.0989  | 0.0049 | 1.37E-89 | 20.0692  | 1349938 | Asthma |
| rs7754464  | 6 | 32690041 | A | G | 0.5526 | -0.0927 | 0.0052 | 2.19E-70 | -17.7364 | 1224666 | Asthma |
| rs9275211  | 6 | 32690067 | C | T | 0.1862 | 0.1054  | 0.0066 | 3.73E-57 | 15.9333  | 1224666 | Asthma |
| rs11967958 | 6 | 32690072 | A | G | 0.2164 | 0.0475  | 0.0064 | 8.07E-14 | 7.4691   | 1133307 | Asthma |
| rs11967921 | 6 | 32690078 | A | C | 0.2164 | 0.0475  | 0.0064 | 8.02E-14 | 7.4699   | 1133307 | Asthma |
| rs7754885  | 6 | 32690081 | G | A | 0.5540 | -0.0929 | 0.0053 | 1.85E-68 | -17.4855 | 1198533 | Asthma |
| rs11963017 | 6 | 32690086 | C | A | 0.2137 | 0.0468  | 0.0069 | 1.44E-11 | 6.7540   | 1064845 | Asthma |
| rs9296035  | 6 | 32690111 | G | A | 0.2173 | 0.0458  | 0.0062 | 2.10E-13 | 7.3425   | 1159440 | Asthma |
| rs12528622 | 6 | 32690482 | A | G | 0.1331 | -0.0665 | 0.0074 | 2.84E-19 | -8.9750  | 1376071 | Asthma |
| rs9275212  | 6 | 32690550 | G | T | 0.4241 | -0.0671 | 0.0050 | 4.20E-41 | -13.4270 | 1376071 | Asthma |
| rs9275213  | 6 | 32690558 | C | T | 0.1080 | 0.1277  | 0.0077 | 1.85E-62 | 16.6791  | 1376071 | Asthma |
| rs28371256 | 6 | 32690589 | C | T | 0.0860 | 0.0452  | 0.0083 | 4.43E-08 | 5.4727   | 1376071 | Asthma |
| rs9368737  | 6 | 32690652 | C | T | 0.2994 | 0.0530  | 0.0052 | 1.20E-24 | 10.2489  | 1376071 | Asthma |
| rs9394110  | 6 | 32690694 | G | A | 0.2133 | 0.0441  | 0.0058 | 2.04E-14 | 7.6481   | 1310845 | Asthma |
| rs2157051  | 6 | 32690847 | G | A | 0.3180 | -0.0699 | 0.0061 | 7.44E-31 | -11.5494 | 1160365 | Asthma |
| rs9275214  | 6 | 32690888 | A | G | 0.1061 | 0.1289  | 0.0086 | 3.05E-50 | 14.9047  | 1193860 | Asthma |
| rs9275215  | 6 | 32690900 | C | T | 0.3201 | 0.1064  | 0.0069 | 2.97E-53 | 15.3615  | 873440  | Asthma |
| rs2858330  | 6 | 32690938 | T | C | 0.5571 | -0.1036 | 0.0066 | 7.32E-56 | -15.7452 | 973993  | Asthma |
| rs9394111  | 6 | 32690967 | T | A | 0.2087 | 0.0646  | 0.0092 | 2.37E-12 | 7.0106   | 778845  | Asthma |
| rs9275216  | 6 | 32690971 | T | A | 0.3416 | 0.1092  | 0.0079 | 2.03E-43 | 13.8167  | 479287  | Asthma |
| rs2858329  | 6 | 32691024 | A | G | 0.5559 | -0.1024 | 0.0066 | 7.79E-55 | -15.5950 | 973993  | Asthma |
| rs9275217  | 6 | 32691090 | A | G | 0.5098 | -0.0514 | 0.0054 | 3.60E-21 | -9.4436  | 1198533 | Asthma |
| rs2858328  | 6 | 32691134 | C | T | 0.4384 | -0.0670 | 0.0060 | 1.36E-28 | -11.0926 | 1042455 | Asthma |
| rs9275218  | 6 | 32691156 | G | C | 0.3215 | 0.1071  | 0.0068 | 3.65E-56 | 15.7902  | 995476  | Asthma |
| rs9275221  | 6 | 32691322 | C | T | 0.1079 | 0.1276  | 0.0077 | 2.77E-62 | 16.6554  | 1376071 | Asthma |
| rs35725597 | 6 | 32691335 | T | C | 0.1266 | -0.0733 | 0.0076 | 5.71E-22 | -9.6348  | 1376071 | Asthma |
| rs5002702  | 6 | 32691381 | G | A | 0.5103 | -0.0484 | 0.0049 | 4.29E-23 | -9.8971  | 1376071 | Asthma |
| rs5002704  | 6 | 32691502 | T | C | 0.5045 | -0.0546 | 0.0059 | 2.38E-20 | -9.2437  | 1130071 | Asthma |
| rs3129717  | 6 | 32691531 | T | C | 0.2951 | -0.0963 | 0.0066 | 3.60E-48 | -14.5831 | 1130071 | Asthma |
| rs28772273 | 6 | 32691537 | T | C | 0.2354 | 0.0486  | 0.0069 | 2.33E-12 | 7.0133   | 1064845 | Asthma |
| rs3134967  | 6 | 32691538 | A | G | 0.2979 | -0.0943 | 0.0061 | 2.47E-53 | -15.3734 | 1198533 | Asthma |

|             |   |          |   |   |        |         |        |          |          |          |        |
|-------------|---|----------|---|---|--------|---------|--------|----------|----------|----------|--------|
| rs5002705   | 6 | 32691542 | C | T | 0.5471 | -0.0485 | 0.0060 | 5.16E-16 | -8.1077  | 1130071  | Asthma |
| rs5002706   | 6 | 32691555 | A | G | 0.1138 | 0.1351  | 0.0090 | 2.21E-51 | 15.0794  | 1130071  | Asthma |
| rs5002707   | 6 | 32691560 | T | C | 0.5047 | -0.0539 | 0.0059 | 8.07E-20 | -9.1121  | 1130071  | Asthma |
| rs5002708   | 6 | 32691580 | T | C | 0.5052 | -0.0535 | 0.0059 | 1.48E-19 | -9.0464  | 1130071  | Asthma |
| rs4713589   | 6 | 32691658 | G | A | 0.4289 | -0.0659 | 0.0050 | 8.37E-40 | -13.2035 | 1376071  | Asthma |
| rs9275222   | 6 | 32691739 | T | A | 0.4478 | 0.0535  | 0.0049 | 9.19E-28 | 10.9206  | 1376071  | Asthma |
| rs4713587   | 6 | 32691758 | G | T | 0.5102 | -0.0485 | 0.0049 | 2.94E-23 | -9.9349  | 1376071  | Asthma |
| rs72844311  | 6 | 32691759 | T | C | 0.1266 | -0.0734 | 0.0076 | 5.32E-22 | -9.6419  | 1376071  | Asthma |
| rs4248168   | 6 | 32691966 | G | C | 0.5039 | -0.0501 | 0.0049 | 1.29E-24 | -10.2417 | 1376071  | Asthma |
| rs3129718   | 6 | 32692061 | T | C | 0.1687 | -0.0469 | 0.0067 | 2.59E-12 | -6.9983  | 1376071  | Asthma |
| rs9275223   | 6 | 32692062 | A | G | 0.1079 | 0.1276  | 0.0077 | 2.12E-62 | 16.6710  | 1376071  | Asthma |
| rs9275224   | 6 | 32692101 | A | G | 0.5037 | -0.0502 | 0.0049 | 9.14E-25 | -10.2749 | 1376071  | Asthma |
| rs35472814  | 6 | 32692120 | C | T | 0.1266 | -0.0734 | 0.0076 | 5.15E-22 | -9.6453  | 1376071  | Asthma |
| rs4713580   | 6 | 32692217 | C | T | 0.5039 | -0.0502 | 0.0049 | 1.05E-24 | -10.2620 | 1376071  | Asthma |
| rs4713581   | 6 | 32692246 | T | C | 0.5126 | -0.0540 | 0.0053 | 9.60E-25 | -10.2702 | 1246149  | Asthma |
| rs4713582   | 6 | 32692274 | T | C | 0.5106 | -0.0485 | 0.0049 | 2.95E-23 | -9.9343  | 1376071  | Asthma |
| rs4713583   | 6 | 32692376 | T | G | 0.5040 | -0.0500 | 0.0049 | 1.52E-24 | -10.2257 | 1376071  | Asthma |
| rs4711304   | 6 | 32692393 | T | C | 0.5094 | -0.0488 | 0.0049 | 1.63E-23 | -9.9932  | 1376071  | Asthma |
| rs4713584   | 6 | 32692460 | C | T | 0.5048 | -0.0516 | 0.0054 | 1.00E-21 | -9.5765  | 1159440  | Asthma |
| rs9275225   | 6 | 32692485 | G | A | 0.5029 | -0.0529 | 0.0053 | 4.04E-23 | -9.9029  | 1224666  | Asthma |
| rs9275226   | 6 | 32692534 | C | T | 0.5099 | -0.0507 | 0.0053 | 2.28E-21 | -9.4913  | 1224666  | Asthma |
| rs9275227   | 6 | 32692560 | C | G | 0.5037 | -0.0526 | 0.0054 | 8.31E-23 | -9.8305  | 1224666  | Asthma |
| rs9275228   | 6 | 32692570 | G | A | 0.5037 | -0.0526 | 0.0054 | 8.18E-23 | -9.8322  | 1224666  | Asthma |
| rs2858324   | 6 | 32692598 | A | G | 0.4242 | -0.0669 | 0.0050 | 6.57E-41 | -13.3939 | 1376071  | Asthma |
| rs9275230   | 6 | 32692665 | A | G | 0.4975 | -0.0531 | 0.0064 | 9.51E-17 | -8.3107  | 661498   | Asthma |
| rs9275231   | 6 | 32692728 | T | C | 0.5104 | -0.0485 | 0.0049 | 3.32E-23 | -9.9226  | 1376071  | Asthma |
| rs9275232   | 6 | 32692797 | C | A | 0.5118 | -0.0518 | 0.0054 | 3.99E-22 | -9.6714  | 1224666  | Asthma |
| rs9275234   | 6 | 32692809 | C | T | 0.5059 | -0.0538 | 0.0055 | 6.04E-23 | -9.8629  | 1198533  | Asthma |
| rs9275235   | 6 | 32692810 | A | G | 0.5054 | -0.0536 | 0.0054 | 1.42E-23 | -10.0071 | 1224666  | Asthma |
| rs9275236   | 6 | 32692824 | A | G | 0.5041 | -0.0529 | 0.0054 | 5.43E-23 | -9.8734  | 1224666  | Asthma |
| rs9275237   | 6 | 32692835 | C | A | 0.5106 | -0.0510 | 0.0053 | 1.45E-21 | -9.5386  | 1224666  | Asthma |
| rs9275238   | 6 | 32692912 | A | G | 0.5046 | -0.0500 | 0.0050 | 7.26E-24 | -10.0733 | 1349938  | Asthma |
| rs28891490  | 6 | 32692920 | A | C | 0.2085 | 0.0474  | 0.0065 | 2.77E-13 | 7.3053   | 1133307  | Asthma |
| rs9275239   | 6 | 32692940 | G | A | 0.5055 | -0.0530 | 0.0055 | 2.89E-22 | -9.7042  | 1198533  | Asthma |
| rs9275240   | 6 | 32692945 | C | T | 0.5049 | -0.0533 | 0.0055 | 1.40E-22 | -9.7777  | 1198533  | Asthma |
| rs9275241   | 6 | 32692964 | G | T | 0.5071 | -0.0502 | 0.0050 | 6.35E-24 | -10.0863 | 1349938  | Asthma |
| rs9275242   | 6 | 32692997 | C | T | 0.5053 | -0.0533 | 0.0055 | 1.38E-22 | -9.7797  | 1198533  | Asthma |
| rs9275243   | 6 | 32693007 | C | G | 0.5109 | -0.0486 | 0.0050 | 1.25E-22 | -9.7893  | 1349938  | Asthma |
| rs9275244   | 6 | 32693104 | G | T | 0.5038 | -0.0500 | 0.0049 | 1.50E-24 | -10.2268 | 1376071  | Asthma |
| rs9275245   | 6 | 32693166 | A | G | 0.5090 | -0.0549 | 0.0053 | 1.55E-25 | -10.4449 | 1246149  | Asthma |
| rs72844343  | 6 | 32693216 | T | A | 0.1265 | -0.0812 | 0.0084 | 5.04E-22 | -9.6473  | 12240016 | Asthma |
| rs9275246   | 6 | 32693226 | C | A | 0.5093 | -0.0511 | 0.0053 | 1.01E-21 | -9.5760  | 1224666  | Asthma |
| rs9275247   | 6 | 32693238 | T | C | 0.5153 | -0.0533 | 0.0053 | 3.93E-24 | -10.1334 | 1246149  | Asthma |
| rs28891491  | 6 | 32693303 | A | G | 0.2111 | 0.0454  | 0.0063 | 7.04E-13 | 7.1787   | 1159440  | Asthma |
| rs9275248   | 6 | 32693358 | A | G | 0.5051 | -0.0531 | 0.0055 | 1.99E-22 | -9.7420  | 1198533  | Asthma |
| rs9275250   | 6 | 32693364 | C | T | 0.5048 | -0.0533 | 0.0055 | 1.42E-22 | -9.7767  | 1198533  | Asthma |
| rs9275251   | 6 | 32693369 | A | C | 0.5041 | -0.0530 | 0.0054 | 4.08E-23 | -9.9020  | 1224666  | Asthma |
| rs62404159  | 6 | 32693373 | G | A | 0.0745 | -0.1115 | 0.0104 | 5.16E-27 | -10.7624 | 1159440  | Asthma |
| rs9275253   | 6 | 32693427 | C | T | 0.5036 | -0.0535 | 0.0054 | 1.56E-23 | -9.9979  | 1224666  | Asthma |
| rs9275254   | 6 | 32693432 | T | G | 0.5036 | -0.0535 | 0.0054 | 1.56E-23 | -9.9981  | 1224666  | Asthma |
| rs9275255   | 6 | 32693469 | T | A | 0.5028 | -0.0530 | 0.0053 | 3.76E-23 | -9.9101  | 1224666  | Asthma |
| rs2858320   | 6 | 32693516 | A | G | 0.5125 | -0.0738 | 0.0055 | 1.36E-41 | -13.5105 | 1224666  | Asthma |
| rs2858319   | 6 | 32693517 | T | C | 0.4701 | -0.0638 | 0.0051 | 1.76E-36 | -12.6142 | 1376071  | Asthma |
| rs2858318   | 6 | 32693525 | T | G | 0.4251 | -0.0696 | 0.0055 | 2.80E-37 | -12.7583 | 1224666  | Asthma |
| rs9275259   | 6 | 32693795 | C | A | 0.5026 | -0.0531 | 0.0053 | 3.20E-23 | -9.9263  | 1224666  | Asthma |
| rs9275260   | 6 | 32693798 | C | T | 0.5026 | -0.0531 | 0.0053 | 3.19E-23 | -9.9267  | 1224666  | Asthma |
| rs3129719   | 6 | 32694002 | T | G | 0.2918 | -0.0958 | 0.0060 | 4.47E-57 | -15.9219 | 1219993  | Asthma |
| rs9275261   | 6 | 32694032 | T | C | 0.5468 | -0.0615 | 0.0068 | 9.66E-20 | -9.0927  | 973993   | Asthma |
| rs2647011   | 6 | 32694138 | C | A | 0.4953 | -0.0601 | 0.0078 | 1.42E-14 | -7.6945  | 844071   | Asthma |
| rs73407347  | 6 | 32694183 | A | T | 0.5035 | -0.0533 | 0.0054 | 1.48E-22 | -9.7728  | 1198533  | Asthma |
| rs79870097  | 6 | 32694218 | C | T | 0.1258 | -0.0729 | 0.0077 | 1.89E-21 | -9.5109  | 1376071  | Asthma |
| rs111391378 | 6 | 32694247 | A | G | 0.5164 | -0.0508 | 0.0058 | 2.33E-18 | -8.7402  | 1068588  | Asthma |
| rs72844346  | 6 | 32694256 | A | G | 0.5207 | -0.0496 | 0.0058 | 1.37E-17 | -8.5379  | 1068588  | Asthma |
| rs72844347  | 6 | 32694282 | A | G | 0.5164 | -0.0508 | 0.0058 | 2.27E-18 | -8.7430  | 1068588  | Asthma |
| rs67838634  | 6 | 32694351 | G | A | 0.4431 | 0.0539  | 0.0058 | 2.16E-20 | 9.2540   | 1068588  | Asthma |
| rs200419915 | 6 | 32694445 | C | T | 0.5189 | -0.0505 | 0.0058 | 4.64E-18 | -8.6621  | 1068588  | Asthma |
| rs201449386 | 6 | 32694462 | T | C | 0.5224 | -0.0502 | 0.0060 | 4.19E-17 | -8.4075  | 1042455  | Asthma |
| rs202170080 | 6 | 32694463 | G | A | 0.5224 | -0.0502 | 0.0060 | 4.19E-17 | -8.4075  | 1042455  | Asthma |
| rs2858317   | 6 | 32694503 | C | A | 0.4572 | -0.0666 | 0.0068 | 1.78E-22 | -9.7537  | 908767   | Asthma |
| rs9275263   | 6 | 32694567 | A | G | 0.5225 | -0.0506 | 0.0059 | 5.62E-18 | -8.6400  | 1068588  | Asthma |
| rs9275264   | 6 | 32694595 | A | G | 0.5193 | -0.0509 | 0.0058 | 2.68E-18 | -8.7241  | 1068588  | Asthma |
| rs9275265   | 6 | 32694612 | C | T | 0.5200 | -0.0510 | 0.0060 | 1.18E-17 | -8.5552  | 1042455  | Asthma |
| rs9275266   | 6 | 32694615 | G | C | 0.5200 | -0.0511 | 0.0060 | 1.06E-17 | -8.5673  | 1042455  | Asthma |
| rs9275267   | 6 | 32694648 | A | G | 0.5182 | -0.0513 | 0.0059 | 6.14E-18 | -8.6299  | 1042455  | Asthma |

|             |   |          |   |   |        |         |        |          |          |         |        |
|-------------|---|----------|---|---|--------|---------|--------|----------|----------|---------|--------|
| rs9275268   | 6 | 32694656 | A | G | 0.5182 | -0.0513 | 0.0059 | 6.61E-18 | -8.6215  | 1042455 | Asthma |
| rs28891492  | 6 | 32694674 | T | C | 0.2192 | 0.0494  | 0.0070 | 2.37E-12 | 7.0109   | 977229  | Asthma |
| rs9275269   | 6 | 32694682 | A | G | 0.5167 | -0.0509 | 0.0058 | 1.92E-18 | -8.7621  | 1068588 | Asthma |
| rs28891493  | 6 | 32694732 | T | A | 0.2178 | 0.0464  | 0.0062 | 1.03E-13 | 7.4371   | 1159440 | Asthma |
| rs9275271   | 6 | 32694756 | T | C | 0.5029 | -0.0532 | 0.0053 | 2.37E-23 | -9.9562  | 1224666 | Asthma |
| rs9275272   | 6 | 32694769 | C | G | 0.3699 | 0.0835  | 0.0054 | 1.13E-54 | 15.5717  | 1224666 | Asthma |
| rs9275273   | 6 | 32694782 | A | C | 0.3693 | 0.0813  | 0.0049 | 3.16E-61 | 16.5089  | 1376071 | Asthma |
| rs9275274   | 6 | 32694789 | C | G | 0.3699 | 0.0833  | 0.0054 | 2.13E-54 | 15.5315  | 1224666 | Asthma |
| rs9275275   | 6 | 32694830 | A | G | 0.1079 | 0.1275  | 0.0077 | 3.03E-62 | 16.6499  | 1376071 | Asthma |
| rs9275276   | 6 | 32694899 | T | C | 0.5039 | -0.0499 | 0.0049 | 1.83E-24 | -10.2077 | 1376071 | Asthma |
| rs9275277   | 6 | 32694900 | G | A | 0.5026 | -0.0531 | 0.0053 | 3.11E-23 | -9.9289  | 1224666 | Asthma |
| rs147804272 | 6 | 32695046 | T | C | 0.1272 | -0.0732 | 0.0084 | 2.32E-18 | -8.7406  | 1224666 | Asthma |
| rs9275279   | 6 | 32695066 | G | A | 0.5030 | -0.0529 | 0.0054 | 4.65E-23 | -9.8890  | 1224666 | Asthma |
| rs2856670   | 6 | 32695127 | G | C | 0.4244 | -0.0670 | 0.0050 | 5.80E-41 | -13.4033 | 1376071 | Asthma |
| rs9275281   | 6 | 32695143 | G | A | 0.5026 | -0.0531 | 0.0053 | 3.16E-23 | -9.9274  | 1224666 | Asthma |
| rs114169440 | 6 | 32695144 | A | C | 0.1267 | -0.0742 | 0.0077 | 7.71E-22 | -9.6037  | 1349938 | Asthma |
| rs9275282   | 6 | 32695197 | C | T | 0.5014 | -0.0496 | 0.0049 | 3.57E-24 | -10.1430 | 1376071 | Asthma |
| rs2647022   | 6 | 32695227 | A | G | 0.4249 | -0.0695 | 0.0055 | 4.07E-37 | -12.7292 | 1224666 | Asthma |
| rs9275284   | 6 | 32695296 | C | T | 0.5026 | -0.0531 | 0.0053 | 3.24E-23 | -9.9250  | 1224666 | Asthma |
| rs9275285   | 6 | 32695303 | A | G | 0.5026 | -0.0530 | 0.0053 | 3.30E-23 | -9.9233  | 1224666 | Asthma |
| rs9275286   | 6 | 32695366 | T | C | 0.5026 | -0.0530 | 0.0053 | 3.72E-23 | -9.9113  | 1224666 | Asthma |
| rs2647021   | 6 | 32695374 | T | C | 0.4259 | -0.0694 | 0.0055 | 5.70E-37 | -12.7029 | 1224666 | Asthma |
| rs146323696 | 6 | 32695380 | A | G | 0.1274 | -0.0732 | 0.0084 | 1.93E-18 | -8.7611  | 1224666 | Asthma |
| rs9275288   | 6 | 32695426 | A | G | 0.5044 | -0.0500 | 0.0050 | 7.43E-24 | -10.0709 | 1349938 | Asthma |
| rs9275289   | 6 | 32695431 | C | A | 0.3517 | 0.0783  | 0.0055 | 2.80E-45 | 14.1215  | 1198533 | Asthma |
| rs2647020   | 6 | 32695479 | T | C | 0.4819 | -0.0573 | 0.0055 | 4.08E-25 | -10.3524 | 1224666 | Asthma |
| rs112927854 | 6 | 32695482 | T | C | 0.1202 | -0.0671 | 0.0083 | 7.26E-16 | -8.0662  | 1224666 | Asthma |
| rs9275291   | 6 | 32695483 | A | G | 0.3565 | 0.0751  | 0.0059 | 8.93E-37 | 12.6677  | 830513  | Asthma |
| rs9275292   | 6 | 32695512 | C | A | 0.5041 | -0.0500 | 0.0049 | 1.73E-24 | -10.2135 | 1376071 | Asthma |
| rs9275293   | 6 | 32695531 | C | T | 0.1079 | 0.1276  | 0.0077 | 2.56E-62 | 16.6597  | 1376071 | Asthma |
| rs68067315  | 6 | 32695563 | A | G | 0.1331 | -0.0665 | 0.0074 | 3.09E-19 | -8.9657  | 1376071 | Asthma |
| rs9275295   | 6 | 32695614 | A | G | 0.5040 | -0.0501 | 0.0049 | 1.16E-24 | -10.2523 | 1376071 | Asthma |
| rs13205804  | 6 | 32695620 | G | A | 0.1212 | -0.0736 | 0.0089 | 1.36E-16 | -8.2682  | 1198533 | Asthma |
| rs13191875  | 6 | 32695626 | A | T | 0.1351 | -0.0660 | 0.0083 | 2.51E-15 | -7.9131  | 1133307 | Asthma |
| rs9275296   | 6 | 32695654 | C | T | 0.1079 | 0.1275  | 0.0077 | 2.91E-62 | 16.6516  | 1376071 | Asthma |
| rs28772275  | 6 | 32695662 | A | C | 0.2108 | 0.0455  | 0.0063 | 6.77E-13 | 7.1840   | 1159440 | Asthma |
| rs13206007  | 6 | 32695665 | G | C | 0.1326 | -0.0663 | 0.0076 | 1.85E-18 | -8.7664  | 1349938 | Asthma |
| rs9275297   | 6 | 32695669 | A | G | 0.3631 | 0.0823  | 0.0054 | 6.99E-53 | 15.3059  | 1224666 | Asthma |
| rs2647018   | 6 | 32695670 | T | C | 0.4251 | -0.0696 | 0.0055 | 3.39E-37 | -12.7435 | 1224666 | Asthma |
| rs13206011  | 6 | 32695720 | T | C | 0.1331 | -0.0665 | 0.0074 | 2.90E-19 | -8.9726  | 1376071 | Asthma |
| rs5000634   | 6 | 32695787 | G | A | 0.3632 | 0.0807  | 0.0049 | 2.99E-60 | 16.3729  | 1376071 | Asthma |
| rs2856668   | 6 | 32695829 | G | C | 0.4242 | -0.0670 | 0.0050 | 4.81E-41 | -13.4170 | 1376071 | Asthma |
| rs5000633   | 6 | 32695833 | C | A | 0.5042 | -0.0518 | 0.0054 | 4.24E-22 | -9.6652  | 1224666 | Asthma |
| rs3129720   | 6 | 32695854 | T | C | 0.2871 | -0.0931 | 0.0055 | 7.64E-64 | -16.8689 | 1376071 | Asthma |
| rs17427431  | 6 | 32695867 | A | G | 0.1331 | -0.0662 | 0.0074 | 4.07E-19 | -8.9352  | 1376071 | Asthma |
| rs35122881  | 6 | 32695900 | T | C | 0.1331 | -0.0661 | 0.0074 | 4.69E-19 | -8.9193  | 1376071 | Asthma |
| rs5000632   | 6 | 32695911 | C | T | 0.2134 | 0.0442  | 0.0058 | 1.83E-14 | 7.6617   | 1310845 | Asthma |
| rs35473146  | 6 | 32695936 | G | A | 0.1265 | -0.0734 | 0.0076 | 5.29E-22 | -9.6423  | 1376071 | Asthma |
| rs17427445  | 6 | 32695987 | A | G | 0.1266 | -0.0727 | 0.0076 | 1.23E-21 | -9.5551  | 1376071 | Asthma |
| rs35169534  | 6 | 32696014 | G | A | 0.1176 | -0.0735 | 0.0080 | 5.12E-20 | -9.1614  | 1219993 | Asthma |
| rs6457617   | 6 | 32696074 | C | T | 0.5105 | -0.0486 | 0.0049 | 2.55E-23 | -9.9488  | 1376071 | Asthma |
| rs373544996 | 6 | 32696096 | G | A | 0.1039 | 0.1222  | 0.0091 | 3.79E-41 | 13.4352  | 791420  | Asthma |
| rs2647016   | 6 | 32696148 | C | A | 0.4240 | -0.0671 | 0.0050 | 3.57E-41 | -13.4391 | 1376071 | Asthma |
| rs34677551  | 6 | 32696159 | C | A | 0.1265 | -0.0731 | 0.0076 | 7.99E-22 | -9.6000  | 1376071 | Asthma |
| rs34392107  | 6 | 32696177 | A | G | 0.1264 | -0.0734 | 0.0084 | 2.73E-18 | -8.7223  | 1224666 | Asthma |
| rs35239297  | 6 | 32696183 | A | G | 0.1264 | -0.0734 | 0.0084 | 2.70E-18 | -8.7234  | 1224666 | Asthma |
| rs34531599  | 6 | 32696201 | T | C | 0.1266 | -0.0734 | 0.0084 | 2.37E-18 | -8.7384  | 1224666 | Asthma |
| rs6457619   | 6 | 32696209 | G | C | 0.3630 | 0.0806  | 0.0049 | 6.92E-60 | 16.3218  | 1376071 | Asthma |
| rs6457620   | 6 | 32696222 | G | C | 0.4959 | -0.0457 | 0.0052 | 9.32E-19 | -8.8431  | 1008051 | Asthma |
| rs35900855  | 6 | 32696261 | G | A | 0.1267 | -0.0732 | 0.0076 | 5.52E-22 | -9.6381  | 1376071 | Asthma |
| rs9275300   | 6 | 32696349 | G | A | 0.1079 | 0.1276  | 0.0077 | 2.49E-62 | 16.6617  | 1376071 | Asthma |
| rs6457622   | 6 | 32696386 | C | A | 0.3630 | 0.0806  | 0.0049 | 6.50E-60 | 16.3257  | 1376071 | Asthma |
| rs2647013   | 6 | 32696507 | C | G | 0.4444 | -0.0693 | 0.0055 | 9.56E-37 | -12.6622 | 1224666 | Asthma |
| rs6923022   | 6 | 32696512 | T | G | 0.1321 | -0.0771 | 0.0080 | 8.02E-22 | -9.5996  | 1008051 | Asthma |
| rs7745040   | 6 | 32696555 | C | T | 0.3633 | 0.0804  | 0.0049 | 1.28E-59 | 16.2843  | 1376071 | Asthma |
| rs2647012   | 6 | 32696681 | T | C | 0.4241 | -0.0670 | 0.0050 | 5.30E-41 | -13.4098 | 1376071 | Asthma |
| rs115255544 | 6 | 32696851 | G | A | 0.1265 | -0.0733 | 0.0076 | 6.31E-22 | -9.6245  | 1376071 | Asthma |
| rs114361720 | 6 | 32696858 | C | G | 0.1266 | -0.0733 | 0.0076 | 5.76E-22 | -9.6337  | 1376071 | Asthma |
| rs2894380   | 6 | 32696898 | G | A | 0.3630 | 0.0806  | 0.0049 | 7.77E-60 | 16.3144  | 1376071 | Asthma |
| rs72847158  | 6 | 32696931 | C | T | 0.1266 | -0.0734 | 0.0076 | 5.36E-22 | -9.6411  | 1376071 | Asthma |
| rs2395522   | 6 | 32696945 | A | T | 0.5039 | -0.0500 | 0.0049 | 1.64E-24 | -10.2182 | 1376071 | Asthma |
| rs115594945 | 6 | 32696994 | A | G | 0.1271 | -0.0733 | 0.0084 | 2.30E-18 | -8.7417  | 1224666 | Asthma |
| rs115785636 | 6 | 32696998 | C | G | 0.1271 | -0.0737 | 0.0084 | 1.53E-18 | -8.7878  | 1224666 | Asthma |
| rs116303320 | 6 | 32697014 | T | C | 0.1271 | -0.0733 | 0.0084 | 2.26E-18 | -8.7433  | 1224666 | Asthma |



|             |   |          |   |   |        |         |        |          |          |         |        |
|-------------|---|----------|---|---|--------|---------|--------|----------|----------|---------|--------|
| rs115074443 | 6 | 32697018 | T | C | 0.1271 | -0.0733 | 0.0084 | 2.27E-18 | -8.7433  | 1224666 | Asthma |
| rs114948848 | 6 | 32697020 | G | A | 0.1251 | -0.0738 | 0.0077 | 8.70E-22 | -9.5913  | 1376071 | Asthma |
| rs2647003   | 6 | 32697103 | T | G | 0.4239 | -0.0671 | 0.0050 | 3.77E-41 | -13.4349 | 1376071 | Asthma |
| rs9357152   | 6 | 32697183 | G | A | 0.2135 | 0.0440  | 0.0058 | 2.21E-14 | 7.6376   | 1310845 | Asthma |
| rs9348891   | 6 | 32697194 | G | A | 0.2133 | 0.0441  | 0.0058 | 2.21E-14 | 7.6377   | 1310845 | Asthma |
| rs9275307   | 6 | 32697213 | T | A | 0.1079 | 0.1276  | 0.0077 | 2.48E-62 | 16.6619  | 1376071 | Asthma |
| rs17499411  | 6 | 32697225 | G | C | 0.1266 | -0.0733 | 0.0076 | 5.62E-22 | -9.6362  | 1376071 | Asthma |
| rs2856667   | 6 | 32697302 | T | C | 0.5506 | -0.0914 | 0.0048 | 9.52E-81 | -19.0304 | 1376071 | Asthma |
| rs2647001   | 6 | 32697309 | C | T | 0.4240 | -0.0670 | 0.0050 | 5.41E-41 | -13.4084 | 1376071 | Asthma |
| rs17206119  | 6 | 32697327 | A | T | 0.1266 | -0.0733 | 0.0076 | 5.85E-22 | -9.6322  | 1376071 | Asthma |
| rs17206126  | 6 | 32697338 | C | T | 0.0407 | -0.1072 | 0.0134 | 1.44E-15 | -7.9821  | 1310845 | Asthma |
| rs17212462  | 6 | 32697348 | T | C | 0.1265 | -0.0731 | 0.0076 | 7.51E-22 | -9.6065  | 1376071 | Asthma |
| rs17212469  | 6 | 32697376 | T | G | 0.1266 | -0.0733 | 0.0076 | 6.12E-22 | -9.6276  | 1376071 | Asthma |
| rs9394113   | 6 | 32697390 | G | A | 0.2133 | 0.0442  | 0.0058 | 1.93E-14 | 7.6553   | 1310845 | Asthma |
| rs17212483  | 6 | 32697473 | T | C | 0.1266 | -0.0731 | 0.0076 | 7.24E-22 | -9.6103  | 1376071 | Asthma |
| rs9275308   | 6 | 32697478 | A | T | 0.1079 | 0.1276  | 0.0077 | 2.81E-62 | 16.6543  | 1376071 | Asthma |
| rs2856666   | 6 | 32697508 | G | T | 0.4244 | -0.0671 | 0.0050 | 3.08E-41 | -13.4500 | 1376071 | Asthma |
| rs17206147  | 6 | 32697534 | C | T | 0.1684 | -0.0646 | 0.0067 | 2.90E-22 | -9.7040  | 1376071 | Asthma |
| rs9275310   | 6 | 32697542 | G | T | 0.1051 | 0.1211  | 0.0081 | 5.65E-50 | 14.8637  | 1008051 | Asthma |
| rs2646998   | 6 | 32697590 | T | G | 0.4280 | -0.0738 | 0.0054 | 5.52E-43 | -13.7442 | 1246149 | Asthma |
| rs17212504  | 6 | 32697592 | G | A | 0.1265 | -0.0732 | 0.0076 | 6.62E-22 | -9.6194  | 1376071 | Asthma |
| rs10484561  | 6 | 32697643 | G | T | 0.1265 | -0.0730 | 0.0076 | 8.64E-22 | -9.5921  | 1376071 | Asthma |
| rs17212518  | 6 | 32697698 | C | A | 0.1259 | -0.0733 | 0.0076 | 9.78E-22 | -9.5793  | 1376071 | Asthma |
| rs17206161  | 6 | 32697713 | C | T | 0.1121 | -0.0731 | 0.0089 | 2.76E-16 | -8.1833  | 1225084 | Asthma |
| rs17206168  | 6 | 32697714 | C | T | 0.1116 | -0.0718 | 0.0090 | 1.15E-15 | -8.0093  | 1225084 | Asthma |
| rs17206175  | 6 | 32697718 | A | C | 0.1145 | -0.0736 | 0.0088 | 4.83E-17 | -8.3906  | 1225084 | Asthma |
| rs17206182  | 6 | 32697727 | T | C | 0.1275 | -0.0737 | 0.0085 | 3.40E-18 | -8.6972  | 1159440 | Asthma |
| rs17212525  | 6 | 32697762 | C | T | 0.1264 | -0.0731 | 0.0076 | 9.25E-22 | -9.5849  | 1376071 | Asthma |
| rs17212532  | 6 | 32697773 | C | A | 0.1268 | -0.0733 | 0.0084 | 2.43E-18 | -8.7353  | 1224666 | Asthma |
| rs2856665   | 6 | 32697820 | G | A | 0.0767 | 0.0538  | 0.0088 | 8.28E-10 | 6.1395   | 1376071 | Asthma |
| rs17212546  | 6 | 32697838 | T | C | 0.1272 | -0.0733 | 0.0084 | 1.98E-18 | -8.7584  | 1224666 | Asthma |
| rs2856664   | 6 | 32697839 | T | G | 0.2930 | 0.0524  | 0.0052 | 9.95E-24 | 10.0422  | 1376071 | Asthma |
| rs17206196  | 6 | 32697852 | T | G | 0.1207 | -0.0746 | 0.0083 | 3.70E-19 | -8.9456  | 1290310 | Asthma |
| rs17206203  | 6 | 32697856 | G | A | 0.1269 | -0.0735 | 0.0084 | 1.95E-18 | -8.7604  | 1224666 | Asthma |
| rs17206210  | 6 | 32697859 | T | C | 0.1269 | -0.0736 | 0.0084 | 1.83E-18 | -8.7670  | 1224666 | Asthma |
| rs9275311   | 6 | 32697863 | T | G | 0.1079 | 0.1276  | 0.0077 | 2.43E-62 | 16.6636  | 1376071 | Asthma |
| rs17212553  | 6 | 32697910 | T | G | 0.1265 | -0.0733 | 0.0076 | 6.31E-22 | -9.6244  | 1376071 | Asthma |
| rs9275312   | 6 | 32697951 | G | A | 0.1565 | 0.0869  | 0.0065 | 1.69E-40 | 13.3234  | 1376071 | Asthma |
| rs2646996   | 6 | 32697964 | G | A | 0.2929 | 0.0523  | 0.0052 | 1.21E-23 | 10.0232  | 1376071 | Asthma |
| rs17212574  | 6 | 32697973 | T | C | 0.1270 | -0.0747 | 0.0085 | 2.09E-18 | -8.7524  | 1198533 | Asthma |
| rs17206224  | 6 | 32697976 | T | C | 0.1267 | -0.0748 | 0.0086 | 2.38E-18 | -8.7378  | 1198533 | Asthma |
| rs9275313   | 6 | 32697982 | T | G | 0.1079 | 0.1275  | 0.0077 | 2.97E-62 | 16.6506  | 1376071 | Asthma |
| rs17212581  | 6 | 32698042 | C | T | 0.1171 | -0.0751 | 0.0091 | 1.92E-16 | -8.2271  | 1042455 | Asthma |
| rs17212588  | 6 | 32698043 | A | G | 0.1169 | -0.0748 | 0.0091 | 2.58E-16 | -8.1915  | 1042455 | Asthma |
| rs9275314   | 6 | 32698132 | A | C | 0.1076 | 0.1275  | 0.0078 | 2.79E-60 | 16.3766  | 1349938 | Asthma |
| rs9275315   | 6 | 32698135 | A | C | 0.1076 | 0.1275  | 0.0078 | 2.87E-60 | 16.3753  | 1349938 | Asthma |
| rs35092732  | 6 | 32698136 | G | A | 0.1216 | -0.0688 | 0.0088 | 5.60E-15 | -7.8128  | 1198533 | Asthma |
| rs17206252  | 6 | 32698138 | C | T | 0.1325 | -0.0648 | 0.0083 | 7.20E-15 | -7.7809  | 1198533 | Asthma |
| rs6934725   | 6 | 32698242 | A | G | 0.2929 | 0.0523  | 0.0052 | 1.11E-23 | 10.0312  | 1376071 | Asthma |
| rs36062941  | 6 | 32698274 | T | C | 0.1265 | -0.0732 | 0.0076 | 6.45E-22 | -9.6222  | 1376071 | Asthma |
| rs34214702  | 6 | 32698304 | A | C | 0.1265 | -0.0733 | 0.0076 | 6.32E-22 | -9.6243  | 1376071 | Asthma |
| rs35740559  | 6 | 32698355 | T | C | 0.1265 | -0.0732 | 0.0076 | 6.65E-22 | -9.6189  | 1376071 | Asthma |
| rs34605008  | 6 | 32698358 | C | T | 0.1269 | -0.0734 | 0.0084 | 2.27E-18 | -8.7430  | 1224666 | Asthma |
| rs34918548  | 6 | 32698365 | G | A | 0.1269 | -0.0734 | 0.0084 | 2.14E-18 | -8.7499  | 1224666 | Asthma |
| rs6935069   | 6 | 32698379 | A | G | 0.2133 | 0.0442  | 0.0058 | 1.94E-14 | 7.6545   | 1310845 | Asthma |
| rs9275318   | 6 | 32698396 | G | A | 0.1499 | 0.0874  | 0.0066 | 1.45E-39 | 13.1619  | 1376071 | Asthma |
| rs34593937  | 6 | 32698494 | C | T | 0.1265 | -0.0732 | 0.0076 | 6.54E-22 | -9.6206  | 1376071 | Asthma |
| rs9275319   | 6 | 32698518 | G | A | 0.1499 | 0.0875  | 0.0066 | 8.95E-40 | 13.1984  | 1376071 | Asthma |
| rs35836258  | 6 | 32698519 | A | G | 0.1265 | -0.0732 | 0.0076 | 6.48E-22 | -9.6217  | 1376071 | Asthma |
| rs34389498  | 6 | 32698571 | C | T | 0.1266 | -0.0732 | 0.0076 | 6.68E-22 | -9.6184  | 1376071 | Asthma |
| rs2856727   | 6 | 32698620 | C | T | 0.4241 | -0.0671 | 0.0050 | 4.12E-41 | -13.4284 | 1376071 | Asthma |
| rs36186647  | 6 | 32698654 | T | C | 0.1265 | -0.0732 | 0.0076 | 7.31E-22 | -9.6093  | 1376071 | Asthma |
| rs36188641  | 6 | 32698694 | G | A | 0.1273 | -0.0732 | 0.0084 | 2.25E-18 | -8.7443  | 1224666 | Asthma |
| rs36160077  | 6 | 32698706 | T | C | 0.1273 | -0.0731 | 0.0084 | 2.22E-18 | -8.7455  | 1224666 | Asthma |
| rs1794282   | 6 | 32698749 | T | C | 0.1168 | 0.0512  | 0.0084 | 9.00E-10 | 6.1263   | 942825  | Asthma |
| rs34475663  | 6 | 32698786 | A | T | 0.1265 | -0.0727 | 0.0076 | 1.35E-21 | -9.5459  | 1376071 | Asthma |
| rs111848638 | 6 | 32698853 | T | A | 0.1265 | -0.0731 | 0.0076 | 8.14E-22 | -9.5981  | 1376071 | Asthma |
| rs9275324   | 6 | 32698858 | T | C | 0.1076 | 0.1279  | 0.0077 | 2.36E-62 | 16.6656  | 1376071 | Asthma |
| rs113984677 | 6 | 32698859 | A | G | 0.1265 | -0.0731 | 0.0076 | 7.89E-22 | -9.6013  | 1376071 | Asthma |
| rs9275325   | 6 | 32698874 | T | G | 0.1075 | 0.1278  | 0.0077 | 2.67E-62 | 16.6569  | 1376071 | Asthma |
| rs9275326   | 6 | 32698883 | T | C | 0.1075 | 0.1278  | 0.0077 | 2.94E-62 | 16.6512  | 1376071 | Asthma |
| rs2856726   | 6 | 32698944 | T | A | 0.2930 | 0.0523  | 0.0052 | 1.16E-23 | 10.0272  | 1376071 | Asthma |
| rs2856725   | 6 | 32698961 | C | T | 0.4241 | -0.0671 | 0.0050 | 4.39E-41 | -13.4239 | 1376071 | Asthma |
| rs9275327   | 6 | 32699025 | T | C | 0.1562 | 0.0866  | 0.0065 | 4.11E-40 | 13.2570  | 1376071 | Asthma |

|             |   |          |   |   |        |         |        |          |          |         |        |
|-------------|---|----------|---|---|--------|---------|--------|----------|----------|---------|--------|
| rs9275328   | 6 | 32699045 | T | C | 0.1562 | 0.0869  | 0.0065 | 1.96E-40 | 13.3127  | 1376071 | Asthma |
| rs9275330   | 6 | 32699098 | G | A | 0.1562 | 0.0870  | 0.0065 | 1.58E-40 | 13.3286  | 1376071 | Asthma |
| rs9275331   | 6 | 32699122 | G | A | 0.1562 | 0.0871  | 0.0065 | 1.43E-40 | 13.3358  | 1376071 | Asthma |
| rs9275333   | 6 | 32699191 | C | T | 0.1562 | 0.0871  | 0.0065 | 1.36E-40 | 13.3398  | 1376071 | Asthma |
| rs35998847  | 6 | 32699220 | A | G | 0.1265 | -0.0728 | 0.0076 | 1.18E-21 | -9.5602  | 1376071 | Asthma |
| rs17427564  | 6 | 32699290 | C | T | 0.1265 | -0.0731 | 0.0076 | 7.78E-22 | -9.6029  | 1376071 | Asthma |
| rs9275334   | 6 | 32699330 | C | T | 0.1076 | 0.1279  | 0.0077 | 1.66E-62 | 16.6862  | 1376071 | Asthma |
| rs3135006   | 6 | 32699342 | T | C | 0.2870 | -0.0932 | 0.0055 | 5.55E-64 | -16.8879 | 1376071 | Asthma |
| rs75778474  | 6 | 32699396 | T | C | 0.1273 | -0.0728 | 0.0084 | 3.15E-18 | -8.7061  | 1224666 | Asthma |
| rs71202902  | 6 | 32699398 | T | C | 0.1265 | -0.0731 | 0.0076 | 7.83E-22 | -9.6021  | 1376071 | Asthma |
| rs78825896  | 6 | 32699404 | G | T | 0.1265 | -0.0732 | 0.0076 | 7.34E-22 | -9.6088  | 1376071 | Asthma |
| rs2858312   | 6 | 32699453 | C | G | 0.2612 | 0.0612  | 0.0054 | 5.40E-30 | 11.3777  | 1376071 | Asthma |
| rs2647040   | 6 | 32699503 | A | G | 0.4218 | -0.0665 | 0.0050 | 2.22E-40 | -13.3034 | 1376071 | Asthma |
| rs9275338   | 6 | 32699566 | T | A | 0.1556 | 0.0872  | 0.0065 | 1.23E-40 | 13.3472  | 1376071 | Asthma |
| rs66795753  | 6 | 32699604 | C | G | 0.1269 | -0.0729 | 0.0084 | 3.92E-18 | -8.6810  | 1224666 | Asthma |
| rs141890570 | 6 | 32699635 | A | G | 0.1333 | -0.0652 | 0.0083 | 5.24E-15 | -7.8212  | 1198533 | Asthma |
| rs150651425 | 6 | 32699644 | T | C | 0.0347 | -0.1156 | 0.0149 | 1.02E-14 | -7.7367  | 1284712 | Asthma |
| rs185350680 | 6 | 32699673 | G | A | 0.1257 | -0.0803 | 0.0094 | 1.30E-17 | -8.5436  | 1130071 | Asthma |
| rs1794514   | 6 | 32699696 | C | G | 0.2027 | 0.0639  | 0.0066 | 6.41E-22 | 9.6227   | 1224666 | Asthma |
| rs71205205  | 6 | 32699711 | A | C | 0.1148 | -0.0816 | 0.0102 | 9.61E-16 | -8.0318  | 973993  | Asthma |
| rs3104394   | 6 | 32699743 | G | A | 0.1743 | -0.0745 | 0.0104 | 9.66E-13 | -7.1355  | 844071  | Asthma |
| rs185398223 | 6 | 32699768 | A | G | 0.1153 | -0.0987 | 0.0120 | 1.57E-16 | -8.2507  | 778845  | Asthma |
| rs2647042   | 6 | 32699771 | C | T | 0.5552 | -0.1179 | 0.0077 | 4.95E-53 | -15.3282 | 778845  | Asthma |
| rs2647043   | 6 | 32699772 | A | G | 0.4399 | -0.0782 | 0.0078 | 7.41E-24 | -10.0710 | 778845  | Asthma |
| rs1794279   | 6 | 32699818 | T | G | 0.1104 | 0.0540  | 0.0087 | 6.60E-10 | 6.1753   | 1128634 | Asthma |
| rs9275347   | 6 | 32699846 | A | G | 0.1405 | 0.1208  | 0.0112 | 3.91E-27 | 10.7887  | 778845  | Asthma |
| rs9275348   | 6 | 32699861 | A | G | 0.1442 | 0.1208  | 0.0111 | 1.09E-27 | 10.9044  | 778845  | Asthma |
| rs9275349   | 6 | 32699886 | C | G | 0.1123 | 0.1524  | 0.0122 | 6.16E-36 | 12.5156  | 778845  | Asthma |
| rs2856723   | 6 | 32699985 | A | G | 0.4315 | -0.0633 | 0.0054 | 4.15E-32 | -11.7948 | 1219993 | Asthma |
| rs9275351   | 6 | 32700016 | A | C | 0.0869 | 0.1564  | 0.0129 | 1.12E-33 | 12.0945  | 908767  | Asthma |
| rs9275356   | 6 | 32700073 | G | C | 0.0992 | 0.1367  | 0.0090 | 7.98E-52 | 15.1468  | 1219993 | Asthma |
| rs9275358   | 6 | 32700118 | G | C | 0.1415 | 0.0948  | 0.0076 | 1.06E-35 | 12.4723  | 1219993 | Asthma |
| rs9275360   | 6 | 32700160 | T | A | 0.1532 | 0.0887  | 0.0066 | 9.53E-41 | 13.3662  | 1376071 | Asthma |
| rs3135190   | 6 | 32700169 | T | G | 0.2847 | -0.0933 | 0.0055 | 1.08E-63 | -16.8486 | 1376071 | Asthma |
| rs9275362   | 6 | 32700180 | T | C | 0.1542 | 0.0882  | 0.0067 | 1.16E-39 | 13.1790  | 1349938 | Asthma |
| rs2856722   | 6 | 32700181 | A | G | 0.4214 | -0.0669 | 0.0050 | 1.10E-40 | -13.3558 | 1376071 | Asthma |
| rs72847174  | 6 | 32700249 | T | C | 0.1178 | -0.0729 | 0.0080 | 9.49E-20 | -9.0947  | 1219993 | Asthma |
| rs2856721   | 6 | 32700254 | C | A | 0.3096 | 0.0535  | 0.0056 | 8.73E-22 | 9.5909   | 1219993 | Asthma |
| rs2647045   | 6 | 32700323 | A | G | 0.2384 | 0.0796  | 0.0055 | 5.11E-47 | 14.4010  | 1376071 | Asthma |
| rs66490218  | 6 | 32700328 | A | G | 0.1267 | -0.0726 | 0.0076 | 1.42E-21 | -9.5405  | 1376071 | Asthma |
| rs9275365   | 6 | 32700348 | A | G | 0.1563 | 0.0867  | 0.0065 | 3.00E-40 | 13.2806  | 1376071 | Asthma |
| rs2858310   | 6 | 32700546 | G | A | 0.4214 | -0.0666 | 0.0050 | 2.08E-40 | -13.3079 | 1376071 | Asthma |
| rs2647046   | 6 | 32700559 | A | C | 0.4214 | -0.0665 | 0.0050 | 2.63E-40 | -13.2905 | 1376071 | Asthma |
| rs9275373   | 6 | 32700634 | A | G | 0.1166 | 0.1152  | 0.0074 | 2.46E-54 | 15.5226  | 1376071 | Asthma |
| rs3135002   | 6 | 32700662 | A | C | 0.2455 | -0.0817 | 0.0058 | 2.33E-45 | -14.1345 | 1376071 | Asthma |
| rs2856720   | 6 | 32700880 | T | C | 0.2955 | 0.0515  | 0.0052 | 4.34E-23 | 9.8961   | 1376071 | Asthma |
| rs2647047   | 6 | 32700927 | G | C | 0.2955 | 0.0515  | 0.0052 | 4.53E-23 | 9.8915   | 1376071 | Asthma |
| rs2647048   | 6 | 32700928 | A | T | 0.4325 | -0.0627 | 0.0055 | 2.41E-30 | -11.4478 | 1224666 | Asthma |
| rs2858309   | 6 | 32700936 | C | G | 0.4215 | -0.0666 | 0.0050 | 1.68E-40 | -13.3241 | 1376071 | Asthma |
| rs9275380   | 6 | 32701037 | C | A | 0.0999 | 0.1209  | 0.0088 | 5.84E-43 | 13.7401  | 1159440 | Asthma |
| rs9275382   | 6 | 32701054 | C | T | 0.1140 | 0.1243  | 0.0075 | 2.98E-62 | 16.6510  | 1376071 | Asthma |
| rs9275383   | 6 | 32701069 | T | G | 0.1144 | 0.1237  | 0.0074 | 5.56E-62 | 16.6141  | 1376071 | Asthma |
| rs9501648   | 6 | 32701109 | G | C | 0.2134 | 0.0442  | 0.0058 | 1.70E-14 | 7.6715   | 1310845 | Asthma |
| rs9275387   | 6 | 32701236 | C | T | 0.1079 | 0.1276  | 0.0077 | 2.37E-62 | 16.6654  | 1376071 | Asthma |
| rs1612904   | 6 | 32701241 | C | A | 0.4048 | -0.0604 | 0.0050 | 5.15E-33 | -11.9693 | 1376071 | Asthma |
| rs72847183  | 6 | 32701336 | C | T | 0.1278 | -0.0731 | 0.0084 | 4.75E-18 | -8.6592  | 1159440 | Asthma |
| rs9280103   | 6 | 32701351 | A | T | 0.3130 | 0.0548  | 0.0062 | 6.99E-19 | 8.8751   | 830513  | Asthma |
| rs9275389   | 6 | 32701355 | C | T | 0.4225 | -0.0688 | 0.0055 | 2.22E-36 | -12.5961 | 1224666 | Asthma |
| rs79876547  | 6 | 32701360 | C | T | 0.1716 | -0.0644 | 0.0072 | 5.21E-19 | -8.9076  | 1224666 | Asthma |
| rs11752643  | 6 | 32701596 | T | C | 0.0390 | -0.1083 | 0.0153 | 1.31E-12 | -7.0935  | 1154767 | Asthma |
| rs9275394   | 6 | 32701677 | C | A | 0.1079 | 0.1276  | 0.0077 | 2.56E-62 | 16.6604  | 1376071 | Asthma |
| rs9275395   | 6 | 32701706 | G | A | 0.1079 | 0.1275  | 0.0077 | 2.66E-62 | 16.6582  | 1376071 | Asthma |
| rs9275400   | 6 | 32701984 | G | C | 0.1079 | 0.1276  | 0.0077 | 2.46E-62 | 16.6623  | 1376071 | Asthma |
| rs2647050   | 6 | 32701990 | C | T | 0.3091 | 0.0531  | 0.0056 | 1.53E-21 | 9.5329   | 1219993 | Asthma |
| rs76901383  | 6 | 32702040 | C | T | 0.1667 | -0.0641 | 0.0067 | 1.44E-21 | -9.5389  | 1376071 | Asthma |
| rs115675626 | 6 | 32702056 | A | G | 0.1140 | -0.0735 | 0.0087 | 2.96E-17 | -8.4481  | 1290310 | Asthma |
| rs9368739   | 6 | 32702168 | T | C | 0.2134 | 0.0442  | 0.0058 | 1.73E-14 | 7.6696   | 1310845 | Asthma |
| rs3135001   | 6 | 32702359 | T | C | 0.2847 | -0.0931 | 0.0055 | 1.56E-63 | -16.8266 | 1376071 | Asthma |
| rs75042695  | 6 | 32702374 | C | T | 0.1148 | -0.0961 | 0.0118 | 2.94E-16 | -8.1760  | 844071  | Asthma |
| rs2856718   | 6 | 32702478 | T | C | 0.2955 | 0.0514  | 0.0052 | 5.86E-23 | 9.8658   | 1376071 | Asthma |
| rs2856717   | 6 | 32702531 | A | G | 0.4215 | -0.0667 | 0.0050 | 1.01E-40 | -13.3618 | 1376071 | Asthma |
| rs35406540  | 6 | 32702591 | G | A | 0.1685 | -0.0645 | 0.0067 | 3.54E-22 | -9.6837  | 1376071 | Asthma |
| rs66709408  | 6 | 32702637 | T | C | 0.1685 | -0.0644 | 0.0067 | 4.16E-22 | -9.6669  | 1376071 | Asthma |
| rs2858305   | 6 | 32702687 | G | T | 0.4214 | -0.0665 | 0.0050 | 2.28E-40 | -13.3013 | 1376071 | Asthma |

|             |   |          |   |   |        |         |        |          |          |         |        |
|-------------|---|----------|---|---|--------|---------|--------|----------|----------|---------|--------|
| rs35120848  | 6 | 32702718 | T | C | 0.1685 | -0.0645 | 0.0067 | 3.70E-22 | -9.6792  | 1376071 | Asthma |
| rs9275422   | 6 | 32702771 | A | G | 0.1079 | 0.1275  | 0.0077 | 2.73E-62 | 16.6556  | 1376071 | Asthma |
| rs34492195  | 6 | 32703056 | A | G | 0.1265 | -0.0731 | 0.0076 | 7.46E-22 | -9.6072  | 1376071 | Asthma |
| rs2647051   | 6 | 32703120 | T | C | 0.4215 | -0.0666 | 0.0050 | 2.00E-40 | -13.3111 | 1376071 | Asthma |
| rs9275426   | 6 | 32703135 | C | T | 0.1078 | 0.1276  | 0.0077 | 2.50E-62 | 16.6612  | 1376071 | Asthma |
| rs2856704   | 6 | 32703237 | A | C | 0.2955 | 0.0515  | 0.0052 | 4.51E-23 | 9.8921   | 1376071 | Asthma |
| rs2858304   | 6 | 32703267 | T | G | 0.2955 | 0.0515  | 0.0052 | 4.87E-23 | 9.8844   | 1376071 | Asthma |
| rs9275429   | 6 | 32703280 | A | G | 0.1079 | 0.1275  | 0.0077 | 2.72E-62 | 16.6567  | 1376071 | Asthma |
| rs9275430   | 6 | 32703309 | T | C | 0.1079 | 0.1275  | 0.0077 | 2.80E-62 | 16.6549  | 1376071 | Asthma |
| rs13192471  | 6 | 32703326 | C | T | 0.1686 | -0.0641 | 0.0067 | 6.34E-22 | -9.6239  | 1376071 | Asthma |
| rs9275434   | 6 | 32703470 | T | C | 0.1079 | 0.1275  | 0.0077 | 2.65E-62 | 16.6582  | 1376071 | Asthma |
| rs1794275   | 6 | 32703471 | A | G | 0.1852 | -0.0706 | 0.0064 | 1.08E-28 | -11.1132 | 1376071 | Asthma |
| rs9275435   | 6 | 32703555 | C | G | 0.1079 | 0.1275  | 0.0077 | 2.92E-62 | 16.6525  | 1376071 | Asthma |
| rs9275437   | 6 | 32703635 | T | C | 0.1079 | 0.1275  | 0.0077 | 3.20E-62 | 16.6462  | 1376071 | Asthma |
| rs28451714  | 6 | 32703824 | T | G | 0.1685 | -0.0645 | 0.0067 | 3.25E-22 | -9.6926  | 1376071 | Asthma |
| rs9275442   | 6 | 32703978 | A | G | 0.1078 | 0.1272  | 0.0078 | 3.31E-60 | 16.3663  | 1349938 | Asthma |
| rs2856699   | 6 | 32703988 | A | G | 0.4215 | -0.0667 | 0.0050 | 1.28E-40 | -13.3445 | 1376071 | Asthma |
| rs9275445   | 6 | 32704034 | A | G | 0.1038 | 0.1438  | 0.0110 | 9.95E-39 | 13.0161  | 908767  | Asthma |
| rs9275453   | 6 | 32704160 | T | C | 0.0976 | 0.1548  | 0.0148 | 1.71E-25 | 10.4356  | 476051  | Asthma |
| rs3134997   | 6 | 32704262 | T | C | 0.4279 | -0.1081 | 0.0088 | 9.56E-35 | -12.2954 | 844071  | Asthma |
| rs3134995   | 6 | 32704312 | T | C | 0.2883 | -0.0962 | 0.0060 | 5.87E-57 | -15.9049 | 1219993 | Asthma |
| rs17499655  | 6 | 32704358 | T | C | 0.1685 | -0.0647 | 0.0067 | 2.49E-22 | -9.7197  | 1376071 | Asthma |
| rs62406889  | 6 | 32704437 | T | G | 0.0719 | -0.1012 | 0.0107 | 2.66E-21 | -9.4757  | 1154767 | Asthma |
| rs549365689 | 6 | 32704576 | G | A | 0.0345 | -0.1178 | 0.0148 | 1.97E-15 | -7.9432  | 1310845 | Asthma |
| rs4568494   | 6 | 32704584 | G | A | 0.1685 | -0.0645 | 0.0067 | 3.44E-22 | -9.6864  | 1376071 | Asthma |
| rs9275476   | 6 | 32704847 | C | T | 0.1078 | 0.1276  | 0.0077 | 2.83E-62 | 16.6547  | 1376071 | Asthma |
| rs9275477   | 6 | 32704864 | C | A | 0.1077 | 0.1276  | 0.0077 | 3.81E-62 | 16.6367  | 1376071 | Asthma |
| rs35030589  | 6 | 32705126 | A | G | 0.1685 | -0.0645 | 0.0067 | 3.35E-22 | -9.6891  | 1376071 | Asthma |
| rs9275486   | 6 | 32705322 | A | T | 0.1077 | 0.1274  | 0.0078 | 2.65E-60 | 16.3800  | 1349938 | Asthma |
| rs6934347   | 6 | 32705446 | G | C | 0.2135 | 0.0442  | 0.0058 | 1.76E-14 | 7.6674   | 1310845 | Asthma |
| rs2856697   | 6 | 32705453 | T | C | 0.0789 | 0.0515  | 0.0087 | 3.13E-09 | 5.9247   | 1376071 | Asthma |
| rs6934185   | 6 | 32705456 | G | A | 0.2135 | 0.0442  | 0.0058 | 1.87E-14 | 7.6591   | 1310845 | Asthma |
| rs77801483  | 6 | 32705500 | G | C | 0.1266 | -0.0731 | 0.0076 | 8.08E-22 | -9.5990  | 1376071 | Asthma |
| rs34751870  | 6 | 32705555 | T | C | 0.1209 | -0.0692 | 0.0078 | 1.13E-18 | -8.8216  | 1376071 | Asthma |
| rs6907114   | 6 | 32705584 | A | G | 0.2134 | 0.0442  | 0.0058 | 1.81E-14 | 7.6634   | 1310845 | Asthma |
| rs6906698   | 6 | 32705648 | T | A | 0.2134 | 0.0442  | 0.0058 | 1.86E-14 | 7.6604   | 1310845 | Asthma |
| rs112214454 | 6 | 32705792 | G | A | 0.1664 | -0.0706 | 0.0073 | 2.50E-22 | -9.7191  | 1246149 | Asthma |
| rs9275495   | 6 | 32705797 | T | A | 0.1078 | 0.1275  | 0.0077 | 3.71E-62 | 16.6375  | 1376071 | Asthma |
| rs28772279  | 6 | 32705977 | A | C | 0.2135 | 0.0442  | 0.0058 | 1.93E-14 | 7.6553   | 1310845 | Asthma |
| rs9275500   | 6 | 32706011 | C | T | 0.5101 | -0.0511 | 0.0054 | 5.97E-21 | -9.3905  | 1198533 | Asthma |
| rs1794269   | 6 | 32706117 | T | C | 0.3992 | 0.0329  | 0.0054 | 9.93E-10 | 6.1106   | 1224666 | Asthma |
| rs28772280  | 6 | 32706122 | T | C | 0.2201 | 0.0450  | 0.0057 | 2.78E-15 | 7.9004   | 1310845 | Asthma |
| rs9275503   | 6 | 32706154 | G | A | 0.1076 | 0.1275  | 0.0078 | 3.43E-60 | 16.3648  | 1349938 | Asthma |
| rs71565344  | 6 | 32706188 | A | G | 0.1264 | -0.0733 | 0.0076 | 7.25E-22 | -9.6101  | 1376071 | Asthma |
| rs3134969   | 6 | 32706250 | C | G | 0.2138 | -0.0801 | 0.0071 | 7.67E-30 | -11.3470 | 765287  | Asthma |
| rs551734789 | 6 | 32706253 | A | C | 0.1146 | -0.0990 | 0.0120 | 1.98E-16 | -8.2234  | 778845  | Asthma |
| rs566764667 | 6 | 32706254 | A | C | 0.1144 | -0.0965 | 0.0118 | 3.33E-16 | -8.1611  | 844071  | Asthma |
| rs3134968   | 6 | 32706282 | A | G | 0.2594 | -0.0717 | 0.0062 | 8.81E-31 | -11.5348 | 1224666 | Asthma |
| rs28772281  | 6 | 32706309 | A | G | 0.2135 | 0.0440  | 0.0058 | 2.34E-14 | 7.6306   | 1310845 | Asthma |
| rs28772282  | 6 | 32706359 | G | A | 0.2136 | 0.0441  | 0.0058 | 2.20E-14 | 7.6382   | 1310845 | Asthma |
| rs35332745  | 6 | 32706448 | C | T | 0.1266 | -0.0732 | 0.0076 | 7.16E-22 | -9.6113  | 1376071 | Asthma |
| rs145281025 | 6 | 32706475 | A | G | 0.1267 | -0.0741 | 0.0077 | 8.84E-22 | -9.5897  | 1349938 | Asthma |
| rs28772283  | 6 | 32706500 | A | G | 0.2605 | 0.0349  | 0.0060 | 5.33E-09 | 5.8366   | 1133307 | Asthma |
| rs3134966   | 6 | 32706521 | T | C | 0.2864 | -0.0929 | 0.0061 | 1.21E-52 | -15.2697 | 1224666 | Asthma |
| rs28772284  | 6 | 32706536 | T | C | 0.2178 | 0.0464  | 0.0062 | 1.03E-13 | 7.4367   | 1159440 | Asthma |
| rs12192620  | 6 | 32706541 | A | G | 0.3412 | 0.0433  | 0.0054 | 1.84E-15 | 7.9514   | 1224666 | Asthma |
| rs9275511   | 6 | 32706552 | A | G | 0.4439 | 0.0534  | 0.0051 | 8.91E-26 | 10.4970  | 1316443 | Asthma |
| rs28371271  | 6 | 32706566 | A | G | 0.3396 | 0.0434  | 0.0050 | 6.77E-18 | 8.6187   | 1376071 | Asthma |
| rs28772285  | 6 | 32706603 | T | G | 0.2201 | 0.0448  | 0.0057 | 3.38E-15 | 7.8759   | 1310845 | Asthma |
| rs28772286  | 6 | 32706608 | C | T | 0.2177 | 0.0464  | 0.0062 | 1.03E-13 | 7.4368   | 1159440 | Asthma |
| rs28772287  | 6 | 32706623 | C | T | 0.2201 | 0.0450  | 0.0057 | 2.59E-15 | 7.9094   | 1310845 | Asthma |
| rs35472821  | 6 | 32706752 | C | G | 0.1266 | -0.0734 | 0.0076 | 5.71E-22 | -9.6345  | 1376071 | Asthma |
| rs9275513   | 6 | 32706787 | A | T | 0.4666 | -0.0726 | 0.0054 | 2.35E-41 | -13.4701 | 1224666 | Asthma |
| rs9275515   | 6 | 32706796 | T | C | 0.4637 | -0.0698 | 0.0049 | 2.68E-45 | -14.1247 | 1376071 | Asthma |
| rs9275516   | 6 | 32706866 | A | G | 0.4635 | -0.0697 | 0.0049 | 2.82E-45 | -14.1209 | 1376071 | Asthma |
| rs9275517   | 6 | 32706872 | A | G | 0.4635 | -0.0698 | 0.0049 | 2.67E-45 | -14.1250 | 1376071 | Asthma |
| rs9275518   | 6 | 32706923 | G | A | 0.4631 | -0.0690 | 0.0049 | 2.31E-44 | -13.9720 | 1376071 | Asthma |
| rs17206294  | 6 | 32707058 | A | C | 0.2996 | 0.0700  | 0.0072 | 1.23E-22 | 9.7908   | 912533  | Asthma |
| rs17212637  | 6 | 32707064 | G | A | 0.3009 | 0.0627  | 0.0065 | 5.48E-22 | 9.6389   | 1004310 | Asthma |
| rs17212643  | 6 | 32707088 | T | A | 0.2258 | 0.0479  | 0.0067 | 8.37E-13 | 7.1549   | 791420  | Asthma |
| rs17212650  | 6 | 32707092 | T | C | 0.3018 | 0.0521  | 0.0052 | 5.79E-24 | 10.0955  | 1376071 | Asthma |
| rs17212657  | 6 | 32707126 | C | T | 0.3021 | 0.0522  | 0.0052 | 5.11E-24 | 10.1077  | 1376071 | Asthma |
| rs9275521   | 6 | 32707175 | T | C | 0.4215 | -0.0666 | 0.0050 | 2.19E-40 | -13.3042 | 1376071 | Asthma |
| rs9275523   | 6 | 32707217 | A | C | 0.2410 | 0.0317  | 0.0057 | 3.20E-08 | 5.5301   | 1376071 | Asthma |

|             |   |          |   |   |        |         |        |          |          |         |        |
|-------------|---|----------|---|---|--------|---------|--------|----------|----------|---------|--------|
| rs17212671  | 6 | 32707225 | C | T | 0.2908 | 0.0516  | 0.0057 | 1.55E-19 | 9.0413   | 1224666 | Asthma |
| rs17206343  | 6 | 32707255 | T | C | 0.2955 | 0.0516  | 0.0052 | 4.22E-23 | 9.8986   | 1376071 | Asthma |
| rs9275524   | 6 | 32707332 | T | C | 0.4635 | -0.0698 | 0.0049 | 2.15E-45 | -14.1399 | 1376071 | Asthma |
| rs17212699  | 6 | 32707353 | G | A | 0.2105 | 0.0455  | 0.0063 | 7.03E-13 | 7.1787   | 1159440 | Asthma |
| rs17206371  | 6 | 32707370 | T | C | 0.2899 | 0.0513  | 0.0057 | 2.96E-19 | 8.9700   | 1224666 | Asthma |
| rs17206378  | 6 | 32707384 | T | G | 0.1266 | -0.0734 | 0.0076 | 5.23E-22 | -9.6436  | 1376071 | Asthma |
| rs17206392  | 6 | 32707394 | T | C | 0.2890 | 0.0504  | 0.0057 | 1.51E-18 | 8.7892   | 1224666 | Asthma |
| rs17212720  | 6 | 32707430 | T | C | 0.2891 | 0.0506  | 0.0057 | 1.10E-18 | 8.8246   | 1224666 | Asthma |
| rs9275525   | 6 | 32707456 | A | G | 0.2430 | 0.0362  | 0.0063 | 7.39E-09 | 5.7817   | 1224666 | Asthma |
| rs9275526   | 6 | 32707460 | G | T | 0.4667 | -0.0725 | 0.0054 | 3.39E-41 | -13.4429 | 1224666 | Asthma |
| rs17206420  | 6 | 32707465 | C | T | 0.2892 | 0.0514  | 0.0057 | 3.00E-19 | 8.9689   | 1224666 | Asthma |
| rs17212748  | 6 | 32707489 | T | C | 0.2955 | 0.0516  | 0.0052 | 4.13E-23 | 9.9008   | 1376071 | Asthma |
| rs17212762  | 6 | 32707535 | C | T | 0.2955 | 0.0516  | 0.0052 | 4.24E-23 | 9.8983   | 1376071 | Asthma |
| rs17219176  | 6 | 32707536 | A | G | 0.2955 | 0.0516  | 0.0052 | 4.38E-23 | 9.8950   | 1376071 | Asthma |
| rs17212776  | 6 | 32707622 | C | T | 0.2899 | 0.0515  | 0.0057 | 2.04E-19 | 9.0110   | 1224666 | Asthma |
| rs9275528   | 6 | 32707630 | C | T | 0.2428 | 0.0359  | 0.0063 | 1.02E-08 | 5.7278   | 1224666 | Asthma |
| rs17212804  | 6 | 32707639 | T | C | 0.2885 | 0.0507  | 0.0057 | 1.06E-18 | 8.8289   | 1224666 | Asthma |
| rs17219211  | 6 | 32707647 | C | A | 0.2884 | 0.0506  | 0.0057 | 1.21E-18 | 8.8137   | 1224666 | Asthma |
| rs9275529   | 6 | 32707653 | T | C | 0.2430 | 0.0355  | 0.0064 | 2.75E-08 | 5.5565   | 1198533 | Asthma |
| rs17212818  | 6 | 32707672 | C | T | 0.2891 | 0.0508  | 0.0057 | 7.46E-19 | 8.8678   | 1224666 | Asthma |
| rs17212832  | 6 | 32707720 | C | T | 0.2955 | 0.0515  | 0.0052 | 4.48E-23 | 9.8927   | 1376071 | Asthma |
| rs17219239  | 6 | 32707734 | G | C | 0.2905 | 0.0514  | 0.0057 | 2.22E-19 | 9.0018   | 1224666 | Asthma |
| rs9275530   | 6 | 32707746 | C | G | 0.1078 | 0.1278  | 0.0077 | 1.68E-62 | 16.6847  | 1376071 | Asthma |
| rs17212846  | 6 | 32707804 | T | A | 0.0791 | 0.0506  | 0.0087 | 6.51E-09 | 5.8031   | 1310845 | Asthma |
| rs9275532   | 6 | 32707857 | G | C | 0.1079 | 0.1278  | 0.0077 | 1.70E-62 | 16.6841  | 1376071 | Asthma |
| rs17219281  | 6 | 32707868 | A | G | 0.0838 | 0.0732  | 0.0087 | 3.37E-17 | 8.4331   | 1310845 | Asthma |
| rs17212867  | 6 | 32707914 | A | G | 0.2907 | 0.0517  | 0.0057 | 1.48E-19 | 9.0462   | 1224666 | Asthma |
| rs17212881  | 6 | 32707932 | C | A | 0.2906 | 0.0516  | 0.0057 | 1.56E-19 | 9.0404   | 1224666 | Asthma |
| rs28371278  | 6 | 32707956 | G | A | 0.2953 | 0.0517  | 0.0052 | 3.45E-23 | 9.9186   | 1376071 | Asthma |
| rs9275533   | 6 | 32707973 | G | C | 0.4667 | -0.0728 | 0.0054 | 1.71E-41 | -13.4935 | 1224666 | Asthma |
| rs28371279  | 6 | 32707974 | C | T | 0.2891 | 0.0532  | 0.0058 | 6.44E-20 | 9.1367   | 1198533 | Asthma |
| rs28371280  | 6 | 32707983 | G | A | 0.2905 | 0.0517  | 0.0057 | 1.32E-19 | 9.0583   | 1224666 | Asthma |
| rs9275534   | 6 | 32707990 | T | C | 0.2427 | 0.0359  | 0.0063 | 9.74E-09 | 5.7353   | 1224666 | Asthma |
| rs9275535   | 6 | 32708012 | G | A | 0.4667 | -0.0727 | 0.0054 | 2.47E-41 | -13.4661 | 1224666 | Asthma |
| rs28371281  | 6 | 32708037 | G | A | 0.2906 | 0.0517  | 0.0057 | 1.34E-19 | 9.0571   | 1224666 | Asthma |
| rs28371282  | 6 | 32708038 | T | C | 0.2906 | 0.0517  | 0.0057 | 1.32E-19 | 9.0584   | 1224666 | Asthma |
| rs9275536   | 6 | 32708052 | A | G | 0.4377 | -0.0703 | 0.0058 | 5.26E-34 | -12.1571 | 856646  | Asthma |
| rs28371283  | 6 | 32708123 | G | A | 0.2892 | 0.0532  | 0.0058 | 6.55E-20 | 9.1349   | 1198533 | Asthma |
| rs28371284  | 6 | 32708124 | T | C | 0.2892 | 0.0532  | 0.0058 | 6.58E-20 | 9.1344   | 1198533 | Asthma |
| rs28371285  | 6 | 32708152 | T | C | 0.2884 | 0.0512  | 0.0057 | 5.27E-19 | 8.9066   | 1224666 | Asthma |
| rs34388057  | 6 | 32708174 | T | A | 0.1266 | -0.0735 | 0.0076 | 5.07E-22 | -9.6469  | 1376071 | Asthma |
| rs28371286  | 6 | 32708217 | T | C | 0.2955 | 0.0516  | 0.0052 | 4.14E-23 | 9.9006   | 1376071 | Asthma |
| rs9275538   | 6 | 32708240 | T | C | 0.4672 | -0.0733 | 0.0054 | 4.49E-42 | -13.5917 | 1224666 | Asthma |
| rs28371287  | 6 | 32708263 | T | C | 0.2895 | 0.0522  | 0.0057 | 7.58E-20 | 9.1191   | 1224666 | Asthma |
| rs28371288  | 6 | 32708266 | T | C | 0.2895 | 0.0522  | 0.0057 | 7.57E-20 | 9.1192   | 1224666 | Asthma |
| rs9275539   | 6 | 32708271 | A | G | 0.2431 | 0.0353  | 0.0064 | 3.04E-08 | 5.5394   | 1198533 | Asthma |
| rs28371289  | 6 | 32708298 | G | A | 0.2953 | 0.0518  | 0.0052 | 3.07E-23 | 9.9304   | 1376071 | Asthma |
| rs28371290  | 6 | 32708348 | T | C | 0.2902 | 0.0516  | 0.0057 | 1.64E-19 | 9.0347   | 1224666 | Asthma |
| rs28371291  | 6 | 32708354 | C | T | 0.2902 | 0.0516  | 0.0057 | 1.64E-19 | 9.0347   | 1224666 | Asthma |
| rs9275540   | 6 | 32708362 | T | A | 0.4668 | -0.0727 | 0.0054 | 2.17E-41 | -13.4758 | 1224666 | Asthma |
| rs9275541   | 6 | 32708382 | G | C | 0.1078 | 0.1279  | 0.0077 | 1.58E-62 | 16.6882  | 1376071 | Asthma |
| rs3129721   | 6 | 32708474 | C | A | 0.4047 | -0.0604 | 0.0050 | 6.02E-33 | -11.9561 | 1376071 | Asthma |
| rs28371292  | 6 | 32708522 | C | T | 0.2955 | 0.0515  | 0.0052 | 4.65E-23 | 9.8889   | 1376071 | Asthma |
| rs9275544   | 6 | 32708576 | G | A | 0.2429 | 0.0353  | 0.0064 | 3.13E-08 | 5.5344   | 1198533 | Asthma |
| rs9275545   | 6 | 32708578 | T | C | 0.2429 | 0.0353  | 0.0064 | 3.19E-08 | 5.5309   | 1198533 | Asthma |
| rs28755383  | 6 | 32708616 | G | C | 0.2907 | 0.0516  | 0.0057 | 1.71E-19 | 9.0303   | 1224666 | Asthma |
| rs28755384  | 6 | 32708621 | C | T | 0.2907 | 0.0516  | 0.0057 | 1.72E-19 | 9.0297   | 1224666 | Asthma |
| rs28755385  | 6 | 32708648 | T | C | 0.2907 | 0.0516  | 0.0057 | 1.57E-19 | 9.0395   | 1224666 | Asthma |
| rs115602986 | 6 | 32708667 | T | C | 0.1267 | -0.0748 | 0.0086 | 2.97E-18 | -8.7128  | 1198533 | Asthma |
| rs9275546   | 6 | 32708668 | G | T | 0.2428 | 0.0352  | 0.0064 | 3.31E-08 | 5.5245   | 1198533 | Asthma |
| rs28755386  | 6 | 32708707 | A | C | 0.2905 | 0.0512  | 0.0057 | 3.13E-19 | 8.9642   | 1224666 | Asthma |
| rs34709043  | 6 | 32708709 | C | A | 0.1268 | -0.0742 | 0.0077 | 7.93E-22 | -9.6008  | 1349938 | Asthma |
| rs28755387  | 6 | 32708711 | C | A | 0.2904 | 0.0513  | 0.0057 | 2.89E-19 | 8.9729   | 1224666 | Asthma |
| rs9275553   | 6 | 32709211 | G | T | 0.3243 | 0.0778  | 0.0079 | 6.27E-23 | 9.8590   | 908767  | Asthma |
| rs9275554   | 6 | 32709239 | T | C | 0.5345 | 0.0870  | 0.0073 | 5.69E-33 | 11.9611  | 908767  | Asthma |
| rs28371293  | 6 | 32709322 | A | T | 0.2954 | 0.0515  | 0.0052 | 4.95E-23 | 9.8826   | 1376071 | Asthma |
| rs28371294  | 6 | 32709347 | A | T | 0.2907 | 0.0515  | 0.0057 | 2.06E-19 | 9.0102   | 1224666 | Asthma |
| rs28371295  | 6 | 32709352 | T | A | 0.2907 | 0.0515  | 0.0057 | 2.05E-19 | 9.0103   | 1224666 | Asthma |
| rs16898264  | 6 | 32709375 | A | G | 0.2958 | 0.0513  | 0.0052 | 6.14E-23 | 9.8612   | 1376071 | Asthma |
| rs9275556   | 6 | 32709413 | C | T | 0.4635 | -0.0697 | 0.0049 | 2.88E-45 | -14.1196 | 1376071 | Asthma |
| rs9275557   | 6 | 32709422 | C | T | 0.4666 | -0.0727 | 0.0054 | 1.99E-41 | -13.4824 | 1224666 | Asthma |
| rs28371297  | 6 | 32709538 | C | T | 0.2955 | 0.0514  | 0.0052 | 5.54E-23 | 9.8714   | 1376071 | Asthma |
| rs28371298  | 6 | 32709544 | C | A | 0.2897 | 0.0517  | 0.0057 | 1.80E-19 | 9.0247   | 1224666 | Asthma |
| rs17581305  | 6 | 32709576 | A | G | 0.2955 | 0.0514  | 0.0052 | 5.51E-23 | 9.8718   | 1376071 | Asthma |

|             |   |          |   |   |        |         |        |          |          |         |        |
|-------------|---|----------|---|---|--------|---------|--------|----------|----------|---------|--------|
| rs10947332  | 6 | 32709663 | A | G | 0.1266 | -0.0736 | 0.0076 | 4.53E-22 | -9.6582  | 1376071 | Asthma |
| rs28371301  | 6 | 32709676 | T | C | 0.2892 | 0.0529  | 0.0058 | 9.61E-20 | 9.0934   | 1198533 | Asthma |
| rs28371302  | 6 | 32709677 | C | T | 0.2907 | 0.0515  | 0.0057 | 1.95E-19 | 9.0158   | 1224666 | Asthma |
| rs28371305  | 6 | 32709913 | G | T | 0.2848 | 0.0522  | 0.0063 | 1.92E-16 | 8.2272   | 1130071 | Asthma |
| rs28371306  | 6 | 32709974 | C | T | 0.2907 | 0.0515  | 0.0057 | 1.96E-19 | 9.0158   | 1224666 | Asthma |
| rs28371307  | 6 | 32709984 | G | A | 0.2907 | 0.0515  | 0.0057 | 1.93E-19 | 9.0170   | 1224666 | Asthma |
| rs9275561   | 6 | 32710012 | T | C | 0.2410 | 0.0318  | 0.0057 | 3.06E-08 | 5.5382   | 1376071 | Asthma |
| rs111944102 | 6 | 32710041 | A | T | 0.1266 | -0.0735 | 0.0076 | 5.20E-22 | -9.6443  | 1376071 | Asthma |
| rs28755388  | 6 | 32710121 | C | T | 0.2890 | 0.0529  | 0.0058 | 1.12E-19 | 9.0764   | 1198533 | Asthma |
| rs9275563   | 6 | 32710135 | T | C | 0.4031 | 0.0969  | 0.0049 | 7.62E-88 | 19.8684  | 1376071 | Asthma |
| rs9275565   | 6 | 32710161 | T | C | 0.4672 | -0.0729 | 0.0054 | 1.67E-41 | -13.4950 | 1224666 | Asthma |
| rs28755389  | 6 | 32710191 | A | C | 0.2906 | 0.0516  | 0.0057 | 1.66E-19 | 9.0342   | 1224666 | Asthma |
| rs28755390  | 6 | 32710192 | G | A | 0.2906 | 0.0516  | 0.0057 | 1.63E-19 | 9.0357   | 1224666 | Asthma |
| rs28755391  | 6 | 32710225 | T | C | 0.2906 | 0.0515  | 0.0057 | 1.89E-19 | 9.0193   | 1224666 | Asthma |
| rs28755392  | 6 | 32710244 | C | T | 0.0791 | 0.0501  | 0.0087 | 9.10E-09 | 5.7466   | 1310845 | Asthma |
| rs9275567   | 6 | 32710354 | A | G | 0.4668 | -0.0727 | 0.0054 | 2.30E-41 | -13.4719 | 1224666 | Asthma |
| rs9275568   | 6 | 32710358 | C | A | 0.2459 | 0.0390  | 0.0070 | 2.43E-08 | 5.5785   | 1068611 | Asthma |
| rs9275569   | 6 | 32710359 | C | T | 0.4638 | -0.0701 | 0.0049 | 1.08E-45 | -14.1882 | 1376071 | Asthma |
| rs28371308  | 6 | 32710385 | A | T | 0.2885 | 0.0524  | 0.0057 | 3.84E-20 | 9.1926   | 1281476 | Asthma |
| rs6932517   | 6 | 32710405 | C | G | 0.4748 | -0.0688 | 0.0051 | 1.24E-41 | -13.5173 | 1316443 | Asthma |
| rs9275570   | 6 | 32710422 | G | A | 0.4769 | -0.0696 | 0.0051 | 1.97E-42 | -13.6517 | 1316443 | Asthma |
| rs3129726   | 6 | 32710429 | G | A | 0.2868 | -0.0923 | 0.0055 | 2.69E-62 | -16.6572 | 1376071 | Asthma |
| rs28371309  | 6 | 32710457 | A | G | 0.2869 | 0.0533  | 0.0058 | 5.90E-20 | 9.1463   | 1198533 | Asthma |
| rs28371310  | 6 | 32710469 | C | T | 0.2593 | 0.0535  | 0.0057 | 9.98E-21 | 9.3363   | 1316443 | Asthma |
| rs4947345   | 6 | 32710483 | T | A | 0.4532 | -0.0697 | 0.0055 | 5.55E-37 | -12.7050 | 1224666 | Asthma |
| rs28371311  | 6 | 32710488 | G | A | 0.2463 | 0.0516  | 0.0059 | 2.42E-18 | 8.7355   | 1224666 | Asthma |
| rs28371312  | 6 | 32710529 | T | C | 0.2891 | 0.0531  | 0.0058 | 7.90E-20 | 9.1147   | 1198533 | Asthma |
| rs28371313  | 6 | 32710532 | T | C | 0.2906 | 0.0516  | 0.0057 | 1.60E-19 | 9.0378   | 1224666 | Asthma |
| rs28371315  | 6 | 32710611 | C | T | 0.2946 | 0.0516  | 0.0052 | 5.87E-23 | 9.8656   | 1376071 | Asthma |
| rs2894281   | 6 | 32710647 | G | A | 0.6375 | -0.0619 | 0.0074 | 6.97E-17 | -8.3477  | 847307  | Asthma |
| rs201544520 | 6 | 32710648 | A | T | 0.3123 | 0.0623  | 0.0067 | 2.69E-20 | 9.2306   | 661498  | Asthma |
| rs3998157   | 6 | 32710700 | C | A | 0.4635 | -0.0696 | 0.0049 | 4.15E-45 | -14.0937 | 1376071 | Asthma |
| rs4273728   | 6 | 32710714 | C | T | 0.1078 | 0.1280  | 0.0077 | 1.44E-62 | 16.6945  | 1376071 | Asthma |
| rs28371316  | 6 | 32710725 | G | A | 0.2955 | 0.0515  | 0.0052 | 5.17E-23 | 9.8783   | 1376071 | Asthma |
| rs3957217   | 6 | 32710732 | G | A | 0.2955 | 0.0515  | 0.0052 | 5.06E-23 | 9.8804   | 1376071 | Asthma |
| rs4273729   | 6 | 32710820 | C | G | 0.4634 | -0.0696 | 0.0049 | 4.29E-45 | -14.0912 | 1376071 | Asthma |
| rs28371317  | 6 | 32710857 | C | T | 0.2956 | 0.0515  | 0.0052 | 5.13E-23 | 9.8793   | 1376071 | Asthma |
| rs28371318  | 6 | 32710963 | G | A | 0.2956 | 0.0515  | 0.0052 | 5.20E-23 | 9.8776   | 1376071 | Asthma |
| rs17581326  | 6 | 32710976 | G | A | 0.2955 | 0.0515  | 0.0052 | 5.32E-23 | 9.8755   | 1376071 | Asthma |
| rs28371319  | 6 | 32711018 | A | T | 0.2955 | 0.0515  | 0.0052 | 5.01E-23 | 9.8816   | 1376071 | Asthma |
| rs9275571   | 6 | 32711070 | G | T | 0.2410 | 0.0318  | 0.0057 | 3.12E-08 | 5.5343   | 1376071 | Asthma |
| rs28371320  | 6 | 32711100 | C | T | 0.2955 | 0.0515  | 0.0052 | 4.92E-23 | 9.8835   | 1376071 | Asthma |
| rs28371321  | 6 | 32711117 | A | T | 0.2955 | 0.0515  | 0.0052 | 5.04E-23 | 9.8809   | 1376071 | Asthma |
| rs9275572   | 6 | 32711222 | A | G | 0.4674 | -0.0699 | 0.0053 | 4.97E-39 | -13.0687 | 1281476 | Asthma |
| rs28371322  | 6 | 32711270 | A | G | 0.2907 | 0.0522  | 0.0057 | 3.98E-20 | 9.1886   | 1281476 | Asthma |
| rs28715209  | 6 | 32711276 | A | T | 0.1266 | -0.0735 | 0.0076 | 4.99E-22 | -9.6484  | 1376071 | Asthma |
| rs28371323  | 6 | 32711282 | A | T | 0.2911 | 0.0511  | 0.0057 | 4.15E-19 | 8.9329   | 1224666 | Asthma |
| rs28371324  | 6 | 32711291 | C | T | 0.2942 | 0.0527  | 0.0053 | 2.27E-23 | 9.9605   | 1349938 | Asthma |
| rs9275573   | 6 | 32711369 | C | G | 0.4635 | -0.0698 | 0.0049 | 2.49E-45 | -14.1298 | 1376071 | Asthma |
| rs28371325  | 6 | 32711411 | T | C | 0.2903 | 0.0515  | 0.0057 | 2.34E-19 | 8.9959   | 1224666 | Asthma |
| rs28371326  | 6 | 32711425 | T | A | 0.2849 | 0.0501  | 0.0055 | 4.19E-20 | 9.1831   | 1316443 | Asthma |
| rs28371328  | 6 | 32711439 | A | G | 0.2903 | 0.0514  | 0.0057 | 2.56E-19 | 8.9862   | 1224666 | Asthma |
| rs28371329  | 6 | 32711459 | A | G | 0.2904 | 0.0514  | 0.0057 | 2.65E-19 | 8.9825   | 1224666 | Asthma |
| rs28371330  | 6 | 32711506 | T | C | 0.2907 | 0.0516  | 0.0057 | 1.76E-19 | 9.0272   | 1224666 | Asthma |
| rs28371331  | 6 | 32711524 | C | A | 0.2478 | 0.0538  | 0.0059 | 7.49E-20 | 9.1202   | 1251217 | Asthma |
| rs28371332  | 6 | 32711534 | G | A | 0.2907 | 0.0516  | 0.0057 | 1.79E-19 | 9.0253   | 1224666 | Asthma |
| rs9275577   | 6 | 32711568 | A | T | 0.4735 | -0.0707 | 0.0054 | 2.80E-39 | -13.1123 | 1224666 | Asthma |
| rs28371333  | 6 | 32711569 | A | G | 0.2892 | 0.0536  | 0.0058 | 3.90E-20 | 9.1909   | 1198533 | Asthma |
| rs9275579   | 6 | 32711682 | A | T | 0.2410 | 0.0318  | 0.0057 | 3.02E-08 | 5.5404   | 1376071 | Asthma |
| rs9275580   | 6 | 32711685 | G | A | 0.2410 | 0.0319  | 0.0057 | 2.70E-08 | 5.5602   | 1376071 | Asthma |
| rs17615293  | 6 | 32711712 | C | A | 0.2956 | 0.0517  | 0.0052 | 3.81E-23 | 9.9089   | 1376071 | Asthma |
| rs17581404  | 6 | 32711741 | G | A | 0.2955 | 0.0515  | 0.0052 | 5.64E-23 | 9.8695   | 1376071 | Asthma |
| rs12203586  | 6 | 32711814 | C | G | 0.2956 | 0.0516  | 0.0052 | 4.04E-23 | 9.9031   | 1376071 | Asthma |
| rs9378124   | 6 | 32711828 | G | A | 0.2956 | 0.0516  | 0.0052 | 4.53E-23 | 9.8916   | 1376071 | Asthma |
| rs9391742   | 6 | 32711831 | A | C | 0.2896 | 0.0516  | 0.0057 | 2.09E-19 | 9.0083   | 1224666 | Asthma |
| rs2647083   | 6 | 32711945 | G | C | 0.2955 | 0.0516  | 0.0052 | 4.33E-23 | 9.8958   | 1376071 | Asthma |
| rs9378125   | 6 | 32711955 | G | A | 0.2135 | 0.0445  | 0.0058 | 1.31E-14 | 7.7054   | 1310845 | Asthma |
| rs28371339  | 6 | 32711981 | A | G | 0.3120 | 0.0546  | 0.0062 | 1.05E-18 | 8.8298   | 830513  | Asthma |
| rs2647084   | 6 | 32712002 | T | A | 0.2956 | 0.0516  | 0.0052 | 4.56E-23 | 9.8908   | 1376071 | Asthma |
| rs3135461   | 6 | 32712345 | G | A | 0.2607 | -0.0808 | 0.0056 | 1.92E-46 | -14.3090 | 1376071 | Asthma |
| rs9275583   | 6 | 32712522 | A | G | 0.1078 | 0.1282  | 0.0077 | 1.01E-62 | 16.7156  | 1376071 | Asthma |
| rs9275586   | 6 | 32712599 | T | G | 0.2427 | 0.0354  | 0.0064 | 3.06E-08 | 5.5380   | 1198533 | Asthma |
| rs9275587   | 6 | 32712602 | T | C | 0.5514 | -0.0435 | 0.0054 | 9.68E-16 | -8.0308  | 1224666 | Asthma |
| rs9275588   | 6 | 32712646 | G | A | 0.5535 | -0.0442 | 0.0049 | 2.91E-19 | -8.9721  | 1376071 | Asthma |



|             |   |          |   |   |        |         |        |           |          |         |        |
|-------------|---|----------|---|---|--------|---------|--------|-----------|----------|---------|--------|
| rs9275589   | 6 | 32712664 | T | G | 0.5535 | -0.0442 | 0.0049 | 3.06E-19  | -8.9664  | 1376071 | Asthma |
| rs7764819   | 6 | 32712799 | G | T | 0.1254 | 0.0403  | 0.0072 | 2.31E-08  | 5.5872   | 1310845 | Asthma |
| rs9275592   | 6 | 32712843 | T | G | 0.1078 | 0.1282  | 0.0077 | 1.10E-62  | 16.7099  | 1376071 | Asthma |
| rs7764856   | 6 | 32712863 | A | T | 0.3599 | 0.0436  | 0.0051 | 9.57E-18  | 8.5790   | 1376071 | Asthma |
| rs17219295  | 6 | 32712920 | T | C | 0.2074 | 0.0354  | 0.0063 | 1.48E-08  | 5.6635   | 1180923 | Asthma |
| rs7765379   | 6 | 32713151 | G | T | 0.1255 | 0.0402  | 0.0072 | 2.38E-08  | 5.5817   | 1310845 | Asthma |
| rs2858332   | 6 | 32713384 | G | T | 0.5471 | -0.0453 | 0.0049 | 3.57E-20  | -9.2005  | 1376071 | Asthma |
| rs17212937  | 6 | 32713562 | T | C | 0.1257 | 0.0405  | 0.0072 | 1.91E-08  | 5.6197   | 1310845 | Asthma |
| rs3957146   | 6 | 32713753 | C | T | 0.1077 | 0.1288  | 0.0077 | 4.16E-63  | 16.7680  | 1376071 | Asthma |
| rs9275596   | 6 | 32713854 | C | T | 0.4057 | -0.0605 | 0.0051 | 4.93E-33  | -11.9728 | 1376071 | Asthma |
| rs3104402   | 6 | 32713899 | T | G | 0.0800 | -0.0532 | 0.0095 | 2.00E-08  | -5.6117  | 1310845 | Asthma |
| rs3129730   | 6 | 32714062 | G | A | 0.0840 | 0.0514  | 0.0092 | 2.02E-08  | 5.6102   | 1154767 | Asthma |
| rs3998158   | 6 | 32714215 | C | T | 0.2290 | 0.0350  | 0.0059 | 2.76E-09  | 5.9452   | 1376071 | Asthma |
| rs3998159   | 6 | 32714242 | C | A | 0.1088 | 0.1265  | 0.0077 | 2.67E-61  | 16.5189  | 1376071 | Asthma |
| rs67373575  | 6 | 32714266 | T | A | 0.1211 | -0.0705 | 0.0079 | 3.95E-19  | -8.9382  | 1376071 | Asthma |
| rs3957148   | 6 | 32714360 | G | A | 0.1090 | 0.1272  | 0.0076 | 2.60E-62  | 16.6595  | 1376071 | Asthma |
| rs35122968  | 6 | 32714422 | C | T | 0.0841 | 0.0733  | 0.0087 | 3.91E-17  | 8.4157   | 1310845 | Asthma |
| rs2894381   | 6 | 32714451 | A | G | 0.2214 | -0.0331 | 0.0059 | 1.68E-08  | -5.6419  | 1284712 | Asthma |
| rs3104405   | 6 | 32714531 | C | A | 0.3750 | -0.0810 | 0.0052 | 2.20E-55  | -15.6764 | 1310845 | Asthma |
| rs9275599   | 6 | 32714652 | T | C | 0.1037 | 0.1310  | 0.0078 | 7.64E-63  | 16.7327  | 1376071 | Asthma |
| rs3104407   | 6 | 32714675 | G | A | 0.4966 | -0.1051 | 0.0049 | 8.47E-101 | -21.3131 | 1310845 | Asthma |
| rs3873444   | 6 | 32714947 | T | C | 0.1025 | -0.0471 | 0.0083 | 1.21E-08  | -5.6984  | 1251217 | Asthma |
| rs9275602   | 6 | 32715035 | A | C | 0.1692 | 0.0732  | 0.0066 | 9.55E-29  | 11.1245  | 1310845 | Asthma |
| rs3873445   | 6 | 32715233 | T | C | 0.1205 | 0.0639  | 0.0084 | 2.88E-14  | 7.6036   | 1133307 | Asthma |
| rs3873448   | 6 | 32715278 | T | C | 0.1243 | 0.0647  | 0.0075 | 5.37E-18  | 8.6451   | 1284712 | Asthma |
| rs3873452   | 6 | 32715532 | C | G | 0.1256 | 0.0787  | 0.0119 | 3.37E-11  | 6.6295   | 778845  | Asthma |
| rs3873453   | 6 | 32715605 | T | C | 0.1256 | 0.0624  | 0.0082 | 2.52E-14  | 7.6210   | 1156622 | Asthma |
| rs9275607   | 6 | 32715868 | G | A | 0.1319 | 0.0411  | 0.0071 | 8.77E-09  | 5.7530   | 1310845 | Asthma |
| rs115308106 | 6 | 32715889 | A | G | 0.0088 | -0.1279 | 0.0232 | 3.73E-08  | -5.5034  | 1310845 | Asthma |
| rs6935940   | 6 | 32715914 | C | A | 0.2198 | 0.0444  | 0.0059 | 6.22E-14  | 7.5034   | 1251217 | Asthma |
| rs9275610   | 6 | 32715973 | C | T | 0.1314 | 0.0409  | 0.0071 | 1.08E-08  | 5.7183   | 1310845 | Asthma |
| rs9275611   | 6 | 32715986 | A | G | 0.1225 | 0.0578  | 0.0074 | 7.12E-15  | 7.7824   | 1310845 | Asthma |
| rs6915986   | 6 | 32716121 | C | T | 0.0089 | -0.1302 | 0.0231 | 1.72E-08  | -5.6386  | 1310845 | Asthma |
| rs6936863   | 6 | 32716252 | G | C | 0.2224 | 0.0439  | 0.0057 | 1.98E-14  | 7.6516   | 1310845 | Asthma |
| rs6936707   | 6 | 32716292 | T | C | 0.0089 | -0.1290 | 0.0231 | 2.27E-08  | -5.5897  | 1310845 | Asthma |
| rs9275614   | 6 | 32716480 | G | A | 0.1238 | 0.0582  | 0.0074 | 2.52E-15  | 7.9126   | 1310845 | Asthma |
| rs9275615   | 6 | 32716495 | A | T | 0.1238 | 0.0585  | 0.0074 | 1.92E-15  | 7.9463   | 1310845 | Asthma |
| rs6916779   | 6 | 32716540 | C | T | 0.1327 | 0.0413  | 0.0071 | 5.29E-09  | 5.8378   | 1310845 | Asthma |
| rs5024431   | 6 | 32716567 | A | G | 0.2224 | 0.0437  | 0.0057 | 2.63E-14  | 7.6155   | 1310845 | Asthma |
| rs9275618   | 6 | 32716610 | G | A | 0.1238 | 0.0583  | 0.0074 | 2.17E-15  | 7.9315   | 1310845 | Asthma |
| rs9275638   | 6 | 32716983 | T | C | 0.1296 | 0.0473  | 0.0072 | 4.13E-11  | 6.5994   | 1310845 | Asthma |
| rs9275639   | 6 | 32717054 | T | A | 0.2209 | 0.0481  | 0.0058 | 2.10E-16  | 8.2165   | 1284712 | Asthma |
| rs9275641   | 6 | 32717142 | T | C | 0.2162 | 0.0498  | 0.0065 | 1.79E-14  | 7.6648   | 1133307 | Asthma |
| rs9275642   | 6 | 32717158 | T | C | 0.2113 | 0.0569  | 0.0066 | 4.01E-18  | 8.6785   | 1133307 | Asthma |
| rs7738118   | 6 | 32717180 | A | G | 0.2174 | 0.0495  | 0.0061 | 2.75E-16  | 8.1839   | 1225084 | Asthma |
| rs7738119   | 6 | 32717182 | A | G | 0.2175 | 0.0494  | 0.0061 | 3.09E-16  | 8.1696   | 1225084 | Asthma |
| rs41288885  | 6 | 32717421 | G | A | 0.0771 | -0.0842 | 0.0093 | 1.82E-19  | -9.0233  | 1310845 | Asthma |
| rs3129732   | 6 | 32717463 | G | C | 0.1063 | 0.0435  | 0.0079 | 4.26E-08  | 5.4796   | 1251217 | Asthma |
| rs3916765   | 6 | 32717773 | A | G | 0.1235 | 0.0587  | 0.0074 | 1.66E-15  | 7.9644   | 1310845 | Asthma |
| rs116706159 | 6 | 32723638 | T | C | 0.0518 | -0.0717 | 0.0119 | 1.78E-09  | -6.0164  | 1154790 | Asthma |
| rs115222658 | 6 | 32726265 | A | G | 0.0537 | -0.0730 | 0.0114 | 1.41E-10  | -6.4150  | 1180923 | Asthma |
| rs9276010   | 6 | 32726909 | T | A | 0.0467 | 0.0674  | 0.0117 | 7.77E-09  | 5.7735   | 1310845 | Asthma |
| rs78705254  | 6 | 32727678 | T | C | 0.0630 | -0.0817 | 0.0122 | 1.98E-11  | -6.7075  | 1121295 | Asthma |
| rs9276189   | 6 | 32731548 | A | G | 0.1406 | -0.0439 | 0.0073 | 1.42E-09  | -6.0538  | 1310845 | Asthma |
| rs10484563  | 6 | 32735385 | G | A | 0.0585 | -0.0583 | 0.0102 | 1.02E-08  | -5.7276  | 1310845 | Asthma |
| rs9276300   | 6 | 32735408 | T | C | 0.0520 | 0.0612  | 0.0108 | 1.54E-08  | 5.6569   | 1310845 | Asthma |
| rs115018313 | 6 | 32742630 | C | T | 0.0295 | 0.1230  | 0.0156 | 2.94E-15  | 7.8935   | 1156622 | Asthma |
| rs28371353  | 6 | 32742733 | G | C | 0.0472 | 0.0661  | 0.0116 | 1.11E-08  | 5.7124   | 1284712 | Asthma |
| rs41288889  | 6 | 32744232 | C | A | 0.0753 | -0.0836 | 0.0094 | 5.96E-19  | -8.8928  | 1310845 | Asthma |
| rs9276434   | 6 | 32744889 | C | T | 0.1400 | -0.0447 | 0.0073 | 8.86E-10  | -6.1287  | 1310845 | Asthma |
| rs17500510  | 6 | 32745041 | A | G | 0.0798 | 0.0574  | 0.0087 | 4.70E-11  | 6.5803   | 1310845 | Asthma |
| rs9276436   | 6 | 32746306 | C | T | 0.0537 | 0.0597  | 0.0108 | 3.41E-08  | 5.5190   | 1284712 | Asthma |
| rs2071800   | 6 | 32746366 | A | G | 0.0581 | 0.0786  | 0.0110 | 7.38E-13  | 7.1725   | 1216250 | Asthma |
| rs9276437   | 6 | 32746391 | G | A | 0.1066 | 0.0933  | 0.0117 | 1.84E-15  | 7.9519   | 908767  | Asthma |
| rs9276442   | 6 | 32747124 | T | C | 0.0537 | 0.0589  | 0.0108 | 4.99E-08  | 5.4520   | 1284712 | Asthma |
| rs2395253   | 6 | 32747383 | A | G | 0.0585 | -0.0579 | 0.0102 | 1.28E-08  | -5.6889  | 1310845 | Asthma |
| rs34878595  | 6 | 32747556 | C | G | 0.0592 | 0.0767  | 0.0100 | 1.53E-14  | 7.6848   | 1310845 | Asthma |
| rs9276448   | 6 | 32747852 | G | A | 0.0574 | 0.0598  | 0.0109 | 4.67E-08  | 5.4634   | 1180923 | Asthma |
| rs9276452   | 6 | 32747945 | G | A | 0.0540 | 0.0579  | 0.0106 | 4.73E-08  | 5.4614   | 1310845 | Asthma |
| rs9276464   | 6 | 32748517 | T | C | 0.0540 | 0.0578  | 0.0106 | 4.89E-08  | 5.4554   | 1310845 | Asthma |
| rs9276465   | 6 | 32748632 | G | A | 0.0540 | 0.0578  | 0.0106 | 4.95E-08  | 5.4531   | 1310845 | Asthma |
| rs9276498   | 6 | 32751304 | A | G | 0.1479 | 0.0656  | 0.0103 | 1.62E-10  | 6.3936   | 1060172 | Asthma |
| rs9469268   | 6 | 32751858 | A | G | 0.0713 | -0.0547 | 0.0093 | 4.94E-09  | -5.8491  | 1310845 | Asthma |
| rs9276511   | 6 | 32752260 | G | T | 0.0540 | 0.0580  | 0.0106 | 4.34E-08  | 5.4761   | 1310845 | Asthma |

|             |   |          |   |   |        |         |        |          |         |         |        |
|-------------|---|----------|---|---|--------|---------|--------|----------|---------|---------|--------|
| rs9276520   | 6 | 32752638 | T | C | 0.0600 | 0.0629  | 0.0108 | 5.33E-09 | 5.8366  | 1154767 | Asthma |
| rs9276547   | 6 | 32754378 | A | G | 0.0540 | 0.0581  | 0.0106 | 4.25E-08 | 5.4801  | 1310845 | Asthma |
| rs9276549   | 6 | 32754465 | T | C | 0.0650 | 0.0654  | 0.0111 | 3.99E-09 | 5.8846  | 1024845 | Asthma |
| rs9276554   | 6 | 32754925 | T | C | 0.0539 | 0.0585  | 0.0106 | 3.59E-08 | 5.5100  | 1310845 | Asthma |
| rs6933763   | 6 | 32755075 | G | A | 0.0774 | -0.0626 | 0.0089 | 2.41E-12 | -7.0085 | 1310845 | Asthma |
| rs9461807   | 6 | 32755729 | G | A | 0.0774 | -0.0626 | 0.0089 | 2.36E-12 | -7.0112 | 1310845 | Asthma |
| rs9276557   | 6 | 32755837 | T | C | 0.0519 | 0.0611  | 0.0108 | 1.62E-08 | 5.6487  | 1310845 | Asthma |
| rs9461808   | 6 | 32755888 | T | C | 0.0772 | -0.0627 | 0.0089 | 2.42E-12 | -7.0076 | 1310845 | Asthma |
| rs7774954   | 6 | 32756412 | A | C | 0.0539 | 0.0585  | 0.0106 | 3.56E-08 | 5.5114  | 1310845 | Asthma |
| rs7757475   | 6 | 32756722 | C | T | 0.0600 | 0.0644  | 0.0108 | 2.27E-09 | 5.9772  | 1154767 | Asthma |
| rs116383515 | 6 | 32758219 | C | T | 0.0585 | -0.0584 | 0.0102 | 9.74E-09 | -5.7353 | 1310845 | Asthma |
| rs11759423  | 6 | 32762615 | T | C | 0.0615 | 0.0804  | 0.0104 | 1.36E-14 | 7.7000  | 1180923 | Asthma |
| rs6919798   | 6 | 32765113 | G | A | 0.0520 | 0.0609  | 0.0108 | 1.77E-08 | 5.6330  | 1310845 | Asthma |
| rs149548865 | 6 | 32765734 | A | T | 0.0593 | -0.0578 | 0.0102 | 1.27E-08 | -5.6900 | 1310845 | Asthma |
| rs144759411 | 6 | 32765735 | A | C | 0.0593 | -0.0577 | 0.0102 | 1.36E-08 | -5.6788 | 1310845 | Asthma |
| rs33998906  | 6 | 32765851 | T | C | 0.0520 | 0.0917  | 0.0106 | 5.93E-18 | 8.6341  | 1310845 | Asthma |
| rs5019292   | 6 | 32765942 | A | G | 0.0520 | 0.0606  | 0.0108 | 2.13E-08 | 5.6010  | 1310845 | Asthma |
| rs35439528  | 6 | 32766046 | T | C | 0.0592 | 0.0757  | 0.0100 | 3.24E-14 | 7.5882  | 1310845 | Asthma |
| rs6457663   | 6 | 32771535 | A | T | 0.0517 | 0.0595  | 0.0109 | 4.28E-08 | 5.4786  | 1310845 | Asthma |
| rs1383264   | 6 | 32772190 | A | T | 0.4350 | 0.0355  | 0.0050 | 8.05E-13 | 7.1603  | 1310845 | Asthma |
| rs2857212   | 6 | 32772634 | G | A | 0.3912 | -0.0286 | 0.0051 | 2.19E-08 | -5.5964 | 1251217 | Asthma |
| rs1480382   | 6 | 32773118 | T | C | 0.3186 | 0.0353  | 0.0051 | 5.67E-12 | 6.8878  | 1310845 | Asthma |
| rs28986328  | 6 | 32773225 | C | T | 0.0820 | -0.0747 | 0.0090 | 1.40E-16 | -8.2645 | 1310845 | Asthma |
| rs9276609   | 6 | 32773710 | G | C | 0.3451 | 0.0524  | 0.0060 | 1.31E-18 | 8.8054  | 1024845 | Asthma |
| rs2857209   | 6 | 32774141 | A | G | 0.3702 | -0.0310 | 0.0051 | 9.47E-10 | -6.1182 | 1310845 | Asthma |
| rs9276610   | 6 | 32774318 | A | T | 0.1407 | -0.0463 | 0.0072 | 1.59E-10 | -6.3964 | 1310845 | Asthma |
| rs28724891  | 6 | 32774794 | C | T | 0.3621 | -0.0430 | 0.0068 | 2.88E-10 | -6.3051 | 635365  | Asthma |
| rs9276611   | 6 | 32774815 | G | A | 0.3186 | 0.0354  | 0.0051 | 4.64E-12 | 6.9161  | 1310845 | Asthma |
| rs9276612   | 6 | 32774935 | A | G | 0.3191 | 0.0356  | 0.0051 | 4.13E-12 | 6.9328  | 1310845 | Asthma |
| rs12663317  | 6 | 32775050 | C | A | 0.0820 | -0.0744 | 0.0090 | 1.71E-16 | -8.2409 | 1310845 | Asthma |
| rs2621412   | 6 | 32775223 | C | A | 0.3702 | -0.0310 | 0.0051 | 9.94E-10 | -6.1105 | 1310845 | Asthma |
| rs12660504  | 6 | 32775361 | A | G | 0.0820 | -0.0742 | 0.0090 | 2.16E-16 | -8.2129 | 1310845 | Asthma |
| rs9276623   | 6 | 32775863 | A | G | 0.3151 | 0.0367  | 0.0056 | 6.19E-11 | 6.5392  | 1159440 | Asthma |
| rs28986330  | 6 | 32775865 | T | C | 0.0835 | -0.0757 | 0.0098 | 1.26E-14 | -7.7094 | 1159440 | Asthma |
| rs2857204   | 6 | 32776570 | T | G | 0.3704 | -0.0312 | 0.0055 | 1.57E-08 | -5.6533 | 1216250 | Asthma |
| rs13203429  | 6 | 32777075 | C | G | 0.3729 | -0.0326 | 0.0051 | 1.21E-10 | -6.4379 | 1310845 | Asthma |
| rs13203438  | 6 | 32777092 | C | G | 0.3730 | -0.0324 | 0.0051 | 1.43E-10 | -6.4127 | 1310845 | Asthma |
| rs28986331  | 6 | 32777115 | T | C | 0.0820 | -0.0743 | 0.0090 | 2.02E-16 | -8.2211 | 1310845 | Asthma |
| rs9276644   | 6 | 32777266 | C | T | 0.3188 | 0.0355  | 0.0051 | 4.25E-12 | 6.9288  | 1310845 | Asthma |
| rs9276646   | 6 | 32777423 | T | A | 0.3187 | 0.0356  | 0.0051 | 3.80E-12 | 6.9445  | 1310845 | Asthma |
| rs12661326  | 6 | 32777658 | T | C | 0.0826 | -0.0730 | 0.0090 | 5.10E-16 | -8.1091 | 1310845 | Asthma |
| rs12661352  | 6 | 32777750 | T | G | 0.0818 | -0.0737 | 0.0092 | 1.01E-15 | -8.0261 | 1284712 | Asthma |
| rs4265062   | 6 | 32778109 | A | G | 0.3215 | 0.0338  | 0.0051 | 4.10E-11 | 6.6006  | 1310845 | Asthma |
| rs2263320   | 6 | 32778159 | C | T | 0.3703 | -0.0309 | 0.0051 | 1.15E-09 | -6.0866 | 1310845 | Asthma |
| rs2621410   | 6 | 32778393 | T | C | 0.3743 | -0.0335 | 0.0055 | 1.53E-09 | -6.0409 | 1159440 | Asthma |
| rs71542470  | 6 | 32778481 | C | T | 0.0859 | -0.0875 | 0.0108 | 6.15E-16 | -8.0862 | 1003385 | Asthma |
| rs7760514   | 6 | 32778532 | A | G | 0.0878 | -0.0920 | 0.0117 | 4.05E-15 | -7.8532 | 934923  | Asthma |
| rs9501203   | 6 | 32778552 | C | T | 0.3513 | -0.0515 | 0.0081 | 1.87E-10 | -6.3720 | 778845  | Asthma |
| rs201402353 | 6 | 32778617 | T | C | 0.0865 | -0.1019 | 0.0145 | 1.80E-12 | -7.0492 | 778845  | Asthma |
| rs9501205   | 6 | 32778636 | T | C | 0.3689 | -0.0396 | 0.0069 | 1.10E-08 | -5.7141 | 934923  | Asthma |
| rs7760779   | 6 | 32778687 | A | G | 0.3116 | 0.0386  | 0.0063 | 6.81E-10 | 6.1705  | 1003385 | Asthma |
| rs9501207   | 6 | 32778705 | T | C | 0.3712 | -0.0401 | 0.0069 | 6.44E-09 | -5.8050 | 934923  | Asthma |
| rs9501208   | 6 | 32778733 | G | A | 0.3718 | -0.0396 | 0.0069 | 8.53E-09 | -5.7576 | 934923  | Asthma |
| rs9501209   | 6 | 32778741 | A | G | 0.3708 | -0.0388 | 0.0069 | 1.82E-08 | -5.6281 | 934923  | Asthma |
| rs28893524  | 6 | 32778894 | T | C | 0.0866 | -0.1020 | 0.0145 | 1.76E-12 | -7.0522 | 778845  | Asthma |
| rs34153000  | 6 | 32779239 | A | C | 0.0458 | 0.0889  | 0.0115 | 8.19E-15 | 7.7646  | 1310845 | Asthma |
| rs13212165  | 6 | 32779252 | A | G | 0.0820 | -0.0741 | 0.0090 | 2.26E-16 | -8.2075 | 1310845 | Asthma |
| rs28893525  | 6 | 32779485 | A | G | 0.0820 | -0.0741 | 0.0090 | 2.32E-16 | -8.2046 | 1310845 | Asthma |
| rs28893526  | 6 | 32779554 | G | C | 0.0820 | -0.0741 | 0.0090 | 2.34E-16 | -8.2033 | 1310845 | Asthma |
| rs4947258   | 6 | 32779725 | G | A | 0.1024 | 0.0443  | 0.0081 | 4.29E-08 | 5.4784  | 1310845 | Asthma |
| rs28893527  | 6 | 32779815 | T | C | 0.0820 | -0.0741 | 0.0090 | 2.30E-16 | -8.2051 | 1310845 | Asthma |
| rs28893528  | 6 | 32779884 | G | C | 0.0820 | -0.0741 | 0.0090 | 2.33E-16 | -8.2041 | 1310845 | Asthma |
| rs28986332  | 6 | 32779901 | C | G | 0.0820 | -0.0741 | 0.0090 | 2.33E-16 | -8.2036 | 1310845 | Asthma |
| rs28986333  | 6 | 32779950 | C | A | 0.0820 | -0.0741 | 0.0090 | 2.36E-16 | -8.2023 | 1310845 | Asthma |
| rs28893532  | 6 | 32780040 | T | C | 0.0820 | -0.0741 | 0.0090 | 2.30E-16 | -8.2052 | 1310845 | Asthma |
| rs28893533  | 6 | 32780050 | T | G | 0.0820 | -0.0741 | 0.0090 | 2.30E-16 | -8.2055 | 1310845 | Asthma |
| rs28986334  | 6 | 32780244 | C | T | 0.0820 | -0.0740 | 0.0090 | 2.54E-16 | -8.1931 | 1310845 | Asthma |
| rs35520662  | 6 | 32780252 | G | T | 0.0458 | 0.0892  | 0.0115 | 6.90E-15 | 7.7862  | 1310845 | Asthma |
| rs28986335  | 6 | 32780360 | T | A | 0.0820 | -0.0740 | 0.0090 | 2.61E-16 | -8.1902 | 1310845 | Asthma |
| rs28986336  | 6 | 32780536 | C | T | 0.0820 | -0.0740 | 0.0090 | 2.52E-16 | -8.1944 | 1310845 | Asthma |
| rs28986337  | 6 | 32780621 | T | C | 0.0820 | -0.0740 | 0.0090 | 2.37E-16 | -8.2017 | 1310845 | Asthma |
| rs34043227  | 6 | 32780813 | T | C | 0.0458 | 0.0890  | 0.0115 | 7.77E-15 | 7.7710  | 1310845 | Asthma |
| rs13217231  | 6 | 32780913 | T | C | 0.0820 | -0.0741 | 0.0090 | 2.25E-16 | -8.2080 | 1310845 | Asthma |
| rs28986338  | 6 | 32781033 | T | C | 0.0820 | -0.0740 | 0.0090 | 2.30E-16 | -8.2055 | 1310845 | Asthma |

|             |   |          |   |   |        |         |        |          |         |         |        |
|-------------|---|----------|---|---|--------|---------|--------|----------|---------|---------|--------|
| rs28986340  | 6 | 32781147 | C | G | 0.0820 | -0.0740 | 0.0090 | 2.72E-16 | -8.1852 | 1310845 | Asthma |
| rs28986341  | 6 | 32781157 | A | G | 0.0822 | -0.0746 | 0.0099 | 6.09E-14 | -7.5063 | 1159440 | Asthma |
| rs28986342  | 6 | 32781160 | C | T | 0.0822 | -0.0746 | 0.0099 | 6.39E-14 | -7.4998 | 1159440 | Asthma |
| rs28986347  | 6 | 32781332 | G | A | 0.0820 | -0.0741 | 0.0090 | 2.37E-16 | -8.2017 | 1310845 | Asthma |
| rs28986348  | 6 | 32781345 | T | C | 0.0820 | -0.0741 | 0.0090 | 2.39E-16 | -8.2008 | 1310845 | Asthma |
| rs28986349  | 6 | 32781363 | A | G | 0.0820 | -0.0741 | 0.0090 | 2.39E-16 | -8.2007 | 1310845 | Asthma |
| rs28986350  | 6 | 32781398 | T | C | 0.0820 | -0.0740 | 0.0090 | 2.46E-16 | -8.1971 | 1310845 | Asthma |
| rs28893535  | 6 | 32781846 | G | T | 0.0823 | -0.0749 | 0.0099 | 4.74E-14 | -7.5390 | 1159440 | Asthma |
| rs28893536  | 6 | 32781882 | T | C | 0.0809 | -0.0724 | 0.0091 | 2.27E-15 | -7.9259 | 1310845 | Asthma |
| rs28893537  | 6 | 32781889 | C | T | 0.0825 | -0.0755 | 0.0099 | 2.60E-14 | -7.6169 | 1159440 | Asthma |
| rs115435152 | 6 | 32782029 | C | G | 0.0840 | -0.0778 | 0.0108 | 5.42E-13 | -7.2145 | 1064845 | Asthma |
| rs28893544  | 6 | 32782207 | G | A | 0.0834 | -0.0755 | 0.0098 | 1.60E-14 | -7.6796 | 1159440 | Asthma |
| rs28893545  | 6 | 32782357 | A | C | 0.0820 | -0.0740 | 0.0090 | 2.51E-16 | -8.1949 | 1310845 | Asthma |
| rs28893546  | 6 | 32782379 | G | A | 0.0820 | -0.0740 | 0.0090 | 2.50E-16 | -8.1953 | 1310845 | Asthma |
| rs4510718   | 6 | 32782403 | T | A | 0.3188 | 0.0352  | 0.0051 | 6.23E-12 | 6.8746  | 1310845 | Asthma |
| rs28893548  | 6 | 32782440 | A | G | 0.0830 | -0.0768 | 0.0099 | 6.81E-15 | -7.7878 | 1159440 | Asthma |
| rs4563763   | 6 | 32782515 | A | G | 0.3215 | 0.0335  | 0.0051 | 6.03E-11 | 6.5430  | 1310845 | Asthma |
| rs28893549  | 6 | 32782569 | A | C | 0.0831 | -0.0754 | 0.0100 | 6.14E-14 | -7.5050 | 1133307 | Asthma |
| rs28893550  | 6 | 32782571 | A | T | 0.0831 | -0.0754 | 0.0099 | 2.12E-14 | -7.6433 | 1159440 | Asthma |
| rs28893551  | 6 | 32782592 | C | T | 0.0820 | -0.0737 | 0.0092 | 9.04E-16 | -8.0393 | 1284712 | Asthma |
| rs28893554  | 6 | 32782727 | T | C | 0.0820 | -0.0740 | 0.0090 | 2.52E-16 | -8.1943 | 1310845 | Asthma |
| rs28893555  | 6 | 32782796 | G | A | 0.0820 | -0.0740 | 0.0090 | 2.60E-16 | -8.1904 | 1310845 | Asthma |
| rs28986351  | 6 | 32782873 | T | C | 0.0820 | -0.0738 | 0.0090 | 3.07E-16 | -8.1706 | 1310845 | Asthma |
| rs28986352  | 6 | 32782879 | G | A | 0.0820 | -0.0740 | 0.0090 | 2.58E-16 | -8.1913 | 1310845 | Asthma |
| rs28893556  | 6 | 32782898 | G | T | 0.0820 | -0.0740 | 0.0090 | 2.59E-16 | -8.1913 | 1310845 | Asthma |
| rs28986353  | 6 | 32783000 | T | C | 0.0820 | -0.0740 | 0.0090 | 2.65E-16 | -8.1884 | 1310845 | Asthma |
| rs28893557  | 6 | 32783082 | T | C | 0.0820 | -0.0740 | 0.0090 | 2.51E-16 | -8.1949 | 1310845 | Asthma |
| rs28893558  | 6 | 32783088 | G | A | 0.0820 | -0.0740 | 0.0090 | 2.52E-16 | -8.1943 | 1310845 | Asthma |
| rs57912571  | 6 | 32783144 | G | A | 0.0330 | 0.0945  | 0.0133 | 1.39E-12 | 7.0851  | 1310845 | Asthma |
| rs28893559  | 6 | 32783161 | T | C | 0.0820 | -0.0740 | 0.0090 | 2.56E-16 | -8.1923 | 1310845 | Asthma |
| rs28893560  | 6 | 32783163 | T | C | 0.0820 | -0.0740 | 0.0090 | 2.49E-16 | -8.1958 | 1310845 | Asthma |
| rs28986355  | 6 | 32783328 | G | A | 0.0820 | -0.0741 | 0.0090 | 2.40E-16 | -8.2002 | 1310845 | Asthma |
| rs28986356  | 6 | 32783408 | C | G | 0.0820 | -0.0741 | 0.0090 | 2.45E-16 | -8.1978 | 1310845 | Asthma |
| rs28986357  | 6 | 32783415 | A | G | 0.0820 | -0.0741 | 0.0090 | 2.45E-16 | -8.1975 | 1310845 | Asthma |
| rs28986358  | 6 | 32783451 | T | A | 0.0820 | -0.0740 | 0.0090 | 2.47E-16 | -8.1970 | 1310845 | Asthma |
| rs28986359  | 6 | 32783572 | C | G | 0.0820 | -0.0739 | 0.0090 | 2.81E-16 | -8.1813 | 1310845 | Asthma |
| rs28986360  | 6 | 32783593 | A | C | 0.0820 | -0.0741 | 0.0090 | 2.29E-16 | -8.2059 | 1310845 | Asthma |
| rs28986361  | 6 | 32783607 | A | G | 0.0820 | -0.0742 | 0.0090 | 2.16E-16 | -8.2129 | 1310845 | Asthma |
| rs28986362  | 6 | 32783674 | G | C | 0.0820 | -0.0741 | 0.0090 | 2.29E-16 | -8.2059 | 1310845 | Asthma |
| rs28986363  | 6 | 32783778 | C | A | 0.0820 | -0.0741 | 0.0090 | 2.40E-16 | -8.2001 | 1310845 | Asthma |
| rs17429127  | 6 | 32783837 | C | G | 0.0846 | -0.0850 | 0.0098 | 6.15E-18 | -8.6298 | 1121295 | Asthma |
| rs28986364  | 6 | 32783914 | C | A | 0.0820 | -0.0740 | 0.0090 | 2.48E-16 | -8.1964 | 1310845 | Asthma |
| rs28986365  | 6 | 32783969 | C | T | 0.0820 | -0.0740 | 0.0090 | 2.47E-16 | -8.1970 | 1310845 | Asthma |
| rs28986366  | 6 | 32783974 | A | G | 0.0820 | -0.0740 | 0.0090 | 2.47E-16 | -8.1969 | 1310845 | Asthma |
| rs28986367  | 6 | 32784023 | T | C | 0.0820 | -0.0741 | 0.0090 | 2.39E-16 | -8.2008 | 1310845 | Asthma |
| rs28986368  | 6 | 32784165 | T | C | 0.0820 | -0.0740 | 0.0090 | 2.46E-16 | -8.1970 | 1310845 | Asthma |
| rs28986369  | 6 | 32784169 | G | A | 0.0820 | -0.0741 | 0.0090 | 2.43E-16 | -8.1989 | 1310845 | Asthma |
| rs28986370  | 6 | 32784183 | A | G | 0.0820 | -0.0741 | 0.0090 | 2.41E-16 | -8.1998 | 1310845 | Asthma |
| rs28986371  | 6 | 32784229 | T | C | 0.0820 | -0.0741 | 0.0090 | 2.34E-16 | -8.2035 | 1310845 | Asthma |
| rs28986372  | 6 | 32784353 | T | A | 0.0820 | -0.0740 | 0.0090 | 2.47E-16 | -8.1967 | 1310845 | Asthma |
| rs28986373  | 6 | 32784373 | A | C | 0.0820 | -0.0740 | 0.0090 | 2.49E-16 | -8.1956 | 1310845 | Asthma |
| rs28986375  | 6 | 32784429 | T | C | 0.0835 | -0.0756 | 0.0098 | 1.36E-14 | -7.7001 | 1159440 | Asthma |
| rs28986376  | 6 | 32784432 | A | T | 0.0835 | -0.0757 | 0.0098 | 1.33E-14 | -7.7025 | 1159440 | Asthma |
| rs28986377  | 6 | 32784445 | C | T | 0.0835 | -0.0757 | 0.0098 | 1.32E-14 | -7.7037 | 1159440 | Asthma |
| rs28986378  | 6 | 32784465 | A | C | 0.0820 | -0.0742 | 0.0090 | 2.12E-16 | -8.2149 | 1310845 | Asthma |
| rs28986379  | 6 | 32784580 | T | G | 0.0820 | -0.0741 | 0.0090 | 2.31E-16 | -8.2050 | 1310845 | Asthma |
| rs28986380  | 6 | 32784615 | G | A | 0.0820 | -0.0742 | 0.0090 | 2.17E-16 | -8.2121 | 1310845 | Asthma |
| rs28986382  | 6 | 32784654 | T | A | 0.0834 | -0.0755 | 0.0098 | 1.54E-14 | -7.6839 | 1159440 | Asthma |
| rs13219960  | 6 | 32784864 | C | T | 0.0814 | -0.0740 | 0.0091 | 4.05E-16 | -8.1370 | 1310845 | Asthma |
| rs13203691  | 6 | 32784870 | G | A | 0.0814 | -0.0737 | 0.0091 | 5.21E-16 | -8.1064 | 1310845 | Asthma |
| rs13219964  | 6 | 32784872 | C | T | 0.0814 | -0.0738 | 0.0091 | 4.94E-16 | -8.1130 | 1310845 | Asthma |
| rs13204139  | 6 | 32784908 | A | G | 0.0821 | -0.0736 | 0.0090 | 3.43E-16 | -8.1572 | 1310845 | Asthma |
| rs28986384  | 6 | 32785254 | T | C | 0.0832 | -0.0757 | 0.0099 | 1.58E-14 | -7.6806 | 1159440 | Asthma |
| rs13215244  | 6 | 32785276 | A | G | 0.0811 | -0.0742 | 0.0101 | 1.77E-13 | -7.3649 | 1154767 | Asthma |
| rs28986386  | 6 | 32785368 | T | C | 0.0839 | -0.0831 | 0.0096 | 5.83E-18 | -8.6359 | 1180923 | Asthma |
| rs28986387  | 6 | 32785372 | T | C | 0.0834 | -0.0754 | 0.0098 | 1.63E-14 | -7.6766 | 1159440 | Asthma |
| rs28986388  | 6 | 32785373 | G | A | 0.0820 | -0.0740 | 0.0090 | 2.70E-16 | -8.1862 | 1310845 | Asthma |
| rs28986389  | 6 | 32785428 | T | A | 0.0820 | -0.0742 | 0.0090 | 2.15E-16 | -8.2134 | 1310845 | Asthma |
| rs28986390  | 6 | 32785470 | A | T | 0.0820 | -0.0742 | 0.0090 | 2.13E-16 | -8.2146 | 1310845 | Asthma |
| rs12665315  | 6 | 32785626 | G | A | 0.0820 | -0.0742 | 0.0090 | 2.12E-16 | -8.2153 | 1310845 | Asthma |
| rs12662462  | 6 | 32785656 | A | G | 0.0820 | -0.0742 | 0.0090 | 2.13E-16 | -8.2145 | 1310845 | Asthma |
| rs12663979  | 6 | 32785877 | C | T | 0.0820 | -0.0742 | 0.0090 | 2.14E-16 | -8.2137 | 1310845 | Asthma |
| rs28986391  | 6 | 32786517 | C | T | 0.0820 | -0.0742 | 0.0090 | 2.14E-16 | -8.2142 | 1310845 | Asthma |
| rs28986392  | 6 | 32786545 | T | A | 0.0819 | -0.0741 | 0.0090 | 2.41E-16 | -8.1996 | 1310845 | Asthma |

|             |   |          |   |   |        |         |        |          |         |         |        |
|-------------|---|----------|---|---|--------|---------|--------|----------|---------|---------|--------|
| rs28986393  | 6 | 32786563 | A | G | 0.0820 | -0.0743 | 0.0090 | 2.08E-16 | -8.2176 | 1310845 | Asthma |
| rs28986394  | 6 | 32786565 | A | G | 0.0820 | -0.0742 | 0.0090 | 2.23E-16 | -8.2091 | 1310845 | Asthma |
| rs28986395  | 6 | 32786611 | A | G | 0.0820 | -0.0741 | 0.0090 | 2.43E-16 | -8.1990 | 1310845 | Asthma |
| rs28986396  | 6 | 32786653 | A | G | 0.0819 | -0.0741 | 0.0090 | 2.38E-16 | -8.2015 | 1310845 | Asthma |
| rs28986397  | 6 | 32786681 | C | T | 0.0820 | -0.0742 | 0.0090 | 2.16E-16 | -8.2129 | 1310845 | Asthma |
| rs28986398  | 6 | 32786739 | A | G | 0.0820 | -0.0742 | 0.0090 | 2.14E-16 | -8.2138 | 1310845 | Asthma |
| rs28986399  | 6 | 32786816 | G | T | 0.0811 | -0.0742 | 0.0101 | 1.73E-13 | -7.3685 | 1154767 | Asthma |
| rs28986400  | 6 | 32786838 | G | A | 0.0835 | -0.0758 | 0.0098 | 1.15E-14 | -7.7212 | 1159440 | Asthma |
| rs28986401  | 6 | 32786990 | A | G | 0.0821 | -0.0745 | 0.0090 | 1.69E-16 | -8.2425 | 1310845 | Asthma |
| rs28986402  | 6 | 32787004 | T | C | 0.0820 | -0.0742 | 0.0090 | 2.16E-16 | -8.2130 | 1310845 | Asthma |
| rs28986403  | 6 | 32787092 | A | G | 0.0820 | -0.0742 | 0.0090 | 2.16E-16 | -8.2130 | 1310845 | Asthma |
| rs116309362 | 6 | 32787099 | C | T | 0.0197 | 0.1273  | 0.0179 | 1.27E-12 | 7.0978  | 1310845 | Asthma |
| rs28986404  | 6 | 32787144 | G | T | 0.0821 | -0.0746 | 0.0090 | 1.38E-16 | -8.2668 | 1310845 | Asthma |
| rs28986405  | 6 | 32787172 | A | G | 0.0820 | -0.0742 | 0.0090 | 2.15E-16 | -8.2133 | 1310845 | Asthma |
| rs28986406  | 6 | 32787247 | A | G | 0.0832 | -0.0758 | 0.0099 | 1.38E-14 | -7.6986 | 1159440 | Asthma |
| rs28986410  | 6 | 32787310 | C | T | 0.0820 | -0.0742 | 0.0090 | 2.15E-16 | -8.2132 | 1310845 | Asthma |
| rs17501072  | 6 | 32787345 | G | C | 0.0820 | -0.0742 | 0.0090 | 2.14E-16 | -8.2139 | 1310845 | Asthma |
| rs34408145  | 6 | 32787400 | C | T | 0.0458 | 0.0890  | 0.0115 | 7.48E-15 | 7.7764  | 1310845 | Asthma |
| rs28986411  | 6 | 32787498 | G | A | 0.0820 | -0.0742 | 0.0090 | 2.24E-16 | -8.2082 | 1310845 | Asthma |
| rs28986412  | 6 | 32787550 | T | A | 0.0820 | -0.0742 | 0.0090 | 2.22E-16 | -8.2096 | 1310845 | Asthma |
| rs28986413  | 6 | 32787598 | G | T | 0.0820 | -0.0742 | 0.0090 | 2.22E-16 | -8.2093 | 1310845 | Asthma |
| rs28986414  | 6 | 32787683 | G | A | 0.0820 | -0.0742 | 0.0090 | 2.24E-16 | -8.2088 | 1310845 | Asthma |
| rs28986415  | 6 | 32787688 | C | T | 0.0820 | -0.0742 | 0.0090 | 2.16E-16 | -8.2131 | 1310845 | Asthma |
| rs28986416  | 6 | 32787729 | G | C | 0.0820 | -0.0742 | 0.0090 | 2.23E-16 | -8.2089 | 1310845 | Asthma |
| rs28986417  | 6 | 32787758 | C | T | 0.0820 | -0.0742 | 0.0090 | 2.22E-16 | -8.2093 | 1310845 | Asthma |
| rs28986418  | 6 | 32787759 | C | T | 0.0820 | -0.0742 | 0.0090 | 2.25E-16 | -8.2079 | 1310845 | Asthma |
| rs28986419  | 6 | 32787856 | G | T | 0.0820 | -0.0742 | 0.0090 | 2.22E-16 | -8.2093 | 1310845 | Asthma |
| rs145680698 | 6 | 32787935 | G | A | 0.0820 | -0.0742 | 0.0090 | 2.23E-16 | -8.2090 | 1310845 | Asthma |
| rs28893562  | 6 | 32788141 | G | A | 0.0820 | -0.0742 | 0.0090 | 2.24E-16 | -8.2086 | 1310845 | Asthma |
| rs13197727  | 6 | 32788515 | G | A | 0.0820 | -0.0742 | 0.0090 | 2.14E-16 | -8.2138 | 1310845 | Asthma |
| rs13197854  | 6 | 32788608 | C | A | 0.0820 | -0.0742 | 0.0090 | 2.14E-16 | -8.2141 | 1310845 | Asthma |
| rs13198082  | 6 | 32788680 | T | C | 0.0820 | -0.0742 | 0.0090 | 2.13E-16 | -8.2146 | 1310845 | Asthma |
| rs13197975  | 6 | 32788703 | G | A | 0.0820 | -0.0742 | 0.0090 | 2.15E-16 | -8.2134 | 1310845 | Asthma |
| rs13198307  | 6 | 32788709 | A | G | 0.0820 | -0.0742 | 0.0090 | 2.13E-16 | -8.2147 | 1310845 | Asthma |
| rs9276699   | 6 | 32788790 | T | A | 0.3517 | 0.0473  | 0.0050 | 4.02E-21 | 9.4322  | 1310845 | Asthma |
| rs13198109  | 6 | 32788798 | G | A | 0.0820 | -0.0742 | 0.0090 | 2.11E-16 | -8.2159 | 1310845 | Asthma |
| rs9276702   | 6 | 32788964 | A | G | 0.1477 | -0.0452 | 0.0071 | 1.54E-10 | -6.4013 | 1310845 | Asthma |
| rs13201537  | 6 | 32789080 | C | A | 0.0820 | -0.0743 | 0.0090 | 1.89E-16 | -8.2288 | 1310845 | Asthma |
| rs13201932  | 6 | 32789173 | C | G | 0.0820 | -0.0740 | 0.0092 | 7.21E-16 | -8.0668 | 1284712 | Asthma |
| rs13217824  | 6 | 32789176 | G | T | 0.0820 | -0.0741 | 0.0090 | 2.51E-16 | -8.1949 | 1310845 | Asthma |
| rs9276710   | 6 | 32789325 | C | T | 0.1992 | 0.0429  | 0.0061 | 1.61E-12 | 7.0651  | 1310845 | Asthma |
| rs9276711   | 6 | 32789520 | T | C | 0.3214 | 0.0338  | 0.0051 | 4.05E-11 | 6.6021  | 1310845 | Asthma |
| rs28986420  | 6 | 32789691 | T | C | 0.0820 | -0.0742 | 0.0090 | 2.18E-16 | -8.2116 | 1310845 | Asthma |
| rs58327373  | 6 | 32789812 | T | A | 0.0330 | 0.0941  | 0.0133 | 1.66E-12 | 7.0606  | 1310845 | Asthma |
| rs28986421  | 6 | 32789821 | G | A | 0.0820 | -0.0742 | 0.0090 | 2.15E-16 | -8.2137 | 1310845 | Asthma |
| rs28986422  | 6 | 32789947 | C | T | 0.0820 | -0.0742 | 0.0090 | 2.21E-16 | -8.2103 | 1310845 | Asthma |
| rs12664558  | 6 | 32790900 | A | G | 0.0820 | -0.0742 | 0.0090 | 2.21E-16 | -8.2100 | 1310845 | Asthma |
| rs12660559  | 6 | 32790997 | C | T | 0.0820 | -0.0742 | 0.0090 | 2.17E-16 | -8.2122 | 1310845 | Asthma |
| rs28986423  | 6 | 32791066 | A | G | 0.0820 | -0.0742 | 0.0090 | 2.17E-16 | -8.2126 | 1310845 | Asthma |
| rs9276712   | 6 | 32791475 | C | A | 0.0821 | -0.0742 | 0.0090 | 1.88E-16 | -8.2293 | 1310845 | Asthma |
| rs3948793   | 6 | 32791671 | A | G | 0.3211 | 0.0333  | 0.0051 | 7.72E-11 | 6.5062  | 1310845 | Asthma |
| rs9276713   | 6 | 32791994 | A | G | 0.0821 | -0.0742 | 0.0090 | 2.11E-16 | -8.2157 | 1310845 | Asthma |
| rs9276714   | 6 | 32792541 | G | A | 0.0822 | -0.0743 | 0.0090 | 1.85E-16 | -8.2312 | 1310845 | Asthma |
| rs9276715   | 6 | 32792946 | A | G | 0.0821 | -0.0743 | 0.0090 | 1.85E-16 | -8.2311 | 1310845 | Asthma |
| rs9276716   | 6 | 32793454 | T | C | 0.0717 | -0.0934 | 0.0108 | 5.10E-18 | -8.6512 | 753275  | Asthma |
| rs9276717   | 6 | 32793621 | A | C | 0.0821 | -0.0741 | 0.0090 | 2.24E-16 | -8.2084 | 1310845 | Asthma |
| rs9276718   | 6 | 32793897 | C | G | 0.0822 | -0.0741 | 0.0090 | 2.24E-16 | -8.2085 | 1310845 | Asthma |
| rs9276719   | 6 | 32793913 | C | A | 0.0822 | -0.0741 | 0.0090 | 2.23E-16 | -8.2089 | 1310845 | Asthma |
| rs9276720   | 6 | 32794162 | G | C | 0.0822 | -0.0741 | 0.0090 | 2.23E-16 | -8.2093 | 1310845 | Asthma |
| rs9276721   | 6 | 32794532 | T | C | 0.0822 | -0.0741 | 0.0090 | 2.16E-16 | -8.2128 | 1310845 | Asthma |
| rs9276722   | 6 | 32794614 | G | A | 0.0822 | -0.0742 | 0.0090 | 1.93E-16 | -8.2263 | 1310845 | Asthma |
| rs2067578   | 6 | 32794684 | A | G | 0.0329 | 0.0942  | 0.0133 | 1.66E-12 | 7.0606  | 1310845 | Asthma |
| rs35805736  | 6 | 32794748 | G | A | 0.0430 | 0.1131  | 0.0130 | 2.57E-18 | 8.7289  | 1159440 | Asthma |
| rs9276723   | 6 | 32795628 | G | A | 0.0822 | -0.0742 | 0.0090 | 1.93E-16 | -8.2262 | 1310845 | Asthma |
| rs35486885  | 6 | 32795729 | G | A | 0.0459 | 0.0879  | 0.0114 | 1.45E-14 | 7.6920  | 1310845 | Asthma |
| rs9276724   | 6 | 32795858 | T | C | 0.0822 | -0.0742 | 0.0090 | 1.97E-16 | -8.2240 | 1310845 | Asthma |
| rs9276725   | 6 | 32796041 | C | T | 0.0822 | -0.0742 | 0.0090 | 2.03E-16 | -8.2204 | 1310845 | Asthma |
| rs9276726   | 6 | 32796111 | C | T | 0.3096 | 0.0303  | 0.0052 | 4.64E-09 | 5.8596  | 1310845 | Asthma |
| rs9276728   | 6 | 32796265 | T | C | 0.0813 | -0.0741 | 0.0103 | 4.92E-13 | -7.2275 | 1128634 | Asthma |
| rs9276729   | 6 | 32796469 | A | G | 0.0822 | -0.0742 | 0.0090 | 2.00E-16 | -8.2224 | 1310845 | Asthma |
| rs2621373   | 6 | 32797353 | C | T | 0.3237 | -0.0496 | 0.0057 | 2.10E-18 | -8.7519 | 1180923 | Asthma |
| rs7767167   | 6 | 32797405 | G | A | 0.1478 | -0.0459 | 0.0071 | 7.51E-11 | -6.5101 | 1310845 | Asthma |
| rs6912002   | 6 | 32797491 | C | T | 0.3179 | 0.0287  | 0.0051 | 2.10E-08 | 5.6033  | 1310845 | Asthma |
| rs2621372   | 6 | 32797525 | A | C | 0.3287 | -0.0452 | 0.0052 | 4.55E-18 | -8.6641 | 1310845 | Asthma |

|            |   |          |   |   |        |         |        |          |         |         |        |
|------------|---|----------|---|---|--------|---------|--------|----------|---------|---------|--------|
| rs1383261  | 6 | 32797674 | T | C | 0.3178 | 0.0286  | 0.0051 | 2.38E-08 | 5.5821  | 1310845 | Asthma |
| rs6932969  | 6 | 32797894 | G | C | 0.3177 | 0.0286  | 0.0051 | 2.56E-08 | 5.5690  | 1310845 | Asthma |
| rs9276732  | 6 | 32798128 | A | T | 0.3178 | 0.0283  | 0.0051 | 3.34E-08 | 5.5224  | 1310845 | Asthma |
| rs6937875  | 6 | 32798264 | T | C | 0.3151 | 0.0282  | 0.0052 | 4.64E-08 | 5.4646  | 1310845 | Asthma |
| rs6457677  | 6 | 32798395 | A | T | 0.3178 | 0.0283  | 0.0051 | 3.33E-08 | 5.5232  | 1310845 | Asthma |
| rs7383562  | 6 | 32798568 | G | A | 0.3176 | 0.0286  | 0.0051 | 2.40E-08 | 5.5802  | 1310845 | Asthma |
| rs73408475 | 6 | 32798719 | G | T | 0.0335 | 0.0930  | 0.0132 | 1.84E-12 | 7.0456  | 1310845 | Asthma |
| rs7383606  | 6 | 32798816 | T | C | 0.3176 | 0.0286  | 0.0051 | 2.58E-08 | 5.5676  | 1310845 | Asthma |
| rs9276734  | 6 | 32799077 | A | G | 0.3176 | 0.0286  | 0.0051 | 2.38E-08 | 5.5821  | 1310845 | Asthma |
| rs7382679  | 6 | 32799393 | G | T | 0.3176 | 0.0287  | 0.0051 | 2.32E-08 | 5.5862  | 1310845 | Asthma |
| rs7381315  | 6 | 32799474 | G | A | 0.3176 | 0.0286  | 0.0051 | 2.49E-08 | 5.5741  | 1310845 | Asthma |
| rs7740209  | 6 | 32799655 | T | C | 0.3176 | 0.0287  | 0.0051 | 2.31E-08 | 5.5872  | 1310845 | Asthma |
| rs7382714  | 6 | 32799719 | C | T | 0.3177 | 0.0287  | 0.0051 | 2.23E-08 | 5.5931  | 1310845 | Asthma |
| rs4947350  | 6 | 32799843 | C | T | 0.2001 | 0.0430  | 0.0061 | 1.22E-12 | 7.1030  | 1310845 | Asthma |
| rs7381376  | 6 | 32799896 | G | C | 0.3176 | 0.0285  | 0.0051 | 2.92E-08 | 5.5462  | 1310845 | Asthma |
| rs34710970 | 6 | 32800338 | G | A | 0.0459 | 0.0875  | 0.0114 | 1.81E-14 | 7.6634  | 1310845 | Asthma |
| rs13212256 | 6 | 32800394 | A | T | 0.0837 | -0.0851 | 0.0109 | 5.35E-15 | -7.8185 | 1024845 | Asthma |
| rs2621369  | 6 | 32800508 | T | C | 0.3225 | -0.0546 | 0.0071 | 1.37E-14 | -7.6989 | 908767  | Asthma |
| rs2857149  | 6 | 32800535 | G | A | 0.3289 | -0.0532 | 0.0064 | 6.59E-17 | -8.3542 | 977229  | Asthma |
| rs2857148  | 6 | 32800537 | G | A | 0.3289 | -0.0532 | 0.0064 | 6.54E-17 | -8.3551 | 977229  | Asthma |
| rs2621368  | 6 | 32800556 | A | G | 0.3289 | -0.0528 | 0.0064 | 1.02E-16 | -8.3027 | 977229  | Asthma |
| rs6457678  | 6 | 32800601 | A | G | 0.3098 | 0.0302  | 0.0052 | 5.45E-09 | 5.8329  | 1310845 | Asthma |
| rs9501663  | 6 | 32800697 | T | C | 0.3288 | -0.0452 | 0.0052 | 4.93E-18 | -8.6551 | 1310845 | Asthma |
| rs9501664  | 6 | 32800711 | A | C | 0.3288 | -0.0453 | 0.0052 | 3.91E-18 | -8.6813 | 1310845 | Asthma |
| rs2621367  | 6 | 32800944 | A | G | 0.3289 | -0.0456 | 0.0052 | 2.49E-18 | -8.7327 | 1310845 | Asthma |
| rs2621366  | 6 | 32801203 | A | C | 0.3375 | -0.0465 | 0.0052 | 3.06E-19 | -8.9664 | 1310845 | Asthma |
| rs2621365  | 6 | 32801363 | T | C | 0.3288 | -0.0455 | 0.0052 | 2.91E-18 | -8.7148 | 1310845 | Asthma |
| rs2621364  | 6 | 32801427 | A | G | 0.3288 | -0.0455 | 0.0052 | 3.02E-18 | -8.7107 | 1310845 | Asthma |
| rs2621362  | 6 | 32801759 | A | C | 0.3369 | -0.0461 | 0.0052 | 5.51E-19 | -8.9014 | 1310845 | Asthma |
| rs2621360  | 6 | 32801798 | A | G | 0.3288 | -0.0455 | 0.0052 | 2.94E-18 | -8.7136 | 1310845 | Asthma |
| rs2219893  | 6 | 32801886 | C | T | 0.3369 | -0.0461 | 0.0052 | 5.50E-19 | -8.9017 | 1310845 | Asthma |
| rs17213609 | 6 | 32801914 | C | T | 0.3325 | -0.0485 | 0.0057 | 1.74E-17 | -8.5102 | 1159440 | Asthma |
| rs2199874  | 6 | 32802149 | G | A | 0.3369 | -0.0464 | 0.0052 | 3.16E-19 | -8.9629 | 1310845 | Asthma |
| rs7755858  | 6 | 32802334 | C | A | 0.3095 | 0.0304  | 0.0052 | 4.19E-09 | 5.8767  | 1310845 | Asthma |
| rs2199873  | 6 | 32802348 | G | A | 0.3288 | -0.0455 | 0.0052 | 2.75E-18 | -8.7214 | 1310845 | Asthma |
| rs2857147  | 6 | 32802403 | T | C | 0.3288 | -0.0455 | 0.0052 | 2.82E-18 | -8.7183 | 1310845 | Asthma |
| rs6919657  | 6 | 32802666 | C | A | 0.3176 | 0.0286  | 0.0051 | 2.42E-08 | 5.5790  | 1310845 | Asthma |
| rs6899857  | 6 | 32802705 | C | T | 0.3177 | 0.0287  | 0.0051 | 2.35E-08 | 5.5837  | 1310845 | Asthma |
| rs6899878  | 6 | 32802753 | A | T | 0.3176 | 0.0286  | 0.0051 | 2.41E-08 | 5.5794  | 1310845 | Asthma |
| rs6457680  | 6 | 32802911 | A | T | 0.3096 | 0.0302  | 0.0052 | 5.39E-09 | 5.8347  | 1310845 | Asthma |
| rs2621358  | 6 | 32803031 | T | C | 0.3288 | -0.0456 | 0.0052 | 2.31E-18 | -8.7409 | 1310845 | Asthma |
| rs2621357  | 6 | 32803139 | T | C | 0.3288 | -0.0455 | 0.0052 | 2.74E-18 | -8.7218 | 1310845 | Asthma |
| rs2857146  | 6 | 32803206 | G | A | 0.3288 | -0.0455 | 0.0052 | 2.75E-18 | -8.7212 | 1310845 | Asthma |
| rs2621356  | 6 | 32803256 | A | G | 0.3288 | -0.0456 | 0.0052 | 2.64E-18 | -8.7256 | 1310845 | Asthma |
| rs9276745  | 6 | 32803634 | T | G | 0.3096 | 0.0302  | 0.0052 | 4.92E-09 | 5.8498  | 1310845 | Asthma |
| rs2857145  | 6 | 32803783 | T | C | 0.3288 | -0.0455 | 0.0052 | 2.95E-18 | -8.7135 | 1310845 | Asthma |
| rs9276749  | 6 | 32804187 | G | T | 0.3096 | 0.0302  | 0.0052 | 5.07E-09 | 5.8449  | 1310845 | Asthma |
| rs9501215  | 6 | 32804627 | T | G | 0.3288 | -0.0456 | 0.0052 | 2.49E-18 | -8.7327 | 1310845 | Asthma |
| rs9276752  | 6 | 32804730 | G | C | 0.6076 | 0.0442  | 0.0078 | 1.20E-08 | 5.7005  | 479287  | Asthma |
| rs2621347  | 6 | 32804892 | A | G | 0.3288 | -0.0455 | 0.0052 | 2.94E-18 | -8.7136 | 1310845 | Asthma |
| rs9276758  | 6 | 32805198 | A | G | 0.3068 | 0.0320  | 0.0052 | 6.46E-10 | 6.1789  | 1310845 | Asthma |
| rs2199872  | 6 | 32805201 | A | G | 0.3288 | -0.0455 | 0.0052 | 2.97E-18 | -8.7128 | 1310845 | Asthma |
| rs9276760  | 6 | 32805325 | T | G | 0.3176 | 0.0286  | 0.0051 | 2.54E-08 | 5.5707  | 1310845 | Asthma |
| rs28744285 | 6 | 32805572 | A | T | 0.6082 | 0.0447  | 0.0078 | 9.16E-09 | 5.7456  | 479287  | Asthma |
| rs9276766  | 6 | 32805573 | C | G | 0.6082 | 0.0446  | 0.0078 | 9.64E-09 | 5.7369  | 479287  | Asthma |
| rs6457681  | 6 | 32805720 | T | G | 0.2145 | 0.0658  | 0.0064 | 9.84E-25 | 10.2679 | 1154767 | Asthma |
| rs7748681  | 6 | 32806081 | A | C | 0.3176 | 0.0286  | 0.0051 | 2.54E-08 | 5.5709  | 1310845 | Asthma |
| rs7748699  | 6 | 32806106 | G | C | 0.3176 | 0.0286  | 0.0051 | 2.60E-08 | 5.5668  | 1310845 | Asthma |
| rs6912056  | 6 | 32806497 | A | G | 0.2001 | 0.0430  | 0.0061 | 1.23E-12 | 7.1023  | 1310845 | Asthma |
| rs9276772  | 6 | 32806514 | G | C | 0.1031 | 0.0440  | 0.0081 | 4.94E-08 | 5.4534  | 1310845 | Asthma |
| rs28744288 | 6 | 32806541 | A | G | 0.0822 | -0.0740 | 0.0090 | 2.38E-16 | -8.2014 | 1310845 | Asthma |
| rs35921062 | 6 | 32806639 | T | C | 0.0459 | 0.0879  | 0.0114 | 1.41E-14 | 7.6956  | 1310845 | Asthma |
| rs6912414  | 6 | 32806688 | A | G | 0.3096 | 0.0301  | 0.0052 | 5.63E-09 | 5.8274  | 1310845 | Asthma |
| rs2857140  | 6 | 32807015 | A | G | 0.3180 | -0.0483 | 0.0056 | 1.14E-17 | -8.5592 | 1154767 | Asthma |
| rs28744289 | 6 | 32807143 | T | G | 0.0823 | -0.0741 | 0.0090 | 2.02E-16 | -8.2208 | 1310845 | Asthma |
| rs6917315  | 6 | 32807224 | T | C | 0.3096 | 0.0301  | 0.0052 | 6.00E-09 | 5.8166  | 1310845 | Asthma |
| rs2621342  | 6 | 32807227 | T | C | 0.3287 | -0.0454 | 0.0052 | 3.31E-18 | -8.7002 | 1310845 | Asthma |
| rs1480381  | 6 | 32807458 | T | A | 0.3288 | -0.0455 | 0.0052 | 3.10E-18 | -8.7076 | 1310845 | Asthma |
| rs9276778  | 6 | 32807535 | A | G | 0.3176 | 0.0286  | 0.0051 | 2.48E-08 | 5.5748  | 1310845 | Asthma |
| rs2621340  | 6 | 32807703 | C | T | 0.3252 | -0.0466 | 0.0055 | 3.73E-17 | -8.4211 | 942825  | Asthma |
| rs2621339  | 6 | 32807805 | A | C | 0.3288 | -0.0455 | 0.0052 | 3.09E-18 | -8.7080 | 1310845 | Asthma |
| rs7382619  | 6 | 32808032 | T | C | 0.3176 | 0.0285  | 0.0051 | 2.65E-08 | 5.5632  | 1310845 | Asthma |
| rs2857134  | 6 | 32808051 | T | C | 0.3288 | -0.0455 | 0.0052 | 2.99E-18 | -8.7118 | 1310845 | Asthma |
| rs7382649  | 6 | 32808310 | T | C | 0.3176 | 0.0286  | 0.0051 | 2.52E-08 | 5.5721  | 1310845 | Asthma |



|             |   |          |   |   |        |         |        |          |          |         |        |
|-------------|---|----------|---|---|--------|---------|--------|----------|----------|---------|--------|
| rs2857132   | 6 | 32808402 | A | G | 0.3288 | -0.0455 | 0.0052 | 2.97E-18 | -8.7126  | 1310845 | Asthma |
| rs2857131   | 6 | 32808481 | T | A | 0.3288 | -0.0455 | 0.0052 | 2.99E-18 | -8.7120  | 1310845 | Asthma |
| rs9276785   | 6 | 32808515 | A | G | 0.3176 | 0.0286  | 0.0051 | 2.60E-08 | 5.5668   | 1310845 | Asthma |
| rs2621338   | 6 | 32808806 | A | G | 0.3289 | -0.0456 | 0.0052 | 2.43E-18 | -8.7353  | 1310845 | Asthma |
| rs4513843   | 6 | 32808813 | C | G | 0.1999 | 0.0430  | 0.0061 | 1.34E-12 | 7.0897   | 1310845 | Asthma |
| rs2621337   | 6 | 32808872 | T | C | 0.3288 | -0.0455 | 0.0052 | 3.05E-18 | -8.7096  | 1310845 | Asthma |
| rs1054684   | 6 | 32809144 | C | T | 0.1001 | 0.0464  | 0.0082 | 1.50E-08 | 5.6620   | 1310845 | Asthma |
| rs34422230  | 6 | 32809218 | C | T | 0.0436 | 0.0950  | 0.0117 | 6.26E-16 | 8.0844   | 1310845 | Asthma |
| rs2127674   | 6 | 32809373 | G | A | 0.3288 | -0.0456 | 0.0052 | 2.73E-18 | -8.7221  | 1310845 | Asthma |
| rs6929904   | 6 | 32809542 | C | A | 0.3176 | 0.0286  | 0.0051 | 2.56E-08 | 5.5691   | 1310845 | Asthma |
| rs2857123   | 6 | 32809652 | T | A | 0.3288 | -0.0455 | 0.0052 | 3.02E-18 | -8.7108  | 1310845 | Asthma |
| rs7383081   | 6 | 32809763 | T | C | 0.3096 | 0.0302  | 0.0052 | 5.24E-09 | 5.8395   | 1310845 | Asthma |
| rs7381867   | 6 | 32809779 | G | T | 0.3176 | 0.0286  | 0.0051 | 2.64E-08 | 5.5640   | 1310845 | Asthma |
| rs2857120   | 6 | 32809828 | C | T | 0.3288 | -0.0455 | 0.0052 | 3.10E-18 | -8.7078  | 1310845 | Asthma |
| rs2857119   | 6 | 32810076 | T | C | 0.3288 | -0.0455 | 0.0052 | 3.03E-18 | -8.7105  | 1310845 | Asthma |
| rs2857118   | 6 | 32810123 | A | G | 0.3181 | -0.0484 | 0.0057 | 3.41E-17 | -8.4317  | 1128634 | Asthma |
| rs2857117   | 6 | 32810249 | T | C | 0.3288 | -0.0455 | 0.0052 | 3.02E-18 | -8.7108  | 1310845 | Asthma |
| rs115196245 | 6 | 32810300 | C | G | 0.0333 | 0.0929  | 0.0132 | 2.34E-12 | 7.0126   | 1310845 | Asthma |
| rs2621333   | 6 | 32810486 | T | C | 0.3288 | -0.0455 | 0.0052 | 3.19E-18 | -8.7045  | 1310845 | Asthma |
| rs2857115   | 6 | 32810504 | A | G | 0.2979 | -0.0435 | 0.0054 | 4.98E-16 | -8.1121  | 1310845 | Asthma |
| rs181268076 | 6 | 32810887 | T | C | 0.0325 | -0.1163 | 0.0186 | 3.88E-10 | -6.2586  | 1064845 | Asthma |
| rs41316239  | 6 | 32811503 | A | G | 0.0721 | 0.1149  | 0.0130 | 1.08E-18 | 8.8260   | 908767  | Asthma |
| rs9276807   | 6 | 32812379 | A | G | 0.3032 | 0.0326  | 0.0056 | 4.47E-09 | 5.8658   | 1180923 | Asthma |
| rs11244     | 6 | 32812947 | A | G | 0.2475 | 0.0341  | 0.0055 | 5.80E-10 | 6.1959   | 1310845 | Asthma |
| rs41258084  | 6 | 32813180 | T | C | 0.0459 | 0.0877  | 0.0114 | 1.61E-14 | 7.6785   | 1310845 | Asthma |
| rs2071479   | 6 | 32813335 | T | C | 0.0326 | 0.0884  | 0.0134 | 4.54E-11 | 6.5852   | 1310845 | Asthma |
| rs2856997   | 6 | 32813999 | A | C | 0.4376 | -0.0304 | 0.0049 | 6.71E-10 | -6.1726  | 1310845 | Asthma |
| rs2071474   | 6 | 32814805 | T | C | 0.3029 | -0.0479 | 0.0053 | 2.86E-19 | -8.9741  | 1310845 | Asthma |
| rs2071473   | 6 | 32814828 | T | C | 0.3694 | -0.0323 | 0.0051 | 1.91E-10 | -6.3686  | 1310845 | Asthma |
| rs41316241  | 6 | 32815018 | A | C | 0.0459 | 0.0877  | 0.0114 | 1.59E-14 | 7.6801   | 1310845 | Asthma |
| rs7383287   | 6 | 32815309 | G | A | 0.1878 | 0.0336  | 0.0061 | 3.39E-08 | 5.5202   | 1310845 | Asthma |
| rs28361064  | 6 | 32815518 | G | T | 0.0821 | -0.0739 | 0.0090 | 2.62E-16 | -8.1896  | 1310845 | Asthma |
| rs2856995   | 6 | 32815560 | A | T | 0.4368 | -0.0287 | 0.0049 | 5.88E-09 | -5.8200  | 1310845 | Asthma |
| rs2621326   | 6 | 32816119 | A | G | 0.4367 | -0.0284 | 0.0049 | 8.00E-09 | -5.7683  | 1310845 | Asthma |
| rs2859579   | 6 | 32816296 | T | G | 0.3028 | -0.0481 | 0.0053 | 2.04E-19 | -9.0115  | 1310845 | Asthma |
| rs2071472   | 6 | 32816843 | T | C | 0.3029 | -0.0480 | 0.0053 | 2.36E-19 | -8.9953  | 1310845 | Asthma |
| rs2071470   | 6 | 32816976 | C | T | 0.3030 | -0.0482 | 0.0053 | 1.52E-19 | -9.0434  | 1310845 | Asthma |
| rs2071469   | 6 | 32817006 | T | C | 0.3964 | -0.0400 | 0.0050 | 1.47E-15 | -7.9799  | 1310845 | Asthma |
| rs5888430   | 6 | 32817365 | A | G | 0.0361 | 0.0825  | 0.0127 | 7.47E-11 | 6.5106   | 1310845 | Asthma |
| rs2157077   | 6 | 32818127 | T | G | 0.3963 | -0.0398 | 0.0050 | 2.04E-15 | -7.9387  | 1310845 | Asthma |
| rs28361065  | 6 | 32818514 | A | G | 0.0728 | -0.0749 | 0.0095 | 3.49E-15 | -7.8721  | 1310845 | Asthma |
| rs1894408   | 6 | 32819056 | G | C | 0.3943 | -0.0323 | 0.0050 | 9.49E-11 | -6.4749  | 1310845 | Asthma |
| rs3763355   | 6 | 32819105 | C | T | 0.0586 | 0.0795  | 0.0098 | 5.98E-16 | 8.0896   | 1310845 | Asthma |
| rs1894407   | 6 | 32819259 | A | C | 0.3943 | -0.0325 | 0.0050 | 7.92E-11 | -6.5019  | 1310845 | Asthma |
| rs1894406   | 6 | 32819279 | T | C | 0.3526 | -0.0526 | 0.0055 | 2.12E-21 | -9.4993  | 1180923 | Asthma |
| rs2857106   | 6 | 32819793 | C | T | 0.1808 | -0.0384 | 0.0064 | 1.76E-09 | -6.0186  | 1310845 | Asthma |
| rs17220157  | 6 | 32819815 | A | G | 0.0377 | 0.0741  | 0.0123 | 1.96E-09 | 6.0010   | 1310845 | Asthma |
| rs17213749  | 6 | 32819874 | A | G | 0.0334 | 0.0933  | 0.0132 | 1.69E-12 | 7.0583   | 1310845 | Asthma |
| rs17213756  | 6 | 32820219 | T | C | 0.0459 | 0.0884  | 0.0114 | 1.04E-14 | 7.7347   | 1310845 | Asthma |
| rs2621323   | 6 | 32820930 | G | A | 0.3300 | -0.0388 | 0.0052 | 7.94E-14 | -7.4713  | 1310845 | Asthma |
| rs2621322   | 6 | 32820935 | G | T | 0.1812 | -0.0389 | 0.0064 | 9.73E-10 | -6.1139  | 1310845 | Asthma |
| rs13210961  | 6 | 32821611 | A | G | 0.0841 | -0.0822 | 0.0096 | 1.16E-17 | -8.5568  | 1180923 | Asthma |
| rs151027268 | 6 | 32821623 | G | A | 0.0322 | -0.1052 | 0.0152 | 4.49E-12 | -6.9209  | 1310845 | Asthma |
| rs2621321   | 6 | 32821703 | G | A | 0.2633 | -0.0579 | 0.0056 | 2.02E-25 | -10.4197 | 1310845 | Asthma |
| rs2857104   | 6 | 32822390 | G | C | 0.2633 | -0.0582 | 0.0056 | 1.29E-25 | -10.4623 | 1310845 | Asthma |
| rs2857103   | 6 | 32823522 | A | C | 0.3264 | -0.0369 | 0.0052 | 1.38E-12 | -7.0860  | 1310845 | Asthma |
| rs2856993   | 6 | 32823626 | C | G | 0.1960 | -0.0374 | 0.0067 | 2.03E-08 | -5.6094  | 942825  | Asthma |
| rs73410785  | 6 | 32824756 | C | A | 0.0362 | 0.0836  | 0.0127 | 3.95E-11 | 6.6058   | 1310845 | Asthma |
| rs13209654  | 6 | 32824882 | C | T | 0.0822 | -0.0740 | 0.0090 | 2.41E-16 | -8.1997  | 1310845 | Asthma |
| rs41316544  | 6 | 32825109 | A | T | 0.0491 | 0.1006  | 0.0119 | 3.59E-17 | 8.4253   | 1154767 | Asthma |
| rs13501     | 6 | 32825746 | A | G | 0.3270 | -0.0372 | 0.0052 | 9.14E-13 | -7.1428  | 1310845 | Asthma |
| rs77152259  | 6 | 32825757 | C | T | 0.0334 | 0.0933  | 0.0132 | 1.68E-12 | 7.0586   | 1310845 | Asthma |
| rs73410789  | 6 | 32825944 | C | G | 0.0333 | 0.0931  | 0.0132 | 1.91E-12 | 7.0411   | 1310845 | Asthma |
| rs2857101   | 6 | 32826899 | C | T | 0.2631 | -0.0578 | 0.0056 | 2.66E-25 | -10.3934 | 1310845 | Asthma |
| rs241456    | 6 | 32828188 | A | G | 0.2671 | -0.0569 | 0.0055 | 5.66E-25 | -10.3211 | 1310845 | Asthma |
| rs241455    | 6 | 32828242 | A | C | 0.2657 | -0.0579 | 0.0055 | 1.58E-25 | -10.4427 | 1310845 | Asthma |
| rs2071545   | 6 | 32828281 | T | C | 0.2652 | -0.0578 | 0.0056 | 2.13E-25 | -10.4145 | 1310845 | Asthma |
| rs241454    | 6 | 32828367 | G | A | 0.2657 | -0.0580 | 0.0055 | 1.37E-25 | -10.4561 | 1310845 | Asthma |
| rs241453    | 6 | 32828449 | A | G | 0.2654 | -0.0582 | 0.0055 | 9.23E-26 | -10.4938 | 1310845 | Asthma |
| rs115360810 | 6 | 32828533 | G | A | 0.0206 | 0.1282  | 0.0173 | 1.07E-13 | 7.4318   | 1310845 | Asthma |
| rs241452    | 6 | 32828569 | C | T | 0.2657 | -0.0580 | 0.0055 | 1.34E-25 | -10.4586 | 1310845 | Asthma |
| rs241451    | 6 | 32828703 | C | T | 0.2351 | -0.0471 | 0.0066 | 1.24E-12 | -7.1003  | 998712  | Asthma |
| rs17034     | 6 | 32828744 | T | C | 0.2633 | -0.0575 | 0.0056 | 4.24E-25 | -10.3487 | 1310845 | Asthma |
| rs241449    | 6 | 32828876 | A | C | 0.2657 | -0.0579 | 0.0055 | 1.59E-25 | -10.4423 | 1310845 | Asthma |

|             |   |          |   |   |        |         |        |          |          |         |        |
|-------------|---|----------|---|---|--------|---------|--------|----------|----------|---------|--------|
| rs241448    | 6 | 32828908 | G | A | 0.2661 | -0.0574 | 0.0055 | 4.52E-25 | -10.3426 | 1310845 | Asthma |
| rs241447    | 6 | 32828974 | C | T | 0.2659 | -0.0574 | 0.0055 | 4.19E-25 | -10.3499 | 1310845 | Asthma |
| rs241446    | 6 | 32829190 | A | G | 0.2656 | -0.0581 | 0.0055 | 1.10E-25 | -10.4773 | 1310845 | Asthma |
| rs241445    | 6 | 32829295 | T | C | 0.2656 | -0.0583 | 0.0056 | 9.77E-26 | -10.4884 | 1310845 | Asthma |
| rs241444    | 6 | 32829332 | A | G | 0.2655 | -0.0582 | 0.0056 | 9.99E-26 | -10.4862 | 1310845 | Asthma |
| rs241443    | 6 | 32829338 | G | T | 0.3279 | -0.0374 | 0.0052 | 7.81E-13 | -7.1645  | 1310845 | Asthma |
| rs41316548  | 6 | 32829390 | T | C | 0.0458 | 0.0875  | 0.0115 | 2.17E-14 | 7.6400   | 1310845 | Asthma |
| rs241442    | 6 | 32829391 | A | G | 0.2656 | -0.0583 | 0.0056 | 8.75E-26 | -10.4989 | 1310845 | Asthma |
| rs241441    | 6 | 32829520 | C | T | 0.2658 | -0.0581 | 0.0056 | 1.26E-25 | -10.4643 | 1310845 | Asthma |
| rs241440    | 6 | 32829584 | T | C | 0.2657 | -0.0580 | 0.0056 | 1.41E-25 | -10.4537 | 1310845 | Asthma |
| rs241439    | 6 | 32829760 | G | T | 0.3896 | -0.0329 | 0.0050 | 3.22E-11 | -6.6361  | 1310845 | Asthma |
| rs241438    | 6 | 32829843 | T | C | 0.3577 | -0.0297 | 0.0050 | 3.93E-09 | -5.8870  | 1310845 | Asthma |
| rs241437    | 6 | 32829907 | G | A | 0.3916 | -0.0338 | 0.0049 | 8.49E-12 | -6.8298  | 1310845 | Asthma |
| rs2228396   | 6 | 32830032 | T | C | 0.0949 | 0.0577  | 0.0082 | 1.77E-12 | 7.0517   | 1310845 | Asthma |
| rs241436    | 6 | 32830099 | G | A | 0.4568 | -0.0341 | 0.0049 | 2.19E-12 | -7.0218  | 1310845 | Asthma |
| rs1042116   | 6 | 32830771 | A | G | 0.1184 | -0.0518 | 0.0078 | 2.59E-11 | -6.6685  | 1310845 | Asthma |
| rs13208583  | 6 | 32833094 | T | C | 0.0727 | -0.0616 | 0.0096 | 1.55E-10 | -6.4006  | 1310845 | Asthma |
| rs62397687  | 6 | 32834232 | T | C | 0.1833 | 0.0536  | 0.0062 | 8.46E-18 | 8.5932   | 1310845 | Asthma |
| rs41317090  | 6 | 32834577 | A | C | 0.0426 | 0.0887  | 0.0118 | 6.37E-14 | 7.5003   | 1310845 | Asthma |
| rs62397688  | 6 | 32834685 | A | G | 0.0487 | 0.0647  | 0.0115 | 1.84E-08 | 5.6263   | 1180923 | Asthma |
| rs55869430  | 6 | 32835799 | G | A | 0.0505 | 0.0660  | 0.0105 | 3.47E-10 | 6.2760   | 1310845 | Asthma |
| rs241429    | 6 | 32836063 | A | G | 0.4251 | 0.0306  | 0.0049 | 5.49E-10 | 6.2043   | 1310845 | Asthma |
| rs3819716   | 6 | 32836507 | G | A | 0.4707 | -0.0279 | 0.0048 | 8.02E-09 | -5.7681  | 1310845 | Asthma |
| rs3819717   | 6 | 32836522 | C | T | 0.4705 | -0.0284 | 0.0048 | 4.16E-09 | -5.8778  | 1310845 | Asthma |
| rs241427    | 6 | 32836637 | A | G | 0.3696 | -0.0369 | 0.0050 | 2.33E-13 | -7.3281  | 1310845 | Asthma |
| rs241426    | 6 | 32836776 | T | A | 0.4247 | -0.0367 | 0.0049 | 5.04E-14 | -7.5310  | 1310845 | Asthma |
| rs3819720   | 6 | 32836793 | A | G | 0.3369 | 0.0540  | 0.0051 | 2.64E-26 | 10.6112  | 1310845 | Asthma |
| rs3819721   | 6 | 32837021 | A | G | 0.2460 | 0.0346  | 0.0056 | 7.71E-10 | 6.1509   | 1251217 | Asthma |
| rs1871665   | 6 | 32837102 | C | T | 0.4738 | -0.0493 | 0.0049 | 5.31E-24 | -10.1041 | 1310845 | Asthma |
| rs1871664   | 6 | 32837104 | G | A | 0.4742 | -0.0493 | 0.0049 | 5.26E-24 | -10.1047 | 1310845 | Asthma |
| rs241425    | 6 | 32837132 | A | G | 0.4696 | -0.0518 | 0.0049 | 2.83E-26 | -10.6047 | 1310845 | Asthma |
| rs2239701   | 6 | 32837272 | C | T | 0.4250 | 0.0464  | 0.0049 | 1.98E-21 | 9.5062   | 1310845 | Asthma |
| rs2071465   | 6 | 32837693 | G | C | 0.4092 | 0.0475  | 0.0051 | 5.38E-21 | 9.4016   | 1251217 | Asthma |
| rs2071544   | 6 | 32838344 | C | T | 0.4669 | 0.0438  | 0.0049 | 1.83E-19 | 9.0230   | 1310845 | Asthma |
| rs4148870   | 6 | 32838614 | T | C | 0.4246 | 0.0437  | 0.0049 | 4.63E-19 | 8.9208   | 1310845 | Asthma |
| rs2071552   | 6 | 32838684 | G | A | 0.4567 | 0.0403  | 0.0051 | 5.01E-15 | 7.8266   | 942825  | Asthma |
| rs4148869   | 6 | 32838799 | T | C | 0.4165 | 0.0440  | 0.0049 | 3.54E-19 | 8.9505   | 1310845 | Asthma |
| rs4148868   | 6 | 32838807 | A | G | 0.4446 | 0.0423  | 0.0049 | 4.17E-18 | 8.6740   | 1310845 | Asthma |
| rs79142022  | 6 | 32838896 | C | T | 0.0327 | -0.1064 | 0.0150 | 1.20E-12 | -7.1051  | 1310845 | Asthma |
| rs4713598   | 6 | 32839009 | G | T | 0.4163 | 0.0441  | 0.0049 | 2.89E-19 | 8.9727   | 1310845 | Asthma |
| rs9391747   | 6 | 32839172 | T | C | 0.4161 | 0.0440  | 0.0049 | 3.34E-19 | 8.9568   | 1310845 | Asthma |
| rs3763366   | 6 | 32839669 | C | G | 0.5180 | -0.0418 | 0.0048 | 6.06E-18 | -8.6314  | 1310845 | Asthma |
| rs3763365   | 6 | 32839676 | A | G | 0.5180 | -0.0420 | 0.0048 | 4.22E-18 | -8.6728  | 1310845 | Asthma |
| rs3763364   | 6 | 32839743 | T | A | 0.4161 | 0.0441  | 0.0049 | 2.90E-19 | 8.9725   | 1310845 | Asthma |
| rs3763349   | 6 | 32840455 | A | G | 0.5017 | -0.0388 | 0.0049 | 1.18E-15 | -8.0066  | 1310845 | Asthma |
| rs2071464   | 6 | 32841299 | A | G | 0.4419 | 0.0435  | 0.0049 | 4.51E-19 | 8.9236   | 1310845 | Asthma |
| rs2071627   | 6 | 32841446 | A | C | 0.4111 | 0.0389  | 0.0049 | 2.86E-15 | 7.8967   | 1310845 | Asthma |
| rs9276810   | 6 | 32842666 | A | G | 0.4422 | 0.0433  | 0.0049 | 6.19E-19 | 8.8886   | 1310845 | Asthma |
| rs6924102   | 6 | 32843606 | G | A | 0.4159 | 0.0447  | 0.0049 | 8.28E-20 | 9.1094   | 1310845 | Asthma |
| rs2071540   | 6 | 32845139 | T | C | 0.4294 | -0.0317 | 0.0049 | 1.09E-10 | -6.4541  | 1310845 | Asthma |
| rs1053752   | 6 | 32846350 | A | G | 0.4189 | 0.0492  | 0.0049 | 1.19E-23 | 10.0246  | 1310845 | Asthma |
| rs6457684   | 6 | 32846670 | C | T | 0.4194 | 0.0488  | 0.0049 | 2.68E-23 | 9.9438   | 1310845 | Asthma |
| rs735883    | 6 | 32848277 | A | G | 0.3940 | 0.0389  | 0.0050 | 3.80E-15 | 7.8613   | 1310845 | Asthma |
| rs4148882   | 6 | 32849181 | G | A | 0.3811 | -0.0440 | 0.0050 | 1.81E-18 | -8.7685  | 1310845 | Asthma |
| rs56318279  | 6 | 32849231 | T | C | 0.0327 | -0.1070 | 0.0149 | 8.28E-13 | -7.1562  | 1310845 | Asthma |
| rs76545695  | 6 | 32849516 | T | C | 0.0327 | -0.1071 | 0.0149 | 7.67E-13 | -7.1672  | 1310845 | Asthma |
| rs113206908 | 6 | 32850253 | C | T | 0.0249 | 0.1028  | 0.0151 | 8.81E-12 | 6.8245   | 1310845 | Asthma |
| rs2071539   | 6 | 32850653 | G | C | 0.0404 | -0.0822 | 0.0130 | 2.49E-10 | -6.3277  | 1310845 | Asthma |
| rs2071538   | 6 | 32850901 | A | G | 0.2508 | -0.0458 | 0.0057 | 8.85E-16 | -8.0419  | 1310845 | Asthma |
| rs4148878   | 6 | 32854409 | G | T | 0.0583 | 0.0849  | 0.0101 | 3.64E-17 | 8.4239   | 1310845 | Asthma |
| rs36234342  | 6 | 32855409 | G | T | 0.0319 | -0.1045 | 0.0153 | 7.85E-12 | -6.8410  | 1310845 | Asthma |
| rs116696906 | 6 | 32857132 | A | G | 0.0320 | -0.1014 | 0.0172 | 3.50E-09 | -5.9061  | 1154767 | Asthma |
| rs17587     | 6 | 32857313 | A | G | 0.2697 | 0.0351  | 0.0055 | 1.43E-10 | 6.4122   | 1310845 | Asthma |
| rs9276821   | 6 | 32861527 | G | A | 0.4330 | -0.0320 | 0.0049 | 6.73E-11 | -6.5265  | 1310845 | Asthma |
| rs7767680   | 6 | 32862640 | T | C | 0.2695 | 0.0353  | 0.0055 | 1.17E-10 | 6.4433   | 1310845 | Asthma |
| rs9276826   | 6 | 32862791 | G | A | 0.0998 | -0.0530 | 0.0086 | 6.22E-10 | -6.1847  | 1154767 | Asthma |
| rs189824532 | 6 | 32863741 | G | A | 0.0319 | -0.1048 | 0.0153 | 6.71E-12 | -6.8638  | 1310845 | Asthma |
| rs3752430   | 6 | 32864890 | T | C | 0.4329 | -0.0318 | 0.0049 | 9.62E-11 | -6.4726  | 1310845 | Asthma |
| rs115482851 | 6 | 32865760 | C | G | 0.0319 | -0.1046 | 0.0153 | 7.34E-12 | -6.8507  | 1310845 | Asthma |
| rs1383266   | 6 | 32866955 | T | C | 0.2703 | -0.0399 | 0.0055 | 5.06E-13 | -7.2237  | 1310845 | Asthma |
| rs75439840  | 6 | 32868559 | C | G | 0.0241 | 0.1034  | 0.0153 | 1.60E-11 | 6.7392   | 1310845 | Asthma |
| rs183380408 | 6 | 32869075 | T | G | 0.0328 | -0.1080 | 0.0166 | 7.11E-11 | -6.5184  | 1159440 | Asthma |
| rs115493740 | 6 | 32870762 | A | G | 0.0759 | 0.0602  | 0.0089 | 1.68E-11 | 6.7316   | 1310845 | Asthma |
| rs9276842   | 6 | 32871851 | G | A | 0.4324 | -0.0327 | 0.0049 | 2.85E-11 | -6.6538  | 1310845 | Asthma |

|             |   |          |   |   |        |         |        |          |         |         |        |
|-------------|---|----------|---|---|--------|---------|--------|----------|---------|---------|--------|
| rs6923186   | 6 | 32873203 | A | G | 0.4334 | -0.0327 | 0.0049 | 2.91E-11 | -6.6511 | 1310845 | Asthma |
| rs9276856   | 6 | 32873539 | T | C | 0.2693 | 0.0352  | 0.0055 | 1.40E-10 | 6.4161  | 1310845 | Asthma |
| rs9276909   | 6 | 32883062 | T | C | 0.2696 | 0.0359  | 0.0055 | 5.36E-11 | 6.5607  | 1310845 | Asthma |
| rs17220297  | 6 | 32884275 | T | G | 0.0321 | -0.1060 | 0.0152 | 3.21E-12 | -6.9683 | 1310845 | Asthma |
| rs112805625 | 6 | 32885301 | T | C | 0.0240 | 0.1065  | 0.0154 | 5.19E-12 | 6.8999  | 1310845 | Asthma |
| rs75008053  | 6 | 32885340 | C | A | 0.0239 | 0.1069  | 0.0155 | 4.90E-12 | 6.9082  | 1310845 | Asthma |
| rs35571244  | 6 | 32885442 | C | T | 0.0663 | 0.0979  | 0.0114 | 1.14E-17 | 8.5587  | 786747  | Asthma |
| rs7767732   | 6 | 32885500 | T | C | 0.1690 | 0.0441  | 0.0068 | 8.53E-11 | 6.4909  | 1216250 | Asthma |
| rs192980829 | 6 | 32885578 | T | C | 0.0317 | -0.1184 | 0.0189 | 3.45E-10 | -6.2768 | 1064845 | Asthma |
| rs140816071 | 6 | 32885583 | A | G | 0.0336 | -0.1122 | 0.0179 | 3.91E-10 | -6.2577 | 1064845 | Asthma |
| rs34975158  | 6 | 32885734 | A | G | 0.0592 | 0.1021  | 0.0110 | 1.27E-20 | 9.3103  | 1154767 | Asthma |
| rs2621417   | 6 | 32885830 | G | A | 0.4187 | -0.0289 | 0.0051 | 1.20E-08 | -5.6998 | 1251217 | Asthma |
| rs2857218   | 6 | 32887563 | G | C | 0.3905 | 0.0322  | 0.0050 | 1.12E-10 | 6.4497  | 1310845 | Asthma |
| rs2018501   | 6 | 32888431 | T | C | 0.4680 | -0.0371 | 0.0049 | 2.89E-14 | -7.6034 | 1310845 | Asthma |
| rs28622052  | 6 | 32889309 | C | T | 0.0241 | 0.1037  | 0.0154 | 1.49E-11 | 6.7491  | 1310845 | Asthma |
| rs9276913   | 6 | 32889719 | G | A | 0.4680 | -0.0370 | 0.0049 | 3.44E-14 | -7.5807 | 1310845 | Asthma |
| rs241414    | 6 | 32890024 | G | T | 0.4218 | 0.0317  | 0.0049 | 1.13E-10 | 6.4480  | 1310845 | Asthma |
| rs115962222 | 6 | 32890771 | G | A | 0.0319 | -0.1034 | 0.0153 | 1.29E-11 | -6.7697 | 1310845 | Asthma |
| rs241413    | 6 | 32891223 | G | A | 0.4219 | 0.0314  | 0.0049 | 1.69E-10 | 6.3867  | 1310845 | Asthma |
| rs147118969 | 6 | 32891746 | C | G | 0.0319 | -0.1034 | 0.0153 | 1.30E-11 | -6.7693 | 1310845 | Asthma |
| rs11969522  | 6 | 32892048 | C | G | 0.0241 | 0.1048  | 0.0154 | 9.86E-12 | 6.8086  | 1310845 | Asthma |
| rs241412    | 6 | 32893839 | T | G | 0.3797 | 0.0322  | 0.0053 | 1.22E-09 | 6.0773  | 942825  | Asthma |
| rs241411    | 6 | 32893854 | C | G | 0.3903 | 0.0326  | 0.0050 | 6.82E-11 | 6.5246  | 1310845 | Asthma |
| rs241410    | 6 | 32893874 | G | C | 0.4929 | 0.0363  | 0.0049 | 7.28E-14 | 7.4827  | 1310845 | Asthma |
| rs78456409  | 6 | 32894621 | C | G | 0.0240 | 0.1020  | 0.0154 | 3.79E-11 | 6.6120  | 1310845 | Asthma |
| rs3749981   | 6 | 32894905 | T | C | 0.0832 | 0.0595  | 0.0086 | 5.07E-12 | 6.9036  | 1310845 | Asthma |
| rs241408    | 6 | 32894934 | A | G | 0.4679 | -0.0368 | 0.0049 | 4.61E-14 | -7.5424 | 1310845 | Asthma |
| rs241407    | 6 | 32894963 | T | C | 0.0947 | 0.0451  | 0.0081 | 2.63E-08 | 5.5643  | 1310845 | Asthma |
| rs241405    | 6 | 32898021 | A | G | 0.4838 | -0.0389 | 0.0049 | 1.47E-15 | -7.9797 | 1310845 | Asthma |
| rs9276915   | 6 | 32898134 | A | G | 0.2638 | 0.0326  | 0.0055 | 3.18E-09 | 5.9220  | 1310845 | Asthma |
| rs241404    | 6 | 32898220 | C | T | 0.4220 | 0.0314  | 0.0049 | 1.75E-10 | 6.3822  | 1310845 | Asthma |
| rs9276916   | 6 | 32898318 | A | G | 0.4193 | -0.0480 | 0.0054 | 7.08E-19 | -8.8736 | 1159440 | Asthma |
| rs241403    | 6 | 32899215 | T | C | 0.4839 | -0.0389 | 0.0049 | 1.45E-15 | -7.9808 | 1310845 | Asthma |
| rs115751886 | 6 | 32900104 | A | C | 0.0241 | 0.1003  | 0.0154 | 7.45E-11 | 6.5115  | 1310845 | Asthma |
| rs241402    | 6 | 32901268 | C | T | 0.4219 | 0.0314  | 0.0049 | 1.89E-10 | 6.3700  | 1310845 | Asthma |
| rs6912492   | 6 | 32901932 | A | G | 0.2640 | 0.0328  | 0.0055 | 2.54E-09 | 5.9586  | 1310845 | Asthma |
| rs3101942   | 6 | 32902280 | G | A | 0.4177 | -0.0469 | 0.0049 | 2.24E-21 | -9.4933 | 1310845 | Asthma |
| rs241400    | 6 | 32903759 | A | G | 0.3908 | 0.0322  | 0.0050 | 1.03E-10 | 6.4633  | 1310845 | Asthma |
| rs241399    | 6 | 32903781 | T | C | 0.4839 | -0.0391 | 0.0049 | 1.18E-15 | -8.0071 | 1310845 | Asthma |
| rs2187688   | 6 | 32904224 | A | G | 0.4840 | -0.0389 | 0.0049 | 1.58E-15 | -7.9706 | 1310845 | Asthma |
| rs11477962  | 6 | 32906167 | T | A | 0.0244 | 0.0977  | 0.0153 | 1.66E-10 | 6.3900  | 1310845 | Asthma |
| rs149028231 | 6 | 32906777 | G | A | 0.0322 | -0.1020 | 0.0153 | 2.29E-11 | -6.6868 | 1310845 | Asthma |
| rs116519115 | 6 | 32906831 | C | A | 0.0322 | -0.1020 | 0.0153 | 2.28E-11 | -6.6868 | 1310845 | Asthma |
| rs241398    | 6 | 32907673 | T | C | 0.4217 | 0.0311  | 0.0049 | 2.79E-10 | 6.3100  | 1310845 | Asthma |
| rs154989    | 6 | 32909396 | A | G | 0.4810 | -0.0396 | 0.0049 | 4.87E-16 | -8.1148 | 1310845 | Asthma |
| rs154988    | 6 | 32909489 | G | A | 0.4840 | -0.0392 | 0.0049 | 9.71E-16 | -8.0304 | 1310845 | Asthma |
| rs154981    | 6 | 32913216 | C | T | 0.4841 | -0.0388 | 0.0049 | 1.71E-15 | -7.9606 | 1310845 | Asthma |
| rs9276922   | 6 | 32913750 | A | T | 0.2420 | -0.0443 | 0.0058 | 1.74E-14 | -7.6681 | 1310845 | Asthma |
| rs3559935   | 6 | 32918710 | C | T | 0.0574 | 0.0889  | 0.0105 | 2.10E-17 | 8.4885  | 1251217 | Asthma |
| rs145912914 | 6 | 32919373 | C | G | 0.0242 | 0.0993  | 0.0153 | 9.67E-11 | 6.4721  | 1310845 | Asthma |
| rs138597301 | 6 | 32919380 | T | C | 0.0319 | -0.1029 | 0.0153 | 1.79E-11 | -6.7222 | 1310845 | Asthma |
| rs241458    | 6 | 32920789 | G | C | 0.4817 | -0.0383 | 0.0050 | 1.83E-14 | -7.6620 | 1251217 | Asthma |
| rs28744290  | 6 | 32924064 | T | C | 0.3933 | 0.0311  | 0.0051 | 1.21E-09 | 6.0784  | 1251217 | Asthma |
| rs114463908 | 6 | 32924107 | A | G | 0.0769 | 0.0675  | 0.0090 | 7.21E-14 | 7.4839  | 1310845 | Asthma |
| rs28744291  | 6 | 32925910 | C | A | 0.2655 | 0.0324  | 0.0056 | 9.17E-09 | 5.7455  | 1251217 | Asthma |
| rs194676    | 6 | 32928553 | A | G | 0.4655 | -0.0387 | 0.0054 | 6.58E-13 | -7.1879 | 1159440 | Asthma |
| rs154978    | 6 | 32931519 | C | T | 0.4712 | -0.0411 | 0.0050 | 2.48E-16 | -8.1964 | 1251217 | Asthma |
| rs3132131   | 6 | 32931708 | A | G | 0.3574 | -0.0441 | 0.0051 | 6.01E-18 | -8.6324 | 1310845 | Asthma |
| rs12662077  | 6 | 32934224 | A | G | 0.0572 | 0.0693  | 0.0106 | 6.26E-11 | 6.5371  | 1310845 | Asthma |
| rs151719    | 6 | 32936123 | C | T | 0.2278 | -0.0326 | 0.0058 | 1.65E-08 | -5.6454 | 1310845 | Asthma |
| rs1007636   | 6 | 32936264 | C | T | 0.1309 | 0.0409  | 0.0073 | 2.28E-08 | 5.5893  | 1251217 | Asthma |
| rs35029304  | 6 | 32941756 | C | T | 0.0365 | 0.0966  | 0.0131 | 1.75E-13 | 7.3669  | 1310845 | Asthma |
| rs142827383 | 6 | 32950173 | C | T | 0.0278 | -0.1026 | 0.0159 | 1.06E-10 | -6.4591 | 1301353 | Asthma |
| rs143074345 | 6 | 32959229 | C | T | 0.0277 | -0.1037 | 0.0159 | 6.95E-11 | -6.5220 | 1301353 | Asthma |
| rs139285716 | 6 | 32970484 | G | T | 0.0274 | -0.1046 | 0.0160 | 6.76E-11 | -6.5257 | 1301353 | Asthma |
| rs144607208 | 6 | 32979739 | G | A | 0.0270 | -0.1029 | 0.0163 | 2.95E-10 | -6.3015 | 1301353 | Asthma |
| rs206776    | 6 | 32985934 | T | C | 0.3149 | -0.0303 | 0.0052 | 4.18E-09 | -5.8767 | 1310845 | Asthma |
| rs140545087 | 6 | 32992717 | A | G | 0.0275 | -0.1038 | 0.0161 | 9.99E-11 | -6.4674 | 1301353 | Asthma |
| rs13207475  | 6 | 33012101 | C | T | 0.0891 | -0.0531 | 0.0085 | 5.25E-10 | -6.2115 | 1310845 | Asthma |
| rs34354079  | 6 | 33013778 | A | G | 0.0891 | -0.0532 | 0.0085 | 4.89E-10 | -6.2226 | 1310845 | Asthma |
| rs71565362  | 6 | 33014164 | T | C | 0.0891 | -0.0530 | 0.0085 | 5.69E-10 | -6.1988 | 1310845 | Asthma |
| rs34570277  | 6 | 33014240 | T | C | 0.0891 | -0.0530 | 0.0085 | 5.76E-10 | -6.1968 | 1310845 | Asthma |
| rs17220575  | 6 | 33015483 | T | C | 0.0890 | -0.0525 | 0.0086 | 8.21E-10 | -6.1408 | 1310845 | Asthma |
| rs13198486  | 6 | 33015855 | C | T | 0.0891 | -0.0525 | 0.0086 | 8.37E-10 | -6.1379 | 1310845 | Asthma |

|             |   |          |   |   |        |         |        |          |         |         |        |
|-------------|---|----------|---|---|--------|---------|--------|----------|---------|---------|--------|
| rs13216195  | 6 | 33016127 | T | C | 0.0891 | -0.0524 | 0.0086 | 8.67E-10 | -6.1322 | 1310845 | Asthma |
| rs17214246  | 6 | 33016312 | C | T | 0.0891 | -0.0525 | 0.0086 | 8.33E-10 | -6.1385 | 1310845 | Asthma |
| rs71565363  | 6 | 33019205 | G | A | 0.0891 | -0.0522 | 0.0086 | 1.05E-09 | -6.1021 | 1310845 | Asthma |
| rs17220681  | 6 | 33019960 | A | G | 0.0891 | -0.0522 | 0.0086 | 1.01E-09 | -6.1078 | 1310845 | Asthma |
| rs13203549  | 6 | 33020420 | A | G | 0.0891 | -0.0519 | 0.0085 | 1.24E-09 | -6.0747 | 1310845 | Asthma |
| rs13203651  | 6 | 33020516 | A | G | 0.0891 | -0.0519 | 0.0086 | 1.27E-09 | -6.0713 | 1310845 | Asthma |
| rs13203920  | 6 | 33020716 | C | G | 0.0923 | -0.0500 | 0.0084 | 3.15E-09 | -5.9236 | 1310845 | Asthma |
| rs35468596  | 6 | 33021398 | G | T | 0.0890 | -0.0521 | 0.0086 | 1.13E-09 | -6.0901 | 1310845 | Asthma |
| rs112148579 | 6 | 33021954 | A | C | 0.0891 | -0.0520 | 0.0086 | 1.17E-09 | -6.0847 | 1310845 | Asthma |
| rs75270549  | 6 | 33022924 | A | G | 0.0891 | -0.0524 | 0.0085 | 8.61E-10 | -6.1333 | 1310845 | Asthma |
| rs13216530  | 6 | 33023683 | T | A | 0.0892 | -0.0524 | 0.0085 | 8.90E-10 | -6.1280 | 1310845 | Asthma |
| rs7738250   | 6 | 33024647 | A | G | 0.0893 | -0.0529 | 0.0085 | 5.81E-10 | -6.1955 | 1310845 | Asthma |
| rs7763814   | 6 | 33027722 | G | A | 0.0834 | -0.0597 | 0.0090 | 3.80E-11 | -6.6116 | 1284712 | Asthma |
| rs13215763  | 6 | 33028823 | C | G | 0.0840 | -0.0624 | 0.0089 | 1.81E-12 | -7.0488 | 1310845 | Asthma |
| rs17220730  | 6 | 33029773 | T | G | 0.0274 | -0.0874 | 0.0160 | 4.29E-08 | -5.4788 | 1310845 | Asthma |
| rs17214345  | 6 | 33029852 | G | C | 0.0840 | -0.0623 | 0.0088 | 1.86E-12 | -7.0443 | 1310845 | Asthma |
| rs34509541  | 6 | 33031104 | C | T | 0.0847 | -0.0607 | 0.0088 | 5.66E-12 | -6.8879 | 1310845 | Asthma |
| rs114649937 | 6 | 33031445 | C | T | 0.0846 | -0.0608 | 0.0088 | 5.41E-12 | -6.8943 | 1310845 | Asthma |
| rs34822845  | 6 | 33032358 | A | G | 0.0845 | -0.0610 | 0.0088 | 4.71E-12 | -6.9141 | 1310845 | Asthma |
| rs13202658  | 6 | 33032909 | A | G | 0.0846 | -0.0610 | 0.0088 | 4.48E-12 | -6.9210 | 1310845 | Asthma |
| rs35988070  | 6 | 33033067 | T | A | 0.0756 | -0.0623 | 0.0105 | 2.70E-09 | -5.9489 | 791420  | Asthma |
| rs13192294  | 6 | 33033646 | C | T | 0.0844 | -0.0613 | 0.0088 | 3.83E-12 | -6.9432 | 1310845 | Asthma |
| rs71565365  | 6 | 33034873 | A | G | 0.0844 | -0.0613 | 0.0088 | 3.72E-12 | -6.9475 | 1310845 | Asthma |
| rs13205699  | 6 | 33036510 | A | G | 0.0845 | -0.0609 | 0.0088 | 4.86E-12 | -6.9095 | 1310845 | Asthma |
| rs34228538  | 6 | 33037293 | A | G | 0.0845 | -0.0610 | 0.0088 | 4.52E-12 | -6.9199 | 1310845 | Asthma |
| rs13209944  | 6 | 33037596 | T | C | 0.0844 | -0.0612 | 0.0088 | 4.05E-12 | -6.9353 | 1310845 | Asthma |
| rs34381517  | 6 | 33039019 | T | C | 0.0845 | -0.0609 | 0.0088 | 5.32E-12 | -6.8966 | 1310845 | Asthma |
| rs7755863   | 6 | 33039862 | A | T | 0.0845 | -0.0607 | 0.0088 | 6.06E-12 | -6.8782 | 1310845 | Asthma |
| rs13196172  | 6 | 33041228 | G | A | 0.0845 | -0.0608 | 0.0088 | 5.85E-12 | -6.8832 | 1310845 | Asthma |
| rs35422538  | 6 | 33042850 | C | T | 0.0845 | -0.0611 | 0.0088 | 4.46E-12 | -6.9218 | 1310845 | Asthma |
| rs149974480 | 6 | 33045835 | T | C | 0.0845 | -0.0608 | 0.0088 | 5.42E-12 | -6.8942 | 1310845 | Asthma |
| rs35085781  | 6 | 33047644 | T | C | 0.0845 | -0.0611 | 0.0088 | 4.54E-12 | -6.9192 | 1310845 | Asthma |
| rs34616074  | 6 | 33047670 | C | T | 0.0845 | -0.0612 | 0.0088 | 4.12E-12 | -6.9330 | 1310845 | Asthma |
| rs71565366  | 6 | 33048295 | A | C | 0.0845 | -0.0612 | 0.0088 | 3.99E-12 | -6.9374 | 1310845 | Asthma |
| rs6918087   | 6 | 33048522 | G | A | 0.0845 | -0.0613 | 0.0088 | 3.87E-12 | -6.9417 | 1310845 | Asthma |
| rs113119046 | 6 | 33053353 | A | C | 0.0658 | -0.0591 | 0.0102 | 6.47E-09 | -5.8043 | 1310845 | Asthma |
| rs58063871  | 6 | 33072701 | A | C | 0.1125 | 0.0414  | 0.0076 | 4.96E-08 | 5.4529  | 1310845 | Asthma |
| rs113711225 | 6 | 33077018 | T | C | 0.0376 | 0.0818  | 0.0132 | 5.39E-10 | 6.2075  | 1310845 | Asthma |
| rs41270518  | 6 | 33080342 | T | C | 0.0377 | 0.0792  | 0.0131 | 1.60E-09 | 6.0344  | 1310845 | Asthma |
| rs111487755 | 6 | 33108332 | A | G | 0.0380 | 0.0794  | 0.0130 | 1.02E-09 | 6.1059  | 1310845 | Asthma |
| rs9277830   | 6 | 33135807 | A | G | 0.1547 | 0.0516  | 0.0089 | 8.06E-09 | 5.7673  | 873440  | Asthma |
| rs1704996   | 6 | 33215118 | C | A | 0.0381 | 0.0765  | 0.0129 | 2.84E-09 | 5.9406  | 1310845 | Asthma |
| rs107860    | 6 | 33252583 | T | C | 0.1449 | 0.0609  | 0.0107 | 1.19E-08 | 5.7019  | 778845  | Asthma |
| rs9348970   | 6 | 35185788 | C | G | 0.1600 | 0.0351  | 0.0064 | 4.46E-08 | 5.4715  | 1376071 | Asthma |
| rs6916141   | 6 | 43140006 | C | T | 0.1164 | 0.0435  | 0.0073 | 2.09E-09 | 5.9904  | 1376071 | Asthma |
| rs6941411   | 6 | 43140205 | T | G | 0.1165 | 0.0435  | 0.0073 | 2.09E-09 | 5.9904  | 1376071 | Asthma |
| rs6933124   | 6 | 43142317 | G | T | 0.1164 | 0.0432  | 0.0073 | 2.68E-09 | 5.9504  | 1376071 | Asthma |
| rs61021888  | 6 | 43160696 | G | A | 0.1175 | 0.0399  | 0.0072 | 2.34E-08 | 5.5848  | 1376071 | Asthma |
| rs1051709   | 6 | 43161114 | C | T | 0.1175 | 0.0397  | 0.0071 | 2.71E-08 | 5.5595  | 1376071 | Asthma |
| rs6458327   | 6 | 43161742 | G | C | 0.1173 | 0.0397  | 0.0072 | 2.84E-08 | 5.5511  | 1376071 | Asthma |
| rs7756307   | 6 | 43161939 | G | A | 0.1177 | 0.0397  | 0.0071 | 2.72E-08 | 5.5588  | 1376071 | Asthma |
| rs7760834   | 6 | 43162248 | A | G | 0.1174 | 0.0396  | 0.0072 | 3.21E-08 | 5.5296  | 1376071 | Asthma |
| rs72664264  | 6 | 43162319 | T | G | 0.1172 | 0.0399  | 0.0072 | 2.55E-08 | 5.5699  | 1376071 | Asthma |
| rs72664265  | 6 | 43162501 | G | A | 0.1173 | 0.0398  | 0.0072 | 2.70E-08 | 5.5598  | 1376071 | Asthma |
| rs4714671   | 6 | 43163102 | G | A | 0.1172 | 0.0398  | 0.0072 | 2.67E-08 | 5.5615  | 1376071 | Asthma |
| rs12662201  | 6 | 43163398 | A | G | 0.1173 | 0.0413  | 0.0073 | 1.67E-08 | 5.6433  | 1316443 | Asthma |
| rs11967948  | 6 | 43165054 | C | T | 0.1168 | 0.0415  | 0.0073 | 1.49E-08 | 5.6632  | 1316443 | Asthma |
| rs11967116  | 6 | 43165282 | G | A | 0.1174 | 0.0399  | 0.0072 | 2.47E-08 | 5.5757  | 1376071 | Asthma |
| rs6923262   | 6 | 43167683 | G | A | 0.1172 | 0.0396  | 0.0072 | 3.12E-08 | 5.5348  | 1376071 | Asthma |
| rs10948066  | 6 | 43169776 | T | G | 0.1166 | 0.0415  | 0.0073 | 1.49E-08 | 5.6626  | 1316443 | Asthma |
| rs4711741   | 6 | 43176880 | A | G | 0.1165 | 0.0416  | 0.0073 | 1.44E-08 | 5.6685  | 1316443 | Asthma |
| rs2273709   | 6 | 43216394 | C | A | 0.1985 | 0.0324  | 0.0059 | 3.81E-08 | 5.4996  | 1376071 | Asthma |
| rs6938026   | 6 | 43217995 | G | A | 0.1983 | 0.0331  | 0.0059 | 2.01E-08 | 5.6110  | 1376071 | Asthma |
| rs2651206   | 6 | 43245739 | T | C | 0.3497 | 0.0294  | 0.0050 | 5.67E-09 | 5.8262  | 1316443 | Asthma |
| rs2841666   | 6 | 43264003 | G | A | 0.4254 | 0.0288  | 0.0048 | 1.37E-09 | 6.0596  | 1376071 | Asthma |
| rs2756184   | 6 | 43266578 | T | G | 0.4253 | 0.0288  | 0.0047 | 1.30E-09 | 6.0669  | 1376071 | Asthma |
| rs2651186   | 6 | 43270832 | G | A | 0.3363 | 0.0288  | 0.0051 | 1.38E-08 | 5.6756  | 1316443 | Asthma |
| rs2841655   | 6 | 43271704 | C | T | 0.3362 | 0.0286  | 0.0051 | 1.86E-08 | 5.6247  | 1316443 | Asthma |
| rs1998297   | 6 | 43273564 | G | A | 0.3391 | 0.0280  | 0.0051 | 3.40E-08 | 5.5195  | 1316443 | Asthma |
| rs7756656   | 6 | 43274932 | G | C | 0.3391 | 0.0280  | 0.0051 | 3.73E-08 | 5.5030  | 1316443 | Asthma |
| rs58537733  | 6 | 43275284 | T | C | 0.3388 | 0.0278  | 0.0051 | 4.60E-08 | 5.4662  | 1316443 | Asthma |
| rs13213141  | 6 | 63585217 | A | G | 0.3119 | -0.0311 | 0.0053 | 3.29E-09 | -5.9163 | 1316443 | Asthma |
| rs12212535  | 6 | 90098633 | T | C | 0.3634 | -0.0434 | 0.0052 | 6.44E-17 | -8.3569 | 1316443 | Asthma |
| rs207253    | 6 | 90098704 | A | G | 0.3883 | -0.0342 | 0.0049 | 4.49E-12 | -6.9207 | 1376071 | Asthma |

|             |   |          |   |   |        |         |        |          |          |         |        |
|-------------|---|----------|---|---|--------|---------|--------|----------|----------|---------|--------|
| rs7753008   | 6 | 90099920 | C | T | 0.3679 | -0.0483 | 0.0051 | 2.48E-21 | -9.4828  | 1316443 | Asthma |
| rs207254    | 6 | 90100853 | G | C | 0.5105 | 0.0405  | 0.0049 | 1.05E-16 | 8.2987   | 1316443 | Asthma |
| rs207255    | 6 | 90101895 | T | C | 0.5093 | 0.0408  | 0.0049 | 5.91E-17 | 8.3670   | 1316443 | Asthma |
| rs207256    | 6 | 90102140 | C | T | 0.5096 | 0.0410  | 0.0049 | 3.64E-17 | 8.4239   | 1316443 | Asthma |
| rs6454802   | 6 | 90104480 | T | C | 0.3710 | -0.0483 | 0.0049 | 7.06E-23 | -9.8470  | 1376071 | Asthma |
| rs12202119  | 6 | 90105471 | T | A | 0.3700 | -0.0484 | 0.0049 | 8.82E-23 | -9.8246  | 1376071 | Asthma |
| rs207259    | 6 | 90106099 | A | G | 0.5090 | 0.0409  | 0.0049 | 3.95E-17 | 8.4143   | 1316443 | Asthma |
| rs207261    | 6 | 90107484 | C | G | 0.5079 | 0.0413  | 0.0049 | 1.86E-17 | 8.5023   | 1316443 | Asthma |
| rs207262    | 6 | 90108542 | C | T | 0.5096 | 0.0414  | 0.0047 | 2.71E-18 | 8.7230   | 1376071 | Asthma |
| rs62408204  | 6 | 90109155 | T | C | 0.3699 | -0.0485 | 0.0049 | 7.58E-23 | -9.8398  | 1376071 | Asthma |
| rs11753332  | 6 | 90109434 | A | G | 0.3700 | -0.0485 | 0.0049 | 7.25E-23 | -9.8443  | 1376071 | Asthma |
| rs12196749  | 6 | 90110096 | A | G | 0.4060 | -0.0461 | 0.0049 | 2.11E-21 | -9.4992  | 1376071 | Asthma |
| rs207263    | 6 | 90110328 | C | T | 0.5096 | 0.0414  | 0.0047 | 2.75E-18 | 8.7215   | 1376071 | Asthma |
| rs207264    | 6 | 90110862 | G | A | 0.4494 | -0.0434 | 0.0048 | 1.16E-19 | -9.0728  | 1376071 | Asthma |
| rs112841    | 6 | 90111878 | G | T | 0.4499 | -0.0434 | 0.0048 | 9.18E-20 | -9.0982  | 1376071 | Asthma |
| rs207265    | 6 | 90113327 | A | T | 0.4496 | -0.0435 | 0.0048 | 8.63E-20 | -9.1050  | 1376071 | Asthma |
| rs12194007  | 6 | 90113440 | T | G | 0.3703 | -0.0485 | 0.0049 | 6.53E-23 | -9.8549  | 1376071 | Asthma |
| rs2325258   | 6 | 90114418 | A | C | 0.4067 | -0.0464 | 0.0048 | 1.08E-21 | -9.5689  | 1376071 | Asthma |
| rs12197750  | 6 | 90115417 | A | G | 0.3709 | -0.0487 | 0.0049 | 3.94E-23 | -9.9054  | 1376071 | Asthma |
| rs207267    | 6 | 90115521 | A | G | 0.5088 | 0.0414  | 0.0047 | 2.58E-18 | 8.7286   | 1376071 | Asthma |
| rs11754356  | 6 | 90116186 | T | C | 0.3705 | -0.0487 | 0.0049 | 4.48E-23 | -9.8929  | 1376071 | Asthma |
| rs72925947  | 6 | 90116553 | A | T | 0.3709 | -0.0486 | 0.0049 | 5.32E-23 | -9.8754  | 1376071 | Asthma |
| rs207268    | 6 | 90116990 | T | C | 0.5087 | 0.0414  | 0.0047 | 2.58E-18 | 8.7286   | 1376071 | Asthma |
| rs207269    | 6 | 90118450 | T | C | 0.5079 | 0.0412  | 0.0047 | 2.54E-18 | 8.7301   | 1376071 | Asthma |
| rs207270    | 6 | 90119163 | C | T | 0.4501 | -0.0432 | 0.0048 | 1.44E-19 | -9.0491  | 1376071 | Asthma |
| rs207271    | 6 | 90119512 | T | C | 0.5086 | 0.0413  | 0.0047 | 2.68E-18 | 8.7241   | 1376071 | Asthma |
| rs207272    | 6 | 90120100 | G | T | 0.5086 | 0.0414  | 0.0047 | 2.33E-18 | 8.7405   | 1376071 | Asthma |
| rs207273    | 6 | 90120229 | T | C | 0.5086 | 0.0414  | 0.0047 | 2.68E-18 | 8.7244   | 1376071 | Asthma |
| rs207274    | 6 | 90120901 | A | G | 0.5087 | 0.0414  | 0.0047 | 2.55E-18 | 8.7300   | 1376071 | Asthma |
| rs207275    | 6 | 90121404 | T | C | 0.5160 | 0.0407  | 0.0050 | 3.78E-16 | 8.1456   | 1008051 | Asthma |
| rs207276    | 6 | 90121441 | C | T | 0.5079 | 0.0414  | 0.0047 | 2.54E-18 | 8.7303   | 1376071 | Asthma |
| rs207277    | 6 | 90121550 | A | T | 0.5033 | 0.0432  | 0.0051 | 2.36E-17 | 8.4747   | 1246149 | Asthma |
| rs12212737  | 6 | 90128956 | A | G | 0.3284 | -0.0552 | 0.0056 | 4.04E-23 | -9.9032  | 1224666 | Asthma |
| rs2501721   | 6 | 90135317 | T | C | 0.5127 | 0.0422  | 0.0049 | 4.73E-18 | 8.6597   | 1316443 | Asthma |
| rs2325259   | 6 | 90140445 | C | T | 0.3404 | -0.0595 | 0.0052 | 1.24E-30 | -11.5055 | 1316443 | Asthma |
| rs12199079  | 6 | 90142539 | G | T | 0.3402 | -0.0591 | 0.0052 | 3.06E-30 | -11.4271 | 1316443 | Asthma |
| rs62408205  | 6 | 90145610 | A | G | 0.3409 | -0.0592 | 0.0052 | 2.46E-30 | -11.4460 | 1316443 | Asthma |
| rs1010473   | 6 | 90147159 | T | G | 0.3405 | -0.0596 | 0.0052 | 1.08E-30 | -11.5170 | 1316443 | Asthma |
| rs1010474   | 6 | 90147309 | C | T | 0.3406 | -0.0596 | 0.0052 | 9.68E-31 | -11.5266 | 1316443 | Asthma |
| rs17711850  | 6 | 90155151 | C | T | 0.3405 | -0.0603 | 0.0052 | 2.21E-31 | -11.6531 | 1316443 | Asthma |
| rs7774138   | 6 | 90156508 | A | T | 0.3405 | -0.0604 | 0.0052 | 1.57E-31 | -11.6826 | 1316443 | Asthma |
| rs62408206  | 6 | 90161868 | A | G | 0.3397 | -0.0610 | 0.0052 | 3.84E-32 | -11.8013 | 1316443 | Asthma |
| rs9451365   | 6 | 90164953 | C | T | 0.3989 | 0.0328  | 0.0053 | 6.34E-10 | 6.1818   | 1224666 | Asthma |
| rs2474618   | 6 | 90167125 | C | T | 0.1762 | 0.0358  | 0.0063 | 1.69E-08 | 5.6409   | 1316443 | Asthma |
| rs2474619   | 6 | 90170316 | C | A | 0.3970 | 0.0311  | 0.0050 | 4.02E-10 | 6.2535   | 1316443 | Asthma |
| rs10944479  | 6 | 90170674 | A | G | 0.1864 | -0.0483 | 0.0063 | 2.16E-14 | -7.6410  | 1376071 | Asthma |
| rs10455168  | 6 | 90173806 | C | T | 0.3415 | -0.0613 | 0.0052 | 1.37E-32 | -11.8878 | 1316443 | Asthma |
| rs10806423  | 6 | 90177105 | T | C | 0.3411 | -0.0615 | 0.0052 | 7.85E-33 | -11.9342 | 1316443 | Asthma |
| rs9344992   | 6 | 90178232 | T | C | 0.1039 | 0.0465  | 0.0078 | 2.71E-09 | 5.9483   | 1316443 | Asthma |
| rs12174872  | 6 | 90181699 | G | A | 0.1035 | 0.0461  | 0.0078 | 3.75E-09 | 5.8949   | 1316443 | Asthma |
| rs2501716   | 6 | 90182680 | C | G | 0.4448 | 0.0317  | 0.0049 | 1.04E-10 | 6.4609   | 1316443 | Asthma |
| rs113191185 | 6 | 90188930 | C | T | 0.0927 | 0.0476  | 0.0085 | 2.34E-08 | 5.5849   | 1299802 | Asthma |
| rs2501720   | 6 | 90189842 | A | G | 0.2720 | 0.0297  | 0.0054 | 4.72E-08 | 5.4614   | 1316443 | Asthma |
| rs9344994   | 6 | 90190824 | T | C | 0.1741 | 0.0344  | 0.0062 | 2.85E-08 | 5.5504   | 1376071 | Asthma |
| rs2501714   | 6 | 90192547 | C | T | 0.3336 | 0.0357  | 0.0051 | 2.95E-12 | 6.9800   | 1316443 | Asthma |
| rs62408211  | 6 | 90193089 | T | A | 0.3422 | -0.0615 | 0.0050 | 2.39E-34 | -12.2213 | 1376071 | Asthma |
| rs2064870   | 6 | 90194271 | C | T | 0.4121 | -0.0544 | 0.0048 | 2.96E-29 | -11.2285 | 1376071 | Asthma |
| rs766153    | 6 | 90195328 | G | A | 0.4115 | -0.0541 | 0.0050 | 8.96E-28 | -10.9228 | 1316443 | Asthma |
| rs4997561   | 6 | 90198338 | T | C | 0.4002 | -0.0567 | 0.0049 | 2.74E-31 | -11.6348 | 1376071 | Asthma |
| rs17712288  | 6 | 90199438 | A | G | 0.4121 | -0.0546 | 0.0048 | 1.72E-29 | -11.2758 | 1376071 | Asthma |
| rs10806424  | 6 | 90202582 | G | T | 0.4838 | 0.0346  | 0.0047 | 3.19E-13 | 7.2860   | 1376071 | Asthma |
| rs12196044  | 6 | 90202810 | A | G | 0.4838 | 0.0346  | 0.0047 | 3.02E-13 | 7.2935   | 1376071 | Asthma |
| rs12209546  | 6 | 90202875 | C | T | 0.4832 | 0.0345  | 0.0047 | 3.04E-13 | 7.2925   | 1376071 | Asthma |
| rs10944480  | 6 | 90203231 | T | C | 0.4002 | -0.0568 | 0.0049 | 2.06E-31 | -11.6593 | 1376071 | Asthma |
| rs4706358   | 6 | 90203525 | A | G | 0.4834 | 0.0346  | 0.0047 | 3.26E-13 | 7.2833   | 1376071 | Asthma |
| rs4706360   | 6 | 90203829 | T | C | 0.3999 | -0.0566 | 0.0049 | 2.96E-31 | -11.6284 | 1376071 | Asthma |
| rs4707605   | 6 | 90205882 | C | T | 0.4811 | 0.0348  | 0.0047 | 2.37E-13 | 7.3262   | 1376071 | Asthma |
| rs4706361   | 6 | 90206191 | T | C | 0.4831 | 0.0346  | 0.0047 | 3.23E-13 | 7.2845   | 1376071 | Asthma |
| rs3734660   | 6 | 90206626 | C | T | 0.4127 | -0.0546 | 0.0048 | 1.27E-29 | -11.3030 | 1376071 | Asthma |
| rs7744528   | 6 | 90207212 | G | C | 0.4035 | -0.0568 | 0.0051 | 9.89E-29 | -11.1212 | 1008051 | Asthma |
| rs10944481  | 6 | 90207595 | A | G | 0.4123 | -0.0546 | 0.0048 | 1.71E-29 | -11.2767 | 1376071 | Asthma |
| rs7381977   | 6 | 90208113 | A | G | 0.4831 | 0.0345  | 0.0047 | 3.54E-13 | 7.2720   | 1376071 | Asthma |
| rs58443172  | 6 | 90209077 | G | T | 0.1046 | 0.0471  | 0.0077 | 9.23E-10 | 6.1221   | 1349938 | Asthma |
| rs10455169  | 6 | 90209097 | T | A | 0.4831 | 0.0347  | 0.0047 | 2.77E-13 | 7.3050   | 1376071 | Asthma |



|            |   |          |   |   |        |         |        |          |          |         |        |
|------------|---|----------|---|---|--------|---------|--------|----------|----------|---------|--------|
| rs9344995  | 6 | 90209868 | T | C | 0.1046 | 0.0460  | 0.0076 | 1.43E-09 | 6.0520   | 1376071 | Asthma |
| rs370409   | 6 | 90212021 | C | A | 0.3374 | 0.0325  | 0.0050 | 5.97E-11 | 6.5444   | 1376071 | Asthma |
| rs1319433  | 6 | 90212269 | A | G | 0.4123 | -0.0545 | 0.0048 | 2.22E-29 | -11.2540 | 1376071 | Asthma |
| rs10806425 | 6 | 90216893 | A | C | 0.3810 | -0.0572 | 0.0049 | 2.40E-31 | -11.6462 | 1376071 | Asthma |
| rs56212747 | 6 | 90217743 | T | C | 0.1044 | 0.0462  | 0.0076 | 1.19E-09 | 6.0815   | 1376071 | Asthma |
| rs206916   | 6 | 90218009 | T | C | 0.3825 | 0.0321  | 0.0050 | 1.16E-10 | 6.4438   | 1316443 | Asthma |
| rs9344996  | 6 | 90219582 | C | T | 0.1054 | 0.0487  | 0.0076 | 1.37E-10 | 6.4195   | 1376071 | Asthma |
| rs2021978  | 6 | 90219815 | T | C | 0.4222 | -0.0609 | 0.0073 | 6.57E-17 | -8.3545  | 570646  | Asthma |
| rs72925996 | 6 | 90220794 | C | T | 0.3256 | -0.0633 | 0.0051 | 1.49E-35 | -12.4451 | 1376071 | Asthma |
| rs62408218 | 6 | 90222139 | T | C | 0.3360 | -0.0604 | 0.0050 | 4.73E-33 | -11.9762 | 1376071 | Asthma |
| rs12055566 | 6 | 90222974 | T | C | 0.1054 | 0.0492  | 0.0076 | 8.33E-11 | 6.4945   | 1376071 | Asthma |
| rs7761522  | 6 | 90224470 | A | T | 0.1054 | 0.0491  | 0.0076 | 9.47E-11 | 6.4752   | 1376071 | Asthma |
| rs60066732 | 6 | 90225664 | G | A | 0.3376 | -0.0606 | 0.0050 | 1.85E-33 | -12.0540 | 1376071 | Asthma |
| rs1018525  | 6 | 90226649 | C | T | 0.1054 | 0.0492  | 0.0076 | 8.40E-11 | 6.4933   | 1376071 | Asthma |
| rs206913   | 6 | 90227175 | C | A | 0.3979 | 0.0304  | 0.0048 | 2.80E-10 | 6.3096   | 1376071 | Asthma |
| rs11757155 | 6 | 90231521 | T | C | 0.3244 | -0.0630 | 0.0051 | 2.42E-35 | -12.4060 | 1376071 | Asthma |
| rs2021716  | 6 | 90231570 | T | C | 0.3195 | -0.0630 | 0.0051 | 7.15E-35 | -12.3192 | 1376071 | Asthma |
| rs17585295 | 6 | 90235112 | T | C | 0.3359 | -0.0607 | 0.0050 | 2.10E-33 | -12.0437 | 1376071 | Asthma |
| rs4707609  | 6 | 90236760 | C | T | 0.3374 | -0.0609 | 0.0050 | 1.04E-33 | -12.1015 | 1376071 | Asthma |
| rs77844882 | 6 | 90237090 | C | A | 0.3255 | -0.0637 | 0.0051 | 5.81E-36 | -12.5197 | 1376071 | Asthma |
| rs17513415 | 6 | 90238148 | T | C | 0.3256 | -0.0636 | 0.0051 | 6.57E-36 | -12.5102 | 1376071 | Asthma |
| rs2655387  | 6 | 90238279 | T | C | 0.3379 | 0.0326  | 0.0050 | 5.79E-11 | 6.5492   | 1376071 | Asthma |
| rs58453446 | 6 | 90238374 | C | G | 0.3241 | -0.0634 | 0.0051 | 1.48E-35 | -12.4453 | 1376071 | Asthma |
| rs62408222 | 6 | 90238757 | G | A | 0.3256 | -0.0637 | 0.0051 | 4.93E-36 | -12.5329 | 1376071 | Asthma |
| rs62408223 | 6 | 90239477 | G | A | 0.1535 | -0.0513 | 0.0066 | 9.69E-15 | -7.7433  | 1376071 | Asthma |
| rs72928017 | 6 | 90239844 | T | C | 0.1120 | 0.0538  | 0.0098 | 4.33E-08 | 5.4769   | 695918  | Asthma |
| rs2875584  | 6 | 90240909 | T | C | 0.3257 | -0.0636 | 0.0051 | 7.12E-36 | -12.5039 | 1376071 | Asthma |
| rs2256672  | 6 | 90241017 | T | C | 0.3959 | 0.0317  | 0.0049 | 8.88E-11 | 6.4849   | 1349938 | Asthma |
| rs17513531 | 6 | 90241520 | T | C | 0.3241 | -0.0634 | 0.0051 | 1.25E-35 | -12.4587 | 1376071 | Asthma |
| rs62408224 | 6 | 90246276 | G | A | 0.3276 | -0.0625 | 0.0051 | 7.63E-35 | -12.3137 | 1376071 | Asthma |
| rs62408225 | 6 | 90246690 | G | A | 0.3277 | -0.0625 | 0.0051 | 9.12E-35 | -12.2996 | 1376071 | Asthma |
| rs3757247  | 6 | 90247744 | T | C | 0.4455 | -0.0342 | 0.0048 | 7.00E-13 | -7.1795  | 1376071 | Asthma |
| rs41506844 | 6 | 90248084 | C | T | 0.1055 | 0.0493  | 0.0076 | 7.14E-11 | 6.5178   | 1376071 | Asthma |
| rs11755527 | 6 | 90248512 | G | C | 0.4337 | -0.0360 | 0.0048 | 5.11E-14 | -7.5291  | 1376071 | Asthma |
| rs905670   | 6 | 90248783 | A | G | 0.3276 | -0.0624 | 0.0051 | 9.42E-35 | -12.2969 | 1376071 | Asthma |
| rs72928023 | 6 | 90249622 | C | A | 0.1055 | 0.0491  | 0.0076 | 8.67E-11 | 6.4885   | 1376071 | Asthma |
| rs673780   | 6 | 90250610 | A | G | 0.4054 | 0.0312  | 0.0048 | 8.68E-11 | 6.4883   | 1376071 | Asthma |
| rs72928026 | 6 | 90252386 | A | G | 0.1053 | 0.0495  | 0.0076 | 6.68E-11 | 6.5276   | 1376071 | Asthma |
| rs62408227 | 6 | 90255452 | G | A | 0.3304 | -0.0629 | 0.0051 | 2.50E-35 | -12.4036 | 1376071 | Asthma |
| rs7752558  | 6 | 90256665 | A | G | 0.1047 | 0.0491  | 0.0076 | 1.15E-10 | 6.4455   | 1376071 | Asthma |
| rs11752685 | 6 | 90256696 | C | A | 0.3304 | -0.0628 | 0.0051 | 3.32E-35 | -12.3808 | 1376071 | Asthma |
| rs1604831  | 6 | 90257478 | A | G | 0.3304 | -0.0628 | 0.0051 | 3.36E-35 | -12.3798 | 1376071 | Asthma |
| rs5881869  | 6 | 90258306 | A | C | 0.3304 | -0.0629 | 0.0051 | 2.58E-35 | -12.4009 | 1376071 | Asthma |
| rs9351236  | 6 | 90258882 | T | C | 0.1053 | 0.0493  | 0.0076 | 7.94E-11 | 6.5018   | 1376071 | Asthma |
| rs619192   | 6 | 90259230 | C | T | 0.4056 | 0.0312  | 0.0048 | 8.61E-11 | 6.4896   | 1376071 | Asthma |
| rs1604830  | 6 | 90259502 | C | T | 0.3303 | -0.0629 | 0.0051 | 2.67E-35 | -12.3984 | 1376071 | Asthma |
| rs2089126  | 6 | 90260493 | G | A | 0.3304 | -0.0630 | 0.0051 | 2.21E-35 | -12.4132 | 1376071 | Asthma |
| rs55817481 | 6 | 90261380 | C | T | 0.1055 | 0.0490  | 0.0076 | 9.81E-11 | 6.4699   | 1376071 | Asthma |
| rs55719595 | 6 | 90263284 | C | T | 0.1054 | 0.0493  | 0.0076 | 7.84E-11 | 6.5037   | 1376071 | Asthma |
| rs1847472  | 6 | 90263440 | A | C | 0.3307 | -0.0627 | 0.0051 | 2.97E-35 | -12.3899 | 1376071 | Asthma |
| rs56106243 | 6 | 90266271 | T | C | 0.3304 | -0.0630 | 0.0051 | 1.81E-35 | -12.4296 | 1376071 | Asthma |
| rs6661713  | 6 | 90266280 | G | A | 0.4049 | 0.0314  | 0.0048 | 5.49E-11 | 6.5570   | 1376071 | Asthma |
| rs55885254 | 6 | 90266515 | C | T | 0.3303 | -0.0631 | 0.0051 | 1.46E-35 | -12.4467 | 1376071 | Asthma |
| rs62408233 | 6 | 90266890 | A | G | 0.3303 | -0.0631 | 0.0051 | 1.66E-35 | -12.4362 | 1376071 | Asthma |
| rs72928038 | 6 | 90267049 | A | G | 0.1675 | -0.0548 | 0.0066 | 5.68E-17 | -8.3716  | 1376071 | Asthma |
| rs9353715  | 6 | 90268051 | T | C | 0.1056 | 0.0493  | 0.0076 | 7.73E-11 | 6.5058   | 1376071 | Asthma |
| rs62408234 | 6 | 90268442 | T | C | 0.1580 | -0.0494 | 0.0066 | 6.29E-14 | -7.5019  | 1376071 | Asthma |
| rs62408235 | 6 | 90268664 | C | T | 0.3259 | -0.0630 | 0.0051 | 3.52E-35 | -12.3761 | 1376071 | Asthma |
| rs618371   | 6 | 90269110 | G | A | 0.3378 | 0.0314  | 0.0050 | 3.09E-10 | 6.2941   | 1376071 | Asthma |
| rs62408236 | 6 | 90270429 | T | C | 0.3304 | -0.0632 | 0.0051 | 1.39E-35 | -12.4505 | 1376071 | Asthma |
| rs62408237 | 6 | 90270626 | G | C | 0.3305 | -0.0633 | 0.0051 | 1.07E-35 | -12.4713 | 1376071 | Asthma |
| rs55771973 | 6 | 90271600 | G | T | 0.3304 | -0.0632 | 0.0051 | 1.24E-35 | -12.4599 | 1376071 | Asthma |
| rs9111     | 6 | 90271934 | C | T | 0.3353 | 0.0318  | 0.0050 | 1.87E-10 | 6.3722   | 1376071 | Asthma |
| rs45553631 | 6 | 90271938 | T | C | 0.3305 | -0.0632 | 0.0051 | 1.22E-35 | -12.4611 | 1376071 | Asthma |
| rs969577   | 6 | 90272668 | C | T | 0.3259 | -0.0631 | 0.0051 | 3.54E-35 | -12.3758 | 1376071 | Asthma |
| rs905671   | 6 | 90274131 | T | A | 0.3305 | -0.0633 | 0.0051 | 9.63E-36 | -12.4796 | 1376071 | Asthma |
| rs943689   | 6 | 90274316 | T | C | 0.3409 | -0.0623 | 0.0055 | 5.73E-30 | -11.3726 | 1219993 | Asthma |
| rs58521088 | 6 | 90275479 | T | A | 0.3305 | -0.0633 | 0.0051 | 9.35E-36 | -12.4821 | 1376071 | Asthma |
| rs78727630 | 6 | 90275577 | A | G | 0.1559 | -0.0494 | 0.0066 | 8.12E-14 | -7.4683  | 1376071 | Asthma |
| rs604912   | 6 | 90276601 | A | G | 0.4034 | 0.0317  | 0.0048 | 4.53E-11 | 6.5855   | 1376071 | Asthma |
| rs6454805  | 6 | 90276634 | G | A | 0.3305 | -0.0633 | 0.0051 | 9.82E-36 | -12.4782 | 1376071 | Asthma |
| rs6899623  | 6 | 90276840 | G | A | 0.3305 | -0.0633 | 0.0051 | 8.76E-36 | -12.4874 | 1376071 | Asthma |
| rs2325291  | 6 | 90276967 | A | G | 0.3303 | -0.0632 | 0.0051 | 1.15E-35 | -12.4657 | 1376071 | Asthma |
| rs2325292  | 6 | 90277030 | C | T | 0.3304 | -0.0633 | 0.0051 | 8.94E-36 | -12.4857 | 1376071 | Asthma |

|             |   |           |   |   |        |         |        |          |          |         |        |
|-------------|---|-----------|---|---|--------|---------|--------|----------|----------|---------|--------|
| rs2134814   | 6 | 90277793  | G | C | 0.3303 | -0.0632 | 0.0051 | 1.28E-35 | -12.4574 | 1376071 | Asthma |
| rs2174281   | 6 | 90278153  | C | T | 0.4451 | -0.0519 | 0.0048 | 1.89E-27 | -10.8548 | 1376071 | Asthma |
| rs7754251   | 6 | 90279406  | G | C | 0.4479 | 0.0336  | 0.0049 | 4.72E-12 | 6.9137   | 1316443 | Asthma |
| rs654537    | 6 | 90280331  | G | A | 0.4070 | 0.0330  | 0.0049 | 1.98E-11 | 6.7073   | 1316443 | Asthma |
| rs639575    | 6 | 90281412  | A | T | 0.4063 | 0.0336  | 0.0049 | 7.79E-12 | 6.8424   | 1316443 | Asthma |
| rs656214    | 6 | 90281769  | T | C | 0.3340 | 0.0340  | 0.0051 | 3.16E-11 | 6.6392   | 1316443 | Asthma |
| rs9294458   | 6 | 90283848  | G | A | 0.4058 | 0.0341  | 0.0049 | 4.04E-12 | 6.9358   | 1316443 | Asthma |
| rs953233    | 6 | 90286098  | T | C | 0.1086 | 0.0492  | 0.0075 | 4.53E-11 | 6.5856   | 1376071 | Asthma |
| rs614120    | 6 | 90286261  | C | G | 0.4066 | 0.0343  | 0.0049 | 3.27E-12 | 6.9655   | 1316443 | Asthma |
| rs4142967   | 6 | 90286630  | T | C | 0.4410 | -0.0523 | 0.0048 | 8.14E-28 | -10.9316 | 1376071 | Asthma |
| rs12212193  | 6 | 90287050  | G | A | 0.4415 | -0.0523 | 0.0048 | 6.02E-28 | -10.9588 | 1376071 | Asthma |
| rs644940    | 6 | 90288603  | A | G | 0.4067 | 0.0342  | 0.0049 | 3.67E-12 | 6.9491   | 1316443 | Asthma |
| rs10498965  | 6 | 90289883  | G | A | 0.1086 | 0.0495  | 0.0075 | 3.56E-11 | 6.6216   | 1376071 | Asthma |
| rs597325    | 6 | 90292775  | A | G | 0.4096 | 0.0335  | 0.0049 | 1.02E-11 | 6.8046   | 1316443 | Asthma |
| rs6908626   | 6 | 90296024  | T | G | 0.1639 | -0.0579 | 0.0068 | 9.66E-18 | -8.5779  | 1316443 | Asthma |
| rs1504215   | 6 | 90296508  | A | G | 0.3160 | -0.0661 | 0.0055 | 1.00E-32 | -11.9139 | 948423  | Asthma |
| rs6925032   | 6 | 90298308  | A | C | 0.3219 | -0.0638 | 0.0052 | 4.93E-34 | -12.1623 | 1316443 | Asthma |
| rs1321859   | 6 | 90301954  | T | C | 0.3223 | -0.0633 | 0.0053 | 1.71E-33 | -12.0603 | 1316443 | Asthma |
| rs56353819  | 6 | 90303148  | T | C | 0.3224 | -0.0633 | 0.0053 | 1.87E-33 | -12.0527 | 1316443 | Asthma |
| rs56297233  | 6 | 90304310  | T | A | 0.4298 | -0.0360 | 0.0049 | 3.42E-13 | -7.2766  | 1316443 | Asthma |
| rs978224    | 6 | 90305974  | T | G | 0.4254 | 0.0328  | 0.0050 | 3.68E-11 | 6.6167   | 1316443 | Asthma |
| rs9342224   | 6 | 90308364  | T | A | 0.1014 | 0.0499  | 0.0081 | 8.59E-10 | 6.1336   | 1299802 | Asthma |
| rs112088616 | 6 | 90308792  | G | A | 0.0936 | 0.0469  | 0.0086 | 4.60E-08 | 5.4660   | 1299802 | Asthma |
| rs1394220   | 6 | 90309585  | C | A | 0.4203 | -0.0547 | 0.0050 | 4.23E-28 | -10.9909 | 1316443 | Asthma |
| rs927297    | 6 | 90314575  | G | C | 0.3868 | -0.0292 | 0.0052 | 1.97E-08 | -5.6150  | 1299802 | Asthma |
| rs10806429  | 6 | 90316707  | A | G | 0.5081 | 0.0313  | 0.0048 | 6.64E-11 | 6.5286   | 1376071 | Asthma |
| rs10944482  | 6 | 90317158  | C | A | 0.5062 | 0.0309  | 0.0048 | 1.18E-10 | 6.4415   | 1376071 | Asthma |
| rs12213604  | 6 | 90317271  | A | G | 0.5060 | 0.0311  | 0.0049 | 2.38E-10 | 6.3345   | 1316443 | Asthma |
| rs4706362   | 6 | 90325422  | T | C | 0.4874 | -0.0280 | 0.0050 | 2.58E-08 | -5.5677  | 1299802 | Asthma |
| rs34599047  | 6 | 106181815 | C | T | 0.2035 | 0.0360  | 0.0058 | 6.82E-10 | 6.1702   | 1376071 | Asthma |
| rs34582442  | 6 | 106181821 | G | A | 0.2035 | 0.0360  | 0.0058 | 6.64E-10 | 6.1745   | 1376071 | Asthma |
| rs1322178   | 6 | 106183905 | T | C | 0.1990 | 0.0357  | 0.0058 | 8.46E-10 | 6.1360   | 1376071 | Asthma |
| rs9386514   | 6 | 106189027 | C | T | 0.2037 | 0.0312  | 0.0054 | 8.49E-09 | 5.7586   | 1376071 | Asthma |
| rs9398073   | 6 | 106202947 | C | G | 0.1987 | 0.0365  | 0.0059 | 5.44E-10 | 6.2058   | 1376071 | Asthma |
| rs9373839   | 6 | 106207742 | C | T | 0.2037 | 0.0366  | 0.0058 | 3.75E-10 | 6.2642   | 1376071 | Asthma |
| rs9372120   | 6 | 106219660 | G | T | 0.2095 | 0.0367  | 0.0058 | 1.98E-10 | 6.3631   | 1376071 | Asthma |
| rs2299864   | 6 | 106220119 | T | C | 0.2046 | 0.0368  | 0.0058 | 2.42E-10 | 6.3321   | 1376071 | Asthma |
| rs9386516   | 6 | 106226756 | G | A | 0.2046 | 0.0369  | 0.0058 | 2.14E-10 | 6.3506   | 1376071 | Asthma |
| rs62422878  | 6 | 106228595 | T | C | 0.1990 | 0.0361  | 0.0059 | 8.07E-10 | 6.1435   | 1376071 | Asthma |
| rs77791277  | 6 | 106234115 | A | G | 0.2041 | 0.0428  | 0.0067 | 1.28E-10 | 6.4299   | 878129  | Asthma |
| rs3827644   | 6 | 106237320 | C | G | 0.2048 | 0.0371  | 0.0058 | 1.67E-10 | 6.3889   | 1376071 | Asthma |
| rs3804329   | 6 | 106238552 | G | A | 0.2048 | 0.0372  | 0.0058 | 1.67E-10 | 6.3889   | 1376071 | Asthma |
| rs62422881  | 6 | 106254902 | C | T | 0.2046 | 0.0370  | 0.0058 | 1.91E-10 | 6.3683   | 1376071 | Asthma |
| rs9398075   | 6 | 106261086 | A | G | 0.1987 | 0.0366  | 0.0059 | 4.50E-10 | 6.2355   | 1376071 | Asthma |
| rs11752888  | 6 | 106271184 | A | G | 0.1987 | 0.0363  | 0.0059 | 5.74E-10 | 6.1975   | 1376071 | Asthma |
| rs10484577  | 6 | 106274291 | C | A | 0.2046 | 0.0369  | 0.0058 | 2.11E-10 | 6.3532   | 1376071 | Asthma |
| rs62422886  | 6 | 106274331 | G | A | 0.2046 | 0.0369  | 0.0058 | 2.22E-10 | 6.3452   | 1376071 | Asthma |
| rs3804333   | 6 | 106279340 | T | C | 0.2045 | 0.0370  | 0.0058 | 1.93E-10 | 6.3671   | 1376071 | Asthma |
| rs9373842   | 6 | 106284272 | G | T | 0.2046 | 0.0369  | 0.0058 | 2.20E-10 | 6.3467   | 1376071 | Asthma |
| rs9372121   | 6 | 106286214 | G | A | 0.2044 | 0.0371  | 0.0058 | 1.77E-10 | 6.3799   | 1376071 | Asthma |
| rs9373843   | 6 | 106306554 | G | A | 0.1930 | 0.0375  | 0.0059 | 2.52E-10 | 6.3257   | 1376071 | Asthma |
| rs9398078   | 6 | 106307720 | C | G | 0.1931 | 0.0375  | 0.0059 | 2.58E-10 | 6.3219   | 1376071 | Asthma |
| rs9373846   | 6 | 106330509 | G | A | 0.1942 | 0.0371  | 0.0059 | 3.59E-10 | 6.2712   | 1376071 | Asthma |
| rs62422916  | 6 | 106334544 | G | C | 0.2261 | 0.0322  | 0.0057 | 1.52E-08 | 5.6596   | 1316443 | Asthma |
| rs7763652   | 6 | 106339294 | T | C | 0.1955 | 0.0371  | 0.0059 | 3.34E-10 | 6.2823   | 1376071 | Asthma |
| rs802731    | 6 | 127958284 | G | C | 0.2703 | 0.0292  | 0.0053 | 3.97E-08 | 5.4920   | 1376071 | Asthma |
| rs9491892   | 6 | 127959213 | G | T | 0.1568 | -0.0361 | 0.0066 | 3.69E-08 | -5.5051  | 1376071 | Asthma |
| rs9482848   | 6 | 127959230 | T | A | 0.1568 | -0.0360 | 0.0066 | 4.29E-08 | -5.4785  | 1376071 | Asthma |
| rs813915    | 6 | 127966168 | T | G | 0.2418 | 0.0323  | 0.0055 | 4.35E-09 | 5.8702   | 1376071 | Asthma |
| rs802719    | 6 | 127967874 | C | T | 0.2926 | 0.0295  | 0.0052 | 1.35E-08 | 5.6792   | 1376071 | Asthma |
| rs3190930   | 6 | 127970054 | T | C | 0.2413 | 0.0332  | 0.0055 | 1.89E-09 | 6.0074   | 1376071 | Asthma |
| rs41285280  | 6 | 127970504 | T | C | 0.2407 | 0.0333  | 0.0055 | 1.69E-09 | 6.0255   | 1376071 | Asthma |
| rs3933376   | 6 | 127970926 | A | T | 0.1768 | 0.0359  | 0.0064 | 2.38E-08 | 5.5815   | 1316443 | Asthma |
| rs4559105   | 6 | 127971247 | T | A | 0.2919 | 0.0323  | 0.0055 | 3.95E-09 | 5.8863   | 1008051 | Asthma |
| rs55743914  | 6 | 127972417 | T | C | 0.2414 | 0.0340  | 0.0055 | 7.51E-10 | 6.1550   | 1376071 | Asthma |
| rs35469349  | 6 | 127973564 | A | T | 0.2759 | 0.0301  | 0.0053 | 1.37E-08 | 5.6779   | 1376071 | Asthma |
| rs72975936  | 6 | 128008716 | G | A | 0.1600 | -0.0377 | 0.0069 | 4.91E-08 | -5.4545  | 1299802 | Asthma |
| rs6931735   | 6 | 135303673 | G | A | 0.4485 | 0.0282  | 0.0049 | 9.39E-09 | 5.7414   | 1316443 | Asthma |
| rs6928977   | 6 | 135305210 | T | G | 0.4200 | 0.0309  | 0.0049 | 3.90E-10 | 6.2580   | 1316443 | Asthma |
| rs6935146   | 6 | 135306231 | T | C | 0.4431 | 0.0296  | 0.0049 | 1.63E-09 | 6.0316   | 1316443 | Asthma |
| rs6912933   | 6 | 135306396 | G | A | 0.4684 | 0.0276  | 0.0049 | 1.45E-08 | 5.6669   | 1316443 | Asthma |
| rs11154798  | 6 | 135311487 | A | C | 0.4358 | 0.0274  | 0.0049 | 2.34E-08 | 5.5846   | 1316443 | Asthma |
| rs4896143   | 6 | 135313962 | G | C | 0.4346 | 0.0285  | 0.0049 | 6.32E-09 | 5.8081   | 1316443 | Asthma |
| rs6918097   | 6 | 135314411 | A | G | 0.4449 | 0.0271  | 0.0049 | 3.06E-08 | 5.5377   | 1316443 | Asthma |

|            |   |           |   |   |        |        |        |          |        |         |        |
|------------|---|-----------|---|---|--------|--------|--------|----------|--------|---------|--------|
| rs6914831  | 6 | 135318506 | C | T | 0.4454 | 0.0283 | 0.0048 | 2.53E-09 | 5.9593 | 1376071 | Asthma |
| rs9389286  | 6 | 135319827 | G | C | 0.4707 | 0.0273 | 0.0047 | 8.55E-09 | 5.7573 | 1376071 | Asthma |
| rs9321501  | 6 | 135320279 | C | A | 0.4584 | 0.0265 | 0.0047 | 2.56E-08 | 5.5694 | 1376071 | Asthma |
| rs2064430  | 6 | 135321618 | T | C | 0.4562 | 0.0268 | 0.0047 | 1.54E-08 | 5.6572 | 1376071 | Asthma |
| rs2064431  | 6 | 135324065 | G | A | 0.4586 | 0.0264 | 0.0047 | 2.60E-08 | 5.5665 | 1376071 | Asthma |
| rs1012645  | 6 | 135324309 | C | T | 0.4586 | 0.0264 | 0.0047 | 2.76E-08 | 5.5561 | 1376071 | Asthma |
| rs9402703  | 6 | 135325097 | A | G | 0.4362 | 0.0276 | 0.0048 | 7.46E-09 | 5.7802 | 1376071 | Asthma |
| rs7772681  | 6 | 135327875 | C | T | 0.4709 | 0.0274 | 0.0047 | 7.34E-09 | 5.7830 | 1376071 | Asthma |
| rs2179780  | 6 | 135329128 | G | A | 0.4709 | 0.0273 | 0.0047 | 8.14E-09 | 5.7656 | 1376071 | Asthma |
| rs6570001  | 6 | 135330583 | G | C | 0.3853 | 0.0279 | 0.0050 | 2.11E-08 | 5.6027 | 1316443 | Asthma |
| rs2614279  | 6 | 135332219 | A | G | 0.4137 | 0.0300 | 0.0049 | 1.12E-09 | 6.0915 | 1316443 | Asthma |
| rs2746419  | 6 | 135332717 | A | C | 0.4618 | 0.0266 | 0.0049 | 4.57E-08 | 5.4672 | 1316443 | Asthma |
| rs2614275  | 6 | 135337376 | C | T | 0.4368 | 0.0288 | 0.0049 | 4.22E-09 | 5.8755 | 1316443 | Asthma |
| rs2746420  | 6 | 135338056 | C | G | 0.4370 | 0.0291 | 0.0050 | 4.80E-09 | 5.8541 | 1290310 | Asthma |
| rs2327613  | 6 | 135341234 | T | C | 0.4379 | 0.0275 | 0.0049 | 1.99E-08 | 5.6125 | 1316443 | Asthma |
| rs2614255  | 6 | 135342443 | C | T | 0.4708 | 0.0273 | 0.0049 | 1.79E-08 | 5.6314 | 1316443 | Asthma |
| rs2614257  | 6 | 135355266 | C | T | 0.4455 | 0.0296 | 0.0049 | 1.35E-09 | 6.0610 | 1316443 | Asthma |
| rs2614258  | 6 | 135356064 | A | G | 0.3849 | 0.0281 | 0.0050 | 1.71E-08 | 5.6389 | 1316443 | Asthma |
| rs2614259  | 6 | 135356114 | C | T | 0.4588 | 0.0266 | 0.0049 | 4.37E-08 | 5.4752 | 1316443 | Asthma |
| rs2614276  | 6 | 135360566 | T | C | 0.3924 | 0.0308 | 0.0050 | 6.00E-10 | 6.1906 | 1316443 | Asthma |
| rs2143793  | 6 | 135364861 | T | C | 0.4448 | 0.0311 | 0.0052 | 2.53E-09 | 5.9594 | 1224666 | Asthma |
| rs2746431  | 6 | 135366063 | C | T | 0.4215 | 0.0323 | 0.0049 | 4.75E-11 | 6.5784 | 1316443 | Asthma |
| rs2223803  | 6 | 135366924 | T | C | 0.4588 | 0.0282 | 0.0049 | 7.17E-09 | 5.7868 | 1316443 | Asthma |
| rs2614284  | 6 | 135368697 | G | A | 0.4591 | 0.0280 | 0.0049 | 8.83E-09 | 5.7518 | 1316443 | Asthma |
| rs2246943  | 6 | 135370378 | A | T | 0.4474 | 0.0298 | 0.0049 | 9.70E-10 | 6.1142 | 1316443 | Asthma |
| rs2246852  | 6 | 135370654 | G | A | 0.3926 | 0.0308 | 0.0050 | 5.36E-10 | 6.2081 | 1316443 | Asthma |
| rs2614285  | 6 | 135371480 | G | A | 0.4591 | 0.0281 | 0.0049 | 7.94E-09 | 5.7697 | 1316443 | Asthma |
| rs2614286  | 6 | 135371533 | C | A | 0.4591 | 0.0280 | 0.0049 | 8.55E-09 | 5.7574 | 1316443 | Asthma |
| rs2614287  | 6 | 135371709 | G | T | 0.4474 | 0.0297 | 0.0049 | 1.13E-09 | 6.0899 | 1316443 | Asthma |
| rs2746432  | 6 | 135375459 | C | T | 0.4458 | 0.0311 | 0.0049 | 1.95E-10 | 6.3655 | 1316443 | Asthma |
| rs2746433  | 6 | 135379567 | T | C | 0.4444 | 0.0310 | 0.0049 | 2.26E-10 | 6.3423 | 1316443 | Asthma |
| rs7773987  | 6 | 135386348 | C | T | 0.4460 | 0.0307 | 0.0049 | 3.13E-10 | 6.2920 | 1316443 | Asthma |
| rs3827780  | 6 | 135388622 | G | A | 0.4477 | 0.0312 | 0.0049 | 1.65E-10 | 6.3913 | 1316443 | Asthma |
| rs2614264  | 6 | 135389556 | G | A | 0.4595 | 0.0293 | 0.0049 | 1.75E-09 | 6.0196 | 1316443 | Asthma |
| rs2614265  | 6 | 135394237 | C | T | 0.4593 | 0.0298 | 0.0049 | 9.39E-10 | 6.1194 | 1316443 | Asthma |
| rs2614266  | 6 | 135395394 | A | T | 0.4475 | 0.0317 | 0.0049 | 7.86E-11 | 6.5033 | 1316443 | Asthma |
| rs2746438  | 6 | 135396930 | T | A | 0.4465 | 0.0315 | 0.0049 | 1.09E-10 | 6.4547 | 1316443 | Asthma |
| rs2179781  | 6 | 135398362 | C | A | 0.4595 | 0.0296 | 0.0049 | 1.22E-09 | 6.0776 | 1316443 | Asthma |
| rs2757649  | 6 | 135405475 | C | A | 0.4462 | 0.0311 | 0.0053 | 3.22E-09 | 5.9202 | 1186521 | Asthma |
| rs2757635  | 6 | 135413172 | T | C | 0.4366 | 0.0306 | 0.0048 | 1.37E-10 | 6.4191 | 1376071 | Asthma |
| rs11154801 | 6 | 135418217 | A | C | 0.3524 | 0.0324 | 0.0049 | 4.52E-11 | 6.5860 | 1376071 | Asthma |
| rs7759971  | 6 | 135425746 | T | C | 0.3524 | 0.0327 | 0.0049 | 3.21E-11 | 6.6366 | 1376071 | Asthma |
| rs2757642  | 6 | 135439655 | T | C | 0.4753 | 0.0271 | 0.0049 | 2.60E-08 | 5.5669 | 1316443 | Asthma |
| rs2757647  | 6 | 135446416 | C | T | 0.4368 | 0.0303 | 0.0048 | 2.08E-10 | 6.3557 | 1376071 | Asthma |
| rs5017497  | 6 | 135451910 | T | G | 0.4469 | 0.0317 | 0.0053 | 2.94E-09 | 5.9350 | 1221848 | Asthma |
| rs2614267  | 6 | 135455340 | T | A | 0.4368 | 0.0302 | 0.0048 | 2.50E-10 | 6.3270 | 1376071 | Asthma |
| rs2614263  | 6 | 135459579 | A | C | 0.4368 | 0.0301 | 0.0048 | 2.69E-10 | 6.3154 | 1376071 | Asthma |
| rs6908428  | 6 | 135472568 | G | A | 0.3531 | 0.0329 | 0.0049 | 2.36E-11 | 6.6821 | 1376071 | Asthma |
| rs12206850 | 6 | 135476670 | C | T | 0.3527 | 0.0327 | 0.0049 | 3.52E-11 | 6.6231 | 1376071 | Asthma |
| rs11154803 | 6 | 135477707 | T | C | 0.3534 | 0.0331 | 0.0049 | 1.96E-11 | 6.7088 | 1376071 | Asthma |
| rs9373131  | 6 | 135478786 | C | T | 0.4368 | 0.0300 | 0.0048 | 3.17E-10 | 6.2901 | 1376071 | Asthma |
| rs13197384 | 6 | 135497759 | A | C | 0.3436 | 0.0334 | 0.0051 | 5.31E-11 | 6.5620 | 1316443 | Asthma |
| rs7750586  | 6 | 135506535 | G | A | 0.3536 | 0.0322 | 0.0049 | 6.55E-11 | 6.5305 | 1376071 | Asthma |
| rs4896153  | 6 | 135512325 | T | A | 0.3529 | 0.0297 | 0.0054 | 3.47E-08 | 5.5161 | 1224666 | Asthma |
| rs58761508 | 6 | 135514763 | A | G | 0.3539 | 0.0323 | 0.0049 | 5.68E-11 | 6.5519 | 1376071 | Asthma |
| rs9385726  | 6 | 135515824 | T | C | 0.3538 | 0.0322 | 0.0049 | 6.11E-11 | 6.5410 | 1376071 | Asthma |
| rs9647635  | 6 | 135519918 | C | A | 0.3541 | 0.0323 | 0.0049 | 5.83E-11 | 6.5481 | 1376071 | Asthma |
| rs9399148  | 6 | 135523221 | T | A | 0.3485 | 0.0310 | 0.0049 | 3.56E-10 | 6.2723 | 1376071 | Asthma |
| rs12214269 | 6 | 135525380 | G | A | 0.4388 | 0.0293 | 0.0048 | 8.10E-10 | 6.1429 | 1376071 | Asthma |
| rs4895451  | 6 | 135526248 | A | G | 0.4333 | 0.0281 | 0.0048 | 3.90E-09 | 5.8883 | 1376071 | Asthma |
| rs9389295  | 6 | 135527085 | C | T | 0.4329 | 0.0280 | 0.0048 | 4.18E-09 | 5.8771 | 1376071 | Asthma |
| rs9402715  | 6 | 135538559 | G | A | 0.4393 | 0.0278 | 0.0048 | 5.32E-09 | 5.8371 | 1376071 | Asthma |
| rs12203875 | 6 | 135539276 | G | A | 0.4393 | 0.0279 | 0.0048 | 4.97E-09 | 5.8482 | 1376071 | Asthma |
| rs9389300  | 6 | 135544091 | G | A | 0.4394 | 0.0278 | 0.0048 | 5.29E-09 | 5.8379 | 1376071 | Asthma |
| rs9389301  | 6 | 135549844 | C | T | 0.4336 | 0.0280 | 0.0048 | 4.62E-09 | 5.8604 | 1376071 | Asthma |
| rs11154806 | 6 | 135552583 | G | T | 0.3492 | 0.0309 | 0.0049 | 4.00E-10 | 6.2541 | 1376071 | Asthma |
| rs9321508  | 6 | 135556839 | A | C | 0.4332 | 0.0280 | 0.0048 | 4.22E-09 | 5.8755 | 1376071 | Asthma |
| rs13208505 | 6 | 135572585 | T | G | 0.3482 | 0.0311 | 0.0049 | 3.09E-10 | 6.2943 | 1376071 | Asthma |
| rs761357   | 6 | 135581461 | T | A | 0.3684 | 0.0293 | 0.0049 | 2.36E-09 | 5.9711 | 1376071 | Asthma |
| rs7759677  | 6 | 135588658 | C | T | 0.3474 | 0.0316 | 0.0051 | 4.56E-10 | 6.2334 | 1316443 | Asthma |
| rs9376110  | 6 | 135595071 | A | C | 0.3908 | 0.0266 | 0.0049 | 4.26E-08 | 5.4798 | 1376071 | Asthma |
| rs9494290  | 6 | 135596407 | G | T | 0.3412 | 0.0288 | 0.0050 | 8.05E-09 | 5.7673 | 1376071 | Asthma |
| rs2327648  | 6 | 135597588 | A | G | 0.3909 | 0.0265 | 0.0048 | 4.58E-08 | 5.4669 | 1376071 | Asthma |
| rs9399150  | 6 | 135599752 | G | A | 0.3909 | 0.0265 | 0.0048 | 4.78E-08 | 5.4594 | 1376071 | Asthma |

|             |   |           |   |   |        |         |        |          |         |         |        |
|-------------|---|-----------|---|---|--------|---------|--------|----------|---------|---------|--------|
| rs6941396   | 6 | 135606388 | A | G | 0.3216 | 0.0311  | 0.0051 | 7.34E-10 | 6.1588  | 1376071 | Asthma |
| rs17064702  | 6 | 135607114 | A | G | 0.3396 | 0.0296  | 0.0050 | 2.77E-09 | 5.9449  | 1376071 | Asthma |
| rs9494296   | 6 | 135610145 | C | T | 0.4089 | 0.0275  | 0.0048 | 1.07E-08 | 5.7200  | 1376071 | Asthma |
| rs4432992   | 6 | 135612356 | A | G | 0.3397 | 0.0295  | 0.0050 | 3.22E-09 | 5.9198  | 1376071 | Asthma |
| rs6925161   | 6 | 135615496 | A | G | 0.3429 | 0.0282  | 0.0050 | 1.54E-08 | 5.6568  | 1376071 | Asthma |
| rs9373136   | 6 | 135617531 | A | G | 0.4092 | 0.0273  | 0.0048 | 1.38E-08 | 5.6754  | 1376071 | Asthma |
| rs719885    | 6 | 135618217 | G | A | 0.3427 | 0.0282  | 0.0050 | 1.49E-08 | 5.6630  | 1376071 | Asthma |
| rs965191    | 6 | 135618363 | G | A | 0.4094 | 0.0273  | 0.0048 | 1.36E-08 | 5.6791  | 1376071 | Asthma |
| rs3734213   | 6 | 135620170 | G | A | 0.3415 | 0.0292  | 0.0050 | 4.57E-09 | 5.8620  | 1376071 | Asthma |
| rs6941629   | 6 | 135621634 | C | T | 0.3415 | 0.0292  | 0.0050 | 4.74E-09 | 5.8559  | 1376071 | Asthma |
| rs9494306   | 6 | 135622823 | G | A | 0.4095 | 0.0274  | 0.0048 | 1.24E-08 | 5.6947  | 1376071 | Asthma |
| rs7761716   | 6 | 135623243 | G | A | 0.3784 | 0.0272  | 0.0050 | 4.84E-08 | 5.4572  | 1316443 | Asthma |
| rs9494308   | 6 | 135627666 | C | G | 0.3424 | 0.0295  | 0.0051 | 6.93E-09 | 5.7926  | 1316443 | Asthma |
| rs6570022   | 6 | 135627683 | C | G | 0.3436 | 0.0285  | 0.0051 | 2.04E-08 | 5.6085  | 1316443 | Asthma |
| rs12211833  | 6 | 135629066 | A | T | 0.3410 | 0.0298  | 0.0051 | 5.17E-09 | 5.8417  | 1316443 | Asthma |
| rs11154810  | 6 | 135629234 | G | A | 0.3436 | 0.0285  | 0.0051 | 2.13E-08 | 5.6009  | 1316443 | Asthma |
| rs78377363  | 6 | 137804744 | C | T | 0.0193 | -0.0957 | 0.0170 | 1.74E-08 | -5.6364 | 1376071 | Asthma |
| rs142373084 | 6 | 137807356 | C | A | 0.0291 | -0.0876 | 0.0143 | 8.33E-10 | -6.1387 | 1376071 | Asthma |
| rs58905141  | 6 | 137810986 | G | A | 0.0277 | -0.0886 | 0.0144 | 6.72E-10 | -6.1724 | 1376071 | Asthma |
| rs10499197  | 6 | 137811379 | G | T | 0.0279 | -0.0864 | 0.0143 | 1.53E-09 | -6.0416 | 1376071 | Asthma |
| rs569305282 | 6 | 137814484 | G | A | 0.0275 | -0.0986 | 0.0158 | 4.45E-10 | -6.2371 | 1224666 | Asthma |
| rs77990078  | 6 | 137815875 | C | T | 0.0277 | -0.0885 | 0.0144 | 7.38E-10 | -6.1577 | 1376071 | Asthma |
| rs78515370  | 6 | 137821596 | C | T | 0.0275 | -0.0860 | 0.0144 | 2.55E-09 | -5.9579 | 1376071 | Asthma |
| rs112020444 | 6 | 137826353 | T | C | 0.0289 | -0.0978 | 0.0170 | 8.26E-09 | -5.7631 | 1068588 | Asthma |
| rs80213143  | 6 | 137836591 | C | G | 0.0275 | -0.0881 | 0.0144 | 1.03E-09 | -6.1042 | 1376071 | Asthma |
| rs111425486 | 6 | 137839585 | G | A | 0.0275 | -0.0883 | 0.0144 | 9.47E-10 | -6.1183 | 1376071 | Asthma |
| rs113496608 | 6 | 137840529 | A | G | 0.0275 | -0.0882 | 0.0144 | 9.81E-10 | -6.1126 | 1376071 | Asthma |
| rs112975146 | 6 | 137844553 | C | T | 0.0275 | -0.0879 | 0.0144 | 1.07E-09 | -6.0989 | 1376071 | Asthma |
| rs112497003 | 6 | 137844887 | A | G | 0.0275 | -0.0884 | 0.0144 | 9.19E-10 | -6.1229 | 1376071 | Asthma |
| rs111883038 | 6 | 137846891 | A | C | 0.0275 | -0.0888 | 0.0144 | 7.33E-10 | -6.1589 | 1376071 | Asthma |
| rs80126770  | 6 | 137846946 | T | C | 0.0275 | -0.0878 | 0.0144 | 1.18E-09 | -6.0838 | 1376071 | Asthma |
| rs9494883   | 6 | 137850329 | G | A | 0.0277 | -0.0890 | 0.0144 | 6.19E-10 | -6.1857 | 1376071 | Asthma |
| rs80300819  | 6 | 137850597 | G | C | 0.0278 | -0.0878 | 0.0143 | 8.74E-10 | -6.1310 | 1376071 | Asthma |
| rs5029924   | 6 | 137866361 | T | C | 0.0296 | -0.0783 | 0.0138 | 1.42E-08 | -5.6717 | 1376071 | Asthma |
| rs5029937   | 6 | 137874014 | T | G | 0.0297 | -0.0772 | 0.0138 | 1.98E-08 | -5.6138 | 1376071 | Asthma |
| rs5029939   | 6 | 137874586 | G | C | 0.0297 | -0.0776 | 0.0138 | 1.66E-08 | -5.6447 | 1376071 | Asthma |
| rs2230926   | 6 | 137874929 | G | T | 0.0297 | -0.0775 | 0.0137 | 1.67E-08 | -5.6436 | 1376071 | Asthma |
| rs5029949   | 6 | 137876369 | G | A | 0.0287 | -0.0882 | 0.0140 | 3.08E-10 | -6.2948 | 1376071 | Asthma |
| rs9494892   | 6 | 137902352 | T | G | 0.0287 | -0.0884 | 0.0141 | 3.38E-10 | -6.2805 | 1376071 | Asthma |
| rs9494893   | 6 | 137902353 | T | G | 0.0286 | -0.0883 | 0.0141 | 3.63E-10 | -6.2691 | 1376071 | Asthma |
| rs7752903   | 6 | 137906227 | G | T | 0.0281 | -0.0871 | 0.0142 | 9.56E-10 | -6.1168 | 1376071 | Asthma |
| rs9494894   | 6 | 137907383 | C | T | 0.0288 | -0.0893 | 0.0140 | 2.02E-10 | -6.3602 | 1376071 | Asthma |
| rs75424836  | 6 | 137908046 | C | T | 0.0222 | -0.0906 | 0.0159 | 1.19E-08 | -5.7009 | 1376071 | Asthma |
| rs200820567 | 6 | 137908903 | A | T | 0.0272 | -0.0989 | 0.0164 | 1.50E-09 | -6.0445 | 1133307 | Asthma |
| rs7749323   | 6 | 137909252 | A | G | 0.0281 | -0.0872 | 0.0142 | 9.39E-10 | -6.1193 | 1376071 | Asthma |
| rs9494895   | 6 | 137913641 | T | C | 0.0287 | -0.0897 | 0.0141 | 1.93E-10 | -6.3670 | 1376071 | Asthma |
| rs77000060  | 6 | 137916852 | T | C | 0.0282 | -0.0859 | 0.0143 | 1.74E-09 | -6.0199 | 1376071 | Asthma |
| rs6932056   | 6 | 137921300 | C | T | 0.0283 | -0.0840 | 0.0143 | 3.76E-09 | -5.8944 | 1376071 | Asthma |
| rs61117627  | 6 | 137922563 | A | G | 0.0282 | -0.0839 | 0.0142 | 3.49E-09 | -5.9069 | 1376071 | Asthma |
| rs58721818  | 6 | 137922602 | T | C | 0.0284 | -0.0835 | 0.0142 | 3.80E-09 | -5.8926 | 1376071 | Asthma |
| rs17781283  | 6 | 137941636 | A | G | 0.0301 | -0.0805 | 0.0140 | 8.74E-09 | -5.7536 | 1376071 | Asthma |
| rs10951076  | 7 | 913152    | C | T | 0.4332 | 0.0280  | 0.0050 | 1.61E-08 | 5.6492  | 1316443 | Asthma |
| rs11768282  | 7 | 923791    | G | A | 0.4253 | 0.0280  | 0.0049 | 1.24E-08 | 5.6947  | 1376071 | Asthma |
| rs13231160  | 7 | 924758    | G | C | 0.2556 | 0.0361  | 0.0056 | 9.00E-11 | 6.4830  | 1376071 | Asthma |
| rs3757856   | 7 | 925955    | A | G | 0.2842 | 0.0349  | 0.0055 | 1.53E-10 | 6.4021  | 1316443 | Asthma |
| rs62430832  | 7 | 926777    | A | G | 0.3725 | 0.0330  | 0.0051 | 8.29E-11 | 6.4952  | 1316443 | Asthma |
| rs3824074   | 7 | 927290    | C | G | 0.3724 | 0.0330  | 0.0051 | 7.54E-11 | 6.5094  | 1316443 | Asthma |
| rs57403078  | 7 | 928833    | A | G | 0.2961 | 0.0298  | 0.0054 | 3.08E-08 | 5.5370  | 1316443 | Asthma |
| rs57983920  | 7 | 951339    | C | G | 0.2900 | 0.0303  | 0.0054 | 1.74E-08 | 5.6360  | 1316443 | Asthma |
| rs10256849  | 7 | 20333296  | A | G | 0.3182 | -0.0324 | 0.0052 | 3.25E-10 | -6.2861 | 1316443 | Asthma |
| rs11982847  | 7 | 20333792  | A | T | 0.3180 | -0.0336 | 0.0050 | 2.70E-11 | -6.6621 | 1376071 | Asthma |
| rs17364645  | 7 | 20334009  | A | G | 0.3175 | -0.0334 | 0.0050 | 3.38E-11 | -6.6292 | 1376071 | Asthma |
| rs17364659  | 7 | 20334190  | A | C | 0.3179 | -0.0336 | 0.0050 | 2.78E-11 | -6.6579 | 1376071 | Asthma |
| rs4460267   | 7 | 20334519  | G | A | 0.3205 | -0.0336 | 0.0050 | 2.42E-11 | -6.6784 | 1376071 | Asthma |
| rs4607493   | 7 | 20334520  | C | G | 0.3205 | -0.0336 | 0.0050 | 2.34E-11 | -6.6830 | 1376071 | Asthma |
| rs4419720   | 7 | 20334715  | A | T | 0.3207 | -0.0337 | 0.0050 | 2.02E-11 | -6.7045 | 1376071 | Asthma |
| rs4472418   | 7 | 20334909  | A | C | 0.3180 | -0.0334 | 0.0050 | 3.62E-11 | -6.6188 | 1376071 | Asthma |
| rs7784850   | 7 | 20335376  | T | A | 0.3204 | -0.0335 | 0.0050 | 2.94E-11 | -6.6494 | 1376071 | Asthma |
| rs7785273   | 7 | 20335593  | T | C | 0.3208 | -0.0335 | 0.0050 | 2.51E-11 | -6.6726 | 1376071 | Asthma |
| rs10486391  | 7 | 20336395  | G | A | 0.4293 | -0.0297 | 0.0048 | 4.63E-10 | -6.2311 | 1376071 | Asthma |
| rs73086541  | 7 | 20336480  | A | C | 0.4134 | -0.0294 | 0.0048 | 8.22E-10 | -6.1406 | 1376071 | Asthma |
| rs7805218   | 7 | 20339178  | A | G | 0.3129 | -0.0334 | 0.0055 | 1.66E-09 | -6.0283 | 1219993 | Asthma |
| rs17455540  | 7 | 20340246  | G | A | 0.3213 | -0.0336 | 0.0050 | 2.20E-11 | -6.6923 | 1376071 | Asthma |
| rs10224046  | 7 | 20346715  | G | T | 0.3208 | -0.0338 | 0.0050 | 1.79E-11 | -6.7225 | 1376071 | Asthma |

|            |   |          |   |   |        |         |        |          |         |         |        |
|------------|---|----------|---|---|--------|---------|--------|----------|---------|---------|--------|
| rs17364847 | 7 | 20350486 | T | C | 0.4128 | -0.0294 | 0.0048 | 7.66E-10 | -6.1518 | 1376071 | Asthma |
| rs17364861 | 7 | 20350508 | T | A | 0.4128 | -0.0295 | 0.0048 | 7.24E-10 | -6.1607 | 1376071 | Asthma |
| rs13233253 | 7 | 20353433 | T | C | 0.3189 | -0.0345 | 0.0050 | 7.19E-12 | -6.8538 | 1376071 | Asthma |
| rs13247636 | 7 | 20353519 | C | T | 0.3197 | -0.0346 | 0.0050 | 6.22E-12 | -6.8743 | 1376071 | Asthma |
| rs10238339 | 7 | 20354862 | C | T | 0.3208 | -0.0341 | 0.0050 | 1.22E-11 | -6.7778 | 1376071 | Asthma |
| rs67199281 | 7 | 20355298 | G | C | 0.3203 | -0.0341 | 0.0050 | 1.25E-11 | -6.7748 | 1376071 | Asthma |
| rs6968646  | 7 | 20355771 | C | G | 0.3206 | -0.0340 | 0.0050 | 1.41E-11 | -6.7574 | 1376071 | Asthma |
| rs10950804 | 7 | 20356652 | G | C | 0.2915 | -0.0360 | 0.0053 | 8.68E-12 | -6.8269 | 1316443 | Asthma |
| rs12154733 | 7 | 20356925 | C | T | 0.2453 | -0.0383 | 0.0056 | 8.35E-12 | -6.8323 | 1316443 | Asthma |
| rs10486392 | 7 | 20357408 | A | G | 0.2907 | -0.0368 | 0.0053 | 3.37E-12 | -6.9612 | 1316443 | Asthma |
| rs34496649 | 7 | 20357948 | A | G | 0.2704 | -0.0399 | 0.0065 | 1.03E-09 | -6.1045 | 1030443 | Asthma |
| rs10251386 | 7 | 20358284 | C | T | 0.2910 | -0.0370 | 0.0053 | 2.69E-12 | -6.9931 | 1316443 | Asthma |
| rs13232403 | 7 | 20358569 | A | G | 0.2910 | -0.0372 | 0.0053 | 1.86E-12 | -7.0449 | 1316443 | Asthma |
| rs10950805 | 7 | 20361504 | G | C | 0.3867 | -0.0316 | 0.0050 | 1.78E-10 | -6.3792 | 1316443 | Asthma |
| rs67574710 | 7 | 20362156 | T | C | 0.2926 | -0.0363 | 0.0053 | 5.79E-12 | -6.8848 | 1316443 | Asthma |
| rs68076830 | 7 | 20362411 | A | G | 0.2926 | -0.0363 | 0.0053 | 5.86E-12 | -6.8831 | 1316443 | Asthma |
| rs17455862 | 7 | 20362635 | C | T | 0.2928 | -0.0363 | 0.0053 | 6.03E-12 | -6.8790 | 1316443 | Asthma |
| rs17455883 | 7 | 20366848 | A | T | 0.3215 | -0.0340 | 0.0050 | 1.31E-11 | -6.7679 | 1376071 | Asthma |
| rs34556056 | 7 | 20366919 | C | A | 0.3216 | -0.0339 | 0.0050 | 1.34E-11 | -6.7645 | 1376071 | Asthma |
| rs34051023 | 7 | 20368372 | T | C | 0.3212 | -0.0341 | 0.0050 | 1.04E-11 | -6.8014 | 1376071 | Asthma |
| rs17365098 | 7 | 20368836 | T | C | 0.3215 | -0.0341 | 0.0050 | 9.92E-12 | -6.8077 | 1376071 | Asthma |
| rs11976345 | 7 | 20371200 | A | G | 0.3213 | -0.0341 | 0.0050 | 1.04E-11 | -6.8015 | 1376071 | Asthma |
| rs13233149 | 7 | 20371891 | C | T | 0.3216 | -0.0341 | 0.0050 | 1.14E-11 | -6.7881 | 1376071 | Asthma |
| rs3757727  | 7 | 20372274 | C | T | 0.4170 | -0.0297 | 0.0048 | 4.30E-10 | -6.2427 | 1376071 | Asthma |
| rs12700184 | 7 | 20373331 | G | A | 0.3215 | -0.0340 | 0.0050 | 1.22E-11 | -6.7779 | 1376071 | Asthma |
| rs12700185 | 7 | 20374315 | G | C | 0.3211 | -0.0341 | 0.0050 | 1.19E-11 | -6.7819 | 1376071 | Asthma |
| rs12700186 | 7 | 20377088 | C | T | 0.4304 | -0.0288 | 0.0049 | 3.10E-09 | -5.9260 | 1316443 | Asthma |
| rs2040732  | 7 | 20378511 | T | C | 0.4304 | -0.0287 | 0.0049 | 3.81E-09 | -5.8922 | 1316443 | Asthma |
| rs12700188 | 7 | 20378567 | G | A | 0.4304 | -0.0285 | 0.0049 | 4.61E-09 | -5.8606 | 1316443 | Asthma |
| rs11973964 | 7 | 20381061 | T | A | 0.3210 | -0.0324 | 0.0050 | 1.25E-10 | -6.4334 | 1376071 | Asthma |
| rs71526323 | 7 | 20381307 | T | C | 0.3212 | -0.0319 | 0.0056 | 1.69E-08 | -5.6411 | 1133307 | Asthma |
| rs17365306 | 7 | 20382431 | T | G | 0.2706 | -0.0327 | 0.0054 | 1.46E-09 | -6.0487 | 1316443 | Asthma |
| rs3807947  | 7 | 20385266 | G | T | 0.4083 | -0.0271 | 0.0049 | 3.06E-08 | -5.5381 | 1316443 | Asthma |
| rs4473914  | 7 | 20386640 | C | T | 0.4087 | -0.0268 | 0.0049 | 4.22E-08 | -5.4814 | 1316443 | Asthma |
| rs10486393 | 7 | 20386674 | C | T | 0.4085 | -0.0268 | 0.0049 | 4.51E-08 | -5.4697 | 1316443 | Asthma |
| rs12700193 | 7 | 20387084 | A | T | 0.3243 | -0.0323 | 0.0050 | 1.15E-10 | -6.4457 | 1376071 | Asthma |
| rs10486394 | 7 | 20389530 | C | T | 0.3252 | -0.0321 | 0.0050 | 1.56E-10 | -6.3989 | 1376071 | Asthma |
| rs17456204 | 7 | 20389742 | C | T | 0.3252 | -0.0315 | 0.0050 | 3.19E-10 | -6.2891 | 1376071 | Asthma |
| rs73088465 | 7 | 20390522 | C | A | 0.3248 | -0.0319 | 0.0050 | 2.01E-10 | -6.3607 | 1376071 | Asthma |
| rs13242959 | 7 | 20392640 | C | T | 0.3239 | -0.0321 | 0.0050 | 1.55E-10 | -6.4007 | 1376071 | Asthma |
| rs7811612  | 7 | 20392951 | T | C | 0.3251 | -0.0315 | 0.0050 | 3.47E-10 | -6.2762 | 1376071 | Asthma |
| rs6944997  | 7 | 20398747 | C | A | 0.3198 | -0.0307 | 0.0050 | 1.03E-09 | -6.1042 | 1376071 | Asthma |
| rs10239311 | 7 | 20399711 | T | C | 0.3108 | -0.0309 | 0.0051 | 1.21E-09 | -6.0787 | 1376071 | Asthma |
| rs34436326 | 7 | 20399929 | A | G | 0.3192 | -0.0309 | 0.0050 | 8.46E-10 | -6.1361 | 1376071 | Asthma |
| rs13242474 | 7 | 20401442 | G | A | 0.2726 | -0.0314 | 0.0054 | 6.05E-09 | -5.8154 | 1316443 | Asthma |
| rs6954502  | 7 | 20403889 | A | T | 0.3127 | -0.0319 | 0.0054 | 4.42E-09 | -5.8678 | 1246149 | Asthma |
| rs6972297  | 7 | 20404098 | G | A | 0.3177 | -0.0302 | 0.0050 | 2.09E-09 | -5.9906 | 1376071 | Asthma |
| rs6955431  | 7 | 20404437 | C | T | 0.3139 | -0.0307 | 0.0051 | 1.36E-09 | -6.0597 | 1376071 | Asthma |
| rs6973059  | 7 | 20404458 | T | C | 0.3035 | -0.0313 | 0.0051 | 8.29E-10 | -6.1393 | 1376071 | Asthma |
| rs4721912  | 7 | 20461581 | T | C | 0.4230 | -0.0308 | 0.0049 | 3.31E-10 | -6.2837 | 1316443 | Asthma |
| rs57834782 | 7 | 20463205 | A | T | 0.2474 | -0.0385 | 0.0060 | 9.97E-11 | -6.4675 | 1219993 | Asthma |
| rs55940702 | 7 | 20463383 | C | T | 0.2476 | -0.0386 | 0.0066 | 5.64E-09 | -5.8272 | 1068588 | Asthma |
| rs61210140 | 7 | 20463384 | A | G | 0.2476 | -0.0385 | 0.0060 | 1.03E-10 | -6.4631 | 1219993 | Asthma |
| rs56231981 | 7 | 20463462 | A | T | 0.2489 | -0.0330 | 0.0054 | 1.21E-09 | -6.0793 | 1376071 | Asthma |
| rs12536825 | 7 | 20464240 | A | G | 0.2491 | -0.0331 | 0.0054 | 1.10E-09 | -6.0945 | 1376071 | Asthma |
| rs1859044  | 7 | 20464342 | C | T | 0.2584 | -0.0335 | 0.0053 | 3.76E-10 | -6.2639 | 1376071 | Asthma |
| rs1859045  | 7 | 20464414 | A | G | 0.2584 | -0.0333 | 0.0053 | 4.86E-10 | -6.2236 | 1376071 | Asthma |
| rs1859046  | 7 | 20464441 | T | A | 0.2493 | -0.0329 | 0.0054 | 1.34E-09 | -6.0631 | 1376071 | Asthma |
| rs1859047  | 7 | 20464493 | C | T | 0.2584 | -0.0332 | 0.0053 | 5.03E-10 | -6.2181 | 1376071 | Asthma |
| rs10950808 | 7 | 20466200 | A | T | 0.2585 | -0.0335 | 0.0053 | 3.69E-10 | -6.2667 | 1376071 | Asthma |
| rs10950809 | 7 | 20466299 | A | G | 0.2585 | -0.0335 | 0.0053 | 3.75E-10 | -6.2643 | 1376071 | Asthma |
| rs10950810 | 7 | 20466472 | T | C | 0.2586 | -0.0334 | 0.0053 | 3.91E-10 | -6.2576 | 1376071 | Asthma |
| rs11974870 | 7 | 20466622 | C | T | 0.2586 | -0.0334 | 0.0053 | 3.94E-10 | -6.2565 | 1376071 | Asthma |
| rs11971231 | 7 | 20466724 | T | C | 0.2586 | -0.0335 | 0.0053 | 3.77E-10 | -6.2630 | 1376071 | Asthma |
| rs12700203 | 7 | 20466768 | G | A | 0.2584 | -0.0335 | 0.0053 | 3.79E-10 | -6.2627 | 1376071 | Asthma |
| rs12700204 | 7 | 20466891 | C | T | 0.2586 | -0.0334 | 0.0053 | 4.07E-10 | -6.2515 | 1376071 | Asthma |
| rs12700205 | 7 | 20466977 | C | T | 0.2586 | -0.0334 | 0.0053 | 3.92E-10 | -6.2570 | 1376071 | Asthma |
| rs12700206 | 7 | 20466998 | C | T | 0.2586 | -0.0334 | 0.0053 | 4.05E-10 | -6.2519 | 1376071 | Asthma |
| rs35120688 | 7 | 20467103 | C | T | 0.2602 | -0.0328 | 0.0058 | 1.72E-08 | -5.6379 | 1224666 | Asthma |
| rs77141869 | 7 | 20467105 | A | G | 0.2603 | -0.0328 | 0.0058 | 1.69E-08 | -5.6414 | 1224666 | Asthma |
| rs78620508 | 7 | 20467106 | A | C | 0.2586 | -0.0336 | 0.0053 | 3.23E-10 | -6.2874 | 1376071 | Asthma |
| rs17142880 | 7 | 20467291 | A | G | 0.2586 | -0.0334 | 0.0053 | 4.09E-10 | -6.2506 | 1376071 | Asthma |
| rs66507521 | 7 | 20467332 | T | C | 0.2586 | -0.0334 | 0.0053 | 4.18E-10 | -6.2472 | 1376071 | Asthma |
| rs11972176 | 7 | 20467374 | A | G | 0.2586 | -0.0334 | 0.0053 | 4.03E-10 | -6.2529 | 1376071 | Asthma |



|            |   |          |   |   |        |         |        |          |         |         |        |
|------------|---|----------|---|---|--------|---------|--------|----------|---------|---------|--------|
| rs11972203 | 7 | 20467463 | A | G | 0.2586 | -0.0334 | 0.0053 | 4.07E-10 | -6.2512 | 1376071 | Asthma |
| rs17142886 | 7 | 20467575 | G | A | 0.2586 | -0.0334 | 0.0053 | 4.05E-10 | -6.2522 | 1376071 | Asthma |
| rs17142890 | 7 | 20467594 | C | A | 0.2586 | -0.0334 | 0.0053 | 4.08E-10 | -6.2512 | 1376071 | Asthma |
| rs73685632 | 7 | 20467672 | G | A | 0.2586 | -0.0334 | 0.0053 | 3.94E-10 | -6.2565 | 1376071 | Asthma |
| rs73090465 | 7 | 20467673 | G | T | 0.2586 | -0.0334 | 0.0053 | 3.93E-10 | -6.2568 | 1376071 | Asthma |
| rs17142894 | 7 | 20467708 | A | G | 0.2586 | -0.0334 | 0.0053 | 3.97E-10 | -6.2552 | 1376071 | Asthma |
| rs17142898 | 7 | 20467757 | T | C | 0.2585 | -0.0334 | 0.0053 | 3.91E-10 | -6.2576 | 1376071 | Asthma |
| rs67316120 | 7 | 20467802 | A | G | 0.2586 | -0.0334 | 0.0053 | 4.08E-10 | -6.2511 | 1376071 | Asthma |
| rs66707141 | 7 | 20467805 | G | A | 0.2585 | -0.0336 | 0.0053 | 3.12E-10 | -6.2926 | 1376071 | Asthma |
| rs34391805 | 7 | 20467989 | C | T | 0.2585 | -0.0333 | 0.0053 | 4.69E-10 | -6.2290 | 1376071 | Asthma |
| rs2390338  | 7 | 20468047 | T | A | 0.2586 | -0.0334 | 0.0053 | 4.27E-10 | -6.2437 | 1376071 | Asthma |
| rs4385375  | 7 | 20468048 | C | G | 0.2586 | -0.0333 | 0.0053 | 4.59E-10 | -6.2323 | 1376071 | Asthma |
| rs2390339  | 7 | 20468221 | T | C | 0.2586 | -0.0334 | 0.0053 | 4.11E-10 | -6.2500 | 1376071 | Asthma |
| rs2390340  | 7 | 20468243 | C | T | 0.2586 | -0.0334 | 0.0053 | 4.21E-10 | -6.2462 | 1376071 | Asthma |
| rs4385376  | 7 | 20468283 | A | G | 0.2586 | -0.0333 | 0.0053 | 4.62E-10 | -6.2314 | 1376071 | Asthma |
| rs7792720  | 7 | 20468480 | C | T | 0.2586 | -0.0333 | 0.0053 | 4.47E-10 | -6.2367 | 1376071 | Asthma |
| rs7792726  | 7 | 20468504 | C | T | 0.2586 | -0.0333 | 0.0053 | 4.78E-10 | -6.2261 | 1376071 | Asthma |
| rs4996785  | 7 | 20468532 | A | T | 0.2604 | -0.0325 | 0.0058 | 2.26E-08 | -5.5913 | 1224666 | Asthma |
| rs4996786  | 7 | 20468545 | A | C | 0.2603 | -0.0326 | 0.0058 | 2.10E-08 | -5.6035 | 1224666 | Asthma |
| rs4996787  | 7 | 20468548 | A | G | 0.2603 | -0.0326 | 0.0058 | 2.15E-08 | -5.5994 | 1224666 | Asthma |
| rs17142906 | 7 | 20468573 | A | T | 0.2554 | -0.0335 | 0.0054 | 4.78E-10 | -6.2261 | 1376071 | Asthma |
| rs4996788  | 7 | 20468585 | A | G | 0.2561 | -0.0328 | 0.0054 | 1.06E-09 | -6.1008 | 1376071 | Asthma |
| rs4996789  | 7 | 20468729 | C | T | 0.2586 | -0.0334 | 0.0053 | 4.21E-10 | -6.2461 | 1376071 | Asthma |
| rs7796906  | 7 | 20468949 | A | T | 0.2586 | -0.0334 | 0.0053 | 4.25E-10 | -6.2444 | 1376071 | Asthma |
| rs17142913 | 7 | 20468974 | T | C | 0.2586 | -0.0334 | 0.0053 | 4.30E-10 | -6.2426 | 1376071 | Asthma |
| rs17142918 | 7 | 20469093 | A | C | 0.2586 | -0.0333 | 0.0053 | 4.34E-10 | -6.2411 | 1376071 | Asthma |
| rs2893001  | 7 | 20469417 | G | A | 0.2586 | -0.0334 | 0.0053 | 4.20E-10 | -6.2465 | 1376071 | Asthma |
| rs10257080 | 7 | 20470049 | C | T | 0.2586 | -0.0333 | 0.0053 | 4.46E-10 | -6.2371 | 1376071 | Asthma |
| rs10241774 | 7 | 20470090 | C | G | 0.2586 | -0.0334 | 0.0053 | 4.29E-10 | -6.2429 | 1376071 | Asthma |
| rs11978564 | 7 | 20470230 | C | T | 0.2581 | -0.0393 | 0.0059 | 2.71E-11 | -6.6617 | 1219993 | Asthma |
| rs10241931 | 7 | 20470392 | T | C | 0.2587 | -0.0334 | 0.0053 | 4.19E-10 | -6.2467 | 1376071 | Asthma |
| rs10261116 | 7 | 20470954 | C | T | 0.2585 | -0.0335 | 0.0053 | 3.65E-10 | -6.2684 | 1376071 | Asthma |
| rs10261508 | 7 | 20471225 | C | T | 0.2585 | -0.0333 | 0.0053 | 4.60E-10 | -6.2322 | 1376071 | Asthma |
| rs10261997 | 7 | 20471658 | C | T | 0.2586 | -0.0334 | 0.0053 | 4.32E-10 | -6.2422 | 1376071 | Asthma |
| rs10246511 | 7 | 20471679 | G | C | 0.2586 | -0.0334 | 0.0053 | 4.25E-10 | -6.2444 | 1376071 | Asthma |
| rs10249562 | 7 | 20471748 | G | C | 0.2585 | -0.0334 | 0.0053 | 4.10E-10 | -6.2502 | 1376071 | Asthma |
| rs10250152 | 7 | 20472304 | T | C | 0.2494 | -0.0330 | 0.0054 | 1.09E-09 | -6.0960 | 1376071 | Asthma |
| rs12535759 | 7 | 20472741 | C | G | 0.4194 | -0.0305 | 0.0049 | 4.37E-10 | -6.2401 | 1316443 | Asthma |
| rs7798189  | 7 | 20472972 | G | C | 0.4195 | -0.0307 | 0.0049 | 3.26E-10 | -6.2862 | 1316443 | Asthma |
| rs56792040 | 7 | 20472976 | C | T | 0.4195 | -0.0307 | 0.0049 | 3.30E-10 | -6.2838 | 1316443 | Asthma |
| rs2390341  | 7 | 20473746 | A | G | 0.4194 | -0.0304 | 0.0049 | 4.86E-10 | -6.2237 | 1316443 | Asthma |
| rs2390342  | 7 | 20474555 | T | G | 0.4275 | -0.0311 | 0.0052 | 1.61E-09 | -6.0327 | 948423  | Asthma |
| rs13236052 | 7 | 20474831 | A | G | 0.4194 | -0.0306 | 0.0049 | 3.65E-10 | -6.2680 | 1316443 | Asthma |
| rs13223048 | 7 | 20474875 | C | T | 0.4194 | -0.0306 | 0.0049 | 3.54E-10 | -6.2730 | 1316443 | Asthma |
| rs10240969 | 7 | 20475354 | A | G | 0.2656 | -0.0334 | 0.0053 | 3.38E-10 | -6.2803 | 1376071 | Asthma |
| rs6461502  | 7 | 20476132 | T | G | 0.4175 | -0.0290 | 0.0048 | 1.25E-09 | -6.0734 | 1376071 | Asthma |
| rs10278110 | 7 | 20477093 | T | A | 0.2584 | -0.0329 | 0.0053 | 7.29E-10 | -6.1598 | 1376071 | Asthma |
| rs2893002  | 7 | 20477697 | A | G | 0.4192 | -0.0294 | 0.0048 | 7.71E-10 | -6.1508 | 1376071 | Asthma |
| rs2893003  | 7 | 20477729 | T | G | 0.4192 | -0.0293 | 0.0048 | 8.69E-10 | -6.1316 | 1376071 | Asthma |
| rs10268102 | 7 | 20477827 | A | T | 0.2583 | -0.0328 | 0.0053 | 8.72E-10 | -6.1313 | 1376071 | Asthma |
| rs7801672  | 7 | 20478836 | A | C | 0.4196 | -0.0297 | 0.0048 | 4.92E-10 | -6.2217 | 1376071 | Asthma |
| rs10261154 | 7 | 20480000 | T | G | 0.4437 | -0.0306 | 0.0050 | 9.27E-10 | -6.1216 | 1008051 | Asthma |
| rs7811804  | 7 | 20480729 | A | G | 0.4436 | -0.0306 | 0.0050 | 9.39E-10 | -6.1193 | 1008051 | Asthma |
| rs4141371  | 7 | 20481993 | T | C | 0.4226 | -0.0322 | 0.0048 | 1.46E-11 | -6.7522 | 1376071 | Asthma |
| rs6947194  | 7 | 20482024 | G | A | 0.4226 | -0.0322 | 0.0048 | 1.36E-11 | -6.7627 | 1376071 | Asthma |
| rs2214243  | 7 | 20482653 | C | T | 0.4176 | -0.0356 | 0.0052 | 1.01E-11 | -6.8056 | 1219993 | Asthma |
| rs17142961 | 7 | 20483143 | G | A | 0.4226 | -0.0321 | 0.0048 | 1.66E-11 | -6.7336 | 1376071 | Asthma |
| rs75456617 | 7 | 20483163 | T | C | 0.1348 | -0.0396 | 0.0069 | 1.02E-08 | -5.7274 | 1376071 | Asthma |
| rs11982540 | 7 | 20483677 | G | A | 0.4717 | 0.0376  | 0.0048 | 7.51E-15 | 7.7758  | 1316443 | Asthma |
| rs10278826 | 7 | 20484652 | A | G | 0.4225 | -0.0324 | 0.0048 | 9.87E-12 | -6.8082 | 1376071 | Asthma |
| rs10263710 | 7 | 20485870 | T | C | 0.2491 | -0.0324 | 0.0054 | 2.30E-09 | -5.9753 | 1376071 | Asthma |
| rs10272302 | 7 | 20487955 | T | C | 0.4226 | -0.0321 | 0.0048 | 1.50E-11 | -6.7484 | 1376071 | Asthma |
| rs28490120 | 7 | 20490086 | C | T | 0.4147 | -0.0330 | 0.0049 | 1.30E-11 | -6.7687 | 1316443 | Asthma |
| rs10226057 | 7 | 20491032 | T | C | 0.2663 | -0.0330 | 0.0053 | 4.79E-10 | -6.2257 | 1376071 | Asthma |
| rs10226083 | 7 | 20491095 | T | C | 0.2662 | -0.0333 | 0.0053 | 3.74E-10 | -6.2647 | 1376071 | Asthma |
| rs10226404 | 7 | 20491144 | T | G | 0.2664 | -0.0331 | 0.0053 | 4.36E-10 | -6.2404 | 1376071 | Asthma |
| rs12531784 | 7 | 20492598 | T | C | 0.2663 | -0.0332 | 0.0053 | 3.88E-10 | -6.2589 | 1376071 | Asthma |
| rs2023789  | 7 | 20493481 | C | G | 0.4136 | -0.0337 | 0.0049 | 5.24E-12 | -6.8988 | 1316443 | Asthma |
| rs2023790  | 7 | 20493548 | C | T | 0.2732 | -0.0331 | 0.0053 | 2.99E-10 | -6.2993 | 1376071 | Asthma |
| rs2023791  | 7 | 20494381 | A | G | 0.4136 | -0.0329 | 0.0048 | 5.86E-12 | -6.8830 | 1376071 | Asthma |
| rs2023792  | 7 | 20494766 | T | C | 0.2637 | -0.0332 | 0.0053 | 3.98E-10 | -6.2550 | 1376071 | Asthma |
| rs10236242 | 7 | 20495086 | A | T | 0.2728 | -0.0336 | 0.0053 | 1.59E-10 | -6.3961 | 1376071 | Asthma |
| rs10250381 | 7 | 20495412 | G | A | 0.2727 | -0.0335 | 0.0053 | 1.76E-10 | -6.3808 | 1376071 | Asthma |
| rs10280157 | 7 | 20495546 | T | C | 0.2728 | -0.0337 | 0.0053 | 1.54E-10 | -6.4011 | 1376071 | Asthma |

|             |   |          |   |   |        |         |        |          |         |         |        |
|-------------|---|----------|---|---|--------|---------|--------|----------|---------|---------|--------|
| rs12535843  | 7 | 20496241 | C | A | 0.2733 | -0.0338 | 0.0052 | 1.22E-10 | -6.4362 | 1376071 | Asthma |
| rs9986779   | 7 | 20496719 | G | T | 0.2649 | -0.0327 | 0.0058 | 1.67E-08 | -5.6427 | 1224666 | Asthma |
| rs10245237  | 7 | 20497600 | C | T | 0.2734 | -0.0337 | 0.0053 | 1.46E-10 | -6.4094 | 1376071 | Asthma |
| rs10232906  | 7 | 20497950 | T | C | 0.4278 | -0.0316 | 0.0048 | 3.18E-11 | -6.6382 | 1376071 | Asthma |
| rs10262289  | 7 | 20498000 | C | A | 0.2734 | -0.0340 | 0.0053 | 9.93E-11 | -6.4680 | 1376071 | Asthma |
| rs7797370   | 7 | 20499418 | C | T | 0.4279 | -0.0318 | 0.0048 | 2.36E-11 | -6.6817 | 1376071 | Asthma |
| rs7801605   | 7 | 20499804 | A | T | 0.4275 | -0.0317 | 0.0048 | 2.85E-11 | -6.6541 | 1376071 | Asthma |
| rs35101150  | 7 | 20499840 | C | A | 0.2735 | -0.0338 | 0.0053 | 1.19E-10 | -6.4410 | 1376071 | Asthma |
| rs10271322  | 7 | 20500501 | C | A | 0.4276 | -0.0318 | 0.0048 | 2.41E-11 | -6.6786 | 1376071 | Asthma |
| rs10265538  | 7 | 20502242 | C | T | 0.2568 | -0.0333 | 0.0054 | 5.02E-10 | -6.2185 | 1376071 | Asthma |
| rs12112720  | 7 | 20502359 | T | G | 0.2646 | -0.0334 | 0.0053 | 3.18E-10 | -6.2898 | 1376071 | Asthma |
| rs7793679   | 7 | 20502415 | T | C | 0.4277 | -0.0330 | 0.0049 | 1.21E-11 | -6.7791 | 1316443 | Asthma |
| rs7793850   | 7 | 20502593 | G | A | 0.4197 | -0.0381 | 0.0059 | 1.56E-10 | -6.3995 | 1042455 | Asthma |
| rs7798883   | 7 | 20503545 | T | A | 0.4278 | -0.0328 | 0.0049 | 1.56E-11 | -6.7422 | 1316443 | Asthma |
| rs28506099  | 7 | 20503872 | A | C | 0.4278 | -0.0327 | 0.0049 | 1.72E-11 | -6.7280 | 1316443 | Asthma |
| rs28712631  | 7 | 20504066 | G | C | 0.4278 | -0.0329 | 0.0049 | 1.42E-11 | -6.7557 | 1316443 | Asthma |
| rs12670982  | 7 | 20504215 | A | G | 0.2646 | -0.0334 | 0.0053 | 3.19E-10 | -6.2894 | 1376071 | Asthma |
| rs12531500  | 7 | 20504586 | G | A | 0.4231 | -0.0380 | 0.0054 | 1.33E-12 | -7.0910 | 1160365 | Asthma |
| rs10269311  | 7 | 20504871 | T | A | 0.2759 | -0.0334 | 0.0052 | 1.81E-10 | -6.3765 | 1376071 | Asthma |
| rs9986877   | 7 | 20505116 | A | T | 0.2756 | -0.0336 | 0.0052 | 1.43E-10 | -6.4132 | 1376071 | Asthma |
| rs6947837   | 7 | 20505172 | T | C | 0.4295 | -0.0324 | 0.0049 | 2.56E-11 | -6.6698 | 1316443 | Asthma |
| rs17142992  | 7 | 20505385 | C | T | 0.2666 | -0.0329 | 0.0053 | 5.30E-10 | -6.2100 | 1376071 | Asthma |
| rs28660983  | 7 | 20505530 | T | G | 0.2664 | -0.0329 | 0.0053 | 5.30E-10 | -6.2098 | 1376071 | Asthma |
| rs12533552  | 7 | 20505666 | G | C | 0.2758 | -0.0335 | 0.0052 | 1.75E-10 | -6.3820 | 1376071 | Asthma |
| rs12533604  | 7 | 20505670 | C | G | 0.2756 | -0.0335 | 0.0052 | 1.71E-10 | -6.3853 | 1376071 | Asthma |
| rs10260049  | 7 | 20506207 | C | T | 0.4300 | -0.0326 | 0.0049 | 1.99E-11 | -6.7066 | 1316443 | Asthma |
| rs10249093  | 7 | 20507467 | T | C | 0.2757 | -0.0336 | 0.0052 | 1.54E-10 | -6.4011 | 1376071 | Asthma |
| rs10264672  | 7 | 20507528 | C | T | 0.2760 | -0.0331 | 0.0052 | 2.61E-10 | -6.3207 | 1376071 | Asthma |
| rs6969222   | 7 | 20509196 | G | A | 0.4160 | -0.0324 | 0.0048 | 1.12E-11 | -6.7904 | 1376071 | Asthma |
| rs10228112  | 7 | 20509706 | G | A | 0.2669 | -0.0329 | 0.0053 | 5.47E-10 | -6.2051 | 1376071 | Asthma |
| rs10260836  | 7 | 20509933 | G | C | 0.4160 | -0.0325 | 0.0048 | 9.05E-12 | -6.8208 | 1376071 | Asthma |
| rs17143003  | 7 | 20510276 | C | T | 0.2760 | -0.0334 | 0.0052 | 1.85E-10 | -6.3736 | 1376071 | Asthma |
| rs929220    | 7 | 20510672 | G | A | 0.4269 | -0.0314 | 0.0050 | 4.03E-10 | -6.2527 | 1008051 | Asthma |
| rs1012870   | 7 | 20512082 | A | G | 0.2668 | -0.0328 | 0.0053 | 5.95E-10 | -6.1918 | 1376071 | Asthma |
| rs10273566  | 7 | 20513045 | T | C | 0.2666 | -0.0330 | 0.0053 | 5.06E-10 | -6.2173 | 1376071 | Asthma |
| rs10273787  | 7 | 20513095 | C | G | 0.2668 | -0.0327 | 0.0053 | 6.54E-10 | -6.1769 | 1376071 | Asthma |
| rs10273717  | 7 | 20513198 | T | C | 0.4158 | -0.0331 | 0.0048 | 3.93E-12 | -6.9396 | 1376071 | Asthma |
| rs7786951   | 7 | 20513643 | G | A | 0.4159 | -0.0327 | 0.0048 | 6.68E-12 | -6.8643 | 1376071 | Asthma |
| rs10274582  | 7 | 20513675 | C | G | 0.2757 | -0.0336 | 0.0052 | 1.47E-10 | -6.4086 | 1376071 | Asthma |
| rs75782801  | 7 | 20514841 | C | T | 0.1422 | -0.0375 | 0.0068 | 2.89E-08 | -5.5478 | 1376071 | Asthma |
| rs10259919  | 7 | 20515051 | A | G | 0.4160 | -0.0328 | 0.0048 | 5.94E-12 | -6.8813 | 1376071 | Asthma |
| rs10950813  | 7 | 20516103 | C | T | 0.4274 | -0.0316 | 0.0050 | 2.99E-10 | -6.2994 | 1008051 | Asthma |
| rs10950814  | 7 | 20516109 | C | T | 0.4160 | -0.0329 | 0.0048 | 5.29E-12 | -6.8976 | 1376071 | Asthma |
| rs10950815  | 7 | 20516279 | G | A | 0.4162 | -0.0328 | 0.0048 | 6.18E-12 | -6.8753 | 1376071 | Asthma |
| rs79921815  | 7 | 20516525 | C | G | 0.2668 | -0.0333 | 0.0053 | 3.30E-10 | -6.2841 | 1376071 | Asthma |
| rs10267914  | 7 | 20516798 | C | G | 0.2668 | -0.0333 | 0.0053 | 3.47E-10 | -6.2763 | 1376071 | Asthma |
| rs7779912   | 7 | 20517414 | T | A | 0.4160 | -0.0327 | 0.0048 | 6.73E-12 | -6.8632 | 1376071 | Asthma |
| rs7780222   | 7 | 20517556 | G | A | 0.4155 | -0.0326 | 0.0051 | 1.86E-10 | -6.3723 | 1246149 | Asthma |
| rs7799620   | 7 | 20517671 | C | T | 0.4162 | -0.0327 | 0.0048 | 6.70E-12 | -6.8638 | 1376071 | Asthma |
| rs28588611  | 7 | 20518411 | T | C | 0.2666 | -0.0331 | 0.0053 | 4.03E-10 | -6.2529 | 1376071 | Asthma |
| rs28707317  | 7 | 20518418 | T | G | 0.2667 | -0.0331 | 0.0053 | 3.96E-10 | -6.2555 | 1376071 | Asthma |
| rs10276280  | 7 | 20518870 | T | C | 0.2664 | -0.0334 | 0.0053 | 3.10E-10 | -6.2939 | 1376071 | Asthma |
| rs10233214  | 7 | 20519195 | C | T | 0.2759 | -0.0338 | 0.0052 | 1.16E-10 | -6.4447 | 1376071 | Asthma |
| rs10233470  | 7 | 20519378 | C | T | 0.2756 | -0.0339 | 0.0052 | 1.06E-10 | -6.4586 | 1376071 | Asthma |
| rs10277230  | 7 | 20519502 | T | G | 0.2648 | -0.0329 | 0.0053 | 5.70E-10 | -6.1985 | 1376071 | Asthma |
| rs10280526  | 7 | 20519966 | A | C | 0.2656 | -0.0336 | 0.0053 | 2.26E-10 | -6.3425 | 1376071 | Asthma |
| rs6461503   | 7 | 20521373 | C | T | 0.5121 | -0.0396 | 0.0048 | 2.24E-16 | -8.2085 | 1316443 | Asthma |
| rs2214244   | 7 | 20521680 | C | T | 0.4165 | -0.0340 | 0.0049 | 2.94E-12 | -6.9804 | 1316443 | Asthma |
| rs28650131  | 7 | 20522250 | G | T | 0.4152 | -0.0350 | 0.0049 | 7.04E-13 | -7.1785 | 1316443 | Asthma |
| rs2214245   | 7 | 20525355 | C | A | 0.4160 | -0.0329 | 0.0048 | 5.42E-12 | -6.8941 | 1376071 | Asthma |
| rs6965263   | 7 | 20525893 | C | A | 0.4163 | -0.0330 | 0.0048 | 4.62E-12 | -6.9168 | 1376071 | Asthma |
| rs2390343   | 7 | 20526805 | C | T | 0.4164 | -0.0344 | 0.0049 | 1.68E-12 | -7.0591 | 1316443 | Asthma |
| rs2106759   | 7 | 20528201 | T | C | 0.4159 | -0.0329 | 0.0048 | 5.06E-12 | -6.9040 | 1376071 | Asthma |
| rs117184372 | 7 | 20528802 | C | G | 0.1246 | -0.0409 | 0.0074 | 3.62E-08 | -5.5087 | 1316443 | Asthma |
| rs4721916   | 7 | 20528914 | T | G | 0.4150 | -0.0333 | 0.0048 | 2.91E-12 | -6.9820 | 1376071 | Asthma |
| rs12700213  | 7 | 20529834 | G | A | 0.4150 | -0.0333 | 0.0048 | 2.93E-12 | -6.9809 | 1376071 | Asthma |
| rs7783149   | 7 | 20530348 | T | A | 0.4151 | -0.0334 | 0.0048 | 2.62E-12 | -6.9966 | 1376071 | Asthma |
| rs7802450   | 7 | 20530448 | A | T | 0.4152 | -0.0334 | 0.0048 | 2.57E-12 | -6.9997 | 1376071 | Asthma |
| rs2188874   | 7 | 20530930 | T | G | 0.4151 | -0.0332 | 0.0048 | 3.26E-12 | -6.9658 | 1376071 | Asthma |
| rs4721917   | 7 | 20531528 | C | T | 0.4161 | -0.0329 | 0.0048 | 4.89E-12 | -6.9085 | 1376071 | Asthma |
| rs2188875   | 7 | 20531919 | G | A | 0.4113 | -0.0363 | 0.0052 | 3.66E-12 | -6.9496 | 1219993 | Asthma |
| rs916787    | 7 | 20532647 | G | T | 0.4160 | -0.0330 | 0.0048 | 4.31E-12 | -6.9268 | 1376071 | Asthma |
| rs916788    | 7 | 20532797 | G | A | 0.4161 | -0.0328 | 0.0048 | 6.12E-12 | -6.8770 | 1376071 | Asthma |
| rs916789    | 7 | 20532907 | T | G | 0.4152 | -0.0332 | 0.0048 | 3.34E-12 | -6.9625 | 1376071 | Asthma |

|            |   |          |   |   |        |         |        |          |         |         |        |
|------------|---|----------|---|---|--------|---------|--------|----------|---------|---------|--------|
| rs916790   | 7 | 20533077 | G | A | 0.4155 | -0.0331 | 0.0048 | 3.60E-12 | -6.9518 | 1376071 | Asthma |
| rs13221999 | 7 | 20533721 | G | A | 0.4152 | -0.0331 | 0.0048 | 4.08E-12 | -6.9346 | 1376071 | Asthma |
| rs17457011 | 7 | 20533907 | T | G | 0.2656 | -0.0336 | 0.0053 | 2.34E-10 | -6.3370 | 1376071 | Asthma |
| rs13225539 | 7 | 20534420 | A | C | 0.4149 | -0.0332 | 0.0048 | 3.37E-12 | -6.9615 | 1376071 | Asthma |
| rs10244416 | 7 | 20536128 | T | C | 0.5108 | -0.0393 | 0.0048 | 4.29E-16 | -8.1298 | 1316443 | Asthma |
| rs10273769 | 7 | 20536134 | C | A | 0.4159 | -0.0327 | 0.0048 | 7.28E-12 | -6.8520 | 1376071 | Asthma |
| rs10260395 | 7 | 20536557 | C | T | 0.2756 | -0.0334 | 0.0053 | 1.92E-10 | -6.3677 | 1376071 | Asthma |
| rs12669602 | 7 | 20537416 | T | C | 0.2743 | -0.0333 | 0.0059 | 1.68E-08 | -5.6418 | 1133307 | Asthma |
| rs13247229 | 7 | 20537811 | C | G | 0.4132 | -0.0307 | 0.0052 | 4.17E-09 | -5.8774 | 1224666 | Asthma |
| rs12700214 | 7 | 20539648 | T | A | 0.4144 | -0.0346 | 0.0049 | 1.41E-12 | -7.0835 | 1316443 | Asthma |
| rs28423374 | 7 | 20540024 | C | T | 0.2749 | -0.0343 | 0.0054 | 1.70E-10 | -6.3860 | 1316443 | Asthma |
| rs4335039  | 7 | 20542326 | A | T | 0.4145 | -0.0343 | 0.0049 | 2.34E-12 | -7.0124 | 1316443 | Asthma |
| rs12700215 | 7 | 20544936 | A | G | 0.3590 | -0.0367 | 0.0050 | 3.06E-13 | -7.2919 | 1316443 | Asthma |
| rs13241235 | 7 | 20545214 | C | T | 0.3637 | -0.0360 | 0.0050 | 7.79E-13 | -7.1649 | 1316443 | Asthma |
| rs16872573 | 7 | 20545860 | C | T | 0.2315 | -0.0365 | 0.0057 | 1.96E-10 | -6.3646 | 1316443 | Asthma |
| rs2188862  | 7 | 20546556 | T | C | 0.2315 | -0.0365 | 0.0057 | 2.03E-10 | -6.3590 | 1316443 | Asthma |
| rs35621564 | 7 | 20547220 | G | A | 0.3724 | -0.0365 | 0.0050 | 3.29E-13 | -7.2819 | 1316443 | Asthma |
| rs10241550 | 7 | 20560207 | C | G | 0.3962 | -0.0295 | 0.0049 | 2.30E-09 | -5.9748 | 1316443 | Asthma |
| rs2188865  | 7 | 20564775 | G | A | 0.3956 | -0.0273 | 0.0048 | 1.35E-08 | -5.6793 | 1376071 | Asthma |
| rs2188868  | 7 | 20567146 | C | G | 0.3871 | -0.0267 | 0.0048 | 3.24E-08 | -5.5279 | 1376071 | Asthma |
| rs7780888  | 7 | 20569793 | G | A | 0.4276 | 0.0263  | 0.0048 | 3.51E-08 | 5.5139  | 1376071 | Asthma |
| rs7781139  | 7 | 20569832 | G | C | 0.4276 | 0.0263  | 0.0048 | 3.29E-08 | 5.5257  | 1376071 | Asthma |
| rs17143089 | 7 | 20575933 | C | G | 0.3875 | 0.0270  | 0.0048 | 2.27E-08 | 5.5899  | 1376071 | Asthma |
| rs10488585 | 7 | 20581865 | C | T | 0.4026 | 0.0309  | 0.0053 | 3.97E-09 | 5.8855  | 1219993 | Asthma |
| rs12673008 | 7 | 20583022 | A | G | 0.4161 | -0.0275 | 0.0048 | 8.90E-09 | -5.7505 | 1376071 | Asthma |
| rs10232988 | 7 | 20583993 | C | T | 0.4334 | 0.0265  | 0.0048 | 2.45E-08 | 5.5767  | 1376071 | Asthma |
| rs1990544  | 7 | 20585638 | A | G | 0.3868 | 0.0270  | 0.0048 | 2.35E-08 | 5.5842  | 1376071 | Asthma |
| rs714811   | 7 | 20586717 | T | C | 0.3868 | 0.0268  | 0.0048 | 3.13E-08 | 5.5342  | 1376071 | Asthma |
| rs10215046 | 7 | 20588148 | C | T | 0.4334 | 0.0267  | 0.0048 | 2.05E-08 | 5.6075  | 1376071 | Asthma |
| rs6955157  | 7 | 20589224 | G | A | 0.4338 | 0.0270  | 0.0048 | 1.46E-08 | 5.6660  | 1376071 | Asthma |
| rs34788132 | 7 | 22699298 | G | A | 0.2103 | 0.0316  | 0.0058 | 4.40E-08 | 5.4740  | 1376071 | Asthma |
| rs34743674 | 7 | 22703193 | T | C | 0.2007 | 0.0345  | 0.0059 | 5.25E-09 | 5.8389  | 1376071 | Asthma |
| rs34198632 | 7 | 22704182 | A | G | 0.2007 | 0.0347  | 0.0059 | 4.29E-09 | 5.8726  | 1376071 | Asthma |
| rs13240836 | 7 | 22704823 | T | A | 0.2010 | 0.0346  | 0.0059 | 4.75E-09 | 5.8558  | 1376071 | Asthma |
| rs62447657 | 7 | 22706167 | A | G | 0.1999 | 0.0356  | 0.0059 | 1.68E-09 | 6.0260  | 1376071 | Asthma |
| rs35225842 | 7 | 22706509 | A | C | 0.1999 | 0.0353  | 0.0059 | 2.26E-09 | 5.9778  | 1376071 | Asthma |
| rs35140375 | 7 | 22706835 | G | T | 0.2007 | 0.0358  | 0.0059 | 1.33E-09 | 6.0643  | 1376071 | Asthma |
| rs62449486 | 7 | 22707394 | T | C | 0.1965 | 0.0348  | 0.0059 | 4.62E-09 | 5.8603  | 1376071 | Asthma |
| rs4386870  | 7 | 22708132 | T | C | 0.1965 | 0.0345  | 0.0059 | 6.11E-09 | 5.8138  | 1376071 | Asthma |
| rs62449489 | 7 | 22708784 | T | C | 0.1903 | 0.0368  | 0.0060 | 1.04E-09 | 6.1027  | 1376071 | Asthma |
| rs62449491 | 7 | 22709335 | T | C | 0.1900 | 0.0369  | 0.0060 | 9.97E-10 | 6.1098  | 1376071 | Asthma |
| rs7776857  | 7 | 22715149 | G | T | 0.3742 | -0.0272 | 0.0049 | 3.95E-08 | -5.4929 | 1376071 | Asthma |
| rs4719711  | 7 | 22716069 | C | T | 0.5167 | -0.0296 | 0.0047 | 3.91E-10 | -6.2575 | 1376071 | Asthma |
| rs4719712  | 7 | 22716188 | C | T | 0.5166 | -0.0297 | 0.0047 | 3.70E-10 | -6.2663 | 1376071 | Asthma |
| rs1404008  | 7 | 22716381 | T | A | 0.5165 | -0.0294 | 0.0047 | 5.36E-10 | -6.2083 | 1376071 | Asthma |
| rs6461662  | 7 | 22717470 | C | T | 0.5173 | -0.0296 | 0.0047 | 4.12E-10 | -6.2493 | 1376071 | Asthma |
| rs6963591  | 7 | 22717651 | A | C | 0.5174 | -0.0296 | 0.0047 | 3.99E-10 | -6.2546 | 1376071 | Asthma |
| rs6963866  | 7 | 22717722 | C | T | 0.5176 | -0.0297 | 0.0047 | 3.52E-10 | -6.2740 | 1376071 | Asthma |
| rs1546762  | 7 | 22717884 | C | T | 0.5175 | -0.0297 | 0.0047 | 3.42E-10 | -6.2786 | 1376071 | Asthma |
| rs1546763  | 7 | 22718224 | G | A | 0.5175 | -0.0296 | 0.0047 | 4.31E-10 | -6.2422 | 1376071 | Asthma |
| rs4719713  | 7 | 22719192 | G | A | 0.5177 | -0.0296 | 0.0047 | 4.46E-10 | -6.2369 | 1376071 | Asthma |
| rs1880242  | 7 | 22719988 | G | T | 0.5166 | -0.0295 | 0.0047 | 5.00E-10 | -6.2191 | 1376071 | Asthma |
| rs1880243  | 7 | 22720036 | A | C | 0.1916 | 0.0355  | 0.0060 | 2.82E-09 | 5.9418  | 1376071 | Asthma |
| rs2056576  | 7 | 22721583 | T | C | 0.3039 | 0.0324  | 0.0053 | 7.59E-10 | 6.1533  | 1316443 | Asthma |
| rs2056577  | 7 | 22721584 | G | A | 0.3041 | 0.0327  | 0.0053 | 5.22E-10 | 6.2123  | 1316443 | Asthma |
| rs12700386 | 7 | 22723390 | G | C | 0.1852 | 0.0358  | 0.0062 | 6.80E-09 | 5.7958  | 1316443 | Asthma |
| rs2002792  | 7 | 22724226 | C | G | 0.5238 | -0.0305 | 0.0048 | 3.33E-10 | -6.2825 | 1316443 | Asthma |
| rs62449495 | 7 | 22724719 | A | G | 0.2005 | 0.0336  | 0.0061 | 2.75E-08 | 5.5564  | 1316443 | Asthma |
| rs1800797  | 7 | 22726602 | A | G | 0.4531 | -0.0312 | 0.0048 | 6.40E-11 | -6.5343 | 1376071 | Asthma |
| rs1800795  | 7 | 22727026 | C | G | 0.4623 | -0.0304 | 0.0048 | 1.70E-10 | -6.3862 | 1376071 | Asthma |
| rs2069832  | 7 | 22727814 | A | G | 0.4606 | -0.0306 | 0.0048 | 1.27E-10 | -6.4310 | 1376071 | Asthma |
| rs1474348  | 7 | 22728289 | C | G | 0.4606 | -0.0308 | 0.0048 | 1.05E-10 | -6.4593 | 1376071 | Asthma |
| rs1474347  | 7 | 22728505 | C | A | 0.4608 | -0.0306 | 0.0048 | 1.34E-10 | -6.4226 | 1376071 | Asthma |
| rs2069840  | 7 | 22728953 | G | C | 0.3376 | 0.0309  | 0.0052 | 2.07E-09 | 5.9922  | 1316443 | Asthma |
| rs1554606  | 7 | 22729088 | T | G | 0.4807 | -0.0284 | 0.0047 | 2.31E-09 | -5.9746 | 1376071 | Asthma |
| rs2069845  | 7 | 22730530 | G | A | 0.4808 | -0.0283 | 0.0047 | 2.60E-09 | -5.9548 | 1376071 | Asthma |
| rs35610689 | 7 | 22734201 | G | A | 0.2713 | 0.0300  | 0.0054 | 3.53E-08 | 5.5128  | 1316443 | Asthma |
| rs7787893  | 7 | 22734818 | A | G | 0.4698 | -0.0263 | 0.0048 | 3.10E-08 | -5.5359 | 1376071 | Asthma |
| rs35436671 | 7 | 22735889 | G | A | 0.4489 | -0.0292 | 0.0048 | 1.04E-09 | -6.1036 | 1376071 | Asthma |
| rs12700390 | 7 | 22737510 | G | T | 0.4491 | -0.0287 | 0.0048 | 1.95E-09 | -6.0017 | 1376071 | Asthma |
| rs12700391 | 7 | 22737708 | C | A | 0.4490 | -0.0289 | 0.0048 | 1.51E-09 | -6.0435 | 1376071 | Asthma |
| rs62449498 | 7 | 22738909 | C | A | 0.4535 | 0.0331  | 0.0049 | 8.95E-12 | 6.8225  | 1316443 | Asthma |
| rs7781534  | 7 | 22738973 | A | C | 0.4489 | -0.0287 | 0.0048 | 1.81E-09 | -6.0136 | 1376071 | Asthma |
| rs4722168  | 7 | 22739383 | G | A | 0.4498 | -0.0284 | 0.0048 | 2.65E-09 | -5.9517 | 1376071 | Asthma |

|             |   |           |   |   |        |         |        |          |         |         |        |
|-------------|---|-----------|---|---|--------|---------|--------|----------|---------|---------|--------|
| rs1581497   | 7 | 22739884  | C | A | 0.4491 | -0.0288 | 0.0048 | 1.64E-09 | -6.0297 | 1376071 | Asthma |
| rs1829927   | 7 | 22740299  | G | A | 0.4489 | -0.0290 | 0.0048 | 1.36E-09 | -6.0600 | 1376071 | Asthma |
| rs6954667   | 7 | 22740703  | A | C | 0.2919 | 0.0294  | 0.0052 | 1.49E-08 | 5.6631  | 1376071 | Asthma |
| rs1524099   | 7 | 22742038  | A | G | 0.3795 | 0.0281  | 0.0050 | 2.05E-08 | 5.6081  | 1316443 | Asthma |
| rs6969258   | 7 | 22742909  | C | T | 0.4494 | -0.0285 | 0.0048 | 2.39E-09 | -5.9690 | 1376071 | Asthma |
| rs2390715   | 7 | 22744259  | A | C | 0.4482 | -0.0291 | 0.0048 | 1.19E-09 | -6.0812 | 1376071 | Asthma |
| rs4722169   | 7 | 22745800  | C | T | 0.4486 | -0.0289 | 0.0048 | 1.55E-09 | -6.0389 | 1376071 | Asthma |
| rs4722171   | 7 | 22746098  | A | G | 0.4486 | -0.0288 | 0.0048 | 1.67E-09 | -6.0273 | 1376071 | Asthma |
| rs7801406   | 7 | 22748655  | A | G | 0.4482 | -0.0285 | 0.0048 | 2.32E-09 | -5.9738 | 1376071 | Asthma |
| rs12537614  | 7 | 22749932  | G | C | 0.4486 | -0.0287 | 0.0048 | 1.91E-09 | -6.0054 | 1376071 | Asthma |
| rs13311155  | 7 | 22750170  | A | C | 0.4485 | -0.0285 | 0.0048 | 2.47E-09 | -5.9634 | 1376071 | Asthma |
| rs13311199  | 7 | 22750174  | A | C | 0.4485 | -0.0285 | 0.0048 | 2.39E-09 | -5.9685 | 1376071 | Asthma |
| rs58507040  | 7 | 22752699  | C | A | 0.2761 | 0.0293  | 0.0053 | 3.00E-08 | 5.5416  | 1376071 | Asthma |
| rs7791032   | 7 | 22753719  | A | G | 0.4559 | -0.0294 | 0.0052 | 1.67E-08 | -5.6434 | 1224666 | Asthma |
| rs1404006   | 7 | 22755458  | T | C | 0.4705 | -0.0267 | 0.0048 | 2.07E-08 | -5.6062 | 1376071 | Asthma |
| rs6461667   | 7 | 22757124  | A | G | 0.4488 | -0.0285 | 0.0048 | 2.33E-09 | -5.9732 | 1376071 | Asthma |
| rs7808122   | 7 | 22758461  | T | C | 0.4782 | -0.0265 | 0.0047 | 2.33E-08 | -5.5860 | 1376071 | Asthma |
| rs7808457   | 7 | 22758646  | T | A | 0.4515 | -0.0281 | 0.0048 | 4.28E-09 | -5.8728 | 1376071 | Asthma |
| rs4722177   | 7 | 22758912  | T | C | 0.4784 | -0.0265 | 0.0047 | 2.25E-08 | -5.5920 | 1376071 | Asthma |
| rs4722178   | 7 | 22759031  | T | C | 0.5221 | -0.0289 | 0.0047 | 1.03E-09 | -6.1044 | 1376071 | Asthma |
| rs10950916  | 7 | 22760048  | C | T | 0.4523 | -0.0282 | 0.0048 | 3.68E-09 | -5.8981 | 1376071 | Asthma |
| rs35779989  | 7 | 22760695  | A | C | 0.4784 | -0.0266 | 0.0047 | 2.13E-08 | -5.6014 | 1376071 | Asthma |
| rs56061963  | 7 | 22760778  | T | C | 0.4782 | -0.0266 | 0.0047 | 2.06E-08 | -5.6067 | 1376071 | Asthma |
| rs35658589  | 7 | 22760816  | C | A | 0.5222 | -0.0291 | 0.0047 | 7.73E-10 | -6.1503 | 1376071 | Asthma |
| rs7804146   | 7 | 22761310  | C | G | 0.5226 | -0.0288 | 0.0047 | 1.16E-09 | -6.0856 | 1376071 | Asthma |
| rs4722179   | 7 | 22764242  | C | A | 0.5349 | -0.0300 | 0.0049 | 6.54E-10 | -6.1770 | 1316443 | Asthma |
| rs4722180   | 7 | 22765453  | A | G | 0.5330 | -0.0304 | 0.0049 | 4.02E-10 | -6.2534 | 1316443 | Asthma |
| rs7793526   | 7 | 22765989  | A | G | 0.3445 | 0.0274  | 0.0050 | 3.37E-08 | 5.5210  | 1376071 | Asthma |
| rs1608555   | 7 | 22767854  | T | C | 0.3446 | 0.0276  | 0.0050 | 2.88E-08 | 5.5487  | 1376071 | Asthma |
| rs1608554   | 7 | 22768015  | G | A | 0.3449 | 0.0281  | 0.0050 | 1.67E-08 | 5.6428  | 1376071 | Asthma |
| rs7787532   | 7 | 22768258  | T | A | 0.3446 | 0.0276  | 0.0050 | 2.98E-08 | 5.5425  | 1376071 | Asthma |
| rs7793125   | 7 | 22769541  | A | G | 0.4891 | -0.0282 | 0.0049 | 6.66E-09 | -5.7994 | 1316443 | Asthma |
| rs2091115   | 7 | 22770547  | G | T | 0.4641 | -0.0298 | 0.0050 | 2.53E-09 | -5.9598 | 1299802 | Asthma |
| rs80156335  | 7 | 22770950  | T | C | 0.4829 | -0.0277 | 0.0050 | 2.94E-08 | -5.5450 | 1299802 | Asthma |
| rs10274928  | 7 | 28102469  | A | G | 0.4950 | 0.0336  | 0.0047 | 1.13E-12 | 7.1136  | 1376071 | Asthma |
| rs10245867  | 7 | 28102567  | T | G | 0.3382 | 0.0310  | 0.0050 | 5.28E-10 | 6.2105  | 1376071 | Asthma |
| rs11771411  | 7 | 28110142  | T | C | 0.3552 | 0.0280  | 0.0049 | 1.22E-08 | 5.6971  | 1376071 | Asthma |
| rs11767776  | 7 | 28110189  | G | T | 0.3534 | 0.0278  | 0.0049 | 1.63E-08 | 5.6470  | 1376071 | Asthma |
| rs10276070  | 7 | 28111070  | T | C | 0.3534 | 0.0278  | 0.0049 | 1.75E-08 | 5.6353  | 1376071 | Asthma |
| rs10275989  | 7 | 28120077  | C | T | 0.3554 | 0.0282  | 0.0049 | 9.75E-09 | 5.7349  | 1376071 | Asthma |
| rs12531540  | 7 | 28123055  | T | C | 0.4825 | -0.0329 | 0.0047 | 2.89E-12 | -6.9829 | 1376071 | Asthma |
| rs702814    | 7 | 28133113  | C | T | 0.5069 | 0.0350  | 0.0047 | 1.15E-13 | 7.4220  | 1376071 | Asthma |
| rs849138    | 7 | 28137719  | G | A | 0.5055 | 0.0353  | 0.0047 | 6.68E-14 | 7.4941  | 1376071 | Asthma |
| rs849139    | 7 | 28139777  | C | T | 0.4018 | 0.0263  | 0.0048 | 4.88E-08 | 5.4559  | 1376071 | Asthma |
| rs864745    | 7 | 28140937  | T | C | 0.5034 | 0.0362  | 0.0047 | 1.44E-14 | 7.6925  | 1376071 | Asthma |
| rs849142    | 7 | 28146272  | T | C | 0.5083 | 0.0359  | 0.0047 | 2.33E-14 | 7.6312  | 1376071 | Asthma |
| rs1635852   | 7 | 28149792  | T | C | 0.5023 | 0.0323  | 0.0047 | 7.08E-12 | 6.8560  | 1376071 | Asthma |
| rs849133    | 7 | 28152661  | C | T | 0.5116 | 0.0353  | 0.0047 | 6.10E-14 | 7.5061  | 1376071 | Asthma |
| rs860262    | 7 | 28154778  | C | A | 0.5121 | 0.0351  | 0.0047 | 9.57E-14 | 7.4467  | 1376071 | Asthma |
| rs849134    | 7 | 28156603  | A | G | 0.5109 | 0.0347  | 0.0047 | 1.53E-13 | 7.3843  | 1376071 | Asthma |
| rs849135    | 7 | 28156794  | G | A | 0.5165 | 0.0351  | 0.0047 | 8.71E-14 | 7.4591  | 1376071 | Asthma |
| rs1708302   | 7 | 28159058  | C | T | 0.5166 | 0.0354  | 0.0047 | 6.14E-14 | 7.5050  | 1376071 | Asthma |
| rs1513272   | 7 | 28160478  | C | T | 0.5165 | 0.0353  | 0.0047 | 6.36E-14 | 7.5003  | 1376071 | Asthma |
| rs849335    | 7 | 28184371  | T | C | 0.3505 | 0.0339  | 0.0049 | 6.79E-12 | 6.8620  | 1376071 | Asthma |
| rs849336    | 7 | 28184434  | A | G | 0.3503 | 0.0339  | 0.0049 | 6.69E-12 | 6.8641  | 1376071 | Asthma |
| rs849327    | 7 | 28192838  | A | G | 0.3501 | 0.0337  | 0.0050 | 1.01E-11 | 6.8053  | 1376071 | Asthma |
| rs10264306  | 7 | 28199847  | G | A | 0.2006 | 0.0328  | 0.0058 | 1.78E-08 | 5.6322  | 1376071 | Asthma |
| rs4428573   | 7 | 28209675  | C | A | 0.1453 | 0.0372  | 0.0066 | 2.19E-08 | 5.5963  | 1376071 | Asthma |
| rs498475    | 7 | 28216621  | G | A | 0.3732 | 0.0292  | 0.0050 | 5.64E-09 | 5.8269  | 1316443 | Asthma |
| rs6967330   | 7 | 106018005 | A | G | 0.1700 | 0.0396  | 0.0061 | 1.13E-10 | 6.4489  | 1376071 | Asthma |
| rs114947103 | 7 | 106018481 | C | T | 0.1766 | 0.0407  | 0.0061 | 2.33E-11 | 6.6840  | 1376071 | Asthma |
| rs10258293  | 7 | 106022244 | C | T | 0.1650 | 0.0366  | 0.0062 | 4.02E-09 | 5.8835  | 1376071 | Asthma |
| rs56235770  | 7 | 106025231 | T | C | 0.1620 | 0.0371  | 0.0063 | 3.15E-09 | 5.9236  | 1376071 | Asthma |
| rs17152480  | 7 | 106025684 | C | G | 0.1630 | 0.0365  | 0.0064 | 1.17E-08 | 5.7041  | 1316443 | Asthma |
| rs73195680  | 7 | 106037229 | T | C | 0.1839 | 0.0384  | 0.0062 | 5.13E-10 | 6.2151  | 1316443 | Asthma |
| rs2945236   | 8 | 8310872   | G | A | 0.4738 | -0.0277 | 0.0050 | 2.82E-08 | -5.5524 | 1376071 | Asthma |
| rs7833103   | 8 | 8349237   | A | G | 0.4797 | -0.0288 | 0.0051 | 1.61E-08 | -5.6493 | 1316443 | Asthma |
| rs2979159   | 8 | 8386469   | T | C | 0.3449 | -0.0370 | 0.0067 | 3.39E-08 | -5.5200 | 662423  | Asthma |
| rs2976940   | 8 | 8421952   | T | G | 0.4571 | -0.0291 | 0.0052 | 1.73E-08 | -5.6368 | 1316443 | Asthma |
| rs2921097   | 8 | 8423632   | T | C | 0.4894 | -0.0285 | 0.0052 | 3.87E-08 | -5.4964 | 1316443 | Asthma |
| rs2921096   | 8 | 8427140   | T | C | 0.4550 | -0.0292 | 0.0050 | 6.19E-09 | -5.8117 | 1376071 | Asthma |
| rs2945858   | 8 | 8428606   | T | C | 0.3154 | -0.0292 | 0.0053 | 3.42E-08 | -5.5186 | 1376071 | Asthma |
| rs2921090   | 8 | 8434729   | T | C | 0.3109 | -0.0290 | 0.0053 | 4.42E-08 | -5.4734 | 1376071 | Asthma |
| rs2921086   | 8 | 8436664   | T | A | 0.3156 | -0.0290 | 0.0053 | 4.19E-08 | -5.4825 | 1376071 | Asthma |

|            |   |          |   |   |        |        |        |          |        |         |        |
|------------|---|----------|---|---|--------|--------|--------|----------|--------|---------|--------|
| rs2979162  | 8 | 8451498  | C | T | 0.3731 | 0.0296 | 0.0054 | 3.47E-08 | 5.5159 | 1316443 | Asthma |
| rs876955   | 8 | 8453374  | G | C | 0.3477 | 0.0300 | 0.0054 | 2.20E-08 | 5.5953 | 1316443 | Asthma |
| rs2976868  | 8 | 8453811  | C | A | 0.3860 | 0.0302 | 0.0053 | 1.66E-08 | 5.6446 | 1316443 | Asthma |
| rs2980764  | 8 | 8454021  | G | T | 0.3525 | 0.0297 | 0.0053 | 2.87E-08 | 5.5493 | 1316443 | Asthma |
| rs2921069  | 8 | 8455810  | T | C | 0.3479 | 0.0292 | 0.0052 | 2.25E-08 | 5.5914 | 1376071 | Asthma |
| rs2976872  | 8 | 8456152  | G | C | 0.3480 | 0.0289 | 0.0052 | 2.92E-08 | 5.5461 | 1376071 | Asthma |
| rs13272530 | 8 | 73648213 | T | C | 0.3759 | 0.0282 | 0.0050 | 1.39E-08 | 5.6753 | 1316443 | Asthma |
| rs10096290 | 8 | 73651778 | C | A | 0.3774 | 0.0280 | 0.0050 | 1.83E-08 | 5.6276 | 1316443 | Asthma |
| rs13273010 | 8 | 73672468 | T | C | 0.3734 | 0.0281 | 0.0050 | 1.83E-08 | 5.6274 | 1316443 | Asthma |
| rs13251768 | 8 | 73691649 | T | C | 0.3758 | 0.0281 | 0.0050 | 1.65E-08 | 5.6456 | 1316443 | Asthma |
| rs10100388 | 8 | 73705694 | G | C | 0.3731 | 0.0281 | 0.0050 | 1.88E-08 | 5.6224 | 1316443 | Asthma |
| rs12548048 | 8 | 73724323 | C | G | 0.3750 | 0.0288 | 0.0050 | 7.84E-09 | 5.7718 | 1316443 | Asthma |
| rs998731   | 8 | 80183160 | T | C | 0.4610 | 0.0305 | 0.0047 | 1.28E-10 | 6.4300 | 1376071 | Asthma |
| rs7011326  | 8 | 80230395 | A | G | 0.3378 | 0.0299 | 0.0051 | 5.30E-09 | 5.8376 | 1316443 | Asthma |
| rs6985385  | 8 | 80233187 | A | G | 0.3398 | 0.0279 | 0.0051 | 4.05E-08 | 5.4886 | 1316443 | Asthma |
| rs11992851 | 8 | 80233374 | C | T | 0.3401 | 0.0280 | 0.0051 | 3.50E-08 | 5.5143 | 1316443 | Asthma |
| rs10086156 | 8 | 80237748 | C | T | 0.3399 | 0.0283 | 0.0051 | 2.60E-08 | 5.5668 | 1316443 | Asthma |
| rs7003277  | 8 | 80237885 | G | T | 0.3401 | 0.0282 | 0.0051 | 2.74E-08 | 5.5571 | 1316443 | Asthma |
| rs9801784  | 8 | 80242431 | C | T | 0.3507 | 0.0287 | 0.0050 | 1.29E-08 | 5.6878 | 1316443 | Asthma |
| rs13268830 | 8 | 80255833 | C | T | 0.3453 | 0.0285 | 0.0051 | 2.16E-08 | 5.5985 | 1316443 | Asthma |
| rs6473215  | 8 | 80256827 | G | C | 0.3673 | 0.0290 | 0.0050 | 6.67E-09 | 5.7991 | 1316443 | Asthma |
| rs4509383  | 8 | 80257869 | A | C | 0.3672 | 0.0289 | 0.0050 | 7.79E-09 | 5.7730 | 1316443 | Asthma |
| rs10957968 | 8 | 80259062 | A | G | 0.3675 | 0.0286 | 0.0049 | 5.42E-09 | 5.8339 | 1376071 | Asthma |
| rs12708110 | 8 | 80259578 | G | A | 0.4591 | 0.0334 | 0.0049 | 7.33E-12 | 6.8511 | 1316443 | Asthma |
| rs4604489  | 8 | 80259750 | T | C | 0.3674 | 0.0293 | 0.0050 | 3.59E-09 | 5.9023 | 1349938 | Asthma |
| rs4474064  | 8 | 80259789 | C | A | 0.3681 | 0.0283 | 0.0049 | 6.97E-09 | 5.7915 | 1376071 | Asthma |
| rs9969433  | 8 | 80261251 | T | G | 0.3698 | 0.0314 | 0.0057 | 3.40E-08 | 5.5198 | 856646  | Asthma |
| rs9969568  | 8 | 80261474 | A | T | 0.3676 | 0.0288 | 0.0049 | 3.72E-09 | 5.8959 | 1376071 | Asthma |
| rs10091074 | 8 | 80262037 | T | C | 0.3672 | 0.0284 | 0.0049 | 6.46E-09 | 5.8045 | 1376071 | Asthma |
| rs10108355 | 8 | 80262917 | G | A | 0.3673 | 0.0288 | 0.0049 | 3.61E-09 | 5.9012 | 1376071 | Asthma |
| rs10957970 | 8 | 80264334 | A | G | 0.3672 | 0.0286 | 0.0049 | 5.11E-09 | 5.8437 | 1376071 | Asthma |
| rs6987012  | 8 | 80264599 | T | C | 0.3672 | 0.0285 | 0.0049 | 5.41E-09 | 5.8340 | 1376071 | Asthma |
| rs10107041 | 8 | 80267949 | C | T | 0.3744 | 0.0282 | 0.0049 | 7.12E-09 | 5.7881 | 1376071 | Asthma |
| rs4740146  | 8 | 80268451 | C | A | 0.3670 | 0.0287 | 0.0049 | 4.96E-09 | 5.8483 | 1376071 | Asthma |
| rs3890382  | 8 | 80270352 | A | G | 0.3671 | 0.0293 | 0.0049 | 2.25E-09 | 5.9788 | 1376071 | Asthma |
| rs5019679  | 8 | 80272622 | C | G | 0.3671 | 0.0287 | 0.0049 | 4.90E-09 | 5.8505 | 1376071 | Asthma |
| rs4740147  | 8 | 80273601 | A | G | 0.3672 | 0.0287 | 0.0049 | 4.58E-09 | 5.8619 | 1376071 | Asthma |
| rs11784890 | 8 | 80273843 | G | T | 0.3691 | 0.0281 | 0.0049 | 9.26E-09 | 5.7437 | 1376071 | Asthma |
| rs13256980 | 8 | 80273981 | T | C | 0.3674 | 0.0288 | 0.0049 | 4.14E-09 | 5.8784 | 1376071 | Asthma |
| rs13255128 | 8 | 80274122 | A | G | 0.3672 | 0.0287 | 0.0049 | 4.90E-09 | 5.8503 | 1376071 | Asthma |
| rs6473216  | 8 | 80274414 | C | G | 0.3672 | 0.0287 | 0.0049 | 4.81E-09 | 5.8536 | 1376071 | Asthma |
| rs7836662  | 8 | 80275483 | G | A | 0.3672 | 0.0286 | 0.0049 | 5.28E-09 | 5.8379 | 1376071 | Asthma |
| rs13256368 | 8 | 80275676 | C | T | 0.3748 | 0.0280 | 0.0049 | 9.24E-09 | 5.7441 | 1376071 | Asthma |
| rs4739733  | 8 | 80276366 | G | A | 0.3675 | 0.0293 | 0.0049 | 2.19E-09 | 5.9831 | 1376071 | Asthma |
| rs13266444 | 8 | 80276605 | G | T | 0.3678 | 0.0292 | 0.0049 | 2.56E-09 | 5.9573 | 1376071 | Asthma |
| rs13266279 | 8 | 80276746 | A | G | 0.3673 | 0.0286 | 0.0049 | 5.07E-09 | 5.8448 | 1376071 | Asthma |
| rs12548637 | 8 | 80278573 | G | A | 0.3674 | 0.0287 | 0.0049 | 4.75E-09 | 5.8556 | 1376071 | Asthma |
| rs7821194  | 8 | 80279452 | A | G | 0.3672 | 0.0287 | 0.0049 | 4.83E-09 | 5.8529 | 1376071 | Asthma |
| rs7839726  | 8 | 80279541 | T | G | 0.3673 | 0.0291 | 0.0049 | 3.03E-09 | 5.9298 | 1376071 | Asthma |
| rs7015498  | 8 | 80286126 | T | C | 0.3759 | 0.0284 | 0.0050 | 1.29E-08 | 5.6876 | 1316443 | Asthma |
| rs10957973 | 8 | 80288499 | C | T | 0.3764 | 0.0282 | 0.0050 | 1.66E-08 | 5.6445 | 1316443 | Asthma |
| rs10957974 | 8 | 80292504 | G | A | 0.3857 | 0.0288 | 0.0050 | 7.51E-09 | 5.7789 | 1316443 | Asthma |
| rs10098225 | 8 | 80293483 | T | C | 0.3469 | 0.0289 | 0.0051 | 1.35E-08 | 5.6795 | 1316443 | Asthma |
| rs10098535 | 8 | 80293737 | T | C | 0.3468 | 0.0290 | 0.0051 | 1.24E-08 | 5.6943 | 1316443 | Asthma |
| rs7004262  | 8 | 80294278 | C | T | 0.3880 | 0.0291 | 0.0050 | 4.51E-09 | 5.8642 | 1316443 | Asthma |
| rs7002075  | 8 | 80295691 | T | A | 0.3581 | 0.0296 | 0.0051 | 4.95E-09 | 5.8490 | 1316443 | Asthma |
| rs4507808  | 8 | 80298300 | G | C | 0.3938 | 0.0293 | 0.0050 | 6.26E-09 | 5.8096 | 1290310 | Asthma |
| rs7842724  | 8 | 80301435 | G | T | 0.3602 | 0.0317 | 0.0051 | 3.33E-10 | 6.2827 | 1316443 | Asthma |
| rs5019763  | 8 | 80302085 | A | G | 0.3600 | 0.0319 | 0.0051 | 2.87E-10 | 6.3058 | 1316443 | Asthma |
| rs13277346 | 8 | 80307950 | G | A | 0.3028 | 0.0403 | 0.0052 | 1.42E-14 | 7.6949 | 1316443 | Asthma |
| rs12678825 | 8 | 80325044 | C | T | 0.3479 | 0.0354 | 0.0050 | 2.28E-12 | 7.0162 | 1316443 | Asthma |
| rs6473218  | 8 | 80329725 | T | G | 0.3030 | 0.0400 | 0.0052 | 2.08E-14 | 7.6456 | 1316443 | Asthma |
| rs6473219  | 8 | 80332768 | C | T | 0.3007 | 0.0327 | 0.0052 | 2.78E-10 | 6.3104 | 1376071 | Asthma |
| rs7822328  | 8 | 80334424 | A | G | 0.3583 | 0.0438 | 0.0050 | 2.75E-18 | 8.7214 | 1316443 | Asthma |
| rs7822342  | 8 | 80334464 | A | G | 0.4034 | 0.0401 | 0.0049 | 3.66E-16 | 8.1494 | 1316443 | Asthma |
| rs7822785  | 8 | 80334777 | A | T | 0.3582 | 0.0435 | 0.0054 | 9.99E-16 | 8.0269 | 1159440 | Asthma |
| rs7006626  | 8 | 80335441 | C | A | 0.3607 | 0.0441 | 0.0050 | 1.51E-18 | 8.7890 | 1316443 | Asthma |
| rs1553668  | 8 | 80337549 | C | T | 0.3606 | 0.0440 | 0.0050 | 1.65E-18 | 8.7790 | 1316443 | Asthma |
| rs1973562  | 8 | 80337600 | A | G | 0.3639 | 0.0427 | 0.0061 | 2.93E-12 | 6.9812 | 1042455 | Asthma |
| rs1973563  | 8 | 80337607 | G | A | 0.2890 | 0.0403 | 0.0053 | 2.87E-14 | 7.6039 | 1316443 | Asthma |
| rs6985449  | 8 | 80338764 | G | A | 0.3532 | 0.0429 | 0.0050 | 2.12E-17 | 8.4870 | 1316443 | Asthma |
| rs6985506  | 8 | 80338948 | C | G | 0.4053 | 0.0406 | 0.0049 | 1.20E-16 | 8.2832 | 1316443 | Asthma |
| rs12542017 | 8 | 80339900 | T | C | 0.3605 | 0.0442 | 0.0050 | 1.19E-18 | 8.8155 | 1316443 | Asthma |
| rs6996867  | 8 | 80341154 | G | A | 0.2891 | 0.0402 | 0.0053 | 2.84E-14 | 7.6052 | 1316443 | Asthma |



|            |   |          |   |   |        |        |        |          |         |         |        |
|------------|---|----------|---|---|--------|--------|--------|----------|---------|---------|--------|
| rs13267071 | 8 | 80343712 | T | G | 0.3867 | 0.0412 | 0.0048 | 1.67E-17 | 8.5151  | 1376071 | Asthma |
| rs13265296 | 8 | 80343806 | C | G | 0.3868 | 0.0412 | 0.0048 | 1.66E-17 | 8.5153  | 1376071 | Asthma |
| rs13266315 | 8 | 80343946 | G | A | 0.3868 | 0.0410 | 0.0048 | 2.31E-17 | 8.4769  | 1376071 | Asthma |
| rs13266153 | 8 | 80344144 | A | T | 0.3868 | 0.0410 | 0.0048 | 2.11E-17 | 8.4873  | 1376071 | Asthma |
| rs13275909 | 8 | 80344307 | T | C | 0.3867 | 0.0412 | 0.0048 | 1.41E-17 | 8.5347  | 1376071 | Asthma |
| rs13276142 | 8 | 80344336 | T | G | 0.3891 | 0.0411 | 0.0054 | 2.25E-14 | 7.6357  | 1193860 | Asthma |
| rs12542061 | 8 | 80346870 | A | G | 0.3637 | 0.0440 | 0.0049 | 1.88E-19 | 9.0199  | 1376071 | Asthma |
| rs10957975 | 8 | 80347211 | G | A | 0.3640 | 0.0441 | 0.0049 | 1.71E-19 | 9.0305  | 1376071 | Asthma |
| rs13275219 | 8 | 80347591 | T | C | 0.3382 | 0.0468 | 0.0050 | 4.20E-21 | 9.4275  | 1376071 | Asthma |
| rs4739735  | 8 | 80347642 | C | T | 0.3639 | 0.0441 | 0.0049 | 1.80E-19 | 9.0251  | 1376071 | Asthma |
| rs11776367 | 8 | 80347816 | A | T | 0.3640 | 0.0442 | 0.0049 | 1.54E-19 | 9.0416  | 1376071 | Asthma |
| rs3913968  | 8 | 80348803 | T | C | 0.3637 | 0.0440 | 0.0049 | 2.25E-19 | 9.0004  | 1376071 | Asthma |
| rs3913969  | 8 | 80348829 | C | T | 0.3637 | 0.0440 | 0.0049 | 2.20E-19 | 9.0029  | 1376071 | Asthma |
| rs62517191 | 8 | 80350292 | T | A | 0.3662 | 0.0442 | 0.0062 | 9.68E-13 | 7.1349  | 977229  | Asthma |
| rs62517192 | 8 | 80350309 | C | T | 0.3667 | 0.0439 | 0.0061 | 4.58E-13 | 7.2373  | 1003362 | Asthma |
| rs62517193 | 8 | 80350604 | C | T | 0.3637 | 0.0439 | 0.0049 | 2.94E-19 | 8.9709  | 1376071 | Asthma |
| rs7824993  | 8 | 80350661 | A | G | 0.3379 | 0.0468 | 0.0050 | 5.07E-21 | 9.4079  | 1376071 | Asthma |
| rs7462675  | 8 | 80351727 | C | A | 0.3415 | 0.0468 | 0.0050 | 3.74E-21 | 9.4396  | 1376071 | Asthma |
| rs13251923 | 8 | 80352356 | C | T | 0.3637 | 0.0438 | 0.0049 | 3.27E-19 | 8.9590  | 1376071 | Asthma |
| rs13252706 | 8 | 80352455 | G | A | 0.3637 | 0.0438 | 0.0049 | 3.25E-19 | 8.9598  | 1376071 | Asthma |
| rs13253128 | 8 | 80352857 | A | T | 0.3415 | 0.0469 | 0.0050 | 3.66E-21 | 9.4421  | 1376071 | Asthma |
| rs13253385 | 8 | 80352911 | C | T | 0.3638 | 0.0436 | 0.0049 | 4.73E-19 | 8.9186  | 1376071 | Asthma |
| rs2370613  | 8 | 80353342 | C | G | 0.3660 | 0.0447 | 0.0053 | 6.36E-17 | 8.3584  | 1219993 | Asthma |
| rs1911715  | 8 | 80353593 | G | A | 0.3384 | 0.0466 | 0.0050 | 7.67E-21 | 9.3642  | 1376071 | Asthma |
| rs1911714  | 8 | 80353701 | G | C | 0.3637 | 0.0438 | 0.0049 | 3.22E-19 | 8.9609  | 1376071 | Asthma |
| rs1911713  | 8 | 80353809 | G | A | 0.3638 | 0.0438 | 0.0049 | 3.28E-19 | 8.9587  | 1376071 | Asthma |
| rs10957977 | 8 | 80354526 | C | T | 0.3637 | 0.0437 | 0.0049 | 4.01E-19 | 8.9368  | 1376071 | Asthma |
| rs13273143 | 8 | 80354667 | G | T | 0.3639 | 0.0439 | 0.0049 | 2.59E-19 | 8.9848  | 1376071 | Asthma |
| rs13274067 | 8 | 80355001 | G | A | 0.3441 | 0.0489 | 0.0059 | 1.01E-16 | 8.3032  | 1090071 | Asthma |
| rs6992476  | 8 | 80355471 | A | G | 0.3415 | 0.0468 | 0.0050 | 3.92E-21 | 9.4350  | 1376071 | Asthma |
| rs7012968  | 8 | 80355573 | T | C | 0.3638 | 0.0437 | 0.0049 | 3.79E-19 | 8.9430  | 1376071 | Asthma |
| rs6473222  | 8 | 80355702 | A | G | 0.3638 | 0.0438 | 0.0049 | 3.48E-19 | 8.9523  | 1376071 | Asthma |
| rs6473223  | 8 | 80355920 | T | C | 0.3380 | 0.0467 | 0.0050 | 6.03E-21 | 9.3895  | 1376071 | Asthma |
| rs6473224  | 8 | 80355982 | T | A | 0.3640 | 0.0438 | 0.0049 | 3.35E-19 | 8.9565  | 1376071 | Asthma |
| rs13274471 | 8 | 80356529 | A | G | 0.3381 | 0.0468 | 0.0050 | 5.24E-21 | 9.4042  | 1376071 | Asthma |
| rs13276888 | 8 | 80356564 | T | C | 0.3638 | 0.0438 | 0.0049 | 3.53E-19 | 8.9511  | 1376071 | Asthma |
| rs13274782 | 8 | 80356619 | A | C | 0.3641 | 0.0437 | 0.0049 | 3.73E-19 | 8.9448  | 1376071 | Asthma |
| rs13258616 | 8 | 80358307 | C | T | 0.3637 | 0.0437 | 0.0049 | 4.11E-19 | 8.9339  | 1376071 | Asthma |
| rs6991991  | 8 | 80359197 | T | C | 0.3412 | 0.0469 | 0.0050 | 2.67E-21 | 9.4748  | 1376071 | Asthma |
| rs6996407  | 8 | 80359601 | T | C | 0.3641 | 0.0437 | 0.0049 | 3.85E-19 | 8.9412  | 1376071 | Asthma |
| rs13282260 | 8 | 80360900 | T | A | 0.3416 | 0.0469 | 0.0050 | 3.53E-21 | 9.4458  | 1376071 | Asthma |
| rs11994858 | 8 | 80360975 | A | G | 0.3382 | 0.0468 | 0.0050 | 5.31E-21 | 9.4031  | 1376071 | Asthma |
| rs6987042  | 8 | 80361648 | A | G | 0.3634 | 0.0438 | 0.0049 | 2.85E-19 | 8.9744  | 1376071 | Asthma |
| rs2202749  | 8 | 80362103 | A | G | 0.3382 | 0.0470 | 0.0050 | 3.14E-21 | 9.4581  | 1376071 | Asthma |
| rs11783496 | 8 | 80363417 | T | C | 0.3416 | 0.0472 | 0.0050 | 2.16E-21 | 9.4967  | 1376071 | Asthma |
| rs11786685 | 8 | 80363600 | A | G | 0.3416 | 0.0471 | 0.0050 | 2.35E-21 | 9.4880  | 1376071 | Asthma |
| rs11786704 | 8 | 80363625 | A | C | 0.3764 | 0.0512 | 0.0063 | 2.76E-16 | 8.1834  | 722051  | Asthma |
| rs13275449 | 8 | 80363878 | G | A | 0.3374 | 0.0476 | 0.0051 | 9.17E-21 | 9.3451  | 1316443 | Asthma |
| rs4739736  | 8 | 80365134 | A | C | 0.3416 | 0.0473 | 0.0050 | 1.79E-21 | 9.5166  | 1376071 | Asthma |
| rs12543811 | 8 | 80366650 | G | A | 0.3374 | 0.0476 | 0.0051 | 8.61E-21 | 9.3520  | 1316443 | Asthma |
| rs13272328 | 8 | 80368261 | T | C | 0.3402 | 0.0477 | 0.0050 | 8.10E-22 | 9.5987  | 1376071 | Asthma |
| rs13270496 | 8 | 80368431 | A | C | 0.3639 | 0.0441 | 0.0049 | 1.97E-19 | 9.0147  | 1376071 | Asthma |
| rs7826521  | 8 | 80368543 | A | G | 0.3637 | 0.0441 | 0.0049 | 2.07E-19 | 9.0095  | 1376071 | Asthma |
| rs6473225  | 8 | 80368772 | G | A | 0.3640 | 0.0443 | 0.0049 | 1.43E-19 | 9.0502  | 1376071 | Asthma |
| rs13282455 | 8 | 80370162 | A | G | 0.3639 | 0.0442 | 0.0049 | 1.58E-19 | 9.0392  | 1376071 | Asthma |
| rs7837219  | 8 | 80370940 | G | A | 0.3360 | 0.0482 | 0.0051 | 3.24E-21 | 9.4549  | 1316443 | Asthma |
| rs7837153  | 8 | 80371141 | A | C | 0.3359 | 0.0483 | 0.0051 | 2.82E-21 | 9.4694  | 1316443 | Asthma |
| rs10957978 | 8 | 80372904 | G | T | 0.3429 | 0.0494 | 0.0050 | 3.14E-23 | 9.9284  | 1376071 | Asthma |
| rs11784337 | 8 | 80373252 | C | T | 0.3703 | 0.0493 | 0.0052 | 1.24E-21 | 9.5551  | 1008051 | Asthma |
| rs6473226  | 8 | 80373524 | T | C | 0.3659 | 0.0461 | 0.0049 | 4.69E-21 | 9.4159  | 1376071 | Asthma |
| rs6473227  | 8 | 80373657 | C | A | 0.3659 | 0.0461 | 0.0049 | 4.84E-21 | 9.4126  | 1376071 | Asthma |
| rs6986109  | 8 | 80374063 | G | T | 0.2816 | 0.0464 | 0.0054 | 4.47E-18 | 8.6661  | 1316443 | Asthma |
| rs13263709 | 8 | 80374940 | T | C | 0.3420 | 0.0498 | 0.0050 | 1.26E-23 | 10.0185 | 1376071 | Asthma |
| rs952559   | 8 | 80376399 | A | G | 0.3421 | 0.0495 | 0.0050 | 2.09E-23 | 9.9686  | 1376071 | Asthma |
| rs952558   | 8 | 80376499 | A | T | 0.3660 | 0.0459 | 0.0049 | 6.35E-21 | 9.3840  | 1376071 | Asthma |
| rs952557   | 8 | 80376690 | G | T | 0.3422 | 0.0497 | 0.0050 | 1.49E-23 | 10.0024 | 1376071 | Asthma |
| rs4739737  | 8 | 80377390 | G | T | 0.3421 | 0.0496 | 0.0050 | 1.72E-23 | 9.9879  | 1376071 | Asthma |
| rs10957979 | 8 | 80377552 | A | G | 0.3421 | 0.0497 | 0.0050 | 1.73E-23 | 9.9875  | 1376071 | Asthma |
| rs2370615  | 8 | 80378152 | C | T | 0.3726 | 0.0453 | 0.0049 | 1.73E-20 | 9.2778  | 1376071 | Asthma |
| rs4739738  | 8 | 80379410 | G | A | 0.3487 | 0.0488 | 0.0050 | 6.20E-23 | 9.8601  | 1376071 | Asthma |
| rs7009110  | 8 | 80379644 | T | C | 0.3721 | 0.0453 | 0.0049 | 1.47E-20 | 9.2953  | 1376071 | Asthma |
| rs6989309  | 8 | 80379973 | A | T | 0.3726 | 0.0454 | 0.0049 | 1.44E-20 | 9.2974  | 1376071 | Asthma |
| rs13267000 | 8 | 80380300 | G | A | 0.3721 | 0.0453 | 0.0049 | 1.48E-20 | 9.2943  | 1376071 | Asthma |
| rs7824394  | 8 | 80380364 | A | C | 0.3467 | 0.0475 | 0.0055 | 5.31E-18 | 8.6466  | 1159440 | Asthma |

|             |   |           |   |   |        |         |        |          |         |         |        |
|-------------|---|-----------|---|---|--------|---------|--------|----------|---------|---------|--------|
| rs2202750   | 8 | 80382269  | T | C | 0.3724 | 0.0454  | 0.0049 | 1.33E-20 | 9.3057  | 1376071 | Asthma |
| rs2221641   | 8 | 80382467  | C | T | 0.3724 | 0.0453  | 0.0049 | 1.53E-20 | 9.2909  | 1376071 | Asthma |
| rs1543857   | 8 | 80382989  | G | A | 0.3752 | 0.0443  | 0.0049 | 9.77E-20 | 9.0915  | 1376071 | Asthma |
| rs2102418   | 8 | 80383509  | G | T | 0.3511 | 0.0479  | 0.0049 | 3.23E-22 | 9.6929  | 1376071 | Asthma |
| rs13272105  | 8 | 80384604  | C | A | 0.3795 | 0.0436  | 0.0059 | 1.84E-13 | 7.3601  | 1068611 | Asthma |
| rs7823800   | 8 | 80385922  | A | G | 0.3731 | 0.0442  | 0.0060 | 1.84E-13 | 7.3599  | 1003385 | Asthma |
| rs7824246   | 8 | 80386149  | C | T | 0.3731 | 0.0420  | 0.0053 | 3.48E-15 | 7.8723  | 1224666 | Asthma |
| rs7824278   | 8 | 80386214  | C | A | 0.3737 | 0.0421  | 0.0053 | 3.00E-15 | 7.8910  | 1224666 | Asthma |
| rs7828306   | 8 | 80386408  | G | T | 0.2920 | 0.0437  | 0.0057 | 2.57E-14 | 7.6183  | 1159440 | Asthma |
| rs13274426  | 8 | 80386543  | C | T | 0.3752 | 0.0445  | 0.0049 | 6.77E-20 | 9.1314  | 1376071 | Asthma |
| rs13274961  | 8 | 80386573  | G | A | 0.3185 | 0.0400  | 0.0051 | 2.31E-15 | 7.9231  | 1376071 | Asthma |
| rs10504716  | 8 | 80386850  | A | T | 0.3185 | 0.0402  | 0.0051 | 1.93E-15 | 7.9460  | 1376071 | Asthma |
| rs7003011   | 8 | 80387368  | A | G | 0.3744 | 0.0446  | 0.0049 | 4.75E-20 | 9.1698  | 1376071 | Asthma |
| rs6473228   | 8 | 80387531  | G | T | 0.3600 | 0.0484  | 0.0058 | 1.12E-16 | 8.2914  | 1090071 | Asthma |
| rs2136016   | 8 | 80388446  | G | A | 0.3758 | 0.0442  | 0.0049 | 1.23E-19 | 9.0663  | 1376071 | Asthma |
| rs2370616   | 8 | 80390682  | T | C | 0.3140 | 0.0395  | 0.0052 | 2.50E-14 | 7.6218  | 1316443 | Asthma |
| rs2001628   | 8 | 80390804  | G | A | 0.3715 | 0.0437  | 0.0050 | 2.24E-18 | 8.7447  | 1316443 | Asthma |
| rs28656344  | 8 | 80392261  | A | G | 0.2852 | 0.0421  | 0.0054 | 4.65E-15 | 7.8361  | 1316443 | Asthma |
| rs4739739   | 8 | 80392341  | G | A | 0.3982 | 0.0381  | 0.0049 | 1.32E-14 | 7.7043  | 1316443 | Asthma |
| rs4739740   | 8 | 80392352  | G | A | 0.3394 | 0.0342  | 0.0051 | 1.93E-11 | 6.7113  | 1316443 | Asthma |
| rs4739741   | 8 | 80392531  | T | C | 0.4105 | 0.0353  | 0.0049 | 7.57E-13 | 7.1688  | 1316443 | Asthma |
| rs28627504  | 8 | 80392532  | A | G | 0.2766 | 0.0386  | 0.0054 | 9.16E-13 | 7.1426  | 1316443 | Asthma |
| rs28583881  | 8 | 80393052  | A | G | 0.3463 | 0.0305  | 0.0051 | 1.66E-09 | 6.0285  | 1316443 | Asthma |
| rs12550844  | 8 | 80394460  | G | A | 0.2933 | 0.0362  | 0.0052 | 2.52E-12 | 7.0022  | 1376071 | Asthma |
| rs10808842  | 8 | 80394772  | A | G | 0.2997 | 0.0382  | 0.0061 | 3.17E-10 | 6.2901  | 1090071 | Asthma |
| rs4237092   | 8 | 80395330  | C | T | 0.4263 | 0.0349  | 0.0049 | 9.86E-13 | 7.1325  | 1316443 | Asthma |
| rs7000782   | 8 | 80395915  | A | T | 0.4264 | 0.0352  | 0.0049 | 6.20E-13 | 7.1960  | 1316443 | Asthma |
| rs78775926  | 8 | 80395985  | C | T | 0.1207 | 0.0408  | 0.0073 | 2.35E-08 | 5.5841  | 1376071 | Asthma |
| rs4739742   | 8 | 80396200  | C | T | 0.4266 | 0.0347  | 0.0049 | 1.44E-12 | 7.0807  | 1316443 | Asthma |
| rs28582689  | 8 | 80396725  | C | G | 0.4266 | 0.0348  | 0.0049 | 1.18E-12 | 7.1082  | 1316443 | Asthma |
| rs11780529  | 8 | 80399647  | T | C | 0.2961 | 0.0359  | 0.0052 | 3.83E-12 | 6.9433  | 1376071 | Asthma |
| rs11784307  | 8 | 80400042  | C | T | 0.3720 | 0.0393  | 0.0050 | 4.20E-15 | 7.8489  | 1316443 | Asthma |
| rs4739743   | 8 | 80400555  | G | A | 0.2925 | 0.0367  | 0.0053 | 4.59E-12 | 6.9176  | 1316443 | Asthma |
| rs4739744   | 8 | 80400685  | A | G | 0.2837 | 0.0353  | 0.0053 | 4.05E-11 | 6.6023  | 1316443 | Asthma |
| rs12547152  | 8 | 80401323  | A | G | 0.2920 | 0.0369  | 0.0053 | 3.06E-12 | 6.9753  | 1316443 | Asthma |
| rs6473229   | 8 | 80401440  | G | A | 0.4266 | 0.0346  | 0.0049 | 1.64E-12 | 7.0624  | 1316443 | Asthma |
| rs10957980  | 8 | 80402757  | G | T | 0.3723 | 0.0389  | 0.0050 | 5.34E-15 | 7.8187  | 1316443 | Asthma |
| rs28661389  | 8 | 80403255  | G | A | 0.3725 | 0.0392  | 0.0050 | 3.38E-15 | 7.8761  | 1316443 | Asthma |
| rs4739746   | 8 | 80403799  | T | C | 0.2922 | 0.0372  | 0.0053 | 2.53E-12 | 7.0014  | 1316443 | Asthma |
| rs6473230   | 8 | 80405146  | C | T | 0.3466 | 0.0308  | 0.0051 | 1.51E-09 | 6.0436  | 1316443 | Asthma |
| rs9632837   | 8 | 80405890  | G | C | 0.4019 | 0.0355  | 0.0050 | 7.72E-13 | 7.1660  | 1316443 | Asthma |
| rs10091870  | 8 | 80406657  | T | C | 0.1324 | 0.0405  | 0.0072 | 1.96E-08 | 5.6158  | 1316443 | Asthma |
| rs4739748   | 8 | 80407192  | A | G | 0.1583 | 0.0417  | 0.0067 | 5.03E-10 | 6.2182  | 1316443 | Asthma |
| rs7814542   | 8 | 80408360  | G | A | 0.1950 | 0.0375  | 0.0060 | 4.62E-10 | 6.2314  | 1376071 | Asthma |
| rs28414398  | 8 | 80409115  | A | C | 0.3406 | 0.0374  | 0.0068 | 4.70E-08 | 5.4623  | 938666  | Asthma |
| rs7820094   | 8 | 80409594  | C | G | 0.1900 | 0.0378  | 0.0062 | 1.29E-09 | 6.0684  | 1316443 | Asthma |
| rs1006258   | 8 | 80410058  | G | C | 0.1900 | 0.0379  | 0.0062 | 1.20E-09 | 6.0800  | 1316443 | Asthma |
| rs7824232   | 8 | 80410301  | T | C | 0.1900 | 0.0380  | 0.0062 | 1.06E-09 | 6.1003  | 1316443 | Asthma |
| rs4739749   | 8 | 80412240  | A | G | 0.1906 | 0.0371  | 0.0062 | 2.82E-09 | 5.9416  | 1316443 | Asthma |
| rs10504724  | 8 | 80412917  | T | C | 0.1905 | 0.0371  | 0.0062 | 2.60E-09 | 5.9553  | 1316443 | Asthma |
| rs529240    | 8 | 80413966  | A | G | 0.3705 | 0.0359  | 0.0051 | 1.29E-12 | 7.0949  | 1316443 | Asthma |
| rs556957    | 8 | 80416489  | C | A | 0.4503 | 0.0286  | 0.0050 | 1.23E-08 | 5.6961  | 1299802 | Asthma |
| rs515876    | 8 | 80416888  | G | C | 0.4499 | 0.0324  | 0.0054 | 2.16E-09 | 5.9853  | 1169880 | Asthma |
| rs72668903  | 8 | 108381824 | A | G | 0.1260 | -0.0417 | 0.0071 | 5.64E-09 | -5.8271 | 1376071 | Asthma |
| rs7816445   | 8 | 108399425 | C | A | 0.3915 | -0.0269 | 0.0048 | 2.43E-08 | -5.5785 | 1376071 | Asthma |
| rs72668919  | 8 | 108415587 | T | G | 0.1241 | -0.0400 | 0.0072 | 3.04E-08 | -5.5391 | 1376071 | Asthma |
| rs13277355  | 8 | 127765473 | A | G | 0.2912 | 0.0334  | 0.0054 | 4.94E-10 | 6.2212  | 1316443 | Asthma |
| rs13279820  | 8 | 127765520 | T | C | 0.2838 | 0.0319  | 0.0054 | 3.87E-09 | 5.8899  | 1316443 | Asthma |
| rs4326353   | 8 | 127778370 | G | A | 0.3689 | 0.0267  | 0.0049 | 4.86E-08 | 5.4563  | 1376071 | Asthma |
| rs6470578   | 8 | 127797311 | T | A | 0.2886 | 0.0296  | 0.0054 | 3.45E-08 | 5.5168  | 1316443 | Asthma |
| rs4410871   | 8 | 127802783 | T | C | 0.2881 | 0.0298  | 0.0052 | 1.27E-08 | 5.6903  | 1376071 | Asthma |
| rs55755011  | 9 | 5542030   | G | A | 0.2223 | 0.0335  | 0.0059 | 1.42E-08 | 5.6707  | 1316443 | Asthma |
| rs56299437  | 9 | 5543346   | C | T | 0.0191 | 0.1177  | 0.0188 | 3.73E-10 | 6.2648  | 1359430 | Asthma |
| rs117748521 | 9 | 5609742   | T | C | 0.0313 | 0.0883  | 0.0150 | 3.72E-09 | 5.8960  | 1316443 | Asthma |
| rs145434936 | 9 | 5643172   | A | T | 0.0202 | -0.0955 | 0.0174 | 4.04E-08 | -5.4890 | 1316443 | Asthma |
| rs78054474  | 9 | 5659683   | C | T | 0.0321 | 0.0934  | 0.0145 | 1.12E-10 | 6.4504  | 1376071 | Asthma |
| rs117026775 | 9 | 5660471   | G | A | 0.0719 | 0.0531  | 0.0094 | 1.93E-08 | 5.6179  | 1376071 | Asthma |
| rs79535452  | 9 | 5665343   | G | A | 0.0890 | 0.0590  | 0.0085 | 3.54E-12 | 6.9543  | 1376071 | Asthma |
| rs7250606   | 9 | 5676527   | A | G | 0.0712 | 0.0549  | 0.0095 | 6.71E-09 | 5.7980  | 1376071 | Asthma |
| rs10975260  | 9 | 5719212   | A | G | 0.4426 | 0.0264  | 0.0047 | 2.76E-08 | 5.5559  | 1376071 | Asthma |
| rs10758700  | 9 | 5720172   | G | C | 0.4442 | 0.0266  | 0.0047 | 2.14E-08 | 5.6002  | 1376071 | Asthma |
| rs7850299   | 9 | 5732483   | C | T | 0.4425 | 0.0262  | 0.0047 | 3.42E-08 | 5.5184  | 1376071 | Asthma |
| rs10758704  | 9 | 5732991   | G | C | 0.4436 | 0.0267  | 0.0047 | 1.87E-08 | 5.6241  | 1376071 | Asthma |
| rs10758705  | 9 | 5733241   | T | C | 0.4422 | 0.0259  | 0.0047 | 4.76E-08 | 5.4600  | 1376071 | Asthma |

|             |   |         |   |   |        |         |        |          |          |         |        |
|-------------|---|---------|---|---|--------|---------|--------|----------|----------|---------|--------|
| rs75007171  | 9 | 5759880 | C | T | 0.0185 | -0.0979 | 0.0178 | 4.13E-08 | -5.4852  | 1316443 | Asthma |
| rs2007489   | 9 | 5766128 | A | G | 0.3379 | 0.0273  | 0.0050 | 4.15E-08 | 5.4843   | 1376071 | Asthma |
| rs10975277  | 9 | 5774661 | A | G | 0.3415 | 0.0279  | 0.0051 | 3.90E-08 | 5.4955   | 1316443 | Asthma |
| rs2093655   | 9 | 5780204 | A | C | 0.2972 | 0.0305  | 0.0052 | 3.51E-09 | 5.9057   | 1376071 | Asthma |
| rs2093656   | 9 | 5780803 | T | C | 0.3106 | 0.0314  | 0.0052 | 1.69E-09 | 6.0255   | 1316443 | Asthma |
| rs1028702   | 9 | 5786850 | A | G | 0.3114 | 0.0291  | 0.0051 | 9.95E-09 | 5.7314   | 1376071 | Asthma |
| rs8181183   | 9 | 5803221 | G | A | 0.3118 | 0.0281  | 0.0051 | 3.21E-08 | 5.5297   | 1376071 | Asthma |
| rs2797513   | 9 | 5803864 | C | T | 0.3165 | 0.0301  | 0.0051 | 2.54E-09 | 5.9586   | 1376071 | Asthma |
| rs1014006   | 9 | 5804276 | A | G | 0.3139 | 0.0297  | 0.0051 | 4.48E-09 | 5.8653   | 1376071 | Asthma |
| rs7865802   | 9 | 5816355 | C | G | 0.3560 | 0.0274  | 0.0049 | 2.51E-08 | 5.5725   | 1376071 | Asthma |
| rs72693791  | 9 | 5816825 | A | G | 0.0883 | 0.0564  | 0.0087 | 8.30E-11 | 6.4952   | 1316443 | Asthma |
| rs1573118   | 9 | 5822308 | T | C | 0.3433 | 0.0285  | 0.0051 | 2.25E-08 | 5.5913   | 1316443 | Asthma |
| rs10815286  | 9 | 5822801 | G | A | 0.3779 | 0.0279  | 0.0050 | 2.18E-08 | 5.5969   | 1316443 | Asthma |
| rs148642300 | 9 | 5840019 | G | A | 0.0256 | 0.1052  | 0.0156 | 1.72E-11 | 6.7274   | 1376071 | Asthma |
| rs12379291  | 9 | 5840749 | G | C | 0.4520 | 0.0343  | 0.0052 | 3.35E-11 | 6.6304   | 948423  | Asthma |
| rs7047575   | 9 | 5841438 | G | A | 0.4813 | 0.0356  | 0.0049 | 2.28E-13 | 7.3312   | 1316443 | Asthma |
| rs12343821  | 9 | 5844217 | A | G | 0.3865 | 0.0278  | 0.0050 | 2.20E-08 | 5.5959   | 1316443 | Asthma |
| rs35598997  | 9 | 5847602 | C | T | 0.4863 | 0.0275  | 0.0047 | 6.06E-09 | 5.8151   | 1376071 | Asthma |
| rs58029167  | 9 | 5850375 | G | A | 0.2863 | 0.0346  | 0.0057 | 1.53E-09 | 6.0406   | 1219993 | Asthma |
| rs4289865   | 9 | 5850834 | T | C | 0.3629 | 0.0299  | 0.0049 | 1.11E-09 | 6.0930   | 1376071 | Asthma |
| rs10733516  | 9 | 5851454 | G | T | 0.3508 | 0.0279  | 0.0049 | 1.70E-08 | 5.6399   | 1376071 | Asthma |
| rs34422907  | 9 | 5853096 | T | C | 0.3547 | 0.0287  | 0.0051 | 1.37E-08 | 5.6769   | 1316443 | Asthma |
| rs9299022   | 9 | 5854323 | A | G | 0.3574 | 0.0287  | 0.0049 | 5.63E-09 | 5.8273   | 1376071 | Asthma |
| rs1418745   | 9 | 5854512 | C | A | 0.2948 | 0.0302  | 0.0052 | 5.09E-09 | 5.8442   | 1376071 | Asthma |
| rs72697337  | 9 | 5855078 | G | T | 0.2950 | 0.0299  | 0.0052 | 7.33E-09 | 5.7830   | 1376071 | Asthma |
| rs6477005   | 9 | 5856209 | G | T | 0.2957 | 0.0300  | 0.0052 | 6.01E-09 | 5.8165   | 1376071 | Asthma |
| rs7872357   | 9 | 5856659 | A | G | 0.3568 | 0.0290  | 0.0049 | 3.82E-09 | 5.8921   | 1376071 | Asthma |
| rs9969808   | 9 | 5856833 | A | G | 0.3567 | 0.0292  | 0.0049 | 2.88E-09 | 5.9382   | 1376071 | Asthma |
| rs55655826  | 9 | 5857375 | C | T | 0.2955 | 0.0306  | 0.0052 | 3.22E-09 | 5.9200   | 1376071 | Asthma |
| rs6477006   | 9 | 5857696 | C | A | 0.3597 | 0.0300  | 0.0049 | 9.40E-10 | 6.1193   | 1376071 | Asthma |
| rs6477007   | 9 | 5857998 | G | A | 0.3585 | 0.0297  | 0.0049 | 1.59E-09 | 6.0351   | 1376071 | Asthma |
| rs999922    | 9 | 5858307 | C | G | 0.2939 | 0.0306  | 0.0052 | 3.46E-09 | 5.9079   | 1376071 | Asthma |
| rs999921    | 9 | 5858571 | G | T | 0.3447 | 0.0290  | 0.0050 | 5.01E-09 | 5.8471   | 1376071 | Asthma |
| rs7037314   | 9 | 5858665 | G | T | 0.3584 | 0.0311  | 0.0049 | 2.30E-10 | 6.3401   | 1376071 | Asthma |
| rs10217579  | 9 | 5859073 | C | T | 0.2863 | 0.0338  | 0.0052 | 9.08E-11 | 6.4817   | 1376071 | Asthma |
| rs12005923  | 9 | 5859338 | A | C | 0.3547 | 0.0297  | 0.0053 | 2.07E-08 | 5.6063   | 1246149 | Asthma |
| rs10732361  | 9 | 5859406 | C | T | 0.3584 | 0.0295  | 0.0049 | 2.05E-09 | 5.9943   | 1376071 | Asthma |
| rs7041526   | 9 | 5859564 | A | G | 0.3555 | 0.0298  | 0.0049 | 1.34E-09 | 6.0631   | 1376071 | Asthma |
| rs10732197  | 9 | 5859774 | C | T | 0.3583 | 0.0295  | 0.0049 | 1.95E-09 | 6.0019   | 1376071 | Asthma |
| rs7041923   | 9 | 5859800 | A | G | 0.2823 | 0.0331  | 0.0052 | 2.52E-10 | 6.3260   | 1376071 | Asthma |
| rs10758711  | 9 | 5860055 | T | A | 0.3561 | 0.0300  | 0.0049 | 1.11E-09 | 6.0921   | 1376071 | Asthma |
| rs7851958   | 9 | 5860763 | C | T | 0.3566 | 0.0293  | 0.0049 | 2.70E-09 | 5.9491   | 1376071 | Asthma |
| rs4595177   | 9 | 5860882 | A | T | 0.3564 | 0.0290  | 0.0049 | 3.91E-09 | 5.8880   | 1376071 | Asthma |
| rs4742127   | 9 | 5860957 | C | G | 0.3043 | 0.0324  | 0.0051 | 2.48E-10 | 6.3282   | 1376071 | Asthma |
| rs7044017   | 9 | 5861604 | G | A | 0.2950 | 0.0304  | 0.0052 | 4.06E-09 | 5.8816   | 1376071 | Asthma |
| rs72697350  | 9 | 5861825 | T | C | 0.2708 | 0.0360  | 0.0058 | 6.36E-10 | 6.1814   | 1219993 | Asthma |
| rs6477009   | 9 | 5861964 | C | T | 0.3537 | 0.0303  | 0.0053 | 9.98E-09 | 5.7311   | 1246149 | Asthma |
| rs10758712  | 9 | 5864276 | G | T | 0.3597 | 0.0313  | 0.0049 | 1.85E-10 | 6.3734   | 1376071 | Asthma |
| rs6477011   | 9 | 5864975 | T | C | 0.3079 | 0.0325  | 0.0051 | 2.28E-10 | 6.3409   | 1376071 | Asthma |
| rs1418741   | 9 | 5865131 | A | G | 0.3511 | 0.0335  | 0.0054 | 6.12E-10 | 6.1873   | 1219993 | Asthma |
| rs2153927   | 9 | 5865596 | G | A | 0.3643 | 0.0317  | 0.0049 | 1.02E-10 | 6.4635   | 1376071 | Asthma |
| rs66632892  | 9 | 5866925 | A | G | 0.2852 | 0.0350  | 0.0052 | 2.35E-11 | 6.6825   | 1376071 | Asthma |
| rs2066415   | 9 | 5867061 | T | C | 0.4000 | 0.0305  | 0.0050 | 7.14E-10 | 6.1630   | 1316443 | Asthma |
| rs2066413   | 9 | 5867140 | A | G | 0.3610 | 0.0318  | 0.0050 | 2.76E-10 | 6.3116   | 1316443 | Asthma |
| rs75557055  | 9 | 5888194 | T | G | 0.0493 | -0.0644 | 0.0112 | 8.48E-09 | -5.7588  | 1376071 | Asthma |
| rs79697966  | 9 | 5890355 | G | A | 0.0213 | 0.1281  | 0.0171 | 7.57E-14 | 7.4775   | 1376071 | Asthma |
| rs112976176 | 9 | 5905008 | T | C | 0.0325 | 0.1075  | 0.0137 | 4.49E-15 | 7.8400   | 1376071 | Asthma |
| rs143293684 | 9 | 5924109 | T | A | 0.0206 | 0.1383  | 0.0176 | 3.68E-15 | 7.8654   | 1376071 | Asthma |
| rs10975357  | 9 | 5934967 | T | C | 0.1648 | -0.0537 | 0.0066 | 4.53E-16 | -8.1234  | 1316443 | Asthma |
| rs117134689 | 9 | 5936490 | G | C | 0.0477 | 0.1187  | 0.0116 | 9.24E-25 | 10.2744  | 1376071 | Asthma |
| rs62556405  | 9 | 5938045 | C | T | 0.0580 | -0.0616 | 0.0103 | 2.19E-09 | -5.9829  | 1376071 | Asthma |
| rs62556407  | 9 | 5948346 | T | A | 0.0857 | -0.0729 | 0.0085 | 1.31E-17 | -8.5426  | 1376071 | Asthma |
| rs78728108  | 9 | 5966313 | C | T | 0.0485 | 0.1151  | 0.0114 | 8.44E-24 | 10.0585  | 1376071 | Asthma |
| rs568270548 | 9 | 5971047 | T | C | 0.0884 | -0.0824 | 0.0139 | 3.29E-09 | -5.9162  | 778845  | Asthma |
| rs111734314 | 9 | 5988733 | C | G | 0.0227 | -0.0849 | 0.0155 | 4.16E-08 | -5.4839  | 1376071 | Asthma |
| rs79743748  | 9 | 5990482 | T | G | 0.0449 | 0.1220  | 0.0120 | 3.13E-24 | 10.1549  | 1376071 | Asthma |
| rs62557310  | 9 | 6021398 | C | G | 0.0913 | -0.0701 | 0.0085 | 1.13E-16 | -8.2902  | 1316443 | Asthma |
| rs191605295 | 9 | 6033726 | T | C | 0.0126 | -0.1392 | 0.0228 | 1.07E-09 | -6.0981  | 1299802 | Asthma |
| rs62557312  | 9 | 6047765 | T | C | 0.1849 | -0.0795 | 0.0076 | 8.86E-26 | -10.4976 | 1042455 | Asthma |
| rs10975410  | 9 | 6047766 | A | G | 0.4330 | -0.0282 | 0.0049 | 7.58E-09 | -5.7777  | 1316443 | Asthma |
| rs10975412  | 9 | 6049547 | G | A | 0.1811 | -0.0717 | 0.0062 | 1.68E-30 | -11.4792 | 1316443 | Asthma |
| rs10975413  | 9 | 6049843 | G | A | 0.1857 | -0.0725 | 0.0061 | 5.85E-33 | -11.9588 | 1376071 | Asthma |
| rs343478    | 9 | 6051399 | A | G | 0.4353 | -0.0295 | 0.0049 | 1.34E-09 | -6.0630  | 1316443 | Asthma |
| rs189349    | 9 | 6051597 | G | A | 0.4307 | -0.0338 | 0.0059 | 8.38E-09 | -5.7608  | 1030443 | Asthma |

|            |   |         |   |   |        |         |        |          |          |         |        |
|------------|---|---------|---|---|--------|---------|--------|----------|----------|---------|--------|
| rs10975416 | 9 | 6051924 | G | T | 0.1857 | -0.0727 | 0.0061 | 3.95E-33 | -11.9912 | 1376071 | Asthma |
| rs1330124  | 9 | 6053098 | C | A | 0.1856 | -0.0722 | 0.0061 | 1.16E-32 | -11.9018 | 1376071 | Asthma |
| rs343479   | 9 | 6054314 | C | T | 0.1869 | -0.0712 | 0.0061 | 6.17E-32 | -11.7615 | 1376071 | Asthma |
| rs380568   | 9 | 6055531 | C | T | 0.1865 | -0.0717 | 0.0061 | 2.71E-32 | -11.8306 | 1376071 | Asthma |
| rs393556   | 9 | 6056468 | G | A | 0.1865 | -0.0717 | 0.0061 | 2.36E-32 | -11.8425 | 1376071 | Asthma |
| rs10975418 | 9 | 6057011 | G | A | 0.1833 | -0.0782 | 0.0073 | 5.40E-27 | -10.7586 | 1090071 | Asthma |
| rs343498   | 9 | 6059145 | A | T | 0.1857 | -0.0715 | 0.0061 | 4.64E-32 | -11.7853 | 1376071 | Asthma |
| rs343499   | 9 | 6059157 | G | A | 0.1857 | -0.0715 | 0.0061 | 4.89E-32 | -11.7810 | 1376071 | Asthma |
| rs7040215  | 9 | 6061661 | C | A | 0.4416 | -0.0314 | 0.0052 | 1.52E-09 | -6.0421  | 1224666 | Asthma |
| rs6477031  | 9 | 6061668 | A | T | 0.5521 | 0.0316  | 0.0056 | 2.11E-08 | 5.6031   | 1094744 | Asthma |
| rs6477032  | 9 | 6061779 | C | G | 0.5518 | 0.0317  | 0.0056 | 2.08E-08 | 5.6056   | 1094744 | Asthma |
| rs343487   | 9 | 6062269 | G | A | 0.1870 | -0.0708 | 0.0060 | 1.00E-31 | -11.7203 | 1376071 | Asthma |
| rs343488   | 9 | 6064071 | C | T | 0.5459 | 0.0293  | 0.0047 | 6.25E-10 | 6.1841   | 1376071 | Asthma |
| rs343489   | 9 | 6064299 | G | C | 0.1868 | -0.0714 | 0.0060 | 3.26E-32 | -11.8152 | 1376071 | Asthma |
| rs343490   | 9 | 6064575 | G | A | 0.1868 | -0.0714 | 0.0060 | 3.00E-32 | -11.8221 | 1376071 | Asthma |
| rs343491   | 9 | 6064640 | C | G | 0.1868 | -0.0714 | 0.0060 | 3.43E-32 | -11.8108 | 1376071 | Asthma |
| rs343492   | 9 | 6065524 | A | G | 0.4478 | -0.0319 | 0.0047 | 1.85E-11 | -6.7176  | 1376071 | Asthma |
| rs343497   | 9 | 6067744 | T | C | 0.4406 | -0.0296 | 0.0047 | 4.79E-10 | -6.2259  | 1376071 | Asthma |
| rs343496   | 9 | 6068077 | T | A | 0.1829 | -0.0722 | 0.0061 | 2.06E-32 | -11.8536 | 1376071 | Asthma |
| rs62558390 | 9 | 6068361 | T | C | 0.1821 | -0.0724 | 0.0061 | 1.77E-32 | -11.8665 | 1376071 | Asthma |
| rs343495   | 9 | 6069445 | C | T | 0.1866 | -0.0716 | 0.0060 | 2.24E-32 | -11.8468 | 1376071 | Asthma |
| rs343494   | 9 | 6070342 | C | T | 0.5450 | 0.0295  | 0.0047 | 4.49E-10 | 6.2363   | 1376071 | Asthma |
| rs343493   | 9 | 6071061 | A | G | 0.5433 | 0.0294  | 0.0047 | 5.52E-10 | 6.2037   | 1376071 | Asthma |
| rs184670   | 9 | 6072071 | A | G | 0.5357 | 0.0274  | 0.0047 | 6.95E-09 | 5.7922   | 1376071 | Asthma |
| rs343476   | 9 | 6072597 | T | C | 0.1838 | -0.0719 | 0.0061 | 2.87E-32 | -11.8259 | 1376071 | Asthma |
| rs343475   | 9 | 6073013 | C | G | 0.1839 | -0.0720 | 0.0061 | 2.28E-32 | -11.8451 | 1376071 | Asthma |
| rs189348   | 9 | 6073194 | T | C | 0.1838 | -0.0719 | 0.0061 | 3.01E-32 | -11.8220 | 1376071 | Asthma |
| rs343474   | 9 | 6073843 | A | G | 0.4436 | -0.0310 | 0.0047 | 6.62E-11 | -6.5290  | 1376071 | Asthma |
| rs411270   | 9 | 6074494 | T | C | 0.1841 | -0.0729 | 0.0066 | 3.83E-28 | -10.9999 | 1224666 | Asthma |
| rs404444   | 9 | 6074495 | T | G | 0.4229 | 0.0297  | 0.0053 | 2.77E-08 | 5.5554   | 1224666 | Asthma |
| rs343473   | 9 | 6074936 | A | G | 0.3325 | -0.0358 | 0.0050 | 7.18E-13 | -7.1760  | 1376071 | Asthma |
| rs4742151  | 9 | 6076102 | G | A | 0.3338 | -0.0364 | 0.0050 | 2.81E-13 | -7.3033  | 1376071 | Asthma |
| rs404582   | 9 | 6076777 | T | A | 0.3309 | -0.0353 | 0.0050 | 1.64E-12 | -7.0623  | 1376071 | Asthma |
| rs397505   | 9 | 6076823 | T | C | 0.1850 | -0.0726 | 0.0061 | 4.34E-33 | -11.9833 | 1376071 | Asthma |
| rs451974   | 9 | 6076844 | A | G | 0.1850 | -0.0726 | 0.0061 | 4.73E-33 | -11.9763 | 1376071 | Asthma |
| rs378952   | 9 | 6078146 | C | T | 0.1854 | -0.0724 | 0.0061 | 5.68E-33 | -11.9610 | 1376071 | Asthma |
| rs371454   | 9 | 6078614 | C | T | 0.1851 | -0.0721 | 0.0061 | 1.09E-32 | -11.9065 | 1376071 | Asthma |
| rs454664   | 9 | 6078763 | A | G | 0.3299 | -0.0350 | 0.0050 | 2.44E-12 | -7.0067  | 1376071 | Asthma |
| rs401834   | 9 | 6078991 | T | C | 0.1851 | -0.0723 | 0.0061 | 6.66E-33 | -11.9478 | 1376071 | Asthma |
| rs184646   | 9 | 6080758 | A | C | 0.5295 | 0.0283  | 0.0048 | 4.63E-09 | 5.8598   | 1316443 | Asthma |
| rs340935   | 9 | 6080998 | C | G | 0.1873 | -0.0725 | 0.0060 | 3.05E-33 | -12.0126 | 1376071 | Asthma |
| rs2150968  | 9 | 6081298 | A | G | 0.3074 | -0.0479 | 0.0051 | 7.47E-21 | -9.3669  | 1376071 | Asthma |
| rs340934   | 9 | 6081804 | G | T | 0.1895 | -0.0742 | 0.0060 | 5.15E-35 | -12.3455 | 1376071 | Asthma |
| rs340933   | 9 | 6085078 | T | G | 0.1752 | -0.0718 | 0.0062 | 2.98E-31 | -11.6278 | 1376071 | Asthma |
| rs340931   | 9 | 6086443 | G | A | 0.3229 | -0.0410 | 0.0050 | 4.05E-16 | -8.1372  | 1376071 | Asthma |
| rs168168   | 9 | 6086695 | A | C | 0.1757 | -0.0722 | 0.0062 | 1.34E-31 | -11.6955 | 1376071 | Asthma |
| rs340929   | 9 | 6086714 | C | T | 0.3310 | -0.0382 | 0.0051 | 8.19E-14 | -7.4673  | 1316443 | Asthma |
| rs340928   | 9 | 6086913 | A | G | 0.0451 | 0.1325  | 0.0121 | 1.02E-27 | 10.9101  | 1316443 | Asthma |
| rs340926   | 9 | 6087252 | T | G | 0.1757 | -0.0718 | 0.0062 | 2.66E-31 | -11.6375 | 1376071 | Asthma |
| rs340925   | 9 | 6088398 | T | G | 0.1766 | -0.0710 | 0.0062 | 9.17E-31 | -11.5313 | 1376071 | Asthma |
| rs340924   | 9 | 6088525 | T | C | 0.1766 | -0.0711 | 0.0062 | 8.03E-31 | -11.5429 | 1376071 | Asthma |
| rs340923   | 9 | 6088628 | G | A | 0.1768 | -0.0712 | 0.0062 | 6.91E-31 | -11.5557 | 1376071 | Asthma |
| rs340922   | 9 | 6088815 | A | C | 0.1766 | -0.0712 | 0.0062 | 6.89E-31 | -11.5561 | 1376071 | Asthma |
| rs340921   | 9 | 6090160 | G | T | 0.1758 | -0.0718 | 0.0062 | 2.86E-31 | -11.6313 | 1376071 | Asthma |
| rs340919   | 9 | 6090704 | A | G | 0.1770 | -0.0711 | 0.0062 | 7.62E-31 | -11.5473 | 1376071 | Asthma |
| rs821164   | 9 | 6090989 | C | G | 0.1767 | -0.0710 | 0.0062 | 1.00E-30 | -11.5239 | 1376071 | Asthma |
| rs340918   | 9 | 6091048 | A | C | 0.1767 | -0.0711 | 0.0062 | 8.56E-31 | -11.5372 | 1376071 | Asthma |
| rs695013   | 9 | 6091565 | C | T | 0.1767 | -0.0710 | 0.0062 | 1.07E-30 | -11.5182 | 1376071 | Asthma |
| rs531759   | 9 | 6091996 | C | T | 0.1767 | -0.0709 | 0.0062 | 1.17E-30 | -11.5107 | 1376071 | Asthma |
| rs639247   | 9 | 6092089 | T | G | 0.1767 | -0.0709 | 0.0062 | 1.17E-30 | -11.5103 | 1376071 | Asthma |
| rs420445   | 9 | 6092154 | G | A | 0.1767 | -0.0709 | 0.0062 | 1.14E-30 | -11.5130 | 1376071 | Asthma |
| rs380888   | 9 | 6092395 | T | G | 0.1767 | -0.0709 | 0.0062 | 1.12E-30 | -11.5139 | 1376071 | Asthma |
| rs372560   | 9 | 6092399 | T | C | 0.1767 | -0.0709 | 0.0062 | 1.08E-30 | -11.5170 | 1376071 | Asthma |
| rs503507   | 9 | 6092757 | G | A | 0.1767 | -0.0709 | 0.0062 | 1.10E-30 | -11.5155 | 1376071 | Asthma |
| rs503384   | 9 | 6092804 | T | A | 0.1767 | -0.0710 | 0.0062 | 1.03E-30 | -11.5212 | 1376071 | Asthma |
| rs371165   | 9 | 6092856 | T | G | 0.1739 | -0.0776 | 0.0074 | 8.11E-26 | -10.5060 | 1090071 | Asthma |
| rs398561   | 9 | 6093132 | G | A | 0.1767 | -0.0711 | 0.0062 | 8.33E-31 | -11.5396 | 1376071 | Asthma |
| rs369996   | 9 | 6093192 | T | A | 0.1767 | -0.0710 | 0.0062 | 1.06E-30 | -11.5186 | 1376071 | Asthma |
| rs397916   | 9 | 6093345 | G | A | 0.1767 | -0.0710 | 0.0062 | 1.03E-30 | -11.5211 | 1376071 | Asthma |
| rs425489   | 9 | 6093790 | T | C | 0.1766 | -0.0710 | 0.0062 | 1.00E-30 | -11.5238 | 1376071 | Asthma |
| rs2150969  | 9 | 6093990 | C | G | 0.1766 | -0.0709 | 0.0062 | 1.10E-30 | -11.5155 | 1376071 | Asthma |
| rs399834   | 9 | 6094454 | G | C | 0.1758 | -0.0716 | 0.0062 | 4.25E-31 | -11.5973 | 1376071 | Asthma |
| rs390158   | 9 | 6094463 | T | G | 0.1757 | -0.0715 | 0.0062 | 5.55E-31 | -11.5745 | 1376071 | Asthma |
| rs10739084 | 9 | 6096189 | G | C | 0.1763 | -0.0704 | 0.0062 | 3.52E-30 | -11.4149 | 1376071 | Asthma |

|            |   |         |   |   |        |         |        |          |          |         |        |
|------------|---|---------|---|---|--------|---------|--------|----------|----------|---------|--------|
| rs401731   | 9 | 6096349 | A | C | 0.1754 | -0.0713 | 0.0062 | 8.96E-31 | -11.5332 | 1376071 | Asthma |
| rs9408638  | 9 | 6096931 | A | G | 0.1758 | -0.0717 | 0.0062 | 3.34E-31 | -11.6179 | 1376071 | Asthma |
| rs340894   | 9 | 6097164 | T | C | 0.1755 | -0.0715 | 0.0062 | 5.51E-31 | -11.5751 | 1376071 | Asthma |
| rs340893   | 9 | 6097390 | C | T | 0.1758 | -0.0718 | 0.0062 | 2.99E-31 | -11.6276 | 1376071 | Asthma |
| rs437389   | 9 | 6099531 | T | C | 0.1754 | -0.0709 | 0.0062 | 1.66E-30 | -11.4800 | 1376071 | Asthma |
| rs340889   | 9 | 6100476 | G | C | 0.3288 | -0.0360 | 0.0051 | 1.98E-12 | -7.0358  | 1316443 | Asthma |
| rs340888   | 9 | 6101163 | C | T | 0.3299 | -0.0358 | 0.0051 | 2.63E-12 | -6.9962  | 1316443 | Asthma |
| rs340887   | 9 | 6101481 | T | A | 0.1763 | -0.0705 | 0.0062 | 3.08E-30 | -11.4266 | 1376071 | Asthma |
| rs340896   | 9 | 6102891 | T | C | 0.1757 | -0.0704 | 0.0062 | 4.66E-30 | -11.3906 | 1376071 | Asthma |
| rs340895   | 9 | 6104244 | C | T | 0.1764 | -0.0705 | 0.0062 | 2.74E-30 | -11.4367 | 1376071 | Asthma |
| rs2890696  | 9 | 6105514 | A | C | 0.1790 | -0.0801 | 0.0092 | 4.43E-18 | -8.6672  | 570646  | Asthma |
| rs340906   | 9 | 6106086 | T | C | 0.1759 | -0.0703 | 0.0062 | 4.84E-30 | -11.3874 | 1376071 | Asthma |
| rs340905   | 9 | 6106169 | A | C | 0.1757 | -0.0702 | 0.0062 | 6.09E-30 | -11.3672 | 1376071 | Asthma |
| rs340904   | 9 | 6106779 | C | A | 0.1753 | -0.0709 | 0.0062 | 1.90E-30 | -11.4686 | 1376071 | Asthma |
| rs340902   | 9 | 6108216 | T | G | 0.1754 | -0.0706 | 0.0062 | 2.94E-30 | -11.4305 | 1376071 | Asthma |
| rs340901   | 9 | 6108398 | G | C | 0.1752 | -0.0710 | 0.0062 | 1.40E-30 | -11.4951 | 1376071 | Asthma |
| rs340900   | 9 | 6108921 | C | T | 0.5580 | 0.0300  | 0.0047 | 2.52E-10 | 6.3258   | 1376071 | Asthma |
| rs340899   | 9 | 6109080 | T | C | 0.5576 | 0.0305  | 0.0047 | 1.23E-10 | 6.4352   | 1376071 | Asthma |
| rs340898   | 9 | 6109516 | C | A | 0.5594 | 0.0300  | 0.0047 | 2.39E-10 | 6.3342   | 1376071 | Asthma |
| rs340897   | 9 | 6110763 | C | T | 0.2699 | -0.0516 | 0.0053 | 1.68E-22 | -9.7597  | 1376071 | Asthma |
| rs189309   | 9 | 6111393 | T | C | 0.4290 | -0.0317 | 0.0048 | 2.68E-11 | -6.6632  | 1376071 | Asthma |
| rs974936   | 9 | 6111703 | A | C | 0.1747 | -0.0714 | 0.0062 | 9.18E-31 | -11.5314 | 1376071 | Asthma |
| rs436300   | 9 | 6112044 | G | C | 0.4319 | -0.0326 | 0.0048 | 7.62E-12 | -6.8455  | 1376071 | Asthma |
| rs405594   | 9 | 6112261 | G | A | 0.2702 | -0.0516 | 0.0053 | 1.66E-22 | -9.7606  | 1376071 | Asthma |
| rs396183   | 9 | 6112501 | G | A | 0.2701 | -0.0516 | 0.0053 | 1.84E-22 | -9.7506  | 1376071 | Asthma |
| rs414320   | 9 | 6112532 | C | T | 0.2702 | -0.0517 | 0.0053 | 1.50E-22 | -9.7712  | 1376071 | Asthma |
| rs441616   | 9 | 6113940 | T | C | 0.1749 | -0.0716 | 0.0062 | 5.51E-31 | -11.5752 | 1376071 | Asthma |
| rs439190   | 9 | 6114076 | C | T | 0.2870 | -0.0514 | 0.0052 | 6.42E-23 | -9.8567  | 1376071 | Asthma |
| rs391813   | 9 | 6114094 | C | T | 0.2870 | -0.0514 | 0.0052 | 6.52E-23 | -9.8550  | 1376071 | Asthma |
| rs444826   | 9 | 6114483 | C | G | 0.5398 | 0.0311  | 0.0047 | 4.84E-11 | 6.5759   | 1376071 | Asthma |
| rs393410   | 9 | 6114512 | A | G | 0.2702 | -0.0516 | 0.0053 | 1.64E-22 | -9.7620  | 1376071 | Asthma |
| rs375560   | 9 | 6114744 | T | C | 0.1750 | -0.0714 | 0.0062 | 6.98E-31 | -11.5548 | 1376071 | Asthma |
| rs1556470  | 9 | 6115538 | C | T | 0.1749 | -0.0715 | 0.0062 | 6.04E-31 | -11.5672 | 1376071 | Asthma |
| rs440366   | 9 | 6115681 | A | T | 0.2610 | -0.0556 | 0.0053 | 2.69E-25 | -10.3923 | 1376071 | Asthma |
| rs410649   | 9 | 6115769 | T | G | 0.5579 | 0.0309  | 0.0047 | 7.50E-11 | 6.5103   | 1376071 | Asthma |
| rs6651526  | 9 | 6116228 | A | G | 0.1768 | -0.0719 | 0.0067 | 8.73E-27 | -10.7142 | 1219993 | Asthma |
| rs4008366  | 9 | 6116407 | C | T | 0.2948 | -0.0536 | 0.0065 | 2.17E-16 | -8.2122  | 977229  | Asthma |
| rs2381385  | 9 | 6116666 | C | T | 0.2931 | -0.0512 | 0.0052 | 4.10E-23 | -9.9016  | 1376071 | Asthma |
| rs10114267 | 9 | 6116820 | G | A | 0.2927 | -0.0513 | 0.0052 | 3.56E-23 | -9.9157  | 1376071 | Asthma |
| rs1591044  | 9 | 6116948 | A | G | 0.1747 | -0.0716 | 0.0062 | 5.14E-31 | -11.5812 | 1376071 | Asthma |
| rs9407312  | 9 | 6116981 | T | C | 0.1746 | -0.0712 | 0.0062 | 1.23E-30 | -11.5063 | 1376071 | Asthma |
| rs1591045  | 9 | 6117094 | A | G | 0.2758 | -0.0521 | 0.0053 | 4.00E-23 | -9.9040  | 1376071 | Asthma |
| rs694965   | 9 | 6117329 | C | T | 0.2757 | -0.0521 | 0.0053 | 4.18E-23 | -9.8996  | 1376071 | Asthma |
| rs397542   | 9 | 6118043 | T | C | 0.2925 | -0.0520 | 0.0052 | 1.02E-23 | -10.0398 | 1376071 | Asthma |
| rs381486   | 9 | 6118911 | G | A | 0.2934 | -0.0516 | 0.0052 | 1.94E-23 | -9.9762  | 1376071 | Asthma |
| rs374672   | 9 | 6119038 | C | T | 0.1754 | -0.0718 | 0.0062 | 3.18E-31 | -11.6221 | 1376071 | Asthma |
| rs374889   | 9 | 6119456 | T | C | 0.2840 | -0.0550 | 0.0052 | 6.66E-26 | -10.5246 | 1376071 | Asthma |
| rs380580   | 9 | 6119479 | A | C | 0.5334 | 0.0323  | 0.0047 | 8.58E-12 | 6.8286   | 1376071 | Asthma |
| rs447778   | 9 | 6119627 | G | T | 0.2933 | -0.0517 | 0.0052 | 1.68E-23 | -9.9901  | 1376071 | Asthma |
| rs372482   | 9 | 6119872 | G | A | 0.2932 | -0.0516 | 0.0052 | 1.77E-23 | -9.9853  | 1376071 | Asthma |
| rs434521   | 9 | 6120137 | C | A | 0.2937 | -0.0517 | 0.0052 | 1.56E-23 | -9.9979  | 1376071 | Asthma |
| rs418014   | 9 | 6120336 | C | T | 0.2933 | -0.0516 | 0.0052 | 1.76E-23 | -9.9855  | 1376071 | Asthma |
| rs1758599  | 9 | 6120543 | T | C | 0.2792 | -0.0630 | 0.0070 | 2.68E-19 | -8.9811  | 995476  | Asthma |
| rs1755529  | 9 | 6120963 | G | A | 0.2931 | -0.0516 | 0.0052 | 1.90E-23 | -9.9778  | 1376071 | Asthma |
| rs369300   | 9 | 6120976 | A | G | 0.5343 | 0.0317  | 0.0047 | 1.93E-11 | 6.7112   | 1376071 | Asthma |
| rs453111   | 9 | 6121382 | G | A | 0.2755 | -0.0521 | 0.0053 | 4.15E-23 | -9.9002  | 1376071 | Asthma |
| rs442246   | 9 | 6121504 | G | T | 0.2939 | -0.0514 | 0.0052 | 2.84E-23 | -9.9383  | 1376071 | Asthma |
| rs392148   | 9 | 6121675 | C | T | 0.2755 | -0.0520 | 0.0053 | 4.65E-23 | -9.8890  | 1376071 | Asthma |
| rs381702   | 9 | 6122331 | C | T | 0.2930 | -0.0514 | 0.0052 | 2.77E-23 | -9.9404  | 1376071 | Asthma |
| rs693838   | 9 | 6122556 | C | T | 0.2927 | -0.0513 | 0.0052 | 3.23E-23 | -9.9255  | 1376071 | Asthma |
| rs443175   | 9 | 6123556 | T | C | 0.1750 | -0.0717 | 0.0062 | 5.50E-31 | -11.5754 | 1376071 | Asthma |
| rs442851   | 9 | 6123782 | C | T | 0.1750 | -0.0715 | 0.0062 | 6.88E-31 | -11.5560 | 1376071 | Asthma |
| rs1332291  | 9 | 6124101 | T | C | 0.1868 | -0.0659 | 0.0060 | 8.67E-28 | -10.9259 | 1376071 | Asthma |
| rs1755531  | 9 | 6124250 | T | G | 0.1750 | -0.0716 | 0.0062 | 6.50E-31 | -11.5609 | 1376071 | Asthma |
| rs1970089  | 9 | 6124359 | T | C | 0.1750 | -0.0715 | 0.0062 | 8.08E-31 | -11.5423 | 1376071 | Asthma |
| rs1537285  | 9 | 6124584 | T | G | 0.1750 | -0.0717 | 0.0062 | 5.32E-31 | -11.5781 | 1376071 | Asthma |
| rs1332292  | 9 | 6124862 | T | C | 0.1750 | -0.0716 | 0.0062 | 6.59E-31 | -11.5597 | 1376071 | Asthma |
| rs7035594  | 9 | 6125353 | A | T | 0.1750 | -0.0716 | 0.0062 | 6.24E-31 | -11.5645 | 1376071 | Asthma |
| rs7039066  | 9 | 6125539 | T | C | 0.1750 | -0.0717 | 0.0062 | 5.32E-31 | -11.5782 | 1376071 | Asthma |
| rs340917   | 9 | 6125912 | A | G | 0.1750 | -0.0716 | 0.0062 | 6.69E-31 | -11.5584 | 1376071 | Asthma |
| rs340916   | 9 | 6126372 | C | T | 0.5374 | 0.0304  | 0.0048 | 3.03E-10 | 6.2975   | 1316443 | Asthma |
| rs340915   | 9 | 6126588 | A | G | 0.1750 | -0.0716 | 0.0062 | 6.83E-31 | -11.5567 | 1376071 | Asthma |
| rs340914   | 9 | 6126799 | A | G | 0.1750 | -0.0716 | 0.0062 | 6.46E-31 | -11.5616 | 1376071 | Asthma |
| rs56024611 | 9 | 6126858 | T | C | 0.1737 | -0.0753 | 0.0075 | 1.96E-23 | -9.9751  | 1064845 | Asthma |



|             |   |         |   |   |        |         |        |          |          |         |        |
|-------------|---|---------|---|---|--------|---------|--------|----------|----------|---------|--------|
| rs340913    | 9 | 6127330 | T | C | 0.1750 | -0.0716 | 0.0062 | 6.63E-31 | -11.5592 | 1376071 | Asthma |
| rs340912    | 9 | 6127851 | A | G | 0.1750 | -0.0717 | 0.0062 | 5.29E-31 | -11.5785 | 1376071 | Asthma |
| rs340911    | 9 | 6128446 | C | G | 0.2924 | -0.0471 | 0.0052 | 8.57E-20 | -9.1057  | 1376071 | Asthma |
| rs340910    | 9 | 6128620 | G | A | 0.5101 | 0.0283  | 0.0048 | 5.07E-09 | 5.8450   | 1316443 | Asthma |
| rs340909    | 9 | 6128646 | G | A | 0.2926 | -0.0474 | 0.0052 | 5.36E-20 | -9.1564  | 1376071 | Asthma |
| rs340908    | 9 | 6128897 | T | C | 0.1751 | -0.0718 | 0.0062 | 4.61E-31 | -11.5904 | 1376071 | Asthma |
| rs340907    | 9 | 6129637 | A | C | 0.1751 | -0.0720 | 0.0062 | 3.24E-31 | -11.6207 | 1376071 | Asthma |
| rs10739086  | 9 | 6130822 | C | T | 0.3088 | -0.0473 | 0.0051 | 2.05E-20 | -9.2596  | 1376071 | Asthma |
| rs10114455  | 9 | 6130938 | A | G | 0.1747 | -0.0721 | 0.0062 | 3.18E-31 | -11.6222 | 1376071 | Asthma |
| rs10114457  | 9 | 6130940 | A | G | 0.1747 | -0.0721 | 0.0062 | 3.29E-31 | -11.6192 | 1376071 | Asthma |
| rs1888908   | 9 | 6131334 | T | A | 0.3086 | -0.0477 | 0.0051 | 9.57E-21 | -9.3408  | 1376071 | Asthma |
| rs1888906   | 9 | 6131460 | G | A | 0.1761 | -0.0730 | 0.0062 | 2.80E-32 | -11.8279 | 1376071 | Asthma |
| rs4742159   | 9 | 6131612 | A | T | 0.1761 | -0.0730 | 0.0062 | 2.86E-32 | -11.8263 | 1376071 | Asthma |
| rs694796    | 9 | 6132621 | A | G | 0.1820 | -0.0692 | 0.0064 | 1.98E-27 | -10.8510 | 1008051 | Asthma |
| rs489464    | 9 | 6132664 | A | T | 0.3088 | -0.0467 | 0.0051 | 6.73E-20 | -9.1319  | 1376071 | Asthma |
| rs386412    | 9 | 6132904 | T | A | 0.3089 | -0.0468 | 0.0051 | 4.90E-20 | -9.1663  | 1376071 | Asthma |
| rs407153    | 9 | 6133014 | T | C | 0.5288 | 0.0309  | 0.0048 | 1.61E-10 | 6.3945   | 1316443 | Asthma |
| rs2026992   | 9 | 6134048 | G | C | 0.2917 | -0.0469 | 0.0052 | 1.39E-19 | -9.0529  | 1376071 | Asthma |
| rs694294    | 9 | 6134402 | C | T | 0.3104 | -0.0476 | 0.0051 | 1.04E-20 | -9.3320  | 1376071 | Asthma |
| rs448115    | 9 | 6134642 | G | A | 0.3104 | -0.0476 | 0.0051 | 1.07E-20 | -9.3291  | 1376071 | Asthma |
| rs409038    | 9 | 6134750 | A | G | 0.3104 | -0.0474 | 0.0051 | 1.62E-20 | -9.2852  | 1376071 | Asthma |
| rs376690    | 9 | 6134926 | C | T | 0.1748 | -0.0720 | 0.0063 | 6.34E-30 | -11.3637 | 1316443 | Asthma |
| rs376382    | 9 | 6134999 | C | T | 0.3110 | -0.0472 | 0.0051 | 1.96E-20 | -9.2644  | 1376071 | Asthma |
| rs2095043   | 9 | 6135847 | C | T | 0.3131 | -0.0489 | 0.0052 | 3.15E-21 | -9.4578  | 1349938 | Asthma |
| rs35326535  | 9 | 6136516 | C | G | 0.1116 | -0.0753 | 0.0133 | 1.35E-08 | -5.6800  | 778845  | Asthma |
| rs62558393  | 9 | 6136593 | A | G | 0.0796 | -0.0880 | 0.0148 | 2.71E-09 | -5.9486  | 778845  | Asthma |
| rs10123047  | 9 | 6137084 | A | G | 0.5139 | 0.0336  | 0.0058 | 9.17E-09 | 5.7455   | 1003385 | Asthma |
| rs150339803 | 9 | 6137521 | T | C | 0.2887 | -0.0665 | 0.0099 | 1.51E-11 | -6.7466  | 778845  | Asthma |
| rs6477047   | 9 | 6138207 | C | G | 0.1728 | -0.0730 | 0.0069 | 8.32E-26 | -10.5036 | 1198533 | Asthma |
| rs7850455   | 9 | 6138327 | C | A | 0.1734 | -0.0715 | 0.0068 | 9.26E-26 | -10.4936 | 1224666 | Asthma |
| rs368981    | 9 | 6139009 | G | A | 0.2934 | -0.0468 | 0.0057 | 1.28E-16 | -8.2753  | 1224666 | Asthma |
| rs12343040  | 9 | 6140320 | T | C | 0.2120 | -0.0640 | 0.0096 | 2.69E-11 | -6.6627  | 778845  | Asthma |
| rs12343041  | 9 | 6140346 | T | A | 0.2097 | -0.0644 | 0.0096 | 2.22E-11 | -6.6907  | 778845  | Asthma |
| rs9407324   | 9 | 6141823 | G | C | 0.1850 | -0.0656 | 0.0071 | 2.20E-20 | -9.2520  | 856646  | Asthma |
| rs544253    | 9 | 6142157 | C | A | 0.3184 | 0.0295  | 0.0051 | 8.20E-09 | 5.7643   | 1376071 | Asthma |
| rs394879    | 9 | 6142418 | T | A | 0.1738 | -0.0721 | 0.0064 | 1.05E-29 | -11.3196 | 1316443 | Asthma |
| rs413382    | 9 | 6142948 | C | A | 0.1839 | -0.0674 | 0.0062 | 3.55E-27 | -10.7971 | 1316443 | Asthma |
| rs386880    | 9 | 6144333 | C | T | 0.3015 | -0.0513 | 0.0052 | 5.34E-23 | -9.8751  | 1376071 | Asthma |
| rs406322    | 9 | 6146121 | T | C | 0.2358 | 0.0787  | 0.0056 | 1.91E-44 | 13.9855  | 1316443 | Asthma |
| rs369756    | 9 | 6146441 | T | G | 0.2154 | 0.0882  | 0.0058 | 7.33E-52 | 15.1522  | 1316443 | Asthma |
| rs384766    | 9 | 6146800 | C | T | 0.2479 | 0.0766  | 0.0056 | 2.96E-43 | 13.7893  | 1316443 | Asthma |
| rs450108    | 9 | 6153485 | C | T | 0.4101 | 0.0678  | 0.0049 | 2.61E-43 | 13.7986  | 1316443 | Asthma |
| rs1116795   | 9 | 6155226 | T | G | 0.4049 | 0.0679  | 0.0049 | 2.10E-43 | 13.8138  | 1316443 | Asthma |
| rs10815359  | 9 | 6155865 | T | C | 0.4033 | 0.0693  | 0.0049 | 5.94E-45 | 14.0683  | 1316443 | Asthma |
| rs2183912   | 9 | 6155928 | A | T | 0.4068 | 0.0678  | 0.0049 | 2.79E-43 | 13.7933  | 1316443 | Asthma |
| rs10975467  | 9 | 6159758 | T | C | 0.2441 | 0.0775  | 0.0054 | 3.97E-46 | 14.2583  | 1376071 | Asthma |
| rs7850598   | 9 | 6159759 | G | A | 0.4082 | 0.0674  | 0.0048 | 7.56E-45 | 14.0514  | 1376071 | Asthma |
| rs4637906   | 9 | 6160049 | G | C | 0.4071 | 0.0675  | 0.0048 | 4.87E-45 | 14.0825  | 1376071 | Asthma |
| rs2890697   | 9 | 6160249 | T | A | 0.4072 | 0.0683  | 0.0048 | 4.99E-46 | 14.2427  | 1376071 | Asthma |
| rs2225537   | 9 | 6160578 | T | C | 0.4052 | 0.0684  | 0.0048 | 5.59E-46 | 14.2346  | 1376071 | Asthma |
| rs2210462   | 9 | 6160648 | T | C | 0.4052 | 0.0682  | 0.0048 | 8.51E-46 | 14.2054  | 1376071 | Asthma |
| rs10124250  | 9 | 6161686 | T | C | 0.4035 | 0.0682  | 0.0048 | 8.01E-46 | 14.2095  | 1376071 | Asthma |
| rs72699183  | 9 | 6163764 | A | G | 0.2369 | 0.0789  | 0.0055 | 3.93E-47 | 14.4191  | 1376071 | Asthma |
| rs10119713  | 9 | 6163823 | A | G | 0.4034 | 0.0682  | 0.0048 | 1.07E-45 | 14.1894  | 1376071 | Asthma |
| rs2079      | 9 | 6166653 | A | G | 0.3381 | 0.0666  | 0.0051 | 3.68E-39 | 13.0913  | 1316443 | Asthma |
| rs2381413   | 9 | 6167017 | G | C | 0.4081 | 0.0654  | 0.0050 | 2.25E-38 | 12.9534  | 1008051 | Asthma |
| rs72699184  | 9 | 6171224 | T | C | 0.0365 | 0.0954  | 0.0131 | 2.99E-13 | 7.2950   | 1316443 | Asthma |
| rs4142528   | 9 | 6172296 | T | A | 0.3133 | 0.0835  | 0.0052 | 4.28E-57 | 15.9246  | 1316443 | Asthma |
| rs7032572   | 9 | 6172380 | G | A | 0.1506 | 0.1212  | 0.0066 | 2.16E-76 | 18.4975  | 1376071 | Asthma |
| rs10815363  | 9 | 6174316 | T | C | 0.3124 | 0.0841  | 0.0052 | 7.10E-58 | 16.0366  | 1316443 | Asthma |
| rs72699185  | 9 | 6175522 | T | G | 0.0545 | 0.0920  | 0.0106 | 4.89E-18 | 8.6563   | 1316443 | Asthma |
| rs72699186  | 9 | 6175855 | T | A | 0.1482 | 0.1223  | 0.0066 | 8.65E-77 | 18.5463  | 1376071 | Asthma |
| rs72699188  | 9 | 6176871 | G | C | 0.1471 | 0.1223  | 0.0066 | 1.69E-76 | 18.5107  | 1376071 | Asthma |
| rs10815364  | 9 | 6177291 | G | T | 0.3128 | 0.0835  | 0.0052 | 4.79E-57 | 15.9176  | 1316443 | Asthma |
| rs10975468  | 9 | 6177302 | T | C | 0.1471 | 0.1226  | 0.0066 | 7.42E-77 | 18.5551  | 1376071 | Asthma |
| rs9777458   | 9 | 6177420 | C | T | 0.2165 | 0.0792  | 0.0070 | 2.68E-29 | 11.2369  | 1068588 | Asthma |
| rs9775039   | 9 | 6177453 | A | G | 0.1455 | 0.1231  | 0.0073 | 5.13E-64 | 16.8925  | 1224666 | Asthma |
| rs552376976 | 9 | 6178277 | T | C | 0.1648 | 0.1256  | 0.0079 | 1.54E-57 | 15.9878  | 1003385 | Asthma |
| rs9697230   | 9 | 6178303 | T | C | 0.3200 | 0.0971  | 0.0076 | 4.62E-37 | 12.7193  | 566903  | Asthma |
| rs62558407  | 9 | 6178411 | T | G | 0.3300 | 0.0874  | 0.0062 | 1.79E-44 | 13.9901  | 1003385 | Asthma |
| rs12376324  | 9 | 6178525 | A | G | 0.1449 | 0.1241  | 0.0073 | 5.84E-65 | 17.0200  | 1224666 | Asthma |
| rs540870314 | 9 | 6178735 | G | A | 0.0399 | 0.0913  | 0.0147 | 5.57E-10 | 6.2021   | 1029518 | Asthma |
| rs11506294  | 9 | 6179117 | G | A | 0.2127 | 0.0843  | 0.0064 | 7.57E-40 | 13.2111  | 1224666 | Asthma |
| rs10975471  | 9 | 6179318 | T | C | 0.1484 | 0.1371  | 0.0089 | 1.23E-53 | 15.4177  | 934923  | Asthma |

|             |   |         |   |   |        |         |        |          |          |         |        |
|-------------|---|---------|---|---|--------|---------|--------|----------|----------|---------|--------|
| rs11521485  | 9 | 6179948 | T | C | 0.1568 | 0.1314  | 0.0087 | 4.05E-51 | 15.0394  | 934923  | Asthma |
| rs4097694   | 9 | 6181307 | T | C | 0.0977 | 0.0493  | 0.0088 | 2.16E-08 | 5.5986   | 1224666 | Asthma |
| rs4529511   | 9 | 6181525 | T | C | 0.2261 | 0.0861  | 0.0079 | 5.19E-28 | 10.9724  | 912533  | Asthma |
| rs10975473  | 9 | 6182542 | T | A | 0.0519 | 0.0861  | 0.0150 | 8.68E-09 | 5.7548   | 847307  | Asthma |
| rs532029992 | 9 | 6182567 | C | G | 0.1465 | 0.1214  | 0.0118 | 6.41E-25 | 10.3090  | 778845  | Asthma |
| rs10975474  | 9 | 6182582 | T | G | 0.0565 | 0.1171  | 0.0136 | 7.47E-18 | 8.6079   | 934923  | Asthma |
| rs10975475  | 9 | 6182815 | C | T | 0.0789 | 0.0866  | 0.0119 | 4.06E-13 | 7.2538   | 934923  | Asthma |
| rs12349858  | 9 | 6185295 | T | C | 0.1534 | 0.1180  | 0.0065 | 3.25E-73 | 18.0997  | 1376071 | Asthma |
| rs76962799  | 9 | 6187132 | A | C | 0.0363 | 0.1528  | 0.0128 | 4.78E-33 | 11.9754  | 1376071 | Asthma |
| rs1929996   | 9 | 6187636 | C | G | 0.3114 | 0.0835  | 0.0051 | 1.18E-59 | 16.2895  | 1376071 | Asthma |
| rs4742166   | 9 | 6188124 | G | C | 0.3111 | 0.0836  | 0.0051 | 1.01E-59 | 16.2985  | 1376071 | Asthma |
| rs1412426   | 9 | 6188652 | A | C | 0.3108 | 0.0836  | 0.0051 | 8.89E-60 | 16.3062  | 1376071 | Asthma |
| rs1412425   | 9 | 6188740 | A | C | 0.3101 | 0.0832  | 0.0051 | 4.42E-59 | 16.2083  | 1376071 | Asthma |
| rs1342326   | 9 | 6190076 | C | A | 0.1492 | 0.1215  | 0.0066 | 2.10E-76 | 18.4990  | 1376071 | Asthma |
| rs2095044   | 9 | 6192796 | T | C | 0.2450 | 0.1035  | 0.0055 | 3.40E-79 | 18.8430  | 1376071 | Asthma |
| rs2381416   | 9 | 6193455 | C | A | 0.2524 | 0.1012  | 0.0054 | 2.40E-77 | 18.6165  | 1376071 | Asthma |
| rs10815370  | 9 | 6194831 | C | A | 0.3163 | 0.0845  | 0.0052 | 7.88E-59 | 16.1725  | 1316443 | Asthma |
| rs4742167   | 9 | 6195285 | C | T | 0.3163 | 0.0845  | 0.0052 | 8.28E-59 | 16.1696  | 1316443 | Asthma |
| rs7033058   | 9 | 6196645 | T | C | 0.3132 | 0.0850  | 0.0052 | 2.82E-59 | 16.2357  | 1316443 | Asthma |
| rs10975479  | 9 | 6197377 | G | A | 0.1504 | 0.1208  | 0.0066 | 8.43E-76 | 18.4233  | 1376071 | Asthma |
| rs1888909   | 9 | 6197392 | T | C | 0.2442 | 0.1048  | 0.0055 | 4.61E-81 | 19.0686  | 1376071 | Asthma |
| rs77632918  | 9 | 6198384 | G | A | 0.0302 | 0.1065  | 0.0137 | 8.41E-15 | 7.7613   | 1376071 | Asthma |
| rs28551499  | 9 | 6198578 | C | A | 0.0624 | 0.0809  | 0.0098 | 1.98E-16 | 8.2231   | 1376071 | Asthma |
| rs928411    | 9 | 6199492 | A | T | 0.3124 | 0.0849  | 0.0052 | 5.06E-59 | 16.1999  | 1316443 | Asthma |
| rs928410    | 9 | 6199536 | T | C | 0.0945 | 0.0447  | 0.0082 | 4.75E-08 | 5.4603   | 1376071 | Asthma |
| rs1929995   | 9 | 6201163 | C | T | 0.1551 | 0.1168  | 0.0065 | 2.37E-72 | 17.9893  | 1376071 | Asthma |
| rs1475658   | 9 | 6201574 | T | A | 0.3107 | 0.0826  | 0.0062 | 6.07E-41 | 13.3996  | 792345  | Asthma |
| rs13298116  | 9 | 6201575 | T | A | 0.2084 | 0.0840  | 0.0063 | 2.58E-40 | 13.2920  | 948423  | Asthma |
| rs10975481  | 9 | 6204469 | G | A | 0.4270 | 0.0632  | 0.0049 | 6.17E-38 | 12.8756  | 1316443 | Asthma |
| rs144829310 | 9 | 6208030 | T | G | 0.1471 | 0.1224  | 0.0066 | 1.33E-76 | 18.5238  | 1376071 | Asthma |
| rs7046661   | 9 | 6209199 | C | G | 0.3144 | 0.0836  | 0.0052 | 1.88E-57 | 15.9761  | 1316443 | Asthma |
| rs992969    | 9 | 6209697 | A | G | 0.2417 | 0.1052  | 0.0055 | 4.40E-81 | 19.0711  | 1376071 | Asthma |
| rs3939286   | 9 | 6210099 | T | C | 0.2426 | 0.1052  | 0.0055 | 4.42E-81 | 19.0703  | 1376071 | Asthma |
| rs72699191  | 9 | 6211813 | C | T | 0.1557 | 0.1168  | 0.0065 | 2.68E-72 | 17.9818  | 1376071 | Asthma |
| rs928412    | 9 | 6213148 | A | G | 0.2503 | 0.1024  | 0.0055 | 5.67E-78 | 18.6919  | 1376071 | Asthma |
| rs928413    | 9 | 6213387 | G | A | 0.2485 | 0.1029  | 0.0055 | 1.25E-78 | 18.7740  | 1376071 | Asthma |
| rs7848215   | 9 | 6213468 | T | C | 0.2465 | 0.1041  | 0.0059 | 8.89E-69 | 17.5272  | 948423  | Asthma |
| rs142807069 | 9 | 6213820 | G | A | 0.1897 | 0.1067  | 0.0084 | 8.52E-37 | 12.6717  | 873440  | Asthma |
| rs10975488  | 9 | 6213829 | G | A | 0.1880 | 0.1089  | 0.0074 | 3.70E-49 | 14.7380  | 1029518 | Asthma |
| rs11791561  | 9 | 6216516 | G | C | 0.4878 | -0.0567 | 0.0049 | 3.79E-31 | -11.6073 | 1316443 | Asthma |
| rs2066361   | 9 | 6218960 | A | T | 0.2438 | 0.0792  | 0.0064 | 3.28E-35 | 12.3818  | 1134232 | Asthma |
| rs2066362   | 9 | 6219176 | T | G | 0.1424 | 0.1175  | 0.0067 | 3.96E-68 | 17.4413  | 1376071 | Asthma |
| rs16924144  | 9 | 6221246 | C | T | 0.3452 | -0.0437 | 0.0051 | 9.17E-18 | -8.5838  | 1316443 | Asthma |
| rs10815376  | 9 | 6222149 | T | C | 0.2976 | 0.0732  | 0.0053 | 5.23E-43 | 13.7479  | 1316443 | Asthma |
| rs7048482   | 9 | 6225659 | A | G | 0.0397 | 0.0986  | 0.0123 | 8.41E-16 | 8.0481   | 1316443 | Asthma |
| rs2006682   | 9 | 6227045 | G | C | 0.2770 | 0.0704  | 0.0053 | 6.87E-40 | 13.2185  | 1376071 | Asthma |
| rs16924159  | 9 | 6229417 | A | G | 0.3376 | -0.0439 | 0.0051 | 1.20E-17 | -8.5528  | 1316443 | Asthma |
| rs12551256  | 9 | 6231239 | G | A | 0.4691 | -0.0523 | 0.0047 | 3.03E-28 | -11.0210 | 1376071 | Asthma |
| rs12551268  | 9 | 6231318 | A | C | 0.2670 | 0.0744  | 0.0054 | 2.54E-43 | 13.8004  | 1376071 | Asthma |
| rs12339348  | 9 | 6233082 | T | A | 0.2089 | 0.0917  | 0.0058 | 4.78E-56 | 15.7728  | 1376071 | Asthma |
| rs17582919  | 9 | 6233376 | C | T | 0.2087 | 0.0916  | 0.0058 | 7.50E-56 | 15.7445  | 1376071 | Asthma |
| rs10975504  | 9 | 6235009 | G | A | 0.2091 | 0.0918  | 0.0058 | 3.67E-56 | 15.7897  | 1376071 | Asthma |
| rs12341955  | 9 | 6235217 | T | A | 0.4687 | -0.0538 | 0.0047 | 9.48E-30 | -11.3285 | 1376071 | Asthma |
| rs5645596   | 9 | 6236407 | G | T | 0.1567 | -0.0459 | 0.0065 | 1.30E-12 | -7.0947  | 1376071 | Asthma |
| rs4237163   | 9 | 6236496 | A | T | 0.4585 | -0.0502 | 0.0048 | 4.16E-26 | -10.5689 | 1376071 | Asthma |
| rs4237164   | 9 | 6236501 | G | T | 0.4586 | -0.0504 | 0.0048 | 3.22E-26 | -10.5928 | 1376071 | Asthma |
| rs112935616 | 9 | 6236830 | T | C | 0.2076 | 0.0911  | 0.0058 | 7.23E-55 | 15.6004  | 1376071 | Asthma |
| rs10975507  | 9 | 6236977 | T | A | 0.2090 | 0.0921  | 0.0058 | 1.86E-56 | 15.8321  | 1376071 | Asthma |
| rs17498196  | 9 | 6237547 | C | A | 0.2089 | 0.0912  | 0.0058 | 2.00E-55 | 15.6821  | 1376071 | Asthma |
| rs72689561  | 9 | 6238750 | C | A | 0.2093 | 0.0908  | 0.0058 | 6.36E-55 | 15.6087  | 1376071 | Asthma |
| rs10815391  | 9 | 6240235 | G | T | 0.2083 | 0.0904  | 0.0060 | 7.20E-52 | 15.1533  | 1316443 | Asthma |
| rs10815392  | 9 | 6240236 | C | T | 0.2083 | 0.0904  | 0.0060 | 7.08E-52 | 15.1543  | 1316443 | Asthma |
| rs10815393  | 9 | 6240324 | C | T | 0.2095 | 0.0917  | 0.0058 | 4.71E-56 | 15.7738  | 1376071 | Asthma |
| rs72689565  | 9 | 6240953 | C | A | 0.2205 | 0.0918  | 0.0067 | 1.82E-42 | 13.6575  | 1090071 | Asthma |
| rs7035413   | 9 | 6243119 | G | A | 0.2095 | 0.0909  | 0.0058 | 4.16E-55 | 15.6357  | 1376071 | Asthma |
| rs7038893   | 9 | 6243392 | C | T | 0.2092 | 0.0905  | 0.0058 | 1.48E-54 | 15.5545  | 1376071 | Asthma |
| rs7019575   | 9 | 6243935 | C | G | 0.4437 | 0.0524  | 0.0049 | 7.21E-27 | 10.7319  | 1316443 | Asthma |
| rs111841620 | 9 | 6246225 | G | C | 0.0290 | 0.0997  | 0.0146 | 9.50E-12 | 6.8140   | 1299802 | Asthma |
| rs141794281 | 9 | 6268707 | C | T | 0.0170 | -0.1140 | 0.0198 | 8.37E-09 | -5.7609  | 1376071 | Asthma |
| rs62568088  | 9 | 6277534 | G | A | 0.1573 | -0.0413 | 0.0064 | 1.38E-10 | -6.4183  | 1376071 | Asthma |
| rs78757963  | 9 | 6282511 | A | G | 0.0336 | 0.1565  | 0.0137 | 3.65E-30 | 11.4117  | 1316443 | Asthma |
| rs744567    | 9 | 6292602 | G | C | 0.2189 | 0.0859  | 0.0057 | 1.47E-50 | 14.9540  | 1376071 | Asthma |
| rs16924291  | 9 | 6293305 | A | C | 0.1556 | -0.0429 | 0.0065 | 3.80E-11 | -6.6116  | 1376071 | Asthma |
| rs143305466 | 9 | 6297108 | T | C | 0.2259 | 0.0910  | 0.0067 | 1.09E-41 | 13.5269  | 1094744 | Asthma |

|             |   |         |   |   |        |         |        |          |         |         |        |
|-------------|---|---------|---|---|--------|---------|--------|----------|---------|---------|--------|
| rs17756142  | 9 | 6301578 | C | A | 0.2290 | 0.0786  | 0.0056 | 5.17E-44 | 13.9145 | 1376071 | Asthma |
| rs112695858 | 9 | 6303358 | A | G | 0.2581 | 0.0759  | 0.0054 | 8.08E-45 | 14.0466 | 1376071 | Asthma |
| rs67128098  | 9 | 6303498 | T | A | 0.2581 | 0.0759  | 0.0054 | 8.16E-45 | 14.0461 | 1376071 | Asthma |
| rs993951    | 9 | 6304401 | G | A | 0.4103 | -0.0386 | 0.0049 | 4.03E-15 | -7.8542 | 1316443 | Asthma |
| rs7467258   | 9 | 6305622 | G | A | 0.3076 | 0.0674  | 0.0051 | 2.53E-39 | 13.1200 | 1376071 | Asthma |
| rs2169287   | 9 | 6305904 | A | C | 0.2490 | 0.0808  | 0.0055 | 1.68E-49 | 14.7910 | 1376071 | Asthma |
| rs12237914  | 9 | 6306896 | G | A | 0.4083 | -0.0378 | 0.0049 | 1.52E-14 | -7.6855 | 1316443 | Asthma |
| rs10975539  | 9 | 6308729 | T | C | 0.2179 | 0.0864  | 0.0058 | 6.34E-51 | 15.0097 | 1376071 | Asthma |
| rs1322166   | 9 | 6309862 | C | T | 0.3077 | 0.0676  | 0.0051 | 1.79E-39 | 13.1464 | 1376071 | Asthma |
| rs10975540  | 9 | 6310195 | G | A | 0.2589 | 0.0751  | 0.0054 | 4.97E-44 | 13.9174 | 1376071 | Asthma |
| rs17705436  | 9 | 6310908 | G | C | 0.2287 | 0.0786  | 0.0057 | 5.93E-44 | 13.9048 | 1376071 | Asthma |
| rs62568154  | 9 | 6311651 | T | C | 0.1514 | -0.0427 | 0.0066 | 7.87E-11 | -6.5031 | 1376071 | Asthma |
| rs62568155  | 9 | 6312633 | C | T | 0.1566 | -0.0422 | 0.0065 | 6.81E-11 | -6.5247 | 1376071 | Asthma |
| rs1973136   | 9 | 6313276 | G | A | 0.2582 | 0.0753  | 0.0054 | 3.94E-44 | 13.9340 | 1376071 | Asthma |
| rs78154521  | 9 | 6313669 | C | T | 0.0173 | -0.1049 | 0.0192 | 4.94E-08 | -5.4537 | 1376071 | Asthma |
| rs7851000   | 9 | 6314487 | T | C | 0.2486 | 0.0813  | 0.0055 | 6.95E-50 | 14.8500 | 1376071 | Asthma |
| rs72691711  | 9 | 6315489 | A | G | 0.2486 | 0.0811  | 0.0055 | 1.25E-49 | 14.8107 | 1376071 | Asthma |
| rs10114407  | 9 | 6317169 | G | C | 0.3077 | 0.0676  | 0.0051 | 1.66E-39 | 13.1517 | 1376071 | Asthma |
| rs111819898 | 9 | 6318195 | C | T | 0.2661 | 0.0743  | 0.0055 | 4.10E-41 | 13.4289 | 1316443 | Asthma |
| rs55779033  | 9 | 6322680 | C | T | 0.2958 | 0.0724  | 0.0053 | 5.98E-42 | 13.5705 | 1316443 | Asthma |
| rs7861651   | 9 | 6322729 | A | G | 0.2957 | 0.0726  | 0.0053 | 3.28E-42 | 13.6146 | 1316443 | Asthma |
| rs4742179   | 9 | 6324376 | A | C | 0.2985 | 0.0725  | 0.0052 | 2.29E-44 | 13.9728 | 1376071 | Asthma |
| rs10758764  | 9 | 6326825 | T | A | 0.2986 | 0.0724  | 0.0052 | 3.21E-44 | 13.9487 | 1376071 | Asthma |
| rs10491836  | 9 | 6331421 | A | C | 0.2496 | 0.0783  | 0.0055 | 1.40E-46 | 14.3312 | 1376071 | Asthma |
| rs16924356  | 9 | 6331610 | A | G | 0.2495 | 0.0782  | 0.0055 | 2.12E-46 | 14.3020 | 1376071 | Asthma |
| rs721352    | 9 | 6332901 | A | C | 0.2990 | 0.0698  | 0.0052 | 3.16E-41 | 13.4481 | 1376071 | Asthma |
| rs2381426   | 9 | 6333666 | A | C | 0.3041 | 0.0678  | 0.0052 | 2.17E-39 | 13.1319 | 1376071 | Asthma |
| rs10739094  | 9 | 6333685 | A | T | 0.2531 | 0.0723  | 0.0059 | 5.40E-34 | 12.1550 | 1219993 | Asthma |
| rs7850988   | 9 | 6335760 | T | A | 0.2510 | 0.0782  | 0.0055 | 1.20E-46 | 14.3417 | 1376071 | Asthma |
| rs76311067  | 9 | 6336033 | A | G | 0.0245 | 0.1393  | 0.0156 | 4.61E-19 | 8.9218  | 1376071 | Asthma |
| rs731585    | 9 | 6342328 | G | A | 0.3038 | 0.0686  | 0.0052 | 2.36E-40 | 13.2988 | 1376071 | Asthma |
| rs10975547  | 9 | 6343945 | A | G | 0.2501 | 0.0783  | 0.0055 | 1.06E-46 | 14.3505 | 1376071 | Asthma |
| rs1574817   | 9 | 6345296 | T | G | 0.3205 | 0.0723  | 0.0060 | 2.85E-33 | 12.0183 | 1090071 | Asthma |
| rs7027505   | 9 | 6345740 | T | C | 0.2514 | 0.0782  | 0.0055 | 1.14E-46 | 14.3450 | 1376071 | Asthma |
| rs7020404   | 9 | 6346844 | T | C | 0.3039 | 0.0678  | 0.0052 | 2.39E-39 | 13.1243 | 1376071 | Asthma |
| rs7035333   | 9 | 6347651 | A | G | 0.2212 | 0.0814  | 0.0057 | 5.07E-46 | 14.2414 | 1376071 | Asthma |
| rs7039959   | 9 | 6348295 | C | G | 0.4226 | 0.0454  | 0.0049 | 2.17E-20 | 9.2537  | 1316443 | Asthma |
| rs7039175   | 9 | 6348355 | G | A | 0.4169 | 0.0467  | 0.0049 | 1.63E-21 | 9.5267  | 1316443 | Asthma |
| rs2169282   | 9 | 6350235 | A | G | 0.3910 | 0.0511  | 0.0048 | 4.85E-26 | 10.5543 | 1376071 | Asthma |
| rs16924428  | 9 | 6351111 | G | A | 0.2504 | 0.0775  | 0.0055 | 7.30E-46 | 14.2160 | 1376071 | Asthma |
| rs10815411  | 9 | 6351521 | C | T | 0.4173 | 0.0476  | 0.0048 | 2.94E-23 | 9.9348  | 1376071 | Asthma |
| rs10975552  | 9 | 6351834 | C | T | 0.3685 | 0.0576  | 0.0052 | 3.09E-28 | 11.0191 | 1246149 | Asthma |
| rs10975553  | 9 | 6352819 | C | T | 0.3661 | 0.0514  | 0.0049 | 7.51E-26 | 10.5133 | 1376071 | Asthma |
| rs7022186   | 9 | 6359144 | C | T | 0.3660 | 0.0511  | 0.0049 | 1.24E-25 | 10.4656 | 1376071 | Asthma |
| rs10815412  | 9 | 6360078 | T | C | 0.4134 | 0.0487  | 0.0048 | 2.77E-24 | 10.1677 | 1376071 | Asthma |
| rs1969731   | 9 | 6360165 | C | T | 0.3663 | 0.0511  | 0.0049 | 1.10E-25 | 10.4769 | 1376071 | Asthma |
| rs59606381  | 9 | 6362124 | T | C | 0.2470 | 0.0767  | 0.0055 | 2.43E-44 | 13.9685 | 1376071 | Asthma |
| rs7851246   | 9 | 6362365 | A | G | 0.2495 | 0.0778  | 0.0055 | 3.63E-46 | 14.2649 | 1376071 | Asthma |
| rs4742181   | 9 | 6363694 | A | G | 0.4116 | 0.0478  | 0.0052 | 7.33E-20 | 9.1226  | 1219993 | Asthma |
| rs10975557  | 9 | 6364332 | G | A | 0.3659 | 0.0509  | 0.0049 | 1.82E-25 | 10.4298 | 1376071 | Asthma |
| rs10975558  | 9 | 6364449 | T | C | 0.2495 | 0.0768  | 0.0055 | 5.09E-45 | 14.0793 | 1376071 | Asthma |
| rs7875811   | 9 | 6364532 | G | A | 0.3658 | 0.0511  | 0.0049 | 1.24E-25 | 10.4657 | 1376071 | Asthma |
| rs7875812   | 9 | 6364533 | T | A | 0.3657 | 0.0509  | 0.0049 | 1.80E-25 | 10.4306 | 1376071 | Asthma |
| rs719724    | 9 | 6365614 | T | A | 0.4134 | 0.0485  | 0.0048 | 4.12E-24 | 10.1287 | 1376071 | Asthma |
| rs719725    | 9 | 6365683 | C | A | 0.3659 | 0.0508  | 0.0049 | 1.88E-25 | 10.4265 | 1376071 | Asthma |
| rs4361812   | 9 | 6365737 | A | C | 0.1481 | 0.0730  | 0.0067 | 7.74E-28 | 10.9361 | 1376071 | Asthma |
| rs1575264   | 9 | 6368793 | T | C | 0.4132 | 0.0484  | 0.0048 | 5.29E-24 | 10.1042 | 1376071 | Asthma |
| rs1575263   | 9 | 6368811 | G | A | 0.4133 | 0.0484  | 0.0048 | 4.90E-24 | 10.1119 | 1376071 | Asthma |
| rs7020964   | 9 | 6370314 | C | A | 0.3649 | 0.0503  | 0.0049 | 7.30E-25 | 10.2966 | 1376071 | Asthma |
| rs10758769  | 9 | 6370579 | G | A | 0.4143 | 0.0482  | 0.0048 | 6.86E-24 | 10.0789 | 1376071 | Asthma |
| rs7036800   | 9 | 6370970 | C | T | 0.4138 | 0.0485  | 0.0048 | 3.83E-24 | 10.1357 | 1376071 | Asthma |
| rs10815415  | 9 | 6371119 | G | C | 0.4140 | 0.0485  | 0.0048 | 4.05E-24 | 10.1306 | 1376071 | Asthma |
| rs66514552  | 9 | 6371626 | A | G | 0.3647 | 0.0506  | 0.0049 | 3.60E-25 | 10.3644 | 1376071 | Asthma |
| rs1841522   | 9 | 6372380 | G | T | 0.4144 | 0.0485  | 0.0048 | 3.85E-24 | 10.1353 | 1376071 | Asthma |
| rs1841521   | 9 | 6372748 | G | A | 0.4143 | 0.0483  | 0.0048 | 5.23E-24 | 10.1052 | 1376071 | Asthma |
| rs10481526  | 9 | 6374992 | G | A | 0.4143 | 0.0484  | 0.0048 | 4.71E-24 | 10.1155 | 1376071 | Asthma |
| rs61345264  | 9 | 6375129 | G | T | 0.3648 | 0.0504  | 0.0049 | 5.49E-25 | 10.3239 | 1376071 | Asthma |
| rs111450597 | 9 | 6375915 | A | C | 0.0386 | 0.1341  | 0.0123 | 1.22E-27 | 10.8947 | 1376071 | Asthma |
| rs7031546   | 9 | 6376567 | C | T | 0.4143 | 0.0484  | 0.0048 | 4.59E-24 | 10.1180 | 1376071 | Asthma |
| rs7020277   | 9 | 6376880 | T | G | 0.4141 | 0.0485  | 0.0048 | 3.94E-24 | 10.1331 | 1376071 | Asthma |
| rs7850770   | 9 | 6382357 | T | C | 0.4142 | 0.0477  | 0.0048 | 1.75E-23 | 9.9862  | 1376071 | Asthma |
| rs7860427   | 9 | 6385637 | A | G | 0.4273 | 0.0467  | 0.0050 | 1.46E-20 | 9.2957  | 1008051 | Asthma |
| rs67852216  | 9 | 6386227 | T | C | 0.3831 | 0.0546  | 0.0062 | 2.16E-18 | 8.7486  | 722051  | Asthma |
| rs60842789  | 9 | 6387076 | T | C | 0.3709 | 0.0484  | 0.0049 | 2.52E-23 | 9.9499  | 1376071 | Asthma |

|             |   |          |   |   |        |         |        |          |         |         |        |
|-------------|---|----------|---|---|--------|---------|--------|----------|---------|---------|--------|
| rs4742192   | 9 | 6387438  | T | C | 0.4203 | 0.0464  | 0.0048 | 2.82E-22 | 9.7070  | 1376071 | Asthma |
| rs138602325 | 9 | 6387564  | T | C | 0.3644 | 0.0412  | 0.0060 | 4.38E-12 | 6.9243  | 1068588 | Asthma |
| rs10975566  | 9 | 6388042  | A | G | 0.3407 | 0.0530  | 0.0081 | 5.13E-11 | 6.5671  | 778845  | Asthma |
| rs10975567  | 9 | 6388100  | C | T | 0.6140 | 0.0529  | 0.0082 | 1.40E-10 | 6.4164  | 778845  | Asthma |
| rs10815425  | 9 | 6388730  | T | C | 0.4191 | 0.0469  | 0.0057 | 1.36E-16 | 8.2685  | 1094744 | Asthma |
| rs10481598  | 9 | 6388803  | T | C | 0.4140 | 0.0408  | 0.0052 | 5.91E-15 | 7.8058  | 1224666 | Asthma |
| rs62566109  | 9 | 6391928  | C | G | 0.1561 | -0.0430 | 0.0066 | 8.49E-11 | -6.4916 | 1316443 | Asthma |
| rs7025295   | 9 | 6395247  | C | T | 0.3637 | 0.0492  | 0.0049 | 6.51E-24 | 10.0838 | 1376071 | Asthma |
| rs7850497   | 9 | 6395540  | A | T | 0.4130 | 0.0474  | 0.0048 | 4.10E-23 | 9.9014  | 1376071 | Asthma |
| rs10217561  | 9 | 6396245  | G | A | 0.4132 | 0.0474  | 0.0048 | 3.44E-23 | 9.9190  | 1376071 | Asthma |
| rs61285187  | 9 | 6396460  | T | A | 0.3636 | 0.0492  | 0.0049 | 6.98E-24 | 10.0772 | 1376071 | Asthma |
| rs10975575  | 9 | 6398151  | A | G | 0.3638 | 0.0494  | 0.0049 | 4.27E-24 | 10.1253 | 1376071 | Asthma |
| rs10815428  | 9 | 6400030  | T | C | 0.3926 | 0.0445  | 0.0049 | 1.83E-19 | 9.0232  | 1316443 | Asthma |
| rs62566113  | 9 | 6400884  | A | G | 0.1558 | -0.0423 | 0.0067 | 2.07E-10 | -6.3563 | 1316443 | Asthma |
| rs10115362  | 9 | 6401096  | A | C | 0.3626 | 0.0489  | 0.0049 | 1.25E-23 | 10.0199 | 1376071 | Asthma |
| rs10758780  | 9 | 6402450  | G | C | 0.4109 | 0.0475  | 0.0049 | 3.12E-22 | 9.6965  | 1316443 | Asthma |
| rs7045097   | 9 | 6402856  | C | T | 0.4113 | 0.0478  | 0.0049 | 1.37E-22 | 9.7799  | 1316443 | Asthma |
| rs2019676   | 9 | 6403232  | G | A | 0.4108 | 0.0476  | 0.0049 | 2.41E-22 | 9.7229  | 1316443 | Asthma |
| rs10758783  | 9 | 6407799  | T | C | 0.4103 | 0.0478  | 0.0049 | 1.55E-22 | 9.7680  | 1316443 | Asthma |
| rs10739097  | 9 | 6407843  | T | C | 0.4101 | 0.0481  | 0.0049 | 8.74E-23 | 9.8256  | 1316443 | Asthma |
| rs7865955   | 9 | 6408247  | G | C | 0.4108 | 0.0479  | 0.0049 | 1.24E-22 | 9.7901  | 1316443 | Asthma |
| rs7857628   | 9 | 6409874  | G | A | 0.3646 | 0.0482  | 0.0050 | 4.94E-22 | 9.6496  | 1316443 | Asthma |
| rs72691740  | 9 | 6411087  | A | G | 0.0575 | 0.0570  | 0.0101 | 1.67E-08 | 5.6432  | 1376071 | Asthma |
| rs12376117  | 9 | 6411838  | C | G | 0.4119 | 0.0481  | 0.0049 | 9.20E-23 | 9.8205  | 1316443 | Asthma |
| rs41306603  | 9 | 6415643  | G | A | 0.0424 | 0.1348  | 0.0117 | 1.56E-30 | 11.4855 | 1376071 | Asthma |
| rs62566152  | 9 | 6479068  | G | A | 0.1566 | -0.0386 | 0.0067 | 7.00E-09 | -5.7909 | 1316443 | Asthma |
| rs10739105  | 9 | 6490248  | A | G | 0.1412 | 0.0691  | 0.0070 | 7.00E-23 | 9.8480  | 1316443 | Asthma |
| rs113626350 | 9 | 6490491  | A | G | 0.0437 | 0.0761  | 0.0116 | 6.04E-11 | 6.5427  | 1376071 | Asthma |
| rs7864027   | 9 | 6504189  | A | C | 0.1271 | 0.0592  | 0.0075 | 3.51E-15 | 7.8714  | 1299802 | Asthma |
| rs112574168 | 9 | 6509277  | T | C | 0.0444 | 0.0775  | 0.0115 | 1.43E-11 | 6.7552  | 1316443 | Asthma |
| rs2228098   | 9 | 6533010  | C | G | 0.3780 | 0.0302  | 0.0050 | 2.10E-09 | 5.9900  | 1316443 | Asthma |
| rs4742211   | 9 | 6535500  | C | T | 0.2066 | 0.0673  | 0.0061 | 6.70E-28 | 10.9492 | 1299802 | Asthma |
| rs928393    | 9 | 6542674  | C | T | 0.3515 | 0.0324  | 0.0050 | 5.97E-11 | 6.5446  | 1376071 | Asthma |
| rs4518719   | 9 | 6544085  | T | C | 0.3179 | 0.0317  | 0.0052 | 1.19E-09 | 6.0822  | 1316443 | Asthma |
| rs4742214   | 9 | 6548053  | G | C | 0.3590 | 0.0275  | 0.0050 | 4.59E-08 | 5.4663  | 1316443 | Asthma |
| rs7863638   | 9 | 6548270  | G | A | 0.3510 | 0.0304  | 0.0051 | 2.01E-09 | 5.9966  | 1316443 | Asthma |
| rs1929933   | 9 | 6555079  | G | A | 0.2655 | 0.0375  | 0.0056 | 3.30E-11 | 6.6324  | 1299802 | Asthma |
| rs10975660  | 9 | 6583518  | T | C | 0.1212 | 0.0488  | 0.0076 | 1.10E-10 | 6.4522  | 1299802 | Asthma |
| rs45582831  | 9 | 6588227  | T | C | 0.0348 | 0.0800  | 0.0129 | 5.69E-10 | 6.1986  | 1376071 | Asthma |
| rs117871988 | 9 | 6615076  | T | C | 0.0184 | 0.1081  | 0.0182 | 2.98E-09 | 5.9328  | 1366579 | Asthma |
| rs148923395 | 9 | 6621027  | G | A | 0.0264 | 0.0853  | 0.0148 | 8.44E-09 | 5.7595  | 1376071 | Asthma |
| rs2890723   | 9 | 6648728  | T | A | 0.3608 | 0.0306  | 0.0051 | 1.65E-09 | 6.0291  | 1316443 | Asthma |
| rs1755610   | 9 | 6649344  | G | C | 0.4360 | 0.0282  | 0.0049 | 9.35E-09 | 5.7422  | 1316443 | Asthma |
| rs12345279  | 9 | 6748447  | T | C | 0.0685 | 0.0503  | 0.0091 | 3.57E-08 | 5.5110  | 1376071 | Asthma |
| rs7857692   | 9 | 6770078  | G | C | 0.0704 | 0.0499  | 0.0090 | 2.90E-08 | 5.5471  | 1376071 | Asthma |
| rs10976921  | 9 | 8291513  | T | C | 0.2368 | 0.0315  | 0.0056 | 1.45E-08 | 5.6672  | 1376071 | Asthma |
| rs10976922  | 9 | 8291569  | A | C | 0.2299 | 0.0324  | 0.0056 | 8.37E-09 | 5.7607  | 1376071 | Asthma |
| rs10976923  | 9 | 8291665  | A | T | 0.2301 | 0.0324  | 0.0056 | 8.05E-09 | 5.7673  | 1376071 | Asthma |
| rs10976925  | 9 | 8292402  | G | C | 0.2295 | 0.0321  | 0.0056 | 1.16E-08 | 5.7060  | 1376071 | Asthma |
| rs12347682  | 9 | 8292974  | G | A | 0.2301 | 0.0319  | 0.0056 | 1.43E-08 | 5.6700  | 1376071 | Asthma |
| rs101122790 | 9 | 8293169  | G | A | 0.2301 | 0.0318  | 0.0056 | 1.51E-08 | 5.6600  | 1376071 | Asthma |
| rs12345366  | 9 | 8294358  | T | C | 0.2239 | 0.0311  | 0.0057 | 4.50E-08 | 5.4699  | 1376071 | Asthma |
| rs1967181   | 9 | 8295684  | A | C | 0.2232 | 0.0315  | 0.0057 | 3.25E-08 | 5.5276  | 1376071 | Asthma |
| rs10965929  | 9 | 23578855 | T | A | 0.4173 | -0.0283 | 0.0050 | 1.13E-08 | -5.7100 | 1316443 | Asthma |
| rs12378266  | 9 | 23578874 | A | G | 0.4096 | -0.0295 | 0.0050 | 2.86E-09 | -5.9392 | 1316443 | Asthma |
| rs56385898  | 9 | 23579107 | G | T | 0.4179 | -0.0286 | 0.0050 | 8.53E-09 | -5.7575 | 1316443 | Asthma |
| rs109156    | 9 | 23579483 | G | A | 0.4185 | -0.0284 | 0.0050 | 1.03E-08 | -5.7262 | 1316443 | Asthma |
| rs10965933  | 9 | 23580814 | T | C | 0.4177 | -0.0283 | 0.0050 | 1.16E-08 | -5.7054 | 1316443 | Asthma |
| rs10965935  | 9 | 23581213 | T | C | 0.4101 | -0.0297 | 0.0050 | 2.25E-09 | -5.9788 | 1316443 | Asthma |
| rs10965936  | 9 | 23581338 | A | G | 0.4101 | -0.0299 | 0.0050 | 1.66E-09 | -6.0276 | 1316443 | Asthma |
| rs10965941  | 9 | 23583323 | A | G | 0.4706 | -0.0289 | 0.0049 | 2.74E-09 | -5.9463 | 1316443 | Asthma |
| rs980896    | 9 | 23583600 | G | A | 0.5280 | 0.0291  | 0.0049 | 2.18E-09 | 5.9837  | 1316443 | Asthma |
| rs274950    | 9 | 23584112 | T | C | 0.5193 | 0.0273  | 0.0049 | 1.91E-08 | 5.6203  | 1316443 | Asthma |
| rs274949    | 9 | 23584703 | G | A | 0.5299 | 0.0294  | 0.0049 | 1.49E-09 | 6.0459  | 1316443 | Asthma |
| rs201191    | 9 | 23585037 | C | A | 0.5241 | 0.0286  | 0.0049 | 4.26E-09 | 5.8739  | 1316443 | Asthma |
| rs274947    | 9 | 23585314 | C | T | 0.4747 | -0.0281 | 0.0049 | 8.10E-09 | -5.7665 | 1316443 | Asthma |
| rs274946    | 9 | 23585352 | T | C | 0.5186 | 0.0266  | 0.0047 | 1.75E-08 | 5.6346  | 1376071 | Asthma |
| rs274945    | 9 | 23585743 | A | C | 0.5182 | 0.0283  | 0.0049 | 5.77E-09 | 5.8232  | 1316443 | Asthma |
| rs274944    | 9 | 23585755 | T | G | 0.5186 | 0.0283  | 0.0049 | 5.86E-09 | 5.8206  | 1316443 | Asthma |
| rs274943    | 9 | 23585841 | T | C | 0.5245 | 0.0276  | 0.0048 | 6.60E-09 | 5.8010  | 1376071 | Asthma |
| rs1107677   | 9 | 23587029 | C | T | 0.5279 | 0.0279  | 0.0049 | 1.04E-08 | 5.7245  | 1316443 | Asthma |
| rs273388    | 9 | 23587228 | A | C | 0.5211 | 0.0282  | 0.0049 | 6.79E-09 | 5.7959  | 1316443 | Asthma |
| rs273389    | 9 | 23587813 | A | C | 0.5199 | 0.0287  | 0.0049 | 3.98E-09 | 5.8850  | 1316443 | Asthma |
| rs16918198  | 9 | 99066490 | A | G | 0.2021 | 0.0326  | 0.0058 | 2.36E-08 | 5.5832  | 1366579 | Asthma |

|            |    |           |   |   |        |         |        |          |         |         |        |
|------------|----|-----------|---|---|--------|---------|--------|----------|---------|---------|--------|
| rs1537504  | 9  | 99067260  | A | G | 0.2019 | 0.0327  | 0.0058 | 2.14E-08 | 5.6005  | 1366579 | Asthma |
| rs13296447 | 9  | 99070905  | G | C | 0.2032 | 0.0326  | 0.0058 | 2.01E-08 | 5.6114  | 1366579 | Asthma |
| rs35032439 | 9  | 114798258 | T | G | 0.1879 | 0.0348  | 0.0063 | 2.72E-08 | 5.5587  | 1306951 | Asthma |
| rs34187507 | 9  | 114835605 | T | G | 0.2338 | 0.0305  | 0.0056 | 4.16E-08 | 5.4842  | 1366579 | Asthma |
| rs2067583  | 9  | 114849783 | C | T | 0.2345 | 0.0308  | 0.0055 | 2.72E-08 | 5.5587  | 1366579 | Asthma |
| rs2026192  | 9  | 124233322 | G | A | 0.5546 | 0.0303  | 0.0049 | 4.62E-10 | 6.2315  | 1306951 | Asthma |
| rs10986284 | 9  | 124236874 | T | A | 0.3488 | 0.0312  | 0.0051 | 1.06E-09 | 6.1009  | 1306951 | Asthma |
| rs4836969  | 9  | 124237464 | C | T | 0.5543 | 0.0301  | 0.0048 | 5.36E-10 | 6.2083  | 1306951 | Asthma |
| rs35711908 | 9  | 124240384 | A | G | 0.3483 | 0.0318  | 0.0050 | 1.92E-10 | 6.3679  | 1366579 | Asthma |
| rs10986285 | 9  | 124242762 | G | A | 0.5436 | 0.0264  | 0.0047 | 2.45E-08 | 5.5765  | 1366579 | Asthma |
| rs10818936 | 9  | 124244067 | G | C | 0.3269 | 0.0313  | 0.0051 | 6.51E-10 | 6.1776  | 1366579 | Asthma |
| rs7856570  | 9  | 124250604 | T | C | 0.3490 | 0.0309  | 0.0050 | 4.96E-10 | 6.2204  | 1366579 | Asthma |
| rs10818937 | 9  | 124253161 | T | C | 0.3268 | 0.0325  | 0.0050 | 1.23E-10 | 6.4355  | 1366579 | Asthma |
| rs10986291 | 9  | 124253992 | T | A | 0.3462 | 0.0307  | 0.0050 | 6.97E-10 | 6.1667  | 1366579 | Asthma |
| rs10986292 | 9  | 124254597 | G | T | 0.3502 | 0.0306  | 0.0050 | 6.58E-10 | 6.1757  | 1366579 | Asthma |
| rs34071757 | 9  | 124255058 | A | G | 0.3500 | 0.0307  | 0.0050 | 5.75E-10 | 6.1971  | 1366579 | Asthma |
| rs2282084  | 9  | 124259253 | C | G | 0.3630 | 0.0297  | 0.0049 | 1.51E-09 | 6.0428  | 1366579 | Asthma |
| rs944337   | 9  | 124259987 | T | G | 0.3400 | 0.0313  | 0.0050 | 4.03E-10 | 6.2531  | 1366579 | Asthma |
| rs944338   | 9  | 124259988 | T | G | 0.3400 | 0.0312  | 0.0050 | 4.17E-10 | 6.2474  | 1366579 | Asthma |
| rs2026190  | 9  | 124260984 | A | G | 0.3408 | 0.0308  | 0.0050 | 7.29E-10 | 6.1596  | 1366579 | Asthma |
| rs2282085  | 9  | 124262761 | G | A | 0.3632 | 0.0298  | 0.0049 | 1.35E-09 | 6.0618  | 1366579 | Asthma |
| rs10760344 | 9  | 124264003 | T | G | 0.3411 | 0.0310  | 0.0050 | 5.39E-10 | 6.2072  | 1366579 | Asthma |
| rs34011920 | 9  | 124265133 | T | C | 0.3397 | 0.0310  | 0.0050 | 5.33E-10 | 6.2090  | 1366579 | Asthma |
| rs34720542 | 9  | 124265471 | A | G | 0.3624 | 0.0298  | 0.0049 | 1.45E-09 | 6.0502  | 1366579 | Asthma |
| rs10116520 | 9  | 124267351 | G | A | 0.3951 | 0.0306  | 0.0048 | 2.30E-10 | 6.3399  | 1366579 | Asthma |
| rs12379417 | 9  | 124267457 | A | G | 0.3709 | 0.0318  | 0.0049 | 9.02E-11 | 6.4827  | 1366579 | Asthma |
| rs1045774  | 9  | 124270328 | G | A | 0.3951 | 0.0306  | 0.0048 | 2.37E-10 | 6.3353  | 1366579 | Asthma |
| rs35956754 | 9  | 124272079 | C | G | 0.3722 | 0.0314  | 0.0049 | 1.36E-10 | 6.4203  | 1366579 | Asthma |
| rs7853472  | 9  | 124274388 | A | G | 0.3937 | 0.0306  | 0.0048 | 2.63E-10 | 6.3188  | 1366579 | Asthma |
| rs10760345 | 9  | 124275517 | G | A | 0.3712 | 0.0316  | 0.0049 | 1.18E-10 | 6.4414  | 1366579 | Asthma |
| rs13298654 | 9  | 124279364 | T | C | 0.3669 | -0.0283 | 0.0050 | 1.54E-08 | -5.6576 | 1306951 | Asthma |
| rs7872321  | 9  | 124289993 | T | C | 0.3358 | -0.0282 | 0.0051 | 3.69E-08 | -5.5053 | 1306951 | Asthma |
| rs10818940 | 9  | 124301180 | T | C | 0.3414 | 0.0303  | 0.0050 | 1.32E-09 | 6.0648  | 1366579 | Asthma |
| rs3758212  | 9  | 124307474 | T | C | 0.3724 | 0.0308  | 0.0050 | 7.86E-10 | 6.1478  | 1306951 | Asthma |
| rs10986311 | 9  | 124309214 | C | T | 0.3729 | 0.0317  | 0.0050 | 2.18E-10 | 6.3480  | 1306951 | Asthma |
| rs1107342  | 9  | 124311033 | C | T | 0.4034 | 0.0312  | 0.0049 | 2.55E-10 | 6.3240  | 1306951 | Asthma |
| rs2274782  | 9  | 124321795 | T | C | 0.3728 | 0.0296  | 0.0050 | 3.39E-09 | 5.9112  | 1306951 | Asthma |
| rs10818943 | 9  | 124325461 | T | C | 0.3420 | 0.0307  | 0.0050 | 6.79E-10 | 6.1708  | 1366579 | Asthma |
| rs2068165  | 9  | 124326071 | A | G | 0.3420 | 0.0310  | 0.0050 | 5.05E-10 | 6.2178  | 1366579 | Asthma |
| rs748741   | 9  | 124327496 | G | A | 0.3729 | 0.0316  | 0.0049 | 1.03E-10 | 6.4619  | 1366579 | Asthma |
| rs912355   | 9  | 124328687 | T | C | 0.3429 | 0.0308  | 0.0050 | 5.75E-10 | 6.1971  | 1366579 | Asthma |
| rs4836973  | 9  | 124329308 | G | A | 0.3437 | 0.0308  | 0.0050 | 6.25E-10 | 6.1840  | 1366579 | Asthma |
| rs3780204  | 9  | 124330608 | C | G | 0.3436 | 0.0307  | 0.0050 | 7.21E-10 | 6.1613  | 1366579 | Asthma |
| rs10986318 | 9  | 124331210 | C | G | 0.3747 | 0.0325  | 0.0051 | 1.40E-10 | 6.4161  | 1290310 | Asthma |
| rs12349571 | 9  | 124331464 | A | G | 0.3744 | 0.0310  | 0.0050 | 5.56E-10 | 6.2024  | 1306951 | Asthma |
| rs10986319 | 9  | 124331544 | C | T | 0.3744 | 0.0309  | 0.0050 | 6.23E-10 | 6.1845  | 1306951 | Asthma |
| rs10986320 | 9  | 124331623 | C | G | 0.3745 | 0.0309  | 0.0050 | 6.45E-10 | 6.1790  | 1306951 | Asthma |
| rs1024255  | 9  | 124332202 | A | G | 0.3732 | 0.0316  | 0.0049 | 9.33E-11 | 6.4773  | 1366579 | Asthma |
| rs753788   | 9  | 124332760 | C | T | 0.3748 | 0.0311  | 0.0050 | 4.73E-10 | 6.2279  | 1306951 | Asthma |
| rs10818951 | 9  | 124368783 | G | A | 0.4105 | 0.0265  | 0.0048 | 3.74E-08 | 5.5028  | 1366579 | Asthma |
| rs4837022  | 9  | 125713100 | T | C | 0.3448 | -0.0285 | 0.0051 | 2.78E-08 | -5.5550 | 1306951 | Asthma |
| rs10118570 | 9  | 125714185 | G | A | 0.3449 | -0.0294 | 0.0050 | 4.64E-09 | -5.8597 | 1366579 | Asthma |
| rs2026134  | 9  | 125917869 | T | C | 0.2929 | -0.0290 | 0.0053 | 4.03E-08 | -5.4895 | 1366579 | Asthma |
| rs1420767  | 9  | 125956877 | G | A | 0.3004 | -0.0288 | 0.0053 | 4.18E-08 | -5.4833 | 1366579 | Asthma |
| rs10513456 | 9  | 125957570 | G | A | 0.3000 | -0.0288 | 0.0052 | 4.15E-08 | -5.4844 | 1366579 | Asthma |
| rs62570477 | 9  | 125975740 | T | A | 0.2967 | -0.0290 | 0.0053 | 3.52E-08 | -5.5134 | 1366579 | Asthma |
| rs2111363  | 9  | 125977736 | A | G | 0.2969 | -0.0291 | 0.0053 | 3.42E-08 | -5.5187 | 1366579 | Asthma |
| rs2275806  | 10 | 8053377   | G | A | 0.4402 | 0.0308  | 0.0049 | 3.94E-10 | 6.2563  | 1316443 | Asthma |
| rs10905277 | 10 | 8055405   | G | A | 0.4715 | 0.0308  | 0.0049 | 4.22E-10 | 6.2455  | 1316443 | Asthma |
| rs3781094  | 10 | 8059464   | A | C | 0.3382 | 0.0326  | 0.0050 | 6.96E-11 | 6.5217  | 1376071 | Asthma |
| rs3802604  | 10 | 8060309   | G | A | 0.3565 | 0.0299  | 0.0049 | 1.29E-09 | 6.0683  | 1376071 | Asthma |
| rs374641   | 10 | 8062017   | C | T | 0.3870 | 0.0286  | 0.0050 | 9.11E-09 | 5.7466  | 1316443 | Asthma |
| rs386680   | 10 | 8062023   | C | G | 0.3870 | 0.0286  | 0.0050 | 9.14E-09 | 5.7462  | 1316443 | Asthma |
| rs371668   | 10 | 8062053   | T | C | 0.3869 | 0.0284  | 0.0050 | 1.13E-08 | 5.7106  | 1316443 | Asthma |
| rs3824660  | 10 | 8062759   | C | T | 0.3903 | 0.0304  | 0.0049 | 4.04E-10 | 6.2525  | 1376071 | Asthma |
| rs2277228  | 10 | 8063782   | G | A | 0.4061 | 0.0293  | 0.0049 | 2.96E-09 | 5.9336  | 1316443 | Asthma |
| rs570730   | 10 | 8064496   | C | T | 0.3773 | 0.0284  | 0.0050 | 1.36E-08 | 5.6779  | 1316443 | Asthma |
| rs570613   | 10 | 8064539   | C | T | 0.3773 | 0.0284  | 0.0050 | 1.44E-08 | 5.6683  | 1316443 | Asthma |
| rs568727   | 10 | 8064738   | A | C | 0.3765 | 0.0304  | 0.0049 | 4.71E-10 | 6.2285  | 1376071 | Asthma |
| rs10752126 | 10 | 8064784   | G | C | 0.4056 | 0.0307  | 0.0048 | 2.15E-10 | 6.3503  | 1376071 | Asthma |
| rs10905279 | 10 | 8065609   | A | G | 0.3986 | 0.0290  | 0.0049 | 4.72E-09 | 5.8567  | 1316443 | Asthma |
| rs7897792  | 10 | 8066327   | G | C | 0.4050 | 0.0287  | 0.0049 | 6.69E-09 | 5.7985  | 1316443 | Asthma |
| rs537544   | 10 | 8066419   | C | T | 0.3769 | 0.0279  | 0.0050 | 2.51E-08 | 5.5724  | 1316443 | Asthma |
| rs3847417  | 10 | 8067613   | T | G | 0.4442 | 0.0282  | 0.0049 | 1.13E-08 | 5.7099  | 1316443 | Asthma |



|            |    |         |   |   |        |         |        |          |         |         |        |
|------------|----|---------|---|---|--------|---------|--------|----------|---------|---------|--------|
| rs3802597  | 10 | 8072425 | A | G | 0.4241 | 0.0326  | 0.0050 | 4.80E-11 | 6.5770  | 1316443 | Asthma |
| rs10905284 | 10 | 8073399 | C | A | 0.4257 | 0.0323  | 0.0050 | 8.04E-11 | 6.4999  | 1316443 | Asthma |
| rs10905348 | 10 | 8347623 | T | A | 0.3129 | -0.0292 | 0.0052 | 2.74E-08 | -5.5574 | 1316443 | Asthma |
| rs2454057  | 10 | 8413956 | C | T | 0.4908 | -0.0268 | 0.0049 | 3.18E-08 | -5.5312 | 1316443 | Asthma |
| rs1572597  | 10 | 8415866 | G | A | 0.4053 | 0.0276  | 0.0049 | 1.99E-08 | 5.6132  | 1316443 | Asthma |
| rs2646423  | 10 | 8421338 | T | C | 0.5103 | -0.0276 | 0.0049 | 1.36E-08 | -5.6780 | 1316443 | Asthma |
| rs4749762  | 10 | 8460610 | C | T | 0.2536 | 0.0343  | 0.0061 | 1.81E-08 | 5.6288  | 1224666 | Asthma |
| rs11255705 | 10 | 8462437 | C | G | 0.2426 | 0.0326  | 0.0057 | 9.49E-09 | 5.7397  | 1376071 | Asthma |
| rs10905379 | 10 | 8463114 | A | T | 0.2390 | 0.0324  | 0.0057 | 1.34E-08 | 5.6804  | 1376071 | Asthma |
| rs10737029 | 10 | 8463420 | T | C | 0.2390 | 0.0323  | 0.0057 | 1.43E-08 | 5.6701  | 1376071 | Asthma |
| rs10737030 | 10 | 8464966 | C | T | 0.2000 | 0.0339  | 0.0060 | 1.98E-08 | 5.6139  | 1376071 | Asthma |
| rs7100408  | 10 | 8466265 | G | A | 0.2791 | 0.0316  | 0.0054 | 3.73E-09 | 5.8958  | 1376071 | Asthma |
| rs6602311  | 10 | 8466283 | A | G | 0.1980 | 0.0345  | 0.0063 | 4.92E-08 | 5.4541  | 1008051 | Asthma |
| rs10905380 | 10 | 8467127 | C | G | 0.2045 | 0.0354  | 0.0060 | 3.19E-09 | 5.9213  | 1376071 | Asthma |
| rs7099257  | 10 | 8468994 | T | A | 0.4096 | 0.0312  | 0.0053 | 4.19E-09 | 5.8765  | 1224666 | Asthma |
| rs12259244 | 10 | 8469094 | C | G | 0.4031 | 0.0298  | 0.0048 | 6.76E-10 | 6.1717  | 1376071 | Asthma |
| rs11255709 | 10 | 8469342 | C | T | 0.4031 | 0.0298  | 0.0048 | 6.79E-10 | 6.1711  | 1376071 | Asthma |
| rs11255710 | 10 | 8469424 | C | T | 0.4031 | 0.0298  | 0.0048 | 6.90E-10 | 6.1683  | 1376071 | Asthma |
| rs10795630 | 10 | 8470394 | T | C | 0.4044 | 0.0310  | 0.0049 | 3.54E-10 | 6.2732  | 1316443 | Asthma |
| rs10795631 | 10 | 8470419 | C | T | 0.3415 | 0.0292  | 0.0051 | 1.23E-08 | 5.6962  | 1316443 | Asthma |
| rs10795632 | 10 | 8471513 | C | T | 0.3888 | 0.0343  | 0.0050 | 6.49E-12 | 6.8687  | 1316443 | Asthma |
| rs7091181  | 10 | 8471661 | G | A | 0.3888 | 0.0343  | 0.0050 | 6.11E-12 | 6.8771  | 1316443 | Asthma |
| rs10795633 | 10 | 8473362 | T | C | 0.4100 | 0.0380  | 0.0050 | 1.58E-14 | 7.6806  | 1316443 | Asthma |
| rs12785018 | 10 | 8473385 | T | C | 0.3574 | 0.0382  | 0.0050 | 1.42E-14 | 7.6949  | 1376071 | Asthma |
| rs7085028  | 10 | 8473442 | G | A | 0.3572 | 0.0381  | 0.0050 | 1.74E-14 | 7.6688  | 1376071 | Asthma |
| rs7089167  | 10 | 8473759 | T | G | 0.4145 | 0.0343  | 0.0054 | 2.65E-10 | 6.3180  | 1160365 | Asthma |
| rs4749764  | 10 | 8474816 | C | T | 0.3078 | 0.0361  | 0.0053 | 1.20E-11 | 6.7804  | 1316443 | Asthma |
| rs7085699  | 10 | 8475477 | A | C | 0.3235 | 0.0301  | 0.0053 | 9.52E-09 | 5.7391  | 1316443 | Asthma |
| rs7085991  | 10 | 8475697 | T | C | 0.2777 | 0.0303  | 0.0055 | 3.90E-08 | 5.4953  | 1316443 | Asthma |
| rs12570583 | 10 | 8475869 | T | C | 0.2763 | 0.0315  | 0.0055 | 1.19E-08 | 5.7017  | 1316443 | Asthma |
| rs12570584 | 10 | 8475872 | T | C | 0.3285 | 0.0303  | 0.0052 | 6.78E-09 | 5.7963  | 1316443 | Asthma |
| rs10795634 | 10 | 8476289 | A | T | 0.4318 | 0.0328  | 0.0049 | 2.56E-11 | 6.6700  | 1316443 | Asthma |
| rs7074392  | 10 | 8476744 | A | G | 0.3810 | 0.0297  | 0.0050 | 3.22E-09 | 5.9198  | 1316443 | Asthma |
| rs7090140  | 10 | 8476917 | G | A | 0.3700 | 0.0315  | 0.0049 | 1.66E-10 | 6.3903  | 1376071 | Asthma |
| rs10795635 | 10 | 8479494 | C | T | 0.4467 | 0.0306  | 0.0048 | 1.49E-10 | 6.4068  | 1376071 | Asthma |
| rs10795637 | 10 | 8479831 | T | C | 0.4497 | 0.0349  | 0.0051 | 8.10E-12 | 6.8369  | 1246149 | Asthma |
| rs10795638 | 10 | 8479940 | T | C | 0.4471 | 0.0306  | 0.0048 | 1.42E-10 | 6.4138  | 1376071 | Asthma |
| rs10905383 | 10 | 8480348 | A | C | 0.4468 | 0.0305  | 0.0048 | 1.60E-10 | 6.3959  | 1376071 | Asthma |
| rs10905384 | 10 | 8481149 | C | A | 0.4468 | 0.0306  | 0.0048 | 1.39E-10 | 6.4167  | 1376071 | Asthma |
| rs7920692  | 10 | 8481202 | A | G | 0.4469 | 0.0305  | 0.0048 | 1.51E-10 | 6.4042  | 1376071 | Asthma |
| rs7904468  | 10 | 8481745 | G | T | 0.4470 | 0.0302  | 0.0048 | 2.18E-10 | 6.3484  | 1376071 | Asthma |
| rs11255714 | 10 | 8482524 | G | A | 0.4472 | 0.0304  | 0.0048 | 1.84E-10 | 6.3743  | 1376071 | Asthma |
| rs10905385 | 10 | 8482810 | G | C | 0.4472 | 0.0306  | 0.0048 | 1.45E-10 | 6.4109  | 1376071 | Asthma |
| rs12761918 | 10 | 8483051 | C | G | 0.2670 | 0.0338  | 0.0058 | 6.29E-09 | 5.8090  | 1246149 | Asthma |
| rs7094182  | 10 | 8484656 | G | C | 0.3937 | 0.0286  | 0.0050 | 9.33E-09 | 5.7424  | 1316443 | Asthma |
| rs55818594 | 10 | 8492233 | C | T | 0.4580 | 0.0333  | 0.0059 | 1.36E-08 | 5.6788  | 1003385 | Asthma |
| rs2646436  | 10 | 8524799 | A | T | 0.2719 | 0.0351  | 0.0058 | 1.68E-09 | 6.0255  | 1224666 | Asthma |
| rs4749778  | 10 | 8526943 | G | C | 0.2714 | 0.0366  | 0.0053 | 5.99E-12 | 6.8801  | 1376071 | Asthma |
| rs2454065  | 10 | 8528479 | A | C | 0.2738 | 0.0377  | 0.0058 | 1.09E-10 | 6.4540  | 1186521 | Asthma |
| rs2646431  | 10 | 8530609 | T | C | 0.2719 | 0.0367  | 0.0054 | 1.48E-11 | 6.7498  | 1316443 | Asthma |
| rs7096592  | 10 | 8530844 | G | A | 0.2723 | 0.0369  | 0.0054 | 1.18E-11 | 6.7829  | 1316443 | Asthma |
| rs10905402 | 10 | 8531648 | T | C | 0.2726 | 0.0366  | 0.0053 | 5.94E-12 | 6.8812  | 1376071 | Asthma |
| rs2477919  | 10 | 8532189 | T | C | 0.2721 | 0.0367  | 0.0054 | 1.50E-11 | 6.7484  | 1316443 | Asthma |
| rs2646396  | 10 | 8533751 | G | A | 0.2725 | 0.0366  | 0.0053 | 5.22E-12 | 6.8993  | 1376071 | Asthma |
| rs4749779  | 10 | 8534243 | G | A | 0.2715 | 0.0370  | 0.0053 | 2.85E-12 | 6.9850  | 1376071 | Asthma |
| rs2765407  | 10 | 8534258 | T | C | 0.2722 | 0.0369  | 0.0053 | 3.80E-12 | 6.9447  | 1376071 | Asthma |
| rs4747801  | 10 | 8534331 | T | C | 0.2713 | 0.0370  | 0.0053 | 3.17E-12 | 6.9700  | 1376071 | Asthma |
| rs2765405  | 10 | 8535834 | G | C | 0.2702 | 0.0368  | 0.0055 | 1.48E-11 | 6.7495  | 1316443 | Asthma |
| rs34839516 | 10 | 8542352 | T | C | 0.2641 | 0.0389  | 0.0055 | 1.52E-12 | 7.0725  | 1316443 | Asthma |
| rs11255737 | 10 | 8544010 | C | T | 0.2644 | 0.0388  | 0.0055 | 1.84E-12 | 7.0458  | 1316443 | Asthma |
| rs66539719 | 10 | 8546809 | A | G | 0.2644 | 0.0388  | 0.0055 | 2.11E-12 | 7.0266  | 1316443 | Asthma |
| rs7894791  | 10 | 8549406 | A | C | 0.4060 | -0.0285 | 0.0050 | 1.03E-08 | -5.7250 | 1316443 | Asthma |
| rs12265609 | 10 | 8550680 | G | A | 0.2643 | 0.0388  | 0.0055 | 2.30E-12 | 7.0148  | 1316443 | Asthma |
| rs10795656 | 10 | 8553876 | A | G | 0.2708 | 0.0369  | 0.0055 | 2.17E-11 | 6.6943  | 1316443 | Asthma |
| rs12782190 | 10 | 8557371 | T | C | 0.2654 | 0.0387  | 0.0055 | 2.48E-12 | 7.0042  | 1316443 | Asthma |
| rs11255744 | 10 | 8559111 | C | T | 0.2666 | 0.0376  | 0.0055 | 1.10E-11 | 6.7928  | 1316443 | Asthma |
| rs4749785  | 10 | 8561881 | T | C | 0.2644 | 0.0388  | 0.0057 | 6.29E-12 | 6.8728  | 1299802 | Asthma |
| rs11255748 | 10 | 8562626 | T | C | 0.2643 | 0.0386  | 0.0057 | 8.88E-12 | 6.8235  | 1299802 | Asthma |
| rs11255753 | 10 | 8563590 | T | G | 0.2681 | 0.0411  | 0.0060 | 6.64E-12 | 6.8652  | 931782  | Asthma |
| rs17144046 | 10 | 8564051 | G | A | 0.2909 | 0.0367  | 0.0056 | 6.90E-11 | 6.5229  | 1299802 | Asthma |
| rs10795672 | 10 | 8735677 | A | G | 0.4530 | 0.0341  | 0.0051 | 1.51E-11 | 6.7474  | 1299802 | Asthma |
| rs11255890 | 10 | 8742810 | C | A | 0.3529 | 0.0278  | 0.0051 | 3.74E-08 | 5.5028  | 1316443 | Asthma |
| rs11255891 | 10 | 8744032 | T | C | 0.3526 | 0.0277  | 0.0051 | 4.37E-08 | 5.4751  | 1316443 | Asthma |
| rs7087891  | 10 | 8750666 | A | T | 0.3556 | 0.0274  | 0.0049 | 2.51E-08 | 5.5729  | 1376071 | Asthma |

|             |    |         |   |   |        |         |        |          |         |         |        |
|-------------|----|---------|---|---|--------|---------|--------|----------|---------|---------|--------|
| rs7079263   | 10 | 8752143 | C | T | 0.3559 | 0.0273  | 0.0049 | 2.85E-08 | 5.5504  | 1376071 | Asthma |
| rs7088921   | 10 | 8754885 | G | A | 0.3557 | 0.0271  | 0.0049 | 3.60E-08 | 5.5093  | 1376071 | Asthma |
| rs7090156   | 10 | 8755661 | T | A | 0.3558 | 0.0270  | 0.0049 | 3.99E-08 | 5.4916  | 1376071 | Asthma |
| rs10795674  | 10 | 8755983 | C | T | 0.3558 | 0.0271  | 0.0049 | 3.48E-08 | 5.5153  | 1376071 | Asthma |
| rs4749820   | 10 | 8758435 | G | A | 0.3559 | 0.0271  | 0.0049 | 3.40E-08 | 5.5195  | 1376071 | Asthma |
| rs10795677  | 10 | 8761618 | T | C | 0.3556 | 0.0272  | 0.0049 | 3.12E-08 | 5.5348  | 1376071 | Asthma |
| rs3928823   | 10 | 8763894 | G | A | 0.3551 | 0.0272  | 0.0049 | 3.08E-08 | 5.5370  | 1376071 | Asthma |
| rs11255912  | 10 | 8766364 | C | A | 0.3550 | 0.0275  | 0.0049 | 2.00E-08 | 5.6117  | 1376071 | Asthma |
| rs9665552   | 10 | 8769071 | T | C | 0.3553 | 0.0273  | 0.0049 | 2.54E-08 | 5.5705  | 1376071 | Asthma |
| rs9665567   | 10 | 8769562 | A | T | 0.3556 | 0.0272  | 0.0049 | 2.77E-08 | 5.5553  | 1376071 | Asthma |
| rs11255914  | 10 | 8769788 | A | G | 0.3555 | 0.0272  | 0.0049 | 2.82E-08 | 5.5519  | 1376071 | Asthma |
| rs10795678  | 10 | 8771666 | C | T | 0.3556 | 0.0271  | 0.0049 | 3.43E-08 | 5.5176  | 1376071 | Asthma |
| rs2027105   | 10 | 8774236 | C | T | 0.3555 | 0.0272  | 0.0049 | 2.81E-08 | 5.5528  | 1376071 | Asthma |
| rs1556593   | 10 | 8776134 | T | A | 0.3555 | 0.0272  | 0.0049 | 3.08E-08 | 5.5366  | 1376071 | Asthma |
| rs982013    | 10 | 8777219 | C | T | 0.3560 | 0.0267  | 0.0049 | 4.95E-08 | 5.4530  | 1376071 | Asthma |
| rs1334561   | 10 | 8778125 | G | A | 0.3560 | 0.0268  | 0.0049 | 4.68E-08 | 5.4632  | 1376071 | Asthma |
| rs7902526   | 10 | 8778463 | A | G | 0.3556 | 0.0270  | 0.0049 | 3.64E-08 | 5.5076  | 1376071 | Asthma |
| rs2039494   | 10 | 8779182 | C | T | 0.3559 | 0.0268  | 0.0049 | 4.80E-08 | 5.4585  | 1376071 | Asthma |
| rs2039495   | 10 | 8779193 | G | T | 0.3560 | 0.0268  | 0.0049 | 4.73E-08 | 5.4614  | 1376071 | Asthma |
| rs2025758   | 10 | 8799706 | C | T | 0.4595 | -0.0428 | 0.0048 | 2.00E-19 | -9.0132 | 1376071 | Asthma |
| rs1334538   | 10 | 8801986 | A | C | 0.1543 | -0.0370 | 0.0067 | 4.25E-08 | -5.4802 | 1359430 | Asthma |
| rs12414804  | 10 | 8804951 | C | A | 0.4105 | 0.0308  | 0.0048 | 1.36E-10 | 6.4199  | 1376071 | Asthma |
| rs7914446   | 10 | 8805984 | C | A | 0.4106 | 0.0308  | 0.0048 | 1.30E-10 | 6.4270  | 1376071 | Asthma |
| rs446522    | 10 | 8806288 | T | A | 0.4093 | 0.0308  | 0.0048 | 1.42E-10 | 6.4137  | 1376071 | Asthma |
| rs11255932  | 10 | 8806824 | G | A | 0.4104 | 0.0307  | 0.0048 | 1.70E-10 | 6.3861  | 1376071 | Asthma |
| rs11255933  | 10 | 8806861 | C | A | 0.4097 | 0.0305  | 0.0048 | 2.48E-10 | 6.3281  | 1376071 | Asthma |
| rs10905467  | 10 | 8806862 | C | T | 0.4094 | 0.0304  | 0.0048 | 2.84E-10 | 6.3073  | 1376071 | Asthma |
| rs184906    | 10 | 8806978 | G | A | 0.4105 | 0.0306  | 0.0048 | 1.78E-10 | 6.3797  | 1376071 | Asthma |
| rs190854    | 10 | 8807038 | A | T | 0.4104 | 0.0307  | 0.0048 | 1.61E-10 | 6.3950  | 1376071 | Asthma |
| rs391063    | 10 | 8807078 | T | C | 0.4105 | 0.0307  | 0.0048 | 1.71E-10 | 6.3855  | 1376071 | Asthma |
| rs10905468  | 10 | 8807563 | G | C | 0.4107 | 0.0308  | 0.0048 | 1.40E-10 | 6.4160  | 1376071 | Asthma |
| rs2478439   | 10 | 8808103 | C | A | 0.4123 | 0.0312  | 0.0048 | 7.81E-11 | 6.5043  | 1376071 | Asthma |
| rs2986302   | 10 | 8808129 | C | T | 0.3955 | 0.0333  | 0.0054 | 6.04E-10 | 6.1895  | 911502  | Asthma |
| rs2986301   | 10 | 8808136 | T | C | 0.4123 | 0.0312  | 0.0048 | 7.86E-11 | 6.5031  | 1376071 | Asthma |
| rs10905469  | 10 | 8808400 | G | A | 0.4111 | 0.0324  | 0.0053 | 6.56E-10 | 6.1765  | 1224666 | Asthma |
| rs2478438   | 10 | 8808581 | C | T | 0.4120 | 0.0313  | 0.0048 | 7.16E-11 | 6.5172  | 1376071 | Asthma |
| rs11255938  | 10 | 8808772 | T | C | 0.4548 | -0.0426 | 0.0048 | 3.96E-19 | -8.9381 | 1376071 | Asthma |
| rs1591299   | 10 | 8810543 | T | A | 0.4104 | 0.0305  | 0.0048 | 2.37E-10 | 6.3353  | 1376071 | Asthma |
| rs2483927   | 10 | 8812522 | T | C | 0.4083 | 0.0313  | 0.0048 | 9.11E-11 | 6.4812  | 1376071 | Asthma |
| rs2483926   | 10 | 8812558 | G | C | 0.4128 | 0.0307  | 0.0048 | 1.88E-10 | 6.3712  | 1376071 | Asthma |
| rs1575916   | 10 | 8812907 | G | A | 0.4130 | 0.0309  | 0.0048 | 1.41E-10 | 6.4149  | 1376071 | Asthma |
| rs1577218   | 10 | 8813281 | A | G | 0.4066 | 0.0317  | 0.0048 | 5.11E-11 | 6.5677  | 1376071 | Asthma |
| rs4749824   | 10 | 8813338 | T | C | 0.4100 | 0.0307  | 0.0048 | 2.03E-10 | 6.3592  | 1376071 | Asthma |
| rs72780903  | 10 | 8815135 | A | T | 0.1882 | 0.0389  | 0.0061 | 1.57E-10 | 6.3985  | 1376071 | Asthma |
| rs112842054 | 10 | 8829429 | C | T | 0.1844 | 0.0419  | 0.0068 | 8.62E-10 | 6.1331  | 1198533 | Asthma |
| rs10737033  | 10 | 8839021 | A | G | 0.1648 | 0.0381  | 0.0067 | 1.29E-08 | 5.6881  | 1299802 | Asthma |
| rs11255962  | 10 | 8885541 | C | T | 0.0302 | -0.0968 | 0.0136 | 1.33E-12 | -7.0909 | 1316443 | Asthma |
| rs11255963  | 10 | 8887477 | G | A | 0.0225 | -0.1069 | 0.0154 | 3.79E-12 | -6.9454 | 1316443 | Asthma |
| rs12253731  | 10 | 8888040 | C | T | 0.0252 | -0.0859 | 0.0144 | 2.44E-09 | -5.9653 | 1316443 | Asthma |
| rs406991    | 10 | 8888235 | G | C | 0.1267 | 0.0540  | 0.0074 | 2.06E-13 | 7.3447  | 1299802 | Asthma |
| rs11255965  | 10 | 8889830 | A | G | 0.0250 | -0.0888 | 0.0142 | 3.63E-10 | -6.2691 | 1376071 | Asthma |
| rs117725518 | 10 | 8890594 | A | G | 0.0348 | -0.0785 | 0.0136 | 8.21E-09 | -5.7641 | 1316443 | Asthma |
| rs290897    | 10 | 8891017 | C | T | 0.0262 | -0.1127 | 0.0147 | 1.70E-14 | -7.6715 | 1359430 | Asthma |
| rs11255967  | 10 | 8891448 | A | G | 0.0252 | -0.0874 | 0.0143 | 1.11E-09 | -6.0928 | 1316443 | Asthma |
| rs78400042  | 10 | 8892059 | G | T | 0.1225 | 0.0575  | 0.0071 | 5.32E-16 | 8.1038  | 1376071 | Asthma |
| rs12218998  | 10 | 8892074 | G | C | 0.0226 | -0.1070 | 0.0150 | 1.05E-12 | -7.1237 | 1376071 | Asthma |
| rs7099087   | 10 | 8892228 | A | G | 0.0226 | -0.1057 | 0.0150 | 1.91E-12 | -7.0409 | 1376071 | Asthma |
| rs76718063  | 10 | 8892817 | T | G | 0.1224 | 0.0574  | 0.0071 | 5.73E-16 | 8.0949  | 1376071 | Asthma |
| rs11255968  | 10 | 8894199 | T | C | 0.0249 | -0.1101 | 0.0145 | 2.65E-14 | -7.6142 | 1376071 | Asthma |
| rs290904    | 10 | 8894945 | G | C | 0.0336 | -0.1003 | 0.0132 | 3.27E-14 | -7.5868 | 1316443 | Asthma |
| rs3847419   | 10 | 8895630 | A | G | 0.0226 | -0.1057 | 0.0150 | 1.81E-12 | -7.0485 | 1376071 | Asthma |
| rs77476954  | 10 | 8896598 | G | A | 0.1225 | 0.0572  | 0.0071 | 6.60E-16 | 8.0778  | 1376071 | Asthma |
| rs78539108  | 10 | 8897235 | T | A | 0.1224 | 0.0572  | 0.0071 | 7.00E-16 | 8.0707  | 1376071 | Asthma |
| rs12253380  | 10 | 8898431 | G | A | 0.0475 | -0.0989 | 0.0106 | 1.46E-20 | -9.2954 | 1316443 | Asthma |
| rs76141549  | 10 | 8898991 | A | G | 0.1224 | 0.0569  | 0.0071 | 1.00E-15 | 8.0265  | 1376071 | Asthma |
| rs7893722   | 10 | 8898999 | G | T | 0.0552 | -0.0945 | 0.0100 | 4.70E-21 | -9.4153 | 1316443 | Asthma |
| rs112085461 | 10 | 8899678 | G | A | 0.1247 | 0.0531  | 0.0070 | 4.42E-14 | 7.5478  | 1376071 | Asthma |
| rs74913673  | 10 | 8900085 | C | T | 0.1247 | 0.0532  | 0.0070 | 4.15E-14 | 7.5561  | 1376071 | Asthma |
| rs79833063  | 10 | 8900186 | T | C | 0.1247 | 0.0532  | 0.0070 | 4.25E-14 | 7.5530  | 1376071 | Asthma |
| rs77461246  | 10 | 8900709 | T | A | 0.1247 | 0.0530  | 0.0070 | 4.89E-14 | 7.5347  | 1376071 | Asthma |
| rs79282820  | 10 | 8900833 | G | T | 0.1248 | 0.0529  | 0.0070 | 5.26E-14 | 7.5254  | 1376071 | Asthma |
| rs74814866  | 10 | 8900839 | A | G | 0.1247 | 0.0530  | 0.0070 | 4.78E-14 | 7.5379  | 1376071 | Asthma |
| rs76407406  | 10 | 8902089 | G | A | 0.1225 | 0.0569  | 0.0071 | 9.22E-16 | 8.0368  | 1376071 | Asthma |
| rs80006116  | 10 | 8902660 | A | G | 0.1199 | 0.0460  | 0.0079 | 4.88E-09 | 5.8514  | 1219993 | Asthma |

|             |    |         |   |   |        |         |        |          |          |         |        |
|-------------|----|---------|---|---|--------|---------|--------|----------|----------|---------|--------|
| rs80143905  | 10 | 8903825 | T | C | 0.1247 | 0.0530  | 0.0070 | 4.89E-14 | 7.5348   | 1376071 | Asthma |
| rs56169495  | 10 | 8903939 | A | T | 0.0557 | -0.0939 | 0.0098 | 8.51E-22 | -9.5936  | 1376071 | Asthma |
| rs77097907  | 10 | 8904507 | A | C | 0.1247 | 0.0531  | 0.0070 | 4.38E-14 | 7.5493   | 1376071 | Asthma |
| rs188331    | 10 | 8904545 | G | C | 0.3081 | -0.0328 | 0.0051 | 1.84E-10 | -6.3740  | 1376071 | Asthma |
| rs78741571  | 10 | 8905116 | A | G | 0.1247 | 0.0531  | 0.0070 | 4.33E-14 | 7.5508   | 1376071 | Asthma |
| rs74516407  | 10 | 8905213 | T | A | 0.1247 | 0.0530  | 0.0070 | 4.54E-14 | 7.5447   | 1376071 | Asthma |
| rs79186901  | 10 | 8905645 | C | T | 0.1224 | 0.0567  | 0.0071 | 1.12E-15 | 8.0127   | 1376071 | Asthma |
| rs17413004  | 10 | 8907217 | A | T | 0.1225 | 0.0568  | 0.0071 | 9.72E-16 | 8.0304   | 1376071 | Asthma |
| rs17504213  | 10 | 8907602 | C | T | 0.1247 | 0.0532  | 0.0070 | 4.00E-14 | 7.5611   | 1376071 | Asthma |
| rs75375842  | 10 | 8909066 | A | C | 0.1225 | 0.0569  | 0.0071 | 9.44E-16 | 8.0339   | 1376071 | Asthma |
| rs17413266  | 10 | 8910589 | T | C | 0.1225 | 0.0568  | 0.0071 | 9.77E-16 | 8.0297   | 1376071 | Asthma |
| rs74319752  | 10 | 8912487 | C | T | 0.1225 | 0.0569  | 0.0071 | 8.58E-16 | 8.0456   | 1376071 | Asthma |
| rs17504534  | 10 | 8912791 | G | C | 0.1225 | 0.0568  | 0.0071 | 9.77E-16 | 8.0298   | 1376071 | Asthma |
| rs118097668 | 10 | 8913082 | T | C | 0.0358 | -0.0819 | 0.0129 | 2.02E-10 | -6.3601  | 1376071 | Asthma |
| rs75806674  | 10 | 8915392 | C | T | 0.1225 | 0.0569  | 0.0071 | 8.70E-16 | 8.0439   | 1376071 | Asthma |
| rs11255975  | 10 | 8916624 | C | T | 0.0554 | -0.0940 | 0.0098 | 7.71E-22 | -9.6038  | 1376071 | Asthma |
| rs12261421  | 10 | 8916848 | T | C | 0.0254 | -0.0879 | 0.0139 | 2.49E-10 | -6.3277  | 1376071 | Asthma |
| rs72782617  | 10 | 8918063 | T | C | 0.0358 | -0.0823 | 0.0129 | 1.62E-10 | -6.3940  | 1376071 | Asthma |
| rs113677559 | 10 | 8920044 | C | T | 0.1149 | 0.0561  | 0.0087 | 1.39E-10 | 6.4171   | 1090071 | Asthma |
| rs117694039 | 10 | 8920166 | A | G | 0.1225 | 0.0569  | 0.0071 | 9.11E-16 | 8.0382   | 1376071 | Asthma |
| rs138501911 | 10 | 8920514 | T | C | 0.1225 | 0.0568  | 0.0071 | 1.01E-15 | 8.0254   | 1376071 | Asthma |
| rs56073665  | 10 | 8920986 | G | T | 0.0254 | -0.0864 | 0.0139 | 5.22E-10 | -6.2123  | 1376071 | Asthma |
| rs79134926  | 10 | 8923021 | T | G | 0.1211 | 0.0621  | 0.0076 | 3.65E-16 | 8.1497   | 1246149 | Asthma |
| rs72782628  | 10 | 8923655 | C | A | 0.0359 | -0.0812 | 0.0128 | 2.38E-10 | -6.3347  | 1376071 | Asthma |
| rs74725049  | 10 | 8924349 | C | T | 0.1221 | 0.0575  | 0.0071 | 4.56E-16 | 8.1226   | 1376071 | Asthma |
| rs17413906  | 10 | 8925693 | T | A | 0.1167 | 0.0514  | 0.0079 | 9.97E-11 | 6.4675   | 1219993 | Asthma |
| rs77481341  | 10 | 8926343 | C | T | 0.1221 | 0.0575  | 0.0071 | 4.63E-16 | 8.1207   | 1376071 | Asthma |
| rs11255979  | 10 | 8927489 | C | T | 0.0541 | -0.0829 | 0.0100 | 1.31E-16 | -8.2732  | 1376071 | Asthma |
| rs10508372  | 10 | 8930055 | A | G | 0.0540 | -0.0836 | 0.0100 | 6.50E-17 | -8.3561  | 1376071 | Asthma |
| rs1243403   | 10 | 8932605 | C | T | 0.0359 | -0.0821 | 0.0128 | 1.58E-10 | -6.3976  | 1376071 | Asthma |
| rs1243402   | 10 | 8933892 | G | C | 0.0359 | -0.0823 | 0.0128 | 1.44E-10 | -6.4114  | 1376071 | Asthma |
| rs10905488  | 10 | 8934081 | C | T | 0.0539 | -0.0829 | 0.0100 | 1.46E-16 | -8.2591  | 1376071 | Asthma |
| rs1243401   | 10 | 8934266 | C | T | 0.0362 | -0.0823 | 0.0128 | 1.15E-10 | -6.4460  | 1376071 | Asthma |
| rs1243400   | 10 | 8934695 | G | A | 0.3267 | -0.0335 | 0.0051 | 4.41E-11 | -6.5897  | 1376071 | Asthma |
| rs1243399   | 10 | 8934744 | T | C | 0.3246 | -0.0343 | 0.0051 | 1.40E-11 | -6.7583  | 1376071 | Asthma |
| rs1243397   | 10 | 8935945 | A | G | 0.3160 | -0.0343 | 0.0051 | 2.25E-11 | -6.6886  | 1376071 | Asthma |
| rs1243396   | 10 | 8936115 | G | C | 0.3186 | -0.0334 | 0.0051 | 6.16E-11 | -6.5400  | 1376071 | Asthma |
| rs11255983  | 10 | 8937042 | A | G | 0.0143 | -0.1186 | 0.0185 | 1.47E-10 | -6.4083  | 1376071 | Asthma |
| rs1342770   | 10 | 8937327 | C | T | 0.3388 | -0.0374 | 0.0050 | 1.01E-13 | -7.4400  | 1376071 | Asthma |
| rs1342771   | 10 | 8937424 | G | T | 0.3388 | -0.0374 | 0.0050 | 1.02E-13 | -7.4386  | 1376071 | Asthma |
| rs1342772   | 10 | 8937497 | T | G | 0.3389 | -0.0373 | 0.0050 | 1.15E-13 | -7.4224  | 1376071 | Asthma |
| rs6602347   | 10 | 8937888 | A | G | 0.3291 | -0.0376 | 0.0051 | 1.21E-13 | -7.4152  | 1376071 | Asthma |
| rs76063842  | 10 | 8939256 | C | T | 0.0371 | -0.1213 | 0.0134 | 1.75E-19 | -9.0281  | 1316443 | Asthma |
| rs1243391   | 10 | 8940434 | G | A | 0.3392 | -0.0365 | 0.0050 | 3.90E-13 | -7.2590  | 1376071 | Asthma |
| rs10905490  | 10 | 8940453 | A | G | 0.0114 | -0.1150 | 0.0201 | 1.07E-08 | -5.7194  | 1376071 | Asthma |
| rs1243392   | 10 | 8940856 | C | A | 0.3366 | -0.0373 | 0.0050 | 1.24E-13 | -7.4125  | 1376071 | Asthma |
| rs1243394   | 10 | 8941241 | A | G | 0.3285 | -0.0372 | 0.0051 | 2.14E-13 | -7.3394  | 1376071 | Asthma |
| rs1243395   | 10 | 8941835 | G | C | 0.0359 | -0.0818 | 0.0128 | 1.86E-10 | -6.3725  | 1376071 | Asthma |
| rs11255986  | 10 | 8942817 | C | T | 0.0114 | -0.1142 | 0.0202 | 1.47E-08 | -5.6652  | 1376071 | Asthma |
| rs78084308  | 10 | 8942992 | A | C | 0.0415 | 0.0983  | 0.0125 | 2.90E-15 | 7.8951   | 1316443 | Asthma |
| rs1444784   | 10 | 8943989 | A | G | 0.3312 | -0.0358 | 0.0051 | 1.48E-12 | -7.0767  | 1376071 | Asthma |
| rs78267753  | 10 | 8944594 | A | G | 0.1220 | 0.0582  | 0.0071 | 2.20E-16 | 8.2105   | 1376071 | Asthma |
| rs827640    | 10 | 8946048 | T | C | 0.3367 | -0.0384 | 0.0050 | 2.45E-14 | -7.6245  | 1376071 | Asthma |
| rs77249403  | 10 | 8947235 | A | G | 0.1220 | 0.0583  | 0.0071 | 2.00E-16 | 8.2223   | 1376071 | Asthma |
| rs827643    | 10 | 8947961 | T | C | 0.3355 | -0.0381 | 0.0052 | 1.50E-13 | -7.3872  | 1316443 | Asthma |
| rs827644    | 10 | 8948487 | G | A | 0.3383 | -0.0366 | 0.0051 | 1.09E-12 | -7.1187  | 1316443 | Asthma |
| rs17505816  | 10 | 8948587 | G | C | 0.1220 | 0.0583  | 0.0071 | 2.02E-16 | 8.2210   | 1376071 | Asthma |
| rs79570477  | 10 | 8948834 | A | T | 0.0371 | -0.1217 | 0.0134 | 1.32E-19 | -9.0581  | 1316443 | Asthma |
| rs827645    | 10 | 8949880 | A | G | 0.3378 | -0.0378 | 0.0052 | 2.29E-13 | -7.3305  | 1316443 | Asthma |
| rs17505882  | 10 | 8950318 | G | A | 0.1221 | 0.0586  | 0.0071 | 1.38E-16 | 8.2667   | 1376071 | Asthma |
| rs11814404  | 10 | 8950490 | C | T | 0.1221 | 0.0586  | 0.0071 | 1.44E-16 | 8.2613   | 1376071 | Asthma |
| rs10905491  | 10 | 8951752 | C | T | 0.0415 | -0.0886 | 0.0115 | 1.02E-14 | -7.7369  | 1376071 | Asthma |
| rs17414748  | 10 | 8952368 | A | G | 0.0650 | 0.0904  | 0.0096 | 3.47E-21 | 9.4475   | 1376071 | Asthma |
| rs74623270  | 10 | 8953329 | A | G | 0.1217 | 0.0588  | 0.0071 | 1.20E-16 | 8.2833   | 1376071 | Asthma |
| rs17506027  | 10 | 8953497 | T | C | 0.1217 | 0.0588  | 0.0071 | 1.21E-16 | 8.2825   | 1376071 | Asthma |
| rs827625    | 10 | 8956555 | A | G | 0.3425 | -0.0395 | 0.0058 | 1.29E-11 | -6.7698  | 851973  | Asthma |
| rs75861713  | 10 | 8956766 | A | C | 0.0358 | -0.1217 | 0.0159 | 1.76E-14 | -7.6667  | 1090071 | Asthma |
| rs11255992  | 10 | 8957327 | T | C | 0.4246 | 0.0301  | 0.0049 | 9.82E-10 | 6.1125   | 1316443 | Asthma |
| rs11255993  | 10 | 8958878 | G | T | 0.4410 | 0.0275  | 0.0049 | 2.08E-08 | 5.6056   | 1316443 | Asthma |
| rs827624    | 10 | 8959364 | T | C | 0.3319 | -0.0360 | 0.0052 | 4.46E-12 | -6.9218  | 1316443 | Asthma |
| rs827620    | 10 | 8960206 | T | A | 0.4515 | -0.0526 | 0.0049 | 4.84E-27 | -10.7686 | 1316443 | Asthma |
| rs827618    | 10 | 8962034 | G | T | 0.1713 | 0.0553  | 0.0062 | 6.40E-19 | 8.8849   | 1376071 | Asthma |
| rs2120793   | 10 | 8963205 | T | C | 0.0844 | -0.0471 | 0.0083 | 1.24E-08 | -5.6942  | 1376071 | Asthma |
| rs35764270  | 10 | 8963311 | C | T | 0.3470 | -0.0295 | 0.0051 | 7.43E-09 | -5.7810  | 1316443 | Asthma |

|             |    |         |   |   |        |         |        |          |          |         |        |
|-------------|----|---------|---|---|--------|---------|--------|----------|----------|---------|--------|
| rs1243425   | 10 | 8963639 | T | C | 0.1660 | 0.0563  | 0.0063 | 4.58E-19 | 8.9220   | 1376071 | Asthma |
| rs1444775   | 10 | 8965233 | A | C | 0.4387 | -0.0416 | 0.0054 | 1.97E-14 | -7.6525  | 878129  | Asthma |
| rs7089760   | 10 | 8968416 | C | T | 0.0894 | -0.0454 | 0.0081 | 1.75E-08 | -5.6347  | 1376071 | Asthma |
| rs827637    | 10 | 8968661 | A | G | 0.4281 | -0.0432 | 0.0048 | 1.58E-19 | -9.0389  | 1376071 | Asthma |
| rs7910930   | 10 | 8969054 | G | A | 0.3456 | -0.0291 | 0.0050 | 5.58E-09 | -5.8291  | 1376071 | Asthma |
| rs10905493  | 10 | 8970090 | A | G | 0.0848 | -0.0463 | 0.0082 | 1.97E-08 | -5.6150  | 1376071 | Asthma |
| rs10430791  | 10 | 8971235 | C | T | 0.0895 | -0.0453 | 0.0080 | 1.85E-08 | -5.6252  | 1376071 | Asthma |
| rs827634    | 10 | 8971815 | A | G | 0.3384 | -0.0302 | 0.0050 | 1.75E-09 | -6.0199  | 1376071 | Asthma |
| rs11255998  | 10 | 8971871 | T | C | 0.0121 | -0.1098 | 0.0196 | 2.15E-08 | -5.5992  | 1376071 | Asthma |
| rs827633    | 10 | 8971937 | G | A | 0.3404 | -0.0297 | 0.0050 | 3.31E-09 | -5.9157  | 1376071 | Asthma |
| rs827632    | 10 | 8972465 | T | G | 0.4254 | -0.0424 | 0.0048 | 7.72E-19 | -8.8638  | 1376071 | Asthma |
| rs827631    | 10 | 8973267 | A | G | 0.1657 | 0.0572  | 0.0063 | 1.46E-19 | 9.0481   | 1376071 | Asthma |
| rs77334607  | 10 | 8973566 | A | G | 0.1340 | 0.0597  | 0.0069 | 5.13E-18 | 8.6506   | 1376071 | Asthma |
| rs1705327   | 10 | 8974284 | C | T | 0.4325 | -0.0418 | 0.0048 | 2.17E-18 | -8.7483  | 1376071 | Asthma |
| rs1705326   | 10 | 8974607 | C | T | 0.4321 | -0.0419 | 0.0048 | 1.66E-18 | -8.7784  | 1376071 | Asthma |
| rs1775568   | 10 | 8974969 | T | G | 0.1678 | 0.0547  | 0.0063 | 3.99E-18 | 8.6792   | 1376071 | Asthma |
| rs1663671   | 10 | 8975515 | T | G | 0.4293 | -0.0429 | 0.0048 | 3.05E-19 | -8.9669  | 1376071 | Asthma |
| rs10795685  | 10 | 8975981 | G | T | 0.2097 | -0.0453 | 0.0058 | 3.94E-15 | -7.8569  | 1376071 | Asthma |
| rs10905495  | 10 | 8976146 | C | T | 0.0906 | -0.0450 | 0.0080 | 1.99E-08 | -5.6127  | 1376071 | Asthma |
| rs11256002  | 10 | 8977062 | G | A | 0.4844 | -0.0375 | 0.0049 | 1.16E-14 | -7.7201  | 1316443 | Asthma |
| rs1663670   | 10 | 8977296 | C | T | 0.1879 | -0.0364 | 0.0062 | 5.30E-09 | -5.8375  | 1316443 | Asthma |
| rs895069    | 10 | 8978487 | T | A | 0.4677 | -0.0337 | 0.0047 | 1.19E-12 | -7.1071  | 1376071 | Asthma |
| rs706773    | 10 | 8979218 | C | T | 0.1960 | -0.0343 | 0.0060 | 9.00E-09 | -5.7486  | 1376071 | Asthma |
| rs827626    | 10 | 8980055 | C | G | 0.1956 | -0.0344 | 0.0060 | 8.41E-09 | -5.7599  | 1376071 | Asthma |
| rs41341945  | 10 | 8980875 | C | G | 0.0944 | 0.0735  | 0.0081 | 9.95E-20 | 9.0896   | 1376071 | Asthma |
| rs4582874   | 10 | 8981756 | C | T | 0.1289 | 0.0706  | 0.0070 | 1.23E-23 | 10.0213  | 1376071 | Asthma |
| rs1775574   | 10 | 8981759 | T | C | 0.1955 | -0.0342 | 0.0060 | 1.06E-08 | -5.7206  | 1376071 | Asthma |
| rs1663691   | 10 | 8981769 | G | A | 0.1955 | -0.0342 | 0.0060 | 1.08E-08 | -5.7181  | 1376071 | Asthma |
| rs11256003  | 10 | 8981917 | A | T | 0.2787 | 0.0330  | 0.0053 | 5.24E-10 | 6.2119   | 1376071 | Asthma |
| rs1775575   | 10 | 8982396 | A | G | 0.1956 | -0.0344 | 0.0060 | 8.42E-09 | -5.7599  | 1376071 | Asthma |
| rs1663690   | 10 | 8982555 | A | G | 0.1983 | -0.0331 | 0.0059 | 2.57E-08 | -5.5687  | 1376071 | Asthma |
| rs1705330   | 10 | 8982756 | A | G | 0.1981 | -0.0329 | 0.0059 | 3.06E-08 | -5.5381  | 1376071 | Asthma |
| rs11256004  | 10 | 8982822 | A | G | 0.0971 | 0.0736  | 0.0080 | 2.73E-20 | 9.2290   | 1376071 | Asthma |
| rs1705328   | 10 | 8982854 | C | A | 0.1981 | -0.0330 | 0.0059 | 2.82E-08 | -5.5524  | 1376071 | Asthma |
| rs1663689   | 10 | 8983232 | C | T | 0.1981 | -0.0330 | 0.0059 | 2.98E-08 | -5.5423  | 1376071 | Asthma |
| rs10905496  | 10 | 8984070 | T | C | 0.5176 | -0.0385 | 0.0060 | 1.18E-10 | -6.4420  | 1003385 | Asthma |
| rs12357714  | 10 | 8984590 | G | A | 0.0952 | 0.0786  | 0.0108 | 3.34E-13 | 7.2800   | 934923  | Asthma |
| rs72782675  | 10 | 8986983 | T | C | 0.0144 | -0.1792 | 0.0190 | 3.29E-21 | -9.4529  | 1376071 | Asthma |
| rs11256006  | 10 | 8988049 | A | G | 0.1273 | 0.0689  | 0.0073 | 2.09E-21 | 9.5005   | 1316443 | Asthma |
| rs1243436   | 10 | 8988067 | C | G | 0.2027 | -0.0329 | 0.0059 | 2.49E-08 | -5.5743  | 1376071 | Asthma |
| rs11256008  | 10 | 8990353 | C | G | 0.1447 | 0.0625  | 0.0069 | 1.94E-19 | 9.0166   | 1316443 | Asthma |
| rs72782676  | 10 | 8990592 | G | C | 0.0073 | -0.3671 | 0.0311 | 4.64E-32 | -11.7856 | 1290310 | Asthma |
| rs72782677  | 10 | 8991760 | T | C | 0.0421 | -0.0976 | 0.0121 | 5.98E-16 | -8.0897  | 1376071 | Asthma |
| rs11256010  | 10 | 8993291 | C | T | 0.0152 | -0.1882 | 0.0186 | 3.89E-24 | -10.1346 | 1376071 | Asthma |
| rs74127604  | 10 | 8994051 | G | A | 0.0422 | -0.0993 | 0.0121 | 1.72E-16 | -8.2400  | 1376071 | Asthma |
| rs1912580   | 10 | 8995019 | C | G | 0.1477 | 0.0636  | 0.0069 | 1.90E-20 | 9.2680   | 1316443 | Asthma |
| rs930579    | 10 | 8995529 | T | G | 0.1471 | 0.0650  | 0.0069 | 3.40E-21 | 9.4497   | 1316443 | Asthma |
| rs118077070 | 10 | 8995706 | A | G | 0.0389 | -0.1186 | 0.0128 | 1.46E-20 | -9.2960  | 1376071 | Asthma |
| rs12356492  | 10 | 8996394 | C | T | 0.0594 | 0.1069  | 0.0099 | 5.07E-27 | 10.7639  | 1376071 | Asthma |
| rs1705333   | 10 | 8997543 | A | G | 0.3936 | 0.0363  | 0.0050 | 2.93E-13 | 7.2975   | 1316443 | Asthma |
| rs4116669   | 10 | 8998737 | C | T | 0.1981 | 0.0829  | 0.0059 | 2.35E-45 | 14.1340  | 1376071 | Asthma |
| rs4379740   | 10 | 9001341 | T | C | 0.1990 | 0.0837  | 0.0060 | 1.98E-44 | 13.9832  | 1316443 | Asthma |
| rs11256016  | 10 | 9001389 | A | G | 0.0522 | 0.1191  | 0.0119 | 1.11E-23 | 10.0320  | 1198533 | Asthma |
| rs61840192  | 10 | 9001441 | A | G | 0.3921 | -0.0822 | 0.0054 | 4.70E-53 | -15.3315 | 1224666 | Asthma |
| rs186856025 | 10 | 9001494 | T | C | 0.0958 | -0.1279 | 0.0084 | 1.34E-52 | -15.2634 | 1349938 | Asthma |
| rs375913359 | 10 | 9001632 | C | T | 0.3302 | 0.0600  | 0.0092 | 6.26E-11 | 6.5374   | 476051  | Asthma |
| rs144536148 | 10 | 9001864 | G | A | 0.0960 | -0.1265 | 0.0082 | 2.27E-53 | -15.3789 | 1376071 | Asthma |
| rs11256017  | 10 | 9001956 | T | C | 0.1982 | 0.0829  | 0.0059 | 2.11E-45 | 14.1416  | 1376071 | Asthma |
| rs2589561   | 10 | 9004682 | A | G | 0.2007 | 0.0831  | 0.0058 | 5.23E-46 | 14.2393  | 1376071 | Asthma |
| rs12413578  | 10 | 9007290 | T | C | 0.0938 | -0.1319 | 0.0083 | 6.15E-57 | -15.9021 | 1376071 | Asthma |
| rs2440781   | 10 | 9009365 | A | G | 0.1903 | 0.0875  | 0.0067 | 1.39E-38 | 12.9903  | 1160365 | Asthma |
| rs7898135   | 10 | 9010073 | A | C | 0.2807 | -0.0831 | 0.0053 | 2.01E-55 | -15.6819 | 1376071 | Asthma |
| rs1775550   | 10 | 9010779 | G | A | 0.2008 | 0.0833  | 0.0058 | 2.64E-46 | 14.2870  | 1376071 | Asthma |
| rs1775551   | 10 | 9011080 | C | A | 0.2008 | 0.0833  | 0.0058 | 2.99E-46 | 14.2782  | 1376071 | Asthma |
| rs962992    | 10 | 9011110 | C | G | 0.3868 | -0.0834 | 0.0049 | 3.26E-65 | -17.0540 | 1376071 | Asthma |
| rs962993    | 10 | 9011169 | T | C | 0.3868 | -0.0831 | 0.0049 | 7.19E-65 | -17.0079 | 1376071 | Asthma |
| rs2797288   | 10 | 9011210 | G | A | 0.2008 | 0.0833  | 0.0058 | 2.53E-46 | 14.2897  | 1376071 | Asthma |
| rs2589562   | 10 | 9011709 | G | A | 0.2626 | 0.0562  | 0.0054 | 5.33E-25 | 10.3267  | 1316443 | Asthma |
| rs72782686  | 10 | 9012131 | T | C | 0.0211 | -0.1229 | 0.0168 | 2.53E-13 | -7.3177  | 1376071 | Asthma |
| rs1775553   | 10 | 9012362 | T | C | 0.3868 | -0.0833 | 0.0049 | 4.53E-65 | -17.0349 | 1376071 | Asthma |
| rs1775554   | 10 | 9012377 | C | A | 0.3868 | -0.0834 | 0.0049 | 3.33E-65 | -17.0527 | 1376071 | Asthma |
| rs1775555   | 10 | 9012683 | C | T | 0.3869 | -0.0833 | 0.0049 | 4.35E-65 | -17.0371 | 1376071 | Asthma |
| rs1663687   | 10 | 9012824 | A | G | 0.3867 | -0.0830 | 0.0049 | 9.20E-65 | -16.9934 | 1376071 | Asthma |
| rs1663680   | 10 | 9015282 | C | T | 0.3869 | -0.0830 | 0.0049 | 8.58E-65 | -16.9975 | 1376071 | Asthma |

|             |    |         |   |   |        |         |        |          |          |         |        |
|-------------|----|---------|---|---|--------|---------|--------|----------|----------|---------|--------|
| rs1031163   | 10 | 9015459 | T | G | 0.3867 | -0.0831 | 0.0049 | 8.39E-65 | -16.9986 | 1376071 | Asthma |
| rs1031162   | 10 | 9015987 | T | C | 0.3208 | 0.0340  | 0.0052 | 5.89E-11 | 6.5465   | 1316443 | Asthma |
| rs1444783   | 10 | 9015993 | T | C | 0.2656 | 0.0531  | 0.0054 | 1.27E-22 | 9.7880   | 1316443 | Asthma |
| rs1031161   | 10 | 9016178 | G | A | 0.3491 | 0.0396  | 0.0051 | 7.28E-15 | 7.7795   | 1316443 | Asthma |
| rs1444782   | 10 | 9016708 | A | G | 0.3868 | -0.0833 | 0.0049 | 3.46E-65 | -17.0506 | 1376071 | Asthma |
| rs61840207  | 10 | 9017418 | C | T | 0.1873 | -0.0371 | 0.0061 | 1.04E-09 | -6.1030  | 1376071 | Asthma |
| rs957349    | 10 | 9018143 | T | A | 0.2014 | 0.0826  | 0.0058 | 1.02E-45 | 14.1924  | 1376071 | Asthma |
| rs61840209  | 10 | 9018245 | T | C | 0.3207 | 0.0339  | 0.0052 | 6.81E-11 | 6.5248   | 1316443 | Asthma |
| rs7916897   | 10 | 9019141 | T | G | 0.3207 | 0.0339  | 0.0052 | 6.98E-11 | 6.5211   | 1316443 | Asthma |
| rs2589559   | 10 | 9019407 | C | T | 0.2007 | 0.0827  | 0.0058 | 1.11E-45 | 14.1868  | 1376071 | Asthma |
| rs6602349   | 10 | 9019835 | C | G | 0.1999 | 0.0820  | 0.0058 | 8.25E-45 | 14.0451  | 1376071 | Asthma |
| rs2589563   | 10 | 9020320 | T | C | 0.1999 | 0.0820  | 0.0058 | 7.66E-45 | 14.0504  | 1376071 | Asthma |
| rs2197415   | 10 | 9020893 | T | G | 0.3872 | -0.0826 | 0.0049 | 2.41E-64 | -16.9369 | 1376071 | Asthma |
| rs1444787   | 10 | 9021567 | A | G | 0.2034 | 0.0782  | 0.0058 | 2.45E-41 | 13.4667  | 1376071 | Asthma |
| rs725861    | 10 | 9021813 | G | A | 0.2001 | 0.0824  | 0.0058 | 2.57E-45 | 14.1275  | 1376071 | Asthma |
| rs1444788   | 10 | 9022157 | C | T | 0.2000 | 0.0823  | 0.0058 | 4.14E-45 | 14.0938  | 1376071 | Asthma |
| rs1444789   | 10 | 9022398 | C | T | 0.1991 | 0.0828  | 0.0058 | 1.75E-45 | 14.1545  | 1376071 | Asthma |
| rs1612986   | 10 | 9022753 | C | T | 0.2019 | 0.0801  | 0.0058 | 6.70E-43 | 13.7300  | 1376071 | Asthma |
| rs1342773   | 10 | 9022992 | A | T | 0.2773 | 0.0445  | 0.0054 | 1.40E-16 | 8.2647   | 1316443 | Asthma |
| rs1663693   | 10 | 9023124 | C | T | 0.2730 | 0.0434  | 0.0054 | 1.06E-15 | 8.0194   | 1316443 | Asthma |
| rs1342774   | 10 | 9023131 | C | G | 0.2354 | 0.0427  | 0.0055 | 8.56E-15 | 7.7588   | 1376071 | Asthma |
| rs2166169   | 10 | 9024960 | A | G | 0.3429 | -0.0533 | 0.0051 | 2.71E-25 | -10.3914 | 1316443 | Asthma |
| rs1149909   | 10 | 9025234 | C | A | 0.2379 | 0.0434  | 0.0056 | 9.59E-15 | 7.7446   | 1316443 | Asthma |
| rs1149910   | 10 | 9026002 | A | T | 0.2371 | 0.0421  | 0.0055 | 1.68E-14 | 7.6733   | 1376071 | Asthma |
| rs1149911   | 10 | 9026201 | G | T | 0.2373 | 0.0417  | 0.0055 | 2.74E-14 | 7.6100   | 1376071 | Asthma |
| rs1149912   | 10 | 9026689 | C | G | 0.2372 | 0.0419  | 0.0055 | 2.40E-14 | 7.6273   | 1376071 | Asthma |
| rs1149913   | 10 | 9026987 | C | G | 0.2450 | 0.0397  | 0.0062 | 1.89E-10 | 6.3702   | 878129  | Asthma |
| rs1149914   | 10 | 9027633 | A | C | 0.2388 | -0.0565 | 0.0057 | 2.86E-23 | -9.9376  | 1316443 | Asthma |
| rs2589567   | 10 | 9028523 | T | C | 0.2371 | 0.0418  | 0.0055 | 2.31E-14 | 7.6320   | 1376071 | Asthma |
| rs77000868  | 10 | 9028714 | G | T | 0.0302 | -0.1232 | 0.0134 | 3.99E-20 | -9.1883  | 1376071 | Asthma |
| rs1444790   | 10 | 9028996 | G | A | 0.2371 | 0.0418  | 0.0055 | 2.60E-14 | 7.6170   | 1376071 | Asthma |
| rs1444791   | 10 | 9029051 | G | T | 0.2372 | 0.0417  | 0.0055 | 2.98E-14 | 7.5993   | 1376071 | Asthma |
| rs2259672   | 10 | 9029351 | T | C | 0.2371 | 0.0418  | 0.0055 | 2.60E-14 | 7.6168   | 1376071 | Asthma |
| rs2397333   | 10 | 9029451 | C | G | 0.2371 | 0.0417  | 0.0055 | 2.73E-14 | 7.6106   | 1376071 | Asthma |
| rs1822802   | 10 | 9029515 | C | T | 0.2371 | 0.0417  | 0.0055 | 2.72E-14 | 7.6109   | 1376071 | Asthma |
| rs2589568   | 10 | 9029822 | T | G | 0.2371 | 0.0417  | 0.0055 | 2.90E-14 | 7.6028   | 1376071 | Asthma |
| rs2760193   | 10 | 9029946 | T | A | 0.2371 | 0.0416  | 0.0055 | 3.27E-14 | 7.5872   | 1376071 | Asthma |
| rs2589569   | 10 | 9030005 | A | G | 0.2371 | 0.0416  | 0.0055 | 3.16E-14 | 7.5918   | 1376071 | Asthma |
| rs72782698  | 10 | 9030353 | T | C | 0.0261 | -0.1019 | 0.0164 | 5.27E-10 | -6.2111  | 1219993 | Asthma |
| rs2589570   | 10 | 9030354 | T | G | 0.2371 | 0.0415  | 0.0055 | 3.57E-14 | 7.5759   | 1376071 | Asthma |
| rs2397334   | 10 | 9030934 | C | A | 0.2371 | 0.0415  | 0.0055 | 3.60E-14 | 7.5749   | 1376071 | Asthma |
| rs990617    | 10 | 9031116 | C | T | 0.2526 | -0.0569 | 0.0056 | 1.66E-24 | -10.2174 | 1316443 | Asthma |
| rs2589571   | 10 | 9031873 | T | G | 0.2236 | 0.0444  | 0.0075 | 2.85E-09 | 5.9402   | 995476  | Asthma |
| rs2476175   | 10 | 9032164 | T | C | 0.2368 | 0.0419  | 0.0055 | 2.31E-14 | 7.6320   | 1376071 | Asthma |
| rs1342766   | 10 | 9032537 | T | G | 0.2369 | 0.0416  | 0.0055 | 2.88E-14 | 7.6035   | 1376071 | Asthma |
| rs1342767   | 10 | 9032940 | T | C | 0.2549 | 0.0404  | 0.0054 | 4.28E-14 | 7.5521   | 1376071 | Asthma |
| rs1663665   | 10 | 9033071 | C | A | 0.2578 | 0.0394  | 0.0053 | 1.58E-13 | 7.3802   | 1376071 | Asthma |
| rs1444772   | 10 | 9033434 | C | T | 0.2591 | -0.0610 | 0.0058 | 5.45E-26 | -10.5435 | 1246149 | Asthma |
| rs1444773   | 10 | 9033926 | G | A | 0.2576 | 0.0396  | 0.0053 | 1.04E-13 | 7.4353   | 1376071 | Asthma |
| rs117418264 | 10 | 9034193 | C | T | 0.0298 | -0.0807 | 0.0139 | 6.81E-09 | -5.7955  | 1376071 | Asthma |
| rs1623646   | 10 | 9034267 | C | T | 0.2531 | -0.0575 | 0.0054 | 3.61E-26 | -10.5820 | 1376071 | Asthma |
| rs1623807   | 10 | 9034333 | A | T | 0.2535 | -0.0571 | 0.0054 | 8.03E-26 | -10.5068 | 1376071 | Asthma |
| rs1263763   | 10 | 9034984 | C | A | 0.2525 | -0.0573 | 0.0054 | 6.37E-26 | -10.5287 | 1376071 | Asthma |
| rs10752155  | 10 | 9035410 | G | C | 0.4048 | -0.0505 | 0.0048 | 1.75E-25 | -10.4331 | 1376071 | Asthma |
| rs1342768   | 10 | 9035997 | T | A | 0.3753 | -0.0519 | 0.0049 | 3.00E-26 | -10.5992 | 1376071 | Asthma |
| rs997339    | 10 | 9036400 | T | C | 0.2533 | -0.0571 | 0.0054 | 7.38E-26 | -10.5149 | 1376071 | Asthma |
| rs2797279   | 10 | 9037507 | C | T | 0.2533 | -0.0569 | 0.0054 | 1.04E-25 | -10.4822 | 1376071 | Asthma |
| rs2760194   | 10 | 9037539 | G | A | 0.2596 | 0.0389  | 0.0053 | 2.60E-13 | 7.3137   | 1376071 | Asthma |
| rs2760196   | 10 | 9037713 | A | C | 0.2533 | -0.0570 | 0.0054 | 9.61E-26 | -10.4898 | 1376071 | Asthma |
| rs2797278   | 10 | 9037754 | C | T | 0.2533 | -0.0570 | 0.0054 | 9.27E-26 | -10.4933 | 1376071 | Asthma |
| rs1891532   | 10 | 9038063 | G | C | 0.4040 | -0.0498 | 0.0048 | 8.12E-25 | -10.2863 | 1376071 | Asthma |
| rs10905504  | 10 | 9038875 | C | G | 0.4049 | -0.0504 | 0.0048 | 2.00E-25 | -10.4205 | 1376071 | Asthma |
| rs2797276   | 10 | 9039443 | T | C | 0.2533 | -0.0571 | 0.0054 | 7.54E-26 | -10.5129 | 1376071 | Asthma |
| rs2797275   | 10 | 9040071 | C | A | 0.2534 | -0.0571 | 0.0054 | 7.02E-26 | -10.5195 | 1376071 | Asthma |
| rs2797274   | 10 | 9041403 | C | T | 0.2535 | -0.0570 | 0.0054 | 9.37E-26 | -10.4923 | 1376071 | Asthma |
| rs2760197   | 10 | 9042246 | G | A | 0.3753 | -0.0518 | 0.0049 | 4.01E-26 | -10.5721 | 1376071 | Asthma |
| rs2797273   | 10 | 9042996 | A | C | 0.3729 | -0.0515 | 0.0054 | 9.47E-22 | -9.5825  | 1224666 | Asthma |
| rs2797272   | 10 | 9043340 | C | T | 0.2595 | 0.0392  | 0.0053 | 1.88E-13 | 7.3573   | 1376071 | Asthma |
| rs2797271   | 10 | 9043377 | A | G | 0.2533 | -0.0572 | 0.0054 | 6.21E-26 | -10.5310 | 1376071 | Asthma |
| rs2797270   | 10 | 9043663 | A | T | 0.3754 | -0.0518 | 0.0049 | 4.26E-26 | -10.5665 | 1376071 | Asthma |
| rs1418699   | 10 | 9043974 | G | C | 0.3754 | -0.0518 | 0.0049 | 3.84E-26 | -10.5764 | 1376071 | Asthma |
| rs11256034  | 10 | 9044184 | T | C | 0.2593 | 0.0389  | 0.0053 | 2.70E-13 | 7.3084   | 1376071 | Asthma |
| rs2797268   | 10 | 9044185 | C | G | 0.3754 | -0.0518 | 0.0049 | 3.61E-26 | -10.5819 | 1376071 | Asthma |
| rs2488420   | 10 | 9044393 | C | A | 0.3943 | -0.0599 | 0.0057 | 1.76E-25 | -10.4329 | 1090071 | Asthma |



|             |    |         |   |   |        |         |        |          |          |         |        |
|-------------|----|---------|---|---|--------|---------|--------|----------|----------|---------|--------|
| rs2093625   | 10 | 9044829 | A | G | 0.3754 | -0.0520 | 0.0049 | 2.77E-26 | -10.6067 | 1376071 | Asthma |
| rs2093626   | 10 | 9044919 | C | T | 0.3754 | -0.0519 | 0.0049 | 2.94E-26 | -10.6010 | 1376071 | Asthma |
| rs1578732   | 10 | 9045223 | C | T | 0.2533 | -0.0572 | 0.0054 | 6.18E-26 | -10.5315 | 1376071 | Asthma |
| rs1857230   | 10 | 9045277 | T | G | 0.3754 | -0.0520 | 0.0049 | 2.59E-26 | -10.6133 | 1376071 | Asthma |
| rs2797267   | 10 | 9046132 | C | T | 0.2534 | -0.0570 | 0.0054 | 8.92E-26 | -10.4969 | 1376071 | Asthma |
| rs2476177   | 10 | 9046457 | T | G | 0.3399 | -0.0565 | 0.0050 | 1.34E-29 | -11.2980 | 1376071 | Asthma |
| rs2488419   | 10 | 9046584 | A | C | 0.3755 | -0.0518 | 0.0049 | 3.61E-26 | -10.5820 | 1376071 | Asthma |
| rs7080830   | 10 | 9046868 | C | G | 0.4049 | -0.0505 | 0.0048 | 1.48E-25 | -10.4489 | 1376071 | Asthma |
| rs2797266   | 10 | 9047197 | G | A | 0.3755 | -0.0519 | 0.0049 | 2.88E-26 | -10.6033 | 1376071 | Asthma |
| rs2797265   | 10 | 9047417 | A | G | 0.2534 | -0.0573 | 0.0054 | 5.04E-26 | -10.5508 | 1376071 | Asthma |
| rs2057441   | 10 | 9047925 | T | C | 0.2524 | -0.0578 | 0.0054 | 2.76E-26 | -10.6072 | 1376071 | Asthma |
| rs2057442   | 10 | 9047971 | C | T | 0.3755 | -0.0519 | 0.0049 | 3.04E-26 | -10.5982 | 1376071 | Asthma |
| rs862385    | 10 | 9049865 | C | A | 0.3755 | -0.0519 | 0.0049 | 3.18E-26 | -10.5938 | 1376071 | Asthma |
| rs860418    | 10 | 9049937 | T | C | 0.3751 | -0.0520 | 0.0049 | 2.27E-26 | -10.6252 | 1376071 | Asthma |
| rs852272    | 10 | 9050492 | A | G | 0.2534 | -0.0573 | 0.0054 | 5.45E-26 | -10.5434 | 1376071 | Asthma |
| rs860419    | 10 | 9050899 | T | G | 0.4066 | -0.0502 | 0.0048 | 2.56E-25 | -10.3970 | 1376071 | Asthma |
| rs72784427  | 10 | 9051350 | A | G | 0.0239 | -0.1039 | 0.0159 | 7.24E-11 | -6.5158  | 1376071 | Asthma |
| rs861172    | 10 | 9051463 | C | T | 0.3775 | -0.0515 | 0.0049 | 7.18E-26 | -10.5174 | 1376071 | Asthma |
| rs852273    | 10 | 9051676 | T | G | 0.3754 | -0.0518 | 0.0049 | 3.97E-26 | -10.5732 | 1376071 | Asthma |
| rs852274    | 10 | 9052518 | C | T | 0.3776 | -0.0516 | 0.0049 | 6.02E-26 | -10.5340 | 1376071 | Asthma |
| rs852275    | 10 | 9053034 | G | T | 0.3776 | -0.0514 | 0.0049 | 9.48E-26 | -10.4913 | 1376071 | Asthma |
| rs1592228   | 10 | 9053204 | A | G | 0.4069 | -0.0502 | 0.0048 | 3.26E-25 | -10.3740 | 1376071 | Asthma |
| rs1475186   | 10 | 9053876 | T | C | 0.4073 | -0.0503 | 0.0048 | 2.43E-25 | -10.4018 | 1376071 | Asthma |
| rs852277    | 10 | 9054363 | G | A | 0.2559 | -0.0568 | 0.0054 | 1.06E-25 | -10.4808 | 1376071 | Asthma |
| rs852278    | 10 | 9054400 | T | A | 0.2559 | -0.0568 | 0.0054 | 1.03E-25 | -10.4830 | 1376071 | Asthma |
| rs852279    | 10 | 9055787 | C | T | 0.3854 | -0.0764 | 0.0089 | 9.47E-18 | -8.5803  | 476051  | Asthma |
| rs9424038   | 10 | 9056017 | C | T | 0.2521 | -0.0561 | 0.0060 | 5.90E-21 | -9.3917  | 1224666 | Asthma |
| rs2488421   | 10 | 9056470 | T | C | 0.3863 | -0.0550 | 0.0052 | 5.95E-26 | -10.5350 | 1246149 | Asthma |
| rs2797289   | 10 | 9056605 | A | G | 0.2546 | -0.0561 | 0.0054 | 4.81E-25 | -10.3367 | 1376071 | Asthma |
| rs2760202   | 10 | 9057283 | C | T | 0.3778 | -0.0518 | 0.0049 | 4.06E-26 | -10.5709 | 1376071 | Asthma |
| rs2797287   | 10 | 9057338 | A | G | 0.3778 | -0.0517 | 0.0049 | 4.05E-26 | -10.5712 | 1376071 | Asthma |
| rs2797286   | 10 | 9057494 | G | C | 0.3759 | -0.0521 | 0.0049 | 1.95E-26 | -10.6396 | 1376071 | Asthma |
| rs2760203   | 10 | 9057607 | T | C | 0.3778 | -0.0518 | 0.0049 | 4.04E-26 | -10.5716 | 1376071 | Asthma |
| rs2797285   | 10 | 9057677 | A | G | 0.2558 | -0.0568 | 0.0054 | 1.07E-25 | -10.4800 | 1376071 | Asthma |
| rs79008649  | 10 | 9057764 | G | A | 0.0113 | 0.1389  | 0.0252 | 3.34E-08 | 5.5223   | 1290310 | Asthma |
| rs2760204   | 10 | 9058012 | C | T | 0.3778 | -0.0517 | 0.0049 | 4.23E-26 | -10.5671 | 1376071 | Asthma |
| rs2146600   | 10 | 9058241 | C | T | 0.3779 | -0.0518 | 0.0049 | 3.44E-26 | -10.5864 | 1376071 | Asthma |
| rs2760205   | 10 | 9058662 | C | T | 0.3779 | -0.0517 | 0.0049 | 4.90E-26 | -10.5534 | 1376071 | Asthma |
| rs2185817   | 10 | 9059001 | C | G | 0.3778 | -0.0516 | 0.0049 | 5.23E-26 | -10.5472 | 1376071 | Asthma |
| rs2146601   | 10 | 9059063 | G | T | 0.2557 | -0.0568 | 0.0054 | 1.08E-25 | -10.4786 | 1376071 | Asthma |
| rs1573109   | 10 | 9059080 | T | C | 0.3767 | -0.0509 | 0.0049 | 2.60E-25 | -10.3956 | 1376071 | Asthma |
| rs2146602   | 10 | 9059222 | T | A | 0.3412 | -0.0556 | 0.0050 | 1.03E-28 | -11.1176 | 1376071 | Asthma |
| rs2760206   | 10 | 9059473 | A | G | 0.3411 | -0.0558 | 0.0050 | 7.72E-29 | -11.1433 | 1376071 | Asthma |
| rs978328    | 10 | 9060565 | G | A | 0.2915 | -0.0498 | 0.0052 | 1.43E-21 | -9.5401  | 1376071 | Asthma |
| rs978329    | 10 | 9060649 | A | T | 0.2548 | -0.0569 | 0.0054 | 9.97E-26 | -10.4863 | 1376071 | Asthma |
| rs1954301   | 10 | 9060744 | C | T | 0.3780 | -0.0514 | 0.0049 | 8.19E-26 | -10.5049 | 1376071 | Asthma |
| rs1543521   | 10 | 9062502 | A | G | 0.2517 | -0.0567 | 0.0055 | 2.59E-25 | -10.3960 | 1376071 | Asthma |
| rs4550140   | 10 | 9063884 | G | A | 0.3781 | -0.0517 | 0.0049 | 5.19E-26 | -10.5481 | 1376071 | Asthma |
| rs1475187   | 10 | 9065673 | C | T | 0.2510 | -0.0537 | 0.0055 | 6.97E-23 | -9.8483  | 1376071 | Asthma |
| rs2397336   | 10 | 9065951 | G | A | 0.3754 | -0.0487 | 0.0050 | 2.71E-22 | -9.7108  | 1316443 | Asthma |
| rs10795689  | 10 | 9066355 | T | C | 0.2626 | -0.0510 | 0.0054 | 1.60E-21 | -9.5279  | 1376071 | Asthma |
| rs17145188  | 10 | 9066555 | A | G | 0.1529 | -0.0606 | 0.0067 | 1.15E-19 | -9.0734  | 1376071 | Asthma |
| rs10795690  | 10 | 9066580 | A | C | 0.2629 | -0.0507 | 0.0054 | 2.91E-21 | -9.4659  | 1376071 | Asthma |
| rs34289477  | 10 | 9067289 | T | C | 0.1520 | -0.0606 | 0.0067 | 1.60E-19 | -9.0377  | 1376071 | Asthma |
| rs113582842 | 10 | 9067839 | A | G | 0.0650 | -0.1005 | 0.0097 | 6.45E-25 | -10.3084 | 1376071 | Asthma |
| rs10752156  | 10 | 9068242 | G | C | 0.2998 | -0.0451 | 0.0052 | 2.48E-18 | -8.7332  | 1376071 | Asthma |
| rs76775848  | 10 | 9069337 | C | T | 0.0286 | 0.0837  | 0.0148 | 1.64E-08 | 5.6469   | 1316443 | Asthma |
| rs72784452  | 10 | 9069863 | T | C | 0.0649 | -0.1016 | 0.0098 | 2.29E-25 | -10.4074 | 1376071 | Asthma |
| rs10905507  | 10 | 9071482 | T | C | 0.3875 | -0.0470 | 0.0050 | 3.56E-21 | -9.4448  | 1316443 | Asthma |
| rs72784455  | 10 | 9071563 | T | C | 0.0655 | -0.0998 | 0.0097 | 7.87E-25 | -10.2894 | 1376071 | Asthma |
| rs11256044  | 10 | 9074998 | T | A | 0.0654 | -0.0987 | 0.0104 | 2.41E-21 | -9.4853  | 1219993 | Asthma |
| rs11256045  | 10 | 9075270 | C | T | 0.1631 | -0.0548 | 0.0065 | 2.14E-17 | -8.4862  | 1376071 | Asthma |
| rs12411907  | 10 | 9075953 | A | G | 0.0310 | -0.1099 | 0.0131 | 5.35E-17 | -8.3787  | 1376071 | Asthma |
| rs116926501 | 10 | 9076776 | A | G | 0.0313 | -0.1105 | 0.0131 | 2.99E-17 | -8.4474  | 1376071 | Asthma |
| rs11256046  | 10 | 9077866 | A | G | 0.0615 | -0.0944 | 0.0099 | 2.09E-21 | -9.5003  | 1376071 | Asthma |
| rs10905509  | 10 | 9078399 | A | T | 0.2024 | -0.0436 | 0.0059 | 2.33E-13 | -7.3283  | 1376071 | Asthma |
| rs17363282  | 10 | 9078931 | G | A | 0.0497 | 0.1002  | 0.0112 | 3.75E-19 | 8.9443   | 1316443 | Asthma |
| rs12253707  | 10 | 9080584 | T | G | 0.1965 | -0.0444 | 0.0068 | 6.90E-11 | -6.5228  | 878129  | Asthma |
| rs11256048  | 10 | 9081521 | A | C | 0.0615 | -0.0950 | 0.0099 | 1.23E-21 | -9.5559  | 1376071 | Asthma |
| rs17145213  | 10 | 9081764 | T | C | 0.1988 | -0.0443 | 0.0060 | 1.61E-13 | -7.3778  | 1376071 | Asthma |
| rs11256049  | 10 | 9083571 | G | A | 0.0615 | -0.0949 | 0.0099 | 1.33E-21 | -9.5472  | 1376071 | Asthma |
| rs10905510  | 10 | 9083996 | C | T | 0.1915 | -0.0404 | 0.0064 | 2.15E-10 | -6.3505  | 1008051 | Asthma |
| rs961945    | 10 | 9084680 | G | T | 0.4395 | -0.0366 | 0.0048 | 1.54E-14 | -7.6845  | 1376071 | Asthma |
| rs11256050  | 10 | 9084877 | C | A | 0.0618 | -0.0916 | 0.0099 | 2.07E-20 | -9.2585  | 1376071 | Asthma |

|             |    |         |   |   |        |         |        |          |         |         |        |
|-------------|----|---------|---|---|--------|---------|--------|----------|---------|---------|--------|
| rs11256051  | 10 | 9090015 | A | T | 0.1008 | -0.0611 | 0.0080 | 2.69E-14 | -7.6125 | 1376071 | Asthma |
| rs11256052  | 10 | 9090100 | T | G | 0.0615 | -0.0945 | 0.0099 | 1.86E-21 | -9.5127 | 1376071 | Asthma |
| rs11256054  | 10 | 9092906 | T | A | 0.0615 | -0.0946 | 0.0099 | 1.70E-21 | -9.5221 | 1376071 | Asthma |
| rs10905511  | 10 | 9093147 | A | G | 0.0621 | -0.0937 | 0.0099 | 2.37E-21 | -9.4875 | 1376071 | Asthma |
| rs10905512  | 10 | 9093202 | T | G | 0.0615 | -0.0945 | 0.0099 | 1.95E-21 | -9.5079 | 1376071 | Asthma |
| rs61181098  | 10 | 9094121 | A | G | 0.1013 | -0.0592 | 0.0080 | 1.42E-13 | -7.3946 | 1376071 | Asthma |
| rs72784469  | 10 | 9095365 | A | G | 0.1012 | -0.0593 | 0.0080 | 1.36E-13 | -7.4001 | 1376071 | Asthma |
| rs17435829  | 10 | 9098349 | C | T | 0.0970 | -0.0569 | 0.0082 | 3.14E-12 | -6.9712 | 1376071 | Asthma |
| rs11256060  | 10 | 9098452 | T | C | 0.1014 | -0.0590 | 0.0080 | 1.59E-13 | -7.3792 | 1376071 | Asthma |
| rs10905515  | 10 | 9098622 | T | C | 0.0618 | -0.0912 | 0.0099 | 3.04E-20 | -9.2176 | 1376071 | Asthma |
| rs11256061  | 10 | 9098845 | G | A | 0.0620 | -0.0902 | 0.0099 | 6.56E-20 | -9.1348 | 1376071 | Asthma |
| rs11256062  | 10 | 9099388 | C | T | 0.1007 | -0.0590 | 0.0080 | 2.01E-13 | -7.3482 | 1376071 | Asthma |
| rs117746614 | 10 | 9099661 | C | T | 0.0624 | -0.1101 | 0.0158 | 3.24E-12 | -6.9669 | 632129  | Asthma |
| rs11256063  | 10 | 9100309 | T | C | 0.0618 | -0.0912 | 0.0099 | 3.04E-20 | -9.2175 | 1376071 | Asthma |
| rs55766029  | 10 | 9100943 | T | A | 0.1213 | -0.0819 | 0.0116 | 1.60E-12 | -7.0658 | 844071  | Asthma |
| rs11256064  | 10 | 9101014 | C | T | 0.1006 | -0.0591 | 0.0080 | 1.91E-13 | -7.3548 | 1376071 | Asthma |
| rs11256065  | 10 | 9101370 | A | G | 0.0618 | -0.0907 | 0.0099 | 4.98E-20 | -9.1644 | 1376071 | Asthma |
| rs10490944  | 10 | 9101548 | T | C | 0.0662 | -0.0920 | 0.0096 | 8.19E-22 | -9.5975 | 1376071 | Asthma |
| rs10490945  | 10 | 9101758 | G | T | 0.0618 | -0.0914 | 0.0099 | 2.54E-20 | -9.2369 | 1376071 | Asthma |
| rs80353671  | 10 | 9103254 | A | G | 0.0311 | -0.1086 | 0.0131 | 1.18E-16 | -8.2845 | 1376071 | Asthma |
| rs17436267  | 10 | 9104913 | A | G | 0.0620 | -0.0908 | 0.0099 | 4.19E-20 | -9.1830 | 1376071 | Asthma |
| rs11256068  | 10 | 9105646 | T | C | 0.0620 | -0.0907 | 0.0099 | 4.47E-20 | -9.1761 | 1376071 | Asthma |
| rs11256069  | 10 | 9105769 | C | T | 0.0972 | -0.0565 | 0.0082 | 4.51E-12 | -6.9202 | 1376071 | Asthma |
| rs11256070  | 10 | 9106637 | C | T | 0.0626 | -0.0903 | 0.0098 | 4.20E-20 | -9.1829 | 1376071 | Asthma |
| rs11256071  | 10 | 9106786 | G | A | 0.0620 | -0.0906 | 0.0099 | 4.99E-20 | -9.1642 | 1376071 | Asthma |
| rs11256072  | 10 | 9106816 | G | T | 0.0979 | -0.0560 | 0.0081 | 5.64E-12 | -6.8884 | 1376071 | Asthma |
| rs72784480  | 10 | 9107716 | T | C | 0.0623 | -0.0935 | 0.0099 | 2.61E-21 | -9.4772 | 1376071 | Asthma |
| rs17436520  | 10 | 9108059 | C | T | 0.0978 | -0.0567 | 0.0081 | 3.24E-12 | -6.9668 | 1376071 | Asthma |
| rs118091978 | 10 | 9108236 | C | A | 0.0281 | -0.1116 | 0.0139 | 8.53E-16 | -8.0466 | 1376071 | Asthma |
| rs402087    | 10 | 9110225 | C | G | 0.4325 | -0.0369 | 0.0048 | 1.03E-14 | -7.7354 | 1376071 | Asthma |
| rs11256073  | 10 | 9110305 | C | T | 0.0619 | -0.0906 | 0.0099 | 5.35E-20 | -9.1567 | 1376071 | Asthma |
| rs7900250   | 10 | 9110355 | T | C | 0.1014 | -0.0587 | 0.0080 | 2.28E-13 | -7.3314 | 1376071 | Asthma |
| rs72784485  | 10 | 9111465 | C | T | 0.0606 | -0.0902 | 0.0099 | 1.20E-19 | -9.0695 | 1376071 | Asthma |
| rs372712    | 10 | 9112074 | A | G | 0.4349 | -0.0393 | 0.0048 | 1.51E-16 | -8.2557 | 1376071 | Asthma |
| rs10905516  | 10 | 9112305 | C | T | 0.1005 | -0.0574 | 0.0080 | 8.12E-13 | -7.1591 | 1376071 | Asthma |
| rs441107    | 10 | 9113635 | A | C | 0.4322 | -0.0398 | 0.0048 | 7.69E-17 | -8.3360 | 1376071 | Asthma |
| rs75908546  | 10 | 9118283 | C | T | 0.0423 | -0.0845 | 0.0117 | 4.37E-13 | -7.2433 | 1376071 | Asthma |
| rs11256078  | 10 | 9122859 | A | T | 0.0601 | -0.0888 | 0.0100 | 6.28E-19 | -8.8870 | 1376071 | Asthma |
| rs7906507   | 10 | 9124382 | A | G | 0.0995 | -0.0569 | 0.0081 | 1.56E-12 | -7.0692 | 1376071 | Asthma |
| rs10905517  | 10 | 9125243 | G | A | 0.0997 | -0.0565 | 0.0080 | 2.16E-12 | -7.0236 | 1376071 | Asthma |
| rs11256080  | 10 | 9125560 | T | C | 0.0594 | -0.0919 | 0.0100 | 5.20E-20 | -9.1597 | 1376071 | Asthma |
| rs10905518  | 10 | 9126776 | G | A | 0.0598 | -0.0886 | 0.0100 | 7.63E-19 | -8.8653 | 1376071 | Asthma |
| rs995523    | 10 | 9127253 | T | C | 0.0992 | -0.0586 | 0.0081 | 3.84E-13 | -7.2612 | 1376071 | Asthma |
| rs2218050   | 10 | 9127672 | T | C | 0.0992 | -0.0586 | 0.0081 | 3.73E-13 | -7.2649 | 1376071 | Asthma |
| rs11256082  | 10 | 9128126 | G | A | 0.0996 | -0.0566 | 0.0080 | 2.02E-12 | -7.0335 | 1376071 | Asthma |
| rs41330048  | 10 | 9128768 | C | T | 0.0599 | -0.0885 | 0.0100 | 6.89E-19 | -8.8767 | 1376071 | Asthma |
| rs72784495  | 10 | 9129375 | C | T | 0.0598 | -0.0888 | 0.0100 | 6.33E-19 | -8.8862 | 1376071 | Asthma |
| rs1149915   | 10 | 9130270 | T | C | 0.1815 | 0.0626  | 0.0062 | 6.77E-24 | 10.0799 | 1316443 | Asthma |
| rs17145278  | 10 | 9130328 | G | A | 0.0599 | -0.0884 | 0.0100 | 7.72E-19 | -8.8640 | 1376071 | Asthma |
| rs1545156   | 10 | 9130532 | A | C | 0.0404 | -0.0849 | 0.0118 | 7.59E-13 | -7.1682 | 1376071 | Asthma |
| rs150163136 | 10 | 9131267 | T | C | 0.0375 | -0.0834 | 0.0124 | 1.50E-11 | -6.7477 | 1376071 | Asthma |
| rs3118110   | 10 | 9132635 | C | T | 0.3912 | -0.0410 | 0.0048 | 2.48E-17 | -8.4686 | 1376071 | Asthma |
| rs1263695   | 10 | 9133279 | G | A | 0.3998 | -0.0402 | 0.0048 | 6.47E-17 | -8.3564 | 1376071 | Asthma |
| rs1263697   | 10 | 9133442 | C | T | 0.4044 | -0.0445 | 0.0058 | 2.54E-14 | -7.6201 | 1068588 | Asthma |
| rs1149916   | 10 | 9133556 | G | A | 0.3997 | -0.0401 | 0.0048 | 7.61E-17 | -8.3374 | 1376071 | Asthma |
| rs1149917   | 10 | 9133597 | G | A | 0.3997 | -0.0401 | 0.0048 | 7.62E-17 | -8.3370 | 1376071 | Asthma |
| rs1149919   | 10 | 9134039 | A | G | 0.4314 | -0.0382 | 0.0048 | 1.21E-15 | -8.0033 | 1376071 | Asthma |
| rs1149920   | 10 | 9134340 | T | C | 0.4314 | -0.0381 | 0.0048 | 1.40E-15 | -7.9851 | 1376071 | Asthma |
| rs12219850  | 10 | 9136757 | C | T | 0.0961 | -0.0539 | 0.0082 | 4.11E-11 | -6.5999 | 1376071 | Asthma |
| rs11256086  | 10 | 9137272 | C | T | 0.0961 | -0.0535 | 0.0082 | 5.56E-11 | -6.5550 | 1376071 | Asthma |
| rs1149921   | 10 | 9137700 | G | T | 0.4225 | -0.0339 | 0.0048 | 1.22E-12 | -7.1036 | 1376071 | Asthma |
| rs1149923   | 10 | 9140753 | C | T | 0.5035 | 0.0532  | 0.0052 | 1.76E-24 | 10.2117 | 1186521 | Asthma |
| rs10905520  | 10 | 9141439 | G | A | 0.0962 | -0.0541 | 0.0082 | 3.53E-11 | -6.6228 | 1376071 | Asthma |
| rs1263698   | 10 | 9141936 | C | A | 0.4263 | -0.0357 | 0.0048 | 7.69E-14 | -7.4757 | 1376071 | Asthma |
| rs7068007   | 10 | 9141982 | A | T | 0.1009 | -0.0581 | 0.0087 | 1.91E-11 | -6.7129 | 1219993 | Asthma |
| rs77839358  | 10 | 9142642 | A | G | 0.0418 | -0.0858 | 0.0117 | 2.19E-13 | -7.3365 | 1376071 | Asthma |
| rs1263702   | 10 | 9147429 | A | G | 0.3978 | -0.0392 | 0.0053 | 8.98E-14 | -7.4550 | 1219993 | Asthma |
| rs3118113   | 10 | 9147639 | A | T | 0.4259 | -0.0356 | 0.0048 | 9.07E-14 | -7.4538 | 1376071 | Asthma |
| rs76730373  | 10 | 9148896 | T | C | 0.0402 | -0.0865 | 0.0119 | 3.03E-13 | -7.2930 | 1376071 | Asthma |
| rs1149927   | 10 | 9149186 | C | T | 0.4263 | -0.0355 | 0.0048 | 9.92E-14 | -7.4420 | 1376071 | Asthma |
| rs11256095  | 10 | 9150641 | A | G | 0.0546 | -0.0830 | 0.0104 | 1.44E-15 | -7.9818 | 1376071 | Asthma |
| rs59201425  | 10 | 9151629 | A | G | 0.0585 | -0.0836 | 0.0101 | 1.14E-16 | -8.2895 | 1376071 | Asthma |
| rs10905521  | 10 | 9157346 | T | G | 0.0548 | -0.0827 | 0.0104 | 1.66E-15 | -7.9643 | 1376071 | Asthma |
| rs11256099  | 10 | 9158043 | A | C | 0.0584 | -0.0840 | 0.0101 | 8.88E-17 | -8.3185 | 1376071 | Asthma |

|             |    |          |   |   |        |         |        |          |         |         |        |
|-------------|----|----------|---|---|--------|---------|--------|----------|---------|---------|--------|
| rs12217609  | 10 | 9158293  | T | C | 0.0584 | -0.0841 | 0.0101 | 7.93E-17 | -8.3321 | 1376071 | Asthma |
| rs10905522  | 10 | 9159138  | A | C | 0.0583 | -0.0845 | 0.0101 | 6.04E-17 | -8.3641 | 1376071 | Asthma |
| rs10905523  | 10 | 9162986  | T | C | 0.0586 | -0.0878 | 0.0101 | 4.73E-18 | -8.6599 | 1376071 | Asthma |
| rs10905524  | 10 | 9163012  | G | A | 0.0622 | -0.0884 | 0.0099 | 3.32E-19 | -8.9574 | 1376071 | Asthma |
| rs10905525  | 10 | 9163031  | T | A | 0.0585 | -0.0874 | 0.0101 | 6.91E-18 | -8.6164 | 1376071 | Asthma |
| rs10905526  | 10 | 9164092  | G | A | 0.0584 | -0.0885 | 0.0102 | 3.22E-18 | -8.7037 | 1376071 | Asthma |
| rs11256101  | 10 | 9165855  | T | A | 0.0584 | -0.0884 | 0.0102 | 3.64E-18 | -8.6899 | 1376071 | Asthma |
| rs17406680  | 10 | 9166241  | C | G | 0.0508 | 0.0991  | 0.0108 | 3.50E-20 | 9.2027  | 1376071 | Asthma |
| rs17485180  | 10 | 9169868  | C | T | 0.0584 | -0.0877 | 0.0102 | 8.31E-18 | -8.5950 | 1376071 | Asthma |
| rs1268866   | 10 | 9171135  | G | T | 0.0943 | -0.0542 | 0.0085 | 1.88E-10 | -6.3708 | 1316443 | Asthma |
| rs1149950   | 10 | 9171939  | C | T | 0.0944 | -0.0539 | 0.0085 | 2.34E-10 | -6.3370 | 1316443 | Asthma |
| rs11256103  | 10 | 9173099  | G | A | 0.0578 | -0.0926 | 0.0105 | 1.37E-18 | -8.7996 | 1316443 | Asthma |
| rs17485264  | 10 | 9175249  | T | C | 0.1083 | -0.0522 | 0.0076 | 8.30E-12 | -6.8333 | 1316443 | Asthma |
| rs12356840  | 10 | 9225342  | A | G | 0.0625 | 0.0660  | 0.0098 | 1.81E-11 | 6.7208  | 1376071 | Asthma |
| rs10905534  | 10 | 9241789  | A | G | 0.3985 | 0.0357  | 0.0064 | 2.97E-08 | 5.5432  | 662423  | Asthma |
| rs10905535  | 10 | 9244018  | C | G | 0.3814 | 0.0344  | 0.0049 | 1.49E-12 | 7.0757  | 1376071 | Asthma |
| rs10795696  | 10 | 9247763  | T | C | 0.3729 | 0.0353  | 0.0049 | 5.60E-13 | 7.2099  | 1376071 | Asthma |
| rs1143869   | 10 | 9251327  | T | C | 0.3993 | 0.0326  | 0.0048 | 1.45E-11 | 6.7527  | 1376071 | Asthma |
| rs1143870   | 10 | 9251678  | T | C | 0.3653 | 0.0346  | 0.0049 | 2.07E-12 | 7.0298  | 1376071 | Asthma |
| rs12258884  | 10 | 9254001  | C | G | 0.2010 | -0.0344 | 0.0060 | 8.70E-09 | -5.7543 | 1316443 | Asthma |
| rs11256131  | 10 | 9255718  | A | G | 0.2011 | -0.0339 | 0.0060 | 1.26E-08 | -5.6912 | 1316443 | Asthma |
| rs11599222  | 10 | 9256001  | T | C | 0.2011 | -0.0341 | 0.0060 | 1.11E-08 | -5.7128 | 1316443 | Asthma |
| rs1408395   | 10 | 9256450  | G | A | 0.2012 | -0.0337 | 0.0060 | 1.57E-08 | -5.6540 | 1316443 | Asthma |
| rs2209288   | 10 | 9256694  | G | A | 0.2014 | -0.0328 | 0.0058 | 1.91E-08 | -5.6203 | 1376071 | Asthma |
| rs1438263   | 10 | 9257220  | T | C | 0.2014 | -0.0328 | 0.0058 | 1.84E-08 | -5.6267 | 1376071 | Asthma |
| rs11256132  | 10 | 9257721  | C | A | 0.2014 | -0.0328 | 0.0058 | 1.76E-08 | -5.6339 | 1376071 | Asthma |
| rs10508398  | 10 | 9257763  | T | G | 0.2006 | -0.0419 | 0.0065 | 8.52E-11 | -6.4911 | 1159440 | Asthma |
| rs1570654   | 10 | 9258868  | G | A | 0.2015 | -0.0330 | 0.0058 | 1.54E-08 | -5.6574 | 1376071 | Asthma |
| rs1570653   | 10 | 9258982  | C | T | 0.2016 | -0.0327 | 0.0058 | 1.94E-08 | -5.6170 | 1376071 | Asthma |
| rs12245918  | 10 | 9259661  | T | C | 0.2016 | -0.0328 | 0.0058 | 1.70E-08 | -5.6402 | 1376071 | Asthma |
| rs10450536  | 10 | 9260300  | C | A | 0.2016 | -0.0327 | 0.0058 | 1.98E-08 | -5.6135 | 1376071 | Asthma |
| rs11256133  | 10 | 9261067  | G | A | 0.2016 | -0.0328 | 0.0058 | 1.75E-08 | -5.6352 | 1376071 | Asthma |
| rs35654771  | 10 | 9268868  | A | C | 0.1632 | 0.0377  | 0.0065 | 5.18E-09 | 5.8411  | 1376071 | Asthma |
| rs34350610  | 10 | 9268958  | C | G | 0.1633 | 0.0372  | 0.0065 | 8.04E-09 | 5.7678  | 1376071 | Asthma |
| rs35205105  | 10 | 9284353  | G | A | 0.1657 | 0.0393  | 0.0064 | 9.67E-10 | 6.1149  | 1376071 | Asthma |
| rs116905303 | 10 | 9317710  | A | G | 0.0476 | -0.0653 | 0.0113 | 8.24E-09 | -5.7635 | 1376071 | Asthma |
| rs77740805  | 10 | 9351521  | A | C | 0.0434 | 0.0905  | 0.0120 | 5.40E-14 | 7.5221  | 1316443 | Asthma |
| rs572431249 | 10 | 9360589  | C | T | 0.0493 | 0.1002  | 0.0159 | 2.77E-10 | 6.3111  | 847307  | Asthma |
| rs55694962  | 10 | 9391164  | T | A | 0.0679 | 0.0730  | 0.0094 | 6.28E-15 | 7.7982  | 1376071 | Asthma |
| rs78306420  | 10 | 9395564  | A | G | 0.0580 | 0.0821  | 0.0101 | 4.70E-16 | 8.1189  | 1376071 | Asthma |
| rs75184873  | 10 | 9398433  | G | T | 0.0586 | 0.0807  | 0.0101 | 1.10E-15 | 8.0157  | 1376071 | Asthma |
| rs11256193  | 10 | 9414926  | C | T | 0.0423 | 0.0948  | 0.0119 | 1.53E-15 | 7.9744  | 1376071 | Asthma |
| rs11256199  | 10 | 9427464  | A | G | 0.0644 | 0.0733  | 0.0096 | 2.66E-14 | 7.6137  | 1376071 | Asthma |
| rs71483712  | 10 | 9428095  | C | T | 0.0454 | -0.0629 | 0.0112 | 1.80E-08 | -5.6301 | 1376071 | Asthma |
| rs4749860   | 10 | 9436851  | G | A | 0.4956 | 0.0258  | 0.0047 | 4.51E-08 | 5.4696  | 1376071 | Asthma |
| rs11256208  | 10 | 9448996  | A | G | 0.0578 | 0.0823  | 0.0101 | 4.46E-16 | 8.1253  | 1376071 | Asthma |
| rs79926952  | 10 | 9514614  | C | T | 0.0280 | -0.0976 | 0.0144 | 1.39E-11 | -6.7592 | 1376071 | Asthma |
| rs12359396  | 10 | 9514663  | T | C | 0.0647 | 0.0720  | 0.0096 | 7.70E-14 | 7.4754  | 1376071 | Asthma |
| rs77333852  | 10 | 9518177  | A | G | 0.0648 | 0.0715  | 0.0096 | 1.08E-13 | 7.4303  | 1376071 | Asthma |
| rs28427465  | 10 | 9553340  | C | A | 0.1074 | 0.0763  | 0.0128 | 2.85E-09 | 5.9400  | 778845  | Asthma |
| rs117629140 | 10 | 9621287  | C | T | 0.0416 | 0.0672  | 0.0119 | 1.75E-08 | 5.6349  | 1376071 | Asthma |
| rs11256307  | 10 | 9702213  | A | C | 0.0424 | 0.0646  | 0.0117 | 3.59E-08 | 5.5100  | 1376071 | Asthma |
| rs11256308  | 10 | 9711650  | C | A | 0.0424 | 0.0643  | 0.0117 | 3.81E-08 | 5.4993  | 1376071 | Asthma |
| rs76473192  | 10 | 9897007  | A | G | 0.0422 | 0.0673  | 0.0120 | 2.11E-08 | 5.6026  | 1359430 | Asthma |
| rs35156049  | 10 | 21409727 | G | A | 0.1594 | 0.0400  | 0.0071 | 1.63E-08 | 5.6469  | 1186521 | Asthma |
| rs10828248  | 10 | 21535690 | G | A | 0.3346 | 0.0304  | 0.0053 | 1.05E-08 | 5.7225  | 1246149 | Asthma |
| rs7092522   | 10 | 92583226 | T | C | 0.3961 | -0.0281 | 0.0048 | 5.57E-09 | -5.8293 | 1376071 | Asthma |
| rs6583824   | 10 | 92585160 | A | G | 0.3952 | -0.0299 | 0.0052 | 7.19E-09 | -5.7865 | 1246149 | Asthma |
| rs2421941   | 10 | 92586152 | G | A | 0.3959 | -0.0281 | 0.0048 | 5.29E-09 | -5.8380 | 1376071 | Asthma |
| rs6583827   | 10 | 92598266 | A | T | 0.4095 | -0.0292 | 0.0048 | 1.06E-09 | -6.0997 | 1376071 | Asthma |
| rs7096101   | 10 | 92603171 | G | A | 0.4096 | -0.0290 | 0.0048 | 1.37E-09 | -6.0591 | 1376071 | Asthma |
| rs10786050  | 10 | 92607473 | A | G | 0.4098 | -0.0293 | 0.0048 | 9.38E-10 | -6.1198 | 1376071 | Asthma |
| rs10882091  | 10 | 92614620 | C | T | 0.4070 | -0.0278 | 0.0050 | 3.53E-08 | -5.5126 | 1008051 | Asthma |
| rs7894183   | 10 | 92622283 | G | A | 0.4104 | -0.0299 | 0.0052 | 1.18E-08 | -5.7021 | 1219993 | Asthma |
| rs7914814   | 10 | 92623193 | T | C | 0.4097 | -0.0293 | 0.0048 | 1.00E-09 | -6.1092 | 1376071 | Asthma |
| rs7071905   | 10 | 92626365 | T | G | 0.4094 | -0.0291 | 0.0048 | 1.22E-09 | -6.0776 | 1376071 | Asthma |
| rs10882094  | 10 | 92627919 | T | A | 0.4095 | -0.0290 | 0.0048 | 1.53E-09 | -6.0409 | 1376071 | Asthma |
| rs10736069  | 10 | 92635636 | T | C | 0.4096 | -0.0291 | 0.0048 | 1.22E-09 | -6.0772 | 1376071 | Asthma |
| rs7900689   | 10 | 92635991 | A | C | 0.4096 | -0.0292 | 0.0048 | 1.15E-09 | -6.0873 | 1376071 | Asthma |
| rs6583830   | 10 | 92638361 | A | G | 0.4095 | -0.0294 | 0.0048 | 9.25E-10 | -6.1220 | 1376071 | Asthma |
| rs6583833   | 10 | 92650043 | C | T | 0.4853 | -0.0262 | 0.0047 | 2.64E-08 | -5.5635 | 1376071 | Asthma |
| rs7078243   | 10 | 92654506 | A | C | 0.4842 | -0.0263 | 0.0047 | 2.42E-08 | -5.5789 | 1376071 | Asthma |
| rs4933734   | 10 | 92654810 | A | T | 0.4096 | -0.0293 | 0.0048 | 9.77E-10 | -6.1131 | 1376071 | Asthma |
| rs7071912   | 10 | 92656472 | T | G | 0.4844 | -0.0264 | 0.0047 | 2.21E-08 | -5.5944 | 1376071 | Asthma |

|             |    |          |   |   |        |         |        |          |         |         |        |
|-------------|----|----------|---|---|--------|---------|--------|----------|---------|---------|--------|
| rs7921040   | 10 | 92658668 | G | A | 0.4839 | -0.0260 | 0.0047 | 3.39E-08 | -5.5200 | 1376071 | Asthma |
| rs7918084   | 10 | 92669710 | C | T | 0.4524 | -0.0298 | 0.0047 | 3.00E-10 | -6.2988 | 1376071 | Asthma |
| rs2497318   | 10 | 92672243 | T | C | 0.4515 | -0.0298 | 0.0047 | 3.04E-10 | -6.2970 | 1376071 | Asthma |
| rs9420589   | 10 | 92690476 | T | G | 0.4406 | -0.0290 | 0.0048 | 1.04E-09 | -6.1030 | 1376071 | Asthma |
| rs10882100  | 10 | 92700930 | C | G | 0.4762 | -0.0262 | 0.0047 | 2.63E-08 | -5.5644 | 1376071 | Asthma |
| rs947591    | 10 | 92735996 | A | C | 0.4705 | -0.0288 | 0.0049 | 3.88E-09 | -5.8893 | 1316443 | Asthma |
| rs35225972  | 11 | 1116487  | G | A | 0.3016 | -0.0405 | 0.0061 | 4.49E-11 | -6.5869 | 1090071 | Asthma |
| rs12788690  | 11 | 1116675  | T | C | 0.3080 | -0.0353 | 0.0051 | 6.12E-12 | -6.8768 | 1376071 | Asthma |
| rs11245962  | 11 | 1117256  | C | T | 0.3107 | -0.0357 | 0.0051 | 3.19E-12 | -6.9690 | 1376071 | Asthma |
| rs10902092  | 11 | 1118564  | A | G | 0.3086 | -0.0364 | 0.0051 | 1.48E-12 | -7.0766 | 1376071 | Asthma |
| rs10751640  | 11 | 1118685  | T | C | 0.3086 | -0.0385 | 0.0056 | 6.28E-12 | -6.8733 | 1224666 | Asthma |
| rs10751641  | 11 | 1118983  | T | G | 0.3084 | -0.0362 | 0.0051 | 1.74E-12 | -7.0540 | 1376071 | Asthma |
| rs10902093  | 11 | 1119089  | G | A | 0.3093 | -0.0366 | 0.0051 | 1.10E-12 | -7.1170 | 1376071 | Asthma |
| rs10902094  | 11 | 1119225  | G | A | 0.3094 | -0.0366 | 0.0051 | 1.07E-12 | -7.1207 | 1376071 | Asthma |
| rs11245964  | 11 | 1119370  | T | C | 0.3094 | -0.0367 | 0.0051 | 9.23E-13 | -7.1415 | 1376071 | Asthma |
| rs11245965  | 11 | 1119542  | A | G | 0.3095 | -0.0366 | 0.0051 | 9.89E-13 | -7.1320 | 1376071 | Asthma |
| rs7479551   | 11 | 1126554  | T | A | 0.3275 | -0.0336 | 0.0052 | 9.47E-11 | -6.4753 | 1316443 | Asthma |
| rs11245968  | 11 | 1127339  | G | A | 0.3274 | -0.0338 | 0.0052 | 6.97E-11 | -6.5212 | 1316443 | Asthma |
| rs12786006  | 11 | 1129154  | C | T | 0.3217 | -0.0334 | 0.0051 | 5.69E-11 | -6.5516 | 1376071 | Asthma |
| rs12786255  | 11 | 1129289  | C | T | 0.3189 | -0.0340 | 0.0051 | 2.56E-11 | -6.6697 | 1376071 | Asthma |
| rs12788104  | 11 | 1129831  | A | G | 0.3032 | -0.0366 | 0.0052 | 1.21E-12 | -7.1039 | 1376071 | Asthma |
| rs7108515   | 11 | 1130788  | T | C | 0.3031 | -0.0369 | 0.0052 | 8.10E-13 | -7.1595 | 1376071 | Asthma |
| rs11245969  | 11 | 1131243  | G | C | 0.3201 | -0.0340 | 0.0051 | 2.28E-11 | -6.6871 | 1376071 | Asthma |
| rs7481640   | 11 | 1132221  | G | C | 0.3032 | -0.0371 | 0.0052 | 6.32E-13 | -7.1936 | 1376071 | Asthma |
| rs12577756  | 11 | 1133504  | C | T | 0.3031 | -0.0372 | 0.0052 | 5.57E-13 | -7.2107 | 1376071 | Asthma |
| rs10794299  | 11 | 1133761  | G | T | 0.3033 | -0.0372 | 0.0051 | 5.19E-13 | -7.2202 | 1376071 | Asthma |
| rs11602802  | 11 | 1139459  | C | A | 0.3027 | -0.0378 | 0.0052 | 2.14E-13 | -7.3400 | 1376071 | Asthma |
| rs11600289  | 11 | 1140599  | C | A | 0.3013 | -0.0375 | 0.0052 | 3.35E-13 | -7.2795 | 1376071 | Asthma |
| rs12791023  | 11 | 1140929  | A | G | 0.3010 | -0.0374 | 0.0052 | 4.15E-13 | -7.2505 | 1376071 | Asthma |
| rs12795839  | 11 | 1141279  | C | T | 0.3010 | -0.0374 | 0.0052 | 4.31E-13 | -7.2455 | 1376071 | Asthma |
| rs10902099  | 11 | 1143069  | G | A | 0.3016 | -0.0389 | 0.0055 | 1.79E-12 | -7.0500 | 1246149 | Asthma |
| rs10902102  | 11 | 1144328  | T | A | 0.3011 | -0.0371 | 0.0052 | 6.38E-13 | -7.1921 | 1376071 | Asthma |
| rs11245979  | 11 | 1145203  | C | T | 0.3023 | -0.0373 | 0.0052 | 4.94E-13 | -7.2269 | 1376071 | Asthma |
| rs113186715 | 11 | 1148422  | T | C | 0.3121 | -0.0469 | 0.0084 | 2.75E-08 | -5.5564 | 778845  | Asthma |
| rs28415845  | 11 | 1151933  | T | C | 0.2883 | -0.0365 | 0.0054 | 8.76E-12 | -6.8256 | 1316443 | Asthma |
| rs28490880  | 11 | 1152442  | A | C | 0.2978 | -0.0381 | 0.0053 | 6.74E-13 | -7.1845 | 1316443 | Asthma |
| rs2052692   | 11 | 10646094 | A | G | 0.3319 | 0.0280  | 0.0050 | 2.33E-08 | 5.5856  | 1376071 | Asthma |
| rs4442541   | 11 | 10647625 | A | G | 0.3277 | 0.0279  | 0.0050 | 3.05E-08 | 5.5386  | 1376071 | Asthma |
| rs7940646   | 11 | 10647681 | T | C | 0.3263 | 0.0279  | 0.0050 | 3.03E-08 | 5.5395  | 1376071 | Asthma |
| rs10835369  | 11 | 28621776 | A | T | 0.3802 | -0.0311 | 0.0057 | 3.70E-08 | -5.5046 | 856646  | Asthma |
| rs174528    | 11 | 61776027 | C | T | 0.3892 | -0.0321 | 0.0049 | 3.95E-11 | -6.6061 | 1376071 | Asthma |
| rs174529    | 11 | 61776489 | C | T | 0.3851 | -0.0327 | 0.0049 | 1.75E-11 | -6.7251 | 1376071 | Asthma |
| rs174530    | 11 | 61779120 | G | A | 0.3834 | -0.0323 | 0.0049 | 3.12E-11 | -6.6408 | 1376071 | Asthma |
| rs7943728   | 11 | 61779596 | A | G | 0.1686 | -0.0426 | 0.0066 | 1.09E-10 | -6.4541 | 1316443 | Asthma |
| rs108499    | 11 | 61779765 | T | C | 0.3395 | -0.0309 | 0.0050 | 6.49E-10 | -6.1782 | 1376071 | Asthma |
| rs174533    | 11 | 61781553 | A | G | 0.3665 | -0.0365 | 0.0049 | 1.26E-13 | -7.4105 | 1376071 | Asthma |
| rs174534    | 11 | 61781986 | G | A | 0.3538 | -0.0320 | 0.0051 | 2.67E-10 | -6.3169 | 1316443 | Asthma |
| rs174535    | 11 | 61783884 | C | T | 0.3697 | -0.0364 | 0.0049 | 1.08E-13 | -7.4313 | 1376071 | Asthma |
| rs174536    | 11 | 61784455 | C | A | 0.3681 | -0.0373 | 0.0049 | 3.25E-14 | -7.5878 | 1376071 | Asthma |
| rs174537    | 11 | 61785208 | T | G | 0.3651 | -0.0375 | 0.0049 | 2.32E-14 | -7.6314 | 1376071 | Asthma |
| rs61896141  | 11 | 61788567 | C | A | 0.1681 | -0.0404 | 0.0064 | 3.63E-10 | -6.2691 | 1376071 | Asthma |
| rs102275    | 11 | 61790331 | C | T | 0.3712 | -0.0352 | 0.0049 | 6.31E-13 | -7.1936 | 1376071 | Asthma |
| rs102274    | 11 | 61790354 | C | T | 0.3661 | -0.0368 | 0.0049 | 7.47E-14 | -7.4795 | 1376071 | Asthma |
| rs174538    | 11 | 61792609 | A | G | 0.3268 | -0.0357 | 0.0050 | 1.46E-12 | -7.0784 | 1376071 | Asthma |
| rs4246215   | 11 | 61796827 | T | G | 0.3811 | -0.0343 | 0.0049 | 2.08E-12 | -7.0288 | 1376071 | Asthma |
| rs174541    | 11 | 61798436 | C | T | 0.3820 | -0.0341 | 0.0049 | 2.82E-12 | -6.9865 | 1376071 | Asthma |
| rs174544    | 11 | 61800281 | A | C | 0.3277 | -0.0386 | 0.0050 | 1.99E-14 | -7.6511 | 1376071 | Asthma |
| rs174545    | 11 | 61801834 | G | C | 0.3651 | -0.0372 | 0.0049 | 3.76E-14 | -7.5689 | 1376071 | Asthma |
| rs174546    | 11 | 61802358 | T | C | 0.3652 | -0.0372 | 0.0049 | 3.63E-14 | -7.5737 | 1376071 | Asthma |
| rs174547    | 11 | 61803311 | C | T | 0.3652 | -0.0373 | 0.0049 | 3.48E-14 | -7.5793 | 1376071 | Asthma |
| rs174548    | 11 | 61803876 | G | C | 0.3342 | -0.0368 | 0.0050 | 2.29E-13 | -7.3310 | 1376071 | Asthma |
| rs174549    | 11 | 61803910 | A | G | 0.3300 | -0.0381 | 0.0050 | 4.12E-14 | -7.5573 | 1376071 | Asthma |
| rs174550    | 11 | 61804006 | C | T | 0.3652 | -0.0373 | 0.0049 | 3.25E-14 | -7.5880 | 1376071 | Asthma |
| rs174551    | 11 | 61806212 | C | T | 0.3601 | -0.0468 | 0.0066 | 1.10E-12 | -7.1175 | 635365  | Asthma |
| rs174553    | 11 | 61807686 | G | A | 0.3651 | -0.0375 | 0.0049 | 2.66E-14 | -7.6139 | 1376071 | Asthma |
| rs174554    | 11 | 61811991 | G | A | 0.3637 | -0.0375 | 0.0049 | 2.83E-14 | -7.6059 | 1376071 | Asthma |
| rs174555    | 11 | 61812288 | C | T | 0.3294 | -0.0410 | 0.0054 | 3.51E-14 | -7.5778 | 1246149 | Asthma |
| rs174556    | 11 | 61813163 | T | C | 0.3278 | -0.0385 | 0.0050 | 2.38E-14 | -7.6280 | 1376071 | Asthma |
| rs174557    | 11 | 61813896 | G | A | 0.3066 | -0.0470 | 0.0079 | 2.48E-09 | -5.9628 | 505420  | Asthma |
| rs174559    | 11 | 61814184 | A | G | 0.2898 | -0.0366 | 0.0052 | 2.38E-12 | -7.0103 | 1376071 | Asthma |
| rs174560    | 11 | 61814292 | C | T | 0.3336 | -0.0371 | 0.0050 | 1.58E-13 | -7.3800 | 1376071 | Asthma |
| rs174561    | 11 | 61815236 | C | T | 0.3292 | -0.0386 | 0.0050 | 1.97E-14 | -7.6524 | 1376071 | Asthma |
| rs174562    | 11 | 61817672 | G | A | 0.3651 | -0.0373 | 0.0049 | 3.49E-14 | -7.5786 | 1376071 | Asthma |
| rs174564    | 11 | 61820833 | G | A | 0.3691 | -0.0368 | 0.0049 | 6.73E-14 | -7.4931 | 1376071 | Asthma |

|            |    |          |   |   |        |         |        |          |         |         |        |
|------------|----|----------|---|---|--------|---------|--------|----------|---------|---------|--------|
| rs28456    | 11 | 61822009 | G | A | 0.3270 | -0.0384 | 0.0053 | 4.27E-13 | -7.2468 | 1008051 | Asthma |
| rs174566   | 11 | 61824890 | G | A | 0.3690 | -0.0360 | 0.0049 | 2.10E-13 | -7.3423 | 1376071 | Asthma |
| rs174567   | 11 | 61825533 | G | A | 0.3698 | -0.0359 | 0.0049 | 2.41E-13 | -7.3237 | 1376071 | Asthma |
| rs174568   | 11 | 61826344 | T | C | 0.3632 | -0.0379 | 0.0049 | 1.52E-14 | -7.6859 | 1376071 | Asthma |
| rs968567   | 11 | 61828092 | T | C | 0.1674 | -0.0403 | 0.0064 | 3.67E-10 | -6.2675 | 1376071 | Asthma |
| rs99780    | 11 | 61829161 | T | C | 0.3695 | -0.0357 | 0.0049 | 3.27E-13 | -7.2829 | 1376071 | Asthma |
| rs1535     | 11 | 61830500 | G | A | 0.3661 | -0.0369 | 0.0049 | 5.71E-14 | -7.5147 | 1376071 | Asthma |
| rs174572   | 11 | 61830816 | T | C | 0.2557 | -0.0390 | 0.0055 | 9.74E-13 | -7.1342 | 1376071 | Asthma |
| rs61897793 | 11 | 61831875 | A | G | 0.1673 | -0.0399 | 0.0064 | 5.43E-10 | -6.2061 | 1376071 | Asthma |
| rs174573   | 11 | 61832855 | A | G | 0.2577 | -0.0386 | 0.0055 | 1.54E-12 | -7.0714 | 1376071 | Asthma |
| rs174574   | 11 | 61832870 | A | C | 0.3708 | -0.0351 | 0.0049 | 8.18E-13 | -7.1581 | 1376071 | Asthma |
| rs174575   | 11 | 61834531 | G | C | 0.2610 | -0.0372 | 0.0054 | 6.94E-12 | -6.8589 | 1376071 | Asthma |
| rs174576   | 11 | 61836038 | A | C | 0.3695 | -0.0357 | 0.0049 | 3.14E-13 | -7.2884 | 1376071 | Asthma |
| rs174577   | 11 | 61837342 | A | C | 0.3699 | -0.0351 | 0.0049 | 7.85E-13 | -7.1638 | 1376071 | Asthma |
| rs174578   | 11 | 61838027 | A | T | 0.3700 | -0.0346 | 0.0049 | 1.64E-12 | -7.0624 | 1376071 | Asthma |
| rs174579   | 11 | 61838141 | T | C | 0.2027 | -0.0366 | 0.0059 | 7.42E-10 | -6.1568 | 1376071 | Asthma |
| rs174580   | 11 | 61839170 | G | A | 0.3636 | -0.0355 | 0.0052 | 6.74E-12 | -6.8629 | 1008051 | Asthma |
| rs174581   | 11 | 61839211 | A | G | 0.3710 | -0.0341 | 0.0049 | 3.29E-12 | -6.9646 | 1376071 | Asthma |
| rs174582   | 11 | 61839696 | G | A | 0.2069 | -0.0352 | 0.0059 | 2.36E-09 | -5.9711 | 1376071 | Asthma |
| rs174583   | 11 | 61842278 | T | C | 0.3714 | -0.0350 | 0.0049 | 8.20E-13 | -7.1579 | 1376071 | Asthma |
| rs174584   | 11 | 61843278 | A | G | 0.3719 | -0.0344 | 0.0049 | 2.05E-12 | -7.0309 | 1376071 | Asthma |
| rs174587   | 11 | 61845358 | T | C | 0.1972 | -0.0338 | 0.0060 | 1.99E-08 | -5.6127 | 1376071 | Asthma |
| rs93923    | 11 | 61846273 | T | C | 0.1979 | -0.0337 | 0.0060 | 2.06E-08 | -5.6074 | 1376071 | Asthma |
| rs174589   | 11 | 61848331 | G | C | 0.1972 | -0.0336 | 0.0060 | 2.45E-08 | -5.5771 | 1376071 | Asthma |
| rs174590   | 11 | 61849505 | C | G | 0.1983 | -0.0329 | 0.0060 | 3.97E-08 | -5.4925 | 1376071 | Asthma |
| rs174591   | 11 | 61850204 | A | T | 0.2560 | -0.0349 | 0.0055 | 1.64E-10 | -6.3916 | 1376071 | Asthma |
| rs174592   | 11 | 61851136 | G | A | 0.3903 | -0.0311 | 0.0049 | 1.37E-10 | -6.4196 | 1376071 | Asthma |
| rs174593   | 11 | 61851359 | C | T | 0.2716 | -0.0314 | 0.0054 | 4.86E-09 | -5.8520 | 1376071 | Asthma |
| rs174594   | 11 | 61852357 | C | A | 0.3918 | -0.0307 | 0.0048 | 2.50E-10 | -6.3272 | 1376071 | Asthma |
| rs174598   | 11 | 61853722 | A | G | 0.3373 | -0.0296 | 0.0050 | 3.70E-09 | -5.8971 | 1376071 | Asthma |
| rs174599   | 11 | 61854084 | C | G | 0.3920 | -0.0318 | 0.0048 | 5.07E-11 | -6.5687 | 1376071 | Asthma |
| rs174600   | 11 | 61854755 | C | T | 0.3380 | -0.0299 | 0.0050 | 2.56E-09 | -5.9574 | 1376071 | Asthma |
| rs174601   | 11 | 61855668 | T | C | 0.3916 | -0.0316 | 0.0048 | 6.56E-11 | -6.5304 | 1376071 | Asthma |
| rs97384    | 11 | 61856709 | T | C | 0.3922 | -0.0343 | 0.0050 | 6.68E-12 | -6.8644 | 1316443 | Asthma |
| rs174603   | 11 | 61858734 | A | G | 0.3269 | -0.0286 | 0.0052 | 3.70E-08 | -5.5047 | 1316443 | Asthma |
| rs174604   | 11 | 61858798 | G | C | 0.3804 | -0.0319 | 0.0050 | 1.93E-10 | -6.3671 | 1316443 | Asthma |
| rs174605   | 11 | 61859449 | T | G | 0.2980 | -0.0301 | 0.0053 | 1.75E-08 | -5.6352 | 1316443 | Asthma |
| rs174606   | 11 | 61859501 | T | G | 0.4595 | -0.0261 | 0.0047 | 3.44E-08 | -5.5171 | 1376071 | Asthma |
| rs174608   | 11 | 61860012 | G | A | 0.3020 | -0.0304 | 0.0053 | 1.15E-08 | -5.7064 | 1316443 | Asthma |
| rs174609   | 11 | 61860339 | C | T | 0.4620 | -0.0260 | 0.0047 | 3.78E-08 | -5.5008 | 1376071 | Asthma |
| rs174610   | 11 | 61860361 | G | A | 0.4619 | -0.0260 | 0.0047 | 3.86E-08 | -5.4972 | 1376071 | Asthma |
| rs174611   | 11 | 61860409 | C | T | 0.3013 | -0.0300 | 0.0053 | 1.78E-08 | -5.6323 | 1316443 | Asthma |
| rs174612   | 11 | 61860794 | G | C | 0.4618 | -0.0259 | 0.0047 | 4.23E-08 | -5.4809 | 1376071 | Asthma |
| rs174613   | 11 | 61861020 | A | G | 0.4612 | -0.0262 | 0.0047 | 3.04E-08 | -5.5389 | 1376071 | Asthma |
| rs174614   | 11 | 61861443 | C | T | 0.4593 | -0.0264 | 0.0047 | 2.45E-08 | -5.5768 | 1376071 | Asthma |
| rs174616   | 11 | 61861650 | A | G | 0.4592 | -0.0266 | 0.0047 | 1.87E-08 | -5.6241 | 1376071 | Asthma |
| rs174617   | 11 | 61861694 | G | A | 0.4596 | -0.0263 | 0.0047 | 2.63E-08 | -5.5645 | 1376071 | Asthma |
| rs174619   | 11 | 61862194 | A | G | 0.4574 | -0.0265 | 0.0047 | 2.12E-08 | -5.6024 | 1376071 | Asthma |
| rs174621   | 11 | 61862632 | A | G | 0.2153 | -0.0373 | 0.0059 | 2.81E-10 | -6.3091 | 1316443 | Asthma |
| rs174622   | 11 | 61864455 | A | G | 0.2153 | -0.0376 | 0.0059 | 2.16E-10 | -6.3495 | 1316443 | Asthma |
| rs174627   | 11 | 61869994 | A | G | 0.1434 | -0.0379 | 0.0069 | 3.33E-08 | -5.5232 | 1376071 | Asthma |
| rs174448   | 11 | 61872101 | G | A | 0.3765 | -0.0292 | 0.0049 | 2.17E-09 | -5.9843 | 1376071 | Asthma |
| rs174449   | 11 | 61872907 | G | A | 0.3725 | -0.0271 | 0.0049 | 3.00E-08 | -5.5414 | 1376071 | Asthma |
| rs174451   | 11 | 61875291 | T | C | 0.2284 | -0.0323 | 0.0058 | 2.50E-08 | -5.5731 | 1316443 | Asthma |
| rs174453   | 11 | 61878495 | G | C | 0.1745 | -0.0385 | 0.0065 | 2.90E-09 | -5.9373 | 1316443 | Asthma |
| rs1000778  | 11 | 61887833 | A | G | 0.2513 | -0.0312 | 0.0056 | 2.04E-08 | -5.6084 | 1316443 | Asthma |
| rs174455   | 11 | 61888645 | G | A | 0.3670 | -0.0292 | 0.0050 | 6.04E-09 | -5.8158 | 1316443 | Asthma |
| rs174456   | 11 | 61888710 | C | A | 0.2515 | -0.0310 | 0.0056 | 2.65E-08 | -5.5630 | 1316443 | Asthma |
| rs1151144  | 11 | 61889113 | T | C | 0.2517 | -0.0309 | 0.0056 | 2.91E-08 | -5.5469 | 1316443 | Asthma |
| rs1295988  | 11 | 61889186 | A | C | 0.2520 | -0.0335 | 0.0060 | 2.29E-08 | -5.5888 | 1186521 | Asthma |
| rs174457   | 11 | 61889503 | T | C | 0.2514 | -0.0309 | 0.0056 | 2.84E-08 | -5.5509 | 1316443 | Asthma |
| rs174458   | 11 | 61889523 | C | T | 0.3017 | -0.0324 | 0.0053 | 6.86E-10 | -6.1693 | 1316443 | Asthma |
| rs174459   | 11 | 61889578 | C | T | 0.2514 | -0.0310 | 0.0056 | 2.73E-08 | -5.5576 | 1316443 | Asthma |
| rs174460   | 11 | 61889638 | C | T | 0.3012 | -0.0335 | 0.0053 | 1.94E-10 | -6.3659 | 1316443 | Asthma |
| rs174461   | 11 | 61889929 | A | C | 0.2514 | -0.0309 | 0.0056 | 3.02E-08 | -5.5402 | 1316443 | Asthma |
| rs174464   | 11 | 61890454 | A | G | 0.2513 | -0.0311 | 0.0056 | 2.45E-08 | -5.5765 | 1316443 | Asthma |
| rs174465   | 11 | 61891328 | C | T | 0.3064 | -0.0325 | 0.0052 | 5.45E-10 | -6.2055 | 1316443 | Asthma |
| rs479844   | 11 | 65784486 | A | G | 0.4431 | -0.0267 | 0.0047 | 1.75E-08 | -5.6346 | 1376071 | Asthma |
| rs3814707  | 11 | 65793314 | A | G | 0.2451 | -0.0371 | 0.0055 | 1.52E-11 | -6.7456 | 1376071 | Asthma |
| rs3897552  | 11 | 65793409 | T | C | 0.1099 | -0.0414 | 0.0075 | 3.70E-08 | -5.5045 | 1376071 | Asthma |
| rs12797706 | 11 | 65793898 | A | G | 0.2297 | -0.0339 | 0.0058 | 3.92E-09 | -5.8874 | 1316443 | Asthma |
| rs2276133  | 11 | 65794786 | A | G | 0.2493 | -0.0370 | 0.0055 | 1.39E-11 | -6.7586 | 1376071 | Asthma |
| rs10400322 | 11 | 76199869 | T | C | 0.3363 | -0.0273 | 0.0050 | 4.57E-08 | -5.4672 | 1376071 | Asthma |
| rs76282174 | 11 | 76272470 | T | C | 0.0214 | 0.1016  | 0.0166 | 8.62E-10 | 6.1328  | 1376071 | Asthma |



|             |    |          |   |   |        |         |        |          |          |         |        |
|-------------|----|----------|---|---|--------|---------|--------|----------|----------|---------|--------|
| rs5684690   | 11 | 76346902 | T | C | 0.0372 | 0.1090  | 0.0127 | 8.22E-18 | 8.5963   | 1376071 | Asthma |
| rs12221507  | 11 | 76399285 | A | G | 0.2393 | 0.0328  | 0.0056 | 4.48E-09 | 5.8654   | 1349938 | Asthma |
| rs12225661  | 11 | 76401668 | T | G | 0.2388 | 0.0315  | 0.0055 | 1.21E-08 | 5.6983   | 1376071 | Asthma |
| rs12420155  | 11 | 76402851 | G | A | 0.2388 | 0.0314  | 0.0055 | 1.28E-08 | 5.6885   | 1376071 | Asthma |
| rs12223763  | 11 | 76403334 | T | C | 0.2389 | 0.0315  | 0.0055 | 1.23E-08 | 5.6951   | 1376071 | Asthma |
| rs7113820   | 11 | 76404187 | A | G | 0.2388 | 0.0315  | 0.0055 | 1.24E-08 | 5.6944   | 1376071 | Asthma |
| rs6592632   | 11 | 76405322 | T | C | 0.2388 | 0.0315  | 0.0055 | 1.17E-08 | 5.7034   | 1376071 | Asthma |
| rs2017759   | 11 | 76405941 | T | C | 0.2408 | 0.0320  | 0.0055 | 6.34E-09 | 5.8075   | 1376071 | Asthma |
| rs867248    | 11 | 76406117 | T | C | 0.2405 | 0.0320  | 0.0055 | 6.24E-09 | 5.8101   | 1376071 | Asthma |
| rs867247    | 11 | 76406169 | T | C | 0.2408 | 0.0321  | 0.0055 | 5.50E-09 | 5.8314   | 1376071 | Asthma |
| rs7927830   | 11 | 76409271 | A | G | 0.2671 | 0.0300  | 0.0053 | 1.75E-08 | 5.6355   | 1376071 | Asthma |
| rs4945084   | 11 | 76410246 | G | C | 0.3481 | 0.0294  | 0.0049 | 2.61E-09 | 5.9547   | 1376071 | Asthma |
| rs2156708   | 11 | 76411169 | C | T | 0.2671 | 0.0301  | 0.0053 | 1.57E-08 | 5.6536   | 1376071 | Asthma |
| rs871911    | 11 | 76412805 | G | A | 0.2671 | 0.0299  | 0.0053 | 1.80E-08 | 5.6307   | 1376071 | Asthma |
| rs11236746  | 11 | 76417446 | T | C | 0.2942 | -0.0342 | 0.0053 | 8.97E-11 | -6.4834  | 1359430 | Asthma |
| rs11236747  | 11 | 76418996 | T | C | 0.2942 | -0.0341 | 0.0053 | 9.75E-11 | -6.4708  | 1359430 | Asthma |
| rs4945087   | 11 | 76425438 | A | G | 0.4269 | -0.0435 | 0.0048 | 7.53E-20 | -9.1197  | 1376071 | Asthma |
| rs59382353  | 11 | 76426199 | A | C | 0.1668 | 0.0415  | 0.0062 | 3.10E-11 | 6.6417   | 1376071 | Asthma |
| rs10793164  | 11 | 76431975 | T | A | 0.4277 | -0.0441 | 0.0048 | 7.70E-20 | -9.1171  | 1349938 | Asthma |
| rs10793166  | 11 | 76435685 | C | T | 0.4276 | -0.0438 | 0.0048 | 3.90E-20 | -9.1905  | 1376071 | Asthma |
| rs4625500   | 11 | 76453915 | G | T | 0.4296 | -0.0445 | 0.0048 | 9.31E-21 | -9.3435  | 1376071 | Asthma |
| rs10899219  | 11 | 76454243 | T | C | 0.4297 | -0.0445 | 0.0048 | 1.03E-20 | -9.3328  | 1376071 | Asthma |
| rs61894509  | 11 | 76460891 | C | G | 0.1649 | 0.0411  | 0.0063 | 6.21E-11 | 6.5386   | 1376071 | Asthma |
| rs10899220  | 11 | 76462193 | T | C | 0.4297 | -0.0445 | 0.0048 | 1.04E-20 | -9.3321  | 1376071 | Asthma |
| rs61894512  | 11 | 76467628 | T | G | 0.2798 | 0.0300  | 0.0053 | 1.25E-08 | 5.6927   | 1376071 | Asthma |
| rs11606394  | 11 | 76468072 | T | C | 0.4302 | -0.0443 | 0.0048 | 1.37E-20 | -9.3024  | 1376071 | Asthma |
| rs61696910  | 11 | 76479339 | G | A | 0.1650 | 0.0411  | 0.0063 | 5.92E-11 | 6.5458   | 1376071 | Asthma |
| rs61894530  | 11 | 76480992 | A | G | 0.1650 | 0.0411  | 0.0063 | 6.04E-11 | 6.5427   | 1376071 | Asthma |
| rs10899224  | 11 | 76481285 | T | C | 0.4285 | -0.0445 | 0.0048 | 1.25E-20 | -9.3128  | 1376071 | Asthma |
| rs11532107  | 11 | 76483949 | T | C | 0.1650 | 0.0410  | 0.0063 | 6.30E-11 | 6.5363   | 1376071 | Asthma |
| rs61894532  | 11 | 76485522 | G | A | 0.1650 | 0.0411  | 0.0063 | 5.92E-11 | 6.5459   | 1376071 | Asthma |
| rs7940390   | 11 | 76493337 | A | G | 0.4251 | -0.0443 | 0.0048 | 1.79E-20 | -9.2740  | 1376071 | Asthma |
| rs11236766  | 11 | 76497407 | A | G | 0.1652 | 0.0421  | 0.0064 | 3.69E-11 | 6.6161   | 1349938 | Asthma |
| rs61894534  | 11 | 76499885 | T | C | 0.1650 | 0.0406  | 0.0063 | 9.80E-11 | 6.4701   | 1376071 | Asthma |
| rs11236767  | 11 | 76500377 | A | G | 0.1650 | 0.0405  | 0.0063 | 1.11E-10 | 6.4507   | 1376071 | Asthma |
| rs57790584  | 11 | 76501120 | C | T | 0.1650 | 0.0406  | 0.0063 | 1.03E-10 | 6.4628   | 1376071 | Asthma |
| rs3016373   | 11 | 76505639 | T | C | 0.4199 | -0.0396 | 0.0058 | 7.72E-12 | -6.8436  | 1064845 | Asthma |
| rs7940373   | 11 | 76505829 | T | C | 0.1652 | 0.0423  | 0.0064 | 2.98E-11 | 6.6474   | 1349938 | Asthma |
| rs7115331   | 11 | 76507546 | G | T | 0.2792 | 0.0298  | 0.0054 | 2.73E-08 | 5.5580   | 1349938 | Asthma |
| rs2513515   | 11 | 76508906 | C | G | 0.4299 | -0.0452 | 0.0048 | 9.52E-21 | -9.3414  | 1349938 | Asthma |
| rs2508738   | 11 | 76511424 | T | C | 0.4297 | -0.0446 | 0.0048 | 7.54E-21 | -9.3660  | 1376071 | Asthma |
| rs35836875  | 11 | 76517947 | C | T | 0.2989 | -0.0350 | 0.0054 | 7.42E-11 | -6.5120  | 1299802 | Asthma |
| rs75430970  | 11 | 76518678 | C | T | 0.1630 | 0.0406  | 0.0069 | 4.30E-09 | 5.8722   | 1219993 | Asthma |
| rs61894541  | 11 | 76520183 | G | A | 0.1652 | 0.0403  | 0.0063 | 1.30E-10 | 6.4274   | 1376071 | Asthma |
| rs1939469   | 11 | 76525176 | G | A | 0.1650 | 0.0408  | 0.0063 | 8.02E-11 | 6.5004   | 1376071 | Asthma |
| rs11236775  | 11 | 76528104 | A | G | 0.1649 | 0.0410  | 0.0063 | 6.31E-11 | 6.5361   | 1376071 | Asthma |
| rs2508756   | 11 | 76532857 | A | G | 0.4294 | -0.0444 | 0.0048 | 1.24E-20 | -9.3136  | 1376071 | Asthma |
| rs2508755   | 11 | 76534518 | A | G | 0.4499 | -0.0415 | 0.0047 | 1.87E-18 | -8.7650  | 1376071 | Asthma |
| rs61894547  | 11 | 76537586 | T | C | 0.0479 | 0.1246  | 0.0112 | 9.83E-29 | 11.1214  | 1376071 | Asthma |
| rs58003764  | 11 | 76541159 | C | G | 0.1649 | 0.0413  | 0.0063 | 5.04E-11 | 6.5698   | 1376071 | Asthma |
| rs3758716   | 11 | 76543485 | T | C | 0.1649 | 0.0412  | 0.0063 | 5.27E-11 | 6.5630   | 1376071 | Asthma |
| rs3758715   | 11 | 76543495 | T | C | 0.1650 | 0.0412  | 0.0063 | 5.14E-11 | 6.5669   | 1376071 | Asthma |
| rs2251075   | 11 | 76543945 | G | C | 0.4405 | -0.0435 | 0.0048 | 5.62E-20 | -9.1514  | 1376071 | Asthma |
| rs17134961  | 11 | 76546715 | C | T | 0.1650 | 0.0408  | 0.0063 | 8.32E-11 | 6.4947   | 1376071 | Asthma |
| rs1044265   | 11 | 76551084 | G | A | 0.4296 | -0.0448 | 0.0048 | 6.04E-21 | -9.3894  | 1376071 | Asthma |
| rs2155220   | 11 | 76555128 | T | C | 0.4299 | -0.0449 | 0.0049 | 3.72E-20 | -9.1960  | 1316443 | Asthma |
| rs2155221   | 11 | 76555223 | T | C | 0.1649 | 0.0404  | 0.0063 | 1.28E-10 | 6.4292   | 1376071 | Asthma |
| rs146738303 | 11 | 76556043 | G | A | 0.0167 | 0.1270  | 0.0192 | 4.01E-11 | 6.6036   | 1246149 | Asthma |
| rs7938856   | 11 | 76556073 | C | A | 0.2610 | 0.0326  | 0.0059 | 3.95E-08 | 5.4932   | 1186521 | Asthma |
| rs60748394  | 11 | 76556723 | A | T | 0.1455 | 0.0436  | 0.0073 | 2.09E-09 | 5.9910   | 1299802 | Asthma |
| rs7130588   | 11 | 76559639 | G | A | 0.3409 | 0.0608  | 0.0050 | 2.91E-34 | 12.2054  | 1376071 | Asthma |
| rs2508746   | 11 | 76559906 | T | C | 0.4870 | 0.0376  | 0.0047 | 1.65E-15 | 7.9650   | 1376071 | Asthma |
| rs6592645   | 11 | 76559961 | A | G | 0.3406 | 0.0611  | 0.0050 | 1.60E-34 | 12.2541  | 1376071 | Asthma |
| rs2513517   | 11 | 76560217 | C | T | 0.5132 | 0.0372  | 0.0047 | 3.20E-15 | 7.8830   | 1376071 | Asthma |
| rs2508747   | 11 | 76560645 | A | G | 0.5126 | 0.0374  | 0.0047 | 1.95E-15 | 7.9446   | 1376071 | Asthma |
| rs1892953   | 11 | 76561498 | G | A | 0.4204 | -0.0477 | 0.0048 | 1.40E-23 | -10.0084 | 1376071 | Asthma |
| rs2509735   | 11 | 76562104 | G | A | 0.4283 | -0.0476 | 0.0048 | 1.75E-23 | -9.9861  | 1376071 | Asthma |
| rs2508748   | 11 | 76562304 | T | A | 0.4281 | -0.0473 | 0.0048 | 2.98E-23 | -9.9335  | 1376071 | Asthma |
| rs2508749   | 11 | 76562390 | T | G | 0.4284 | -0.0472 | 0.0048 | 3.33E-23 | -9.9221  | 1376071 | Asthma |
| rs2508750   | 11 | 76562396 | T | C | 0.4281 | -0.0473 | 0.0048 | 3.06E-23 | -9.9307  | 1376071 | Asthma |
| rs2508751   | 11 | 76562482 | A | T | 0.4281 | -0.0475 | 0.0048 | 2.19E-23 | -9.9641  | 1376071 | Asthma |
| rs2155226   | 11 | 76562811 | T | C | 0.4304 | -0.0469 | 0.0048 | 7.17E-23 | -9.8454  | 1376071 | Asthma |
| rs2513518   | 11 | 76563190 | G | C | 0.4281 | -0.0472 | 0.0048 | 3.56E-23 | -9.9158  | 1376071 | Asthma |
| rs35238963  | 11 | 76564098 | A | G | 0.4282 | -0.0474 | 0.0048 | 2.60E-23 | -9.9471  | 1376071 | Asthma |

|             |    |           |   |   |        |         |        |          |          |         |        |
|-------------|----|-----------|---|---|--------|---------|--------|----------|----------|---------|--------|
| rs11606100  | 11 | 76564534  | A | T | 0.4282 | -0.0474 | 0.0048 | 2.40E-23 | -9.9549  | 1376071 | Asthma |
| rs12789493  | 11 | 76564659  | T | C | 0.4281 | -0.0473 | 0.0048 | 2.85E-23 | -9.9378  | 1376071 | Asthma |
| rs12282537  | 11 | 76564812  | C | A | 0.4286 | -0.0484 | 0.0051 | 2.94E-21 | -9.4648  | 1246149 | Asthma |
| rs12295411  | 11 | 76564919  | G | A | 0.4298 | -0.0468 | 0.0057 | 1.41E-16 | -8.2641  | 1094744 | Asthma |
| rs12290718  | 11 | 76564946  | A | C | 0.4310 | -0.0464 | 0.0058 | 7.99E-16 | -8.0544  | 1029518 | Asthma |
| rs12292220  | 11 | 76565104  | T | C | 0.4314 | -0.0471 | 0.0059 | 1.00E-15 | -8.0264  | 1003385 | Asthma |
| rs10899230  | 11 | 76565144  | C | T | 0.4298 | -0.0468 | 0.0057 | 1.45E-16 | -8.2609  | 1094744 | Asthma |
| rs148317073 | 11 | 76565234  | A | C | 0.4293 | -0.0459 | 0.0052 | 1.10E-18 | -8.8243  | 1224666 | Asthma |
| rs10793174  | 11 | 76565372  | C | A | 0.4292 | -0.0460 | 0.0052 | 1.08E-18 | -8.8262  | 1224666 | Asthma |
| rs10899231  | 11 | 76565411  | C | A | 0.4293 | -0.0459 | 0.0052 | 1.13E-18 | -8.8213  | 1224666 | Asthma |
| rs7106634   | 11 | 76565949  | A | G | 0.4292 | -0.0458 | 0.0052 | 1.35E-18 | -8.8014  | 1224666 | Asthma |
| rs7109963   | 11 | 76565968  | T | A | 0.4292 | -0.0459 | 0.0052 | 1.19E-18 | -8.8155  | 1224666 | Asthma |
| rs7106745   | 11 | 76566031  | A | C | 0.4292 | -0.0459 | 0.0052 | 1.23E-18 | -8.8124  | 1224666 | Asthma |
| rs4275648   | 11 | 76566503  | C | A | 0.4283 | -0.0474 | 0.0048 | 2.70E-23 | -9.9435  | 1376071 | Asthma |
| rs1892955   | 11 | 76566543  | T | C | 0.4292 | -0.0460 | 0.0052 | 1.00E-18 | -8.8352  | 1224666 | Asthma |
| rs1892956   | 11 | 76566637  | C | T | 0.4284 | -0.0474 | 0.0048 | 2.19E-23 | -9.9641  | 1376071 | Asthma |
| rs1892957   | 11 | 76566653  | A | G | 0.4295 | -0.0475 | 0.0048 | 1.90E-23 | -9.9784  | 1376071 | Asthma |
| rs1892958   | 11 | 76566858  | C | T | 0.1009 | -0.0506 | 0.0081 | 4.08E-10 | -6.2508  | 1359430 | Asthma |
| rs7936562   | 11 | 76567214  | T | C | 0.4200 | -0.0482 | 0.0048 | 4.63E-24 | -10.1172 | 1376071 | Asthma |
| rs1892959   | 11 | 76567724  | T | C | 0.4205 | -0.0489 | 0.0048 | 5.11E-24 | -10.1075 | 1359430 | Asthma |
| rs10899232  | 11 | 76568135  | C | T | 0.4204 | -0.0488 | 0.0048 | 6.37E-24 | -10.0860 | 1359430 | Asthma |
| rs6592646   | 11 | 76569102  | C | T | 0.4286 | -0.0485 | 0.0048 | 9.18E-24 | -10.0501 | 1359430 | Asthma |
| rs6592647   | 11 | 76569388  | T | A | 0.4205 | -0.0489 | 0.0048 | 4.53E-24 | -10.1195 | 1359430 | Asthma |
| rs2226612   | 11 | 76570175  | A | G | 0.4205 | -0.0488 | 0.0048 | 5.56E-24 | -10.0995 | 1359430 | Asthma |
| rs2212434   | 11 | 76570549  | T | C | 0.4289 | 0.0665  | 0.0048 | 2.43E-43 | 13.8036  | 1359430 | Asthma |
| rs7931195   | 11 | 76570928  | T | C | 0.4256 | -0.0492 | 0.0048 | 2.27E-24 | -10.1870 | 1359430 | Asthma |
| rs3862807   | 11 | 76572037  | G | A | 0.4177 | -0.0494 | 0.0048 | 1.87E-24 | -10.2057 | 1359430 | Asthma |
| rs6592650   | 11 | 76573731  | A | T | 0.1008 | -0.0508 | 0.0081 | 3.71E-10 | -6.2657  | 1359430 | Asthma |
| rs6592652   | 11 | 76574535  | G | A | 0.4252 | -0.0491 | 0.0048 | 3.29E-24 | -10.1510 | 1359430 | Asthma |
| rs10899234  | 11 | 76577893  | A | G | 0.3531 | -0.0370 | 0.0051 | 6.69E-13 | -7.1856  | 1299802 | Asthma |
| rs61893460  | 11 | 76580110  | A | G | 0.4319 | 0.0654  | 0.0047 | 3.55E-43 | 13.7762  | 1376071 | Asthma |
| rs11236787  | 11 | 76580122  | T | C | 0.2887 | -0.0384 | 0.0053 | 5.24E-13 | -7.2189  | 1359430 | Asthma |
| rs7126418   | 11 | 76581529  | T | A | 0.4320 | 0.0655  | 0.0047 | 2.69E-43 | 13.7960  | 1376071 | Asthma |
| rs7110818   | 11 | 76581531  | T | C | 0.4317 | 0.0652  | 0.0048 | 8.26E-43 | 13.7149  | 1376071 | Asthma |
| rs7114362   | 11 | 76582026  | T | C | 0.4812 | 0.0636  | 0.0052 | 5.98E-35 | 12.3336  | 1224666 | Asthma |
| rs112679028 | 11 | 76582186  | A | G | 0.1029 | -0.0529 | 0.0088 | 1.81E-09 | -6.0140  | 1203352 | Asthma |
| rs7936070   | 11 | 76582483  | T | G | 0.4539 | 0.0638  | 0.0051 | 5.52E-36 | 12.5240  | 1281476 | Asthma |
| rs7926367   | 11 | 76582515  | T | C | 0.1008 | -0.0505 | 0.0081 | 4.56E-10 | -6.2336  | 1359430 | Asthma |
| rs7936312   | 11 | 76582682  | T | G | 0.4566 | 0.0650  | 0.0047 | 4.01E-43 | 13.7673  | 1376071 | Asthma |
| rs7936323   | 11 | 76582714  | A | G | 0.4568 | 0.0652  | 0.0047 | 2.40E-43 | 13.8043  | 1376071 | Asthma |
| rs7936434   | 11 | 76582761  | C | G | 0.4572 | 0.0647  | 0.0047 | 9.74E-43 | 13.7029  | 1376071 | Asthma |
| rs4494327   | 11 | 76583792  | T | A | 0.4840 | 0.0635  | 0.0048 | 1.24E-39 | 13.1739  | 1316443 | Asthma |
| rs11236791  | 11 | 76584554  | A | G | 0.4318 | 0.0657  | 0.0047 | 1.57E-43 | 13.8350  | 1376071 | Asthma |
| rs72934321  | 11 | 76584656  | A | G | 0.0179 | 0.1413  | 0.0187 | 4.51E-14 | 7.5451   | 1376071 | Asthma |
| rs11236795  | 11 | 76585239  | T | C | 0.2262 | -0.0477 | 0.0059 | 5.89E-16 | -8.0915  | 1299802 | Asthma |
| rs10160518  | 11 | 76585627  | G | A | 0.4853 | 0.0621  | 0.0047 | 1.23E-39 | 13.1746  | 1376071 | Asthma |
| rs2155219   | 11 | 76588150  | T | G | 0.4850 | 0.0623  | 0.0047 | 5.96E-40 | 13.2291  | 1376071 | Asthma |
| rs55646091  | 11 | 76588387  | A | G | 0.0460 | 0.1428  | 0.0115 | 1.51E-35 | 12.4440  | 1376071 | Asthma |
| rs11236797  | 11 | 76588605  | A | C | 0.4315 | 0.0654  | 0.0047 | 2.97E-43 | 13.7889  | 1376071 | Asthma |
| rs7926914   | 11 | 76590211  | T | G | 0.3702 | 0.0586  | 0.0049 | 5.88E-33 | 11.9582  | 1376071 | Asthma |
| rs7927894   | 11 | 76590272  | T | C | 0.3717 | 0.0588  | 0.0049 | 2.82E-33 | 12.0193  | 1376071 | Asthma |
| rs7927997   | 11 | 76590331  | T | C | 0.3721 | 0.0590  | 0.0049 | 1.98E-33 | 12.0483  | 1376071 | Asthma |
| rs7931483   | 11 | 76591023  | A | C | 0.4622 | 0.0715  | 0.0065 | 8.57E-28 | 10.9268  | 873440  | Asthma |
| rs7930763   | 11 | 76591029  | A | G | 0.4847 | 0.0635  | 0.0048 | 1.75E-39 | 13.1478  | 1316443 | Asthma |
| rs141420268 | 11 | 76601899  | G | C | 0.0188 | 0.1439  | 0.0176 | 2.47E-16 | 8.1973   | 1376071 | Asthma |
| rs75729369  | 11 | 76616322  | T | C | 0.1417 | -0.0391 | 0.0069 | 1.16E-08 | -5.7060  | 1376071 | Asthma |
| rs11236810  | 11 | 76624380  | G | C | 0.1988 | 0.0445  | 0.0062 | 5.87E-13 | 7.2036   | 1359430 | Asthma |
| rs72934351  | 11 | 76627383  | A | G | 0.1406 | -0.0406 | 0.0071 | 1.23E-08 | -5.6958  | 1299802 | Asthma |
| rs11236813  | 11 | 76632383  | C | G | 0.1012 | -0.0457 | 0.0078 | 5.43E-09 | -5.8335  | 1359430 | Asthma |
| rs11236814  | 11 | 76632384  | T | A | 0.1011 | -0.0457 | 0.0078 | 5.91E-09 | -5.8193  | 1359430 | Asthma |
| rs12281800  | 11 | 76634466  | T | C | 0.0795 | -0.0553 | 0.0086 | 1.12E-10 | -6.4499  | 1376071 | Asthma |
| rs12283565  | 11 | 76635149  | T | C | 0.0796 | -0.0562 | 0.0086 | 5.43E-11 | -6.5589  | 1376071 | Asthma |
| rs13377416  | 11 | 76635258  | T | C | 0.0795 | -0.0559 | 0.0086 | 7.60E-11 | -6.5082  | 1376071 | Asthma |
| rs7929272   | 11 | 76636900  | G | A | 0.0794 | -0.0551 | 0.0086 | 1.41E-10 | -6.4150  | 1376071 | Asthma |
| rs61893488  | 11 | 76638063  | A | G | 0.0793 | -0.0549 | 0.0086 | 1.73E-10 | -6.3837  | 1376071 | Asthma |
| rs12275758  | 11 | 76638585  | A | G | 0.0794 | -0.0553 | 0.0086 | 1.17E-10 | -6.4434  | 1376071 | Asthma |
| rs3781701   | 11 | 76658375  | A | G | 0.3502 | 0.0274  | 0.0049 | 2.75E-08 | 5.5564   | 1376071 | Asthma |
| rs3781700   | 11 | 76658665  | A | C | 0.3508 | 0.0270  | 0.0049 | 4.45E-08 | 5.4721   | 1376071 | Asthma |
| rs117051189 | 11 | 76670770  | G | A | 0.0352 | -0.0949 | 0.0158 | 1.67E-09 | -6.0269  | 1142799 | Asthma |
| rs6589681   | 11 | 118735812 | T | C | 0.2148 | -0.0346 | 0.0063 | 4.33E-08 | -5.4769  | 1281476 | Asthma |
| rs11826521  | 11 | 118739840 | T | G | 0.2089 | -0.0323 | 0.0058 | 2.11E-08 | -5.6031  | 1376071 | Asthma |
| rs10892280  | 11 | 118741108 | T | C | 0.2089 | -0.0324 | 0.0058 | 2.04E-08 | -5.6086  | 1376071 | Asthma |
| rs56758835  | 11 | 118744631 | A | G | 0.2057 | -0.0324 | 0.0058 | 2.09E-08 | -5.6043  | 1376071 | Asthma |
| rs11217009  | 11 | 118745076 | T | C | 0.2060 | -0.0330 | 0.0059 | 1.95E-08 | -5.6165  | 1349938 | Asthma |

|            |    |           |   |   |        |         |        |          |         |         |        |
|------------|----|-----------|---|---|--------|---------|--------|----------|---------|---------|--------|
| rs2077579  | 11 | 118748338 | G | T | 0.2057 | -0.0324 | 0.0058 | 2.27E-08 | -5.5899 | 1376071 | Asthma |
| rs2004781  | 11 | 118748544 | T | C | 0.2057 | -0.0322 | 0.0058 | 2.56E-08 | -5.5689 | 1376071 | Asthma |
| rs74676029 | 11 | 118757664 | T | C | 0.2056 | -0.0327 | 0.0058 | 1.57E-08 | -5.6542 | 1376071 | Asthma |
| rs11217020 | 11 | 118768644 | A | G | 0.2056 | -0.0325 | 0.0058 | 2.07E-08 | -5.6058 | 1376071 | Asthma |
| rs10892286 | 11 | 118771376 | C | A | 0.2057 | -0.0327 | 0.0058 | 1.65E-08 | -5.6449 | 1376071 | Asthma |
| rs10892287 | 11 | 118772290 | C | T | 0.2057 | -0.0326 | 0.0058 | 1.79E-08 | -5.6314 | 1376071 | Asthma |
| rs10892288 | 11 | 118773985 | G | A | 0.2057 | -0.0328 | 0.0058 | 1.47E-08 | -5.6652 | 1376071 | Asthma |
| rs10892289 | 11 | 118775294 | T | C | 0.2057 | -0.0328 | 0.0058 | 1.50E-08 | -5.6621 | 1376071 | Asthma |
| rs56043232 | 11 | 118777664 | T | C | 0.2056 | -0.0329 | 0.0058 | 1.36E-08 | -5.6789 | 1376071 | Asthma |
| rs10892290 | 11 | 118782794 | T | G | 0.2056 | -0.0326 | 0.0058 | 1.75E-08 | -5.6356 | 1376071 | Asthma |
| rs10892291 | 11 | 118782808 | T | C | 0.2056 | -0.0327 | 0.0058 | 1.70E-08 | -5.6397 | 1376071 | Asthma |
| rs10892292 | 11 | 118784631 | C | G | 0.2057 | -0.0329 | 0.0058 | 1.38E-08 | -5.6760 | 1376071 | Asthma |
| rs874621   | 11 | 118784936 | A | G | 0.2057 | -0.0327 | 0.0058 | 1.57E-08 | -5.6534 | 1376071 | Asthma |
| rs57494551 | 11 | 118790689 | T | C | 0.2052 | -0.0319 | 0.0058 | 3.67E-08 | -5.5062 | 1376071 | Asthma |
| rs11217074 | 11 | 118863291 | C | T | 0.1884 | -0.0337 | 0.0060 | 2.03E-08 | -5.6092 | 1376071 | Asthma |
| rs4938572  | 11 | 118870222 | C | T | 0.1950 | -0.0356 | 0.0065 | 3.48E-08 | -5.5155 | 948423  | Asthma |
| rs4938573  | 11 | 118871133 | C | T | 0.1897 | -0.0339 | 0.0060 | 1.58E-08 | -5.6526 | 1376071 | Asthma |
| rs74541740 | 11 | 118872091 | A | G | 0.1897 | -0.0338 | 0.0060 | 1.67E-08 | -5.6435 | 1376071 | Asthma |
| rs12365699 | 11 | 118872577 | A | G | 0.1654 | -0.0357 | 0.0064 | 3.12E-08 | -5.5343 | 1316443 | Asthma |
| rs1940378  | 11 | 128261118 | A | G | 0.2355 | -0.0423 | 0.0056 | 6.08E-14 | -7.5063 | 1376071 | Asthma |
| rs1940377  | 11 | 128261371 | A | G | 0.2355 | -0.0424 | 0.0056 | 5.66E-14 | -7.5157 | 1376071 | Asthma |
| rs61907677 | 11 | 128265414 | A | C | 0.2731 | -0.0388 | 0.0054 | 4.58E-13 | -7.2373 | 1376071 | Asthma |
| rs10893834 | 11 | 128266565 | A | T | 0.2733 | -0.0393 | 0.0054 | 2.24E-13 | -7.3336 | 1376071 | Asthma |
| rs61907678 | 11 | 128267953 | T | C | 0.2352 | -0.0420 | 0.0056 | 9.37E-14 | -7.4496 | 1376071 | Asthma |
| rs567295   | 11 | 128269649 | A | T | 0.3534 | -0.0272 | 0.0050 | 4.91E-08 | -5.4547 | 1376071 | Asthma |
| rs55974252 | 11 | 128277554 | G | C | 0.2674 | -0.0418 | 0.0058 | 4.75E-13 | -7.2325 | 1246149 | Asthma |
| rs61907681 | 11 | 128278384 | G | C | 0.4002 | 0.0278  | 0.0048 | 8.21E-09 | 5.7641  | 1376071 | Asthma |
| rs722345   | 11 | 128279170 | A | G | 0.4002 | 0.0276  | 0.0048 | 9.68E-09 | 5.7363  | 1376071 | Asthma |
| rs4936044  | 11 | 128280144 | C | A | 0.4002 | 0.0276  | 0.0048 | 1.00E-08 | 5.7301  | 1376071 | Asthma |
| rs4937310  | 11 | 128280252 | C | T | 0.4011 | 0.0282  | 0.0048 | 4.69E-09 | 5.8579  | 1376071 | Asthma |
| rs56168180 | 11 | 128282977 | A | G | 0.4002 | 0.0276  | 0.0048 | 9.91E-09 | 5.7323  | 1376071 | Asthma |
| rs61907683 | 11 | 128283912 | C | T | 0.2355 | -0.0423 | 0.0056 | 5.40E-14 | -7.5218 | 1376071 | Asthma |
| rs767179   | 11 | 128287008 | A | G | 0.2379 | -0.0411 | 0.0056 | 2.03E-13 | -7.3468 | 1376071 | Asthma |
| rs500207   | 11 | 128287748 | G | A | 0.5231 | -0.0299 | 0.0047 | 3.00E-10 | -6.2989 | 1376071 | Asthma |
| rs61907710 | 11 | 128287970 | T | C | 0.2404 | -0.0411 | 0.0056 | 2.01E-13 | -7.3480 | 1376071 | Asthma |
| rs56402126 | 11 | 128288293 | G | A | 0.2406 | -0.0411 | 0.0056 | 1.81E-13 | -7.3621 | 1376071 | Asthma |
| rs56129466 | 11 | 128288294 | G | A | 0.2406 | -0.0412 | 0.0056 | 1.58E-13 | -7.3802 | 1376071 | Asthma |
| rs55969014 | 11 | 128288703 | T | C | 0.2406 | -0.0413 | 0.0056 | 1.38E-13 | -7.3982 | 1376071 | Asthma |
| rs12786743 | 11 | 128289134 | G | A | 0.3968 | 0.0276  | 0.0048 | 1.03E-08 | 5.7253  | 1376071 | Asthma |
| rs61907712 | 11 | 128291247 | G | C | 0.2036 | -0.0435 | 0.0059 | 1.90E-13 | -7.3558 | 1376071 | Asthma |
| rs61907713 | 11 | 128293212 | A | G | 0.2401 | -0.0415 | 0.0056 | 1.18E-13 | -7.4193 | 1376071 | Asthma |
| rs34415928 | 11 | 128293313 | T | C | 0.3972 | 0.0278  | 0.0048 | 8.49E-09 | 5.7583  | 1376071 | Asthma |
| rs12418638 | 11 | 128293562 | T | C | 0.2400 | -0.0415 | 0.0056 | 1.27E-13 | -7.4091 | 1376071 | Asthma |
| rs12419147 | 11 | 128295232 | A | G | 0.4352 | 0.0263  | 0.0048 | 3.54E-08 | 5.5123  | 1376071 | Asthma |
| rs61907714 | 11 | 128295896 | T | C | 0.3972 | 0.0273  | 0.0049 | 3.37E-08 | 5.5211  | 1316443 | Asthma |
| rs57573835 | 11 | 128297193 | T | C | 0.3971 | 0.0270  | 0.0049 | 4.62E-08 | 5.4654  | 1316443 | Asthma |
| rs12291771 | 11 | 128298557 | C | A | 0.3977 | 0.0279  | 0.0049 | 1.76E-08 | 5.6338  | 1316443 | Asthma |
| rs55836957 | 11 | 128298736 | A | C | 0.2411 | -0.0421 | 0.0057 | 2.07E-13 | -7.3443 | 1316443 | Asthma |
| rs12801570 | 11 | 128299397 | G | T | 0.3976 | 0.0276  | 0.0049 | 2.31E-08 | 5.5870  | 1316443 | Asthma |
| rs12806750 | 11 | 128300428 | C | A | 0.3991 | 0.0317  | 0.0053 | 2.69E-09 | 5.9496  | 1186521 | Asthma |
| rs12807383 | 11 | 128300808 | T | A | 0.3985 | 0.0279  | 0.0049 | 1.77E-08 | 5.6331  | 1316443 | Asthma |
| rs34584722 | 11 | 128301139 | A | T | 0.3976 | 0.0278  | 0.0049 | 1.97E-08 | 5.6145  | 1316443 | Asthma |
| rs61907718 | 11 | 128302575 | A | G | 0.2411 | -0.0426 | 0.0057 | 1.11E-13 | -7.4271 | 1316443 | Asthma |
| rs73018928 | 11 | 128302748 | A | T | 0.2411 | -0.0428 | 0.0057 | 8.87E-14 | -7.4567 | 1316443 | Asthma |
| rs73018933 | 11 | 128304886 | A | G | 0.2410 | -0.0428 | 0.0057 | 9.33E-14 | -7.4501 | 1316443 | Asthma |
| rs11221247 | 11 | 128307433 | A | G | 0.4258 | 0.0275  | 0.0049 | 2.25E-08 | 5.5915  | 1316443 | Asthma |
| rs61907721 | 11 | 128308903 | C | A | 0.2408 | -0.0415 | 0.0057 | 5.10E-13 | -7.2227 | 1316443 | Asthma |
| rs1522435  | 11 | 128309572 | A | G | 0.4257 | 0.0274  | 0.0049 | 2.27E-08 | 5.5897  | 1316443 | Asthma |
| rs4144896  | 11 | 128312131 | T | C | 0.4638 | 0.0325  | 0.0049 | 2.99E-11 | 6.6468  | 1316443 | Asthma |
| rs73018941 | 11 | 128312716 | A | G | 0.1759 | -0.0392 | 0.0064 | 7.77E-10 | -6.1496 | 1376071 | Asthma |
| rs12417297 | 11 | 128315259 | T | C | 0.1766 | -0.0392 | 0.0065 | 1.78E-09 | -6.0172 | 1316443 | Asthma |
| rs10893844 | 11 | 128315955 | C | G | 0.4717 | 0.0330  | 0.0047 | 3.43E-12 | 6.9589  | 1376071 | Asthma |
| rs10893845 | 11 | 128316987 | G | T | 0.4705 | 0.0329  | 0.0047 | 3.44E-12 | 6.9585  | 1376071 | Asthma |
| rs73026088 | 11 | 128317159 | T | G | 0.1765 | -0.0387 | 0.0065 | 2.87E-09 | -5.9390 | 1316443 | Asthma |
| rs7127307  | 11 | 128317488 | C | T | 0.4998 | -0.0349 | 0.0049 | 6.86E-13 | -7.1823 | 1316443 | Asthma |
| rs970924   | 11 | 128318007 | G | A | 0.4658 | 0.0323  | 0.0049 | 6.26E-11 | 6.5374  | 1316443 | Asthma |
| rs12362034 | 11 | 128318503 | T | G | 0.4940 | -0.0305 | 0.0051 | 3.24E-09 | -5.9189 | 1299802 | Asthma |
| rs60463738 | 12 | 38353018  | G | A | 0.1050 | 0.0414  | 0.0076 | 4.66E-08 | 5.4638  | 1376071 | Asthma |
| rs11168581 | 12 | 38562356  | C | T | 0.1089 | 0.0460  | 0.0081 | 1.52E-08 | 5.6599  | 1159440 | Asthma |
| rs12231649 | 12 | 38621857  | G | T | 0.1101 | 0.0457  | 0.0080 | 9.60E-09 | 5.7376  | 1224666 | Asthma |
| rs4768192  | 12 | 38627174  | T | C | 0.1106 | 0.0454  | 0.0080 | 1.18E-08 | 5.7027  | 1224666 | Asthma |
| rs2134396  | 12 | 38642379  | C | T | 0.1101 | 0.0444  | 0.0080 | 2.56E-08 | 5.5689  | 1224666 | Asthma |
| rs826844   | 12 | 38758355  | T | C | 0.0749 | 0.0550  | 0.0095 | 7.00E-09 | 5.7909  | 1224666 | Asthma |
| rs4309192  | 12 | 39026791  | G | T | 0.4059 | 0.0261  | 0.0048 | 4.85E-08 | 5.4567  | 1376071 | Asthma |

|             |    |          |   |   |        |         |        |          |         |         |        |
|-------------|----|----------|---|---|--------|---------|--------|----------|---------|---------|--------|
| rs12308157  | 12 | 39027965 | C | T | 0.2824 | 0.0293  | 0.0052 | 1.93E-08 | 5.6180  | 1376071 | Asthma |
| rs1375795   | 12 | 39029540 | T | A | 0.4056 | 0.0261  | 0.0048 | 4.84E-08 | 5.4570  | 1376071 | Asthma |
| rs11170433  | 12 | 39030274 | C | T | 0.4052 | 0.0263  | 0.0048 | 3.96E-08 | 5.4927  | 1376071 | Asthma |
| rs1463210   | 12 | 39032547 | A | G | 0.4043 | 0.0263  | 0.0048 | 4.28E-08 | 5.4788  | 1376071 | Asthma |
| rs11610110  | 12 | 39032621 | G | T | 0.4049 | 0.0263  | 0.0048 | 4.10E-08 | 5.4865  | 1376071 | Asthma |
| rs718150    | 12 | 39118922 | A | G | 0.4149 | 0.0265  | 0.0048 | 3.31E-08 | 5.5244  | 1376071 | Asthma |
| rs1463209   | 12 | 39124491 | C | T | 0.4126 | 0.0263  | 0.0048 | 4.28E-08 | 5.4788  | 1376071 | Asthma |
| rs12817660  | 12 | 39138924 | A | G | 0.4130 | 0.0312  | 0.0052 | 2.56E-09 | 5.9574  | 1224666 | Asthma |
| rs2525041   | 12 | 47791010 | A | G | 0.3657 | -0.0319 | 0.0053 | 2.26E-09 | -5.9777 | 1299802 | Asthma |
| rs2544026   | 12 | 47792780 | A | T | 0.2713 | -0.0362 | 0.0054 | 2.28E-11 | -6.6869 | 1376071 | Asthma |
| rs2525055   | 12 | 47792955 | G | T | 0.3507 | -0.0273 | 0.0050 | 4.46E-08 | -5.4718 | 1376071 | Asthma |
| rs73107980  | 12 | 47793818 | T | C | 0.2548 | -0.0361 | 0.0056 | 8.11E-11 | -6.4985 | 1376071 | Asthma |
| rs11831883  | 12 | 47796261 | T | C | 0.3278 | -0.0290 | 0.0052 | 2.14E-08 | -5.5999 | 1349938 | Asthma |
| rs11831940  | 12 | 47796383 | A | G | 0.3376 | -0.0290 | 0.0051 | 1.01E-08 | -5.7289 | 1376071 | Asthma |
| rs112689589 | 12 | 47796486 | T | C | 0.2461 | -0.0367 | 0.0057 | 1.19E-10 | -6.4409 | 1349938 | Asthma |
| rs34922454  | 12 | 47798279 | C | A | 0.3250 | -0.0316 | 0.0051 | 6.79E-10 | -6.1709 | 1376071 | Asthma |
| rs875023    | 12 | 47800652 | T | C | 0.2476 | -0.0372 | 0.0056 | 3.12E-11 | -6.6408 | 1376071 | Asthma |
| rs2544029   | 12 | 47801174 | T | C | 0.2884 | -0.0324 | 0.0053 | 9.32E-10 | -6.1206 | 1376071 | Asthma |
| rs2525053   | 12 | 47801565 | C | T | 0.3437 | -0.0284 | 0.0050 | 1.16E-08 | -5.7058 | 1376071 | Asthma |
| rs2525052   | 12 | 47801641 | T | C | 0.3437 | -0.0289 | 0.0050 | 8.71E-09 | -5.7542 | 1376071 | Asthma |
| rs2544030   | 12 | 47801668 | A | G | 0.2888 | -0.0323 | 0.0054 | 1.82E-09 | -6.0129 | 1349938 | Asthma |
| rs73107993  | 12 | 47802090 | T | C | 0.2648 | -0.0359 | 0.0055 | 5.34E-11 | -6.5610 | 1376071 | Asthma |
| rs2525051   | 12 | 47802156 | C | G | 0.5130 | -0.0286 | 0.0049 | 3.82E-09 | -5.8917 | 1316443 | Asthma |
| rs55726902  | 12 | 47803199 | A | G | 0.2621 | -0.0367 | 0.0055 | 2.42E-11 | -6.6783 | 1376071 | Asthma |
| rs11168244  | 12 | 47809158 | T | C | 0.2603 | -0.0358 | 0.0055 | 8.21E-11 | -6.4967 | 1376071 | Asthma |
| rs11168245  | 12 | 47810716 | G | C | 0.2605 | -0.0359 | 0.0055 | 6.90E-11 | -6.5227 | 1376071 | Asthma |
| rs56389811  | 12 | 47811575 | T | C | 0.2602 | -0.0352 | 0.0055 | 1.66E-10 | -6.3900 | 1376071 | Asthma |
| rs11168249  | 12 | 47814585 | C | T | 0.4882 | -0.0300 | 0.0047 | 2.23E-10 | -6.3446 | 1376071 | Asthma |
| rs11168250  | 12 | 47815382 | T | G | 0.2609 | -0.0349 | 0.0055 | 2.21E-10 | -6.3459 | 1376071 | Asthma |
| rs11168252  | 12 | 47816535 | A | T | 0.2386 | -0.0363 | 0.0059 | 6.10E-10 | -6.1878 | 1008051 | Asthma |
| rs73109811  | 12 | 47818936 | T | C | 0.2132 | -0.0367 | 0.0060 | 9.50E-10 | -6.1177 | 1376071 | Asthma |
| rs80325942  | 12 | 47820208 | T | C | 0.3041 | -0.0339 | 0.0052 | 1.05E-10 | -6.4590 | 1376071 | Asthma |
| rs7487637   | 12 | 47821042 | A | G | 0.3037 | -0.0345 | 0.0052 | 4.87E-11 | -6.5750 | 1376071 | Asthma |
| rs7487602   | 12 | 47821050 | A | C | 0.3036 | -0.0343 | 0.0052 | 6.07E-11 | -6.5420 | 1376071 | Asthma |
| rs11168256  | 12 | 47823230 | G | A | 0.3081 | -0.0335 | 0.0052 | 1.48E-10 | -6.4073 | 1376071 | Asthma |
| rs11168257  | 12 | 47824117 | G | A | 0.3082 | -0.0335 | 0.0052 | 1.38E-10 | -6.4181 | 1376071 | Asthma |
| rs7973956   | 12 | 47826964 | C | G | 0.3061 | -0.0331 | 0.0054 | 6.91E-10 | -6.1681 | 1316443 | Asthma |
| rs55913294  | 12 | 47829771 | G | C | 0.3365 | -0.0335 | 0.0052 | 1.37E-10 | -6.4191 | 1316443 | Asthma |
| rs12721362  | 12 | 47831959 | C | T | 0.3282 | -0.0335 | 0.0053 | 2.19E-10 | -6.3475 | 1316443 | Asthma |
| rs2069408   | 12 | 55970537 | G | A | 0.3260 | 0.0313  | 0.0050 | 5.40E-10 | 6.2071  | 1376071 | Asthma |
| rs773107    | 12 | 55975722 | G | A | 0.3224 | 0.0345  | 0.0052 | 3.24E-11 | 6.6352  | 1316443 | Asthma |
| rs773108    | 12 | 55976127 | G | A | 0.3267 | 0.0361  | 0.0051 | 8.91E-13 | 7.1464  | 1376071 | Asthma |
| rs773109    | 12 | 55980911 | A | G | 0.3269 | 0.0346  | 0.0052 | 2.14E-11 | 6.6959  | 1316443 | Asthma |
| rs773110    | 12 | 55981353 | G | C | 0.3267 | 0.0362  | 0.0051 | 7.68E-13 | 7.1669  | 1376071 | Asthma |
| rs773111    | 12 | 55981956 | A | C | 0.3266 | 0.0362  | 0.0051 | 8.40E-13 | 7.1546  | 1376071 | Asthma |
| rs773112    | 12 | 55982097 | T | C | 0.3270 | 0.0348  | 0.0052 | 1.63E-11 | 6.7356  | 1316443 | Asthma |
| rs773114    | 12 | 55985276 | T | A | 0.4105 | 0.0342  | 0.0048 | 9.59E-13 | 7.1363  | 1376071 | Asthma |
| rs1873914   | 12 | 55985643 | C | G | 0.4101 | 0.0340  | 0.0048 | 1.42E-12 | 7.0822  | 1376071 | Asthma |
| rs2048036   | 12 | 55986335 | A | T | 0.3267 | 0.0359  | 0.0050 | 1.16E-12 | 7.1105  | 1376071 | Asthma |
| rs61937247  | 12 | 55987700 | C | A | 0.3267 | 0.0359  | 0.0050 | 1.10E-12 | 7.1180  | 1376071 | Asthma |
| rs61937248  | 12 | 55987921 | T | C | 0.3223 | 0.0385  | 0.0054 | 1.21E-12 | 7.1042  | 981918  | Asthma |
| rs61937249  | 12 | 55988132 | G | A | 0.3267 | 0.0360  | 0.0050 | 1.04E-12 | 7.1258  | 1376071 | Asthma |
| rs705698    | 12 | 55990903 | C | T | 0.3278 | 0.0356  | 0.0050 | 1.58E-12 | 7.0676  | 1376071 | Asthma |
| rs705699    | 12 | 55991020 | A | G | 0.4114 | 0.0336  | 0.0048 | 2.48E-12 | 7.0045  | 1376071 | Asthma |
| rs705700    | 12 | 55995509 | C | T | 0.4115 | 0.0339  | 0.0048 | 1.47E-12 | 7.0774  | 1376071 | Asthma |
| rs772920    | 12 | 55996580 | G | C | 0.3277 | 0.0357  | 0.0050 | 1.34E-12 | 7.0900  | 1376071 | Asthma |
| rs705702    | 12 | 55996852 | G | A | 0.3277 | 0.0354  | 0.0050 | 1.82E-12 | 7.0474  | 1376071 | Asthma |
| rs1081975   | 12 | 55999553 | G | C | 0.4112 | 0.0342  | 0.0048 | 9.88E-13 | 7.1323  | 1376071 | Asthma |
| rs773125    | 12 | 56001170 | G | A | 0.4111 | 0.0331  | 0.0055 | 2.44E-09 | 5.9656  | 1134232 | Asthma |
| rs1689510   | 12 | 56002984 | C | G | 0.3313 | 0.0376  | 0.0050 | 6.26E-14 | 7.5025  | 1376071 | Asthma |
| rs10876864  | 12 | 56007301 | G | A | 0.4159 | 0.0360  | 0.0050 | 8.05E-13 | 7.1604  | 1008051 | Asthma |
| rs772921    | 12 | 56009793 | T | C | 0.3344 | 0.0383  | 0.0050 | 1.87E-14 | 7.6591  | 1376071 | Asthma |
| rs1701704   | 12 | 56018703 | G | T | 0.3348 | 0.0380  | 0.0050 | 2.85E-14 | 7.6050  | 1376071 | Asthma |
| rs2456973   | 12 | 56023144 | C | A | 0.3348 | 0.0379  | 0.0050 | 3.11E-14 | 7.5934  | 1376071 | Asthma |
| rs1702877   | 12 | 56034024 | T | C | 0.3340 | 0.0379  | 0.0050 | 3.71E-14 | 7.5708  | 1376071 | Asthma |
| rs705704    | 12 | 56041628 | A | G | 0.3346 | 0.0383  | 0.0050 | 1.86E-14 | 7.6600  | 1376071 | Asthma |
| rs705705    | 12 | 56041720 | C | G | 0.3291 | 0.0487  | 0.0082 | 2.26E-09 | 5.9782  | 778845  | Asthma |
| rs1131017   | 12 | 56042145 | C | G | 0.4262 | 0.0380  | 0.0051 | 1.03E-13 | 7.4369  | 1246149 | Asthma |
| rs34415530  | 12 | 56050848 | T | C | 0.3371 | 0.0409  | 0.0055 | 6.86E-14 | 7.4907  | 1219993 | Asthma |
| rs10876866  | 12 | 56051582 | A | G | 0.3350 | 0.0385  | 0.0050 | 1.43E-14 | 7.6934  | 1376071 | Asthma |
| rs61938962  | 12 | 56052982 | T | C | 0.3329 | 0.0390  | 0.0050 | 6.30E-15 | 7.7977  | 1376071 | Asthma |
| rs61938963  | 12 | 56053020 | T | C | 0.3330 | 0.0391  | 0.0050 | 5.88E-15 | 7.8064  | 1376071 | Asthma |
| rs7302200   | 12 | 56055651 | A | G | 0.3301 | 0.0381  | 0.0050 | 3.71E-14 | 7.5709  | 1376071 | Asthma |
| rs2640564   | 12 | 56061510 | T | C | 0.3349 | 0.0388  | 0.0051 | 2.31E-14 | 7.6320  | 1349938 | Asthma |

|            |    |          |   |   |        |         |        |          |         |         |        |
|------------|----|----------|---|---|--------|---------|--------|----------|---------|---------|--------|
| rs2640562  | 12 | 56072689 | T | C | 0.3400 | 0.0370  | 0.0050 | 1.14E-13 | 7.4233  | 1376071 | Asthma |
| rs7312770  | 12 | 56073803 | C | T | 0.4882 | 0.0307  | 0.0049 | 2.66E-10 | 6.3175  | 1316443 | Asthma |
| rs7955865  | 12 | 56074922 | A | T | 0.3404 | 0.0365  | 0.0054 | 1.86E-11 | 6.7168  | 1224666 | Asthma |
| rs11171739 | 12 | 56076841 | C | T | 0.4243 | 0.0331  | 0.0048 | 3.82E-12 | 6.9438  | 1376071 | Asthma |
| rs7297175  | 12 | 56080024 | T | C | 0.4239 | 0.0330  | 0.0048 | 4.38E-12 | 6.9244  | 1376071 | Asthma |
| rs3741499  | 12 | 56080595 | T | C | 0.3403 | 0.0358  | 0.0050 | 6.23E-13 | 7.1955  | 1376071 | Asthma |
| rs4759229  | 12 | 56080696 | A | G | 0.3402 | 0.0362  | 0.0051 | 7.47E-13 | 7.1707  | 1349938 | Asthma |
| rs2271194  | 12 | 56083910 | A | T | 0.4184 | 0.0321  | 0.0048 | 2.02E-11 | 6.7043  | 1376071 | Asthma |
| rs10876870 | 12 | 56084218 | A | C | 0.4185 | 0.0320  | 0.0048 | 2.21E-11 | 6.6916  | 1376071 | Asthma |
| rs7971751  | 12 | 56084874 | A | C | 0.4245 | 0.0354  | 0.0057 | 4.39E-10 | 6.2396  | 1090071 | Asthma |
| rs877636   | 12 | 56086799 | G | A | 0.3341 | 0.0344  | 0.0051 | 1.79E-11 | 6.7224  | 1316443 | Asthma |
| rs705696   | 12 | 56086864 | A | G | 0.3330 | 0.0360  | 0.0050 | 7.10E-13 | 7.1775  | 1376071 | Asthma |
| rs2292239  | 12 | 56088396 | T | G | 0.3336 | 0.0358  | 0.0050 | 7.90E-13 | 7.1630  | 1376071 | Asthma |
| rs11531227 | 12 | 56850384 | G | A | 0.4753 | 0.0372  | 0.0058 | 1.86E-10 | 6.3722  | 1030443 | Asthma |
| rs7311373  | 12 | 56853403 | T | C | 0.4800 | 0.0298  | 0.0048 | 7.37E-10 | 6.1579  | 1316443 | Asthma |
| rs10735869 | 12 | 56854093 | T | C | 0.4805 | 0.0301  | 0.0048 | 4.51E-10 | 6.2353  | 1316443 | Asthma |
| rs4237805  | 12 | 56855816 | A | G | 0.4801 | 0.0296  | 0.0048 | 8.51E-10 | 6.1352  | 1316443 | Asthma |
| rs78342208 | 12 | 56857439 | T | C | 0.4803 | 0.0355  | 0.0059 | 1.58E-09 | 6.0359  | 1042455 | Asthma |
| rs7303219  | 12 | 56858748 | A | G | 0.4800 | 0.0296  | 0.0048 | 8.84E-10 | 6.1290  | 1316443 | Asthma |
| rs7306442  | 12 | 56859089 | A | C | 0.4800 | 0.0295  | 0.0048 | 9.76E-10 | 6.1133  | 1316443 | Asthma |
| rs7305700  | 12 | 56862596 | T | A | 0.4171 | 0.0340  | 0.0049 | 4.11E-12 | 6.9333  | 1316443 | Asthma |
| rs12423843 | 12 | 56862615 | A | T | 0.4112 | 0.0330  | 0.0053 | 4.88E-10 | 6.2229  | 1186521 | Asthma |
| rs7314652  | 12 | 56864128 | G | T | 0.4172 | 0.0341  | 0.0049 | 3.70E-12 | 6.9482  | 1316443 | Asthma |
| rs7314567  | 12 | 56864231 | C | T | 0.4983 | 0.0304  | 0.0048 | 2.80E-10 | 6.3097  | 1316443 | Asthma |
| rs61937853 | 12 | 56866670 | G | A | 0.1344 | -0.0397 | 0.0070 | 1.36E-08 | -5.6785 | 1376071 | Asthma |
| rs11172025 | 12 | 56868174 | A | G | 0.4149 | 0.0316  | 0.0048 | 4.75E-11 | 6.5785  | 1376071 | Asthma |
| rs10876940 | 12 | 56871233 | G | C | 0.4959 | 0.0284  | 0.0047 | 1.61E-09 | 6.0334  | 1376071 | Asthma |
| rs4254104  | 12 | 56872168 | T | C | 0.4137 | 0.0321  | 0.0048 | 2.59E-11 | 6.6681  | 1376071 | Asthma |
| rs10783807 | 12 | 56872529 | T | C | 0.4789 | -0.0304 | 0.0047 | 1.25E-10 | -6.4331 | 1376071 | Asthma |
| rs10876941 | 12 | 56873432 | T | C | 0.4134 | 0.0320  | 0.0048 | 2.94E-11 | 6.6494  | 1376071 | Asthma |
| rs11172026 | 12 | 56874477 | T | C | 0.1448 | -0.0386 | 0.0067 | 7.00E-09 | -5.7910 | 1376071 | Asthma |
| rs4759261  | 12 | 56875039 | C | G | 0.1448 | -0.0384 | 0.0067 | 8.00E-09 | -5.7684 | 1376071 | Asthma |
| rs10876942 | 12 | 56875770 | A | G | 0.1424 | -0.0386 | 0.0067 | 9.29E-09 | -5.7433 | 1376071 | Asthma |
| rs4472974  | 12 | 56875859 | A | G | 0.4134 | 0.0321  | 0.0048 | 2.51E-11 | 6.6726  | 1376071 | Asthma |
| rs4759262  | 12 | 56878310 | G | C | 0.1166 | -0.0444 | 0.0074 | 1.65E-09 | -6.0289 | 1376071 | Asthma |
| rs4759036  | 12 | 56878830 | T | C | 0.4170 | 0.0318  | 0.0048 | 4.03E-11 | 6.6031  | 1376071 | Asthma |
| rs7295197  | 12 | 56879081 | T | C | 0.1166 | -0.0441 | 0.0074 | 2.01E-09 | -5.9966 | 1376071 | Asthma |
| rs9668259  | 12 | 56879082 | A | G | 0.4170 | 0.0319  | 0.0048 | 3.40E-11 | 6.6281  | 1376071 | Asthma |
| rs7961602  | 12 | 56879697 | T | C | 0.4171 | 0.0321  | 0.0048 | 2.51E-11 | 6.6726  | 1376071 | Asthma |
| rs11613486 | 12 | 56879902 | G | A | 0.1167 | -0.0443 | 0.0074 | 1.80E-09 | -6.0151 | 1376071 | Asthma |
| rs10876943 | 12 | 56880864 | G | A | 0.4169 | 0.0319  | 0.0048 | 3.13E-11 | 6.6407  | 1376071 | Asthma |
| rs4477472  | 12 | 56881688 | A | C | 0.1166 | -0.0443 | 0.0074 | 1.76E-09 | -6.0190 | 1376071 | Asthma |
| rs4477473  | 12 | 56881744 | A | C | 0.4169 | 0.0319  | 0.0048 | 3.35E-11 | 6.6303  | 1376071 | Asthma |
| rs7960618  | 12 | 56882855 | C | T | 0.4203 | 0.0327  | 0.0052 | 4.50E-10 | 6.2356  | 1224666 | Asthma |
| rs7955918  | 12 | 56883024 | T | G | 0.4170 | 0.0319  | 0.0048 | 3.25E-11 | 6.6348  | 1376071 | Asthma |
| rs7959654  | 12 | 56884055 | G | A | 0.4170 | 0.0318  | 0.0048 | 3.51E-11 | 6.6234  | 1376071 | Asthma |
| rs7960137  | 12 | 56884384 | T | C | 0.4170 | 0.0320  | 0.0048 | 2.70E-11 | 6.6623  | 1376071 | Asthma |
| rs7979655  | 12 | 56885817 | C | T | 0.4169 | 0.0320  | 0.0048 | 2.89E-11 | 6.6521  | 1376071 | Asthma |
| rs4435043  | 12 | 56886027 | A | G | 0.1167 | -0.0440 | 0.0074 | 2.19E-09 | -5.9829 | 1376071 | Asthma |
| rs7967940  | 12 | 56886172 | T | G | 0.4169 | 0.0319  | 0.0048 | 3.40E-11 | 6.6279  | 1376071 | Asthma |
| rs7307358  | 12 | 56887246 | C | G | 0.1167 | -0.0439 | 0.0074 | 2.36E-09 | -5.9707 | 1376071 | Asthma |
| rs7972591  | 12 | 56887618 | A | G | 0.4169 | 0.0320  | 0.0048 | 2.91E-11 | 6.6509  | 1376071 | Asthma |
| rs7311658  | 12 | 56888508 | T | C | 0.1167 | -0.0440 | 0.0074 | 2.21E-09 | -5.9814 | 1376071 | Asthma |
| rs11172033 | 12 | 56889007 | T | C | 0.4169 | 0.0321  | 0.0048 | 2.54E-11 | 6.6709  | 1376071 | Asthma |
| rs56023460 | 12 | 56889425 | G | A | 0.4169 | 0.0321  | 0.0048 | 2.37E-11 | 6.6814  | 1376071 | Asthma |
| rs7956391  | 12 | 56890814 | T | C | 0.4169 | 0.0322  | 0.0048 | 2.24E-11 | 6.6893  | 1376071 | Asthma |
| rs7959253  | 12 | 56890939 | G | A | 0.4169 | 0.0321  | 0.0048 | 2.59E-11 | 6.6683  | 1376071 | Asthma |
| rs7959725  | 12 | 56891306 | T | C | 0.4169 | 0.0322  | 0.0048 | 2.09E-11 | 6.6997  | 1376071 | Asthma |
| rs4759266  | 12 | 56891333 | G | T | 0.1167 | -0.0438 | 0.0074 | 2.61E-09 | -5.9545 | 1376071 | Asthma |
| rs11172038 | 12 | 56893738 | A | T | 0.1167 | -0.0443 | 0.0074 | 1.73E-09 | -6.0216 | 1376071 | Asthma |
| rs55812315 | 12 | 56893910 | T | G | 0.4169 | 0.0324  | 0.0048 | 1.72E-11 | 6.7283  | 1376071 | Asthma |
| rs4415812  | 12 | 56895116 | C | T | 0.1167 | -0.0442 | 0.0074 | 1.82E-09 | -6.0133 | 1376071 | Asthma |
| rs4237807  | 12 | 56895213 | T | C | 0.1167 | -0.0443 | 0.0074 | 1.76E-09 | -6.0185 | 1376071 | Asthma |
| rs4759041  | 12 | 56897715 | G | C | 0.4168 | 0.0324  | 0.0048 | 1.68E-11 | 6.7311  | 1376071 | Asthma |
| rs61939604 | 12 | 56897910 | C | A | 0.4168 | 0.0324  | 0.0048 | 1.70E-11 | 6.7294  | 1376071 | Asthma |
| rs12422981 | 12 | 56900282 | C | T | 0.4785 | -0.0296 | 0.0047 | 3.53E-10 | -6.2733 | 1376071 | Asthma |
| rs2888108  | 12 | 56902640 | G | A | 0.4171 | 0.0322  | 0.0048 | 2.24E-11 | 6.6897  | 1376071 | Asthma |
| rs11172046 | 12 | 56903756 | C | G | 0.1168 | -0.0444 | 0.0074 | 1.61E-09 | -6.0333 | 1376071 | Asthma |
| rs4759268  | 12 | 56904847 | G | C | 0.1168 | -0.0450 | 0.0074 | 9.81E-10 | -6.1125 | 1376071 | Asthma |
| rs2888107  | 12 | 56907610 | T | C | 0.4159 | 0.0328  | 0.0048 | 1.03E-11 | 6.8025  | 1376071 | Asthma |
| rs2888106  | 12 | 56907614 | C | T | 0.4159 | 0.0328  | 0.0048 | 9.18E-12 | 6.8188  | 1376071 | Asthma |
| rs1846398  | 12 | 56909015 | A | C | 0.4197 | 0.0321  | 0.0048 | 2.17E-11 | 6.6941  | 1376071 | Asthma |
| rs7965441  | 12 | 56910505 | A | G | 0.1178 | -0.0435 | 0.0073 | 3.00E-09 | -5.9316 | 1376071 | Asthma |
| rs12304073 | 12 | 56911860 | T | G | 0.1179 | -0.0438 | 0.0073 | 2.36E-09 | -5.9712 | 1376071 | Asthma |



|             |    |          |   |   |        |         |        |          |          |         |        |
|-------------|----|----------|---|---|--------|---------|--------|----------|----------|---------|--------|
| rs58801386  | 12 | 56912440 | C | A | 0.0821 | -0.0666 | 0.0088 | 4.73E-14 | -7.5393  | 1376071 | Asthma |
| rs10735871  | 12 | 56912893 | C | T | 0.4199 | 0.0325  | 0.0048 | 1.44E-11 | 6.7535   | 1376071 | Asthma |
| rs11172055  | 12 | 56914476 | T | A | 0.5117 | 0.0379  | 0.0056 | 1.76E-11 | 6.7250   | 1090071 | Asthma |
| rs1909328   | 12 | 56915152 | G | A | 0.4193 | 0.0325  | 0.0048 | 1.47E-11 | 6.7510   | 1376071 | Asthma |
| rs7964087   | 12 | 56915541 | G | A | 0.1179 | -0.0434 | 0.0073 | 3.17E-09 | -5.9227  | 1376071 | Asthma |
| rs17119149  | 12 | 56916301 | A | G | 0.1179 | -0.0435 | 0.0073 | 2.98E-09 | -5.9328  | 1376071 | Asthma |
| rs10876953  | 12 | 56916418 | A | T | 0.5166 | 0.0308  | 0.0047 | 7.20E-11 | 6.5164   | 1376071 | Asthma |
| rs10876955  | 12 | 56924542 | A | G | 0.1186 | -0.0446 | 0.0073 | 1.07E-09 | -6.0980  | 1376071 | Asthma |
| rs10876956  | 12 | 56924947 | C | A | 0.1181 | -0.0445 | 0.0073 | 1.26E-09 | -6.0727  | 1376071 | Asthma |
| rs11172064  | 12 | 56925243 | G | A | 0.1186 | -0.0446 | 0.0073 | 1.12E-09 | -6.0913  | 1376071 | Asthma |
| rs11172065  | 12 | 56925442 | G | A | 0.1186 | -0.0446 | 0.0073 | 1.09E-09 | -6.0956  | 1376071 | Asthma |
| rs11172066  | 12 | 56925707 | T | A | 0.1185 | -0.0444 | 0.0073 | 1.35E-09 | -6.0615  | 1376071 | Asthma |
| rs844469    | 12 | 56926026 | C | T | 0.2866 | -0.0322 | 0.0053 | 1.75E-09 | -6.0190  | 1316443 | Asthma |
| rs11172067  | 12 | 56926834 | C | T | 0.0770 | -0.0731 | 0.0091 | 1.32E-15 | -7.9928  | 1376071 | Asthma |
| rs7296999   | 12 | 56927428 | T | C | 0.0770 | -0.0733 | 0.0091 | 9.90E-16 | -8.0280  | 1376071 | Asthma |
| rs7297019   | 12 | 56927487 | G | C | 0.0764 | -0.0726 | 0.0092 | 2.08E-15 | -7.9365  | 1376071 | Asthma |
| rs1872436   | 12 | 56928708 | T | C | 0.1709 | -0.0378 | 0.0064 | 3.02E-09 | -5.9304  | 1376071 | Asthma |
| rs11172068  | 12 | 56929069 | A | G | 0.0764 | -0.0720 | 0.0092 | 3.69E-15 | -7.8652  | 1376071 | Asthma |
| rs840161    | 12 | 56929739 | A | G | 0.3883 | 0.0343  | 0.0050 | 6.94E-12 | 6.8589   | 1316443 | Asthma |
| rs840160    | 12 | 56930712 | C | T | 0.1715 | -0.0380 | 0.0064 | 2.33E-09 | -5.9729  | 1376071 | Asthma |
| rs11172069  | 12 | 56930729 | G | T | 0.0768 | -0.0722 | 0.0092 | 3.20E-15 | -7.8828  | 1376071 | Asthma |
| rs2629413   | 12 | 56931793 | C | G | 0.1714 | -0.0379 | 0.0065 | 4.36E-09 | -5.8699  | 1349938 | Asthma |
| rs864541    | 12 | 56931934 | G | A | 0.1620 | -0.0409 | 0.0068 | 1.42E-09 | -6.0534  | 1008051 | Asthma |
| rs863459    | 12 | 56932400 | G | T | 0.1715 | -0.0378 | 0.0064 | 2.72E-09 | -5.9479  | 1376071 | Asthma |
| rs719750    | 12 | 56932537 | T | C | 0.1716 | -0.0379 | 0.0064 | 2.47E-09 | -5.9635  | 1376071 | Asthma |
| rs719749    | 12 | 56932654 | G | A | 0.1715 | -0.0377 | 0.0064 | 3.12E-09 | -5.9254  | 1376071 | Asthma |
| rs747275    | 12 | 56934498 | A | G | 0.0777 | -0.0697 | 0.0091 | 1.62E-14 | -7.6780  | 1376071 | Asthma |
| rs61939617  | 12 | 56935623 | A | G | 0.0762 | -0.0746 | 0.0092 | 4.05E-16 | -8.1370  | 1376071 | Asthma |
| rs10506346  | 12 | 56937074 | A | G | 0.0394 | -0.0865 | 0.0141 | 7.82E-10 | -6.1484  | 1186521 | Asthma |
| rs11172071  | 12 | 56937487 | C | A | 0.1931 | -0.0391 | 0.0060 | 9.75E-11 | -6.4707  | 1376071 | Asthma |
| rs10506348  | 12 | 56937586 | G | A | 0.0840 | -0.0770 | 0.0087 | 5.56E-19 | -8.9005  | 1376071 | Asthma |
| rs11172072  | 12 | 56937807 | T | C | 0.1928 | -0.0390 | 0.0060 | 1.21E-10 | -6.4383  | 1376071 | Asthma |
| rs725956    | 12 | 56938152 | G | A | 0.0840 | -0.0775 | 0.0087 | 3.56E-19 | -8.9499  | 1376071 | Asthma |
| rs11829786  | 12 | 56938448 | T | C | 0.0848 | -0.0747 | 0.0108 | 3.85E-12 | -6.9427  | 1003385 | Asthma |
| rs61939618  | 12 | 56938573 | G | A | 0.0842 | -0.0760 | 0.0108 | 2.14E-12 | -7.0251  | 1003385 | Asthma |
| rs1813815   | 12 | 56939293 | C | T | 0.0812 | -0.0759 | 0.0110 | 5.91E-12 | -6.8819  | 1064845 | Asthma |
| rs1813814   | 12 | 56939330 | C | T | 0.0813 | -0.0756 | 0.0101 | 6.09E-14 | -7.5061  | 1133307 | Asthma |
| rs1813813   | 12 | 56939441 | T | A | 0.1919 | -0.0363 | 0.0067 | 4.80E-08 | -5.4586  | 1224666 | Asthma |
| rs1813812   | 12 | 56939611 | G | A | 0.0840 | -0.0769 | 0.0087 | 6.54E-19 | -8.8826  | 1376071 | Asthma |
| rs111873928 | 12 | 56939964 | G | A | 0.1174 | -0.0753 | 0.0114 | 3.82E-11 | -6.6109  | 505420  | Asthma |
| rs58009868  | 12 | 56942314 | C | G | 0.1987 | -0.0369 | 0.0060 | 5.86E-10 | -6.1941  | 1376071 | Asthma |
| rs59665366  | 12 | 56942603 | A | C | 0.1971 | -0.0366 | 0.0060 | 8.39E-10 | -6.1374  | 1376071 | Asthma |
| rs60101051  | 12 | 56944057 | C | T | 0.1984 | -0.0375 | 0.0060 | 2.85E-10 | -6.3067  | 1376071 | Asthma |
| rs57926126  | 12 | 56944892 | A | G | 0.1987 | -0.0369 | 0.0059 | 5.44E-10 | -6.2060  | 1376071 | Asthma |
| rs61939622  | 12 | 56946647 | C | T | 0.0826 | -0.0778 | 0.0087 | 4.24E-19 | -8.9305  | 1376071 | Asthma |
| rs1825514   | 12 | 56948012 | T | G | 0.1987 | -0.0367 | 0.0059 | 6.44E-10 | -6.1791  | 1376071 | Asthma |
| rs1072669   | 12 | 56948404 | G | A | 0.1988 | -0.0365 | 0.0059 | 7.74E-10 | -6.1501  | 1376071 | Asthma |
| rs1601405   | 12 | 56949379 | T | G | 0.1972 | -0.0368 | 0.0060 | 6.56E-10 | -6.1765  | 1376071 | Asthma |
| rs10876960  | 12 | 56950040 | A | G | 0.1987 | -0.0365 | 0.0059 | 7.78E-10 | -6.1494  | 1376071 | Asthma |
| rs7134373   | 12 | 56950093 | C | G | 0.0826 | -0.0774 | 0.0087 | 6.62E-19 | -8.8811  | 1376071 | Asthma |
| rs901069    | 12 | 56952595 | A | G | 0.1972 | -0.0370 | 0.0060 | 5.82E-10 | -6.1953  | 1376071 | Asthma |
| rs4319546   | 12 | 56953044 | T | C | 0.2662 | 0.0341  | 0.0055 | 4.96E-10 | 6.2206   | 1376071 | Asthma |
| rs3782331   | 12 | 56953506 | T | C | 0.1973 | -0.0370 | 0.0060 | 5.60E-10 | -6.2013  | 1376071 | Asthma |
| rs7314151   | 12 | 56954102 | C | G | 0.1972 | -0.0369 | 0.0060 | 6.47E-10 | -6.1784  | 1376071 | Asthma |
| rs7314262   | 12 | 56954142 | A | G | 0.1972 | -0.0369 | 0.0060 | 5.90E-10 | -6.1930  | 1376071 | Asthma |
| rs7958413   | 12 | 56956410 | C | A | 0.0797 | -0.0771 | 0.0088 | 2.91E-18 | -8.7148  | 1376071 | Asthma |
| rs11524050  | 12 | 56960730 | A | G | 0.0780 | -0.0787 | 0.0090 | 1.41E-18 | -8.7964  | 1376071 | Asthma |
| rs11172076  | 12 | 56966190 | T | C | 0.1913 | -0.0389 | 0.0061 | 2.35E-10 | -6.3369  | 1316443 | Asthma |
| rs1843314   | 12 | 56968638 | A | G | 0.3808 | 0.0320  | 0.0049 | 7.99E-11 | 6.5007   | 1376071 | Asthma |
| rs7132082   | 12 | 56972426 | G | A | 0.3844 | 0.0295  | 0.0054 | 3.74E-08 | 5.5027   | 1224666 | Asthma |
| rs4759042   | 12 | 56983563 | T | C | 0.3767 | 0.0310  | 0.0049 | 2.78E-10 | 6.3106   | 1376071 | Asthma |
| rs12370257  | 12 | 56991503 | A | G | 0.0790 | -0.0821 | 0.0089 | 3.94E-20 | -9.1896  | 1376071 | Asthma |
| rs3741578   | 12 | 57000851 | C | G | 0.0786 | -0.0807 | 0.0090 | 2.71E-19 | -8.9799  | 1376071 | Asthma |
| rs4759272   | 12 | 57044874 | G | T | 0.2858 | 0.0316  | 0.0055 | 7.95E-09 | 5.7695   | 1316443 | Asthma |
| rs324021    | 12 | 57052061 | C | A | 0.4771 | 0.0301  | 0.0047 | 1.97E-10 | 6.3637   | 1376071 | Asthma |
| rs11172086  | 12 | 57055423 | T | C | 0.0792 | -0.0827 | 0.0090 | 2.62E-20 | -9.2334  | 1376071 | Asthma |
| rs1044931   | 12 | 57056027 | T | C | 0.4770 | 0.0301  | 0.0047 | 1.91E-10 | 6.3682   | 1376071 | Asthma |
| rs61937566  | 12 | 57074908 | C | T | 0.4780 | 0.0313  | 0.0048 | 9.28E-11 | 6.4784   | 1316443 | Asthma |
| rs324020    | 12 | 57092250 | C | A | 0.4739 | 0.0339  | 0.0048 | 2.66E-12 | 6.9950   | 1316443 | Asthma |
| rs1059513   | 12 | 57095926 | C | T | 0.0939 | -0.0914 | 0.0083 | 2.80E-28 | -11.0278 | 1376071 | Asthma |
| rs703817    | 12 | 57096045 | T | C | 0.5337 | 0.0422  | 0.0048 | 2.77E-18 | 8.7203   | 1316443 | Asthma |
| rs3024971   | 12 | 57099944 | G | T | 0.0932 | -0.0914 | 0.0083 | 6.49E-28 | -10.9521 | 1376071 | Asthma |
| rs703816    | 12 | 57103222 | C | T | 0.4669 | 0.0483  | 0.0049 | 4.38E-23 | 9.8949   | 1316443 | Asthma |
| rs324011    | 12 | 57108399 | T | C | 0.4486 | 0.0466  | 0.0048 | 1.60E-22 | 9.7646   | 1376071 | Asthma |

|            |    |          |   |   |        |         |        |          |         |         |        |
|------------|----|----------|---|---|--------|---------|--------|----------|---------|---------|--------|
| rs324012   | 12 | 57109198 | T | C | 0.4848 | 0.0414  | 0.0048 | 1.32E-17 | 8.5423  | 1316443 | Asthma |
| rs167769   | 12 | 57109992 | T | C | 0.4331 | 0.0479  | 0.0048 | 1.69E-23 | 9.9896  | 1376071 | Asthma |
| rs3001427  | 12 | 57114866 | T | G | 0.4381 | 0.0484  | 0.0049 | 6.05E-23 | 9.8625  | 1316443 | Asthma |
| rs3001426  | 12 | 57115272 | C | T | 0.4874 | 0.0430  | 0.0049 | 8.39E-19 | 8.8547  | 1316443 | Asthma |
| rs3122929  | 12 | 57115319 | T | C | 0.4382 | 0.0486  | 0.0049 | 4.49E-23 | 9.8925  | 1316443 | Asthma |
| rs3001425  | 12 | 57115786 | T | C | 0.4385 | 0.0487  | 0.0049 | 3.16E-23 | 9.9275  | 1316443 | Asthma |
| rs324014   | 12 | 57116526 | C | T | 0.4874 | 0.0428  | 0.0048 | 1.10E-18 | 8.8242  | 1316443 | Asthma |
| rs61937568 | 12 | 57117002 | C | G | 0.0857 | -0.0686 | 0.0088 | 5.98E-15 | -7.8044 | 1316443 | Asthma |
| rs12312693 | 12 | 57117951 | C | T | 0.4830 | 0.0420  | 0.0048 | 4.39E-18 | 8.6682  | 1316443 | Asthma |
| rs12368672 | 12 | 57118687 | G | C | 0.4422 | 0.0473  | 0.0049 | 4.57E-22 | 9.6575  | 1316443 | Asthma |
| rs11172106 | 12 | 57119092 | G | C | 0.4828 | 0.0422  | 0.0048 | 2.93E-18 | 8.7142  | 1316443 | Asthma |
| rs12322902 | 12 | 57120083 | G | A | 0.4567 | 0.0410  | 0.0054 | 1.89E-14 | 7.6577  | 1160365 | Asthma |
| rs12309413 | 12 | 57120096 | G | C | 0.4610 | 0.0483  | 0.0065 | 1.01E-13 | 7.4392  | 938666  | Asthma |
| rs10876963 | 12 | 57120771 | C | T | 0.4512 | 0.0364  | 0.0048 | 2.25E-14 | 7.6353  | 1376071 | Asthma |
| rs12298170 | 12 | 57121580 | G | A | 0.4512 | 0.0367  | 0.0048 | 1.41E-14 | 7.6957  | 1376071 | Asthma |
| rs11172110 | 12 | 57121986 | C | T | 0.4544 | 0.0370  | 0.0052 | 1.29E-12 | 7.0957  | 1224666 | Asthma |
| rs11172111 | 12 | 57122021 | G | T | 0.4511 | 0.0369  | 0.0048 | 9.92E-15 | 7.7403  | 1376071 | Asthma |
| rs10467124 | 12 | 57125911 | C | G | 0.4509 | 0.0366  | 0.0048 | 1.57E-14 | 7.6820  | 1376071 | Asthma |
| rs73120411 | 12 | 57126043 | T | C | 0.4092 | 0.0425  | 0.0049 | 1.88E-18 | 8.7643  | 1376071 | Asthma |
| rs35140931 | 12 | 57130316 | G | T | 0.0935 | -0.0605 | 0.0081 | 6.97E-14 | -7.4884 | 1376071 | Asthma |
| rs35616842 | 12 | 57130325 | C | T | 0.1230 | -0.0510 | 0.0073 | 3.47E-12 | -6.9570 | 1316443 | Asthma |
| rs4759275  | 12 | 57131973 | A | G | 0.4200 | 0.0363  | 0.0052 | 2.27E-12 | 7.0169  | 948423  | Asthma |
| rs4759276  | 12 | 57132863 | A | G | 0.3857 | 0.0297  | 0.0052 | 1.48E-08 | 5.6638  | 948423  | Asthma |
| rs11172113 | 12 | 57133500 | C | T | 0.4274 | 0.0263  | 0.0048 | 3.68E-08 | 5.5055  | 1376071 | Asthma |
| rs4257011  | 12 | 57134414 | A | G | 0.3649 | 0.0331  | 0.0049 | 2.37E-11 | 6.6814  | 1376071 | Asthma |
| rs10747776 | 12 | 57134896 | A | G | 0.3652 | 0.0329  | 0.0050 | 3.13E-11 | 6.6404  | 1376071 | Asthma |
| rs11172114 | 12 | 57135660 | T | C | 0.3691 | 0.0328  | 0.0049 | 3.39E-11 | 6.6284  | 1376071 | Asthma |
| rs17547610 | 12 | 57136558 | A | C | 0.1519 | -0.0534 | 0.0067 | 1.37E-15 | -7.9881 | 1316443 | Asthma |
| rs4759044  | 12 | 57136887 | C | T | 0.4526 | 0.0358  | 0.0049 | 2.32E-13 | 7.3287  | 1316443 | Asthma |
| rs10876964 | 12 | 57137031 | C | T | 0.3691 | 0.0325  | 0.0049 | 4.53E-11 | 6.5857  | 1376071 | Asthma |
| rs10876965 | 12 | 57137667 | G | A | 0.3691 | 0.0326  | 0.0049 | 3.83E-11 | 6.6105  | 1376071 | Asthma |
| rs4367982  | 12 | 57137849 | G | A | 0.3799 | 0.0352  | 0.0053 | 4.78E-11 | 6.5776  | 1219993 | Asthma |
| rs1385526  | 12 | 57138966 | C | G | 0.3680 | 0.0325  | 0.0049 | 4.53E-11 | 6.5855  | 1376071 | Asthma |
| rs4759277  | 12 | 57139907 | A | C | 0.3750 | 0.0316  | 0.0049 | 1.14E-10 | 6.4473  | 1376071 | Asthma |
| rs1466535  | 12 | 57140687 | A | G | 0.3690 | 0.0322  | 0.0049 | 6.24E-11 | 6.5379  | 1376071 | Asthma |
| rs4759045  | 12 | 57140858 | A | G | 0.3689 | 0.0323  | 0.0049 | 5.48E-11 | 6.5573  | 1376071 | Asthma |
| rs1799737  | 12 | 57141129 | A | G | 0.3690 | 0.0326  | 0.0049 | 3.81E-11 | 6.6114  | 1376071 | Asthma |
| rs1799986  | 12 | 57141483 | T | C | 0.1456 | -0.0536 | 0.0073 | 2.14E-13 | -7.3397 | 1186521 | Asthma |
| rs11172124 | 12 | 57201172 | A | G | 0.2566 | 0.0307  | 0.0054 | 1.34E-08 | 5.6807  | 1376071 | Asthma |
| rs73120022 | 12 | 57219997 | A | G | 0.2539 | 0.0309  | 0.0056 | 2.80E-08 | 5.5533  | 1316443 | Asthma |
| rs3847800  | 12 | 94152637 | A | G | 0.1668 | -0.0361 | 0.0065 | 3.43E-08 | -5.5181 | 1316443 | Asthma |
| rs10745677 | 12 | 94154273 | T | C | 0.1667 | -0.0358 | 0.0065 | 4.41E-08 | -5.4736 | 1316443 | Asthma |
| rs11107420 | 12 | 94161037 | A | G | 0.1433 | -0.0389 | 0.0070 | 2.33E-08 | -5.5859 | 1316443 | Asthma |
| rs3847803  | 12 | 94164800 | C | T | 0.1323 | -0.0452 | 0.0072 | 3.26E-10 | -6.2859 | 1316443 | Asthma |
| rs3858608  | 12 | 94165632 | C | G | 0.1384 | -0.0445 | 0.0071 | 4.10E-10 | -6.2502 | 1316443 | Asthma |
| rs2885259  | 12 | 94165937 | T | G | 0.1387 | -0.0448 | 0.0071 | 2.64E-10 | -6.3187 | 1316443 | Asthma |
| rs2361357  | 12 | 94167771 | C | T | 0.1370 | -0.0456 | 0.0071 | 1.49E-10 | -6.4063 | 1316443 | Asthma |
| rs10732654 | 12 | 94168644 | A | G | 0.1379 | -0.0459 | 0.0071 | 1.07E-10 | -6.4562 | 1316443 | Asthma |
| rs2361358  | 12 | 94169026 | G | A | 0.1408 | -0.0450 | 0.0071 | 1.96E-10 | -6.3645 | 1316443 | Asthma |
| rs2361359  | 12 | 94169099 | C | G | 0.1371 | -0.0458 | 0.0071 | 1.17E-10 | -6.4437 | 1316443 | Asthma |
| rs3843642  | 12 | 94169862 | C | T | 0.1379 | -0.0460 | 0.0071 | 8.69E-11 | -6.4881 | 1316443 | Asthma |
| rs3847804  | 12 | 94172522 | C | T | 0.2042 | -0.0338 | 0.0059 | 1.28E-08 | -5.6892 | 1376071 | Asthma |
| rs3912399  | 12 | 94172816 | C | T | 0.2005 | -0.0342 | 0.0060 | 9.29E-09 | -5.7432 | 1376071 | Asthma |
| rs4761466  | 12 | 94175584 | T | G | 0.1290 | -0.0418 | 0.0071 | 3.66E-09 | -5.8986 | 1376071 | Asthma |
| rs3847811  | 12 | 94187358 | A | G | 0.1432 | -0.0406 | 0.0068 | 2.00E-09 | -5.9982 | 1376071 | Asthma |
| rs7134784  | 12 | 94188701 | T | C | 0.1424 | -0.0408 | 0.0068 | 1.70E-09 | -6.0239 | 1376071 | Asthma |
| rs10777584 | 12 | 94189373 | C | G | 0.2088 | -0.0343 | 0.0059 | 4.44E-09 | -5.8670 | 1376071 | Asthma |
| rs7977516  | 12 | 94190901 | G | T | 0.1424 | -0.0410 | 0.0068 | 1.42E-09 | -6.0533 | 1376071 | Asthma |
| rs10777585 | 12 | 94192937 | A | G | 0.2089 | -0.0346 | 0.0059 | 3.23E-09 | -5.9195 | 1376071 | Asthma |
| rs10745679 | 12 | 94195211 | A | G | 0.1421 | -0.0418 | 0.0068 | 6.98E-10 | -6.1667 | 1376071 | Asthma |
| rs3912393  | 12 | 94200259 | A | G | 0.4442 | -0.0272 | 0.0048 | 1.16E-08 | -5.7053 | 1376071 | Asthma |
| rs10859685 | 12 | 94200861 | A | C | 0.4442 | -0.0272 | 0.0048 | 1.15E-08 | -5.7070 | 1376071 | Asthma |
| rs4761592  | 12 | 94202054 | T | C | 0.1419 | -0.0420 | 0.0068 | 5.70E-10 | -6.1985 | 1376071 | Asthma |
| rs3912397  | 12 | 94203186 | G | A | 0.1419 | -0.0420 | 0.0068 | 5.78E-10 | -6.1965 | 1376071 | Asthma |
| rs7979879  | 12 | 94204012 | A | G | 0.1420 | -0.0420 | 0.0068 | 6.17E-10 | -6.1861 | 1376071 | Asthma |
| rs7135586  | 12 | 94206166 | T | G | 0.1418 | -0.0420 | 0.0068 | 6.26E-10 | -6.1837 | 1376071 | Asthma |
| rs7961712  | 12 | 94211187 | G | A | 0.1418 | -0.0421 | 0.0068 | 5.68E-10 | -6.1990 | 1376071 | Asthma |
| rs7953000  | 12 | 94214733 | C | G | 0.4753 | -0.0298 | 0.0048 | 7.47E-10 | -6.1558 | 1316443 | Asthma |
| rs7953001  | 12 | 94214737 | C | T | 0.4753 | -0.0298 | 0.0048 | 7.49E-10 | -6.1554 | 1316443 | Asthma |
| rs7298918  | 12 | 94217236 | C | T | 0.2650 | -0.0327 | 0.0054 | 1.22E-09 | -6.0776 | 1376071 | Asthma |
| rs4761593  | 12 | 94217308 | C | T | 0.2654 | -0.0329 | 0.0054 | 9.94E-10 | -6.1104 | 1376071 | Asthma |
| rs5005507  | 12 | 94218132 | G | C | 0.2650 | -0.0330 | 0.0054 | 8.83E-10 | -6.1293 | 1376071 | Asthma |
| rs11107457 | 12 | 94220838 | C | G | 0.2617 | -0.0343 | 0.0055 | 5.83E-10 | -6.1950 | 1316443 | Asthma |
| rs10745680 | 12 | 94221051 | A | G | 0.2620 | -0.0338 | 0.0055 | 1.01E-09 | -6.1079 | 1316443 | Asthma |

|            |    |           |   |   |        |         |        |          |         |         |        |
|------------|----|-----------|---|---|--------|---------|--------|----------|---------|---------|--------|
| rs1077586  | 12 | 94221201  | C | T | 0.4733 | -0.0294 | 0.0049 | 1.52E-09 | -6.0418 | 1316443 | Asthma |
| rs10859687 | 12 | 94221315  | C | A | 0.4559 | -0.0285 | 0.0049 | 4.53E-09 | -5.8636 | 1316443 | Asthma |
| rs10859688 | 12 | 94221344  | A | G | 0.4560 | -0.0284 | 0.0049 | 5.48E-09 | -5.8320 | 1316443 | Asthma |
| rs4275659  | 12 | 122963381 | T | C | 0.2889 | -0.0318 | 0.0054 | 3.15E-09 | -5.9237 | 1316443 | Asthma |
| rs4148856  | 12 | 122966218 | G | C | 0.2169 | -0.0360 | 0.0060 | 1.46E-09 | -6.0487 | 1316443 | Asthma |
| rs61955196 | 12 | 122966471 | G | C | 0.2941 | -0.0311 | 0.0053 | 5.36E-09 | -5.8358 | 1316443 | Asthma |
| rs7296418  | 12 | 122973072 | C | T | 0.2898 | -0.0295 | 0.0052 | 1.65E-08 | -5.6456 | 1376071 | Asthma |
| rs883562   | 12 | 122976172 | C | G | 0.2809 | -0.0328 | 0.0057 | 7.13E-09 | -5.7879 | 948423  | Asthma |
| rs883563   | 12 | 122976276 | A | G | 0.2098 | -0.0355 | 0.0061 | 6.27E-09 | -5.8094 | 1008051 | Asthma |
| rs884956   | 12 | 122976415 | T | C | 0.2904 | -0.0308 | 0.0053 | 8.83E-09 | -5.7519 | 1316443 | Asthma |
| rs3759115  | 12 | 122979732 | T | C | 0.2907 | -0.0309 | 0.0053 | 7.26E-09 | -5.7848 | 1316443 | Asthma |
| rs55742290 | 12 | 122981564 | C | T | 0.2912 | -0.0313 | 0.0053 | 4.79E-09 | -5.8542 | 1316443 | Asthma |
| rs3741530  | 12 | 122985100 | G | T | 0.2914 | -0.0311 | 0.0053 | 5.96E-09 | -5.8177 | 1316443 | Asthma |
| rs12811109 | 12 | 122986547 | A | G | 0.2049 | -0.0339 | 0.0060 | 1.23E-08 | -5.6950 | 1376071 | Asthma |
| rs1463877  | 12 | 122988707 | T | C | 0.2019 | -0.0367 | 0.0062 | 3.36E-09 | -5.9132 | 1008051 | Asthma |
| rs7135296  | 12 | 122992039 | G | A | 0.2919 | -0.0312 | 0.0053 | 4.97E-09 | -5.8482 | 1316443 | Asthma |
| rs937564   | 12 | 122992764 | T | C | 0.2138 | -0.0342 | 0.0059 | 8.31E-09 | -5.7621 | 1349938 | Asthma |
| rs1984658  | 12 | 122998879 | G | A | 0.2918 | -0.0314 | 0.0053 | 4.12E-09 | -5.8793 | 1316443 | Asthma |
| rs883263   | 12 | 123000641 | A | G | 0.2141 | -0.0346 | 0.0058 | 3.21E-09 | -5.9206 | 1376071 | Asthma |
| rs28755851 | 12 | 123001735 | A | T | 0.2907 | -0.0309 | 0.0053 | 7.56E-09 | -5.7779 | 1316443 | Asthma |
| rs7305511  | 12 | 123013706 | G | T | 0.2928 | -0.0320 | 0.0053 | 2.03E-09 | -5.9957 | 1316443 | Asthma |
| rs12425850 | 12 | 123017425 | T | C | 0.2908 | -0.0318 | 0.0053 | 2.62E-09 | -5.9539 | 1316443 | Asthma |
| rs12425009 | 12 | 123017497 | C | T | 0.2935 | -0.0330 | 0.0057 | 8.13E-09 | -5.7658 | 1186521 | Asthma |
| rs1630820  | 12 | 123032370 | C | G | 0.2211 | -0.0335 | 0.0058 | 5.92E-09 | -5.8188 | 1376071 | Asthma |
| rs641760   | 12 | 123034319 | T | C | 0.2137 | -0.0344 | 0.0058 | 4.01E-09 | -5.8838 | 1376071 | Asthma |
| rs17884869 | 12 | 123034565 | A | G | 0.0353 | 0.0784  | 0.0140 | 2.10E-08 | 5.6040  | 1359430 | Asthma |
| rs11613937 | 12 | 123035524 | C | T | 0.2953 | -0.0326 | 0.0053 | 9.62E-10 | -6.1157 | 1316443 | Asthma |
| rs520088   | 12 | 123037603 | C | G | 0.2143 | -0.0344 | 0.0058 | 3.93E-09 | -5.8868 | 1376071 | Asthma |
| rs655293   | 12 | 123043858 | G | A | 0.2146 | -0.0343 | 0.0058 | 4.45E-09 | -5.8663 | 1376071 | Asthma |
| rs11608811 | 12 | 123044509 | A | G | 0.2910 | -0.0313 | 0.0053 | 4.62E-09 | -5.8602 | 1316443 | Asthma |
| rs71444568 | 12 | 123048692 | A | G | 0.2062 | -0.0341 | 0.0059 | 9.23E-09 | -5.7443 | 1376071 | Asthma |
| rs10773921 | 12 | 123057059 | C | T | 0.2919 | -0.0304 | 0.0052 | 5.81E-09 | -5.8223 | 1376071 | Asthma |
| rs7957096  | 12 | 123060331 | A | G | 0.2909 | -0.0313 | 0.0053 | 4.75E-09 | -5.8557 | 1316443 | Asthma |
| rs585522   | 12 | 123066266 | A | G | 0.2210 | -0.0337 | 0.0058 | 5.01E-09 | -5.8468 | 1316443 | Asthma |
| rs1260294  | 12 | 123075742 | C | T | 0.2053 | -0.0340 | 0.0059 | 1.09E-08 | -5.7158 | 1376071 | Asthma |
| rs4148862  | 12 | 123084072 | A | C | 0.2899 | -0.0304 | 0.0052 | 6.22E-09 | -5.8106 | 1376071 | Asthma |
| rs4148863  | 12 | 123084828 | A | G | 0.2908 | -0.0302 | 0.0052 | 7.58E-09 | -5.7775 | 1376071 | Asthma |
| rs10848428 | 12 | 123087948 | C | T | 0.2903 | -0.0300 | 0.0052 | 9.96E-09 | -5.7313 | 1376071 | Asthma |
| rs1727307  | 12 | 123091195 | A | G | 0.2891 | -0.0311 | 0.0052 | 2.59E-09 | -5.9554 | 1376071 | Asthma |
| rs1790094  | 12 | 123102141 | T | C | 0.2901 | -0.0316 | 0.0054 | 3.60E-09 | -5.9019 | 1316443 | Asthma |
| rs1617156  | 12 | 123105618 | T | C | 0.2150 | -0.0354 | 0.0058 | 1.22E-09 | -6.0781 | 1376071 | Asthma |
| rs1790106  | 12 | 123107049 | G | T | 0.2919 | -0.0305 | 0.0052 | 5.15E-09 | -5.8421 | 1376071 | Asthma |
| rs7132277  | 12 | 123108835 | T | C | 0.1952 | -0.0343 | 0.0061 | 1.75E-08 | -5.6349 | 1376071 | Asthma |
| rs7299943  | 12 | 123108938 | A | T | 0.2038 | -0.0350 | 0.0060 | 4.34E-09 | -5.8708 | 1376071 | Asthma |
| rs949143   | 12 | 123110616 | G | A | 0.2919 | -0.0305 | 0.0052 | 5.33E-09 | -5.8366 | 1376071 | Asthma |
| rs7975763  | 12 | 123119506 | T | C | 0.2095 | -0.0348 | 0.0059 | 3.51E-09 | -5.9058 | 1376071 | Asthma |
| rs1790121  | 12 | 123119945 | G | A | 0.2916 | -0.0307 | 0.0052 | 4.08E-09 | -5.8809 | 1376071 | Asthma |
| rs1790122  | 12 | 123122192 | G | A | 0.2912 | -0.0309 | 0.0052 | 3.41E-09 | -5.9108 | 1376071 | Asthma |
| rs1790120  | 12 | 123129018 | A | C | 0.2070 | -0.0346 | 0.0059 | 5.11E-09 | -5.8435 | 1376071 | Asthma |
| rs2510885  | 12 | 123130266 | G | C | 0.2187 | -0.0347 | 0.0058 | 2.20E-09 | -5.9821 | 1376071 | Asthma |
| rs1790119  | 12 | 123130551 | C | A | 0.2226 | -0.0358 | 0.0062 | 7.21E-09 | -5.7861 | 1246149 | Asthma |
| rs1727294  | 12 | 123131967 | A | G | 0.2186 | -0.0349 | 0.0058 | 1.82E-09 | -6.0132 | 1376071 | Asthma |
| rs1727295  | 12 | 123132314 | G | A | 0.2853 | -0.0314 | 0.0053 | 2.75E-09 | -5.9457 | 1376071 | Asthma |
| rs1790116  | 12 | 123133997 | G | T | 0.2184 | -0.0349 | 0.0058 | 1.90E-09 | -6.0064 | 1376071 | Asthma |
| rs1727316  | 12 | 123134056 | C | T | 0.2187 | -0.0345 | 0.0058 | 2.82E-09 | -5.9419 | 1376071 | Asthma |
| rs1727317  | 12 | 123134395 | T | C | 0.2089 | -0.0348 | 0.0059 | 4.09E-09 | -5.8807 | 1376071 | Asthma |
| rs1616131  | 12 | 123135291 | G | A | 0.2182 | -0.0348 | 0.0058 | 2.17E-09 | -5.9847 | 1376071 | Asthma |
| rs1616181  | 12 | 123135309 | T | A | 0.2182 | -0.0348 | 0.0058 | 2.16E-09 | -5.9852 | 1376071 | Asthma |
| rs1619561  | 12 | 123135721 | G | C | 0.2044 | -0.0376 | 0.0068 | 3.73E-08 | -5.5030 | 856646  | Asthma |
| rs1790115  | 12 | 123135723 | C | G | 0.2182 | -0.0361 | 0.0064 | 1.42E-08 | -5.6708 | 1224666 | Asthma |
| rs1727318  | 12 | 123136663 | T | C | 0.2053 | -0.0370 | 0.0062 | 1.92E-09 | -6.0041 | 1008051 | Asthma |
| rs2851441  | 12 | 123137662 | A | G | 0.2182 | -0.0347 | 0.0058 | 2.23E-09 | -5.9799 | 1376071 | Asthma |
| rs1611973  | 12 | 123138184 | C | G | 0.2914 | -0.0311 | 0.0052 | 2.99E-09 | -5.9323 | 1376071 | Asthma |
| rs2695482  | 12 | 123138627 | C | T | 0.2182 | -0.0348 | 0.0058 | 2.16E-09 | -5.9852 | 1376071 | Asthma |
| rs1106240  | 12 | 123142435 | C | T | 0.2095 | -0.0347 | 0.0059 | 4.29E-09 | -5.8728 | 1376071 | Asthma |
| rs1106241  | 12 | 123142469 | T | C | 0.2180 | -0.0349 | 0.0058 | 1.98E-09 | -5.9996 | 1376071 | Asthma |
| rs1569068  | 12 | 123147729 | G | A | 0.2176 | -0.0352 | 0.0058 | 1.30E-09 | -6.0669 | 1376071 | Asthma |
| rs1727302  | 12 | 123148383 | G | A | 0.2472 | -0.0303 | 0.0055 | 4.04E-08 | -5.4891 | 1376071 | Asthma |
| rs1727305  | 12 | 123148835 | T | C | 0.2805 | -0.0332 | 0.0055 | 2.11E-09 | -5.9895 | 1008051 | Asthma |
| rs1790090  | 12 | 123148877 | G | A | 0.2179 | -0.0351 | 0.0058 | 1.51E-09 | -6.0428 | 1376071 | Asthma |
| rs949142   | 12 | 123149496 | T | C | 0.2179 | -0.0351 | 0.0058 | 1.60E-09 | -6.0344 | 1376071 | Asthma |
| rs884548   | 12 | 123149575 | A | G | 0.2179 | -0.0351 | 0.0058 | 1.53E-09 | -6.0415 | 1376071 | Asthma |
| rs1790108  | 12 | 123152294 | A | G | 0.2188 | -0.0355 | 0.0058 | 9.74E-10 | -6.1138 | 1376071 | Asthma |
| rs1716184  | 12 | 123152962 | G | C | 0.2911 | -0.0313 | 0.0052 | 2.29E-09 | -5.9755 | 1376071 | Asthma |

|            |    |           |   |   |        |         |        |          |         |         |        |
|------------|----|-----------|---|---|--------|---------|--------|----------|---------|---------|--------|
| rs1790109  | 12 | 123153205 | C | G | 0.2182 | -0.0351 | 0.0058 | 1.43E-09 | -6.0520 | 1376071 | Asthma |
| rs1716185  | 12 | 123153523 | A | T | 0.2182 | -0.0352 | 0.0058 | 1.36E-09 | -6.0607 | 1376071 | Asthma |
| rs1627724  | 12 | 123154033 | T | A | 0.2182 | -0.0351 | 0.0058 | 1.48E-09 | -6.0468 | 1376071 | Asthma |
| rs1727315  | 12 | 123154383 | G | A | 0.2182 | -0.0351 | 0.0058 | 1.46E-09 | -6.0485 | 1376071 | Asthma |
| rs1727314  | 12 | 123156117 | C | A | 0.2182 | -0.0352 | 0.0058 | 1.35E-09 | -6.0610 | 1376071 | Asthma |
| rs1727313  | 12 | 123156306 | C | G | 0.2094 | -0.0349 | 0.0059 | 3.65E-09 | -5.8995 | 1376071 | Asthma |
| rs1051434  | 12 | 123156653 | C | T | 0.2912 | -0.0314 | 0.0052 | 1.97E-09 | -6.0002 | 1376071 | Asthma |
| rs2682429  | 12 | 123158408 | C | G | 0.2182 | -0.0352 | 0.0058 | 1.34E-09 | -6.0628 | 1376071 | Asthma |
| rs2695481  | 12 | 123158873 | T | C | 0.2182 | -0.0352 | 0.0058 | 1.38E-09 | -6.0576 | 1376071 | Asthma |
| rs2851438  | 12 | 123159142 | T | C | 0.2184 | -0.0351 | 0.0058 | 1.52E-09 | -6.0424 | 1376071 | Asthma |
| rs10744147 | 12 | 123159182 | A | G | 0.2097 | -0.0353 | 0.0059 | 2.25E-09 | -5.9785 | 1376071 | Asthma |
| rs1047158  | 12 | 123159509 | C | A | 0.2182 | -0.0352 | 0.0058 | 1.28E-09 | -6.0701 | 1376071 | Asthma |
| rs1051431  | 12 | 123161256 | G | A | 0.2182 | -0.0353 | 0.0058 | 1.27E-09 | -6.0708 | 1376071 | Asthma |
| rs1727296  | 12 | 123163178 | G | C | 0.2178 | -0.0350 | 0.0059 | 2.98E-09 | -5.9328 | 1349938 | Asthma |
| rs1727293  | 12 | 123163485 | C | T | 0.2911 | -0.0315 | 0.0052 | 1.90E-09 | -6.0060 | 1376071 | Asthma |
| rs1716165  | 12 | 123164334 | C | T | 0.2182 | -0.0351 | 0.0058 | 1.43E-09 | -6.0526 | 1376071 | Asthma |
| rs1617434  | 12 | 123164939 | A | G | 0.2098 | -0.0350 | 0.0059 | 3.03E-09 | -5.9302 | 1376071 | Asthma |
| rs1615350  | 12 | 123165788 | C | T | 0.2478 | -0.0303 | 0.0055 | 4.01E-08 | -5.4904 | 1376071 | Asthma |
| rs1618679  | 12 | 123166167 | A | G | 0.2182 | -0.0351 | 0.0058 | 1.49E-09 | -6.0451 | 1376071 | Asthma |
| rs1621194  | 12 | 123166471 | T | C | 0.2182 | -0.0351 | 0.0058 | 1.54E-09 | -6.0406 | 1376071 | Asthma |
| rs1716167  | 12 | 123166615 | A | G | 0.2182 | -0.0351 | 0.0058 | 1.53E-09 | -6.0416 | 1376071 | Asthma |
| rs1716168  | 12 | 123167419 | G | C | 0.2182 | -0.0350 | 0.0058 | 1.62E-09 | -6.0320 | 1376071 | Asthma |
| rs2682426  | 12 | 123169009 | C | T | 0.2161 | -0.0358 | 0.0058 | 9.11E-10 | -6.1243 | 1376071 | Asthma |
| rs2950537  | 12 | 123170231 | C | T | 0.2164 | -0.0351 | 0.0058 | 1.63E-09 | -6.0310 | 1376071 | Asthma |
| rs3018098  | 12 | 123170265 | T | C | 0.2164 | -0.0353 | 0.0058 | 1.43E-09 | -6.0516 | 1376071 | Asthma |
| rs1790097  | 12 | 123170502 | A | G | 0.2076 | -0.0349 | 0.0059 | 3.97E-09 | -5.8855 | 1376071 | Asthma |
| rs1716177  | 12 | 123170910 | C | T | 0.2164 | -0.0353 | 0.0058 | 1.46E-09 | -6.0493 | 1376071 | Asthma |
| rs1716176  | 12 | 123170920 | T | G | 0.2161 | -0.0352 | 0.0059 | 2.89E-09 | -5.9378 | 1349938 | Asthma |
| rs1790098  | 12 | 123170934 | A | C | 0.2161 | -0.0351 | 0.0059 | 3.06E-09 | -5.9284 | 1349938 | Asthma |
| rs1790100  | 12 | 123172178 | G | T | 0.2163 | -0.0352 | 0.0058 | 1.47E-09 | -6.0481 | 1376071 | Asthma |
| rs2049114  | 12 | 123172791 | T | C | 0.2097 | -0.0357 | 0.0059 | 1.30E-09 | -6.0679 | 1376071 | Asthma |
| rs1727309  | 12 | 123173711 | A | G | 0.2011 | -0.0355 | 0.0060 | 3.38E-09 | -5.9120 | 1376071 | Asthma |
| rs1716175  | 12 | 123173841 | A | T | 0.2097 | -0.0357 | 0.0059 | 1.30E-09 | -6.0678 | 1376071 | Asthma |
| rs1790123  | 12 | 123174995 | C | T | 0.2010 | -0.0355 | 0.0060 | 3.10E-09 | -5.9259 | 1376071 | Asthma |
| rs1727310  | 12 | 123175963 | A | G | 0.2009 | -0.0360 | 0.0060 | 2.15E-09 | -5.9860 | 1376071 | Asthma |
| rs1727311  | 12 | 123176169 | T | G | 0.2007 | -0.0356 | 0.0060 | 3.25E-09 | -5.9185 | 1376071 | Asthma |
| rs1716174  | 12 | 123176170 | T | C | 0.2008 | -0.0356 | 0.0060 | 3.15E-09 | -5.9234 | 1376071 | Asthma |
| rs1716173  | 12 | 123176174 | A | T | 0.2094 | -0.0358 | 0.0059 | 1.36E-09 | -6.0602 | 1376071 | Asthma |
| rs1790124  | 12 | 123178804 | G | A | 0.2164 | -0.0352 | 0.0058 | 1.59E-09 | -6.0354 | 1376071 | Asthma |
| rs1716164  | 12 | 123179113 | G | A | 0.2164 | -0.0352 | 0.0058 | 1.52E-09 | -6.0420 | 1376071 | Asthma |
| rs1727300  | 12 | 123179658 | C | T | 0.2164 | -0.0352 | 0.0058 | 1.53E-09 | -6.0410 | 1376071 | Asthma |
| rs2851447  | 12 | 123180566 | G | C | 0.2459 | -0.0308 | 0.0055 | 2.93E-08 | -5.5457 | 1376071 | Asthma |
| rs1790125  | 12 | 123180709 | C | T | 0.2098 | -0.0357 | 0.0059 | 1.33E-09 | -6.0643 | 1376071 | Asthma |
| rs1727306  | 12 | 123181148 | A | G | 0.2098 | -0.0357 | 0.0059 | 1.31E-09 | -6.0660 | 1376071 | Asthma |
| rs12229700 | 12 | 123182102 | G | A | 0.2907 | -0.0315 | 0.0052 | 1.76E-09 | -6.0189 | 1376071 | Asthma |
| rs10846478 | 12 | 123182401 | A | G | 0.2098 | -0.0356 | 0.0059 | 1.48E-09 | -6.0461 | 1376071 | Asthma |
| rs2851436  | 12 | 123182807 | G | T | 0.2098 | -0.0358 | 0.0059 | 1.23E-09 | -6.0759 | 1376071 | Asthma |
| rs1790105  | 12 | 123183403 | T | C | 0.2098 | -0.0357 | 0.0059 | 1.30E-09 | -6.0670 | 1376071 | Asthma |
| rs1616484  | 12 | 123183405 | A | G | 0.2907 | -0.0315 | 0.0052 | 1.91E-09 | -6.0054 | 1376071 | Asthma |
| rs1615694  | 12 | 123183475 | A | G | 0.2100 | -0.0354 | 0.0059 | 1.83E-09 | -6.0123 | 1376071 | Asthma |
| rs1790135  | 12 | 123184688 | C | T | 0.2459 | -0.0306 | 0.0055 | 3.51E-08 | -5.5138 | 1376071 | Asthma |
| rs1716159  | 12 | 123184921 | T | C | 0.2097 | -0.0356 | 0.0059 | 1.53E-09 | -6.0411 | 1376071 | Asthma |
| rs1716158  | 12 | 123184961 | A | G | 0.2097 | -0.0356 | 0.0059 | 1.54E-09 | -6.0397 | 1376071 | Asthma |
| rs1716157  | 12 | 123185926 | T | C | 0.2097 | -0.0355 | 0.0059 | 1.66E-09 | -6.0281 | 1376071 | Asthma |
| rs1716156  | 12 | 123186763 | T | C | 0.2097 | -0.0355 | 0.0059 | 1.72E-09 | -6.0225 | 1376071 | Asthma |
| rs10772995 | 12 | 123187214 | T | C | 0.2097 | -0.0355 | 0.0059 | 1.64E-09 | -6.0298 | 1376071 | Asthma |
| rs1790087  | 12 | 123188087 | T | C | 0.2097 | -0.0354 | 0.0059 | 1.91E-09 | -6.0051 | 1376071 | Asthma |
| rs1790088  | 12 | 123188711 | G | A | 0.2906 | -0.0312 | 0.0052 | 2.48E-09 | -5.9628 | 1376071 | Asthma |
| rs2947099  | 12 | 123189704 | G | A | 0.2165 | -0.0351 | 0.0058 | 1.80E-09 | -6.0155 | 1376071 | Asthma |
| rs2102949  | 12 | 123192216 | G | A | 0.2459 | -0.0305 | 0.0055 | 3.85E-08 | -5.4976 | 1376071 | Asthma |
| rs4460848  | 12 | 123193263 | A | G | 0.2459 | -0.0305 | 0.0055 | 3.86E-08 | -5.4974 | 1376071 | Asthma |
| rs1727286  | 12 | 123196016 | T | C | 0.2906 | -0.0310 | 0.0052 | 3.20E-09 | -5.9210 | 1376071 | Asthma |
| rs1790095  | 12 | 123196675 | G | A | 0.2164 | -0.0350 | 0.0058 | 2.01E-09 | -5.9971 | 1376071 | Asthma |
| rs11614406 | 12 | 123197849 | C | T | 0.2621 | -0.0349 | 0.0059 | 4.40E-09 | -5.8685 | 1224666 | Asthma |
| rs11610710 | 12 | 123198047 | G | A | 0.2904 | -0.0319 | 0.0053 | 2.02E-09 | -5.9963 | 1349938 | Asthma |
| rs1716182  | 12 | 123201580 | A | C | 0.2206 | -0.0356 | 0.0062 | 9.46E-09 | -5.7401 | 1246149 | Asthma |
| rs1402274  | 12 | 123201677 | T | C | 0.2163 | -0.0347 | 0.0058 | 2.77E-09 | -5.9447 | 1376071 | Asthma |
| rs2695479  | 12 | 123204839 | T | C | 0.2076 | -0.0345 | 0.0059 | 6.23E-09 | -5.8105 | 1376071 | Asthma |
| rs2695478  | 12 | 123204974 | C | T | 0.2076 | -0.0346 | 0.0059 | 5.76E-09 | -5.8236 | 1376071 | Asthma |
| rs1790129  | 12 | 123205350 | G | A | 0.2906 | -0.0312 | 0.0052 | 2.50E-09 | -5.9614 | 1376071 | Asthma |
| rs1727290  | 12 | 123207758 | T | C | 0.2164 | -0.0350 | 0.0058 | 1.98E-09 | -5.9997 | 1376071 | Asthma |
| rs1270594  | 12 | 123208418 | A | T | 0.2082 | -0.0356 | 0.0061 | 4.51E-09 | -5.8643 | 1316443 | Asthma |
| rs11057192 | 12 | 123208873 | T | C | 0.2160 | -0.0345 | 0.0059 | 5.74E-09 | -5.8241 | 1349938 | Asthma |
| rs2695476  | 12 | 123209659 | T | C | 0.2076 | -0.0343 | 0.0059 | 7.64E-09 | -5.7763 | 1376071 | Asthma |

|            |    |           |   |   |        |         |        |          |         |         |        |
|------------|----|-----------|---|---|--------|---------|--------|----------|---------|---------|--------|
| rs2682434  | 12 | 123210177 | C | T | 0.2164 | -0.0361 | 0.0060 | 1.46E-09 | -6.0485 | 1316443 | Asthma |
| rs10744148 | 12 | 123211371 | C | T | 0.2165 | -0.0362 | 0.0060 | 1.23E-09 | -6.0769 | 1316443 | Asthma |
| rs2682433  | 12 | 123212494 | A | G | 0.2071 | -0.0344 | 0.0059 | 6.63E-09 | -5.8000 | 1376071 | Asthma |
| rs10772996 | 12 | 123212984 | T | C | 0.2072 | -0.0407 | 0.0068 | 2.72E-09 | -5.9476 | 818501  | Asthma |
| rs1727325  | 12 | 123213785 | G | C | 0.2165 | -0.0363 | 0.0060 | 1.16E-09 | -6.0857 | 1316443 | Asthma |
| rs1790133  | 12 | 123213971 | T | G | 0.2171 | -0.0356 | 0.0064 | 2.52E-08 | -5.5722 | 1224666 | Asthma |
| rs1790132  | 12 | 123213972 | G | T | 0.2172 | -0.0356 | 0.0064 | 2.55E-08 | -5.5699 | 1224666 | Asthma |
| rs1727323  | 12 | 123214243 | T | C | 0.2165 | -0.0363 | 0.0060 | 1.21E-09 | -6.0791 | 1316443 | Asthma |
| rs1727322  | 12 | 123214973 | A | G | 0.2080 | -0.0355 | 0.0061 | 4.87E-09 | -5.8516 | 1316443 | Asthma |
| rs1716160  | 12 | 123215678 | C | T | 0.2165 | -0.0363 | 0.0060 | 1.11E-09 | -6.0924 | 1316443 | Asthma |
| rs1727320  | 12 | 123215929 | T | A | 0.2163 | -0.0359 | 0.0060 | 1.73E-09 | -6.0215 | 1316443 | Asthma |
| rs1790131  | 12 | 123216463 | G | T | 0.2164 | -0.0362 | 0.0060 | 1.32E-09 | -6.0655 | 1316443 | Asthma |
| rs1790130  | 12 | 123216723 | A | C | 0.2166 | -0.0362 | 0.0060 | 1.32E-09 | -6.0653 | 1316443 | Asthma |
| rs1727319  | 12 | 123216806 | T | C | 0.2461 | -0.0320 | 0.0057 | 1.76E-08 | -5.6340 | 1316443 | Asthma |
| rs2851451  | 12 | 123218556 | T | C | 0.2167 | -0.0362 | 0.0060 | 1.28E-09 | -6.0700 | 1316443 | Asthma |
| rs2682431  | 12 | 123218679 | T | A | 0.2032 | -0.0391 | 0.0064 | 7.69E-10 | -6.1513 | 948423  | Asthma |
| rs2851450  | 12 | 123218954 | C | T | 0.2167 | -0.0363 | 0.0060 | 1.22E-09 | -6.0772 | 1316443 | Asthma |
| rs2682430  | 12 | 123219034 | A | C | 0.2167 | -0.0363 | 0.0060 | 1.20E-09 | -6.0807 | 1316443 | Asthma |
| rs2695480  | 12 | 123220022 | C | T | 0.2083 | -0.0354 | 0.0061 | 5.27E-09 | -5.8386 | 1316443 | Asthma |
| rs1716178  | 12 | 123220051 | G | A | 0.2905 | -0.0325 | 0.0054 | 1.46E-09 | -6.0482 | 1316443 | Asthma |
| rs1790101  | 12 | 123220297 | T | C | 0.2167 | -0.0363 | 0.0060 | 1.23E-09 | -6.0759 | 1316443 | Asthma |
| rs1790102  | 12 | 123220343 | G | A | 0.2167 | -0.0363 | 0.0060 | 1.16E-09 | -6.0853 | 1316443 | Asthma |
| rs1630693  | 12 | 123220695 | A | G | 0.2167 | -0.0364 | 0.0060 | 1.07E-09 | -6.0993 | 1316443 | Asthma |
| rs1630905  | 12 | 123220783 | A | C | 0.2167 | -0.0363 | 0.0060 | 1.20E-09 | -6.0802 | 1316443 | Asthma |
| rs1626899  | 12 | 123223516 | A | G | 0.2167 | -0.0365 | 0.0060 | 9.47E-10 | -6.1182 | 1316443 | Asthma |
| rs1790104  | 12 | 123224862 | C | T | 0.2905 | -0.0326 | 0.0054 | 1.25E-09 | -6.0731 | 1316443 | Asthma |
| rs10846486 | 12 | 123225380 | G | A | 0.2167 | -0.0365 | 0.0060 | 9.79E-10 | -6.1129 | 1316443 | Asthma |
| rs1790096  | 12 | 123225817 | C | T | 0.2906 | -0.0327 | 0.0054 | 1.17E-09 | -6.0848 | 1316443 | Asthma |
| rs1626703  | 12 | 123226288 | A | C | 0.2658 | -0.0352 | 0.0055 | 2.14E-10 | -6.3508 | 1316443 | Asthma |
| rs2851435  | 12 | 123227869 | G | A | 0.2085 | -0.0359 | 0.0061 | 3.36E-09 | -5.9129 | 1316443 | Asthma |
| rs1716172  | 12 | 123228165 | G | T | 0.2211 | -0.0387 | 0.0059 | 5.33E-11 | -6.5616 | 1316443 | Asthma |
| rs1727334  | 12 | 123229689 | A | G | 0.2209 | -0.0383 | 0.0059 | 8.37E-11 | -6.4937 | 1316443 | Asthma |
| rs941306   | 12 | 123230566 | C | T | 0.2209 | -0.0383 | 0.0059 | 8.81E-11 | -6.4861 | 1316443 | Asthma |
| rs941305   | 12 | 123230719 | T | C | 0.2209 | -0.0384 | 0.0059 | 8.03E-11 | -6.5000 | 1316443 | Asthma |
| rs1716171  | 12 | 123231829 | C | T | 0.2209 | -0.0383 | 0.0059 | 8.42E-11 | -6.4930 | 1316443 | Asthma |
| rs1716170  | 12 | 123231966 | C | T | 0.2209 | -0.0382 | 0.0059 | 9.64E-11 | -6.4725 | 1316443 | Asthma |
| rs1716169  | 12 | 123232383 | A | T | 0.1999 | -0.0404 | 0.0064 | 2.66E-10 | -6.3172 | 948423  | Asthma |
| rs1619283  | 12 | 123232815 | A | G | 0.2851 | -0.0373 | 0.0057 | 4.36E-11 | -6.5912 | 948423  | Asthma |
| rs1727332  | 12 | 123233754 | C | T | 0.2507 | -0.0349 | 0.0056 | 5.33E-10 | -6.2090 | 1316443 | Asthma |
| rs1727331  | 12 | 123234332 | C | G | 0.2512 | -0.0353 | 0.0056 | 3.30E-10 | -6.2842 | 1316443 | Asthma |
| rs7304782  | 12 | 123234897 | G | A | 0.2507 | -0.0351 | 0.0056 | 3.77E-10 | -6.2636 | 1316443 | Asthma |
| rs7139321  | 12 | 123234981 | T | G | 0.3316 | -0.0302 | 0.0052 | 5.28E-09 | -5.8379 | 1316443 | Asthma |
| rs4759409  | 12 | 123235038 | G | C | 0.2208 | -0.0388 | 0.0059 | 4.66E-11 | -6.5814 | 1316443 | Asthma |
| rs10772997 | 12 | 123235333 | C | A | 0.2512 | -0.0352 | 0.0056 | 3.41E-10 | -6.2791 | 1316443 | Asthma |
| rs11057202 | 12 | 123236228 | G | T | 0.2513 | -0.0353 | 0.0056 | 3.39E-10 | -6.2798 | 1316443 | Asthma |
| rs10772998 | 12 | 123236630 | T | G | 0.2208 | -0.0389 | 0.0059 | 4.08E-11 | -6.6013 | 1316443 | Asthma |
| rs10744150 | 12 | 123237067 | A | C | 0.2513 | -0.0353 | 0.0056 | 3.16E-10 | -6.2908 | 1316443 | Asthma |
| rs10744151 | 12 | 123239188 | G | C | 0.2512 | -0.0355 | 0.0056 | 2.61E-10 | -6.3204 | 1316443 | Asthma |
| rs58809476 | 12 | 123240333 | T | C | 0.2113 | -0.0372 | 0.0059 | 2.40E-10 | -6.3335 | 1376071 | Asthma |
| rs12829456 | 12 | 123240848 | T | C | 0.2108 | -0.0372 | 0.0059 | 2.28E-10 | -6.3413 | 1376071 | Asthma |
| rs11057204 | 12 | 123241280 | T | C | 0.2209 | -0.0390 | 0.0059 | 3.62E-11 | -6.6190 | 1316443 | Asthma |
| rs11057205 | 12 | 123241407 | G | A | 0.2512 | -0.0354 | 0.0056 | 2.90E-10 | -6.3040 | 1316443 | Asthma |
| rs34841857 | 12 | 123241430 | C | T | 0.3319 | -0.0301 | 0.0052 | 6.18E-09 | -5.8119 | 1316443 | Asthma |
| rs10846487 | 12 | 123241587 | A | G | 0.2209 | -0.0390 | 0.0059 | 3.75E-11 | -6.6135 | 1316443 | Asthma |
| rs7313483  | 12 | 123242287 | C | T | 0.2209 | -0.0390 | 0.0059 | 3.78E-11 | -6.6125 | 1316443 | Asthma |
| rs1879379  | 12 | 123242896 | G | A | 0.3319 | -0.0300 | 0.0052 | 6.31E-09 | -5.8084 | 1316443 | Asthma |
| rs10772999 | 12 | 123243683 | G | A | 0.2513 | -0.0353 | 0.0056 | 3.17E-10 | -6.2905 | 1316443 | Asthma |
| rs12817892 | 12 | 123244155 | A | G | 0.2107 | -0.0372 | 0.0059 | 2.38E-10 | -6.3344 | 1376071 | Asthma |
| rs12818067 | 12 | 123244192 | A | G | 0.2110 | -0.0372 | 0.0059 | 2.36E-10 | -6.3359 | 1376071 | Asthma |
| rs7137286  | 12 | 123244721 | C | T | 0.2512 | -0.0355 | 0.0056 | 2.59E-10 | -6.3217 | 1316443 | Asthma |
| rs34341465 | 12 | 123245074 | A | G | 0.2111 | -0.0372 | 0.0059 | 2.35E-10 | -6.3367 | 1376071 | Asthma |
| rs11057206 | 12 | 123246283 | T | C | 0.2208 | -0.0387 | 0.0059 | 4.99E-11 | -6.5713 | 1316443 | Asthma |
| rs11057207 | 12 | 123246344 | T | G | 0.2512 | -0.0351 | 0.0056 | 3.86E-10 | -6.2596 | 1316443 | Asthma |
| rs11532322 | 12 | 123246876 | A | G | 0.2513 | -0.0350 | 0.0056 | 4.42E-10 | -6.2383 | 1316443 | Asthma |
| rs2337630  | 12 | 123248539 | A | T | 0.3318 | -0.0299 | 0.0052 | 6.92E-09 | -5.7929 | 1316443 | Asthma |
| rs2337631  | 12 | 123248777 | C | A | 0.3318 | -0.0298 | 0.0052 | 7.36E-09 | -5.7825 | 1316443 | Asthma |
| rs11057209 | 12 | 123249074 | A | G | 0.2512 | -0.0351 | 0.0056 | 4.04E-10 | -6.2525 | 1316443 | Asthma |
| rs11057210 | 12 | 123249252 | A | G | 0.2209 | -0.0387 | 0.0059 | 5.02E-11 | -6.5703 | 1316443 | Asthma |
| rs4268544  | 12 | 123250227 | T | G | 0.2209 | -0.0387 | 0.0059 | 5.51E-11 | -6.5566 | 1316443 | Asthma |
| rs1609520  | 12 | 123251390 | G | A | 0.2520 | -0.0355 | 0.0056 | 2.53E-10 | -6.3254 | 1316443 | Asthma |
| rs1568427  | 12 | 123254131 | A | G | 0.2514 | -0.0351 | 0.0056 | 3.82E-10 | -6.2612 | 1316443 | Asthma |
| rs1568428  | 12 | 123254329 | C | T | 0.3199 | -0.0317 | 0.0052 | 1.19E-09 | -6.0813 | 1316443 | Asthma |
| rs1879380  | 12 | 123254564 | A | G | 0.2110 | -0.0367 | 0.0059 | 4.04E-10 | -6.2527 | 1376071 | Asthma |
| rs10773001 | 12 | 123256653 | A | G | 0.2211 | -0.0383 | 0.0059 | 7.83E-11 | -6.5039 | 1316443 | Asthma |



|            |    |           |   |   |        |         |        |          |         |         |        |
|------------|----|-----------|---|---|--------|---------|--------|----------|---------|---------|--------|
| rs1969354  | 12 | 123257229 | T | C | 0.2211 | -0.0384 | 0.0059 | 7.50E-11 | -6.5105 | 1316443 | Asthma |
| rs1533703  | 12 | 123257546 | T | G | 0.2210 | -0.0381 | 0.0059 | 1.00E-10 | -6.4668 | 1316443 | Asthma |
| rs4759371  | 12 | 123258016 | T | C | 0.2212 | -0.0386 | 0.0059 | 6.06E-11 | -6.5421 | 1316443 | Asthma |
| rs10734900 | 12 | 123258898 | G | A | 0.2512 | -0.0349 | 0.0056 | 5.38E-10 | -6.2076 | 1316443 | Asthma |
| rs10734901 | 12 | 123258900 | G | A | 0.2513 | -0.0347 | 0.0056 | 6.48E-10 | -6.1782 | 1316443 | Asthma |
| rs4759415  | 12 | 123259127 | T | C | 0.2212 | -0.0383 | 0.0059 | 8.08E-11 | -6.4992 | 1316443 | Asthma |
| rs10732573 | 12 | 123259336 | G | C | 0.2516 | -0.0349 | 0.0056 | 5.11E-10 | -6.2158 | 1316443 | Asthma |
| rs10846489 | 12 | 123259380 | G | A | 0.3201 | -0.0318 | 0.0052 | 9.51E-10 | -6.1173 | 1316443 | Asthma |
| rs1980251  | 12 | 123260408 | G | A | 0.2516 | -0.0348 | 0.0056 | 5.51E-10 | -6.2039 | 1316443 | Asthma |
| rs1980252  | 12 | 123260631 | C | G | 0.2212 | -0.0382 | 0.0059 | 9.46E-11 | -6.4754 | 1316443 | Asthma |
| rs2337934  | 12 | 123260812 | A | G | 0.2210 | -0.0382 | 0.0059 | 8.80E-11 | -6.4862 | 1316443 | Asthma |
| rs6633     | 12 | 123261262 | T | G | 0.2111 | -0.0361 | 0.0059 | 7.42E-10 | -6.1567 | 1376071 | Asthma |
| rs4759416  | 12 | 123261810 | C | G | 0.2213 | -0.0379 | 0.0059 | 1.33E-10 | -6.4241 | 1316443 | Asthma |
| rs4759417  | 12 | 123261963 | C | T | 0.2213 | -0.0379 | 0.0059 | 1.24E-10 | -6.4348 | 1316443 | Asthma |
| rs10773002 | 12 | 123262414 | A | T | 0.2517 | -0.0344 | 0.0056 | 8.55E-10 | -6.1345 | 1316443 | Asthma |
| rs12824957 | 12 | 123265681 | C | T | 0.2111 | -0.0362 | 0.0059 | 7.02E-10 | -6.1656 | 1376071 | Asthma |
| rs4553407  | 12 | 123266201 | G | C | 0.3197 | -0.0310 | 0.0052 | 2.50E-09 | -5.9612 | 1316443 | Asthma |
| rs1402275  | 12 | 123266348 | A | G | 0.2212 | -0.0379 | 0.0059 | 1.33E-10 | -6.4235 | 1316443 | Asthma |
| rs10846491 | 12 | 123268945 | C | G | 0.2219 | -0.0374 | 0.0059 | 2.12E-10 | -6.3523 | 1316443 | Asthma |
| rs1109559  | 12 | 123273314 | G | A | 0.3194 | -0.0311 | 0.0052 | 2.26E-09 | -5.9776 | 1316443 | Asthma |
| rs7953929  | 12 | 123273688 | G | C | 0.2121 | -0.0355 | 0.0059 | 1.45E-09 | -6.0498 | 1376071 | Asthma |
| rs7303754  | 12 | 123277457 | G | A | 0.3094 | -0.0334 | 0.0055 | 1.44E-09 | -6.0505 | 948423  | Asthma |
| rs7306755  | 12 | 123283382 | A | G | 0.2008 | -0.0390 | 0.0062 | 3.41E-10 | -6.2789 | 1008051 | Asthma |
| rs11057238 | 12 | 123283424 | C | A | 0.3246 | -0.0311 | 0.0052 | 2.08E-09 | -5.9916 | 1316443 | Asthma |
| rs71444571 | 12 | 123286468 | A | G | 0.2140 | -0.0365 | 0.0059 | 4.49E-10 | -6.2360 | 1376071 | Asthma |
| rs9739070  | 12 | 123286485 | A | G | 0.2158 | -0.0371 | 0.0060 | 5.01E-10 | -6.2187 | 1316443 | Asthma |
| rs7974099  | 12 | 123286928 | A | G | 0.3242 | -0.0312 | 0.0052 | 1.87E-09 | -6.0092 | 1316443 | Asthma |
| rs12582153 | 12 | 123298319 | C | T | 0.3243 | -0.0310 | 0.0052 | 2.25E-09 | -5.9786 | 1316443 | Asthma |
| rs12821431 | 12 | 123299447 | T | C | 0.2141 | -0.0362 | 0.0058 | 6.09E-10 | -6.1880 | 1376071 | Asthma |
| rs11608305 | 12 | 123306618 | C | G | 0.3242 | -0.0312 | 0.0052 | 2.00E-09 | -5.9978 | 1316443 | Asthma |
| rs11057251 | 12 | 123306680 | C | T | 0.3242 | -0.0310 | 0.0052 | 2.27E-09 | -5.9772 | 1316443 | Asthma |
| rs2277343  | 12 | 123309903 | A | T | 0.3242 | -0.0311 | 0.0052 | 2.15E-09 | -5.9861 | 1316443 | Asthma |
| rs11057254 | 12 | 123310034 | A | C | 0.3242 | -0.0311 | 0.0052 | 2.12E-09 | -5.9888 | 1316443 | Asthma |
| rs4759420  | 12 | 123310324 | G | C | 0.2161 | -0.0368 | 0.0060 | 6.57E-10 | -6.1761 | 1316443 | Asthma |
| rs11057261 | 12 | 123313020 | T | C | 0.3242 | -0.0311 | 0.0052 | 2.15E-09 | -5.9858 | 1316443 | Asthma |
| rs6488868  | 12 | 123315427 | A | G | 0.2864 | -0.0319 | 0.0054 | 3.57E-09 | -5.9031 | 1316443 | Asthma |
| rs10773008 | 12 | 123316273 | A | G | 0.2161 | -0.0368 | 0.0060 | 7.02E-10 | -6.1656 | 1316443 | Asthma |
| rs10846515 | 12 | 123317125 | T | G | 0.2161 | -0.0367 | 0.0060 | 7.14E-10 | -6.1630 | 1316443 | Asthma |
| rs1060105  | 12 | 123321672 | T | C | 0.2142 | -0.0360 | 0.0058 | 7.00E-10 | -6.1662 | 1376071 | Asthma |
| rs11057270 | 12 | 123323526 | C | T | 0.2150 | -0.0354 | 0.0058 | 1.30E-09 | -6.0673 | 1376071 | Asthma |
| rs12304248 | 12 | 123325878 | T | C | 0.2150 | -0.0356 | 0.0058 | 1.06E-09 | -6.1002 | 1376071 | Asthma |
| rs61388686 | 12 | 123326326 | G | A | 0.3243 | -0.0312 | 0.0052 | 1.90E-09 | -6.0062 | 1316443 | Asthma |
| rs7955457  | 12 | 123326678 | A | C | 0.2150 | -0.0354 | 0.0058 | 1.21E-09 | -6.0785 | 1376071 | Asthma |
| rs28419092 | 12 | 123328082 | G | C | 0.3241 | -0.0312 | 0.0052 | 1.92E-09 | -6.0048 | 1316443 | Asthma |
| rs11611677 | 12 | 123333016 | C | A | 0.3241 | -0.0313 | 0.0052 | 1.71E-09 | -6.0231 | 1316443 | Asthma |
| rs12824685 | 12 | 123333022 | T | G | 0.1604 | -0.0408 | 0.0062 | 5.49E-11 | -6.5570 | 1349938 | Asthma |
| rs11611680 | 12 | 123333029 | C | G | 0.3243 | -0.0313 | 0.0052 | 1.76E-09 | -6.0186 | 1316443 | Asthma |
| rs12316131 | 12 | 123333249 | C | T | 0.2151 | -0.0357 | 0.0058 | 8.45E-10 | -6.1361 | 1376071 | Asthma |
| rs11057275 | 12 | 123334578 | C | T | 0.3236 | -0.0310 | 0.0052 | 2.41E-09 | -5.9676 | 1316443 | Asthma |
| rs11057276 | 12 | 123335850 | T | C | 0.3243 | -0.0312 | 0.0052 | 1.79E-09 | -6.0161 | 1316443 | Asthma |
| rs7980687  | 12 | 123338164 | A | G | 0.2149 | -0.0362 | 0.0058 | 4.95E-10 | -6.2207 | 1376071 | Asthma |
| rs11830103 | 12 | 123338999 | G | A | 0.2153 | -0.0358 | 0.0058 | 7.62E-10 | -6.1526 | 1376071 | Asthma |
| rs67624109 | 12 | 123340088 | T | C | 0.2147 | -0.0361 | 0.0058 | 5.72E-10 | -6.1981 | 1376071 | Asthma |
| rs12322888 | 12 | 123341012 | T | C | 0.2153 | -0.0359 | 0.0058 | 6.85E-10 | -6.1695 | 1376071 | Asthma |
| rs11608297 | 12 | 123342095 | T | C | 0.3239 | -0.0304 | 0.0051 | 2.09E-09 | -5.9909 | 1376071 | Asthma |
| rs56197170 | 12 | 123342227 | G | A | 0.3239 | -0.0304 | 0.0051 | 2.32E-09 | -5.9741 | 1376071 | Asthma |
| rs12298826 | 12 | 123344481 | G | A | 0.2153 | -0.0356 | 0.0058 | 8.84E-10 | -6.1292 | 1376071 | Asthma |
| rs34997336 | 12 | 123344569 | A | G | 0.2152 | -0.0357 | 0.0058 | 9.00E-10 | -6.1261 | 1376071 | Asthma |
| rs11057284 | 12 | 123346145 | G | C | 0.3245 | -0.0311 | 0.0052 | 2.04E-09 | -5.9949 | 1316443 | Asthma |
| rs35818434 | 12 | 123348365 | T | C | 0.3240 | -0.0304 | 0.0051 | 2.15E-09 | -5.9860 | 1376071 | Asthma |
| rs28683528 | 12 | 123360804 | T | C | 0.2151 | -0.0359 | 0.0058 | 7.56E-10 | -6.1539 | 1376071 | Asthma |
| rs28631104 | 12 | 123362265 | T | C | 0.3236 | -0.0304 | 0.0051 | 2.28E-09 | -5.9761 | 1376071 | Asthma |
| rs7485502  | 12 | 123364549 | G | C | 0.2167 | -0.0370 | 0.0064 | 5.97E-09 | -5.8175 | 1224666 | Asthma |
| rs78455769 | 12 | 123371896 | G | A | 0.3237 | -0.0303 | 0.0051 | 2.51E-09 | -5.9607 | 1376071 | Asthma |
| rs28582096 | 12 | 123372451 | A | G | 0.2152 | -0.0359 | 0.0058 | 7.58E-10 | -6.1534 | 1376071 | Asthma |
| rs60835840 | 12 | 123376392 | T | C | 0.3236 | -0.0303 | 0.0051 | 2.53E-09 | -5.9597 | 1376071 | Asthma |
| rs28450974 | 12 | 123376873 | G | A | 0.3242 | -0.0306 | 0.0051 | 1.74E-09 | -6.0202 | 1376071 | Asthma |
| rs28413626 | 12 | 123376905 | A | G | 0.2226 | -0.0378 | 0.0059 | 1.34E-10 | -6.4229 | 1316443 | Asthma |
| rs12299125 | 12 | 123377900 | T | C | 0.2151 | -0.0358 | 0.0059 | 1.43E-09 | -6.0524 | 1349938 | Asthma |
| rs34032470 | 12 | 123378266 | T | C | 0.3152 | -0.0292 | 0.0051 | 1.20E-08 | -5.7000 | 1376071 | Asthma |
| rs28458312 | 12 | 123378718 | T | G | 0.2152 | -0.0358 | 0.0058 | 8.52E-10 | -6.1350 | 1376071 | Asthma |
| rs28583837 | 12 | 123379073 | A | G | 0.2146 | -0.0361 | 0.0058 | 6.53E-10 | -6.1771 | 1376071 | Asthma |
| rs28809230 | 12 | 123380814 | C | T | 0.2152 | -0.0357 | 0.0058 | 9.25E-10 | -6.1219 | 1376071 | Asthma |
| rs28592876 | 12 | 123381882 | A | G | 0.2149 | -0.0356 | 0.0058 | 9.66E-10 | -6.1150 | 1376071 | Asthma |

|            |    |           |   |   |        |         |        |          |         |         |        |
|------------|----|-----------|---|---|--------|---------|--------|----------|---------|---------|--------|
| rs28636834 | 12 | 123386523 | C | A | 0.2152 | -0.0356 | 0.0058 | 9.70E-10 | -6.1143 | 1376071 | Asthma |
| rs28533432 | 12 | 123388695 | C | T | 0.3012 | -0.0320 | 0.0054 | 3.03E-09 | -5.9299 | 1008051 | Asthma |
| rs28825193 | 12 | 123393715 | T | C | 0.3237 | -0.0306 | 0.0051 | 1.76E-09 | -6.0182 | 1376071 | Asthma |
| rs28372579 | 12 | 123396629 | G | A | 0.2150 | -0.0357 | 0.0058 | 9.57E-10 | -6.1164 | 1376071 | Asthma |
| rs13303208 | 12 | 123401370 | G | A | 0.3214 | -0.0314 | 0.0057 | 2.68E-08 | -5.5611 | 1159440 | Asthma |
| rs28855757 | 12 | 123401390 | T | C | 0.2168 | -0.0387 | 0.0064 | 1.92E-09 | -6.0042 | 1159440 | Asthma |
| rs28768122 | 12 | 123401427 | T | C | 0.2455 | -0.0323 | 0.0055 | 5.73E-09 | -5.8246 | 1376071 | Asthma |
| rs28574664 | 12 | 123401837 | C | T | 0.3236 | -0.0308 | 0.0051 | 1.34E-09 | -6.0631 | 1376071 | Asthma |
| rs28472704 | 12 | 123402822 | T | C | 0.2150 | -0.0357 | 0.0058 | 9.53E-10 | -6.1170 | 1376071 | Asthma |
| rs28690326 | 12 | 123403140 | C | T | 0.3156 | -0.0297 | 0.0051 | 6.90E-09 | -5.7934 | 1376071 | Asthma |
| rs28576953 | 12 | 123405729 | T | C | 0.2150 | -0.0359 | 0.0058 | 7.84E-10 | -6.1482 | 1376071 | Asthma |
| rs28496545 | 12 | 123406346 | C | T | 0.3156 | -0.0298 | 0.0051 | 6.22E-09 | -5.8108 | 1376071 | Asthma |
| rs61955125 | 12 | 123406560 | C | T | 0.3156 | -0.0297 | 0.0051 | 6.39E-09 | -5.8062 | 1376071 | Asthma |
| rs73216931 | 12 | 123406662 | C | T | 0.3238 | -0.0311 | 0.0051 | 9.20E-10 | -6.1228 | 1376071 | Asthma |
| rs28406193 | 12 | 123407318 | T | G | 0.2152 | -0.0358 | 0.0058 | 8.48E-10 | -6.1355 | 1376071 | Asthma |
| rs6576     | 12 | 123408387 | G | T | 0.2216 | -0.0378 | 0.0069 | 3.73E-08 | -5.5033 | 1094744 | Asthma |
| rs28642812 | 12 | 123409363 | T | C | 0.2949 | -0.0323 | 0.0058 | 2.56E-08 | -5.5694 | 1159440 | Asthma |
| rs28577594 | 12 | 123411359 | G | C | 0.2892 | -0.0301 | 0.0053 | 1.08E-08 | -5.7177 | 1376071 | Asthma |
| rs28569885 | 12 | 123412630 | A | G | 0.2127 | -0.0372 | 0.0059 | 2.58E-10 | -6.3223 | 1376071 | Asthma |
| rs11562637 | 12 | 123413200 | A | C | 0.2080 | -0.0383 | 0.0066 | 6.98E-09 | -5.7912 | 1159440 | Asthma |
| rs28410896 | 12 | 123416596 | T | C | 0.2055 | -0.0374 | 0.0061 | 9.98E-10 | -6.1098 | 1316443 | Asthma |
| rs28481863 | 12 | 123417814 | G | A | 0.1896 | -0.0413 | 0.0065 | 2.68E-10 | -6.3161 | 948423  | Asthma |
| rs28715490 | 12 | 123419079 | T | C | 0.2037 | -0.0371 | 0.0060 | 6.74E-10 | -6.1722 | 1376071 | Asthma |
| rs28676499 | 12 | 123421760 | T | C | 0.2043 | -0.0382 | 0.0061 | 4.77E-10 | -6.2263 | 1316443 | Asthma |
| rs28625019 | 12 | 123423016 | A | G | 0.2049 | -0.0383 | 0.0061 | 4.18E-10 | -6.2470 | 1316443 | Asthma |
| rs28706696 | 12 | 123423579 | T | C | 0.2048 | -0.0382 | 0.0061 | 4.72E-10 | -6.2281 | 1316443 | Asthma |
| rs28376121 | 12 | 123423743 | C | T | 0.2079 | -0.0399 | 0.0066 | 1.72E-09 | -6.0226 | 1159440 | Asthma |
| rs4930719  | 12 | 123424401 | A | G | 0.1978 | -0.0380 | 0.0068 | 2.94E-08 | -5.5451 | 1160365 | Asthma |
| rs4930718  | 12 | 123428886 | G | A | 0.2222 | -0.0368 | 0.0059 | 5.82E-10 | -6.1953 | 1316443 | Asthma |
| rs7330515  | 13 | 39659267  | T | C | 0.3383 | -0.0297 | 0.0050 | 2.19E-09 | -5.9282 | 1376071 | Asthma |
| rs7330016  | 13 | 39659554  | C | T | 0.3383 | -0.0298 | 0.0050 | 1.88E-09 | -6.0077 | 1376071 | Asthma |
| rs6563737  | 13 | 39659829  | C | A | 0.3383 | -0.0298 | 0.0050 | 1.90E-09 | -6.0063 | 1376071 | Asthma |
| rs4598779  | 13 | 39661236  | C | T | 0.3383 | -0.0297 | 0.0050 | 2.13E-09 | -5.9874 | 1376071 | Asthma |
| rs4943688  | 13 | 39662253  | A | G | 0.3383 | -0.0296 | 0.0050 | 2.32E-09 | -5.9735 | 1376071 | Asthma |
| rs4943689  | 13 | 39662368  | T | C | 0.3383 | -0.0296 | 0.0050 | 2.42E-09 | -5.9666 | 1376071 | Asthma |
| rs7999758  | 13 | 39662464  | G | A | 0.3495 | -0.0284 | 0.0052 | 4.80E-08 | -5.4585 | 1008051 | Asthma |
| rs4492929  | 13 | 39663774  | G | A | 0.3382 | -0.0296 | 0.0050 | 2.52E-09 | -5.9598 | 1376071 | Asthma |
| rs4636783  | 13 | 39664025  | C | G | 0.3382 | -0.0296 | 0.0050 | 2.45E-09 | -5.9646 | 1376071 | Asthma |
| rs4566029  | 13 | 39664250  | T | C | 0.3381 | -0.0296 | 0.0050 | 2.38E-09 | -5.9696 | 1376071 | Asthma |
| rs9548871  | 13 | 39664344  | T | C | 0.3380 | -0.0296 | 0.0050 | 2.44E-09 | -5.9655 | 1376071 | Asthma |
| rs9548872  | 13 | 39664346  | G | A | 0.3381 | -0.0296 | 0.0050 | 2.35E-09 | -5.9714 | 1376071 | Asthma |
| rs9548873  | 13 | 39664355  | C | T | 0.3381 | -0.0295 | 0.0050 | 2.59E-09 | -5.9557 | 1376071 | Asthma |
| rs4275735  | 13 | 39664704  | A | G | 0.3381 | -0.0296 | 0.0050 | 2.47E-09 | -5.9638 | 1376071 | Asthma |
| rs4514547  | 13 | 39664762  | C | T | 0.3382 | -0.0296 | 0.0050 | 2.32E-09 | -5.9739 | 1376071 | Asthma |
| rs4277227  | 13 | 39664866  | A | T | 0.3381 | -0.0296 | 0.0050 | 2.28E-09 | -5.9768 | 1376071 | Asthma |
| rs4569133  | 13 | 39664907  | T | G | 0.3381 | -0.0297 | 0.0050 | 2.24E-09 | -5.9792 | 1376071 | Asthma |
| rs7991151  | 13 | 39665002  | G | A | 0.3381 | -0.0296 | 0.0050 | 2.34E-09 | -5.9725 | 1376071 | Asthma |
| rs6563738  | 13 | 39665627  | G | A | 0.3381 | -0.0296 | 0.0050 | 2.37E-09 | -5.9698 | 1376071 | Asthma |
| rs6563739  | 13 | 39665648  | G | T | 0.3381 | -0.0298 | 0.0050 | 1.83E-09 | -6.0118 | 1376071 | Asthma |
| rs6563740  | 13 | 39667736  | G | T | 0.3382 | -0.0297 | 0.0050 | 2.17E-09 | -5.9844 | 1376071 | Asthma |
| rs7325354  | 13 | 39667960  | C | T | 0.3382 | -0.0297 | 0.0050 | 2.20E-09 | -5.9824 | 1376071 | Asthma |
| rs4432137  | 13 | 39671363  | G | A | 0.3381 | -0.0296 | 0.0050 | 2.40E-09 | -5.9678 | 1376071 | Asthma |
| rs9548876  | 13 | 39673237  | G | A | 0.3382 | -0.0297 | 0.0050 | 2.16E-09 | -5.9853 | 1376071 | Asthma |
| rs9548877  | 13 | 39673420  | T | C | 0.3381 | -0.0297 | 0.0050 | 2.23E-09 | -5.9803 | 1376071 | Asthma |
| rs4485233  | 13 | 39677285  | A | G | 0.3381 | -0.0297 | 0.0050 | 2.16E-09 | -5.9857 | 1376071 | Asthma |
| rs4941940  | 13 | 39679764  | A | G | 0.3381 | -0.0296 | 0.0050 | 2.35E-09 | -5.9713 | 1376071 | Asthma |
| rs4334152  | 13 | 39683283  | G | A | 0.3381 | -0.0297 | 0.0050 | 2.15E-09 | -5.9862 | 1376071 | Asthma |
| rs9532417  | 13 | 39683948  | G | A | 0.3381 | -0.0296 | 0.0050 | 2.37E-09 | -5.9704 | 1376071 | Asthma |
| rs9548881  | 13 | 39688623  | T | C | 0.3394 | -0.0296 | 0.0050 | 2.36E-09 | -5.9707 | 1376071 | Asthma |
| rs9548884  | 13 | 39691927  | T | A | 0.3395 | -0.0297 | 0.0050 | 2.09E-09 | -5.9909 | 1376071 | Asthma |
| rs9603603  | 13 | 39726191  | G | T | 0.3641 | -0.0319 | 0.0050 | 1.88E-10 | -6.3712 | 1316443 | Asthma |
| rs7989997  | 13 | 39728273  | G | A | 0.2434 | -0.0308 | 0.0054 | 1.52E-08 | -5.6594 | 1376071 | Asthma |
| rs9603605  | 13 | 39734170  | C | T | 0.3447 | -0.0311 | 0.0049 | 3.16E-10 | -6.2909 | 1376071 | Asthma |
| rs9603608  | 13 | 39744682  | C | A | 0.3470 | -0.0318 | 0.0049 | 1.19E-10 | -6.4401 | 1376071 | Asthma |
| rs28635831 | 13 | 39745817  | G | A | 0.3468 | -0.0353 | 0.0054 | 5.80E-11 | -6.5486 | 1224666 | Asthma |
| rs9943     | 13 | 39752145  | G | A | 0.3458 | -0.0318 | 0.0054 | 3.73E-09 | -5.8957 | 1219993 | Asthma |
| rs9603610  | 13 | 39755913  | A | G | 0.2427 | -0.0303 | 0.0054 | 2.53E-08 | -5.5713 | 1376071 | Asthma |
| rs9603611  | 13 | 39755968  | A | G | 0.2427 | -0.0302 | 0.0054 | 2.96E-08 | -5.5439 | 1376071 | Asthma |
| rs34394770 | 13 | 39759232  | C | T | 0.3444 | -0.0316 | 0.0049 | 1.60E-10 | -6.3951 | 1376071 | Asthma |
| rs9603612  | 13 | 39760715  | G | C | 0.3466 | -0.0322 | 0.0049 | 6.38E-11 | -6.5345 | 1376071 | Asthma |
| rs12875311 | 13 | 39768420  | A | G | 0.3465 | -0.0321 | 0.0049 | 7.34E-11 | -6.5135 | 1376071 | Asthma |
| rs7319041  | 13 | 39771219  | A | G | 0.3459 | -0.0321 | 0.0049 | 7.57E-11 | -6.5088 | 1376071 | Asthma |
| rs7320598  | 13 | 39771329  | T | C | 0.3457 | -0.0320 | 0.0049 | 9.07E-11 | -6.4818 | 1376071 | Asthma |
| rs7993214  | 13 | 39776775  | T | C | 0.3459 | -0.0323 | 0.0049 | 5.62E-11 | -6.5536 | 1376071 | Asthma |

|             |    |          |   |   |        |         |        |          |         |         |        |
|-------------|----|----------|---|---|--------|---------|--------|----------|---------|---------|--------|
| rs7986796   | 13 | 39776927 | G | T | 0.3669 | -0.0296 | 0.0050 | 3.13E-09 | -5.9244 | 1316443 | Asthma |
| rs12876235  | 13 | 39776957 | G | T | 0.3457 | -0.0323 | 0.0049 | 5.84E-11 | -6.5479 | 1376071 | Asthma |
| rs9532430   | 13 | 39777204 | A | G | 0.3463 | -0.0335 | 0.0050 | 3.07E-11 | -6.6432 | 1316443 | Asthma |
| rs9532433   | 13 | 39778534 | C | A | 0.3465 | -0.0336 | 0.0050 | 3.00E-11 | -6.6467 | 1316443 | Asthma |
| rs9548932   | 13 | 39779093 | G | T | 0.3464 | -0.0335 | 0.0051 | 3.35E-11 | -6.6303 | 1316443 | Asthma |
| rs12872801  | 13 | 39780063 | T | C | 0.3453 | -0.0322 | 0.0049 | 7.15E-11 | -6.5174 | 1376071 | Asthma |
| rs9532434   | 13 | 39781776 | T | C | 0.3485 | -0.0345 | 0.0050 | 7.95E-12 | -6.8395 | 1316443 | Asthma |
| rs8002731   | 13 | 39788092 | C | A | 0.3482 | -0.0338 | 0.0049 | 7.24E-12 | -6.8529 | 1376071 | Asthma |
| rs9603616   | 13 | 39793932 | T | C | 0.3459 | -0.0336 | 0.0049 | 1.04E-11 | -6.8006 | 1376071 | Asthma |
| rs11618582  | 13 | 39794307 | G | A | 0.3458 | -0.0335 | 0.0049 | 1.27E-11 | -6.7716 | 1376071 | Asthma |
| rs9594366   | 13 | 39794464 | T | C | 0.3457 | -0.0335 | 0.0049 | 1.23E-11 | -6.7765 | 1376071 | Asthma |
| rs9548985   | 13 | 39928848 | C | A | 0.4431 | -0.0268 | 0.0047 | 1.55E-08 | -5.6555 | 1376071 | Asthma |
| rs9548987   | 13 | 39929435 | G | C | 0.4430 | 0.0282  | 0.0049 | 8.26E-09 | 5.7630  | 1316443 | Asthma |
| rs9532461   | 13 | 39930533 | G | A | 0.4421 | 0.0320  | 0.0052 | 9.85E-10 | 6.1119  | 1224666 | Asthma |
| rs9532462   | 13 | 39930867 | T | C | 0.4431 | 0.0288  | 0.0049 | 4.15E-09 | 5.8783  | 1316443 | Asthma |
| rs9532463   | 13 | 39930996 | A | G | 0.4431 | 0.0287  | 0.0049 | 4.28E-09 | 5.8729  | 1316443 | Asthma |
| rs9532464   | 13 | 39931121 | T | C | 0.4431 | 0.0287  | 0.0049 | 4.24E-09 | 5.8745  | 1316443 | Asthma |
| rs9548988   | 13 | 39931373 | T | C | 0.4432 | 0.0288  | 0.0049 | 4.05E-09 | 5.8824  | 1316443 | Asthma |
| rs9603649   | 13 | 39931945 | A | G | 0.4694 | -0.0295 | 0.0049 | 1.20E-09 | -6.0807 | 1316443 | Asthma |
| rs9566487   | 13 | 39932437 | G | T | 0.4433 | 0.0287  | 0.0049 | 4.17E-09 | 5.8772  | 1316443 | Asthma |
| rs9548989   | 13 | 39932527 | T | C | 0.4433 | 0.0287  | 0.0049 | 4.27E-09 | 5.8733  | 1316443 | Asthma |
| rs9548990   | 13 | 39932587 | T | C | 0.4432 | 0.0288  | 0.0049 | 3.80E-09 | 5.8927  | 1316443 | Asthma |
| rs9548991   | 13 | 39932749 | G | A | 0.4433 | 0.0287  | 0.0049 | 4.31E-09 | 5.8720  | 1316443 | Asthma |
| rs9548992   | 13 | 39932794 | G | C | 0.4433 | 0.0287  | 0.0049 | 4.29E-09 | 5.8724  | 1316443 | Asthma |
| rs9548993   | 13 | 39932984 | A | G | 0.4432 | 0.0287  | 0.0049 | 4.46E-09 | 5.8659  | 1316443 | Asthma |
| rs9532465   | 13 | 39933444 | G | A | 0.4433 | 0.0287  | 0.0049 | 4.40E-09 | 5.8682  | 1316443 | Asthma |
| rs9548994   | 13 | 39933662 | T | C | 0.4441 | 0.0285  | 0.0049 | 5.70E-09 | 5.8253  | 1316443 | Asthma |
| rs9532467   | 13 | 39933705 | T | C | 0.4441 | 0.0286  | 0.0049 | 5.12E-09 | 5.8433  | 1316443 | Asthma |
| rs9532468   | 13 | 39933721 | A | T | 0.4441 | 0.0285  | 0.0049 | 5.64E-09 | 5.8269  | 1316443 | Asthma |
| rs9548996   | 13 | 39934352 | T | C | 0.4441 | 0.0285  | 0.0049 | 5.42E-09 | 5.8337  | 1316443 | Asthma |
| rs9532469   | 13 | 39934515 | C | A | 0.4443 | 0.0286  | 0.0049 | 4.74E-09 | 5.8560  | 1316443 | Asthma |
| rs9532470   | 13 | 39935164 | T | C | 0.4458 | 0.0278  | 0.0048 | 5.75E-09 | 5.8239  | 1376071 | Asthma |
| rs9532471   | 13 | 39935616 | T | A | 0.4455 | 0.0280  | 0.0048 | 4.30E-09 | 5.8724  | 1376071 | Asthma |
| rs9548997   | 13 | 39935726 | A | C | 0.4456 | 0.0280  | 0.0048 | 4.44E-09 | 5.8671  | 1376071 | Asthma |
| rs9548998   | 13 | 39935901 | G | A | 0.4455 | 0.0280  | 0.0048 | 4.35E-09 | 5.8702  | 1376071 | Asthma |
| rs9548999   | 13 | 39936062 | T | A | 0.4432 | 0.0315  | 0.0052 | 1.64E-09 | 6.0296  | 1224666 | Asthma |
| rs9549000   | 13 | 39936143 | G | A | 0.4689 | 0.0367  | 0.0064 | 1.08E-08 | 5.7181  | 938666  | Asthma |
| rs55961001  | 13 | 39936288 | A | G | 0.4431 | 0.0318  | 0.0052 | 1.27E-09 | 6.0718  | 1224666 | Asthma |
| rs9549002   | 13 | 39936367 | A | G | 0.4431 | 0.0318  | 0.0052 | 1.27E-09 | 6.0707  | 1224666 | Asthma |
| rs9549003   | 13 | 39936434 | G | T | 0.4686 | -0.0296 | 0.0049 | 1.11E-09 | -6.0928 | 1316443 | Asthma |
| rs7990710   | 13 | 39938073 | A | C | 0.4362 | -0.0270 | 0.0049 | 3.69E-08 | -5.5049 | 1316443 | Asthma |
| rs7986971   | 13 | 39940289 | T | A | 0.4986 | -0.0267 | 0.0048 | 2.03E-08 | -5.6092 | 1376071 | Asthma |
| rs7986114   | 13 | 39940401 | C | T | 0.4987 | -0.0268 | 0.0048 | 1.79E-08 | -5.6315 | 1376071 | Asthma |
| rs7986142   | 13 | 39940461 | C | T | 0.4986 | -0.0268 | 0.0048 | 1.85E-08 | -5.6259 | 1376071 | Asthma |
| rs7330039   | 13 | 39943915 | G | A | 0.4624 | -0.0267 | 0.0048 | 1.97E-08 | -5.6144 | 1376071 | Asthma |
| rs7331617   | 13 | 39943979 | C | T | 0.4623 | -0.0269 | 0.0047 | 1.40E-08 | -5.6732 | 1376071 | Asthma |
| rs9576926   | 13 | 39945205 | T | G | 0.4628 | -0.0269 | 0.0048 | 1.52E-08 | -5.6588 | 1376071 | Asthma |
| rs9576928   | 13 | 39950273 | C | T | 0.4630 | -0.0270 | 0.0048 | 1.26E-08 | -5.6916 | 1376071 | Asthma |
| rs9635097   | 13 | 39950959 | C | T | 0.4629 | -0.0270 | 0.0048 | 1.26E-08 | -5.6912 | 1376071 | Asthma |
| rs981625    | 13 | 73465798 | G | C | 0.0625 | 0.0634  | 0.0101 | 4.04E-10 | 6.2521  | 1316443 | Asthma |
| rs56035412  | 13 | 99122609 | G | A | 0.2279 | -0.0314 | 0.0057 | 3.26E-08 | -5.5269 | 1376071 | Asthma |
| rs2025915   | 13 | 99126775 | G | A | 0.3587 | 0.0279  | 0.0051 | 3.58E-08 | 5.5104  | 1316443 | Asthma |
| rs1927567   | 13 | 99127016 | T | C | 0.3588 | 0.0280  | 0.0051 | 3.15E-08 | 5.5327  | 1316443 | Asthma |
| rs72645655  | 13 | 99129124 | T | G | 0.1261 | -0.0561 | 0.0072 | 4.81E-15 | -7.8319 | 1376071 | Asthma |
| rs2390192   | 13 | 99129226 | G | A | 0.1277 | -0.0572 | 0.0073 | 4.38E-15 | -7.8437 | 1316443 | Asthma |
| rs72645656  | 13 | 99131666 | C | T | 0.1270 | -0.0571 | 0.0071 | 1.36E-15 | -7.9894 | 1376071 | Asthma |
| rs7320949   | 13 | 99135915 | A | G | 0.3559 | 0.0270  | 0.0049 | 4.67E-08 | 5.4634  | 1376071 | Asthma |
| rs9517621   | 13 | 99140529 | C | T | 0.3593 | 0.0275  | 0.0049 | 2.51E-08 | 5.5722  | 1376071 | Asthma |
| rs9513565   | 13 | 99141620 | T | C | 0.3567 | 0.0270  | 0.0049 | 4.24E-08 | 5.4804  | 1376071 | Asthma |
| rs111442029 | 13 | 99147408 | T | C | 0.3549 | 0.0271  | 0.0049 | 4.33E-08 | 5.4768  | 1376071 | Asthma |
| rs7331698   | 13 | 99151339 | T | C | 0.3588 | 0.0274  | 0.0049 | 2.69E-08 | 5.5602  | 1376071 | Asthma |
| rs9513569   | 13 | 99152315 | A | G | 0.3563 | 0.0272  | 0.0049 | 3.58E-08 | 5.5106  | 1376071 | Asthma |
| rs7986564   | 13 | 99153767 | A | G | 0.3565 | 0.0270  | 0.0049 | 4.18E-08 | 5.4831  | 1376071 | Asthma |
| rs7987707   | 13 | 99153825 | G | T | 0.3565 | 0.0270  | 0.0049 | 4.18E-08 | 5.4830  | 1376071 | Asthma |
| rs9517624   | 13 | 99155055 | T | C | 0.1259 | -0.0557 | 0.0072 | 7.43E-15 | -7.7769 | 1376071 | Asthma |
| rs72645668  | 13 | 99157192 | A | T | 0.1267 | -0.0560 | 0.0071 | 4.75E-15 | -7.8334 | 1376071 | Asthma |
| rs7336019   | 13 | 99158697 | C | T | 0.3640 | 0.0272  | 0.0049 | 3.01E-08 | 5.5410  | 1376071 | Asthma |
| rs9513572   | 13 | 99163288 | T | A | 0.1251 | -0.0579 | 0.0072 | 8.01E-16 | -8.0542 | 1376071 | Asthma |
| rs111364214 | 13 | 99163443 | A | G | 0.1253 | -0.0578 | 0.0072 | 9.38E-16 | -8.0347 | 1376071 | Asthma |
| rs9513573   | 13 | 99163644 | A | G | 0.2852 | 0.0338  | 0.0059 | 1.35E-08 | 5.6801  | 1133307 | Asthma |
| rs9557170   | 13 | 99164683 | G | A | 0.1994 | -0.0393 | 0.0062 | 1.68E-10 | -6.3885 | 1316443 | Asthma |
| rs72645671  | 13 | 99164689 | A | G | 0.1250 | -0.0583 | 0.0072 | 6.10E-16 | -8.0874 | 1376071 | Asthma |
| rs9557172   | 13 | 99169175 | A | G | 0.1214 | -0.0643 | 0.0072 | 6.87E-19 | -8.8770 | 1376071 | Asthma |
| rs9554560   | 13 | 99170808 | G | T | 0.1191 | -0.0668 | 0.0102 | 6.61E-11 | -6.5294 | 912533  | Asthma |

|             |    |          |   |   |        |         |        |          |          |         |        |
|-------------|----|----------|---|---|--------|---------|--------|----------|----------|---------|--------|
| rs9517627   | 13 | 99171423 | T | A | 0.1217 | -0.0643 | 0.0072 | 6.15E-19 | -8.8893  | 1376071 | Asthma |
| rs9513575   | 13 | 99173193 | A | G | 0.1214 | -0.0646 | 0.0072 | 4.60E-19 | -8.9215  | 1376071 | Asthma |
| rs9517628   | 13 | 99175415 | C | T | 0.1224 | -0.0642 | 0.0072 | 5.03E-19 | -8.9116  | 1376071 | Asthma |
| rs9517629   | 13 | 99176660 | A | C | 0.3611 | 0.0283  | 0.0049 | 9.61E-09 | 5.7374   | 1376071 | Asthma |
| rs72645678  | 13 | 99177204 | C | T | 0.3631 | 0.0278  | 0.0049 | 1.46E-08 | 5.6657   | 1376071 | Asthma |
| rs6491491   | 13 | 99183779 | A | C | 0.2970 | -0.0522 | 0.0051 | 4.05E-24 | -10.1303 | 1376071 | Asthma |
| rs9517632   | 13 | 99184293 | G | A | 0.3706 | 0.0289  | 0.0049 | 3.51E-09 | 5.9058   | 1376071 | Asthma |
| rs9517633   | 13 | 99184567 | C | T | 0.1223 | -0.0639 | 0.0072 | 7.71E-19 | -8.8641  | 1376071 | Asthma |
| rs9517635   | 13 | 99185940 | A | G | 0.2969 | -0.0523 | 0.0051 | 2.99E-24 | -10.1600 | 1376071 | Asthma |
| rs2096382   | 13 | 99186894 | G | A | 0.4060 | -0.0464 | 0.0048 | 3.94E-22 | -9.6727  | 1376071 | Asthma |
| rs9517636   | 13 | 99187479 | G | A | 0.3706 | 0.0291  | 0.0049 | 2.81E-09 | 5.9422   | 1376071 | Asthma |
| rs12583613  | 13 | 99187655 | A | C | 0.3706 | 0.0291  | 0.0049 | 2.78E-09 | 5.9442   | 1376071 | Asthma |
| rs9517637   | 13 | 99189561 | T | C | 0.3977 | -0.0467 | 0.0048 | 3.12E-22 | -9.6964  | 1376071 | Asthma |
| rs9517638   | 13 | 99189585 | T | C | 0.2964 | -0.0525 | 0.0052 | 2.20E-24 | -10.1901 | 1376071 | Asthma |
| rs113168193 | 13 | 99189830 | A | C | 0.3625 | 0.0293  | 0.0049 | 2.49E-09 | 5.9625   | 1376071 | Asthma |
| rs9517640   | 13 | 99192458 | A | T | 0.1211 | -0.0647 | 0.0072 | 4.25E-19 | -8.9303  | 1376071 | Asthma |
| rs8000983   | 13 | 99192807 | G | C | 0.2964 | -0.0527 | 0.0052 | 1.55E-24 | -10.2239 | 1376071 | Asthma |
| rs12428348  | 13 | 99193296 | T | C | 0.1212 | -0.0649 | 0.0072 | 2.46E-19 | -8.9904  | 1376071 | Asthma |
| rs2149140   | 13 | 99193504 | A | C | 0.3589 | 0.0310  | 0.0052 | 2.23E-09 | 5.9800   | 1008051 | Asthma |
| rs9517642   | 13 | 99193658 | G | A | 0.2888 | -0.0539 | 0.0057 | 2.91E-21 | -9.4659  | 1219993 | Asthma |
| rs9517643   | 13 | 99194264 | C | T | 0.3710 | 0.0291  | 0.0049 | 2.72E-09 | 5.9474   | 1376071 | Asthma |
| rs9517644   | 13 | 99194645 | T | C | 0.2968 | -0.0528 | 0.0051 | 1.14E-24 | -10.2534 | 1376071 | Asthma |
| rs9517645   | 13 | 99194763 | T | C | 0.3620 | 0.0296  | 0.0049 | 1.70E-09 | 6.0238   | 1376071 | Asthma |
| rs9513578   | 13 | 99195162 | G | A | 0.3710 | 0.0291  | 0.0049 | 2.76E-09 | 5.9453   | 1376071 | Asthma |
| rs9517646   | 13 | 99196065 | T | C | 0.1112 | -0.0648 | 0.0075 | 6.60E-18 | -8.6215  | 1376071 | Asthma |
| rs9557175   | 13 | 99196135 | G | C | 0.4012 | -0.0461 | 0.0057 | 6.09E-16 | -8.0876  | 830513  | Asthma |
| rs9554570   | 13 | 99196142 | A | G | 0.3893 | -0.0443 | 0.0053 | 4.13E-17 | -8.4092  | 1224666 | Asthma |
| rs3825427   | 13 | 99196717 | A | C | 0.1213 | -0.0647 | 0.0072 | 3.34E-19 | -8.9569  | 1376071 | Asthma |
| rs3742131   | 13 | 99196959 | A | C | 0.3629 | 0.0294  | 0.0049 | 2.09E-09 | 5.9910   | 1376071 | Asthma |
| rs11069357  | 13 | 99197376 | A | G | 0.2968 | -0.0530 | 0.0051 | 7.65E-25 | -10.2921 | 1376071 | Asthma |
| rs9517647   | 13 | 99198169 | G | T | 0.3679 | 0.0302  | 0.0053 | 9.86E-09 | 5.7331   | 1246149 | Asthma |
| rs1927565   | 13 | 99198781 | A | G | 0.2968 | -0.0529 | 0.0051 | 9.17E-25 | -10.2746 | 1376071 | Asthma |
| rs78720707  | 13 | 99199643 | T | G | 0.3701 | 0.0293  | 0.0049 | 2.07E-09 | 5.9922   | 1376071 | Asthma |
| rs2296860   | 13 | 99200499 | A | G | 0.2966 | -0.0528 | 0.0051 | 1.02E-24 | -10.2648 | 1376071 | Asthma |
| rs9513579   | 13 | 99202348 | A | G | 0.1113 | -0.0648 | 0.0075 | 6.43E-18 | -8.6246  | 1376071 | Asthma |
| rs2182885   | 13 | 99202870 | G | A | 0.3953 | -0.0471 | 0.0048 | 1.21E-22 | -9.7925  | 1376071 | Asthma |
| rs9517648   | 13 | 99203059 | A | G | 0.3082 | -0.0525 | 0.0056 | 3.51E-21 | -9.4463  | 1224666 | Asthma |
| rs9585021   | 13 | 99204226 | T | C | 0.2966 | -0.0528 | 0.0051 | 1.11E-24 | -10.2565 | 1376071 | Asthma |
| rs9557177   | 13 | 99205730 | T | C | 0.3883 | -0.0458 | 0.0048 | 2.28E-21 | -9.4916  | 1376071 | Asthma |
| rs72648069  | 13 | 99206009 | T | C | 0.1212 | -0.0647 | 0.0072 | 3.69E-19 | -8.9459  | 1376071 | Asthma |
| rs34925730  | 13 | 99208581 | T | A | 0.2975 | -0.0528 | 0.0051 | 9.86E-25 | -10.2677 | 1376071 | Asthma |
| rs34209917  | 13 | 99209940 | C | T | 0.2975 | -0.0527 | 0.0051 | 1.12E-24 | -10.2548 | 1376071 | Asthma |
| rs17655647  | 13 | 99210128 | G | A | 0.3004 | -0.0526 | 0.0051 | 1.19E-24 | -10.2494 | 1376071 | Asthma |
| rs72648071  | 13 | 99211076 | T | C | 0.1121 | -0.0644 | 0.0075 | 7.90E-18 | -8.6010  | 1376071 | Asthma |
| rs72648072  | 13 | 99211223 | C | G | 0.1121 | -0.0645 | 0.0075 | 7.39E-18 | -8.6087  | 1376071 | Asthma |
| rs9517649   | 13 | 99211745 | C | T | 0.3707 | 0.0296  | 0.0049 | 1.42E-09 | 6.0529   | 1376071 | Asthma |
| rs9513582   | 13 | 99213003 | C | T | 0.3886 | -0.0457 | 0.0048 | 2.87E-21 | -9.4675  | 1376071 | Asthma |
| rs9517650   | 13 | 99213025 | G | C | 0.3883 | -0.0455 | 0.0048 | 4.21E-21 | -9.4274  | 1376071 | Asthma |
| rs7983491   | 13 | 99214814 | A | G | 0.2969 | -0.0526 | 0.0051 | 1.54E-24 | -10.2245 | 1376071 | Asthma |
| rs9517651   | 13 | 99215180 | T | A | 0.2967 | -0.0527 | 0.0051 | 1.19E-24 | -10.2494 | 1376071 | Asthma |
| rs9554571   | 13 | 99216140 | C | T | 0.3986 | -0.0471 | 0.0048 | 1.07E-22 | -9.8050  | 1376071 | Asthma |
| rs7338177   | 13 | 99217202 | C | T | 0.3920 | -0.0455 | 0.0048 | 3.28E-21 | -9.4533  | 1376071 | Asthma |
| rs752820    | 13 | 99217858 | T | C | 0.1222 | -0.0646 | 0.0072 | 3.16E-19 | -8.9632  | 1376071 | Asthma |
| rs7139964   | 13 | 99217960 | G | A | 0.2975 | -0.0529 | 0.0051 | 8.25E-25 | -10.2848 | 1376071 | Asthma |
| rs9517652   | 13 | 99218211 | C | T | 0.3707 | 0.0294  | 0.0049 | 1.82E-09 | 6.0134   | 1376071 | Asthma |
| rs731955    | 13 | 99218386 | T | A | 0.3921 | -0.0455 | 0.0048 | 3.44E-21 | -9.4485  | 1376071 | Asthma |
| rs984477    | 13 | 99220179 | G | C | 0.3674 | -0.0465 | 0.0051 | 3.64E-20 | -9.1982  | 1316443 | Asthma |
| rs9557179   | 13 | 99223911 | G | A | 0.1222 | -0.0642 | 0.0072 | 5.04E-19 | -8.9114  | 1376071 | Asthma |
| rs9513584   | 13 | 99224027 | G | A | 0.2975 | -0.0526 | 0.0051 | 1.32E-24 | -10.2393 | 1376071 | Asthma |
| rs12583989  | 13 | 99224490 | T | C | 0.3704 | 0.0296  | 0.0049 | 1.47E-09 | 6.0478   | 1376071 | Asthma |
| rs7332672   | 13 | 99225217 | C | T | 0.3875 | -0.0470 | 0.0052 | 1.27E-19 | -9.0629  | 1246149 | Asthma |
| rs7322572   | 13 | 99227242 | C | T | 0.3918 | -0.0455 | 0.0048 | 3.52E-21 | -9.4462  | 1376071 | Asthma |
| rs7323873   | 13 | 99227750 | A | G | 0.3710 | 0.0296  | 0.0049 | 1.41E-09 | 6.0546   | 1376071 | Asthma |
| rs9513585   | 13 | 99229328 | A | C | 0.2996 | -0.0525 | 0.0051 | 1.46E-24 | -10.2297 | 1376071 | Asthma |
| rs9517653   | 13 | 99229428 | C | T | 0.3983 | -0.0472 | 0.0048 | 7.56E-23 | -9.8400  | 1376071 | Asthma |
| rs9517654   | 13 | 99230509 | C | G | 0.3890 | -0.0454 | 0.0048 | 4.99E-21 | -9.4094  | 1376071 | Asthma |
| rs9554573   | 13 | 99234508 | A | G | 0.2997 | -0.0526 | 0.0051 | 1.12E-24 | -10.2553 | 1376071 | Asthma |
| rs9517656   | 13 | 99237671 | T | C | 0.3264 | 0.0308  | 0.0052 | 3.06E-09 | 5.9281   | 1316443 | Asthma |
| rs7995524   | 13 | 99238069 | G | A | 0.3005 | -0.0527 | 0.0051 | 8.48E-25 | -10.2823 | 1376071 | Asthma |
| rs2296911   | 13 | 99240059 | G | A | 0.2978 | -0.0529 | 0.0051 | 8.02E-25 | -10.2877 | 1376071 | Asthma |
| rs7139654   | 13 | 99240634 | T | G | 0.3702 | 0.0297  | 0.0049 | 1.32E-09 | 6.0652   | 1376071 | Asthma |
| rs9517658   | 13 | 99242319 | T | C | 0.1187 | -0.0642 | 0.0098 | 5.11E-11 | -6.5678  | 934923  | Asthma |
| rs9557185   | 13 | 99242853 | T | C | 0.1174 | -0.0666 | 0.0118 | 1.83E-08 | -5.6275  | 778845  | Asthma |
| rs7993615   | 13 | 99243030 | G | T | 0.3004 | -0.0528 | 0.0051 | 7.31E-25 | -10.2965 | 1376071 | Asthma |

|            |    |          |   |   |        |         |        |          |          |         |        |
|------------|----|----------|---|---|--------|---------|--------|----------|----------|---------|--------|
| rs7335403  | 13 | 99243519 | A | G | 0.2975 | -0.0530 | 0.0051 | 6.48E-25 | -10.3080 | 1376071 | Asthma |
| rs9517660  | 13 | 99247205 | T | G | 0.2870 | -0.0568 | 0.0083 | 6.71E-12 | -6.8636  | 479287  | Asthma |
| rs59020204 | 13 | 99247224 | G | T | 0.2856 | -0.0598 | 0.0082 | 3.69E-13 | -7.2666  | 844071  | Asthma |
| rs9517662  | 13 | 99247308 | C | G | 0.3309 | -0.0501 | 0.0062 | 7.11E-16 | -8.0687  | 1064845 | Asthma |
| rs6491493  | 13 | 99248166 | G | C | 0.2968 | -0.0529 | 0.0051 | 8.79E-25 | -10.2788 | 1376071 | Asthma |
| rs7333055  | 13 | 99248367 | A | G | 0.3311 | -0.0474 | 0.0052 | 3.31E-20 | -9.2081  | 1316443 | Asthma |
| rs7993146  | 13 | 99251227 | G | A | 0.3116 | -0.0518 | 0.0051 | 1.89E-24 | -10.2047 | 1376071 | Asthma |
| rs7322759  | 13 | 99257424 | G | C | 0.1216 | -0.0646 | 0.0072 | 3.52E-19 | -8.9512  | 1376071 | Asthma |
| rs3759444  | 13 | 99258009 | T | C | 0.1215 | -0.0648 | 0.0072 | 2.75E-19 | -8.9781  | 1376071 | Asthma |
| rs1927726  | 13 | 99260629 | G | A | 0.1220 | -0.0649 | 0.0072 | 2.22E-19 | -9.0020  | 1376071 | Asthma |
| rs9517667  | 13 | 99262881 | A | G | 0.1215 | -0.0649 | 0.0072 | 2.37E-19 | -8.9946  | 1376071 | Asthma |
| rs7994398  | 13 | 99265896 | G | A | 0.1220 | -0.0648 | 0.0072 | 2.49E-19 | -8.9892  | 1376071 | Asthma |
| rs61970284 | 13 | 99266517 | C | T | 0.3071 | -0.0545 | 0.0051 | 1.11E-26 | -10.6921 | 1376071 | Asthma |
| rs72648094 | 13 | 99268342 | A | G | 0.3704 | 0.0300  | 0.0049 | 8.99E-10 | 6.1264   | 1376071 | Asthma |
| rs9517668  | 13 | 99271586 | T | A | 0.1228 | -0.0646 | 0.0072 | 2.40E-19 | -8.9933  | 1376071 | Asthma |
| rs9513587  | 13 | 99272114 | C | T | 0.3990 | -0.0477 | 0.0048 | 2.85E-23 | -9.9379  | 1376071 | Asthma |
| rs9300536  | 13 | 99273210 | T | C | 0.1244 | -0.0633 | 0.0071 | 7.94E-19 | -8.8608  | 1376071 | Asthma |
| rs9517669  | 13 | 99275102 | A | G | 0.1215 | -0.0647 | 0.0072 | 3.27E-19 | -8.9591  | 1376071 | Asthma |
| rs7985056  | 13 | 99276732 | G | A | 0.3712 | 0.0296  | 0.0049 | 1.39E-09 | 6.0573   | 1376071 | Asthma |
| rs2149261  | 13 | 99277844 | T | C | 0.2958 | -0.0526 | 0.0052 | 1.81E-24 | -10.2092 | 1376071 | Asthma |
| rs9517670  | 13 | 99281389 | G | A | 0.1122 | -0.0646 | 0.0075 | 6.20E-18 | -8.6289  | 1376071 | Asthma |
| rs9513588  | 13 | 99282859 | C | T | 0.3707 | 0.0295  | 0.0049 | 1.66E-09 | 6.0277   | 1376071 | Asthma |
| rs7338185  | 13 | 99284256 | T | C | 0.3695 | 0.0297  | 0.0049 | 1.36E-09 | 6.0600   | 1376071 | Asthma |
| rs9513589  | 13 | 99286540 | G | A | 0.1215 | -0.0648 | 0.0072 | 2.85E-19 | -8.9745  | 1376071 | Asthma |
| rs9517672  | 13 | 99286652 | T | C | 0.1215 | -0.0648 | 0.0072 | 2.84E-19 | -8.9746  | 1376071 | Asthma |
| rs72648100 | 13 | 99291082 | A | T | 0.1222 | -0.0644 | 0.0072 | 3.70E-19 | -8.9455  | 1376071 | Asthma |
| rs9517673  | 13 | 99291981 | T | A | 0.3711 | 0.0297  | 0.0049 | 1.22E-09 | 6.0776   | 1376071 | Asthma |
| rs9284183  | 13 | 99294117 | G | A | 0.2988 | -0.0526 | 0.0051 | 1.35E-24 | -10.2375 | 1376071 | Asthma |
| rs2230341  | 13 | 99295007 | T | C | 0.1216 | -0.0646 | 0.0072 | 3.56E-19 | -8.9498  | 1376071 | Asthma |
| rs75888208 | 13 | 99296505 | T | C | 0.0305 | -0.0789 | 0.0142 | 2.70E-08 | -5.5599  | 1316443 | Asthma |
| rs9517676  | 13 | 99297124 | G | A | 0.1223 | -0.0644 | 0.0072 | 3.76E-19 | -8.9439  | 1376071 | Asthma |
| rs1887703  | 13 | 99297729 | T | C | 0.3638 | 0.0318  | 0.0052 | 7.23E-10 | 6.1610   | 1008051 | Asthma |
| rs1927728  | 13 | 99303279 | C | T | 0.3704 | 0.0297  | 0.0049 | 1.21E-09 | 6.0786   | 1376071 | Asthma |
| rs72649510 | 13 | 99305367 | T | C | 0.1223 | -0.0643 | 0.0072 | 4.32E-19 | -8.9284  | 1376071 | Asthma |
| rs1927730  | 13 | 99306311 | C | T | 0.3709 | 0.0295  | 0.0049 | 1.54E-09 | 6.0400   | 1376071 | Asthma |
| rs9517678  | 13 | 99308805 | C | T | 0.1222 | -0.0645 | 0.0072 | 3.26E-19 | -8.9595  | 1376071 | Asthma |
| rs12583270 | 13 | 99309459 | T | G | 0.3702 | 0.0298  | 0.0049 | 1.08E-09 | 6.0969   | 1376071 | Asthma |
| rs72649512 | 13 | 99310324 | T | C | 0.3695 | 0.0297  | 0.0049 | 1.23E-09 | 6.0759   | 1376071 | Asthma |
| rs9554581  | 13 | 99310638 | T | C | 0.1213 | -0.0643 | 0.0072 | 5.81E-19 | -8.8957  | 1376071 | Asthma |
| rs1998475  | 13 | 99312121 | G | A | 0.1225 | -0.0643 | 0.0072 | 4.28E-19 | -8.9295  | 1376071 | Asthma |
| rs9517679  | 13 | 99313279 | T | C | 0.3693 | 0.0299  | 0.0049 | 1.06E-09 | 6.0997   | 1376071 | Asthma |
| rs9517680  | 13 | 99313823 | C | A | 0.1214 | -0.0649 | 0.0072 | 2.43E-19 | -8.9918  | 1376071 | Asthma |
| rs9517683  | 13 | 99315897 | G | A | 0.2589 | -0.0501 | 0.0055 | 1.32E-19 | -9.0588  | 1316443 | Asthma |
| rs9557199  | 13 | 99317252 | C | T | 0.1227 | -0.0643 | 0.0072 | 4.10E-19 | -8.9342  | 1376071 | Asthma |
| rs1887704  | 13 | 99322238 | C | G | 0.3295 | -0.0499 | 0.0051 | 1.89E-22 | -9.7474  | 1316443 | Asthma |
| rs9517684  | 13 | 99322721 | C | A | 0.3707 | 0.0296  | 0.0049 | 1.47E-09 | 6.0477   | 1376071 | Asthma |
| rs7338726  | 13 | 99323079 | A | G | 0.2864 | -0.0535 | 0.0052 | 9.89E-25 | -10.2673 | 1376071 | Asthma |
| rs7339230  | 13 | 99323126 | G | A | 0.2961 | -0.0530 | 0.0052 | 7.19E-25 | -10.2980 | 1376071 | Asthma |
| rs7139522  | 13 | 99323407 | C | A | 0.3990 | -0.0480 | 0.0048 | 1.68E-23 | -9.9906  | 1376071 | Asthma |
| rs7139916  | 13 | 99323644 | T | C | 0.3696 | 0.0290  | 0.0049 | 3.03E-09 | 5.9299   | 1376071 | Asthma |
| rs11842736 | 13 | 99324606 | C | T | 0.2956 | -0.0521 | 0.0052 | 4.53E-24 | -10.1195 | 1376071 | Asthma |
| rs9517685  | 13 | 99325338 | T | C | 0.3698 | 0.0291  | 0.0049 | 2.77E-09 | 5.9448   | 1376071 | Asthma |
| rs9517686  | 13 | 99325498 | G | A | 0.2860 | -0.0525 | 0.0052 | 7.12E-24 | -10.0752 | 1376071 | Asthma |
| rs9517687  | 13 | 99326313 | A | G | 0.1212 | -0.0651 | 0.0072 | 2.23E-19 | -9.0015  | 1376071 | Asthma |
| rs3825426  | 13 | 99326818 | C | G | 0.1224 | -0.0661 | 0.0078 | 1.54E-17 | -8.5243  | 1246149 | Asthma |
| rs9513598  | 13 | 99329849 | G | A | 0.3709 | 0.0293  | 0.0049 | 2.22E-09 | 5.9805   | 1376071 | Asthma |
| rs2181502  | 13 | 99331065 | G | A | 0.2962 | -0.0533 | 0.0051 | 4.51E-25 | -10.3428 | 1376071 | Asthma |
| rs2146678  | 13 | 99331755 | A | T | 0.3707 | 0.0292  | 0.0049 | 2.27E-09 | 5.9774   | 1376071 | Asthma |
| rs17575643 | 13 | 99332421 | T | C | 0.1108 | -0.0656 | 0.0075 | 3.59E-18 | -8.6910  | 1376071 | Asthma |
| rs4511390  | 13 | 99333774 | G | A | 0.2986 | -0.0529 | 0.0051 | 6.96E-25 | -10.3012 | 1376071 | Asthma |
| rs59186511 | 13 | 99333984 | T | C | 0.1210 | -0.0649 | 0.0072 | 2.82E-19 | -8.9756  | 1376071 | Asthma |
| rs9517690  | 13 | 99334422 | C | A | 0.3710 | 0.0292  | 0.0049 | 2.32E-09 | 5.9736   | 1376071 | Asthma |
| rs927989   | 13 | 99335452 | G | C | 0.2962 | -0.0536 | 0.0052 | 2.54E-25 | -10.3977 | 1376071 | Asthma |
| rs9517691  | 13 | 99336723 | G | C | 0.4645 | 0.0270  | 0.0047 | 1.09E-08 | 5.7166   | 1376071 | Asthma |
| rs9517692  | 13 | 99336792 | G | A | 0.3710 | 0.0293  | 0.0049 | 2.23E-09 | 5.9800   | 1376071 | Asthma |
| rs913464   | 13 | 99337735 | A | G | 0.1216 | -0.0648 | 0.0072 | 2.86E-19 | -8.9740  | 1376071 | Asthma |
| rs9517693  | 13 | 99337795 | A | G | 0.1213 | -0.0646 | 0.0072 | 4.22E-19 | -8.9311  | 1376071 | Asthma |
| rs2004229  | 13 | 99338300 | T | C | 0.1214 | -0.0640 | 0.0072 | 8.56E-19 | -8.8523  | 1376071 | Asthma |
| rs9557202  | 13 | 99340026 | G | A | 0.1943 | 0.0329  | 0.0060 | 3.89E-08 | 5.4957   | 1376071 | Asthma |
| rs1927725  | 13 | 99340233 | C | T | 0.3720 | 0.0292  | 0.0049 | 2.45E-09 | 5.9646   | 1376071 | Asthma |
| rs2390239  | 13 | 99341466 | T | G | 0.1208 | -0.0641 | 0.0072 | 9.15E-19 | -8.8450  | 1376071 | Asthma |
| rs4772189  | 13 | 99342319 | T | C | 0.1212 | -0.0640 | 0.0072 | 7.60E-19 | -8.8659  | 1376071 | Asthma |
| rs55689056 | 13 | 99342895 | A | G | 0.4084 | 0.0274  | 0.0048 | 1.20E-08 | 5.6993   | 1376071 | Asthma |
| rs9513600  | 13 | 99343761 | G | A | 0.2961 | -0.0507 | 0.0052 | 7.32E-23 | -9.8432  | 1376071 | Asthma |



|             |    |          |   |   |        |         |        |          |          |         |        |
|-------------|----|----------|---|---|--------|---------|--------|----------|----------|---------|--------|
| rs1319132   | 13 | 99347347 | G | C | 0.2868 | -0.0600 | 0.0081 | 1.13E-13 | -7.4242  | 544513  | Asthma |
| rs9513601   | 13 | 99347880 | A | G | 0.4996 | 0.0264  | 0.0047 | 2.04E-08 | 5.6085   | 1376071 | Asthma |
| rs9585037   | 13 | 99348586 | T | A | 0.1941 | 0.0330  | 0.0060 | 3.89E-08 | 5.4958   | 1376071 | Asthma |
| rs9585038   | 13 | 99348598 | G | A | 0.1940 | 0.0329  | 0.0060 | 3.93E-08 | 5.4941   | 1376071 | Asthma |
| rs113868732 | 13 | 99349936 | A | G | 0.3262 | 0.0299  | 0.0052 | 8.27E-09 | 5.7628   | 1316443 | Asthma |
| rs9513602   | 13 | 99350142 | G | A | 0.2959 | -0.0533 | 0.0051 | 4.30E-25 | -10.3474 | 1376071 | Asthma |
| rs12877371  | 13 | 99350687 | C | A | 0.1944 | 0.0327  | 0.0060 | 4.68E-08 | 5.4632   | 1376071 | Asthma |
| rs727263    | 13 | 99351854 | A | G | 0.1221 | -0.0636 | 0.0072 | 1.11E-18 | -8.8239  | 1376071 | Asthma |
| rs1923897   | 13 | 99352087 | T | C | 0.3386 | -0.0521 | 0.0050 | 1.08E-25 | -10.4790 | 1376071 | Asthma |
| rs731150    | 13 | 99355296 | C | T | 0.3713 | 0.0292  | 0.0049 | 2.45E-09 | 5.9645   | 1376071 | Asthma |
| rs2146677   | 13 | 99359417 | T | A | 0.3748 | 0.0293  | 0.0049 | 1.96E-09 | 6.0011   | 1376071 | Asthma |
| rs9517697   | 13 | 99360510 | C | T | 0.3750 | 0.0290  | 0.0049 | 3.24E-09 | 5.9187   | 1376071 | Asthma |
| rs9517698   | 13 | 99362292 | G | A | 0.1222 | -0.0639 | 0.0072 | 6.71E-19 | -8.8795  | 1376071 | Asthma |
| rs1923896   | 13 | 99366033 | G | A | 0.3735 | 0.0289  | 0.0049 | 3.53E-09 | 5.9047   | 1376071 | Asthma |
| rs1923895   | 13 | 99366338 | G | A | 0.2960 | -0.0533 | 0.0051 | 4.31E-25 | -10.3471 | 1376071 | Asthma |
| rs7998034   | 13 | 99366721 | T | C | 0.1904 | 0.0330  | 0.0060 | 4.11E-08 | 5.4860   | 1376071 | Asthma |
| rs7318947   | 13 | 99367958 | A | G | 0.1220 | -0.0646 | 0.0072 | 2.95E-19 | -8.9704  | 1376071 | Asthma |
| rs4636771   | 13 | 99369264 | T | G | 0.1223 | -0.0646 | 0.0072 | 2.94E-19 | -8.9709  | 1376071 | Asthma |
| rs7325242   | 13 | 99370249 | C | T | 0.2949 | -0.0523 | 0.0052 | 3.71E-24 | -10.1391 | 1376071 | Asthma |
| rs7332161   | 13 | 99371215 | A | G | 0.1220 | -0.0647 | 0.0072 | 2.83E-19 | -8.9751  | 1376071 | Asthma |
| rs7332358   | 13 | 99371275 | A | G | 0.1111 | -0.0655 | 0.0075 | 3.10E-18 | -8.7078  | 1376071 | Asthma |
| rs9513605   | 13 | 99371334 | C | T | 0.3750 | 0.0291  | 0.0049 | 2.80E-09 | 5.9426   | 1376071 | Asthma |
| rs2892975   | 13 | 99373549 | C | T | 0.3749 | 0.0290  | 0.0049 | 3.11E-09 | 5.9255   | 1376071 | Asthma |
| rs10508037  | 13 | 99374502 | C | A | 0.3649 | 0.0313  | 0.0052 | 1.34E-09 | 6.0626   | 1008051 | Asthma |
| rs9517700   | 13 | 99375558 | A | G | 0.3739 | 0.0291  | 0.0049 | 2.79E-09 | 5.9432   | 1376071 | Asthma |
| rs8181880   | 13 | 99375703 | G | A | 0.1914 | 0.0334  | 0.0060 | 2.58E-08 | 5.5676   | 1376071 | Asthma |
| rs9517701   | 13 | 99377286 | G | A | 0.1222 | -0.0638 | 0.0072 | 7.04E-19 | -8.8742  | 1376071 | Asthma |
| rs7325747   | 13 | 99377678 | T | C | 0.1222 | -0.0640 | 0.0072 | 6.10E-19 | -8.8902  | 1376071 | Asthma |
| rs9517702   | 13 | 99377955 | G | A | 0.3747 | 0.0291  | 0.0049 | 2.82E-09 | 5.9415   | 1376071 | Asthma |
| rs2093642   | 13 | 99379376 | T | C | 0.1219 | -0.0644 | 0.0072 | 4.09E-19 | -8.9345  | 1376071 | Asthma |
| rs912131    | 13 | 99380092 | A | G | 0.3031 | -0.0549 | 0.0051 | 6.02E-27 | -10.7486 | 1376071 | Asthma |
| rs912130    | 13 | 99380148 | G | T | 0.2957 | -0.0533 | 0.0052 | 4.38E-25 | -10.3456 | 1376071 | Asthma |
| rs9517704   | 13 | 99380807 | A | T | 0.3050 | -0.0539 | 0.0051 | 4.72E-26 | -10.5568 | 1376071 | Asthma |
| rs912129    | 13 | 99381398 | A | G | 0.1327 | -0.0648 | 0.0070 | 1.24E-20 | -9.3132  | 1376071 | Asthma |
| rs4772190   | 13 | 99381862 | A | G | 0.1224 | -0.0648 | 0.0072 | 2.30E-19 | -8.9981  | 1376071 | Asthma |
| rs1977254   | 13 | 99382266 | C | G | 0.1224 | -0.0649 | 0.0072 | 2.18E-19 | -9.0038  | 1376071 | Asthma |
| rs1977253   | 13 | 99382274 | A | G | 0.1253 | -0.0639 | 0.0071 | 3.02E-19 | -8.9682  | 1376071 | Asthma |
| rs59240606  | 13 | 99382521 | G | A | 0.3711 | 0.0289  | 0.0049 | 3.63E-09 | 5.9004   | 1376071 | Asthma |
| rs9557205   | 13 | 99383018 | G | C | 0.1944 | 0.0333  | 0.0060 | 2.70E-08 | 5.5597   | 1376071 | Asthma |
| rs9557207   | 13 | 99384164 | G | A | 0.1951 | 0.0335  | 0.0060 | 2.13E-08 | 5.6014   | 1376071 | Asthma |
| rs9554586   | 13 | 99387985 | G | A | 0.1220 | -0.0649 | 0.0072 | 2.11E-19 | -9.0073  | 1376071 | Asthma |
| rs9300542   | 13 | 99388225 | A | G | 0.3062 | -0.0546 | 0.0051 | 9.13E-27 | -10.7100 | 1376071 | Asthma |
| rs9554587   | 13 | 99388400 | G | A | 0.1957 | 0.0334  | 0.0060 | 2.43E-08 | 5.5784   | 1376071 | Asthma |
| rs7992229   | 13 | 99388725 | G | A | 0.3035 | -0.0547 | 0.0051 | 1.10E-26 | -10.6930 | 1376071 | Asthma |
| rs9557209   | 13 | 99388957 | A | G | 0.1220 | -0.0651 | 0.0072 | 1.78E-19 | -9.0263  | 1376071 | Asthma |
| rs9513607   | 13 | 99389210 | A | G | 0.1328 | -0.0651 | 0.0070 | 7.41E-21 | -9.3676  | 1376071 | Asthma |
| rs7335046   | 13 | 99389484 | G | C | 0.1326 | -0.0653 | 0.0069 | 5.11E-21 | -9.4068  | 1376071 | Asthma |
| rs7982347   | 13 | 99390621 | C | T | 0.1303 | -0.0652 | 0.0070 | 1.40E-20 | -9.3008  | 1376071 | Asthma |
| rs72651024  | 13 | 99391743 | G | A | 0.1222 | -0.0646 | 0.0072 | 3.35E-19 | -8.9565  | 1376071 | Asthma |
| rs12586002  | 13 | 99393852 | G | T | 0.3740 | 0.0299  | 0.0049 | 1.05E-09 | 6.1018   | 1376071 | Asthma |
| rs58353209  | 13 | 99394302 | C | A | 0.3723 | 0.0302  | 0.0049 | 7.34E-10 | 6.1587   | 1376071 | Asthma |
| rs9513608   | 13 | 99400461 | T | C | 0.1206 | -0.0649 | 0.0072 | 3.36E-19 | -8.9562  | 1376071 | Asthma |
| rs4772194   | 13 | 99401737 | T | C | 0.1926 | -0.0525 | 0.0061 | 6.78E-18 | -8.6186  | 1316443 | Asthma |
| rs9300544   | 13 | 99403018 | A | G | 0.1961 | -0.0521 | 0.0064 | 6.79E-16 | -8.0741  | 1224666 | Asthma |
| rs7999077   | 13 | 99405867 | T | C | 0.1213 | -0.0628 | 0.0072 | 3.71E-18 | -8.6875  | 1376071 | Asthma |
| rs2892976   | 13 | 99406307 | G | A | 0.1971 | -0.0512 | 0.0060 | 2.36E-17 | -8.4747  | 1316443 | Asthma |
| rs7982416   | 13 | 99406414 | G | A | 0.1212 | -0.0629 | 0.0072 | 3.37E-18 | -8.6981  | 1376071 | Asthma |
| rs4772195   | 13 | 99406443 | G | C | 0.1949 | -0.0503 | 0.0061 | 1.11E-16 | -8.2922  | 1316443 | Asthma |
| rs9513609   | 13 | 99407538 | C | T | 0.1948 | -0.0505 | 0.0061 | 9.59E-17 | -8.3098  | 1316443 | Asthma |
| rs2015346   | 13 | 99408310 | T | C | 0.1281 | -0.0627 | 0.0087 | 4.65E-13 | -7.2352  | 1030443 | Asthma |
| rs2015349   | 13 | 99408328 | T | C | 0.1346 | -0.0613 | 0.0078 | 3.38E-15 | -7.8762  | 1160365 | Asthma |
| rs9517707   | 13 | 99408638 | G | A | 0.1395 | -0.0595 | 0.0069 | 6.16E-18 | -8.6295  | 1316443 | Asthma |
| rs150786584 | 13 | 99410681 | A | G | 0.0364 | -0.0812 | 0.0125 | 8.89E-11 | -6.4849  | 1376071 | Asthma |
| rs72651032  | 13 | 99410975 | T | C | 0.3715 | 0.0296  | 0.0049 | 1.44E-09 | 6.0506   | 1376071 | Asthma |
| rs4319612   | 13 | 99411911 | G | A | 0.2353 | -0.0404 | 0.0055 | 2.51E-13 | -7.3181  | 1376071 | Asthma |
| rs4238216   | 13 | 99412716 | C | T | 0.1394 | -0.0600 | 0.0067 | 6.42E-19 | -8.8846  | 1376071 | Asthma |
| rs4421856   | 13 | 99412793 | A | G | 0.1390 | -0.0607 | 0.0068 | 2.59E-19 | -8.9850  | 1376071 | Asthma |
| rs9557215   | 13 | 99413364 | A | T | 0.1208 | -0.0624 | 0.0072 | 7.19E-18 | -8.6118  | 1376071 | Asthma |
| rs4772197   | 13 | 99413660 | T | G | 0.1418 | -0.0601 | 0.0067 | 3.15E-19 | -8.9634  | 1376071 | Asthma |
| rs3887082   | 13 | 99413867 | T | C | 0.1209 | -0.0624 | 0.0072 | 6.58E-18 | -8.6219  | 1376071 | Asthma |
| rs4772198   | 13 | 99414838 | G | C | 0.1418 | -0.0598 | 0.0067 | 5.00E-19 | -8.9123  | 1376071 | Asthma |
| rs4772199   | 13 | 99415192 | T | G | 0.1314 | -0.0626 | 0.0083 | 5.79E-14 | -7.5129  | 1090071 | Asthma |
| rs9557217   | 13 | 99416013 | C | T | 0.2578 | -0.0380 | 0.0055 | 5.20E-12 | -6.9000  | 1316443 | Asthma |
| rs4771332   | 13 | 99418203 | T | C | 0.3208 | -0.0482 | 0.0050 | 1.21E-21 | -9.5573  | 1376071 | Asthma |

|             |    |          |   |   |        |         |        |          |         |         |        |
|-------------|----|----------|---|---|--------|---------|--------|----------|---------|---------|--------|
| rs7987173   | 13 | 99421088 | A | C | 0.4475 | -0.0440 | 0.0048 | 2.31E-20 | -9.2474 | 1376071 | Asthma |
| rs6491500   | 13 | 99421411 | G | A | 0.4521 | -0.0435 | 0.0047 | 5.09E-20 | -9.1620 | 1376071 | Asthma |
| rs9517711   | 13 | 99422026 | G | A | 0.4509 | -0.0430 | 0.0048 | 1.46E-19 | -9.0480 | 1376071 | Asthma |
| rs912128    | 13 | 99422127 | A | G | 0.1143 | -0.0605 | 0.0075 | 6.71E-16 | -8.0758 | 1316443 | Asthma |
| rs2057456   | 13 | 99424191 | T | C | 0.3535 | -0.0312 | 0.0049 | 2.77E-10 | -6.3109 | 1376071 | Asthma |
| rs2057455   | 13 | 99424294 | C | A | 0.3585 | -0.0304 | 0.0049 | 6.77E-10 | -6.1713 | 1376071 | Asthma |
| rs2057454   | 13 | 99424373 | C | T | 0.4491 | -0.0432 | 0.0049 | 5.49E-19 | -8.9019 | 1316443 | Asthma |
| rs9513614   | 13 | 99424609 | G | T | 0.4525 | -0.0428 | 0.0047 | 2.02E-19 | -9.0119 | 1376071 | Asthma |
| rs9513615   | 13 | 99424635 | A | T | 0.1036 | -0.0590 | 0.0077 | 2.35E-14 | -7.6301 | 1376071 | Asthma |
| rs4456363   | 13 | 99425957 | G | A | 0.1084 | -0.0551 | 0.0075 | 2.52E-13 | -7.3178 | 1376071 | Asthma |
| rs2892977   | 13 | 99426005 | T | C | 0.1086 | -0.0549 | 0.0075 | 2.83E-13 | -7.3024 | 1376071 | Asthma |
| rs72650098  | 13 | 99426205 | T | C | 0.1085 | -0.0549 | 0.0075 | 2.98E-13 | -7.2951 | 1376071 | Asthma |
| rs72650099  | 13 | 99426621 | T | C | 0.1081 | -0.0548 | 0.0075 | 3.59E-13 | -7.2702 | 1376071 | Asthma |
| rs9557222   | 13 | 99426661 | T | G | 0.3591 | -0.0315 | 0.0050 | 3.65E-10 | -6.2685 | 1316443 | Asthma |
| rs9517712   | 13 | 99427579 | T | C | 0.2493 | -0.0340 | 0.0054 | 3.19E-10 | -6.2891 | 1376071 | Asthma |
| rs9517713   | 13 | 99427590 | T | C | 0.1474 | -0.0463 | 0.0066 | 2.31E-12 | -7.0146 | 1376071 | Asthma |
| rs9517715   | 13 | 99427653 | T | C | 0.4568 | -0.0419 | 0.0047 | 9.06E-19 | -8.8461 | 1376071 | Asthma |
| rs9517716   | 13 | 99427671 | A | G | 0.4568 | -0.0420 | 0.0047 | 7.65E-19 | -8.8650 | 1376071 | Asthma |
| rs9517719   | 13 | 99428614 | A | G | 0.1476 | -0.0458 | 0.0066 | 3.59E-12 | -6.9525 | 1376071 | Asthma |
| rs12585127  | 13 | 99429015 | C | T | 0.4578 | -0.0421 | 0.0047 | 6.45E-19 | -8.8841 | 1376071 | Asthma |
| rs72651404  | 13 | 99429399 | G | A | 0.1086 | -0.0553 | 0.0075 | 1.92E-13 | -7.3542 | 1376071 | Asthma |
| rs9585056   | 13 | 99429512 | C | T | 0.2435 | -0.0364 | 0.0056 | 5.32E-11 | -6.5617 | 1316443 | Asthma |
| rs12585522  | 13 | 99430457 | G | C | 0.1118 | -0.0552 | 0.0074 | 7.53E-14 | -7.4784 | 1376071 | Asthma |
| rs11616509  | 13 | 99430769 | T | C | 0.3114 | -0.0436 | 0.0052 | 7.74E-17 | -8.3351 | 1316443 | Asthma |
| rs72651406  | 13 | 99431119 | A | G | 0.1018 | -0.0558 | 0.0077 | 4.11E-13 | -7.2520 | 1376071 | Asthma |
| rs9517722   | 13 | 99431413 | T | G | 0.3929 | -0.0411 | 0.0049 | 1.02E-16 | -8.3024 | 1316443 | Asthma |
| rs4772201   | 13 | 99434005 | G | A | 0.1859 | -0.0538 | 0.0060 | 3.64E-19 | -8.9472 | 1376071 | Asthma |
| rs9300546   | 13 | 99435465 | T | G | 0.4373 | -0.0405 | 0.0048 | 1.67E-17 | -8.5147 | 1376071 | Asthma |
| rs72651412  | 13 | 99435784 | T | G | 0.1016 | -0.0556 | 0.0077 | 5.90E-13 | -7.2027 | 1376071 | Asthma |
| rs61176003  | 13 | 99436457 | A | G | 0.1019 | -0.0554 | 0.0077 | 6.26E-13 | -7.1947 | 1376071 | Asthma |
| rs12583732  | 13 | 99436604 | A | G | 0.1020 | -0.0552 | 0.0077 | 7.26E-13 | -7.1745 | 1376071 | Asthma |
| rs1923892   | 13 | 99438010 | C | T | 0.1020 | -0.0550 | 0.0077 | 9.30E-13 | -7.1404 | 1376071 | Asthma |
| rs72651415  | 13 | 99438809 | A | G | 0.1019 | -0.0552 | 0.0077 | 7.81E-13 | -7.1645 | 1376071 | Asthma |
| rs9585063   | 13 | 99442617 | T | G | 0.1023 | -0.0543 | 0.0077 | 1.65E-12 | -7.0617 | 1376071 | Asthma |
| rs9300549   | 13 | 99451480 | G | A | 0.3834 | -0.0371 | 0.0050 | 8.67E-14 | -7.4597 | 1316443 | Asthma |
| rs12584934  | 13 | 99452463 | T | G | 0.1219 | -0.0474 | 0.0072 | 3.68E-11 | -6.6163 | 1376071 | Asthma |
| rs12583331  | 13 | 99452669 | G | A | 0.1334 | -0.0416 | 0.0069 | 1.48E-09 | -6.0464 | 1376071 | Asthma |
| rs72651421  | 13 | 99452974 | G | A | 0.1335 | -0.0417 | 0.0069 | 1.28E-09 | -6.0704 | 1376071 | Asthma |
| rs8001011   | 13 | 99453109 | C | T | 0.1333 | -0.0421 | 0.0069 | 9.60E-10 | -6.1159 | 1376071 | Asthma |
| rs9513616   | 13 | 99454919 | G | A | 0.4611 | -0.0363 | 0.0049 | 9.24E-14 | -7.4515 | 1316443 | Asthma |
| rs11069365  | 13 | 99455686 | C | T | 0.4474 | -0.0362 | 0.0051 | 2.09E-12 | -7.0286 | 948423  | Asthma |
| rs17472526  | 13 | 99456862 | T | A | 0.4526 | -0.0354 | 0.0049 | 3.35E-13 | -7.2795 | 1316443 | Asthma |
| rs17610319  | 13 | 99457526 | T | C | 0.2068 | -0.0343 | 0.0060 | 8.65E-09 | -5.7552 | 1316443 | Asthma |
| rs17656442  | 13 | 99458755 | C | T | 0.1456 | -0.0452 | 0.0068 | 3.64E-11 | -6.6180 | 1316443 | Asthma |
| rs58825568  | 13 | 99458949 | G | T | 0.1456 | -0.0451 | 0.0068 | 4.18E-11 | -6.5975 | 1316443 | Asthma |
| rs9517738   | 13 | 99460268 | G | A | 0.3286 | -0.0376 | 0.0052 | 2.94E-13 | -7.2969 | 1316443 | Asthma |
| rs9557238   | 13 | 99461146 | C | T | 0.2739 | -0.0364 | 0.0054 | 2.05E-11 | -6.7021 | 1316443 | Asthma |
| rs4346089   | 13 | 99462142 | G | A | 0.4494 | -0.0317 | 0.0048 | 2.59E-11 | -6.6683 | 1376071 | Asthma |
| rs12868465  | 13 | 99462900 | T | C | 0.4493 | -0.0320 | 0.0048 | 1.76E-11 | -6.7248 | 1376071 | Asthma |
| rs67817457  | 13 | 99463285 | A | T | 0.4495 | -0.0320 | 0.0048 | 1.83E-11 | -6.7188 | 1376071 | Asthma |
| rs4325408   | 13 | 99463408 | A | G | 0.4499 | -0.0319 | 0.0048 | 2.03E-11 | -6.7038 | 1376071 | Asthma |
| rs4353368   | 13 | 99463420 | G | C | 0.4500 | -0.0321 | 0.0048 | 1.55E-11 | -6.7428 | 1376071 | Asthma |
| rs4393428   | 13 | 99465024 | T | C | 0.4959 | 0.0316  | 0.0049 | 1.08E-10 | 6.4553  | 1316443 | Asthma |
| rs4290345   | 13 | 99473115 | G | A | 0.4762 | -0.0271 | 0.0048 | 2.17E-08 | -5.5980 | 1316443 | Asthma |
| rs4270029   | 13 | 99477746 | A | G | 0.4640 | -0.0265 | 0.0048 | 4.34E-08 | -5.4767 | 1316443 | Asthma |
| rs35691677  | 13 | 99480385 | C | T | 0.4656 | -0.0269 | 0.0048 | 2.94E-08 | -5.5451 | 1316443 | Asthma |
| rs9517745   | 13 | 99483779 | T | C | 0.4653 | -0.0266 | 0.0048 | 4.06E-08 | -5.4884 | 1316443 | Asthma |
| rs9517747   | 13 | 99492551 | G | A | 0.4650 | -0.0264 | 0.0047 | 2.39E-08 | -5.5810 | 1376071 | Asthma |
| rs9517748   | 13 | 99492978 | C | T | 0.4648 | -0.0264 | 0.0047 | 2.58E-08 | -5.5675 | 1376071 | Asthma |
| rs11069369  | 13 | 99493648 | T | C | 0.4648 | -0.0263 | 0.0047 | 2.99E-08 | -5.5419 | 1376071 | Asthma |
| rs9517749   | 13 | 99494689 | G | A | 0.4649 | -0.0263 | 0.0047 | 2.75E-08 | -5.5569 | 1376071 | Asthma |
| rs2031426   | 13 | 99508091 | A | G | 0.4648 | -0.0266 | 0.0047 | 2.00E-08 | -5.6124 | 1376071 | Asthma |
| rs9517757   | 13 | 99520916 | C | T | 0.4649 | -0.0264 | 0.0047 | 2.51E-08 | -5.5729 | 1376071 | Asthma |
| rs17472806  | 13 | 99539886 | G | A | 0.4650 | -0.0261 | 0.0047 | 3.48E-08 | -5.5153 | 1376071 | Asthma |
| rs4771335   | 13 | 99547918 | T | C | 0.4647 | -0.0261 | 0.0047 | 3.48E-08 | -5.5156 | 1376071 | Asthma |
| rs9517767   | 13 | 99550115 | C | A | 0.4679 | -0.0261 | 0.0047 | 3.54E-08 | -5.5125 | 1376071 | Asthma |
| rs9517774   | 13 | 99565721 | C | T | 0.4873 | -0.0274 | 0.0049 | 1.92E-08 | -5.6191 | 1316443 | Asthma |
| rs1957569   | 14 | 68260789 | G | A | 0.3222 | 0.0379  | 0.0052 | 5.04E-13 | 7.2243  | 1316443 | Asthma |
| rs28498223  | 14 | 68261708 | T | C | 0.2856 | 0.0471  | 0.0052 | 2.03E-19 | 9.0116  | 1376071 | Asthma |
| rs17105278  | 14 | 68261762 | C | T | 0.2870 | 0.0461  | 0.0052 | 9.02E-19 | 8.8467  | 1376071 | Asthma |
| rs1957570   | 14 | 68262507 | C | A | 0.2875 | 0.0466  | 0.0052 | 3.16E-19 | 8.9631  | 1376071 | Asthma |
| rs4902562   | 14 | 68264741 | A | G | 0.4351 | -0.0282 | 0.0049 | 1.10E-08 | -5.7153 | 1316443 | Asthma |
| rs118030449 | 14 | 68265705 | A | T | 0.3761 | -0.0298 | 0.0051 | 3.75E-09 | -5.8947 | 1316443 | Asthma |
| rs117732038 | 14 | 68265706 | A | C | 0.3760 | -0.0298 | 0.0051 | 3.80E-09 | -5.8927 | 1316443 | Asthma |

|            |    |          |   |   |        |         |        |          |         |         |        |
|------------|----|----------|---|---|--------|---------|--------|----------|---------|---------|--------|
| rs6573823  | 14 | 68266915 | A | G | 0.3660 | -0.0297 | 0.0051 | 5.00E-09 | -5.8471 | 1316443 | Asthma |
| rs8015139  | 14 | 68272584 | T | G | 0.2829 | 0.0474  | 0.0058 | 4.40E-16 | 8.1268  | 1193860 | Asthma |
| rs72727425 | 14 | 68273251 | C | G | 0.1994 | 0.0487  | 0.0059 | 2.02E-16 | 8.2211  | 1376071 | Asthma |
| rs7148882  | 14 | 68274207 | G | A | 0.2852 | 0.0473  | 0.0055 | 7.85E-18 | 8.6017  | 1008051 | Asthma |
| rs10131490 | 14 | 68276590 | G | A | 0.2847 | 0.0454  | 0.0053 | 1.99E-17 | 8.4942  | 1316443 | Asthma |
| rs7148416  | 14 | 68281151 | T | A | 0.2862 | 0.0471  | 0.0052 | 1.46E-19 | 9.0479  | 1376071 | Asthma |
| rs3784099  | 14 | 68283210 | A | G | 0.2837 | 0.0473  | 0.0052 | 1.11E-19 | 9.0774  | 1376071 | Asthma |
| rs8008961  | 14 | 68285926 | T | C | 0.2826 | 0.0462  | 0.0052 | 9.86E-19 | 8.8367  | 1376071 | Asthma |
| rs2208397  | 14 | 68286570 | T | G | 0.2831 | 0.0464  | 0.0052 | 7.07E-19 | 8.8739  | 1376071 | Asthma |
| rs911263   | 14 | 68286876 | C | T | 0.2868 | 0.0461  | 0.0052 | 6.94E-19 | 8.8759  | 1376071 | Asthma |
| rs2104047  | 14 | 68287700 | T | C | 0.2852 | 0.0467  | 0.0052 | 3.08E-19 | 8.9658  | 1376071 | Asthma |
| rs1885013  | 14 | 68287978 | G | A | 0.2852 | 0.0467  | 0.0052 | 3.02E-19 | 8.9680  | 1376071 | Asthma |
| rs7155473  | 14 | 68291042 | A | T | 0.3650 | 0.0406  | 0.0050 | 5.93E-16 | 8.0909  | 1316443 | Asthma |
| rs1950897  | 14 | 68293424 | C | T | 0.2897 | 0.0455  | 0.0052 | 1.76E-18 | 8.7718  | 1376071 | Asthma |
| rs7140939  | 14 | 68293810 | A | G | 0.3929 | 0.0387  | 0.0050 | 6.51E-15 | 7.7936  | 1316443 | Asthma |
| rs2877455  | 14 | 68294269 | C | G | 0.3675 | 0.0441  | 0.0049 | 2.28E-19 | 8.9991  | 1376071 | Asthma |
| rs12880842 | 14 | 68297537 | A | G | 0.3643 | 0.0441  | 0.0049 | 2.59E-19 | 8.9847  | 1376071 | Asthma |
| rs7150454  | 14 | 68298941 | G | A | 0.2013 | 0.0476  | 0.0059 | 6.51E-16 | 8.0794  | 1376071 | Asthma |
| rs7151629  | 14 | 68299007 | T | G | 0.2813 | 0.0404  | 0.0054 | 6.98E-14 | 7.4882  | 1316443 | Asthma |
| rs2064914  | 14 | 68299588 | C | G | 0.2826 | 0.0409  | 0.0053 | 8.46E-15 | 7.7606  | 1376071 | Asthma |
| rs927220   | 14 | 68301255 | G | T | 0.2839 | 0.0409  | 0.0053 | 7.36E-15 | 7.7783  | 1376071 | Asthma |
| rs7148322  | 14 | 68302002 | T | A | 0.2835 | 0.0409  | 0.0053 | 7.38E-15 | 7.7777  | 1376071 | Asthma |
| rs12889206 | 14 | 68302465 | A | G | 0.2001 | 0.0481  | 0.0059 | 3.82E-16 | 8.1441  | 1376071 | Asthma |
| rs61985135 | 14 | 68302478 | C | T | 0.4503 | 0.0378  | 0.0055 | 8.76E-12 | 6.8255  | 1198533 | Asthma |
| rs61985136 | 14 | 68302482 | C | T | 0.4582 | 0.0409  | 0.0055 | 1.52E-13 | 7.3856  | 1198533 | Asthma |
| rs10135678 | 14 | 68302637 | A | G | 0.2810 | 0.0411  | 0.0053 | 6.51E-15 | 7.7937  | 1376071 | Asthma |
| rs10136039 | 14 | 68302993 | A | C | 0.2820 | 0.0410  | 0.0053 | 7.22E-15 | 7.7807  | 1376071 | Asthma |
| rs12885750 | 14 | 68303314 | T | G | 0.3654 | 0.0439  | 0.0049 | 3.29E-19 | 8.9585  | 1376071 | Asthma |
| rs4902564  | 14 | 68303981 | A | C | 0.2000 | 0.0481  | 0.0059 | 3.91E-16 | 8.1414  | 1376071 | Asthma |
| rs12886238 | 14 | 68304102 | G | A | 0.3652 | 0.0436  | 0.0049 | 6.66E-19 | 8.8804  | 1376071 | Asthma |
| rs911258   | 14 | 68304733 | A | G | 0.2814 | 0.0406  | 0.0053 | 1.23E-14 | 7.7131  | 1376071 | Asthma |
| rs1108590  | 14 | 68305893 | A | G | 0.3655 | 0.0439  | 0.0049 | 3.76E-19 | 8.9439  | 1376071 | Asthma |
| rs60593979 | 14 | 68306581 | C | G | 0.3687 | 0.0419  | 0.0054 | 9.98E-15 | 7.7394  | 1159440 | Asthma |
| rs2180770  | 14 | 68306636 | G | A | 0.3675 | 0.0437  | 0.0049 | 4.83E-19 | 8.9161  | 1376071 | Asthma |
| rs3784104  | 14 | 68306752 | A | G | 0.3671 | 0.0436  | 0.0049 | 5.71E-19 | 8.8976  | 1376071 | Asthma |
| rs3825729  | 14 | 68307027 | T | G | 0.3683 | 0.0413  | 0.0053 | 1.20E-14 | 7.7165  | 1224666 | Asthma |
| rs12889949 | 14 | 68308137 | T | G | 0.3655 | 0.0438  | 0.0049 | 4.31E-19 | 8.9287  | 1376071 | Asthma |
| rs11158729 | 14 | 68309343 | T | C | 0.3655 | 0.0437  | 0.0049 | 5.41E-19 | 8.9037  | 1376071 | Asthma |
| rs10141370 | 14 | 68309453 | G | A | 0.3645 | 0.0437  | 0.0049 | 5.74E-19 | 8.8969  | 1376071 | Asthma |
| rs8003738  | 14 | 68309491 | A | G | 0.1994 | 0.0483  | 0.0059 | 2.98E-16 | 8.1742  | 1376071 | Asthma |
| rs7148073  | 14 | 68310325 | T | C | 0.3645 | 0.0437  | 0.0049 | 5.43E-19 | 8.9032  | 1376071 | Asthma |
| rs7148412  | 14 | 68310488 | T | G | 0.2810 | 0.0409  | 0.0053 | 8.84E-15 | 7.7549  | 1376071 | Asthma |
| rs3784106  | 14 | 68314180 | G | A | 0.2824 | 0.0406  | 0.0053 | 1.24E-14 | 7.7114  | 1376071 | Asthma |
| rs12890109 | 14 | 68314876 | C | A | 0.3676 | 0.0435  | 0.0049 | 7.52E-19 | 8.8670  | 1376071 | Asthma |
| rs12890110 | 14 | 68314878 | C | T | 0.3676 | 0.0433  | 0.0049 | 9.73E-19 | 8.8383  | 1376071 | Asthma |
| rs12890124 | 14 | 68314897 | C | A | 0.3674 | 0.0434  | 0.0049 | 7.87E-19 | 8.8620  | 1376071 | Asthma |
| rs11628890 | 14 | 68315583 | G | A | 0.3673 | 0.0435  | 0.0049 | 6.70E-19 | 8.8798  | 1376071 | Asthma |
| rs11628825 | 14 | 68315600 | C | T | 0.3674 | 0.0431  | 0.0049 | 1.32E-18 | 8.8040  | 1376071 | Asthma |
| rs11628954 | 14 | 68315887 | C | T | 0.3672 | 0.0435  | 0.0049 | 6.50E-19 | 8.8831  | 1376071 | Asthma |
| rs1956532  | 14 | 68316557 | T | C | 0.3670 | 0.0435  | 0.0049 | 6.16E-19 | 8.8892  | 1376071 | Asthma |
| rs12881502 | 14 | 68317074 | A | C | 0.3672 | 0.0434  | 0.0049 | 7.35E-19 | 8.8694  | 1376071 | Asthma |
| rs8013078  | 14 | 68318182 | G | A | 0.2841 | 0.0414  | 0.0053 | 3.20E-15 | 7.8828  | 1376071 | Asthma |
| rs8017304  | 14 | 68318360 | G | A | 0.3669 | 0.0436  | 0.0049 | 4.89E-19 | 8.9148  | 1376071 | Asthma |
| rs8022860  | 14 | 68319582 | A | G | 0.2832 | 0.0409  | 0.0053 | 8.04E-15 | 7.7670  | 1376071 | Asthma |
| rs12878858 | 14 | 68320080 | G | A | 0.3669 | 0.0433  | 0.0049 | 9.93E-19 | 8.8359  | 1376071 | Asthma |
| rs11626138 | 14 | 68320276 | A | G | 0.3674 | 0.0436  | 0.0049 | 5.43E-19 | 8.9032  | 1376071 | Asthma |
| rs7146850  | 14 | 68321164 | A | C | 0.3655 | 0.0434  | 0.0049 | 8.69E-19 | 8.8508  | 1376071 | Asthma |
| rs1956529  | 14 | 68322207 | C | T | 0.3672 | 0.0435  | 0.0049 | 6.38E-19 | 8.8854  | 1376071 | Asthma |
| rs1956528  | 14 | 68322251 | T | C | 0.3670 | 0.0434  | 0.0049 | 7.43E-19 | 8.8682  | 1376071 | Asthma |
| rs3784108  | 14 | 68322966 | T | C | 0.3669 | 0.0433  | 0.0049 | 9.67E-19 | 8.8388  | 1376071 | Asthma |
| rs3784109  | 14 | 68323194 | T | G | 0.3659 | 0.0433  | 0.0049 | 9.67E-19 | 8.8387  | 1376071 | Asthma |
| rs10083393 | 14 | 68323580 | C | T | 0.2842 | 0.0406  | 0.0053 | 1.04E-14 | 7.7340  | 1376071 | Asthma |
| rs3825730  | 14 | 68323862 | G | A | 0.3669 | 0.0431  | 0.0049 | 1.45E-18 | 8.7938  | 1376071 | Asthma |
| rs11626195 | 14 | 68326209 | G | A | 0.3673 | 0.0434  | 0.0049 | 8.27E-19 | 8.8563  | 1376071 | Asthma |
| rs4902566  | 14 | 68326837 | T | C | 0.2852 | 0.0412  | 0.0053 | 4.54E-15 | 7.8392  | 1376071 | Asthma |
| rs7150988  | 14 | 68326987 | C | T | 0.3675 | 0.0435  | 0.0049 | 7.09E-19 | 8.8735  | 1376071 | Asthma |
| rs12878627 | 14 | 68328432 | G | A | 0.3675 | 0.0435  | 0.0049 | 7.31E-19 | 8.8700  | 1376071 | Asthma |
| rs4899238  | 14 | 68328522 | G | C | 0.2843 | 0.0412  | 0.0053 | 4.31E-15 | 7.8456  | 1376071 | Asthma |
| rs9989152  | 14 | 68329458 | A | G | 0.2839 | 0.0411  | 0.0054 | 2.21E-14 | 7.6376  | 1316443 | Asthma |
| rs12884901 | 14 | 68329748 | G | A | 0.3676 | 0.0433  | 0.0049 | 9.58E-19 | 8.8399  | 1376071 | Asthma |
| rs9323506  | 14 | 68329967 | C | G | 0.2850 | 0.0413  | 0.0054 | 1.42E-14 | 7.6947  | 1316443 | Asthma |
| rs7147852  | 14 | 68330082 | C | T | 0.3668 | 0.0430  | 0.0049 | 1.90E-18 | 8.7628  | 1376071 | Asthma |
| rs2145423  | 14 | 68330213 | A | G | 0.3688 | 0.0443  | 0.0052 | 3.00E-17 | 8.4467  | 1246149 | Asthma |
| rs2145422  | 14 | 68330452 | G | C | 0.3668 | 0.0430  | 0.0049 | 1.89E-18 | 8.7639  | 1376071 | Asthma |

|            |    |          |   |   |        |         |        |          |         |         |        |
|------------|----|----------|---|---|--------|---------|--------|----------|---------|---------|--------|
| rs2180769  | 14 | 68332385 | A | T | 0.3800 | 0.0420  | 0.0050 | 4.70E-17 | 8.3941  | 1316443 | Asthma |
| rs1956526  | 14 | 68333070 | A | C | 0.3614 | 0.0409  | 0.0050 | 4.73E-16 | 8.1181  | 1316443 | Asthma |
| rs1956525  | 14 | 68333142 | G | A | 0.3670 | 0.0412  | 0.0050 | 2.24E-16 | 8.2083  | 1316443 | Asthma |
| rs1956524  | 14 | 68333676 | G | A | 0.3672 | 0.0416  | 0.0050 | 1.18E-16 | 8.2850  | 1316443 | Asthma |
| rs4902567  | 14 | 68333883 | T | C | 0.2009 | 0.0486  | 0.0059 | 1.61E-16 | 8.2479  | 1376071 | Asthma |
| rs4410007  | 14 | 68334085 | T | C | 0.2847 | 0.0408  | 0.0054 | 3.15E-14 | 7.5918  | 1316443 | Asthma |
| rs10131654 | 14 | 68334509 | A | G | 0.2846 | 0.0410  | 0.0054 | 2.35E-14 | 7.6299  | 1316443 | Asthma |
| rs11621881 | 14 | 68335023 | G | A | 0.2811 | 0.0414  | 0.0060 | 3.79E-12 | 6.9448  | 1160365 | Asthma |
| rs7493547  | 14 | 68335395 | C | T | 0.2847 | 0.0410  | 0.0054 | 2.44E-14 | 7.6250  | 1316443 | Asthma |
| rs911255   | 14 | 68335705 | T | C | 0.2847 | 0.0410  | 0.0054 | 2.44E-14 | 7.6250  | 1316443 | Asthma |
| rs1956523  | 14 | 68337687 | A | T | 0.2844 | 0.0409  | 0.0054 | 2.80E-14 | 7.6071  | 1316443 | Asthma |
| rs2331727  | 14 | 68337969 | G | T | 0.2835 | 0.0439  | 0.0073 | 1.77E-09 | 6.0177  | 873440  | Asthma |
| rs911254   | 14 | 68338606 | T | A | 0.3691 | 0.0424  | 0.0054 | 3.25E-15 | 7.8809  | 1186521 | Asthma |
| rs2013413  | 14 | 68338734 | C | G | 0.3670 | 0.0414  | 0.0050 | 1.62E-16 | 8.2474  | 1316443 | Asthma |
| rs1810623  | 14 | 68339008 | T | C | 0.2012 | 0.0481  | 0.0059 | 3.15E-16 | 8.1676  | 1376071 | Asthma |
| rs2064912  | 14 | 68340415 | A | G | 0.3672 | 0.0415  | 0.0050 | 1.28E-16 | 8.2756  | 1316443 | Asthma |
| rs2064911  | 14 | 68340581 | T | C | 0.3672 | 0.0414  | 0.0050 | 1.63E-16 | 8.2467  | 1316443 | Asthma |
| rs6573834  | 14 | 68341681 | T | C | 0.2010 | 0.0489  | 0.0060 | 4.29E-16 | 8.1301  | 1316443 | Asthma |
| rs10483807 | 14 | 68342107 | A | G | 0.3669 | 0.0412  | 0.0050 | 2.21E-16 | 8.2100  | 1316443 | Asthma |
| rs11627646 | 14 | 68342847 | T | A | 0.3673 | 0.0417  | 0.0050 | 1.02E-16 | 8.3029  | 1316443 | Asthma |
| rs8013968  | 14 | 68343093 | A | C | 0.2845 | 0.0409  | 0.0054 | 2.90E-14 | 7.6029  | 1316443 | Asthma |
| rs12883719 | 14 | 68343500 | G | T | 0.3673 | 0.0417  | 0.0050 | 9.75E-17 | 8.3079  | 1316443 | Asthma |
| rs10144669 | 14 | 68344159 | G | T | 0.2814 | 0.0453  | 0.0065 | 3.44E-12 | 6.9585  | 1030443 | Asthma |
| rs7158493  | 14 | 68345613 | C | G | 0.3671 | 0.0418  | 0.0050 | 9.14E-17 | 8.3155  | 1316443 | Asthma |
| rs12896939 | 14 | 68345945 | T | C | 0.3668 | 0.0414  | 0.0050 | 1.74E-16 | 8.2386  | 1316443 | Asthma |
| rs11158730 | 14 | 68346039 | T | C | 0.3668 | 0.0413  | 0.0050 | 2.17E-16 | 8.2123  | 1316443 | Asthma |
| rs12880109 | 14 | 68346315 | C | T | 0.3667 | 0.0414  | 0.0050 | 1.77E-16 | 8.2370  | 1316443 | Asthma |
| rs1570106  | 14 | 68346398 | T | C | 0.2009 | 0.0482  | 0.0059 | 2.77E-16 | 8.1829  | 1376071 | Asthma |
| rs7149396  | 14 | 68347930 | A | G | 0.2914 | 0.0389  | 0.0054 | 3.99E-13 | 7.2557  | 1316443 | Asthma |
| rs1028577  | 14 | 68348544 | G | A | 0.3771 | 0.0392  | 0.0050 | 7.06E-15 | 7.7834  | 1316443 | Asthma |
| rs8017831  | 14 | 68348788 | G | A | 0.2010 | 0.0447  | 0.0066 | 1.62E-11 | 6.7368  | 1198533 | Asthma |
| rs35338922 | 14 | 68348792 | A | G | 0.2010 | 0.0448  | 0.0066 | 1.52E-11 | 6.7463  | 1198533 | Asthma |
| rs34607161 | 14 | 68348794 | G | A | 0.2010 | 0.0448  | 0.0066 | 1.39E-11 | 6.7591  | 1198533 | Asthma |
| rs35243852 | 14 | 68348796 | G | A | 0.2010 | 0.0450  | 0.0066 | 1.19E-11 | 6.7821  | 1198533 | Asthma |
| rs4904747  | 14 | 91117419 | G | A | 0.2127 | -0.0327 | 0.0060 | 4.65E-08 | -5.4641 | 1316443 | Asthma |
| rs8007818  | 14 | 91117764 | G | A | 0.2127 | -0.0328 | 0.0060 | 4.57E-08 | -5.4674 | 1316443 | Asthma |
| rs8007888  | 14 | 91118043 | A | G | 0.2127 | -0.0329 | 0.0060 | 3.90E-08 | -5.4954 | 1316443 | Asthma |
| rs12434859 | 14 | 92539943 | G | C | 0.1774 | -0.0348 | 0.0063 | 3.04E-08 | -5.5390 | 1316443 | Asthma |
| rs73326382 | 14 | 92540201 | C | G | 0.1771 | -0.0350 | 0.0063 | 2.71E-08 | -5.5595 | 1316443 | Asthma |
| rs1887558  | 14 | 92541097 | G | A | 0.1774 | -0.0350 | 0.0063 | 2.62E-08 | -5.5652 | 1316443 | Asthma |
| rs28386786 | 14 | 92544622 | T | A | 0.3404 | 0.0310  | 0.0053 | 4.03E-09 | 5.8828  | 1299802 | Asthma |
| rs58052182 | 14 | 92546021 | C | G | 0.3291 | 0.0310  | 0.0051 | 1.43E-09 | 6.0525  | 1316443 | Asthma |
| rs59911846 | 14 | 92546189 | T | G | 0.3298 | 0.0310  | 0.0051 | 1.30E-09 | 6.0671  | 1316443 | Asthma |
| rs61409971 | 14 | 92546280 | A | G | 0.3291 | 0.0310  | 0.0051 | 1.29E-09 | 6.0688  | 1316443 | Asthma |
| rs10147664 | 14 | 92546779 | A | G | 0.3296 | 0.0318  | 0.0050 | 1.87E-10 | 6.3721  | 1376071 | Asthma |
| rs2104241  | 14 | 92547675 | C | T | 0.3292 | 0.0316  | 0.0050 | 2.21E-10 | 6.3456  | 1376071 | Asthma |
| rs745381   | 14 | 92548144 | T | C | 0.3291 | 0.0316  | 0.0050 | 2.14E-10 | 6.3510  | 1376071 | Asthma |
| rs737522   | 14 | 92548327 | G | A | 0.3291 | 0.0318  | 0.0050 | 1.58E-10 | 6.3971  | 1376071 | Asthma |
| rs66906591 | 14 | 92548566 | T | C | 0.3304 | 0.0312  | 0.0050 | 3.73E-10 | 6.2650  | 1376071 | Asthma |
| rs10131276 | 14 | 92549019 | T | C | 0.3291 | 0.0318  | 0.0050 | 1.60E-10 | 6.3959  | 1376071 | Asthma |
| rs10131197 | 14 | 92549049 | G | A | 0.3293 | 0.0318  | 0.0050 | 1.74E-10 | 6.3826  | 1376071 | Asthma |
| rs10131290 | 14 | 92549134 | C | A | 0.3291 | 0.0318  | 0.0050 | 1.62E-10 | 6.3934  | 1376071 | Asthma |
| rs10131571 | 14 | 92549398 | T | C | 0.3290 | 0.0319  | 0.0050 | 1.50E-10 | 6.4055  | 1376071 | Asthma |
| rs10131588 | 14 | 92549489 | G | A | 0.3291 | 0.0318  | 0.0050 | 1.63E-10 | 6.3928  | 1376071 | Asthma |
| rs67868394 | 14 | 92549503 | C | T | 0.3291 | 0.0318  | 0.0050 | 1.61E-10 | 6.3948  | 1376071 | Asthma |
| rs67641625 | 14 | 92549734 | T | C | 0.3290 | 0.0316  | 0.0050 | 2.16E-10 | 6.3495  | 1376071 | Asthma |
| rs57222338 | 14 | 92549973 | A | G | 0.3291 | 0.0316  | 0.0050 | 2.06E-10 | 6.3570  | 1376071 | Asthma |
| rs57851052 | 14 | 92550096 | C | T | 0.3290 | 0.0318  | 0.0050 | 1.54E-10 | 6.4012  | 1376071 | Asthma |
| rs11622930 | 14 | 92550331 | A | G | 0.3291 | 0.0316  | 0.0050 | 2.04E-10 | 6.3582  | 1376071 | Asthma |
| rs11622871 | 14 | 92550470 | G | A | 0.3290 | 0.0315  | 0.0050 | 2.48E-10 | 6.3286  | 1376071 | Asthma |
| rs10137524 | 14 | 92550804 | T | C | 0.3291 | 0.0316  | 0.0050 | 2.21E-10 | 6.3460  | 1376071 | Asthma |
| rs7157029  | 14 | 92551221 | A | G | 0.3292 | 0.0316  | 0.0050 | 2.24E-10 | 6.3436  | 1376071 | Asthma |
| rs12884739 | 14 | 92553166 | A | G | 0.3707 | 0.0288  | 0.0049 | 2.86E-09 | 5.9397  | 1376071 | Asthma |
| rs11628180 | 14 | 92602171 | A | G | 0.2863 | -0.0297 | 0.0052 | 1.28E-08 | -5.6890 | 1376071 | Asthma |
| rs72697295 | 14 | 92603635 | C | G | 0.1667 | -0.0388 | 0.0070 | 2.70E-08 | -5.5600 | 1186521 | Asthma |
| rs7141996  | 14 | 92627953 | A | G | 0.1687 | -0.0353 | 0.0063 | 2.13E-08 | -5.6012 | 1376071 | Asthma |
| rs11623779 | 14 | 92630046 | C | T | 0.1688 | -0.0350 | 0.0063 | 2.75E-08 | -5.5569 | 1376071 | Asthma |
| rs11621587 | 14 | 92631994 | C | G | 0.1677 | -0.0350 | 0.0063 | 2.93E-08 | -5.5453 | 1376071 | Asthma |
| rs72699846 | 14 | 92632272 | A | G | 0.1690 | -0.0353 | 0.0063 | 2.00E-08 | -5.6122 | 1376071 | Asthma |
| rs11627441 | 14 | 92632889 | A | T | 0.1708 | -0.0376 | 0.0066 | 1.31E-08 | -5.6843 | 1008051 | Asthma |
| rs7146689  | 14 | 92633679 | C | T | 0.1692 | -0.0351 | 0.0063 | 2.44E-08 | -5.5773 | 1376071 | Asthma |
| rs17184313 | 14 | 92635906 | T | C | 0.1691 | -0.0353 | 0.0063 | 1.97E-08 | -5.6145 | 1376071 | Asthma |
| rs10498635 | 14 | 92636964 | T | C | 0.1690 | -0.0354 | 0.0063 | 1.88E-08 | -5.6232 | 1376071 | Asthma |
| rs7143806  | 14 | 92637384 | A | G | 0.1694 | -0.0346 | 0.0063 | 3.84E-08 | -5.4979 | 1376071 | Asthma |

|             |    |           |   |   |        |         |        |          |         |         |        |
|-------------|----|-----------|---|---|--------|---------|--------|----------|---------|---------|--------|
| rs11627032  | 14 | 92637727  | C | T | 0.2519 | -0.0312 | 0.0056 | 2.29E-08 | -5.5882 | 1316443 | Asthma |
| rs72699855  | 14 | 92639608  | C | G | 0.1766 | -0.0392 | 0.0065 | 2.08E-09 | -5.9911 | 1008051 | Asthma |
| rs1075472   | 14 | 92641786  | G | A | 0.1719 | -0.0361 | 0.0062 | 7.64E-09 | -5.7763 | 1376071 | Asthma |
| rs11624512  | 14 | 92644775  | T | C | 0.1734 | -0.0371 | 0.0062 | 2.78E-09 | -5.9439 | 1376071 | Asthma |
| rs112560164 | 14 | 92646579  | A | G | 0.1734 | -0.0369 | 0.0062 | 3.13E-09 | -5.9245 | 1376071 | Asthma |
| rs72699866  | 14 | 92648442  | A | G | 0.1724 | -0.0376 | 0.0064 | 4.14E-09 | -5.8787 | 1316443 | Asthma |
| rs754388    | 14 | 92649065  | G | C | 0.1728 | -0.0365 | 0.0064 | 1.10E-08 | -5.7144 | 1316443 | Asthma |
| rs72699870  | 14 | 92650006  | C | T | 0.1791 | -0.0360 | 0.0063 | 1.11E-08 | -5.7136 | 1316443 | Asthma |
| rs75860277  | 14 | 92987890  | A | G | 0.0680 | -0.0520 | 0.0092 | 1.85E-08 | -5.6259 | 1376071 | Asthma |
| rs75346669  | 14 | 92989352  | C | G | 0.0682 | -0.0525 | 0.0092 | 1.27E-08 | -5.6897 | 1376071 | Asthma |
| rs76030571  | 14 | 93009120  | T | C | 0.0676 | -0.0507 | 0.0093 | 4.79E-08 | -5.4588 | 1376071 | Asthma |
| rs12434251  | 14 | 93490238  | C | T | 0.4359 | -0.0289 | 0.0052 | 2.68E-08 | -5.5608 | 1224666 | Asthma |
| rs4905076   | 14 | 93534138  | T | G | 0.4406 | -0.0310 | 0.0055 | 1.97E-08 | -5.6144 | 856646  | Asthma |
| rs6575341   | 14 | 93566790  | A | G | 0.3816 | -0.0272 | 0.0050 | 4.96E-08 | -5.4527 | 1316443 | Asthma |
| rs41286560  | 14 | 100883117 | T | G | 0.0274 | 0.0856  | 0.0148 | 7.63E-09 | 5.7762  | 1376071 | Asthma |
| rs16962414  | 15 | 49384692  | G | A | 0.0562 | -0.0589 | 0.0103 | 1.13E-08 | -5.7097 | 1376071 | Asthma |
| rs36023246  | 15 | 49407114  | G | A | 0.3889 | 0.0270  | 0.0049 | 2.78E-08 | 5.5545  | 1376071 | Asthma |
| rs10519224  | 15 | 49427756  | C | A | 0.3888 | 0.0272  | 0.0049 | 2.07E-08 | 5.6058  | 1376071 | Asthma |
| rs9920722   | 15 | 49442915  | C | T | 0.3837 | 0.0291  | 0.0049 | 2.01E-09 | 5.9972  | 1376071 | Asthma |
| rs12916839  | 15 | 49443468  | T | C | 0.3420 | 0.0283  | 0.0050 | 1.31E-08 | 5.6848  | 1376071 | Asthma |
| rs17478694  | 15 | 49446345  | G | C | 0.3797 | 0.0295  | 0.0049 | 1.37E-09 | 6.0588  | 1376071 | Asthma |
| rs17478785  | 15 | 49448107  | C | A | 0.3803 | 0.0291  | 0.0050 | 6.77E-09 | 5.7967  | 1316443 | Asthma |
| rs4389093   | 15 | 49450872  | G | A | 0.3798 | 0.0297  | 0.0049 | 1.15E-09 | 6.0873  | 1376071 | Asthma |
| rs12903654  | 15 | 49453480  | G | C | 0.0529 | -0.0581 | 0.0106 | 4.42E-08 | -5.4735 | 1376071 | Asthma |
| rs11639111  | 15 | 49457538  | T | C | 0.3914 | 0.0277  | 0.0048 | 9.35E-09 | 5.7423  | 1376071 | Asthma |
| rs34377746  | 15 | 49462822  | A | G | 0.0562 | -0.0600 | 0.0103 | 6.48E-09 | -5.8040 | 1376071 | Asthma |
| rs35224895  | 15 | 49474660  | T | G | 0.0561 | -0.0595 | 0.0104 | 8.80E-09 | -5.7523 | 1376071 | Asthma |
| rs36114417  | 15 | 49476937  | A | G | 0.0561 | -0.0594 | 0.0103 | 9.31E-09 | -5.7430 | 1376071 | Asthma |
| rs56248339  | 15 | 49480708  | T | C | 0.0561 | -0.0595 | 0.0103 | 8.94E-09 | -5.7495 | 1376071 | Asthma |
| rs12913643  | 15 | 49481678  | A | T | 0.0561 | -0.0595 | 0.0103 | 8.96E-09 | -5.7495 | 1376071 | Asthma |
| rs34146550  | 15 | 49498680  | C | T | 0.3384 | 0.0280  | 0.0051 | 2.99E-08 | 5.5418  | 1349938 | Asthma |
| rs34764073  | 15 | 49508421  | G | T | 0.0562 | -0.0591 | 0.0103 | 1.04E-08 | -5.7242 | 1376071 | Asthma |
| rs35699093  | 15 | 49508765  | G | A | 0.0561 | -0.0589 | 0.0103 | 1.24E-08 | -5.6946 | 1376071 | Asthma |
| rs34091160  | 15 | 49516851  | C | A | 0.0561 | -0.0589 | 0.0103 | 1.20E-08 | -5.6997 | 1376071 | Asthma |
| rs1588129   | 15 | 49520437  | C | A | 0.0561 | -0.0588 | 0.0103 | 1.25E-08 | -5.6932 | 1376071 | Asthma |
| rs16962583  | 15 | 49520918  | C | T | 0.0561 | -0.0588 | 0.0103 | 1.30E-08 | -5.6862 | 1376071 | Asthma |
| rs34208295  | 15 | 49536670  | T | C | 0.0562 | -0.0588 | 0.0103 | 1.29E-08 | -5.6875 | 1376071 | Asthma |
| rs72729172  | 15 | 49537422  | A | T | 0.0564 | -0.0592 | 0.0103 | 9.74E-09 | -5.7352 | 1376071 | Asthma |
| rs12901023  | 15 | 49558881  | T | C | 0.0561 | -0.0582 | 0.0103 | 1.79E-08 | -5.6314 | 1376071 | Asthma |
| rs35563735  | 15 | 49562744  | T | A | 0.0561 | -0.0583 | 0.0103 | 1.77E-08 | -5.6331 | 1376071 | Asthma |
| rs71467692  | 15 | 49564581  | G | A | 0.0561 | -0.0583 | 0.0103 | 1.68E-08 | -5.6422 | 1376071 | Asthma |
| rs34951376  | 15 | 49568747  | A | G | 0.0561 | -0.0584 | 0.0103 | 1.61E-08 | -5.6492 | 1376071 | Asthma |
| rs12907986  | 15 | 49569226  | T | C | 0.0561 | -0.0583 | 0.0103 | 1.74E-08 | -5.6368 | 1376071 | Asthma |
| rs34531968  | 15 | 49569967  | A | G | 0.0561 | -0.0583 | 0.0103 | 1.70E-08 | -5.6405 | 1376071 | Asthma |
| rs34980263  | 15 | 49581941  | T | C | 0.0561 | -0.0583 | 0.0103 | 1.71E-08 | -5.6398 | 1376071 | Asthma |
| rs12901631  | 15 | 49589203  | C | G | 0.0561 | -0.0583 | 0.0103 | 1.69E-08 | -5.6409 | 1376071 | Asthma |
| rs4304966   | 15 | 49592940  | A | G | 0.0561 | -0.0584 | 0.0103 | 1.65E-08 | -5.6454 | 1376071 | Asthma |
| rs12913706  | 15 | 49606916  | A | T | 0.0561 | -0.0585 | 0.0103 | 1.51E-08 | -5.6606 | 1376071 | Asthma |
| rs66535408  | 15 | 49607843  | A | C | 0.0561 | -0.0584 | 0.0103 | 1.59E-08 | -5.6516 | 1376071 | Asthma |
| rs34982209  | 15 | 49617031  | C | T | 0.0561 | -0.0583 | 0.0103 | 1.78E-08 | -5.6318 | 1376071 | Asthma |
| rs35112372  | 15 | 49628996  | G | C | 0.0561 | -0.0584 | 0.0103 | 1.68E-08 | -5.6424 | 1376071 | Asthma |
| rs16962673  | 15 | 49629267  | G | A | 0.0561 | -0.0583 | 0.0103 | 1.69E-08 | -5.6407 | 1376071 | Asthma |
| rs11070712  | 15 | 49640403  | T | C | 0.0535 | -0.0617 | 0.0105 | 4.68E-09 | -5.8579 | 1376071 | Asthma |
| rs12902098  | 15 | 49663163  | T | A | 0.0561 | -0.0581 | 0.0103 | 1.86E-08 | -5.6247 | 1376071 | Asthma |
| rs12906970  | 15 | 49663541  | A | G | 0.0535 | -0.0616 | 0.0105 | 5.01E-09 | -5.8468 | 1376071 | Asthma |
| rs10519237  | 15 | 49664475  | T | C | 0.0536 | -0.0610 | 0.0105 | 6.66E-09 | -5.7994 | 1376071 | Asthma |
| rs2202712   | 15 | 49665663  | G | T | 0.0561 | -0.0582 | 0.0103 | 1.80E-08 | -5.6304 | 1376071 | Asthma |
| rs2202713   | 15 | 49669189  | T | C | 0.0561 | -0.0586 | 0.0103 | 1.46E-08 | -5.6659 | 1376071 | Asthma |
| rs16962733  | 15 | 49670793  | G | A | 0.0561 | -0.0589 | 0.0103 | 1.23E-08 | -5.6954 | 1376071 | Asthma |
| rs34798694  | 15 | 49678320  | G | A | 0.0562 | -0.0577 | 0.0103 | 2.45E-08 | -5.5766 | 1376071 | Asthma |
| rs34443321  | 15 | 49678642  | C | T | 0.0561 | -0.0580 | 0.0103 | 2.09E-08 | -5.6044 | 1376071 | Asthma |
| rs34779255  | 15 | 49685282  | T | C | 0.0535 | -0.0598 | 0.0106 | 1.47E-08 | -5.6653 | 1376071 | Asthma |
| rs35451130  | 15 | 49689812  | G | C | 0.0560 | -0.0575 | 0.0104 | 2.97E-08 | -5.5433 | 1376071 | Asthma |
| rs67196042  | 15 | 49692265  | C | A | 0.0560 | -0.0576 | 0.0104 | 2.81E-08 | -5.5528 | 1376071 | Asthma |
| rs34764936  | 15 | 49696581  | C | G | 0.0560 | -0.0573 | 0.0104 | 3.29E-08 | -5.5249 | 1376071 | Asthma |
| rs16962755  | 15 | 49698012  | G | C | 0.0560 | -0.0568 | 0.0104 | 4.87E-08 | -5.4562 | 1376071 | Asthma |
| rs12904876  | 15 | 49698453  | G | C | 0.0560 | -0.0576 | 0.0104 | 3.26E-08 | -5.5265 | 1376071 | Asthma |
| rs12910139  | 15 | 49699407  | T | A | 0.0560 | -0.0570 | 0.0104 | 4.40E-08 | -5.4744 | 1376071 | Asthma |
| rs34940145  | 15 | 49700084  | A | G | 0.0560 | -0.0576 | 0.0104 | 3.14E-08 | -5.5333 | 1376071 | Asthma |
| rs28819483  | 15 | 49700665  | A | G | 0.3398 | 0.0276  | 0.0050 | 3.84E-08 | 5.4979  | 1376071 | Asthma |
| rs35293062  | 15 | 49700702  | C | G | 0.0559 | -0.0581 | 0.0104 | 2.41E-08 | -5.5799 | 1376071 | Asthma |
| rs35503206  | 15 | 49700863  | C | G | 0.0559 | -0.0581 | 0.0104 | 2.53E-08 | -5.5713 | 1376071 | Asthma |
| rs11639326  | 15 | 49700946  | C | G | 0.3397 | 0.0275  | 0.0050 | 4.38E-08 | 5.4748  | 1376071 | Asthma |
| rs146588764 | 15 | 49701213  | A | G | 0.0559 | -0.0574 | 0.0104 | 3.61E-08 | -5.5090 | 1376071 | Asthma |



|            |    |          |   |   |        |         |        |          |         |         |        |
|------------|----|----------|---|---|--------|---------|--------|----------|---------|---------|--------|
| rs11634947 | 15 | 49705019 | G | C | 0.3450 | 0.0275  | 0.0050 | 4.15E-08 | 5.4842  | 1376071 | Asthma |
| rs7180421  | 15 | 49708075 | T | C | 0.3440 | 0.0275  | 0.0050 | 4.29E-08 | 5.4784  | 1376071 | Asthma |
| rs62022700 | 15 | 49710202 | G | A | 0.3440 | 0.0276  | 0.0050 | 3.79E-08 | 5.5005  | 1376071 | Asthma |
| rs17404727 | 15 | 49711886 | C | T | 0.3440 | 0.0309  | 0.0054 | 9.98E-09 | 5.7310  | 1281476 | Asthma |
| rs67487456 | 15 | 49714380 | G | C | 0.0596 | -0.0597 | 0.0106 | 1.85E-08 | -5.6260 | 1299802 | Asthma |
| rs17483319 | 15 | 49715064 | G | T | 0.3613 | 0.0283  | 0.0051 | 2.74E-08 | 5.5576  | 1359430 | Asthma |
| rs341415   | 15 | 60739855 | T | A | 0.1397 | -0.0487 | 0.0070 | 4.07E-12 | -6.9348 | 1316443 | Asthma |
| rs9920962  | 15 | 60744351 | G | A | 0.1434 | -0.0472 | 0.0069 | 8.13E-12 | -6.8362 | 1316443 | Asthma |
| rs7172011  | 15 | 60747188 | T | C | 0.1420 | -0.0577 | 0.0069 | 1.02E-16 | -8.3019 | 1316443 | Asthma |
| rs11632684 | 15 | 60748392 | G | T | 0.1416 | -0.0565 | 0.0070 | 4.61E-16 | -8.1213 | 1316443 | Asthma |
| rs11071553 | 15 | 60749867 | A | C | 0.2328 | -0.0458 | 0.0057 | 1.15E-15 | -8.0101 | 1316443 | Asthma |
| rs1351544  | 15 | 60750668 | T | G | 0.1475 | -0.0600 | 0.0068 | 1.30E-18 | -8.8058 | 1316443 | Asthma |
| rs1817479  | 15 | 60750936 | C | G | 0.1472 | -0.0606 | 0.0067 | 1.10E-19 | -9.0785 | 1376071 | Asthma |
| rs8025324  | 15 | 60751179 | A | G | 0.1472 | -0.0608 | 0.0067 | 9.36E-20 | -9.0962 | 1376071 | Asthma |
| rs28378989 | 15 | 60754860 | A | C | 0.1468 | -0.0614 | 0.0067 | 3.76E-20 | -9.1947 | 1376071 | Asthma |
| rs16943064 | 15 | 60754945 | A | G | 0.1488 | -0.0590 | 0.0066 | 5.43E-19 | -8.9032 | 1376071 | Asthma |
| rs9920526  | 15 | 60755327 | T | C | 0.1480 | -0.0579 | 0.0073 | 1.40E-15 | -7.9859 | 1224666 | Asthma |
| rs9920610  | 15 | 60755491 | C | T | 0.1486 | -0.0580 | 0.0072 | 1.18E-15 | -8.0062 | 1224666 | Asthma |
| rs11637301 | 15 | 60755699 | T | A | 0.1466 | -0.0611 | 0.0067 | 6.47E-20 | -9.1360 | 1376071 | Asthma |
| rs9920577  | 15 | 60755727 | A | G | 0.1465 | -0.0615 | 0.0067 | 3.57E-20 | -9.2004 | 1376071 | Asthma |
| rs9920560  | 15 | 60755731 | A | C | 0.1467 | -0.0616 | 0.0067 | 2.84E-20 | -9.2250 | 1376071 | Asthma |
| rs9920592  | 15 | 60756001 | T | C | 0.1467 | -0.0614 | 0.0067 | 3.69E-20 | -9.1968 | 1376071 | Asthma |
| rs9920593  | 15 | 60756014 | T | C | 0.1467 | -0.0614 | 0.0067 | 3.63E-20 | -9.1984 | 1376071 | Asthma |
| rs1020730  | 15 | 60756379 | T | C | 0.1467 | -0.0613 | 0.0067 | 4.50E-20 | -9.1755 | 1376071 | Asthma |
| rs16943070 | 15 | 60757044 | A | T | 0.1468 | -0.0613 | 0.0067 | 4.39E-20 | -9.1783 | 1376071 | Asthma |
| rs7162065  | 15 | 60757341 | A | G | 0.1468 | -0.0611 | 0.0067 | 5.72E-20 | -9.1496 | 1376071 | Asthma |
| rs7183955  | 15 | 60757370 | C | A | 0.2093 | -0.0442 | 0.0059 | 4.98E-14 | -7.5324 | 1376071 | Asthma |
| rs922783   | 15 | 60761752 | G | A | 0.1466 | -0.0588 | 0.0066 | 9.76E-19 | -8.8379 | 1376071 | Asthma |
| rs12900122 | 15 | 60763212 | T | C | 0.1455 | -0.0612 | 0.0067 | 5.12E-20 | -9.1616 | 1376071 | Asthma |
| rs12903966 | 15 | 60763261 | T | C | 0.1455 | -0.0624 | 0.0068 | 3.04E-20 | -9.2174 | 1349938 | Asthma |
| rs16943087 | 15 | 60763836 | G | A | 0.1453 | -0.0616 | 0.0067 | 2.69E-20 | -9.2304 | 1376071 | Asthma |
| rs2279294  | 15 | 60765034 | C | G | 0.1466 | -0.0611 | 0.0067 | 3.91E-20 | -9.1906 | 1376071 | Asthma |
| rs2279293  | 15 | 60765158 | G | C | 0.1465 | -0.0612 | 0.0067 | 3.41E-20 | -9.2051 | 1376071 | Asthma |
| rs2279292  | 15 | 60765571 | C | T | 0.1474 | -0.0607 | 0.0066 | 5.44E-20 | -9.1550 | 1376071 | Asthma |
| rs8025689  | 15 | 60767062 | C | G | 0.1481 | -0.0596 | 0.0066 | 2.10E-19 | -9.0081 | 1376071 | Asthma |
| rs12905602 | 15 | 60772499 | A | G | 0.1467 | -0.0622 | 0.0066 | 8.29E-21 | -9.3559 | 1376071 | Asthma |
| rs11633029 | 15 | 60773354 | C | T | 0.1480 | -0.0599 | 0.0066 | 1.48E-19 | -9.0463 | 1376071 | Asthma |
| rs11639084 | 15 | 60774317 | T | C | 0.1459 | -0.0621 | 0.0067 | 1.20E-20 | -9.3167 | 1376071 | Asthma |
| rs10519067 | 15 | 60776148 | A | G | 0.1375 | -0.0670 | 0.0068 | 9.30E-23 | -9.8193 | 1376071 | Asthma |
| rs10519068 | 15 | 60776505 | A | G | 0.1389 | -0.0657 | 0.0068 | 4.13E-22 | -9.6679 | 1376071 | Asthma |
| rs11071557 | 15 | 60776755 | C | T | 0.1410 | -0.0638 | 0.0067 | 2.44E-21 | -9.4845 | 1376071 | Asthma |
| rs34753162 | 15 | 60776978 | C | T | 0.1416 | -0.0641 | 0.0067 | 1.59E-21 | -9.5287 | 1376071 | Asthma |
| rs34986765 | 15 | 60777002 | C | T | 0.1411 | -0.0631 | 0.0067 | 8.22E-21 | -9.3567 | 1376071 | Asthma |
| rs11071559 | 15 | 60777789 | T | C | 0.1407 | -0.0642 | 0.0067 | 1.69E-21 | -9.5225 | 1376071 | Asthma |
| rs7173981  | 15 | 60778755 | C | T | 0.1744 | -0.0560 | 0.0062 | 1.57E-19 | -9.0397 | 1376071 | Asthma |
| rs1963497  | 15 | 60779592 | A | C | 0.1885 | -0.0473 | 0.0060 | 3.11E-15 | -7.8864 | 1376071 | Asthma |
| rs16943117 | 15 | 60786637 | T | C | 0.1899 | -0.0446 | 0.0060 | 1.05E-13 | -7.4345 | 1376071 | Asthma |
| rs12915776 | 15 | 60787178 | A | G | 0.1905 | -0.0452 | 0.0060 | 4.48E-14 | -7.5463 | 1376071 | Asthma |
| rs28617673 | 15 | 67078906 | T | C | 0.0981 | 0.0506  | 0.0081 | 3.37E-10 | 6.2806  | 1316443 | Asthma |
| rs12592283 | 15 | 67079082 | G | T | 0.0990 | 0.0527  | 0.0081 | 6.08E-11 | 6.5418  | 1316443 | Asthma |
| rs11856909 | 15 | 67085695 | A | G | 0.4079 | -0.0332 | 0.0050 | 2.06E-11 | -6.7016 | 1316443 | Asthma |
| rs8035486  | 15 | 67086949 | G | T | 0.4535 | -0.0294 | 0.0051 | 7.57E-09 | -5.7779 | 1246149 | Asthma |
| rs4776888  | 15 | 67091921 | C | T | 0.4380 | -0.0269 | 0.0048 | 1.90E-08 | -5.6208 | 1376071 | Asthma |
| rs1465842  | 15 | 67092995 | T | C | 0.4376 | -0.0270 | 0.0048 | 1.74E-08 | -5.6359 | 1376071 | Asthma |
| rs1465840  | 15 | 67093153 | C | T | 0.4379 | -0.0271 | 0.0048 | 1.66E-08 | -5.6438 | 1376071 | Asthma |
| rs881862   | 15 | 67093359 | C | G | 0.4378 | -0.0271 | 0.0048 | 1.58E-08 | -5.6526 | 1376071 | Asthma |
| rs881861   | 15 | 67093637 | A | G | 0.4377 | -0.0271 | 0.0048 | 1.72E-08 | -5.6385 | 1376071 | Asthma |
| rs7169183  | 15 | 67094523 | G | C | 0.4376 | -0.0268 | 0.0049 | 4.89E-08 | -5.4554 | 1316443 | Asthma |
| rs17293443 | 15 | 67145525 | C | T | 0.2304 | 0.0532  | 0.0057 | 1.24E-20 | 9.3136  | 1316443 | Asthma |
| rs72743459 | 15 | 67146685 | T | C | 0.2217 | 0.0559  | 0.0058 | 4.35E-22 | 9.6626  | 1316443 | Asthma |
| rs2289263  | 15 | 67146869 | G | T | 0.4646 | 0.0268  | 0.0049 | 4.16E-08 | 5.4839  | 1316443 | Asthma |
| rs7167532  | 15 | 67148918 | T | G | 0.2208 | -0.0396 | 0.0057 | 4.84E-12 | -6.9103 | 1316443 | Asthma |
| rs72743461 | 15 | 67149412 | A | C | 0.2391 | 0.0830  | 0.0055 | 1.34E-51 | 15.1126 | 1376071 | Asthma |
| rs2033785  | 15 | 67149528 | G | C | 0.2209 | -0.0386 | 0.0056 | 5.65E-12 | -6.8884 | 1376071 | Asthma |
| rs1866316  | 15 | 67149659 | C | T | 0.2974 | 0.0707  | 0.0066 | 1.18E-26 | 10.6860 | 722051  | Asthma |
| rs11637659 | 15 | 67150048 | A | G | 0.2100 | -0.0323 | 0.0059 | 4.24E-08 | -5.4804 | 1376071 | Asthma |
| rs11637816 | 15 | 67150217 | A | G | 0.2209 | -0.0386 | 0.0056 | 5.12E-12 | -6.9022 | 1376071 | Asthma |
| rs17293632 | 15 | 67150258 | T | C | 0.2392 | 0.0829  | 0.0055 | 1.21E-51 | 15.1192 | 1376071 | Asthma |
| rs8024330  | 15 | 67151588 | T | C | 0.2884 | 0.0699  | 0.0052 | 1.15E-41 | 13.5229 | 1376071 | Asthma |
| rs10152544 | 15 | 67152409 | C | T | 0.5008 | 0.0381  | 0.0047 | 6.74E-16 | 8.0751  | 1376071 | Asthma |
| rs744910   | 15 | 67154447 | G | A | 0.5013 | 0.0378  | 0.0047 | 9.27E-16 | 8.0363  | 1376071 | Asthma |
| rs35533195 | 15 | 67155069 | C | G | 0.2205 | -0.0387 | 0.0057 | 9.05E-12 | -6.8207 | 1349938 | Asthma |
| rs11634793 | 15 | 67155114 | C | T | 0.5016 | 0.0377  | 0.0047 | 1.20E-15 | 8.0047  | 1376071 | Asthma |
| rs12441344 | 15 | 67155557 | G | A | 0.2110 | -0.0404 | 0.0057 | 1.07E-12 | -7.1211 | 1376071 | Asthma |

|             |    |          |   |   |        |         |        |          |          |         |        |
|-------------|----|----------|---|---|--------|---------|--------|----------|----------|---------|--------|
| rs28434383  | 15 | 67155843 | T | C | 0.2885 | 0.0699  | 0.0052 | 1.05E-41 | 13.5290  | 1376071 | Asthma |
| rs56375023  | 15 | 67156025 | A | G | 0.2397 | 0.0826  | 0.0055 | 3.42E-51 | 15.0506  | 1376071 | Asthma |
| rs8032739   | 15 | 67156561 | G | A | 0.2909 | 0.0700  | 0.0052 | 6.63E-42 | 13.5631  | 1376071 | Asthma |
| rs11637537  | 15 | 67156801 | C | G | 0.2112 | -0.0341 | 0.0062 | 4.20E-08 | -5.4824  | 1219993 | Asthma |
| rs2033784   | 15 | 67157322 | G | A | 0.2910 | 0.0701  | 0.0052 | 4.75E-42 | 13.5876  | 1376071 | Asthma |
| rs17228058  | 15 | 67157967 | G | A | 0.2402 | 0.0824  | 0.0055 | 4.13E-51 | 15.0382  | 1376071 | Asthma |
| rs7173698   | 15 | 67158555 | G | A | 0.2911 | 0.0699  | 0.0052 | 7.47E-42 | 13.5543  | 1376071 | Asthma |
| rs7174445   | 15 | 67158877 | G | C | 0.2910 | 0.0698  | 0.0052 | 9.42E-42 | 13.5373  | 1376071 | Asthma |
| rs72743467  | 15 | 67159072 | C | A | 0.1861 | 0.0818  | 0.0071 | 1.79E-30 | 11.4738  | 818501  | Asthma |
| rs4601989   | 15 | 67159616 | T | C | 0.2208 | -0.0395 | 0.0056 | 1.47E-12 | -7.0778  | 1376071 | Asthma |
| rs9920190   | 15 | 67160650 | G | A | 0.2907 | 0.0702  | 0.0052 | 3.86E-42 | 13.6027  | 1376071 | Asthma |
| rs7164786   | 15 | 67160704 | A | G | 0.2903 | 0.0679  | 0.0056 | 2.89E-33 | 12.0171  | 1219993 | Asthma |
| rs56062135  | 15 | 67163292 | T | C | 0.2393 | 0.0829  | 0.0055 | 1.53E-51 | 15.1039  | 1376071 | Asthma |
| rs2289261   | 15 | 67165147 | G | C | 0.3822 | -0.0494 | 0.0049 | 7.30E-24 | -10.0725 | 1376071 | Asthma |
| rs56336520  | 15 | 67165502 | A | G | 0.0334 | 0.0942  | 0.0133 | 1.23E-12 | 7.1023   | 1376071 | Asthma |
| rs4562997   | 15 | 67165814 | A | G | 0.2879 | 0.0731  | 0.0056 | 1.32E-39 | 13.1694  | 1246149 | Asthma |
| rs28360855  | 15 | 67166467 | G | A | 0.4153 | 0.0450  | 0.0048 | 5.72E-21 | 9.3952   | 1376071 | Asthma |
| rs11638064  | 15 | 67167671 | A | G | 0.2261 | -0.0395 | 0.0055 | 1.14E-12 | -7.1133  | 1376071 | Asthma |
| rs11639295  | 15 | 67168419 | T | C | 0.3036 | -0.0401 | 0.0051 | 4.09E-15 | -7.8524  | 1376071 | Asthma |
| rs7165382   | 15 | 67169660 | G | C | 0.2270 | -0.0400 | 0.0055 | 5.61E-13 | -7.2096  | 1376071 | Asthma |
| rs16950687  | 15 | 67171675 | G | A | 0.2699 | 0.0677  | 0.0054 | 6.92E-36 | 12.5061  | 1316443 | Asthma |
| rs72743477  | 15 | 67171953 | G | A | 0.2213 | 0.0798  | 0.0057 | 5.22E-45 | 14.0776  | 1376071 | Asthma |
| rs34708051  | 15 | 67172207 | T | C | 0.2294 | -0.0397 | 0.0055 | 6.57E-13 | -7.1880  | 1376071 | Asthma |
| rs1866320   | 15 | 67172982 | T | G | 0.2236 | -0.0453 | 0.0060 | 3.83E-14 | -7.5665  | 1246149 | Asthma |
| rs72743482  | 15 | 67174261 | G | A | 0.2232 | 0.0786  | 0.0057 | 6.72E-44 | 13.8958  | 1376071 | Asthma |
| rs2278546   | 15 | 67174264 | G | A | 0.2697 | 0.0664  | 0.0054 | 2.08E-34 | 12.2325  | 1316443 | Asthma |
| rs12912010  | 15 | 67174805 | T | G | 0.2117 | -0.0438 | 0.0057 | 1.36E-14 | -7.7000  | 1376071 | Asthma |
| rs12912045  | 15 | 67174959 | T | C | 0.2118 | -0.0439 | 0.0057 | 1.18E-14 | -7.7185  | 1376071 | Asthma |
| rs12913547  | 15 | 67175169 | C | T | 0.2120 | -0.0436 | 0.0057 | 1.61E-14 | -7.6785  | 1376071 | Asthma |
| rs12708492  | 15 | 67175203 | T | C | 0.4972 | 0.0327  | 0.0049 | 1.82E-11 | 6.7199   | 1316443 | Asthma |
| rs17294280  | 15 | 67175947 | G | A | 0.2608 | 0.0722  | 0.0054 | 2.31E-40 | 13.3001  | 1376071 | Asthma |
| rs35251008  | 15 | 67176187 | G | A | 0.2740 | -0.0378 | 0.0053 | 8.92E-13 | -7.1462  | 1376071 | Asthma |
| rs117009032 | 15 | 67176321 | A | G | 0.0803 | 0.0600  | 0.0089 | 1.54E-11 | 6.7438   | 1376071 | Asthma |
| rs1470002   | 15 | 67177230 | A | G | 0.4068 | -0.0309 | 0.0049 | 2.42E-10 | -6.3324  | 1376071 | Asthma |
| rs1470001   | 15 | 67177232 | G | A | 0.4812 | -0.0316 | 0.0050 | 3.87E-10 | -6.2591  | 1316443 | Asthma |
| rs893475    | 15 | 67177870 | G | A | 0.3417 | -0.0392 | 0.0050 | 6.41E-15 | -7.7958  | 1376071 | Asthma |
| rs3784681   | 15 | 67179847 | C | G | 0.2801 | -0.0377 | 0.0053 | 1.09E-12 | -7.1188  | 1376071 | Asthma |
| rs7178824   | 15 | 67180345 | C | G | 0.2325 | -0.0484 | 0.0056 | 7.25E-18 | -8.6110  | 1376071 | Asthma |
| rs10152566  | 15 | 67182745 | T | C | 0.2775 | -0.0374 | 0.0053 | 2.13E-12 | -7.0257  | 1376071 | Asthma |
| rs10152593  | 15 | 67183097 | T | C | 0.2907 | -0.0395 | 0.0057 | 5.08E-12 | -6.9034  | 1219993 | Asthma |
| rs10152595  | 15 | 67183150 | G | C | 0.2431 | -0.0504 | 0.0055 | 8.66E-20 | -9.1045  | 1376071 | Asthma |
| rs7181877   | 15 | 67184397 | A | G | 0.2320 | -0.0482 | 0.0056 | 1.01E-17 | -8.5731  | 1376071 | Asthma |
| rs7181543   | 15 | 67184418 | T | C | 0.2300 | -0.0480 | 0.0056 | 1.82E-17 | -8.5046  | 1376071 | Asthma |
| rs7181556   | 15 | 67184430 | T | C | 0.2299 | -0.0481 | 0.0056 | 1.80E-17 | -8.5062  | 1376071 | Asthma |
| rs2289791   | 15 | 67184614 | T | G | 0.2360 | -0.0489 | 0.0056 | 2.30E-18 | -8.7415  | 1376071 | Asthma |
| rs2289790   | 15 | 67184632 | C | T | 0.2323 | -0.0485 | 0.0056 | 5.71E-18 | -8.6380  | 1376071 | Asthma |
| rs3825977   | 15 | 67188910 | T | C | 0.1860 | -0.0460 | 0.0061 | 5.09E-14 | -7.5295  | 1376071 | Asthma |
| rs8025774   | 15 | 67190938 | T | C | 0.2132 | -0.0471 | 0.0058 | 4.56E-16 | -8.1229  | 1376071 | Asthma |
| rs8031440   | 15 | 67191641 | A | G | 0.2134 | -0.0471 | 0.0058 | 4.81E-16 | -8.1163  | 1376071 | Asthma |
| rs8031627   | 15 | 67191781 | A | G | 0.2134 | -0.0471 | 0.0058 | 4.41E-16 | -8.1269  | 1376071 | Asthma |
| rs2278670   | 15 | 67191959 | T | C | 0.2134 | -0.0472 | 0.0058 | 4.11E-16 | -8.1354  | 1376071 | Asthma |
| rs12595334  | 15 | 67192818 | T | C | 0.2137 | -0.0475 | 0.0058 | 2.61E-16 | -8.1903  | 1376071 | Asthma |
| rs3743342   | 15 | 67193329 | T | C | 0.2138 | -0.0475 | 0.0058 | 2.38E-16 | -8.2013  | 1376071 | Asthma |
| rs10438355  | 15 | 67195211 | G | C | 0.2191 | -0.0481 | 0.0057 | 5.97E-17 | -8.3657  | 1376071 | Asthma |
| rs10163040  | 15 | 67198148 | A | C | 0.2134 | -0.0471 | 0.0058 | 4.76E-16 | -8.1175  | 1376071 | Asthma |
| rs12917612  | 15 | 67198936 | A | C | 0.2192 | -0.0482 | 0.0057 | 4.94E-17 | -8.3881  | 1376071 | Asthma |
| rs7166081   | 15 | 67199963 | G | A | 0.2199 | -0.0480 | 0.0059 | 2.77E-16 | -8.1830  | 1316443 | Asthma |
| rs12476     | 15 | 67201388 | C | T | 0.2195 | -0.0481 | 0.0057 | 4.89E-17 | -8.3893  | 1376071 | Asthma |
| rs10518716  | 15 | 67202485 | C | G | 0.2195 | -0.0480 | 0.0057 | 5.45E-17 | -8.3766  | 1376071 | Asthma |
| rs12148121  | 15 | 67202584 | C | T | 0.2194 | -0.0480 | 0.0057 | 5.59E-17 | -8.3736  | 1376071 | Asthma |
| rs11071940  | 15 | 67207139 | C | A | 0.2196 | -0.0482 | 0.0057 | 4.17E-17 | -8.4081  | 1376071 | Asthma |
| rs4776905   | 15 | 67207992 | C | T | 0.2196 | -0.0483 | 0.0057 | 3.49E-17 | -8.4289  | 1376071 | Asthma |
| rs2289262   | 15 | 67208695 | A | G | 0.2195 | -0.0482 | 0.0057 | 4.26E-17 | -8.4054  | 1376071 | Asthma |
| rs16953610  | 15 | 67209254 | T | C | 0.2195 | -0.0483 | 0.0057 | 3.70E-17 | -8.4219  | 1376071 | Asthma |
| rs67486165  | 15 | 67210245 | A | G | 0.2195 | -0.0482 | 0.0057 | 3.97E-17 | -8.4136  | 1376071 | Asthma |
| rs72625777  | 15 | 67211470 | C | G | 0.2194 | -0.0483 | 0.0057 | 3.53E-17 | -8.4276  | 1376071 | Asthma |
| rs877177    | 15 | 67213622 | A | T | 0.2195 | -0.0482 | 0.0057 | 3.95E-17 | -8.4144  | 1376071 | Asthma |
| rs35997299  | 15 | 67215252 | T | C | 0.2194 | -0.0483 | 0.0057 | 3.63E-17 | -8.4244  | 1376071 | Asthma |
| rs2033783   | 15 | 67215430 | T | C | 0.2195 | -0.0483 | 0.0057 | 3.66E-17 | -8.4235  | 1376071 | Asthma |
| rs16950776  | 15 | 67218266 | C | G | 0.2196 | -0.0483 | 0.0057 | 3.39E-17 | -8.4322  | 1376071 | Asthma |
| rs8026870   | 15 | 67219051 | A | G | 0.2196 | -0.0484 | 0.0057 | 2.89E-17 | -8.4510  | 1376071 | Asthma |
| rs35322464  | 15 | 67219152 | G | A | 0.2196 | -0.0484 | 0.0057 | 3.05E-17 | -8.4449  | 1376071 | Asthma |
| rs34590589  | 15 | 67221852 | C | T | 0.2192 | -0.0480 | 0.0057 | 6.03E-17 | -8.3646  | 1376071 | Asthma |
| rs34699563  | 15 | 67221879 | C | T | 0.2192 | -0.0479 | 0.0057 | 6.71E-17 | -8.3521  | 1376071 | Asthma |

|             |    |          |   |   |        |         |        |          |         |         |        |
|-------------|----|----------|---|---|--------|---------|--------|----------|---------|---------|--------|
| rs34296414  | 15 | 67222071 | T | C | 0.2192 | -0.0479 | 0.0057 | 6.40E-17 | -8.3576 | 1376071 | Asthma |
| rs9806590   | 15 | 67224003 | C | T | 0.2192 | -0.0480 | 0.0057 | 5.61E-17 | -8.3731 | 1376071 | Asthma |
| rs11071942  | 15 | 67224610 | C | T | 0.2254 | -0.0482 | 0.0062 | 6.26E-15 | -7.7985 | 1219993 | Asthma |
| rs12594065  | 15 | 67225663 | A | G | 0.2192 | -0.0480 | 0.0057 | 5.76E-17 | -8.3700 | 1376071 | Asthma |
| rs8031500   | 15 | 67226702 | T | C | 0.2193 | -0.0480 | 0.0057 | 4.96E-17 | -8.3877 | 1376071 | Asthma |
| rs4776906   | 15 | 67228279 | C | T | 0.2192 | -0.0480 | 0.0057 | 5.36E-17 | -8.3785 | 1376071 | Asthma |
| rs78553942  | 15 | 67229472 | A | C | 0.2289 | -0.0531 | 0.0067 | 1.81E-15 | -7.9535 | 1090071 | Asthma |
| rs12915085  | 15 | 67229800 | G | C | 0.2194 | -0.0480 | 0.0057 | 5.29E-17 | -8.3799 | 1376071 | Asthma |
| rs12900758  | 15 | 67230705 | G | A | 0.2193 | -0.0481 | 0.0057 | 4.31E-17 | -8.4042 | 1376071 | Asthma |
| rs12898685  | 15 | 67233434 | C | T | 0.2193 | -0.0480 | 0.0057 | 5.15E-17 | -8.3831 | 1376071 | Asthma |
| rs12899067  | 15 | 67234161 | A | G | 0.2192 | -0.0483 | 0.0057 | 3.46E-17 | -8.4297 | 1376071 | Asthma |
| rs7173826   | 15 | 67236036 | G | T | 0.3347 | -0.0433 | 0.0050 | 4.34E-18 | -8.6693 | 1376071 | Asthma |
| rs28645602  | 15 | 67238985 | G | A | 0.2194 | -0.0483 | 0.0057 | 3.12E-17 | -8.4420 | 1376071 | Asthma |
| rs2289789   | 15 | 67240045 | T | C | 0.2194 | -0.0483 | 0.0057 | 3.18E-17 | -8.4396 | 1376071 | Asthma |
| rs4776348   | 15 | 67240966 | C | T | 0.2194 | -0.0484 | 0.0057 | 2.92E-17 | -8.4496 | 1376071 | Asthma |
| rs7182798   | 15 | 67242874 | G | C | 0.2194 | -0.0484 | 0.0057 | 2.92E-17 | -8.4495 | 1376071 | Asthma |
| rs12900708  | 15 | 67243102 | C | T | 0.2193 | -0.0483 | 0.0057 | 3.55E-17 | -8.4270 | 1376071 | Asthma |
| rs12910196  | 15 | 67244731 | T | G | 0.2192 | -0.0483 | 0.0057 | 3.40E-17 | -8.4320 | 1376071 | Asthma |
| rs12910062  | 15 | 67244872 | G | A | 0.2193 | -0.0482 | 0.0057 | 3.93E-17 | -8.4149 | 1376071 | Asthma |
| rs112173287 | 15 | 67246694 | C | T | 0.2375 | -0.0591 | 0.0091 | 9.71E-11 | -6.4713 | 778845  | Asthma |
| rs12591495  | 15 | 67246854 | G | A | 0.2194 | -0.0484 | 0.0057 | 2.93E-17 | -8.4493 | 1376071 | Asthma |
| rs4776908   | 15 | 67247749 | C | T | 0.2194 | -0.0484 | 0.0057 | 2.94E-17 | -8.4489 | 1376071 | Asthma |
| rs4776350   | 15 | 67249841 | G | C | 0.2192 | -0.0485 | 0.0057 | 2.65E-17 | -8.4609 | 1376071 | Asthma |
| rs4776909   | 15 | 67250011 | A | T | 0.2192 | -0.0485 | 0.0057 | 2.51E-17 | -8.4673 | 1376071 | Asthma |
| rs58074225  | 15 | 67253554 | A | G | 0.2191 | -0.0485 | 0.0057 | 2.46E-17 | -8.4694 | 1376071 | Asthma |
| rs12911370  | 15 | 67253983 | T | C | 0.2191 | -0.0486 | 0.0057 | 2.29E-17 | -8.4783 | 1376071 | Asthma |
| rs3743347   | 15 | 67254963 | A | C | 0.2189 | -0.0487 | 0.0057 | 2.16E-17 | -8.4849 | 1376071 | Asthma |
| rs8038652   | 15 | 67259726 | A | G | 0.2193 | -0.0489 | 0.0057 | 1.32E-17 | -8.5417 | 1376071 | Asthma |
| rs16950804  | 15 | 67262141 | G | A | 0.2192 | -0.0486 | 0.0057 | 2.40E-17 | -8.4726 | 1376071 | Asthma |
| rs12443472  | 15 | 67263620 | A | G | 0.2193 | -0.0490 | 0.0057 | 1.23E-17 | -8.5504 | 1376071 | Asthma |
| rs8042237   | 15 | 67264287 | A | G | 0.2193 | -0.0489 | 0.0057 | 1.30E-17 | -8.5438 | 1376071 | Asthma |
| rs8025621   | 15 | 67264388 | G | A | 0.2193 | -0.0490 | 0.0057 | 1.23E-17 | -8.5506 | 1376071 | Asthma |
| rs12592400  | 15 | 67265672 | A | C | 0.2191 | -0.0486 | 0.0057 | 2.40E-17 | -8.4724 | 1376071 | Asthma |
| rs16950805  | 15 | 67268339 | G | T | 0.2193 | -0.0484 | 0.0057 | 2.85E-17 | -8.4526 | 1376071 | Asthma |
| rs12443279  | 15 | 67269017 | G | C | 0.2288 | -0.0538 | 0.0067 | 8.08E-16 | -8.0530 | 1090071 | Asthma |
| rs67872952  | 15 | 67269260 | T | C | 0.2195 | -0.0488 | 0.0057 | 1.58E-17 | -8.5211 | 1376071 | Asthma |
| rs12901789  | 15 | 67269876 | C | A | 0.2218 | -0.0528 | 0.0061 | 6.40E-18 | -8.6251 | 1246149 | Asthma |
| rs71400364  | 15 | 67271177 | T | G | 0.2193 | -0.0484 | 0.0057 | 2.98E-17 | -8.4472 | 1376071 | Asthma |
| rs35129260  | 15 | 67273349 | T | C | 0.2193 | -0.0488 | 0.0057 | 1.53E-17 | -8.5250 | 1376071 | Asthma |
| rs35151633  | 15 | 67275927 | C | T | 0.2193 | -0.0484 | 0.0057 | 2.77E-17 | -8.4560 | 1376071 | Asthma |
| rs12442171  | 15 | 67279948 | A | G | 0.2191 | -0.0484 | 0.0057 | 2.99E-17 | -8.4470 | 1376071 | Asthma |
| rs12899051  | 15 | 67281403 | G | A | 0.2191 | -0.0486 | 0.0057 | 2.32E-17 | -8.4765 | 1376071 | Asthma |
| rs35524716  | 15 | 67286649 | A | G | 0.2192 | -0.0487 | 0.0057 | 2.06E-17 | -8.4903 | 1376071 | Asthma |
| rs34796890  | 15 | 67286753 | T | C | 0.2191 | -0.0483 | 0.0057 | 3.45E-17 | -8.4301 | 1376071 | Asthma |
| rs4776913   | 15 | 67288018 | C | A | 0.2191 | -0.0485 | 0.0057 | 2.64E-17 | -8.4618 | 1376071 | Asthma |
| rs12324222  | 15 | 67288944 | A | G | 0.2192 | -0.0483 | 0.0057 | 3.25E-17 | -8.4369 | 1376071 | Asthma |
| rs12595736  | 15 | 67290264 | A | T | 0.2191 | -0.0485 | 0.0057 | 2.66E-17 | -8.4608 | 1376071 | Asthma |
| rs72625778  | 15 | 67297765 | G | A | 0.2192 | -0.0484 | 0.0057 | 3.08E-17 | -8.4435 | 1376071 | Asthma |
| rs12595533  | 15 | 67298536 | T | C | 0.0593 | -0.0596 | 0.0107 | 2.27E-08 | -5.5902 | 1316443 | Asthma |
| rs12916403  | 15 | 67299327 | G | A | 0.2192 | -0.0483 | 0.0057 | 3.61E-17 | -8.4250 | 1376071 | Asthma |
| rs12901312  | 15 | 67299634 | A | C | 0.2191 | -0.0483 | 0.0057 | 3.54E-17 | -8.4273 | 1376071 | Asthma |
| rs12148134  | 15 | 67299760 | C | G | 0.2191 | -0.0482 | 0.0057 | 4.08E-17 | -8.4107 | 1376071 | Asthma |
| rs12594229  | 15 | 67303746 | C | A | 0.2191 | -0.0484 | 0.0057 | 2.88E-17 | -8.4514 | 1376071 | Asthma |
| rs12594234  | 15 | 67303816 | G | A | 0.2191 | -0.0484 | 0.0057 | 3.02E-17 | -8.4458 | 1376071 | Asthma |
| rs34310656  | 15 | 67307637 | T | C | 0.2191 | -0.0483 | 0.0057 | 3.55E-17 | -8.4268 | 1376071 | Asthma |
| rs4776917   | 15 | 67308006 | G | A | 0.2191 | -0.0483 | 0.0057 | 3.88E-17 | -8.4167 | 1376071 | Asthma |
| rs17526859  | 15 | 67318728 | T | G | 0.2191 | -0.0484 | 0.0057 | 2.84E-17 | -8.4531 | 1376071 | Asthma |
| rs9806377   | 15 | 67319724 | G | A | 0.2186 | -0.0486 | 0.0058 | 7.14E-17 | -8.3449 | 1349938 | Asthma |
| rs35008245  | 15 | 67322629 | A | G | 0.2192 | -0.0483 | 0.0057 | 3.54E-17 | -8.4272 | 1376071 | Asthma |
| rs113203559 | 15 | 67324200 | T | C | 0.2192 | -0.0482 | 0.0057 | 4.02E-17 | -8.4125 | 1376071 | Asthma |
| rs8030620   | 15 | 67328327 | A | G | 0.2192 | -0.0482 | 0.0057 | 3.98E-17 | -8.4134 | 1376071 | Asthma |
| rs35722009  | 15 | 67333195 | G | A | 0.2192 | -0.0482 | 0.0057 | 4.36E-17 | -8.4028 | 1376071 | Asthma |
| rs12915601  | 15 | 67338933 | C | T | 0.2193 | -0.0484 | 0.0057 | 3.03E-17 | -8.4456 | 1376071 | Asthma |
| rs4238407   | 15 | 67341446 | A | G | 0.2193 | -0.0484 | 0.0057 | 3.06E-17 | -8.4442 | 1376071 | Asthma |
| rs4776922   | 15 | 67342099 | G | A | 0.2216 | -0.0525 | 0.0061 | 1.02E-17 | -8.5719 | 1246149 | Asthma |
| rs4432221   | 15 | 67342524 | C | T | 0.2193 | -0.0482 | 0.0057 | 3.96E-17 | -8.4140 | 1376071 | Asthma |
| rs1444935   | 15 | 67343082 | G | A | 0.2193 | -0.0485 | 0.0057 | 2.75E-17 | -8.4568 | 1376071 | Asthma |
| rs1444936   | 15 | 67343211 | A | G | 0.2187 | -0.0488 | 0.0058 | 5.54E-17 | -8.3746 | 1349938 | Asthma |
| rs35688953  | 15 | 67347791 | C | T | 0.2290 | -0.0536 | 0.0067 | 1.03E-15 | -8.0240 | 1090071 | Asthma |
| rs4352000   | 15 | 67351367 | C | T | 0.2193 | -0.0485 | 0.0057 | 2.61E-17 | -8.4628 | 1376071 | Asthma |
| rs34221449  | 15 | 67351925 | T | C | 0.2193 | -0.0485 | 0.0057 | 2.49E-17 | -8.4682 | 1376071 | Asthma |
| rs35011221  | 15 | 67352675 | C | G | 0.2239 | -0.0476 | 0.0069 | 5.20E-12 | -6.9000 | 1068588 | Asthma |
| rs10152973  | 15 | 67354880 | C | T | 0.2195 | -0.0485 | 0.0057 | 2.45E-17 | -8.4704 | 1376071 | Asthma |
| rs10152913  | 15 | 67354990 | T | A | 0.2193 | -0.0486 | 0.0057 | 2.31E-17 | -8.4769 | 1376071 | Asthma |

|            |    |          |   |   |        |         |        |          |          |         |        |
|------------|----|----------|---|---|--------|---------|--------|----------|----------|---------|--------|
| rs3743349  | 15 | 67359759 | C | G | 0.2216 | -0.0525 | 0.0061 | 1.01E-17 | -8.5728  | 1246149 | Asthma |
| rs8042007  | 15 | 67360638 | G | A | 0.2194 | -0.0486 | 0.0057 | 2.47E-17 | -8.4694  | 1376071 | Asthma |
| rs4491456  | 15 | 67361301 | T | C | 0.2193 | -0.0484 | 0.0057 | 3.27E-17 | -8.4365  | 1376071 | Asthma |
| rs4536412  | 15 | 67361426 | C | A | 0.2193 | -0.0484 | 0.0057 | 3.12E-17 | -8.4422  | 1376071 | Asthma |
| rs12442323 | 15 | 67362581 | T | C | 0.2193 | -0.0483 | 0.0057 | 3.97E-17 | -8.4138  | 1376071 | Asthma |
| rs12915659 | 15 | 67363635 | C | G | 0.2193 | -0.0483 | 0.0057 | 3.64E-17 | -8.4238  | 1376071 | Asthma |
| rs8039943  | 15 | 67364092 | T | C | 0.2192 | -0.0483 | 0.0057 | 3.80E-17 | -8.4189  | 1376071 | Asthma |
| rs28696998 | 15 | 67364525 | G | A | 0.2192 | -0.0484 | 0.0057 | 3.56E-17 | -8.4267  | 1376071 | Asthma |
| rs8043060  | 15 | 67369446 | A | G | 0.2193 | -0.0484 | 0.0057 | 3.34E-17 | -8.4339  | 1376071 | Asthma |
| rs11648656 | 16 | 10926598 | C | T | 0.3502 | -0.0293 | 0.0052 | 1.55E-08 | -5.6561  | 1316443 | Asthma |
| rs79748582 | 16 | 10937884 | G | A | 0.1998 | -0.0571 | 0.0059 | 2.36E-22 | -9.7250  | 1376071 | Asthma |
| rs17802927 | 16 | 10943881 | G | A | 0.2064 | -0.0570 | 0.0063 | 1.72E-19 | -9.0298  | 1219993 | Asthma |
| rs3743976  | 16 | 10944967 | T | C | 0.2040 | -0.0554 | 0.0058 | 1.71E-21 | -9.5212  | 1376071 | Asthma |
| rs36094971 | 16 | 10946540 | T | C | 0.2071 | -0.0545 | 0.0058 | 4.69E-21 | -9.4161  | 1376071 | Asthma |
| rs34315692 | 16 | 10947987 | A | G | 0.2042 | -0.0530 | 0.0065 | 2.71E-16 | -8.1857  | 1198533 | Asthma |
| rs12930888 | 16 | 10948114 | T | C | 0.2034 | -0.0559 | 0.0069 | 8.09E-16 | -8.0529  | 1094744 | Asthma |
| rs12935412 | 16 | 10948128 | C | T | 0.2066 | -0.0539 | 0.0063 | 1.79E-17 | -8.5068  | 1224666 | Asthma |
| rs12929836 | 16 | 10948129 | A | G | 0.2056 | -0.0534 | 0.0063 | 4.02E-17 | -8.4124  | 1224666 | Asthma |
| rs12931878 | 16 | 10948337 | G | A | 0.1663 | -0.0561 | 0.0063 | 5.25E-19 | -8.9069  | 1376071 | Asthma |
| rs35919309 | 16 | 10951504 | G | A | 0.2069 | -0.0557 | 0.0058 | 5.23E-22 | -9.6436  | 1376071 | Asthma |
| rs36030173 | 16 | 10954079 | A | G | 0.2069 | -0.0553 | 0.0058 | 1.10E-21 | -9.5669  | 1376071 | Asthma |
| rs1035088  | 16 | 10954517 | G | A | 0.2069 | -0.0551 | 0.0058 | 1.42E-21 | -9.5408  | 1376071 | Asthma |
| rs34033347 | 16 | 10957186 | G | A | 0.2070 | -0.0550 | 0.0058 | 1.81E-21 | -9.5154  | 1376071 | Asthma |
| rs12923849 | 16 | 10968140 | A | G | 0.1604 | -0.0567 | 0.0064 | 8.70E-19 | -8.8507  | 1376071 | Asthma |
| rs17229044 | 16 | 10969079 | T | C | 0.1952 | -0.0605 | 0.0059 | 1.32E-24 | -10.2395 | 1376071 | Asthma |
| rs12921922 | 16 | 10970464 | C | T | 0.1925 | -0.0622 | 0.0059 | 1.06E-25 | -10.4803 | 1376071 | Asthma |
| rs12708713 | 16 | 10978602 | T | C | 0.1662 | -0.0565 | 0.0063 | 2.32E-19 | -8.9970  | 1376071 | Asthma |
| rs12708714 | 16 | 10978668 | C | T | 0.1664 | -0.0564 | 0.0063 | 2.27E-19 | -8.9996  | 1376071 | Asthma |
| rs35498631 | 16 | 10980884 | C | T | 0.1955 | -0.0605 | 0.0059 | 1.23E-24 | -10.2460 | 1376071 | Asthma |
| rs7201845  | 16 | 10984481 | G | A | 0.2031 | -0.0569 | 0.0058 | 1.45E-22 | -9.7744  | 1376071 | Asthma |
| rs9652599  | 16 | 10985304 | A | G | 0.2036 | -0.0568 | 0.0058 | 1.49E-22 | -9.7717  | 1376071 | Asthma |
| rs9926433  | 16 | 10986729 | C | G | 0.2021 | -0.0583 | 0.0083 | 1.66E-12 | -7.0606  | 847307  | Asthma |
| rs6498142  | 16 | 10987392 | C | G | 0.1730 | -0.0543 | 0.0063 | 4.09E-18 | -8.6761  | 1349938 | Asthma |
| rs9888873  | 16 | 10989017 | T | G | 0.2038 | -0.0569 | 0.0058 | 1.18E-22 | -9.7952  | 1376071 | Asthma |
| rs8055968  | 16 | 10990846 | A | G | 0.1995 | -0.0581 | 0.0059 | 3.48E-23 | -9.9180  | 1376071 | Asthma |
| rs7403919  | 16 | 10992111 | C | T | 0.3409 | -0.0370 | 0.0049 | 7.81E-14 | -7.4735  | 1376071 | Asthma |
| rs7192393  | 16 | 10993239 | T | C | 0.1941 | -0.0608 | 0.0059 | 8.16E-25 | -10.2860 | 1376071 | Asthma |
| rs13339285 | 16 | 10994837 | T | C | 0.1938 | -0.0607 | 0.0059 | 1.12E-24 | -10.2555 | 1376071 | Asthma |
| rs13330041 | 16 | 10994951 | A | G | 0.1963 | -0.0601 | 0.0059 | 2.12E-24 | -10.1936 | 1376071 | Asthma |
| rs8062322  | 16 | 10998462 | A | C | 0.2914 | -0.0355 | 0.0051 | 4.97E-12 | -6.9065  | 1376071 | Asthma |
| rs80223137 | 16 | 10998531 | T | C | 0.1668 | -0.0569 | 0.0063 | 1.25E-19 | -9.0647  | 1376071 | Asthma |
| rs9926367  | 16 | 10999322 | C | T | 0.2907 | -0.0353 | 0.0051 | 6.89E-12 | -6.8599  | 1376071 | Asthma |
| rs13337334 | 16 | 11000561 | C | G | 0.2679 | -0.0374 | 0.0053 | 1.79E-12 | -7.0499  | 1376071 | Asthma |
| rs6498143  | 16 | 11001179 | G | T | 0.3922 | -0.0283 | 0.0048 | 3.91E-09 | -5.8879  | 1376071 | Asthma |
| rs723586   | 16 | 11004522 | G | C | 0.2686 | -0.0371 | 0.0053 | 2.65E-12 | -6.9953  | 1376071 | Asthma |
| rs7194305  | 16 | 11005850 | G | A | 0.3940 | -0.0278 | 0.0048 | 8.10E-09 | -5.7663  | 1376071 | Asthma |
| rs17804470 | 16 | 11006111 | C | G | 0.4007 | -0.0334 | 0.0055 | 1.09E-09 | -6.0962  | 878129  | Asthma |
| rs9926615  | 16 | 11009303 | A | G | 0.3943 | -0.0276 | 0.0048 | 9.40E-09 | -5.7412  | 1376071 | Asthma |
| rs12934193 | 16 | 11009868 | C | T | 0.1666 | -0.0567 | 0.0063 | 1.91E-19 | -9.0182  | 1376071 | Asthma |
| rs9935174  | 16 | 11017490 | T | C | 0.3990 | -0.0281 | 0.0048 | 4.98E-09 | -5.8478  | 1376071 | Asthma |
| rs9937309  | 16 | 11018255 | C | G | 0.2696 | -0.0368 | 0.0053 | 3.56E-12 | -6.9539  | 1376071 | Asthma |
| rs3862471  | 16 | 11019606 | T | G | 0.3980 | -0.0284 | 0.0048 | 3.43E-09 | -5.9095  | 1376071 | Asthma |
| rs2286975  | 16 | 11020149 | A | G | 0.2686 | -0.0373 | 0.0053 | 1.78E-12 | -7.0510  | 1376071 | Asthma |
| rs2286974  | 16 | 11020655 | G | A | 0.4096 | -0.0292 | 0.0050 | 6.75E-09 | -5.7971  | 1008051 | Asthma |
| rs1985372  | 16 | 11020982 | T | C | 0.3989 | -0.0285 | 0.0048 | 2.86E-09 | -5.9395  | 1376071 | Asthma |
| rs1861548  | 16 | 11024643 | C | G | 0.3941 | -0.0327 | 0.0052 | 2.49E-10 | -6.3274  | 1246149 | Asthma |
| rs8049882  | 16 | 11025629 | G | T | 0.3982 | -0.0283 | 0.0048 | 3.76E-09 | -5.8946  | 1376071 | Asthma |
| rs8045749  | 16 | 11025796 | G | A | 0.3981 | -0.0284 | 0.0048 | 3.13E-09 | -5.9247  | 1376071 | Asthma |
| rs7197422  | 16 | 11027214 | G | C | 0.3983 | -0.0283 | 0.0048 | 3.72E-09 | -5.8960  | 1376071 | Asthma |
| rs2867168  | 16 | 11029932 | T | G | 0.3915 | -0.0286 | 0.0048 | 3.02E-09 | -5.9307  | 1376071 | Asthma |
| rs71381186 | 16 | 11030842 | A | G | 0.2022 | -0.0589 | 0.0062 | 1.70E-21 | -9.5220  | 1008051 | Asthma |
| rs71381187 | 16 | 11030891 | T | C | 0.0628 | -0.0628 | 0.0095 | 4.19E-11 | -6.5973  | 1376071 | Asthma |
| rs11859698 | 16 | 11032878 | T | C | 0.3921 | -0.0282 | 0.0048 | 5.15E-09 | -5.8423  | 1376071 | Asthma |
| rs12923583 | 16 | 11032986 | A | G | 0.1956 | -0.0603 | 0.0059 | 1.73E-24 | -10.2132 | 1376071 | Asthma |
| rs17804890 | 16 | 11034328 | T | C | 0.1958 | -0.0603 | 0.0059 | 1.77E-24 | -10.2113 | 1376071 | Asthma |
| rs12920271 | 16 | 11034416 | A | G | 0.0658 | -0.0593 | 0.0093 | 1.94E-10 | -6.3658  | 1376071 | Asthma |
| rs35434150 | 16 | 11034666 | T | G | 0.1967 | -0.0599 | 0.0059 | 3.29E-24 | -10.1507 | 1376071 | Asthma |
| rs71381188 | 16 | 11035386 | T | G | 0.1966 | -0.0598 | 0.0059 | 4.04E-24 | -10.1305 | 1376071 | Asthma |
| rs35559153 | 16 | 11035403 | A | G | 0.1964 | -0.0597 | 0.0059 | 4.76E-24 | -10.1145 | 1376071 | Asthma |
| rs34251053 | 16 | 11035460 | A | G | 0.1966 | -0.0598 | 0.0059 | 4.25E-24 | -10.1256 | 1376071 | Asthma |
| rs7197754  | 16 | 11036522 | T | G | 0.3923 | -0.0278 | 0.0048 | 8.64E-09 | -5.7556  | 1376071 | Asthma |
| rs9923455  | 16 | 11038007 | C | G | 0.3924 | -0.0273 | 0.0048 | 1.45E-08 | -5.6670  | 1376071 | Asthma |
| rs720130   | 16 | 11038776 | T | G | 0.3922 | -0.0273 | 0.0048 | 1.52E-08 | -5.6595  | 1376071 | Asthma |
| rs9932114  | 16 | 11041046 | A | G | 0.0737 | 0.0525  | 0.0091 | 7.09E-09 | 5.7888   | 1376071 | Asthma |

|            |    |          |   |   |        |         |        |          |          |         |        |
|------------|----|----------|---|---|--------|---------|--------|----------|----------|---------|--------|
| rs9937838  | 16 | 11042942 | T | G | 0.0740 | 0.0551  | 0.0099 | 2.52E-08 | 5.5722   | 1219993 | Asthma |
| rs8056098  | 16 | 11044955 | A | G | 0.3970 | -0.0281 | 0.0048 | 5.34E-09 | -5.8362  | 1376071 | Asthma |
| rs9929081  | 16 | 11045140 | T | C | 0.0734 | 0.0535  | 0.0091 | 4.02E-09 | 5.8833   | 1376071 | Asthma |
| rs11865480 | 16 | 11048145 | A | G | 0.0759 | 0.0528  | 0.0089 | 3.52E-09 | 5.9052   | 1376071 | Asthma |
| rs17230818 | 16 | 11048280 | A | T | 0.2004 | -0.0616 | 0.0059 | 7.22E-26 | -10.5168 | 1376071 | Asthma |
| rs3901386  | 16 | 11048863 | C | T | 0.4023 | -0.0275 | 0.0048 | 9.41E-09 | -5.7409  | 1376071 | Asthma |
| rs1985872  | 16 | 11049272 | C | G | 0.4027 | -0.0275 | 0.0048 | 9.80E-09 | -5.7342  | 1376071 | Asthma |
| rs876457   | 16 | 11049869 | A | G | 0.0758 | 0.0533  | 0.0089 | 2.46E-09 | 5.9639   | 1376071 | Asthma |
| rs16957993 | 16 | 11052027 | G | C | 0.0624 | -0.0633 | 0.0096 | 3.69E-11 | -6.6160  | 1376071 | Asthma |
| rs34083796 | 16 | 11054156 | T | C | 0.1702 | -0.0585 | 0.0062 | 5.34E-21 | -9.4023  | 1376071 | Asthma |
| rs12924259 | 16 | 11056241 | C | G | 0.4211 | -0.0271 | 0.0048 | 1.48E-08 | -5.6638  | 1376071 | Asthma |
| rs876476   | 16 | 11056391 | A | G | 0.2758 | -0.0315 | 0.0053 | 2.04E-09 | -5.9948  | 1376071 | Asthma |
| rs34582516 | 16 | 11059795 | A | G | 0.1700 | -0.0590 | 0.0062 | 2.71E-21 | -9.4735  | 1376071 | Asthma |
| rs2286973  | 16 | 11060913 | A | G | 0.3996 | -0.0296 | 0.0048 | 6.96E-10 | -6.1669  | 1376071 | Asthma |
| rs71381191 | 16 | 11062955 | A | G | 0.0666 | -0.0615 | 0.0093 | 3.71E-11 | -6.6152  | 1376071 | Asthma |
| rs887864   | 16 | 11065028 | G | A | 0.3458 | -0.0494 | 0.0056 | 2.00E-18 | -8.7575  | 878129  | Asthma |
| rs741175   | 16 | 11065828 | C | T | 0.4142 | -0.0271 | 0.0048 | 1.47E-08 | -5.6650  | 1376071 | Asthma |
| rs741174   | 16 | 11065981 | T | C | 0.4142 | -0.0269 | 0.0048 | 1.80E-08 | -5.6304  | 1376071 | Asthma |
| rs741173   | 16 | 11066062 | A | C | 0.4141 | -0.0270 | 0.0048 | 1.53E-08 | -5.6586  | 1376071 | Asthma |
| rs56177808 | 16 | 11066217 | G | A | 0.0777 | 0.0501  | 0.0088 | 1.50E-08 | 5.6614   | 1376071 | Asthma |
| rs8062923  | 16 | 11067109 | A | C | 0.2217 | -0.0619 | 0.0057 | 1.27E-27 | -10.8909 | 1376071 | Asthma |
| rs4781035  | 16 | 11067321 | A | G | 0.1857 | -0.0567 | 0.0060 | 6.04E-21 | -9.3893  | 1376071 | Asthma |
| rs11648019 | 16 | 11069759 | G | A | 0.2231 | -0.0656 | 0.0057 | 3.77E-31 | -11.6076 | 1376071 | Asthma |
| rs7200940  | 16 | 11070710 | G | C | 0.3177 | -0.0365 | 0.0050 | 3.68E-13 | -7.2667  | 1376071 | Asthma |
| rs11860603 | 16 | 11071160 | C | T | 0.3116 | -0.0379 | 0.0051 | 6.19E-14 | -7.5042  | 1376071 | Asthma |
| rs7184615  | 16 | 11071685 | C | G | 0.3452 | -0.0446 | 0.0049 | 1.60E-19 | -9.0374  | 1376071 | Asthma |
| rs9934969  | 16 | 11072145 | A | G | 0.3107 | -0.0376 | 0.0051 | 1.12E-13 | -7.4263  | 1376071 | Asthma |
| rs11865121 | 16 | 11072831 | A | C | 0.3111 | -0.0381 | 0.0051 | 5.33E-14 | -7.5237  | 1376071 | Asthma |
| rs7198621  | 16 | 11073601 | G | C | 0.3116 | -0.0380 | 0.0051 | 6.09E-14 | -7.5061  | 1376071 | Asthma |
| rs7204643  | 16 | 11073746 | C | T | 0.3116 | -0.0380 | 0.0051 | 5.71E-14 | -7.5146  | 1376071 | Asthma |
| rs7192790  | 16 | 11074057 | A | C | 0.1885 | -0.0599 | 0.0060 | 1.31E-23 | -10.0152 | 1376071 | Asthma |
| rs725613   | 16 | 11075826 | G | T | 0.3447 | -0.0444 | 0.0049 | 2.44E-19 | -8.9915  | 1376071 | Asthma |
| rs12444495 | 16 | 11076598 | T | C | 0.1990 | -0.0567 | 0.0059 | 4.28E-22 | -9.6643  | 1376071 | Asthma |
| rs7184491  | 16 | 11076904 | C | T | 0.1990 | -0.0567 | 0.0059 | 3.89E-22 | -9.6740  | 1376071 | Asthma |
| rs12925642 | 16 | 11077745 | G | A | 0.3109 | -0.0379 | 0.0051 | 6.90E-14 | -7.4898  | 1376071 | Asthma |
| rs2058531  | 16 | 11078252 | C | T | 0.3113 | -0.0380 | 0.0051 | 5.42E-14 | -7.5215  | 1376071 | Asthma |
| rs9652601  | 16 | 11080508 | A | G | 0.3162 | -0.0378 | 0.0050 | 6.85E-14 | -7.4906  | 1376071 | Asthma |
| rs9652582  | 16 | 11080707 | A | G | 0.3070 | -0.0381 | 0.0051 | 5.60E-14 | -7.5172  | 1376071 | Asthma |
| rs2041670  | 16 | 11080795 | A | G | 0.3069 | -0.0380 | 0.0051 | 6.69E-14 | -7.4938  | 1376071 | Asthma |
| rs12923098 | 16 | 11083196 | C | T | 0.3104 | -0.0384 | 0.0051 | 3.34E-14 | -7.5843  | 1376071 | Asthma |
| rs9931397  | 16 | 11083537 | C | G | 0.3077 | -0.0380 | 0.0051 | 6.35E-14 | -7.5008  | 1376071 | Asthma |
| rs12708715 | 16 | 11083967 | T | C | 0.3077 | -0.0381 | 0.0051 | 5.33E-14 | -7.5234  | 1376071 | Asthma |
| rs12932833 | 16 | 11084213 | G | C | 0.1917 | -0.0603 | 0.0059 | 3.78E-24 | -10.1372 | 1376071 | Asthma |
| rs9929994  | 16 | 11084388 | G | A | 0.3422 | -0.0446 | 0.0049 | 1.65E-19 | -9.0347  | 1376071 | Asthma |
| rs34443974 | 16 | 11085448 | T | C | 0.1878 | -0.0594 | 0.0060 | 3.24E-23 | -9.9250  | 1376071 | Asthma |
| rs12708716 | 16 | 11086016 | G | A | 0.3418 | -0.0446 | 0.0049 | 1.78E-19 | -9.0260  | 1376071 | Asthma |
| rs7192287  | 16 | 11086680 | T | A | 0.3105 | -0.0384 | 0.0051 | 3.26E-14 | -7.5874  | 1376071 | Asthma |
| rs9888908  | 16 | 11087387 | A | C | 0.3075 | -0.0383 | 0.0051 | 4.05E-14 | -7.5594  | 1376071 | Asthma |
| rs7204099  | 16 | 11087899 | C | T | 0.3453 | -0.0446 | 0.0049 | 1.60E-19 | -9.0375  | 1376071 | Asthma |
| rs7203793  | 16 | 11088277 | G | C | 0.3450 | -0.0446 | 0.0049 | 1.76E-19 | -9.0277  | 1376071 | Asthma |
| rs11642009 | 16 | 11089036 | G | T | 0.2476 | -0.0598 | 0.0055 | 2.62E-27 | -10.8252 | 1376071 | Asthma |
| rs9888868  | 16 | 11089706 | C | T | 0.4242 | -0.0304 | 0.0048 | 1.74E-10 | -6.3828  | 1376071 | Asthma |
| rs11861236 | 16 | 11089769 | C | T | 0.4242 | -0.0306 | 0.0048 | 1.31E-10 | -6.4258  | 1376071 | Asthma |
| rs17805769 | 16 | 11092016 | G | A | 0.4241 | -0.0302 | 0.0048 | 2.27E-10 | -6.3417  | 1376071 | Asthma |
| rs12924729 | 16 | 11093926 | A | G | 0.3131 | -0.0396 | 0.0050 | 4.01E-15 | -7.8546  | 1376071 | Asthma |
| rs12917656 | 16 | 11094005 | C | T | 0.4298 | -0.0302 | 0.0050 | 1.54E-09 | -6.0403  | 1008051 | Asthma |
| rs12919083 | 16 | 11095073 | C | A | 0.3084 | -0.0438 | 0.0060 | 3.69E-13 | -7.2664  | 1090071 | Asthma |
| rs12917716 | 16 | 11095291 | C | G | 0.4231 | -0.0309 | 0.0048 | 8.23E-11 | -6.4962  | 1376071 | Asthma |
| rs35099084 | 16 | 11095760 | T | C | 0.1901 | -0.0615 | 0.0060 | 6.00E-25 | -10.3155 | 1376071 | Asthma |
| rs12599402 | 16 | 11096031 | C | T | 0.4251 | -0.0303 | 0.0048 | 1.84E-10 | -6.3739  | 1376071 | Asthma |
| rs12928537 | 16 | 11097543 | A | G | 0.3110 | -0.0388 | 0.0051 | 1.76E-14 | -7.6672  | 1376071 | Asthma |
| rs12928726 | 16 | 11097715 | A | G | 0.4227 | -0.0312 | 0.0048 | 5.80E-11 | -6.5487  | 1376071 | Asthma |
| rs12708717 | 16 | 11098522 | C | G | 0.4223 | -0.0313 | 0.0048 | 5.20E-11 | -6.5653  | 1376071 | Asthma |
| rs17806056 | 16 | 11098642 | A | T | 0.2251 | -0.0652 | 0.0056 | 4.73E-31 | -11.5882 | 1376071 | Asthma |
| rs8061826  | 16 | 11098930 | G | A | 0.4224 | -0.0314 | 0.0048 | 4.03E-11 | -6.6028  | 1376071 | Asthma |
| rs12922303 | 16 | 11099608 | T | A | 0.4241 | -0.0308 | 0.0048 | 9.86E-11 | -6.4691  | 1376071 | Asthma |
| rs3893661  | 16 | 11100023 | G | C | 0.4244 | -0.0307 | 0.0048 | 1.15E-10 | -6.4452  | 1376071 | Asthma |
| rs3893660  | 16 | 11100073 | G | A | 0.4242 | -0.0309 | 0.0048 | 8.86E-11 | -6.4851  | 1376071 | Asthma |
| rs3862468  | 16 | 11100161 | C | G | 0.4247 | -0.0308 | 0.0048 | 9.30E-11 | -6.4780  | 1376071 | Asthma |
| rs3862469  | 16 | 11100223 | T | C | 0.3173 | -0.0392 | 0.0051 | 9.72E-15 | -7.7430  | 1376071 | Asthma |
| rs12927355 | 16 | 11100914 | T | C | 0.3105 | -0.0389 | 0.0051 | 1.55E-14 | -7.6831  | 1376071 | Asthma |
| rs35383879 | 16 | 11100966 | A | G | 0.1875 | -0.0601 | 0.0060 | 9.25E-24 | -10.0495 | 1376071 | Asthma |
| rs9941107  | 16 | 11102184 | A | G | 0.4189 | -0.0311 | 0.0048 | 7.42E-11 | -6.5119  | 1376071 | Asthma |
| rs12923829 | 16 | 11103406 | G | C | 0.1869 | -0.0613 | 0.0061 | 7.86E-24 | -10.0654 | 1349938 | Asthma |



|             |    |          |   |   |        |         |        |          |          |         |        |
|-------------|----|----------|---|---|--------|---------|--------|----------|----------|---------|--------|
| rs12924667  | 16 | 11103533 | T | A | 0.4288 | -0.0305 | 0.0050 | 1.07E-09 | -6.0986  | 1008051 | Asthma |
| rs11642631  | 16 | 11104978 | C | T | 0.4275 | -0.0307 | 0.0048 | 1.10E-10 | -6.4520  | 1376071 | Asthma |
| rs35300161  | 16 | 11105075 | T | C | 0.1839 | -0.0600 | 0.0060 | 3.15E-23 | -9.9279  | 1376071 | Asthma |
| rs34972832  | 16 | 11105081 | A | G | 0.1839 | -0.0603 | 0.0060 | 2.18E-23 | -9.9646  | 1376071 | Asthma |
| rs6498160   | 16 | 11105590 | C | T | 0.4213 | -0.0303 | 0.0048 | 1.94E-10 | -6.3663  | 1376071 | Asthma |
| rs998592    | 16 | 11105821 | T | C | 0.4183 | -0.0304 | 0.0048 | 1.90E-10 | -6.3692  | 1376071 | Asthma |
| rs17806299  | 16 | 11106123 | A | G | 0.1880 | -0.0611 | 0.0060 | 2.23E-24 | -10.1883 | 1376071 | Asthma |
| rs11648049  | 16 | 11106325 | G | C | 0.2993 | -0.0417 | 0.0051 | 5.77E-16 | -8.0942  | 1376071 | Asthma |
| rs741172    | 16 | 11106941 | T | C | 0.3068 | -0.0382 | 0.0051 | 5.64E-14 | -7.5164  | 1376071 | Asthma |
| rs9933507   | 16 | 11107571 | C | T | 0.4239 | -0.0309 | 0.0048 | 8.59E-11 | -6.4900  | 1376071 | Asthma |
| rs7193670   | 16 | 11108848 | C | T | 0.4215 | -0.0299 | 0.0048 | 3.48E-10 | -6.2757  | 1376071 | Asthma |
| rs12923054  | 16 | 11108881 | T | C | 0.3176 | -0.0387 | 0.0059 | 5.22E-11 | -6.5646  | 856646  | Asthma |
| rs9926078   | 16 | 11109708 | C | G | 0.4191 | -0.0304 | 0.0048 | 1.98E-10 | -6.3632  | 1376071 | Asthma |
| rs12103174  | 16 | 11109873 | G | A | 0.4200 | -0.0305 | 0.0048 | 1.67E-10 | -6.3886  | 1376071 | Asthma |
| rs767448    | 16 | 11110364 | G | A | 0.4201 | -0.0305 | 0.0048 | 1.53E-10 | -6.4022  | 1376071 | Asthma |
| rs2110605   | 16 | 11112606 | A | G | 0.2953 | -0.0406 | 0.0052 | 4.34E-15 | -7.8448  | 1376071 | Asthma |
| rs7198004   | 16 | 11113760 | G | A | 0.4216 | -0.0300 | 0.0048 | 2.96E-10 | -6.3009  | 1376071 | Asthma |
| rs7203150   | 16 | 11113865 | C | T | 0.4264 | -0.0300 | 0.0050 | 2.15E-09 | -5.9859  | 1008051 | Asthma |
| rs36110069  | 16 | 11113960 | G | T | 0.2212 | -0.0652 | 0.0057 | 1.48E-30 | -11.4900 | 1376071 | Asthma |
| rs9746695   | 16 | 11114037 | C | T | 0.3090 | -0.0380 | 0.0051 | 6.07E-14 | -7.5066  | 1376071 | Asthma |
| rs12924985  | 16 | 11114465 | C | G | 0.4198 | -0.0300 | 0.0048 | 3.00E-10 | -6.2989  | 1376071 | Asthma |
| rs9921287   | 16 | 11115882 | C | T | 0.4230 | -0.0290 | 0.0052 | 2.66E-08 | -5.5626  | 1219993 | Asthma |
| rs9939397   | 16 | 11115907 | G | A | 0.4196 | -0.0304 | 0.0048 | 1.76E-10 | -6.3808  | 1376071 | Asthma |
| rs9923856   | 16 | 11116558 | C | T | 0.3036 | -0.0406 | 0.0051 | 2.43E-15 | -7.9173  | 1376071 | Asthma |
| rs12935413  | 16 | 11116590 | A | G | 0.3394 | -0.0451 | 0.0050 | 1.08E-19 | -9.0811  | 1376071 | Asthma |
| rs7186106   | 16 | 11116974 | A | G | 0.3397 | -0.0461 | 0.0050 | 1.81E-20 | -9.2732  | 1376071 | Asthma |
| rs7186145   | 16 | 11117021 | A | G | 0.4194 | -0.0318 | 0.0048 | 2.89E-11 | -6.6522  | 1376071 | Asthma |
| rs7186295   | 16 | 11117067 | A | G | 0.4593 | -0.0270 | 0.0048 | 2.59E-08 | -5.5672  | 1316443 | Asthma |
| rs1079186   | 16 | 11117168 | G | T | 0.4718 | -0.0290 | 0.0049 | 2.77E-09 | -5.9445  | 1316443 | Asthma |
| rs9806963   | 16 | 11118282 | T | C | 0.3051 | 0.0296  | 0.0052 | 1.11E-08 | 5.7130   | 1376071 | Asthma |
| rs9927527   | 16 | 11118824 | G | A | 0.3343 | -0.0464 | 0.0050 | 1.20E-20 | -9.3168  | 1376071 | Asthma |
| rs35441874  | 16 | 11119164 | A | T | 0.2376 | -0.0663 | 0.0055 | 5.44E-33 | -11.9648 | 1376071 | Asthma |
| rs34306440  | 16 | 11121178 | G | A | 0.2040 | -0.0630 | 0.0058 | 2.66E-27 | -10.8237 | 1376071 | Asthma |
| rs35032408  | 16 | 11121567 | G | T | 0.2044 | -0.0709 | 0.0069 | 1.15E-24 | -10.2524 | 1090071 | Asthma |
| rs11074952  | 16 | 11124749 | A | G | 0.3055 | 0.0287  | 0.0052 | 2.99E-08 | 5.5422   | 1376071 | Asthma |
| rs12935657  | 16 | 11125184 | A | G | 0.2367 | -0.0662 | 0.0055 | 7.06E-33 | -11.9430 | 1376071 | Asthma |
| rs2003400   | 16 | 11125464 | A | G | 0.3057 | 0.0292  | 0.0052 | 1.74E-08 | 5.6362   | 1376071 | Asthma |
| rs8064154   | 16 | 11125562 | G | A | 0.3358 | -0.0456 | 0.0050 | 5.12E-20 | -9.1613  | 1376071 | Asthma |
| rs12924112  | 16 | 11125863 | G | T | 0.3348 | -0.0457 | 0.0050 | 4.07E-20 | -9.1862  | 1376071 | Asthma |
| rs34540843  | 16 | 11127430 | G | A | 0.2382 | -0.0652 | 0.0055 | 4.37E-32 | -11.7905 | 1376071 | Asthma |
| rs139337054 | 16 | 11129870 | T | C | 0.0560 | -0.0744 | 0.0101 | 1.76E-13 | -7.3659  | 1376071 | Asthma |
| rs36045143  | 16 | 11131109 | G | A | 0.2379 | -0.0648 | 0.0055 | 8.28E-32 | -11.7366 | 1376071 | Asthma |
| rs2241099   | 16 | 11131207 | G | C | 0.2380 | -0.0648 | 0.0055 | 9.29E-32 | -11.7267 | 1376071 | Asthma |
| rs34342224  | 16 | 11131584 | C | A | 0.0563 | -0.0730 | 0.0101 | 4.05E-13 | -7.2536  | 1376071 | Asthma |
| rs12919828  | 16 | 11132922 | G | A | 0.2390 | -0.0647 | 0.0055 | 9.23E-32 | -11.7273 | 1376071 | Asthma |
| rs35732840  | 16 | 11134498 | G | T | 0.3440 | -0.0434 | 0.0052 | 1.05E-16 | -8.2986  | 1008051 | Asthma |
| rs62026376  | 16 | 11134855 | T | C | 0.2389 | -0.0643 | 0.0055 | 2.03E-31 | -11.6606 | 1376071 | Asthma |
| rs62026377  | 16 | 11135271 | T | G | 0.2391 | -0.0646 | 0.0055 | 1.02E-31 | -11.7188 | 1376071 | Asthma |
| rs79078433  | 16 | 11135428 | T | G | 0.0663 | -0.0619 | 0.0093 | 2.65E-11 | -6.6646  | 1376071 | Asthma |
| rs7203459   | 16 | 11136846 | C | T | 0.2365 | -0.0642 | 0.0055 | 3.51E-31 | -11.6138 | 1376071 | Asthma |
| rs2867880   | 16 | 11138000 | A | G | 0.3306 | -0.0456 | 0.0050 | 6.80E-20 | -9.1308  | 1376071 | Asthma |
| rs9923175   | 16 | 11138690 | T | G | 0.4019 | 0.0314  | 0.0049 | 2.24E-10 | 6.3440   | 1316443 | Asthma |
| rs12919732  | 16 | 11141266 | G | A | 0.2400 | -0.0644 | 0.0055 | 1.78E-31 | -11.6717 | 1376071 | Asthma |
| rs2903692   | 16 | 11144926 | A | G | 0.3257 | -0.0456 | 0.0051 | 5.16E-19 | -8.9088  | 1316443 | Asthma |
| rs4322688   | 16 | 11145134 | G | C | 0.3286 | -0.0463 | 0.0051 | 1.41E-19 | -9.0512  | 1316443 | Asthma |
| rs12930373  | 16 | 11145742 | A | G | 0.3285 | -0.0462 | 0.0051 | 1.67E-19 | -9.0332  | 1316443 | Asthma |
| rs12917893  | 16 | 11146121 | T | A | 0.3286 | -0.0461 | 0.0051 | 1.95E-19 | -9.0163  | 1316443 | Asthma |
| rs35294447  | 16 | 11146997 | T | A | 0.3254 | -0.0452 | 0.0052 | 3.71E-18 | -8.6875  | 1290310 | Asthma |
| rs62026379  | 16 | 11147949 | A | G | 0.2367 | -0.0635 | 0.0055 | 2.18E-30 | -11.4565 | 1376071 | Asthma |
| rs17673553  | 16 | 11148049 | G | A | 0.2361 | -0.0679 | 0.0060 | 3.59E-30 | -11.4132 | 1246149 | Asthma |
| rs34720006  | 16 | 11149598 | A | C | 0.2367 | -0.0636 | 0.0055 | 1.91E-30 | -11.4681 | 1376071 | Asthma |
| rs11864680  | 16 | 11150337 | G | T | 0.2373 | -0.0638 | 0.0055 | 1.04E-30 | -11.5208 | 1376071 | Asthma |
| rs12925631  | 16 | 11159977 | T | C | 0.0461 | -0.0753 | 0.0110 | 8.49E-12 | -6.8297  | 1376071 | Asthma |
| rs12325077  | 16 | 11160031 | G | A | 0.4211 | -0.0327 | 0.0048 | 1.03E-11 | -6.8022  | 1376071 | Asthma |
| rs767019    | 16 | 11163079 | T | G | 0.4152 | -0.0328 | 0.0048 | 8.85E-12 | -6.8240  | 1376071 | Asthma |
| rs76939267  | 16 | 11166853 | A | C | 0.0167 | -0.1081 | 0.0189 | 1.06E-08 | -5.7215  | 1316443 | Asthma |
| rs117378200 | 16 | 11172267 | G | T | 0.0168 | -0.1111 | 0.0190 | 5.31E-09 | -5.8370  | 1316443 | Asthma |
| rs62023562  | 16 | 11173584 | C | T | 0.1076 | -0.0472 | 0.0077 | 1.08E-09 | -6.0965  | 1376071 | Asthma |
| rs11644510  | 16 | 11183501 | T | C | 0.3648 | -0.0422 | 0.0051 | 7.46E-17 | -8.3396  | 1316443 | Asthma |
| rs248829    | 16 | 11187211 | G | C | 0.3457 | 0.0282  | 0.0052 | 4.99E-08 | 5.4516   | 1316443 | Asthma |
| rs248831    | 16 | 11187361 | A | G | 0.2500 | -0.0526 | 0.0056 | 5.75E-21 | -9.3945  | 1316443 | Asthma |
| rs1990572   | 16 | 11195285 | A | G | 0.1694 | -0.0484 | 0.0065 | 1.04E-13 | -7.4363  | 1316443 | Asthma |
| rs80247693  | 16 | 11198624 | T | C | 0.1820 | -0.0456 | 0.0062 | 1.78E-13 | -7.3642  | 1376071 | Asthma |
| rs56741530  | 16 | 11201540 | T | C | 0.2152 | -0.0396 | 0.0058 | 1.03E-11 | -6.8016  | 1376071 | Asthma |

|             |    |          |   |   |        |         |        |          |         |         |        |
|-------------|----|----------|---|---|--------|---------|--------|----------|---------|---------|--------|
| rs59785529  | 16 | 11202428 | A | G | 0.2141 | -0.0399 | 0.0058 | 7.50E-12 | -6.8479 | 1376071 | Asthma |
| rs55806963  | 16 | 11203416 | G | A | 0.2162 | -0.0400 | 0.0058 | 5.71E-12 | -6.8866 | 1376071 | Asthma |
| rs79156681  | 16 | 11210463 | T | C | 0.0626 | -0.0534 | 0.0097 | 4.19E-08 | -5.4827 | 1376071 | Asthma |
| rs61401018  | 16 | 11212361 | A | C | 0.1997 | -0.0360 | 0.0060 | 1.51E-09 | -6.0437 | 1376071 | Asthma |
| rs58729719  | 16 | 11212380 | C | A | 0.2066 | -0.0336 | 0.0060 | 2.65E-08 | -5.5632 | 1316443 | Asthma |
| rs2291657   | 16 | 11213167 | T | C | 0.1995 | -0.0354 | 0.0060 | 2.96E-09 | -5.9337 | 1376071 | Asthma |
| rs152304    | 16 | 11213995 | G | T | 0.4589 | 0.0357  | 0.0049 | 2.23E-13 | 7.3343  | 1316443 | Asthma |
| rs152302    | 16 | 11216925 | C | T | 0.4801 | 0.0322  | 0.0052 | 4.81E-10 | 6.2254  | 1224666 | Asthma |
| rs193764    | 16 | 11216979 | C | A | 0.4758 | 0.0310  | 0.0047 | 5.82E-11 | 6.5485  | 1376071 | Asthma |
| rs193763    | 16 | 11217210 | G | A | 0.4756 | 0.0312  | 0.0047 | 4.71E-11 | 6.5798  | 1376071 | Asthma |
| rs11649554  | 16 | 11223808 | G | A | 0.4306 | -0.0382 | 0.0053 | 4.80E-13 | -7.2307 | 1159440 | Asthma |
| rs4781047   | 16 | 11224680 | A | G | 0.4643 | 0.0310  | 0.0048 | 1.59E-10 | 6.3963  | 1316443 | Asthma |
| rs11649613  | 16 | 11225500 | C | T | 0.5331 | 0.0344  | 0.0049 | 1.79E-12 | 7.0498  | 1316443 | Asthma |
| rs8046011   | 16 | 11226805 | G | A | 0.2745 | 0.0311  | 0.0055 | 1.11E-08 | 5.7132  | 1316443 | Asthma |
| rs1646071   | 16 | 11227866 | G | C | 0.4227 | 0.0276  | 0.0049 | 1.95E-08 | 5.6166  | 1316443 | Asthma |
| rs1690495   | 16 | 11228034 | T | C | 0.4231 | 0.0277  | 0.0049 | 1.77E-08 | 5.6335  | 1316443 | Asthma |
| rs10451095  | 16 | 11228135 | A | G | 0.4307 | -0.0376 | 0.0049 | 1.36E-14 | -7.7000 | 1316443 | Asthma |
| rs12600100  | 16 | 11232273 | G | A | 0.4213 | 0.0282  | 0.0048 | 4.38E-09 | 5.8692  | 1376071 | Asthma |
| rs193756    | 16 | 11232928 | A | G | 0.3963 | 0.0265  | 0.0048 | 4.34E-08 | 5.4763  | 1376071 | Asthma |
| rs1630347   | 16 | 11233580 | C | A | 0.4205 | 0.0283  | 0.0048 | 4.13E-09 | 5.8787  | 1376071 | Asthma |
| rs193754    | 16 | 11233797 | T | C | 0.4205 | 0.0280  | 0.0049 | 1.27E-08 | 5.6899  | 1316443 | Asthma |
| rs34817272  | 16 | 11239992 | C | T | 0.4044 | 0.0273  | 0.0050 | 3.80E-08 | 5.4998  | 1316443 | Asthma |
| rs814260    | 16 | 11242142 | G | A | 0.4042 | 0.0271  | 0.0050 | 4.70E-08 | 5.4624  | 1316443 | Asthma |
| rs6498001   | 16 | 27205918 | T | C | 0.5108 | 0.0266  | 0.0048 | 2.18E-08 | 5.5968  | 1376071 | Asthma |
| rs62028349  | 16 | 27206299 | C | G | 0.5118 | 0.0285  | 0.0049 | 5.39E-09 | 5.8347  | 1316443 | Asthma |
| rs12934702  | 16 | 27207759 | G | A | 0.3757 | 0.0288  | 0.0051 | 1.31E-08 | 5.6855  | 1316443 | Asthma |
| rs34179621  | 16 | 27221459 | A | T | 0.1763 | -0.0345 | 0.0063 | 4.03E-08 | -5.4893 | 1316443 | Asthma |
| rs4076135   | 16 | 27223339 | A | G | 0.1738 | -0.0355 | 0.0063 | 1.68E-08 | -5.6418 | 1316443 | Asthma |
| rs10852315  | 16 | 27224471 | C | A | 0.5132 | 0.0300  | 0.0049 | 6.79E-10 | 6.1709  | 1316443 | Asthma |
| rs7192633   | 16 | 27224774 | T | C | 0.4972 | 0.0325  | 0.0049 | 2.37E-11 | 6.6810  | 1316443 | Asthma |
| rs2958      | 16 | 27225082 | A | G | 0.3686 | 0.0279  | 0.0050 | 3.09E-08 | 5.5364  | 1316443 | Asthma |
| rs34561002  | 16 | 27226081 | G | A | 0.3696 | 0.0276  | 0.0050 | 4.15E-08 | 5.4843  | 1316443 | Asthma |
| rs1127228   | 16 | 27226789 | T | C | 0.3691 | 0.0275  | 0.0050 | 4.66E-08 | 5.4638  | 1316443 | Asthma |
| rs12928394  | 16 | 27227416 | A | G | 0.3698 | 0.0277  | 0.0050 | 3.76E-08 | 5.5019  | 1316443 | Asthma |
| rs35966245  | 16 | 27227974 | G | A | 0.3703 | 0.0281  | 0.0050 | 2.40E-08 | 5.5801  | 1316443 | Asthma |
| rs34913006  | 16 | 27228065 | A | G | 0.3702 | 0.0281  | 0.0050 | 2.19E-08 | 5.5960  | 1316443 | Asthma |
| rs7201783   | 16 | 27228193 | G | C | 0.1844 | -0.0405 | 0.0061 | 3.73E-11 | -6.6143 | 1316443 | Asthma |
| rs74016038  | 16 | 27228326 | G | A | 0.3703 | 0.0281  | 0.0050 | 2.39E-08 | 5.5813  | 1316443 | Asthma |
| rs62028354  | 16 | 27228370 | C | G | 0.1715 | -0.0382 | 0.0068 | 1.75E-08 | -5.6349 | 1186521 | Asthma |
| rs56007547  | 16 | 27230011 | T | C | 0.3698 | 0.0279  | 0.0050 | 2.86E-08 | 5.5501  | 1316443 | Asthma |
| rs34356479  | 16 | 27230287 | C | T | 0.1733 | -0.0340 | 0.0062 | 3.30E-08 | -5.5247 | 1376071 | Asthma |
| rs61701543  | 16 | 27232808 | T | C | 0.1681 | -0.0349 | 0.0064 | 4.30E-08 | -5.4781 | 1316443 | Asthma |
| rs11646067  | 16 | 27233831 | A | G | 0.1843 | -0.0404 | 0.0061 | 3.77E-11 | -6.6127 | 1316443 | Asthma |
| rs34939984  | 16 | 27234391 | T | C | 0.3695 | 0.0269  | 0.0049 | 4.47E-08 | 5.4711  | 1376071 | Asthma |
| rs11647383  | 16 | 27234494 | A | T | 0.1844 | -0.0404 | 0.0061 | 4.13E-11 | -6.5993 | 1316443 | Asthma |
| rs17856580  | 16 | 27235296 | C | T | 0.1823 | -0.0361 | 0.0062 | 4.29E-09 | -5.8725 | 1316443 | Asthma |
| rs12934276  | 16 | 27236158 | G | A | 0.1849 | -0.0400 | 0.0061 | 5.86E-11 | -6.5474 | 1316443 | Asthma |
| rs12445506  | 16 | 27237215 | A | C | 0.1728 | -0.0350 | 0.0061 | 1.21E-08 | -5.6980 | 1376071 | Asthma |
| rs453637    | 16 | 27243639 | T | C | 0.1714 | -0.0341 | 0.0062 | 3.09E-08 | -5.5364 | 1376071 | Asthma |
| rs4536480   | 16 | 27243681 | T | C | 0.1822 | -0.0391 | 0.0060 | 8.17E-11 | -6.4973 | 1376071 | Asthma |
| rs4410081   | 16 | 27244028 | C | T | 0.1825 | -0.0396 | 0.0060 | 4.70E-11 | -6.5801 | 1376071 | Asthma |
| rs12934622  | 16 | 27244998 | C | T | 0.1831 | -0.0395 | 0.0060 | 5.10E-11 | -6.5681 | 1376071 | Asthma |
| rs11860191  | 16 | 27246262 | T | C | 0.1822 | -0.0397 | 0.0062 | 1.07E-10 | -6.4566 | 1316443 | Asthma |
| rs143827850 | 16 | 27269560 | T | G | 0.0197 | -0.1211 | 0.0191 | 2.46E-10 | -6.3297 | 862596  | Asthma |
| rs12923804  | 16 | 27272778 | A | G | 0.3533 | 0.0312  | 0.0053 | 4.75E-09 | 5.8558  | 1246149 | Asthma |
| rs7184464   | 16 | 27274492 | T | G | 0.3439 | 0.0279  | 0.0051 | 4.77E-08 | 5.4596  | 1316443 | Asthma |
| rs150796231 | 16 | 27276225 | C | T | 0.0200 | -0.1218 | 0.0190 | 1.40E-10 | -6.4159 | 862596  | Asthma |
| rs117304401 | 16 | 27278081 | G | T | 0.0201 | -0.1205 | 0.0190 | 2.08E-10 | -6.3557 | 862596  | Asthma |
| rs62028359  | 16 | 27279056 | G | A | 0.1724 | -0.0352 | 0.0063 | 2.25E-08 | -5.5919 | 1316443 | Asthma |
| rs12929847  | 16 | 27280421 | G | A | 0.3435 | 0.0308  | 0.0056 | 4.50E-08 | 5.4700  | 1133307 | Asthma |
| rs4547335   | 16 | 27285369 | C | T | 0.1673 | -0.0381 | 0.0064 | 2.08E-09 | -5.9919 | 1316443 | Asthma |
| rs71388090  | 16 | 27288348 | A | G | 0.3484 | 0.0311  | 0.0051 | 1.29E-09 | 6.0689  | 1316443 | Asthma |
| rs11074852  | 16 | 27289275 | T | C | 0.2569 | -0.0399 | 0.0056 | 1.11E-12 | -7.1156 | 1299802 | Asthma |
| rs8050048   | 16 | 27290063 | C | G | 0.2640 | 0.0354  | 0.0056 | 1.83E-10 | 6.3752  | 1316443 | Asthma |
| rs8056488   | 16 | 27291408 | G | T | 0.3134 | 0.0365  | 0.0052 | 3.26E-12 | 6.9660  | 1316443 | Asthma |
| rs138009430 | 16 | 27291576 | A | C | 0.0197 | -0.1212 | 0.0189 | 1.48E-10 | -6.4072 | 879485  | Asthma |
| rs12933581  | 16 | 27293527 | A | G | 0.3131 | 0.0371  | 0.0052 | 1.50E-12 | 7.0750  | 1316443 | Asthma |
| rs11859690  | 16 | 27295080 | G | A | 0.4239 | 0.0326  | 0.0052 | 5.39E-10 | 6.2073  | 1224666 | Asthma |
| rs8059713   | 16 | 27295323 | A | T | 0.4241 | 0.0305  | 0.0049 | 4.77E-10 | 6.2267  | 1316443 | Asthma |
| rs7350849   | 16 | 27296065 | T | C | 0.3083 | 0.0376  | 0.0053 | 9.39E-13 | 7.1391  | 1316443 | Asthma |
| rs4360944   | 16 | 27296366 | G | T | 0.3146 | 0.0366  | 0.0052 | 2.81E-12 | 6.9867  | 1316443 | Asthma |
| rs4309400   | 16 | 27296418 | G | A | 0.4243 | 0.0307  | 0.0049 | 4.04E-10 | 6.2527  | 1316443 | Asthma |
| rs9745586   | 16 | 27297310 | C | T | 0.4243 | 0.0303  | 0.0049 | 6.37E-10 | 6.1810  | 1316443 | Asthma |
| rs4453499   | 16 | 27297512 | G | A | 0.4243 | 0.0303  | 0.0049 | 6.41E-10 | 6.1799  | 1316443 | Asthma |

|             |    |          |   |   |        |         |        |          |         |         |        |
|-------------|----|----------|---|---|--------|---------|--------|----------|---------|---------|--------|
| rs4395078   | 16 | 27299297 | C | G | 0.4243 | 0.0307  | 0.0049 | 4.10E-10 | 6.2505  | 1316443 | Asthma |
| rs4238953   | 16 | 27302768 | A | G | 0.3079 | 0.0374  | 0.0053 | 1.22E-12 | 7.1029  | 1316443 | Asthma |
| rs4238954   | 16 | 27302790 | G | A | 0.4243 | 0.0306  | 0.0049 | 4.64E-10 | 6.2307  | 1316443 | Asthma |
| rs67984374  | 16 | 27304471 | T | C | 0.4237 | 0.0306  | 0.0049 | 4.29E-10 | 6.2430  | 1316443 | Asthma |
| rs4523933   | 16 | 27304962 | C | T | 0.4307 | 0.0324  | 0.0049 | 3.43E-11 | 6.6268  | 1316443 | Asthma |
| rs4547336   | 16 | 27305080 | C | A | 0.4301 | 0.0327  | 0.0049 | 2.23E-11 | 6.6903  | 1316443 | Asthma |
| rs4238955   | 16 | 27305255 | T | G | 0.2969 | 0.0407  | 0.0053 | 1.52E-14 | 7.6857  | 1316443 | Asthma |
| rs74630264  | 16 | 27305654 | A | G | 0.0180 | -0.1136 | 0.0168 | 1.36E-11 | -6.7625 | 1290310 | Asthma |
| rs12931920  | 16 | 27305956 | T | C | 0.4444 | 0.0344  | 0.0052 | 5.56E-11 | 6.5551  | 1186521 | Asthma |
| rs34050529  | 16 | 27307041 | C | T | 0.4303 | 0.0324  | 0.0049 | 3.57E-11 | 6.6210  | 1316443 | Asthma |
| rs35156641  | 16 | 27307161 | G | C | 0.4308 | 0.0322  | 0.0049 | 4.42E-11 | 6.5893  | 1316443 | Asthma |
| rs34645004  | 16 | 27307503 | G | T | 0.4189 | 0.0342  | 0.0052 | 3.57E-11 | 6.6208  | 948423  | Asthma |
| rs12933283  | 16 | 27308057 | T | C | 0.2970 | 0.0403  | 0.0052 | 7.08E-15 | 7.7830  | 1376071 | Asthma |
| rs34469358  | 16 | 27308578 | A | G | 0.4308 | 0.0322  | 0.0049 | 4.44E-11 | 6.5886  | 1316443 | Asthma |
| rs8057585   | 16 | 27309048 | C | G | 0.4309 | 0.0322  | 0.0049 | 4.33E-11 | 6.5924  | 1316443 | Asthma |
| rs7205663   | 16 | 27310062 | T | C | 0.4303 | 0.0323  | 0.0048 | 1.31E-11 | 6.7673  | 1376071 | Asthma |
| rs7205510   | 16 | 27310077 | G | A | 0.2908 | 0.0417  | 0.0052 | 1.04E-15 | 8.0227  | 1376071 | Asthma |
| rs2057768   | 16 | 27310774 | T | C | 0.2958 | 0.0403  | 0.0052 | 7.00E-15 | 7.7844  | 1376071 | Asthma |
| rs8060798   | 16 | 27313559 | C | A | 0.4818 | -0.0392 | 0.0057 | 8.01E-12 | -6.8384 | 1029518 | Asthma |
| rs8060938   | 16 | 27313560 | A | C | 0.4882 | -0.0327 | 0.0053 | 4.71E-10 | -6.2284 | 1159440 | Asthma |
| rs12927172  | 16 | 27313700 | A | G | 0.4600 | 0.0315  | 0.0051 | 4.74E-10 | 6.2277  | 1316443 | Asthma |
| rs7499292   | 16 | 27314947 | G | T | 0.3768 | 0.0320  | 0.0050 | 1.42E-10 | 6.4138  | 1316443 | Asthma |
| rs8052962   | 16 | 27315521 | T | G | 0.3769 | 0.0311  | 0.0049 | 1.96E-10 | 6.3647  | 1376071 | Asthma |
| rs8060025   | 16 | 27315893 | T | G | 0.3768 | 0.0322  | 0.0050 | 1.10E-10 | 6.4530  | 1316443 | Asthma |
| rs6498011   | 16 | 27320573 | A | G | 0.3771 | 0.0317  | 0.0049 | 8.04E-11 | 6.4998  | 1376071 | Asthma |
| rs6498012   | 16 | 27320653 | C | G | 0.3774 | 0.0317  | 0.0049 | 8.90E-11 | 6.4846  | 1376071 | Asthma |
| rs7187471   | 16 | 27321013 | A | G | 0.3774 | 0.0317  | 0.0049 | 8.99E-11 | 6.4830  | 1376071 | Asthma |
| rs144660294 | 16 | 27323509 | T | C | 0.0267 | -0.0834 | 0.0147 | 1.48E-08 | -5.6638 | 1376071 | Asthma |
| rs1110470   | 16 | 27325106 | A | G | 0.4835 | -0.0315 | 0.0047 | 2.82E-11 | -6.6555 | 1376071 | Asthma |
| rs2040789   | 16 | 27325116 | T | C | 0.4732 | -0.0356 | 0.0051 | 2.49E-12 | -7.0038 | 1246149 | Asthma |
| rs71388093  | 16 | 27327703 | C | T | 0.3043 | 0.0450  | 0.0053 | 1.20E-17 | 8.5535  | 1316443 | Asthma |
| rs35004258  | 16 | 27327706 | C | T | 0.3048 | 0.0449  | 0.0053 | 1.44E-17 | 8.5320  | 1316443 | Asthma |
| rs9673499   | 16 | 27327824 | C | T | 0.3045 | 0.0453  | 0.0053 | 7.62E-18 | 8.6052  | 1316443 | Asthma |
| rs58653621  | 16 | 27328441 | G | T | 0.4548 | 0.0346  | 0.0049 | 1.11E-12 | 7.1163  | 1316443 | Asthma |
| rs6498013   | 16 | 27329414 | C | T | 0.3108 | 0.0464  | 0.0052 | 8.14E-19 | 8.8582  | 1316443 | Asthma |
| rs4787948   | 16 | 27329738 | G | A | 0.2983 | 0.0470  | 0.0053 | 7.86E-19 | 8.8619  | 1316443 | Asthma |
| rs7190472   | 16 | 27330232 | C | T | 0.2988 | 0.0470  | 0.0053 | 6.60E-19 | 8.8813  | 1316443 | Asthma |
| rs12925861  | 16 | 27331275 | A | T | 0.2989 | 0.0471  | 0.0053 | 6.16E-19 | 8.8891  | 1316443 | Asthma |
| rs2107355   | 16 | 27332158 | G | A | 0.3034 | 0.0465  | 0.0053 | 1.90E-18 | 8.7632  | 1316443 | Asthma |
| rs2107354   | 16 | 27332194 | C | T | 0.2985 | 0.0470  | 0.0052 | 1.04E-19 | 9.0843  | 1376071 | Asthma |
| rs4787951   | 16 | 27332642 | C | T | 0.2914 | 0.0480  | 0.0052 | 3.15E-20 | 9.2136  | 1376071 | Asthma |
| rs3916997   | 16 | 27333793 | G | A | 0.4489 | 0.0353  | 0.0048 | 1.24E-13 | 7.4122  | 1376071 | Asthma |
| rs1981551   | 16 | 27334031 | T | C | 0.2900 | 0.0507  | 0.0057 | 7.47E-19 | 8.8677  | 1224666 | Asthma |
| rs2283563   | 16 | 27335033 | T | C | 0.3285 | -0.0392 | 0.0053 | 1.09E-13 | -7.4302 | 1290310 | Asthma |
| rs12445247  | 16 | 27337309 | A | G | 0.4756 | -0.0289 | 0.0049 | 2.47E-09 | -5.9636 | 1316443 | Asthma |
| rs3785356   | 16 | 27337847 | T | C | 0.2907 | 0.0476  | 0.0052 | 6.21E-20 | 9.1407  | 1376071 | Asthma |
| rs9940480   | 16 | 27338117 | C | T | 0.4381 | 0.0412  | 0.0048 | 5.93E-18 | 8.6338  | 1376071 | Asthma |
| rs2382720   | 16 | 27338691 | T | C | 0.4470 | 0.0359  | 0.0048 | 4.59E-14 | 7.5431  | 1376071 | Asthma |
| rs3024530   | 16 | 27339366 | G | A | 0.4483 | 0.0388  | 0.0048 | 3.41E-16 | 8.1577  | 1376071 | Asthma |
| rs2057767   | 16 | 27340017 | G | A | 0.4452 | 0.0378  | 0.0048 | 1.84E-15 | 7.9513  | 1376071 | Asthma |
| rs3024548   | 16 | 27343210 | G | C | 0.4423 | 0.0366  | 0.0048 | 1.67E-14 | 7.6736  | 1376071 | Asthma |
| rs3024552   | 16 | 27343683 | C | G | 0.4362 | 0.0407  | 0.0048 | 1.58E-17 | 8.5215  | 1376071 | Asthma |
| rs3024556   | 16 | 27344041 | A | G | 0.2979 | 0.0471  | 0.0052 | 9.74E-20 | 9.0917  | 1376071 | Asthma |
| rs1805010   | 16 | 27344882 | G | A | 0.4420 | 0.0372  | 0.0049 | 2.30E-14 | 7.6327  | 1316443 | Asthma |
| rs144651842 | 16 | 27344903 | A | G | 0.0200 | -0.1247 | 0.0189 | 4.63E-11 | -6.5824 | 862596  | Asthma |
| rs2074572   | 16 | 27345038 | T | C | 0.3518 | 0.0390  | 0.0056 | 2.46E-12 | 7.0054  | 1160365 | Asthma |
| rs2072130   | 16 | 27345077 | T | C | 0.3587 | 0.0387  | 0.0055 | 2.92E-12 | 6.9815  | 1160365 | Asthma |
| rs3024560   | 16 | 27345346 | G | T | 0.3475 | 0.0434  | 0.0051 | 1.66E-17 | 8.5157  | 1316443 | Asthma |
| rs2301807   | 16 | 27346777 | A | C | 0.0609 | -0.0746 | 0.0104 | 5.55E-13 | -7.2114 | 1299802 | Asthma |
| rs3024575   | 16 | 27346811 | T | C | 0.3696 | 0.0431  | 0.0050 | 8.96E-18 | 8.5866  | 1316443 | Asthma |
| rs3024577   | 16 | 27346882 | G | A | 0.4428 | 0.0309  | 0.0049 | 2.46E-10 | 6.3293  | 1316443 | Asthma |
| rs2283562   | 16 | 27347442 | C | T | 0.4607 | 0.0374  | 0.0049 | 1.49E-14 | 7.6883  | 1316443 | Asthma |
| rs2239348   | 16 | 27347627 | A | G | 0.4657 | -0.0276 | 0.0049 | 1.33E-08 | -5.6827 | 1316443 | Asthma |
| rs2239347   | 16 | 27347700 | C | A | 0.4545 | 0.0407  | 0.0049 | 5.38E-17 | 8.3781  | 1316443 | Asthma |
| rs2239346   | 16 | 27347740 | T | A | 0.4544 | 0.0409  | 0.0049 | 4.48E-17 | 8.3997  | 1316443 | Asthma |
| rs3024585   | 16 | 27348523 | A | G | 0.4430 | 0.0309  | 0.0049 | 2.04E-10 | 6.3583  | 1316443 | Asthma |
| rs3024589   | 16 | 27349306 | A | G | 0.4859 | -0.0289 | 0.0048 | 2.60E-09 | -5.9548 | 1316443 | Asthma |
| rs3024590   | 16 | 27349307 | T | C | 0.4859 | -0.0289 | 0.0048 | 2.49E-09 | -5.9622 | 1316443 | Asthma |
| rs2283561   | 16 | 27349846 | C | A | 0.4412 | 0.0389  | 0.0049 | 1.57E-15 | 7.9718  | 1316443 | Asthma |
| rs3024608   | 16 | 27352365 | G | C | 0.0610 | -0.0737 | 0.0101 | 2.49E-13 | -7.3190 | 1359430 | Asthma |
| rs3024611   | 16 | 27352879 | A | C | 0.1521 | -0.0401 | 0.0069 | 7.43E-09 | -5.7810 | 1299802 | Asthma |
| rs3024612   | 16 | 27352912 | G | A | 0.0616 | -0.0734 | 0.0101 | 3.19E-13 | -7.2862 | 1316443 | Asthma |
| rs3024614   | 16 | 27353024 | G | A | 0.0620 | -0.0726 | 0.0102 | 1.11E-12 | -7.1157 | 1299802 | Asthma |
| rs3024619   | 16 | 27353485 | A | G | 0.3508 | 0.0454  | 0.0050 | 6.43E-20 | 9.1368  | 1376071 | Asthma |

|             |    |          |   |   |        |         |        |          |         |         |        |
|-------------|----|----------|---|---|--------|---------|--------|----------|---------|---------|--------|
| rs3024620   | 16 | 27353597 | G | C | 0.0609 | -0.0743 | 0.0101 | 1.71E-13 | -7.3695 | 1359430 | Asthma |
| rs3024622   | 16 | 27354132 | G | C | 0.3507 | 0.0455  | 0.0050 | 5.68E-20 | 9.1503  | 1376071 | Asthma |
| rs3024629   | 16 | 27354709 | A | G | 0.0615 | -0.0741 | 0.0100 | 1.54E-13 | -7.3832 | 1359430 | Asthma |
| rs3024634   | 16 | 27355241 | G | A | 0.1516 | -0.0415 | 0.0069 | 1.65E-09 | -6.0289 | 1316443 | Asthma |
| rs3024644   | 16 | 27356505 | C | G | 0.1559 | -0.0387 | 0.0069 | 1.95E-08 | -5.6166 | 1299802 | Asthma |
| rs3024647   | 16 | 27356651 | G | A | 0.1561 | -0.0386 | 0.0069 | 2.10E-08 | -5.6032 | 1299802 | Asthma |
| rs3024648   | 16 | 27356678 | C | T | 0.0609 | -0.0754 | 0.0101 | 7.50E-14 | -7.4790 | 1359430 | Asthma |
| rs2891058   | 16 | 27357512 | G | A | 0.1565 | -0.0392 | 0.0068 | 7.62E-09 | -5.7768 | 1316443 | Asthma |
| rs3024655   | 16 | 27358181 | A | G | 0.0678 | -0.0823 | 0.0098 | 4.76E-17 | -8.3927 | 1299802 | Asthma |
| rs3024658   | 16 | 27359133 | A | G | 0.0606 | -0.0761 | 0.0100 | 2.13E-14 | -7.6424 | 1376071 | Asthma |
| rs3024660   | 16 | 27359837 | C | T | 0.1538 | -0.0388 | 0.0068 | 1.28E-08 | -5.6882 | 1316443 | Asthma |
| rs3024664   | 16 | 27360103 | T | C | 0.0672 | -0.0815 | 0.0098 | 1.26E-16 | -8.2777 | 1299802 | Asthma |
| rs3024665   | 16 | 27360218 | C | T | 0.0678 | -0.0815 | 0.0098 | 9.17E-17 | -8.3150 | 1299802 | Asthma |
| rs3024666   | 16 | 27360250 | G | A | 0.1535 | -0.0390 | 0.0068 | 1.13E-08 | -5.7097 | 1316443 | Asthma |
| rs3024667   | 16 | 27360263 | T | C | 0.0619 | -0.0749 | 0.0102 | 2.43E-13 | -7.3227 | 1299802 | Asthma |
| rs3024668   | 16 | 27360628 | A | G | 0.0583 | -0.0760 | 0.0106 | 8.03E-13 | -7.1604 | 1299802 | Asthma |
| rs1805011   | 16 | 27362551 | C | A | 0.1140 | -0.0452 | 0.0080 | 1.51E-08 | -5.6609 | 1246149 | Asthma |
| rs2234898   | 16 | 27362594 | T | G | 0.1148 | -0.0431 | 0.0074 | 6.37E-09 | -5.8069 | 1376071 | Asthma |
| rs1805012   | 16 | 27362643 | C | T | 0.1136 | -0.0436 | 0.0075 | 5.18E-09 | -5.8413 | 1376071 | Asthma |
| rs2234900   | 16 | 27362651 | C | T | 0.1203 | -0.0446 | 0.0073 | 8.41E-10 | -6.1370 | 1376071 | Asthma |
| rs1049631   | 16 | 27364221 | G | A | 0.4546 | 0.0314  | 0.0051 | 9.39E-10 | 6.1196  | 948423  | Asthma |
| rs8832      | 16 | 27364466 | A | G | 0.4468 | 0.0290  | 0.0048 | 1.24E-09 | 6.0747  | 1376071 | Asthma |
| rs1029489   | 16 | 27364896 | A | G | 0.4056 | 0.0322  | 0.0048 | 2.30E-11 | 6.6860  | 1376071 | Asthma |
| rs2382721   | 16 | 27365316 | G | A | 0.3541 | 0.0309  | 0.0049 | 3.72E-10 | 6.2654  | 1376071 | Asthma |
| rs3024685   | 16 | 27365589 | C | T | 0.4054 | 0.0322  | 0.0048 | 2.32E-11 | 6.6842  | 1376071 | Asthma |
| rs4787956   | 16 | 27366928 | G | A | 0.3556 | 0.0303  | 0.0049 | 7.59E-10 | 6.1534  | 1376071 | Asthma |
| rs75763833  | 16 | 27369351 | A | G | 0.0815 | -0.0624 | 0.0089 | 2.13E-12 | -7.0256 | 1376071 | Asthma |
| rs77315098  | 16 | 27370327 | A | C | 0.0812 | -0.0633 | 0.0089 | 1.18E-12 | -7.1080 | 1376071 | Asthma |
| rs16976728  | 16 | 27370391 | T | C | 0.3881 | 0.0279  | 0.0050 | 2.79E-08 | 5.5542  | 1316443 | Asthma |
| rs4787424   | 16 | 27373047 | G | A | 0.0775 | -0.0569 | 0.0098 | 5.32E-09 | -5.8369 | 922290  | Asthma |
| rs140049631 | 16 | 27373987 | T | C | 0.0238 | -0.0970 | 0.0158 | 8.27E-10 | -6.1395 | 1366579 | Asthma |
| rs112869008 | 16 | 27376892 | G | A | 0.0787 | -0.0573 | 0.0092 | 5.73E-10 | -6.1976 | 1316443 | Asthma |
| rs4787957   | 16 | 27377180 | T | C | 0.0342 | -0.0915 | 0.0132 | 4.74E-12 | -6.9130 | 1376071 | Asthma |
| rs1119132   | 16 | 27392148 | A | G | 0.1284 | 0.0423  | 0.0071 | 2.94E-09 | 5.9350  | 1376071 | Asthma |
| rs9933895   | 16 | 27392352 | C | T | 0.1286 | 0.0424  | 0.0071 | 2.59E-09 | 5.9557  | 1376071 | Asthma |
| rs1988004   | 16 | 27394105 | C | T | 0.1287 | 0.0426  | 0.0071 | 2.27E-09 | 5.9769  | 1376071 | Asthma |
| rs6498019   | 16 | 27397624 | C | T | 0.1284 | 0.0404  | 0.0073 | 3.60E-08 | 5.5097  | 1316443 | Asthma |
| rs6498020   | 16 | 27397759 | A | T | 0.1284 | 0.0406  | 0.0073 | 3.09E-08 | 5.5361  | 1316443 | Asthma |
| rs2107357   | 16 | 27399508 | A | G | 0.1286 | 0.0405  | 0.0073 | 3.35E-08 | 5.5223  | 1316443 | Asthma |
| rs6498021   | 16 | 27403057 | T | G | 0.1340 | 0.0428  | 0.0073 | 4.00E-09 | 5.8844  | 1316443 | Asthma |
| rs179771    | 16 | 27406423 | C | G | 0.4919 | 0.0289  | 0.0049 | 3.15E-09 | 5.9237  | 1316443 | Asthma |
| rs12596049  | 16 | 27408821 | C | T | 0.3129 | 0.0290  | 0.0051 | 1.64E-08 | 5.6464  | 1376071 | Asthma |
| rs179768    | 16 | 27412850 | C | T | 0.4596 | 0.0353  | 0.0049 | 6.09E-13 | 7.1986  | 1316443 | Asthma |
| rs179762    | 16 | 27426650 | G | A | 0.2291 | -0.0319 | 0.0056 | 1.41E-08 | -5.6720 | 1376071 | Asthma |
| rs9933843   | 16 | 30892358 | C | T | 0.3870 | 0.0283  | 0.0051 | 2.24E-08 | 5.5927  | 1294267 | Asthma |
| rs1046276   | 16 | 30903305 | T | C | 0.3484 | 0.0316  | 0.0052 | 8.86E-10 | 6.1287  | 1294267 | Asthma |
| rs1458201   | 16 | 30904808 | A | G | 0.2405 | 0.0327  | 0.0057 | 1.00E-08 | 5.7304  | 1294267 | Asthma |
| rs8052245   | 16 | 30905109 | C | G | 0.3543 | 0.0318  | 0.0051 | 6.08E-10 | 6.1884  | 1294267 | Asthma |
| rs112934900 | 16 | 30912281 | A | T | 0.3624 | 0.0308  | 0.0051 | 1.68E-09 | 6.0259  | 1294267 | Asthma |
| rs7185007   | 16 | 30916188 | T | C | 0.2410 | 0.0328  | 0.0057 | 8.68E-09 | 5.7546  | 1294267 | Asthma |
| rs12924903  | 16 | 30917649 | A | G | 0.3488 | 0.0316  | 0.0051 | 8.55E-10 | 6.1343  | 1294267 | Asthma |
| rs4889685   | 16 | 30918123 | C | T | 0.3508 | 0.0312  | 0.0051 | 1.33E-09 | 6.0633  | 1294267 | Asthma |
| rs9319588   | 16 | 30919662 | C | T | 0.3547 | 0.0313  | 0.0051 | 9.84E-10 | 6.1120  | 1294267 | Asthma |
| rs12930657  | 16 | 30920647 | C | T | 0.3546 | 0.0314  | 0.0051 | 9.37E-10 | 6.1199  | 1294267 | Asthma |
| rs3813020   | 16 | 30922754 | G | A | 0.3546 | 0.0314  | 0.0051 | 8.69E-10 | 6.1316  | 1294267 | Asthma |
| rs35675346  | 16 | 30924760 | A | G | 0.2415 | 0.0333  | 0.0057 | 4.98E-09 | 5.8479  | 1294267 | Asthma |
| rs72799341  | 16 | 30925422 | A | G | 0.2418 | 0.0328  | 0.0057 | 7.98E-09 | 5.7690  | 1294267 | Asthma |
| rs8050588   | 16 | 30926478 | A | G | 0.3548 | 0.0314  | 0.0051 | 8.54E-10 | 6.1345  | 1294267 | Asthma |
| rs12930545  | 16 | 30927490 | A | G | 0.3552 | 0.0315  | 0.0051 | 8.13E-10 | 6.1424  | 1294267 | Asthma |
| rs11150600  | 16 | 30929010 | C | T | 0.3554 | 0.0306  | 0.0052 | 4.21E-09 | 5.8756  | 1268134 | Asthma |
| rs10782001  | 16 | 30931304 | G | A | 0.3549 | 0.0312  | 0.0051 | 1.07E-09 | 6.0988  | 1294267 | Asthma |
| rs4889514   | 16 | 30931775 | A | G | 0.3553 | 0.0314  | 0.0051 | 8.93E-10 | 6.1276  | 1294267 | Asthma |
| rs12928852  | 16 | 30932667 | C | T | 0.3553 | 0.0314  | 0.0051 | 8.65E-10 | 6.1326  | 1294267 | Asthma |
| rs12599631  | 16 | 30932927 | A | G | 0.3605 | 0.0313  | 0.0055 | 1.46E-08 | 5.6661  | 900114  | Asthma |
| rs34873012  | 16 | 30934540 | T | C | 0.3552 | 0.0316  | 0.0051 | 7.44E-10 | 6.1565  | 1294267 | Asthma |
| rs10782002  | 16 | 30935185 | A | G | 0.3552 | 0.0316  | 0.0051 | 7.05E-10 | 6.1650  | 1294267 | Asthma |
| rs7200879   | 16 | 30936251 | G | A | 0.2419 | 0.0334  | 0.0057 | 4.61E-09 | 5.8609  | 1294267 | Asthma |
| rs4889571   | 16 | 30937726 | A | G | 0.3533 | 0.0320  | 0.0055 | 7.21E-09 | 5.7860  | 1164345 | Asthma |
| rs11640534  | 16 | 30938194 | G | A | 0.3552 | 0.0316  | 0.0051 | 7.19E-10 | 6.1617  | 1294267 | Asthma |
| rs7206511   | 16 | 30939031 | G | A | 0.3552 | 0.0316  | 0.0051 | 7.09E-10 | 6.1641  | 1294267 | Asthma |
| rs1458202   | 16 | 30941881 | G | A | 0.3552 | 0.0316  | 0.0051 | 6.84E-10 | 6.1697  | 1294267 | Asthma |
| rs4889599   | 16 | 30957268 | C | T | 0.3710 | 0.0326  | 0.0051 | 1.51E-10 | 6.4048  | 1294267 | Asthma |
| rs62055866  | 16 | 30958236 | G | C | 0.3725 | 0.0308  | 0.0056 | 4.08E-08 | 5.4872  | 1138189 | Asthma |
| rs2305884   | 16 | 30959420 | G | A | 0.3710 | 0.0326  | 0.0051 | 1.57E-10 | 6.3986  | 1294267 | Asthma |

|             |    |          |   |   |        |        |        |          |        |         |        |
|-------------|----|----------|---|---|--------|--------|--------|----------|--------|---------|--------|
| rs1870293   | 16 | 30959620 | T | C | 0.3656 | 0.0327 | 0.0051 | 1.54E-10 | 6.4011 | 1294267 | Asthma |
| rs2054213   | 16 | 30960489 | A | G | 0.3710 | 0.0327 | 0.0051 | 1.20E-10 | 6.4395 | 1294267 | Asthma |
| rs11150601  | 16 | 30966478 | G | A | 0.3708 | 0.0326 | 0.0051 | 1.38E-10 | 6.4178 | 1294267 | Asthma |
| rs4502227   | 16 | 30968733 | A | G | 0.3710 | 0.0326 | 0.0051 | 1.41E-10 | 6.4147 | 1294267 | Asthma |
| rs897986    | 16 | 30969581 | T | C | 0.3709 | 0.0327 | 0.0051 | 1.30E-10 | 6.4275 | 1294267 | Asthma |
| rs12716978  | 16 | 30970223 | C | G | 0.3709 | 0.0328 | 0.0051 | 1.20E-10 | 6.4389 | 1294267 | Asthma |
| rs28360557  | 16 | 30971939 | A | C | 0.3709 | 0.0326 | 0.0051 | 1.38E-10 | 6.4178 | 1294267 | Asthma |
| rs7204459   | 16 | 30972891 | G | A | 0.3700 | 0.0330 | 0.0051 | 9.59E-11 | 6.4734 | 1294267 | Asthma |
| rs4889604   | 16 | 30974673 | G | T | 0.3702 | 0.0330 | 0.0051 | 9.49E-11 | 6.4749 | 1294267 | Asthma |
| rs12931046  | 16 | 30975823 | G | A | 0.3702 | 0.0320 | 0.0052 | 6.36E-10 | 6.1812 | 1268134 | Asthma |
| rs4889525   | 16 | 30978537 | T | C | 0.3708 | 0.0328 | 0.0051 | 1.14E-10 | 6.4476 | 1294267 | Asthma |
| rs11076     | 16 | 30984207 | A | G | 0.3639 | 0.0305 | 0.0051 | 2.32E-09 | 5.9735 | 1294267 | Asthma |
| rs6950      | 16 | 30984348 | T | C | 0.3710 | 0.0315 | 0.0052 | 1.08E-09 | 6.0980 | 1268134 | Asthma |
| rs12443808  | 16 | 30985550 | C | G | 0.3719 | 0.0318 | 0.0052 | 7.12E-10 | 6.1635 | 1268134 | Asthma |
| rs12443627  | 16 | 30985551 | G | C | 0.3663 | 0.0331 | 0.0051 | 8.52E-11 | 6.4910 | 1294267 | Asthma |
| rs9938550   | 16 | 30987821 | A | G | 0.3707 | 0.0325 | 0.0051 | 1.53E-10 | 6.4028 | 1294267 | Asthma |
| rs2305880   | 16 | 30988141 | T | C | 0.3709 | 0.0329 | 0.0051 | 1.01E-10 | 6.4654 | 1294267 | Asthma |
| rs13708     | 16 | 30989488 | G | A | 0.3709 | 0.0329 | 0.0051 | 9.60E-11 | 6.4731 | 1294267 | Asthma |
| rs8062719   | 16 | 30991343 | A | G | 0.3646 | 0.0335 | 0.0051 | 5.87E-11 | 6.5469 | 1294267 | Asthma |
| rs8060857   | 16 | 30991399 | G | A | 0.3716 | 0.0334 | 0.0051 | 5.16E-11 | 6.5663 | 1294267 | Asthma |
| rs12445568  | 16 | 30993491 | C | T | 0.3767 | 0.0368 | 0.0051 | 3.39E-13 | 7.2778 | 1294267 | Asthma |
| rs34454770  | 16 | 30994246 | C | T | 0.3728 | 0.0361 | 0.0051 | 1.19E-12 | 7.1065 | 1294267 | Asthma |
| rs2199036   | 16 | 30995651 | T | C | 0.3769 | 0.0372 | 0.0051 | 1.92E-13 | 7.3540 | 1294267 | Asthma |
| rs729482    | 16 | 31005649 | C | T | 0.3777 | 0.0352 | 0.0051 | 6.80E-12 | 6.8618 | 1268134 | Asthma |
| rs7203999   | 16 | 31006233 | T | C | 0.3823 | 0.0364 | 0.0050 | 5.24E-13 | 7.2189 | 1294267 | Asthma |
| rs7184567   | 16 | 31009757 | T | C | 0.3815 | 0.0364 | 0.0050 | 5.58E-13 | 7.2104 | 1294267 | Asthma |
| rs72800847  | 16 | 31011318 | A | G | 0.3771 | 0.0355 | 0.0051 | 2.11E-12 | 7.0273 | 1294267 | Asthma |
| rs12447930  | 16 | 31011952 | A | G | 0.3819 | 0.0362 | 0.0051 | 1.58E-12 | 7.0677 | 1268134 | Asthma |
| rs4889609   | 16 | 31015106 | G | A | 0.3801 | 0.0362 | 0.0050 | 7.51E-13 | 7.1698 | 1294267 | Asthma |
| rs4889526   | 16 | 31019023 | A | C | 0.3798 | 0.0364 | 0.0050 | 5.29E-13 | 7.2177 | 1294267 | Asthma |
| rs35961830  | 16 | 31020996 | C | T | 0.3822 | 0.0367 | 0.0053 | 6.13E-12 | 6.8766 | 926247  | Asthma |
| rs57576577  | 16 | 31025046 | A | G | 0.3800 | 0.0362 | 0.0050 | 7.02E-13 | 7.1791 | 1294267 | Asthma |
| rs9673641   | 16 | 31028055 | A | G | 0.3801 | 0.0361 | 0.0050 | 7.49E-13 | 7.1703 | 1294267 | Asthma |
| rs112906665 | 16 | 31028818 | C | T | 0.3807 | 0.0360 | 0.0051 | 2.13E-12 | 7.0257 | 1268134 | Asthma |
| rs7500176   | 16 | 31029816 | A | G | 0.3761 | 0.0352 | 0.0051 | 3.28E-12 | 6.9652 | 1294267 | Asthma |
| rs58726213  | 16 | 31033362 | G | A | 0.3803 | 0.0359 | 0.0050 | 1.09E-12 | 7.1190 | 1294267 | Asthma |
| rs12445650  | 16 | 31033576 | A | G | 0.3807 | 0.0358 | 0.0051 | 2.55E-12 | 7.0006 | 1268134 | Asthma |
| rs8056842   | 16 | 31036009 | C | T | 0.3808 | 0.0358 | 0.0051 | 2.56E-12 | 7.0001 | 1268134 | Asthma |
| rs5979739   | 16 | 31037834 | G | A | 0.3779 | 0.0347 | 0.0050 | 5.96E-12 | 6.8806 | 1294267 | Asthma |
| rs732173    | 16 | 31038702 | A | C | 0.3782 | 0.0347 | 0.0051 | 1.31E-11 | 6.7671 | 1268134 | Asthma |
| rs732172    | 16 | 31038712 | T | C | 0.3784 | 0.0344 | 0.0051 | 1.77E-11 | 6.7235 | 1268134 | Asthma |
| rs56284083  | 16 | 31041574 | A | G | 0.3813 | 0.0356 | 0.0050 | 1.49E-12 | 7.0756 | 1294267 | Asthma |
| rs1108431   | 16 | 31043286 | T | C | 0.3781 | 0.0348 | 0.0050 | 5.02E-12 | 6.9052 | 1294267 | Asthma |
| rs35468353  | 16 | 31045112 | G | A | 0.3818 | 0.0354 | 0.0050 | 2.03E-12 | 7.0326 | 1294267 | Asthma |
| rs11862744  | 16 | 31046479 | A | G | 0.3817 | 0.0355 | 0.0050 | 1.86E-12 | 7.0443 | 1294267 | Asthma |
| rs17839567  | 16 | 31046624 | G | A | 0.3817 | 0.0355 | 0.0050 | 1.73E-12 | 7.0545 | 1294267 | Asthma |
| rs11640957  | 16 | 31049042 | T | C | 0.3820 | 0.0353 | 0.0050 | 2.33E-12 | 7.0133 | 1294267 | Asthma |
| rs11640767  | 16 | 31049326 | A | G | 0.3821 | 0.0353 | 0.0050 | 2.40E-12 | 7.0088 | 1294267 | Asthma |
| rs57434408  | 16 | 31055059 | A | C | 0.3793 | 0.0305 | 0.0056 | 4.56E-08 | 5.4674 | 1138189 | Asthma |
| rs11642003  | 16 | 31057070 | A | G | 0.3825 | 0.0352 | 0.0050 | 2.88E-12 | 6.9832 | 1294267 | Asthma |
| rs11642303  | 16 | 31057071 | A | C | 0.3821 | 0.0352 | 0.0050 | 2.83E-12 | 6.9858 | 1294267 | Asthma |
| rs8061047   | 16 | 31057639 | C | T | 0.3827 | 0.0350 | 0.0050 | 3.72E-12 | 6.9476 | 1294267 | Asthma |
| rs72785520  | 16 | 31059457 | T | C | 0.3829 | 0.0341 | 0.0055 | 4.14E-10 | 6.2485 | 1137264 | Asthma |
| rs11647284  | 16 | 31066014 | A | G | 0.3826 | 0.0345 | 0.0050 | 7.05E-12 | 6.8566 | 1294267 | Asthma |
| rs28814987  | 16 | 31070139 | T | C | 0.3831 | 0.0341 | 0.0050 | 1.27E-11 | 6.7720 | 1294267 | Asthma |
| rs11642192  | 16 | 31070704 | C | T | 0.3871 | 0.0349 | 0.0050 | 3.96E-12 | 6.9384 | 1294267 | Asthma |
| rs7197717   | 16 | 31071754 | C | A | 0.3870 | 0.0347 | 0.0050 | 4.69E-12 | 6.9147 | 1294267 | Asthma |
| rs6565217   | 16 | 31072003 | A | G | 0.3870 | 0.0347 | 0.0050 | 4.52E-12 | 6.9200 | 1294267 | Asthma |
| rs35713203  | 16 | 31079086 | C | G | 0.3828 | 0.0339 | 0.0050 | 1.74E-11 | 6.7265 | 1294267 | Asthma |
| rs3751855   | 16 | 31079888 | C | T | 0.3870 | 0.0346 | 0.0050 | 5.61E-12 | 6.8892 | 1294267 | Asthma |
| rs7196726   | 16 | 31080754 | A | G | 0.3871 | 0.0343 | 0.0051 | 1.87E-11 | 6.7157 | 1268134 | Asthma |
| rs750952    | 16 | 31082633 | T | C | 0.3833 | 0.0338 | 0.0050 | 1.77E-11 | 6.7237 | 1294267 | Asthma |
| rs11865038  | 16 | 31083850 | T | C | 0.3870 | 0.0346 | 0.0050 | 5.49E-12 | 6.8922 | 1294267 | Asthma |
| rs11864806  | 16 | 31083883 | C | G | 0.3870 | 0.0346 | 0.0050 | 5.98E-12 | 6.8802 | 1294267 | Asthma |
| rs11864839  | 16 | 31083930 | C | G | 0.3870 | 0.0346 | 0.0050 | 5.57E-12 | 6.8904 | 1294267 | Asthma |
| rs7199949   | 16 | 31084843 | C | G | 0.3873 | 0.0343 | 0.0051 | 1.77E-11 | 6.7242 | 1268134 | Asthma |
| rs4468641   | 16 | 31085555 | C | A | 0.3871 | 0.0346 | 0.0050 | 5.70E-12 | 6.8868 | 1294267 | Asthma |
| rs17839568  | 16 | 31088462 | C | T | 0.3871 | 0.0345 | 0.0050 | 6.34E-12 | 6.8718 | 1294267 | Asthma |
| rs73530203  | 16 | 31088538 | A | G | 0.3829 | 0.0336 | 0.0050 | 2.31E-11 | 6.6848 | 1294267 | Asthma |
| rs7294      | 16 | 31091000 | T | C | 0.3836 | 0.0334 | 0.0051 | 5.73E-11 | 6.5506 | 1268134 | Asthma |
| rs59924013  | 16 | 31097969 | T | G | 0.3824 | 0.0328 | 0.0055 | 1.98E-09 | 5.9992 | 1137264 | Asthma |
| rs889555    | 16 | 31111250 | T | C | 0.2959 | 0.0322 | 0.0057 | 1.47E-08 | 5.6648 | 926247  | Asthma |
| rs11865499  | 16 | 31120929 | G | A | 0.2897 | 0.0304 | 0.0054 | 1.49E-08 | 5.6628 | 1294267 | Asthma |
| rs28725459  | 16 | 31121341 | A | G | 0.2899 | 0.0298 | 0.0055 | 4.94E-08 | 5.4534 | 1268134 | Asthma |



|            |    |          |   |   |        |        |        |          |        |         |        |
|------------|----|----------|---|---|--------|--------|--------|----------|--------|---------|--------|
| rs59735493 | 16 | 31121779 | A | G | 0.2893 | 0.0301 | 0.0054 | 2.23E-08 | 5.5932 | 1294267 | Asthma |
| rs1060506  | 16 | 31122128 | T | C | 0.2893 | 0.0302 | 0.0054 | 2.12E-08 | 5.6020 | 1294267 | Asthma |
| rs60996860 | 16 | 31122892 | A | T | 0.2971 | 0.0346 | 0.0061 | 1.76E-08 | 5.6340 | 834470  | Asthma |
| rs1549299  | 16 | 31142825 | G | A | 0.3006 | 0.0309 | 0.0054 | 9.14E-09 | 5.7460 | 1294267 | Asthma |
| rs78924645 | 16 | 31143037 | A | G | 0.2951 | 0.0297 | 0.0054 | 3.83E-08 | 5.4985 | 1294267 | Asthma |
| rs57292959 | 16 | 53765367 | T | G | 0.4331 | 0.0299 | 0.0053 | 2.25E-08 | 5.5918 | 1133307 | Asthma |
| rs9937053  | 16 | 53765595 | A | G | 0.4336 | 0.0287 | 0.0047 | 1.56E-09 | 6.0378 | 1376071 | Asthma |
| rs9937354  | 16 | 53765935 | A | G | 0.4334 | 0.0287 | 0.0047 | 1.45E-09 | 6.0494 | 1376071 | Asthma |
| rs9928094  | 16 | 53765993 | G | A | 0.4335 | 0.0287 | 0.0047 | 1.46E-09 | 6.0490 | 1376071 | Asthma |
| rs9930397  | 16 | 53766073 | A | T | 0.4331 | 0.0290 | 0.0047 | 1.02E-09 | 6.1068 | 1376071 | Asthma |
| rs9940278  | 16 | 53766288 | T | C | 0.4330 | 0.0291 | 0.0047 | 8.91E-10 | 6.1279 | 1376071 | Asthma |
| rs9939973  | 16 | 53766656 | A | G | 0.4332 | 0.0290 | 0.0047 | 1.01E-09 | 6.1084 | 1376071 | Asthma |
| rs9940646  | 16 | 53766717 | G | C | 0.4331 | 0.0290 | 0.0047 | 1.04E-09 | 6.1028 | 1376071 | Asthma |
| rs9940128  | 16 | 53766842 | A | G | 0.4333 | 0.0289 | 0.0047 | 1.14E-09 | 6.0877 | 1376071 | Asthma |
| rs1421085  | 16 | 53767042 | C | T | 0.4140 | 0.0290 | 0.0048 | 1.18E-09 | 6.0823 | 1376071 | Asthma |
| rs1421086  | 16 | 53767431 | A | C | 0.4331 | 0.0290 | 0.0047 | 1.05E-09 | 6.1017 | 1376071 | Asthma |
| rs9923147  | 16 | 53767637 | T | C | 0.4331 | 0.0289 | 0.0047 | 1.13E-09 | 6.0895 | 1376071 | Asthma |
| rs9923544  | 16 | 53768073 | T | C | 0.4332 | 0.0289 | 0.0047 | 1.22E-09 | 6.0771 | 1376071 | Asthma |
| rs11642015 | 16 | 53768582 | T | C | 0.4140 | 0.0290 | 0.0048 | 1.21E-09 | 6.0791 | 1376071 | Asthma |
| rs1558901  | 16 | 53769275 | T | A | 0.4331 | 0.0289 | 0.0047 | 1.18E-09 | 6.0834 | 1376071 | Asthma |
| rs62048402 | 16 | 53769311 | A | G | 0.4139 | 0.0289 | 0.0048 | 1.36E-09 | 6.0602 | 1376071 | Asthma |
| rs1558902  | 16 | 53769662 | A | T | 0.4141 | 0.0291 | 0.0048 | 1.09E-09 | 6.0952 | 1376071 | Asthma |
| rs11075985 | 16 | 53771295 | A | C | 0.4337 | 0.0286 | 0.0047 | 1.70E-09 | 6.0245 | 1376071 | Asthma |
| rs56094641 | 16 | 53772541 | G | A | 0.4144 | 0.0285 | 0.0048 | 2.33E-09 | 5.9726 | 1376071 | Asthma |
| rs55872725 | 16 | 53775211 | T | C | 0.4143 | 0.0289 | 0.0048 | 1.35E-09 | 6.0610 | 1376071 | Asthma |
| rs1121980  | 16 | 53775335 | A | G | 0.4338 | 0.0289 | 0.0047 | 1.08E-09 | 6.0976 | 1376071 | Asthma |
| rs7193144  | 16 | 53776774 | C | T | 0.4049 | 0.0276 | 0.0048 | 7.80E-09 | 5.7726 | 1376071 | Asthma |
| rs62033399 | 16 | 53777031 | T | C | 0.4047 | 0.0278 | 0.0048 | 6.75E-09 | 5.7971 | 1376071 | Asthma |
| rs62033400 | 16 | 53777876 | G | A | 0.4045 | 0.0275 | 0.0048 | 1.02E-08 | 5.7281 | 1376071 | Asthma |
| rs8063057  | 16 | 53778521 | C | T | 0.4053 | 0.0274 | 0.0048 | 1.11E-08 | 5.7124 | 1376071 | Asthma |
| rs17817449 | 16 | 53779455 | G | T | 0.4050 | 0.0277 | 0.0048 | 7.47E-09 | 5.7801 | 1376071 | Asthma |
| rs8043757  | 16 | 53779538 | T | A | 0.4050 | 0.0277 | 0.0048 | 7.02E-09 | 5.7904 | 1376071 | Asthma |
| rs9972653  | 16 | 53780451 | T | G | 0.4090 | 0.0279 | 0.0048 | 5.97E-09 | 5.8177 | 1376071 | Asthma |
| rs17817497 | 16 | 53781523 | C | T | 0.4041 | 0.0277 | 0.0048 | 8.03E-09 | 5.7679 | 1376071 | Asthma |
| rs8050136  | 16 | 53782363 | A | C | 0.4048 | 0.0278 | 0.0048 | 6.74E-09 | 5.7971 | 1376071 | Asthma |
| rs8051591  | 16 | 53782840 | G | A | 0.4045 | 0.0275 | 0.0049 | 1.46E-08 | 5.6665 | 1349938 | Asthma |
| rs9935401  | 16 | 53782926 | A | G | 0.4046 | 0.0277 | 0.0048 | 7.00E-09 | 5.7909 | 1376071 | Asthma |
| rs9933509  | 16 | 53784255 | C | T | 0.4235 | 0.0279 | 0.0048 | 4.66E-09 | 5.8589 | 1376071 | Asthma |
| rs3751812  | 16 | 53784548 | T | G | 0.4039 | 0.0277 | 0.0048 | 7.49E-09 | 5.7797 | 1376071 | Asthma |
| rs3751814  | 16 | 53784812 | A | G | 0.4046 | 0.0279 | 0.0048 | 5.85E-09 | 5.8211 | 1376071 | Asthma |
| rs9931900  | 16 | 53784901 | G | A | 0.4235 | 0.0279 | 0.0048 | 4.50E-09 | 5.8645 | 1376071 | Asthma |
| rs56313538 | 16 | 53784922 | G | A | 0.4046 | 0.0279 | 0.0048 | 5.78E-09 | 5.8228 | 1376071 | Asthma |
| rs9936385  | 16 | 53785257 | C | T | 0.4048 | 0.0281 | 0.0048 | 4.59E-09 | 5.8617 | 1376071 | Asthma |
| rs9923233  | 16 | 53785286 | C | G | 0.4046 | 0.0280 | 0.0048 | 5.21E-09 | 5.8404 | 1376071 | Asthma |
| rs9923312  | 16 | 53785455 | A | G | 0.4046 | 0.0280 | 0.0048 | 5.41E-09 | 5.8339 | 1376071 | Asthma |
| rs11075988 | 16 | 53785859 | A | G | 0.4046 | 0.0280 | 0.0048 | 4.92E-09 | 5.8497 | 1376071 | Asthma |
| rs11075989 | 16 | 53785965 | T | C | 0.4046 | 0.0279 | 0.0048 | 5.72E-09 | 5.8248 | 1376071 | Asthma |
| rs11075990 | 16 | 53785981 | G | A | 0.4047 | 0.0279 | 0.0048 | 5.37E-09 | 5.8356 | 1376071 | Asthma |
| rs11075991 | 16 | 53786025 | T | A | 0.4046 | 0.0279 | 0.0048 | 5.74E-09 | 5.8244 | 1376071 | Asthma |
| rs11075992 | 16 | 53786154 | C | T | 0.4046 | 0.0279 | 0.0048 | 5.67E-09 | 5.8262 | 1376071 | Asthma |
| rs9926289  | 16 | 53786591 | A | G | 0.4046 | 0.0279 | 0.0048 | 5.45E-09 | 5.8327 | 1376071 | Asthma |
| rs9939609  | 16 | 53786615 | A | T | 0.4047 | 0.0279 | 0.0048 | 5.42E-09 | 5.8336 | 1376071 | Asthma |
| rs9937709  | 16 | 53786901 | G | A | 0.4235 | 0.0280 | 0.0048 | 4.14E-09 | 5.8786 | 1376071 | Asthma |
| rs17817712 | 16 | 53787213 | G | A | 0.4039 | 0.0278 | 0.0048 | 6.75E-09 | 5.7971 | 1376071 | Asthma |
| rs7206410  | 16 | 53787385 | C | T | 0.4046 | 0.0280 | 0.0048 | 5.00E-09 | 5.8472 | 1376071 | Asthma |
| rs7206629  | 16 | 53787501 | C | T | 0.4235 | 0.0280 | 0.0048 | 4.00E-09 | 5.8843 | 1376071 | Asthma |
| rs7202116  | 16 | 53787703 | G | A | 0.4048 | 0.0279 | 0.0048 | 5.49E-09 | 5.8315 | 1376071 | Asthma |
| rs7201850  | 16 | 53787950 | T | C | 0.4235 | 0.0280 | 0.0048 | 4.03E-09 | 5.8828 | 1376071 | Asthma |
| rs66908032 | 16 | 53788230 | A | C | 0.4045 | 0.0279 | 0.0048 | 5.95E-09 | 5.8183 | 1376071 | Asthma |
| rs72803697 | 16 | 53788271 | T | C | 0.4044 | 0.0279 | 0.0049 | 9.95E-09 | 5.7314 | 1349938 | Asthma |
| rs62033403 | 16 | 53788325 | G | A | 0.4046 | 0.0280 | 0.0048 | 5.24E-09 | 5.8394 | 1376071 | Asthma |
| rs62033404 | 16 | 53788327 | G | A | 0.4046 | 0.0280 | 0.0048 | 5.17E-09 | 5.8417 | 1376071 | Asthma |
| rs62033405 | 16 | 53788475 | T | C | 0.4039 | 0.0278 | 0.0048 | 6.64E-09 | 5.7999 | 1376071 | Asthma |
| rs7206122  | 16 | 53788528 | A | G | 0.4045 | 0.0281 | 0.0048 | 4.75E-09 | 5.8557 | 1376071 | Asthma |
| rs7185735  | 16 | 53788739 | G | A | 0.4047 | 0.0280 | 0.0048 | 4.96E-09 | 5.8483 | 1376071 | Asthma |
| rs9941349  | 16 | 53791576 | T | C | 0.4228 | 0.0279 | 0.0048 | 4.74E-09 | 5.8562 | 1376071 | Asthma |
| rs56137030 | 16 | 53791993 | A | G | 0.4054 | 0.0292 | 0.0052 | 2.34E-08 | 5.5845 | 1224666 | Asthma |
| rs28567725 | 16 | 53792116 | C | T | 0.4230 | 0.0275 | 0.0048 | 1.23E-08 | 5.6962 | 1349938 | Asthma |
| rs9931494  | 16 | 53793267 | G | C | 0.4226 | 0.0273 | 0.0048 | 1.61E-08 | 5.6496 | 1349938 | Asthma |
| rs10468280 | 16 | 53793567 | G | A | 0.4040 | 0.0277 | 0.0048 | 7.58E-09 | 5.7774 | 1376071 | Asthma |
| rs62033408 | 16 | 53794050 | G | A | 0.4040 | 0.0277 | 0.0048 | 7.30E-09 | 5.7838 | 1376071 | Asthma |
| rs17817964 | 16 | 53794154 | T | C | 0.4041 | 0.0278 | 0.0048 | 6.47E-09 | 5.8040 | 1376071 | Asthma |
| rs62033413 | 16 | 53796143 | G | C | 0.4169 | 0.0288 | 0.0048 | 1.67E-09 | 6.0275 | 1376071 | Asthma |
| rs9930501  | 16 | 53796540 | G | A | 0.4413 | 0.0294 | 0.0047 | 5.40E-10 | 6.2071 | 1376071 | Asthma |

|            |    |          |   |   |        |         |        |          |         |         |        |
|------------|----|----------|---|---|--------|---------|--------|----------|---------|---------|--------|
| rs9930506  | 16 | 53796553 | G | A | 0.4414 | 0.0297  | 0.0047 | 3.33E-10 | 6.2824  | 1376071 | Asthma |
| rs9932754  | 16 | 53796579 | C | T | 0.4413 | 0.0293  | 0.0047 | 6.03E-10 | 6.1898  | 1376071 | Asthma |
| rs9933040  | 16 | 53796955 | A | T | 0.4413 | 0.0295  | 0.0047 | 5.07E-10 | 6.2169  | 1376071 | Asthma |
| rs9922708  | 16 | 53797234 | T | C | 0.4413 | 0.0295  | 0.0047 | 4.84E-10 | 6.2242  | 1376071 | Asthma |
| rs72805611 | 16 | 53797442 | T | C | 0.4168 | 0.0287  | 0.0048 | 1.83E-09 | 6.0121  | 1376071 | Asthma |
| rs9922619  | 16 | 53797859 | T | G | 0.4412 | 0.0293  | 0.0047 | 6.51E-10 | 6.1776  | 1376071 | Asthma |
| rs7188250  | 16 | 53800695 | C | T | 0.4181 | 0.0282  | 0.0048 | 3.51E-09 | 5.9056  | 1376071 | Asthma |
| rs72805612 | 16 | 53800696 | A | G | 0.4168 | 0.0286  | 0.0048 | 2.14E-09 | 5.9872  | 1376071 | Asthma |
| rs11075993 | 16 | 53803232 | T | G | 0.4173 | 0.0285  | 0.0048 | 2.51E-09 | 5.9605  | 1376071 | Asthma |
| rs72805613 | 16 | 53803430 | G | A | 0.4175 | 0.0285  | 0.0048 | 2.31E-09 | 5.9741  | 1376071 | Asthma |
| rs12149574 | 16 | 53806613 | G | C | 0.4175 | 0.0285  | 0.0048 | 2.41E-09 | 5.9672  | 1376071 | Asthma |
| rs12149832 | 16 | 53808996 | A | G | 0.4167 | 0.0289  | 0.0048 | 1.45E-09 | 6.0495  | 1376071 | Asthma |
| rs11649091 | 16 | 53811257 | G | T | 0.4506 | 0.0279  | 0.0048 | 9.06E-09 | 5.7475  | 1316443 | Asthma |
| rs2126202  | 17 | 2192418  | C | A | 0.4849 | 0.0266  | 0.0049 | 4.32E-08 | 5.4772  | 1316443 | Asthma |
| rs71368508 | 17 | 4618178  | A | C | 0.0209 | -0.0999 | 0.0180 | 2.93E-08 | -5.5456 | 1366579 | Asthma |
| rs2324082  | 17 | 15964977 | G | A | 0.4874 | -0.0299 | 0.0050 | 3.15E-09 | -5.9237 | 1299802 | Asthma |
| rs2779207  | 17 | 15967087 | T | A | 0.4510 | -0.0281 | 0.0049 | 1.11E-08 | -5.7126 | 1316443 | Asthma |
| rs2779208  | 17 | 15967894 | C | T | 0.4511 | -0.0283 | 0.0049 | 8.51E-09 | -5.7581 | 1316443 | Asthma |
| rs2015353  | 17 | 15969961 | T | C | 0.4945 | -0.0289 | 0.0049 | 2.81E-09 | -5.9424 | 1316443 | Asthma |
| rs2779210  | 17 | 15971833 | G | A | 0.4420 | -0.0271 | 0.0049 | 3.25E-08 | -5.5275 | 1316443 | Asthma |
| rs2779211  | 17 | 15972621 | A | G | 0.4950 | -0.0286 | 0.0049 | 4.03E-09 | -5.8829 | 1316443 | Asthma |
| rs1045599  | 17 | 15976596 | C | T | 0.4421 | -0.0271 | 0.0049 | 3.03E-08 | -5.5394 | 1316443 | Asthma |
| rs11654    | 17 | 15977837 | C | G | 0.4399 | -0.0272 | 0.0048 | 1.41E-08 | -5.6725 | 1316443 | Asthma |
| rs2109632  | 17 | 15978414 | A | G | 0.4397 | -0.0271 | 0.0048 | 1.54E-08 | -5.6572 | 1316443 | Asthma |
| rs2535614  | 17 | 15978426 | T | C | 0.4397 | -0.0271 | 0.0048 | 1.59E-08 | -5.6516 | 1316443 | Asthma |
| rs2159643  | 17 | 15978502 | C | G | 0.4397 | -0.0271 | 0.0048 | 1.53E-08 | -5.6579 | 1316443 | Asthma |
| rs2286795  | 17 | 15980495 | C | T | 0.4350 | -0.0272 | 0.0048 | 1.31E-08 | -5.6850 | 1316443 | Asthma |
| rs4239134  | 17 | 15980653 | T | C | 0.4894 | -0.0283 | 0.0047 | 2.42E-09 | -5.9670 | 1316443 | Asthma |
| rs2286796  | 17 | 15980913 | A | G | 0.4343 | -0.0268 | 0.0048 | 2.17E-08 | -5.5979 | 1316443 | Asthma |
| rs10491104 | 17 | 15981247 | C | T | 0.4901 | -0.0289 | 0.0049 | 2.78E-09 | -5.9441 | 1316443 | Asthma |
| rs55676330 | 17 | 15981317 | C | T | 0.4898 | -0.0287 | 0.0049 | 3.31E-09 | -5.9153 | 1316443 | Asthma |
| rs34236618 | 17 | 15983269 | C | T | 0.4901 | -0.0280 | 0.0047 | 3.44E-09 | -5.9089 | 1316443 | Asthma |
| rs11868809 | 17 | 15983696 | C | T | 0.4903 | -0.0283 | 0.0047 | 2.56E-09 | -5.9577 | 1316443 | Asthma |
| rs8070859  | 17 | 15984475 | A | G | 0.4430 | -0.0262 | 0.0048 | 4.26E-08 | -5.4798 | 1316443 | Asthma |
| rs11869563 | 17 | 15984994 | A | C | 0.4430 | -0.0262 | 0.0048 | 4.27E-08 | -5.4792 | 1316443 | Asthma |
| rs6502479  | 17 | 15985219 | A | G | 0.4430 | -0.0262 | 0.0048 | 4.28E-08 | -5.4788 | 1316443 | Asthma |
| rs6502480  | 17 | 15985265 | A | T | 0.4430 | -0.0262 | 0.0048 | 4.34E-08 | -5.4765 | 1316443 | Asthma |
| rs9889745  | 17 | 15985275 | G | A | 0.4913 | -0.0277 | 0.0048 | 1.13E-08 | -5.7105 | 1316443 | Asthma |
| rs4792708  | 17 | 15987696 | T | C | 0.4430 | -0.0261 | 0.0048 | 4.73E-08 | -5.4612 | 1316443 | Asthma |
| rs9899995  | 17 | 15987905 | T | C | 0.4431 | -0.0261 | 0.0048 | 4.55E-08 | -5.4682 | 1316443 | Asthma |
| rs4792709  | 17 | 15989127 | A | T | 0.4429 | -0.0263 | 0.0048 | 3.67E-08 | -5.5059 | 1316443 | Asthma |
| rs7216949  | 17 | 15989815 | G | A | 0.4430 | -0.0261 | 0.0048 | 4.50E-08 | -5.4701 | 1316443 | Asthma |
| rs7217614  | 17 | 15990177 | G | A | 0.4913 | -0.0278 | 0.0048 | 1.01E-08 | -5.7285 | 1316443 | Asthma |
| rs11655456 | 17 | 15991475 | C | T | 0.4430 | -0.0261 | 0.0048 | 4.51E-08 | -5.4697 | 1316443 | Asthma |
| rs7209094  | 17 | 15992358 | A | T | 0.4431 | -0.0261 | 0.0048 | 4.61E-08 | -5.4656 | 1316443 | Asthma |
| rs2324084  | 17 | 15993277 | T | C | 0.4903 | -0.0280 | 0.0047 | 3.40E-09 | -5.9108 | 1316443 | Asthma |
| rs7214891  | 17 | 15993458 | C | T | 0.4904 | -0.0280 | 0.0047 | 3.28E-09 | -5.9169 | 1316443 | Asthma |
| rs11078320 | 17 | 15995374 | T | C | 0.4429 | -0.0262 | 0.0048 | 3.79E-08 | -5.5005 | 1316443 | Asthma |
| rs7210655  | 17 | 15995673 | C | A | 0.4430 | -0.0261 | 0.0048 | 4.35E-08 | -5.4762 | 1316443 | Asthma |
| rs6502482  | 17 | 15995927 | C | G | 0.4526 | -0.0270 | 0.0048 | 1.40E-08 | -5.6739 | 1316443 | Asthma |
| rs4792711  | 17 | 15996557 | C | T | 0.4903 | -0.0279 | 0.0047 | 3.62E-09 | -5.9008 | 1316443 | Asthma |
| rs758853   | 17 | 16000288 | C | A | 0.4901 | -0.0275 | 0.0047 | 6.08E-09 | -5.8148 | 1316443 | Asthma |
| rs3760298  | 17 | 16001876 | A | G | 0.4903 | -0.0279 | 0.0047 | 3.82E-09 | -5.8917 | 1316443 | Asthma |
| rs2302415  | 17 | 16003077 | C | T | 0.4437 | -0.0267 | 0.0048 | 2.26E-08 | -5.5907 | 1316443 | Asthma |
| rs11078321 | 17 | 16003078 | T | C | 0.4913 | -0.0281 | 0.0047 | 2.90E-09 | -5.9372 | 1316443 | Asthma |
| rs2041459  | 17 | 16003332 | C | T | 0.4905 | -0.0279 | 0.0047 | 3.81E-09 | -5.8924 | 1316443 | Asthma |
| rs2041460  | 17 | 16003598 | G | A | 0.4905 | -0.0279 | 0.0047 | 3.88E-09 | -5.8894 | 1316443 | Asthma |
| rs3826360  | 17 | 16006972 | A | G | 0.4853 | -0.0283 | 0.0047 | 2.30E-09 | -5.9750 | 1316443 | Asthma |
| rs4792712  | 17 | 16007791 | T | G | 0.4430 | -0.0263 | 0.0048 | 3.48E-08 | -5.5152 | 1316443 | Asthma |
| rs8075345  | 17 | 16014908 | G | A | 0.4429 | -0.0264 | 0.0048 | 3.08E-08 | -5.5366 | 1316443 | Asthma |
| rs9899002  | 17 | 16018105 | G | A | 0.4853 | -0.0282 | 0.0047 | 2.52E-09 | -5.9605 | 1316443 | Asthma |
| rs11869450 | 17 | 16020395 | C | T | 0.4429 | -0.0265 | 0.0048 | 2.72E-08 | -5.5587 | 1316443 | Asthma |
| rs6416868  | 17 | 16021056 | A | G | 0.4436 | -0.0262 | 0.0048 | 3.88E-08 | -5.4962 | 1316443 | Asthma |
| rs3785633  | 17 | 16022420 | A | G | 0.4852 | -0.0283 | 0.0047 | 2.16E-09 | -5.9849 | 1316443 | Asthma |
| rs12451075 | 17 | 16022719 | T | C | 0.4852 | -0.0283 | 0.0047 | 2.30E-09 | -5.9752 | 1316443 | Asthma |
| rs4792715  | 17 | 16023909 | C | A | 0.4429 | -0.0264 | 0.0048 | 3.11E-08 | -5.5353 | 1316443 | Asthma |
| rs2157992  | 17 | 16025571 | A | G | 0.4841 | -0.0280 | 0.0047 | 3.10E-09 | -5.9259 | 1316443 | Asthma |
| rs62073587 | 17 | 16025689 | A | C | 0.4650 | 0.0291  | 0.0047 | 7.61E-10 | 6.1529  | 1316443 | Asthma |
| rs35168566 | 17 | 16026773 | G | A | 0.4519 | -0.0274 | 0.0047 | 7.96E-09 | -5.7693 | 1316443 | Asthma |
| rs9890012  | 17 | 16029313 | T | C | 0.4841 | -0.0285 | 0.0047 | 1.61E-09 | -6.0334 | 1316443 | Asthma |
| rs9916868  | 17 | 16029506 | G | C | 0.4515 | -0.0275 | 0.0047 | 7.02E-09 | -5.7906 | 1316443 | Asthma |
| rs8076864  | 17 | 16032956 | A | G | 0.4847 | -0.0284 | 0.0047 | 1.79E-09 | -6.0158 | 1316443 | Asthma |
| rs6502488  | 17 | 16034173 | C | A | 0.4526 | -0.0276 | 0.0047 | 5.94E-09 | -5.8184 | 1316443 | Asthma |
| rs9908031  | 17 | 16035376 | G | A | 0.4846 | -0.0289 | 0.0047 | 9.29E-10 | -6.1211 | 1316443 | Asthma |

|            |    |          |   |   |        |         |        |          |         |         |        |
|------------|----|----------|---|---|--------|---------|--------|----------|---------|---------|--------|
| rs8081406  | 17 | 16038831 | T | C | 0.4523 | -0.0279 | 0.0047 | 4.41E-09 | -5.8679 | 1376071 | Asthma |
| rs4792716  | 17 | 16039830 | A | G | 0.4515 | -0.0276 | 0.0048 | 6.05E-09 | -5.8155 | 1376071 | Asthma |
| rs11657160 | 17 | 16040017 | G | C | 0.4515 | -0.0278 | 0.0048 | 5.08E-09 | -5.8445 | 1376071 | Asthma |
| rs1075901  | 17 | 16040596 | T | C | 0.4515 | -0.0277 | 0.0048 | 5.57E-09 | -5.8291 | 1376071 | Asthma |
| rs3785631  | 17 | 16042632 | A | G | 0.4840 | -0.0292 | 0.0047 | 6.39E-10 | -6.1805 | 1376071 | Asthma |
| rs4435297  | 17 | 16043903 | T | C | 0.4521 | -0.0281 | 0.0047 | 3.38E-09 | -5.9118 | 1376071 | Asthma |
| rs4792717  | 17 | 16045116 | A | G | 0.4518 | -0.0280 | 0.0047 | 3.70E-09 | -5.8970 | 1376071 | Asthma |
| rs9889822  | 17 | 16045649 | C | T | 0.4847 | -0.0292 | 0.0047 | 6.89E-10 | -6.1685 | 1376071 | Asthma |
| rs9909615  | 17 | 16045785 | C | T | 0.4848 | -0.0293 | 0.0047 | 6.02E-10 | -6.1899 | 1376071 | Asthma |
| rs1079533  | 17 | 16046884 | G | A | 0.4854 | -0.0289 | 0.0047 | 9.99E-10 | -6.1095 | 1376071 | Asthma |
| rs11651290 | 17 | 16048157 | C | T | 0.4855 | -0.0290 | 0.0047 | 8.48E-10 | -6.1356 | 1376071 | Asthma |
| rs3815039  | 17 | 16049274 | C | A | 0.4856 | -0.0288 | 0.0047 | 1.03E-09 | -6.1047 | 1376071 | Asthma |
| rs11078327 | 17 | 16049627 | C | G | 0.4525 | -0.0279 | 0.0047 | 4.35E-09 | -5.8703 | 1376071 | Asthma |
| rs4792718  | 17 | 16051378 | A | G | 0.4427 | -0.0273 | 0.0048 | 1.04E-08 | -5.7247 | 1376071 | Asthma |
| rs12945546 | 17 | 16051592 | T | C | 0.4854 | -0.0289 | 0.0047 | 1.02E-09 | -6.1070 | 1376071 | Asthma |
| rs8065190  | 17 | 16051695 | G | T | 0.4525 | -0.0281 | 0.0047 | 3.16E-09 | -5.9229 | 1376071 | Asthma |
| rs11078328 | 17 | 16052177 | T | A | 0.4851 | -0.0278 | 0.0051 | 4.07E-08 | -5.4878 | 1246149 | Asthma |
| rs11657912 | 17 | 16052826 | G | T | 0.4856 | -0.0289 | 0.0047 | 9.80E-10 | -6.1127 | 1376071 | Asthma |
| rs11656046 | 17 | 16054700 | T | C | 0.4524 | -0.0284 | 0.0047 | 2.25E-09 | -5.9790 | 1376071 | Asthma |
| rs12945463 | 17 | 16054871 | A | G | 0.4522 | -0.0284 | 0.0047 | 2.14E-09 | -5.9871 | 1376071 | Asthma |
| rs4792719  | 17 | 16055088 | A | G | 0.4851 | -0.0291 | 0.0047 | 7.79E-10 | -6.1492 | 1376071 | Asthma |
| rs9652827  | 17 | 16055460 | C | T | 0.4529 | -0.0283 | 0.0047 | 2.68E-09 | -5.9503 | 1376071 | Asthma |
| rs9652828  | 17 | 16056400 | C | T | 0.4858 | -0.0293 | 0.0047 | 5.71E-10 | -6.1982 | 1376071 | Asthma |
| rs2157991  | 17 | 16058637 | A | G | 0.4533 | -0.0283 | 0.0047 | 2.53E-09 | -5.9599 | 1376071 | Asthma |
| rs2157990  | 17 | 16058679 | T | A | 0.4530 | -0.0285 | 0.0047 | 1.94E-09 | -6.0029 | 1376071 | Asthma |
| rs3785629  | 17 | 16058807 | A | G | 0.4532 | -0.0284 | 0.0047 | 2.09E-09 | -5.9909 | 1376071 | Asthma |
| rs9709250  | 17 | 16058837 | A | G | 0.4532 | -0.0285 | 0.0047 | 2.06E-09 | -5.9931 | 1376071 | Asthma |
| rs11652025 | 17 | 16062549 | T | G | 0.4532 | -0.0283 | 0.0047 | 2.47E-09 | -5.9637 | 1376071 | Asthma |
| rs2285583  | 17 | 16064829 | T | C | 0.4430 | -0.0277 | 0.0048 | 6.23E-09 | -5.8105 | 1376071 | Asthma |
| rs3815038  | 17 | 16065235 | A | C | 0.4861 | -0.0291 | 0.0047 | 7.06E-10 | -6.1648 | 1376071 | Asthma |
| rs2285582  | 17 | 16065359 | G | A | 0.4532 | -0.0283 | 0.0047 | 2.64E-09 | -5.9526 | 1376071 | Asthma |
| rs3785628  | 17 | 16067368 | C | T | 0.4530 | -0.0283 | 0.0047 | 2.64E-09 | -5.9526 | 1376071 | Asthma |
| rs12948361 | 17 | 16068767 | G | A | 0.4858 | -0.0292 | 0.0047 | 6.91E-10 | -6.1681 | 1376071 | Asthma |
| rs12942295 | 17 | 16070530 | A | T | 0.4856 | -0.0291 | 0.0047 | 6.98E-10 | -6.1666 | 1376071 | Asthma |
| rs9891379  | 17 | 16073244 | T | G | 0.4853 | -0.0291 | 0.0047 | 7.16E-10 | -6.1625 | 1376071 | Asthma |
| rs11078330 | 17 | 16073691 | A | T | 0.4860 | -0.0291 | 0.0047 | 7.68E-10 | -6.1513 | 1376071 | Asthma |
| rs9896441  | 17 | 16073729 | C | T | 0.4533 | -0.0283 | 0.0047 | 2.38E-09 | -5.9694 | 1376071 | Asthma |
| rs9898313  | 17 | 16073818 | T | C | 0.4853 | -0.0291 | 0.0047 | 6.94E-10 | -6.1676 | 1376071 | Asthma |
| rs11078331 | 17 | 16074555 | T | G | 0.4528 | -0.0284 | 0.0047 | 2.08E-09 | -5.9912 | 1376071 | Asthma |
| rs9905429  | 17 | 16075090 | G | C | 0.4854 | -0.0291 | 0.0047 | 7.06E-10 | -6.1646 | 1376071 | Asthma |
| rs7223346  | 17 | 16078560 | T | C | 0.4528 | -0.0284 | 0.0047 | 2.13E-09 | -5.9874 | 1376071 | Asthma |
| rs2051736  | 17 | 16086699 | T | C | 0.4878 | -0.0290 | 0.0047 | 8.78E-10 | -6.1302 | 1376071 | Asthma |
| rs8080706  | 17 | 16088246 | G | C | 0.4863 | -0.0287 | 0.0047 | 1.22E-09 | -6.0774 | 1376071 | Asthma |
| rs8081667  | 17 | 16088254 | T | C | 0.4438 | -0.0273 | 0.0048 | 9.96E-09 | -5.7314 | 1376071 | Asthma |
| rs12947205 | 17 | 16090013 | G | A | 0.4868 | -0.0287 | 0.0047 | 1.29E-09 | -6.0684 | 1376071 | Asthma |
| rs1125156  | 17 | 16091240 | G | A | 0.4859 | -0.0280 | 0.0051 | 3.27E-08 | -5.5265 | 1246149 | Asthma |
| rs2078050  | 17 | 16091574 | C | T | 0.4532 | -0.0281 | 0.0047 | 3.15E-09 | -5.9237 | 1376071 | Asthma |
| rs8064702  | 17 | 16092448 | C | T | 0.4513 | -0.0280 | 0.0048 | 3.75E-09 | -5.8951 | 1376071 | Asthma |
| rs72833498 | 17 | 16092488 | T | C | 0.4877 | -0.0285 | 0.0047 | 1.65E-09 | -6.0292 | 1376071 | Asthma |
| rs11871961 | 17 | 16094112 | A | G | 0.4882 | -0.0284 | 0.0047 | 1.85E-09 | -6.0104 | 1376071 | Asthma |
| rs11872032 | 17 | 16094459 | A | C | 0.4880 | -0.0284 | 0.0047 | 1.85E-09 | -6.0107 | 1376071 | Asthma |
| rs36001065 | 17 | 16094858 | A | C | 0.4905 | -0.0303 | 0.0052 | 4.48E-09 | -5.8654 | 1224666 | Asthma |
| rs7207463  | 17 | 16100945 | A | G | 0.4521 | -0.0278 | 0.0048 | 4.98E-09 | -5.8477 | 1376071 | Asthma |
| rs7207889  | 17 | 16101054 | C | T | 0.4888 | -0.0285 | 0.0047 | 1.67E-09 | -6.0270 | 1376071 | Asthma |
| rs2285580  | 17 | 16101873 | T | C | 0.4515 | -0.0279 | 0.0048 | 4.59E-09 | -5.8613 | 1376071 | Asthma |
| rs4791661  | 17 | 16105394 | G | A | 0.4885 | -0.0283 | 0.0047 | 2.00E-09 | -5.9979 | 1376071 | Asthma |
| rs4791662  | 17 | 16105558 | T | C | 0.4879 | -0.0283 | 0.0047 | 2.06E-09 | -5.9930 | 1376071 | Asthma |
| rs9907273  | 17 | 16107445 | A | G | 0.4516 | -0.0277 | 0.0048 | 6.03E-09 | -5.8159 | 1376071 | Asthma |
| rs4566208  | 17 | 16107606 | A | G | 0.4514 | -0.0275 | 0.0048 | 6.78E-09 | -5.7962 | 1376071 | Asthma |
| rs7222886  | 17 | 16109180 | A | T | 0.4516 | -0.0277 | 0.0048 | 5.79E-09 | -5.8225 | 1376071 | Asthma |
| rs6502490  | 17 | 16111551 | A | G | 0.4518 | -0.0276 | 0.0048 | 6.50E-09 | -5.8035 | 1376071 | Asthma |
| rs1126148  | 17 | 16112265 | G | A | 0.4887 | -0.0282 | 0.0047 | 2.46E-09 | -5.9643 | 1376071 | Asthma |
| rs35160872 | 17 | 16112725 | G | A | 0.4686 | -0.0274 | 0.0050 | 3.69E-08 | -5.5053 | 1008051 | Asthma |
| rs9905225  | 17 | 16113758 | C | T | 0.4516 | -0.0276 | 0.0048 | 6.26E-09 | -5.8097 | 1376071 | Asthma |
| rs9909697  | 17 | 16116664 | G | A | 0.4886 | -0.0280 | 0.0047 | 2.95E-09 | -5.9344 | 1376071 | Asthma |
| rs35622628 | 17 | 16116714 | A | G | 0.4909 | -0.0299 | 0.0052 | 1.03E-08 | -5.7255 | 1159440 | Asthma |
| rs12449895 | 17 | 16118297 | A | G | 0.5073 | -0.0295 | 0.0047 | 4.20E-10 | -6.2465 | 1376071 | Asthma |
| rs11658564 | 17 | 16120273 | T | C | 0.4517 | -0.0278 | 0.0048 | 4.86E-09 | -5.8517 | 1376071 | Asthma |
| rs12150017 | 17 | 16120780 | T | C | 0.4878 | -0.0283 | 0.0047 | 2.06E-09 | -5.9928 | 1376071 | Asthma |
| rs11870608 | 17 | 16122356 | A | G | 0.4516 | -0.0278 | 0.0048 | 4.98E-09 | -5.8479 | 1376071 | Asthma |
| rs11078332 | 17 | 16122754 | A | G | 0.4883 | -0.0282 | 0.0047 | 2.28E-09 | -5.9762 | 1376071 | Asthma |
| rs10852833 | 17 | 16124047 | A | G | 0.4885 | -0.0281 | 0.0047 | 2.57E-09 | -5.9567 | 1376071 | Asthma |
| rs11655773 | 17 | 16126985 | A | G | 0.4878 | -0.0284 | 0.0047 | 1.92E-09 | -6.0042 | 1376071 | Asthma |
| rs7216834  | 17 | 16129451 | C | A | 0.4888 | -0.0282 | 0.0047 | 2.47E-09 | -5.9636 | 1376071 | Asthma |

|            |    |          |   |   |        |         |        |          |         |         |        |
|------------|----|----------|---|---|--------|---------|--------|----------|---------|---------|--------|
| rs1160109  | 17 | 16129818 | T | A | 0.4888 | -0.0282 | 0.0047 | 2.50E-09 | -5.9613 | 1376071 | Asthma |
| rs2324141  | 17 | 16130129 | C | A | 0.4526 | -0.0276 | 0.0048 | 6.32E-09 | -5.8079 | 1376071 | Asthma |
| rs9902141  | 17 | 16131459 | G | T | 0.4884 | -0.0282 | 0.0047 | 2.52E-09 | -5.9601 | 1376071 | Asthma |
| rs10451230 | 17 | 16131911 | A | T | 0.4518 | -0.0276 | 0.0048 | 6.26E-09 | -5.8099 | 1376071 | Asthma |
| rs9891646  | 17 | 16133547 | T | C | 0.4878 | -0.0285 | 0.0047 | 1.67E-09 | -6.0274 | 1376071 | Asthma |
| rs9897388  | 17 | 16134312 | C | A | 0.4525 | -0.0277 | 0.0048 | 6.11E-09 | -5.8137 | 1376071 | Asthma |
| rs1972503  | 17 | 16136598 | G | A | 0.4931 | -0.0276 | 0.0047 | 5.65E-09 | -5.8269 | 1376071 | Asthma |
| rs2324142  | 17 | 16137992 | C | A | 0.4514 | -0.0278 | 0.0048 | 5.24E-09 | -5.8394 | 1376071 | Asthma |
| rs2875265  | 17 | 16138322 | T | C | 0.4517 | -0.0279 | 0.0048 | 4.74E-09 | -5.8558 | 1376071 | Asthma |
| rs6502491  | 17 | 16138463 | C | T | 0.4516 | -0.0279 | 0.0048 | 4.53E-09 | -5.8637 | 1376071 | Asthma |
| rs3760293  | 17 | 16138478 | A | G | 0.4518 | -0.0278 | 0.0048 | 5.24E-09 | -5.8391 | 1376071 | Asthma |
| rs1989856  | 17 | 16140337 | T | C | 0.4884 | -0.0283 | 0.0047 | 2.12E-09 | -5.9886 | 1376071 | Asthma |
| rs2285579  | 17 | 16143531 | A | T | 0.4520 | -0.0277 | 0.0048 | 6.01E-09 | -5.8164 | 1376071 | Asthma |
| rs9907313  | 17 | 16145776 | G | A | 0.4884 | -0.0283 | 0.0047 | 2.10E-09 | -5.9899 | 1376071 | Asthma |
| rs8079969  | 17 | 16148130 | C | T | 0.4522 | -0.0279 | 0.0048 | 4.48E-09 | -5.8656 | 1376071 | Asthma |
| rs9903464  | 17 | 16149067 | C | T | 0.4910 | -0.0278 | 0.0047 | 4.33E-09 | -5.8709 | 1376071 | Asthma |
| rs178662   | 17 | 16152345 | G | A | 0.4681 | -0.0277 | 0.0050 | 2.82E-08 | -5.5523 | 1008051 | Asthma |
| rs178659   | 17 | 16153128 | C | T | 0.4884 | -0.0283 | 0.0047 | 2.13E-09 | -5.9875 | 1376071 | Asthma |
| rs178658   | 17 | 16154176 | G | C | 0.4886 | -0.0283 | 0.0047 | 2.17E-09 | -5.9850 | 1376071 | Asthma |
| rs178657   | 17 | 16154619 | A | G | 0.4877 | -0.0282 | 0.0047 | 2.51E-09 | -5.9610 | 1376071 | Asthma |
| rs178654   | 17 | 16161402 | A | G | 0.4510 | -0.0275 | 0.0048 | 7.63E-09 | -5.7764 | 1376071 | Asthma |
| rs178838   | 17 | 16172587 | A | T | 0.4519 | -0.0279 | 0.0048 | 4.73E-09 | -5.8565 | 1376071 | Asthma |
| rs178837   | 17 | 16173584 | C | A | 0.5064 | -0.0297 | 0.0047 | 3.21E-10 | -6.2886 | 1376071 | Asthma |
| rs178836   | 17 | 16173684 | G | C | 0.4516 | -0.0276 | 0.0048 | 6.31E-09 | -5.8086 | 1376071 | Asthma |
| rs178835   | 17 | 16173802 | T | A | 0.4516 | -0.0278 | 0.0048 | 5.39E-09 | -5.8348 | 1376071 | Asthma |
| rs178834   | 17 | 16173810 | A | T | 0.4872 | -0.0281 | 0.0047 | 2.80E-09 | -5.9432 | 1376071 | Asthma |
| rs178833   | 17 | 16175522 | C | T | 0.4513 | -0.0277 | 0.0048 | 5.60E-09 | -5.8281 | 1376071 | Asthma |
| rs178831   | 17 | 16177535 | A | G | 0.4415 | -0.0268 | 0.0048 | 1.91E-08 | -5.6200 | 1376071 | Asthma |
| rs178830   | 17 | 16178644 | C | T | 0.5064 | -0.0298 | 0.0047 | 2.85E-10 | -6.3066 | 1376071 | Asthma |
| rs178829   | 17 | 16179875 | G | A | 0.4875 | -0.0283 | 0.0047 | 2.27E-09 | -5.9773 | 1376071 | Asthma |
| rs178828   | 17 | 16180272 | C | T | 0.4513 | -0.0277 | 0.0048 | 5.53E-09 | -5.8305 | 1376071 | Asthma |
| rs178827   | 17 | 16180352 | A | G | 0.4513 | -0.0276 | 0.0048 | 6.84E-09 | -5.7949 | 1376071 | Asthma |
| rs178826   | 17 | 16180370 | C | T | 0.4516 | -0.0277 | 0.0048 | 6.05E-09 | -5.8153 | 1376071 | Asthma |
| rs178825   | 17 | 16182516 | A | G | 0.4516 | -0.0275 | 0.0048 | 7.03E-09 | -5.7902 | 1376071 | Asthma |
| rs178824   | 17 | 16183093 | T | A | 0.4515 | -0.0276 | 0.0048 | 6.72E-09 | -5.7978 | 1376071 | Asthma |
| rs21180    | 17 | 16184694 | C | T | 0.5064 | -0.0297 | 0.0047 | 3.49E-10 | -6.2755 | 1376071 | Asthma |
| rs178821   | 17 | 16184821 | T | C | 0.4513 | -0.0277 | 0.0048 | 5.70E-09 | -5.8255 | 1376071 | Asthma |
| rs178820   | 17 | 16187471 | A | G | 0.4876 | -0.0282 | 0.0047 | 2.54E-09 | -5.9589 | 1376071 | Asthma |
| rs545755   | 17 | 16187856 | T | C | 0.4518 | -0.0273 | 0.0048 | 1.61E-08 | -5.6494 | 1349938 | Asthma |
| rs178817   | 17 | 16188480 | G | A | 0.4877 | -0.0281 | 0.0047 | 2.58E-09 | -5.9564 | 1376071 | Asthma |
| rs178816   | 17 | 16189588 | A | G | 0.4876 | -0.0282 | 0.0047 | 2.47E-09 | -5.9633 | 1376071 | Asthma |
| rs178815   | 17 | 16189615 | C | T | 0.4512 | -0.0275 | 0.0048 | 7.08E-09 | -5.7890 | 1376071 | Asthma |
| rs178814   | 17 | 16190841 | G | C | 0.4510 | -0.0276 | 0.0048 | 6.25E-09 | -5.8100 | 1376071 | Asthma |
| rs178813   | 17 | 16193756 | C | T | 0.5096 | -0.0314 | 0.0056 | 2.25E-08 | -5.5916 | 1094744 | Asthma |
| rs178811   | 17 | 16193830 | T | C | 0.4858 | -0.0299 | 0.0052 | 7.07E-09 | -5.7892 | 1224666 | Asthma |
| rs178810   | 17 | 16194116 | C | T | 0.4511 | -0.0275 | 0.0048 | 7.34E-09 | -5.7831 | 1376071 | Asthma |
| rs178809   | 17 | 16196459 | C | A | 0.4874 | -0.0282 | 0.0047 | 2.32E-09 | -5.9737 | 1376071 | Asthma |
| rs178808   | 17 | 16196640 | G | A | 0.5079 | -0.0317 | 0.0052 | 8.76E-10 | -6.1306 | 1224666 | Asthma |
| rs178807   | 17 | 16197247 | A | G | 0.4509 | -0.0276 | 0.0048 | 6.59E-09 | -5.8011 | 1376071 | Asthma |
| rs178805   | 17 | 16197814 | T | C | 0.4875 | -0.0282 | 0.0047 | 2.32E-09 | -5.9733 | 1376071 | Asthma |
| rs178804   | 17 | 16199924 | G | T | 0.4878 | -0.0283 | 0.0047 | 2.00E-09 | -5.9979 | 1376071 | Asthma |
| rs178803   | 17 | 16200112 | C | T | 0.4876 | -0.0283 | 0.0047 | 2.20E-09 | -5.9824 | 1376071 | Asthma |
| rs178801   | 17 | 16205150 | G | A | 0.4877 | -0.0282 | 0.0047 | 2.43E-09 | -5.9661 | 1376071 | Asthma |
| rs178800   | 17 | 16205612 | G | A | 0.4873 | -0.0282 | 0.0047 | 2.38E-09 | -5.9696 | 1376071 | Asthma |
| rs178799   | 17 | 16210871 | A | G | 0.4884 | -0.0282 | 0.0047 | 2.31E-09 | -5.9743 | 1376071 | Asthma |
| rs178798   | 17 | 16214045 | C | A | 0.4876 | -0.0283 | 0.0047 | 2.10E-09 | -5.9898 | 1376071 | Asthma |
| rs178797   | 17 | 16215740 | G | A | 0.4897 | -0.0277 | 0.0047 | 4.76E-09 | -5.8552 | 1376071 | Asthma |
| rs178796   | 17 | 16220273 | A | G | 0.4895 | -0.0276 | 0.0047 | 5.08E-09 | -5.8446 | 1376071 | Asthma |
| rs178795   | 17 | 16220559 | G | A | 0.4895 | -0.0276 | 0.0047 | 5.06E-09 | -5.8452 | 1376071 | Asthma |
| rs178794   | 17 | 16220582 | A | G | 0.4896 | -0.0275 | 0.0047 | 5.64E-09 | -5.8271 | 1376071 | Asthma |
| rs178793   | 17 | 16221654 | C | G | 0.4906 | -0.0282 | 0.0047 | 2.38E-09 | -5.9694 | 1376071 | Asthma |
| rs178792   | 17 | 16221865 | C | T | 0.4906 | -0.0282 | 0.0047 | 2.50E-09 | -5.9613 | 1376071 | Asthma |
| rs178791   | 17 | 16223892 | A | C | 0.4893 | -0.0276 | 0.0047 | 5.12E-09 | -5.8431 | 1376071 | Asthma |
| rs178790   | 17 | 16227808 | G | A | 0.4894 | -0.0277 | 0.0047 | 4.62E-09 | -5.8605 | 1376071 | Asthma |
| rs178789   | 17 | 16227882 | T | C | 0.4896 | -0.0276 | 0.0047 | 5.43E-09 | -5.8335 | 1376071 | Asthma |
| rs178788   | 17 | 16228654 | A | G | 0.4994 | -0.0266 | 0.0047 | 1.76E-08 | -5.6342 | 1376071 | Asthma |
| rs178787   | 17 | 16229730 | G | A | 0.4993 | -0.0265 | 0.0047 | 1.79E-08 | -5.6311 | 1376071 | Asthma |
| rs12936233 | 17 | 16234943 | C | T | 0.4643 | 0.0276  | 0.0047 | 4.74E-09 | 5.8560  | 1376071 | Asthma |
| rs12945855 | 17 | 16235835 | C | T | 0.4641 | 0.0277  | 0.0047 | 4.65E-09 | 5.8592  | 1376071 | Asthma |
| rs11652044 | 17 | 16236740 | A | G | 0.5005 | -0.0262 | 0.0047 | 2.73E-08 | -5.5581 | 1376071 | Asthma |
| rs62072527 | 17 | 16239003 | G | A | 0.5003 | -0.0262 | 0.0047 | 2.71E-08 | -5.5595 | 1376071 | Asthma |
| rs34331598 | 17 | 16239374 | A | G | 0.5005 | -0.0262 | 0.0047 | 2.87E-08 | -5.5493 | 1376071 | Asthma |
| rs62072528 | 17 | 16239521 | G | C | 0.4629 | 0.0271  | 0.0047 | 9.08E-09 | 5.7469  | 1376071 | Asthma |
| rs4470185  | 17 | 16240395 | T | C | 0.5005 | -0.0262 | 0.0047 | 2.80E-08 | -5.5537 | 1376071 | Asthma |

|             |    |          |   |   |        |         |        |          |         |         |        |
|-------------|----|----------|---|---|--------|---------|--------|----------|---------|---------|--------|
| rs9916220   | 17 | 16241770 | A | T | 0.4630 | 0.0273  | 0.0047 | 7.78E-09 | 5.7732  | 1376071 | Asthma |
| rs7223428   | 17 | 16242857 | G | A | 0.5001 | -0.0264 | 0.0047 | 2.16E-08 | -5.5987 | 1376071 | Asthma |
| rs12946619  | 17 | 16243345 | T | C | 0.5001 | -0.0264 | 0.0047 | 2.09E-08 | -5.6045 | 1376071 | Asthma |
| rs11653500  | 17 | 16245195 | A | G | 0.5003 | -0.0264 | 0.0047 | 2.31E-08 | -5.5868 | 1376071 | Asthma |
| rs11653650  | 17 | 16245530 | T | C | 0.4631 | 0.0270  | 0.0047 | 1.07E-08 | 5.7191  | 1376071 | Asthma |
| rs12150285  | 17 | 16245612 | G | C | 0.5006 | -0.0263 | 0.0048 | 3.94E-08 | -5.4937 | 1349938 | Asthma |
| rs9909022   | 17 | 16250166 | T | C | 0.4629 | 0.0272  | 0.0047 | 9.03E-09 | 5.7480  | 1376071 | Asthma |
| rs1029809   | 17 | 16252921 | G | A | 0.4629 | 0.0273  | 0.0047 | 7.35E-09 | 5.7825  | 1376071 | Asthma |
| rs11650427  | 17 | 16255460 | C | A | 0.4630 | 0.0274  | 0.0047 | 6.54E-09 | 5.8022  | 1376071 | Asthma |
| rs12945959  | 17 | 16257154 | T | C | 0.5183 | -0.0273 | 0.0049 | 2.51E-08 | -5.5727 | 1290310 | Asthma |
| rs8073259   | 17 | 16261243 | T | C | 0.4877 | -0.0266 | 0.0048 | 3.97E-08 | -5.4920 | 1316443 | Asthma |
| rs12936529  | 17 | 16265470 | T | C | 0.4676 | 0.0273  | 0.0047 | 7.71E-09 | 5.7746  | 1376071 | Asthma |
| rs9910148   | 17 | 16265695 | A | G | 0.4674 | 0.0273  | 0.0047 | 7.89E-09 | 5.7706  | 1376071 | Asthma |
| rs7210990   | 17 | 16267450 | A | C | 0.4675 | 0.0273  | 0.0047 | 7.36E-09 | 5.7823  | 1376071 | Asthma |
| rs12150564  | 17 | 16269438 | G | A | 0.4674 | 0.0273  | 0.0047 | 7.86E-09 | 5.7715  | 1376071 | Asthma |
| rs10852834  | 17 | 16271192 | G | C | 0.4676 | 0.0274  | 0.0047 | 6.74E-09 | 5.7973  | 1376071 | Asthma |
| rs35565381  | 17 | 16271711 | C | T | 0.4802 | -0.0273 | 0.0047 | 7.59E-09 | -5.7774 | 1376071 | Asthma |
| rs56269147  | 17 | 16271972 | C | A | 0.4788 | -0.0270 | 0.0047 | 1.10E-08 | -5.7153 | 1376071 | Asthma |
| rs2014604   | 17 | 16273569 | T | C | 0.4845 | -0.0269 | 0.0047 | 1.18E-08 | -5.7021 | 1376071 | Asthma |
| rs7219687   | 17 | 16274073 | C | G | 0.4844 | -0.0270 | 0.0047 | 1.02E-08 | -5.7276 | 1376071 | Asthma |
| rs12938394  | 17 | 16274596 | A | G | 0.4842 | -0.0272 | 0.0047 | 8.25E-09 | -5.7632 | 1376071 | Asthma |
| rs12948244  | 17 | 16274786 | T | C | 0.4844 | -0.0270 | 0.0047 | 9.87E-09 | -5.7332 | 1376071 | Asthma |
| rs7225920   | 17 | 16275432 | G | C | 0.4844 | -0.0271 | 0.0047 | 9.58E-09 | -5.7380 | 1376071 | Asthma |
| rs1963811   | 17 | 16280737 | A | G | 0.4816 | 0.0282  | 0.0047 | 2.31E-09 | 5.9745  | 1376071 | Asthma |
| rs2109262   | 17 | 16281315 | G | T | 0.4815 | 0.0283  | 0.0047 | 2.06E-09 | 5.9931  | 1376071 | Asthma |
| rs3785626   | 17 | 16281934 | G | T | 0.4818 | 0.0286  | 0.0047 | 1.38E-09 | 6.0583  | 1376071 | Asthma |
| rs12938397  | 17 | 16282786 | A | G | 0.4565 | 0.0297  | 0.0047 | 3.52E-10 | 6.2741  | 1376071 | Asthma |
| rs2324306   | 17 | 16283047 | T | G | 0.4812 | 0.0281  | 0.0047 | 2.43E-09 | 5.9663  | 1376071 | Asthma |
| rs4792728   | 17 | 16283501 | T | C | 0.4818 | 0.0283  | 0.0047 | 1.96E-09 | 6.0012  | 1376071 | Asthma |
| rs11651578  | 17 | 16284278 | A | G | 0.4814 | 0.0282  | 0.0047 | 2.29E-09 | 5.9759  | 1376071 | Asthma |
| rs4792729   | 17 | 16285105 | A | G | 0.4814 | 0.0282  | 0.0047 | 2.30E-09 | 5.9754  | 1376071 | Asthma |
| rs4792730   | 17 | 16285262 | C | G | 0.4843 | -0.0270 | 0.0047 | 1.00E-08 | -5.7303 | 1376071 | Asthma |
| rs3785625   | 17 | 16287104 | C | G | 0.4814 | 0.0282  | 0.0047 | 2.11E-09 | 5.9894  | 1376071 | Asthma |
| rs11078337  | 17 | 16290130 | A | G | 0.4564 | 0.0297  | 0.0047 | 3.14E-10 | 6.2921  | 1376071 | Asthma |
| rs9747114   | 17 | 16291722 | A | G | 0.4844 | -0.0270 | 0.0047 | 1.07E-08 | -5.7190 | 1376071 | Asthma |
| rs4791665   | 17 | 16292742 | A | G | 0.4842 | -0.0269 | 0.0047 | 1.04E-08 | -5.7241 | 1376071 | Asthma |
| rs11868284  | 17 | 16292961 | C | T | 0.4831 | 0.0283  | 0.0047 | 1.78E-09 | 6.0169  | 1376071 | Asthma |
| rs6502498   | 17 | 16295661 | T | C | 0.4814 | 0.0281  | 0.0047 | 2.39E-09 | 5.9691  | 1376071 | Asthma |
| rs3785623   | 17 | 16297846 | T | C | 0.4844 | -0.0269 | 0.0047 | 1.17E-08 | -5.7048 | 1376071 | Asthma |
| rs4792731   | 17 | 16298627 | C | T | 0.4833 | 0.0285  | 0.0047 | 1.45E-09 | 6.0497  | 1376071 | Asthma |
| rs8074727   | 17 | 16300500 | A | G | 0.4829 | 0.0282  | 0.0047 | 2.21E-09 | 5.9818  | 1376071 | Asthma |
| rs2324307   | 17 | 16301355 | G | C | 0.4828 | 0.0282  | 0.0047 | 2.27E-09 | 5.9775  | 1376071 | Asthma |
| rs11654658  | 17 | 16304141 | T | G | 0.4830 | 0.0284  | 0.0047 | 1.58E-09 | 6.0364  | 1376071 | Asthma |
| rs3095171   | 17 | 16304152 | G | C | 0.4803 | -0.0271 | 0.0047 | 9.03E-09 | -5.7479 | 1376071 | Asthma |
| rs3112511   | 17 | 16304212 | A | G | 0.4806 | -0.0272 | 0.0047 | 8.03E-09 | -5.7678 | 1376071 | Asthma |
| rs3112513   | 17 | 16305498 | G | A | 0.4803 | -0.0270 | 0.0047 | 9.74E-09 | -5.7353 | 1376071 | Asthma |
| rs28516015  | 17 | 16306241 | A | G | 0.4796 | -0.0271 | 0.0047 | 9.20E-09 | -5.7449 | 1376071 | Asthma |
| rs9303135   | 17 | 16306757 | A | G | 0.4845 | -0.0271 | 0.0047 | 9.33E-09 | -5.7426 | 1376071 | Asthma |
| rs9944524   | 17 | 16309336 | G | A | 0.4829 | 0.0285  | 0.0047 | 1.43E-09 | 6.0525  | 1376071 | Asthma |
| rs11655325  | 17 | 16309686 | A | G | 0.4941 | -0.0265 | 0.0048 | 4.10E-08 | -5.4865 | 1316443 | Asthma |
| rs11656811  | 17 | 16310940 | T | C | 0.4826 | 0.0283  | 0.0047 | 2.07E-09 | 5.9921  | 1376071 | Asthma |
| rs142298795 | 17 | 16312252 | G | C | 0.4804 | 0.0299  | 0.0053 | 1.77E-08 | 5.6329  | 1133307 | Asthma |
| rs12939078  | 17 | 16313152 | T | G | 0.4824 | 0.0285  | 0.0047 | 1.49E-09 | 6.0458  | 1376071 | Asthma |
| rs12938878  | 17 | 16313291 | C | A | 0.4829 | 0.0287  | 0.0047 | 1.14E-09 | 6.0883  | 1376071 | Asthma |
| rs3785622   | 17 | 16315372 | G | C | 0.4823 | 0.0284  | 0.0047 | 1.86E-09 | 6.0093  | 1376071 | Asthma |
| rs3785621   | 17 | 16315532 | T | C | 0.4851 | -0.0271 | 0.0047 | 9.17E-09 | -5.7455 | 1376071 | Asthma |
| rs2074995   | 17 | 16317177 | A | T | 0.4711 | -0.0276 | 0.0049 | 1.50E-08 | -5.6620 | 1316443 | Asthma |
| rs9890539   | 17 | 16318005 | T | C | 0.4827 | -0.0274 | 0.0047 | 7.47E-09 | -5.7800 | 1376071 | Asthma |
| rs7224367   | 17 | 16319180 | A | G | 0.4828 | -0.0274 | 0.0047 | 7.40E-09 | -5.7816 | 1376071 | Asthma |
| rs12948905  | 17 | 16321561 | C | A | 0.4848 | 0.0290  | 0.0047 | 8.95E-10 | 6.1273  | 1376071 | Asthma |
| rs9893005   | 17 | 16322192 | G | C | 0.4782 | -0.0274 | 0.0047 | 6.86E-09 | -5.7941 | 1376071 | Asthma |
| rs15739     | 17 | 16325918 | G | A | 0.4847 | 0.0288  | 0.0047 | 1.09E-09 | 6.0963  | 1376071 | Asthma |
| rs9890867   | 17 | 16327176 | A | G | 0.4381 | 0.0277  | 0.0049 | 1.36E-08 | 5.6789  | 1316443 | Asthma |
| rs4792732   | 17 | 16328021 | T | C | 0.4636 | 0.0266  | 0.0048 | 4.25E-08 | 5.4800  | 1316443 | Asthma |
| rs1476810   | 17 | 16329903 | T | C | 0.4643 | 0.0263  | 0.0047 | 2.78E-08 | 5.5545  | 1376071 | Asthma |
| rs11651955  | 17 | 16332148 | A | G | 0.4817 | 0.0278  | 0.0047 | 4.09E-09 | 5.8806  | 1376071 | Asthma |
| rs12945877  | 17 | 16334889 | T | C | 0.4813 | 0.0276  | 0.0047 | 5.58E-09 | 5.8286  | 1376071 | Asthma |
| rs35762856  | 17 | 16334921 | T | C | 0.4820 | 0.0276  | 0.0047 | 5.68E-09 | 5.8261  | 1376071 | Asthma |
| rs12946717  | 17 | 16335062 | A | G | 0.4820 | 0.0280  | 0.0047 | 3.27E-09 | 5.9175  | 1376071 | Asthma |
| rs11650283  | 17 | 16336518 | C | A | 0.4818 | 0.0275  | 0.0047 | 6.20E-09 | 5.8112  | 1376071 | Asthma |
| rs7210776   | 17 | 31934989 | A | G | 0.1863 | -0.0345 | 0.0063 | 4.32E-08 | -5.4771 | 1316443 | Asthma |
| rs68140514  | 17 | 32008762 | C | T | 0.1513 | -0.0375 | 0.0068 | 4.25E-08 | -5.4800 | 1316443 | Asthma |
| rs6505274   | 17 | 32017562 | T | G | 0.1674 | -0.0368 | 0.0066 | 2.00E-08 | -5.6123 | 1316443 | Asthma |
| rs2076882   | 17 | 32020318 | T | G | 0.1498 | -0.0381 | 0.0069 | 3.13E-08 | -5.5341 | 1316443 | Asthma |



|            |    |          |   |   |        |         |        |          |         |         |        |
|------------|----|----------|---|---|--------|---------|--------|----------|---------|---------|--------|
| rs8066884  | 17 | 32026809 | G | A | 0.1498 | -0.0377 | 0.0069 | 4.13E-08 | -5.4852 | 1316443 | Asthma |
| rs8066156  | 17 | 32034610 | C | T | 0.1530 | -0.0374 | 0.0068 | 4.38E-08 | -5.4750 | 1316443 | Asthma |
| rs1843083  | 17 | 32049913 | A | C | 0.1530 | -0.0373 | 0.0068 | 4.86E-08 | -5.4565 | 1316443 | Asthma |
| rs16967101 | 17 | 32050143 | G | A | 0.1530 | -0.0374 | 0.0068 | 4.47E-08 | -5.4710 | 1316443 | Asthma |
| rs2627115  | 17 | 32053021 | G | T | 0.1531 | -0.0374 | 0.0068 | 4.29E-08 | -5.4785 | 1316443 | Asthma |
| rs2627118  | 17 | 32054038 | G | A | 0.1530 | -0.0376 | 0.0068 | 3.86E-08 | -5.4974 | 1316443 | Asthma |
| rs9893342  | 17 | 32055983 | G | A | 0.1710 | -0.0432 | 0.0079 | 3.92E-08 | -5.4944 | 1030443 | Asthma |
| rs28708703 | 17 | 32059826 | G | C | 0.1517 | -0.0378 | 0.0069 | 3.80E-08 | -5.4997 | 1316443 | Asthma |
| rs12950186 | 17 | 39237142 | A | C | 0.1307 | 0.0488  | 0.0073 | 1.65E-11 | 6.7345  | 1299802 | Asthma |
| rs34473775 | 17 | 39239948 | G | T | 0.2337 | 0.0334  | 0.0057 | 6.15E-09 | 5.8125  | 1316443 | Asthma |
| rs11078893 | 17 | 39240426 | T | C | 0.2330 | 0.0342  | 0.0057 | 2.59E-09 | 5.9559  | 1316443 | Asthma |
| rs11078894 | 17 | 39240552 | C | G | 0.1309 | 0.0486  | 0.0072 | 1.98E-11 | 6.7074  | 1299802 | Asthma |
| rs10432030 | 17 | 39241454 | C | T | 0.2337 | 0.0333  | 0.0057 | 6.67E-09 | 5.7991  | 1316443 | Asthma |
| rs10432031 | 17 | 39241599 | G | A | 0.2337 | 0.0331  | 0.0057 | 8.09E-09 | 5.7666  | 1316443 | Asthma |
| rs4375688  | 17 | 39242817 | G | A | 0.2337 | 0.0329  | 0.0057 | 9.62E-09 | 5.7373  | 1316443 | Asthma |
| rs2338795  | 17 | 39243111 | T | G | 0.2336 | 0.0330  | 0.0057 | 9.10E-09 | 5.7467  | 1316443 | Asthma |
| rs2879258  | 17 | 39243126 | G | T | 0.1302 | 0.0480  | 0.0073 | 3.85E-11 | 6.6097  | 1299802 | Asthma |
| rs8076462  | 17 | 39243772 | G | C | 0.2345 | 0.0330  | 0.0057 | 8.47E-09 | 5.7590  | 1316443 | Asthma |
| rs11078895 | 17 | 39244798 | A | G | 0.1315 | 0.0484  | 0.0071 | 1.00E-11 | 6.8065  | 1316443 | Asthma |
| rs2100651  | 17 | 39246027 | C | A | 0.2331 | 0.0343  | 0.0057 | 2.27E-09 | 5.9771  | 1316443 | Asthma |
| rs3964723  | 17 | 39247726 | C | T | 0.2331 | 0.0342  | 0.0057 | 2.59E-09 | 5.9554  | 1316443 | Asthma |
| rs55689507 | 17 | 39248183 | G | C | 0.2338 | 0.0332  | 0.0057 | 6.73E-09 | 5.7976  | 1316443 | Asthma |
| rs2061342  | 17 | 39249404 | T | G | 0.2339 | 0.0333  | 0.0057 | 6.55E-09 | 5.8022  | 1316443 | Asthma |
| rs11655972 | 17 | 39250819 | C | T | 0.1316 | 0.0485  | 0.0071 | 8.14E-12 | 6.8360  | 1316443 | Asthma |
| rs2168785  | 17 | 39250882 | C | T | 0.2334 | 0.0331  | 0.0057 | 8.50E-09 | 5.7581  | 1316443 | Asthma |
| rs7215889  | 17 | 39251509 | C | T | 0.2332 | 0.0345  | 0.0057 | 1.78E-09 | 6.0170  | 1316443 | Asthma |
| rs755500   | 17 | 39253612 | G | A | 0.2332 | 0.0345  | 0.0057 | 1.92E-09 | 6.0044  | 1316443 | Asthma |
| rs752314   | 17 | 39254447 | C | T | 0.2339 | 0.0336  | 0.0057 | 4.65E-09 | 5.8594  | 1316443 | Asthma |
| rs2879259  | 17 | 39254639 | C | G | 0.1316 | 0.0487  | 0.0071 | 6.89E-12 | 6.8599  | 1316443 | Asthma |
| rs4325601  | 17 | 39255176 | G | A | 0.2341 | 0.0335  | 0.0057 | 5.28E-09 | 5.8381  | 1316443 | Asthma |
| rs57933226 | 17 | 39256576 | C | T | 0.1322 | 0.0474  | 0.0071 | 2.14E-11 | 6.6961  | 1316443 | Asthma |
| rs3744349  | 17 | 39258589 | C | T | 0.1316 | 0.0487  | 0.0071 | 6.86E-12 | 6.8606  | 1316443 | Asthma |
| rs11078896 | 17 | 39259291 | C | T | 0.2347 | 0.0333  | 0.0057 | 5.86E-09 | 5.8207  | 1316443 | Asthma |
| rs11078897 | 17 | 39259617 | C | T | 0.2339 | 0.0336  | 0.0057 | 4.49E-09 | 5.8650  | 1316443 | Asthma |
| rs3744348  | 17 | 39261322 | C | G | 0.2339 | 0.0335  | 0.0057 | 4.84E-09 | 5.8527  | 1316443 | Asthma |
| rs62074994 | 17 | 39261958 | G | A | 0.2339 | 0.0336  | 0.0057 | 4.48E-09 | 5.8654  | 1316443 | Asthma |
| rs61368704 | 17 | 39262823 | T | C | 0.1316 | 0.0489  | 0.0071 | 5.41E-12 | 6.8945  | 1316443 | Asthma |
| rs2338756  | 17 | 39262967 | G | A | 0.2339 | 0.0336  | 0.0057 | 4.69E-09 | 5.8578  | 1316443 | Asthma |
| rs2338755  | 17 | 39263064 | T | C | 0.2339 | 0.0338  | 0.0057 | 3.70E-09 | 5.8971  | 1316443 | Asthma |
| rs2061338  | 17 | 39265514 | T | C | 0.2339 | 0.0337  | 0.0057 | 4.17E-09 | 5.8773  | 1316443 | Asthma |
| rs8073907  | 17 | 39267896 | C | T | 0.1316 | 0.0489  | 0.0071 | 5.08E-12 | 6.9034  | 1316443 | Asthma |
| rs1966916  | 17 | 39268985 | T | G | 0.2339 | 0.0337  | 0.0057 | 4.24E-09 | 5.8747  | 1316443 | Asthma |
| rs1966915  | 17 | 39269009 | A | C | 0.2339 | 0.0337  | 0.0057 | 4.20E-09 | 5.8759  | 1316443 | Asthma |
| rs8079662  | 17 | 39269334 | C | G | 0.2343 | 0.0336  | 0.0057 | 4.55E-09 | 5.8629  | 1316443 | Asthma |
| rs8079590  | 17 | 39269948 | T | C | 0.2339 | 0.0336  | 0.0057 | 4.27E-09 | 5.8734  | 1316443 | Asthma |
| rs33933929 | 17 | 39270188 | A | C | 0.2340 | 0.0335  | 0.0057 | 4.89E-09 | 5.8511  | 1316443 | Asthma |
| rs4795355  | 17 | 39271129 | C | T | 0.2341 | 0.0336  | 0.0057 | 4.45E-09 | 5.8666  | 1316443 | Asthma |
| rs644173   | 17 | 39274266 | T | C | 0.2338 | 0.0334  | 0.0057 | 5.44E-09 | 5.8329  | 1316443 | Asthma |
| rs11656287 | 17 | 39276430 | G | A | 0.2339 | 0.0334  | 0.0057 | 5.70E-09 | 5.8252  | 1316443 | Asthma |
| rs602282   | 17 | 39276768 | C | T | 0.2339 | 0.0334  | 0.0057 | 5.55E-09 | 5.8297  | 1316443 | Asthma |
| rs600010   | 17 | 39277264 | T | C | 0.2339 | 0.0333  | 0.0057 | 5.92E-09 | 5.8188  | 1316443 | Asthma |
| rs587880   | 17 | 39277646 | G | A | 0.1316 | 0.0484  | 0.0071 | 8.51E-12 | 6.8297  | 1316443 | Asthma |
| rs801430   | 17 | 39278956 | G | C | 0.1316 | 0.0483  | 0.0071 | 9.57E-12 | 6.8128  | 1316443 | Asthma |
| rs801429   | 17 | 39279125 | T | C | 0.1315 | 0.0483  | 0.0071 | 1.01E-11 | 6.8058  | 1316443 | Asthma |
| rs801427   | 17 | 39280458 | A | G | 0.1316 | 0.0484  | 0.0071 | 8.39E-12 | 6.8318  | 1316443 | Asthma |
| rs634365   | 17 | 39280713 | C | T | 0.2339 | 0.0333  | 0.0057 | 5.97E-09 | 5.8176  | 1316443 | Asthma |
| rs602688   | 17 | 39283243 | C | T | 0.2333 | 0.0337  | 0.0057 | 3.95E-09 | 5.8863  | 1316443 | Asthma |
| rs588193   | 17 | 39284186 | C | A | 0.2331 | 0.0335  | 0.0057 | 4.87E-09 | 5.8513  | 1316443 | Asthma |
| rs587343   | 17 | 39284350 | T | C | 0.2325 | 0.0344  | 0.0057 | 1.87E-09 | 6.0087  | 1316443 | Asthma |
| rs801426   | 17 | 39284856 | A | G | 0.2331 | 0.0335  | 0.0057 | 4.84E-09 | 5.8525  | 1316443 | Asthma |
| rs679995   | 17 | 39285426 | T | A | 0.2324 | 0.0345  | 0.0057 | 1.84E-09 | 6.0112  | 1316443 | Asthma |
| rs667239   | 17 | 39285988 | G | A | 0.1320 | 0.0463  | 0.0071 | 5.47E-11 | 6.5575  | 1316443 | Asthma |
| rs612194   | 17 | 39286454 | A | T | 0.2326 | 0.0336  | 0.0057 | 4.48E-09 | 5.8655  | 1316443 | Asthma |
| rs612209   | 17 | 39286460 | C | G | 0.2332 | 0.0334  | 0.0057 | 5.36E-09 | 5.8357  | 1316443 | Asthma |
| rs632606   | 17 | 39287085 | G | C | 0.2332 | 0.0334  | 0.0057 | 5.03E-09 | 5.8463  | 1316443 | Asthma |
| rs651827   | 17 | 39287119 | A | G | 0.1308 | 0.0492  | 0.0071 | 3.58E-12 | 6.9528  | 1316443 | Asthma |
| rs585961   | 17 | 39287783 | A | G | 0.2330 | 0.0337  | 0.0057 | 3.87E-09 | 5.8897  | 1316443 | Asthma |
| rs590051   | 17 | 39290318 | C | T | 0.1325 | 0.0503  | 0.0069 | 2.49E-13 | 7.3193  | 1376071 | Asthma |
| rs683948   | 17 | 39291195 | C | T | 0.2340 | 0.0354  | 0.0056 | 2.33E-10 | 6.3379  | 1376071 | Asthma |
| rs667193   | 17 | 39292582 | C | T | 0.1326 | 0.0502  | 0.0069 | 2.95E-13 | 7.2969  | 1376071 | Asthma |
| rs583980   | 17 | 39292918 | G | A | 0.2332 | 0.0335  | 0.0057 | 4.66E-09 | 5.8589  | 1316443 | Asthma |
| rs638201   | 17 | 39294413 | C | T | 0.2332 | 0.0335  | 0.0057 | 4.85E-09 | 5.8523  | 1316443 | Asthma |
| rs650106   | 17 | 39295306 | G | A | 0.2332 | 0.0334  | 0.0057 | 5.00E-09 | 5.8473  | 1316443 | Asthma |
| rs632202   | 17 | 39297041 | A | C | 0.2340 | 0.0332  | 0.0057 | 5.94E-09 | 5.8184  | 1316443 | Asthma |

|             |    |          |   |   |        |         |        |          |         |         |        |
|-------------|----|----------|---|---|--------|---------|--------|----------|---------|---------|--------|
| rs594794    | 17 | 39297232 | C | T | 0.1326 | 0.0503  | 0.0069 | 2.65E-13 | 7.3110  | 1376071 | Asthma |
| rs620686    | 17 | 39297364 | G | A | 0.2332 | 0.0336  | 0.0057 | 4.31E-09 | 5.8717  | 1316443 | Asthma |
| rs593480    | 17 | 39297527 | C | A | 0.2340 | 0.0332  | 0.0057 | 5.91E-09 | 5.8193  | 1316443 | Asthma |
| rs582176    | 17 | 39297746 | C | T | 0.1326 | 0.0502  | 0.0069 | 2.70E-13 | 7.3085  | 1376071 | Asthma |
| rs582088    | 17 | 39297796 | C | T | 0.1326 | 0.0503  | 0.0069 | 2.58E-13 | 7.3148  | 1376071 | Asthma |
| rs665413    | 17 | 39299425 | A | T | 0.1325 | 0.0506  | 0.0069 | 1.92E-13 | 7.3546  | 1376071 | Asthma |
| rs2302073   | 17 | 39301089 | G | A | 0.1326 | 0.0502  | 0.0069 | 2.68E-13 | 7.3095  | 1376071 | Asthma |
| rs9890198   | 17 | 39301227 | C | A | 0.1324 | 0.0499  | 0.0069 | 4.26E-13 | 7.2471  | 1376071 | Asthma |
| rs801418    | 17 | 39301729 | C | G | 0.1382 | 0.0509  | 0.0073 | 3.51E-12 | 6.9556  | 1219993 | Asthma |
| rs597069    | 17 | 39302259 | T | G | 0.1353 | 0.0530  | 0.0073 | 3.34E-13 | 7.2800  | 1246149 | Asthma |
| rs801417    | 17 | 39302619 | T | C | 0.1318 | 0.0498  | 0.0069 | 5.48E-13 | 7.2129  | 1376071 | Asthma |
| rs190577398 | 17 | 39302697 | C | G | 0.0250 | 0.1154  | 0.0172 | 2.08E-11 | 6.7005  | 862596  | Asthma |
| rs584377    | 17 | 39303875 | A | G | 0.1326 | 0.0501  | 0.0069 | 3.06E-13 | 7.2918  | 1376071 | Asthma |
| rs677888    | 17 | 39304765 | G | T | 0.2327 | 0.0381  | 0.0068 | 2.27E-08 | 5.5903  | 1030443 | Asthma |
| rs10491129  | 17 | 39305390 | G | T | 0.2338 | 0.0335  | 0.0057 | 4.49E-09 | 5.8651  | 1316443 | Asthma |
| rs649180    | 17 | 39308706 | C | A | 0.1323 | 0.0501  | 0.0069 | 3.33E-13 | 7.2804  | 1376071 | Asthma |
| rs801420    | 17 | 39309850 | G | C | 0.2459 | 0.0401  | 0.0067 | 1.94E-09 | 6.0025  | 1030443 | Asthma |
| rs801419    | 17 | 39310074 | G | A | 0.2340 | 0.0353  | 0.0056 | 2.62E-10 | 6.3200  | 1376071 | Asthma |
| rs9904334   | 17 | 39312083 | A | G | 0.2332 | 0.0333  | 0.0057 | 5.60E-09 | 5.8282  | 1316443 | Asthma |
| rs9913320   | 17 | 39312345 | C | T | 0.2341 | 0.0354  | 0.0056 | 2.33E-10 | 6.3376  | 1376071 | Asthma |
| rs9893735   | 17 | 39313605 | C | A | 0.1326 | 0.0501  | 0.0069 | 3.01E-13 | 7.2942  | 1376071 | Asthma |
| rs2024073   | 17 | 39315077 | G | T | 0.2333 | 0.0333  | 0.0057 | 5.94E-09 | 5.8186  | 1316443 | Asthma |
| rs4516267   | 17 | 39315229 | T | G | 0.1326 | 0.0502  | 0.0069 | 2.72E-13 | 7.3075  | 1376071 | Asthma |
| rs8079355   | 17 | 39316765 | A | G | 0.2332 | 0.0335  | 0.0057 | 4.74E-09 | 5.8560  | 1316443 | Asthma |
| rs8081220   | 17 | 39316904 | C | A | 0.2340 | 0.0353  | 0.0056 | 2.47E-10 | 6.3290  | 1376071 | Asthma |
| rs9747342   | 17 | 39317943 | T | C | 0.2340 | 0.0354  | 0.0056 | 2.35E-10 | 6.3368  | 1376071 | Asthma |
| rs8066704   | 17 | 39320965 | T | C | 0.2331 | 0.0336  | 0.0057 | 4.31E-09 | 5.8719  | 1316443 | Asthma |
| rs8067948   | 17 | 39321391 | G | A | 0.2331 | 0.0336  | 0.0057 | 4.37E-09 | 5.8695  | 1316443 | Asthma |
| rs8070695   | 17 | 39321809 | A | G | 0.2468 | 0.0374  | 0.0066 | 1.34E-08 | 5.6810  | 792345  | Asthma |
| rs9891892   | 17 | 39323603 | C | A | 0.1325 | 0.0504  | 0.0069 | 2.27E-13 | 7.3319  | 1376071 | Asthma |
| rs8067302   | 17 | 39324537 | A | G | 0.2340 | 0.0331  | 0.0057 | 6.46E-09 | 5.8044  | 1316443 | Asthma |
| rs7503081   | 17 | 39326420 | G | A | 0.1325 | 0.0504  | 0.0069 | 2.22E-13 | 7.3350  | 1376071 | Asthma |
| rs7223331   | 17 | 39326677 | G | A | 0.2332 | 0.0334  | 0.0057 | 4.96E-09 | 5.8485  | 1316443 | Asthma |
| rs9944411   | 17 | 39327346 | C | T | 0.2340 | 0.0355  | 0.0056 | 2.07E-10 | 6.3565  | 1376071 | Asthma |
| rs9944459   | 17 | 39327932 | C | T | 0.1325 | 0.0504  | 0.0069 | 2.25E-13 | 7.3327  | 1376071 | Asthma |
| rs6503500   | 17 | 39329672 | G | A | 0.1325 | 0.0504  | 0.0069 | 2.28E-13 | 7.3314  | 1376071 | Asthma |
| rs28431963  | 17 | 39329907 | C | T | 0.1154 | -0.0436 | 0.0077 | 1.80E-08 | -5.6303 | 1290310 | Asthma |
| rs7220650   | 17 | 39330915 | C | T | 0.2336 | 0.0333  | 0.0057 | 5.61E-09 | 5.8279  | 1316443 | Asthma |
| rs10221223  | 17 | 39332847 | G | T | 0.2359 | 0.0352  | 0.0059 | 2.12E-09 | 5.9880  | 1008051 | Asthma |
| rs146781981 | 17 | 39337345 | A | C | 0.1291 | 0.0438  | 0.0076 | 8.61E-09 | 5.7561  | 1224666 | Asthma |
| rs9912212   | 17 | 39338292 | G | T | 0.1325 | 0.0505  | 0.0069 | 2.11E-13 | 7.3417  | 1376071 | Asthma |
| rs28482878  | 17 | 39340847 | G | A | 0.1325 | 0.0504  | 0.0069 | 2.28E-13 | 7.3315  | 1376071 | Asthma |
| rs8079560   | 17 | 39341408 | T | C | 0.2346 | 0.0347  | 0.0056 | 4.90E-10 | 6.2223  | 1376071 | Asthma |
| rs2338800   | 17 | 39341896 | C | G | 0.2346 | 0.0347  | 0.0056 | 5.02E-10 | 6.2186  | 1376071 | Asthma |
| rs9908760   | 17 | 39342806 | C | T | 0.2340 | 0.0356  | 0.0056 | 1.86E-10 | 6.3726  | 1376071 | Asthma |
| rs9903363   | 17 | 39343351 | G | C | 0.2346 | 0.0347  | 0.0056 | 4.89E-10 | 6.2226  | 1376071 | Asthma |
| rs7218484   | 17 | 39344051 | A | G | 0.2346 | 0.0347  | 0.0056 | 4.88E-10 | 6.2230  | 1376071 | Asthma |
| rs9909064   | 17 | 39344181 | T | G | 0.2347 | 0.0346  | 0.0056 | 5.58E-10 | 6.2019  | 1376071 | Asthma |
| rs9909304   | 17 | 39344255 | T | G | 0.1325 | 0.0504  | 0.0069 | 2.17E-13 | 7.3380  | 1376071 | Asthma |
| rs6503502   | 17 | 39345602 | G | A | 0.2346 | 0.0347  | 0.0056 | 4.99E-10 | 6.2194  | 1376071 | Asthma |
| rs9912310   | 17 | 39346757 | C | T | 0.1325 | 0.0506  | 0.0069 | 1.87E-13 | 7.3579  | 1376071 | Asthma |
| rs7359658   | 17 | 39346951 | C | T | 0.2340 | 0.0357  | 0.0056 | 1.62E-10 | 6.3936  | 1376071 | Asthma |
| rs1971663   | 17 | 39348188 | T | C | 0.1324 | 0.0501  | 0.0069 | 3.13E-13 | 7.2886  | 1376071 | Asthma |
| rs8069451   | 17 | 39348680 | C | T | 0.2273 | 0.0357  | 0.0058 | 5.71E-10 | 6.1983  | 1316443 | Asthma |
| rs9894586   | 17 | 39349168 | T | C | 0.2346 | 0.0346  | 0.0056 | 5.11E-10 | 6.2157  | 1376071 | Asthma |
| rs8081033   | 17 | 39350397 | G | A | 0.2345 | 0.0362  | 0.0057 | 1.60E-10 | 6.3958  | 1349938 | Asthma |
| rs9894864   | 17 | 39351190 | A | G | 0.2335 | 0.0365  | 0.0056 | 6.55E-11 | 6.5306  | 1376071 | Asthma |
| rs7214151   | 17 | 39351519 | C | T | 0.4232 | -0.0274 | 0.0049 | 2.12E-08 | -5.6016 | 1359430 | Asthma |
| rs8071300   | 17 | 39352271 | C | G | 0.1401 | 0.0520  | 0.0072 | 4.74E-13 | 7.2326  | 1008051 | Asthma |
| rs9898170   | 17 | 39353839 | C | T | 0.2336 | 0.0365  | 0.0056 | 6.59E-11 | 6.5297  | 1376071 | Asthma |
| rs9892055   | 17 | 39354149 | T | C | 0.2342 | 0.0355  | 0.0056 | 1.86E-10 | 6.3728  | 1376071 | Asthma |
| rs8068427   | 17 | 39355264 | A | G | 0.2339 | 0.0356  | 0.0056 | 1.81E-10 | 6.3768  | 1376071 | Asthma |
| rs113569895 | 17 | 39357101 | C | T | 0.2343 | 0.0354  | 0.0056 | 2.13E-10 | 6.3513  | 1376071 | Asthma |
| rs7208274   | 17 | 39357543 | T | C | 0.2342 | 0.0356  | 0.0056 | 1.69E-10 | 6.3874  | 1376071 | Asthma |
| rs4287601   | 17 | 39357599 | C | T | 0.1321 | 0.0519  | 0.0069 | 4.64E-14 | 7.5417  | 1376071 | Asthma |
| rs2338799   | 17 | 39357688 | A | G | 0.1321 | 0.0520  | 0.0069 | 4.59E-14 | 7.5432  | 1376071 | Asthma |
| rs6503503   | 17 | 39358120 | A | G | 0.2336 | 0.0365  | 0.0056 | 6.53E-11 | 6.5311  | 1376071 | Asthma |
| rs6503504   | 17 | 39358159 | G | A | 0.1321 | 0.0520  | 0.0069 | 4.58E-14 | 7.5434  | 1376071 | Asthma |
| rs9894500   | 17 | 39359482 | C | G | 0.2340 | 0.0356  | 0.0056 | 1.66E-10 | 6.3898  | 1376071 | Asthma |
| rs8065879   | 17 | 39359725 | A | G | 0.2346 | 0.0349  | 0.0056 | 3.63E-10 | 6.2690  | 1376071 | Asthma |
| rs8076494   | 17 | 39360469 | C | T | 0.2339 | 0.0356  | 0.0056 | 1.85E-10 | 6.3735  | 1376071 | Asthma |
| rs11869259  | 17 | 39361888 | A | C | 0.2380 | 0.0365  | 0.0059 | 8.30E-10 | 6.1391  | 1246149 | Asthma |
| rs11869109  | 17 | 39361952 | T | G | 0.2342 | 0.0354  | 0.0056 | 2.19E-10 | 6.3475  | 1376071 | Asthma |
| rs11871813  | 17 | 39362049 | C | A | 0.1395 | 0.0535  | 0.0072 | 1.14E-13 | 7.4242  | 1008051 | Asthma |

|             |    |          |   |   |        |         |        |          |         |         |        |
|-------------|----|----------|---|---|--------|---------|--------|----------|---------|---------|--------|
| rs11869323  | 17 | 39362246 | T | C | 0.2342 | 0.0356  | 0.0056 | 1.78E-10 | 6.3793  | 1376071 | Asthma |
| rs8078599   | 17 | 39362407 | T | C | 0.1320 | 0.0513  | 0.0069 | 9.74E-14 | 7.4444  | 1376071 | Asthma |
| rs9908131   | 17 | 39364196 | C | T | 0.1325 | 0.0505  | 0.0069 | 1.94E-13 | 7.3527  | 1376071 | Asthma |
| rs146205295 | 17 | 39364595 | T | A | 0.0581 | -0.0594 | 0.0107 | 3.17E-08 | -5.5317 | 1299802 | Asthma |
| rs7223438   | 17 | 39365102 | C | T | 0.2335 | 0.0364  | 0.0056 | 7.00E-11 | 6.5206  | 1376071 | Asthma |
| rs7215983   | 17 | 39368308 | T | C | 0.1320 | 0.0513  | 0.0069 | 9.39E-14 | 7.4493  | 1376071 | Asthma |
| rs6503507   | 17 | 39369021 | T | C | 0.2342 | 0.0355  | 0.0056 | 1.94E-10 | 6.3661  | 1376071 | Asthma |
| rs68178216  | 17 | 39369988 | C | A | 0.2344 | 0.0357  | 0.0056 | 1.53E-10 | 6.4023  | 1376071 | Asthma |
| rs7212621   | 17 | 39371658 | G | T | 0.1580 | 0.0569  | 0.0083 | 5.53E-12 | 6.8913  | 722051  | Asthma |
| rs8077104   | 17 | 39374257 | G | A | 0.2346 | 0.0348  | 0.0056 | 4.09E-10 | 6.2504  | 1376071 | Asthma |
| rs8079303   | 17 | 39374502 | C | G | 0.2341 | 0.0356  | 0.0056 | 1.65E-10 | 6.3905  | 1376071 | Asthma |
| rs4794807   | 17 | 39375465 | A | T | 0.2342 | 0.0353  | 0.0056 | 2.44E-10 | 6.3306  | 1376071 | Asthma |
| rs4794808   | 17 | 39375663 | T | C | 0.1321 | 0.0519  | 0.0069 | 5.13E-14 | 7.5285  | 1376071 | Asthma |
| rs9898773   | 17 | 39376254 | G | C | 0.2367 | 0.0343  | 0.0059 | 4.91E-09 | 5.8502  | 1008051 | Asthma |
| rs4511574   | 17 | 39376663 | T | C | 0.2343 | 0.0356  | 0.0056 | 1.67E-10 | 6.3892  | 1376071 | Asthma |
| rs28799952  | 17 | 39376803 | T | C | 0.1321 | 0.0519  | 0.0069 | 4.83E-14 | 7.5365  | 1376071 | Asthma |
| rs7221117   | 17 | 39377523 | T | C | 0.1336 | 0.0481  | 0.0084 | 9.93E-09 | 5.7320  | 1003362 | Asthma |
| rs113414512 | 17 | 39379045 | T | C | 0.2425 | 0.0395  | 0.0060 | 4.01E-11 | 6.6036  | 1219993 | Asthma |
| rs73293051  | 17 | 39379083 | C | T | 0.2474 | 0.0399  | 0.0064 | 3.69E-10 | 6.2667  | 851973  | Asthma |
| rs4795356   | 17 | 39379378 | T | C | 0.2345 | 0.0347  | 0.0056 | 4.61E-10 | 6.2321  | 1376071 | Asthma |
| rs11078898  | 17 | 39380227 | G | A | 0.2345 | 0.0347  | 0.0056 | 4.51E-10 | 6.2351  | 1376071 | Asthma |
| rs13341996  | 17 | 39380609 | T | C | 0.2342 | 0.0355  | 0.0056 | 1.99E-10 | 6.3618  | 1376071 | Asthma |
| rs9896913   | 17 | 39381095 | G | A | 0.2342 | 0.0355  | 0.0056 | 1.92E-10 | 6.3678  | 1376071 | Asthma |
| rs7210488   | 17 | 39383566 | G | T | 0.2342 | 0.0356  | 0.0056 | 1.65E-10 | 6.3912  | 1376071 | Asthma |
| rs9899069   | 17 | 39384519 | G | A | 0.1325 | 0.0505  | 0.0069 | 1.93E-13 | 7.3534  | 1376071 | Asthma |
| rs7218074   | 17 | 39386089 | C | A | 0.2339 | 0.0357  | 0.0056 | 1.61E-10 | 6.3950  | 1376071 | Asthma |
| rs8073511   | 17 | 39386255 | C | G | 0.1607 | 0.0479  | 0.0068 | 1.40E-12 | 7.0845  | 1008051 | Asthma |
| rs7221875   | 17 | 39387075 | A | G | 0.2357 | 0.0344  | 0.0056 | 5.55E-10 | 6.2028  | 1376071 | Asthma |
| rs7208487   | 17 | 39387196 | G | T | 0.1326 | 0.0506  | 0.0069 | 1.57E-13 | 7.3816  | 1376071 | Asthma |
| rs7208714   | 17 | 39387539 | G | A | 0.2340 | 0.0355  | 0.0056 | 1.95E-10 | 6.3651  | 1376071 | Asthma |
| rs2338798   | 17 | 39391016 | C | T | 0.2342 | 0.0353  | 0.0056 | 2.47E-10 | 6.3291  | 1376071 | Asthma |
| rs9906612   | 17 | 39391378 | C | A | 0.1320 | 0.0517  | 0.0069 | 5.52E-14 | 7.5189  | 1376071 | Asthma |
| rs2338797   | 17 | 39391988 | A | G | 0.2341 | 0.0356  | 0.0056 | 1.68E-10 | 6.3876  | 1376071 | Asthma |
| rs9892675   | 17 | 39392947 | T | C | 0.1612 | 0.0412  | 0.0063 | 6.80E-11 | 6.5249  | 1376071 | Asthma |
| rs57399933  | 17 | 39394936 | G | A | 0.2342 | 0.0355  | 0.0056 | 1.84E-10 | 6.3746  | 1376071 | Asthma |
| rs10491128  | 17 | 39395735 | A | G | 0.2338 | 0.0361  | 0.0056 | 8.89E-11 | 6.4846  | 1376071 | Asthma |
| rs12600625  | 17 | 39396528 | A | G | 0.2335 | 0.0364  | 0.0056 | 7.36E-11 | 6.5132  | 1376071 | Asthma |
| rs34597616  | 17 | 39396736 | A | G | 0.2343 | 0.0352  | 0.0056 | 2.69E-10 | 6.3154  | 1376071 | Asthma |
| rs113825099 | 17 | 39396883 | A | G | 0.2334 | 0.0364  | 0.0056 | 6.96E-11 | 6.5216  | 1376071 | Asthma |
| rs34432983  | 17 | 39396915 | C | T | 0.2416 | 0.0395  | 0.0060 | 4.16E-11 | 6.5984  | 1219993 | Asthma |
| rs12600751  | 17 | 39397398 | C | G | 0.2333 | 0.0359  | 0.0056 | 1.20E-10 | 6.4396  | 1376071 | Asthma |
| rs8076546   | 17 | 39399150 | A | G | 0.2328 | 0.0343  | 0.0057 | 1.93E-09 | 6.0038  | 1316443 | Asthma |
| rs35285898  | 17 | 39399619 | C | A | 0.2349 | 0.0355  | 0.0056 | 1.79E-10 | 6.3780  | 1376071 | Asthma |
| rs9905432   | 17 | 39399665 | A | C | 0.2349 | 0.0356  | 0.0056 | 1.73E-10 | 6.3832  | 1376071 | Asthma |
| rs149930714 | 17 | 39399712 | G | A | 0.0198 | 0.1154  | 0.0163 | 1.31E-12 | 7.0932  | 1273421 | Asthma |
| rs9904919   | 17 | 39400178 | C | G | 0.2350 | 0.0351  | 0.0056 | 3.10E-10 | 6.2934  | 1376071 | Asthma |
| rs138314144 | 17 | 39400347 | A | G | 0.0197 | 0.1151  | 0.0163 | 1.68E-12 | 7.0589  | 1273421 | Asthma |
| rs9901219   | 17 | 39402116 | G | T | 0.1619 | 0.0399  | 0.0063 | 2.66E-10 | 6.3177  | 1376071 | Asthma |
| rs6503513   | 17 | 39405360 | G | A | 0.1619 | 0.0399  | 0.0063 | 2.57E-10 | 6.3225  | 1376071 | Asthma |
| rs4795357   | 17 | 39413298 | T | C | 0.2342 | 0.0364  | 0.0056 | 7.02E-11 | 6.5201  | 1376071 | Asthma |
| rs12939831  | 17 | 39414120 | A | G | 0.2342 | 0.0364  | 0.0056 | 6.97E-11 | 6.5213  | 1376071 | Asthma |
| rs34627893  | 17 | 39414484 | C | T | 0.2350 | 0.0355  | 0.0056 | 1.89E-10 | 6.3698  | 1376071 | Asthma |
| rs12948560  | 17 | 39414733 | A | G | 0.2343 | 0.0363  | 0.0056 | 7.79E-11 | 6.5046  | 1376071 | Asthma |
| rs12948381  | 17 | 39415672 | T | C | 0.2943 | 0.0375  | 0.0056 | 1.51E-11 | 6.7468  | 1376071 | Asthma |
| rs35667594  | 17 | 39415674 | G | A | 0.2620 | 0.0365  | 0.0055 | 4.61E-11 | 6.5830  | 1376071 | Asthma |
| rs12937703  | 17 | 39415710 | G | A | 0.2342 | 0.0365  | 0.0056 | 6.31E-11 | 6.5361  | 1376071 | Asthma |
| rs12938268  | 17 | 39415886 | G | A | 0.2342 | 0.0364  | 0.0056 | 6.84E-11 | 6.5240  | 1376071 | Asthma |
| rs4795358   | 17 | 39416812 | A | C | 0.1327 | 0.0517  | 0.0069 | 6.21E-14 | 7.5037  | 1376071 | Asthma |
| rs4795359   | 17 | 39416893 | C | T | 0.2348 | 0.0356  | 0.0056 | 1.73E-10 | 6.3840  | 1376071 | Asthma |
| rs4795360   | 17 | 39417192 | T | C | 0.2348 | 0.0356  | 0.0056 | 1.73E-10 | 6.3838  | 1376071 | Asthma |
| rs4795362   | 17 | 39417263 | A | G | 0.2342 | 0.0364  | 0.0056 | 6.80E-11 | 6.5250  | 1376071 | Asthma |
| rs146644295 | 17 | 39418339 | C | G | 0.0274 | 0.1103  | 0.0162 | 1.14E-11 | 6.7875  | 1203352 | Asthma |
| rs12452509  | 17 | 39418469 | G | A | 0.2343 | 0.0356  | 0.0056 | 1.72E-10 | 6.3841  | 1376071 | Asthma |
| rs11650081  | 17 | 39419516 | T | G | 0.2348 | 0.0356  | 0.0056 | 1.85E-10 | 6.3731  | 1376071 | Asthma |
| rs7501488   | 17 | 39420164 | T | G | 0.2348 | 0.0357  | 0.0056 | 1.64E-10 | 6.3919  | 1376071 | Asthma |
| rs4795364   | 17 | 39420293 | G | A | 0.2348 | 0.0357  | 0.0056 | 1.55E-10 | 6.4008  | 1376071 | Asthma |
| rs145835664 | 17 | 39423130 | A | G | 0.1629 | -0.0588 | 0.0068 | 7.22E-18 | -8.6114 | 1299802 | Asthma |
| rs7405667   | 17 | 39423950 | T | C | 0.2348 | 0.0356  | 0.0056 | 1.75E-10 | 6.3823  | 1376071 | Asthma |
| rs36064019  | 17 | 39425552 | C | T | 0.2348 | 0.0357  | 0.0056 | 1.53E-10 | 6.4020  | 1376071 | Asthma |
| rs8072351   | 17 | 39426424 | G | T | 0.2348 | 0.0358  | 0.0056 | 1.47E-10 | 6.4080  | 1376071 | Asthma |
| rs7208252   | 17 | 39428115 | A | G | 0.1326 | 0.0519  | 0.0069 | 4.92E-14 | 7.5341  | 1376071 | Asthma |
| rs12150493  | 17 | 39429901 | T | C | 0.2348 | 0.0357  | 0.0056 | 1.60E-10 | 6.3959  | 1376071 | Asthma |
| rs11868133  | 17 | 39430603 | G | C | 0.2348 | 0.0355  | 0.0056 | 1.91E-10 | 6.3683  | 1376071 | Asthma |
| rs4410117   | 17 | 39432474 | G | A | 0.2349 | 0.0356  | 0.0056 | 1.84E-10 | 6.3739  | 1376071 | Asthma |

|             |    |          |   |   |        |         |        |          |         |         |        |
|-------------|----|----------|---|---|--------|---------|--------|----------|---------|---------|--------|
| rs11651089  | 17 | 39432808 | T | G | 0.2348 | 0.0356  | 0.0056 | 1.78E-10 | 6.3792  | 1376071 | Asthma |
| rs10445305  | 17 | 39433111 | G | A | 0.2349 | 0.0357  | 0.0056 | 1.53E-10 | 6.4024  | 1376071 | Asthma |
| rs12452880  | 17 | 39434896 | G | C | 0.2348 | 0.0355  | 0.0056 | 1.91E-10 | 6.3685  | 1376071 | Asthma |
| rs10445306  | 17 | 39435169 | A | G | 0.2348 | 0.0357  | 0.0056 | 1.68E-10 | 6.3879  | 1376071 | Asthma |
| rs34363096  | 17 | 39438041 | G | A | 0.2348 | 0.0357  | 0.0056 | 1.55E-10 | 6.4004  | 1376071 | Asthma |
| rs9646419   | 17 | 39440932 | A | G | 0.1321 | 0.0517  | 0.0069 | 5.06E-14 | 7.5304  | 1376071 | Asthma |
| rs11867312  | 17 | 39441495 | C | T | 0.2348 | 0.0356  | 0.0056 | 1.85E-10 | 6.3734  | 1376071 | Asthma |
| rs11078899  | 17 | 39441586 | G | A | 0.1327 | 0.0516  | 0.0069 | 6.61E-14 | 7.4954  | 1376071 | Asthma |
| rs11650146  | 17 | 39441857 | C | A | 0.2348 | 0.0355  | 0.0056 | 1.91E-10 | 6.3684  | 1376071 | Asthma |
| rs11659010  | 17 | 39444864 | A | G | 0.2349 | 0.0355  | 0.0056 | 2.03E-10 | 6.3590  | 1376071 | Asthma |
| rs12150047  | 17 | 39445502 | A | G | 0.1327 | 0.0515  | 0.0069 | 7.77E-14 | 7.4742  | 1376071 | Asthma |
| rs7218944   | 17 | 39446646 | T | C | 0.1382 | 0.0509  | 0.0074 | 7.45E-12 | 6.8487  | 948423  | Asthma |
| rs4794810   | 17 | 39447521 | T | C | 0.2350 | 0.0352  | 0.0056 | 2.82E-10 | 6.3086  | 1376071 | Asthma |
| rs12947620  | 17 | 39449111 | T | C | 0.2348 | 0.0354  | 0.0056 | 2.13E-10 | 6.3518  | 1376071 | Asthma |
| rs6503515   | 17 | 39450180 | G | T | 0.2348 | 0.0354  | 0.0056 | 2.32E-10 | 6.3383  | 1376071 | Asthma |
| rs7212715   | 17 | 39451651 | C | T | 0.2348 | 0.0354  | 0.0056 | 2.16E-10 | 6.3492  | 1376071 | Asthma |
| rs4795367   | 17 | 39452590 | G | C | 0.1327 | 0.0513  | 0.0069 | 8.95E-14 | 7.4555  | 1376071 | Asthma |
| rs12943928  | 17 | 39455077 | G | A | 0.2348 | 0.0355  | 0.0056 | 1.93E-10 | 6.3671  | 1376071 | Asthma |
| rs8067511   | 17 | 39455099 | C | T | 0.1309 | 0.0496  | 0.0071 | 2.43E-12 | 7.0071  | 1316443 | Asthma |
| rs55722796  | 17 | 39455833 | C | T | 0.2341 | 0.0363  | 0.0056 | 8.00E-11 | 6.5005  | 1376071 | Asthma |
| rs12938099  | 17 | 39456657 | T | G | 0.1315 | 0.0526  | 0.0069 | 2.73E-14 | 7.6107  | 1376071 | Asthma |
| rs35112839  | 17 | 39457631 | A | G | 0.2336 | 0.0362  | 0.0056 | 9.88E-11 | 6.4688  | 1376071 | Asthma |
| rs11078900  | 17 | 39458388 | C | T | 0.2336 | 0.0361  | 0.0056 | 1.08E-10 | 6.4548  | 1376071 | Asthma |
| rs8074855   | 17 | 39459272 | T | C | 0.1314 | 0.0526  | 0.0069 | 2.89E-14 | 7.6034  | 1376071 | Asthma |
| rs61161659  | 17 | 39459292 | T | C | 0.2329 | 0.0345  | 0.0057 | 1.72E-09 | 6.0227  | 1316443 | Asthma |
| rs4390625   | 17 | 39464094 | A | G | 0.2339 | 0.0346  | 0.0056 | 6.29E-10 | 6.1831  | 1376071 | Asthma |
| rs35497503  | 17 | 39464374 | C | T | 0.2338 | 0.0346  | 0.0056 | 5.93E-10 | 6.1924  | 1376071 | Asthma |
| rs12950666  | 17 | 39466264 | C | T | 0.2338 | 0.0346  | 0.0056 | 6.16E-10 | 6.1863  | 1376071 | Asthma |
| rs62075056  | 17 | 39466541 | G | A | 0.2339 | 0.0346  | 0.0056 | 5.91E-10 | 6.1927  | 1376071 | Asthma |
| rs10445307  | 17 | 39467213 | A | G | 0.2332 | 0.0355  | 0.0056 | 2.39E-10 | 6.3340  | 1376071 | Asthma |
| rs7219014   | 17 | 39468537 | A | G | 0.2320 | 0.0363  | 0.0056 | 1.03E-10 | 6.4629  | 1376071 | Asthma |
| rs7219294   | 17 | 39468658 | A | G | 0.2322 | 0.0367  | 0.0057 | 1.14E-10 | 6.4470  | 1349938 | Asthma |
| rs7223896   | 17 | 39468931 | T | C | 0.2326 | 0.0354  | 0.0056 | 2.60E-10 | 6.3209  | 1376071 | Asthma |
| rs9747983   | 17 | 39470363 | T | C | 0.1270 | 0.0437  | 0.0077 | 1.40E-08 | 5.6739  | 1224666 | Asthma |
| rs11657899  | 17 | 39470710 | G | A | 0.2327 | 0.0354  | 0.0056 | 2.59E-10 | 6.3218  | 1376071 | Asthma |
| rs12941418  | 17 | 39472406 | A | G | 0.1289 | 0.0497  | 0.0071 | 3.29E-12 | 6.9649  | 1316443 | Asthma |
| rs12947600  | 17 | 39472507 | C | T | 0.2316 | 0.0344  | 0.0057 | 2.06E-09 | 5.9933  | 1316443 | Asthma |
| rs11078902  | 17 | 39475630 | C | G | 0.2291 | 0.0340  | 0.0058 | 3.76E-09 | 5.8945  | 1316443 | Asthma |
| rs11078903  | 17 | 39475671 | G | A | 0.2275 | 0.0334  | 0.0058 | 7.08E-09 | 5.7891  | 1316443 | Asthma |
| rs12449852  | 17 | 39475835 | A | G | 0.1269 | 0.0472  | 0.0072 | 4.92E-11 | 6.5734  | 1316443 | Asthma |
| rs12453397  | 17 | 39477717 | C | A | 0.2295 | 0.0338  | 0.0058 | 4.46E-09 | 5.8662  | 1316443 | Asthma |
| rs149871892 | 17 | 39479233 | A | G | 0.0954 | -0.0570 | 0.0085 | 2.03E-11 | -6.7039 | 1299802 | Asthma |
| rs4795371   | 17 | 39480442 | T | G | 0.2415 | 0.0402  | 0.0067 | 2.32E-09 | 5.9737  | 1030443 | Asthma |
| rs57448077  | 17 | 39481150 | G | A | 0.2291 | 0.0341  | 0.0058 | 3.20E-09 | 5.9212  | 1316443 | Asthma |
| rs4286140   | 17 | 39483074 | G | A | 0.2292 | 0.0342  | 0.0058 | 2.95E-09 | 5.9344  | 1316443 | Asthma |
| rs4462633   | 17 | 39485614 | A | C | 0.2292 | 0.0342  | 0.0058 | 3.00E-09 | 5.9315  | 1316443 | Asthma |
| rs72827105  | 17 | 39487123 | G | C | 0.1809 | -0.0523 | 0.0065 | 1.07E-15 | -8.0184 | 1299802 | Asthma |
| rs12948906  | 17 | 39488601 | C | T | 0.2333 | 0.0352  | 0.0057 | 8.00E-10 | 6.1451  | 1316443 | Asthma |
| rs11870631  | 17 | 39488876 | C | T | 0.2333 | 0.0354  | 0.0057 | 6.74E-10 | 6.1720  | 1316443 | Asthma |
| rs12452682  | 17 | 39490336 | T | C | 0.2333 | 0.0353  | 0.0057 | 7.57E-10 | 6.1536  | 1316443 | Asthma |
| rs12936646  | 17 | 39491197 | A | T | 0.2333 | 0.0349  | 0.0057 | 1.15E-09 | 6.0873  | 1316443 | Asthma |
| rs34957982  | 17 | 39491463 | T | C | 0.2344 | 0.0347  | 0.0057 | 1.33E-09 | 6.0639  | 1316443 | Asthma |
| rs8074276   | 17 | 39491513 | G | A | 0.1317 | 0.0497  | 0.0071 | 2.15E-12 | 7.0242  | 1316443 | Asthma |
| rs12942352  | 17 | 39491887 | G | C | 0.2345 | 0.0345  | 0.0057 | 1.62E-09 | 6.0316  | 1316443 | Asthma |
| rs12942360  | 17 | 39491897 | G | T | 0.2344 | 0.0347  | 0.0057 | 1.25E-09 | 6.0744  | 1316443 | Asthma |
| rs8081780   | 17 | 39493254 | C | T | 0.2334 | 0.0350  | 0.0057 | 1.03E-09 | 6.1047  | 1316443 | Asthma |
| rs6503517   | 17 | 39493434 | G | A | 0.2349 | 0.0355  | 0.0062 | 8.24E-09 | 5.7633  | 1186521 | Asthma |
| rs11868029  | 17 | 39494051 | A | G | 0.2327 | 0.0363  | 0.0057 | 2.67E-10 | 6.3167  | 1316443 | Asthma |
| rs11868030  | 17 | 39494079 | A | G | 0.2333 | 0.0353  | 0.0057 | 7.39E-10 | 6.1575  | 1316443 | Asthma |
| rs11078904  | 17 | 39494316 | G | A | 0.2333 | 0.0354  | 0.0057 | 6.67E-10 | 6.1736  | 1316443 | Asthma |
| rs62077463  | 17 | 39495687 | C | T | 0.2343 | 0.0348  | 0.0057 | 1.23E-09 | 6.0764  | 1316443 | Asthma |
| rs12940193  | 17 | 39495925 | T | G | 0.2480 | 0.0405  | 0.0067 | 1.38E-09 | 6.0583  | 1030443 | Asthma |
| rs12947281  | 17 | 39495957 | G | T | 0.2369 | 0.0336  | 0.0057 | 3.85E-09 | 5.8905  | 1316443 | Asthma |
| rs62077464  | 17 | 39499803 | C | G | 0.2339 | 0.0350  | 0.0057 | 9.51E-10 | 6.1174  | 1316443 | Asthma |
| rs4591174   | 17 | 39502252 | G | A | 0.1304 | 0.0506  | 0.0071 | 1.14E-12 | 7.1122  | 1316443 | Asthma |
| rs2018026   | 17 | 39503353 | G | A | 0.2333 | 0.0353  | 0.0057 | 6.99E-10 | 6.1663  | 1316443 | Asthma |
| rs6503518   | 17 | 39504216 | A | G | 0.2333 | 0.0353  | 0.0057 | 7.54E-10 | 6.1543  | 1316443 | Asthma |
| rs11078905  | 17 | 39506460 | C | G | 0.2333 | 0.0355  | 0.0057 | 6.21E-10 | 6.1850  | 1316443 | Asthma |
| rs11078906  | 17 | 39506514 | C | T | 0.2333 | 0.0353  | 0.0057 | 7.33E-10 | 6.1589  | 1316443 | Asthma |
| rs4795375   | 17 | 39506679 | T | C | 0.1305 | 0.0512  | 0.0071 | 6.22E-13 | 7.1955  | 1316443 | Asthma |
| rs11078907  | 17 | 39506701 | C | T | 0.2333 | 0.0355  | 0.0057 | 6.03E-10 | 6.1896  | 1316443 | Asthma |
| rs7225096   | 17 | 39508190 | T | C | 0.2333 | 0.0355  | 0.0057 | 5.83E-10 | 6.1950  | 1316443 | Asthma |
| rs12936996  | 17 | 39509301 | G | A | 0.2333 | 0.0355  | 0.0057 | 5.95E-10 | 6.1917  | 1316443 | Asthma |
| rs12937013  | 17 | 39509318 | G | A | 0.1305 | 0.0512  | 0.0071 | 6.05E-13 | 7.1994  | 1316443 | Asthma |

|             |    |          |   |   |        |         |        |          |         |         |        |
|-------------|----|----------|---|---|--------|---------|--------|----------|---------|---------|--------|
| rs4795376   | 17 | 39512790 | T | C | 0.2340 | 0.0353  | 0.0057 | 7.11E-10 | 6.1637  | 1316443 | Asthma |
| rs4795377   | 17 | 39512803 | C | T | 0.2332 | 0.0355  | 0.0057 | 5.70E-10 | 6.1984  | 1316443 | Asthma |
| rs12952384  | 17 | 39513283 | T | C | 0.2332 | 0.0356  | 0.0057 | 5.63E-10 | 6.2006  | 1316443 | Asthma |
| rs7503705   | 17 | 39513451 | A | G | 0.2333 | 0.0356  | 0.0057 | 5.51E-10 | 6.2039  | 1316443 | Asthma |
| rs7503514   | 17 | 39513631 | G | C | 0.2340 | 0.0353  | 0.0057 | 6.88E-10 | 6.1688  | 1316443 | Asthma |
| rs4794813   | 17 | 39514741 | A | T | 0.2327 | 0.0365  | 0.0057 | 2.07E-10 | 6.3565  | 1316443 | Asthma |
| rs11078910  | 17 | 39515016 | G | T | 0.2333 | 0.0356  | 0.0057 | 5.50E-10 | 6.2040  | 1316443 | Asthma |
| rs11078911  | 17 | 39515069 | C | T | 0.2340 | 0.0354  | 0.0057 | 6.69E-10 | 6.1733  | 1316443 | Asthma |
| rs11078912  | 17 | 39515237 | A | G | 0.2333 | 0.0355  | 0.0057 | 6.32E-10 | 6.1824  | 1316443 | Asthma |
| rs11078913  | 17 | 39515461 | G | T | 0.2340 | 0.0353  | 0.0057 | 6.82E-10 | 6.1702  | 1316443 | Asthma |
| rs8081528   | 17 | 39516731 | T | C | 0.1303 | 0.0504  | 0.0071 | 1.42E-12 | 7.0821  | 1316443 | Asthma |
| rs4795379   | 17 | 39518430 | T | G | 0.1306 | 0.0513  | 0.0071 | 5.82E-13 | 7.2047  | 1316443 | Asthma |
| rs8067884   | 17 | 39518661 | G | C | 0.2332 | 0.0357  | 0.0057 | 4.91E-10 | 6.2220  | 1316443 | Asthma |
| rs7406928   | 17 | 39520801 | C | T | 0.2333 | 0.0356  | 0.0057 | 5.64E-10 | 6.2001  | 1316443 | Asthma |
| rs10775391  | 17 | 39521431 | T | A | 0.2341 | 0.0353  | 0.0057 | 7.51E-10 | 6.1549  | 1316443 | Asthma |
| rs11658678  | 17 | 39523843 | C | T | 0.2344 | 0.0354  | 0.0057 | 6.60E-10 | 6.1754  | 1316443 | Asthma |
| rs8065963   | 17 | 39525079 | C | T | 0.2333 | 0.0354  | 0.0057 | 6.92E-10 | 6.1678  | 1316443 | Asthma |
| rs3889368   | 17 | 39526978 | C | T | 0.2341 | 0.0354  | 0.0057 | 6.92E-10 | 6.1678  | 1316443 | Asthma |
| rs1077715   | 17 | 39527295 | A | T | 0.2334 | 0.0353  | 0.0057 | 7.41E-10 | 6.1571  | 1316443 | Asthma |
| rs7405770   | 17 | 39528154 | T | A | 0.2327 | 0.0364  | 0.0057 | 2.30E-10 | 6.3397  | 1316443 | Asthma |
| rs55660616  | 17 | 39528737 | C | A | 0.2333 | 0.0356  | 0.0057 | 5.80E-10 | 6.1958  | 1316443 | Asthma |
| rs8069074   | 17 | 39529148 | A | G | 0.1306 | 0.0512  | 0.0071 | 6.67E-13 | 7.1860  | 1316443 | Asthma |
| rs1054488   | 17 | 39531715 | A | G | 0.1306 | 0.0512  | 0.0071 | 6.10E-13 | 7.1982  | 1316443 | Asthma |
| rs8073248   | 17 | 39537676 | T | C | 0.1306 | 0.0509  | 0.0071 | 8.68E-13 | 7.1499  | 1316443 | Asthma |
| rs12450559  | 17 | 39538456 | G | A | 0.2333 | 0.0354  | 0.0057 | 6.86E-10 | 6.1694  | 1316443 | Asthma |
| rs4239222   | 17 | 39539982 | G | T | 0.2327 | 0.0364  | 0.0057 | 2.38E-10 | 6.3350  | 1316443 | Asthma |
| rs4794814   | 17 | 39540599 | G | A | 0.2333 | 0.0354  | 0.0057 | 7.19E-10 | 6.1617  | 1316443 | Asthma |
| rs7503069   | 17 | 39540875 | C | G | 0.2338 | 0.0348  | 0.0057 | 1.36E-09 | 6.0603  | 1316443 | Asthma |
| rs11655531  | 17 | 39541706 | T | C | 0.2333 | 0.0354  | 0.0057 | 7.06E-10 | 6.1648  | 1316443 | Asthma |
| rs10852933  | 17 | 39541941 | G | T | 0.2333 | 0.0355  | 0.0057 | 6.14E-10 | 6.1869  | 1316443 | Asthma |
| rs4795381   | 17 | 39542661 | C | T | 0.2334 | 0.0355  | 0.0057 | 6.52E-10 | 6.1774  | 1316443 | Asthma |
| rs11657058  | 17 | 39543125 | T | G | 0.1306 | 0.0509  | 0.0071 | 8.59E-13 | 7.1514  | 1316443 | Asthma |
| rs11657153  | 17 | 39543476 | A | G | 0.1305 | 0.0509  | 0.0071 | 8.58E-13 | 7.1515  | 1316443 | Asthma |
| rs4795382   | 17 | 39544607 | A | G | 0.2333 | 0.0352  | 0.0057 | 8.51E-10 | 6.1351  | 1316443 | Asthma |
| rs4392104   | 17 | 39544664 | T | C | 0.2404 | 0.0401  | 0.0069 | 4.66E-09 | 5.8588  | 1065770 | Asthma |
| rs4572421   | 17 | 39544792 | A | G | 0.4245 | -0.0275 | 0.0050 | 4.43E-08 | -5.4729 | 1299802 | Asthma |
| rs11654935  | 17 | 39546203 | G | A | 0.2334 | 0.0356  | 0.0057 | 5.76E-10 | 6.1970  | 1316443 | Asthma |
| rs11654018  | 17 | 39547487 | T | C | 0.2334 | 0.0355  | 0.0057 | 6.06E-10 | 6.1890  | 1316443 | Asthma |
| rs2303316   | 17 | 39547964 | A | G | 0.2334 | 0.0353  | 0.0057 | 7.35E-10 | 6.1585  | 1316443 | Asthma |
| rs4332770   | 17 | 39548459 | T | C | 0.1306 | 0.0507  | 0.0071 | 1.04E-12 | 7.1251  | 1316443 | Asthma |
| rs7219909   | 17 | 39549990 | C | T | 0.2560 | 0.0433  | 0.0072 | 2.26E-09 | 5.9776  | 662423  | Asthma |
| rs6503519   | 17 | 39550325 | A | G | 0.2334 | 0.0353  | 0.0057 | 7.62E-10 | 6.1527  | 1316443 | Asthma |
| rs12947506  | 17 | 39551339 | T | C | 0.1310 | 0.0509  | 0.0071 | 8.21E-13 | 7.1577  | 1316443 | Asthma |
| rs7503377   | 17 | 39552588 | T | C | 0.1308 | 0.0506  | 0.0071 | 1.11E-12 | 7.1165  | 1316443 | Asthma |
| rs7216086   | 17 | 39553169 | G | A | 0.2338 | 0.0356  | 0.0057 | 5.66E-10 | 6.1997  | 1316443 | Asthma |
| rs11658219  | 17 | 39553529 | G | A | 0.2344 | 0.0354  | 0.0057 | 6.48E-10 | 6.1784  | 1316443 | Asthma |
| rs35335692  | 17 | 39553753 | A | G | 0.2337 | 0.0357  | 0.0057 | 4.92E-10 | 6.2217  | 1316443 | Asthma |
| rs12941619  | 17 | 39554683 | C | A | 0.1310 | 0.0509  | 0.0071 | 7.77E-13 | 7.1651  | 1316443 | Asthma |
| rs6503520   | 17 | 39558818 | T | A | 0.1309 | 0.0510  | 0.0071 | 7.12E-13 | 7.1771  | 1316443 | Asthma |
| rs11078915  | 17 | 39559173 | T | C | 0.2337 | 0.0358  | 0.0057 | 4.37E-10 | 6.2402  | 1316443 | Asthma |
| rs6503521   | 17 | 39559298 | G | T | 0.1348 | 0.0537  | 0.0073 | 2.07E-13 | 7.3443  | 1246149 | Asthma |
| rs4795384   | 17 | 39560518 | C | G | 0.2331 | 0.0366  | 0.0057 | 1.74E-10 | 6.3824  | 1316443 | Asthma |
| rs4239223   | 17 | 39560751 | T | C | 0.1310 | 0.0509  | 0.0071 | 7.71E-13 | 7.1661  | 1316443 | Asthma |
| rs4357971   | 17 | 39561027 | C | T | 0.2472 | 0.0420  | 0.0067 | 3.43E-10 | 6.2781  | 1030443 | Asthma |
| rs4488484   | 17 | 39561124 | T | A | 0.1310 | 0.0510  | 0.0071 | 7.17E-13 | 7.1763  | 1316443 | Asthma |
| rs903507    | 17 | 39570170 | T | C | 0.1318 | 0.0530  | 0.0069 | 1.76E-14 | 7.6667  | 1376071 | Asthma |
| rs8075737   | 17 | 39571063 | T | C | 0.1493 | 0.0499  | 0.0065 | 1.83E-14 | 7.6622  | 1376071 | Asthma |
| rs8182252   | 17 | 39571697 | C | T | 0.1495 | 0.0498  | 0.0065 | 2.09E-14 | 7.6452  | 1376071 | Asthma |
| rs1874226   | 17 | 39572778 | T | C | 0.1318 | 0.0531  | 0.0069 | 1.57E-14 | 7.6817  | 1376071 | Asthma |
| rs4795385   | 17 | 39576895 | G | A | 0.1319 | 0.0534  | 0.0069 | 1.07E-14 | 7.7303  | 1376071 | Asthma |
| rs12942391  | 17 | 39577484 | A | T | 0.1309 | 0.0513  | 0.0071 | 5.08E-13 | 7.2231  | 1316443 | Asthma |
| rs439537    | 17 | 39578229 | T | C | 0.1309 | 0.0511  | 0.0071 | 6.37E-13 | 7.1923  | 1316443 | Asthma |
| rs412430    | 17 | 39580841 | C | G | 0.2333 | 0.0373  | 0.0058 | 1.65E-10 | 6.3911  | 1290310 | Asthma |
| rs1619021   | 17 | 39583021 | G | A | 0.2337 | 0.0360  | 0.0057 | 3.62E-10 | 6.2697  | 1316443 | Asthma |
| rs364989    | 17 | 39583317 | A | C | 0.2337 | 0.0360  | 0.0057 | 3.60E-10 | 6.2705  | 1316443 | Asthma |
| rs1877030   | 17 | 39583908 | T | C | 0.1324 | 0.0524  | 0.0069 | 3.43E-14 | 7.5809  | 1376071 | Asthma |
| rs187843636 | 17 | 39584117 | T | C | 0.0246 | 0.1093  | 0.0171 | 1.64E-10 | 6.3913  | 879485  | Asthma |
| rs12453198  | 17 | 39585626 | T | C | 0.1665 | 0.0666  | 0.0064 | 1.65E-25 | 10.4388 | 1316443 | Asthma |
| rs12453217  | 17 | 39585729 | T | C | 0.1842 | 0.0642  | 0.0061 | 1.05E-25 | 10.4816 | 1316443 | Asthma |
| rs12951665  | 17 | 39585768 | C | T | 0.1842 | 0.0644  | 0.0061 | 7.54E-26 | 10.5129 | 1316443 | Asthma |
| rs9903269   | 17 | 39586130 | A | T | 0.1666 | 0.0669  | 0.0064 | 1.09E-25 | 10.4780 | 1316443 | Asthma |
| rs9909875   | 17 | 39586368 | T | C | 0.1665 | 0.0666  | 0.0064 | 1.76E-25 | 10.4324 | 1316443 | Asthma |
| rs11654954  | 17 | 39589726 | A | G | 0.1670 | 0.0673  | 0.0062 | 2.46E-27 | 10.8309 | 1376071 | Asthma |
| rs11078916  | 17 | 39590054 | T | C | 0.2689 | 0.0516  | 0.0054 | 2.56E-21 | 9.4794  | 1316443 | Asthma |



|             |    |          |   |   |        |         |        |          |          |         |        |
|-------------|----|----------|---|---|--------|---------|--------|----------|----------|---------|--------|
| rs4795386   | 17 | 39590594 | A | G | 0.2690 | 0.0516  | 0.0054 | 2.82E-21 | 9.4692   | 1316443 | Asthma |
| rs74952769  | 17 | 39600575 | A | G | 0.0528 | -0.0619 | 0.0108 | 9.50E-09 | -5.7392  | 1316443 | Asthma |
| rs11078918  | 17 | 39604932 | G | C | 0.2565 | 0.0506  | 0.0055 | 7.11E-20 | 9.1259   | 1316443 | Asthma |
| rs4795388   | 17 | 39611200 | A | G | 0.2610 | 0.0574  | 0.0055 | 1.51E-25 | 10.4472  | 1316443 | Asthma |
| rs12453682  | 17 | 39613752 | C | T | 0.3042 | 0.0562  | 0.0053 | 1.46E-26 | 10.6664  | 1316443 | Asthma |
| rs9915323   | 17 | 39614228 | A | T | 0.2762 | 0.0587  | 0.0054 | 1.01E-27 | 10.9118  | 1316443 | Asthma |
| rs4795389   | 17 | 39616403 | A | C | 0.2621 | 0.0568  | 0.0055 | 3.93E-25 | 10.3560  | 1316443 | Asthma |
| rs1874228   | 17 | 39619021 | A | G | 0.2621 | 0.0570  | 0.0055 | 2.84E-25 | 10.3872  | 1316443 | Asthma |
| rs72827167  | 17 | 39620122 | A | G | 0.0506 | -0.0652 | 0.0111 | 4.49E-09 | -5.8649  | 1359430 | Asthma |
| rs116846837 | 17 | 39621257 | T | C | 0.0809 | -0.0619 | 0.0090 | 5.09E-12 | -6.9032  | 1299802 | Asthma |
| rs33953566  | 17 | 39624043 | A | T | 0.2754 | 0.0587  | 0.0054 | 9.90E-28 | 10.9138  | 1316443 | Asthma |
| rs4795390   | 17 | 39625357 | G | C | 0.1600 | 0.0738  | 0.0065 | 5.25E-30 | 11.3802  | 1316443 | Asthma |
| rs879606    | 17 | 39625596 | A | G | 0.1602 | 0.0737  | 0.0065 | 6.46E-30 | 11.3621  | 1316443 | Asthma |
| rs10852934  | 17 | 39626157 | T | C | 0.1601 | 0.0738  | 0.0065 | 5.29E-30 | 11.3796  | 1316443 | Asthma |
| rs3751903   | 17 | 39627534 | C | G | 0.1737 | 0.0729  | 0.0063 | 2.08E-31 | 11.6584  | 1316443 | Asthma |
| rs1495099   | 17 | 39628211 | C | G | 0.2762 | 0.0602  | 0.0055 | 2.79E-28 | 11.0282  | 1290310 | Asthma |
| rs2271309   | 17 | 39628737 | G | A | 0.2026 | 0.0633  | 0.0059 | 4.69E-27 | 10.7717  | 1316443 | Asthma |
| rs11651497  | 17 | 39633745 | T | C | 0.2026 | 0.0636  | 0.0059 | 2.48E-27 | 10.8303  | 1316443 | Asthma |
| rs907094    | 17 | 39634118 | G | A | 0.2027 | 0.0636  | 0.0059 | 2.14E-27 | 10.8437  | 1316443 | Asthma |
| rs3764353   | 17 | 39634528 | T | C | 0.2026 | 0.0636  | 0.0059 | 2.53E-27 | 10.8284  | 1316443 | Asthma |
| rs3764352   | 17 | 39634686 | C | T | 0.2025 | 0.0635  | 0.0059 | 3.04E-27 | 10.8113  | 1316443 | Asthma |
| rs3794712   | 17 | 39635234 | A | C | 0.1681 | 0.0717  | 0.0076 | 2.91E-21 | 9.4661   | 1030443 | Asthma |
| rs3817160   | 17 | 39637562 | C | G | 0.2028 | 0.0638  | 0.0059 | 1.90E-27 | 10.8545  | 1316443 | Asthma |
| rs72827174  | 17 | 39637780 | G | A | 0.1471 | -0.0589 | 0.0070 | 4.64E-17 | -8.3954  | 1299802 | Asthma |
| rs4794817   | 17 | 39638098 | T | A | 0.1738 | 0.0737  | 0.0062 | 3.43E-32 | 11.8109  | 1316443 | Asthma |
| rs74682567  | 17 | 39648422 | G | A | 0.0792 | 0.0828  | 0.0090 | 4.08E-20 | 9.1859   | 1299802 | Asthma |
| rs9972882   | 17 | 39651445 | A | C | 0.2484 | 0.0654  | 0.0054 | 2.50E-33 | 12.0291  | 1376071 | Asthma |
| rs881844    | 17 | 39653965 | C | G | 0.3312 | 0.0635  | 0.0050 | 5.97E-37 | 12.6994  | 1376071 | Asthma |
| rs11869286  | 17 | 39657603 | G | C | 0.3305 | 0.0634  | 0.0050 | 6.08E-37 | 12.6978  | 1376071 | Asthma |
| rs1877031   | 17 | 39657827 | G | A | 0.3306 | 0.0649  | 0.0051 | 1.35E-37 | 12.8151  | 1349938 | Asthma |
| rs11658786  | 17 | 39659646 | G | A | 0.3298 | 0.0636  | 0.0050 | 4.67E-37 | 12.7184  | 1376071 | Asthma |
| rs2271308   | 17 | 39661229 | T | C | 0.2660 | 0.0643  | 0.0053 | 8.84E-34 | 12.1146  | 1376071 | Asthma |
| rs931992    | 17 | 39665182 | G | T | 0.3299 | 0.0634  | 0.0050 | 7.26E-37 | 12.6837  | 1376071 | Asthma |
| rs1053651   | 17 | 39666058 | A | C | 0.2660 | 0.0645  | 0.0053 | 5.19E-34 | 12.1582  | 1376071 | Asthma |
| rs3764351   | 17 | 39668086 | G | A | 0.3338 | 0.0647  | 0.0050 | 2.70E-38 | 12.9393  | 1376071 | Asthma |
| rs876493    | 17 | 39668292 | G | A | 0.4091 | 0.0620  | 0.0048 | 1.47E-37 | 12.8084  | 1376071 | Asthma |
| rs407307    | 17 | 39670910 | A | G | 0.3161 | 0.0691  | 0.0052 | 1.13E-40 | 13.3538  | 1316443 | Asthma |
| rs3152      | 17 | 39671417 | A | G | 0.1021 | -0.0533 | 0.0080 | 3.48E-11 | -6.6246  | 1316443 | Asthma |
| rs14050     | 17 | 39671819 | C | T | 0.2942 | 0.0695  | 0.0053 | 1.12E-39 | 13.1819  | 1316443 | Asthma |
| rs2952151   | 17 | 39672243 | T | C | 0.2940 | 0.0695  | 0.0053 | 1.10E-39 | 13.1829  | 1316443 | Asthma |
| rs2941503   | 17 | 39672492 | A | G | 0.2941 | 0.0696  | 0.0053 | 9.67E-40 | 13.1927  | 1316443 | Asthma |
| rs907087    | 17 | 39672534 | G | A | 0.2967 | 0.0684  | 0.0056 | 1.28E-34 | 12.2723  | 948423  | Asthma |
| rs2247862   | 17 | 39672876 | A | G | 0.2936 | 0.0702  | 0.0053 | 2.31E-40 | 13.3004  | 1316443 | Asthma |
| rs903504    | 17 | 39673317 | C | G | 0.3126 | 0.0698  | 0.0052 | 2.44E-41 | 13.4671  | 1316443 | Asthma |
| rs903503    | 17 | 39673318 | C | A | 0.3126 | 0.0698  | 0.0052 | 2.11E-41 | 13.4779  | 1316443 | Asthma |
| rs903502    | 17 | 39673351 | C | T | 0.3127 | 0.0697  | 0.0052 | 2.58E-41 | 13.4629  | 1316443 | Asthma |
| rs2934956   | 17 | 39674194 | T | A | 0.3131 | 0.0699  | 0.0051 | 1.98E-43 | 13.8184  | 1376071 | Asthma |
| rs2941504   | 17 | 39674647 | A | G | 0.2943 | 0.0705  | 0.0052 | 1.23E-42 | 13.6860  | 1376071 | Asthma |
| rs1565922   | 17 | 39674782 | A | G | 0.2948 | 0.0695  | 0.0051 | 1.41E-41 | 13.5078  | 1376071 | Asthma |
| rs10558975  | 17 | 39675051 | C | G | 0.3233 | 0.0692  | 0.0079 | 2.54E-18 | 8.7303   | 354462  | Asthma |
| rs1565920   | 17 | 39675360 | G | A | 0.3125 | 0.0692  | 0.0051 | 1.51E-42 | 13.6714  | 1376071 | Asthma |
| rs1495102   | 17 | 39675840 | T | C | 0.2933 | 0.0706  | 0.0052 | 1.06E-42 | 13.6969  | 1376071 | Asthma |
| rs1495101   | 17 | 39675850 | C | A | 0.2933 | 0.0706  | 0.0052 | 1.01E-42 | 13.7006  | 1376071 | Asthma |
| rs1495100   | 17 | 39676026 | C | T | 0.3125 | 0.0691  | 0.0051 | 1.99E-42 | 13.6510  | 1376071 | Asthma |
| rs2934953   | 17 | 39676062 | T | A | 0.2933 | 0.0706  | 0.0052 | 1.14E-42 | 13.6918  | 1376071 | Asthma |
| rs2934952   | 17 | 39676113 | G | A | 0.2933 | 0.0706  | 0.0052 | 1.06E-42 | 13.6965  | 1376071 | Asthma |
| rs2941505   | 17 | 39676451 | A | G | 0.3117 | 0.0697  | 0.0051 | 4.25E-43 | 13.7631  | 1376071 | Asthma |
| rs2952152   | 17 | 39676482 | T | C | 0.3119 | 0.0698  | 0.0051 | 3.16E-43 | 13.7845  | 1376071 | Asthma |
| rs2941506   | 17 | 39676782 | A | G | 0.3116 | 0.0698  | 0.0051 | 3.35E-43 | 13.7803  | 1376071 | Asthma |
| rs2934951   | 17 | 39677075 | A | G | 0.3117 | 0.0696  | 0.0051 | 4.81E-43 | 13.7540  | 1376071 | Asthma |
| rs907088    | 17 | 39677314 | G | C | 0.3223 | 0.0658  | 0.0050 | 2.82E-39 | 13.1116  | 1376071 | Asthma |
| rs907089    | 17 | 39677347 | G | A | 0.3223 | 0.0658  | 0.0050 | 2.58E-39 | 13.1184  | 1376071 | Asthma |
| rs907090    | 17 | 39677379 | T | C | 0.3223 | 0.0657  | 0.0050 | 3.12E-39 | 13.1041  | 1376071 | Asthma |
| rs9675194   | 17 | 39677552 | T | C | 0.3223 | 0.0657  | 0.0050 | 3.10E-39 | 13.1046  | 1376071 | Asthma |
| rs2313171   | 17 | 39677589 | T | C | 0.3223 | 0.0657  | 0.0050 | 3.61E-39 | 13.0930  | 1376071 | Asthma |
| rs732084    | 17 | 39678104 | A | C | 0.3217 | 0.0665  | 0.0054 | 5.22E-35 | 12.3446  | 1246149 | Asthma |
| rs732083    | 17 | 39678114 | G | A | 0.3239 | 0.0654  | 0.0050 | 5.49E-39 | 13.0612  | 1376071 | Asthma |
| rs12150298  | 17 | 39678288 | T | C | 0.3223 | 0.0658  | 0.0050 | 2.42E-39 | 13.1232  | 1376071 | Asthma |
| rs12150603  | 17 | 39678462 | G | A | 0.3323 | 0.0632  | 0.0053 | 3.71E-33 | 11.9965  | 1008051 | Asthma |
| rs72832915  | 17 | 39678555 | A | G | 0.3142 | -0.0525 | 0.0052 | 3.04E-24 | -10.1585 | 1376071 | Asthma |
| rs8077172   | 17 | 39678724 | G | T | 0.3222 | 0.0658  | 0.0050 | 2.56E-39 | 13.1193  | 1376071 | Asthma |
| rs8078228   | 17 | 39678745 | C | T | 0.3222 | 0.0658  | 0.0050 | 2.62E-39 | 13.1175  | 1376071 | Asthma |
| rs1018246   | 17 | 39678987 | C | T | 0.3223 | 0.0658  | 0.0050 | 2.37E-39 | 13.1252  | 1376071 | Asthma |
| rs11078919  | 17 | 39679502 | T | C | 0.3221 | 0.0658  | 0.0050 | 2.55E-39 | 13.1194  | 1376071 | Asthma |

|             |    |          |   |   |        |         |        |          |          |         |        |
|-------------|----|----------|---|---|--------|---------|--------|----------|----------|---------|--------|
| rs1476278   | 17 | 39679990 | C | T | 0.3229 | 0.0652  | 0.0050 | 9.91E-39 | 13.0162  | 1376071 | Asthma |
| rs9303274   | 17 | 39680100 | T | C | 0.3228 | 0.0652  | 0.0050 | 1.02E-38 | 13.0136  | 1376071 | Asthma |
| rs12940986  | 17 | 39680328 | G | A | 0.3230 | 0.0673  | 0.0051 | 6.07E-40 | 13.2280  | 1349938 | Asthma |
| rs2517952   | 17 | 39682048 | A | G | 0.2929 | 0.0707  | 0.0052 | 1.05E-42 | 13.6974  | 1376071 | Asthma |
| rs2517957   | 17 | 39682463 | G | A | 0.3231 | 0.0652  | 0.0050 | 1.07E-38 | 13.0101  | 1376071 | Asthma |
| rs2517958   | 17 | 39682498 | G | A | 0.3231 | 0.0653  | 0.0050 | 8.53E-39 | 13.0274  | 1376071 | Asthma |
| rs903501    | 17 | 39683240 | T | C | 0.3039 | 0.0665  | 0.0051 | 1.03E-38 | 13.0129  | 1376071 | Asthma |
| rs2517953   | 17 | 39684958 | G | C | 0.3373 | 0.0655  | 0.0050 | 1.04E-39 | 13.1871  | 1376071 | Asthma |
| rs2517954   | 17 | 39687297 | T | C | 0.3180 | 0.0685  | 0.0051 | 9.20E-41 | 13.3689  | 1349938 | Asthma |
| rs2517955   | 17 | 39687428 | C | T | 0.3373 | 0.0654  | 0.0050 | 1.27E-39 | 13.1723  | 1376071 | Asthma |
| rs2517956   | 17 | 39687606 | G | A | 0.3178 | 0.0664  | 0.0050 | 1.70E-39 | 13.1503  | 1376071 | Asthma |
| rs2517959   | 17 | 39690259 | A | T | 0.3161 | 0.0629  | 0.0055 | 6.18E-30 | 11.3659  | 1224666 | Asthma |
| rs2517960   | 17 | 39690268 | T | C | 0.3370 | 0.0652  | 0.0050 | 2.17E-39 | 13.1314  | 1376071 | Asthma |
| rs2904765   | 17 | 39692422 | T | G | 0.3488 | 0.0606  | 0.0081 | 9.47E-14 | 7.4481   | 778845  | Asthma |
| rs2904766   | 17 | 39692424 | A | G | 0.3193 | 0.0633  | 0.0081 | 7.61E-15 | 7.7739   | 778845  | Asthma |
| rs2643194   | 17 | 39696795 | C | T | 0.3055 | 0.0703  | 0.0051 | 4.20E-43 | 13.7640  | 1376071 | Asthma |
| rs2517951   | 17 | 39696844 | C | T | 0.3231 | 0.0691  | 0.0050 | 3.56E-43 | 13.7757  | 1376071 | Asthma |
| rs2643195   | 17 | 39696865 | A | G | 0.3058 | 0.0703  | 0.0051 | 3.81E-43 | 13.7709  | 1376071 | Asthma |
| rs2934971   | 17 | 39698254 | G | T | 0.3081 | 0.0702  | 0.0061 | 4.62E-31 | 11.5903  | 1090071 | Asthma |
| rs1565923   | 17 | 39702425 | A | G | 0.3052 | 0.0706  | 0.0051 | 2.04E-43 | 13.8161  | 1376071 | Asthma |
| rs2952155   | 17 | 39705465 | T | C | 0.2383 | 0.0754  | 0.0056 | 3.93E-41 | 13.4321  | 1316443 | Asthma |
| rs1810132   | 17 | 39709752 | C | T | 0.3053 | 0.0700  | 0.0052 | 6.49E-41 | 13.3948  | 1316443 | Asthma |
| rs4252627   | 17 | 39712462 | C | T | 0.3231 | 0.0705  | 0.0052 | 8.83E-42 | 13.5419  | 1290310 | Asthma |
| rs146251853 | 17 | 39713625 | T | C | 0.0308 | 0.1017  | 0.0134 | 3.37E-14 | 7.5832   | 1359430 | Asthma |
| rs2934967   | 17 | 39714125 | G | A | 0.3050 | 0.0699  | 0.0052 | 1.06E-40 | 13.3581  | 1316443 | Asthma |
| rs2952156   | 17 | 39720582 | A | G | 0.3063 | 0.0704  | 0.0052 | 2.13E-41 | 13.4773  | 1316443 | Asthma |
| rs2952157   | 17 | 39721159 | G | A | 0.3064 | 0.0702  | 0.0052 | 4.02E-41 | 13.4303  | 1316443 | Asthma |
| rs11653998  | 17 | 39721194 | C | G | 0.3246 | 0.0692  | 0.0051 | 1.38E-41 | 13.5093  | 1316443 | Asthma |
| rs2088126   | 17 | 39722777 | A | G | 0.3063 | 0.0704  | 0.0052 | 2.10E-41 | 13.4784  | 1316443 | Asthma |
| rs903506    | 17 | 39723509 | G | A | 0.3240 | 0.0691  | 0.0051 | 2.22E-41 | 13.4742  | 1316443 | Asthma |
| rs1058808   | 17 | 39727784 | C | G | 0.3236 | 0.0695  | 0.0051 | 7.56E-42 | 13.5534  | 1316443 | Asthma |
| rs3809717   | 17 | 39730733 | A | C | 0.3027 | -0.0566 | 0.0053 | 1.43E-26 | -10.6682 | 1316443 | Asthma |
| rs4795393   | 17 | 39737231 | C | T | 0.3760 | 0.0567  | 0.0050 | 5.39E-30 | 11.3778  | 1316443 | Asthma |
| rs2941520   | 17 | 39747477 | T | C | 0.3045 | 0.0731  | 0.0052 | 2.36E-44 | 13.9705  | 1316443 | Asthma |
| rs2941519   | 17 | 39747478 | G | A | 0.5039 | -0.0783 | 0.0048 | 1.28E-58 | -16.1425 | 1316443 | Asthma |
| rs9747973   | 17 | 39748854 | T | C | 0.4641 | 0.0840  | 0.0048 | 1.44E-67 | 17.3680  | 1316443 | Asthma |
| rs11078921  | 17 | 39752614 | A | C | 0.3419 | -0.0633 | 0.0051 | 3.35E-35 | -12.3802 | 1316443 | Asthma |
| rs2941522   | 17 | 39754115 | T | C | 0.4637 | 0.0839  | 0.0048 | 1.59E-67 | 17.3626  | 1316443 | Asthma |
| rs12946510  | 17 | 39756124 | T | C | 0.4813 | -0.0765 | 0.0047 | 3.91E-59 | -16.2158 | 1376071 | Asthma |
| rs3764354   | 17 | 39760570 | T | C | 0.1563 | -0.0427 | 0.0066 | 1.25E-10 | -6.4337  | 1376071 | Asthma |
| rs907091    | 17 | 39765489 | T | C | 0.4685 | 0.0834  | 0.0048 | 8.30E-67 | 17.2673  | 1316443 | Asthma |
| rs907092    | 17 | 39766006 | A | G | 0.4856 | -0.0773 | 0.0047 | 2.56E-60 | -16.3823 | 1376071 | Asthma |
| rs141489261 | 17 | 39770349 | C | T | 0.0339 | 0.0754  | 0.0135 | 2.62E-08 | 5.5652   | 1299802 | Asthma |
| rs2952140   | 17 | 39771806 | T | C | 0.4667 | 0.0840  | 0.0048 | 9.22E-68 | 17.3934  | 1316443 | Asthma |
| rs2313430   | 17 | 39773563 | C | T | 0.4668 | 0.0842  | 0.0048 | 3.45E-68 | 17.4499  | 1316443 | Asthma |
| rs10445308  | 17 | 39781794 | T | C | 0.4884 | -0.0788 | 0.0047 | 1.28E-62 | -16.7013 | 1376071 | Asthma |
| rs12942330  | 17 | 39783586 | T | C | 0.4884 | -0.0789 | 0.0047 | 1.09E-62 | -16.7110 | 1376071 | Asthma |
| rs11658993  | 17 | 39784555 | T | C | 0.4877 | -0.0791 | 0.0047 | 4.81E-63 | -16.7599 | 1376071 | Asthma |
| rs112350333 | 17 | 39796736 | T | C | 0.1446 | -0.0422 | 0.0077 | 4.80E-08 | -5.4584  | 1160365 | Asthma |
| rs17607816  | 17 | 39800982 | C | T | 0.0373 | -0.0684 | 0.0124 | 3.74E-08 | -5.5024  | 1316443 | Asthma |
| rs2952144   | 17 | 39803764 | T | C | 0.4666 | 0.0844  | 0.0048 | 1.69E-68 | 17.4906  | 1316443 | Asthma |
| rs4795395   | 17 | 39806734 | A | T | 0.4886 | -0.0791 | 0.0047 | 4.40E-63 | -16.7649 | 1376071 | Asthma |
| rs9909593   | 17 | 39813896 | G | A | 0.4885 | -0.0789 | 0.0047 | 9.56E-63 | -16.7189 | 1376071 | Asthma |
| rs12450323  | 17 | 39816455 | T | G | 0.1948 | 0.0821  | 0.0060 | 1.28E-42 | 13.6831  | 1316443 | Asthma |
| rs9303277   | 17 | 39820216 | C | T | 0.4669 | 0.0845  | 0.0048 | 1.01E-68 | 17.5200  | 1316443 | Asthma |
| rs146459536 | 17 | 39822742 | T | C | 0.0805 | 0.0866  | 0.0088 | 6.43E-23 | 9.8564   | 1299802 | Asthma |
| rs12944882  | 17 | 39827239 | T | C | 0.4494 | 0.0832  | 0.0048 | 3.87E-66 | 17.1783  | 1316443 | Asthma |
| rs143669790 | 17 | 39829526 | A | G | 0.0315 | 0.1057  | 0.0136 | 8.25E-15 | 7.7638   | 1299802 | Asthma |
| rs3816470   | 17 | 39829548 | A | G | 0.4497 | 0.0834  | 0.0048 | 1.74E-66 | 17.2245  | 1316443 | Asthma |
| rs62066988  | 17 | 39836028 | T | C | 0.3335 | -0.0674 | 0.0050 | 8.07E-41 | -13.3787 | 1376071 | Asthma |
| rs9916765   | 17 | 39849342 | T | C | 0.4689 | 0.0842  | 0.0066 | 1.60E-37 | 12.8020  | 912533  | Asthma |
| rs79411018  | 17 | 39850018 | G | T | 0.0742 | 0.0917  | 0.0117 | 4.81E-15 | 7.8316   | 1013802 | Asthma |
| rs8071789   | 17 | 39850080 | C | T | 0.5092 | 0.0809  | 0.0077 | 5.74E-26 | 10.5386  | 479287  | Asthma |
| rs35222145  | 17 | 39851068 | G | T | 0.4712 | -0.0798 | 0.0059 | 7.10E-42 | -13.5580 | 1030443 | Asthma |
| rs34073687  | 17 | 39851070 | T | G | 0.4959 | 0.0806  | 0.0059 | 2.96E-42 | 13.6220  | 1030443 | Asthma |
| rs9635726   | 17 | 39863888 | T | C | 0.1981 | 0.0837  | 0.0059 | 6.08E-45 | 14.0667  | 1316443 | Asthma |
| rs1453559   | 17 | 39864166 | T | C | 0.4708 | 0.0879  | 0.0047 | 2.20E-77 | 18.6202  | 1376071 | Asthma |
| rs4795397   | 17 | 39867492 | G | A | 0.4855 | -0.0830 | 0.0054 | 8.64E-54 | -15.4412 | 878129  | Asthma |
| rs11557466  | 17 | 39868373 | T | C | 0.4797 | -0.0824 | 0.0047 | 3.40E-68 | -17.4507 | 1376071 | Asthma |
| rs11078925  | 17 | 39868955 | C | T | 0.4797 | -0.0824 | 0.0047 | 3.07E-68 | -17.4563 | 1376071 | Asthma |
| rs12150079  | 17 | 39869164 | A | G | 0.3282 | -0.0691 | 0.0051 | 1.24E-42 | -13.6853 | 1376071 | Asthma |
| rs34120102  | 17 | 39869782 | A | G | 0.4745 | -0.0825 | 0.0052 | 2.72E-57 | -15.9530 | 1219993 | Asthma |
| rs11655198  | 17 | 39869916 | C | T | 0.4733 | 0.0881  | 0.0047 | 9.47E-78 | 18.6653  | 1376071 | Asthma |
| rs11650661  | 17 | 39870033 | A | T | 0.4733 | 0.0881  | 0.0047 | 8.97E-78 | 18.6682  | 1376071 | Asthma |

|             |    |          |   |   |        |         |        |          |          |         |        |
|-------------|----|----------|---|---|--------|---------|--------|----------|----------|---------|--------|
| rs11655292  | 17 | 39870108 | C | G | 0.4733 | 0.0881  | 0.0047 | 8.53E-78 | 18.6710  | 1376071 | Asthma |
| rs12709365  | 17 | 39871147 | G | A | 0.4799 | -0.0825 | 0.0047 | 2.38E-68 | -17.4708 | 1376071 | Asthma |
| rs13380815  | 17 | 39871330 | G | A | 0.4799 | -0.0825 | 0.0047 | 2.40E-68 | -17.4708 | 1376071 | Asthma |
| rs11557467  | 17 | 39872381 | G | T | 0.4732 | 0.0883  | 0.0047 | 3.60E-78 | 18.7167  | 1376071 | Asthma |
| rs12936231  | 17 | 39872867 | C | G | 0.4721 | 0.0878  | 0.0047 | 2.62E-77 | 18.6109  | 1376071 | Asthma |
| rs11870965  | 17 | 39873952 | A | T | 0.4799 | -0.0825 | 0.0047 | 2.22E-68 | -17.4750 | 1376071 | Asthma |
| rs9903250   | 17 | 39874777 | G | A | 0.4733 | 0.0881  | 0.0047 | 9.79E-78 | 18.6639  | 1376071 | Asthma |
| rs9905959   | 17 | 39874885 | G | A | 0.4798 | -0.0824 | 0.0047 | 2.79E-68 | -17.4620 | 1376071 | Asthma |
| rs11658278  | 17 | 39874911 | T | C | 0.4732 | 0.0883  | 0.0047 | 3.77E-78 | 18.7144  | 1376071 | Asthma |
| rs10852935  | 17 | 39875421 | T | C | 0.4797 | -0.0824 | 0.0047 | 2.95E-68 | -17.4588 | 1376071 | Asthma |
| rs10852936  | 17 | 39875461 | T | C | 0.4799 | -0.0824 | 0.0047 | 3.00E-68 | -17.4580 | 1376071 | Asthma |
| rs9891174   | 17 | 39875549 | A | T | 0.4736 | -0.0804 | 0.0050 | 9.72E-59 | -16.1597 | 1008051 | Asthma |
| rs59716545  | 17 | 39875604 | G | T | 0.4714 | -0.0846 | 0.0061 | 5.50E-44 | -13.9101 | 722051  | Asthma |
| rs36095411  | 17 | 39875612 | G | T | 0.4831 | -0.0771 | 0.0071 | 3.07E-27 | -10.8105 | 570646  | Asthma |
| rs12939457  | 17 | 39875935 | C | T | 0.4761 | -0.0768 | 0.0058 | 1.21E-40 | -13.3487 | 1068588 | Asthma |
| rs34189114  | 17 | 39876207 | T | C | 0.4797 | -0.0824 | 0.0047 | 3.14E-68 | -17.4553 | 1376071 | Asthma |
| rs35736272  | 17 | 39876427 | C | T | 0.4797 | -0.0824 | 0.0047 | 3.46E-68 | -17.4499 | 1376071 | Asthma |
| rs1054609   | 17 | 39877024 | C | A | 0.4799 | -0.0825 | 0.0047 | 2.29E-68 | -17.4733 | 1376071 | Asthma |
| rs9907088   | 17 | 39878863 | A | G | 0.4798 | -0.0825 | 0.0047 | 2.13E-68 | -17.4773 | 1376071 | Asthma |
| rs36038753  | 17 | 39879117 | T | G | 0.4798 | -0.0825 | 0.0047 | 2.23E-68 | -17.4748 | 1376071 | Asthma |
| rs35569035  | 17 | 39879371 | T | C | 0.4790 | -0.0867 | 0.0056 | 1.39E-53 | -15.4104 | 1090071 | Asthma |
| rs9910826   | 17 | 39879395 | G | A | 0.4839 | -0.0856 | 0.0051 | 3.84E-64 | -16.9094 | 1246149 | Asthma |
| rs9904624   | 17 | 39880333 | G | A | 0.4798 | -0.0825 | 0.0047 | 1.97E-68 | -17.4819 | 1376071 | Asthma |
| rs4795398   | 17 | 39881926 | T | C | 0.4797 | -0.0824 | 0.0047 | 3.02E-68 | -17.4575 | 1376071 | Asthma |
| rs12939565  | 17 | 39882136 | A | T | 0.4727 | 0.0837  | 0.0064 | 4.63E-39 | 13.0741  | 938666  | Asthma |
| rs12939566  | 17 | 39882137 | T | A | 0.4812 | -0.0803 | 0.0064 | 4.68E-36 | -12.5370 | 938666  | Asthma |
| rs62067029  | 17 | 39882138 | T | A | 0.4691 | -0.0797 | 0.0065 | 7.90E-35 | -12.3111 | 938666  | Asthma |
| rs12232497  | 17 | 39883866 | C | T | 0.4796 | -0.0824 | 0.0047 | 3.30E-68 | -17.4523 | 1376071 | Asthma |
| rs12232498  | 17 | 39884110 | C | T | 0.4798 | -0.0825 | 0.0047 | 1.86E-68 | -17.4852 | 1376071 | Asthma |
| rs12941333  | 17 | 39884281 | T | C | 0.4798 | -0.0825 | 0.0047 | 2.11E-68 | -17.4778 | 1376071 | Asthma |
| rs2872507   | 17 | 39884510 | A | G | 0.4798 | -0.0824 | 0.0047 | 3.37E-68 | -17.4511 | 1376071 | Asthma |
| rs9908132   | 17 | 39886524 | T | A | 0.4733 | 0.0884  | 0.0047 | 3.17E-78 | 18.7236  | 1376071 | Asthma |
| rs9901146   | 17 | 39887090 | G | A | 0.4733 | 0.0884  | 0.0047 | 3.04E-78 | 18.7261  | 1376071 | Asthma |
| rs12936409  | 17 | 39887396 | T | C | 0.4796 | -0.0826 | 0.0047 | 1.85E-68 | -17.4855 | 1376071 | Asthma |
| rs12103884  | 17 | 39889472 | C | T | 0.4734 | 0.0884  | 0.0047 | 3.17E-78 | 18.7237  | 1376071 | Asthma |
| rs9906951   | 17 | 39891991 | T | C | 0.4730 | 0.0883  | 0.0047 | 3.73E-78 | 18.7153  | 1376071 | Asthma |
| rs12950209  | 17 | 39892849 | T | C | 0.4731 | 0.0883  | 0.0047 | 3.61E-78 | 18.7167  | 1376071 | Asthma |
| rs12950743  | 17 | 39892980 | T | C | 0.4730 | 0.0883  | 0.0047 | 4.07E-78 | 18.7103  | 1376071 | Asthma |
| rs7359623   | 17 | 39893336 | C | T | 0.4763 | 0.0882  | 0.0047 | 8.89E-78 | 18.6689  | 1376071 | Asthma |
| rs8067378   | 17 | 39895095 | A | G | 0.4718 | 0.0879  | 0.0047 | 1.82E-77 | 18.6307  | 1376071 | Asthma |
| rs12453507  | 17 | 39896954 | G | C | 0.5143 | -0.0894 | 0.0047 | 2.59E-80 | -18.9781 | 1376071 | Asthma |
| rs11651596  | 17 | 39899863 | C | T | 0.4715 | -0.0842 | 0.0047 | 5.13E-71 | -17.8180 | 1376071 | Asthma |
| rs117504211 | 17 | 39900379 | C | A | 0.0822 | -0.0620 | 0.0089 | 3.84E-12 | -6.9431  | 1316443 | Asthma |
| rs12949100  | 17 | 39900936 | A | G | 0.4712 | -0.0840 | 0.0047 | 1.29E-70 | -17.7662 | 1376071 | Asthma |
| rs8069176   | 17 | 39900944 | A | G | 0.4715 | -0.0841 | 0.0047 | 7.21E-71 | -17.7989 | 1376071 | Asthma |
| rs11657449  | 17 | 39901588 | C | G | 0.3209 | -0.0712 | 0.0051 | 1.66E-44 | -13.9955 | 1376071 | Asthma |
| rs74370059  | 17 | 39903646 | C | T | 0.0909 | 0.0474  | 0.0086 | 3.07E-08 | 5.5378   | 1316443 | Asthma |
| rs4795399   | 17 | 39905186 | C | T | 0.4729 | -0.0837 | 0.0047 | 2.89E-70 | -17.7208 | 1376071 | Asthma |
| rs2305480   | 17 | 39905943 | A | G | 0.4730 | -0.0834 | 0.0047 | 9.57E-70 | -17.6535 | 1376071 | Asthma |
| rs2305479   | 17 | 39905964 | C | T | 0.4801 | 0.0889  | 0.0047 | 2.01E-79 | 18.8699  | 1376071 | Asthma |
| rs56750287  | 17 | 39906691 | C | A | 0.2400 | -0.0818 | 0.0070 | 1.32E-31 | -11.6970 | 866419  | Asthma |
| rs11078926  | 17 | 39906723 | A | G | 0.4729 | -0.0835 | 0.0047 | 7.68E-70 | -17.6659 | 1376071 | Asthma |
| rs883770    | 17 | 39907128 | C | T | 0.4802 | 0.0890  | 0.0047 | 1.33E-79 | 18.8918  | 1376071 | Asthma |
| rs62067034  | 17 | 39907485 | C | T | 0.4802 | 0.0889  | 0.0047 | 2.27E-79 | 18.8637  | 1376071 | Asthma |
| rs36000226  | 17 | 39907676 | T | C | 0.4802 | 0.0889  | 0.0047 | 2.22E-79 | 18.8647  | 1376071 | Asthma |
| rs11078927  | 17 | 39908152 | T | C | 0.4728 | -0.0834 | 0.0047 | 1.00E-69 | -17.6511 | 1376071 | Asthma |
| rs11078928  | 17 | 39908216 | C | T | 0.4729 | -0.0833 | 0.0047 | 1.43E-69 | -17.6307 | 1376071 | Asthma |
| rs12939832  | 17 | 39908623 | A | G | 0.4730 | -0.0838 | 0.0047 | 2.12E-70 | -17.7382 | 1376071 | Asthma |
| rs117097909 | 17 | 39908718 | A | G | 0.0695 | 0.0958  | 0.0095 | 3.98E-24 | 10.1322  | 1299802 | Asthma |
| rs2290400   | 17 | 39909987 | T | C | 0.4782 | 0.0880  | 0.0047 | 6.26E-78 | 18.6876  | 1376071 | Asthma |
| rs1008723   | 17 | 39910014 | G | T | 0.4796 | 0.0888  | 0.0047 | 3.52E-79 | 18.8406  | 1376071 | Asthma |
| rs56380902  | 17 | 39910119 | T | C | 0.4779 | 0.0879  | 0.0047 | 1.48E-77 | 18.6415  | 1376071 | Asthma |
| rs7213668   | 17 | 39910256 | A | G | 0.2058 | 0.0842  | 0.0059 | 2.32E-46 | 14.2958  | 1316443 | Asthma |
| rs4795400   | 17 | 39910767 | T | C | 0.4738 | -0.0839 | 0.0048 | 1.67E-68 | -17.4912 | 1349938 | Asthma |
| rs4795401   | 17 | 39911280 | A | G | 0.4792 | 0.0894  | 0.0048 | 9.09E-78 | 18.6678  | 1349938 | Asthma |
| rs869402    | 17 | 39911790 | C | T | 0.4819 | 0.0879  | 0.0050 | 7.43E-70 | 17.6676  | 1008051 | Asthma |
| rs870830    | 17 | 39912120 | A | G | 0.2058 | 0.0844  | 0.0059 | 1.36E-46 | 14.3329  | 1316443 | Asthma |
| rs870829    | 17 | 39912129 | A | C | 0.4088 | -0.0763 | 0.0048 | 2.26E-56 | -15.8203 | 1376071 | Asthma |
| rs1011082   | 17 | 39912261 | C | T | 0.4744 | 0.0892  | 0.0047 | 1.15E-79 | 18.8999  | 1376071 | Asthma |
| rs921650    | 17 | 39912823 | A | G | 0.4744 | 0.0890  | 0.0047 | 3.60E-79 | 18.8395  | 1376071 | Asthma |
| rs921649    | 17 | 39913021 | T | C | 0.4743 | 0.0889  | 0.0047 | 4.48E-79 | 18.8275  | 1376071 | Asthma |
| rs6503524   | 17 | 39913556 | T | C | 0.4744 | 0.0890  | 0.0047 | 3.54E-79 | 18.8400  | 1376071 | Asthma |
| rs7216389   | 17 | 39913696 | T | C | 0.4745 | 0.0889  | 0.0047 | 3.72E-79 | 18.8376  | 1376071 | Asthma |
| rs7216558   | 17 | 39913818 | T | C | 0.4731 | 0.0886  | 0.0047 | 1.20E-78 | 18.7753  | 1376071 | Asthma |

|            |    |          |   |   |        |         |        |          |          |         |        |
|------------|----|----------|---|---|--------|---------|--------|----------|----------|---------|--------|
| rs7221605  | 17 | 39914536 | T | C | 0.4973 | 0.0858  | 0.0050 | 1.02E-66 | 17.2554  | 1008051 | Asthma |
| rs1031458  | 17 | 39915920 | T | G | 0.4889 | 0.0865  | 0.0047 | 4.92E-75 | 18.3283  | 1376071 | Asthma |
| rs1031459  | 17 | 39915992 | C | G | 0.3491 | -0.0725 | 0.0050 | 5.51E-48 | -14.5538 | 1376071 | Asthma |
| rs1031460  | 17 | 39915994 | G | T | 0.4908 | 0.0864  | 0.0047 | 6.97E-75 | 18.3095  | 1376071 | Asthma |
| rs8065777  | 17 | 39916149 | T | C | 0.4889 | 0.0864  | 0.0047 | 6.83E-75 | 18.3103  | 1376071 | Asthma |
| rs2872516  | 17 | 39916474 | C | T | 0.4643 | -0.0813 | 0.0047 | 4.95E-66 | -17.1639 | 1376071 | Asthma |
| rs9303279  | 17 | 39917715 | G | C | 0.4787 | -0.0833 | 0.0047 | 1.47E-69 | -17.6293 | 1376071 | Asthma |
| rs9303280  | 17 | 39917778 | C | T | 0.4888 | 0.0862  | 0.0047 | 1.14E-74 | 18.2822  | 1376071 | Asthma |
| rs9303281  | 17 | 39917793 | A | G | 0.4729 | 0.0884  | 0.0047 | 2.79E-78 | 18.7305  | 1376071 | Asthma |
| rs7219923  | 17 | 39918265 | T | C | 0.4730 | 0.0884  | 0.0047 | 3.27E-78 | 18.7223  | 1376071 | Asthma |
| rs7224129  | 17 | 39919173 | A | G | 0.4728 | 0.0885  | 0.0047 | 1.80E-78 | 18.7540  | 1376071 | Asthma |
| rs8074437  | 17 | 39919884 | G | T | 0.4713 | 0.0883  | 0.0047 | 5.48E-78 | 18.6949  | 1376071 | Asthma |
| rs4065275  | 17 | 39924612 | G | A | 0.4914 | 0.0847  | 0.0047 | 5.02E-72 | 17.9475  | 1376071 | Asthma |
| rs8076131  | 17 | 39924659 | G | A | 0.4748 | -0.0828 | 0.0047 | 1.50E-68 | -17.4973 | 1376071 | Asthma |
| rs12603332 | 17 | 39926554 | C | T | 0.4967 | 0.0850  | 0.0051 | 1.97E-63 | 16.8129  | 981918  | Asthma |
| rs3744246  | 17 | 39928097 | T | C | 0.2128 | -0.0455 | 0.0058 | 5.41E-15 | -7.8171  | 1376071 | Asthma |
| rs4795402  | 17 | 39929132 | A | C | 0.2602 | -0.0467 | 0.0054 | 8.79E-18 | -8.5888  | 1376071 | Asthma |
| rs4795403  | 17 | 39929469 | T | C | 0.2137 | -0.0457 | 0.0058 | 4.68E-15 | -7.8352  | 1376071 | Asthma |
| rs4795404  | 17 | 39929538 | A | C | 0.2130 | -0.0453 | 0.0058 | 7.23E-15 | -7.7803  | 1376071 | Asthma |
| rs7224908  | 17 | 39930601 | A | G | 0.2127 | -0.0439 | 0.0059 | 1.30E-13 | -7.4061  | 1349938 | Asthma |
| rs12946393 | 17 | 39931176 | T | G | 0.2133 | -0.0450 | 0.0058 | 1.21E-14 | -7.7155  | 1376071 | Asthma |
| rs35557848 | 17 | 39931186 | T | C | 0.2480 | -0.0686 | 0.0055 | 1.31E-35 | -12.4555 | 1376071 | Asthma |
| rs4795405  | 17 | 39932164 | T | C | 0.4621 | -0.0796 | 0.0048 | 1.24E-60 | -16.4265 | 1316443 | Asthma |
| rs4794820  | 17 | 39933091 | A | G | 0.4504 | -0.0778 | 0.0049 | 1.40E-57 | -15.9944 | 1316443 | Asthma |
| rs7221814  | 17 | 39933464 | A | G | 0.4473 | -0.0774 | 0.0049 | 7.51E-57 | -15.8893 | 1316443 | Asthma |
| rs7222154  | 17 | 39933720 | A | G | 0.4186 | -0.0644 | 0.0050 | 1.49E-38 | -12.9853 | 1316443 | Asthma |
| rs56199421 | 17 | 39934555 | C | T | 0.4477 | -0.0594 | 0.0048 | 7.14E-35 | -12.3194 | 1349938 | Asthma |
| rs7207600  | 17 | 39935407 | G | A | 0.3714 | -0.0599 | 0.0049 | 3.47E-34 | -12.1910 | 1376071 | Asthma |
| rs8079416  | 17 | 39936460 | C | T | 0.4354 | 0.0642  | 0.0048 | 1.52E-41 | 13.5022  | 1376071 | Asthma |
| rs35123741 | 17 | 39936677 | G | A | 0.4410 | 0.0592  | 0.0058 | 1.26E-24 | 10.2443  | 1068588 | Asthma |
| rs12601749 | 17 | 39937062 | A | G | 0.4402 | -0.0621 | 0.0048 | 7.16E-39 | -13.0411 | 1376071 | Asthma |
| rs12603481 | 17 | 39937086 | A | G | 0.4349 | 0.0639  | 0.0048 | 6.00E-40 | 13.2287  | 1349938 | Asthma |
| rs6503525  | 17 | 39938921 | C | G | 0.4354 | 0.0637  | 0.0048 | 7.95E-41 | 13.3796  | 1376071 | Asthma |
| rs7216564  | 17 | 39940919 | A | T | 0.4354 | 0.0638  | 0.0048 | 4.76E-41 | 13.4176  | 1376071 | Asthma |
| rs62068169 | 17 | 39942341 | A | G | 0.1109 | 0.0572  | 0.0077 | 1.00E-13 | 7.4407   | 1290310 | Asthma |
| rs8065126  | 17 | 39942782 | T | C | 0.3680 | -0.0607 | 0.0049 | 5.44E-35 | -12.3409 | 1376071 | Asthma |
| rs4795406  | 17 | 39943881 | C | G | 0.4355 | 0.0637  | 0.0048 | 6.86E-41 | 13.3907  | 1376071 | Asthma |
| rs3848395  | 17 | 39945215 | T | C | 0.3688 | -0.0606 | 0.0049 | 6.88E-35 | -12.3223 | 1376071 | Asthma |
| rs4065985  | 17 | 39945679 | G | C | 0.4397 | -0.0620 | 0.0048 | 7.31E-39 | -13.0394 | 1376071 | Asthma |
| rs4065986  | 17 | 39946388 | A | G | 0.4388 | 0.0624  | 0.0050 | 1.28E-35 | 12.4571  | 1008051 | Asthma |
| rs3893044  | 17 | 39946763 | T | C | 0.4394 | -0.0622 | 0.0048 | 4.10E-39 | -13.0832 | 1376071 | Asthma |
| rs62068170 | 17 | 39946957 | G | A | 0.4467 | -0.0601 | 0.0047 | 9.63E-37 | -12.6618 | 1376071 | Asthma |
| rs62068171 | 17 | 39946989 | G | A | 0.4466 | -0.0599 | 0.0047 | 1.31E-36 | -12.6376 | 1376071 | Asthma |
| rs8080734  | 17 | 39947032 | G | A | 0.4396 | -0.0621 | 0.0048 | 5.45E-39 | -13.0616 | 1376071 | Asthma |
| rs7217240  | 17 | 39949081 | T | C | 0.2093 | 0.0396  | 0.0058 | 1.28E-11 | 6.7714   | 1376071 | Asthma |
| rs8071050  | 17 | 39950346 | A | G | 0.4800 | -0.0574 | 0.0050 | 7.21E-31 | -11.5519 | 1008051 | Asthma |
| rs4795408  | 17 | 39951374 | A | G | 0.4346 | 0.0638  | 0.0048 | 4.54E-41 | 13.4212  | 1376071 | Asthma |
| rs9889711  | 17 | 39952039 | A | T | 0.3688 | -0.0612 | 0.0050 | 1.52E-34 | -12.2583 | 1349938 | Asthma |
| rs9889716  | 17 | 39952045 | A | G | 0.3689 | -0.0608 | 0.0049 | 4.76E-35 | -12.3520 | 1376071 | Asthma |
| rs9895948  | 17 | 39952110 | T | C | 0.3688 | -0.0612 | 0.0050 | 1.41E-34 | -12.2639 | 1349938 | Asthma |
| rs7223318  | 17 | 39952300 | G | C | 0.3690 | -0.0608 | 0.0049 | 4.30E-35 | -12.3601 | 1376071 | Asthma |
| rs7209742  | 17 | 39952455 | A | G | 0.3689 | -0.0607 | 0.0049 | 4.88E-35 | -12.3500 | 1376071 | Asthma |
| rs28618095 | 17 | 39952822 | T | C | 0.3782 | -0.0627 | 0.0063 | 1.37E-23 | -10.0109 | 722051  | Asthma |
| rs56301252 | 17 | 39952902 | T | G | 0.3807 | -0.0635 | 0.0065 | 9.27E-23 | -9.8195  | 995476  | Asthma |
| rs55927420 | 17 | 39952998 | G | T | 0.4281 | -0.0597 | 0.0079 | 4.32E-14 | -7.5511  | 778845  | Asthma |
| rs56410675 | 17 | 39953001 | A | G | 0.3664 | -0.0586 | 0.0077 | 2.10E-14 | -7.6447  | 804978  | Asthma |
| rs60667221 | 17 | 39954137 | T | A | 0.3688 | -0.0600 | 0.0049 | 3.12E-34 | -12.1997 | 1376071 | Asthma |
| rs17609240 | 17 | 39954436 | T | G | 0.3688 | -0.0599 | 0.0049 | 4.37E-34 | -12.1722 | 1376071 | Asthma |
| rs8076474  | 17 | 39954981 | G | C | 0.3688 | -0.0601 | 0.0049 | 2.84E-34 | -12.2074 | 1376071 | Asthma |
| rs1007654  | 17 | 39955101 | A | G | 0.3688 | -0.0601 | 0.0049 | 2.31E-34 | -12.2242 | 1376071 | Asthma |
| rs1007655  | 17 | 39955166 | G | A | 0.3690 | -0.0600 | 0.0049 | 3.10E-34 | -12.2004 | 1376071 | Asthma |
| rs1563103  | 17 | 39955487 | G | A | 0.3689 | -0.0601 | 0.0049 | 2.30E-34 | -12.2245 | 1376071 | Asthma |
| rs2313640  | 17 | 39955592 | C | T | 0.3688 | -0.0601 | 0.0049 | 2.40E-34 | -12.2211 | 1376071 | Asthma |
| rs8068522  | 17 | 39955823 | T | C | 0.3689 | -0.0602 | 0.0049 | 1.79E-34 | -12.2448 | 1376071 | Asthma |
| rs8081437  | 17 | 39955861 | G | A | 0.3689 | -0.0603 | 0.0049 | 1.58E-34 | -12.2553 | 1376071 | Asthma |
| rs8081462  | 17 | 39955937 | C | G | 0.4426 | 0.0651  | 0.0047 | 6.30E-43 | 13.7347  | 1376071 | Asthma |
| rs62068174 | 17 | 39956002 | G | C | 0.3690 | -0.0602 | 0.0049 | 1.84E-34 | -12.2428 | 1376071 | Asthma |
| rs62068175 | 17 | 39956047 | A | C | 0.3689 | -0.0602 | 0.0049 | 1.92E-34 | -12.2392 | 1376071 | Asthma |
| rs62068176 | 17 | 39956185 | A | G | 0.3764 | -0.0526 | 0.0058 | 8.64E-20 | -9.1049  | 1090898 | Asthma |
| rs62068177 | 17 | 39956348 | G | A | 0.3776 | -0.0594 | 0.0054 | 1.75E-28 | -11.0704 | 1219993 | Asthma |
| rs62068178 | 17 | 39956355 | C | T | 0.3776 | -0.0592 | 0.0054 | 2.45E-28 | -11.0398 | 1219993 | Asthma |
| rs62068179 | 17 | 39956364 | G | A | 0.3774 | -0.0592 | 0.0054 | 2.40E-28 | -11.0417 | 1219993 | Asthma |
| rs67480438 | 17 | 39956521 | A | G | 0.3699 | -0.0587 | 0.0056 | 4.11E-26 | -10.5698 | 1133307 | Asthma |
| rs62068180 | 17 | 39956572 | T | C | 0.3720 | -0.0615 | 0.0050 | 1.07E-34 | -12.2867 | 1349938 | Asthma |

|             |    |          |   |   |        |         |        |          |          |         |        |
|-------------|----|----------|---|---|--------|---------|--------|----------|----------|---------|--------|
| rs62068181  | 17 | 39956579 | T | C | 0.3712 | -0.0608 | 0.0049 | 6.59E-35 | -12.3255 | 1376071 | Asthma |
| rs62068182  | 17 | 39956611 | G | A | 0.3704 | -0.0565 | 0.0054 | 1.06E-25 | -10.4810 | 1224666 | Asthma |
| rs62068183  | 17 | 39956665 | C | T | 0.3696 | -0.0603 | 0.0049 | 1.51E-34 | -12.2589 | 1376071 | Asthma |
| rs62068184  | 17 | 39956801 | C | T | 0.3695 | -0.0604 | 0.0049 | 1.32E-34 | -12.2694 | 1376071 | Asthma |
| rs4134500   | 17 | 39957017 | C | T | 0.3933 | -0.0585 | 0.0079 | 1.17E-13 | -7.4202  | 778845  | Asthma |
| rs4134499   | 17 | 39957021 | C | T | 0.3931 | -0.0584 | 0.0079 | 1.28E-13 | -7.4081  | 778845  | Asthma |
| rs4134417   | 17 | 39957025 | C | T | 0.3799 | -0.0429 | 0.0077 | 2.26E-08 | -5.5912  | 540747  | Asthma |
| rs4134498   | 17 | 39957029 | C | T | 0.3799 | -0.0429 | 0.0077 | 2.24E-08 | -5.5924  | 540747  | Asthma |
| rs7218742   | 17 | 39958108 | A | G | 0.3687 | -0.0603 | 0.0049 | 1.69E-34 | -12.2494 | 1376071 | Asthma |
| rs7218321   | 17 | 39958216 | C | T | 0.3693 | -0.0605 | 0.0049 | 9.29E-35 | -12.2980 | 1376071 | Asthma |
| rs7219080   | 17 | 39958263 | A | C | 0.3693 | -0.0604 | 0.0049 | 1.09E-34 | -12.2849 | 1376071 | Asthma |
| rs6503526   | 17 | 39958345 | T | C | 0.4417 | 0.0652  | 0.0047 | 5.68E-43 | 13.7423  | 1376071 | Asthma |
| rs6503527   | 17 | 39958466 | G | A | 0.3687 | -0.0603 | 0.0049 | 1.70E-34 | -12.2490 | 1376071 | Asthma |
| rs3931960   | 17 | 39958724 | G | C | 0.4859 | -0.0594 | 0.0047 | 2.30E-36 | -12.5932 | 1376071 | Asthma |
| rs55913526  | 17 | 39959046 | T | C | 0.0754 | 0.0528  | 0.0090 | 4.59E-09 | 5.8613   | 1376071 | Asthma |
| rs56340811  | 17 | 39959177 | A | C | 0.5249 | -0.0604 | 0.0075 | 7.95E-16 | -8.0551  | 706598  | Asthma |
| rs11869855  | 17 | 39961400 | A | G | 0.3688 | -0.0604 | 0.0049 | 1.33E-34 | -12.2688 | 1376071 | Asthma |
| rs3902025   | 17 | 39963001 | G | T | 0.4397 | -0.0619 | 0.0048 | 9.94E-39 | -13.0159 | 1376071 | Asthma |
| rs3902024   | 17 | 39963295 | A | G | 0.3688 | -0.0607 | 0.0049 | 5.78E-35 | -12.3361 | 1376071 | Asthma |
| rs55739615  | 17 | 39963385 | C | T | 0.4399 | -0.0619 | 0.0048 | 8.68E-39 | -13.0264 | 1376071 | Asthma |
| rs56396280  | 17 | 39963455 | A | C | 0.3688 | -0.0606 | 0.0049 | 8.37E-35 | -12.3063 | 1376071 | Asthma |
| rs12451084  | 17 | 39963504 | T | G | 0.4435 | 0.0651  | 0.0047 | 8.34E-43 | 13.7144  | 1376071 | Asthma |
| rs12451100  | 17 | 39963578 | T | G | 0.4420 | 0.0653  | 0.0047 | 5.04E-43 | 13.7508  | 1376071 | Asthma |
| rs2001476   | 17 | 39964351 | T | C | 0.3690 | -0.0606 | 0.0049 | 7.75E-35 | -12.3124 | 1376071 | Asthma |
| rs4795409   | 17 | 39964483 | T | C | 0.4434 | 0.0651  | 0.0047 | 8.18E-43 | 13.7158  | 1376071 | Asthma |
| rs12943476  | 17 | 39965261 | A | G | 0.3912 | -0.0533 | 0.0088 | 1.65E-09 | -6.0292  | 476051  | Asthma |
| rs4458030   | 17 | 39965453 | G | A | 0.3675 | -0.0597 | 0.0049 | 9.18E-34 | -12.1116 | 1376071 | Asthma |
| rs3894194   | 17 | 39965740 | A | G | 0.4440 | 0.0653  | 0.0047 | 3.28E-43 | 13.7817  | 1376071 | Asthma |
| rs8069202   | 17 | 39965947 | A | G | 0.4434 | 0.0652  | 0.0047 | 5.13E-43 | 13.7496  | 1376071 | Asthma |
| rs7212944   | 17 | 39966433 | A | G | 0.3396 | -0.0549 | 0.0050 | 9.36E-28 | -10.9189 | 1376071 | Asthma |
| rs9914973   | 17 | 39966455 | C | T | 0.3367 | -0.0554 | 0.0050 | 4.30E-28 | -10.9892 | 1376071 | Asthma |
| rs4794821   | 17 | 39967950 | C | T | 0.4566 | 0.0638  | 0.0049 | 2.25E-39 | 13.1289  | 1316443 | Asthma |
| rs60725845  | 17 | 39968377 | G | T | 0.4582 | 0.0587  | 0.0058 | 3.25E-24 | 10.1518  | 1068588 | Asthma |
| rs559843584 | 17 | 39968639 | A | C | 0.2142 | 0.0363  | 0.0060 | 1.35E-09 | 6.0610   | 1316443 | Asthma |
| rs3894193   | 17 | 39969093 | G | C | 0.4551 | 0.0639  | 0.0049 | 1.94E-39 | 13.1403  | 1316443 | Asthma |
| rs3859193   | 17 | 39969603 | A | T | 0.4601 | 0.0604  | 0.0051 | 6.86E-32 | 11.7523  | 948423  | Asthma |
| rs59269632  | 17 | 39969978 | G | A | 0.4520 | 0.0601  | 0.0052 | 5.03E-31 | 11.5828  | 1224666 | Asthma |
| rs4580194   | 17 | 39970224 | G | A | 0.4297 | 0.0619  | 0.0049 | 7.17E-37 | 12.6848  | 1316443 | Asthma |
| rs4239225   | 17 | 39970859 | A | G | 0.4744 | 0.0554  | 0.0047 | 8.01E-32 | 11.7392  | 1376071 | Asthma |
| rs72832993  | 17 | 39972348 | A | C | 0.0869 | 0.0645  | 0.0089 | 5.72E-13 | 7.2070   | 1316443 | Asthma |
| rs3859192   | 17 | 39972395 | T | C | 0.4739 | 0.0556  | 0.0047 | 4.00E-32 | 11.7979  | 1376071 | Asthma |
| rs3859191   | 17 | 39972461 | A | G | 0.4738 | 0.0559  | 0.0047 | 2.16E-32 | 11.8501  | 1376071 | Asthma |
| rs8077456   | 17 | 39972512 | C | G | 0.3350 | -0.0488 | 0.0050 | 1.71E-22 | -9.7578  | 1376071 | Asthma |
| rs4065876   | 17 | 39973253 | A | G | 0.4683 | 0.0583  | 0.0052 | 1.11E-29 | 11.3147  | 1220016 | Asthma |
| rs11870683  | 17 | 39973588 | A | T | 0.3470 | -0.0452 | 0.0058 | 5.07E-15 | -7.8252  | 851973  | Asthma |
| rs60137005  | 17 | 39973743 | T | A | 0.4696 | 0.0537  | 0.0050 | 3.37E-27 | 10.8019  | 1008051 | Asthma |
| rs56326707  | 17 | 39973886 | T | C | 0.4697 | 0.0536  | 0.0050 | 4.40E-27 | 10.7776  | 1008051 | Asthma |
| rs62066853  | 17 | 39974239 | C | T | 0.2427 | 0.0508  | 0.0058 | 2.38E-18 | 8.7376   | 1008051 | Asthma |
| rs56030650  | 17 | 39974934 | A | C | 0.4731 | 0.0555  | 0.0047 | 5.94E-32 | 11.7646  | 1376071 | Asthma |
| rs28496749  | 17 | 39977292 | C | T | 0.5621 | -0.0586 | 0.0069 | 1.42E-17 | -8.5334  | 935848  | Asthma |
| rs60134943  | 17 | 39977539 | T | G | 0.4729 | 0.0557  | 0.0047 | 4.09E-32 | 11.7963  | 1376071 | Asthma |
| rs3907022   | 17 | 39978636 | C | T | 0.4730 | 0.0557  | 0.0047 | 3.82E-32 | 11.8017  | 1376071 | Asthma |
| rs9898547   | 17 | 39979773 | T | G | 0.4496 | -0.0473 | 0.0047 | 1.64E-23 | -9.9926  | 1376071 | Asthma |
| rs3859189   | 17 | 39980780 | G | A | 0.4519 | -0.0467 | 0.0047 | 6.30E-23 | -9.8584  | 1376071 | Asthma |
| rs3087852   | 17 | 39981111 | A | G | 0.4510 | -0.0469 | 0.0047 | 3.82E-23 | -9.9085  | 1376071 | Asthma |
| rs8075668   | 17 | 39981370 | T | C | 0.4517 | -0.0468 | 0.0047 | 4.97E-23 | -9.8823  | 1376071 | Asthma |
| rs2305481   | 17 | 39982371 | A | G | 0.3670 | -0.0487 | 0.0049 | 2.26E-23 | -9.9607  | 1376071 | Asthma |
| rs11655264  | 17 | 39982742 | C | G | 0.4516 | -0.0465 | 0.0047 | 7.91E-23 | -9.8356  | 1376071 | Asthma |
| rs2305482   | 17 | 39984674 | A | C | 0.4633 | 0.0385  | 0.0047 | 3.96E-16 | 8.1397   | 1376071 | Asthma |
| rs11078930  | 17 | 39985702 | T | C | 0.3654 | -0.0478 | 0.0049 | 1.82E-22 | -9.7511  | 1376071 | Asthma |
| rs3816472   | 17 | 39986424 | A | C | 0.4660 | 0.0381  | 0.0047 | 6.62E-16 | 8.0774   | 1376071 | Asthma |
| rs4433838   | 17 | 39987279 | C | T | 0.4661 | 0.0382  | 0.0047 | 5.24E-16 | 8.1059   | 1376071 | Asthma |
| rs4065321   | 17 | 39987295 | C | T | 0.4660 | 0.0383  | 0.0047 | 4.71E-16 | 8.1188   | 1376071 | Asthma |
| rs12940405  | 17 | 39987515 | C | T | 0.4661 | 0.0382  | 0.0047 | 5.55E-16 | 8.0987   | 1376071 | Asthma |
| rs12450800  | 17 | 39987863 | C | T | 0.4661 | 0.0382  | 0.0047 | 5.68E-16 | 8.0957   | 1376071 | Asthma |
| rs12453764  | 17 | 39987934 | T | C | 0.4661 | 0.0381  | 0.0047 | 6.51E-16 | 8.0793   | 1376071 | Asthma |
| rs12450688  | 17 | 39987976 | G | A | 0.4676 | 0.0370  | 0.0052 | 7.12E-13 | 7.1772   | 1224666 | Asthma |
| rs12453249  | 17 | 39987988 | A | C | 0.4661 | 0.0382  | 0.0047 | 5.97E-16 | 8.0899   | 1376071 | Asthma |
| rs9915252   | 17 | 39988835 | C | G | 0.4662 | 0.0381  | 0.0047 | 6.68E-16 | 8.0761   | 1376071 | Asthma |
| rs57968500  | 17 | 39989575 | G | A | 0.3892 | 0.0489  | 0.0048 | 2.81E-24 | 10.1662  | 1376071 | Asthma |
| rs3744245   | 17 | 39990289 | G | C | 0.3653 | -0.0478 | 0.0049 | 1.88E-22 | -9.7481  | 1376071 | Asthma |
| rs8066582   | 17 | 39990676 | T | C | 0.4661 | 0.0382  | 0.0047 | 5.51E-16 | 8.0997   | 1376071 | Asthma |
| rs11078931  | 17 | 39991041 | T | C | 0.3660 | -0.0477 | 0.0049 | 2.08E-22 | -9.7382  | 1376071 | Asthma |
| rs11867302  | 17 | 39991404 | T | C | 0.3653 | -0.0476 | 0.0049 | 2.71E-22 | -9.7111  | 1376071 | Asthma |



|             |    |          |   |   |        |         |        |          |          |         |        |
|-------------|----|----------|---|---|--------|---------|--------|----------|----------|---------|--------|
| rs60082402  | 17 | 39992012 | G | A | 0.3808 | 0.0455  | 0.0067 | 8.26E-12 | 6.8340   | 973993  | Asthma |
| rs60666652  | 17 | 39992019 | C | T | 0.3816 | 0.0451  | 0.0067 | 1.27E-11 | 6.7720   | 973993  | Asthma |
| rs576295138 | 17 | 39992776 | T | G | 0.3728 | -0.0493 | 0.0079 | 4.28E-10 | -6.2433  | 778845  | Asthma |
| rs543563352 | 17 | 39992777 | C | G | 0.3728 | -0.0493 | 0.0079 | 4.28E-10 | -6.2433  | 778845  | Asthma |
| rs11658328  | 17 | 39992983 | T | C | 0.4659 | 0.0381  | 0.0047 | 6.56E-16 | 8.0786   | 1376071 | Asthma |
| rs8073254   | 17 | 39993097 | C | G | 0.4659 | 0.0381  | 0.0047 | 7.32E-16 | 8.0649   | 1376071 | Asthma |
| rs34648856  | 17 | 39993158 | A | G | 0.3656 | -0.0476 | 0.0049 | 2.61E-22 | -9.7145  | 1376071 | Asthma |
| rs3785549   | 17 | 39993471 | T | C | 0.4672 | 0.0367  | 0.0052 | 1.24E-12 | 7.1013   | 1224666 | Asthma |
| rs3785550   | 17 | 39993474 | C | T | 0.4659 | 0.0381  | 0.0047 | 6.75E-16 | 8.0749   | 1376071 | Asthma |
| rs3826331   | 17 | 39994239 | T | C | 0.3961 | 0.0488  | 0.0048 | 3.18E-24 | 10.1539  | 1376071 | Asthma |
| rs4795412   | 17 | 39994351 | T | C | 0.3892 | 0.0491  | 0.0048 | 2.03E-24 | 10.1975  | 1376071 | Asthma |
| rs3859187   | 17 | 39994360 | C | A | 0.4659 | 0.0381  | 0.0047 | 6.90E-16 | 8.0722   | 1376071 | Asthma |
| rs4795413   | 17 | 39994693 | T | C | 0.0747 | 0.0540  | 0.0091 | 2.63E-09 | 5.9535   | 1376071 | Asthma |
| rs2241245   | 17 | 39994761 | C | T | 0.4659 | 0.0381  | 0.0047 | 6.80E-16 | 8.0741   | 1376071 | Asthma |
| rs8070444   | 17 | 39995707 | A | G | 0.4658 | 0.0382  | 0.0047 | 5.63E-16 | 8.0970   | 1376071 | Asthma |
| rs8071037   | 17 | 39996051 | A | T | 0.4659 | 0.0381  | 0.0047 | 6.36E-16 | 8.0823   | 1376071 | Asthma |
| rs12453334  | 17 | 39997220 | T | C | 0.3640 | -0.0479 | 0.0049 | 1.45E-22 | -9.7748  | 1376071 | Asthma |
| rs2241244   | 17 | 39997301 | G | C | 0.4661 | 0.0381  | 0.0047 | 7.34E-16 | 8.0648   | 1376071 | Asthma |
| rs7021      | 17 | 39997622 | A | T | 0.3892 | 0.0491  | 0.0048 | 2.18E-24 | 10.1909  | 1376071 | Asthma |
| rs8081692   | 17 | 39998342 | G | A | 0.3898 | 0.0488  | 0.0048 | 3.59E-24 | 10.1422  | 1376071 | Asthma |
| rs4794822   | 17 | 40000459 | T | C | 0.3895 | 0.0491  | 0.0048 | 1.99E-24 | 10.1993  | 1376071 | Asthma |
| rs56922390  | 17 | 40000768 | G | C | 0.3894 | 0.0491  | 0.0048 | 2.10E-24 | 10.1946  | 1376071 | Asthma |
| rs35272691  | 17 | 40001588 | C | T | 0.3673 | -0.0486 | 0.0049 | 3.18E-23 | -9.9270  | 1376071 | Asthma |
| rs4795414   | 17 | 40001667 | T | G | 0.3951 | 0.0490  | 0.0051 | 4.34E-22 | 9.6628   | 1008051 | Asthma |
| rs4795415   | 17 | 40001742 | T | C | 0.3894 | 0.0492  | 0.0048 | 1.46E-24 | 10.2298  | 1376071 | Asthma |
| rs4795416   | 17 | 40001880 | T | C | 0.3895 | 0.0493  | 0.0048 | 1.32E-24 | 10.2399  | 1376071 | Asthma |
| rs12941811  | 17 | 40003082 | T | C | 0.4230 | 0.0425  | 0.0048 | 4.24E-19 | 8.9307   | 1376071 | Asthma |
| rs12602513  | 17 | 40003491 | G | A | 0.3746 | -0.0517 | 0.0058 | 5.36E-19 | -8.9046  | 1090071 | Asthma |
| rs12602514  | 17 | 40003492 | G | A | 0.3746 | -0.0517 | 0.0058 | 5.49E-19 | -8.9019  | 1090071 | Asthma |
| rs8065519   | 17 | 40003755 | T | C | 0.3894 | 0.0491  | 0.0048 | 1.83E-24 | 10.2075  | 1376071 | Asthma |
| rs8070454   | 17 | 40004501 | T | C | 0.3895 | 0.0490  | 0.0048 | 2.50E-24 | 10.1775  | 1376071 | Asthma |
| rs34342173  | 17 | 40005254 | C | T | 0.3672 | -0.0483 | 0.0049 | 5.17E-23 | -9.8784  | 1376071 | Asthma |
| rs6503530   | 17 | 40005570 | C | T | 0.3894 | 0.0489  | 0.0048 | 2.77E-24 | 10.1674  | 1376071 | Asthma |
| rs34933056  | 17 | 40006730 | A | G | 0.3672 | -0.0485 | 0.0049 | 3.82E-23 | -9.9084  | 1376071 | Asthma |
| rs12600856  | 17 | 40007042 | C | T | 0.3952 | 0.0488  | 0.0051 | 6.08E-22 | 9.6282   | 1008051 | Asthma |
| rs12602172  | 17 | 40007314 | A | G | 0.3895 | 0.0489  | 0.0048 | 2.75E-24 | 10.1681  | 1376071 | Asthma |
| rs12451644  | 17 | 40007387 | A | G | 0.1590 | -0.0486 | 0.0073 | 2.89E-11 | -6.6519  | 1221848 | Asthma |
| rs8068260   | 17 | 40007397 | T | C | 0.4427 | -0.0543 | 0.0048 | 1.42E-29 | -11.2930 | 1349938 | Asthma |
| rs8067817   | 17 | 40007683 | C | T | 0.4435 | -0.0535 | 0.0047 | 1.54E-29 | -11.2860 | 1376071 | Asthma |
| rs8072548   | 17 | 40007772 | T | G | 0.4435 | -0.0534 | 0.0047 | 1.67E-29 | -11.2790 | 1376071 | Asthma |
| rs55846942  | 17 | 40008217 | A | G | 0.3894 | 0.0489  | 0.0048 | 3.00E-24 | 10.1598  | 1376071 | Asthma |
| rs4795418   | 17 | 40008598 | C | T | 0.3894 | 0.0490  | 0.0048 | 2.72E-24 | 10.1695  | 1376071 | Asthma |
| rs55736351  | 17 | 40009044 | A | C | 0.3894 | 0.0495  | 0.0049 | 3.51E-24 | 10.1442  | 1349938 | Asthma |
| rs55771023  | 17 | 40009045 | A | C | 0.3892 | 0.0488  | 0.0048 | 3.94E-24 | 10.1331  | 1376071 | Asthma |
| rs7221894   | 17 | 40009232 | C | T | 0.3817 | 0.0471  | 0.0078 | 1.61E-09 | 6.0335   | 778845  | Asthma |
| rs7222039   | 17 | 40009288 | T | C | 0.4434 | -0.0534 | 0.0047 | 1.86E-29 | -11.2693 | 1376071 | Asthma |
| rs4795419   | 17 | 40009750 | A | G | 0.3894 | 0.0489  | 0.0048 | 3.32E-24 | 10.1500  | 1376071 | Asthma |
| rs4794823   | 17 | 40010012 | T | A | 0.3894 | 0.0488  | 0.0048 | 3.40E-24 | 10.1475  | 1376071 | Asthma |
| rs8078723   | 17 | 40010626 | C | T | 0.3896 | 0.0489  | 0.0048 | 2.60E-24 | 10.1738  | 1376071 | Asthma |
| rs62065177  | 17 | 40011260 | G | A | 0.3895 | 0.0491  | 0.0048 | 1.95E-24 | 10.2019  | 1376071 | Asthma |
| rs4795420   | 17 | 40011374 | G | A | 0.3895 | 0.0491  | 0.0048 | 1.88E-24 | 10.2052  | 1376071 | Asthma |
| rs57065891  | 17 | 40011974 | T | C | 0.3895 | 0.0492  | 0.0048 | 1.53E-24 | 10.2254  | 1376071 | Asthma |
| rs7208815   | 17 | 40012462 | T | C | 0.3893 | 0.0491  | 0.0048 | 2.17E-24 | 10.1911  | 1376071 | Asthma |
| rs150260796 | 17 | 40012575 | G | A | 0.0306 | 0.0815  | 0.0133 | 9.34E-10 | 6.1205   | 1359430 | Asthma |
| rs7209755   | 17 | 40012656 | C | A | 0.3887 | 0.0526  | 0.0058 | 7.40E-20 | 9.1217   | 792368  | Asthma |
| rs7214085   | 17 | 40012842 | C | T | 0.3884 | 0.0464  | 0.0053 | 1.48E-18 | 8.7914   | 1219993 | Asthma |
| rs59925331  | 17 | 40013020 | G | C | 0.3953 | 0.0489  | 0.0051 | 4.86E-22 | 9.6511   | 1008051 | Asthma |
| rs2227315   | 17 | 40013461 | A | G | 0.3896 | 0.0499  | 0.0049 | 1.70E-24 | 10.2150  | 1349938 | Asthma |
| rs2227319   | 17 | 40014592 | A | G | 0.3672 | -0.0486 | 0.0049 | 3.04E-23 | -9.9313  | 1376071 | Asthma |
| rs2227321   | 17 | 40015041 | C | G | 0.3668 | -0.0495 | 0.0050 | 1.99E-23 | -9.9738  | 1349938 | Asthma |
| rs2227322   | 17 | 40015415 | G | C | 0.3896 | 0.0493  | 0.0048 | 1.28E-24 | 10.2424  | 1376071 | Asthma |
| rs25645     | 17 | 40016890 | A | G | 0.3674 | -0.0486 | 0.0049 | 2.85E-23 | -9.9377  | 1376071 | Asthma |
| rs1042658   | 17 | 40017649 | T | C | 0.3894 | 0.0491  | 0.0048 | 1.90E-24 | 10.2042  | 1376071 | Asthma |
| rs2227333   | 17 | 40017914 | G | C | 0.3663 | -0.0485 | 0.0049 | 4.05E-23 | -9.9030  | 1376071 | Asthma |
| rs2227336   | 17 | 40018602 | G | T | 0.3894 | 0.0492  | 0.0048 | 1.79E-24 | 10.2102  | 1376071 | Asthma |
| rs1045929   | 17 | 40019173 | T | C | 0.3832 | 0.0499  | 0.0071 | 2.11E-12 | 7.0270   | 627456  | Asthma |
| rs12309     | 17 | 40019209 | T | C | 0.3673 | -0.0513 | 0.0072 | 9.64E-13 | -7.1356  | 627456  | Asthma |
| rs709592    | 17 | 40019300 | T | C | 0.3893 | 0.0492  | 0.0048 | 1.73E-24 | 10.2134  | 1376071 | Asthma |
| rs709591    | 17 | 40019308 | A | T | 0.3893 | 0.0493  | 0.0048 | 1.41E-24 | 10.2329  | 1376071 | Asthma |
| rs2270401   | 17 | 40020003 | T | A | 0.3639 | -0.0473 | 0.0052 | 4.73E-20 | -9.1701  | 1008051 | Asthma |
| rs11871747  | 17 | 40021029 | C | T | 0.3900 | 0.0490  | 0.0048 | 2.57E-24 | 10.1749  | 1376071 | Asthma |
| rs12453732  | 17 | 40021586 | C | A | 0.4069 | -0.0283 | 0.0049 | 6.91E-09 | -5.7931  | 1376071 | Asthma |
| rs2302776   | 17 | 40021896 | G | A | 0.4380 | -0.0505 | 0.0048 | 6.63E-26 | -10.5249 | 1376071 | Asthma |
| rs3213762   | 17 | 40022374 | G | A | 0.3888 | 0.0484  | 0.0048 | 1.10E-23 | 10.0321  | 1376071 | Asthma |

|             |    |          |   |   |        |         |        |          |          |         |        |
|-------------|----|----------|---|---|--------|---------|--------|----------|----------|---------|--------|
| rs12451897  | 17 | 40023022 | T | G | 0.3679 | -0.0481 | 0.0049 | 8.46E-23 | -9.8288  | 1376071 | Asthma |
| rs4794824   | 17 | 40023037 | A | G | 0.3882 | 0.0487  | 0.0048 | 5.58E-24 | 10.0989  | 1376071 | Asthma |
| rs4247366   | 17 | 40023121 | A | G | 0.0745 | 0.0566  | 0.0091 | 4.57E-10 | 6.2334   | 1376071 | Asthma |
| rs2302777   | 17 | 40023239 | G | A | 0.3680 | -0.0481 | 0.0049 | 8.13E-23 | -9.8329  | 1376071 | Asthma |
| rs34453912  | 17 | 40024099 | A | T | 0.3680 | -0.0482 | 0.0049 | 7.41E-23 | -9.8423  | 1376071 | Asthma |
| rs12453341  | 17 | 40024880 | T | C | 0.3667 | -0.0479 | 0.0049 | 1.35E-22 | -9.7812  | 1376071 | Asthma |
| rs12451547  | 17 | 40024915 | C | T | 0.3681 | -0.0477 | 0.0049 | 2.22E-22 | -9.7313  | 1376071 | Asthma |
| rs12453343  | 17 | 40024923 | A | C | 0.3681 | -0.0477 | 0.0049 | 1.85E-22 | -9.7498  | 1376071 | Asthma |
| rs9916158   | 17 | 40025976 | T | G | 0.3681 | -0.0480 | 0.0049 | 9.75E-23 | -9.8145  | 1376071 | Asthma |
| rs2302774   | 17 | 40026837 | T | G | 0.3769 | -0.0500 | 0.0049 | 1.03E-24 | -10.2635 | 1376071 | Asthma |
| rs6503533   | 17 | 40028327 | C | T | 0.3798 | 0.0511  | 0.0048 | 5.26E-26 | 10.5468  | 1376071 | Asthma |
| rs7502971   | 17 | 40030248 | A | C | 0.3692 | -0.0491 | 0.0049 | 1.18E-23 | -10.0255 | 1376071 | Asthma |
| rs36071767  | 17 | 40030572 | C | T | 0.3693 | -0.0491 | 0.0049 | 1.05E-23 | -10.0372 | 1376071 | Asthma |
| rs3935281   | 17 | 40032166 | T | C | 0.3691 | -0.0490 | 0.0049 | 1.26E-23 | -10.0188 | 1376071 | Asthma |
| rs7502514   | 17 | 40032591 | A | G | 0.3881 | 0.0494  | 0.0048 | 1.15E-24 | 10.2532  | 1376071 | Asthma |
| rs4072639   | 17 | 40032796 | A | G | 0.3690 | -0.0490 | 0.0049 | 1.23E-23 | -10.0213 | 1376071 | Asthma |
| rs3935280   | 17 | 40032802 | A | G | 0.3887 | 0.0494  | 0.0048 | 1.10E-24 | 10.2567  | 1376071 | Asthma |
| rs11078934  | 17 | 40033540 | T | C | 0.3880 | 0.0495  | 0.0048 | 1.08E-24 | 10.2586  | 1376071 | Asthma |
| rs11078935  | 17 | 40035884 | G | T | 0.3528 | -0.0465 | 0.0052 | 3.81E-19 | -8.9425  | 1008051 | Asthma |
| rs9303283   | 17 | 40036380 | C | T | 0.4335 | 0.0487  | 0.0048 | 1.24E-24 | 10.2455  | 1376071 | Asthma |
| rs34003767  | 17 | 40038043 | G | A | 0.3625 | -0.0477 | 0.0049 | 2.78E-22 | -9.7086  | 1376071 | Asthma |
| rs12939682  | 17 | 40038488 | A | G | 0.3612 | -0.0476 | 0.0049 | 3.31E-22 | -9.6906  | 1376071 | Asthma |
| rs3936197   | 17 | 40038546 | G | A | 0.4264 | 0.0485  | 0.0048 | 2.20E-24 | 10.1902  | 1376071 | Asthma |
| rs11654208  | 17 | 40040240 | A | G | 0.3619 | -0.0474 | 0.0049 | 5.33E-22 | -9.6417  | 1376071 | Asthma |
| rs11655655  | 17 | 40040704 | T | C | 0.3608 | -0.0474 | 0.0049 | 5.90E-22 | -9.6314  | 1376071 | Asthma |
| rs11078936  | 17 | 40041661 | C | T | 0.3622 | -0.0473 | 0.0049 | 6.68E-22 | -9.6184  | 1376071 | Asthma |
| rs8066846   | 17 | 40047399 | T | C | 0.4260 | 0.0480  | 0.0048 | 7.43E-24 | 10.0709  | 1376071 | Asthma |
| rs10445310  | 17 | 40049143 | A | C | 0.3610 | -0.0476 | 0.0049 | 4.15E-22 | -9.6673  | 1376071 | Asthma |
| rs9303284   | 17 | 40049540 | C | T | 0.4091 | 0.0527  | 0.0057 | 2.79E-20 | 9.2268   | 1090071 | Asthma |
| rs66826786  | 17 | 40049839 | C | T | 0.3622 | -0.0476 | 0.0049 | 4.38E-22 | -9.6620  | 1376071 | Asthma |
| rs8065443   | 17 | 40052687 | A | G | 0.4216 | 0.0493  | 0.0048 | 4.72E-25 | 10.3385  | 1376071 | Asthma |
| rs34540281  | 17 | 40056110 | A | G | 0.3622 | -0.0478 | 0.0049 | 3.09E-22 | -9.6975  | 1376071 | Asthma |
| rs868150    | 17 | 40057106 | A | G | 0.4217 | 0.0493  | 0.0048 | 5.36E-25 | 10.3261  | 1376071 | Asthma |
| rs3884477   | 17 | 40057190 | A | G | 0.4301 | 0.0490  | 0.0050 | 2.09E-22 | 9.7372   | 1008051 | Asthma |
| rs12602854  | 17 | 40057402 | G | A | 0.3685 | -0.0471 | 0.0054 | 1.67E-18 | -8.7773  | 1219993 | Asthma |
| rs12601333  | 17 | 40057566 | G | C | 0.3622 | -0.0479 | 0.0049 | 2.80E-22 | -9.7076  | 1376071 | Asthma |
| rs35982947  | 17 | 40058022 | C | A | 0.3623 | -0.0479 | 0.0049 | 2.70E-22 | -9.7115  | 1376071 | Asthma |
| rs8078692   | 17 | 40058864 | A | G | 0.5036 | 0.0560  | 0.0047 | 2.68E-32 | 11.8317  | 1376071 | Asthma |
| rs12950335  | 17 | 40059061 | A | G | 0.4215 | 0.0493  | 0.0048 | 5.06E-25 | 10.3319  | 1376071 | Asthma |
| rs12601929  | 17 | 40059242 | T | C | 0.3619 | -0.0482 | 0.0049 | 1.58E-22 | -9.7660  | 1376071 | Asthma |
| rs7503555   | 17 | 40059442 | C | T | 0.4216 | 0.0493  | 0.0048 | 5.62E-25 | 10.3216  | 1376071 | Asthma |
| rs7502912   | 17 | 40059695 | A | G | 0.4205 | 0.0493  | 0.0048 | 5.12E-25 | 10.3307  | 1376071 | Asthma |
| rs7502966   | 17 | 40060269 | C | T | 0.4121 | -0.0290 | 0.0050 | 6.75E-09 | -5.7972  | 1316443 | Asthma |
| rs34670005  | 17 | 40060680 | C | T | 0.3387 | -0.0366 | 0.0051 | 7.56E-13 | -7.1690  | 1316443 | Asthma |
| rs62065216  | 17 | 40062520 | A | G | 0.4434 | 0.0457  | 0.0049 | 6.80E-21 | 9.3768   | 1316443 | Asthma |
| rs7502233   | 17 | 40062551 | G | A | 0.3190 | -0.0418 | 0.0051 | 1.22E-16 | -8.2809  | 1376071 | Asthma |
| rs7502539   | 17 | 40062752 | A | G | 0.3189 | -0.0342 | 0.0063 | 4.90E-08 | -5.4548  | 1003362 | Asthma |
| rs76713974  | 17 | 40070329 | C | T | 0.0730 | 0.0537  | 0.0092 | 4.85E-09 | 5.8524   | 1376071 | Asthma |
| rs12450388  | 17 | 40070602 | C | T | 0.4310 | -0.0308 | 0.0053 | 5.78E-09 | -5.8230  | 948423  | Asthma |
| rs939348    | 17 | 40075600 | T | C | 0.2882 | 0.0303  | 0.0052 | 7.32E-09 | 5.7836   | 1376071 | Asthma |
| rs2102928   | 17 | 40096975 | T | C | 0.3093 | -0.0290 | 0.0053 | 4.65E-08 | -5.4641  | 1316443 | Asthma |
| rs2269457   | 17 | 40098436 | C | T | 0.2704 | 0.0382  | 0.0055 | 5.76E-12 | 6.8855   | 1316443 | Asthma |
| rs12941465  | 17 | 40099312 | A | G | 0.2578 | 0.0333  | 0.0054 | 7.15E-10 | 6.1628   | 1376071 | Asthma |
| rs35737523  | 17 | 40117457 | T | C | 0.2807 | 0.0302  | 0.0053 | 1.11E-08 | 5.7131   | 1376071 | Asthma |
| rs9911690   | 17 | 40117944 | C | T | 0.2807 | 0.0304  | 0.0053 | 9.04E-09 | 5.7478   | 1376071 | Asthma |
| rs117827273 | 17 | 40122783 | G | C | 0.1616 | 0.0366  | 0.0065 | 1.92E-08 | 5.6188   | 1376071 | Asthma |
| rs75905358  | 17 | 40128610 | C | G | 0.2597 | 0.0360  | 0.0056 | 8.83E-11 | 6.4857   | 1316443 | Asthma |
| rs7211770   | 17 | 40132750 | G | A | 0.2824 | 0.0295  | 0.0054 | 4.57E-08 | 5.4673   | 1316443 | Asthma |
| rs77916145  | 17 | 40139533 | G | C | 0.0711 | 0.0533  | 0.0092 | 6.48E-09 | 5.8038   | 1376071 | Asthma |
| rs56077329  | 17 | 40202289 | T | C | 0.0714 | 0.0515  | 0.0094 | 4.43E-08 | 5.4726   | 1316443 | Asthma |
| rs76277587  | 17 | 40241730 | C | T | 0.0714 | 0.0518  | 0.0094 | 3.76E-08 | 5.5019   | 1316443 | Asthma |
| rs78275004  | 17 | 40257805 | G | T | 0.0717 | 0.0528  | 0.0094 | 1.93E-08 | 5.6185   | 1316443 | Asthma |
| rs56124263  | 17 | 40325955 | T | C | 0.0711 | 0.0543  | 0.0092 | 3.78E-09 | 5.8934   | 1376071 | Asthma |
| rs2715554   | 17 | 40332918 | G | A | 0.1613 | 0.0358  | 0.0065 | 3.80E-08 | 5.4999   | 1376071 | Asthma |
| rs190471737 | 17 | 40421164 | G | A | 0.0711 | 0.0569  | 0.0095 | 1.79E-09 | 6.0157   | 1316443 | Asthma |
| rs8067124   | 17 | 40713238 | T | A | 0.0220 | 0.1391  | 0.0251 | 3.18E-08 | 5.5309   | 645782  | Asthma |
| rs55743352  | 17 | 42213582 | A | C | 0.4189 | -0.0278 | 0.0051 | 3.81E-08 | -5.4996  | 1299802 | Asthma |
| rs62076925  | 17 | 42243214 | A | G | 0.2782 | -0.0330 | 0.0058 | 1.16E-08 | -5.7060  | 1224666 | Asthma |
| rs55883500  | 17 | 42243249 | G | T | 0.2824 | -0.0328 | 0.0053 | 4.53E-10 | -6.2345  | 1376071 | Asthma |
| rs16967593  | 17 | 42243527 | A | T | 0.2823 | -0.0328 | 0.0053 | 4.53E-10 | -6.2347  | 1376071 | Asthma |
| rs16967596  | 17 | 42243877 | G | A | 0.2823 | -0.0328 | 0.0053 | 4.38E-10 | -6.2397  | 1376071 | Asthma |
| rs60137456  | 17 | 42244137 | G | A | 0.2824 | -0.0326 | 0.0053 | 5.13E-10 | -6.2152  | 1376071 | Asthma |
| rs72820892  | 17 | 42244532 | A | G | 0.2825 | -0.0327 | 0.0053 | 4.60E-10 | -6.2321  | 1376071 | Asthma |
| rs28606005  | 17 | 42245758 | A | G | 0.2823 | -0.0328 | 0.0053 | 3.94E-10 | -6.2563  | 1376071 | Asthma |

|             |    |          |   |   |        |         |        |          |         |         |        |
|-------------|----|----------|---|---|--------|---------|--------|----------|---------|---------|--------|
| rs28420465  | 17 | 42245794 | G | A | 0.2825 | -0.0326 | 0.0052 | 5.41E-10 | -6.2066 | 1376071 | Asthma |
| rs0802188   | 17 | 42246807 | T | C | 0.2824 | -0.0327 | 0.0052 | 4.90E-10 | -6.2224 | 1376071 | Asthma |
| rs8082391   | 17 | 42246955 | A | C | 0.2826 | -0.0327 | 0.0052 | 4.58E-10 | -6.2328 | 1376071 | Asthma |
| rs28552790  | 17 | 42247930 | C | T | 0.2825 | -0.0327 | 0.0052 | 4.35E-10 | -6.2410 | 1376071 | Asthma |
| rs16967609  | 17 | 42248394 | T | C | 0.2876 | -0.0323 | 0.0057 | 1.37E-08 | -5.6778 | 1219993 | Asthma |
| rs16967611  | 17 | 42249549 | G | A | 0.2824 | -0.0326 | 0.0052 | 5.34E-10 | -6.2090 | 1376071 | Asthma |
| rs8071671   | 17 | 42251917 | T | C | 0.2825 | -0.0328 | 0.0052 | 4.32E-10 | -6.2419 | 1376071 | Asthma |
| rs12600584  | 17 | 42256039 | G | C | 0.2823 | -0.0327 | 0.0053 | 4.78E-10 | -6.2263 | 1376071 | Asthma |
| rs9893794   | 17 | 42256379 | A | C | 0.2823 | -0.0327 | 0.0053 | 4.78E-10 | -6.2261 | 1376071 | Asthma |
| rs62076928  | 17 | 42256723 | A | G | 0.2818 | -0.0329 | 0.0053 | 3.81E-10 | -6.2615 | 1376071 | Asthma |
| rs9906933   | 17 | 42258027 | A | G | 0.2822 | -0.0329 | 0.0053 | 3.85E-10 | -6.2599 | 1376071 | Asthma |
| rs1136897   | 17 | 42259935 | A | G | 0.2822 | -0.0329 | 0.0053 | 3.66E-10 | -6.2679 | 1376071 | Asthma |
| rs7216004   | 17 | 42260803 | T | A | 0.2826 | -0.0327 | 0.0053 | 4.89E-10 | -6.2225 | 1376071 | Asthma |
| rs11079040  | 17 | 42261797 | C | T | 0.2827 | -0.0328 | 0.0053 | 4.29E-10 | -6.2432 | 1376071 | Asthma |
| rs11079041  | 17 | 42262061 | A | T | 0.2826 | -0.0327 | 0.0053 | 4.61E-10 | -6.2318 | 1376071 | Asthma |
| rs7207591   | 17 | 42262844 | G | A | 0.2586 | -0.0487 | 0.0088 | 3.42E-08 | -5.5186 | 778845  | Asthma |
| rs34129849  | 17 | 42266938 | C | A | 0.2822 | -0.0330 | 0.0053 | 3.21E-10 | -6.2882 | 1376071 | Asthma |
| rs6503692   | 17 | 42269495 | A | G | 0.2826 | -0.0328 | 0.0053 | 4.02E-10 | -6.2533 | 1376071 | Asthma |
| rs16967620  | 17 | 42270323 | T | G | 0.2847 | -0.0326 | 0.0055 | 3.86E-09 | -5.8900 | 1008051 | Asthma |
| rs8064638   | 17 | 42272237 | A | G | 0.2826 | -0.0328 | 0.0053 | 4.30E-10 | -6.2429 | 1376071 | Asthma |
| rs7218653   | 17 | 42273302 | G | A | 0.2826 | -0.0328 | 0.0053 | 4.25E-10 | -6.2445 | 1376071 | Asthma |
| rs7223228   | 17 | 42273476 | C | T | 0.2826 | -0.0328 | 0.0053 | 4.30E-10 | -6.2429 | 1376071 | Asthma |
| rs9907247   | 17 | 42273858 | A | G | 0.2822 | -0.0329 | 0.0053 | 3.62E-10 | -6.2696 | 1376071 | Asthma |
| rs7219855   | 17 | 42274049 | T | A | 0.2826 | -0.0328 | 0.0053 | 4.12E-10 | -6.2494 | 1376071 | Asthma |
| rs7209222   | 17 | 42274471 | C | T | 0.2823 | -0.0348 | 0.0053 | 6.95E-11 | -6.5217 | 1349938 | Asthma |
| rs8080122   | 17 | 42275129 | A | G | 0.2825 | -0.0330 | 0.0053 | 3.38E-10 | -6.2805 | 1376071 | Asthma |
| rs4029774   | 17 | 42276943 | G | A | 0.2827 | -0.0330 | 0.0053 | 3.24E-10 | -6.2868 | 1376071 | Asthma |
| rs8079317   | 17 | 42279516 | G | A | 0.2818 | -0.0341 | 0.0054 | 2.18E-10 | -6.3481 | 1316443 | Asthma |
| rs56938023  | 17 | 42282841 | G | A | 0.2821 | -0.0328 | 0.0053 | 4.17E-10 | -6.2474 | 1376071 | Asthma |
| rs16967637  | 17 | 42294404 | A | C | 0.2813 | -0.0330 | 0.0053 | 3.49E-10 | -6.2753 | 1376071 | Asthma |
| rs8073664   | 17 | 42294934 | A | G | 0.2810 | -0.0348 | 0.0053 | 7.59E-11 | -6.5085 | 1349938 | Asthma |
| rs7217728   | 17 | 42295383 | C | T | 0.2818 | -0.0330 | 0.0053 | 3.60E-10 | -6.2706 | 1376071 | Asthma |
| rs2293158   | 17 | 42295540 | C | T | 0.2815 | -0.0331 | 0.0053 | 3.03E-10 | -6.2972 | 1376071 | Asthma |
| rs9909244   | 17 | 42296794 | T | C | 0.2812 | -0.0333 | 0.0053 | 2.66E-10 | -6.3175 | 1376071 | Asthma |
| rs9907571   | 17 | 42296826 | A | G | 0.2803 | -0.0341 | 0.0054 | 2.39E-10 | -6.3343 | 1316443 | Asthma |
| rs9908318   | 17 | 42297133 | T | G | 0.2806 | -0.0341 | 0.0054 | 2.42E-10 | -6.3322 | 1316443 | Asthma |
| rs9889323   | 17 | 42297228 | C | T | 0.2806 | -0.0342 | 0.0054 | 2.18E-10 | -6.3480 | 1316443 | Asthma |
| rs28380298  | 17 | 42297466 | C | T | 0.2837 | -0.0342 | 0.0062 | 4.34E-08 | -5.4764 | 1094744 | Asthma |
| rs9896755   | 17 | 42297994 | C | T | 0.2779 | -0.0335 | 0.0059 | 1.69E-08 | -5.6415 | 1160365 | Asthma |
| rs2293157   | 17 | 42300657 | A | C | 0.2620 | -0.0328 | 0.0055 | 2.43E-09 | -5.9663 | 1316443 | Asthma |
| rs59695806  | 17 | 45078655 | C | T | 0.2861 | 0.0368  | 0.0062 | 2.96E-09 | 5.9340  | 1090071 | Asthma |
| rs56360935  | 17 | 45078767 | T | A | 0.2766 | 0.0293  | 0.0053 | 2.99E-08 | 5.5421  | 1376071 | Asthma |
| rs2239923   | 17 | 45099436 | T | C | 0.2763 | 0.0303  | 0.0054 | 1.61E-08 | 5.6496  | 1349938 | Asthma |
| rs11653796  | 17 | 45140892 | G | A | 0.2610 | 0.0308  | 0.0055 | 2.28E-08 | 5.5891  | 1316443 | Asthma |
| rs60289499  | 17 | 45141310 | A | G | 0.2724 | 0.0315  | 0.0054 | 5.71E-09 | 5.8249  | 1316443 | Asthma |
| rs137989694 | 17 | 45142299 | A | G | 0.2606 | 0.0308  | 0.0055 | 2.32E-08 | 5.5864  | 1316443 | Asthma |
| rs71373536  | 17 | 45144441 | A | G | 0.2494 | 0.0317  | 0.0054 | 5.64E-09 | 5.8269  | 1376071 | Asthma |
| rs12051846  | 17 | 45149520 | G | A | 0.2492 | 0.0336  | 0.0057 | 4.71E-09 | 5.8571  | 1008051 | Asthma |
| rs1044977   | 17 | 45149847 | C | T | 0.2498 | 0.0321  | 0.0054 | 3.67E-09 | 5.8986  | 1376071 | Asthma |
| rs76233987  | 17 | 45154646 | A | G | 0.2617 | 0.0300  | 0.0055 | 4.75E-08 | 5.4605  | 1316443 | Asthma |
| rs77243715  | 17 | 45154647 | T | G | 0.2616 | 0.0322  | 0.0056 | 7.57E-09 | 5.7778  | 1290310 | Asthma |
| rs11657325  | 17 | 45165327 | A | G | 0.2521 | 0.0318  | 0.0054 | 4.58E-09 | 5.8619  | 1376071 | Asthma |
| rs4248280   | 17 | 45257611 | G | C | 0.5344 | -0.0265 | 0.0048 | 3.99E-08 | -5.4912 | 1316443 | Asthma |
| rs56269837  | 17 | 45258283 | A | G | 0.4317 | 0.0270  | 0.0049 | 2.94E-08 | 5.5450  | 1316443 | Asthma |
| rs4248914   | 17 | 45259113 | C | T | 0.2427 | 0.0296  | 0.0054 | 4.42E-08 | 5.4731  | 1376071 | Asthma |
| rs4986168   | 17 | 45259207 | C | T | 0.4345 | 0.0266  | 0.0047 | 2.01E-08 | 5.6109  | 1376071 | Asthma |
| rs4247364   | 17 | 45259320 | G | C | 0.2934 | 0.0338  | 0.0051 | 4.59E-11 | 6.5836  | 1376071 | Asthma |
| rs4792836   | 17 | 45259403 | T | C | 0.2429 | 0.0297  | 0.0054 | 4.61E-08 | 5.4657  | 1376071 | Asthma |
| rs7210761   | 17 | 45259630 | T | C | 0.2934 | 0.0335  | 0.0051 | 6.43E-11 | 6.5334  | 1376071 | Asthma |
| rs7224548   | 17 | 45259769 | G | T | 0.2934 | 0.0336  | 0.0051 | 6.07E-11 | 6.5420  | 1376071 | Asthma |
| rs7211069   | 17 | 45259804 | T | C | 0.2428 | 0.0298  | 0.0054 | 3.95E-08 | 5.4932  | 1376071 | Asthma |
| rs7225083   | 17 | 45260134 | G | C | 0.2934 | 0.0337  | 0.0051 | 5.86E-11 | 6.5473  | 1376071 | Asthma |
| rs11656414  | 17 | 45260603 | A | G | 0.4312 | 0.0264  | 0.0048 | 2.87E-08 | 5.5494  | 1376071 | Asthma |
| rs7215764   | 17 | 45261574 | G | C | 0.2570 | 0.0294  | 0.0054 | 4.19E-08 | 5.4828  | 1376071 | Asthma |
| rs708563    | 17 | 45263569 | G | A | 0.4501 | 0.0301  | 0.0050 | 1.70E-09 | 6.0243  | 1008051 | Asthma |
| rs1047833   | 17 | 45264774 | G | C | 0.2639 | 0.0296  | 0.0053 | 2.22E-08 | 5.5944  | 1376071 | Asthma |
| rs2285674   | 17 | 45264939 | C | A | 0.4437 | 0.0259  | 0.0047 | 3.14E-08 | 5.5334  | 1376071 | Asthma |
| rs4792809   | 17 | 45269613 | G | T | 0.2427 | 0.0313  | 0.0057 | 3.43E-08 | 5.5182  | 1290310 | Asthma |
| rs4792811   | 17 | 45269969 | C | G | 0.2453 | 0.0325  | 0.0056 | 5.12E-09 | 5.8431  | 1316443 | Asthma |
| rs4247365   | 17 | 45271520 | G | A | 0.2432 | 0.0322  | 0.0056 | 8.27E-09 | 5.7630  | 1316443 | Asthma |
| rs7214657   | 17 | 45272553 | G | T | 0.2430 | 0.0322  | 0.0056 | 8.25E-09 | 5.7633  | 1316443 | Asthma |
| rs11079502  | 17 | 45273299 | A | G | 0.4428 | 0.0268  | 0.0049 | 3.32E-08 | 5.5239  | 1316443 | Asthma |
| rs2072090   | 17 | 45273760 | G | C | 0.4432 | 0.0271  | 0.0049 | 2.41E-08 | 5.5801  | 1316443 | Asthma |
| rs9972936   | 17 | 45276310 | G | A | 0.4453 | 0.0271  | 0.0048 | 1.98E-08 | 5.6142  | 1316443 | Asthma |

|             |    |          |   |   |        |         |        |          |         |         |        |
|-------------|----|----------|---|---|--------|---------|--------|----------|---------|---------|--------|
| rs1985556   | 17 | 45281874 | A | G | 0.2449 | 0.0323  | 0.0056 | 6.81E-09 | 5.7955  | 1316443 | Asthma |
| rs4792842   | 17 | 45282690 | G | A | 0.4454 | 0.0272  | 0.0048 | 1.98E-08 | 5.6140  | 1316443 | Asthma |
| rs7207549   | 17 | 45282761 | A | G | 0.2449 | 0.0324  | 0.0056 | 6.26E-09 | 5.8097  | 1316443 | Asthma |
| rs3785802   | 17 | 45283983 | C | G | 0.2449 | 0.0323  | 0.0056 | 6.81E-09 | 5.7957  | 1316443 | Asthma |
| rs2074291   | 17 | 45284522 | C | A | 0.4447 | 0.0268  | 0.0049 | 3.40E-08 | 5.5195  | 1316443 | Asthma |
| rs62074057  | 17 | 47728445 | G | A | 0.1358 | 0.0407  | 0.0069 | 4.38E-09 | 5.8691  | 1376071 | Asthma |
| rs10514934  | 17 | 47734758 | C | T | 0.1356 | 0.0410  | 0.0069 | 3.31E-09 | 5.9153  | 1376071 | Asthma |
| rs56308324  | 17 | 47741840 | T | A | 0.1353 | 0.0408  | 0.0069 | 4.14E-09 | 5.8785  | 1376071 | Asthma |
| rs111725931 | 17 | 47755514 | T | C | 0.1351 | 0.0414  | 0.0070 | 2.79E-09 | 5.9438  | 1376071 | Asthma |
| rs62076090  | 17 | 47757214 | G | C | 0.1351 | 0.0414  | 0.0070 | 2.57E-09 | 5.9570  | 1376071 | Asthma |
| rs62076092  | 17 | 47766278 | C | T | 0.1348 | 0.0408  | 0.0070 | 4.60E-09 | 5.8608  | 1376071 | Asthma |
| rs62076093  | 17 | 47766933 | A | C | 0.1348 | 0.0409  | 0.0070 | 4.34E-09 | 5.8706  | 1376071 | Asthma |
| rs4141183   | 17 | 47781121 | T | C | 0.1353 | 0.0404  | 0.0071 | 1.48E-08 | 5.6637  | 1316443 | Asthma |
| rs72833417  | 17 | 47795683 | T | A | 0.1350 | 0.0445  | 0.0073 | 1.25E-09 | 6.0737  | 1299802 | Asthma |
| rs17708997  | 17 | 49024676 | G | A | 0.1202 | 0.0423  | 0.0074 | 1.12E-08 | 5.7122  | 1376071 | Asthma |
| rs67892095  | 17 | 49047266 | A | G | 0.1200 | 0.0420  | 0.0074 | 1.61E-08 | 5.6492  | 1376071 | Asthma |
| rs4794029   | 17 | 49202939 | T | C | 0.3224 | 0.0308  | 0.0051 | 1.90E-09 | 6.0058  | 1316443 | Asthma |
| rs7222840   | 17 | 49203553 | T | C | 0.3224 | 0.0311  | 0.0051 | 1.44E-09 | 6.0515  | 1316443 | Asthma |
| rs55634267  | 17 | 49206453 | T | C | 0.3191 | 0.0308  | 0.0050 | 9.84E-10 | 6.1121  | 1376071 | Asthma |
| rs55978930  | 17 | 49222427 | G | A | 0.3148 | 0.0324  | 0.0051 | 1.62E-10 | 6.3936  | 1376071 | Asthma |
| rs648980    | 17 | 49226094 | C | T | 0.4642 | -0.0288 | 0.0049 | 2.82E-09 | -5.9416 | 1316443 | Asthma |
| rs617182    | 17 | 49229912 | A | G | 0.4652 | -0.0285 | 0.0047 | 1.72E-09 | -6.0226 | 1376071 | Asthma |
| rs850523    | 17 | 49236569 | C | T | 0.3540 | -0.0324 | 0.0049 | 4.66E-11 | -6.5814 | 1376071 | Asthma |
| rs624177    | 17 | 49237051 | G | A | 0.3494 | -0.0314 | 0.0049 | 2.06E-10 | -6.3568 | 1376071 | Asthma |
| rs671095    | 17 | 49237995 | G | A | 0.3503 | -0.0314 | 0.0049 | 2.08E-10 | -6.3557 | 1376071 | Asthma |
| rs7218175   | 17 | 49238562 | T | C | 0.3469 | -0.0318 | 0.0050 | 1.41E-10 | -6.4151 | 1376071 | Asthma |
| rs111459132 | 17 | 49240466 | T | C | 0.3464 | -0.0327 | 0.0060 | 4.29E-08 | -5.4787 | 1125398 | Asthma |
| rs12950511  | 17 | 49243576 | T | C | 0.3411 | 0.0406  | 0.0051 | 1.36E-15 | 7.9889  | 1316443 | Asthma |
| rs669686    | 17 | 49243869 | C | T | 0.4445 | -0.0377 | 0.0049 | 1.07E-14 | -7.7307 | 1316443 | Asthma |
| rs112991248 | 17 | 49244401 | T | C | 0.2192 | -0.0360 | 0.0060 | 1.91E-09 | -6.0050 | 1290310 | Asthma |
| rs62076383  | 17 | 49244605 | T | C | 0.2153 | -0.0349 | 0.0059 | 3.06E-09 | -5.9286 | 1316443 | Asthma |
| rs12601665  | 17 | 49244902 | G | C | 0.4404 | -0.0431 | 0.0049 | 9.50E-19 | -8.8407 | 1316443 | Asthma |
| rs9916779   | 17 | 49245384 | A | G | 0.4595 | 0.0413  | 0.0048 | 1.46E-17 | 8.5301  | 1316443 | Asthma |
| rs8064862   | 17 | 49246018 | A | G | 0.2270 | -0.0342 | 0.0057 | 1.61E-09 | -6.0333 | 1376071 | Asthma |
| rs4277393   | 17 | 49246333 | T | C | 0.4599 | 0.0412  | 0.0048 | 1.71E-17 | 8.5122  | 1316443 | Asthma |
| rs16947546  | 17 | 49246991 | C | T | 0.2256 | -0.0340 | 0.0057 | 2.18E-09 | -5.9839 | 1376071 | Asthma |
| rs11079866  | 17 | 49247123 | T | C | 0.4600 | 0.0412  | 0.0048 | 1.75E-17 | 8.5095  | 1316443 | Asthma |
| rs686112    | 17 | 49248355 | T | C | 0.4593 | 0.0414  | 0.0048 | 1.18E-17 | 8.5550  | 1316443 | Asthma |
| rs28397663  | 17 | 49250821 | T | C | 0.3659 | 0.0485  | 0.0050 | 2.36E-22 | 9.7250  | 1316443 | Asthma |
| rs72699     | 17 | 49251528 | G | C | 0.4566 | 0.0424  | 0.0048 | 1.99E-18 | 8.7580  | 1316443 | Asthma |
| rs598905    | 17 | 49251933 | C | G | 0.2240 | -0.0333 | 0.0057 | 4.54E-09 | -5.8631 | 1376071 | Asthma |
| rs646876    | 17 | 49252003 | C | A | 0.4563 | 0.0424  | 0.0048 | 1.80E-18 | 8.7689  | 1316443 | Asthma |
| rs596783    | 17 | 49252343 | C | T | 0.2244 | -0.0330 | 0.0057 | 6.36E-09 | -5.8069 | 1376071 | Asthma |
| rs619726    | 17 | 49253528 | A | G | 0.4575 | 0.0425  | 0.0048 | 1.58E-18 | 8.7839  | 1316443 | Asthma |
| rs663576    | 17 | 49254625 | C | T | 0.4574 | 0.0420  | 0.0048 | 3.98E-18 | 8.6795  | 1316443 | Asthma |
| rs850521    | 17 | 49255445 | G | A | 0.4544 | 0.0429  | 0.0048 | 6.95E-19 | 8.8757  | 1316443 | Asthma |
| rs850520    | 17 | 49255705 | A | G | 0.4542 | 0.0430  | 0.0048 | 6.37E-19 | 8.8853  | 1316443 | Asthma |
| rs1916289   | 17 | 49255909 | C | T | 0.2238 | -0.0337 | 0.0057 | 3.33E-09 | -5.9145 | 1376071 | Asthma |
| rs9893777   | 17 | 49259324 | T | G | 0.4662 | -0.0411 | 0.0048 | 1.86E-17 | -8.5023 | 1316443 | Asthma |
| rs1010322   | 17 | 49260721 | C | G | 0.4528 | 0.0435  | 0.0048 | 2.51E-19 | 8.9885  | 1316443 | Asthma |
| rs4794030   | 17 | 49261528 | C | G | 0.2256 | -0.0338 | 0.0057 | 2.55E-09 | -5.9580 | 1376071 | Asthma |
| rs113462175 | 17 | 49262464 | T | C | 0.2256 | -0.0337 | 0.0057 | 2.76E-09 | -5.9453 | 1376071 | Asthma |
| rs111702517 | 17 | 49262474 | C | G | 0.2256 | -0.0337 | 0.0057 | 2.74E-09 | -5.9464 | 1376071 | Asthma |
| rs917054    | 17 | 49262791 | T | C | 0.4682 | -0.0413 | 0.0048 | 1.19E-17 | -8.5538 | 1316443 | Asthma |
| rs2011767   | 17 | 49262935 | T | C | 0.4683 | -0.0410 | 0.0048 | 2.02E-17 | -8.4924 | 1316443 | Asthma |
| rs2011768   | 17 | 49262949 | T | G | 0.2256 | -0.0338 | 0.0057 | 2.61E-09 | -5.9545 | 1376071 | Asthma |
| rs9899665   | 17 | 49264218 | T | C | 0.4531 | 0.0417  | 0.0048 | 3.70E-18 | 8.6876  | 1349938 | Asthma |
| rs4793614   | 17 | 49264509 | T | C | 0.4531 | 0.0417  | 0.0047 | 1.13E-18 | 8.8213  | 1376071 | Asthma |
| rs4794031   | 17 | 49264791 | C | T | 0.4527 | 0.0416  | 0.0047 | 1.40E-18 | 8.7979  | 1376071 | Asthma |
| rs12940278  | 17 | 49265420 | C | T | 0.4529 | 0.0414  | 0.0047 | 1.88E-18 | 8.7641  | 1376071 | Asthma |
| rs2411977   | 17 | 49265915 | T | C | 0.4529 | 0.0415  | 0.0047 | 1.70E-18 | 8.7754  | 1376071 | Asthma |
| rs11655466  | 17 | 49267168 | T | C | 0.4476 | 0.0379  | 0.0052 | 2.55E-13 | 7.3161  | 1219993 | Asthma |
| rs757554    | 17 | 49268485 | T | C | 0.2245 | -0.0332 | 0.0057 | 4.71E-09 | -5.8571 | 1376071 | Asthma |
| rs8075803   | 17 | 49269167 | T | C | 0.5075 | -0.0358 | 0.0049 | 2.96E-13 | -7.2962 | 1290310 | Asthma |
| rs62076392  | 17 | 49270312 | T | G | 0.2372 | -0.0350 | 0.0056 | 3.38E-10 | -6.2801 | 1376071 | Asthma |
| rs4794032   | 17 | 49270517 | C | G | 0.4495 | 0.0417  | 0.0047 | 1.15E-18 | 8.8191  | 1376071 | Asthma |
| rs71379351  | 17 | 49270778 | C | T | 0.4709 | -0.0400 | 0.0047 | 2.28E-17 | -8.4786 | 1376071 | Asthma |
| rs113476886 | 17 | 49270785 | G | T | 0.2373 | -0.0350 | 0.0056 | 3.37E-10 | -6.2808 | 1376071 | Asthma |
| rs12949836  | 17 | 49271490 | G | A | 0.4709 | -0.0399 | 0.0047 | 2.89E-17 | -8.4507 | 1376071 | Asthma |
| rs7225606   | 17 | 49271690 | A | G | 0.4499 | 0.0419  | 0.0047 | 8.95E-19 | 8.8475  | 1376071 | Asthma |
| rs112792621 | 17 | 49272586 | A | G | 0.2373 | -0.0355 | 0.0056 | 2.05E-10 | -6.3577 | 1376071 | Asthma |
| rs111766349 | 17 | 49273080 | T | A | 0.2372 | -0.0354 | 0.0056 | 2.16E-10 | -6.3497 | 1376071 | Asthma |
| rs7406234   | 17 | 49273302 | T | C | 0.4501 | 0.0418  | 0.0047 | 1.04E-18 | 8.8309  | 1376071 | Asthma |
| rs1124881   | 17 | 49276125 | G | T | 0.4463 | 0.0412  | 0.0047 | 3.20E-18 | 8.7042  | 1376071 | Asthma |

|             |    |          |   |   |        |         |        |          |         |         |        |
|-------------|----|----------|---|---|--------|---------|--------|----------|---------|---------|--------|
| rs11079867  | 17 | 49277423 | C | A | 0.4749 | -0.0392 | 0.0047 | 8.52E-17 | -8.3240 | 1376071 | Asthma |
| rs12602769  | 17 | 49277686 | G | T | 0.4748 | -0.0393 | 0.0047 | 7.34E-17 | -8.3415 | 1376071 | Asthma |
| rs2107634   | 17 | 49278738 | A | G | 0.4463 | 0.0414  | 0.0047 | 2.02E-18 | 8.7564  | 1376071 | Asthma |
| rs57345398  | 17 | 49280088 | G | C | 0.4603 | 0.0413  | 0.0050 | 1.11E-16 | 8.2925  | 1008051 | Asthma |
| rs11079868  | 17 | 49280607 | A | G | 0.4464 | 0.0414  | 0.0047 | 2.34E-18 | 8.7396  | 1376071 | Asthma |
| rs4794034   | 17 | 49281198 | G | C | 0.4463 | 0.0414  | 0.0047 | 1.99E-18 | 8.7578  | 1376071 | Asthma |
| rs35243817  | 17 | 49282496 | G | A | 0.2374 | -0.0352 | 0.0056 | 2.77E-10 | -6.3113 | 1376071 | Asthma |
| rs4794035   | 17 | 49283527 | C | T | 0.4545 | 0.0396  | 0.0047 | 5.03E-17 | 8.3860  | 1376071 | Asthma |
| rs78763027  | 17 | 49284040 | T | C | 0.2380 | -0.0367 | 0.0061 | 1.63E-09 | -6.0312 | 1224666 | Asthma |
| rs62076398  | 17 | 49287433 | T | C | 0.4577 | 0.0415  | 0.0047 | 1.71E-18 | 8.7752  | 1376071 | Asthma |
| rs62076399  | 17 | 49287629 | A | G | 0.2363 | -0.0353 | 0.0056 | 2.56E-10 | -6.3231 | 1376071 | Asthma |
| rs3179840   | 17 | 49290174 | T | G | 0.4580 | 0.0413  | 0.0047 | 2.24E-18 | 8.7445  | 1376071 | Asthma |
| rs16947943  | 17 | 49291584 | A | G | 0.2363 | -0.0353 | 0.0056 | 2.76E-10 | -6.3119 | 1376071 | Asthma |
| rs4794036   | 17 | 49291737 | A | G | 0.4579 | 0.0414  | 0.0047 | 1.90E-18 | 8.7633  | 1376071 | Asthma |
| rs4794037   | 17 | 49291940 | G | A | 0.2363 | -0.0353 | 0.0056 | 2.54E-10 | -6.3243 | 1376071 | Asthma |
| rs11079869  | 17 | 49296055 | C | T | 0.2365 | -0.0354 | 0.0056 | 2.32E-10 | -6.3387 | 1376071 | Asthma |
| rs2240301   | 17 | 49299905 | T | C | 0.4571 | 0.0415  | 0.0047 | 1.52E-18 | 8.7883  | 1376071 | Asthma |
| rs4794038   | 17 | 49300514 | T | A | 0.2368 | -0.0350 | 0.0056 | 3.78E-10 | -6.2628 | 1376071 | Asthma |
| rs2960169   | 17 | 49301007 | A | G | 0.4571 | 0.0415  | 0.0047 | 1.52E-18 | 8.7887  | 1376071 | Asthma |
| rs4794039   | 17 | 49301367 | G | A | 0.2378 | -0.0355 | 0.0060 | 3.22E-09 | -5.9199 | 1281476 | Asthma |
| rs2960170   | 17 | 49301404 | C | T | 0.4566 | 0.0441  | 0.0051 | 4.97E-18 | 8.6541  | 1281476 | Asthma |
| rs2960171   | 17 | 49301409 | C | T | 0.4565 | 0.0440  | 0.0051 | 5.40E-18 | 8.6445  | 1281476 | Asthma |
| rs34666276  | 17 | 49302124 | C | T | 0.3644 | 0.0512  | 0.0049 | 8.28E-26 | 10.5040 | 1376071 | Asthma |
| rs2906095   | 17 | 49304906 | A | G | 0.4650 | 0.0423  | 0.0073 | 6.71E-09 | 5.7981  | 567828  | Asthma |
| rs917051    | 17 | 49306583 | C | G | 0.2307 | -0.0348 | 0.0056 | 7.26E-10 | -6.1602 | 1376071 | Asthma |
| rs141063723 | 17 | 49307655 | G | A | 0.2385 | -0.0358 | 0.0056 | 1.31E-10 | -6.4266 | 1376071 | Asthma |
| rs7221336   | 17 | 49310242 | T | C | 0.2365 | -0.0350 | 0.0056 | 3.82E-10 | -6.2612 | 1376071 | Asthma |
| rs6504604   | 17 | 49312573 | T | G | 0.2364 | -0.0351 | 0.0056 | 3.39E-10 | -6.2797 | 1376071 | Asthma |
| rs2906101   | 17 | 49313928 | T | C | 0.4539 | 0.0395  | 0.0052 | 2.34E-14 | 7.6306  | 1219993 | Asthma |
| rs76156757  | 17 | 49314445 | A | C | 0.2365 | -0.0351 | 0.0056 | 3.34E-10 | -6.2821 | 1376071 | Asthma |
| rs4794040   | 17 | 49315356 | G | A | 0.2365 | -0.0351 | 0.0056 | 3.29E-10 | -6.2845 | 1376071 | Asthma |
| rs62076405  | 17 | 49316243 | A | G | 0.2365 | -0.0352 | 0.0056 | 2.99E-10 | -6.2994 | 1376071 | Asthma |
| rs2960164   | 17 | 49319961 | T | C | 0.4549 | 0.0420  | 0.0047 | 6.94E-19 | 8.8759  | 1376071 | Asthma |
| rs17701489  | 17 | 49320131 | T | C | 0.2388 | -0.0353 | 0.0056 | 2.20E-10 | -6.3468 | 1376071 | Asthma |
| rs2906093   | 17 | 49320217 | A | G | 0.4549 | 0.0419  | 0.0047 | 7.47E-19 | 8.8677  | 1376071 | Asthma |
| rs9889262   | 17 | 49320708 | A | T | 0.3643 | 0.0510  | 0.0049 | 1.05E-25 | 10.4812 | 1376071 | Asthma |
| rs17709919  | 17 | 49322238 | G | C | 0.4546 | 0.0421  | 0.0047 | 5.11E-19 | 8.9100  | 1376071 | Asthma |
| rs6504605   | 17 | 49325354 | G | A | 0.1218 | -0.0402 | 0.0073 | 3.94E-08 | -5.4935 | 1376071 | Asthma |
| rs12940887  | 17 | 49325445 | T | C | 0.3644 | 0.0510  | 0.0049 | 1.04E-25 | 10.4820 | 1376071 | Asthma |
| rs12951873  | 17 | 49326191 | C | T | 0.4546 | 0.0421  | 0.0047 | 4.82E-19 | 8.9164  | 1376071 | Asthma |
| rs12600968  | 17 | 49326364 | C | G | 0.2392 | -0.0354 | 0.0056 | 1.95E-10 | -6.3655 | 1376071 | Asthma |
| rs12948660  | 17 | 49326378 | C | G | 0.4546 | 0.0421  | 0.0047 | 5.08E-19 | 8.9105  | 1376071 | Asthma |
| rs62076439  | 17 | 49327266 | T | G | 0.3643 | 0.0511  | 0.0049 | 9.87E-26 | 10.4874 | 1376071 | Asthma |
| rs2898858   | 17 | 49328051 | C | A | 0.2365 | -0.0349 | 0.0056 | 3.93E-10 | -6.2567 | 1376071 | Asthma |
| rs747039    | 17 | 49329551 | G | A | 0.4569 | 0.0415  | 0.0047 | 1.55E-18 | 8.7861  | 1376071 | Asthma |
| rs12185242  | 17 | 49329709 | C | A | 0.4505 | 0.0434  | 0.0047 | 4.65E-20 | 9.1720  | 1376071 | Asthma |
| rs9747090   | 17 | 49331283 | A | G | 0.2365 | -0.0350 | 0.0056 | 3.64E-10 | -6.2686 | 1376071 | Asthma |
| rs34255993  | 17 | 49331312 | A | G | 0.4559 | 0.0413  | 0.0052 | 1.19E-15 | 8.0060  | 1224666 | Asthma |
| rs9747404   | 17 | 49331367 | T | C | 0.2365 | -0.0349 | 0.0056 | 4.01E-10 | -6.2534 | 1376071 | Asthma |
| rs4420575   | 17 | 49332765 | A | C | 0.2365 | -0.0350 | 0.0056 | 3.51E-10 | -6.2745 | 1376071 | Asthma |
| rs62076442  | 17 | 49333317 | C | A | 0.2365 | -0.0349 | 0.0056 | 4.22E-10 | -6.2458 | 1376071 | Asthma |
| rs2411981   | 17 | 49334213 | C | G | 0.3223 | -0.0342 | 0.0051 | 1.43E-11 | -6.7543 | 1376071 | Asthma |
| rs9895986   | 17 | 49334625 | G | A | 0.4569 | 0.0416  | 0.0047 | 1.37E-18 | 8.8002  | 1376071 | Asthma |
| rs35587648  | 17 | 49340816 | A | G | 0.3711 | 0.0487  | 0.0049 | 1.02E-23 | 10.0396 | 1376071 | Asthma |
| rs12943264  | 17 | 49341336 | C | T | 0.4679 | 0.0414  | 0.0050 | 8.88E-17 | 8.3190  | 1008051 | Asthma |
| rs35406341  | 17 | 49343917 | A | G | 0.4773 | 0.0316  | 0.0048 | 7.10E-11 | 6.5185  | 1316443 | Asthma |
| rs4644893   | 17 | 49344007 | C | G | 0.4549 | 0.0405  | 0.0053 | 1.42E-14 | 7.6944  | 1198533 | Asthma |
| rs4566223   | 17 | 49344008 | T | C | 0.4545 | 0.0409  | 0.0052 | 2.82E-15 | 7.8987  | 1224666 | Asthma |
| rs4514717   | 17 | 49344147 | A | G | 0.4567 | 0.0426  | 0.0048 | 1.20E-18 | 8.8148  | 1316443 | Asthma |
| rs35073649  | 17 | 49345148 | T | C | 0.3711 | 0.0493  | 0.0050 | 3.10E-23 | 9.9295  | 1316443 | Asthma |
| rs4794044   | 17 | 49346349 | A | G | 0.3229 | -0.0341 | 0.0052 | 4.75E-11 | -6.5787 | 1316443 | Asthma |
| rs7207729   | 17 | 49346378 | T | C | 0.3710 | 0.0491  | 0.0050 | 4.39E-23 | 9.8946  | 1316443 | Asthma |
| rs6504608   | 17 | 49347319 | A | C | 0.3710 | 0.0492  | 0.0050 | 3.92E-23 | 9.9061  | 1316443 | Asthma |
| rs2411979   | 17 | 49349881 | A | G | 0.2365 | -0.0348 | 0.0056 | 4.54E-10 | -6.2341 | 1376071 | Asthma |
| rs9909827   | 17 | 49350149 | C | T | 0.4567 | 0.0425  | 0.0048 | 1.37E-18 | 8.7999  | 1316443 | Asthma |
| rs4444384   | 17 | 49350837 | A | G | 0.4511 | 0.0406  | 0.0059 | 3.94E-12 | 6.9395  | 1003362 | Asthma |
| rs7225787   | 17 | 49351211 | C | A | 0.4544 | 0.0423  | 0.0052 | 4.28E-16 | 8.1305  | 1186521 | Asthma |
| rs28618326  | 17 | 49353734 | C | T | 0.4568 | 0.0425  | 0.0048 | 1.50E-18 | 8.7899  | 1316443 | Asthma |
| rs78724452  | 17 | 49354850 | T | C | 0.2364 | -0.0348 | 0.0056 | 4.88E-10 | -6.2229 | 1376071 | Asthma |
| rs7213090   | 17 | 49355215 | C | T | 0.4567 | 0.0424  | 0.0048 | 1.60E-18 | 8.7825  | 1316443 | Asthma |
| rs28483960  | 17 | 49355517 | T | C | 0.4567 | 0.0425  | 0.0048 | 1.32E-18 | 8.8041  | 1316443 | Asthma |
| rs16948042  | 17 | 49358678 | C | T | 0.2364 | -0.0348 | 0.0056 | 4.60E-10 | -6.2324 | 1376071 | Asthma |
| rs56010116  | 17 | 49359152 | A | G | 0.2364 | -0.0348 | 0.0056 | 4.49E-10 | -6.2360 | 1376071 | Asthma |
| rs8081878   | 17 | 49359450 | T | A | 0.4600 | 0.0415  | 0.0048 | 9.57E-18 | 8.5789  | 1316443 | Asthma |



|             |    |          |   |   |        |         |        |          |          |         |        |
|-------------|----|----------|---|---|--------|---------|--------|----------|----------|---------|--------|
| rs112502960 | 17 | 49361940 | A | G | 0.3471 | 0.0455  | 0.0067 | 1.24E-11 | 6.7757   | 938666  | Asthma |
| rs1867087   | 17 | 49363058 | G | A | 0.3235 | -0.0347 | 0.0052 | 2.16E-11 | -6.6947  | 1316443 | Asthma |
| rs16948048  | 17 | 49363104 | G | A | 0.3703 | 0.0506  | 0.0050 | 1.75E-24 | 10.2121  | 1316443 | Asthma |
| rs62076449  | 17 | 49364316 | T | C | 0.2360 | -0.0355 | 0.0056 | 2.11E-10 | -6.3534  | 1376071 | Asthma |
| rs76667225  | 17 | 49365165 | T | C | 0.2344 | -0.0356 | 0.0056 | 2.07E-10 | -6.3561  | 1376071 | Asthma |
| rs12150526  | 17 | 49366218 | T | C | 0.4581 | 0.0435  | 0.0048 | 2.44E-19 | 8.9913   | 1316443 | Asthma |
| rs8067459   | 17 | 49366751 | C | T | 0.4581 | 0.0435  | 0.0048 | 2.41E-19 | 8.9926   | 1316443 | Asthma |
| rs12937404  | 17 | 49367059 | G | T | 0.4581 | 0.0435  | 0.0048 | 2.12E-19 | 9.0070   | 1316443 | Asthma |
| rs12937634  | 17 | 49367080 | C | T | 0.4582 | 0.0435  | 0.0048 | 2.40E-19 | 8.9932   | 1316443 | Asthma |
| rs1317700   | 17 | 49367426 | A | G | 0.2349 | -0.0358 | 0.0056 | 1.64E-10 | -6.3919  | 1376071 | Asthma |
| rs1317701   | 17 | 49367432 | C | T | 0.3139 | -0.0321 | 0.0051 | 3.92E-10 | -6.2574  | 1376071 | Asthma |
| rs11651335  | 17 | 49368745 | T | C | 0.2364 | -0.0327 | 0.0057 | 1.14E-08 | -5.7081  | 1316443 | Asthma |
| rs11655704  | 17 | 49370810 | C | T | 0.3150 | -0.0313 | 0.0051 | 8.91E-10 | -6.1277  | 1376071 | Asthma |
| rs11649878  | 17 | 49370983 | G | C | 0.2359 | -0.0356 | 0.0056 | 1.76E-10 | -6.3814  | 1376071 | Asthma |
| rs12952581  | 17 | 49370984 | A | G | 0.3641 | 0.0523  | 0.0050 | 8.93E-26 | 10.4969  | 1316443 | Asthma |
| rs7209400   | 17 | 49372695 | C | T | 0.4686 | -0.0434 | 0.0048 | 3.70E-19 | -8.9455  | 1316443 | Asthma |
| rs11657381  | 17 | 49372771 | G | A | 0.2457 | -0.0369 | 0.0057 | 7.04E-11 | -6.5197  | 1316443 | Asthma |
| rs35317317  | 17 | 49373159 | A | T | 0.3642 | 0.0464  | 0.0055 | 3.15E-17 | 8.4411   | 1160365 | Asthma |
| rs62077690  | 17 | 49373282 | T | C | 0.2457 | -0.0368 | 0.0057 | 7.41E-11 | -6.5121  | 1316443 | Asthma |
| rs28394864  | 17 | 49373413 | A | G | 0.4530 | 0.0450  | 0.0048 | 1.87E-20 | 9.2693   | 1316443 | Asthma |
| rs62077691  | 17 | 49373755 | T | C | 0.2457 | -0.0368 | 0.0057 | 7.49E-11 | -6.5105  | 1316443 | Asthma |
| rs77764116  | 17 | 49375502 | A | G | 0.2338 | -0.0356 | 0.0057 | 5.42E-10 | -6.2062  | 1316443 | Asthma |
| rs76138634  | 17 | 49375794 | T | A | 0.2338 | -0.0357 | 0.0057 | 4.92E-10 | -6.2215  | 1316443 | Asthma |
| rs12953014  | 17 | 49376082 | G | A | 0.3651 | 0.0466  | 0.0055 | 2.02E-17 | 8.4928   | 1160365 | Asthma |
| rs28406364  | 17 | 49377145 | T | C | 0.3729 | 0.0497  | 0.0050 | 1.49E-23 | 10.0024  | 1316443 | Asthma |
| rs28412876  | 17 | 49377153 | T | G | 0.3728 | 0.0498  | 0.0050 | 1.37E-23 | 10.0105  | 1316443 | Asthma |
| rs11654339  | 17 | 49379467 | C | G | 0.2336 | -0.0354 | 0.0058 | 7.49E-10 | -6.1555  | 1316443 | Asthma |
| rs17637472  | 17 | 49384071 | A | G | 0.3960 | 0.0485  | 0.0049 | 7.72E-23 | 9.8378   | 1316443 | Asthma |
| rs2671654   | 17 | 49390649 | G | A | 0.4349 | -0.0479 | 0.0049 | 1.15E-22 | -9.7975  | 1316443 | Asthma |
| rs2584663   | 17 | 49390785 | A | G | 0.3682 | -0.0468 | 0.0049 | 1.48E-21 | -9.5362  | 1376071 | Asthma |
| rs2412099   | 17 | 49391824 | A | G | 0.4204 | -0.0476 | 0.0052 | 3.56E-20 | -9.2006  | 948423  | Asthma |
| rs9916130   | 17 | 49391867 | G | C | 0.3682 | -0.0465 | 0.0049 | 2.65E-21 | -9.4759  | 1376071 | Asthma |
| rs2584662   | 17 | 49393125 | C | A | 0.4347 | -0.0477 | 0.0049 | 1.56E-22 | -9.7668  | 1316443 | Asthma |
| rs2584661   | 17 | 49393172 | A | G | 0.3638 | -0.0457 | 0.0049 | 1.71E-20 | -9.2790  | 1376071 | Asthma |
| rs2671657   | 17 | 49396254 | A | G | 0.4347 | -0.0473 | 0.0049 | 3.66E-22 | -9.6804  | 1316443 | Asthma |
| rs2671659   | 17 | 49397167 | A | G | 0.3649 | -0.0461 | 0.0050 | 5.18E-20 | -9.1602  | 1316443 | Asthma |
| rs56366200  | 17 | 49399313 | C | T | 0.4436 | 0.0401  | 0.0065 | 6.41E-10 | 6.1801   | 674435  | Asthma |
| rs7208925   | 17 | 49402529 | G | C | 0.2734 | -0.0302 | 0.0055 | 3.23E-08 | -5.5285  | 1316443 | Asthma |
| rs4987082   | 17 | 49404012 | C | T | 0.4315 | 0.0360  | 0.0048 | 5.41E-14 | 7.5218   | 1376071 | Asthma |
| rs17650301  | 17 | 64483156 | C | A | 0.3352 | -0.0299 | 0.0053 | 1.74E-08 | -5.6363  | 1316443 | Asthma |
| rs1991401   | 17 | 64506317 | G | A | 0.3563 | -0.0295 | 0.0052 | 1.37E-08 | -5.6767  | 1316443 | Asthma |
| rs11081564  | 18 | 79791586 | G | A | 0.2656 | 0.0328  | 0.0056 | 3.58E-09 | 5.9027   | 1316443 | Asthma |
| rs11665567  | 18 | 79803334 | A | G | 0.2116 | 0.0345  | 0.0059 | 6.67E-09 | 5.7990   | 1316443 | Asthma |
| rs71367544  | 18 | 79814374 | T | C | 0.2142 | 0.0335  | 0.0058 | 7.35E-09 | 5.7829   | 1376071 | Asthma |
| rs71367545  | 18 | 79816337 | A | G | 0.2117 | 0.0328  | 0.0058 | 1.53E-08 | 5.6578   | 1376071 | Asthma |
| rs11664298  | 18 | 79818986 | A | G | 0.2112 | 0.0329  | 0.0058 | 1.54E-08 | 5.6570   | 1376071 | Asthma |
| rs7236339   | 18 | 79819773 | A | G | 0.2279 | 0.0331  | 0.0059 | 2.27E-08 | 5.5899   | 1008051 | Asthma |
| rs7241572   | 18 | 79820712 | A | G | 0.2110 | 0.0341  | 0.0059 | 8.81E-09 | 5.7523   | 1349938 | Asthma |
| rs2240157   | 19 | 1004741  | T | C | 0.3031 | 0.0299  | 0.0054 | 2.93E-08 | 5.5458   | 1299802 | Asthma |
| rs10403909  | 19 | 1008359  | A | G | 0.2868 | 0.0300  | 0.0055 | 4.71E-08 | 5.4618   | 1299802 | Asthma |
| rs35388517  | 19 | 6593303  | T | C | 0.3261 | 0.0285  | 0.0052 | 3.43E-08 | 5.5179   | 1316443 | Asthma |
| rs12971302  | 19 | 6595449  | C | T | 0.3374 | 0.0295  | 0.0052 | 1.20E-08 | 5.6995   | 1316443 | Asthma |
| rs35703209  | 19 | 9014953  | A | G | 0.3963 | -0.0286 | 0.0049 | 5.10E-09 | -5.8440  | 1376071 | Asthma |
| rs34872811  | 19 | 9015342  | A | G | 0.3970 | -0.0311 | 0.0050 | 5.21E-10 | -6.2126  | 1316443 | Asthma |
| rs35396714  | 19 | 9015361  | A | G | 0.3970 | -0.0310 | 0.0050 | 5.61E-10 | -6.2011  | 1316443 | Asthma |
| rs11667379  | 19 | 9015792  | C | G | 0.3971 | -0.0310 | 0.0050 | 6.35E-10 | -6.1813  | 1316443 | Asthma |
| rs10413947  | 19 | 9017666  | G | A | 0.2766 | 0.0364  | 0.0058 | 2.65E-10 | 6.3179   | 1299802 | Asthma |
| rs11669374  | 19 | 9017733  | T | C | 0.2582 | 0.0376  | 0.0062 | 1.18E-09 | 6.0829   | 931782  | Asthma |
| rs10426510  | 19 | 9018916  | A | G | 0.3378 | 0.0376  | 0.0053 | 1.07E-12 | 7.1214   | 1316443 | Asthma |
| rs10416530  | 19 | 9018984  | C | T | 0.3379 | 0.0378  | 0.0053 | 8.67E-13 | 7.1503   | 1316443 | Asthma |
| rs73012738  | 19 | 9026519  | G | T | 0.3294 | 0.0392  | 0.0064 | 7.97E-10 | 6.1455   | 1030443 | Asthma |
| rs142148789 | 19 | 9026560  | A | G | 0.2096 | 0.0353  | 0.0064 | 3.26E-08 | 5.5268   | 1299802 | Asthma |
| rs113660049 | 19 | 9026584  | A | G | 0.3151 | 0.0377  | 0.0054 | 2.45E-12 | 7.0059   | 1316443 | Asthma |
| rs7246313   | 19 | 9030448  | A | G | 0.2808 | 0.0366  | 0.0055 | 3.56E-11 | 6.6216   | 1316443 | Asthma |
| rs7258329   | 19 | 9030483  | A | C | 0.2805 | 0.0375  | 0.0056 | 2.36E-11 | 6.6821   | 1290310 | Asthma |
| rs73005006  | 19 | 14625358 | A | C | 0.3252 | 0.0288  | 0.0052 | 2.85E-08 | 5.5505   | 1316443 | Asthma |
| rs34381727  | 19 | 14625476 | G | C | 0.3269 | 0.0300  | 0.0052 | 6.97E-09 | 5.7918   | 1316443 | Asthma |
| rs62124014  | 19 | 14630253 | A | G | 0.3268 | 0.0284  | 0.0051 | 2.03E-08 | 5.6095   | 1376071 | Asthma |
| rs732722    | 19 | 14633220 | A | G | 0.3284 | 0.0281  | 0.0050 | 2.28E-08 | 5.5891   | 1376071 | Asthma |
| rs62124017  | 19 | 14633499 | A | G | 0.3281 | 0.0283  | 0.0050 | 1.98E-08 | 5.6138   | 1376071 | Asthma |
| rs10417375  | 19 | 33218804 | T | C | 0.2342 | -0.0357 | 0.0060 | 3.17E-09 | -5.9226  | 1299802 | Asthma |
| rs11671925  | 19 | 33227147 | A | G | 0.1828 | -0.0463 | 0.0065 | 1.08E-12 | -7.1201  | 1299802 | Asthma |
| rs10414065  | 19 | 33230549 | T | C | 0.0742 | -0.1101 | 0.0097 | 9.47E-30 | -11.3282 | 1299802 | Asthma |
| rs7359893   | 19 | 33231776 | G | A | 0.4160 | -0.0291 | 0.0050 | 7.23E-09 | -5.7854  | 1299802 | Asthma |

|             |    |          |   |   |        |         |        |          |          |         |        |
|-------------|----|----------|---|---|--------|---------|--------|----------|----------|---------|--------|
| rs10410558  | 19 | 33234951 | G | C | 0.1914 | -0.0436 | 0.0064 | 7.03E-12 | -6.8570  | 1299802 | Asthma |
| rs11672303  | 19 | 33235469 | C | T | 0.1259 | -0.0696 | 0.0075 | 2.32E-20 | -9.2465  | 1299802 | Asthma |
| rs118013485 | 19 | 33235671 | A | G | 0.0756 | -0.1112 | 0.0097 | 1.02E-30 | -11.5221 | 1299802 | Asthma |
| rs117710327 | 19 | 33235672 | A | C | 0.0755 | -0.1117 | 0.0097 | 6.56E-31 | -11.5598 | 1299802 | Asthma |
| rs7248385   | 19 | 33245373 | C | G | 0.3369 | -0.0407 | 0.0052 | 5.11E-15 | -7.8241  | 1316443 | Asthma |
| rs111067327 | 19 | 33250475 | T | C | 0.2798 | -0.0462 | 0.0075 | 6.04E-10 | -6.1894  | 912533  | Asthma |
| rs34635674  | 19 | 33251045 | G | A | 0.3180 | 0.0291  | 0.0052 | 1.58E-08 | 5.6525   | 1316443 | Asthma |
| rs7251615   | 19 | 33251532 | A | G | 0.1834 | -0.0494 | 0.0064 | 1.23E-14 | -7.7126  | 1316443 | Asthma |
| rs73926277  | 19 | 33251720 | T | C | 0.3174 | 0.0288  | 0.0052 | 2.19E-08 | 5.5960   | 1316443 | Asthma |
| rs62126607  | 19 | 33252033 | T | C | 0.1838 | -0.0491 | 0.0064 | 1.60E-14 | -7.6795  | 1316443 | Asthma |
| rs78476878  | 19 | 33252092 | G | T | 0.1837 | -0.0491 | 0.0064 | 1.44E-14 | -7.6926  | 1316443 | Asthma |
| rs7508294   | 19 | 33252791 | A | G | 0.3172 | 0.0289  | 0.0052 | 1.95E-08 | 5.6162   | 1316443 | Asthma |
| rs62126608  | 19 | 33252991 | C | A | 0.1628 | -0.0459 | 0.0067 | 5.83E-12 | -6.8838  | 1316443 | Asthma |
| rs78287368  | 19 | 33254872 | T | C | 0.0491 | -0.0700 | 0.0123 | 1.19E-08 | -5.7015  | 1299802 | Asthma |
| rs62126609  | 19 | 33255610 | T | C | 0.1631 | -0.0451 | 0.0067 | 1.15E-11 | -6.7869  | 1316443 | Asthma |
| rs62126610  | 19 | 33257277 | G | A | 0.1755 | -0.0466 | 0.0076 | 1.08E-09 | -6.0976  | 1068588 | Asthma |
| rs62126611  | 19 | 33257415 | T | C | 0.1719 | -0.0439 | 0.0063 | 3.88E-12 | -6.9415  | 1376071 | Asthma |
| rs62126612  | 19 | 33258253 | T | C | 0.1752 | -0.0468 | 0.0077 | 1.50E-09 | -6.0446  | 1003362 | Asthma |
| rs77453301  | 19 | 33258518 | T | C | 0.1720 | -0.0444 | 0.0063 | 1.93E-12 | -7.0395  | 1376071 | Asthma |
| rs62126613  | 19 | 33258542 | A | G | 0.1718 | -0.0446 | 0.0063 | 1.67E-12 | -7.0599  | 1376071 | Asthma |
| rs74629046  | 19 | 33258656 | T | C | 0.1743 | -0.0507 | 0.0075 | 1.34E-11 | -6.7648  | 1090071 | Asthma |
| rs62126614  | 19 | 33258669 | C | A | 0.1697 | -0.0485 | 0.0079 | 9.23E-10 | -6.1222  | 1003362 | Asthma |
| rs62126615  | 19 | 33258804 | T | C | 0.1717 | -0.0442 | 0.0063 | 2.65E-12 | -6.9950  | 1376071 | Asthma |
| rs62126616  | 19 | 33258808 | T | C | 0.1741 | -0.0417 | 0.0063 | 3.44E-11 | -6.6263  | 1376071 | Asthma |
| rs62126617  | 19 | 33259171 | T | C | 0.1719 | -0.0444 | 0.0063 | 1.87E-12 | -7.0435  | 1376071 | Asthma |
| rs11084716  | 19 | 33259384 | A | G | 0.1719 | -0.0445 | 0.0063 | 1.78E-12 | -7.0504  | 1376071 | Asthma |
| rs10500264  | 19 | 33259408 | A | G | 0.1721 | -0.0444 | 0.0063 | 1.75E-12 | -7.0530  | 1376071 | Asthma |
| rs55737395  | 19 | 33260443 | A | G | 0.3155 | 0.0293  | 0.0050 | 5.68E-09 | 5.8262   | 1376071 | Asthma |
| rs55803162  | 19 | 33260733 | T | C | 0.3153 | 0.0290  | 0.0050 | 8.09E-09 | 5.7665   | 1376071 | Asthma |
| rs62126619  | 19 | 33261549 | C | A | 0.1656 | -0.0450 | 0.0064 | 2.46E-12 | -7.0057  | 1376071 | Asthma |
| rs2081048   | 19 | 33262260 | C | T | 0.3230 | 0.0288  | 0.0050 | 8.57E-09 | 5.7569   | 1376071 | Asthma |
| rs62126620  | 19 | 33262294 | A | G | 0.1949 | -0.0425 | 0.0062 | 7.51E-12 | -6.8476  | 1316443 | Asthma |
| rs12150887  | 19 | 33262414 | G | C | 0.2148 | -0.0397 | 0.0060 | 4.30E-11 | -6.5934  | 1316443 | Asthma |
| rs8100197   | 19 | 44750325 | A | G | 0.2758 | 0.0376  | 0.0066 | 1.04E-08 | 5.7240   | 1030443 | Asthma |
| rs7256524   | 19 | 45721396 | T | C | 0.3361 | -0.0286 | 0.0051 | 2.14E-08 | -5.6000  | 1316443 | Asthma |
| rs36120341  | 19 | 45721713 | T | C | 0.3358 | -0.0281 | 0.0051 | 4.08E-08 | -5.4874  | 1316443 | Asthma |
| rs9807819   | 19 | 45736340 | T | C | 0.3370 | -0.0273 | 0.0050 | 4.77E-08 | -5.4598  | 1376071 | Asthma |
| rs725660    | 19 | 45759028 | A | C | 0.3375 | -0.0272 | 0.0050 | 4.42E-08 | -5.4730  | 1376071 | Asthma |
| rs2070737   | 19 | 45779632 | T | A | 0.3385 | -0.0273 | 0.0050 | 4.23E-08 | -5.4809  | 1376071 | Asthma |
| rs8109951   | 19 | 45786245 | T | C | 0.3376 | -0.0272 | 0.0050 | 4.48E-08 | -5.4709  | 1376071 | Asthma |
| rs72626215  | 19 | 45790878 | A | G | 0.2641 | -0.0328 | 0.0054 | 9.43E-10 | -6.1187  | 1376071 | Asthma |
| rs8108474   | 19 | 45798221 | T | C | 0.3374 | -0.0271 | 0.0050 | 4.99E-08 | -5.4518  | 1376071 | Asthma |
| rs8108864   | 19 | 45798413 | A | G | 0.3370 | -0.0276 | 0.0050 | 3.06E-08 | -5.5378  | 1376071 | Asthma |
| rs1132645   | 19 | 45816157 | C | G | 0.2941 | -0.0341 | 0.0055 | 5.09E-10 | -6.2163  | 1299802 | Asthma |
| rs74821481  | 19 | 45816783 | T | G | 0.3212 | -0.0307 | 0.0053 | 5.58E-09 | -5.8287  | 1290310 | Asthma |
| rs11669073  | 19 | 45821622 | T | C | 0.3223 | -0.0300 | 0.0052 | 6.75E-09 | -5.7971  | 1316443 | Asthma |
| rs35114617  | 19 | 45822225 | C | T | 0.3225 | -0.0298 | 0.0052 | 7.75E-09 | -5.7738  | 1316443 | Asthma |
| rs11671524  | 19 | 45823908 | A | G | 0.3225 | -0.0301 | 0.0052 | 5.84E-09 | -5.8213  | 1316443 | Asthma |
| rs8102876   | 19 | 45829584 | T | C | 0.3224 | -0.0299 | 0.0052 | 7.57E-09 | -5.7778  | 1316443 | Asthma |
| rs7258283   | 19 | 45832253 | T | C | 0.3225 | -0.0301 | 0.0052 | 6.16E-09 | -5.8122  | 1316443 | Asthma |
| rs7256192   | 19 | 45835234 | A | G | 0.3267 | -0.0323 | 0.0055 | 5.57E-09 | -5.8291  | 1186521 | Asthma |
| rs7254067   | 19 | 45839627 | A | G | 0.3221 | -0.0302 | 0.0052 | 5.42E-09 | -5.8336  | 1316443 | Asthma |
| rs62109854  | 19 | 45847117 | C | A | 0.3232 | -0.0305 | 0.0052 | 3.51E-09 | -5.9056  | 1316443 | Asthma |
| rs7252363   | 19 | 45851535 | A | G | 0.3217 | -0.0298 | 0.0052 | 8.57E-09 | -5.7569  | 1316443 | Asthma |
| rs7250497   | 19 | 45855167 | G | A | 0.3232 | -0.0308 | 0.0052 | 2.66E-09 | -5.9514  | 1316443 | Asthma |
| rs11671106  | 19 | 45863767 | T | C | 0.3219 | -0.0302 | 0.0052 | 5.67E-09 | -5.8261  | 1316443 | Asthma |
| rs34315674  | 20 | 32273592 | T | C | 0.1570 | 0.0359  | 0.0064 | 2.21E-08 | 5.5946   | 1376071 | Asthma |
| rs34358744  | 20 | 32273594 | A | G | 0.1569 | 0.0359  | 0.0064 | 2.10E-08 | 5.6040   | 1376071 | Asthma |
| rs6119231   | 20 | 32276789 | A | G | 0.1579 | 0.0363  | 0.0064 | 1.29E-08 | 5.6876   | 1376071 | Asthma |
| rs6087862   | 20 | 32282730 | T | G | 0.1606 | 0.0348  | 0.0063 | 4.25E-08 | 5.4801   | 1376071 | Asthma |
| rs6087361   | 20 | 32286409 | G | T | 0.1583 | 0.0361  | 0.0064 | 1.57E-08 | 5.6539   | 1376071 | Asthma |
| rs3787374   | 20 | 32290181 | A | G | 0.1607 | 0.0347  | 0.0063 | 4.35E-08 | 5.4761   | 1376071 | Asthma |
| rs6119809   | 20 | 32293337 | G | C | 0.1583 | 0.0359  | 0.0064 | 1.79E-08 | 5.6317   | 1376071 | Asthma |
| rs6087868   | 20 | 32300072 | A | G | 0.1558 | 0.0457  | 0.0077 | 3.33E-09 | 5.9142   | 1029518 | Asthma |
| rs6119237   | 20 | 32301214 | G | A | 0.1584 | 0.0359  | 0.0064 | 1.78E-08 | 5.6319   | 1376071 | Asthma |
| rs6119811   | 20 | 32303423 | A | G | 0.1583 | 0.0359  | 0.0064 | 1.78E-08 | 5.6317   | 1376071 | Asthma |
| rs35459003  | 20 | 32303513 | T | C | 0.1584 | 0.0359  | 0.0064 | 1.75E-08 | 5.6349   | 1376071 | Asthma |
| rs1129012   | 20 | 32327658 | C | T | 0.1585 | 0.0356  | 0.0064 | 2.21E-08 | 5.5950   | 1376071 | Asthma |
| rs3813921   | 20 | 32334043 | G | A | 0.1585 | 0.0354  | 0.0064 | 2.58E-08 | 5.5682   | 1376071 | Asthma |
| rs6087882   | 20 | 32336989 | T | G | 0.1583 | 0.0357  | 0.0064 | 2.24E-08 | 5.5925   | 1376071 | Asthma |
| rs6119241   | 20 | 32341292 | T | G | 0.1586 | 0.0358  | 0.0064 | 1.88E-08 | 5.6227   | 1376071 | Asthma |
| rs2424873   | 20 | 32351702 | C | T | 0.1591 | 0.0361  | 0.0064 | 1.53E-08 | 5.6579   | 1376071 | Asthma |
| rs6087374   | 20 | 32372684 | G | T | 0.1618 | 0.0347  | 0.0063 | 4.27E-08 | 5.4794   | 1376071 | Asthma |
| rs4911222   | 20 | 32373397 | T | C | 0.1591 | 0.0362  | 0.0064 | 1.44E-08 | 5.6690   | 1376071 | Asthma |

|            |    |          |   |   |        |         |        |          |         |         |        |
|------------|----|----------|---|---|--------|---------|--------|----------|---------|---------|--------|
| rs3903368  | 20 | 32374383 | T | G | 0.1586 | 0.0364  | 0.0064 | 1.19E-08 | 5.7009  | 1376071 | Asthma |
| rs6057570  | 20 | 32400295 | A | T | 0.1590 | 0.0360  | 0.0064 | 1.76E-08 | 5.6336  | 1376071 | Asthma |
| rs6058684  | 20 | 32410413 | C | T | 0.1592 | 0.0357  | 0.0064 | 2.22E-08 | 5.5941  | 1376071 | Asthma |
| rs6058689  | 20 | 32423563 | G | T | 0.1592 | 0.0359  | 0.0064 | 1.88E-08 | 5.6228  | 1376071 | Asthma |
| rs2295765  | 20 | 32431221 | C | T | 0.1592 | 0.0359  | 0.0064 | 1.86E-08 | 5.6250  | 1376071 | Asthma |
| rs1040751  | 20 | 32441200 | C | G | 0.1616 | 0.0349  | 0.0063 | 3.64E-08 | 5.5075  | 1376071 | Asthma |
| rs1742980  | 20 | 32450354 | C | T | 0.1673 | 0.0349  | 0.0063 | 2.31E-08 | 5.5868  | 1376071 | Asthma |
| rs910888   | 20 | 32451579 | A | G | 0.1627 | 0.0356  | 0.0063 | 1.83E-08 | 5.6278  | 1376071 | Asthma |
| rs1737889  | 20 | 32454373 | T | C | 0.1935 | 0.0352  | 0.0061 | 8.80E-09 | 5.7523  | 1316443 | Asthma |
| rs1742981  | 20 | 32454545 | C | T | 0.1881 | 0.0361  | 0.0061 | 4.19E-09 | 5.8764  | 1316443 | Asthma |
| rs1737890  | 20 | 32454792 | T | G | 0.2034 | 0.0345  | 0.0060 | 8.87E-09 | 5.7511  | 1316443 | Asthma |
| rs2738774  | 20 | 63637985 | A | G | 0.3434 | -0.0313 | 0.0056 | 2.49E-08 | -5.5740 | 1198533 | Asthma |
| rs909333   | 20 | 63639284 | G | T | 0.2537 | -0.0375 | 0.0056 | 2.23E-11 | -6.6900 | 1376071 | Asthma |
| rs909334   | 20 | 63639577 | A | C | 0.2539 | -0.0374 | 0.0056 | 2.47E-11 | -6.6752 | 1376071 | Asthma |
| rs6010986  | 20 | 63644491 | T | C | 0.2400 | -0.0370 | 0.0063 | 3.77E-09 | -5.8941 | 1224666 | Asthma |
| rs4809319  | 20 | 63646569 | A | G | 0.2394 | -0.0361 | 0.0059 | 8.00E-10 | -6.1450 | 1316443 | Asthma |
| rs4809320  | 20 | 63651086 | G | A | 0.2408 | -0.0349 | 0.0058 | 2.48E-09 | -5.9630 | 1316443 | Asthma |
| rs3761124  | 20 | 63657399 | T | C | 0.2516 | -0.0334 | 0.0056 | 2.42E-09 | -5.9666 | 1376071 | Asthma |
| rs6089953  | 20 | 63659655 | A | G | 0.2520 | -0.0347 | 0.0057 | 1.48E-09 | -6.0466 | 1316443 | Asthma |
| rs6010994  | 20 | 63660085 | T | C | 0.2511 | -0.0335 | 0.0056 | 2.50E-09 | -5.9614 | 1376071 | Asthma |
| rs2738778  | 20 | 63660477 | T | C | 0.2452 | -0.0356 | 0.0057 | 3.58E-10 | -6.2713 | 1376071 | Asthma |
| rs2297433  | 20 | 63662107 | T | C | 0.2520 | -0.0333 | 0.0056 | 2.65E-09 | -5.9518 | 1376071 | Asthma |
| rs6010998  | 20 | 63663049 | A | T | 0.2520 | -0.0333 | 0.0056 | 2.78E-09 | -5.9443 | 1376071 | Asthma |
| rs3848669  | 20 | 63669458 | G | T | 0.2523 | -0.0334 | 0.0056 | 2.46E-09 | -5.9642 | 1376071 | Asthma |
| rs6011016  | 20 | 63671297 | C | G | 0.2514 | -0.0336 | 0.0056 | 2.17E-09 | -5.9849 | 1376071 | Asthma |
| rs4809219  | 20 | 63671762 | C | A | 0.2523 | -0.0334 | 0.0056 | 2.31E-09 | -5.9744 | 1376071 | Asthma |
| rs6011018  | 20 | 63672269 | T | G | 0.2523 | -0.0335 | 0.0056 | 2.28E-09 | -5.9762 | 1376071 | Asthma |
| rs4809321  | 20 | 63672946 | T | G | 0.2518 | -0.0336 | 0.0056 | 2.00E-09 | -5.9977 | 1376071 | Asthma |
| rs3787100  | 20 | 63675057 | A | G | 0.2515 | -0.0332 | 0.0056 | 3.16E-09 | -5.9230 | 1376071 | Asthma |
| rs2738783  | 20 | 63677259 | T | G | 0.2196 | -0.0344 | 0.0062 | 2.37E-08 | -5.5824 | 1299802 | Asthma |
| rs41309367 | 20 | 63678201 | C | T | 0.3325 | -0.0284 | 0.0052 | 4.75E-08 | -5.4604 | 1316443 | Asthma |
| rs6010620  | 20 | 63678486 | A | G | 0.2525 | -0.0335 | 0.0056 | 1.96E-09 | -6.0015 | 1376071 | Asthma |
| rs8114049  | 20 | 63679453 | C | T | 0.3325 | -0.0286 | 0.0052 | 4.07E-08 | -5.4880 | 1316443 | Asthma |
| rs6062301  | 20 | 63679457 | T | C | 0.2526 | -0.0335 | 0.0056 | 2.00E-09 | -5.9980 | 1376071 | Asthma |
| rs6010621  | 20 | 63679519 | T | G | 0.2528 | -0.0336 | 0.0056 | 1.83E-09 | -6.0123 | 1376071 | Asthma |
| rs2297438  | 20 | 63679745 | G | A | 0.2527 | -0.0333 | 0.0056 | 2.63E-09 | -5.9535 | 1376071 | Asthma |
| rs2297440  | 20 | 63680946 | T | C | 0.2493 | -0.0343 | 0.0056 | 1.02E-09 | -6.1060 | 1376071 | Asthma |
| rs4809323  | 20 | 63681144 | A | G | 0.2492 | -0.0346 | 0.0056 | 7.60E-10 | -6.1531 | 1376071 | Asthma |
| rs7361098  | 20 | 63681402 | G | A | 0.2492 | -0.0347 | 0.0056 | 6.77E-10 | -6.1713 | 1376071 | Asthma |
| rs3787092  | 20 | 63684240 | C | T | 0.2500 | -0.0363 | 0.0058 | 2.81E-10 | -6.3088 | 1316443 | Asthma |
| rs3787091  | 20 | 63684241 | G | T | 0.2499 | -0.0364 | 0.0058 | 2.47E-10 | -6.3291 | 1316443 | Asthma |
| rs3787090  | 20 | 63685094 | C | T | 0.2254 | -0.0354 | 0.0061 | 8.86E-09 | -5.7512 | 948423  | Asthma |
| rs3787089  | 20 | 63685277 | C | T | 0.3294 | -0.0294 | 0.0052 | 1.84E-08 | -5.6261 | 1316443 | Asthma |
| rs3787088  | 20 | 63685281 | T | G | 0.3291 | -0.0294 | 0.0052 | 1.78E-08 | -5.6319 | 1316443 | Asthma |
| rs6062490  | 20 | 63687503 | G | C | 0.2496 | -0.0359 | 0.0058 | 4.51E-10 | -6.2355 | 1316443 | Asthma |
| rs2738785  | 20 | 63688111 | T | C | 0.2500 | -0.0362 | 0.0058 | 3.31E-10 | -6.2833 | 1316443 | Asthma |
| rs2777941  | 20 | 63688251 | A | C | 0.2492 | -0.0363 | 0.0058 | 2.94E-10 | -6.3018 | 1316443 | Asthma |
| rs6062302  | 20 | 63689615 | T | C | 0.2507 | -0.0354 | 0.0058 | 7.68E-10 | -6.1515 | 1316443 | Asthma |
| rs2236506  | 20 | 63690302 | G | A | 0.2503 | -0.0356 | 0.0058 | 6.23E-10 | -6.1846 | 1316443 | Asthma |
| rs3208007  | 20 | 63690935 | T | C | 0.2496 | -0.0365 | 0.0058 | 2.35E-10 | -6.3366 | 1316443 | Asthma |
| rs6011033  | 20 | 63691346 | A | G | 0.2438 | -0.0357 | 0.0058 | 7.95E-10 | -6.1460 | 1316443 | Asthma |
| rs3208008  | 20 | 63694757 | A | C | 0.2574 | -0.0376 | 0.0057 | 3.97E-11 | -6.6050 | 1316443 | Asthma |
| rs2297441  | 20 | 63696229 | G | A | 0.2579 | -0.0377 | 0.0057 | 3.48E-11 | -6.6246 | 1316443 | Asthma |
| rs2257440  | 20 | 63696914 | T | C | 0.2572 | -0.0372 | 0.0057 | 6.73E-11 | -6.5266 | 1316443 | Asthma |
| rs2258056  | 20 | 63697100 | C | T | 0.2575 | -0.0380 | 0.0057 | 2.36E-11 | -6.6816 | 1316443 | Asthma |
| rs909341   | 20 | 63697389 | T | C | 0.2571 | -0.0380 | 0.0057 | 2.42E-11 | -6.6783 | 1316443 | Asthma |
| rs1291205  | 20 | 63697476 | G | C | 0.2574 | -0.0379 | 0.0057 | 2.58E-11 | -6.6686 | 1316443 | Asthma |
| rs1291206  | 20 | 63697816 | A | G | 0.2574 | -0.0379 | 0.0057 | 2.52E-11 | -6.6720 | 1316443 | Asthma |
| rs1291207  | 20 | 63698059 | A | G | 0.2321 | -0.0372 | 0.0061 | 9.22E-10 | -6.1224 | 948423  | Asthma |
| rs1291209  | 20 | 63699086 | C | T | 0.2564 | -0.0365 | 0.0056 | 5.48E-11 | -6.5575 | 1376071 | Asthma |
| rs1295810  | 20 | 63699131 | A | G | 0.2540 | -0.0354 | 0.0056 | 2.39E-10 | -6.3337 | 1376071 | Asthma |
| rs1048665  | 20 | 63700637 | G | T | 0.2562 | -0.0373 | 0.0056 | 2.18E-11 | -6.6932 | 1376071 | Asthma |
| rs1623866  | 20 | 63701670 | A | G | 0.2541 | -0.0352 | 0.0056 | 2.83E-10 | -6.3081 | 1376071 | Asthma |
| rs2236508  | 20 | 63701763 | A | G | 0.2298 | -0.0345 | 0.0060 | 7.00E-09 | -5.7907 | 1008051 | Asthma |
| rs2257885  | 20 | 63702868 | A | G | 0.2564 | -0.0365 | 0.0056 | 5.22E-11 | -6.5646 | 1376071 | Asthma |
| rs1291210  | 20 | 63703941 | C | A | 0.2565 | -0.0367 | 0.0056 | 4.40E-11 | -6.5901 | 1376071 | Asthma |
| rs6062497  | 20 | 63704906 | C | T | 0.3368 | -0.0305 | 0.0052 | 4.55E-09 | -5.8627 | 1316443 | Asthma |
| rs6011040  | 20 | 63706054 | A | G | 0.3361 | -0.0306 | 0.0052 | 4.05E-09 | -5.8823 | 1316443 | Asthma |
| rs6062498  | 20 | 63707707 | C | G | 0.3381 | -0.0287 | 0.0052 | 3.39E-08 | -5.5200 | 1316443 | Asthma |
| rs2750480  | 20 | 63711302 | A | G | 0.2557 | -0.0357 | 0.0056 | 1.54E-10 | -6.4019 | 1376071 | Asthma |
| rs2872881  | 20 | 63711449 | A | G | 0.2557 | -0.0356 | 0.0056 | 1.86E-10 | -6.3723 | 1376071 | Asthma |
| rs2750481  | 20 | 63711788 | G | A | 0.2557 | -0.0356 | 0.0056 | 1.75E-10 | -6.3818 | 1376071 | Asthma |
| rs2750482  | 20 | 63711812 | C | T | 0.2557 | -0.0356 | 0.0056 | 1.76E-10 | -6.3806 | 1376071 | Asthma |
| rs2315009  | 20 | 63712788 | G | C | 0.2672 | -0.0361 | 0.0059 | 8.15E-10 | -6.1421 | 1246149 | Asthma |

|             |    |          |   |   |        |         |        |          |         |         |        |
|-------------|----|----------|---|---|--------|---------|--------|----------|---------|---------|--------|
| rs35046559  | 20 | 63713128 | G | A | 0.2595 | -0.0355 | 0.0056 | 1.53E-10 | -6.4020 | 1376071 | Asthma |
| rs35201382  | 20 | 63713342 | C | T | 0.2600 | -0.0354 | 0.0055 | 1.83E-10 | -6.3749 | 1376071 | Asthma |
| rs67468102  | 20 | 63713531 | C | G | 0.2598 | -0.0354 | 0.0055 | 1.85E-10 | -6.3735 | 1376071 | Asthma |
| rs2750483   | 20 | 63714118 | G | A | 0.2598 | -0.0353 | 0.0055 | 2.00E-10 | -6.3611 | 1376071 | Asthma |
| rs2259858   | 20 | 63715107 | T | A | 0.2594 | -0.0355 | 0.0055 | 1.61E-10 | -6.3946 | 1376071 | Asthma |
| rs6089961   | 20 | 63718139 | A | G | 0.2599 | -0.0353 | 0.0055 | 1.94E-10 | -6.3663 | 1376071 | Asthma |
| rs2738758   | 20 | 63718273 | G | C | 0.2599 | -0.0354 | 0.0055 | 1.69E-10 | -6.3877 | 1376071 | Asthma |
| rs2263805   | 20 | 63719798 | C | T | 0.2558 | -0.0356 | 0.0056 | 1.77E-10 | -6.3804 | 1376071 | Asthma |
| rs1291213   | 20 | 63721274 | T | C | 0.2553 | -0.0358 | 0.0056 | 1.45E-10 | -6.4104 | 1376071 | Asthma |
| rs1758205   | 20 | 63724404 | A | G | 0.2557 | -0.0357 | 0.0056 | 1.61E-10 | -6.3948 | 1376071 | Asthma |
| rs2263806   | 20 | 63725186 | A | G | 0.2555 | -0.0358 | 0.0056 | 1.47E-10 | -6.4083 | 1376071 | Asthma |
| rs34251386  | 20 | 63726119 | A | G | 0.2557 | -0.0357 | 0.0056 | 1.65E-10 | -6.3908 | 1376071 | Asthma |
| rs6122154   | 20 | 63727993 | T | C | 0.2556 | -0.0356 | 0.0056 | 1.81E-10 | -6.3767 | 1376071 | Asthma |
| rs2427529   | 20 | 63728212 | A | T | 0.2557 | -0.0357 | 0.0056 | 1.62E-10 | -6.3940 | 1376071 | Asthma |
| rs2427530   | 20 | 63730385 | A | G | 0.2563 | -0.0349 | 0.0056 | 4.06E-10 | -6.2518 | 1376071 | Asthma |
| rs2427531   | 20 | 63730764 | C | G | 0.2558 | -0.0351 | 0.0056 | 3.38E-10 | -6.2800 | 1376071 | Asthma |
| rs6122158   | 20 | 63731744 | A | G | 0.2552 | -0.0358 | 0.0056 | 1.45E-10 | -6.4104 | 1376071 | Asthma |
| rs71325464  | 20 | 63732101 | G | A | 0.2250 | -0.0381 | 0.0067 | 1.64E-08 | -5.6463 | 830513  | Asthma |
| rs67616625  | 20 | 63732135 | G | A | 0.2558 | -0.0358 | 0.0056 | 1.41E-10 | -6.4148 | 1376071 | Asthma |
| rs1151622   | 20 | 63734204 | G | A | 0.2557 | -0.0356 | 0.0056 | 1.75E-10 | -6.3820 | 1376071 | Asthma |
| rs2427534   | 20 | 63735126 | G | A | 0.2282 | -0.0357 | 0.0060 | 2.11E-09 | -5.9891 | 1008051 | Asthma |
| rs1275330   | 20 | 63737186 | G | C | 0.2575 | -0.0356 | 0.0062 | 9.32E-09 | -5.7426 | 1159440 | Asthma |
| rs1151623   | 20 | 63737253 | T | C | 0.2575 | -0.0372 | 0.0057 | 7.49E-11 | -6.5104 | 1316443 | Asthma |
| rs2236510   | 20 | 63737451 | T | C | 0.2558 | -0.0360 | 0.0056 | 1.24E-10 | -6.4345 | 1376071 | Asthma |
| rs914559    | 20 | 63737947 | C | G | 0.2581 | -0.0372 | 0.0057 | 7.73E-11 | -6.5058 | 1316443 | Asthma |
| rs1151624   | 20 | 63738542 | A | G | 0.2564 | -0.0376 | 0.0057 | 5.21E-11 | -6.5650 | 1316443 | Asthma |
| rs1056441   | 20 | 63738996 | T | C | 0.3316 | -0.0294 | 0.0052 | 2.04E-08 | -5.6086 | 1316443 | Asthma |
| rs6122159   | 20 | 63739379 | T | G | 0.2550 | -0.0362 | 0.0056 | 9.61E-11 | -6.4730 | 1376071 | Asthma |
| rs1741708   | 20 | 63740688 | T | G | 0.2545 | -0.0361 | 0.0056 | 1.12E-10 | -6.4499 | 1376071 | Asthma |
| rs6062510   | 20 | 63740795 | G | C | 0.3324 | -0.0288 | 0.0052 | 3.72E-08 | -5.5037 | 1316443 | Asthma |
| rs4809221   | 20 | 63741353 | G | A | 0.3330 | -0.0288 | 0.0052 | 3.63E-08 | -5.5082 | 1316443 | Asthma |
| rs2253823   | 20 | 63741603 | T | C | 0.2554 | -0.0356 | 0.0056 | 1.92E-10 | -6.3679 | 1376071 | Asthma |
| rs2253829   | 20 | 63741726 | C | G | 0.2555 | -0.0357 | 0.0056 | 1.82E-10 | -6.3762 | 1376071 | Asthma |
| rs2281926   | 20 | 63752956 | C | G | 0.1934 | -0.0364 | 0.0063 | 5.89E-09 | -5.8197 | 1376071 | Asthma |
| rs4809334   | 20 | 63753619 | A | G | 0.1941 | -0.0360 | 0.0062 | 7.96E-09 | -5.7693 | 1376071 | Asthma |
| rs13041528  | 20 | 63754093 | C | G | 0.1941 | -0.0360 | 0.0062 | 8.02E-09 | -5.7678 | 1376071 | Asthma |
| rs12481497  | 20 | 63754188 | A | G | 0.1941 | -0.0360 | 0.0062 | 7.91E-09 | -5.7703 | 1376071 | Asthma |
| rs6089971   | 20 | 63754493 | A | G | 0.1941 | -0.0359 | 0.0062 | 8.34E-09 | -5.7614 | 1376071 | Asthma |
| rs11696871  | 20 | 63756064 | A | G | 0.1960 | -0.0357 | 0.0062 | 9.08E-09 | -5.7472 | 1376071 | Asthma |
| rs6512287   | 20 | 63764368 | A | G | 0.1948 | -0.0360 | 0.0064 | 1.63E-08 | -5.6468 | 1316443 | Asthma |
| rs6011097   | 20 | 63767472 | G | A | 0.1943 | -0.0356 | 0.0062 | 1.11E-08 | -5.7127 | 1376071 | Asthma |
| rs6011098   | 20 | 63767582 | C | T | 0.1944 | -0.0357 | 0.0062 | 1.05E-08 | -5.7219 | 1376071 | Asthma |
| rs2315654   | 20 | 63768288 | C | T | 0.1936 | -0.0349 | 0.0062 | 2.12E-08 | -5.6017 | 1376071 | Asthma |
| rs6010648   | 20 | 63768668 | T | C | 0.1941 | -0.0352 | 0.0064 | 3.92E-08 | -5.4945 | 1316443 | Asthma |
| rs56045941  | 21 | 35049034 | C | T | 0.1651 | 0.0389  | 0.0066 | 3.55E-09 | 5.9042  | 1316443 | Asthma |
| rs17227210  | 21 | 35051694 | T | C | 0.1409 | 0.0493  | 0.0071 | 3.39E-12 | 6.9607  | 1316443 | Asthma |
| rs8134848   | 21 | 35052584 | A | G | 0.1140 | 0.0488  | 0.0079 | 7.78E-10 | 6.1495  | 1290310 | Asthma |
| rs73203066  | 21 | 35056743 | G | C | 0.1453 | 0.0502  | 0.0083 | 1.57E-09 | 6.0373  | 1030443 | Asthma |
| rs17227231  | 21 | 35063733 | C | T | 0.1411 | 0.0451  | 0.0069 | 4.85E-11 | 6.5756  | 1376071 | Asthma |
| rs8128904   | 21 | 35064155 | T | C | 0.1417 | 0.0451  | 0.0068 | 4.51E-11 | 6.5862  | 1376071 | Asthma |
| rs8133101   | 21 | 35064754 | T | C | 0.1418 | 0.0446  | 0.0068 | 7.54E-11 | 6.5095  | 1376071 | Asthma |
| rs8133245   | 21 | 35064874 | A | C | 0.1411 | 0.0451  | 0.0069 | 4.71E-11 | 6.5799  | 1376071 | Asthma |
| rs8133412   | 21 | 35065082 | G | A | 0.1453 | 0.0473  | 0.0072 | 5.90E-11 | 6.5462  | 1246149 | Asthma |
| rs73203077  | 21 | 35065356 | T | C | 0.1416 | 0.0452  | 0.0068 | 3.85E-11 | 6.6098  | 1376071 | Asthma |
| rs17812893  | 21 | 35065428 | G | A | 0.1416 | 0.0453  | 0.0068 | 3.56E-11 | 6.6212  | 1376071 | Asthma |
| rs17812899  | 21 | 35067208 | T | C | 0.1412 | 0.0455  | 0.0069 | 3.12E-11 | 6.6407  | 1376071 | Asthma |
| rs11088308  | 21 | 35070232 | C | G | 0.1408 | 0.0452  | 0.0069 | 4.57E-11 | 6.5843  | 1376071 | Asthma |
| rs17227266  | 21 | 35072927 | T | G | 0.1408 | 0.0453  | 0.0069 | 3.84E-11 | 6.6101  | 1376071 | Asthma |
| rs17227273  | 21 | 35077437 | C | G | 0.1408 | 0.0455  | 0.0069 | 3.10E-11 | 6.6419  | 1376071 | Asthma |
| rs8133974   | 21 | 35078544 | T | C | 0.1419 | 0.0461  | 0.0068 | 1.65E-11 | 6.7339  | 1376071 | Asthma |
| rs6517275   | 21 | 35079268 | A | C | 0.1427 | 0.0459  | 0.0068 | 1.76E-11 | 6.7246  | 1376071 | Asthma |
| rs73203086  | 21 | 35079926 | A | G | 0.1427 | 0.0460  | 0.0068 | 1.57E-11 | 6.7413  | 1376071 | Asthma |
| rs8126516   | 21 | 35080321 | A | G | 0.1427 | 0.0462  | 0.0068 | 1.33E-11 | 6.7660  | 1376071 | Asthma |
| rs73203090  | 21 | 35080976 | C | G | 0.1407 | 0.0453  | 0.0069 | 3.83E-11 | 6.6104  | 1376071 | Asthma |
| rs2242900   | 21 | 35081540 | G | A | 0.1408 | 0.0452  | 0.0069 | 4.30E-11 | 6.5932  | 1376071 | Asthma |
| rs17812911  | 21 | 35083253 | A | G | 0.1407 | 0.0455  | 0.0069 | 3.38E-11 | 6.6290  | 1376071 | Asthma |
| rs73203092  | 21 | 35085208 | A | T | 0.1398 | 0.0456  | 0.0069 | 3.67E-11 | 6.6167  | 1376071 | Asthma |
| rs73203093  | 21 | 35085209 | G | C | 0.1354 | 0.0470  | 0.0073 | 1.24E-10 | 6.4342  | 1008051 | Asthma |
| rs17812917  | 21 | 35087401 | A | G | 0.1399 | 0.0461  | 0.0069 | 1.79E-11 | 6.7220  | 1376071 | Asthma |
| rs11088309  | 21 | 35092334 | G | C | 0.1392 | 0.0466  | 0.0069 | 1.17E-11 | 6.7843  | 1376071 | Asthma |
| rs73205303  | 21 | 35095533 | A | G | 0.1474 | 0.0415  | 0.0067 | 6.44E-10 | 6.1795  | 1376071 | Asthma |
| rs117826984 | 21 | 35104390 | C | T | 0.1504 | 0.0403  | 0.0066 | 1.38E-09 | 6.0576  | 1376071 | Asthma |
| rs73205318  | 21 | 35105762 | A | G | 0.1494 | 0.0405  | 0.0067 | 1.28E-09 | 6.0702  | 1376071 | Asthma |
| rs8129889   | 21 | 35107932 | A | G | 0.1488 | 0.0412  | 0.0067 | 7.37E-10 | 6.1579  | 1376071 | Asthma |

|             |    |          |   |   |        |         |        |          |         |         |        |
|-------------|----|----------|---|---|--------|---------|--------|----------|---------|---------|--------|
| rs41360844  | 21 | 35109174 | C | G | 0.1489 | 0.0406  | 0.0067 | 1.19E-09 | 6.0817  | 1376071 | Asthma |
| rs12152026  | 21 | 35113024 | C | T | 0.1469 | 0.0403  | 0.0067 | 1.89E-09 | 6.0075  | 1376071 | Asthma |
| rs17812953  | 21 | 35116525 | C | T | 0.1453 | 0.0386  | 0.0068 | 1.14E-08 | 5.7085  | 1376071 | Asthma |
| rs73205380  | 21 | 35118750 | A | G | 0.1457 | 0.0400  | 0.0067 | 3.04E-09 | 5.9294  | 1376071 | Asthma |
| rs73205381  | 21 | 35122751 | A | G | 0.1456 | 0.0410  | 0.0067 | 1.19E-09 | 6.0814  | 1376071 | Asthma |
| rs146315463 | 21 | 35125156 | T | C | 0.1455 | 0.0400  | 0.0068 | 3.16E-09 | 5.9234  | 1376071 | Asthma |
| rs2834787   | 21 | 35130261 | G | A | 0.1502 | 0.0395  | 0.0067 | 3.12E-09 | 5.9249  | 1376071 | Asthma |
| rs17812977  | 21 | 35133580 | T | C | 0.1457 | 0.0392  | 0.0068 | 6.79E-09 | 5.7960  | 1376071 | Asthma |
| rs2834794   | 21 | 35135489 | G | A | 0.1462 | 0.0391  | 0.0067 | 6.91E-09 | 5.7930  | 1376071 | Asthma |
| rs13048344  | 21 | 35318094 | C | A | 0.4423 | 0.0329  | 0.0049 | 1.89E-11 | 6.7145  | 1316443 | Asthma |
| rs7277833   | 21 | 35318686 | C | T | 0.4293 | 0.0314  | 0.0049 | 1.54E-10 | 6.4018  | 1316443 | Asthma |
| rs2409620   | 21 | 35318891 | C | T | 0.4293 | 0.0313  | 0.0049 | 1.59E-10 | 6.3963  | 1316443 | Asthma |
| rs732569    | 21 | 35319155 | A | G | 0.4277 | 0.0318  | 0.0049 | 8.80E-11 | 6.4862  | 1316443 | Asthma |
| rs35640344  | 21 | 35319895 | T | G | 0.4305 | 0.0324  | 0.0049 | 3.02E-11 | 6.6455  | 1316443 | Asthma |
| rs2834905   | 21 | 35320056 | T | G | 0.4301 | 0.0323  | 0.0049 | 3.79E-11 | 6.6122  | 1316443 | Asthma |
| rs8133814   | 21 | 35320152 | C | G | 0.4300 | 0.0320  | 0.0049 | 5.17E-11 | 6.5661  | 1316443 | Asthma |
| rs13052959  | 21 | 35320745 | G | A | 0.4316 | 0.0321  | 0.0049 | 4.86E-11 | 6.5751  | 1316443 | Asthma |
| rs28460413  | 21 | 35321790 | T | C | 0.4291 | 0.0319  | 0.0048 | 2.21E-11 | 6.6914  | 1376071 | Asthma |
| rs13050284  | 21 | 35321894 | A | G | 0.4290 | 0.0320  | 0.0048 | 2.03E-11 | 6.7039  | 1376071 | Asthma |
| rs13050093  | 21 | 35321897 | T | C | 0.4290 | 0.0319  | 0.0048 | 2.20E-11 | 6.6919  | 1376071 | Asthma |
| rs2834907   | 21 | 35321948 | C | T | 0.4290 | 0.0319  | 0.0048 | 2.21E-11 | 6.6913  | 1376071 | Asthma |
| rs2834908   | 21 | 35322309 | A | G | 0.4290 | 0.0320  | 0.0048 | 1.93E-11 | 6.7109  | 1376071 | Asthma |
| rs2834909   | 21 | 35322878 | C | T | 0.4291 | 0.0319  | 0.0049 | 5.94E-11 | 6.5454  | 1316443 | Asthma |
| rs7279489   | 21 | 35322960 | G | A | 0.4148 | 0.0318  | 0.0049 | 8.09E-11 | 6.4989  | 1316443 | Asthma |
| rs6517291   | 21 | 35323240 | C | T | 0.3994 | 0.0316  | 0.0049 | 1.54E-10 | 6.4016  | 1316443 | Asthma |
| rs2409621   | 21 | 35323263 | C | G | 0.3991 | 0.0315  | 0.0049 | 1.72E-10 | 6.3844  | 1316443 | Asthma |
| rs2205049   | 21 | 35323611 | T | C | 0.4268 | -0.0387 | 0.0049 | 3.26E-15 | -7.8806 | 1316443 | Asthma |
| rs8134849   | 21 | 35328761 | A | T | 0.4348 | 0.0331  | 0.0049 | 1.03E-11 | 6.8024  | 1316443 | Asthma |
| rs1040313   | 21 | 35339820 | C | T | 0.4348 | 0.0329  | 0.0049 | 1.41E-11 | 6.7573  | 1316443 | Asthma |
| rs8129030   | 21 | 35340290 | T | A | 0.3710 | -0.0362 | 0.0049 | 1.68E-13 | -7.3725 | 1376071 | Asthma |
| rs9979383   | 21 | 35343463 | C | T | 0.3722 | -0.0360 | 0.0049 | 1.92E-13 | -7.3541 | 1376071 | Asthma |
| rs1022461   | 21 | 35353673 | G | A | 0.4329 | 0.0327  | 0.0049 | 1.99E-11 | 6.7069  | 1316443 | Asthma |
| rs13051961  | 21 | 35361254 | C | T | 0.4345 | 0.0316  | 0.0049 | 8.92E-11 | 6.4843  | 1316443 | Asthma |
| rs6517292   | 21 | 35361786 | A | G | 0.4341 | 0.0318  | 0.0049 | 7.14E-11 | 6.5178  | 1316443 | Asthma |
| rs13051252  | 21 | 35362636 | T | A | 0.4344 | 0.0316  | 0.0049 | 9.86E-11 | 6.4691  | 1316443 | Asthma |
| rs62218300  | 21 | 35363416 | C | T | 0.4352 | 0.0312  | 0.0049 | 1.72E-10 | 6.3846  | 1316443 | Asthma |
| rs8133843   | 21 | 35365944 | G | A | 0.3851 | -0.0321 | 0.0049 | 4.70E-11 | -6.5802 | 1376071 | Asthma |
| rs8138917   | 22 | 41016421 | C | T | 0.3984 | 0.0267  | 0.0048 | 2.61E-08 | 5.5655  | 1376071 | Asthma |
| rs8138349   | 22 | 41016719 | T | C | 0.3984 | 0.0268  | 0.0048 | 2.53E-08 | 5.5710  | 1376071 | Asthma |
| rs8138520   | 22 | 41016924 | G | A | 0.3985 | 0.0267  | 0.0048 | 2.61E-08 | 5.5660  | 1376071 | Asthma |
| rs9611457   | 22 | 41017631 | G | C | 0.3985 | 0.0267  | 0.0048 | 2.58E-08 | 5.5678  | 1376071 | Asthma |
| rs4821980   | 22 | 41019475 | G | C | 0.3985 | 0.0267  | 0.0048 | 2.71E-08 | 5.5592  | 1376071 | Asthma |
| rs4821981   | 22 | 41019640 | T | G | 0.3986 | 0.0268  | 0.0048 | 2.38E-08 | 5.5820  | 1376071 | Asthma |
| rs8139770   | 22 | 41020177 | T | C | 0.3998 | 0.0269  | 0.0048 | 2.08E-08 | 5.6057  | 1376071 | Asthma |
| rs8135524   | 22 | 41040438 | C | T | 0.3956 | 0.0265  | 0.0048 | 3.72E-08 | 5.5038  | 1376071 | Asthma |
| rs9754487   | 22 | 41043600 | G | A | 0.3956 | 0.0263  | 0.0048 | 4.57E-08 | 5.4673  | 1376071 | Asthma |
| rs7286603   | 22 | 41044057 | C | T | 0.3956 | 0.0264  | 0.0048 | 3.93E-08 | 5.4941  | 1376071 | Asthma |
| rs9611546   | 22 | 41302538 | G | C | 0.3157 | 0.0277  | 0.0051 | 4.78E-08 | 5.4592  | 1376071 | Asthma |
| rs2092564   | 22 | 41304026 | C | G | 0.3160 | 0.0278  | 0.0051 | 4.19E-08 | 5.4829  | 1376071 | Asthma |
| rs9611555   | 22 | 41317107 | A | G | 0.3175 | 0.0278  | 0.0051 | 4.16E-08 | 5.4840  | 1376071 | Asthma |
| rs5758300   | 22 | 41329176 | G | C | 0.2373 | 0.0300  | 0.0055 | 4.94E-08 | 5.4536  | 1376071 | Asthma |
| rs2143695   | 22 | 41332616 | C | T | 0.2374 | 0.0302  | 0.0055 | 3.81E-08 | 5.4995  | 1376071 | Asthma |
| rs2235845   | 22 | 41333290 | G | T | 0.2375 | 0.0302  | 0.0055 | 3.84E-08 | 5.4980  | 1376071 | Asthma |
| rs5758301   | 22 | 41336385 | C | T | 0.2367 | 0.0306  | 0.0055 | 2.51E-08 | 5.5724  | 1376071 | Asthma |
| rs5751080   | 22 | 41340263 | G | A | 0.2369 | 0.0304  | 0.0055 | 3.23E-08 | 5.5287  | 1376071 | Asthma |
| rs1883828   | 22 | 41343366 | T | C | 0.4953 | -0.0268 | 0.0047 | 1.39E-08 | -5.6748 | 1376071 | Asthma |
| rs2235846   | 22 | 41345038 | C | G | 0.2368 | 0.0308  | 0.0055 | 2.13E-08 | 5.6012  | 1376071 | Asthma |
| rs4822023   | 22 | 41345540 | A | G | 0.2352 | 0.0308  | 0.0055 | 2.34E-08 | 5.5845  | 1376071 | Asthma |
| rs5751081   | 22 | 41346784 | T | A | 0.2368 | 0.0307  | 0.0055 | 2.28E-08 | 5.5890  | 1376071 | Asthma |
| rs761366    | 22 | 41348018 | G | C | 0.2303 | 0.0314  | 0.0056 | 1.47E-08 | 5.6646  | 1376071 | Asthma |
| rs2281331   | 22 | 41349351 | A | G | 0.4955 | -0.0271 | 0.0047 | 9.96E-09 | -5.7315 | 1376071 | Asthma |
| rs2281332   | 22 | 41350208 | C | T | 0.2369 | 0.0308  | 0.0055 | 1.99E-08 | 5.6133  | 1376071 | Asthma |
| rs3817999   | 22 | 41351713 | A | G | 0.2183 | 0.0311  | 0.0056 | 3.53E-08 | 5.5129  | 1376071 | Asthma |
| rs2281333   | 22 | 41353626 | C | T | 0.2174 | 0.0308  | 0.0056 | 4.72E-08 | 5.4617  | 1376071 | Asthma |
| rs7290404   | 22 | 41353792 | T | C | 0.2157 | 0.0311  | 0.0057 | 4.02E-08 | 5.4901  | 1376071 | Asthma |
| rs5758307   | 22 | 41354215 | G | A | 0.2174 | 0.0309  | 0.0056 | 4.46E-08 | 5.4716  | 1376071 | Asthma |
| rs11090045  | 22 | 41357599 | A | G | 0.3015 | 0.0306  | 0.0053 | 6.92E-09 | 5.7930  | 1316443 | Asthma |
| rs9611567   | 22 | 41373750 | G | A | 0.2295 | 0.0371  | 0.0066 | 1.93E-08 | 5.6180  | 1090071 | Asthma |
| rs4822025   | 22 | 41380642 | C | G | 0.2098 | 0.0321  | 0.0057 | 2.00E-08 | 5.6120  | 1376071 | Asthma |
| rs2234052   | 22 | 41381237 | G | A | 0.2102 | 0.0319  | 0.0057 | 2.25E-08 | 5.5915  | 1376071 | Asthma |
| rs9607799   | 22 | 41381554 | G | A | 0.2105 | 0.0323  | 0.0057 | 1.55E-08 | 5.6565  | 1376071 | Asthma |
| rs2234058   | 22 | 41381879 | A | G | 0.2100 | 0.0320  | 0.0057 | 2.11E-08 | 5.6025  | 1376071 | Asthma |
| rs2234059   | 22 | 41381909 | C | T | 0.2099 | 0.0318  | 0.0057 | 2.60E-08 | 5.5665  | 1376071 | Asthma |
| rs3788584   | 22 | 41383069 | A | T | 0.2098 | 0.0319  | 0.0057 | 2.27E-08 | 5.5897  | 1376071 | Asthma |



|             |    |          |   |   |        |         |        |          |         |         |        |
|-------------|----|----------|---|---|--------|---------|--------|----------|---------|---------|--------|
| rs767593    | 22 | 41383967 | T | G | 0.2098 | 0.0319  | 0.0057 | 2.31E-08 | 5.5870  | 1376071 | Asthma |
| rs73176685  | 22 | 41385090 | G | C | 0.2421 | 0.0352  | 0.0063 | 1.82E-08 | 5.6284  | 878129  | Asthma |
| rs73176686  | 22 | 41386115 | T | C | 0.1960 | 0.0358  | 0.0058 | 7.79E-10 | 6.1492  | 1376071 | Asthma |
| rs73176687  | 22 | 41386419 | A | C | 0.1960 | 0.0360  | 0.0058 | 6.60E-10 | 6.1754  | 1376071 | Asthma |
| rs111763257 | 22 | 41386431 | A | G | 0.1987 | 0.0380  | 0.0062 | 8.32E-10 | 6.1388  | 1246149 | Asthma |
| rs73176689  | 22 | 41386629 | C | T | 0.2046 | 0.0405  | 0.0068 | 2.62E-09 | 5.9537  | 851973  | Asthma |
| rs9611570   | 22 | 41386717 | T | G | 0.1963 | 0.0356  | 0.0058 | 9.46E-10 | 6.1183  | 1376071 | Asthma |
| rs11546403  | 22 | 41387655 | T | C | 0.2138 | 0.0358  | 0.0057 | 2.75E-10 | 6.3123  | 1376071 | Asthma |
| rs9607800   | 22 | 41388558 | G | A | 0.2138 | 0.0357  | 0.0057 | 2.94E-10 | 6.3021  | 1376071 | Asthma |
| rs9611571   | 22 | 41388863 | A | G | 0.2140 | 0.0357  | 0.0057 | 3.12E-10 | 6.2925  | 1376071 | Asthma |
| rs9611572   | 22 | 41389283 | A | G | 0.2139 | 0.0357  | 0.0057 | 3.10E-10 | 6.2936  | 1376071 | Asthma |
| rs73176692  | 22 | 41389731 | A | G | 0.2139 | 0.0357  | 0.0057 | 3.14E-10 | 6.2920  | 1376071 | Asthma |
| rs28604950  | 22 | 41389808 | G | A | 0.2138 | 0.0356  | 0.0057 | 3.34E-10 | 6.2823  | 1376071 | Asthma |
| rs4822027   | 22 | 41390223 | A | G | 0.1962 | 0.0360  | 0.0058 | 6.28E-10 | 6.1831  | 1376071 | Asthma |
| rs73176694  | 22 | 41390784 | T | C | 0.2135 | 0.0364  | 0.0058 | 2.61E-10 | 6.3206  | 1349938 | Asthma |
| rs9611573   | 22 | 41391672 | C | G | 0.2139 | 0.0355  | 0.0057 | 3.87E-10 | 6.2590  | 1376071 | Asthma |
| rs5758324   | 22 | 41391946 | T | G | 0.2031 | 0.0353  | 0.0057 | 8.50E-10 | 6.1353  | 1376071 | Asthma |
| rs4822028   | 22 | 41393404 | G | A | 0.2142 | 0.0359  | 0.0057 | 2.47E-10 | 6.3286  | 1376071 | Asthma |
| rs60119330  | 22 | 41395041 | C | T | 0.2143 | 0.0359  | 0.0057 | 2.34E-10 | 6.3369  | 1376071 | Asthma |
| rs74484224  | 22 | 41395196 | A | G | 0.2140 | 0.0355  | 0.0057 | 3.80E-10 | 6.2618  | 1376071 | Asthma |
| rs2073167   | 22 | 41395532 | C | T | 0.4687 | -0.0265 | 0.0047 | 2.00E-08 | -5.6120 | 1376071 | Asthma |
| rs9611577   | 22 | 41397086 | G | T | 0.2142 | 0.0354  | 0.0057 | 4.13E-10 | 6.2490  | 1376071 | Asthma |
| rs132901    | 22 | 41401543 | C | T | 0.1968 | 0.0359  | 0.0058 | 6.95E-10 | 6.1673  | 1376071 | Asthma |
| rs132902    | 22 | 41401754 | G | A | 0.1966 | 0.0360  | 0.0058 | 5.90E-10 | 6.1932  | 1376071 | Asthma |
| rs202645    | 22 | 41402516 | A | G | 0.1883 | 0.0342  | 0.0059 | 7.01E-09 | 5.7907  | 1376071 | Asthma |
| rs132904    | 22 | 41402892 | G | C | 0.2064 | 0.0339  | 0.0057 | 3.65E-09 | 5.8993  | 1376071 | Asthma |
| rs132905    | 22 | 41403102 | C | A | 0.2063 | 0.0338  | 0.0057 | 3.86E-09 | 5.8899  | 1376071 | Asthma |
| rs132906    | 22 | 41403763 | G | C | 0.2126 | 0.0332  | 0.0057 | 4.85E-09 | 5.8521  | 1376071 | Asthma |
| rs75784     | 22 | 41403829 | G | T | 0.2063 | 0.0339  | 0.0057 | 3.47E-09 | 5.9076  | 1376071 | Asthma |
| rs169364    | 22 | 41404674 | C | T | 0.2063 | 0.0338  | 0.0057 | 4.06E-09 | 5.8816  | 1376071 | Asthma |
| rs132907    | 22 | 41405264 | A | C | 0.2043 | 0.0337  | 0.0058 | 4.55E-09 | 5.8628  | 1376071 | Asthma |
| rs6002372   | 22 | 41405295 | A | T | 0.2062 | 0.0333  | 0.0057 | 6.65E-09 | 5.7996  | 1376071 | Asthma |
| rs132908    | 22 | 41405791 | G | A | 0.2061 | 0.0338  | 0.0057 | 4.14E-09 | 5.8783  | 1376071 | Asthma |
| rs132909    | 22 | 41406027 | G | A | 0.2063 | 0.0336  | 0.0057 | 4.80E-09 | 5.8542  | 1376071 | Asthma |
| rs5751094   | 22 | 41407275 | C | T | 0.2063 | 0.0337  | 0.0057 | 4.27E-09 | 5.8734  | 1376071 | Asthma |
| rs132911    | 22 | 41408156 | C | T | 0.2187 | 0.0345  | 0.0060 | 9.39E-09 | 5.7415  | 1008051 | Asthma |
| rs132912    | 22 | 41408210 | A | G | 0.2064 | 0.0337  | 0.0057 | 4.15E-09 | 5.8780  | 1376071 | Asthma |
| rs132914    | 22 | 41409745 | T | C | 0.2065 | 0.0336  | 0.0057 | 4.83E-09 | 5.8530  | 1376071 | Asthma |
| rs132915    | 22 | 41409778 | T | C | 0.2063 | 0.0338  | 0.0057 | 4.04E-09 | 5.8824  | 1376071 | Asthma |
| rs132917    | 22 | 41410924 | T | C | 0.2063 | 0.0339  | 0.0057 | 3.53E-09 | 5.9049  | 1376071 | Asthma |
| rs132918    | 22 | 41412346 | C | T | 0.2064 | 0.0338  | 0.0057 | 3.93E-09 | 5.8871  | 1376071 | Asthma |
| rs202634    | 22 | 41413619 | A | G | 0.2016 | 0.0361  | 0.0063 | 1.17E-08 | 5.7041  | 1219993 | Asthma |
| rs202635    | 22 | 41413633 | C | T | 0.2183 | 0.0345  | 0.0060 | 9.45E-09 | 5.7403  | 1008051 | Asthma |
| rs132920    | 22 | 41414166 | T | C | 0.2063 | 0.0337  | 0.0057 | 4.21E-09 | 5.8756  | 1376071 | Asthma |
| rs202659    | 22 | 41415616 | T | C | 0.2063 | 0.0338  | 0.0057 | 4.01E-09 | 5.8840  | 1376071 | Asthma |
| rs132921    | 22 | 41416040 | G | A | 0.2064 | 0.0339  | 0.0057 | 3.69E-09 | 5.8975  | 1376071 | Asthma |
| rs132922    | 22 | 41416080 | G | A | 0.2063 | 0.0338  | 0.0057 | 3.82E-09 | 5.8919  | 1376071 | Asthma |
| rs202661    | 22 | 41416435 | A | G | 0.2064 | 0.0339  | 0.0057 | 3.48E-09 | 5.9071  | 1376071 | Asthma |
| rs202662    | 22 | 41416751 | C | T | 0.2088 | 0.0365  | 0.0061 | 2.45E-09 | 5.9651  | 1246149 | Asthma |
| rs202663    | 22 | 41416815 | T | C | 0.2064 | 0.0339  | 0.0057 | 3.63E-09 | 5.9002  | 1376071 | Asthma |
| rs202664    | 22 | 41417882 | C | T | 0.1887 | 0.0346  | 0.0059 | 4.44E-09 | 5.8670  | 1376071 | Asthma |
| rs202665    | 22 | 41418397 | A | G | 0.1886 | 0.0343  | 0.0059 | 6.08E-09 | 5.8147  | 1376071 | Asthma |
| rs202666    | 22 | 41418715 | T | C | 0.1887 | 0.0345  | 0.0059 | 4.92E-09 | 5.8500  | 1376071 | Asthma |
| rs5758343   | 22 | 41420648 | A | T | 0.1840 | 0.0412  | 0.0071 | 6.35E-09 | 5.8074  | 1090071 | Asthma |
| rs5758344   | 22 | 41421681 | G | A | 0.1885 | 0.0348  | 0.0059 | 3.79E-09 | 5.8931  | 1376071 | Asthma |
| rs5758345   | 22 | 41421874 | A | G | 0.1885 | 0.0348  | 0.0059 | 3.83E-09 | 5.8912  | 1376071 | Asthma |
| rs2413643   | 22 | 41422230 | A | G | 0.1885 | 0.0347  | 0.0059 | 3.97E-09 | 5.8853  | 1376071 | Asthma |
| rs2413644   | 22 | 41422272 | A | G | 0.1885 | 0.0348  | 0.0059 | 3.82E-09 | 5.8917  | 1376071 | Asthma |
| rs420071    | 22 | 41423663 | T | C | 0.1895 | 0.0346  | 0.0059 | 4.09E-09 | 5.8804  | 1376071 | Asthma |
| rs12165508  | 22 | 41423956 | T | C | 0.1951 | 0.0338  | 0.0058 | 6.74E-09 | 5.7974  | 1376071 | Asthma |
| rs2142505   | 22 | 41424537 | A | G | 0.1885 | 0.0348  | 0.0059 | 3.76E-09 | 5.8943  | 1376071 | Asthma |
| rs5758347   | 22 | 41425015 | G | T | 0.1885 | 0.0348  | 0.0059 | 3.61E-09 | 5.9013  | 1376071 | Asthma |
| rs6002378   | 22 | 41425212 | T | C | 0.1885 | 0.0348  | 0.0059 | 3.65E-09 | 5.8995  | 1376071 | Asthma |
| rs6002379   | 22 | 41425249 | G | A | 0.1893 | 0.0347  | 0.0059 | 4.06E-09 | 5.8819  | 1376071 | Asthma |
| rs6002380   | 22 | 41425419 | C | T | 0.1886 | 0.0348  | 0.0059 | 3.64E-09 | 5.8997  | 1376071 | Asthma |
| rs6002381   | 22 | 41425456 | T | C | 0.2033 | 0.0362  | 0.0062 | 4.01E-09 | 5.8840  | 1008051 | Asthma |
| rs202613    | 22 | 41425989 | C | A | 0.1885 | 0.0348  | 0.0059 | 3.78E-09 | 5.8936  | 1376071 | Asthma |
| rs202614    | 22 | 41426146 | A | C | 0.1885 | 0.0348  | 0.0059 | 3.65E-09 | 5.8993  | 1376071 | Asthma |
| rs202616    | 22 | 41426217 | C | G | 0.1887 | 0.0347  | 0.0059 | 4.04E-09 | 5.8828  | 1376071 | Asthma |
| rs188057    | 22 | 41426301 | T | G | 0.1885 | 0.0348  | 0.0059 | 3.76E-09 | 5.8945  | 1376071 | Asthma |
| rs202617    | 22 | 41426789 | G | A | 0.1885 | 0.0348  | 0.0059 | 3.88E-09 | 5.8892  | 1376071 | Asthma |
| rs202618    | 22 | 41426852 | A | G | 0.1885 | 0.0348  | 0.0059 | 3.73E-09 | 5.8955  | 1376071 | Asthma |
| rs202619    | 22 | 41427622 | T | C | 0.1885 | 0.0348  | 0.0059 | 3.59E-09 | 5.9020  | 1376071 | Asthma |
| rs202620    | 22 | 41428832 | T | C | 0.1885 | 0.0349  | 0.0059 | 3.48E-09 | 5.9071  | 1376071 | Asthma |

|             |    |          |   |   |        |        |        |          |        |         |        |
|-------------|----|----------|---|---|--------|--------|--------|----------|--------|---------|--------|
| rs202622    | 22 | 41429338 | T | G | 0.1885 | 0.0348 | 0.0059 | 3.78E-09 | 5.8936 | 1376071 | Asthma |
| rs202623    | 22 | 41430436 | T | C | 0.1885 | 0.0347 | 0.0059 | 4.01E-09 | 5.8837 | 1376071 | Asthma |
| rs202624    | 22 | 41430798 | G | A | 0.1885 | 0.0347 | 0.0059 | 4.00E-09 | 5.8844 | 1376071 | Asthma |
| rs202625    | 22 | 41431078 | G | A | 0.1886 | 0.0347 | 0.0059 | 3.98E-09 | 5.8850 | 1376071 | Asthma |
| rs169362    | 22 | 41431585 | G | C | 0.1950 | 0.0338 | 0.0058 | 6.48E-09 | 5.8040 | 1376071 | Asthma |
| rs5751101   | 22 | 41432107 | C | T | 0.1886 | 0.0347 | 0.0059 | 4.13E-09 | 5.8789 | 1376071 | Asthma |
| rs7285041   | 22 | 41433145 | G | T | 0.1885 | 0.0348 | 0.0059 | 3.85E-09 | 5.8905 | 1376071 | Asthma |
| rs6609      | 22 | 41433790 | C | G | 0.1885 | 0.0348 | 0.0059 | 3.76E-09 | 5.8947 | 1376071 | Asthma |
| rs9611591   | 22 | 41434208 | G | A | 0.1954 | 0.0340 | 0.0058 | 5.63E-09 | 5.8273 | 1376071 | Asthma |
| rs202641    | 22 | 41437112 | C | T | 0.1899 | 0.0349 | 0.0059 | 3.23E-09 | 5.9193 | 1376071 | Asthma |
| rs202642    | 22 | 41437523 | C | T | 0.1899 | 0.0349 | 0.0059 | 3.26E-09 | 5.9177 | 1376071 | Asthma |
| rs2011790   | 22 | 41439448 | G | A | 0.1884 | 0.0348 | 0.0059 | 3.84E-09 | 5.8910 | 1376071 | Asthma |
| rs79005     | 22 | 41439540 | G | A | 0.1899 | 0.0349 | 0.0059 | 3.22E-09 | 5.9202 | 1376071 | Asthma |
| rs202650    | 22 | 41441537 | G | C | 0.1898 | 0.0349 | 0.0059 | 2.99E-09 | 5.9322 | 1376071 | Asthma |
| rs202652    | 22 | 41442788 | A | G | 0.1887 | 0.0330 | 0.0060 | 4.46E-08 | 5.4716 | 1316443 | Asthma |
| rs169365    | 22 | 41443710 | G | A | 0.1958 | 0.0475 | 0.0077 | 6.98E-10 | 6.1666 | 757378  | Asthma |
| rs106860    | 22 | 41444403 | T | C | 0.1887 | 0.0347 | 0.0059 | 4.22E-09 | 5.8754 | 1376071 | Asthma |
| rs202654    | 22 | 41445030 | G | A | 0.1943 | 0.0326 | 0.0060 | 4.37E-08 | 5.4753 | 1316443 | Asthma |
| rs202656    | 22 | 41446199 | T | A | 0.1887 | 0.0344 | 0.0059 | 5.40E-09 | 5.8343 | 1376071 | Asthma |
| rs202657    | 22 | 41448782 | G | T | 0.1887 | 0.0343 | 0.0059 | 6.10E-09 | 5.8138 | 1376071 | Asthma |
| rs202630    | 22 | 41454226 | C | T | 0.2043 | 0.0356 | 0.0061 | 6.82E-09 | 5.7953 | 1008051 | Asthma |
| rs79008     | 22 | 41454496 | A | G | 0.1891 | 0.0343 | 0.0059 | 6.31E-09 | 5.8083 | 1376071 | Asthma |
| rs5758368   | 22 | 41466284 | T | C | 0.1884 | 0.0330 | 0.0060 | 4.71E-08 | 5.4621 | 1316443 | Asthma |
| rs202631    | 22 | 41467419 | A | G | 0.1884 | 0.0330 | 0.0060 | 4.75E-08 | 5.4602 | 1316443 | Asthma |
| rs505533    | 22 | 41468212 | A | C | 0.1941 | 0.0327 | 0.0060 | 4.58E-08 | 5.4667 | 1316443 | Asthma |
| rs19573     | 22 | 41469805 | C | A | 0.1884 | 0.0331 | 0.0060 | 4.35E-08 | 5.4760 | 1316443 | Asthma |
| rs79011     | 22 | 41470934 | A | G | 0.1884 | 0.0332 | 0.0060 | 4.02E-08 | 5.4901 | 1316443 | Asthma |
| rs169361    | 22 | 41481985 | A | G | 0.1846 | 0.0342 | 0.0061 | 2.13E-08 | 5.6008 | 1316443 | Asthma |
| rs137830    | 22 | 41506499 | C | T | 0.1842 | 0.0340 | 0.0061 | 2.54E-08 | 5.5705 | 1316443 | Asthma |
| rs2076199   | 22 | 41507739 | T | G | 0.1933 | 0.0329 | 0.0060 | 3.83E-08 | 5.4986 | 1316443 | Asthma |
| rs2413646   | 22 | 41510321 | T | C | 0.1836 | 0.0343 | 0.0061 | 1.92E-08 | 5.6192 | 1316443 | Asthma |
| rs2413647   | 22 | 41511144 | A | G | 0.1837 | 0.0342 | 0.0061 | 2.09E-08 | 5.6046 | 1316443 | Asthma |
| rs9611602   | 22 | 41512401 | C | T | 0.1838 | 0.0344 | 0.0061 | 1.79E-08 | 5.6311 | 1316443 | Asthma |
| rs1569516   | 22 | 41514240 | T | C | 0.1837 | 0.0344 | 0.0061 | 1.84E-08 | 5.6268 | 1316443 | Asthma |
| rs9611603   | 22 | 41516746 | G | A | 0.1837 | 0.0340 | 0.0061 | 2.70E-08 | 5.5602 | 1316443 | Asthma |
| rs203320    | 22 | 41517473 | C | T | 0.1934 | 0.0329 | 0.0060 | 3.83E-08 | 5.4985 | 1316443 | Asthma |
| rs17367716  | 22 | 41517840 | G | A | 0.1838 | 0.0341 | 0.0061 | 2.36E-08 | 5.5835 | 1316443 | Asthma |
| rs203319    | 22 | 41518589 | T | C | 0.1931 | 0.0327 | 0.0060 | 4.51E-08 | 5.4697 | 1316443 | Asthma |
| rs11090049  | 22 | 41519325 | T | C | 0.1835 | 0.0340 | 0.0061 | 2.68E-08 | 5.5615 | 1316443 | Asthma |
| rs9611604   | 22 | 41519997 | G | C | 0.1835 | 0.0343 | 0.0061 | 1.95E-08 | 5.6166 | 1316443 | Asthma |
| rs12484694  | 22 | 41523326 | G | A | 0.1837 | 0.0345 | 0.0061 | 1.65E-08 | 5.6453 | 1316443 | Asthma |
| rs73178621  | 22 | 41525661 | G | A | 0.1837 | 0.0342 | 0.0061 | 2.02E-08 | 5.6100 | 1316443 | Asthma |
| rs17367849  | 22 | 41527640 | A | G | 0.1836 | 0.0343 | 0.0061 | 1.86E-08 | 5.6241 | 1316443 | Asthma |
| rs4822032   | 22 | 41529531 | C | T | 0.1936 | 0.0329 | 0.0060 | 3.52E-08 | 5.5134 | 1316443 | Asthma |
| rs1810460   | 22 | 41531696 | T | C | 0.1838 | 0.0345 | 0.0061 | 1.62E-08 | 5.6481 | 1316443 | Asthma |
| rs1810461   | 22 | 41531816 | A | G | 0.1838 | 0.0343 | 0.0061 | 1.83E-08 | 5.6270 | 1316443 | Asthma |
| rs73178625  | 22 | 41532316 | C | G | 0.1839 | 0.0344 | 0.0061 | 1.80E-08 | 5.6305 | 1316443 | Asthma |
| rs73178626  | 22 | 41532367 | G | T | 0.1838 | 0.0343 | 0.0061 | 1.98E-08 | 5.6134 | 1316443 | Asthma |
| rs4822033   | 22 | 41533956 | G | T | 0.1838 | 0.0345 | 0.0061 | 1.57E-08 | 5.6541 | 1316443 | Asthma |
| rs4822034   | 22 | 41535006 | C | T | 0.1839 | 0.0345 | 0.0061 | 1.51E-08 | 5.6607 | 1316443 | Asthma |
| rs9611606   | 22 | 41535070 | G | A | 0.1839 | 0.0345 | 0.0061 | 1.56E-08 | 5.6550 | 1316443 | Asthma |
| rs116959331 | 22 | 41536770 | G | A | 0.1839 | 0.0345 | 0.0061 | 1.53E-08 | 5.6584 | 1316443 | Asthma |
| rs56319767  | 22 | 41537833 | A | G | 0.1837 | 0.0346 | 0.0061 | 1.39E-08 | 5.6752 | 1316443 | Asthma |
| rs73178632  | 22 | 41538569 | T | C | 0.1837 | 0.0346 | 0.0061 | 1.39E-08 | 5.6743 | 1316443 | Asthma |
| rs28530678  | 22 | 41538957 | C | G | 0.1834 | 0.0343 | 0.0061 | 1.91E-08 | 5.6201 | 1316443 | Asthma |
| rs12483991  | 22 | 41539281 | G | A | 0.1926 | 0.0332 | 0.0060 | 2.96E-08 | 5.5438 | 1316443 | Asthma |
| rs12483998  | 22 | 41539358 | G | A | 0.1841 | 0.0342 | 0.0061 | 2.00E-08 | 5.6119 | 1316443 | Asthma |
| rs4822035   | 22 | 41539908 | A | G | 0.1837 | 0.0346 | 0.0061 | 1.43E-08 | 5.6698 | 1316443 | Asthma |
| rs4822036   | 22 | 41540015 | G | A | 0.1837 | 0.0347 | 0.0061 | 1.24E-08 | 5.6941 | 1316443 | Asthma |
| rs12483786  | 22 | 41542532 | G | A | 0.1837 | 0.0347 | 0.0061 | 1.36E-08 | 5.6787 | 1316443 | Asthma |
| rs12484228  | 22 | 41543735 | G | A | 0.1837 | 0.0348 | 0.0061 | 1.17E-08 | 5.7042 | 1316443 | Asthma |
| rs9607813   | 22 | 41545475 | A | G | 0.1838 | 0.0348 | 0.0061 | 1.21E-08 | 5.6988 | 1316443 | Asthma |
| rs5758389   | 22 | 41545745 | C | T | 0.1930 | 0.0339 | 0.0060 | 1.53E-08 | 5.6586 | 1316443 | Asthma |
| rs73178638  | 22 | 41546900 | C | T | 0.1898 | 0.0407 | 0.0072 | 1.73E-08 | 5.6366 | 792345  | Asthma |
| rs56904812  | 22 | 41548069 | T | C | 0.1839 | 0.0343 | 0.0061 | 1.99E-08 | 5.6133 | 1316443 | Asthma |
| rs4822037   | 22 | 41549109 | T | G | 0.1835 | 0.0350 | 0.0061 | 1.04E-08 | 5.7239 | 1316443 | Asthma |
| rs9611609   | 22 | 41549353 | A | C | 0.1838 | 0.0349 | 0.0061 | 1.07E-08 | 5.7187 | 1316443 | Asthma |
| rs9607814   | 22 | 41550515 | A | C | 0.2022 | 0.0389 | 0.0069 | 1.52E-08 | 5.6596 | 818501  | Asthma |
| rs9611610   | 22 | 41553255 | G | A | 0.1856 | 0.0347 | 0.0061 | 1.15E-08 | 5.7077 | 1316443 | Asthma |
| rs9611611   | 22 | 41554171 | T | C | 0.1856 | 0.0347 | 0.0061 | 1.20E-08 | 5.6998 | 1316443 | Asthma |
| rs76930421  | 22 | 41554224 | C | T | 0.1856 | 0.0347 | 0.0061 | 1.15E-08 | 5.7067 | 1316443 | Asthma |
| rs9607815   | 22 | 41554667 | T | A | 0.1856 | 0.0348 | 0.0061 | 1.08E-08 | 5.7173 | 1316443 | Asthma |
| rs9607816   | 22 | 41554893 | A | G | 0.1860 | 0.0349 | 0.0061 | 9.68E-09 | 5.7363 | 1316443 | Asthma |
| rs56364401  | 22 | 41555239 | G | T | 0.1861 | 0.0349 | 0.0061 | 9.46E-09 | 5.7400 | 1316443 | Asthma |

|             |    |          |   |   |        |        |        |          |        |         |        |
|-------------|----|----------|---|---|--------|--------|--------|----------|--------|---------|--------|
| rs73178641  | 22 | 41556071 | T | A | 0.1768 | 0.0382 | 0.0068 | 2.22E-08 | 5.5942 | 1160365 | Asthma |
| rs12484175  | 22 | 41557735 | C | A | 0.1839 | 0.0349 | 0.0061 | 1.05E-08 | 5.7221 | 1316443 | Asthma |
| rs1972057   | 22 | 41558247 | G | A | 0.1843 | 0.0351 | 0.0061 | 8.66E-09 | 5.7552 | 1316443 | Asthma |
| rs12484722  | 22 | 41558820 | C | T | 0.1834 | 0.0347 | 0.0061 | 1.44E-08 | 5.6682 | 1316443 | Asthma |
| rs9607818   | 22 | 41558915 | T | C | 0.1764 | 0.0379 | 0.0068 | 2.88E-08 | 5.5488 | 1160365 | Asthma |
| rs12484467  | 22 | 41561606 | C | T | 0.1796 | 0.0341 | 0.0062 | 2.91E-08 | 5.5469 | 1316443 | Asthma |
| rs4822038   | 22 | 41562491 | A | G | 0.1789 | 0.0359 | 0.0060 | 2.40E-09 | 5.9682 | 1376071 | Asthma |
| rs4822039   | 22 | 41565130 | A | G | 0.1824 | 0.0477 | 0.0078 | 1.11E-09 | 6.0928 | 722051  | Asthma |
| rs6002402   | 22 | 41566288 | G | C | 0.1770 | 0.0364 | 0.0061 | 1.86E-09 | 6.0096 | 1376071 | Asthma |
| rs73178647  | 22 | 41568164 | A | G | 0.1700 | 0.0401 | 0.0069 | 5.45E-09 | 5.8328 | 1193860 | Asthma |
| rs6002406   | 22 | 41569233 | T | A | 0.1783 | 0.0359 | 0.0060 | 2.81E-09 | 5.9424 | 1376071 | Asthma |
| rs1006407   | 22 | 41576028 | C | T | 0.1782 | 0.0360 | 0.0060 | 2.76E-09 | 5.9455 | 1376071 | Asthma |
| rs4822044   | 22 | 41583664 | C | G | 0.1770 | 0.0361 | 0.0061 | 2.46E-09 | 5.9639 | 1376071 | Asthma |
| rs2076200   | 22 | 41589952 | T | G | 0.1770 | 0.0360 | 0.0061 | 2.66E-09 | 5.9513 | 1376071 | Asthma |
| rs4822045   | 22 | 41589954 | A | C | 0.1766 | 0.0357 | 0.0061 | 3.92E-09 | 5.8874 | 1376071 | Asthma |
| rs9611619   | 22 | 41590710 | T | C | 0.1769 | 0.0358 | 0.0061 | 3.39E-09 | 5.9116 | 1376071 | Asthma |
| rs4822046   | 22 | 41591539 | A | G | 0.1770 | 0.0359 | 0.0061 | 3.15E-09 | 5.9235 | 1376071 | Asthma |
| rs28750375  | 22 | 41594640 | C | A | 0.1862 | 0.0338 | 0.0059 | 1.21E-08 | 5.6982 | 1376071 | Asthma |
| rs4822049   | 22 | 41597492 | A | G | 0.1769 | 0.0360 | 0.0061 | 2.66E-09 | 5.9513 | 1376071 | Asthma |
| rs8139993   | 22 | 41599331 | C | T | 0.1872 | 0.0337 | 0.0059 | 1.32E-08 | 5.6839 | 1376071 | Asthma |
| rs148894219 | 22 | 41600127 | T | C | 0.1772 | 0.0359 | 0.0061 | 3.05E-09 | 5.9287 | 1376071 | Asthma |
| rs132761    | 22 | 41608367 | C | T | 0.1770 | 0.0345 | 0.0062 | 2.60E-08 | 5.5663 | 1316443 | Asthma |
| rs132765    | 22 | 41612064 | A | G | 0.1769 | 0.0345 | 0.0062 | 2.64E-08 | 5.5638 | 1316443 | Asthma |
| rs132767    | 22 | 41613516 | T | C | 0.1770 | 0.0344 | 0.0062 | 2.80E-08 | 5.5534 | 1316443 | Asthma |
| rs132768    | 22 | 41617519 | C | A | 0.1771 | 0.0344 | 0.0062 | 2.92E-08 | 5.5461 | 1316443 | Asthma |
| rs5758397   | 22 | 41623247 | C | T | 0.1776 | 0.0358 | 0.0061 | 3.31E-09 | 5.9153 | 1376071 | Asthma |
| rs13055759  | 22 | 41626031 | C | G | 0.1771 | 0.0341 | 0.0062 | 3.65E-08 | 5.5069 | 1316443 | Asthma |
| rs132771    | 22 | 41629346 | A | G | 0.1771 | 0.0342 | 0.0062 | 3.51E-08 | 5.5141 | 1316443 | Asthma |
| rs132773    | 22 | 41635764 | T | A | 0.1892 | 0.0365 | 0.0065 | 1.80E-08 | 5.6304 | 948423  | Asthma |
| rs132776    | 22 | 41640370 | T | C | 0.1771 | 0.0344 | 0.0062 | 2.75E-08 | 5.5566 | 1316443 | Asthma |
| rs132779    | 22 | 41642636 | A | G | 0.1771 | 0.0346 | 0.0062 | 2.48E-08 | 5.5745 | 1316443 | Asthma |
| rs9611636   | 22 | 41645306 | C | A | 0.1710 | 0.0427 | 0.0073 | 4.88E-09 | 5.8512 | 1090071 | Asthma |
| rs132781    | 22 | 41650118 | T | G | 0.1644 | 0.0361 | 0.0064 | 1.70E-08 | 5.6405 | 1316443 | Asthma |
| rs5751135   | 22 | 41652862 | T | C | 0.1643 | 0.0357 | 0.0064 | 2.39E-08 | 5.5810 | 1316443 | Asthma |
| rs132784    | 22 | 41656359 | G | A | 0.1642 | 0.0357 | 0.0064 | 2.31E-08 | 5.5867 | 1316443 | Asthma |
| rs132793    | 22 | 41667677 | A | G | 0.1747 | 0.0352 | 0.0062 | 1.73E-08 | 5.6368 | 1316443 | Asthma |
| rs132797    | 22 | 41668761 | A | G | 0.1771 | 0.0341 | 0.0062 | 3.84E-08 | 5.4979 | 1316443 | Asthma |
| rs132805    | 22 | 41672598 | T | C | 0.1771 | 0.0339 | 0.0062 | 4.32E-08 | 5.4771 | 1316443 | Asthma |
| rs8779      | 22 | 41674272 | T | C | 0.1770 | 0.0341 | 0.0062 | 3.72E-08 | 5.5037 | 1316443 | Asthma |
| rs132807    | 22 | 41675580 | T | C | 0.1769 | 0.0341 | 0.0062 | 3.86E-08 | 5.4973 | 1316443 | Asthma |
| rs1811113   | 22 | 41677130 | C | T | 0.1770 | 0.0342 | 0.0062 | 3.46E-08 | 5.5166 | 1316443 | Asthma |
| rs949438    | 22 | 41678038 | A | C | 0.1782 | 0.0367 | 0.0066 | 3.15E-08 | 5.5329 | 1186521 | Asthma |
| rs5758408   | 22 | 41681733 | A | C | 0.1771 | 0.0340 | 0.0062 | 4.09E-08 | 5.4871 | 1316443 | Asthma |
| rs5758412   | 22 | 41684799 | T | A | 0.1770 | 0.0342 | 0.0062 | 3.55E-08 | 5.5118 | 1316443 | Asthma |
| rs13056262  | 22 | 41685917 | A | G | 0.1766 | 0.0340 | 0.0062 | 4.16E-08 | 5.4838 | 1316443 | Asthma |
| rs5758416   | 22 | 41686787 | T | C | 0.1790 | 0.0345 | 0.0063 | 4.08E-08 | 5.4873 | 1290310 | Asthma |
| rs739134    | 22 | 41693619 | T | C | 0.1857 | 0.0333 | 0.0059 | 2.15E-08 | 5.5993 | 1376071 | Asthma |
| rs739135    | 22 | 41694065 | A | C | 0.1771 | 0.0343 | 0.0062 | 3.24E-08 | 5.5283 | 1316443 | Asthma |
| rs2187795   | 22 | 41696221 | C | A | 0.1771 | 0.0342 | 0.0062 | 3.54E-08 | 5.5126 | 1316443 | Asthma |
| rs5751139   | 22 | 41703977 | G | C | 0.1769 | 0.0343 | 0.0062 | 3.07E-08 | 5.5376 | 1316443 | Asthma |
| rs739136    | 22 | 41704271 | A | G | 0.1771 | 0.0342 | 0.0062 | 3.40E-08 | 5.5198 | 1316443 | Asthma |
| rs6002445   | 22 | 41704677 | A | G | 0.1771 | 0.0341 | 0.0062 | 3.61E-08 | 5.5088 | 1316443 | Asthma |
| rs2097413   | 22 | 41705811 | G | A | 0.2040 | 0.0326 | 0.0059 | 3.39E-08 | 5.5200 | 1316443 | Asthma |
| rs5758428   | 22 | 41710212 | G | A | 0.1771 | 0.0343 | 0.0062 | 3.08E-08 | 5.5367 | 1316443 | Asthma |
| rs2413653   | 22 | 41710992 | T | C | 0.1769 | 0.0345 | 0.0062 | 2.60E-08 | 5.5665 | 1316443 | Asthma |
| rs2413654   | 22 | 41711258 | T | C | 0.1769 | 0.0343 | 0.0062 | 3.04E-08 | 5.5393 | 1316443 | Asthma |
| rs5751141   | 22 | 41711741 | A | G | 0.1769 | 0.0343 | 0.0062 | 3.05E-08 | 5.5389 | 1316443 | Asthma |
| rs739129    | 22 | 41722245 | G | A | 0.1781 | 0.0338 | 0.0062 | 4.77E-08 | 5.4598 | 1316443 | Asthma |
| rs739132    | 22 | 41727095 | A | T | 0.1770 | 0.0342 | 0.0062 | 3.36E-08 | 5.5216 | 1316443 | Asthma |
| rs5758436   | 22 | 41728261 | C | T | 0.1769 | 0.0342 | 0.0062 | 3.44E-08 | 5.5174 | 1316443 | Asthma |
| rs2092275   | 22 | 41733960 | T | C | 0.1769 | 0.0343 | 0.0062 | 3.14E-08 | 5.5332 | 1316443 | Asthma |
| rs5758439   | 22 | 41735758 | C | T | 0.1769 | 0.0343 | 0.0062 | 3.21E-08 | 5.5298 | 1316443 | Asthma |
| rs5758443   | 22 | 41737439 | G | A | 0.1774 | 0.0357 | 0.0061 | 3.79E-09 | 5.8930 | 1376071 | Asthma |
| rs5751145   | 22 | 41737548 | C | T | 0.1887 | 0.0378 | 0.0063 | 2.36E-09 | 5.9709 | 1008051 | Asthma |
| rs5758444   | 22 | 41737917 | T | A | 0.1821 | 0.0342 | 0.0062 | 2.75E-08 | 5.5566 | 1316443 | Asthma |
| rs2899346   | 22 | 41738891 | T | C | 0.1774 | 0.0356 | 0.0060 | 3.86E-09 | 5.8902 | 1376071 | Asthma |
| rs768414    | 22 | 41739747 | T | C | 0.1773 | 0.0357 | 0.0061 | 3.70E-09 | 5.8969 | 1376071 | Asthma |
| rs8141103   | 22 | 41740926 | T | C | 0.1774 | 0.0356 | 0.0061 | 4.21E-09 | 5.8755 | 1376071 | Asthma |
| rs5751147   | 22 | 41743050 | G | A | 0.1776 | 0.0354 | 0.0060 | 4.63E-09 | 5.8600 | 1376071 | Asthma |
| rs5751148   | 22 | 41743074 | A | G | 0.1775 | 0.0356 | 0.0060 | 3.92E-09 | 5.8876 | 1376071 | Asthma |
| rs5751149   | 22 | 41743497 | A | G | 0.1775 | 0.0356 | 0.0060 | 3.93E-09 | 5.8870 | 1376071 | Asthma |
| rs5996058   | 22 | 41745448 | A | G | 0.1774 | 0.0356 | 0.0061 | 4.17E-09 | 5.8775 | 1376071 | Asthma |
| rs5758450   | 22 | 41745636 | G | A | 0.1776 | 0.0356 | 0.0060 | 4.04E-09 | 5.8828 | 1376071 | Asthma |
| rs964898    | 22 | 41746302 | T | C | 0.1773 | 0.0355 | 0.0060 | 4.23E-09 | 5.8749 | 1376071 | Asthma |

|             |    |           |   |   |        |         |        |          |         |         |        |
|-------------|----|-----------|---|---|--------|---------|--------|----------|---------|---------|--------|
| rs964899    | 22 | 41746382  | G | A | 0.1773 | 0.0357  | 0.0061 | 3.71E-09 | 5.8964  | 1376071 | Asthma |
| rs1883369   | 22 | 41747568  | A | G | 0.1774 | 0.0356  | 0.0061 | 4.22E-09 | 5.8755  | 1376071 | Asthma |
| rs1807725   | 22 | 41751721  | A | G | 0.1774 | 0.0356  | 0.0060 | 3.88E-09 | 5.8892  | 1376071 | Asthma |
| rs715498    | 22 | 41752463  | G | A | 0.1775 | 0.0356  | 0.0060 | 3.79E-09 | 5.8932  | 1376071 | Asthma |
| rs1534932   | 22 | 41754142  | C | T | 0.1774 | 0.0353  | 0.0061 | 5.37E-09 | 5.8351  | 1376071 | Asthma |
| rs2050031   | 22 | 41756262  | A | G | 0.1774 | 0.0354  | 0.0060 | 4.72E-09 | 5.8568  | 1376071 | Asthma |
| rs5751150   | 22 | 41757288  | T | G | 0.1775 | 0.0356  | 0.0060 | 4.08E-09 | 5.8808  | 1376071 | Asthma |
| rs5758458   | 22 | 41758128  | G | A | 0.1775 | 0.0355  | 0.0060 | 4.60E-09 | 5.8609  | 1376071 | Asthma |
| rs5751153   | 22 | 41760557  | T | C | 0.1775 | 0.0358  | 0.0060 | 3.09E-09 | 5.9270  | 1376071 | Asthma |
| rs5758459   | 22 | 41761077  | T | C | 0.1772 | 0.0357  | 0.0061 | 3.79E-09 | 5.8933  | 1376071 | Asthma |
| rs2899347   | 22 | 41762200  | T | C | 0.1767 | 0.0359  | 0.0061 | 5.21E-09 | 5.8404  | 1349938 | Asthma |
| rs713988    | 22 | 41763068  | A | G | 0.1888 | 0.0364  | 0.0065 | 1.92E-08 | 5.6194  | 948423  | Asthma |
| rs2050033   | 22 | 41763225  | G | T | 0.1771 | 0.0357  | 0.0061 | 3.79E-09 | 5.8931  | 1376071 | Asthma |
| rs5758461   | 22 | 41766185  | G | C | 0.1885 | 0.0379  | 0.0063 | 1.97E-09 | 6.0002  | 1008051 | Asthma |
| rs2899348   | 22 | 41768512  | C | G | 0.1774 | 0.0355  | 0.0060 | 4.14E-09 | 5.8787  | 1376071 | Asthma |
| rs2899349   | 22 | 41768656  | T | C | 0.1773 | 0.0358  | 0.0060 | 3.41E-09 | 5.9104  | 1376071 | Asthma |
| rs1983576   | 22 | 41770482  | G | A | 0.1773 | 0.0357  | 0.0061 | 3.65E-09 | 5.8992  | 1376071 | Asthma |
| rs5996062   | 22 | 41771460  | C | G | 0.1773 | 0.0356  | 0.0061 | 4.04E-09 | 5.8827  | 1376071 | Asthma |
| rs6002474   | 22 | 41772177  | A | G | 0.1773 | 0.0357  | 0.0060 | 3.71E-09 | 5.8965  | 1376071 | Asthma |
| rs5996063   | 22 | 41772763  | G | A | 0.1773 | 0.0356  | 0.0060 | 3.85E-09 | 5.8907  | 1376071 | Asthma |
| rs5751156   | 22 | 41774021  | A | G | 0.1773 | 0.0358  | 0.0060 | 3.32E-09 | 5.9148  | 1376071 | Asthma |
| rs6519289   | 22 | 41774428  | A | C | 0.1773 | 0.0357  | 0.0060 | 3.43E-09 | 5.9096  | 1376071 | Asthma |
| rs5758464   | 22 | 41775296  | T | C | 0.1773 | 0.0357  | 0.0060 | 3.60E-09 | 5.9016  | 1376071 | Asthma |
| rs5758465   | 22 | 41779310  | T | C | 0.1772 | 0.0357  | 0.0061 | 3.83E-09 | 5.8913  | 1376071 | Asthma |
| rs5751160   | 22 | 41779691  | A | G | 0.1772 | 0.0357  | 0.0061 | 3.76E-09 | 5.8943  | 1376071 | Asthma |
| rs45500192  | 22 | 41781895  | G | A | 0.1768 | 0.0358  | 0.0061 | 3.51E-09 | 5.9057  | 1376071 | Asthma |
| rs139545    | 22 | 41785494  | C | T | 0.1776 | 0.0364  | 0.0060 | 1.74E-09 | 6.0208  | 1376071 | Asthma |
| rs9607841   | 22 | 41790834  | A | G | 0.1768 | 0.0356  | 0.0061 | 3.97E-09 | 5.8854  | 1376071 | Asthma |
| rs9611667   | 22 | 41791011  | T | C | 0.1768 | 0.0354  | 0.0061 | 4.94E-09 | 5.8491  | 1376071 | Asthma |
| rs73163343  | 22 | 41796478  | A | G | 0.1788 | 0.0360  | 0.0060 | 2.48E-09 | 5.9631  | 1376071 | Asthma |
| rs9607842   | 22 | 41796718  | A | G | 0.1788 | 0.0360  | 0.0060 | 2.48E-09 | 5.9627  | 1376071 | Asthma |
| rs4822052   | 22 | 41797737  | A | G | 0.1872 | 0.0337  | 0.0059 | 1.22E-08 | 5.6966  | 1376071 | Asthma |
| rs4820443   | 22 | 41797909  | C | T | 0.1788 | 0.0359  | 0.0060 | 2.47E-09 | 5.9634  | 1376071 | Asthma |
| rs139560    | 22 | 41798958  | G | A | 0.1788 | 0.0359  | 0.0060 | 2.59E-09 | 5.9554  | 1376071 | Asthma |
| rs139561    | 22 | 41799406  | C | T | 0.1787 | 0.0359  | 0.0060 | 2.55E-09 | 5.9586  | 1376071 | Asthma |
| rs139562    | 22 | 41800680  | C | G | 0.1770 | 0.0357  | 0.0061 | 3.60E-09 | 5.9016  | 1376071 | Asthma |
| rs139564    | 22 | 41802892  | T | C | 0.1768 | 0.0359  | 0.0061 | 2.99E-09 | 5.9319  | 1376071 | Asthma |
| rs139566    | 22 | 41803273  | G | A | 0.1770 | 0.0359  | 0.0061 | 3.05E-09 | 5.9290  | 1376071 | Asthma |
| rs73163354  | 22 | 41804912  | G | A | 0.1769 | 0.0358  | 0.0061 | 3.25E-09 | 5.9183  | 1376071 | Asthma |
| rs4820444   | 22 | 41806602  | A | G | 0.1770 | 0.0358  | 0.0061 | 3.35E-09 | 5.9135  | 1376071 | Asthma |
| rs112524762 | 22 | 41806940  | A | G | 0.1770 | 0.0357  | 0.0061 | 3.46E-09 | 5.9083  | 1376071 | Asthma |
| rs9611671   | 22 | 41808109  | A | G | 0.1770 | 0.0358  | 0.0061 | 3.45E-09 | 5.9087  | 1376071 | Asthma |
| rs4512      | 22 | 41810080  | C | G | 0.1769 | 0.0355  | 0.0061 | 4.37E-09 | 5.8698  | 1376071 | Asthma |
| rs9611672   | 22 | 41813918  | G | A | 0.1771 | 0.0356  | 0.0060 | 3.96E-09 | 5.8857  | 1376071 | Asthma |
| rs139571    | 22 | 41818234  | A | G | 0.1769 | 0.0358  | 0.0061 | 3.21E-09 | 5.9207  | 1376071 | Asthma |
| rs139572    | 22 | 41818528  | A | G | 0.1773 | 0.0356  | 0.0060 | 4.04E-09 | 5.8824  | 1376071 | Asthma |
| rs139573    | 22 | 41818781  | A | G | 0.1771 | 0.0358  | 0.0060 | 3.09E-09 | 5.9266  | 1376071 | Asthma |
| rs4820446   | 22 | 41819680  | T | C | 0.1772 | 0.0356  | 0.0061 | 4.20E-09 | 5.8760  | 1376071 | Asthma |
| rs4423631   | 2  | 648758    | T | C | 0.1718 | -0.0631 | 0.0114 | 3.44E-08 | -5.5174 | 741929  | COPD   |
| rs4356682   | 2  | 22305412  | G | T | 0.4886 | 0.0524  | 0.0094 | 2.24E-08 | 5.5925  | 649623  | COPD   |
| rs200613906 | 2  | 22307083  | T | C | 0.4945 | 0.0536  | 0.0093 | 1.00E-08 | 5.7308  | 649623  | COPD   |
| rs2160203   | 2  | 102344364 | G | A | 0.2586 | -0.0445 | 0.0077 | 6.18E-09 | -5.8118 | 995917  | COPD   |
| rs17409597  | 2  | 145287492 | C | T | 0.4934 | 0.0455  | 0.0074 | 8.89E-10 | 6.1282  | 869711  | COPD   |
| rs13081578  | 3  | 169044328 | C | A | 0.2381 | 0.0480  | 0.0087 | 3.98E-08 | 5.4919  | 869711  | COPD   |
| rs6446731   | 4  | 3283024   | A | G | 0.2942 | 0.0412  | 0.0073 | 1.58E-08 | 5.6521  | 995917  | COPD   |
| rs4860797   | 4  | 66935416  | G | A | 0.4206 | 0.0387  | 0.0068 | 1.13E-08 | 5.7106  | 995917  | COPD   |
| rs1390069   | 4  | 66936380  | G | T | 0.3816 | 0.0422  | 0.0069 | 8.46E-10 | 6.1361  | 995917  | COPD   |
| rs1390070   | 4  | 66936451  | A | C | 0.3815 | 0.0422  | 0.0069 | 8.55E-10 | 6.1343  | 995917  | COPD   |
| rs1390071   | 4  | 66936513  | G | A | 0.3816 | 0.0422  | 0.0069 | 8.76E-10 | 6.1305  | 995917  | COPD   |
| rs12509944  | 4  | 66936710  | T | C | 0.3816 | 0.0424  | 0.0069 | 7.17E-10 | 6.1624  | 995917  | COPD   |
| rs35631117  | 4  | 66938586  | G | T | 0.4593 | 0.0441  | 0.0067 | 4.54E-11 | 6.5855  | 995917  | COPD   |
| rs1603179   | 4  | 66939629  | A | C | 0.3815 | 0.0424  | 0.0069 | 7.20E-10 | 6.1616  | 995917  | COPD   |
| rs11947612  | 4  | 66942136  | G | A | 0.3811 | 0.0422  | 0.0069 | 8.07E-10 | 6.1435  | 995917  | COPD   |
| rs6857547   | 4  | 66942735  | A | G | 0.3815 | 0.0423  | 0.0069 | 7.87E-10 | 6.1476  | 995917  | COPD   |
| rs13143549  | 4  | 66944813  | G | A | 0.4997 | -0.0429 | 0.0067 | 1.54E-10 | -6.4011 | 995917  | COPD   |
| rs13102903  | 4  | 66945016  | T | C | 0.3816 | 0.0425  | 0.0069 | 6.10E-10 | 6.1878  | 995917  | COPD   |
| rs13102956  | 4  | 66945109  | T | C | 0.4595 | 0.0440  | 0.0067 | 5.19E-11 | 6.5654  | 995917  | COPD   |
| rs12498631  | 4  | 66945825  | T | C | 0.3815 | 0.0423  | 0.0069 | 7.88E-10 | 6.1473  | 995917  | COPD   |
| rs12509233  | 4  | 66945900  | C | T | 0.3815 | 0.0423  | 0.0069 | 7.48E-10 | 6.1556  | 995917  | COPD   |
| rs2164300   | 4  | 66947299  | T | C | 0.4999 | -0.0407 | 0.0070 | 7.76E-09 | -5.7736 | 935597  | COPD   |
| rs1481265   | 4  | 66948264  | A | G | 0.3815 | 0.0422  | 0.0069 | 8.14E-10 | 6.1422  | 995917  | COPD   |
| rs35185289  | 4  | 66949493  | C | T | 0.4593 | 0.0435  | 0.0067 | 8.49E-11 | 6.4917  | 995917  | COPD   |
| rs13109017  | 4  | 66950774  | C | T | 0.4544 | 0.0415  | 0.0067 | 5.73E-10 | 6.1977  | 995917  | COPD   |
| rs1594996   | 4  | 66951698  | T | C | 0.4541 | 0.0414  | 0.0067 | 6.20E-10 | 6.1854  | 995917  | COPD   |

|            |   |          |   |   |        |        |        |          |        |        |      |
|------------|---|----------|---|---|--------|--------|--------|----------|--------|--------|------|
| rs12502923 | 4 | 66952256 | G | C | 0.4541 | 0.0414 | 0.0067 | 6.24E-10 | 6.1843 | 995917 | COPD |
| rs892834   | 4 | 66952765 | A | G | 0.4541 | 0.0414 | 0.0067 | 6.27E-10 | 6.1835 | 995917 | COPD |
| rs12506131 | 4 | 66955198 | G | A | 0.4478 | 0.0392 | 0.0067 | 4.96E-09 | 5.8487 | 995917 | COPD |
| rs4415008  | 4 | 66955758 | A | G | 0.4478 | 0.0391 | 0.0067 | 5.55E-09 | 5.8298 | 995917 | COPD |
| rs4308415  | 4 | 66956156 | C | G | 0.4478 | 0.0392 | 0.0067 | 5.12E-09 | 5.8431 | 995917 | COPD |
| rs1121213  | 4 | 66956569 | G | C | 0.4478 | 0.0391 | 0.0067 | 5.42E-09 | 5.8337 | 995917 | COPD |
| rs59047505 | 4 | 66956940 | C | T | 0.4478 | 0.0391 | 0.0067 | 5.21E-09 | 5.8405 | 995917 | COPD |
| rs58740840 | 4 | 66956994 | G | A | 0.4478 | 0.0391 | 0.0067 | 5.33E-09 | 5.8364 | 995917 | COPD |
| rs12508529 | 4 | 66957684 | G | T | 0.4478 | 0.0391 | 0.0067 | 5.30E-09 | 5.8374 | 995917 | COPD |
| rs1481255  | 4 | 66963334 | A | G | 0.4458 | 0.0385 | 0.0067 | 9.28E-09 | 5.7434 | 995917 | COPD |
| rs4309893  | 4 | 66965738 | C | T | 0.4459 | 0.0383 | 0.0067 | 1.13E-08 | 5.7097 | 995917 | COPD |
| rs2318541  | 4 | 66965860 | C | T | 0.4469 | 0.0386 | 0.0067 | 8.41E-09 | 5.7600 | 995917 | COPD |
| rs2318540  | 4 | 66965863 | T | G | 0.4463 | 0.0388 | 0.0067 | 6.74E-09 | 5.7973 | 995917 | COPD |
| rs2318539  | 4 | 66965910 | C | A | 0.4459 | 0.0385 | 0.0067 | 9.40E-09 | 5.7413 | 995917 | COPD |
| rs10518016 | 4 | 66970016 | A | T | 0.4459 | 0.0383 | 0.0067 | 1.13E-08 | 5.7102 | 995917 | COPD |
| rs12512590 | 4 | 66974215 | T | C | 0.4457 | 0.0381 | 0.0067 | 1.39E-08 | 5.6751 | 995917 | COPD |
| rs12500111 | 4 | 66974596 | G | T | 0.4402 | 0.0381 | 0.0067 | 1.44E-08 | 5.6687 | 995917 | COPD |
| rs12500130 | 4 | 66974708 | G | T | 0.4402 | 0.0381 | 0.0067 | 1.36E-08 | 5.6789 | 995917 | COPD |
| rs1904957  | 4 | 66975928 | A | G | 0.4403 | 0.0380 | 0.0067 | 1.46E-08 | 5.6659 | 995917 | COPD |
| rs6840124  | 4 | 66976146 | T | C | 0.4403 | 0.0381 | 0.0067 | 1.38E-08 | 5.6757 | 995917 | COPD |
| rs6810682  | 4 | 66976429 | C | T | 0.4403 | 0.0382 | 0.0067 | 1.32E-08 | 5.6836 | 995917 | COPD |
| rs6836004  | 4 | 66976629 | A | C | 0.4403 | 0.0382 | 0.0067 | 1.31E-08 | 5.6847 | 995917 | COPD |
| rs10434248 | 4 | 66977203 | G | A | 0.4459 | 0.0383 | 0.0067 | 1.16E-08 | 5.7058 | 995917 | COPD |
| rs12500685 | 4 | 66977658 | T | C | 0.4399 | 0.0382 | 0.0067 | 1.21E-08 | 5.6989 | 995917 | COPD |
| rs1030784  | 4 | 66978739 | C | T | 0.4403 | 0.0382 | 0.0067 | 1.26E-08 | 5.6915 | 995917 | COPD |
| rs13126839 | 4 | 66979132 | A | G | 0.4403 | 0.0382 | 0.0067 | 1.23E-08 | 5.6957 | 995917 | COPD |
| rs1030785  | 4 | 66979711 | G | A | 0.4403 | 0.0382 | 0.0067 | 1.27E-08 | 5.6903 | 995917 | COPD |
| rs11131664 | 4 | 66982025 | G | T | 0.4403 | 0.0382 | 0.0067 | 1.28E-08 | 5.6882 | 995917 | COPD |
| rs12502891 | 4 | 66982306 | G | A | 0.4458 | 0.0384 | 0.0067 | 1.03E-08 | 5.7261 | 995917 | COPD |
| rs1842588  | 4 | 66982555 | A | G | 0.4403 | 0.0382 | 0.0067 | 1.26E-08 | 5.6912 | 995917 | COPD |
| rs1842589  | 4 | 66982874 | C | T | 0.4403 | 0.0382 | 0.0067 | 1.30E-08 | 5.6867 | 995917 | COPD |
| rs12500554 | 4 | 66983455 | A | C | 0.4403 | 0.0381 | 0.0067 | 1.39E-08 | 5.6751 | 995917 | COPD |
| rs11561693 | 4 | 66986914 | C | A | 0.4459 | 0.0383 | 0.0067 | 1.12E-08 | 5.7109 | 995917 | COPD |
| rs34960043 | 4 | 66986954 | G | A | 0.4403 | 0.0382 | 0.0067 | 1.32E-08 | 5.6833 | 995917 | COPD |
| rs4860806  | 4 | 66988215 | T | A | 0.4403 | 0.0382 | 0.0067 | 1.30E-08 | 5.6862 | 995917 | COPD |
| rs4860807  | 4 | 66988216 | C | A | 0.4407 | 0.0381 | 0.0067 | 1.37E-08 | 5.6775 | 995917 | COPD |
| rs6814687  | 4 | 66989303 | C | T | 0.4399 | 0.0379 | 0.0067 | 1.72E-08 | 5.6380 | 995917 | COPD |
| rs6552056  | 4 | 66989550 | A | T | 0.4399 | 0.0377 | 0.0067 | 1.94E-08 | 5.6172 | 995917 | COPD |
| rs6552057  | 4 | 66989599 | C | A | 0.4455 | 0.0379 | 0.0067 | 1.53E-08 | 5.6580 | 995917 | COPD |
| rs1383724  | 4 | 66990439 | A | G | 0.4415 | 0.0377 | 0.0067 | 1.85E-08 | 5.6254 | 995917 | COPD |
| rs34240677 | 4 | 66990753 | G | A | 0.4418 | 0.0378 | 0.0067 | 1.86E-08 | 5.6244 | 995917 | COPD |
| rs6839397  | 4 | 66991478 | G | A | 0.4418 | 0.0376 | 0.0067 | 2.11E-08 | 5.6028 | 995917 | COPD |
| rs6823144  | 4 | 66991746 | T | C | 0.4474 | 0.0377 | 0.0067 | 1.81E-08 | 5.6291 | 995917 | COPD |
| rs13116047 | 4 | 66992040 | G | A | 0.4418 | 0.0376 | 0.0067 | 2.21E-08 | 5.5944 | 995917 | COPD |
| rs13149766 | 4 | 66992115 | T | G | 0.4482 | 0.0377 | 0.0067 | 1.87E-08 | 5.6235 | 995917 | COPD |
| rs13107995 | 4 | 66994415 | A | G | 0.4418 | 0.0375 | 0.0067 | 2.36E-08 | 5.5835 | 995917 | COPD |
| rs4470686  | 4 | 66995736 | A | T | 0.4426 | 0.0377 | 0.0067 | 2.01E-08 | 5.6112 | 995917 | COPD |
| rs6850626  | 4 | 66995739 | T | C | 0.4426 | 0.0373 | 0.0067 | 2.78E-08 | 5.5546 | 995917 | COPD |
| rs11131666 | 4 | 66997589 | T | G | 0.4415 | 0.0376 | 0.0067 | 2.04E-08 | 5.6084 | 995917 | COPD |
| rs17087844 | 4 | 66998018 | C | T | 0.4474 | 0.0379 | 0.0067 | 1.48E-08 | 5.6641 | 995917 | COPD |
| rs17087847 | 4 | 66999153 | G | T | 0.4473 | 0.0378 | 0.0067 | 1.72E-08 | 5.6381 | 995917 | COPD |
| rs11736448 | 4 | 66999377 | A | G | 0.4418 | 0.0376 | 0.0067 | 2.21E-08 | 5.5947 | 995917 | COPD |
| rs13106782 | 4 | 67000986 | T | A | 0.4472 | 0.0377 | 0.0067 | 1.82E-08 | 5.6287 | 995917 | COPD |
| rs13143231 | 4 | 67001192 | G | T | 0.4418 | 0.0376 | 0.0067 | 2.17E-08 | 5.5978 | 995917 | COPD |
| rs12512218 | 4 | 67001793 | G | C | 0.4418 | 0.0376 | 0.0067 | 2.19E-08 | 5.5962 | 995917 | COPD |
| rs12506832 | 4 | 67003419 | C | T | 0.4419 | 0.0375 | 0.0067 | 2.30E-08 | 5.5881 | 995917 | COPD |
| rs11131667 | 4 | 67004290 | A | T | 0.4418 | 0.0376 | 0.0067 | 2.16E-08 | 5.5988 | 995917 | COPD |
| rs4860232  | 4 | 67004535 | C | T | 0.4475 | 0.0376 | 0.0067 | 1.92E-08 | 5.6193 | 995917 | COPD |
| rs4860809  | 4 | 67004677 | T | C | 0.4419 | 0.0375 | 0.0067 | 2.41E-08 | 5.5800 | 995917 | COPD |
| rs12502136 | 4 | 67006289 | G | A | 0.4418 | 0.0376 | 0.0067 | 2.16E-08 | 5.5989 | 995917 | COPD |
| rs11131668 | 4 | 67008210 | C | G | 0.4418 | 0.0375 | 0.0067 | 2.29E-08 | 5.5882 | 995917 | COPD |
| rs6828871  | 4 | 67009179 | G | A | 0.4419 | 0.0375 | 0.0067 | 2.29E-08 | 5.5883 | 995917 | COPD |
| rs6830599  | 4 | 67009291 | C | A | 0.4419 | 0.0375 | 0.0067 | 2.29E-08 | 5.5889 | 995917 | COPD |
| rs35730788 | 4 | 67010750 | T | C | 0.4420 | 0.0376 | 0.0067 | 2.23E-08 | 5.5930 | 995917 | COPD |
| rs35862943 | 4 | 67010809 | G | A | 0.4473 | 0.0377 | 0.0067 | 1.86E-08 | 5.6249 | 995917 | COPD |
| rs13107506 | 4 | 67010960 | G | A | 0.4472 | 0.0376 | 0.0067 | 2.09E-08 | 5.6042 | 995917 | COPD |
| rs13108103 | 4 | 67011211 | T | C | 0.4418 | 0.0375 | 0.0067 | 2.46E-08 | 5.5762 | 995917 | COPD |
| rs2196314  | 4 | 67011938 | T | C | 0.4418 | 0.0374 | 0.0067 | 2.52E-08 | 5.5718 | 995917 | COPD |
| rs2217823  | 4 | 67012147 | G | C | 0.4418 | 0.0375 | 0.0067 | 2.38E-08 | 5.5817 | 995917 | COPD |
| rs2217824  | 4 | 67012193 | C | T | 0.4419 | 0.0375 | 0.0067 | 2.41E-08 | 5.5798 | 995917 | COPD |
| rs34253662 | 4 | 67016545 | C | A | 0.4475 | 0.0376 | 0.0067 | 2.01E-08 | 5.6110 | 995917 | COPD |
| rs1600729  | 4 | 67016810 | C | G | 0.4475 | 0.0377 | 0.0067 | 1.85E-08 | 5.6257 | 995917 | COPD |
| rs10518017 | 4 | 67019382 | T | A | 0.4473 | 0.0376 | 0.0067 | 2.14E-08 | 5.6002 | 995917 | COPD |
| rs12506840 | 4 | 67021032 | G | C | 0.4473 | 0.0377 | 0.0067 | 1.88E-08 | 5.6229 | 995917 | COPD |



|            |   |           |   |   |        |         |        |          |         |        |      |
|------------|---|-----------|---|---|--------|---------|--------|----------|---------|--------|------|
| rs1435424  | 4 | 67021352  | G | A | 0.4473 | 0.0377  | 0.0067 | 1.93E-08 | 5.6186  | 995917 | COPD |
| rs60623527 | 4 | 67026885  | C | T | 0.4471 | 0.0381  | 0.0067 | 1.29E-08 | 5.6878  | 995917 | COPD |
| rs2164299  | 4 | 67028453  | G | A | 0.4416 | 0.0379  | 0.0067 | 1.68E-08 | 5.6424  | 995917 | COPD |
| rs2117685  | 4 | 67028767  | A | G | 0.4417 | 0.0377  | 0.0067 | 1.95E-08 | 5.6161  | 995917 | COPD |
| rs2117686  | 4 | 67028805  | A | C | 0.4417 | 0.0377  | 0.0067 | 1.99E-08 | 5.6127  | 995917 | COPD |
| rs11736356 | 4 | 67029188  | A | G | 0.4416 | 0.0379  | 0.0067 | 1.71E-08 | 5.6393  | 995917 | COPD |
| rs33912520 | 4 | 67029703  | T | C | 0.4416 | 0.0379  | 0.0067 | 1.63E-08 | 5.6472  | 995917 | COPD |
| rs892833   | 4 | 67030652  | T | C | 0.4409 | 0.0381  | 0.0067 | 1.40E-08 | 5.6728  | 995917 | COPD |
| rs953241   | 4 | 67031161  | C | A | 0.4410 | 0.0381  | 0.0067 | 1.35E-08 | 5.6799  | 995917 | COPD |
| rs12506221 | 4 | 67033517  | T | G | 0.4465 | 0.0382  | 0.0067 | 1.15E-08 | 5.7071  | 995917 | COPD |
| rs12506222 | 4 | 67033532  | T | C | 0.4471 | 0.0381  | 0.0067 | 1.41E-08 | 5.6725  | 995917 | COPD |
| rs1435434  | 4 | 67035808  | G | T | 0.4411 | 0.0380  | 0.0067 | 1.53E-08 | 5.6584  | 995917 | COPD |
| rs1435433  | 4 | 67035843  | A | G | 0.4409 | 0.0381  | 0.0067 | 1.36E-08 | 5.6784  | 995917 | COPD |
| rs1897979  | 4 | 67036224  | C | T | 0.4410 | 0.0382  | 0.0067 | 1.30E-08 | 5.6858  | 995917 | COPD |
| rs873129   | 4 | 67037612  | G | C | 0.4471 | 0.0381  | 0.0067 | 1.34E-08 | 5.6805  | 995917 | COPD |
| rs787361   | 4 | 67038877  | T | C | 0.4414 | 0.0385  | 0.0067 | 9.93E-09 | 5.7319  | 995917 | COPD |
| rs787362   | 4 | 67039213  | A | T | 0.4422 | 0.0379  | 0.0067 | 1.66E-08 | 5.6441  | 995917 | COPD |
| rs813104   | 4 | 67039773  | C | T | 0.4422 | 0.0380  | 0.0067 | 1.61E-08 | 5.6493  | 995917 | COPD |
| rs787364   | 4 | 67041010  | C | T | 0.4430 | 0.0378  | 0.0067 | 1.92E-08 | 5.6189  | 995917 | COPD |
| rs34712979 | 4 | 105897896 | A | G | 0.2572 | 0.0486  | 0.0078 | 4.73E-10 | 6.2278  | 995917 | COPD |
| rs77854845 | 4 | 111450477 | C | T | 0.1316 | -0.0585 | 0.0100 | 5.88E-09 | -5.8200 | 995917 | COPD |
| rs79532211 | 4 | 111475377 | G | A | 0.1318 | -0.0567 | 0.0101 | 1.79E-08 | -5.6314 | 995917 | COPD |
| rs72678859 | 4 | 111485805 | T | C | 0.1556 | -0.0553 | 0.0099 | 2.31E-08 | -5.5873 | 935597 | COPD |
| rs72678864 | 4 | 111500989 | A | G | 0.1563 | -0.0545 | 0.0099 | 3.65E-08 | -5.5069 | 935597 | COPD |
| rs13106167 | 4 | 144308558 | T | C | 0.5134 | -0.0393 | 0.0071 | 2.67E-08 | -5.5621 | 935597 | COPD |
| rs12512788 | 4 | 144328123 | G | A | 0.5140 | -0.0383 | 0.0067 | 1.16E-08 | -5.7052 | 995917 | COPD |
| rs2202507  | 4 | 144336529 | G | T | 0.5137 | -0.0401 | 0.0071 | 1.30E-08 | -5.6866 | 935597 | COPD |
| rs13105210 | 4 | 144341775 | T | C | 0.3337 | -0.0417 | 0.0075 | 2.76E-08 | -5.5561 | 935597 | COPD |
| rs6822064  | 4 | 144342604 | T | C | 0.2711 | 0.0433  | 0.0079 | 4.06E-08 | 5.4884  | 935597 | COPD |
| rs6840871  | 4 | 144342862 | C | T | 0.2705 | 0.0433  | 0.0079 | 3.85E-08 | 5.4976  | 935597 | COPD |
| rs4493485  | 4 | 144346482 | T | C | 0.2711 | 0.0431  | 0.0079 | 4.68E-08 | 5.4632  | 935597 | COPD |
| rs4266245  | 4 | 144346628 | A | T | 0.2711 | 0.0431  | 0.0079 | 4.84E-08 | 5.4572  | 935597 | COPD |
| rs12503296 | 4 | 144348576 | T | C | 0.2665 | 0.0415  | 0.0075 | 3.51E-08 | 5.5141  | 995917 | COPD |
| rs17709487 | 4 | 144348912 | T | G | 0.3347 | -0.0410 | 0.0075 | 4.15E-08 | -5.4845 | 935597 | COPD |
| rs987246   | 4 | 144349715 | C | T | 0.2711 | 0.0433  | 0.0079 | 4.13E-08 | 5.4852  | 935597 | COPD |
| rs6834183  | 4 | 144349803 | C | T | 0.3350 | -0.0412 | 0.0075 | 3.53E-08 | -5.5129 | 935597 | COPD |
| rs4340757  | 4 | 144349919 | C | G | 0.2711 | 0.0433  | 0.0079 | 4.10E-08 | 5.4867  | 935597 | COPD |
| rs34991888 | 4 | 144350967 | T | C | 0.3350 | -0.0413 | 0.0075 | 3.41E-08 | -5.5189 | 935597 | COPD |
| rs17766168 | 4 | 144351540 | A | G | 0.3350 | -0.0415 | 0.0075 | 2.99E-08 | -5.5419 | 935597 | COPD |
| rs989346   | 4 | 144353618 | T | C | 0.2666 | 0.0416  | 0.0075 | 3.32E-08 | 5.5235  | 995917 | COPD |
| rs7688932  | 4 | 144358521 | T | C | 0.2662 | 0.0429  | 0.0075 | 1.26E-08 | 5.6918  | 995917 | COPD |
| rs7683975  | 4 | 144358549 | A | C | 0.2667 | 0.0434  | 0.0075 | 7.90E-09 | 5.7706  | 995917 | COPD |
| rs6537280  | 4 | 144359226 | T | C | 0.2707 | 0.0441  | 0.0079 | 2.25E-08 | 5.5918  | 935597 | COPD |
| rs6537281  | 4 | 144362114 | T | A | 0.2663 | 0.0428  | 0.0075 | 1.28E-08 | 5.6884  | 995917 | COPD |
| rs7378179  | 4 | 144363056 | T | A | 0.2707 | 0.0442  | 0.0079 | 2.10E-08 | 5.6035  | 935597 | COPD |
| rs4525925  | 4 | 144365340 | A | G | 0.2663 | 0.0428  | 0.0075 | 1.34E-08 | 5.6809  | 995917 | COPD |
| rs4465994  | 4 | 144369976 | C | T | 0.2664 | 0.0427  | 0.0075 | 1.37E-08 | 5.6770  | 995917 | COPD |
| rs4465995  | 4 | 144370054 | C | T | 0.2719 | 0.0438  | 0.0075 | 4.58E-09 | 5.8619  | 995917 | COPD |
| rs6537283  | 4 | 144370908 | T | C | 0.2666 | 0.0429  | 0.0075 | 1.17E-08 | 5.7037  | 995917 | COPD |
| rs4475093  | 4 | 144371524 | C | G | 0.2718 | 0.0437  | 0.0075 | 5.04E-09 | 5.8460  | 995917 | COPD |
| rs10029738 | 4 | 144376267 | C | A | 0.2743 | 0.0438  | 0.0075 | 4.34E-09 | 5.8707  | 995917 | COPD |
| rs10029931 | 4 | 144376466 | C | T | 0.2740 | 0.0437  | 0.0075 | 4.61E-09 | 5.8608  | 995917 | COPD |
| rs7681655  | 4 | 144377677 | G | A | 0.2741 | 0.0437  | 0.0075 | 4.38E-09 | 5.8692  | 995917 | COPD |
| rs4511954  | 4 | 144378125 | C | G | 0.2686 | 0.0428  | 0.0075 | 1.18E-08 | 5.7025  | 995917 | COPD |
| rs7376541  | 4 | 144378974 | T | C | 0.2741 | 0.0436  | 0.0075 | 4.87E-09 | 5.8516  | 995917 | COPD |
| rs4469023  | 4 | 144379282 | A | C | 0.2741 | 0.0436  | 0.0075 | 4.69E-09 | 5.8579  | 995917 | COPD |
| rs4370082  | 4 | 144379477 | C | T | 0.2741 | 0.0436  | 0.0075 | 4.79E-09 | 5.8545  | 995917 | COPD |
| rs7665807  | 4 | 144380230 | G | A | 0.2741 | 0.0436  | 0.0075 | 4.67E-09 | 5.8587  | 995917 | COPD |
| rs4318599  | 4 | 144380971 | C | T | 0.2741 | 0.0437  | 0.0075 | 4.62E-09 | 5.8602  | 995917 | COPD |
| rs4339155  | 4 | 144381566 | T | C | 0.2686 | 0.0427  | 0.0075 | 1.20E-08 | 5.6992  | 995917 | COPD |
| rs6537284  | 4 | 144382539 | A | G | 0.2741 | 0.0437  | 0.0074 | 4.60E-09 | 5.8611  | 995917 | COPD |
| rs4642189  | 4 | 144383418 | A | G | 0.2686 | 0.0429  | 0.0075 | 1.09E-08 | 5.7160  | 995917 | COPD |
| rs4383570  | 4 | 144383452 | T | C | 0.2741 | 0.0437  | 0.0074 | 4.40E-09 | 5.8684  | 995917 | COPD |
| rs7693416  | 4 | 144384205 | C | T | 0.2741 | 0.0436  | 0.0074 | 4.70E-09 | 5.8573  | 995917 | COPD |
| rs7692044  | 4 | 144384280 | G | A | 0.2686 | 0.0428  | 0.0075 | 1.14E-08 | 5.7090  | 995917 | COPD |
| rs7699291  | 4 | 144385659 | G | A | 0.2691 | 0.0433  | 0.0075 | 7.44E-09 | 5.7806  | 995917 | COPD |
| rs6811667  | 4 | 144386027 | C | G | 0.2686 | 0.0428  | 0.0075 | 1.16E-08 | 5.7059  | 995917 | COPD |
| rs12645910 | 4 | 144386269 | T | G | 0.2741 | 0.0437  | 0.0074 | 4.61E-09 | 5.8608  | 995917 | COPD |
| rs6537285  | 4 | 144388895 | A | G | 0.2692 | 0.0432  | 0.0075 | 7.90E-09 | 5.7705  | 995917 | COPD |
| rs6537287  | 4 | 144390875 | A | C | 0.2742 | 0.0435  | 0.0074 | 5.16E-09 | 5.8418  | 995917 | COPD |
| rs6827753  | 4 | 144393636 | G | C | 0.2691 | 0.0432  | 0.0075 | 8.50E-09 | 5.7583  | 995917 | COPD |
| rs6812520  | 4 | 144394507 | A | G | 0.2741 | 0.0436  | 0.0074 | 4.91E-09 | 5.8502  | 995917 | COPD |
| rs4342151  | 4 | 144398820 | C | T | 0.2690 | 0.0426  | 0.0075 | 1.34E-08 | 5.6813  | 995917 | COPD |
| rs4572828  | 4 | 144399141 | T | C | 0.2742 | 0.0436  | 0.0074 | 5.03E-09 | 5.8462  | 995917 | COPD |

|             |   |           |   |   |        |         |        |          |         |        |      |
|-------------|---|-----------|---|---|--------|---------|--------|----------|---------|--------|------|
| rs7654571   | 4 | 144399854 | A | G | 0.2362 | 0.0443  | 0.0078 | 1.69E-08 | 5.6415  | 995917 | COPD |
| rs7676032   | 4 | 144399916 | G | C | 0.2742 | 0.0436  | 0.0074 | 4.94E-09 | 5.8491  | 995917 | COPD |
| rs4420930   | 4 | 144400085 | C | T | 0.2742 | 0.0435  | 0.0074 | 5.05E-09 | 5.8456  | 995917 | COPD |
| rs4376087   | 4 | 144400203 | C | T | 0.2742 | 0.0435  | 0.0074 | 5.29E-09 | 5.8378  | 995917 | COPD |
| rs4385002   | 4 | 144401758 | T | C | 0.2687 | 0.0425  | 0.0075 | 1.52E-08 | 5.6596  | 995917 | COPD |
| rs17019336  | 4 | 144412457 | A | T | 0.2351 | 0.0442  | 0.0078 | 1.83E-08 | 5.6270  | 995917 | COPD |
| rs17019341  | 4 | 144413017 | T | C | 0.2683 | 0.0427  | 0.0075 | 1.17E-08 | 5.7041  | 995917 | COPD |
| rs62334724  | 4 | 144417317 | G | A | 0.2678 | 0.0432  | 0.0075 | 8.33E-09 | 5.7617  | 995917 | COPD |
| rs62334726  | 4 | 144419890 | C | T | 0.2679 | 0.0432  | 0.0075 | 8.43E-09 | 5.7596  | 995917 | COPD |
| rs72731556  | 4 | 144424832 | A | G | 0.2679 | 0.0429  | 0.0075 | 1.07E-08 | 5.7198  | 995917 | COPD |
| rs17019346  | 4 | 144425965 | C | T | 0.2678 | 0.0429  | 0.0075 | 1.06E-08 | 5.7217  | 995917 | COPD |
| rs12499537  | 4 | 144426946 | T | G | 0.3351 | -0.0427 | 0.0075 | 1.15E-08 | -5.7070 | 935597 | COPD |
| rs11726412  | 4 | 144432871 | A | C | 0.2678 | 0.0429  | 0.0075 | 1.12E-08 | 5.7109  | 995917 | COPD |
| rs1817762   | 4 | 144435156 | T | C | 0.2357 | 0.0441  | 0.0078 | 1.97E-08 | 5.6144  | 995917 | COPD |
| rs144044336 | 4 | 144440044 | C | T | 0.2678 | 0.0427  | 0.0075 | 1.23E-08 | 5.6955  | 995917 | COPD |
| rs62334729  | 4 | 144440756 | A | T | 0.2677 | 0.0426  | 0.0075 | 1.35E-08 | 5.6801  | 995917 | COPD |
| rs62334730  | 4 | 144441739 | G | A | 0.2678 | 0.0428  | 0.0075 | 1.21E-08 | 5.6986  | 995917 | COPD |
| rs11735249  | 4 | 144442629 | C | A | 0.2352 | 0.0438  | 0.0078 | 2.41E-08 | 5.5794  | 995917 | COPD |
| rs749316    | 4 | 144450194 | G | A | 0.2675 | 0.0424  | 0.0075 | 1.49E-08 | 5.6625  | 995917 | COPD |
| rs749317    | 4 | 144450857 | C | T | 0.2672 | 0.0427  | 0.0075 | 1.28E-08 | 5.6890  | 995917 | COPD |
| rs17019365  | 4 | 144451982 | G | A | 0.2672 | 0.0428  | 0.0075 | 1.16E-08 | 5.7056  | 995917 | COPD |
| rs17019368  | 4 | 144454253 | G | T | 0.2672 | 0.0427  | 0.0075 | 1.33E-08 | 5.6827  | 995917 | COPD |
| rs62334742  | 4 | 144459481 | A | C | 0.4131 | -0.0515 | 0.0072 | 6.56E-13 | -7.1884 | 935597 | COPD |
| rs1505770   | 4 | 144459650 | C | T | 0.4131 | -0.0514 | 0.0072 | 7.08E-13 | -7.1779 | 935597 | COPD |
| rs17019370  | 4 | 144460614 | C | A | 0.2772 | 0.0427  | 0.0074 | 9.57E-09 | 5.7381  | 995917 | COPD |
| rs55694701  | 4 | 144461375 | T | C | 0.4122 | -0.0516 | 0.0072 | 6.15E-13 | -7.1972 | 935597 | COPD |
| rs56268708  | 4 | 144461380 | G | C | 0.4122 | -0.0516 | 0.0072 | 6.45E-13 | -7.1905 | 935597 | COPD |
| rs11733975  | 4 | 144465321 | C | T | 0.2818 | 0.0435  | 0.0078 | 2.35E-08 | 5.5838  | 935597 | COPD |
| rs2130499   | 4 | 144467682 | T | G | 0.4130 | -0.0515 | 0.0072 | 6.50E-13 | -7.1896 | 935597 | COPD |
| rs62343635  | 4 | 144467802 | A | G | 0.2818 | 0.0433  | 0.0078 | 2.71E-08 | 5.5594  | 935597 | COPD |
| rs72731571  | 4 | 144474667 | G | T | 0.2778 | 0.0439  | 0.0074 | 3.40E-09 | 5.9109  | 995917 | COPD |
| rs72731572  | 4 | 144474733 | T | C | 0.2777 | 0.0441  | 0.0074 | 3.04E-09 | 5.9292  | 995917 | COPD |
| rs56304346  | 4 | 144476714 | G | A | 0.4205 | -0.0518 | 0.0072 | 4.66E-13 | -7.2348 | 935597 | COPD |
| rs35440220  | 4 | 144478680 | C | A | 0.4203 | -0.0519 | 0.0072 | 3.86E-13 | -7.2603 | 935597 | COPD |
| rs7666298   | 4 | 144480798 | A | C | 0.4204 | -0.0519 | 0.0072 | 4.15E-13 | -7.2504 | 935597 | COPD |
| rs1961266   | 4 | 144483361 | A | G | 0.4207 | -0.0518 | 0.0071 | 4.10E-13 | -7.2522 | 935597 | COPD |
| rs2200943   | 4 | 144483980 | A | G | 0.2781 | 0.0436  | 0.0074 | 4.25E-09 | 5.8743  | 995917 | COPD |
| rs62343638  | 4 | 144484867 | A | C | 0.2780 | 0.0436  | 0.0074 | 4.40E-09 | 5.8684  | 995917 | COPD |
| rs62343639  | 4 | 144485612 | T | C | 0.2780 | 0.0436  | 0.0074 | 4.33E-09 | 5.8712  | 995917 | COPD |
| rs1813337   | 4 | 144486570 | A | G | 0.4206 | -0.0519 | 0.0071 | 3.62E-13 | -7.2690 | 935597 | COPD |
| rs11732987  | 4 | 144488959 | C | T | 0.2781 | 0.0436  | 0.0074 | 4.30E-09 | 5.8724  | 995917 | COPD |
| rs13142879  | 4 | 144489325 | T | C | 0.4182 | -0.0495 | 0.0068 | 3.11E-13 | -7.2895 | 995917 | COPD |
| rs72731580  | 4 | 144490953 | T | C | 0.2781 | 0.0439  | 0.0074 | 3.34E-09 | 5.9142  | 995917 | COPD |
| rs7656246   | 4 | 144491359 | A | C | 0.4180 | -0.0497 | 0.0068 | 2.69E-13 | -7.3091 | 995917 | COPD |
| rs17019390  | 4 | 144496166 | C | T | 0.2721 | 0.0446  | 0.0075 | 2.21E-09 | 5.9813  | 995917 | COPD |
| rs11736238  | 4 | 144497142 | C | T | 0.2721 | 0.0448  | 0.0075 | 1.89E-09 | 6.0067  | 995917 | COPD |
| rs72731582  | 4 | 144497651 | T | G | 0.2712 | 0.0452  | 0.0079 | 9.17E-09 | 5.7454  | 935597 | COPD |
| rs60539540  | 4 | 144501399 | T | C | 0.2722 | 0.0449  | 0.0075 | 1.79E-09 | 6.0160  | 995917 | COPD |
| rs56071345  | 4 | 144502298 | C | T | 0.2722 | 0.0449  | 0.0075 | 1.72E-09 | 6.0222  | 995917 | COPD |
| rs973796    | 4 | 144502816 | C | A | 0.4157 | -0.0501 | 0.0068 | 1.68E-13 | -7.3723 | 995917 | COPD |
| rs13116963  | 4 | 144503615 | T | C | 0.2721 | 0.0449  | 0.0075 | 1.78E-09 | 6.0168  | 995917 | COPD |
| rs12639777  | 4 | 144503888 | G | T | 0.2722 | 0.0448  | 0.0075 | 1.86E-09 | 6.0094  | 995917 | COPD |
| rs1960493   | 4 | 144504600 | A | G | 0.4159 | -0.0500 | 0.0068 | 1.83E-13 | -7.3606 | 995917 | COPD |
| rs35937742  | 4 | 144504697 | C | A | 0.4158 | -0.0499 | 0.0068 | 2.03E-13 | -7.3470 | 995917 | COPD |
| rs34265962  | 4 | 144504784 | G | A | 0.4157 | -0.0499 | 0.0068 | 2.05E-13 | -7.3453 | 995917 | COPD |
| rs17019400  | 4 | 144507359 | A | G | 0.2723 | 0.0452  | 0.0075 | 1.33E-09 | 6.0638  | 995917 | COPD |
| rs60950736  | 4 | 144508726 | A | G | 0.2722 | 0.0454  | 0.0075 | 1.16E-09 | 6.0852  | 995917 | COPD |
| rs1512283   | 4 | 144509941 | T | C | 0.4158 | -0.0499 | 0.0068 | 1.88E-13 | -7.3569 | 995917 | COPD |
| rs1512282   | 4 | 144510345 | G | A | 0.4163 | -0.0498 | 0.0068 | 2.06E-13 | -7.3451 | 995917 | COPD |
| rs11727583  | 4 | 144511850 | A | G | 0.2723 | 0.0452  | 0.0075 | 1.33E-09 | 6.0633  | 995917 | COPD |
| rs13142776  | 4 | 144512139 | A | C | 0.4155 | -0.0499 | 0.0068 | 2.08E-13 | -7.3436 | 995917 | COPD |
| rs17019408  | 4 | 144512300 | A | C | 0.2723 | 0.0448  | 0.0075 | 1.91E-09 | 6.0052  | 995917 | COPD |
| rs7678427   | 4 | 144512423 | A | C | 0.4155 | -0.0500 | 0.0068 | 1.88E-13 | -7.3568 | 995917 | COPD |
| rs1032295   | 4 | 144513432 | G | T | 0.4201 | -0.0512 | 0.0068 | 4.89E-14 | -7.5347 | 995917 | COPD |
| rs1032296   | 4 | 144513536 | T | C | 0.3839 | 0.0566  | 0.0073 | 8.40E-15 | 7.7615  | 935597 | COPD |
| rs1032297   | 4 | 144513592 | G | A | 0.4519 | -0.0607 | 0.0068 | 2.84E-19 | -8.9747 | 995917 | COPD |
| rs1512281   | 4 | 144513749 | G | A | 0.4518 | -0.0620 | 0.0068 | 4.57E-20 | -9.1736 | 995917 | COPD |
| rs12504628  | 4 | 144515172 | C | T | 0.4407 | -0.0617 | 0.0068 | 6.79E-20 | -9.1311 | 995917 | COPD |
| rs7697189   | 4 | 144515742 | C | G | 0.4404 | -0.0619 | 0.0068 | 5.56E-20 | -9.1526 | 995917 | COPD |
| rs7681384   | 4 | 144515862 | T | C | 0.4313 | 0.0537  | 0.0068 | 2.12E-15 | 7.9341  | 995917 | COPD |
| rs7698984   | 4 | 144515929 | C | A | 0.4265 | 0.0525  | 0.0068 | 8.74E-15 | 7.7564  | 995917 | COPD |
| rs7677035   | 4 | 144516167 | A | G | 0.4262 | 0.0524  | 0.0068 | 9.93E-15 | 7.7401  | 995917 | COPD |
| rs4835637   | 4 | 144517875 | A | G | 0.4264 | 0.0527  | 0.0068 | 7.14E-15 | 7.7820  | 995917 | COPD |
| rs6829956   | 4 | 144519136 | C | T | 0.4265 | 0.0531  | 0.0068 | 4.39E-15 | 7.8432  | 995917 | COPD |

|             |   |           |   |   |        |         |        |          |         |        |      |
|-------------|---|-----------|---|---|--------|---------|--------|----------|---------|--------|------|
| rs13116999  | 4 | 144521212 | G | A | 0.4265 | 0.0534  | 0.0068 | 3.11E-15 | 7.8864  | 995917 | COPD |
| rs13107186  | 4 | 144522887 | A | C | 0.4265 | 0.0535  | 0.0068 | 2.87E-15 | 7.8964  | 995917 | COPD |
| rs4619908   | 4 | 144523965 | A | G | 0.4227 | 0.0585  | 0.0082 | 8.04E-13 | 7.1604  | 775829 | COPD |
| rs7658614   | 4 | 144524542 | T | A | 0.4222 | 0.0572  | 0.0077 | 9.73E-14 | 7.4445  | 868135 | COPD |
| rs138641402 | 4 | 144524627 | T | A | 0.4465 | -0.0601 | 0.0076 | 3.56E-15 | -7.8696 | 868135 | COPD |
| rs1512285   | 4 | 144529807 | A | G | 0.4265 | 0.0538  | 0.0068 | 2.01E-15 | 7.9407  | 995917 | COPD |
| rs4835639   | 4 | 144530761 | G | T | 0.4514 | 0.0565  | 0.0098 | 7.28E-09 | 5.7844  | 548291 | COPD |
| rs6821114   | 4 | 144531237 | A | G | 0.4226 | 0.0525  | 0.0068 | 1.07E-14 | 7.7306  | 995917 | COPD |
| rs6821716   | 4 | 144531551 | A | C | 0.4225 | 0.0525  | 0.0068 | 1.04E-14 | 7.7345  | 995917 | COPD |
| rs6843820   | 4 | 144531552 | G | C | 0.4225 | 0.0525  | 0.0068 | 1.04E-14 | 7.7342  | 995917 | COPD |
| rs6845536   | 4 | 144531631 | C | T | 0.4276 | 0.0534  | 0.0068 | 3.28E-15 | 7.8796  | 995917 | COPD |
| rs1489764   | 4 | 144533076 | T | C | 0.4230 | 0.0526  | 0.0068 | 9.58E-15 | 7.7446  | 995917 | COPD |
| rs1489763   | 4 | 144533080 | T | C | 0.4405 | -0.0628 | 0.0068 | 1.61E-20 | -9.2856 | 995917 | COPD |
| rs13129662  | 4 | 144533222 | T | C | 0.4405 | -0.0629 | 0.0068 | 1.38E-20 | -9.3021 | 995917 | COPD |
| rs1489762   | 4 | 144533812 | C | T | 0.4407 | -0.0628 | 0.0068 | 1.65E-20 | -9.2832 | 995917 | COPD |
| rs1489761   | 4 | 144534339 | G | A | 0.4228 | 0.0524  | 0.0068 | 1.18E-14 | 7.7186  | 995917 | COPD |
| rs7435469   | 4 | 144534398 | T | C | 0.4406 | -0.0628 | 0.0068 | 1.59E-20 | -9.2870 | 995917 | COPD |
| rs7692102   | 4 | 144535989 | A | G | 0.4227 | 0.0523  | 0.0068 | 1.35E-14 | 7.7013  | 995917 | COPD |
| rs7674469   | 4 | 144536849 | C | A | 0.4228 | 0.0523  | 0.0068 | 1.20E-14 | 7.7155  | 995917 | COPD |
| rs11936476  | 4 | 144537332 | C | T | 0.4404 | -0.0631 | 0.0068 | 1.01E-20 | -9.3351 | 995917 | COPD |
| rs13147758  | 4 | 144539078 | G | A | 0.4409 | -0.0631 | 0.0068 | 9.02E-21 | -9.3470 | 995917 | COPD |
| rs13148031  | 4 | 144539186 | G | A | 0.4407 | -0.0632 | 0.0068 | 9.11E-21 | -9.3459 | 995917 | COPD |
| rs720484    | 4 | 144541212 | A | G | 0.4413 | -0.0628 | 0.0068 | 1.43E-20 | -9.2983 | 995917 | COPD |
| rs720485    | 4 | 144541436 | C | A | 0.4406 | -0.0631 | 0.0068 | 9.97E-21 | -9.3364 | 995917 | COPD |
| rs6828540   | 4 | 144542079 | A | G | 0.4344 | -0.0642 | 0.0088 | 2.22E-13 | -7.3350 | 741929 | COPD |
| rs6833979   | 4 | 144542369 | A | G | 0.4451 | -0.0613 | 0.0077 | 1.27E-15 | -7.9975 | 868135 | COPD |
| rs6817238   | 4 | 144542381 | C | T | 0.4448 | -0.0610 | 0.0077 | 1.60E-15 | -7.9692 | 868135 | COPD |
| rs6835650   | 4 | 144542415 | T | C | 0.3927 | -0.0746 | 0.0104 | 9.22E-13 | -7.1414 | 522846 | COPD |
| rs6537291   | 4 | 144542922 | A | T | 0.4444 | -0.0669 | 0.0074 | 1.00E-19 | -9.0887 | 908453 | COPD |
| rs2130339   | 4 | 144543733 | G | A | 0.4415 | -0.0625 | 0.0068 | 2.40E-20 | -9.2427 | 995917 | COPD |
| rs36023701  | 4 | 144544309 | G | C | 0.4408 | -0.0629 | 0.0068 | 1.26E-20 | -9.3112 | 995917 | COPD |
| rs6830832   | 4 | 144544339 | G | T | 0.4415 | -0.0623 | 0.0068 | 2.80E-20 | -9.2262 | 995917 | COPD |
| rs11938745  | 4 | 144544616 | C | T | 0.4407 | -0.0630 | 0.0068 | 1.20E-20 | -9.3169 | 995917 | COPD |
| rs12506874  | 4 | 144546060 | T | A | 0.4412 | -0.0623 | 0.0068 | 3.09E-20 | -9.2158 | 995917 | COPD |
| rs7663578   | 4 | 144547639 | G | A | 0.4276 | 0.0530  | 0.0068 | 4.93E-15 | 7.8288  | 995917 | COPD |
| rs7663740   | 4 | 144547693 | G | T | 0.4224 | 0.0523  | 0.0068 | 1.26E-14 | 7.7099  | 995917 | COPD |
| rs62346060  | 4 | 144548221 | A | G | 0.2269 | -0.0454 | 0.0081 | 1.86E-08 | -5.6247 | 995917 | COPD |
| rs6537292   | 4 | 144548816 | T | G | 0.4410 | -0.0632 | 0.0068 | 9.29E-21 | -9.3438 | 995917 | COPD |
| rs6828982   | 4 | 144549452 | T | C | 0.4098 | 0.0507  | 0.0068 | 1.05E-13 | 7.4340  | 995917 | COPD |
| rs6829184   | 4 | 144549505 | A | T | 0.4411 | -0.0632 | 0.0068 | 8.79E-21 | -9.3498 | 995917 | COPD |
| rs12511230  | 4 | 144550093 | T | A | 0.3991 | -0.0708 | 0.0082 | 5.42E-18 | -8.6442 | 676073 | COPD |
| rs6831503   | 4 | 144550793 | G | A | 0.4418 | -0.0628 | 0.0068 | 1.57E-20 | -9.2884 | 995917 | COPD |
| rs13107665  | 4 | 144551492 | A | G | 0.4046 | 0.0542  | 0.0078 | 2.80E-12 | 6.9873  | 868135 | COPD |
| rs13113445  | 4 | 144551614 | T | G | 0.4098 | 0.0506  | 0.0068 | 1.26E-13 | 7.4099  | 995917 | COPD |
| rs1818444   | 4 | 144551799 | A | G | 0.4415 | -0.0627 | 0.0068 | 1.82E-20 | -9.2726 | 995917 | COPD |
| rs1828590   | 4 | 144552044 | A | G | 0.4407 | -0.0627 | 0.0068 | 1.75E-20 | -9.2768 | 995917 | COPD |
| rs1489760   | 4 | 144553145 | A | G | 0.4409 | -0.0630 | 0.0068 | 1.17E-20 | -9.3190 | 995917 | COPD |
| rs1489759   | 4 | 144553321 | G | A | 0.4421 | -0.0624 | 0.0068 | 2.47E-20 | -9.2398 | 995917 | COPD |
| rs1813903   | 4 | 144556897 | G | C | 0.4410 | -0.0630 | 0.0068 | 1.15E-20 | -9.3218 | 995917 | COPD |
| rs995758    | 4 | 144557049 | T | C | 0.4410 | -0.0631 | 0.0068 | 1.07E-20 | -9.3292 | 995917 | COPD |
| rs12509311  | 4 | 144557510 | T | C | 0.4409 | -0.0630 | 0.0068 | 1.13E-20 | -9.3234 | 995917 | COPD |
| rs4834988   | 4 | 144557625 | C | A | 0.4098 | 0.0506  | 0.0068 | 1.12E-13 | 7.4255  | 995917 | COPD |
| rs11100860  | 4 | 144557987 | G | A | 0.4418 | -0.0625 | 0.0068 | 2.09E-20 | -9.2576 | 995917 | COPD |
| rs6537293   | 4 | 144558609 | G | A | 0.4416 | -0.0625 | 0.0068 | 2.18E-20 | -9.2531 | 995917 | COPD |
| rs6537294   | 4 | 144558611 | A | C | 0.4412 | -0.0627 | 0.0068 | 1.83E-20 | -9.2716 | 995917 | COPD |
| rs6842889   | 4 | 144558728 | C | T | 0.4409 | -0.0627 | 0.0068 | 1.70E-20 | -9.2795 | 995917 | COPD |
| rs1828591   | 4 | 144559628 | G | A | 0.4420 | -0.0624 | 0.0068 | 2.47E-20 | -9.2398 | 995917 | COPD |
| rs28626624  | 4 | 144561091 | T | C | 0.4409 | -0.0629 | 0.0068 | 1.44E-20 | -9.2974 | 995917 | COPD |
| rs1565330   | 4 | 144561395 | T | C | 0.4409 | -0.0628 | 0.0068 | 1.63E-20 | -9.2844 | 995917 | COPD |
| rs12510044  | 4 | 144563486 | C | G | 0.4097 | 0.0504  | 0.0068 | 1.52E-13 | 7.3856  | 995917 | COPD |
| rs1980056   | 4 | 144563771 | A | C | 0.4409 | -0.0628 | 0.0068 | 1.60E-20 | -9.2859 | 995917 | COPD |
| rs1980057   | 4 | 144564586 | T | C | 0.4411 | -0.0628 | 0.0068 | 1.44E-20 | -9.2973 | 995917 | COPD |
| rs7655625   | 4 | 144564763 | C | T | 0.4416 | -0.0625 | 0.0068 | 2.14E-20 | -9.2553 | 995917 | COPD |
| rs13118928  | 4 | 144565237 | G | A | 0.4413 | -0.0628 | 0.0068 | 1.35E-20 | -9.3042 | 995917 | COPD |
| rs6537296   | 4 | 144566782 | G | A | 0.4412 | -0.0625 | 0.0068 | 2.32E-20 | -9.2467 | 995917 | COPD |
| rs1542725   | 4 | 144567182 | T | C | 0.4409 | -0.0631 | 0.0068 | 1.08E-20 | -9.3275 | 995917 | COPD |
| rs13113591  | 4 | 144567945 | T | C | 0.4401 | -0.0630 | 0.0068 | 1.42E-20 | -9.2985 | 995917 | COPD |
| rs13140176  | 4 | 144567946 | G | A | 0.4401 | -0.0629 | 0.0068 | 1.47E-20 | -9.2949 | 995917 | COPD |
| rs11940733  | 4 | 144568176 | A | G | 0.4409 | -0.0632 | 0.0068 | 9.26E-21 | -9.3442 | 995917 | COPD |
| rs12501071  | 4 | 144569207 | T | C | 0.4465 | -0.0611 | 0.0068 | 1.54E-19 | -9.0423 | 995917 | COPD |
| rs1512288   | 4 | 144570129 | A | G | 0.4464 | -0.0611 | 0.0068 | 1.39E-19 | -9.0535 | 995917 | COPD |
| rs6817273   | 4 | 144570851 | C | T | 0.4458 | -0.0619 | 0.0068 | 4.90E-20 | -9.1660 | 995917 | COPD |
| rs10029430  | 4 | 144577260 | G | A | 0.4097 | 0.0508  | 0.0068 | 1.04E-13 | 7.4361  | 995917 | COPD |
| rs6537297   | 4 | 144580877 | C | T | 0.4054 | 0.0498  | 0.0068 | 3.56E-13 | 7.2713  | 995917 | COPD |

|             |   |           |   |   |        |         |        |          |         |        |      |
|-------------|---|-----------|---|---|--------|---------|--------|----------|---------|--------|------|
| rs13141641  | 4 | 144585304 | C | T | 0.4527 | -0.0641 | 0.0068 | 2.92E-21 | -9.4657 | 995917 | COPD |
| rs6537298   | 4 | 144585719 | C | T | 0.3974 | 0.0547  | 0.0069 | 1.83E-15 | 7.9528  | 995917 | COPD |
| rs11724319  | 4 | 144589888 | G | A | 0.2348 | 0.0630  | 0.0084 | 8.74E-14 | 7.4588  | 935597 | COPD |
| rs7670758   | 4 | 144590723 | A | G | 0.3966 | 0.0546  | 0.0069 | 2.08E-15 | 7.9363  | 995917 | COPD |
| rs1542726   | 4 | 144594617 | A | C | 0.3940 | 0.0580  | 0.0073 | 1.89E-15 | 7.9482  | 935597 | COPD |
| rs1489765   | 4 | 144595226 | C | T | 0.4044 | 0.0572  | 0.0073 | 4.13E-15 | 7.8509  | 935597 | COPD |
| rs2353397   | 4 | 144596426 | C | T | 0.4311 | 0.0410  | 0.0072 | 1.12E-08 | 5.7117  | 935597 | COPD |
| rs10071051  | 5 | 132416928 | A | G | 0.2705 | 0.0439  | 0.0076 | 7.66E-09 | 5.7757  | 995917 | COPD |
| rs2079054   | 5 | 132418770 | T | C | 0.2717 | 0.0448  | 0.0076 | 3.44E-09 | 5.9091  | 995917 | COPD |
| rs2097731   | 5 | 132419007 | T | C | 0.2715 | 0.0450  | 0.0076 | 3.17E-09 | 5.9226  | 995917 | COPD |
| rs2285673   | 5 | 132420277 | T | C | 0.2715 | 0.0449  | 0.0076 | 3.35E-09 | 5.9136  | 995917 | COPD |
| rs10076733  | 5 | 132425039 | T | G | 0.2431 | 0.0496  | 0.0079 | 2.81E-10 | 6.3092  | 995917 | COPD |
| rs11242112  | 5 | 132432196 | T | C | 0.2486 | 0.0490  | 0.0078 | 3.23E-10 | 6.2874  | 995917 | COPD |
| rs2158101   | 5 | 132433581 | A | G | 0.2443 | 0.0487  | 0.0078 | 5.49E-10 | 6.2043  | 995917 | COPD |
| rs28655019  | 5 | 132435189 | A | C | 0.2443 | 0.0488  | 0.0078 | 4.99E-10 | 6.2194  | 995917 | COPD |
| rs11741543  | 5 | 132435623 | T | G | 0.2443 | 0.0489  | 0.0078 | 4.64E-10 | 6.2310  | 995917 | COPD |
| rs10062371  | 5 | 132442721 | G | A | 0.2453 | 0.0482  | 0.0078 | 7.50E-10 | 6.1552  | 995917 | COPD |
| rs17622378  | 5 | 132442760 | G | A | 0.3882 | -0.0381 | 0.0069 | 4.01E-08 | -5.4906 | 995917 | COPD |
| rs11743941  | 5 | 132443509 | T | C | 0.2450 | 0.0484  | 0.0078 | 6.31E-10 | 6.1825  | 995917 | COPD |
| rs11744116  | 5 | 132444068 | T | C | 0.2450 | 0.0485  | 0.0078 | 6.09E-10 | 6.1881  | 995917 | COPD |
| rs4540166   | 5 | 132444165 | T | C | 0.2453 | 0.0483  | 0.0078 | 7.01E-10 | 6.1660  | 995917 | COPD |
| rs4371745   | 5 | 132444263 | T | C | 0.2453 | 0.0482  | 0.0078 | 7.35E-10 | 6.1584  | 995917 | COPD |
| rs4643947   | 5 | 132445089 | A | G | 0.2453 | 0.0482  | 0.0078 | 7.41E-10 | 6.1569  | 995917 | COPD |
| rs1012794   | 5 | 132445989 | C | G | 0.2455 | 0.0560  | 0.0087 | 1.25E-10 | 6.4330  | 869711 | COPD |
| rs4235801   | 5 | 132446752 | T | C | 0.2453 | 0.0482  | 0.0078 | 7.43E-10 | 6.1566  | 995917 | COPD |
| rs4235802   | 5 | 132447145 | C | A | 0.2454 | 0.0482  | 0.0078 | 7.83E-10 | 6.1482  | 995917 | COPD |
| rs7703152   | 5 | 132447521 | C | T | 0.2454 | 0.0482  | 0.0078 | 7.52E-10 | 6.1548  | 995917 | COPD |
| rs11747902  | 5 | 132448023 | A | G | 0.2451 | 0.0483  | 0.0078 | 6.98E-10 | 6.1664  | 995917 | COPD |
| rs6867325   | 5 | 132448313 | A | G | 0.2462 | 0.0486  | 0.0078 | 5.12E-10 | 6.2154  | 995917 | COPD |
| rs12521868  | 5 | 132448701 | T | G | 0.3881 | -0.0379 | 0.0069 | 4.65E-08 | -5.4644 | 995917 | COPD |
| rs10036896  | 5 | 132449486 | T | C | 0.2453 | 0.0492  | 0.0078 | 3.29E-10 | 6.2846  | 995917 | COPD |
| rs113120136 | 5 | 132450285 | G | A | 0.2458 | 0.0494  | 0.0078 | 2.68E-10 | 6.3162  | 995917 | COPD |
| rs6866614   | 5 | 132451445 | A | G | 0.3867 | -0.0402 | 0.0070 | 8.45E-09 | -5.7591 | 995917 | COPD |
| rs59041913  | 5 | 132452443 | T | C | 0.2480 | 0.0505  | 0.0078 | 9.03E-11 | 6.4823  | 995917 | COPD |
| rs7713065   | 5 | 132452642 | A | C | 0.2842 | 0.0520  | 0.0075 | 3.49E-12 | 6.9565  | 995917 | COPD |
| rs10069798  | 5 | 132452729 | A | T | 0.2479 | 0.0505  | 0.0078 | 8.76E-11 | 6.4869  | 995917 | COPD |
| rs10066308  | 5 | 132454924 | A | G | 0.3287 | 0.0432  | 0.0072 | 1.56E-09 | 6.0378  | 995917 | COPD |
| rs4705950   | 5 | 132457594 | T | C | 0.3881 | -0.0382 | 0.0069 | 3.78E-08 | -5.5008 | 995917 | COPD |
| rs1023518   | 5 | 132458080 | T | G | 0.2840 | 0.0527  | 0.0075 | 1.66E-12 | 7.0602  | 995917 | COPD |
| rs3857440   | 5 | 132458377 | A | G | 0.2839 | 0.0525  | 0.0075 | 1.96E-12 | 7.0371  | 995917 | COPD |
| rs72797303  | 5 | 132460471 | C | T | 0.3884 | -0.0385 | 0.0069 | 2.79E-08 | -5.5541 | 995917 | COPD |
| rs2706396   | 5 | 132461117 | A | C | 0.3887 | -0.0384 | 0.0069 | 2.98E-08 | -5.5425 | 995917 | COPD |
| rs11745587  | 5 | 132461230 | A | G | 0.3666 | 0.0391  | 0.0070 | 2.01E-08 | 5.6115  | 995917 | COPD |
| rs6894249   | 5 | 132461855 | G | A | 0.4080 | 0.0424  | 0.0068 | 5.50E-10 | 6.2042  | 995917 | COPD |
| rs2522051   | 5 | 132461886 | C | T | 0.4931 | 0.0379  | 0.0067 | 1.69E-08 | 5.6407  | 995917 | COPD |
| rs2522052   | 5 | 132462795 | C | T | 0.3885 | -0.0383 | 0.0069 | 3.26E-08 | -5.5270 | 995917 | COPD |
| rs2706403   | 5 | 132463320 | A | G | 0.3886 | -0.0385 | 0.0069 | 2.83E-08 | -5.5519 | 995917 | COPD |
| rs3749833   | 5 | 132463934 | C | T | 0.2837 | 0.0526  | 0.0075 | 1.80E-12 | 7.0490  | 995917 | COPD |
| rs11748326  | 5 | 132464267 | T | C | 0.2513 | 0.0510  | 0.0078 | 4.54E-11 | 6.5851  | 995917 | COPD |
| rs2706336   | 5 | 132464269 | T | C | 0.3886 | -0.0386 | 0.0069 | 2.57E-08 | -5.5683 | 995917 | COPD |
| rs72797306  | 5 | 132465058 | C | G | 0.3885 | -0.0385 | 0.0069 | 2.80E-08 | -5.5537 | 995917 | COPD |
| rs10077785  | 5 | 132465466 | T | C | 0.2514 | 0.0508  | 0.0077 | 5.35E-11 | 6.5608  | 995917 | COPD |
| rs2522057   | 5 | 132466255 | G | C | 0.3885 | -0.0386 | 0.0069 | 2.59E-08 | -5.5674 | 995917 | COPD |
| rs10067603  | 5 | 132468176 | G | A | 0.2477 | 0.0509  | 0.0078 | 6.48E-11 | 6.5323  | 995917 | COPD |
| rs2248116   | 5 | 132468655 | C | A | 0.3883 | -0.0385 | 0.0069 | 2.88E-08 | -5.5486 | 995917 | COPD |
| rs10039559  | 5 | 132468815 | C | T | 0.2478 | 0.0510  | 0.0078 | 6.10E-11 | 6.5414  | 995917 | COPD |
| rs3846729   | 5 | 132471076 | C | G | 0.2477 | 0.0509  | 0.0078 | 6.45E-11 | 6.5329  | 995917 | COPD |
| rs3846730   | 5 | 132471088 | T | C | 0.2536 | 0.0507  | 0.0077 | 5.60E-11 | 6.5542  | 995917 | COPD |
| rs2548993   | 5 | 132473177 | G | A | 0.2978 | 0.0509  | 0.0074 | 4.59E-12 | 6.9177  | 995917 | COPD |
| rs2057657   | 5 | 132473624 | G | A | 0.2480 | 0.0513  | 0.0078 | 4.85E-11 | 6.5754  | 995917 | COPD |
| rs9271365   | 6 | 32619017  | G | T | 0.4113 | 0.0438  | 0.0077 | 1.39E-08 | 5.6744  | 869711 | COPD |
| rs3104376   | 6 | 32632226  | T | C | 0.2179 | -0.0510 | 0.0091 | 1.91E-08 | -5.6198 | 869711 | COPD |
| rs3104369   | 6 | 32634705  | T | C | 0.2604 | -0.0499 | 0.0086 | 6.73E-09 | -5.7975 | 869711 | COPD |
| rs9272363   | 6 | 32636808  | T | A | 0.1843 | 0.0943  | 0.0168 | 1.88E-08 | 5.6223  | 460827 | COPD |
| rs9272385   | 6 | 32636986  | C | T | 0.2184 | 0.0913  | 0.0153 | 2.60E-09 | 5.9546  | 460827 | COPD |
| rs9272390   | 6 | 32637018  | T | C | 0.2228 | 0.0877  | 0.0152 | 8.56E-09 | 5.7569  | 460827 | COPD |
| rs9272425   | 6 | 32637401  | C | T | 0.2166 | 0.0903  | 0.0153 | 3.75E-09 | 5.8947  | 460827 | COPD |
| rs9272456   | 6 | 32637778  | A | T | 0.2116 | 0.0932  | 0.0154 | 1.43E-09 | 6.0523  | 460827 | COPD |
| rs9272466   | 6 | 32637919  | T | G | 0.2105 | 0.0936  | 0.0155 | 1.41E-09 | 6.0546  | 460827 | COPD |
| rs41268938  | 6 | 32638839  | T | A | 0.1982 | 0.0699  | 0.0128 | 4.53E-08 | 5.4690  | 587033 | COPD |
| rs41268940  | 6 | 32639210  | G | T | 0.2116 | 0.0933  | 0.0154 | 1.40E-09 | 6.0558  | 460827 | COPD |
| rs41268942  | 6 | 32639349  | G | A | 0.1881 | 0.0711  | 0.0129 | 3.51E-08 | 5.5138  | 587033 | COPD |
| rs35248896  | 6 | 32639593  | T | C | 0.1796 | 0.0730  | 0.0132 | 3.12E-08 | 5.5343  | 587033 | COPD |
| rs41269944  | 6 | 32639850  | T | C | 0.1733 | 0.0765  | 0.0137 | 2.66E-08 | 5.5621  | 587033 | COPD |

|             |   |           |   |   |        |        |        |          |        |        |      |
|-------------|---|-----------|---|---|--------|--------|--------|----------|--------|--------|------|
| rs35874654  | 6 | 32641702  | A | C | 0.1820 | 0.0714 | 0.0130 | 4.20E-08 | 5.4824 | 587033 | COPD |
| rs9272742   | 6 | 32641945  | T | C | 0.1869 | 0.0712 | 0.0129 | 3.71E-08 | 5.5039 | 587033 | COPD |
| rs17612712  | 6 | 32648168  | T | A | 0.4094 | 0.0808 | 0.0123 | 5.15E-11 | 6.5666 | 502814 | COPD |
| rs9273404   | 6 | 32659383  | G | A | 0.4695 | 0.0658 | 0.0105 | 3.87E-10 | 6.2592 | 696452 | COPD |
| rs6910737   | 6 | 164913730 | A | G | 0.3131 | 0.0421 | 0.0076 | 3.12E-08 | 5.5344 | 935597 | COPD |
| rs12528995  | 6 | 164915524 | T | C | 0.3133 | 0.0406 | 0.0072 | 1.91E-08 | 5.6202 | 995917 | COPD |
| rs9459253   | 6 | 164927096 | G | T | 0.3232 | 0.0404 | 0.0071 | 1.43E-08 | 5.6697 | 995917 | COPD |
| rs9459254   | 6 | 164928056 | A | G | 0.3197 | 0.0403 | 0.0072 | 1.71E-08 | 5.6390 | 995917 | COPD |
| rs752485    | 6 | 164928978 | C | T | 0.3201 | 0.0398 | 0.0071 | 2.58E-08 | 5.5677 | 995917 | COPD |
| rs4385288   | 6 | 164948912 | C | G | 0.3232 | 0.0396 | 0.0071 | 2.78E-08 | 5.5549 | 995917 | COPD |
| rs1322187   | 6 | 164951975 | T | G | 0.3253 | 0.0451 | 0.0079 | 1.08E-08 | 5.7185 | 869711 | COPD |
| rs147678978 | 7 | 117269518 | T | G | 0.0147 | 0.2642 | 0.0274 | 5.65E-22 | 9.6361 | 995917 | COPD |
| rs112477657 | 7 | 117307790 | T | A | 0.0274 | 0.1307 | 0.0216 | 1.53E-09 | 6.0410 | 935597 | COPD |
| rs113812546 | 7 | 117327784 | A | C | 0.0193 | 0.1668 | 0.0260 | 1.36E-10 | 6.4205 | 935597 | COPD |
| rs73480763  | 7 | 117401887 | A | G | 0.0859 | 0.0820 | 0.0119 | 6.04E-12 | 6.8786 | 995917 | COPD |
| rs112785519 | 7 | 117413013 | G | A | 0.0259 | 0.1550 | 0.0225 | 5.24E-12 | 6.8992 | 935597 | COPD |
| rs10487364  | 7 | 117418166 | G | A | 0.0870 | 0.0805 | 0.0118 | 1.07E-11 | 6.7966 | 995917 | COPD |
| rs17139821  | 7 | 117422163 | G | C | 0.0861 | 0.0817 | 0.0119 | 6.30E-12 | 6.8726 | 995917 | COPD |
| rs112534719 | 7 | 117456239 | C | T | 0.0236 | 0.1678 | 0.0234 | 7.78E-13 | 7.1649 | 935597 | COPD |
| rs17544734  | 7 | 117472068 | G | A | 0.0865 | 0.0798 | 0.0118 | 1.61E-11 | 6.7376 | 995917 | COPD |
| rs35715578  | 7 | 117482400 | G | T | 0.0868 | 0.0797 | 0.0118 | 1.51E-11 | 6.7464 | 995917 | COPD |
| rs34268361  | 7 | 117482811 | A | G | 0.0856 | 0.0812 | 0.0119 | 8.18E-12 | 6.8352 | 995917 | COPD |
| rs35141759  | 7 | 117491130 | T | C | 0.1334 | 0.0590 | 0.0100 | 3.33E-09 | 5.9146 | 995917 | COPD |
| rs17545644  | 7 | 117495158 | T | C | 0.0864 | 0.0800 | 0.0118 | 1.35E-11 | 6.7631 | 995917 | COPD |
| rs34654194  | 7 | 117503664 | G | A | 0.0853 | 0.0809 | 0.0119 | 1.03E-11 | 6.8017 | 995917 | COPD |
| rs35003065  | 7 | 117522979 | C | G | 0.0866 | 0.0800 | 0.0118 | 1.25E-11 | 6.7741 | 995917 | COPD |
| rs35820454  | 7 | 117523031 | A | T | 0.0866 | 0.0800 | 0.0118 | 1.26E-11 | 6.7729 | 995917 | COPD |
| rs7802924   | 7 | 117523562 | G | A | 0.0866 | 0.0801 | 0.0118 | 1.16E-11 | 6.7858 | 995917 | COPD |
| rs34420782  | 7 | 117524716 | A | G | 0.0855 | 0.0814 | 0.0119 | 7.13E-12 | 6.8552 | 995917 | COPD |
| rs113662424 | 7 | 117530051 | A | G | 0.0266 | 0.1506 | 0.0221 | 8.81E-12 | 6.8246 | 935597 | COPD |
| rs34159932  | 7 | 117535089 | A | G | 0.1333 | 0.0590 | 0.0100 | 3.38E-09 | 5.9119 | 995917 | COPD |
| rs1800503   | 7 | 117536684 | T | C | 0.0854 | 0.0816 | 0.0119 | 6.25E-12 | 6.8740 | 995917 | COPD |
| rs34638253  | 7 | 117540958 | T | C | 0.1104 | 0.0791 | 0.0127 | 5.20E-10 | 6.2129 | 676073 | COPD |
| rs35130797  | 7 | 117546957 | A | G | 0.0855 | 0.0811 | 0.0119 | 8.76E-12 | 6.8258 | 995917 | COPD |
| rs35987553  | 7 | 117555503 | C | T | 0.0866 | 0.0793 | 0.0118 | 1.85E-11 | 6.7175 | 995917 | COPD |
| rs2518872   | 7 | 117574319 | C | G | 0.0896 | 0.0717 | 0.0116 | 7.28E-10 | 6.1598 | 995917 | COPD |
| rs17547485  | 7 | 117574417 | G | T | 0.0884 | 0.0747 | 0.0117 | 1.89E-10 | 6.3696 | 995917 | COPD |
| rs1025342   | 7 | 117577671 | T | C | 0.0884 | 0.0739 | 0.0117 | 2.85E-10 | 6.3067 | 995917 | COPD |
| rs17450482  | 7 | 117577933 | C | T | 0.0884 | 0.0752 | 0.0117 | 1.41E-10 | 6.4152 | 995917 | COPD |
| rs213954    | 7 | 117580349 | G | A | 0.0895 | 0.0717 | 0.0117 | 7.73E-10 | 6.1502 | 995917 | COPD |
| rs213972    | 7 | 117594344 | A | T | 0.0876 | 0.0726 | 0.0118 | 7.95E-10 | 6.1460 | 995917 | COPD |
| rs111811152 | 7 | 117606024 | A | G | 0.0220 | 0.1550 | 0.0245 | 2.32E-10 | 6.3388 | 935597 | COPD |
| rs111309367 | 7 | 117637500 | T | A | 0.0170 | 0.1902 | 0.0277 | 6.92E-12 | 6.8591 | 935597 | COPD |
| rs113827944 | 7 | 117659380 | A | G | 0.0157 | 0.2028 | 0.0292 | 4.08E-12 | 6.9347 | 935597 | COPD |
| rs112426201 | 7 | 117717553 | C | T | 0.0177 | 0.1801 | 0.0275 | 5.63E-11 | 6.5533 | 935597 | COPD |
| rs35596763  | 7 | 117767828 | A | G | 0.1052 | 0.0649 | 0.0112 | 6.42E-09 | 5.8053 | 979276 | COPD |
| rs4841437   | 8 | 10739285  | T | G | 0.4252 | 0.0382 | 0.0070 | 4.34E-08 | 5.4763 | 995917 | COPD |
| rs2116094   | 8 | 10741312  | C | T | 0.4243 | 0.0387 | 0.0070 | 3.06E-08 | 5.5380 | 995917 | COPD |
| rs6982210   | 8 | 10742484  | G | A | 0.4213 | 0.0386 | 0.0070 | 3.44E-08 | 5.5176 | 995917 | COPD |
| rs3905581   | 8 | 10746195  | G | T | 0.4225 | 0.0384 | 0.0070 | 3.78E-08 | 5.5006 | 995917 | COPD |
| rs2898252   | 8 | 10746654  | T | C | 0.4207 | 0.0385 | 0.0070 | 3.60E-08 | 5.5097 | 995917 | COPD |
| rs13276026  | 8 | 10752445  | G | A | 0.4365 | 0.0452 | 0.0082 | 3.30E-08 | 5.5246 | 676073 | COPD |
| rs1073913   | 8 | 10754198  | A | C | 0.4217 | 0.0383 | 0.0070 | 4.03E-08 | 5.4897 | 995917 | COPD |
| rs4840513   | 8 | 10755296  | G | T | 0.4227 | 0.0385 | 0.0070 | 3.55E-08 | 5.5121 | 995917 | COPD |
| rs718741    | 8 | 10756874  | C | T | 0.4241 | 0.0382 | 0.0070 | 4.42E-08 | 5.4731 | 995917 | COPD |
| rs2005309   | 8 | 10794660  | T | C | 0.4153 | 0.0382 | 0.0070 | 4.82E-08 | 5.4579 | 995917 | COPD |
| rs11250077  | 8 | 10798927  | T | C | 0.4159 | 0.0391 | 0.0070 | 2.25E-08 | 5.5919 | 995917 | COPD |
| rs10097283  | 8 | 10801896  | G | C | 0.4169 | 0.0389 | 0.0070 | 2.71E-08 | 5.5590 | 995917 | COPD |
| rs12542888  | 8 | 10805045  | A | C | 0.4173 | 0.0385 | 0.0070 | 3.67E-08 | 5.5062 | 995917 | COPD |
| rs4551304   | 8 | 10807559  | A | G | 0.4174 | 0.0393 | 0.0070 | 1.85E-08 | 5.6259 | 995917 | COPD |
| rs11250078  | 8 | 10809071  | G | A | 0.4175 | 0.0393 | 0.0070 | 1.85E-08 | 5.6257 | 995917 | COPD |
| rs7002282   | 8 | 10809483  | A | G | 0.4169 | 0.0397 | 0.0070 | 1.34E-08 | 5.6812 | 995917 | COPD |
| rs4840516   | 8 | 10809825  | C | G | 0.4175 | 0.0393 | 0.0070 | 1.83E-08 | 5.6276 | 995917 | COPD |
| rs12676417  | 8 | 10811124  | A | G | 0.4167 | 0.0397 | 0.0070 | 1.38E-08 | 5.6761 | 995917 | COPD |
| rs2409658   | 8 | 10811455  | A | G | 0.4169 | 0.0397 | 0.0070 | 1.35E-08 | 5.6798 | 995917 | COPD |
| rs6601529   | 8 | 10813040  | T | C | 0.4164 | 0.0391 | 0.0070 | 2.16E-08 | 5.5991 | 995917 | COPD |
| rs9969626   | 8 | 10813291  | A | C | 0.4162 | 0.0396 | 0.0070 | 1.40E-08 | 5.6729 | 995917 | COPD |
| rs7814757   | 8 | 10817678  | T | C | 0.4177 | 0.0387 | 0.0070 | 2.92E-08 | 5.5462 | 995917 | COPD |
| rs34653170  | 8 | 10819032  | G | T | 0.4215 | 0.0389 | 0.0070 | 2.55E-08 | 5.5701 | 995917 | COPD |
| rs10098699  | 8 | 10819246  | C | T | 0.4216 | 0.0393 | 0.0070 | 1.94E-08 | 5.6175 | 995917 | COPD |
| rs2277130   | 8 | 10820091  | G | C | 0.4215 | 0.0387 | 0.0070 | 2.99E-08 | 5.5418 | 995917 | COPD |
| rs6980805   | 8 | 10822332  | G | C | 0.4208 | 0.0396 | 0.0070 | 1.52E-08 | 5.6589 | 995917 | COPD |
| rs4841452   | 8 | 10829611  | A | G | 0.4200 | 0.0392 | 0.0070 | 2.08E-08 | 5.6055 | 995917 | COPD |
| rs11986043  | 8 | 10833767  | A | C | 0.4415 | 0.0462 | 0.0084 | 3.71E-08 | 5.5042 | 650628 | COPD |



|             |   |           |   |   |        |         |        |          |         |        |      |
|-------------|---|-----------|---|---|--------|---------|--------|----------|---------|--------|------|
| rs35091929  | 8 | 10835982  | T | C | 0.4161 | 0.0382  | 0.0070 | 4.74E-08 | 5.4607  | 995917 | COPD |
| rs10093774  | 8 | 10845783  | T | C | 0.3976 | 0.0386  | 0.0071 | 4.83E-08 | 5.4577  | 995917 | COPD |
| rs6989160   | 8 | 10847850  | A | C | 0.4176 | 0.0386  | 0.0070 | 3.46E-08 | 5.5167  | 995917 | COPD |
| rs1991651   | 8 | 10848901  | C | G | 0.3970 | 0.0390  | 0.0071 | 3.64E-08 | 5.5077  | 995917 | COPD |
| rs71519637  | 8 | 27476581  | T | C | 0.0996 | 0.0663  | 0.0111 | 2.29E-09 | 5.9757  | 995917 | COPD |
| rs35505579  | 8 | 27479528  | T | A | 0.0994 | 0.0673  | 0.0111 | 1.47E-09 | 6.0471  | 995917 | COPD |
| rs62504286  | 8 | 27510766  | T | C | 0.0650 | -0.0770 | 0.0137 | 1.94E-08 | -5.6176 | 995917 | COPD |
| rs55986679  | 8 | 27548836  | T | A | 0.1848 | -0.0511 | 0.0090 | 1.61E-08 | -5.6493 | 935597 | COPD |
| rs35132097  | 8 | 27549858  | T | C | 0.1678 | -0.0764 | 0.0125 | 9.59E-10 | -6.1160 | 649623 | COPD |
| rs149467044 | 8 | 27553583  | G | T | 0.1680 | -0.0578 | 0.0101 | 1.13E-08 | -5.7101 | 868135 | COPD |
| rs11782089  | 8 | 27554275  | A | G | 0.1670 | -0.0730 | 0.0116 | 2.72E-10 | -6.3138 | 741929 | COPD |
| rs113623975 | 8 | 27555088  | G | A | 0.1188 | -0.0689 | 0.0109 | 2.91E-10 | -6.3035 | 935597 | COPD |
| rs7839435   | 8 | 27555436  | A | G | 0.1696 | -0.0535 | 0.0094 | 1.10E-08 | -5.7151 | 935597 | COPD |
| rs56223946  | 8 | 27556469  | T | C | 0.1188 | -0.0685 | 0.0109 | 3.78E-10 | -6.2631 | 935597 | COPD |
| rs73227362  | 8 | 27557833  | C | A | 0.1833 | -0.0506 | 0.0091 | 2.34E-08 | -5.5851 | 935597 | COPD |
| rs59339059  | 8 | 27558605  | G | A | 0.1832 | -0.0502 | 0.0091 | 3.04E-08 | -5.5391 | 935597 | COPD |
| rs11776293  | 8 | 27560912  | T | C | 0.1686 | -0.0525 | 0.0094 | 2.04E-08 | -5.6085 | 935597 | COPD |
| rs11780592  | 8 | 27561230  | G | A | 0.1686 | -0.0521 | 0.0094 | 2.65E-08 | -5.5631 | 935597 | COPD |
| rs11780834  | 8 | 27562086  | G | A | 0.1685 | -0.0514 | 0.0089 | 7.65E-09 | -5.7761 | 995917 | COPD |
| rs11778040  | 8 | 27562290  | T | C | 0.1821 | -0.0498 | 0.0091 | 3.99E-08 | -5.4912 | 935597 | COPD |
| rs4732724   | 8 | 27565545  | C | G | 0.3234 | -0.0443 | 0.0075 | 3.85E-09 | -5.8905 | 935597 | COPD |
| rs59724122  | 8 | 27567179  | T | C | 0.1519 | -0.0521 | 0.0093 | 1.86E-08 | -5.6242 | 995917 | COPD |
| rs11783093  | 8 | 27567832  | T | C | 0.1516 | -0.0525 | 0.0093 | 1.48E-08 | -5.6638 | 995917 | COPD |
| rs1565735   | 8 | 27568560  | A | T | 0.1880 | -0.0496 | 0.0089 | 3.01E-08 | -5.5407 | 935597 | COPD |
| rs4352801   | 8 | 27577684  | C | T | 0.3756 | -0.0379 | 0.0069 | 3.62E-08 | -5.5086 | 995917 | COPD |
| rs56372821  | 8 | 27578983  | A | G | 0.1524 | -0.0516 | 0.0092 | 2.38E-08 | -5.5818 | 995917 | COPD |
| rs6558008   | 8 | 27580789  | C | A | 0.2316 | -0.0500 | 0.0088 | 1.10E-08 | -5.7139 | 869711 | COPD |
| rs7844965   | 8 | 27584547  | A | G | 0.2315 | -0.0461 | 0.0079 | 5.49E-09 | -5.8316 | 995917 | COPD |
| rs73229090  | 8 | 27584610  | A | C | 0.1120 | -0.0663 | 0.0106 | 4.09E-10 | -6.2506 | 995917 | COPD |
| rs73229093  | 8 | 27584812  | T | C | 0.1526 | -0.0534 | 0.0092 | 7.25E-09 | -5.7851 | 995917 | COPD |
| rs35236974  | 8 | 27596062  | G | A | 0.1543 | -0.0528 | 0.0092 | 9.73E-09 | -5.7353 | 995917 | COPD |
| rs4838290   | 9 | 125712777 | C | T | 0.3590 | -0.0719 | 0.0113 | 1.95E-10 | -6.3652 | 455985 | COPD |
| rs4837022   | 9 | 125713100 | T | C | 0.3294 | -0.0490 | 0.0075 | 6.46E-11 | -6.5327 | 935597 | COPD |
| rs10118570  | 9 | 125714185 | G | A | 0.3306 | -0.0470 | 0.0071 | 3.34E-11 | -6.6310 | 995917 | COPD |
| rs10123227  | 9 | 125721073 | T | G | 0.3403 | -0.0424 | 0.0074 | 1.16E-08 | -5.7057 | 935597 | COPD |
| rs7849174   | 9 | 125721348 | T | C | 0.3529 | -0.0417 | 0.0074 | 1.50E-08 | -5.6615 | 935597 | COPD |
| rs7018617   | 9 | 125724803 | G | T | 0.3407 | -0.0425 | 0.0074 | 1.09E-08 | -5.7169 | 935597 | COPD |
| rs10124367  | 9 | 125726380 | C | T | 0.3386 | -0.0469 | 0.0080 | 4.62E-09 | -5.8605 | 868135 | COPD |
| rs10441758  | 9 | 125734058 | A | G | 0.3405 | -0.0416 | 0.0074 | 2.19E-08 | -5.5966 | 935597 | COPD |
| rs10819064  | 9 | 125737677 | G | T | 0.3397 | -0.0409 | 0.0074 | 3.84E-08 | -5.4982 | 935597 | COPD |
| rs7864529   | 9 | 125739600 | A | C | 0.3397 | -0.0406 | 0.0074 | 4.65E-08 | -5.4644 | 935597 | COPD |
| rs7847035   | 9 | 125747877 | G | A | 0.3845 | -0.0403 | 0.0072 | 2.50E-08 | -5.5733 | 935597 | COPD |
| rs6478712   | 9 | 125752329 | T | C | 0.3349 | -0.0416 | 0.0075 | 2.61E-08 | -5.5658 | 935597 | COPD |
| rs7867207   | 9 | 125752767 | A | C | 0.3838 | -0.0399 | 0.0072 | 3.50E-08 | -5.5143 | 935597 | COPD |
| rs11999260  | 9 | 125759194 | C | T | 0.3826 | -0.0406 | 0.0072 | 2.15E-08 | -5.5999 | 935597 | COPD |
| rs10760400  | 9 | 125761990 | A | G | 0.3335 | -0.0421 | 0.0075 | 1.82E-08 | -5.6286 | 935597 | COPD |
| rs2050764   | 9 | 125762755 | A | G | 0.3825 | -0.0404 | 0.0072 | 2.44E-08 | -5.5775 | 935597 | COPD |
| rs1339498   | 9 | 125767975 | A | G | 0.3314 | -0.0418 | 0.0075 | 2.25E-08 | -5.5915 | 935597 | COPD |
| rs10986894  | 9 | 125769283 | A | G | 0.3825 | -0.0408 | 0.0072 | 1.77E-08 | -5.6329 | 935597 | COPD |
| rs10760401  | 9 | 125776562 | C | A | 0.3326 | -0.0422 | 0.0075 | 1.74E-08 | -5.6361 | 935597 | COPD |
| rs11788829  | 9 | 125778439 | A | G | 0.3818 | -0.0406 | 0.0072 | 2.04E-08 | -5.6084 | 935597 | COPD |
| rs7044841   | 9 | 125783953 | G | A | 0.3328 | -0.0423 | 0.0075 | 1.61E-08 | -5.6496 | 935597 | COPD |
| rs12341976  | 9 | 125784080 | G | T | 0.3818 | -0.0406 | 0.0072 | 2.08E-08 | -5.6053 | 935597 | COPD |
| rs10121853  | 9 | 125788575 | C | T | 0.3307 | -0.0418 | 0.0075 | 2.43E-08 | -5.5783 | 935597 | COPD |
| rs10986931  | 9 | 125801930 | C | T | 0.3911 | -0.0398 | 0.0069 | 6.19E-09 | -5.8117 | 995917 | COPD |
| rs12552782  | 9 | 125802046 | A | G | 0.3622 | -0.0395 | 0.0070 | 1.41E-08 | -5.6723 | 995917 | COPD |
| rs11794655  | 9 | 125802925 | C | G | 0.3812 | -0.0399 | 0.0069 | 6.41E-09 | -5.8057 | 995917 | COPD |
| rs10986936  | 9 | 125807498 | G | A | 0.3809 | -0.0399 | 0.0069 | 5.96E-09 | -5.8180 | 995917 | COPD |
| rs7040425   | 9 | 125812908 | G | C | 0.3285 | -0.0425 | 0.0075 | 1.52E-08 | -5.6588 | 935597 | COPD |
| rs12554865  | 9 | 125813165 | A | G | 0.3813 | -0.0399 | 0.0069 | 6.46E-09 | -5.8045 | 995917 | COPD |
| rs12352375  | 9 | 125815260 | A | G | 0.3260 | -0.0415 | 0.0075 | 3.64E-08 | -5.5077 | 935597 | COPD |
| rs7870250   | 9 | 125816437 | C | A | 0.3286 | -0.0427 | 0.0075 | 1.30E-08 | -5.6861 | 935597 | COPD |
| rs10819079  | 9 | 125821620 | A | G | 0.3260 | -0.0415 | 0.0075 | 3.60E-08 | -5.5095 | 935597 | COPD |
| rs4258094   | 9 | 125824208 | T | A | 0.3285 | -0.0425 | 0.0075 | 1.56E-08 | -5.6552 | 935597 | COPD |
| rs4287036   | 9 | 125825926 | G | T | 0.3287 | -0.0426 | 0.0075 | 1.38E-08 | -5.6756 | 935597 | COPD |
| rs4838296   | 9 | 125829251 | C | T | 0.3765 | -0.0389 | 0.0069 | 1.73E-08 | -5.6375 | 995917 | COPD |
| rs7873499   | 9 | 125829922 | A | G | 0.3813 | -0.0399 | 0.0069 | 6.82E-09 | -5.7955 | 995917 | COPD |
| rs6478713   | 9 | 125830806 | G | A | 0.3285 | -0.0425 | 0.0075 | 1.55E-08 | -5.6556 | 935597 | COPD |
| rs7848507   | 9 | 125830853 | G | T | 0.3414 | -0.0421 | 0.0074 | 1.47E-08 | -5.6653 | 935597 | COPD |
| rs12338120  | 9 | 125832356 | T | C | 0.3238 | -0.0411 | 0.0075 | 4.92E-08 | -5.4543 | 935597 | COPD |
| rs10986965  | 9 | 125832989 | G | A | 0.3235 | -0.0416 | 0.0075 | 3.46E-08 | -5.5162 | 935597 | COPD |
| rs9969756   | 9 | 125833218 | A | G | 0.3255 | -0.0423 | 0.0075 | 1.97E-08 | -5.6145 | 935597 | COPD |
| rs7864299   | 9 | 125834491 | A | G | 0.3808 | -0.0405 | 0.0069 | 3.97E-09 | -5.8855 | 995917 | COPD |
| rs7875710   | 9 | 125835113 | G | A | 0.3305 | -0.0438 | 0.0075 | 5.39E-09 | -5.8348 | 935597 | COPD |

|            |   |           |   |   |        |         |        |          |         |        |      |
|------------|---|-----------|---|---|--------|---------|--------|----------|---------|--------|------|
| rs13293667 | 9 | 125839482 | A | G | 0.3765 | -0.0392 | 0.0069 | 1.38E-08 | -5.6765 | 995917 | COPD |
| rs10760403 | 9 | 125846216 | G | T | 0.3287 | -0.0429 | 0.0075 | 1.07E-08 | -5.7187 | 935597 | COPD |
| rs7857894  | 9 | 125850655 | G | A | 0.3285 | -0.0433 | 0.0075 | 7.85E-09 | -5.7717 | 935597 | COPD |
| rs4515655  | 9 | 125853794 | T | C | 0.3761 | -0.0392 | 0.0069 | 1.35E-08 | -5.6801 | 995917 | COPD |
| rs11789020 | 9 | 125854097 | A | G | 0.3761 | -0.0393 | 0.0069 | 1.32E-08 | -5.6830 | 995917 | COPD |
| rs10156445 | 9 | 125854965 | A | G | 0.3278 | -0.0431 | 0.0075 | 1.01E-08 | -5.7297 | 935597 | COPD |
| rs10986983 | 9 | 125857730 | C | T | 0.3303 | -0.0434 | 0.0075 | 7.64E-09 | -5.7763 | 935597 | COPD |
| rs12344218 | 9 | 125858608 | A | T | 0.3719 | -0.0450 | 0.0078 | 9.98E-09 | -5.7311 | 868135 | COPD |
| rs13299979 | 9 | 125863644 | A | G | 0.3796 | -0.0416 | 0.0073 | 9.78E-09 | -5.7345 | 935597 | COPD |
| rs10115938 | 9 | 125866292 | G | A | 0.3284 | -0.0432 | 0.0075 | 8.86E-09 | -5.7514 | 935597 | COPD |
| rs10819081 | 9 | 125866895 | A | C | 0.3615 | -0.0405 | 0.0073 | 3.58E-08 | -5.5103 | 935597 | COPD |
| rs4838298  | 9 | 125867209 | C | T | 0.3238 | -0.0420 | 0.0075 | 2.69E-08 | -5.5602 | 935597 | COPD |
| rs7849076  | 9 | 125878423 | C | T | 0.2938 | -0.0505 | 0.0077 | 6.74E-11 | -6.5262 | 935597 | COPD |
| rs10819082 | 9 | 125883338 | G | A | 0.2959 | -0.0505 | 0.0077 | 6.70E-11 | -6.5274 | 935597 | COPD |
| rs12553980 | 9 | 125884584 | T | A | 0.3388 | -0.0471 | 0.0074 | 2.60E-10 | -6.3210 | 935597 | COPD |
| rs6478715  | 9 | 125886194 | G | C | 0.2939 | -0.0505 | 0.0077 | 6.88E-11 | -6.5232 | 935597 | COPD |
| rs10987006 | 9 | 125889260 | C | G | 0.3387 | -0.0469 | 0.0074 | 3.08E-10 | -6.2945 | 935597 | COPD |
| rs10760404 | 9 | 125890736 | G | C | 0.2936 | -0.0502 | 0.0077 | 9.36E-11 | -6.4769 | 935597 | COPD |
| rs4304424  | 9 | 125891468 | G | A | 0.2938 | -0.0504 | 0.0077 | 7.37E-11 | -6.5130 | 935597 | COPD |
| rs7024396  | 9 | 125892044 | C | T | 0.3078 | -0.0521 | 0.0078 | 2.60E-11 | -6.6675 | 910152 | COPD |
| rs1952670  | 9 | 125892113 | A | G | 0.2936 | -0.0502 | 0.0077 | 8.98E-11 | -6.4831 | 935597 | COPD |
| rs1411352  | 9 | 125892836 | T | G | 0.2936 | -0.0501 | 0.0077 | 1.01E-10 | -6.4649 | 935597 | COPD |
| rs10819083 | 9 | 125897928 | C | T | 0.3210 | -0.0453 | 0.0076 | 2.07E-09 | -5.9923 | 935597 | COPD |
| rs1952669  | 9 | 125898397 | G | A | 0.2955 | -0.0500 | 0.0077 | 1.01E-10 | -6.4657 | 935597 | COPD |
| rs10114213 | 9 | 125899056 | G | A | 0.2936 | -0.0497 | 0.0077 | 1.35E-10 | -6.4214 | 935597 | COPD |
| rs4455974  | 9 | 125899487 | A | C | 0.3578 | -0.0664 | 0.0106 | 4.31E-10 | -6.2423 | 522846 | COPD |
| rs10987017 | 9 | 125906436 | A | G | 0.3385 | -0.0461 | 0.0074 | 5.97E-10 | -6.1911 | 935597 | COPD |
| rs1411350  | 9 | 125907900 | A | G | 0.2910 | -0.0481 | 0.0078 | 5.56E-10 | -6.2025 | 935597 | COPD |
| rs7021260  | 9 | 125908872 | C | T | 0.2856 | -0.0553 | 0.0084 | 5.02E-11 | -6.5702 | 868135 | COPD |
| rs10513454 | 9 | 125910947 | T | G | 0.3339 | -0.0445 | 0.0075 | 2.54E-09 | -5.9590 | 935597 | COPD |
| rs7869867  | 9 | 125913540 | G | C | 0.2934 | -0.0496 | 0.0077 | 1.49E-10 | -6.4068 | 935597 | COPD |
| rs7856095  | 9 | 125913592 | T | A | 0.2934 | -0.0496 | 0.0077 | 1.49E-10 | -6.4069 | 935597 | COPD |
| rs2026134  | 9 | 125917869 | T | C | 0.2769 | -0.0459 | 0.0075 | 7.63E-10 | -6.1524 | 995917 | COPD |
| rs10739664 | 9 | 125922298 | G | C | 0.2777 | -0.0492 | 0.0079 | 4.09E-10 | -6.2505 | 935597 | COPD |
| rs10987043 | 9 | 125927461 | T | A | 0.2937 | -0.0478 | 0.0077 | 6.87E-10 | -6.1690 | 935597 | COPD |
| rs10819087 | 9 | 125932901 | A | G | 0.2771 | -0.0453 | 0.0079 | 9.70E-09 | -5.7359 | 935597 | COPD |
| rs1411354  | 9 | 125936485 | A | G | 0.2876 | -0.0465 | 0.0078 | 2.36E-09 | -5.9708 | 935597 | COPD |
| rs10987049 | 9 | 125936910 | G | C | 0.2891 | -0.0462 | 0.0078 | 2.94E-09 | -5.9350 | 935597 | COPD |
| rs2149993  | 9 | 125940567 | T | C | 0.2753 | -0.0470 | 0.0079 | 2.74E-09 | -5.9466 | 935597 | COPD |
| rs11789188 | 9 | 125942733 | G | A | 0.2758 | -0.0476 | 0.0079 | 1.60E-09 | -6.0342 | 935597 | COPD |
| rs11791242 | 9 | 125942910 | T | C | 0.2758 | -0.0476 | 0.0079 | 1.63E-09 | -6.0311 | 935597 | COPD |
| rs10987054 | 9 | 125942948 | T | C | 0.2754 | -0.0470 | 0.0079 | 2.63E-09 | -5.9531 | 935597 | COPD |
| rs11792816 | 9 | 125945029 | T | C | 0.2801 | -0.0485 | 0.0079 | 6.93E-10 | -6.1678 | 935597 | COPD |
| rs10987055 | 9 | 125945289 | C | T | 0.2800 | -0.0485 | 0.0079 | 6.87E-10 | -6.1691 | 935597 | COPD |
| rs12353435 | 9 | 125946974 | A | G | 0.2937 | -0.0475 | 0.0077 | 8.33E-10 | -6.1385 | 935597 | COPD |
| rs7859110  | 9 | 125947321 | T | C | 0.2730 | -0.0474 | 0.0079 | 2.10E-09 | -5.9897 | 935597 | COPD |
| rs13293109 | 9 | 125948653 | A | G | 0.2890 | -0.0460 | 0.0078 | 3.51E-09 | -5.9059 | 935597 | COPD |
| rs1999200  | 9 | 125948750 | A | G | 0.2778 | -0.0457 | 0.0075 | 9.89E-10 | -6.1110 | 995917 | COPD |
| rs1999199  | 9 | 125948835 | A | T | 0.2891 | -0.0459 | 0.0078 | 3.58E-09 | -5.9027 | 935597 | COPD |
| rs10760405 | 9 | 125949176 | T | G | 0.2778 | -0.0457 | 0.0075 | 9.92E-10 | -6.1108 | 995917 | COPD |
| rs13298715 | 9 | 125949530 | A | G | 0.2897 | -0.0451 | 0.0078 | 6.87E-09 | -5.7941 | 935597 | COPD |
| rs7024493  | 9 | 125949963 | A | G | 0.2757 | -0.0476 | 0.0079 | 1.70E-09 | -6.0239 | 935597 | COPD |
| rs12351249 | 9 | 125953417 | T | C | 0.2781 | -0.0458 | 0.0075 | 8.73E-10 | -6.1312 | 995917 | COPD |
| rs7868801  | 9 | 125953697 | C | T | 0.2781 | -0.0459 | 0.0075 | 8.53E-10 | -6.1347 | 995917 | COPD |
| rs2111359  | 9 | 125954113 | A | G | 0.2778 | -0.0456 | 0.0075 | 1.09E-09 | -6.0962 | 995917 | COPD |
| rs7873205  | 9 | 125954597 | G | A | 0.2937 | -0.0474 | 0.0077 | 9.57E-10 | -6.1164 | 935597 | COPD |
| rs2041943  | 9 | 125954852 | T | G | 0.2781 | -0.0459 | 0.0075 | 8.51E-10 | -6.1350 | 995917 | COPD |
| rs10987058 | 9 | 125955451 | C | A | 0.2890 | -0.0459 | 0.0078 | 3.75E-09 | -5.8951 | 935597 | COPD |
| rs10987059 | 9 | 125956392 | A | G | 0.2757 | -0.0475 | 0.0079 | 1.87E-09 | -6.0087 | 935597 | COPD |
| rs1420767  | 9 | 125956877 | G | A | 0.2826 | -0.0466 | 0.0074 | 3.68E-10 | -6.2671 | 995917 | COPD |
| rs10513456 | 9 | 125957570 | G | A | 0.2820 | -0.0466 | 0.0074 | 3.53E-10 | -6.2734 | 995917 | COPD |
| rs10819089 | 9 | 125958010 | G | A | 0.2937 | -0.0474 | 0.0077 | 8.98E-10 | -6.1266 | 935597 | COPD |
| rs10760406 | 9 | 125958409 | A | G | 0.2778 | -0.0456 | 0.0075 | 1.08E-09 | -6.0978 | 995917 | COPD |
| rs10819090 | 9 | 125958445 | T | C | 0.2890 | -0.0460 | 0.0078 | 3.51E-09 | -5.9059 | 935597 | COPD |
| rs7867968  | 9 | 125959016 | C | T | 0.2778 | -0.0456 | 0.0075 | 1.11E-09 | -6.0930 | 995917 | COPD |
| rs7868182  | 9 | 125959032 | G | A | 0.2778 | -0.0456 | 0.0075 | 1.03E-09 | -6.1046 | 995917 | COPD |
| rs7857456  | 9 | 125959279 | T | C | 0.2778 | -0.0454 | 0.0075 | 1.24E-09 | -6.0748 | 995917 | COPD |
| rs7871599  | 9 | 125959549 | C | G | 0.2753 | -0.0467 | 0.0079 | 3.26E-09 | -5.9179 | 935597 | COPD |
| rs62570472 | 9 | 125960942 | G | T | 0.2827 | -0.0585 | 0.0099 | 3.42E-09 | -5.9101 | 713810 | COPD |
| rs62570473 | 9 | 125960943 | A | C | 0.2827 | -0.0585 | 0.0099 | 3.42E-09 | -5.9101 | 713810 | COPD |
| rs872525   | 9 | 125961280 | A | G | 0.2778 | -0.0455 | 0.0075 | 1.15E-09 | -6.0869 | 995917 | COPD |
| rs872524   | 9 | 125961540 | G | T | 0.2778 | -0.0455 | 0.0075 | 1.13E-09 | -6.0900 | 995917 | COPD |
| rs888230   | 9 | 125962025 | A | C | 0.2753 | -0.0468 | 0.0079 | 3.09E-09 | -5.9268 | 935597 | COPD |
| rs2111358  | 9 | 125962404 | A | C | 0.2778 | -0.0455 | 0.0075 | 1.21E-09 | -6.0795 | 995917 | COPD |

|             |    |           |   |   |        |         |        |          |          |        |      |
|-------------|----|-----------|---|---|--------|---------|--------|----------|----------|--------|------|
| rs7026855   | 9  | 125962552 | C | T | 0.2777 | -0.0455 | 0.0075 | 1.22E-09 | -6.0783  | 995917 | COPD |
| rs10987060  | 9  | 125962667 | A | G | 0.2778 | -0.0455 | 0.0075 | 1.20E-09 | -6.0808  | 995917 | COPD |
| rs1105727   | 9  | 125963264 | T | C | 0.2754 | -0.0468 | 0.0079 | 3.19E-09 | -5.9218  | 935597 | COPD |
| rs3829098   | 9  | 125964756 | T | C | 0.2778 | -0.0454 | 0.0075 | 1.23E-09 | -6.0765  | 995917 | COPD |
| rs3793622   | 9  | 125964891 | C | T | 0.2889 | -0.0458 | 0.0078 | 3.97E-09 | -5.8855  | 935597 | COPD |
| rs7853588   | 9  | 125967424 | G | A | 0.2778 | -0.0456 | 0.0075 | 1.11E-09 | -6.0928  | 995917 | COPD |
| rs7853604   | 9  | 125967451 | G | A | 0.2786 | -0.0455 | 0.0075 | 1.17E-09 | -6.0840  | 995917 | COPD |
| rs7868811   | 9  | 125967467 | T | A | 0.2778 | -0.0455 | 0.0075 | 1.12E-09 | -6.0919  | 995917 | COPD |
| rs10739665  | 9  | 125967698 | A | G | 0.2778 | -0.0456 | 0.0075 | 1.03E-09 | -6.1047  | 995917 | COPD |
| rs2416983   | 9  | 125968680 | T | C | 0.2754 | -0.0471 | 0.0079 | 2.48E-09 | -5.9625  | 935597 | COPD |
| rs9644951   | 9  | 125968952 | G | A | 0.2754 | -0.0471 | 0.0079 | 2.49E-09 | -5.9618  | 935597 | COPD |
| rs2058851   | 9  | 125969415 | G | A | 0.2772 | -0.0482 | 0.0079 | 9.84E-10 | -6.1120  | 935597 | COPD |
| rs2058850   | 9  | 125969539 | A | G | 0.2771 | -0.0482 | 0.0079 | 9.49E-10 | -6.1178  | 935597 | COPD |
| rs7862061   | 9  | 125969651 | G | C | 0.2829 | -0.0497 | 0.0087 | 1.13E-08 | -5.7100  | 809391 | COPD |
| rs12336219  | 9  | 125969996 | C | T | 0.2908 | -0.0469 | 0.0078 | 1.51E-09 | -6.0436  | 935597 | COPD |
| rs12345427  | 9  | 125970196 | A | G | 0.2772 | -0.0480 | 0.0079 | 1.15E-09 | -6.0872  | 935597 | COPD |
| rs13292724  | 9  | 125971041 | G | A | 0.2776 | -0.0487 | 0.0079 | 6.40E-10 | -6.1802  | 935597 | COPD |
| rs2416984   | 9  | 125971647 | T | C | 0.2782 | -0.0480 | 0.0079 | 1.07E-09 | -6.0987  | 935597 | COPD |
| rs7864769   | 9  | 125973762 | T | C | 0.2766 | -0.0476 | 0.0079 | 1.54E-09 | -6.0404  | 935597 | COPD |
| rs7849481   | 9  | 125973871 | C | T | 0.2753 | -0.0471 | 0.0079 | 2.47E-09 | -5.9633  | 935597 | COPD |
| rs7849781   | 9  | 125973901 | G | A | 0.2753 | -0.0472 | 0.0079 | 2.26E-09 | -5.9777  | 935597 | COPD |
| rs1477147   | 9  | 125974232 | C | G | 0.2773 | -0.0473 | 0.0079 | 2.01E-09 | -5.9972  | 935597 | COPD |
| rs62570477  | 9  | 125975740 | T | A | 0.2796 | -0.0454 | 0.0075 | 1.16E-09 | -6.0857  | 995917 | COPD |
| rs2149992   | 9  | 125976312 | G | A | 0.2913 | -0.0450 | 0.0078 | 6.61E-09 | -5.8005  | 935597 | COPD |
| rs2111363   | 9  | 125977736 | A | G | 0.2798 | -0.0460 | 0.0075 | 6.89E-10 | -6.1685  | 995917 | COPD |
| rs10819094  | 9  | 125978522 | G | C | 0.2776 | -0.0469 | 0.0079 | 2.57E-09 | -5.9570  | 935597 | COPD |
| rs1592608   | 9  | 125979826 | G | A | 0.2777 | -0.0468 | 0.0079 | 2.91E-09 | -5.9366  | 935597 | COPD |
| rs10819096  | 9  | 125980049 | A | G | 0.2861 | -0.0457 | 0.0078 | 5.62E-09 | -5.8276  | 935597 | COPD |
| rs12238134  | 9  | 125984333 | A | G | 0.2734 | -0.0461 | 0.0079 | 5.82E-09 | -5.8218  | 935597 | COPD |
| rs3025343   | 9  | 133613233 | A | G | 0.0959 | 0.0621  | 0.0111 | 2.00E-08 | 5.6124   | 995917 | COPD |
| rs3025360   | 9  | 133616083 | A | G | 0.0957 | 0.0619  | 0.0111 | 2.55E-08 | 5.5701   | 995917 | COPD |
| rs7130588   | 11 | 76559639  | G | A | 0.3342 | 0.0385  | 0.0070 | 4.73E-08 | 5.4612   | 995917 | COPD |
| rs6592645   | 11 | 76559961  | A | G | 0.3338 | 0.0385  | 0.0071 | 4.88E-08 | 5.4557   | 995917 | COPD |
| rs73137887  | 12 | 67721356  | G | C | 0.0983 | -0.0633 | 0.0114 | 2.47E-08 | -5.5753  | 995917 | COPD |
| rs12307208  | 12 | 67723961  | C | T | 0.0987 | -0.0642 | 0.0113 | 1.52E-08 | -5.6593  | 995917 | COPD |
| rs12300300  | 12 | 67724218  | T | C | 0.0983 | -0.0633 | 0.0113 | 2.47E-08 | -5.5752  | 995917 | COPD |
| rs12302184  | 12 | 67725229  | T | C | 0.0985 | -0.0637 | 0.0113 | 1.94E-08 | -5.6176  | 995917 | COPD |
| rs7294798   | 12 | 67727257  | C | T | 0.0984 | -0.0632 | 0.0114 | 2.57E-08 | -5.5684  | 995917 | COPD |
| rs12307118  | 12 | 67732916  | A | C | 0.1009 | -0.0673 | 0.0122 | 3.69E-08 | -5.5054  | 918956 | COPD |
| rs324789    | 12 | 83553708  | T | G | 0.3877 | -0.0424 | 0.0077 | 4.49E-08 | -5.4706  | 868135 | COPD |
| rs112458284 | 14 | 94206394  | C | T | 0.0384 | 0.1076  | 0.0176 | 9.94E-10 | 6.1105   | 995917 | COPD |
| rs45505795  | 14 | 94290606  | C | G | 0.0336 | 0.1188  | 0.0190 | 3.83E-10 | 6.2610   | 995917 | COPD |
| rs112635299 | 14 | 94371805  | T | G | 0.0200 | 0.1882  | 0.0253 | 1.12E-13 | 7.4257   | 935597 | COPD |
| rs28929474  | 14 | 94378610  | T | C | 0.0196 | 0.2015  | 0.0257 | 4.04E-15 | 7.8538   | 926793 | COPD |
| rs10152595  | 15 | 67183150  | G | C | 0.2465 | -0.0433 | 0.0078 | 2.97E-08 | -5.5431  | 987113 | COPD |
| rs7173826   | 15 | 67236036  | G | T | 0.3321 | -0.0397 | 0.0071 | 2.32E-08 | -5.5862  | 987113 | COPD |
| rs2869030   | 15 | 78419461  | G | T | 0.2533 | -0.0590 | 0.0084 | 2.01E-12 | -7.0334  | 910152 | COPD |
| rs4526984   | 15 | 78419777  | A | T | 0.2436 | -0.0798 | 0.0121 | 4.43E-11 | -6.5888  | 522846 | COPD |
| rs2869032   | 15 | 78422219  | C | T | 0.2241 | -0.0814 | 0.0082 | 4.08E-23 | -9.9020  | 970472 | COPD |
| rs2869045   | 15 | 78426557  | T | C | 0.2239 | -0.0816 | 0.0082 | 3.21E-23 | -9.9258  | 970472 | COPD |
| rs72736802  | 15 | 78427159  | T | A | 0.3490 | 0.0753  | 0.0095 | 2.98E-15 | 7.8918   | 590308 | COPD |
| rs72738704  | 15 | 78427490  | C | G | 0.3219 | 0.0966  | 0.0076 | 1.92E-37 | 12.7879  | 926793 | COPD |
| rs2656055   | 15 | 78427852  | C | A | 0.2318 | -0.0775 | 0.0081 | 1.21E-21 | -9.5571  | 970472 | COPD |
| rs2568497   | 15 | 78429055  | G | T | 0.2312 | -0.0785 | 0.0081 | 3.81E-22 | -9.6761  | 970472 | COPD |
| rs2568499   | 15 | 78430017  | T | C | 0.2311 | -0.0801 | 0.0080 | 8.88E-24 | -10.0535 | 987113 | COPD |
| rs2656056   | 15 | 78430177  | T | C | 0.2311 | -0.0802 | 0.0080 | 8.09E-24 | -10.0625 | 987113 | COPD |
| rs11072763  | 15 | 78431914  | A | G | 0.2370 | -0.0735 | 0.0083 | 6.84E-19 | -8.8775  | 926793 | COPD |
| rs1394371   | 15 | 78432127  | T | C | 0.2781 | 0.0846  | 0.0079 | 8.66E-27 | 10.7150  | 926793 | COPD |
| rs2036528   | 15 | 78433929  | G | C | 0.2311 | -0.0799 | 0.0080 | 1.02E-23 | -10.0394 | 987113 | COPD |
| rs2036529   | 15 | 78433930  | A | T | 0.2311 | -0.0799 | 0.0080 | 1.01E-23 | -10.0408 | 987113 | COPD |
| rs2656070   | 15 | 78437910  | A | G | 0.2313 | -0.0797 | 0.0080 | 1.24E-23 | -10.0201 | 987113 | COPD |
| rs17483548  | 15 | 78437971  | A | G | 0.3227 | 0.1068  | 0.0079 | 1.69E-41 | 13.4948  | 860907 | COPD |
| rs17405217  | 15 | 78438807  | T | C | 0.3214 | 0.0991  | 0.0071 | 1.16E-43 | 13.8569  | 987113 | COPD |
| rs924840    | 15 | 78439466  | T | A | 0.2315 | -0.0797 | 0.0080 | 1.21E-23 | -10.0230 | 987113 | COPD |
| rs2938671   | 15 | 78440412  | A | G | 0.2314 | -0.0797 | 0.0080 | 1.13E-23 | -10.0297 | 987113 | COPD |
| rs17483686  | 15 | 78441048  | T | A | 0.3261 | 0.1003  | 0.0071 | 5.36E-45 | 14.0755  | 987113 | COPD |
| rs17483721  | 15 | 78441389  | C | T | 0.3265 | 0.1002  | 0.0071 | 5.47E-45 | 14.0747  | 987113 | COPD |
| rs4887056   | 15 | 78442243  | G | A | 0.3250 | 0.1090  | 0.0083 | 4.14E-39 | 13.0827  | 792470 | COPD |
| rs55983731  | 15 | 78442927  | T | C | 0.3261 | 0.1002  | 0.0071 | 5.79E-45 | 14.0706  | 987113 | COPD |
| rs72738718  | 15 | 78443096  | C | G | 0.3261 | 0.1002  | 0.0071 | 5.99E-45 | 14.0678  | 987113 | COPD |
| rs2568488   | 15 | 78444251  | T | A | 0.2311 | -0.0801 | 0.0080 | 6.91E-24 | -10.0781 | 987113 | COPD |
| rs2568490   | 15 | 78446028  | T | C | 0.2312 | -0.0802 | 0.0079 | 5.88E-24 | -10.0938 | 987113 | COPD |
| rs2915695   | 15 | 78447129  | T | C | 0.2311 | -0.0803 | 0.0079 | 5.50E-24 | -10.1004 | 987113 | COPD |
| rs2089162   | 15 | 78447421  | G | A | 0.3218 | 0.0992  | 0.0071 | 8.45E-44 | 13.8794  | 987113 | COPD |

|            |    |          |   |   |        |         |        |          |          |        |      |
|------------|----|----------|---|---|--------|---------|--------|----------|----------|--------|------|
| rs2568493  | 15 | 78447891 | G | A | 0.2312 | -0.0806 | 0.0079 | 3.72E-24 | -10.1386 | 987113 | COPD |
| rs2938670  | 15 | 78448346 | G | T | 0.3269 | 0.0997  | 0.0071 | 1.24E-44 | 14.0161  | 987113 | COPD |
| rs2656052  | 15 | 78448590 | C | A | 0.3269 | 0.0997  | 0.0071 | 1.31E-44 | 14.0122  | 987113 | COPD |
| rs2568494  | 15 | 78448622 | A | G | 0.3269 | 0.0997  | 0.0071 | 1.22E-44 | 14.0177  | 987113 | COPD |
| rs2656074  | 15 | 78449042 | T | C | 0.2312 | -0.0804 | 0.0079 | 4.65E-24 | -10.1169 | 987113 | COPD |
| rs7181486  | 15 | 78449276 | C | T | 0.3263 | 0.1003  | 0.0071 | 3.90E-45 | 14.0974  | 987113 | COPD |
| rs2656073  | 15 | 78449934 | T | G | 0.2312 | -0.0803 | 0.0079 | 5.17E-24 | -10.1064 | 987113 | COPD |
| rs17483929 | 15 | 78450034 | A | G | 0.3266 | 0.1001  | 0.0071 | 4.58E-45 | 14.0868  | 987113 | COPD |
| rs56219465 | 15 | 78450237 | G | A | 0.3263 | 0.1002  | 0.0071 | 4.91E-45 | 14.0820  | 987113 | COPD |
| rs2958719  | 15 | 78450687 | G | A | 0.2312 | -0.0805 | 0.0079 | 4.24E-24 | -10.1258 | 987113 | COPD |
| rs2656072  | 15 | 78451950 | A | G | 0.2312 | -0.0804 | 0.0079 | 4.64E-24 | -10.1170 | 987113 | COPD |
| rs2656071  | 15 | 78453001 | T | A | 0.2311 | -0.0803 | 0.0079 | 5.26E-24 | -10.1048 | 987113 | COPD |
| rs2656069  | 15 | 78453365 | C | T | 0.2312 | -0.0804 | 0.0079 | 4.46E-24 | -10.1210 | 987113 | COPD |
| rs2656065  | 15 | 78458207 | A | G | 0.3273 | 0.0998  | 0.0071 | 9.29E-45 | 14.0368  | 987113 | COPD |
| rs11637656 | 15 | 78459619 | C | T | 0.3940 | -0.0794 | 0.0068 | 3.76E-31 | -11.6078 | 987113 | COPD |
| rs12442456 | 15 | 78459620 | T | G | 0.1516 | -0.0596 | 0.0101 | 3.41E-09 | -5.9107  | 910152 | COPD |
| rs2568485  | 15 | 78459772 | C | T | 0.2313 | -0.0805 | 0.0079 | 3.83E-24 | -10.1359 | 987113 | COPD |
| rs72738732 | 15 | 78459846 | G | C | 0.3219 | 0.0993  | 0.0071 | 5.80E-44 | 13.9063  | 987113 | COPD |
| rs2568483  | 15 | 78460001 | G | A | 0.2313 | -0.0805 | 0.0079 | 3.92E-24 | -10.1335 | 987113 | COPD |
| rs1964678  | 15 | 78461658 | A | G | 0.3929 | -0.0791 | 0.0068 | 8.10E-31 | -11.5421 | 987113 | COPD |
| rs2009746  | 15 | 78461760 | G | A | 0.3271 | 0.1005  | 0.0071 | 2.61E-45 | 14.1269  | 987113 | COPD |
| rs2938674  | 15 | 78465571 | A | C | 0.2305 | -0.0800 | 0.0079 | 7.74E-24 | -10.0669 | 987113 | COPD |
| rs958025   | 15 | 78467006 | T | C | 0.2322 | -0.0673 | 0.0090 | 9.27E-14 | -7.4509  | 733155 | COPD |
| rs4887057  | 15 | 78468576 | A | G | 0.3927 | -0.0784 | 0.0068 | 2.12E-30 | -11.4588 | 987113 | COPD |
| rs17484235 | 15 | 78469072 | G | C | 0.3227 | 0.1072  | 0.0079 | 8.33E-42 | 13.5463  | 860907 | COPD |
| rs28480606 | 15 | 78469971 | G | A | 0.2303 | -0.0803 | 0.0079 | 5.16E-24 | -10.1068 | 987113 | COPD |
| rs7174190  | 15 | 78471275 | T | C | 0.2303 | -0.0803 | 0.0079 | 5.59E-24 | -10.0989 | 987113 | COPD |
| rs72738736 | 15 | 78472780 | T | G | 0.3263 | 0.1006  | 0.0071 | 2.22E-45 | 14.1378  | 987113 | COPD |
| rs12593229 | 15 | 78472948 | T | G | 0.3938 | -0.0790 | 0.0068 | 7.13E-31 | -11.5529 | 987113 | COPD |
| rs4299116  | 15 | 78473852 | T | A | 0.3960 | -0.0845 | 0.0077 | 6.42E-28 | -10.9532 | 859331 | COPD |
| rs1504550  | 15 | 78473908 | G | A | 0.3211 | 0.0996  | 0.0071 | 3.88E-44 | 13.9350  | 987113 | COPD |
| rs1504549  | 15 | 78474287 | C | T | 0.3946 | -0.0790 | 0.0068 | 7.21E-31 | -11.5519 | 987113 | COPD |
| rs12592111 | 15 | 78475004 | G | A | 0.3976 | -0.0987 | 0.0095 | 4.50E-25 | -10.3431 | 649623 | COPD |
| rs12910910 | 15 | 78475508 | C | T | 0.3940 | -0.0792 | 0.0068 | 5.24E-31 | -11.5794 | 987113 | COPD |
| rs28602670 | 15 | 78475825 | G | C | 0.2313 | -0.0775 | 0.0083 | 1.35E-20 | -9.3045  | 926793 | COPD |
| rs8043227  | 15 | 78476529 | C | G | 0.3939 | -0.0793 | 0.0068 | 4.16E-31 | -11.5993 | 987113 | COPD |
| rs12916801 | 15 | 78476788 | A | G | 0.3939 | -0.0793 | 0.0068 | 4.11E-31 | -11.6003 | 987113 | COPD |
| rs11072766 | 15 | 78479204 | T | C | 0.2262 | -0.0902 | 0.0089 | 3.21E-24 | -10.1531 | 860907 | COPD |
| rs17484524 | 15 | 78480334 | G | A | 0.3220 | 0.0996  | 0.0071 | 2.73E-44 | 13.9600  | 987113 | COPD |
| rs35031105 | 15 | 78480464 | T | C | 0.2308 | -0.0807 | 0.0079 | 2.80E-24 | -10.1662 | 987113 | COPD |
| rs8042238  | 15 | 78481929 | C | T | 0.3941 | -0.0792 | 0.0068 | 4.36E-31 | -11.5951 | 987113 | COPD |
| rs8042260  | 15 | 78482032 | A | G | 0.3940 | -0.0792 | 0.0068 | 4.45E-31 | -11.5934 | 987113 | COPD |
| rs10851906 | 15 | 78482334 | G | A | 0.2306 | -0.0806 | 0.0079 | 3.31E-24 | -10.1501 | 987113 | COPD |
| rs16969894 | 15 | 78484114 | T | C | 0.2323 | -0.0805 | 0.0079 | 3.24E-24 | -10.1522 | 987113 | COPD |
| rs12903285 | 15 | 78486611 | A | G | 0.3897 | -0.0754 | 0.0083 | 1.15E-19 | -9.0733  | 667269 | COPD |
| rs12903295 | 15 | 78486630 | A | G | 0.3941 | -0.0790 | 0.0068 | 6.90E-31 | -11.5558 | 987113 | COPD |
| rs12904234 | 15 | 78487042 | C | T | 0.3935 | -0.0788 | 0.0068 | 6.67E-31 | -11.5588 | 987113 | COPD |
| rs36146269 | 15 | 78487168 | T | A | 0.3946 | -0.0790 | 0.0068 | 5.98E-31 | -11.5680 | 987113 | COPD |
| rs12101809 | 15 | 78487459 | T | C | 0.2307 | -0.0807 | 0.0079 | 3.10E-24 | -10.1564 | 987113 | COPD |
| rs2036533  | 15 | 78489345 | A | G | 0.2307 | -0.0806 | 0.0079 | 3.24E-24 | -10.1523 | 987113 | COPD |
| rs4887059  | 15 | 78489753 | C | T | 0.3946 | -0.0788 | 0.0068 | 9.85E-31 | -11.5251 | 987113 | COPD |
| rs11858836 | 15 | 78490935 | A | G | 0.3201 | 0.0990  | 0.0071 | 5.88E-44 | 13.9053  | 987113 | COPD |
| rs28511883 | 15 | 78491341 | T | C | 0.2307 | -0.0809 | 0.0079 | 2.22E-24 | -10.1888 | 987113 | COPD |
| rs965604   | 15 | 78496881 | G | A | 0.3951 | -0.0776 | 0.0072 | 3.06E-27 | -10.8109 | 926793 | COPD |
| rs13180    | 15 | 78497146 | C | T | 0.3946 | -0.0771 | 0.0072 | 5.38E-27 | -10.7588 | 926793 | COPD |
| rs12899351 | 15 | 78500056 | T | C | 0.3946 | -0.0776 | 0.0072 | 3.34E-27 | -10.8029 | 926793 | COPD |
| rs7174348  | 15 | 78500097 | A | G | 0.2305 | -0.0810 | 0.0080 | 2.18E-24 | -10.1910 | 987113 | COPD |
| rs1062980  | 15 | 78500185 | C | T | 0.3934 | -0.0772 | 0.0072 | 6.50E-27 | -10.7414 | 926793 | COPD |
| rs12594711 | 15 | 78501579 | C | T | 0.3952 | -0.0780 | 0.0072 | 1.84E-27 | -10.8571 | 926793 | COPD |
| rs4362358  | 15 | 78503762 | C | T | 0.3948 | -0.0783 | 0.0073 | 1.46E-26 | -10.6665 | 910152 | COPD |
| rs74925218 | 15 | 78504390 | T | C | 0.2314 | -0.0766 | 0.0085 | 2.09E-19 | -9.0082  | 910152 | COPD |
| rs9672608  | 15 | 78505121 | A | T | 0.2202 | -0.0728 | 0.0109 | 2.11E-11 | -6.6988  | 590308 | COPD |
| rs11852372 | 15 | 78509052 | C | A | 0.3349 | 0.0931  | 0.0096 | 2.17E-22 | 9.7334   | 590308 | COPD |
| rs9788682  | 15 | 78510244 | A | G | 0.2208 | -0.0832 | 0.0087 | 8.81E-22 | -9.5899  | 910152 | COPD |
| rs9788721  | 15 | 78510527 | C | T | 0.3446 | 0.1029  | 0.0076 | 4.07E-42 | 13.5994  | 910152 | COPD |
| rs7164594  | 15 | 78510715 | T | C | 0.2368 | -0.0875 | 0.0085 | 6.00E-25 | -10.3154 | 910152 | COPD |
| rs8034191  | 15 | 78513681 | C | T | 0.3347 | 0.1036  | 0.0074 | 6.04E-44 | 13.9033  | 926793 | COPD |
| rs28437878 | 15 | 78515530 | T | C | 0.2358 | -0.0881 | 0.0085 | 3.38E-25 | -10.3703 | 910152 | COPD |
| rs12438181 | 15 | 78519756 | A | G | 0.2327 | -0.1040 | 0.0091 | 1.92E-30 | -11.4678 | 844266 | COPD |
| rs12441426 | 15 | 78519987 | C | T | 0.2351 | -0.0912 | 0.0079 | 1.51E-30 | -11.4887 | 987113 | COPD |
| rs34684276 | 15 | 78520813 | A | G | 0.3332 | 0.1106  | 0.0093 | 1.83E-32 | 11.8633  | 713810 | COPD |
| rs10519203 | 15 | 78521704 | G | A | 0.3367 | 0.1021  | 0.0071 | 2.91E-47 | 14.4397  | 987113 | COPD |
| rs7181245  | 15 | 78522047 | T | C | 0.2353 | -0.0902 | 0.0079 | 5.73E-30 | -11.3726 | 987113 | COPD |
| rs7181447  | 15 | 78522225 | G | A | 0.2353 | -0.0902 | 0.0079 | 6.19E-30 | -11.3656 | 987113 | COPD |

|             |    |          |   |   |        |         |        |          |          |        |      |
|-------------|----|----------|---|---|--------|---------|--------|----------|----------|--------|------|
| rs7163730   | 15 | 78522339 | G | A | 0.2354 | -0.0900 | 0.0079 | 6.54E-30 | -11.3610 | 987113 | COPD |
| rs61204066  | 15 | 78522956 | A | G | 0.2351 | -0.0907 | 0.0079 | 2.90E-30 | -11.4318 | 987113 | COPD |
| rs8031948   | 15 | 78523715 | T | G | 0.3346 | 0.1025  | 0.0071 | 1.70E-47 | 14.4764  | 987113 | COPD |
| rs4461039   | 15 | 78525105 | T | A | 0.2355 | -0.0901 | 0.0079 | 6.32E-30 | -11.3640 | 987113 | COPD |
| rs8042849   | 15 | 78525587 | C | T | 0.3456 | 0.1013  | 0.0072 | 1.90E-45 | 14.1488  | 970472 | COPD |
| rs12441354  | 15 | 78528674 | A | G | 0.2351 | -0.0909 | 0.0079 | 2.30E-30 | -11.4519 | 987113 | COPD |
| rs7169584   | 15 | 78530318 | T | A | 0.2349 | -0.0917 | 0.0079 | 8.17E-31 | -11.5413 | 987113 | COPD |
| rs12438659  | 15 | 78532582 | A | G | 0.2350 | -0.0910 | 0.0079 | 1.92E-30 | -11.4676 | 987113 | COPD |
| rs931794    | 15 | 78533838 | G | A | 0.3373 | 0.1023  | 0.0071 | 1.44E-47 | 14.4885  | 987113 | COPD |
| rs2036534   | 15 | 78534606 | C | T | 0.2350 | -0.0917 | 0.0079 | 6.74E-31 | -11.5578 | 987113 | COPD |
| rs72738786  | 15 | 78535744 | T | G | 0.3349 | 0.1027  | 0.0071 | 8.23E-48 | 14.5258  | 987113 | COPD |
| rs12439240  | 15 | 78536749 | C | T | 0.2356 | -0.0904 | 0.0079 | 3.91E-30 | -11.4058 | 987113 | COPD |
| rs34664138  | 15 | 78539282 | G | T | 0.2354 | -0.0908 | 0.0079 | 2.17E-30 | -11.4571 | 987113 | COPD |
| rs34138960  | 15 | 78539326 | G | A | 0.2354 | -0.0908 | 0.0079 | 2.20E-30 | -11.4557 | 987113 | COPD |
| rs35212593  | 15 | 78539484 | A | G | 0.2354 | -0.0908 | 0.0079 | 2.41E-30 | -11.4479 | 987113 | COPD |
| rs56117933  | 15 | 78540007 | C | T | 0.1870 | 0.0918  | 0.0091 | 7.57E-24 | 10.0691  | 926793 | COPD |
| rs3813570   | 15 | 78540490 | C | T | 0.2356 | -0.0904 | 0.0079 | 4.07E-30 | -11.4024 | 987113 | COPD |
| rs57064725  | 15 | 78540694 | A | C | 0.2366 | -0.0894 | 0.0079 | 1.40E-29 | -11.2943 | 987113 | COPD |
| rs59133824  | 15 | 78541108 | A | C | 0.2344 | -0.0909 | 0.0080 | 3.11E-30 | -11.4257 | 987113 | COPD |
| rs59683676  | 15 | 78541111 | C | T | 0.2344 | -0.0909 | 0.0080 | 3.11E-30 | -11.4258 | 987113 | COPD |
| rs28498264  | 15 | 78545331 | T | C | 0.2314 | -0.0912 | 0.0080 | 4.32E-30 | -11.3971 | 987113 | COPD |
| rs113352275 | 15 | 78548225 | T | C | 0.2116 | -0.0881 | 0.0099 | 6.65E-19 | -8.8806  | 667269 | COPD |
| rs905739    | 15 | 78552768 | G | A | 0.2357 | -0.0904 | 0.0079 | 4.24E-30 | -11.3987 | 987113 | COPD |
| rs540472629 | 15 | 78556659 | G | A | 0.0605 | -0.1024 | 0.0165 | 5.24E-10 | -6.2118  | 842690 | COPD |
| rs376499689 | 15 | 78556660 | C | T | 0.0636 | -0.0904 | 0.0151 | 1.94E-09 | -6.0025  | 910152 | COPD |
| rs58365910  | 15 | 78556692 | C | T | 0.3345 | 0.1025  | 0.0071 | 1.62E-47 | 14.4798  | 987113 | COPD |
| rs72740955  | 15 | 78557437 | T | C | 0.3336 | 0.1027  | 0.0071 | 1.02E-47 | 14.5121  | 987113 | COPD |
| rs7173514   | 15 | 78557576 | T | C | 0.2470 | -0.0884 | 0.0078 | 1.16E-29 | -11.3109 | 987113 | COPD |
| rs28395178  | 15 | 78558216 | A | G | 0.2172 | -0.0880 | 0.0081 | 2.65E-27 | -10.8239 | 987113 | COPD |
| rs2036527   | 15 | 78559273 | A | G | 0.3338 | 0.1028  | 0.0071 | 6.17E-48 | 14.5458  | 987113 | COPD |
| rs503464    | 15 | 78565554 | A | T | 0.2492 | -0.0881 | 0.0078 | 1.23E-29 | -11.3056 | 987113 | COPD |
| rs5853698   | 15 | 78565597 | G | T | 0.3342 | 0.1016  | 0.0071 | 7.22E-47 | 14.3775  | 987113 | COPD |
| rs55781567  | 15 | 78565644 | G | C | 0.3342 | 0.1018  | 0.0071 | 5.65E-47 | 14.3934  | 987113 | COPD |
| rs684513    | 15 | 78566058 | G | C | 0.2162 | -0.0981 | 0.0090 | 1.51E-27 | -10.8753 | 860907 | COPD |
| rs1711731   | 15 | 78569576 | A | G | 0.2223 | -0.0905 | 0.0082 | 3.26E-28 | -11.0143 | 970472 | COPD |
| rs11633958  | 15 | 78569722 | T | C | 0.3301 | 0.1023  | 0.0071 | 3.97E-47 | 14.4188  | 987113 | COPD |
| rs7172118   | 15 | 78570111 | A | C | 0.3302 | 0.1030  | 0.0071 | 8.57E-48 | 14.5232  | 987113 | COPD |
| rs664172    | 15 | 78570420 | A | G | 0.2229 | -0.0919 | 0.0130 | 1.77E-12 | -7.0515  | 455985 | COPD |
| rs667282    | 15 | 78571130 | C | T | 0.2448 | -0.0934 | 0.0078 | 7.02E-33 | -11.9436 | 987113 | COPD |
| rs17486195  | 15 | 78572855 | G | A | 0.3303 | 0.1032  | 0.0071 | 4.57E-48 | 14.5672  | 987113 | COPD |
| rs140330585 | 15 | 78574103 | A | G | 0.3303 | 0.1031  | 0.0071 | 6.39E-48 | 14.5442  | 987113 | COPD |
| rs17486278  | 15 | 78575140 | C | A | 0.3311 | 0.1028  | 0.0071 | 9.67E-48 | 14.5156  | 987113 | COPD |
| rs2456020   | 15 | 78576056 | T | C | 0.2459 | -0.0940 | 0.0078 | 1.89E-33 | -12.0523 | 987113 | COPD |
| rs72740964  | 15 | 78576294 | A | G | 0.3300 | 0.1024  | 0.0071 | 2.76E-47 | 14.4432  | 987113 | COPD |
| rs576982    | 15 | 78578461 | T | C | 0.2447 | -0.0935 | 0.0078 | 5.37E-33 | -11.9658 | 987113 | COPD |
| rs569207    | 15 | 78580777 | T | C | 0.2446 | -0.0936 | 0.0078 | 4.74E-33 | -11.9762 | 987113 | COPD |
| rs637137    | 15 | 78581634 | A | T | 0.2446 | -0.0936 | 0.0078 | 5.24E-33 | -11.9677 | 987113 | COPD |
| rs7180002   | 15 | 78581651 | T | A | 0.3303 | 0.1035  | 0.0071 | 2.70E-48 | 14.6029  | 987113 | COPD |
| rs116991229 | 15 | 78582213 | C | T | 0.0117 | 0.2019  | 0.0318 | 2.19E-10 | 6.3478   | 970472 | COPD |
| rs1700006   | 15 | 78583281 | G | A | 0.2223 | -0.0908 | 0.0082 | 1.89E-28 | -11.0635 | 970472 | COPD |
| rs56390833  | 15 | 78585039 | A | C | 0.3303 | 0.1031  | 0.0071 | 6.40E-48 | 14.5432  | 987113 | COPD |
| rs951266    | 15 | 78586199 | A | G | 0.3304 | 0.1031  | 0.0071 | 5.72E-48 | 14.5519  | 987113 | COPD |
| rs2229961   | 15 | 78588410 | A | G | 0.0132 | 0.1744  | 0.0294 | 3.13E-09 | 5.9247   | 970472 | COPD |
| rs16969968  | 15 | 78590583 | A | G | 0.3302 | 0.1033  | 0.0071 | 3.79E-48 | 14.5793  | 987113 | COPD |
| rs518425    | 15 | 78591471 | G | A | 0.2934 | -0.0745 | 0.0073 | 3.65E-24 | -10.1406 | 987113 | COPD |
| rs76474922  | 15 | 78592211 | C | A | 0.0813 | -0.1070 | 0.0124 | 7.50E-18 | -8.6076  | 987113 | COPD |
| rs8192482   | 15 | 78593856 | T | C | 0.3303 | 0.1033  | 0.0071 | 3.94E-48 | 14.5773  | 987113 | COPD |
| rs564585    | 15 | 78593885 | G | A | 0.2896 | -0.0770 | 0.0086 | 4.11E-19 | -8.9338  | 792470 | COPD |
| rs4887067   | 15 | 78594605 | A | G | 0.3303 | 0.1034  | 0.0071 | 3.37E-48 | 14.5874  | 987113 | COPD |
| rs578776    | 15 | 78596058 | A | G | 0.2882 | -0.0762 | 0.0074 | 5.35E-25 | -10.3265 | 987113 | COPD |
| rs12910984  | 15 | 78599285 | G | A | 0.2453 | -0.0932 | 0.0078 | 7.26E-33 | -11.9409 | 987113 | COPD |
| rs7359276   | 15 | 78600319 | C | T | 0.2468 | -0.0934 | 0.0078 | 3.84E-33 | -11.9936 | 987113 | COPD |
| rs1051730   | 15 | 78601997 | A | G | 0.3309 | 0.1031  | 0.0071 | 4.80E-48 | 14.5635  | 987113 | COPD |
| rs3743078   | 15 | 78602417 | C | G | 0.2471 | -0.0931 | 0.0078 | 6.14E-33 | -11.9547 | 987113 | COPD |
| rs1317286   | 15 | 78603787 | G | A | 0.3321 | 0.1024  | 0.0071 | 1.80E-47 | 14.4732  | 987113 | COPD |
| rs938682    | 15 | 78604205 | G | A | 0.2450 | -0.0924 | 0.0078 | 2.48E-32 | -11.8380 | 987113 | COPD |
| rs12914385  | 15 | 78606381 | T | C | 0.3770 | 0.0901  | 0.0074 | 2.32E-34 | 12.2237  | 793475 | COPD |
| rs55676755  | 15 | 78606590 | G | C | 0.3312 | 0.1030  | 0.0071 | 6.17E-48 | 14.5461  | 987113 | COPD |
| rs56077333  | 15 | 78606661 | A | C | 0.3272 | 0.1031  | 0.0071 | 1.83E-47 | 14.4715  | 987113 | COPD |
| rs7183604   | 15 | 78606871 | T | C | 0.2451 | -0.0927 | 0.0078 | 1.64E-32 | -11.8729 | 987113 | COPD |
| rs11637630  | 15 | 78607377 | G | A | 0.2451 | -0.0926 | 0.0078 | 2.06E-32 | -11.8537 | 987113 | COPD |
| rs112878080 | 15 | 78608305 | G | A | 0.3310 | 0.1030  | 0.0071 | 7.29E-48 | 14.5347  | 987113 | COPD |
| rs111704647 | 15 | 78608308 | T | C | 0.3313 | 0.1132  | 0.0080 | 3.63E-45 | 14.1032  | 859331 | COPD |
| rs138544659 | 15 | 78608359 | G | T | 0.3313 | 0.1028  | 0.0071 | 1.05E-47 | 14.5100  | 987113 | COPD |



|             |    |          |   |   |        |         |        |          |          |        |      |
|-------------|----|----------|---|---|--------|---------|--------|----------|----------|--------|------|
| rs147144681 | 15 | 78608566 | T | C | 0.3311 | 0.1132  | 0.0080 | 3.69E-45 | 14.1025  | 859331 | COPD |
| rs7171869   | 15 | 78608567 | A | G | 0.2473 | -0.0942 | 0.0088 | 8.22E-27 | -10.7197 | 859331 | COPD |
| rs113931022 | 15 | 78608771 | T | C | 0.3315 | 0.1028  | 0.0071 | 9.06E-48 | 14.5196  | 987113 | COPD |
| rs189218934 | 15 | 78611645 | T | C | 0.2471 | -0.0943 | 0.0088 | 7.04E-27 | -10.7342 | 859331 | COPD |
| rs146009840 | 15 | 78613835 | T | A | 0.3306 | 0.1033  | 0.0071 | 4.35E-48 | 14.5707  | 987113 | COPD |
| rs77438700  | 15 | 78614295 | G | A | 0.0696 | -0.0937 | 0.0134 | 2.33E-12 | -7.0129  | 987113 | COPD |
| rs7177514   | 15 | 78615064 | G | C | 0.2449 | -0.0929 | 0.0078 | 1.27E-32 | -11.8944 | 987113 | COPD |
| rs6495308   | 15 | 78615314 | C | T | 0.2450 | -0.0930 | 0.0078 | 1.10E-32 | -11.9059 | 987113 | COPD |
| rs12443170  | 15 | 78615394 | A | G | 0.1408 | -0.0622 | 0.0103 | 1.70E-09 | -6.0239  | 910152 | COPD |
| rs8042059   | 15 | 78615517 | C | A | 0.2450 | -0.0929 | 0.0078 | 1.26E-32 | -11.8948 | 987113 | COPD |
| rs8042494   | 15 | 78615668 | T | C | 0.2446 | -0.0928 | 0.0078 | 1.74E-32 | -11.8680 | 987113 | COPD |
| rs8042374   | 15 | 78615690 | G | A | 0.2450 | -0.0929 | 0.0078 | 1.27E-32 | -11.8938 | 987113 | COPD |
| rs8043009   | 15 | 78615812 | C | G | 0.2450 | -0.0929 | 0.0078 | 1.32E-32 | -11.8907 | 987113 | COPD |
| rs28681284  | 15 | 78616223 | T | C | 0.2217 | -0.0875 | 0.0085 | 5.09E-25 | -10.3312 | 926793 | COPD |
| rs4887069   | 15 | 78616728 | G | A | 0.2481 | -0.0907 | 0.0078 | 2.82E-31 | -11.6326 | 987113 | COPD |
| rs3825845   | 15 | 78617916 | T | C | 0.2361 | -0.0982 | 0.0079 | 1.85E-35 | -12.4278 | 987113 | COPD |
| rs28669908  | 15 | 78617925 | A | C | 0.2130 | -0.0959 | 0.0082 | 8.90E-32 | -11.7303 | 987113 | COPD |
| rs8192478   | 15 | 78618120 | G | A | 0.2831 | -0.0811 | 0.0086 | 4.69E-21 | -9.4159  | 842690 | COPD |
| rs8192477   | 15 | 78618121 | C | G | 0.2834 | -0.0815 | 0.0086 | 2.46E-21 | -9.4835  | 842690 | COPD |
| rs8040868   | 15 | 78618839 | C | T | 0.3877 | 0.1066  | 0.0068 | 9.00E-55 | 15.5857  | 987113 | COPD |
| rs4243084   | 15 | 78619330 | C | G | 0.3401 | 0.1045  | 0.0070 | 7.34E-50 | 14.8458  | 987113 | COPD |
| rs117832812 | 15 | 78620130 | A | C | 0.0796 | -0.1056 | 0.0125 | 3.84E-17 | -8.4181  | 987113 | COPD |
| rs7170068   | 15 | 78620601 | A | G | 0.2315 | -0.0983 | 0.0080 | 6.13E-35 | -12.3315 | 987113 | COPD |
| rs13329271  | 15 | 78621888 | C | A | 0.2307 | -0.0991 | 0.0080 | 2.00E-35 | -12.4212 | 987113 | COPD |
| rs8039449   | 15 | 78622192 | T | C | 0.3635 | 0.0984  | 0.0069 | 9.86E-46 | 14.1948  | 987113 | COPD |
| rs6495309   | 15 | 78622903 | T | C | 0.2292 | -0.0992 | 0.0080 | 2.82E-35 | -12.3940 | 987113 | COPD |
| rs10851907  | 15 | 78623522 | A | G | 0.4038 | 0.1013  | 0.0068 | 3.27E-50 | 14.9010  | 987113 | COPD |
| rs55958997  | 15 | 78623530 | A | C | 0.3630 | 0.0974  | 0.0069 | 8.74E-45 | 14.0411  | 987113 | COPD |
| rs12593950  | 15 | 78628593 | C | G | 0.2401 | -0.0983 | 0.0079 | 1.15E-35 | -12.4658 | 987113 | COPD |
| rs2869548   | 15 | 78630296 | A | G | 0.3517 | 0.1009  | 0.0070 | 3.74E-47 | 14.4221  | 987113 | COPD |
| rs28534575  | 15 | 78631503 | G | T | 0.2398 | -0.0984 | 0.0079 | 1.19E-35 | -12.4627 | 987113 | COPD |
| rs17487223  | 15 | 78631645 | T | C | 0.3529 | 0.0995  | 0.0070 | 6.74E-46 | 14.2215  | 987113 | COPD |
| rs77802411  | 15 | 78633072 | C | T | 0.0434 | 0.0981  | 0.0178 | 3.46E-08 | 5.5162   | 987113 | COPD |
| rs4887072   | 15 | 78633093 | G | A | 0.2399 | -0.0984 | 0.0079 | 1.13E-35 | -12.4673 | 987113 | COPD |
| rs72743158  | 15 | 78634103 | C | T | 0.3593 | 0.0967  | 0.0070 | 1.18E-43 | 13.8555  | 987113 | COPD |
| rs12440014  | 15 | 78634384 | G | C | 0.2495 | -0.0950 | 0.0078 | 4.04E-34 | -12.1786 | 987113 | COPD |
| rs12441088  | 15 | 78635922 | G | T | 0.2663 | -0.0809 | 0.0081 | 2.04E-23 | -9.9710  | 926793 | COPD |
| rs67175876  | 15 | 78636057 | G | A | 0.2159 | -0.0860 | 0.0087 | 3.55E-23 | -9.9159  | 926793 | COPD |
| rs11636605  | 15 | 78636536 | A | G | 0.2144 | -0.0865 | 0.0087 | 2.55E-23 | -9.9490  | 926793 | COPD |
| rs12441998  | 15 | 78637030 | G | A | 0.2160 | -0.0850 | 0.0087 | 9.39E-23 | -9.8183  | 926793 | COPD |
| rs11072768  | 15 | 78637136 | T | G | 0.2144 | -0.0861 | 0.0087 | 3.76E-23 | -9.9102  | 926793 | COPD |
| rs1316971   | 15 | 78638168 | A | G | 0.2139 | -0.0845 | 0.0087 | 1.99E-22 | -9.7423  | 926793 | COPD |
| rs9920506   | 15 | 78638715 | A | G | 0.1670 | -0.0779 | 0.0096 | 5.92E-16 | -8.0910  | 926793 | COPD |
| rs67426328  | 15 | 78641976 | G | C | 0.3817 | 0.0854  | 0.0073 | 9.40E-32 | 11.7257  | 926793 | COPD |
| rs3813567   | 15 | 78642209 | G | A | 0.2213 | -0.0905 | 0.0091 | 2.38E-23 | -9.9558  | 860907 | COPD |
| rs55988292  | 15 | 78643826 | G | A | 0.3822 | 0.0847  | 0.0073 | 2.87E-31 | 11.6310  | 926793 | COPD |
| rs12915539  | 15 | 78644853 | A | T | 0.3481 | -0.0425 | 0.0074 | 9.14E-09 | -5.7459  | 926793 | COPD |
| rs11633178  | 15 | 78652196 | G | A | 0.3894 | 0.0662  | 0.0072 | 5.76E-20 | 9.1488   | 926793 | COPD |
| rs11634351  | 15 | 78652376 | A | G | 0.3893 | 0.0663  | 0.0072 | 4.93E-20 | 9.1655   | 926793 | COPD |
| rs12594247  | 15 | 78654291 | T | C | 0.1627 | -0.0636 | 0.0091 | 3.00E-12 | -6.9775  | 987113 | COPD |
| rs1021070   | 15 | 78654521 | G | C | 0.3604 | -0.0459 | 0.0073 | 3.71E-10 | -6.2656  | 926793 | COPD |
| rs2170311   | 15 | 78655269 | A | G | 0.3892 | 0.0665  | 0.0072 | 3.79E-20 | 9.1938   | 926793 | COPD |
| rs7181405   | 15 | 78655810 | G | A | 0.3609 | -0.0461 | 0.0073 | 2.84E-10 | -6.3073  | 926793 | COPD |
| rs11638830  | 15 | 78655977 | C | G | 0.3891 | 0.0666  | 0.0072 | 2.81E-20 | 9.2261   | 926793 | COPD |
| rs11072774  | 15 | 78660355 | T | C | 0.1784 | -0.0659 | 0.0090 | 1.89E-13 | -7.3565  | 970472 | COPD |
| rs12595350  | 15 | 78661122 | A | G | 0.1659 | -0.0617 | 0.0091 | 1.02E-11 | -6.8037  | 987113 | COPD |
| rs7163204   | 15 | 78661398 | A | G | 0.1661 | -0.0623 | 0.0091 | 5.87E-12 | -6.8828  | 987113 | COPD |
| rs17487514  | 15 | 78661443 | T | C | 0.2647 | 0.0630  | 0.0078 | 8.19E-16 | 8.0514   | 970472 | COPD |
| rs7164665   | 15 | 78661577 | C | T | 0.1663 | -0.0626 | 0.0090 | 4.64E-12 | -6.9162  | 987113 | COPD |
| rs12899135  | 15 | 78662037 | G | A | 0.3900 | 0.0659  | 0.0069 | 6.60E-22 | 9.6197   | 987113 | COPD |
| rs12148319  | 15 | 78663850 | G | A | 0.1673 | -0.0586 | 0.0095 | 5.89E-10 | -6.1934  | 926793 | COPD |
| rs1996371   | 15 | 78664464 | C | T | 0.3902 | 0.0660  | 0.0068 | 5.27E-22 | 9.6430   | 987113 | COPD |
| rs12594550  | 15 | 78666695 | G | C | 0.1655 | -0.0637 | 0.0091 | 1.99E-12 | -7.0355  | 987113 | COPD |
| rs6495314   | 15 | 78668187 | C | A | 0.3913 | 0.0649  | 0.0068 | 1.98E-21 | 9.5064   | 987113 | COPD |
| rs12324203  | 15 | 78669079 | A | G | 0.0519 | -0.0916 | 0.0152 | 1.57E-09 | -6.0371  | 987113 | COPD |
| rs74634068  | 15 | 78672867 | A | G | 0.0518 | -0.0917 | 0.0152 | 1.61E-09 | -6.0334  | 987113 | COPD |
| rs11639372  | 15 | 78674313 | T | C | 0.3850 | 0.0627  | 0.0069 | 6.52E-20 | 9.1352   | 987113 | COPD |
| rs12902602  | 15 | 78675059 | G | A | 0.3849 | 0.0627  | 0.0069 | 6.31E-20 | 9.1389   | 987113 | COPD |
| rs1021071   | 15 | 78675837 | C | G | 0.3844 | 0.0631  | 0.0069 | 4.33E-20 | 9.1795   | 987113 | COPD |
| rs11072785  | 15 | 78675887 | T | C | 0.3844 | 0.0629  | 0.0069 | 5.42E-20 | 9.1554   | 987113 | COPD |
| rs11857532  | 15 | 78675926 | G | T | 0.4362 | 0.0431  | 0.0071 | 1.19E-09 | 6.0810   | 926793 | COPD |
| rs4886579   | 15 | 78676914 | T | C | 0.3841 | 0.0631  | 0.0069 | 3.96E-20 | 9.1892   | 987113 | COPD |
| rs4886580   | 15 | 78677043 | G | T | 0.3852 | 0.0623  | 0.0069 | 1.10E-19 | 9.0786   | 987113 | COPD |
| rs77163824  | 15 | 78679803 | G | A | 0.0520 | -0.0905 | 0.0152 | 2.66E-09 | -5.9509  | 987113 | COPD |

|            |    |          |   |   |        |         |        |          |         |        |      |
|------------|----|----------|---|---|--------|---------|--------|----------|---------|--------|------|
| rs8043105  | 15 | 78681014 | T | C | 0.0523 | -0.0896 | 0.0152 | 3.73E-09 | -5.8959 | 987113 | COPD |
| rs8038920  | 15 | 78682203 | A | G | 0.3455 | -0.0439 | 0.0074 | 2.90E-09 | -5.9370 | 926793 | COPD |
| rs72743199 | 15 | 78683513 | T | A | 0.3807 | 0.0631  | 0.0073 | 3.99E-18 | 8.6791  | 926793 | COPD |
| rs4887077  | 15 | 78686022 | T | C | 0.3836 | 0.0640  | 0.0069 | 1.39E-20 | 9.3012  | 987113 | COPD |
| rs12901913 | 15 | 78689006 | T | C | 0.3836 | 0.0636  | 0.0070 | 1.24E-19 | 9.0661  | 970472 | COPD |
| rs11638372 | 15 | 78691217 | T | C | 0.3837 | 0.0641  | 0.0069 | 1.25E-20 | 9.3125  | 987113 | COPD |
| rs922692   | 15 | 78691872 | A | C | 0.3837 | 0.0641  | 0.0069 | 1.30E-20 | 9.3086  | 987113 | COPD |
| rs11072790 | 15 | 78699683 | T | C | 0.3885 | 0.0605  | 0.0072 | 6.57E-17 | 8.3545  | 926793 | COPD |
| rs7169223  | 15 | 78699774 | G | A | 0.3484 | -0.0405 | 0.0070 | 8.15E-09 | -5.7654 | 987113 | COPD |
| rs12910627 | 15 | 78702591 | C | G | 0.3863 | 0.0616  | 0.0072 | 1.89E-17 | 8.5006  | 926793 | COPD |
| rs12324870 | 15 | 78703459 | T | C | 0.3650 | -0.0449 | 0.0073 | 9.05E-10 | -6.1252 | 926793 | COPD |
| rs11072791 | 15 | 78704734 | A | C | 0.3857 | 0.0611  | 0.0072 | 3.74E-17 | 8.4208  | 926793 | COPD |
| rs11072792 | 15 | 78707569 | G | A | 0.4000 | 0.0549  | 0.0072 | 2.37E-14 | 7.6286  | 926793 | COPD |
| rs12901241 | 15 | 78710320 | G | A | 0.3507 | -0.0402 | 0.0070 | 1.02E-08 | -5.7273 | 987113 | COPD |
| rs12905273 | 15 | 78710413 | G | A | 0.3433 | -0.0452 | 0.0074 | 1.19E-09 | -6.0820 | 926793 | COPD |
| rs35704045 | 15 | 78710950 | C | G | 0.3502 | -0.0407 | 0.0070 | 6.86E-09 | -5.7943 | 987113 | COPD |
| rs11634543 | 15 | 78713162 | T | C | 0.3872 | 0.0639  | 0.0069 | 1.33E-20 | 9.3060  | 987113 | COPD |
| rs11638490 | 15 | 78715608 | T | C | 0.3875 | 0.0642  | 0.0069 | 8.98E-21 | 9.3474  | 987113 | COPD |
| rs76919723 | 15 | 78724939 | C | T | 0.3845 | 0.0676  | 0.0080 | 2.86E-17 | 8.4523  | 842690 | COPD |
| rs8038543  | 15 | 78725343 | T | A | 0.3833 | 0.0678  | 0.0080 | 2.23E-17 | 8.4814  | 842690 | COPD |
| rs1808065  | 15 | 78726356 | G | A | 0.3767 | -0.0422 | 0.0074 | 1.40E-08 | -5.6732 | 910152 | COPD |
| rs11629637 | 15 | 78726682 | T | C | 0.3872 | 0.0637  | 0.0070 | 9.69E-20 | 9.0923  | 970472 | COPD |
| rs3829786  | 15 | 78727204 | A | C | 0.3872 | 0.0636  | 0.0070 | 1.04E-19 | 9.0846  | 970472 | COPD |
| rs3813565  | 15 | 78727268 | T | G | 0.3806 | 0.0648  | 0.0070 | 3.37E-20 | 9.2064  | 970472 | COPD |
| rs35583595 | 15 | 78727810 | G | C | 0.3912 | 0.0658  | 0.0083 | 2.32E-15 | 7.9230  | 783946 | COPD |
| rs34563625 | 15 | 78727936 | C | G | 0.3872 | 0.0636  | 0.0070 | 1.04E-19 | 9.0847  | 970472 | COPD |
| rs2869554  | 15 | 78728695 | C | T | 0.3871 | 0.0635  | 0.0070 | 1.29E-19 | 9.0616  | 970472 | COPD |
| rs4886582  | 15 | 78729099 | G | A | 0.3991 | 0.0524  | 0.0088 | 2.15E-09 | 5.9860  | 649052 | COPD |
| rs34225855 | 15 | 78729794 | G | C | 0.3872 | 0.0635  | 0.0070 | 1.17E-19 | 9.0723  | 970472 | COPD |
| rs8027972  | 15 | 78730273 | C | T | 0.3792 | 0.0680  | 0.0080 | 2.85E-17 | 8.4528  | 842690 | COPD |
| rs8027011  | 15 | 78730274 | A | G | 0.3793 | 0.0679  | 0.0080 | 2.98E-17 | 8.4474  | 842690 | COPD |
| rs1825082  | 15 | 78731091 | A | G | 0.3872 | 0.0638  | 0.0070 | 9.02E-20 | 9.1002  | 970472 | COPD |
| rs1825083  | 15 | 78731125 | C | T | 0.3871 | 0.0637  | 0.0070 | 9.36E-20 | 9.0961  | 970472 | COPD |
| rs1825084  | 15 | 78731235 | T | C | 0.3829 | 0.0680  | 0.0080 | 1.91E-17 | 8.4993  | 842690 | COPD |
| rs1825085  | 15 | 78731236 | G | A | 0.3873 | 0.0636  | 0.0070 | 1.00E-19 | 9.0888  | 970472 | COPD |
| rs11639049 | 15 | 78731388 | G | A | 0.3866 | 0.0638  | 0.0070 | 9.44E-20 | 9.0953  | 970472 | COPD |
| rs11639166 | 15 | 78731424 | C | G | 0.3866 | 0.0638  | 0.0070 | 9.15E-20 | 9.0985  | 970472 | COPD |
| rs11639181 | 15 | 78731674 | G | A | 0.3878 | 0.0639  | 0.0070 | 6.92E-20 | 9.1289  | 970472 | COPD |
| rs11639375 | 15 | 78731872 | A | G | 0.3872 | 0.0636  | 0.0070 | 1.10E-19 | 9.0788  | 970472 | COPD |
| rs11639382 | 15 | 78731926 | A | G | 0.3872 | 0.0635  | 0.0070 | 1.14E-19 | 9.0748  | 970472 | COPD |
| rs11639347 | 15 | 78732008 | T | C | 0.3872 | 0.0635  | 0.0070 | 1.26E-19 | 9.0636  | 970472 | COPD |
| rs4887082  | 15 | 78732725 | C | T | 0.3898 | 0.0649  | 0.0080 | 5.17E-16 | 8.1074  | 842690 | COPD |
| rs2869561  | 15 | 78733174 | C | T | 0.3878 | 0.0649  | 0.0080 | 4.39E-16 | 8.1272  | 842690 | COPD |
| rs4887083  | 15 | 78733235 | T | C | 0.3886 | 0.0643  | 0.0080 | 8.61E-16 | 8.0453  | 842690 | COPD |
| rs4887084  | 15 | 78733251 | C | T | 0.3839 | 0.0663  | 0.0080 | 1.26E-16 | 8.2774  | 842690 | COPD |
| rs12907753 | 15 | 78733505 | G | C | 0.3925 | 0.0703  | 0.0092 | 1.70E-14 | 7.6717  | 716484 | COPD |
| rs12907620 | 15 | 78733534 | G | A | 0.3922 | 0.0705  | 0.0092 | 1.49E-14 | 7.6884  | 716484 | COPD |
| rs12908179 | 15 | 78733547 | A | G | 0.3921 | 0.0703  | 0.0092 | 1.75E-14 | 7.6677  | 716484 | COPD |
| rs12907915 | 15 | 78733566 | T | C | 0.3919 | 0.0728  | 0.0096 | 3.22E-14 | 7.5890  | 649623 | COPD |
| rs12907920 | 15 | 78733577 | T | C | 0.3918 | 0.0699  | 0.0092 | 2.62E-14 | 7.6157  | 716484 | COPD |
| rs12908207 | 15 | 78733621 | T | G | 0.3872 | 0.0649  | 0.0080 | 4.40E-16 | 8.1271  | 842690 | COPD |
| rs3894347  | 15 | 78733659 | A | C | 0.3921 | 0.0731  | 0.0096 | 2.51E-14 | 7.6215  | 649623 | COPD |
| rs79067624 | 15 | 78733742 | T | C | 0.3866 | 0.0671  | 0.0083 | 4.68E-16 | 8.1194  | 775829 | COPD |
| rs76420170 | 15 | 78733797 | T | G | 0.3914 | 0.0700  | 0.0092 | 2.31E-14 | 7.6318  | 716484 | COPD |
| rs76506217 | 15 | 78733815 | A | G | 0.3899 | 0.0653  | 0.0104 | 2.86E-10 | 6.3062  | 654465 | COPD |
| rs4886585  | 15 | 78733973 | A | G | 0.4004 | 0.0512  | 0.0088 | 5.16E-09 | 5.8418  | 649052 | COPD |
| rs80162468 | 15 | 78733974 | C | T | 0.4004 | 0.0513  | 0.0088 | 4.69E-09 | 5.8578  | 649052 | COPD |
| rs2869563  | 15 | 78734093 | A | T | 0.3869 | 0.0671  | 0.0083 | 4.62E-16 | 8.1211  | 775829 | COPD |
| rs2869565  | 15 | 78734095 | G | C | 0.3874 | 0.0658  | 0.0080 | 1.69E-16 | 8.2421  | 842690 | COPD |
| rs4887086  | 15 | 78734187 | T | C | 0.3902 | 0.0621  | 0.0070 | 7.36E-19 | 8.8693  | 970472 | COPD |
| rs4887087  | 15 | 78734199 | T | C | 0.3863 | 0.0636  | 0.0070 | 1.15E-19 | 9.0740  | 970472 | COPD |
| rs4886586  | 15 | 78734332 | A | G | 0.3912 | 0.0620  | 0.0070 | 7.95E-19 | 8.8607  | 970472 | COPD |
| rs4886587  | 15 | 78734480 | A | T | 0.3911 | 0.0620  | 0.0070 | 8.39E-19 | 8.8548  | 970472 | COPD |
| rs11853608 | 15 | 78738351 | C | A | 0.3864 | 0.0639  | 0.0070 | 7.86E-20 | 9.1150  | 970472 | COPD |
| rs56354501 | 15 | 78741178 | G | A | 0.3912 | 0.0625  | 0.0070 | 4.57E-19 | 8.9223  | 970472 | COPD |
| rs8031513  | 15 | 78741934 | C | T | 0.3922 | 0.0622  | 0.0070 | 6.65E-19 | 8.8805  | 970472 | COPD |
| rs56195905 | 15 | 78747975 | C | A | 0.3928 | 0.0617  | 0.0070 | 1.15E-18 | 8.8200  | 970472 | COPD |
| rs899984   | 15 | 78750394 | C | T | 0.3777 | 0.0628  | 0.0081 | 7.42E-15 | 7.7772  | 842690 | COPD |
| rs4887090  | 15 | 78751060 | A | G | 0.3883 | 0.0630  | 0.0080 | 3.30E-15 | 7.8791  | 842690 | COPD |
| rs55834964 | 15 | 78757424 | A | C | 0.3936 | 0.0608  | 0.0070 | 4.03E-18 | 8.6781  | 970472 | COPD |
| rs2011330  | 15 | 78758110 | T | C | 0.4005 | -0.0521 | 0.0080 | 6.02E-11 | -6.5431 | 842690 | COPD |
| rs12286    | 15 | 78759417 | A | G | 0.3911 | 0.0575  | 0.0075 | 1.72E-14 | 7.6701  | 908453 | COPD |
| rs7182642  | 15 | 78759935 | T | C | 0.3818 | 0.0633  | 0.0075 | 2.69E-17 | 8.4593  | 910152 | COPD |
| rs28590060 | 15 | 78759970 | A | G | 0.3771 | 0.0667  | 0.0081 | 2.50E-16 | 8.1953  | 842690 | COPD |

|             |    |          |   |   |        |        |        |          |        |        |      |
|-------------|----|----------|---|---|--------|--------|--------|----------|--------|--------|------|
| rs12906653  | 15 | 78760238 | A | G | 0.3890 | 0.0614 | 0.0070 | 2.50E-18 | 8.7320 | 970472 | COPD |
| rs4887095   | 15 | 78760865 | A | C | 0.3872 | 0.0619 | 0.0080 | 1.06E-14 | 7.7322 | 842690 | COPD |
| rs4887096   | 15 | 78760942 | C | T | 0.3998 | 0.0671 | 0.0078 | 5.08E-18 | 8.6516 | 844266 | COPD |
| rs1809419   | 15 | 78761472 | A | G | 0.3918 | 0.0609 | 0.0070 | 4.06E-18 | 8.6770 | 970472 | COPD |
| rs12916326  | 15 | 78761669 | G | A | 0.3925 | 0.0610 | 0.0070 | 3.53E-18 | 8.6932 | 970472 | COPD |
| rs12898346  | 15 | 78761775 | C | T | 0.3840 | 0.0616 | 0.0080 | 1.73E-14 | 7.6689 | 842690 | COPD |
| rs12916648  | 15 | 78761787 | T | C | 0.3917 | 0.0608 | 0.0070 | 4.30E-18 | 8.6704 | 970472 | COPD |
| rs7168391   | 15 | 78762821 | T | G | 0.3917 | 0.0611 | 0.0080 | 2.50E-14 | 7.6222 | 842690 | COPD |
| rs1809420   | 15 | 78764427 | C | T | 0.3952 | 0.0607 | 0.0070 | 4.62E-18 | 8.6622 | 970472 | COPD |
| rs11633351  | 15 | 78764473 | T | C | 0.3954 | 0.0606 | 0.0070 | 4.89E-18 | 8.6560 | 970472 | COPD |
| rs6495267   | 15 | 78764751 | A | G | 0.3952 | 0.0606 | 0.0070 | 4.87E-18 | 8.6565 | 970472 | COPD |
| rs4887097   | 15 | 78765607 | C | T | 0.3898 | 0.0652 | 0.0083 | 3.08E-15 | 7.8876 | 775829 | COPD |
| rs4887098   | 15 | 78765608 | C | G | 0.3898 | 0.0652 | 0.0083 | 3.22E-15 | 7.8820 | 775829 | COPD |
| rs1810165   | 15 | 78767107 | G | A | 0.4094 | 0.0564 | 0.0074 | 1.67E-14 | 7.6739 | 910152 | COPD |
| rs3894351   | 15 | 78767181 | A | C | 0.4061 | 0.0597 | 0.0079 | 5.46E-14 | 7.5204 | 842690 | COPD |
| rs3894352   | 15 | 78767184 | G | T | 0.4135 | 0.0670 | 0.0091 | 1.60E-13 | 7.3786 | 716484 | COPD |
| rs4887099   | 15 | 78767205 | C | G | 0.4135 | 0.0669 | 0.0091 | 1.71E-13 | 7.3701 | 716484 | COPD |
| rs1809423   | 15 | 78767328 | C | T | 0.4061 | 0.0595 | 0.0079 | 6.39E-14 | 7.4998 | 842690 | COPD |
| rs2904223   | 15 | 78767349 | A | G | 0.4043 | 0.0560 | 0.0074 | 3.46E-14 | 7.5799 | 910152 | COPD |
| rs116901435 | 15 | 78767353 | T | C | 0.4039 | 0.0587 | 0.0080 | 1.72E-13 | 7.3690 | 842690 | COPD |
| rs117290887 | 15 | 78767354 | C | G | 0.4061 | 0.0599 | 0.0079 | 4.42E-14 | 7.5481 | 842690 | COPD |
| rs1809424   | 15 | 78767361 | C | T | 0.4059 | 0.0596 | 0.0079 | 6.12E-14 | 7.5055 | 842690 | COPD |
| rs8043119   | 15 | 78768660 | A | G | 0.3957 | 0.0610 | 0.0070 | 2.98E-18 | 8.7123 | 970472 | COPD |
| rs1807007   | 15 | 78769760 | G | T | 0.3957 | 0.0609 | 0.0070 | 3.29E-18 | 8.7009 | 970472 | COPD |
| rs1807006   | 15 | 78769998 | G | C | 0.3957 | 0.0610 | 0.0070 | 3.03E-18 | 8.7103 | 970472 | COPD |
| rs1809409   | 15 | 78771132 | T | A | 0.3959 | 0.0609 | 0.0070 | 3.35E-18 | 8.6989 | 970472 | COPD |
| rs11635931  | 15 | 78771738 | A | G | 0.3959 | 0.0609 | 0.0070 | 3.12E-18 | 8.7072 | 970472 | COPD |
| rs11635870  | 15 | 78771801 | G | C | 0.3959 | 0.0609 | 0.0070 | 3.34E-18 | 8.6994 | 970472 | COPD |
| rs7174367   | 15 | 78772325 | G | A | 0.3953 | 0.0607 | 0.0070 | 4.47E-18 | 8.6663 | 970472 | COPD |
| rs3743063   | 15 | 78772829 | A | C | 0.4140 | 0.0582 | 0.0074 | 4.84E-15 | 7.8309 | 910152 | COPD |
| rs35934157  | 15 | 78775043 | A | G | 0.3691 | 0.0601 | 0.0071 | 2.50E-17 | 8.4679 | 970472 | COPD |
| rs4887102   | 15 | 78775153 | G | A | 0.4046 | 0.0541 | 0.0085 | 1.80E-10 | 6.3779 | 650628 | COPD |
| rs7171578   | 15 | 78775580 | T | C | 0.3689 | 0.0601 | 0.0071 | 2.66E-17 | 8.4604 | 970472 | COPD |
| rs7171916   | 15 | 78775609 | G | C | 0.3847 | 0.0650 | 0.0078 | 8.81E-17 | 8.3197 | 844266 | COPD |
| rs12906691  | 15 | 78775986 | A | G | 0.3692 | 0.0602 | 0.0071 | 2.35E-17 | 8.4753 | 970472 | COPD |
| rs11854507  | 15 | 78776779 | G | A | 0.3748 | 0.0576 | 0.0071 | 4.39E-16 | 8.1274 | 970472 | COPD |
| rs7161774   | 15 | 78777392 | G | T | 0.3762 | 0.0581 | 0.0071 | 2.18E-16 | 8.2116 | 970472 | COPD |
| rs12907764  | 15 | 78778096 | G | A | 0.3858 | 0.0551 | 0.0070 | 5.31E-15 | 7.8193 | 970472 | COPD |
| rs12913260  | 15 | 78778753 | A | G | 0.3887 | 0.0562 | 0.0070 | 1.24E-15 | 8.0004 | 970472 | COPD |
| rs2004038   | 15 | 78779064 | A | G | 0.3932 | 0.0541 | 0.0070 | 1.04E-14 | 7.7349 | 970472 | COPD |
| rs112321636 | 15 | 78779758 | T | G | 0.3935 | 0.0559 | 0.0069 | 3.92E-16 | 8.1410 | 987113 | COPD |
| rs61226407  | 15 | 78781112 | C | G | 0.3936 | 0.0562 | 0.0069 | 2.91E-16 | 8.1772 | 987113 | COPD |
| rs35474770  | 15 | 78781658 | G | A | 0.3938 | 0.0560 | 0.0069 | 3.66E-16 | 8.1492 | 987113 | COPD |
| rs36061084  | 15 | 78781911 | A | G | 0.3940 | 0.0561 | 0.0069 | 3.21E-16 | 8.1652 | 987113 | COPD |
| rs4887109   | 15 | 78781952 | T | C | 0.3874 | 0.0578 | 0.0069 | 4.85E-17 | 8.3903 | 987113 | COPD |
| rs4886589   | 15 | 78782038 | T | C | 0.4243 | 0.0545 | 0.0082 | 2.67E-11 | 6.6637 | 667269 | COPD |
| rs4886590   | 15 | 78782164 | A | G | 0.3884 | 0.0577 | 0.0069 | 5.44E-17 | 8.3767 | 987113 | COPD |
| rs4886591   | 15 | 78782176 | A | G | 0.4272 | 0.0637 | 0.0075 | 1.78E-17 | 8.5072 | 860907 | COPD |
| rs10163145  | 15 | 78782993 | A | G | 0.4159 | 0.0546 | 0.0077 | 1.87E-12 | 7.0441 | 859331 | COPD |
| rs12050525  | 15 | 78783404 | C | T | 0.4058 | 0.0551 | 0.0068 | 6.38E-16 | 8.0819 | 987113 | COPD |
| rs2904220   | 15 | 78784362 | T | G | 0.4232 | 0.0453 | 0.0073 | 4.47E-10 | 6.2366 | 793475 | COPD |
| rs1825087   | 15 | 78784772 | G | A | 0.4057 | 0.0546 | 0.0068 | 1.15E-15 | 8.0101 | 987113 | COPD |
| rs11072803  | 15 | 78785536 | A | G | 0.4371 | 0.0591 | 0.0104 | 1.34E-08 | 5.6809 | 472626 | COPD |
| rs11072806  | 15 | 78786732 | A | G | 0.4056 | 0.0548 | 0.0068 | 8.61E-16 | 8.0453 | 987113 | COPD |
| rs12899147  | 15 | 78787170 | G | A | 0.4059 | 0.0549 | 0.0068 | 6.89E-16 | 8.0724 | 987113 | COPD |
| rs1994016   | 15 | 78787892 | T | C | 0.3910 | 0.0487 | 0.0072 | 1.42E-11 | 6.7554 | 926793 | COPD |
| rs4886592   | 15 | 78790205 | C | T | 0.4086 | 0.0531 | 0.0068 | 5.73E-15 | 7.8098 | 987113 | COPD |
| rs2277546   | 15 | 78791034 | A | C | 0.4086 | 0.0531 | 0.0068 | 5.89E-15 | 7.8062 | 987113 | COPD |
| rs2277545   | 15 | 78791249 | C | T | 0.4086 | 0.0531 | 0.0068 | 5.84E-15 | 7.8073 | 987113 | COPD |
| rs11639044  | 15 | 78791472 | T | C | 0.4081 | 0.0532 | 0.0068 | 4.84E-15 | 7.8310 | 987113 | COPD |
| rs12903203  | 15 | 78792591 | C | T | 0.4083 | 0.0531 | 0.0068 | 5.39E-15 | 7.8174 | 987113 | COPD |
| rs11631955  | 15 | 78793573 | G | A | 0.4080 | 0.0532 | 0.0068 | 5.05E-15 | 7.8256 | 987113 | COPD |
| rs11632102  | 15 | 78793715 | A | G | 0.4075 | 0.0533 | 0.0068 | 4.62E-15 | 7.8369 | 987113 | COPD |
| rs3825807   | 15 | 78796769 | G | A | 0.4172 | 0.0511 | 0.0068 | 4.34E-14 | 7.5505 | 987113 | COPD |
| rs7177699   | 15 | 78797392 | C | T | 0.4170 | 0.0512 | 0.0068 | 4.12E-14 | 7.5571 | 987113 | COPD |
| rs28610385  | 15 | 78798264 | A | C | 0.4170 | 0.0512 | 0.0068 | 4.01E-14 | 7.5605 | 987113 | COPD |
| rs11638321  | 15 | 78799841 | C | T | 0.4461 | 0.0525 | 0.0081 | 1.02E-10 | 6.4646 | 667269 | COPD |
| rs7167806   | 15 | 78800024 | G | C | 0.4120 | 0.0506 | 0.0077 | 4.77E-11 | 6.5778 | 859331 | COPD |
| rs7173267   | 15 | 78800408 | C | G | 0.4168 | 0.0513 | 0.0068 | 4.08E-14 | 7.5582 | 987113 | COPD |
| rs11634450  | 15 | 78800859 | G | A | 0.4170 | 0.0513 | 0.0068 | 4.01E-14 | 7.5607 | 987113 | COPD |
| rs11856536  | 15 | 78801983 | G | A | 0.4169 | 0.0512 | 0.0068 | 4.78E-14 | 7.5378 | 987113 | COPD |
| rs4887113   | 15 | 78802945 | T | C | 0.4164 | 0.0515 | 0.0068 | 3.14E-14 | 7.5923 | 987113 | COPD |
| rs12592721  | 15 | 78806803 | C | G | 0.4169 | 0.0511 | 0.0068 | 5.29E-14 | 7.5244 | 987113 | COPD |
| rs11634042  | 15 | 78813008 | T | C | 0.4092 | 0.0455 | 0.0068 | 2.65E-11 | 6.6651 | 987113 | COPD |

|            |    |          |   |   |        |         |        |          |         |        |      |
|------------|----|----------|---|---|--------|---------|--------|----------|---------|--------|------|
| rs77719127 | 15 | 78818441 | T | C | 0.1430 | 0.0669  | 0.0100 | 2.36E-11 | 6.6817  | 970472 | COPD |
| rs7166764  | 15 | 78831167 | T | G | 0.4045 | 0.0411  | 0.0075 | 4.84E-08 | 5.4572  | 860907 | COPD |
| rs28694044 | 15 | 78842376 | T | A | 0.4200 | 0.0372  | 0.0068 | 4.13E-08 | 5.4852  | 987113 | COPD |
| rs28580532 | 15 | 78842382 | T | C | 0.4200 | 0.0372  | 0.0068 | 4.19E-08 | 5.4827  | 987113 | COPD |
| rs12232282 | 15 | 78844183 | C | T | 0.4200 | 0.0371  | 0.0068 | 4.53E-08 | 5.4690  | 987113 | COPD |
| rs4420501  | 15 | 78846136 | T | A | 0.4202 | 0.0370  | 0.0068 | 4.81E-08 | 5.4583  | 987113 | COPD |
| rs4438276  | 15 | 78846223 | G | A | 0.4200 | 0.0371  | 0.0068 | 4.43E-08 | 5.4728  | 987113 | COPD |
| rs4439728  | 15 | 78846566 | G | A | 0.4201 | 0.0370  | 0.0068 | 4.90E-08 | 5.4549  | 987113 | COPD |
| rs11637783 | 15 | 78846658 | C | T | 0.4201 | 0.0370  | 0.0068 | 4.84E-08 | 5.4573  | 987113 | COPD |
| rs8037171  | 15 | 78847136 | A | C | 0.4202 | 0.0370  | 0.0068 | 4.99E-08 | 5.4517  | 987113 | COPD |
| rs11857877 | 15 | 78848496 | C | G | 0.4213 | 0.0376  | 0.0068 | 3.08E-08 | 5.5366  | 987113 | COPD |
| rs4132786  | 15 | 78849246 | A | G | 0.4201 | 0.0370  | 0.0068 | 4.91E-08 | 5.4544  | 987113 | COPD |
| rs11632020 | 15 | 78851417 | T | C | 0.4201 | 0.0371  | 0.0068 | 4.39E-08 | 5.4741  | 987113 | COPD |
| rs12903249 | 15 | 78859518 | T | C | 0.4235 | 0.0370  | 0.0068 | 4.99E-08 | 5.4518  | 987113 | COPD |
| rs12903542 | 15 | 78859657 | T | C | 0.4235 | 0.0371  | 0.0068 | 4.81E-08 | 5.4582  | 987113 | COPD |
| rs5029904  | 15 | 78860080 | G | C | 0.4236 | 0.0371  | 0.0068 | 4.62E-08 | 5.4652  | 987113 | COPD |
| rs7542     | 16 | 30114519 | C | G | 0.4444 | -0.0419 | 0.0074 | 1.36E-08 | -5.6786 | 899058 | COPD |
| rs34898535 | 16 | 31014320 | T | C | 0.3794 | -0.0466 | 0.0083 | 1.75E-08 | -5.6354 | 789493 | COPD |
| rs4795400  | 17 | 39910767 | T | C | 0.4708 | -0.0383 | 0.0068 | 1.92E-08 | -5.6194 | 970472 | COPD |
| rs2872516  | 17 | 39916474 | C | T | 0.4621 | -0.0371 | 0.0067 | 3.31E-08 | -5.5246 | 995917 | COPD |
| rs9303279  | 17 | 39917715 | G | C | 0.4771 | -0.0382 | 0.0067 | 1.22E-08 | -5.6971 | 995917 | COPD |
| rs8076131  | 17 | 39924659 | G | A | 0.4747 | -0.0378 | 0.0067 | 1.80E-08 | -5.6306 | 995917 | COPD |
| rs62065216 | 17 | 40062520 | A | G | 0.4436 | 0.0439  | 0.0071 | 7.71E-10 | 6.1507  | 935597 | COPD |
| rs948537   | 18 | 37545198 | T | C | 0.2202 | 0.0452  | 0.0081 | 2.12E-08 | 5.6019  | 995917 | COPD |
| rs948536   | 18 | 37545351 | G | A | 0.2202 | 0.0452  | 0.0081 | 2.02E-08 | 5.6102  | 995917 | COPD |
| rs7506216  | 18 | 37545899 | T | C | 0.2227 | 0.0442  | 0.0080 | 3.61E-08 | 5.5090  | 995917 | COPD |
| rs1557341  | 18 | 37547464 | A | C | 0.3134 | 0.0454  | 0.0072 | 3.76E-10 | 6.2638  | 995917 | COPD |
| rs11877758 | 18 | 37558147 | G | T | 0.2915 | 0.0514  | 0.0078 | 3.47E-11 | 6.6253  | 935597 | COPD |
| rs12967855 | 18 | 37558282 | A | G | 0.3107 | 0.0450  | 0.0073 | 5.42E-10 | 6.2063  | 995917 | COPD |
| rs11082011 | 18 | 37565159 | C | T | 0.3115 | 0.0451  | 0.0072 | 4.84E-10 | 6.2244  | 995917 | COPD |
| rs80035064 | 18 | 37566403 | A | T | 0.2163 | 0.0448  | 0.0081 | 3.37E-08 | 5.5209  | 995917 | COPD |
| rs11665070 | 18 | 37572600 | G | A | 0.3124 | 0.0443  | 0.0072 | 9.30E-10 | 6.1210  | 995917 | COPD |
| rs62081465 | 18 | 37574233 | C | T | 0.2166 | 0.0443  | 0.0081 | 4.10E-08 | 5.4863  | 995917 | COPD |
| rs17570353 | 18 | 37574771 | A | G | 0.2166 | 0.0443  | 0.0081 | 4.36E-08 | 5.4755  | 995917 | COPD |
| rs4799949  | 18 | 37575947 | C | T | 0.3115 | 0.0446  | 0.0072 | 6.19E-10 | 6.1855  | 995917 | COPD |
| rs7243428  | 18 | 37576214 | G | A | 0.2166 | 0.0443  | 0.0081 | 4.26E-08 | 5.4798  | 995917 | COPD |
| rs7243439  | 18 | 37576233 | G | A | 0.2166 | 0.0443  | 0.0081 | 4.18E-08 | 5.4831  | 995917 | COPD |
| rs9964724  | 18 | 37579161 | C | T | 0.2989 | 0.0480  | 0.0073 | 4.77E-11 | 6.5781  | 995917 | COPD |
| rs1557343  | 18 | 37579209 | A | T | 0.2984 | 0.0474  | 0.0073 | 8.50E-11 | 6.4914  | 995917 | COPD |
| rs1941954  | 18 | 37579633 | A | C | 0.3045 | 0.0466  | 0.0073 | 1.32E-10 | 6.4252  | 995917 | COPD |
| rs7242923  | 18 | 37579870 | T | C | 0.3207 | 0.0452  | 0.0071 | 2.49E-10 | 6.3276  | 995917 | COPD |
| rs7504262  | 18 | 37580180 | A | G | 0.3169 | 0.0461  | 0.0072 | 1.21E-10 | 6.4383  | 995917 | COPD |
| rs12954661 | 18 | 37580692 | C | T | 0.3214 | 0.0446  | 0.0071 | 4.29E-10 | 6.2432  | 995917 | COPD |
| rs7243102  | 18 | 37581870 | C | T | 0.3385 | 0.0505  | 0.0085 | 2.79E-09 | 5.9437  | 676073 | COPD |
| rs1941955  | 18 | 37582875 | T | C | 0.3204 | 0.0455  | 0.0071 | 1.77E-10 | 6.3798  | 995917 | COPD |
| rs12709690 | 18 | 37585889 | T | C | 0.3364 | 0.0419  | 0.0071 | 3.04E-09 | 5.9297  | 995917 | COPD |
| rs7237475  | 18 | 37587259 | T | C | 0.3352 | 0.0427  | 0.0070 | 1.40E-09 | 6.0557  | 995917 | COPD |
| rs12967741 | 18 | 37588300 | A | G | 0.3358 | 0.0426  | 0.0071 | 1.61E-09 | 6.0326  | 995917 | COPD |
| rs6507210  | 18 | 37589534 | T | A | 0.3363 | 0.0420  | 0.0071 | 2.71E-09 | 5.9485  | 995917 | COPD |
| rs4799950  | 18 | 37590082 | C | G | 0.3209 | 0.0446  | 0.0071 | 4.33E-10 | 6.2416  | 995917 | COPD |
| rs12956949 | 18 | 37591690 | G | A | 0.3366 | 0.0416  | 0.0071 | 3.64E-09 | 5.8996  | 995917 | COPD |
| rs7505519  | 18 | 37592353 | G | A | 0.3364 | 0.0416  | 0.0071 | 3.89E-09 | 5.8888  | 995917 | COPD |
| rs12962050 | 18 | 37599845 | G | A | 0.3370 | 0.0429  | 0.0071 | 1.15E-09 | 6.0866  | 995917 | COPD |
| rs9961847  | 18 | 37601262 | G | A | 0.3221 | 0.0397  | 0.0071 | 2.64E-08 | 5.5636  | 995917 | COPD |
| rs12969294 | 18 | 37606159 | A | G | 0.3210 | 0.0393  | 0.0071 | 3.74E-08 | 5.5025  | 995917 | COPD |
| rs58011088 | 18 | 37608486 | A | G | 0.3202 | 0.0431  | 0.0075 | 1.05E-08 | 5.7221  | 935597 | COPD |
| rs6507215  | 18 | 37615666 | T | C | 0.3237 | 0.0403  | 0.0071 | 1.49E-08 | 5.6632  | 995917 | COPD |
| rs6507216  | 18 | 37615756 | T | G | 0.3223 | 0.0451  | 0.0075 | 1.87E-09 | 6.0092  | 935597 | COPD |
| rs28414828 | 18 | 37616311 | G | A | 0.3231 | 0.0439  | 0.0075 | 4.65E-09 | 5.8594  | 935597 | COPD |
| rs35064785 | 18 | 37617899 | A | G | 0.3252 | 0.0397  | 0.0072 | 4.23E-08 | 5.4809  | 970472 | COPD |
| rs11082014 | 18 | 37617942 | T | G | 0.3234 | 0.0440  | 0.0077 | 8.80E-09 | 5.7524  | 910152 | COPD |
| rs2567177  | 18 | 40870233 | C | A | 0.3617 | 0.0431  | 0.0075 | 8.53E-09 | 5.7575  | 918956 | COPD |
| rs323598   | 18 | 40898849 | T | C | 0.3578 | 0.0397  | 0.0071 | 2.53E-08 | 5.5711  | 979276 | COPD |
| rs502766   | 18 | 40918092 | C | T | 0.3728 | 0.0423  | 0.0075 | 1.59E-08 | 5.6516  | 918956 | COPD |
| rs3787138  | 20 | 63347872 | G | A | 0.1204 | 0.0707  | 0.0103 | 6.97E-12 | 6.8581  | 995917 | COPD |
| rs6062439  | 20 | 63348208 | G | C | 0.1203 | 0.0708  | 0.0103 | 6.70E-12 | 6.8642  | 995917 | COPD |
| rs6062899  | 20 | 63348441 | G | A | 0.1808 | 0.0644  | 0.0088 | 2.26E-13 | 7.3322  | 995917 | COPD |
| rs6062900  | 20 | 63348773 | C | T | 0.1206 | 0.0698  | 0.0103 | 1.21E-11 | 6.7789  | 995917 | COPD |
| rs6062901  | 20 | 63348909 | G | A | 0.1831 | 0.0606  | 0.0092 | 4.72E-11 | 6.5795  | 935597 | COPD |
| rs2229959  | 20 | 63350202 | C | A | 0.1138 | 0.0721  | 0.0105 | 6.88E-12 | 6.8600  | 995917 | COPD |
| rs1044393  | 20 | 63350772 | A | G | 0.1134 | 0.0719  | 0.0105 | 7.75E-12 | 6.8430  | 995917 | COPD |
| rs6010916  | 20 | 63351468 | T | C | 0.0715 | 0.0791  | 0.0129 | 8.82E-10 | 6.1294  | 995917 | COPD |
| rs4809541  | 20 | 63351529 | C | T | 0.1138 | 0.0721  | 0.0105 | 6.53E-12 | 6.8674  | 995917 | COPD |
| rs45568836 | 20 | 63352197 | T | C | 0.0715 | 0.0788  | 0.0129 | 1.02E-09 | 6.1054  | 995917 | COPD |

|             |    |           |   |   |        |         |        |          |         |        |      |
|-------------|----|-----------|---|---|--------|---------|--------|----------|---------|--------|------|
| rs6011776   | 20 | 63352404  | C | T | 0.1120 | 0.0738  | 0.0105 | 2.60E-12 | 6.9981  | 995917 | COPD |
| rs6011778   | 20 | 63352780  | G | A | 0.0714 | 0.0787  | 0.0129 | 1.14E-09 | 6.0882  | 995917 | COPD |
| rs6011779   | 20 | 63352965  | C | T | 0.2062 | 0.0698  | 0.0083 | 4.83E-17 | 8.3909  | 995917 | COPD |
| rs45473291  | 20 | 63355511  | G | C | 0.0718 | 0.0797  | 0.0129 | 6.05E-10 | 6.1890  | 995917 | COPD |
| rs2273500   | 20 | 63355597  | C | T | 0.1643 | 0.0690  | 0.0091 | 3.07E-14 | 7.5952  | 995917 | COPD |
| rs2273501   | 20 | 63355777  | T | C | 0.0717 | 0.0795  | 0.0129 | 6.70E-10 | 6.1729  | 995917 | COPD |
| rs2273502   | 20 | 63356470  | T | C | 0.0716 | 0.0794  | 0.0129 | 7.32E-10 | 6.1590  | 995917 | COPD |
| rs13036436  | 20 | 63357030  | G | A | 0.1827 | 0.0877  | 0.0157 | 2.16E-08 | 5.5989  | 460827 | COPD |
| rs13042047  | 20 | 63357043  | C | T | 0.1750 | 0.0613  | 0.0112 | 4.08E-08 | 5.4876  | 780671 | COPD |
| rs12479680  | 20 | 63357061  | A | G | 0.2023 | 0.0626  | 0.0104 | 1.83E-09 | 6.0120  | 674497 | COPD |
| rs3787140   | 20 | 63357759  | C | T | 0.0718 | 0.0800  | 0.0129 | 5.36E-10 | 6.2079  | 995917 | COPD |
| rs3787141   | 20 | 63358042  | C | T | 0.0717 | 0.0798  | 0.0129 | 6.01E-10 | 6.1903  | 995917 | COPD |
| rs3827021   | 20 | 63358226  | T | C | 0.0716 | 0.0797  | 0.0129 | 6.41E-10 | 6.1800  | 995917 | COPD |
| rs6011783   | 20 | 63358401  | T | C | 0.0716 | 0.0797  | 0.0129 | 6.52E-10 | 6.1776  | 995917 | COPD |
| rs3787142   | 20 | 63358830  | T | C | 0.0715 | 0.0795  | 0.0129 | 7.25E-10 | 6.1604  | 995917 | COPD |
| rs6011788   | 20 | 63359231  | C | G | 0.0712 | 0.0776  | 0.0129 | 2.04E-09 | 5.9948  | 995917 | COPD |
| rs2273505   | 20 | 63359526  | T | C | 0.0715 | 0.0803  | 0.0129 | 4.92E-10 | 6.2214  | 995917 | COPD |
| rs2273506   | 20 | 63359587  | A | G | 0.0716 | 0.0802  | 0.0129 | 4.83E-10 | 6.2242  | 995917 | COPD |
| rs11697662  | 20 | 63360653  | C | T | 0.2022 | 0.0626  | 0.0089 | 2.00E-12 | 7.0345  | 935597 | COPD |
| rs6090387   | 20 | 63361195  | G | C | 0.2411 | 0.0494  | 0.0090 | 3.49E-08 | 5.5149  | 868135 | COPD |
| rs755204    | 20 | 63362813  | A | G | 0.0706 | 0.0812  | 0.0131 | 5.18E-10 | 6.2134  | 995917 | COPD |
| rs1971698   | 2  | 50454187  | A | G | 0.2648 | 0.1274  | 0.0230 | 2.89E-08 | 5.5480  | 903869 | IPF  |
| rs1005431   | 2  | 50455324  | T | C | 0.2649 | 0.1273  | 0.0230 | 2.97E-08 | 5.5433  | 903869 | IPF  |
| rs10069690  | 5  | 1279675   | T | C | 0.2692 | -0.1641 | 0.0212 | 1.01E-14 | -7.7387 | 953873 | IPF  |
| rs10054203  | 5  | 1279849   | C | G | 0.4155 | -0.1450 | 0.0205 | 1.57E-12 | -7.0686 | 903869 | IPF  |
| rs2242652   | 5  | 1279913   | A | G | 0.2044 | -0.1608 | 0.0236 | 8.68E-12 | -6.8269 | 953873 | IPF  |
| rs7734992   | 5  | 1280013   | C | T | 0.4299 | -0.1494 | 0.0205 | 2.78E-13 | -7.3048 | 903869 | IPF  |
| rs4975538   | 5  | 1280715   | C | G | 0.3717 | -0.1434 | 0.0210 | 8.70E-12 | -6.8264 | 903869 | IPF  |
| rs6897196   | 5  | 1280823   | G | A | 0.4100 | -0.1743 | 0.0237 | 1.79E-13 | -7.3638 | 820856 | IPF  |
| rs7726159   | 5  | 1282204   | A | C | 0.3265 | -0.1597 | 0.0214 | 9.04E-14 | -7.4545 | 903869 | IPF  |
| rs7725218   | 5  | 1282299   | A | G | 0.3456 | -0.1578 | 0.0211 | 8.31E-14 | -7.4657 | 903869 | IPF  |
| rs7705526   | 5  | 1285859   | A | C | 0.3247 | -0.1485 | 0.0215 | 5.46E-12 | -6.8933 | 903869 | IPF  |
| rs2736100   | 5  | 1286401   | C | A | 0.4909 | -0.1239 | 0.0187 | 3.17E-11 | -6.6384 | 953873 | IPF  |
| rs2853672   | 5  | 1292868   | A | C | 0.5061 | 0.1100  | 0.0187 | 3.82E-09 | 5.8920  | 953873 | IPF  |
| rs2735940   | 5  | 1296371   | G | A | 0.5063 | 0.1093  | 0.0187 | 4.95E-09 | 5.8486  | 953873 | IPF  |
| rs76183814  | 5  | 169462850 | G | C | 0.0242 | 0.4079  | 0.0744 | 4.13E-08 | 5.4853  | 887228 | IPF  |
| rs145315307 | 5  | 169477001 | G | T | 0.0231 | 0.4571  | 0.0693 | 4.27E-11 | 6.5944  | 937232 | IPF  |
| rs1998323   | 6  | 7546171   | A | G | 0.3963 | -0.1094 | 0.0193 | 1.42E-08 | -5.6716 | 953873 | IPF  |
| rs2076295   | 6  | 7562999   | G | T | 0.4355 | 0.1337  | 0.0188 | 1.11E-12 | 7.1164  | 953873 | IPF  |
| rs7803714   | 7  | 99987527  | T | G | 0.3827 | 0.1144  | 0.0191 | 2.22E-09 | 5.9810  | 953873 | IPF  |
| rs6975827   | 7  | 99988175  | C | G | 0.4226 | 0.1155  | 0.0189 | 9.15E-10 | 6.1239  | 953873 | IPF  |
| rs6465759   | 7  | 99990357  | T | C | 0.4226 | 0.1156  | 0.0189 | 9.06E-10 | 6.1252  | 953873 | IPF  |
| rs886453    | 7  | 99990602  | A | G | 0.3826 | 0.1145  | 0.0191 | 2.13E-09 | 5.9874  | 953873 | IPF  |
| rs66748925  | 7  | 99992220  | G | A | 0.3808 | 0.1159  | 0.0191 | 1.34E-09 | 6.0624  | 953873 | IPF  |
| rs6974373   | 7  | 99993270  | G | C | 0.3807 | 0.1147  | 0.0191 | 1.97E-09 | 6.0006  | 953873 | IPF  |
| rs4727443   | 7  | 99995723  | A | C | 0.3810 | 0.1148  | 0.0191 | 1.75E-09 | 6.0200  | 953873 | IPF  |
| rs56173013  | 7  | 100002782 | T | A | 0.3960 | 0.1242  | 0.0204 | 1.14E-09 | 6.0886  | 903869 | IPF  |
| rs11770546  | 7  | 100007746 | A | G | 0.3703 | 0.1289  | 0.0193 | 2.48E-11 | 6.6743  | 953873 | IPF  |
| rs73158411  | 7  | 100012504 | A | G | 0.3701 | 0.1340  | 0.0207 | 8.74E-11 | 6.4873  | 903869 | IPF  |
| rs13243708  | 7  | 100018668 | C | T | 0.3701 | 0.1357  | 0.0235 | 7.36E-09 | 5.7822  | 885936 | IPF  |
| rs35228488  | 7  | 100020229 | C | G | 0.3707 | 0.1249  | 0.0193 | 9.57E-11 | 6.4739  | 953873 | IPF  |
| rs6963345   | 7  | 100020983 | A | G | 0.3718 | 0.1324  | 0.0197 | 1.86E-11 | 6.7165  | 819655 | IPF  |
| rs12531809  | 7  | 100022850 | T | G | 0.3703 | 0.1263  | 0.0193 | 6.03E-11 | 6.5431  | 953873 | IPF  |
| rs13238380  | 7  | 100031438 | T | C | 0.3710 | 0.1248  | 0.0193 | 9.51E-11 | 6.4744  | 953873 | IPF  |
| rs2897075   | 7  | 100032719 | T | C | 0.3710 | 0.1248  | 0.0193 | 9.73E-11 | 6.4713  | 953873 | IPF  |
| rs67110214  | 7  | 100036116 | C | G | 0.2700 | 0.1130  | 0.0207 | 4.79E-08 | 5.4586  | 953873 | IPF  |
| rs13238352  | 7  | 129007888 | T | C | 0.1262 | 0.1562  | 0.0284 | 3.96E-08 | 5.4927  | 953873 | IPF  |
| rs78721871  | 11 | 983626    | A | G | 0.0284 | 0.4262  | 0.0711 | 2.02E-09 | 5.9959  | 887228 | IPF  |
| rs148989610 | 11 | 1023824   | A | G | 0.0207 | 0.4873  | 0.0772 | 2.78E-10 | 6.3103  | 937232 | IPF  |
| rs10902073  | 11 | 1060934   | A | C | 0.3457 | 0.1087  | 0.0197 | 3.65E-08 | 5.5071  | 953873 | IPF  |
| rs10794278  | 11 | 1061718   | T | G | 0.3460 | 0.1077  | 0.0196 | 4.07E-08 | 5.4879  | 953873 | IPF  |
| rs10794279  | 11 | 1061781   | T | C | 0.3461 | 0.1078  | 0.0196 | 3.94E-08 | 5.4932  | 953873 | IPF  |
| rs7109046   | 11 | 1067616   | G | C | 0.3473 | 0.1078  | 0.0196 | 3.79E-08 | 5.4999  | 953873 | IPF  |
| rs7109045   | 11 | 1067618   | T | C | 0.3471 | 0.1072  | 0.0196 | 4.56E-08 | 5.4677  | 953873 | IPF  |
| rs7105873   | 11 | 1067666   | T | C | 0.3474 | 0.1080  | 0.0196 | 3.57E-08 | 5.5110  | 953873 | IPF  |
| rs10794285  | 11 | 1069195   | T | C | 0.3472 | 0.1094  | 0.0196 | 2.41E-08 | 5.5799  | 953873 | IPF  |
| rs41359951  | 11 | 1081750   | T | C | 0.0349 | 0.4133  | 0.0621 | 2.77E-11 | 6.6583  | 903869 | IPF  |
| rs7127117   | 11 | 1081883   | T | C | 0.4734 | -0.1441 | 0.0223 | 9.67E-11 | -6.4722 | 887228 | IPF  |
| rs41414549  | 11 | 1093142   | A | G | 0.0500 | 0.3122  | 0.0505 | 6.22E-10 | 6.1847  | 903869 | IPF  |
| rs7944723   | 11 | 1099802   | C | G | 0.1961 | 0.3063  | 0.0362 | 2.50E-17 | 8.4680  | 553704 | IPF  |
| rs7934606   | 11 | 1100037   | T | C | 0.4280 | 0.1647  | 0.0192 | 8.27E-18 | 8.5960  | 953873 | IPF  |
| rs10902089  | 11 | 1100449   | G | A | 0.5196 | 0.1400  | 0.0204 | 6.42E-12 | 6.8696  | 903869 | IPF  |
| rs11245950  | 11 | 1100721   | T | C | 0.5183 | 0.1398  | 0.0204 | 7.03E-12 | 6.8569  | 903869 | IPF  |
| rs10794291  | 11 | 1100782   | C | T | 0.5183 | 0.1387  | 0.0204 | 1.02E-11 | 6.8040  | 903869 | IPF  |



|             |    |         |   |   |        |         |        |          |         |        |     |
|-------------|----|---------|---|---|--------|---------|--------|----------|---------|--------|-----|
| rs10794292  | 11 | 1100845 | A | C | 0.4282 | 0.1628  | 0.0206 | 3.03E-15 | 7.8901  | 903869 | IPF |
| rs6597999   | 11 | 1101174 | A | C | 0.4282 | 0.1627  | 0.0206 | 3.18E-15 | 7.8837  | 903869 | IPF |
| rs76658708  | 11 | 1102870 | T | C | 0.0503 | 0.3228  | 0.0503 | 1.42E-10 | 6.4137  | 903869 | IPF |
| rs10794293  | 11 | 1105031 | T | C | 0.3679 | 0.1178  | 0.0212 | 2.91E-08 | 5.5465  | 903869 | IPF |
| rs7396585   | 11 | 1106997 | A | G | 0.2777 | -0.1332 | 0.0229 | 6.25E-09 | -5.8100 | 903869 | IPF |
| rs56079025  | 11 | 1116976 | A | G | 0.1032 | 0.3614  | 0.0309 | 1.14E-31 | 11.7093 | 953873 | IPF |
| rs55762625  | 11 | 1117274 | T | C | 0.1034 | 0.3639  | 0.0308 | 3.82E-32 | 11.8019 | 953873 | IPF |
| rs72842467  | 11 | 1118113 | T | C | 0.1002 | 0.2834  | 0.0338 | 5.48E-17 | 8.3760  | 755859 | IPF |
| rs113948005 | 11 | 1118898 | T | G | 0.0451 | 0.3354  | 0.0491 | 8.82E-12 | 6.8248  | 953873 | IPF |
| rs79373603  | 11 | 1119779 | A | G | 0.1037 | 0.3599  | 0.0308 | 1.43E-31 | 11.6902 | 953873 | IPF |
| rs72842470  | 11 | 1120870 | G | T | 0.1038 | 0.3600  | 0.0308 | 1.17E-31 | 11.7072 | 953873 | IPF |
| rs116291817 | 11 | 1121247 | T | A | 0.1038 | 0.3600  | 0.0308 | 1.18E-31 | 11.7066 | 953873 | IPF |
| rs7480725   | 11 | 1122962 | G | A | 0.1043 | 0.2944  | 0.0344 | 1.17E-17 | 8.5553  | 621641 | IPF |
| rs72842479  | 11 | 1123799 | T | C | 0.1434 | 0.2429  | 0.0270 | 2.40E-19 | 8.9931  | 953873 | IPF |
| rs75900172  | 11 | 1125806 | G | A | 0.1433 | 0.2430  | 0.0270 | 2.28E-19 | 8.9988  | 953873 | IPF |
| rs60582557  | 11 | 1127707 | T | G | 0.1434 | 0.2439  | 0.0270 | 1.45E-19 | 9.0486  | 953873 | IPF |
| rs72842485  | 11 | 1128369 | A | G | 0.1432 | 0.2455  | 0.0270 | 8.90E-20 | 9.1016  | 953873 | IPF |
| rs113775821 | 11 | 1128814 | T | C | 0.0449 | 0.3335  | 0.0494 | 1.45E-11 | 6.7524  | 953873 | IPF |
| rs72842486  | 11 | 1129192 | T | C | 0.1422 | 0.2514  | 0.0271 | 1.55E-20 | 9.2900  | 953873 | IPF |
| rs79645252  | 11 | 1129535 | G | C | 0.1027 | 0.3716  | 0.0308 | 1.69E-33 | 12.0613 | 953873 | IPF |
| rs7947691   | 11 | 1129848 | A | G | 0.1423 | 0.2498  | 0.0270 | 2.39E-20 | 9.2436  | 953873 | IPF |
| rs72842488  | 11 | 1129980 | T | C | 0.1034 | 0.3731  | 0.0308 | 7.49E-34 | 12.1281 | 953873 | IPF |
| rs57614263  | 11 | 1130667 | T | C | 0.1423 | 0.2494  | 0.0270 | 2.68E-20 | 9.2309  | 953873 | IPF |
| rs72842489  | 11 | 1131693 | T | C | 0.1423 | 0.2495  | 0.0270 | 2.60E-20 | 9.2345  | 953873 | IPF |
| rs72842490  | 11 | 1131710 | A | G | 0.1423 | 0.2495  | 0.0270 | 2.60E-20 | 9.2345  | 953873 | IPF |
| rs72842493  | 11 | 1133595 | C | A | 0.1423 | 0.2495  | 0.0270 | 2.49E-20 | 9.2389  | 953873 | IPF |
| rs113700231 | 11 | 1136398 | C | G | 0.1424 | 0.2492  | 0.0270 | 2.68E-20 | 9.2309  | 953873 | IPF |
| rs72846303  | 11 | 1139887 | A | G | 0.1425 | 0.2525  | 0.0270 | 7.50E-21 | 9.3665  | 953873 | IPF |
| rs72846309  | 11 | 1143020 | A | G | 0.1424 | 0.2517  | 0.0271 | 1.35E-20 | 9.3046  | 953873 | IPF |
| rs72846316  | 11 | 1145131 | A | T | 0.1426 | 0.2533  | 0.0270 | 7.47E-21 | 9.3669  | 953873 | IPF |
| rs9667239   | 11 | 1149193 | T | C | 0.1428 | 0.2506  | 0.0271 | 2.26E-20 | 9.2494  | 953873 | IPF |
| rs72846323  | 11 | 1150138 | T | C | 0.1516 | 0.2823  | 0.0421 | 2.10E-11 | 6.6986  | 603963 | IPF |
| rs56126327  | 11 | 1151357 | G | C | 0.1311 | 0.2553  | 0.0308 | 1.14E-16 | 8.2889  | 903869 | IPF |
| rs72846326  | 11 | 1153801 | T | C | 0.1045 | 0.3714  | 0.0307 | 1.21E-33 | 12.0888 | 953873 | IPF |
| rs55846509  | 11 | 1160678 | A | G | 0.0231 | 0.5657  | 0.0605 | 8.57E-21 | 9.3524  | 953873 | IPF |
| rs35396393  | 11 | 1161648 | A | G | 0.2082 | 0.1571  | 0.0253 | 5.08E-10 | 6.2171  | 903869 | IPF |
| rs35783651  | 11 | 1163029 | G | C | 0.2085 | 0.1640  | 0.0252 | 8.35E-11 | 6.4942  | 903869 | IPF |
| rs34664315  | 11 | 1163092 | A | G | 0.2090 | 0.1610  | 0.0252 | 1.73E-10 | 6.3833  | 903869 | IPF |
| rs36021067  | 11 | 1163133 | A | C | 0.2091 | 0.1611  | 0.0252 | 1.71E-10 | 6.3852  | 903869 | IPF |
| rs34207169  | 11 | 1163212 | T | C | 0.2091 | 0.1614  | 0.0252 | 1.58E-10 | 6.3980  | 903869 | IPF |
| rs28691231  | 11 | 1164456 | T | C | 0.2095 | 0.1611  | 0.0252 | 1.64E-10 | 6.3913  | 903869 | IPF |
| rs28403537  | 11 | 1167980 | T | C | 0.0411 | 0.4199  | 0.0504 | 8.37E-17 | 8.3259  | 903869 | IPF |
| rs34974357  | 11 | 1168600 | A | C | 0.2113 | 0.1620  | 0.0251 | 1.19E-10 | 6.4405  | 903869 | IPF |
| rs28653192  | 11 | 1192581 | C | T | 0.2142 | 0.1523  | 0.0250 | 1.12E-09 | 6.0913  | 903869 | IPF |
| rs35705491  | 11 | 1193124 | G | A | 0.2161 | 0.1577  | 0.0252 | 4.11E-10 | 6.2498  | 882012 | IPF |
| rs71469854  | 11 | 1193912 | T | C | 0.1614 | 0.2424  | 0.0278 | 3.07E-18 | 8.7089  | 903869 | IPF |
| rs34462515  | 11 | 1197252 | A | G | 0.2155 | 0.1545  | 0.0249 | 5.34E-10 | 6.2087  | 903869 | IPF |
| rs35779873  | 11 | 1197482 | T | C | 0.2154 | 0.1551  | 0.0249 | 4.61E-10 | 6.2319  | 903869 | IPF |
| rs35700114  | 11 | 1197868 | G | A | 0.2121 | 0.1564  | 0.0251 | 4.49E-10 | 6.2361  | 903869 | IPF |
| rs35915689  | 11 | 1197925 | G | C | 0.2169 | 0.1557  | 0.0248 | 3.63E-10 | 6.2692  | 903869 | IPF |
| rs34474233  | 11 | 1197926 | A | G | 0.0397 | 0.4199  | 0.0525 | 1.29E-15 | 7.9953  | 903869 | IPF |
| rs34815853  | 11 | 1197927 | A | C | 0.0398 | 0.4295  | 0.0525 | 2.91E-16 | 8.1770  | 903869 | IPF |
| rs34666042  | 11 | 1198547 | T | C | 0.1614 | 0.2440  | 0.0279 | 2.01E-18 | 8.7567  | 903869 | IPF |
| rs34831688  | 11 | 1198945 | T | C | 0.2155 | 0.1554  | 0.0249 | 4.23E-10 | 6.2452  | 903869 | IPF |
| rs35288961  | 11 | 1199236 | T | G | 0.2155 | 0.1559  | 0.0249 | 3.68E-10 | 6.2671  | 903869 | IPF |
| rs35968147  | 11 | 1200038 | C | T | 0.2156 | 0.1557  | 0.0249 | 3.87E-10 | 6.2590  | 903869 | IPF |
| rs28728088  | 11 | 1200366 | T | C | 0.2158 | 0.1549  | 0.0249 | 4.69E-10 | 6.2291  | 903869 | IPF |
| rs3087562   | 11 | 1200759 | T | C | 0.2157 | 0.1553  | 0.0249 | 4.30E-10 | 6.2427  | 903869 | IPF |
| rs13010     | 11 | 1201051 | C | A | 0.2157 | 0.1561  | 0.0249 | 3.53E-10 | 6.2734  | 903869 | IPF |
| rs28666868  | 11 | 1204373 | C | T | 0.2170 | 0.1579  | 0.0249 | 2.36E-10 | 6.3364  | 903869 | IPF |
| rs139052365 | 11 | 1204458 | T | C | 0.0238 | 0.5676  | 0.0602 | 4.24E-21 | 9.4267  | 953873 | IPF |
| rs35671223  | 11 | 1205839 | T | C | 0.3025 | 0.1653  | 0.0244 | 1.38E-11 | 6.7602  | 887228 | IPF |
| rs28742153  | 11 | 1206616 | C | T | 0.4806 | 0.2357  | 0.0191 | 6.46E-35 | 12.3273 | 953873 | IPF |
| rs28532970  | 11 | 1206709 | T | G | 0.2955 | -0.1445 | 0.0224 | 1.09E-10 | -6.4539 | 903869 | IPF |
| rs28678421  | 11 | 1207775 | G | A | 0.2348 | -0.1429 | 0.0244 | 4.57E-09 | -5.8620 | 903869 | IPF |
| rs34595903  | 11 | 1209163 | T | C | 0.3071 | -0.1410 | 0.0221 | 1.92E-10 | -6.3679 | 903869 | IPF |
| rs28464598  | 11 | 1209352 | C | T | 0.2694 | -0.1481 | 0.0233 | 2.07E-10 | -6.3563 | 903869 | IPF |
| rs28722627  | 11 | 1209625 | C | T | 0.2503 | -0.1527 | 0.0239 | 1.68E-10 | -6.3876 | 903869 | IPF |
| rs28783382  | 11 | 1211472 | T | A | 0.3133 | -0.1522 | 0.0221 | 5.86E-12 | -6.8833 | 903869 | IPF |
| rs7945077   | 11 | 1213040 | T | G | 0.2476 | -0.1511 | 0.0241 | 3.75E-10 | -6.2643 | 903869 | IPF |
| rs7947858   | 11 | 1214868 | T | C | 0.2528 | -0.1514 | 0.0239 | 2.56E-10 | -6.3228 | 903869 | IPF |
| rs12802931  | 11 | 1214934 | G | A | 0.1879 | 0.5179  | 0.0271 | 2.94E-81 | 19.0923 | 903869 | IPF |
| rs10768602  | 11 | 1215983 | T | C | 0.3109 | -0.1554 | 0.0222 | 2.76E-12 | -6.9897 | 903869 | IPF |
| rs7120886   | 11 | 1217598 | G | T | 0.2687 | -0.1414 | 0.0219 | 1.12E-10 | -6.4492 | 953873 | IPF |

|             |    |         |   |   |        |         |        |           |         |        |     |
|-------------|----|---------|---|---|--------|---------|--------|-----------|---------|--------|-----|
| rs2672792   | 11 | 1219108 | C | T | 0.2438 | -0.1824 | 0.0283 | 1.22E-10  | -6.4367 | 751718 | IPF |
| rs2672794   | 11 | 1219775 | T | C | 0.3906 | -0.1807 | 0.0198 | 6.28E-20  | -9.1392 | 953873 | IPF |
| rs35705950  | 11 | 1219991 | T | G | 0.1076 | 0.8521  | 0.0349 | 2.57E-131 | 24.3835 | 903869 | IPF |
| rs35619543  | 11 | 1221020 | T | G | 0.2810 | 0.1386  | 0.0254 | 4.77E-08  | 5.4598  | 887228 | IPF |
| rs868903    | 11 | 1221460 | T | C | 0.4892 | -0.1329 | 0.0231 | 9.32E-09  | -5.7428 | 887228 | IPF |
| rs56321310  | 11 | 1224068 | T | C | 0.1823 | 0.2531  | 0.0245 | 4.69E-25  | 10.3390 | 953873 | IPF |
| rs56293203  | 11 | 1226857 | A | G | 0.0125 | 0.6137  | 0.1026 | 2.21E-09  | 5.9815  | 887228 | IPF |
| rs2672812   | 11 | 1228142 | A | G | 0.5179 | -0.1547 | 0.0202 | 2.01E-14  | -7.6499 | 903869 | IPF |
| rs2471912   | 11 | 1229154 | G | A | 0.4945 | -0.1416 | 0.0203 | 2.79E-12  | -6.9881 | 903869 | IPF |
| rs2075859   | 11 | 1229258 | T | C | 0.3634 | -0.1360 | 0.0210 | 9.42E-11  | -6.4760 | 903869 | IPF |
| rs2075860   | 11 | 1229373 | C | G | 0.4924 | -0.1418 | 0.0203 | 2.58E-12  | -6.9993 | 903869 | IPF |
| rs10832955  | 11 | 1229466 | T | C | 0.3631 | -0.1361 | 0.0210 | 9.47E-11  | -6.4752 | 903869 | IPF |
| rs2735709   | 11 | 1231478 | C | G | 0.5181 | -0.1540 | 0.0202 | 2.57E-14  | -7.6185 | 903869 | IPF |
| rs12421917  | 11 | 1232171 | G | C | 0.3873 | -0.1452 | 0.0207 | 2.18E-12  | -7.0227 | 903869 | IPF |
| rs1318321   | 11 | 1232626 | C | T | 0.5182 | -0.1804 | 0.0228 | 2.68E-15  | -7.9049 | 885936 | IPF |
| rs908229    | 11 | 1232712 | C | T | 0.5209 | -0.1760 | 0.0236 | 8.79E-14  | -7.4580 | 751718 | IPF |
| rs2672806   | 11 | 1233369 | C | T | 0.5182 | -0.1544 | 0.0202 | 2.12E-14  | -7.6432 | 903869 | IPF |
| rs2735719   | 11 | 1233710 | A | G | 0.4479 | -0.1263 | 0.0203 | 4.94E-10  | -6.2211 | 903869 | IPF |
| rs55771420  | 11 | 1233760 | A | G | 0.0263 | 0.5005  | 0.0570 | 1.55E-18  | 8.7858  | 953873 | IPF |
| rs2735727   | 11 | 1236229 | A | G | 0.4480 | -0.1270 | 0.0203 | 3.73E-10  | -6.2651 | 903869 | IPF |
| rs2672803   | 11 | 1236637 | C | T | 0.5175 | -0.1549 | 0.0188 | 1.95E-16  | -8.2246 | 953873 | IPF |
| rs2014486   | 11 | 1237573 | G | A | 0.5170 | -0.1541 | 0.0188 | 2.61E-16  | -8.1899 | 953873 | IPF |
| rs2735733   | 11 | 1240410 | T | C | 0.4593 | -0.1311 | 0.0202 | 8.97E-11  | -6.4835 | 903869 | IPF |
| rs55933911  | 11 | 1242457 | T | C | 0.0694 | 0.4270  | 0.0425 | 8.88E-24  | 10.0535 | 903869 | IPF |
| rs4963051   | 11 | 1243735 | A | G | 0.1863 | 0.3111  | 0.0339 | 4.77E-20  | 9.1691  | 735077 | IPF |
| rs199749553 | 11 | 1244192 | A | G | 0.1796 | 0.3191  | 0.0350 | 7.42E-20  | 9.1213  | 669997 | IPF |
| rs60787297  | 11 | 1244556 | T | C | 0.4337 | -0.1919 | 0.0305 | 2.96E-10  | -6.3008 | 669043 | IPF |
| rs2943496   | 11 | 1244706 | C | T | 0.0256 | 0.4408  | 0.0737 | 2.25E-09  | 5.9783  | 753010 | IPF |
| rs139052978 | 11 | 1245928 | A | G | 0.0254 | 0.4040  | 0.0621 | 7.83E-11  | 6.5038  | 755859 | IPF |
| rs55813014  | 11 | 1246095 | C | T | 0.4913 | -0.1436 | 0.0188 | 2.19E-14  | -7.6390 | 953873 | IPF |
| rs60268710  | 11 | 1246332 | T | C | 0.3014 | -0.1266 | 0.0218 | 6.08E-09  | -5.8144 | 937232 | IPF |
| rs75101148  | 11 | 1246742 | G | A | 0.0390 | 0.6549  | 0.0928 | 1.72E-12  | 7.0555  | 603963 | IPF |
| rs2943529   | 11 | 1247283 | C | G | 0.4899 | -0.1602 | 0.0228 | 2.26E-12  | -7.0174 | 885936 | IPF |
| rs4963057   | 11 | 1248442 | C | T | 0.4994 | -0.1720 | 0.0229 | 5.94E-14  | -7.5096 | 885936 | IPF |
| rs201466769 | 11 | 1248948 | T | C | 0.0300 | 0.5029  | 0.0917 | 4.18E-08  | 5.4830  | 603963 | IPF |
| rs2943517   | 11 | 1250091 | G | C | 0.4509 | -0.1842 | 0.0283 | 7.70E-11  | -6.5061 | 803261 | IPF |
| rs4963059   | 11 | 1251628 | T | C | 0.2997 | -0.1213 | 0.0205 | 3.09E-09  | -5.9268 | 953873 | IPF |
| rs2249073   | 11 | 1252603 | C | T | 0.5167 | -0.1511 | 0.0187 | 6.95E-16  | -8.0714 | 953873 | IPF |
| rs2857472   | 11 | 1253697 | A | G | 0.4468 | -0.1278 | 0.0188 | 1.19E-11  | -6.7822 | 953873 | IPF |
| rs72846374  | 11 | 1253788 | A | C | 0.0860 | 0.3151  | 0.0371 | 1.83E-17  | 8.5043  | 903869 | IPF |
| rs72846376  | 11 | 1253876 | A | G | 0.1813 | 0.2437  | 0.0242 | 8.78E-24  | 10.0545 | 953873 | IPF |
| rs2249550   | 11 | 1258256 | G | A | 0.5168 | -0.1512 | 0.0187 | 6.77E-16  | -8.0748 | 953873 | IPF |
| rs2857476   | 11 | 1259904 | T | C | 0.4793 | 0.1542  | 0.0187 | 1.74E-16  | 8.2385  | 953873 | IPF |
| rs12417955  | 11 | 1262997 | G | A | 0.5167 | -0.1500 | 0.0187 | 1.12E-15  | -8.0132 | 953873 | IPF |
| rs11041133  | 11 | 1270024 | G | C | 0.4828 | -0.1468 | 0.0201 | 2.93E-13  | -7.2976 | 903869 | IPF |
| rs5744034   | 11 | 1275007 | G | A | 0.1814 | 0.2416  | 0.0241 | 1.36E-23  | 10.0112 | 953873 | IPF |
| rs5744033   | 11 | 1275033 | C | G | 0.1813 | 0.2418  | 0.0241 | 1.33E-23  | 10.0137 | 953873 | IPF |
| rs3168046   | 11 | 1275419 | A | G | 0.4384 | 0.1633  | 0.0189 | 4.53E-18  | 8.6643  | 953873 | IPF |
| rs3829223   | 11 | 1279176 | C | T | 0.5002 | -0.1413 | 0.0187 | 4.41E-14  | -7.5482 | 953873 | IPF |
| rs5744002   | 11 | 1280458 | C | T | 0.4328 | -0.1203 | 0.0189 | 2.04E-10  | -6.3584 | 953873 | IPF |
| rs3793964   | 11 | 1280752 | T | C | 0.3651 | -0.1149 | 0.0195 | 4.15E-09  | -5.8779 | 953873 | IPF |
| rs3793965   | 11 | 1281477 | T | C | 0.4376 | 0.1638  | 0.0188 | 3.63E-18  | 8.6898  | 953873 | IPF |
| rs3793966   | 11 | 1281718 | C | T | 0.5007 | -0.1412 | 0.0187 | 4.68E-14  | -7.5406 | 953873 | IPF |
| rs3750920   | 11 | 1288726 | T | C | 0.4330 | 0.1664  | 0.0203 | 2.56E-16  | 8.1924  | 903869 | IPF |
| rs72846383  | 11 | 1291288 | T | C | 0.1810 | 0.2439  | 0.0242 | 6.49E-24  | 10.0839 | 953873 | IPF |
| rs111521887 | 11 | 1291476 | G | C | 0.1811 | 0.2568  | 0.0256 | 1.06E-23  | 10.0364 | 937232 | IPF |
| rs908225    | 11 | 1291999 | T | C | 0.3032 | -0.1211 | 0.0204 | 3.10E-09  | -5.9257 | 953873 | IPF |
| rs3793969   | 11 | 1297654 | T | A | 0.4807 | 0.1496  | 0.0187 | 1.39E-15  | 7.9863  | 953873 | IPF |
| rs5743931   | 11 | 1297665 | T | C | 0.1801 | 0.2441  | 0.0242 | 6.86E-24  | 10.0789 | 953873 | IPF |
| rs5743894   | 11 | 1303542 | C | T | 0.1802 | 0.2439  | 0.0242 | 6.69E-24  | 10.0814 | 953873 | IPF |
| rs7483044   | 11 | 1318818 | T | C | 0.4915 | -0.1505 | 0.0188 | 1.11E-15  | -8.0144 | 953873 | IPF |
| rs4963063   | 11 | 1320844 | A | G | 0.2085 | 0.2175  | 0.0229 | 1.95E-21  | 9.5078  | 953873 | IPF |
| rs4963065   | 11 | 1323097 | T | C | 0.2081 | 0.2180  | 0.0229 | 1.54E-21  | 9.5322  | 953873 | IPF |
| rs1033198   | 11 | 1325572 | T | G | 0.4914 | -0.1533 | 0.0188 | 3.13E-16  | -8.1687 | 953873 | IPF |
| rs7118481   | 11 | 1327108 | G | C | 0.4916 | -0.1530 | 0.0188 | 3.65E-16  | -8.1491 | 953873 | IPF |
| rs11022612  | 11 | 1330377 | A | G | 0.4692 | 0.1312  | 0.0188 | 2.83E-12  | 6.9863  | 953873 | IPF |
| rs12420789  | 11 | 1334424 | A | G | 0.4684 | 0.1296  | 0.0201 | 1.18E-10  | 6.4423  | 903869 | IPF |
| rs11022939  | 11 | 1336943 | A | G | 0.4682 | 0.1299  | 0.0201 | 1.08E-10  | 6.4561  | 903869 | IPF |
| rs66496921  | 11 | 1337377 | C | G | 0.4181 | -0.1291 | 0.0203 | 2.24E-10  | -6.3444 | 903869 | IPF |
| rs72846402  | 11 | 1338880 | A | G | 0.1688 | 0.2161  | 0.0269 | 9.52E-16  | 8.0331  | 903869 | IPF |
| rs61869689  | 11 | 1340313 | T | C | 0.4662 | 0.1314  | 0.0202 | 7.34E-11  | 6.5134  | 903869 | IPF |
| rs10832241  | 11 | 1342959 | T | C | 0.2262 | -0.1253 | 0.0223 | 2.05E-08  | -5.6075 | 953873 | IPF |
| rs4963074   | 11 | 1343414 | G | A | 0.2332 | -0.1344 | 0.0223 | 1.55E-09  | -6.0386 | 953873 | IPF |
| rs10832253  | 11 | 1344012 | C | T | 0.3055 | -0.1340 | 0.0204 | 4.96E-11  | -6.5723 | 953873 | IPF |

|             |    |         |   |   |        |         |        |          |         |        |     |
|-------------|----|---------|---|---|--------|---------|--------|----------|---------|--------|-----|
| rs57958928  | 11 | 1344647 | C | T | 0.2177 | 0.2225  | 0.0328 | 1.20E-11 | 6.7805  | 497920 | IPF |
| rs111965262 | 11 | 1344870 | T | C | 0.1683 | 0.2274  | 0.0250 | 9.90E-20 | 9.0901  | 953873 | IPF |
| rs11023334  | 11 | 1347676 | A | G | 0.3086 | -0.1300 | 0.0203 | 1.43E-10 | -6.4125 | 953873 | IPF |
| rs11023339  | 11 | 1347813 | A | G | 0.3059 | -0.1309 | 0.0203 | 1.22E-10 | -6.4372 | 953873 | IPF |
| rs7479201   | 11 | 1348125 | A | G | 0.3085 | -0.1297 | 0.0203 | 1.58E-10 | -6.3980 | 953873 | IPF |
| rs11023369  | 11 | 1348621 | G | A | 0.3085 | -0.1293 | 0.0202 | 1.71E-10 | -6.3855 | 953873 | IPF |
| rs11023372  | 11 | 1348675 | C | T | 0.4117 | -0.1470 | 0.0191 | 1.30E-14 | -7.7061 | 953873 | IPF |
| rs10741659  | 11 | 1349090 | T | C | 0.3058 | -0.1308 | 0.0203 | 1.28E-10 | -6.4294 | 953873 | IPF |
| rs72849408  | 11 | 1350417 | G | C | 0.0885 | 0.3441  | 0.0371 | 1.80E-20 | 9.2735  | 903869 | IPF |
| rs10741664  | 11 | 1350839 | T | C | 0.3087 | -0.1288 | 0.0203 | 2.07E-10 | -6.3563 | 953873 | IPF |
| rs12284920  | 11 | 1351581 | G | A | 0.3088 | -0.1282 | 0.0203 | 2.43E-10 | -6.3314 | 953873 | IPF |
| rs10832369  | 11 | 1351624 | G | A | 0.4140 | -0.1474 | 0.0191 | 1.00E-14 | -7.7387 | 953873 | IPF |
| rs12290143  | 11 | 1351704 | C | T | 0.4139 | -0.1463 | 0.0190 | 1.52E-14 | -7.6863 | 953873 | IPF |
| rs12787723  | 11 | 1351765 | C | G | 0.3042 | -0.1200 | 0.0218 | 3.65E-08 | -5.5073 | 903869 | IPF |
| rs7122936   | 11 | 1353226 | C | A | 0.4095 | -0.1456 | 0.0191 | 2.41E-14 | -7.6264 | 953873 | IPF |
| rs72849411  | 11 | 1353902 | T | C | 0.1682 | 0.2235  | 0.0250 | 3.74E-19 | 8.9441  | 953873 | IPF |
| rs10832442  | 11 | 1354301 | C | T | 0.4116 | -0.1442 | 0.0191 | 3.85E-14 | -7.5664 | 953873 | IPF |
| rs11023590  | 11 | 1354730 | C | T | 0.4127 | -0.1465 | 0.0190 | 1.39E-14 | -7.6974 | 953873 | IPF |
| rs72849414  | 11 | 1354861 | T | C | 0.1684 | 0.2246  | 0.0250 | 2.39E-19 | 8.9939  | 953873 | IPF |
| rs6578277   | 11 | 1357870 | G | A | 0.3413 | -0.1258 | 0.0198 | 2.28E-10 | -6.3416 | 953873 | IPF |
| rs6421028   | 11 | 1359059 | G | A | 0.3388 | -0.1241 | 0.0198 | 4.00E-10 | -6.2543 | 953873 | IPF |
| rs11023856  | 11 | 1361377 | T | C | 0.3134 | 0.1192  | 0.0201 | 3.05E-09 | 5.9293  | 953873 | IPF |
| rs908228    | 11 | 1362059 | G | A | 0.3385 | -0.1241 | 0.0198 | 3.76E-10 | -6.2637 | 953873 | IPF |
| rs72849425  | 11 | 1363459 | C | T | 0.1806 | 0.2057  | 0.0242 | 2.02E-17 | 8.4928  | 953873 | IPF |
| rs7396228   | 11 | 1366675 | G | A | 0.3388 | -0.1233 | 0.0198 | 5.12E-10 | -6.2154 | 953873 | IPF |
| rs6578295   | 11 | 1368981 | C | A | 0.3409 | -0.1244 | 0.0198 | 3.58E-10 | -6.2714 | 953873 | IPF |
| rs77167348  | 11 | 1370387 | C | T | 0.1804 | 0.2042  | 0.0243 | 4.56E-17 | 8.3976  | 953873 | IPF |
| rs7104241   | 11 | 1372260 | A | G | 0.2974 | -0.1215 | 0.0219 | 3.04E-08 | -5.5391 | 903869 | IPF |
| rs72849433  | 11 | 1378104 | C | T | 0.0377 | 0.5354  | 0.0617 | 4.23E-18 | 8.6725  | 887228 | IPF |
| rs2334657   | 11 | 1380493 | C | T | 0.4007 | -0.1166 | 0.0205 | 1.22E-08 | -5.6964 | 903869 | IPF |
| rs4247481   | 11 | 1381399 | A | T | 0.4714 | -0.1397 | 0.0202 | 4.38E-12 | -6.9246 | 903869 | IPF |
| rs7944761   | 11 | 1383608 | C | T | 0.4609 | -0.1534 | 0.0204 | 5.44E-14 | -7.5210 | 903869 | IPF |
| rs4255564   | 11 | 1384495 | C | T | 0.2911 | 0.1492  | 0.0208 | 6.90E-13 | 7.1815  | 953873 | IPF |
| rs7395835   | 11 | 1387501 | C | T | 0.3444 | 0.1229  | 0.0199 | 6.24E-10 | 6.1842  | 953873 | IPF |
| rs7394830   | 11 | 1387662 | G | A | 0.3437 | 0.1209  | 0.0198 | 1.06E-09 | 6.1003  | 953873 | IPF |
| rs36064646  | 11 | 1388965 | G | C | 0.3416 | 0.1209  | 0.0199 | 1.28E-09 | 6.0698  | 953873 | IPF |
| rs7932863   | 11 | 1391618 | A | G | 0.3010 | 0.1486  | 0.0221 | 1.82E-11 | 6.7196  | 903869 | IPF |
| rs7395567   | 11 | 1391826 | T | C | 0.2939 | 0.1479  | 0.0251 | 4.06E-09 | 5.8816  | 885936 | IPF |
| rs7394747   | 11 | 1391828 | C | T | 0.3516 | 0.1284  | 0.0198 | 9.10E-11 | 6.4811  | 953873 | IPF |
| rs10833086  | 11 | 1392586 | G | A | 0.3516 | 0.1275  | 0.0199 | 1.45E-10 | 6.4107  | 953873 | IPF |
| rs4881748   | 11 | 1393350 | A | G | 0.2264 | 0.1787  | 0.0244 | 2.39E-13 | 7.3248  | 903869 | IPF |
| rs61867617  | 11 | 1398968 | A | G | 0.2211 | 0.1587  | 0.0228 | 3.31E-12 | 6.9639  | 953873 | IPF |
| rs10833257  | 11 | 1401496 | T | C | 0.4864 | 0.1119  | 0.0188 | 2.83E-09 | 5.9413  | 953873 | IPF |
| rs7103987   | 11 | 1401564 | C | T | 0.4864 | 0.1124  | 0.0188 | 2.37E-09 | 5.9697  | 953873 | IPF |
| rs61867618  | 11 | 1401608 | T | C | 0.2210 | 0.1567  | 0.0228 | 5.77E-12 | 6.8852  | 953873 | IPF |
| rs4963040   | 11 | 1402389 | G | A | 0.2616 | 0.1269  | 0.0215 | 3.81E-09 | 5.8919  | 953873 | IPF |
| rs4963041   | 11 | 1402540 | G | A | 0.4862 | 0.1115  | 0.0188 | 3.14E-09 | 5.9243  | 953873 | IPF |
| rs61867619  | 11 | 1402832 | G | C | 0.2211 | 0.1567  | 0.0228 | 5.79E-12 | 6.8846  | 953873 | IPF |
| rs61867620  | 11 | 1402851 | C | G | 0.2211 | 0.1564  | 0.0228 | 6.34E-12 | 6.8717  | 953873 | IPF |
| rs3934561   | 11 | 1403170 | T | C | 0.4732 | -0.1035 | 0.0189 | 4.09E-08 | -5.4873 | 953873 | IPF |
| rs4341570   | 11 | 1404233 | T | C | 0.2210 | 0.1563  | 0.0228 | 6.64E-12 | 6.8653  | 953873 | IPF |
| rs2334648   | 11 | 1404848 | C | G | 0.2210 | 0.1547  | 0.0228 | 1.07E-11 | 6.7960  | 953873 | IPF |
| rs111286120 | 11 | 1406378 | A | G | 0.2212 | 0.1534  | 0.0227 | 1.52E-11 | 6.7460  | 953873 | IPF |
| rs72843211  | 11 | 1409231 | A | G | 0.2211 | 0.1531  | 0.0227 | 1.64E-11 | 6.7352  | 953873 | IPF |
| rs61867654  | 11 | 1409425 | T | C | 0.2212 | 0.1536  | 0.0227 | 1.35E-11 | 6.7635  | 953873 | IPF |
| rs61867658  | 11 | 1410700 | A | C | 0.2211 | 0.1537  | 0.0227 | 1.34E-11 | 6.7648  | 953873 | IPF |
| rs61867659  | 11 | 1411191 | G | C | 0.2211 | 0.1535  | 0.0227 | 1.45E-11 | 6.7532  | 953873 | IPF |
| rs61868964  | 11 | 1413529 | T | C | 0.2213 | 0.1532  | 0.0227 | 1.55E-11 | 6.7428  | 953873 | IPF |
| rs61868965  | 11 | 1416009 | G | A | 0.2271 | 0.1527  | 0.0225 | 1.10E-11 | 6.7930  | 953873 | IPF |
| rs4963081   | 11 | 1418661 | A | G | 0.2320 | 0.1505  | 0.0223 | 1.41E-11 | 6.7576  | 953873 | IPF |
| rs4963043   | 11 | 1420170 | A | G | 0.2321 | 0.1497  | 0.0223 | 1.78E-11 | 6.7229  | 953873 | IPF |
| rs116913822 | 11 | 1423171 | G | T | 0.0239 | 0.5114  | 0.0596 | 9.39E-18 | 8.5812  | 953873 | IPF |
| rs61868972  | 11 | 1426778 | T | C | 0.2498 | 0.1301  | 0.0234 | 2.90E-08 | 5.5470  | 903869 | IPF |
| rs117764428 | 11 | 1426936 | T | C | 0.2498 | 0.1300  | 0.0234 | 2.98E-08 | 5.5429  | 903869 | IPF |
| rs61869026  | 11 | 1437864 | A | C | 0.2488 | 0.1366  | 0.0236 | 7.21E-09 | 5.7859  | 903869 | IPF |
| rs149574814 | 11 | 1439847 | T | C | 0.0231 | 0.5518  | 0.0670 | 1.74E-16 | 8.2391  | 803014 | IPF |
| rs3902811   | 11 | 1442817 | G | T | 0.2534 | 0.1342  | 0.0235 | 1.08E-08 | 5.7177  | 903869 | IPF |
| rs11602061  | 11 | 1452980 | A | G | 0.2841 | 0.1457  | 0.0207 | 1.73E-12 | 7.0546  | 953873 | IPF |
| rs11604075  | 11 | 1453156 | T | C | 0.2839 | 0.1457  | 0.0207 | 1.89E-12 | 7.0426  | 953873 | IPF |
| rs143559543 | 11 | 1459725 | T | C | 0.0214 | 0.4704  | 0.0699 | 1.73E-11 | 6.7273  | 937232 | IPF |
| rs74760554  | 11 | 1500895 | T | C | 0.0241 | 0.4524  | 0.0576 | 3.83E-15 | 7.8606  | 953873 | IPF |
| rs117654829 | 11 | 1618711 | T | A | 0.0237 | 0.4525  | 0.0592 | 2.22E-14 | 7.6375  | 953873 | IPF |
| rs181332597 | 11 | 1622057 | T | C | 0.0222 | 0.6135  | 0.0990 | 5.72E-10 | 6.1981  | 803261 | IPF |
| rs36105923  | 11 | 1659914 | C | G | 0.0107 | 0.4909  | 0.0852 | 8.43E-09 | 5.7597  | 953873 | IPF |

|             |    |          |   |   |        |         |        |          |         |        |     |
|-------------|----|----------|---|---|--------|---------|--------|----------|---------|--------|-----|
| rs117666717 | 11 | 1758831  | T | C | 0.0146 | 0.4281  | 0.0713 | 1.96E-09 | 6.0009  | 953873 | IPF |
| rs61149329  | 15 | 40389353 | T | C | 0.1862 | 0.1389  | 0.0243 | 1.10E-08 | 5.7145  | 953873 | IPF |
| rs6492945   | 15 | 40397746 | C | T | 0.4785 | 0.1081  | 0.0192 | 1.69E-08 | 5.6411  | 819655 | IPF |
| rs4244578   | 15 | 40410057 | C | T | 0.2522 | 0.1581  | 0.0261 | 1.44E-09 | 6.0512  | 885936 | IPF |
| rs4924464   | 15 | 40410071 | G | C | 0.2500 | 0.1416  | 0.0216 | 5.63E-11 | 6.5531  | 953873 | IPF |
| rs11070271  | 15 | 40417902 | T | G | 0.5420 | 0.1201  | 0.0187 | 1.50E-10 | 6.4054  | 953873 | IPF |
| rs11638033  | 15 | 40417909 | T | A | 0.4089 | 0.1081  | 0.0190 | 1.24E-08 | 5.6941  | 953873 | IPF |
| rs2075624   | 15 | 40418524 | A | G | 0.2513 | 0.1345  | 0.0215 | 4.14E-10 | 6.2488  | 953873 | IPF |
| rs2075625   | 15 | 40419071 | G | C | 0.5420 | 0.1200  | 0.0187 | 1.55E-10 | 6.4003  | 953873 | IPF |
| rs11630850  | 15 | 40419840 | G | C | 0.5420 | 0.1201  | 0.0187 | 1.47E-10 | 6.4085  | 953873 | IPF |
| rs11630878  | 15 | 40419873 | T | C | 0.5420 | 0.1202  | 0.0187 | 1.46E-10 | 6.4097  | 953873 | IPF |
| rs7207      | 15 | 40421107 | C | T | 0.5420 | 0.1203  | 0.0187 | 1.38E-10 | 6.4186  | 953873 | IPF |
| rs1001528   | 15 | 40421575 | G | A | 0.5420 | 0.1206  | 0.0187 | 1.22E-10 | 6.4366  | 953873 | IPF |
| rs12593066  | 15 | 40421820 | T | C | 0.2516 | 0.1339  | 0.0216 | 5.32E-10 | 6.2093  | 953873 | IPF |
| rs11633883  | 15 | 40422202 | G | A | 0.4090 | 0.1077  | 0.0190 | 1.42E-08 | 5.6710  | 953873 | IPF |
| rs35700143  | 15 | 40422954 | T | C | 0.5423 | 0.1184  | 0.0187 | 2.67E-10 | 6.3174  | 953873 | IPF |
| rs12901440  | 15 | 40423176 | C | G | 0.5424 | 0.1183  | 0.0187 | 2.76E-10 | 6.3115  | 953873 | IPF |
| rs12902310  | 15 | 40423228 | C | T | 0.4096 | 0.1074  | 0.0190 | 1.56E-08 | 5.6550  | 953873 | IPF |
| rs2304645   | 15 | 40424054 | C | G | 0.5415 | 0.1172  | 0.0188 | 4.12E-10 | 6.2495  | 953873 | IPF |
| rs11637756  | 15 | 40424455 | T | A | 0.5427 | 0.1197  | 0.0188 | 1.72E-10 | 6.3845  | 953873 | IPF |
| rs2034650   | 15 | 40425103 | A | G | 0.5428 | 0.1194  | 0.0187 | 1.85E-10 | 6.3737  | 953873 | IPF |
| rs8040128   | 15 | 40425194 | A | G | 0.5427 | 0.1197  | 0.0187 | 1.73E-10 | 6.3831  | 953873 | IPF |
| rs8040086   | 15 | 40425476 | G | A | 0.5274 | 0.1245  | 0.0205 | 1.19E-09 | 6.0818  | 755859 | IPF |
| rs10851395  | 15 | 40426335 | C | T | 0.5500 | 0.1238  | 0.0188 | 4.29E-11 | 6.5935  | 953873 | IPF |
| rs59424629  | 15 | 40428343 | T | G | 0.5499 | 0.1241  | 0.0188 | 3.92E-11 | 6.6069  | 953873 | IPF |
| rs61661087  | 15 | 40428344 | C | T | 0.5521 | 0.1309  | 0.0229 | 1.03E-08 | 5.7250  | 885936 | IPF |
| rs17733719  | 15 | 40428587 | A | G | 0.4173 | 0.1130  | 0.0190 | 2.47E-09 | 5.9635  | 953873 | IPF |
| rs17672016  | 15 | 40428705 | A | G | 0.2599 | 0.1389  | 0.0214 | 8.24E-11 | 6.4962  | 953873 | IPF |
| rs8033249   | 15 | 40429740 | G | A | 0.4179 | 0.1119  | 0.0189 | 3.44E-09 | 5.9090  | 953873 | IPF |
| rs1979189   | 15 | 40431252 | A | G | 0.1905 | 0.1332  | 0.0241 | 3.45E-08 | 5.5170  | 953873 | IPF |
| rs12368     | 15 | 40435837 | T | C | 0.2654 | 0.1288  | 0.0229 | 1.96E-08 | 5.6156  | 903869 | IPF |
| rs1453184   | 15 | 40437201 | A | G | 0.4416 | -0.1153 | 0.0203 | 1.34E-08 | -5.6812 | 903869 | IPF |
| rs56328224  | 17 | 45495053 | T | C | 0.1880 | -0.1385 | 0.0246 | 1.77E-08 | -5.6336 | 819655 | IPF |
| rs62065453  | 17 | 45496053 | T | C | 0.1874 | -0.1391 | 0.0246 | 1.64E-08 | -5.6463 | 819655 | IPF |
| rs369209138 | 17 | 45603484 | C | G | 0.1832 | -0.1926 | 0.0352 | 4.64E-08 | -5.4644 | 669997 | IPF |
| rs385383    | 17 | 45626665 | A | C | 0.1833 | -0.1699 | 0.0311 | 4.79E-08 | -5.4591 | 686638 | IPF |
| rs413917    | 17 | 45645823 | A | G | 0.1873 | -0.1424 | 0.0245 | 6.06E-09 | -5.8151 | 819655 | IPF |
| rs17688944  | 17 | 45702053 | A | T | 0.1775 | -0.1315 | 0.0241 | 4.90E-08 | -5.4548 | 953873 | IPF |
| rs968028    | 17 | 45703739 | G | A | 0.1774 | -0.1323 | 0.0241 | 4.13E-08 | -5.4852 | 953873 | IPF |
| rs62056909  | 17 | 45706437 | G | A | 0.1780 | -0.1332 | 0.0242 | 3.58E-08 | -5.5107 | 953873 | IPF |
| rs62056925  | 17 | 45711283 | C | T | 0.1774 | -0.1318 | 0.0241 | 4.65E-08 | -5.4641 | 953873 | IPF |
| rs62056926  | 17 | 45711300 | G | C | 0.1774 | -0.1317 | 0.0241 | 4.76E-08 | -5.4603 | 953873 | IPF |
| rs62056931  | 17 | 45712332 | A | G | 0.1762 | -0.1350 | 0.0242 | 2.40E-08 | -5.5806 | 953873 | IPF |
| rs62056932  | 17 | 45712605 | C | G | 0.1766 | -0.1324 | 0.0242 | 4.37E-08 | -5.4752 | 953873 | IPF |
| rs62056933  | 17 | 45712612 | A | G | 0.1767 | -0.1326 | 0.0242 | 4.15E-08 | -5.4842 | 953873 | IPF |
| rs62056934  | 17 | 45712639 | G | A | 0.1769 | -0.1324 | 0.0242 | 4.20E-08 | -5.4822 | 953873 | IPF |
| rs79322350  | 17 | 45713035 | G | A | 0.1774 | -0.1317 | 0.0241 | 4.75E-08 | -5.4605 | 953873 | IPF |
| rs77387379  | 17 | 45714063 | A | G | 0.1774 | -0.1318 | 0.0241 | 4.57E-08 | -5.4674 | 953873 | IPF |
| rs75990322  | 17 | 45714102 | C | T | 0.1774 | -0.1316 | 0.0241 | 4.86E-08 | -5.4564 | 953873 | IPF |
| rs56220242  | 17 | 45714960 | T | C | 0.1774 | -0.1318 | 0.0241 | 4.53E-08 | -5.4690 | 953873 | IPF |
| rs56160448  | 17 | 45714992 | G | A | 0.1774 | -0.1318 | 0.0241 | 4.57E-08 | -5.4671 | 953873 | IPF |
| rs111415173 | 17 | 45718207 | T | C | 0.1774 | -0.1315 | 0.0241 | 4.91E-08 | -5.4545 | 953873 | IPF |
| rs56167344  | 17 | 45719721 | T | A | 0.1775 | -0.1316 | 0.0241 | 4.82E-08 | -5.4581 | 953873 | IPF |
| rs55838058  | 17 | 45721536 | T | C | 0.1764 | -0.1326 | 0.0242 | 4.15E-08 | -5.4842 | 953873 | IPF |
| rs56062621  | 17 | 45721537 | G | A | 0.1764 | -0.1326 | 0.0242 | 4.11E-08 | -5.4860 | 953873 | IPF |
| rs55896111  | 17 | 45721682 | A | G | 0.1765 | -0.1330 | 0.0242 | 3.65E-08 | -5.5067 | 953873 | IPF |
| rs55787734  | 17 | 45721686 | G | A | 0.1767 | -0.1330 | 0.0241 | 3.59E-08 | -5.5101 | 953873 | IPF |
| rs62054393  | 17 | 45731898 | G | T | 0.1774 | -0.1315 | 0.0241 | 4.84E-08 | -5.4568 | 953873 | IPF |
| rs77807457  | 17 | 45733485 | C | G | 0.1760 | -0.1329 | 0.0242 | 3.99E-08 | -5.4914 | 953873 | IPF |
| rs77804065  | 17 | 45733530 | T | C | 0.1845 | -0.1341 | 0.0239 | 1.98E-08 | -5.6137 | 953873 | IPF |
| rs62054427  | 17 | 45743696 | G | A | 0.1773 | -0.1314 | 0.0241 | 4.89E-08 | -5.4553 | 953873 | IPF |
| rs17426106  | 17 | 45751569 | C | G | 0.1775 | -0.1315 | 0.0241 | 4.78E-08 | -5.4595 | 953873 | IPF |
| rs35631660  | 17 | 45754971 | G | A | 0.1772 | -0.1319 | 0.0241 | 4.43E-08 | -5.4725 | 953873 | IPF |
| rs17426195  | 17 | 45755001 | A | G | 0.1772 | -0.1316 | 0.0241 | 4.85E-08 | -5.4569 | 953873 | IPF |
| rs11079718  | 17 | 45762585 | T | A | 0.1772 | -0.1339 | 0.0241 | 2.83E-08 | -5.5515 | 953873 | IPF |
| rs11079719  | 17 | 45762640 | G | T | 0.1767 | -0.1339 | 0.0241 | 2.87E-08 | -5.5489 | 953873 | IPF |
| rs62055890  | 17 | 45763315 | T | C | 0.1775 | -0.1318 | 0.0241 | 4.61E-08 | -5.4657 | 953873 | IPF |
| rs11079723  | 17 | 45764363 | C | T | 0.1775 | -0.1314 | 0.0241 | 4.98E-08 | -5.4522 | 953873 | IPF |
| rs56082319  | 17 | 45767432 | A | G | 0.1772 | -0.1314 | 0.0241 | 4.96E-08 | -5.4527 | 953873 | IPF |
| rs62055933  | 17 | 45771095 | A | G | 0.1772 | -0.1317 | 0.0241 | 4.68E-08 | -5.4628 | 953873 | IPF |
| rs62055935  | 17 | 45771384 | C | T | 0.1765 | -0.1340 | 0.0242 | 3.00E-08 | -5.5418 | 953873 | IPF |
| rs62055936  | 17 | 45771395 | A | T | 0.1764 | -0.1340 | 0.0242 | 3.04E-08 | -5.5393 | 953873 | IPF |
| rs62055937  | 17 | 45771602 | T | G | 0.1762 | -0.1322 | 0.0242 | 4.79E-08 | -5.4591 | 953873 | IPF |
| rs76294809  | 17 | 45771961 | A | G | 0.1766 | -0.1411 | 0.0259 | 4.98E-08 | -5.4522 | 937232 | IPF |

|             |    |          |   |   |        |         |        |          |         |        |     |
|-------------|----|----------|---|---|--------|---------|--------|----------|---------|--------|-----|
| rs60814418  | 17 | 45773279 | T | C | 0.1786 | -0.1308 | 0.0240 | 4.95E-08 | -5.4533 | 953873 | IPF |
| rs62055946  | 17 | 45774605 | A | C | 0.1774 | -0.1314 | 0.0241 | 4.93E-08 | -5.4536 | 953873 | IPF |
| rs56043078  | 17 | 45775869 | G | T | 0.1773 | -0.1316 | 0.0241 | 4.79E-08 | -5.4589 | 953873 | IPF |
| rs17689471  | 17 | 45815607 | C | T | 0.1777 | -0.1318 | 0.0241 | 4.47E-08 | -5.4711 | 953873 | IPF |
| rs28364025  | 17 | 45816736 | C | T | 0.1775 | -0.1315 | 0.0241 | 4.78E-08 | -5.4592 | 953873 | IPF |
| rs55779147  | 17 | 45817144 | A | G | 0.1774 | -0.1322 | 0.0241 | 4.08E-08 | -5.4874 | 953873 | IPF |
| rs4277389   | 17 | 45818287 | G | A | 0.1773 | -0.1313 | 0.0241 | 5.00E-08 | -5.4512 | 953873 | IPF |
| rs4309444   | 17 | 45818431 | C | T | 0.1774 | -0.1314 | 0.0241 | 4.86E-08 | -5.4562 | 953873 | IPF |
| rs78074121  | 17 | 45819324 | C | T | 0.1775 | -0.1314 | 0.0241 | 4.91E-08 | -5.4547 | 953873 | IPF |
| rs62057112  | 17 | 45819836 | A | T | 0.1774 | -0.1318 | 0.0241 | 4.44E-08 | -5.4723 | 953873 | IPF |
| rs78587102  | 17 | 45819880 | G | A | 0.1774 | -0.1323 | 0.0241 | 3.95E-08 | -5.4932 | 953873 | IPF |
| rs62057113  | 17 | 45820083 | T | A | 0.1774 | -0.1316 | 0.0241 | 4.62E-08 | -5.4654 | 953873 | IPF |
| rs78506181  | 17 | 45820114 | G | A | 0.1774 | -0.1316 | 0.0241 | 4.66E-08 | -5.4640 | 953873 | IPF |
| rs79600142  | 17 | 45820356 | C | T | 0.1774 | -0.1315 | 0.0241 | 4.82E-08 | -5.4578 | 953873 | IPF |
| rs111739681 | 17 | 45821093 | T | C | 0.1774 | -0.1313 | 0.0241 | 4.96E-08 | -5.4525 | 953873 | IPF |
| rs4335809   | 17 | 45824850 | T | C | 0.1775 | -0.1313 | 0.0241 | 4.99E-08 | -5.4516 | 953873 | IPF |
| rs4341787   | 17 | 45825139 | T | C | 0.1774 | -0.1327 | 0.0241 | 3.59E-08 | -5.5097 | 953873 | IPF |
| rs4523962   | 17 | 45825156 | A | G | 0.1774 | -0.1322 | 0.0241 | 4.00E-08 | -5.4910 | 953873 | IPF |
| rs3885074   | 17 | 45825372 | A | C | 0.1774 | -0.1317 | 0.0241 | 4.55E-08 | -5.4679 | 953873 | IPF |
| rs62057147  | 17 | 45825932 | A | G | 0.1777 | -0.1313 | 0.0241 | 4.93E-08 | -5.4541 | 953873 | IPF |
| rs17763050  | 17 | 45825970 | A | G | 0.1768 | -0.1334 | 0.0242 | 3.39E-08 | -5.5203 | 953873 | IPF |
| rs62057153  | 17 | 45827162 | C | T | 0.1775 | -0.1318 | 0.0241 | 4.42E-08 | -5.4732 | 953873 | IPF |
| rs62057154  | 17 | 45827244 | T | C | 0.1775 | -0.1313 | 0.0241 | 4.96E-08 | -5.4526 | 953873 | IPF |
| rs62057156  | 17 | 45827582 | C | G | 0.1775 | -0.1313 | 0.0241 | 5.00E-08 | -5.4514 | 953873 | IPF |
| rs78872653  | 17 | 45827768 | A | G | 0.1775 | -0.1313 | 0.0241 | 4.97E-08 | -5.4526 | 953873 | IPF |
| rs17763086  | 17 | 45828115 | G | T | 0.1775 | -0.1314 | 0.0241 | 4.89E-08 | -5.4551 | 953873 | IPF |
| rs17425752  | 17 | 45829360 | C | A | 0.1773 | -0.1316 | 0.0241 | 4.74E-08 | -5.4604 | 953873 | IPF |
| rs62057158  | 17 | 45829777 | A | G | 0.1775 | -0.1314 | 0.0241 | 4.90E-08 | -5.4549 | 953873 | IPF |
| rs16940671  | 17 | 45830785 | T | C | 0.1770 | -0.1316 | 0.0241 | 4.82E-08 | -5.4579 | 953873 | IPF |
| rs16940672  | 17 | 45830786 | T | C | 0.1770 | -0.1317 | 0.0241 | 4.72E-08 | -5.4613 | 953873 | IPF |
| rs55763795  | 17 | 45831407 | C | G | 0.1775 | -0.1313 | 0.0241 | 5.00E-08 | -5.4516 | 953873 | IPF |
| rs16940674  | 17 | 45833141 | T | C | 0.1774 | -0.1318 | 0.0241 | 4.52E-08 | -5.4693 | 953873 | IPF |
| rs16940676  | 17 | 45833670 | A | G | 0.1774 | -0.1313 | 0.0241 | 4.95E-08 | -5.4530 | 953873 | IPF |
| rs1876828   | 17 | 45834159 | T | C | 0.1775 | -0.1314 | 0.0241 | 4.91E-08 | -5.4544 | 953873 | IPF |
| rs878886    | 17 | 45835124 | G | C | 0.1775 | -0.1313 | 0.0241 | 4.96E-08 | -5.4527 | 953873 | IPF |
| rs56127111  | 17 | 45835949 | T | C | 0.1774 | -0.1313 | 0.0241 | 4.95E-08 | -5.4530 | 953873 | IPF |
| rs75104593  | 17 | 45836191 | G | T | 0.1758 | -0.1327 | 0.0242 | 4.28E-08 | -5.4786 | 953873 | IPF |
| rs7498289   | 17 | 45836192 | G | T | 0.1758 | -0.1328 | 0.0242 | 4.23E-08 | -5.4807 | 953873 | IPF |
| rs10445362  | 17 | 45837188 | A | C | 0.1774 | -0.1314 | 0.0241 | 4.86E-08 | -5.4564 | 953873 | IPF |
| rs10445363  | 17 | 45837192 | A | G | 0.1773 | -0.1316 | 0.0241 | 4.67E-08 | -5.4632 | 953873 | IPF |
| rs62054802  | 17 | 45837232 | C | G | 0.1774 | -0.1314 | 0.0241 | 4.84E-08 | -5.4572 | 953873 | IPF |
| rs62054804  | 17 | 45837443 | T | C | 0.1776 | -0.1314 | 0.0241 | 4.75E-08 | -5.4606 | 953873 | IPF |
| rs62054806  | 17 | 45837946 | T | C | 0.1774 | -0.1317 | 0.0241 | 4.50E-08 | -5.4700 | 953873 | IPF |
| rs10445333  | 17 | 45839143 | G | A | 0.1775 | -0.1313 | 0.0241 | 4.99E-08 | -5.4519 | 953873 | IPF |
| rs17690176  | 17 | 45839407 | C | A | 0.1775 | -0.1316 | 0.0241 | 4.66E-08 | -5.4639 | 953873 | IPF |
| rs78328427  | 17 | 45839566 | A | G | 0.1776 | -0.1315 | 0.0241 | 4.74E-08 | -5.4609 | 953873 | IPF |
| rs77692262  | 17 | 45839720 | G | A | 0.1775 | -0.1313 | 0.0241 | 4.93E-08 | -5.4538 | 953873 | IPF |
| rs112583797 | 17 | 45841052 | G | A | 0.1775 | -0.1318 | 0.0241 | 4.36E-08 | -5.4756 | 953873 | IPF |
| rs74922289  | 17 | 45841158 | G | A | 0.1775 | -0.1313 | 0.0241 | 4.90E-08 | -5.4551 | 953873 | IPF |
| rs56971664  | 17 | 45841247 | C | T | 0.1775 | -0.1314 | 0.0241 | 4.79E-08 | -5.4588 | 953873 | IPF |
| rs62054811  | 17 | 45841285 | G | C | 0.1774 | -0.1314 | 0.0241 | 4.79E-08 | -5.4589 | 953873 | IPF |
| rs2106785   | 17 | 45841739 | T | C | 0.1852 | -0.1450 | 0.0246 | 3.71E-09 | -5.8964 | 819655 | IPF |
| rs56150806  | 17 | 45841935 | C | T | 0.1775 | -0.1315 | 0.0241 | 4.69E-08 | -5.4627 | 953873 | IPF |
| rs17690314  | 17 | 45842518 | G | T | 0.1775 | -0.1314 | 0.0241 | 4.87E-08 | -5.4563 | 953873 | IPF |
| rs56233672  | 17 | 45842934 | C | T | 0.1775 | -0.1313 | 0.0241 | 4.96E-08 | -5.4528 | 953873 | IPF |
| rs17763596  | 17 | 45843844 | T | G | 0.1775 | -0.1313 | 0.0241 | 4.98E-08 | -5.4519 | 953873 | IPF |
| rs62621252  | 17 | 45845576 | C | T | 0.1778 | -0.1321 | 0.0241 | 4.06E-08 | -5.4883 | 953873 | IPF |
| rs62054815  | 17 | 45845900 | A | G | 0.1774 | -0.1315 | 0.0241 | 4.70E-08 | -5.4624 | 953873 | IPF |
| rs12185268  | 17 | 45846317 | G | A | 0.1775 | -0.1313 | 0.0241 | 4.95E-08 | -5.4531 | 953873 | IPF |
| rs12185235  | 17 | 45846337 | T | C | 0.1774 | -0.1314 | 0.0241 | 4.88E-08 | -5.4558 | 953873 | IPF |
| rs17690661  | 17 | 45847155 | A | G | 0.1775 | -0.1314 | 0.0241 | 4.85E-08 | -5.4567 | 953873 | IPF |
| rs62054822  | 17 | 45850342 | G | A | 0.1779 | -0.1317 | 0.0240 | 4.20E-08 | -5.4823 | 953873 | IPF |
| rs62054824  | 17 | 45852626 | T | C | 0.1775 | -0.1318 | 0.0241 | 4.43E-08 | -5.4725 | 953873 | IPF |
| rs62054825  | 17 | 45852667 | A | G | 0.1775 | -0.1313 | 0.0241 | 4.88E-08 | -5.4559 | 953873 | IPF |
| rs79589869  | 17 | 45852872 | A | C | 0.1774 | -0.1317 | 0.0241 | 4.47E-08 | -5.4712 | 953873 | IPF |
| rs2316769   | 17 | 45853432 | G | A | 0.1775 | -0.1320 | 0.0241 | 4.20E-08 | -5.4821 | 953873 | IPF |
| rs2873268   | 17 | 45853589 | A | G | 0.1775 | -0.1322 | 0.0241 | 3.98E-08 | -5.4919 | 953873 | IPF |
| rs4340365   | 17 | 45853614 | T | C | 0.1774 | -0.1322 | 0.0241 | 4.03E-08 | -5.4898 | 953873 | IPF |
| rs2873269   | 17 | 45853756 | T | C | 0.1775 | -0.1321 | 0.0241 | 4.05E-08 | -5.4885 | 953873 | IPF |
| rs56026128  | 17 | 45853878 | C | G | 0.1774 | -0.1324 | 0.0241 | 3.80E-08 | -5.5000 | 953873 | IPF |
| rs56329743  | 17 | 45853879 | A | G | 0.1775 | -0.1323 | 0.0241 | 3.95E-08 | -5.4930 | 953873 | IPF |
| rs56288604  | 17 | 45854014 | G | A | 0.1776 | -0.1319 | 0.0241 | 4.29E-08 | -5.4785 | 953873 | IPF |
| rs17690987  | 17 | 45854260 | C | T | 0.1775 | -0.1319 | 0.0241 | 4.30E-08 | -5.4783 | 953873 | IPF |
| rs56146262  | 17 | 45854541 | A | C | 0.1775 | -0.1317 | 0.0241 | 4.48E-08 | -5.4705 | 953873 | IPF |



|             |    |          |   |   |        |         |        |          |         |        |     |
|-------------|----|----------|---|---|--------|---------|--------|----------|---------|--------|-----|
| rs55942528  | 17 | 45854662 | G | A | 0.1776 | -0.1321 | 0.0241 | 4.09E-08 | -5.4869 | 953873 | IPF |
| rs56254732  | 17 | 45854683 | T | C | 0.1775 | -0.1319 | 0.0241 | 4.27E-08 | -5.4792 | 953873 | IPF |
| rs113856644 | 17 | 45854911 | A | G | 0.1775 | -0.1321 | 0.0241 | 4.09E-08 | -5.4868 | 953873 | IPF |
| rs62054832  | 17 | 45856213 | A | C | 0.1780 | -0.1327 | 0.0241 | 3.61E-08 | -5.5089 | 953873 | IPF |
| rs62054833  | 17 | 45856307 | C | T | 0.1776 | -0.1339 | 0.0241 | 2.68E-08 | -5.5611 | 953873 | IPF |
| rs76563578  | 17 | 45856513 | G | C | 0.1776 | -0.1339 | 0.0241 | 2.71E-08 | -5.5591 | 953873 | IPF |
| rs111962225 | 17 | 45856650 | C | G | 0.1769 | -0.1445 | 0.0259 | 2.29E-08 | -5.5884 | 937232 | IPF |
| rs62054834  | 17 | 45856948 | C | T | 0.1776 | -0.1341 | 0.0241 | 2.59E-08 | -5.5668 | 953873 | IPF |
| rs62054835  | 17 | 45857306 | C | A | 0.1776 | -0.1341 | 0.0241 | 2.58E-08 | -5.5679 | 953873 | IPF |
| rs10445369  | 17 | 45857410 | G | A | 0.1775 | -0.1349 | 0.0241 | 2.16E-08 | -5.5990 | 953873 | IPF |
| rs10445334  | 17 | 45857460 | G | T | 0.1776 | -0.1341 | 0.0241 | 2.56E-08 | -5.5691 | 953873 | IPF |
| rs10445335  | 17 | 45857530 | A | T | 0.1776 | -0.1344 | 0.0241 | 2.41E-08 | -5.5799 | 953873 | IPF |
| rs10445336  | 17 | 45857582 | G | A | 0.1776 | -0.1339 | 0.0241 | 2.74E-08 | -5.5577 | 953873 | IPF |
| rs10445370  | 17 | 45857752 | A | G | 0.1776 | -0.1340 | 0.0241 | 2.64E-08 | -5.5639 | 953873 | IPF |
| rs55996632  | 17 | 45858522 | T | C | 0.1777 | -0.1332 | 0.0241 | 3.21E-08 | -5.5299 | 953873 | IPF |
| rs55886302  | 17 | 45858645 | G | A | 0.1776 | -0.1341 | 0.0241 | 2.56E-08 | -5.5691 | 953873 | IPF |
| rs56136075  | 17 | 45858932 | A | C | 0.1776 | -0.1341 | 0.0241 | 2.56E-08 | -5.5691 | 953873 | IPF |
| rs62054841  | 17 | 45859738 | A | G | 0.1776 | -0.1343 | 0.0241 | 2.49E-08 | -5.5742 | 953873 | IPF |
| rs62054842  | 17 | 45859796 | T | C | 0.1776 | -0.1348 | 0.0241 | 2.18E-08 | -5.5970 | 953873 | IPF |
| rs62054843  | 17 | 45859818 | C | T | 0.1776 | -0.1347 | 0.0241 | 2.20E-08 | -5.5957 | 953873 | IPF |
| rs62054844  | 17 | 45859967 | G | T | 0.1776 | -0.1341 | 0.0241 | 2.56E-08 | -5.5691 | 953873 | IPF |
| rs76627340  | 17 | 45860094 | A | G | 0.1776 | -0.1341 | 0.0241 | 2.56E-08 | -5.5687 | 953873 | IPF |
| rs75945623  | 17 | 45860139 | T | C | 0.1777 | -0.1338 | 0.0241 | 2.79E-08 | -5.5542 | 953873 | IPF |
| rs79889833  | 17 | 45860267 | G | A | 0.1776 | -0.1336 | 0.0241 | 2.87E-08 | -5.5492 | 953873 | IPF |
| rs77625338  | 17 | 45860305 | T | C | 0.1776 | -0.1336 | 0.0241 | 2.87E-08 | -5.5492 | 953873 | IPF |
| rs77489223  | 17 | 45860370 | T | C | 0.1776 | -0.1336 | 0.0241 | 2.87E-08 | -5.5496 | 953873 | IPF |
| rs55888391  | 17 | 45860741 | G | A | 0.1776 | -0.1336 | 0.0241 | 2.88E-08 | -5.5488 | 953873 | IPF |
| rs76329216  | 17 | 45861133 | A | G | 0.1776 | -0.1337 | 0.0241 | 2.85E-08 | -5.5500 | 953873 | IPF |
| rs62054846  | 17 | 45861268 | G | A | 0.1776 | -0.1336 | 0.0241 | 2.89E-08 | -5.5479 | 953873 | IPF |
| rs55646970  | 17 | 45861430 | G | A | 0.1776 | -0.1336 | 0.0241 | 2.88E-08 | -5.5484 | 953873 | IPF |
| rs55673092  | 17 | 45861516 | A | G | 0.1776 | -0.1337 | 0.0241 | 2.86E-08 | -5.5500 | 953873 | IPF |
| rs56347602  | 17 | 45861889 | C | T | 0.1776 | -0.1334 | 0.0241 | 3.04E-08 | -5.5392 | 953873 | IPF |
| rs56249080  | 17 | 45862066 | T | G | 0.1872 | -0.1459 | 0.0245 | 2.48E-09 | -5.9630 | 819655 | IPF |
| rs56227067  | 17 | 45862243 | T | A | 0.1775 | -0.1339 | 0.0241 | 2.70E-08 | -5.5600 | 953873 | IPF |
| rs55719714  | 17 | 45862272 | A | G | 0.1775 | -0.1340 | 0.0241 | 2.67E-08 | -5.5621 | 953873 | IPF |
| rs56299858  | 17 | 45862293 | A | G | 0.1775 | -0.1339 | 0.0241 | 2.74E-08 | -5.5573 | 953873 | IPF |
| rs62054857  | 17 | 45862570 | A | G | 0.1776 | -0.1335 | 0.0241 | 2.95E-08 | -5.5446 | 953873 | IPF |
| rs75210307  | 17 | 45862646 | C | T | 0.1753 | -0.1337 | 0.0242 | 3.18E-08 | -5.5314 | 953873 | IPF |
| rs74944644  | 17 | 45862654 | C | T | 0.1753 | -0.1339 | 0.0242 | 3.09E-08 | -5.5364 | 953873 | IPF |
| rs79412431  | 17 | 45862655 | A | G | 0.1753 | -0.1336 | 0.0242 | 3.23E-08 | -5.5284 | 953873 | IPF |
| rs62054858  | 17 | 45862822 | C | T | 0.1776 | -0.1335 | 0.0241 | 2.98E-08 | -5.5428 | 953873 | IPF |
| rs79406732  | 17 | 45863131 | T | C | 0.1774 | -0.1326 | 0.0241 | 3.74E-08 | -5.5029 | 953873 | IPF |
| rs62054859  | 17 | 45863319 | A | G | 0.1776 | -0.1329 | 0.0241 | 3.39E-08 | -5.5203 | 953873 | IPF |
| rs62055460  | 17 | 45863459 | C | G | 0.1776 | -0.1335 | 0.0241 | 2.97E-08 | -5.5434 | 953873 | IPF |
| rs62055461  | 17 | 45863984 | T | C | 0.1776 | -0.1335 | 0.0241 | 2.97E-08 | -5.5434 | 953873 | IPF |
| rs62055462  | 17 | 45864110 | C | A | 0.1776 | -0.1335 | 0.0241 | 2.96E-08 | -5.5438 | 953873 | IPF |
| rs62055463  | 17 | 45864125 | G | A | 0.1776 | -0.1335 | 0.0241 | 2.98E-08 | -5.5425 | 953873 | IPF |
| rs77652965  | 17 | 45864242 | G | C | 0.1776 | -0.1335 | 0.0241 | 2.94E-08 | -5.5450 | 953873 | IPF |
| rs75690239  | 17 | 45864344 | T | C | 0.1776 | -0.1336 | 0.0241 | 2.93E-08 | -5.5459 | 953873 | IPF |
| rs62055464  | 17 | 45864492 | G | T | 0.1776 | -0.1335 | 0.0241 | 2.96E-08 | -5.5438 | 953873 | IPF |
| rs62055465  | 17 | 45864680 | A | T | 0.1776 | -0.1335 | 0.0241 | 2.96E-08 | -5.5438 | 953873 | IPF |
| rs62055466  | 17 | 45865290 | A | G | 0.1776 | -0.1335 | 0.0241 | 2.96E-08 | -5.5438 | 953873 | IPF |
| rs62055467  | 17 | 45865454 | C | T | 0.1776 | -0.1336 | 0.0241 | 2.92E-08 | -5.5465 | 953873 | IPF |
| rs62055468  | 17 | 45865634 | C | A | 0.1776 | -0.1332 | 0.0241 | 3.16E-08 | -5.5324 | 953873 | IPF |
| rs62055469  | 17 | 45866289 | C | A | 0.1776 | -0.1333 | 0.0241 | 3.09E-08 | -5.5361 | 953873 | IPF |
| rs62055470  | 17 | 45866291 | G | A | 0.1776 | -0.1324 | 0.0241 | 3.85E-08 | -5.4977 | 953873 | IPF |
| rs62055471  | 17 | 45866389 | C | T | 0.1776 | -0.1324 | 0.0241 | 3.81E-08 | -5.4998 | 953873 | IPF |
| rs56327054  | 17 | 45866591 | C | G | 0.1776 | -0.1327 | 0.0241 | 3.58E-08 | -5.5106 | 953873 | IPF |
| rs56036719  | 17 | 45866608 | T | C | 0.1776 | -0.1326 | 0.0241 | 3.64E-08 | -5.5077 | 953873 | IPF |
| rs55781174  | 17 | 45866792 | T | C | 0.1776 | -0.1326 | 0.0241 | 3.66E-08 | -5.5069 | 953873 | IPF |
| rs12150223  | 17 | 45866838 | C | T | 0.1776 | -0.1326 | 0.0241 | 3.69E-08 | -5.5052 | 953873 | IPF |
| rs12150516  | 17 | 45867153 | T | C | 0.1776 | -0.1326 | 0.0241 | 3.66E-08 | -5.5066 | 953873 | IPF |
| rs62055475  | 17 | 45867740 | C | T | 0.1776 | -0.1326 | 0.0241 | 3.63E-08 | -5.5081 | 953873 | IPF |
| rs78637438  | 17 | 45868489 | A | G | 0.1777 | -0.1327 | 0.0241 | 3.58E-08 | -5.5100 | 953873 | IPF |
| rs23167771  | 17 | 45868565 | C | T | 0.1776 | -0.1326 | 0.0241 | 3.69E-08 | -5.5054 | 953873 | IPF |
| rs62055478  | 17 | 45868572 | T | C | 0.1776 | -0.1326 | 0.0241 | 3.67E-08 | -5.5058 | 953873 | IPF |
| rs1078830   | 17 | 45868746 | C | T | 0.1776 | -0.1326 | 0.0241 | 3.66E-08 | -5.5065 | 953873 | IPF |
| rs753235    | 17 | 45868857 | A | G | 0.1785 | -0.1314 | 0.0240 | 4.51E-08 | -5.4699 | 953873 | IPF |
| rs23167772  | 17 | 45869057 | C | A | 0.1774 | -0.1328 | 0.0241 | 3.62E-08 | -5.5080 | 953873 | IPF |
| rs23167773  | 17 | 45869170 | T | C | 0.1777 | -0.1321 | 0.0241 | 4.13E-08 | -5.4850 | 953873 | IPF |
| rs23167774  | 17 | 45869276 | C | T | 0.1776 | -0.1332 | 0.0241 | 3.20E-08 | -5.5303 | 953873 | IPF |
| rs739643    | 17 | 45869341 | C | T | 0.1872 | -0.1455 | 0.0245 | 2.74E-09 | -5.9465 | 819655 | IPF |
| rs739642    | 17 | 45869472 | A | C | 0.1776 | -0.1324 | 0.0241 | 3.85E-08 | -5.4973 | 953873 | IPF |
| rs757055    | 17 | 45869509 | T | C | 0.1776 | -0.1328 | 0.0241 | 3.55E-08 | -5.5117 | 953873 | IPF |

|             |    |          |   |   |        |         |        |          |         |        |     |
|-------------|----|----------|---|---|--------|---------|--------|----------|---------|--------|-----|
| rs56398500  | 17 | 45870122 | G | A | 0.1776 | -0.1327 | 0.0241 | 3.57E-08 | -5.5111 | 953873 | IPF |
| rs56289364  | 17 | 45870562 | G | A | 0.1776 | -0.1328 | 0.0241 | 3.54E-08 | -5.5124 | 953873 | IPF |
| rs62055483  | 17 | 45870674 | T | C | 0.1776 | -0.1327 | 0.0241 | 3.56E-08 | -5.5113 | 953873 | IPF |
| rs78238042  | 17 | 45870793 | A | G | 0.1776 | -0.1328 | 0.0241 | 3.54E-08 | -5.5124 | 953873 | IPF |
| rs55673340  | 17 | 45871367 | T | C | 0.1776 | -0.1327 | 0.0241 | 3.61E-08 | -5.5092 | 953873 | IPF |
| rs77092481  | 17 | 45871642 | T | C | 0.1775 | -0.1331 | 0.0241 | 3.29E-08 | -5.5252 | 953873 | IPF |
| rs62055486  | 17 | 45871726 | G | T | 0.1776 | -0.1333 | 0.0241 | 3.16E-08 | -5.5325 | 953873 | IPF |
| rs34739559  | 17 | 45871976 | A | G | 0.1770 | -0.1327 | 0.0242 | 4.10E-08 | -5.4865 | 953873 | IPF |
| rs34097347  | 17 | 45872082 | A | C | 0.1757 | -0.1336 | 0.0243 | 3.81E-08 | -5.4997 | 953873 | IPF |
| rs2106784   | 17 | 45872526 | T | C | 0.1776 | -0.1329 | 0.0241 | 3.44E-08 | -5.5172 | 953873 | IPF |
| rs2158072   | 17 | 45872829 | C | T | 0.1776 | -0.1328 | 0.0241 | 3.48E-08 | -5.5155 | 953873 | IPF |
| rs62055488  | 17 | 45873028 | T | C | 0.1776 | -0.1328 | 0.0241 | 3.48E-08 | -5.5159 | 953873 | IPF |
| rs62055490  | 17 | 45873167 | G | A | 0.1777 | -0.1329 | 0.0241 | 3.41E-08 | -5.5186 | 953873 | IPF |
| rs62055491  | 17 | 45873754 | C | T | 0.1776 | -0.1329 | 0.0241 | 3.46E-08 | -5.5163 | 953873 | IPF |
| rs34416056  | 17 | 45873854 | G | T | 0.1776 | -0.1327 | 0.0241 | 3.54E-08 | -5.5125 | 953873 | IPF |
| rs62055492  | 17 | 45873979 | A | C | 0.1776 | -0.1330 | 0.0241 | 3.39E-08 | -5.5203 | 953873 | IPF |
| rs2055794   | 17 | 45874351 | A | G | 0.1776 | -0.1327 | 0.0241 | 3.57E-08 | -5.5107 | 953873 | IPF |
| rs2055795   | 17 | 45874629 | T | C | 0.1776 | -0.1327 | 0.0241 | 3.57E-08 | -5.5109 | 953873 | IPF |
| rs2055796   | 17 | 45874825 | T | A | 0.1776 | -0.1327 | 0.0241 | 3.57E-08 | -5.5105 | 953873 | IPF |
| rs80348388  | 17 | 45875268 | T | A | 0.1768 | -0.1432 | 0.0259 | 3.04E-08 | -5.5393 | 937232 | IPF |
| rs62055493  | 17 | 45875578 | C | T | 0.1776 | -0.1329 | 0.0241 | 3.44E-08 | -5.5178 | 953873 | IPF |
| rs62055494  | 17 | 45875650 | T | C | 0.1775 | -0.1327 | 0.0241 | 3.60E-08 | -5.5092 | 953873 | IPF |
| rs62055495  | 17 | 45875677 | C | A | 0.1776 | -0.1330 | 0.0241 | 3.36E-08 | -5.5215 | 953873 | IPF |
| rs62055496  | 17 | 45875941 | T | C | 0.1776 | -0.1328 | 0.0241 | 3.50E-08 | -5.5142 | 953873 | IPF |
| rs62055497  | 17 | 45876163 | G | A | 0.1776 | -0.1328 | 0.0241 | 3.50E-08 | -5.5146 | 953873 | IPF |
| rs2188888   | 17 | 45876329 | C | T | 0.1768 | -0.1321 | 0.0242 | 4.54E-08 | -5.4685 | 953873 | IPF |
| rs3919455   | 17 | 45876341 | T | C | 0.1768 | -0.1324 | 0.0242 | 4.18E-08 | -5.4831 | 953873 | IPF |
| rs2214258   | 17 | 45876353 | C | G | 0.1768 | -0.1325 | 0.0242 | 4.15E-08 | -5.4842 | 953873 | IPF |
| rs62055498  | 17 | 45876448 | A | G | 0.1776 | -0.1329 | 0.0241 | 3.42E-08 | -5.5188 | 953873 | IPF |
| rs62055499  | 17 | 45876625 | G | C | 0.1776 | -0.1329 | 0.0241 | 3.43E-08 | -5.5180 | 953873 | IPF |
| rs62055500  | 17 | 45876768 | A | G | 0.1776 | -0.1329 | 0.0241 | 3.42E-08 | -5.5184 | 953873 | IPF |
| rs62055501  | 17 | 45876861 | A | G | 0.1776 | -0.1329 | 0.0241 | 3.44E-08 | -5.5172 | 953873 | IPF |
| rs62055502  | 17 | 45876918 | A | G | 0.1774 | -0.1330 | 0.0241 | 3.37E-08 | -5.5213 | 953873 | IPF |
| rs916793    | 17 | 45877320 | A | G | 0.1776 | -0.1329 | 0.0241 | 3.43E-08 | -5.5178 | 953873 | IPF |
| rs4441322   | 17 | 45877664 | G | A | 0.1776 | -0.1329 | 0.0241 | 3.43E-08 | -5.5178 | 953873 | IPF |
| rs113414067 | 17 | 45877727 | C | T | 0.1776 | -0.1329 | 0.0241 | 3.43E-08 | -5.5180 | 953873 | IPF |
| rs55905252  | 17 | 45877999 | A | C | 0.1776 | -0.1329 | 0.0241 | 3.43E-08 | -5.5184 | 953873 | IPF |
| rs17691328  | 17 | 45878121 | T | C | 0.1777 | -0.1326 | 0.0241 | 3.61E-08 | -5.5090 | 953873 | IPF |
| rs62055515  | 17 | 45879004 | T | G | 0.1775 | -0.1332 | 0.0241 | 3.20E-08 | -5.5303 | 953873 | IPF |
| rs62055516  | 17 | 45879024 | C | T | 0.1775 | -0.1332 | 0.0241 | 3.21E-08 | -5.5299 | 953873 | IPF |
| rs62055517  | 17 | 45879059 | T | C | 0.1775 | -0.1332 | 0.0241 | 3.25E-08 | -5.5274 | 953873 | IPF |
| rs62055518  | 17 | 45879139 | C | A | 0.1775 | -0.1333 | 0.0241 | 3.13E-08 | -5.5341 | 953873 | IPF |
| rs56364632  | 17 | 45879276 | C | T | 0.1775 | -0.1334 | 0.0241 | 3.04E-08 | -5.5393 | 953873 | IPF |
| rs55768605  | 17 | 45879368 | A | C | 0.1776 | -0.1336 | 0.0241 | 2.88E-08 | -5.5482 | 953873 | IPF |
| rs55653657  | 17 | 45879412 | G | A | 0.1776 | -0.1334 | 0.0241 | 3.04E-08 | -5.5393 | 953873 | IPF |
| rs55894109  | 17 | 45879855 | T | C | 0.1776 | -0.1331 | 0.0241 | 3.28E-08 | -5.5259 | 953873 | IPF |
| rs56101773  | 17 | 45879903 | C | T | 0.1776 | -0.1331 | 0.0241 | 3.26E-08 | -5.5271 | 953873 | IPF |
| rs56249780  | 17 | 45879962 | T | C | 0.1776 | -0.1332 | 0.0241 | 3.19E-08 | -5.5305 | 953873 | IPF |
| rs56040418  | 17 | 45880713 | T | C | 0.1779 | -0.1332 | 0.0241 | 3.09E-08 | -5.5363 | 953873 | IPF |
| rs55721252  | 17 | 45880733 | C | T | 0.1774 | -0.1330 | 0.0241 | 3.44E-08 | -5.5171 | 953873 | IPF |
| rs55876817  | 17 | 45880773 | C | A | 0.1774 | -0.1332 | 0.0241 | 3.30E-08 | -5.5248 | 953873 | IPF |
| rs55944735  | 17 | 45880806 | G | A | 0.1774 | -0.1334 | 0.0241 | 3.11E-08 | -5.5351 | 953873 | IPF |
| rs62055525  | 17 | 45881370 | A | G | 0.1775 | -0.1324 | 0.0241 | 3.87E-08 | -5.4970 | 953873 | IPF |
| rs112915466 | 17 | 45881378 | G | A | 0.1774 | -0.1324 | 0.0241 | 3.94E-08 | -5.4937 | 953873 | IPF |
| rs56343551  | 17 | 45881726 | T | G | 0.1776 | -0.1330 | 0.0241 | 3.36E-08 | -5.5215 | 953873 | IPF |
| rs55975673  | 17 | 45881747 | G | A | 0.1776 | -0.1330 | 0.0241 | 3.37E-08 | -5.5209 | 953873 | IPF |
| rs56387391  | 17 | 45881895 | A | G | 0.1776 | -0.1331 | 0.0241 | 3.28E-08 | -5.5259 | 953873 | IPF |
| rs2006305   | 17 | 45882386 | T | A | 0.1776 | -0.1331 | 0.0241 | 3.30E-08 | -5.5251 | 953873 | IPF |
| rs2019822   | 17 | 45882552 | A | T | 0.1776 | -0.1331 | 0.0241 | 3.27E-08 | -5.5263 | 953873 | IPF |
| rs62055529  | 17 | 45882654 | G | A | 0.1776 | -0.1332 | 0.0241 | 3.21E-08 | -5.5296 | 953873 | IPF |
| rs79580365  | 17 | 45882806 | T | C | 0.1776 | -0.1330 | 0.0241 | 3.37E-08 | -5.5209 | 953873 | IPF |
| rs55937610  | 17 | 45882917 | G | A | 0.1776 | -0.1331 | 0.0241 | 3.28E-08 | -5.5255 | 953873 | IPF |
| rs56365901  | 17 | 45882957 | G | A | 0.1761 | -0.1331 | 0.0242 | 3.74E-08 | -5.5028 | 953873 | IPF |
| rs55767267  | 17 | 45882959 | C | T | 0.1761 | -0.1331 | 0.0242 | 3.77E-08 | -5.5013 | 953873 | IPF |
| rs56127309  | 17 | 45882975 | A | G | 0.1762 | -0.1332 | 0.0242 | 3.69E-08 | -5.5052 | 953873 | IPF |
| rs56194412  | 17 | 45883234 | C | T | 0.1776 | -0.1331 | 0.0241 | 3.26E-08 | -5.5271 | 953873 | IPF |
| rs56338487  | 17 | 45883446 | T | A | 0.1776 | -0.1331 | 0.0241 | 3.27E-08 | -5.5267 | 953873 | IPF |
| rs56180212  | 17 | 45883545 | G | A | 0.1776 | -0.1335 | 0.0241 | 2.95E-08 | -5.5448 | 953873 | IPF |
| rs56301449  | 17 | 45883552 | C | T | 0.1774 | -0.1335 | 0.0241 | 3.00E-08 | -5.5414 | 953873 | IPF |
| rs62055538  | 17 | 45883631 | C | T | 0.1776 | -0.1331 | 0.0241 | 3.24E-08 | -5.5282 | 953873 | IPF |
| rs62055539  | 17 | 45883678 | G | A | 0.1776 | -0.1330 | 0.0241 | 3.31E-08 | -5.5242 | 953873 | IPF |
| rs62055540  | 17 | 45883776 | C | T | 0.1776 | -0.1331 | 0.0241 | 3.30E-08 | -5.5244 | 953873 | IPF |
| rs17770108  | 17 | 45883926 | T | G | 0.1776 | -0.1331 | 0.0241 | 3.28E-08 | -5.5259 | 953873 | IPF |
| rs62055541  | 17 | 45884651 | C | G | 0.1776 | -0.1330 | 0.0241 | 3.31E-08 | -5.5242 | 953873 | IPF |

|             |    |          |   |   |        |         |        |          |         |        |     |
|-------------|----|----------|---|---|--------|---------|--------|----------|---------|--------|-----|
| rs77426526  | 17 | 45885616 | A | G | 0.1776 | -0.1330 | 0.0241 | 3.38E-08 | -5.5203 | 953873 | IPF |
| rs77129180  | 17 | 45885680 | A | G | 0.1776 | -0.1331 | 0.0241 | 3.28E-08 | -5.5259 | 953873 | IPF |
| rs74863825  | 17 | 45885754 | T | C | 0.1776 | -0.1330 | 0.0241 | 3.35E-08 | -5.5223 | 953873 | IPF |
| rs112425426 | 17 | 45886050 | G | C | 0.1776 | -0.1331 | 0.0241 | 3.28E-08 | -5.5255 | 953873 | IPF |
| rs62055542  | 17 | 45886478 | T | C | 0.1776 | -0.1334 | 0.0241 | 3.07E-08 | -5.5375 | 953873 | IPF |
| rs17770120  | 17 | 45886577 | A | C | 0.1776 | -0.1333 | 0.0241 | 3.08E-08 | -5.5367 | 953873 | IPF |
| rs17770150  | 17 | 45886797 | A | G | 0.1776 | -0.1333 | 0.0241 | 3.09E-08 | -5.5363 | 953873 | IPF |
| rs17770186  | 17 | 45886825 | A | C | 0.1775 | -0.1327 | 0.0241 | 3.61E-08 | -5.5091 | 953873 | IPF |
| rs17691449  | 17 | 45886917 | C | G | 0.1776 | -0.1332 | 0.0241 | 3.18E-08 | -5.5311 | 953873 | IPF |
| rs62055544  | 17 | 45887173 | G | A | 0.1778 | -0.1351 | 0.0241 | 2.14E-08 | -5.6001 | 953873 | IPF |
| rs62055545  | 17 | 45887195 | T | C | 0.1765 | -0.1334 | 0.0242 | 3.41E-08 | -5.5186 | 953873 | IPF |
| rs62055546  | 17 | 45887201 | C | A | 0.1761 | -0.1336 | 0.0242 | 3.32E-08 | -5.5235 | 953873 | IPF |
| rs62055547  | 17 | 45887389 | T | C | 0.1776 | -0.1334 | 0.0241 | 3.07E-08 | -5.5375 | 953873 | IPF |
| rs62055548  | 17 | 45887533 | G | A | 0.1776 | -0.1334 | 0.0241 | 3.07E-08 | -5.5371 | 953873 | IPF |
| rs113327263 | 17 | 45887697 | C | T | 0.1776 | -0.1333 | 0.0241 | 3.12E-08 | -5.5344 | 953873 | IPF |
| rs62055549  | 17 | 45888229 | C | G | 0.1776 | -0.1333 | 0.0241 | 3.08E-08 | -5.5367 | 953873 | IPF |
| rs62055550  | 17 | 45888314 | A | G | 0.1779 | -0.1337 | 0.0241 | 2.81E-08 | -5.5532 | 953873 | IPF |
| rs62055551  | 17 | 45888321 | G | C | 0.1779 | -0.1337 | 0.0241 | 2.79E-08 | -5.5541 | 953873 | IPF |
| rs62055552  | 17 | 45888589 | G | A | 0.1776 | -0.1333 | 0.0241 | 3.08E-08 | -5.5367 | 953873 | IPF |
| rs62055553  | 17 | 45888812 | A | C | 0.1776 | -0.1333 | 0.0241 | 3.08E-08 | -5.5367 | 953873 | IPF |
| rs62055554  | 17 | 45888894 | G | A | 0.1776 | -0.1333 | 0.0241 | 3.08E-08 | -5.5367 | 953873 | IPF |
| rs62055555  | 17 | 45888916 | T | G | 0.1776 | -0.1333 | 0.0241 | 3.08E-08 | -5.5367 | 953873 | IPF |
| rs111941646 | 17 | 45889242 | T | A | 0.1776 | -0.1334 | 0.0241 | 3.08E-08 | -5.5371 | 953873 | IPF |
| rs62055556  | 17 | 45889383 | C | T | 0.1776 | -0.1333 | 0.0241 | 3.09E-08 | -5.5361 | 953873 | IPF |
| rs62055557  | 17 | 45889429 | A | C | 0.1776 | -0.1333 | 0.0241 | 3.09E-08 | -5.5367 | 953873 | IPF |
| rs62055558  | 17 | 45889589 | G | A | 0.1776 | -0.1333 | 0.0241 | 3.08E-08 | -5.5367 | 953873 | IPF |
| rs62055559  | 17 | 45889772 | G | T | 0.1776 | -0.1333 | 0.0241 | 3.13E-08 | -5.5342 | 953873 | IPF |
| rs79193046  | 17 | 45890196 | C | T | 0.1775 | -0.1334 | 0.0241 | 3.07E-08 | -5.5372 | 953873 | IPF |
| rs17691466  | 17 | 45890853 | G | A | 0.1776 | -0.1333 | 0.0241 | 3.08E-08 | -5.5367 | 953873 | IPF |
| rs17691508  | 17 | 45891097 | G | C | 0.1776 | -0.1333 | 0.0241 | 3.15E-08 | -5.5329 | 953873 | IPF |
| rs62056760  | 17 | 45891206 | A | G | 0.1776 | -0.1334 | 0.0241 | 3.02E-08 | -5.5404 | 953873 | IPF |
| rs55943606  | 17 | 45891508 | G | A | 0.1768 | -0.1437 | 0.0259 | 2.74E-08 | -5.5576 | 937232 | IPF |
| rs55895732  | 17 | 45891571 | C | T | 0.1776 | -0.1332 | 0.0241 | 3.20E-08 | -5.5300 | 953873 | IPF |
| rs55960528  | 17 | 45891628 | C | T | 0.1776 | -0.1332 | 0.0241 | 3.23E-08 | -5.5288 | 953873 | IPF |
| rs55877243  | 17 | 45891653 | C | T | 0.1776 | -0.1332 | 0.0241 | 3.19E-08 | -5.5311 | 953873 | IPF |
| rs17770296  | 17 | 45891770 | T | C | 0.1776 | -0.1333 | 0.0241 | 3.12E-08 | -5.5346 | 953873 | IPF |
| rs17691556  | 17 | 45891802 | A | T | 0.1776 | -0.1334 | 0.0241 | 3.04E-08 | -5.5392 | 953873 | IPF |
| rs62056761  | 17 | 45892320 | A | T | 0.1768 | -0.1436 | 0.0259 | 2.78E-08 | -5.5552 | 937232 | IPF |
| rs17770337  | 17 | 45892413 | T | G | 0.1776 | -0.1332 | 0.0241 | 3.21E-08 | -5.5294 | 953873 | IPF |
| rs62056773  | 17 | 45892467 | G | A | 0.1776 | -0.1332 | 0.0241 | 3.17E-08 | -5.5319 | 953873 | IPF |
| rs62056774  | 17 | 45892535 | A | G | 0.1776 | -0.1333 | 0.0241 | 3.09E-08 | -5.5360 | 953873 | IPF |
| rs62056775  | 17 | 45892586 | C | T | 0.1776 | -0.1332 | 0.0241 | 3.17E-08 | -5.5315 | 953873 | IPF |
| rs62056776  | 17 | 45892629 | T | C | 0.1776 | -0.1332 | 0.0241 | 3.16E-08 | -5.5323 | 953873 | IPF |
| rs17770343  | 17 | 45892788 | C | T | 0.1776 | -0.1331 | 0.0241 | 3.21E-08 | -5.5293 | 953873 | IPF |
| rs62056777  | 17 | 45892937 | A | G | 0.1776 | -0.1331 | 0.0241 | 3.26E-08 | -5.5269 | 953873 | IPF |
| rs17691610  | 17 | 45893296 | T | G | 0.1776 | -0.1334 | 0.0241 | 3.07E-08 | -5.5377 | 953873 | IPF |
| rs76594404  | 17 | 45894091 | C | G | 0.1776 | -0.1333 | 0.0241 | 3.08E-08 | -5.5369 | 953873 | IPF |
| rs80233201  | 17 | 45894115 | C | T | 0.1776 | -0.1332 | 0.0241 | 3.13E-08 | -5.5341 | 953873 | IPF |
| rs62056778  | 17 | 45894238 | G | C | 0.1777 | -0.1336 | 0.0241 | 2.93E-08 | -5.5459 | 953873 | IPF |
| rs11575895  | 17 | 45894419 | G | A | 0.1776 | -0.1332 | 0.0241 | 3.22E-08 | -5.5290 | 953873 | IPF |
| rs62056779  | 17 | 45894571 | A | C | 0.1776 | -0.1332 | 0.0241 | 3.19E-08 | -5.5309 | 953873 | IPF |
| rs11575896  | 17 | 45894776 | A | G | 0.1776 | -0.1334 | 0.0241 | 3.06E-08 | -5.5382 | 953873 | IPF |
| rs74457229  | 17 | 45895215 | T | C | 0.1776 | -0.1333 | 0.0241 | 3.11E-08 | -5.5351 | 953873 | IPF |
| rs74548327  | 17 | 45895714 | G | A | 0.1776 | -0.1333 | 0.0241 | 3.12E-08 | -5.5346 | 953873 | IPF |
| rs111972148 | 17 | 45895755 | C | G | 0.1776 | -0.1333 | 0.0241 | 3.14E-08 | -5.5338 | 953873 | IPF |
| rs76324150  | 17 | 45895867 | T | C | 0.1776 | -0.1332 | 0.0241 | 3.16E-08 | -5.5325 | 953873 | IPF |
| rs113347741 | 17 | 45896042 | T | C | 0.1776 | -0.1333 | 0.0241 | 3.10E-08 | -5.5361 | 953873 | IPF |
| rs78720789  | 17 | 45896047 | G | A | 0.1776 | -0.1334 | 0.0241 | 3.07E-08 | -5.5371 | 953873 | IPF |
| rs62056780  | 17 | 45896286 | T | C | 0.1776 | -0.1333 | 0.0241 | 3.11E-08 | -5.5354 | 953873 | IPF |
| rs62056781  | 17 | 45896533 | C | T | 0.1776 | -0.1333 | 0.0241 | 3.10E-08 | -5.5357 | 953873 | IPF |
| rs74496580  | 17 | 45896699 | A | C | 0.1776 | -0.1333 | 0.0241 | 3.10E-08 | -5.5357 | 953873 | IPF |
| rs62056782  | 17 | 45896864 | T | C | 0.1776 | -0.1333 | 0.0241 | 3.10E-08 | -5.5357 | 953873 | IPF |
| rs80346216  | 17 | 45897110 | T | G | 0.1776 | -0.1333 | 0.0241 | 3.13E-08 | -5.5342 | 953873 | IPF |
| rs76632685  | 17 | 45897111 | T | A | 0.1776 | -0.1333 | 0.0241 | 3.13E-08 | -5.5338 | 953873 | IPF |
| rs62056783  | 17 | 45897183 | C | G | 0.1776 | -0.1333 | 0.0241 | 3.13E-08 | -5.5342 | 953873 | IPF |
| rs62056784  | 17 | 45897523 | G | C | 0.1776 | -0.1332 | 0.0241 | 3.17E-08 | -5.5319 | 953873 | IPF |
| rs62056785  | 17 | 45897897 | C | T | 0.1776 | -0.1333 | 0.0241 | 3.09E-08 | -5.5363 | 953873 | IPF |
| rs62056786  | 17 | 45897919 | C | T | 0.1776 | -0.1333 | 0.0241 | 3.12E-08 | -5.5346 | 953873 | IPF |
| rs62056789  | 17 | 45898049 | C | A | 0.1775 | -0.1336 | 0.0241 | 2.88E-08 | -5.5485 | 953873 | IPF |
| rs62056790  | 17 | 45898051 | A | G | 0.1775 | -0.1336 | 0.0241 | 2.88E-08 | -5.5485 | 953873 | IPF |
| rs62056791  | 17 | 45898698 | C | T | 0.1776 | -0.1338 | 0.0241 | 2.76E-08 | -5.5562 | 953873 | IPF |
| rs77561671  | 17 | 45899261 | T | G | 0.1775 | -0.1337 | 0.0241 | 2.88E-08 | -5.5484 | 953873 | IPF |
| rs62056792  | 17 | 45899278 | A | G | 0.1775 | -0.1338 | 0.0241 | 2.80E-08 | -5.5536 | 953873 | IPF |
| rs62056793  | 17 | 45899652 | G | A | 0.1776 | -0.1333 | 0.0241 | 3.09E-08 | -5.5363 | 953873 | IPF |

|             |    |          |   |   |        |         |        |          |         |        |     |
|-------------|----|----------|---|---|--------|---------|--------|----------|---------|--------|-----|
| rs62056794  | 17 | 45899683 | G | A | 0.1776 | -0.1333 | 0.0241 | 3.09E-08 | -5.5363 | 953873 | IPF |
| rs1864324   | 17 | 45900336 | T | C | 0.1776 | -0.1339 | 0.0241 | 2.70E-08 | -5.5599 | 953873 | IPF |
| rs1864325   | 17 | 45900461 | T | C | 0.1776 | -0.1332 | 0.0241 | 3.15E-08 | -5.5328 | 953873 | IPF |
| rs62056795  | 17 | 45900675 | T | C | 0.1776 | -0.1333 | 0.0241 | 3.09E-08 | -5.5361 | 953873 | IPF |
| rs62056796  | 17 | 45900754 | G | A | 0.1776 | -0.1328 | 0.0241 | 3.47E-08 | -5.5157 | 953873 | IPF |
| rs55691306  | 17 | 45900929 | C | G | 0.1776 | -0.1327 | 0.0241 | 3.54E-08 | -5.5123 | 953873 | IPF |
| rs55823844  | 17 | 45900954 | A | G | 0.1776 | -0.1328 | 0.0241 | 3.44E-08 | -5.5173 | 953873 | IPF |
| rs1560310   | 17 | 45901168 | A | G | 0.1769 | -0.1432 | 0.0259 | 3.07E-08 | -5.5374 | 937232 | IPF |
| rs1467962   | 17 | 45901238 | G | A | 0.1776 | -0.1328 | 0.0241 | 3.48E-08 | -5.5153 | 953873 | IPF |
| rs1560311   | 17 | 45901259 | C | T | 0.1776 | -0.1328 | 0.0241 | 3.49E-08 | -5.5149 | 953873 | IPF |
| rs1467963   | 17 | 45901568 | G | T | 0.1776 | -0.1328 | 0.0241 | 3.48E-08 | -5.5153 | 953873 | IPF |
| rs62056800  | 17 | 45902102 | A | T | 0.1776 | -0.1329 | 0.0241 | 3.47E-08 | -5.5161 | 953873 | IPF |
| rs62056801  | 17 | 45902138 | A | G | 0.1776 | -0.1329 | 0.0241 | 3.42E-08 | -5.5182 | 953873 | IPF |
| rs113834264 | 17 | 45902256 | A | G | 0.1776 | -0.1328 | 0.0241 | 3.47E-08 | -5.5157 | 953873 | IPF |
| rs2099151   | 17 | 45902456 | T | A | 0.1776 | -0.1329 | 0.0241 | 3.43E-08 | -5.5178 | 953873 | IPF |
| rs2082068   | 17 | 45902605 | T | C | 0.1776 | -0.1330 | 0.0241 | 3.35E-08 | -5.5224 | 953873 | IPF |
| rs1984937   | 17 | 45903164 | C | A | 0.1776 | -0.1329 | 0.0241 | 3.44E-08 | -5.5174 | 953873 | IPF |
| rs62056802  | 17 | 45903396 | G | A | 0.1776 | -0.1334 | 0.0241 | 3.06E-08 | -5.5382 | 953873 | IPF |
| rs112275277 | 17 | 45904592 | T | C | 0.1767 | -0.1438 | 0.0259 | 2.72E-08 | -5.5586 | 937232 | IPF |
| rs62056803  | 17 | 45904793 | G | A | 0.1776 | -0.1329 | 0.0241 | 3.46E-08 | -5.5166 | 953873 | IPF |
| rs62056804  | 17 | 45904920 | T | C | 0.1776 | -0.1330 | 0.0241 | 3.37E-08 | -5.5211 | 953873 | IPF |
| rs74573628  | 17 | 45905595 | C | T | 0.1776 | -0.1326 | 0.0241 | 3.70E-08 | -5.5043 | 953873 | IPF |
| rs75617973  | 17 | 45905793 | C | T | 0.1776 | -0.1328 | 0.0241 | 3.45E-08 | -5.5166 | 953873 | IPF |
| rs62056805  | 17 | 45905997 | A | G | 0.1774 | -0.1332 | 0.0241 | 3.20E-08 | -5.5302 | 953873 | IPF |
| rs62056806  | 17 | 45906435 | G | A | 0.1776 | -0.1328 | 0.0241 | 3.47E-08 | -5.5158 | 953873 | IPF |
| rs62056807  | 17 | 45906887 | C | G | 0.1776 | -0.1328 | 0.0241 | 3.52E-08 | -5.5135 | 953873 | IPF |
| rs1467966   | 17 | 45907033 | T | C | 0.1776 | -0.1329 | 0.0241 | 3.45E-08 | -5.5170 | 953873 | IPF |
| rs62056808  | 17 | 45907280 | C | T | 0.1769 | -0.1319 | 0.0241 | 4.60E-08 | -5.4659 | 953873 | IPF |
| rs62056809  | 17 | 45907303 | G | A | 0.1769 | -0.1324 | 0.0241 | 4.13E-08 | -5.4851 | 953873 | IPF |
| rs62056810  | 17 | 45907306 | C | T | 0.1769 | -0.1319 | 0.0241 | 4.59E-08 | -5.4663 | 953873 | IPF |
| rs79492906  | 17 | 45907498 | T | C | 0.1776 | -0.1328 | 0.0241 | 3.46E-08 | -5.5166 | 953873 | IPF |
| rs62056811  | 17 | 45907881 | T | C | 0.1776 | -0.1327 | 0.0241 | 3.61E-08 | -5.5089 | 953873 | IPF |
| rs74509629  | 17 | 45908231 | T | C | 0.1776 | -0.1328 | 0.0241 | 3.47E-08 | -5.5162 | 953873 | IPF |
| rs79290980  | 17 | 45908296 | C | T | 0.1776 | -0.1329 | 0.0241 | 3.44E-08 | -5.5170 | 953873 | IPF |
| rs1467968   | 17 | 45909030 | T | C | 0.1774 | -0.1328 | 0.0241 | 3.50E-08 | -5.5146 | 953873 | IPF |
| rs4371195   | 17 | 45909054 | G | A | 0.1774 | -0.1328 | 0.0241 | 3.54E-08 | -5.5123 | 953873 | IPF |
| rs12150125  | 17 | 45909066 | A | G | 0.1776 | -0.1331 | 0.0241 | 3.28E-08 | -5.5257 | 953873 | IPF |
| rs12150527  | 17 | 45909096 | G | A | 0.1774 | -0.1325 | 0.0241 | 3.81E-08 | -5.4996 | 953873 | IPF |
| rs7502888   | 17 | 45909626 | C | G | 0.1776 | -0.1328 | 0.0241 | 3.46E-08 | -5.5166 | 953873 | IPF |
| rs28439143  | 17 | 45910357 | A | G | 0.1772 | -0.1317 | 0.0241 | 4.72E-08 | -5.4617 | 953873 | IPF |
| rs56189701  | 17 | 45910435 | C | T | 0.1773 | -0.1325 | 0.0241 | 4.09E-08 | -5.4873 | 953873 | IPF |
| rs2435204   | 17 | 45910839 | G | A | 0.1922 | -0.1406 | 0.0243 | 7.36E-09 | -5.7825 | 819655 | IPF |
| rs62056835  | 17 | 45911257 | A | G | 0.1776 | -0.1332 | 0.0241 | 3.20E-08 | -5.5299 | 953873 | IPF |
| rs62056837  | 17 | 45911518 | C | T | 0.1776 | -0.1324 | 0.0241 | 3.85E-08 | -5.4975 | 953873 | IPF |
| rs62056838  | 17 | 45911721 | G | A | 0.1776 | -0.1326 | 0.0241 | 3.68E-08 | -5.5058 | 953873 | IPF |
| rs62056839  | 17 | 45911855 | C | T | 0.1776 | -0.1326 | 0.0241 | 3.68E-08 | -5.5058 | 953873 | IPF |
| rs62056840  | 17 | 45912323 | C | T | 0.1776 | -0.1327 | 0.0241 | 3.60E-08 | -5.5093 | 953873 | IPF |
| rs112116311 | 17 | 45912532 | G | T | 0.1776 | -0.1327 | 0.0241 | 3.57E-08 | -5.5110 | 953873 | IPF |
| rs78209533  | 17 | 45912543 | G | A | 0.1776 | -0.1327 | 0.0241 | 3.57E-08 | -5.5110 | 953873 | IPF |
| rs62056841  | 17 | 45912675 | C | A | 0.1776 | -0.1328 | 0.0241 | 3.54E-08 | -5.5123 | 953873 | IPF |
| rs79860128  | 17 | 45912706 | G | A | 0.1776 | -0.1326 | 0.0241 | 3.70E-08 | -5.5048 | 953873 | IPF |
| rs9944484   | 17 | 45913296 | A | G | 0.1777 | -0.1328 | 0.0241 | 3.50E-08 | -5.5146 | 953873 | IPF |
| rs17563965  | 17 | 45913553 | G | A | 0.1776 | -0.1331 | 0.0241 | 3.26E-08 | -5.5272 | 953873 | IPF |
| rs17563986  | 17 | 45913906 | G | A | 0.1776 | -0.1336 | 0.0241 | 2.89E-08 | -5.5481 | 953873 | IPF |
| rs17564020  | 17 | 45914415 | T | G | 0.1777 | -0.1326 | 0.0241 | 3.58E-08 | -5.5104 | 953873 | IPF |
| rs55682376  | 17 | 45914522 | A | G | 0.1776 | -0.1331 | 0.0241 | 3.24E-08 | -5.5282 | 953873 | IPF |
| rs55788678  | 17 | 45914867 | T | C | 0.1771 | -0.1346 | 0.0241 | 2.41E-08 | -5.5793 | 953873 | IPF |
| rs56042957  | 17 | 45914878 | A | G | 0.1773 | -0.1344 | 0.0241 | 2.47E-08 | -5.5750 | 953873 | IPF |
| rs55810795  | 17 | 45914917 | G | A | 0.1773 | -0.1342 | 0.0241 | 2.61E-08 | -5.5654 | 953873 | IPF |
| rs55933304  | 17 | 45914939 | A | G | 0.1773 | -0.1343 | 0.0241 | 2.53E-08 | -5.5717 | 953873 | IPF |
| rs62056848  | 17 | 45915090 | A | G | 0.1776 | -0.1332 | 0.0241 | 3.16E-08 | -5.5321 | 953873 | IPF |
| rs62056849  | 17 | 45915097 | C | G | 0.1776 | -0.1332 | 0.0241 | 3.16E-08 | -5.5321 | 953873 | IPF |
| rs62056850  | 17 | 45915215 | T | C | 0.1781 | -0.1311 | 0.0240 | 4.98E-08 | -5.4522 | 953873 | IPF |
| rs111541901 | 17 | 45916992 | T | C | 0.1770 | -0.1331 | 0.0241 | 3.37E-08 | -5.5210 | 953873 | IPF |
| rs17649518  | 17 | 45917020 | A | C | 0.1773 | -0.1335 | 0.0241 | 3.06E-08 | -5.5378 | 953873 | IPF |
| rs62056859  | 17 | 45917069 | G | A | 0.1775 | -0.1335 | 0.0241 | 3.01E-08 | -5.5405 | 953873 | IPF |
| rs112647192 | 17 | 45917257 | A | G | 0.1774 | -0.1338 | 0.0241 | 2.81E-08 | -5.5527 | 953873 | IPF |
| rs17649553  | 17 | 45917282 | T | C | 0.1783 | -0.1329 | 0.0241 | 3.35E-08 | -5.5221 | 953873 | IPF |
| rs17649571  | 17 | 45917586 | G | A | 0.1774 | -0.1339 | 0.0241 | 2.72E-08 | -5.5588 | 953873 | IPF |
| rs17564153  | 17 | 45917732 | A | G | 0.1774 | -0.1339 | 0.0241 | 2.73E-08 | -5.5578 | 953873 | IPF |
| rs17649635  | 17 | 45918624 | G | A | 0.1774 | -0.1340 | 0.0241 | 2.69E-08 | -5.5609 | 953873 | IPF |
| rs55760800  | 17 | 45919542 | G | T | 0.1774 | -0.1339 | 0.0241 | 2.76E-08 | -5.5561 | 953873 | IPF |
| rs56303672  | 17 | 45919594 | G | A | 0.1774 | -0.1339 | 0.0241 | 2.74E-08 | -5.5572 | 953873 | IPF |
| rs17649641  | 17 | 45920006 | C | T | 0.1775 | -0.1342 | 0.0241 | 2.57E-08 | -5.5681 | 953873 | IPF |

|             |    |          |   |   |        |         |        |          |         |        |     |
|-------------|----|----------|---|---|--------|---------|--------|----------|---------|--------|-----|
| rs75046472  | 17 | 45920133 | T | A | 0.1774 | -0.1339 | 0.0241 | 2.78E-08 | -5.5551 | 953873 | IPF |
| rs17564223  | 17 | 45920154 | T | C | 0.1774 | -0.1339 | 0.0241 | 2.78E-08 | -5.5551 | 953873 | IPF |
| rs17649700  | 17 | 45920535 | C | G | 0.1768 | -0.1440 | 0.0259 | 2.55E-08 | -5.5700 | 937232 | IPF |
| rs62058962  | 17 | 45920785 | T | C | 0.1768 | -0.1439 | 0.0259 | 2.61E-08 | -5.5660 | 937232 | IPF |
| rs1467969   | 17 | 45920962 | T | C | 0.1768 | -0.1439 | 0.0259 | 2.65E-08 | -5.5631 | 937232 | IPF |
| rs1467970   | 17 | 45921208 | G | T | 0.1768 | -0.1440 | 0.0259 | 2.60E-08 | -5.5669 | 937232 | IPF |
| rs767058    | 17 | 45921401 | C | T | 0.1772 | -0.1446 | 0.0259 | 2.23E-08 | -5.5928 | 937232 | IPF |
| rs767057    | 17 | 45921456 | G | A | 0.1769 | -0.1441 | 0.0259 | 2.50E-08 | -5.5732 | 937232 | IPF |
| rs767056    | 17 | 45921544 | T | C | 0.1769 | -0.1441 | 0.0259 | 2.52E-08 | -5.5715 | 937232 | IPF |
| rs62058964  | 17 | 45922040 | G | A | 0.1769 | -0.1441 | 0.0259 | 2.52E-08 | -5.5722 | 937232 | IPF |
| rs62058965  | 17 | 45922163 | C | G | 0.1769 | -0.1440 | 0.0259 | 2.55E-08 | -5.5699 | 937232 | IPF |
| rs1967981   | 17 | 45922419 | G | C | 0.1769 | -0.1441 | 0.0259 | 2.51E-08 | -5.5724 | 937232 | IPF |
| rs1476127   | 17 | 45922427 | A | G | 0.1769 | -0.1441 | 0.0259 | 2.51E-08 | -5.5724 | 937232 | IPF |
| rs55929431  | 17 | 45922836 | A | G | 0.1769 | -0.1443 | 0.0259 | 2.40E-08 | -5.5807 | 937232 | IPF |
| rs8079501   | 17 | 45922868 | T | A | 0.1769 | -0.1441 | 0.0259 | 2.53E-08 | -5.5710 | 937232 | IPF |
| rs56002706  | 17 | 45923139 | T | C | 0.1769 | -0.1441 | 0.0259 | 2.52E-08 | -5.5720 | 937232 | IPF |
| rs8078495   | 17 | 45923244 | A | G | 0.1769 | -0.1441 | 0.0259 | 2.53E-08 | -5.5710 | 937232 | IPF |
| rs17649866  | 17 | 45923548 | C | T | 0.1769 | -0.1441 | 0.0259 | 2.51E-08 | -5.5728 | 937232 | IPF |
| rs62058968  | 17 | 45923862 | A | G | 0.1769 | -0.1441 | 0.0259 | 2.48E-08 | -5.5747 | 937232 | IPF |
| rs17564493  | 17 | 45924013 | T | C | 0.1769 | -0.1441 | 0.0259 | 2.50E-08 | -5.5736 | 937232 | IPF |
| rs17649918  | 17 | 45924255 | G | A | 0.1769 | -0.1442 | 0.0259 | 2.46E-08 | -5.5761 | 937232 | IPF |
| rs17649954  | 17 | 45924295 | G | A | 0.1769 | -0.1442 | 0.0259 | 2.47E-08 | -5.5755 | 937232 | IPF |
| rs55685451  | 17 | 45924591 | G | T | 0.1769 | -0.1442 | 0.0259 | 2.44E-08 | -5.5776 | 937232 | IPF |
| rs17564591  | 17 | 45924696 | C | A | 0.1768 | -0.1446 | 0.0259 | 2.27E-08 | -5.5903 | 937232 | IPF |
| rs17564619  | 17 | 45924772 | G | A | 0.1769 | -0.1442 | 0.0259 | 2.47E-08 | -5.5755 | 937232 | IPF |
| rs62059003  | 17 | 45925065 | T | C | 0.1769 | -0.1440 | 0.0259 | 2.55E-08 | -5.5696 | 937232 | IPF |
| rs17650063  | 17 | 45925189 | G | A | 0.1769 | -0.1441 | 0.0259 | 2.50E-08 | -5.5736 | 937232 | IPF |
| rs17564703  | 17 | 45925229 | T | C | 0.1769 | -0.1436 | 0.0259 | 2.83E-08 | -5.5519 | 937232 | IPF |
| rs76090253  | 17 | 45925603 | C | A | 0.1769 | -0.1442 | 0.0259 | 2.47E-08 | -5.5751 | 937232 | IPF |
| rs55788597  | 17 | 45926031 | A | T | 0.1769 | -0.1441 | 0.0259 | 2.49E-08 | -5.5739 | 937232 | IPF |
| rs56197117  | 17 | 45926080 | G | A | 0.1769 | -0.1441 | 0.0259 | 2.49E-08 | -5.5743 | 937232 | IPF |
| rs56249311  | 17 | 45926233 | T | C | 0.1769 | -0.1442 | 0.0259 | 2.47E-08 | -5.5751 | 937232 | IPF |
| rs62059004  | 17 | 45926527 | G | A | 0.1769 | -0.1441 | 0.0259 | 2.51E-08 | -5.5724 | 937232 | IPF |
| rs76500077  | 17 | 45926710 | C | T | 0.1768 | -0.1442 | 0.0259 | 2.47E-08 | -5.5751 | 937232 | IPF |
| rs62059005  | 17 | 45927106 | G | A | 0.1769 | -0.1442 | 0.0259 | 2.44E-08 | -5.5778 | 937232 | IPF |
| rs113796169 | 17 | 45927888 | A | T | 0.1768 | -0.1436 | 0.0259 | 2.80E-08 | -5.5534 | 937232 | IPF |
| rs17564780  | 17 | 45928047 | G | A | 0.1769 | -0.1442 | 0.0259 | 2.46E-08 | -5.5761 | 937232 | IPF |
| rs62059007  | 17 | 45928249 | G | A | 0.1768 | -0.1436 | 0.0259 | 2.79E-08 | -5.5546 | 937232 | IPF |
| rs62059008  | 17 | 45928719 | G | A | 0.1768 | -0.1439 | 0.0259 | 2.65E-08 | -5.5630 | 937232 | IPF |
| rs62059009  | 17 | 45928764 | C | T | 0.1768 | -0.1441 | 0.0259 | 2.54E-08 | -5.5708 | 937232 | IPF |
| rs62061705  | 17 | 45928886 | C | T | 0.1769 | -0.1442 | 0.0259 | 2.44E-08 | -5.5776 | 937232 | IPF |
| rs17564829  | 17 | 45929235 | C | T | 0.1769 | -0.1437 | 0.0259 | 2.74E-08 | -5.5570 | 937232 | IPF |
| rs62061706  | 17 | 45929530 | C | T | 0.1768 | -0.1439 | 0.0259 | 2.62E-08 | -5.5652 | 937232 | IPF |
| rs62061707  | 17 | 45929588 | C | T | 0.1759 | -0.1445 | 0.0260 | 2.61E-08 | -5.5657 | 937232 | IPF |
| rs62061708  | 17 | 45929590 | G | A | 0.1759 | -0.1446 | 0.0260 | 2.57E-08 | -5.5682 | 937232 | IPF |
| rs62061709  | 17 | 45930127 | T | C | 0.1769 | -0.1441 | 0.0259 | 2.51E-08 | -5.5730 | 937232 | IPF |
| rs2316782   | 17 | 45932674 | G | A | 0.1769 | -0.1441 | 0.0259 | 2.53E-08 | -5.5710 | 937232 | IPF |
| rs2316783   | 17 | 45932752 | C | G | 0.1769 | -0.1441 | 0.0259 | 2.53E-08 | -5.5714 | 937232 | IPF |
| rs4255816   | 17 | 45932998 | G | C | 0.1769 | -0.1441 | 0.0259 | 2.53E-08 | -5.5710 | 937232 | IPF |
| rs62061713  | 17 | 45933039 | G | A | 0.1768 | -0.1441 | 0.0259 | 2.52E-08 | -5.5718 | 937232 | IPF |
| rs78077519  | 17 | 45933618 | A | G | 0.1768 | -0.1439 | 0.0259 | 2.62E-08 | -5.5654 | 937232 | IPF |
| rs17564871  | 17 | 45933652 | G | A | 0.1768 | -0.1439 | 0.0259 | 2.67E-08 | -5.5622 | 937232 | IPF |
| rs17650258  | 17 | 45933707 | A | G | 0.1768 | -0.1440 | 0.0259 | 2.56E-08 | -5.5694 | 937232 | IPF |
| rs62061715  | 17 | 45934160 | G | A | 0.1769 | -0.1441 | 0.0259 | 2.51E-08 | -5.5726 | 937232 | IPF |
| rs17564948  | 17 | 45934383 | G | A | 0.1769 | -0.1441 | 0.0259 | 2.51E-08 | -5.5726 | 937232 | IPF |
| rs17564983  | 17 | 45934459 | C | A | 0.1768 | -0.1437 | 0.0259 | 2.78E-08 | -5.5553 | 937232 | IPF |
| rs62061716  | 17 | 45934730 | G | A | 0.1769 | -0.1441 | 0.0259 | 2.50E-08 | -5.5736 | 937232 | IPF |
| rs17650335  | 17 | 45934977 | A | G | 0.1769 | -0.1441 | 0.0259 | 2.50E-08 | -5.5736 | 937232 | IPF |
| rs17565025  | 17 | 45935097 | C | T | 0.1771 | -0.1446 | 0.0258 | 2.24E-08 | -5.5927 | 937232 | IPF |
| rs77924424  | 17 | 45935549 | C | T | 0.1769 | -0.1443 | 0.0259 | 2.43E-08 | -5.5785 | 937232 | IPF |
| rs62061719  | 17 | 45935623 | T | C | 0.1769 | -0.1441 | 0.0259 | 2.50E-08 | -5.5733 | 937232 | IPF |
| rs17650381  | 17 | 45935658 | C | T | 0.1769 | -0.1441 | 0.0259 | 2.49E-08 | -5.5737 | 937232 | IPF |
| rs17650417  | 17 | 45935737 | T | G | 0.1768 | -0.1440 | 0.0259 | 2.61E-08 | -5.5661 | 937232 | IPF |
| rs62061720  | 17 | 45935823 | T | C | 0.1769 | -0.1441 | 0.0259 | 2.51E-08 | -5.5722 | 937232 | IPF |
| rs62061721  | 17 | 45935980 | C | T | 0.1769 | -0.1441 | 0.0259 | 2.50E-08 | -5.5730 | 937232 | IPF |
| rs79857651  | 17 | 45936109 | A | G | 0.1761 | -0.1441 | 0.0259 | 2.74E-08 | -5.5575 | 937232 | IPF |
| rs113756354 | 17 | 45936117 | G | A | 0.1761 | -0.1441 | 0.0259 | 2.73E-08 | -5.5579 | 937232 | IPF |
| rs12150111  | 17 | 45936572 | G | A | 0.1776 | -0.1334 | 0.0241 | 3.02E-08 | -5.5403 | 953873 | IPF |
| rs12150460  | 17 | 45936771 | T | G | 0.1776 | -0.1334 | 0.0241 | 3.02E-08 | -5.5403 | 953873 | IPF |
| rs12150195  | 17 | 45936897 | C | T | 0.1776 | -0.1334 | 0.0241 | 2.99E-08 | -5.5419 | 953873 | IPF |
| rs55874169  | 17 | 45937018 | A | G | 0.1776 | -0.1334 | 0.0241 | 3.02E-08 | -5.5403 | 953873 | IPF |
| rs12150229  | 17 | 45938080 | G | A | 0.1771 | -0.1345 | 0.0241 | 2.41E-08 | -5.5792 | 953873 | IPF |
| rs12150230  | 17 | 45938098 | G | A | 0.1771 | -0.1345 | 0.0241 | 2.38E-08 | -5.5819 | 953873 | IPF |
| rs12150576  | 17 | 45938258 | A | G | 0.1776 | -0.1333 | 0.0241 | 3.05E-08 | -5.5382 | 953873 | IPF |



|             |    |          |   |   |        |         |        |          |         |        |     |
|-------------|----|----------|---|---|--------|---------|--------|----------|---------|--------|-----|
| rs12150235  | 17 | 45938379 | G | A | 0.1776 | -0.1333 | 0.0241 | 3.05E-08 | -5.5382 | 953873 | IPF |
| rs12150242  | 17 | 45938450 | G | A | 0.1776 | -0.1333 | 0.0241 | 3.03E-08 | -5.5394 | 953873 | IPF |
| rs12150104  | 17 | 45938563 | A | G | 0.1776 | -0.1333 | 0.0241 | 3.04E-08 | -5.5390 | 953873 | IPF |
| rs62061725  | 17 | 45938791 | C | G | 0.1776 | -0.1333 | 0.0241 | 3.07E-08 | -5.5371 | 953873 | IPF |
| rs62061726  | 17 | 45938975 | A | G | 0.1776 | -0.1335 | 0.0241 | 2.95E-08 | -5.5445 | 953873 | IPF |
| rs113537106 | 17 | 45939096 | G | A | 0.1776 | -0.1333 | 0.0241 | 3.04E-08 | -5.5390 | 953873 | IPF |
| rs62061727  | 17 | 45939758 | T | G | 0.1776 | -0.1334 | 0.0241 | 3.03E-08 | -5.5399 | 953873 | IPF |
| rs62061728  | 17 | 45939814 | G | T | 0.1776 | -0.1333 | 0.0241 | 3.06E-08 | -5.5382 | 953873 | IPF |
| rs62061729  | 17 | 45939917 | G | A | 0.1776 | -0.1333 | 0.0241 | 3.04E-08 | -5.5390 | 953873 | IPF |
| rs62061730  | 17 | 45939976 | G | A | 0.1776 | -0.1334 | 0.0241 | 3.00E-08 | -5.5415 | 953873 | IPF |
| rs62061731  | 17 | 45940300 | A | C | 0.1776 | -0.1333 | 0.0241 | 3.08E-08 | -5.5370 | 953873 | IPF |
| rs62061732  | 17 | 45940575 | T | G | 0.1776 | -0.1333 | 0.0241 | 3.07E-08 | -5.5374 | 953873 | IPF |
| rs62062768  | 17 | 45942113 | G | C | 0.1776 | -0.1337 | 0.0241 | 2.82E-08 | -5.5523 | 953873 | IPF |
| rs62062769  | 17 | 45942277 | A | G | 0.1776 | -0.1337 | 0.0241 | 2.79E-08 | -5.5540 | 953873 | IPF |
| rs62062770  | 17 | 45942314 | C | T | 0.1777 | -0.1340 | 0.0241 | 2.57E-08 | -5.5682 | 953873 | IPF |
| rs62062771  | 17 | 45942916 | A | G | 0.1776 | -0.1334 | 0.0241 | 2.98E-08 | -5.5429 | 953873 | IPF |
| rs62062772  | 17 | 45942948 | T | C | 0.1776 | -0.1334 | 0.0241 | 3.01E-08 | -5.5412 | 953873 | IPF |
| rs62062773  | 17 | 45943179 | G | A | 0.1776 | -0.1339 | 0.0241 | 2.67E-08 | -5.5617 | 953873 | IPF |
| rs79115768  | 17 | 45943695 | T | C | 0.1776 | -0.1338 | 0.0241 | 2.73E-08 | -5.5580 | 953873 | IPF |
| rs28416808  | 17 | 45943852 | T | C | 0.1777 | -0.1336 | 0.0241 | 2.83E-08 | -5.5516 | 953873 | IPF |
| rs62062774  | 17 | 45944097 | C | T | 0.1776 | -0.1338 | 0.0241 | 2.74E-08 | -5.5571 | 953873 | IPF |
| rs2316784   | 17 | 45944333 | T | G | 0.1766 | -0.1334 | 0.0241 | 3.23E-08 | -5.5283 | 953873 | IPF |
| rs4327091   | 17 | 45944351 | A | G | 0.1766 | -0.1334 | 0.0241 | 3.27E-08 | -5.5262 | 953873 | IPF |
| rs4479290   | 17 | 45944378 | C | T | 0.1768 | -0.1331 | 0.0241 | 3.42E-08 | -5.5188 | 953873 | IPF |
| rs62062776  | 17 | 45944677 | C | A | 0.1776 | -0.1331 | 0.0241 | 3.19E-08 | -5.5307 | 953873 | IPF |
| rs62062777  | 17 | 45944702 | A | G | 0.1769 | -0.1438 | 0.0259 | 2.66E-08 | -5.5629 | 937232 | IPF |
| rs75839508  | 17 | 45944953 | A | G | 0.1776 | -0.1338 | 0.0241 | 2.76E-08 | -5.5562 | 953873 | IPF |
| rs75686108  | 17 | 45945010 | T | C | 0.1776 | -0.1336 | 0.0241 | 2.90E-08 | -5.5474 | 953873 | IPF |
| rs79765413  | 17 | 45945067 | C | T | 0.1769 | -0.1331 | 0.0241 | 3.52E-08 | -5.5132 | 953873 | IPF |
| rs78834738  | 17 | 45945068 | A | G | 0.1769 | -0.1335 | 0.0241 | 3.22E-08 | -5.5293 | 953873 | IPF |
| rs62062778  | 17 | 45945162 | G | A | 0.1774 | -0.1332 | 0.0241 | 3.15E-08 | -5.5328 | 953873 | IPF |
| rs62062779  | 17 | 45945211 | C | A | 0.1771 | -0.1331 | 0.0241 | 3.41E-08 | -5.5194 | 953873 | IPF |
| rs62062780  | 17 | 45945227 | T | C | 0.1771 | -0.1330 | 0.0241 | 3.51E-08 | -5.5142 | 953873 | IPF |
| rs62062781  | 17 | 45945266 | A | G | 0.1774 | -0.1336 | 0.0241 | 2.93E-08 | -5.5452 | 953873 | IPF |
| rs62062782  | 17 | 45945721 | A | G | 0.1776 | -0.1342 | 0.0241 | 2.49E-08 | -5.5745 | 953873 | IPF |
| rs62062783  | 17 | 45946154 | G | T | 0.1776 | -0.1342 | 0.0241 | 2.48E-08 | -5.5751 | 953873 | IPF |
| rs62062784  | 17 | 45947186 | G | C | 0.1775 | -0.1341 | 0.0241 | 2.58E-08 | -5.5679 | 953873 | IPF |
| rs62062785  | 17 | 45947196 | T | G | 0.1775 | -0.1341 | 0.0241 | 2.55E-08 | -5.5696 | 953873 | IPF |
| rs62062786  | 17 | 45947294 | C | G | 0.1776 | -0.1344 | 0.0241 | 2.39E-08 | -5.5813 | 953873 | IPF |
| rs62062787  | 17 | 45947499 | C | T | 0.1776 | -0.1343 | 0.0241 | 2.43E-08 | -5.5782 | 953873 | IPF |
| rs62062788  | 17 | 45947540 | G | A | 0.1776 | -0.1342 | 0.0241 | 2.51E-08 | -5.5726 | 953873 | IPF |
| rs62062789  | 17 | 45947667 | C | T | 0.1769 | -0.1346 | 0.0241 | 2.47E-08 | -5.5750 | 953873 | IPF |
| rs62062790  | 17 | 45947679 | T | C | 0.1769 | -0.1344 | 0.0241 | 2.60E-08 | -5.5667 | 953873 | IPF |
| rs62062791  | 17 | 45947907 | A | G | 0.1776 | -0.1341 | 0.0241 | 2.54E-08 | -5.5709 | 953873 | IPF |
| rs62062792  | 17 | 45947981 | C | T | 0.1776 | -0.1341 | 0.0241 | 2.52E-08 | -5.5713 | 953873 | IPF |
| rs78026984  | 17 | 45948226 | C | G | 0.1776 | -0.1342 | 0.0241 | 2.49E-08 | -5.5738 | 953873 | IPF |
| rs113395365 | 17 | 45948284 | C | T | 0.1776 | -0.1342 | 0.0241 | 2.50E-08 | -5.5734 | 953873 | IPF |
| rs242559    | 17 | 45948522 | C | A | 0.1847 | -0.1364 | 0.0237 | 8.72E-09 | -5.7539 | 953873 | IPF |
| rs62062793  | 17 | 45948955 | C | T | 0.1776 | -0.1341 | 0.0241 | 2.53E-08 | -5.5709 | 953873 | IPF |
| rs62062794  | 17 | 45949028 | G | A | 0.1776 | -0.1341 | 0.0241 | 2.54E-08 | -5.5705 | 953873 | IPF |
| rs78556223  | 17 | 45949112 | G | A | 0.1768 | -0.1337 | 0.0241 | 2.89E-08 | -5.5480 | 953873 | IPF |
| rs242561    | 17 | 45949182 | T | C | 0.1774 | -0.1452 | 0.0259 | 2.14E-08 | -5.6002 | 937232 | IPF |
| rs62062795  | 17 | 45949724 | T | C | 0.1776 | -0.1342 | 0.0241 | 2.52E-08 | -5.5722 | 953873 | IPF |
| rs62062796  | 17 | 45949950 | A | G | 0.1775 | -0.1341 | 0.0241 | 2.57E-08 | -5.5688 | 953873 | IPF |
| rs62062797  | 17 | 45950000 | G | T | 0.1767 | -0.1363 | 0.0242 | 1.67E-08 | -5.6432 | 953873 | IPF |
| rs62062798  | 17 | 45950017 | G | A | 0.1767 | -0.1365 | 0.0242 | 1.60E-08 | -5.6502 | 953873 | IPF |
| rs62062799  | 17 | 45950155 | T | G | 0.1776 | -0.1341 | 0.0241 | 2.56E-08 | -5.5688 | 953873 | IPF |
| rs62062800  | 17 | 45950387 | G | A | 0.1776 | -0.1341 | 0.0241 | 2.57E-08 | -5.5684 | 953873 | IPF |
| rs62062803  | 17 | 45950817 | C | T | 0.1777 | -0.1342 | 0.0241 | 2.52E-08 | -5.5719 | 953873 | IPF |
| rs74903707  | 17 | 45951341 | A | G | 0.1776 | -0.1341 | 0.0241 | 2.56E-08 | -5.5688 | 953873 | IPF |
| rs77017444  | 17 | 45951430 | C | T | 0.1775 | -0.1339 | 0.0241 | 2.71E-08 | -5.5596 | 953873 | IPF |
| rs76839282  | 17 | 45951812 | C | G | 0.1775 | -0.1340 | 0.0241 | 2.60E-08 | -5.5669 | 953873 | IPF |
| rs17650579  | 17 | 45952749 | T | C | 0.1777 | -0.1333 | 0.0241 | 3.10E-08 | -5.5354 | 953873 | IPF |
| rs17650597  | 17 | 45952829 | T | A | 0.1776 | -0.1335 | 0.0241 | 2.94E-08 | -5.5451 | 953873 | IPF |
| rs17650633  | 17 | 45952865 | C | T | 0.1776 | -0.1335 | 0.0241 | 2.92E-08 | -5.5461 | 953873 | IPF |
| rs17650651  | 17 | 45952945 | G | T | 0.1776 | -0.1335 | 0.0241 | 2.95E-08 | -5.5443 | 953873 | IPF |
| rs62062805  | 17 | 45953407 | G | A | 0.1775 | -0.1336 | 0.0241 | 2.88E-08 | -5.5490 | 953873 | IPF |
| rs62062806  | 17 | 45954054 | A | G | 0.1776 | -0.1339 | 0.0241 | 2.71E-08 | -5.5592 | 953873 | IPF |
| rs55978005  | 17 | 45954174 | T | G | 0.1776 | -0.1339 | 0.0241 | 2.71E-08 | -5.5597 | 953873 | IPF |
| rs55946323  | 17 | 45954580 | G | A | 0.1776 | -0.1341 | 0.0241 | 2.55E-08 | -5.5694 | 953873 | IPF |
| rs56317731  | 17 | 45954707 | G | A | 0.1776 | -0.1336 | 0.0241 | 2.90E-08 | -5.5474 | 953873 | IPF |
| rs55821155  | 17 | 45955104 | G | C | 0.1776 | -0.1337 | 0.0241 | 2.84E-08 | -5.5507 | 953873 | IPF |
| rs56080482  | 17 | 45955231 | A | G | 0.1776 | -0.1336 | 0.0241 | 2.90E-08 | -5.5474 | 953873 | IPF |
| rs17571718  | 17 | 45955402 | C | T | 0.1775 | -0.1339 | 0.0241 | 2.66E-08 | -5.5621 | 953873 | IPF |

|             |    |          |   |   |        |         |        |          |         |        |     |
|-------------|----|----------|---|---|--------|---------|--------|----------|---------|--------|-----|
| rs78555354  | 17 | 45955513 | G | A | 0.1774 | -0.1346 | 0.0241 | 2.28E-08 | -5.5895 | 953873 | IPF |
| rs17571739  | 17 | 45955549 | C | T | 0.1771 | -0.1347 | 0.0241 | 2.37E-08 | -5.5831 | 953873 | IPF |
| rs62062813  | 17 | 45955590 | A | G | 0.1771 | -0.1349 | 0.0241 | 2.24E-08 | -5.5926 | 953873 | IPF |
| rs62063262  | 17 | 45955636 | C | T | 0.1774 | -0.1341 | 0.0241 | 2.57E-08 | -5.5689 | 953873 | IPF |
| rs113520245 | 17 | 45955766 | T | C | 0.1750 | -0.1353 | 0.0243 | 2.43E-08 | -5.5781 | 953873 | IPF |
| rs113277432 | 17 | 45955803 | C | T | 0.1750 | -0.1352 | 0.0243 | 2.48E-08 | -5.5751 | 953873 | IPF |
| rs112950348 | 17 | 45955822 | A | G | 0.1750 | -0.1353 | 0.0243 | 2.45E-08 | -5.5772 | 953873 | IPF |
| rs62063263  | 17 | 45956028 | C | G | 0.1767 | -0.1331 | 0.0241 | 3.56E-08 | -5.5117 | 953873 | IPF |
| rs62063264  | 17 | 45956035 | T | C | 0.1767 | -0.1329 | 0.0241 | 3.75E-08 | -5.5026 | 953873 | IPF |
| rs62063265  | 17 | 45956102 | A | G | 0.1774 | -0.1339 | 0.0241 | 2.81E-08 | -5.5531 | 953873 | IPF |
| rs62063266  | 17 | 45956122 | T | C | 0.1774 | -0.1340 | 0.0241 | 2.74E-08 | -5.5573 | 953873 | IPF |
| rs17571781  | 17 | 45956436 | C | T | 0.1775 | -0.1333 | 0.0241 | 3.13E-08 | -5.5336 | 953873 | IPF |
| rs56201245  | 17 | 45956974 | T | C | 0.1827 | -0.2029 | 0.0352 | 8.60E-09 | -5.7563 | 669997 | IPF |
| rs62063269  | 17 | 45957467 | A | G | 0.1774 | -0.1337 | 0.0241 | 2.92E-08 | -5.5461 | 953873 | IPF |
| rs17571809  | 17 | 45957493 | G | A | 0.1775 | -0.1338 | 0.0241 | 2.86E-08 | -5.5498 | 953873 | IPF |
| rs17650771  | 17 | 45958001 | G | A | 0.1776 | -0.1336 | 0.0241 | 2.97E-08 | -5.5431 | 953873 | IPF |
| rs77555455  | 17 | 45958150 | A | G | 0.1776 | -0.1333 | 0.0241 | 3.19E-08 | -5.5307 | 953873 | IPF |
| rs17571857  | 17 | 45958340 | G | A | 0.1776 | -0.1338 | 0.0241 | 2.81E-08 | -5.5524 | 953873 | IPF |
| rs62063271  | 17 | 45958681 | A | G | 0.1775 | -0.1340 | 0.0241 | 2.69E-08 | -5.5610 | 953873 | IPF |
| rs62063275  | 17 | 45958921 | G | A | 0.1776 | -0.1336 | 0.0241 | 2.89E-08 | -5.5478 | 953873 | IPF |
| rs62063277  | 17 | 45959096 | A | T | 0.1776 | -0.1336 | 0.0241 | 2.92E-08 | -5.5463 | 953873 | IPF |
| rs17650818  | 17 | 45959421 | C | T | 0.1778 | -0.1338 | 0.0241 | 2.81E-08 | -5.5528 | 953873 | IPF |
| rs62063278  | 17 | 45959548 | T | C | 0.1769 | -0.1343 | 0.0241 | 2.69E-08 | -5.5608 | 953873 | IPF |
| rs62063279  | 17 | 45959570 | A | G | 0.1770 | -0.1341 | 0.0241 | 2.81E-08 | -5.5529 | 953873 | IPF |
| rs113793114 | 17 | 45959713 | A | G | 0.1777 | -0.1334 | 0.0241 | 3.03E-08 | -5.5397 | 953873 | IPF |
| rs62063280  | 17 | 45959933 | C | G | 0.1773 | -0.1338 | 0.0241 | 2.89E-08 | -5.5481 | 953873 | IPF |
| rs17650842  | 17 | 45960125 | G | A | 0.1775 | -0.1320 | 0.0241 | 4.29E-08 | -5.4781 | 953873 | IPF |
| rs17650860  | 17 | 45961642 | A | G | 0.1766 | -0.1340 | 0.0242 | 2.90E-08 | -5.5472 | 953873 | IPF |
| rs62063282  | 17 | 45961677 | A | G | 0.1774 | -0.1328 | 0.0241 | 3.54E-08 | -5.5121 | 953873 | IPF |
| rs111520035 | 17 | 45962044 | G | A | 0.1775 | -0.1323 | 0.0241 | 3.99E-08 | -5.4915 | 953873 | IPF |
| rs17650872  | 17 | 45962150 | T | G | 0.1775 | -0.1323 | 0.0241 | 3.98E-08 | -5.4921 | 953873 | IPF |
| rs17650901  | 17 | 45962325 | G | A | 0.1768 | -0.1428 | 0.0259 | 3.34E-08 | -5.5223 | 937232 | IPF |
| rs55780945  | 17 | 45962754 | T | C | 0.1775 | -0.1324 | 0.0241 | 3.85E-08 | -5.4977 | 953873 | IPF |
| rs55711941  | 17 | 45963457 | T | C | 0.1775 | -0.1329 | 0.0241 | 3.43E-08 | -5.5176 | 953873 | IPF |
| rs55709241  | 17 | 45963735 | C | T | 0.1763 | -0.1321 | 0.0242 | 4.67E-08 | -5.4636 | 953873 | IPF |
| rs56280951  | 17 | 45963741 | A | G | 0.1763 | -0.1321 | 0.0242 | 4.66E-08 | -5.4636 | 953873 | IPF |
| rs56166491  | 17 | 45964855 | G | A | 0.1775 | -0.1332 | 0.0241 | 3.20E-08 | -5.5300 | 953873 | IPF |
| rs56226437  | 17 | 45964995 | C | T | 0.1769 | -0.1343 | 0.0241 | 2.60E-08 | -5.5667 | 953873 | IPF |
| rs55907036  | 17 | 45965000 | A | G | 0.1769 | -0.1344 | 0.0241 | 2.58E-08 | -5.5679 | 953873 | IPF |
| rs56294117  | 17 | 45965417 | A | G | 0.1769 | -0.1435 | 0.0259 | 2.85E-08 | -5.5503 | 937232 | IPF |
| rs112415880 | 17 | 45965502 | A | G | 0.1768 | -0.1440 | 0.0259 | 2.54E-08 | -5.5709 | 937232 | IPF |
| rs62063291  | 17 | 45966012 | C | T | 0.1775 | -0.1318 | 0.0241 | 4.45E-08 | -5.4722 | 953873 | IPF |
| rs62063292  | 17 | 45966270 | T | C | 0.1775 | -0.1323 | 0.0241 | 3.89E-08 | -5.4956 | 953873 | IPF |
| rs62063293  | 17 | 45966453 | A | G | 0.1775 | -0.1323 | 0.0241 | 3.89E-08 | -5.4958 | 953873 | IPF |
| rs62063294  | 17 | 45966791 | A | G | 0.1775 | -0.1327 | 0.0241 | 3.61E-08 | -5.5091 | 953873 | IPF |
| rs17650973  | 17 | 45966854 | T | A | 0.1775 | -0.1327 | 0.0241 | 3.62E-08 | -5.5087 | 953873 | IPF |
| rs62063295  | 17 | 45967065 | T | C | 0.1775 | -0.1327 | 0.0241 | 3.61E-08 | -5.5087 | 953873 | IPF |
| rs17650991  | 17 | 45967142 | C | A | 0.1775 | -0.1324 | 0.0241 | 3.88E-08 | -5.4963 | 953873 | IPF |
| rs75145092  | 17 | 45967457 | A | T | 0.1775 | -0.1323 | 0.0241 | 3.90E-08 | -5.4954 | 953873 | IPF |
| rs113857334 | 17 | 45967574 | C | T | 0.1775 | -0.1324 | 0.0241 | 3.83E-08 | -5.4988 | 953873 | IPF |
| rs17572147  | 17 | 45967619 | G | A | 0.1774 | -0.1322 | 0.0241 | 4.11E-08 | -5.4863 | 953873 | IPF |
| rs77513497  | 17 | 45968108 | G | A | 0.1775 | -0.1323 | 0.0241 | 3.90E-08 | -5.4954 | 953873 | IPF |
| rs17572169  | 17 | 45968608 | T | C | 0.1775 | -0.1323 | 0.0241 | 3.91E-08 | -5.4946 | 953873 | IPF |
| rs62063296  | 17 | 45968836 | T | C | 0.1775 | -0.1324 | 0.0241 | 3.82E-08 | -5.4988 | 953873 | IPF |
| rs62641967  | 17 | 45969850 | G | T | 0.1871 | -0.1447 | 0.0245 | 3.32E-09 | -5.9145 | 819655 | IPF |
| rs74373419  | 17 | 45970243 | T | C | 0.1775 | -0.1323 | 0.0241 | 3.90E-08 | -5.4952 | 953873 | IPF |
| rs62063297  | 17 | 45970436 | T | A | 0.1775 | -0.1323 | 0.0241 | 3.90E-08 | -5.4952 | 953873 | IPF |
| rs62063298  | 17 | 45970957 | T | G | 0.1764 | -0.1336 | 0.0242 | 3.22E-08 | -5.5291 | 953873 | IPF |
| rs62063299  | 17 | 45970970 | C | T | 0.1764 | -0.1336 | 0.0242 | 3.21E-08 | -5.5293 | 953873 | IPF |
| rs62063300  | 17 | 45970984 | C | T | 0.1764 | -0.1336 | 0.0242 | 3.21E-08 | -5.5293 | 953873 | IPF |
| rs62063303  | 17 | 45971767 | C | T | 0.1775 | -0.1322 | 0.0241 | 4.04E-08 | -5.4890 | 953873 | IPF |
| rs75242405  | 17 | 45971963 | T | C | 0.1775 | -0.1323 | 0.0241 | 3.97E-08 | -5.4923 | 953873 | IPF |
| rs17651093  | 17 | 45972184 | A | G | 0.1776 | -0.1325 | 0.0241 | 3.72E-08 | -5.5036 | 953873 | IPF |
| rs17572248  | 17 | 45972501 | G | A | 0.1775 | -0.1321 | 0.0241 | 4.15E-08 | -5.4844 | 953873 | IPF |
| rs62063304  | 17 | 45972534 | G | A | 0.1774 | -0.1320 | 0.0241 | 4.30E-08 | -5.4778 | 953873 | IPF |
| rs62063305  | 17 | 45972916 | A | G | 0.1775 | -0.1322 | 0.0241 | 4.03E-08 | -5.4896 | 953873 | IPF |
| rs17651134  | 17 | 45972974 | A | G | 0.1775 | -0.1322 | 0.0241 | 3.99E-08 | -5.4915 | 953873 | IPF |
| rs62063306  | 17 | 45973029 | A | C | 0.1775 | -0.1321 | 0.0241 | 4.10E-08 | -5.4867 | 953873 | IPF |
| rs62063774  | 17 | 45973097 | C | T | 0.1775 | -0.1321 | 0.0241 | 4.10E-08 | -5.4863 | 953873 | IPF |
| rs62063775  | 17 | 45973457 | T | G | 0.1775 | -0.1324 | 0.0241 | 3.82E-08 | -5.4990 | 953873 | IPF |
| rs62063776  | 17 | 45973484 | G | A | 0.1775 | -0.1322 | 0.0241 | 4.07E-08 | -5.4880 | 953873 | IPF |
| rs117124984 | 17 | 45974222 | G | C | 0.1745 | -0.1326 | 0.0243 | 4.78E-08 | -5.4592 | 953873 | IPF |
| rs118087478 | 17 | 45974223 | G | T | 0.1745 | -0.1328 | 0.0243 | 4.55E-08 | -5.4681 | 953873 | IPF |
| rs77875796  | 17 | 45974246 | G | A | 0.1757 | -0.1340 | 0.0242 | 3.20E-08 | -5.5300 | 953873 | IPF |

|             |    |          |   |   |        |         |        |          |         |        |     |
|-------------|----|----------|---|---|--------|---------|--------|----------|---------|--------|-----|
| rs1800547   | 17 | 45974480 | G | A | 0.1775 | -0.1322 | 0.0241 | 3.99E-08 | -5.4915 | 953873 | IPF |
| rs17651213  | 17 | 45974558 | A | G | 0.1775 | -0.1322 | 0.0241 | 3.99E-08 | -5.4915 | 953873 | IPF |
| rs17572361  | 17 | 45974643 | C | T | 0.1768 | -0.1426 | 0.0259 | 3.46E-08 | -5.5164 | 937232 | IPF |
| rs17651243  | 17 | 45974918 | A | G | 0.1775 | -0.1322 | 0.0241 | 4.04E-08 | -5.4894 | 953873 | IPF |
| rs78104015  | 17 | 45975367 | G | A | 0.1776 | -0.1323 | 0.0241 | 3.87E-08 | -5.4965 | 953873 | IPF |
| rs62063777  | 17 | 45975805 | G | A | 0.1775 | -0.1323 | 0.0241 | 3.94E-08 | -5.4936 | 953873 | IPF |
| rs2217394   | 17 | 45976082 | G | A | 0.1775 | -0.1323 | 0.0241 | 3.96E-08 | -5.4928 | 953873 | IPF |
| rs62063778  | 17 | 45976623 | A | G | 0.1775 | -0.1323 | 0.0241 | 3.93E-08 | -5.4940 | 953873 | IPF |
| rs17651285  | 17 | 45976871 | A | G | 0.1775 | -0.1322 | 0.0241 | 4.00E-08 | -5.4907 | 953873 | IPF |
| rs17572467  | 17 | 45977022 | C | T | 0.1775 | -0.1322 | 0.0241 | 4.02E-08 | -5.4898 | 953873 | IPF |
| rs17572495  | 17 | 45977230 | G | T | 0.1775 | -0.1322 | 0.0241 | 4.02E-08 | -5.4900 | 953873 | IPF |
| rs62063779  | 17 | 45977305 | T | C | 0.1775 | -0.1320 | 0.0241 | 4.25E-08 | -5.4799 | 953873 | IPF |
| rs754513    | 17 | 45978272 | A | T | 0.1774 | -0.1324 | 0.0241 | 3.85E-08 | -5.4978 | 953873 | IPF |
| rs754512    | 17 | 45978281 | T | A | 0.1775 | -0.1325 | 0.0241 | 3.80E-08 | -5.5002 | 953873 | IPF |
| rs62063780  | 17 | 45978872 | G | A | 0.1775 | -0.1326 | 0.0241 | 3.66E-08 | -5.5065 | 953873 | IPF |
| rs2163129   | 17 | 45979067 | C | T | 0.1775 | -0.1326 | 0.0241 | 3.66E-08 | -5.5065 | 953873 | IPF |
| rs2163130   | 17 | 45979068 | A | G | 0.1768 | -0.1427 | 0.0259 | 3.41E-08 | -5.5188 | 937232 | IPF |
| rs1981997   | 17 | 45979401 | A | G | 0.1775 | -0.1321 | 0.0241 | 4.07E-08 | -5.4879 | 953873 | IPF |
| rs1981998   | 17 | 45979467 | A | G | 0.1776 | -0.1323 | 0.0241 | 3.96E-08 | -5.4928 | 953873 | IPF |
| rs17572613  | 17 | 45980638 | G | A | 0.1775 | -0.1327 | 0.0241 | 3.57E-08 | -5.5106 | 953873 | IPF |
| rs77527347  | 17 | 45980651 | T | G | 0.1775 | -0.1326 | 0.0241 | 3.62E-08 | -5.5085 | 953873 | IPF |
| rs17572627  | 17 | 45981263 | A | T | 0.1776 | -0.1327 | 0.0241 | 3.58E-08 | -5.5102 | 953873 | IPF |
| rs17651483  | 17 | 45981495 | A | C | 0.1776 | -0.1323 | 0.0241 | 3.93E-08 | -5.4936 | 953873 | IPF |
| rs62063783  | 17 | 45981849 | T | C | 0.1776 | -0.1324 | 0.0241 | 3.86E-08 | -5.4969 | 953873 | IPF |
| rs62063784  | 17 | 45982409 | G | A | 0.1776 | -0.1323 | 0.0241 | 3.88E-08 | -5.4961 | 953873 | IPF |
| rs56234850  | 17 | 45982882 | A | G | 0.1776 | -0.1324 | 0.0241 | 3.80E-08 | -5.4998 | 953873 | IPF |
| rs63750417  | 17 | 45983409 | T | C | 0.1776 | -0.1322 | 0.0241 | 3.94E-08 | -5.4933 | 953873 | IPF |
| rs62063786  | 17 | 45983657 | A | G | 0.1776 | -0.1327 | 0.0241 | 3.60E-08 | -5.5096 | 953873 | IPF |
| rs62063787  | 17 | 45983670 | C | T | 0.1776 | -0.1323 | 0.0241 | 3.84E-08 | -5.4981 | 953873 | IPF |
| rs17651549  | 17 | 45983912 | T | C | 0.1776 | -0.1322 | 0.0241 | 3.95E-08 | -5.4931 | 953873 | IPF |
| rs10445371  | 17 | 45988044 | A | G | 0.1776 | -0.1324 | 0.0241 | 3.79E-08 | -5.5005 | 953873 | IPF |
| rs919461    | 17 | 45988303 | T | A | 0.1776 | -0.1323 | 0.0241 | 3.87E-08 | -5.4963 | 953873 | IPF |
| rs919462    | 17 | 45988374 | T | C | 0.1776 | -0.1324 | 0.0241 | 3.85E-08 | -5.4975 | 953873 | IPF |
| rs919464    | 17 | 45988535 | T | C | 0.1776 | -0.1324 | 0.0241 | 3.86E-08 | -5.4971 | 953873 | IPF |
| rs62063794  | 17 | 45988722 | A | T | 0.1776 | -0.1325 | 0.0241 | 3.71E-08 | -5.5040 | 953873 | IPF |
| rs112385572 | 17 | 45988806 | G | A | 0.1776 | -0.1324 | 0.0241 | 3.80E-08 | -5.4996 | 953873 | IPF |
| rs17651700  | 17 | 45989268 | G | C | 0.1768 | -0.1427 | 0.0259 | 3.37E-08 | -5.5208 | 937232 | IPF |
| rs372810927 | 17 | 45989502 | A | C | 0.1826 | -0.1927 | 0.0346 | 2.62E-08 | -5.5654 | 735077 | IPF |
| rs111240522 | 17 | 45989508 | A | G | 0.1827 | -0.1934 | 0.0346 | 2.32E-08 | -5.5861 | 735077 | IPF |
| rs113134013 | 17 | 45989629 | T | C | 0.1776 | -0.1324 | 0.0241 | 3.79E-08 | -5.5000 | 953873 | IPF |
| rs76357066  | 17 | 45989680 | A | G | 0.1776 | -0.1323 | 0.0241 | 3.88E-08 | -5.4963 | 953873 | IPF |
| rs10445337  | 17 | 45990034 | C | T | 0.1777 | -0.1329 | 0.0241 | 3.38E-08 | -5.5205 | 953873 | IPF |
| rs79447161  | 17 | 45990142 | G | A | 0.1776 | -0.1327 | 0.0241 | 3.57E-08 | -5.5110 | 953873 | IPF |
| rs17651754  | 17 | 45990180 | C | T | 0.1776 | -0.1324 | 0.0241 | 3.87E-08 | -5.4967 | 953873 | IPF |
| rs10445338  | 17 | 45990316 | A | G | 0.1776 | -0.1323 | 0.0241 | 3.92E-08 | -5.4944 | 953873 | IPF |
| rs111652694 | 17 | 45990465 | C | T | 0.1776 | -0.1324 | 0.0241 | 3.87E-08 | -5.4967 | 953873 | IPF |
| rs75743061  | 17 | 45990746 | G | C | 0.1869 | -0.1446 | 0.0245 | 3.46E-09 | -5.9082 | 819655 | IPF |
| rs62063795  | 17 | 45990872 | T | C | 0.1776 | -0.1323 | 0.0241 | 3.93E-08 | -5.4942 | 953873 | IPF |
| rs62063796  | 17 | 45990923 | A | G | 0.1776 | -0.1323 | 0.0241 | 3.90E-08 | -5.4952 | 953873 | IPF |
| rs62063797  | 17 | 45990928 | C | G | 0.1776 | -0.1323 | 0.0241 | 3.91E-08 | -5.4951 | 953873 | IPF |
| rs77290642  | 17 | 45991114 | C | T | 0.1775 | -0.1322 | 0.0241 | 4.01E-08 | -5.4906 | 953873 | IPF |
| rs76618565  | 17 | 45991115 | A | G | 0.1774 | -0.1323 | 0.0241 | 3.94E-08 | -5.4935 | 953873 | IPF |
| rs62063798  | 17 | 45991177 | A | G | 0.1775 | -0.1322 | 0.0241 | 3.99E-08 | -5.4913 | 953873 | IPF |
| rs1052551   | 17 | 45991558 | A | G | 0.1776 | -0.1322 | 0.0241 | 3.99E-08 | -5.4913 | 953873 | IPF |
| rs62063800  | 17 | 45991832 | T | C | 0.1776 | -0.1324 | 0.0241 | 3.82E-08 | -5.4988 | 953873 | IPF |
| rs17651857  | 17 | 45992321 | G | A | 0.1776 | -0.1324 | 0.0241 | 3.87E-08 | -5.4965 | 953873 | IPF |
| rs74759276  | 17 | 45992402 | G | A | 0.1776 | -0.1327 | 0.0241 | 3.53E-08 | -5.5127 | 953873 | IPF |
| rs17651887  | 17 | 45992474 | A | G | 0.1776 | -0.1327 | 0.0241 | 3.55E-08 | -5.5119 | 953873 | IPF |
| rs78599197  | 17 | 45992604 | G | C | 0.1776 | -0.1328 | 0.0241 | 3.52E-08 | -5.5137 | 953873 | IPF |
| rs62063842  | 17 | 45992745 | C | G | 0.1776 | -0.1328 | 0.0241 | 3.52E-08 | -5.5133 | 953873 | IPF |
| rs55662347  | 17 | 45993179 | A | G | 0.1776 | -0.1328 | 0.0241 | 3.52E-08 | -5.5133 | 953873 | IPF |
| rs55913645  | 17 | 45993590 | A | T | 0.1776 | -0.1328 | 0.0241 | 3.51E-08 | -5.5139 | 953873 | IPF |
| rs17573175  | 17 | 45993723 | G | C | 0.1776 | -0.1328 | 0.0241 | 3.50E-08 | -5.5146 | 953873 | IPF |
| rs62063845  | 17 | 45993928 | C | T | 0.1776 | -0.1327 | 0.0241 | 3.55E-08 | -5.5121 | 953873 | IPF |
| rs62063846  | 17 | 45994308 | G | A | 0.1776 | -0.1327 | 0.0241 | 3.54E-08 | -5.5123 | 953873 | IPF |
| rs55736025  | 17 | 45994651 | A | C | 0.1776 | -0.1328 | 0.0241 | 3.52E-08 | -5.5135 | 953873 | IPF |
| rs55886080  | 17 | 45994675 | A | T | 0.1776 | -0.1327 | 0.0241 | 3.57E-08 | -5.5110 | 953873 | IPF |
| rs17573245  | 17 | 45995488 | C | T | 0.1776 | -0.1329 | 0.0241 | 3.44E-08 | -5.5175 | 953873 | IPF |
| rs17573266  | 17 | 45995515 | G | C | 0.1777 | -0.1329 | 0.0241 | 3.38E-08 | -5.5204 | 953873 | IPF |
| rs112572874 | 17 | 45995618 | G | A | 0.1793 | -0.1340 | 0.0240 | 2.44E-08 | -5.5775 | 953873 | IPF |
| rs17652036  | 17 | 45995661 | A | G | 0.1776 | -0.1327 | 0.0241 | 3.61E-08 | -5.5086 | 953873 | IPF |
| rs62063849  | 17 | 45995696 | G | T | 0.1779 | -0.1325 | 0.0241 | 3.70E-08 | -5.5047 | 953873 | IPF |
| rs17652066  | 17 | 45995779 | C | G | 0.1774 | -0.1330 | 0.0241 | 3.46E-08 | -5.5166 | 953873 | IPF |
| rs62063850  | 17 | 45996373 | A | G | 0.1776 | -0.1328 | 0.0241 | 3.53E-08 | -5.5131 | 953873 | IPF |

|             |    |          |   |   |        |         |        |          |         |        |     |
|-------------|----|----------|---|---|--------|---------|--------|----------|---------|--------|-----|
| rs1052553   | 17 | 45996523 | G | A | 0.1778 | -0.1335 | 0.0241 | 2.91E-08 | -5.5467 | 953873 | IPF |
| rs17652121  | 17 | 45996607 | C | T | 0.1776 | -0.1327 | 0.0241 | 3.50E-08 | -5.5143 | 953873 | IPF |
| rs62063851  | 17 | 45997069 | G | C | 0.1776 | -0.1323 | 0.0241 | 3.91E-08 | -5.4950 | 953873 | IPF |
| rs62063852  | 17 | 45997215 | G | A | 0.1776 | -0.1322 | 0.0241 | 4.13E-08 | -5.4852 | 953873 | IPF |
| rs62063853  | 17 | 45997247 | G | A | 0.1771 | -0.1328 | 0.0241 | 3.73E-08 | -5.5033 | 953873 | IPF |
| rs62063854  | 17 | 45997253 | A | G | 0.1771 | -0.1327 | 0.0241 | 3.83E-08 | -5.4983 | 953873 | IPF |
| rs2004673   | 17 | 45997733 | C | T | 0.1774 | -0.1328 | 0.0241 | 3.66E-08 | -5.5064 | 953873 | IPF |
| rs2004674   | 17 | 45997744 | T | A | 0.1774 | -0.1328 | 0.0241 | 3.69E-08 | -5.5052 | 953873 | IPF |
| rs62063855  | 17 | 45998169 | C | T | 0.1778 | -0.1326 | 0.0241 | 3.72E-08 | -5.5036 | 953873 | IPF |
| rs1078269   | 17 | 45998471 | C | T | 0.1778 | -0.1326 | 0.0241 | 3.70E-08 | -5.5047 | 953873 | IPF |
| rs1078268   | 17 | 45998535 | G | A | 0.1778 | -0.1326 | 0.0241 | 3.71E-08 | -5.5043 | 953873 | IPF |
| rs62063856  | 17 | 45999100 | G | A | 0.1777 | -0.1324 | 0.0241 | 3.87E-08 | -5.4968 | 953873 | IPF |
| rs62063857  | 17 | 45999299 | G | A | 0.1778 | -0.1320 | 0.0241 | 4.23E-08 | -5.4809 | 953873 | IPF |
| rs79959255  | 17 | 46000342 | T | G | 0.1778 | -0.1327 | 0.0241 | 3.68E-08 | -5.5055 | 953873 | IPF |
| rs56301633  | 17 | 46000484 | A | G | 0.1856 | -0.1494 | 0.0246 | 1.28E-09 | -6.0700 | 819655 | IPF |
| rs56108300  | 17 | 46000485 | A | T | 0.1765 | -0.1362 | 0.0242 | 1.84E-08 | -5.6271 | 953873 | IPF |
| rs62063859  | 17 | 46001250 | A | G | 0.1777 | -0.1320 | 0.0241 | 4.27E-08 | -5.4793 | 953873 | IPF |
| rs62064660  | 17 | 46001466 | A | G | 0.1777 | -0.1325 | 0.0241 | 3.82E-08 | -5.4988 | 953873 | IPF |
| rs62064661  | 17 | 46001526 | A | G | 0.1777 | -0.1324 | 0.0241 | 3.88E-08 | -5.4962 | 953873 | IPF |
| rs17573447  | 17 | 46002201 | T | C | 0.1778 | -0.1316 | 0.0241 | 4.69E-08 | -5.4627 | 953873 | IPF |
| rs62064662  | 17 | 46002355 | G | A | 0.1777 | -0.1324 | 0.0241 | 3.84E-08 | -5.4979 | 953873 | IPF |
| rs62064663  | 17 | 46002673 | G | T | 0.1780 | -0.1332 | 0.0241 | 3.18E-08 | -5.5311 | 953873 | IPF |
| rs62064664  | 17 | 46004096 | C | T | 0.1777 | -0.1324 | 0.0241 | 3.90E-08 | -5.4952 | 953873 | IPF |
| rs62064665  | 17 | 46004161 | C | T | 0.1777 | -0.1324 | 0.0241 | 3.91E-08 | -5.4948 | 953873 | IPF |
| rs111324579 | 17 | 46004815 | G | A | 0.1778 | -0.1327 | 0.0241 | 3.62E-08 | -5.5085 | 953873 | IPF |
| rs113201171 | 17 | 46004883 | T | A | 0.1777 | -0.1332 | 0.0241 | 3.25E-08 | -5.5273 | 953873 | IPF |
| rs62064666  | 17 | 46005148 | C | T | 0.1775 | -0.1322 | 0.0241 | 4.14E-08 | -5.4847 | 953873 | IPF |
| rs62064667  | 17 | 46005162 | T | A | 0.1779 | -0.1336 | 0.0241 | 3.03E-08 | -5.5397 | 953873 | IPF |
| rs17573593  | 17 | 46005237 | C | A | 0.1777 | -0.1323 | 0.0241 | 3.97E-08 | -5.4923 | 953873 | IPF |
| rs62064668  | 17 | 46005615 | A | G | 0.1778 | -0.1320 | 0.0241 | 4.23E-08 | -5.4807 | 953873 | IPF |
| rs17573607  | 17 | 46005715 | A | G | 0.1775 | -0.1317 | 0.0241 | 4.77E-08 | -5.4599 | 953873 | IPF |
| rs17652337  | 17 | 46005957 | T | C | 0.1786 | -0.1372 | 0.0241 | 1.28E-08 | -5.6888 | 953873 | IPF |
| rs62064669  | 17 | 46007310 | T | C | 0.1777 | -0.1322 | 0.0241 | 4.08E-08 | -5.4875 | 953873 | IPF |
| rs78962882  | 17 | 46007478 | C | G | 0.1777 | -0.1321 | 0.0241 | 4.16E-08 | -5.4838 | 953873 | IPF |
| rs62064670  | 17 | 46008486 | A | T | 0.1777 | -0.1322 | 0.0241 | 4.07E-08 | -5.4879 | 953873 | IPF |
| rs62064671  | 17 | 46008734 | C | T | 0.1777 | -0.1322 | 0.0241 | 4.08E-08 | -5.4875 | 953873 | IPF |
| rs62064672  | 17 | 46009155 | A | G | 0.1777 | -0.1322 | 0.0241 | 4.09E-08 | -5.4867 | 953873 | IPF |
| rs62064674  | 17 | 46011406 | A | C | 0.1777 | -0.1322 | 0.0241 | 4.04E-08 | -5.4892 | 953873 | IPF |
| rs62064675  | 17 | 46011560 | T | C | 0.1776 | -0.1321 | 0.0241 | 4.25E-08 | -5.4800 | 953873 | IPF |
| rs17652449  | 17 | 46011571 | C | G | 0.1871 | -0.1448 | 0.0245 | 3.42E-09 | -5.9098 | 819655 | IPF |
| rs76723223  | 17 | 46011742 | C | T | 0.1777 | -0.1323 | 0.0241 | 4.03E-08 | -5.4896 | 953873 | IPF |
| rs733966    | 17 | 46012197 | T | C | 0.1777 | -0.1320 | 0.0241 | 4.36E-08 | -5.4757 | 953873 | IPF |
| rs733967    | 17 | 46012324 | C | T | 0.1776 | -0.1325 | 0.0241 | 3.90E-08 | -5.4954 | 953873 | IPF |
| rs733968    | 17 | 46012349 | T | C | 0.1776 | -0.1324 | 0.0241 | 3.92E-08 | -5.4948 | 953873 | IPF |
| rs733969    | 17 | 46012361 | A | G | 0.1776 | -0.1324 | 0.0241 | 3.92E-08 | -5.4948 | 953873 | IPF |
| rs4283261   | 17 | 46012555 | T | C | 0.1777 | -0.1324 | 0.0241 | 3.99E-08 | -5.4915 | 953873 | IPF |
| rs62062265  | 17 | 46012669 | G | C | 0.1769 | -0.1433 | 0.0259 | 3.10E-08 | -5.5360 | 937232 | IPF |
| rs4306559   | 17 | 46012870 | C | T | 0.1777 | -0.1323 | 0.0241 | 4.04E-08 | -5.4892 | 953873 | IPF |
| rs747152    | 17 | 46012973 | C | T | 0.1777 | -0.1324 | 0.0241 | 3.92E-08 | -5.4946 | 953873 | IPF |
| rs12150254  | 17 | 46013089 | C | T | 0.1777 | -0.1323 | 0.0241 | 4.04E-08 | -5.4890 | 953873 | IPF |
| rs12150170  | 17 | 46013280 | G | A | 0.1777 | -0.1323 | 0.0241 | 4.04E-08 | -5.4889 | 953873 | IPF |
| rs12150515  | 17 | 46013319 | T | G | 0.1777 | -0.1323 | 0.0241 | 4.01E-08 | -5.4902 | 953873 | IPF |
| rs62062266  | 17 | 46013338 | G | A | 0.1777 | -0.1323 | 0.0241 | 4.03E-08 | -5.4898 | 953873 | IPF |
| rs17573858  | 17 | 46013430 | C | T | 0.1777 | -0.1324 | 0.0241 | 3.96E-08 | -5.4927 | 953873 | IPF |
| rs62062267  | 17 | 46013488 | T | C | 0.1777 | -0.1324 | 0.0241 | 3.96E-08 | -5.4929 | 953873 | IPF |
| rs62062268  | 17 | 46013492 | T | C | 0.1777 | -0.1324 | 0.0241 | 3.95E-08 | -5.4931 | 953873 | IPF |
| rs62062269  | 17 | 46013726 | C | G | 0.1777 | -0.1324 | 0.0241 | 3.93E-08 | -5.4940 | 953873 | IPF |
| rs62062270  | 17 | 46013829 | C | T | 0.1777 | -0.1324 | 0.0241 | 3.95E-08 | -5.4931 | 953873 | IPF |
| rs75534191  | 17 | 46014358 | A | G | 0.1777 | -0.1324 | 0.0241 | 3.94E-08 | -5.4938 | 953873 | IPF |
| rs9891103   | 17 | 46014520 | T | C | 0.1817 | -0.1334 | 0.0239 | 2.37E-08 | -5.5825 | 953873 | IPF |
| rs12150469  | 17 | 46015131 | C | T | 0.1777 | -0.1324 | 0.0241 | 3.98E-08 | -5.4915 | 953873 | IPF |
| rs12149995  | 17 | 46015435 | A | G | 0.1778 | -0.1333 | 0.0241 | 3.14E-08 | -5.5335 | 953873 | IPF |
| rs62062274  | 17 | 46015953 | A | G | 0.1777 | -0.1324 | 0.0241 | 3.93E-08 | -5.4940 | 953873 | IPF |
| rs62062275  | 17 | 46016130 | G | A | 0.1777 | -0.1324 | 0.0241 | 3.98E-08 | -5.4921 | 953873 | IPF |
| rs62062276  | 17 | 46016261 | G | A | 0.1778 | -0.1325 | 0.0241 | 3.85E-08 | -5.4975 | 953873 | IPF |
| rs62062278  | 17 | 46016494 | G | A | 0.1777 | -0.1324 | 0.0241 | 3.96E-08 | -5.4923 | 953873 | IPF |
| rs62062281  | 17 | 46016746 | G | A | 0.1777 | -0.1324 | 0.0241 | 3.95E-08 | -5.4927 | 953873 | IPF |
| rs62062282  | 17 | 46017008 | G | A | 0.1777 | -0.1324 | 0.0241 | 3.96E-08 | -5.4927 | 953873 | IPF |
| rs17652502  | 17 | 46017105 | A | G | 0.1777 | -0.1324 | 0.0241 | 3.90E-08 | -5.4954 | 953873 | IPF |
| rs2316948   | 17 | 46017301 | G | C | 0.1777 | -0.1324 | 0.0241 | 3.97E-08 | -5.4919 | 953873 | IPF |
| rs111976319 | 17 | 46017969 | A | C | 0.1777 | -0.1324 | 0.0241 | 3.95E-08 | -5.4931 | 953873 | IPF |
| rs62062284  | 17 | 46018204 | A | G | 0.1777 | -0.1323 | 0.0241 | 4.04E-08 | -5.4890 | 953873 | IPF |
| rs62062285  | 17 | 46018295 | G | T | 0.1777 | -0.1324 | 0.0241 | 3.97E-08 | -5.4923 | 953873 | IPF |
| rs62062286  | 17 | 46019120 | T | C | 0.1779 | -0.1323 | 0.0241 | 4.04E-08 | -5.4892 | 953873 | IPF |

|             |    |          |   |   |        |         |        |          |         |        |     |
|-------------|----|----------|---|---|--------|---------|--------|----------|---------|--------|-----|
| rs62062289  | 17 | 46019869 | C | G | 0.1777 | -0.1324 | 0.0241 | 3.97E-08 | -5.4919 | 953873 | IPF |
| rs17573907  | 17 | 46021716 | T | C | 0.1777 | -0.1339 | 0.0241 | 2.76E-08 | -5.5562 | 953873 | IPF |
| rs62062290  | 17 | 46021763 | A | C | 0.1776 | -0.1333 | 0.0241 | 3.23E-08 | -5.5285 | 953873 | IPF |
| rs62062292  | 17 | 46022443 | C | A | 0.1777 | -0.1323 | 0.0241 | 4.05E-08 | -5.4886 | 953873 | IPF |
| rs77747656  | 17 | 46022461 | G | C | 0.1777 | -0.1324 | 0.0241 | 3.92E-08 | -5.4942 | 953873 | IPF |
| rs62062293  | 17 | 46023187 | A | C | 0.1777 | -0.1324 | 0.0241 | 3.96E-08 | -5.4929 | 953873 | IPF |
| rs62062294  | 17 | 46023300 | C | A | 0.1777 | -0.1328 | 0.0241 | 3.59E-08 | -5.5104 | 953873 | IPF |
| rs62062295  | 17 | 46023540 | G | A | 0.1777 | -0.1328 | 0.0241 | 3.57E-08 | -5.5108 | 953873 | IPF |
| rs62062296  | 17 | 46023550 | T | C | 0.1777 | -0.1328 | 0.0241 | 3.62E-08 | -5.5087 | 953873 | IPF |
| rs62062297  | 17 | 46023638 | G | A | 0.1777 | -0.1328 | 0.0241 | 3.61E-08 | -5.5091 | 953873 | IPF |
| rs1052587   | 17 | 46025238 | C | T | 0.1777 | -0.1322 | 0.0241 | 4.05E-08 | -5.4887 | 953873 | IPF |
| rs1052590   | 17 | 46025272 | G | A | 0.1776 | -0.1324 | 0.0241 | 3.99E-08 | -5.4912 | 953873 | IPF |
| rs1052594   | 17 | 46025323 | C | G | 0.1776 | -0.1324 | 0.0241 | 3.96E-08 | -5.4925 | 953873 | IPF |
| rs17574040  | 17 | 46025499 | C | A | 0.1777 | -0.1328 | 0.0241 | 3.60E-08 | -5.5095 | 953873 | IPF |
| rs16940799  | 17 | 46025567 | C | T | 0.1777 | -0.1338 | 0.0241 | 2.88E-08 | -5.5484 | 953873 | IPF |
| rs7687      | 17 | 46025930 | C | T | 0.1777 | -0.1324 | 0.0241 | 3.96E-08 | -5.4929 | 953873 | IPF |
| rs17652748  | 17 | 46026250 | T | C | 0.1777 | -0.1323 | 0.0241 | 4.03E-08 | -5.4896 | 953873 | IPF |
| rs75010486  | 17 | 46026459 | C | T | 0.1760 | -0.1331 | 0.0242 | 4.04E-08 | -5.4893 | 953873 | IPF |
| rs16940806  | 17 | 46026460 | A | G | 0.1760 | -0.1330 | 0.0242 | 4.11E-08 | -5.4858 | 953873 | IPF |
| rs2158257   | 17 | 46026977 | C | A | 0.1777 | -0.1324 | 0.0241 | 3.96E-08 | -5.4925 | 953873 | IPF |
| rs17574228  | 17 | 46027143 | C | T | 0.1777 | -0.1324 | 0.0241 | 3.94E-08 | -5.4934 | 953873 | IPF |
| rs78681971  | 17 | 46028853 | T | C | 0.1776 | -0.1327 | 0.0241 | 3.85E-08 | -5.4975 | 953873 | IPF |
| rs79772576  | 17 | 46028854 | G | A | 0.1777 | -0.1328 | 0.0241 | 3.76E-08 | -5.5018 | 953873 | IPF |
| rs7350928   | 17 | 46030734 | T | C | 0.1777 | -0.1324 | 0.0241 | 3.94E-08 | -5.4938 | 953873 | IPF |
| rs17574361  | 17 | 46030836 | G | A | 0.1777 | -0.1324 | 0.0241 | 4.01E-08 | -5.4906 | 953873 | IPF |
| rs17652961  | 17 | 46030989 | A | G | 0.1777 | -0.1324 | 0.0241 | 3.94E-08 | -5.4938 | 953873 | IPF |
| rs17574425  | 17 | 46031822 | G | C | 0.1777 | -0.1323 | 0.0241 | 4.04E-08 | -5.4890 | 953873 | IPF |
| rs55881134  | 17 | 46031882 | A | G | 0.1777 | -0.1323 | 0.0241 | 4.04E-08 | -5.4892 | 953873 | IPF |
| rs1076222   | 17 | 46032403 | G | C | 0.1777 | -0.1323 | 0.0241 | 3.99E-08 | -5.4913 | 953873 | IPF |
| rs7350980   | 17 | 46032905 | A | G | 0.1807 | -0.1320 | 0.0239 | 3.38E-08 | -5.5208 | 953873 | IPF |
| rs36076725  | 17 | 46033166 | A | G | 0.1777 | -0.1320 | 0.0241 | 4.32E-08 | -5.4776 | 953873 | IPF |
| rs35833914  | 17 | 46033175 | A | G | 0.1777 | -0.1324 | 0.0241 | 3.95E-08 | -5.4936 | 953873 | IPF |
| rs4597358   | 17 | 46033304 | G | C | 0.1807 | -0.1320 | 0.0239 | 3.33E-08 | -5.5229 | 953873 | IPF |
| rs77009866  | 17 | 46033522 | T | A | 0.1777 | -0.1324 | 0.0241 | 3.98E-08 | -5.4921 | 953873 | IPF |
| rs62062321  | 17 | 46033743 | G | A | 0.1777 | -0.1324 | 0.0241 | 3.96E-08 | -5.4929 | 953873 | IPF |
| rs17574604  | 17 | 46034247 | G | A | 0.1777 | -0.1324 | 0.0241 | 3.93E-08 | -5.4942 | 953873 | IPF |
| rs17653162  | 17 | 46034461 | A | C | 0.1777 | -0.1324 | 0.0241 | 3.94E-08 | -5.4938 | 953873 | IPF |
| rs62062322  | 17 | 46035019 | G | A | 0.1777 | -0.1324 | 0.0241 | 3.93E-08 | -5.4938 | 953873 | IPF |
| rs17653193  | 17 | 46035075 | A | G | 0.1777 | -0.1324 | 0.0241 | 3.93E-08 | -5.4938 | 953873 | IPF |
| rs17653211  | 17 | 46035272 | C | T | 0.1777 | -0.1322 | 0.0241 | 4.06E-08 | -5.4885 | 953873 | IPF |
| rs17653255  | 17 | 46035377 | A | C | 0.1777 | -0.1324 | 0.0241 | 3.95E-08 | -5.4934 | 953873 | IPF |
| rs4608377   | 17 | 46035993 | C | T | 0.1777 | -0.1324 | 0.0241 | 3.97E-08 | -5.4921 | 953873 | IPF |
| rs12185225  | 17 | 46036125 | C | T | 0.1777 | -0.1324 | 0.0241 | 3.95E-08 | -5.4934 | 953873 | IPF |
| rs12150438  | 17 | 46036597 | T | C | 0.1777 | -0.1325 | 0.0241 | 3.86E-08 | -5.4976 | 953873 | IPF |
| rs12150162  | 17 | 46036852 | C | T | 0.1777 | -0.1324 | 0.0241 | 3.94E-08 | -5.4934 | 953873 | IPF |
| rs62062134  | 17 | 46037066 | C | A | 0.1777 | -0.1324 | 0.0241 | 3.94E-08 | -5.4938 | 953873 | IPF |
| rs17574796  | 17 | 46037708 | C | T | 0.1777 | -0.1323 | 0.0241 | 4.03E-08 | -5.4898 | 953873 | IPF |
| rs17574824  | 17 | 46037741 | T | C | 0.1777 | -0.1324 | 0.0241 | 3.96E-08 | -5.4925 | 953873 | IPF |
| rs12185243  | 17 | 46037985 | C | T | 0.1777 | -0.1325 | 0.0241 | 3.88E-08 | -5.4961 | 953873 | IPF |
| rs8077487   | 17 | 46038074 | C | T | 0.1807 | -0.1321 | 0.0239 | 3.29E-08 | -5.5252 | 953873 | IPF |
| rs11079729  | 17 | 46038203 | A | C | 0.1777 | -0.1324 | 0.0241 | 3.96E-08 | -5.4925 | 953873 | IPF |
| rs12150542  | 17 | 46038364 | A | G | 0.1777 | -0.1323 | 0.0241 | 4.00E-08 | -5.4909 | 953873 | IPF |
| rs12150090  | 17 | 46038520 | T | C | 0.1777 | -0.1323 | 0.0241 | 3.99E-08 | -5.4913 | 953873 | IPF |
| rs41437445  | 17 | 46038872 | A | G | 0.1777 | -0.1324 | 0.0241 | 3.97E-08 | -5.4921 | 953873 | IPF |
| rs62062136  | 17 | 46038946 | C | T | 0.1777 | -0.1324 | 0.0241 | 3.95E-08 | -5.4929 | 953873 | IPF |
| rs7221390   | 17 | 46039584 | G | T | 0.1807 | -0.1320 | 0.0239 | 3.33E-08 | -5.5231 | 953873 | IPF |
| rs34043286  | 17 | 46039753 | G | A | 0.1777 | -0.1322 | 0.0241 | 4.05E-08 | -5.4887 | 953873 | IPF |
| rs10514897  | 17 | 46040031 | G | A | 0.1777 | -0.1323 | 0.0241 | 4.05E-08 | -5.4888 | 953873 | IPF |
| rs62062137  | 17 | 46041482 | A | G | 0.1776 | -0.1321 | 0.0241 | 4.34E-08 | -5.4765 | 953873 | IPF |
| rs41382552  | 17 | 46041633 | G | A | 0.1777 | -0.1323 | 0.0241 | 4.01E-08 | -5.4905 | 953873 | IPF |
| rs55893711  | 17 | 46041954 | T | C | 0.1778 | -0.1323 | 0.0241 | 4.07E-08 | -5.4880 | 953873 | IPF |
| rs10514898  | 17 | 46042270 | C | A | 0.1777 | -0.1323 | 0.0241 | 4.05E-08 | -5.4884 | 953873 | IPF |
| rs41374248  | 17 | 46043076 | G | A | 0.1777 | -0.1324 | 0.0241 | 3.95E-08 | -5.4931 | 953873 | IPF |
| rs79252344  | 17 | 46043242 | G | A | 0.1777 | -0.1323 | 0.0241 | 4.01E-08 | -5.4900 | 953873 | IPF |
| rs62063670  | 17 | 46045882 | C | T | 0.1777 | -0.1323 | 0.0241 | 4.02E-08 | -5.4900 | 953873 | IPF |
| rs74571696  | 17 | 46046319 | A | G | 0.1778 | -0.1323 | 0.0241 | 4.02E-08 | -5.4902 | 953873 | IPF |
| rs79698033  | 17 | 46046351 | T | C | 0.1777 | -0.1323 | 0.0241 | 4.02E-08 | -5.4900 | 953873 | IPF |
| rs79065019  | 17 | 46047169 | C | T | 0.1779 | -0.1335 | 0.0241 | 3.06E-08 | -5.5382 | 953873 | IPF |
| rs62063671  | 17 | 46047471 | G | A | 0.1770 | -0.1429 | 0.0259 | 3.37E-08 | -5.5211 | 953873 | IPF |
| rs112578465 | 17 | 46047700 | T | C | 0.1777 | -0.1323 | 0.0241 | 4.04E-08 | -5.4890 | 953873 | IPF |
| rs62063673  | 17 | 46048118 | G | T | 0.1777 | -0.1324 | 0.0241 | 3.99E-08 | -5.4917 | 953873 | IPF |
| rs12150336  | 17 | 46048338 | T | C | 0.1777 | -0.1321 | 0.0241 | 4.26E-08 | -5.4800 | 953873 | IPF |
| rs12150570  | 17 | 46048852 | A | G | 0.1777 | -0.1330 | 0.0241 | 3.44E-08 | -5.5173 | 953873 | IPF |
| rs7218319   | 17 | 46048999 | T | C | 0.1805 | -0.1333 | 0.0239 | 2.52E-08 | -5.5719 | 953873 | IPF |



|             |    |          |   |   |        |         |        |          |         |        |     |
|-------------|----|----------|---|---|--------|---------|--------|----------|---------|--------|-----|
| rs74977736  | 17 | 46049611 | C | G | 0.1777 | -0.1327 | 0.0241 | 3.70E-08 | -5.5049 | 953873 | IPF |
| rs12150447  | 17 | 46050759 | C | A | 0.1777 | -0.1323 | 0.0241 | 3.99E-08 | -5.4913 | 953873 | IPF |
| rs12150064  | 17 | 46051041 | A | C | 0.1777 | -0.1325 | 0.0241 | 3.85E-08 | -5.4978 | 953873 | IPF |
| rs17653836  | 17 | 46051510 | A | T | 0.1777 | -0.1323 | 0.0241 | 4.03E-08 | -5.4892 | 953873 | IPF |
| rs17575423  | 17 | 46051887 | C | T | 0.1777 | -0.1323 | 0.0241 | 4.03E-08 | -5.4892 | 953873 | IPF |
| rs62063676  | 17 | 46052434 | A | G | 0.1777 | -0.1323 | 0.0241 | 4.01E-08 | -5.4905 | 953873 | IPF |
| rs62063677  | 17 | 46052519 | T | C | 0.1777 | -0.1322 | 0.0241 | 4.10E-08 | -5.4867 | 953873 | IPF |
| rs79649865  | 17 | 46053221 | G | T | 0.1777 | -0.1323 | 0.0241 | 4.07E-08 | -5.4877 | 953873 | IPF |
| rs111853996 | 17 | 46053512 | G | A | 0.1777 | -0.1321 | 0.0241 | 4.21E-08 | -5.4819 | 953873 | IPF |
| rs112674766 | 17 | 46053558 | T | A | 0.1777 | -0.1322 | 0.0241 | 4.13E-08 | -5.4852 | 953873 | IPF |
| rs112074397 | 17 | 46053656 | C | T | 0.1777 | -0.1322 | 0.0241 | 4.15E-08 | -5.4842 | 953873 | IPF |
| rs62063680  | 17 | 46054193 | A | C | 0.1777 | -0.1322 | 0.0241 | 4.12E-08 | -5.4857 | 953873 | IPF |
| rs62063681  | 17 | 46054226 | G | A | 0.1777 | -0.1322 | 0.0241 | 4.11E-08 | -5.4861 | 953873 | IPF |
| rs62063682  | 17 | 46054256 | A | G | 0.1777 | -0.1330 | 0.0241 | 3.42E-08 | -5.5188 | 953873 | IPF |
| rs62063683  | 17 | 46054351 | A | G | 0.1777 | -0.1323 | 0.0241 | 4.04E-08 | -5.4892 | 953873 | IPF |
| rs79180862  | 17 | 46054432 | T | C | 0.1777 | -0.1323 | 0.0241 | 4.02E-08 | -5.4900 | 953873 | IPF |
| rs62063684  | 17 | 46054903 | C | T | 0.1777 | -0.1329 | 0.0241 | 3.49E-08 | -5.5151 | 953873 | IPF |
| rs62063687  | 17 | 46055226 | G | A | 0.1777 | -0.1323 | 0.0241 | 4.06E-08 | -5.4882 | 953873 | IPF |
| rs17575437  | 17 | 46055665 | A | T | 0.1777 | -0.1323 | 0.0241 | 4.02E-08 | -5.4900 | 953873 | IPF |
| rs17653889  | 17 | 46055704 | T | A | 0.1777 | -0.1323 | 0.0241 | 4.00E-08 | -5.4909 | 953873 | IPF |
| rs17653906  | 17 | 46055776 | A | G | 0.1777 | -0.1322 | 0.0241 | 4.09E-08 | -5.4871 | 953873 | IPF |
| rs62060761  | 17 | 46055796 | C | A | 0.1777 | -0.1322 | 0.0241 | 4.12E-08 | -5.4857 | 953873 | IPF |
| rs62060762  | 17 | 46056030 | A | G | 0.1777 | -0.1326 | 0.0241 | 3.77E-08 | -5.5013 | 953873 | IPF |
| rs62060763  | 17 | 46056037 | C | T | 0.1777 | -0.1326 | 0.0241 | 3.80E-08 | -5.5001 | 953873 | IPF |
| rs111259120 | 17 | 46056168 | T | C | 0.1777 | -0.1323 | 0.0241 | 4.06E-08 | -5.4884 | 953873 | IPF |
| rs62060764  | 17 | 46056267 | G | A | 0.1777 | -0.1327 | 0.0241 | 3.71E-08 | -5.5041 | 953873 | IPF |
| rs62060765  | 17 | 46056282 | C | A | 0.1777 | -0.1326 | 0.0241 | 3.74E-08 | -5.5029 | 953873 | IPF |
| rs17575507  | 17 | 46056729 | G | A | 0.1777 | -0.1322 | 0.0241 | 4.10E-08 | -5.4867 | 953873 | IPF |
| rs876944    | 17 | 46057025 | T | G | 0.1777 | -0.1323 | 0.0241 | 4.04E-08 | -5.4892 | 953873 | IPF |
| rs62060767  | 17 | 46057544 | A | G | 0.1777 | -0.1323 | 0.0241 | 4.04E-08 | -5.4892 | 953873 | IPF |
| rs62060768  | 17 | 46057618 | A | G | 0.1778 | -0.1325 | 0.0241 | 3.81E-08 | -5.4994 | 953873 | IPF |
| rs62060769  | 17 | 46057660 | C | G | 0.1777 | -0.1323 | 0.0241 | 4.04E-08 | -5.4892 | 953873 | IPF |
| rs1107820   | 17 | 46057993 | C | T | 0.1777 | -0.1323 | 0.0241 | 4.04E-08 | -5.4888 | 953873 | IPF |
| rs17575556  | 17 | 46058461 | A | G | 0.1777 | -0.1323 | 0.0241 | 4.02E-08 | -5.4896 | 953873 | IPF |
| rs17653998  | 17 | 46058619 | G | A | 0.1777 | -0.1323 | 0.0241 | 4.07E-08 | -5.4880 | 953873 | IPF |
| rs111372048 | 17 | 46059211 | C | A | 0.1777 | -0.1322 | 0.0241 | 4.09E-08 | -5.4869 | 953873 | IPF |
| rs62060785  | 17 | 46059268 | A | G | 0.1777 | -0.1323 | 0.0241 | 4.05E-08 | -5.4888 | 953873 | IPF |
| rs62060786  | 17 | 46059397 | T | C | 0.1777 | -0.1323 | 0.0241 | 4.07E-08 | -5.4880 | 953873 | IPF |
| rs62060787  | 17 | 46059437 | T | G | 0.1777 | -0.1323 | 0.0241 | 4.07E-08 | -5.4877 | 953873 | IPF |
| rs55714296  | 17 | 46059823 | T | A | 0.1777 | -0.1324 | 0.0241 | 3.95E-08 | -5.4934 | 953873 | IPF |
| rs55690782  | 17 | 46059945 | A | G | 0.1778 | -0.1325 | 0.0241 | 3.84E-08 | -5.4977 | 953873 | IPF |
| rs17654016  | 17 | 46060559 | C | T | 0.1777 | -0.1324 | 0.0241 | 3.97E-08 | -5.4921 | 953873 | IPF |
| rs7220752   | 17 | 46060835 | C | T | 0.1806 | -0.1321 | 0.0239 | 3.31E-08 | -5.5241 | 953873 | IPF |
| rs2316951   | 17 | 46061717 | C | G | 0.1777 | -0.1323 | 0.0241 | 4.07E-08 | -5.4880 | 953873 | IPF |
| rs2316952   | 17 | 46061824 | C | G | 0.1777 | -0.1323 | 0.0241 | 4.06E-08 | -5.4880 | 953873 | IPF |
| rs2316953   | 17 | 46062975 | A | G | 0.1777 | -0.1323 | 0.0241 | 4.01E-08 | -5.4903 | 953873 | IPF |
| rs12150127  | 17 | 46064366 | A | G | 0.1777 | -0.1322 | 0.0241 | 4.17E-08 | -5.4832 | 953873 | IPF |
| rs62060792  | 17 | 46064589 | A | T | 0.1777 | -0.1322 | 0.0241 | 4.18E-08 | -5.4832 | 953873 | IPF |
| rs76307183  | 17 | 46064755 | A | G | 0.1777 | -0.1322 | 0.0241 | 4.15E-08 | -5.4844 | 953873 | IPF |
| rs62060793  | 17 | 46065061 | G | A | 0.1777 | -0.1322 | 0.0241 | 4.11E-08 | -5.4861 | 953873 | IPF |
| rs62060794  | 17 | 46065200 | T | C | 0.1777 | -0.1322 | 0.0241 | 4.09E-08 | -5.4867 | 953873 | IPF |
| rs62060795  | 17 | 46065297 | T | C | 0.1777 | -0.1321 | 0.0241 | 4.16E-08 | -5.4841 | 953873 | IPF |
| rs17575773  | 17 | 46065513 | T | C | 0.1777 | -0.1322 | 0.0241 | 4.11E-08 | -5.4857 | 953873 | IPF |
| rs62060797  | 17 | 46065978 | A | G | 0.1777 | -0.1323 | 0.0241 | 4.07E-08 | -5.4876 | 953873 | IPF |
| rs12150344  | 17 | 46066118 | A | G | 0.1777 | -0.1323 | 0.0241 | 4.07E-08 | -5.4880 | 953873 | IPF |
| rs62060798  | 17 | 46066786 | C | T | 0.1777 | -0.1323 | 0.0241 | 4.08E-08 | -5.4876 | 953873 | IPF |
| rs62060799  | 17 | 46066885 | T | G | 0.1777 | -0.1323 | 0.0241 | 4.08E-08 | -5.4876 | 953873 | IPF |
| rs17575822  | 17 | 46066979 | G | A | 0.1777 | -0.1323 | 0.0241 | 4.03E-08 | -5.4896 | 953873 | IPF |
| rs17575850  | 17 | 46067021 | A | C | 0.1777 | -0.1321 | 0.0241 | 4.29E-08 | -5.4788 | 953873 | IPF |
| rs17659731  | 17 | 46067268 | A | G | 0.1776 | -0.1321 | 0.0241 | 4.24E-08 | -5.4806 | 953873 | IPF |
| rs75641221  | 17 | 46068007 | C | T | 0.1777 | -0.1321 | 0.0241 | 4.24E-08 | -5.4807 | 953873 | IPF |
| rs62060800  | 17 | 46068226 | G | A | 0.1777 | -0.1322 | 0.0241 | 4.15E-08 | -5.4844 | 953873 | IPF |
| rs62060801  | 17 | 46068494 | G | A | 0.1777 | -0.1322 | 0.0241 | 4.16E-08 | -5.4840 | 953873 | IPF |
| rs17659743  | 17 | 46068799 | G | C | 0.1769 | -0.1425 | 0.0259 | 3.65E-08 | -5.5070 | 937232 | IPF |
| rs62060802  | 17 | 46068970 | C | A | 0.1777 | -0.1320 | 0.0241 | 4.38E-08 | -5.4753 | 953873 | IPF |
| rs75975083  | 17 | 46068991 | C | T | 0.1777 | -0.1320 | 0.0241 | 4.36E-08 | -5.4757 | 953873 | IPF |
| rs77950913  | 17 | 46069085 | C | T | 0.1777 | -0.1321 | 0.0241 | 4.25E-08 | -5.4800 | 953873 | IPF |
| rs79782347  | 17 | 46069201 | C | T | 0.1777 | -0.1321 | 0.0241 | 4.26E-08 | -5.4800 | 953873 | IPF |
| rs56318865  | 17 | 46070045 | A | G | 0.1777 | -0.1322 | 0.0241 | 4.10E-08 | -5.4865 | 953873 | IPF |
| rs56041778  | 17 | 46070145 | C | G | 0.1777 | -0.1320 | 0.0241 | 4.33E-08 | -5.4767 | 953873 | IPF |
| rs55947022  | 17 | 46070208 | A | G | 0.1776 | -0.1320 | 0.0241 | 4.37E-08 | -5.4754 | 953873 | IPF |
| rs55929190  | 17 | 46070233 | C | G | 0.1776 | -0.1320 | 0.0241 | 4.37E-08 | -5.4754 | 953873 | IPF |
| rs56323408  | 17 | 46070355 | T | C | 0.1777 | -0.1322 | 0.0241 | 4.09E-08 | -5.4867 | 953873 | IPF |
| rs55831516  | 17 | 46070901 | T | C | 0.1777 | -0.1327 | 0.0241 | 3.67E-08 | -5.5060 | 953873 | IPF |

|             |    |          |   |   |        |         |        |          |         |        |     |
|-------------|----|----------|---|---|--------|---------|--------|----------|---------|--------|-----|
| rs62060809  | 17 | 46071247 | A | G | 0.1777 | -0.1322 | 0.0241 | 4.14E-08 | -5.4848 | 953873 | IPF |
| rs62060810  | 17 | 46071308 | G | A | 0.1777 | -0.1322 | 0.0241 | 4.14E-08 | -5.4848 | 953873 | IPF |
| rs1117253   | 17 | 46071931 | C | A | 0.1777 | -0.1315 | 0.0241 | 4.84E-08 | -5.4572 | 953873 | IPF |
| rs12150625  | 17 | 46072082 | G | C | 0.1777 | -0.1321 | 0.0241 | 4.21E-08 | -5.4817 | 953873 | IPF |
| rs12150627  | 17 | 46072171 | G | C | 0.1777 | -0.1325 | 0.0241 | 3.90E-08 | -5.4955 | 953873 | IPF |
| rs12150628  | 17 | 46072215 | T | C | 0.1777 | -0.1322 | 0.0241 | 4.16E-08 | -5.4840 | 953873 | IPF |
| rs12150611  | 17 | 46072375 | A | G | 0.1777 | -0.1322 | 0.0241 | 4.14E-08 | -5.4848 | 953873 | IPF |
| rs74850776  | 17 | 46072676 | C | T | 0.1777 | -0.1322 | 0.0241 | 4.14E-08 | -5.4848 | 953873 | IPF |
| rs974295    | 17 | 46072786 | T | A | 0.1777 | -0.1320 | 0.0241 | 4.21E-08 | -5.4818 | 953873 | IPF |
| rs974293    | 17 | 46072867 | A | G | 0.1777 | -0.1322 | 0.0241 | 4.18E-08 | -5.4832 | 953873 | IPF |
| rs974292    | 17 | 46073098 | C | T | 0.1777 | -0.1323 | 0.0241 | 4.04E-08 | -5.4891 | 953873 | IPF |
| rs974291    | 17 | 46073114 | T | A | 0.1777 | -0.1322 | 0.0241 | 4.13E-08 | -5.4852 | 953873 | IPF |
| rs12150551  | 17 | 46073554 | C | T | 0.1777 | -0.1322 | 0.0241 | 4.17E-08 | -5.4838 | 953873 | IPF |
| rs12150558  | 17 | 46073790 | C | T | 0.1777 | -0.1322 | 0.0241 | 4.14E-08 | -5.4848 | 953873 | IPF |
| rs9907738   | 17 | 46074180 | G | T | 0.1807 | -0.1317 | 0.0239 | 3.58E-08 | -5.5102 | 953873 | IPF |
| rs62060812  | 17 | 46074301 | G | A | 0.1777 | -0.1322 | 0.0241 | 4.12E-08 | -5.4857 | 953873 | IPF |
| rs62060834  | 17 | 46074331 | T | A | 0.1777 | -0.1322 | 0.0241 | 4.14E-08 | -5.4848 | 953873 | IPF |
| rs62060835  | 17 | 46075024 | T | C | 0.1778 | -0.1322 | 0.0241 | 4.09E-08 | -5.4871 | 953873 | IPF |
| rs62060836  | 17 | 46075081 | A | G | 0.1777 | -0.1322 | 0.0241 | 4.16E-08 | -5.4840 | 953873 | IPF |
| rs62060838  | 17 | 46075778 | G | A | 0.1777 | -0.1322 | 0.0241 | 4.14E-08 | -5.4848 | 953873 | IPF |
| rs62060839  | 17 | 46075861 | G | A | 0.1777 | -0.1322 | 0.0241 | 4.13E-08 | -5.4852 | 953873 | IPF |
| rs62060840  | 17 | 46075892 | G | A | 0.1778 | -0.1324 | 0.0241 | 3.93E-08 | -5.4940 | 953873 | IPF |
| rs62060841  | 17 | 46076020 | T | A | 0.1777 | -0.1322 | 0.0241 | 4.09E-08 | -5.4869 | 953873 | IPF |
| rs62060842  | 17 | 46076241 | A | T | 0.1777 | -0.1321 | 0.0241 | 4.22E-08 | -5.4813 | 953873 | IPF |
| rs62060843  | 17 | 46076260 | T | C | 0.1871 | -0.1445 | 0.0245 | 3.67E-09 | -5.8984 | 819655 | IPF |
| rs62060845  | 17 | 46077027 | G | A | 0.1777 | -0.1322 | 0.0241 | 4.17E-08 | -5.4836 | 953873 | IPF |
| rs62060846  | 17 | 46077095 | C | A | 0.1777 | -0.1322 | 0.0241 | 4.17E-08 | -5.4836 | 953873 | IPF |
| rs74481389  | 17 | 46077241 | C | T | 0.1777 | -0.1322 | 0.0241 | 4.16E-08 | -5.4840 | 953873 | IPF |
| rs62060847  | 17 | 46077580 | T | C | 0.1777 | -0.1322 | 0.0241 | 4.15E-08 | -5.4844 | 953873 | IPF |
| rs56100031  | 17 | 46077791 | T | C | 0.1770 | -0.1427 | 0.0259 | 3.49E-08 | -5.5148 | 937232 | IPF |
| rs55972730  | 17 | 46078341 | T | C | 0.1777 | -0.1321 | 0.0241 | 4.19E-08 | -5.4828 | 953873 | IPF |
| rs2066899   | 17 | 46078366 | T | C | 0.1807 | -0.1317 | 0.0239 | 3.56E-08 | -5.5114 | 953873 | IPF |
| rs17659881  | 17 | 46080231 | G | A | 0.1778 | -0.1322 | 0.0241 | 4.09E-08 | -5.4867 | 953873 | IPF |
| rs62060850  | 17 | 46080616 | T | A | 0.1777 | -0.1321 | 0.0241 | 4.21E-08 | -5.4817 | 953873 | IPF |
| rs62060851  | 17 | 46080626 | C | T | 0.1770 | -0.1426 | 0.0259 | 3.56E-08 | -5.5112 | 937232 | IPF |
| rs1476554   | 17 | 46081736 | T | C | 0.1777 | -0.1321 | 0.0241 | 4.19E-08 | -5.4828 | 953873 | IPF |
| rs77138434  | 17 | 46082189 | A | C | 0.1777 | -0.1321 | 0.0241 | 4.20E-08 | -5.4821 | 953873 | IPF |
| rs111913701 | 17 | 46082265 | G | T | 0.1777 | -0.1322 | 0.0241 | 4.17E-08 | -5.4836 | 953873 | IPF |
| rs111519055 | 17 | 46082306 | G | A | 0.1777 | -0.1322 | 0.0241 | 4.15E-08 | -5.4844 | 953873 | IPF |
| rs77925835  | 17 | 46082329 | T | C | 0.1777 | -0.1322 | 0.0241 | 4.15E-08 | -5.4844 | 953873 | IPF |
| rs17659953  | 17 | 46082359 | T | C | 0.1777 | -0.1322 | 0.0241 | 4.17E-08 | -5.4836 | 953873 | IPF |
| rs17576165  | 17 | 46082483 | C | T | 0.1777 | -0.1326 | 0.0241 | 3.76E-08 | -5.5020 | 953873 | IPF |
| rs17576200  | 17 | 46082622 | A | G | 0.1777 | -0.1322 | 0.0241 | 4.17E-08 | -5.4836 | 953873 | IPF |
| rs62060852  | 17 | 46082684 | A | G | 0.1777 | -0.1321 | 0.0241 | 4.20E-08 | -5.4823 | 953873 | IPF |
| rs62060853  | 17 | 46083226 | A | G | 0.1777 | -0.1322 | 0.0241 | 4.09E-08 | -5.4869 | 953873 | IPF |
| rs17660017  | 17 | 46083308 | C | G | 0.1777 | -0.1322 | 0.0241 | 4.15E-08 | -5.4844 | 953873 | IPF |
| rs113788190 | 17 | 46083936 | G | A | 0.1777 | -0.1321 | 0.0241 | 4.21E-08 | -5.4817 | 953873 | IPF |
| rs112364920 | 17 | 46083994 | T | A | 0.1777 | -0.1322 | 0.0241 | 4.17E-08 | -5.4836 | 953873 | IPF |
| rs62060855  | 17 | 46084494 | T | C | 0.1777 | -0.1321 | 0.0241 | 4.28E-08 | -5.4788 | 953873 | IPF |
| rs62060856  | 17 | 46084509 | C | A | 0.1777 | -0.1320 | 0.0241 | 4.29E-08 | -5.4784 | 953873 | IPF |
| rs2316955   | 17 | 46084619 | G | T | 0.1777 | -0.1321 | 0.0241 | 4.25E-08 | -5.4802 | 953873 | IPF |
| rs17660065  | 17 | 46084918 | C | T | 0.1777 | -0.1321 | 0.0241 | 4.19E-08 | -5.4828 | 953873 | IPF |
| rs8080583   | 17 | 46085231 | A | C | 0.1807 | -0.1316 | 0.0239 | 3.67E-08 | -5.5062 | 953873 | IPF |
| rs55864131  | 17 | 46086045 | C | T | 0.1777 | -0.1322 | 0.0241 | 4.18E-08 | -5.4832 | 953873 | IPF |
| rs62060858  | 17 | 46086724 | C | G | 0.1777 | -0.1322 | 0.0241 | 4.18E-08 | -5.4832 | 953873 | IPF |
| rs62060859  | 17 | 46086767 | A | G | 0.1777 | -0.1324 | 0.0241 | 3.97E-08 | -5.4921 | 953873 | IPF |
| rs55692232  | 17 | 46086957 | A | G | 0.1777 | -0.1321 | 0.0241 | 4.22E-08 | -5.4813 | 953873 | IPF |
| rs3912063   | 17 | 46087683 | G | A | 0.1772 | -0.1319 | 0.0241 | 4.68E-08 | -5.4629 | 953873 | IPF |
| rs3912062   | 17 | 46087703 | G | A | 0.1867 | -0.1445 | 0.0245 | 3.77E-09 | -5.8938 | 819655 | IPF |
| rs3912061   | 17 | 46087732 | T | C | 0.1873 | -0.1446 | 0.0245 | 3.49E-09 | -5.9065 | 819655 | IPF |
| rs3912060   | 17 | 46088069 | T | C | 0.1777 | -0.1323 | 0.0241 | 4.03E-08 | -5.4895 | 953873 | IPF |
| rs17660132  | 17 | 46088437 | C | T | 0.1777 | -0.1330 | 0.0241 | 3.50E-08 | -5.5143 | 953873 | IPF |
| rs74348235  | 17 | 46088486 | G | A | 0.1777 | -0.1320 | 0.0241 | 4.32E-08 | -5.4775 | 953873 | IPF |
| rs62061764  | 17 | 46088831 | G | A | 0.1777 | -0.1324 | 0.0241 | 4.00E-08 | -5.4907 | 953873 | IPF |
| rs17660167  | 17 | 46088945 | T | C | 0.1777 | -0.1320 | 0.0241 | 4.38E-08 | -5.4748 | 953873 | IPF |
| rs17660251  | 17 | 46089280 | T | C | 0.1777 | -0.1320 | 0.0241 | 4.40E-08 | -5.4739 | 953873 | IPF |
| rs17660294  | 17 | 46089735 | C | T | 0.1770 | -0.1425 | 0.0259 | 3.68E-08 | -5.5058 | 937232 | IPF |
| rs62061766  | 17 | 46090098 | A | G | 0.1777 | -0.1321 | 0.0241 | 4.21E-08 | -5.4817 | 953873 | IPF |
| rs79923630  | 17 | 46090295 | T | G | 0.1777 | -0.1319 | 0.0241 | 4.42E-08 | -5.4734 | 953873 | IPF |
| rs62061767  | 17 | 46090363 | G | A | 0.1777 | -0.1326 | 0.0241 | 3.79E-08 | -5.5007 | 953873 | IPF |
| rs111364350 | 17 | 46091142 | T | C | 0.1777 | -0.1319 | 0.0241 | 4.42E-08 | -5.4731 | 953873 | IPF |
| rs2097760   | 17 | 46091311 | G | A | 0.1807 | -0.1319 | 0.0239 | 3.42E-08 | -5.5183 | 953873 | IPF |
| rs62061770  | 17 | 46092011 | C | G | 0.1769 | -0.1432 | 0.0259 | 3.19E-08 | -5.5307 | 937232 | IPF |
| rs62061771  | 17 | 46092040 | A | G | 0.1767 | -0.1432 | 0.0259 | 3.25E-08 | -5.5275 | 937232 | IPF |

|             |    |          |   |   |        |         |        |          |         |        |     |
|-------------|----|----------|---|---|--------|---------|--------|----------|---------|--------|-----|
| rs62061772  | 17 | 46092071 | C | T | 0.1774 | -0.1321 | 0.0241 | 4.34E-08 | -5.4767 | 953873 | IPF |
| rs111970616 | 17 | 46092215 | C | T | 0.1776 | -0.1317 | 0.0241 | 4.65E-08 | -5.4643 | 953873 | IPF |
| rs17660337  | 17 | 46092239 | C | T | 0.1776 | -0.1317 | 0.0241 | 4.73E-08 | -5.4610 | 953873 | IPF |
| rs62061788  | 17 | 46092393 | A | G | 0.1777 | -0.1319 | 0.0241 | 4.51E-08 | -5.4700 | 953873 | IPF |
| rs62061789  | 17 | 46092403 | T | C | 0.1777 | -0.1318 | 0.0241 | 4.54E-08 | -5.4681 | 953873 | IPF |
| rs112596352 | 17 | 46092872 | A | G | 0.1779 | -0.1320 | 0.0241 | 4.30E-08 | -5.4777 | 953873 | IPF |
| rs62061790  | 17 | 46093048 | A | G | 0.1772 | -0.1427 | 0.0259 | 3.55E-08 | -5.5120 | 937232 | IPF |
| rs17660398  | 17 | 46093246 | T | C | 0.1777 | -0.1321 | 0.0241 | 4.29E-08 | -5.4783 | 953873 | IPF |
| rs62061791  | 17 | 46093658 | C | T | 0.1780 | -0.1321 | 0.0241 | 4.29E-08 | -5.4785 | 953873 | IPF |
| rs62061792  | 17 | 46094188 | A | G | 0.1776 | -0.1322 | 0.0241 | 4.30E-08 | -5.4778 | 953873 | IPF |
| rs62061793  | 17 | 46094199 | A | C | 0.1768 | -0.1437 | 0.0259 | 2.95E-08 | -5.5442 | 937232 | IPF |
| rs17576695  | 17 | 46094961 | A | T | 0.1780 | -0.1325 | 0.0241 | 3.88E-08 | -5.4964 | 953873 | IPF |
| rs80020809  | 17 | 46095025 | T | C | 0.1771 | -0.1429 | 0.0259 | 3.43E-08 | -5.5178 | 937232 | IPF |
| rs77044307  | 17 | 46095042 | G | C | 0.1778 | -0.1319 | 0.0241 | 4.51E-08 | -5.4697 | 953873 | IPF |
| rs79348289  | 17 | 46095332 | C | T | 0.1772 | -0.1427 | 0.0259 | 3.51E-08 | -5.5139 | 937232 | IPF |
| rs75412750  | 17 | 46095407 | T | C | 0.1780 | -0.1321 | 0.0241 | 4.28E-08 | -5.4791 | 953873 | IPF |
| rs62061795  | 17 | 46095813 | A | C | 0.1779 | -0.1318 | 0.0241 | 4.59E-08 | -5.4665 | 953873 | IPF |
| rs17576709  | 17 | 46095990 | G | C | 0.1779 | -0.1321 | 0.0241 | 4.30E-08 | -5.4778 | 953873 | IPF |
| rs62061796  | 17 | 46096042 | A | G | 0.1779 | -0.1320 | 0.0241 | 4.34E-08 | -5.4764 | 953873 | IPF |
| rs62061800  | 17 | 46096743 | C | G | 0.1805 | -0.1963 | 0.0350 | 2.00E-08 | -5.6122 | 735077 | IPF |
| rs62061802  | 17 | 46096985 | A | T | 0.1779 | -0.1323 | 0.0241 | 4.08E-08 | -5.4874 | 953873 | IPF |
| rs62061803  | 17 | 46097147 | A | C | 0.1780 | -0.1323 | 0.0241 | 4.06E-08 | -5.4881 | 953873 | IPF |
| rs55900347  | 17 | 46098726 | A | G | 0.1779 | -0.1320 | 0.0241 | 4.38E-08 | -5.4749 | 953873 | IPF |
| rs56240678  | 17 | 46098804 | G | C | 0.1772 | -0.1427 | 0.0259 | 3.55E-08 | -5.5116 | 937232 | IPF |
| rs62061808  | 17 | 46099971 | T | C | 0.1780 | -0.1321 | 0.0241 | 4.22E-08 | -5.4815 | 953873 | IPF |
| rs77604208  | 17 | 46100303 | T | C | 0.1772 | -0.1427 | 0.0259 | 3.51E-08 | -5.5139 | 937232 | IPF |
| rs17660464  | 17 | 46100627 | A | C | 0.1780 | -0.1321 | 0.0241 | 4.27E-08 | -5.4794 | 953873 | IPF |
| rs17576779  | 17 | 46100906 | T | C | 0.1779 | -0.1320 | 0.0241 | 4.39E-08 | -5.4746 | 953873 | IPF |
| rs17660488  | 17 | 46100971 | C | T | 0.1779 | -0.1319 | 0.0241 | 4.48E-08 | -5.4708 | 953873 | IPF |
| rs62061809  | 17 | 46101473 | C | T | 0.1779 | -0.1323 | 0.0241 | 4.03E-08 | -5.4895 | 953873 | IPF |
| rs62061810  | 17 | 46101518 | A | G | 0.1779 | -0.1325 | 0.0241 | 3.91E-08 | -5.4947 | 953873 | IPF |
| rs112102887 | 17 | 46102383 | A | G | 0.1779 | -0.1324 | 0.0241 | 4.04E-08 | -5.4892 | 953873 | IPF |
| rs112893440 | 17 | 46102603 | A | G | 0.1779 | -0.1319 | 0.0241 | 4.44E-08 | -5.4724 | 953873 | IPF |
| rs17576842  | 17 | 46102626 | G | A | 0.1779 | -0.1321 | 0.0241 | 4.32E-08 | -5.4774 | 953873 | IPF |
| rs62061811  | 17 | 46102807 | G | T | 0.1780 | -0.1320 | 0.0241 | 4.34E-08 | -5.4764 | 953873 | IPF |
| rs17576870  | 17 | 46103076 | G | A | 0.1779 | -0.1320 | 0.0241 | 4.33E-08 | -5.4768 | 953873 | IPF |
| rs17660595  | 17 | 46103588 | G | A | 0.1780 | -0.1320 | 0.0241 | 4.34E-08 | -5.4762 | 953873 | IPF |
| rs62061812  | 17 | 46103631 | T | C | 0.1779 | -0.1319 | 0.0241 | 4.49E-08 | -5.4704 | 953873 | IPF |
| rs111952388 | 17 | 46104088 | T | C | 0.1779 | -0.1324 | 0.0241 | 4.00E-08 | -5.4906 | 953873 | IPF |
| rs62061814  | 17 | 46104142 | G | T | 0.1779 | -0.1323 | 0.0241 | 4.14E-08 | -5.4850 | 953873 | IPF |
| rs62061815  | 17 | 46104315 | G | A | 0.1779 | -0.1321 | 0.0241 | 4.30E-08 | -5.4780 | 953873 | IPF |
| rs17576954  | 17 | 46104567 | C | T | 0.1779 | -0.1321 | 0.0241 | 4.29E-08 | -5.4786 | 953873 | IPF |
| rs62061816  | 17 | 46104970 | A | C | 0.1779 | -0.1319 | 0.0241 | 4.50E-08 | -5.4699 | 953873 | IPF |
| rs62061817  | 17 | 46105340 | G | A | 0.1779 | -0.1325 | 0.0241 | 3.89E-08 | -5.4958 | 953873 | IPF |
| rs62061818  | 17 | 46105551 | G | C | 0.1772 | -0.1425 | 0.0259 | 3.67E-08 | -5.5059 | 937232 | IPF |
| rs111676341 | 17 | 46106037 | G | A | 0.1772 | -0.1426 | 0.0259 | 3.59E-08 | -5.5101 | 937232 | IPF |
| rs17576989  | 17 | 46106250 | A | C | 0.1780 | -0.1321 | 0.0241 | 4.22E-08 | -5.4812 | 953873 | IPF |
| rs79923708  | 17 | 46106424 | A | G | 0.1779 | -0.1321 | 0.0241 | 4.29E-08 | -5.4785 | 953873 | IPF |
| rs79346219  | 17 | 46107009 | G | A | 0.1777 | -0.1324 | 0.0241 | 4.05E-08 | -5.4890 | 953873 | IPF |
| rs73984689  | 17 | 46107038 | A | G | 0.1778 | -0.1336 | 0.0241 | 3.09E-08 | -5.5363 | 953873 | IPF |
| rs111295615 | 17 | 46107062 | C | T | 0.1777 | -0.1331 | 0.0241 | 3.45E-08 | -5.5172 | 953873 | IPF |
| rs76761511  | 17 | 46107879 | A | C | 0.1779 | -0.1322 | 0.0241 | 4.19E-08 | -5.4826 | 953873 | IPF |
| rs62061821  | 17 | 46108689 | A | G | 0.1871 | -0.1460 | 0.0245 | 2.71E-09 | -5.9482 | 819655 | IPF |
| rs16940904  | 17 | 46108697 | T | C | 0.1802 | -0.1331 | 0.0240 | 2.78E-08 | -5.5545 | 953873 | IPF |
| rs17577024  | 17 | 46108886 | A | G | 0.1779 | -0.1321 | 0.0241 | 4.26E-08 | -5.4799 | 953873 | IPF |
| rs17577052  | 17 | 46108935 | C | T | 0.1779 | -0.1320 | 0.0241 | 4.34E-08 | -5.4766 | 953873 | IPF |
| rs77635460  | 17 | 46109227 | C | T | 0.1779 | -0.1321 | 0.0241 | 4.27E-08 | -5.4795 | 953873 | IPF |
| rs62061822  | 17 | 46109528 | C | A | 0.1779 | -0.1324 | 0.0241 | 3.98E-08 | -5.4917 | 953873 | IPF |
| rs9303525   | 17 | 46109891 | G | A | 0.1810 | -0.1313 | 0.0239 | 4.00E-08 | -5.4909 | 953873 | IPF |
| rs17577094  | 17 | 46110126 | G | A | 0.1780 | -0.1323 | 0.0241 | 4.10E-08 | -5.4862 | 953873 | IPF |
| rs17577159  | 17 | 46111111 | G | T | 0.1779 | -0.1321 | 0.0241 | 4.23E-08 | -5.4807 | 953873 | IPF |
| rs62061823  | 17 | 46111279 | T | C | 0.1780 | -0.1321 | 0.0241 | 4.26E-08 | -5.4795 | 953873 | IPF |
| rs62061824  | 17 | 46111389 | C | T | 0.1772 | -0.1431 | 0.0259 | 3.27E-08 | -5.5263 | 937232 | IPF |
| rs55794067  | 17 | 46111398 | C | T | 0.1772 | -0.1438 | 0.0259 | 2.77E-08 | -5.5555 | 937232 | IPF |
| rs17660847  | 17 | 46112007 | T | C | 0.1772 | -0.1429 | 0.0259 | 3.36E-08 | -5.5217 | 937232 | IPF |
| rs17660865  | 17 | 46112042 | C | T | 0.1779 | -0.1315 | 0.0241 | 4.98E-08 | -5.4521 | 953873 | IPF |
| rs7972780   | 17 | 46112489 | A | G | 0.1763 | -0.1437 | 0.0260 | 3.28E-08 | -5.5256 | 937232 | IPF |
| rs76640332  | 17 | 46112492 | A | G | 0.1764 | -0.1436 | 0.0260 | 3.22E-08 | -5.5291 | 937232 | IPF |
| rs78929339  | 17 | 46112544 | G | A | 0.1774 | -0.1344 | 0.0242 | 2.64E-08 | -5.5638 | 953873 | IPF |
| rs17660907  | 17 | 46113719 | A | G | 0.1779 | -0.1321 | 0.0241 | 4.27E-08 | -5.4791 | 953873 | IPF |
| rs17660936  | 17 | 46113793 | T | C | 0.1780 | -0.1321 | 0.0241 | 4.24E-08 | -5.4808 | 953873 | IPF |
| rs62061847  | 17 | 46114316 | A | G | 0.1779 | -0.1323 | 0.0241 | 4.15E-08 | -5.4846 | 953873 | IPF |
| rs17577313  | 17 | 46114469 | G | A | 0.1779 | -0.1320 | 0.0241 | 4.40E-08 | -5.4739 | 953873 | IPF |
| rs4606752   | 17 | 46115252 | G | A | 0.1772 | -0.1426 | 0.0259 | 3.61E-08 | -5.5089 | 937232 | IPF |

|             |    |          |   |   |        |         |        |          |         |        |     |
|-------------|----|----------|---|---|--------|---------|--------|----------|---------|--------|-----|
| rs17577369  | 17 | 46115557 | G | A | 0.1758 | -0.1446 | 0.0261 | 2.90E-08 | -5.5473 | 937232 | IPF |
| rs62061848  | 17 | 46115580 | T | C | 0.1756 | -0.1448 | 0.0261 | 2.74E-08 | -5.5569 | 937232 | IPF |
| rs17661015  | 17 | 46115591 | C | T | 0.1758 | -0.1460 | 0.0261 | 2.16E-08 | -5.5988 | 937232 | IPF |
| rs17661027  | 17 | 46115731 | A | C | 0.1774 | -0.1348 | 0.0242 | 2.38E-08 | -5.5818 | 953873 | IPF |
| rs62061849  | 17 | 46116516 | T | C | 0.1771 | -0.1428 | 0.0259 | 3.52E-08 | -5.5138 | 937232 | IPF |
| rs17661045  | 17 | 46116786 | A | T | 0.1779 | -0.1324 | 0.0241 | 4.02E-08 | -5.4898 | 953873 | IPF |
| rs17577447  | 17 | 46117015 | A | T | 0.1779 | -0.1322 | 0.0241 | 4.18E-08 | -5.4827 | 953873 | IPF |
| rs62061850  | 17 | 46117153 | C | T | 0.1779 | -0.1322 | 0.0241 | 4.23E-08 | -5.4809 | 953873 | IPF |
| rs111880194 | 17 | 46117255 | G | C | 0.1779 | -0.1321 | 0.0241 | 4.34E-08 | -5.4768 | 953873 | IPF |
| rs10514901  | 17 | 46117369 | T | G | 0.1779 | -0.1323 | 0.0241 | 4.12E-08 | -5.4855 | 953873 | IPF |
| rs17577496  | 17 | 46117469 | C | T | 0.1779 | -0.1322 | 0.0241 | 4.20E-08 | -5.4825 | 953873 | IPF |
| rs62061851  | 17 | 46117525 | T | C | 0.1779 | -0.1322 | 0.0241 | 4.16E-08 | -5.4838 | 953873 | IPF |
| rs62061852  | 17 | 46118058 | C | A | 0.1780 | -0.1324 | 0.0241 | 3.96E-08 | -5.4923 | 953873 | IPF |
| rs727425    | 17 | 46118129 | A | G | 0.1772 | -0.1429 | 0.0259 | 3.42E-08 | -5.5186 | 937232 | IPF |
| rs17661141  | 17 | 46118649 | G | C | 0.1779 | -0.1326 | 0.0241 | 3.83E-08 | -5.4983 | 953873 | IPF |
| rs62061853  | 17 | 46118759 | C | T | 0.1779 | -0.1333 | 0.0241 | 3.25E-08 | -5.5277 | 953873 | IPF |
| rs1468241   | 17 | 46118787 | G | A | 0.1771 | -0.1435 | 0.0259 | 2.99E-08 | -5.5418 | 937232 | IPF |
| rs1468240   | 17 | 46119081 | A | T | 0.1875 | -0.1447 | 0.0245 | 3.46E-09 | -5.9078 | 819655 | IPF |
| rs75229280  | 17 | 46119287 | A | G | 0.1771 | -0.1429 | 0.0259 | 3.43E-08 | -5.5177 | 937232 | IPF |
| rs112813897 | 17 | 46119433 | A | G | 0.1771 | -0.1428 | 0.0259 | 3.51E-08 | -5.5141 | 937232 | IPF |
| rs113909426 | 17 | 46119456 | A | G | 0.1778 | -0.1323 | 0.0241 | 4.07E-08 | -5.4879 | 953873 | IPF |
| rs111678697 | 17 | 46119666 | C | T | 0.1779 | -0.1324 | 0.0241 | 4.00E-08 | -5.4910 | 953873 | IPF |
| rs4383188   | 17 | 46120237 | C | T | 0.1780 | -0.1329 | 0.0241 | 3.55E-08 | -5.5118 | 953873 | IPF |
| rs1966345   | 17 | 46120440 | C | T | 0.1779 | -0.1322 | 0.0241 | 4.21E-08 | -5.4817 | 953873 | IPF |
| rs62061854  | 17 | 46120714 | T | C | 0.1779 | -0.1325 | 0.0241 | 3.91E-08 | -5.4950 | 953873 | IPF |
| rs3087534   | 17 | 46121440 | C | T | 0.1779 | -0.1323 | 0.0241 | 4.07E-08 | -5.4880 | 953873 | IPF |
| rs76924476  | 17 | 46121663 | C | T | 0.1776 | -0.1416 | 0.0259 | 4.50E-08 | -5.4700 | 937232 | IPF |
| rs112560196 | 17 | 46122712 | T | A | 0.1779 | -0.1324 | 0.0241 | 4.05E-08 | -5.4887 | 953873 | IPF |
| rs75652502  | 17 | 46123144 | A | C | 0.1779 | -0.1324 | 0.0241 | 3.98E-08 | -5.4916 | 953873 | IPF |
| rs62061859  | 17 | 46123743 | G | C | 0.1779 | -0.1329 | 0.0241 | 3.60E-08 | -5.5097 | 953873 | IPF |
| rs55802590  | 17 | 46123978 | C | G | 0.1779 | -0.1330 | 0.0241 | 3.51E-08 | -5.5136 | 953873 | IPF |
| rs56257094  | 17 | 46124301 | A | G | 0.1779 | -0.1324 | 0.0241 | 4.04E-08 | -5.4894 | 953873 | IPF |
| rs55672516  | 17 | 46124314 | C | A | 0.1779 | -0.1324 | 0.0241 | 4.04E-08 | -5.4891 | 953873 | IPF |
| rs112073200 | 17 | 46124425 | C | G | 0.1778 | -0.1326 | 0.0241 | 3.91E-08 | -5.4951 | 953873 | IPF |
| rs62063163  | 17 | 46124499 | T | C | 0.1778 | -0.1329 | 0.0241 | 3.59E-08 | -5.5101 | 953873 | IPF |
| rs62063164  | 17 | 46124521 | T | C | 0.1771 | -0.1430 | 0.0259 | 3.43E-08 | -5.5180 | 937232 | IPF |
| rs62063165  | 17 | 46124781 | G | A | 0.1778 | -0.1326 | 0.0241 | 3.91E-08 | -5.4952 | 953873 | IPF |
| rs62063166  | 17 | 46124865 | G | A | 0.1778 | -0.1324 | 0.0241 | 4.02E-08 | -5.4902 | 953873 | IPF |
| rs55669501  | 17 | 46125198 | A | G | 0.1779 | -0.1323 | 0.0241 | 4.14E-08 | -5.4850 | 953873 | IPF |
| rs55686102  | 17 | 46125242 | T | C | 0.1778 | -0.1326 | 0.0241 | 3.90E-08 | -5.4955 | 953873 | IPF |
| rs55885063  | 17 | 46125586 | G | C | 0.1778 | -0.1317 | 0.0241 | 4.76E-08 | -5.4599 | 953873 | IPF |
| rs56273589  | 17 | 46125765 | G | C | 0.1778 | -0.1323 | 0.0241 | 4.18E-08 | -5.4829 | 953873 | IPF |
| rs62063171  | 17 | 46125945 | T | C | 0.1779 | -0.1323 | 0.0241 | 4.12E-08 | -5.4856 | 953873 | IPF |
| rs62063172  | 17 | 46126000 | C | T | 0.1778 | -0.1322 | 0.0241 | 4.33E-08 | -5.4770 | 953873 | IPF |
| rs76380490  | 17 | 46126047 | T | C | 0.1778 | -0.1323 | 0.0241 | 4.18E-08 | -5.4831 | 953873 | IPF |
| rs113120855 | 17 | 46126154 | T | C | 0.1869 | -0.1579 | 0.0264 | 2.17E-09 | -5.9849 | 803014 | IPF |
| rs77095128  | 17 | 46126938 | G | T | 0.1779 | -0.1323 | 0.0241 | 4.15E-08 | -5.4842 | 953873 | IPF |
| rs4581739   | 17 | 46127373 | C | T | 0.1771 | -0.1431 | 0.0259 | 3.28E-08 | -5.5259 | 937232 | IPF |
| rs113638513 | 17 | 46127383 | G | A | 0.1778 | -0.1324 | 0.0241 | 4.01E-08 | -5.4907 | 953873 | IPF |
| rs62063174  | 17 | 46127756 | G | C | 0.1869 | -0.1582 | 0.0264 | 1.97E-09 | -6.0004 | 803014 | IPF |
| rs17577650  | 17 | 46128134 | G | A | 0.1779 | -0.1328 | 0.0241 | 3.69E-08 | -5.5050 | 953873 | IPF |
| rs4471723   | 17 | 46128324 | T | C | 0.1788 | -0.1462 | 0.0258 | 1.47E-08 | -5.6652 | 937232 | IPF |
| rs1122381   | 17 | 46128473 | G | A | 0.1779 | -0.1326 | 0.0241 | 3.88E-08 | -5.4963 | 953873 | IPF |
| rs1122380   | 17 | 46128713 | T | C | 0.1779 | -0.1328 | 0.0241 | 3.66E-08 | -5.5065 | 953873 | IPF |
| rs62063200  | 17 | 46129116 | T | C | 0.1779 | -0.1322 | 0.0241 | 4.24E-08 | -5.4807 | 953873 | IPF |
| rs10514903  | 17 | 46129280 | G | C | 0.1779 | -0.1324 | 0.0241 | 4.08E-08 | -5.4871 | 953873 | IPF |
| rs17661348  | 17 | 46129700 | G | A | 0.1779 | -0.1330 | 0.0241 | 3.55E-08 | -5.5123 | 953873 | IPF |
| rs17661385  | 17 | 46130412 | G | A | 0.1779 | -0.1323 | 0.0241 | 4.15E-08 | -5.4844 | 953873 | IPF |
| rs10514904  | 17 | 46130521 | T | C | 0.1790 | -0.1320 | 0.0241 | 4.28E-08 | -5.4788 | 953873 | IPF |
| rs79301522  | 17 | 46130566 | G | A | 0.1770 | -0.1426 | 0.0259 | 3.71E-08 | -5.5044 | 937232 | IPF |
| rs17661428  | 17 | 46130778 | G | C | 0.1779 | -0.1321 | 0.0241 | 4.31E-08 | -5.4773 | 953873 | IPF |
| rs17577877  | 17 | 46130852 | G | A | 0.1779 | -0.1323 | 0.0241 | 4.12E-08 | -5.4859 | 953873 | IPF |
| rs6503457   | 17 | 46130946 | T | G | 0.1808 | -0.1322 | 0.0239 | 3.23E-08 | -5.5285 | 953873 | IPF |
| rs8070942   | 17 | 46131308 | T | G | 0.1809 | -0.1318 | 0.0239 | 3.61E-08 | -5.5091 | 953873 | IPF |
| rs62063202  | 17 | 46131579 | T | C | 0.1779 | -0.1325 | 0.0241 | 3.95E-08 | -5.4934 | 953873 | IPF |
| rs62063203  | 17 | 46131947 | C | T | 0.1778 | -0.1325 | 0.0241 | 3.93E-08 | -5.4942 | 953873 | IPF |
| rs111724389 | 17 | 46131998 | A | G | 0.1778 | -0.1329 | 0.0241 | 3.63E-08 | -5.5083 | 953873 | IPF |
| rs112401617 | 17 | 46132108 | T | A | 0.1875 | -0.1451 | 0.0245 | 3.13E-09 | -5.9246 | 819655 | IPF |
| rs17577954  | 17 | 46132262 | C | T | 0.1779 | -0.1327 | 0.0241 | 3.72E-08 | -5.5038 | 953873 | IPF |
| rs55780786  | 17 | 46132509 | C | T | 0.1778 | -0.1333 | 0.0241 | 3.32E-08 | -5.5239 | 953873 | IPF |
| rs3089      | 17 | 46132553 | G | C | 0.1771 | -0.1443 | 0.0259 | 2.58E-08 | -5.5677 | 937232 | IPF |
| rs55909047  | 17 | 46132591 | G | A | 0.1771 | -0.1437 | 0.0259 | 2.91E-08 | -5.5469 | 937232 | IPF |
| rs56119705  | 17 | 46132619 | C | T | 0.1778 | -0.1332 | 0.0241 | 3.35E-08 | -5.5221 | 953873 | IPF |
| rs17577975  | 17 | 46133076 | T | C | 0.1776 | -0.1325 | 0.0241 | 4.04E-08 | -5.4890 | 953873 | IPF |

|             |    |           |   |   |        |         |        |           |          |        |           |
|-------------|----|-----------|---|---|--------|---------|--------|-----------|----------|--------|-----------|
| rs7207582   | 17 | 46133567  | G | A | 0.1808 | -0.1322 | 0.0239 | 3.27E-08  | -5.5261  | 953873 | IPF       |
| rs12150087  | 17 | 46133622  | G | C | 0.1778 | -0.1328 | 0.0241 | 3.71E-08  | -5.5039  | 953873 | IPF       |
| rs111424940 | 17 | 46134136  | A | G | 0.1771 | -0.1438 | 0.0259 | 2.83E-08  | -5.5516  | 937232 | IPF       |
| rs62063207  | 17 | 46134536  | G | A | 0.1779 | -0.1324 | 0.0241 | 4.05E-08  | -5.4884  | 953873 | IPF       |
| rs10221243  | 17 | 46134944  | A | G | 0.1808 | -0.1318 | 0.0239 | 3.62E-08  | -5.5084  | 953873 | IPF       |
| rs9915547   | 17 | 46135416  | C | T | 0.1814 | -0.1303 | 0.0239 | 4.82E-08  | -5.4578  | 953873 | IPF       |
| rs2532233   | 17 | 46195852  | T | C | 0.1773 | -0.1336 | 0.0243 | 3.73E-08  | -5.5033  | 953873 | IPF       |
| rs2532229   | 17 | 46199899  | C | A | 0.1772 | -0.1329 | 0.0243 | 4.38E-08  | -5.4747  | 953873 | IPF       |
| rs17664048  | 17 | 46201376  | G | A | 0.1772 | -0.1334 | 0.0243 | 3.99E-08  | -5.4912  | 953873 | IPF       |
| rs1918786   | 17 | 46201735  | G | A | 0.1764 | -0.1428 | 0.0261 | 4.49E-08  | -5.4704  | 937232 | IPF       |
| rs1918787   | 17 | 46201886  | G | A | 0.1772 | -0.1332 | 0.0243 | 4.09E-08  | -5.4872  | 953873 | IPF       |
| rs2950015   | 17 | 46254985  | G | A | 0.1851 | -0.1897 | 0.0347 | 4.46E-08  | -5.4714  | 735077 | IPF       |
| rs2732625   | 17 | 46255063  | T | C | 0.1827 | -0.1970 | 0.0353 | 2.38E-08  | -5.5821  | 669997 | IPF       |
| rs190796367 | 17 | 46255927  | G | A | 0.1818 | -0.2013 | 0.0354 | 1.23E-08  | -5.6949  | 669997 | IPF       |
| rs150592114 | 17 | 46255965  | G | A | 0.1761 | -0.2076 | 0.0359 | 7.46E-09  | -5.7802  | 669997 | IPF       |
| rs62074562  | 17 | 46257402  | G | A | 0.1824 | -0.1977 | 0.0353 | 2.14E-08  | -5.6005  | 669997 | IPF       |
| rs199461    | 17 | 46685223  | A | G | 0.2376 | -0.1396 | 0.0250 | 2.22E-08  | -5.5943  | 621641 | IPF       |
| rs199437    | 17 | 46708970  | A | T | 0.2110 | -0.1266 | 0.0228 | 2.66E-08  | -5.5625  | 953873 | IPF       |
| rs183211    | 17 | 46710944  | A | G | 0.2112 | -0.1264 | 0.0227 | 2.49E-08  | -5.5743  | 953873 | IPF       |
| rs199436    | 17 | 46711919  | G | A | 0.2109 | -0.1264 | 0.0228 | 2.74E-08  | -5.5573  | 953873 | IPF       |
| rs199438    | 17 | 46714277  | A | G | 0.2109 | -0.1267 | 0.0228 | 2.58E-08  | -5.5679  | 953873 | IPF       |
| rs199454    | 17 | 46722744  | G | A | 0.2120 | -0.1233 | 0.0226 | 4.96E-08  | -5.4528  | 953873 | IPF       |
| rs199453    | 17 | 46723580  | T | C | 0.2109 | -0.1273 | 0.0228 | 2.23E-08  | -5.5932  | 953873 | IPF       |
| rs199452    | 17 | 46723974  | T | C | 0.2103 | -0.1258 | 0.0228 | 3.36E-08  | -5.5216  | 953873 | IPF       |
| rs199449    | 17 | 46731536  | A | G | 0.2110 | -0.1274 | 0.0228 | 2.25E-08  | -5.5915  | 953873 | IPF       |
| rs199528    | 17 | 46765770  | T | C | 0.1705 | -0.1373 | 0.0246 | 2.50E-08  | -5.5732  | 953873 | IPF       |
| rs199525    | 17 | 46770468  | G | T | 0.1709 | -0.1346 | 0.0246 | 4.40E-08  | -5.4738  | 953873 | IPF       |
| rs60886550  | 20 | 63577093  | A | G | 0.0309 | 0.3240  | 0.0571 | 1.39E-08  | 5.6752   | 953873 | IPF       |
| rs56406843  | 20 | 63577467  | A | G | 0.0309 | 0.3290  | 0.0570 | 8.06E-09  | 5.7672   | 953873 | IPF       |
| rs58620180  | 20 | 63577960  | A | G | 0.0310 | 0.3270  | 0.0569 | 9.04E-09  | 5.7477   | 953873 | IPF       |
| rs3859582   | 20 | 63578972  | T | C | 0.0308 | 0.3307  | 0.0571 | 6.99E-09  | 5.7910   | 953873 | IPF       |
| rs59957953  | 20 | 63581849  | T | A | 0.0309 | 0.3321  | 0.0567 | 4.67E-09  | 5.8587   | 953873 | IPF       |
| rs73315842  | 20 | 63582771  | A | G | 0.0309 | 0.3309  | 0.0567 | 5.28E-09  | 5.8382   | 953873 | IPF       |
| rs73315845  | 20 | 63582806  | A | G | 0.0309 | 0.3323  | 0.0566 | 4.41E-09  | 5.8680   | 953873 | IPF       |
| rs60218791  | 20 | 63585923  | T | G | 0.0332 | 0.3066  | 0.0552 | 2.73E-08  | 5.5581   | 953873 | IPF       |
| rs57612798  | 20 | 63586180  | A | G | 0.0306 | 0.3551  | 0.0565 | 3.36E-10  | 6.2811   | 953873 | IPF       |
| rs60261153  | 20 | 63596004  | A | G | 0.0306 | 0.3472  | 0.0568 | 9.81E-10  | 6.1125   | 953873 | IPF       |
| rs58847566  | 20 | 63596269  | A | G | 0.0306 | 0.3475  | 0.0568 | 9.59E-10  | 6.1161   | 953873 | IPF       |
| rs145783026 | 20 | 63605726  | A | G | 0.0306 | 0.3510  | 0.0569 | 6.64E-10  | 6.1746   | 953873 | IPF       |
| rs147310575 | 20 | 63616148  | A | G | 0.0305 | 0.3452  | 0.0574 | 1.78E-09  | 6.0169   | 953873 | IPF       |
| rs148583745 | 20 | 63623343  | G | A | 0.0304 | 0.3470  | 0.0574 | 1.50E-09  | 6.0442   | 953873 | IPF       |
| rs57389015  | 20 | 63623837  | C | T | 0.0325 | 0.3384  | 0.0554 | 1.01E-09  | 6.1082   | 953873 | IPF       |
| rs181370706 | 20 | 63641408  | C | G | 0.0226 | 0.3946  | 0.0703 | 2.03E-08  | 5.6096   | 937232 | IPF       |
| rs10078017  | 5  | 1314009   | C | T | 0.3852 | -0.1322 | 0.0121 | 1.23E-27  | -10.8937 | 85716  | lungCance |
| rs10083696  | 15 | 79124016  | A | G | 0.4024 | 0.0867  | 0.0120 | 5.59E-13  | 7.2103   | 85716  | lungCance |
| rs10083697  | 15 | 79124039  | A | G | 0.4021 | 0.0868  | 0.0120 | 5.24E-13  | 7.2188   | 85716  | lungCance |
| rs10163145  | 15 | 79075335  | A | G | 0.4307 | 0.1338  | 0.0128 | 1.19E-25  | 10.4700  | 85716  | lungCance |
| rs1021070   | 15 | 78946863  | G | C | 0.3651 | -0.1111 | 0.0124 | 2.47E-19  | -8.9903  | 85716  | lungCance |
| rs1021071   | 15 | 78968179  | C | G | 0.4080 | 0.1796  | 0.0118 | 5.06E-52  | 15.1761  | 85716  | lungCance |
| rs1036377   | 15 | 79197129  | A | G | 0.2679 | -0.0922 | 0.0135 | 9.69E-12  | -6.8113  | 85716  | lungCance |
| rs1044059   | 6  | 167369897 | A | C | 0.4694 | 0.0658  | 0.0119 | 2.82E-08  | 5.5524   | 85716  | lungCance |
| rs1045130   | 15 | 79051721  | A | G | 0.3232 | -0.0861 | 0.0142 | 1.46E-09  | -6.0487  | 85716  | lungCance |
| rs1047985   | 6  | 32605216  | A | G | 0.2142 | 0.0972  | 0.0152 | 1.43E-10  | 6.4126   | 85716  | lungCance |
| rs1047993   | 6  | 32605271  | T | C | 0.2539 | 0.0809  | 0.0146 | 3.16E-08  | 5.5324   | 85716  | lungCance |
| rs10484399  | 6  | 27534528  | G | A | 0.0800 | 0.1306  | 0.0212 | 6.86E-10  | 6.1691   | 85716  | lungCance |
| rs10484439  | 6  | 26309908  | A | G | 0.0757 | 0.1226  | 0.0218 | 1.88E-08  | 5.6225   | 85716  | lungCance |
| rs1051730   | 15 | 78894339  | A | G | 0.3643 | 0.2562  | 0.0120 | 5.52E-101 | 21.3342  | 85716  | lungCance |
| rs10519198  | 15 | 78742754  | A | C | 0.4285 | -0.0774 | 0.0118 | 5.98E-11  | -6.5441  | 85716  | lungCance |
| rs10519203  | 15 | 78814046  | G | A | 0.3681 | 0.2502  | 0.0120 | 2.46E-96  | 20.8276  | 85716  | lungCance |
| rs1056562   | 11 | 118125625 | T | C | 0.4759 | 0.0659  | 0.0117 | 1.92E-08  | 5.6188   | 85716  | lungCance |
| rs1062980   | 15 | 78792527  | C | T | 0.3730 | -0.1705 | 0.0121 | 2.89E-45  | -14.1197 | 85716  | lungCance |
| rs1064991   | 6  | 32611176  | C | G | 0.2466 | 0.0865  | 0.0156 | 2.75E-08  | 5.5569   | 85716  | lungCance |
| rs10849601  | 12 | 1062430   | A | G | 0.4858 | -0.0692 | 0.0117 | 3.13E-09  | -5.9248  | 85716  | lungCance |
| rs10849602  | 12 | 1062479   | A | G | 0.4872 | -0.0691 | 0.0117 | 3.74E-09  | -5.8953  | 85716  | lungCance |
| rs10849605  | 12 | 1064438   | T | C | 0.4857 | -0.0683 | 0.0117 | 4.88E-09  | -5.8514  | 85716  | lungCance |
| rs10851906  | 15 | 78774676  | G | A | 0.2103 | -0.1992 | 0.0143 | 4.93E-44  | -13.9181 | 85716  | lungCance |
| rs10851911  | 15 | 79077666  | T | C | 0.2610 | -0.0878 | 0.0140 | 4.03E-10  | -6.2529  | 85716  | lungCance |
| rs10946198  | 6  | 167404432 | C | T | 0.4739 | 0.0648  | 0.0117 | 3.07E-08  | 5.5374   | 85716  | lungCance |
| rs10946199  | 6  | 167404492 | G | A | 0.4759 | 0.0646  | 0.0117 | 3.61E-08  | 5.5090   | 85716  | lungCance |
| rs10946808  | 6  | 26233387  | G | A | 0.2975 | -0.0765 | 0.0128 | 2.36E-09  | -5.9709  | 85716  | lungCance |
| rs10946810  | 6  | 26288055  | A | G | 0.3322 | -0.0725 | 0.0125 | 6.11E-09  | -5.8135  | 85716  | lungCance |
| rs11072763  | 15 | 78724256  | A | G | 0.2227 | -0.1912 | 0.0141 | 1.19E-41  | -13.5203 | 85716  | lungCance |
| rs11072765  | 15 | 78734292  | G | A | 0.4291 | -0.0772 | 0.0118 | 6.64E-11  | -6.5288  | 85716  | lungCance |
| rs11072766  | 15 | 78771546  | T | C | 0.2099 | -0.1993 | 0.0143 | 4.97E-44  | -13.9171 | 85716  | lungCance |



|             |    |          |   |   |        |         |        |           |          |       |           |
|-------------|----|----------|---|---|--------|---------|--------|-----------|----------|-------|-----------|
| rs11072768  | 15 | 78929478 | T | G | 0.1952 | -0.1959 | 0.0151 | 1.28E-38  | -12.9963 | 85716 | lungCance |
| rs11072774  | 15 | 78952697 | T | C | 0.1640 | -0.1671 | 0.0160 | 1.63E-25  | -10.4396 | 85716 | lungCance |
| rs11072785  | 15 | 78968229 | T | C | 0.4084 | 0.1795  | 0.0118 | 5.33E-52  | 15.1732  | 85716 | lungCance |
| rs11072787  | 15 | 78972977 | C | T | 0.2368 | -0.1082 | 0.0138 | 3.98E-15  | -7.8557  | 85716 | lungCance |
| rs11072790  | 15 | 78992025 | T | C | 0.4155 | 0.1752  | 0.0120 | 1.89E-48  | 14.6275  | 85716 | lungCance |
| rs11072791  | 15 | 78997076 | A | C | 0.4118 | 0.1778  | 0.0121 | 3.08E-49  | 14.7503  | 85716 | lungCance |
| rs11072792  | 15 | 78999911 | G | A | 0.4222 | 0.1686  | 0.0121 | 3.44E-44  | 13.9436  | 85716 | lungCance |
| rs11072793  | 15 | 79006442 | G | A | 0.2447 | -0.1154 | 0.0137 | 3.98E-17  | -8.4135  | 85716 | lungCance |
| rs11072794  | 15 | 79006582 | T | C | 0.2444 | -0.1143 | 0.0137 | 8.01E-17  | -8.3310  | 85716 | lungCance |
| rs11072799  | 15 | 79027814 | G | T | 0.2401 | -0.1177 | 0.0150 | 4.04E-15  | -7.8535  | 85716 | lungCance |
| rs11072800  | 15 | 79045857 | A | G | 0.2503 | -0.1229 | 0.0151 | 3.45E-16  | -8.1568  | 85716 | lungCance |
| rs11072801  | 15 | 79054932 | C | G | 0.3568 | 0.1748  | 0.0141 | 2.06E-35  | 12.4195  | 85716 | lungCance |
| rs11072802  | 15 | 79067857 | T | G | 0.4300 | -0.0995 | 0.0142 | 2.35E-12  | -7.0122  | 85716 | lungCance |
| rs11072803  | 15 | 79077878 | A | G | 0.4261 | 0.1333  | 0.0124 | 4.19E-27  | 10.7824  | 85716 | lungCance |
| rs11072804  | 15 | 79078486 | G | T | 0.4253 | 0.1334  | 0.0124 | 4.14E-27  | 10.7830  | 85716 | lungCance |
| rs11072805  | 15 | 79078518 | C | T | 0.4253 | 0.1333  | 0.0124 | 4.12E-27  | 10.7838  | 85716 | lungCance |
| rs11072806  | 15 | 79079074 | A | G | 0.4305 | 0.1313  | 0.0122 | 5.07E-27  | 10.7646  | 85716 | lungCance |
| rs11072807  | 15 | 79111517 | A | G | 0.4031 | 0.0866  | 0.0119 | 3.73E-13  | 7.2651   | 85716 | lungCance |
| rs11072810  | 15 | 79132206 | C | T | 0.5089 | -0.0898 | 0.0117 | 1.95E-14  | -7.6539  | 85716 | lungCance |
| rs11072811  | 15 | 79132330 | C | A | 0.5096 | -0.0909 | 0.0117 | 9.42E-15  | -7.7471  | 85716 | lungCance |
| rs11083569  | 19 | 41340321 | C | G | 0.3858 | -0.0927 | 0.0140 | 4.10E-11  | -6.6004  | 85716 | lungCance |
| rs11133729  | 5  | 1327101  | G | C | 0.4252 | -0.1405 | 0.0119 | 3.63E-32  | -11.8060 | 85716 | lungCance |
| rs111354037 | 6  | 32579285 | C | A | 0.2125 | 0.0977  | 0.0152 | 1.33E-10  | 6.4239   | 85716 | lungCance |
| rs1114829   | 15 | 78989821 | A | G | 0.2123 | -0.1019 | 0.0145 | 1.80E-12  | -7.0495  | 85716 | lungCance |
| rs111725959 | 15 | 78899346 | A | G | 0.3636 | -0.0906 | 0.0122 | 1.12E-13  | -7.4260  | 85716 | lungCance |
| rs111775124 | 15 | 79062454 | A | G | 0.2985 | -0.0872 | 0.0147 | 2.83E-09  | -5.9414  | 85716 | lungCance |
| rs112321636 | 15 | 79072100 | T | G | 0.4186 | 0.1465  | 0.0128 | 3.78E-30  | 11.4087  | 85716 | lungCance |
| rs112348856 | 15 | 79127523 | A | G | 0.3703 | -0.0726 | 0.0124 | 4.56E-09  | -5.8626  | 85716 | lungCance |
| rs112401627 | 5  | 1300269  | A | G | 0.0275 | 0.2655  | 0.0422 | 3.03E-10  | 6.2973   | 85716 | lungCance |
| rs11244     | 6  | 32780724 | A | G | 0.2590 | 0.0724  | 0.0130 | 2.47E-08  | 5.5752   | 85716 | lungCance |
| rs1125000   | 6  | 26287256 | C | T | 0.4626 | 0.0724  | 0.0117 | 6.49E-10  | 6.1780   | 85716 | lungCance |
| rs112723723 | 15 | 79031139 | G | C | 0.2570 | -0.1229 | 0.0149 | 1.39E-16  | -8.2657  | 85716 | lungCance |
| rs112827102 | 15 | 79058968 | C | T | 0.0792 | -0.1622 | 0.0261 | 5.24E-10  | -6.2118  | 85716 | lungCance |
| rs113029345 | 19 | 41370176 | T | C | 0.5137 | -0.0988 | 0.0139 | 1.33E-12  | -7.0907  | 85716 | lungCance |
| rs113134286 | 15 | 79012888 | T | C | 0.4128 | 0.1819  | 0.0125 | 3.23E-48  | 14.5902  | 85716 | lungCance |
| rs113205291 | 6  | 29862621 | G | A | 0.2436 | 0.0908  | 0.0157 | 7.08E-09  | 5.7888   | 85716 | lungCance |
| rs113352275 | 15 | 78840567 | T | C | 0.1954 | -0.2313 | 0.0150 | 2.07E-53  | -15.3852 | 85716 | lungCance |
| rs113458918 | 15 | 79098383 | T | C | 0.2996 | -0.0732 | 0.0130 | 1.79E-08  | -5.6310  | 85716 | lungCance |
| rs114046333 | 6  | 31296388 | C | G | 0.1018 | 0.1546  | 0.0207 | 7.31E-14  | 7.4820   | 85716 | lungCance |
| rs114088589 | 6  | 29819602 | T | C | 0.1986 | 0.1015  | 0.0150 | 1.36E-11  | 6.7624   | 85716 | lungCance |
| rs114786106 | 6  | 32596878 | G | A | 0.1080 | -0.1183 | 0.0214 | 3.43E-08  | -5.5179  | 85716 | lungCance |
| rs1150752   | 6  | 32064726 | C | T | 0.0974 | 0.1661  | 0.0192 | 5.96E-18  | 8.6332   | 85716 | lungCance |
| rs1150753   | 6  | 32059867 | G | A | 0.0983 | 0.1659  | 0.0192 | 5.71E-18  | 8.6383   | 85716 | lungCance |
| rs1150754   | 6  | 32050758 | T | C | 0.1389 | 0.1241  | 0.0168 | 1.49E-13  | 7.3878   | 85716 | lungCance |
| rs1150755   | 6  | 32038550 | T | C | 0.1390 | 0.1251  | 0.0168 | 9.41E-14  | 7.4489   | 85716 | lungCance |
| rs1150757   | 6  | 32029205 | A | G | 0.0974 | 0.1671  | 0.0193 | 4.40E-18  | 8.6681   | 85716 | lungCance |
| rs1150758   | 6  | 32028149 | C | G | 0.1389 | 0.1245  | 0.0168 | 1.30E-13  | 7.4066   | 85716 | lungCance |
| rs115566240 | 6  | 32601718 | T | C | 0.2582 | -0.0855 | 0.0147 | 6.55E-09  | -5.8021  | 85716 | lungCance |
| rs115648484 | 6  | 25938767 | A | T | 0.0670 | 0.1321  | 0.0231 | 1.03E-08  | 5.7258   | 85716 | lungCance |
| rs11571376  | 12 | 1059556  | G | C | 0.2904 | -0.0747 | 0.0130 | 1.01E-08  | -5.7290  | 85716 | lungCance |
| rs11571378  | 12 | 1059281  | T | A | 0.5010 | 0.0681  | 0.0119 | 9.53E-09  | 5.7392   | 85716 | lungCance |
| rs11571379  | 12 | 1059143  | A | G | 0.5080 | 0.0676  | 0.0118 | 1.03E-08  | 5.7259   | 85716 | lungCance |
| rs11571815  | 13 | 32968550 | A | G | 0.0109 | 0.4713  | 0.0584 | 6.69E-16  | 8.0761   | 85716 | lungCance |
| rs11571818  | 13 | 32968810 | C | T | 0.0109 | 0.4717  | 0.0584 | 6.62E-16  | 8.0774   | 85716 | lungCance |
| rs11571833  | 13 | 32972626 | T | A | 0.0109 | 0.4722  | 0.0584 | 6.12E-16  | 8.0868   | 85716 | lungCance |
| rs11629637  | 15 | 79019024 | T | C | 0.4134 | 0.1834  | 0.0125 | 1.21E-48  | 14.6579  | 85716 | lungCance |
| rs11629639  | 15 | 79019086 | A | G | 0.2446 | -0.1221 | 0.0143 | 1.70E-17  | -8.5130  | 85716 | lungCance |
| rs11629824  | 15 | 79005524 | T | G | 0.2442 | -0.1139 | 0.0137 | 1.10E-16  | -8.2932  | 85716 | lungCance |
| rs11630027  | 15 | 79096983 | C | A | 0.2571 | -0.0815 | 0.0137 | 3.12E-09  | -5.9250  | 85716 | lungCance |
| rs11630236  | 15 | 79058298 | C | T | 0.4159 | 0.1752  | 0.0134 | 8.00E-39  | 13.0322  | 85716 | lungCance |
| rs11630349  | 15 | 78824608 | T | C | 0.4093 | -0.0912 | 0.0119 | 1.97E-14  | -7.6529  | 85716 | lungCance |
| rs11631955  | 15 | 79085915 | G | A | 0.4350 | 0.1277  | 0.0120 | 2.51E-26  | 10.6164  | 85716 | lungCance |
| rs11632102  | 15 | 79086057 | A | G | 0.4366 | 0.1297  | 0.0120 | 4.72E-27  | 10.7706  | 85716 | lungCance |
| rs11632604  | 15 | 78821914 | C | T | 0.4092 | -0.0911 | 0.0119 | 2.14E-14  | -7.6418  | 85716 | lungCance |
| rs11632672  | 15 | 79044330 | A | G | 0.2562 | -0.1218 | 0.0150 | 5.74E-16  | -8.0945  | 85716 | lungCance |
| rs11632963  | 15 | 79132644 | G | A | 0.4928 | 0.0898  | 0.0117 | 2.01E-14  | 7.6502   | 85716 | lungCance |
| rs11633152  | 15 | 79032256 | C | T | 0.2549 | -0.1254 | 0.0149 | 4.44E-17  | -8.4004  | 85716 | lungCance |
| rs11633170  | 15 | 79004642 | C | T | 0.2444 | -0.1146 | 0.0137 | 6.74E-17  | -8.3517  | 85716 | lungCance |
| rs11633178  | 15 | 78944538 | G | A | 0.4116 | 0.1862  | 0.0120 | 2.07E-54  | 15.5332  | 85716 | lungCance |
| rs11633223  | 15 | 78935476 | C | T | 0.3843 | -0.0920 | 0.0124 | 1.05E-13  | -7.4336  | 85716 | lungCance |
| rs11633351  | 15 | 79056815 | T | C | 0.4256 | 0.1727  | 0.0133 | 2.07E-38  | 12.9601  | 85716 | lungCance |
| rs11633519  | 15 | 78999552 | A | G | 0.2385 | -0.1018 | 0.0140 | 4.07E-13  | -7.2532  | 85716 | lungCance |
| rs11633958  | 15 | 78862064 | T | C | 0.3615 | 0.2583  | 0.0121 | 5.32E-101 | 21.3347  | 85716 | lungCance |
| rs11634042  | 15 | 79105350 | T | C | 0.4384 | 0.1153  | 0.0121 | 2.13E-21  | 9.4985   | 85716 | lungCance |

|             |    |           |   |   |        |         |        |          |          |       |           |
|-------------|----|-----------|---|---|--------|---------|--------|----------|----------|-------|-----------|
| rs11634351  | 15 | 78944718  | A | G | 0.4114 | 0.1863  | 0.0120 | 1.42E-54 | 15.5574  | 85716 | lungCance |
| rs11634450  | 15 | 79093201  | G | A | 0.4436 | 0.1255  | 0.0120 | 1.20E-25 | 10.4693  | 85716 | lungCance |
| rs11634543  | 15 | 79005504  | T | C | 0.4140 | 0.1795  | 0.0121 | 1.50E-49 | 14.7986  | 85716 | lungCance |
| rs11634628  | 15 | 79005579  | G | A | 0.2444 | -0.1146 | 0.0137 | 6.80E-17 | -8.3506  | 85716 | lungCance |
| rs11634901  | 15 | 49335218  | A | C | 0.2657 | -0.0753 | 0.0133 | 1.66E-08 | -5.6439  | 85716 | lungCance |
| rs11635249  | 15 | 78924604  | T | G | 0.4523 | -0.0936 | 0.0125 | 6.97E-14 | -7.4885  | 85716 | lungCance |
| rs11635870  | 15 | 79064143  | G | C | 0.4247 | 0.1734  | 0.0134 | 1.70E-38 | 12.9750  | 85716 | lungCance |
| rs11635931  | 15 | 79064080  | A | G | 0.4210 | 0.1733  | 0.0135 | 6.81E-38 | 12.8679  | 85716 | lungCance |
| rs11636131  | 15 | 78821606  | T | C | 0.4094 | -0.0918 | 0.0119 | 1.41E-14 | -7.6955  | 85716 | lungCance |
| rs11636545  | 15 | 79140348  | T | C | 0.3886 | -0.0885 | 0.0122 | 4.34E-13 | -7.2444  | 85716 | lungCance |
| rs11636605  | 15 | 78928878  | A | G | 0.1949 | -0.1962 | 0.0151 | 9.97E-39 | -13.0159 | 85716 | lungCance |
| rs11636753  | 15 | 78928946  | T | G | 0.3961 | -0.0896 | 0.0122 | 2.01E-13 | -7.3483  | 85716 | lungCance |
| rs11637092  | 15 | 79017595  | G | C | 0.3240 | -0.1203 | 0.0149 | 6.08E-16 | -8.0878  | 85716 | lungCance |
| rs11637630  | 15 | 78899719  | G | A | 0.2190 | -0.2319 | 0.0142 | 4.38E-60 | -16.3495 | 85716 | lungCance |
| rs11637635  | 15 | 78877150  | A | G | 0.3636 | -0.0907 | 0.0122 | 1.12E-13 | -7.4262  | 85716 | lungCance |
| rs11637656  | 15 | 78751961  | C | T | 0.3750 | -0.1699 | 0.0121 | 5.54E-45 | -14.0731 | 85716 | lungCance |
| rs11637890  | 15 | 78935419  | G | C | 0.3842 | -0.0922 | 0.0124 | 9.40E-14 | -7.4488  | 85716 | lungCance |
| rs11638020  | 15 | 79107724  | A | G | 0.4025 | 0.0912  | 0.0120 | 3.22E-14 | 7.5892   | 85716 | lungCance |
| rs11638321  | 15 | 79092183  | C | T | 0.4343 | 0.1274  | 0.0121 | 8.58E-26 | 10.5008  | 85716 | lungCance |
| rs11638372  | 15 | 78983559  | T | C | 0.4054 | 0.1776  | 0.0119 | 1.69E-50 | 14.9446  | 85716 | lungCance |
| rs11638490  | 15 | 79007950  | T | C | 0.4123 | 0.1821  | 0.0123 | 2.57E-49 | 14.7620  | 85716 | lungCance |
| rs11638830  | 15 | 78948319  | C | G | 0.4106 | 0.1822  | 0.0119 | 9.45E-53 | 15.2863  | 85716 | lungCance |
| rs11639044  | 15 | 79083814  | T | C | 0.4347 | 0.1297  | 0.0120 | 4.63E-27 | 10.7728  | 85716 | lungCance |
| rs11639049  | 15 | 79023730  | G | A | 0.4135 | 0.1848  | 0.0126 | 1.03E-48 | 14.6679  | 85716 | lungCance |
| rs11639166  | 15 | 79023766  | C | G | 0.4135 | 0.1849  | 0.0126 | 1.01E-48 | 14.6698  | 85716 | lungCance |
| rs11639181  | 15 | 79024016  | G | A | 0.4135 | 0.1849  | 0.0126 | 9.70E-49 | 14.6726  | 85716 | lungCance |
| rs11639224  | 15 | 78753371  | G | A | 0.4281 | -0.0776 | 0.0118 | 5.77E-11 | -6.5498  | 85716 | lungCance |
| rs11639347  | 15 | 79024350  | T | C | 0.4135 | 0.1850  | 0.0126 | 8.82E-49 | 14.6785  | 85716 | lungCance |
| rs11639372  | 15 | 78966655  | T | C | 0.4088 | 0.1800  | 0.0118 | 2.93E-52 | 15.2124  | 85716 | lungCance |
| rs11639375  | 15 | 79024214  | A | G | 0.4135 | 0.1850  | 0.0126 | 9.46E-49 | 14.6735  | 85716 | lungCance |
| rs11639382  | 15 | 79024268  | A | G | 0.4135 | 0.1850  | 0.0126 | 9.47E-49 | 14.6735  | 85716 | lungCance |
| rs116591906 | 6  | 28583392  | G | A | 0.1393 | 0.1011  | 0.0169 | 2.09E-09 | 5.9908   | 85716 | lungCance |
| rs116667074 | 6  | 32285362  | T | C | 0.0948 | 0.1651  | 0.0196 | 3.10E-17 | 8.4429   | 85716 | lungCance |
| rs11667314  | 19 | 41340983  | T | C | 0.3368 | -0.0962 | 0.0139 | 4.47E-12 | -6.9215  | 85716 | lungCance |
| rs116991229 | 15 | 78874555  | C | T | 0.0211 | 0.3719  | 0.0499 | 9.54E-14 | 7.4471   | 85716 | lungCance |
| rs117189732 | 15 | 79083280  | T | C | 0.1051 | 0.1565  | 0.0240 | 7.53E-11 | 6.5097   | 85716 | lungCance |
| rs11745877  | 5  | 1364439   | C | T | 0.2652 | -0.0784 | 0.0137 | 9.31E-09 | -5.7427  | 85716 | lungCance |
| rs11780471  | 8  | 27344719  | A | G | 0.0596 | -0.1411 | 0.0250 | 1.69E-08 | -5.6408  | 85716 | lungCance |
| rs117832812 | 15 | 78912472  | A | C | 0.0690 | -0.2121 | 0.0251 | 2.60E-17 | -8.4632  | 85716 | lungCance |
| rs11852372  | 15 | 78801394  | C | A | 0.3453 | 0.2544  | 0.0125 | 1.66E-92 | 20.3999  | 85716 | lungCance |
| rs11852459  | 15 | 47490614  | G | A | 0.4042 | 0.0654  | 0.0119 | 4.29E-08 | 5.4787   | 85716 | lungCance |
| rs11852830  | 15 | 79125429  | A | T | 0.4907 | 0.0889  | 0.0118 | 5.50E-14 | 7.5193   | 85716 | lungCance |
| rs11852887  | 15 | 79030578  | A | C | 0.2487 | -0.1222 | 0.0150 | 3.20E-16 | -8.1658  | 85716 | lungCance |
| rs11852980  | 15 | 79054911  | G | A | 0.3619 | 0.1679  | 0.0140 | 2.68E-33 | 12.0232  | 85716 | lungCance |
| rs11853054  | 15 | 79054919  | A | G | 0.3486 | 0.1693  | 0.0142 | 6.01E-33 | 11.9565  | 85716 | lungCance |
| rs11853608  | 15 | 79030693  | C | A | 0.4054 | 0.1734  | 0.0132 | 2.58E-39 | 13.1184  | 85716 | lungCance |
| rs11854507  | 15 | 79069121  | G | A | 0.3915 | 0.1612  | 0.0137 | 4.04E-32 | 11.7972  | 85716 | lungCance |
| rs11856441  | 15 | 79030526  | T | G | 0.2387 | -0.1187 | 0.0150 | 2.98E-15 | -7.8919  | 85716 | lungCance |
| rs11856536  | 15 | 79094325  | G | A | 0.4436 | 0.1255  | 0.0120 | 1.27E-25 | 10.4641  | 85716 | lungCance |
| rs11856903  | 15 | 79140017  | A | G | 0.3989 | -0.0867 | 0.0120 | 5.48E-13 | -7.2129  | 85716 | lungCance |
| rs11856953  | 15 | 79117302  | T | C | 0.4012 | 0.0876  | 0.0120 | 3.16E-13 | 7.2875   | 85716 | lungCance |
| rs11857532  | 15 | 78968268  | G | T | 0.4593 | 0.1472  | 0.0117 | 4.00E-36 | 12.5497  | 85716 | lungCance |
| rs11858210  | 15 | 79078358  | A | G | 0.4256 | 0.1335  | 0.0124 | 4.06E-27 | 10.7851  | 85716 | lungCance |
| rs11858230  | 15 | 78835552  | A | G | 0.4094 | -0.0905 | 0.0119 | 3.13E-14 | -7.5928  | 85716 | lungCance |
| rs11858836  | 15 | 78783277  | A | G | 0.3532 | 0.2253  | 0.0122 | 3.87E-76 | 18.4668  | 85716 | lungCance |
| rs1187530   | 6  | 167376812 | T | C | 0.4725 | 0.0643  | 0.0117 | 3.97E-08 | 5.4922   | 85716 | lungCance |
| rs1187532   | 6  | 167382020 | G | A | 0.4736 | 0.0649  | 0.0117 | 2.72E-08 | 5.5588   | 85716 | lungCance |
| rs11878604  | 19 | 41333284  | C | T | 0.0933 | -0.1404 | 0.0241 | 5.99E-09 | -5.8170  | 85716 | lungCance |
| rs11879413  | 19 | 41337923  | T | C | 0.0875 | -0.1474 | 0.0249 | 3.46E-09 | -5.9083  | 85716 | lungCance |
| rs11881918  | 19 | 41334199  | A | G | 0.0878 | -0.1463 | 0.0249 | 4.10E-09 | -5.8800  | 85716 | lungCance |
| rs12050525  | 15 | 79075746  | C | T | 0.4287 | 0.1341  | 0.0124 | 3.95E-27 | 10.7878  | 85716 | lungCance |
| rs12101809  | 15 | 78779801  | T | C | 0.2102 | -0.1998 | 0.0143 | 2.77E-44 | -13.9593 | 85716 | lungCance |
| rs1211447   | 6  | 167381979 | C | T | 0.4735 | 0.0649  | 0.0117 | 2.73E-08 | 5.5582   | 85716 | lungCance |
| rs12148319  | 15 | 78956192  | G | A | 0.1506 | -0.1666 | 0.0165 | 5.74E-24 | -10.0964 | 85716 | lungCance |
| rs12148817  | 15 | 79041128  | A | G | 0.2509 | -0.1252 | 0.0150 | 8.49E-17 | -8.3240  | 85716 | lungCance |
| rs12286     | 15 | 79051759  | A | G | 0.4132 | 0.1743  | 0.0135 | 2.13E-38 | 12.9579  | 85716 | lungCance |
| rs12324870  | 15 | 78995801  | T | C | 0.3632 | -0.1090 | 0.0125 | 2.87E-18 | -8.7164  | 85716 | lungCance |
| rs12324886  | 15 | 79054108  | A | G | 0.2602 | -0.1116 | 0.0151 | 1.64E-13 | -7.3753  | 85716 | lungCance |
| rs12437644  | 15 | 79188644  | C | T | 0.2631 | -0.0919 | 0.0136 | 1.39E-11 | -6.7585  | 85716 | lungCance |
| rs12437868  | 15 | 79088460  | C | T | 0.3011 | -0.0734 | 0.0129 | 1.24E-08 | -5.6939  | 85716 | lungCance |
| rs12438008  | 15 | 79084680  | A | G | 0.3048 | -0.0717 | 0.0129 | 2.79E-08 | -5.5544  | 85716 | lungCance |
| rs12438181  | 15 | 78812098  | A | G | 0.2133 | -0.2273 | 0.0144 | 3.49E-56 | -15.7925 | 85716 | lungCance |
| rs12438645  | 15 | 79068203  | G | A | 0.2603 | -0.0942 | 0.0148 | 1.96E-10 | -6.3642  | 85716 | lungCance |
| rs12438659  | 15 | 78824924  | A | G | 0.2130 | -0.2296 | 0.0144 | 1.37E-57 | -15.9955 | 85716 | lungCance |

|            |    |          |   |   |        |         |        |          |          |       |           |
|------------|----|----------|---|---|--------|---------|--------|----------|----------|-------|-----------|
| rs12438758 | 15 | 79052227 | C | T | 0.2049 | -0.1051 | 0.0164 | 1.64E-10 | -6.3918  | 85716 | lungCance |
| rs12439240 | 15 | 78829091 | C | T | 0.2145 | -0.2296 | 0.0143 | 7.51E-58 | -16.0329 | 85716 | lungCance |
| rs12440014 | 15 | 78926726 | G | C | 0.2256 | -0.2183 | 0.0143 | 2.78E-52 | -15.2157 | 85716 | lungCance |
| rs12441088 | 15 | 78928264 | G | T | 0.2571 | -0.1933 | 0.0143 | 7.43E-42 | -13.5547 | 85716 | lungCance |
| rs12441354 | 15 | 78821016 | A | G | 0.2131 | -0.2282 | 0.0144 | 6.44E-57 | -15.8988 | 85716 | lungCance |
| rs12441426 | 15 | 78812329 | C | T | 0.2133 | -0.2285 | 0.0144 | 1.01E-56 | -15.8708 | 85716 | lungCance |
| rs12441998 | 15 | 78929372 | G | A | 0.1956 | -0.1968 | 0.0150 | 3.90E-39 | -13.0872 | 85716 | lungCance |
| rs12442456 | 15 | 78751962 | T | G | 0.1389 | -0.2011 | 0.0177 | 5.18E-30 | -11.3815 | 85716 | lungCance |
| rs12442476 | 15 | 79117856 | G | A | 0.4033 | 0.0860  | 0.0120 | 7.55E-13 | 7.1692   | 85716 | lungCance |
| rs12443170 | 15 | 78907736 | A | G | 0.1221 | -0.2264 | 0.0187 | 9.17E-34 | -12.1116 | 85716 | lungCance |
| rs12459249 | 19 | 41339896 | T | C | 0.3382 | -0.0948 | 0.0139 | 8.85E-12 | -6.8243  | 85716 | lungCance |
| rs12461383 | 19 | 41370338 | C | G | 0.4883 | -0.0995 | 0.0138 | 6.39E-13 | -7.1919  | 85716 | lungCance |
| rs12525187 | 6  | 26337537 | G | A | 0.3910 | -0.0715 | 0.0120 | 2.27E-09 | -5.9768  | 85716 | lungCance |
| rs12591557 | 15 | 78811732 | G | A | 0.4089 | -0.0910 | 0.0120 | 2.66E-14 | -7.6137  | 85716 | lungCance |
| rs12592111 | 15 | 78767346 | G | A | 0.3861 | -0.1705 | 0.0122 | 1.07E-44 | -14.0270 | 85716 | lungCance |
| rs12592721 | 15 | 79099145 | C | G | 0.4437 | 0.1253  | 0.0120 | 2.44E-25 | 10.4014  | 85716 | lungCance |
| rs12592823 | 15 | 79004643 | A | G | 0.0879 | -0.1676 | 0.0222 | 3.83E-14 | -7.5664  | 85716 | lungCance |
| rs12593207 | 15 | 78987225 | A | G | 0.0952 | -0.1568 | 0.0206 | 2.88E-14 | -7.6038  | 85716 | lungCance |
| rs12593229 | 15 | 78765290 | T | G | 0.3736 | -0.1694 | 0.0121 | 1.05E-44 | -14.0277 | 85716 | lungCance |
| rs12593950 | 15 | 78920935 | C | G | 0.2148 | -0.2265 | 0.0144 | 1.26E-55 | -15.7118 | 85716 | lungCance |
| rs12594247 | 15 | 78946633 | T | C | 0.1479 | -0.1649 | 0.0165 | 1.60E-23 | -9.9956  | 85716 | lungCance |
| rs12594391 | 15 | 78816240 | G | A | 0.4093 | -0.0912 | 0.0119 | 2.12E-14 | -7.6436  | 85716 | lungCance |
| rs12594550 | 15 | 78959037 | G | C | 0.1489 | -0.1667 | 0.0166 | 9.80E-24 | -10.0439 | 85716 | lungCance |
| rs12594711 | 15 | 78793921 | C | T | 0.3790 | -0.1674 | 0.0121 | 1.22E-43 | -13.8525 | 85716 | lungCance |
| rs12595330 | 15 | 78953464 | A | G | 0.1501 | -0.1630 | 0.0165 | 4.44E-23 | -9.8938  | 85716 | lungCance |
| rs12595538 | 15 | 79154453 | T | A | 0.3874 | -0.0816 | 0.0121 | 1.64E-11 | -6.7348  | 85716 | lungCance |
| rs1265057  | 6  | 31078615 | C | T | 0.4072 | 0.0645  | 0.0118 | 4.84E-08 | 5.4569   | 85716 | lungCance |
| rs1265061  | 6  | 31078257 | A | C | 0.3322 | 0.0682  | 0.0122 | 2.38E-08 | 5.5821   | 85716 | lungCance |
| rs1265062  | 6  | 31078005 | T | C | 0.3321 | 0.0681  | 0.0122 | 2.47E-08 | 5.5754   | 85716 | lungCance |
| rs1265888  | 6  | 32066447 | A | G | 0.1400 | 0.1219  | 0.0168 | 3.54E-13 | 7.2718   | 85716 | lungCance |
| rs12660432 | 6  | 26317384 | T | C | 0.3622 | -0.0680 | 0.0121 | 2.11E-08 | -5.6023  | 85716 | lungCance |
| rs12661552 | 6  | 26265200 | A | G | 0.3579 | -0.0677 | 0.0123 | 3.55E-08 | -5.5117  | 85716 | lungCance |
| rs12665035 | 6  | 26275649 | C | T | 0.3313 | -0.0727 | 0.0125 | 5.96E-09 | -5.8180  | 85716 | lungCance |
| rs1268928  | 6  | 31078899 | T | G | 0.3324 | 0.0681  | 0.0122 | 2.42E-08 | 5.5788   | 85716 | lungCance |
| rs1269852  | 6  | 32080191 | C | G | 0.0970 | 0.1631  | 0.0193 | 3.25E-17 | 8.4373   | 85716 | lungCance |
| rs1270942  | 6  | 31918860 | G | A | 0.0980 | 0.1642  | 0.0192 | 1.17E-17 | 8.5556   | 85716 | lungCance |
| rs12816367 | 12 | 1072696  | C | T | 0.1811 | -0.0850 | 0.0155 | 3.83E-08 | -5.4983  | 85716 | lungCance |
| rs1281937  | 6  | 32578143 | C | T | 0.2615 | 0.0781  | 0.0140 | 2.71E-08 | 5.5596   | 85716 | lungCance |
| rs12898292 | 15 | 79112603 | A | G | 0.4055 | 0.0823  | 0.0120 | 6.68E-12 | 6.8646   | 85716 | lungCance |
| rs12898293 | 15 | 79112568 | C | A | 0.4214 | 0.0832  | 0.0122 | 7.64E-12 | 6.8454   | 85716 | lungCance |
| rs12898323 | 15 | 79054084 | C | T | 0.4175 | 0.1709  | 0.0134 | 1.92E-37 | 12.7879  | 85716 | lungCance |
| rs12898346 | 15 | 79054117 | C | T | 0.4104 | 0.1696  | 0.0135 | 2.37E-36 | 12.5908  | 85716 | lungCance |
| rs12898392 | 15 | 79112432 | G | A | 0.4086 | 0.0836  | 0.0120 | 2.60E-12 | 6.9974   | 85716 | lungCance |
| rs12898452 | 15 | 79112628 | C | A | 0.4061 | 0.0826  | 0.0120 | 5.18E-12 | 6.9004   | 85716 | lungCance |
| rs12898578 | 15 | 79112574 | G | A | 0.4123 | 0.0851  | 0.0121 | 1.88E-12 | 7.0428   | 85716 | lungCance |
| rs12898712 | 15 | 79112622 | G | T | 0.4061 | 0.0826  | 0.0120 | 5.18E-12 | 6.9008   | 85716 | lungCance |
| rs12899131 | 15 | 78726885 | G | A | 0.4295 | -0.0765 | 0.0118 | 1.01E-10 | -6.4659  | 85716 | lungCance |
| rs12899135 | 15 | 78954379 | G | A | 0.4098 | 0.1817  | 0.0119 | 1.18E-52 | 15.2719  | 85716 | lungCance |
| rs12899147 | 15 | 79079512 | A | A | 0.4328 | 0.1318  | 0.0122 | 2.45E-27 | 10.8314  | 85716 | lungCance |
| rs12899201 | 15 | 79033534 | G | A | 0.2482 | -0.1152 | 0.0150 | 1.63E-14 | -7.6770  | 85716 | lungCance |
| rs12899351 | 15 | 78792398 | T | C | 0.3752 | -0.1707 | 0.0121 | 1.61E-45 | -14.1608 | 85716 | lungCance |
| rs12899452 | 15 | 79112550 | T | A | 0.4140 | 0.0853  | 0.0121 | 1.49E-12 | 7.0754   | 85716 | lungCance |
| rs12899940 | 15 | 79001699 | C | T | 0.2443 | -0.1150 | 0.0137 | 5.16E-17 | -8.3828  | 85716 | lungCance |
| rs12900612 | 15 | 78823993 | T | C | 0.4068 | -0.0911 | 0.0119 | 2.23E-14 | -7.6364  | 85716 | lungCance |
| rs12900783 | 15 | 78815523 | A | G | 0.4092 | -0.0908 | 0.0119 | 2.74E-14 | -7.6103  | 85716 | lungCance |
| rs12901228 | 15 | 79030049 | G | T | 0.2461 | -0.1220 | 0.0149 | 2.80E-16 | -8.1818  | 85716 | lungCance |
| rs12901241 | 15 | 79002662 | G | A | 0.3530 | -0.1078 | 0.0127 | 1.57E-17 | -8.5222  | 85716 | lungCance |
| rs12901300 | 15 | 78892952 | A | G | 0.4140 | -0.0842 | 0.0119 | 1.32E-12 | -7.0918  | 85716 | lungCance |
| rs12901331 | 15 | 79021097 | C | T | 0.3418 | -0.1034 | 0.0133 | 7.60E-15 | -7.7741  | 85716 | lungCance |
| rs12901913 | 15 | 78981348 | T | C | 0.4053 | 0.1769  | 0.0119 | 6.51E-50 | 14.8548  | 85716 | lungCance |
| rs12901971 | 15 | 78942159 | T | G | 0.2237 | -0.1111 | 0.0141 | 2.72E-15 | -7.9028  | 85716 | lungCance |
| rs12902294 | 15 | 78942339 | T | C | 0.2257 | -0.1091 | 0.0141 | 8.42E-15 | -7.7613  | 85716 | lungCance |
| rs12902493 | 15 | 78819275 | G | C | 0.4092 | -0.0916 | 0.0119 | 1.60E-14 | -7.6796  | 85716 | lungCance |
| rs12902602 | 15 | 78967401 | G | A | 0.4082 | 0.1797  | 0.0118 | 4.19E-52 | 15.1890  | 85716 | lungCance |
| rs12903129 | 15 | 78819606 | T | C | 0.4091 | -0.0916 | 0.0119 | 1.59E-14 | -7.6799  | 85716 | lungCance |
| rs12903203 | 15 | 79084933 | C | T | 0.4357 | 0.1289  | 0.0120 | 9.12E-27 | 10.7099  | 85716 | lungCance |
| rs12903285 | 15 | 78778953 | A | G | 0.3987 | -0.1684 | 0.0122 | 3.28E-43 | -13.7821 | 85716 | lungCance |
| rs12903295 | 15 | 78778972 | A | G | 0.3738 | -0.1700 | 0.0121 | 5.26E-45 | -14.0772 | 85716 | lungCance |
| rs12903355 | 15 | 79129145 | A | T | 0.5066 | 0.0881  | 0.0118 | 9.04E-14 | 7.4540   | 85716 | lungCance |
| rs12903613 | 15 | 79129076 | G | T | 0.4926 | 0.0892  | 0.0117 | 2.51E-14 | 7.6217   | 85716 | lungCance |
| rs12903668 | 15 | 79129320 | A | G | 0.4925 | 0.0894  | 0.0117 | 2.30E-14 | 7.6326   | 85716 | lungCance |
| rs12904234 | 15 | 78779384 | C | T | 0.3718 | -0.1712 | 0.0121 | 1.32E-45 | -14.1749 | 85716 | lungCance |
| rs12904489 | 15 | 79033925 | T | A | 0.2485 | -0.1201 | 0.0149 | 9.38E-16 | -8.0347  | 85716 | lungCance |
| rs12905116 | 15 | 79042734 | T | A | 0.2789 | -0.1261 | 0.0151 | 7.49E-17 | -8.3392  | 85716 | lungCance |

|            |    |          |   |   |        |         |        |          |          |       |           |
|------------|----|----------|---|---|--------|---------|--------|----------|----------|-------|-----------|
| rs12905273 | 15 | 79002755 | G | A | 0.3398 | -0.1079 | 0.0129 | 6.06E-17 | -8.3643  | 85716 | lungCance |
| rs12905641 | 15 | 78964362 | T | C | 0.3400 | -0.1005 | 0.0124 | 5.37E-16 | -8.1027  | 85716 | lungCance |
| rs12905740 | 15 | 79082364 | T | C | 0.2530 | -0.0821 | 0.0139 | 3.79E-09 | -5.8933  | 85716 | lungCance |
| rs12906022 | 15 | 79030838 | A | G | 0.2838 | -0.1201 | 0.0148 | 6.21E-16 | -8.0854  | 85716 | lungCance |
| rs12906165 | 15 | 79030830 | C | T | 0.2808 | -0.1197 | 0.0148 | 7.37E-16 | -8.0640  | 85716 | lungCance |
| rs12906171 | 15 | 79029640 | T | C | 0.3397 | -0.0994 | 0.0138 | 6.41E-13 | -7.1916  | 85716 | lungCance |
| rs12906284 | 15 | 78825105 | T | C | 0.4093 | -0.0910 | 0.0119 | 2.11E-14 | -7.6434  | 85716 | lungCance |
| rs12906653 | 15 | 79052580 | A | G | 0.4187 | 0.1735  | 0.0133 | 9.79E-39 | 13.0170  | 85716 | lungCance |
| rs12906691 | 15 | 79068328 | A | G | 0.3983 | 0.1614  | 0.0135 | 6.22E-33 | 11.9533  | 85716 | lungCance |
| rs12906835 | 15 | 79046989 | A | G | 0.2445 | -0.1209 | 0.0151 | 1.39E-15 | -7.9862  | 85716 | lungCance |
| rs12906846 | 15 | 78825295 | A | G | 0.4093 | -0.0910 | 0.0119 | 2.14E-14 | -7.6421  | 85716 | lungCance |
| rs12906847 | 15 | 79031357 | A | G | 0.2678 | -0.1134 | 0.0149 | 2.98E-14 | -7.5991  | 85716 | lungCance |
| rs12906977 | 15 | 79031329 | C | A | 0.2498 | -0.1216 | 0.0150 | 4.42E-16 | -8.1267  | 85716 | lungCance |
| rs12907065 | 15 | 79107355 | G | A | 0.3962 | 0.0963  | 0.0122 | 3.37E-15 | 7.8762   | 85716 | lungCance |
| rs12907169 | 15 | 78825498 | C | G | 0.4092 | -0.0910 | 0.0119 | 2.12E-14 | -7.6433  | 85716 | lungCance |
| rs12907178 | 15 | 78997922 | A | G | 0.2390 | -0.1028 | 0.0140 | 2.19E-13 | -7.3366  | 85716 | lungCance |
| rs12907207 | 15 | 79031290 | G | A | 0.2472 | -0.1225 | 0.0150 | 2.69E-16 | -8.1864  | 85716 | lungCance |
| rs12907425 | 15 | 78825149 | A | T | 0.4092 | -0.0910 | 0.0119 | 2.12E-14 | -7.6430  | 85716 | lungCance |
| rs12907432 | 15 | 79031473 | G | C | 0.2486 | -0.1225 | 0.0150 | 2.65E-16 | -8.1885  | 85716 | lungCance |
| rs12907511 | 15 | 78998061 | C | G | 0.2344 | -0.1047 | 0.0140 | 6.81E-14 | -7.4918  | 85716 | lungCance |
| rs12907535 | 15 | 79070182 | C | T | 0.3858 | -0.0895 | 0.0144 | 4.38E-10 | -6.2398  | 85716 | lungCance |
| rs12907536 | 15 | 79031485 | G | A | 0.2462 | -0.1235 | 0.0150 | 1.94E-16 | -8.2257  | 85716 | lungCance |
| rs12907739 | 15 | 78997980 | G | A | 0.2505 | -0.1040 | 0.0140 | 1.08E-13 | -7.4301  | 85716 | lungCance |
| rs12907764 | 15 | 79070438 | G | A | 0.4222 | 0.1400  | 0.0135 | 2.32E-25 | 10.4064  | 85716 | lungCance |
| rs12907966 | 15 | 78843051 | T | C | 0.4124 | -0.0944 | 0.0120 | 3.07E-15 | -7.8881  | 85716 | lungCance |
| rs12908207 | 15 | 79025963 | T | G | 0.4120 | 0.1806  | 0.0131 | 1.59E-43 | 13.8335  | 85716 | lungCance |
| rs12908341 | 15 | 79126561 | G | T | 0.4914 | -0.0892 | 0.0119 | 5.97E-14 | -7.5091  | 85716 | lungCance |
| rs12908510 | 15 | 78997972 | T | C | 0.2483 | -0.1053 | 0.0140 | 5.99E-14 | -7.5085  | 85716 | lungCance |
| rs12909317 | 15 | 79114419 | T | G | 0.4030 | 0.0863  | 0.0119 | 4.89E-13 | 7.2284   | 85716 | lungCance |
| rs12909921 | 15 | 78743260 | G | A | 0.4285 | -0.0774 | 0.0118 | 5.77E-11 | -6.5495  | 85716 | lungCance |
| rs12910090 | 15 | 78743300 | C | A | 0.4296 | -0.0775 | 0.0118 | 5.50E-11 | -6.5571  | 85716 | lungCance |
| rs12910100 | 15 | 78822667 | T | C | 0.4092 | -0.0912 | 0.0119 | 2.05E-14 | -7.6469  | 85716 | lungCance |
| rs12910237 | 15 | 78956338 | T | C | 0.3515 | -0.1018 | 0.0124 | 1.81E-16 | -8.2341  | 85716 | lungCance |
| rs12910289 | 15 | 78822065 | G | T | 0.4074 | -0.0919 | 0.0119 | 1.41E-14 | -7.6956  | 85716 | lungCance |
| rs12910627 | 15 | 78994933 | C | G | 0.4121 | 0.1767  | 0.0120 | 3.78E-49 | 14.7365  | 85716 | lungCance |
| rs12910726 | 15 | 78817034 | T | C | 0.4069 | -0.0912 | 0.0119 | 2.22E-14 | -7.6372  | 85716 | lungCance |
| rs12910831 | 15 | 79043801 | T | C | 0.2649 | -0.1224 | 0.0150 | 3.80E-16 | -8.1446  | 85716 | lungCance |
| rs12910910 | 15 | 78767850 | C | T | 0.3737 | -0.1693 | 0.0121 | 1.13E-44 | -14.0233 | 85716 | lungCance |
| rs12910969 | 15 | 78816980 | A | G | 0.4093 | -0.0912 | 0.0119 | 2.17E-14 | -7.6404  | 85716 | lungCance |
| rs12910978 | 15 | 78810017 | G | A | 0.4088 | -0.0905 | 0.0120 | 3.70E-14 | -7.5710  | 85716 | lungCance |
| rs12910984 | 15 | 78891627 | G | A | 0.2191 | -0.2321 | 0.0142 | 2.60E-60 | -16.3815 | 85716 | lungCance |
| rs12911602 | 15 | 78891449 | C | T | 0.4139 | -0.0840 | 0.0119 | 1.47E-12 | -7.0768  | 85716 | lungCance |
| rs12912022 | 15 | 78810585 | G | A | 0.3998 | -0.0872 | 0.0121 | 5.66E-13 | -7.2084  | 85716 | lungCance |
| rs12912245 | 15 | 79039464 | A | G | 0.2638 | -0.1163 | 0.0150 | 1.05E-14 | -7.7332  | 85716 | lungCance |
| rs12912524 | 15 | 78952756 | G | A | 0.2380 | -0.1154 | 0.0137 | 4.60E-17 | -8.3961  | 85716 | lungCance |
| rs12912673 | 15 | 78810216 | C | T | 0.4088 | -0.0906 | 0.0120 | 3.57E-14 | -7.5756  | 85716 | lungCance |
| rs12913173 | 15 | 78810546 | C | T | 0.4072 | -0.0891 | 0.0120 | 9.72E-14 | -7.4444  | 85716 | lungCance |
| rs12913260 | 15 | 79071095 | A | G | 0.4170 | 0.1488  | 0.0128 | 4.21E-31 | 11.5979  | 85716 | lungCance |
| rs12913779 | 15 | 79032355 | T | C | 0.2473 | -0.1225 | 0.0150 | 2.63E-16 | -8.1889  | 85716 | lungCance |
| rs12914694 | 15 | 78814444 | A | G | 0.4090 | -0.0911 | 0.0119 | 2.37E-14 | -7.6286  | 85716 | lungCance |
| rs12914822 | 15 | 78941119 | A | G | 0.2479 | -0.1097 | 0.0141 | 8.29E-15 | -7.7631  | 85716 | lungCance |
| rs12915192 | 15 | 79115585 | G | A | 0.4193 | 0.0867  | 0.0121 | 6.99E-13 | 7.1796   | 85716 | lungCance |
| rs12915366 | 15 | 78831753 | A | G | 0.4072 | -0.0916 | 0.0119 | 1.64E-14 | -7.6762  | 85716 | lungCance |
| rs12915428 | 15 | 78823368 | A | G | 0.4092 | -0.0911 | 0.0119 | 2.09E-14 | -7.6448  | 85716 | lungCance |
| rs12915539 | 15 | 78940795 | A | T | 0.3513 | -0.1075 | 0.0126 | 1.13E-17 | -8.5596  | 85716 | lungCance |
| rs12915652 | 15 | 78831928 | A | G | 0.4080 | -0.0910 | 0.0119 | 2.34E-14 | -7.6306  | 85716 | lungCance |
| rs12915669 | 15 | 78950101 | A | C | 0.2406 | -0.1147 | 0.0138 | 1.05E-16 | -8.2992  | 85716 | lungCance |
| rs12916326 | 15 | 79054011 | G | A | 0.4197 | 0.1714  | 0.0133 | 8.47E-38 | 12.8516  | 85716 | lungCance |
| rs12916483 | 15 | 78832397 | A | G | 0.4093 | -0.0907 | 0.0119 | 2.69E-14 | -7.6123  | 85716 | lungCance |
| rs12916648 | 15 | 79054129 | T | C | 0.4147 | 0.1710  | 0.0134 | 2.68E-37 | 12.7617  | 85716 | lungCance |
| rs12916717 | 15 | 79014948 | T | C | 0.2785 | -0.1192 | 0.0143 | 6.74E-17 | -8.3512  | 85716 | lungCance |
| rs12916801 | 15 | 78769130 | A | G | 0.3733 | -0.1687 | 0.0121 | 4.95E-44 | -13.9172 | 85716 | lungCance |
| rs12916999 | 15 | 78826912 | T | C | 0.4092 | -0.0910 | 0.0119 | 2.25E-14 | -7.6355  | 85716 | lungCance |
| rs12917502 | 15 | 79045521 | T | C | 0.2641 | -0.1218 | 0.0150 | 4.81E-16 | -8.1164  | 85716 | lungCance |
| rs13156167 | 5  | 1275857  | C | T | 0.1299 | 0.1321  | 0.0204 | 1.02E-10 | 6.4632   | 85716 | lungCance |
| rs13167280 | 5  | 1280477  | A | G | 0.1439 | 0.1098  | 0.0191 | 8.14E-09 | 5.7656   | 85716 | lungCance |
| rs1316971  | 15 | 78930510 | A | G | 0.1952 | -0.1937 | 0.0151 | 7.42E-38 | -12.8614 | 85716 | lungCance |
| rs13170453 | 5  | 1317481  | G | A | 0.2071 | -0.1423 | 0.0146 | 1.88E-22 | -9.7482  | 85716 | lungCance |
| rs1317286  | 15 | 78896129 | G | A | 0.3670 | 0.2531  | 0.0120 | 8.28E-99 | 21.0986  | 85716 | lungCance |
| rs13178866 | 5  | 1323212  | T | C | 0.4225 | -0.1396 | 0.0119 | 8.49E-32 | -11.7342 | 85716 | lungCance |
| rs13180    | 15 | 78789488 | C | T | 0.3748 | -0.1704 | 0.0121 | 2.25E-45 | -14.1363 | 85716 | lungCance |
| rs13189073 | 5  | 1307648  | A | G | 0.1332 | -0.1127 | 0.0189 | 2.58E-09 | -5.9564  | 85716 | lungCance |
| rs13190888 | 6  | 28285985 | A | G | 0.0871 | 0.1463  | 0.0210 | 3.42E-12 | 6.9593   | 85716 | lungCance |
| rs13191227 | 6  | 27390115 | C | G | 0.0770 | 0.1407  | 0.0215 | 6.42E-11 | 6.5335   | 85716 | lungCance |

|            |   |           |   |   |        |        |        |          |        |       |           |
|------------|---|-----------|---|---|--------|--------|--------|----------|--------|-------|-----------|
| rs13191296 | 6 | 25684606  | T | C | 0.0667 | 0.1318 | 0.0235 | 1.99E-08 | 5.6126 | 85716 | lungCance |
| rs13191445 | 6 | 26015489  | A | G | 0.0677 | 0.1394 | 0.0230 | 1.38E-09 | 6.0582 | 85716 | lungCance |
| rs13191474 | 6 | 27413345  | T | C | 0.0781 | 0.1402 | 0.0213 | 4.92E-11 | 6.5733 | 85716 | lungCance |
| rs13191786 | 6 | 28277671  | G | T | 0.0775 | 0.1443 | 0.0213 | 1.28E-11 | 6.7704 | 85716 | lungCance |
| rs13192426 | 6 | 167393848 | A | G | 0.4842 | 0.0656 | 0.0118 | 2.58E-08 | 5.5679 | 85716 | lungCance |
| rs13192965 | 6 | 27671825  | A | G | 0.0784 | 0.1297 | 0.0212 | 9.58E-10 | 6.1162 | 85716 | lungCance |
| rs13193295 | 6 | 28003228  | G | C | 0.0778 | 0.1348 | 0.0213 | 2.56E-10 | 6.3235 | 85716 | lungCance |
| rs13193480 | 6 | 27702561  | G | A | 0.0785 | 0.1288 | 0.0212 | 1.22E-09 | 6.0771 | 85716 | lungCance |
| rs13193542 | 6 | 27702425  | T | G | 0.0785 | 0.1288 | 0.0212 | 1.23E-09 | 6.0767 | 85716 | lungCance |
| rs13194781 | 6 | 27815639  | G | A | 0.0783 | 0.1270 | 0.0212 | 2.01E-09 | 5.9973 | 85716 | lungCance |
| rs13195040 | 6 | 27413924  | G | A | 0.0781 | 0.1401 | 0.0213 | 5.00E-11 | 6.5710 | 85716 | lungCance |
| rs13195291 | 6 | 28169241  | A | G | 0.0776 | 0.1373 | 0.0213 | 1.12E-10 | 6.4504 | 85716 | lungCance |
| rs13195401 | 6 | 26463574  | T | G | 0.0655 | 0.1372 | 0.0247 | 2.79E-08 | 5.5542 | 85716 | lungCance |
| rs13195402 | 6 | 26463575  | T | G | 0.0655 | 0.1375 | 0.0247 | 2.58E-08 | 5.5677 | 85716 | lungCance |
| rs13195636 | 6 | 27509493  | C | A | 0.0792 | 0.1313 | 0.0212 | 5.96E-10 | 6.1913 | 85716 | lungCance |
| rs13195728 | 6 | 27771106  | C | T | 0.0783 | 0.1293 | 0.0212 | 1.05E-09 | 6.1018 | 85716 | lungCance |
| rs13196692 | 6 | 27379119  | T | C | 0.0771 | 0.1413 | 0.0215 | 5.17E-11 | 6.5659 | 85716 | lungCance |
| rs13197176 | 6 | 28129232  | T | C | 0.0770 | 0.1372 | 0.0214 | 1.42E-10 | 6.4134 | 85716 | lungCance |
| rs13197574 | 6 | 28060239  | C | T | 0.0777 | 0.1350 | 0.0213 | 2.37E-10 | 6.3354 | 85716 | lungCance |
| rs13197633 | 6 | 28174757  | A | G | 0.0777 | 0.1380 | 0.0213 | 9.04E-11 | 6.4822 | 85716 | lungCance |
| rs13198474 | 6 | 25874423  | A | G | 0.0643 | 0.1317 | 0.0237 | 2.60E-08 | 5.5665 | 85716 | lungCance |
| rs13198716 | 6 | 26582035  | T | C | 0.0768 | 0.1217 | 0.0218 | 2.49E-08 | 5.5740 | 85716 | lungCance |
| rs13198809 | 6 | 28323702  | A | G | 0.0780 | 0.1475 | 0.0213 | 4.06E-12 | 6.9351 | 85716 | lungCance |
| rs13199649 | 6 | 27868792  | T | C | 0.0771 | 0.1357 | 0.0214 | 2.37E-10 | 6.3354 | 85716 | lungCance |
| rs13199772 | 6 | 27834085  | G | A | 0.0784 | 0.1261 | 0.0212 | 2.62E-09 | 5.9539 | 85716 | lungCance |
| rs13199906 | 6 | 27834139  | G | C | 0.0783 | 0.1271 | 0.0212 | 1.97E-09 | 6.0000 | 85716 | lungCance |
| rs13200214 | 6 | 28017250  | T | C | 0.0775 | 0.1363 | 0.0213 | 1.67E-10 | 6.3885 | 85716 | lungCance |
| rs13201294 | 6 | 27556141  | T | A | 0.0919 | 0.1146 | 0.0197 | 5.83E-09 | 5.8214 | 85716 | lungCance |
| rs13201308 | 6 | 28130089  | T | C | 0.0777 | 0.1358 | 0.0213 | 1.74E-10 | 6.3827 | 85716 | lungCance |
| rs13201341 | 6 | 25822661  | T | C | 0.0660 | 0.1304 | 0.0233 | 2.07E-08 | 5.6064 | 85716 | lungCance |
| rs13201681 | 6 | 28394680  | T | C | 0.0781 | 0.1460 | 0.0213 | 6.71E-12 | 6.8636 | 85716 | lungCance |
| rs13201782 | 6 | 26651053  | A | T | 0.0770 | 0.1222 | 0.0219 | 2.58E-08 | 5.5677 | 85716 | lungCance |
| rs13202291 | 6 | 27698857  | G | A | 0.0788 | 0.1282 | 0.0212 | 1.40E-09 | 6.0552 | 85716 | lungCance |
| rs13202295 | 6 | 27698837  | T | C | 0.0774 | 0.1303 | 0.0214 | 1.09E-09 | 6.0962 | 85716 | lungCance |
| rs13202592 | 6 | 25935591  | T | C | 0.0688 | 0.1285 | 0.0229 | 2.01E-08 | 5.6114 | 85716 | lungCance |
| rs13202688 | 6 | 25993469  | G | A | 0.0675 | 0.1383 | 0.0230 | 1.90E-09 | 6.0065 | 85716 | lungCance |
| rs13202775 | 6 | 27564879  | C | T | 0.0786 | 0.1296 | 0.0212 | 9.97E-10 | 6.1100 | 85716 | lungCance |
| rs13203816 | 6 | 28079598  | C | T | 0.0777 | 0.1350 | 0.0213 | 2.42E-10 | 6.3324 | 85716 | lungCance |
| rs13204012 | 6 | 28201531  | A | G | 0.0774 | 0.1447 | 0.0213 | 1.12E-11 | 6.7900 | 85716 | lungCance |
| rs13204572 | 6 | 26189356  | C | G | 0.0712 | 0.1307 | 0.0225 | 6.18E-09 | 5.8118 | 85716 | lungCance |
| rs13205211 | 6 | 28203056  | G | T | 0.0774 | 0.1445 | 0.0213 | 1.17E-11 | 6.7833 | 85716 | lungCance |
| rs13205911 | 6 | 28124114  | T | C | 0.0777 | 0.1353 | 0.0213 | 2.02E-10 | 6.3599 | 85716 | lungCance |
| rs13207082 | 6 | 27251379  | G | A | 0.0760 | 0.1312 | 0.0217 | 1.54E-09 | 6.0398 | 85716 | lungCance |
| rs13207345 | 6 | 28265572  | T | C | 0.0778 | 0.1453 | 0.0213 | 8.70E-12 | 6.8266 | 85716 | lungCance |
| rs13207689 | 6 | 27369704  | G | C | 0.0769 | 0.1397 | 0.0216 | 9.29E-11 | 6.4780 | 85716 | lungCance |
| rs13208096 | 6 | 28225311  | G | C | 0.0775 | 0.1436 | 0.0213 | 1.53E-11 | 6.7445 | 85716 | lungCance |
| rs13209332 | 6 | 27520752  | A | T | 0.0785 | 0.1314 | 0.0212 | 5.89E-10 | 6.1931 | 85716 | lungCance |
| rs13210041 | 6 | 26037601  | A | G | 0.0675 | 0.1377 | 0.0231 | 2.34E-09 | 5.9725 | 85716 | lungCance |
| rs13210634 | 6 | 27646492  | G | A | 0.0784 | 0.1294 | 0.0212 | 1.05E-09 | 6.1009 | 85716 | lungCance |
| rs13211507 | 6 | 28257377  | C | T | 0.0787 | 0.1472 | 0.0211 | 3.30E-12 | 6.9644 | 85716 | lungCance |
| rs13211947 | 6 | 25864818  | T | C | 0.0643 | 0.1333 | 0.0239 | 2.39E-08 | 5.5810 | 85716 | lungCance |
| rs13212093 | 6 | 27606716  | T | C | 0.0785 | 0.1298 | 0.0212 | 9.50E-10 | 6.1177 | 85716 | lungCance |
| rs13212318 | 6 | 27688841  | C | A | 0.0785 | 0.1280 | 0.0212 | 1.53E-09 | 6.0410 | 85716 | lungCance |
| rs13212534 | 6 | 25983010  | A | G | 0.0687 | 0.1302 | 0.0229 | 1.25E-08 | 5.6933 | 85716 | lungCance |
| rs13212562 | 6 | 27300310  | G | A | 0.0901 | 0.1219 | 0.0199 | 8.46E-10 | 6.1360 | 85716 | lungCance |
| rs13212651 | 6 | 27806985  | G | A | 0.0783 | 0.1290 | 0.0212 | 1.15E-09 | 6.0872 | 85716 | lungCance |
| rs13212921 | 6 | 27205422  | T | C | 0.1025 | 0.1047 | 0.0189 | 3.00E-08 | 5.5415 | 85716 | lungCance |
| rs13213152 | 6 | 28349698  | G | A | 0.0780 | 0.1463 | 0.0212 | 5.58E-12 | 6.8899 | 85716 | lungCance |
| rs13213200 | 6 | 26755915  | T | C | 0.0883 | 0.1274 | 0.0225 | 1.48E-08 | 5.6638 | 85716 | lungCance |
| rs13213957 | 6 | 25786226  | C | T | 0.0666 | 0.1288 | 0.0232 | 2.78E-08 | 5.5548 | 85716 | lungCance |
| rs13213986 | 6 | 28358009  | A | T | 0.0781 | 0.1462 | 0.0213 | 6.30E-12 | 6.8728 | 85716 | lungCance |
| rs13214023 | 6 | 28332141  | A | G | 0.0781 | 0.1472 | 0.0212 | 4.08E-12 | 6.9342 | 85716 | lungCance |
| rs13214169 | 6 | 25890656  | G | A | 0.0934 | 0.1115 | 0.0196 | 1.34E-08 | 5.6812 | 85716 | lungCance |
| rs13215275 | 6 | 27647509  | T | G | 0.0784 | 0.1294 | 0.0212 | 1.05E-09 | 6.1009 | 85716 | lungCance |
| rs13216117 | 6 | 27938484  | G | A | 0.0774 | 0.1351 | 0.0214 | 2.54E-10 | 6.3244 | 85716 | lungCance |
| rs13217619 | 6 | 28306671  | C | T | 0.0818 | 0.1372 | 0.0211 | 7.32E-11 | 6.5139 | 85716 | lungCance |
| rs13217620 | 6 | 27653120  | T | C | 0.0752 | 0.1394 | 0.0217 | 1.37E-10 | 6.4192 | 85716 | lungCance |
| rs13217984 | 6 | 28139710  | T | A | 0.0776 | 0.1357 | 0.0213 | 1.79E-10 | 6.3781 | 85716 | lungCance |
| rs13218537 | 6 | 27377235  | G | A | 0.0782 | 0.1377 | 0.0213 | 1.05E-10 | 6.4594 | 85716 | lungCance |
| rs13218875 | 6 | 27884012  | T | C | 0.0819 | 0.1327 | 0.0211 | 3.16E-10 | 6.2908 | 85716 | lungCance |
| rs13219354 | 6 | 27185664  | C | T | 0.1027 | 0.1038 | 0.0188 | 3.56E-08 | 5.5114 | 85716 | lungCance |
| rs13220261 | 6 | 26499185  | T | C | 0.0907 | 0.1116 | 0.0204 | 4.44E-08 | 5.4723 | 85716 | lungCance |
| rs13220495 | 6 | 26441640  | T | C | 0.0758 | 0.1260 | 0.0218 | 7.74E-09 | 5.7739 | 85716 | lungCance |
| rs13220522 | 6 | 26316295  | A | G | 0.0734 | 0.1319 | 0.0223 | 3.16E-09 | 5.9231 | 85716 | lungCance |



|             |    |           |   |   |        |         |        |           |          |       |           |
|-------------|----|-----------|---|---|--------|---------|--------|-----------|----------|-------|-----------|
| rs13220570  | 6  | 26753800  | C | T | 0.1027 | 0.1190  | 0.0215 | 3.26E-08  | 5.5271   | 85716 | lungCance |
| rs13329271  | 15 | 78914230  | C | A | 0.2073 | -0.2275 | 0.0144 | 6.38E-56  | -15.7550 | 85716 | lungCance |
| rs13355267  | 5  | 1312935   | T | C | 0.4117 | -0.1287 | 0.0121 | 1.82E-26  | -10.6461 | 85716 | lungCance |
| rs13356727  | 5  | 1312457   | G | A | 0.4043 | -0.1340 | 0.0120 | 7.83E-29  | -11.1424 | 85716 | lungCance |
| rs138234416 | 6  | 27992898  | A | G | 0.0765 | 0.1388  | 0.0215 | 1.19E-10  | 6.4410   | 85716 | lungCance |
| rs1383634   | 15 | 79029396  | T | C | 0.2460 | -0.1202 | 0.0149 | 7.65E-16  | -8.0597  | 85716 | lungCance |
| rs1383635   | 15 | 79029511  | T | C | 0.2463 | -0.1202 | 0.0149 | 7.50E-16  | -8.0622  | 85716 | lungCance |
| rs1383636   | 15 | 79106220  | G | A | 0.2628 | -0.0797 | 0.0140 | 1.11E-08  | -5.7134  | 85716 | lungCance |
| rs138833245 | 15 | 79045868  | C | T | 0.0406 | -0.1881 | 0.0340 | 3.13E-08  | -5.5341  | 85716 | lungCance |
| rs1394371   | 15 | 78724469  | T | C | 0.3023 | 0.1850  | 0.0127 | 8.38E-48  | 14.5253  | 85716 | lungCance |
| rs139978901 | 15 | 78902026  | A | C | 0.3814 | -0.0896 | 0.0123 | 2.82E-13  | -7.3028  | 85716 | lungCance |
| rs139990267 | 15 | 79017588  | T | C | 0.3081 | -0.0982 | 0.0140 | 2.02E-12  | -7.0336  | 85716 | lungCance |
| rs140330585 | 15 | 78866445  | A | G | 0.3640 | 0.2574  | 0.0121 | 7.79E-101 | 21.3170  | 85716 | lungCance |
| rs140365013 | 6  | 27523869  | A | G | 0.0785 | 0.1319  | 0.0212 | 4.89E-10  | 6.2228   | 85716 | lungCance |
| rs141342723 | 6  | 27622084  | C | T | 0.0788 | 0.1294  | 0.0212 | 1.05E-09  | 6.1016   | 85716 | lungCance |
| rs141649669 | 6  | 31225261  | A | G | 0.2370 | 0.0791  | 0.0143 | 3.06E-08  | 5.5381   | 85716 | lungCance |
| rs1419696   | 6  | 29695180  | A | G | 0.2436 | 0.0946  | 0.0135 | 2.66E-12  | 6.9946   | 85716 | lungCance |
| rs142259499 | 6  | 31341771  | A | G | 0.2674 | 0.0799  | 0.0140 | 1.07E-08  | 5.7189   | 85716 | lungCance |
| rs142965311 | 6  | 27989252  | T | C | 0.0775 | 0.1351  | 0.0213 | 2.43E-10  | 6.3314   | 85716 | lungCance |
| rs143525179 | 6  | 29751998  | T | C | 0.2213 | 0.0843  | 0.0143 | 3.81E-09  | 5.8921   | 85716 | lungCance |
| rs143527274 | 15 | 78953924  | T | C | 0.0278 | -0.2672 | 0.0402 | 2.87E-11  | -6.6533  | 85716 | lungCance |
| rs144125760 | 6  | 29750187  | T | A | 0.2931 | 0.0760  | 0.0128 | 3.22E-09  | 5.9200   | 85716 | lungCance |
| rs144223821 | 6  | 29849380  | T | C | 0.1167 | 0.1504  | 0.0215 | 2.55E-12  | 7.0004   | 85716 | lungCance |
| rs144447022 | 6  | 29244219  | T | G | 0.0875 | 0.1440  | 0.0209 | 5.97E-12  | 6.8805   | 85716 | lungCance |
| rs144969912 | 6  | 27616843  | T | C | 0.0785 | 0.1297  | 0.0212 | 9.74E-10  | 6.1135   | 85716 | lungCance |
| rs145043018 | 6  | 29751401  | C | G | 0.3158 | 0.0718  | 0.0127 | 1.42E-08  | 5.6714   | 85716 | lungCance |
| rs1454836   | 15 | 47551054  | A | T | 0.3961 | 0.0655  | 0.0119 | 4.19E-08  | 5.4824   | 85716 | lungCance |
| rs146009840 | 15 | 78906177  | T | A | 0.3641 | 0.2563  | 0.0121 | 2.34E-100 | 21.2660  | 85716 | lungCance |
| rs146722791 | 15 | 79140191  | T | C | 0.0849 | 0.1503  | 0.0267 | 1.73E-08  | 5.6366   | 85716 | lungCance |
| rs147144681 | 15 | 78900908  | T | C | 0.3496 | 0.2602  | 0.0124 | 2.99E-98  | 21.0374  | 85716 | lungCance |
| rs148696809 | 6  | 28934352  | C | T | 0.0866 | 0.1459  | 0.0209 | 2.57E-12  | 6.9992   | 85716 | lungCance |
| rs148993644 | 15 | 79146583  | T | C | 0.1417 | 0.1274  | 0.0201 | 2.44E-10  | 6.3309   | 85716 | lungCance |
| rs149372736 | 15 | 79045871  | G | A | 0.0406 | -0.1881 | 0.0340 | 3.13E-08  | -5.5341  | 85716 | lungCance |
| rs149543464 | 6  | 30400763  | A | G | 0.1032 | 0.1651  | 0.0193 | 1.32E-17  | 8.5415   | 85716 | lungCance |
| rs149583087 | 6  | 27912437  | A | G | 0.0777 | 0.1342  | 0.0213 | 3.03E-10  | 6.2970   | 85716 | lungCance |
| rs1496402   | 19 | 41366134  | T | A | 0.3387 | -0.0893 | 0.0143 | 4.11E-10  | -6.2500  | 85716 | lungCance |
| rs149866169 | 6  | 27441723  | A | T | 0.0865 | 0.1364  | 0.0202 | 1.60E-11  | 6.7385   | 85716 | lungCance |
| rs149943    | 6  | 28002388  | A | G | 0.1069 | 0.1111  | 0.0183 | 1.23E-09  | 6.0762   | 85716 | lungCance |
| rs149949    | 6  | 28011516  | C | T | 0.1058 | 0.1176  | 0.0184 | 1.47E-10  | 6.4087   | 85716 | lungCance |
| rs149990    | 6  | 27998258  | A | G | 0.1069 | 0.1112  | 0.0183 | 1.17E-09  | 6.0846   | 85716 | lungCance |
| rs150254595 | 6  | 29278406  | A | G | 0.1372 | 0.1121  | 0.0171 | 5.48E-11  | 6.5573   | 85716 | lungCance |
| rs1504545   | 15 | 78818471  | C | G | 0.4093 | -0.0915 | 0.0119 | 1.79E-14  | -7.6650  | 85716 | lungCance |
| rs1504546   | 15 | 78824235  | T | C | 0.4093 | -0.0912 | 0.0119 | 1.96E-14  | -7.6532  | 85716 | lungCance |
| rs1504548   | 15 | 78843246  | T | G | 0.4125 | -0.0944 | 0.0120 | 2.96E-15  | -7.8924  | 85716 | lungCance |
| rs1504549   | 15 | 78766629  | C | T | 0.3737 | -0.1693 | 0.0121 | 1.22E-44  | -14.0171 | 85716 | lungCance |
| rs1504550   | 15 | 78766250  | G | A | 0.3532 | 0.2243  | 0.0122 | 1.72E-75  | 18.3858  | 85716 | lungCance |
| rs151118057 | 15 | 78988620  | A | G | 0.0177 | -0.2939 | 0.0512 | 9.56E-09  | -5.7383  | 85716 | lungCance |
| rs1535275   | 6  | 26520767  | G | C | 0.2139 | -0.0788 | 0.0142 | 2.88E-08  | -5.5488  | 85716 | lungCance |
| rs1543681   | 6  | 26187783  | C | A | 0.4927 | 0.0687  | 0.0118 | 6.58E-09  | 5.8015   | 85716 | lungCance |
| rs1564499   | 15 | 79084808  | T | C | 0.2530 | -0.0829 | 0.0138 | 1.84E-09  | -6.0110  | 85716 | lungCance |
| rs156743    | 6  | 27967089  | C | T | 0.1068 | 0.1100  | 0.0183 | 1.83E-09  | 6.0122   | 85716 | lungCance |
| rs1590257   | 6  | 167377782 | T | G | 0.4726 | 0.0643  | 0.0117 | 3.74E-08  | 5.5026   | 85716 | lungCance |
| rs1620933   | 6  | 167394243 | A | G | 0.4732 | 0.0646  | 0.0117 | 3.09E-08  | 5.5359   | 85716 | lungCance |
| rs1628578   | 6  | 29695502  | C | A | 0.2436 | 0.0946  | 0.0135 | 2.71E-12  | 6.9919   | 85716 | lungCance |
| rs1629083   | 11 | 118126576 | T | C | 0.5024 | -0.0670 | 0.0118 | 1.25E-08  | -5.6929  | 85716 | lungCance |
| rs1632908   | 6  | 29893403  | G | C | 0.1683 | 0.1380  | 0.0169 | 2.85E-16  | 8.1794   | 85716 | lungCance |
| rs1632957   | 6  | 29688667  | G | A | 0.2468 | 0.0913  | 0.0135 | 1.51E-11  | 6.7468   | 85716 | lungCance |
| rs16969894  | 15 | 78776456  | T | C | 0.2103 | -0.2002 | 0.0143 | 2.13E-44  | -13.9777 | 85716 | lungCance |
| rs16969968  | 15 | 78882925  | A | G | 0.3632 | 0.2570  | 0.0120 | 3.32E-101 | 21.3576  | 85716 | lungCance |
| rs16970006  | 15 | 78970259  | C | T | 0.0738 | -0.1658 | 0.0227 | 2.86E-13  | -7.3008  | 85716 | lungCance |
| rs1700006   | 15 | 78875623  | G | A | 0.1963 | -0.2278 | 0.0149 | 1.29E-52  | -15.2663 | 85716 | lungCance |
| rs1711731   | 15 | 78861918  | A | G | 0.1951 | -0.2292 | 0.0150 | 2.08E-52  | -15.2351 | 85716 | lungCance |
| rs1715449   | 11 | 118128455 | G | A | 0.4758 | 0.0655  | 0.0117 | 2.31E-08  | 5.5869   | 85716 | lungCance |
| rs1715450   | 11 | 118128445 | C | G | 0.4765 | 0.0655  | 0.0117 | 2.34E-08  | 5.5848   | 85716 | lungCance |
| rs1715453   | 11 | 118125077 | T | C | 0.4761 | 0.0653  | 0.0117 | 2.61E-08  | 5.5655   | 85716 | lungCance |
| rs1715456   | 11 | 118123517 | A | G | 0.4872 | 0.0645  | 0.0117 | 3.86E-08  | 5.4972   | 85716 | lungCance |
| rs17243470  | 15 | 79172766  | G | T | 0.2692 | -0.0888 | 0.0134 | 3.06E-11  | -6.6435  | 85716 | lungCance |
| rs17244648  | 15 | 79202749  | T | C | 0.1457 | 0.1280  | 0.0199 | 1.16E-10  | 6.4446   | 85716 | lungCance |
| rs17312661  | 6  | 28300336  | G | A | 0.1619 | 0.0881  | 0.0156 | 1.58E-08  | 5.6524   | 85716 | lungCance |
| rs1736922   | 6  | 29693969  | T | C | 0.2435 | 0.0941  | 0.0135 | 3.48E-12  | 6.9572   | 85716 | lungCance |
| rs17391694  | 1  | 78623626  | T | C | 0.1179 | 0.1063  | 0.0191 | 2.62E-08  | 5.5650   | 85716 | lungCance |
| rs17393193  | 15 | 49332079  | C | T | 0.2650 | -0.0743 | 0.0133 | 2.57E-08  | -5.5684  | 85716 | lungCance |
| rs17405217  | 15 | 78731149  | T | C | 0.3547 | 0.2222  | 0.0121 | 9.21E-75  | 18.2941  | 85716 | lungCance |
| rs17407257  | 15 | 78826249  | G | A | 0.4092 | -0.0910 | 0.0119 | 2.23E-14  | -7.6371  | 85716 | lungCance |

|             |    |           |   |   |        |         |        |           |          |       |           |
|-------------|----|-----------|---|---|--------|---------|--------|-----------|----------|-------|-----------|
| rs17408276  | 15 | 78881618  | C | T | 0.3642 | -0.0900 | 0.0122 | 1.63E-13  | -7.3757  | 85716 | lungCance |
| rs1743439   | 6  | 167393407 | C | T | 0.4732 | 0.0646  | 0.0117 | 3.09E-08  | 5.5361   | 85716 | lungCance |
| rs1743440   | 6  | 167404606 | G | A | 0.4740 | 0.0648  | 0.0117 | 3.10E-08  | 5.5359   | 85716 | lungCance |
| rs1743441   | 6  | 167404689 | A | G | 0.4741 | 0.0648  | 0.0117 | 3.11E-08  | 5.5350   | 85716 | lungCance |
| rs17483548  | 15 | 78730313  | A | G | 0.3548 | 0.2220  | 0.0121 | 1.18E-74  | 18.2804  | 85716 | lungCance |
| rs17483686  | 15 | 78733390  | T | A | 0.3592 | 0.2230  | 0.0121 | 7.54E-76  | 18.4300  | 85716 | lungCance |
| rs17483721  | 15 | 78733731  | C | T | 0.3593 | 0.2231  | 0.0121 | 6.77E-76  | 18.4363  | 85716 | lungCance |
| rs17483929  | 15 | 78742376  | A | G | 0.3595 | 0.2236  | 0.0121 | 1.25E-76  | 18.5273  | 85716 | lungCance |
| rs17484235  | 15 | 78761414  | G | C | 0.3555 | 0.2238  | 0.0122 | 1.02E-75  | 18.4130  | 85716 | lungCance |
| rs17484524  | 15 | 78772676  | G | A | 0.3558 | 0.2243  | 0.0122 | 5.04E-76  | 18.4514  | 85716 | lungCance |
| rs17486195  | 15 | 78865197  | G | A | 0.3630 | 0.2572  | 0.0121 | 1.21E-100 | 21.2976  | 85716 | lungCance |
| rs17486278  | 15 | 78867482  | C | A | 0.3640 | 0.2559  | 0.0121 | 9.88E-100 | 21.1984  | 85716 | lungCance |
| rs17487514  | 15 | 78953785  | T | C | 0.2971 | 0.1641  | 0.0130 | 2.53E-36  | 12.5853  | 85716 | lungCance |
| rs17526722  | 6  | 25918855  | A | G | 0.0667 | 0.1314  | 0.0231 | 1.26E-08  | 5.6910   | 85716 | lungCance |
| rs17528178  | 6  | 25983777  | T | C | 0.0674 | 0.1388  | 0.0230 | 1.68E-09  | 6.0262   | 85716 | lungCance |
| rs175597    | 6  | 27810626  | C | T | 0.0929 | 0.1148  | 0.0194 | 3.12E-09  | 5.9252   | 85716 | lungCance |
| rs17598658  | 6  | 26175866  | C | A | 0.0710 | 0.1271  | 0.0225 | 1.61E-08  | 5.6497   | 85716 | lungCance |
| rs17608582  | 6  | 26318799  | A | C | 0.3621 | -0.0680 | 0.0121 | 2.03E-08  | -5.6091  | 85716 | lungCance |
| rs17695758  | 6  | 27837183  | C | T | 0.0783 | 0.1271  | 0.0212 | 2.01E-09  | 5.9968   | 85716 | lungCance |
| rs17749927  | 6  | 27669976  | G | A | 0.0784 | 0.1298  | 0.0212 | 9.24E-10  | 6.1219   | 85716 | lungCance |
| rs17750424  | 6  | 27701122  | C | T | 0.0785 | 0.1287  | 0.0212 | 1.25E-09  | 6.0738   | 85716 | lungCance |
| rs17750747  | 6  | 27730334  | C | T | 0.0786 | 0.1288  | 0.0212 | 1.25E-09  | 6.0732   | 85716 | lungCance |
| rs17751184  | 6  | 27775028  | T | C | 0.0783 | 0.1288  | 0.0212 | 1.19E-09  | 6.0812   | 85716 | lungCance |
| rs17763089  | 6  | 27835218  | A | G | 0.0783 | 0.1271  | 0.0212 | 1.98E-09  | 5.9998   | 85716 | lungCance |
| rs17832351  | 15 | 79173005  | G | A | 0.2692 | -0.0891 | 0.0134 | 2.65E-11  | -6.6652  | 85716 | lungCance |
| rs17843560  | 6  | 32609388  | T | G | 0.0342 | 0.2159  | 0.0382 | 1.57E-08  | 5.6540   | 85716 | lungCance |
| rs1793149   | 11 | 118127347 | A | G | 0.4759 | 0.0654  | 0.0117 | 2.38E-08  | 5.5820   | 85716 | lungCance |
| rs1793150   | 11 | 118127314 | G | A | 0.4760 | 0.0655  | 0.0117 | 2.37E-08  | 5.5828   | 85716 | lungCance |
| rs1793151   | 11 | 118126920 | C | T | 0.4781 | 0.0647  | 0.0117 | 3.63E-08  | 5.5077   | 85716 | lungCance |
| rs1794693   | 6  | 167405670 | T | C | 0.4741 | 0.0648  | 0.0117 | 3.11E-08  | 5.5351   | 85716 | lungCance |
| rs1794694   | 6  | 167404751 | T | C | 0.4740 | 0.0648  | 0.0117 | 3.15E-08  | 5.5331   | 85716 | lungCance |
| rs1794696   | 6  | 167396174 | T | C | 0.4742 | 0.0650  | 0.0117 | 2.54E-08  | 5.5707   | 85716 | lungCance |
| rs1794697   | 6  | 167395410 | C | T | 0.4733 | 0.0646  | 0.0117 | 3.12E-08  | 5.5346   | 85716 | lungCance |
| rs1794699   | 6  | 167393395 | G | C | 0.4739 | 0.0644  | 0.0117 | 3.45E-08  | 5.5167   | 85716 | lungCance |
| rs1794700   | 6  | 167389103 | C | T | 0.4730 | 0.0644  | 0.0117 | 3.48E-08  | 5.5152   | 85716 | lungCance |
| rs1800628   | 6  | 31546850  | A | G | 0.1009 | 0.1567  | 0.0193 | 3.96E-16  | 8.1396   | 85716 | lungCance |
| rs1807006   | 15 | 79062340  | G | C | 0.4229 | 0.1730  | 0.0134 | 3.48E-38  | 12.9195  | 85716 | lungCance |
| rs1807007   | 15 | 79062102  | G | T | 0.3974 | 0.1756  | 0.0137 | 9.10E-38  | 12.8457  | 85716 | lungCance |
| rs180725355 | 5  | 1307555   | C | T | 0.3386 | -0.1047 | 0.0141 | 1.34E-13  | -7.4019  | 85716 | lungCance |
| rs1809409   | 15 | 79063474  | T | A | 0.4205 | 0.1733  | 0.0134 | 4.44E-38  | 12.9009  | 85716 | lungCance |
| rs1809412   | 15 | 79021908  | C | T | 0.2447 | -0.1192 | 0.0144 | 1.08E-16  | -8.2961  | 85716 | lungCance |
| rs1809414   | 15 | 79028120  | G | T | 0.2409 | -0.1161 | 0.0150 | 8.95E-15  | -7.7533  | 85716 | lungCance |
| rs1809415   | 15 | 79028201  | T | C | 0.2018 | -0.1046 | 0.0160 | 6.10E-11  | -6.5413  | 85716 | lungCance |
| rs1809419   | 15 | 79053814  | A | G | 0.4149 | 0.1707  | 0.0134 | 3.17E-37  | 12.7484  | 85716 | lungCance |
| rs1809420   | 15 | 79056769  | C | T | 0.3931 | 0.1685  | 0.0137 | 6.53E-35  | 12.3265  | 85716 | lungCance |
| rs1809423   | 15 | 79059670  | C | T | 0.4342 | 0.1677  | 0.0133 | 3.23E-36  | 12.5662  | 85716 | lungCance |
| rs1810165   | 15 | 79059449  | G | A | 0.4358 | 0.1663  | 0.0133 | 1.04E-35  | 12.4737  | 85716 | lungCance |
| rs1811120   | 6  | 167403589 | C | T | 0.4921 | 0.0669  | 0.0119 | 2.01E-08  | 5.6110   | 85716 | lungCance |
| rs1811197   | 6  | 31327660  | A | G | 0.1763 | 0.0919  | 0.0153 | 1.70E-09  | 6.0244   | 85716 | lungCance |
| rs1814880   | 15 | 79021140  | T | C | 0.2424 | -0.1208 | 0.0144 | 5.37E-17  | -8.3781  | 85716 | lungCance |
| rs1819333   | 6  | 167373547 | G | T | 0.4727 | 0.0644  | 0.0118 | 4.57E-08  | 5.4673   | 85716 | lungCance |
| rs1825082   | 15 | 79023433  | A | G | 0.4135 | 0.1847  | 0.0126 | 1.07E-48  | 14.6649  | 85716 | lungCance |
| rs1825083   | 15 | 79023467  | C | T | 0.4135 | 0.1848  | 0.0126 | 1.07E-48  | 14.6650  | 85716 | lungCance |
| rs1825084   | 15 | 79023577  | T | C | 0.3814 | 0.1814  | 0.0133 | 3.52E-42  | 13.6089  | 85716 | lungCance |
| rs1825085   | 15 | 79023578  | G | A | 0.3814 | 0.1814  | 0.0133 | 3.51E-42  | 13.6094  | 85716 | lungCance |
| rs1825086   | 15 | 79029492  | A | G | 0.2461 | -0.1202 | 0.0149 | 7.41E-16  | -8.0635  | 85716 | lungCance |
| rs1825087   | 15 | 79077114  | G | A | 0.4295 | 0.1336  | 0.0124 | 3.44E-27  | 10.7999  | 85716 | lungCance |
| rs183257831 | 5  | 1307642   | G | A | 0.2211 | 0.1132  | 0.0157 | 5.72E-13  | 7.2069   | 85716 | lungCance |
| rs183280845 | 6  | 26921528  | A | G | 0.0819 | 0.1195  | 0.0215 | 2.68E-08  | 5.5610   | 85716 | lungCance |
| rs183822442 | 15 | 78902775  | G | A | 0.4067 | -0.0849 | 0.0120 | 1.26E-12  | -7.0993  | 85716 | lungCance |
| rs1847529   | 15 | 78735070  | C | A | 0.4295 | -0.0769 | 0.0118 | 7.72E-11  | -6.5058  | 85716 | lungCance |
| rs1847530   | 15 | 78824031  | A | G | 0.4092 | -0.0914 | 0.0119 | 1.74E-14  | -7.6685  | 85716 | lungCance |
| rs185381850 | 5  | 1307558   | G | T | 0.3202 | -0.1209 | 0.0142 | 1.61E-17  | -8.5191  | 85716 | lungCance |
| rs186156459 | 5  | 1307647   | C | T | 0.1325 | -0.1269 | 0.0190 | 2.47E-11  | -6.6751  | 85716 | lungCance |
| rs1878399   | 15 | 78912003  | G | C | 0.4165 | -0.0931 | 0.0119 | 4.94E-15  | -7.8282  | 85716 | lungCance |
| rs188015    | 6  | 27877446  | A | T | 0.1066 | 0.1129  | 0.0183 | 7.39E-10  | 6.1573   | 85716 | lungCance |
| rs1883213   | 6  | 26303178  | G | T | 0.3623 | -0.0681 | 0.0121 | 2.00E-08  | -5.6120  | 85716 | lungCance |
| rs189218934 | 15 | 78903987  | T | C | 0.3142 | -0.2134 | 0.0143 | 2.23E-50  | -14.9261 | 85716 | lungCance |
| rs1892250   | 6  | 25769024  | T | C | 0.0803 | 0.1175  | 0.0209 | 1.88E-08  | 5.6226   | 85716 | lungCance |
| rs190008454 | 15 | 79031138  | A | C | 0.3108 | -0.0890 | 0.0143 | 5.07E-10  | -6.2171  | 85716 | lungCance |
| rs190259891 | 15 | 78902906  | A | G | 0.4147 | -0.0859 | 0.0119 | 4.63E-13  | -7.2361  | 85716 | lungCance |
| rs1904920   | 15 | 79029587  | C | T | 0.2554 | -0.1168 | 0.0149 | 4.05E-15  | -7.8531  | 85716 | lungCance |
| rs190945449 | 6  | 26828359  | T | C | 0.0921 | 0.1246  | 0.0222 | 1.90E-08  | 5.6208   | 85716 | lungCance |
| rs192804591 | 6  | 27729706  | A | T | 0.0670 | 0.1477  | 0.0248 | 2.81E-09  | 5.9424   | 85716 | lungCance |

|           |    |           |   |   |        |         |        |           |          |       |           |
|-----------|----|-----------|---|---|--------|---------|--------|-----------|----------|-------|-----------|
| rs1948    | 15 | 78917399  | A | G | 0.3366 | -0.0885 | 0.0124 | 9.46E-13  | -7.1382  | 85716 | lungCance |
| rs1954598 | 6  | 25776060  | T | C | 0.0804 | 0.1175  | 0.0209 | 1.86E-08  | 5.6247   | 85716 | lungCance |
| rs1964562 | 15 | 79046491  | G | C | 0.3218 | -0.0888 | 0.0142 | 4.27E-10  | -6.2441  | 85716 | lungCance |
| rs1964678 | 15 | 78754000  | A | G | 0.3749 | -0.1693 | 0.0121 | 1.19E-44  | -14.0195 | 85716 | lungCance |
| rs1976007 | 15 | 79085023  | T | C | 0.2590 | -0.0824 | 0.0138 | 2.61E-09  | -5.9541  | 85716 | lungCance |
| rs1979905 | 15 | 78842374  | A | C | 0.4125 | -0.0944 | 0.0120 | 3.15E-15  | -7.8850  | 85716 | lungCance |
| rs1979906 | 15 | 78842289  | C | T | 0.4125 | -0.0943 | 0.0120 | 3.15E-15  | -7.8848  | 85716 | lungCance |
| rs1979907 | 15 | 78842239  | T | C | 0.4125 | -0.0943 | 0.0120 | 3.15E-15  | -7.8846  | 85716 | lungCance |
| rs1979908 | 15 | 78843564  | C | T | 0.4125 | -0.0945 | 0.0120 | 2.93E-15  | -7.8940  | 85716 | lungCance |
| rs1987244 | 6  | 26298538  | A | G | 0.3622 | -0.0682 | 0.0121 | 1.90E-08  | -5.6206  | 85716 | lungCance |
| rs1994016 | 15 | 79080234  | T | C | 0.4130 | 0.1281  | 0.0125 | 9.73E-25  | 10.2692  | 85716 | lungCance |
| rs1994017 | 15 | 79080306  | T | C | 0.2539 | -0.0838 | 0.0139 | 1.81E-09  | -6.0146  | 85716 | lungCance |
| rs1996371 | 15 | 78956806  | C | T | 0.4101 | 0.1783  | 0.0118 | 1.92E-51  | 15.0888  | 85716 | lungCance |
| rs2002854 | 15 | 79053014  | A | G | 0.2547 | -0.1207 | 0.0151 | 1.27E-15  | -7.9976  | 85716 | lungCance |
| rs2004038 | 15 | 79071406  | A | G | 0.4209 | 0.1460  | 0.0128 | 4.79E-30  | 11.3877  | 85716 | lungCance |
| rs2004039 | 15 | 79071399  | A | G | 0.3143 | -0.0871 | 0.0137 | 2.09E-10  | -6.3543  | 85716 | lungCance |
| rs200481  | 6  | 27773832  | A | T | 0.0932 | 0.1160  | 0.0194 | 2.03E-09  | 5.9951   | 85716 | lungCance |
| rs200482  | 6  | 27773904  | A | G | 0.0932 | 0.1153  | 0.0194 | 2.52E-09  | 5.9605   | 85716 | lungCance |
| rs200483  | 6  | 27774824  | A | G | 0.0930 | 0.1160  | 0.0194 | 2.14E-09  | 5.9865   | 85716 | lungCance |
| rs200484  | 6  | 27775674  | G | A | 0.1000 | 0.1118  | 0.0193 | 6.82E-09  | 5.7953   | 85716 | lungCance |
| rs200485  | 6  | 27775697  | C | G | 0.0932 | 0.1152  | 0.0194 | 2.65E-09  | 5.9523   | 85716 | lungCance |
| rs200489  | 6  | 27798257  | C | T | 0.0929 | 0.1153  | 0.0194 | 2.81E-09  | 5.9424   | 85716 | lungCance |
| rs200490  | 6  | 27796935  | T | G | 0.0931 | 0.1141  | 0.0194 | 3.88E-09  | 5.8892   | 85716 | lungCance |
| rs200493  | 6  | 27795418  | A | G | 0.0979 | 0.1149  | 0.0192 | 2.13E-09  | 5.9873   | 85716 | lungCance |
| rs200497  | 6  | 27792640  | T | C | 0.0930 | 0.1148  | 0.0194 | 3.20E-09  | 5.9207   | 85716 | lungCance |
| rs200501  | 6  | 27788942  | T | C | 0.0934 | 0.1153  | 0.0193 | 2.55E-09  | 5.9578   | 85716 | lungCance |
| rs2005263 | 15 | 79032825  | T | C | 0.3359 | -0.0851 | 0.0140 | 1.16E-09  | -6.0851  | 85716 | lungCance |
| rs200948  | 6  | 27835272  | C | T | 0.0930 | 0.1137  | 0.0194 | 4.45E-09  | 5.8667   | 85716 | lungCance |
| rs200950  | 6  | 27835772  | G | A | 0.0930 | 0.1137  | 0.0194 | 4.48E-09  | 5.8654   | 85716 | lungCance |
| rs200952  | 6  | 27836976  | T | C | 0.0929 | 0.1138  | 0.0194 | 4.40E-09  | 5.8686   | 85716 | lungCance |
| rs200953  | 6  | 27837267  | C | T | 0.0932 | 0.1136  | 0.0193 | 4.16E-09  | 5.8777   | 85716 | lungCance |
| rs200954  | 6  | 27838764  | G | C | 0.0929 | 0.1136  | 0.0194 | 4.69E-09  | 5.8576   | 85716 | lungCance |
| rs2009746 | 15 | 78754102  | G | A | 0.3603 | 0.2231  | 0.0121 | 8.78E-76  | 18.4214  | 85716 | lungCance |
| rs200977  | 6  | 27854301  | C | T | 0.0921 | 0.1177  | 0.0195 | 1.57E-09  | 6.0366   | 85716 | lungCance |
| rs200981  | 6  | 27833174  | G | A | 0.0932 | 0.1132  | 0.0193 | 4.72E-09  | 5.8568   | 85716 | lungCance |
| rs200983  | 6  | 27830326  | T | C | 0.0930 | 0.1139  | 0.0193 | 3.96E-09  | 5.8856   | 85716 | lungCance |
| rs200989  | 6  | 27816442  | G | A | 0.0930 | 0.1138  | 0.0194 | 4.05E-09  | 5.8822   | 85716 | lungCance |
| rs200990  | 6  | 27815823  | G | T | 0.0932 | 0.1131  | 0.0193 | 4.78E-09  | 5.8545   | 85716 | lungCance |
| rs200992  | 6  | 27814677  | G | A | 0.0871 | 0.1130  | 0.0201 | 1.84E-08  | 5.6264   | 85716 | lungCance |
| rs200995  | 6  | 27813694  | C | T | 0.0930 | 0.1140  | 0.0194 | 4.04E-09  | 5.8826   | 85716 | lungCance |
| rs200996  | 6  | 27811828  | A | G | 0.0930 | 0.1147  | 0.0194 | 3.21E-09  | 5.9203   | 85716 | lungCance |
| rs201002  | 6  | 27808192  | G | A | 0.0931 | 0.1144  | 0.0194 | 3.40E-09  | 5.9108   | 85716 | lungCance |
| rs2010752 | 15 | 79053395  | T | C | 0.0564 | -0.1837 | 0.0299 | 7.80E-10  | -6.1489  | 85716 | lungCance |
| rs2013815 | 6  | 167373812 | A | T | 0.4727 | 0.0645  | 0.0118 | 4.44E-08  | 5.4725   | 85716 | lungCance |
| rs2017091 | 15 | 79032744  | G | A | 0.2473 | -0.1223 | 0.0150 | 2.96E-16  | -8.1750  | 85716 | lungCance |
| rs2017295 | 15 | 79033269  | A | G | 0.3343 | -0.0828 | 0.0141 | 4.11E-09  | -5.8801  | 85716 | lungCance |
| rs202906  | 6  | 28011652  | C | T | 0.1063 | 0.1165  | 0.0183 | 2.02E-10  | 6.3598   | 85716 | lungCance |
| rs2036527 | 15 | 78851615  | A | G | 0.3660 | 0.2584  | 0.0121 | 1.19E-101 | 21.4065  | 85716 | lungCance |
| rs2036529 | 15 | 78726272  | A | T | 0.2110 | -0.1985 | 0.0144 | 3.26E-43  | -13.7818 | 85716 | lungCance |
| rs2036532 | 15 | 78727386  | A | G | 0.4295 | -0.0767 | 0.0118 | 9.27E-11  | -6.4783  | 85716 | lungCance |
| rs2036533 | 15 | 78781687  | A | G | 0.2100 | -0.2003 | 0.0143 | 1.83E-44  | -13.9882 | 85716 | lungCance |
| rs2036534 | 15 | 78826948  | C | T | 0.2129 | -0.2311 | 0.0144 | 2.46E-58  | -16.1024 | 85716 | lungCance |
| rs2046143 | 15 | 79040223  | G | A | 0.3224 | -0.0943 | 0.0142 | 3.14E-11  | -6.6395  | 85716 | lungCance |
| rs2046144 | 15 | 79074562  | A | G | 0.2671 | -0.0951 | 0.0143 | 2.58E-11  | -6.6688  | 85716 | lungCance |
| rs2067808 | 15 | 78911780  | A | G | 0.3682 | -0.0993 | 0.0122 | 3.14E-16  | -8.1675  | 85716 | lungCance |
| rs2089162 | 15 | 78739763  | G | A | 0.3573 | 0.2230  | 0.0122 | 4.66E-75  | 18.3319  | 85716 | lungCance |
| rs2149083 | 6  | 167370971 | C | G | 0.4730 | 0.0652  | 0.0118 | 3.30E-08  | 5.5248   | 85716 | lungCance |
| rs2149085 | 6  | 167371110 | C | T | 0.4732 | 0.0650  | 0.0118 | 3.58E-08  | 5.5106   | 85716 | lungCance |
| rs2149090 | 6  | 167372764 | C | T | 0.4728 | 0.0645  | 0.0118 | 4.46E-08  | 5.4716   | 85716 | lungCance |
| rs2149091 | 6  | 167372786 | T | C | 0.4728 | 0.0645  | 0.0118 | 4.47E-08  | 5.4714   | 85716 | lungCance |
| rs2149092 | 6  | 167372978 | T | C | 0.4733 | 0.0652  | 0.0118 | 3.10E-08  | 5.5355   | 85716 | lungCance |
| rs2149093 | 6  | 167373045 | C | T | 0.4737 | 0.0647  | 0.0118 | 3.87E-08  | 5.4970   | 85716 | lungCance |
| rs2170311 | 15 | 78947611  | A | G | 0.4106 | 0.1848  | 0.0120 | 7.62E-54  | 15.4490  | 85716 | lungCance |
| rs2179517 | 6  | 26198845  | G | C | 0.5088 | 0.0646  | 0.0118 | 3.99E-08  | 5.4914   | 85716 | lungCance |
| rs2219939 | 15 | 79029723  | G | A | 0.2471 | -0.1215 | 0.0149 | 3.41E-16  | -8.1582  | 85716 | lungCance |
| rs2229961 | 15 | 78880752  | A | G | 0.0222 | 0.3587  | 0.0476 | 5.01E-14  | 7.5316   | 85716 | lungCance |
| rs2232423 | 6  | 28366151  | G | A | 0.0781 | 0.1453  | 0.0213 | 8.04E-12  | 6.8378   | 85716 | lungCance |
| rs2232426 | 6  | 28360659  | C | G | 0.0781 | 0.1454  | 0.0213 | 7.96E-12  | 6.8393   | 85716 | lungCance |
| rs2232429 | 6  | 28359632  | G | T | 0.0782 | 0.1453  | 0.0213 | 8.06E-12  | 6.8376   | 85716 | lungCance |
| rs2233956 | 6  | 31081205  | C | T | 0.1673 | 0.1271  | 0.0154 | 1.64E-16  | 8.2459   | 85716 | lungCance |
| rs2233959 | 6  | 31081065  | C | T | 0.4136 | 0.0694  | 0.0119 | 5.14E-09  | 5.8425   | 85716 | lungCance |
| rs2233974 | 6  | 31080016  | G | C | 0.1698 | 0.1104  | 0.0150 | 1.78E-13  | 7.3643   | 85716 | lungCance |
| rs2233980 | 6  | 31079644  | A | G | 0.1070 | 0.1537  | 0.0185 | 9.11E-17  | 8.3158   | 85716 | lungCance |
| rs2233986 | 6  | 31079076  | A | G | 0.3332 | 0.0676  | 0.0122 | 3.13E-08  | 5.5339   | 85716 | lungCance |

|           |    |           |   |   |        |         |        |          |          |       |           |
|-----------|----|-----------|---|---|--------|---------|--------|----------|----------|-------|-----------|
| rs2233987 | 6  | 31079074  | T | C | 0.3325 | 0.0682  | 0.0122 | 2.31E-08 | 5.5870   | 85716 | lungCance |
| rs2249935 | 6  | 31327178  | A | G | 0.2003 | 0.0807  | 0.0145 | 2.73E-08 | 5.5578   | 85716 | lungCance |
| rs2258314 | 19 | 41338835  | T | C | 0.0783 | -0.1534 | 0.0265 | 7.44E-09 | -5.7806  | 85716 | lungCance |
| rs2277545 | 15 | 79083591  | C | T | 0.4353 | 0.1296  | 0.0120 | 4.67E-27 | 10.7722  | 85716 | lungCance |
| rs2277546 | 15 | 79083376  | A | C | 0.4353 | 0.1300  | 0.0120 | 3.47E-27 | 10.7992  | 85716 | lungCance |
| rs2277547 | 15 | 79082431  | G | A | 0.2614 | -0.0764 | 0.0132 | 7.65E-09 | -5.7758  | 85716 | lungCance |
| rs2277549 | 15 | 79067055  | T | C | 0.3525 | 0.1366  | 0.0153 | 3.97E-19 | 8.9382   | 85716 | lungCance |
| rs2284189 | 6  | 32607396  | C | T | 0.1119 | 0.1325  | 0.0197 | 1.60E-11 | 6.7383   | 85716 | lungCance |
| rs2292117 | 15 | 78834689  | A | G | 0.4094 | -0.0906 | 0.0119 | 2.89E-14 | -7.6031  | 85716 | lungCance |
| rs2345571 | 6  | 167403400 | T | G | 0.4752 | 0.0659  | 0.0117 | 1.90E-08 | 5.6206   | 85716 | lungCance |
| rs2393593 | 6  | 26285683  | T | C | 0.4383 | 0.0757  | 0.0118 | 1.44E-10 | 6.4124   | 85716 | lungCance |
| rs2393649 | 6  | 26338538  | G | T | 0.3357 | -0.0743 | 0.0125 | 2.69E-09 | -5.9495  | 85716 | lungCance |
| rs239934  | 6  | 167412048 | G | A | 0.4867 | 0.0652  | 0.0119 | 4.02E-08 | 5.4898   | 85716 | lungCance |
| rs239935  | 6  | 167411788 | G | A | 0.4785 | 0.0668  | 0.0118 | 1.29E-08 | 5.6877   | 85716 | lungCance |
| rs239936  | 6  | 167411616 | C | T | 0.4256 | 0.0660  | 0.0119 | 3.02E-08 | 5.5401   | 85716 | lungCance |
| rs2415186 | 15 | 79026069  | G | A | 0.3271 | -0.1011 | 0.0139 | 4.07E-13 | -7.2532  | 85716 | lungCance |
| rs2442727 | 6  | 31319667  | A | G | 0.1392 | 0.1362  | 0.0168 | 4.64E-16 | 8.1207   | 85716 | lungCance |
| rs2447853 | 5  | 1333077   | G | A | 0.4352 | -0.1414 | 0.0120 | 8.13E-32 | -11.7383 | 85716 | lungCance |
| rs2456019 | 15 | 78868489  | T | G | 0.3789 | -0.0928 | 0.0123 | 4.92E-14 | -7.5344  | 85716 | lungCance |
| rs2456020 | 15 | 78868398  | T | C | 0.2217 | -0.2290 | 0.0141 | 3.42E-59 | -16.2239 | 85716 | lungCance |
| rs2507989 | 6  | 31324415  | C | A | 0.1871 | 0.0870  | 0.0159 | 4.62E-08 | 5.4651   | 85716 | lungCance |
| rs2517910 | 6  | 29688501  | A | C | 0.4226 | 0.0671  | 0.0117 | 1.07E-08 | 5.7193   | 85716 | lungCance |
| rs2523571 | 6  | 31329691  | A | T | 0.1058 | 0.1542  | 0.0186 | 1.09E-16 | 8.2942   | 85716 | lungCance |
| rs2523573 | 6  | 31328988  | G | C | 0.1053 | 0.1572  | 0.0186 | 3.18E-17 | 8.4396   | 85716 | lungCance |
| rs2523593 | 6  | 31326703  | C | T | 0.1028 | 0.1580  | 0.0187 | 3.26E-17 | 8.4368   | 85716 | lungCance |
| rs2523607 | 6  | 31322790  | A | T | 0.1135 | 0.1411  | 0.0183 | 1.10E-14 | 7.7270   | 85716 | lungCance |
| rs2524005 | 6  | 29899677  | A | G | 0.1992 | 0.1005  | 0.0148 | 1.11E-11 | 6.7921   | 85716 | lungCance |
| rs2535238 | 6  | 29645038  | A | C | 0.2130 | 0.0999  | 0.0140 | 1.00E-12 | 7.1297   | 85716 | lungCance |
| rs2568483 | 15 | 78752343  | G | A | 0.2095 | -0.1989 | 0.0143 | 7.71E-44 | -13.8862 | 85716 | lungCance |
| rs2568485 | 15 | 78752114  | C | T | 0.2092 | -0.1986 | 0.0144 | 1.84E-43 | -13.8233 | 85716 | lungCance |
| rs2568488 | 15 | 78736593  | T | A | 0.2084 | -0.1998 | 0.0143 | 3.97E-44 | -13.9335 | 85716 | lungCance |
| rs2568490 | 15 | 78738370  | T | C | 0.2086 | -0.1991 | 0.0143 | 6.53E-44 | -13.8982 | 85716 | lungCance |
| rs2568493 | 15 | 78740233  | G | A | 0.2086 | -0.1992 | 0.0143 | 6.15E-44 | -13.9025 | 85716 | lungCance |
| rs2568494 | 15 | 78740964  | A | G | 0.3609 | 0.2225  | 0.0121 | 4.74E-76 | 18.4556  | 85716 | lungCance |
| rs2568497 | 15 | 78721397  | G | T | 0.2080 | -0.1977 | 0.0144 | 4.50E-43 | -13.7589 | 85716 | lungCance |
| rs2568498 | 15 | 78721932  | T | A | 0.4360 | -0.0761 | 0.0118 | 1.25E-10 | -6.4330  | 85716 | lungCance |
| rs2568499 | 15 | 78722359  | T | C | 0.2080 | -0.1980 | 0.0144 | 3.42E-43 | -13.7790 | 85716 | lungCance |
| rs2568500 | 15 | 78726928  | T | C | 0.4315 | -0.0778 | 0.0118 | 4.66E-11 | -6.5813  | 85716 | lungCance |
| rs2589373 | 15 | 79044865  | C | T | 0.0584 | -0.1946 | 0.0286 | 1.08E-11 | -6.7953  | 85716 | lungCance |
| rs2596495 | 6  | 31323416  | C | G | 0.1133 | 0.1416  | 0.0183 | 1.05E-14 | 7.7334   | 85716 | lungCance |
| rs2596500 | 6  | 31321267  | C | A | 0.1045 | 0.1572  | 0.0189 | 8.92E-17 | 8.3184   | 85716 | lungCance |
| rs2622821 | 15 | 79046693  | A | G | 0.2508 | -0.1216 | 0.0151 | 7.74E-16 | -8.0585  | 85716 | lungCance |
| rs2656052 | 15 | 78740932  | C | A | 0.3609 | 0.2228  | 0.0121 | 3.22E-76 | 18.4755  | 85716 | lungCance |
| rs2656055 | 15 | 78720194  | C | A | 0.2081 | -0.1963 | 0.0144 | 2.06E-42 | -13.6485 | 85716 | lungCance |
| rs2656056 | 15 | 78722519  | T | C | 0.2276 | -0.1918 | 0.0143 | 9.23E-41 | -13.3689 | 85716 | lungCance |
| rs2656058 | 15 | 78723411  | T | G | 0.4350 | -0.0758 | 0.0118 | 1.60E-10 | -6.3958  | 85716 | lungCance |
| rs2656065 | 15 | 78750549  | A | G | 0.3621 | 0.2220  | 0.0120 | 8.38E-76 | 18.4246  | 85716 | lungCance |
| rs2656069 | 15 | 78745707  | C | T | 0.2093 | -0.1989 | 0.0143 | 7.79E-44 | -13.8856 | 85716 | lungCance |
| rs2656070 | 15 | 78730252  | A | G | 0.2029 | -0.2026 | 0.0146 | 1.49E-43 | -13.8384 | 85716 | lungCance |
| rs2656071 | 15 | 78745343  | T | A | 0.2087 | -0.2017 | 0.0144 | 1.61E-44 | -13.9979 | 85716 | lungCance |
| rs2656072 | 15 | 78744292  | A | G | 0.2101 | -0.1982 | 0.0143 | 1.40E-43 | -13.8431 | 85716 | lungCance |
| rs2656073 | 15 | 78742276  | T | G | 0.2086 | -0.1992 | 0.0143 | 6.18E-44 | -13.9020 | 85716 | lungCance |
| rs2656074 | 15 | 78741384  | T | C | 0.2086 | -0.1992 | 0.0143 | 5.90E-44 | -13.9049 | 85716 | lungCance |
| rs27066   | 5  | 1359133   | T | C | 0.1258 | 0.1078  | 0.0186 | 6.63E-09 | 5.7999   | 85716 | lungCance |
| rs27068   | 5  | 1347239   | T | C | 0.2472 | -0.1230 | 0.0140 | 1.45E-18 | -8.7937  | 85716 | lungCance |
| rs27069   | 5  | 1347128   | T | C | 0.4258 | -0.1220 | 0.0121 | 7.60E-24 | -10.0690 | 85716 | lungCance |
| rs27071   | 5  | 1346081   | C | T | 0.2477 | -0.1193 | 0.0140 | 1.26E-17 | -8.5470  | 85716 | lungCance |
| rs2735845 | 5  | 1300584   | G | C | 0.1962 | 0.1069  | 0.0153 | 2.59E-12 | 6.9985   | 85716 | lungCance |
| rs2735944 | 5  | 1304432   | T | C | 0.1211 | -0.1370 | 0.0194 | 1.57E-12 | -7.0683  | 85716 | lungCance |
| rs2735945 | 5  | 1303901   | T | C | 0.3480 | -0.1309 | 0.0129 | 2.79E-24 | -10.1670 | 85716 | lungCance |
| rs2735946 | 5  | 1300429   | T | G | 0.3025 | -0.1098 | 0.0135 | 5.30E-16 | -8.1042  | 85716 | lungCance |
| rs2735947 | 5  | 1299392   | A | G | 0.1373 | -0.1217 | 0.0185 | 4.32E-11 | -6.5925  | 85716 | lungCance |
| rs2735948 | 5  | 1299213   | A | G | 0.4093 | -0.1167 | 0.0127 | 3.93E-20 | -9.1898  | 85716 | lungCance |
| rs2736102 | 5  | 1302144   | T | C | 0.3484 | -0.1301 | 0.0129 | 6.76E-24 | -10.0802 | 85716 | lungCance |
| rs2736109 | 5  | 1296759   | T | C | 0.4036 | 0.1176  | 0.0131 | 2.98E-19 | 8.9696   | 85716 | lungCance |
| rs2747054 | 6  | 27783359  | G | A | 0.0932 | 0.1157  | 0.0193 | 2.16E-09 | 5.9851   | 85716 | lungCance |
| rs2747421 | 6  | 29645118  | C | G | 0.2134 | 0.0989  | 0.0140 | 1.60E-12 | 7.0661   | 85716 | lungCance |
| rs2747427 | 6  | 29648119  | G | A | 0.2128 | 0.0995  | 0.0140 | 1.37E-12 | 7.0866   | 85716 | lungCance |
| rs2747428 | 6  | 29648126  | G | C | 0.2128 | 0.0995  | 0.0140 | 1.37E-12 | 7.0866   | 85716 | lungCance |
| rs2747429 | 6  | 29648377  | C | T | 0.2131 | 0.1002  | 0.0140 | 8.55E-13 | 7.1522   | 85716 | lungCance |
| rs2747430 | 6  | 29648506  | A | G | 0.2971 | 0.0739  | 0.0127 | 6.35E-09 | 5.8075   | 85716 | lungCance |
| rs2747431 | 6  | 29648564  | T | C | 0.2755 | 0.0794  | 0.0130 | 9.40E-10 | 6.1191   | 85716 | lungCance |
| rs2757042 | 6  | 167371234 | T | A | 0.4741 | 0.0649  | 0.0118 | 3.71E-08 | 5.5040   | 85716 | lungCance |
| rs2757046 | 6  | 167374353 | T | C | 0.4728 | 0.0645  | 0.0118 | 4.37E-08 | 5.4753   | 85716 | lungCance |

|            |    |           |   |   |        |         |        |          |          |       |           |
|------------|----|-----------|---|---|--------|---------|--------|----------|----------|-------|-----------|
| rs2757047  | 6  | 167374489 | T | C | 0.4728 | 0.0645  | 0.0118 | 4.36E-08 | 5.4759   | 85716 | lungCance |
| rs2757050  | 6  | 167377165 | T | G | 0.4723 | 0.0643  | 0.0117 | 3.86E-08 | 5.4974   | 85716 | lungCance |
| rs2757052  | 6  | 167380174 | C | T | 0.4714 | 0.0651  | 0.0117 | 2.59E-08 | 5.5669   | 85716 | lungCance |
| rs2757054  | 6  | 167380501 | G | A | 0.4721 | 0.0658  | 0.0117 | 1.92E-08 | 5.6186   | 85716 | lungCance |
| rs2763981  | 6  | 31840021  | T | A | 0.2911 | 0.0785  | 0.0131 | 2.02E-09 | 5.9963   | 85716 | lungCance |
| rs2769347  | 6  | 167371737 | A | T | 0.4732 | 0.0648  | 0.0118 | 3.80E-08 | 5.5003   | 85716 | lungCance |
| rs2769349  | 6  | 167374119 | A | G | 0.4728 | 0.0645  | 0.0118 | 4.40E-08 | 5.4739   | 85716 | lungCance |
| rs2769351  | 6  | 167378568 | G | A | 0.4683 | 0.0646  | 0.0118 | 4.07E-08 | 5.4881   | 85716 | lungCance |
| rs2769352  | 6  | 167378619 | G | A | 0.4736 | 0.0647  | 0.0117 | 3.13E-08 | 5.5338   | 85716 | lungCance |
| rs2769354  | 6  | 167379771 | T | G | 0.4728 | 0.0644  | 0.0117 | 3.47E-08 | 5.5161   | 85716 | lungCance |
| rs2769355  | 6  | 167380493 | A | G | 0.4714 | 0.0656  | 0.0117 | 2.05E-08 | 5.6081   | 85716 | lungCance |
| rs27919    | 5  | 1361888   | T | C | 0.1073 | 0.1161  | 0.0197 | 4.03E-09 | 5.8830   | 85716 | lungCance |
| rs27996    | 5  | 1345474   | G | A | 0.4263 | -0.1278 | 0.0121 | 3.58E-26 | -10.5826 | 85716 | lungCance |
| rs28360499 | 6  | 27945396  | A | G | 0.0775 | 0.1340  | 0.0214 | 3.48E-10 | 6.2760   | 85716 | lungCance |
| rs28360634 | 6  | 27332891  | C | T | 0.0781 | 0.1368  | 0.0214 | 1.50E-10 | 6.4049   | 85716 | lungCance |
| rs28379291 | 5  | 1313701   | A | G | 0.3855 | -0.1323 | 0.0121 | 1.15E-27 | -10.8996 | 85716 | lungCance |
| rs28383322 | 6  | 32592796  | T | C | 0.2402 | -0.0858 | 0.0152 | 1.53E-08 | -5.6577  | 85716 | lungCance |
| rs28392948 | 15 | 78836866  | T | C | 0.4094 | -0.0906 | 0.0119 | 3.05E-14 | -7.5965  | 85716 | lungCance |
| rs28395178 | 15 | 78850558  | A | G | 0.1954 | -0.2353 | 0.0151 | 1.25E-54 | -15.5660 | 85716 | lungCance |
| rs28408315 | 15 | 79185180  | A | G | 0.2760 | -0.0918 | 0.0133 | 4.39E-12 | -6.9239  | 85716 | lungCance |
| rs28412066 | 6  | 25775570  | T | A | 0.0803 | 0.1178  | 0.0209 | 1.71E-08 | 5.6393   | 85716 | lungCance |
| rs28437878 | 15 | 78807872  | T | C | 0.2136 | -0.2287 | 0.0144 | 8.72E-57 | -15.8805 | 85716 | lungCance |
| rs28438420 | 15 | 78836288  | A | T | 0.4201 | -0.0878 | 0.0118 | 1.15E-13 | -7.4224  | 85716 | lungCance |
| rs28439027 | 15 | 79135478  | C | A | 0.3989 | -0.0873 | 0.0121 | 5.10E-13 | -7.2223  | 85716 | lungCance |
| rs28444683 | 15 | 78984507  | A | C | 0.3310 | -0.0908 | 0.0126 | 5.06E-13 | -7.2234  | 85716 | lungCance |
| rs28455815 | 15 | 79114453  | C | T | 0.4461 | 0.0935  | 0.0120 | 6.91E-15 | 7.7858   | 85716 | lungCance |
| rs28480606 | 15 | 78762313  | G | A | 0.2098 | -0.1995 | 0.0143 | 4.47E-44 | -13.9247 | 85716 | lungCance |
| rs28498264 | 15 | 78837673  | T | C | 0.2119 | -0.2371 | 0.0145 | 6.45E-60 | -16.3258 | 85716 | lungCance |
| rs28505515 | 15 | 79114477  | C | G | 0.4748 | 0.0875  | 0.0119 | 2.38E-13 | 7.3258   | 85716 | lungCance |
| rs28511883 | 15 | 78783683  | T | C | 0.2101 | -0.1996 | 0.0143 | 3.33E-44 | -13.9462 | 85716 | lungCance |
| rs28513584 | 15 | 79109856  | G | A | 0.4074 | 0.0885  | 0.0119 | 1.25E-13 | 7.4115   | 85716 | lungCance |
| rs28534575 | 15 | 78923845  | G | T | 0.2140 | -0.2246 | 0.0144 | 1.67E-54 | -15.5472 | 85716 | lungCance |
| rs2853666  | 5  | 1302914   | G | A | 0.3485 | -0.1307 | 0.0129 | 4.16E-24 | -10.1278 | 85716 | lungCance |
| rs2853668  | 5  | 1300025   | T | G | 0.2421 | 0.0774  | 0.0135 | 9.36E-09 | 5.7419   | 85716 | lungCance |
| rs2853677  | 5  | 1287194   | G | A | 0.4231 | 0.1107  | 0.0127 | 2.66E-18 | 8.7254   | 85716 | lungCance |
| rs2853999  | 6  | 31326074  | T | A | 0.1028 | 0.1588  | 0.0188 | 3.32E-17 | 8.4346   | 85716 | lungCance |
| rs28542482 | 15 | 79098354  | G | A | 0.2567 | -0.0822 | 0.0138 | 2.36E-09 | -5.9709  | 85716 | lungCance |
| rs2854275  | 6  | 32628428  | A | C | 0.0929 | 0.1543  | 0.0220 | 2.06E-12 | 7.0307   | 85716 | lungCance |
| rs2854277  | 6  | 32628084  | T | C | 0.0951 | 0.1639  | 0.0226 | 3.60E-13 | 7.2698   | 85716 | lungCance |
| rs2856698  | 6  | 32636376  | G | C | 0.2682 | 0.1006  | 0.0144 | 2.77E-12 | 6.9888   | 85716 | lungCance |
| rs28577997 | 15 | 79065384  | A | G | 0.2596 | -0.0905 | 0.0156 | 6.01E-09 | -5.8166  | 85716 | lungCance |
| rs28580532 | 15 | 79134724  | T | C | 0.4543 | 0.0980  | 0.0118 | 7.63E-17 | 8.3366   | 85716 | lungCance |
| rs28580559 | 15 | 79075235  | G | A | 0.2901 | -0.0829 | 0.0145 | 1.09E-08 | -5.7154  | 85716 | lungCance |
| rs2858864  | 6  | 32578229  | T | C | 0.2455 | 0.0810  | 0.0143 | 1.43E-08 | 5.6701   | 85716 | lungCance |
| rs28590060 | 15 | 79052312  | A | G | 0.3901 | 0.1779  | 0.0138 | 3.92E-38 | 12.9111  | 85716 | lungCance |
| rs28602670 | 15 | 78768167  | G | C | 0.2088 | -0.1995 | 0.0144 | 7.61E-44 | -13.8871 | 85716 | lungCance |
| rs28610385 | 15 | 79090606  | A | C | 0.4430 | 0.1258  | 0.0120 | 7.60E-26 | 10.5123  | 85716 | lungCance |
| rs28624856 | 15 | 79075233  | C | T | 0.2405 | -0.0938 | 0.0154 | 1.06E-09 | -6.1005  | 85716 | lungCance |
| rs28661610 | 15 | 78985317  | A | G | 0.2234 | -0.1075 | 0.0141 | 2.89E-14 | -7.6032  | 85716 | lungCance |
| rs28669908 | 15 | 78910267  | A | C | 0.1870 | -0.2330 | 0.0152 | 5.19E-53 | -15.3252 | 85716 | lungCance |
| rs28681284 | 15 | 78908565  | T | C | 0.1935 | -0.2321 | 0.0150 | 8.59E-54 | -15.4414 | 85716 | lungCance |
| rs2869030  | 15 | 78711803  | G | T | 0.2369 | -0.1625 | 0.0148 | 5.17E-28 | -10.9730 | 85716 | lungCance |
| rs2869032  | 15 | 78714561  | C | T | 0.1993 | -0.1952 | 0.0146 | 8.90E-41 | -13.3710 | 85716 | lungCance |
| rs2869045  | 15 | 78718899  | T | C | 0.2002 | -0.1955 | 0.0146 | 6.89E-41 | -13.3899 | 85716 | lungCance |
| rs2869055  | 15 | 78822388  | G | C | 0.4204 | -0.0897 | 0.0118 | 3.26E-14 | -7.5875  | 85716 | lungCance |
| rs28691842 | 15 | 79094196  | G | A | 0.2996 | -0.0737 | 0.0129 | 1.25E-08 | -5.6931  | 85716 | lungCance |
| rs28694044 | 15 | 79134718  | T | A | 0.4543 | 0.0982  | 0.0118 | 6.69E-17 | 8.3526   | 85716 | lungCance |
| rs2869544  | 15 | 78839400  | G | A | 0.4092 | -0.0917 | 0.0119 | 1.63E-14 | -7.6769  | 85716 | lungCance |
| rs2869546  | 15 | 78907345  | C | T | 0.3714 | -0.0916 | 0.0122 | 4.73E-14 | -7.5388  | 85716 | lungCance |
| rs2869552  | 15 | 78993600  | C | T | 0.2091 | -0.1010 | 0.0146 | 4.54E-12 | -6.9194  | 85716 | lungCance |
| rs2869553  | 15 | 79012613  | G | T | 0.1961 | -0.1048 | 0.0156 | 1.74E-11 | -6.7261  | 85716 | lungCance |
| rs2869554  | 15 | 79021037  | C | T | 0.4047 | 0.1821  | 0.0127 | 7.92E-47 | 14.3705  | 85716 | lungCance |
| rs2869561  | 15 | 79025516  | C | T | 0.4172 | 0.1793  | 0.0130 | 2.77E-43 | 13.7938  | 85716 | lungCance |
| rs2869571  | 15 | 79033018  | A | G | 0.2066 | -0.1034 | 0.0161 | 1.36E-10 | -6.4200  | 85716 | lungCance |
| rs2869861  | 15 | 79076744  | G | A | 0.4074 | 0.1383  | 0.0127 | 1.80E-27 | 10.8590  | 85716 | lungCance |
| rs2869862  | 15 | 79076885  | G | A | 0.2617 | -0.0782 | 0.0135 | 7.12E-09 | -5.7878  | 85716 | lungCance |
| rs2869868  | 15 | 79052755  | G | A | 0.2675 | -0.1152 | 0.0150 | 1.28E-14 | -7.7079  | 85716 | lungCance |
| rs2869876  | 15 | 79064360  | A | C | 0.1846 | -0.0949 | 0.0170 | 2.27E-08 | -5.5897  | 85716 | lungCance |
| rs2869887  | 15 | 79155033  | T | G | 0.2505 | -0.0754 | 0.0138 | 4.44E-08 | -5.4721  | 85716 | lungCance |
| rs28699256 | 15 | 79058951  | C | T | 0.4603 | 0.1523  | 0.0136 | 4.51E-29 | 11.1909  | 85716 | lungCance |
| rs2893820  | 6  | 26295686  | A | G | 0.3622 | -0.0682 | 0.0121 | 1.91E-08 | -5.6202  | 85716 | lungCance |
| rs2893842  | 6  | 26338434  | G | T | 0.3355 | -0.0740 | 0.0124 | 2.76E-09 | -5.9448  | 85716 | lungCance |
| rs2893843  | 6  | 26338697  | G | A | 0.3915 | -0.0723 | 0.0121 | 2.03E-09 | -5.9956  | 85716 | lungCance |
| rs2904130  | 15 | 78916622  | C | G | 0.3504 | -0.0921 | 0.0123 | 6.89E-14 | -7.4900  | 85716 | lungCance |



|            |    |          |   |   |        |         |        |          |          |       |           |
|------------|----|----------|---|---|--------|---------|--------|----------|----------|-------|-----------|
| rs2904220  | 15 | 79076704 | T | G | 0.4289 | 0.1343  | 0.0124 | 2.18E-27 | 10.8414  | 85716 | lungCance |
| rs2904222  | 15 | 79052753 | G | A | 0.3093 | -0.0970 | 0.0145 | 2.04E-11 | -6.7030  | 85716 | lungCance |
| rs2904223  | 15 | 79059691 | A | G | 0.4342 | 0.1676  | 0.0133 | 3.59E-36 | 12.5579  | 85716 | lungCance |
| rs2904228  | 15 | 79086099 | A | G | 0.2492 | -0.0812 | 0.0139 | 4.70E-09 | -5.8572  | 85716 | lungCance |
| rs2915695  | 15 | 78739471 | T | C | 0.2084 | -0.1997 | 0.0143 | 3.64E-44 | -13.9392 | 85716 | lungCance |
| rs2929154  | 15 | 79048551 | G | A | 0.3253 | -0.0908 | 0.0143 | 2.32E-10 | -6.3383  | 85716 | lungCance |
| rs2929155  | 15 | 79058013 | C | T | 0.2477 | -0.1174 | 0.0153 | 1.67E-14 | -7.6742  | 85716 | lungCance |
| rs2938670  | 15 | 78740688 | G | T | 0.3609 | 0.2225  | 0.0121 | 4.79E-76 | 18.4552  | 85716 | lungCance |
| rs2938671  | 15 | 78732754 | A | G | 0.2186 | -0.1982 | 0.0143 | 7.81E-44 | -13.8850 | 85716 | lungCance |
| rs2938674  | 15 | 78757913 | A | C | 0.2105 | -0.1984 | 0.0143 | 1.22E-43 | -13.8525 | 85716 | lungCance |
| rs2958719  | 15 | 78743029 | G | A | 0.2093 | -0.1987 | 0.0143 | 9.93E-44 | -13.8673 | 85716 | lungCance |
| rs3094005  | 6  | 31465047 | T | G | 0.1036 | 0.1489  | 0.0187 | 1.56E-15 | 7.9716   | 85716 | lungCance |
| rs3094216  | 6  | 31084048 | G | A | 0.2105 | 0.0818  | 0.0142 | 8.13E-09 | 5.7660   | 85716 | lungCance |
| rs3094220  | 6  | 31082987 | G | A | 0.2098 | 0.0831  | 0.0142 | 4.87E-09 | 5.8515   | 85716 | lungCance |
| rs3094222  | 6  | 31081434 | G | A | 0.1083 | 0.1521  | 0.0183 | 9.00E-17 | 8.3175   | 85716 | lungCance |
| rs3094669  | 6  | 31103195 | G | C | 0.1139 | 0.1395  | 0.0179 | 5.99E-15 | 7.8042   | 85716 | lungCance |
| rs3095233  | 6  | 31469774 | G | A | 0.1031 | 0.1493  | 0.0187 | 1.33E-15 | 7.9922   | 85716 | lungCance |
| rs3095298  | 6  | 31082932 | T | C | 0.2098 | 0.0830  | 0.0142 | 4.89E-09 | 5.8508   | 85716 | lungCance |
| rs3095300  | 6  | 31082476 | T | C | 0.2002 | 0.0934  | 0.0145 | 1.14E-10 | 6.4467   | 85716 | lungCance |
| rs3101018  | 6  | 31705864 | T | C | 0.0986 | 0.1647  | 0.0191 | 7.16E-18 | 8.6126   | 85716 | lungCance |
| rs3115672  | 6  | 31727897 | T | C | 0.0989 | 0.1661  | 0.0191 | 3.47E-18 | 8.6949   | 85716 | lungCance |
| rs3117573  | 6  | 31718396 | G | C | 0.0988 | 0.1640  | 0.0191 | 9.43E-18 | 8.5806   | 85716 | lungCance |
| rs3117574  | 6  | 31725230 | A | G | 0.0992 | 0.1658  | 0.0191 | 3.77E-18 | 8.6856   | 85716 | lungCance |
| rs3117575  | 6  | 31726253 | C | T | 0.0988 | 0.1659  | 0.0191 | 4.05E-18 | 8.6776   | 85716 | lungCance |
| rs3117576  | 6  | 31726794 | C | T | 0.0989 | 0.1661  | 0.0191 | 3.54E-18 | 8.6925   | 85716 | lungCance |
| rs3117577  | 6  | 31727474 | G | A | 0.0986 | 0.1656  | 0.0191 | 4.88E-18 | 8.6561   | 85716 | lungCance |
| rs3129     | 15 | 79214215 | T | C | 0.2687 | -0.0922 | 0.0138 | 2.21E-11 | -6.6913  | 85716 | lungCance |
| rs3129058  | 6  | 29648199 | T | C | 0.1938 | 0.1058  | 0.0146 | 3.56E-13 | 7.2712   | 85716 | lungCance |
| rs3129062  | 6  | 29645937 | T | C | 0.2131 | 0.1000  | 0.0140 | 9.69E-13 | 7.1349   | 85716 | lungCance |
| rs3129063  | 6  | 29645613 | A | C | 0.1939 | 0.1059  | 0.0145 | 3.18E-13 | 7.2866   | 85716 | lungCance |
| rs3130063  | 6  | 31558702 | T | C | 0.1007 | 0.1441  | 0.0191 | 3.98E-14 | 7.5616   | 85716 | lungCance |
| rs3130484  | 6  | 31715882 | C | T | 0.0989 | 0.1656  | 0.0191 | 4.47E-18 | 8.6660   | 85716 | lungCance |
| rs3130552  | 6  | 31082127 | A | G | 0.3024 | 0.0776  | 0.0125 | 5.39E-10 | 6.2073   | 85716 | lungCance |
| rs3130557  | 6  | 31094703 | T | C | 0.1084 | 0.1521  | 0.0183 | 9.71E-17 | 8.3085   | 85716 | lungCance |
| rs3130562  | 6  | 31100974 | C | T | 0.1083 | 0.1514  | 0.0183 | 1.28E-16 | 8.2752   | 85716 | lungCance |
| rs3130564  | 6  | 31101674 | T | C | 0.1840 | 0.0945  | 0.0149 | 2.49E-10 | 6.3279   | 85716 | lungCance |
| rs3130566  | 6  | 31102618 | G | C | 0.1139 | 0.1393  | 0.0179 | 6.20E-15 | 7.7997   | 85716 | lungCance |
| rs3130573  | 6  | 31106268 | G | A | 0.3366 | 0.0693  | 0.0122 | 1.35E-08 | 5.6799   | 85716 | lungCance |
| rs3130614  | 6  | 31476458 | A | T | 0.0980 | 0.1580  | 0.0192 | 1.96E-16 | 8.2246   | 85716 | lungCance |
| rs3130616  | 6  | 31473746 | A | G | 0.1034 | 0.1484  | 0.0187 | 1.75E-15 | 7.9576   | 85716 | lungCance |
| rs3130923  | 6  | 31462135 | A | G | 0.1038 | 0.1491  | 0.0187 | 1.53E-15 | 7.9746   | 85716 | lungCance |
| rs3130975  | 6  | 31081838 | T | C | 0.2871 | 0.0775  | 0.0127 | 1.17E-09 | 6.0834   | 85716 | lungCance |
| rs3130976  | 6  | 31081940 | C | T | 0.2165 | 0.0907  | 0.0140 | 8.27E-11 | 6.4956   | 85716 | lungCance |
| rs3130977  | 6  | 31081989 | C | T | 0.3047 | 0.0757  | 0.0124 | 1.14E-09 | 6.0880   | 85716 | lungCance |
| rs3130978  | 6  | 31082188 | A | G | 0.2969 | 0.0708  | 0.0126 | 1.76E-08 | 5.6344   | 85716 | lungCance |
| rs3130979  | 6  | 31082197 | C | G | 0.2967 | 0.0708  | 0.0126 | 1.75E-08 | 5.6353   | 85716 | lungCance |
| rs3130985  | 6  | 31085356 | T | C | 0.1082 | 0.1516  | 0.0183 | 1.22E-16 | 8.2808   | 85716 | lungCance |
| rs3131006  | 6  | 31098134 | T | A | 0.1842 | 0.0953  | 0.0150 | 1.87E-10 | 6.3720   | 85716 | lungCance |
| rs3131378  | 6  | 31725285 | G | A | 0.0989 | 0.1664  | 0.0191 | 3.08E-18 | 8.7088   | 85716 | lungCance |
| rs3131379  | 6  | 31721033 | A | G | 0.0989 | 0.1655  | 0.0191 | 4.80E-18 | 8.6581   | 85716 | lungCance |
| rs3131380  | 6  | 31709778 | G | A | 0.0987 | 0.1651  | 0.0191 | 5.74E-18 | 8.6378   | 85716 | lungCance |
| rs3131381  | 6  | 31708463 | A | C | 0.0987 | 0.1651  | 0.0191 | 5.86E-18 | 8.6353   | 85716 | lungCance |
| rs3131383  | 6  | 31704294 | T | G | 0.0987 | 0.1650  | 0.0191 | 6.07E-18 | 8.6314   | 85716 | lungCance |
| rs3132445  | 6  | 31712196 | A | G | 0.0989 | 0.1657  | 0.0191 | 4.40E-18 | 8.6678   | 85716 | lungCance |
| rs3132541  | 6  | 31098734 | C | A | 0.1083 | 0.1515  | 0.0183 | 1.22E-16 | 8.2809   | 85716 | lungCance |
| rs3132556  | 6  | 31078809 | T | A | 0.1722 | 0.1109  | 0.0149 | 9.99E-14 | 7.4411   | 85716 | lungCance |
| rs3132566  | 6  | 31102790 | T | G | 0.1138 | 0.1394  | 0.0179 | 6.06E-15 | 7.8027   | 85716 | lungCance |
| rs31484    | 5  | 1337906  | T | A | 0.4251 | -0.1402 | 0.0119 | 4.67E-32 | -11.7849 | 85716 | lungCance |
| rs31487    | 5  | 1341101  | C | G | 0.4211 | -0.1395 | 0.0119 | 1.41E-31 | -11.6910 | 85716 | lungCance |
| rs31489    | 5  | 1342714  | A | C | 0.3988 | -0.1358 | 0.0120 | 1.02E-29 | -11.3220 | 85716 | lungCance |
| rs31490    | 5  | 1344458  | A | G | 0.4200 | -0.1372 | 0.0119 | 1.44E-30 | -11.4928 | 85716 | lungCance |
| rs3207966  | 6  | 32605197 | A | G | 0.2128 | 0.0960  | 0.0152 | 2.56E-10 | 6.3234   | 85716 | lungCance |
| rs33932084 | 6  | 28268824 | G | A | 0.0784 | 0.1429  | 0.0212 | 1.41E-11 | 6.7568   | 85716 | lungCance |
| rs33961405 | 5  | 1277577  | A | G | 0.5084 | -0.0979 | 0.0127 | 1.55E-14 | -7.6830  | 85716 | lungCance |
| rs34019568 | 15 | 79044233 | T | C | 0.3299 | -0.0900 | 0.0141 | 1.90E-10 | -6.3691  | 85716 | lungCance |
| rs34038546 | 6  | 27607660 | A | C | 0.0785 | 0.1297  | 0.0212 | 9.74E-10 | 6.1137   | 85716 | lungCance |
| rs34043431 | 6  | 25875084 | C | T | 0.0669 | 0.1287  | 0.0231 | 2.45E-08 | 5.5769   | 85716 | lungCance |
| rs34064842 | 6  | 27688625 | T | G | 0.0785 | 0.1280  | 0.0212 | 1.56E-09 | 6.0383   | 85716 | lungCance |
| rs34067845 | 15 | 79023415 | C | T | 0.3409 | -0.1045 | 0.0134 | 5.21E-15 | -7.8218  | 85716 | lungCance |
| rs34071253 | 6  | 27391802 | T | C | 0.0784 | 0.1375  | 0.0213 | 1.04E-10 | 6.4617   | 85716 | lungCance |
| rs34099810 | 15 | 79024355 | G | A | 0.3440 | -0.1042 | 0.0134 | 6.08E-15 | -7.8022  | 85716 | lungCance |
| rs34104395 | 6  | 26478252 | T | C | 0.0906 | 0.1133  | 0.0204 | 2.75E-08 | 5.5566   | 85716 | lungCance |
| rs34105070 | 6  | 27560805 | T | C | 0.0785 | 0.1299  | 0.0212 | 9.11E-10 | 6.1242   | 85716 | lungCance |
| rs34107459 | 6  | 26328353 | C | T | 0.0737 | 0.1342  | 0.0222 | 1.61E-09 | 6.0332   | 85716 | lungCance |

|            |    |          |   |   |        |         |        |          |          |       |           |
|------------|----|----------|---|---|--------|---------|--------|----------|----------|-------|-----------|
| rs34115022 | 15 | 79052972 | G | C | 0.3114 | -0.0927 | 0.0143 | 1.04E-10 | -6.4609  | 85716 | lungCance |
| rs34138960 | 15 | 78831668 | G | A | 0.2140 | -0.2310 | 0.0143 | 2.07E-58 | -16.1133 | 85716 | lungCance |
| rs34150729 | 6  | 27388754 | C | T | 0.0770 | 0.1409  | 0.0215 | 5.90E-11 | 6.5463   | 85716 | lungCance |
| rs34152723 | 5  | 1360534  | C | T | 0.0694 | -0.1396 | 0.0247 | 1.68E-08 | -5.6423  | 85716 | lungCance |
| rs34158769 | 6  | 26336572 | A | G | 0.0750 | 0.1352  | 0.0220 | 8.32E-10 | 6.1385   | 85716 | lungCance |
| rs34166054 | 6  | 28065801 | C | T | 0.0777 | 0.1349  | 0.0213 | 2.48E-10 | 6.3280   | 85716 | lungCance |
| rs34194357 | 6  | 27818535 | G | A | 0.0783 | 0.1275  | 0.0212 | 1.75E-09 | 6.0199   | 85716 | lungCance |
| rs34196306 | 6  | 27425644 | C | G | 0.0749 | 0.1434  | 0.0219 | 5.71E-11 | 6.5512   | 85716 | lungCance |
| rs34197618 | 6  | 26083519 | C | T | 0.0677 | 0.1388  | 0.0231 | 1.76E-09 | 6.0187   | 85716 | lungCance |
| rs34218844 | 6  | 28290647 | C | T | 0.0776 | 0.1445  | 0.0213 | 1.10E-11 | 6.7922   | 85716 | lungCance |
| rs34225855 | 15 | 79022136 | G | C | 0.4127 | 0.1843  | 0.0126 | 1.24E-48 | 14.6555  | 85716 | lungCance |
| rs34243448 | 6  | 28193102 | A | C | 0.0774 | 0.1445  | 0.0213 | 1.22E-11 | 6.7778   | 85716 | lungCance |
| rs34244947 | 6  | 26761745 | C | T | 0.0880 | 0.1290  | 0.0225 | 9.44E-09 | 5.7404   | 85716 | lungCance |
| rs34275594 | 15 | 78981282 | C | A | 0.3417 | -0.0972 | 0.0125 | 6.75E-15 | -7.7892  | 85716 | lungCance |
| rs34295134 | 6  | 27828151 | A | T | 0.0930 | 0.1139  | 0.0193 | 3.95E-09 | 5.8861   | 85716 | lungCance |
| rs34332556 | 6  | 27357414 | G | C | 0.0826 | 0.1355  | 0.0212 | 1.83E-10 | 6.3751   | 85716 | lungCance |
| rs34371502 | 6  | 28081758 | C | T | 0.0776 | 0.1350  | 0.0213 | 2.36E-10 | 6.3358   | 85716 | lungCance |
| rs34372090 | 15 | 79110735 | T | C | 0.4034 | 0.0868  | 0.0119 | 3.53E-13 | 7.2729   | 85716 | lungCance |
| rs34382226 | 15 | 79047648 | T | C | 0.3430 | -0.1262 | 0.0146 | 6.77E-18 | -8.6189  | 85716 | lungCance |
| rs34396849 | 6  | 28250955 | C | A | 0.0786 | 0.1477  | 0.0211 | 2.89E-12 | 6.9832   | 85716 | lungCance |
| rs34409918 | 6  | 27685348 | G | A | 0.0785 | 0.1282  | 0.0212 | 1.45E-09 | 6.0501   | 85716 | lungCance |
| rs34422348 | 15 | 79020472 | G | A | 0.3406 | -0.1020 | 0.0134 | 2.24E-14 | -7.6363  | 85716 | lungCance |
| rs34432857 | 6  | 27685825 | A | G | 0.0788 | 0.1279  | 0.0212 | 1.58E-09 | 6.0361   | 85716 | lungCance |
| rs34449854 | 15 | 79188389 | T | C | 0.2678 | -0.0895 | 0.0135 | 2.90E-11 | -6.6515  | 85716 | lungCance |
| rs34505829 | 6  | 28133239 | T | A | 0.0777 | 0.1359  | 0.0213 | 1.71E-10 | 6.3852   | 85716 | lungCance |
| rs34517439 | 1  | 78450517 | A | C | 0.1054 | 0.1271  | 0.0201 | 2.33E-10 | 6.3379   | 85716 | lungCance |
| rs34525648 | 6  | 25914853 | A | G | 0.0906 | 0.1127  | 0.0199 | 1.60E-08 | 5.6507   | 85716 | lungCance |
| rs34543938 | 6  | 27624640 | G | A | 0.0785 | 0.1297  | 0.0212 | 9.73E-10 | 6.1137   | 85716 | lungCance |
| rs34546498 | 6  | 26961280 | T | C | 0.0741 | 0.1280  | 0.0225 | 1.34E-08 | 5.6809   | 85716 | lungCance |
| rs34546986 | 6  | 28362309 | A | G | 0.0780 | 0.1462  | 0.0213 | 6.27E-12 | 6.8734   | 85716 | lungCance |
| rs34552906 | 15 | 79029939 | G | A | 0.3294 | -0.0968 | 0.0141 | 5.88E-12 | -6.8823  | 85716 | lungCance |
| rs34563625 | 15 | 79020278 | C | G | 0.4066 | 0.1823  | 0.0126 | 2.98E-47 | 14.4378  | 85716 | lungCance |
| rs34569761 | 6  | 26334306 | G | A | 0.0898 | 0.1118  | 0.0198 | 1.60E-08 | 5.6504   | 85716 | lungCance |
| rs34573979 | 6  | 27480526 | T | C | 0.0784 | 0.1359  | 0.0213 | 1.85E-10 | 6.3734   | 85716 | lungCance |
| rs34577742 | 15 | 79215568 | T | C | 0.2694 | -0.0934 | 0.0138 | 1.40E-11 | -6.7576  | 85716 | lungCance |
| rs34588114 | 6  | 28080628 | A | C | 0.0776 | 0.1350  | 0.0213 | 2.38E-10 | 6.3345   | 85716 | lungCance |
| rs34605993 | 6  | 26454363 | T | C | 0.0906 | 0.1115  | 0.0204 | 4.78E-08 | 5.4592   | 85716 | lungCance |
| rs34613987 | 6  | 27433029 | T | C | 0.0857 | 0.1323  | 0.0202 | 6.50E-11 | 6.5317   | 85716 | lungCance |
| rs34653907 | 15 | 79028672 | A | G | 0.3304 | -0.0968 | 0.0140 | 4.22E-12 | -6.9296  | 85716 | lungCance |
| rs34661125 | 6  | 28281894 | A | G | 0.0788 | 0.1482  | 0.0211 | 2.24E-12 | 7.0189   | 85716 | lungCance |
| rs34662244 | 6  | 28073881 | A | G | 0.0868 | 0.1342  | 0.0209 | 1.49E-10 | 6.4068   | 85716 | lungCance |
| rs34664138 | 15 | 78831624 | G | T | 0.2140 | -0.2310 | 0.0143 | 2.08E-58 | -16.1131 | 85716 | lungCance |
| rs34676049 | 6  | 28453618 | G | T | 0.0782 | 0.1436  | 0.0213 | 1.57E-11 | 6.7412   | 85716 | lungCance |
| rs34684276 | 15 | 78813155 | A | G | 0.3292 | 0.2490  | 0.0128 | 1.75E-84 | 19.4763  | 85716 | lungCance |
| rs34691223 | 6  | 28258208 | A | C | 0.0787 | 0.1470  | 0.0211 | 3.60E-12 | 6.9521   | 85716 | lungCance |
| rs34694149 | 15 | 78965917 | T | C | 0.3402 | -0.1011 | 0.0124 | 3.80E-16 | -8.1447  | 85716 | lungCance |
| rs34706883 | 6  | 27805255 | C | A | 0.0783 | 0.1290  | 0.0212 | 1.14E-09 | 6.0886   | 85716 | lungCance |
| rs34718920 | 6  | 27783941 | T | C | 0.0783 | 0.1290  | 0.0212 | 1.13E-09 | 6.0898   | 85716 | lungCance |
| rs34765154 | 6  | 28130450 | A | G | 0.0777 | 0.1358  | 0.0213 | 1.73E-10 | 6.3832   | 85716 | lungCance |
| rs34788973 | 6  | 27879200 | A | C | 0.0776 | 0.1320  | 0.0213 | 6.00E-10 | 6.1905   | 85716 | lungCance |
| rs34803085 | 15 | 79148813 | A | G | 0.2515 | -0.0754 | 0.0138 | 4.83E-08 | -5.4574  | 85716 | lungCance |
| rs34816374 | 6  | 26949672 | G | A | 0.0793 | 0.1209  | 0.0213 | 1.45E-08 | 5.6677   | 85716 | lungCance |
| rs34816637 | 15 | 79045517 | A | G | 0.3031 | -0.0899 | 0.0145 | 5.88E-10 | -6.1940  | 85716 | lungCance |
| rs34832585 | 6  | 28150878 | T | C | 0.0776 | 0.1361  | 0.0213 | 1.63E-10 | 6.3927   | 85716 | lungCance |
| rs34851962 | 15 | 79203038 | C | A | 0.2688 | -0.0904 | 0.0136 | 3.35E-11 | -6.6303  | 85716 | lungCance |
| rs34864796 | 6  | 27459923 | A | G | 0.0857 | 0.1317  | 0.0202 | 7.78E-11 | 6.5049   | 85716 | lungCance |
| rs34871267 | 6  | 28364232 | A | G | 0.0780 | 0.1462  | 0.0213 | 6.28E-12 | 6.8733   | 85716 | lungCance |
| rs34878803 | 6  | 28250179 | C | T | 0.0787 | 0.1476  | 0.0211 | 2.98E-12 | 6.9783   | 85716 | lungCance |
| rs34888489 | 6  | 26073375 | A | C | 0.0676 | 0.1385  | 0.0231 | 1.99E-09 | 5.9982   | 85716 | lungCance |
| rs34950484 | 6  | 28278688 | A | G | 0.0788 | 0.1477  | 0.0211 | 2.83E-12 | 6.9860   | 85716 | lungCance |
| rs34953377 | 6  | 27381660 | C | T | 0.0782 | 0.1388  | 0.0213 | 7.46E-11 | 6.5112   | 85716 | lungCance |
| rs34961555 | 6  | 26199903 | T | C | 0.0704 | 0.1309  | 0.0227 | 8.10E-09 | 5.7663   | 85716 | lungCance |
| rs34965299 | 6  | 27521856 | G | A | 0.0785 | 0.1312  | 0.0212 | 6.10E-10 | 6.1880   | 85716 | lungCance |
| rs35001169 | 6  | 28187632 | G | T | 0.0774 | 0.1430  | 0.0214 | 2.17E-11 | 6.6941   | 85716 | lungCance |
| rs35016036 | 6  | 28314880 | T | C | 0.0779 | 0.1466  | 0.0213 | 5.41E-12 | 6.8944   | 85716 | lungCance |
| rs35017208 | 6  | 28345282 | T | C | 0.0782 | 0.1456  | 0.0212 | 6.96E-12 | 6.8583   | 85716 | lungCance |
| rs35030260 | 6  | 28305508 | A | G | 0.0777 | 0.1461  | 0.0213 | 7.20E-12 | 6.8539   | 85716 | lungCance |
| rs35031105 | 15 | 78772806 | T | C | 0.2100 | -0.1995 | 0.0143 | 4.31E-44 | -13.9276 | 85716 | lungCance |
| rs35037868 | 6  | 27759115 | C | G | 0.0767 | 0.1365  | 0.0215 | 2.03E-10 | 6.3587   | 85716 | lungCance |
| rs35050608 | 6  | 26067360 | G | A | 0.0681 | 0.1390  | 0.0230 | 1.51E-09 | 6.0434   | 85716 | lungCance |
| rs35072899 | 6  | 28281541 | T | C | 0.0775 | 0.1448  | 0.0213 | 1.03E-11 | 6.8028   | 85716 | lungCance |
| rs35098436 | 6  | 28134221 | C | T | 0.0777 | 0.1359  | 0.0213 | 1.71E-10 | 6.3856   | 85716 | lungCance |
| rs35120058 | 6  | 27358166 | G | A | 0.0809 | 0.1372  | 0.0212 | 1.01E-10 | 6.4660   | 85716 | lungCance |
| rs35162296 | 6  | 26318262 | T | C | 0.0758 | 0.1228  | 0.0218 | 1.84E-08 | 5.6268   | 85716 | lungCance |

|            |    |           |   |   |        |         |        |          |          |       |           |
|------------|----|-----------|---|---|--------|---------|--------|----------|----------|-------|-----------|
| rs35173303 | 6  | 26935379  | T | C | 0.0728 | 0.1269  | 0.0231 | 3.95E-08 | 5.4933   | 85716 | lungCance |
| rs35202262 | 6  | 27799514  | T | C | 0.0695 | 0.1426  | 0.0235 | 1.29E-09 | 6.0682   | 85716 | lungCance |
| rs35212593 | 15 | 78831826  | A | G | 0.2140 | -0.2310 | 0.0143 | 2.28E-58 | -16.1072 | 85716 | lungCance |
| rs35255262 | 15 | 47569263  | C | A | 0.3730 | 0.0656  | 0.0120 | 4.78E-08 | 5.4592   | 85716 | lungCance |
| rs35331607 | 15 | 79047646  | T | C | 0.2920 | -0.0961 | 0.0152 | 2.53E-10 | -6.3252  | 85716 | lungCance |
| rs35345226 | 6  | 28091580  | G | A | 0.0776 | 0.1355  | 0.0213 | 2.08E-10 | 6.3555   | 85716 | lungCance |
| rs35353359 | 6  | 28324378  | T | C | 0.0781 | 0.1471  | 0.0213 | 4.50E-12 | 6.9207   | 85716 | lungCance |
| rs35400317 | 6  | 26593275  | T | C | 0.0762 | 0.1218  | 0.0218 | 2.39E-08 | 5.5812   | 85716 | lungCance |
| rs35474770 | 15 | 79074000  | G | A | 0.4234 | 0.1448  | 0.0127 | 5.14E-30 | 11.3824  | 85716 | lungCance |
| rs35501037 | 6  | 27739566  | A | T | 0.0788 | 0.1288  | 0.0212 | 1.19E-09 | 6.0820   | 85716 | lungCance |
| rs35506517 | 6  | 26044864  | C | T | 0.0680 | 0.1387  | 0.0230 | 1.58E-09 | 6.0365   | 85716 | lungCance |
| rs35565446 | 6  | 27145341  | T | C | 0.0770 | 0.1240  | 0.0216 | 1.00E-08 | 5.7305   | 85716 | lungCance |
| rs35583595 | 15 | 79020152  | G | C | 0.4136 | 0.1838  | 0.0125 | 1.20E-48 | 14.6575  | 85716 | lungCance |
| rs35602248 | 15 | 79030598  | T | G | 0.3320 | -0.1009 | 0.0140 | 4.95E-13 | -7.2267  | 85716 | lungCance |
| rs35656932 | 6  | 28191288  | T | G | 0.0775 | 0.1430  | 0.0214 | 2.14E-11 | 6.6965   | 85716 | lungCance |
| rs35701817 | 15 | 79004968  | G | A | 0.3416 | -0.0995 | 0.0128 | 7.14E-15 | -7.7817  | 85716 | lungCance |
| rs35704045 | 15 | 79003292  | C | G | 0.3517 | -0.1084 | 0.0127 | 1.69E-17 | -8.5134  | 85716 | lungCance |
| rs35715914 | 6  | 27592003  | T | C | 0.0781 | 0.1306  | 0.0213 | 8.53E-10 | 6.1348   | 85716 | lungCance |
| rs35716472 | 6  | 27406607  | G | C | 0.0784 | 0.1380  | 0.0213 | 8.72E-11 | 6.4877   | 85716 | lungCance |
| rs35741852 | 15 | 79029943  | A | G | 0.3279 | -0.0975 | 0.0141 | 4.60E-12 | -6.9172  | 85716 | lungCance |
| rs35744819 | 6  | 28318331  | T | G | 0.0779 | 0.1476  | 0.0213 | 3.95E-12 | 6.9389   | 85716 | lungCance |
| rs35749575 | 6  | 28114818  | T | G | 0.0776 | 0.1358  | 0.0213 | 1.77E-10 | 6.3800   | 85716 | lungCance |
| rs35755165 | 19 | 41345989  | A | G | 0.5129 | -0.1042 | 0.0135 | 9.83E-15 | -7.7411  | 85716 | lungCance |
| rs35768595 | 6  | 27141904  | T | C | 0.0767 | 0.1268  | 0.0217 | 4.79E-09 | 5.8544   | 85716 | lungCance |
| rs35781323 | 6  | 28144832  | C | T | 0.0776 | 0.1357  | 0.0213 | 1.83E-10 | 6.3750   | 85716 | lungCance |
| rs35819751 | 6  | 27810569  | G | A | 0.0783 | 0.1290  | 0.0212 | 1.14E-09 | 6.0877   | 85716 | lungCance |
| rs35848276 | 6  | 27521096  | T | C | 0.0781 | 0.1322  | 0.0213 | 5.37E-10 | 6.2077   | 85716 | lungCance |
| rs35869525 | 6  | 26946687  | T | C | 0.0790 | 0.1215  | 0.0213 | 1.15E-08 | 5.7077   | 85716 | lungCance |
| rs35883476 | 6  | 28368508  | C | G | 0.0780 | 0.1462  | 0.0213 | 6.31E-12 | 6.8726   | 85716 | lungCance |
| rs35902873 | 6  | 28058949  | C | G | 0.0777 | 0.1347  | 0.0213 | 2.60E-10 | 6.3206   | 85716 | lungCance |
| rs35934157 | 15 | 79067385  | A | G | 0.4029 | 0.1616  | 0.0135 | 6.55E-33 | 11.9493  | 85716 | lungCance |
| rs35942569 | 6  | 26339131  | G | A | 0.0761 | 0.1278  | 0.0219 | 5.83E-09 | 5.8216   | 85716 | lungCance |
| rs35949109 | 6  | 28025926  | C | T | 0.1070 | 0.1129  | 0.0183 | 7.04E-10 | 6.1652   | 85716 | lungCance |
| rs35952432 | 6  | 28074901  | T | C | 0.0854 | 0.1378  | 0.0211 | 6.28E-11 | 6.5369   | 85716 | lungCance |
| rs35953391 | 5  | 1312329   | T | C | 0.1886 | -0.1417 | 0.0152 | 1.01E-20 | -9.3350  | 85716 | lungCance |
| rs35969124 | 15 | 79104793  | T | C | 0.1675 | -0.0944 | 0.0170 | 2.64E-08 | -5.5635  | 85716 | lungCance |
| rs35984974 | 6  | 27410422  | A | G | 0.0836 | 0.1161  | 0.0205 | 1.49E-08 | 5.6629   | 85716 | lungCance |
| rs36014129 | 6  | 25884519  | A | G | 0.0667 | 0.1306  | 0.0231 | 1.62E-08 | 5.6481   | 85716 | lungCance |
| rs36019446 | 5  | 1339890   | A | G | 0.5305 | 0.1262  | 0.0125 | 6.43E-24 | 10.0855  | 85716 | lungCance |
| rs36033628 | 6  | 26456074  | G | T | 0.0898 | 0.1138  | 0.0205 | 2.88E-08 | 5.5487   | 85716 | lungCance |
| rs36045869 | 15 | 78929498  | T | C | 0.3870 | -0.0933 | 0.0123 | 2.84E-14 | -7.6053  | 85716 | lungCance |
| rs36061084 | 15 | 79074253  | A | G | 0.4406 | 0.1502  | 0.0129 | 3.26E-31 | 11.6199  | 85716 | lungCance |
| rs36092177 | 6  | 28357807  | T | C | 0.0782 | 0.1455  | 0.0213 | 7.65E-12 | 6.8451   | 85716 | lungCance |
| rs36101351 | 6  | 27943369  | T | C | 0.0774 | 0.1351  | 0.0214 | 2.53E-10 | 6.3256   | 85716 | lungCance |
| rs36109883 | 6  | 26133070  | A | G | 0.0686 | 0.1386  | 0.0230 | 1.59E-09 | 6.0350   | 85716 | lungCance |
| rs36115365 | 5  | 1313242   | C | G | 0.1886 | -0.1417 | 0.0152 | 1.04E-20 | -9.3319  | 85716 | lungCance |
| rs36116761 | 6  | 27818482  | G | C | 0.0783 | 0.1275  | 0.0212 | 1.75E-09 | 6.0199   | 85716 | lungCance |
| rs36146269 | 15 | 78779510  | T | A | 0.3751 | -0.1704 | 0.0121 | 2.44E-45 | -14.1310 | 85716 | lungCance |
| rs36162392 | 6  | 26569135  | C | T | 0.0908 | 0.1118  | 0.0205 | 4.56E-08 | 5.4676   | 85716 | lungCance |
| rs364283   | 6  | 167383750 | C | T | 0.4728 | 0.0645  | 0.0117 | 3.29E-08 | 5.5252   | 85716 | lungCance |
| rs364451   | 6  | 167384756 | G | A | 0.4739 | 0.0649  | 0.0117 | 2.69E-08 | 5.5604   | 85716 | lungCance |
| rs365052   | 6  | 29648398  | C | G | 0.2749 | 0.0792  | 0.0130 | 1.03E-09 | 6.1050   | 85716 | lungCance |
| rs365189   | 6  | 167384545 | G | A | 0.4727 | 0.0644  | 0.0117 | 3.39E-08 | 5.5201   | 85716 | lungCance |
| rs367364   | 6  | 32019946  | T | C | 0.1389 | 0.1250  | 0.0168 | 1.05E-13 | 7.4348   | 85716 | lungCance |
| rs369637   | 6  | 32025863  | T | C | 0.1389 | 0.1244  | 0.0168 | 1.32E-13 | 7.4046   | 85716 | lungCance |
| rs37003    | 5  | 1356771   | C | A | 0.4267 | -0.1309 | 0.0124 | 3.54E-26 | -10.5835 | 85716 | lungCance |
| rs37004    | 5  | 1356684   | T | C | 0.2202 | -0.1478 | 0.0149 | 2.73E-23 | -9.9421  | 85716 | lungCance |
| rs37005    | 5  | 1356450   | T | C | 0.4285 | -0.1320 | 0.0123 | 1.09E-26 | -10.6939 | 85716 | lungCance |
| rs37006    | 5  | 1355058   | T | C | 0.4266 | -0.1320 | 0.0123 | 7.45E-27 | -10.7289 | 85716 | lungCance |
| rs37007    | 5  | 1352372   | C | G | 0.4230 | -0.1275 | 0.0122 | 2.04E-25 | -10.4182 | 85716 | lungCance |
| rs37008    | 5  | 1351538   | A | G | 0.4221 | -0.1274 | 0.0122 | 1.47E-25 | -10.4499 | 85716 | lungCance |
| rs37009    | 5  | 1350339   | T | C | 0.4258 | -0.1266 | 0.0121 | 1.61E-25 | -10.4404 | 85716 | lungCance |
| rs37010    | 5  | 1349535   | G | A | 0.4220 | -0.1285 | 0.0122 | 4.76E-26 | -10.5557 | 85716 | lungCance |
| rs37011    | 5  | 1348798   | T | A | 0.4267 | -0.1249 | 0.0121 | 6.97E-25 | -10.3014 | 85716 | lungCance |
| rs370155   | 6  | 27782031  | G | T | 0.0931 | 0.1153  | 0.0194 | 2.54E-09 | 5.9589   | 85716 | lungCance |
| rs370348   | 5  | 1331219   | G | A | 0.4246 | -0.1405 | 0.0119 | 3.59E-32 | -11.8068 | 85716 | lungCance |
| rs3734523  | 6  | 25925987  | A | G | 0.0907 | 0.1131  | 0.0199 | 1.33E-08 | 5.6821   | 85716 | lungCance |
| rs3734542  | 6  | 26468326  | A | G | 0.0906 | 0.1135  | 0.0204 | 2.54E-08 | 5.5708   | 85716 | lungCance |
| rs3734543  | 6  | 26468545  | C | G | 0.0906 | 0.1135  | 0.0204 | 2.54E-08 | 5.5707   | 85716 | lungCance |
| rs3743057  | 15 | 79089007  | T | C | 0.2535 | -0.0823 | 0.0137 | 1.74E-09 | -6.0207  | 85716 | lungCance |
| rs3743058  | 15 | 79080798  | T | C | 0.2611 | -0.0767 | 0.0132 | 7.02E-09 | -5.7906  | 85716 | lungCance |
| rs3743063  | 15 | 79065171  | A | C | 0.4329 | 0.1724  | 0.0133 | 3.49E-38 | 12.9193  | 85716 | lungCance |
| rs3743065  | 15 | 79048569  | T | C | 0.1921 | -0.0911 | 0.0167 | 4.58E-08 | -5.4671  | 85716 | lungCance |
| rs3743073  | 15 | 78909539  | G | T | 0.3652 | -0.0933 | 0.0122 | 1.75E-14 | -7.6677  | 85716 | lungCance |

|           |    |           |   |   |        |         |        |          |          |       |           |
|-----------|----|-----------|---|---|--------|---------|--------|----------|----------|-------|-----------|
| rs3743074 | 15 | 78909480  | G | A | 0.3650 | -0.0936 | 0.0122 | 1.43E-14 | -7.6935  | 85716 | lungCance |
| rs3743075 | 15 | 78909452  | T | C | 0.3638 | -0.0943 | 0.0122 | 1.03E-14 | -7.7356  | 85716 | lungCance |
| rs3743077 | 15 | 78894896  | T | C | 0.4130 | -0.0849 | 0.0119 | 8.60E-13 | -7.1511  | 85716 | lungCance |
| rs3743078 | 15 | 78894759  | C | G | 0.2219 | -0.2327 | 0.0141 | 2.60E-61 | -16.5204 | 85716 | lungCance |
| rs374317  | 6  | 29644040  | T | C | 0.2131 | 0.1000  | 0.0140 | 9.66E-13 | 7.1352   | 85716 | lungCance |
| rs3748522 | 12 | 1058688   | A | C | 0.4825 | -0.0723 | 0.0118 | 8.19E-10 | -6.1414  | 85716 | lungCance |
| rs375984  | 6  | 29644502  | T | C | 0.2131 | 0.1000  | 0.0140 | 9.87E-13 | 7.1321   | 85716 | lungCance |
| rs376097  | 6  | 167410878 | A | G | 0.4751 | 0.0647  | 0.0117 | 3.43E-08 | 5.5178   | 85716 | lungCance |
| rs376319  | 6  | 29644633  | T | C | 0.2131 | 0.1000  | 0.0140 | 9.69E-13 | 7.1351   | 85716 | lungCance |
| rs376551  | 6  | 167384923 | G | A | 0.4727 | 0.0644  | 0.0117 | 3.41E-08 | 5.5191   | 85716 | lungCance |
| rs376574  | 6  | 167389956 | A | T | 0.4731 | 0.0645  | 0.0117 | 3.22E-08 | 5.5290   | 85716 | lungCance |
| rs377232  | 6  | 167409638 | C | A | 0.4746 | 0.0644  | 0.0117 | 3.99E-08 | 5.4913   | 85716 | lungCance |
| rs377753  | 6  | 167389496 | A | T | 0.4731 | 0.0645  | 0.0117 | 3.23E-08 | 5.5287   | 85716 | lungCance |
| rs380145  | 5  | 1328897   | T | C | 0.2088 | -0.1420 | 0.0146 | 1.83E-22 | -9.7510  | 85716 | lungCance |
| rs380286  | 5  | 1320247   | A | G | 0.4226 | -0.1413 | 0.0119 | 1.51E-32 | -11.8798 | 85716 | lungCance |
| rs3813565 | 15 | 79019610  | T | G | 0.4057 | 0.1894  | 0.0125 | 1.75E-51 | 15.0951  | 85716 | lungCance |
| rs3813567 | 15 | 78934551  | G | A | 0.1985 | -0.1848 | 0.0151 | 3.05E-34 | -12.2015 | 85716 | lungCance |
| rs3813570 | 15 | 78832832  | C | T | 0.2129 | -0.2304 | 0.0144 | 5.41E-58 | -16.0532 | 85716 | lungCance |
| rs3813571 | 15 | 78832792  | T | G | 0.4091 | -0.0910 | 0.0119 | 2.33E-14 | -7.6307  | 85716 | lungCance |
| rs3813572 | 15 | 78832588  | C | T | 0.4091 | -0.0908 | 0.0119 | 2.52E-14 | -7.6210  | 85716 | lungCance |
| rs3816659 | 5  | 1317820   | A | G | 0.4043 | -0.1389 | 0.0120 | 6.19E-31 | -11.5654 | 85716 | lungCance |
| rs381949  | 5  | 1322468   | A | G | 0.3989 | -0.1368 | 0.0120 | 5.90E-30 | -11.3695 | 85716 | lungCance |
| rs382009  | 6  | 167403121 | G | C | 0.4694 | 0.0643  | 0.0118 | 4.60E-08 | 5.4659   | 85716 | lungCance |
| rs3825807 | 15 | 79089111  | G | A | 0.4431 | 0.1258  | 0.0120 | 7.80E-26 | 10.5093  | 85716 | lungCance |
| rs3825845 | 15 | 78910258  | T | C | 0.2109 | -0.2325 | 0.0144 | 7.40E-59 | -16.1767 | 85716 | lungCance |
| rs3829786 | 15 | 79019546  | A | C | 0.4135 | 0.1833  | 0.0125 | 1.32E-48 | 14.6517  | 85716 | lungCance |
| rs3829787 | 15 | 78856266  | T | C | 0.3568 | -0.0950 | 0.0124 | 1.63E-14 | -7.6766  | 85716 | lungCance |
| rs383009  | 5  | 1327851   | T | C | 0.4022 | -0.1391 | 0.0120 | 7.68E-31 | -11.5469 | 85716 | lungCance |
| rs385113  | 6  | 167403971 | A | G | 0.4739 | 0.0648  | 0.0117 | 3.05E-08 | 5.5390   | 85716 | lungCance |
| rs385863  | 6  | 167386615 | C | G | 0.4729 | 0.0644  | 0.0117 | 3.43E-08 | 5.5179   | 85716 | lungCance |
| rs3861180 | 15 | 79043393  | A | G | 0.0589 | -0.1989 | 0.0286 | 3.59E-12 | -6.9526  | 85716 | lungCance |
| rs3865453 | 19 | 41338556  | T | C | 0.0874 | -0.1474 | 0.0250 | 3.46E-09 | -5.9081  | 85716 | lungCance |
| rs386548  | 6  | 167385533 | T | A | 0.4729 | 0.0645  | 0.0117 | 3.26E-08 | 5.5266   | 85716 | lungCance |
| rs3875149 | 19 | 41359996  | A | G | 0.3582 | -0.0851 | 0.0144 | 3.05E-09 | -5.9290  | 85716 | lungCance |
| rs387642  | 6  | 29645634  | T | C | 0.2130 | 0.0999  | 0.0140 | 9.92E-13 | 7.1318   | 85716 | lungCance |
| rs387733  | 6  | 167409771 | A | G | 0.4751 | 0.0648  | 0.0117 | 3.32E-08 | 5.5241   | 85716 | lungCance |
| rs3884025 | 6  | 25930088  | A | G | 0.0666 | 0.1308  | 0.0231 | 1.56E-08 | 5.6551   | 85716 | lungCance |
| rs388406  | 6  | 167409562 | A | G | 0.4750 | 0.0647  | 0.0117 | 3.45E-08 | 5.5170   | 85716 | lungCance |
| rs3890715 | 15 | 79107862  | C | A | 0.4039 | 0.0899  | 0.0120 | 6.76E-14 | 7.4923   | 85716 | lungCance |
| rs3894347 | 15 | 79026001  | A | C | 0.4130 | 0.1785  | 0.0131 | 1.76E-42 | 13.6606  | 85716 | lungCance |
| rs3894351 | 15 | 79059523  | A | C | 0.4311 | 0.1678  | 0.0134 | 4.94E-36 | 12.5330  | 85716 | lungCance |
| rs3894352 | 15 | 79059526  | G | T | 0.4307 | 0.1683  | 0.0134 | 3.30E-36 | 12.5644  | 85716 | lungCance |
| rs389946  | 6  | 167407268 | T | C | 0.4790 | 0.0652  | 0.0117 | 2.73E-08 | 5.5580   | 85716 | lungCance |
| rs389956  | 6  | 167407254 | T | G | 0.4875 | 0.0646  | 0.0118 | 4.72E-08 | 5.4613   | 85716 | lungCance |
| rs390764  | 6  | 27782535  | T | C | 0.0931 | 0.1157  | 0.0193 | 2.18E-09 | 5.9840   | 85716 | lungCance |
| rs3934898 | 15 | 79055278  | G | A | 0.3212 | -0.0924 | 0.0143 | 9.62E-11 | -6.4729  | 85716 | lungCance |
| rs393558  | 6  | 167397750 | A | C | 0.4735 | 0.0650  | 0.0117 | 2.82E-08 | 5.5522   | 85716 | lungCance |
| rs393727  | 6  | 167398632 | T | A | 0.4734 | 0.0648  | 0.0117 | 2.99E-08 | 5.5421   | 85716 | lungCance |
| rs394439  | 6  | 32025555  | A | C | 0.1365 | 0.1257  | 0.0172 | 2.34E-13 | 7.3276   | 85716 | lungCance |
| rs394522  | 6  | 167398071 | A | C | 0.4734 | 0.0646  | 0.0117 | 3.06E-08 | 5.5379   | 85716 | lungCance |
| rs3949215 | 6  | 25777497  | A | T | 0.0804 | 0.1176  | 0.0209 | 1.79E-08 | 5.6310   | 85716 | lungCance |
| rs396660  | 6  | 29646165  | T | C | 0.2972 | 0.0741  | 0.0127 | 5.59E-09 | 5.8284   | 85716 | lungCance |
| rs3971703 | 15 | 79092481  | G | C | 0.2590 | -0.0823 | 0.0137 | 2.17E-09 | -5.9845  | 85716 | lungCance |
| rs3971708 | 15 | 79055117  | G | C | 0.3130 | -0.0878 | 0.0144 | 1.07E-09 | -6.0981  | 85716 | lungCance |
| rs3971710 | 15 | 79055144  | A | G | 0.2575 | -0.0864 | 0.0154 | 1.96E-08 | -5.6155  | 85716 | lungCance |
| rs3971828 | 15 | 79040042  | C | T | 0.7181 | -0.1032 | 0.0186 | 3.11E-08 | -5.5353  | 85716 | lungCance |
| rs3971829 | 15 | 79109052  | A | G | 0.4034 | 0.0890  | 0.0120 | 9.74E-14 | 7.4446   | 85716 | lungCance |
| rs3971859 | 15 | 79026277  | T | C | 0.3388 | 0.1803  | 0.0142 | 3.82E-37 | 12.7339  | 85716 | lungCance |
| rs3971860 | 15 | 79026278  | G | A | 0.3388 | 0.1803  | 0.0142 | 3.83E-37 | 12.7344  | 85716 | lungCance |
| rs3971866 | 15 | 79022343  | G | A | 0.3237 | -0.1141 | 0.0149 | 2.04E-14 | -7.6483  | 85716 | lungCance |
| rs3971868 | 15 | 79022403  | G | T | 0.2855 | -0.1176 | 0.0145 | 4.16E-16 | -8.1338  | 85716 | lungCance |
| rs3971869 | 15 | 79022420  | T | C | 0.3673 | -0.1025 | 0.0136 | 4.58E-14 | -7.5435  | 85716 | lungCance |
| rs397640  | 5  | 1334729   | T | C | 0.0866 | -0.1225 | 0.0210 | 5.58E-09 | -5.8288  | 85716 | lungCance |
| rs397713  | 6  | 167386714 | G | A | 0.4730 | 0.0645  | 0.0117 | 3.25E-08 | 5.5273   | 85716 | lungCance |
| rs398278  | 6  | 167388169 | A | G | 0.4742 | 0.0646  | 0.0117 | 3.26E-08 | 5.5272   | 85716 | lungCance |
| rs3998182 | 6  | 32561915  | C | T | 0.2386 | 0.0989  | 0.0150 | 3.79E-11 | 6.6119   | 85716 | lungCance |
| rs3999544 | 6  | 26285867  | C | T | 0.4387 | 0.0758  | 0.0118 | 1.34E-10 | 6.4232   | 85716 | lungCance |
| rs400063  | 6  | 167386592 | C | T | 0.4728 | 0.0644  | 0.0117 | 3.50E-08 | 5.5148   | 85716 | lungCance |
| rs400176  | 6  | 167406238 | T | C | 0.4742 | 0.0647  | 0.0117 | 3.20E-08 | 5.5304   | 85716 | lungCance |
| rs400837  | 6  | 167411008 | T | C | 0.4750 | 0.0648  | 0.0117 | 3.19E-08 | 5.5307   | 85716 | lungCance |
| rs401681  | 5  | 1322087   | T | C | 0.4310 | -0.1357 | 0.0119 | 3.25E-30 | -11.4220 | 85716 | lungCance |
| rs401754  | 6  | 27782538  | A | T | 0.0932 | 0.1157  | 0.0193 | 2.18E-09 | 5.9840   | 85716 | lungCance |
| rs401763  | 6  | 27782528  | C | T | 0.0899 | 0.1152  | 0.0198 | 6.55E-09 | 5.8021   | 85716 | lungCance |
| rs40181   | 5  | 1354462   | T | G | 0.4269 | -0.1321 | 0.0123 | 5.26E-27 | -10.7608 | 85716 | lungCance |

|            |    |           |   |   |        |         |        |          |          |       |           |
|------------|----|-----------|---|---|--------|---------|--------|----------|----------|-------|-----------|
| rs40182    | 5  | 1350397   | A | G | 0.4268 | -0.1268 | 0.0121 | 1.45E-25 | -10.4513 | 85716 | lungCance |
| rs40183    | 5  | 1348352   | A | G | 0.0931 | -0.1255 | 0.0215 | 4.99E-09 | -5.8474  | 85716 | lungCance |
| rs402191   | 6  | 167405553 | T | C | 0.4741 | 0.0648  | 0.0117 | 3.10E-08 | 5.5360   | 85716 | lungCance |
| rs402749   | 6  | 167386104 | C | T | 0.4729 | 0.0645  | 0.0117 | 3.25E-08 | 5.5271   | 85716 | lungCance |
| rs404222   | 6  | 167402150 | G | A | 0.4744 | 0.0654  | 0.0117 | 2.31E-08 | 5.5870   | 85716 | lungCance |
| rs405553   | 6  | 167395058 | A | G | 0.4728 | 0.0639  | 0.0117 | 4.58E-08 | 5.4672   | 85716 | lungCance |
| rs406095   | 6  | 167409087 | C | T | 0.4749 | 0.0647  | 0.0117 | 3.35E-08 | 5.5220   | 85716 | lungCance |
| rs4073322  | 15 | 79122541  | G | C | 0.4027 | 0.0857  | 0.0120 | 9.28E-13 | 7.1407   | 85716 | lungCance |
| rs407515   | 6  | 167407544 | G | C | 0.4749 | 0.0647  | 0.0117 | 3.49E-08 | 5.5146   | 85716 | lungCance |
| rs408040   | 6  | 167398903 | A | T | 0.4734 | 0.0649  | 0.0117 | 2.86E-08 | 5.5501   | 85716 | lungCance |
| rs408080   | 6  | 167392522 | T | C | 0.4741 | 0.0649  | 0.0117 | 2.65E-08 | 5.5634   | 85716 | lungCance |
| rs408087   | 6  | 167398952 | C | T | 0.4733 | 0.0648  | 0.0117 | 2.97E-08 | 5.5428   | 85716 | lungCance |
| rs408918   | 6  | 167399282 | G | T | 0.4734 | 0.0649  | 0.0117 | 2.85E-08 | 5.5502   | 85716 | lungCance |
| rs409356   | 6  | 167405226 | T | A | 0.4741 | 0.0648  | 0.0117 | 3.07E-08 | 5.5376   | 85716 | lungCance |
| rs410805   | 5  | 1323196   | T | C | 0.1724 | 0.1329  | 0.0162 | 2.00E-16 | 8.2221   | 85716 | lungCance |
| rs41266779 | 6  | 26021872  | T | C | 0.0673 | 0.1382  | 0.0231 | 2.17E-09 | 5.9842   | 85716 | lungCance |
| rs41266839 | 6  | 26409890  | C | G | 0.0757 | 0.1285  | 0.0218 | 3.93E-09 | 5.8871   | 85716 | lungCance |
| rs41269265 | 6  | 27425349  | C | T | 0.0781 | 0.1403  | 0.0213 | 4.63E-11 | 6.5822   | 85716 | lungCance |
| rs413232   | 6  | 167400972 | G | A | 0.4736 | 0.0649  | 0.0117 | 2.94E-08 | 5.5453   | 85716 | lungCance |
| rs4145878  | 6  | 26198046  | T | A | 0.4916 | 0.0685  | 0.0119 | 7.52E-09 | 5.7790   | 85716 | lungCance |
| rs414965   | 5  | 1324121   | A | G | 0.4029 | -0.1361 | 0.0120 | 1.21E-29 | -11.3077 | 85716 | lungCance |
| rs415842   | 6  | 167406681 | G | A | 0.4742 | 0.0647  | 0.0117 | 3.27E-08 | 5.5265   | 85716 | lungCance |
| rs415890   | 6  | 167406633 | G | C | 0.4742 | 0.0647  | 0.0117 | 3.24E-08 | 5.5281   | 85716 | lungCance |
| rs415987   | 6  | 167395375 | G | A | 0.4747 | 0.0650  | 0.0117 | 2.87E-08 | 5.5492   | 85716 | lungCance |
| rs416131   | 6  | 167406544 | G | T | 0.4742 | 0.0647  | 0.0117 | 3.22E-08 | 5.5290   | 85716 | lungCance |
| rs416568   | 6  | 29647628  | A | T | 0.2749 | 0.0792  | 0.0130 | 1.04E-09 | 6.1038   | 85716 | lungCance |
| rs417764   | 6  | 29648137  | A | G | 0.2128 | 0.0995  | 0.0140 | 1.37E-12 | 7.0866   | 85716 | lungCance |
| rs421214   | 6  | 167396629 | A | G | 0.4734 | 0.0651  | 0.0117 | 2.71E-08 | 5.5595   | 85716 | lungCance |
| rs421284   | 5  | 1325590   | C | T | 0.4262 | -0.1404 | 0.0119 | 3.62E-32 | -11.8063 | 85716 | lungCance |
| rs421629   | 5  | 1320136   | A | G | 0.4233 | -0.1406 | 0.0119 | 2.88E-32 | -11.8260 | 85716 | lungCance |
| rs422094   | 6  | 167397033 | C | G | 0.4735 | 0.0650  | 0.0117 | 2.80E-08 | 5.5534   | 85716 | lungCance |
| rs422562   | 6  | 167406318 | A | G | 0.4742 | 0.0647  | 0.0117 | 3.20E-08 | 5.5304   | 85716 | lungCance |
| rs42269    | 5  | 1339985   | A | C | 0.3357 | -0.1384 | 0.0130 | 1.77E-26 | -10.6491 | 85716 | lungCance |
| rs422694   | 6  | 167406074 | G | T | 0.4737 | 0.0649  | 0.0117 | 2.94E-08 | 5.5450   | 85716 | lungCance |
| rs422780   | 6  | 167406209 | A | G | 0.4742 | 0.0648  | 0.0117 | 3.18E-08 | 5.5312   | 85716 | lungCance |
| rs4236040  | 6  | 25761209  | T | C | 0.0805 | 0.1163  | 0.0209 | 2.61E-08 | 5.5659   | 85716 | lungCance |
| rs424185   | 6  | 167410907 | C | T | 0.4751 | 0.0647  | 0.0117 | 3.43E-08 | 5.5180   | 85716 | lungCance |
| rs4243083  | 15 | 78833830  | C | G | 0.4095 | -0.0904 | 0.0119 | 3.29E-14 | -7.5862  | 85716 | lungCance |
| rs4243084  | 15 | 78911672  | C | G | 0.3731 | 0.2537  | 0.0120 | 1.13E-98 | 21.0839  | 85716 | lungCance |
| rs4243085  | 15 | 79057723  | G | C | 0.2458 | -0.1186 | 0.0153 | 8.01E-15 | -7.7675  | 85716 | lungCance |
| rs425039   | 6  | 167410527 | C | T | 0.4757 | 0.0647  | 0.0117 | 3.54E-08 | 5.5124   | 85716 | lungCance |
| rs4275821  | 15 | 78849541  | C | T | 0.3576 | -0.0946 | 0.0124 | 1.93E-14 | -7.6556  | 85716 | lungCance |
| rs427824   | 6  | 167403918 | T | G | 0.4751 | 0.0656  | 0.0117 | 2.14E-08 | 5.6004   | 85716 | lungCance |
| rs428499   | 5  | 1322663   | T | C | 0.1872 | 0.1132  | 0.0156 | 4.67E-13 | 7.2345   | 85716 | lungCance |
| rs428805   | 6  | 167403132 | C | A | 0.4695 | 0.0643  | 0.0118 | 4.61E-08 | 5.4657   | 85716 | lungCance |
| rs429083   | 6  | 167383972 | T | C | 0.4727 | 0.0645  | 0.0117 | 3.29E-08 | 5.5250   | 85716 | lungCance |
| rs4299116  | 15 | 78766194  | T | A | 0.3765 | -0.1707 | 0.0121 | 2.37E-45 | -14.1333 | 85716 | lungCance |
| rs430097   | 6  | 167405073 | A | G | 0.4740 | 0.0647  | 0.0117 | 3.22E-08 | 5.5290   | 85716 | lungCance |
| rs430145   | 6  | 167410369 | C | T | 0.4750 | 0.0647  | 0.0117 | 3.38E-08 | 5.5204   | 85716 | lungCance |
| rs430293   | 6  | 167404958 | A | G | 0.4740 | 0.0648  | 0.0117 | 3.04E-08 | 5.5392   | 85716 | lungCance |
| rs430477   | 6  | 167389851 | T | C | 0.4731 | 0.0645  | 0.0117 | 3.22E-08 | 5.5290   | 85716 | lungCance |
| rs433061   | 6  | 32014828  | A | G | 0.0979 | 0.1627  | 0.0193 | 3.31E-17 | 8.4353   | 85716 | lungCance |
| rs433191   | 6  | 167409662 | T | A | 0.4754 | 0.0645  | 0.0117 | 3.89E-08 | 5.4954   | 85716 | lungCance |
| rs434093   | 6  | 167382449 | T | C | 0.4728 | 0.0647  | 0.0117 | 2.96E-08 | 5.5440   | 85716 | lungCance |
| rs4341710  | 15 | 79140460  | C | T | 0.3996 | -0.0879 | 0.0120 | 2.58E-13 | -7.3147  | 85716 | lungCance |
| rs4362358  | 15 | 78796104  | C | T | 0.3743 | -0.1717 | 0.0121 | 2.41E-45 | -14.1324 | 85716 | lungCance |
| rs436625   | 6  | 167398345 | C | A | 0.4734 | 0.0649  | 0.0117 | 2.86E-08 | 5.5498   | 85716 | lungCance |
| rs4366683  | 15 | 78912203  | C | T | 0.4498 | -0.0826 | 0.0122 | 1.37E-11 | -6.7613  | 85716 | lungCance |
| rs436707   | 6  | 167388843 | T | C | 0.4730 | 0.0645  | 0.0117 | 3.25E-08 | 5.5273   | 85716 | lungCance |
| rs4380028  | 15 | 79111093  | T | C | 0.4032 | 0.0864  | 0.0119 | 4.14E-13 | 7.2512   | 85716 | lungCance |
| rs4387568  | 15 | 79109514  | G | C | 0.4042 | 0.0875  | 0.0119 | 2.33E-13 | 7.3283   | 85716 | lungCance |
| rs4389112  | 15 | 79122099  | A | G | 0.4013 | 0.0878  | 0.0120 | 2.80E-13 | 7.3036   | 85716 | lungCance |
| rs4389113  | 15 | 79121739  | A | G | 0.4021 | 0.0867  | 0.0120 | 5.30E-13 | 7.2172   | 85716 | lungCance |
| rs4390557  | 15 | 78717905  | C | T | 0.4420 | -0.0789 | 0.0119 | 3.04E-11 | -6.6443  | 85716 | lungCance |
| rs439237   | 6  | 167391392 | A | G | 0.4731 | 0.0646  | 0.0117 | 3.13E-08 | 5.5338   | 85716 | lungCance |
| rs439553   | 6  | 167391212 | A | G | 0.4741 | 0.0637  | 0.0117 | 4.92E-08 | 5.5450   | 85716 | lungCance |
| rs4401016  | 15 | 79134791  | A | G | 0.3990 | -0.0871 | 0.0121 | 5.82E-13 | -7.2045  | 85716 | lungCance |
| rs4404721  | 5  | 1306165   | T | C | 0.3656 | -0.1324 | 0.0127 | 2.04E-25 | -10.4181 | 85716 | lungCance |
| rs4412192  | 6  | 26290377  | G | A | 0.4639 | 0.0727  | 0.0117 | 5.55E-10 | 6.2026   | 85716 | lungCance |
| rs4412193  | 6  | 26338056  | G | A | 0.3910 | -0.0714 | 0.0120 | 2.34E-09 | -5.9717  | 85716 | lungCance |
| rs4420500  | 15 | 78962964  | T | C | 0.4090 | 0.1728  | 0.0121 | 2.93E-46 | 14.2799  | 85716 | lungCance |
| rs442298   | 6  | 167389452 | G | C | 0.4740 | 0.0637  | 0.0117 | 4.94E-08 | 5.4533   | 85716 | lungCance |
| rs4433781  | 15 | 79121835  | T | A | 0.4023 | 0.0865  | 0.0120 | 5.66E-13 | 7.2083   | 85716 | lungCance |
| rs443570   | 6  | 167389925 | G | A | 0.4729 | 0.0644  | 0.0117 | 3.44E-08 | 5.5177   | 85716 | lungCance |



|            |    |           |   |   |        |         |        |           |          |       |           |
|------------|----|-----------|---|---|--------|---------|--------|-----------|----------|-------|-----------|
| rs4436747  | 15 | 78714008  | G | A | 0.4369 | -0.0794 | 0.0119 | 2.87E-11  | -6.6529  | 85716 | lungCance |
| rs444210   | 6  | 167390242 | A | G | 0.4581 | 0.0646  | 0.0117 | 3.61E-08  | 5.5090   | 85716 | lungCance |
| rs4449583  | 5  | 1284135   | T | C | 0.3509 | 0.0904  | 0.0133 | 1.07E-11  | 6.7969   | 85716 | lungCance |
| rs444988   | 6  | 167389674 | A | T | 0.4740 | 0.0649  | 0.0117 | 2.73E-08  | 5.5575   | 85716 | lungCance |
| rs445150   | 6  | 29646879  | C | T | 0.2972 | 0.0742  | 0.0127 | 5.38E-09  | 5.8347   | 85716 | lungCance |
| rs4452638  | 6  | 27229265  | A | G | 0.1024 | 0.1045  | 0.0189 | 3.28E-08  | 5.5256   | 85716 | lungCance |
| rs4461039  | 15 | 78817447  | T | A | 0.2132 | -0.2270 | 0.0144 | 3.48E-56  | -15.7930 | 85716 | lungCance |
| rs4468572  | 15 | 79124475  | T | C | 0.4293 | 0.0939  | 0.0119 | 3.75E-15  | 7.8630   | 85716 | lungCance |
| rs447042   | 6  | 167405435 | C | T | 0.4741 | 0.0648  | 0.0117 | 3.08E-08  | 5.5366   | 85716 | lungCance |
| rs448060   | 6  | 167382622 | A | G | 0.4731 | 0.0646  | 0.0117 | 3.08E-08  | 5.5368   | 85716 | lungCance |
| rs448380   | 6  | 29647545  | C | T | 0.2120 | 0.1006  | 0.0141 | 8.96E-13  | 7.1458   | 85716 | lungCance |
| rs448489   | 6  | 29647642  | C | T | 0.2131 | 0.1001  | 0.0140 | 9.23E-13  | 7.1417   | 85716 | lungCance |
| rs451360   | 5  | 1319680   | A | C | 0.2059 | -0.1418 | 0.0146 | 3.15E-22  | -9.6955  | 85716 | lungCance |
| rs452384   | 5  | 1330840   | C | T | 0.4231 | -0.1406 | 0.0119 | 4.24E-32  | -11.7928 | 85716 | lungCance |
| rs4526984  | 15 | 78712119  | A | T | 0.2714 | -0.1764 | 0.0144 | 1.48E-34  | -12.2602 | 85716 | lungCance |
| rs452932   | 5  | 1330253   | C | T | 0.4244 | -0.1408 | 0.0119 | 2.67E-32  | -11.8322 | 85716 | lungCance |
| rs4530805  | 5  | 1306331   | T | C | 0.3622 | -0.1339 | 0.0127 | 8.04E-26  | -10.5068 | 85716 | lungCance |
| rs453184   | 6  | 167387404 | A | C | 0.4730 | 0.0645  | 0.0117 | 3.25E-08  | 5.5274   | 85716 | lungCance |
| rs4533253  | 15 | 79138841  | T | C | 0.3998 | -0.0877 | 0.0121 | 3.36E-13  | -7.2790  | 85716 | lungCance |
| rs4539564  | 15 | 79128499  | A | G | 0.5065 | -0.0876 | 0.0117 | 6.98E-14  | -7.4882  | 85716 | lungCance |
| rs45509595 | 6  | 27840926  | C | T | 0.0765 | 0.1344  | 0.0215 | 3.78E-10  | 6.2629   | 85716 | lungCance |
| rs4551997  | 15 | 79130433  | G | A | 0.4933 | 0.0889  | 0.0117 | 3.29E-14  | 7.5866   | 85716 | lungCance |
| rs45527431 | 6  | 26599509  | G | A | 0.0760 | 0.1228  | 0.0219 | 2.01E-08  | 5.6107   | 85716 | lungCance |
| rs455433   | 5  | 1336243   | G | A | 0.4258 | -0.1402 | 0.0119 | 4.92E-32  | -11.7805 | 85716 | lungCance |
| rs456366   | 5  | 1337070   | C | T | 0.4262 | -0.1402 | 0.0119 | 4.97E-32  | -11.7792 | 85716 | lungCance |
| rs457130   | 5  | 1336178   | T | A | 0.4055 | -0.1377 | 0.0120 | 2.35E-30  | -11.4502 | 85716 | lungCance |
| rs459961   | 5  | 1337106   | A | T | 0.4258 | -0.1404 | 0.0119 | 3.90E-32  | -11.7997 | 85716 | lungCance |
| rs460073   | 5  | 1336459   | C | T | 0.4258 | -0.1402 | 0.0119 | 4.97E-32  | -11.7798 | 85716 | lungCance |
| rs4608303  | 15 | 79136713  | C | T | 0.3993 | -0.0874 | 0.0121 | 4.73E-13  | -7.2328  | 85716 | lungCance |
| rs4619206  | 12 | 1002857   | T | C | 0.2988 | -0.0843 | 0.0129 | 5.37E-11  | -6.5605  | 85716 | lungCance |
| rs462608   | 5  | 1336626   | A | T | 0.4166 | -0.1385 | 0.0121 | 1.47E-30  | -11.4900 | 85716 | lungCance |
| rs4635969  | 5  | 1308552   | A | G | 0.1851 | -0.1449 | 0.0152 | 1.17E-21  | -9.5607  | 85716 | lungCance |
| rs465498   | 5  | 1325803   | G | A | 0.4246 | -0.1407 | 0.0119 | 2.68E-32  | -11.8316 | 85716 | lungCance |
| rs467095   | 5  | 1336221   | C | T | 0.4235 | -0.1411 | 0.0120 | 3.86E-32  | -11.8006 | 85716 | lungCance |
| rs4710147  | 6  | 167374239 | A | G | 0.4728 | 0.0644  | 0.0118 | 4.53E-08  | 5.4689   | 85716 | lungCance |
| rs4710161  | 6  | 167409374 | T | C | 0.4749 | 0.0647  | 0.0117 | 3.38E-08  | 5.5203   | 85716 | lungCance |
| rs4712969  | 6  | 25764192  | A | G | 0.0804 | 0.1169  | 0.0209 | 2.30E-08  | 5.5874   | 85716 | lungCance |
| rs471889   | 15 | 78870235  | T | C | 0.3659 | -0.0924 | 0.0122 | 2.98E-14  | -7.5990  | 85716 | lungCance |
| rs472054   | 15 | 78887994  | A | G | 0.3644 | -0.0894 | 0.0122 | 2.13E-13  | -7.3404  | 85716 | lungCance |
| rs4774488  | 15 | 47491291  | C | T | 0.4042 | 0.0658  | 0.0119 | 3.60E-08  | 5.5094   | 85716 | lungCance |
| rs4774489  | 15 | 47491305  | T | C | 0.4044 | 0.0655  | 0.0119 | 4.15E-08  | 5.4842   | 85716 | lungCance |
| rs481134   | 15 | 78877563  | A | G | 0.4142 | -0.0848 | 0.0119 | 9.64E-13  | -7.1356  | 85716 | lungCance |
| rs483143   | 6  | 27846744  | C | G | 0.0913 | 0.1186  | 0.0195 | 1.31E-09  | 6.0667   | 85716 | lungCance |
| rs4886571  | 15 | 78833758  | G | A | 0.4095 | -0.0905 | 0.0119 | 3.17E-14  | -7.5910  | 85716 | lungCance |
| rs4886572  | 15 | 78837452  | A | G | 0.4094 | -0.0909 | 0.0119 | 2.56E-14  | -7.6186  | 85716 | lungCance |
| rs4886579  | 15 | 78969256  | T | C | 0.4080 | 0.1796  | 0.0118 | 4.72E-52  | 15.1810  | 85716 | lungCance |
| rs4886580  | 15 | 78969385  | G | T | 0.4099 | 0.1779  | 0.0118 | 3.87E-51  | 15.0427  | 85716 | lungCance |
| rs4886585  | 15 | 79026315  | A | G | 0.3760 | 0.1767  | 0.0135 | 5.54E-39  | 13.0605  | 85716 | lungCance |
| rs4886586  | 15 | 79026674  | A | G | 0.4089 | 0.1768  | 0.0131 | 1.09E-41  | 13.5267  | 85716 | lungCance |
| rs4886587  | 15 | 79026822  | A | T | 0.4177 | 0.1757  | 0.0130 | 1.24E-41  | 13.5171  | 85716 | lungCance |
| rs4886590  | 15 | 79074506  | A | G | 0.4138 | 0.1471  | 0.0128 | 1.00E-30  | 11.5233  | 85716 | lungCance |
| rs4886591  | 15 | 79074518  | A | G | 0.4371 | 0.1547  | 0.0127 | 4.38E-34  | 12.1724  | 85716 | lungCance |
| rs4886592  | 15 | 79082547  | C | T | 0.4356 | 0.1300  | 0.0121 | 5.08E-27  | 10.7638  | 85716 | lungCance |
| rs4886982  | 15 | 79071598  | A | G | 0.3161 | -0.0881 | 0.0137 | 1.23E-10  | -6.4359  | 85716 | lungCance |
| rs4887057  | 15 | 78760918  | A | G | 0.3739 | -0.1703 | 0.0121 | 3.45E-45  | -14.1062 | 85716 | lungCance |
| rs4887059  | 15 | 78782095  | C | T | 0.3758 | -0.1715 | 0.0121 | 1.18E-45  | -14.1828 | 85716 | lungCance |
| rs4887062  | 15 | 78837801  | G | A | 0.4154 | -0.0854 | 0.0119 | 8.57E-13  | -7.1514  | 85716 | lungCance |
| rs4887063  | 15 | 78839715  | C | T | 0.4077 | -0.0917 | 0.0119 | 1.66E-14  | -7.6745  | 85716 | lungCance |
| rs4887064  | 15 | 78842847  | G | C | 0.4116 | -0.0936 | 0.0120 | 5.64E-15  | -7.8122  | 85716 | lungCance |
| rs4887067  | 15 | 78886947  | A | G | 0.3636 | 0.2570  | 0.0120 | 2.58E-101 | 21.3699  | 85716 | lungCance |
| rs4887069  | 15 | 78909070  | G | A | 0.2273 | -0.2230 | 0.0142 | 6.49E-56  | -15.7535 | 85716 | lungCance |
| rs4887070  | 15 | 78916187  | C | T | 0.3533 | -0.0921 | 0.0123 | 5.81E-14  | -7.5126  | 85716 | lungCance |
| rs4887072  | 15 | 78925435  | G | A | 0.2139 | -0.2237 | 0.0146 | 2.97E-53  | -15.3618 | 85716 | lungCance |
| rs4887074  | 15 | 78952110  | G | C | 0.2380 | -0.1156 | 0.0137 | 4.15E-17  | -8.4087  | 85716 | lungCance |
| rs4887077  | 15 | 78978364  | T | C | 0.4082 | 0.1775  | 0.0119 | 1.76E-50  | 14.9418  | 85716 | lungCance |
| rs4887078  | 15 | 79011073  | C | T | 0.2452 | -0.1181 | 0.0141 | 5.83E-17  | -8.3689  | 85716 | lungCance |
| rs4887083  | 15 | 79025577  | T | C | 0.4173 | 0.1791  | 0.0130 | 3.14E-43  | 13.7846  | 85716 | lungCance |
| rs4887084  | 15 | 79025593  | C | T | 0.4115 | 0.1832  | 0.0130 | 5.57E-45  | 14.0726  | 85716 | lungCance |
| rs4887085  | 15 | 79025683  | G | C | 0.2449 | -0.1156 | 0.0153 | 3.59E-14  | -7.5749  | 85716 | lungCance |
| rs4887086  | 15 | 79026529  | T | C | 0.4188 | 0.1773  | 0.0130 | 1.56E-42  | 13.6692  | 85716 | lungCance |
| rs4887087  | 15 | 79026541  | T | C | 0.4123 | 0.1805  | 0.0130 | 8.65E-44  | 13.8778  | 85716 | lungCance |
| rs4887090  | 15 | 79043402  | A | G | 0.4191 | 0.1739  | 0.0133 | 2.43E-39  | 13.1230  | 85716 | lungCance |
| rs4887091  | 15 | 79043580  | T | C | 0.2532 | -0.1219 | 0.0151 | 5.66E-16  | -8.0963  | 85716 | lungCance |
| rs4887092  | 15 | 79043675  | T | C | 0.2506 | -0.1234 | 0.0151 | 2.46E-16  | -8.1971  | 85716 | lungCance |

|            |    |           |   |   |        |         |        |           |          |       |           |
|------------|----|-----------|---|---|--------|---------|--------|-----------|----------|-------|-----------|
| rs4887095  | 15 | 79053207  | A | C | 0.4218 | 0.1692  | 0.0133 | 4.93E-37  | 12.7146  | 85716 | lungCance |
| rs4887096  | 15 | 79053284  | C | T | 0.4196 | 0.1728  | 0.0133 | 2.27E-38  | 12.9524  | 85716 | lungCance |
| rs4887097  | 15 | 79057949  | C | T | 0.3983 | 0.1725  | 0.0136 | 7.84E-37  | 12.6783  | 85716 | lungCance |
| rs4887098  | 15 | 79057950  | C | G | 0.3983 | 0.1725  | 0.0136 | 7.40E-37  | 12.6822  | 85716 | lungCance |
| rs4887099  | 15 | 79059547  | C | G | 0.4331 | 0.1679  | 0.0134 | 4.89E-36  | 12.5335  | 85716 | lungCance |
| rs4887100  | 15 | 79067448  | C | T | 0.2541 | 0.1550  | 0.0155 | 2.14E-23  | 9.9664   | 85716 | lungCance |
| rs4887101  | 15 | 79067449  | C | T | 0.2524 | 0.1555  | 0.0156 | 1.75E-23  | 9.9863   | 85716 | lungCance |
| rs4887102  | 15 | 79067495  | G | A | 0.3412 | 0.1560  | 0.0143 | 9.23E-28  | 10.9200  | 85716 | lungCance |
| rs4887109  | 15 | 79074294  | T | C | 0.4019 | 0.1438  | 0.0129 | 5.09E-29  | 11.1806  | 85716 | lungCance |
| rs4887113  | 15 | 79095287  | T | C | 0.4422 | 0.1259  | 0.0120 | 1.01E-25  | 10.4853  | 85716 | lungCance |
| rs493161   | 6  | 27850714  | T | A | 0.0910 | 0.1197  | 0.0196 | 9.84E-10  | 6.1120   | 85716 | lungCance |
| rs495090   | 15 | 78870003  | A | G | 0.3659 | -0.0922 | 0.0122 | 3.24E-14  | -7.5885  | 85716 | lungCance |
| rs495956   | 15 | 78869930  | C | T | 0.3659 | -0.0924 | 0.0122 | 2.96E-14  | -7.6000  | 85716 | lungCance |
| rs497309   | 6  | 31892484  | C | A | 0.0981 | 0.1658  | 0.0192 | 5.81E-18  | 8.6363   | 85716 | lungCance |
| rs4975615  | 5  | 1315343   | G | A | 0.3903 | -0.1329 | 0.0121 | 6.26E-28  | -10.9551 | 85716 | lungCance |
| rs4975616  | 5  | 1315660   | G | A | 0.4066 | -0.1344 | 0.0120 | 2.99E-29  | -11.2272 | 85716 | lungCance |
| rs5012374  | 6  | 26298640  | T | A | 0.3578 | -0.0686 | 0.0123 | 2.15E-08  | -5.5993  | 85716 | lungCance |
| rs5019044  | 15 | 78796282  | A | T | 0.1833 | -0.2102 | 0.0152 | 1.23E-43  | -13.8526 | 85716 | lungCance |
| rs501942   | 6  | 31840477  | T | C | 0.0986 | 0.1699  | 0.0192 | 8.40E-19  | 8.8547   | 85716 | lungCance |
| rs5020533  | 6  | 167394177 | T | C | 0.4737 | 0.0645  | 0.0117 | 3.27E-08  | 5.5264   | 85716 | lungCance |
| rs502055   | 6  | 32579003  | C | T | 0.2535 | 0.0836  | 0.0142 | 3.88E-09  | 5.8895   | 85716 | lungCance |
| rs5022780  | 15 | 78808235  | T | A | 0.3989 | -0.0912 | 0.0121 | 4.21E-14  | -7.5544  | 85716 | lungCance |
| rs502771   | 6  | 32578970  | C | T | 0.2536 | 0.0838  | 0.0142 | 3.52E-09  | 5.9051   | 85716 | lungCance |
| rs503464   | 15 | 78857896  | A | T | 0.2261 | -0.2349 | 0.0143 | 9.21E-61  | -16.4447 | 85716 | lungCance |
| rs514743   | 15 | 78884227  | T | A | 0.3644 | -0.0902 | 0.0122 | 1.42E-13  | -7.3943  | 85716 | lungCance |
| rs518425   | 15 | 78883813  | G | A | 0.2708 | -0.2036 | 0.0132 | 1.69E-53  | -15.3983 | 85716 | lungCance |
| rs535777   | 6  | 32577633  | C | G | 0.0998 | 0.1486  | 0.0227 | 6.12E-11  | 6.5406   | 85716 | lungCance |
| rs555018   | 15 | 78879242  | G | A | 0.4143 | -0.0850 | 0.0119 | 9.04E-13  | -7.1441  | 85716 | lungCance |
| rs55664827 | 6  | 26824920  | C | T | 0.0918 | 0.1261  | 0.0223 | 1.55E-08  | 5.6556   | 85716 | lungCance |
| rs55676755 | 15 | 78898932  | G | C | 0.3651 | 0.2554  | 0.0120 | 2.59E-100 | 21.2614  | 85716 | lungCance |
| rs55690619 | 15 | 78833612  | A | G | 0.4096 | -0.0905 | 0.0119 | 3.10E-14  | -7.5943  | 85716 | lungCance |
| rs55690788 | 6  | 28436145  | C | T | 0.0782 | 0.1455  | 0.0212 | 7.61E-12  | 6.8459   | 85716 | lungCance |
| rs557042   | 6  | 27845129  | T | C | 0.0911 | 0.1192  | 0.0196 | 1.14E-09  | 6.0879   | 85716 | lungCance |
| rs55706012 | 6  | 26266311  | C | A | 0.0738 | 0.1329  | 0.0222 | 2.32E-09  | 5.9735   | 85716 | lungCance |
| rs55768116 | 11 | 118108331 | A | C | 0.4872 | -0.0659 | 0.0118 | 2.42E-08  | -5.5784  | 85716 | lungCance |
| rs55781567 | 15 | 78857986  | G | C | 0.3667 | 0.2604  | 0.0121 | 3.08E-103 | 21.5760  | 85716 | lungCance |
| rs55791720 | 12 | 1066834   | T | C | 0.4876 | -0.0704 | 0.0117 | 2.00E-09  | -5.9974  | 85716 | lungCance |
| rs55834529 | 6  | 27072542  | G | A | 0.0763 | 0.1252  | 0.0218 | 8.78E-09  | 5.7527   | 85716 | lungCance |
| rs55834964 | 15 | 79049766  | A | C | 0.4239 | 0.1733  | 0.0133 | 1.12E-38  | 13.0073  | 85716 | lungCance |
| rs55833698 | 15 | 78857939  | G | T | 0.3658 | 0.2591  | 0.0121 | 3.15E-102 | 21.4677  | 85716 | lungCance |
| rs55870734 | 15 | 79117917  | T | A | 0.4028 | 0.0867  | 0.0120 | 4.65E-13  | 7.2354   | 85716 | lungCance |
| rs55901723 | 5  | 1342154   | C | T | 0.2060 | -0.1291 | 0.0175 | 1.91E-13  | -7.3554  | 85716 | lungCance |
| rs55912630 | 6  | 25866935  | C | T | 0.0666 | 0.1276  | 0.0231 | 3.41E-08  | 5.5190   | 85716 | lungCance |
| rs55958997 | 15 | 78915872  | A | C | 0.3988 | 0.2369  | 0.0120 | 1.94E-87  | 19.8216  | 85716 | lungCance |
| rs55983731 | 15 | 78735269  | T | C | 0.3593 | 0.2231  | 0.0121 | 5.92E-76  | 18.4425  | 85716 | lungCance |
| rs55988292 | 15 | 78936168  | G | A | 0.4116 | 0.2086  | 0.0121 | 7.99E-67  | 17.2690  | 85716 | lungCance |
| rs56007453 | 15 | 78826239  | C | T | 0.4092 | -0.0910 | 0.0119 | 2.22E-14  | -7.6373  | 85716 | lungCance |
| rs56075693 | 6  | 28290328  | G | T | 0.0776 | 0.1445  | 0.0213 | 1.11E-11  | 6.7914   | 85716 | lungCance |
| rs56076311 | 15 | 79115120  | G | A | 0.4066 | 0.0875  | 0.0120 | 2.99E-13  | 7.2948   | 85716 | lungCance |
| rs56077333 | 15 | 78899003  | A | C | 0.3546 | 0.2606  | 0.0123 | 4.58E-100 | 21.2346  | 85716 | lungCance |
| rs56113850 | 19 | 41353107  | T | C | 0.4404 | -0.1228 | 0.0138 | 5.02E-19  | -8.9115  | 85716 | lungCance |
| rs56114371 | 6  | 27274834  | T | C | 0.0760 | 0.1338  | 0.0217 | 6.97E-10  | 6.1668   | 85716 | lungCance |
| rs56189111 | 6  | 28271973  | A | C | 0.0775 | 0.1442  | 0.0213 | 1.34E-11  | 6.7646   | 85716 | lungCance |
| rs56195905 | 15 | 79040317  | C | A | 0.4185 | 0.1748  | 0.0132 | 8.86E-40  | 13.1997  | 85716 | lungCance |
| rs56219465 | 15 | 78742579  | G | A | 0.3595 | 0.2234  | 0.0121 | 1.61E-76  | 18.5128  | 85716 | lungCance |
| rs56219480 | 15 | 78864024  | T | C | 0.0362 | -0.2015 | 0.0334 | 1.58E-09  | -6.0365  | 85716 | lungCance |
| rs56267346 | 19 | 41353338  | G | A | 0.1821 | -0.1101 | 0.0185 | 2.84E-09  | -5.9408  | 85716 | lungCance |
| rs56345976 | 5  | 1276873   | G | A | 0.4227 | 0.0929  | 0.0133 | 2.60E-12  | 6.9980   | 85716 | lungCance |
| rs56354501 | 15 | 79033520  | G | A | 0.4167 | 0.1701  | 0.0132 | 3.47E-38  | 12.9198  | 85716 | lungCance |
| rs56390833 | 15 | 78877381  | A | C | 0.3622 | 0.2562  | 0.0121 | 5.89E-100 | 21.2235  | 85716 | lungCance |
| rs56401801 | 6  | 27301512  | A | T | 0.0777 | 0.1362  | 0.0215 | 2.27E-10  | 6.3421   | 85716 | lungCance |
| rs56405707 | 6  | 27640246  | A | G | 0.0785 | 0.1293  | 0.0212 | 1.08E-09  | 6.0972   | 85716 | lungCance |
| rs564585   | 15 | 78886227  | G | A | 0.2632 | -0.2070 | 0.0133 | 1.97E-54  | -15.5367 | 85716 | lungCance |
| rs56683682 | 15 | 79112524  | T | G | 0.4047 | 0.0859  | 0.0120 | 6.66E-13  | 7.1858   | 85716 | lungCance |
| rs56763414 | 6  | 26286468  | C | T | 0.3317 | -0.0725 | 0.0125 | 6.12E-09  | -5.8134  | 85716 | lungCance |
| rs56862318 | 6  | 27185354  | A | G | 0.1026 | 0.1034  | 0.0189 | 4.11E-08  | 5.4860   | 85716 | lungCance |
| rs569207   | 15 | 78873119  | T | C | 0.2191 | -0.2294 | 0.0142 | 6.02E-59  | -16.1888 | 85716 | lungCance |
| rs57064725 | 15 | 78833036  | A | C | 0.2173 | -0.2334 | 0.0145 | 1.81E-58  | -16.1208 | 85716 | lungCance |
| rs57260218 | 15 | 78973772  | T | C | 0.2358 | -0.1090 | 0.0139 | 3.73E-15  | -7.8636  | 85716 | lungCance |
| rs576982   | 15 | 78870803  | T | C | 0.2183 | -0.2296 | 0.0142 | 1.46E-58  | -16.1338 | 85716 | lungCance |
| rs57708073 | 15 | 79066653  | G | A | 0.2627 | -0.0960 | 0.0148 | 9.66E-11  | -6.4722  | 85716 | lungCance |
| rs57728226 | 15 | 78929350  | C | G | 0.3869 | -0.0929 | 0.0123 | 3.52E-14  | -7.5776  | 85716 | lungCance |
| rs57837628 | 19 | 41357910  | A | G | 0.4887 | -0.0985 | 0.0137 | 6.95E-13  | -7.1805  | 85716 | lungCance |
| rs578776   | 15 | 78888400  | A | G | 0.2634 | -0.2058 | 0.0133 | 5.14E-54  | -15.4750 | 85716 | lungCance |

|            |    |          |   |   |        |         |        |           |          |       |           |
|------------|----|----------|---|---|--------|---------|--------|-----------|----------|-------|-----------|
| rs57945453 | 15 | 78862845 | T | C | 0.3631 | -0.0916 | 0.0122 | 6.45E-14  | -7.4986  | 85716 | lungCance |
| rs58021857 | 15 | 79119229 | A | C | 0.4026 | 0.0867  | 0.0120 | 4.59E-13  | 7.2368   | 85716 | lungCance |
| rs582591   | 6  | 32579373 | A | G | 0.2087 | 0.0978  | 0.0150 | 7.03E-11  | 6.5199   | 85716 | lungCance |
| rs583177   | 6  | 32579567 | A | C | 0.2553 | 0.0827  | 0.0142 | 5.56E-09  | 5.8295   | 85716 | lungCance |
| rs58365910 | 15 | 78849034 | C | T | 0.3680 | 0.2580  | 0.0121 | 3.67E-101 | 21.3535  | 85716 | lungCance |
| rs584135   | 15 | 78883628 | A | G | 0.3667 | -0.0892 | 0.0122 | 2.56E-13  | -7.3156  | 85716 | lungCance |
| rs58526289 | 15 | 79012418 | C | T | 0.3413 | -0.0999 | 0.0132 | 3.10E-14  | -7.5938  | 85716 | lungCance |
| rs58616630 | 6  | 27474715 | G | A | 0.0784 | 0.1360  | 0.0213 | 1.76E-10  | 6.3806   | 85716 | lungCance |
| rs58717592 | 15 | 79030417 | C | T | 0.2016 | -0.1057 | 0.0160 | 4.28E-11  | -6.5943  | 85716 | lungCance |
| rs588765   | 15 | 78865425 | T | C | 0.4146 | -0.0853 | 0.0119 | 6.96E-13  | -7.1801  | 85716 | lungCance |
| rs58946838 | 15 | 78961449 | C | A | 0.3466 | -0.1001 | 0.0124 | 6.20E-16  | -8.0857  | 85716 | lungCance |
| rs59133824 | 15 | 78833450 | A | C | 0.2141 | -0.2331 | 0.0144 | 2.72E-59  | -16.2381 | 85716 | lungCance |
| rs59414039 | 15 | 79043766 | C | T | 0.3294 | -0.0900 | 0.0141 | 1.67E-10  | -6.3893  | 85716 | lungCance |
| rs59671175 | 15 | 79017933 | G | A | 0.2072 | -0.1088 | 0.0153 | 1.19E-12  | -7.1064  | 85716 | lungCance |
| rs59683676 | 15 | 78833453 | C | T | 0.2141 | -0.2332 | 0.0144 | 2.43E-59  | -16.2444 | 85716 | lungCance |
| rs59697303 | 15 | 79071961 | T | C | 0.2641 | -0.0799 | 0.0140 | 1.19E-08  | -5.7017  | 85716 | lungCance |
| rs59709310 | 15 | 79061214 | C | T | 0.3226 | -0.0929 | 0.0143 | 7.98E-11  | -6.5008  | 85716 | lungCance |
| rs601079   | 15 | 78869579 | T | A | 0.4168 | -0.0859 | 0.0119 | 4.47E-13  | -7.2409  | 85716 | lungCance |
| rs60622800 | 5  | 1309904  | G | A | 0.3845 | -0.1341 | 0.0122 | 3.51E-28  | -11.0072 | 85716 | lungCance |
| rs60703442 | 15 | 79055157 | T | C | 0.2898 | -0.0938 | 0.0147 | 1.73E-10  | -6.3837  | 85716 | lungCance |
| rs60882115 | 6  | 26909096 | G | C | 0.0792 | 0.1236  | 0.0217 | 1.17E-08  | 5.7033   | 85716 | lungCance |
| rs61012457 | 15 | 78865694 | G | C | 0.3629 | -0.0914 | 0.0122 | 7.29E-14  | -7.4827  | 85716 | lungCance |
| rs61043060 | 15 | 79120277 | C | T | 0.4032 | 0.0873  | 0.0120 | 3.43E-13  | 7.2761   | 85716 | lungCance |
| rs61204066 | 15 | 78815298 | A | G | 0.2129 | -0.2285 | 0.0144 | 6.43E-57  | -15.8986 | 85716 | lungCance |
| rs61324092 | 6  | 26297392 | A | G | 0.3622 | -0.0681 | 0.0121 | 1.96E-08  | -5.6158  | 85716 | lungCance |
| rs61534839 | 6  | 26305623 | T | C | 0.3317 | -0.0722 | 0.0125 | 7.04E-09  | -5.7901  | 85716 | lungCance |
| rs615470   | 15 | 78885988 | T | C | 0.3650 | -0.0894 | 0.0122 | 2.19E-13  | -7.3369  | 85716 | lungCance |
| rs61574973 | 5  | 1309168  | T | C | 0.3641 | -0.1331 | 0.0124 | 4.43E-27  | -10.7773 | 85716 | lungCance |
| rs61630816 | 15 | 78965866 | C | T | 0.3402 | -0.1011 | 0.0124 | 3.75E-16  | -8.1463  | 85716 | lungCance |
| rs617058   | 6  | 32574479 | T | G | 0.2274 | 0.0968  | 0.0146 | 2.98E-11  | 6.6476   | 85716 | lungCance |
| rs61742093 | 6  | 27879982 | G | A | 0.0776 | 0.1320  | 0.0213 | 6.00E-10  | 6.1905   | 85716 | lungCance |
| rs62008174 | 15 | 78808947 | T | C | 0.4088 | -0.0909 | 0.0120 | 2.91E-14  | -7.6027  | 85716 | lungCance |
| rs62008193 | 15 | 78813334 | A | G | 0.3903 | -0.0934 | 0.0121 | 1.23E-14  | -7.7134  | 85716 | lungCance |
| rs62008194 | 15 | 78813805 | T | G | 0.4090 | -0.0907 | 0.0119 | 3.09E-14  | -7.5941  | 85716 | lungCance |
| rs62010327 | 15 | 78892784 | A | G | 0.3650 | -0.0944 | 0.0122 | 1.05E-14  | -7.7331  | 85716 | lungCance |
| rs62010328 | 15 | 78894971 | T | C | 0.3570 | -0.0947 | 0.0123 | 1.10E-14  | -7.7275  | 85716 | lungCance |
| rs62010330 | 15 | 78905854 | C | T | 0.1270 | -0.2186 | 0.0185 | 2.51E-32  | -11.8373 | 85716 | lungCance |
| rs62010332 | 15 | 78918762 | C | G | 0.3399 | -0.0936 | 0.0124 | 4.61E-14  | -7.5426  | 85716 | lungCance |
| rs62010552 | 15 | 78987686 | C | T | 0.2104 | -0.1018 | 0.0145 | 2.12E-12  | -7.0260  | 85716 | lungCance |
| rs62010554 | 15 | 79002832 | G | A | 0.2089 | -0.1048 | 0.0146 | 7.54E-13  | -7.1695  | 85716 | lungCance |
| rs62010555 | 15 | 79007555 | A | G | 0.3417 | -0.0999 | 0.0128 | 5.09E-15  | -7.8249  | 85716 | lungCance |
| rs62010556 | 15 | 79012311 | A | G | 0.3331 | -0.1039 | 0.0133 | 4.53E-15  | -7.8392  | 85716 | lungCance |
| rs62011001 | 15 | 79120467 | G | A | 0.4317 | 0.0801  | 0.0122 | 4.65E-11  | 6.5817   | 85716 | lungCance |
| rs62011002 | 15 | 79120578 | C | T | 0.4040 | 0.0863  | 0.0120 | 6.37E-13  | 7.1924   | 85716 | lungCance |
| rs62011004 | 15 | 79126536 | T | C | 0.4899 | -0.0898 | 0.0119 | 4.32E-14  | -7.5510  | 85716 | lungCance |
| rs62011028 | 15 | 79136110 | A | G | 0.2586 | -0.0807 | 0.0137 | 4.25E-09  | -5.8741  | 85716 | lungCance |
| rs62012588 | 15 | 79032942 | A | G | 0.2090 | -0.1074 | 0.0160 | 1.71E-11  | -6.7291  | 85716 | lungCance |
| rs62012623 | 15 | 79062888 | A | G | 0.3210 | -0.0920 | 0.0143 | 1.37E-10  | -6.4190  | 85716 | lungCance |
| rs62012628 | 15 | 79070000 | T | C | 0.3002 | -0.0957 | 0.0144 | 2.75E-11  | -6.6598  | 85716 | lungCance |
| rs621849   | 15 | 78872861 | G | A | 0.4167 | -0.0859 | 0.0119 | 4.35E-13  | -7.2442  | 85716 | lungCance |
| rs62332591 | 5  | 1290319  | T | G | 0.5230 | 0.0880  | 0.0136 | 1.12E-10  | 6.4494   | 85716 | lungCance |
| rs62394764 | 6  | 26305503 | C | T | 0.3622 | -0.0679 | 0.0121 | 2.21E-08  | -5.5951  | 85716 | lungCance |
| rs62394768 | 6  | 26326033 | T | C | 0.3621 | -0.0683 | 0.0121 | 1.77E-08  | -5.6330  | 85716 | lungCance |
| rs62394769 | 6  | 26326182 | T | C | 0.3309 | -0.0724 | 0.0125 | 6.34E-09  | -5.8076  | 85716 | lungCance |
| rs62396185 | 6  | 26180634 | C | G | 0.2843 | -0.0792 | 0.0131 | 1.53E-09  | -6.0406  | 85716 | lungCance |
| rs629444   | 6  | 25885814 | T | C | 0.1018 | 0.1071  | 0.0189 | 1.40E-08  | 5.6733   | 85716 | lungCance |
| rs637137   | 15 | 78873976 | A | T | 0.2191 | -0.2294 | 0.0142 | 5.85E-59  | -16.1913 | 85716 | lungCance |
| rs6456701  | 6  | 25774130 | C | T | 0.0804 | 0.1177  | 0.0209 | 1.77E-08  | 5.6329   | 85716 | lungCance |
| rs6456711  | 6  | 26302572 | A | C | 0.4471 | 0.0751  | 0.0119 | 2.64E-10  | 6.3186   | 85716 | lungCance |
| rs6456712  | 6  | 26302573 | A | C | 0.4459 | 0.0749  | 0.0119 | 2.93E-10  | 6.3025   | 85716 | lungCance |
| rs647041   | 15 | 78880481 | T | C | 0.4140 | -0.0839 | 0.0119 | 1.70E-12  | -7.0568  | 85716 | lungCance |
| rs6495267  | 15 | 79057093 | A | G | 0.4151 | 0.1763  | 0.0135 | 5.44E-39  | 13.0613  | 85716 | lungCance |
| rs6495306  | 15 | 78865893 | G | A | 0.4146 | -0.0854 | 0.0119 | 6.40E-13  | -7.1920  | 85716 | lungCance |
| rs6495307  | 15 | 78890321 | T | C | 0.4152 | -0.0844 | 0.0119 | 1.22E-12  | -7.1030  | 85716 | lungCance |
| rs6495308  | 15 | 78907656 | C | T | 0.2191 | -0.2324 | 0.0142 | 2.05E-60  | -16.3954 | 85716 | lungCance |
| rs6495309  | 15 | 78915245 | T | C | 0.2063 | -0.2254 | 0.0144 | 6.79E-55  | -15.6041 | 85716 | lungCance |
| rs6495314  | 15 | 78960529 | C | A | 0.4117 | 0.1770  | 0.0118 | 5.41E-51  | 15.0204  | 85716 | lungCance |
| rs6495317  | 15 | 78991716 | C | A | 0.2101 | -0.1019 | 0.0145 | 2.24E-12  | -7.0185  | 85716 | lungCance |
| rs6495318  | 15 | 78992137 | C | G | 0.2120 | -0.1006 | 0.0145 | 3.61E-12  | -6.9517  | 85716 | lungCance |
| rs6495329  | 15 | 79092603 | A | G | 0.3004 | -0.0739 | 0.0129 | 1.08E-08  | -5.7181  | 85716 | lungCance |
| rs6495330  | 15 | 79099938 | G | C | 0.2999 | -0.0728 | 0.0130 | 2.14E-08  | -5.6004  | 85716 | lungCance |
| rs6495333  | 15 | 79113215 | G | A | 0.4036 | 0.0854  | 0.0119 | 8.22E-13  | 7.1576   | 85716 | lungCance |
| rs6495335  | 15 | 79117133 | G | T | 0.4034 | 0.0859  | 0.0120 | 7.74E-13  | 7.1655   | 85716 | lungCance |
| rs6495337  | 15 | 79125689 | G | C | 0.5067 | -0.0885 | 0.0117 | 4.92E-14  | -7.5344  | 85716 | lungCance |

|            |    |           |   |   |        |         |        |          |          |       |           |
|------------|----|-----------|---|---|--------|---------|--------|----------|----------|-------|-----------|
| rs6495338  | 15 | 79128030  | T | C | 0.3745 | -0.0736 | 0.0123 | 2.08E-09 | -5.9913  | 85716 | lungCance |
| rs6495339  | 15 | 79128272  | C | T | 0.5064 | -0.0879 | 0.0117 | 5.89E-14 | -7.5107  | 85716 | lungCance |
| rs6495340  | 15 | 79128396  | G | A | 0.5064 | -0.0879 | 0.0117 | 5.84E-14 | -7.5115  | 85716 | lungCance |
| rs6495341  | 15 | 79133026  | T | C | 0.3992 | -0.0878 | 0.0121 | 3.65E-13 | -7.2679  | 85716 | lungCance |
| rs6495346  | 15 | 79157755  | C | T | 0.3836 | -0.0818 | 0.0122 | 1.96E-11 | -6.7095  | 85716 | lungCance |
| rs652888   | 6  | 31851234  | G | A | 0.1959 | 0.0946  | 0.0144 | 5.49E-11 | 6.5570   | 85716 | lungCance |
| rs6554758  | 5  | 1310152   | G | A | 0.3864 | -0.1340 | 0.0122 | 3.27E-28 | -11.0138 | 85716 | lungCance |
| rs660652   | 15 | 78887832  | A | G | 0.3643 | -0.0893 | 0.0122 | 2.39E-13 | -7.3248  | 85716 | lungCance |
| rs664172   | 15 | 78862762  | A | G | 0.1997 | -0.2367 | 0.0149 | 1.59E-56 | -15.8421 | 85716 | lungCance |
| rs66462181 | 6  | 27091661  | C | T | 0.0772 | 0.1238  | 0.0216 | 1.06E-08 | 5.7202   | 85716 | lungCance |
| rs66488313 | 6  | 26631568  | T | G | 0.0765 | 0.1234  | 0.0219 | 1.88E-08 | 5.6228   | 85716 | lungCance |
| rs667282   | 15 | 78863472  | C | T | 0.2192 | -0.2300 | 0.0142 | 3.33E-59 | -16.2260 | 85716 | lungCance |
| rs66757203 | 6  | 26454956  | T | C | 0.0904 | 0.1127  | 0.0204 | 3.30E-08 | 5.5245   | 85716 | lungCance |
| rs66759488 | 15 | 47577451  | A | G | 0.3618 | 0.0679  | 0.0122 | 2.83E-08 | 5.5514   | 85716 | lungCance |
| rs66785117 | 6  | 27523298  | G | T | 0.0784 | 0.1313  | 0.0212 | 5.98E-10 | 6.1909   | 85716 | lungCance |
| rs66841633 | 6  | 27382386  | T | G | 0.0785 | 0.1369  | 0.0213 | 1.26E-10 | 6.4321   | 85716 | lungCance |
| rs66868086 | 6  | 27865902  | T | A | 0.0767 | 0.1355  | 0.0215 | 2.82E-10 | 6.3083   | 85716 | lungCance |
| rs66925868 | 15 | 79115406  | G | A | 0.4021 | 0.0878  | 0.0120 | 2.19E-13 | 7.3372   | 85716 | lungCance |
| rs66975207 | 6  | 26942146  | C | A | 0.0766 | 0.1196  | 0.0218 | 3.82E-08 | 5.4991   | 85716 | lungCance |
| rs67040724 | 6  | 27905509  | C | T | 0.0774 | 0.1347  | 0.0214 | 2.79E-10 | 6.3097   | 85716 | lungCance |
| rs67092078 | 6  | 27054772  | A | G | 0.0768 | 0.1212  | 0.0217 | 2.52E-08 | 5.5718   | 85716 | lungCance |
| rs67101035 | 6  | 27798887  | G | C | 0.0783 | 0.1289  | 0.0212 | 1.16E-09 | 6.0856   | 85716 | lungCance |
| rs67175876 | 15 | 78928399  | G | A | 0.2030 | -0.1951 | 0.0151 | 3.27E-38 | -12.9244 | 85716 | lungCance |
| rs67210567 | 19 | 41357457  | T | G | 0.0264 | -0.2366 | 0.0427 | 2.96E-08 | -5.5436  | 85716 | lungCance |
| rs67240003 | 6  | 27443202  | T | G | 0.0857 | 0.1320  | 0.0202 | 6.99E-11 | 6.5209   | 85716 | lungCance |
| rs67340775 | 6  | 28304384  | C | A | 0.0787 | 0.1478  | 0.0212 | 2.89E-12 | 6.9833   | 85716 | lungCance |
| rs67381177 | 6  | 28411941  | C | G | 0.0781 | 0.1459  | 0.0213 | 6.89E-12 | 6.8599   | 85716 | lungCance |
| rs67426328 | 15 | 78934318  | G | C | 0.4099 | 0.2092  | 0.0121 | 4.35E-67 | 17.3045  | 85716 | lungCance |
| rs674313   | 6  | 32578082  | T | C | 0.2234 | 0.0915  | 0.0147 | 4.69E-10 | 6.2295   | 85716 | lungCance |
| rs67457459 | 6  | 27198343  | G | T | 0.1025 | 0.1045  | 0.0189 | 3.19E-08 | 5.5305   | 85716 | lungCance |
| rs67662114 | 6  | 27932301  | A | G | 0.0774 | 0.1350  | 0.0214 | 2.55E-10 | 6.3238   | 85716 | lungCance |
| rs67682613 | 6  | 31826705  | A | G | 0.1358 | 0.1172  | 0.0167 | 2.38E-12 | 7.0102   | 85716 | lungCance |
| rs67745769 | 15 | 79124832  | A | G | 0.4010 | 0.0867  | 0.0120 | 6.03E-13 | 7.2001   | 85716 | lungCance |
| rs67775542 | 15 | 79027561  | G | A | 0.3407 | -0.1017 | 0.0138 | 1.42E-13 | -7.3947  | 85716 | lungCance |
| rs67777156 | 6  | 26633711  | A | T | 0.0768 | 0.1223  | 0.0219 | 2.31E-08 | 5.5872   | 85716 | lungCance |
| rs67859638 | 6  | 27357978  | G | A | 0.0767 | 0.1386  | 0.0216 | 1.38E-10 | 6.4181   | 85716 | lungCance |
| rs678770   | 6  | 32570817  | A | T | 0.2221 | 0.0934  | 0.0147 | 2.18E-10 | 6.3477   | 85716 | lungCance |
| rs67981811 | 6  | 28354835  | G | C | 0.0782 | 0.1453  | 0.0213 | 8.06E-12 | 6.8377   | 85716 | lungCance |
| rs67998226 | 6  | 28238059  | C | T | 0.0787 | 0.1478  | 0.0211 | 2.54E-12 | 7.0010   | 85716 | lungCance |
| rs68006638 | 6  | 25710571  | A | G | 0.0669 | 0.1280  | 0.0232 | 3.42E-08 | 5.5185   | 85716 | lungCance |
| rs680244   | 15 | 78871288  | T | C | 0.4170 | -0.0862 | 0.0118 | 3.51E-13 | -7.2733  | 85716 | lungCance |
| rs68188794 | 6  | 28080777  | C | T | 0.0552 | 0.1628  | 0.0266 | 8.87E-10 | 6.1286   | 85716 | lungCance |
| rs684513   | 15 | 78858400  | G | C | 0.1992 | -0.2329 | 0.0149 | 7.54E-55 | -15.5982 | 85716 | lungCance |
| rs6866294  | 5  | 1311693   | T | C | 0.4039 | -0.1341 | 0.0120 | 7.99E-29 | -11.1401 | 85716 | lungCance |
| rs6866783  | 5  | 1312020   | T | C | 0.3872 | -0.1328 | 0.0121 | 7.64E-28 | -10.9375 | 85716 | lungCance |
| rs6889886  | 5  | 1358822   | T | C | 0.2614 | -0.0852 | 0.0140 | 1.04E-09 | -6.1029  | 85716 | lungCance |
| rs6890396  | 5  | 1359098   | T | C | 0.2607 | -0.0840 | 0.0139 | 1.72E-09 | -6.0221  | 85716 | lungCance |
| rs6902211  | 6  | 25767437  | G | A | 0.0804 | 0.1171  | 0.0209 | 2.16E-08 | 5.5985   | 85716 | lungCance |
| rs6903228  | 6  | 25903047  | G | A | 0.0906 | 0.1121  | 0.0199 | 1.89E-08 | 5.6221   | 85716 | lungCance |
| rs6904596  | 6  | 27491299  | A | G | 0.0863 | 0.1299  | 0.0202 | 1.15E-10 | 6.4462   | 85716 | lungCance |
| rs6908402  | 6  | 26293014  | T | A | 0.3956 | -0.0695 | 0.0119 | 5.98E-09 | -5.8170  | 85716 | lungCance |
| rs6910310  | 6  | 32604221  | G | A | 0.1019 | 0.1432  | 0.0199 | 5.72E-13 | 7.2070   | 85716 | lungCance |
| rs6912292  | 6  | 26511805  | C | A | 0.2221 | -0.0796 | 0.0143 | 2.50E-08 | -5.5731  | 85716 | lungCance |
| rs6916289  | 6  | 26289122  | A | T | 0.4643 | 0.0735  | 0.0117 | 3.58E-10 | 6.2714   | 85716 | lungCance |
| rs6918325  | 6  | 26327965  | G | T | 0.3616 | -0.0692 | 0.0121 | 1.20E-08 | -5.6998  | 85716 | lungCance |
| rs6918792  | 6  | 27451419  | G | A | 0.0864 | 0.1267  | 0.0204 | 5.23E-10 | 6.2120   | 85716 | lungCance |
| rs6920364  | 6  | 167376466 | C | G | 0.4562 | 0.0677  | 0.0119 | 1.29E-08 | 5.6870   | 85716 | lungCance |
| rs692780   | 15 | 78876505  | C | G | 0.3632 | -0.0917 | 0.0122 | 5.97E-14 | -7.5086  | 85716 | lungCance |
| rs6930616  | 6  | 26331969  | G | A | 0.3907 | -0.0716 | 0.0120 | 2.22E-09 | -5.9804  | 85716 | lungCance |
| rs6931120  | 6  | 25925634  | A | G | 0.0907 | 0.1130  | 0.0199 | 1.35E-08 | 5.6794   | 85716 | lungCance |
| rs6933289  | 6  | 32604551  | T | C | 0.1032 | 0.1443  | 0.0198 | 3.42E-13 | 7.2768   | 85716 | lungCance |
| rs6939306  | 6  | 31835164  | C | G | 0.1340 | 0.1181  | 0.0168 | 1.82E-12 | 7.0475   | 85716 | lungCance |
| rs6939196  | 6  | 167378988 | T | C | 0.4728 | 0.0644  | 0.0117 | 3.57E-08 | 5.5111   | 85716 | lungCance |
| rs6939978  | 6  | 26328462  | C | G | 0.0921 | 0.1074  | 0.0197 | 4.96E-08 | 5.4529   | 85716 | lungCance |
| rs6940007  | 6  | 25931957  | C | A | 0.0907 | 0.1128  | 0.0199 | 1.51E-08 | 5.6603   | 85716 | lungCance |
| rs707949   | 6  | 32609952  | C | T | 0.2330 | 0.0936  | 0.0156 | 1.81E-09 | 6.0145   | 85716 | lungCance |
| rs707952   | 6  | 32609806  | T | C | 0.2418 | 0.0884  | 0.0154 | 9.05E-09 | 5.7475   | 85716 | lungCance |
| rs707962   | 6  | 32609974  | G | T | 0.2303 | 0.0943  | 0.0156 | 1.41E-09 | 6.0545   | 85716 | lungCance |
| rs707963   | 6  | 32609969  | G | T | 0.2303 | 0.0944  | 0.0156 | 1.40E-09 | 6.0556   | 85716 | lungCance |
| rs71206067 | 6  | 26903379  | T | C | 0.0757 | 0.1256  | 0.0227 | 3.11E-08 | 5.5352   | 85716 | lungCance |
| rs71402966 | 15 | 79031059  | G | A | 0.2616 | -0.1224 | 0.0149 | 1.84E-16 | -8.2315  | 85716 | lungCance |
| rs71402967 | 15 | 79031079  | T | C | 0.2716 | -0.1192 | 0.0149 | 1.19E-15 | -8.0055  | 85716 | lungCance |
| rs71407277 | 15 | 79025630  | C | T | 0.2155 | -0.0973 | 0.0167 | 5.03E-09 | -5.8461  | 85716 | lungCance |
| rs71407278 | 15 | 79025633  | G | A | 0.2115 | -0.0969 | 0.0168 | 7.33E-09 | -5.7834  | 85716 | lungCance |

|            |    |          |   |   |        |         |        |           |          |       |           |
|------------|----|----------|---|---|--------|---------|--------|-----------|----------|-------|-----------|
| rs71407279 | 15 | 79025636 | C | T | 0.2104 | -0.0961 | 0.0168 | 1.06E-08  | -5.7207  | 85716 | lungCance |
| rs71407280 | 15 | 79025641 | G | C | 0.2111 | -0.0979 | 0.0168 | 5.05E-09  | -5.8454  | 85716 | lungCance |
| rs71537559 | 6  | 27309779 | C | G | 0.0784 | 0.1358  | 0.0213 | 1.87E-10  | 6.3716   | 85716 | lungCance |
| rs71537572 | 6  | 27970715 | C | T | 0.0774 | 0.1346  | 0.0214 | 2.89E-10  | 6.3048   | 85716 | lungCance |
| rs71557312 | 6  | 26003070 | G | C | 0.0676 | 0.1387  | 0.0230 | 1.72E-09  | 6.0225   | 85716 | lungCance |
| rs71557378 | 6  | 26903585 | G | T | 0.0792 | 0.1229  | 0.0218 | 1.80E-08  | 5.6301   | 85716 | lungCance |
| rs71559024 | 6  | 27352750 | A | G | 0.0780 | 0.1365  | 0.0214 | 1.65E-10  | 6.3910   | 85716 | lungCance |
| rs71559038 | 6  | 27640989 | G | A | 0.0785 | 0.1287  | 0.0212 | 1.28E-09  | 6.0698   | 85716 | lungCance |
| rs71559051 | 6  | 27799470 | G | A | 0.0650 | 0.1457  | 0.0254 | 1.02E-08  | 5.7270   | 85716 | lungCance |
| rs71559054 | 6  | 27896799 | C | A | 0.0774 | 0.1346  | 0.0214 | 2.91E-10  | 6.3035   | 85716 | lungCance |
| rs71559067 | 6  | 27994416 | T | A | 0.0774 | 0.1355  | 0.0213 | 2.19E-10  | 6.3475   | 85716 | lungCance |
| rs71559070 | 6  | 28038929 | A | G | 0.0777 | 0.1342  | 0.0213 | 3.05E-10  | 6.2963   | 85716 | lungCance |
| rs71559072 | 6  | 28089481 | T | C | 0.0776 | 0.1357  | 0.0213 | 1.96E-10  | 6.3646   | 85716 | lungCance |
| rs7161774  | 15 | 79069734 | G | T | 0.4032 | 0.1620  | 0.0135 | 3.04E-33  | 12.0125  | 85716 | lungCance |
| rs7163204  | 15 | 78953740 | A | G | 0.1507 | -0.1637 | 0.0164 | 2.25E-23  | -9.9614  | 85716 | lungCance |
| rs7163236  | 15 | 78991292 | A | C | 0.2104 | -0.1018 | 0.0145 | 2.39E-12  | -7.0095  | 85716 | lungCance |
| rs7163730  | 15 | 78814681 | G | A | 0.2130 | -0.2283 | 0.0144 | 7.86E-57  | -15.8863 | 85716 | lungCance |
| rs7164030  | 15 | 78844661 | G | A | 0.4117 | -0.0951 | 0.0120 | 2.09E-15  | -7.9353  | 85716 | lungCance |
| rs7164479  | 15 | 79123054 | C | T | 0.4307 | 0.0945  | 0.0119 | 2.36E-15  | 7.9205   | 85716 | lungCance |
| rs7164529  | 15 | 79145798 | A | G | 0.3960 | -0.0841 | 0.0121 | 3.24E-12  | -6.9666  | 85716 | lungCance |
| rs7164594  | 15 | 78803057 | T | C | 0.2155 | -0.2275 | 0.0144 | 2.22E-56  | -15.8211 | 85716 | lungCance |
| rs7164665  | 15 | 78953919 | C | T | 0.1507 | -0.1641 | 0.0164 | 1.76E-23  | -9.9859  | 85716 | lungCance |
| rs7165042  | 15 | 79123338 | C | G | 0.4297 | 0.0940  | 0.0119 | 3.15E-15  | 7.8851   | 85716 | lungCance |
| rs7165075  | 15 | 79115965 | G | A | 0.4032 | 0.0854  | 0.0120 | 1.03E-12  | 7.1265   | 85716 | lungCance |
| rs7165081  | 15 | 79123396 | C | G | 0.4296 | 0.0938  | 0.0119 | 3.44E-15  | 7.8737   | 85716 | lungCance |
| rs7165733  | 15 | 79123505 | G | A | 0.4296 | 0.0939  | 0.0119 | 3.34E-15  | 7.8775   | 85716 | lungCance |
| rs71658797 | 1  | 77967507 | A | T | 0.1034 | 0.1278  | 0.0193 | 3.25E-11  | 6.6347   | 85716 | lungCance |
| rs7165902  | 15 | 79115872 | T | G | 0.4032 | 0.0855  | 0.0120 | 1.00E-12  | 7.1299   | 85716 | lungCance |
| rs7166340  | 15 | 79113293 | C | T | 0.4187 | 0.0842  | 0.0120 | 2.57E-12  | 6.9996   | 85716 | lungCance |
| rs7166501  | 15 | 79133739 | T | C | 0.3986 | -0.0868 | 0.0121 | 6.94E-13  | -7.1808  | 85716 | lungCance |
| rs7166723  | 15 | 79133848 | T | C | 0.3984 | -0.0878 | 0.0121 | 3.87E-13  | -7.2598  | 85716 | lungCance |
| rs7166764  | 15 | 79123509 | T | G | 0.4313 | 0.0936  | 0.0119 | 4.49E-15  | 7.8408   | 85716 | lungCance |
| rs7166770  | 15 | 79113568 | A | G | 0.4165 | 0.0843  | 0.0120 | 2.50E-12  | 7.0035   | 85716 | lungCance |
| rs7167056  | 15 | 79113484 | G | T | 0.4182 | 0.0844  | 0.0120 | 2.27E-12  | 7.0167   | 85716 | lungCance |
| rs7167242  | 15 | 79113541 | G | A | 0.4231 | 0.0860  | 0.0121 | 1.02E-12  | 7.1271   | 85716 | lungCance |
| rs7167853  | 15 | 79113318 | T | C | 0.4074 | 0.0858  | 0.0120 | 7.40E-13  | 7.1717   | 85716 | lungCance |
| rs7168391  | 15 | 79055163 | T | G | 0.4303 | 0.1724  | 0.0133 | 3.21E-38  | 12.9258  | 85716 | lungCance |
| rs7168915  | 15 | 79128889 | G | A | 0.4577 | 0.0942  | 0.0117 | 9.62E-16  | 8.0319   | 85716 | lungCance |
| rs7169068  | 15 | 79094069 | C | G | 0.2996 | -0.0736 | 0.0129 | 1.26E-08  | -5.6919  | 85716 | lungCance |
| rs7169223  | 15 | 78992116 | G | A | 0.3491 | -0.1061 | 0.0125 | 2.37E-17  | -8.4740  | 85716 | lungCance |
| rs7169511  | 15 | 79128665 | C | T | 0.5065 | -0.0880 | 0.0117 | 5.58E-14  | -7.5178  | 85716 | lungCance |
| rs7169584  | 15 | 78822660 | T | A | 0.2127 | -0.2308 | 0.0144 | 4.35E-58  | -16.0668 | 85716 | lungCance |
| rs7170068  | 15 | 78912943 | A | G | 0.2018 | -0.2319 | 0.0147 | 5.27E-56  | -15.7666 | 85716 | lungCance |
| rs7170552  | 15 | 78994066 | C | A | 0.2113 | -0.1016 | 0.0145 | 2.46E-12  | -7.0055  | 85716 | lungCance |
| rs7170563  | 15 | 78994094 | G | A | 0.2041 | -0.1025 | 0.0147 | 3.32E-12  | -6.9634  | 85716 | lungCance |
| rs7171045  | 15 | 79067669 | T | C | 0.3261 | -0.0868 | 0.0145 | 1.96E-09  | -6.0009  | 85716 | lungCance |
| rs7171347  | 15 | 79067660 | A | G | 0.3194 | -0.0871 | 0.0145 | 1.74E-09  | -6.0201  | 85716 | lungCance |
| rs7171578  | 15 | 79067922 | T | C | 0.3984 | 0.1612  | 0.0135 | 7.59E-33  | 11.9373  | 85716 | lungCance |
| rs7171869  | 15 | 78900909 | A | G | 0.2491 | -0.2097 | 0.0142 | 1.67E-49  | -14.7909 | 85716 | lungCance |
| rs7171916  | 15 | 79067951 | G | C | 0.4029 | 0.1605  | 0.0135 | 1.22E-32  | 11.8973  | 85716 | lungCance |
| rs7172118  | 15 | 78862453 | A | C | 0.3629 | 0.2578  | 0.0121 | 5.91E-101 | 21.3307  | 85716 | lungCance |
| rs7173267  | 15 | 79092750 | C | G | 0.4437 | 0.1255  | 0.0120 | 1.16E-25  | 10.4725  | 85716 | lungCance |
| rs7173512  | 15 | 78849914 | C | T | 0.3576 | -0.0945 | 0.0124 | 2.06E-14  | -7.6465  | 85716 | lungCance |
| rs7173514  | 15 | 78849918 | T | C | 0.2190 | -0.2377 | 0.0145 | 8.12E-61  | -16.4515 | 85716 | lungCance |
| rs7173955  | 15 | 79143857 | G | A | 0.3979 | -0.0852 | 0.0121 | 1.55E-12  | -7.0704  | 85716 | lungCance |
| rs7174190  | 15 | 78763617 | T | C | 0.2088 | -0.1996 | 0.0144 | 6.75E-44  | -13.8955 | 85716 | lungCance |
| rs7174348  | 15 | 78792439 | A | G | 0.2039 | -0.2041 | 0.0146 | 1.26E-44  | -14.0153 | 85716 | lungCance |
| rs7174367  | 15 | 79064667 | G | A | 0.4173 | 0.1764  | 0.0135 | 2.81E-39  | 13.1121  | 85716 | lungCance |
| rs7175271  | 15 | 79144509 | A | G | 0.3984 | -0.0859 | 0.0120 | 9.78E-13  | -7.1337  | 85716 | lungCance |
| rs7176070  | 15 | 79033489 | T | C | 0.2390 | -0.1155 | 0.0151 | 2.09E-14  | -7.6451  | 85716 | lungCance |
| rs7176187  | 15 | 79121373 | T | C | 0.4029 | 0.0857  | 0.0120 | 9.08E-13  | 7.1436   | 85716 | lungCance |
| rs7176492  | 15 | 79051264 | T | C | 0.1917 | -0.0915 | 0.0167 | 4.21E-08  | -5.4820  | 85716 | lungCance |
| rs7177143  | 15 | 79051453 | A | G | 0.1928 | -0.0943 | 0.0166 | 1.41E-08  | -5.6719  | 85716 | lungCance |
| rs7177201  | 15 | 79065380 | T | C | 0.2775 | -0.1238 | 0.0150 | 1.52E-16  | -8.2545  | 85716 | lungCance |
| rs7177514  | 15 | 78907406 | G | C | 0.2191 | -0.2324 | 0.0142 | 2.16E-60  | -16.3929 | 85716 | lungCance |
| rs7177699  | 15 | 79089734 | C | T | 0.4431 | 0.1260  | 0.0120 | 5.98E-26  | 10.5341  | 85716 | lungCance |
| rs7178007  | 15 | 78965254 | A | G | 0.3399 | -0.1002 | 0.0124 | 6.98E-16  | -8.0707  | 85716 | lungCance |
| rs7178051  | 15 | 79118296 | T | C | 0.4032 | 0.0866  | 0.0120 | 4.96E-13  | 7.2262   | 85716 | lungCance |
| rs7178270  | 15 | 78921077 | G | C | 0.3925 | -0.0927 | 0.0121 | 2.21E-14  | -7.6380  | 85716 | lungCance |
| rs7178750  | 15 | 79126909 | A | G | 0.5064 | -0.0884 | 0.0117 | 4.76E-14  | -7.5386  | 85716 | lungCance |
| rs7179953  | 15 | 79121776 | C | T | 0.4307 | 0.0943  | 0.0119 | 2.59E-15  | 7.9095   | 85716 | lungCance |
| rs7180002  | 15 | 78873993 | T | A | 0.3630 | 0.2562  | 0.0121 | 4.91E-100 | 21.2307  | 85716 | lungCance |
| rs7180375  | 15 | 79157379 | C | T | 0.3844 | -0.0817 | 0.0122 | 1.89E-11  | -6.7147  | 85716 | lungCance |
| rs7181033  | 15 | 79152414 | T | C | 0.3911 | -0.0822 | 0.0121 | 1.05E-11  | -6.7990  | 85716 | lungCance |



|            |    |          |   |   |        |         |        |           |          |       |           |
|------------|----|----------|---|---|--------|---------|--------|-----------|----------|-------|-----------|
| rs7181245  | 15 | 78814389 | T | C | 0.2134 | -0.2271 | 0.0144 | 2.52E-56  | -15.8130 | 85716 | lungCance |
| rs7181405  | 15 | 78948152 | G | A | 0.3660 | -0.1099 | 0.0123 | 4.34E-19  | -8.9282  | 85716 | lungCance |
| rs7181432  | 15 | 79123779 | C | T | 0.4297 | 0.0939  | 0.0119 | 3.43E-15  | 7.8742   | 85716 | lungCance |
| rs7181447  | 15 | 78814567 | G | A | 0.2135 | -0.2270 | 0.0143 | 2.20E-56  | -15.8218 | 85716 | lungCance |
| rs7181486  | 15 | 78741618 | C | T | 0.3595 | 0.2232  | 0.0121 | 2.20E-76  | 18.4965  | 85716 | lungCance |
| rs7182103  | 15 | 79123946 | G | T | 0.4296 | 0.0938  | 0.0119 | 3.58E-15  | 7.8687   | 85716 | lungCance |
| rs7182529  | 15 | 79123631 | T | C | 0.4297 | 0.0939  | 0.0119 | 3.34E-15  | 7.8773   | 85716 | lungCance |
| rs7182567  | 15 | 79045054 | A | G | 0.2495 | -0.1228 | 0.0151 | 4.41E-16  | -8.1267  | 85716 | lungCance |
| rs7182583  | 15 | 78899210 | C | G | 0.3642 | -0.0911 | 0.0122 | 7.59E-14  | -7.4773  | 85716 | lungCance |
| rs7182642  | 15 | 79052277 | T | C | 0.4172 | 0.1753  | 0.0134 | 5.03E-39  | 13.0682  | 85716 | lungCance |
| rs7182694  | 15 | 79045030 | C | T | 0.2495 | -0.1228 | 0.0151 | 4.39E-16  | -8.1274  | 85716 | lungCance |
| rs7182716  | 15 | 79123753 | T | C | 0.4297 | 0.0937  | 0.0119 | 3.66E-15  | 7.8662   | 85716 | lungCance |
| rs7182809  | 15 | 79105106 | G | C | 0.1707 | -0.0956 | 0.0168 | 1.22E-08  | -5.6971  | 85716 | lungCance |
| rs7182993  | 15 | 79045014 | G | A | 0.2495 | -0.1228 | 0.0151 | 4.40E-16  | -8.1270  | 85716 | lungCance |
| rs7183604  | 15 | 78899213 | T | C | 0.2200 | -0.2321 | 0.0142 | 3.18E-60  | -16.3691 | 85716 | lungCance |
| rs7183621  | 15 | 79105576 | G | A | 0.2593 | -0.0819 | 0.0139 | 3.90E-09  | -5.8884  | 85716 | lungCance |
| rs725575   | 6  | 26301919 | T | A | 0.3622 | -0.0681 | 0.0121 | 2.04E-08  | -5.6087  | 85716 | lungCance |
| rs72625802 | 15 | 78992811 | A | G | 0.2103 | -0.1042 | 0.0145 | 7.48E-13  | -7.1704  | 85716 | lungCance |
| rs72736802 | 15 | 78719501 | T | A | 0.3690 | 0.2205  | 0.0124 | 1.01E-70  | 17.7796  | 85716 | lungCance |
| rs72738704 | 15 | 78719832 | C | G | 0.3565 | 0.2210  | 0.0122 | 2.13E-73  | 18.1228  | 85716 | lungCance |
| rs72738718 | 15 | 78735438 | C | G | 0.3586 | 0.2229  | 0.0121 | 9.38E-76  | 18.4178  | 85716 | lungCance |
| rs72738732 | 15 | 78752188 | G | C | 0.3553 | 0.2233  | 0.0122 | 2.03E-75  | 18.3770  | 85716 | lungCance |
| rs72738736 | 15 | 78765122 | T | G | 0.3598 | 0.2244  | 0.0121 | 1.16E-76  | 18.5308  | 85716 | lungCance |
| rs72738786 | 15 | 78828086 | T | G | 0.3657 | 0.2547  | 0.0120 | 2.25E-99  | 21.1599  | 85716 | lungCance |
| rs72740955 | 15 | 78849779 | T | C | 0.3657 | 0.2588  | 0.0121 | 6.58E-102 | 21.4328  | 85716 | lungCance |
| rs72740964 | 15 | 78868636 | A | G | 0.3625 | 0.2568  | 0.0121 | 2.01E-100 | 21.2730  | 85716 | lungCance |
| rs72743158 | 15 | 78926445 | C | T | 0.3925 | 0.2374  | 0.0121 | 1.80E-85  | 19.5924  | 85716 | lungCance |
| rs72743199 | 15 | 78975855 | T | A | 0.4078 | 0.1786  | 0.0119 | 4.40E-51  | 15.0338  | 85716 | lungCance |
| rs72749206 | 15 | 79122948 | A | G | 0.4012 | 0.0880  | 0.0120 | 2.47E-13  | 7.3209   | 85716 | lungCance |
| rs72839445 | 6  | 27249686 | A | G | 0.0759 | 0.1322  | 0.0217 | 1.20E-09  | 6.0805   | 85716 | lungCance |
| rs72839477 | 6  | 27327000 | T | C | 0.0770 | 0.1398  | 0.0216 | 9.11E-11  | 6.4810   | 85716 | lungCance |
| rs72843784 | 6  | 26498758 | T | G | 0.0760 | 0.1242  | 0.0219 | 1.37E-08  | 5.6772   | 85716 | lungCance |
| rs72844462 | 6  | 26563864 | C | A | 0.0913 | 0.1118  | 0.0204 | 4.48E-08  | 5.4710   | 85716 | lungCance |
| rs72845046 | 6  | 27575268 | A | T | 0.0783 | 0.1296  | 0.0213 | 1.11E-09  | 6.0928   | 85716 | lungCance |
| rs72845070 | 6  | 27668300 | C | A | 0.0768 | 0.1317  | 0.0218 | 1.43E-09  | 6.0520   | 85716 | lungCance |
| rs72846780 | 6  | 28119055 | C | T | 0.0777 | 0.1358  | 0.0213 | 1.77E-10  | 6.3801   | 85716 | lungCance |
| rs72846794 | 6  | 28137499 | A | G | 0.0777 | 0.1358  | 0.0213 | 1.74E-10  | 6.3823   | 85716 | lungCance |
| rs72847313 | 6  | 27730082 | T | C | 0.0786 | 0.1288  | 0.0212 | 1.26E-09  | 6.0730   | 85716 | lungCance |
| rs72854513 | 6  | 28265954 | T | A | 0.0775 | 0.1440  | 0.0213 | 1.43E-11  | 6.7554   | 85716 | lungCance |
| rs7359276  | 15 | 78892661 | C | T | 0.2226 | -0.2323 | 0.0141 | 8.50E-61  | -16.4493 | 85716 | lungCance |
| rs7383287  | 6  | 32783086 | G | A | 0.1960 | 0.0914  | 0.0142 | 1.12E-10  | 6.4495   | 85716 | lungCance |
| rs7402376  | 15 | 79113570 | G | A | 0.4028 | 0.0865  | 0.0120 | 4.51E-13  | 7.2394   | 85716 | lungCance |
| rs7402877  | 15 | 79132814 | C | T | 0.3993 | -0.0876 | 0.0121 | 4.00E-13  | -7.2553  | 85716 | lungCance |
| rs7403155  | 15 | 79130424 | A | G | 0.3047 | 0.1021  | 0.0135 | 3.58E-14  | 7.5756   | 85716 | lungCance |
| rs7403393  | 15 | 79135802 | G | C | 0.3996 | -0.0878 | 0.0121 | 3.57E-13  | -7.2709  | 85716 | lungCance |
| rs7403438  | 15 | 79136048 | T | C | 0.3994 | -0.0876 | 0.0121 | 3.99E-13  | -7.2557  | 85716 | lungCance |
| rs7403442  | 15 | 79136123 | G | A | 0.3997 | -0.0876 | 0.0121 | 4.17E-13  | -7.2501  | 85716 | lungCance |
| rs7403593  | 15 | 79111962 | G | A | 0.4031 | 0.0865  | 0.0119 | 3.92E-13  | 7.2582   | 85716 | lungCance |
| rs7403608  | 15 | 79115570 | G | A | 0.4027 | 0.0862  | 0.0120 | 6.26E-13  | 7.1945   | 85716 | lungCance |
| rs7403708  | 15 | 79123885 | C | T | 0.4022 | 0.0868  | 0.0120 | 5.01E-13  | 7.2247   | 85716 | lungCance |
| rs7403714  | 15 | 79118650 | T | C | 0.4025 | 0.0868  | 0.0120 | 4.57E-13  | 7.2376   | 85716 | lungCance |
| rs7403728  | 15 | 79112016 | G | T | 0.4036 | 0.0864  | 0.0119 | 4.27E-13  | 7.2468   | 85716 | lungCance |
| rs7446461  | 5  | 1306521  | C | G | 0.1619 | -0.1534 | 0.0167 | 3.59E-20  | -9.1996  | 85716 | lungCance |
| rs74925218 | 15 | 78796732 | T | C | 0.2124 | -0.2044 | 0.0145 | 2.50E-45  | -14.1297 | 85716 | lungCance |
| rs7495518  | 15 | 78900574 | T | C | 0.3585 | -0.0924 | 0.0123 | 5.64E-14  | -7.5164  | 85716 | lungCance |
| rs7495616  | 15 | 79054900 | C | G | 0.2511 | -0.1158 | 0.0152 | 2.17E-14  | -7.6402  | 85716 | lungCance |
| rs7497171  | 15 | 79014509 | C | A | 0.2732 | -0.1096 | 0.0143 | 1.94E-14  | -7.6546  | 85716 | lungCance |
| rs7497235  | 15 | 79014517 | G | A | 0.2731 | -0.1104 | 0.0143 | 1.21E-14  | -7.7147  | 85716 | lungCance |
| rs755998   | 15 | 79032469 | C | T | 0.2473 | -0.1225 | 0.0150 | 2.67E-16  | -8.1872  | 85716 | lungCance |
| rs75716787 | 15 | 79067864 | G | A | 0.4323 | -0.0991 | 0.0142 | 2.84E-12  | -6.9854  | 85716 | lungCance |
| rs75754317 | 15 | 78836721 | G | C | 0.4362 | -0.0772 | 0.0122 | 2.45E-10  | -6.3300  | 85716 | lungCance |
| rs75782365 | 6  | 26408551 | G | T | 0.0759 | 0.1273  | 0.0218 | 5.22E-09  | 5.8398   | 85716 | lungCance |
| rs75884254 | 15 | 79030673 | A | G | 0.3248 | -0.1027 | 0.0150 | 6.97E-12  | -6.8582  | 85716 | lungCance |
| rs76412132 | 15 | 79030671 | C | T | 0.3155 | -0.0998 | 0.0150 | 2.61E-11  | -6.6672  | 85716 | lungCance |
| rs76474922 | 15 | 78884553 | C | A | 0.0738 | -0.2248 | 0.0239 | 6.13E-21  | -9.3877  | 85716 | lungCance |
| rs76681511 | 15 | 79030672 | C | T | 0.3266 | -0.1024 | 0.0150 | 8.24E-12  | -6.8345  | 85716 | lungCance |
| rs76712448 | 15 | 78836719 | A | G | 0.4338 | -0.0794 | 0.0121 | 6.27E-11  | -6.5370  | 85716 | lungCance |
| rs76919723 | 15 | 79017281 | C | T | 0.4085 | 0.1855  | 0.0126 | 3.36E-49  | 14.7443  | 85716 | lungCance |
| rs77000541 | 6  | 32635605 | A | G | 0.3061 | 0.0888  | 0.0141 | 2.91E-10  | 6.3037   | 85716 | lungCance |
| rs7705526  | 5  | 1285974  | A | C | 0.3403 | 0.1171  | 0.0133 | 1.01E-18  | 8.8337   | 85716 | lungCance |
| rs77097561 | 15 | 79030877 | C | G | 0.3760 | -0.0920 | 0.0151 | 1.01E-09  | -6.1083  | 85716 | lungCance |
| rs7725218  | 5  | 1282414  | A | G | 0.3690 | 0.0853  | 0.0132 | 1.00E-10  | 6.4667   | 85716 | lungCance |
| rs7726159  | 5  | 1282319  | A | C | 0.3544 | 0.0895  | 0.0133 | 1.93E-11  | 6.7109   | 85716 | lungCance |
| rs77338180 | 15 | 79078921 | G | A | 0.0495 | -0.1636 | 0.0292 | 2.20E-08  | -5.5953  | 85716 | lungCance |

|            |    |          |   |   |        |         |        |          |          |       |           |
|------------|----|----------|---|---|--------|---------|--------|----------|----------|-------|-----------|
| rs7734992  | 5  | 1280128  | C | T | 0.4264 | 0.0809  | 0.0131 | 5.65E-10 | 6.1998   | 85716 | lungCance |
| rs77403874 | 15 | 78903165 | C | T | 0.4155 | -0.0859 | 0.0119 | 4.50E-13 | -7.2399  | 85716 | lungCance |
| rs77434238 | 15 | 78836726 | T | C | 0.4369 | -0.0764 | 0.0122 | 3.68E-10 | -6.2670  | 85716 | lungCance |
| rs77438700 | 15 | 78906637 | G | A | 0.0583 | -0.2167 | 0.0267 | 5.18E-16 | -8.1072  | 85716 | lungCance |
| rs77468143 | 15 | 49376624 | G | T | 0.2539 | -0.0827 | 0.0135 | 1.00E-09 | -6.1087  | 85716 | lungCance |
| rs7748167  | 6  | 25904652 | C | A | 0.0937 | 0.1093  | 0.0196 | 2.36E-08 | 5.5834   | 85716 | lungCance |
| rs7749305  | 6  | 27446566 | C | T | 0.0857 | 0.1320  | 0.0202 | 6.99E-11 | 6.5209   | 85716 | lungCance |
| rs7750960  | 6  | 25887217 | C | A | 0.0934 | 0.1098  | 0.0196 | 2.15E-08 | 5.5997   | 85716 | lungCance |
| rs7752448  | 6  | 28301099 | G | A | 0.0921 | 0.1181  | 0.0196 | 1.66E-09 | 6.0277   | 85716 | lungCance |
| rs7755741  | 6  | 26337264 | A | G | 0.3350 | -0.0740 | 0.0125 | 2.83E-09 | -5.9411  | 85716 | lungCance |
| rs7761298  | 6  | 26278436 | C | T | 0.4641 | 0.0731  | 0.0117 | 4.65E-10 | 6.2307   | 85716 | lungCance |
| rs7763805  | 6  | 32607254 | A | G | 0.1047 | 0.1393  | 0.0209 | 2.53E-11 | 6.6716   | 85716 | lungCance |
| rs7765920  | 6  | 26514771 | C | T | 0.2138 | -0.0786 | 0.0142 | 3.39E-08 | -5.5200  | 85716 | lungCance |
| rs7766356  | 6  | 28400538 | C | T | 0.1612 | 0.0870  | 0.0156 | 2.46E-08 | 5.5760   | 85716 | lungCance |
| rs7766531  | 6  | 25886577 | C | T | 0.0935 | 0.1097  | 0.0196 | 2.25E-08 | 5.5913   | 85716 | lungCance |
| rs7766641  | 6  | 26184102 | A | G | 0.2865 | -0.0789 | 0.0130 | 1.33E-09 | -6.0634  | 85716 | lungCance |
| rs77666565 | 6  | 26851415 | A | G | 0.0936 | 0.1212  | 0.0220 | 3.75E-08 | 5.5021   | 85716 | lungCance |
| rs77719127 | 15 | 79110783 | T | C | 0.1661 | 0.1333  | 0.0181 | 1.79E-13 | 7.3631   | 85716 | lungCance |
| rs77786718 | 15 | 79030876 | C | G | 0.3673 | -0.0986 | 0.0150 | 5.20E-11 | -6.5651  | 85716 | lungCance |
| rs78385743 | 15 | 78750388 | T | A | 0.0391 | -0.1941 | 0.0337 | 8.12E-09 | -5.7659  | 85716 | lungCance |
| rs78406067 | 15 | 78836723 | T | C | 0.4362 | -0.0772 | 0.0122 | 2.38E-10 | -6.3343  | 85716 | lungCance |
| rs78632183 | 15 | 79067866 | T | G | 0.4294 | -0.0979 | 0.0142 | 5.10E-12 | -6.9029  | 85716 | lungCance |
| rs78657732 | 15 | 79067862 | C | G | 0.4298 | -0.0984 | 0.0142 | 3.91E-12 | -6.9403  | 85716 | lungCance |
| rs79040073 | 15 | 49330854 | T | C | 0.2500 | -0.0815 | 0.0137 | 2.81E-09 | -5.9424  | 85716 | lungCance |
| rs7953330  | 12 | 998819   | C | G | 0.3121 | -0.0873 | 0.0127 | 6.10E-12 | -6.8773  | 85716 | lungCance |
| rs79609284 | 15 | 78928411 | A | G | 0.3310 | -0.0947 | 0.0128 | 1.35E-13 | -7.4006  | 85716 | lungCance |
| rs80162468 | 15 | 79026316 | C | T | 0.3773 | 0.1775  | 0.0135 | 1.79E-39 | 13.1463  | 85716 | lungCance |
| rs8023462  | 15 | 78914734 | C | T | 0.3518 | -0.0932 | 0.0123 | 2.91E-14 | -7.6022  | 85716 | lungCance |
| rs8023822  | 15 | 78945040 | C | G | 0.2202 | -0.1087 | 0.0141 | 1.28E-14 | -7.7083  | 85716 | lungCance |
| rs8024048  | 15 | 79127907 | A | G | 0.5059 | -0.0877 | 0.0117 | 7.05E-14 | -7.4870  | 85716 | lungCance |
| rs8024939  | 15 | 79049237 | T | C | 0.1923 | -0.0926 | 0.0166 | 2.58E-08 | -5.5674  | 85716 | lungCance |
| rs8025188  | 15 | 78912278 | C | G | 0.4165 | -0.0932 | 0.0119 | 5.47E-15 | -7.8159  | 85716 | lungCance |
| rs8025429  | 15 | 78836362 | G | A | 0.4094 | -0.0905 | 0.0119 | 3.21E-14 | -7.5895  | 85716 | lungCance |
| rs80264589 | 6  | 26927602 | A | G | 0.0792 | 0.1222  | 0.0214 | 1.09E-08 | 5.7160   | 85716 | lungCance |
| rs8026598  | 15 | 79112938 | A | G | 0.4037 | 0.0855  | 0.0119 | 7.72E-13 | 7.1659   | 85716 | lungCance |
| rs8027833  | 15 | 79112837 | T | C | 0.4037 | 0.0854  | 0.0119 | 8.58E-13 | 7.1518   | 85716 | lungCance |
| rs8027870  | 15 | 79134045 | G | A | 0.3998 | -0.0880 | 0.0121 | 3.33E-13 | -7.2801  | 85716 | lungCance |
| rs8027972  | 15 | 79022615 | C | T | 0.3936 | 0.1837  | 0.0129 | 3.45E-46 | 14.2682  | 85716 | lungCance |
| rs8028410  | 15 | 79134267 | T | C | 0.3997 | -0.0881 | 0.0121 | 3.17E-13 | -7.2871  | 85716 | lungCance |
| rs8029039  | 15 | 79100871 | G | C | 0.2503 | -0.0800 | 0.0139 | 9.68E-09 | -5.7361  | 85716 | lungCance |
| rs8029173  | 15 | 79134568 | A | G | 0.3996 | -0.0877 | 0.0121 | 3.87E-13 | -7.2598  | 85716 | lungCance |
| rs80292109 | 6  | 26237068 | G | A | 0.2964 | -0.0758 | 0.0129 | 4.30E-09 | -5.8721  | 85716 | lungCance |
| rs8029659  | 15 | 79167603 | G | A | 0.2761 | -0.0908 | 0.0132 | 5.51E-12 | -6.8919  | 85716 | lungCance |
| rs8030090  | 15 | 79034260 | A | G | 0.2486 | -0.1193 | 0.0150 | 1.49E-15 | -7.9779  | 85716 | lungCance |
| rs8030335  | 15 | 79034124 | G | A | 0.2483 | -0.1204 | 0.0150 | 8.27E-16 | -8.0503  | 85716 | lungCance |
| rs8030937  | 15 | 79129587 | T | G | 0.5054 | -0.0875 | 0.0117 | 8.11E-14 | -7.4685  | 85716 | lungCance |
| rs8031513  | 15 | 79034276 | C | T | 0.4147 | 0.1695  | 0.0132 | 9.56E-38 | 12.8417  | 85716 | lungCance |
| rs8031948  | 15 | 78816057 | T | G | 0.3660 | 0.2514  | 0.0120 | 6.49E-97 | 20.8910  | 85716 | lungCance |
| rs8032156  | 15 | 78964498 | A | G | 0.1710 | -0.0839 | 0.0154 | 4.71E-08 | -5.4619  | 85716 | lungCance |
| rs8032552  | 15 | 78971136 | C | T | 0.2369 | -0.1098 | 0.0138 | 1.60E-15 | -7.9691  | 85716 | lungCance |
| rs8032771  | 15 | 79126059 | G | A | 0.5063 | -0.0885 | 0.0117 | 4.64E-14 | -7.5420  | 85716 | lungCance |
| rs8032842  | 15 | 79125849 | A | G | 0.5062 | -0.0885 | 0.0117 | 4.57E-14 | -7.5438  | 85716 | lungCance |
| rs8032908  | 15 | 79117436 | G | C | 0.4757 | 0.0878  | 0.0120 | 2.18E-13 | 7.3375   | 85716 | lungCance |
| rs8034191  | 15 | 78806023 | C | T | 0.3654 | 0.2491  | 0.0120 | 8.91E-96 | 20.7657  | 85716 | lungCance |
| rs8034274  | 15 | 79126155 | T | C | 0.4613 | 0.0940  | 0.0118 | 1.66E-15 | 7.9641   | 85716 | lungCance |
| rs8034658  | 15 | 79165441 | T | G | 0.2713 | -0.0896 | 0.0133 | 1.66E-11 | -6.7334  | 85716 | lungCance |
| rs8034804  | 15 | 79129600 | C | T | 0.4926 | 0.0896  | 0.0117 | 2.05E-14 | 7.6475   | 85716 | lungCance |
| rs8035039  | 15 | 79129823 | A | G | 0.4926 | 0.0896  | 0.0117 | 2.02E-14 | 7.6498   | 85716 | lungCance |
| rs8035093  | 15 | 79120670 | T | C | 0.4040 | 0.0863  | 0.0120 | 6.69E-13 | 7.1854   | 85716 | lungCance |
| rs8035783  | 15 | 79135481 | G | T | 0.3998 | -0.0879 | 0.0121 | 3.33E-13 | -7.2806  | 85716 | lungCance |
| rs8037017  | 15 | 79139441 | A | C | 0.4002 | -0.0879 | 0.0121 | 3.17E-13 | -7.2869  | 85716 | lungCance |
| rs8038189  | 15 | 79099026 | G | C | 0.2602 | -0.0848 | 0.0138 | 7.09E-10 | -6.1639  | 85716 | lungCance |
| rs8038543  | 15 | 79017685 | T | A | 0.4133 | 0.1845  | 0.0125 | 5.73E-49 | 14.7081  | 85716 | lungCance |
| rs8038920  | 15 | 78974545 | A | G | 0.3526 | -0.1057 | 0.0123 | 6.66E-18 | -8.6206  | 85716 | lungCance |
| rs8039034  | 15 | 79017861 | C | T | 0.3192 | -0.1147 | 0.0145 | 2.27E-15 | -7.9257  | 85716 | lungCance |
| rs8039449  | 15 | 78914534 | T | C | 0.4000 | 0.2380  | 0.0119 | 3.40E-89 | 20.0248  | 85716 | lungCance |
| rs8039600  | 15 | 78990300 | A | G | 0.2108 | -0.1015 | 0.0145 | 2.47E-12 | -7.0049  | 85716 | lungCance |
| rs8040544  | 15 | 78904261 | A | G | 0.3546 | -0.0839 | 0.0128 | 6.17E-11 | -6.5395  | 85716 | lungCance |
| rs8041064  | 15 | 79115388 | A | G | 0.4036 | 0.0858  | 0.0120 | 7.28E-13 | 7.1742   | 85716 | lungCance |
| rs8041389  | 15 | 79115491 | C | T | 0.4180 | 0.0843  | 0.0121 | 2.94E-12 | 6.9808   | 85716 | lungCance |
| rs8041628  | 15 | 78735355 | G | C | 0.4295 | -0.0769 | 0.0118 | 7.65E-11 | -6.5071  | 85716 | lungCance |
| rs8041818  | 15 | 79139831 | T | C | 0.3986 | -0.0871 | 0.0121 | 5.08E-13 | -7.2234  | 85716 | lungCance |
| rs8042059  | 15 | 78907859 | C | A | 0.2191 | -0.2323 | 0.0142 | 2.28E-60 | -16.3889 | 85716 | lungCance |
| rs8042170  | 15 | 79096599 | G | A | 0.2570 | -0.0814 | 0.0137 | 3.19E-09 | -5.9215  | 85716 | lungCance |

|           |    |          |   |   |        |         |        |           |          |       |           |
|-----------|----|----------|---|---|--------|---------|--------|-----------|----------|-------|-----------|
| rs8042238 | 15 | 78774271 | C | T | 0.3746 | -0.1703 | 0.0121 | 2.73E-45  | -14.1233 | 85716 | lungCance |
| rs8042260 | 15 | 78774374 | A | G | 0.3746 | -0.1704 | 0.0121 | 2.54E-45  | -14.1286 | 85716 | lungCance |
| rs8042374 | 15 | 78908032 | G | A | 0.2191 | -0.2321 | 0.0142 | 2.91E-60  | -16.3744 | 85716 | lungCance |
| rs8042494 | 15 | 78908010 | T | C | 0.2188 | -0.2326 | 0.0142 | 2.21E-60  | -16.3915 | 85716 | lungCance |
| rs8042849 | 15 | 78817929 | C | T | 0.4105 | 0.2474  | 0.0122 | 2.06E-91  | 20.2766  | 85716 | lungCance |
| rs8043009 | 15 | 78908154 | C | G | 0.2190 | -0.2323 | 0.0142 | 2.41E-60  | -16.3860 | 85716 | lungCance |
| rs8043119 | 15 | 79061002 | A | G | 0.4254 | 0.1732  | 0.0134 | 1.76E-38  | 12.9721  | 85716 | lungCance |
| rs8043123 | 15 | 78973393 | T | C | 0.2344 | -0.1090 | 0.0138 | 3.24E-15  | -7.8811  | 85716 | lungCance |
| rs8043227 | 15 | 78768871 | C | G | 0.3737 | -0.1694 | 0.0121 | 1.00E-44  | -14.0318 | 85716 | lungCance |
| rs8053    | 15 | 78841220 | T | C | 0.4092 | -0.0918 | 0.0120 | 1.64E-14  | -7.6764  | 85716 | lungCance |
| rs806789  | 6  | 26229161 | C | A | 0.4940 | 0.0690  | 0.0118 | 4.89E-09  | 5.8508   | 85716 | lungCance |
| rs806794  | 6  | 26200677 | G | A | 0.2981 | -0.0785 | 0.0128 | 9.14E-10  | -6.1235  | 85716 | lungCance |
| rs806795  | 6  | 26205293 | G | A | 0.4957 | 0.0655  | 0.0118 | 3.06E-08  | 5.5377   | 85716 | lungCance |
| rs806798  | 6  | 26214473 | T | C | 0.4979 | 0.0664  | 0.0119 | 2.49E-08  | 5.5739   | 85716 | lungCance |
| rs806977  | 6  | 26189615 | A | G | 0.4988 | 0.0658  | 0.0118 | 2.22E-08  | 5.5938   | 85716 | lungCance |
| rs8102900 | 19 | 41366928 | G | A | 0.3495 | -0.0878 | 0.0143 | 7.53E-10  | -6.1547  | 85716 | lungCance |
| rs811041  | 6  | 26226032 | G | C | 0.3097 | -0.0769 | 0.0127 | 1.30E-09  | -6.0674  | 85716 | lungCance |
| rs8192477 | 15 | 78910463 | C | G | 0.2471 | -0.2060 | 0.0137 | 6.20E-51  | -15.0116 | 85716 | lungCance |
| rs8192478 | 15 | 78910462 | G | A | 0.2471 | -0.2059 | 0.0137 | 6.73E-51  | -15.0058 | 85716 | lungCance |
| rs8192479 | 15 | 78909398 | T | C | 0.0216 | 0.2480  | 0.0444 | 2.29E-08  | 5.5885   | 85716 | lungCance |
| rs8192482 | 15 | 78886198 | T | C | 0.3636 | 0.2570  | 0.0120 | 2.48E-101 | 21.3717  | 85716 | lungCance |
| rs8192733 | 19 | 41349550 | G | C | 0.5174 | -0.0977 | 0.0139 | 1.86E-12  | -7.0446  | 85716 | lungCance |
| rs871058  | 15 | 78858491 | A | G | 0.3413 | -0.0968 | 0.0126 | 1.45E-14  | -7.6919  | 85716 | lungCance |
| rs880395  | 15 | 78844356 | A | G | 0.4117 | -0.0951 | 0.0120 | 2.00E-15  | -7.9413  | 85716 | lungCance |
| rs885945  | 6  | 29696852 | T | C | 0.2218 | 0.1031  | 0.0139 | 1.36E-13  | 7.4007   | 85716 | lungCance |
| rs885946  | 6  | 29696657 | C | T | 0.2114 | 0.1050  | 0.0142 | 1.35E-13  | 7.4014   | 85716 | lungCance |
| rs885947  | 6  | 29696656 | A | G | 0.2332 | 0.0964  | 0.0138 | 2.44E-12  | 7.0066   | 85716 | lungCance |
| rs899984  | 15 | 79042736 | C | T | 0.4105 | 0.1764  | 0.0135 | 3.07E-39  | 13.1053  | 85716 | lungCance |
| rs899997  | 15 | 79019578 | G | T | 0.2450 | -0.1231 | 0.0143 | 9.49E-18  | -8.5800  | 85716 | lungCance |
| rs905739  | 15 | 78845110 | G | A | 0.2148 | -0.2354 | 0.0144 | 5.60E-60  | -16.3343 | 85716 | lungCance |
| rs905740  | 15 | 78844386 | T | C | 0.4133 | -0.0944 | 0.0120 | 4.07E-15  | -7.8529  | 85716 | lungCance |
| rs922691  | 15 | 78963994 | G | A | 0.3483 | -0.1017 | 0.0123 | 1.70E-16  | -8.2417  | 85716 | lungCance |
| rs922692  | 15 | 78984214 | A | C | 0.4082 | 0.1780  | 0.0119 | 8.19E-51  | 14.9925  | 85716 | lungCance |
| rs924840  | 15 | 78731808 | T | A | 0.2087 | -0.1992 | 0.0143 | 6.48E-44  | -13.8985 | 85716 | lungCance |
| rs9259927 | 6  | 29902254 | T | C | 0.1652 | 0.1403  | 0.0168 | 6.05E-17  | 8.3643   | 85716 | lungCance |
| rs9259928 | 6  | 29902279 | G | C | 0.1636 | 0.1402  | 0.0172 | 4.09E-16  | 8.1359   | 85716 | lungCance |
| rs9263708 | 6  | 31095270 | C | T | 0.2000 | 0.0955  | 0.0145 | 4.40E-11  | 6.5901   | 85716 | lungCance |
| rs9264490 | 6  | 31232578 | G | A | 0.2451 | 0.0776  | 0.0140 | 2.68E-08  | 5.5607   | 85716 | lungCance |
| rs9267488 | 6  | 31514247 | G | A | 0.1031 | 0.1510  | 0.0187 | 6.99E-16  | 8.0708   | 85716 | lungCance |
| rs9270475 | 6  | 32559007 | T | A | 0.2239 | 0.1068  | 0.0158 | 1.31E-11  | 6.7673   | 85716 | lungCance |
| rs9270493 | 6  | 32559110 | C | T | 0.2374 | 0.0962  | 0.0155 | 4.76E-10  | 6.2269   | 85716 | lungCance |
| rs9270510 | 6  | 32559359 | A | C | 0.2506 | 0.0889  | 0.0154 | 8.01E-09  | 5.7683   | 85716 | lungCance |
| rs9270611 | 6  | 32565075 | T | C | 0.2617 | 0.0845  | 0.0145 | 6.13E-09  | 5.8130   | 85716 | lungCance |
| rs9270620 | 6  | 32565272 | A | T | 0.2300 | 0.1050  | 0.0150 | 2.23E-12  | 7.0193   | 85716 | lungCance |
| rs9270623 | 6  | 32565331 | C | A | 0.2298 | 0.1043  | 0.0150 | 3.14E-12  | 6.9715   | 85716 | lungCance |
| rs9270637 | 6  | 32565650 | G | A | 0.2668 | 0.0795  | 0.0145 | 4.02E-08  | 5.4898   | 85716 | lungCance |
| rs9270645 | 6  | 32565773 | C | T | 0.2590 | 0.0859  | 0.0145 | 3.48E-09  | 5.9069   | 85716 | lungCance |
| rs9270868 | 6  | 32571117 | G | A | 0.2029 | 0.1080  | 0.0152 | 1.26E-12  | 7.0983   | 85716 | lungCance |
| rs9271437 | 6  | 32588166 | A | G | 0.2693 | 0.0771  | 0.0137 | 1.88E-08  | 5.6224   | 85716 | lungCance |
| rs9271524 | 6  | 32589820 | C | A | 0.2235 | 0.1106  | 0.0138 | 1.29E-15  | 7.9954   | 85716 | lungCance |
| rs9271526 | 6  | 32589862 | A | G | 0.2752 | 0.0815  | 0.0133 | 8.74E-10  | 6.1307   | 85716 | lungCance |
| rs9271528 | 6  | 32589923 | T | C | 0.2217 | 0.1110  | 0.0138 | 8.12E-16  | 8.0526   | 85716 | lungCance |
| rs9271541 | 6  | 32590070 | C | A | 0.2218 | 0.1110  | 0.0138 | 8.13E-16  | 8.0523   | 85716 | lungCance |
| rs9271545 | 6  | 32590153 | T | C | 0.2236 | 0.1102  | 0.0138 | 1.25E-15  | 7.9996   | 85716 | lungCance |
| rs9271550 | 6  | 32590274 | A | T | 0.2777 | 0.0806  | 0.0132 | 9.61E-10  | 6.1159   | 85716 | lungCance |
| rs9271619 | 6  | 32591773 | A | G | 0.2195 | 0.1125  | 0.0140 | 8.09E-16  | 8.0529   | 85716 | lungCance |
| rs9271626 | 6  | 32591944 | A | C | 0.2152 | 0.1137  | 0.0142 | 9.91E-16  | 8.0282   | 85716 | lungCance |
| rs9271627 | 6  | 32591949 | T | C | 0.2152 | 0.1138  | 0.0142 | 9.89E-16  | 8.0283   | 85716 | lungCance |
| rs9271633 | 6  | 32592072 | G | T | 0.2166 | 0.1139  | 0.0141 | 6.78E-16  | 8.0746   | 85716 | lungCance |
| rs9271656 | 6  | 32592574 | A | T | 0.1892 | 0.1094  | 0.0158 | 4.65E-12  | 6.9159   | 85716 | lungCance |
| rs9271659 | 6  | 32592593 | A | G | 0.1952 | 0.1183  | 0.0154 | 1.39E-14  | 7.6971   | 85716 | lungCance |
| rs9271666 | 6  | 32592693 | C | T | 0.2110 | 0.1103  | 0.0148 | 8.48E-14  | 7.4626   | 85716 | lungCance |
| rs9272306 | 6  | 32603880 | T | C | 0.2116 | 0.0856  | 0.0154 | 2.61E-08  | 5.5660   | 85716 | lungCance |
| rs9272307 | 6  | 32603886 | T | G | 0.2160 | 0.0865  | 0.0154 | 1.98E-08  | 5.6139   | 85716 | lungCance |
| rs9272311 | 6  | 32603953 | A | G | 0.2040 | 0.0976  | 0.0152 | 1.44E-10  | 6.4118   | 85716 | lungCance |
| rs9272324 | 6  | 32604152 | G | A | 0.4012 | 0.0821  | 0.0132 | 4.77E-10  | 6.2266   | 85716 | lungCance |
| rs9272326 | 6  | 32604169 | T | C | 0.1916 | 0.1016  | 0.0157 | 1.01E-10  | 6.4653   | 85716 | lungCance |
| rs9272343 | 6  | 32604326 | G | A | 0.1956 | 0.0996  | 0.0155 | 1.30E-10  | 6.4273   | 85716 | lungCance |
| rs9272348 | 6  | 32604396 | T | C | 0.2403 | 0.0803  | 0.0147 | 4.48E-08  | 5.4709   | 85716 | lungCance |
| rs9272351 | 6  | 32604423 | A | G | 0.2051 | 0.0920  | 0.0153 | 1.71E-09  | 6.0229   | 85716 | lungCance |
| rs9272369 | 6  | 32604643 | T | C | 0.1971 | 0.0938  | 0.0157 | 2.25E-09  | 5.9784   | 85716 | lungCance |
| rs9272405 | 6  | 32604919 | C | T | 0.1969 | 0.1039  | 0.0159 | 5.75E-11  | 6.5502   | 85716 | lungCance |
| rs9272406 | 6  | 32604929 | C | G | 0.2291 | 0.0869  | 0.0153 | 1.21E-08  | 5.6977   | 85716 | lungCance |
| rs9272408 | 6  | 32604963 | G | A | 0.2085 | 0.0974  | 0.0155 | 3.31E-10  | 6.2837   | 85716 | lungCance |

|           |    |           |   |   |        |         |        |          |          |       |           |
|-----------|----|-----------|---|---|--------|---------|--------|----------|----------|-------|-----------|
| rs9272413 | 6  | 32604987  | C | T | 0.2100 | 0.1001  | 0.0154 | 8.21E-11 | 6.4966   | 85716 | lungCance |
| rs9272414 | 6  | 32604994  | T | A | 0.2419 | 0.0815  | 0.0149 | 4.10E-08 | 5.4866   | 85716 | lungCance |
| rs9272421 | 6  | 32605118  | A | G | 0.2542 | 0.0803  | 0.0146 | 3.83E-08 | 5.4986   | 85716 | lungCance |
| rs9272423 | 6  | 32605164  | G | T | 0.2181 | 0.0940  | 0.0152 | 5.67E-10 | 6.1992   | 85716 | lungCance |
| rs9272426 | 6  | 32605189  | G | A | 0.4139 | 0.0735  | 0.0132 | 2.56E-08 | 5.5695   | 85716 | lungCance |
| rs9272434 | 6  | 32605325  | T | C | 0.2149 | 0.0969  | 0.0151 | 1.53E-10 | 6.4029   | 85716 | lungCance |
| rs9272440 | 6  | 32605371  | C | G | 0.2161 | 0.0979  | 0.0153 | 1.54E-10 | 6.4016   | 85716 | lungCance |
| rs9272462 | 6  | 32605620  | A | G | 0.2224 | 0.0983  | 0.0149 | 4.49E-11 | 6.5869   | 85716 | lungCance |
| rs9272469 | 6  | 32605713  | C | A | 0.2008 | 0.0950  | 0.0154 | 7.73E-10 | 6.1504   | 85716 | lungCance |
| rs9272470 | 6  | 32605714  | G | T | 0.2028 | 0.0974  | 0.0153 | 2.07E-10 | 6.3558   | 85716 | lungCance |
| rs9272487 | 6  | 32606002  | T | C | 0.2378 | 0.0820  | 0.0147 | 2.49E-08 | 5.5736   | 85716 | lungCance |
| rs9272489 | 6  | 32606030  | T | A | 0.1958 | 0.0961  | 0.0157 | 1.05E-09 | 6.1015   | 85716 | lungCance |
| rs9272495 | 6  | 32606133  | A | C | 0.2205 | 0.0949  | 0.0152 | 4.73E-10 | 6.2277   | 85716 | lungCance |
| rs9272505 | 6  | 32606314  | T | C | 0.3592 | 0.0755  | 0.0138 | 4.66E-08 | 5.4637   | 85716 | lungCance |
| rs9272506 | 6  | 32606315  | G | A | 0.3590 | 0.0757  | 0.0138 | 4.30E-08 | 5.4782   | 85716 | lungCance |
| rs9272532 | 6  | 32606643  | A | C | 0.1870 | 0.0931  | 0.0167 | 2.51E-08 | 5.5722   | 85716 | lungCance |
| rs9272535 | 6  | 32606756  | A | G | 0.2274 | 0.0847  | 0.0153 | 3.26E-08 | 5.5268   | 85716 | lungCance |
| rs9272536 | 6  | 32606773  | T | G | 0.2245 | 0.0851  | 0.0155 | 4.45E-08 | 5.4721   | 85716 | lungCance |
| rs9272539 | 6  | 32606819  | A | G | 0.3941 | 0.0745  | 0.0136 | 4.31E-08 | 5.4776   | 85716 | lungCance |
| rs9272560 | 6  | 32607140  | C | T | 0.1985 | 0.0947  | 0.0159 | 2.53E-09 | 5.9597   | 85716 | lungCance |
| rs9272569 | 6  | 32607225  | T | G | 0.2019 | 0.0927  | 0.0160 | 6.21E-09 | 5.8110   | 85716 | lungCance |
| rs9272616 | 6  | 32607890  | G | C | 0.2277 | 0.0877  | 0.0154 | 1.16E-08 | 5.7064   | 85716 | lungCance |
| rs9272626 | 6  | 32608041  | C | A | 0.2376 | 0.0871  | 0.0153 | 1.20E-08 | 5.6998   | 85716 | lungCance |
| rs9272640 | 6  | 32608221  | C | T | 0.2152 | 0.0905  | 0.0156 | 5.99E-09 | 5.8170   | 85716 | lungCance |
| rs9272648 | 6  | 32608524  | C | T | 0.2159 | 0.0952  | 0.0156 | 1.16E-09 | 6.0852   | 85716 | lungCance |
| rs9272658 | 6  | 32608658  | A | G | 0.2058 | 0.0957  | 0.0157 | 1.03E-09 | 6.1039   | 85716 | lungCance |
| rs9272665 | 6  | 32608721  | A | G | 0.2204 | 0.0914  | 0.0155 | 3.30E-09 | 5.9159   | 85716 | lungCance |
| rs9272678 | 6  | 32608915  | C | T | 0.4348 | 0.0789  | 0.0134 | 4.00E-09 | 5.8843   | 85716 | lungCance |
| rs9272682 | 6  | 32608953  | T | C | 0.2253 | 0.0933  | 0.0154 | 1.32E-09 | 6.0645   | 85716 | lungCance |
| rs9272686 | 6  | 32609015  | T | C | 0.2263 | 0.0933  | 0.0154 | 1.31E-09 | 6.0662   | 85716 | lungCance |
| rs9272713 | 6  | 32609345  | A | C | 0.1977 | 0.0994  | 0.0161 | 6.19E-10 | 6.1853   | 85716 | lungCance |
| rs9272721 | 6  | 32609401  | A | C | 0.2062 | 0.0980  | 0.0158 | 5.18E-10 | 6.2135   | 85716 | lungCance |
| rs9272728 | 6  | 32609593  | G | A | 0.2355 | 0.0958  | 0.0155 | 6.50E-10 | 6.1776   | 85716 | lungCance |
| rs9272729 | 6  | 32609594  | A | G | 0.1250 | 0.1393  | 0.0202 | 5.47E-12 | 6.8928   | 85716 | lungCance |
| rs9273289 | 6  | 32614534  | A | T | 0.2092 | 0.0948  | 0.0166 | 1.05E-08 | 5.7228   | 85716 | lungCance |
| rs9274454 | 6  | 32633371  | G | T | 0.0691 | 0.1584  | 0.0256 | 6.12E-10 | 6.1874   | 85716 | lungCance |
| rs9295675 | 6  | 25918473  | T | C | 0.0923 | 0.1105  | 0.0198 | 2.36E-08 | 5.5833   | 85716 | lungCance |
| rs9295696 | 6  | 26550288  | C | T | 0.2162 | -0.0785 | 0.0142 | 3.06E-08 | -5.5381  | 85716 | lungCance |
| rs931794  | 15 | 78826180  | G | A | 0.3692 | 0.2523  | 0.0120 | 5.39E-98 | 21.0095  | 85716 | lungCance |
| rs932644  | 6  | 167404187 | A | C | 0.4739 | 0.0648  | 0.0117 | 3.07E-08 | 5.5375   | 85716 | lungCance |
| rs9348211 | 6  | 167375173 | C | G | 0.4738 | 0.0649  | 0.0118 | 3.62E-08 | 5.5082   | 85716 | lungCance |
| rs9357004 | 6  | 26303319  | T | C | 0.4825 | 0.0729  | 0.0117 | 4.88E-10 | 6.2228   | 85716 | lungCance |
| rs9357005 | 6  | 26336838  | A | C | 0.3905 | -0.0717 | 0.0120 | 2.16E-09 | -5.9851  | 85716 | lungCance |
| rs9358912 | 6  | 26211146  | T | G | 0.2989 | -0.0744 | 0.0129 | 9.32E-09 | -5.7426  | 85716 | lungCance |
| rs9358913 | 6  | 26239404  | G | A | 0.2795 | -0.0720 | 0.0131 | 4.05E-08 | -5.4888  | 85716 | lungCance |
| rs9358914 | 6  | 26262063  | T | G | 0.3296 | -0.0730 | 0.0126 | 6.18E-09 | -5.8119  | 85716 | lungCance |
| rs9358915 | 6  | 26277268  | G | A | 0.4641 | 0.0731  | 0.0117 | 4.62E-10 | 6.2313   | 85716 | lungCance |
| rs9358916 | 6  | 26283185  | A | G | 0.3880 | -0.0686 | 0.0120 | 1.02E-08 | -5.7271  | 85716 | lungCance |
| rs9358917 | 6  | 26284417  | T | C | 0.4641 | 0.0732  | 0.0117 | 4.26E-10 | 6.2440   | 85716 | lungCance |
| rs9358918 | 6  | 26286744  | T | C | 0.3882 | -0.0687 | 0.0120 | 9.83E-09 | -5.7336  | 85716 | lungCance |
| rs9358919 | 6  | 26287862  | C | T | 0.4640 | 0.0732  | 0.0117 | 4.09E-10 | 6.2504   | 85716 | lungCance |
| rs9358920 | 6  | 26292029  | T | C | 0.3882 | -0.0688 | 0.0120 | 9.31E-09 | -5.7428  | 85716 | lungCance |
| rs9358924 | 6  | 26322473  | A | G | 0.3316 | -0.0726 | 0.0125 | 5.85E-09 | -5.8210  | 85716 | lungCance |
| rs9358925 | 6  | 26322768  | G | C | 0.3621 | -0.0681 | 0.0121 | 1.94E-08 | -5.6174  | 85716 | lungCance |
| rs9358926 | 6  | 26323132  | G | C | 0.3315 | -0.0726 | 0.0125 | 5.80E-09 | -5.8226  | 85716 | lungCance |
| rs9358927 | 6  | 26330492  | G | T | 0.3909 | -0.0716 | 0.0120 | 2.15E-09 | -5.9862  | 85716 | lungCance |
| rs9366648 | 6  | 26306282  | C | T | 0.3614 | -0.0677 | 0.0121 | 2.43E-08 | -5.5779  | 85716 | lungCance |
| rs9366649 | 6  | 26329103  | T | A | 0.4636 | 0.0736  | 0.0117 | 3.54E-10 | 6.2729   | 85716 | lungCance |
| rs9366650 | 6  | 26335997  | A | G | 0.3909 | -0.0714 | 0.0120 | 2.42E-09 | -5.9666  | 85716 | lungCance |
| rs9366651 | 6  | 26336696  | G | T | 0.4642 | 0.0755  | 0.0118 | 1.42E-10 | 6.4140   | 85716 | lungCance |
| rs9366717 | 6  | 28191057  | T | C | 0.1207 | 0.0993  | 0.0178 | 2.55E-08 | 5.5701   | 85716 | lungCance |
| rs9368531 | 6  | 27781872  | C | G | 0.0930 | 0.1160  | 0.0194 | 2.12E-09 | 5.9886   | 85716 | lungCance |
| rs9379833 | 6  | 26207175  | A | C | 0.2866 | -0.0773 | 0.0131 | 3.25E-09 | -5.9185  | 85716 | lungCance |
| rs9379838 | 6  | 26277133  | C | T | 0.4641 | 0.0731  | 0.0117 | 4.64E-10 | 6.2307   | 85716 | lungCance |
| rs9379842 | 6  | 26289310  | C | T | 0.3882 | -0.0688 | 0.0120 | 9.06E-09 | -5.7476  | 85716 | lungCance |
| rs9379844 | 6  | 26291527  | A | G | 0.3883 | -0.0688 | 0.0120 | 9.29E-09 | -5.7433  | 85716 | lungCance |
| rs9379845 | 6  | 26291601  | T | C | 0.3316 | -0.0725 | 0.0125 | 6.21E-09 | -5.8109  | 85716 | lungCance |
| rs9379846 | 6  | 26314238  | C | G | 0.3622 | -0.0679 | 0.0121 | 2.14E-08 | -5.6007  | 85716 | lungCance |
| rs938682  | 15 | 78896547  | G | A | 0.2189 | -0.2320 | 0.0142 | 3.93E-60 | -16.3563 | 85716 | lungCance |
| rs9393688 | 6  | 26207174  | T | A | 0.2866 | -0.0772 | 0.0131 | 3.48E-09 | -5.9068  | 85716 | lungCance |
| rs9393691 | 6  | 26272829  | C | T | 0.3873 | -0.0688 | 0.0120 | 9.53E-09 | -5.7392  | 85716 | lungCance |
| rs9393692 | 6  | 26276650  | A | G | 0.4408 | 0.0737  | 0.0118 | 4.24E-10 | 6.2449   | 85716 | lungCance |
| rs9393693 | 6  | 26277408  | C | A | 0.4641 | 0.0731  | 0.0117 | 4.57E-10 | 6.2329   | 85716 | lungCance |
| rs9393694 | 6  | 26279296  | T | C | 0.4641 | 0.0731  | 0.0117 | 4.61E-10 | 6.2321   | 85716 | lungCance |

|            |    |           |   |   |        |         |        |           |          |        |           |
|------------|----|-----------|---|---|--------|---------|--------|-----------|----------|--------|-----------|
| rs9393696  | 6  | 26291591  | C | T | 0.3883 | -0.0686 | 0.0120 | 1.02E-08  | -5.7274  | 85716  | lungCance |
| rs9393697  | 6  | 26293841  | T | C | 0.3882 | -0.0689 | 0.0120 | 8.88E-09  | -5.7512  | 85716  | lungCance |
| rs9393908  | 6  | 28190830  | A | T | 0.1207 | 0.0993  | 0.0178 | 2.56E-08  | 5.5691   | 85716  | lungCance |
| rs9457247  | 6  | 167392174 | C | T | 0.4739 | 0.0643  | 0.0117 | 3.65E-08  | 5.5069   | 85716  | lungCance |
| rs9459827  | 6  | 167392204 | A | T | 0.4739 | 0.0643  | 0.0117 | 3.61E-08  | 5.5089   | 85716  | lungCance |
| rs9461222  | 6  | 25905111  | A | G | 0.0906 | 0.1121  | 0.0199 | 1.89E-08  | 5.6216   | 85716  | lungCance |
| rs9461223  | 6  | 25918335  | C | T | 0.0906 | 0.1128  | 0.0199 | 1.54E-08  | 5.6570   | 85716  | lungCance |
| rs9467635  | 6  | 25909166  | C | A | 0.0906 | 0.1124  | 0.0199 | 1.77E-08  | 5.6333   | 85716  | lungCance |
| rs950776   | 15 | 78926018  | C | T | 0.3370 | -0.0898 | 0.0125 | 7.34E-13  | -7.1728  | 85716  | lungCance |
| rs951266   | 15 | 78878541  | A | G | 0.3632 | 0.2563  | 0.0121 | 4.01E-100 | 21.2413  | 85716  | lungCance |
| rs951984   | 15 | 78720915  | A | T | 0.2929 | 0.1878  | 0.0132 | 3.22E-46  | 14.2726  | 85716  | lungCance |
| rs952215   | 15 | 78819153  | C | T | 0.4092 | -0.0916 | 0.0119 | 1.62E-14  | -7.6779  | 85716  | lungCance |
| rs952216   | 15 | 78819202  | T | C | 0.4092 | -0.0916 | 0.0119 | 1.62E-14  | -7.6777  | 85716  | lungCance |
| rs954144   | 15 | 78730591  | T | C | 0.4298 | -0.0764 | 0.0118 | 1.10E-10  | -6.4533  | 85716  | lungCance |
| rs958025   | 15 | 78759348  | T | C | 0.2072 | -0.2015 | 0.0144 | 2.25E-44  | -13.9734 | 85716  | lungCance |
| rs9646187  | 15 | 78906128  | A | C | 0.4158 | -0.0898 | 0.0123 | 3.51E-13  | -7.2734  | 85716  | lungCance |
| rs965604   | 15 | 78789223  | G | A | 0.3745 | -0.1697 | 0.0121 | 6.50E-45  | -14.0626 | 85716  | lungCance |
| rs9672608  | 15 | 78797463  | A | T | 0.2099 | -0.2068 | 0.0145 | 5.26E-46  | -14.2385 | 85716  | lungCance |
| rs9788682  | 15 | 78802586  | A | G | 0.2005 | -0.2227 | 0.0148 | 6.15E-51  | -15.0117 | 85716  | lungCance |
| rs9788721  | 15 | 78802869  | C | T | 0.3702 | 0.2515  | 0.0121 | 9.51E-97  | 20.8729  | 85716  | lungCance |
| rs9806363  | 15 | 79110302  | G | A | 0.4033 | 0.0871  | 0.0119 | 2.83E-13  | 7.3026   | 85716  | lungCance |
| rs9888691  | 15 | 79010046  | T | C | 0.2451 | -0.1181 | 0.0141 | 5.57E-17  | -8.3738  | 85716  | lungCance |
| rs989133   | 6  | 26336300  | C | T | 0.3357 | -0.0732 | 0.0124 | 4.00E-09  | -5.8840  | 85716  | lungCance |
| rs989134   | 6  | 26336224  | A | C | 0.4642 | 0.0756  | 0.0118 | 1.35E-10  | 6.4207   | 85716  | lungCance |
| rs9920324  | 15 | 79129142  | A | T | 0.4692 | -0.0833 | 0.0121 | 6.77E-12  | -6.8627  | 85716  | lungCance |
| rs9920493  | 15 | 79113846  | A | C | 0.4036 | 0.0854  | 0.0119 | 8.24E-13  | 7.1573   | 85716  | lungCance |
| rs9920506  | 15 | 78931057  | A | G | 0.1719 | -0.1954 | 0.0168 | 2.25E-31  | -11.6520 | 85716  | lungCance |
| rs9920968  | 15 | 79118747  | G | A | 0.4182 | 0.0858  | 0.0121 | 1.21E-12  | 7.1047   | 85716  | lungCance |
| rs1000972  | 20 | 6621717   | T | A | 0.3658 | -0.0062 | 0.0011 | 1.00E-08  | -5.6854  | 408317 | Snoring   |
| rs1002330  | 17 | 46253515  | T | C | 0.3867 | 0.0062  | 0.0011 | 3.90E-09  | 5.8005   | 408317 | Snoring   |
| rs10057967 | 5  | 74997756  | C | T | 0.3631 | -0.0070 | 0.0011 | 6.70E-11  | -6.4449  | 408317 | Snoring   |
| rs10078021 | 5  | 75038431  | G | T | 0.3697 | -0.0067 | 0.0011 | 4.90E-10  | -6.1277  | 408317 | Snoring   |
| rs1007852  | 13 | 50784892  | T | C | 0.4784 | 0.0067  | 0.0010 | 1.20E-10  | 6.4025   | 408317 | Snoring   |
| rs10086761 | 8  | 78114305  | A | G | 0.2854 | -0.0068 | 0.0012 | 3.70E-09  | -5.8736  | 408317 | Snoring   |
| rs10089583 | 8  | 71849484  | A | G | 0.4821 | -0.0059 | 0.0010 | 2.00E-08  | -5.6286  | 408317 | Snoring   |
| rs10091471 | 8  | 71953755  | C | T | 0.4780 | -0.0065 | 0.0010 | 7.50E-10  | -6.1841  | 408317 | Snoring   |
| rs10094506 | 8  | 78116203  | T | C | 0.2854 | -0.0068 | 0.0012 | 3.70E-09  | -5.8736  | 408317 | Snoring   |
| rs10094574 | 8  | 78116067  | A | G | 0.2854 | -0.0068 | 0.0012 | 3.70E-09  | -5.8738  | 408317 | Snoring   |
| rs10096619 | 8  | 78112513  | C | T | 0.2855 | -0.0068 | 0.0012 | 4.40E-09  | -5.8459  | 408317 | Snoring   |
| rs10103623 | 8  | 78106082  | G | A | 0.2855 | -0.0068 | 0.0012 | 4.30E-09  | -5.8507  | 408317 | Snoring   |
| rs10107588 | 8  | 78106974  | A | C | 0.2855 | -0.0068 | 0.0012 | 4.50E-09  | -5.8442  | 408317 | Snoring   |
| rs10110676 | 8  | 71970809  | G | C | 0.4296 | -0.0060 | 0.0011 | 1.60E-08  | -5.6890  | 408317 | Snoring   |
| rs10111935 | 8  | 78131147  | A | G | 0.2849 | -0.0067 | 0.0012 | 5.80E-09  | -5.8024  | 408317 | Snoring   |
| rs10127531 | 1  | 51199193  | T | C | 0.4038 | 0.0060  | 0.0011 | 1.40E-08  | 5.6711   | 408317 | Snoring   |
| rs10190879 | 2  | 156693033 | T | C | 0.2991 | -0.0065 | 0.0011 | 2.50E-08  | -5.6657  | 408317 | Snoring   |
| rs10221243 | 17 | 44212310  | A | G | 0.2284 | 0.0073  | 0.0012 | 5.90E-09  | 5.8425   | 408317 | Snoring   |
| rs10251423 | 7  | 127482600 | G | C | 0.4129 | -0.0058 | 0.0011 | 3.60E-08  | -5.4278  | 408317 | Snoring   |
| rs10251548 | 7  | 127445594 | A | G | 0.4114 | -0.0059 | 0.0011 | 1.60E-08  | -5.5775  | 408317 | Snoring   |
| rs10283320 | 8  | 71858207  | C | T | 0.4874 | -0.0062 | 0.0010 | 2.90E-09  | -5.9696  | 408317 | Snoring   |
| rs1029463  | 17 | 44150161  | G | T | 0.2266 | 0.0072  | 0.0013 | 8.10E-09  | 5.7839   | 408317 | Snoring   |
| rs1029497  | 17 | 67960564  | C | T | 0.3445 | 0.0065  | 0.0011 | 4.00E-09  | 5.8999   | 408317 | Snoring   |
| rs1029927  | 7  | 127489607 | A | C | 0.4128 | -0.0058 | 0.0011 | 3.50E-08  | -5.4281  | 408317 | Snoring   |
| rs1034621  | 17 | 67960949  | C | T | 0.3455 | 0.0064  | 0.0011 | 5.70E-09  | 5.8365   | 408317 | Snoring   |
| rs10401820 | 19 | 32193522  | C | A | 0.0948 | -0.0105 | 0.0018 | 2.50E-09  | -5.8716  | 408317 | Snoring   |
| rs10402822 | 19 | 32172295  | C | A | 0.0934 | -0.0108 | 0.0018 | 1.10E-09  | -6.0101  | 408317 | Snoring   |
| rs10415180 | 19 | 32210308  | A | T | 0.0945 | -0.0105 | 0.0018 | 2.60E-09  | -5.8654  | 408317 | Snoring   |
| rs10415992 | 19 | 32181118  | G | C | 0.0950 | -0.0108 | 0.0018 | 7.50E-10  | -6.0673  | 408317 | Snoring   |
| rs10418420 | 19 | 32213552  | T | C | 0.0950 | -0.0105 | 0.0018 | 3.00E-09  | -5.8438  | 408317 | Snoring   |
| rs10418433 | 19 | 32169761  | C | G | 0.0951 | -0.0108 | 0.0018 | 9.40E-10  | -6.0312  | 408317 | Snoring   |
| rs10421945 | 19 | 32203838  | C | T | 0.1022 | -0.0093 | 0.0017 | 4.20E-08  | -5.3801  | 408317 | Snoring   |
| rs10422107 | 19 | 32181078  | C | T | 0.0951 | -0.0108 | 0.0018 | 6.70E-10  | -6.0837  | 408317 | Snoring   |
| rs10425159 | 19 | 32213748  | C | T | 0.0950 | -0.0105 | 0.0018 | 3.10E-09  | -5.8410  | 408317 | Snoring   |
| rs10425801 | 19 | 32184092  | C | A | 0.1065 | -0.0093 | 0.0017 | 3.80E-08  | -5.4321  | 408317 | Snoring   |
| rs1042602  | 11 | 88911696  | A | C | 0.3657 | -0.0059 | 0.0011 | 3.90E-08  | -5.4475  | 408317 | Snoring   |
| rs10426677 | 19 | 32184500  | T | A | 0.1064 | -0.0093 | 0.0017 | 3.60E-08  | -5.4406  | 408317 | Snoring   |
| rs10445333 | 17 | 43916509  | G | A | 0.2253 | 0.0076  | 0.0012 | 1.10E-09  | 6.1167   | 408317 | Snoring   |
| rs10445334 | 17 | 43934826  | G | T | 0.2255 | 0.0076  | 0.0012 | 1.50E-09  | 6.0686   | 408317 | Snoring   |
| rs10445335 | 17 | 43934896  | A | T | 0.2255 | 0.0076  | 0.0012 | 1.50E-09  | 6.0724   | 408317 | Snoring   |
| rs10445336 | 17 | 43934948  | G | A | 0.2255 | 0.0076  | 0.0012 | 1.50E-09  | 6.0745   | 408317 | Snoring   |
| rs10445337 | 17 | 44067400  | C | T | 0.2259 | 0.0076  | 0.0012 | 1.70E-09  | 6.0574   | 408317 | Snoring   |
| rs10445338 | 17 | 44067682  | A | G | 0.2254 | 0.0075  | 0.0012 | 2.00E-09  | 6.0220   | 408317 | Snoring   |
| rs10445339 | 17 | 46216314  | A | G | 0.3865 | 0.0062  | 0.0011 | 4.10E-09  | 5.7913   | 408317 | Snoring   |
| rs10445362 | 17 | 43914554  | A | C | 0.2253 | 0.0076  | 0.0012 | 1.10E-09  | 6.1184   | 408317 | Snoring   |
| rs10445363 | 17 | 43914558  | A | G | 0.2253 | 0.0076  | 0.0012 | 1.10E-09  | 6.1184   | 408317 | Snoring   |



|            |    |           |   |   |        |         |        |          |         |        |         |
|------------|----|-----------|---|---|--------|---------|--------|----------|---------|--------|---------|
| rs10445364 | 17 | 43916356  | A | G | 0.2253 | 0.0076  | 0.0012 | 1.10E-09 | 6.1188  | 408317 | Snoring |
| rs10445368 | 17 | 43933171  | T | C | 0.2207 | 0.0075  | 0.0013 | 3.80E-09 | 5.9183  | 408317 | Snoring |
| rs10445369 | 17 | 43934776  | G | A | 0.2255 | 0.0076  | 0.0012 | 1.50E-09 | 6.0748  | 408317 | Snoring |
| rs10445370 | 17 | 43935118  | A | G | 0.2255 | 0.0076  | 0.0012 | 1.40E-09 | 6.0786  | 408317 | Snoring |
| rs10445371 | 17 | 44065410  | A | G | 0.2254 | 0.0075  | 0.0012 | 2.00E-09 | 6.0223  | 408317 | Snoring |
| rs10445377 | 17 | 46214168  | C | T | 0.3867 | 0.0063  | 0.0011 | 3.10E-09 | 5.8331  | 408317 | Snoring |
| rs10448014 | 8  | 71688165  | G | A | 0.4820 | -0.0059 | 0.0010 | 1.50E-08 | -5.6785 | 408317 | Snoring |
| rs10451283 | 17 | 43814020  | C | T | 0.2255 | 0.0077  | 0.0012 | 6.30E-10 | 6.2050  | 408317 | Snoring |
| rs10467143 | 12 | 65798512  | T | A | 0.3743 | 0.0085  | 0.0011 | 1.50E-15 | 7.9030  | 408317 | Snoring |
| rs10468280 | 16 | 53827479  | G | A | 0.3923 | 0.0064  | 0.0011 | 2.80E-09 | 5.9514  | 408317 | Snoring |
| rs10487497 | 7  | 127400667 | C | T | 0.3426 | 0.0064  | 0.0011 | 3.50E-09 | 5.8418  | 408317 | Snoring |
| rs10491143 | 17 | 43773248  | T | A | 0.2253 | 0.0077  | 0.0012 | 8.90E-10 | 6.1509  | 408317 | Snoring |
| rs10491144 | 17 | 43773124  | C | A | 0.2253 | 0.0077  | 0.0012 | 8.90E-10 | 6.1510  | 408317 | Snoring |
| rs10501087 | 11 | 27670108  | C | T | 0.2001 | -0.0074 | 0.0013 | 2.10E-08 | -5.6955 | 408317 | Snoring |
| rs10504479 | 8  | 71577515  | T | A | 0.4784 | -0.0061 | 0.0010 | 8.00E-09 | -5.7917 | 408317 | Snoring |
| rs10504480 | 8  | 71578247  | C | T | 0.4337 | 0.0069  | 0.0011 | 5.80E-11 | 6.5472  | 408317 | Snoring |
| rs10504481 | 8  | 71699517  | T | G | 0.4802 | -0.0059 | 0.0010 | 2.10E-08 | -5.6255 | 408317 | Snoring |
| rs10504487 | 8  | 71843599  | A | G | 0.4295 | 0.0069  | 0.0011 | 6.40E-11 | 6.5280  | 408317 | Snoring |
| rs10504492 | 8  | 71977959  | C | T | 0.4345 | 0.0068  | 0.0011 | 1.40E-10 | 6.4067  | 408317 | Snoring |
| rs10504497 | 8  | 72008887  | A | G | 0.4711 | 0.0063  | 0.0010 | 1.90E-09 | 5.9944  | 408317 | Snoring |
| rs10504649 | 8  | 78119533  | G | A | 0.2855 | -0.0068 | 0.0012 | 4.60E-09 | -5.8419 | 408317 | Snoring |
| rs10506522 | 12 | 65886277  | C | T | 0.4497 | 0.0068  | 0.0011 | 1.10E-10 | 6.4850  | 408317 | Snoring |
| rs10506525 | 12 | 65783378  | T | C | 0.3743 | 0.0086  | 0.0011 | 1.00E-15 | 7.9454  | 408317 | Snoring |
| rs10514879 | 17 | 43802971  | T | C | 0.2251 | 0.0077  | 0.0012 | 1.00E-09 | 6.1335  | 408317 | Snoring |
| rs10514897 | 17 | 44117397  | G | A | 0.2254 | 0.0075  | 0.0012 | 1.90E-09 | 6.0300  | 408317 | Snoring |
| rs10514898 | 17 | 44119636  | C | A | 0.2254 | 0.0075  | 0.0012 | 2.00E-09 | 6.0261  | 408317 | Snoring |
| rs10514901 | 17 | 44194735  | T | G | 0.2258 | 0.0076  | 0.0012 | 1.50E-09 | 6.0756  | 408317 | Snoring |
| rs10514903 | 17 | 44206646  | G | C | 0.2258 | 0.0076  | 0.0012 | 1.40E-09 | 6.0835  | 408317 | Snoring |
| rs10514904 | 17 | 44207887  | T | C | 0.2264 | 0.0076  | 0.0012 | 1.70E-09 | 6.0646  | 408317 | Snoring |
| rs1052551  | 17 | 44068924  | A | G | 0.2254 | 0.0075  | 0.0012 | 2.10E-09 | 6.0210  | 408317 | Snoring |
| rs1052553  | 17 | 44073889  | G | A | 0.2257 | 0.0075  | 0.0012 | 2.20E-09 | 6.0083  | 408317 | Snoring |
| rs1052587  | 17 | 44102604  | C | T | 0.2254 | 0.0075  | 0.0012 | 2.00E-09 | 6.0288  | 408317 | Snoring |
| rs1052590  | 17 | 44102638  | G | A | 0.2253 | 0.0075  | 0.0012 | 1.90E-09 | 6.0360  | 408317 | Snoring |
| rs1052594  | 17 | 44102689  | C | G | 0.2254 | 0.0075  | 0.0012 | 2.00E-09 | 6.0288  | 408317 | Snoring |
| rs10735928 | 12 | 65769626  | A | C | 0.3742 | 0.0086  | 0.0011 | 7.60E-16 | 7.9822  | 408317 | Snoring |
| rs10748018 | 12 | 65783403  | G | A | 0.3744 | 0.0085  | 0.0011 | 1.40E-15 | 7.9074  | 408317 | Snoring |
| rs1076222  | 17 | 44109769  | G | C | 0.2254 | 0.0075  | 0.0012 | 2.00E-09 | 6.0246  | 408317 | Snoring |
| rs10765186 | 11 | 88831337  | A | T | 0.5008 | 0.0061  | 0.0010 | 5.60E-09 | 5.7944  | 408317 | Snoring |
| rs10765190 | 11 | 88882425  | C | T | 0.4886 | 0.0063  | 0.0010 | 1.70E-09 | 5.9929  | 408317 | Snoring |
| rs10765191 | 11 | 88882550  | G | A | 0.4885 | 0.0062  | 0.0010 | 1.90E-09 | 5.9688  | 408317 | Snoring |
| rs10765195 | 11 | 88901170  | T | C | 0.4897 | 0.0061  | 0.0010 | 3.20E-09 | 5.8840  | 408317 | Snoring |
| rs10767654 | 11 | 27640223  | T | G | 0.2007 | -0.0074 | 0.0013 | 2.50E-08 | -5.6725 | 408317 | Snoring |
| rs10767664 | 11 | 27725986  | T | A | 0.2072 | -0.0077 | 0.0013 | 4.30E-09 | -5.9415 | 408317 | Snoring |
| rs10775404 | 17 | 44167366  | C | A | 0.1864 | -0.0078 | 0.0013 | 7.00E-09 | -5.7795 | 408317 | Snoring |
| rs1078268  | 17 | 44075901  | G | A | 0.2255 | 0.0075  | 0.0012 | 1.90E-09 | 6.0334  | 408317 | Snoring |
| rs1078269  | 17 | 44075837  | C | T | 0.2255 | 0.0075  | 0.0013 | 1.90E-09 | 6.0350  | 408317 | Snoring |
| rs10784446 | 12 | 65764979  | A | G | 0.3726 | 0.0085  | 0.0011 | 1.40E-15 | 7.9029  | 408317 | Snoring |
| rs10784447 | 12 | 65766498  | T | C | 0.3728 | 0.0086  | 0.0011 | 8.20E-16 | 7.9734  | 408317 | Snoring |
| rs10784448 | 12 | 65788363  | A | C | 0.3743 | 0.0085  | 0.0011 | 1.80E-15 | 7.8785  | 408317 | Snoring |
| rs10784449 | 12 | 65788409  | C | T | 0.3742 | 0.0085  | 0.0011 | 1.50E-15 | 7.8971  | 408317 | Snoring |
| rs10784450 | 12 | 65788422  | G | A | 0.3743 | 0.0085  | 0.0011 | 1.50E-15 | 7.8976  | 408317 | Snoring |
| rs10784459 | 12 | 65854675  | C | A | 0.4495 | 0.0070  | 0.0011 | 3.60E-11 | 6.6490  | 408317 | Snoring |
| rs10784460 | 12 | 65863584  | A | G | 0.4495 | 0.0069  | 0.0011 | 5.10E-11 | 6.5963  | 408317 | Snoring |
| rs10784463 | 12 | 65877452  | G | A | 0.4500 | 0.0069  | 0.0011 | 7.30E-11 | 6.5462  | 408317 | Snoring |
| rs10784464 | 12 | 65877505  | A | G | 0.4500 | 0.0069  | 0.0011 | 7.30E-11 | 6.5463  | 408317 | Snoring |
| rs10784465 | 12 | 65882536  | G | A | 0.4599 | 0.0067  | 0.0011 | 2.50E-10 | 6.3324  | 408317 | Snoring |
| rs10784466 | 12 | 65885798  | C | A | 0.4497 | 0.0068  | 0.0011 | 1.20E-10 | 6.4714  | 408317 | Snoring |
| rs10784467 | 12 | 65885856  | A | C | 0.4497 | 0.0068  | 0.0011 | 1.30E-10 | 6.4647  | 408317 | Snoring |
| rs10784468 | 12 | 65887683  | G | A | 0.4496 | 0.0068  | 0.0011 | 1.10E-10 | 6.4802  | 408317 | Snoring |
| rs10784469 | 12 | 65888693  | G | T | 0.4492 | 0.0069  | 0.0011 | 5.70E-11 | 6.5841  | 408317 | Snoring |
| rs1078830  | 17 | 43946112  | C | T | 0.2255 | 0.0076  | 0.0012 | 1.40E-09 | 6.0806  | 408317 | Snoring |
| rs10830204 | 11 | 88787544  | A | G | 0.4844 | -0.0063 | 0.0011 | 1.20E-09 | -6.0467 | 408317 | Snoring |
| rs10830206 | 11 | 88816137  | A | T | 0.3737 | 0.0058  | 0.0011 | 4.90E-08 | 5.3673  | 408317 | Snoring |
| rs10830208 | 11 | 88828356  | T | C | 0.4979 | 0.0061  | 0.0010 | 5.70E-09 | 5.7951  | 408317 | Snoring |
| rs10830209 | 11 | 88838984  | A | G | 0.5014 | 0.0061  | 0.0010 | 4.00E-09 | 5.8449  | 408317 | Snoring |
| rs10830212 | 11 | 88851105  | T | G | 0.3534 | 0.0059  | 0.0011 | 4.20E-08 | 5.3802  | 408317 | Snoring |
| rs10830220 | 11 | 88874152  | G | C | 0.4917 | 0.0063  | 0.0011 | 1.60E-09 | 5.9896  | 408317 | Snoring |
| rs10830221 | 11 | 88877463  | A | G | 0.4870 | 0.0061  | 0.0010 | 5.70E-09 | 5.7921  | 408317 | Snoring |
| rs10830223 | 11 | 88883885  | A | G | 0.4885 | 0.0062  | 0.0010 | 2.20E-09 | 5.9468  | 408317 | Snoring |
| rs10830224 | 11 | 88884079  | T | C | 0.4806 | 0.0061  | 0.0010 | 3.40E-09 | 5.8698  | 408317 | Snoring |
| rs10830225 | 11 | 88885945  | G | A | 0.4798 | 0.0059  | 0.0010 | 1.20E-08 | 5.6691  | 408317 | Snoring |
| rs10830227 | 11 | 88890822  | G | A | 0.4275 | 0.0059  | 0.0011 | 2.00E-08 | 5.5819  | 408317 | Snoring |
| rs10830228 | 11 | 88891114  | A | G | 0.4302 | 0.0060  | 0.0011 | 9.50E-09 | 5.7092  | 408317 | Snoring |
| rs10830230 | 11 | 88894537  | C | T | 0.4258 | 0.0057  | 0.0011 | 4.40E-08 | 5.4416  | 408317 | Snoring |

|            |    |           |   |   |        |         |        |          |         |        |         |
|------------|----|-----------|---|---|--------|---------|--------|----------|---------|--------|---------|
| rs10830231 | 11 | 88895388  | C | T | 0.4259 | 0.0057  | 0.0011 | 4.80E-08 | 5.4266  | 408317 | Snoring |
| rs10830232 | 11 | 88895962  | A | T | 0.4273 | 0.0058  | 0.0011 | 4.50E-08 | 5.4382  | 408317 | Snoring |
| rs10830234 | 11 | 88897444  | A | G | 0.4597 | 0.0060  | 0.0011 | 1.70E-08 | 5.6025  | 408317 | Snoring |
| rs10830237 | 11 | 88902144  | C | T | 0.4286 | 0.0057  | 0.0011 | 4.50E-08 | 5.4399  | 408317 | Snoring |
| rs10830239 | 11 | 88937602  | C | T | 0.4865 | 0.0057  | 0.0010 | 3.30E-08 | 5.4533  | 408317 | Snoring |
| rs10852521 | 16 | 53804965  | T | C | 0.4983 | -0.0063 | 0.0010 | 1.70E-09 | -6.0030 | 408317 | Snoring |
| rs10853098 | 17 | 46236581  | G | A | 0.3867 | 0.0062  | 0.0011 | 3.90E-09 | 5.8005  | 408317 | Snoring |
| rs10873829 | 1  | 87773431  | A | G | 0.3504 | -0.0060 | 0.0011 | 3.80E-08 | -5.5246 | 408317 | Snoring |
| rs10878266 | 12 | 65765283  | C | A | 0.3736 | 0.0086  | 0.0011 | 1.20E-15 | 7.9233  | 408317 | Snoring |
| rs10878268 | 12 | 65779193  | G | T | 0.3738 | 0.0086  | 0.0011 | 9.70E-16 | 7.9578  | 408317 | Snoring |
| rs10878269 | 12 | 65791463  | T | C | 0.3643 | 0.0089  | 0.0011 | 2.30E-16 | 8.1534  | 408317 | Snoring |
| rs10878270 | 12 | 65792175  | G | A | 0.3743 | 0.0086  | 0.0011 | 1.10E-15 | 7.9317  | 408317 | Snoring |
| rs10878271 | 12 | 65795603  | T | C | 0.3643 | 0.0089  | 0.0011 | 2.40E-16 | 8.1502  | 408317 | Snoring |
| rs10878272 | 12 | 65797720  | G | A | 0.3745 | 0.0085  | 0.0011 | 1.50E-15 | 7.8973  | 408317 | Snoring |
| rs10878277 | 12 | 65821687  | T | C | 0.3738 | 0.0086  | 0.0011 | 1.30E-15 | 7.9283  | 408317 | Snoring |
| rs10878281 | 12 | 65845000  | G | A | 0.4496 | 0.0070  | 0.0011 | 3.00E-11 | 6.6732  | 408317 | Snoring |
| rs10878282 | 12 | 65850543  | T | C | 0.4494 | 0.0070  | 0.0011 | 3.50E-11 | 6.6493  | 408317 | Snoring |
| rs10878283 | 12 | 65851171  | C | T | 0.4598 | 0.0067  | 0.0010 | 1.30E-10 | 6.4221  | 408317 | Snoring |
| rs10878285 | 12 | 65874288  | C | T | 0.4601 | 0.0067  | 0.0011 | 2.30E-10 | 6.3455  | 408317 | Snoring |
| rs10878286 | 12 | 65882677  | C | T | 0.4495 | 0.0069  | 0.0011 | 6.10E-11 | 6.5749  | 408317 | Snoring |
| rs10878287 | 12 | 65882734  | G | A | 0.4496 | 0.0069  | 0.0011 | 6.10E-11 | 6.5747  | 408317 | Snoring |
| rs10878288 | 12 | 65883504  | A | G | 0.4487 | 0.0068  | 0.0011 | 1.40E-10 | 6.4468  | 408317 | Snoring |
| rs10888707 | 1  | 51226608  | A | G | 0.4031 | 0.0059  | 0.0011 | 2.60E-08 | 5.5616  | 408317 | Snoring |
| rs10888708 | 1  | 51237194  | C | T | 0.4242 | 0.0060  | 0.0011 | 2.20E-08 | 5.6253  | 408317 | Snoring |
| rs10888709 | 1  | 51314782  | C | A | 0.4242 | 0.0060  | 0.0011 | 2.00E-08 | 5.6446  | 408317 | Snoring |
| rs10888711 | 1  | 51397457  | A | T | 0.4234 | 0.0059  | 0.0011 | 3.30E-08 | 5.5500  | 408317 | Snoring |
| rs10888715 | 1  | 39699244  | C | T | 0.3167 | 0.0061  | 0.0011 | 4.10E-08 | 5.4615  | 408317 | Snoring |
| rs10954163 | 7  | 127375129 | A | G | 0.4102 | -0.0059 | 0.0011 | 2.10E-08 | -5.5224 | 408317 | Snoring |
| rs10954164 | 7  | 127533877 | C | T | 0.3420 | 0.0063  | 0.0011 | 7.10E-09 | 5.7296  | 408317 | Snoring |
| rs10957529 | 8  | 71714467  | A | G | 0.4320 | 0.0068  | 0.0011 | 1.30E-10 | 6.4243  | 408317 | Snoring |
| rs10957532 | 8  | 71758010  | T | A | 0.4303 | 0.0068  | 0.0011 | 1.00E-10 | 6.4583  | 408317 | Snoring |
| rs10957533 | 8  | 71825107  | G | A | 0.4297 | 0.0068  | 0.0011 | 1.20E-10 | 6.4346  | 408317 | Snoring |
| rs11018434 | 11 | 88765779  | A | G | 0.4826 | -0.0064 | 0.0011 | 7.70E-10 | -6.1218 | 408317 | Snoring |
| rs11018479 | 11 | 88845435  | A | C | 0.3712 | 0.0058  | 0.0011 | 4.20E-08 | 5.3926  | 408317 | Snoring |
| rs11018488 | 11 | 88861590  | T | A | 0.3733 | -0.0068 | 0.0011 | 5.30E-10 | -6.1711 | 408317 | Snoring |
| rs11018510 | 11 | 88883499  | A | G | 0.4886 | 0.0062  | 0.0010 | 1.90E-09 | 5.9735  | 408317 | Snoring |
| rs11018511 | 11 | 88883648  | C | A | 0.4886 | 0.0063  | 0.0010 | 1.80E-09 | 5.9780  | 408317 | Snoring |
| rs11018515 | 11 | 88894768  | A | G | 0.4258 | 0.0057  | 0.0011 | 4.70E-08 | 5.4296  | 408317 | Snoring |
| rs11018519 | 11 | 88901570  | G | A | 0.4898 | 0.0061  | 0.0010 | 3.70E-09 | 5.8574  | 408317 | Snoring |
| rs11018544 | 11 | 88970006  | T | A | 0.4881 | 0.0056  | 0.0010 | 4.70E-08 | 5.3887  | 408317 | Snoring |
| rs11030084 | 11 | 27643725  | T | C | 0.1856 | -0.0083 | 0.0013 | 9.90E-10 | -6.2103 | 408317 | Snoring |
| rs11030099 | 11 | 27677583  | A | C | 0.1982 | -0.0074 | 0.0013 | 2.60E-08 | -5.6655 | 408317 | Snoring |
| rs11030100 | 11 | 27677586  | T | G | 0.1982 | -0.0075 | 0.0013 | 2.30E-08 | -5.6872 | 408317 | Snoring |
| rs11030104 | 11 | 27684517  | G | A | 0.2023 | -0.0074 | 0.0013 | 1.90E-08 | -5.7085 | 408317 | Snoring |
| rs1105569  | 17 | 43793388  | T | C | 0.2251 | 0.0076  | 0.0012 | 1.10E-09 | 6.1219  | 408317 | Snoring |
| rs1105570  | 17 | 43793342  | G | A | 0.2251 | 0.0076  | 0.0012 | 1.10E-09 | 6.1219  | 408317 | Snoring |
| rs1105571  | 17 | 43793200  | T | A | 0.2251 | 0.0077  | 0.0012 | 1.10E-09 | 6.1243  | 408317 | Snoring |
| rs11075985 | 16 | 53805207  | A | C | 0.4231 | 0.0069  | 0.0011 | 6.40E-11 | 6.5332  | 408317 | Snoring |
| rs11075987 | 16 | 53815161  | T | G | 0.5084 | -0.0059 | 0.0010 | 1.90E-08 | -5.6054 | 408317 | Snoring |
| rs11075988 | 16 | 53819771  | A | G | 0.3931 | 0.0063  | 0.0011 | 3.40E-09 | 5.9157  | 408317 | Snoring |
| rs11075989 | 16 | 53819877  | T | C | 0.3931 | 0.0063  | 0.0011 | 3.50E-09 | 5.9111  | 408317 | Snoring |
| rs11075990 | 16 | 53819893  | G | A | 0.3931 | 0.0063  | 0.0011 | 3.50E-09 | 5.9111  | 408317 | Snoring |
| rs11075991 | 16 | 53819937  | T | A | 0.3931 | 0.0063  | 0.0011 | 3.50E-09 | 5.9123  | 408317 | Snoring |
| rs11075992 | 16 | 53820066  | C | T | 0.3931 | 0.0063  | 0.0011 | 3.40E-09 | 5.9144  | 408317 | Snoring |
| rs11075993 | 16 | 53837144  | T | G | 0.4121 | 0.0059  | 0.0011 | 3.30E-08 | 5.5220  | 408317 | Snoring |
| rs11076    | 16 | 30995528  | A | G | 0.3679 | 0.0059  | 0.0011 | 4.70E-08 | 5.4782  | 408317 | Snoring |
| rs11077469 | 17 | 67937331  | A | G | 0.3439 | 0.0065  | 0.0011 | 4.00E-09 | 5.9051  | 408317 | Snoring |
| rs1107820  | 17 | 44135359  | C | T | 0.2254 | 0.0075  | 0.0012 | 2.00E-09 | 6.0247  | 408317 | Snoring |
| rs11078768 | 17 | 1915090   | A | G | 0.3107 | -0.0062 | 0.0011 | 3.40E-08 | -5.5135 | 408317 | Snoring |
| rs11078769 | 17 | 1915107   | T | C | 0.3108 | -0.0062 | 0.0011 | 3.00E-08 | -5.5323 | 408317 | Snoring |
| rs11079717 | 17 | 43835351  | C | T | 0.2252 | 0.0076  | 0.0012 | 1.30E-09 | 6.0972  | 408317 | Snoring |
| rs11079718 | 17 | 43839951  | T | A | 0.2246 | 0.0076  | 0.0013 | 2.10E-09 | 6.0227  | 408317 | Snoring |
| rs11079719 | 17 | 43840006  | G | T | 0.2233 | 0.0075  | 0.0013 | 3.40E-09 | 5.9422  | 408317 | Snoring |
| rs11079720 | 17 | 43840016  | A | G | 0.2228 | 0.0075  | 0.0013 | 3.40E-09 | 5.9386  | 408317 | Snoring |
| rs11079721 | 17 | 43840107  | A | C | 0.2252 | 0.0076  | 0.0013 | 1.40E-09 | 6.0806  | 408317 | Snoring |
| rs11079723 | 17 | 43841729  | C | T | 0.2250 | 0.0076  | 0.0013 | 1.30E-09 | 6.0936  | 408317 | Snoring |
| rs11079724 | 17 | 43841912  | T | C | 0.2251 | 0.0076  | 0.0012 | 1.20E-09 | 6.1059  | 408317 | Snoring |
| rs11079725 | 17 | 43923934  | C | T | 0.2253 | 0.0076  | 0.0012 | 1.10E-09 | 6.1236  | 408317 | Snoring |
| rs11079729 | 17 | 44115569  | A | C | 0.2254 | 0.0075  | 0.0012 | 1.90E-09 | 6.0300  | 408317 | Snoring |
| rs11079731 | 17 | 44143470  | T | C | 0.1818 | -0.0075 | 0.0014 | 2.80E-08 | -5.5483 | 408317 | Snoring |
| rs11079814 | 17 | 46268439  | T | C | 0.3866 | 0.0062  | 0.0011 | 3.80E-09 | 5.8068  | 408317 | Snoring |
| rs1108431  | 16 | 31054607  | T | C | 0.3732 | 0.0066  | 0.0011 | 1.20E-09 | 6.1087  | 408317 | Snoring |
| rs1109337  | 1  | 50816390  | A | G | 0.4582 | 0.0060  | 0.0011 | 1.00E-08 | 5.7482  | 408317 | Snoring |
| rs1109338  | 1  | 50816484  | T | C | 0.4581 | 0.0060  | 0.0011 | 1.10E-08 | 5.7402  | 408317 | Snoring |

|             |    |          |   |   |        |         |        |          |         |        |         |
|-------------|----|----------|---|---|--------|---------|--------|----------|---------|--------|---------|
| rs1109340   | 1  | 50817519 | G | A | 0.4582 | 0.0060  | 0.0011 | 1.10E-08 | 5.7418  | 408317 | Snoring |
| rs1110220   | 1  | 50815397 | G | A | 0.4581 | 0.0060  | 0.0010 | 1.20E-08 | 5.7230  | 408317 | Snoring |
| rs111164082 | 17 | 44047037 | A | T | 0.2224 | 0.0076  | 0.0013 | 1.60E-09 | 6.0646  | 408317 | Snoring |
| rs111240522 | 17 | 44066874 | A | G | 0.2254 | 0.0075  | 0.0012 | 1.80E-09 | 6.0389  | 408317 | Snoring |
| rs111259120 | 17 | 44133534 | T | C | 0.2254 | 0.0075  | 0.0012 | 2.00E-09 | 6.0240  | 408317 | Snoring |
| rs111273167 | 17 | 43740967 | T | C | 0.2253 | 0.0077  | 0.0012 | 8.40E-10 | 6.1596  | 408317 | Snoring |
| rs11128078  | 3  | 90030538 | T | C | 0.4263 | -0.0057 | 0.0011 | 4.30E-08 | -5.4029 | 408317 | Snoring |
| rs111295615 | 17 | 44184428 | C | T | 0.2255 | 0.0076  | 0.0013 | 1.50E-09 | 6.0800  | 408317 | Snoring |
| rs111321973 | 17 | 43953170 | T | C | 0.2255 | 0.0076  | 0.0012 | 1.30E-09 | 6.0933  | 408317 | Snoring |
| rs111324579 | 17 | 44082181 | G | A | 0.2256 | 0.0076  | 0.0012 | 1.80E-09 | 6.0466  | 408317 | Snoring |
| rs111327992 | 17 | 44126691 | A | G | 0.2256 | 0.0075  | 0.0012 | 2.30E-09 | 6.0052  | 408317 | Snoring |
| rs111364350 | 17 | 44168508 | T | C | 0.2254 | 0.0075  | 0.0012 | 2.20E-09 | 6.0136  | 408317 | Snoring |
| rs111370985 | 17 | 43852742 | C | T | 0.2244 | 0.0077  | 0.0013 | 9.50E-10 | 6.1414  | 408317 | Snoring |
| rs111372048 | 17 | 44136577 | C | A | 0.2253 | 0.0075  | 0.0012 | 2.20E-09 | 6.0094  | 408317 | Snoring |
| rs111374028 | 17 | 43846820 | A | G | 0.2251 | 0.0077  | 0.0012 | 1.00E-09 | 6.1368  | 408317 | Snoring |
| rs111413387 | 17 | 44344409 | C | A | 0.2280 | 0.0074  | 0.0013 | 5.60E-09 | 5.8703  | 408317 | Snoring |
| rs111415173 | 17 | 43795573 | T | C | 0.2251 | 0.0077  | 0.0012 | 1.10E-09 | 6.1239  | 408317 | Snoring |
| rs11142940  | 17 | 44211502 | A | G | 0.2258 | 0.0076  | 0.0012 | 1.40E-09 | 6.0859  | 408317 | Snoring |
| rs111433752 | 17 | 43857989 | G | T | 0.2206 | 0.0076  | 0.0013 | 2.60E-09 | 5.9807  | 408317 | Snoring |
| rs111446248 | 17 | 44355173 | C | T | 0.1999 | 0.0082  | 0.0014 | 1.90E-09 | 6.0419  | 408317 | Snoring |
| rs111447859 | 17 | 43987184 | C | T | 0.2256 | 0.0077  | 0.0012 | 9.00E-10 | 6.1529  | 408317 | Snoring |
| rs111497072 | 17 | 43824201 | A | G | 0.2252 | 0.0076  | 0.0012 | 1.10E-09 | 6.1182  | 408317 | Snoring |
| rs111511018 | 17 | 43794828 | C | T | 0.2242 | 0.0077  | 0.0013 | 1.10E-09 | 6.1138  | 408317 | Snoring |
| rs111519055 | 17 | 44159672 | G | A | 0.2254 | 0.0075  | 0.0012 | 2.00E-09 | 6.0244  | 408317 | Snoring |
| rs111520035 | 17 | 44039410 | G | A | 0.2254 | 0.0075  | 0.0012 | 2.10E-09 | 6.0171  | 408317 | Snoring |
| rs111535660 | 17 | 44314148 | A | T | 0.2012 | 0.0079  | 0.0013 | 4.50E-09 | 5.8846  | 408317 | Snoring |
| rs111541901 | 17 | 43994358 | T | C | 0.2252 | 0.0076  | 0.0012 | 1.60E-09 | 6.0586  | 408317 | Snoring |
| rs111549407 | 13 | 50760184 | A | G | 0.4614 | 0.0062  | 0.0010 | 2.70E-09 | 5.9399  | 408317 | Snoring |
| rs111652694 | 17 | 44067831 | C | T | 0.2254 | 0.0075  | 0.0012 | 2.10E-09 | 6.0215  | 408317 | Snoring |
| rs111664122 | 17 | 43857990 | C | T | 0.2205 | 0.0076  | 0.0013 | 2.50E-09 | 5.9854  | 408317 | Snoring |
| rs111676341 | 17 | 44183403 | G | A | 0.2259 | 0.0076  | 0.0012 | 1.50E-09 | 6.0790  | 408317 | Snoring |
| rs111678697 | 17 | 44197032 | C | T | 0.2258 | 0.0076  | 0.0012 | 1.50E-09 | 6.0676  | 408317 | Snoring |
| rs111678999 | 8  | 71667983 | T | G | 0.4302 | 0.0068  | 0.0011 | 1.20E-10 | 6.4295  | 408317 | Snoring |
| rs111689007 | 17 | 43981103 | A | C | 0.2254 | 0.0076  | 0.0012 | 1.40E-09 | 6.0840  | 408317 | Snoring |
| rs111724389 | 17 | 44209364 | A | G | 0.2258 | 0.0076  | 0.0012 | 1.40E-09 | 6.0862  | 408317 | Snoring |
| rs1117253   | 17 | 44149297 | C | A | 0.2254 | 0.0075  | 0.0012 | 2.00E-09 | 6.0261  | 408317 | Snoring |
| rs111735741 | 17 | 43856372 | A | G | 0.2238 | 0.0075  | 0.0013 | 2.50E-09 | 5.9903  | 408317 | Snoring |
| rs111739681 | 17 | 43898459 | T | C | 0.2250 | 0.0076  | 0.0012 | 1.10E-09 | 6.1167  | 408317 | Snoring |
| rs111751251 | 17 | 44042951 | T | C | 0.2199 | 0.0076  | 0.0013 | 2.50E-09 | 5.9916  | 408317 | Snoring |
| rs11175746  | 12 | 65791358 | A | C | 0.3741 | 0.0086  | 0.0011 | 1.00E-15 | 7.9440  | 408317 | Snoring |
| rs11175752  | 12 | 65799744 | T | G | 0.3741 | 0.0086  | 0.0011 | 1.00E-15 | 7.9486  | 408317 | Snoring |
| rs11175753  | 12 | 65802055 | A | G | 0.3741 | 0.0086  | 0.0011 | 1.10E-15 | 7.9330  | 408317 | Snoring |
| rs11175761  | 12 | 65817320 | G | C | 0.3646 | 0.0088  | 0.0011 | 3.20E-16 | 8.1159  | 408317 | Snoring |
| rs11175762  | 12 | 65824224 | T | C | 0.3738 | 0.0086  | 0.0011 | 1.30E-15 | 7.9253  | 408317 | Snoring |
| rs11175768  | 12 | 65850681 | G | C | 0.4493 | 0.0070  | 0.0011 | 3.60E-11 | 6.6476  | 408317 | Snoring |
| rs11175770  | 12 | 65851829 | T | C | 0.4499 | 0.0070  | 0.0011 | 4.10E-11 | 6.6292  | 408317 | Snoring |
| rs11175781  | 12 | 65881019 | G | T | 0.4497 | 0.0069  | 0.0011 | 7.10E-11 | 6.5500  | 408317 | Snoring |
| rs11175783  | 12 | 65881702 | T | C | 0.4500 | 0.0069  | 0.0011 | 7.40E-11 | 6.5433  | 408317 | Snoring |
| rs11175785  | 12 | 65888364 | C | T | 0.4496 | 0.0068  | 0.0011 | 1.20E-10 | 6.4737  | 408317 | Snoring |
| rs111825734 | 17 | 44019107 | G | T | 0.2337 | 0.0072  | 0.0012 | 7.30E-09 | 5.8257  | 408317 | Snoring |
| rs111853996 | 17 | 44130878 | G | A | 0.2254 | 0.0075  | 0.0012 | 2.00E-09 | 6.0231  | 408317 | Snoring |
| rs111854089 | 17 | 44344541 | A | C | 0.2045 | 0.0077  | 0.0013 | 6.90E-09 | 5.8116  | 408317 | Snoring |
| rs111878933 | 17 | 43856341 | T | C | 0.2238 | 0.0075  | 0.0013 | 2.50E-09 | 5.9894  | 408317 | Snoring |
| rs111880194 | 17 | 44194621 | G | C | 0.2258 | 0.0076  | 0.0012 | 1.50E-09 | 6.0714  | 408317 | Snoring |
| rs111905143 | 17 | 44184808 | G | C | 0.2249 | 0.0076  | 0.0013 | 1.20E-09 | 6.1066  | 408317 | Snoring |
| rs111912558 | 17 | 44356694 | C | T | 0.2025 | 0.0082  | 0.0013 | 1.40E-09 | 6.0794  | 408317 | Snoring |
| rs111913701 | 17 | 44159631 | G | T | 0.2254 | 0.0075  | 0.0012 | 2.00E-09 | 6.0244  | 408317 | Snoring |
| rs111920741 | 17 | 44333412 | A | G | 0.2222 | 0.0073  | 0.0013 | 6.90E-09 | 5.8298  | 408317 | Snoring |
| rs111941646 | 17 | 43966608 | T | A | 0.2255 | 0.0076  | 0.0012 | 1.40E-09 | 6.0837  | 408317 | Snoring |
| rs111952388 | 17 | 44181454 | T | C | 0.2257 | 0.0076  | 0.0012 | 1.60E-09 | 6.0603  | 408317 | Snoring |
| rs111957446 | 17 | 44179723 | C | T | 0.2250 | 0.0075  | 0.0013 | 2.10E-09 | 6.0206  | 408317 | Snoring |
| rs111962225 | 17 | 43934016 | C | G | 0.2255 | 0.0076  | 0.0012 | 1.50E-09 | 6.0761  | 408317 | Snoring |
| rs111970616 | 17 | 44169581 | C | T | 0.2254 | 0.0075  | 0.0012 | 2.10E-09 | 6.0166  | 408317 | Snoring |
| rs111972148 | 17 | 43973121 | C | G | 0.2255 | 0.0076  | 0.0012 | 1.40E-09 | 6.0836  | 408317 | Snoring |
| rs111976319 | 17 | 44095335 | A | C | 0.2254 | 0.0075  | 0.0012 | 1.90E-09 | 6.0337  | 408317 | Snoring |
| rs111985258 | 17 | 43795859 | G | A | 0.2251 | 0.0077  | 0.0012 | 1.00E-09 | 6.1356  | 408317 | Snoring |
| rs112003140 | 17 | 43980998 | A | G | 0.2255 | 0.0076  | 0.0012 | 1.40E-09 | 6.0809  | 408317 | Snoring |
| rs112003311 | 17 | 44042939 | A | G | 0.2190 | 0.0075  | 0.0013 | 4.30E-09 | 5.8934  | 408317 | Snoring |
| rs112010353 | 17 | 43666492 | T | C | 0.2249 | 0.0077  | 0.0013 | 8.10E-10 | 6.1613  | 408317 | Snoring |
| rs11205709  | 1  | 50809294 | G | C | 0.4563 | 0.0059  | 0.0010 | 1.70E-08 | 5.6559  | 408317 | Snoring |
| rs11205713  | 1  | 50820336 | C | T | 0.4333 | 0.0063  | 0.0011 | 7.00E-09 | 5.8167  | 408317 | Snoring |
| rs11205714  | 1  | 50820421 | T | A | 0.4583 | 0.0060  | 0.0011 | 1.10E-08 | 5.7399  | 408317 | Snoring |
| rs11205761  | 1  | 51183257 | C | T | 0.4039 | 0.0060  | 0.0011 | 1.30E-08 | 5.6792  | 408317 | Snoring |
| rs11205768  | 1  | 51220127 | C | T | 0.4040 | 0.0061  | 0.0011 | 1.10E-08 | 5.7161  | 408317 | Snoring |

|             |    |          |   |   |        |         |        |          |         |        |         |
|-------------|----|----------|---|---|--------|---------|--------|----------|---------|--------|---------|
| rs11205769  | 1  | 51223480 | T | C | 0.4038 | 0.0060  | 0.0011 | 1.40E-08 | 5.6742  | 408317 | Snoring |
| rs11205802  | 1  | 39699114 | C | T | 0.3166 | 0.0061  | 0.0011 | 4.40E-08 | 5.4510  | 408317 | Snoring |
| rs112058117 | 17 | 44041562 | T | G | 0.2207 | 0.0074  | 0.0013 | 7.40E-09 | 5.8121  | 408317 | Snoring |
| rs11205823  | 1  | 39714238 | T | A | 0.2868 | 0.0064  | 0.0012 | 2.70E-08 | 5.5369  | 408317 | Snoring |
| rs112073200 | 17 | 44201791 | C | G | 0.2257 | 0.0076  | 0.0012 | 1.80E-09 | 6.0456  | 408317 | Snoring |
| rs112074397 | 17 | 44131022 | C | T | 0.2254 | 0.0075  | 0.0012 | 2.10E-09 | 6.0216  | 408317 | Snoring |
| rs112082260 | 17 | 44355303 | C | T | 0.2218 | 0.0077  | 0.0013 | 2.50E-09 | 6.0000  | 408317 | Snoring |
| rs112102887 | 17 | 44179749 | A | G | 0.2259 | 0.0076  | 0.0012 | 1.50E-09 | 6.0794  | 408317 | Snoring |
| rs112116311 | 17 | 43989898 | G | T | 0.2255 | 0.0076  | 0.0012 | 1.60E-09 | 6.0670  | 408317 | Snoring |
| rs112123127 | 17 | 43785098 | T | C | 0.2222 | 0.0078  | 0.0013 | 6.40E-10 | 6.2046  | 408317 | Snoring |
| rs112137135 | 17 | 43900817 | G | A | 0.2252 | 0.0076  | 0.0012 | 1.30E-09 | 6.0996  | 408317 | Snoring |
| rs112155389 | 17 | 43758078 | A | G | 0.2252 | 0.0077  | 0.0012 | 8.70E-10 | 6.1539  | 408317 | Snoring |
| rs112166495 | 17 | 44005361 | A | G | 0.2235 | 0.0075  | 0.0013 | 2.60E-09 | 5.9877  | 408317 | Snoring |
| rs112169475 | 17 | 43760192 | G | A | 0.2253 | 0.0077  | 0.0012 | 9.00E-10 | 6.1493  | 408317 | Snoring |
| rs112176793 | 17 | 1909793  | T | C | 0.3176 | -0.0062 | 0.0011 | 4.70E-08 | -5.4448 | 408317 | Snoring |
| rs112186939 | 8  | 78113532 | T | C | 0.2855 | -0.0067 | 0.0012 | 4.90E-09 | -5.8311 | 408317 | Snoring |
| rs112197756 | 17 | 44154105 | G | A | 0.2254 | 0.0075  | 0.0012 | 2.00E-09 | 6.0259  | 408317 | Snoring |
| rs1121980   | 16 | 53809247 | A | G | 0.4223 | 0.0068  | 0.0011 | 1.10E-10 | 6.4542  | 408317 | Snoring |
| rs112206871 | 17 | 44041817 | G | A | 0.2254 | 0.0075  | 0.0012 | 2.20E-09 | 6.0112  | 408317 | Snoring |
| rs1122380   | 17 | 44206079 | T | C | 0.2258 | 0.0076  | 0.0012 | 1.40E-09 | 6.0822  | 408317 | Snoring |
| rs1122381   | 17 | 44205839 | G | A | 0.2258 | 0.0076  | 0.0012 | 1.40E-09 | 6.0874  | 408317 | Snoring |
| rs112243618 | 17 | 44355284 | A | G | 0.2020 | 0.0081  | 0.0014 | 2.20E-09 | 5.9998  | 408317 | Snoring |
| rs112254607 | 17 | 44357392 | A | C | 0.2078 | 0.0080  | 0.0013 | 2.90E-09 | 5.9520  | 408317 | Snoring |
| rs112275277 | 17 | 43981958 | T | C | 0.2255 | 0.0076  | 0.0012 | 1.40E-09 | 6.0801  | 408317 | Snoring |
| rs112305366 | 17 | 44337903 | G | C | 0.2164 | 0.0074  | 0.0013 | 8.70E-09 | 5.8021  | 408317 | Snoring |
| rs112310745 | 17 | 44082432 | A | G | 0.2246 | 0.0076  | 0.0013 | 1.80E-09 | 6.0411  | 408317 | Snoring |
| rs112327620 | 17 | 43669491 | G | A | 0.2203 | 0.0075  | 0.0013 | 4.80E-09 | 5.9003  | 408317 | Snoring |
| rs112333322 | 17 | 44126673 | G | A | 0.2236 | 0.0076  | 0.0013 | 2.00E-09 | 6.0236  | 408317 | Snoring |
| rs112364920 | 17 | 44161360 | T | A | 0.2254 | 0.0075  | 0.0012 | 2.00E-09 | 6.0234  | 408317 | Snoring |
| rs112385572 | 17 | 44066172 | G | A | 0.2254 | 0.0075  | 0.0012 | 2.10E-09 | 6.0216  | 408317 | Snoring |
| rs112401617 | 17 | 44209474 | T | A | 0.2258 | 0.0076  | 0.0012 | 1.40E-09 | 6.0860  | 408317 | Snoring |
| rs112411928 | 17 | 44139762 | G | C | 0.2254 | 0.0075  | 0.0012 | 2.00E-09 | 6.0268  | 408317 | Snoring |
| rs112415880 | 17 | 44042868 | A | G | 0.2254 | 0.0075  | 0.0012 | 2.20E-09 | 6.0091  | 408317 | Snoring |
| rs112425426 | 17 | 43963416 | G | C | 0.2255 | 0.0076  | 0.0012 | 1.40E-09 | 6.0846  | 408317 | Snoring |
| rs112431991 | 17 | 43758885 | G | A | 0.2236 | 0.0078  | 0.0013 | 4.80E-10 | 6.2452  | 408317 | Snoring |
| rs112439933 | 17 | 44005226 | C | A | 0.2263 | 0.0075  | 0.0012 | 1.90E-09 | 6.0377  | 408317 | Snoring |
| rs112454267 | 17 | 44005329 | A | G | 0.2255 | 0.0076  | 0.0012 | 1.50E-09 | 6.0750  | 408317 | Snoring |
| rs112480703 | 17 | 44189799 | C | T | 0.2225 | 0.0077  | 0.0013 | 1.10E-09 | 6.1201  | 408317 | Snoring |
| rs112493812 | 17 | 44314179 | A | G | 0.2248 | 0.0075  | 0.0012 | 2.30E-09 | 6.0080  | 408317 | Snoring |
| rs112534607 | 17 | 44344376 | A | G | 0.2282 | 0.0074  | 0.0013 | 6.30E-09 | 5.8504  | 408317 | Snoring |
| rs112556326 | 17 | 43575946 | T | G | 0.2267 | 0.0076  | 0.0012 | 1.10E-09 | 6.1256  | 408317 | Snoring |
| rs11256017  | 10 | 9043919  | T | C | 0.1836 | 0.0089  | 0.0014 | 4.60E-11 | 6.5745  | 408317 | Snoring |
| rs112560196 | 17 | 44200078 | T | A | 0.2259 | 0.0076  | 0.0012 | 1.50E-09 | 6.0700  | 408317 | Snoring |
| rs11256034  | 10 | 9086147  | T | C | 0.2482 | 0.0078  | 0.0012 | 1.40E-10 | 6.4037  | 408317 | Snoring |
| rs112570965 | 17 | 43801092 | C | T | 0.2251 | 0.0077  | 0.0012 | 1.00E-09 | 6.1284  | 408317 | Snoring |
| rs112572874 | 17 | 44072984 | G | A | 0.2271 | 0.0074  | 0.0012 | 3.40E-09 | 5.9361  | 408317 | Snoring |
| rs112578465 | 17 | 44125066 | T | C | 0.2254 | 0.0075  | 0.0012 | 2.10E-09 | 6.0167  | 408317 | Snoring |
| rs112583797 | 17 | 43918418 | G | A | 0.2252 | 0.0076  | 0.0012 | 1.10E-09 | 6.1220  | 408317 | Snoring |
| rs112596352 | 17 | 44170238 | A | G | 0.2259 | 0.0076  | 0.0012 | 1.50E-09 | 6.0740  | 408317 | Snoring |
| rs112637166 | 17 | 43751101 | G | A | 0.2251 | 0.0077  | 0.0012 | 7.20E-10 | 6.1882  | 408317 | Snoring |
| rs112647192 | 17 | 43994623 | A | G | 0.2255 | 0.0076  | 0.0012 | 1.50E-09 | 6.0754  | 408317 | Snoring |
| rs112665297 | 17 | 44348634 | C | T | 0.2042 | 0.0078  | 0.0013 | 7.60E-09 | 5.8172  | 408317 | Snoring |
| rs112674766 | 17 | 44130924 | T | A | 0.2254 | 0.0075  | 0.0012 | 2.00E-09 | 6.0231  | 408317 | Snoring |
| rs112746008 | 17 | 44126650 | T | C | 0.2254 | 0.0075  | 0.0012 | 2.00E-09 | 6.0250  | 408317 | Snoring |
| rs112750270 | 17 | 44357562 | T | C | 0.2021 | 0.0080  | 0.0014 | 3.70E-09 | 5.9153  | 408317 | Snoring |
| rs112813897 | 17 | 44196799 | A | G | 0.2259 | 0.0076  | 0.0012 | 1.60E-09 | 6.0654  | 408317 | Snoring |
| rs112836774 | 17 | 44084002 | C | T | 0.2229 | 0.0075  | 0.0013 | 3.60E-09 | 5.9393  | 408317 | Snoring |
| rs112893440 | 17 | 44179969 | A | G | 0.2259 | 0.0076  | 0.0012 | 1.40E-09 | 6.0793  | 408317 | Snoring |
| rs112896750 | 17 | 46263909 | A | G | 0.0968 | -0.0106 | 0.0018 | 3.20E-09 | -5.9064 | 408317 | Snoring |
| rs112906665 | 16 | 31040139 | C | T | 0.3767 | 0.0065  | 0.0011 | 2.30E-09 | 6.0057  | 408317 | Snoring |
| rs112915466 | 17 | 43958744 | G | A | 0.2251 | 0.0076  | 0.0012 | 1.30E-09 | 6.0914  | 408317 | Snoring |
| rs112950348 | 17 | 44033188 | A | G | 0.2205 | 0.0078  | 0.0013 | 1.20E-09 | 6.1102  | 408317 | Snoring |
| rs112972619 | 17 | 43776425 | T | C | 0.2221 | 0.0078  | 0.0013 | 7.30E-10 | 6.1777  | 408317 | Snoring |
| rs112995313 | 17 | 43795768 | C | T | 0.2251 | 0.0077  | 0.0012 | 1.10E-09 | 6.1240  | 408317 | Snoring |
| rs112997627 | 17 | 43695263 | G | T | 0.2226 | 0.0077  | 0.0013 | 1.50E-09 | 6.0694  | 408317 | Snoring |
| rs113029914 | 17 | 43981831 | T | A | 0.2255 | 0.0076  | 0.0012 | 1.40E-09 | 6.0825  | 408317 | Snoring |
| rs113056783 | 17 | 44348616 | T | C | 0.2038 | 0.0078  | 0.0013 | 5.90E-09 | 5.8378  | 408317 | Snoring |
| rs113093579 | 17 | 43934116 | G | T | 0.2253 | 0.0076  | 0.0012 | 1.40E-09 | 6.0783  | 408317 | Snoring |
| rs113120855 | 17 | 44203520 | T | C | 0.2258 | 0.0076  | 0.0012 | 1.70E-09 | 6.0550  | 408317 | Snoring |
| rs113130019 | 17 | 44357172 | T | C | 0.2024 | 0.0081  | 0.0014 | 2.80E-09 | 5.9641  | 408317 | Snoring |
| rs113134013 | 17 | 44066995 | T | C | 0.2254 | 0.0075  | 0.0012 | 2.10E-09 | 6.0209  | 408317 | Snoring |
| rs113138968 | 17 | 44314261 | T | C | 0.2244 | 0.0076  | 0.0013 | 1.60E-09 | 6.0661  | 408317 | Snoring |
| rs113145808 | 11 | 27706040 | C | T | 0.2073 | -0.0077 | 0.0013 | 3.70E-09 | -5.9695 | 408317 | Snoring |
| rs113161176 | 17 | 43974354 | A | G | 0.2249 | 0.0076  | 0.0013 | 1.40E-09 | 6.0894  | 408317 | Snoring |

|             |    |           |   |   |        |         |        |          |         |        |         |
|-------------|----|-----------|---|---|--------|---------|--------|----------|---------|--------|---------|
| rs113173628 | 17 | 43794899  | T | C | 0.2184 | 0.0076  | 0.0013 | 3.00E-09 | 5.9426  | 408317 | Snoring |
| rs113178301 | 17 | 44339354  | C | T | 0.2099 | 0.0078  | 0.0013 | 2.90E-09 | 5.9458  | 408317 | Snoring |
| rs113201171 | 17 | 44082249  | T | A | 0.2255 | 0.0075  | 0.0012 | 1.90E-09 | 6.0314  | 408317 | Snoring |
| rs113271363 | 17 | 43996721  | G | C | 0.2254 | 0.0076  | 0.0012 | 1.60E-09 | 6.0586  | 408317 | Snoring |
| rs113277432 | 17 | 44033169  | C | T | 0.2205 | 0.0078  | 0.0013 | 1.20E-09 | 6.1105  | 408317 | Snoring |
| rs113279829 | 11 | 88845892  | T | C | 0.4976 | 0.0061  | 0.0010 | 3.80E-09 | 5.8490  | 408317 | Snoring |
| rs113311910 | 17 | 43681738  | T | C | 0.1855 | 0.0087  | 0.0014 | 1.10E-09 | 6.1501  | 408317 | Snoring |
| rs113313477 | 17 | 44005186  | A | G | 0.2263 | 0.0075  | 0.0012 | 2.00E-09 | 6.0331  | 408317 | Snoring |
| rs113313727 | 17 | 44338594  | A | G | 0.2308 | 0.0071  | 0.0012 | 1.70E-08 | 5.6766  | 408317 | Snoring |
| rs113316734 | 17 | 44084157  | C | T | 0.2253 | 0.0076  | 0.0012 | 1.60E-09 | 6.0662  | 408317 | Snoring |
| rs113322852 | 17 | 43569245  | A | T | 0.1847 | 0.0073  | 0.0013 | 4.90E-08 | 5.4439  | 408317 | Snoring |
| rs113327263 | 17 | 43965063  | C | T | 0.2255 | 0.0076  | 0.0012 | 1.40E-09 | 6.0843  | 408317 | Snoring |
| rs113343439 | 17 | 44314217  | G | A | 0.2247 | 0.0076  | 0.0013 | 1.30E-09 | 6.0969  | 408317 | Snoring |
| rs113343751 | 17 | 44333532  | G | C | 0.2237 | 0.0074  | 0.0013 | 4.00E-09 | 5.9150  | 408317 | Snoring |
| rs113347741 | 17 | 43973408  | T | C | 0.2255 | 0.0076  | 0.0012 | 1.40E-09 | 6.0852  | 408317 | Snoring |
| rs113395365 | 17 | 44025650  | C | T | 0.2254 | 0.0076  | 0.0012 | 1.30E-09 | 6.0897  | 408317 | Snoring |
| rs113414067 | 17 | 43955093  | C | T | 0.2255 | 0.0076  | 0.0012 | 1.40E-09 | 6.0827  | 408317 | Snoring |
| rs113434679 | 17 | 44126765  | A | C | 0.2002 | 0.0079  | 0.0013 | 2.10E-09 | 6.0248  | 408317 | Snoring |
| rs113486004 | 17 | 43751427  | C | T | 0.2251 | 0.0077  | 0.0012 | 9.10E-10 | 6.1502  | 408317 | Snoring |
| rs113520245 | 17 | 44033132  | T | C | 0.2204 | 0.0078  | 0.0013 | 1.10E-09 | 6.1257  | 408317 | Snoring |
| rs113537106 | 17 | 44016462  | G | A | 0.2255 | 0.0076  | 0.0012 | 1.50E-09 | 6.0717  | 408317 | Snoring |
| rs113539437 | 13 | 50760138  | C | G | 0.4714 | 0.0061  | 0.0010 | 4.70E-09 | 5.8310  | 408317 | Snoring |
| rs113551219 | 8  | 71886926  | A | T | 0.4303 | 0.0067  | 0.0011 | 1.70E-10 | 6.3762  | 408317 | Snoring |
| rs113589236 | 17 | 43981795  | A | G | 0.2255 | 0.0076  | 0.0012 | 1.40E-09 | 6.0826  | 408317 | Snoring |
| rs113638513 | 17 | 44204749  | G | A | 0.2257 | 0.0076  | 0.0012 | 1.60E-09 | 6.0647  | 408317 | Snoring |
| rs113640950 | 1  | 50816985  | G | C | 0.4582 | 0.0061  | 0.0011 | 6.80E-09 | 5.8137  | 408317 | Snoring |
| rs113661667 | 17 | 43791610  | C | T | 0.2251 | 0.0077  | 0.0012 | 1.10E-09 | 6.1228  | 408317 | Snoring |
| rs113677423 | 17 | 44355750  | T | C | 0.2180 | 0.0079  | 0.0013 | 1.50E-09 | 6.0811  | 408317 | Snoring |
| rs113707721 | 2  | 156997445 | G | C | 0.1356 | 0.0119  | 0.0015 | 5.20E-15 | 7.7763  | 408317 | Snoring |
| rs113710662 | 8  | 71762718  | A | G | 0.4600 | -0.0060 | 0.0011 | 1.80E-08 | -5.6471 | 408317 | Snoring |
| rs113728380 | 17 | 43760199  | T | C | 0.2253 | 0.0077  | 0.0012 | 8.90E-10 | 6.1503  | 408317 | Snoring |
| rs113756354 | 17 | 44013483  | G | A | 0.2242 | 0.0077  | 0.0013 | 1.20E-09 | 6.1065  | 408317 | Snoring |
| rs113758975 | 17 | 44207523  | A | T | 0.2215 | 0.0078  | 0.0013 | 7.10E-10 | 6.2004  | 408317 | Snoring |
| rs113762994 | 17 | 43847095  | T | C | 0.2251 | 0.0076  | 0.0013 | 1.20E-09 | 6.1065  | 408317 | Snoring |
| rs113788190 | 17 | 44161302  | G | A | 0.2254 | 0.0075  | 0.0012 | 2.00E-09 | 6.0234  | 408317 | Snoring |
| rs113790915 | 17 | 43810782  | C | G | 0.2252 | 0.0077  | 0.0012 | 9.40E-10 | 6.1443  | 408317 | Snoring |
| rs113793114 | 17 | 44037079  | A | G | 0.2255 | 0.0076  | 0.0012 | 1.60E-09 | 6.0613  | 408317 | Snoring |
| rs113796169 | 17 | 44005254  | A | T | 0.2255 | 0.0076  | 0.0012 | 1.50E-09 | 6.0746  | 408317 | Snoring |
| rs113830390 | 17 | 44344552  | T | C | 0.2049 | 0.0078  | 0.0013 | 7.30E-09 | 5.8247  | 408317 | Snoring |
| rs113834264 | 17 | 43979622  | A | G | 0.2255 | 0.0076  | 0.0012 | 1.40E-09 | 6.0841  | 408317 | Snoring |
| rs113856644 | 17 | 43932277  | A | G | 0.2253 | 0.0077  | 0.0012 | 1.10E-09 | 6.1311  | 408317 | Snoring |
| rs113857334 | 17 | 44044940  | C | T | 0.2254 | 0.0075  | 0.0012 | 2.20E-09 | 6.0123  | 408317 | Snoring |
| rs113871181 | 17 | 43852733  | A | G | 0.2243 | 0.0077  | 0.0013 | 1.10E-09 | 6.1230  | 408317 | Snoring |
| rs1138896   | 12 | 65858010  | C | T | 0.4495 | 0.0070  | 0.0011 | 3.80E-11 | 6.6388  | 408317 | Snoring |
| rs113896715 | 17 | 44356746  | C | T | 0.2029 | 0.0081  | 0.0013 | 1.90E-09 | 6.0252  | 408317 | Snoring |
| rs113899460 | 1  | 51217065  | G | A | 0.4040 | 0.0061  | 0.0011 | 1.20E-08 | 5.7030  | 408317 | Snoring |
| rs113909426 | 17 | 44196822  | A | G | 0.2258 | 0.0076  | 0.0012 | 1.60E-09 | 6.0650  | 408317 | Snoring |
| rs113912415 | 17 | 44007785  | G | A | 0.2253 | 0.0075  | 0.0012 | 1.90E-09 | 6.0335  | 408317 | Snoring |
| rs113925422 | 17 | 44046934  | A | T | 0.2152 | 0.0080  | 0.0013 | 7.70E-10 | 6.1817  | 408317 | Snoring |
| rs113927637 | 17 | 43807911  | G | A | 0.2253 | 0.0077  | 0.0012 | 7.80E-10 | 6.1743  | 408317 | Snoring |
| rs113934115 | 17 | 43847039  | T | C | 0.2251 | 0.0077  | 0.0012 | 9.90E-10 | 6.1371  | 408317 | Snoring |
| rs113952577 | 17 | 44010661  | G | A | 0.2254 | 0.0076  | 0.0012 | 1.50E-09 | 6.0714  | 408317 | Snoring |
| rs113955100 | 17 | 44161522  | C | A | 0.2254 | 0.0075  | 0.0012 | 2.00E-09 | 6.0275  | 408317 | Snoring |
| rs113991678 | 17 | 43795634  | T | C | 0.2251 | 0.0077  | 0.0012 | 1.10E-09 | 6.1240  | 408317 | Snoring |
| rs1149827   | 13 | 51129412  | T | C | 0.4644 | 0.0058  | 0.0011 | 2.90E-08 | 5.5350  | 408317 | Snoring |
| rs1149909   | 10 | 9067197   | C | A | 0.2275 | 0.0074  | 0.0012 | 3.00E-09 | 5.9210  | 408317 | Snoring |
| rs1149910   | 10 | 9067965   | A | T | 0.2273 | 0.0074  | 0.0012 | 2.30E-09 | 5.9661  | 408317 | Snoring |
| rs1149911   | 10 | 9068164   | G | T | 0.2277 | 0.0074  | 0.0012 | 3.00E-09 | 5.9191  | 408317 | Snoring |
| rs1149912   | 10 | 9068652   | C | G | 0.2275 | 0.0074  | 0.0012 | 2.90E-09 | 5.9270  | 408317 | Snoring |
| rs1149913   | 10 | 9068950   | C | G | 0.2275 | 0.0074  | 0.0012 | 2.70E-09 | 5.9391  | 408317 | Snoring |
| rs1149915   | 10 | 9172233   | T | C | 0.1676 | 0.0077  | 0.0014 | 3.20E-08 | 5.5226  | 408317 | Snoring |
| rs11521053  | 7  | 127432561 | A | T | 0.4109 | -0.0058 | 0.0011 | 3.60E-08 | -5.4315 | 408317 | Snoring |
| rs1156955   | 8  | 71754959  | G | A | 0.4302 | 0.0069  | 0.0011 | 4.70E-11 | 6.5715  | 408317 | Snoring |
| rs11575895  | 17 | 43971785  | G | A | 0.2255 | 0.0076  | 0.0012 | 1.40E-09 | 6.0835  | 408317 | Snoring |
| rs11575896  | 17 | 43972142  | A | G | 0.2255 | 0.0076  | 0.0012 | 1.40E-09 | 6.0835  | 408317 | Snoring |
| rs11576814  | 1  | 50822873  | A | G | 0.4583 | 0.0060  | 0.0011 | 1.10E-08 | 5.7321  | 408317 | Snoring |
| rs11577207  | 1  | 50822965  | A | G | 0.4583 | 0.0061  | 0.0011 | 9.90E-09 | 5.7536  | 408317 | Snoring |
| rs1159724   | 8  | 71999821  | A | T | 0.3725 | -0.0060 | 0.0011 | 4.20E-08 | -5.5324 | 408317 | Snoring |
| rs11640767  | 16 | 31060647  | A | G | 0.3781 | 0.0065  | 0.0011 | 1.60E-09 | 6.0557  | 408317 | Snoring |
| rs11640957  | 16 | 31060363  | T | C | 0.3780 | 0.0065  | 0.0011 | 1.50E-09 | 6.0678  | 408317 | Snoring |
| rs11642003  | 16 | 31068391  | A | G | 0.3791 | 0.0065  | 0.0011 | 1.80E-09 | 6.0379  | 408317 | Snoring |
| rs11642015  | 16 | 53802494  | T | C | 0.4024 | 0.0068  | 0.0011 | 1.70E-10 | 6.3935  | 408317 | Snoring |
| rs11642192  | 16 | 31082025  | C | T | 0.3844 | 0.0063  | 0.0011 | 5.40E-09 | 5.8661  | 408317 | Snoring |
| rs11642303  | 16 | 31068392  | A | C | 0.3780 | 0.0065  | 0.0011 | 1.70E-09 | 6.0501  | 408317 | Snoring |



|             |    |           |   |   |        |         |        |          |         |        |         |
|-------------|----|-----------|---|---|--------|---------|--------|----------|---------|--------|---------|
| rs11647284  | 16 | 31077335  | A | G | 0.3791 | 0.0063  | 0.0011 | 7.10E-09 | 5.8184  | 408317 | Snoring |
| rs11652003  | 17 | 44132659  | A | G | 0.1871 | -0.0078 | 0.0013 | 5.90E-09 | -5.8099 | 408317 | Snoring |
| rs11653927  | 17 | 2012094   | T | C | 0.3863 | -0.0061 | 0.0011 | 1.10E-08 | -5.6544 | 408317 | Snoring |
| rs11654636  | 17 | 2008904   | A | G | 0.3777 | -0.0063 | 0.0011 | 3.50E-09 | -5.8394 | 408317 | Snoring |
| rs11654642  | 17 | 2008938   | A | G | 0.3777 | -0.0063 | 0.0011 | 3.50E-09 | -5.8395 | 408317 | Snoring |
| rs116956554 | 17 | 44699851  | A | G | 0.2111 | 0.0072  | 0.0013 | 4.30E-08 | 5.5068  | 408317 | Snoring |
| rs117124984 | 17 | 44051588  | G | C | 0.2191 | 0.0076  | 0.0013 | 2.50E-09 | 5.9898  | 408317 | Snoring |
| rs117280966 | 19 | 32195010  | C | G | 0.0519 | -0.0134 | 0.0024 | 1.30E-08 | -5.6169 | 408317 | Snoring |
| rs117365970 | 17 | 43893259  | A | G | 0.2246 | 0.0077  | 0.0013 | 1.00E-09 | 6.1333  | 408317 | Snoring |
| rs117368197 | 17 | 43715924  | G | A | 0.2253 | 0.0077  | 0.0012 | 8.80E-10 | 6.1534  | 408317 | Snoring |
| rs117629202 | 17 | 44344596  | A | C | 0.2047 | 0.0078  | 0.0013 | 5.00E-09 | 5.8619  | 408317 | Snoring |
| rs117646503 | 17 | 43893260  | C | T | 0.2253 | 0.0077  | 0.0012 | 1.10E-09 | 6.1241  | 408317 | Snoring |
| rs11768841  | 7  | 127551403 | C | T | 0.3412 | 0.0063  | 0.0011 | 6.50E-09 | 5.7443  | 408317 | Snoring |
| rs11772303  | 7  | 127398962 | T | G | 0.3424 | 0.0064  | 0.0011 | 3.60E-09 | 5.8374  | 408317 | Snoring |
| rs11778981  | 8  | 78112184  | C | G | 0.2855 | -0.0067 | 0.0012 | 4.70E-09 | -5.8368 | 408317 | Snoring |
| rs11779364  | 8  | 71954596  | A | C | 0.4019 | -0.0059 | 0.0011 | 4.30E-08 | -5.5100 | 408317 | Snoring |
| rs11781571  | 8  | 78120273  | T | C | 0.2855 | -0.0068 | 0.0012 | 4.50E-09 | -5.8429 | 408317 | Snoring |
| rs11781651  | 8  | 78120371  | A | G | 0.2855 | -0.0067 | 0.0012 | 4.80E-09 | -5.8348 | 408317 | Snoring |
| rs117913167 | 17 | 44212362  | T | C | 0.1819 | -0.0075 | 0.0014 | 2.80E-08 | -5.5434 | 408317 | Snoring |
| rs117995241 | 17 | 44344595  | T | G | 0.2048 | 0.0078  | 0.0013 | 4.90E-09 | 5.8653  | 408317 | Snoring |
| rs118005503 | 19 | 32167803  | C | G | 0.0842 | -0.0109 | 0.0019 | 5.70E-09 | -5.7549 | 408317 | Snoring |
| rs11804849  | 1  | 50819112  | G | C | 0.4583 | 0.0060  | 0.0011 | 1.10E-08 | 5.7396  | 408317 | Snoring |
| rs11804858  | 1  | 50819213  | T | C | 0.4583 | 0.0060  | 0.0011 | 1.10E-08 | 5.7330  | 408317 | Snoring |
| rs11804870  | 1  | 50819243  | T | C | 0.4586 | 0.0061  | 0.0011 | 6.70E-09 | 5.8160  | 408317 | Snoring |
| rs118087478 | 17 | 44051589  | G | T | 0.2192 | 0.0076  | 0.0013 | 2.30E-09 | 6.0048  | 408317 | Snoring |
| rs11811316  | 1  | 50819545  | A | G | 0.4583 | 0.0060  | 0.0011 | 1.10E-08 | 5.7407  | 408317 | Snoring |
| rs118127175 | 17 | 46188183  | T | G | 0.0379 | -0.0153 | 0.0027 | 2.80E-08 | -5.5974 | 408317 | Snoring |
| rs11821161  | 11 | 88888262  | C | T | 0.4273 | 0.0060  | 0.0011 | 1.40E-08 | 5.6442  | 408317 | Snoring |
| rs11830223  | 12 | 65883743  | A | T | 0.4596 | 0.0064  | 0.0011 | 9.90E-10 | 6.1168  | 408317 | Snoring |
| rs11862744  | 16 | 31057800  | A | G | 0.3777 | 0.0065  | 0.0011 | 2.00E-09 | 6.0289  | 408317 | Snoring |
| rs11864806  | 16 | 31095204  | C | G | 0.3845 | 0.0063  | 0.0011 | 5.10E-09 | 5.8794  | 408317 | Snoring |
| rs11864839  | 16 | 31095251  | C | G | 0.3845 | 0.0063  | 0.0011 | 5.00E-09 | 5.8812  | 408317 | Snoring |
| rs11865038  | 16 | 31095171  | T | C | 0.3846 | 0.0063  | 0.0011 | 4.50E-09 | 5.9004  | 408317 | Snoring |
| rs11870056  | 17 | 46219764  | C | T | 0.3867 | 0.0063  | 0.0011 | 3.20E-09 | 5.8314  | 408317 | Snoring |
| rs11872095  | 17 | 46271172  | T | G | 0.3867 | 0.0062  | 0.0011 | 3.80E-09 | 5.8087  | 408317 | Snoring |
| rs11948444  | 5  | 134452410 | T | C | 0.3288 | -0.0068 | 0.0011 | 1.00E-09 | -6.1199 | 408317 | Snoring |
| rs11948459  | 5  | 134452379 | C | G | 0.3300 | -0.0068 | 0.0011 | 1.30E-09 | -6.0770 | 408317 | Snoring |
| rs11972774  | 7  | 127347733 | C | G | 0.4106 | -0.0057 | 0.0011 | 4.90E-08 | -5.3792 | 408317 | Snoring |
| rs11985375  | 8  | 71613472  | G | A | 0.4834 | -0.0059 | 0.0010 | 1.60E-08 | -5.6625 | 408317 | Snoring |
| rs11985953  | 8  | 71785052  | T | C | 0.4298 | 0.0068  | 0.0011 | 1.20E-10 | 6.4382  | 408317 | Snoring |
| rs11986334  | 8  | 71644474  | T | C | 0.4304 | 0.0068  | 0.0011 | 8.20E-11 | 6.4901  | 408317 | Snoring |
| rs11987148  | 8  | 71661310  | A | G | 0.4304 | 0.0068  | 0.0011 | 8.10E-11 | 6.4908  | 408317 | Snoring |
| rs11987260  | 8  | 71773882  | C | A | 0.4301 | 0.0068  | 0.0011 | 9.30E-11 | 6.4693  | 408317 | Snoring |
| rs11987409  | 8  | 71980060  | G | A | 0.4343 | 0.0068  | 0.0011 | 8.60E-11 | 6.4843  | 408317 | Snoring |
| rs11987501  | 8  | 71578518  | C | A | 0.4337 | 0.0069  | 0.0011 | 5.80E-11 | 6.5481  | 408317 | Snoring |
| rs11987511  | 8  | 71645871  | C | T | 0.4828 | -0.0060 | 0.0010 | 1.20E-08 | -5.7095 | 408317 | Snoring |
| rs11988593  | 8  | 78255388  | C | T | 0.2864 | -0.0072 | 0.0012 | 5.80E-10 | -6.1925 | 408317 | Snoring |
| rs11988792  | 8  | 71763195  | A | G | 0.4303 | 0.0068  | 0.0011 | 1.00E-10 | 6.4536  | 408317 | Snoring |
| rs11989553  | 8  | 71640899  | A | T | 0.4819 | -0.0059 | 0.0010 | 1.50E-08 | -5.6754 | 408317 | Snoring |
| rs11991273  | 8  | 71645860  | T | C | 0.4828 | -0.0060 | 0.0010 | 1.20E-08 | -5.7165 | 408317 | Snoring |
| rs11991584  | 8  | 71771347  | A | G | 0.4288 | 0.0067  | 0.0011 | 2.30E-10 | 6.3351  | 408317 | Snoring |
| rs11991605  | 8  | 71771352  | A | G | 0.4288 | 0.0067  | 0.0011 | 2.30E-10 | 6.3351  | 408317 | Snoring |
| rs11992027  | 8  | 71688870  | T | A | 0.4304 | 0.0068  | 0.0011 | 7.80E-11 | 6.4971  | 408317 | Snoring |
| rs11993847  | 8  | 71733416  | T | C | 0.4320 | 0.0068  | 0.0011 | 1.30E-10 | 6.4246  | 408317 | Snoring |
| rs11994581  | 8  | 71774407  | G | C | 0.4303 | 0.0068  | 0.0011 | 1.20E-10 | 6.4361  | 408317 | Snoring |
| rs12044446  | 1  | 87772532  | A | G | 0.3503 | -0.0060 | 0.0011 | 3.80E-08 | -5.5222 | 408317 | Snoring |
| rs12044462  | 1  | 87772615  | A | G | 0.3504 | -0.0060 | 0.0011 | 3.80E-08 | -5.5251 | 408317 | Snoring |
| rs12048194  | 1  | 87772526  | C | T | 0.3503 | -0.0060 | 0.0011 | 3.80E-08 | -5.5222 | 408317 | Snoring |
| rs12056347  | 8  | 71984609  | C | A | 0.3896 | -0.0060 | 0.0011 | 3.60E-08 | -5.5442 | 408317 | Snoring |
| rs12084257  | 1  | 51242674  | G | C | 0.4242 | 0.0059  | 0.0011 | 2.30E-08 | 5.6146  | 408317 | Snoring |
| rs12085479  | 1  | 51199116  | G | T | 0.4037 | 0.0060  | 0.0011 | 1.50E-08 | 5.6572  | 408317 | Snoring |
| rs12089414  | 1  | 50804768  | A | G | 0.4561 | 0.0060  | 0.0010 | 1.20E-08 | 5.7199  | 408317 | Snoring |
| rs12119849  | 1  | 96878072  | A | G | 0.0875 | 0.0123  | 0.0019 | 4.10E-11 | 6.5877  | 408317 | Snoring |
| rs12120432  | 1  | 97026871  | C | T | 0.0873 | 0.0116  | 0.0019 | 3.90E-10 | 6.2472  | 408317 | Snoring |
| rs12128472  | 1  | 96765998  | G | C | 0.0773 | 0.0127  | 0.0020 | 1.10E-10 | 6.4673  | 408317 | Snoring |
| rs12133254  | 1  | 96736546  | T | A | 0.0817 | 0.0120  | 0.0019 | 4.20E-10 | 6.2646  | 408317 | Snoring |
| rs12149574  | 16 | 53840525  | G | C | 0.4123 | 0.0058  | 0.0011 | 4.20E-08 | 5.4779  | 408317 | Snoring |
| rs12149995  | 17 | 44092801  | A | G | 0.2256 | 0.0075  | 0.0012 | 2.00E-09 | 6.0293  | 408317 | Snoring |
| rs12150048  | 17 | 43827471  | C | G | 0.2253 | 0.0076  | 0.0012 | 1.10E-09 | 6.1170  | 408317 | Snoring |
| rs12150064  | 17 | 44128407  | A | C | 0.2254 | 0.0075  | 0.0012 | 2.00E-09 | 6.0232  | 408317 | Snoring |
| rs12150087  | 17 | 44210988  | G | C | 0.2257 | 0.0076  | 0.0012 | 1.50E-09 | 6.0733  | 408317 | Snoring |
| rs12150090  | 17 | 44115886  | T | C | 0.2254 | 0.0075  | 0.0012 | 1.90E-09 | 6.0299  | 408317 | Snoring |
| rs12150091  | 17 | 43776242  | G | A | 0.2252 | 0.0077  | 0.0012 | 9.20E-10 | 6.1444  | 408317 | Snoring |
| rs12150104  | 17 | 44015929  | A | G | 0.2255 | 0.0076  | 0.0012 | 1.50E-09 | 6.0731  | 408317 | Snoring |

|            |    |          |   |   |        |         |        |          |         |        |         |
|------------|----|----------|---|---|--------|---------|--------|----------|---------|--------|---------|
| rs12150111 | 17 | 44013938 | G | A | 0.2255 | 0.0076  | 0.0012 | 1.50E-09 | 6.0730  | 408317 | Snoring |
| rs12150117 | 17 | 46443258 | A | G | 0.2226 | -0.0072 | 0.0013 | 7.40E-09 | -5.7606 | 408317 | Snoring |
| rs12150125 | 17 | 43986432 | A | G | 0.2256 | 0.0076  | 0.0012 | 1.60E-09 | 6.0567  | 408317 | Snoring |
| rs12150127 | 17 | 44141732 | A | G | 0.2254 | 0.0075  | 0.0012 | 2.00E-09 | 6.0279  | 408317 | Snoring |
| rs12150141 | 17 | 43775145 | A | G | 0.2252 | 0.0077  | 0.0012 | 9.00E-10 | 6.1486  | 408317 | Snoring |
| rs12150162 | 17 | 44114218 | C | T | 0.2254 | 0.0075  | 0.0012 | 1.90E-09 | 6.0299  | 408317 | Snoring |
| rs12150170 | 17 | 44090646 | G | A | 0.2254 | 0.0075  | 0.0012 | 2.00E-09 | 6.0295  | 408317 | Snoring |
| rs12150195 | 17 | 44014263 | C | T | 0.2255 | 0.0076  | 0.0012 | 1.50E-09 | 6.0702  | 408317 | Snoring |
| rs12150223 | 17 | 43944204 | C | T | 0.2255 | 0.0076  | 0.0012 | 1.50E-09 | 6.0775  | 408317 | Snoring |
| rs12150229 | 17 | 44015446 | G | A | 0.2243 | 0.0074  | 0.0013 | 3.30E-09 | 5.9432  | 408317 | Snoring |
| rs12150230 | 17 | 44015464 | G | A | 0.2244 | 0.0074  | 0.0013 | 3.50E-09 | 5.9319  | 408317 | Snoring |
| rs12150235 | 17 | 44015745 | G | A | 0.2255 | 0.0076  | 0.0012 | 1.60E-09 | 6.0595  | 408317 | Snoring |
| rs12150242 | 17 | 44015816 | G | A | 0.2254 | 0.0076  | 0.0012 | 1.50E-09 | 6.0720  | 408317 | Snoring |
| rs12150254 | 17 | 44090455 | C | T | 0.2254 | 0.0075  | 0.0012 | 2.00E-09 | 6.0256  | 408317 | Snoring |
| rs12150332 | 17 | 43824908 | T | C | 0.2252 | 0.0076  | 0.0012 | 1.10E-09 | 6.1182  | 408317 | Snoring |
| rs12150336 | 17 | 44125704 | T | C | 0.2254 | 0.0075  | 0.0012 | 2.20E-09 | 6.0064  | 408317 | Snoring |
| rs12150344 | 17 | 44143484 | A | G | 0.2254 | 0.0075  | 0.0012 | 2.00E-09 | 6.0277  | 408317 | Snoring |
| rs12150363 | 17 | 43826351 | G | A | 0.2252 | 0.0076  | 0.0012 | 1.10E-09 | 6.1183  | 408317 | Snoring |
| rs12150390 | 17 | 43896228 | C | T | 0.2253 | 0.0077  | 0.0012 | 1.00E-09 | 6.1301  | 408317 | Snoring |
| rs12150435 | 17 | 43776391 | C | G | 0.2252 | 0.0077  | 0.0012 | 9.20E-10 | 6.1442  | 408317 | Snoring |
| rs12150438 | 17 | 44113963 | T | C | 0.2254 | 0.0075  | 0.0012 | 1.90E-09 | 6.0300  | 408317 | Snoring |
| rs12150447 | 17 | 44128125 | C | A | 0.2254 | 0.0075  | 0.0012 | 2.00E-09 | 6.0222  | 408317 | Snoring |
| rs12150451 | 17 | 43827431 | G | A | 0.2253 | 0.0076  | 0.0012 | 1.10E-09 | 6.1167  | 408317 | Snoring |
| rs12150454 | 17 | 43776061 | T | C | 0.2252 | 0.0077  | 0.0012 | 9.30E-10 | 6.1433  | 408317 | Snoring |
| rs12150455 | 17 | 43827508 | G | A | 0.2252 | 0.0076  | 0.0012 | 1.10E-09 | 6.1151  | 408317 | Snoring |
| rs12150460 | 17 | 44014137 | T | G | 0.2255 | 0.0076  | 0.0012 | 1.50E-09 | 6.0698  | 408317 | Snoring |
| rs12150464 | 17 | 43776371 | T | C | 0.2252 | 0.0077  | 0.0012 | 9.20E-10 | 6.1442  | 408317 | Snoring |
| rs12150469 | 17 | 44092497 | C | T | 0.2254 | 0.0075  | 0.0012 | 1.90E-09 | 6.0299  | 408317 | Snoring |
| rs12150515 | 17 | 44090685 | T | G | 0.2254 | 0.0075  | 0.0012 | 2.00E-09 | 6.0273  | 408317 | Snoring |
| rs12150516 | 17 | 43944519 | T | C | 0.2255 | 0.0076  | 0.0012 | 1.40E-09 | 6.0839  | 408317 | Snoring |
| rs12150527 | 17 | 43986462 | G | A | 0.2251 | 0.0076  | 0.0012 | 1.20E-09 | 6.1178  | 408317 | Snoring |
| rs12150530 | 17 | 44090393 | C | T | 0.1759 | -0.0081 | 0.0014 | 3.80E-09 | -5.8977 | 408317 | Snoring |
| rs12150533 | 17 | 46287541 | T | C | 0.3866 | 0.0062  | 0.0011 | 3.70E-09 | 5.8109  | 408317 | Snoring |
| rs12150542 | 17 | 44115730 | A | G | 0.2254 | 0.0075  | 0.0012 | 1.90E-09 | 6.0299  | 408317 | Snoring |
| rs12150547 | 17 | 43775546 | G | A | 0.2253 | 0.0077  | 0.0012 | 9.00E-10 | 6.1486  | 408317 | Snoring |
| rs12150551 | 17 | 44150920 | C | T | 0.2254 | 0.0075  | 0.0012 | 2.00E-09 | 6.0265  | 408317 | Snoring |
| rs12150558 | 17 | 44151156 | C | T | 0.2254 | 0.0075  | 0.0012 | 2.00E-09 | 6.0265  | 408317 | Snoring |
| rs12150570 | 17 | 44126218 | A | G | 0.2254 | 0.0075  | 0.0012 | 2.20E-09 | 6.0128  | 408317 | Snoring |
| rs12150576 | 17 | 44015624 | A | G | 0.2255 | 0.0076  | 0.0012 | 1.50E-09 | 6.0736  | 408317 | Snoring |
| rs12150604 | 17 | 43828221 | A | T | 0.2252 | 0.0076  | 0.0012 | 1.10E-09 | 6.1181  | 408317 | Snoring |
| rs12150608 | 17 | 43775402 | C | T | 0.2252 | 0.0077  | 0.0012 | 9.10E-10 | 6.1475  | 408317 | Snoring |
| rs12150610 | 17 | 43775479 | C | T | 0.2251 | 0.0077  | 0.0012 | 9.50E-10 | 6.1424  | 408317 | Snoring |
| rs12150611 | 17 | 44149741 | A | G | 0.2254 | 0.0075  | 0.0012 | 2.00E-09 | 6.0248  | 408317 | Snoring |
| rs12150621 | 17 | 43838482 | T | G | 0.2251 | 0.0076  | 0.0012 | 1.20E-09 | 6.1030  | 408317 | Snoring |
| rs12150625 | 17 | 44149448 | G | C | 0.2254 | 0.0075  | 0.0012 | 2.00E-09 | 6.0244  | 408317 | Snoring |
| rs12150627 | 17 | 44149537 | G | C | 0.2254 | 0.0075  | 0.0012 | 2.10E-09 | 6.0207  | 408317 | Snoring |
| rs12150628 | 17 | 44149581 | T | C | 0.2254 | 0.0075  | 0.0012 | 2.00E-09 | 6.0248  | 408317 | Snoring |
| rs12150658 | 17 | 43826305 | A | G | 0.2252 | 0.0076  | 0.0012 | 1.10E-09 | 6.1226  | 408317 | Snoring |
| rs12150672 | 17 | 43826637 | A | G | 0.2252 | 0.0076  | 0.0012 | 1.10E-09 | 6.1182  | 408317 | Snoring |
| rs12150683 | 17 | 43824848 | G | A | 0.2252 | 0.0076  | 0.0012 | 1.10E-09 | 6.1182  | 408317 | Snoring |
| rs12156041 | 8  | 71826925 | T | C | 0.4298 | 0.0068  | 0.0011 | 1.30E-10 | 6.4193  | 408317 | Snoring |
| rs12156043 | 8  | 71614043 | G | A | 0.4288 | 0.0068  | 0.0011 | 1.20E-10 | 6.4257  | 408317 | Snoring |
| rs12156377 | 8  | 71787692 | T | C | 0.4298 | 0.0068  | 0.0011 | 1.40E-10 | 6.4145  | 408317 | Snoring |
| rs12185225 | 17 | 44113491 | C | T | 0.2254 | 0.0075  | 0.0012 | 1.90E-09 | 6.0299  | 408317 | Snoring |
| rs12185233 | 17 | 43923654 | C | G | 0.2260 | 0.0077  | 0.0012 | 9.30E-10 | 6.1490  | 408317 | Snoring |
| rs12185235 | 17 | 43923703 | T | C | 0.2251 | 0.0077  | 0.0012 | 8.80E-10 | 6.1569  | 408317 | Snoring |
| rs12185243 | 17 | 44115351 | C | T | 0.2254 | 0.0075  | 0.0012 | 1.90E-09 | 6.0299  | 408317 | Snoring |
| rs12185268 | 17 | 43923683 | G | A | 0.2253 | 0.0076  | 0.0012 | 1.60E-09 | 6.0630  | 408317 | Snoring |
| rs12229918 | 12 | 65762058 | C | G | 0.3622 | 0.0088  | 0.0011 | 4.40E-16 | 8.0704  | 408317 | Snoring |
| rs12230663 | 12 | 65882125 | C | G | 0.4502 | 0.0069  | 0.0011 | 8.10E-11 | 6.5286  | 408317 | Snoring |
| rs12285584 | 11 | 88935088 | T | C | 0.3645 | -0.0060 | 0.0011 | 3.50E-08 | -5.4725 | 408317 | Snoring |
| rs12295166 | 11 | 88976157 | C | T | 0.3753 | -0.0062 | 0.0011 | 1.50E-08 | -5.5995 | 408317 | Snoring |
| rs12313934 | 12 | 65768690 | C | T | 0.3739 | 0.0086  | 0.0011 | 7.60E-16 | 7.9808  | 408317 | Snoring |
| rs12330385 | 3  | 77605757 | A | T | 0.4538 | 0.0064  | 0.0011 | 6.00E-10 | 6.1159  | 408317 | Snoring |
| rs12368809 | 12 | 65789204 | T | C | 0.3644 | 0.0088  | 0.0011 | 2.90E-16 | 8.1272  | 408317 | Snoring |
| rs12373123 | 17 | 43924073 | C | T | 0.2253 | 0.0077  | 0.0012 | 9.90E-10 | 6.1381  | 408317 | Snoring |
| rs12373124 | 17 | 43924219 | C | T | 0.2236 | 0.0077  | 0.0013 | 1.10E-09 | 6.1196  | 408317 | Snoring |
| rs12373139 | 17 | 43924130 | A | G | 0.2253 | 0.0076  | 0.0012 | 1.10E-09 | 6.1197  | 408317 | Snoring |
| rs12373140 | 17 | 43924231 | A | G | 0.2236 | 0.0077  | 0.0013 | 1.10E-09 | 6.1202  | 408317 | Snoring |
| rs12373142 | 17 | 43924200 | G | C | 0.2237 | 0.0077  | 0.0013 | 1.10E-09 | 6.1141  | 408317 | Snoring |
| rs12373168 | 17 | 43924337 | C | A | 0.2261 | 0.0077  | 0.0012 | 8.10E-10 | 6.1684  | 408317 | Snoring |
| rs12409412 | 1  | 87772277 | A | G | 0.3502 | -0.0060 | 0.0011 | 4.40E-08 | -5.4972 | 408317 | Snoring |
| rs12410025 | 1  | 87770251 | C | T | 0.3504 | -0.0060 | 0.0011 | 3.70E-08 | -5.5266 | 408317 | Snoring |
| rs12419948 | 11 | 27666984 | A | T | 0.2001 | -0.0074 | 0.0013 | 2.20E-08 | -5.6904 | 408317 | Snoring |

|            |    |           |   |   |        |         |        |          |         |        |         |
|------------|----|-----------|---|---|--------|---------|--------|----------|---------|--------|---------|
| rs12427782 | 13 | 40745813  | T | G | 0.4919 | -0.0068 | 0.0011 | 6.80E-11 | -6.4550 | 408317 | Snoring |
| rs12427974 | 13 | 40746149  | A | G | 0.4761 | -0.0064 | 0.0011 | 1.10E-09 | -6.0264 | 408317 | Snoring |
| rs12429765 | 13 | 40745860  | G | A | 0.4920 | -0.0068 | 0.0011 | 6.20E-11 | -6.4708 | 408317 | Snoring |
| rs12445568 | 16 | 31004812  | C | T | 0.3734 | 0.0062  | 0.0011 | 1.10E-08 | 5.7511  | 408317 | Snoring |
| rs12445650 | 16 | 31044897  | A | G | 0.3768 | 0.0065  | 0.0011 | 2.20E-09 | 6.0159  | 408317 | Snoring |
| rs12447930 | 16 | 31023273  | A | G | 0.3761 | 0.0064  | 0.0011 | 3.00E-09 | 5.9634  | 408317 | Snoring |
| rs12449566 | 17 | 1914758   | T | C | 0.3113 | -0.0062 | 0.0011 | 3.00E-08 | -5.5293 | 408317 | Snoring |
| rs12449843 | 17 | 2058207   | A | G | 0.3771 | -0.0064 | 0.0011 | 1.70E-09 | -5.9622 | 408317 | Snoring |
| rs12449873 | 17 | 2058289   | C | G | 0.3771 | -0.0064 | 0.0011 | 1.70E-09 | -5.9644 | 408317 | Snoring |
| rs12450430 | 17 | 1914777   | G | A | 0.3109 | -0.0062 | 0.0011 | 3.80E-08 | -5.4917 | 408317 | Snoring |
| rs12452273 | 17 | 43552921  | T | C | 0.1848 | 0.0074  | 0.0013 | 4.20E-08 | 5.4722  | 408317 | Snoring |
| rs12452956 | 17 | 46273937  | C | T | 0.3866 | 0.0062  | 0.0011 | 3.80E-09 | 5.8080  | 408317 | Snoring |
| rs12459290 | 19 | 32185120  | C | G | 0.0910 | -0.0107 | 0.0018 | 2.20E-09 | -5.8961 | 408317 | Snoring |
| rs12460608 | 19 | 32177891  | G | A | 0.0951 | -0.0109 | 0.0018 | 6.70E-10 | -6.0839 | 408317 | Snoring |
| rs12461705 | 19 | 32179214  | C | T | 0.0951 | -0.0109 | 0.0018 | 6.50E-10 | -6.0893 | 408317 | Snoring |
| rs12485753 | 3  | 94048931  | C | T | 0.3924 | -0.0059 | 0.0011 | 2.30E-08 | -5.4810 | 408317 | Snoring |
| rs12485780 | 3  | 90314380  | C | T | 0.4242 | -0.0058 | 0.0011 | 4.00E-08 | -5.4044 | 408317 | Snoring |
| rs12490606 | 3  | 90500225  | T | C | 0.3639 | -0.0062 | 0.0011 | 1.70E-08 | -5.5773 | 408317 | Snoring |
| rs12520423 | 5  | 134447159 | T | G | 0.3291 | -0.0068 | 0.0011 | 9.50E-10 | -6.1206 | 408317 | Snoring |
| rs12522532 | 5  | 134450121 | G | C | 0.3300 | -0.0068 | 0.0011 | 1.20E-09 | -6.0961 | 408317 | Snoring |
| rs12531440 | 7  | 127392607 | G | T | 0.4111 | -0.0058 | 0.0011 | 3.50E-08 | -5.4331 | 408317 | Snoring |
| rs12533846 | 7  | 127392697 | G | A | 0.4114 | -0.0058 | 0.0011 | 2.60E-08 | -5.4892 | 408317 | Snoring |
| rs12539411 | 7  | 127468928 | T | C | 0.3424 | 0.0064  | 0.0011 | 4.20E-09 | 5.8104  | 408317 | Snoring |
| rs12539728 | 7  | 127426983 | G | A | 0.4109 | -0.0058 | 0.0011 | 3.40E-08 | -5.4415 | 408317 | Snoring |
| rs12540484 | 7  | 127370040 | A | G | 0.3253 | 0.0061  | 0.0011 | 3.20E-08 | 5.4756  | 408317 | Snoring |
| rs12540865 | 7  | 127405586 | T | C | 0.4111 | -0.0058 | 0.0011 | 3.40E-08 | -5.4405 | 408317 | Snoring |
| rs12542300 | 8  | 71951395  | G | C | 0.4779 | -0.0065 | 0.0010 | 6.50E-10 | -6.2038 | 408317 | Snoring |
| rs12565379 | 1  | 51216616  | T | C | 0.4038 | 0.0060  | 0.0011 | 1.30E-08 | 5.6789  | 408317 | Snoring |
| rs12569137 | 1  | 50820561  | A | G | 0.4583 | 0.0060  | 0.0011 | 1.10E-08 | 5.7414  | 408317 | Snoring |
| rs12569139 | 1  | 50820623  | A | G | 0.4583 | 0.0060  | 0.0011 | 1.10E-08 | 5.7417  | 408317 | Snoring |
| rs12569177 | 1  | 51237409  | C | G | 0.4242 | 0.0059  | 0.0011 | 2.40E-08 | 5.6073  | 408317 | Snoring |
| rs12575096 | 11 | 27708844  | G | A | 0.2020 | -0.0076 | 0.0013 | 9.40E-09 | -5.8316 | 408317 | Snoring |
| rs12603115 | 17 | 46248994  | C | T | 0.4218 | 0.0064  | 0.0011 | 1.00E-09 | 6.0750  | 408317 | Snoring |
| rs12603380 | 17 | 46204408  | G | A | 0.4230 | 0.0064  | 0.0011 | 1.30E-09 | 6.0322  | 408317 | Snoring |
| rs12630845 | 3  | 93988559  | T | C | 0.3991 | -0.0059 | 0.0011 | 1.80E-08 | -5.5295 | 408317 | Snoring |
| rs12638900 | 3  | 94012612  | C | T | 0.4008 | -0.0060 | 0.0011 | 1.30E-08 | -5.5910 | 408317 | Snoring |
| rs12667197 | 7  | 127369147 | A | T | 0.3254 | 0.0062  | 0.0011 | 2.70E-08 | 5.5094  | 408317 | Snoring |
| rs12668077 | 7  | 127476253 | C | T | 0.3425 | 0.0064  | 0.0011 | 3.70E-09 | 5.8283  | 408317 | Snoring |
| rs12673293 | 7  | 127520162 | G | T | 0.3414 | 0.0064  | 0.0011 | 4.90E-09 | 5.7885  | 408317 | Snoring |
| rs12674694 | 8  | 71570834  | C | A | 0.4334 | 0.0069  | 0.0011 | 4.80E-11 | 6.5800  | 408317 | Snoring |
| rs12674838 | 8  | 71990280  | A | G | 0.4467 | 0.0066  | 0.0011 | 3.20E-10 | 6.2836  | 408317 | Snoring |
| rs12674966 | 8  | 71684410  | T | C | 0.4296 | 0.0069  | 0.0011 | 4.90E-11 | 6.5635  | 408317 | Snoring |
| rs12675094 | 8  | 71797203  | C | A | 0.4297 | 0.0068  | 0.0011 | 1.20E-10 | 6.4384  | 408317 | Snoring |
| rs12675116 | 8  | 71797291  | G | A | 0.4299 | 0.0068  | 0.0011 | 1.40E-10 | 6.4119  | 408317 | Snoring |
| rs12675271 | 8  | 71602009  | A | G | 0.4821 | -0.0060 | 0.0010 | 1.20E-08 | -5.7176 | 408317 | Snoring |
| rs12678064 | 8  | 71670018  | T | C | 0.4282 | 0.0069  | 0.0011 | 5.60E-11 | 6.5413  | 408317 | Snoring |
| rs12678084 | 8  | 71670013  | T | G | 0.4281 | 0.0069  | 0.0011 | 7.50E-11 | 6.4969  | 408317 | Snoring |
| rs12678320 | 8  | 71537192  | G | A | 0.4347 | 0.0070  | 0.0011 | 2.10E-11 | 6.6814  | 408317 | Snoring |
| rs12678625 | 8  | 71488342  | C | A | 0.4276 | 0.0070  | 0.0011 | 4.30E-11 | 6.5696  | 408317 | Snoring |
| rs12679132 | 8  | 71662505  | G | T | 0.4286 | 0.0069  | 0.0011 | 8.00E-11 | 6.4925  | 408317 | Snoring |
| rs12679261 | 8  | 71844649  | A | G | 0.4822 | -0.0059 | 0.0010 | 2.00E-08 | -5.6325 | 408317 | Snoring |
| rs12680103 | 8  | 71678484  | C | T | 0.4827 | -0.0060 | 0.0010 | 1.00E-08 | -5.7434 | 408317 | Snoring |
| rs12680166 | 8  | 71678638  | G | C | 0.4827 | -0.0060 | 0.0010 | 1.00E-08 | -5.7434 | 408317 | Snoring |
| rs12680988 | 8  | 71695890  | T | G | 0.4802 | -0.0059 | 0.0010 | 1.90E-08 | -5.6369 | 408317 | Snoring |
| rs12681114 | 8  | 71662498  | G | A | 0.4286 | 0.0068  | 0.0011 | 8.40E-11 | 6.4838  | 408317 | Snoring |
| rs12681420 | 8  | 71593198  | G | A | 0.4304 | 0.0069  | 0.0011 | 7.20E-11 | 6.5096  | 408317 | Snoring |
| rs12681588 | 8  | 71601887  | C | T | 0.4302 | 0.0069  | 0.0011 | 6.00E-11 | 6.5363  | 408317 | Snoring |
| rs12682053 | 8  | 78257162  | A | T | 0.2860 | -0.0073 | 0.0012 | 2.70E-10 | -6.3132 | 408317 | Snoring |
| rs12733298 | 1  | 96763322  | T | G | 0.0800 | 0.0122  | 0.0019 | 3.10E-10 | 6.3113  | 408317 | Snoring |
| rs12737227 | 1  | 96797021  | C | T | 0.0801 | 0.0122  | 0.0019 | 3.40E-10 | 6.2971  | 408317 | Snoring |
| rs12743471 | 1  | 96918527  | A | G | 0.0856 | 0.0120  | 0.0019 | 1.10E-10 | 6.4376  | 408317 | Snoring |
| rs12756558 | 1  | 96905140  | G | A | 0.0871 | 0.0119  | 0.0019 | 1.20E-10 | 6.4297  | 408317 | Snoring |
| rs12790234 | 11 | 27708963  | G | A | 0.2073 | -0.0077 | 0.0013 | 3.70E-09 | -5.9697 | 408317 | Snoring |
| rs12795279 | 11 | 88905261  | C | T | 0.4270 | 0.0057  | 0.0011 | 4.50E-08 | 5.4332  | 408317 | Snoring |
| rs12810744 | 12 | 65782040  | C | T | 0.3746 | 0.0085  | 0.0011 | 1.30E-15 | 7.9132  | 408317 | Snoring |
| rs12920772 | 16 | 31012781  | G | A | 0.3733 | 0.0065  | 0.0011 | 3.70E-09 | 5.9265  | 408317 | Snoring |
| rs12938032 | 17 | 46347928  | T | C | 0.2171 | -0.0074 | 0.0013 | 5.70E-09 | -5.8122 | 408317 | Snoring |
| rs12939324 | 17 | 46687752  | A | C | 0.1655 | -0.0079 | 0.0014 | 2.30E-08 | -5.5967 | 408317 | Snoring |
| rs12939328 | 17 | 44363616  | T | A | 0.1887 | -0.0079 | 0.0014 | 8.60E-09 | -5.7560 | 408317 | Snoring |
| rs12939680 | 17 | 46458651  | C | T | 0.2225 | -0.0072 | 0.0013 | 7.60E-09 | -5.7528 | 408317 | Snoring |
| rs12940162 | 17 | 46417315  | T | C | 0.2236 | -0.0073 | 0.0013 | 5.90E-09 | -5.7964 | 408317 | Snoring |
| rs12940931 | 17 | 46336764  | C | T | 0.2171 | -0.0074 | 0.0013 | 5.60E-09 | -5.8153 | 408317 | Snoring |
| rs12941738 | 17 | 44212030  | C | A | 0.1819 | -0.0075 | 0.0014 | 3.00E-08 | -5.5324 | 408317 | Snoring |
| rs12941754 | 17 | 46337036  | C | T | 0.2173 | -0.0074 | 0.0013 | 4.50E-09 | -5.8487 | 408317 | Snoring |

|            |    |           |   |   |        |         |        |          |         |        |         |
|------------|----|-----------|---|---|--------|---------|--------|----------|---------|--------|---------|
| rs12941830 | 17 | 46219131  | T | C | 0.3865 | 0.0062  | 0.0011 | 4.10E-09 | 5.7914  | 408317 | Snoring |
| rs12941877 | 17 | 46426334  | A | C | 0.2227 | -0.0073 | 0.0013 | 5.90E-09 | -5.7963 | 408317 | Snoring |
| rs12943082 | 17 | 46345985  | C | T | 0.2171 | -0.0074 | 0.0013 | 5.60E-09 | -5.8146 | 408317 | Snoring |
| rs12943085 | 17 | 43834482  | A | G | 0.2252 | 0.0076  | 0.0012 | 1.30E-09 | 6.0980  | 408317 | Snoring |
| rs12944235 | 17 | 43813221  | G | A | 0.4523 | 0.0059  | 0.0010 | 2.40E-08 | 5.5799  | 408317 | Snoring |
| rs12945780 | 17 | 46496941  | A | G | 0.2156 | -0.0074 | 0.0013 | 4.70E-09 | -5.8366 | 408317 | Snoring |
| rs12945803 | 17 | 46552229  | C | T | 0.2177 | -0.0074 | 0.0013 | 5.00E-09 | -5.8183 | 408317 | Snoring |
| rs12947089 | 17 | 46237990  | A | G | 0.3869 | 0.0063  | 0.0011 | 3.00E-09 | 5.8405  | 408317 | Snoring |
| rs12948086 | 17 | 46481407  | T | C | 0.2225 | -0.0072 | 0.0013 | 6.90E-09 | -5.7681 | 408317 | Snoring |
| rs12948128 | 17 | 46354673  | G | A | 0.2171 | -0.0073 | 0.0013 | 7.10E-09 | -5.7741 | 408317 | Snoring |
| rs12948216 | 17 | 43836673  | T | C | 0.2251 | 0.0076  | 0.0012 | 1.30E-09 | 6.0988  | 408317 | Snoring |
| rs12948810 | 17 | 46267732  | C | T | 0.3866 | 0.0062  | 0.0011 | 3.80E-09 | 5.8068  | 408317 | Snoring |
| rs12950225 | 17 | 46145200  | A | G | 0.4183 | 0.0063  | 0.0011 | 2.40E-09 | 5.9323  | 408317 | Snoring |
| rs12950325 | 17 | 46346056  | A | G | 0.2171 | -0.0074 | 0.0013 | 5.70E-09 | -5.8114 | 408317 | Snoring |
| rs12950965 | 17 | 43551151  | G | C | 0.1848 | 0.0074  | 0.0013 | 3.90E-08 | 5.4849  | 408317 | Snoring |
| rs12951057 | 17 | 44794558  | G | C | 0.1682 | -0.0078 | 0.0014 | 3.80E-08 | -5.5006 | 408317 | Snoring |
| rs12952051 | 17 | 1982790   | T | C | 0.4438 | -0.0064 | 0.0011 | 9.40E-10 | -6.0864 | 408317 | Snoring |
| rs12952262 | 17 | 46683800  | T | C | 0.1654 | -0.0078 | 0.0014 | 3.50E-08 | -5.5167 | 408317 | Snoring |
| rs12952670 | 17 | 46300404  | C | T | 0.4231 | 0.0064  | 0.0011 | 1.40E-09 | 6.0233  | 408317 | Snoring |
| rs12952824 | 17 | 46478195  | A | C | 0.2224 | -0.0072 | 0.0013 | 7.70E-09 | -5.7519 | 408317 | Snoring |
| rs12953096 | 17 | 44332959  | T | C | 0.1776 | -0.0084 | 0.0014 | 1.20E-09 | -6.0901 | 408317 | Snoring |
| rs13066454 | 3  | 93994255  | T | C | 0.4021 | -0.0060 | 0.0011 | 8.30E-09 | -5.6686 | 408317 | Snoring |
| rs13079023 | 3  | 93997558  | A | G | 0.4010 | -0.0060 | 0.0011 | 1.30E-08 | -5.5870 | 408317 | Snoring |
| rs1315085  | 1  | 51356764  | C | T | 0.4236 | 0.0059  | 0.0011 | 3.10E-08 | 5.5657  | 408317 | Snoring |
| rs13156484 | 5  | 122653399 | A | G | 0.4718 | -0.0058 | 0.0011 | 2.70E-08 | -5.4865 | 408317 | Snoring |
| rs1316657  | 17 | 46251391  | T | C | 0.3867 | 0.0062  | 0.0011 | 3.90E-09 | 5.8005  | 408317 | Snoring |
| rs13172520 | 5  | 134448701 | A | C | 0.3289 | -0.0068 | 0.0011 | 9.60E-10 | -6.1230 | 408317 | Snoring |
| rs1318815  | 12 | 65862486  | C | T | 0.4495 | 0.0069  | 0.0011 | 5.10E-11 | 6.5953  | 408317 | Snoring |
| rs1321432  | 20 | 6614691   | A | C | 0.3714 | -0.0061 | 0.0011 | 1.80E-08 | -5.6253 | 408317 | Snoring |
| rs1321455  | 20 | 6599475   | G | A | 0.3729 | -0.0060 | 0.0011 | 2.40E-08 | -5.5760 | 408317 | Snoring |
| rs1321456  | 20 | 6599528   | G | A | 0.3730 | -0.0060 | 0.0011 | 2.40E-08 | -5.5763 | 408317 | Snoring |
| rs1321457  | 20 | 6599570   | G | A | 0.3729 | -0.0060 | 0.0011 | 2.40E-08 | -5.5757 | 408317 | Snoring |
| rs13236900 | 7  | 127350196 | A | G | 0.4103 | -0.0058 | 0.0011 | 3.50E-08 | -5.4356 | 408317 | Snoring |
| rs13250391 | 8  | 71797772  | G | A | 0.4295 | 0.0069  | 0.0011 | 7.50E-11 | 6.5078  | 408317 | Snoring |
| rs13251292 | 8  | 71474355  | G | A | 0.4111 | 0.0074  | 0.0011 | 4.30E-12 | 6.9105  | 408317 | Snoring |
| rs13251955 | 8  | 71798238  | T | C | 0.4291 | 0.0067  | 0.0011 | 1.70E-10 | 6.3725  | 408317 | Snoring |
| rs13252230 | 8  | 71798316  | T | C | 0.4299 | 0.0068  | 0.0011 | 1.40E-10 | 6.4118  | 408317 | Snoring |
| rs13252719 | 8  | 71734569  | G | A | 0.4802 | -0.0059 | 0.0010 | 1.90E-08 | -5.6373 | 408317 | Snoring |
| rs13253842 | 8  | 71625503  | G | A | 0.4832 | -0.0059 | 0.0010 | 1.90E-08 | -5.6315 | 408317 | Snoring |
| rs13254801 | 8  | 71688984  | T | A | 0.4820 | -0.0059 | 0.0010 | 1.50E-08 | -5.6795 | 408317 | Snoring |
| rs13254908 | 8  | 71626098  | A | G | 0.4832 | -0.0059 | 0.0010 | 1.90E-08 | -5.6315 | 408317 | Snoring |
| rs13255152 | 8  | 71859619  | A | G | 0.4874 | -0.0062 | 0.0010 | 2.90E-09 | -5.9699 | 408317 | Snoring |
| rs13255735 | 8  | 71859739  | C | T | 0.4875 | -0.0063 | 0.0010 | 2.80E-09 | -5.9763 | 408317 | Snoring |
| rs13255886 | 8  | 71565954  | G | T | 0.4817 | -0.0061 | 0.0010 | 6.60E-09 | -5.8135 | 408317 | Snoring |
| rs13256093 | 8  | 71596377  | G | A | 0.4300 | 0.0069  | 0.0011 | 6.40E-11 | 6.5252  | 408317 | Snoring |
| rs13256250 | 8  | 71596193  | G | T | 0.4822 | -0.0060 | 0.0010 | 1.10E-08 | -5.7262 | 408317 | Snoring |
| rs13257800 | 8  | 71714133  | T | C | 0.4802 | -0.0059 | 0.0010 | 1.90E-08 | -5.6356 | 408317 | Snoring |
| rs13258368 | 8  | 71548751  | A | G | 0.4350 | 0.0071  | 0.0011 | 1.40E-11 | 6.7386  | 408317 | Snoring |
| rs13261146 | 8  | 71726919  | G | A | 0.4302 | 0.0068  | 0.0011 | 9.10E-11 | 6.4721  | 408317 | Snoring |
| rs13261712 | 8  | 71732264  | T | C | 0.4823 | -0.0060 | 0.0010 | 1.00E-08 | -5.7397 | 408317 | Snoring |
| rs13262205 | 8  | 71571925  | A | C | 0.4303 | 0.0070  | 0.0011 | 4.10E-11 | 6.5931  | 408317 | Snoring |
| rs13262350 | 8  | 71981606  | T | C | 0.3876 | -0.0059 | 0.0011 | 3.80E-08 | -5.5339 | 408317 | Snoring |
| rs13263047 | 8  | 71727296  | A | G | 0.4302 | 0.0068  | 0.0011 | 9.10E-11 | 6.4719  | 408317 | Snoring |
| rs13263370 | 8  | 71969534  | C | A | 0.4312 | 0.0068  | 0.0011 | 1.50E-10 | 6.4016  | 408317 | Snoring |
| rs13264053 | 8  | 71991336  | T | C | 0.4467 | 0.0066  | 0.0011 | 3.30E-10 | 6.2775  | 408317 | Snoring |
| rs13264669 | 8  | 71626772  | G | A | 0.4833 | -0.0059 | 0.0010 | 1.90E-08 | -5.6310 | 408317 | Snoring |
| rs13266540 | 8  | 71598707  | G | C | 0.4300 | 0.0069  | 0.0011 | 5.70E-11 | 6.5451  | 408317 | Snoring |
| rs13267098 | 8  | 71811886  | A | C | 0.4179 | 0.0073  | 0.0011 | 7.30E-12 | 6.8548  | 408317 | Snoring |
| rs13268251 | 8  | 71978814  | T | G | 0.4021 | -0.0059 | 0.0011 | 4.70E-08 | -5.4916 | 408317 | Snoring |
| rs13269410 | 8  | 71638008  | T | G | 0.4304 | 0.0068  | 0.0011 | 8.20E-11 | 6.4906  | 408317 | Snoring |
| rs13269513 | 8  | 71578079  | A | C | 0.4784 | -0.0061 | 0.0010 | 7.00E-09 | -5.8120 | 408317 | Snoring |
| rs13271286 | 8  | 71806599  | C | T | 0.4297 | 0.0068  | 0.0011 | 1.20E-10 | 6.4290  | 408317 | Snoring |
| rs13271442 | 8  | 71585169  | T | C | 0.4817 | -0.0060 | 0.0010 | 9.60E-09 | -5.7518 | 408317 | Snoring |
| rs13272343 | 8  | 71794507  | C | A | 0.4298 | 0.0068  | 0.0011 | 1.30E-10 | 6.4185  | 408317 | Snoring |
| rs13272523 | 8  | 71641472  | G | A | 0.4819 | -0.0059 | 0.0010 | 1.50E-08 | -5.6753 | 408317 | Snoring |
| rs13273193 | 8  | 71611796  | T | C | 0.4287 | 0.0068  | 0.0011 | 1.20E-10 | 6.4308  | 408317 | Snoring |
| rs13273718 | 8  | 71669720  | T | C | 0.4304 | 0.0068  | 0.0011 | 9.10E-11 | 6.4725  | 408317 | Snoring |
| rs13273773 | 8  | 71779247  | T | C | 0.4302 | 0.0068  | 0.0011 | 1.20E-10 | 6.4386  | 408317 | Snoring |
| rs13273873 | 8  | 71855219  | G | A | 0.4297 | 0.0068  | 0.0011 | 1.40E-10 | 6.4137  | 408317 | Snoring |
| rs13274062 | 8  | 71737087  | G | C | 0.4802 | -0.0059 | 0.0010 | 1.80E-08 | -5.6500 | 408317 | Snoring |
| rs13274381 | 8  | 71765094  | A | G | 0.4819 | -0.0059 | 0.0010 | 1.60E-08 | -5.6628 | 408317 | Snoring |
| rs13274981 | 8  | 71765280  | G | A | 0.4303 | 0.0068  | 0.0011 | 1.10E-10 | 6.4483  | 408317 | Snoring |
| rs13278019 | 8  | 71533344  | A | T | 0.4339 | 0.0070  | 0.0011 | 2.10E-11 | 6.6867  | 408317 | Snoring |
| rs13280740 | 8  | 71858521  | A | G | 0.4297 | 0.0068  | 0.0011 | 1.40E-10 | 6.4104  | 408317 | Snoring |

|             |    |           |   |   |        |         |        |          |         |        |         |
|-------------|----|-----------|---|---|--------|---------|--------|----------|---------|--------|---------|
| rs13281838  | 8  | 71734442  | C | T | 0.4320 | 0.0068  | 0.0011 | 1.30E-10 | 6.4218  | 408317 | Snoring |
| rs13376700  | 1  | 51477643  | A | T | 0.4342 | 0.0058  | 0.0011 | 4.50E-08 | 5.4543  | 408317 | Snoring |
| rs1342766   | 10 | 9074500   | T | G | 0.2270 | 0.0073  | 0.0012 | 3.70E-09 | 5.8842  | 408317 | Snoring |
| rs1342767   | 10 | 9074903   | T | C | 0.2471 | 0.0075  | 0.0012 | 6.20E-10 | 6.1778  | 408317 | Snoring |
| rs1342774   | 10 | 9065094   | C | G | 0.2279 | 0.0074  | 0.0012 | 2.70E-09 | 5.9524  | 408317 | Snoring |
| rs1344946   | 12 | 65764172  | A | T | 0.3734 | 0.0086  | 0.0011 | 8.20E-16 | 7.9715  | 408317 | Snoring |
| rs1348535   | 8  | 71662741  | T | G | 0.4820 | -0.0059 | 0.0010 | 1.60E-08 | -5.6615 | 408317 | Snoring |
| rs1353057   | 8  | 71922097  | C | T | 0.4776 | -0.0065 | 0.0010 | 7.80E-10 | -6.1747 | 408317 | Snoring |
| rs1353058   | 8  | 71922018  | G | A | 0.4776 | -0.0065 | 0.0010 | 7.80E-10 | -6.1747 | 408317 | Snoring |
| rs1358071   | 17 | 43803189  | C | A | 0.2708 | 0.0075  | 0.0012 | 2.60E-10 | 6.3491  | 408317 | Snoring |
| rs1358439   | 17 | 44219905  | A | G | 0.1858 | 0.0080  | 0.0014 | 2.40E-08 | 5.5868  | 408317 | Snoring |
| rs1359613   | 13 | 50766240  | A | G | 0.4713 | 0.0062  | 0.0010 | 2.70E-09 | 5.9228  | 408317 | Snoring |
| rs1373480   | 8  | 71686967  | T | C | 0.4803 | -0.0059 | 0.0010 | 1.70E-08 | -5.6549 | 408317 | Snoring |
| rs1374892   | 3  | 77605621  | C | A | 0.4537 | 0.0064  | 0.0011 | 6.00E-10 | 6.1154  | 408317 | Snoring |
| rs1374893   | 3  | 77605566  | C | T | 0.4537 | 0.0064  | 0.0011 | 6.00E-10 | 6.1153  | 408317 | Snoring |
| rs1374894   | 3  | 77605552  | C | A | 0.4537 | 0.0064  | 0.0011 | 6.00E-10 | 6.1153  | 408317 | Snoring |
| rs1374895   | 3  | 77615539  | C | T | 0.4545 | 0.0065  | 0.0011 | 4.50E-10 | 6.1612  | 408317 | Snoring |
| rs1377201   | 17 | 46312128  | T | C | 0.3867 | 0.0062  | 0.0011 | 3.60E-09 | 5.8166  | 408317 | Snoring |
| rs1378358   | 17 | 44787312  | T | C | 0.2151 | 0.0072  | 0.0013 | 2.00E-08 | 5.6440  | 408317 | Snoring |
| rs1388637   | 3  | 94050852  | T | A | 0.3924 | -0.0059 | 0.0011 | 2.40E-08 | -5.4760 | 408317 | Snoring |
| rs1389198   | 8  | 71834107  | G | A | 0.4300 | 0.0068  | 0.0011 | 1.20E-10 | 6.4372  | 408317 | Snoring |
| rs1389202   | 8  | 71852285  | C | T | 0.4875 | -0.0062 | 0.0010 | 3.00E-09 | -5.9615 | 408317 | Snoring |
| rs1389204   | 8  | 71928298  | T | C | 0.4777 | -0.0065 | 0.0010 | 7.20E-10 | -6.1862 | 408317 | Snoring |
| rs1389206   | 8  | 71924862  | A | G | 0.4777 | -0.0065 | 0.0010 | 6.40E-10 | -6.2049 | 408317 | Snoring |
| rs1389799   | 12 | 65824846  | G | A | 0.3644 | 0.0088  | 0.0011 | 3.00E-16 | 8.1249  | 408317 | Snoring |
| rs139077859 | 17 | 44335579  | A | G | 0.2072 | 0.0077  | 0.0013 | 5.40E-09 | 5.8342  | 408317 | Snoring |
| rs1393632   | 1  | 50814015  | C | T | 0.4584 | 0.0060  | 0.0010 | 1.20E-08 | 5.7222  | 408317 | Snoring |
| rs1393634   | 1  | 50811905  | T | C | 0.4565 | 0.0059  | 0.0010 | 2.10E-08 | 5.6181  | 408317 | Snoring |
| rs1393635   | 1  | 50811839  | G | T | 0.4567 | 0.0059  | 0.0010 | 1.90E-08 | 5.6295  | 408317 | Snoring |
| rs1396862   | 17 | 43902997  | A | G | 0.2253 | 0.0076  | 0.0012 | 1.10E-09 | 6.1191  | 408317 | Snoring |
| rs1396870   | 17 | 46495412  | G | T | 0.2157 | -0.0074 | 0.0013 | 4.60E-09 | -5.8412 | 408317 | Snoring |
| rs1403848   | 3  | 77609655  | C | A | 0.4444 | 0.0063  | 0.0011 | 1.70E-09 | 5.9570  | 408317 | Snoring |
| rs1405238   | 14 | 99733954  | C | T | 0.4221 | -0.0073 | 0.0011 | 1.40E-11 | -6.7646 | 408317 | Snoring |
| rs1407038   | 20 | 6603820   | A | G | 0.3730 | -0.0061 | 0.0011 | 1.60E-08 | -5.6473 | 408317 | Snoring |
| rs1407039   | 20 | 6603948   | A | G | 0.3729 | -0.0061 | 0.0011 | 1.90E-08 | -5.6164 | 408317 | Snoring |
| rs140713557 | 17 | 43953179  | G | A | 0.2258 | 0.0076  | 0.0012 | 1.30E-09 | 6.1019  | 408317 | Snoring |
| rs140812695 | 2  | 157065193 | A | G | 0.1357 | 0.0118  | 0.0015 | 9.10E-15 | 7.7098  | 408317 | Snoring |
| rs140820592 | 16 | 31021880  | T | G | 0.3735 | 0.0065  | 0.0011 | 3.10E-09 | 5.9743  | 408317 | Snoring |
| rs141020749 | 8  | 71723997  | C | A | 0.4302 | 0.0068  | 0.0011 | 9.50E-11 | 6.4656  | 408317 | Snoring |
| rs141261718 | 8  | 71887638  | A | T | 0.4303 | 0.0067  | 0.0011 | 2.50E-10 | 6.3180  | 408317 | Snoring |
| rs141450    | 7  | 127452420 | G | C | 0.4130 | -0.0057 | 0.0011 | 4.60E-08 | -5.3888 | 408317 | Snoring |
| rs1414935   | 13 | 40742958  | C | T | 0.4659 | 0.0057  | 0.0010 | 2.70E-08 | 5.4893  | 408317 | Snoring |
| rs1416685   | 1  | 51243374  | C | G | 0.4078 | 0.0062  | 0.0011 | 5.30E-09 | 5.8385  | 408317 | Snoring |
| rs141783865 | 17 | 44755729  | C | A | 0.2147 | 0.0072  | 0.0013 | 1.90E-08 | 5.6530  | 408317 | Snoring |
| rs1419967   | 7  | 127474435 | C | G | 0.3425 | 0.0064  | 0.0011 | 3.60E-09 | 5.8322  | 408317 | Snoring |
| rs1421085   | 16 | 53800954  | C | T | 0.4021 | 0.0068  | 0.0011 | 1.80E-10 | 6.3823  | 408317 | Snoring |
| rs1421086   | 16 | 53801343  | A | C | 0.4219 | 0.0069  | 0.0011 | 7.60E-11 | 6.5022  | 408317 | Snoring |
| rs142327126 | 8  | 78115715  | T | A | 0.2854 | -0.0068 | 0.0012 | 3.60E-09 | -5.8806 | 408317 | Snoring |
| rs142955985 | 17 | 43933790  | T | G | 0.2190 | 0.0077  | 0.0013 | 1.40E-09 | 6.0734  | 408317 | Snoring |
| rs1430079   | 2  | 103873312 | T | C | 0.2680 | 0.0064  | 0.0012 | 4.40E-08 | 5.3967  | 408317 | Snoring |
| rs143021741 | 8  | 71690622  | C | T | 0.4078 | 0.0063  | 0.0011 | 2.00E-09 | 5.9726  | 408317 | Snoring |
| rs143154509 | 2  | 103876695 | G | C | 0.2683 | 0.0064  | 0.0012 | 4.90E-08 | 5.3736  | 408317 | Snoring |
| rs143242847 | 19 | 32189687  | T | C | 0.0917 | -0.0106 | 0.0018 | 2.90E-09 | -5.8514 | 408317 | Snoring |
| rs143345034 | 17 | 43696920  | T | C | 0.2255 | 0.0077  | 0.0012 | 7.50E-10 | 6.1778  | 408317 | Snoring |
| rs144338146 | 2  | 103886061 | T | C | 0.2679 | 0.0064  | 0.0012 | 4.60E-08 | 5.3860  | 408317 | Snoring |
| rs144416125 | 17 | 44296523  | A | G | 0.2246 | 0.0076  | 0.0013 | 1.50E-09 | 6.0652  | 408317 | Snoring |
| rs1444339   | 8  | 71700642  | G | A | 0.4300 | 0.0068  | 0.0011 | 9.90E-11 | 6.4604  | 408317 | Snoring |
| rs1444343   | 8  | 71672984  | A | G | 0.4300 | 0.0069  | 0.0011 | 5.30E-11 | 6.5526  | 408317 | Snoring |
| rs144462017 | 17 | 44443036  | A | G | 0.2489 | -0.0072 | 0.0013 | 3.80E-08 | -5.4744 | 408317 | Snoring |
| rs1444773   | 10 | 9075889   | G | A | 0.2476 | 0.0076  | 0.0012 | 2.90E-10 | 6.2944  | 408317 | Snoring |
| rs1444787   | 10 | 9063530   | A | G | 0.1909 | 0.0089  | 0.0013 | 2.60E-11 | 6.6519  | 408317 | Snoring |
| rs1444788   | 10 | 9064120   | C | T | 0.1879 | 0.0091  | 0.0013 | 1.20E-11 | 6.7623  | 408317 | Snoring |
| rs1444789   | 10 | 9064361   | C | T | 0.1870 | 0.0091  | 0.0013 | 1.30E-11 | 6.7463  | 408317 | Snoring |
| rs1444790   | 10 | 9070959   | G | A | 0.2275 | 0.0073  | 0.0012 | 4.50E-09 | 5.8506  | 408317 | Snoring |
| rs1444791   | 10 | 9071014   | G | T | 0.2275 | 0.0073  | 0.0012 | 4.50E-09 | 5.8510  | 408317 | Snoring |
| rs1447841   | 3  | 77604605  | A | T | 0.4537 | 0.0064  | 0.0010 | 6.20E-10 | 6.1100  | 408317 | Snoring |
| rs1447842   | 3  | 77602090  | G | A | 0.4537 | 0.0064  | 0.0010 | 6.40E-10 | 6.1075  | 408317 | Snoring |
| rs1447843   | 3  | 77601589  | C | T | 0.4537 | 0.0064  | 0.0010 | 7.50E-10 | 6.0819  | 408317 | Snoring |
| rs1452666   | 17 | 46307750  | T | C | 0.3866 | 0.0062  | 0.0011 | 3.60E-09 | 5.8183  | 408317 | Snoring |
| rs1452667   | 17 | 46302415  | G | A | 0.3866 | 0.0062  | 0.0011 | 3.60E-09 | 5.8185  | 408317 | Snoring |
| rs1452815   | 8  | 78123634  | G | A | 0.2855 | -0.0068 | 0.0012 | 4.10E-09 | -5.8576 | 408317 | Snoring |
| rs1452816   | 8  | 78123233  | C | T | 0.2855 | -0.0068 | 0.0012 | 4.40E-09 | -5.8470 | 408317 | Snoring |
| rs1452822   | 8  | 78138334  | A | T | 0.2848 | -0.0067 | 0.0012 | 5.30E-09 | -5.8176 | 408317 | Snoring |
| rs145367119 | 3  | 90049321  | T | C | 0.4278 | -0.0060 | 0.0011 | 1.20E-08 | -5.6336 | 408317 | Snoring |



|             |    |           |   |   |        |         |        |          |         |        |         |
|-------------|----|-----------|---|---|--------|---------|--------|----------|---------|--------|---------|
| rs145414283 | 8  | 78189250  | C | G | 0.2789 | -0.0070 | 0.0012 | 1.80E-09 | -6.0112 | 408317 | Snoring |
| rs145472926 | 17 | 43671522  | T | C | 0.2231 | 0.0076  | 0.0013 | 1.80E-09 | 6.0326  | 408317 | Snoring |
| rs145636338 | 2  | 157053704 | A | G | 0.1030 | 0.0101  | 0.0017 | 4.00E-09 | 5.8696  | 408317 | Snoring |
| rs1457198   | 8  | 71747169  | G | T | 0.4302 | 0.0068  | 0.0011 | 9.10E-11 | 6.4712  | 408317 | Snoring |
| rs1458202   | 16 | 30953202  | G | A | 0.3629 | 0.0059  | 0.0011 | 4.80E-08 | 5.4539  | 408317 | Snoring |
| rs1466389   | 17 | 2096384   | T | C | 0.3472 | -0.0060 | 0.0011 | 4.60E-08 | -5.4227 | 408317 | Snoring |
| rs1467962   | 17 | 43978604  | G | A | 0.2255 | 0.0076  | 0.0012 | 1.40E-09 | 6.0865  | 408317 | Snoring |
| rs1467963   | 17 | 43978934  | G | T | 0.2255 | 0.0076  | 0.0012 | 1.40E-09 | 6.0854  | 408317 | Snoring |
| rs1467966   | 17 | 43984399  | T | C | 0.2255 | 0.0076  | 0.0012 | 1.40E-09 | 6.0801  | 408317 | Snoring |
| rs1467968   | 17 | 43986396  | T | C | 0.2253 | 0.0076  | 0.0012 | 1.50E-09 | 6.0681  | 408317 | Snoring |
| rs1467969   | 17 | 43998328  | T | C | 0.2254 | 0.0076  | 0.0012 | 1.60E-09 | 6.0599  | 408317 | Snoring |
| rs1467970   | 17 | 43998574  | G | T | 0.2254 | 0.0076  | 0.0012 | 1.60E-09 | 6.0613  | 408317 | Snoring |
| rs1468240   | 17 | 44196447  | A | T | 0.2259 | 0.0076  | 0.0012 | 1.60E-09 | 6.0656  | 408317 | Snoring |
| rs1468241   | 17 | 44196153  | G | A | 0.2257 | 0.0076  | 0.0012 | 1.60E-09 | 6.0580  | 408317 | Snoring |
| rs1471114   | 8  | 71675547  | T | C | 0.4820 | -0.0059 | 0.0010 | 1.50E-08 | -5.6798 | 408317 | Snoring |
| rs147420990 | 8  | 71887706  | C | T | 0.4303 | 0.0067  | 0.0011 | 2.50E-10 | 6.3180  | 408317 | Snoring |
| rs147431626 | 17 | 44335635  | A | G | 0.2299 | 0.0073  | 0.0012 | 5.90E-09 | 5.8560  | 408317 | Snoring |
| rs1476127   | 17 | 43999793  | A | G | 0.2255 | 0.0076  | 0.0012 | 1.50E-09 | 6.0783  | 408317 | Snoring |
| rs147642589 | 17 | 44300067  | G | A | 0.2023 | 0.0080  | 0.0013 | 3.20E-09 | 5.9349  | 408317 | Snoring |
| rs1476554   | 17 | 44159102  | T | C | 0.2254 | 0.0076  | 0.0012 | 1.80E-09 | 6.0464  | 408317 | Snoring |
| rs1477943   | 8  | 71582763  | A | G | 0.4306 | 0.0069  | 0.0011 | 6.90E-11 | 6.5133  | 408317 | Snoring |
| rs1477944   | 8  | 71615600  | C | T | 0.4834 | -0.0059 | 0.0010 | 1.70E-08 | -5.6597 | 408317 | Snoring |
| rs1477945   | 8  | 71615553  | G | T | 0.4289 | 0.0068  | 0.0011 | 9.80E-11 | 6.4616  | 408317 | Snoring |
| rs148033495 | 17 | 44313224  | G | A | 0.1990 | 0.0077  | 0.0013 | 1.60E-08 | 5.6787  | 408317 | Snoring |
| rs1481801   | 8  | 71989719  | A | C | 0.3876 | -0.0059 | 0.0011 | 4.30E-08 | -5.5166 | 408317 | Snoring |
| rs1481804   | 8  | 71969430  | A | G | 0.4734 | -0.0065 | 0.0010 | 8.50E-10 | -6.1526 | 408317 | Snoring |
| rs1488830   | 11 | 27636885  | C | T | 0.2006 | -0.0074 | 0.0013 | 2.60E-08 | -5.6682 | 408317 | Snoring |
| rs149092028 | 3  | 90049995  | C | A | 0.4301 | -0.0059 | 0.0011 | 2.70E-08 | -5.4924 | 408317 | Snoring |
| rs1493198   | 8  | 71851957  | G | A | 0.4875 | -0.0062 | 0.0010 | 3.10E-09 | -5.9567 | 408317 | Snoring |
| rs1493199   | 8  | 71846504  | C | A | 0.4295 | 0.0069  | 0.0011 | 6.00E-11 | 6.5380  | 408317 | Snoring |
| rs1493203   | 8  | 71926507  | C | T | 0.4777 | -0.0065 | 0.0010 | 6.50E-10 | -6.2028 | 408317 | Snoring |
| rs149366495 | 17 | 43549608  | A | G | 0.1848 | 0.0074  | 0.0013 | 3.90E-08 | 5.4823  | 408317 | Snoring |
| rs1494507   | 12 | 65875745  | T | C | 0.4496 | 0.0069  | 0.0011 | 6.60E-11 | 6.5601  | 408317 | Snoring |
| rs1494511   | 12 | 65871205  | A | G | 0.4493 | 0.0069  | 0.0011 | 7.60E-11 | 6.5434  | 408317 | Snoring |
| rs149753849 | 17 | 44316509  | C | G | 0.2085 | 0.0077  | 0.0013 | 4.70E-09 | 5.8688  | 408317 | Snoring |
| rs150592114 | 17 | 44333331  | G | A | 0.2146 | 0.0081  | 0.0013 | 4.50E-10 | 6.2808  | 408317 | Snoring |
| rs151224679 | 2  | 156997603 | A | G | 0.1348 | 0.0119  | 0.0015 | 8.40E-15 | 7.7139  | 408317 | Snoring |
| rs1520339   | 2  | 156751921 | T | C | 0.3083 | -0.0066 | 0.0011 | 9.80E-09 | -5.8185 | 408317 | Snoring |
| rs1523757   | 3  | 77606280  | C | T | 0.4542 | 0.0064  | 0.0011 | 5.30E-10 | 6.1321  | 408317 | Snoring |
| rs1523758   | 3  | 77606267  | T | A | 0.4540 | 0.0064  | 0.0011 | 5.40E-10 | 6.1302  | 408317 | Snoring |
| rs1526125   | 17 | 43812177  | T | C | 0.2251 | 0.0077  | 0.0012 | 9.40E-10 | 6.1452  | 408317 | Snoring |
| rs1526126   | 17 | 43812218  | T | C | 0.2251 | 0.0077  | 0.0012 | 8.70E-10 | 6.1564  | 408317 | Snoring |
| rs1526127   | 17 | 43812398  | G | C | 0.2252 | 0.0077  | 0.0012 | 9.80E-10 | 6.1386  | 408317 | Snoring |
| rs1526128   | 17 | 43779624  | T | C | 0.2237 | 0.0079  | 0.0013 | 3.90E-10 | 6.2791  | 408317 | Snoring |
| rs1526129   | 17 | 43779657  | C | T | 0.2252 | 0.0077  | 0.0012 | 7.50E-10 | 6.1787  | 408317 | Snoring |
| rs1529715   | 19 | 32204967  | G | A | 0.0904 | -0.0102 | 0.0018 | 1.20E-08 | -5.6124 | 408317 | Snoring |
| rs1529716   | 19 | 32205176  | T | C | 0.0946 | -0.0105 | 0.0018 | 2.90E-09 | -5.8472 | 408317 | Snoring |
| rs1532738   | 1  | 50807429  | G | T | 0.4562 | 0.0060  | 0.0010 | 1.40E-08 | 5.6818  | 408317 | Snoring |
| rs1533057   | 17 | 46519105  | A | C | 0.2157 | -0.0074 | 0.0013 | 4.80E-09 | -5.8287 | 408317 | Snoring |
| rs1540803   | 2  | 156709593 | T | A | 0.3090 | -0.0066 | 0.0011 | 9.50E-09 | -5.8245 | 408317 | Snoring |
| rs1540840   | 14 | 99733384  | C | G | 0.4843 | -0.0061 | 0.0011 | 2.50E-08 | -5.6225 | 408317 | Snoring |
| rs155771    | 17 | 44531724  | T | C | 0.3045 | 0.0072  | 0.0013 | 2.20E-08 | 5.5723  | 408317 | Snoring |
| rs1558901   | 16 | 53803187  | T | A | 0.4221 | 0.0069  | 0.0011 | 6.90E-11 | 6.5173  | 408317 | Snoring |
| rs1558902   | 16 | 53803574  | A | T | 0.4023 | 0.0068  | 0.0011 | 1.60E-10 | 6.3984  | 408317 | Snoring |
| rs1560310   | 17 | 43978534  | A | G | 0.2255 | 0.0076  | 0.0012 | 1.30E-09 | 6.0933  | 408317 | Snoring |
| rs1560311   | 17 | 43978625  | C | T | 0.2255 | 0.0076  | 0.0012 | 1.40E-09 | 6.0864  | 408317 | Snoring |
| rs1563304   | 17 | 44874453  | T | C | 0.1798 | 0.0077  | 0.0014 | 1.90E-08 | 5.6354  | 408317 | Snoring |
| rs1568949   | 17 | 43792975  | A | G | 0.2251 | 0.0076  | 0.0012 | 1.10E-09 | 6.1218  | 408317 | Snoring |
| rs1568950   | 17 | 43792896  | C | T | 0.2251 | 0.0076  | 0.0012 | 1.20E-09 | 6.1078  | 408317 | Snoring |
| rs1568951   | 17 | 43792895  | G | T | 0.2251 | 0.0076  | 0.0012 | 1.20E-09 | 6.1078  | 408317 | Snoring |
| rs1570727   | 1  | 96882331  | C | A | 0.0874 | 0.0118  | 0.0019 | 1.90E-10 | 6.3529  | 408317 | Snoring |
| rs1580098   | 3  | 94003659  | G | A | 0.4010 | -0.0060 | 0.0011 | 1.30E-08 | -5.5897 | 408317 | Snoring |
| rs1582931   | 5  | 122657199 | A | G | 0.4730 | -0.0057 | 0.0011 | 3.90E-08 | -5.4361 | 408317 | Snoring |
| rs1589720   | 3  | 77603606  | T | C | 0.4537 | 0.0064  | 0.0010 | 6.10E-10 | 6.1130  | 408317 | Snoring |
| rs1596565   | 8  | 71698832  | T | C | 0.4321 | 0.0068  | 0.0011 | 1.10E-10 | 6.4525  | 408317 | Snoring |
| rs1596566   | 8  | 71698576  | A | C | 0.4802 | -0.0059 | 0.0010 | 1.90E-08 | -5.6368 | 408317 | Snoring |
| rs1597089   | 3  | 77603437  | G | T | 0.4537 | 0.0064  | 0.0010 | 6.10E-10 | 6.1131  | 408317 | Snoring |
| rs1597090   | 3  | 77603270  | T | C | 0.4537 | 0.0064  | 0.0010 | 6.10E-10 | 6.1132  | 408317 | Snoring |
| rs1597091   | 3  | 77603226  | G | A | 0.4542 | 0.0064  | 0.0010 | 5.50E-10 | 6.1323  | 408317 | Snoring |
| rs1597092   | 3  | 77603154  | G | A | 0.4537 | 0.0064  | 0.0010 | 6.10E-10 | 6.1135  | 408317 | Snoring |
| rs1597093   | 3  | 77602842  | C | A | 0.4537 | 0.0064  | 0.0010 | 6.10E-10 | 6.1124  | 408317 | Snoring |
| rs1598220   | 3  | 94021248  | T | G | 0.3978 | -0.0060 | 0.0011 | 1.20E-08 | -5.6101 | 408317 | Snoring |
| rs1598223   | 3  | 94016563  | A | G | 0.4008 | -0.0060 | 0.0011 | 1.40E-08 | -5.5820 | 408317 | Snoring |
| rs1598224   | 3  | 94016380  | C | T | 0.3812 | -0.0060 | 0.0011 | 3.70E-08 | -5.4102 | 408317 | Snoring |

|            |    |           |   |   |        |         |        |          |         |        |         |
|------------|----|-----------|---|---|--------|---------|--------|----------|---------|--------|---------|
| rs1598229  | 3  | 94008890  | G | A | 0.4008 | -0.0060 | 0.0011 | 1.30E-08 | -5.5937 | 408317 | Snoring |
| rs1598230  | 3  | 94008845  | G | A | 0.4009 | -0.0060 | 0.0011 | 1.20E-08 | -5.6086 | 408317 | Snoring |
| rs1598234  | 3  | 94004156  | T | G | 0.4010 | -0.0060 | 0.0011 | 1.30E-08 | -5.5960 | 408317 | Snoring |
| rs1603067  | 12 | 65878782  | A | G | 0.4500 | 0.0069  | 0.0011 | 7.30E-11 | 6.5453  | 408317 | Snoring |
| rs1608955  | 17 | 43815713  | T | C | 0.2252 | 0.0076  | 0.0012 | 1.10E-09 | 6.1224  | 408317 | Snoring |
| rs1608956  | 17 | 43815820  | A | T | 0.2252 | 0.0076  | 0.0012 | 1.10E-09 | 6.1219  | 408317 | Snoring |
| rs1609721  | 3  | 94009049  | C | T | 0.3995 | -0.0061 | 0.0011 | 8.00E-09 | -5.6756 | 408317 | Snoring |
| rs1612986  | 10 | 9064716   | C | T | 0.1862 | 0.0088  | 0.0013 | 6.50E-11 | 6.5178  | 408317 | Snoring |
| rs1625316  | 3  | 77605869  | C | A | 0.4538 | 0.0064  | 0.0011 | 6.30E-10 | 6.1087  | 408317 | Snoring |
| rs1630095  | 17 | 43750172  | G | A | 0.2456 | 0.0082  | 0.0012 | 1.50E-11 | 6.7684  | 408317 | Snoring |
| rs1631850  | 17 | 43749942  | A | G | 0.2456 | 0.0082  | 0.0012 | 1.20E-11 | 6.8012  | 408317 | Snoring |
| rs1635285  | 17 | 43684209  | G | C | 0.2279 | 0.0076  | 0.0012 | 1.50E-09 | 6.0657  | 408317 | Snoring |
| rs1635288  | 17 | 43756969  | A | G | 0.2476 | 0.0082  | 0.0012 | 1.70E-11 | 6.7443  | 408317 | Snoring |
| rs1635291  | 17 | 43751913  | G | A | 0.2461 | 0.0081  | 0.0012 | 2.30E-11 | 6.7029  | 408317 | Snoring |
| rs1635298  | 17 | 43744344  | T | A | 0.2432 | 0.0081  | 0.0012 | 2.40E-11 | 6.6964  | 408317 | Snoring |
| rs1641511  | 17 | 7559677   | G | A | 0.2405 | 0.0071  | 0.0012 | 5.00E-09 | 5.7930  | 408317 | Snoring |
| rs1641512  | 17 | 7559462   | G | A | 0.2404 | 0.0071  | 0.0012 | 5.30E-09 | 5.7759  | 408317 | Snoring |
| rs1642763  | 17 | 7557419   | A | G | 0.2387 | 0.0070  | 0.0012 | 6.60E-09 | 5.7430  | 408317 | Snoring |
| rs1663665  | 10 | 9075034   | C | A | 0.2475 | 0.0076  | 0.0012 | 3.10E-10 | 6.2856  | 408317 | Snoring |
| rs1666112  | 3  | 77604824  | G | A | 0.4538 | 0.0064  | 0.0011 | 6.40E-10 | 6.1045  | 408317 | Snoring |
| rs1666113  | 3  | 77604816  | G | A | 0.4549 | 0.0064  | 0.0011 | 6.50E-10 | 6.1080  | 408317 | Snoring |
| rs1666114  | 3  | 77604119  | G | A | 0.4537 | 0.0064  | 0.0010 | 6.40E-10 | 6.1051  | 408317 | Snoring |
| rs1666115  | 3  | 77603834  | G | A | 0.4537 | 0.0064  | 0.0010 | 6.40E-10 | 6.1067  | 408317 | Snoring |
| rs1666125  | 3  | 77650799  | T | C | 0.4247 | 0.0058  | 0.0011 | 3.70E-08 | 5.4088  | 408317 | Snoring |
| rs1666130  | 3  | 77598943  | C | T | 0.4537 | 0.0064  | 0.0010 | 6.10E-10 | 6.1148  | 408317 | Snoring |
| rs1666131  | 3  | 77648741  | A | G | 0.4243 | 0.0058  | 0.0011 | 3.50E-08 | 5.4215  | 408317 | Snoring |
| rs1666132  | 3  | 77649190  | C | T | 0.4244 | 0.0058  | 0.0011 | 3.60E-08 | 5.4174  | 408317 | Snoring |
| rs16840025 | 2  | 156982591 | A | T | 0.1104 | 0.0097  | 0.0017 | 3.70E-09 | 5.8368  | 408317 | Snoring |
| rs16840048 | 2  | 156992261 | G | A | 0.1383 | 0.0112  | 0.0015 | 1.20E-13 | 7.3718  | 408317 | Snoring |
| rs16840194 | 2  | 157156832 | G | A | 0.0907 | 0.0108  | 0.0018 | 1.90E-09 | 5.9220  | 408317 | Snoring |
| rs16871926 | 7  | 127517785 | T | C | 0.3413 | 0.0064  | 0.0011 | 4.40E-09 | 5.8051  | 408317 | Snoring |
| rs16872768 | 5  | 74982207  | C | T | 0.3671 | -0.0071 | 0.0011 | 3.40E-11 | -6.5512 | 408317 | Snoring |
| rs16917204 | 11 | 27668355  | C | G | 0.2001 | -0.0074 | 0.0013 | 2.30E-08 | -5.6841 | 408317 | Snoring |
| rs16917237 | 11 | 27702383  | T | G | 0.2021 | -0.0075 | 0.0013 | 1.20E-08 | -5.7923 | 408317 | Snoring |
| rs169201   | 17 | 44790203  | G | A | 0.2148 | 0.0072  | 0.0013 | 1.90E-08 | 5.6552  | 408317 | Snoring |
| rs16940633 | 17 | 43710371  | A | G | 0.2252 | 0.0077  | 0.0012 | 9.20E-10 | 6.1460  | 408317 | Snoring |
| rs16940665 | 17 | 43907896  | C | T | 0.2252 | 0.0076  | 0.0012 | 1.10E-09 | 6.1208  | 408317 | Snoring |
| rs16940668 | 17 | 43907966  | A | G | 0.2252 | 0.0076  | 0.0012 | 1.10E-09 | 6.1167  | 408317 | Snoring |
| rs16940671 | 17 | 43908151  | T | C | 0.2243 | 0.0077  | 0.0013 | 8.80E-10 | 6.1561  | 408317 | Snoring |
| rs16940672 | 17 | 43908152  | T | C | 0.2244 | 0.0077  | 0.0013 | 9.30E-10 | 6.1466  | 408317 | Snoring |
| rs16940674 | 17 | 43910507  | T | C | 0.2252 | 0.0077  | 0.0012 | 1.10E-09 | 6.1240  | 408317 | Snoring |
| rs16940676 | 17 | 43911036  | A | G | 0.2252 | 0.0077  | 0.0012 | 1.00E-09 | 6.1312  | 408317 | Snoring |
| rs16940677 | 17 | 43911898  | T | C | 0.2252 | 0.0077  | 0.0012 | 1.10E-09 | 6.1260  | 408317 | Snoring |
| rs16940681 | 17 | 43912159  | C | G | 0.2251 | 0.0076  | 0.0012 | 1.20E-09 | 6.1131  | 408317 | Snoring |
| rs16940799 | 17 | 44102933  | C | T | 0.2254 | 0.0075  | 0.0012 | 2.00E-09 | 6.0250  | 408317 | Snoring |
| rs16940806 | 17 | 44103826  | A | G | 0.2222 | 0.0076  | 0.0013 | 1.80E-09 | 6.0482  | 408317 | Snoring |
| rs16940904 | 17 | 44186063  | T | C | 0.2273 | 0.0073  | 0.0012 | 6.40E-09 | 5.8257  | 408317 | Snoring |
| rs16941035 | 17 | 43761519  | G | T | 0.2453 | 0.0083  | 0.0012 | 1.10E-11 | 6.8111  | 408317 | Snoring |
| rs16941038 | 17 | 43761565  | C | T | 0.2453 | 0.0083  | 0.0012 | 1.10E-11 | 6.8123  | 408317 | Snoring |
| rs16966171 | 19 | 32187130  | A | G | 0.0952 | -0.0108 | 0.0018 | 9.00E-10 | -6.0380 | 408317 | Snoring |
| rs16966173 | 19 | 32191921  | A | G | 0.0913 | -0.0103 | 0.0018 | 8.20E-09 | -5.6797 | 408317 | Snoring |
| rs16966188 | 19 | 32196439  | C | T | 0.1024 | -0.0093 | 0.0017 | 3.60E-08 | -5.4092 | 408317 | Snoring |
| rs16966191 | 19 | 32200796  | C | T | 0.1025 | -0.0093 | 0.0017 | 3.90E-08 | -5.3962 | 408317 | Snoring |
| rs17028504 | 2  | 103875129 | T | C | 0.2682 | 0.0064  | 0.0012 | 4.80E-08 | 5.3812  | 408317 | Snoring |
| rs17028556 | 2  | 103900583 | T | G | 0.2680 | 0.0064  | 0.0012 | 4.60E-08 | 5.3881  | 408317 | Snoring |
| rs17060460 | 6  | 100827834 | G | A | 0.2266 | 0.0071  | 0.0012 | 1.40E-08 | 5.6866  | 408317 | Snoring |
| rs17060480 | 6  | 100836636 | T | A | 0.2282 | 0.0070  | 0.0012 | 2.30E-08 | 5.6055  | 408317 | Snoring |
| rs17060492 | 6  | 100840091 | T | A | 0.2282 | 0.0070  | 0.0012 | 2.20E-08 | 5.6110  | 408317 | Snoring |
| rs1706722  | 17 | 43684094  | C | T | 0.2293 | 0.0080  | 0.0012 | 1.50E-10 | 6.4181  | 408317 | Snoring |
| rs1706725  | 17 | 44324185  | G | A | 0.2369 | 0.0072  | 0.0012 | 5.80E-09 | 5.8248  | 408317 | Snoring |
| rs1706741  | 17 | 43664231  | G | T | 0.2134 | 0.0080  | 0.0013 | 5.00E-10 | 6.2597  | 408317 | Snoring |
| rs1706746  | 17 | 43721457  | T | C | 0.2253 | 0.0077  | 0.0012 | 8.60E-10 | 6.1568  | 408317 | Snoring |
| rs1706748  | 17 | 43722509  | G | C | 0.2253 | 0.0077  | 0.0012 | 9.60E-10 | 6.1380  | 408317 | Snoring |
| rs17151229 | 7  | 127382155 | C | G | 0.3412 | 0.0065  | 0.0011 | 1.90E-09 | 5.9325  | 408317 | Snoring |
| rs17151241 | 7  | 127382743 | G | A | 0.4112 | -0.0059 | 0.0011 | 2.00E-08 | -5.5309 | 408317 | Snoring |
| rs17151270 | 7  | 127400913 | A | G | 0.4107 | -0.0058 | 0.0011 | 3.20E-08 | -5.4486 | 408317 | Snoring |
| rs17151377 | 7  | 127458009 | A | C | 0.3421 | 0.0064  | 0.0011 | 4.80E-09 | 5.7892  | 408317 | Snoring |
| rs17151470 | 7  | 127517965 | G | A | 0.3414 | 0.0064  | 0.0011 | 5.20E-09 | 5.7796  | 408317 | Snoring |
| rs1721175  | 3  | 77650694  | C | T | 0.4247 | 0.0058  | 0.0011 | 3.60E-08 | 5.4149  | 408317 | Snoring |
| rs1721187  | 3  | 77598227  | G | C | 0.4538 | 0.0064  | 0.0010 | 6.20E-10 | 6.1119  | 408317 | Snoring |
| rs1721188  | 3  | 77609875  | G | A | 0.4542 | 0.0065  | 0.0011 | 5.10E-10 | 6.1439  | 408317 | Snoring |
| rs1721195  | 3  | 77604044  | A | T | 0.4537 | 0.0064  | 0.0010 | 6.40E-10 | 6.1050  | 408317 | Snoring |
| rs1721196  | 3  | 77603987  | A | G | 0.4537 | 0.0064  | 0.0010 | 6.30E-10 | 6.1092  | 408317 | Snoring |
| rs1721197  | 3  | 77603476  | T | C | 0.4537 | 0.0064  | 0.0010 | 6.10E-10 | 6.1133  | 408317 | Snoring |

|            |    |           |   |   |        |         |        |          |         |        |         |
|------------|----|-----------|---|---|--------|---------|--------|----------|---------|--------|---------|
| rs1721200  | 3  | 77602339  | A | G | 0.4537 | 0.0064  | 0.0010 | 6.50E-10 | 6.1044  | 408317 | Snoring |
| rs1721201  | 3  | 77602286  | G | T | 0.4537 | 0.0064  | 0.0010 | 6.40E-10 | 6.1062  | 408317 | Snoring |
| rs1724390  | 17 | 43663247  | A | C | 0.2269 | 0.0077  | 0.0012 | 8.50E-10 | 6.1551  | 408317 | Snoring |
| rs1724400  | 17 | 43755871  | A | C | 0.2456 | 0.0083  | 0.0012 | 1.10E-11 | 6.8117  | 408317 | Snoring |
| rs1724401  | 17 | 43755857  | C | A | 0.2456 | 0.0083  | 0.0012 | 1.10E-11 | 6.8121  | 408317 | Snoring |
| rs1724402  | 17 | 43754914  | C | T | 0.2458 | 0.0083  | 0.0012 | 1.00E-11 | 6.8194  | 408317 | Snoring |
| rs1724404  | 17 | 44323425  | T | C | 0.2282 | 0.0074  | 0.0012 | 4.60E-09 | 5.8890  | 408317 | Snoring |
| rs1724407  | 17 | 43747615  | C | T | 0.2456 | 0.0082  | 0.0012 | 1.20E-11 | 6.7914  | 408317 | Snoring |
| rs1724409  | 17 | 43740565  | G | T | 0.2564 | 0.0078  | 0.0012 | 8.00E-11 | 6.5163  | 408317 | Snoring |
| rs17248221 | 2  | 157126101 | T | A | 0.0902 | 0.0109  | 0.0018 | 1.60E-09 | 5.9466  | 408317 | Snoring |
| rs17334797 | 17 | 43825912  | G | A | 0.2252 | 0.0076  | 0.0012 | 1.10E-09 | 6.1160  | 408317 | Snoring |
| rs17334894 | 17 | 43827209  | A | G | 0.2252 | 0.0076  | 0.0012 | 1.10E-09 | 6.1190  | 408317 | Snoring |
| rs17334923 | 17 | 43827244  | T | C | 0.2258 | 0.0076  | 0.0012 | 1.10E-09 | 6.1141  | 408317 | Snoring |
| rs17334944 | 17 | 43828617  | A | G | 0.2252 | 0.0076  | 0.0012 | 1.10E-09 | 6.1173  | 408317 | Snoring |
| rs17379249 | 8  | 78103029  | T | C | 0.2855 | -0.0068 | 0.0012 | 4.50E-09 | -5.8445 | 408317 | Snoring |
| rs17379354 | 8  | 78108034  | C | T | 0.2855 | -0.0068 | 0.0012 | 4.70E-09 | -5.8378 | 408317 | Snoring |
| rs17380376 | 8  | 78121914  | C | G | 0.2854 | -0.0068 | 0.0012 | 4.30E-09 | -5.8501 | 408317 | Snoring |
| rs17380516 | 8  | 78122913  | T | C | 0.2855 | -0.0068 | 0.0012 | 4.40E-09 | -5.8486 | 408317 | Snoring |
| rs17380738 | 8  | 78125457  | T | C | 0.2854 | -0.0067 | 0.0012 | 5.00E-09 | -5.8269 | 408317 | Snoring |
| rs17382178 | 1  | 50823046  | T | C | 0.4584 | 0.0061  | 0.0011 | 9.30E-09 | 5.7611  | 408317 | Snoring |
| rs17382199 | 1  | 50823231  | C | T | 0.4586 | 0.0061  | 0.0011 | 7.70E-09 | 5.7959  | 408317 | Snoring |
| rs17386024 | 1  | 50808204  | A | G | 0.4559 | 0.0059  | 0.0010 | 1.60E-08 | 5.6650  | 408317 | Snoring |
| rs17386190 | 1  | 50817952  | C | T | 0.4582 | 0.0060  | 0.0011 | 1.00E-08 | 5.7429  | 408317 | Snoring |
| rs17413833 | 2  | 103900735 | A | G | 0.2680 | 0.0064  | 0.0012 | 4.20E-08 | 5.4023  | 408317 | Snoring |
| rs17425752 | 17 | 43906726  | C | A | 0.2252 | 0.0077  | 0.0013 | 8.60E-10 | 6.1595  | 408317 | Snoring |
| rs17426064 | 17 | 43828698  | T | C | 0.2252 | 0.0076  | 0.0012 | 1.10E-09 | 6.1193  | 408317 | Snoring |
| rs17426106 | 17 | 43828935  | C | G | 0.2252 | 0.0076  | 0.0012 | 1.10E-09 | 6.1180  | 408317 | Snoring |
| rs17426174 | 17 | 43830938  | C | G | 0.2251 | 0.0076  | 0.0012 | 1.30E-09 | 6.0956  | 408317 | Snoring |
| rs17426195 | 17 | 43832367  | A | G | 0.2248 | 0.0076  | 0.0013 | 1.50E-09 | 6.0665  | 408317 | Snoring |
| rs17464255 | 8  | 78110269  | G | C | 0.2855 | -0.0068 | 0.0012 | 4.70E-09 | -5.8378 | 408317 | Snoring |
| rs17464353 | 8  | 78110650  | T | C | 0.2855 | -0.0068 | 0.0012 | 4.70E-09 | -5.8378 | 408317 | Snoring |
| rs17465108 | 8  | 78121878  | T | G | 0.2855 | -0.0068 | 0.0012 | 4.40E-09 | -5.8460 | 408317 | Snoring |
| rs17501397 | 19 | 32168343  | T | C | 0.0860 | -0.0108 | 0.0019 | 5.80E-09 | -5.7724 | 408317 | Snoring |
| rs17563433 | 17 | 43800351  | C | A | 0.2251 | 0.0077  | 0.0012 | 1.00E-09 | 6.1285  | 408317 | Snoring |
| rs17563501 | 17 | 43801695  | T | C | 0.2251 | 0.0077  | 0.0012 | 1.00E-09 | 6.1296  | 408317 | Snoring |
| rs17563599 | 17 | 43807955  | C | A | 0.2252 | 0.0077  | 0.0012 | 9.50E-10 | 6.1440  | 408317 | Snoring |
| rs17563683 | 17 | 43811072  | G | A | 0.2251 | 0.0077  | 0.0012 | 9.30E-10 | 6.1464  | 408317 | Snoring |
| rs17563718 | 17 | 43811673  | T | C | 0.2251 | 0.0077  | 0.0012 | 9.40E-10 | 6.1447  | 408317 | Snoring |
| rs17563787 | 17 | 43813252  | G | C | 0.2252 | 0.0077  | 0.0012 | 9.80E-10 | 6.1383  | 408317 | Snoring |
| rs17563800 | 17 | 43817459  | T | C | 0.2252 | 0.0077  | 0.0012 | 9.70E-10 | 6.1404  | 408317 | Snoring |
| rs17563827 | 17 | 43818222  | A | C | 0.2252 | 0.0077  | 0.0012 | 9.70E-10 | 6.1404  | 408317 | Snoring |
| rs17563861 | 17 | 43818906  | G | A | 0.2252 | 0.0077  | 0.0012 | 9.80E-10 | 6.1383  | 408317 | Snoring |
| rs17563889 | 17 | 43818946  | T | A | 0.2252 | 0.0077  | 0.0012 | 9.80E-10 | 6.1384  | 408317 | Snoring |
| rs17563923 | 17 | 43819450  | A | G | 0.2252 | 0.0077  | 0.0012 | 1.00E-09 | 6.1327  | 408317 | Snoring |
| rs17563965 | 17 | 43990919  | G | A | 0.2255 | 0.0076  | 0.0012 | 1.50E-09 | 6.0772  | 408317 | Snoring |
| rs17563986 | 17 | 43991272  | G | A | 0.2255 | 0.0076  | 0.0012 | 1.40E-09 | 6.0810  | 408317 | Snoring |
| rs17564020 | 17 | 43991781  | T | G | 0.2255 | 0.0076  | 0.0012 | 1.50E-09 | 6.0770  | 408317 | Snoring |
| rs17564153 | 17 | 43995098  | A | G | 0.2254 | 0.0076  | 0.0012 | 1.70E-09 | 6.0523  | 408317 | Snoring |
| rs17564223 | 17 | 43997520  | T | C | 0.2255 | 0.0076  | 0.0012 | 1.50E-09 | 6.0763  | 408317 | Snoring |
| rs17564493 | 17 | 44001379  | T | C | 0.2255 | 0.0076  | 0.0012 | 1.50E-09 | 6.0780  | 408317 | Snoring |
| rs17564591 | 17 | 44002062  | C | A | 0.2255 | 0.0076  | 0.0012 | 1.40E-09 | 6.0794  | 408317 | Snoring |
| rs17564619 | 17 | 44002138  | G | A | 0.2255 | 0.0076  | 0.0012 | 1.40E-09 | 6.0794  | 408317 | Snoring |
| rs17564703 | 17 | 44002595  | T | C | 0.2255 | 0.0076  | 0.0012 | 1.50E-09 | 6.0780  | 408317 | Snoring |
| rs17564780 | 17 | 44005413  | G | A | 0.2255 | 0.0076  | 0.0012 | 1.50E-09 | 6.0686  | 408317 | Snoring |
| rs17564829 | 17 | 44006601  | C | T | 0.2255 | 0.0076  | 0.0012 | 1.60E-09 | 6.0664  | 408317 | Snoring |
| rs17564871 | 17 | 44011018  | G | A | 0.2254 | 0.0076  | 0.0012 | 1.70E-09 | 6.0561  | 408317 | Snoring |
| rs17564948 | 17 | 44011749  | G | A | 0.2255 | 0.0076  | 0.0012 | 1.50E-09 | 6.0735  | 408317 | Snoring |
| rs17564983 | 17 | 44011825  | C | A | 0.2255 | 0.0076  | 0.0012 | 1.50E-09 | 6.0762  | 408317 | Snoring |
| rs17565025 | 17 | 44012463  | C | T | 0.2258 | 0.0076  | 0.0012 | 1.30E-09 | 6.0993  | 408317 | Snoring |
| rs17571718 | 17 | 44032768  | C | T | 0.2254 | 0.0076  | 0.0012 | 1.40E-09 | 6.0792  | 408317 | Snoring |
| rs17571739 | 17 | 44032915  | C | T | 0.2248 | 0.0076  | 0.0013 | 1.20E-09 | 6.1074  | 408317 | Snoring |
| rs17571781 | 17 | 44033802  | C | T | 0.2254 | 0.0076  | 0.0012 | 1.30E-09 | 6.0903  | 408317 | Snoring |
| rs17571809 | 17 | 44034859  | G | A | 0.2253 | 0.0076  | 0.0013 | 1.80E-09 | 6.0454  | 408317 | Snoring |
| rs17571857 | 17 | 44035706  | G | A | 0.2255 | 0.0076  | 0.0012 | 1.60E-09 | 6.0649  | 408317 | Snoring |
| rs17572147 | 17 | 44044985  | G | A | 0.2253 | 0.0075  | 0.0012 | 2.30E-09 | 6.0036  | 408317 | Snoring |
| rs17572169 | 17 | 44045974  | T | C | 0.2254 | 0.0075  | 0.0012 | 2.20E-09 | 6.0133  | 408317 | Snoring |
| rs17572248 | 17 | 44049867  | G | A | 0.2254 | 0.0075  | 0.0012 | 2.00E-09 | 6.0277  | 408317 | Snoring |
| rs17572361 | 17 | 44052009  | C | T | 0.2254 | 0.0075  | 0.0012 | 2.00E-09 | 6.0283  | 408317 | Snoring |
| rs17572467 | 17 | 44054388  | C | T | 0.2254 | 0.0075  | 0.0012 | 2.00E-09 | 6.0285  | 408317 | Snoring |
| rs17572495 | 17 | 44054596  | G | T | 0.2254 | 0.0075  | 0.0012 | 2.00E-09 | 6.0294  | 408317 | Snoring |
| rs17572613 | 17 | 44058004  | G | A | 0.2254 | 0.0075  | 0.0012 | 2.00E-09 | 6.0247  | 408317 | Snoring |
| rs17572627 | 17 | 44058629  | A | T | 0.2254 | 0.0075  | 0.0012 | 2.00E-09 | 6.0283  | 408317 | Snoring |
| rs17573175 | 17 | 44071089  | G | C | 0.2254 | 0.0075  | 0.0012 | 2.00E-09 | 6.0239  | 408317 | Snoring |
| rs17573245 | 17 | 44072854  | C | T | 0.2255 | 0.0075  | 0.0012 | 2.10E-09 | 6.0208  | 408317 | Snoring |

|            |    |          |   |   |        |         |        |          |         |        |         |
|------------|----|----------|---|---|--------|---------|--------|----------|---------|--------|---------|
| rs17573266 | 17 | 44072881 | G | C | 0.2255 | 0.0075  | 0.0012 | 2.10E-09 | 6.0192  | 408317 | Snoring |
| rs17573447 | 17 | 44079567 | T | C | 0.2255 | 0.0075  | 0.0012 | 1.90E-09 | 6.0373  | 408317 | Snoring |
| rs17573593 | 17 | 44082603 | C | A | 0.2254 | 0.0075  | 0.0012 | 1.90E-09 | 6.0372  | 408317 | Snoring |
| rs17573607 | 17 | 44083081 | A | G | 0.2253 | 0.0075  | 0.0012 | 2.00E-09 | 6.0280  | 408317 | Snoring |
| rs17573858 | 17 | 44090796 | C | T | 0.2254 | 0.0075  | 0.0012 | 2.00E-09 | 6.0268  | 408317 | Snoring |
| rs17573907 | 17 | 44099082 | T | C | 0.2254 | 0.0076  | 0.0012 | 1.70E-09 | 6.0563  | 408317 | Snoring |
| rs17574040 | 17 | 44102865 | C | A | 0.2254 | 0.0075  | 0.0012 | 2.00E-09 | 6.0280  | 408317 | Snoring |
| rs17574228 | 17 | 44104509 | C | T | 0.2254 | 0.0075  | 0.0012 | 1.90E-09 | 6.0328  | 408317 | Snoring |
| rs17574361 | 17 | 44108202 | G | A | 0.2254 | 0.0075  | 0.0012 | 2.00E-09 | 6.0286  | 408317 | Snoring |
| rs17574425 | 17 | 44109188 | G | C | 0.2254 | 0.0075  | 0.0012 | 2.00E-09 | 6.0284  | 408317 | Snoring |
| rs17574604 | 17 | 44111613 | G | A | 0.2254 | 0.0075  | 0.0012 | 1.90E-09 | 6.0299  | 408317 | Snoring |
| rs17574796 | 17 | 44115074 | C | T | 0.2254 | 0.0075  | 0.0012 | 1.90E-09 | 6.0299  | 408317 | Snoring |
| rs17574824 | 17 | 44115107 | T | C | 0.2254 | 0.0075  | 0.0012 | 1.90E-09 | 6.0299  | 408317 | Snoring |
| rs17575423 | 17 | 44129253 | C | T | 0.2254 | 0.0075  | 0.0012 | 2.10E-09 | 6.0208  | 408317 | Snoring |
| rs17575437 | 17 | 44133031 | A | T | 0.2254 | 0.0075  | 0.0012 | 2.00E-09 | 6.0226  | 408317 | Snoring |
| rs17575507 | 17 | 44134095 | G | A | 0.2254 | 0.0075  | 0.0012 | 2.00E-09 | 6.0242  | 408317 | Snoring |
| rs17575556 | 17 | 44135827 | A | G | 0.2254 | 0.0075  | 0.0012 | 2.00E-09 | 6.0241  | 408317 | Snoring |
| rs17575683 | 17 | 44139662 | T | C | 0.2254 | 0.0075  | 0.0012 | 2.00E-09 | 6.0268  | 408317 | Snoring |
| rs17575773 | 17 | 44142879 | T | C | 0.2254 | 0.0075  | 0.0012 | 2.00E-09 | 6.0278  | 408317 | Snoring |
| rs17575822 | 17 | 44144345 | G | A | 0.2253 | 0.0075  | 0.0012 | 2.20E-09 | 6.0113  | 408317 | Snoring |
| rs17575850 | 17 | 44144387 | A | C | 0.2253 | 0.0075  | 0.0012 | 2.20E-09 | 6.0113  | 408317 | Snoring |
| rs17576165 | 17 | 44159849 | C | T | 0.2254 | 0.0075  | 0.0012 | 2.00E-09 | 6.0244  | 408317 | Snoring |
| rs17576200 | 17 | 44159988 | A | G | 0.2254 | 0.0075  | 0.0012 | 2.00E-09 | 6.0225  | 408317 | Snoring |
| rs17576631 | 17 | 44170018 | C | G | 0.2259 | 0.0076  | 0.0012 | 1.50E-09 | 6.0747  | 408317 | Snoring |
| rs17576695 | 17 | 44172327 | A | T | 0.2259 | 0.0076  | 0.0012 | 1.40E-09 | 6.0809  | 408317 | Snoring |
| rs17576709 | 17 | 44173356 | G | C | 0.2259 | 0.0076  | 0.0012 | 1.50E-09 | 6.0750  | 408317 | Snoring |
| rs17576779 | 17 | 44178272 | T | C | 0.2259 | 0.0076  | 0.0012 | 1.40E-09 | 6.0799  | 408317 | Snoring |
| rs17576842 | 17 | 44179992 | G | A | 0.2259 | 0.0076  | 0.0012 | 1.40E-09 | 6.0808  | 408317 | Snoring |
| rs17576870 | 17 | 44180442 | G | A | 0.2259 | 0.0076  | 0.0012 | 1.40E-09 | 6.0795  | 408317 | Snoring |
| rs17576954 | 17 | 44181933 | C | T | 0.2259 | 0.0076  | 0.0012 | 1.50E-09 | 6.0790  | 408317 | Snoring |
| rs17576989 | 17 | 44183616 | A | C | 0.2259 | 0.0076  | 0.0012 | 1.50E-09 | 6.0787  | 408317 | Snoring |
| rs17577024 | 17 | 44186252 | A | G | 0.2259 | 0.0076  | 0.0012 | 1.40E-09 | 6.0807  | 408317 | Snoring |
| rs17577052 | 17 | 44186301 | C | T | 0.2259 | 0.0076  | 0.0012 | 1.40E-09 | 6.0808  | 408317 | Snoring |
| rs17577094 | 17 | 44187492 | G | A | 0.2259 | 0.0076  | 0.0012 | 1.40E-09 | 6.0808  | 408317 | Snoring |
| rs17577159 | 17 | 44188477 | G | T | 0.2258 | 0.0076  | 0.0012 | 1.50E-09 | 6.0783  | 408317 | Snoring |
| rs17577313 | 17 | 44191835 | G | A | 0.2258 | 0.0076  | 0.0012 | 1.70E-09 | 6.0533  | 408317 | Snoring |
| rs17577369 | 17 | 44192923 | G | A | 0.2239 | 0.0076  | 0.0013 | 1.90E-09 | 6.0381  | 408317 | Snoring |
| rs17577447 | 17 | 44194381 | A | T | 0.2259 | 0.0076  | 0.0012 | 1.50E-09 | 6.0716  | 408317 | Snoring |
| rs17577496 | 17 | 44194835 | C | T | 0.2258 | 0.0076  | 0.0012 | 1.50E-09 | 6.0750  | 408317 | Snoring |
| rs17577650 | 17 | 44205500 | G | A | 0.2258 | 0.0076  | 0.0012 | 1.40E-09 | 6.0834  | 408317 | Snoring |
| rs17577877 | 17 | 44208218 | G | A | 0.2258 | 0.0076  | 0.0012 | 1.40E-09 | 6.0830  | 408317 | Snoring |
| rs17577954 | 17 | 44209628 | C | T | 0.2258 | 0.0076  | 0.0012 | 1.50E-09 | 6.0725  | 408317 | Snoring |
| rs17577975 | 17 | 44210442 | T | C | 0.2253 | 0.0077  | 0.0013 | 1.10E-09 | 6.1157  | 408317 | Snoring |
| rs17591848 | 13 | 40744051 | G | A | 0.4869 | -0.0066 | 0.0010 | 2.20E-10 | -6.3017 | 408317 | Snoring |
| rs17617053 | 17 | 46050669 | C | T | 0.1000 | -0.0105 | 0.0017 | 1.80E-09 | -5.9887 | 408317 | Snoring |
| rs17620033 | 17 | 46291414 | G | A | 0.3866 | 0.0062  | 0.0011 | 3.70E-09 | 5.8124  | 408317 | Snoring |
| rs17621199 | 17 | 46342275 | A | G | 0.2171 | -0.0074 | 0.0013 | 5.60E-09 | -5.8148 | 408317 | Snoring |
| rs17621297 | 17 | 46346487 | G | A | 0.2171 | -0.0074 | 0.0013 | 5.70E-09 | -5.8129 | 408317 | Snoring |
| rs17621707 | 17 | 46359278 | C | T | 0.2170 | -0.0073 | 0.0013 | 7.20E-09 | -5.7706 | 408317 | Snoring |
| rs17623482 | 17 | 46432173 | C | T | 0.2226 | -0.0073 | 0.0013 | 5.90E-09 | -5.7970 | 408317 | Snoring |
| rs17631676 | 17 | 43549526 | G | A | 0.1848 | 0.0074  | 0.0013 | 3.90E-08 | 5.4849  | 408317 | Snoring |
| rs17649019 | 17 | 43801593 | A | G | 0.2251 | 0.0077  | 0.0012 | 1.00E-09 | 6.1285  | 408317 | Snoring |
| rs17649138 | 17 | 43808067 | A | G | 0.2252 | 0.0077  | 0.0012 | 9.50E-10 | 6.1440  | 408317 | Snoring |
| rs17649162 | 17 | 43810371 | C | G | 0.2252 | 0.0077  | 0.0012 | 9.50E-10 | 6.1439  | 408317 | Snoring |
| rs17649518 | 17 | 43994386 | A | C | 0.2253 | 0.0076  | 0.0012 | 1.50E-09 | 6.0743  | 408317 | Snoring |
| rs17649553 | 17 | 43994648 | T | C | 0.2257 | 0.0077  | 0.0012 | 9.80E-10 | 6.1408  | 408317 | Snoring |
| rs17649571 | 17 | 43994952 | G | A | 0.2255 | 0.0076  | 0.0012 | 1.40E-09 | 6.0843  | 408317 | Snoring |
| rs17649635 | 17 | 43995990 | G | A | 0.2255 | 0.0076  | 0.0012 | 1.50E-09 | 6.0681  | 408317 | Snoring |
| rs17649641 | 17 | 43997372 | C | T | 0.2255 | 0.0076  | 0.0012 | 1.40E-09 | 6.0919  | 408317 | Snoring |
| rs17649700 | 17 | 43997901 | C | G | 0.2254 | 0.0076  | 0.0012 | 1.60E-09 | 6.0641  | 408317 | Snoring |
| rs17649866 | 17 | 44000914 | C | T | 0.2255 | 0.0076  | 0.0012 | 1.50E-09 | 6.0781  | 408317 | Snoring |
| rs17649918 | 17 | 44001621 | G | A | 0.2255 | 0.0076  | 0.0012 | 1.50E-09 | 6.0782  | 408317 | Snoring |
| rs17649954 | 17 | 44001661 | G | A | 0.2255 | 0.0076  | 0.0012 | 1.50E-09 | 6.0780  | 408317 | Snoring |
| rs17650063 | 17 | 44002555 | G | A | 0.2255 | 0.0076  | 0.0012 | 1.50E-09 | 6.0780  | 408317 | Snoring |
| rs17650258 | 17 | 44011073 | A | G | 0.2255 | 0.0076  | 0.0012 | 1.50E-09 | 6.0718  | 408317 | Snoring |
| rs17650335 | 17 | 44012343 | A | G | 0.2255 | 0.0076  | 0.0012 | 1.50E-09 | 6.0734  | 408317 | Snoring |
| rs17650381 | 17 | 44013024 | C | T | 0.2255 | 0.0076  | 0.0012 | 1.50E-09 | 6.0682  | 408317 | Snoring |
| rs17650417 | 17 | 44013103 | T | G | 0.2255 | 0.0076  | 0.0012 | 1.50E-09 | 6.0740  | 408317 | Snoring |
| rs17650579 | 17 | 44030115 | T | C | 0.2254 | 0.0076  | 0.0012 | 1.60E-09 | 6.0577  | 408317 | Snoring |
| rs17650597 | 17 | 44030195 | T | A | 0.2254 | 0.0076  | 0.0012 | 1.70E-09 | 6.0491  | 408317 | Snoring |
| rs17650633 | 17 | 44030231 | C | T | 0.2254 | 0.0076  | 0.0012 | 1.70E-09 | 6.0498  | 408317 | Snoring |
| rs17650651 | 17 | 44030311 | G | T | 0.2254 | 0.0076  | 0.0012 | 1.70E-09 | 6.0462  | 408317 | Snoring |
| rs17650771 | 17 | 44035367 | G | A | 0.2255 | 0.0076  | 0.0012 | 1.50E-09 | 6.0675  | 408317 | Snoring |
| rs17650818 | 17 | 44036787 | C | T | 0.2255 | 0.0076  | 0.0012 | 1.80E-09 | 6.0444  | 408317 | Snoring |

|            |    |           |   |   |        |         |        |          |         |        |         |
|------------|----|-----------|---|---|--------|---------|--------|----------|---------|--------|---------|
| rs17650842 | 17 | 44037491  | G | A | 0.2252 | 0.0075  | 0.0013 | 2.10E-09 | 6.0174  | 408317 | Snoring |
| rs17650860 | 17 | 44039008  | A | G | 0.2245 | 0.0075  | 0.0013 | 2.90E-09 | 5.9725  | 408317 | Snoring |
| rs17650872 | 17 | 44039516  | T | G | 0.2254 | 0.0075  | 0.0012 | 2.10E-09 | 6.0182  | 408317 | Snoring |
| rs17650901 | 17 | 44039691  | G | A | 0.2254 | 0.0075  | 0.0012 | 2.10E-09 | 6.0140  | 408317 | Snoring |
| rs17650973 | 17 | 44044220  | T | A | 0.2254 | 0.0075  | 0.0012 | 2.20E-09 | 6.0116  | 408317 | Snoring |
| rs17650991 | 17 | 44044508  | C | A | 0.2254 | 0.0075  | 0.0012 | 2.20E-09 | 6.0122  | 408317 | Snoring |
| rs17651093 | 17 | 44049550  | A | G | 0.2255 | 0.0075  | 0.0012 | 2.10E-09 | 6.0177  | 408317 | Snoring |
| rs17651134 | 17 | 44050340  | A | G | 0.2254 | 0.0075  | 0.0012 | 2.00E-09 | 6.0274  | 408317 | Snoring |
| rs17651213 | 17 | 44051924  | A | G | 0.2254 | 0.0075  | 0.0012 | 2.00E-09 | 6.0283  | 408317 | Snoring |
| rs17651243 | 17 | 44052284  | A | G | 0.2254 | 0.0075  | 0.0012 | 2.00E-09 | 6.0278  | 408317 | Snoring |
| rs17651285 | 17 | 44054237  | A | G | 0.2254 | 0.0075  | 0.0012 | 2.00E-09 | 6.0280  | 408317 | Snoring |
| rs17651483 | 17 | 44058861  | A | C | 0.2254 | 0.0075  | 0.0012 | 2.00E-09 | 6.0291  | 408317 | Snoring |
| rs17651549 | 17 | 44061278  | T | C | 0.2254 | 0.0075  | 0.0012 | 1.90E-09 | 6.0313  | 408317 | Snoring |
| rs17651700 | 17 | 44066634  | G | C | 0.2254 | 0.0075  | 0.0012 | 2.10E-09 | 6.0216  | 408317 | Snoring |
| rs17651754 | 17 | 44067546  | C | T | 0.2254 | 0.0075  | 0.0012 | 2.10E-09 | 6.0215  | 408317 | Snoring |
| rs17651857 | 17 | 44069687  | G | A | 0.2254 | 0.0075  | 0.0012 | 2.00E-09 | 6.0228  | 408317 | Snoring |
| rs17651887 | 17 | 44069840  | A | G | 0.2254 | 0.0075  | 0.0012 | 2.00E-09 | 6.0221  | 408317 | Snoring |
| rs17652036 | 17 | 44073027  | A | G | 0.2254 | 0.0074  | 0.0012 | 3.10E-09 | 5.9545  | 408317 | Snoring |
| rs17652066 | 17 | 44073145  | C | G | 0.2252 | 0.0075  | 0.0012 | 2.20E-09 | 6.0101  | 408317 | Snoring |
| rs17652121 | 17 | 44073973  | C | T | 0.2254 | 0.0075  | 0.0012 | 2.00E-09 | 6.0255  | 408317 | Snoring |
| rs17652337 | 17 | 44083323  | T | C | 0.2268 | 0.0076  | 0.0012 | 1.40E-09 | 6.0875  | 408317 | Snoring |
| rs17652449 | 17 | 44088937  | C | G | 0.2254 | 0.0075  | 0.0012 | 2.00E-09 | 6.0269  | 408317 | Snoring |
| rs17652502 | 17 | 44094471  | A | G | 0.2254 | 0.0075  | 0.0012 | 1.90E-09 | 6.0316  | 408317 | Snoring |
| rs17652520 | 17 | 44098967  | A | G | 0.2304 | 0.0073  | 0.0012 | 5.60E-09 | 5.8536  | 408317 | Snoring |
| rs17652748 | 17 | 44103616  | T | C | 0.2254 | 0.0075  | 0.0012 | 1.90E-09 | 6.0329  | 408317 | Snoring |
| rs17652961 | 17 | 44108355  | A | G | 0.2254 | 0.0075  | 0.0012 | 2.00E-09 | 6.0262  | 408317 | Snoring |
| rs17653162 | 17 | 44111827  | A | C | 0.2254 | 0.0075  | 0.0012 | 1.90E-09 | 6.0298  | 408317 | Snoring |
| rs17653193 | 17 | 44112441  | A | G | 0.2254 | 0.0075  | 0.0012 | 1.90E-09 | 6.0299  | 408317 | Snoring |
| rs17653211 | 17 | 44112638  | C | T | 0.2254 | 0.0075  | 0.0012 | 1.90E-09 | 6.0299  | 408317 | Snoring |
| rs17653255 | 17 | 44112743  | A | C | 0.2254 | 0.0075  | 0.0012 | 1.90E-09 | 6.0299  | 408317 | Snoring |
| rs17653836 | 17 | 44128876  | A | T | 0.2254 | 0.0075  | 0.0012 | 2.00E-09 | 6.0224  | 408317 | Snoring |
| rs17653889 | 17 | 44133070  | T | A | 0.2254 | 0.0075  | 0.0012 | 2.00E-09 | 6.0226  | 408317 | Snoring |
| rs17653906 | 17 | 44133142  | A | G | 0.2254 | 0.0075  | 0.0012 | 2.10E-09 | 6.0191  | 408317 | Snoring |
| rs17653998 | 17 | 44135985  | G | A | 0.2254 | 0.0075  | 0.0012 | 2.00E-09 | 6.0242  | 408317 | Snoring |
| rs17654016 | 17 | 44137925  | C | T | 0.2254 | 0.0075  | 0.0012 | 2.00E-09 | 6.0263  | 408317 | Snoring |
| rs17659254 | 5  | 134451317 | G | C | 0.3304 | -0.0067 | 0.0011 | 1.70E-09 | -6.0355 | 408317 | Snoring |
| rs17659312 | 5  | 134453073 | T | C | 0.3293 | -0.0067 | 0.0011 | 1.60E-09 | -6.0428 | 408317 | Snoring |
| rs17659731 | 17 | 44144634  | A | G | 0.2253 | 0.0075  | 0.0012 | 2.20E-09 | 6.0113  | 408317 | Snoring |
| rs17659743 | 17 | 44146165  | G | C | 0.2253 | 0.0075  | 0.0012 | 2.20E-09 | 6.0111  | 408317 | Snoring |
| rs17659881 | 17 | 44157597  | G | A | 0.2255 | 0.0076  | 0.0012 | 1.60E-09 | 6.0641  | 408317 | Snoring |
| rs17659953 | 17 | 44159725  | T | C | 0.2254 | 0.0075  | 0.0012 | 2.00E-09 | 6.0244  | 408317 | Snoring |
| rs17660017 | 17 | 44160674  | C | G | 0.2254 | 0.0075  | 0.0012 | 2.00E-09 | 6.0230  | 408317 | Snoring |
| rs17660065 | 17 | 44162284  | C | T | 0.2254 | 0.0075  | 0.0012 | 2.00E-09 | 6.0243  | 408317 | Snoring |
| rs17660132 | 17 | 44165803  | C | T | 0.2254 | 0.0075  | 0.0012 | 2.10E-09 | 6.0211  | 408317 | Snoring |
| rs17660167 | 17 | 44166311  | T | C | 0.2254 | 0.0075  | 0.0012 | 2.10E-09 | 6.0167  | 408317 | Snoring |
| rs17660228 | 17 | 44166500  | A | G | 0.2261 | 0.0076  | 0.0012 | 1.70E-09 | 6.0525  | 408317 | Snoring |
| rs17660251 | 17 | 44166646  | T | C | 0.2254 | 0.0075  | 0.0012 | 2.30E-09 | 6.0002  | 408317 | Snoring |
| rs17660294 | 17 | 44167101  | C | T | 0.2254 | 0.0075  | 0.0012 | 2.10E-09 | 6.0158  | 408317 | Snoring |
| rs17660337 | 17 | 44169605  | C | T | 0.2254 | 0.0075  | 0.0012 | 2.10E-09 | 6.0207  | 408317 | Snoring |
| rs17660398 | 17 | 44170612  | T | C | 0.2254 | 0.0075  | 0.0012 | 2.10E-09 | 6.0159  | 408317 | Snoring |
| rs17660464 | 17 | 44177993  | A | C | 0.2259 | 0.0076  | 0.0012 | 1.40E-09 | 6.0799  | 408317 | Snoring |
| rs17660488 | 17 | 44178337  | C | T | 0.2259 | 0.0076  | 0.0012 | 1.40E-09 | 6.0799  | 408317 | Snoring |
| rs17660595 | 17 | 44180954  | G | A | 0.2259 | 0.0076  | 0.0012 | 1.40E-09 | 6.0805  | 408317 | Snoring |
| rs17660847 | 17 | 44189373  | T | C | 0.2259 | 0.0076  | 0.0012 | 1.40E-09 | 6.0803  | 408317 | Snoring |
| rs17660865 | 17 | 44189408  | C | T | 0.2259 | 0.0076  | 0.0012 | 1.40E-09 | 6.0802  | 408317 | Snoring |
| rs17660907 | 17 | 44191085  | A | G | 0.2259 | 0.0076  | 0.0012 | 1.40E-09 | 6.0859  | 408317 | Snoring |
| rs17660936 | 17 | 44191159  | T | C | 0.2259 | 0.0076  | 0.0012 | 1.40E-09 | 6.0818  | 408317 | Snoring |
| rs17661015 | 17 | 44192957  | C | T | 0.2238 | 0.0076  | 0.0013 | 2.00E-09 | 6.0309  | 408317 | Snoring |
| rs17661027 | 17 | 44193097  | A | C | 0.2257 | 0.0076  | 0.0012 | 1.70E-09 | 6.0534  | 408317 | Snoring |
| rs17661045 | 17 | 44194152  | A | T | 0.2259 | 0.0076  | 0.0012 | 1.50E-09 | 6.0709  | 408317 | Snoring |
| rs17661141 | 17 | 44196015  | G | C | 0.2259 | 0.0076  | 0.0012 | 1.50E-09 | 6.0715  | 408317 | Snoring |
| rs17661348 | 17 | 44207066  | G | A | 0.2258 | 0.0076  | 0.0012 | 1.40E-09 | 6.0871  | 408317 | Snoring |
| rs17661385 | 17 | 44207778  | G | A | 0.2258 | 0.0076  | 0.0012 | 1.30E-09 | 6.0972  | 408317 | Snoring |
| rs17661428 | 17 | 44208144  | G | C | 0.2258 | 0.0076  | 0.0012 | 1.40E-09 | 6.0832  | 408317 | Snoring |
| rs17665188 | 17 | 44357351  | C | T | 0.2224 | 0.0077  | 0.0013 | 2.40E-09 | 5.9930  | 408317 | Snoring |
| rs17680229 | 17 | 46129762  | A | G | 0.1547 | -0.0091 | 0.0015 | 4.30E-10 | -6.2555 | 408317 | Snoring |
| rs17681336 | 17 | 46249792  | A | G | 0.3867 | 0.0062  | 0.0011 | 3.90E-09 | 5.8005  | 408317 | Snoring |
| rs17686610 | 17 | 43710384  | C | A | 0.2252 | 0.0077  | 0.0012 | 9.30E-10 | 6.1448  | 408317 | Snoring |
| rs17687462 | 17 | 43744990  | T | C | 0.2252 | 0.0077  | 0.0012 | 9.10E-10 | 6.1486  | 408317 | Snoring |
| rs17687504 | 17 | 43746721  | G | A | 0.2253 | 0.0077  | 0.0012 | 8.50E-10 | 6.1588  | 408317 | Snoring |
| rs17687534 | 17 | 43749579  | C | T | 0.2253 | 0.0077  | 0.0012 | 8.20E-10 | 6.1645  | 408317 | Snoring |
| rs17687571 | 17 | 43750010  | A | G | 0.2253 | 0.0077  | 0.0012 | 8.00E-10 | 6.1680  | 408317 | Snoring |
| rs17687625 | 17 | 43750238  | G | A | 0.2253 | 0.0077  | 0.0012 | 8.20E-10 | 6.1644  | 408317 | Snoring |
| rs17687667 | 17 | 43754099  | A | G | 0.2253 | 0.0077  | 0.0012 | 7.90E-10 | 6.1709  | 408317 | Snoring |



|            |    |           |   |   |        |         |        |          |         |        |         |
|------------|----|-----------|---|---|--------|---------|--------|----------|---------|--------|---------|
| rs17687740 | 17 | 43756376  | C | G | 0.2253 | 0.0077  | 0.0012 | 8.30E-10 | 6.1622  | 408317 | Snoring |
| rs17687838 | 17 | 43759048  | C | T | 0.2253 | 0.0077  | 0.0012 | 8.70E-10 | 6.1552  | 408317 | Snoring |
| rs17687849 | 17 | 43759719  | G | A | 0.2253 | 0.0077  | 0.0012 | 8.70E-10 | 6.1552  | 408317 | Snoring |
| rs17688002 | 17 | 43762594  | T | A | 0.2253 | 0.0077  | 0.0012 | 8.60E-10 | 6.1565  | 408317 | Snoring |
| rs17688032 | 17 | 43763202  | A | G | 0.2253 | 0.0077  | 0.0012 | 8.90E-10 | 6.1511  | 408317 | Snoring |
| rs17688056 | 17 | 43763241  | T | C | 0.2253 | 0.0077  | 0.0012 | 8.80E-10 | 6.1523  | 408317 | Snoring |
| rs17688068 | 17 | 43763935  | G | A | 0.2253 | 0.0077  | 0.0012 | 8.60E-10 | 6.1556  | 408317 | Snoring |
| rs17688090 | 17 | 43764987  | A | G | 0.2253 | 0.0077  | 0.0012 | 8.70E-10 | 6.1541  | 408317 | Snoring |
| rs17688126 | 17 | 43765080  | G | A | 0.2252 | 0.0077  | 0.0012 | 8.10E-10 | 6.1657  | 408317 | Snoring |
| rs17688205 | 17 | 43766352  | C | G | 0.2253 | 0.0077  | 0.0012 | 8.80E-10 | 6.1525  | 408317 | Snoring |
| rs17688249 | 17 | 43766754  | T | C | 0.2253 | 0.0077  | 0.0012 | 8.70E-10 | 6.1554  | 408317 | Snoring |
| rs17688296 | 17 | 43767815  | T | C | 0.2253 | 0.0077  | 0.0012 | 8.60E-10 | 6.1572  | 408317 | Snoring |
| rs17688313 | 8  | 71683864  | C | T | 0.4827 | -0.0060 | 0.0010 | 9.40E-09 | -5.7561 | 408317 | Snoring |
| rs17688391 | 17 | 43772109  | A | C | 0.2253 | 0.0077  | 0.0012 | 8.80E-10 | 6.1526  | 408317 | Snoring |
| rs17688410 | 17 | 43772251  | T | C | 0.2253 | 0.0077  | 0.0012 | 8.60E-10 | 6.1564  | 408317 | Snoring |
| rs17688434 | 17 | 43772540  | A | G | 0.2253 | 0.0077  | 0.0012 | 8.80E-10 | 6.1524  | 408317 | Snoring |
| rs17688452 | 17 | 43773085  | A | G | 0.2253 | 0.0077  | 0.0012 | 8.90E-10 | 6.1509  | 408317 | Snoring |
| rs17688511 | 17 | 43773607  | G | T | 0.2253 | 0.0077  | 0.0012 | 8.90E-10 | 6.1507  | 408317 | Snoring |
| rs17688534 | 17 | 43773877  | T | A | 0.2253 | 0.0077  | 0.0012 | 8.90E-10 | 6.1504  | 408317 | Snoring |
| rs17688558 | 17 | 43773943  | G | A | 0.2253 | 0.0077  | 0.0012 | 8.90E-10 | 6.1504  | 408317 | Snoring |
| rs17688682 | 17 | 43775929  | G | C | 0.2253 | 0.0077  | 0.0012 | 9.00E-10 | 6.1483  | 408317 | Snoring |
| rs17688767 | 17 | 43777542  | G | A | 0.2252 | 0.0077  | 0.0012 | 9.00E-10 | 6.1494  | 408317 | Snoring |
| rs17688773 | 17 | 43777710  | C | T | 0.2252 | 0.0077  | 0.0012 | 9.00E-10 | 6.1494  | 408317 | Snoring |
| rs17688875 | 17 | 43778406  | G | A | 0.2254 | 0.0077  | 0.0012 | 8.30E-10 | 6.1619  | 408317 | Snoring |
| rs17688916 | 17 | 43778680  | A | T | 0.2042 | 0.0081  | 0.0013 | 8.80E-10 | 6.1411  | 408317 | Snoring |
| rs17688922 | 17 | 43779351  | A | G | 0.2251 | 0.0077  | 0.0012 | 8.50E-10 | 6.1586  | 408317 | Snoring |
| rs17688944 | 17 | 43779419  | A | T | 0.2252 | 0.0077  | 0.0012 | 7.40E-10 | 6.1810  | 408317 | Snoring |
| rs17689104 | 17 | 43782492  | G | A | 0.2251 | 0.0077  | 0.0012 | 9.10E-10 | 6.1482  | 408317 | Snoring |
| rs17689116 | 17 | 43782558  | C | T | 0.2251 | 0.0077  | 0.0012 | 9.00E-10 | 6.1508  | 408317 | Snoring |
| rs17689182 | 17 | 43783573  | T | C | 0.2236 | 0.0077  | 0.0013 | 1.30E-09 | 6.1043  | 408317 | Snoring |
| rs17689218 | 17 | 43785808  | C | T | 0.2251 | 0.0077  | 0.0012 | 1.10E-09 | 6.1252  | 408317 | Snoring |
| rs17689378 | 17 | 43881790  | T | C | 0.2252 | 0.0076  | 0.0012 | 1.20E-09 | 6.1019  | 408317 | Snoring |
| rs17689471 | 17 | 43892973  | C | T | 0.2253 | 0.0077  | 0.0012 | 1.10E-09 | 6.1255  | 408317 | Snoring |
| rs17689585 | 8  | 71818801  | T | C | 0.4823 | -0.0059 | 0.0010 | 1.80E-08 | -5.6488 | 408317 | Snoring |
| rs17689608 | 17 | 43896528  | G | C | 0.2252 | 0.0076  | 0.0012 | 1.20E-09 | 6.1131  | 408317 | Snoring |
| rs17689653 | 17 | 43898963  | T | A | 0.2252 | 0.0076  | 0.0012 | 1.20E-09 | 6.1129  | 408317 | Snoring |
| rs17689824 | 17 | 43904397  | T | C | 0.2252 | 0.0076  | 0.0012 | 1.10E-09 | 6.1222  | 408317 | Snoring |
| rs17689882 | 17 | 43906828  | A | G | 0.2249 | 0.0078  | 0.0012 | 6.70E-10 | 6.2019  | 408317 | Snoring |
| rs17689918 | 17 | 43910088  | A | G | 0.2251 | 0.0077  | 0.0012 | 1.00E-09 | 6.1291  | 408317 | Snoring |
| rs17689943 | 8  | 71848380  | C | T | 0.4294 | 0.0069  | 0.0011 | 7.20E-11 | 6.5110  | 408317 | Snoring |
| rs17689955 | 8  | 71848864  | C | G | 0.4874 | -0.0063 | 0.0010 | 2.60E-09 | -5.9845 | 408317 | Snoring |
| rs17689989 | 8  | 71849004  | T | C | 0.4297 | 0.0068  | 0.0011 | 1.40E-10 | 6.4071  | 408317 | Snoring |
| rs17690176 | 17 | 43916773  | C | A | 0.2253 | 0.0076  | 0.0012 | 1.30E-09 | 6.0883  | 408317 | Snoring |
| rs17690181 | 8  | 71854466  | G | T | 0.4297 | 0.0068  | 0.0011 | 1.40E-10 | 6.4143  | 408317 | Snoring |
| rs17690314 | 17 | 43919884  | G | T | 0.2253 | 0.0076  | 0.0012 | 1.10E-09 | 6.1210  | 408317 | Snoring |
| rs17690326 | 17 | 43920974  | C | T | 0.2253 | 0.0076  | 0.0012 | 1.10E-09 | 6.1210  | 408317 | Snoring |
| rs17690661 | 17 | 43924521  | A | G | 0.2253 | 0.0077  | 0.0012 | 1.10E-09 | 6.1248  | 408317 | Snoring |
| rs17690679 | 17 | 43924803  | G | A | 0.2252 | 0.0076  | 0.0012 | 1.10E-09 | 6.1205  | 408317 | Snoring |
| rs17690703 | 17 | 43925297  | T | C | 0.2634 | 0.0074  | 0.0012 | 5.50E-10 | 6.2678  | 408317 | Snoring |
| rs17690987 | 17 | 43931626  | C | T | 0.2254 | 0.0077  | 0.0012 | 1.00E-09 | 6.1399  | 408317 | Snoring |
| rs17691328 | 17 | 43955487  | T | C | 0.2256 | 0.0076  | 0.0012 | 1.60E-09 | 6.0655  | 408317 | Snoring |
| rs17691449 | 17 | 43964283  | C | G | 0.2255 | 0.0076  | 0.0012 | 1.40E-09 | 6.0844  | 408317 | Snoring |
| rs17691466 | 17 | 43968219  | G | A | 0.2255 | 0.0076  | 0.0012 | 1.40E-09 | 6.0835  | 408317 | Snoring |
| rs17691508 | 17 | 43968463  | G | C | 0.2255 | 0.0076  | 0.0012 | 1.40E-09 | 6.0835  | 408317 | Snoring |
| rs17691556 | 17 | 43969168  | A | T | 0.2255 | 0.0076  | 0.0012 | 1.40E-09 | 6.0845  | 408317 | Snoring |
| rs17691610 | 17 | 43970662  | T | G | 0.2255 | 0.0076  | 0.0012 | 1.40E-09 | 6.0837  | 408317 | Snoring |
| rs17694192 | 17 | 46341041  | G | T | 0.2171 | -0.0074 | 0.0013 | 5.70E-09 | -5.8117 | 408317 | Snoring |
| rs17694895 | 17 | 46361755  | C | G | 0.2170 | -0.0073 | 0.0013 | 7.30E-09 | -5.7693 | 408317 | Snoring |
| rs17696503 | 17 | 46431838  | G | A | 0.2226 | -0.0073 | 0.0013 | 5.90E-09 | -5.7987 | 408317 | Snoring |
| rs17696640 | 17 | 46444420  | G | A | 0.2226 | -0.0072 | 0.0013 | 7.40E-09 | -5.7607 | 408317 | Snoring |
| rs17697950 | 17 | 46555268  | G | A | 0.2490 | -0.0066 | 0.0012 | 4.50E-08 | -5.4358 | 408317 | Snoring |
| rs17699084 | 8  | 71963411  | G | A | 0.4317 | 0.0067  | 0.0011 | 2.30E-10 | 6.3298  | 408317 | Snoring |
| rs17699455 | 8  | 71972373  | C | T | 0.4322 | 0.0067  | 0.0011 | 2.00E-10 | 6.3534  | 408317 | Snoring |
| rs17699685 | 8  | 71979004  | A | G | 0.4345 | 0.0068  | 0.0011 | 1.50E-10 | 6.3985  | 408317 | Snoring |
| rs17699710 | 8  | 71980210  | A | G | 0.4345 | 0.0068  | 0.0011 | 1.40E-10 | 6.4048  | 408317 | Snoring |
| rs17715902 | 5  | 134451465 | A | G | 0.3297 | -0.0068 | 0.0011 | 1.20E-09 | -6.0847 | 408317 | Snoring |
| rs1775550  | 10 | 9052742   | G | A | 0.1872 | 0.0089  | 0.0013 | 2.50E-11 | 6.6508  | 408317 | Snoring |
| rs1775551  | 10 | 9053043   | C | A | 0.1871 | 0.0089  | 0.0013 | 2.60E-11 | 6.6500  | 408317 | Snoring |
| rs17758721 | 8  | 71464551  | T | C | 0.4525 | 0.0062  | 0.0011 | 5.40E-09 | 5.8446  | 408317 | Snoring |
| rs17760050 | 8  | 71574251  | A | T | 0.4784 | -0.0061 | 0.0010 | 6.80E-09 | -5.8182 | 408317 | Snoring |
| rs17760497 | 8  | 71617045  | G | A | 0.4832 | -0.0059 | 0.0010 | 1.90E-08 | -5.6342 | 408317 | Snoring |
| rs17760532 | 8  | 71620287  | T | C | 0.4291 | 0.0068  | 0.0011 | 1.20E-10 | 6.4316  | 408317 | Snoring |
| rs17760577 | 17 | 43741452  | T | C | 0.2253 | 0.0077  | 0.0012 | 8.50E-10 | 6.1593  | 408317 | Snoring |
| rs17760631 | 17 | 43743045  | C | T | 0.2253 | 0.0077  | 0.0012 | 8.50E-10 | 6.1584  | 408317 | Snoring |

|            |    |          |   |   |        |         |        |          |         |        |         |
|------------|----|----------|---|---|--------|---------|--------|----------|---------|--------|---------|
| rs17760733 | 17 | 43746276 | T | G | 0.2253 | 0.0077  | 0.0012 | 8.50E-10 | 6.1581  | 408317 | Snoring |
| rs17760766 | 8  | 71671189 | A | G | 0.4298 | 0.0069  | 0.0011 | 6.60E-11 | 6.5156  | 408317 | Snoring |
| rs17760817 | 17 | 43750137 | C | G | 0.2253 | 0.0077  | 0.0012 | 8.00E-10 | 6.1682  | 408317 | Snoring |
| rs17761046 | 17 | 43758382 | C | T | 0.2253 | 0.0077  | 0.0012 | 8.70E-10 | 6.1552  | 408317 | Snoring |
| rs17761100 | 17 | 43760389 | G | A | 0.2253 | 0.0077  | 0.0012 | 8.60E-10 | 6.1566  | 408317 | Snoring |
| rs17761124 | 17 | 43760516 | T | A | 0.2253 | 0.0077  | 0.0012 | 8.60E-10 | 6.1566  | 408317 | Snoring |
| rs17761207 | 17 | 43762255 | C | T | 0.2253 | 0.0077  | 0.0012 | 8.50E-10 | 6.1587  | 408317 | Snoring |
| rs17761387 | 17 | 43765450 | A | G | 0.2253 | 0.0077  | 0.0012 | 8.70E-10 | 6.1538  | 408317 | Snoring |
| rs17761581 | 17 | 43769088 | C | T | 0.2253 | 0.0077  | 0.0012 | 8.70E-10 | 6.1541  | 408317 | Snoring |
| rs17761838 | 17 | 43774959 | C | T | 0.2252 | 0.0077  | 0.0012 | 9.10E-10 | 6.1470  | 408317 | Snoring |
| rs17761985 | 17 | 43776787 | T | C | 0.2253 | 0.0077  | 0.0012 | 9.00E-10 | 6.1498  | 408317 | Snoring |
| rs17762165 | 17 | 43778602 | T | C | 0.2252 | 0.0077  | 0.0012 | 9.10E-10 | 6.1474  | 408317 | Snoring |
| rs17762308 | 17 | 43780948 | C | T | 0.2252 | 0.0077  | 0.0012 | 7.00E-10 | 6.1916  | 408317 | Snoring |
| rs17762361 | 17 | 43781778 | G | A | 0.2251 | 0.0077  | 0.0012 | 8.80E-10 | 6.1532  | 408317 | Snoring |
| rs17762535 | 17 | 43787130 | C | T | 0.2251 | 0.0077  | 0.0012 | 1.10E-09 | 6.1250  | 408317 | Snoring |
| rs17762769 | 17 | 43893403 | A | G | 0.2253 | 0.0077  | 0.0012 | 1.10E-09 | 6.1265  | 408317 | Snoring |
| rs17762882 | 17 | 43898887 | C | T | 0.2252 | 0.0076  | 0.0012 | 1.20E-09 | 6.1112  | 408317 | Snoring |
| rs17762912 | 17 | 43899161 | C | A | 0.2250 | 0.0076  | 0.0013 | 1.20E-09 | 6.1024  | 408317 | Snoring |
| rs17762954 | 17 | 43899786 | T | C | 0.2250 | 0.0076  | 0.0012 | 1.40E-09 | 6.0857  | 408317 | Snoring |
| rs17763050 | 17 | 43903336 | A | G | 0.2244 | 0.0077  | 0.0013 | 1.10E-09 | 6.1254  | 408317 | Snoring |
| rs17763086 | 17 | 43905481 | G | T | 0.2252 | 0.0076  | 0.0012 | 1.10E-09 | 6.1223  | 408317 | Snoring |
| rs17763199 | 17 | 43910183 | A | G | 0.2252 | 0.0076  | 0.0012 | 1.10E-09 | 6.1161  | 408317 | Snoring |
| rs17763515 | 17 | 43917818 | A | G | 0.2252 | 0.0076  | 0.0012 | 1.20E-09 | 6.1087  | 408317 | Snoring |
| rs17763533 | 17 | 43918190 | C | T | 0.2253 | 0.0076  | 0.0012 | 1.10E-09 | 6.1175  | 408317 | Snoring |
| rs17763596 | 17 | 43921210 | T | G | 0.2253 | 0.0076  | 0.0012 | 1.10E-09 | 6.1219  | 408317 | Snoring |
| rs17763634 | 17 | 43921754 | C | T | 0.2252 | 0.0076  | 0.0012 | 1.20E-09 | 6.1040  | 408317 | Snoring |
| rs17768191 | 8  | 71851877 | C | T | 0.4296 | 0.0067  | 0.0011 | 1.60E-10 | 6.3918  | 408317 | Snoring |
| rs17769490 | 17 | 43925605 | A | G | 0.2258 | 0.0077  | 0.0012 | 9.40E-10 | 6.1490  | 408317 | Snoring |
| rs17769552 | 17 | 43927290 | A | G | 0.2224 | 0.0078  | 0.0013 | 5.70E-10 | 6.2488  | 408317 | Snoring |
| rs17770108 | 17 | 43961292 | T | G | 0.2255 | 0.0076  | 0.0012 | 1.40E-09 | 6.0842  | 408317 | Snoring |
| rs17770120 | 17 | 43963943 | A | C | 0.2255 | 0.0076  | 0.0012 | 1.40E-09 | 6.0845  | 408317 | Snoring |
| rs17770150 | 17 | 43964163 | A | G | 0.2255 | 0.0076  | 0.0012 | 1.40E-09 | 6.0842  | 408317 | Snoring |
| rs17770186 | 17 | 43964191 | A | C | 0.2255 | 0.0076  | 0.0012 | 1.40E-09 | 6.0882  | 408317 | Snoring |
| rs17770296 | 17 | 43969136 | T | C | 0.2255 | 0.0076  | 0.0012 | 1.40E-09 | 6.0830  | 408317 | Snoring |
| rs17770337 | 17 | 43969779 | T | G | 0.2254 | 0.0076  | 0.0012 | 1.60E-09 | 6.0667  | 408317 | Snoring |
| rs17770343 | 17 | 43970154 | C | T | 0.2254 | 0.0076  | 0.0012 | 1.60E-09 | 6.0682  | 408317 | Snoring |
| rs17778232 | 8  | 71991518 | A | G | 0.4466 | 0.0066  | 0.0011 | 3.10E-10 | 6.2854  | 408317 | Snoring |
| rs17804073 | 3  | 90124806 | A | T | 0.4342 | -0.0057 | 0.0011 | 3.50E-08 | -5.4380 | 408317 | Snoring |
| rs17815906 | 3  | 94050683 | G | A | 0.3820 | -0.0060 | 0.0011 | 1.50E-08 | -5.5511 | 408317 | Snoring |
| rs17817288 | 16 | 53807764 | A | G | 0.5182 | -0.0061 | 0.0010 | 5.30E-09 | -5.8255 | 408317 | Snoring |
| rs17817449 | 16 | 53813367 | G | T | 0.3938 | 0.0063  | 0.0011 | 3.50E-09 | 5.9097  | 408317 | Snoring |
| rs17817497 | 16 | 53815435 | C | T | 0.3931 | 0.0065  | 0.0011 | 1.50E-09 | 6.0547  | 408317 | Snoring |
| rs17817712 | 16 | 53821125 | G | A | 0.3924 | 0.0064  | 0.0011 | 2.50E-09 | 5.9634  | 408317 | Snoring |
| rs17817964 | 16 | 53828066 | T | C | 0.3923 | 0.0064  | 0.0011 | 2.50E-09 | 5.9692  | 408317 | Snoring |
| rs17839567 | 16 | 31057945 | G | A | 0.3777 | 0.0065  | 0.0011 | 2.00E-09 | 6.0291  | 408317 | Snoring |
| rs17839568 | 16 | 31099783 | C | T | 0.3848 | 0.0064  | 0.0011 | 3.60E-09 | 5.9341  | 408317 | Snoring |
| rs1800547  | 17 | 44051846 | G | A | 0.2254 | 0.0075  | 0.0012 | 2.00E-09 | 6.0291  | 408317 | Snoring |
| rs180058   | 17 | 67963779 | A | T | 0.3990 | -0.0066 | 0.0011 | 4.40E-09 | -5.9220 | 408317 | Snoring |
| rs180059   | 17 | 67963609 | A | G | 0.3941 | -0.0066 | 0.0011 | 4.00E-09 | -5.9306 | 408317 | Snoring |
| rs180061   | 17 | 67962664 | A | G | 0.4012 | -0.0067 | 0.0011 | 2.20E-09 | -6.0400 | 408317 | Snoring |
| rs180062   | 17 | 67962604 | T | C | 0.4018 | -0.0067 | 0.0011 | 1.80E-09 | -6.0676 | 408317 | Snoring |
| rs180079   | 17 | 67952648 | G | A | 0.3487 | -0.0063 | 0.0011 | 1.40E-08 | -5.7248 | 408317 | Snoring |
| rs180080   | 17 | 67952334 | G | A | 0.3486 | -0.0062 | 0.0011 | 1.70E-08 | -5.6873 | 408317 | Snoring |
| rs180081   | 17 | 67951894 | A | G | 0.3486 | -0.0062 | 0.0011 | 1.80E-08 | -5.6745 | 408317 | Snoring |
| rs180082   | 17 | 67951868 | C | G | 0.3478 | -0.0063 | 0.0011 | 1.40E-08 | -5.7231 | 408317 | Snoring |
| rs180083   | 17 | 67950795 | T | C | 0.3476 | -0.0062 | 0.0011 | 1.70E-08 | -5.6879 | 408317 | Snoring |
| rs180084   | 17 | 67950466 | A | G | 0.3482 | -0.0062 | 0.0011 | 1.70E-08 | -5.6881 | 408317 | Snoring |
| rs180085   | 17 | 67949912 | T | A | 0.3482 | -0.0062 | 0.0011 | 1.70E-08 | -5.6864 | 408317 | Snoring |
| rs180087   | 17 | 67947823 | C | G | 0.3486 | -0.0063 | 0.0011 | 1.20E-08 | -5.7481 | 408317 | Snoring |
| rs180088   | 17 | 67947596 | T | C | 0.3478 | -0.0063 | 0.0011 | 1.30E-08 | -5.7405 | 408317 | Snoring |
| rs180089   | 17 | 67947348 | C | G | 0.3487 | -0.0063 | 0.0011 | 1.10E-08 | -5.7685 | 408317 | Snoring |
| rs180090   | 17 | 67945713 | T | C | 0.3473 | -0.0062 | 0.0011 | 1.80E-08 | -5.6835 | 408317 | Snoring |
| rs180091   | 17 | 67944708 | A | G | 0.3515 | -0.0062 | 0.0011 | 2.40E-08 | -5.6350 | 408317 | Snoring |
| rs180094   | 17 | 67943540 | T | C | 0.3474 | -0.0062 | 0.0011 | 2.50E-08 | -5.6295 | 408317 | Snoring |
| rs180095   | 17 | 67943414 | T | G | 0.3474 | -0.0062 | 0.0011 | 2.40E-08 | -5.6330 | 408317 | Snoring |
| rs180096   | 17 | 67942734 | A | G | 0.3474 | -0.0061 | 0.0011 | 3.10E-08 | -5.5883 | 408317 | Snoring |
| rs180100   | 17 | 67938845 | A | G | 0.3474 | -0.0061 | 0.0011 | 3.30E-08 | -5.5812 | 408317 | Snoring |
| rs180103   | 17 | 67934510 | A | G | 0.3475 | -0.0061 | 0.0011 | 3.30E-08 | -5.5838 | 408317 | Snoring |
| rs180104   | 17 | 67933833 | A | G | 0.3475 | -0.0061 | 0.0011 | 3.70E-08 | -5.5612 | 408317 | Snoring |
| rs180105   | 17 | 67933424 | T | G | 0.3477 | -0.0061 | 0.0011 | 2.80E-08 | -5.6094 | 408317 | Snoring |
| rs180107   | 17 | 67930772 | A | T | 0.4097 | -0.0068 | 0.0011 | 2.10E-10 | -6.4146 | 408317 | Snoring |
| rs180110   | 17 | 67930613 | G | A | 0.4097 | -0.0068 | 0.0011 | 2.10E-10 | -6.4166 | 408317 | Snoring |
| rs180111   | 17 | 67925897 | C | A | 0.3478 | -0.0061 | 0.0011 | 4.00E-08 | -5.5491 | 408317 | Snoring |
| rs180112   | 17 | 67925761 | A | G | 0.3478 | -0.0061 | 0.0011 | 3.90E-08 | -5.5498 | 408317 | Snoring |

|             |    |           |   |   |        |         |        |          |         |        |         |
|-------------|----|-----------|---|---|--------|---------|--------|----------|---------|--------|---------|
| rs180113    | 17 | 67925129  | T | C | 0.3486 | -0.0061 | 0.0011 | 3.50E-08 | -5.5718 | 408317 | Snoring |
| rs180115    | 17 | 67924179  | C | T | 0.3480 | -0.0061 | 0.0011 | 3.90E-08 | -5.5518 | 408317 | Snoring |
| rs180116    | 17 | 67924078  | T | C | 0.3478 | -0.0061 | 0.0011 | 4.40E-08 | -5.5284 | 408317 | Snoring |
| rs180117    | 17 | 67922658  | A | G | 0.3486 | -0.0061 | 0.0011 | 3.60E-08 | -5.5659 | 408317 | Snoring |
| rs180118    | 17 | 67921940  | C | G | 0.3486 | -0.0061 | 0.0011 | 2.90E-08 | -5.6017 | 408317 | Snoring |
| rs180119    | 17 | 67921845  | T | C | 0.3486 | -0.0061 | 0.0011 | 2.90E-08 | -5.6012 | 408317 | Snoring |
| rs180120    | 17 | 67921757  | T | G | 0.3484 | -0.0061 | 0.0011 | 3.90E-08 | -5.5513 | 408317 | Snoring |
| rs180121    | 17 | 67921480  | T | C | 0.3485 | -0.0061 | 0.0011 | 4.00E-08 | -5.5432 | 408317 | Snoring |
| rs180122    | 17 | 67921175  | A | G | 0.3484 | -0.0061 | 0.0011 | 4.00E-08 | -5.5451 | 408317 | Snoring |
| rs180124    | 17 | 67920636  | C | T | 0.3484 | -0.0061 | 0.0011 | 4.10E-08 | -5.5414 | 408317 | Snoring |
| rs180127    | 17 | 67919783  | G | A | 0.3484 | -0.0060 | 0.0011 | 4.90E-08 | -5.5088 | 408317 | Snoring |
| rs180130    | 17 | 67919459  | C | T | 0.3430 | -0.0061 | 0.0011 | 3.60E-08 | -5.5692 | 408317 | Snoring |
| rs180131    | 17 | 67919259  | A | T | 0.3487 | -0.0061 | 0.0011 | 3.90E-08 | -5.5524 | 408317 | Snoring |
| rs180133    | 17 | 67918216  | A | G | 0.3489 | -0.0061 | 0.0011 | 4.20E-08 | -5.5338 | 408317 | Snoring |
| rs180134    | 17 | 67917612  | C | T | 0.3487 | -0.0061 | 0.0011 | 4.10E-08 | -5.5417 | 408317 | Snoring |
| rs1811649   | 12 | 65852266  | C | G | 0.4495 | 0.0070  | 0.0011 | 4.10E-11 | 6.6288  | 408317 | Snoring |
| rs181355045 | 2  | 156998417 | A | C | 0.1359 | 0.0118  | 0.0015 | 8.90E-15 | 7.7072  | 408317 | Snoring |
| rs182140502 | 8  | 71767871  | A | G | 0.3885 | 0.0065  | 0.0011 | 3.30E-09 | 5.8915  | 408317 | Snoring |
| rs1822651   | 8  | 71736661  | A | G | 0.4302 | 0.0068  | 0.0011 | 9.00E-11 | 6.4741  | 408317 | Snoring |
| rs1822802   | 10 | 9071478   | C | T | 0.2275 | 0.0073  | 0.0012 | 4.50E-09 | 5.8480  | 408317 | Snoring |
| rs1824729   | 8  | 71622853  | T | G | 0.4291 | 0.0068  | 0.0011 | 1.10E-10 | 6.4417  | 408317 | Snoring |
| rs1826663   | 12 | 65797709  | C | T | 0.3743 | 0.0085  | 0.0011 | 1.60E-15 | 7.8904  | 408317 | Snoring |
| rs1829469   | 11 | 27730556  | G | A | 0.2019 | -0.0076 | 0.0013 | 8.90E-09 | -5.8384 | 408317 | Snoring |
| rs1838393   | 8  | 71702591  | G | A | 0.4802 | -0.0059 | 0.0010 | 1.90E-08 | -5.6367 | 408317 | Snoring |
| rs183884374 | 8  | 71667853  | G | A | 0.4304 | 0.0068  | 0.0011 | 7.80E-11 | 6.4966  | 408317 | Snoring |
| rs1845217   | 8  | 71897251  | A | T | 0.4310 | 0.0066  | 0.0011 | 2.80E-10 | 6.3004  | 408317 | Snoring |
| rs1845467   | 12 | 65878510  | G | A | 0.4603 | 0.0066  | 0.0011 | 2.90E-10 | 6.3040  | 408317 | Snoring |
| rs184745911 | 17 | 43698899  | G | A | 0.2251 | 0.0077  | 0.0013 | 7.80E-10 | 6.1703  | 408317 | Snoring |
| rs1860862   | 17 | 46204836  | A | C | 0.3865 | 0.0062  | 0.0011 | 4.60E-09 | 5.7707  | 408317 | Snoring |
| rs1860863   | 17 | 46204678  | G | C | 0.3865 | 0.0062  | 0.0011 | 4.10E-09 | 5.7907  | 408317 | Snoring |
| rs1860934   | 7  | 127481759 | T | G | 0.4126 | -0.0058 | 0.0011 | 3.10E-08 | -5.4449 | 408317 | Snoring |
| rs1861866   | 16 | 53804340  | C | T | 0.4994 | -0.0062 | 0.0010 | 2.30E-09 | -5.9558 | 408317 | Snoring |
| rs1864324   | 17 | 43977702  | T | C | 0.2255 | 0.0076  | 0.0012 | 1.40E-09 | 6.0860  | 408317 | Snoring |
| rs1864325   | 17 | 43977827  | T | C | 0.2255 | 0.0076  | 0.0012 | 1.40E-09 | 6.0868  | 408317 | Snoring |
| rs1875639   | 1  | 50822003  | G | T | 0.4586 | 0.0060  | 0.0011 | 1.10E-08 | 5.7344  | 408317 | Snoring |
| rs1875640   | 1  | 50821886  | G | C | 0.4584 | 0.0060  | 0.0011 | 1.10E-08 | 5.7398  | 408317 | Snoring |
| rs1875641   | 1  | 50818087  | G | A | 0.4586 | 0.0060  | 0.0011 | 1.00E-08 | 5.7440  | 408317 | Snoring |
| rs1875645   | 1  | 50789880  | T | C | 0.4514 | 0.0058  | 0.0011 | 4.10E-08 | 5.5007  | 408317 | Snoring |
| rs1876827   | 17 | 43911832  | C | T | 0.2252 | 0.0077  | 0.0012 | 1.10E-09 | 6.1240  | 408317 | Snoring |
| rs1876828   | 17 | 43911525  | T | C | 0.2252 | 0.0077  | 0.0012 | 1.10E-09 | 6.1241  | 408317 | Snoring |
| rs1876829   | 17 | 43911443  | C | T | 0.2252 | 0.0077  | 0.0012 | 1.10E-09 | 6.1241  | 408317 | Snoring |
| rs1876830   | 17 | 43911352  | T | C | 0.2252 | 0.0077  | 0.0012 | 1.10E-09 | 6.1241  | 408317 | Snoring |
| rs1876831   | 17 | 43907745  | T | C | 0.2252 | 0.0076  | 0.0012 | 1.10E-09 | 6.1208  | 408317 | Snoring |
| rs1879581   | 17 | 43545893  | C | T | 0.1848 | 0.0074  | 0.0013 | 4.10E-08 | 5.4757  | 408317 | Snoring |
| rs1879585   | 17 | 43567175  | G | T | 0.1846 | 0.0073  | 0.0013 | 4.70E-08 | 5.4506  | 408317 | Snoring |
| rs187959271 | 17 | 46115222  | A | C | 0.1003 | -0.0103 | 0.0018 | 4.10E-09 | -5.8536 | 408317 | Snoring |
| rs1880749   | 17 | 43792586  | C | A | 0.2251 | 0.0076  | 0.0012 | 1.10E-09 | 6.1145  | 408317 | Snoring |
| rs1880750   | 17 | 43796541  | A | T | 0.2251 | 0.0077  | 0.0012 | 1.10E-09 | 6.1236  | 408317 | Snoring |
| rs1880752   | 17 | 43806264  | T | C | 0.2252 | 0.0077  | 0.0012 | 9.50E-10 | 6.1440  | 408317 | Snoring |
| rs1880753   | 17 | 43811260  | G | A | 0.4525 | 0.0059  | 0.0010 | 2.40E-08 | 5.5811  | 408317 | Snoring |
| rs1880755   | 17 | 43829404  | C | T | 0.4523 | 0.0059  | 0.0011 | 2.30E-08 | 5.5885  | 408317 | Snoring |
| rs1881084   | 7  | 127344680 | A | G | 0.4102 | -0.0057 | 0.0011 | 4.60E-08 | -5.3877 | 408317 | Snoring |
| rs1884897   | 20 | 6612832   | A | G | 0.3722 | -0.0061 | 0.0011 | 1.70E-08 | -5.6319 | 408317 | Snoring |
| rs1884902   | 20 | 6608502   | C | T | 0.3733 | -0.0060 | 0.0011 | 2.30E-08 | -5.5784 | 408317 | Snoring |
| rs188710438 | 17 | 43573649  | T | C | 0.2267 | 0.0076  | 0.0012 | 1.10E-09 | 6.1248  | 408317 | Snoring |
| rs189777036 | 17 | 43574229  | C | T | 0.2267 | 0.0076  | 0.0012 | 1.00E-09 | 6.1296  | 408317 | Snoring |
| rs190043078 | 4  | 25377811  | C | A | 0.2322 | -0.0071 | 0.0013 | 2.50E-08 | -5.6194 | 408317 | Snoring |
| rs1901706   | 8  | 78138146  | A | G | 0.2848 | -0.0067 | 0.0012 | 5.00E-09 | -5.8268 | 408317 | Snoring |
| rs1902614   | 8  | 71656167  | C | T | 0.4822 | -0.0060 | 0.0010 | 1.30E-08 | -5.7073 | 408317 | Snoring |
| rs190796367 | 17 | 44333293  | G | A | 0.2240 | 0.0074  | 0.0013 | 4.50E-09 | 5.8966  | 408317 | Snoring |
| rs1908031   | 8  | 71788638  | A | G | 0.4298 | 0.0068  | 0.0011 | 1.30E-10 | 6.4178  | 408317 | Snoring |
| rs1908032   | 8  | 71788970  | G | A | 0.4298 | 0.0068  | 0.0011 | 1.30E-10 | 6.4188  | 408317 | Snoring |
| rs1908033   | 8  | 71922799  | C | A | 0.4776 | -0.0065 | 0.0010 | 7.40E-10 | -6.1811 | 408317 | Snoring |
| rs1908034   | 8  | 71922554  | T | C | 0.4776 | -0.0065 | 0.0010 | 7.90E-10 | -6.1711 | 408317 | Snoring |
| rs1908035   | 8  | 71922408  | T | C | 0.4776 | -0.0065 | 0.0010 | 7.60E-10 | -6.1777 | 408317 | Snoring |
| rs1908036   | 8  | 71922324  | C | T | 0.4776 | -0.0065 | 0.0010 | 7.70E-10 | -6.1768 | 408317 | Snoring |
| rs1908325   | 12 | 65784325  | T | C | 0.3741 | 0.0086  | 0.0011 | 1.10E-15 | 7.9419  | 408317 | Snoring |
| rs1912151   | 17 | 43902944  | T | C | 0.2253 | 0.0076  | 0.0012 | 1.10E-09 | 6.1153  | 408317 | Snoring |
| rs191247549 | 17 | 44326105  | C | G | 0.2247 | 0.0074  | 0.0013 | 3.30E-09 | 5.9482  | 408317 | Snoring |
| rs1918786   | 17 | 44279101  | G | A | 0.2240 | 0.0077  | 0.0013 | 1.70E-09 | 6.0532  | 408317 | Snoring |
| rs1918787   | 17 | 44279252  | G | A | 0.2240 | 0.0077  | 0.0013 | 1.70E-09 | 6.0521  | 408317 | Snoring |
| rs191921080 | 2  | 157150418 | A | G | 0.0902 | 0.0106  | 0.0018 | 4.40E-09 | 5.7797  | 408317 | Snoring |
| rs192252295 | 17 | 43702296  | C | T | 0.2246 | 0.0077  | 0.0013 | 9.50E-10 | 6.1435  | 408317 | Snoring |
| rs192856660 | 17 | 44359779  | T | G | 0.2284 | 0.0070  | 0.0013 | 4.90E-08 | 5.4863  | 408317 | Snoring |

|             |    |           |   |   |        |         |        |          |         |        |         |
|-------------|----|-----------|---|---|--------|---------|--------|----------|---------|--------|---------|
| rs1939252   | 11 | 88953819  | G | C | 0.4881 | 0.0057  | 0.0010 | 3.40E-08 | 5.4461  | 408317 | Snoring |
| rs1942481   | 11 | 88899728  | G | A | 0.4267 | 0.0057  | 0.0011 | 4.40E-08 | 5.4424  | 408317 | Snoring |
| rs1942496   | 11 | 88840925  | A | G | 0.4906 | -0.0060 | 0.0011 | 8.60E-09 | -5.7118 | 408317 | Snoring |
| rs1942498   | 11 | 88903317  | G | A | 0.4270 | 0.0057  | 0.0011 | 4.40E-08 | 5.4398  | 408317 | Snoring |
| rs1965800   | 13 | 50784735  | T | C | 0.4787 | 0.0067  | 0.0010 | 1.30E-10 | 6.3899  | 408317 | Snoring |
| rs1966345   | 17 | 44197806  | C | T | 0.2259 | 0.0076  | 0.0012 | 1.50E-09 | 6.0711  | 408317 | Snoring |
| rs1967981   | 17 | 43999785  | G | C | 0.2255 | 0.0076  | 0.0012 | 1.50E-09 | 6.0783  | 408317 | Snoring |
| rs1971374   | 17 | 43659738  | C | T | 0.2135 | 0.0076  | 0.0013 | 3.20E-09 | 5.9493  | 408317 | Snoring |
| rs1975371   | 13 | 50784670  | T | G | 0.4605 | 0.0063  | 0.0010 | 1.30E-09 | 6.0440  | 408317 | Snoring |
| rs1976271   | 12 | 65787392  | T | C | 0.3737 | 0.0086  | 0.0011 | 9.80E-16 | 7.9558  | 408317 | Snoring |
| rs1976272   | 12 | 65787391  | G | A | 0.3737 | 0.0086  | 0.0011 | 9.80E-16 | 7.9556  | 408317 | Snoring |
| rs1976273   | 12 | 65787136  | G | A | 0.3742 | 0.0085  | 0.0011 | 1.50E-15 | 7.9001  | 408317 | Snoring |
| rs1976274   | 12 | 65787098  | G | A | 0.3744 | 0.0085  | 0.0011 | 1.60E-15 | 7.8940  | 408317 | Snoring |
| rs1981997   | 17 | 44056767  | A | G | 0.2254 | 0.0075  | 0.0012 | 2.00E-09 | 6.0290  | 408317 | Snoring |
| rs1981998   | 17 | 44056833  | A | G | 0.2254 | 0.0075  | 0.0012 | 2.00E-09 | 6.0290  | 408317 | Snoring |
| rs1984937   | 17 | 43980530  | C | A | 0.2255 | 0.0076  | 0.0012 | 1.40E-09 | 6.0823  | 408317 | Snoring |
| rs1985704   | 13 | 50784852  | T | A | 0.4785 | 0.0067  | 0.0010 | 1.10E-10 | 6.4102  | 408317 | Snoring |
| rs1991556   | 17 | 44083402  | A | G | 0.2268 | 0.0077  | 0.0013 | 1.00E-09 | 6.1367  | 408317 | Snoring |
| rs1993195   | 8  | 78109823  | T | A | 0.2855 | -0.0068 | 0.0012 | 4.60E-09 | -5.8396 | 408317 | Snoring |
| rs1993862   | 8  | 71579362  | A | G | 0.4784 | -0.0061 | 0.0010 | 7.70E-09 | -5.7973 | 408317 | Snoring |
| rs199439    | 17 | 44793503  | G | A | 0.2148 | 0.0072  | 0.0013 | 2.00E-08 | 5.6422  | 408317 | Snoring |
| rs199441    | 17 | 44773783  | A | G | 0.2167 | 0.0072  | 0.0013 | 1.50E-08 | 5.6991  | 408317 | Snoring |
| rs199443    | 17 | 44819565  | T | C | 0.2147 | 0.0073  | 0.0013 | 1.20E-08 | 5.7306  | 408317 | Snoring |
| rs199445    | 17 | 44817408  | T | C | 0.2145 | 0.0073  | 0.0013 | 1.30E-08 | 5.7146  | 408317 | Snoring |
| rs199447    | 17 | 44812188  | T | C | 0.2145 | 0.0072  | 0.0013 | 1.40E-08 | 5.6999  | 408317 | Snoring |
| rs199448    | 17 | 44809001  | G | A | 0.2145 | 0.0073  | 0.0013 | 1.40E-08 | 5.7051  | 408317 | Snoring |
| rs199451    | 17 | 44801784  | A | G | 0.2148 | 0.0071  | 0.0013 | 2.30E-08 | 5.6221  | 408317 | Snoring |
| rs199456    | 17 | 44797919  | T | C | 0.2145 | 0.0071  | 0.0013 | 2.90E-08 | 5.5815  | 408317 | Snoring |
| rs199457    | 17 | 44795469  | T | C | 0.2148 | 0.0072  | 0.0013 | 1.90E-08 | 5.6508  | 408317 | Snoring |
| rs199464    | 17 | 44538038  | C | A | 0.3024 | 0.0074  | 0.0013 | 1.50E-08 | 5.6435  | 408317 | Snoring |
| rs199492340 | 17 | 44442747  | A | T | 0.2987 | -0.0075 | 0.0013 | 8.20E-09 | -5.7013 | 408317 | Snoring |
| rs199497    | 17 | 44866602  | C | T | 0.1761 | 0.0092  | 0.0014 | 2.30E-10 | 6.3627  | 408317 | Snoring |
| rs199499    | 17 | 44865498  | T | C | 0.2061 | 0.0076  | 0.0014 | 3.80E-08 | 5.5267  | 408317 | Snoring |
| rs199503    | 17 | 44862162  | A | G | 0.2153 | 0.0070  | 0.0013 | 3.60E-08 | 5.5352  | 408317 | Snoring |
| rs199504    | 17 | 44861003  | C | T | 0.2174 | 0.0072  | 0.0013 | 1.20E-08 | 5.7211  | 408317 | Snoring |
| rs199505    | 17 | 44859410  | A | G | 0.2162 | 0.0070  | 0.0013 | 3.30E-08 | 5.5529  | 408317 | Snoring |
| rs199506    | 17 | 44859031  | A | G | 0.2163 | 0.0070  | 0.0013 | 3.30E-08 | 5.5498  | 408317 | Snoring |
| rs199507    | 17 | 44858855  | A | G | 0.2164 | 0.0071  | 0.0013 | 3.00E-08 | 5.5692  | 408317 | Snoring |
| rs199509    | 17 | 44858728  | G | A | 0.2164 | 0.0071  | 0.0013 | 3.00E-08 | 5.5705  | 408317 | Snoring |
| rs199510    | 17 | 44857929  | A | C | 0.2164 | 0.0070  | 0.0013 | 3.80E-08 | 5.5316  | 408317 | Snoring |
| rs199512    | 17 | 44857352  | T | C | 0.2163 | 0.0071  | 0.0013 | 2.90E-08 | 5.5777  | 408317 | Snoring |
| rs199513    | 17 | 44856932  | A | G | 0.2164 | 0.0071  | 0.0013 | 3.00E-08 | 5.5727  | 408317 | Snoring |
| rs199514    | 17 | 44856881  | G | A | 0.2164 | 0.0071  | 0.0013 | 3.00E-08 | 5.5727  | 408317 | Snoring |
| rs199515    | 17 | 44856641  | G | C | 0.2163 | 0.0071  | 0.0013 | 2.90E-08 | 5.5745  | 408317 | Snoring |
| rs199516    | 17 | 44856485  | C | T | 0.2163 | 0.0071  | 0.0013 | 3.00E-08 | 5.5723  | 408317 | Snoring |
| rs199525    | 17 | 44847834  | G | T | 0.2160 | 0.0073  | 0.0013 | 1.00E-08 | 5.7671  | 408317 | Snoring |
| rs199528    | 17 | 44843136  | T | C | 0.2154 | 0.0073  | 0.0013 | 1.40E-08 | 5.7133  | 408317 | Snoring |
| rs199533    | 17 | 44828931  | A | G | 0.2160 | 0.0071  | 0.0013 | 2.30E-08 | 5.6149  | 408317 | Snoring |
| rs199534    | 17 | 44824213  | G | T | 0.2146 | 0.0073  | 0.0013 | 1.20E-08 | 5.7254  | 408317 | Snoring |
| rs199535    | 17 | 44822662  | G | A | 0.2147 | 0.0073  | 0.0013 | 1.10E-08 | 5.7406  | 408317 | Snoring |
| rs199913382 | 17 | 44625866  | C | A | 0.2184 | 0.0075  | 0.0013 | 2.40E-08 | 5.5924  | 408317 | Snoring |
| rs2001797   | 19 | 32189660  | C | G | 0.0959 | -0.0108 | 0.0018 | 7.30E-10 | -6.0723 | 408317 | Snoring |
| rs200411925 | 12 | 65816182  | T | A | 0.3645 | 0.0088  | 0.0011 | 4.00E-16 | 8.0899  | 408317 | Snoring |
| rs2004260   | 17 | 43822398  | C | T | 0.2252 | 0.0077  | 0.0012 | 1.10E-09 | 6.1238  | 408317 | Snoring |
| rs2004673   | 17 | 44075099  | C | T | 0.2251 | 0.0075  | 0.0013 | 2.50E-09 | 5.9890  | 408317 | Snoring |
| rs2004674   | 17 | 44075110  | T | A | 0.2250 | 0.0075  | 0.0013 | 2.50E-09 | 5.9882  | 408317 | Snoring |
| rs2005544   | 1  | 50816576  | C | T | 0.4584 | 0.0060  | 0.0011 | 9.90E-09 | 5.7524  | 408317 | Snoring |
| rs2006305   | 17 | 43959752  | T | A | 0.2255 | 0.0076  | 0.0012 | 1.40E-09 | 6.0837  | 408317 | Snoring |
| rs2014427   | 12 | 65890148  | G | A | 0.4497 | 0.0069  | 0.0011 | 1.00E-10 | 6.5022  | 408317 | Snoring |
| rs2014583   | 7  | 127413482 | C | G | 0.4104 | -0.0058 | 0.0011 | 3.00E-08 | -5.4605 | 408317 | Snoring |
| rs2015333   | 12 | 65862790  | T | C | 0.4784 | -0.0067 | 0.0010 | 2.20E-10 | -6.3552 | 408317 | Snoring |
| rs2016730   | 17 | 44204373  | C | T | 0.1871 | -0.0078 | 0.0013 | 6.20E-09 | -5.8019 | 408317 | Snoring |
| rs2016786   | 7  | 127392859 | T | C | 0.4118 | -0.0059 | 0.0011 | 1.60E-08 | -5.5698 | 408317 | Snoring |
| rs2017035   | 8  | 71841806  | G | C | 0.4295 | 0.0069  | 0.0011 | 6.60E-11 | 6.5224  | 408317 | Snoring |
| rs201801376 | 8  | 71691179  | C | T | 0.4820 | -0.0059 | 0.0010 | 1.60E-08 | -5.6649 | 408317 | Snoring |
| rs2019816   | 17 | 43959661  | A | G | 0.2255 | 0.0076  | 0.0012 | 1.40E-09 | 6.0837  | 408317 | Snoring |
| rs2019822   | 17 | 43959918  | A | T | 0.2255 | 0.0076  | 0.0012 | 1.40E-09 | 6.0837  | 408317 | Snoring |
| rs202124623 | 8  | 78115461  | A | T | 0.2853 | -0.0068 | 0.0012 | 4.00E-09 | -5.8611 | 408317 | Snoring |
| rs2021752   | 17 | 46240263  | C | T | 0.3869 | 0.0062  | 0.0011 | 5.10E-09 | 5.7588  | 408317 | Snoring |
| rs2021811   | 17 | 46237782  | A | G | 0.3867 | 0.0062  | 0.0011 | 3.90E-09 | 5.8005  | 408317 | Snoring |
| rs2022265   | 6  | 84293271  | G | A | 0.4545 | 0.0058  | 0.0011 | 3.30E-08 | 5.4948  | 408317 | Snoring |
| rs2029004   | 3  | 77599763  | C | T | 0.4543 | 0.0064  | 0.0010 | 5.50E-10 | 6.1323  | 408317 | Snoring |
| rs2030323   | 11 | 27728539  | A | C | 0.2072 | -0.0077 | 0.0013 | 4.20E-09 | -5.9435 | 408317 | Snoring |
| rs2035196   | 8  | 71485350  | C | A | 0.4344 | 0.0069  | 0.0011 | 7.60E-11 | 6.5008  | 408317 | Snoring |

|           |    |           |   |   |        |         |        |          |         |        |         |
|-----------|----|-----------|---|---|--------|---------|--------|----------|---------|--------|---------|
| rs2035924 | 8  | 71914453  | C | T | 0.4309 | 0.0067  | 0.0011 | 1.60E-10 | 6.3862  | 408317 | Snoring |
| rs2035925 | 8  | 71914216  | A | T | 0.4308 | 0.0066  | 0.0011 | 3.10E-10 | 6.2860  | 408317 | Snoring |
| rs2035926 | 8  | 71913574  | C | A | 0.4241 | 0.0068  | 0.0011 | 1.80E-10 | 6.3619  | 408317 | Snoring |
| rs2035927 | 8  | 71913560  | G | C | 0.4230 | 0.0068  | 0.0011 | 2.40E-10 | 6.3209  | 408317 | Snoring |
| rs2035928 | 8  | 71913555  | G | A | 0.4225 | 0.0067  | 0.0011 | 2.90E-10 | 6.2894  | 408317 | Snoring |
| rs2035929 | 8  | 71913372  | G | A | 0.4308 | 0.0066  | 0.0011 | 3.20E-10 | 6.2838  | 408317 | Snoring |
| rs2039621 | 13 | 40741364  | A | G | 0.4740 | 0.0058  | 0.0010 | 1.80E-08 | 5.5509  | 408317 | Snoring |
| rs2040844 | 17 | 43767219  | C | A | 0.2253 | 0.0077  | 0.0012 | 8.70E-10 | 6.1539  | 408317 | Snoring |
| rs2040845 | 17 | 43767188  | C | G | 0.2237 | 0.0077  | 0.0013 | 9.60E-10 | 6.1374  | 408317 | Snoring |
| rs2040846 | 17 | 43762846  | G | A | 0.2253 | 0.0077  | 0.0012 | 8.60E-10 | 6.1565  | 408317 | Snoring |
| rs2041572 | 17 | 46205273  | T | C | 0.3865 | 0.0062  | 0.0011 | 4.10E-09 | 5.7909  | 408317 | Snoring |
| rs2047059 | 5  | 75008193  | C | T | 0.2796 | -0.0062 | 0.0012 | 4.70E-08 | -5.3517 | 408317 | Snoring |
| rs2049045 | 11 | 27694241  | C | G | 0.1863 | -0.0083 | 0.0013 | 8.80E-10 | -6.2179 | 408317 | Snoring |
| rs2049515 | 17 | 43761856  | T | C | 0.2253 | 0.0077  | 0.0012 | 8.70E-10 | 6.1536  | 408317 | Snoring |
| rs2055794 | 17 | 43951717  | A | G | 0.2254 | 0.0076  | 0.0012 | 1.60E-09 | 6.0645  | 408317 | Snoring |
| rs2055795 | 17 | 43951995  | T | C | 0.2254 | 0.0076  | 0.0012 | 1.60E-09 | 6.0646  | 408317 | Snoring |
| rs2055796 | 17 | 43952191  | T | A | 0.2254 | 0.0076  | 0.0012 | 1.60E-09 | 6.0652  | 408317 | Snoring |
| rs2058457 | 7  | 127493657 | T | A | 0.3424 | 0.0064  | 0.0011 | 4.10E-09 | 5.8168  | 408317 | Snoring |
| rs2060876 | 17 | 46322966  | G | A | 0.3868 | 0.0063  | 0.0011 | 2.50E-09 | 5.8767  | 408317 | Snoring |
| rs2066623 | 13 | 50753772  | G | A | 0.3213 | 0.0067  | 0.0011 | 3.40E-09 | 5.9361  | 408317 | Snoring |
| rs2066624 | 13 | 50753785  | A | G | 0.3210 | 0.0066  | 0.0011 | 4.50E-09 | 5.8895  | 408317 | Snoring |
| rs2066625 | 13 | 50754200  | G | A | 0.4695 | 0.0065  | 0.0011 | 7.00E-10 | 6.1450  | 408317 | Snoring |
| rs2066626 | 13 | 50754215  | A | C | 0.4608 | 0.0065  | 0.0011 | 7.10E-10 | 6.1569  | 408317 | Snoring |
| rs2066627 | 13 | 50754252  | T | C | 0.4615 | 0.0064  | 0.0011 | 9.20E-10 | 6.1161  | 408317 | Snoring |
| rs2066632 | 13 | 50761943  | A | G | 0.4623 | 0.0063  | 0.0010 | 1.50E-09 | 6.0339  | 408317 | Snoring |
| rs2066633 | 13 | 50762081  | A | G | 0.3206 | 0.0065  | 0.0011 | 8.60E-09 | 5.7879  | 408317 | Snoring |
| rs2066634 | 13 | 50764482  | G | A | 0.4712 | 0.0062  | 0.0010 | 2.90E-09 | 5.9107  | 408317 | Snoring |
| rs2066644 | 13 | 50777978  | T | C | 0.3204 | 0.0066  | 0.0011 | 4.00E-09 | 5.9141  | 408317 | Snoring |
| rs2066646 | 13 | 50778558  | A | T | 0.3202 | 0.0066  | 0.0011 | 5.90E-09 | 5.8492  | 408317 | Snoring |
| rs2066648 | 13 | 50782442  | C | T | 0.3202 | 0.0066  | 0.0011 | 5.90E-09 | 5.8504  | 408317 | Snoring |
| rs2066650 | 13 | 50787556  | A | G | 0.3205 | 0.0067  | 0.0011 | 3.60E-09 | 5.9300  | 408317 | Snoring |
| rs2066899 | 17 | 44155732  | T | C | 0.2281 | 0.0072  | 0.0012 | 7.20E-09 | 5.8085  | 408317 | Snoring |
| rs2072441 | 17 | 46185014  | C | G | 0.4230 | 0.0064  | 0.0011 | 1.50E-09 | 6.0129  | 408317 | Snoring |
| rs2082068 | 17 | 43979971  | T | C | 0.2255 | 0.0076  | 0.0012 | 1.40E-09 | 6.0825  | 408317 | Snoring |
| rs2090847 | 17 | 43550107  | G | A | 0.1848 | 0.0074  | 0.0013 | 3.90E-08 | 5.4841  | 408317 | Snoring |
| rs2097760 | 17 | 44168677  | G | A | 0.2281 | 0.0072  | 0.0012 | 7.80E-09 | 5.7959  | 408317 | Snoring |
| rs2099151 | 17 | 43979822  | T | A | 0.2255 | 0.0076  | 0.0012 | 1.40E-09 | 6.0838  | 408317 | Snoring |
| rs2100908 | 8  | 71583310  | G | A | 0.4816 | -0.0060 | 0.0010 | 1.10E-08 | -5.7289 | 408317 | Snoring |
| rs2106784 | 17 | 43949892  | T | C | 0.2255 | 0.0076  | 0.0012 | 1.40E-09 | 6.0807  | 408317 | Snoring |
| rs2106785 | 17 | 43919105  | T | C | 0.2223 | 0.0076  | 0.0013 | 1.90E-09 | 6.0288  | 408317 | Snoring |
| rs2106786 | 17 | 43919096  | G | A | 0.2210 | 0.0076  | 0.0013 | 1.90E-09 | 6.0365  | 408317 | Snoring |
| rs2109982 | 17 | 46244769  | G | A | 0.3867 | 0.0062  | 0.0011 | 3.90E-09 | 5.8004  | 408317 | Snoring |
| rs2112347 | 5  | 75015242  | G | T | 0.3594 | -0.0071 | 0.0011 | 3.60E-11 | -6.5372 | 408317 | Snoring |
| rs2115855 | 2  | 103875811 | G | T | 0.2699 | 0.0064  | 0.0012 | 3.60E-08 | 5.4224  | 408317 | Snoring |
| rs2118963 | 13 | 50791372  | A | T | 0.3203 | 0.0066  | 0.0011 | 5.20E-09 | 5.8718  | 408317 | Snoring |
| rs2123341 | 17 | 46264626  | A | C | 0.3868 | 0.0063  | 0.0011 | 3.10E-09 | 5.8397  | 408317 | Snoring |
| rs2123397 | 8  | 78105153  | A | C | 0.2855 | -0.0068 | 0.0012 | 4.60E-09 | -5.8413 | 408317 | Snoring |
| rs2123403 | 8  | 78110825  | A | G | 0.2855 | -0.0067 | 0.0012 | 4.70E-09 | -5.8371 | 408317 | Snoring |
| rs2124958 | 8  | 71674027  | T | C | 0.4302 | 0.0068  | 0.0011 | 9.80E-11 | 6.4602  | 408317 | Snoring |
| rs2131700 | 17 | 2124724   | A | G | 0.3870 | -0.0060 | 0.0011 | 2.30E-08 | -5.5470 | 408317 | Snoring |
| rs2134456 | 1  | 50803586  | T | G | 0.4545 | 0.0060  | 0.0011 | 1.00E-08 | 5.7398  | 408317 | Snoring |
| rs2145270 | 20 | 6621685   | C | T | 0.3815 | -0.0061 | 0.0011 | 9.70E-09 | -5.7055 | 408317 | Snoring |
| rs2145271 | 20 | 6626140   | T | A | 0.3645 | -0.0062 | 0.0011 | 8.70E-09 | -5.7123 | 408317 | Snoring |
| rs2145272 | 20 | 6626218   | G | A | 0.3645 | -0.0062 | 0.0011 | 8.70E-09 | -5.7111 | 408317 | Snoring |
| rs2158072 | 17 | 43950195  | C | T | 0.2255 | 0.0076  | 0.0012 | 1.50E-09 | 6.0784  | 408317 | Snoring |
| rs2158257 | 17 | 44104343  | C | A | 0.2254 | 0.0075  | 0.0012 | 1.90E-09 | 6.0331  | 408317 | Snoring |
| rs2158474 | 17 | 43761939  | C | G | 0.2253 | 0.0077  | 0.0012 | 8.50E-10 | 6.1588  | 408317 | Snoring |
| rs2163129 | 17 | 44056433  | C | T | 0.2254 | 0.0075  | 0.0012 | 2.00E-09 | 6.0253  | 408317 | Snoring |
| rs2163130 | 17 | 44056434  | A | G | 0.2254 | 0.0075  | 0.0012 | 2.00E-09 | 6.0260  | 408317 | Snoring |
| rs2167731 | 8  | 78104885  | A | T | 0.2855 | -0.0068 | 0.0012 | 4.50E-09 | -5.8456 | 408317 | Snoring |
| rs2167732 | 8  | 78111145  | A | G | 0.2855 | -0.0067 | 0.0012 | 4.70E-09 | -5.8375 | 408317 | Snoring |
| rs2167733 | 8  | 78110734  | A | G | 0.2848 | -0.0068 | 0.0012 | 3.30E-09 | -5.8972 | 408317 | Snoring |
| rs2167734 | 8  | 78110704  | A | G | 0.2848 | -0.0068 | 0.0012 | 3.30E-09 | -5.8972 | 408317 | Snoring |
| rs2188888 | 17 | 43953695  | C | T | 0.2240 | 0.0077  | 0.0013 | 1.20E-09 | 6.1105  | 408317 | Snoring |
| rs2198619 | 3  | 94011922  | A | G | 0.4008 | -0.0060 | 0.0011 | 1.30E-08 | -5.5907 | 408317 | Snoring |
| rs2198620 | 3  | 94011789  | G | A | 0.4008 | -0.0060 | 0.0011 | 1.40E-08 | -5.5835 | 408317 | Snoring |
| rs2199036 | 16 | 31006972  | T | C | 0.3728 | 0.0063  | 0.0011 | 6.60E-09 | 5.8374  | 408317 | Snoring |
| rs2206925 | 20 | 6634895   | T | C | 0.3639 | -0.0063 | 0.0011 | 5.30E-09 | -5.7932 | 408317 | Snoring |
| rs2207944 | 6  | 84307328  | C | T | 0.4546 | 0.0059  | 0.0011 | 2.00E-08 | 5.5839  | 408317 | Snoring |
| rs2212333 | 11 | 88768897  | A | T | 0.4302 | 0.0058  | 0.0011 | 3.70E-08 | 5.4510  | 408317 | Snoring |
| rs2212751 | 11 | 88894922  | A | G | 0.4260 | 0.0058  | 0.0011 | 4.30E-08 | 5.4475  | 408317 | Snoring |
| rs2214258 | 17 | 43953719  | C | G | 0.2240 | 0.0077  | 0.0013 | 1.20E-09 | 6.1078  | 408317 | Snoring |
| rs2217394 | 17 | 44053448  | G | A | 0.2254 | 0.0075  | 0.0012 | 2.00E-09 | 6.0278  | 408317 | Snoring |
| rs2220752 | 8  | 71762720  | G | A | 0.4600 | -0.0060 | 0.0011 | 1.80E-08 | -5.6471 | 408317 | Snoring |



|           |    |           |   |   |        |         |        |          |         |        |         |
|-----------|----|-----------|---|---|--------|---------|--------|----------|---------|--------|---------|
| rs2224195 | 6  | 84307726  | C | T | 0.4544 | 0.0059  | 0.0011 | 2.10E-08 | 5.5764  | 408317 | Snoring |
| rs2243967 | 17 | 44329636  | C | T | 0.2208 | 0.0074  | 0.0013 | 5.70E-09 | 5.8630  | 408317 | Snoring |
| rs2257575 | 17 | 44326063  | G | T | 0.2106 | 0.0076  | 0.0013 | 6.10E-09 | 5.8278  | 408317 | Snoring |
| rs2259672 | 10 | 9071314   | T | C | 0.2275 | 0.0073  | 0.0012 | 4.60E-09 | 5.8471  | 408317 | Snoring |
| rs2261016 | 17 | 44349899  | A | G | 0.2038 | 0.0078  | 0.0013 | 5.30E-09 | 5.8571  | 408317 | Snoring |
| rs2262140 | 17 | 44349736  | T | C | 0.2038 | 0.0078  | 0.0013 | 5.30E-09 | 5.8572  | 408317 | Snoring |
| rs2262144 | 17 | 44350511  | G | A | 0.2038 | 0.0078  | 0.0013 | 5.30E-09 | 5.8577  | 408317 | Snoring |
| rs2266497 | 17 | 44294786  | G | A | 0.2248 | 0.0076  | 0.0013 | 1.70E-09 | 6.0487  | 408317 | Snoring |
| rs2270547 | 12 | 65831114  | T | C | 0.3646 | 0.0088  | 0.0011 | 3.10E-16 | 8.1214  | 408317 | Snoring |
| rs227727  | 17 | 54776955  | T | A | 0.4579 | 0.0060  | 0.0010 | 1.40E-08 | 5.6906  | 408317 | Snoring |
| rs227731  | 17 | 54773238  | G | T | 0.4583 | 0.0059  | 0.0010 | 2.20E-08 | 5.6075  | 408317 | Snoring |
| rs2277339 | 12 | 57146069  | G | T | 0.1035 | -0.0099 | 0.0017 | 5.90E-09 | -5.7914 | 408317 | Snoring |
| rs2278868 | 17 | 46262171  | C | T | 0.3866 | 0.0062  | 0.0011 | 4.10E-09 | 5.7928  | 408317 | Snoring |
| rs2279128 | 8  | 71581559  | T | G | 0.4306 | 0.0069  | 0.0011 | 7.50E-11 | 6.5011  | 408317 | Snoring |
| rs2285569 | 17 | 67944404  | G | A | 0.3384 | 0.0066  | 0.0011 | 2.90E-09 | 5.9688  | 408317 | Snoring |
| rs2290702 | 8  | 71646980  | C | T | 0.4304 | 0.0068  | 0.0011 | 8.30E-11 | 6.4876  | 408317 | Snoring |
| rs2295596 | 6  | 100834674 | T | C | 0.2282 | 0.0070  | 0.0012 | 2.40E-08 | 5.5953  | 408317 | Snoring |
| rs2305433 | 17 | 46265433  | G | C | 0.3868 | 0.0063  | 0.0011 | 3.00E-09 | 5.8436  | 408317 | Snoring |
| rs2307111 | 5  | 75003678  | C | T | 0.3933 | -0.0077 | 0.0011 | 4.80E-13 | -7.1670 | 408317 | Snoring |
| rs2310743 | 8  | 78135681  | G | A | 0.3150 | -0.0064 | 0.0011 | 1.10E-08 | -5.6729 | 408317 | Snoring |
| rs2310747 | 8  | 78185098  | A | G | 0.2990 | -0.0063 | 0.0011 | 2.60E-08 | -5.5607 | 408317 | Snoring |
| rs2316763 | 17 | 43895530  | T | C | 0.2252 | 0.0076  | 0.0012 | 1.10E-09 | 6.1164  | 408317 | Snoring |
| rs2316764 | 17 | 43895602  | G | T | 0.2251 | 0.0076  | 0.0012 | 1.30E-09 | 6.0991  | 408317 | Snoring |
| rs2316765 | 17 | 43912454  | C | T | 0.2252 | 0.0076  | 0.0012 | 1.10E-09 | 6.1205  | 408317 | Snoring |
| rs2316766 | 17 | 43919068  | T | G | 0.2196 | 0.0077  | 0.0013 | 1.60E-09 | 6.0690  | 408317 | Snoring |
| rs2316767 | 17 | 43919070  | C | T | 0.2196 | 0.0077  | 0.0013 | 1.60E-09 | 6.0690  | 408317 | Snoring |
| rs2316768 | 17 | 43919073  | T | G | 0.2196 | 0.0077  | 0.0013 | 1.60E-09 | 6.0690  | 408317 | Snoring |
| rs2316769 | 17 | 43930798  | G | A | 0.2254 | 0.0076  | 0.0012 | 1.10E-09 | 6.1211  | 408317 | Snoring |
| rs2316771 | 17 | 43945931  | C | T | 0.2255 | 0.0076  | 0.0012 | 1.40E-09 | 6.0803  | 408317 | Snoring |
| rs2316772 | 17 | 43946423  | C | A | 0.2255 | 0.0076  | 0.0012 | 1.70E-09 | 6.0537  | 408317 | Snoring |
| rs2316773 | 17 | 43946536  | T | C | 0.2256 | 0.0075  | 0.0012 | 2.00E-09 | 6.0255  | 408317 | Snoring |
| rs2316774 | 17 | 43946642  | C | T | 0.2255 | 0.0076  | 0.0012 | 1.30E-09 | 6.0924  | 408317 | Snoring |
| rs2316782 | 17 | 44010040  | G | A | 0.2255 | 0.0076  | 0.0012 | 1.50E-09 | 6.0763  | 408317 | Snoring |
| rs2316783 | 17 | 44010118  | C | G | 0.2255 | 0.0076  | 0.0012 | 1.50E-09 | 6.0753  | 408317 | Snoring |
| rs2316784 | 17 | 44021699  | T | G | 0.2237 | 0.0077  | 0.0013 | 1.30E-09 | 6.0958  | 408317 | Snoring |
| rs2316948 | 17 | 44094667  | G | C | 0.2254 | 0.0075  | 0.0012 | 1.90E-09 | 6.0339  | 408317 | Snoring |
| rs2316951 | 17 | 44139083  | C | G | 0.2254 | 0.0075  | 0.0012 | 2.00E-09 | 6.0268  | 408317 | Snoring |
| rs2316952 | 17 | 44139190  | C | G | 0.2254 | 0.0075  | 0.0012 | 2.00E-09 | 6.0269  | 408317 | Snoring |
| rs2316953 | 17 | 44140341  | A | G | 0.2254 | 0.0075  | 0.0012 | 2.00E-09 | 6.0278  | 408317 | Snoring |
| rs2316954 | 17 | 44156167  | A | G | 0.2254 | 0.0075  | 0.0012 | 2.00E-09 | 6.0255  | 408317 | Snoring |
| rs2316955 | 17 | 44161985  | G | T | 0.2254 | 0.0075  | 0.0012 | 2.00E-09 | 6.0239  | 408317 | Snoring |
| rs2316956 | 17 | 44162056  | A | T | 0.2223 | 0.0076  | 0.0013 | 1.60E-09 | 6.0671  | 408317 | Snoring |
| rs2326787 | 20 | 6451752   | T | C | 0.2275 | 0.0070  | 0.0013 | 2.30E-08 | 5.5690  | 408317 | Snoring |
| rs2326844 | 20 | 6628406   | G | C | 0.3654 | -0.0063 | 0.0011 | 4.90E-09 | -5.8115 | 408317 | Snoring |
| rs2336712 | 12 | 65794564  | A | G | 0.3734 | 0.0086  | 0.0011 | 7.70E-16 | 7.9850  | 408317 | Snoring |
| rs2336713 | 12 | 65797096  | G | T | 0.3644 | 0.0088  | 0.0011 | 3.00E-16 | 8.1240  | 408317 | Snoring |
| rs2336714 | 12 | 65797106  | T | C | 0.3644 | 0.0088  | 0.0011 | 3.20E-16 | 8.1152  | 408317 | Snoring |
| rs2336715 | 12 | 65780528  | C | T | 0.3744 | 0.0085  | 0.0011 | 1.40E-15 | 7.9110  | 408317 | Snoring |
| rs2347959 | 3  | 90039465  | A | G | 0.4279 | -0.0059 | 0.0011 | 1.70E-08 | -5.5690 | 408317 | Snoring |
| rs2356864 | 1  | 50839740  | G | A | 0.4774 | 0.0058  | 0.0010 | 3.80E-08 | 5.5169  | 408317 | Snoring |
| rs2356870 | 1  | 50816977  | C | T | 0.4582 | 0.0061  | 0.0011 | 7.20E-09 | 5.8055  | 408317 | Snoring |
| rs2356871 | 1  | 50816979  | C | T | 0.4582 | 0.0061  | 0.0011 | 6.80E-09 | 5.8141  | 408317 | Snoring |
| rs2356872 | 1  | 50817302  | C | A | 0.4586 | 0.0060  | 0.0011 | 1.00E-08 | 5.7476  | 408317 | Snoring |
| rs2380687 | 8  | 71680355  | T | G | 0.4814 | -0.0060 | 0.0010 | 1.40E-08 | -5.6953 | 408317 | Snoring |
| rs2380688 | 8  | 71681766  | C | T | 0.4296 | 0.0069  | 0.0011 | 4.90E-11 | 6.5635  | 408317 | Snoring |
| rs2380691 | 8  | 71785177  | A | G | 0.4298 | 0.0068  | 0.0011 | 1.30E-10 | 6.4228  | 408317 | Snoring |
| rs2397333 | 10 | 9071414   | C | G | 0.2275 | 0.0073  | 0.0012 | 4.60E-09 | 5.8478  | 408317 | Snoring |
| rs2397334 | 10 | 9072897   | C | A | 0.2275 | 0.0073  | 0.0012 | 4.70E-09 | 5.8425  | 408317 | Snoring |
| rs2402870 | 7  | 127438463 | G | C | 0.4134 | -0.0059 | 0.0011 | 1.80E-08 | -5.5521 | 408317 | Snoring |
| rs2402871 | 7  | 127439519 | A | G | 0.3424 | 0.0064  | 0.0011 | 4.50E-09 | 5.7978  | 408317 | Snoring |
| rs2408111 | 13 | 51234240  | A | T | 0.1366 | 0.0090  | 0.0015 | 4.40E-09 | 5.8793  | 408317 | Snoring |
| rs241020  | 17 | 43738676  | A | C | 0.2253 | 0.0077  | 0.0012 | 8.40E-10 | 6.1596  | 408317 | Snoring |
| rs241021  | 17 | 43738627  | G | T | 0.2253 | 0.0077  | 0.0012 | 8.50E-10 | 6.1596  | 408317 | Snoring |
| rs241022  | 17 | 43737730  | C | T | 0.2253 | 0.0077  | 0.0012 | 8.50E-10 | 6.1581  | 408317 | Snoring |
| rs241023  | 17 | 43737040  | A | G | 0.2253 | 0.0077  | 0.0012 | 8.50E-10 | 6.1595  | 408317 | Snoring |
| rs241024  | 17 | 43736763  | T | C | 0.2253 | 0.0077  | 0.0012 | 8.50E-10 | 6.1595  | 408317 | Snoring |
| rs241025  | 17 | 43736504  | C | T | 0.2232 | 0.0077  | 0.0013 | 8.30E-10 | 6.1608  | 408317 | Snoring |
| rs241026  | 17 | 43735555  | A | G | 0.2253 | 0.0077  | 0.0012 | 8.50E-10 | 6.1594  | 408317 | Snoring |
| rs241027  | 17 | 43735478  | G | A | 0.2253 | 0.0077  | 0.0012 | 8.60E-10 | 6.1572  | 408317 | Snoring |
| rs241028  | 17 | 43735276  | T | C | 0.2253 | 0.0077  | 0.0012 | 8.60E-10 | 6.1571  | 408317 | Snoring |
| rs241029  | 17 | 43734643  | C | T | 0.2253 | 0.0077  | 0.0012 | 8.50E-10 | 6.1590  | 408317 | Snoring |
| rs241030  | 17 | 43734503  | G | A | 0.2253 | 0.0077  | 0.0012 | 8.50E-10 | 6.1596  | 408317 | Snoring |
| rs241031  | 17 | 43734304  | C | T | 0.2253 | 0.0077  | 0.0012 | 8.50E-10 | 6.1593  | 408317 | Snoring |
| rs241032  | 17 | 43734145  | C | T | 0.2254 | 0.0077  | 0.0012 | 6.80E-10 | 6.1964  | 408317 | Snoring |

|           |    |           |   |   |        |         |        |          |         |        |         |
|-----------|----|-----------|---|---|--------|---------|--------|----------|---------|--------|---------|
| rs241033  | 17 | 43733983  | A | G | 0.2253 | 0.0077  | 0.0012 | 8.00E-10 | 6.1678  | 408317 | Snoring |
| rs241034  | 17 | 43733048  | T | A | 0.2253 | 0.0077  | 0.0012 | 8.50E-10 | 6.1593  | 408317 | Snoring |
| rs241035  | 17 | 43731896  | T | C | 0.2253 | 0.0077  | 0.0012 | 8.50E-10 | 6.1592  | 408317 | Snoring |
| rs241036  | 17 | 43731719  | C | A | 0.2257 | 0.0077  | 0.0012 | 8.40E-10 | 6.1614  | 408317 | Snoring |
| rs241037  | 17 | 43730636  | T | G | 0.2252 | 0.0077  | 0.0012 | 8.70E-10 | 6.1545  | 408317 | Snoring |
| rs241038  | 17 | 43730598  | A | G | 0.2252 | 0.0077  | 0.0012 | 8.70E-10 | 6.1545  | 408317 | Snoring |
| rs241039  | 17 | 43714673  | T | A | 0.2253 | 0.0077  | 0.0012 | 8.80E-10 | 6.1523  | 408317 | Snoring |
| rs241041  | 17 | 43713925  | G | A | 0.2253 | 0.0077  | 0.0012 | 8.80E-10 | 6.1524  | 408317 | Snoring |
| rs241042  | 17 | 43712657  | C | T | 0.2253 | 0.0077  | 0.0012 | 8.80E-10 | 6.1535  | 408317 | Snoring |
| rs241044  | 17 | 43712464  | A | G | 0.2253 | 0.0077  | 0.0012 | 8.80E-10 | 6.1535  | 408317 | Snoring |
| rs241045  | 17 | 43712337  | T | C | 0.2253 | 0.0077  | 0.0012 | 8.80E-10 | 6.1535  | 408317 | Snoring |
| rs242557  | 17 | 44019712  | A | G | 0.3829 | -0.0067 | 0.0011 | 8.00E-10 | -6.2033 | 408317 | Snoring |
| rs242559  | 17 | 44025888  | C | A | 0.2323 | 0.0073  | 0.0012 | 5.00E-09 | 5.8669  | 408317 | Snoring |
| rs242561  | 17 | 44026548  | T | C | 0.2255 | 0.0076  | 0.0012 | 1.40E-09 | 6.0836  | 408317 | Snoring |
| rs242562  | 17 | 44026739  | A | G | 0.3804 | -0.0068 | 0.0011 | 6.70E-10 | -6.2454 | 408317 | Snoring |
| rs2429438 | 17 | 44348265  | C | G | 0.2248 | 0.0076  | 0.0013 | 3.10E-09 | 5.9599  | 408317 | Snoring |
| rs2429440 | 17 | 44342563  | G | A | 0.2098 | 0.0078  | 0.0013 | 2.90E-09 | 5.9452  | 408317 | Snoring |
| rs2435204 | 17 | 43988205  | G | A | 0.2325 | 0.0073  | 0.0012 | 5.60E-09 | 5.8645  | 408317 | Snoring |
| rs2440781 | 10 | 9051328   | A | G | 0.1872 | 0.0088  | 0.0013 | 4.70E-11 | 6.5602  | 408317 | Snoring |
| rs2458216 | 17 | 44346962  | T | C | 0.2043 | 0.0078  | 0.0013 | 5.70E-09 | 5.8431  | 408317 | Snoring |
| rs2458217 | 17 | 44353206  | C | T | 0.2036 | 0.0079  | 0.0013 | 4.00E-09 | 5.9017  | 408317 | Snoring |
| rs2458218 | 17 | 44361383  | C | T | 0.2165 | 0.0077  | 0.0013 | 4.10E-09 | 5.9206  | 408317 | Snoring |
| rs2462835 | 17 | 43671739  | G | A | 0.2365 | 0.0076  | 0.0012 | 1.10E-09 | 6.1093  | 408317 | Snoring |
| rs2463514 | 17 | 44338869  | T | C | 0.1906 | 0.0079  | 0.0014 | 1.90E-08 | 5.6297  | 408317 | Snoring |
| rs2463523 | 17 | 43671737  | C | A | 0.2365 | 0.0076  | 0.0012 | 1.10E-09 | 6.1093  | 408317 | Snoring |
| rs2469937 | 17 | 44336976  | C | T | 0.2065 | 0.0079  | 0.0013 | 2.80E-09 | 5.9460  | 408317 | Snoring |
| rs2469939 | 17 | 44351739  | A | G | 0.2038 | 0.0078  | 0.0013 | 5.50E-09 | 5.8500  | 408317 | Snoring |
| rs2469940 | 17 | 44351731  | G | T | 0.2038 | 0.0078  | 0.0013 | 5.50E-09 | 5.8500  | 408317 | Snoring |
| rs2469941 | 17 | 44349744  | G | A | 0.2038 | 0.0078  | 0.0013 | 5.30E-09 | 5.8572  | 408317 | Snoring |
| rs2469943 | 17 | 44349347  | G | C | 0.2038 | 0.0078  | 0.0013 | 5.40E-09 | 5.8545  | 408317 | Snoring |
| rs2469944 | 17 | 44349283  | C | T | 0.2038 | 0.0078  | 0.0013 | 5.40E-09 | 5.8544  | 408317 | Snoring |
| rs2471738 | 17 | 44076063  | T | C | 0.2348 | -0.0070 | 0.0012 | 1.60E-08 | -5.6609 | 408317 | Snoring |
| rs2476175 | 10 | 9074127   | T | C | 0.2271 | 0.0073  | 0.0012 | 3.40E-09 | 5.8942  | 408317 | Snoring |
| rs2496482 | 14 | 99750164  | T | C | 0.4210 | -0.0074 | 0.0011 | 2.90E-12 | -6.9227 | 408317 | Snoring |
| rs2532239 | 17 | 44266227  | C | T | 0.2256 | 0.0075  | 0.0013 | 1.90E-09 | 6.0293  | 408317 | Snoring |
| rs2532322 | 17 | 44358428  | A | G | 0.2211 | 0.0077  | 0.0013 | 2.20E-09 | 6.0170  | 408317 | Snoring |
| rs2532329 | 17 | 44350090  | A | G | 0.2225 | 0.0077  | 0.0013 | 1.90E-09 | 6.0338  | 408317 | Snoring |
| rs2532330 | 17 | 44349867  | A | G | 0.2262 | 0.0077  | 0.0013 | 1.50E-09 | 6.0814  | 408317 | Snoring |
| rs2532339 | 17 | 44345668  | G | A | 0.2051 | 0.0080  | 0.0013 | 2.20E-09 | 5.9921  | 408317 | Snoring |
| rs2532340 | 17 | 44345653  | G | A | 0.2256 | 0.0076  | 0.0013 | 2.40E-09 | 6.0056  | 408317 | Snoring |
| rs2532341 | 17 | 44345428  | A | G | 0.2905 | -0.0068 | 0.0012 | 7.00E-09 | -5.8069 | 408317 | Snoring |
| rs2532343 | 17 | 44344097  | C | G | 0.2265 | 0.0075  | 0.0013 | 3.80E-09 | 5.9248  | 408317 | Snoring |
| rs2532345 | 17 | 44343902  | A | G | 0.2867 | -0.0068 | 0.0012 | 6.90E-09 | -5.7937 | 408317 | Snoring |
| rs2532349 | 17 | 44339473  | G | A | 0.2312 | 0.0072  | 0.0013 | 8.40E-09 | 5.7919  | 408317 | Snoring |
| rs2532363 | 17 | 44333423  | T | G | 0.2244 | 0.0076  | 0.0013 | 2.40E-09 | 5.9955  | 408317 | Snoring |
| rs2532364 | 17 | 44332970  | G | A | 0.2215 | 0.0075  | 0.0013 | 3.30E-09 | 5.9524  | 408317 | Snoring |
| rs2532379 | 17 | 44321273  | C | A | 0.1569 | -0.0085 | 0.0015 | 2.80E-08 | -5.5403 | 408317 | Snoring |
| rs2532387 | 17 | 44313522  | T | G | 0.2181 | 0.0073  | 0.0013 | 9.10E-09 | 5.7796  | 408317 | Snoring |
| rs2532389 | 17 | 44311107  | C | G | 0.2203 | 0.0078  | 0.0013 | 7.90E-10 | 6.1734  | 408317 | Snoring |
| rs2532392 | 17 | 44309856  | A | G | 0.2242 | 0.0076  | 0.0013 | 1.50E-09 | 6.0744  | 408317 | Snoring |
| rs2532395 | 17 | 44307193  | T | C | 0.2140 | 0.0078  | 0.0013 | 1.50E-09 | 6.0646  | 408317 | Snoring |
| rs2532416 | 17 | 44289291  | C | A | 0.2269 | 0.0075  | 0.0012 | 1.90E-09 | 6.0340  | 408317 | Snoring |
| rs2532417 | 17 | 44289220  | T | C | 0.2258 | 0.0076  | 0.0013 | 1.70E-09 | 6.0539  | 408317 | Snoring |
| rs2532423 | 17 | 44285952  | C | T | 0.2261 | 0.0075  | 0.0013 | 1.80E-09 | 6.0363  | 408317 | Snoring |
| rs2532424 | 17 | 44368926  | A | C | 0.2281 | 0.0072  | 0.0013 | 2.60E-08 | 5.5806  | 408317 | Snoring |
| rs254556  | 5  | 134446395 | A | G | 0.3292 | -0.0068 | 0.0011 | 9.60E-10 | -6.1187 | 408317 | Snoring |
| rs254557  | 5  | 134446275 | T | G | 0.3292 | -0.0068 | 0.0011 | 9.40E-10 | -6.1217 | 408317 | Snoring |
| rs254564  | 5  | 134439287 | T | C | 0.3886 | -0.0061 | 0.0011 | 1.40E-08 | -5.6826 | 408317 | Snoring |
| rs2580184 | 13 | 50792591  | C | G | 0.4787 | 0.0067  | 0.0010 | 1.40E-10 | 6.3831  | 408317 | Snoring |
| rs2580195 | 13 | 50780292  | T | C | 0.3201 | 0.0065  | 0.0011 | 6.60E-09 | 5.8320  | 408317 | Snoring |
| rs258494  | 5  | 75038718  | C | G | 0.3657 | -0.0066 | 0.0011 | 9.70E-10 | -6.0404 | 408317 | Snoring |
| rs258495  | 5  | 75038901  | T | A | 0.3753 | -0.0068 | 0.0011 | 2.40E-10 | -6.2518 | 408317 | Snoring |
| rs2589559 | 10 | 9061370   | C | T | 0.1882 | 0.0090  | 0.0013 | 1.30E-11 | 6.7581  | 408317 | Snoring |
| rs2589561 | 10 | 9046645   | A | G | 0.1871 | 0.0089  | 0.0013 | 3.10E-11 | 6.6205  | 408317 | Snoring |
| rs2589563 | 10 | 9062283   | T | C | 0.1878 | 0.0090  | 0.0013 | 1.30E-11 | 6.7500  | 408317 | Snoring |
| rs2589567 | 10 | 9070486   | T | C | 0.2275 | 0.0073  | 0.0012 | 4.50E-09 | 5.8503  | 408317 | Snoring |
| rs2589568 | 10 | 9071785   | T | G | 0.2275 | 0.0073  | 0.0012 | 4.40E-09 | 5.8535  | 408317 | Snoring |
| rs2589569 | 10 | 9071968   | A | G | 0.2275 | 0.0073  | 0.0012 | 4.40E-09 | 5.8535  | 408317 | Snoring |
| rs2589570 | 10 | 9072317   | T | G | 0.2275 | 0.0073  | 0.0012 | 4.70E-09 | 5.8437  | 408317 | Snoring |
| rs2589571 | 10 | 9073836   | T | G | 0.2271 | 0.0074  | 0.0012 | 3.00E-09 | 5.9173  | 408317 | Snoring |
| rs2614461 | 14 | 99747991  | C | T | 0.3925 | 0.0058  | 0.0011 | 4.20E-08 | 5.4482  | 408317 | Snoring |
| rs2614463 | 14 | 99746274  | T | A | 0.4220 | -0.0073 | 0.0011 | 4.80E-12 | -6.8584 | 408317 | Snoring |
| rs2614464 | 14 | 99743113  | A | G | 0.4235 | -0.0074 | 0.0011 | 1.40E-12 | -7.0360 | 408317 | Snoring |
| rs2614488 | 14 | 99751588  | A | G | 0.4097 | -0.0077 | 0.0011 | 1.60E-12 | -7.0688 | 408317 | Snoring |

|           |    |          |   |   |        |         |        |          |         |        |         |
|-----------|----|----------|---|---|--------|---------|--------|----------|---------|--------|---------|
| rs2639896 | 8  | 71920783 | T | C | 0.4776 | -0.0065 | 0.0010 | 7.60E-10 | -6.1786 | 408317 | Snoring |
| rs2639897 | 8  | 71920676 | T | C | 0.4776 | -0.0065 | 0.0010 | 7.50E-10 | -6.1791 | 408317 | Snoring |
| rs2639898 | 8  | 71920310 | G | A | 0.4776 | -0.0065 | 0.0010 | 7.30E-10 | -6.1793 | 408317 | Snoring |
| rs2639899 | 8  | 71919462 | T | C | 0.4774 | -0.0065 | 0.0010 | 8.00E-10 | -6.1685 | 408317 | Snoring |
| rs2639900 | 8  | 71918568 | A | G | 0.4813 | 0.0068  | 0.0011 | 2.60E-10 | 6.3606  | 408317 | Snoring |
| rs2639901 | 8  | 71917751 | A | G | 0.4866 | -0.0062 | 0.0010 | 3.70E-09 | -5.9211 | 408317 | Snoring |
| rs2639902 | 8  | 71917527 | A | G | 0.4866 | -0.0062 | 0.0010 | 3.50E-09 | -5.9324 | 408317 | Snoring |
| rs2639903 | 8  | 71917444 | T | C | 0.4902 | -0.0063 | 0.0011 | 2.10E-09 | -6.0112 | 408317 | Snoring |
| rs2639904 | 8  | 71917130 | T | C | 0.4866 | -0.0062 | 0.0010 | 3.70E-09 | -5.9209 | 408317 | Snoring |
| rs2639910 | 8  | 71861884 | C | G | 0.4297 | 0.0068  | 0.0011 | 1.40E-10 | 6.4090  | 408317 | Snoring |
| rs2639911 | 8  | 71860712 | A | G | 0.4297 | 0.0068  | 0.0011 | 1.40E-10 | 6.4105  | 408317 | Snoring |
| rs2639912 | 8  | 71895369 | A | C | 0.4301 | 0.0066  | 0.0011 | 3.30E-10 | 6.2794  | 408317 | Snoring |
| rs2639913 | 8  | 71880164 | T | C | 0.4304 | 0.0066  | 0.0011 | 3.10E-10 | 6.2885  | 408317 | Snoring |
| rs2639914 | 8  | 71879653 | T | C | 0.4303 | 0.0067  | 0.0011 | 2.60E-10 | 6.3164  | 408317 | Snoring |
| rs2639916 | 8  | 71879034 | C | G | 0.4302 | 0.0067  | 0.0011 | 1.80E-10 | 6.3706  | 408317 | Snoring |
| rs2639918 | 8  | 71875269 | G | A | 0.4300 | 0.0067  | 0.0011 | 1.90E-10 | 6.3594  | 408317 | Snoring |
| rs2639919 | 8  | 71875128 | A | G | 0.4869 | -0.0062 | 0.0010 | 3.50E-09 | -5.9342 | 408317 | Snoring |
| rs2639921 | 8  | 71874834 | G | A | 0.4870 | -0.0062 | 0.0010 | 3.40E-09 | -5.9375 | 408317 | Snoring |
| rs2639924 | 8  | 71905541 | A | G | 0.4308 | 0.0066  | 0.0011 | 2.90E-10 | 6.3001  | 408317 | Snoring |
| rs2639926 | 8  | 71901211 | T | C | 0.4309 | 0.0067  | 0.0011 | 2.70E-10 | 6.3074  | 408317 | Snoring |
| rs2639928 | 8  | 71883649 | G | T | 0.4303 | 0.0067  | 0.0011 | 2.50E-10 | 6.3186  | 408317 | Snoring |
| rs2639931 | 8  | 71886437 | G | A | 0.4303 | 0.0067  | 0.0011 | 2.50E-10 | 6.3184  | 408317 | Snoring |
| rs2639932 | 8  | 71886451 | A | T | 0.4303 | 0.0067  | 0.0011 | 2.50E-10 | 6.3184  | 408317 | Snoring |
| rs2639935 | 8  | 71866280 | T | A | 0.4331 | 0.0066  | 0.0011 | 2.70E-10 | 6.2982  | 408317 | Snoring |
| rs2639936 | 8  | 71914735 | C | T | 0.4303 | 0.0068  | 0.0011 | 1.20E-10 | 6.4248  | 408317 | Snoring |
| rs2639937 | 8  | 71914356 | C | G | 0.4308 | 0.0066  | 0.0011 | 3.30E-10 | 6.2764  | 408317 | Snoring |
| rs2639938 | 8  | 71914352 | A | G | 0.4308 | 0.0066  | 0.0011 | 3.40E-10 | 6.2751  | 408317 | Snoring |
| rs2639939 | 8  | 71913923 | T | A | 0.4252 | 0.0065  | 0.0011 | 8.60E-10 | 6.1306  | 408317 | Snoring |
| rs2639940 | 8  | 71913921 | A | G | 0.4308 | 0.0066  | 0.0011 | 3.20E-10 | 6.2811  | 408317 | Snoring |
| rs2639941 | 8  | 71913905 | A | G | 0.4308 | 0.0066  | 0.0011 | 3.10E-10 | 6.2861  | 408317 | Snoring |
| rs2639943 | 8  | 71913140 | C | T | 0.4308 | 0.0066  | 0.0011 | 3.20E-10 | 6.2845  | 408317 | Snoring |
| rs2639944 | 8  | 71912747 | A | G | 0.4308 | 0.0066  | 0.0011 | 3.20E-10 | 6.2838  | 408317 | Snoring |
| rs2639945 | 8  | 71912539 | T | G | 0.4306 | 0.0066  | 0.0011 | 2.90E-10 | 6.2958  | 408317 | Snoring |
| rs2639946 | 8  | 71912500 | A | G | 0.4303 | 0.0067  | 0.0011 | 2.60E-10 | 6.3136  | 408317 | Snoring |
| rs2639947 | 8  | 71911437 | A | G | 0.4309 | 0.0067  | 0.0011 | 2.70E-10 | 6.3077  | 408317 | Snoring |
| rs2639948 | 8  | 71908486 | C | T | 0.4309 | 0.0067  | 0.0011 | 2.80E-10 | 6.3031  | 408317 | Snoring |
| rs2639949 | 8  | 71867016 | T | C | 0.4301 | 0.0067  | 0.0011 | 1.70E-10 | 6.3796  | 408317 | Snoring |
| rs2639950 | 8  | 71867058 | T | G | 0.4301 | 0.0067  | 0.0011 | 1.70E-10 | 6.3767  | 408317 | Snoring |
| rs2639951 | 8  | 71927225 | C | G | 0.4777 | -0.0065 | 0.0010 | 6.50E-10 | -6.2028 | 408317 | Snoring |
| rs2639952 | 8  | 71925730 | T | G | 0.4777 | -0.0065 | 0.0010 | 6.10E-10 | -6.2133 | 408317 | Snoring |
| rs2639953 | 8  | 71925660 | G | A | 0.4779 | -0.0066 | 0.0010 | 3.90E-10 | -6.2855 | 408317 | Snoring |
| rs2639954 | 8  | 71925575 | G | A | 0.4777 | -0.0065 | 0.0010 | 6.30E-10 | -6.2077 | 408317 | Snoring |
| rs2639955 | 8  | 71925342 | A | G | 0.4777 | -0.0065 | 0.0010 | 6.30E-10 | -6.2083 | 408317 | Snoring |
| rs2639956 | 8  | 71924091 | T | C | 0.4778 | -0.0065 | 0.0010 | 5.80E-10 | -6.2214 | 408317 | Snoring |
| rs2639957 | 8  | 71923202 | G | A | 0.4777 | -0.0065 | 0.0010 | 6.70E-10 | -6.1984 | 408317 | Snoring |
| rs2639958 | 8  | 71922150 | T | C | 0.4776 | -0.0065 | 0.0010 | 7.80E-10 | -6.1733 | 408317 | Snoring |
| rs2639960 | 8  | 71922139 | A | T | 0.4776 | -0.0065 | 0.0010 | 7.80E-10 | -6.1747 | 408317 | Snoring |
| rs2653891 | 1  | 50822880 | G | A | 0.4588 | 0.0060  | 0.0011 | 1.00E-08 | 5.7432  | 408317 | Snoring |
| rs2664299 | 14 | 99742187 | C | T | 0.4208 | -0.0075 | 0.0011 | 1.10E-12 | -7.0740 | 408317 | Snoring |
| rs2664303 | 14 | 99750520 | T | C | 0.4234 | -0.0075 | 0.0011 | 1.40E-12 | -7.0354 | 408317 | Snoring |
| rs2664304 | 14 | 99751267 | T | C | 0.4173 | -0.0076 | 0.0011 | 3.10E-12 | -6.9747 | 408317 | Snoring |
| rs2668611 | 17 | 44350125 | T | C | 0.2038 | 0.0078  | 0.0013 | 5.30E-09 | 5.8573  | 408317 | Snoring |
| rs2668614 | 17 | 44350310 | A | G | 0.2038 | 0.0078  | 0.0013 | 5.30E-09 | 5.8578  | 408317 | Snoring |
| rs2668622 | 17 | 44352131 | T | G | 0.2227 | 0.0077  | 0.0013 | 2.10E-09 | 6.0186  | 408317 | Snoring |
| rs2668626 | 17 | 44353175 | C | T | 0.2036 | 0.0079  | 0.0013 | 4.00E-09 | 5.9017  | 408317 | Snoring |
| rs2668627 | 17 | 44353693 | C | T | 0.2239 | 0.0078  | 0.0013 | 1.40E-09 | 6.0913  | 408317 | Snoring |
| rs2668632 | 17 | 44319366 | T | C | 0.2241 | 0.0076  | 0.0013 | 2.10E-09 | 6.0191  | 408317 | Snoring |
| rs2668639 | 17 | 44324539 | T | C | 0.2287 | 0.0073  | 0.0012 | 4.50E-09 | 5.8798  | 408317 | Snoring |
| rs2668645 | 17 | 44288640 | G | A | 0.2265 | 0.0076  | 0.0013 | 1.10E-09 | 6.1156  | 408317 | Snoring |
| rs2668653 | 17 | 44288156 | C | T | 0.2269 | 0.0076  | 0.0013 | 1.60E-09 | 6.0537  | 408317 | Snoring |
| rs2668658 | 17 | 44282472 | C | T | 0.1838 | 0.0086  | 0.0014 | 1.70E-09 | 6.0172  | 408317 | Snoring |
| rs2668662 | 17 | 44290759 | C | T | 0.2240 | 0.0077  | 0.0013 | 1.60E-09 | 6.0586  | 408317 | Snoring |
| rs2668665 | 17 | 44290047 | A | G | 0.2240 | 0.0077  | 0.0013 | 1.60E-09 | 6.0572  | 408317 | Snoring |
| rs2668668 | 17 | 44284641 | G | T | 0.2254 | 0.0076  | 0.0013 | 1.20E-09 | 6.1027  | 408317 | Snoring |
| rs2668670 | 17 | 44289628 | C | A | 0.2240 | 0.0077  | 0.0013 | 1.60E-09 | 6.0570  | 408317 | Snoring |
| rs2668673 | 17 | 43657267 | G | A | 0.2025 | 0.0074  | 0.0013 | 1.80E-08 | 5.6538  | 408317 | Snoring |
| rs2668685 | 17 | 44340151 | C | T | 0.2267 | 0.0072  | 0.0013 | 1.20E-08 | 5.7202  | 408317 | Snoring |
| rs2668687 | 17 | 44339712 | G | T | 0.2096 | 0.0078  | 0.0013 | 3.40E-09 | 5.9219  | 408317 | Snoring |
| rs2668692 | 17 | 44293020 | A | G | 0.2240 | 0.0076  | 0.0013 | 2.00E-09 | 6.0252  | 408317 | Snoring |
| rs2668694 | 17 | 44292319 | C | T | 0.2240 | 0.0077  | 0.0013 | 1.80E-09 | 6.0450  | 408317 | Snoring |
| rs2668709 | 17 | 43692338 | C | T | 0.2232 | 0.0076  | 0.0013 | 1.70E-09 | 6.0483  | 408317 | Snoring |
| rs2668713 | 17 | 44342513 | C | T | 0.2098 | 0.0078  | 0.0013 | 2.90E-09 | 5.9459  | 408317 | Snoring |
| rs2668719 | 17 | 44345090 | A | C | 0.2045 | 0.0077  | 0.0013 | 7.20E-09 | 5.8036  | 408317 | Snoring |
| rs2684670 | 17 | 43574016 | G | A | 0.2254 | 0.0077  | 0.0013 | 9.70E-10 | 6.1424  | 408317 | Snoring |

|           |    |          |   |   |        |         |        |          |         |        |         |
|-----------|----|----------|---|---|--------|---------|--------|----------|---------|--------|---------|
| rs2687938 | 13 | 50754246 | T | C | 0.4609 | 0.0066  | 0.0011 | 4.40E-10 | 6.2337  | 408317 | Snoring |
| rs2687939 | 13 | 50760323 | G | A | 0.4557 | 0.0064  | 0.0011 | 1.20E-09 | 6.0688  | 408317 | Snoring |
| rs2687940 | 13 | 50760329 | G | A | 0.4557 | 0.0064  | 0.0011 | 1.20E-09 | 6.0687  | 408317 | Snoring |
| rs2687941 | 13 | 50760363 | C | T | 0.4558 | 0.0064  | 0.0011 | 1.10E-09 | 6.0814  | 408317 | Snoring |
| rs2693333 | 17 | 44311200 | C | T | 0.2159 | 0.0077  | 0.0013 | 2.20E-09 | 6.0164  | 408317 | Snoring |
| rs2693359 | 17 | 43661751 | A | T | 0.2143 | 0.0075  | 0.0013 | 3.20E-09 | 5.9508  | 408317 | Snoring |
| rs2693362 | 17 | 43657393 | G | A | 0.1989 | 0.0078  | 0.0013 | 6.10E-09 | 5.8631  | 408317 | Snoring |
| rs2693672 | 14 | 99741074 | G | C | 0.4188 | -0.0075 | 0.0011 | 1.60E-12 | -7.0280 | 408317 | Snoring |
| rs2693673 | 14 | 99735480 | C | T | 0.4146 | -0.0071 | 0.0011 | 8.50E-11 | -6.4647 | 408317 | Snoring |
| rs2696422 | 17 | 44333889 | C | T | 0.2221 | 0.0074  | 0.0013 | 3.70E-09 | 5.9269  | 408317 | Snoring |
| rs2696423 | 17 | 44333890 | A | G | 0.2224 | 0.0075  | 0.0013 | 3.00E-09 | 5.9614  | 408317 | Snoring |
| rs2696429 | 17 | 44335274 | A | G | 0.2132 | 0.0075  | 0.0013 | 8.10E-09 | 5.7730  | 408317 | Snoring |
| rs2696430 | 17 | 44338279 | C | G | 0.2347 | 0.0069  | 0.0012 | 4.80E-08 | 5.4910  | 408317 | Snoring |
| rs2696431 | 17 | 44338280 | A | T | 0.2093 | 0.0078  | 0.0013 | 2.90E-09 | 5.9429  | 408317 | Snoring |
| rs2696432 | 17 | 44338285 | T | C | 0.2094 | 0.0078  | 0.0013 | 3.50E-09 | 5.9114  | 408317 | Snoring |
| rs2696444 | 17 | 44288672 | A | G | 0.2256 | 0.0076  | 0.0013 | 1.40E-09 | 6.0818  | 408317 | Snoring |
| rs2696494 | 17 | 44365000 | G | C | 0.2199 | 0.0077  | 0.0013 | 2.40E-09 | 6.0140  | 408317 | Snoring |
| rs2696495 | 17 | 44364864 | T | C | 0.2216 | 0.0077  | 0.0013 | 2.00E-09 | 6.0342  | 408317 | Snoring |
| rs2696515 | 17 | 44358109 | T | A | 0.2227 | 0.0076  | 0.0013 | 3.00E-09 | 5.9681  | 408317 | Snoring |
| rs2696516 | 17 | 44358107 | T | G | 0.2236 | 0.0076  | 0.0013 | 5.80E-09 | 5.8616  | 408317 | Snoring |
| rs2696518 | 17 | 44357885 | G | T | 0.2058 | 0.0079  | 0.0013 | 5.00E-09 | 5.8733  | 408317 | Snoring |
| rs2696522 | 17 | 44356890 | C | T | 0.2249 | 0.0076  | 0.0013 | 4.30E-09 | 5.9155  | 408317 | Snoring |
| rs2696524 | 17 | 44356793 | G | A | 0.2225 | 0.0076  | 0.0013 | 2.40E-09 | 5.9908  | 408317 | Snoring |
| rs2696525 | 17 | 44356637 | T | C | 0.2085 | 0.0081  | 0.0013 | 1.40E-09 | 6.0740  | 408317 | Snoring |
| rs2696527 | 17 | 44356433 | T | G | 0.1996 | 0.0084  | 0.0014 | 1.20E-09 | 6.1114  | 408317 | Snoring |
| rs2696528 | 17 | 44356320 | T | C | 0.2078 | 0.0080  | 0.0013 | 2.30E-09 | 5.9921  | 408317 | Snoring |
| rs2696530 | 17 | 44355714 | G | A | 0.2218 | 0.0076  | 0.0013 | 3.60E-09 | 5.9396  | 408317 | Snoring |
| rs2696532 | 17 | 44355602 | G | A | 0.2205 | 0.0076  | 0.0013 | 3.70E-09 | 5.9235  | 408317 | Snoring |
| rs2696533 | 17 | 44355343 | C | T | 0.2221 | 0.0077  | 0.0013 | 1.80E-09 | 6.0502  | 408317 | Snoring |
| rs2696534 | 17 | 44355162 | G | A | 0.2190 | 0.0078  | 0.0013 | 2.30E-09 | 6.0098  | 408317 | Snoring |
| rs2696535 | 17 | 44355130 | G | A | 0.2084 | 0.0081  | 0.0013 | 1.40E-09 | 6.0746  | 408317 | Snoring |
| rs2696541 | 17 | 44351743 | A | G | 0.2003 | 0.0085  | 0.0014 | 6.00E-10 | 6.2051  | 408317 | Snoring |
| rs2696542 | 17 | 44351533 | G | A | 0.2266 | 0.0074  | 0.0013 | 7.50E-09 | 5.8050  | 408317 | Snoring |
| rs2696547 | 17 | 44350395 | C | G | 0.2074 | 0.0080  | 0.0013 | 1.80E-09 | 6.0577  | 408317 | Snoring |
| rs2696549 | 17 | 44349372 | A | C | 0.2069 | 0.0081  | 0.0013 | 1.30E-09 | 6.1014  | 408317 | Snoring |
| rs2696550 | 17 | 44349290 | G | C | 0.2058 | 0.0083  | 0.0013 | 5.20E-10 | 6.2553  | 408317 | Snoring |
| rs2696551 | 17 | 44349234 | T | C | 0.2058 | 0.0083  | 0.0013 | 5.20E-10 | 6.2550  | 408317 | Snoring |
| rs2696555 | 17 | 44348370 | G | A | 0.2266 | 0.0073  | 0.0013 | 1.20E-08 | 5.7366  | 408317 | Snoring |
| rs2696559 | 17 | 44346674 | C | T | 0.2170 | 0.0074  | 0.0013 | 9.00E-09 | 5.7904  | 408317 | Snoring |
| rs2696561 | 17 | 44346393 | G | C | 0.2072 | 0.0079  | 0.0013 | 2.50E-09 | 5.9761  | 408317 | Snoring |
| rs2696568 | 17 | 44266342 | C | T | 0.2264 | 0.0076  | 0.0013 | 1.60E-09 | 6.0656  | 408317 | Snoring |
| rs2696569 | 17 | 44266290 | C | G | 0.2293 | 0.0074  | 0.0013 | 4.30E-09 | 5.9059  | 408317 | Snoring |
| rs2696607 | 17 | 44319167 | A | G | 0.2251 | 0.0075  | 0.0013 | 2.40E-09 | 5.9983  | 408317 | Snoring |
| rs2696610 | 17 | 44291820 | G | A | 0.2240 | 0.0077  | 0.0013 | 1.70E-09 | 6.0564  | 408317 | Snoring |
| rs2696673 | 17 | 44315803 | C | A | 0.2108 | 0.0079  | 0.0013 | 1.50E-09 | 6.0616  | 408317 | Snoring |
| rs2703083 | 13 | 50793867 | G | C | 0.3203 | 0.0066  | 0.0011 | 4.30E-09 | 5.9016  | 408317 | Snoring |
| rs2703088 | 13 | 50762944 | A | T | 0.4625 | 0.0063  | 0.0010 | 1.80E-09 | 6.0032  | 408317 | Snoring |
| rs2732087 | 8  | 71860439 | A | G | 0.4874 | -0.0062 | 0.0010 | 2.90E-09 | -5.9704 | 408317 | Snoring |
| rs2732088 | 8  | 71912777 | T | C | 0.4308 | 0.0066  | 0.0011 | 3.20E-10 | 6.2842  | 408317 | Snoring |
| rs2732089 | 8  | 71915164 | T | C | 0.4308 | 0.0066  | 0.0011 | 3.20E-10 | 6.2832  | 408317 | Snoring |
| rs2732090 | 8  | 71918257 | G | A | 0.4866 | -0.0062 | 0.0010 | 3.80E-09 | -5.9182 | 408317 | Snoring |
| rs2732091 | 8  | 71918423 | A | G | 0.4866 | -0.0062 | 0.0010 | 3.70E-09 | -5.9204 | 408317 | Snoring |
| rs2732092 | 8  | 71918599 | G | A | 0.4866 | -0.0062 | 0.0010 | 3.80E-09 | -5.9184 | 408317 | Snoring |
| rs2732093 | 8  | 71919079 | A | G | 0.4776 | -0.0065 | 0.0010 | 7.80E-10 | -6.1737 | 408317 | Snoring |
| rs2732094 | 8  | 71919918 | A | G | 0.4786 | -0.0065 | 0.0010 | 6.40E-10 | -6.2058 | 408317 | Snoring |
| rs2732095 | 8  | 71919946 | A | G | 0.4785 | -0.0065 | 0.0010 | 7.50E-10 | -6.1820 | 408317 | Snoring |
| rs2732096 | 8  | 71919980 | G | A | 0.4785 | -0.0065 | 0.0010 | 7.50E-10 | -6.1823 | 408317 | Snoring |
| rs2732097 | 8  | 71920013 | A | G | 0.4784 | -0.0065 | 0.0010 | 6.50E-10 | -6.2037 | 408317 | Snoring |
| rs2732099 | 8  | 71921050 | A | G | 0.4774 | -0.0065 | 0.0010 | 6.80E-10 | -6.1936 | 408317 | Snoring |
| rs2732102 | 8  | 71922872 | T | C | 0.4776 | -0.0065 | 0.0010 | 7.80E-10 | -6.1747 | 408317 | Snoring |
| rs2732103 | 8  | 71923496 | A | G | 0.4777 | -0.0065 | 0.0010 | 6.30E-10 | -6.2080 | 408317 | Snoring |
| rs2732104 | 8  | 71923519 | C | T | 0.4777 | -0.0065 | 0.0010 | 6.50E-10 | -6.2028 | 408317 | Snoring |
| rs2732105 | 8  | 71923645 | A | T | 0.4777 | -0.0065 | 0.0010 | 4.70E-10 | -6.2481 | 408317 | Snoring |
| rs2732106 | 8  | 71923839 | G | A | 0.4778 | -0.0065 | 0.0010 | 5.70E-10 | -6.2231 | 408317 | Snoring |
| rs2732107 | 8  | 71925308 | A | T | 0.4781 | -0.0064 | 0.0010 | 9.00E-10 | -6.1491 | 408317 | Snoring |
| rs2732108 | 8  | 71926099 | C | T | 0.4777 | -0.0065 | 0.0010 | 6.50E-10 | -6.2028 | 408317 | Snoring |
| rs2732109 | 8  | 71926223 | C | T | 0.4777 | -0.0065 | 0.0010 | 6.50E-10 | -6.2028 | 408317 | Snoring |
| rs2732110 | 8  | 71926811 | C | T | 0.4777 | -0.0065 | 0.0010 | 6.50E-10 | -6.2035 | 408317 | Snoring |
| rs2732111 | 8  | 71927429 | A | G | 0.4294 | 0.0065  | 0.0011 | 8.50E-10 | 6.1230  | 408317 | Snoring |
| rs2732112 | 8  | 71927841 | A | T | 0.4777 | -0.0065 | 0.0010 | 6.50E-10 | -6.2035 | 408317 | Snoring |
| rs2732113 | 8  | 71928549 | G | C | 0.4777 | -0.0065 | 0.0010 | 6.50E-10 | -6.2035 | 408317 | Snoring |
| rs2732114 | 8  | 71928712 | T | C | 0.4777 | -0.0065 | 0.0010 | 6.50E-10 | -6.2023 | 408317 | Snoring |
| rs2732115 | 8  | 71928854 | C | T | 0.4777 | -0.0065 | 0.0010 | 5.80E-10 | -6.2211 | 408317 | Snoring |
| rs2732116 | 8  | 71929327 | T | C | 0.4777 | -0.0065 | 0.0010 | 6.30E-10 | -6.2082 | 408317 | Snoring |

|            |    |          |   |   |        |         |        |          |         |        |         |
|------------|----|----------|---|---|--------|---------|--------|----------|---------|--------|---------|
| rs2732118  | 8  | 71908665 | C | T | 0.4309 | 0.0067  | 0.0011 | 2.80E-10 | 6.3031  | 408317 | Snoring |
| rs2732122  | 8  | 71901143 | A | G | 0.4309 | 0.0067  | 0.0011 | 2.70E-10 | 6.3084  | 408317 | Snoring |
| rs2732123  | 8  | 71899936 | T | G | 0.4309 | 0.0066  | 0.0011 | 2.90E-10 | 6.2985  | 408317 | Snoring |
| rs2732125  | 8  | 71898501 | A | G | 0.4309 | 0.0066  | 0.0011 | 2.90E-10 | 6.2978  | 408317 | Snoring |
| rs2732126  | 8  | 71898492 | T | C | 0.4309 | 0.0066  | 0.0011 | 2.90E-10 | 6.2947  | 408317 | Snoring |
| rs2732129  | 8  | 71894969 | A | C | 0.4301 | 0.0066  | 0.0011 | 3.70E-10 | 6.2583  | 408317 | Snoring |
| rs2732138  | 8  | 71883607 | A | G | 0.4300 | 0.0067  | 0.0011 | 1.60E-10 | 6.3898  | 408317 | Snoring |
| rs2732139  | 8  | 71880037 | C | T | 0.4304 | 0.0066  | 0.0011 | 3.10E-10 | 6.2857  | 408317 | Snoring |
| rs2732140  | 8  | 71910726 | T | C | 0.4309 | 0.0067  | 0.0011 | 2.70E-10 | 6.3072  | 408317 | Snoring |
| rs2732141  | 8  | 71910907 | C | T | 0.4309 | 0.0067  | 0.0011 | 2.70E-10 | 6.3075  | 408317 | Snoring |
| rs2732144  | 8  | 71866619 | A | G | 0.4301 | 0.0067  | 0.0011 | 1.70E-10 | 6.3795  | 408317 | Snoring |
| rs2732145  | 8  | 71912069 | A | C | 0.4309 | 0.0067  | 0.0011 | 2.70E-10 | 6.3071  | 408317 | Snoring |
| rs2732146  | 8  | 71912118 | G | A | 0.4309 | 0.0067  | 0.0011 | 2.70E-10 | 6.3074  | 408317 | Snoring |
| rs2732147  | 8  | 71912414 | C | T | 0.4308 | 0.0066  | 0.0011 | 3.20E-10 | 6.2838  | 408317 | Snoring |
| rs2732149  | 8  | 71912502 | C | T | 0.4308 | 0.0066  | 0.0011 | 3.20E-10 | 6.2836  | 408317 | Snoring |
| rs2732601  | 17 | 44291479 | A | G | 0.2240 | 0.0077  | 0.0013 | 1.70E-09 | 6.0563  | 408317 | Snoring |
| rs2732608  | 17 | 44365980 | T | A | 0.2319 | 0.0078  | 0.0013 | 1.10E-09 | 6.1197  | 408317 | Snoring |
| rs2732611  | 17 | 44365487 | C | A | 0.2077 | 0.0079  | 0.0013 | 4.40E-09 | 5.8812  | 408317 | Snoring |
| rs2732613  | 17 | 44364829 | C | A | 0.2226 | 0.0077  | 0.0013 | 3.00E-09 | 5.9683  | 408317 | Snoring |
| rs2732615  | 17 | 44364056 | C | T | 0.1934 | 0.0085  | 0.0014 | 9.20E-10 | 6.1509  | 408317 | Snoring |
| rs2732625  | 17 | 44332429 | T | C | 0.2246 | 0.0073  | 0.0013 | 6.80E-09 | 5.8257  | 408317 | Snoring |
| rs2732626  | 17 | 43669800 | G | A | 0.2228 | 0.0078  | 0.0013 | 6.00E-10 | 6.2184  | 408317 | Snoring |
| rs2732629  | 17 | 44289101 | G | A | 0.2240 | 0.0077  | 0.0013 | 1.60E-09 | 6.0573  | 408317 | Snoring |
| rs2732630  | 17 | 44289150 | C | A | 0.2258 | 0.0076  | 0.0013 | 1.60E-09 | 6.0605  | 408317 | Snoring |
| rs2732631  | 17 | 44289232 | T | G | 0.2282 | 0.0076  | 0.0013 | 1.30E-09 | 6.0914  | 408317 | Snoring |
| rs2732649  | 17 | 44344810 | G | T | 0.2226 | 0.0074  | 0.0013 | 5.80E-09 | 5.8562  | 408317 | Snoring |
| rs2732650  | 17 | 44344988 | G | C | 0.2258 | 0.0073  | 0.0013 | 1.10E-08 | 5.7544  | 408317 | Snoring |
| rs2732651  | 17 | 44345063 | T | C | 0.1935 | 0.0087  | 0.0014 | 4.60E-10 | 6.2646  | 408317 | Snoring |
| rs2732652  | 17 | 44345114 | T | C | 0.2045 | 0.0077  | 0.0013 | 7.20E-09 | 5.8036  | 408317 | Snoring |
| rs2732654  | 17 | 44346405 | T | C | 0.2023 | 0.0076  | 0.0013 | 1.80E-08 | 5.6697  | 408317 | Snoring |
| rs2732655  | 17 | 44346407 | C | G | 0.2023 | 0.0076  | 0.0013 | 1.80E-08 | 5.6697  | 408317 | Snoring |
| rs2732682  | 17 | 44339675 | C | T | 0.2109 | 0.0078  | 0.0013 | 3.40E-09 | 5.9193  | 408317 | Snoring |
| rs2732683  | 17 | 44339665 | G | C | 0.2109 | 0.0078  | 0.0013 | 3.40E-09 | 5.9193  | 408317 | Snoring |
| rs2732685  | 17 | 44339408 | T | C | 0.2307 | 0.0074  | 0.0013 | 5.20E-09 | 5.8724  | 408317 | Snoring |
| rs2732704  | 17 | 44353114 | C | T | 0.2036 | 0.0079  | 0.0013 | 4.00E-09 | 5.9022  | 408317 | Snoring |
| rs2732705  | 17 | 44351929 | G | T | 0.2226 | 0.0077  | 0.0013 | 1.90E-09 | 6.0326  | 408317 | Snoring |
| rs2732706  | 17 | 44351686 | T | C | 0.2228 | 0.0077  | 0.0013 | 1.60E-09 | 6.0575  | 408317 | Snoring |
| rs2732707  | 17 | 44351600 | T | C | 0.2095 | 0.0081  | 0.0013 | 8.00E-10 | 6.1781  | 408317 | Snoring |
| rs2732708  | 17 | 44351387 | T | C | 0.2225 | 0.0077  | 0.0013 | 1.60E-09 | 6.0557  | 408317 | Snoring |
| rs2732710  | 17 | 44350527 | A | T | 0.2038 | 0.0078  | 0.0013 | 5.30E-09 | 5.8575  | 408317 | Snoring |
| rs2732711  | 17 | 44350293 | G | A | 0.2014 | 0.0085  | 0.0014 | 4.60E-10 | 6.2485  | 408317 | Snoring |
| rs2732712  | 17 | 44348932 | G | T | 0.2249 | 0.0076  | 0.0013 | 2.70E-09 | 5.9841  | 408317 | Snoring |
| rs2732713  | 17 | 44348593 | G | A | 0.2227 | 0.0075  | 0.0013 | 5.40E-09 | 5.8670  | 408317 | Snoring |
| rs2732714  | 17 | 44321478 | G | A | 0.1948 | 0.0082  | 0.0014 | 2.10E-09 | 6.0058  | 408317 | Snoring |
| rs2732715  | 17 | 44321527 | T | C | 0.2246 | 0.0075  | 0.0013 | 2.50E-09 | 5.9897  | 408317 | Snoring |
| rs273534   | 17 | 44410179 | T | C | 0.2403 | -0.0079 | 0.0013 | 1.70E-09 | -6.0263 | 408317 | Snoring |
| rs2740515  | 13 | 50760310 | C | G | 0.4557 | 0.0064  | 0.0011 | 1.20E-09 | 6.0685  | 408317 | Snoring |
| rs2740516  | 13 | 50761619 | A | G | 0.4623 | 0.0063  | 0.0010 | 1.80E-09 | 6.0024  | 408317 | Snoring |
| rs2740518  | 13 | 50762945 | C | G | 0.4625 | 0.0063  | 0.0010 | 1.80E-09 | 6.0066  | 408317 | Snoring |
| rs2740520  | 13 | 50786363 | C | A | 0.4786 | 0.0067  | 0.0010 | 1.50E-10 | 6.3697  | 408317 | Snoring |
| rs2748809  | 14 | 99735233 | C | T | 0.4315 | -0.0074 | 0.0011 | 5.30E-12 | -6.8854 | 408317 | Snoring |
| rs2760193  | 10 | 9071909  | T | A | 0.2275 | 0.0073  | 0.0012 | 4.40E-09 | 5.8533  | 408317 | Snoring |
| rs2760194  | 10 | 9079502  | G | A | 0.2482 | 0.0078  | 0.0012 | 1.30E-10 | 6.4213  | 408317 | Snoring |
| rs2762049  | 13 | 50822363 | C | G | 0.3922 | 0.0069  | 0.0011 | 1.10E-10 | 6.4341  | 408317 | Snoring |
| rs2762060  | 13 | 50830002 | A | G | 0.4588 | 0.0067  | 0.0010 | 2.20E-10 | 6.3355  | 408317 | Snoring |
| rs2765756  | 13 | 50773486 | G | A | 0.4604 | 0.0063  | 0.0010 | 1.60E-09 | 6.0129  | 408317 | Snoring |
| rs2765762  | 13 | 50781256 | C | G | 0.4784 | 0.0067  | 0.0010 | 1.40E-10 | 6.3719  | 408317 | Snoring |
| rs2765892  | 1  | 50824328 | G | A | 0.4981 | 0.0061  | 0.0011 | 8.90E-09 | 5.7373  | 408317 | Snoring |
| rs2797272  | 10 | 9085303  | C | T | 0.2484 | 0.0077  | 0.0012 | 1.90E-10 | 6.3612  | 408317 | Snoring |
| rs2797288  | 10 | 9053173  | G | A | 0.1872 | 0.0089  | 0.0013 | 2.60E-11 | 6.6492  | 408317 | Snoring |
| rs2812228  | 13 | 50773790 | T | C | 0.4784 | 0.0067  | 0.0010 | 1.60E-10 | 6.3598  | 408317 | Snoring |
| rs28364021 | 17 | 43912282 | T | C | 0.2252 | 0.0077  | 0.0012 | 1.10E-09 | 6.1242  | 408317 | Snoring |
| rs28364023 | 17 | 43894159 | T | C | 0.2252 | 0.0077  | 0.0012 | 1.10E-09 | 6.1281  | 408317 | Snoring |
| rs28364025 | 17 | 43894102 | C | T | 0.2253 | 0.0077  | 0.0012 | 1.10E-09 | 6.1260  | 408317 | Snoring |
| rs2838     | 17 | 44141347 | G | A | 0.2254 | 0.0075  | 0.0012 | 2.00E-09 | 6.0278  | 408317 | Snoring |
| rs28399179 | 17 | 19111170 | A | G | 0.3107 | -0.0062 | 0.0011 | 3.80E-08 | -5.4903 | 408317 | Snoring |
| rs28416808 | 17 | 44021218 | T | C | 0.2255 | 0.0076  | 0.0012 | 1.50E-09 | 6.0676  | 408317 | Snoring |
| rs28429148 | 16 | 53798319 | A | G | 0.4346 | 0.0062  | 0.0011 | 8.10E-09 | 5.7720  | 408317 | Snoring |
| rs28439143 | 17 | 43987723 | A | G | 0.2248 | 0.0077  | 0.0012 | 7.60E-10 | 6.1781  | 408317 | Snoring |
| rs28439278 | 17 | 43838071 | T | C | 0.2251 | 0.0076  | 0.0012 | 1.30E-09 | 6.0940  | 408317 | Snoring |
| rs28489859 | 19 | 32193988 | C | T | 0.0948 | -0.0105 | 0.0018 | 2.50E-09 | -5.8722 | 408317 | Snoring |
| rs28562191 | 16 | 53799303 | T | C | 0.4202 | 0.0068  | 0.0011 | 1.50E-10 | 6.4024  | 408317 | Snoring |
| rs28567725 | 16 | 53826028 | C | T | 0.4118 | 0.0065  | 0.0011 | 1.10E-09 | 6.0964  | 408317 | Snoring |
| rs28598587 | 8  | 78150418 | C | T | 0.2849 | -0.0067 | 0.0012 | 4.90E-09 | -5.8291 | 408317 | Snoring |



|            |    |          |   |   |        |         |        |          |         |        |         |
|------------|----|----------|---|---|--------|---------|--------|----------|---------|--------|---------|
| rs2864087  | 17 | 43807063 | T | C | 0.2252 | 0.0077  | 0.0012 | 9.50E-10 | 6.1439  | 408317 | Snoring |
| rs28677108 | 19 | 32178316 | G | T | 0.0950 | -0.0108 | 0.0018 | 7.70E-10 | -6.0623 | 408317 | Snoring |
| rs28694586 | 19 | 32176053 | G | C | 0.0950 | -0.0108 | 0.0018 | 8.10E-10 | -6.0562 | 408317 | Snoring |
| rs2873268  | 17 | 43930955 | A | G | 0.2252 | 0.0076  | 0.0012 | 1.40E-09 | 6.0899  | 408317 | Snoring |
| rs2873269  | 17 | 43931122 | T | C | 0.2253 | 0.0077  | 0.0012 | 1.10E-09 | 6.1240  | 408317 | Snoring |
| rs28763630 | 19 | 32214848 | G | A | 0.1024 | -0.0094 | 0.0017 | 4.50E-08 | -5.3792 | 408317 | Snoring |
| rs28787109 | 1  | 51218695 | A | G | 0.4013 | 0.0060  | 0.0011 | 1.60E-08 | 5.6452  | 408317 | Snoring |
| rs28795799 | 17 | 43688905 | G | A | 0.2310 | 0.0074  | 0.0012 | 2.80E-09 | 5.9644  | 408317 | Snoring |
| rs28814987 | 16 | 31081460 | T | C | 0.3798 | 0.0064  | 0.0011 | 3.00E-09 | 5.9588  | 408317 | Snoring |
| rs2884049  | 1  | 50813433 | A | G | 0.4581 | 0.0060  | 0.0010 | 1.20E-08 | 5.7197  | 408317 | Snoring |
| rs2884488  | 12 | 65865986 | A | G | 0.4496 | 0.0069  | 0.0011 | 6.10E-11 | 6.5714  | 408317 | Snoring |
| rs2884489  | 12 | 65887365 | T | G | 0.4500 | 0.0068  | 0.0011 | 1.20E-10 | 6.4672  | 408317 | Snoring |
| rs2884738  | 16 | 31126321 | A | C | 0.2815 | 0.0064  | 0.0012 | 3.10E-08 | 5.5531  | 408317 | Snoring |
| rs2902661  | 17 | 43807099 | A | G | 0.2253 | 0.0077  | 0.0012 | 9.80E-10 | 6.1388  | 408317 | Snoring |
| rs2902662  | 17 | 43806925 | A | G | 0.2252 | 0.0077  | 0.0012 | 9.50E-10 | 6.1440  | 408317 | Snoring |
| rs2906006  | 17 | 43685021 | T | C | 0.2252 | 0.0076  | 0.0013 | 1.30E-09 | 6.0960  | 408317 | Snoring |
| rs2906007  | 17 | 43684920 | T | C | 0.2256 | 0.0077  | 0.0013 | 9.90E-10 | 6.1352  | 408317 | Snoring |
| rs2906009  | 17 | 43684563 | C | T | 0.2257 | 0.0077  | 0.0012 | 1.00E-09 | 6.1322  | 408317 | Snoring |
| rs2924251  | 17 | 46338677 | A | G | 0.3318 | 0.0066  | 0.0011 | 1.90E-09 | 5.9622  | 408317 | Snoring |
| rs2924257  | 17 | 46317555 | C | G | 0.4231 | 0.0064  | 0.0011 | 1.40E-09 | 6.0258  | 408317 | Snoring |
| rs2933847  | 8  | 71885181 | T | C | 0.4303 | 0.0067  | 0.0011 | 2.60E-10 | 6.3115  | 408317 | Snoring |
| rs2933848  | 8  | 71886779 | T | C | 0.4303 | 0.0067  | 0.0011 | 2.50E-10 | 6.3182  | 408317 | Snoring |
| rs2933852  | 8  | 71877393 | C | G | 0.4302 | 0.0067  | 0.0011 | 1.80E-10 | 6.3714  | 408317 | Snoring |
| rs2933853  | 8  | 71909222 | T | C | 0.4863 | -0.0062 | 0.0010 | 3.60E-09 | -5.9229 | 408317 | Snoring |
| rs2933858  | 8  | 71906344 | A | T | 0.4309 | 0.0067  | 0.0011 | 2.80E-10 | 6.3032  | 408317 | Snoring |
| rs2933859  | 8  | 71906129 | G | A | 0.4309 | 0.0066  | 0.0011 | 2.90E-10 | 6.2996  | 408317 | Snoring |
| rs2938475  | 17 | 46345925 | T | C | 0.3318 | 0.0066  | 0.0011 | 1.90E-09 | 5.9595  | 408317 | Snoring |
| rs2938483  | 17 | 46318004 | C | T | 0.3866 | 0.0062  | 0.0011 | 3.50E-09 | 5.8237  | 408317 | Snoring |
| rs2942003  | 17 | 44576704 | T | G | 0.3634 | -0.0073 | 0.0012 | 2.90E-09 | -5.9199 | 408317 | Snoring |
| rs2942164  | 17 | 43721283 | C | G | 0.2253 | 0.0077  | 0.0012 | 8.80E-10 | 6.1547  | 408317 | Snoring |
| rs2942165  | 17 | 43715619 | C | G | 0.2253 | 0.0077  | 0.0012 | 8.80E-10 | 6.1533  | 408317 | Snoring |
| rs2942166  | 17 | 43715427 | C | T | 0.2254 | 0.0077  | 0.0012 | 1.00E-09 | 6.1291  | 408317 | Snoring |
| rs2942167  | 17 | 43715018 | C | T | 0.2253 | 0.0077  | 0.0012 | 8.80E-10 | 6.1534  | 408317 | Snoring |
| rs2942168  | 17 | 43714850 | A | G | 0.2253 | 0.0077  | 0.0012 | 9.00E-10 | 6.1487  | 408317 | Snoring |
| rs2942169  | 17 | 43711539 | C | G | 0.2253 | 0.0077  | 0.0012 | 8.80E-10 | 6.1537  | 408317 | Snoring |
| rs2942170  | 17 | 43711312 | T | C | 0.2252 | 0.0077  | 0.0012 | 9.50E-10 | 6.1417  | 408317 | Snoring |
| rs2942175  | 17 | 44348825 | G | C | 0.2038 | 0.0078  | 0.0013 | 6.10E-09 | 5.8319  | 408317 | Snoring |
| rs2942176  | 17 | 44348848 | A | G | 0.2038 | 0.0078  | 0.0013 | 6.10E-09 | 5.8319  | 408317 | Snoring |
| rs2942177  | 17 | 44348987 | A | G | 0.2038 | 0.0078  | 0.0013 | 6.10E-09 | 5.8317  | 408317 | Snoring |
| rs2942185  | 17 | 44338422 | A | G | 0.2093 | 0.0078  | 0.0013 | 3.50E-09 | 5.9150  | 408317 | Snoring |
| rs2949997  | 17 | 43687072 | A | G | 0.2194 | 0.0077  | 0.0013 | 2.00E-09 | 6.0211  | 408317 | Snoring |
| rs2950015  | 17 | 44332351 | G | A | 0.2284 | 0.0070  | 0.0012 | 2.10E-08 | 5.6332  | 408317 | Snoring |
| rs2950656  | 17 | 44338433 | A | T | 0.2094 | 0.0078  | 0.0013 | 3.60E-09 | 5.9106  | 408317 | Snoring |
| rs2950691  | 17 | 44348768 | G | A | 0.2038 | 0.0078  | 0.0013 | 6.10E-09 | 5.8327  | 408317 | Snoring |
| rs2950692  | 17 | 44348387 | G | A | 0.2038 | 0.0078  | 0.0013 | 5.90E-09 | 5.8373  | 408317 | Snoring |
| rs2950693  | 17 | 44348356 | A | T | 0.2038 | 0.0078  | 0.0013 | 5.80E-09 | 5.8392  | 408317 | Snoring |
| rs2950694  | 17 | 44348298 | G | A | 0.1934 | 0.0086  | 0.0014 | 5.40E-10 | 6.2370  | 408317 | Snoring |
| rs2955617  | 17 | 7538785  | C | A | 0.3438 | 0.0061  | 0.0011 | 3.00E-08 | 5.4983  | 408317 | Snoring |
| rs2956610  | 8  | 71929533 | T | C | 0.4777 | -0.0065 | 0.0010 | 6.50E-10 | -6.2034 | 408317 | Snoring |
| rs2956611  | 8  | 71897868 | C | T | 0.4308 | 0.0067  | 0.0011 | 1.60E-10 | 6.3860  | 408317 | Snoring |
| rs2956615  | 8  | 71886754 | C | T | 0.4303 | 0.0067  | 0.0011 | 2.50E-10 | 6.3172  | 408317 | Snoring |
| rs2957297  | 17 | 44368212 | A | C | 0.1932 | 0.0086  | 0.0014 | 6.10E-10 | 6.2155  | 408317 | Snoring |
| rs2957321  | 17 | 44336594 | G | A | 0.2242 | 0.0073  | 0.0013 | 5.30E-09 | 5.8647  | 408317 | Snoring |
| rs2958126  | 12 | 57074183 | T | G | 0.3488 | 0.0066  | 0.0012 | 1.50E-08 | 5.6648  | 408317 | Snoring |
| rs2959992  | 17 | 43544206 | C | G | 0.1847 | 0.0074  | 0.0013 | 3.60E-08 | 5.4992  | 408317 | Snoring |
| rs3087534  | 17 | 44198806 | C | T | 0.2259 | 0.0076  | 0.0012 | 1.50E-09 | 6.0722  | 408317 | Snoring |
| rs3089     | 17 | 44209919 | G | C | 0.2257 | 0.0076  | 0.0013 | 1.30E-09 | 6.0909  | 408317 | Snoring |
| rs3098858  | 8  | 71863273 | T | G | 0.4295 | 0.0069  | 0.0011 | 7.70E-11 | 6.5019  | 408317 | Snoring |
| rs3098859  | 8  | 71865032 | A | G | 0.4301 | 0.0067  | 0.0011 | 1.70E-10 | 6.3816  | 408317 | Snoring |
| rs3098860  | 8  | 71870601 | T | G | 0.4313 | 0.0067  | 0.0011 | 2.00E-10 | 6.3595  | 408317 | Snoring |
| rs3098862  | 8  | 71877941 | A | T | 0.4302 | 0.0067  | 0.0011 | 1.70E-10 | 6.3769  | 408317 | Snoring |
| rs3098863  | 8  | 71878166 | A | T | 0.4302 | 0.0067  | 0.0011 | 1.80E-10 | 6.3722  | 408317 | Snoring |
| rs3098865  | 8  | 71915984 | G | T | 0.4308 | 0.0066  | 0.0011 | 3.20E-10 | 6.2811  | 408317 | Snoring |
| rs3098866  | 8  | 71916574 | A | T | 0.4866 | -0.0062 | 0.0010 | 3.70E-09 | -5.9231 | 408317 | Snoring |
| rs3098867  | 8  | 71916871 | T | C | 0.4866 | -0.0062 | 0.0010 | 3.70E-09 | -5.9209 | 408317 | Snoring |
| rs3098868  | 8  | 71929692 | G | A | 0.4777 | -0.0065 | 0.0010 | 6.50E-10 | -6.2035 | 408317 | Snoring |
| rs3098869  | 8  | 71929832 | G | A | 0.4015 | -0.0059 | 0.0011 | 3.10E-08 | -5.5621 | 408317 | Snoring |
| rs3098870  | 8  | 71929935 | A | G | 0.4777 | -0.0065 | 0.0010 | 6.30E-10 | -6.2083 | 408317 | Snoring |
| rs3098871  | 8  | 71930415 | C | A | 0.4780 | -0.0065 | 0.0010 | 7.10E-10 | -6.1918 | 408317 | Snoring |
| rs3098872  | 8  | 71932204 | G | T | 0.4015 | -0.0059 | 0.0011 | 3.10E-08 | -5.5651 | 408317 | Snoring |
| rs3098873  | 8  | 71932586 | G | C | 0.4777 | -0.0065 | 0.0010 | 6.30E-10 | -6.2083 | 408317 | Snoring |
| rs3098874  | 8  | 71934338 | G | T | 0.4776 | -0.0065 | 0.0010 | 7.40E-10 | -6.1833 | 408317 | Snoring |
| rs3098875  | 8  | 71934688 | A | C | 0.4014 | -0.0059 | 0.0011 | 3.90E-08 | -5.5240 | 408317 | Snoring |
| rs3098876  | 8  | 71936244 | T | A | 0.4775 | -0.0065 | 0.0010 | 6.40E-10 | -6.2045 | 408317 | Snoring |

|            |    |           |   |   |        |         |        |          |         |        |         |
|------------|----|-----------|---|---|--------|---------|--------|----------|---------|--------|---------|
| rs3098877  | 8  | 71936446  | T | C | 0.4775 | -0.0065 | 0.0010 | 6.40E-10 | -6.2046 | 408317 | Snoring |
| rs3098878  | 8  | 71937469  | T | C | 0.4013 | -0.0059 | 0.0011 | 3.20E-08 | -5.5582 | 408317 | Snoring |
| rs3098879  | 8  | 71938460  | T | C | 0.4775 | -0.0065 | 0.0010 | 6.40E-10 | -6.2044 | 408317 | Snoring |
| rs3098880  | 8  | 71938921  | T | C | 0.4775 | -0.0065 | 0.0010 | 6.40E-10 | -6.2046 | 408317 | Snoring |
| rs3098881  | 8  | 71939690  | T | C | 0.4778 | -0.0065 | 0.0010 | 8.10E-10 | -6.1683 | 408317 | Snoring |
| rs3098882  | 8  | 71940094  | T | C | 0.4015 | -0.0059 | 0.0011 | 3.20E-08 | -5.5566 | 408317 | Snoring |
| rs3098883  | 8  | 71943567  | T | C | 0.4780 | -0.0065 | 0.0010 | 7.50E-10 | -6.1836 | 408317 | Snoring |
| rs3108317  | 17 | 43719870  | A | G | 0.2253 | 0.0077  | 0.0012 | 8.70E-10 | 6.1543  | 408317 | Snoring |
| rs3110239  | 8  | 71916745  | G | A | 0.4866 | -0.0062 | 0.0010 | 3.80E-09 | -5.9189 | 408317 | Snoring |
| rs3110240  | 8  | 71930104  | C | T | 0.4777 | -0.0065 | 0.0010 | 6.30E-10 | -6.2069 | 408317 | Snoring |
| rs3110241  | 8  | 71932964  | C | A | 0.4777 | -0.0065 | 0.0010 | 6.20E-10 | -6.2111 | 408317 | Snoring |
| rs3110242  | 8  | 71932967  | C | T | 0.4777 | -0.0065 | 0.0010 | 6.10E-10 | -6.2121 | 408317 | Snoring |
| rs3110243  | 8  | 71933069  | G | A | 0.4777 | -0.0065 | 0.0010 | 6.20E-10 | -6.2111 | 408317 | Snoring |
| rs3110244  | 8  | 71933197  | T | C | 0.4777 | -0.0065 | 0.0010 | 6.20E-10 | -6.2111 | 408317 | Snoring |
| rs3110246  | 8  | 71934613  | A | G | 0.4776 | -0.0065 | 0.0010 | 7.30E-10 | -6.1846 | 408317 | Snoring |
| rs3110247  | 8  | 71934887  | G | A | 0.4776 | -0.0065 | 0.0010 | 7.60E-10 | -6.1785 | 408317 | Snoring |
| rs3110248  | 8  | 71934935  | A | T | 0.4776 | -0.0065 | 0.0010 | 7.60E-10 | -6.1785 | 408317 | Snoring |
| rs3110249  | 8  | 71935545  | G | A | 0.4776 | -0.0065 | 0.0010 | 7.40E-10 | -6.1830 | 408317 | Snoring |
| rs3110250  | 8  | 71936384  | C | T | 0.4775 | -0.0065 | 0.0010 | 6.10E-10 | -6.2129 | 408317 | Snoring |
| rs3110251  | 8  | 71936974  | C | T | 0.4775 | -0.0065 | 0.0010 | 6.40E-10 | -6.2046 | 408317 | Snoring |
| rs3110252  | 8  | 71937220  | A | G | 0.4775 | -0.0065 | 0.0010 | 6.40E-10 | -6.2055 | 408317 | Snoring |
| rs3110253  | 8  | 71937553  | A | G | 0.4775 | -0.0065 | 0.0010 | 6.40E-10 | -6.2045 | 408317 | Snoring |
| rs3110254  | 8  | 71937862  | A | T | 0.4775 | -0.0065 | 0.0010 | 6.40E-10 | -6.2044 | 408317 | Snoring |
| rs3110255  | 8  | 71938050  | A | G | 0.4773 | -0.0065 | 0.0010 | 5.70E-10 | -6.2225 | 408317 | Snoring |
| rs3110256  | 8  | 71938136  | A | G | 0.4775 | -0.0065 | 0.0010 | 6.50E-10 | -6.2027 | 408317 | Snoring |
| rs3110257  | 8  | 71938151  | A | G | 0.4775 | -0.0065 | 0.0010 | 6.50E-10 | -6.2037 | 408317 | Snoring |
| rs3110258  | 8  | 71938532  | A | T | 0.4779 | -0.0065 | 0.0010 | 4.80E-10 | -6.2462 | 408317 | Snoring |
| rs3110259  | 8  | 71940182  | A | T | 0.5166 | 0.0065  | 0.0011 | 1.00E-09 | 6.1379  | 408317 | Snoring |
| rs3110260  | 8  | 71940488  | A | T | 0.4018 | -0.0059 | 0.0011 | 3.60E-08 | -5.5399 | 408317 | Snoring |
| rs3110261  | 8  | 71941451  | G | A | 0.4017 | -0.0059 | 0.0011 | 3.30E-08 | -5.5554 | 408317 | Snoring |
| rs3110262  | 8  | 71941630  | A | G | 0.4017 | -0.0059 | 0.0011 | 3.30E-08 | -5.5571 | 408317 | Snoring |
| rs3110263  | 8  | 71942692  | G | A | 0.4306 | 0.0067  | 0.0011 | 2.20E-10 | 6.3470  | 408317 | Snoring |
| rs3110264  | 8  | 71944280  | A | G | 0.4017 | -0.0059 | 0.0011 | 3.50E-08 | -5.5474 | 408317 | Snoring |
| rs3110266  | 8  | 71888789  | G | C | 0.4303 | 0.0067  | 0.0011 | 2.50E-10 | 6.3180  | 408317 | Snoring |
| rs3110268  | 8  | 71866168  | G | A | 0.4301 | 0.0067  | 0.0011 | 1.70E-10 | 6.3794  | 408317 | Snoring |
| rs3110331  | 17 | 44318575  | G | T | 0.2269 | 0.0075  | 0.0012 | 2.70E-09 | 5.9816  | 408317 | Snoring |
| rs325440   | 7  | 127447499 | A | T | 0.4107 | -0.0058 | 0.0011 | 3.30E-08 | -5.4434 | 408317 | Snoring |
| rs325442   | 7  | 127457228 | A | G | 0.4105 | -0.0058 | 0.0011 | 3.00E-08 | -5.4620 | 408317 | Snoring |
| rs325444   | 7  | 127460455 | T | C | 0.4126 | -0.0058 | 0.0011 | 2.90E-08 | -5.4595 | 408317 | Snoring |
| rs325445   | 7  | 127461467 | C | A | 0.4127 | -0.0058 | 0.0011 | 3.20E-08 | -5.4463 | 408317 | Snoring |
| rs325446   | 7  | 127464386 | G | A | 0.4130 | -0.0058 | 0.0011 | 3.70E-08 | -5.4240 | 408317 | Snoring |
| rs325447   | 7  | 127466608 | A | C | 0.4130 | -0.0057 | 0.0011 | 3.70E-08 | -5.4214 | 408317 | Snoring |
| rs325451   | 7  | 127475188 | C | T | 0.4131 | -0.0057 | 0.0011 | 3.70E-08 | -5.4190 | 408317 | Snoring |
| rs33970442 | 3  | 93997409  | A | T | 0.4010 | -0.0060 | 0.0011 | 1.30E-08 | -5.5869 | 408317 | Snoring |
| rs33998002 | 1  | 87770171  | A | T | 0.3503 | -0.0060 | 0.0011 | 3.60E-08 | -5.5310 | 408317 | Snoring |
| rs34008514 | 17 | 43834314  | G | A | 0.2252 | 0.0076  | 0.0012 | 1.30E-09 | 6.0982  | 408317 | Snoring |
| rs34022947 | 8  | 71984608  | A | T | 0.4438 | 0.0066  | 0.0011 | 6.30E-10 | 6.1737  | 408317 | Snoring |
| rs34042354 | 8  | 71730961  | A | G | 0.4817 | -0.0060 | 0.0010 | 9.80E-09 | -5.7503 | 408317 | Snoring |
| rs34043286 | 17 | 44117119  | G | A | 0.2254 | 0.0075  | 0.0012 | 2.00E-09 | 6.0291  | 408317 | Snoring |
| rs34046424 | 17 | 44339513  | C | A | 0.2100 | 0.0078  | 0.0013 | 2.90E-09 | 5.9415  | 408317 | Snoring |
| rs34085166 | 8  | 71608136  | T | C | 0.4932 | -0.0063 | 0.0011 | 2.30E-09 | -6.0025 | 408317 | Snoring |
| rs34097347 | 17 | 43949448  | A | C | 0.2238 | 0.0079  | 0.0013 | 4.90E-10 | 6.2601  | 408317 | Snoring |
| rs34162193 | 8  | 71763857  | G | A | 0.4304 | 0.0068  | 0.0011 | 9.70E-11 | 6.4631  | 408317 | Snoring |
| rs3418     | 17 | 43723462  | T | C | 0.2253 | 0.0077  | 0.0012 | 8.60E-10 | 6.1570  | 408317 | Snoring |
| rs34195569 | 17 | 43833921  | A | G | 0.2252 | 0.0076  | 0.0012 | 1.30E-09 | 6.0982  | 408317 | Snoring |
| rs34211253 | 17 | 43834074  | G | C | 0.2251 | 0.0076  | 0.0012 | 1.30E-09 | 6.0959  | 408317 | Snoring |
| rs34246566 | 17 | 46362970  | T | C | 0.2170 | -0.0073 | 0.0013 | 7.10E-09 | -5.7752 | 408317 | Snoring |
| rs34270993 | 8  | 71645268  | G | C | 0.4819 | -0.0059 | 0.0010 | 1.50E-08 | -5.6729 | 408317 | Snoring |
| rs34282253 | 8  | 71582366  | A | G | 0.4783 | -0.0060 | 0.0010 | 1.00E-08 | -5.7549 | 408317 | Snoring |
| rs34283254 | 17 | 43902861  | A | C | 0.2252 | 0.0076  | 0.0012 | 1.10E-09 | 6.1206  | 408317 | Snoring |
| rs34301443 | 8  | 71775396  | A | G | 0.4303 | 0.0068  | 0.0011 | 1.10E-10 | 6.4466  | 408317 | Snoring |
| rs34303488 | 17 | 43848181  | T | C | 0.2251 | 0.0077  | 0.0012 | 9.90E-10 | 6.1371  | 408317 | Snoring |
| rs34315217 | 8  | 71711942  | G | A | 0.4317 | 0.0068  | 0.0011 | 8.00E-11 | 6.4959  | 408317 | Snoring |
| rs34351710 | 8  | 71608019  | A | G | 0.4875 | -0.0060 | 0.0010 | 1.30E-08 | -5.6985 | 408317 | Snoring |
| rs34358    | 5  | 74965122  | G | A | 0.3449 | -0.0062 | 0.0011 | 1.00E-08 | -5.6531 | 408317 | Snoring |
| rs34359    | 5  | 74967693  | G | C | 0.3450 | -0.0062 | 0.0011 | 1.40E-08 | -5.6006 | 408317 | Snoring |
| rs34360    | 5  | 74967708  | C | A | 0.3454 | -0.0062 | 0.0011 | 1.30E-08 | -5.6129 | 408317 | Snoring |
| rs34361    | 5  | 74971846  | A | G | 0.3463 | -0.0063 | 0.0011 | 5.40E-09 | -5.7556 | 408317 | Snoring |
| rs34366597 | 8  | 71844893  | T | C | 0.4295 | 0.0069  | 0.0011 | 6.10E-11 | 6.5349  | 408317 | Snoring |
| rs34379767 | 11 | 27704209  | A | G | 0.2073 | -0.0077 | 0.0013 | 3.60E-09 | -5.9750 | 408317 | Snoring |
| rs34409123 | 8  | 71662116  | A | G | 0.4820 | -0.0059 | 0.0010 | 1.60E-08 | -5.6671 | 408317 | Snoring |
| rs34416056 | 17 | 43951220  | G | T | 0.2255 | 0.0076  | 0.0012 | 1.40E-09 | 6.0816  | 408317 | Snoring |
| rs34430074 | 3  | 94020064  | C | G | 0.3978 | -0.0060 | 0.0011 | 1.30E-08 | -5.5937 | 408317 | Snoring |
| rs34454770 | 16 | 31005567  | C | T | 0.3682 | 0.0063  | 0.0011 | 6.50E-09 | 5.8337  | 408317 | Snoring |

|            |    |           |   |   |        |         |        |          |         |        |         |
|------------|----|-----------|---|---|--------|---------|--------|----------|---------|--------|---------|
| rs34466582 | 17 | 46433414  | T | C | 0.2226 | -0.0073 | 0.0013 | 6.00E-09 | -5.7939 | 408317 | Snoring |
| rs34471605 | 8  | 71762218  | A | G | 0.4302 | 0.0068  | 0.0011 | 1.60E-10 | 6.3915  | 408317 | Snoring |
| rs34490194 | 17 | 46648744  | T | C | 0.1929 | -0.0080 | 0.0013 | 2.30E-09 | -5.9912 | 408317 | Snoring |
| rs34504063 | 8  | 71726071  | A | C | 0.4299 | 0.0069  | 0.0011 | 5.30E-11 | 6.5542  | 408317 | Snoring |
| rs34505448 | 8  | 71722996  | C | A | 0.4302 | 0.0068  | 0.0011 | 9.60E-11 | 6.4639  | 408317 | Snoring |
| rs34508469 | 8  | 71628463  | G | A | 0.4834 | -0.0059 | 0.0010 | 1.80E-08 | -5.6426 | 408317 | Snoring |
| rs34515576 | 8  | 71933788  | G | A | 0.4777 | -0.0065 | 0.0010 | 4.80E-10 | -6.2443 | 408317 | Snoring |
| rs34527992 | 17 | 46659561  | A | C | 0.1897 | -0.0081 | 0.0013 | 1.40E-09 | -6.0571 | 408317 | Snoring |
| rs34558600 | 8  | 71586152  | G | A | 0.4820 | -0.0060 | 0.0010 | 1.30E-08 | -5.7022 | 408317 | Snoring |
| rs34579278 | 17 | 43833981  | G | A | 0.2251 | 0.0076  | 0.0012 | 1.30E-09 | 6.0935  | 408317 | Snoring |
| rs34579536 | 17 | 44108906  | G | A | 0.2266 | 0.0073  | 0.0012 | 6.00E-09 | 5.8456  | 408317 | Snoring |
| rs34643336 | 8  | 71627953  | G | A | 0.4289 | 0.0068  | 0.0011 | 1.20E-10 | 6.4347  | 408317 | Snoring |
| rs34677078 | 8  | 71617715  | A | G | 0.4828 | -0.0058 | 0.0010 | 2.60E-08 | -5.5836 | 408317 | Snoring |
| rs34716264 | 8  | 71799091  | A | T | 0.4299 | 0.0068  | 0.0011 | 1.40E-10 | 6.4114  | 408317 | Snoring |
| rs34719517 | 8  | 71600101  | T | C | 0.4301 | 0.0069  | 0.0011 | 6.00E-11 | 6.5352  | 408317 | Snoring |
| rs34739559 | 17 | 43949342  | A | G | 0.2256 | 0.0076  | 0.0013 | 1.50E-09 | 6.0695  | 408317 | Snoring |
| rs34751830 | 8  | 71730474  | A | G | 0.4302 | 0.0068  | 0.0011 | 8.90E-11 | 6.4755  | 408317 | Snoring |
| rs34768553 | 8  | 71776990  | A | G | 0.4303 | 0.0068  | 0.0011 | 1.10E-10 | 6.4400  | 408317 | Snoring |
| rs34771639 | 17 | 46528529  | G | A | 0.2179 | -0.0073 | 0.0013 | 6.20E-09 | -5.7861 | 408317 | Snoring |
| rs34811474 | 4  | 25408838  | A | G | 0.2322 | -0.0080 | 0.0012 | 1.30E-10 | -6.4647 | 408317 | Snoring |
| rs34822124 | 17 | 46648679  | T | G | 0.1929 | -0.0079 | 0.0013 | 2.50E-09 | -5.9735 | 408317 | Snoring |
| rs34856835 | 8  | 71970611  | C | G | 0.4789 | -0.0064 | 0.0010 | 1.10E-09 | -6.1210 | 408317 | Snoring |
| rs34871190 | 3  | 94023635  | C | T | 0.3978 | -0.0060 | 0.0011 | 1.30E-08 | -5.5967 | 408317 | Snoring |
| rs34882924 | 8  | 71566308  | T | C | 0.4784 | -0.0061 | 0.0010 | 6.50E-09 | -5.8245 | 408317 | Snoring |
| rs34905858 | 8  | 71659450  | G | A | 0.4820 | -0.0059 | 0.0010 | 1.50E-08 | -5.6789 | 408317 | Snoring |
| rs34917985 | 8  | 71574661  | A | T | 0.4338 | 0.0070  | 0.0011 | 4.10E-11 | 6.5990  | 408317 | Snoring |
| rs34949267 | 17 | 46212052  | G | C | 0.3865 | 0.0062  | 0.0011 | 4.10E-09 | 5.7913  | 408317 | Snoring |
| rs34972504 | 8  | 71601721  | A | T | 0.4301 | 0.0069  | 0.0011 | 5.80E-11 | 6.5414  | 408317 | Snoring |
| rs35003027 | 17 | 46433607  | A | G | 0.2226 | -0.0073 | 0.0013 | 5.90E-09 | -5.7966 | 408317 | Snoring |
| rs35016324 | 11 | 88889886  | C | T | 0.4275 | 0.0059  | 0.0011 | 1.70E-08 | 5.6076  | 408317 | Snoring |
| rs35034654 | 16 | 31032405  | T | C | 0.3769 | 0.0065  | 0.0011 | 1.70E-09 | 6.0597  | 408317 | Snoring |
| rs35038967 | 11 | 27703480  | A | T | 0.2019 | -0.0076 | 0.0013 | 9.70E-09 | -5.8284 | 408317 | Snoring |
| rs35051342 | 11 | 27634373  | C | G | 0.2001 | -0.0073 | 0.0013 | 4.90E-08 | -5.5607 | 408317 | Snoring |
| rs35062079 | 8  | 71645156  | G | C | 0.4304 | 0.0068  | 0.0011 | 8.20E-11 | 6.4906  | 408317 | Snoring |
| rs35063572 | 1  | 50820524  | A | G | 0.4584 | 0.0060  | 0.0011 | 1.10E-08 | 5.7374  | 408317 | Snoring |
| rs35067079 | 3  | 94021951  | G | A | 0.3978 | -0.0060 | 0.0011 | 1.20E-08 | -5.6033 | 408317 | Snoring |
| rs35074484 | 8  | 71674761  | A | C | 0.4302 | 0.0068  | 0.0011 | 1.00E-10 | 6.4573  | 408317 | Snoring |
| rs35109143 | 8  | 71577900  | C | T | 0.4784 | -0.0061 | 0.0010 | 7.60E-09 | -5.7995 | 408317 | Snoring |
| rs35115527 | 8  | 71643009  | T | C | 0.4820 | -0.0059 | 0.0010 | 1.50E-08 | -5.6730 | 408317 | Snoring |
| rs35115647 | 8  | 71698012  | G | A | 0.4320 | 0.0068  | 0.0011 | 1.30E-10 | 6.4189  | 408317 | Snoring |
| rs35121681 | 7  | 127355371 | A | G | 0.4104 | -0.0058 | 0.0011 | 3.30E-08 | -5.4475 | 408317 | Snoring |
| rs35148124 | 11 | 88889893  | G | T | 0.4204 | 0.0059  | 0.0011 | 4.50E-08 | 5.4304  | 408317 | Snoring |
| rs35163442 | 17 | 44023842  | A | G | 0.2254 | 0.0076  | 0.0012 | 1.70E-09 | 6.0537  | 408317 | Snoring |
| rs35201629 | 8  | 71974499  | T | C | 0.4319 | 0.0067  | 0.0011 | 2.40E-10 | 6.3273  | 408317 | Snoring |
| rs35207116 | 8  | 71708971  | G | A | 0.4820 | -0.0059 | 0.0010 | 1.50E-08 | -5.6757 | 408317 | Snoring |
| rs35214141 | 8  | 71574564  | T | C | 0.4784 | -0.0061 | 0.0010 | 7.00E-09 | -5.8131 | 408317 | Snoring |
| rs35223750 | 3  | 93996638  | T | G | 0.4009 | -0.0059 | 0.0011 | 1.40E-08 | -5.5775 | 408317 | Snoring |
| rs35233766 | 8  | 71710223  | A | G | 0.4818 | -0.0059 | 0.0010 | 1.60E-08 | -5.6694 | 408317 | Snoring |
| rs35282504 | 17 | 43832618  | A | G | 0.2251 | 0.0076  | 0.0012 | 1.40E-09 | 6.0819  | 408317 | Snoring |
| rs35295900 | 8  | 71642061  | G | C | 0.4819 | -0.0059 | 0.0010 | 1.50E-08 | -5.6751 | 408317 | Snoring |
| rs35318824 | 8  | 71732622  | G | A | 0.4321 | 0.0068  | 0.0011 | 1.00E-10 | 6.4594  | 408317 | Snoring |
| rs35323776 | 8  | 71710166  | T | C | 0.4302 | 0.0068  | 0.0011 | 9.00E-11 | 6.4741  | 408317 | Snoring |
| rs35329349 | 17 | 43520675  | C | T | 0.1730 | 0.0077  | 0.0014 | 4.70E-08 | 5.4516  | 408317 | Snoring |
| rs35343840 | 8  | 71777395  | A | G | 0.4303 | 0.0068  | 0.0011 | 1.20E-10 | 6.4378  | 408317 | Snoring |
| rs35380538 | 8  | 71757667  | T | G | 0.4303 | 0.0068  | 0.0011 | 9.90E-11 | 6.4601  | 408317 | Snoring |
| rs35387091 | 17 | 46528238  | G | T | 0.2179 | -0.0073 | 0.0013 | 6.20E-09 | -5.7853 | 408317 | Snoring |
| rs35434885 | 8  | 71691181  | T | C | 0.4820 | -0.0059 | 0.0010 | 1.60E-08 | -5.6662 | 408317 | Snoring |
| rs35445111 | 19 | 32172047  | G | A | 0.0934 | -0.0108 | 0.0018 | 1.10E-09 | -6.0088 | 408317 | Snoring |
| rs35468353 | 16 | 31056433  | G | A | 0.3778 | 0.0065  | 0.0011 | 2.30E-09 | 6.0078  | 408317 | Snoring |
| rs35509644 | 17 | 46418147  | A | T | 0.2227 | -0.0073 | 0.0013 | 6.00E-09 | -5.7945 | 408317 | Snoring |
| rs35524223 | 17 | 44192590  | A | T | 0.2210 | 0.0074  | 0.0013 | 5.20E-09 | 5.8564  | 408317 | Snoring |
| rs3553     | 12 | 65859140  | C | T | 0.4496 | 0.0070  | 0.0011 | 3.90E-11 | 6.6375  | 408317 | Snoring |
| rs35533148 | 17 | 46487600  | A | G | 0.2225 | -0.0073 | 0.0013 | 6.00E-09 | -5.7931 | 408317 | Snoring |
| rs35544920 | 8  | 71599787  | A | T | 0.4301 | 0.0069  | 0.0011 | 5.90E-11 | 6.5378  | 408317 | Snoring |
| rs35562935 | 1  | 96689205  | A | G | 0.0769 | 0.0126  | 0.0020 | 1.50E-10 | 6.4045  | 408317 | Snoring |
| rs35564237 | 8  | 71600474  | G | T | 0.4822 | -0.0060 | 0.0010 | 1.10E-08 | -5.7256 | 408317 | Snoring |
| rs35580034 | 8  | 71572073  | G | A | 0.4788 | -0.0061 | 0.0010 | 5.90E-09 | -5.8445 | 408317 | Snoring |
| rs35621553 | 8  | 71628075  | G | A | 0.4290 | 0.0068  | 0.0011 | 1.10E-10 | 6.4478  | 408317 | Snoring |
| rs35624684 | 17 | 46658475  | T | C | 0.1900 | -0.0080 | 0.0013 | 1.80E-09 | -6.0250 | 408317 | Snoring |
| rs35631660 | 17 | 43832337  | G | A | 0.2248 | 0.0076  | 0.0013 | 1.50E-09 | 6.0690  | 408317 | Snoring |
| rs35680046 | 17 | 46531793  | A | G | 0.2179 | -0.0073 | 0.0013 | 6.40E-09 | -5.7793 | 408317 | Snoring |
| rs35689708 | 8  | 71761978  | A | G | 0.4304 | 0.0068  | 0.0011 | 1.10E-10 | 6.4414  | 408317 | Snoring |
| rs35713035 | 17 | 46501710  | T | C | 0.2156 | -0.0074 | 0.0013 | 4.80E-09 | -5.8304 | 408317 | Snoring |
| rs35713203 | 16 | 31090407  | C | G | 0.3789 | 0.0063  | 0.0011 | 6.00E-09 | 5.8482  | 408317 | Snoring |

|             |    |           |   |   |        |         |        |          |         |        |         |
|-------------|----|-----------|---|---|--------|---------|--------|----------|---------|--------|---------|
| rs35732828  | 17 | 44833217  | A | C | 0.1632 | -0.0078 | 0.0014 | 4.30E-08 | -5.4868 | 408317 | Snoring |
| rs35759756  | 17 | 46432987  | A | G | 0.2226 | -0.0073 | 0.0013 | 5.90E-09 | -5.7967 | 408317 | Snoring |
| rs35762981  | 8  | 71801640  | A | G | 0.4298 | 0.0068  | 0.0011 | 1.40E-10 | 6.4106  | 408317 | Snoring |
| rs35767277  | 8  | 71718497  | G | A | 0.4320 | 0.0068  | 0.0011 | 1.30E-10 | 6.4224  | 408317 | Snoring |
| rs35767434  | 17 | 46528375  | C | T | 0.2179 | -0.0073 | 0.0013 | 6.20E-09 | -5.7859 | 408317 | Snoring |
| rs35833914  | 17 | 44110541  | A | G | 0.2254 | 0.0075  | 0.0012 | 1.90E-09 | 6.0298  | 408317 | Snoring |
| rs35841748  | 8  | 71656886  | C | G | 0.4299 | 0.0069  | 0.0011 | 5.70E-11 | 6.5448  | 408317 | Snoring |
| rs35863913  | 8  | 71573259  | T | C | 0.4336 | 0.0069  | 0.0011 | 5.80E-11 | 6.5475  | 408317 | Snoring |
| rs35879086  | 17 | 43830382  | A | G | 0.2251 | 0.0076  | 0.0012 | 1.30E-09 | 6.0896  | 408317 | Snoring |
| rs35893260  | 8  | 71620073  | C | T | 0.4832 | -0.0059 | 0.0010 | 1.90E-08 | -5.6315 | 408317 | Snoring |
| rs35921782  | 8  | 71748924  | A | G | 0.4301 | 0.0068  | 0.0011 | 8.80E-11 | 6.4770  | 408317 | Snoring |
| rs35931247  | 8  | 71656084  | T | C | 0.4302 | 0.0068  | 0.0011 | 1.10E-10 | 6.4501  | 408317 | Snoring |
| rs35940771  | 7  | 127430974 | T | G | 0.4111 | -0.0059 | 0.0011 | 1.40E-08 | -5.5933 | 408317 | Snoring |
| rs35954749  | 8  | 71633778  | T | C | 0.4819 | -0.0059 | 0.0010 | 1.40E-08 | -5.6873 | 408317 | Snoring |
| rs35960437  | 8  | 71661960  | C | G | 0.4820 | -0.0059 | 0.0010 | 1.60E-08 | -5.6613 | 408317 | Snoring |
| rs35961830  | 16 | 31032317  | C | T | 0.3766 | 0.0065  | 0.0011 | 2.30E-09 | 6.0077  | 408317 | Snoring |
| rs35971861  | 7  | 127414667 | T | C | 0.4108 | -0.0058 | 0.0011 | 3.50E-08 | -5.4338 | 408317 | Snoring |
| rs36029218  | 11 | 27648371  | T | A | 0.2003 | -0.0074 | 0.0013 | 2.50E-08 | -5.6690 | 408317 | Snoring |
| rs36036607  | 17 | 44339651  | C | T | 0.2111 | 0.0078  | 0.0013 | 3.50E-09 | 5.9090  | 408317 | Snoring |
| rs36047693  | 17 | 43833824  | C | G | 0.2252 | 0.0076  | 0.0012 | 1.30E-09 | 6.0981  | 408317 | Snoring |
| rs36047866  | 8  | 71557050  | G | C | 0.4418 | 0.0069  | 0.0011 | 4.00E-11 | 6.6001  | 408317 | Snoring |
| rs36050210  | 17 | 44353414  | G | A | 0.2263 | 0.0072  | 0.0013 | 1.80E-08 | 5.6536  | 408317 | Snoring |
| rs36057069  | 17 | 46542911  | G | A | 0.2170 | -0.0074 | 0.0013 | 4.80E-09 | -5.8278 | 408317 | Snoring |
| rs36076725  | 17 | 44110532  | A | G | 0.2254 | 0.0075  | 0.0012 | 1.90E-09 | 6.0298  | 408317 | Snoring |
| rs36096333  | 5  | 134450662 | C | T | 0.3304 | -0.0067 | 0.0011 | 1.70E-09 | -6.0355 | 408317 | Snoring |
| rs36123991  | 17 | 44359663  | T | G | 0.2035 | 0.0084  | 0.0014 | 7.90E-10 | 6.1613  | 408317 | Snoring |
| rs36137830  | 8  | 71651134  | C | A | 0.4820 | -0.0059 | 0.0010 | 1.50E-08 | -5.6752 | 408317 | Snoring |
| rs36142266  | 8  | 71691055  | A | G | 0.4303 | 0.0068  | 0.0011 | 1.00E-10 | 6.4522  | 408317 | Snoring |
| rs36147116  | 8  | 71690727  | G | C | 0.4820 | -0.0059 | 0.0010 | 1.50E-08 | -5.6792 | 408317 | Snoring |
| rs36162059  | 8  | 71914706  | T | C | 0.4304 | 0.0068  | 0.0011 | 1.40E-10 | 6.4114  | 408317 | Snoring |
| rs36167700  | 8  | 71651368  | C | T | 0.3657 | 0.0064  | 0.0011 | 2.30E-08 | 5.5948  | 408317 | Snoring |
| rs36177480  | 8  | 71725070  | G | A | 0.4802 | -0.0059 | 0.0010 | 2.00E-08 | -5.6282 | 408317 | Snoring |
| rs36196590  | 8  | 71648576  | A | G | 0.4060 | 0.0066  | 0.0011 | 8.00E-10 | 6.1204  | 408317 | Snoring |
| rs365825    | 17 | 43705601  | G | A | 0.2261 | 0.0076  | 0.0012 | 1.40E-09 | 6.0787  | 408317 | Snoring |
| rs366858    | 17 | 43726588  | T | C | 0.2252 | 0.0077  | 0.0012 | 8.20E-10 | 6.1640  | 408317 | Snoring |
| rs367820416 | 17 | 43982069  | G | T | 0.2255 | 0.0076  | 0.0012 | 1.40E-09 | 6.0796  | 408317 | Snoring |
| rs368673667 | 17 | 43708418  | G | C | 0.2249 | 0.0077  | 0.0013 | 1.00E-09 | 6.1312  | 408317 | Snoring |
| rs369209138 | 17 | 43680850  | C | G | 0.2257 | 0.0077  | 0.0012 | 9.90E-10 | 6.1329  | 408317 | Snoring |
| rs369234167 | 17 | 44611782  | C | T | 0.2009 | 0.0079  | 0.0014 | 1.80E-08 | 5.6364  | 408317 | Snoring |
| rs369533348 | 17 | 44337122  | T | C | 0.1893 | -0.0078 | 0.0013 | 6.30E-09 | -5.8129 | 408317 | Snoring |
| rs369761090 | 17 | 43691195  | T | G | 0.1318 | 0.0099  | 0.0018 | 2.70E-08 | 5.6124  | 408317 | Snoring |
| rs371894855 | 17 | 44355304  | T | G | 0.2057 | 0.0080  | 0.0013 | 2.90E-09 | 5.9722  | 408317 | Snoring |
| rs371996525 | 17 | 44183317  | A | C | 0.2272 | 0.0077  | 0.0012 | 9.60E-10 | 6.1415  | 408317 | Snoring |
| rs372745970 | 17 | 44322577  | C | G | 0.2138 | 0.0078  | 0.0013 | 1.90E-09 | 6.0377  | 408317 | Snoring |
| rs372810927 | 17 | 44066868  | A | C | 0.2254 | 0.0075  | 0.0012 | 2.00E-09 | 6.0278  | 408317 | Snoring |
| rs373417    | 17 | 43691173  | T | C | 0.2241 | 0.0076  | 0.0013 | 1.40E-09 | 6.0805  | 408317 | Snoring |
| rs373695612 | 17 | 44360349  | G | A | 0.2176 | 0.0077  | 0.0013 | 2.90E-09 | 5.9771  | 408317 | Snoring |
| rs373853    | 17 | 43704491  | A | G | 0.2250 | 0.0077  | 0.0013 | 9.50E-10 | 6.1436  | 408317 | Snoring |
| rs374090709 | 17 | 44538511  | C | T | 0.3024 | 0.0074  | 0.0013 | 1.50E-08 | 5.6406  | 408317 | Snoring |
| rs374242426 | 17 | 44358812  | A | G | 0.1927 | 0.0079  | 0.0014 | 2.10E-08 | 5.6556  | 408317 | Snoring |
| rs374250672 | 2  | 157111635 | G | A | 0.0894 | 0.0108  | 0.0018 | 2.10E-09 | 5.8908  | 408317 | Snoring |
| rs374316043 | 17 | 43675431  | A | T | 0.2188 | 0.0076  | 0.0013 | 2.60E-09 | 5.9834  | 408317 | Snoring |
| rs374470873 | 17 | 44328919  | C | T | 0.1913 | 0.0080  | 0.0014 | 1.30E-08 | 5.7396  | 408317 | Snoring |
| rs3751812   | 16 | 53818460  | T | G | 0.3925 | 0.0064  | 0.0011 | 2.20E-09 | 5.9923  | 408317 | Snoring |
| rs3751814   | 16 | 53818724  | A | G | 0.3931 | 0.0063  | 0.0011 | 3.20E-09 | 5.9282  | 408317 | Snoring |
| rs3751855   | 16 | 31091209  | C | T | 0.3845 | 0.0063  | 0.0011 | 5.20E-09 | 5.8755  | 408317 | Snoring |
| rs3757778   | 7  | 127456607 | T | C | 0.3423 | 0.0064  | 0.0011 | 4.10E-09 | 5.8138  | 408317 | Snoring |
| rs3757780   | 7  | 127435520 | G | T | 0.3429 | 0.0065  | 0.0011 | 2.70E-09 | 5.8859  | 408317 | Snoring |
| rs376120    | 17 | 43705518  | G | A | 0.2253 | 0.0077  | 0.0012 | 8.50E-10 | 6.1584  | 408317 | Snoring |
| rs376299484 | 8  | 71918570  | A | T | 0.4631 | 0.0067  | 0.0011 | 6.40E-10 | 6.1737  | 408317 | Snoring |
| rs37762376  | 17 | 44328921  | G | T | 0.1913 | 0.0080  | 0.0014 | 1.30E-08 | 5.7396  | 408317 | Snoring |
| rs3778039   | 6  | 100840756 | T | C | 0.2281 | 0.0070  | 0.0012 | 1.90E-08 | 5.6375  | 408317 | Snoring |
| rs3779529   | 7  | 127486662 | A | G | 0.4125 | -0.0058 | 0.0011 | 2.90E-08 | -5.4617 | 408317 | Snoring |
| rs3779530   | 7  | 127486390 | T | C | 0.4125 | -0.0058 | 0.0011 | 2.80E-08 | -5.4634 | 408317 | Snoring |
| rs378392    | 17 | 43687542  | G | C | 0.2276 | 0.0077  | 0.0012 | 8.20E-10 | 6.1574  | 408317 | Snoring |
| rs3785884   | 17 | 44057595  | A | G | 0.2292 | 0.0071  | 0.0012 | 1.20E-08 | 5.7307  | 408317 | Snoring |
| rs3792692   | 17 | 46255092  | G | A | 0.3867 | 0.0062  | 0.0011 | 4.00E-09 | 5.7963  | 408317 | Snoring |
| rs3792694   | 17 | 46260442  | C | T | 0.3866 | 0.0062  | 0.0011 | 4.00E-09 | 5.7999  | 408317 | Snoring |
| rs3796291   | 3  | 77600273  | C | A | 0.4537 | 0.0064  | 0.0010 | 6.50E-10 | 6.1042  | 408317 | Snoring |
| rs3796292   | 3  | 77600326  | C | T | 0.4537 | 0.0064  | 0.0010 | 6.50E-10 | 6.1042  | 408317 | Snoring |
| rs3797580   | 5  | 75003056  | G | A | 0.3635 | -0.0070 | 0.0011 | 6.00E-11 | -6.4630 | 408317 | Snoring |
| rs3798516   | 6  | 100839163 | C | T | 0.2282 | 0.0070  | 0.0012 | 2.20E-08 | 5.6065  | 408317 | Snoring |
| rs3805363   | 17 | 46241622  | C | T | 0.3866 | 0.0062  | 0.0011 | 4.10E-09 | 5.7931  | 408317 | Snoring |
| rs3805370   | 17 | 46259093  | A | C | 0.3866 | 0.0062  | 0.0011 | 3.90E-09 | 5.8001  | 408317 | Snoring |

|            |    |           |   |   |        |         |        |          |         |        |         |
|------------|----|-----------|---|---|--------|---------|--------|----------|---------|--------|---------|
| rs3805371  | 17 | 46259101  | G | A | 0.3866 | 0.0062  | 0.0011 | 4.00E-09 | 5.7975  | 408317 | Snoring |
| rs3808078  | 7  | 127581677 | A | G | 0.3412 | 0.0063  | 0.0011 | 6.70E-09 | 5.7437  | 408317 | Snoring |
| rs3808086  | 7  | 127539245 | C | G | 0.3415 | 0.0064  | 0.0011 | 5.10E-09 | 5.7820  | 408317 | Snoring |
| rs3808088  | 7  | 127526038 | T | C | 0.3413 | 0.0064  | 0.0011 | 4.80E-09 | 5.7919  | 408317 | Snoring |
| rs3808092  | 7  | 127387887 | T | C | 0.4111 | -0.0058 | 0.0011 | 2.70E-08 | -5.4844 | 408317 | Snoring |
| rs3808097  | 7  | 127360225 | A | C | 0.4104 | -0.0057 | 0.0011 | 4.40E-08 | -5.3950 | 408317 | Snoring |
| rs3816745  | 8  | 71506634  | C | G | 0.4337 | 0.0069  | 0.0011 | 6.40E-11 | 6.5263  | 408317 | Snoring |
| rs3821737  | 3  | 77600445  | T | A | 0.4537 | 0.0064  | 0.0010 | 6.40E-10 | 6.1058  | 408317 | Snoring |
| rs382362   | 17 | 43691377  | C | T | 0.1973 | 0.0082  | 0.0014 | 2.50E-09 | 5.9903  | 408317 | Snoring |
| rs3824003  | 7  | 127469624 | T | C | 0.3425 | 0.0064  | 0.0011 | 4.00E-09 | 5.8183  | 408317 | Snoring |
| rs383241   | 17 | 43705356  | A | G | 0.2253 | 0.0077  | 0.0012 | 8.50E-10 | 6.1584  | 408317 | Snoring |
| rs385199   | 17 | 43686419  | C | A | 0.2284 | 0.0075  | 0.0012 | 1.70E-09 | 6.0403  | 408317 | Snoring |
| rs385383   | 17 | 43704031  | A | C | 0.2250 | 0.0077  | 0.0013 | 9.40E-10 | 6.1450  | 408317 | Snoring |
| rs385691   | 17 | 43726125  | C | A | 0.2253 | 0.0077  | 0.0012 | 8.50E-10 | 6.1592  | 408317 | Snoring |
| rs3858643  | 12 | 65787790  | G | A | 0.3743 | 0.0085  | 0.0011 | 1.60E-15 | 7.8967  | 408317 | Snoring |
| rs3862266  | 1  | 50822435  | A | G | 0.3057 | 0.0064  | 0.0011 | 2.40E-08 | 5.6334  | 408317 | Snoring |
| rs3862267  | 1  | 50822565  | C | T | 0.4586 | 0.0060  | 0.0011 | 1.10E-08 | 5.7361  | 408317 | Snoring |
| rs3865315  | 17 | 44165169  | T | C | 0.2289 | 0.0073  | 0.0012 | 5.60E-09 | 5.8494  | 408317 | Snoring |
| rs3885074  | 17 | 43902738  | A | C | 0.2252 | 0.0076  | 0.0012 | 1.10E-09 | 6.1188  | 408317 | Snoring |
| rs3885075  | 17 | 43902799  | G | A | 0.2252 | 0.0076  | 0.0012 | 1.10E-09 | 6.1206  | 408317 | Snoring |
| rs389217   | 17 | 43717131  | T | C | 0.2253 | 0.0077  | 0.0012 | 8.90E-10 | 6.1519  | 408317 | Snoring |
| rs3897206  | 1  | 50822720  | C | T | 0.4586 | 0.0060  | 0.0011 | 1.10E-08 | 5.7377  | 408317 | Snoring |
| rs3897986  | 17 | 46261539  | G | A | 0.3868 | 0.0063  | 0.0011 | 3.00E-09 | 5.8456  | 408317 | Snoring |
| rs389978   | 17 | 43717415  | G | A | 0.2254 | 0.0077  | 0.0012 | 9.10E-10 | 6.1477  | 408317 | Snoring |
| rs3912060  | 17 | 44165435  | T | C | 0.2254 | 0.0075  | 0.0012 | 2.10E-09 | 6.0212  | 408317 | Snoring |
| rs3912061  | 17 | 44165098  | T | C | 0.2254 | 0.0075  | 0.0012 | 2.10E-09 | 6.0175  | 408317 | Snoring |
| rs3912062  | 17 | 44165069  | G | A | 0.2247 | 0.0076  | 0.0013 | 1.80E-09 | 6.0443  | 408317 | Snoring |
| rs3912063  | 17 | 44165049  | G | A | 0.2247 | 0.0076  | 0.0013 | 1.80E-09 | 6.0439  | 408317 | Snoring |
| rs391338   | 17 | 43687268  | A | G | 0.2220 | 0.0076  | 0.0013 | 2.30E-09 | 5.9932  | 408317 | Snoring |
| rs3919455  | 17 | 43953707  | T | C | 0.2240 | 0.0077  | 0.0013 | 1.20E-09 | 6.1093  | 408317 | Snoring |
| rs392116   | 17 | 43703555  | G | A | 0.2250 | 0.0077  | 0.0013 | 9.40E-10 | 6.1453  | 408317 | Snoring |
| rs393152   | 17 | 43719143  | G | A | 0.2262 | 0.0075  | 0.0012 | 2.00E-09 | 6.0257  | 408317 | Snoring |
| rs393675   | 17 | 43723605  | C | T | 0.2253 | 0.0077  | 0.0012 | 8.70E-10 | 6.1550  | 408317 | Snoring |
| rs393838   | 17 | 43705756  | C | G | 0.2260 | 0.0076  | 0.0012 | 1.40E-09 | 6.0763  | 408317 | Snoring |
| rs3944039  | 17 | 46205070  | T | C | 0.3865 | 0.0062  | 0.0011 | 4.10E-09 | 5.7906  | 408317 | Snoring |
| rs3954897  | 8  | 71635955  | A | G | 0.4819 | -0.0059 | 0.0010 | 1.50E-08 | -5.6793 | 408317 | Snoring |
| rs396593   | 17 | 43707955  | A | C | 0.2253 | 0.0077  | 0.0012 | 8.40E-10 | 6.1598  | 408317 | Snoring |
| rs40060    | 5  | 74967386  | C | T | 0.3447 | -0.0062 | 0.0011 | 1.30E-08 | -5.6147 | 408317 | Snoring |
| rs406400   | 17 | 43723930  | G | A | 0.2204 | 0.0078  | 0.0013 | 9.80E-10 | 6.1315  | 408317 | Snoring |
| rs4074134  | 11 | 27647285  | T | C | 0.1998 | -0.0075 | 0.0013 | 1.80E-08 | -5.7391 | 408317 | Snoring |
| rs4074462  | 17 | 43855228  | T | G | 0.2251 | 0.0076  | 0.0012 | 1.20E-09 | 6.1041  | 408317 | Snoring |
| rs4074908  | 8  | 71955332  | T | A | 0.4019 | -0.0059 | 0.0011 | 4.30E-08 | -5.5117 | 408317 | Snoring |
| rs4074909  | 8  | 71955827  | A | G | 0.4780 | -0.0065 | 0.0010 | 7.60E-10 | -6.1811 | 408317 | Snoring |
| rs4078067  | 8  | 71956471  | C | T | 0.4780 | -0.0065 | 0.0010 | 7.70E-10 | -6.1806 | 408317 | Snoring |
| rs4081455  | 11 | 88891543  | C | T | 0.4276 | 0.0059  | 0.0011 | 1.90E-08 | 5.5890  | 408317 | Snoring |
| rs4082671  | 1  | 50822099  | C | T | 0.4586 | 0.0060  | 0.0011 | 1.10E-08 | 5.7355  | 408317 | Snoring |
| rs411305   | 17 | 43687393  | T | C | 0.2093 | 0.0081  | 0.0013 | 5.20E-10 | 6.2525  | 408317 | Snoring |
| rs4116669  | 10 | 9040700   | C | T | 0.1836 | 0.0089  | 0.0014 | 4.10E-11 | 6.5931  | 408317 | Snoring |
| rs4121729  | 11 | 88863140  | T | G | 0.3736 | 0.0059  | 0.0011 | 3.20E-08 | 5.4354  | 408317 | Snoring |
| rs4121744  | 11 | 88874969  | T | C | 0.4838 | 0.0060  | 0.0010 | 8.10E-09 | 5.7418  | 408317 | Snoring |
| rs41280116 | 17 | 43902842  | T | C | 0.2252 | 0.0076  | 0.0012 | 1.10E-09 | 6.1207  | 408317 | Snoring |
| rs41280118 | 17 | 43903089  | T | C | 0.2253 | 0.0076  | 0.0012 | 1.10E-09 | 6.1158  | 408317 | Snoring |
| rs4128439  | 17 | 46375211  | T | A | 0.2170 | -0.0073 | 0.0013 | 7.70E-09 | -5.7613 | 408317 | Snoring |
| rs413519   | 17 | 43685826  | G | A | 0.2247 | 0.0077  | 0.0013 | 8.70E-10 | 6.1542  | 408317 | Snoring |
| rs41374248 | 17 | 44120442  | G | A | 0.2254 | 0.0075  | 0.0012 | 2.00E-09 | 6.0257  | 408317 | Snoring |
| rs413778   | 17 | 43716885  | G | A | 0.2253 | 0.0077  | 0.0012 | 8.80E-10 | 6.1533  | 408317 | Snoring |
| rs41382552 | 17 | 44118999  | G | A | 0.2254 | 0.0075  | 0.0012 | 2.10E-09 | 6.0176  | 408317 | Snoring |
| rs413844   | 17 | 43729384  | A | G | 0.2252 | 0.0077  | 0.0012 | 8.70E-10 | 6.1548  | 408317 | Snoring |
| rs41384744 | 17 | 44137070  | G | A | 0.2254 | 0.0075  | 0.0012 | 2.10E-09 | 6.0185  | 408317 | Snoring |
| rs413917   | 17 | 43723189  | A | G | 0.2253 | 0.0077  | 0.0012 | 1.00E-09 | 6.1277  | 408317 | Snoring |
| rs4142037  | 20 | 6601749   | G | A | 0.3727 | -0.0061 | 0.0011 | 1.90E-08 | -5.6132 | 408317 | Snoring |
| rs41437445 | 17 | 44116238  | A | G | 0.2254 | 0.0075  | 0.0012 | 1.90E-09 | 6.0300  | 408317 | Snoring |
| rs41457044 | 17 | 43911424  | T | C | 0.2252 | 0.0077  | 0.0012 | 1.10E-09 | 6.1278  | 408317 | Snoring |
| rs415430   | 17 | 44859144  | C | T | 0.2163 | 0.0071  | 0.0013 | 3.00E-08 | 5.5711  | 408317 | Snoring |
| rs417968   | 17 | 43728376  | G | A | 0.2573 | 0.0077  | 0.0012 | 1.30E-10 | 6.4407  | 408317 | Snoring |
| rs422112   | 17 | 43728137  | A | G | 0.2252 | 0.0077  | 0.0012 | 8.70E-10 | 6.1552  | 408317 | Snoring |
| rs42302    | 5  | 74965554  | A | G | 0.3388 | -0.0062 | 0.0011 | 1.00E-08 | -5.6415 | 408317 | Snoring |
| rs4239069  | 17 | 1914005   | C | T | 0.3112 | -0.0062 | 0.0011 | 3.10E-08 | -5.5242 | 408317 | Snoring |
| rs424243   | 17 | 43727887  | T | A | 0.2253 | 0.0077  | 0.0012 | 8.60E-10 | 6.1573  | 408317 | Snoring |
| rs4244531  | 11 | 27657250  | G | A | 0.1999 | -0.0074 | 0.0013 | 2.30E-08 | -5.6867 | 408317 | Snoring |
| rs4255542  | 11 | 88885187  | C | T | 0.4807 | 0.0061  | 0.0010 | 4.10E-09 | 5.8405  | 408317 | Snoring |
| rs4255816  | 17 | 44010364  | G | C | 0.2255 | 0.0076  | 0.0012 | 1.50E-09 | 6.0712  | 408317 | Snoring |
| rs4272413  | 8  | 71636187  | G | A | 0.4819 | -0.0059 | 0.0010 | 1.50E-08 | -5.6730 | 408317 | Snoring |
| rs4277389  | 17 | 43895653  | G | A | 0.2252 | 0.0076  | 0.0012 | 1.20E-09 | 6.1039  | 408317 | Snoring |



|           |    |          |   |   |        |         |        |          |         |        |         |
|-----------|----|----------|---|---|--------|---------|--------|----------|---------|--------|---------|
| rs428029  | 17 | 67918299 | G | A | 0.3488 | -0.0060 | 0.0011 | 4.90E-08 | -5.5058 | 408317 | Snoring |
| rs4283261 | 17 | 44089921 | T | C | 0.2254 | 0.0075  | 0.0012 | 1.90E-09 | 6.0348  | 408317 | Snoring |
| rs4301669 | 1  | 50819085 | G | A | 0.4583 | 0.0060  | 0.0011 | 1.10E-08 | 5.7396  | 408317 | Snoring |
| rs4306559 | 17 | 44090236 | C | T | 0.2254 | 0.0075  | 0.0012 | 1.90E-09 | 6.0345  | 408317 | Snoring |
| rs430685  | 17 | 44859148 | T | C | 0.2163 | 0.0071  | 0.0013 | 3.00E-08 | 5.5711  | 408317 | Snoring |
| rs430688  | 17 | 43685707 | C | T | 0.2244 | 0.0076  | 0.0013 | 1.70E-09 | 6.0527  | 408317 | Snoring |
| rs430789  | 17 | 44295157 | G | A | 0.2248 | 0.0076  | 0.0013 | 1.70E-09 | 6.0500  | 408317 | Snoring |
| rs4309163 | 11 | 88886767 | A | T | 0.4807 | 0.0062  | 0.0010 | 2.80E-09 | 5.9023  | 408317 | Snoring |
| rs4309444 | 17 | 43895797 | C | T | 0.2251 | 0.0076  | 0.0012 | 1.20E-09 | 6.1019  | 408317 | Snoring |
| rs4315072 | 11 | 88878052 | A | T | 0.4873 | 0.0061  | 0.0010 | 5.60E-09 | 5.7950  | 408317 | Snoring |
| rs4315372 | 17 | 1912473  | A | G | 0.3112 | -0.0062 | 0.0011 | 3.30E-08 | -5.5134 | 408317 | Snoring |
| rs4317542 | 8  | 78196383 | G | T | 0.2788 | -0.0070 | 0.0012 | 1.70E-09 | -6.0240 | 408317 | Snoring |
| rs4320526 | 8  | 78195702 | G | A | 0.2994 | -0.0064 | 0.0011 | 2.30E-08 | -5.5798 | 408317 | Snoring |
| rs4324452 | 3  | 77629576 | A | C | 0.4173 | 0.0061  | 0.0011 | 4.90E-09 | 5.7620  | 408317 | Snoring |
| rs4327090 | 17 | 43902541 | G | A | 0.1978 | 0.0082  | 0.0013 | 8.00E-10 | 6.1822  | 408317 | Snoring |
| rs4327091 | 17 | 44021717 | A | G | 0.2237 | 0.0077  | 0.0013 | 1.30E-09 | 6.0962  | 408317 | Snoring |
| rs4332569 | 12 | 65793224 | A | G | 0.3735 | 0.0086  | 0.0011 | 8.50E-16 | 7.9714  | 408317 | Snoring |
| rs4335809 | 17 | 43902216 | T | C | 0.2253 | 0.0076  | 0.0012 | 1.10E-09 | 6.1208  | 408317 | Snoring |
| rs4338076 | 8  | 78200458 | T | G | 0.2993 | -0.0064 | 0.0011 | 2.40E-08 | -5.5752 | 408317 | Snoring |
| rs4340365 | 17 | 43930980 | T | C | 0.2251 | 0.0076  | 0.0013 | 1.20E-09 | 6.1073  | 408317 | Snoring |
| rs4341787 | 17 | 43902505 | T | C | 0.2252 | 0.0076  | 0.0012 | 1.10E-09 | 6.1212  | 408317 | Snoring |
| rs4343073 | 12 | 65793266 | C | T | 0.3741 | 0.0086  | 0.0011 | 1.10E-15 | 7.9400  | 408317 | Snoring |
| rs434428  | 17 | 43725684 | A | G | 0.2253 | 0.0077  | 0.0012 | 8.50E-10 | 6.1590  | 408317 | Snoring |
| rs434598  | 17 | 43725762 | A | G | 0.2253 | 0.0077  | 0.0012 | 8.50E-10 | 6.1591  | 408317 | Snoring |
| rs4346218 | 16 | 30980130 | T | A | 0.3756 | 0.0062  | 0.0011 | 2.20E-08 | 5.5927  | 408317 | Snoring |
| rs434805  | 17 | 43718336 | C | T | 0.2260 | 0.0076  | 0.0012 | 1.40E-09 | 6.0761  | 408317 | Snoring |
| rs434971  | 17 | 43725992 | A | G | 0.2253 | 0.0077  | 0.0012 | 8.50E-10 | 6.1593  | 408317 | Snoring |
| rs4362428 | 17 | 2090341  | A | C | 0.4091 | -0.0058 | 0.0011 | 2.90E-08 | -5.4534 | 408317 | Snoring |
| rs436667  | 17 | 43709415 | T | C | 0.2253 | 0.0077  | 0.0012 | 9.50E-10 | 6.1376  | 408317 | Snoring |
| rs4371195 | 17 | 43986420 | G | A | 0.2253 | 0.0076  | 0.0012 | 1.50E-09 | 6.0696  | 408317 | Snoring |
| rs4379740 | 10 | 9043304  | T | C | 0.1837 | 0.0088  | 0.0014 | 5.80E-11 | 6.5404  | 408317 | Snoring |
| rs4383188 | 17 | 44197603 | C | T | 0.2260 | 0.0076  | 0.0012 | 1.70E-09 | 6.0536  | 408317 | Snoring |
| rs4390635 | 17 | 43809016 | T | C | 0.2252 | 0.0077  | 0.0012 | 9.50E-10 | 6.1440  | 408317 | Snoring |
| rs439558  | 17 | 43717803 | C | T | 0.2253 | 0.0076  | 0.0012 | 1.10E-09 | 6.1248  | 408317 | Snoring |
| rs4397857 | 11 | 88885480 | C | T | 0.4896 | 0.0062  | 0.0010 | 1.90E-09 | 5.9691  | 408317 | Snoring |
| rs439945  | 17 | 43726659 | A | C | 0.2571 | 0.0077  | 0.0012 | 1.50E-10 | 6.4171  | 408317 | Snoring |
| rs4399895 | 3  | 94005583 | G | A | 0.4009 | -0.0060 | 0.0011 | 1.30E-08 | -5.5871 | 408317 | Snoring |
| rs4401083 | 17 | 43806015 | A | G | 0.2252 | 0.0077  | 0.0012 | 1.00E-09 | 6.1300  | 408317 | Snoring |
| rs440778  | 17 | 43686420 | G | A | 0.2239 | 0.0076  | 0.0013 | 1.50E-09 | 6.0632  | 408317 | Snoring |
| rs4420272 | 11 | 88850382 | T | A | 0.3535 | 0.0059  | 0.0011 | 4.60E-08 | 5.3652  | 408317 | Snoring |
| rs4434651 | 8  | 71947187 | G | A | 0.4778 | -0.0065 | 0.0010 | 8.20E-10 | -6.1672 | 408317 | Snoring |
| rs444071  | 17 | 43707951 | T | C | 0.2253 | 0.0077  | 0.0012 | 8.40E-10 | 6.1598  | 408317 | Snoring |
| rs4441322 | 17 | 43955030 | G | A | 0.2255 | 0.0076  | 0.0012 | 1.40E-09 | 6.0827  | 408317 | Snoring |
| rs444654  | 11 | 27705905 | T | G | 0.2073 | -0.0076 | 0.0013 | 4.60E-09 | -5.9352 | 408317 | Snoring |
| rs444967  | 17 | 43685698 | G | A | 0.2259 | 0.0077  | 0.0013 | 7.90E-10 | 6.1686  | 408317 | Snoring |
| rs4458044 | 17 | 43873727 | C | G | 0.2560 | -0.0070 | 0.0012 | 5.70E-09 | -5.7808 | 408317 | Snoring |
| rs4468641 | 16 | 31096876 | C | A | 0.3846 | 0.0063  | 0.0011 | 5.10E-09 | 5.8780  | 408317 | Snoring |
| rs4471723 | 17 | 44205690 | T | C | 0.2280 | 0.0074  | 0.0012 | 3.40E-09 | 5.9357  | 408317 | Snoring |
| rs4471725 | 17 | 43683611 | T | G | 0.2258 | 0.0077  | 0.0012 | 9.60E-10 | 6.1392  | 408317 | Snoring |
| rs4471726 | 17 | 43807134 | C | T | 0.2250 | 0.0076  | 0.0013 | 1.20E-09 | 6.1013  | 408317 | Snoring |
| rs4478609 | 8  | 71624159 | T | C | 0.4274 | 0.0068  | 0.0011 | 9.70E-11 | 6.4656  | 408317 | Snoring |
| rs4479288 | 17 | 43793828 | A | G | 0.2253 | 0.0077  | 0.0012 | 9.40E-10 | 6.1451  | 408317 | Snoring |
| rs4479289 | 17 | 43793951 | A | G | 0.2251 | 0.0077  | 0.0012 | 1.10E-09 | 6.1227  | 408317 | Snoring |
| rs4479290 | 17 | 44021744 | C | T | 0.2241 | 0.0076  | 0.0013 | 1.30E-09 | 6.0967  | 408317 | Snoring |
| rs4482334 | 17 | 43912830 | C | T | 0.2252 | 0.0077  | 0.0012 | 1.10E-09 | 6.1269  | 408317 | Snoring |
| rs4485406 | 17 | 43683627 | G | C | 0.2279 | 0.0076  | 0.0013 | 1.20E-09 | 6.1048  | 408317 | Snoring |
| rs4486953 | 17 | 43763007 | C | T | 0.2253 | 0.0077  | 0.0012 | 8.60E-10 | 6.1566  | 408317 | Snoring |
| rs448830  | 17 | 43725212 | A | G | 0.2253 | 0.0077  | 0.0012 | 8.50E-10 | 6.1585  | 408317 | Snoring |
| rs4489795 | 12 | 65793429 | A | G | 0.3741 | 0.0086  | 0.0011 | 1.00E-15 | 7.9439  | 408317 | Snoring |
| rs4490807 | 8  | 78202838 | G | A | 0.2788 | -0.0070 | 0.0012 | 1.70E-09 | -6.0244 | 408317 | Snoring |
| rs449501  | 17 | 43724555 | A | G | 0.2253 | 0.0077  | 0.0012 | 8.50E-10 | 6.1591  | 408317 | Snoring |
| rs450237  | 17 | 43709225 | C | T | 0.2248 | 0.0076  | 0.0013 | 1.40E-09 | 6.0817  | 408317 | Snoring |
| rs4504667 | 8  | 71956792 | T | C | 0.4781 | -0.0065 | 0.0010 | 8.10E-10 | -6.1715 | 408317 | Snoring |
| rs451737  | 17 | 43683392 | G | A | 0.2255 | 0.0076  | 0.0013 | 1.10E-09 | 6.1144  | 408317 | Snoring |
| rs4519092 | 11 | 88880402 | G | A | 0.4882 | 0.0062  | 0.0010 | 2.30E-09 | 5.9407  | 408317 | Snoring |
| rs4523230 | 8  | 78234143 | A | T | 0.2849 | -0.0074 | 0.0012 | 1.80E-10 | -6.3755 | 408317 | Snoring |
| rs4523962 | 17 | 43902522 | A | G | 0.2252 | 0.0076  | 0.0012 | 1.10E-09 | 6.1212  | 408317 | Snoring |
| rs4525537 | 17 | 43912723 | C | T | 0.2252 | 0.0077  | 0.0012 | 1.10E-09 | 6.1286  | 408317 | Snoring |
| rs4526394 | 8  | 71988327 | G | A | 0.4466 | 0.0066  | 0.0011 | 3.00E-10 | 6.2908  | 408317 | Snoring |
| rs4528616 | 17 | 43683597 | G | T | 0.2259 | 0.0077  | 0.0012 | 1.00E-09 | 6.1324  | 408317 | Snoring |
| rs4532626 | 8  | 71944895 | T | C | 0.4307 | 0.0066  | 0.0011 | 3.60E-10 | 6.2645  | 408317 | Snoring |
| rs4534896 | 17 | 46303558 | A | G | 0.1923 | -0.0080 | 0.0013 | 4.10E-09 | -5.9747 | 408317 | Snoring |
| rs4539917 | 3  | 77650239 | C | T | 0.4244 | 0.0058  | 0.0011 | 3.70E-08 | 5.4112  | 408317 | Snoring |
| rs453997  | 17 | 43727061 | T | C | 0.2252 | 0.0077  | 0.0012 | 8.70E-10 | 6.1557  | 408317 | Snoring |

|           |    |           |   |   |        |         |        |          |         |        |         |
|-----------|----|-----------|---|---|--------|---------|--------|----------|---------|--------|---------|
| rs4548919 | 17 | 44192395  | T | G | 0.2259 | 0.0076  | 0.0012 | 1.40E-09 | 6.0815  | 408317 | Snoring |
| rs455028  | 17 | 43726574  | C | T | 0.2253 | 0.0077  | 0.0012 | 8.50E-10 | 6.1595  | 408317 | Snoring |
| rs4564621 | 17 | 43895501  | C | G | 0.2252 | 0.0076  | 0.0012 | 1.10E-09 | 6.1208  | 408317 | Snoring |
| rs4566211 | 17 | 43895696  | A | G | 0.2252 | 0.0076  | 0.0012 | 1.10E-09 | 6.1152  | 408317 | Snoring |
| rs4566212 | 17 | 43895751  | A | G | 0.2252 | 0.0076  | 0.0012 | 1.10E-09 | 6.1205  | 408317 | Snoring |
| rs4569335 | 17 | 43811950  | C | A | 0.2251 | 0.0077  | 0.0012 | 9.40E-10 | 6.1452  | 408317 | Snoring |
| rs4571761 | 8  | 71957173  | C | A | 0.4781 | -0.0065 | 0.0010 | 8.00E-10 | -6.1729 | 408317 | Snoring |
| rs4581739 | 17 | 44204739  | C | T | 0.2257 | 0.0076  | 0.0012 | 1.60E-09 | 6.0647  | 408317 | Snoring |
| rs4597358 | 17 | 44110670  | G | C | 0.2281 | 0.0072  | 0.0012 | 7.30E-09 | 5.8069  | 408317 | Snoring |
| rs4605208 | 17 | 43794209  | C | G | 0.2251 | 0.0077  | 0.0012 | 1.10E-09 | 6.1228  | 408317 | Snoring |
| rs4606752 | 17 | 44192618  | G | A | 0.2259 | 0.0076  | 0.0012 | 1.40E-09 | 6.0809  | 408317 | Snoring |
| rs4608377 | 17 | 44113359  | C | T | 0.2254 | 0.0075  | 0.0012 | 1.90E-09 | 6.0299  | 408317 | Snoring |
| rs4609898 | 17 | 43794182  | A | G | 0.2251 | 0.0077  | 0.0012 | 1.10E-09 | 6.1257  | 408317 | Snoring |
| rs4609899 | 17 | 43807113  | T | C | 0.2250 | 0.0076  | 0.0013 | 1.20E-09 | 6.0988  | 408317 | Snoring |
| rs4611203 | 11 | 88767496  | G | A | 0.4334 | 0.0057  | 0.0011 | 4.40E-08 | 5.4145  | 408317 | Snoring |
| rs4617909 | 17 | 43806451  | T | C | 0.2252 | 0.0077  | 0.0012 | 9.30E-10 | 6.1463  | 408317 | Snoring |
| rs4623462 | 8  | 71946384  | A | T | 0.4017 | -0.0059 | 0.0011 | 4.30E-08 | -5.5107 | 408317 | Snoring |
| rs4627402 | 17 | 43932741  | T | C | 0.2217 | 0.0077  | 0.0013 | 1.60E-09 | 6.0748  | 408317 | Snoring |
| rs4628281 | 8  | 71839164  | T | G | 0.4795 | -0.0058 | 0.0010 | 3.90E-08 | -5.5151 | 408317 | Snoring |
| rs4629903 | 8  | 71805132  | A | G | 0.4297 | 0.0068  | 0.0011 | 1.30E-10 | 6.4261  | 408317 | Snoring |
| rs4630591 | 17 | 44192568  | T | C | 0.2062 | 0.0080  | 0.0013 | 1.10E-09 | 6.1200  | 408317 | Snoring |
| rs4640231 | 17 | 43912786  | C | G | 0.2252 | 0.0077  | 0.0012 | 1.10E-09 | 6.1269  | 408317 | Snoring |
| rs4643207 | 13 | 51128800  | G | T | 0.4642 | 0.0058  | 0.0011 | 2.60E-08 | 5.5483  | 408317 | Snoring |
| rs4655844 | 1  | 87775058  | G | A | 0.3504 | -0.0060 | 0.0011 | 3.90E-08 | -5.5197 | 408317 | Snoring |
| rs4704230 | 5  | 74986481  | C | T | 0.3635 | -0.0070 | 0.0011 | 5.00E-11 | -6.4900 | 408317 | Snoring |
| rs4704234 | 5  | 75001432  | G | A | 0.2812 | -0.0062 | 0.0012 | 4.30E-08 | -5.3714 | 408317 | Snoring |
| rs4728079 | 7  | 127480364 | G | A | 0.3425 | 0.0064  | 0.0011 | 4.30E-09 | 5.8060  | 408317 | Snoring |
| rs4731377 | 7  | 127381201 | A | T | 0.3414 | 0.0065  | 0.0011 | 2.70E-09 | 5.8753  | 408317 | Snoring |
| rs4731378 | 7  | 127383990 | C | T | 0.4119 | -0.0060 | 0.0011 | 1.00E-08 | -5.6529 | 408317 | Snoring |
| rs4731380 | 7  | 127415303 | T | G | 0.4100 | -0.0058 | 0.0011 | 4.10E-08 | -5.4129 | 408317 | Snoring |
| rs4731381 | 7  | 127415304 | T | C | 0.4100 | -0.0058 | 0.0011 | 4.00E-08 | -5.4160 | 408317 | Snoring |
| rs4735677 | 8  | 78148191  | T | A | 0.2847 | -0.0067 | 0.0012 | 5.10E-09 | -5.8213 | 408317 | Snoring |
| rs4735761 | 8  | 78097161  | C | A | 0.2855 | -0.0068 | 0.0012 | 4.50E-09 | -5.8447 | 408317 | Snoring |
| rs4735764 | 8  | 78097725  | T | C | 0.2939 | -0.0064 | 0.0011 | 2.00E-08 | -5.5726 | 408317 | Snoring |
| rs4735766 | 8  | 78099782  | T | G | 0.2853 | -0.0068 | 0.0012 | 4.20E-09 | -5.8568 | 408317 | Snoring |
| rs4735767 | 8  | 78099795  | C | G | 0.2855 | -0.0068 | 0.0012 | 4.50E-09 | -5.8459 | 408317 | Snoring |
| rs4735769 | 8  | 78104676  | C | A | 0.2855 | -0.0068 | 0.0012 | 4.60E-09 | -5.8402 | 408317 | Snoring |
| rs4738105 | 8  | 71958918  | C | A | 0.4788 | -0.0065 | 0.0010 | 6.80E-10 | -6.1973 | 408317 | Snoring |
| rs4744369 | 9  | 97475396  | T | A | 0.4130 | -0.0058 | 0.0011 | 4.00E-08 | -5.4542 | 408317 | Snoring |
| rs4753214 | 11 | 88969066  | T | C | 0.4880 | 0.0057  | 0.0010 | 4.40E-08 | 5.4006  | 408317 | Snoring |
| rs4762097 | 12 | 65835548  | G | A | 0.3646 | 0.0088  | 0.0011 | 3.20E-16 | 8.1175  | 408317 | Snoring |
| rs4762099 | 12 | 65867925  | G | A | 0.4496 | 0.0069  | 0.0011 | 6.40E-11 | 6.5634  | 408317 | Snoring |
| rs4762100 | 12 | 65876752  | T | C | 0.4496 | 0.0069  | 0.0011 | 6.60E-11 | 6.5611  | 408317 | Snoring |
| rs4790309 | 17 | 1966889   | T | C | 0.4481 | -0.0063 | 0.0011 | 2.40E-09 | -5.9502 | 408317 | Snoring |
| rs4790862 | 17 | 1914177   | A | G | 0.3112 | -0.0062 | 0.0011 | 3.20E-08 | -5.5184 | 408317 | Snoring |
| rs4790863 | 17 | 1914267   | T | C | 0.3112 | -0.0062 | 0.0011 | 3.00E-08 | -5.5333 | 408317 | Snoring |
| rs4792824 | 17 | 43750910  | C | T | 0.2456 | 0.0082  | 0.0012 | 1.20E-11 | 6.8016  | 408317 | Snoring |
| rs4792830 | 17 | 44199290  | C | T | 0.1821 | -0.0075 | 0.0014 | 3.50E-08 | -5.5068 | 408317 | Snoring |
| rs4792831 | 17 | 44206665  | A | G | 0.1871 | -0.0078 | 0.0013 | 5.50E-09 | -5.8227 | 408317 | Snoring |
| rs4792897 | 17 | 44086267  | G | A | 0.1760 | -0.0081 | 0.0014 | 3.20E-09 | -5.9289 | 408317 | Snoring |
| rs4793779 | 17 | 46306597  | G | A | 0.3866 | 0.0062  | 0.0011 | 3.50E-09 | 5.8215  | 408317 | Snoring |
| rs4793846 | 17 | 46532906  | T | C | 0.2181 | -0.0072 | 0.0013 | 9.80E-09 | -5.7101 | 408317 | Snoring |
| rs4793937 | 17 | 46663850  | A | G | 0.1783 | -0.0080 | 0.0014 | 5.20E-09 | -5.8316 | 408317 | Snoring |
| rs4794447 | 17 | 46180724  | T | C | 0.2788 | 0.0066  | 0.0012 | 1.10E-08 | 5.6606  | 408317 | Snoring |
| rs4794505 | 17 | 46283306  | A | G | 0.3866 | 0.0062  | 0.0011 | 3.70E-09 | 5.8112  | 408317 | Snoring |
| rs4794517 | 17 | 46291853  | C | G | 0.3866 | 0.0062  | 0.0011 | 3.70E-09 | 5.8133  | 408317 | Snoring |
| rs4794525 | 17 | 46298358  | C | T | 0.3866 | 0.0062  | 0.0011 | 3.60E-09 | 5.8182  | 408317 | Snoring |
| rs4813800 | 20 | 6595646   | A | G | 0.3704 | -0.0060 | 0.0011 | 3.50E-08 | -5.5093 | 408317 | Snoring |
| rs4815897 | 20 | 6411069   | G | A | 0.1882 | 0.0076  | 0.0013 | 1.20E-08 | 5.7245  | 408317 | Snoring |
| rs4815915 | 20 | 6635509   | G | A | 0.3636 | -0.0064 | 0.0011 | 4.00E-09 | -5.8364 | 408317 | Snoring |
| rs4840130 | 6  | 100833142 | T | C | 0.2282 | 0.0070  | 0.0012 | 2.00E-08 | 5.6232  | 408317 | Snoring |
| rs4857069 | 3  | 94024316  | C | A | 0.3978 | -0.0060 | 0.0011 | 1.30E-08 | -5.5908 | 408317 | Snoring |
| rs4857091 | 3  | 94056338  | G | A | 0.3925 | -0.0058 | 0.0011 | 2.80E-08 | -5.4502 | 408317 | Snoring |
| rs4857289 | 3  | 93998872  | A | G | 0.4011 | -0.0060 | 0.0011 | 1.30E-08 | -5.5898 | 408317 | Snoring |
| rs4857299 | 3  | 94016224  | T | C | 0.4008 | -0.0059 | 0.0011 | 1.40E-08 | -5.5751 | 408317 | Snoring |
| rs4857300 | 3  | 94016272  | C | A | 0.4009 | -0.0060 | 0.0011 | 1.40E-08 | -5.5791 | 408317 | Snoring |
| rs4857379 | 3  | 94061599  | C | A | 0.3922 | -0.0058 | 0.0011 | 2.70E-08 | -5.4548 | 408317 | Snoring |
| rs4889526 | 16 | 31030344  | A | C | 0.3758 | 0.0065  | 0.0011 | 2.40E-09 | 6.0033  | 408317 | Snoring |
| rs4889609 | 16 | 31026427  | G | A | 0.3766 | 0.0064  | 0.0011 | 2.70E-09 | 5.9814  | 408317 | Snoring |
| rs4922793 | 11 | 27729505  | G | A | 0.2072 | -0.0077 | 0.0013 | 4.30E-09 | -5.9402 | 408317 | Snoring |
| rs4923457 | 11 | 27648580  | T | A | 0.1999 | -0.0074 | 0.0013 | 2.60E-08 | -5.6666 | 408317 | Snoring |
| rs4923458 | 11 | 27656113  | C | T | 0.1999 | -0.0074 | 0.0013 | 2.50E-08 | -5.6709 | 408317 | Snoring |
| rs4923460 | 11 | 27656789  | T | G | 0.1999 | -0.0074 | 0.0013 | 2.60E-08 | -5.6685 | 408317 | Snoring |
| rs4923461 | 11 | 27656910  | G | A | 0.1998 | -0.0073 | 0.0013 | 3.40E-08 | -5.6237 | 408317 | Snoring |

|             |    |           |   |   |        |         |        |          |         |        |         |
|-------------|----|-----------|---|---|--------|---------|--------|----------|---------|--------|---------|
| rs4923463   | 11 | 27672500  | G | A | 0.2001 | -0.0074 | 0.0013 | 2.50E-08 | -5.6663 | 408317 | Snoring |
| rs4923464   | 11 | 27683618  | T | C | 0.2026 | -0.0074 | 0.0013 | 1.90E-08 | -5.7040 | 408317 | Snoring |
| rs4923466   | 11 | 27706565  | A | C | 0.2073 | -0.0077 | 0.0013 | 3.70E-09 | -5.9697 | 408317 | Snoring |
| rs4926873   | 1  | 51403595  | C | T | 0.4236 | 0.0059  | 0.0011 | 2.80E-08 | 5.5782  | 408317 | Snoring |
| rs4949980   | 1  | 96621739  | G | A | 0.0680 | 0.0118  | 0.0021 | 2.10E-08 | 5.6331  | 408317 | Snoring |
| rs4974357   | 3  | 90127762  | C | T | 0.4341 | -0.0057 | 0.0011 | 3.20E-08 | -5.4548 | 408317 | Snoring |
| rs4976268   | 5  | 134452529 | T | C | 0.3288 | -0.0068 | 0.0011 | 8.80E-10 | -6.1394 | 408317 | Snoring |
| rs4976269   | 5  | 134452597 | A | G | 0.3288 | -0.0068 | 0.0011 | 8.60E-10 | -6.1428 | 408317 | Snoring |
| rs4987719   | 18 | 60960310  | T | C | 0.0334 | 0.0162  | 0.0029 | 3.50E-08 | 5.5828  | 408317 | Snoring |
| rs4997213   | 17 | 44186267  | A | G | 0.1819 | -0.0075 | 0.0014 | 2.60E-08 | -5.5597 | 408317 | Snoring |
| rs4998767   | 11 | 88891876  | T | A | 0.4304 | 0.0060  | 0.0011 | 9.70E-09 | 5.7054  | 408317 | Snoring |
| rs5026246   | 17 | 43572896  | G | T | 0.2268 | 0.0076  | 0.0012 | 1.30E-09 | 6.0917  | 408317 | Snoring |
| rs529311580 | 17 | 43699113  | G | A | 0.2228 | 0.0077  | 0.0013 | 9.40E-10 | 6.1418  | 408317 | Snoring |
| rs529381335 | 8  | 71583916  | G | A | 0.4843 | -0.0061 | 0.0010 | 6.10E-09 | -5.8321 | 408317 | Snoring |
| rs530258810 | 8  | 71650187  | C | A | 0.3478 | 0.0067  | 0.0012 | 2.40E-08 | 5.6489  | 408317 | Snoring |
| rs534260203 | 8  | 71583939  | G | A | 0.4940 | -0.0061 | 0.0011 | 7.40E-09 | -5.7990 | 408317 | Snoring |
| rs536275664 | 17 | 44355138  | A | G | 0.1990 | 0.0083  | 0.0014 | 1.20E-09 | 6.1005  | 408317 | Snoring |
| rs537176681 | 8  | 71597646  | G | C | 0.3912 | 0.0067  | 0.0011 | 8.20E-10 | 6.1283  | 408317 | Snoring |
| rs538194544 | 8  | 71583927  | C | T | 0.4817 | -0.0060 | 0.0010 | 1.20E-08 | -5.7180 | 408317 | Snoring |
| rs538628    | 17 | 44787313  | C | G | 0.2148 | 0.0072  | 0.0013 | 2.00E-08 | 5.6470  | 408317 | Snoring |
| rs541891089 | 17 | 44364481  | G | C | 0.1923 | 0.0081  | 0.0014 | 6.00E-09 | 5.8278  | 408317 | Snoring |
| rs547528772 | 5  | 74995634  | T | C | 0.2082 | -0.0077 | 0.0014 | 1.80E-08 | -5.5350 | 408317 | Snoring |
| rs548922694 | 8  | 71597643  | C | A | 0.3912 | 0.0067  | 0.0011 | 8.20E-10 | 6.1283  | 408317 | Snoring |
| rs549543455 | 8  | 71583917  | C | A | 0.4843 | -0.0061 | 0.0010 | 6.10E-09 | -5.8321 | 408317 | Snoring |
| rs550994768 | 8  | 71597647  | G | A | 0.3912 | 0.0067  | 0.0011 | 8.20E-10 | 6.1283  | 408317 | Snoring |
| rs551316551 | 8  | 71905835  | T | A | 0.4309 | 0.0068  | 0.0011 | 1.50E-10 | 6.3926  | 408317 | Snoring |
| rs551508816 | 8  | 71583930  | G | T | 0.4817 | -0.0060 | 0.0010 | 1.20E-08 | -5.7180 | 408317 | Snoring |
| rs552290972 | 17 | 43947883  | G | T | 0.2130 | 0.0075  | 0.0013 | 9.70E-09 | 5.7671  | 408317 | Snoring |
| rs553682853 | 17 | 44759766  | A | G | 0.1681 | 0.0089  | 0.0015 | 6.60E-09 | 5.8324  | 408317 | Snoring |
| rs553926554 | 8  | 71583941  | G | A | 0.4940 | -0.0061 | 0.0011 | 7.40E-09 | -5.7990 | 408317 | Snoring |
| rs554105021 | 17 | 44482352  | G | T | 0.3004 | 0.0072  | 0.0013 | 3.00E-08 | 5.5166  | 408317 | Snoring |
| rs55638417  | 17 | 43900434  | G | A | 0.2251 | 0.0076  | 0.0012 | 1.30E-09 | 6.0971  | 408317 | Snoring |
| rs55643511  | 17 | 43556982  | A | G | 0.1848 | 0.0074  | 0.0013 | 4.10E-08 | 5.4745  | 408317 | Snoring |
| rs55645418  | 17 | 43832115  | G | A | 0.2252 | 0.0076  | 0.0012 | 1.30E-09 | 6.0973  | 408317 | Snoring |
| rs55646970  | 17 | 43938796  | G | A | 0.2255 | 0.0076  | 0.0012 | 1.40E-09 | 6.0789  | 408317 | Snoring |
| rs55649944  | 17 | 44119463  | T | C | 0.2236 | 0.0074  | 0.0013 | 3.60E-09 | 5.9269  | 408317 | Snoring |
| rs55651627  | 17 | 43758011  | C | G | 0.2253 | 0.0077  | 0.0012 | 8.60E-10 | 6.1556  | 408317 | Snoring |
| rs55652155  | 17 | 43548481  | G | A | 0.1848 | 0.0074  | 0.0013 | 4.10E-08 | 5.4777  | 408317 | Snoring |
| rs55653657  | 17 | 43956778  | G | A | 0.2254 | 0.0076  | 0.0012 | 1.50E-09 | 6.0772  | 408317 | Snoring |
| rs55653937  | 17 | 44316076  | T | G | 0.2244 | 0.0076  | 0.0013 | 2.00E-09 | 6.0287  | 408317 | Snoring |
| rs55653963  | 17 | 43799509  | C | A | 0.2250 | 0.0077  | 0.0012 | 1.00E-09 | 6.1317  | 408317 | Snoring |
| rs55657917  | 17 | 43844560  | G | T | 0.2219 | 0.0079  | 0.0013 | 4.50E-10 | 6.2594  | 408317 | Snoring |
| rs55660209  | 17 | 43932173  | G | A | 0.2250 | 0.0077  | 0.0013 | 1.00E-09 | 6.1330  | 408317 | Snoring |
| rs55662347  | 17 | 44070545  | A | G | 0.2254 | 0.0075  | 0.0012 | 2.00E-09 | 6.0220  | 408317 | Snoring |
| rs55663797  | 17 | 43544379  | A | G | 0.1848 | 0.0074  | 0.0013 | 4.00E-08 | 5.4773  | 408317 | Snoring |
| rs55668363  | 17 | 43892788  | A | G | 0.2223 | 0.0076  | 0.0013 | 1.70E-09 | 6.0526  | 408317 | Snoring |
| rs55668559  | 17 | 1914635   | G | A | 0.3112 | -0.0062 | 0.0011 | 3.00E-08 | -5.5353 | 408317 | Snoring |
| rs55669046  | 17 | 43768501  | T | C | 0.2252 | 0.0077  | 0.0012 | 1.00E-09 | 6.1288  | 408317 | Snoring |
| rs55669501  | 17 | 44202564  | A | G | 0.2258 | 0.0076  | 0.0012 | 1.70E-09 | 6.0533  | 408317 | Snoring |
| rs55671319  | 17 | 43548424  | G | A | 0.1848 | 0.0074  | 0.0013 | 3.90E-08 | 5.4851  | 408317 | Snoring |
| rs55672516  | 17 | 44201680  | C | A | 0.2258 | 0.0076  | 0.0012 | 1.70E-09 | 6.0531  | 408317 | Snoring |
| rs55673092  | 17 | 43938882  | A | G | 0.2255 | 0.0076  | 0.0012 | 1.40E-09 | 6.0791  | 408317 | Snoring |
| rs55673340  | 17 | 43948733  | T | C | 0.2255 | 0.0076  | 0.0012 | 1.50E-09 | 6.0780  | 408317 | Snoring |
| rs55682156  | 17 | 46513175  | T | C | 0.2155 | -0.0075 | 0.0013 | 3.00E-09 | -5.9085 | 408317 | Snoring |
| rs55682376  | 17 | 43991888  | A | G | 0.2255 | 0.0076  | 0.0012 | 1.50E-09 | 6.0772  | 408317 | Snoring |
| rs55685451  | 17 | 44001957  | G | T | 0.2255 | 0.0076  | 0.0012 | 1.40E-09 | 6.0792  | 408317 | Snoring |
| rs55686102  | 17 | 44202608  | T | C | 0.2257 | 0.0076  | 0.0012 | 1.60E-09 | 6.0690  | 408317 | Snoring |
| rs55688739  | 17 | 43741136  | T | C | 0.2256 | 0.0076  | 0.0013 | 1.40E-09 | 6.0820  | 408317 | Snoring |
| rs55690782  | 17 | 44137311  | A | G | 0.2255 | 0.0075  | 0.0012 | 1.90E-09 | 6.0318  | 408317 | Snoring |
| rs55691306  | 17 | 43978295  | C | G | 0.2255 | 0.0076  | 0.0012 | 1.40E-09 | 6.0857  | 408317 | Snoring |
| rs55692232  | 17 | 44164323  | A | G | 0.2254 | 0.0075  | 0.0012 | 2.10E-09 | 6.0167  | 408317 | Snoring |
| rs55707339  | 17 | 43842462  | C | T | 0.2249 | 0.0077  | 0.0013 | 1.00E-09 | 6.1317  | 408317 | Snoring |
| rs55709241  | 17 | 44041101  | C | T | 0.2229 | 0.0076  | 0.0013 | 2.10E-09 | 6.0186  | 408317 | Snoring |
| rs55711631  | 17 | 43958431  | C | T | 0.2255 | 0.0076  | 0.0012 | 1.30E-09 | 6.0961  | 408317 | Snoring |
| rs55711941  | 17 | 44040823  | T | C | 0.2254 | 0.0075  | 0.0012 | 2.20E-09 | 6.0078  | 408317 | Snoring |
| rs55714296  | 17 | 44137189  | T | A | 0.2254 | 0.0075  | 0.0012 | 2.10E-09 | 6.0189  | 408317 | Snoring |
| rs55718212  | 17 | 43920411  | C | T | 0.2253 | 0.0077  | 0.0012 | 1.10E-09 | 6.1237  | 408317 | Snoring |
| rs55719714  | 17 | 43939638  | A | G | 0.2253 | 0.0076  | 0.0012 | 1.70E-09 | 6.0486  | 408317 | Snoring |
| rs55721252  | 17 | 43958099  | C | T | 0.2253 | 0.0076  | 0.0012 | 1.60E-09 | 6.0665  | 408317 | Snoring |
| rs557236423 | 17 | 44517766  | A | T | 0.2602 | 0.0086  | 0.0013 | 1.80E-10 | 6.3723  | 408317 | Snoring |
| rs55725840  | 17 | 43844486  | A | T | 0.2251 | 0.0077  | 0.0012 | 1.10E-09 | 6.1266  | 408317 | Snoring |
| rs55726761  | 17 | 44099669  | A | G | 0.2254 | 0.0075  | 0.0012 | 1.90E-09 | 6.0335  | 408317 | Snoring |
| rs55735563  | 17 | 44165596  | T | C | 0.2220 | 0.0075  | 0.0013 | 2.90E-09 | 5.9656  | 408317 | Snoring |
| rs55736025  | 17 | 44072017  | A | C | 0.2254 | 0.0075  | 0.0012 | 2.00E-09 | 6.0247  | 408317 | Snoring |

|            |    |          |   |   |        |         |        |          |         |        |         |
|------------|----|----------|---|---|--------|---------|--------|----------|---------|--------|---------|
| rs55740254 | 8  | 71840560 | A | G | 0.4295 | 0.0069  | 0.0011 | 6.70E-11 | 6.5220  | 408317 | Snoring |
| rs55744103 | 17 | 44316280 | C | T | 0.2247 | 0.0076  | 0.0013 | 1.50E-09 | 6.0743  | 408317 | Snoring |
| rs55746658 | 17 | 44034575 | C | T | 0.2254 | 0.0076  | 0.0012 | 1.60E-09 | 6.0563  | 408317 | Snoring |
| rs55746869 | 17 | 43551083 | T | C | 0.1846 | 0.0074  | 0.0013 | 4.00E-08 | 5.4746  | 408317 | Snoring |
| rs55747440 | 17 | 43837115 | G | A | 0.2251 | 0.0076  | 0.0012 | 1.20E-09 | 6.1094  | 408317 | Snoring |
| rs55751924 | 17 | 43932155 | G | A | 0.2253 | 0.0077  | 0.0013 | 9.50E-10 | 6.1453  | 408317 | Snoring |
| rs55760800 | 17 | 43996908 | G | T | 0.2255 | 0.0076  | 0.0012 | 1.50E-09 | 6.0693  | 408317 | Snoring |
| rs55762633 | 19 | 32213209 | T | C | 0.0905 | -0.0103 | 0.0018 | 1.20E-08 | -5.6184 | 408317 | Snoring |
| rs55763795 | 17 | 43908773 | C | G | 0.2252 | 0.0076  | 0.0012 | 1.10E-09 | 6.1234  | 408317 | Snoring |
| rs55766044 | 16 | 31117698 | T | C | 0.2805 | 0.0064  | 0.0012 | 4.30E-08 | 5.5003  | 408317 | Snoring |
| rs55767267 | 17 | 43960325 | C | T | 0.2231 | 0.0077  | 0.0013 | 1.10E-09 | 6.1230  | 408317 | Snoring |
| rs55768605 | 17 | 43956734 | A | C | 0.2254 | 0.0076  | 0.0012 | 1.50E-09 | 6.0758  | 408317 | Snoring |
| rs55779147 | 17 | 43894510 | A | G | 0.2253 | 0.0077  | 0.0012 | 1.10E-09 | 6.1248  | 408317 | Snoring |
| rs55780786 | 17 | 44209875 | C | T | 0.2257 | 0.0076  | 0.0013 | 1.30E-09 | 6.0919  | 408317 | Snoring |
| rs55780945 | 17 | 44040120 | T | C | 0.2254 | 0.0075  | 0.0012 | 2.10E-09 | 6.0153  | 408317 | Snoring |
| rs55781174 | 17 | 43944158 | T | C | 0.2255 | 0.0076  | 0.0012 | 1.50E-09 | 6.0780  | 408317 | Snoring |
| rs55787105 | 17 | 43853109 | A | G | 0.2250 | 0.0077  | 0.0013 | 9.30E-10 | 6.1495  | 408317 | Snoring |
| rs55787734 | 17 | 43799052 | G | A | 0.2237 | 0.0078  | 0.0013 | 5.90E-10 | 6.2146  | 408317 | Snoring |
| rs55788597 | 17 | 44003397 | A | T | 0.2255 | 0.0076  | 0.0012 | 1.50E-09 | 6.0784  | 408317 | Snoring |
| rs55788678 | 17 | 43992233 | T | C | 0.2244 | 0.0075  | 0.0013 | 2.20E-09 | 6.0115  | 408317 | Snoring |
| rs55794067 | 17 | 44188764 | C | T | 0.2259 | 0.0076  | 0.0012 | 1.40E-09 | 6.0806  | 408317 | Snoring |
| rs55801356 | 17 | 43837237 | G | A | 0.2251 | 0.0076  | 0.0012 | 1.20E-09 | 6.1037  | 408317 | Snoring |
| rs55802590 | 17 | 44201344 | C | G | 0.2258 | 0.0076  | 0.0012 | 1.50E-09 | 6.0718  | 408317 | Snoring |
| rs55810795 | 17 | 43992283 | G | A | 0.2248 | 0.0076  | 0.0013 | 1.90E-09 | 6.0323  | 408317 | Snoring |
| rs55821155 | 17 | 44032470 | G | C | 0.2255 | 0.0076  | 0.0012 | 1.60E-09 | 6.0578  | 408317 | Snoring |
| rs55823844 | 17 | 43978320 | A | G | 0.2255 | 0.0076  | 0.0012 | 1.40E-09 | 6.0858  | 408317 | Snoring |
| rs55825513 | 17 | 44176215 | A | G | 0.2250 | 0.0075  | 0.0013 | 2.30E-09 | 6.0007  | 408317 | Snoring |
| rs55831516 | 17 | 44148267 | T | C | 0.2254 | 0.0075  | 0.0012 | 2.00E-09 | 6.0247  | 408317 | Snoring |
| rs55838058 | 17 | 43798902 | T | C | 0.2233 | 0.0077  | 0.0013 | 1.20E-09 | 6.0964  | 408317 | Snoring |
| rs55840731 | 17 | 43769277 | G | C | 0.2252 | 0.0077  | 0.0012 | 8.70E-10 | 6.1540  | 408317 | Snoring |
| rs55841786 | 17 | 43978308 | C | T | 0.2223 | 0.0076  | 0.0013 | 2.20E-09 | 6.0108  | 408317 | Snoring |
| rs55849949 | 17 | 43853526 | G | A | 0.2250 | 0.0076  | 0.0012 | 1.10E-09 | 6.1202  | 408317 | Snoring |
| rs55849973 | 17 | 43792418 | C | T | 0.2238 | 0.0076  | 0.0013 | 1.60E-09 | 6.0518  | 408317 | Snoring |
| rs55855305 | 8  | 71702877 | G | A | 0.4316 | 0.0067  | 0.0011 | 1.60E-10 | 6.3865  | 408317 | Snoring |
| rs55862702 | 8  | 71693737 | A | C | 0.4321 | 0.0068  | 0.0011 | 1.10E-10 | 6.4525  | 408317 | Snoring |
| rs55864131 | 17 | 44163411 | C | T | 0.2254 | 0.0075  | 0.0012 | 2.00E-09 | 6.0235  | 408317 | Snoring |
| rs55865599 | 8  | 71704586 | T | C | 0.4304 | 0.0069  | 0.0011 | 7.40E-11 | 6.5054  | 408317 | Snoring |
| rs55865707 | 17 | 43908826 | G | T | 0.2252 | 0.0076  | 0.0012 | 1.10E-09 | 6.1233  | 408317 | Snoring |
| rs55872725 | 16 | 53809123 | T | C | 0.4023 | 0.0067  | 0.0011 | 2.50E-10 | 6.3306  | 408317 | Snoring |
| rs55874169 | 17 | 44014384 | A | G | 0.2255 | 0.0076  | 0.0012 | 1.50E-09 | 6.0725  | 408317 | Snoring |
| rs55876817 | 17 | 43958139 | C | A | 0.2252 | 0.0076  | 0.0012 | 1.40E-09 | 6.0803  | 408317 | Snoring |
| rs55877243 | 17 | 43969019 | C | T | 0.2254 | 0.0076  | 0.0012 | 1.60E-09 | 6.0662  | 408317 | Snoring |
| rs55881134 | 17 | 44109248 | A | G | 0.2254 | 0.0075  | 0.0012 | 2.00E-09 | 6.0286  | 408317 | Snoring |
| rs55885063 | 17 | 44202952 | G | C | 0.2257 | 0.0076  | 0.0012 | 1.70E-09 | 6.0535  | 408317 | Snoring |
| rs55886080 | 17 | 44072041 | A | T | 0.2254 | 0.0075  | 0.0012 | 2.00E-09 | 6.0239  | 408317 | Snoring |
| rs55886302 | 17 | 43936011 | G | A | 0.2255 | 0.0076  | 0.0012 | 1.40E-09 | 6.0787  | 408317 | Snoring |
| rs55888391 | 17 | 43938107 | G | A | 0.2255 | 0.0076  | 0.0012 | 1.40E-09 | 6.0788  | 408317 | Snoring |
| rs55893711 | 17 | 44119320 | T | C | 0.2254 | 0.0075  | 0.0012 | 2.00E-09 | 6.0256  | 408317 | Snoring |
| rs55894109 | 17 | 43957221 | T | C | 0.2255 | 0.0076  | 0.0012 | 1.40E-09 | 6.0830  | 408317 | Snoring |
| rs55895732 | 17 | 43968937 | C | T | 0.2255 | 0.0076  | 0.0012 | 1.40E-09 | 6.0819  | 408317 | Snoring |
| rs55896111 | 17 | 43799048 | A | G | 0.2234 | 0.0078  | 0.0013 | 4.90E-10 | 6.2449  | 408317 | Snoring |
| rs55900347 | 17 | 44176092 | A | G | 0.2258 | 0.0076  | 0.0012 | 1.40E-09 | 6.0836  | 408317 | Snoring |
| rs55905252 | 17 | 43955365 | A | C | 0.2255 | 0.0076  | 0.0012 | 1.40E-09 | 6.0829  | 408317 | Snoring |
| rs55907036 | 17 | 44042366 | A | G | 0.2242 | 0.0075  | 0.0013 | 2.90E-09 | 5.9605  | 408317 | Snoring |
| rs55909047 | 17 | 44209957 | G | A | 0.2258 | 0.0076  | 0.0012 | 1.40E-09 | 6.0807  | 408317 | Snoring |
| rs55913645 | 17 | 44070956 | A | T | 0.2254 | 0.0075  | 0.0012 | 2.00E-09 | 6.0235  | 408317 | Snoring |
| rs55915640 | 8  | 71964658 | C | T | 0.4316 | 0.0067  | 0.0011 | 2.70E-10 | 6.3068  | 408317 | Snoring |
| rs55915917 | 17 | 43892784 | G | T | 0.2229 | 0.0077  | 0.0013 | 1.60E-09 | 6.0751  | 408317 | Snoring |
| rs55925547 | 17 | 43556807 | C | T | 0.1853 | 0.0074  | 0.0013 | 4.00E-08 | 5.4796  | 408317 | Snoring |
| rs55927630 | 17 | 43772407 | T | C | 0.2253 | 0.0077  | 0.0012 | 8.80E-10 | 6.1524  | 408317 | Snoring |
| rs55929190 | 17 | 44147599 | C | G | 0.2254 | 0.0075  | 0.0012 | 2.00E-09 | 6.0271  | 408317 | Snoring |
| rs55929431 | 17 | 44000202 | A | G | 0.2255 | 0.0076  | 0.0012 | 1.60E-09 | 6.0621  | 408317 | Snoring |
| rs55930887 | 17 | 43548321 | C | T | 0.1848 | 0.0074  | 0.0013 | 4.10E-08 | 5.4768  | 408317 | Snoring |
| rs55933304 | 17 | 43992305 | A | G | 0.2249 | 0.0076  | 0.0013 | 1.80E-09 | 6.0387  | 408317 | Snoring |
| rs55937610 | 17 | 43960283 | G | A | 0.2255 | 0.0076  | 0.0012 | 1.40E-09 | 6.0842  | 408317 | Snoring |
| rs55938136 | 17 | 43798360 | A | G | 0.7749 | -0.0077 | 0.0012 | 1.00E-09 | -6.1290 | 408317 | Snoring |
| rs55941940 | 19 | 32181129 | C | T | 0.0909 | -0.0107 | 0.0018 | 2.60E-09 | -5.8694 | 408317 | Snoring |
| rs55942528 | 17 | 43932028 | G | A | 0.2255 | 0.0077  | 0.0012 | 9.60E-10 | 6.1447  | 408317 | Snoring |
| rs55943044 | 17 | 43872228 | A | G | 0.2248 | 0.0077  | 0.0013 | 8.20E-10 | 6.1691  | 408317 | Snoring |
| rs55943606 | 17 | 43968874 | G | A | 0.2255 | 0.0076  | 0.0012 | 1.40E-09 | 6.0835  | 408317 | Snoring |
| rs55943825 | 17 | 43924776 | T | C | 0.2253 | 0.0076  | 0.0012 | 1.10E-09 | 6.1222  | 408317 | Snoring |
| rs55944735 | 17 | 43958172 | G | A | 0.2252 | 0.0076  | 0.0012 | 1.70E-09 | 6.0562  | 408317 | Snoring |
| rs55946323 | 17 | 44031946 | G | A | 0.2255 | 0.0076  | 0.0012 | 1.50E-09 | 6.0726  | 408317 | Snoring |
| rs55947022 | 17 | 44147574 | A | G | 0.2254 | 0.0075  | 0.0012 | 2.00E-09 | 6.0271  | 408317 | Snoring |

|             |    |           |   |   |        |         |        |          |         |        |         |
|-------------|----|-----------|---|---|--------|---------|--------|----------|---------|--------|---------|
| rs55947210  | 17 | 43808763  | G | A | 0.2252 | 0.0077  | 0.0012 | 9.50E-10 | 6.1440  | 408317 | Snoring |
| rs55950910  | 19 | 32185811  | T | A | 0.0910 | -0.0106 | 0.0018 | 3.10E-09 | -5.8400 | 408317 | Snoring |
| rs55955207  | 17 | 44165594  | A | C | 0.2220 | 0.0075  | 0.0013 | 2.90E-09 | 5.9655  | 408317 | Snoring |
| rs55960528  | 17 | 43968994  | C | T | 0.2254 | 0.0076  | 0.0012 | 1.60E-09 | 6.0662  | 408317 | Snoring |
| rs55962674  | 17 | 43799033  | T | C | 0.2250 | 0.0077  | 0.0012 | 1.00E-09 | 6.1283  | 408317 | Snoring |
| rs55967721  | 17 | 43948977  | A | G | 0.2247 | 0.0076  | 0.0013 | 1.50E-09 | 6.0719  | 408317 | Snoring |
| rs55970604  | 8  | 71977773  | A | G | 0.4345 | 0.0067  | 0.0011 | 1.70E-10 | 6.3792  | 408317 | Snoring |
| rs55972157  | 17 | 43768703  | T | C | 0.2253 | 0.0077  | 0.0012 | 8.70E-10 | 6.1550  | 408317 | Snoring |
| rs55972730  | 17 | 44155707  | T | C | 0.2254 | 0.0075  | 0.0012 | 1.90E-09 | 6.0328  | 408317 | Snoring |
| rs55973918  | 17 | 43792252  | A | C | 0.2251 | 0.0077  | 0.0012 | 1.00E-09 | 6.1326  | 408317 | Snoring |
| rs55974014  | 17 | 43757450  | A | C | 0.2199 | 0.0078  | 0.0013 | 7.00E-10 | 6.1958  | 408317 | Snoring |
| rs55975673  | 17 | 43959113  | G | A | 0.2254 | 0.0076  | 0.0012 | 1.60E-09 | 6.0671  | 408317 | Snoring |
| rs55978005  | 17 | 44031540  | T | G | 0.2255 | 0.0076  | 0.0012 | 1.50E-09 | 6.0672  | 408317 | Snoring |
| rs55979424  | 17 | 43900081  | T | C | 0.2253 | 0.0076  | 0.0012 | 1.40E-09 | 6.0873  | 408317 | Snoring |
| rs55979739  | 16 | 31049155  | G | A | 0.3732 | 0.0066  | 0.0011 | 1.40E-09 | 6.0894  | 408317 | Snoring |
| rs55980621  | 17 | 43768496  | T | C | 0.2252 | 0.0077  | 0.0012 | 1.00E-09 | 6.1319  | 408317 | Snoring |
| rs55982346  | 17 | 46275874  | C | T | 0.3866 | 0.0062  | 0.0011 | 3.80E-09 | 5.8086  | 408317 | Snoring |
| rs55987700  | 17 | 44161146  | G | T | 0.2254 | 0.0075  | 0.0012 | 2.00E-09 | 6.0280  | 408317 | Snoring |
| rs55989971  | 17 | 43798160  | A | G | 0.2251 | 0.0077  | 0.0012 | 1.00E-09 | 6.1289  | 408317 | Snoring |
| rs55991914  | 17 | 43854267  | T | C | 0.2250 | 0.0076  | 0.0012 | 1.10E-09 | 6.1202  | 408317 | Snoring |
| rs55996632  | 17 | 43935888  | T | C | 0.2255 | 0.0076  | 0.0012 | 1.30E-09 | 6.0950  | 408317 | Snoring |
| rs56002706  | 17 | 44000505  | T | C | 0.2255 | 0.0076  | 0.0012 | 1.50E-09 | 6.0781  | 408317 | Snoring |
| rs56006248  | 17 | 43815141  | G | A | 0.2252 | 0.0077  | 0.0012 | 9.90E-10 | 6.1372  | 408317 | Snoring |
| rs56013908  | 17 | 43836920  | C | T | 0.2251 | 0.0076  | 0.0012 | 1.20E-09 | 6.1027  | 408317 | Snoring |
| rs56015792  | 17 | 43551321  | C | G | 0.1848 | 0.0074  | 0.0013 | 4.00E-08 | 5.4773  | 408317 | Snoring |
| rs56023973  | 17 | 43917776  | T | G | 0.2252 | 0.0076  | 0.0012 | 1.20E-09 | 6.1107  | 408317 | Snoring |
| rs56026128  | 17 | 43931244  | C | G | 0.2252 | 0.0076  | 0.0012 | 1.40E-09 | 6.0826  | 408317 | Snoring |
| rs56026232  | 17 | 43939399  | C | A | 0.2183 | 0.0078  | 0.0013 | 1.50E-09 | 6.0790  | 408317 | Snoring |
| rs56026524  | 17 | 43939389  | T | C | 0.2191 | 0.0076  | 0.0013 | 2.50E-09 | 5.9882  | 408317 | Snoring |
| rs56036719  | 17 | 43943974  | T | C | 0.2255 | 0.0076  | 0.0012 | 1.50E-09 | 6.0775  | 408317 | Snoring |
| rs56040418  | 17 | 43958079  | T | C | 0.2258 | 0.0075  | 0.0012 | 2.10E-09 | 6.0195  | 408317 | Snoring |
| rs56041778  | 17 | 44147511  | C | G | 0.2254 | 0.0075  | 0.0012 | 2.00E-09 | 6.0271  | 408317 | Snoring |
| rs56042957  | 17 | 43992244  | A | G | 0.2248 | 0.0076  | 0.0013 | 1.90E-09 | 6.0323  | 408317 | Snoring |
| rs56043078  | 17 | 43853235  | G | T | 0.2250 | 0.0076  | 0.0012 | 1.10E-09 | 6.1202  | 408317 | Snoring |
| rs56043721  | 8  | 71630427  | A | T | 0.4834 | -0.0059 | 0.0010 | 1.80E-08 | -5.6426 | 408317 | Snoring |
| rs56046792  | 17 | 43797246  | T | C | 0.2251 | 0.0077  | 0.0012 | 1.00E-09 | 6.1282  | 408317 | Snoring |
| rs56050731  | 13 | 111566790 | A | G | 0.3680 | -0.0058 | 0.0011 | 4.40E-08 | -5.4145 | 408317 | Snoring |
| rs56062621  | 17 | 43798903  | G | A | 0.2233 | 0.0077  | 0.0013 | 1.20E-09 | 6.0961  | 408317 | Snoring |
| rs56070245  | 17 | 43847868  | C | T | 0.2251 | 0.0077  | 0.0012 | 1.00E-09 | 6.1321  | 408317 | Snoring |
| rs56080482  | 17 | 44032597  | A | G | 0.2255 | 0.0076  | 0.0012 | 1.50E-09 | 6.0678  | 408317 | Snoring |
| rs56082319  | 17 | 43844798  | A | G | 0.2251 | 0.0077  | 0.0012 | 1.10E-09 | 6.1256  | 408317 | Snoring |
| rs56094641  | 16 | 53806453  | G | A | 0.4034 | 0.0068  | 0.0011 | 1.50E-10 | 6.4138  | 408317 | Snoring |
| rs56094661  | 8  | 71644728  | T | C | 0.4302 | 0.0068  | 0.0011 | 1.10E-10 | 6.4447  | 408317 | Snoring |
| rs56099546  | 17 | 43894609  | G | A | 0.2251 | 0.0076  | 0.0012 | 1.40E-09 | 6.0815  | 408317 | Snoring |
| rs56099911  | 8  | 71622391  | C | T | 0.4289 | 0.0067  | 0.0011 | 1.50E-10 | 6.3997  | 408317 | Snoring |
| rs56100013  | 17 | 43768467  | T | C | 0.2252 | 0.0077  | 0.0012 | 8.70E-10 | 6.1540  | 408317 | Snoring |
| rs56100031  | 17 | 44155157  | T | C | 0.2254 | 0.0075  | 0.0012 | 2.00E-09 | 6.0258  | 408317 | Snoring |
| rs56100710  | 17 | 43939395  | T | A | 0.2183 | 0.0078  | 0.0013 | 1.40E-09 | 6.0799  | 408317 | Snoring |
| rs56101773  | 17 | 43957269  | C | T | 0.2255 | 0.0076  | 0.0012 | 1.50E-09 | 6.0758  | 408317 | Snoring |
| rs56108300  | 17 | 44077851  | A | T | 0.2229 | 0.0076  | 0.0013 | 1.80E-09 | 6.0506  | 408317 | Snoring |
| rs56108781  | 8  | 71728754  | G | A | 0.4320 | 0.0068  | 0.0011 | 1.40E-10 | 6.4141  | 408317 | Snoring |
| rs56109643  | 17 | 43844859  | G | A | 0.2251 | 0.0077  | 0.0012 | 1.10E-09 | 6.1268  | 408317 | Snoring |
| rs561098785 | 8  | 71583915  | T | C | 0.4843 | -0.0061 | 0.0010 | 6.10E-09 | -5.8321 | 408317 | Snoring |
| rs56110538  | 17 | 43768727  | A | G | 0.2253 | 0.0077  | 0.0012 | 8.40E-10 | 6.1614  | 408317 | Snoring |
| rs56112621  | 8  | 71588394  | G | A | 0.4820 | -0.0060 | 0.0010 | 1.30E-08 | -5.7013 | 408317 | Snoring |
| rs56113217  | 17 | 43926948  | G | A | 0.2255 | 0.0076  | 0.0012 | 1.10E-09 | 6.1220  | 408317 | Snoring |
| rs56115633  | 8  | 71597511  | G | A | 0.4819 | -0.0060 | 0.0010 | 1.30E-08 | -5.6946 | 408317 | Snoring |
| rs56119705  | 17 | 44209985  | C | T | 0.2257 | 0.0076  | 0.0012 | 1.40E-09 | 6.0844  | 408317 | Snoring |
| rs56127111  | 17 | 43913315  | T | C | 0.2252 | 0.0076  | 0.0012 | 1.10E-09 | 6.1216  | 408317 | Snoring |
| rs56127309  | 17 | 43960341  | A | G | 0.2231 | 0.0077  | 0.0013 | 1.10E-09 | 6.1251  | 408317 | Snoring |
| rs56136075  | 17 | 43936298  | A | C | 0.2255 | 0.0076  | 0.0012 | 1.40E-09 | 6.0787  | 408317 | Snoring |
| rs56137030  | 16 | 53825905  | A | G | 0.3923 | 0.0064  | 0.0011 | 2.90E-09 | 5.9435  | 408317 | Snoring |
| rs56146024  | 17 | 46472449  | G | A | 0.2225 | -0.0072 | 0.0013 | 7.50E-09 | -5.7555 | 408317 | Snoring |
| rs56146262  | 17 | 43931907  | A | C | 0.2252 | 0.0077  | 0.0012 | 1.00E-09 | 6.1338  | 408317 | Snoring |
| rs56150806  | 17 | 43919301  | C | T | 0.2253 | 0.0076  | 0.0012 | 1.10E-09 | 6.1192  | 408317 | Snoring |
| rs56156614  | 8  | 71643051  | G | C | 0.4302 | 0.0068  | 0.0011 | 1.10E-10 | 6.4450  | 408317 | Snoring |
| rs56159231  | 17 | 43556862  | T | C | 0.1847 | 0.0074  | 0.0013 | 4.30E-08 | 5.4673  | 408317 | Snoring |
| rs56160448  | 17 | 43792358  | G | A | 0.2250 | 0.0077  | 0.0012 | 1.10E-09 | 6.1261  | 408317 | Snoring |
| rs56162163  | 17 | 43774497  | T | A | 0.2252 | 0.0077  | 0.0012 | 9.10E-10 | 6.1476  | 408317 | Snoring |
| rs56166491  | 17 | 44042221  | G | A | 0.2254 | 0.0075  | 0.0012 | 1.90E-09 | 6.0373  | 408317 | Snoring |
| rs56167344  | 17 | 43797087  | T | A | 0.2253 | 0.0077  | 0.0012 | 1.10E-09 | 6.1236  | 408317 | Snoring |
| rs56167560  | 17 | 43792411  | G | A | 0.2238 | 0.0076  | 0.0013 | 1.60E-09 | 6.0560  | 408317 | Snoring |
| rs56168907  | 17 | 43837091  | C | T | 0.2251 | 0.0076  | 0.0012 | 1.20E-09 | 6.1054  | 408317 | Snoring |
| rs56173818  | 8  | 71622373  | G | A | 0.4291 | 0.0068  | 0.0011 | 1.10E-10 | 6.4417  | 408317 | Snoring |



|            |    |           |   |   |        |         |        |          |         |        |         |
|------------|----|-----------|---|---|--------|---------|--------|----------|---------|--------|---------|
| rs56178230 | 17 | 43817832  | A | G | 0.2252 | 0.0077  | 0.0012 | 9.70E-10 | 6.1401  | 408317 | Snoring |
| rs56180212 | 17 | 43960911  | G | A | 0.2256 | 0.0075  | 0.0012 | 2.00E-09 | 6.0323  | 408317 | Snoring |
| rs56185520 | 7  | 127364310 | G | A | 0.3254 | 0.0061  | 0.0011 | 3.00E-08 | 5.4882  | 408317 | Snoring |
| rs56189701 | 17 | 43987801  | C | T | 0.2251 | 0.0076  | 0.0012 | 1.30E-09 | 6.0938  | 408317 | Snoring |
| rs56194412 | 17 | 43960600  | C | T | 0.2255 | 0.0076  | 0.0012 | 1.40E-09 | 6.0877  | 408317 | Snoring |
| rs56194509 | 17 | 43844559  | G | T | 0.2219 | 0.0079  | 0.0013 | 4.50E-10 | 6.2593  | 408317 | Snoring |
| rs56197117 | 17 | 44003446  | G | A | 0.2255 | 0.0076  | 0.0012 | 1.50E-09 | 6.0783  | 408317 | Snoring |
| rs56200760 | 17 | 43772018  | T | G | 0.2253 | 0.0077  | 0.0012 | 8.80E-10 | 6.1526  | 408317 | Snoring |
| rs56201245 | 17 | 44034340  | T | C | 0.2254 | 0.0076  | 0.0012 | 1.60E-09 | 6.0575  | 408317 | Snoring |
| rs56205560 | 17 | 43804389  | A | T | 0.2252 | 0.0077  | 0.0012 | 1.10E-09 | 6.1234  | 408317 | Snoring |
| rs56214516 | 17 | 43836953  | C | A | 0.1970 | 0.0082  | 0.0013 | 8.50E-10 | 6.1676  | 408317 | Snoring |
| rs56220242 | 17 | 43792326  | T | C | 0.2251 | 0.0077  | 0.0012 | 1.10E-09 | 6.1230  | 408317 | Snoring |
| rs56226437 | 17 | 44042361  | C | T | 0.2242 | 0.0075  | 0.0013 | 3.00E-09 | 5.9579  | 408317 | Snoring |
| rs56226958 | 8  | 71695696  | T | C | 0.4322 | 0.0068  | 0.0011 | 1.10E-10 | 6.4491  | 408317 | Snoring |
| rs56227067 | 17 | 43939609  | T | A | 0.2253 | 0.0075  | 0.0012 | 1.80E-09 | 6.0419  | 408317 | Snoring |
| rs56233672 | 17 | 43920300  | C | T | 0.2253 | 0.0076  | 0.0012 | 1.10E-09 | 6.1219  | 408317 | Snoring |
| rs56234850 | 17 | 44060248  | A | G | 0.2254 | 0.0075  | 0.0012 | 2.00E-09 | 6.0266  | 408317 | Snoring |
| rs56240678 | 17 | 44176170  | G | C | 0.2259 | 0.0076  | 0.0012 | 1.40E-09 | 6.0801  | 408317 | Snoring |
| rs56249080 | 17 | 43939432  | T | G | 0.2255 | 0.0076  | 0.0012 | 1.40E-09 | 6.0789  | 408317 | Snoring |
| rs56249311 | 17 | 44003599  | T | C | 0.2255 | 0.0076  | 0.0012 | 1.50E-09 | 6.0783  | 408317 | Snoring |
| rs56249780 | 17 | 43957328  | T | C | 0.2255 | 0.0076  | 0.0012 | 1.40E-09 | 6.0832  | 408317 | Snoring |
| rs56254732 | 17 | 43932049  | T | C | 0.2255 | 0.0077  | 0.0012 | 9.40E-10 | 6.1480  | 408317 | Snoring |
| rs56257094 | 17 | 44201667  | A | G | 0.2258 | 0.0076  | 0.0012 | 1.70E-09 | 6.0531  | 408317 | Snoring |
| rs56268325 | 17 | 43847741  | C | T | 0.2251 | 0.0077  | 0.0012 | 9.90E-10 | 6.1373  | 408317 | Snoring |
| rs56269136 | 17 | 43926992  | T | C | 0.2256 | 0.0076  | 0.0012 | 1.20E-09 | 6.1162  | 408317 | Snoring |
| rs56273589 | 17 | 44203131  | G | C | 0.2257 | 0.0076  | 0.0012 | 1.70E-09 | 6.0557  | 408317 | Snoring |
| rs56280222 | 17 | 43803788  | C | T | 0.2251 | 0.0077  | 0.0012 | 1.10E-09 | 6.1266  | 408317 | Snoring |
| rs56280951 | 17 | 44041107  | A | G | 0.2229 | 0.0076  | 0.0013 | 2.10E-09 | 6.0186  | 408317 | Snoring |
| rs56283089 | 17 | 43769321  | C | A | 0.2253 | 0.0077  | 0.0012 | 8.70E-10 | 6.1541  | 408317 | Snoring |
| rs56284083 | 16 | 31052895  | A | G | 0.3778 | 0.0065  | 0.0011 | 2.30E-09 | 6.0097  | 408317 | Snoring |
| rs56288604 | 17 | 43931380  | G | A | 0.2254 | 0.0077  | 0.0012 | 1.10E-09 | 6.1299  | 408317 | Snoring |
| rs56289364 | 17 | 43947928  | G | A | 0.2255 | 0.0076  | 0.0012 | 1.50E-09 | 6.0784  | 408317 | Snoring |
| rs56289931 | 8  | 71837754  | A | G | 0.4821 | -0.0059 | 0.0010 | 2.00E-08 | -5.6312 | 408317 | Snoring |
| rs56290582 | 17 | 43788371  | T | C | 0.2251 | 0.0076  | 0.0012 | 1.10E-09 | 6.1169  | 408317 | Snoring |
| rs56294117 | 17 | 44042783  | A | G | 0.2254 | 0.0075  | 0.0012 | 2.20E-09 | 6.0091  | 408317 | Snoring |
| rs56295996 | 17 | 43817557  | T | C | 0.2252 | 0.0077  | 0.0012 | 9.70E-10 | 6.1404  | 408317 | Snoring |
| rs56298110 | 17 | 43815336  | G | A | 0.2252 | 0.0077  | 0.0012 | 9.70E-10 | 6.1394  | 408317 | Snoring |
| rs56299858 | 17 | 43939659  | A | G | 0.2253 | 0.0076  | 0.0012 | 1.70E-09 | 6.0496  | 408317 | Snoring |
| rs56299871 | 8  | 71816818  | G | A | 0.4828 | -0.0060 | 0.0010 | 1.40E-08 | -5.7010 | 408317 | Snoring |
| rs56301449 | 17 | 43960918  | C | T | 0.2254 | 0.0076  | 0.0012 | 1.60E-09 | 6.0703  | 408317 | Snoring |
| rs56301633 | 17 | 44077850  | A | G | 0.2229 | 0.0076  | 0.0013 | 1.80E-09 | 6.0453  | 408317 | Snoring |
| rs56303031 | 17 | 43853922  | A | G | 0.2251 | 0.0076  | 0.0012 | 1.10E-09 | 6.1211  | 408317 | Snoring |
| rs56303672 | 17 | 43996960  | G | A | 0.2255 | 0.0076  | 0.0012 | 1.50E-09 | 6.0694  | 408317 | Snoring |
| rs56306380 | 17 | 43978306  | A | G | 0.2225 | 0.0076  | 0.0013 | 1.60E-09 | 6.0654  | 408317 | Snoring |
| rs56312737 | 17 | 43769516  | A | C | 0.2253 | 0.0077  | 0.0012 | 8.70E-10 | 6.1541  | 408317 | Snoring |
| rs56313538 | 16 | 53818834  | G | A | 0.3931 | 0.0063  | 0.0011 | 3.20E-09 | 5.9248  | 408317 | Snoring |
| rs56317731 | 17 | 44032073  | G | A | 0.2255 | 0.0076  | 0.0012 | 1.60E-09 | 6.0662  | 408317 | Snoring |
| rs56318865 | 17 | 44147411  | A | G | 0.2254 | 0.0075  | 0.0012 | 2.00E-09 | 6.0271  | 408317 | Snoring |
| rs56319902 | 17 | 43871982  | T | C | 0.2248 | 0.0078  | 0.0013 | 5.90E-10 | 6.2209  | 408317 | Snoring |
| rs56323304 | 17 | 43932129  | T | C | 0.2254 | 0.0077  | 0.0013 | 8.20E-10 | 6.1720  | 408317 | Snoring |
| rs56323408 | 17 | 44147721  | T | C | 0.2254 | 0.0075  | 0.0012 | 2.00E-09 | 6.0271  | 408317 | Snoring |
| rs56323722 | 17 | 43798015  | C | A | 0.2251 | 0.0076  | 0.0012 | 1.10E-09 | 6.1203  | 408317 | Snoring |
| rs56323832 | 17 | 43768633  | A | G | 0.2253 | 0.0077  | 0.0012 | 7.70E-10 | 6.1747  | 408317 | Snoring |
| rs56327054 | 17 | 43943957  | C | G | 0.2255 | 0.0076  | 0.0012 | 1.50E-09 | 6.0677  | 408317 | Snoring |
| rs56328224 | 17 | 43572419  | T | C | 0.2265 | 0.0079  | 0.0012 | 3.10E-10 | 6.3168  | 408317 | Snoring |
| rs56329743 | 17 | 43931245  | A | G | 0.2253 | 0.0076  | 0.0012 | 1.10E-09 | 6.1184  | 408317 | Snoring |
| rs56338487 | 17 | 43960812  | T | A | 0.2255 | 0.0076  | 0.0012 | 1.40E-09 | 6.0864  | 408317 | Snoring |
| rs56340658 | 17 | 43689090  | C | T | 0.2259 | 0.0077  | 0.0013 | 9.70E-10 | 6.1370  | 408317 | Snoring |
| rs56343551 | 17 | 43959092  | T | G | 0.2254 | 0.0076  | 0.0012 | 1.60E-09 | 6.0671  | 408317 | Snoring |
| rs56347602 | 17 | 43939255  | C | T | 0.2255 | 0.0076  | 0.0012 | 1.40E-09 | 6.0796  | 408317 | Snoring |
| rs56352991 | 8  | 71568078  | T | C | 0.4334 | 0.0069  | 0.0011 | 4.50E-11 | 6.5878  | 408317 | Snoring |
| rs56354807 | 17 | 43920378  | T | C | 0.2253 | 0.0076  | 0.0012 | 1.10E-09 | 6.1224  | 408317 | Snoring |
| rs56356641 | 17 | 43958362  | G | T | 0.2271 | 0.0075  | 0.0012 | 2.30E-09 | 6.0040  | 408317 | Snoring |
| rs56357543 | 17 | 43894547  | T | C | 0.2251 | 0.0076  | 0.0012 | 1.40E-09 | 6.0813  | 408317 | Snoring |
| rs56364632 | 17 | 43956642  | C | T | 0.2253 | 0.0076  | 0.0012 | 1.40E-09 | 6.0866  | 408317 | Snoring |
| rs56365901 | 17 | 43960323  | G | A | 0.2231 | 0.0077  | 0.0013 | 1.20E-09 | 6.1117  | 408317 | Snoring |
| rs56367860 | 17 | 44034673  | G | T | 0.2253 | 0.0076  | 0.0013 | 1.40E-09 | 6.0795  | 408317 | Snoring |
| rs56369036 | 17 | 43841571  | A | T | 0.2251 | 0.0076  | 0.0012 | 1.10E-09 | 6.1141  | 408317 | Snoring |
| rs56371647 | 17 | 43855503  | T | C | 0.2252 | 0.0077  | 0.0013 | 1.00E-09 | 6.1282  | 408317 | Snoring |
| rs56380663 | 17 | 43804619  | T | C | 0.2252 | 0.0076  | 0.0012 | 1.30E-09 | 6.0990  | 408317 | Snoring |
| rs56383608 | 8  | 71780647  | T | C | 0.4301 | 0.0068  | 0.0011 | 1.40E-10 | 6.4115  | 408317 | Snoring |
| rs56384960 | 17 | 43817608  | A | G | 0.2252 | 0.0077  | 0.0012 | 9.70E-10 | 6.1404  | 408317 | Snoring |
| rs56385452 | 17 | 46539411  | C | G | 0.2263 | -0.0074 | 0.0013 | 2.20E-09 | -5.9417 | 408317 | Snoring |
| rs56385754 | 17 | 43927255  | T | G | 0.2259 | 0.0077  | 0.0012 | 9.20E-10 | 6.1532  | 408317 | Snoring |

|             |    |           |   |   |        |         |        |          |         |        |         |
|-------------|----|-----------|---|---|--------|---------|--------|----------|---------|--------|---------|
| rs56387266  | 17 | 43847912  | C | T | 0.2251 | 0.0077  | 0.0012 | 9.90E-10 | 6.1374  | 408317 | Snoring |
| rs56387391  | 17 | 43959261  | A | G | 0.2255 | 0.0076  | 0.0012 | 1.40E-09 | 6.0837  | 408317 | Snoring |
| rs56391096  | 17 | 43774845  | T | C | 0.2252 | 0.0077  | 0.0012 | 9.10E-10 | 6.1470  | 408317 | Snoring |
| rs56397077  | 17 | 43788419  | A | C | 0.2251 | 0.0076  | 0.0012 | 1.10E-09 | 6.1211  | 408317 | Snoring |
| rs56398500  | 17 | 43947488  | G | A | 0.2255 | 0.0076  | 0.0012 | 1.40E-09 | 6.0819  | 408317 | Snoring |
| rs56400821  | 17 | 43760080  | A | C | 0.2251 | 0.0077  | 0.0012 | 8.60E-10 | 6.1553  | 408317 | Snoring |
| rs56406407  | 17 | 43792099  | C | T | 0.2217 | 0.0076  | 0.0013 | 2.80E-09 | 5.9698  | 408317 | Snoring |
| rs56406462  | 17 | 44119474  | C | T | 0.2236 | 0.0074  | 0.0013 | 3.60E-09 | 5.9260  | 408317 | Snoring |
| rs565370971 | 17 | 43681796  | A | G | 0.1826 | 0.0089  | 0.0014 | 6.10E-10 | 6.2337  | 408317 | Snoring |
| rs566127718 | 17 | 43575452  | G | A | 0.2267 | 0.0076  | 0.0012 | 1.10E-09 | 6.1261  | 408317 | Snoring |
| rs56655886  | 17 | 46526891  | G | A | 0.2179 | -0.0073 | 0.0013 | 6.20E-09 | -5.7864 | 408317 | Snoring |
| rs567642046 | 17 | 44358811  | A | G | 0.1927 | 0.0079  | 0.0014 | 2.10E-08 | 5.6556  | 408317 | Snoring |
| rs568589031 | 17 | 44311099  | A | G | 0.2203 | 0.0078  | 0.0013 | 7.90E-10 | 6.1734  | 408317 | Snoring |
| rs56912706  | 5  | 75037086  | G | A | 0.3754 | -0.0066 | 0.0011 | 7.90E-10 | -6.0810 | 408317 | Snoring |
| rs569386000 | 8  | 71583926  | C | T | 0.4817 | -0.0060 | 0.0010 | 1.20E-08 | -5.7180 | 408317 | Snoring |
| rs56971664  | 17 | 43918613  | C | T | 0.2253 | 0.0076  | 0.0012 | 1.10E-09 | 6.1146  | 408317 | Snoring |
| rs570063581 | 17 | 46406618  | G | A | 0.2227 | -0.0073 | 0.0013 | 5.90E-09 | -5.7976 | 408317 | Snoring |
| rs57062342  | 1  | 50818041  | G | A | 0.4582 | 0.0060  | 0.0011 | 1.10E-08 | 5.7393  | 408317 | Snoring |
| rs570817202 | 11 | 88890147  | G | A | 0.4385 | 0.0058  | 0.0011 | 4.50E-08 | 5.4541  | 408317 | Snoring |
| rs571876586 | 8  | 71583935  | A | G | 0.4940 | -0.0061 | 0.0011 | 7.40E-09 | -5.7990 | 408317 | Snoring |
| rs57222984  | 17 | 43758898  | G | A | 0.2437 | 0.0084  | 0.0012 | 5.40E-12 | 6.9127  | 408317 | Snoring |
| rs572543580 | 17 | 43914981  | G | C | 0.2257 | 0.0075  | 0.0013 | 2.30E-09 | 5.9984  | 408317 | Snoring |
| rs572628404 | 4  | 25377777  | C | A | 0.2322 | -0.0071 | 0.0013 | 2.60E-08 | -5.6143 | 408317 | Snoring |
| rs572771346 | 17 | 43681771  | T | C | 0.1896 | 0.0089  | 0.0014 | 2.10E-10 | 6.3821  | 408317 | Snoring |
| rs57292959  | 16 | 53799279  | T | G | 0.4210 | 0.0069  | 0.0011 | 5.10E-11 | 6.5609  | 408317 | Snoring |
| rs573943463 | 8  | 71583942  | C | T | 0.4940 | -0.0061 | 0.0011 | 7.40E-09 | -5.7990 | 408317 | Snoring |
| rs57434408  | 16 | 31066380  | A | C | 0.3777 | 0.0065  | 0.0011 | 1.60E-09 | 6.0598  | 408317 | Snoring |
| rs57576577  | 16 | 31036367  | A | G | 0.3765 | 0.0065  | 0.0011 | 2.10E-09 | 6.0202  | 408317 | Snoring |
| rs57585149  | 12 | 65856152  | G | T | 0.4496 | 0.0069  | 0.0011 | 4.70E-11 | 6.6078  | 408317 | Snoring |
| rs578102530 | 17 | 44364335  | A | G | 0.1877 | 0.0078  | 0.0014 | 3.20E-08 | 5.5197  | 408317 | Snoring |
| rs58089049  | 17 | 43845480  | T | C | 0.2715 | 0.0075  | 0.0012 | 2.30E-10 | 6.3798  | 408317 | Snoring |
| rs58106688  | 7  | 127483211 | C | T | 0.3426 | 0.0064  | 0.0011 | 3.60E-09 | 5.8322  | 408317 | Snoring |
| rs58127265  | 8  | 71667707  | T | C | 0.4820 | -0.0059 | 0.0010 | 1.50E-08 | -5.6737 | 408317 | Snoring |
| rs58235906  | 1  | 51340598  | C | T | 0.4235 | 0.0059  | 0.0011 | 3.60E-08 | 5.5372  | 408317 | Snoring |
| rs58272938  | 17 | 1912729   | T | C | 0.2963 | -0.0063 | 0.0012 | 4.80E-08 | -5.4356 | 408317 | Snoring |
| rs58583807  | 7  | 127396789 | A | G | 0.4084 | -0.0058 | 0.0011 | 3.60E-08 | -5.4308 | 408317 | Snoring |
| rs58726213  | 16 | 31044683  | G | A | 0.3768 | 0.0065  | 0.0011 | 2.10E-09 | 6.0237  | 408317 | Snoring |
| rs58761932  | 8  | 71632351  | G | A | 0.4834 | -0.0059 | 0.0010 | 1.80E-08 | -5.6427 | 408317 | Snoring |
| rs58872976  | 1  | 50821747  | C | G | 0.4583 | 0.0060  | 0.0011 | 1.10E-08 | 5.7371  | 408317 | Snoring |
| rs58879558  | 17 | 44095467  | C | T | 0.2301 | 0.0070  | 0.0012 | 2.20E-08 | 5.6253  | 408317 | Snoring |
| rs59061704  | 16 | 31062704  | C | G | 0.3781 | 0.0065  | 0.0011 | 1.60E-09 | 6.0596  | 408317 | Snoring |
| rs59070384  | 13 | 111566989 | A | G | 0.3680 | -0.0058 | 0.0011 | 4.70E-08 | -5.4027 | 408317 | Snoring |
| rs59140894  | 7  | 127430797 | T | C | 0.3424 | 0.0064  | 0.0011 | 5.20E-09 | 5.7749  | 408317 | Snoring |
| rs59206857  | 1  | 50817888  | T | G | 0.4582 | 0.0060  | 0.0011 | 1.10E-08 | 5.7396  | 408317 | Snoring |
| rs592333    | 13 | 51340315  | G | A | 0.4439 | 0.0091  | 0.0011 | 1.00E-17 | 8.6168  | 408317 | Snoring |
| rs593720    | 17 | 43707848  | T | G | 0.2198 | 0.0075  | 0.0013 | 4.20E-09 | 5.9067  | 408317 | Snoring |
| rs594591    | 17 | 43707620  | T | G | 0.2253 | 0.0077  | 0.0012 | 8.70E-10 | 6.1556  | 408317 | Snoring |
| rs59539549  | 17 | 1912287   | T | C | 0.3110 | -0.0062 | 0.0011 | 3.10E-08 | -5.5248 | 408317 | Snoring |
| rs59559528  | 1  | 50821382  | A | G | 0.4583 | 0.0060  | 0.0011 | 1.10E-08 | 5.7406  | 408317 | Snoring |
| rs59924013  | 16 | 31109290  | T | G | 0.3794 | 0.0065  | 0.0011 | 1.80E-09 | 6.0438  | 408317 | Snoring |
| rs59992214  | 8  | 71599545  | C | T | 0.4819 | -0.0059 | 0.0010 | 1.40E-08 | -5.6897 | 408317 | Snoring |
| rs6038557   | 20 | 6594349   | G | A | 0.3707 | -0.0060 | 0.0011 | 3.30E-08 | -5.5215 | 408317 | Snoring |
| rs60493340  | 12 | 65856151  | G | T | 0.4496 | 0.0070  | 0.0011 | 4.40E-11 | 6.6173  | 408317 | Snoring |
| rs60535899  | 17 | 1912311   | G | C | 0.3112 | -0.0062 | 0.0011 | 3.20E-08 | -5.5188 | 408317 | Snoring |
| rs6054292   | 20 | 6454661   | G | A | 0.2381 | 0.0069  | 0.0012 | 1.60E-08 | 5.6467  | 408317 | Snoring |
| rs6054390   | 20 | 6592094   | G | A | 0.3714 | -0.0060 | 0.0011 | 2.90E-08 | -5.5430 | 408317 | Snoring |
| rs6054392   | 20 | 6594443   | T | C | 0.3707 | -0.0059 | 0.0011 | 3.90E-08 | -5.4890 | 408317 | Snoring |
| rs6054405   | 20 | 6607103   | A | G | 0.3725 | -0.0061 | 0.0011 | 1.70E-08 | -5.6363 | 408317 | Snoring |
| rs6054427   | 20 | 6635266   | G | A | 0.3792 | -0.0063 | 0.0011 | 4.00E-09 | -5.8482 | 408317 | Snoring |
| rs60676839  | 17 | 1914653   | G | A | 0.3112 | -0.0062 | 0.0011 | 3.00E-08 | -5.5341 | 408317 | Snoring |
| rs60814418  | 17 | 43850645  | T | C | 0.2263 | 0.0076  | 0.0012 | 1.50E-09 | 6.0657  | 408317 | Snoring |
| rs6085565   | 20 | 6449228   | G | A | 0.2273 | 0.0070  | 0.0013 | 2.40E-08 | 5.5587  | 408317 | Snoring |
| rs6085566   | 20 | 6449281   | A | G | 0.2275 | 0.0070  | 0.0013 | 2.40E-08 | 5.5591  | 408317 | Snoring |
| rs6085569   | 20 | 6453105   | G | C | 0.2276 | 0.0070  | 0.0013 | 2.10E-08 | 5.5812  | 408317 | Snoring |
| rs6099273   | 20 | 55347828  | T | C | 0.2521 | 0.0067  | 0.0012 | 2.60E-08 | 5.5413  | 408317 | Snoring |
| rs60996860  | 16 | 31134213  | A | T | 0.2798 | 0.0066  | 0.0012 | 2.60E-08 | 5.6014  | 408317 | Snoring |
| rs611351    | 17 | 43692935  | G | A | 0.2254 | 0.0077  | 0.0012 | 9.80E-10 | 6.1379  | 408317 | Snoring |
| rs6117259   | 20 | 6420731   | C | T | 0.1868 | 0.0077  | 0.0013 | 1.30E-08 | 5.7173  | 408317 | Snoring |
| rs6117271   | 20 | 6446150   | T | C | 0.2270 | 0.0069  | 0.0013 | 4.10E-08 | 5.4715  | 408317 | Snoring |
| rs6117273   | 20 | 6447536   | C | T | 0.2275 | 0.0070  | 0.0013 | 2.20E-08 | 5.5717  | 408317 | Snoring |
| rs6117275   | 20 | 6448432   | G | A | 0.2273 | 0.0070  | 0.0013 | 2.40E-08 | 5.5638  | 408317 | Snoring |
| rs6117277   | 20 | 6448678   | T | G | 0.2275 | 0.0070  | 0.0013 | 2.30E-08 | 5.5706  | 408317 | Snoring |
| rs6117278   | 20 | 6448768   | T | A | 0.2275 | 0.0069  | 0.0013 | 2.60E-08 | 5.5454  | 408317 | Snoring |
| rs6117281   | 20 | 6455349   | G | A | 0.2274 | 0.0069  | 0.0012 | 3.10E-08 | 5.5190  | 408317 | Snoring |

|            |    |           |   |   |        |         |        |          |         |        |         |
|------------|----|-----------|---|---|--------|---------|--------|----------|---------|--------|---------|
| rs61239537 | 16 | 31012813  | T | G | 0.3759 | 0.0066  | 0.0011 | 1.80E-09 | 6.0480  | 408317 | Snoring |
| rs61269160 | 17 | 1912721   | T | A | 0.2964 | -0.0063 | 0.0012 | 4.80E-08 | -5.4367 | 408317 | Snoring |
| rs6140041  | 20 | 6591654   | A | G | 0.3718 | -0.0060 | 0.0011 | 3.50E-08 | -5.5126 | 408317 | Snoring |
| rs6140050  | 20 | 6632901   | C | A | 0.3651 | -0.0063 | 0.0011 | 5.70E-09 | -5.7805 | 408317 | Snoring |
| rs61597598 | 2  | 156996626 | A | G | 0.1357 | 0.0119  | 0.0015 | 5.10E-15 | 7.7784  | 408317 | Snoring |
| rs61667602 | 17 | 43785349  | C | T | 0.2252 | 0.0076  | 0.0012 | 1.20E-09 | 6.1070  | 408317 | Snoring |
| rs61780657 | 1  | 50821303  | T | C | 0.4583 | 0.0060  | 0.0011 | 1.10E-08 | 5.7411  | 408317 | Snoring |
| rs61784245 | 1  | 50814108  | C | G | 0.4578 | 0.0060  | 0.0010 | 1.20E-08 | 5.7153  | 408317 | Snoring |
| rs61784246 | 1  | 50814112  | A | C | 0.4578 | 0.0060  | 0.0010 | 1.30E-08 | 5.7077  | 408317 | Snoring |
| rs61903387 | 11 | 88809812  | T | C | 0.4140 | -0.0063 | 0.0011 | 5.10E-09 | -5.8233 | 408317 | Snoring |
| rs61903389 | 11 | 88828429  | A | T | 0.3584 | -0.0065 | 0.0011 | 3.70E-09 | -5.8554 | 408317 | Snoring |
| rs61903411 | 11 | 88889868  | C | T | 0.4202 | 0.0059  | 0.0011 | 4.00E-08 | 5.4491  | 408317 | Snoring |
| rs61903412 | 11 | 88890451  | G | A | 0.4815 | 0.0061  | 0.0010 | 3.30E-09 | 5.8748  | 408317 | Snoring |
| rs61921506 | 12 | 65856899  | T | C | 0.4492 | 0.0070  | 0.0011 | 4.30E-11 | 6.6226  | 408317 | Snoring |
| rs61921525 | 12 | 65882018  | A | T | 0.4495 | 0.0069  | 0.0011 | 6.10E-11 | 6.5750  | 408317 | Snoring |
| rs62033399 | 16 | 53810943  | T | C | 0.3935 | 0.0063  | 0.0011 | 3.40E-09 | 5.9086  | 408317 | Snoring |
| rs62033400 | 16 | 53811788  | G | A | 0.3938 | 0.0064  | 0.0011 | 2.40E-09 | 5.9738  | 408317 | Snoring |
| rs62033403 | 16 | 53822237  | G | A | 0.3930 | 0.0063  | 0.0011 | 3.70E-09 | 5.9030  | 408317 | Snoring |
| rs62033404 | 16 | 53822239  | G | A | 0.3930 | 0.0063  | 0.0011 | 3.60E-09 | 5.9063  | 408317 | Snoring |
| rs62033405 | 16 | 53822387  | T | C | 0.3924 | 0.0063  | 0.0011 | 3.40E-09 | 5.9169  | 408317 | Snoring |
| rs62033406 | 16 | 53824226  | G | A | 0.4089 | 0.0062  | 0.0011 | 5.10E-09 | 5.8502  | 408317 | Snoring |
| rs62033408 | 16 | 53827962  | G | A | 0.3923 | 0.0064  | 0.0011 | 2.50E-09 | 5.9673  | 408317 | Snoring |
| rs62033413 | 16 | 53830055  | G | C | 0.4122 | 0.0059  | 0.0011 | 2.70E-08 | 5.5540  | 408317 | Snoring |
| rs62048402 | 16 | 53803223  | A | G | 0.4023 | 0.0068  | 0.0011 | 1.60E-10 | 6.3975  | 408317 | Snoring |
| rs62053939 | 17 | 43740856  | T | C | 0.2253 | 0.0077  | 0.0012 | 7.20E-10 | 6.1835  | 408317 | Snoring |
| rs62053940 | 17 | 43741028  | G | A | 0.2253 | 0.0077  | 0.0012 | 8.40E-10 | 6.1596  | 408317 | Snoring |
| rs62053945 | 17 | 43746839  | C | T | 0.2253 | 0.0077  | 0.0012 | 8.40E-10 | 6.1613  | 408317 | Snoring |
| rs62053946 | 17 | 43747677  | T | C | 0.2253 | 0.0077  | 0.0012 | 8.40E-10 | 6.1599  | 408317 | Snoring |
| rs62053947 | 17 | 43747683  | A | G | 0.2253 | 0.0077  | 0.0012 | 8.40E-10 | 6.1599  | 408317 | Snoring |
| rs62053948 | 17 | 43748046  | T | C | 0.2253 | 0.0077  | 0.0012 | 8.20E-10 | 6.1640  | 408317 | Snoring |
| rs62053949 | 17 | 43748101  | G | A | 0.2253 | 0.0077  | 0.0012 | 8.40E-10 | 6.1604  | 408317 | Snoring |
| rs62053950 | 17 | 43748412  | G | A | 0.2253 | 0.0077  | 0.0012 | 8.30E-10 | 6.1615  | 408317 | Snoring |
| rs62053951 | 17 | 43749168  | C | G | 0.2253 | 0.0077  | 0.0012 | 8.30E-10 | 6.1615  | 408317 | Snoring |
| rs62053952 | 17 | 43749261  | C | T | 0.2253 | 0.0077  | 0.0012 | 8.20E-10 | 6.1640  | 408317 | Snoring |
| rs62053953 | 17 | 43749454  | A | G | 0.2253 | 0.0077  | 0.0012 | 8.50E-10 | 6.1585  | 408317 | Snoring |
| rs62053954 | 17 | 43749949  | A | G | 0.2253 | 0.0077  | 0.0012 | 8.50E-10 | 6.1597  | 408317 | Snoring |
| rs62053955 | 17 | 43749980  | C | T | 0.2253 | 0.0077  | 0.0012 | 8.20E-10 | 6.1641  | 408317 | Snoring |
| rs62053956 | 17 | 43750315  | G | A | 0.2253 | 0.0077  | 0.0012 | 8.20E-10 | 6.1637  | 408317 | Snoring |
| rs62053957 | 17 | 43750939  | C | T | 0.2253 | 0.0077  | 0.0012 | 8.00E-10 | 6.1684  | 408317 | Snoring |
| rs62053958 | 17 | 43751223  | T | A | 0.2251 | 0.0077  | 0.0012 | 9.10E-10 | 6.1499  | 408317 | Snoring |
| rs62053959 | 17 | 43751246  | T | C | 0.2251 | 0.0077  | 0.0012 | 9.40E-10 | 6.1454  | 408317 | Snoring |
| rs62054372 | 17 | 43798775  | C | G | 0.2227 | 0.0077  | 0.0013 | 1.40E-09 | 6.0793  | 408317 | Snoring |
| rs62054378 | 17 | 43799667  | A | C | 0.2250 | 0.0077  | 0.0012 | 1.00E-09 | 6.1287  | 408317 | Snoring |
| rs62054380 | 17 | 43800987  | A | C | 0.2251 | 0.0077  | 0.0012 | 1.00E-09 | 6.1298  | 408317 | Snoring |
| rs62054381 | 17 | 43801185  | G | A | 0.2252 | 0.0076  | 0.0012 | 1.20E-09 | 6.1100  | 408317 | Snoring |
| rs62054382 | 17 | 43802525  | T | C | 0.2251 | 0.0077  | 0.0012 | 9.50E-10 | 6.1419  | 408317 | Snoring |
| rs62054383 | 17 | 43802907  | C | T | 0.2251 | 0.0077  | 0.0012 | 1.00E-09 | 6.1303  | 408317 | Snoring |
| rs62054384 | 17 | 43804306  | C | T | 0.2251 | 0.0076  | 0.0012 | 1.20E-09 | 6.1057  | 408317 | Snoring |
| rs62054387 | 17 | 43805525  | C | A | 0.2252 | 0.0077  | 0.0012 | 9.40E-10 | 6.1450  | 408317 | Snoring |
| rs62054388 | 17 | 43805590  | T | C | 0.2251 | 0.0077  | 0.0012 | 1.10E-09 | 6.1245  | 408317 | Snoring |
| rs62054389 | 17 | 43808321  | A | G | 0.2252 | 0.0077  | 0.0012 | 9.50E-10 | 6.1440  | 408317 | Snoring |
| rs62054390 | 17 | 43808443  | C | A | 0.2252 | 0.0077  | 0.0012 | 9.50E-10 | 6.1440  | 408317 | Snoring |
| rs62054392 | 17 | 43808945  | T | C | 0.2252 | 0.0077  | 0.0012 | 9.50E-10 | 6.1440  | 408317 | Snoring |
| rs62054393 | 17 | 43809264  | G | T | 0.2252 | 0.0077  | 0.0012 | 9.50E-10 | 6.1438  | 408317 | Snoring |
| rs62054394 | 17 | 43810608  | A | T | 0.2252 | 0.0077  | 0.0012 | 9.40E-10 | 6.1443  | 408317 | Snoring |
| rs62054395 | 17 | 43811060  | G | T | 0.2252 | 0.0077  | 0.0012 | 9.40E-10 | 6.1444  | 408317 | Snoring |
| rs62054396 | 17 | 43811510  | C | T | 0.2251 | 0.0077  | 0.0012 | 9.40E-10 | 6.1446  | 408317 | Snoring |
| rs62054397 | 17 | 43811792  | T | C | 0.2251 | 0.0077  | 0.0012 | 9.40E-10 | 6.1452  | 408317 | Snoring |
| rs62054398 | 17 | 43812599  | G | A | 0.2252 | 0.0077  | 0.0012 | 9.80E-10 | 6.1386  | 408317 | Snoring |
| rs62054399 | 17 | 43812624  | A | G | 0.2252 | 0.0077  | 0.0012 | 9.80E-10 | 6.1386  | 408317 | Snoring |
| rs62054400 | 17 | 43812649  | C | T | 0.2252 | 0.0077  | 0.0012 | 9.80E-10 | 6.1386  | 408317 | Snoring |
| rs62054411 | 17 | 43812684  | G | A | 0.2252 | 0.0077  | 0.0012 | 9.80E-10 | 6.1386  | 408317 | Snoring |
| rs62054412 | 17 | 43813002  | A | G | 0.2252 | 0.0077  | 0.0012 | 9.80E-10 | 6.1384  | 408317 | Snoring |
| rs62054413 | 17 | 43813370  | C | G | 0.2252 | 0.0077  | 0.0012 | 9.80E-10 | 6.1383  | 408317 | Snoring |
| rs62054414 | 17 | 43813415  | A | G | 0.2252 | 0.0077  | 0.0012 | 9.80E-10 | 6.1383  | 408317 | Snoring |
| rs62054417 | 17 | 43815859  | C | A | 0.2252 | 0.0077  | 0.0012 | 9.70E-10 | 6.1404  | 408317 | Snoring |
| rs62054418 | 17 | 43816306  | A | G | 0.2251 | 0.0076  | 0.0012 | 1.10E-09 | 6.1206  | 408317 | Snoring |
| rs62054419 | 17 | 43816605  | C | A | 0.2252 | 0.0077  | 0.0012 | 9.70E-10 | 6.1404  | 408317 | Snoring |
| rs62054420 | 17 | 43816655  | G | C | 0.2252 | 0.0077  | 0.0012 | 9.70E-10 | 6.1405  | 408317 | Snoring |
| rs62054421 | 17 | 43816657  | A | G | 0.2252 | 0.0077  | 0.0012 | 9.70E-10 | 6.1405  | 408317 | Snoring |
| rs62054424 | 17 | 43819384  | A | G | 0.2252 | 0.0077  | 0.0012 | 1.00E-09 | 6.1334  | 408317 | Snoring |
| rs62054425 | 17 | 43819480  | T | C | 0.2252 | 0.0077  | 0.0012 | 1.00E-09 | 6.1324  | 408317 | Snoring |
| rs62054426 | 17 | 43820741  | T | A | 0.2252 | 0.0076  | 0.0012 | 1.10E-09 | 6.1182  | 408317 | Snoring |
| rs62054427 | 17 | 43821062  | G | A | 0.2252 | 0.0076  | 0.0012 | 1.10E-09 | 6.1169  | 408317 | Snoring |

|            |    |          |   |   |        |        |        |          |        |        |         |
|------------|----|----------|---|---|--------|--------|--------|----------|--------|--------|---------|
| rs62054428 | 17 | 43822511 | A | G | 0.2252 | 0.0077 | 0.0012 | 1.10E-09 | 6.1269 | 408317 | Snoring |
| rs62054429 | 17 | 43823125 | A | G | 0.2252 | 0.0077 | 0.0012 | 1.00E-09 | 6.1309 | 408317 | Snoring |
| rs62054431 | 17 | 43823880 | T | C | 0.2252 | 0.0076 | 0.0012 | 1.10E-09 | 6.1182 | 408317 | Snoring |
| rs62054432 | 17 | 43823889 | A | C | 0.2252 | 0.0076 | 0.0012 | 1.10E-09 | 6.1182 | 408317 | Snoring |
| rs62054433 | 17 | 43824348 | C | T | 0.2252 | 0.0076 | 0.0012 | 1.10E-09 | 6.1182 | 408317 | Snoring |
| rs62054434 | 17 | 43824382 | G | T | 0.2252 | 0.0076 | 0.0012 | 1.10E-09 | 6.1182 | 408317 | Snoring |
| rs62054435 | 17 | 43825339 | G | C | 0.2252 | 0.0076 | 0.0012 | 1.20E-09 | 6.1109 | 408317 | Snoring |
| rs62054436 | 17 | 43825568 | T | C | 0.2239 | 0.0077 | 0.0013 | 8.80E-10 | 6.1557 | 408317 | Snoring |
| rs62054437 | 17 | 43825576 | C | T | 0.2239 | 0.0077 | 0.0013 | 8.80E-10 | 6.1561 | 408317 | Snoring |
| rs62054438 | 17 | 43825711 | C | A | 0.2252 | 0.0076 | 0.0012 | 1.10E-09 | 6.1160 | 408317 | Snoring |
| rs62054439 | 17 | 43825725 | T | G | 0.2252 | 0.0076 | 0.0012 | 1.10E-09 | 6.1160 | 408317 | Snoring |
| rs62054440 | 17 | 43827391 | C | G | 0.2253 | 0.0076 | 0.0012 | 1.10E-09 | 6.1138 | 408317 | Snoring |
| rs62054442 | 17 | 43829353 | G | A | 0.2253 | 0.0076 | 0.0012 | 1.10E-09 | 6.1195 | 408317 | Snoring |
| rs62054760 | 17 | 43908989 | T | C | 0.2237 | 0.0076 | 0.0013 | 1.80E-09 | 6.0425 | 408317 | Snoring |
| rs62054761 | 17 | 43909008 | T | C | 0.2237 | 0.0076 | 0.0013 | 1.80E-09 | 6.0411 | 408317 | Snoring |
| rs62054762 | 17 | 43909022 | T | G | 0.2237 | 0.0076 | 0.0013 | 1.80E-09 | 6.0388 | 408317 | Snoring |
| rs62054763 | 17 | 43910262 | G | C | 0.2252 | 0.0077 | 0.0012 | 1.10E-09 | 6.1243 | 408317 | Snoring |
| rs62054802 | 17 | 43914598 | C | G | 0.2253 | 0.0076 | 0.0012 | 1.10E-09 | 6.1161 | 408317 | Snoring |
| rs62054803 | 17 | 43914728 | T | G | 0.2252 | 0.0076 | 0.0012 | 1.10E-09 | 6.1175 | 408317 | Snoring |
| rs62054804 | 17 | 43914809 | T | C | 0.2255 | 0.0077 | 0.0012 | 9.70E-10 | 6.1442 | 408317 | Snoring |
| rs62054805 | 17 | 43915054 | G | A | 0.2253 | 0.0076 | 0.0012 | 1.10E-09 | 6.1167 | 408317 | Snoring |
| rs62054806 | 17 | 43915312 | T | C | 0.2253 | 0.0076 | 0.0012 | 1.10E-09 | 6.1167 | 408317 | Snoring |
| rs62054809 | 17 | 43918239 | T | C | 0.2252 | 0.0076 | 0.0012 | 1.20E-09 | 6.1143 | 408317 | Snoring |
| rs62054811 | 17 | 43918651 | G | C | 0.2252 | 0.0076 | 0.0012 | 1.10E-09 | 6.1155 | 408317 | Snoring |
| rs62054814 | 17 | 43921572 | A | T | 0.2253 | 0.0076 | 0.0012 | 1.10E-09 | 6.1212 | 408317 | Snoring |
| rs62054815 | 17 | 43923266 | A | G | 0.2252 | 0.0076 | 0.0012 | 1.20E-09 | 6.1053 | 408317 | Snoring |
| rs62054817 | 17 | 43925966 | A | G | 0.2259 | 0.0077 | 0.0012 | 9.30E-10 | 6.1498 | 408317 | Snoring |
| rs62054818 | 17 | 43926056 | C | A | 0.2258 | 0.0077 | 0.0012 | 9.40E-10 | 6.1495 | 408317 | Snoring |
| rs62054819 | 17 | 43926149 | G | A | 0.2257 | 0.0077 | 0.0012 | 9.60E-10 | 6.1466 | 408317 | Snoring |
| rs62054820 | 17 | 43926755 | G | A | 0.2258 | 0.0077 | 0.0012 | 9.30E-10 | 6.1499 | 408317 | Snoring |
| rs62054822 | 17 | 43927708 | G | A | 0.2259 | 0.0076 | 0.0012 | 1.10E-09 | 6.1314 | 408317 | Snoring |
| rs62054823 | 17 | 43929029 | G | A | 0.2256 | 0.0077 | 0.0012 | 9.40E-10 | 6.1513 | 408317 | Snoring |
| rs62054824 | 17 | 43929992 | T | C | 0.2253 | 0.0076 | 0.0012 | 1.20E-09 | 6.1074 | 408317 | Snoring |
| rs62054825 | 17 | 43930033 | A | G | 0.2254 | 0.0076 | 0.0012 | 1.10E-09 | 6.1188 | 408317 | Snoring |
| rs62054831 | 17 | 43932381 | T | C | 0.2251 | 0.0076 | 0.0012 | 1.30E-09 | 6.0988 | 408317 | Snoring |
| rs62054832 | 17 | 43933579 | A | C | 0.2253 | 0.0076 | 0.0012 | 1.20E-09 | 6.1027 | 408317 | Snoring |
| rs62054833 | 17 | 43933673 | C | T | 0.2254 | 0.0076 | 0.0012 | 1.70E-09 | 6.0525 | 408317 | Snoring |
| rs62054834 | 17 | 43934314 | C | T | 0.2255 | 0.0076 | 0.0012 | 1.50E-09 | 6.0741 | 408317 | Snoring |
| rs62054835 | 17 | 43934672 | C | A | 0.2255 | 0.0076 | 0.0012 | 1.50E-09 | 6.0771 | 408317 | Snoring |
| rs62054839 | 17 | 43936804 | G | A | 0.2244 | 0.0077 | 0.0013 | 9.60E-10 | 6.1456 | 408317 | Snoring |
| rs62054840 | 17 | 43936812 | A | G | 0.2244 | 0.0077 | 0.0013 | 1.00E-09 | 6.1345 | 408317 | Snoring |
| rs62054841 | 17 | 43937104 | A | G | 0.2255 | 0.0076 | 0.0012 | 1.40E-09 | 6.0791 | 408317 | Snoring |
| rs62054842 | 17 | 43937162 | T | C | 0.2255 | 0.0076 | 0.0012 | 1.40E-09 | 6.0791 | 408317 | Snoring |
| rs62054843 | 17 | 43937184 | C | T | 0.2255 | 0.0076 | 0.0012 | 1.40E-09 | 6.0795 | 408317 | Snoring |
| rs62054844 | 17 | 43937333 | G | T | 0.2255 | 0.0076 | 0.0012 | 1.40E-09 | 6.0787 | 408317 | Snoring |
| rs62054846 | 17 | 43938634 | G | A | 0.2255 | 0.0076 | 0.0012 | 1.40E-09 | 6.0789 | 408317 | Snoring |
| rs62054857 | 17 | 43939936 | A | G | 0.2255 | 0.0076 | 0.0012 | 1.50E-09 | 6.0773 | 408317 | Snoring |
| rs62054858 | 17 | 43940188 | C | T | 0.2255 | 0.0076 | 0.0012 | 1.40E-09 | 6.0789 | 408317 | Snoring |
| rs62054859 | 17 | 43940685 | A | G | 0.2255 | 0.0076 | 0.0012 | 1.40E-09 | 6.0788 | 408317 | Snoring |
| rs62055460 | 17 | 43940825 | C | G | 0.2255 | 0.0076 | 0.0012 | 1.40E-09 | 6.0788 | 408317 | Snoring |
| rs62055461 | 17 | 43941350 | T | C | 0.2255 | 0.0076 | 0.0012 | 1.40E-09 | 6.0789 | 408317 | Snoring |
| rs62055462 | 17 | 43941476 | C | A | 0.2255 | 0.0076 | 0.0012 | 1.50E-09 | 6.0785 | 408317 | Snoring |
| rs62055463 | 17 | 43941491 | G | A | 0.2255 | 0.0076 | 0.0012 | 1.40E-09 | 6.0791 | 408317 | Snoring |
| rs62055464 | 17 | 43941858 | G | T | 0.2255 | 0.0076 | 0.0012 | 1.40E-09 | 6.0789 | 408317 | Snoring |
| rs62055465 | 17 | 43942046 | A | T | 0.2255 | 0.0076 | 0.0012 | 1.40E-09 | 6.0789 | 408317 | Snoring |
| rs62055466 | 17 | 43942656 | A | G | 0.2255 | 0.0076 | 0.0012 | 1.40E-09 | 6.0790 | 408317 | Snoring |
| rs62055467 | 17 | 43942820 | C | T | 0.2255 | 0.0076 | 0.0012 | 1.40E-09 | 6.0790 | 408317 | Snoring |
| rs62055468 | 17 | 43943000 | C | A | 0.2255 | 0.0076 | 0.0012 | 1.40E-09 | 6.0832 | 408317 | Snoring |
| rs62055469 | 17 | 43943655 | C | A | 0.2255 | 0.0076 | 0.0012 | 1.50E-09 | 6.0746 | 408317 | Snoring |
| rs62055470 | 17 | 43943657 | G | A | 0.2255 | 0.0076 | 0.0012 | 1.50E-09 | 6.0731 | 408317 | Snoring |
| rs62055471 | 17 | 43943755 | C | T | 0.2255 | 0.0076 | 0.0012 | 1.50E-09 | 6.0731 | 408317 | Snoring |
| rs62055475 | 17 | 43945106 | C | T | 0.2255 | 0.0076 | 0.0012 | 1.40E-09 | 6.0822 | 408317 | Snoring |
| rs62055478 | 17 | 43945938 | T | C | 0.2255 | 0.0076 | 0.0012 | 1.40E-09 | 6.0803 | 408317 | Snoring |
| rs62055483 | 17 | 43948040 | T | C | 0.2255 | 0.0076 | 0.0012 | 1.40E-09 | 6.0819 | 408317 | Snoring |
| rs62055486 | 17 | 43949092 | G | T | 0.2255 | 0.0076 | 0.0012 | 1.40E-09 | 6.0873 | 408317 | Snoring |
| rs62055488 | 17 | 43950394 | T | C | 0.2255 | 0.0076 | 0.0012 | 1.40E-09 | 6.0820 | 408317 | Snoring |
| rs62055489 | 17 | 43950441 | A | C | 0.2231 | 0.0079 | 0.0013 | 4.70E-10 | 6.2566 | 408317 | Snoring |
| rs62055490 | 17 | 43950533 | G | A | 0.2255 | 0.0076 | 0.0012 | 1.40E-09 | 6.0822 | 408317 | Snoring |
| rs62055491 | 17 | 43951120 | C | T | 0.2255 | 0.0076 | 0.0012 | 1.40E-09 | 6.0820 | 408317 | Snoring |
| rs62055492 | 17 | 43951345 | A | C | 0.2255 | 0.0076 | 0.0012 | 1.40E-09 | 6.0819 | 408317 | Snoring |
| rs62055493 | 17 | 43952944 | C | T | 0.2255 | 0.0076 | 0.0012 | 1.40E-09 | 6.0826 | 408317 | Snoring |
| rs62055494 | 17 | 43953016 | T | C | 0.2254 | 0.0076 | 0.0012 | 1.60E-09 | 6.0655 | 408317 | Snoring |
| rs62055495 | 17 | 43953043 | C | A | 0.2255 | 0.0076 | 0.0012 | 1.40E-09 | 6.0826 | 408317 | Snoring |
| rs62055496 | 17 | 43953307 | T | C | 0.2254 | 0.0076 | 0.0012 | 1.60E-09 | 6.0650 | 408317 | Snoring |

|            |    |          |   |   |        |        |        |          |        |        |         |
|------------|----|----------|---|---|--------|--------|--------|----------|--------|--------|---------|
| rs62055497 | 17 | 43953529 | G | A | 0.2254 | 0.0076 | 0.0012 | 1.60E-09 | 6.0650 | 408317 | Snoring |
| rs62055498 | 17 | 43953814 | A | G | 0.2255 | 0.0076 | 0.0012 | 1.40E-09 | 6.0823 | 408317 | Snoring |
| rs62055499 | 17 | 43953991 | G | C | 0.2255 | 0.0076 | 0.0012 | 1.40E-09 | 6.0824 | 408317 | Snoring |
| rs62055500 | 17 | 43954134 | A | G | 0.2255 | 0.0076 | 0.0012 | 1.40E-09 | 6.0824 | 408317 | Snoring |
| rs62055501 | 17 | 43954227 | A | G | 0.2255 | 0.0076 | 0.0012 | 1.40E-09 | 6.0825 | 408317 | Snoring |
| rs62055502 | 17 | 43954284 | A | G | 0.2255 | 0.0076 | 0.0012 | 1.40E-09 | 6.0840 | 408317 | Snoring |
| rs62055515 | 17 | 43956370 | T | G | 0.2253 | 0.0076 | 0.0012 | 1.40E-09 | 6.0863 | 408317 | Snoring |
| rs62055516 | 17 | 43956390 | C | T | 0.2253 | 0.0076 | 0.0012 | 1.40E-09 | 6.0863 | 408317 | Snoring |
| rs62055517 | 17 | 43956425 | T | C | 0.2253 | 0.0076 | 0.0012 | 1.40E-09 | 6.0863 | 408317 | Snoring |
| rs62055518 | 17 | 43956505 | C | A | 0.2253 | 0.0076 | 0.0012 | 1.40E-09 | 6.0866 | 408317 | Snoring |
| rs62055525 | 17 | 43958736 | A | G | 0.2252 | 0.0076 | 0.0012 | 1.40E-09 | 6.0811 | 408317 | Snoring |
| rs62055529 | 17 | 43960020 | G | A | 0.2255 | 0.0076 | 0.0012 | 1.40E-09 | 6.0837 | 408317 | Snoring |
| rs62055538 | 17 | 43960997 | C | T | 0.2255 | 0.0076 | 0.0012 | 1.40E-09 | 6.0864 | 408317 | Snoring |
| rs62055539 | 17 | 43961044 | G | A | 0.2255 | 0.0076 | 0.0012 | 1.40E-09 | 6.0848 | 408317 | Snoring |
| rs62055540 | 17 | 43961142 | C | T | 0.2255 | 0.0076 | 0.0012 | 1.40E-09 | 6.0873 | 408317 | Snoring |
| rs62055541 | 17 | 43962017 | C | G | 0.2255 | 0.0076 | 0.0012 | 1.40E-09 | 6.0839 | 408317 | Snoring |
| rs62055542 | 17 | 43963844 | T | C | 0.2255 | 0.0076 | 0.0012 | 1.40E-09 | 6.0845 | 408317 | Snoring |
| rs62055544 | 17 | 43964539 | G | A | 0.2253 | 0.0077 | 0.0013 | 1.00E-09 | 6.1374 | 408317 | Snoring |
| rs62055545 | 17 | 43964561 | T | C | 0.2233 | 0.0076 | 0.0013 | 2.30E-09 | 5.9994 | 408317 | Snoring |
| rs62055546 | 17 | 43964567 | C | A | 0.2227 | 0.0076 | 0.0013 | 1.60E-09 | 6.0573 | 408317 | Snoring |
| rs62055547 | 17 | 43964755 | T | C | 0.2255 | 0.0076 | 0.0012 | 1.50E-09 | 6.0749 | 408317 | Snoring |
| rs62055548 | 17 | 43964899 | G | A | 0.2255 | 0.0076 | 0.0012 | 1.40E-09 | 6.0843 | 408317 | Snoring |
| rs62055549 | 17 | 43965595 | C | G | 0.2255 | 0.0076 | 0.0012 | 1.40E-09 | 6.0846 | 408317 | Snoring |
| rs62055550 | 17 | 43965680 | A | G | 0.2261 | 0.0076 | 0.0012 | 1.20E-09 | 6.1086 | 408317 | Snoring |
| rs62055551 | 17 | 43965687 | G | C | 0.2261 | 0.0076 | 0.0012 | 1.20E-09 | 6.1077 | 408317 | Snoring |
| rs62055552 | 17 | 43965955 | G | A | 0.2255 | 0.0076 | 0.0012 | 1.40E-09 | 6.0843 | 408317 | Snoring |
| rs62055553 | 17 | 43966178 | A | C | 0.2255 | 0.0076 | 0.0012 | 1.40E-09 | 6.0838 | 408317 | Snoring |
| rs62055554 | 17 | 43966260 | G | A | 0.2255 | 0.0076 | 0.0012 | 1.40E-09 | 6.0838 | 408317 | Snoring |
| rs62055555 | 17 | 43966282 | T | G | 0.2255 | 0.0076 | 0.0012 | 1.40E-09 | 6.0838 | 408317 | Snoring |
| rs62055556 | 17 | 43966749 | C | T | 0.2255 | 0.0076 | 0.0012 | 1.40E-09 | 6.0836 | 408317 | Snoring |
| rs62055557 | 17 | 43966795 | A | C | 0.2255 | 0.0076 | 0.0012 | 1.40E-09 | 6.0838 | 408317 | Snoring |
| rs62055558 | 17 | 43966955 | G | A | 0.2255 | 0.0076 | 0.0012 | 1.40E-09 | 6.0836 | 408317 | Snoring |
| rs62055559 | 17 | 43967138 | G | T | 0.2255 | 0.0076 | 0.0012 | 1.40E-09 | 6.0840 | 408317 | Snoring |
| rs62055660 | 17 | 43751308 | C | T | 0.2251 | 0.0077 | 0.0012 | 9.10E-10 | 6.1500 | 408317 | Snoring |
| rs62055661 | 17 | 43752039 | T | C | 0.2253 | 0.0077 | 0.0012 | 7.90E-10 | 6.1708 | 408317 | Snoring |
| rs62055662 | 17 | 43752566 | T | C | 0.2253 | 0.0077 | 0.0012 | 7.90E-10 | 6.1708 | 408317 | Snoring |
| rs62055663 | 17 | 43753454 | G | A | 0.2253 | 0.0077 | 0.0012 | 7.90E-10 | 6.1710 | 408317 | Snoring |
| rs62055664 | 17 | 43753642 | G | A | 0.2253 | 0.0077 | 0.0012 | 7.90E-10 | 6.1710 | 408317 | Snoring |
| rs62055665 | 17 | 43754505 | C | A | 0.2253 | 0.0077 | 0.0012 | 7.90E-10 | 6.1713 | 408317 | Snoring |
| rs62055689 | 17 | 43754569 | A | G | 0.2253 | 0.0077 | 0.0012 | 8.20E-10 | 6.1651 | 408317 | Snoring |
| rs62055690 | 17 | 43754576 | G | C | 0.2253 | 0.0077 | 0.0012 | 7.90E-10 | 6.1715 | 408317 | Snoring |
| rs62055691 | 17 | 43754850 | C | T | 0.2253 | 0.0077 | 0.0012 | 7.80E-10 | 6.1717 | 408317 | Snoring |
| rs62055692 | 17 | 43754909 | G | A | 0.2251 | 0.0077 | 0.0012 | 9.10E-10 | 6.1498 | 408317 | Snoring |
| rs62055693 | 17 | 43756910 | C | T | 0.2252 | 0.0077 | 0.0012 | 9.20E-10 | 6.1458 | 408317 | Snoring |
| rs62055696 | 17 | 43758125 | G | A | 0.2185 | 0.0080 | 0.0013 | 4.70E-10 | 6.2673 | 408317 | Snoring |
| rs62055697 | 17 | 43758148 | T | C | 0.2253 | 0.0077 | 0.0012 | 8.50E-10 | 6.1591 | 408317 | Snoring |
| rs62055698 | 17 | 43758238 | T | C | 0.2253 | 0.0077 | 0.0012 | 8.40E-10 | 6.1602 | 408317 | Snoring |
| rs62055700 | 17 | 43758742 | C | T | 0.2252 | 0.0077 | 0.0012 | 9.00E-10 | 6.1488 | 408317 | Snoring |
| rs62055701 | 17 | 43758787 | A | G | 0.2231 | 0.0077 | 0.0013 | 7.90E-10 | 6.1636 | 408317 | Snoring |
| rs62055702 | 17 | 43758790 | T | C | 0.2231 | 0.0078 | 0.0013 | 7.80E-10 | 6.1671 | 408317 | Snoring |
| rs62055704 | 17 | 43760577 | A | G | 0.2253 | 0.0077 | 0.0012 | 8.60E-10 | 6.1567 | 408317 | Snoring |
| rs62055705 | 17 | 43760599 | C | A | 0.2253 | 0.0077 | 0.0012 | 8.60E-10 | 6.1567 | 408317 | Snoring |
| rs62055706 | 17 | 43760685 | C | T | 0.2253 | 0.0077 | 0.0012 | 8.60E-10 | 6.1564 | 408317 | Snoring |
| rs62055707 | 17 | 43761482 | C | T | 0.2253 | 0.0077 | 0.0012 | 8.60E-10 | 6.1564 | 408317 | Snoring |
| rs62055708 | 17 | 43761974 | A | C | 0.2253 | 0.0077 | 0.0012 | 8.60E-10 | 6.1558 | 408317 | Snoring |
| rs62055709 | 17 | 43762429 | T | C | 0.2253 | 0.0077 | 0.0012 | 8.70E-10 | 6.1536 | 408317 | Snoring |
| rs62055710 | 17 | 43762537 | A | T | 0.2226 | 0.0077 | 0.0013 | 1.00E-09 | 6.1339 | 408317 | Snoring |
| rs62055711 | 17 | 43762554 | G | A | 0.2253 | 0.0077 | 0.0012 | 8.60E-10 | 6.1561 | 408317 | Snoring |
| rs62055712 | 17 | 43764565 | G | A | 0.2253 | 0.0077 | 0.0012 | 8.70E-10 | 6.1544 | 408317 | Snoring |
| rs62055713 | 17 | 43764685 | T | C | 0.2253 | 0.0077 | 0.0012 | 8.70E-10 | 6.1544 | 408317 | Snoring |
| rs62055714 | 17 | 43764796 | T | G | 0.2252 | 0.0077 | 0.0012 | 8.50E-10 | 6.1581 | 408317 | Snoring |
| rs62055715 | 17 | 43764847 | A | G | 0.2252 | 0.0077 | 0.0012 | 8.50E-10 | 6.1580 | 408317 | Snoring |
| rs62055716 | 17 | 43765778 | T | C | 0.2253 | 0.0077 | 0.0012 | 8.60E-10 | 6.1555 | 408317 | Snoring |
| rs62055717 | 17 | 43766415 | G | A | 0.2236 | 0.0077 | 0.0013 | 9.00E-10 | 6.1483 | 408317 | Snoring |
| rs62055718 | 17 | 43766418 | T | C | 0.2236 | 0.0077 | 0.0013 | 8.70E-10 | 6.1538 | 408317 | Snoring |
| rs62055751 | 17 | 43767538 | G | A | 0.2253 | 0.0077 | 0.0012 | 8.70E-10 | 6.1550 | 408317 | Snoring |
| rs62055752 | 17 | 43767628 | A | G | 0.2252 | 0.0077 | 0.0012 | 9.00E-10 | 6.1495 | 408317 | Snoring |
| rs62055753 | 17 | 43767631 | A | G | 0.2253 | 0.0077 | 0.0012 | 8.70E-10 | 6.1549 | 408317 | Snoring |
| rs62055754 | 17 | 43768230 | G | C | 0.2253 | 0.0077 | 0.0012 | 8.70E-10 | 6.1547 | 408317 | Snoring |
| rs62055868 | 17 | 43830640 | T | C | 0.2251 | 0.0076 | 0.0012 | 1.30E-09 | 6.0985 | 408317 | Snoring |
| rs62055869 | 17 | 43830685 | A | G | 0.2251 | 0.0076 | 0.0012 | 1.30E-09 | 6.0991 | 408317 | Snoring |
| rs62055871 | 17 | 43831112 | A | G | 0.2251 | 0.0076 | 0.0012 | 1.30E-09 | 6.0921 | 408317 | Snoring |
| rs62055875 | 17 | 43832864 | C | T | 0.2251 | 0.0076 | 0.0012 | 1.40E-09 | 6.0803 | 408317 | Snoring |
| rs62055876 | 17 | 43832940 | G | A | 0.2245 | 0.0076 | 0.0013 | 1.70E-09 | 6.0514 | 408317 | Snoring |



|            |    |          |   |   |        |        |        |          |        |        |         |
|------------|----|----------|---|---|--------|--------|--------|----------|--------|--------|---------|
| rs62055878 | 17 | 43835854 | A | C | 0.2252 | 0.0076 | 0.0012 | 1.30E-09 | 6.0982 | 408317 | Snoring |
| rs62055879 | 17 | 43836578 | A | G | 0.2252 | 0.0077 | 0.0012 | 1.00E-09 | 6.1309 | 408317 | Snoring |
| rs62055883 | 17 | 43837446 | G | C | 0.2250 | 0.0076 | 0.0012 | 1.40E-09 | 6.0838 | 408317 | Snoring |
| rs62055884 | 17 | 43837567 | T | C | 0.2251 | 0.0076 | 0.0012 | 1.20E-09 | 6.1091 | 408317 | Snoring |
| rs62055885 | 17 | 43838014 | G | A | 0.2251 | 0.0076 | 0.0012 | 1.20E-09 | 6.1068 | 408317 | Snoring |
| rs62055886 | 17 | 43838678 | A | G | 0.2248 | 0.0077 | 0.0013 | 1.10E-09 | 6.1278 | 408317 | Snoring |
| rs62055887 | 17 | 43838710 | C | T | 0.2248 | 0.0077 | 0.0013 | 1.10E-09 | 6.1242 | 408317 | Snoring |
| rs62055888 | 17 | 43838720 | T | C | 0.2212 | 0.0080 | 0.0013 | 3.00E-10 | 6.3448 | 408317 | Snoring |
| rs62055889 | 17 | 43838919 | A | G | 0.2250 | 0.0076 | 0.0013 | 1.10E-09 | 6.1138 | 408317 | Snoring |
| rs62055890 | 17 | 43840681 | T | C | 0.2251 | 0.0076 | 0.0013 | 1.40E-09 | 6.0770 | 408317 | Snoring |
| rs62055893 | 17 | 43842494 | G | A | 0.2249 | 0.0077 | 0.0013 | 9.80E-10 | 6.1366 | 408317 | Snoring |
| rs62055894 | 17 | 43843943 | A | G | 0.2251 | 0.0077 | 0.0012 | 1.00E-09 | 6.1291 | 408317 | Snoring |
| rs62055895 | 17 | 43844044 | G | A | 0.2251 | 0.0077 | 0.0012 | 1.10E-09 | 6.1264 | 408317 | Snoring |
| rs62055896 | 17 | 43844201 | T | C | 0.2251 | 0.0077 | 0.0012 | 1.10E-09 | 6.1266 | 408317 | Snoring |
| rs62055899 | 17 | 43844977 | A | T | 0.2250 | 0.0077 | 0.0013 | 1.00E-09 | 6.1349 | 408317 | Snoring |
| rs62055900 | 17 | 43845002 | G | C | 0.2250 | 0.0077 | 0.0013 | 1.00E-09 | 6.1303 | 408317 | Snoring |
| rs62055901 | 17 | 43845041 | A | G | 0.2251 | 0.0077 | 0.0012 | 1.00E-09 | 6.1352 | 408317 | Snoring |
| rs62055903 | 17 | 43846668 | A | C | 0.2251 | 0.0077 | 0.0012 | 9.90E-10 | 6.1370 | 408317 | Snoring |
| rs62055928 | 17 | 43847374 | A | G | 0.2251 | 0.0077 | 0.0012 | 9.70E-10 | 6.1416 | 408317 | Snoring |
| rs62055932 | 17 | 43848412 | G | A | 0.2251 | 0.0077 | 0.0013 | 9.60E-10 | 6.1431 | 408317 | Snoring |
| rs62055933 | 17 | 43848461 | A | G | 0.2248 | 0.0077 | 0.0013 | 1.00E-09 | 6.1307 | 408317 | Snoring |
| rs62055934 | 17 | 43848638 | A | G | 0.2257 | 0.0074 | 0.0013 | 4.10E-09 | 5.9069 | 408317 | Snoring |
| rs62055935 | 17 | 43848750 | C | T | 0.2231 | 0.0077 | 0.0013 | 9.80E-10 | 6.1374 | 408317 | Snoring |
| rs62055936 | 17 | 43848761 | A | T | 0.2231 | 0.0077 | 0.0013 | 1.00E-09 | 6.1347 | 408317 | Snoring |
| rs62055937 | 17 | 43848968 | T | G | 0.2246 | 0.0076 | 0.0013 | 1.60E-09 | 6.0637 | 408317 | Snoring |
| rs62055938 | 17 | 43849656 | A | C | 0.2251 | 0.0076 | 0.0012 | 1.20E-09 | 6.1090 | 408317 | Snoring |
| rs62055939 | 17 | 43849787 | T | A | 0.2251 | 0.0076 | 0.0012 | 1.20E-09 | 6.1118 | 408317 | Snoring |
| rs62055940 | 17 | 43849896 | G | A | 0.2251 | 0.0076 | 0.0012 | 1.20E-09 | 6.1119 | 408317 | Snoring |
| rs62055942 | 17 | 43850966 | G | A | 0.2251 | 0.0076 | 0.0012 | 1.20E-09 | 6.1134 | 408317 | Snoring |
| rs62055943 | 17 | 43851018 | C | T | 0.2251 | 0.0076 | 0.0012 | 1.20E-09 | 6.1123 | 408317 | Snoring |
| rs62055945 | 17 | 43851851 | A | G | 0.2250 | 0.0076 | 0.0012 | 1.10E-09 | 6.1195 | 408317 | Snoring |
| rs62055946 | 17 | 43851971 | A | C | 0.2250 | 0.0076 | 0.0012 | 1.10E-09 | 6.1172 | 408317 | Snoring |
| rs62055947 | 17 | 43852605 | T | C | 0.2242 | 0.0076 | 0.0013 | 1.40E-09 | 6.0797 | 408317 | Snoring |
| rs62055948 | 17 | 43852621 | C | T | 0.2242 | 0.0076 | 0.0013 | 1.40E-09 | 6.0785 | 408317 | Snoring |
| rs62055950 | 17 | 43853133 | C | T | 0.2250 | 0.0077 | 0.0012 | 1.10E-09 | 6.1222 | 408317 | Snoring |
| rs62055955 | 17 | 43854340 | G | A | 0.2250 | 0.0076 | 0.0012 | 1.10E-09 | 6.1197 | 408317 | Snoring |
| rs62055956 | 17 | 43854449 | T | C | 0.2255 | 0.0077 | 0.0012 | 9.90E-10 | 6.1374 | 408317 | Snoring |
| rs62055957 | 17 | 43854536 | A | C | 0.2251 | 0.0076 | 0.0012 | 1.20E-09 | 6.1130 | 408317 | Snoring |
| rs62056760 | 17 | 43968572 | A | G | 0.2255 | 0.0076 | 0.0012 | 1.30E-09 | 6.0909 | 408317 | Snoring |
| rs62056761 | 17 | 43969686 | A | T | 0.2254 | 0.0076 | 0.0012 | 1.60E-09 | 6.0668 | 408317 | Snoring |
| rs62056773 | 17 | 43969833 | G | A | 0.2254 | 0.0076 | 0.0012 | 1.60E-09 | 6.0668 | 408317 | Snoring |
| rs62056774 | 17 | 43969901 | A | G | 0.2254 | 0.0076 | 0.0012 | 1.60E-09 | 6.0667 | 408317 | Snoring |
| rs62056775 | 17 | 43969952 | C | T | 0.2254 | 0.0076 | 0.0012 | 1.60E-09 | 6.0681 | 408317 | Snoring |
| rs62056776 | 17 | 43969995 | T | C | 0.2254 | 0.0076 | 0.0012 | 1.60E-09 | 6.0682 | 408317 | Snoring |
| rs62056777 | 17 | 43970303 | A | G | 0.2254 | 0.0076 | 0.0012 | 1.60E-09 | 6.0667 | 408317 | Snoring |
| rs62056778 | 17 | 43971604 | G | C | 0.2255 | 0.0076 | 0.0012 | 1.40E-09 | 6.0792 | 408317 | Snoring |
| rs62056779 | 17 | 43971937 | A | C | 0.2255 | 0.0076 | 0.0012 | 1.40E-09 | 6.0835 | 408317 | Snoring |
| rs62056780 | 17 | 43973652 | T | C | 0.2255 | 0.0076 | 0.0012 | 1.40E-09 | 6.0853 | 408317 | Snoring |
| rs62056781 | 17 | 43973899 | C | T | 0.2255 | 0.0076 | 0.0012 | 1.40E-09 | 6.0856 | 408317 | Snoring |
| rs62056782 | 17 | 43974230 | T | C | 0.2255 | 0.0076 | 0.0012 | 1.40E-09 | 6.0864 | 408317 | Snoring |
| rs62056783 | 17 | 43974549 | C | G | 0.2255 | 0.0076 | 0.0012 | 1.40E-09 | 6.0870 | 408317 | Snoring |
| rs62056784 | 17 | 43974889 | G | C | 0.2255 | 0.0076 | 0.0012 | 1.40E-09 | 6.0828 | 408317 | Snoring |
| rs62056785 | 17 | 43975263 | C | T | 0.2255 | 0.0076 | 0.0012 | 1.40E-09 | 6.0839 | 408317 | Snoring |
| rs62056786 | 17 | 43975285 | C | T | 0.2255 | 0.0076 | 0.0012 | 1.40E-09 | 6.0839 | 408317 | Snoring |
| rs62056789 | 17 | 43975415 | C | A | 0.2255 | 0.0076 | 0.0012 | 1.40E-09 | 6.0844 | 408317 | Snoring |
| rs62056790 | 17 | 43975417 | A | G | 0.2255 | 0.0076 | 0.0012 | 1.40E-09 | 6.0844 | 408317 | Snoring |
| rs62056791 | 17 | 43976064 | C | T | 0.2255 | 0.0076 | 0.0012 | 1.30E-09 | 6.0944 | 408317 | Snoring |
| rs62056792 | 17 | 43976644 | A | G | 0.2255 | 0.0076 | 0.0012 | 1.40E-09 | 6.0870 | 408317 | Snoring |
| rs62056793 | 17 | 43977018 | G | A | 0.2255 | 0.0076 | 0.0012 | 1.40E-09 | 6.0866 | 408317 | Snoring |
| rs62056794 | 17 | 43977049 | G | A | 0.2255 | 0.0076 | 0.0012 | 1.40E-09 | 6.0866 | 408317 | Snoring |
| rs62056795 | 17 | 43978041 | T | C | 0.2255 | 0.0076 | 0.0012 | 1.40E-09 | 6.0868 | 408317 | Snoring |
| rs62056796 | 17 | 43978120 | G | A | 0.2255 | 0.0076 | 0.0012 | 1.40E-09 | 6.0862 | 408317 | Snoring |
| rs62056800 | 17 | 43979468 | A | T | 0.2255 | 0.0076 | 0.0012 | 1.40E-09 | 6.0843 | 408317 | Snoring |
| rs62056801 | 17 | 43979504 | A | G | 0.2255 | 0.0076 | 0.0012 | 1.30E-09 | 6.0909 | 408317 | Snoring |
| rs62056802 | 17 | 43980762 | G | A | 0.2255 | 0.0076 | 0.0012 | 1.40E-09 | 6.0827 | 408317 | Snoring |
| rs62056803 | 17 | 43982159 | G | A | 0.2255 | 0.0076 | 0.0012 | 1.40E-09 | 6.0837 | 408317 | Snoring |
| rs62056804 | 17 | 43982286 | T | C | 0.2255 | 0.0076 | 0.0012 | 1.40E-09 | 6.0800 | 408317 | Snoring |
| rs62056805 | 17 | 43983363 | A | G | 0.2255 | 0.0076 | 0.0012 | 1.40E-09 | 6.0844 | 408317 | Snoring |
| rs62056806 | 17 | 43983801 | G | A | 0.2255 | 0.0076 | 0.0012 | 1.40E-09 | 6.0803 | 408317 | Snoring |
| rs62056807 | 17 | 43984253 | C | G | 0.2255 | 0.0076 | 0.0012 | 1.40E-09 | 6.0802 | 408317 | Snoring |
| rs62056808 | 17 | 43984646 | C | T | 0.2244 | 0.0077 | 0.0013 | 9.60E-10 | 6.1447 | 408317 | Snoring |
| rs62056809 | 17 | 43984669 | G | A | 0.2244 | 0.0077 | 0.0013 | 9.20E-10 | 6.1532 | 408317 | Snoring |
| rs62056810 | 17 | 43984672 | C | T | 0.2244 | 0.0077 | 0.0013 | 9.80E-10 | 6.1421 | 408317 | Snoring |
| rs62056811 | 17 | 43985247 | T | C | 0.2255 | 0.0076 | 0.0012 | 1.40E-09 | 6.0798 | 408317 | Snoring |

|            |    |          |   |   |        |        |        |          |        |        |         |
|------------|----|----------|---|---|--------|--------|--------|----------|--------|--------|---------|
| rs62056812 | 17 | 43987154 | A | G | 0.2253 | 0.0077 | 0.0012 | 1.00E-09 | 6.1348 | 408317 | Snoring |
| rs62056835 | 17 | 43988623 | A | G | 0.2255 | 0.0076 | 0.0012 | 1.50E-09 | 6.0760 | 408317 | Snoring |
| rs62056837 | 17 | 43988884 | C | T | 0.2254 | 0.0076 | 0.0012 | 1.40E-09 | 6.0839 | 408317 | Snoring |
| rs62056838 | 17 | 43989087 | G | A | 0.2255 | 0.0076 | 0.0012 | 1.40E-09 | 6.0785 | 408317 | Snoring |
| rs62056839 | 17 | 43989221 | C | T | 0.2255 | 0.0076 | 0.0012 | 1.50E-09 | 6.0784 | 408317 | Snoring |
| rs62056840 | 17 | 43989689 | C | T | 0.2255 | 0.0076 | 0.0012 | 1.50E-09 | 6.0684 | 408317 | Snoring |
| rs62056841 | 17 | 43990041 | C | A | 0.2254 | 0.0076 | 0.0012 | 1.70E-09 | 6.0539 | 408317 | Snoring |
| rs62056848 | 17 | 43992456 | A | G | 0.2255 | 0.0076 | 0.0012 | 1.40E-09 | 6.0828 | 408317 | Snoring |
| rs62056849 | 17 | 43992463 | C | G | 0.2255 | 0.0076 | 0.0012 | 1.40E-09 | 6.0828 | 408317 | Snoring |
| rs62056850 | 17 | 43992581 | T | C | 0.2260 | 0.0076 | 0.0012 | 1.20E-09 | 6.1057 | 408317 | Snoring |
| rs62056851 | 17 | 43992806 | G | A | 0.2255 | 0.0076 | 0.0012 | 1.40E-09 | 6.0790 | 408317 | Snoring |
| rs62056856 | 17 | 43992939 | C | T | 0.2255 | 0.0076 | 0.0012 | 1.60E-09 | 6.0625 | 408317 | Snoring |
| rs62056859 | 17 | 43994435 | G | A | 0.2255 | 0.0076 | 0.0012 | 1.70E-09 | 6.0535 | 408317 | Snoring |
| rs62056861 | 17 | 43770443 | C | T | 0.2253 | 0.0077 | 0.0012 | 8.80E-10 | 6.1536 | 408317 | Snoring |
| rs62056862 | 17 | 43770525 | T | C | 0.2253 | 0.0077 | 0.0012 | 8.80E-10 | 6.1527 | 408317 | Snoring |
| rs62056863 | 17 | 43770595 | G | A | 0.2253 | 0.0077 | 0.0012 | 8.80E-10 | 6.1535 | 408317 | Snoring |
| rs62056864 | 17 | 43770995 | A | G | 0.2253 | 0.0077 | 0.0012 | 8.80E-10 | 6.1531 | 408317 | Snoring |
| rs62056865 | 17 | 43771193 | C | T | 0.2253 | 0.0077 | 0.0012 | 9.00E-10 | 6.1489 | 408317 | Snoring |
| rs62056866 | 17 | 43771493 | A | G | 0.2253 | 0.0077 | 0.0012 | 9.00E-10 | 6.1488 | 408317 | Snoring |
| rs62056867 | 17 | 43771627 | G | A | 0.2253 | 0.0077 | 0.0012 | 8.80E-10 | 6.1527 | 408317 | Snoring |
| rs62056869 | 17 | 43773447 | C | T | 0.2253 | 0.0077 | 0.0012 | 8.90E-10 | 6.1509 | 408317 | Snoring |
| rs62056870 | 17 | 43773784 | A | C | 0.2252 | 0.0077 | 0.0012 | 9.00E-10 | 6.1488 | 408317 | Snoring |
| rs62056872 | 17 | 43775015 | C | T | 0.2253 | 0.0077 | 0.0012 | 9.00E-10 | 6.1500 | 408317 | Snoring |
| rs62056873 | 17 | 43776945 | C | T | 0.2253 | 0.0077 | 0.0012 | 9.00E-10 | 6.1495 | 408317 | Snoring |
| rs62056874 | 17 | 43777578 | T | C | 0.2252 | 0.0077 | 0.0012 | 9.00E-10 | 6.1494 | 408317 | Snoring |
| rs62056875 | 17 | 43778003 | A | T | 0.2252 | 0.0077 | 0.0012 | 9.00E-10 | 6.1490 | 408317 | Snoring |
| rs62056876 | 17 | 43778752 | T | C | 0.2251 | 0.0078 | 0.0012 | 6.00E-10 | 6.2110 | 408317 | Snoring |
| rs62056877 | 17 | 43778828 | G | T | 0.2257 | 0.0078 | 0.0012 | 6.00E-10 | 6.2127 | 408317 | Snoring |
| rs62056878 | 17 | 43780561 | T | C | 0.2252 | 0.0077 | 0.0012 | 8.60E-10 | 6.1568 | 408317 | Snoring |
| rs62056879 | 17 | 43781426 | C | T | 0.2250 | 0.0077 | 0.0012 | 9.90E-10 | 6.1358 | 408317 | Snoring |
| rs62056880 | 17 | 43782304 | C | T | 0.2252 | 0.0077 | 0.0012 | 8.00E-10 | 6.1699 | 408317 | Snoring |
| rs62056881 | 17 | 43782455 | T | G | 0.2250 | 0.0077 | 0.0012 | 9.20E-10 | 6.1470 | 408317 | Snoring |
| rs62056905 | 17 | 43782693 | G | A | 0.2255 | 0.0077 | 0.0013 | 8.20E-10 | 6.1632 | 408317 | Snoring |
| rs62056906 | 17 | 43782708 | C | T | 0.2252 | 0.0077 | 0.0012 | 8.50E-10 | 6.1583 | 408317 | Snoring |
| rs62056908 | 17 | 43783590 | A | G | 0.2195 | 0.0078 | 0.0013 | 7.90E-10 | 6.1747 | 408317 | Snoring |
| rs62056909 | 17 | 43783803 | G | A | 0.2257 | 0.0077 | 0.0013 | 9.20E-10 | 6.1530 | 408317 | Snoring |
| rs62056910 | 17 | 43784222 | C | T | 0.2252 | 0.0077 | 0.0012 | 8.60E-10 | 6.1591 | 408317 | Snoring |
| rs62056911 | 17 | 43784624 | C | T | 0.2251 | 0.0077 | 0.0012 | 1.00E-09 | 6.1294 | 408317 | Snoring |
| rs62056912 | 17 | 43784948 | T | G | 0.2251 | 0.0077 | 0.0012 | 1.00E-09 | 6.1306 | 408317 | Snoring |
| rs62056913 | 17 | 43784994 | T | C | 0.2249 | 0.0077 | 0.0013 | 1.10E-09 | 6.1265 | 408317 | Snoring |
| rs62056915 | 17 | 43785627 | T | A | 0.2251 | 0.0077 | 0.0012 | 1.10E-09 | 6.1234 | 408317 | Snoring |
| rs62056916 | 17 | 43785938 | T | C | 0.2251 | 0.0076 | 0.0012 | 1.10E-09 | 6.1214 | 408317 | Snoring |
| rs62056917 | 17 | 43786013 | T | G | 0.2251 | 0.0076 | 0.0012 | 1.10E-09 | 6.1214 | 408317 | Snoring |
| rs62056918 | 17 | 43786676 | G | T | 0.2250 | 0.0076 | 0.0013 | 1.30E-09 | 6.0960 | 408317 | Snoring |
| rs62056919 | 17 | 43786698 | T | C | 0.2250 | 0.0076 | 0.0013 | 1.30E-09 | 6.0973 | 408317 | Snoring |
| rs62056920 | 17 | 43787226 | A | G | 0.2252 | 0.0076 | 0.0012 | 1.10E-09 | 6.1200 | 408317 | Snoring |
| rs62056921 | 17 | 43787306 | C | T | 0.2252 | 0.0076 | 0.0012 | 1.10E-09 | 6.1211 | 408317 | Snoring |
| rs62056922 | 17 | 43787563 | G | C | 0.2251 | 0.0076 | 0.0012 | 1.10E-09 | 6.1220 | 408317 | Snoring |
| rs62056925 | 17 | 43788649 | C | T | 0.2251 | 0.0076 | 0.0012 | 1.10E-09 | 6.1209 | 408317 | Snoring |
| rs62056926 | 17 | 43788666 | G | C | 0.2251 | 0.0076 | 0.0012 | 1.10E-09 | 6.1209 | 408317 | Snoring |
| rs62056927 | 17 | 43788767 | A | G | 0.2251 | 0.0077 | 0.0012 | 1.10E-09 | 6.1234 | 408317 | Snoring |
| rs62056928 | 17 | 43788782 | T | C | 0.2252 | 0.0077 | 0.0012 | 1.10E-09 | 6.1240 | 408317 | Snoring |
| rs62056929 | 17 | 43789144 | A | G | 0.2251 | 0.0077 | 0.0012 | 1.10E-09 | 6.1233 | 408317 | Snoring |
| rs62056930 | 17 | 43789640 | C | A | 0.2254 | 0.0076 | 0.0012 | 1.30E-09 | 6.0881 | 408317 | Snoring |
| rs62056931 | 17 | 43789698 | A | G | 0.2233 | 0.0074 | 0.0013 | 3.80E-09 | 5.9258 | 408317 | Snoring |
| rs62056932 | 17 | 43789971 | C | G | 0.2238 | 0.0077 | 0.0013 | 9.50E-10 | 6.1426 | 408317 | Snoring |
| rs62056933 | 17 | 43789978 | A | G | 0.2238 | 0.0077 | 0.0013 | 1.10E-09 | 6.1235 | 408317 | Snoring |
| rs62056934 | 17 | 43790005 | G | A | 0.2243 | 0.0077 | 0.0013 | 1.10E-09 | 6.1214 | 408317 | Snoring |
| rs62056935 | 17 | 43790446 | G | A | 0.2251 | 0.0076 | 0.0012 | 1.10E-09 | 6.1218 | 408317 | Snoring |
| rs62056936 | 17 | 43790911 | T | A | 0.2251 | 0.0076 | 0.0012 | 1.10E-09 | 6.1223 | 408317 | Snoring |
| rs62056937 | 17 | 43791181 | C | A | 0.2251 | 0.0077 | 0.0012 | 1.10E-09 | 6.1231 | 408317 | Snoring |
| rs62056939 | 17 | 43791332 | C | T | 0.2251 | 0.0076 | 0.0012 | 1.10E-09 | 6.1117 | 408317 | Snoring |
| rs62056940 | 17 | 43791344 | A | T | 0.2251 | 0.0076 | 0.0012 | 1.10E-09 | 6.1117 | 408317 | Snoring |
| rs62056946 | 17 | 43798401 | A | G | 0.2251 | 0.0076 | 0.0012 | 1.10E-09 | 6.1212 | 408317 | Snoring |
| rs62057061 | 17 | 43856639 | G | C | 0.2246 | 0.0076 | 0.0013 | 1.30E-09 | 6.0979 | 408317 | Snoring |
| rs62057062 | 17 | 43856710 | A | G | 0.2250 | 0.0077 | 0.0012 | 1.10E-09 | 6.1250 | 408317 | Snoring |
| rs62057063 | 17 | 43856730 | T | C | 0.2247 | 0.0077 | 0.0013 | 1.10E-09 | 6.1247 | 408317 | Snoring |
| rs62057064 | 17 | 43857033 | T | C | 0.2250 | 0.0077 | 0.0012 | 1.10E-09 | 6.1218 | 408317 | Snoring |
| rs62057065 | 17 | 43858187 | T | G | 0.2250 | 0.0076 | 0.0013 | 1.40E-09 | 6.0862 | 408317 | Snoring |
| rs62057066 | 17 | 43858307 | C | T | 0.2236 | 0.0077 | 0.0013 | 1.20E-09 | 6.1105 | 408317 | Snoring |
| rs62057067 | 17 | 43858326 | T | C | 0.2251 | 0.0076 | 0.0012 | 1.20E-09 | 6.1025 | 408317 | Snoring |
| rs62057068 | 17 | 43858629 | G | A | 0.2251 | 0.0076 | 0.0012 | 1.20E-09 | 6.0999 | 408317 | Snoring |
| rs62057069 | 17 | 43859065 | C | T | 0.2251 | 0.0076 | 0.0012 | 1.30E-09 | 6.0976 | 408317 | Snoring |
| rs62057070 | 17 | 43859640 | G | A | 0.2251 | 0.0076 | 0.0012 | 1.30E-09 | 6.0971 | 408317 | Snoring |

|            |    |          |   |   |        |        |        |          |        |        |         |
|------------|----|----------|---|---|--------|--------|--------|----------|--------|--------|---------|
| rs62057071 | 17 | 43859691 | G | C | 0.2251 | 0.0076 | 0.0012 | 1.30E-09 | 6.0972 | 408317 | Snoring |
| rs62057073 | 17 | 43861117 | T | C | 0.2249 | 0.0076 | 0.0013 | 1.20E-09 | 6.0974 | 408317 | Snoring |
| rs62057101 | 17 | 43885291 | A | G | 0.2253 | 0.0076 | 0.0012 | 1.20E-09 | 6.1054 | 408317 | Snoring |
| rs62057103 | 17 | 43887480 | C | T | 0.2259 | 0.0076 | 0.0012 | 1.80E-09 | 6.0464 | 408317 | Snoring |
| rs62057107 | 17 | 43896032 | T | C | 0.2252 | 0.0077 | 0.0012 | 1.10E-09 | 6.1239 | 408317 | Snoring |
| rs62057108 | 17 | 43896616 | C | T | 0.2252 | 0.0076 | 0.0012 | 1.20E-09 | 6.1131 | 408317 | Snoring |
| rs62057109 | 17 | 43896637 | C | T | 0.2252 | 0.0076 | 0.0012 | 1.20E-09 | 6.1132 | 408317 | Snoring |
| rs62057110 | 17 | 43896734 | C | T | 0.2252 | 0.0076 | 0.0012 | 1.20E-09 | 6.1132 | 408317 | Snoring |
| rs62057111 | 17 | 43897130 | G | A | 0.2253 | 0.0077 | 0.0012 | 9.10E-10 | 6.1514 | 408317 | Snoring |
| rs62057112 | 17 | 43897202 | A | T | 0.2252 | 0.0077 | 0.0012 | 1.10E-09 | 6.1257 | 408317 | Snoring |
| rs62057113 | 17 | 43897449 | T | A | 0.2252 | 0.0076 | 0.0012 | 1.20E-09 | 6.1134 | 408317 | Snoring |
| rs62057114 | 17 | 43899401 | T | C | 0.2251 | 0.0076 | 0.0012 | 1.30E-09 | 6.1015 | 408317 | Snoring |
| rs62057115 | 17 | 43899417 | C | G | 0.2251 | 0.0076 | 0.0012 | 1.30E-09 | 6.1009 | 408317 | Snoring |
| rs62057116 | 17 | 43899655 | C | T | 0.2251 | 0.0076 | 0.0012 | 1.20E-09 | 6.1056 | 408317 | Snoring |
| rs62057117 | 17 | 43899657 | G | C | 0.2251 | 0.0076 | 0.0012 | 1.20E-09 | 6.1029 | 408317 | Snoring |
| rs62057118 | 17 | 43899727 | G | A | 0.2249 | 0.0076 | 0.0013 | 1.40E-09 | 6.0796 | 408317 | Snoring |
| rs62057119 | 17 | 43899736 | A | G | 0.2249 | 0.0076 | 0.0013 | 1.40E-09 | 6.0876 | 408317 | Snoring |
| rs62057121 | 17 | 43900760 | A | G | 0.2202 | 0.0079 | 0.0013 | 5.80E-10 | 6.2045 | 408317 | Snoring |
| rs62057122 | 17 | 43901001 | T | C | 0.2252 | 0.0076 | 0.0012 | 1.30E-09 | 6.1006 | 408317 | Snoring |
| rs62057123 | 17 | 43901238 | G | A | 0.2252 | 0.0076 | 0.0012 | 1.20E-09 | 6.1050 | 408317 | Snoring |
| rs62057143 | 17 | 43901528 | C | T | 0.2253 | 0.0076 | 0.0012 | 1.10E-09 | 6.1208 | 408317 | Snoring |
| rs62057144 | 17 | 43901558 | G | A | 0.2253 | 0.0076 | 0.0012 | 1.20E-09 | 6.1084 | 408317 | Snoring |
| rs62057146 | 17 | 43903106 | G | A | 0.2252 | 0.0076 | 0.0012 | 1.20E-09 | 6.1134 | 408317 | Snoring |
| rs62057147 | 17 | 43903298 | A | G | 0.2257 | 0.0076 | 0.0012 | 1.20E-09 | 6.1057 | 408317 | Snoring |
| rs62057148 | 17 | 43903485 | C | G | 0.2253 | 0.0076 | 0.0012 | 1.10E-09 | 6.1162 | 408317 | Snoring |
| rs62057149 | 17 | 43903546 | G | A | 0.2253 | 0.0076 | 0.0012 | 1.10E-09 | 6.1169 | 408317 | Snoring |
| rs62057150 | 17 | 43903548 | T | C | 0.2253 | 0.0076 | 0.0012 | 1.10E-09 | 6.1169 | 408317 | Snoring |
| rs62057151 | 17 | 43903842 | T | C | 0.2328 | 0.0074 | 0.0012 | 2.30E-09 | 5.9921 | 408317 | Snoring |
| rs62057152 | 17 | 43904110 | C | G | 0.2252 | 0.0076 | 0.0012 | 1.10E-09 | 6.1217 | 408317 | Snoring |
| rs62057153 | 17 | 43904528 | C | T | 0.2252 | 0.0076 | 0.0012 | 1.10E-09 | 6.1234 | 408317 | Snoring |
| rs62057154 | 17 | 43904610 | T | C | 0.2252 | 0.0076 | 0.0012 | 1.10E-09 | 6.1229 | 408317 | Snoring |
| rs62057155 | 17 | 43904673 | T | C | 0.2252 | 0.0076 | 0.0012 | 1.10E-09 | 6.1230 | 408317 | Snoring |
| rs62057156 | 17 | 43904948 | C | G | 0.2252 | 0.0076 | 0.0012 | 1.10E-09 | 6.1232 | 408317 | Snoring |
| rs62057157 | 17 | 43905313 | C | G | 0.2252 | 0.0076 | 0.0012 | 1.10E-09 | 6.1235 | 408317 | Snoring |
| rs62057158 | 17 | 43907143 | A | G | 0.2252 | 0.0077 | 0.0012 | 1.10E-09 | 6.1276 | 408317 | Snoring |
| rs62058962 | 17 | 43998151 | T | C | 0.2254 | 0.0076 | 0.0012 | 1.60E-09 | 6.0628 | 408317 | Snoring |
| rs62058964 | 17 | 43999406 | G | A | 0.2255 | 0.0076 | 0.0012 | 1.50E-09 | 6.0779 | 408317 | Snoring |
| rs62058965 | 17 | 43999529 | C | G | 0.2255 | 0.0076 | 0.0012 | 1.50E-09 | 6.0783 | 408317 | Snoring |
| rs62058968 | 17 | 44001228 | A | G | 0.2255 | 0.0076 | 0.0012 | 1.50E-09 | 6.0748 | 408317 | Snoring |
| rs62059003 | 17 | 44002431 | T | C | 0.2255 | 0.0076 | 0.0012 | 1.50E-09 | 6.0780 | 408317 | Snoring |
| rs62059004 | 17 | 44003893 | G | A | 0.2255 | 0.0076 | 0.0012 | 1.50E-09 | 6.0783 | 408317 | Snoring |
| rs62059005 | 17 | 44004472 | G | A | 0.2255 | 0.0076 | 0.0012 | 1.50E-09 | 6.0681 | 408317 | Snoring |
| rs62059007 | 17 | 44005615 | G | A | 0.2255 | 0.0076 | 0.0012 | 1.40E-09 | 6.0849 | 408317 | Snoring |
| rs62059008 | 17 | 44006085 | G | A | 0.2255 | 0.0076 | 0.0012 | 1.50E-09 | 6.0692 | 408317 | Snoring |
| rs62059009 | 17 | 44006130 | C | T | 0.2255 | 0.0076 | 0.0012 | 1.50E-09 | 6.0678 | 408317 | Snoring |
| rs62060760 | 17 | 44132887 | T | C | 0.2254 | 0.0075 | 0.0012 | 2.00E-09 | 6.0236 | 408317 | Snoring |
| rs62060761 | 17 | 44133162 | C | A | 0.2254 | 0.0075 | 0.0012 | 2.00E-09 | 6.0226 | 408317 | Snoring |
| rs62060762 | 17 | 44133396 | A | G | 0.2254 | 0.0075 | 0.0012 | 2.10E-09 | 6.0200 | 408317 | Snoring |
| rs62060763 | 17 | 44133403 | C | T | 0.2254 | 0.0075 | 0.0012 | 2.10E-09 | 6.0200 | 408317 | Snoring |
| rs62060764 | 17 | 44133633 | G | A | 0.2254 | 0.0075 | 0.0012 | 2.00E-09 | 6.0240 | 408317 | Snoring |
| rs62060765 | 17 | 44133648 | C | A | 0.2254 | 0.0075 | 0.0012 | 2.00E-09 | 6.0240 | 408317 | Snoring |
| rs62060767 | 17 | 44134910 | A | G | 0.2254 | 0.0075 | 0.0012 | 2.00E-09 | 6.0244 | 408317 | Snoring |
| rs62060768 | 17 | 44134984 | A | G | 0.2255 | 0.0075 | 0.0012 | 2.10E-09 | 6.0196 | 408317 | Snoring |
| rs62060769 | 17 | 44135026 | C | G | 0.2254 | 0.0075 | 0.0012 | 2.00E-09 | 6.0244 | 408317 | Snoring |
| rs62060785 | 17 | 44136634 | A | G | 0.2254 | 0.0075 | 0.0012 | 2.00E-09 | 6.0259 | 408317 | Snoring |
| rs62060786 | 17 | 44136763 | T | C | 0.2254 | 0.0075 | 0.0012 | 2.10E-09 | 6.0187 | 408317 | Snoring |
| rs62060787 | 17 | 44136803 | T | G | 0.2254 | 0.0075 | 0.0012 | 2.10E-09 | 6.0187 | 408317 | Snoring |
| rs62060792 | 17 | 44141955 | A | T | 0.2254 | 0.0075 | 0.0012 | 2.00E-09 | 6.0279 | 408317 | Snoring |
| rs62060793 | 17 | 44142427 | G | A | 0.2254 | 0.0075 | 0.0012 | 2.00E-09 | 6.0283 | 408317 | Snoring |
| rs62060794 | 17 | 44142566 | T | C | 0.2254 | 0.0075 | 0.0012 | 2.00E-09 | 6.0246 | 408317 | Snoring |
| rs62060795 | 17 | 44142663 | T | C | 0.2254 | 0.0075 | 0.0012 | 2.00E-09 | 6.0278 | 408317 | Snoring |
| rs62060797 | 17 | 44143344 | A | G | 0.2254 | 0.0075 | 0.0012 | 2.00E-09 | 6.0277 | 408317 | Snoring |
| rs62060798 | 17 | 44144152 | C | T | 0.2254 | 0.0075 | 0.0012 | 2.00E-09 | 6.0278 | 408317 | Snoring |
| rs62060799 | 17 | 44144251 | T | G | 0.2254 | 0.0075 | 0.0012 | 2.00E-09 | 6.0277 | 408317 | Snoring |
| rs62060800 | 17 | 44145592 | G | A | 0.2253 | 0.0075 | 0.0012 | 2.20E-09 | 6.0109 | 408317 | Snoring |
| rs62060801 | 17 | 44145860 | G | A | 0.2253 | 0.0075 | 0.0012 | 2.20E-09 | 6.0107 | 408317 | Snoring |
| rs62060802 | 17 | 44146336 | C | A | 0.2253 | 0.0075 | 0.0012 | 2.20E-09 | 6.0107 | 408317 | Snoring |
| rs62060809 | 17 | 44148613 | A | G | 0.2254 | 0.0075 | 0.0012 | 2.00E-09 | 6.0250 | 408317 | Snoring |
| rs62060810 | 17 | 44148674 | G | A | 0.2254 | 0.0075 | 0.0012 | 2.00E-09 | 6.0250 | 408317 | Snoring |
| rs62060812 | 17 | 44151667 | G | A | 0.2254 | 0.0075 | 0.0012 | 2.00E-09 | 6.0264 | 408317 | Snoring |
| rs62060834 | 17 | 44151697 | T | A | 0.2254 | 0.0075 | 0.0012 | 2.00E-09 | 6.0260 | 408317 | Snoring |
| rs62060835 | 17 | 44152390 | T | C | 0.2254 | 0.0075 | 0.0012 | 2.00E-09 | 6.0260 | 408317 | Snoring |
| rs62060836 | 17 | 44152447 | A | G | 0.2254 | 0.0075 | 0.0012 | 2.00E-09 | 6.0260 | 408317 | Snoring |
| rs62060837 | 17 | 44152760 | G | T | 0.2254 | 0.0075 | 0.0012 | 2.00E-09 | 6.0271 | 408317 | Snoring |

|            |    |          |   |   |        |        |        |          |        |        |         |
|------------|----|----------|---|---|--------|--------|--------|----------|--------|--------|---------|
| rs62060838 | 17 | 44153144 | G | A | 0.2254 | 0.0075 | 0.0012 | 2.00E-09 | 6.0259 | 408317 | Snoring |
| rs62060839 | 17 | 44153227 | G | A | 0.2254 | 0.0075 | 0.0012 | 2.00E-09 | 6.0260 | 408317 | Snoring |
| rs62060840 | 17 | 44153258 | G | A | 0.2255 | 0.0075 | 0.0012 | 1.80E-09 | 6.0403 | 408317 | Snoring |
| rs62060841 | 17 | 44153386 | T | A | 0.2254 | 0.0075 | 0.0012 | 2.00E-09 | 6.0258 | 408317 | Snoring |
| rs62060842 | 17 | 44153607 | A | T | 0.2254 | 0.0075 | 0.0012 | 2.00E-09 | 6.0258 | 408317 | Snoring |
| rs62060843 | 17 | 44153626 | T | C | 0.2254 | 0.0075 | 0.0012 | 2.00E-09 | 6.0260 | 408317 | Snoring |
| rs62060844 | 17 | 44153836 | T | C | 0.2256 | 0.0076 | 0.0012 | 1.70E-09 | 6.0540 | 408317 | Snoring |
| rs62060845 | 17 | 44154393 | G | A | 0.2254 | 0.0075 | 0.0012 | 2.00E-09 | 6.0259 | 408317 | Snoring |
| rs62060846 | 17 | 44154461 | C | A | 0.2254 | 0.0075 | 0.0012 | 2.00E-09 | 6.0259 | 408317 | Snoring |
| rs62060847 | 17 | 44154946 | T | C | 0.2254 | 0.0075 | 0.0012 | 2.00E-09 | 6.0258 | 408317 | Snoring |
| rs62060850 | 17 | 44157982 | T | A | 0.2254 | 0.0075 | 0.0012 | 2.00E-09 | 6.0265 | 408317 | Snoring |
| rs62060851 | 17 | 44157992 | C | T | 0.2254 | 0.0075 | 0.0012 | 2.00E-09 | 6.0264 | 408317 | Snoring |
| rs62060852 | 17 | 44160050 | A | G | 0.2254 | 0.0075 | 0.0012 | 2.00E-09 | 6.0225 | 408317 | Snoring |
| rs62060853 | 17 | 44160592 | A | G | 0.2254 | 0.0075 | 0.0012 | 2.00E-09 | 6.0230 | 408317 | Snoring |
| rs62060855 | 17 | 44161860 | T | C | 0.2254 | 0.0075 | 0.0012 | 2.00E-09 | 6.0239 | 408317 | Snoring |
| rs62060856 | 17 | 44161875 | C | A | 0.2254 | 0.0075 | 0.0012 | 2.00E-09 | 6.0239 | 408317 | Snoring |
| rs62060858 | 17 | 44164090 | C | G | 0.2254 | 0.0075 | 0.0012 | 2.10E-09 | 6.0168 | 408317 | Snoring |
| rs62060859 | 17 | 44164133 | A | G | 0.2254 | 0.0075 | 0.0012 | 2.20E-09 | 6.0129 | 408317 | Snoring |
| rs62061705 | 17 | 44006252 | C | T | 0.2255 | 0.0076 | 0.0012 | 1.50E-09 | 6.0683 | 408317 | Snoring |
| rs62061706 | 17 | 44006896 | C | T | 0.2254 | 0.0076 | 0.0012 | 1.60E-09 | 6.0688 | 408317 | Snoring |
| rs62061707 | 17 | 44006954 | C | T | 0.2237 | 0.0077 | 0.0013 | 9.10E-10 | 6.1554 | 408317 | Snoring |
| rs62061708 | 17 | 44006956 | G | A | 0.2237 | 0.0077 | 0.0013 | 8.50E-10 | 6.1658 | 408317 | Snoring |
| rs62061709 | 17 | 44007493 | T | C | 0.2255 | 0.0076 | 0.0012 | 1.60E-09 | 6.0670 | 408317 | Snoring |
| rs62061710 | 17 | 44007727 | T | C | 0.2255 | 0.0076 | 0.0012 | 1.60E-09 | 6.0656 | 408317 | Snoring |
| rs62061711 | 17 | 44007764 | C | T | 0.2255 | 0.0076 | 0.0012 | 1.60E-09 | 6.0657 | 408317 | Snoring |
| rs62061712 | 17 | 44009876 | A | C | 0.2255 | 0.0076 | 0.0012 | 1.50E-09 | 6.0765 | 408317 | Snoring |
| rs62061713 | 17 | 44010405 | G | A | 0.2255 | 0.0076 | 0.0012 | 1.40E-09 | 6.0884 | 408317 | Snoring |
| rs62061714 | 17 | 44010452 | A | C | 0.2255 | 0.0076 | 0.0012 | 1.40E-09 | 6.0884 | 408317 | Snoring |
| rs62061715 | 17 | 44011526 | G | A | 0.2255 | 0.0076 | 0.0012 | 1.50E-09 | 6.0735 | 408317 | Snoring |
| rs62061716 | 17 | 44012096 | G | A | 0.2255 | 0.0076 | 0.0012 | 1.50E-09 | 6.0734 | 408317 | Snoring |
| rs62061717 | 17 | 44012248 | A | T | 0.2241 | 0.0076 | 0.0013 | 1.30E-09 | 6.0936 | 408317 | Snoring |
| rs62061719 | 17 | 44012989 | T | C | 0.2255 | 0.0076 | 0.0012 | 1.50E-09 | 6.0683 | 408317 | Snoring |
| rs62061720 | 17 | 44013189 | T | C | 0.2255 | 0.0076 | 0.0012 | 1.50E-09 | 6.0729 | 408317 | Snoring |
| rs62061721 | 17 | 44013346 | C | T | 0.2255 | 0.0076 | 0.0012 | 1.50E-09 | 6.0737 | 408317 | Snoring |
| rs62061723 | 17 | 44014981 | T | G | 0.2209 | 0.0076 | 0.0013 | 2.10E-09 | 6.0141 | 408317 | Snoring |
| rs62061724 | 17 | 44014982 | T | G | 0.2209 | 0.0076 | 0.0013 | 2.10E-09 | 6.0141 | 408317 | Snoring |
| rs62061725 | 17 | 44016157 | C | G | 0.2255 | 0.0076 | 0.0012 | 1.50E-09 | 6.0715 | 408317 | Snoring |
| rs62061726 | 17 | 44016341 | A | G | 0.2255 | 0.0076 | 0.0012 | 1.40E-09 | 6.0873 | 408317 | Snoring |
| rs62061727 | 17 | 44017124 | T | G | 0.2255 | 0.0076 | 0.0012 | 1.60E-09 | 6.0593 | 408317 | Snoring |
| rs62061728 | 17 | 44017180 | G | T | 0.2255 | 0.0076 | 0.0012 | 1.50E-09 | 6.0716 | 408317 | Snoring |
| rs62061729 | 17 | 44017283 | G | A | 0.2255 | 0.0076 | 0.0012 | 1.50E-09 | 6.0722 | 408317 | Snoring |
| rs62061730 | 17 | 44017342 | G | A | 0.2255 | 0.0076 | 0.0012 | 1.40E-09 | 6.0791 | 408317 | Snoring |
| rs62061731 | 17 | 44017666 | A | C | 0.2255 | 0.0076 | 0.0012 | 1.50E-09 | 6.0723 | 408317 | Snoring |
| rs62061732 | 17 | 44017941 | T | G | 0.2255 | 0.0076 | 0.0012 | 1.50E-09 | 6.0689 | 408317 | Snoring |
| rs62061733 | 17 | 44018399 | G | A | 0.2286 | 0.0074 | 0.0012 | 3.10E-09 | 5.9599 | 408317 | Snoring |
| rs62061764 | 17 | 44166197 | G | A | 0.2254 | 0.0075 | 0.0012 | 2.00E-09 | 6.0213 | 408317 | Snoring |
| rs62061766 | 17 | 44167464 | A | G | 0.2254 | 0.0075 | 0.0012 | 2.10E-09 | 6.0157 | 408317 | Snoring |
| rs62061767 | 17 | 44167729 | G | A | 0.2254 | 0.0075 | 0.0012 | 2.10E-09 | 6.0157 | 408317 | Snoring |
| rs62061770 | 17 | 44169377 | C | G | 0.2254 | 0.0075 | 0.0012 | 2.10E-09 | 6.0163 | 408317 | Snoring |
| rs62061771 | 17 | 44169406 | A | G | 0.2251 | 0.0076 | 0.0013 | 1.80E-09 | 6.0430 | 408317 | Snoring |
| rs62061772 | 17 | 44169437 | C | T | 0.2251 | 0.0076 | 0.0013 | 1.60E-09 | 6.0594 | 408317 | Snoring |
| rs62061788 | 17 | 44169759 | A | G | 0.2254 | 0.0075 | 0.0012 | 2.10E-09 | 6.0197 | 408317 | Snoring |
| rs62061789 | 17 | 44169769 | T | C | 0.2254 | 0.0075 | 0.0012 | 2.10E-09 | 6.0198 | 408317 | Snoring |
| rs62061790 | 17 | 44170414 | A | G | 0.2259 | 0.0076 | 0.0012 | 1.50E-09 | 6.0741 | 408317 | Snoring |
| rs62061791 | 17 | 44171024 | C | T | 0.2259 | 0.0076 | 0.0012 | 1.50E-09 | 6.0748 | 408317 | Snoring |
| rs62061792 | 17 | 44171554 | A | G | 0.2252 | 0.0076 | 0.0013 | 1.50E-09 | 6.0783 | 408317 | Snoring |
| rs62061793 | 17 | 44171565 | A | C | 0.2252 | 0.0076 | 0.0013 | 1.40E-09 | 6.0866 | 408317 | Snoring |
| rs62061795 | 17 | 44173179 | A | C | 0.2259 | 0.0076 | 0.0012 | 1.50E-09 | 6.0762 | 408317 | Snoring |
| rs62061796 | 17 | 44173408 | A | G | 0.2259 | 0.0076 | 0.0012 | 1.50E-09 | 6.0750 | 408317 | Snoring |
| rs62061798 | 17 | 44173812 | A | G | 0.2243 | 0.0076 | 0.0013 | 1.50E-09 | 6.0748 | 408317 | Snoring |
| rs62061799 | 17 | 44174068 | C | T | 0.2234 | 0.0077 | 0.0013 | 1.60E-09 | 6.0592 | 408317 | Snoring |
| rs62061800 | 17 | 44174109 | C | G | 0.2227 | 0.0076 | 0.0013 | 2.40E-09 | 6.0055 | 408317 | Snoring |
| rs62061801 | 17 | 44174235 | G | A | 0.2243 | 0.0076 | 0.0013 | 1.60E-09 | 6.0578 | 408317 | Snoring |
| rs62061802 | 17 | 44174351 | A | T | 0.2259 | 0.0076 | 0.0012 | 1.50E-09 | 6.0747 | 408317 | Snoring |
| rs62061803 | 17 | 44174513 | A | C | 0.2259 | 0.0076 | 0.0012 | 1.50E-09 | 6.0751 | 408317 | Snoring |
| rs62061807 | 17 | 44177097 | T | C | 0.2252 | 0.0075 | 0.0012 | 2.20E-09 | 6.0114 | 408317 | Snoring |
| rs62061808 | 17 | 44177337 | T | C | 0.2259 | 0.0076 | 0.0012 | 1.40E-09 | 6.0801 | 408317 | Snoring |
| rs62061809 | 17 | 44178839 | C | T | 0.2259 | 0.0076 | 0.0012 | 1.40E-09 | 6.0814 | 408317 | Snoring |
| rs62061810 | 17 | 44178884 | A | G | 0.2259 | 0.0076 | 0.0012 | 1.40E-09 | 6.0851 | 408317 | Snoring |
| rs62061811 | 17 | 44180173 | G | T | 0.2259 | 0.0076 | 0.0012 | 1.40E-09 | 6.0803 | 408317 | Snoring |
| rs62061812 | 17 | 44180997 | T | C | 0.2259 | 0.0076 | 0.0012 | 1.40E-09 | 6.0805 | 408317 | Snoring |
| rs62061814 | 17 | 44181508 | G | T | 0.2257 | 0.0076 | 0.0012 | 1.60E-09 | 6.0625 | 408317 | Snoring |
| rs62061815 | 17 | 44181681 | G | A | 0.2259 | 0.0076 | 0.0012 | 1.50E-09 | 6.0792 | 408317 | Snoring |
| rs62061816 | 17 | 44182336 | A | C | 0.2258 | 0.0076 | 0.0012 | 1.60E-09 | 6.0634 | 408317 | Snoring |

|            |    |          |   |   |        |        |        |          |        |        |         |
|------------|----|----------|---|---|--------|--------|--------|----------|--------|--------|---------|
| rs62061817 | 17 | 44182706 | G | A | 0.2257 | 0.0076 | 0.0012 | 1.60E-09 | 6.0660 | 408317 | Snoring |
| rs62061818 | 17 | 44182917 | G | C | 0.2259 | 0.0076 | 0.0012 | 1.50E-09 | 6.0790 | 408317 | Snoring |
| rs62061820 | 17 | 44185431 | C | T | 0.2271 | 0.0073 | 0.0012 | 5.00E-09 | 5.8696 | 408317 | Snoring |
| rs62061821 | 17 | 44186055 | A | G | 0.2252 | 0.0076 | 0.0013 | 1.70E-09 | 6.0534 | 408317 | Snoring |
| rs62061822 | 17 | 44186894 | C | A | 0.2259 | 0.0076 | 0.0012 | 1.40E-09 | 6.0810 | 408317 | Snoring |
| rs62061823 | 17 | 44188645 | T | C | 0.2259 | 0.0076 | 0.0012 | 1.40E-09 | 6.0816 | 408317 | Snoring |
| rs62061824 | 17 | 44188755 | C | T | 0.2259 | 0.0076 | 0.0012 | 1.40E-09 | 6.0806 | 408317 | Snoring |
| rs62061845 | 17 | 44190156 | C | T | 0.2203 | 0.0076 | 0.0013 | 3.10E-09 | 5.9558 | 408317 | Snoring |
| rs62061847 | 17 | 44191682 | A | G | 0.2259 | 0.0076 | 0.0012 | 1.40E-09 | 6.0818 | 408317 | Snoring |
| rs62061848 | 17 | 44192946 | T | C | 0.2236 | 0.0075 | 0.0013 | 2.70E-09 | 5.9768 | 408317 | Snoring |
| rs62061849 | 17 | 44193882 | T | C | 0.2258 | 0.0076 | 0.0012 | 1.50E-09 | 6.0717 | 408317 | Snoring |
| rs62061850 | 17 | 44194519 | C | T | 0.2259 | 0.0076 | 0.0012 | 1.50E-09 | 6.0709 | 408317 | Snoring |
| rs62061851 | 17 | 44194891 | T | C | 0.2258 | 0.0076 | 0.0012 | 1.50E-09 | 6.0749 | 408317 | Snoring |
| rs62061852 | 17 | 44195424 | C | A | 0.2259 | 0.0076 | 0.0012 | 1.50E-09 | 6.0709 | 408317 | Snoring |
| rs62061853 | 17 | 44196125 | C | T | 0.2258 | 0.0076 | 0.0012 | 1.40E-09 | 6.0781 | 408317 | Snoring |
| rs62061854 | 17 | 44198080 | T | C | 0.2259 | 0.0076 | 0.0012 | 1.50E-09 | 6.0709 | 408317 | Snoring |
| rs62061855 | 17 | 44199670 | A | G | 0.2234 | 0.0076 | 0.0013 | 1.50E-09 | 6.0650 | 408317 | Snoring |
| rs62061856 | 17 | 44200015 | C | T | 0.2247 | 0.0076 | 0.0013 | 1.30E-09 | 6.0948 | 408317 | Snoring |
| rs62061858 | 17 | 44200033 | C | T | 0.2244 | 0.0077 | 0.0013 | 1.20E-09 | 6.1105 | 408317 | Snoring |
| rs62061859 | 17 | 44201109 | G | C | 0.2259 | 0.0076 | 0.0012 | 1.50E-09 | 6.0699 | 408317 | Snoring |
| rs62062133 | 17 | 44114372 | C | T | 0.2223 | 0.0076 | 0.0013 | 1.70E-09 | 6.0509 | 408317 | Snoring |
| rs62062134 | 17 | 44114432 | C | A | 0.2254 | 0.0075 | 0.0012 | 1.90E-09 | 6.0299 | 408317 | Snoring |
| rs62062136 | 17 | 44116312 | C | T | 0.2254 | 0.0075 | 0.0012 | 1.90E-09 | 6.0300 | 408317 | Snoring |
| rs62062137 | 17 | 44118848 | A | G | 0.2251 | 0.0076 | 0.0013 | 1.40E-09 | 6.0853 | 408317 | Snoring |
| rs62062265 | 17 | 44090035 | G | C | 0.2254 | 0.0075 | 0.0012 | 1.90E-09 | 6.0344 | 408317 | Snoring |
| rs62062266 | 17 | 44090704 | G | A | 0.2254 | 0.0075 | 0.0012 | 2.00E-09 | 6.0281 | 408317 | Snoring |
| rs62062267 | 17 | 44090854 | T | C | 0.2254 | 0.0075 | 0.0012 | 2.00E-09 | 6.0272 | 408317 | Snoring |
| rs62062268 | 17 | 44090858 | T | C | 0.2254 | 0.0075 | 0.0012 | 2.00E-09 | 6.0275 | 408317 | Snoring |
| rs62062269 | 17 | 44091092 | C | G | 0.2254 | 0.0075 | 0.0012 | 2.00E-09 | 6.0276 | 408317 | Snoring |
| rs62062270 | 17 | 44091195 | C | T | 0.2254 | 0.0075 | 0.0012 | 2.00E-09 | 6.0268 | 408317 | Snoring |
| rs62062271 | 17 | 44091988 | C | T | 0.2287 | 0.0069 | 0.0012 | 3.00E-08 | 5.5719 | 408317 | Snoring |
| rs62062272 | 17 | 44092108 | C | T | 0.2254 | 0.0075 | 0.0012 | 1.90E-09 | 6.0347 | 408317 | Snoring |
| rs62062273 | 17 | 44092243 | T | C | 0.2254 | 0.0076 | 0.0012 | 1.70E-09 | 6.0512 | 408317 | Snoring |
| rs62062274 | 17 | 44093319 | A | G | 0.2254 | 0.0075 | 0.0012 | 1.80E-09 | 6.0419 | 408317 | Snoring |
| rs62062275 | 17 | 44093496 | G | A | 0.2254 | 0.0075 | 0.0012 | 1.90E-09 | 6.0342 | 408317 | Snoring |
| rs62062276 | 17 | 44093627 | G | A | 0.2254 | 0.0075 | 0.0012 | 1.90E-09 | 6.0342 | 408317 | Snoring |
| rs62062277 | 17 | 44093753 | G | T | 0.2250 | 0.0076 | 0.0013 | 1.60E-09 | 6.0659 | 408317 | Snoring |
| rs62062278 | 17 | 44093860 | G | A | 0.2254 | 0.0075 | 0.0012 | 1.90E-09 | 6.0341 | 408317 | Snoring |
| rs62062279 | 17 | 44093964 | C | T | 0.2253 | 0.0075 | 0.0012 | 2.00E-09 | 6.0299 | 408317 | Snoring |
| rs62062280 | 17 | 44093993 | T | C | 0.2253 | 0.0075 | 0.0012 | 2.00E-09 | 6.0302 | 408317 | Snoring |
| rs62062281 | 17 | 44094112 | G | A | 0.2254 | 0.0075 | 0.0012 | 1.90E-09 | 6.0341 | 408317 | Snoring |
| rs62062282 | 17 | 44094374 | G | A | 0.2254 | 0.0075 | 0.0012 | 1.90E-09 | 6.0340 | 408317 | Snoring |
| rs62062283 | 17 | 44095055 | A | C | 0.2254 | 0.0075 | 0.0012 | 1.90E-09 | 6.0338 | 408317 | Snoring |
| rs62062284 | 17 | 44095570 | A | G | 0.2254 | 0.0075 | 0.0012 | 1.90E-09 | 6.0336 | 408317 | Snoring |
| rs62062285 | 17 | 44095661 | G | T | 0.2254 | 0.0075 | 0.0012 | 1.90E-09 | 6.0336 | 408317 | Snoring |
| rs62062286 | 17 | 44096486 | T | C | 0.2257 | 0.0075 | 0.0012 | 1.90E-09 | 6.0384 | 408317 | Snoring |
| rs62062288 | 17 | 44096553 | A | G | 0.2199 | 0.0072 | 0.0013 | 2.20E-08 | 5.6284 | 408317 | Snoring |
| rs62062289 | 17 | 44097235 | C | G | 0.2254 | 0.0075 | 0.0012 | 2.00E-09 | 6.0264 | 408317 | Snoring |
| rs62062290 | 17 | 44099129 | A | C | 0.2253 | 0.0076 | 0.0012 | 1.50E-09 | 6.0697 | 408317 | Snoring |
| rs62062292 | 17 | 44099809 | C | A | 0.2254 | 0.0075 | 0.0012 | 1.90E-09 | 6.0331 | 408317 | Snoring |
| rs62062293 | 17 | 44100553 | A | C | 0.2254 | 0.0075 | 0.0012 | 1.90E-09 | 6.0371 | 408317 | Snoring |
| rs62062294 | 17 | 44100666 | C | A | 0.2254 | 0.0075 | 0.0012 | 2.00E-09 | 6.0295 | 408317 | Snoring |
| rs62062295 | 17 | 44100906 | G | A | 0.2254 | 0.0075 | 0.0012 | 1.90E-09 | 6.0326 | 408317 | Snoring |
| rs62062296 | 17 | 44100916 | T | C | 0.2254 | 0.0075 | 0.0012 | 1.90E-09 | 6.0323 | 408317 | Snoring |
| rs62062297 | 17 | 44101004 | G | A | 0.2254 | 0.0075 | 0.0012 | 1.90E-09 | 6.0325 | 408317 | Snoring |
| rs62062321 | 17 | 44111109 | G | A | 0.2254 | 0.0075 | 0.0012 | 1.90E-09 | 6.0299 | 408317 | Snoring |
| rs62062322 | 17 | 44112385 | G | A | 0.2254 | 0.0075 | 0.0012 | 1.90E-09 | 6.0299 | 408317 | Snoring |
| rs62062323 | 17 | 44113224 | T | C | 0.2255 | 0.0075 | 0.0012 | 1.90E-09 | 6.0367 | 408317 | Snoring |
| rs62062324 | 17 | 44114362 | T | A | 0.2216 | 0.0076 | 0.0013 | 1.90E-09 | 6.0336 | 408317 | Snoring |
| rs62062325 | 17 | 44114364 | A | C | 0.2216 | 0.0076 | 0.0013 | 1.90E-09 | 6.0335 | 408317 | Snoring |
| rs62062768 | 17 | 44019479 | G | C | 0.2255 | 0.0076 | 0.0012 | 1.40E-09 | 6.0824 | 408317 | Snoring |
| rs62062769 | 17 | 44019643 | A | G | 0.2255 | 0.0076 | 0.0012 | 1.20E-09 | 6.1052 | 408317 | Snoring |
| rs62062770 | 17 | 44019680 | C | T | 0.2255 | 0.0076 | 0.0012 | 1.20E-09 | 6.1053 | 408317 | Snoring |
| rs62062771 | 17 | 44020282 | A | G | 0.2255 | 0.0076 | 0.0012 | 1.40E-09 | 6.0790 | 408317 | Snoring |
| rs62062772 | 17 | 44020314 | T | C | 0.2255 | 0.0076 | 0.0012 | 1.40E-09 | 6.0786 | 408317 | Snoring |
| rs62062773 | 17 | 44020545 | G | A | 0.2255 | 0.0076 | 0.0012 | 1.50E-09 | 6.0746 | 408317 | Snoring |
| rs62062774 | 17 | 44021463 | C | T | 0.2255 | 0.0076 | 0.0012 | 1.50E-09 | 6.0747 | 408317 | Snoring |
| rs62062776 | 17 | 44022043 | C | A | 0.2255 | 0.0076 | 0.0012 | 1.50E-09 | 6.0750 | 408317 | Snoring |
| rs62062777 | 17 | 44022068 | A | G | 0.2255 | 0.0076 | 0.0012 | 1.50E-09 | 6.0755 | 408317 | Snoring |
| rs62062778 | 17 | 44022528 | G | A | 0.2253 | 0.0076 | 0.0012 | 1.40E-09 | 6.0873 | 408317 | Snoring |
| rs62062779 | 17 | 44022577 | C | A | 0.2248 | 0.0077 | 0.0013 | 1.10E-09 | 6.1188 | 408317 | Snoring |
| rs62062780 | 17 | 44022593 | T | C | 0.2248 | 0.0077 | 0.0013 | 1.10E-09 | 6.1134 | 408317 | Snoring |
| rs62062781 | 17 | 44022632 | A | G | 0.2252 | 0.0076 | 0.0012 | 1.20E-09 | 6.1003 | 408317 | Snoring |
| rs62062782 | 17 | 44023087 | A | G | 0.2254 | 0.0076 | 0.0012 | 1.40E-09 | 6.0841 | 408317 | Snoring |



|            |    |          |   |   |        |        |        |          |        |        |         |
|------------|----|----------|---|---|--------|--------|--------|----------|--------|--------|---------|
| rs62062783 | 17 | 44023520 | G | T | 0.2254 | 0.0076 | 0.0012 | 1.40E-09 | 6.0852 | 408317 | Snoring |
| rs62062784 | 17 | 44024552 | G | C | 0.2254 | 0.0076 | 0.0012 | 1.50E-09 | 6.0665 | 408317 | Snoring |
| rs62062785 | 17 | 44024562 | T | G | 0.2254 | 0.0076 | 0.0012 | 1.40E-09 | 6.0776 | 408317 | Snoring |
| rs62062786 | 17 | 44024660 | C | G | 0.2255 | 0.0076 | 0.0012 | 1.30E-09 | 6.0976 | 408317 | Snoring |
| rs62062787 | 17 | 44024865 | C | T | 0.2255 | 0.0076 | 0.0012 | 1.20E-09 | 6.1046 | 408317 | Snoring |
| rs62062788 | 17 | 44024906 | G | A | 0.2255 | 0.0076 | 0.0012 | 1.30E-09 | 6.0998 | 408317 | Snoring |
| rs62062789 | 17 | 44025033 | C | T | 0.2240 | 0.0076 | 0.0013 | 2.10E-09 | 6.0247 | 408317 | Snoring |
| rs62062790 | 17 | 44025045 | T | C | 0.2240 | 0.0076 | 0.0013 | 2.10E-09 | 6.0248 | 408317 | Snoring |
| rs62062791 | 17 | 44025273 | A | G | 0.2254 | 0.0076 | 0.0012 | 1.30E-09 | 6.0918 | 408317 | Snoring |
| rs62062792 | 17 | 44025347 | C | T | 0.2254 | 0.0076 | 0.0012 | 1.30E-09 | 6.0902 | 408317 | Snoring |
| rs62062793 | 17 | 44026321 | C | T | 0.2254 | 0.0076 | 0.0012 | 1.30E-09 | 6.0962 | 408317 | Snoring |
| rs62062794 | 17 | 44026394 | G | A | 0.2254 | 0.0076 | 0.0012 | 1.30E-09 | 6.0961 | 408317 | Snoring |
| rs62062795 | 17 | 44027090 | T | C | 0.2254 | 0.0076 | 0.0012 | 1.30E-09 | 6.0945 | 408317 | Snoring |
| rs62062796 | 17 | 44027316 | A | G | 0.2252 | 0.0076 | 0.0012 | 1.70E-09 | 6.0577 | 408317 | Snoring |
| rs62062797 | 17 | 44027366 | G | T | 0.2236 | 0.0075 | 0.0013 | 2.30E-09 | 6.0090 | 408317 | Snoring |
| rs62062798 | 17 | 44027383 | G | A | 0.2235 | 0.0075 | 0.0013 | 2.50E-09 | 5.9934 | 408317 | Snoring |
| rs62062799 | 17 | 44027521 | T | G | 0.2254 | 0.0076 | 0.0012 | 1.40E-09 | 6.0818 | 408317 | Snoring |
| rs62062800 | 17 | 44027753 | G | A | 0.2254 | 0.0076 | 0.0012 | 1.40E-09 | 6.0817 | 408317 | Snoring |
| rs62062801 | 17 | 44028011 | G | T | 0.2254 | 0.0076 | 0.0012 | 1.40E-09 | 6.0812 | 408317 | Snoring |
| rs62062802 | 17 | 44028045 | T | G | 0.2255 | 0.0076 | 0.0012 | 1.60E-09 | 6.0652 | 408317 | Snoring |
| rs62062803 | 17 | 44028183 | C | T | 0.2256 | 0.0076 | 0.0012 | 1.50E-09 | 6.0749 | 408317 | Snoring |
| rs62062805 | 17 | 44030773 | G | A | 0.2252 | 0.0076 | 0.0013 | 1.40E-09 | 6.0760 | 408317 | Snoring |
| rs62062806 | 17 | 44031420 | A | G | 0.2255 | 0.0076 | 0.0012 | 1.50E-09 | 6.0692 | 408317 | Snoring |
| rs62062813 | 17 | 44032956 | A | G | 0.2247 | 0.0076 | 0.0013 | 1.30E-09 | 6.0904 | 408317 | Snoring |
| rs62063163 | 17 | 44201865 | T | C | 0.2257 | 0.0076 | 0.0012 | 1.80E-09 | 6.0465 | 408317 | Snoring |
| rs62063164 | 17 | 44201887 | T | C | 0.2257 | 0.0076 | 0.0012 | 1.80E-09 | 6.0465 | 408317 | Snoring |
| rs62063165 | 17 | 44202147 | G | A | 0.2257 | 0.0076 | 0.0012 | 1.80E-09 | 6.0467 | 408317 | Snoring |
| rs62063166 | 17 | 44202231 | G | A | 0.2257 | 0.0076 | 0.0012 | 1.80E-09 | 6.0469 | 408317 | Snoring |
| rs62063171 | 17 | 44203311 | T | C | 0.2258 | 0.0076 | 0.0012 | 1.70E-09 | 6.0542 | 408317 | Snoring |
| rs62063172 | 17 | 44203366 | C | T | 0.2257 | 0.0076 | 0.0012 | 1.70E-09 | 6.0545 | 408317 | Snoring |
| rs62063174 | 17 | 44205122 | G | C | 0.2258 | 0.0076 | 0.0012 | 1.40E-09 | 6.0879 | 408317 | Snoring |
| rs62063200 | 17 | 44206482 | T | C | 0.2258 | 0.0076 | 0.0012 | 1.40E-09 | 6.0833 | 408317 | Snoring |
| rs62063201 | 17 | 44207360 | T | C | 0.2234 | 0.0075 | 0.0013 | 2.70E-09 | 5.9793 | 408317 | Snoring |
| rs62063202 | 17 | 44208945 | T | C | 0.2258 | 0.0076 | 0.0012 | 1.40E-09 | 6.0873 | 408317 | Snoring |
| rs62063203 | 17 | 44209313 | C | T | 0.2258 | 0.0076 | 0.0012 | 1.40E-09 | 6.0863 | 408317 | Snoring |
| rs62063207 | 17 | 44211902 | G | A | 0.2258 | 0.0076 | 0.0012 | 1.40E-09 | 6.0870 | 408317 | Snoring |
| rs62063208 | 17 | 44212032 | A | C | 0.2258 | 0.0076 | 0.0012 | 1.40E-09 | 6.0868 | 408317 | Snoring |
| rs62063262 | 17 | 44033002 | C | T | 0.2253 | 0.0076 | 0.0012 | 1.60E-09 | 6.0539 | 408317 | Snoring |
| rs62063263 | 17 | 44033394 | C | G | 0.2238 | 0.0077 | 0.0013 | 1.10E-09 | 6.1203 | 408317 | Snoring |
| rs62063264 | 17 | 44033401 | T | C | 0.2238 | 0.0077 | 0.0013 | 1.00E-09 | 6.1337 | 408317 | Snoring |
| rs62063265 | 17 | 44033468 | A | G | 0.2252 | 0.0076 | 0.0013 | 1.10E-09 | 6.1165 | 408317 | Snoring |
| rs62063266 | 17 | 44033488 | T | C | 0.2253 | 0.0076 | 0.0013 | 1.30E-09 | 6.0933 | 408317 | Snoring |
| rs62063269 | 17 | 44034833 | A | G | 0.2253 | 0.0076 | 0.0013 | 1.50E-09 | 6.0705 | 408317 | Snoring |
| rs62063271 | 17 | 44036047 | A | G | 0.2255 | 0.0076 | 0.0012 | 1.50E-09 | 6.0693 | 408317 | Snoring |
| rs62063275 | 17 | 44036287 | G | A | 0.2255 | 0.0076 | 0.0012 | 1.60E-09 | 6.0606 | 408317 | Snoring |
| rs62063276 | 17 | 44036408 | G | T | 0.2256 | 0.0075 | 0.0012 | 1.90E-09 | 6.0360 | 408317 | Snoring |
| rs62063277 | 17 | 44036462 | A | T | 0.2256 | 0.0076 | 0.0012 | 1.60E-09 | 6.0555 | 408317 | Snoring |
| rs62063278 | 17 | 44036914 | T | C | 0.2244 | 0.0076 | 0.0013 | 1.50E-09 | 6.0714 | 408317 | Snoring |
| rs62063279 | 17 | 44036936 | A | G | 0.2244 | 0.0076 | 0.0013 | 1.50E-09 | 6.0693 | 408317 | Snoring |
| rs62063280 | 17 | 44037299 | C | G | 0.2250 | 0.0075 | 0.0013 | 2.00E-09 | 6.0297 | 408317 | Snoring |
| rs62063281 | 17 | 44038785 | G | A | 0.2208 | 0.0079 | 0.0013 | 2.90E-10 | 6.3097 | 408317 | Snoring |
| rs62063282 | 17 | 44039043 | A | G | 0.2253 | 0.0075 | 0.0012 | 2.10E-09 | 6.0138 | 408317 | Snoring |
| rs62063291 | 17 | 44043378 | C | T | 0.2255 | 0.0074 | 0.0012 | 3.40E-09 | 5.9387 | 408317 | Snoring |
| rs62063292 | 17 | 44043636 | T | C | 0.2254 | 0.0075 | 0.0012 | 2.20E-09 | 6.0118 | 408317 | Snoring |
| rs62063293 | 17 | 44043819 | A | G | 0.2254 | 0.0075 | 0.0012 | 2.20E-09 | 6.0119 | 408317 | Snoring |
| rs62063294 | 17 | 44044157 | A | G | 0.2254 | 0.0075 | 0.0012 | 2.20E-09 | 6.0122 | 408317 | Snoring |
| rs62063295 | 17 | 44044431 | T | C | 0.2254 | 0.0075 | 0.0012 | 2.20E-09 | 6.0116 | 408317 | Snoring |
| rs62063296 | 17 | 44046202 | T | C | 0.2254 | 0.0075 | 0.0012 | 2.10E-09 | 6.0147 | 408317 | Snoring |
| rs62063297 | 17 | 44047802 | T | A | 0.2254 | 0.0075 | 0.0012 | 2.10E-09 | 6.0140 | 408317 | Snoring |
| rs62063298 | 17 | 44048323 | T | G | 0.2232 | 0.0075 | 0.0013 | 2.70E-09 | 5.9768 | 408317 | Snoring |
| rs62063299 | 17 | 44048336 | C | T | 0.2232 | 0.0075 | 0.0013 | 2.70E-09 | 5.9793 | 408317 | Snoring |
| rs62063300 | 17 | 44048350 | C | T | 0.2232 | 0.0075 | 0.0013 | 2.60E-09 | 5.9811 | 408317 | Snoring |
| rs62063301 | 17 | 44048941 | C | G | 0.2251 | 0.0076 | 0.0013 | 1.70E-09 | 6.0515 | 408317 | Snoring |
| rs62063302 | 17 | 44048943 | A | G | 0.2251 | 0.0076 | 0.0013 | 1.80E-09 | 6.0437 | 408317 | Snoring |
| rs62063303 | 17 | 44049133 | C | T | 0.2254 | 0.0075 | 0.0012 | 2.10E-09 | 6.0159 | 408317 | Snoring |
| rs62063304 | 17 | 44049900 | G | A | 0.2254 | 0.0075 | 0.0012 | 1.80E-09 | 6.0434 | 408317 | Snoring |
| rs62063305 | 17 | 44050282 | A | G | 0.2254 | 0.0075 | 0.0012 | 2.00E-09 | 6.0290 | 408317 | Snoring |
| rs62063306 | 17 | 44050395 | A | C | 0.2254 | 0.0075 | 0.0012 | 2.00E-09 | 6.0274 | 408317 | Snoring |
| rs62063670 | 17 | 44123248 | C | T | 0.2254 | 0.0075 | 0.0012 | 2.00E-09 | 6.0265 | 408317 | Snoring |
| rs62063671 | 17 | 44124837 | G | A | 0.2254 | 0.0075 | 0.0012 | 2.10E-09 | 6.0186 | 408317 | Snoring |
| rs62063672 | 17 | 44125288 | G | A | 0.2190 | 0.0076 | 0.0013 | 3.10E-09 | 5.9553 | 408317 | Snoring |
| rs62063673 | 17 | 44125484 | G | T | 0.2254 | 0.0075 | 0.0012 | 2.10E-09 | 6.0160 | 408317 | Snoring |
| rs62063675 | 17 | 44126575 | T | C | 0.2256 | 0.0075 | 0.0012 | 2.40E-09 | 5.9985 | 408317 | Snoring |
| rs62063676 | 17 | 44129800 | A | G | 0.2254 | 0.0075 | 0.0012 | 2.00E-09 | 6.0221 | 408317 | Snoring |

|            |    |          |   |   |        |         |        |          |         |        |         |
|------------|----|----------|---|---|--------|---------|--------|----------|---------|--------|---------|
| rs62063677 | 17 | 44129885 | T | C | 0.2254 | 0.0075  | 0.0012 | 2.00E-09 | 6.0231  | 408317 | Snoring |
| rs62063678 | 17 | 44129949 | G | C | 0.2254 | 0.0075  | 0.0012 | 2.00E-09 | 6.0231  | 408317 | Snoring |
| rs62063680 | 17 | 44131559 | A | C | 0.2254 | 0.0075  | 0.0012 | 2.10E-09 | 6.0199  | 408317 | Snoring |
| rs62063681 | 17 | 44131592 | G | A | 0.2254 | 0.0075  | 0.0012 | 2.10E-09 | 6.0198  | 408317 | Snoring |
| rs62063682 | 17 | 44131622 | A | G | 0.2254 | 0.0075  | 0.0012 | 2.10E-09 | 6.0198  | 408317 | Snoring |
| rs62063683 | 17 | 44131717 | A | G | 0.2254 | 0.0075  | 0.0012 | 2.10E-09 | 6.0206  | 408317 | Snoring |
| rs62063684 | 17 | 44132269 | C | T | 0.2254 | 0.0075  | 0.0012 | 2.00E-09 | 6.0226  | 408317 | Snoring |
| rs62063686 | 17 | 44132458 | A | G | 0.2254 | 0.0075  | 0.0012 | 1.90E-09 | 6.0316  | 408317 | Snoring |
| rs62063687 | 17 | 44132592 | G | A | 0.2254 | 0.0075  | 0.0012 | 2.00E-09 | 6.0226  | 408317 | Snoring |
| rs62063774 | 17 | 44050463 | C | T | 0.2254 | 0.0075  | 0.0012 | 2.00E-09 | 6.0274  | 408317 | Snoring |
| rs62063775 | 17 | 44050823 | T | G | 0.2254 | 0.0075  | 0.0012 | 2.00E-09 | 6.0275  | 408317 | Snoring |
| rs62063776 | 17 | 44050850 | G | A | 0.2254 | 0.0075  | 0.0012 | 2.00E-09 | 6.0275  | 408317 | Snoring |
| rs62063777 | 17 | 44053171 | G | A | 0.2254 | 0.0075  | 0.0012 | 2.00E-09 | 6.0278  | 408317 | Snoring |
| rs62063778 | 17 | 44053989 | A | G | 0.2254 | 0.0075  | 0.0012 | 2.00E-09 | 6.0283  | 408317 | Snoring |
| rs62063779 | 17 | 44054671 | T | C | 0.2254 | 0.0075  | 0.0012 | 1.90E-09 | 6.0300  | 408317 | Snoring |
| rs62063780 | 17 | 44056238 | G | A | 0.2254 | 0.0075  | 0.0012 | 2.00E-09 | 6.0283  | 408317 | Snoring |
| rs62063781 | 17 | 44058691 | T | G | 0.2254 | 0.0075  | 0.0012 | 2.00E-09 | 6.0274  | 408317 | Snoring |
| rs62063782 | 17 | 44058716 | T | G | 0.2256 | 0.0075  | 0.0012 | 1.90E-09 | 6.0291  | 408317 | Snoring |
| rs62063783 | 17 | 44059215 | T | C | 0.2254 | 0.0075  | 0.0012 | 1.90E-09 | 6.0318  | 408317 | Snoring |
| rs62063784 | 17 | 44059775 | G | A | 0.2254 | 0.0075  | 0.0012 | 2.00E-09 | 6.0275  | 408317 | Snoring |
| rs62063786 | 17 | 44061023 | A | G | 0.2257 | 0.0075  | 0.0012 | 1.80E-09 | 6.0412  | 408317 | Snoring |
| rs62063787 | 17 | 44061036 | C | T | 0.2254 | 0.0075  | 0.0012 | 2.00E-09 | 6.0275  | 408317 | Snoring |
| rs62063794 | 17 | 44066088 | A | T | 0.2254 | 0.0075  | 0.0012 | 2.10E-09 | 6.0216  | 408317 | Snoring |
| rs62063795 | 17 | 44068238 | T | C | 0.2254 | 0.0075  | 0.0012 | 2.10E-09 | 6.0215  | 408317 | Snoring |
| rs62063796 | 17 | 44068289 | A | G | 0.2254 | 0.0075  | 0.0012 | 2.10E-09 | 6.0215  | 408317 | Snoring |
| rs62063797 | 17 | 44068294 | C | G | 0.2254 | 0.0075  | 0.0012 | 2.10E-09 | 6.0215  | 408317 | Snoring |
| rs62063798 | 17 | 44068543 | A | G | 0.2254 | 0.0075  | 0.0012 | 2.10E-09 | 6.0215  | 408317 | Snoring |
| rs62063799 | 17 | 44069180 | G | C | 0.2254 | 0.0075  | 0.0012 | 2.00E-09 | 6.0227  | 408317 | Snoring |
| rs62063800 | 17 | 44069198 | T | C | 0.2254 | 0.0075  | 0.0012 | 2.00E-09 | 6.0228  | 408317 | Snoring |
| rs62063801 | 17 | 44069376 | T | G | 0.2254 | 0.0075  | 0.0012 | 2.00E-09 | 6.0295  | 408317 | Snoring |
| rs62063842 | 17 | 44070111 | C | G | 0.2254 | 0.0075  | 0.0012 | 2.00E-09 | 6.0221  | 408317 | Snoring |
| rs62063845 | 17 | 44071294 | C | T | 0.2254 | 0.0075  | 0.0012 | 2.00E-09 | 6.0239  | 408317 | Snoring |
| rs62063846 | 17 | 44071674 | G | A | 0.2254 | 0.0075  | 0.0012 | 2.00E-09 | 6.0256  | 408317 | Snoring |
| rs62063849 | 17 | 44073062 | G | T | 0.2257 | 0.0075  | 0.0012 | 2.40E-09 | 5.9994  | 408317 | Snoring |
| rs62063850 | 17 | 44073739 | A | G | 0.2254 | 0.0075  | 0.0012 | 2.00E-09 | 6.0249  | 408317 | Snoring |
| rs62063851 | 17 | 44074435 | G | C | 0.2255 | 0.0075  | 0.0012 | 1.90E-09 | 6.0350  | 408317 | Snoring |
| rs62063852 | 17 | 44074581 | G | A | 0.2254 | 0.0076  | 0.0013 | 1.40E-09 | 6.0812  | 408317 | Snoring |
| rs62063853 | 17 | 44074613 | G | A | 0.2243 | 0.0076  | 0.0013 | 1.90E-09 | 6.0344  | 408317 | Snoring |
| rs62063854 | 17 | 44074619 | A | G | 0.2243 | 0.0076  | 0.0013 | 1.70E-09 | 6.0539  | 408317 | Snoring |
| rs62063855 | 17 | 44075535 | C | T | 0.2255 | 0.0075  | 0.0013 | 2.20E-09 | 6.0129  | 408317 | Snoring |
| rs62063856 | 17 | 44076466 | G | A | 0.2254 | 0.0075  | 0.0012 | 1.80E-09 | 6.0395  | 408317 | Snoring |
| rs62063857 | 17 | 44076665 | G | A | 0.2254 | 0.0075  | 0.0012 | 2.10E-09 | 6.0209  | 408317 | Snoring |
| rs62063859 | 17 | 44078616 | A | G | 0.2254 | 0.0075  | 0.0012 | 1.80E-09 | 6.0436  | 408317 | Snoring |
| rs62064364 | 17 | 43654468 | T | C | 0.2213 | 0.0078  | 0.0013 | 1.10E-09 | 6.1237  | 408317 | Snoring |
| rs62064388 | 17 | 43663169 | C | T | 0.2266 | 0.0077  | 0.0012 | 7.00E-10 | 6.1929  | 408317 | Snoring |
| rs62064389 | 17 | 43663843 | T | C | 0.1993 | 0.0080  | 0.0013 | 3.20E-09 | 5.9682  | 408317 | Snoring |
| rs62064395 | 17 | 43666001 | C | A | 0.2342 | 0.0077  | 0.0012 | 7.90E-10 | 6.1621  | 408317 | Snoring |
| rs62064564 | 17 | 46664979 | T | C | 0.1506 | -0.0084 | 0.0015 | 9.30E-09 | -5.7302 | 408317 | Snoring |
| rs62064660 | 17 | 44078832 | A | G | 0.2254 | 0.0075  | 0.0012 | 1.80E-09 | 6.0430  | 408317 | Snoring |
| rs62064661 | 17 | 44078892 | A | G | 0.2254 | 0.0075  | 0.0012 | 1.80E-09 | 6.0446  | 408317 | Snoring |
| rs62064662 | 17 | 44079721 | G | A | 0.2254 | 0.0075  | 0.0012 | 1.80E-09 | 6.0402  | 408317 | Snoring |
| rs62064663 | 17 | 44080039 | G | T | 0.2259 | 0.0076  | 0.0012 | 1.60E-09 | 6.0562  | 408317 | Snoring |
| rs62064664 | 17 | 44081462 | C | T | 0.2254 | 0.0075  | 0.0012 | 1.90E-09 | 6.0368  | 408317 | Snoring |
| rs62064665 | 17 | 44081527 | C | T | 0.2254 | 0.0075  | 0.0012 | 1.80E-09 | 6.0429  | 408317 | Snoring |
| rs62064666 | 17 | 44082514 | C | T | 0.2251 | 0.0075  | 0.0013 | 2.60E-09 | 5.9824  | 408317 | Snoring |
| rs62064667 | 17 | 44082528 | T | A | 0.2258 | 0.0072  | 0.0013 | 8.80E-09 | 5.7853  | 408317 | Snoring |
| rs62064668 | 17 | 44082981 | A | G | 0.2256 | 0.0076  | 0.0012 | 1.70E-09 | 6.0488  | 408317 | Snoring |
| rs62064669 | 17 | 44084676 | T | C | 0.2254 | 0.0075  | 0.0012 | 1.80E-09 | 6.0391  | 408317 | Snoring |
| rs62064670 | 17 | 44085852 | A | T | 0.2254 | 0.0075  | 0.0012 | 1.90E-09 | 6.0346  | 408317 | Snoring |
| rs62064671 | 17 | 44086100 | C | T | 0.2254 | 0.0075  | 0.0012 | 1.90E-09 | 6.0363  | 408317 | Snoring |
| rs62064672 | 17 | 44086521 | A | G | 0.2254 | 0.0075  | 0.0012 | 1.90E-09 | 6.0376  | 408317 | Snoring |
| rs62064674 | 17 | 44088772 | A | C | 0.2254 | 0.0075  | 0.0012 | 1.90E-09 | 6.0325  | 408317 | Snoring |
| rs62064675 | 17 | 44088926 | T | C | 0.2255 | 0.0075  | 0.0012 | 2.60E-09 | 5.9859  | 408317 | Snoring |
| rs62064921 | 17 | 46175361 | T | C | 0.0379 | -0.0154 | 0.0027 | 2.80E-08 | -5.5976 | 408317 | Snoring |
| rs62064954 | 17 | 46194223 | C | T | 0.4231 | 0.0064  | 0.0011 | 1.30E-09 | 6.0349  | 408317 | Snoring |
| rs62065396 | 17 | 43543207 | C | T | 0.1852 | 0.0074  | 0.0013 | 2.90E-08 | 5.5327  | 408317 | Snoring |
| rs62065399 | 17 | 43546057 | T | G | 0.1847 | 0.0074  | 0.0013 | 3.90E-08 | 5.4826  | 408317 | Snoring |
| rs62065404 | 17 | 43551613 | T | C | 0.1848 | 0.0074  | 0.0013 | 4.00E-08 | 5.4775  | 408317 | Snoring |
| rs62065436 | 17 | 43556652 | A | G | 0.1848 | 0.0074  | 0.0013 | 4.20E-08 | 5.4697  | 408317 | Snoring |
| rs62065437 | 17 | 43557612 | A | G | 0.1848 | 0.0074  | 0.0013 | 4.20E-08 | 5.4709  | 408317 | Snoring |
| rs62065438 | 17 | 43558092 | T | C | 0.1848 | 0.0074  | 0.0013 | 4.20E-08 | 5.4691  | 408317 | Snoring |
| rs62065442 | 17 | 43563894 | C | T | 0.1848 | 0.0074  | 0.0013 | 4.00E-08 | 5.4772  | 408317 | Snoring |
| rs62065445 | 17 | 43565840 | A | G | 0.1848 | 0.0074  | 0.0013 | 4.30E-08 | 5.4684  | 408317 | Snoring |
| rs62065448 | 17 | 43569770 | T | C | 0.1834 | 0.0075  | 0.0014 | 3.40E-08 | 5.5051  | 408317 | Snoring |

|            |    |           |   |   |        |         |        |          |         |        |         |
|------------|----|-----------|---|---|--------|---------|--------|----------|---------|--------|---------|
| rs62065452 | 17 | 43573061  | C | T | 0.2250 | 0.0076  | 0.0013 | 1.30E-09 | 6.0991  | 408317 | Snoring |
| rs62065453 | 17 | 43573419  | T | C | 0.2257 | 0.0080  | 0.0013 | 2.00E-10 | 6.3783  | 408317 | Snoring |
| rs62065457 | 17 | 43574611  | A | G | 0.2255 | 0.0076  | 0.0013 | 1.80E-09 | 6.0416  | 408317 | Snoring |
| rs62066085 | 17 | 43688249  | C | G | 0.2251 | 0.0077  | 0.0013 | 8.00E-10 | 6.1664  | 408317 | Snoring |
| rs62066086 | 17 | 43688387  | G | A | 0.2255 | 0.0077  | 0.0013 | 9.90E-10 | 6.1348  | 408317 | Snoring |
| rs62066125 | 17 | 43702701  | G | C | 0.2258 | 0.0076  | 0.0012 | 1.70E-09 | 6.0498  | 408317 | Snoring |
| rs62066407 | 17 | 46235348  | T | C | 0.3869 | 0.0063  | 0.0011 | 3.00E-09 | 5.8405  | 408317 | Snoring |
| rs62066447 | 17 | 46277800  | G | A | 0.3867 | 0.0062  | 0.0011 | 3.50E-09 | 5.8209  | 408317 | Snoring |
| rs62066451 | 17 | 46316540  | G | A | 0.0503 | -0.0140 | 0.0024 | 8.30E-09 | -5.7764 | 408317 | Snoring |
| rs62066460 | 17 | 43574935  | T | C | 0.2267 | 0.0076  | 0.0012 | 1.00E-09 | 6.1343  | 408317 | Snoring |
| rs62066686 | 17 | 46600906  | C | T | 0.0796 | -0.0113 | 0.0019 | 4.20E-09 | -5.8677 | 408317 | Snoring |
| rs62067799 | 17 | 46347995  | A | G | 0.2170 | -0.0074 | 0.0013 | 5.80E-09 | -5.8086 | 408317 | Snoring |
| rs62070952 | 17 | 44309255  | A | C | 0.2077 | 0.0080  | 0.0013 | 2.10E-09 | 6.0225  | 408317 | Snoring |
| rs62071365 | 17 | 44442745  | T | A | 0.2487 | -0.0072 | 0.0013 | 4.80E-08 | -5.4340 | 408317 | Snoring |
| rs62071370 | 17 | 44444802  | G | A | 0.2501 | -0.0074 | 0.0013 | 1.70E-08 | -5.6177 | 408317 | Snoring |
| rs62071573 | 17 | 44342994  | T | C | 0.2255 | 0.0073  | 0.0013 | 8.40E-09 | 5.7920  | 408317 | Snoring |
| rs62071576 | 17 | 44346829  | T | C | 0.2042 | 0.0078  | 0.0013 | 5.70E-09 | 5.8434  | 408317 | Snoring |
| rs62071595 | 17 | 44349167  | A | G | 0.2041 | 0.0077  | 0.0013 | 1.10E-08 | 5.7563  | 408317 | Snoring |
| rs62071596 | 17 | 44349169  | C | T | 0.2041 | 0.0077  | 0.0013 | 1.10E-08 | 5.7563  | 408317 | Snoring |
| rs62072119 | 17 | 44537776  | C | T | 0.3024 | 0.0074  | 0.0013 | 1.50E-08 | 5.6423  | 408317 | Snoring |
| rs62072124 | 17 | 44544470  | T | C | 0.3028 | 0.0073  | 0.0013 | 1.80E-08 | 5.6055  | 408317 | Snoring |
| rs62072129 | 17 | 44554156  | A | G | 0.3022 | 0.0074  | 0.0013 | 1.30E-08 | 5.6541  | 408317 | Snoring |
| rs62072137 | 17 | 44563656  | A | G | 0.3035 | 0.0076  | 0.0013 | 4.40E-09 | 5.8322  | 408317 | Snoring |
| rs62073098 | 17 | 44316449  | C | A | 0.2244 | 0.0076  | 0.0013 | 2.00E-09 | 6.0247  | 408317 | Snoring |
| rs62073099 | 17 | 44316491  | C | G | 0.2012 | 0.0076  | 0.0013 | 1.40E-08 | 5.6800  | 408317 | Snoring |
| rs62073146 | 17 | 44328871  | G | A | 0.1949 | 0.0080  | 0.0014 | 1.20E-08 | 5.7525  | 408317 | Snoring |
| rs62073155 | 17 | 44333121  | A | G | 0.2240 | 0.0074  | 0.0013 | 4.50E-09 | 5.8962  | 408317 | Snoring |
| rs62073156 | 17 | 44333568  | C | T | 0.2238 | 0.0074  | 0.0013 | 4.60E-09 | 5.8932  | 408317 | Snoring |
| rs62073157 | 17 | 44334052  | A | G | 0.2245 | 0.0076  | 0.0013 | 2.30E-09 | 6.0060  | 408317 | Snoring |
| rs62073178 | 17 | 44368431  | T | C | 0.2198 | 0.0077  | 0.0013 | 3.00E-09 | 5.9668  | 408317 | Snoring |
| rs62073257 | 17 | 44412076  | G | A | 0.2174 | 0.0080  | 0.0013 | 6.50E-10 | 6.2122  | 408317 | Snoring |
| rs62074562 | 17 | 44334768  | G | A | 0.2240 | 0.0073  | 0.0013 | 5.40E-09 | 5.8632  | 408317 | Snoring |
| rs621313   | 11 | 88913663  | G | A | 0.4924 | 0.0058  | 0.0010 | 2.00E-08 | 5.5394  | 408317 | Snoring |
| rs62276243 | 3  | 90121534  | T | C | 0.4338 | -0.0057 | 0.0011 | 3.20E-08 | -5.4526 | 408317 | Snoring |
| rs62481385 | 7  | 127410711 | A | G | 0.3425 | 0.0064  | 0.0011 | 3.70E-09 | 5.8283  | 408317 | Snoring |
| rs62481416 | 7  | 127478125 | T | C | 0.3425 | 0.0064  | 0.0011 | 3.70E-09 | 5.8289  | 408317 | Snoring |
| rs62481419 | 7  | 127488007 | G | A | 0.3425 | 0.0064  | 0.0011 | 4.10E-09 | 5.8126  | 408317 | Snoring |
| rs62481443 | 7  | 127530017 | A | G | 0.3414 | 0.0064  | 0.0011 | 4.90E-09 | 5.7895  | 408317 | Snoring |
| rs62481447 | 7  | 127563189 | T | G | 0.3412 | 0.0063  | 0.0011 | 6.60E-09 | 5.7444  | 408317 | Snoring |
| rs62481450 | 7  | 127568983 | T | C | 0.3413 | 0.0064  | 0.0011 | 6.10E-09 | 5.7566  | 408317 | Snoring |
| rs62506036 | 8  | 71979125  | A | G | 0.4343 | 0.0068  | 0.0011 | 9.30E-11 | 6.4729  | 408317 | Snoring |
| rs62506037 | 8  | 71979194  | G | C | 0.4345 | 0.0068  | 0.0011 | 1.50E-10 | 6.3965  | 408317 | Snoring |
| rs62506898 | 8  | 71847502  | G | A | 0.4298 | 0.0068  | 0.0011 | 1.30E-10 | 6.4217  | 408317 | Snoring |
| rs62508770 | 8  | 71692504  | T | C | 0.4321 | 0.0068  | 0.0011 | 1.10E-10 | 6.4516  | 408317 | Snoring |
| rs62508771 | 8  | 71692688  | C | T | 0.4802 | -0.0059 | 0.0010 | 1.90E-08 | -5.6396 | 408317 | Snoring |
| rs62508777 | 8  | 71695004  | A | G | 0.4319 | 0.0067  | 0.0011 | 1.60E-10 | 6.3930  | 408317 | Snoring |
| rs62508819 | 8  | 71718106  | T | C | 0.4802 | -0.0059 | 0.0010 | 1.90E-08 | -5.6386 | 408317 | Snoring |
| rs62508826 | 8  | 71727954  | A | G | 0.4821 | -0.0059 | 0.0010 | 1.50E-08 | -5.6751 | 408317 | Snoring |
| rs62508827 | 8  | 71728055  | T | C | 0.4302 | 0.0068  | 0.0011 | 9.20E-11 | 6.4704  | 408317 | Snoring |
| rs62508828 | 8  | 71728209  | G | A | 0.4302 | 0.0068  | 0.0011 | 9.10E-11 | 6.4723  | 408317 | Snoring |
| rs62510667 | 8  | 71762693  | G | C | 0.4285 | 0.0069  | 0.0011 | 5.50E-11 | 6.5491  | 408317 | Snoring |
| rs62510668 | 8  | 71764358  | A | G | 0.4819 | -0.0059 | 0.0010 | 1.60E-08 | -5.6634 | 408317 | Snoring |
| rs62530770 | 8  | 71600996  | G | C | 0.4300 | 0.0068  | 0.0011 | 8.10E-11 | 6.4914  | 408317 | Snoring |
| rs62530772 | 8  | 71601541  | T | C | 0.4822 | -0.0060 | 0.0010 | 1.20E-08 | -5.7187 | 408317 | Snoring |
| rs62530785 | 8  | 71612304  | A | T | 0.4834 | -0.0059 | 0.0010 | 1.60E-08 | -5.6623 | 408317 | Snoring |
| rs62530792 | 8  | 71618767  | T | G | 0.4832 | -0.0059 | 0.0010 | 1.90E-08 | -5.6315 | 408317 | Snoring |
| rs62530812 | 8  | 71623955  | T | C | 0.4274 | 0.0068  | 0.0011 | 9.70E-11 | 6.4656  | 408317 | Snoring |
| rs62530826 | 8  | 71641643  | T | C | 0.4819 | -0.0059 | 0.0010 | 1.50E-08 | -5.6751 | 408317 | Snoring |
| rs62530853 | 8  | 71651799  | A | G | 0.4291 | 0.0068  | 0.0011 | 8.40E-11 | 6.4829  | 408317 | Snoring |
| rs62530854 | 8  | 71651841  | T | C | 0.4290 | 0.0068  | 0.0011 | 8.80E-11 | 6.4765  | 408317 | Snoring |
| rs62530855 | 8  | 71652541  | T | C | 0.4820 | -0.0059 | 0.0010 | 1.50E-08 | -5.6780 | 408317 | Snoring |
| rs62530856 | 8  | 71652665  | A | G | 0.4247 | 0.0069  | 0.0011 | 6.10E-11 | 6.5360  | 408317 | Snoring |
| rs62530857 | 8  | 71652678  | T | C | 0.4251 | 0.0069  | 0.0011 | 6.90E-11 | 6.5158  | 408317 | Snoring |
| rs62531711 | 8  | 71530500  | C | T | 0.4338 | 0.0070  | 0.0011 | 2.60E-11 | 6.6586  | 408317 | Snoring |
| rs62531713 | 8  | 71544246  | T | C | 0.4323 | 0.0069  | 0.0011 | 5.60E-11 | 6.5347  | 408317 | Snoring |
| rs62532062 | 8  | 71657159  | C | T | 0.4720 | 0.0063  | 0.0011 | 3.80E-09 | 5.8845  | 408317 | Snoring |
| rs62532068 | 8  | 71663187  | T | C | 0.4304 | 0.0068  | 0.0011 | 8.90E-11 | 6.4763  | 408317 | Snoring |
| rs62532069 | 8  | 71663405  | A | C | 0.4304 | 0.0068  | 0.0011 | 9.00E-11 | 6.4745  | 408317 | Snoring |
| rs62532093 | 8  | 71666294  | C | T | 0.5086 | -0.0065 | 0.0011 | 1.60E-09 | -6.0518 | 408317 | Snoring |
| rs62532099 | 8  | 71667876  | G | C | 0.4302 | 0.0068  | 0.0011 | 9.80E-11 | 6.4599  | 408317 | Snoring |
| rs62533063 | 8  | 71586059  | C | G | 0.4301 | 0.0068  | 0.0011 | 9.60E-11 | 6.4635  | 408317 | Snoring |
| rs62621252 | 17 | 43922942  | C | T | 0.2260 | 0.0078  | 0.0012 | 6.30E-10 | 6.2126  | 408317 | Snoring |
| rs62641967 | 17 | 44047216  | G | T | 0.2254 | 0.0075  | 0.0012 | 2.20E-09 | 6.0099  | 408317 | Snoring |
| rs6265     | 11 | 27679916  | T | C | 0.1882 | -0.0083 | 0.0013 | 8.90E-10 | -6.2157 | 408317 | Snoring |

|            |    |           |   |   |        |         |        |          |         |        |         |
|------------|----|-----------|---|---|--------|---------|--------|----------|---------|--------|---------|
| rs62858761 | 11 | 88895963  | A | C | 0.4274 | 0.0058  | 0.0011 | 4.60E-08 | 5.4326  | 408317 | Snoring |
| rs63750417 | 17 | 44060775  | T | C | 0.2254 | 0.0075  | 0.0012 | 1.90E-09 | 6.0306  | 408317 | Snoring |
| rs642185   | 17 | 43690637  | C | T | 0.2247 | 0.0077  | 0.0013 | 1.20E-09 | 6.1039  | 408317 | Snoring |
| rs643024   | 17 | 43690468  | T | C | 0.2256 | 0.0077  | 0.0013 | 9.50E-10 | 6.1422  | 408317 | Snoring |
| rs6453142  | 5  | 75022694  | T | C | 0.3191 | -0.0065 | 0.0011 | 5.70E-09 | -5.7447 | 408317 | Snoring |
| rs6453143  | 5  | 75023210  | C | G | 0.3672 | -0.0067 | 0.0011 | 5.30E-10 | -6.1422 | 408317 | Snoring |
| rs6467145  | 7  | 127382265 | G | A | 0.4119 | -0.0060 | 0.0011 | 1.00E-08 | -5.6544 | 408317 | Snoring |
| rs6472538  | 8  | 71586971  | A | G | 0.4819 | -0.0060 | 0.0010 | 1.20E-08 | -5.7084 | 408317 | Snoring |
| rs6472539  | 8  | 71629810  | G | C | 0.4848 | -0.0060 | 0.0010 | 8.60E-09 | -5.7727 | 408317 | Snoring |
| rs6472542  | 8  | 71654087  | A | G | 0.4820 | -0.0059 | 0.0010 | 1.60E-08 | -5.6707 | 408317 | Snoring |
| rs6472543  | 8  | 71664408  | A | G | 0.4820 | -0.0059 | 0.0010 | 1.70E-08 | -5.6552 | 408317 | Snoring |
| rs6472551  | 8  | 71781849  | G | A | 0.4821 | -0.0059 | 0.0010 | 2.10E-08 | -5.6227 | 408317 | Snoring |
| rs6472561  | 8  | 71955183  | T | A | 0.4780 | -0.0065 | 0.0010 | 7.50E-10 | -6.1833 | 408317 | Snoring |
| rs6472562  | 8  | 71969878  | A | C | 0.4791 | -0.0064 | 0.0010 | 9.50E-10 | -6.1411 | 408317 | Snoring |
| rs6472563  | 8  | 71969907  | A | T | 0.4791 | -0.0064 | 0.0010 | 9.40E-10 | -6.1423 | 408317 | Snoring |
| rs6472564  | 8  | 71978400  | A | G | 0.4345 | 0.0068  | 0.0011 | 1.50E-10 | 6.4019  | 408317 | Snoring |
| rs6473011  | 8  | 78111261  | G | T | 0.2855 | -0.0067 | 0.0012 | 4.70E-09 | -5.8371 | 408317 | Snoring |
| rs6473015  | 8  | 78178485  | C | A | 0.2857 | -0.0065 | 0.0012 | 1.50E-08 | -5.6426 | 408317 | Snoring |
| rs6473016  | 8  | 78186862  | G | A | 0.2994 | -0.0064 | 0.0011 | 2.30E-08 | -5.5876 | 408317 | Snoring |
| rs6473018  | 8  | 78190220  | T | C | 0.2788 | -0.0070 | 0.0012 | 1.50E-09 | -6.0456 | 408317 | Snoring |
| rs647483   | 17 | 43729432  | T | C | 0.2252 | 0.0077  | 0.0012 | 8.70E-10 | 6.1553  | 408317 | Snoring |
| rs6484320  | 11 | 27703188  | T | A | 0.2078 | -0.0076 | 0.0013 | 5.80E-09 | -5.8862 | 408317 | Snoring |
| rs6501357  | 17 | 67962004  | A | C | 0.3444 | 0.0065  | 0.0011 | 9.70E-09 | 5.7530  | 408317 | Snoring |
| rs6503443  | 17 | 43765881  | C | T | 0.2453 | 0.0082  | 0.0012 | 1.20E-11 | 6.7956  | 408317 | Snoring |
| rs6503454  | 17 | 44118269  | G | A | 0.1818 | -0.0076 | 0.0014 | 2.50E-08 | -5.5700 | 408317 | Snoring |
| rs6503456  | 17 | 44148705  | C | A | 0.1818 | -0.0075 | 0.0014 | 2.80E-08 | -5.5462 | 408317 | Snoring |
| rs6503457  | 17 | 44208312  | T | G | 0.2285 | 0.0073  | 0.0012 | 5.40E-09 | 5.8595  | 408317 | Snoring |
| rs6504108  | 17 | 46292923  | C | T | 0.2793 | 0.0067  | 0.0012 | 6.20E-09 | 5.7567  | 408317 | Snoring |
| rs6504135  | 17 | 46332665  | G | T | 0.2171 | -0.0074 | 0.0013 | 5.50E-09 | -5.8189 | 408317 | Snoring |
| rs6504145  | 17 | 46340591  | T | C | 0.2171 | -0.0074 | 0.0013 | 5.60E-09 | -5.8162 | 408317 | Snoring |
| rs6504257  | 17 | 46526022  | G | A | 0.2180 | -0.0073 | 0.0013 | 6.20E-09 | -5.7846 | 408317 | Snoring |
| rs650927   | 17 | 43709867  | G | T | 0.2252 | 0.0077  | 0.0012 | 9.40E-10 | 6.1421  | 408317 | Snoring |
| rs6565217  | 16 | 31083324  | A | G | 0.3844 | 0.0063  | 0.0011 | 5.50E-09 | 5.8634  | 408317 | Snoring |
| rs6581635  | 12 | 65846231  | T | C | 0.4488 | 0.0070  | 0.0011 | 3.80E-11 | 6.6422  | 408317 | Snoring |
| rs6581636  | 12 | 65849797  | G | A | 0.4590 | 0.0068  | 0.0010 | 1.10E-10 | 6.4593  | 408317 | Snoring |
| rs6581638  | 12 | 65853742  | C | G | 0.4598 | 0.0068  | 0.0010 | 1.10E-10 | 6.4564  | 408317 | Snoring |
| rs6581639  | 12 | 65854114  | A | G | 0.4590 | 0.0068  | 0.0010 | 1.00E-10 | 6.4659  | 408317 | Snoring |
| rs6581640  | 12 | 65869957  | G | T | 0.4492 | 0.0069  | 0.0011 | 6.00E-11 | 6.5779  | 408317 | Snoring |
| rs6602349  | 10 | 9061798   | C | G | 0.1877 | 0.0090  | 0.0013 | 1.50E-11 | 6.7339  | 408317 | Snoring |
| rs66527120 | 3  | 94060079  | C | T | 0.3919 | -0.0058 | 0.0011 | 3.50E-08 | -5.4118 | 408317 | Snoring |
| rs66529852 | 17 | 46521200  | A | T | 0.2158 | -0.0074 | 0.0013 | 4.30E-09 | -5.8444 | 408317 | Snoring |
| rs66612454 | 3  | 94066766  | T | C | 0.3922 | -0.0058 | 0.0011 | 3.10E-08 | -5.4311 | 408317 | Snoring |
| rs66631608 | 17 | 1910493   | C | T | 0.3112 | -0.0062 | 0.0011 | 3.20E-08 | -5.5194 | 408317 | Snoring |
| rs6666140  | 1  | 50791587  | G | A | 0.4512 | 0.0058  | 0.0011 | 3.30E-08 | 5.5390  | 408317 | Snoring |
| rs66683298 | 17 | 46277748  | T | C | 0.3868 | 0.0063  | 0.0011 | 2.90E-09 | 5.8477  | 408317 | Snoring |
| rs6668519  | 1  | 51193555  | G | A | 0.4039 | 0.0061  | 0.0011 | 1.20E-08 | 5.6954  | 408317 | Snoring |
| rs6671962  | 1  | 51259645  | G | A | 0.4245 | 0.0060  | 0.0011 | 2.00E-08 | 5.6374  | 408317 | Snoring |
| rs6678244  | 1  | 51418437  | G | A | 0.4181 | 0.0059  | 0.0011 | 3.80E-08 | 5.5037  | 408317 | Snoring |
| rs66787104 | 5  | 75015698  | A | G | 0.3094 | -0.0064 | 0.0011 | 1.00E-08 | -5.6126 | 408317 | Snoring |
| rs6680349  | 1  | 50822364  | A | G | 0.4584 | 0.0060  | 0.0011 | 1.10E-08 | 5.7418  | 408317 | Snoring |
| rs6680846  | 1  | 51188674  | C | G | 0.4037 | 0.0060  | 0.0011 | 1.40E-08 | 5.6667  | 408317 | Snoring |
| rs6684901  | 1  | 51298828  | G | A | 0.4238 | 0.0059  | 0.0011 | 2.40E-08 | 5.6109  | 408317 | Snoring |
| rs66908032 | 16 | 53822142  | A | C | 0.3930 | 0.0063  | 0.0011 | 3.90E-09 | 5.8946  | 408317 | Snoring |
| rs6691061  | 1  | 51235019  | C | T | 0.4243 | 0.0060  | 0.0011 | 2.10E-08 | 5.6302  | 408317 | Snoring |
| rs6692769  | 1  | 39683175  | G | C | 0.3159 | 0.0062  | 0.0011 | 3.50E-08 | 5.4955  | 408317 | Snoring |
| rs6693790  | 1  | 51181099  | C | T | 0.4039 | 0.0060  | 0.0011 | 1.40E-08 | 5.6792  | 408317 | Snoring |
| rs6695869  | 1  | 51413205  | A | G | 0.4235 | 0.0059  | 0.0011 | 3.00E-08 | 5.5690  | 408317 | Snoring |
| rs669915   | 17 | 43724245  | A | G | 0.2233 | 0.0080  | 0.0013 | 2.50E-10 | 6.3490  | 408317 | Snoring |
| rs6703250  | 1  | 51418472  | C | T | 0.4177 | 0.0059  | 0.0011 | 3.30E-08 | 5.5287  | 408317 | Snoring |
| rs67117025 | 5  | 134451525 | A | C | 0.3298 | -0.0068 | 0.0011 | 1.20E-09 | -6.0935 | 408317 | Snoring |
| rs671740   | 17 | 43709893  | G | A | 0.2252 | 0.0077  | 0.0012 | 9.40E-10 | 6.1421  | 408317 | Snoring |
| rs6732887  | 2  | 156999024 | A | C | 0.1355 | 0.0119  | 0.0015 | 5.50E-15 | 7.7661  | 408317 | Snoring |
| rs67338333 | 7  | 127461701 | T | A | 0.3424 | 0.0064  | 0.0011 | 4.10E-09 | 5.8133  | 408317 | Snoring |
| rs6736241  | 2  | 156975459 | T | C | 0.1105 | 0.0099  | 0.0017 | 1.60E-09 | 5.9740  | 408317 | Snoring |
| rs67446770 | 17 | 46235745  | A | C | 0.3869 | 0.0063  | 0.0011 | 3.00E-09 | 5.8395  | 408317 | Snoring |
| rs6762431  | 3  | 94053850  | G | A | 0.3924 | -0.0058 | 0.0011 | 2.80E-08 | -5.4465 | 408317 | Snoring |
| rs67674827 | 8  | 78124967  | T | C | 0.2854 | -0.0067 | 0.0012 | 4.90E-09 | -5.8315 | 408317 | Snoring |
| rs67781030 | 8  | 71748854  | G | T | 0.4298 | 0.0068  | 0.0011 | 1.00E-10 | 6.4584  | 408317 | Snoring |
| rs67811013 | 3  | 94014607  | A | T | 0.4009 | -0.0060 | 0.0011 | 1.40E-08 | -5.5829 | 408317 | Snoring |
| rs6783548  | 3  | 94059733  | C | T | 0.3925 | -0.0058 | 0.0011 | 2.90E-08 | -5.4408 | 408317 | Snoring |
| rs6783764  | 3  | 77600734  | G | A | 0.4538 | 0.0064  | 0.0010 | 7.00E-10 | 6.0915  | 408317 | Snoring |
| rs6783792  | 3  | 77600881  | C | T | 0.4537 | 0.0064  | 0.0010 | 6.50E-10 | 6.1042  | 408317 | Snoring |
| rs6783971  | 3  | 77600872  | G | A | 0.4537 | 0.0064  | 0.0010 | 6.50E-10 | 6.1042  | 408317 | Snoring |
| rs67919228 | 17 | 67955527  | C | T | 0.2751 | 0.0066  | 0.0012 | 2.20E-08 | 5.6453  | 408317 | Snoring |

|            |    |           |   |   |        |         |        |          |         |        |         |
|------------|----|-----------|---|---|--------|---------|--------|----------|---------|--------|---------|
| rs6797842  | 3  | 94024808  | T | G | 0.3980 | -0.0059 | 0.0011 | 1.90E-08 | -5.5278 | 408317 | Snoring |
| rs681485   | 17 | 43707619  | A | C | 0.2254 | 0.0076  | 0.0012 | 1.20E-09 | 6.0953  | 408317 | Snoring |
| rs68152632 | 3  | 94062280  | G | A | 0.3922 | -0.0058 | 0.0011 | 2.80E-08 | -5.4500 | 408317 | Snoring |
| rs6864091  | 5  | 75010002  | C | T | 0.3603 | -0.0070 | 0.0011 | 7.10E-11 | -6.4323 | 408317 | Snoring |
| rs6874626  | 5  | 74999576  | A | G | 0.3672 | -0.0071 | 0.0011 | 3.70E-11 | -6.5391 | 408317 | Snoring |
| rs6881648  | 5  | 74991849  | C | A | 0.3671 | -0.0071 | 0.0011 | 3.90E-11 | -6.5285 | 408317 | Snoring |
| rs6961381  | 7  | 127370048 | T | G | 0.4104 | -0.0058 | 0.0011 | 3.00E-08 | -5.4599 | 408317 | Snoring |
| rs6963455  | 7  | 127405334 | G | A | 0.4112 | -0.0057 | 0.0011 | 4.30E-08 | -5.4019 | 408317 | Snoring |
| rs6968199  | 7  | 127419237 | G | A | 0.4105 | -0.0058 | 0.0011 | 2.40E-08 | -5.4984 | 408317 | Snoring |
| rs6969880  | 7  | 127472009 | C | T | 0.4138 | -0.0059 | 0.0011 | 1.80E-08 | -5.5503 | 408317 | Snoring |
| rs6980835  | 8  | 71645926  | T | C | 0.4302 | 0.0068  | 0.0011 | 1.20E-10 | 6.4366  | 408317 | Snoring |
| rs6981149  | 8  | 71694682  | A | T | 0.4321 | 0.0068  | 0.0011 | 1.20E-10 | 6.4306  | 408317 | Snoring |
| rs6981435  | 8  | 71637148  | T | G | 0.4819 | -0.0059 | 0.0010 | 1.50E-08 | -5.6750 | 408317 | Snoring |
| rs6982406  | 8  | 71654608  | T | A | 0.4820 | -0.0059 | 0.0010 | 1.60E-08 | -5.6644 | 408317 | Snoring |
| rs6982838  | 8  | 71742739  | C | T | 0.4300 | 0.0068  | 0.0011 | 8.00E-11 | 6.4924  | 408317 | Snoring |
| rs698408   | 7  | 127345936 | A | G | 0.3132 | 0.0063  | 0.0011 | 2.10E-08 | 5.5458  | 408317 | Snoring |
| rs6984618  | 8  | 71795569  | G | T | 0.4298 | 0.0068  | 0.0011 | 1.40E-10 | 6.4065  | 408317 | Snoring |
| rs6985251  | 8  | 71765855  | A | T | 0.4303 | 0.0068  | 0.0011 | 1.10E-10 | 6.4498  | 408317 | Snoring |
| rs6985299  | 8  | 71613079  | T | C | 0.4833 | -0.0059 | 0.0010 | 1.50E-08 | -5.6778 | 408317 | Snoring |
| rs6986479  | 8  | 71697558  | G | C | 0.4320 | 0.0068  | 0.0011 | 1.30E-10 | 6.4162  | 408317 | Snoring |
| rs6987007  | 8  | 71600942  | T | C | 0.4822 | -0.0060 | 0.0010 | 1.30E-08 | -5.7066 | 408317 | Snoring |
| rs6987313  | 8  | 71570989  | T | C | 0.4787 | -0.0061 | 0.0010 | 6.60E-09 | -5.8262 | 408317 | Snoring |
| rs6987515  | 8  | 71640302  | A | G | 0.4302 | 0.0068  | 0.0011 | 1.10E-10 | 6.4440  | 408317 | Snoring |
| rs6988053  | 8  | 71546963  | T | C | 0.4348 | 0.0071  | 0.0011 | 1.60E-11 | 6.7252  | 408317 | Snoring |
| rs6988495  | 8  | 71605003  | T | C | 0.4301 | 0.0069  | 0.0011 | 6.20E-11 | 6.5308  | 408317 | Snoring |
| rs6988596  | 8  | 71604917  | G | A | 0.4822 | -0.0060 | 0.0010 | 1.20E-08 | -5.7220 | 408317 | Snoring |
| rs6988746  | 8  | 71598021  | A | G | 0.4820 | -0.0059 | 0.0010 | 1.60E-08 | -5.6626 | 408317 | Snoring |
| rs6990100  | 8  | 71680508  | A | G | 0.4291 | 0.0069  | 0.0011 | 7.40E-11 | 6.5045  | 408317 | Snoring |
| rs6990850  | 8  | 71768772  | C | G | 0.4302 | 0.0068  | 0.0011 | 8.40E-11 | 6.4827  | 408317 | Snoring |
| rs6991329  | 8  | 71593425  | G | A | 0.4820 | -0.0060 | 0.0010 | 1.30E-08 | -5.7031 | 408317 | Snoring |
| rs6992879  | 8  | 71699283  | A | T | 0.4802 | -0.0059 | 0.0010 | 2.00E-08 | -5.6295 | 408317 | Snoring |
| rs6993115  | 8  | 71699183  | G | C | 0.4802 | -0.0059 | 0.0010 | 2.10E-08 | -5.6255 | 408317 | Snoring |
| rs6993170  | 8  | 71693519  | A | T | 0.4802 | -0.0059 | 0.0010 | 1.90E-08 | -5.6377 | 408317 | Snoring |
| rs6993326  | 8  | 71575600  | A | C | 0.4338 | 0.0069  | 0.0011 | 4.70E-11 | 6.5797  | 408317 | Snoring |
| rs6994488  | 8  | 71653464  | G | A | 0.4302 | 0.0068  | 0.0011 | 1.00E-10 | 6.4517  | 408317 | Snoring |
| rs699451   | 3  | 77595835  | A | G | 0.4536 | 0.0064  | 0.0010 | 5.60E-10 | 6.1258  | 408317 | Snoring |
| rs699452   | 3  | 77595880  | A | G | 0.4537 | 0.0064  | 0.0010 | 5.70E-10 | 6.1243  | 408317 | Snoring |
| rs6994814  | 8  | 71569138  | A | G | 0.4332 | 0.0069  | 0.0011 | 5.40E-11 | 6.5650  | 408317 | Snoring |
| rs6996049  | 8  | 71800006  | T | A | 0.4299 | 0.0068  | 0.0011 | 1.40E-10 | 6.4113  | 408317 | Snoring |
| rs6996877  | 8  | 78139368  | C | T | 0.2848 | -0.0067 | 0.0012 | 5.00E-09 | -5.8261 | 408317 | Snoring |
| rs6998024  | 8  | 71660840  | T | C | 0.4820 | -0.0059 | 0.0010 | 1.50E-08 | -5.6751 | 408317 | Snoring |
| rs6998354  | 8  | 71786169  | A | T | 0.4298 | 0.0068  | 0.0011 | 1.30E-10 | 6.4221  | 408317 | Snoring |
| rs6998397  | 8  | 71670042  | G | A | 0.4830 | -0.0059 | 0.0010 | 1.90E-08 | -5.6394 | 408317 | Snoring |
| rs6998786  | 8  | 71694630  | A | G | 0.4803 | -0.0059 | 0.0010 | 2.20E-08 | -5.6166 | 408317 | Snoring |
| rs6998989  | 8  | 71694531  | A | G | 0.4322 | 0.0068  | 0.0011 | 1.10E-10 | 6.4491  | 408317 | Snoring |
| rs6999739  | 8  | 71637212  | G | A | 0.4819 | -0.0059 | 0.0010 | 1.50E-08 | -5.6730 | 408317 | Snoring |
| rs7000647  | 8  | 71688408  | C | A | 0.4820 | -0.0059 | 0.0010 | 1.50E-08 | -5.6796 | 408317 | Snoring |
| rs7001162  | 8  | 71587470  | G | A | 0.4821 | -0.0060 | 0.0010 | 1.20E-08 | -5.7198 | 408317 | Snoring |
| rs7003123  | 8  | 71613089  | A | G | 0.4833 | -0.0059 | 0.0010 | 1.60E-08 | -5.6617 | 408317 | Snoring |
| rs7003688  | 8  | 71779881  | A | T | 0.4299 | 0.0068  | 0.0011 | 1.30E-10 | 6.4236  | 408317 | Snoring |
| rs7003788  | 8  | 71789124  | T | C | 0.4298 | 0.0068  | 0.0011 | 1.30E-10 | 6.4195  | 408317 | Snoring |
| rs7005777  | 8  | 78233600  | G | T | 0.2849 | -0.0074 | 0.0012 | 1.90E-10 | -6.3646 | 408317 | Snoring |
| rs7006615  | 8  | 71639807  | T | A | 0.4819 | -0.0059 | 0.0010 | 1.60E-08 | -5.6724 | 408317 | Snoring |
| rs7007450  | 8  | 71640269  | T | C | 0.4819 | -0.0059 | 0.0010 | 1.50E-08 | -5.6753 | 408317 | Snoring |
| rs7007887  | 8  | 71555913  | T | C | 0.4360 | 0.0071  | 0.0011 | 1.10E-11 | 6.7734  | 408317 | Snoring |
| rs7009297  | 8  | 71672366  | A | G | 0.4820 | -0.0059 | 0.0010 | 1.50E-08 | -5.6797 | 408317 | Snoring |
| rs7012404  | 8  | 71668698  | T | C | 0.4820 | -0.0059 | 0.0010 | 1.70E-08 | -5.6552 | 408317 | Snoring |
| rs7012577  | 8  | 71472044  | C | G | 0.4318 | 0.0067  | 0.0011 | 2.70E-10 | 6.3040  | 408317 | Snoring |
| rs7013657  | 8  | 71637559  | G | A | 0.4819 | -0.0059 | 0.0010 | 1.50E-08 | -5.6750 | 408317 | Snoring |
| rs7013793  | 8  | 71973552  | T | C | 0.4320 | 0.0067  | 0.0011 | 2.10E-10 | 6.3464  | 408317 | Snoring |
| rs7014012  | 8  | 71672743  | G | T | 0.4820 | -0.0059 | 0.0010 | 1.50E-08 | -5.6797 | 408317 | Snoring |
| rs7014185  | 8  | 71994793  | A | T | 0.4454 | 0.0066  | 0.0011 | 4.70E-10 | 6.2225  | 408317 | Snoring |
| rs7014481  | 8  | 71761054  | G | A | 0.4303 | 0.0068  | 0.0011 | 9.20E-11 | 6.4699  | 408317 | Snoring |
| rs7015035  | 8  | 71653601  | T | C | 0.4820 | -0.0059 | 0.0010 | 1.60E-08 | -5.6625 | 408317 | Snoring |
| rs7015825  | 8  | 71778673  | T | C | 0.4302 | 0.0068  | 0.0011 | 1.20E-10 | 6.4332  | 408317 | Snoring |
| rs7015947  | 8  | 71660946  | G | A | 0.4302 | 0.0068  | 0.0011 | 1.00E-10 | 6.4532  | 408317 | Snoring |
| rs7017473  | 8  | 72000474  | A | T | 0.4372 | 0.0062  | 0.0011 | 8.20E-09 | 5.7436  | 408317 | Snoring |
| rs7017481  | 8  | 71676770  | C | T | 0.4304 | 0.0068  | 0.0011 | 7.80E-11 | 6.4970  | 408317 | Snoring |
| rs7017914  | 8  | 71591203  | A | G | 0.4820 | -0.0060 | 0.0010 | 1.30E-08 | -5.6975 | 408317 | Snoring |
| rs7018381  | 8  | 71670117  | T | C | 0.4820 | -0.0059 | 0.0010 | 1.50E-08 | -5.6786 | 408317 | Snoring |
| rs70600    | 17 | 44860021  | T | C | 0.2159 | 0.0071  | 0.0013 | 2.90E-08 | 5.5782  | 408317 | Snoring |
| rs70602    | 17 | 44859715  | T | C | 0.2161 | 0.0070  | 0.0013 | 3.80E-08 | 5.5229  | 408317 | Snoring |
| rs706606   | 13 | 50833707  | T | C | 0.4682 | 0.0066  | 0.0010 | 2.50E-10 | 6.2956  | 408317 | Snoring |
| rs7103411  | 11 | 27700125  | C | T | 0.2075 | -0.0077 | 0.0013 | 3.80E-09 | -5.9659 | 408317 | Snoring |



|            |    |           |   |   |        |         |        |          |         |        |         |
|------------|----|-----------|---|---|--------|---------|--------|----------|---------|--------|---------|
| rs7108473  | 11 | 88896425  | C | T | 0.4258 | 0.0057  | 0.0011 | 4.80E-08 | 5.4264  | 408317 | Snoring |
| rs71238846 | 17 | 43552537  | A | G | 0.1848 | 0.0074  | 0.0013 | 4.00E-08 | 5.4782  | 408317 | Snoring |
| rs7124483  | 11 | 88896664  | A | G | 0.4292 | 0.0059  | 0.0011 | 2.40E-08 | 5.5505  | 408317 | Snoring |
| rs712707   | 7  | 127322614 | T | C | 0.3282 | 0.0061  | 0.0011 | 3.80E-08 | 5.4466  | 408317 | Snoring |
| rs712712   | 7  | 127331814 | G | A | 0.4108 | -0.0058 | 0.0011 | 2.70E-08 | -5.4877 | 408317 | Snoring |
| rs712715   | 7  | 127333136 | T | C | 0.3259 | 0.0061  | 0.0011 | 3.30E-08 | 5.4769  | 408317 | Snoring |
| rs712716   | 7  | 127333279 | A | G | 0.4107 | -0.0058 | 0.0011 | 2.90E-08 | -5.4750 | 408317 | Snoring |
| rs712718   | 7  | 127346950 | G | C | 0.3271 | 0.0062  | 0.0011 | 2.50E-08 | 5.5221  | 408317 | Snoring |
| rs712719   | 7  | 127357644 | A | G | 0.3255 | 0.0061  | 0.0011 | 3.40E-08 | 5.4688  | 408317 | Snoring |
| rs7127661  | 11 | 88896609  | T | G | 0.4287 | 0.0058  | 0.0011 | 2.80E-08 | 5.5269  | 408317 | Snoring |
| rs71326817 | 3  | 93997029  | A | G | 0.4009 | -0.0059 | 0.0011 | 1.40E-08 | -5.5772 | 408317 | Snoring |
| rs71375313 | 17 | 43839253  | A | G | 0.2248 | 0.0076  | 0.0013 | 1.20E-09 | 6.1062  | 408317 | Snoring |
| rs71375338 | 17 | 44332793  | A | G | 0.2690 | 0.0068  | 0.0012 | 1.00E-08 | 5.7405  | 408317 | Snoring |
| rs7138942  | 12 | 65868428  | G | C | 0.4496 | 0.0069  | 0.0011 | 6.40E-11 | 6.5633  | 408317 | Snoring |
| rs71434496 | 13 | 50756042  | C | T | 0.4555 | 0.0066  | 0.0011 | 4.70E-10 | 6.2179  | 408317 | Snoring |
| rs7146019  | 14 | 99734984  | A | G | 0.4307 | -0.0073 | 0.0011 | 1.20E-11 | -6.7668 | 408317 | Snoring |
| rs71480157 | 11 | 27610041  | C | T | 0.1814 | -0.0078 | 0.0014 | 1.90E-08 | -5.7314 | 408317 | Snoring |
| rs71510796 | 1  | 97028456  | G | C | 0.0873 | 0.0116  | 0.0019 | 4.00E-10 | 6.2445  | 408317 | Snoring |
| rs71523196 | 8  | 71608912  | T | G | 0.4867 | -0.0060 | 0.0010 | 1.50E-08 | -5.6818 | 408317 | Snoring |
| rs71525106 | 8  | 71666046  | A | G | 0.4304 | 0.0068  | 0.0011 | 7.80E-11 | 6.4966  | 408317 | Snoring |
| rs71654480 | 1  | 96729343  | C | G | 0.0800 | 0.0121  | 0.0019 | 4.00E-10 | 6.2709  | 408317 | Snoring |
| rs7184567  | 16 | 31021078  | T | C | 0.3761 | 0.0064  | 0.0011 | 3.20E-09 | 5.9556  | 408317 | Snoring |
| rs7185735  | 16 | 53822651  | G | A | 0.3930 | 0.0063  | 0.0011 | 3.90E-09 | 5.8913  | 408317 | Snoring |
| rs7187250  | 16 | 53810546  | A | C | 0.3931 | 0.0063  | 0.0011 | 4.40E-09 | 5.8686  | 408317 | Snoring |
| rs7190396  | 16 | 53822502  | G | T | 0.3930 | 0.0063  | 0.0011 | 3.70E-09 | 5.9027  | 408317 | Snoring |
| rs7193144  | 16 | 53810686  | C | T | 0.3936 | 0.0063  | 0.0011 | 3.40E-09 | 5.9114  | 408317 | Snoring |
| rs7196726  | 16 | 31092075  | A | G | 0.3842 | 0.0063  | 0.0011 | 4.20E-09 | 5.9077  | 408317 | Snoring |
| rs7197717  | 16 | 31083075  | C | A | 0.3844 | 0.0063  | 0.0011 | 5.40E-09 | 5.8668  | 408317 | Snoring |
| rs7199949  | 16 | 31096164  | C | G | 0.3845 | 0.0063  | 0.0011 | 5.00E-09 | 5.8832  | 408317 | Snoring |
| rs7201850  | 16 | 53821862  | T | C | 0.4124 | 0.0064  | 0.0011 | 1.30E-09 | 6.0714  | 408317 | Snoring |
| rs7202116  | 16 | 53821615  | G | A | 0.3931 | 0.0063  | 0.0011 | 3.80E-09 | 5.8995  | 408317 | Snoring |
| rs7202296  | 16 | 53821690  | G | A | 0.3931 | 0.0063  | 0.0011 | 3.60E-09 | 5.9061  | 408317 | Snoring |
| rs7203999  | 16 | 31017554  | T | C | 0.3763 | 0.0064  | 0.0011 | 4.70E-09 | 5.8869  | 408317 | Snoring |
| rs7206122  | 16 | 53822440  | A | G | 0.3930 | 0.0063  | 0.0011 | 3.90E-09 | 5.8936  | 408317 | Snoring |
| rs7206410  | 16 | 53821297  | C | T | 0.3931 | 0.0063  | 0.0011 | 3.40E-09 | 5.9168  | 408317 | Snoring |
| rs7206629  | 16 | 53821413  | C | T | 0.4124 | 0.0065  | 0.0011 | 1.20E-09 | 6.0830  | 408317 | Snoring |
| rs7206790  | 16 | 53797908  | C | G | 0.5335 | -0.0064 | 0.0011 | 9.70E-10 | -6.1074 | 408317 | Snoring |
| rs7206951  | 17 | 46396831  | G | A | 0.2227 | -0.0073 | 0.0013 | 6.00E-09 | -5.7924 | 408317 | Snoring |
| rs7207373  | 17 | 43770712  | T | C | 0.2451 | 0.0083  | 0.0012 | 1.10E-11 | 6.8109  | 408317 | Snoring |
| rs7207400  | 17 | 43824360  | C | T | 0.2714 | 0.0074  | 0.0012 | 3.00E-10 | 6.3302  | 408317 | Snoring |
| rs7207582  | 17 | 44210933  | G | A | 0.2284 | 0.0073  | 0.0012 | 5.80E-09 | 5.8463  | 408317 | Snoring |
| rs7208449  | 17 | 46663535  | A | G | 0.1511 | -0.0084 | 0.0015 | 9.70E-09 | -5.7222 | 408317 | Snoring |
| rs7209589  | 17 | 44369420  | A | G | 0.2265 | -0.0080 | 0.0013 | 9.70E-10 | -6.1166 | 408317 | Snoring |
| rs7210149  | 17 | 46297622  | A | G | 0.3866 | 0.0062  | 0.0011 | 3.60E-09 | 5.8189  | 408317 | Snoring |
| rs7210219  | 17 | 44018519  | C | T | 0.2244 | 0.0079  | 0.0013 | 7.30E-10 | 6.1834  | 408317 | Snoring |
| rs7211607  | 17 | 46336299  | T | C | 0.2172 | -0.0074 | 0.0013 | 5.50E-09 | -5.8172 | 408317 | Snoring |
| rs7211712  | 17 | 46505696  | G | A | 0.2158 | -0.0075 | 0.0013 | 3.70E-09 | -5.8730 | 408317 | Snoring |
| rs7211983  | 17 | 44172679  | A | G | 0.1872 | -0.0078 | 0.0013 | 5.40E-09 | -5.8257 | 408317 | Snoring |
| rs7212857  | 17 | 44132301  | A | C | 0.1872 | -0.0078 | 0.0013 | 6.00E-09 | -5.8097 | 408317 | Snoring |
| rs7213876  | 17 | 46274574  | T | C | 0.3866 | 0.0062  | 0.0011 | 3.80E-09 | 5.8086  | 408317 | Snoring |
| rs7214067  | 17 | 67961623  | A | G | 0.2748 | 0.0066  | 0.0012 | 2.30E-08 | 5.6341  | 408317 | Snoring |
| rs7214269  | 17 | 46515483  | G | T | 0.2155 | -0.0075 | 0.0013 | 2.90E-09 | -5.9103 | 408317 | Snoring |
| rs7214674  | 17 | 44113969  | T | C | 0.1818 | -0.0076 | 0.0014 | 2.50E-08 | -5.5692 | 408317 | Snoring |
| rs7214931  | 17 | 46298235  | A | G | 0.4154 | 0.0066  | 0.0011 | 5.30E-10 | 6.1706  | 408317 | Snoring |
| rs7215143  | 17 | 46380044  | C | T | 0.2171 | -0.0073 | 0.0013 | 7.10E-09 | -5.7751 | 408317 | Snoring |
| rs7215239  | 17 | 43767773  | C | T | 0.2454 | 0.0082  | 0.0012 | 1.20E-11 | 6.7934  | 408317 | Snoring |
| rs7217107  | 17 | 1909180   | G | A | 0.3148 | -0.0063 | 0.0011 | 2.60E-08 | -5.5575 | 408317 | Snoring |
| rs7218217  | 17 | 46502888  | T | C | 0.2156 | -0.0074 | 0.0013 | 4.60E-09 | -5.8363 | 408317 | Snoring |
| rs7218319  | 17 | 44126365  | T | C | 0.2281 | 0.0072  | 0.0012 | 7.40E-09 | 5.8030  | 408317 | Snoring |
| rs7218848  | 17 | 46418589  | G | A | 0.2226 | -0.0073 | 0.0013 | 6.10E-09 | -5.7914 | 408317 | Snoring |
| rs7219967  | 17 | 46294074  | G | T | 0.3866 | 0.0063  | 0.0011 | 3.40E-09 | 5.8275  | 408317 | Snoring |
| rs7220387  | 17 | 46500100  | A | G | 0.2158 | -0.0073 | 0.0013 | 7.20E-09 | -5.7591 | 408317 | Snoring |
| rs7220619  | 17 | 46216700  | C | T | 0.3865 | 0.0062  | 0.0011 | 4.10E-09 | 5.7913  | 408317 | Snoring |
| rs7220752  | 17 | 44138201  | C | T | 0.2281 | 0.0072  | 0.0012 | 7.30E-09 | 5.8066  | 408317 | Snoring |
| rs7220768  | 17 | 46224829  | A | G | 0.3865 | 0.0062  | 0.0011 | 4.10E-09 | 5.7912  | 408317 | Snoring |
| rs7220839  | 17 | 43815145  | C | T | 0.4523 | 0.0059  | 0.0010 | 2.40E-08 | 5.5799  | 408317 | Snoring |
| rs7220904  | 17 | 46342872  | G | A | 0.2171 | -0.0074 | 0.0013 | 5.50E-09 | -5.8171 | 408317 | Snoring |
| rs7220922  | 17 | 46224908  | A | G | 0.3865 | 0.0062  | 0.0011 | 4.10E-09 | 5.7912  | 408317 | Snoring |
| rs7221192  | 17 | 46579232  | T | C | 0.0799 | -0.0110 | 0.0019 | 9.30E-09 | -5.7350 | 408317 | Snoring |
| rs7221390  | 17 | 44116950  | G | T | 0.2282 | 0.0072  | 0.0012 | 6.80E-09 | 5.8173  | 408317 | Snoring |
| rs7222593  | 17 | 46330434  | C | T | 0.2172 | -0.0074 | 0.0013 | 5.40E-09 | -5.8205 | 408317 | Snoring |
| rs7223867  | 17 | 46230156  | T | A | 0.3867 | 0.0062  | 0.0011 | 3.80E-09 | 5.8076  | 408317 | Snoring |
| rs7223886  | 17 | 67959695  | T | C | 0.3430 | 0.0064  | 0.0011 | 6.10E-09 | 5.8315  | 408317 | Snoring |
| rs7223893  | 17 | 67959701  | G | C | 0.3430 | 0.0064  | 0.0011 | 6.50E-09 | 5.8190  | 408317 | Snoring |

|            |    |           |   |   |        |         |        |          |         |        |         |
|------------|----|-----------|---|---|--------|---------|--------|----------|---------|--------|---------|
| rs7224686  | 17 | 46428568  | T | C | 0.2226 | -0.0073 | 0.0013 | 5.90E-09 | -5.7983 | 408317 | Snoring |
| rs7225435  | 17 | 46210034  | C | T | 0.3865 | 0.0062  | 0.0011 | 4.10E-09 | 5.7899  | 408317 | Snoring |
| rs7225550  | 17 | 46225243  | T | C | 0.3865 | 0.0062  | 0.0011 | 4.10E-09 | 5.7913  | 408317 | Snoring |
| rs7225625  | 17 | 1911885   | A | G | 0.3108 | -0.0062 | 0.0011 | 3.30E-08 | -5.5182 | 408317 | Snoring |
| rs7225865  | 17 | 46209964  | A | G | 0.3865 | 0.0062  | 0.0011 | 4.10E-09 | 5.7905  | 408317 | Snoring |
| rs7248703  | 19 | 32215431  | T | C | 0.0921 | -0.0103 | 0.0018 | 1.10E-08 | -5.6389 | 408317 | Snoring |
| rs7249868  | 19 | 32209988  | C | A | 0.0945 | -0.0105 | 0.0018 | 2.80E-09 | -5.8515 | 408317 | Snoring |
| rs7251718  | 19 | 32214927  | A | T | 0.0949 | -0.0105 | 0.0018 | 3.40E-09 | -5.8310 | 408317 | Snoring |
| rs725861   | 10 | 9063776   | G | A | 0.1880 | 0.0091  | 0.0013 | 1.00E-11 | 6.7888  | 408317 | Snoring |
| rs7262110  | 20 | 6448094   | A | G | 0.2274 | 0.0070  | 0.0013 | 2.20E-08 | 5.5758  | 408317 | Snoring |
| rs72633979 | 5  | 74990178  | T | A | 0.2804 | -0.0062 | 0.0012 | 4.50E-08 | -5.3681 | 408317 | Snoring |
| rs72663709 | 8  | 78117990  | T | C | 0.2855 | -0.0068 | 0.0012 | 4.60E-09 | -5.8396 | 408317 | Snoring |
| rs727425   | 17 | 44195495  | A | G | 0.2259 | 0.0076  | 0.0012 | 1.50E-09 | 6.0709  | 408317 | Snoring |
| rs72785520 | 16 | 31070778  | T | C | 0.3794 | 0.0065  | 0.0011 | 2.30E-09 | 5.9972  | 408317 | Snoring |
| rs72800847 | 16 | 31022639  | A | G | 0.3704 | 0.0064  | 0.0011 | 3.40E-09 | 5.9421  | 408317 | Snoring |
| rs72803697 | 16 | 53822183  | T | C | 0.3930 | 0.0063  | 0.0011 | 3.70E-09 | 5.9027  | 408317 | Snoring |
| rs72805611 | 16 | 53831354  | T | C | 0.4122 | 0.0059  | 0.0011 | 2.90E-08 | 5.5403  | 408317 | Snoring |
| rs72805612 | 16 | 53834608  | A | G | 0.4121 | 0.0059  | 0.0011 | 3.00E-08 | 5.5399  | 408317 | Snoring |
| rs72805613 | 16 | 53837342  | G | A | 0.4124 | 0.0058  | 0.0011 | 3.50E-08 | 5.5058  | 408317 | Snoring |
| rs72809514 | 17 | 1908363   | A | G | 0.3092 | -0.0062 | 0.0011 | 4.90E-08 | -5.4425 | 408317 | Snoring |
| rs72815304 | 17 | 2007004   | T | C | 0.3778 | -0.0063 | 0.0011 | 4.30E-09 | -5.8062 | 408317 | Snoring |
| rs72817574 | 17 | 2078890   | A | G | 0.3767 | -0.0063 | 0.0011 | 4.10E-09 | -5.8100 | 408317 | Snoring |
| rs72856759 | 17 | 67956298  | A | C | 0.3444 | 0.0065  | 0.0011 | 3.00E-09 | 5.9498  | 408317 | Snoring |
| rs72902129 | 2  | 156969427 | A | G | 0.1099 | 0.0097  | 0.0017 | 4.80E-09 | 5.7919  | 408317 | Snoring |
| rs72902130 | 2  | 156971379 | A | G | 0.1099 | 0.0097  | 0.0017 | 4.70E-09 | 5.7952  | 408317 | Snoring |
| rs72902175 | 2  | 157013035 | T | C | 0.1349 | 0.0119  | 0.0015 | 5.30E-15 | 7.7670  | 408317 | Snoring |
| rs72902177 | 2  | 157016257 | T | C | 0.1355 | 0.0119  | 0.0015 | 5.30E-15 | 7.7679  | 408317 | Snoring |
| rs72904207 | 2  | 157044693 | A | T | 0.1359 | 0.0117  | 0.0015 | 1.10E-14 | 7.6878  | 408317 | Snoring |
| rs72904209 | 2  | 157046432 | C | T | 0.1352 | 0.0118  | 0.0015 | 9.50E-15 | 7.6959  | 408317 | Snoring |
| rs72904220 | 2  | 157052971 | T | A | 0.1030 | 0.0101  | 0.0017 | 4.20E-09 | 5.8655  | 408317 | Snoring |
| rs72904292 | 2  | 157058426 | C | T | 0.1357 | 0.0118  | 0.0015 | 8.90E-15 | 7.7104  | 408317 | Snoring |
| rs72906130 | 2  | 157076893 | G | C | 0.1358 | 0.0118  | 0.0015 | 7.80E-15 | 7.7289  | 408317 | Snoring |
| rs72907878 | 2  | 157083697 | A | G | 0.1352 | 0.0118  | 0.0015 | 7.30E-15 | 7.7350  | 408317 | Snoring |
| rs7294     | 16 | 31102321  | T | C | 0.3798 | 0.0064  | 0.0011 | 3.50E-09 | 5.9314  | 408317 | Snoring |
| rs729482   | 16 | 31016970  | C | T | 0.3703 | 0.0064  | 0.0011 | 3.80E-09 | 5.9173  | 408317 | Snoring |
| rs7295395  | 12 | 65797796  | C | T | 0.3743 | 0.0085  | 0.0011 | 1.50E-15 | 7.9040  | 408317 | Snoring |
| rs7300522  | 12 | 65799359  | G | C | 0.3741 | 0.0086  | 0.0011 | 1.00E-15 | 7.9488  | 408317 | Snoring |
| rs7302024  | 12 | 65869933  | A | G | 0.4492 | 0.0069  | 0.0011 | 6.20E-11 | 6.5726  | 408317 | Snoring |
| rs73030263 | 19 | 32171579  | C | T | 0.0953 | -0.0109 | 0.0018 | 6.50E-10 | -6.0914 | 408317 | Snoring |
| rs73030268 | 19 | 32172296  | A | G | 0.0911 | -0.0107 | 0.0018 | 2.70E-09 | -5.8586 | 408317 | Snoring |
| rs73030270 | 19 | 32173403  | G | A | 0.0910 | -0.0107 | 0.0018 | 2.50E-09 | -5.8758 | 408317 | Snoring |
| rs73030271 | 19 | 32175897  | C | T | 0.0909 | -0.0107 | 0.0018 | 2.70E-09 | -5.8639 | 408317 | Snoring |
| rs73030274 | 19 | 32178543  | A | G | 0.0910 | -0.0107 | 0.0018 | 2.20E-09 | -5.8981 | 408317 | Snoring |
| rs73030282 | 19 | 32181822  | T | C | 0.0909 | -0.0107 | 0.0018 | 2.30E-09 | -5.8863 | 408317 | Snoring |
| rs73030283 | 19 | 32182610  | T | C | 0.0910 | -0.0106 | 0.0018 | 3.40E-09 | -5.8273 | 408317 | Snoring |
| rs73030285 | 19 | 32183260  | A | G | 0.0909 | -0.0107 | 0.0018 | 2.40E-09 | -5.8777 | 408317 | Snoring |
| rs73030287 | 19 | 32187112  | G | A | 0.0910 | -0.0106 | 0.0018 | 3.80E-09 | -5.8103 | 408317 | Snoring |
| rs73030289 | 19 | 32189421  | G | A | 0.0959 | -0.0108 | 0.0018 | 7.40E-10 | -6.0688 | 408317 | Snoring |
| rs73030290 | 19 | 32191039  | G | A | 0.0957 | -0.0107 | 0.0018 | 1.30E-09 | -5.9767 | 408317 | Snoring |
| rs73030291 | 19 | 32191728  | T | A | 0.0913 | -0.0104 | 0.0018 | 8.00E-09 | -5.6844 | 408317 | Snoring |
| rs73030293 | 19 | 32192040  | T | C | 0.0913 | -0.0103 | 0.0018 | 8.20E-09 | -5.6797 | 408317 | Snoring |
| rs73030297 | 19 | 32195344  | T | C | 0.0906 | -0.0103 | 0.0018 | 9.70E-09 | -5.6498 | 408317 | Snoring |
| rs73031903 | 19 | 32213596  | T | C | 0.0904 | -0.0103 | 0.0018 | 1.20E-08 | -5.6173 | 408317 | Snoring |
| rs7306113  | 12 | 65855476  | A | G | 0.4598 | 0.0067  | 0.0010 | 1.30E-10 | 6.4284  | 408317 | Snoring |
| rs73119451 | 12 | 65761089  | A | G | 0.1467 | 0.0090  | 0.0015 | 1.00E-09 | 6.0707  | 408317 | Snoring |
| rs73123651 | 12 | 65872839  | A | T | 0.1422 | 0.0084  | 0.0015 | 1.90E-08 | 5.6097  | 408317 | Snoring |
| rs73123659 | 12 | 65883737  | G | T | 0.4493 | 0.0067  | 0.0011 | 2.00E-10 | 6.3944  | 408317 | Snoring |
| rs7315374  | 12 | 65814891  | A | C | 0.3737 | 0.0086  | 0.0011 | 1.20E-15 | 7.9352  | 408317 | Snoring |
| rs7315978  | 12 | 65798921  | T | C | 0.3645 | 0.0088  | 0.0011 | 3.30E-16 | 8.1124  | 408317 | Snoring |
| rs7316024  | 12 | 65857555  | A | T | 0.4496 | 0.0070  | 0.0011 | 4.20E-11 | 6.6246  | 408317 | Snoring |
| rs73164792 | 3  | 94113405  | A | G | 0.3750 | -0.0058 | 0.0011 | 4.20E-08 | -5.3459 | 408317 | Snoring |
| rs73186318 | 13 | 51356435  | T | C | 0.0964 | 0.0114  | 0.0018 | 1.20E-10 | 6.4478  | 408317 | Snoring |
| rs732172   | 16 | 31050033  | T | C | 0.3731 | 0.0066  | 0.0011 | 1.30E-09 | 6.0987  | 408317 | Snoring |
| rs732173   | 16 | 31050023  | A | C | 0.3731 | 0.0066  | 0.0011 | 1.30E-09 | 6.1002  | 408317 | Snoring |
| rs73234899 | 7  | 127398247 | A | G | 0.4079 | -0.0058 | 0.0011 | 3.30E-08 | -5.4457 | 408317 | Snoring |
| rs73234901 | 7  | 127398248 | A | T | 0.4079 | -0.0058 | 0.0011 | 3.30E-08 | -5.4457 | 408317 | Snoring |
| rs73292184 | 17 | 1914559   | A | G | 0.3112 | -0.0062 | 0.0011 | 2.90E-08 | -5.5382 | 408317 | Snoring |
| rs7339301  | 13 | 40739333  | A | G | 0.4710 | -0.0064 | 0.0010 | 7.20E-10 | -6.0997 | 408317 | Snoring |
| rs733966   | 17 | 44089563  | T | C | 0.2254 | 0.0075  | 0.0012 | 2.00E-09 | 6.0247  | 408317 | Snoring |
| rs733967   | 17 | 44089690  | C | T | 0.2254 | 0.0075  | 0.0012 | 1.90E-09 | 6.0370  | 408317 | Snoring |
| rs733968   | 17 | 44089715  | T | C | 0.2254 | 0.0075  | 0.0012 | 1.90E-09 | 6.0348  | 408317 | Snoring |
| rs733969   | 17 | 44089727  | A | G | 0.2254 | 0.0075  | 0.0012 | 1.90E-09 | 6.0372  | 408317 | Snoring |
| rs7342208  | 11 | 88876845  | A | G | 0.4878 | 0.0061  | 0.0010 | 3.80E-09 | 5.8601  | 408317 | Snoring |
| rs7350923  | 17 | 43834970  | T | C | 0.2252 | 0.0076  | 0.0012 | 1.20E-09 | 6.1003  | 408317 | Snoring |

|            |    |           |   |   |        |         |        |          |         |        |         |
|------------|----|-----------|---|---|--------|---------|--------|----------|---------|--------|---------|
| rs7350928  | 17 | 44108100  | T | C | 0.2254 | 0.0075  | 0.0012 | 2.00E-09 | 6.0241  | 408317 | Snoring |
| rs7350950  | 17 | 46163867  | A | G | 0.0978 | -0.0108 | 0.0018 | 1.00E-09 | -6.0824 | 408317 | Snoring |
| rs7350980  | 17 | 44110271  | A | G | 0.2281 | 0.0072  | 0.0012 | 7.50E-09 | 5.8031  | 408317 | Snoring |
| rs73530203 | 16 | 31099859  | A | G | 0.3792 | 0.0064  | 0.0011 | 4.30E-09 | 5.9022  | 408317 | Snoring |
| rs73946368 | 2  | 103894434 | G | A | 0.2680 | 0.0064  | 0.0012 | 4.90E-08 | 5.3735  | 408317 | Snoring |
| rs739642   | 17 | 43946838  | A | C | 0.2255 | 0.0076  | 0.0012 | 1.50E-09 | 6.0769  | 408317 | Snoring |
| rs739643   | 17 | 43946707  | C | T | 0.2255 | 0.0076  | 0.0012 | 1.50E-09 | 6.0769  | 408317 | Snoring |
| rs739644   | 17 | 43895008  | G | C | 0.2253 | 0.0077  | 0.0012 | 1.10E-09 | 6.1289  | 408317 | Snoring |
| rs739645   | 17 | 43894990  | G | T | 0.2253 | 0.0077  | 0.0012 | 1.00E-09 | 6.1312  | 408317 | Snoring |
| rs73984689 | 17 | 44184404  | A | G | 0.2256 | 0.0076  | 0.0013 | 1.40E-09 | 6.0875  | 408317 | Snoring |
| rs7424080  | 2  | 156997602 | C | T | 0.1348 | 0.0119  | 0.0015 | 8.40E-15 | 7.7139  | 408317 | Snoring |
| rs74348235 | 17 | 44165852  | G | A | 0.2254 | 0.0075  | 0.0012 | 2.10E-09 | 6.0169  | 408317 | Snoring |
| rs74358353 | 17 | 44344858  | G | A | 0.2045 | 0.0078  | 0.0013 | 6.80E-09 | 5.8141  | 408317 | Snoring |
| rs74373419 | 17 | 44047609  | T | C | 0.2254 | 0.0075  | 0.0012 | 2.10E-09 | 6.0138  | 408317 | Snoring |
| rs74390346 | 17 | 44356410  | C | T | 0.1933 | 0.0084  | 0.0014 | 2.00E-09 | 6.0272  | 408317 | Snoring |
| rs74398257 | 17 | 43756340  | C | T | 0.2253 | 0.0077  | 0.0012 | 8.10E-10 | 6.1671  | 408317 | Snoring |
| rs74450848 | 17 | 44082441  | C | T | 0.2235 | 0.0076  | 0.0013 | 2.30E-09 | 5.9986  | 408317 | Snoring |
| rs74457229 | 17 | 43972581  | T | C | 0.2255 | 0.0076  | 0.0012 | 1.70E-09 | 6.0543  | 408317 | Snoring |
| rs74464991 | 17 | 43821685  | A | C | 0.2252 | 0.0076  | 0.0012 | 1.10E-09 | 6.1169  | 408317 | Snoring |
| rs74481389 | 17 | 44154607  | C | T | 0.2254 | 0.0075  | 0.0012 | 2.00E-09 | 6.0259  | 408317 | Snoring |
| rs74496580 | 17 | 43974065  | A | C | 0.2255 | 0.0076  | 0.0012 | 1.40E-09 | 6.0859  | 408317 | Snoring |
| rs74509629 | 17 | 43985597  | T | C | 0.2255 | 0.0076  | 0.0012 | 1.40E-09 | 6.0797  | 408317 | Snoring |
| rs74514268 | 17 | 43836191  | A | G | 0.2251 | 0.0076  | 0.0012 | 1.20E-09 | 6.1042  | 408317 | Snoring |
| rs74531363 | 17 | 44026495  | G | A | 0.2215 | 0.0076  | 0.0013 | 2.00E-09 | 6.0184  | 408317 | Snoring |
| rs74548327 | 17 | 43973080  | G | A | 0.2255 | 0.0076  | 0.0012 | 1.40E-09 | 6.0801  | 408317 | Snoring |
| rs74571696 | 17 | 44123685  | A | G | 0.2254 | 0.0075  | 0.0012 | 2.00E-09 | 6.0254  | 408317 | Snoring |
| rs74573628 | 17 | 43982961  | C | T | 0.2254 | 0.0076  | 0.0012 | 1.40E-09 | 6.0848  | 408317 | Snoring |
| rs74579538 | 17 | 43791652  | A | G | 0.2251 | 0.0077  | 0.0012 | 1.10E-09 | 6.1228  | 408317 | Snoring |
| rs7459778  | 8  | 71674355  | T | G | 0.4304 | 0.0068  | 0.0011 | 7.80E-11 | 6.4971  | 408317 | Snoring |
| rs74652075 | 17 | 44344926  | G | A | 0.2045 | 0.0078  | 0.0013 | 6.80E-09 | 5.8135  | 408317 | Snoring |
| rs747152   | 17 | 44090339  | C | T | 0.2254 | 0.0075  | 0.0012 | 1.90E-09 | 6.0346  | 408317 | Snoring |
| rs74759276 | 17 | 44069768  | G | A | 0.2254 | 0.0075  | 0.0012 | 2.00E-09 | 6.0221  | 408317 | Snoring |
| rs74765707 | 17 | 43770416  | C | T | 0.2253 | 0.0077  | 0.0012 | 8.70E-10 | 6.1536  | 408317 | Snoring |
| rs74807476 | 17 | 44355726  | A | T | 0.2217 | 0.0076  | 0.0012 | 3.60E-09 | 5.9379  | 408317 | Snoring |
| rs7480884  | 11 | 88851967  | G | A | 0.3535 | 0.0059  | 0.0011 | 4.50E-08 | 5.3681  | 408317 | Snoring |
| rs74829364 | 17 | 44084533  | C | T | 0.2254 | 0.0075  | 0.0012 | 1.80E-09 | 6.0394  | 408317 | Snoring |
| rs7483762  | 11 | 27653879  | A | G | 0.1999 | -0.0074 | 0.0013 | 2.30E-08 | -5.6915 | 408317 | Snoring |
| rs74839514 | 17 | 44357453  | T | G | 0.2216 | 0.0076  | 0.0013 | 3.60E-09 | 5.9406  | 408317 | Snoring |
| rs74846646 | 17 | 44082446  | A | G | 0.2235 | 0.0076  | 0.0013 | 2.30E-09 | 5.9986  | 408317 | Snoring |
| rs74850776 | 17 | 44150042  | C | T | 0.2254 | 0.0075  | 0.0012 | 2.00E-09 | 6.0254  | 408317 | Snoring |
| rs74863825 | 17 | 43963120  | T | C | 0.2254 | 0.0076  | 0.0012 | 1.60E-09 | 6.0677  | 408317 | Snoring |
| rs74872829 | 17 | 43938394  | G | A | 0.2248 | 0.0077  | 0.0013 | 1.10E-09 | 6.1259  | 408317 | Snoring |
| rs74903707 | 17 | 44028707  | A | G | 0.2255 | 0.0076  | 0.0012 | 1.50E-09 | 6.0768  | 408317 | Snoring |
| rs74918686 | 17 | 43840899  | C | G | 0.2250 | 0.0076  | 0.0013 | 1.10E-09 | 6.1183  | 408317 | Snoring |
| rs74922289 | 17 | 43918524  | G | A | 0.2253 | 0.0076  | 0.0012 | 1.10E-09 | 6.1173  | 408317 | Snoring |
| rs74944644 | 17 | 43940020  | C | T | 0.2209 | 0.0077  | 0.0013 | 1.40E-09 | 6.0851  | 408317 | Snoring |
| rs74977736 | 17 | 44126977  | C | G | 0.2254 | 0.0075  | 0.0012 | 2.10E-09 | 6.0218  | 408317 | Snoring |
| rs74998289 | 17 | 43913558  | G | T | 0.2219 | 0.0079  | 0.0013 | 5.70E-10 | 6.2256  | 408317 | Snoring |
| rs7500176  | 16 | 31041137  | A | G | 0.3712 | 0.0065  | 0.0011 | 2.50E-09 | 5.9941  | 408317 | Snoring |
| rs75010486 | 17 | 44103825  | C | T | 0.2222 | 0.0076  | 0.0013 | 1.80E-09 | 6.0461  | 408317 | Snoring |
| rs7501759  | 17 | 44009921  | G | A | 0.2255 | 0.0076  | 0.0012 | 1.50E-09 | 6.0765  | 408317 | Snoring |
| rs7501770  | 17 | 46232276  | G | T | 0.3867 | 0.0062  | 0.0011 | 3.90E-09 | 5.8032  | 408317 | Snoring |
| rs75022332 | 17 | 43810873  | T | A | 0.2217 | 0.0077  | 0.0013 | 1.20E-09 | 6.1002  | 408317 | Snoring |
| rs7502555  | 17 | 19126664  | G | A | 0.3112 | -0.0062 | 0.0011 | 3.40E-08 | -5.5081 | 408317 | Snoring |
| rs7502718  | 17 | 43793651  | A | G | 0.2251 | 0.0076  | 0.0012 | 1.10E-09 | 6.1181  | 408317 | Snoring |
| rs7502888  | 17 | 43986992  | C | G | 0.2255 | 0.0076  | 0.0012 | 1.40E-09 | 6.0851  | 408317 | Snoring |
| rs7502937  | 17 | 43793665  | G | A | 0.2251 | 0.0077  | 0.0012 | 1.10E-09 | 6.1243  | 408317 | Snoring |
| rs75033119 | 17 | 44357360  | A | G | 0.2021 | 0.0080  | 0.0014 | 4.20E-09 | 5.8971  | 408317 | Snoring |
| rs75046472 | 17 | 43997499  | T | A | 0.2255 | 0.0076  | 0.0012 | 1.40E-09 | 6.0791  | 408317 | Snoring |
| rs75076131 | 17 | 43790649  | A | C | 0.2251 | 0.0076  | 0.0012 | 1.10E-09 | 6.1220  | 408317 | Snoring |
| rs750952   | 16 | 31093954  | T | C | 0.3799 | 0.0064  | 0.0011 | 2.80E-09 | 5.9700  | 408317 | Snoring |
| rs75104593 | 17 | 43913557  | G | T | 0.2219 | 0.0079  | 0.0013 | 5.60E-10 | 6.2257  | 408317 | Snoring |
| rs75115093 | 17 | 43761381  | G | A | 0.2253 | 0.0077  | 0.0012 | 8.60E-10 | 6.1564  | 408317 | Snoring |
| rs75144690 | 1  | 39698433  | T | G | 0.3116 | 0.0063  | 0.0011 | 1.80E-08 | 5.5952  | 408317 | Snoring |
| rs75145092 | 17 | 44044823  | A | T | 0.2254 | 0.0075  | 0.0012 | 2.20E-09 | 6.0123  | 408317 | Snoring |
| rs7515597  | 1  | 51159347  | T | C | 0.4037 | 0.0060  | 0.0011 | 1.90E-08 | 5.6220  | 408317 | Snoring |
| rs75183956 | 17 | 44182956  | G | A | 0.2232 | 0.0077  | 0.0013 | 1.30E-09 | 6.0954  | 408317 | Snoring |
| rs7518971  | 1  | 50812286  | A | G | 0.4581 | 0.0060  | 0.0010 | 1.20E-08 | 5.7230  | 408317 | Snoring |
| rs75210307 | 17 | 43940012  | C | T | 0.2209 | 0.0077  | 0.0013 | 1.50E-09 | 6.0731  | 408317 | Snoring |
| rs7522611  | 1  | 51257608  | C | T | 0.4244 | 0.0060  | 0.0011 | 2.00E-08 | 5.6389  | 408317 | Snoring |
| rs75229280 | 17 | 44196653  | A | G | 0.2258 | 0.0076  | 0.0012 | 1.50E-09 | 6.0681  | 408317 | Snoring |
| rs75242405 | 17 | 44049329  | T | C | 0.2254 | 0.0075  | 0.0012 | 2.00E-09 | 6.0230  | 408317 | Snoring |
| rs75257002 | 17 | 43843395  | T | C | 0.2248 | 0.0077  | 0.0013 | 1.00E-09 | 6.1305  | 408317 | Snoring |
| rs75257416 | 17 | 44349079  | A | C | 0.1936 | 0.0086  | 0.0014 | 7.40E-10 | 6.1889  | 408317 | Snoring |

|            |    |           |   |   |        |         |        |          |         |        |         |
|------------|----|-----------|---|---|--------|---------|--------|----------|---------|--------|---------|
| rs75310534 | 17 | 43794286  | T | C | 0.2251 | 0.0077  | 0.0012 | 1.10E-09 | 6.1266  | 408317 | Snoring |
| rs753235   | 17 | 43946223  | A | G | 0.2262 | 0.0075  | 0.0012 | 2.30E-09 | 6.0032  | 408317 | Snoring |
| rs753236   | 17 | 43946318  | C | T | 0.2274 | 0.0076  | 0.0013 | 1.90E-09 | 6.0409  | 408317 | Snoring |
| rs75330746 | 17 | 44182955  | T | C | 0.2232 | 0.0077  | 0.0013 | 1.30E-09 | 6.0954  | 408317 | Snoring |
| rs75342548 | 17 | 44356394  | G | T | 0.1933 | 0.0084  | 0.0014 | 2.00E-09 | 6.0246  | 408317 | Snoring |
| rs7539478  | 1  | 51168696  | T | A | 0.4034 | 0.0059  | 0.0011 | 3.40E-08 | 5.5105  | 408317 | Snoring |
| rs75403953 | 17 | 43798546  | G | A | 0.2251 | 0.0077  | 0.0012 | 1.00E-09 | 6.1289  | 408317 | Snoring |
| rs75412750 | 17 | 44172773  | T | C | 0.2259 | 0.0076  | 0.0012 | 1.50E-09 | 6.0761  | 408317 | Snoring |
| rs754512   | 17 | 44055647  | T | A | 0.2254 | 0.0075  | 0.0012 | 1.90E-09 | 6.0322  | 408317 | Snoring |
| rs754513   | 17 | 44055638  | A | T | 0.2253 | 0.0075  | 0.0012 | 2.00E-09 | 6.0273  | 408317 | Snoring |
| rs754593   | 17 | 44054696  | G | A | 0.4048 | 0.0061  | 0.0011 | 1.00E-08 | 5.7394  | 408317 | Snoring |
| rs754846   | 8  | 71744539  | A | G | 0.4302 | 0.0068  | 0.0011 | 9.00E-11 | 6.4727  | 408317 | Snoring |
| rs75500942 | 17 | 43816106  | A | C | 0.2251 | 0.0076  | 0.0012 | 1.10E-09 | 6.1205  | 408317 | Snoring |
| rs7552837  | 1  | 51262960  | T | C | 0.4239 | 0.0059  | 0.0011 | 3.20E-08 | 5.5602  | 408317 | Snoring |
| rs75530705 | 17 | 44154048  | T | C | 0.2254 | 0.0075  | 0.0012 | 2.00E-09 | 6.0266  | 408317 | Snoring |
| rs75534191 | 17 | 44091724  | A | G | 0.2254 | 0.0075  | 0.0012 | 1.90E-09 | 6.0320  | 408317 | Snoring |
| rs75546272 | 17 | 44130668  | A | T | 0.2254 | 0.0075  | 0.0012 | 1.90E-09 | 6.0309  | 408317 | Snoring |
| rs75617973 | 17 | 43983159  | C | T | 0.2255 | 0.0076  | 0.0012 | 1.40E-09 | 6.0804  | 408317 | Snoring |
| rs75641221 | 17 | 44145373  | C | T | 0.2253 | 0.0075  | 0.0012 | 2.20E-09 | 6.0113  | 408317 | Snoring |
| rs75643244 | 17 | 43823326  | G | A | 0.2252 | 0.0077  | 0.0012 | 1.10E-09 | 6.1259  | 408317 | Snoring |
| rs75652502 | 17 | 44200510  | A | C | 0.2259 | 0.0076  | 0.0012 | 1.50E-09 | 6.0699  | 408317 | Snoring |
| rs75666751 | 17 | 44090148  | C | A | 0.2254 | 0.0075  | 0.0012 | 1.90E-09 | 6.0347  | 408317 | Snoring |
| rs75676226 | 17 | 43947171  | A | G | 0.2230 | 0.0079  | 0.0013 | 4.00E-10 | 6.2860  | 408317 | Snoring |
| rs75686108 | 17 | 44022376  | T | C | 0.2254 | 0.0076  | 0.0012 | 1.50E-09 | 6.0735  | 408317 | Snoring |
| rs75690239 | 17 | 43941710  | T | C | 0.2255 | 0.0076  | 0.0012 | 1.40E-09 | 6.0808  | 408317 | Snoring |
| rs757055   | 17 | 43946875  | T | C | 0.2254 | 0.0076  | 0.0012 | 1.50E-09 | 6.0738  | 408317 | Snoring |
| rs75715199 | 17 | 43825478  | A | G | 0.2252 | 0.0076  | 0.0012 | 1.10E-09 | 6.1160  | 408317 | Snoring |
| rs75743061 | 17 | 44068112  | G | C | 0.2254 | 0.0075  | 0.0012 | 2.10E-09 | 6.0215  | 408317 | Snoring |
| rs757500   | 17 | 43756833  | A | C | 0.2253 | 0.0077  | 0.0012 | 8.60E-10 | 6.1569  | 408317 | Snoring |
| rs757501   | 17 | 43756685  | G | A | 0.2252 | 0.0077  | 0.0012 | 9.70E-10 | 6.1382  | 408317 | Snoring |
| rs757502   | 17 | 43756506  | T | C | 0.2252 | 0.0077  | 0.0012 | 1.10E-09 | 6.1242  | 408317 | Snoring |
| rs757503   | 17 | 43756466  | C | T | 0.2245 | 0.0078  | 0.0013 | 6.20E-10 | 6.2066  | 408317 | Snoring |
| rs75788861 | 17 | 43822769  | T | C | 0.2189 | 0.0081  | 0.0013 | 2.70E-10 | 6.3491  | 408317 | Snoring |
| rs75839508 | 17 | 44022319  | A | G | 0.2254 | 0.0076  | 0.0012 | 1.40E-09 | 6.0836  | 408317 | Snoring |
| rs758999   | 17 | 46206015  | C | T | 0.3864 | 0.0062  | 0.0011 | 4.20E-09 | 5.7883  | 408317 | Snoring |
| rs75916678 | 17 | 43849366  | C | T | 0.2252 | 0.0076  | 0.0012 | 1.20E-09 | 6.1032  | 408317 | Snoring |
| rs75944932 | 17 | 44072423  | C | A | 0.2255 | 0.0076  | 0.0012 | 1.60E-09 | 6.0651  | 408317 | Snoring |
| rs75945623 | 17 | 43937505  | T | C | 0.2256 | 0.0076  | 0.0012 | 1.60E-09 | 6.0651  | 408317 | Snoring |
| rs75975083 | 17 | 44146357  | C | T | 0.2253 | 0.0075  | 0.0012 | 2.20E-09 | 6.0134  | 408317 | Snoring |
| rs75986348 | 17 | 43809328  | G | A | 0.2252 | 0.0077  | 0.0012 | 9.40E-10 | 6.1443  | 408317 | Snoring |
| rs75990322 | 17 | 43791468  | C | T | 0.2251 | 0.0076  | 0.0012 | 1.10E-09 | 6.1108  | 408317 | Snoring |
| rs76007856 | 17 | 43795238  | A | G | 0.2251 | 0.0077  | 0.0012 | 1.10E-09 | 6.1237  | 408317 | Snoring |
| rs76019839 | 8  | 71690022  | T | C | 0.4319 | 0.0068  | 0.0011 | 1.30E-10 | 6.4218  | 408317 | Snoring |
| rs76090253 | 17 | 44002969  | C | A | 0.2255 | 0.0076  | 0.0012 | 1.50E-09 | 6.0785  | 408317 | Snoring |
| rs76117428 | 2  | 156967584 | G | A | 0.1099 | 0.0097  | 0.0017 | 5.30E-09 | 5.7751  | 408317 | Snoring |
| rs76147580 | 17 | 44330106  | C | T | 0.1972 | 0.0081  | 0.0014 | 2.70E-09 | 5.9778  | 408317 | Snoring |
| rs76154201 | 17 | 44154033  | C | T | 0.2254 | 0.0075  | 0.0012 | 2.00E-09 | 6.0266  | 408317 | Snoring |
| rs76155390 | 17 | 44335752  | C | T | 0.2241 | 0.0073  | 0.0013 | 5.60E-09 | 5.8579  | 408317 | Snoring |
| rs7615886  | 3  | 93995180  | A | G | 0.4011 | -0.0060 | 0.0011 | 1.40E-08 | -5.5818 | 408317 | Snoring |
| rs76167437 | 17 | 44356436  | C | T | 0.1940 | 0.0083  | 0.0014 | 2.30E-09 | 6.0027  | 408317 | Snoring |
| rs76171147 | 17 | 43823229  | C | T | 0.2257 | 0.0077  | 0.0012 | 1.00E-09 | 6.1270  | 408317 | Snoring |
| rs7617895  | 3  | 94063648  | T | C | 0.3922 | -0.0058 | 0.0011 | 2.80E-08 | -5.4471 | 408317 | Snoring |
| rs7622335  | 3  | 94112901  | C | G | 0.3749 | -0.0058 | 0.0011 | 4.10E-08 | -5.3504 | 408317 | Snoring |
| rs76246795 | 11 | 88845920  | T | C | 0.3561 | 0.0060  | 0.0011 | 2.30E-08 | 5.4856  | 408317 | Snoring |
| rs76294809 | 17 | 43849327  | A | G | 0.2251 | 0.0076  | 0.0012 | 1.20E-09 | 6.1058  | 408317 | Snoring |
| rs7630241  | 3  | 93990585  | G | A | 0.3992 | -0.0059 | 0.0011 | 1.90E-08 | -5.5232 | 408317 | Snoring |
| rs76307183 | 17 | 44142121  | A | G | 0.2254 | 0.0075  | 0.0012 | 2.00E-09 | 6.0279  | 408317 | Snoring |
| rs76311426 | 17 | 43818690  | T | G | 0.2252 | 0.0077  | 0.0012 | 9.80E-10 | 6.1383  | 408317 | Snoring |
| rs76324150 | 17 | 43973233  | T | C | 0.2255 | 0.0076  | 0.0012 | 1.40E-09 | 6.0845  | 408317 | Snoring |
| rs76329216 | 17 | 43938499  | A | G | 0.2255 | 0.0076  | 0.0012 | 1.40E-09 | 6.0789  | 408317 | Snoring |
| rs76333921 | 17 | 43759426  | T | C | 0.2253 | 0.0077  | 0.0012 | 8.60E-10 | 6.1559  | 408317 | Snoring |
| rs76357066 | 17 | 44067046  | A | G | 0.2254 | 0.0075  | 0.0012 | 2.10E-09 | 6.0215  | 408317 | Snoring |
| rs7637738  | 3  | 77608666  | G | A | 0.4537 | 0.0064  | 0.0011 | 6.10E-10 | 6.1142  | 408317 | Snoring |
| rs76380490 | 17 | 44203413  | T | C | 0.2257 | 0.0076  | 0.0012 | 1.70E-09 | 6.0514  | 408317 | Snoring |
| rs76402917 | 17 | 44126477  | A | G | 0.2282 | 0.0073  | 0.0012 | 5.70E-09 | 5.8453  | 408317 | Snoring |
| rs76421814 | 17 | 43814427  | C | T | 0.2252 | 0.0077  | 0.0012 | 9.90E-10 | 6.1372  | 408317 | Snoring |
| rs76453925 | 17 | 43759431  | T | C | 0.2253 | 0.0077  | 0.0012 | 8.70E-10 | 6.1556  | 408317 | Snoring |
| rs7646963  | 3  | 94010524  | C | T | 0.4010 | -0.0060 | 0.0011 | 1.30E-08 | -5.5930 | 408317 | Snoring |
| rs76475191 | 17 | 44290849  | A | T | 0.2251 | 0.0076  | 0.0013 | 1.40E-09 | 6.0869  | 408317 | Snoring |
| rs76493835 | 17 | 43807642  | G | T | 0.2252 | 0.0077  | 0.0012 | 9.40E-10 | 6.1441  | 408317 | Snoring |
| rs76500077 | 17 | 44004076  | C | T | 0.2254 | 0.0076  | 0.0012 | 1.50E-09 | 6.0775  | 408317 | Snoring |
| rs76527351 | 17 | 44212526  | G | A | 0.2250 | 0.0076  | 0.0013 | 1.90E-09 | 6.0359  | 408317 | Snoring |
| rs76539714 | 17 | 43758887  | G | A | 0.2248 | 0.0079  | 0.0013 | 4.10E-10 | 6.2753  | 408317 | Snoring |
| rs76563578 | 17 | 43933879  | G | C | 0.2254 | 0.0076  | 0.0012 | 1.60E-09 | 6.0610  | 408317 | Snoring |

|            |    |           |   |   |        |         |        |          |         |        |         |
|------------|----|-----------|---|---|--------|---------|--------|----------|---------|--------|---------|
| rs76586925 | 17 | 46198168  | A | G | 0.0373 | -0.0156 | 0.0028 | 2.80E-08 | -5.5980 | 408317 | Snoring |
| rs76594404 | 17 | 43971457  | C | G | 0.2255 | 0.0076  | 0.0012 | 1.40E-09 | 6.0834  | 408317 | Snoring |
| rs765971   | 7  | 127420642 | T | C | 0.3426 | 0.0064  | 0.0011 | 3.80E-09 | 5.8242  | 408317 | Snoring |
| rs76618565 | 17 | 44068481  | A | G | 0.2253 | 0.0075  | 0.0012 | 2.20E-09 | 6.0124  | 408317 | Snoring |
| rs76627340 | 17 | 43937460  | A | G | 0.2255 | 0.0076  | 0.0012 | 1.50E-09 | 6.0720  | 408317 | Snoring |
| rs76632685 | 17 | 43974477  | T | A | 0.2255 | 0.0076  | 0.0012 | 1.40E-09 | 6.0869  | 408317 | Snoring |
| rs76640332 | 17 | 44189858  | A | G | 0.2245 | 0.0076  | 0.0013 | 1.70E-09 | 6.0503  | 408317 | Snoring |
| rs76667867 | 17 | 43799810  | C | G | 0.2250 | 0.0077  | 0.0012 | 1.00E-09 | 6.1283  | 408317 | Snoring |
| rs76669427 | 17 | 43836051  | A | T | 0.2252 | 0.0076  | 0.0012 | 1.40E-09 | 6.0795  | 408317 | Snoring |
| rs767056   | 17 | 43998910  | T | C | 0.2255 | 0.0076  | 0.0012 | 1.50E-09 | 6.0760  | 408317 | Snoring |
| rs767057   | 17 | 43998822  | G | A | 0.2254 | 0.0076  | 0.0012 | 1.60E-09 | 6.0590  | 408317 | Snoring |
| rs767058   | 17 | 43998767  | C | T | 0.2256 | 0.0076  | 0.0012 | 1.60E-09 | 6.0648  | 408317 | Snoring |
| rs76717812 | 17 | 43754010  | C | T | 0.2253 | 0.0077  | 0.0012 | 7.90E-10 | 6.1712  | 408317 | Snoring |
| rs76723223 | 17 | 44089108  | C | T | 0.2254 | 0.0075  | 0.0012 | 1.90E-09 | 6.0324  | 408317 | Snoring |
| rs76728632 | 17 | 43818160  | C | A | 0.2252 | 0.0077  | 0.0012 | 9.60E-10 | 6.1421  | 408317 | Snoring |
| rs76761511 | 17 | 44185245  | A | C | 0.2259 | 0.0076  | 0.0012 | 1.40E-09 | 6.0793  | 408317 | Snoring |
| rs76761706 | 17 | 43776741  | C | T | 0.2242 | 0.0077  | 0.0013 | 7.60E-10 | 6.1747  | 408317 | Snoring |
| rs76830096 | 17 | 43857129  | C | A | 0.2251 | 0.0076  | 0.0012 | 1.20E-09 | 6.1108  | 408317 | Snoring |
| rs76839282 | 17 | 44029178  | C | G | 0.2254 | 0.0076  | 0.0012 | 1.70E-09 | 6.0469  | 408317 | Snoring |
| rs76844415 | 2  | 156991269 | G | C | 0.1389 | 0.0114  | 0.0015 | 4.00E-14 | 7.5227  | 408317 | Snoring |
| rs7687     | 17 | 44103296  | C | T | 0.2254 | 0.0075  | 0.0012 | 1.90E-09 | 6.0329  | 408317 | Snoring |
| rs76885724 | 17 | 43850519  | T | C | 0.2251 | 0.0076  | 0.0012 | 1.20E-09 | 6.1121  | 408317 | Snoring |
| rs76924476 | 17 | 44199029  | C | T | 0.2263 | 0.0076  | 0.0012 | 1.70E-09 | 6.0562  | 408317 | Snoring |
| rs76934998 | 17 | 44344822  | A | G | 0.2045 | 0.0078  | 0.0013 | 6.70E-09 | 5.8151  | 408317 | Snoring |
| rs77009866 | 17 | 44110888  | T | A | 0.2254 | 0.0075  | 0.0012 | 1.90E-09 | 6.0299  | 408317 | Snoring |
| rs77017444 | 17 | 44028796  | C | T | 0.2253 | 0.0076  | 0.0012 | 1.80E-09 | 6.0447  | 408317 | Snoring |
| rs77044307 | 17 | 44172408  | G | C | 0.2258 | 0.0076  | 0.0012 | 1.50E-09 | 6.0760  | 408317 | Snoring |
| rs77063768 | 17 | 43925729  | G | A | 0.2258 | 0.0077  | 0.0012 | 9.40E-10 | 6.1489  | 408317 | Snoring |
| rs7707588  | 5  | 75038267  | A | G | 0.3678 | -0.0067 | 0.0011 | 3.70E-10 | -6.1835 | 408317 | Snoring |
| rs77084869 | 17 | 43982903  | G | A | 0.2255 | 0.0076  | 0.0012 | 1.40E-09 | 6.0845  | 408317 | Snoring |
| rs77092481 | 17 | 43949008  | T | C | 0.2255 | 0.0076  | 0.0012 | 1.50E-09 | 6.0783  | 408317 | Snoring |
| rs77095128 | 17 | 44204304  | G | T | 0.2258 | 0.0076  | 0.0012 | 1.80E-09 | 6.0472  | 408317 | Snoring |
| rs77105679 | 17 | 44122896  | A | G | 0.2254 | 0.0075  | 0.0012 | 1.90E-09 | 6.0355  | 408317 | Snoring |
| rs77114624 | 17 | 43818657  | C | T | 0.2252 | 0.0077  | 0.0012 | 9.80E-10 | 6.1383  | 408317 | Snoring |
| rs7712499  | 5  | 74993709  | A | C | 0.2823 | -0.0063 | 0.0012 | 4.20E-08 | -5.3761 | 408317 | Snoring |
| rs77129180 | 17 | 43963046  | A | G | 0.2255 | 0.0076  | 0.0012 | 1.40E-09 | 6.0847  | 408317 | Snoring |
| rs7713337  | 5  | 75029784  | C | T | 0.3276 | -0.0062 | 0.0011 | 1.50E-08 | -5.5639 | 408317 | Snoring |
| rs77138434 | 17 | 44159555  | A | C | 0.2254 | 0.0075  | 0.0012 | 2.00E-09 | 6.0244  | 408317 | Snoring |
| rs7715806  | 5  | 75034387  | T | C | 0.3684 | -0.0070 | 0.0011 | 8.10E-11 | -6.4421 | 408317 | Snoring |
| rs77183941 | 2  | 157173800 | A | G | 0.0905 | 0.0109  | 0.0018 | 1.80E-09 | 5.9251  | 408317 | Snoring |
| rs77220413 | 17 | 43764378  | A | G | 0.2253 | 0.0077  | 0.0012 | 8.70E-10 | 6.1536  | 408317 | Snoring |
| rs77266933 | 17 | 44026490  | C | A | 0.2215 | 0.0076  | 0.0013 | 2.00E-09 | 6.0183  | 408317 | Snoring |
| rs77290642 | 17 | 44068480  | C | T | 0.2254 | 0.0075  | 0.0012 | 2.10E-09 | 6.0215  | 408317 | Snoring |
| rs77291250 | 13 | 50760166  | A | G | 0.4614 | 0.0062  | 0.0010 | 2.60E-09 | 5.9449  | 408317 | Snoring |
| rs77301847 | 17 | 43810902  | G | A | 0.2207 | 0.0079  | 0.0013 | 5.30E-10 | 6.2288  | 408317 | Snoring |
| rs7730516  | 5  | 75030034  | A | G | 0.3274 | -0.0062 | 0.0011 | 1.70E-08 | -5.5445 | 408317 | Snoring |
| rs77310586 | 17 | 43765381  | C | G | 0.2253 | 0.0077  | 0.0012 | 8.70E-10 | 6.1549  | 408317 | Snoring |
| rs77347005 | 2  | 103790006 | A | G | 0.2658 | 0.0064  | 0.0012 | 4.60E-08 | 5.3856  | 408317 | Snoring |
| rs77370070 | 17 | 43800404  | G | T | 0.2251 | 0.0077  | 0.0012 | 1.00E-09 | 6.1284  | 408317 | Snoring |
| rs77387379 | 17 | 43791429  | A | G | 0.2251 | 0.0076  | 0.0012 | 1.10E-09 | 6.1117  | 408317 | Snoring |
| rs77426526 | 17 | 43962982  | A | G | 0.2255 | 0.0076  | 0.0012 | 1.30E-09 | 6.0914  | 408317 | Snoring |
| rs77488920 | 17 | 44346589  | A | G | 0.2044 | 0.0078  | 0.0013 | 5.90E-09 | 5.8385  | 408317 | Snoring |
| rs77489223 | 17 | 43937736  | T | C | 0.2255 | 0.0076  | 0.0012 | 1.50E-09 | 6.0728  | 408317 | Snoring |
| rs77508068 | 1  | 50804536  | G | A | 0.3045 | 0.0063  | 0.0011 | 3.80E-08 | 5.5454  | 408317 | Snoring |
| rs77513497 | 17 | 44045474  | G | A | 0.2254 | 0.0075  | 0.0012 | 2.20E-09 | 6.0124  | 408317 | Snoring |
| rs77527347 | 17 | 44058017  | T | G | 0.2254 | 0.0075  | 0.0012 | 1.90E-09 | 6.0300  | 408317 | Snoring |
| rs77555455 | 17 | 44035516  | A | G | 0.2255 | 0.0076  | 0.0012 | 1.70E-09 | 6.0500  | 408317 | Snoring |
| rs77561671 | 17 | 43976627  | T | G | 0.2255 | 0.0076  | 0.0012 | 1.40E-09 | 6.0872  | 408317 | Snoring |
| rs77566074 | 17 | 44048936  | A | C | 0.2226 | 0.0075  | 0.0013 | 2.40E-09 | 5.9923  | 408317 | Snoring |
| rs77568881 | 17 | 44344970  | C | T | 0.2045 | 0.0078  | 0.0013 | 6.80E-09 | 5.8134  | 408317 | Snoring |
| rs775709   | 3  | 77655818  | A | C | 0.4214 | 0.0057  | 0.0011 | 4.10E-08 | 5.3961  | 408317 | Snoring |
| rs775713   | 3  | 77617219  | C | G | 0.4447 | 0.0063  | 0.0011 | 1.60E-09 | 5.9707  | 408317 | Snoring |
| rs775718   | 3  | 77645984  | A | G | 0.4205 | 0.0060  | 0.0011 | 1.20E-08 | 5.6082  | 408317 | Snoring |
| rs775719   | 3  | 77645417  | C | G | 0.4206 | 0.0059  | 0.0011 | 1.30E-08 | 5.5931  | 408317 | Snoring |
| rs775720   | 3  | 77644039  | A | G | 0.4204 | 0.0060  | 0.0011 | 9.70E-09 | 5.6395  | 408317 | Snoring |
| rs775721   | 3  | 77643650  | G | T | 0.4212 | 0.0060  | 0.0011 | 1.20E-08 | 5.5998  | 408317 | Snoring |
| rs775723   | 3  | 77643174  | G | T | 0.4212 | 0.0060  | 0.0011 | 1.20E-08 | 5.6009  | 408317 | Snoring |
| rs775724   | 3  | 77642438  | A | G | 0.4114 | 0.0058  | 0.0011 | 3.90E-08 | 5.4114  | 408317 | Snoring |
| rs775725   | 3  | 77641929  | C | T | 0.4214 | 0.0060  | 0.0011 | 1.20E-08 | 5.6104  | 408317 | Snoring |
| rs775726   | 3  | 77641892  | G | A | 0.4214 | 0.0060  | 0.0011 | 1.20E-08 | 5.6100  | 408317 | Snoring |
| rs775728   | 3  | 77639136  | A | G | 0.4081 | 0.0060  | 0.0011 | 1.10E-08 | 5.6336  | 408317 | Snoring |
| rs775731   | 3  | 77624784  | C | T | 0.4080 | 0.0059  | 0.0011 | 1.60E-08 | 5.5755  | 408317 | Snoring |
| rs775734   | 3  | 77637321  | C | T | 0.4080 | 0.0060  | 0.0011 | 1.30E-08 | 5.6104  | 408317 | Snoring |
| rs775735   | 3  | 77637025  | A | G | 0.4081 | 0.0060  | 0.0011 | 1.30E-08 | 5.6016  | 408317 | Snoring |



|            |    |           |   |   |        |         |        |          |         |        |         |
|------------|----|-----------|---|---|--------|---------|--------|----------|---------|--------|---------|
| rs775736   | 3  | 77636880  | A | G | 0.4081 | 0.0060  | 0.0011 | 1.30E-08 | 5.6023  | 408317 | Snoring |
| rs775737   | 3  | 77636752  | G | C | 0.4081 | 0.0060  | 0.0011 | 1.30E-08 | 5.6004  | 408317 | Snoring |
| rs775739   | 3  | 77635691  | C | T | 0.4176 | 0.0061  | 0.0011 | 4.40E-09 | 5.7763  | 408317 | Snoring |
| rs775740   | 3  | 77635242  | G | A | 0.4176 | 0.0062  | 0.0011 | 4.10E-09 | 5.7912  | 408317 | Snoring |
| rs775741   | 3  | 77635154  | T | C | 0.4084 | 0.0060  | 0.0011 | 1.10E-08 | 5.6266  | 408317 | Snoring |
| rs775743   | 3  | 77635029  | G | T | 0.4177 | 0.0061  | 0.0011 | 4.50E-09 | 5.7742  | 408317 | Snoring |
| rs775744   | 3  | 77632302  | C | A | 0.4182 | 0.0062  | 0.0011 | 4.40E-09 | 5.7756  | 408317 | Snoring |
| rs775745   | 3  | 77632127  | G | C | 0.4176 | 0.0061  | 0.0011 | 4.70E-09 | 5.7700  | 408317 | Snoring |
| rs775746   | 3  | 77593971  | T | A | 0.4542 | 0.0064  | 0.0010 | 5.00E-10 | 6.1451  | 408317 | Snoring |
| rs775748   | 3  | 77596460  | T | A | 0.4542 | 0.0064  | 0.0010 | 5.10E-10 | 6.1439  | 408317 | Snoring |
| rs775750   | 3  | 77597518  | G | A | 0.4537 | 0.0064  | 0.0010 | 6.60E-10 | 6.1010  | 408317 | Snoring |
| rs775769   | 3  | 77609345  | C | T | 0.4537 | 0.0064  | 0.0011 | 6.30E-10 | 6.1095  | 408317 | Snoring |
| rs775771   | 3  | 77609047  | T | C | 0.4537 | 0.0064  | 0.0011 | 6.90E-10 | 6.0936  | 408317 | Snoring |
| rs775772   | 3  | 77607719  | G | T | 0.4537 | 0.0064  | 0.0011 | 6.40E-10 | 6.1064  | 408317 | Snoring |
| rs775773   | 3  | 77607618  | A | G | 0.4542 | 0.0064  | 0.0011 | 5.50E-10 | 6.1318  | 408317 | Snoring |
| rs775774   | 3  | 77607569  | C | T | 0.4542 | 0.0064  | 0.0011 | 5.50E-10 | 6.1304  | 408317 | Snoring |
| rs77604208 | 17 | 44177669  | T | C | 0.2259 | 0.0076  | 0.0012 | 1.40E-09 | 6.0794  | 408317 | Snoring |
| rs77625338 | 17 | 43937671  | T | C | 0.2255 | 0.0076  | 0.0012 | 1.50E-09 | 6.0719  | 408317 | Snoring |
| rs77635460 | 17 | 44186593  | C | T | 0.2258 | 0.0076  | 0.0012 | 1.60E-09 | 6.0644  | 408317 | Snoring |
| rs77652965 | 17 | 43941608  | G | C | 0.2255 | 0.0076  | 0.0012 | 1.50E-09 | 6.0785  | 408317 | Snoring |
| rs77692262 | 17 | 43917086  | G | A | 0.2253 | 0.0076  | 0.0012 | 1.20E-09 | 6.1127  | 408317 | Snoring |
| rs77727624 | 17 | 43790770  | G | A | 0.2279 | 0.0075  | 0.0012 | 2.00E-09 | 6.0235  | 408317 | Snoring |
| rs77747656 | 17 | 44099827  | G | C | 0.2254 | 0.0075  | 0.0012 | 1.90E-09 | 6.0331  | 408317 | Snoring |
| rs77804065 | 17 | 43810896  | T | C | 0.2254 | 0.0076  | 0.0013 | 1.40E-09 | 6.0681  | 408317 | Snoring |
| rs77807457 | 17 | 43810851  | C | G | 0.2229 | 0.0077  | 0.0013 | 1.30E-09 | 6.0917  | 408317 | Snoring |
| rs77819001 | 17 | 43799804  | A | C | 0.2250 | 0.0077  | 0.0012 | 1.00E-09 | 6.1287  | 408317 | Snoring |
| rs77849344 | 17 | 43840864  | A | G | 0.2251 | 0.0076  | 0.0012 | 1.30E-09 | 6.0978  | 408317 | Snoring |
| rs7785050  | 7  | 127450559 | G | A | 0.4118 | -0.0059 | 0.0011 | 1.80E-08 | -5.5525 | 408317 | Snoring |
| rs77875796 | 17 | 44051612  | G | A | 0.2217 | 0.0076  | 0.0013 | 2.40E-09 | 5.9956  | 408317 | Snoring |
| rs77887223 | 8  | 71690534  | A | G | 0.4300 | 0.0068  | 0.0011 | 1.10E-10 | 6.4501  | 408317 | Snoring |
| rs77917260 | 17 | 44339607  | T | C | 0.2134 | 0.0078  | 0.0013 | 2.00E-09 | 6.0260  | 408317 | Snoring |
| rs77924366 | 17 | 44182181  | C | T | 0.2259 | 0.0076  | 0.0012 | 1.40E-09 | 6.0796  | 408317 | Snoring |
| rs77924424 | 17 | 44012915  | C | T | 0.2255 | 0.0076  | 0.0012 | 1.50E-09 | 6.0769  | 408317 | Snoring |
| rs77925835 | 17 | 44159695  | T | C | 0.2254 | 0.0075  | 0.0012 | 2.00E-09 | 6.0244  | 408317 | Snoring |
| rs77926909 | 17 | 43994252  | C | T | 0.2258 | 0.0076  | 0.0012 | 1.30E-09 | 6.1009  | 408317 | Snoring |
| rs77934996 | 8  | 71608003  | G | A | 0.4875 | -0.0060 | 0.0010 | 1.30E-08 | -5.6985 | 408317 | Snoring |
| rs77950913 | 17 | 44146451  | C | T | 0.2253 | 0.0075  | 0.0012 | 2.20E-09 | 6.0107  | 408317 | Snoring |
| rs77965652 | 17 | 43853457  | G | A | 0.2250 | 0.0076  | 0.0012 | 1.10E-09 | 6.1202  | 408317 | Snoring |
| rs77976663 | 7  | 127413279 | A | G | 0.4104 | -0.0058 | 0.0011 | 3.00E-08 | -5.4582 | 408317 | Snoring |
| rs7799882  | 7  | 127429287 | C | G | 0.4111 | -0.0059 | 0.0011 | 1.40E-08 | -5.5932 | 408317 | Snoring |
| rs78011262 | 17 | 43837917  | C | T | 0.3002 | 0.0066  | 0.0012 | 1.40E-08 | 5.6759  | 408317 | Snoring |
| rs78026984 | 17 | 44025592  | C | G | 0.2254 | 0.0076  | 0.0012 | 1.30E-09 | 6.0897  | 408317 | Snoring |
| rs78052495 | 17 | 43768347  | T | C | 0.2240 | 0.0077  | 0.0013 | 1.10E-09 | 6.1192  | 408317 | Snoring |
| rs78074121 | 17 | 43896690  | C | T | 0.2253 | 0.0076  | 0.0012 | 1.20E-09 | 6.1121  | 408317 | Snoring |
| rs78077519 | 17 | 44010984  | A | G | 0.2255 | 0.0076  | 0.0012 | 1.50E-09 | 6.0731  | 408317 | Snoring |
| rs78104015 | 17 | 44052733  | G | A | 0.2255 | 0.0076  | 0.0012 | 1.70E-09 | 6.0515  | 408317 | Snoring |
| rs7813315  | 8  | 71551147  | C | G | 0.4419 | 0.0069  | 0.0011 | 4.90E-11 | 6.5665  | 408317 | Snoring |
| rs7814274  | 8  | 71570411  | T | C | 0.4788 | -0.0061 | 0.0010 | 5.90E-09 | -5.8458 | 408317 | Snoring |
| rs7814648  | 8  | 71603984  | A | G | 0.4820 | -0.0060 | 0.0010 | 1.40E-08 | -5.6923 | 408317 | Snoring |
| rs7814774  | 8  | 71847116  | T | C | 0.4297 | 0.0068  | 0.0011 | 1.40E-10 | 6.4156  | 408317 | Snoring |
| rs7819332  | 8  | 71668265  | G | C | 0.4820 | -0.0059 | 0.0010 | 1.70E-08 | -5.6552 | 408317 | Snoring |
| rs78209533 | 17 | 43989909  | G | A | 0.2255 | 0.0076  | 0.0012 | 1.60E-09 | 6.0670  | 408317 | Snoring |
| rs7822474  | 8  | 71705733  | T | C | 0.4302 | 0.0068  | 0.0011 | 9.40E-11 | 6.4676  | 408317 | Snoring |
| rs78229689 | 17 | 44106806  | A | G | 0.2255 | 0.0075  | 0.0012 | 1.90E-09 | 6.0341  | 408317 | Snoring |
| rs78238042 | 17 | 43948159  | A | G | 0.2255 | 0.0076  | 0.0012 | 1.40E-09 | 6.0819  | 408317 | Snoring |
| rs7824514  | 8  | 71598605  | A | G | 0.4298 | 0.0069  | 0.0011 | 7.60E-11 | 6.4992  | 408317 | Snoring |
| rs7824723  | 8  | 78107150  | G | A | 0.2840 | -0.0067 | 0.0012 | 5.70E-09 | -5.8011 | 408317 | Snoring |
| rs7825446  | 8  | 71664174  | G | A | 0.4820 | -0.0059 | 0.0010 | 1.70E-08 | -5.6552 | 408317 | Snoring |
| rs7825815  | 8  | 71986405  | A | T | 0.4466 | 0.0066  | 0.0011 | 3.10E-10 | 6.2848  | 408317 | Snoring |
| rs7826100  | 8  | 71681506  | A | G | 0.4296 | 0.0069  | 0.0011 | 4.90E-11 | 6.5635  | 408317 | Snoring |
| rs7826483  | 8  | 71702893  | T | G | 0.4802 | -0.0059 | 0.0010 | 1.90E-08 | -5.6367 | 408317 | Snoring |
| rs7828481  | 8  | 71816193  | G | T | 0.4297 | 0.0068  | 0.0011 | 1.20E-10 | 6.4371  | 408317 | Snoring |
| rs7829639  | 8  | 78215352  | A | G | 0.2896 | -0.0074 | 0.0012 | 1.40E-10 | -6.4179 | 408317 | Snoring |
| rs7830515  | 8  | 71570234  | A | G | 0.4333 | 0.0069  | 0.0011 | 4.70E-11 | 6.5819  | 408317 | Snoring |
| rs7830550  | 8  | 71570431  | C | G | 0.4788 | -0.0061 | 0.0010 | 5.90E-09 | -5.8458 | 408317 | Snoring |
| rs7831507  | 8  | 71595226  | T | C | 0.4300 | 0.0069  | 0.0011 | 5.90E-11 | 6.5381  | 408317 | Snoring |
| rs7831544  | 8  | 71551208  | C | T | 0.4419 | 0.0069  | 0.0011 | 5.20E-11 | 6.5596  | 408317 | Snoring |
| rs7831792  | 8  | 71565356  | A | G | 0.4784 | -0.0061 | 0.0010 | 6.50E-09 | -5.8227 | 408317 | Snoring |
| rs78328427 | 17 | 43916932  | A | G | 0.2252 | 0.0077  | 0.0012 | 1.10E-09 | 6.1269  | 408317 | Snoring |
| rs7833211  | 8  | 71604138  | G | T | 0.4300 | 0.0068  | 0.0011 | 8.70E-11 | 6.4798  | 408317 | Snoring |
| rs7835018  | 8  | 71543315  | A | G | 0.4323 | 0.0069  | 0.0011 | 5.40E-11 | 6.5388  | 408317 | Snoring |
| rs78351569 | 8  | 71608004  | G | A | 0.4833 | -0.0059 | 0.0010 | 1.40E-08 | -5.6803 | 408317 | Snoring |
| rs7839977  | 8  | 71845302  | T | G | 0.4295 | 0.0069  | 0.0011 | 6.20E-11 | 6.5342  | 408317 | Snoring |
| rs7841286  | 8  | 71803143  | G | A | 0.4294 | 0.0068  | 0.0011 | 1.30E-10 | 6.4238  | 408317 | Snoring |

|            |    |           |   |   |        |         |        |          |         |        |         |
|------------|----|-----------|---|---|--------|---------|--------|----------|---------|--------|---------|
| rs7842091  | 8  | 71614781  | G | A | 0.4288 | 0.0068  | 0.0011 | 9.60E-11 | 6.4660  | 408317 | Snoring |
| rs7842851  | 8  | 71663805  | T | C | 0.4820 | -0.0059 | 0.0010 | 1.70E-08 | -5.6552 | 408317 | Snoring |
| rs7842996  | 8  | 78107140  | A | T | 0.2841 | -0.0067 | 0.0012 | 5.70E-09 | -5.8011 | 408317 | Snoring |
| rs78440279 | 17 | 43816052  | T | C | 0.2252 | 0.0077  | 0.0012 | 9.00E-10 | 6.1525  | 408317 | Snoring |
| rs7844239  | 8  | 71602837  | T | G | 0.4301 | 0.0069  | 0.0011 | 6.60E-11 | 6.5219  | 408317 | Snoring |
| rs7844306  | 8  | 78133906  | A | G | 0.2849 | -0.0067 | 0.0012 | 5.40E-09 | -5.8122 | 408317 | Snoring |
| rs7844868  | 8  | 71682082  | C | T | 0.4311 | 0.0068  | 0.0011 | 7.80E-11 | 6.4965  | 408317 | Snoring |
| rs78454137 | 17 | 43785096  | A | G | 0.2222 | 0.0078  | 0.0013 | 6.40E-10 | 6.2046  | 408317 | Snoring |
| rs7846385  | 8  | 78160179  | C | T | 0.2847 | -0.0067 | 0.0012 | 5.30E-09 | -5.8173 | 408317 | Snoring |
| rs78471340 | 17 | 43768346  | A | G | 0.2240 | 0.0077  | 0.0013 | 1.00E-09 | 6.1272  | 408317 | Snoring |
| rs78487840 | 17 | 43757161  | T | C | 0.2253 | 0.0077  | 0.0012 | 9.30E-10 | 6.1441  | 408317 | Snoring |
| rs78506181 | 17 | 43897480  | G | A | 0.2253 | 0.0077  | 0.0012 | 9.60E-10 | 6.1441  | 408317 | Snoring |
| rs78555354 | 17 | 44032879  | G | A | 0.2253 | 0.0076  | 0.0012 | 1.70E-09 | 6.0474  | 408317 | Snoring |
| rs78556223 | 17 | 44026478  | G | A | 0.2236 | 0.0074  | 0.0013 | 5.50E-09 | 5.8568  | 408317 | Snoring |
| rs78568882 | 17 | 43784935  | G | C | 0.2250 | 0.0077  | 0.0013 | 1.10E-09 | 6.1236  | 408317 | Snoring |
| rs78570732 | 17 | 44349080  | G | C | 0.2038 | 0.0078  | 0.0013 | 6.10E-09 | 5.8325  | 408317 | Snoring |
| rs78587102 | 17 | 43897246  | G | A | 0.2252 | 0.0077  | 0.0012 | 1.10E-09 | 6.1258  | 408317 | Snoring |
| rs78599197 | 17 | 44069970  | G | C | 0.2254 | 0.0075  | 0.0012 | 2.00E-09 | 6.0221  | 408317 | Snoring |
| rs78608249 | 17 | 7455707   | T | C | 0.2910 | 0.0065  | 0.0012 | 1.50E-08 | 5.6020  | 408317 | Snoring |
| rs78637438 | 17 | 43945855  | A | G | 0.2255 | 0.0076  | 0.0012 | 1.40E-09 | 6.0803  | 408317 | Snoring |
| rs78646618 | 2  | 156981466 | T | A | 0.1176 | 0.0090  | 0.0016 | 2.10E-08 | 5.5581  | 408317 | Snoring |
| rs78681971 | 17 | 44106219  | T | C | 0.2254 | 0.0075  | 0.0012 | 1.90E-09 | 6.0315  | 408317 | Snoring |
| rs78720789 | 17 | 43973413  | G | A | 0.2255 | 0.0076  | 0.0012 | 1.40E-09 | 6.0852  | 408317 | Snoring |
| rs78729125 | 17 | 43970108  | A | C | 0.2255 | 0.0076  | 0.0012 | 1.50E-09 | 6.0759  | 408317 | Snoring |
| rs78752526 | 8  | 71886883  | C | A | 0.4301 | 0.0068  | 0.0011 | 1.50E-10 | 6.4031  | 408317 | Snoring |
| rs78773690 | 17 | 44126478  | C | T | 0.2281 | 0.0073  | 0.0012 | 5.60E-09 | 5.8473  | 408317 | Snoring |
| rs78826239 | 17 | 44290850  | A | T | 0.2030 | 0.0082  | 0.0013 | 1.30E-09 | 6.1014  | 408317 | Snoring |
| rs78834738 | 17 | 44022434  | A | G | 0.2242 | 0.0076  | 0.0013 | 1.30E-09 | 6.0880  | 408317 | Snoring |
| rs78872653 | 17 | 43905134  | A | G | 0.2252 | 0.0076  | 0.0012 | 1.10E-09 | 6.1202  | 408317 | Snoring |
| rs78903072 | 17 | 44338966  | C | A | 0.2307 | 0.0071  | 0.0013 | 2.00E-08 | 5.6366  | 408317 | Snoring |
| rs78917479 | 17 | 43899611  | T | C | 0.2251 | 0.0076  | 0.0012 | 1.20E-09 | 6.1036  | 408317 | Snoring |
| rs78917495 | 17 | 43858482  | T | C | 0.2251 | 0.0076  | 0.0012 | 1.30E-09 | 6.0999  | 408317 | Snoring |
| rs78929339 | 17 | 44189910  | G | A | 0.2248 | 0.0076  | 0.0013 | 1.50E-09 | 6.0674  | 408317 | Snoring |
| rs78938131 | 17 | 44157622  | G | T | 0.2254 | 0.0075  | 0.0012 | 2.00E-09 | 6.0259  | 408317 | Snoring |
| rs78946586 | 1  | 50807476  | C | T | 0.3035 | 0.0064  | 0.0011 | 3.10E-08 | 5.5808  | 408317 | Snoring |
| rs78962882 | 17 | 44084844  | C | G | 0.2254 | 0.0075  | 0.0012 | 1.90E-09 | 6.0341  | 408317 | Snoring |
| rs78993847 | 17 | 43933834  | T | G | 0.2188 | 0.0076  | 0.0013 | 2.10E-09 | 6.0043  | 408317 | Snoring |
| rs79065019 | 17 | 44124535  | C | T | 0.2259 | 0.0075  | 0.0012 | 2.10E-09 | 6.0135  | 408317 | Snoring |
| rs79073784 | 17 | 43754209  | C | G | 0.2253 | 0.0077  | 0.0012 | 7.90E-10 | 6.1713  | 408317 | Snoring |
| rs79115768 | 17 | 44021061  | T | C | 0.2255 | 0.0076  | 0.0012 | 1.40E-09 | 6.0785  | 408317 | Snoring |
| rs79180862 | 17 | 44131798  | T | C | 0.2254 | 0.0075  | 0.0012 | 2.20E-09 | 6.0143  | 408317 | Snoring |
| rs79193046 | 17 | 43967562  | C | T | 0.2254 | 0.0076  | 0.0012 | 1.40E-09 | 6.0857  | 408317 | Snoring |
| rs79226879 | 17 | 43807485  | C | T | 0.2252 | 0.0077  | 0.0012 | 9.50E-10 | 6.1439  | 408317 | Snoring |
| rs79252344 | 17 | 44120608  | G | A | 0.2254 | 0.0075  | 0.0012 | 2.00E-09 | 6.0266  | 408317 | Snoring |
| rs7925346  | 11 | 88860927  | C | T | 0.3737 | 0.0059  | 0.0011 | 3.20E-08 | 5.4340  | 408317 | Snoring |
| rs7926362  | 11 | 27707486  | A | C | 0.2073 | -0.0077 | 0.0013 | 3.90E-09 | -5.9619 | 408317 | Snoring |
| rs79275904 | 17 | 46517797  | T | C | 0.0902 | -0.0111 | 0.0018 | 1.30E-09 | -6.0547 | 408317 | Snoring |
| rs79290980 | 17 | 43985662  | C | T | 0.2255 | 0.0076  | 0.0012 | 1.40E-09 | 6.0795  | 408317 | Snoring |
| rs7929744  | 11 | 88804684  | C | A | 0.4894 | -0.0062 | 0.0010 | 2.60E-09 | -5.9418 | 408317 | Snoring |
| rs79301522 | 17 | 44207932  | G | A | 0.2257 | 0.0076  | 0.0013 | 1.30E-09 | 6.0957  | 408317 | Snoring |
| rs7930256  | 11 | 88849434  | C | T | 0.3566 | 0.0061  | 0.0011 | 9.60E-09 | 5.6350  | 408317 | Snoring |
| rs79322350 | 17 | 43790401  | G | A | 0.2251 | 0.0076  | 0.0012 | 1.10E-09 | 6.1216  | 408317 | Snoring |
| rs79346219 | 17 | 44184375  | G | A | 0.2256 | 0.0076  | 0.0013 | 1.50E-09 | 6.0772  | 408317 | Snoring |
| rs79348289 | 17 | 44172698  | C | T | 0.2259 | 0.0076  | 0.0012 | 1.50E-09 | 6.0760  | 408317 | Snoring |
| rs79406732 | 17 | 43940497  | T | C | 0.2250 | 0.0077  | 0.0012 | 9.80E-10 | 6.1427  | 408317 | Snoring |
| rs79412431 | 17 | 43940021  | A | G | 0.2208 | 0.0077  | 0.0013 | 1.20E-09 | 6.1033  | 408317 | Snoring |
| rs79447161 | 17 | 44067508  | G | A | 0.2254 | 0.0075  | 0.0012 | 2.10E-09 | 6.0215  | 408317 | Snoring |
| rs79451833 | 8  | 78187414  | C | T | 0.2994 | -0.0064 | 0.0011 | 2.20E-08 | -5.5942 | 408317 | Snoring |
| rs7947287  | 11 | 88899362  | C | T | 0.4266 | 0.0058  | 0.0011 | 3.80E-08 | 5.4661  | 408317 | Snoring |
| rs79475968 | 17 | 44326895  | C | T | 0.1885 | -0.0082 | 0.0014 | 1.60E-09 | -6.0317 | 408317 | Snoring |
| rs79492906 | 17 | 43984864  | T | C | 0.2255 | 0.0076  | 0.0012 | 1.40E-09 | 6.0799  | 408317 | Snoring |
| rs79501144 | 17 | 43900697  | T | C | 0.2252 | 0.0076  | 0.0012 | 1.20E-09 | 6.1034  | 408317 | Snoring |
| rs7950415  | 11 | 88899605  | C | T | 0.4819 | 0.0061  | 0.0010 | 3.70E-09 | 5.8581  | 408317 | Snoring |
| rs79523636 | 17 | 44359499  | T | C | 0.2218 | 0.0076  | 0.0013 | 3.10E-09 | 5.9612  | 408317 | Snoring |
| rs7954156  | 12 | 65879425  | A | C | 0.4500 | 0.0069  | 0.0011 | 7.30E-11 | 6.5468  | 408317 | Snoring |
| rs79545140 | 17 | 43840935  | C | T | 0.2251 | 0.0076  | 0.0013 | 1.10E-09 | 6.1169  | 408317 | Snoring |
| rs7956325  | 12 | 65882981  | C | T | 0.4598 | 0.0067  | 0.0011 | 2.40E-10 | 6.3374  | 408317 | Snoring |
| rs79580365 | 17 | 43960172  | T | C | 0.2255 | 0.0076  | 0.0012 | 1.40E-09 | 6.0833  | 408317 | Snoring |
| rs7958224  | 12 | 65880407  | T | C | 0.4497 | 0.0069  | 0.0011 | 6.80E-11 | 6.5574  | 408317 | Snoring |
| rs79589869 | 17 | 43930238  | A | C | 0.2251 | 0.0076  | 0.0013 | 1.30E-09 | 6.0975  | 408317 | Snoring |
| rs79600142 | 17 | 43897722  | C | T | 0.2251 | 0.0077  | 0.0012 | 1.00E-09 | 6.1336  | 408317 | Snoring |
| rs7960759  | 12 | 65877072  | A | T | 0.4501 | 0.0069  | 0.0011 | 7.50E-11 | 6.5416  | 408317 | Snoring |
| rs7963025  | 12 | 65844546  | C | T | 0.4496 | 0.0070  | 0.0011 | 3.00E-11 | 6.6753  | 408317 | Snoring |
| rs79641193 | 17 | 44330105  | G | A | 0.1972 | 0.0081  | 0.0014 | 2.70E-09 | 5.9778  | 408317 | Snoring |

|            |    |           |   |   |        |         |        |          |         |        |         |
|------------|----|-----------|---|---|--------|---------|--------|----------|---------|--------|---------|
| rs7964169  | 12 | 65781052  | G | A | 0.3743 | 0.0086  | 0.0011 | 1.00E-15 | 7.9487  | 408317 | Snoring |
| rs7964344  | 12 | 65781376  | C | A | 0.3744 | 0.0085  | 0.0011 | 1.40E-15 | 7.9062  | 408317 | Snoring |
| rs79649865 | 17 | 44130587  | G | T | 0.2254 | 0.0075  | 0.0012 | 2.00E-09 | 6.0227  | 408317 | Snoring |
| rs796527   | 3  | 77619393  | G | T | 0.4542 | 0.0065  | 0.0011 | 4.70E-10 | 6.1558  | 408317 | Snoring |
| rs796528   | 3  | 77633886  | C | A | 0.4176 | 0.0061  | 0.0011 | 4.20E-09 | 5.7838  | 408317 | Snoring |
| rs79675109 | 17 | 43746418  | A | T | 0.2253 | 0.0077  | 0.0012 | 8.50E-10 | 6.1583  | 408317 | Snoring |
| rs79698033 | 17 | 44123717  | T | C | 0.2254 | 0.0075  | 0.0012 | 2.00E-09 | 6.0254  | 408317 | Snoring |
| rs7973013  | 12 | 65767528  | T | C | 0.3734 | 0.0086  | 0.0011 | 8.90E-16 | 7.9609  | 408317 | Snoring |
| rs7973042  | 12 | 65770709  | C | A | 0.3744 | 0.0086  | 0.0011 | 1.20E-15 | 7.9274  | 408317 | Snoring |
| rs79730878 | 17 | 43849415  | C | T | 0.2297 | 0.0076  | 0.0012 | 1.20E-09 | 6.1227  | 408317 | Snoring |
| rs7974027  | 12 | 65877187  | G | A | 0.4501 | 0.0069  | 0.0011 | 7.50E-11 | 6.5421  | 408317 | Snoring |
| rs7974199  | 12 | 65877034  | A | G | 0.4500 | 0.0069  | 0.0011 | 7.20E-11 | 6.5471  | 408317 | Snoring |
| rs79742625 | 17 | 43657257  | T | C | 0.2057 | 0.0080  | 0.0013 | 1.20E-09 | 6.1241  | 408317 | Snoring |
| rs7974799  | 12 | 65789148  | A | G | 0.3741 | 0.0086  | 0.0011 | 9.30E-16 | 7.9575  | 408317 | Snoring |
| rs79765413 | 17 | 44022433  | C | T | 0.2242 | 0.0076  | 0.0013 | 1.50E-09 | 6.0704  | 408317 | Snoring |
| rs7976802  | 12 | 65828547  | A | T | 0.3737 | 0.0086  | 0.0011 | 1.40E-15 | 7.9168  | 408317 | Snoring |
| rs79772576 | 17 | 44106220  | G | A | 0.2261 | 0.0075  | 0.0012 | 2.10E-09 | 6.0154  | 408317 | Snoring |
| rs79772780 | 17 | 44189855  | A | G | 0.2242 | 0.0076  | 0.0013 | 2.10E-09 | 6.0159  | 408317 | Snoring |
| rs79782347 | 17 | 44146567  | C | T | 0.2253 | 0.0075  | 0.0012 | 2.20E-09 | 6.0107  | 408317 | Snoring |
| rs7979584  | 12 | 65864251  | C | T | 0.4597 | 0.0066  | 0.0010 | 2.50E-10 | 6.3274  | 408317 | Snoring |
| rs7980920  | 12 | 65891257  | A | G | 0.4514 | 0.0068  | 0.0011 | 1.90E-10 | 6.4038  | 408317 | Snoring |
| rs79857651 | 17 | 44013475  | A | G | 0.2242 | 0.0077  | 0.0013 | 1.20E-09 | 6.1067  | 408317 | Snoring |
| rs79860128 | 17 | 43990072  | G | A | 0.2255 | 0.0076  | 0.0012 | 1.40E-09 | 6.0839  | 408317 | Snoring |
| rs79882507 | 17 | 43837782  | G | A | 0.2251 | 0.0076  | 0.0012 | 1.20E-09 | 6.1025  | 408317 | Snoring |
| rs7988551  | 13 | 40736804  | A | G | 0.4712 | -0.0064 | 0.0010 | 7.10E-10 | -6.1033 | 408317 | Snoring |
| rs79889833 | 17 | 43937633  | G | A | 0.2255 | 0.0076  | 0.0012 | 1.50E-09 | 6.0719  | 408317 | Snoring |
| rs79892630 | 17 | 43781505  | T | C | 0.2251 | 0.0077  | 0.0012 | 8.50E-10 | 6.1601  | 408317 | Snoring |
| rs7989971  | 13 | 40744099  | C | G | 0.4660 | 0.0057  | 0.0010 | 3.60E-08 | 5.4386  | 408317 | Snoring |
| rs79923630 | 17 | 44167661  | T | G | 0.2254 | 0.0075  | 0.0012 | 2.10E-09 | 6.0157  | 408317 | Snoring |
| rs79923708 | 17 | 44183790  | A | G | 0.2259 | 0.0076  | 0.0012 | 1.40E-09 | 6.0863  | 408317 | Snoring |
| rs79928920 | 17 | 44338967  | C | T | 0.2307 | 0.0071  | 0.0013 | 1.90E-08 | 5.6422  | 408317 | Snoring |
| rs79932406 | 8  | 71607667  | T | G | 0.4304 | 0.0068  | 0.0011 | 8.00E-11 | 6.4923  | 408317 | Snoring |
| rs79947689 | 17 | 44339608  | G | A | 0.2115 | 0.0077  | 0.0013 | 3.70E-09 | 5.9038  | 408317 | Snoring |
| rs79959255 | 17 | 44077708  | T | G | 0.2255 | 0.0075  | 0.0012 | 2.00E-09 | 6.0226  | 408317 | Snoring |
| rs79994966 | 16 | 53823727  | C | T | 0.3924 | 0.0064  | 0.0011 | 2.70E-09 | 5.9518  | 408317 | Snoring |
| rs80020809 | 17 | 44172391  | T | C | 0.2258 | 0.0076  | 0.0012 | 1.30E-09 | 6.0921  | 408317 | Snoring |
| rs80028338 | 17 | 44161470  | C | A | 0.2064 | 0.0080  | 0.0013 | 1.90E-09 | 6.0337  | 408317 | Snoring |
| rs80072429 | 17 | 43818611  | A | G | 0.2252 | 0.0077  | 0.0012 | 9.80E-10 | 6.1383  | 408317 | Snoring |
| rs80093081 | 1  | 39698437  | T | G | 0.3113 | 0.0063  | 0.0011 | 1.80E-08 | 5.5957  | 408317 | Snoring |
| rs80120913 | 17 | 44177755  | G | C | 0.2258 | 0.0076  | 0.0012 | 1.40E-09 | 6.0840  | 408317 | Snoring |
| rs80143279 | 17 | 43776742  | C | T | 0.2242 | 0.0078  | 0.0013 | 7.20E-10 | 6.1828  | 408317 | Snoring |
| rs80157557 | 17 | 43817898  | A | G | 0.2252 | 0.0077  | 0.0012 | 9.70E-10 | 6.1401  | 408317 | Snoring |
| rs80184151 | 17 | 43879308  | G | A | 0.2253 | 0.0076  | 0.0012 | 1.20E-09 | 6.1104  | 408317 | Snoring |
| rs80190331 | 17 | 44035233  | T | A | 0.2254 | 0.0076  | 0.0012 | 1.70E-09 | 6.0532  | 408317 | Snoring |
| rs80209523 | 17 | 43933830  | T | G | 0.2188 | 0.0076  | 0.0013 | 2.10E-09 | 6.0042  | 408317 | Snoring |
| rs80233201 | 17 | 43971481  | C | T | 0.2255 | 0.0076  | 0.0012 | 1.40E-09 | 6.0834  | 408317 | Snoring |
| rs80254317 | 17 | 43963282  | G | C | 0.2255 | 0.0076  | 0.0012 | 1.40E-09 | 6.0846  | 408317 | Snoring |
| rs80290584 | 17 | 44339375  | G | A | 0.2099 | 0.0078  | 0.0013 | 2.90E-09 | 5.9421  | 408317 | Snoring |
| rs80296410 | 17 | 44357198  | A | G | 0.2026 | 0.0081  | 0.0013 | 2.70E-09 | 5.9684  | 408317 | Snoring |
| rs80346216 | 17 | 43974476  | T | G | 0.2255 | 0.0076  | 0.0012 | 1.40E-09 | 6.0868  | 408317 | Snoring |
| rs80348388 | 17 | 43952634  | T | A | 0.2255 | 0.0076  | 0.0012 | 1.40E-09 | 6.0821  | 408317 | Snoring |
| rs8043757  | 16 | 53813450  | T | A | 0.3939 | 0.0063  | 0.0011 | 3.00E-09 | 5.9320  | 408317 | Snoring |
| rs8047395  | 16 | 53798523  | G | A | 0.5003 | -0.0065 | 0.0010 | 5.30E-10 | -6.1850 | 408317 | Snoring |
| rs8047587  | 16 | 53798622  | T | G | 0.4377 | 0.0066  | 0.0011 | 4.00E-10 | 6.2629  | 408317 | Snoring |
| rs8047803  | 16 | 31079834  | A | C | 0.3850 | 0.0063  | 0.0011 | 6.50E-09 | 5.8361  | 408317 | Snoring |
| rs8050136  | 16 | 53816275  | A | C | 0.3936 | 0.0064  | 0.0011 | 2.00E-09 | 6.0053  | 408317 | Snoring |
| rs8051591  | 16 | 53816752  | G | A | 0.3936 | 0.0064  | 0.0011 | 2.40E-09 | 5.9745  | 408317 | Snoring |
| rs8055197  | 16 | 53803156  | G | A | 0.4994 | -0.0062 | 0.0010 | 2.10E-09 | -5.9709 | 408317 | Snoring |
| rs8056842  | 16 | 31047330  | C | T | 0.3769 | 0.0065  | 0.0011 | 2.10E-09 | 6.0207  | 408317 | Snoring |
| rs8057044  | 16 | 53812614  | A | G | 0.4752 | 0.0058  | 0.0010 | 2.30E-08 | 5.5709  | 408317 | Snoring |
| rs8061047  | 16 | 31068960  | C | T | 0.3792 | 0.0065  | 0.0011 | 1.70E-09 | 6.0455  | 408317 | Snoring |
| rs806166   | 7  | 127309934 | C | T | 0.3257 | 0.0061  | 0.0011 | 4.50E-08 | 5.4168  | 408317 | Snoring |
| rs806292   | 13 | 50811031  | A | G | 0.4675 | 0.0068  | 0.0010 | 1.00E-10 | 6.4415  | 408317 | Snoring |
| rs806293   | 13 | 50812982  | T | A | 0.4676 | 0.0067  | 0.0010 | 1.60E-10 | 6.3673  | 408317 | Snoring |
| rs806295   | 13 | 50815467  | G | A | 0.4678 | 0.0067  | 0.0010 | 1.60E-10 | 6.3651  | 408317 | Snoring |
| rs806296   | 13 | 50817541  | A | G | 0.4679 | 0.0067  | 0.0010 | 1.60E-10 | 6.3637  | 408317 | Snoring |
| rs806297   | 13 | 50817643  | G | T | 0.4679 | 0.0067  | 0.0010 | 1.70E-10 | 6.3586  | 408317 | Snoring |
| rs8063057  | 16 | 53812433  | C | T | 0.3948 | 0.0064  | 0.0011 | 2.60E-09 | 5.9591  | 408317 | Snoring |
| rs806316   | 13 | 50838230  | C | G | 0.4680 | 0.0065  | 0.0010 | 4.10E-10 | 6.2267  | 408317 | Snoring |
| rs806319   | 13 | 50840657  | C | T | 0.4681 | 0.0065  | 0.0010 | 4.00E-10 | 6.2277  | 408317 | Snoring |
| rs806321   | 13 | 50841323  | C | T | 0.4698 | 0.0064  | 0.0010 | 9.40E-10 | 6.0928  | 408317 | Snoring |
| rs806322   | 13 | 50841444  | G | A | 0.3924 | 0.0068  | 0.0011 | 2.00E-10 | 6.3452  | 408317 | Snoring |
| rs8065115  | 17 | 46337573  | T | C | 0.2171 | -0.0074 | 0.0013 | 5.40E-09 | -5.8214 | 408317 | Snoring |
| rs8067056  | 17 | 44083948  | C | T | 0.3757 | 0.0061  | 0.0011 | 1.10E-08 | 5.6948  | 408317 | Snoring |

|           |    |           |   |   |        |         |        |          |         |        |         |
|-----------|----|-----------|---|---|--------|---------|--------|----------|---------|--------|---------|
| rs8067857 | 17 | 46542240  | T | G | 0.2165 | -0.0074 | 0.0013 | 5.90E-09 | -5.7900 | 408317 | Snoring |
| rs8069064 | 17 | 46280663  | G | A | 0.3867 | 0.0062  | 0.0011 | 3.50E-09 | 5.8210  | 408317 | Snoring |
| rs8069263 | 17 | 46286778  | T | G | 0.3868 | 0.0063  | 0.0011 | 3.00E-09 | 5.8451  | 408317 | Snoring |
| rs8069900 | 17 | 46366725  | G | A | 0.2171 | -0.0073 | 0.0013 | 7.10E-09 | -5.7739 | 408317 | Snoring |
| rs8069947 | 17 | 1985843   | T | C | 0.4459 | -0.0066 | 0.0011 | 2.80E-10 | -6.2835 | 408317 | Snoring |
| rs8070723 | 17 | 44081064  | G | A | 0.2260 | 0.0075  | 0.0012 | 1.70E-09 | 6.0504  | 408317 | Snoring |
| rs8070942 | 17 | 44208674  | T | G | 0.2285 | 0.0073  | 0.0012 | 5.20E-09 | 5.8646  | 408317 | Snoring |
| rs8071267 | 17 | 46195926  | C | T | 0.4229 | 0.0064  | 0.0011 | 1.20E-09 | 6.0391  | 408317 | Snoring |
| rs8072282 | 17 | 46276858  | A | G | 0.3867 | 0.0062  | 0.0011 | 3.50E-09 | 5.8215  | 408317 | Snoring |
| rs8072451 | 17 | 43893716  | T | C | 0.2247 | 0.0077  | 0.0013 | 1.10E-09 | 6.1265  | 408317 | Snoring |
| rs8072521 | 17 | 46429622  | C | T | 0.2214 | -0.0072 | 0.0013 | 7.60E-09 | -5.7513 | 408317 | Snoring |
| rs8072770 | 17 | 46533886  | T | C | 0.2178 | -0.0073 | 0.0013 | 5.70E-09 | -5.8019 | 408317 | Snoring |
| rs8073146 | 17 | 43893751  | G | A | 0.2245 | 0.0077  | 0.0013 | 1.10E-09 | 6.1294  | 408317 | Snoring |
| rs8073466 | 17 | 46506679  | T | C | 0.2145 | -0.0076 | 0.0013 | 2.40E-09 | -5.9486 | 408317 | Snoring |
| rs8074054 | 17 | 46542587  | A | T | 0.2165 | -0.0074 | 0.0013 | 6.10E-09 | -5.7857 | 408317 | Snoring |
| rs8074761 | 17 | 44124640  | A | G | 0.1818 | -0.0075 | 0.0014 | 2.60E-08 | -5.5609 | 408317 | Snoring |
| rs8075270 | 17 | 46275010  | T | C | 0.3866 | 0.0062  | 0.0011 | 3.80E-09 | 5.8086  | 408317 | Snoring |
| rs8076266 | 17 | 67961906  | T | C | 0.3452 | 0.0065  | 0.0011 | 7.70E-09 | 5.7921  | 408317 | Snoring |
| rs8076655 | 17 | 46363787  | C | T | 0.2171 | -0.0073 | 0.0013 | 7.10E-09 | -5.7734 | 408317 | Snoring |
| rs8077036 | 17 | 67962340  | G | C | 0.3440 | 0.0064  | 0.0011 | 2.30E-08 | 5.6154  | 408317 | Snoring |
| rs8077454 | 17 | 1914469   | C | T | 0.3112 | -0.0063 | 0.0011 | 2.80E-08 | -5.5468 | 408317 | Snoring |
| rs8077487 | 17 | 44115440  | C | T | 0.2282 | 0.0072  | 0.0012 | 6.40E-09 | 5.8264  | 408317 | Snoring |
| rs8078495 | 17 | 44000610  | A | G | 0.2255 | 0.0076  | 0.0012 | 1.50E-09 | 6.0781  | 408317 | Snoring |
| rs8078999 | 17 | 46427985  | C | G | 0.2226 | -0.0073 | 0.0013 | 5.90E-09 | -5.7965 | 408317 | Snoring |
| rs8079501 | 17 | 44000234  | T | A | 0.2255 | 0.0076  | 0.0012 | 1.50E-09 | 6.0781  | 408317 | Snoring |
| rs8079695 | 17 | 44161441  | T | C | 0.1871 | -0.0078 | 0.0013 | 5.70E-09 | -5.8172 | 408317 | Snoring |
| rs8080583 | 17 | 44162597  | A | C | 0.2281 | 0.0072  | 0.0012 | 7.40E-09 | 5.8044  | 408317 | Snoring |
| rs8081548 | 17 | 7438834   | T | A | 0.3421 | 0.0066  | 0.0011 | 2.10E-09 | 5.9530  | 408317 | Snoring |
| rs8081754 | 17 | 46328667  | A | G | 0.2171 | -0.0074 | 0.0013 | 3.80E-09 | -5.8747 | 408317 | Snoring |
| rs8108291 | 19 | 32191799  | C | G | 0.0954 | -0.0105 | 0.0018 | 2.10E-09 | -5.9001 | 408317 | Snoring |
| rs8108822 | 19 | 32183171  | T | C | 0.0951 | -0.0109 | 0.0018 | 6.20E-10 | -6.0991 | 408317 | Snoring |
| rs811353  | 3  | 77596321  | T | C | 0.4542 | 0.0064  | 0.0010 | 5.50E-10 | 6.1314  | 408317 | Snoring |
| rs812328  | 3  | 77630462  | T | C | 0.4173 | 0.0061  | 0.0011 | 4.40E-09 | 5.7788  | 408317 | Snoring |
| rs812888  | 3  | 77630267  | T | C | 0.4172 | 0.0061  | 0.0011 | 4.20E-09 | 5.7844  | 408317 | Snoring |
| rs81632   | 17 | 43710127  | A | T | 0.2252 | 0.0077  | 0.0012 | 9.30E-10 | 6.1447  | 408317 | Snoring |
| rs8712    | 17 | 44101871  | G | A | 0.2261 | 0.0075  | 0.0012 | 2.80E-09 | 5.9731  | 408317 | Snoring |
| rs872972  | 17 | 43756458  | A | G | 0.2244 | 0.0077  | 0.0013 | 7.30E-10 | 6.1804  | 408317 | Snoring |
| rs876944  | 17 | 44134391  | T | G | 0.2254 | 0.0075  | 0.0012 | 2.00E-09 | 6.0242  | 408317 | Snoring |
| rs878886  | 17 | 43912490  | G | C | 0.2252 | 0.0076  | 0.0012 | 1.10E-09 | 6.1208  | 408317 | Snoring |
| rs878887  | 17 | 43912582  | T | C | 0.2252 | 0.0077  | 0.0012 | 1.10E-09 | 6.1273  | 408317 | Snoring |
| rs878888  | 17 | 43912635  | G | A | 0.2252 | 0.0077  | 0.0012 | 1.10E-09 | 6.1269  | 408317 | Snoring |
| rs879048  | 11 | 27638934  | C | A | 0.2007 | -0.0074 | 0.0013 | 2.40E-08 | -5.6787 | 408317 | Snoring |
| rs882380  | 17 | 46294236  | C | A | 0.3868 | 0.0063  | 0.0011 | 2.90E-09 | 5.8525  | 408317 | Snoring |
| rs882694  | 7  | 127496768 | G | A | 0.3427 | 0.0064  | 0.0011 | 3.90E-09 | 5.8228  | 408317 | Snoring |
| rs885639  | 17 | 43928614  | G | T | 0.2260 | 0.0076  | 0.0012 | 1.20E-09 | 6.1181  | 408317 | Snoring |
| rs886249  | 17 | 43946291  | G | A | 0.2036 | 0.0079  | 0.0013 | 2.50E-09 | 6.0014  | 408317 | Snoring |
| rs889555  | 16 | 31122571  | T | C | 0.2815 | 0.0065  | 0.0012 | 2.70E-08 | 5.5771  | 408317 | Snoring |
| rs897184  | 3  | 93989499  | G | A | 0.3991 | -0.0059 | 0.0011 | 1.80E-08 | -5.5317 | 408317 | Snoring |
| rs916793  | 17 | 43954686  | A | G | 0.2255 | 0.0076  | 0.0012 | 1.40E-09 | 6.0826  | 408317 | Snoring |
| rs917832  | 7  | 127481278 | A | G | 0.4125 | -0.0058 | 0.0011 | 2.90E-08 | -5.4612 | 408317 | Snoring |
| rs918793  | 7  | 127361269 | A | G | 0.4104 | -0.0057 | 0.0011 | 4.30E-08 | -5.4006 | 408317 | Snoring |
| rs919461  | 17 | 44065669  | T | A | 0.2254 | 0.0075  | 0.0012 | 2.00E-09 | 6.0220  | 408317 | Snoring |
| rs919462  | 17 | 44065740  | T | C | 0.2254 | 0.0075  | 0.0012 | 2.00E-09 | 6.0240  | 408317 | Snoring |
| rs919464  | 17 | 44065901  | T | C | 0.2254 | 0.0075  | 0.0012 | 2.00E-09 | 6.0227  | 408317 | Snoring |
| rs925947  | 11 | 27667367  | T | G | 0.2001 | -0.0074 | 0.0013 | 2.20E-08 | -5.6897 | 408317 | Snoring |
| rs9283801 | 6  | 84294486  | C | T | 0.4545 | 0.0059  | 0.0011 | 3.20E-08 | 5.4994  | 408317 | Snoring |
| rs9303524 | 17 | 44136576  | T | A | 0.1818 | -0.0075 | 0.0014 | 2.80E-08 | -5.5476 | 408317 | Snoring |
| rs9303525 | 17 | 44187257  | G | A | 0.2286 | 0.0073  | 0.0012 | 5.60E-09 | 5.8509  | 408317 | Snoring |
| rs9304829 | 19 | 32193147  | A | G | 0.0948 | -0.0105 | 0.0018 | 2.50E-09 | -5.8755 | 408317 | Snoring |
| rs9304830 | 19 | 32193389  | A | C | 0.0948 | -0.0105 | 0.0018 | 2.50E-09 | -5.8699 | 408317 | Snoring |
| rs9309771 | 3  | 77593064  | A | G | 0.4543 | 0.0065  | 0.0010 | 4.90E-10 | 6.1502  | 408317 | Snoring |
| rs9309772 | 3  | 77593127  | G | A | 0.4543 | 0.0064  | 0.0010 | 5.40E-10 | 6.1363  | 408317 | Snoring |
| rs9309773 | 3  | 77593147  | T | C | 0.4543 | 0.0064  | 0.0010 | 5.40E-10 | 6.1335  | 408317 | Snoring |
| rs9309774 | 3  | 77638713  | A | C | 0.4173 | 0.0061  | 0.0011 | 4.60E-09 | 5.7702  | 408317 | Snoring |
| rs931550  | 12 | 65861284  | A | G | 0.4783 | -0.0067 | 0.0010 | 2.30E-10 | -6.3545 | 408317 | Snoring |
| rs9322033 | 6  | 100852016 | T | C | 0.2255 | 0.0070  | 0.0012 | 1.90E-08 | 5.6276  | 408317 | Snoring |
| rs9325180 | 12 | 65874608  | A | G | 0.4496 | 0.0069  | 0.0011 | 6.50E-11 | 6.5642  | 408317 | Snoring |
| rs933317  | 17 | 44136030  | T | C | 0.1818 | -0.0075 | 0.0014 | 2.80E-08 | -5.5484 | 408317 | Snoring |
| rs9376947 | 6  | 100825490 | G | A | 0.2282 | 0.0070  | 0.0012 | 2.10E-08 | 5.6116  | 408317 | Snoring |
| rs9376948 | 6  | 100828871 | T | C | 0.2283 | 0.0069  | 0.0012 | 3.20E-08 | 5.5440  | 408317 | Snoring |
| rs9386123 | 6  | 100824140 | T | C | 0.2281 | 0.0070  | 0.0012 | 1.80E-08 | 5.6459  | 408317 | Snoring |
| rs9386126 | 6  | 100836022 | C | T | 0.2282 | 0.0070  | 0.0012 | 2.30E-08 | 5.6038  | 408317 | Snoring |
| rs9390332 | 6  | 100830259 | T | A | 0.2282 | 0.0069  | 0.0012 | 2.50E-08 | 5.5862  | 408317 | Snoring |
| rs9390366 | 6  | 100864938 | G | T | 0.2257 | 0.0069  | 0.0012 | 3.50E-08 | 5.5231  | 408317 | Snoring |

|            |    |           |   |   |        |         |        |          |         |        |         |
|------------|----|-----------|---|---|--------|---------|--------|----------|---------|--------|---------|
| rs9399552  | 6  | 100826916 | C | G | 0.2282 | 0.0070  | 0.0012 | 2.30E-08 | 5.6048  | 408317 | Snoring |
| rs9403711  | 6  | 100824183 | A | G | 0.2281 | 0.0070  | 0.0012 | 1.80E-08 | 5.6497  | 408317 | Snoring |
| rs9403716  | 6  | 100825710 | A | G | 0.2281 | 0.0070  | 0.0012 | 2.00E-08 | 5.6297  | 408317 | Snoring |
| rs9403718  | 6  | 100827450 | C | T | 0.2283 | 0.0069  | 0.0012 | 2.70E-08 | 5.5715  | 408317 | Snoring |
| rs9403719  | 6  | 100827758 | C | T | 0.2283 | 0.0069  | 0.0012 | 3.10E-08 | 5.5496  | 408317 | Snoring |
| rs9436450  | 1  | 50813393  | A | T | 0.4584 | 0.0060  | 0.0010 | 1.10E-08 | 5.7302  | 408317 | Snoring |
| rs9446824  | 6  | 73737716  | G | A | 0.1685 | 0.0076  | 0.0014 | 2.60E-08 | 5.4071  | 408317 | Snoring |
| rs9468     | 17 | 44101563  | C | T | 0.2261 | 0.0075  | 0.0012 | 2.60E-09 | 5.9838  | 408317 | Snoring |
| rs947612   | 6  | 73738661  | G | A | 0.2470 | 0.0067  | 0.0012 | 1.50E-08 | 5.5602  | 408317 | Snoring |
| rs949537   | 11 | 88902830  | T | C | 0.4286 | 0.0057  | 0.0011 | 4.20E-08 | 5.4515  | 408317 | Snoring |
| rs950903   | 8  | 71900774  | G | T | 0.4310 | 0.0066  | 0.0011 | 2.80E-10 | 6.3019  | 408317 | Snoring |
| rs9515311  | 13 | 111564228 | T | C | 0.3676 | -0.0059 | 0.0011 | 4.30E-08 | -5.4172 | 408317 | Snoring |
| rs9535478  | 13 | 51323754  | A | T | 0.0963 | 0.0101  | 0.0018 | 2.60E-08 | 5.6029  | 408317 | Snoring |
| rs953959   | 20 | 6431316   | C | T | 0.2187 | 0.0072  | 0.0013 | 1.40E-08 | 5.6733  | 408317 | Snoring |
| rs954226   | 17 | 46304812  | T | A | 0.3868 | 0.0063  | 0.0011 | 2.90E-09 | 5.8519  | 408317 | Snoring |
| rs957349   | 10 | 9060106   | T | A | 0.1881 | 0.0090  | 0.0013 | 1.10E-11 | 6.7768  | 408317 | Snoring |
| rs9583546  | 13 | 111566412 | G | C | 0.3678 | -0.0059 | 0.0011 | 4.00E-08 | -5.4308 | 408317 | Snoring |
| rs9583547  | 13 | 111566432 | A | G | 0.3680 | -0.0059 | 0.0011 | 4.30E-08 | -5.4157 | 408317 | Snoring |
| rs958605   | 8  | 71900591  | G | A | 0.4305 | 0.0068  | 0.0011 | 1.40E-10 | 6.4084  | 408317 | Snoring |
| rs9603691  | 13 | 40737911  | T | C | 0.4710 | -0.0064 | 0.0010 | 8.00E-10 | -6.0831 | 408317 | Snoring |
| rs9603692  | 13 | 40738316  | G | T | 0.4899 | 0.0056  | 0.0010 | 4.10E-08 | 5.4007  | 408317 | Snoring |
| rs9603693  | 13 | 40738347  | C | T | 0.4711 | -0.0064 | 0.0010 | 6.70E-10 | -6.1127 | 408317 | Snoring |
| rs9650238  | 8  | 71992706  | C | T | 0.4467 | 0.0066  | 0.0011 | 3.60E-10 | 6.2626  | 408317 | Snoring |
| rs9668058  | 12 | 65785867  | A | T | 0.3737 | 0.0086  | 0.0011 | 1.30E-15 | 7.9248  | 408317 | Snoring |
| rs9673641  | 16 | 31039376  | A | G | 0.3765 | 0.0065  | 0.0011 | 2.10E-09 | 6.0169  | 408317 | Snoring |
| rs968027   | 17 | 43781250  | T | C | 0.2249 | 0.0077  | 0.0013 | 1.00E-09 | 6.1285  | 408317 | Snoring |
| rs968028   | 17 | 43781105  | G | A | 0.2251 | 0.0077  | 0.0013 | 8.20E-10 | 6.1648  | 408317 | Snoring |
| rs9694313  | 8  | 71610780  | T | A | 0.4289 | 0.0069  | 0.0011 | 7.40E-11 | 6.5037  | 408317 | Snoring |
| rs9709338  | 17 | 44094871  | G | A | 0.2250 | 0.0075  | 0.0013 | 2.30E-09 | 6.0044  | 408317 | Snoring |
| rs974291   | 17 | 44150480  | T | A | 0.2254 | 0.0075  | 0.0012 | 2.00E-09 | 6.0253  | 408317 | Snoring |
| rs974292   | 17 | 44150464  | C | T | 0.2254 | 0.0075  | 0.0012 | 2.00E-09 | 6.0251  | 408317 | Snoring |
| rs974293   | 17 | 44150233  | A | G | 0.2254 | 0.0075  | 0.0012 | 2.00E-09 | 6.0253  | 408317 | Snoring |
| rs974294   | 17 | 44150163  | G | T | 0.2239 | 0.0075  | 0.0013 | 2.90E-09 | 5.9640  | 408317 | Snoring |
| rs974295   | 17 | 44150152  | T | A | 0.2254 | 0.0075  | 0.0012 | 2.00E-09 | 6.0253  | 408317 | Snoring |
| rs9771769  | 8  | 71689436  | A | G | 0.4302 | 0.0068  | 0.0011 | 9.80E-11 | 6.4608  | 408317 | Snoring |
| rs9783497  | 12 | 65830349  | A | G | 0.3645 | 0.0088  | 0.0011 | 3.10E-16 | 8.1193  | 408317 | Snoring |
| rs9788296  | 13 | 40744582  | T | C | 0.4869 | -0.0066 | 0.0010 | 2.40E-10 | -6.2890 | 408317 | Snoring |
| rs979011   | 20 | 6623833   | C | A | 0.3649 | -0.0062 | 0.0011 | 7.10E-09 | -5.7474 | 408317 | Snoring |
| rs979012   | 20 | 6623374   | T | C | 0.3653 | -0.0063 | 0.0011 | 4.70E-09 | -5.8203 | 408317 | Snoring |
| rs9791922  | 7  | 127559133 | C | T | 0.3413 | 0.0064  | 0.0011 | 6.00E-09 | 5.7592  | 408317 | Snoring |
| rs9852322  | 3  | 93999571  | T | C | 0.4008 | -0.0058 | 0.0011 | 2.90E-08 | -5.4492 | 408317 | Snoring |
| rs988748   | 11 | 27724745  | C | G | 0.2084 | -0.0076 | 0.0013 | 5.10E-09 | -5.9124 | 408317 | Snoring |
| rs9891103  | 17 | 44091886  | T | C | 0.2295 | 0.0073  | 0.0012 | 4.50E-09 | 5.8869  | 408317 | Snoring |
| rs9892297  | 17 | 7446027   | G | A | 0.3382 | 0.0066  | 0.0011 | 2.10E-09 | 5.9668  | 408317 | Snoring |
| rs9894775  | 17 | 1909823   | T | C | 0.3112 | -0.0062 | 0.0011 | 3.50E-08 | -5.5023 | 408317 | Snoring |
| rs9895433  | 17 | 1912416   | A | G | 0.3112 | -0.0062 | 0.0011 | 3.30E-08 | -5.5166 | 408317 | Snoring |
| rs9896243  | 17 | 44826056  | G | C | 0.2159 | 0.0074  | 0.0013 | 6.00E-09 | 5.8482  | 408317 | Snoring |
| rs9897399  | 17 | 43804317  | A | G | 0.2256 | 0.0077  | 0.0012 | 8.10E-10 | 6.1666  | 408317 | Snoring |
| rs9900496  | 17 | 7439739   | C | T | 0.3405 | 0.0066  | 0.0011 | 1.80E-09 | 5.9798  | 408317 | Snoring |
| rs9902593  | 17 | 67881015  | C | T | 0.3887 | -0.0063 | 0.0011 | 7.40E-09 | -5.8149 | 408317 | Snoring |
| rs9906314  | 17 | 1911992   | C | T | 0.3110 | -0.0062 | 0.0011 | 2.90E-08 | -5.5336 | 408317 | Snoring |
| rs9906974  | 17 | 43822772  | C | T | 0.2192 | 0.0081  | 0.0013 | 2.70E-10 | 6.3443  | 408317 | Snoring |
| rs9907738  | 17 | 44151546  | G | T | 0.2281 | 0.0072  | 0.0012 | 6.90E-09 | 5.8159  | 408317 | Snoring |
| rs9910683  | 17 | 44200023  | A | G | 0.1872 | -0.0078 | 0.0013 | 6.70E-09 | -5.7885 | 408317 | Snoring |
| rs9912001  | 17 | 7445372   | T | C | 0.3383 | 0.0066  | 0.0011 | 1.90E-09 | 5.9808  | 408317 | Snoring |
| rs9922047  | 16 | 53806280  | C | G | 0.4984 | -0.0062 | 0.0010 | 2.00E-09 | -5.9794 | 408317 | Snoring |
| rs9922619  | 16 | 53831771  | T | G | 0.4321 | 0.0060  | 0.0011 | 9.00E-09 | 5.7360  | 408317 | Snoring |
| rs9922708  | 16 | 53831146  | T | C | 0.4324 | 0.0060  | 0.0011 | 1.40E-08 | 5.6602  | 408317 | Snoring |
| rs9923147  | 16 | 53801549  | T | C | 0.4219 | 0.0069  | 0.0011 | 7.60E-11 | 6.5034  | 408317 | Snoring |
| rs9923233  | 16 | 53819198  | C | G | 0.3931 | 0.0063  | 0.0011 | 3.20E-09 | 5.9242  | 408317 | Snoring |
| rs9923312  | 16 | 53819367  | A | G | 0.3931 | 0.0063  | 0.0011 | 3.30E-09 | 5.9230  | 408317 | Snoring |
| rs9923544  | 16 | 53801985  | T | C | 0.4221 | 0.0069  | 0.0011 | 7.50E-11 | 6.5057  | 408317 | Snoring |
| rs9926289  | 16 | 53820503  | A | G | 0.3931 | 0.0063  | 0.0011 | 3.40E-09 | 5.9149  | 408317 | Snoring |
| rs9928094  | 16 | 53799905  | G | A | 0.4227 | 0.0069  | 0.0011 | 7.20E-11 | 6.5132  | 408317 | Snoring |
| rs9930397  | 16 | 53799985  | A | T | 0.4218 | 0.0069  | 0.0011 | 8.20E-11 | 6.4905  | 408317 | Snoring |
| rs9930501  | 16 | 53830452  | G | A | 0.4326 | 0.0059  | 0.0011 | 1.60E-08 | 5.6357  | 408317 | Snoring |
| rs9930506  | 16 | 53830465  | G | A | 0.4325 | 0.0059  | 0.0011 | 2.20E-08 | 5.5859  | 408317 | Snoring |
| rs9931494  | 16 | 53827179  | G | C | 0.4117 | 0.0065  | 0.0011 | 8.10E-10 | 6.1444  | 408317 | Snoring |
| rs9931900  | 16 | 53818813  | G | A | 0.4125 | 0.0065  | 0.0011 | 1.10E-09 | 6.0895  | 408317 | Snoring |
| rs9932754  | 16 | 53830491  | C | T | 0.4326 | 0.0059  | 0.0011 | 1.50E-08 | 5.6396  | 408317 | Snoring |
| rs9933040  | 16 | 53830867  | A | T | 0.4327 | 0.0060  | 0.0011 | 1.50E-08 | 5.6489  | 408317 | Snoring |
| rs9933509  | 16 | 53818167  | C | T | 0.4125 | 0.0065  | 0.0011 | 1.00E-09 | 6.1059  | 408317 | Snoring |
| rs99335401 | 16 | 53816838  | A | G | 0.3933 | 0.0064  | 0.0011 | 2.80E-09 | 5.9470  | 408317 | Snoring |
| rs9936385  | 16 | 53819169  | C | T | 0.3931 | 0.0063  | 0.0011 | 3.20E-09 | 5.9242  | 408317 | Snoring |



|           |    |           |   |   |        |         |        |          |         |        |         |
|-----------|----|-----------|---|---|--------|---------|--------|----------|---------|--------|---------|
| rs9937053 | 16 | 53799507  | A | G | 0.4227 | 0.0069  | 0.0011 | 7.00E-11 | 6.5168  | 408317 | Snoring |
| rs9937354 | 16 | 53799847  | A | G | 0.4227 | 0.0069  | 0.0011 | 7.20E-11 | 6.5126  | 408317 | Snoring |
| rs9937521 | 16 | 53799296  | T | C | 0.4203 | 0.0068  | 0.0011 | 1.30E-10 | 6.4187  | 408317 | Snoring |
| rs9937709 | 16 | 53820813  | G | A | 0.4124 | 0.0064  | 0.0011 | 1.20E-09 | 6.0779  | 408317 | Snoring |
| rs9939609 | 16 | 53820527  | A | T | 0.3931 | 0.0063  | 0.0011 | 3.40E-09 | 5.9140  | 408317 | Snoring |
| rs9939973 | 16 | 53800568  | A | G | 0.4218 | 0.0069  | 0.0011 | 7.60E-11 | 6.5025  | 408317 | Snoring |
| rs9940128 | 16 | 53800754  | A | G | 0.4219 | 0.0069  | 0.0011 | 7.80E-11 | 6.4983  | 408317 | Snoring |
| rs9940278 | 16 | 53800200  | T | C | 0.4218 | 0.0069  | 0.0011 | 7.60E-11 | 6.5024  | 408317 | Snoring |
| rs9940646 | 16 | 53800629  | G | C | 0.4218 | 0.0069  | 0.0011 | 7.70E-11 | 6.5012  | 408317 | Snoring |
| rs9941349 | 16 | 53825488  | T | C | 0.4116 | 0.0065  | 0.0011 | 9.70E-10 | 6.1154  | 408317 | Snoring |
| rs9942416 | 5  | 75037295  | G | C | 0.3758 | -0.0067 | 0.0011 | 4.30E-10 | -6.1741 | 408317 | Snoring |
| rs9944484 | 17 | 43990662  | A | G | 0.2256 | 0.0076  | 0.0012 | 1.40E-09 | 6.0883  | 408317 | Snoring |
| rs9972653 | 16 | 53814363  | T | G | 0.3982 | 0.0064  | 0.0011 | 1.80E-09 | 6.0306  | 408317 | Snoring |
| rs9986145 | 5  | 134453390 | A | G | 0.3524 | -0.0064 | 0.0011 | 5.50E-09 | -5.8528 | 408317 | Snoring |
