# Supplementary material for: Shared genetic aetiology of respiratory diseases: a genome-wide multitraits association analysis
Source: PubMed Central journal article supplement — BMJ Open Respir Res. 2024 Jun 4;11(1):e002148. doi: 10.1136/bmjresp-2023-002148 (PMC11163672; doi:10.1136/bmjresp-2023-002148), 2024-06-04
Supplement: bmjresp-2023-002148supp004.pdf [file bmjresp-2023-002148supp004.pdf]

**Table 3. Detailed information of instrumental variables used in MR analyses**

| Exposure | Outcome | SNP         | Effect allele | Other allele | Exposure |        |          | Outcome |        |          | mr_keep |
|----------|---------|-------------|---------------|--------------|----------|--------|----------|---------|--------|----------|---------|
|          |         |             |               |              | Beta     | SE     | P-value  | Beta    | SE     | P-value  |         |
| Asthma   | COPD    | rs10075764  | G             | A            | -0.0381  | 0.0049 | 1.35E-14 | -0.0273 | 0.0070 | 1.03E-04 | TRUE    |
| Asthma   | COPD    | rs10131571  | T             | C            | 0.0319   | 0.0050 | 1.50E-10 | 0.0169  | 0.0070 | 1.60E-02 | TRUE    |
| Asthma   | COPD    | rs10416530  | C             | T            | 0.0378   | 0.0053 | 8.67E-13 | 0.0129  | 0.0077 | 9.62E-02 | TRUE    |
| Asthma   | COPD    | rs1048665   | G             | T            | -0.0373  | 0.0056 | 2.18E-11 | -0.0314 | 0.0080 | 7.97E-05 | TRUE    |
| Asthma   | COPD    | rs10519067  | A             | G            | -0.0670  | 0.0068 | 9.30E-23 | -0.0018 | 0.0096 | 8.53E-01 | TRUE    |
| Asthma   | COPD    | rs1059513   | C             | T            | -0.0914  | 0.0083 | 2.80E-28 | -0.0256 | 0.0116 | 2.80E-02 | TRUE    |
| Asthma   | COPD    | rs10803511  | T             | C            | -0.0309  | 0.0052 | 2.56E-09 | 0.0206  | 0.0072 | 4.06E-03 | TRUE    |
| Asthma   | COPD    | rs10828248  | G             | A            | 0.0304   | 0.0053 | 1.05E-08 | 0.0252  | 0.0077 | 1.09E-03 | TRUE    |
| Asthma   | COPD    | rs10835369  | A             | T            | -0.0311  | 0.0057 | 3.70E-08 | -0.0222 | 0.0078 | 4.33E-03 | TRUE    |
| Asthma   | COPD    | rs10912564  | T             | C            | 0.0293   | 0.0052 | 1.76E-08 | 0.0170  | 0.0076 | 2.50E-02 | TRUE    |
| Asthma   | COPD    | rs10920569  | C             | T            | -0.0385  | 0.0050 | 1.90E-14 | -0.0108 | 0.0071 | 1.27E-01 | TRUE    |
| Asthma   | COPD    | rs10976923  | A             | T            | 0.0324   | 0.0056 | 8.05E-09 | 0.0231  | 0.0080 | 3.73E-03 | TRUE    |
| Asthma   | COPD    | rs11057204  | T             | C            | -0.0390  | 0.0059 | 3.62E-11 | -0.0001 | 0.0086 | 9.91E-01 | TRUE    |
| Asthma   | COPD    | rs11081564  | G             | A            | 0.0328   | 0.0056 | 3.58E-09 | 0.0191  | 0.0081 | 1.86E-02 | TRUE    |
| Asthma   | COPD    | rs11154803  | T             | C            | 0.0331   | 0.0049 | 1.96E-11 | 0.0138  | 0.0070 | 4.85E-02 | TRUE    |
| Asthma   | COPD    | rs11236791  | A             | G            | 0.0657   | 0.0047 | 1.57E-43 | 0.0305  | 0.0067 | 5.23E-06 | TRUE    |
| Asthma   | COPD    | rs11236813  | C             | G            | -0.0457  | 0.0078 | 5.43E-09 | -0.0163 | 0.0110 | 1.40E-01 | TRUE    |
| Asthma   | COPD    | rs1132645   | C             | G            | -0.0341  | 0.0055 | 5.09E-10 | -0.0257 | 0.0081 | 1.42E-03 | TRUE    |
| Asthma   | COPD    | rs114947103 | C             | T            | 0.0407   | 0.0061 | 2.33E-11 | 0.0157  | 0.0086 | 6.81E-02 | TRUE    |
| Asthma   | COPD    | rs11602802  | C             | A            | -0.0378  | 0.0052 | 2.14E-13 | -0.0140 | 0.0073 | 5.51E-02 | TRUE    |
| Asthma   | COPD    | rs117121    | A             | C            | 0.0480   | 0.0080 | 1.95E-09 | 0.0133  | 0.0117 | 2.57E-01 | TRUE    |
| Asthma   | COPD    | rs117710327 | A             | C            | -0.1117  | 0.0097 | 6.56E-31 | -0.0562 | 0.0143 | 9.09E-05 | TRUE    |
| Asthma   | COPD    | rs11942410  | T             | C            | -0.0343  | 0.0058 | 2.83E-09 | -0.0147 | 0.0084 | 8.04E-02 | TRUE    |
| Asthma   | COPD    | rs12123821  | T             | C            | 0.0970   | 0.0121 | 8.94E-16 | 0.0285  | 0.0174 | 1.01E-01 | TRUE    |
| Asthma   | COPD    | rs12379417  | A             | G            | 0.0318   | 0.0049 | 9.02E-11 | 0.0183  | 0.0069 | 8.41E-03 | TRUE    |
| Asthma   | COPD    | rs1293202   | A             | G            | -0.0460  | 0.0070 | 6.49E-11 | -0.0393 | 0.0099 | 7.25E-05 | TRUE    |
| Asthma   | COPD    | rs112631341 | A             | G            | -0.0311  | 0.0053 | 3.29E-09 | -0.0224 | 0.0076 | 3.46E-03 | TRUE    |
| Asthma   | COPD    | rs13232403  | A             | G            | -0.0372  | 0.0053 | 1.86E-12 | -0.0162 | 0.0076 | 3.36E-02 | TRUE    |
| Asthma   | COPD    | rs13263709  | T             | C            | 0.0498   | 0.0050 | 1.26E-23 | 0.0287  | 0.0070 | 4.43E-05 | TRUE    |
| Asthma   | COPD    | rs13277355  | A             | G            | 0.0334   | 0.0054 | 4.94E-10 | 0.0198  | 0.0079 | 1.18E-02 | TRUE    |
| Asthma   | COPD    | rs13296447  | G             | C            | 0.0326   | 0.0058 | 2.01E-08 | 0.0081  | 0.0082 | 3.24E-01 | TRUE    |
| Asthma   | COPD    | rs138316828 | T             | C            | 0.0431   | 0.0078 | 2.79E-08 | 0.0250  | 0.0109 | 2.25E-02 | TRUE    |
| Asthma   | COPD    | rs144569746 | T             | C            | 0.0720   | 0.0074 | 3.78E-22 | 0.0334  | 0.0104 | 1.35E-03 | TRUE    |
| Asthma   | COPD    | rs16853094  | A             | G            | 0.0300   | 0.0054 | 3.15E-08 | 0.0374  | 0.0077 | 1.31E-06 | TRUE    |
| Asthma   | COPD    | rs16903574  | G             | C            | 0.0682   | 0.0087 | 5.00E-15 | 0.0300  | 0.0128 | 1.90E-02 | TRUE    |
| Asthma   | COPD    | rs17227210  | T             | C            | 0.0493   | 0.0071 | 3.39E-12 | 0.0036  | 0.0105 | 7.31E-01 | TRUE    |
| Asthma   | COPD    | rs1723016   | C             | T            | -0.0391  | 0.0049 | 1.66E-15 | -0.0078 | 0.0069 | 2.59E-01 | TRUE    |
| Asthma   | COPD    | rs17293632  | T             | C            | 0.0829   | 0.0055 | 1.21E-51 | 0.0310  | 0.0078 | 6.79E-05 | TRUE    |
| Asthma   | COPD    | rs174568    | T             | C            | -0.0379  | 0.0049 | 1.52E-14 | -0.0185 | 0.0070 | 7.88E-03 | TRUE    |
| Asthma   | COPD    | rs178830    | C             | T            | -0.0298  | 0.0047 | 2.85E-10 | -0.0132 | 0.0067 | 4.78E-02 | TRUE    |
| Asthma   | COPD    | rs1837253   | T             | C            | -0.0997  | 0.0054 | 2.45E-76 | -0.0319 | 0.0076 | 2.63E-05 | TRUE    |
| Asthma   | COPD    | rs1991401   | G             | A            | -0.0295  | 0.0052 | 1.37E-08 | -0.0205 | 0.0076 | 7.28E-03 | TRUE    |
| Asthma   | COPD    | rs2025758   | C             | T            | -0.0428  | 0.0048 | 2.00E-19 | -0.0298 | 0.0067 | 9.03E-06 | TRUE    |
| Asthma   | COPD    | rs2052692   | A             | G            | 0.0280   | 0.0050 | 2.33E-08 | 0.0119  | 0.0071 | 9.28E-02 | TRUE    |
| Asthma   | COPD    | rs2070901   | T             | G            | 0.0407   | 0.0055 | 1.38E-13 | 0.0069  | 0.0080 | 3.93E-01 | TRUE    |
| Asthma   | COPD    | rs2126202   | C             | A            | 0.0266   | 0.0049 | 4.32E-08 | 0.0060  | 0.0071 | 4.01E-01 | TRUE    |
| Asthma   | COPD    | rs2135481   | A             | G            | -0.0332  | 0.0057 | 5.57E-09 | -0.0017 | 0.0083 | 8.41E-01 | TRUE    |
| Asthma   | COPD    | rs2188962   | T             | C            | -0.0661  | 0.0049 | 2.40E-41 | -0.0373 | 0.0069 | 7.72E-08 | TRUE    |
| Asthma   | COPD    | rs2199036   | T             | C            | 0.0372   | 0.0051 | 1.92E-13 | 0.0310  | 0.0073 | 2.42E-05 | TRUE    |
| Asthma   | COPD    | rs2205049   | T             | C            | -0.0387  | 0.0049 | 3.26E-15 | -0.0207 | 0.0071 | 3.80E-03 | TRUE    |
| Asthma   | COPD    | rs2240157   | T             | C            | 0.0299   | 0.0054 | 2.93E-08 | 0.0283  | 0.0079 | 3.40E-04 | TRUE    |
| Asthma   | COPD    | rs2276133   | A             | G            | -0.0370  | 0.0055 | 1.39E-11 | -0.0177 | 0.0077 | 2.22E-02 | TRUE    |
| Asthma   | COPD    | rs2294878   | T             | G            | 0.0427   | 0.0049 | 2.29E-18 | 0.0148  | 0.0070 | 3.32E-02 | TRUE    |
| Asthma   | COPD    | rs249681    | G             | C            | -0.0450  | 0.0051 | 1.85E-18 | -0.0281 | 0.0075 | 1.78E-04 | TRUE    |
| Asthma   | COPD    | rs2524084   | G             | A            | 0.0289   | 0.0050 | 9.39E-09 | 0.0167  | 0.0072 | 2.02E-02 | TRUE    |
| Asthma   | COPD    | rs2671654   | G             | A            | -0.0479  | 0.0049 | 1.15E-22 | -0.0138 | 0.0071 | 5.31E-02 | TRUE    |
| Asthma   | COPD    | rs274949    | G             | A            | 0.0294   | 0.0049 | 1.49E-09 | 0.0227  | 0.0071 | 1.35E-03 | TRUE    |
| Asthma   | COPD    | rs2756184   | T             | G            | 0.0288   | 0.0047 | 1.30E-09 | 0.0171  | 0.0067 | 1.08E-02 | TRUE    |
| Asthma   | COPD    | rs2811381   | A             | G            | -0.0415  | 0.0075 | 2.92E-08 | -0.0247 | 0.0105 | 1.81E-02 | TRUE    |
| Asthma   | COPD    | rs290897    | C             | T            | -0.1127  | 0.0147 | 1.70E-14 | -0.0743 | 0.0204 | 2.82E-04 | TRUE    |
| Asthma   | COPD    | rs2921096   | T             | C            | -0.0292  | 0.0050 | 6.19E-09 | -0.0267 | 0.0070 | 1.34E-04 | TRUE    |
| Asthma   | COPD    | rs2951185   | T             | C            | 0.0293   | 0.0053 | 2.48E-08 | -0.0103 | 0.0075 | 1.68E-01 | TRUE    |
| Asthma   | COPD    | rs34290285  | A             | G            | -0.0828  | 0.0056 | 3.60E-50 | -0.0338 | 0.0080 | 2.68E-05 | TRUE    |
| Asthma   | COPD    | rs34381727  | G             | C            | 0.0300   | 0.0052 | 6.97E-09 | 0.0170  | 0.0075 | 2.36E-02 | TRUE    |
| Asthma   | COPD    | rs35441874  | A             | T            | -0.0663  | 0.0055 | 5.44E-33 | -0.0236 | 0.0078 | 2.40E-03 | TRUE    |
| Asthma   | COPD    | rs35668054  | T             | C            | -0.0610  | 0.0090 | 1.15E-11 | -0.0202 | 0.0128 | 1.13E-01 | TRUE    |
| Asthma   | COPD    | rs36068512  | C             | T            | 0.0488   | 0.0085 | 9.06E-09 | 0.0412  | 0.0122 | 7.26E-04 | TRUE    |
| Asthma   | COPD    | rs3784099   | A             | G            | 0.0473   | 0.0052 | 1.11E-19 | 0.0205  | 0.0074 | 5.63E-03 | TRUE    |
| Asthma   | COPD    | rs3824074   | C             | G            | 0.0330   | 0.0051 | 7.54E-11 | 0.0187  | 0.0074 | 1.16E-02 | TRUE    |
| Asthma   | COPD    | rs3843642   | C             | T            | -0.0460  | 0.0071 | 8.69E-11 | -0.0160 | 0.0103 | 1.20E-01 | TRUE    |
| Asthma   | COPD    | rs3856439   | T             | C            | -0.0419  | 0.0052 | 8.45E-16 | -0.0064 | 0.0070 | 3.62E-01 | TRUE    |

|        |      |             |   |   |         |        |           |         |        |          |      |
|--------|------|-------------|---|---|---------|--------|-----------|---------|--------|----------|------|
| Asthma | COPD | rs4099209   | G | T | 0.0565  | 0.0071 | 1.52E-15  | 0.0108  | 0.0100 | 2.79E-01 | TRUE |
| Asthma | COPD | rs4308313   | G | A | 0.0435  | 0.0075 | 7.71E-09  | 0.0130  | 0.0107 | 2.23E-01 | TRUE |
| Asthma | COPD | rs4389093   | G | A | 0.0297  | 0.0049 | 1.15E-09  | 0.0172  | 0.0069 | 1.26E-02 | TRUE |
| Asthma | COPD | rs4664443   | G | A | 0.0271  | 0.0049 | 4.58E-08  | 0.0216  | 0.0072 | 2.66E-03 | TRUE |
| Asthma | COPD | rs4787951   | C | T | 0.0480  | 0.0052 | 3.15E-20  | 0.0063  | 0.0074 | 3.98E-01 | TRUE |
| Asthma | COPD | rs4895369   | A | G | -0.0335 | 0.0052 | 1.09E-10  | -0.0260 | 0.0074 | 4.34E-04 | TRUE |
| Asthma | COPD | rs491087    | A | G | 0.0311  | 0.0050 | 4.09E-10  | 0.0142  | 0.0071 | 4.49E-02 | TRUE |
| Asthma | COPD | rs55730955  | A | T | -0.0580 | 0.0104 | 2.58E-08  | -0.0122 | 0.0146 | 4.03E-01 | TRUE |
| Asthma | COPD | rs55743914  | T | C | 0.0340  | 0.0055 | 7.51E-10  | 0.0136  | 0.0078 | 8.26E-02 | TRUE |
| Asthma | COPD | rs55755011  | G | A | 0.0335  | 0.0059 | 1.42E-08  | 0.0243  | 0.0087 | 4.98E-03 | TRUE |
| Asthma | COPD | rs56035021  | A | G | 0.0454  | 0.0051 | 3.38E-19  | 0.0030  | 0.0074 | 6.81E-01 | TRUE |
| Asthma | COPD | rs5743618   | A | C | -0.0562 | 0.0059 | 1.43E-21  | -0.0114 | 0.0087 | 1.88E-01 | TRUE |
| Asthma | COPD | rs57594613  | A | G | 0.0686  | 0.0123 | 2.35E-08  | -0.0107 | 0.0178 | 5.47E-01 | TRUE |
| Asthma | COPD | rs60119330  | C | T | 0.0359  | 0.0057 | 2.34E-10  | -0.0152 | 0.0080 | 5.89E-02 | TRUE |
| Asthma | COPD | rs6087868   | A | G | 0.0457  | 0.0077 | 3.33E-09  | 0.0211  | 0.0121 | 8.18E-02 | TRUE |
| Asthma | COPD | rs616488    | G | A | -0.0314 | 0.0050 | 3.41E-10  | -0.0154 | 0.0071 | 2.92E-02 | TRUE |
| Asthma | COPD | rs61907683  | C | T | -0.0423 | 0.0056 | 5.40E-14  | -0.0179 | 0.0080 | 2.45E-02 | TRUE |
| Asthma | COPD | rs61938963  | T | C | 0.0391  | 0.0050 | 5.88E-15  | 0.0128  | 0.0071 | 7.10E-02 | TRUE |
| Asthma | COPD | rs62242108  | A | G | -0.0328 | 0.0054 | 1.13E-09  | -0.0304 | 0.0078 | 1.03E-04 | TRUE |
| Asthma | COPD | rs62294337  | T | A | -0.0342 | 0.0056 | 8.73E-10  | -0.0011 | 0.0078 | 8.86E-01 | TRUE |
| Asthma | COPD | rs62408222  | G | A | -0.0637 | 0.0051 | 4.93E-36  | -0.0333 | 0.0072 | 3.53E-06 | TRUE |
| Asthma | COPD | rs62449498  | C | A | 0.0331  | 0.0049 | 8.95E-12  | -0.0044 | 0.0071 | 5.31E-01 | TRUE |
| Asthma | COPD | rs6461503   | C | T | -0.0396 | 0.0048 | 2.24E-16  | -0.0228 | 0.0070 | 1.20E-03 | TRUE |
| Asthma | COPD | rs6505274   | T | G | -0.0368 | 0.0066 | 2.00E-08  | -0.0250 | 0.0096 | 9.11E-03 | TRUE |
| Asthma | COPD | rs66632892  | A | G | 0.0350  | 0.0052 | 2.35E-11  | 0.0144  | 0.0074 | 5.27E-02 | TRUE |
| Asthma | COPD | rs6782834   | G | A | 0.0296  | 0.0053 | 1.92E-08  | -0.0007 | 0.0076 | 9.30E-01 | TRUE |
| Asthma | COPD | rs6905736   | C | A | -0.0413 | 0.0071 | 6.82E-09  | -0.0425 | 0.0105 | 5.11E-05 | TRUE |
| Asthma | COPD | rs708563    | G | A | 0.0301  | 0.0050 | 1.70E-09  | 0.0154  | 0.0067 | 2.20E-02 | TRUE |
| Asthma | COPD | rs71368508  | A | C | -0.0999 | 0.0180 | 2.93E-08  | -0.0407 | 0.0259 | 1.16E-01 | TRUE |
| Asthma | COPD | rs72668903  | A | G | -0.0417 | 0.0071 | 5.64E-09  | -0.0396 | 0.0100 | 7.35E-05 | TRUE |
| Asthma | COPD | rs72699870  | C | T | -0.0360 | 0.0063 | 1.11E-08  | -0.0332 | 0.0091 | 2.65E-04 | TRUE |
| Asthma | COPD | rs72823641  | A | T | -0.1268 | 0.0068 | 2.91E-78  | -0.0386 | 0.0094 | 3.73E-05 | TRUE |
| Asthma | COPD | rs7555082   | A | G | -0.0627 | 0.0079 | 1.34E-15  | -0.0389 | 0.0114 | 6.38E-04 | TRUE |
| Asthma | COPD | rs7562979   | G | C | 0.0449  | 0.0073 | 7.15E-10  | 0.0265  | 0.0104 | 1.12E-02 | TRUE |
| Asthma | COPD | rs77791277  | A | G | 0.0428  | 0.0067 | 1.28E-10  | 0.0217  | 0.0092 | 1.81E-02 | TRUE |
| Asthma | COPD | rs7918084   | C | T | -0.0298 | 0.0047 | 3.00E-10  | 0.0002  | 0.0067 | 9.71E-01 | TRUE |
| Asthma | COPD | rs8002731   | C | A | -0.0338 | 0.0049 | 7.24E-12  | -0.0086 | 0.0069 | 2.13E-01 | TRUE |
| Asthma | COPD | rs8100197   | A | G | 0.0376  | 0.0066 | 1.04E-08  | 0.0199  | 0.0099 | 4.46E-02 | TRUE |
| Asthma | COPD | rs826844    | T | C | 0.0550  | 0.0095 | 7.00E-09  | 0.0296  | 0.0138 | 3.20E-02 | TRUE |
| Asthma | COPD | rs875023    | T | C | -0.0372 | 0.0056 | 3.12E-11  | -0.0183 | 0.0080 | 2.21E-02 | TRUE |
| Asthma | COPD | rs912131    | A | G | -0.0549 | 0.0051 | 6.02E-27  | -0.0298 | 0.0072 | 3.70E-05 | TRUE |
| Asthma | COPD | rs9270911   | C | T | -0.1281 | 0.0053 | 6.15E-128 | -0.0427 | 0.0079 | 5.80E-08 | TRUE |
| Asthma | COPD | rs9272245   | C | G | 0.0726  | 0.0059 | 1.17E-34  | 0.0102  | 0.0093 | 2.72E-01 | TRUE |
| Asthma | COPD | rs9290877   | C | T | 0.0426  | 0.0053 | 5.88E-16  | 0.0024  | 0.0074 | 7.49E-01 | TRUE |
| Asthma | COPD | rs962992    | C | G | -0.0834 | 0.0049 | 3.26E-65  | -0.0304 | 0.0069 | 1.05E-05 | TRUE |
| Asthma | COPD | rs981625    | G | C | 0.0634  | 0.0101 | 4.04E-10  | 0.0047  | 0.0148 | 7.52E-01 | TRUE |
| Asthma | COPD | rs9828592   | C | T | 0.0446  | 0.0049 | 4.53E-20  | 0.0178  | 0.0071 | 1.21E-02 | TRUE |
| Asthma | COPD | rs992969    | A | G | 0.1052  | 0.0055 | 4.40E-81  | 0.0289  | 0.0079 | 2.35E-04 | TRUE |
| Asthma | COPD | rs9930506   | G | A | 0.0297  | 0.0047 | 3.33E-10  | 0.0098  | 0.0067 | 1.43E-01 | TRUE |
| Asthma | IPF  | rs10075764  | G | A | -0.0381 | 0.0049 | 1.35E-14  | 0.0142  | 0.0197 | 4.71E-01 | TRUE |
| Asthma | IPF  | rs10131571  | T | C | 0.0319  | 0.0050 | 1.50E-10  | 0.0160  | 0.0196 | 4.13E-01 | TRUE |
| Asthma | IPF  | rs10416530  | C | T | 0.0378  | 0.0053 | 8.67E-13  | 0.0023  | 0.0222 | 9.19E-01 | TRUE |
| Asthma | IPF  | rs1048665   | G | T | -0.0373 | 0.0056 | 2.18E-11  | -0.0243 | 0.0222 | 2.74E-01 | TRUE |
| Asthma | IPF  | rs10519067  | A | G | -0.0670 | 0.0068 | 9.30E-23  | 0.0341  | 0.0270 | 2.07E-01 | TRUE |
| Asthma | IPF  | rs1059513   | C | T | -0.0914 | 0.0083 | 2.80E-28  | -0.0023 | 0.0319 | 9.43E-01 | TRUE |
| Asthma | IPF  | rs10803511  | T | C | -0.0309 | 0.0052 | 2.56E-09  | 0.0116  | 0.0205 | 5.72E-01 | TRUE |
| Asthma | IPF  | rs10828248  | G | A | 0.0304  | 0.0053 | 1.05E-08  | 0.0221  | 0.0199 | 2.67E-01 | TRUE |
| Asthma | IPF  | rs10835369  | A | T | -0.0311 | 0.0057 | 3.70E-08  | 0.0224  | 0.0234 | 3.40E-01 | TRUE |
| Asthma | IPF  | rs10912564  | T | C | 0.0293  | 0.0052 | 1.76E-08  | -0.0025 | 0.0214 | 9.07E-01 | TRUE |
| Asthma | IPF  | rs10920569  | C | T | -0.0385 | 0.0050 | 1.90E-14  | -0.0293 | 0.0199 | 1.41E-01 | TRUE |
| Asthma | IPF  | rs10976923  | A | T | 0.0324  | 0.0056 | 8.05E-09  | -0.0188 | 0.0222 | 3.98E-01 | TRUE |
| Asthma | IPF  | rs11057204  | T | C | -0.0390 | 0.0059 | 3.62E-11  | -0.0079 | 0.0243 | 7.46E-01 | TRUE |
| Asthma | IPF  | rs11081564  | G | A | 0.0328  | 0.0056 | 3.58E-09  | 0.0193  | 0.0231 | 4.02E-01 | TRUE |
| Asthma | IPF  | rs11154803  | T | C | 0.0331  | 0.0049 | 1.96E-11  | 0.0479  | 0.0195 | 1.43E-02 | TRUE |
| Asthma | IPF  | rs11236791  | A | G | 0.0657  | 0.0047 | 1.57E-43  | 0.0335  | 0.0188 | 7.47E-02 | TRUE |
| Asthma | IPF  | rs11236813  | C | G | -0.0457 | 0.0078 | 5.43E-09  | 0.0259  | 0.0321 | 4.21E-01 | TRUE |
| Asthma | IPF  | rs1132645   | C | G | -0.0341 | 0.0055 | 5.09E-10  | -0.0086 | 0.0239 | 7.19E-01 | TRUE |
| Asthma | IPF  | rs114947103 | C | T | 0.0407  | 0.0061 | 2.33E-11  | 0.0155  | 0.0239 | 5.16E-01 | TRUE |
| Asthma | IPF  | rs11602802  | C | A | -0.0378 | 0.0052 | 2.14E-13  | 0.0692  | 0.0201 | 5.83E-04 | TRUE |
| Asthma | IPF  | rs11721     | A | C | 0.0480  | 0.0080 | 1.95E-09  | 0.0385  | 0.0341 | 2.59E-01 | TRUE |
| Asthma | IPF  | rs117710327 | A | C | -0.1117 | 0.0097 | 6.56E-31  | -0.1011 | 0.0425 | 1.73E-02 | TRUE |
| Asthma | IPF  | rs11942410  | T | C | -0.0343 | 0.0058 | 2.83E-09  | 0.0138  | 0.0235 | 5.56E-01 | TRUE |
| Asthma | IPF  | rs12123821  | T | C | 0.0970  | 0.0121 | 8.94E-16  | -0.0312 | 0.0505 | 5.36E-01 | TRUE |
| Asthma | IPF  | rs12379417  | A | G | 0.0318  | 0.0049 | 9.02E-11  | 0.0222  | 0.0194 | 2.53E-01 | TRUE |

|        |     |             |   |   |         |        |          |         |        |          |      |
|--------|-----|-------------|---|---|---------|--------|----------|---------|--------|----------|------|
| Asthma | IPF | rs1293202   | A | G | -0.0460 | 0.0070 | 6.49E-11 | 0.0241  | 0.0283 | 3.94E-01 | TRUE |
| Asthma | IPF | rs13213141  | A | G | -0.0311 | 0.0053 | 3.29E-09 | 0.0021  | 0.0217 | 9.24E-01 | TRUE |
| Asthma | IPF | rs13232403  | A | G | -0.0372 | 0.0053 | 1.86E-12 | 0.0115  | 0.0219 | 6.00E-01 | TRUE |
| Asthma | IPF | rs13263709  | T | C | -0.0498 | 0.0050 | 1.26E-23 | 0.0226  | 0.0196 | 2.49E-01 | TRUE |
| Asthma | IPF | rs13277355  | A | G | 0.0334  | 0.0054 | 4.94E-10 | -0.0128 | 0.0222 | 5.64E-01 | TRUE |
| Asthma | IPF | rs13296447  | G | C | 0.0326  | 0.0058 | 2.01E-08 | -0.0073 | 0.0226 | 7.45E-01 | TRUE |
| Asthma | IPF | rs138316828 | T | C | 0.0431  | 0.0078 | 2.79E-08 | 0.0065  | 0.0309 | 8.34E-01 | TRUE |
| Asthma | IPF | rs144569746 | T | C | 0.0720  | 0.0074 | 3.78E-22 | -0.0217 | 0.0299 | 4.69E-01 | TRUE |
| Asthma | IPF | rs1489762   | C | T | -0.0395 | 0.0048 | 1.39E-16 | 0.0144  | 0.0189 | 4.48E-01 | TRUE |
| Asthma | IPF | rs16853094  | A | G | 0.0300  | 0.0054 | 3.15E-08 | -0.0031 | 0.0218 | 8.86E-01 | TRUE |
| Asthma | IPF | rs16903574  | G | C | 0.0682  | 0.0087 | 5.00E-15 | 0.0206  | 0.0388 | 5.96E-01 | TRUE |
| Asthma | IPF | rs17227210  | T | C | 0.0493  | 0.0071 | 3.39E-12 | 0.0035  | 0.0293 | 9.05E-01 | TRUE |
| Asthma | IPF | rs1723016   | C | T | -0.0391 | 0.0049 | 1.66E-15 | -0.0206 | 0.0195 | 2.90E-01 | TRUE |
| Asthma | IPF | rs17293632  | T | C | 0.0829  | 0.0055 | 1.21E-51 | -0.0160 | 0.0218 | 4.62E-01 | TRUE |
| Asthma | IPF | rs174568    | T | C | -0.0379 | 0.0049 | 1.52E-14 | -0.0243 | 0.0196 | 2.15E-01 | TRUE |
| Asthma | IPF | rs178830    | C | T | -0.0298 | 0.0047 | 2.85E-10 | -0.0605 | 0.0186 | 1.17E-03 | TRUE |
| Asthma | IPF | rs1837253   | T | C | -0.0997 | 0.0054 | 2.45E-76 | -0.0031 | 0.0214 | 8.84E-01 | TRUE |
| Asthma | IPF | rs1991401   | G | A | -0.0295 | 0.0052 | 1.37E-08 | 0.0007  | 0.0224 | 9.77E-01 | TRUE |
| Asthma | IPF | rs2025758   | C | T | -0.0428 | 0.0048 | 2.00E-19 | -0.0109 | 0.0188 | 5.63E-01 | TRUE |
| Asthma | IPF | rs2052692   | A | G | 0.0280  | 0.0050 | 2.33E-08 | -0.0049 | 0.0200 | 8.07E-01 | TRUE |
| Asthma | IPF | rs2070901   | T | G | 0.0407  | 0.0055 | 1.38E-13 | -0.0011 | 0.0226 | 9.60E-01 | TRUE |
| Asthma | IPF | rs2111363   | A | G | -0.0291 | 0.0053 | 3.42E-08 | -0.0177 | 0.0206 | 3.91E-01 | TRUE |
| Asthma | IPF | rs2126202   | C | A | 0.0266  | 0.0049 | 4.32E-08 | -0.0142 | 0.0201 | 4.80E-01 | TRUE |
| Asthma | IPF | rs2135481   | A | G | -0.0332 | 0.0057 | 5.57E-09 | -0.0076 | 0.0234 | 7.44E-01 | TRUE |
| Asthma | IPF | rs2188962   | T | C | -0.0661 | 0.0049 | 2.40E-41 | -0.0219 | 0.0193 | 2.56E-01 | TRUE |
| Asthma | IPF | rs2199036   | T | C | 0.0372  | 0.0051 | 1.92E-13 | 0.0319  | 0.0210 | 1.28E-01 | TRUE |
| Asthma | IPF | rs2205049   | T | C | -0.0387 | 0.0049 | 3.26E-15 | -0.0125 | 0.0204 | 5.41E-01 | TRUE |
| Asthma | IPF | rs2240157   | T | C | 0.0299  | 0.0054 | 2.93E-08 | -0.0103 | 0.0238 | 6.64E-01 | TRUE |
| Asthma | IPF | rs2276133   | A | G | -0.0370 | 0.0055 | 1.39E-11 | 0.0150  | 0.0216 | 4.89E-01 | TRUE |
| Asthma | IPF | rs2294878   | T | G | 0.0427  | 0.0049 | 2.29E-18 | -0.0304 | 0.0192 | 1.13E-01 | TRUE |
| Asthma | IPF | rs249681    | G | C | -0.0450 | 0.0051 | 1.85E-18 | 0.0011  | 0.0207 | 9.59E-01 | TRUE |
| Asthma | IPF | rs2524084   | G | A | 0.0289  | 0.0050 | 9.39E-09 | 0.0193  | 0.0199 | 3.31E-01 | TRUE |
| Asthma | IPF | rs2671654   | G | A | -0.0479 | 0.0049 | 1.15E-22 | 0.0322  | 0.0203 | 1.12E-01 | TRUE |
| Asthma | IPF | rs274949    | G | A | 0.0294  | 0.0049 | 1.49E-09 | 0.0008  | 0.0201 | 9.70E-01 | TRUE |
| Asthma | IPF | rs2756184   | T | G | 0.0288  | 0.0047 | 1.30E-09 | -0.0093 | 0.0188 | 6.20E-01 | TRUE |
| Asthma | IPF | rs2811381   | A | G | -0.0415 | 0.0075 | 2.92E-08 | -0.0308 | 0.0308 | 3.18E-01 | TRUE |
| Asthma | IPF | rs290897    | C | T | -0.1127 | 0.0147 | 1.70E-14 | -0.0459 | 0.0580 | 4.28E-01 | TRUE |
| Asthma | IPF | rs2921096   | T | C | -0.0292 | 0.0050 | 6.19E-09 | -0.0362 | 0.0197 | 6.69E-02 | TRUE |
| Asthma | IPF | rs2951185   | T | C | 0.0293  | 0.0053 | 2.48E-08 | 0.0062  | 0.0209 | 7.67E-01 | TRUE |
| Asthma | IPF | rs34290285  | A | G | -0.0828 | 0.0056 | 3.60E-50 | 0.0246  | 0.0231 | 2.88E-01 | TRUE |
| Asthma | IPF | rs34381727  | G | C | 0.0300  | 0.0052 | 6.97E-09 | -0.0009 | 0.0213 | 9.68E-01 | TRUE |
| Asthma | IPF | rs34712979  | A | G | 0.0471  | 0.0055 | 1.32E-17 | -0.0128 | 0.0221 | 5.62E-01 | TRUE |
| Asthma | IPF | rs35441874  | A | T | -0.0663 | 0.0055 | 5.44E-33 | 0.0317  | 0.0217 | 1.45E-01 | TRUE |
| Asthma | IPF | rs35668054  | T | C | -0.0610 | 0.0090 | 1.15E-11 | -0.0405 | 0.0366 | 2.69E-01 | TRUE |
| Asthma | IPF | rs36068512  | C | T | 0.0488  | 0.0085 | 9.06E-09 | -0.0239 | 0.0343 | 4.86E-01 | TRUE |
| Asthma | IPF | rs3784099   | A | G | 0.0473  | 0.0052 | 1.11E-19 | -0.0162 | 0.0205 | 4.30E-01 | TRUE |
| Asthma | IPF | rs3824074   | C | G | 0.0330  | 0.0051 | 7.54E-11 | 0.0041  | 0.0211 | 8.45E-01 | TRUE |
| Asthma | IPF | rs3843642   | C | T | -0.0460 | 0.0071 | 8.69E-11 | 0.0089  | 0.0291 | 7.59E-01 | TRUE |
| Asthma | IPF | rs3856439   | T | C | -0.0419 | 0.0052 | 8.45E-16 | -0.0515 | 0.0197 | 8.89E-03 | TRUE |
| Asthma | IPF | rs4099209   | G | T | 0.0565  | 0.0071 | 1.52E-15 | 0.0611  | 0.0295 | 3.80E-02 | TRUE |
| Asthma | IPF | rs4308313   | G | A | 0.0435  | 0.0075 | 7.71E-09 | -0.0508 | 0.0314 | 1.07E-01 | TRUE |
| Asthma | IPF | rs4389093   | G | A | 0.0297  | 0.0049 | 1.15E-09 | 0.0227  | 0.0193 | 2.38E-01 | TRUE |
| Asthma | IPF | rs4664443   | G | A | 0.0271  | 0.0049 | 4.58E-08 | 0.0192  | 0.0205 | 3.48E-01 | TRUE |
| Asthma | IPF | rs4787951   | C | T | 0.0480  | 0.0052 | 3.15E-20 | 0.0119  | 0.0206 | 5.63E-01 | TRUE |
| Asthma | IPF | rs4895369   | A | G | -0.0335 | 0.0052 | 1.09E-10 | 0.0201  | 0.0215 | 3.51E-01 | TRUE |
| Asthma | IPF | rs491087    | A | G | 0.0311  | 0.0050 | 4.09E-10 | 0.0129  | 0.0197 | 5.12E-01 | TRUE |
| Asthma | IPF | rs55730955  | A | T | -0.0580 | 0.0104 | 2.58E-08 | 0.0730  | 0.0411 | 7.57E-02 | TRUE |
| Asthma | IPF | rs55743914  | T | C | 0.0340  | 0.0055 | 7.51E-10 | 0.0193  | 0.0220 | 3.80E-01 | TRUE |
| Asthma | IPF | rs55755011  | G | A | 0.0335  | 0.0059 | 1.42E-08 | 0.0330  | 0.0245 | 1.78E-01 | TRUE |
| Asthma | IPF | rs56035021  | A | G | 0.0454  | 0.0051 | 3.38E-19 | 0.0023  | 0.0211 | 9.13E-01 | TRUE |
| Asthma | IPF | rs5743618   | A | C | -0.0562 | 0.0059 | 1.43E-21 | 0.0362  | 0.0261 | 1.65E-01 | TRUE |
| Asthma | IPF | rs57594613  | A | G | 0.0686  | 0.0123 | 2.35E-08 | -0.0343 | 0.0491 | 4.85E-01 | TRUE |
| Asthma | IPF | rs60119330  | C | T | 0.0359  | 0.0057 | 2.34E-10 | 0.0355  | 0.0220 | 1.07E-01 | TRUE |
| Asthma | IPF | rs6087868   | A | G | 0.0457  | 0.0077 | 3.33E-09 | -0.0255 | 0.0320 | 4.25E-01 | TRUE |
| Asthma | IPF | rs616488    | G | A | -0.0314 | 0.0050 | 3.41E-10 | -0.0029 | 0.0198 | 8.84E-01 | TRUE |
| Asthma | IPF | rs61907683  | C | T | -0.0423 | 0.0056 | 5.40E-14 | 0.0175  | 0.0226 | 4.39E-01 | TRUE |
| Asthma | IPF | rs61938963  | T | C | 0.0391  | 0.0050 | 5.88E-15 | -0.0138 | 0.0198 | 4.85E-01 | TRUE |
| Asthma | IPF | rs62242108  | A | G | -0.0328 | 0.0054 | 1.13E-09 | -0.0165 | 0.0224 | 4.61E-01 | TRUE |
| Asthma | IPF | rs62294337  | T | A | -0.0342 | 0.0056 | 8.73E-10 | 0.0033  | 0.0220 | 8.79E-01 | TRUE |
| Asthma | IPF | rs62408222  | G | A | -0.0637 | 0.0051 | 4.93E-36 | 0.0073  | 0.0201 | 7.15E-01 | TRUE |
| Asthma | IPF | rs62449498  | C | A | 0.0331  | 0.0049 | 8.95E-12 | 0.0180  | 0.0200 | 3.70E-01 | TRUE |
| Asthma | IPF | rs6461503   | C | T | -0.0396 | 0.0048 | 2.24E-16 | -0.0079 | 0.0199 | 6.91E-01 | TRUE |
| Asthma | IPF | rs6505274   | T | G | -0.0368 | 0.0066 | 2.00E-08 | -0.0555 | 0.0272 | 4.16E-02 | TRUE |
| Asthma | IPF | rs66632892  | A | G | 0.0350  | 0.0052 | 2.35E-11 | 0.0174  | 0.0210 | 4.09E-01 | TRUE |

|        |            |             |   |   |         |        |           |         |        |          |      |
|--------|------------|-------------|---|---|---------|--------|-----------|---------|--------|----------|------|
| Asthma | IPF        | rs6782834   | G | A | 0.0296  | 0.0053 | 1.92E-08  | -0.0162 | 0.0218 | 4.58E-01 | TRUE |
| Asthma | IPF        | rs6905736   | C | A | -0.0413 | 0.0071 | 6.82E-09  | -0.0601 | 0.0304 | 4.80E-02 | TRUE |
| Asthma | IPF        | rs708563    | G | A | 0.0301  | 0.0050 | 1.70E-09  | 0.0350  | 0.0186 | 6.07E-02 | TRUE |
| Asthma | IPF        | rs71368508  | A | C | -0.0999 | 0.0180 | 2.93E-08  | -0.0122 | 0.0725 | 8.66E-01 | TRUE |
| Asthma | IPF        | rs72668903  | A | G | -0.0417 | 0.0071 | 5.64E-09  | -0.0073 | 0.0276 | 7.92E-01 | TRUE |
| Asthma | IPF        | rs72699870  | C | T | -0.0360 | 0.0063 | 1.11E-08  | -0.0322 | 0.0258 | 2.11E-01 | TRUE |
| Asthma | IPF        | rs72823641  | A | T | -0.1268 | 0.0068 | 2.91E-78  | -0.0355 | 0.0263 | 1.78E-01 | TRUE |
| Asthma | IPF        | rs7555082   | A | G | -0.0627 | 0.0079 | 1.34E-15  | -0.0340 | 0.0325 | 2.96E-01 | TRUE |
| Asthma | IPF        | rs7562979   | G | C | 0.0449  | 0.0073 | 7.15E-10  | 0.0052  | 0.0288 | 8.58E-01 | TRUE |
| Asthma | IPF        | rs77791277  | A | G | 0.0428  | 0.0067 | 1.28E-10  | 0.0284  | 0.0239 | 2.35E-01 | TRUE |
| Asthma | IPF        | rs7918084   | C | T | -0.0298 | 0.0047 | 3.00E-10  | 0.0268  | 0.0187 | 1.53E-01 | TRUE |
| Asthma | IPF        | rs8002731   | C | A | -0.0338 | 0.0049 | 7.24E-12  | -0.0402 | 0.0195 | 3.98E-02 | TRUE |
| Asthma | IPF        | rs8100197   | A | G | 0.0376  | 0.0066 | 1.04E-08  | 0.0206  | 0.0258 | 4.25E-01 | TRUE |
| Asthma | IPF        | rs826844    | T | C | 0.0550  | 0.0095 | 7.00E-09  | -0.0224 | 0.0406 | 5.82E-01 | TRUE |
| Asthma | IPF        | rs875023    | T | C | -0.0372 | 0.0056 | 3.12E-11  | -0.0069 | 0.0224 | 7.59E-01 | TRUE |
| Asthma | IPF        | rs912131    | A | G | -0.0549 | 0.0051 | 6.02E-27  | 0.0008  | 0.0202 | 9.67E-01 | TRUE |
| Asthma | IPF        | rs9270911   | C | T | -0.1281 | 0.0053 | 6.15E-128 | -0.0355 | 0.0209 | 8.99E-02 | TRUE |
| Asthma | IPF        | rs9272245   | C | G | 0.0726  | 0.0059 | 1.17E-34  | -0.0116 | 0.0249 | 6.41E-01 | TRUE |
| Asthma | IPF        | rs9290877   | C | T | 0.0426  | 0.0053 | 5.88E-16  | 0.0146  | 0.0206 | 4.79E-01 | TRUE |
| Asthma | IPF        | rs962992    | C | G | -0.0834 | 0.0049 | 3.26E-65  | 0.0190  | 0.0191 | 3.22E-01 | TRUE |
| Asthma | IPF        | rs981625    | G | C | 0.0634  | 0.0101 | 4.04E-10  | -0.0209 | 0.0424 | 6.22E-01 | TRUE |
| Asthma | IPF        | rs9828592   | C | T | 0.0446  | 0.0049 | 4.53E-20  | 0.0242  | 0.0201 | 2.28E-01 | TRUE |
| Asthma | IPF        | rs992969    | A | G | 0.1052  | 0.0055 | 4.40E-81  | 0.0489  | 0.0216 | 2.32E-02 | TRUE |
| Asthma | IPF        | rs9930506   | G | A | 0.0297  | 0.0047 | 3.33E-10  | -0.0106 | 0.0187 | 5.71E-01 | TRUE |
| Asthma | LungCancer | rs10075764  | G | A | -0.0381 | 0.0049 | 1.35E-14  | 0.0015  | 0.0127 | 9.03E-01 | TRUE |
| Asthma | LungCancer | rs10131571  | T | C | 0.0319  | 0.0050 | 1.50E-10  | -0.0137 | 0.0123 | 2.68E-01 | TRUE |
| Asthma | LungCancer | rs10416530  | C | T | 0.0378  | 0.0053 | 8.67E-13  | 0.0039  | 0.0146 | 7.87E-01 | TRUE |
| Asthma | LungCancer | rs1048665   | G | T | -0.0373 | 0.0056 | 2.18E-11  | -0.0247 | 0.0140 | 7.66E-02 | TRUE |
| Asthma | LungCancer | rs10519067  | A | G | -0.0670 | 0.0068 | 9.30E-23  | 0.0116  | 0.0169 | 4.90E-01 | TRUE |
| Asthma | LungCancer | rs10803511  | T | C | -0.0309 | 0.0052 | 2.56E-09  | 0.0169  | 0.0117 | 1.48E-01 | TRUE |
| Asthma | LungCancer | rs10828248  | G | A | 0.0304  | 0.0053 | 1.05E-08  | 0.0016  | 0.0122 | 8.94E-01 | TRUE |
| Asthma | LungCancer | rs10835369  | A | T | -0.0311 | 0.0057 | 3.70E-08  | -0.0259 | 0.0120 | 3.18E-02 | TRUE |
| Asthma | LungCancer | rs10912564  | T | C | 0.0293  | 0.0052 | 1.76E-08  | -0.0203 | 0.0124 | 1.03E-01 | TRUE |
| Asthma | LungCancer | rs10920569  | C | T | -0.0385 | 0.0050 | 1.90E-14  | 0.0134  | 0.0126 | 2.84E-01 | TRUE |
| Asthma | LungCancer | rs10976923  | A | T | 0.0324  | 0.0056 | 8.05E-09  | -0.0161 | 0.0140 | 2.51E-01 | TRUE |
| Asthma | LungCancer | rs11057204  | T | C | -0.0390 | 0.0059 | 3.62E-11  | -0.0257 | 0.0143 | 7.26E-02 | TRUE |
| Asthma | LungCancer | rs11081564  | G | A | 0.0328  | 0.0056 | 3.58E-09  | 0.0144  | 0.0145 | 3.22E-01 | TRUE |
| Asthma | LungCancer | rs11236791  | A | G | 0.0657  | 0.0047 | 1.57E-43  | 0.0239  | 0.0118 | 4.33E-02 | TRUE |
| Asthma | LungCancer | rs1132645   | C | G | -0.0341 | 0.0055 | 5.09E-10  | -0.0034 | 0.0135 | 8.02E-01 | TRUE |
| Asthma | LungCancer | rs114947103 | C | T | 0.0407  | 0.0061 | 2.33E-11  | 0.0167  | 0.0154 | 2.80E-01 | TRUE |
| Asthma | LungCancer | rs11602802  | C | A | -0.0378 | 0.0052 | 2.14E-13  | 0.0209  | 0.0143 | 1.44E-01 | TRUE |
| Asthma | LungCancer | rs11721     | A | C | 0.0480  | 0.0080 | 1.95E-09  | -0.0255 | 0.0216 | 2.37E-01 | TRUE |
| Asthma | LungCancer | rs117710327 | A | C | -0.1117 | 0.0097 | 6.56E-31  | 0.0024  | 0.0260 | 9.26E-01 | TRUE |
| Asthma | LungCancer | rs11942410  | T | C | -0.0343 | 0.0058 | 2.83E-09  | -0.0133 | 0.0136 | 3.27E-01 | TRUE |
| Asthma | LungCancer | rs12123821  | T | C | 0.0970  | 0.0121 | 8.94E-16  | -0.0331 | 0.0344 | 3.36E-01 | TRUE |
| Asthma | LungCancer | rs12379417  | A | G | 0.0318  | 0.0049 | 9.02E-11  | 0.0085  | 0.0121 | 4.84E-01 | TRUE |
| Asthma | LungCancer | rs1293202   | A | G | -0.0460 | 0.0070 | 6.49E-11  | 0.0074  | 0.0192 | 7.00E-01 | TRUE |
| Asthma | LungCancer | rs13213141  | A | G | -0.0311 | 0.0053 | 3.29E-09  | 0.0348  | 0.0127 | 6.28E-03 | TRUE |
| Asthma | LungCancer | rs13232403  | A | G | -0.0372 | 0.0053 | 1.86E-12  | 0.0030  | 0.0133 | 8.23E-01 | TRUE |
| Asthma | LungCancer | rs13263709  | T | C | 0.0498  | 0.0050 | 1.26E-23  | -0.0034 | 0.0122 | 7.79E-01 | TRUE |
| Asthma | LungCancer | rs13277355  | A | G | 0.0334  | 0.0054 | 4.94E-10  | 0.0034  | 0.0132 | 7.96E-01 | TRUE |
| Asthma | LungCancer | rs13296447  | G | C | 0.0326  | 0.0058 | 2.01E-08  | -0.0131 | 0.0141 | 3.53E-01 | TRUE |
| Asthma | LungCancer | rs138316828 | T | C | 0.0431  | 0.0078 | 2.79E-08  | -0.0060 | 0.0194 | 7.58E-01 | TRUE |
| Asthma | LungCancer | rs144569746 | T | C | 0.0720  | 0.0074 | 3.78E-22  | 0.0044  | 0.0186 | 8.13E-01 | TRUE |
| Asthma | LungCancer | rs16853094  | A | G | 0.0300  | 0.0054 | 3.15E-08  | -0.0088 | 0.0139 | 5.24E-01 | TRUE |
| Asthma | LungCancer | rs16903574  | G | C | 0.0682  | 0.0087 | 5.00E-15  | -0.0172 | 0.0253 | 4.98E-01 | TRUE |
| Asthma | LungCancer | rs17227210  | T | C | 0.0493  | 0.0071 | 3.39E-12  | -0.0442 | 0.0172 | 1.02E-02 | TRUE |
| Asthma | LungCancer | rs1723016   | C | T | -0.0391 | 0.0049 | 1.66E-15  | 0.0156  | 0.0121 | 1.98E-01 | TRUE |
| Asthma | LungCancer | rs17293632  | T | C | 0.0829  | 0.0055 | 1.21E-51  | -0.0103 | 0.0139 | 4.59E-01 | TRUE |
| Asthma | LungCancer | rs174568    | T | C | -0.0379 | 0.0049 | 1.52E-14  | -0.0306 | 0.0125 | 1.44E-02 | TRUE |
| Asthma | LungCancer | rs178830    | C | T | -0.0298 | 0.0047 | 2.85E-10  | -0.0063 | 0.0119 | 5.98E-01 | TRUE |
| Asthma | LungCancer | rs1837253   | T | C | -0.0997 | 0.0054 | 2.45E-76  | -0.0302 | 0.0133 | 2.35E-02 | TRUE |
| Asthma | LungCancer | rs1991401   | G | A | -0.0295 | 0.0052 | 1.37E-08  | -0.0098 | 0.0138 | 4.78E-01 | TRUE |
| Asthma | LungCancer | rs2025758   | C | T | -0.0428 | 0.0048 | 2.00E-19  | -0.0175 | 0.0119 | 1.42E-01 | TRUE |
| Asthma | LungCancer | rs2052692   | A | G | 0.0280  | 0.0050 | 2.33E-08  | -0.0115 | 0.0125 | 3.58E-01 | TRUE |
| Asthma | LungCancer | rs2126202   | C | A | 0.0266  | 0.0049 | 4.32E-08  | -0.0053 | 0.0120 | 6.57E-01 | TRUE |
| Asthma | LungCancer | rs2135481   | A | G | -0.0332 | 0.0057 | 5.57E-09  | 0.0263  | 0.0140 | 6.05E-02 | TRUE |
| Asthma | LungCancer | rs2188962   | T | C | -0.0661 | 0.0049 | 2.40E-41  | 0.0116  | 0.0119 | 3.31E-01 | TRUE |
| Asthma | LungCancer | rs2199036   | T | C | 0.0372  | 0.0051 | 1.92E-13  | 0.0295  | 0.0122 | 1.56E-02 | TRUE |
| Asthma | LungCancer | rs2205049   | T | C | -0.0387 | 0.0049 | 3.26E-15  | -0.0019 | 0.0128 | 8.83E-01 | TRUE |
| Asthma | LungCancer | rs2240157   | T | C | 0.0299  | 0.0054 | 2.93E-08  | -0.0088 | 0.0134 | 5.12E-01 | TRUE |
| Asthma | LungCancer | rs2276133   | A | G | -0.0370 | 0.0055 | 1.39E-11  | -0.0107 | 0.0135 | 4.28E-01 | TRUE |
| Asthma | LungCancer | rs249681    | G | C | -0.0450 | 0.0051 | 1.85E-18  | 0.0147  | 0.0121 | 2.24E-01 | TRUE |
| Asthma | LungCancer | rs2671654   | G | A | -0.0479 | 0.0049 | 1.15E-22  | -0.0128 | 0.0120 | 2.86E-01 | TRUE |

|        |            |             |   |   |         |        |           |         |        |          |      |
|--------|------------|-------------|---|---|---------|--------|-----------|---------|--------|----------|------|
| Asthma | LungCancer | rs2756184   | T | G | 0.0288  | 0.0047 | 1.30E-09  | 0.0272  | 0.0118 | 2.12E-02 | TRUE |
| Asthma | LungCancer | rs2811381   | A | G | -0.0415 | 0.0075 | 2.92E-08  | -0.0052 | 0.0182 | 7.75E-01 | TRUE |
| Asthma | LungCancer | rs290897    | C | T | -0.1127 | 0.0147 | 1.70E-14  | -0.0429 | 0.0332 | 1.97E-01 | TRUE |
| Asthma | LungCancer | rs2921096   | T | C | -0.0292 | 0.0050 | 6.19E-09  | -0.0017 | 0.0117 | 8.85E-01 | TRUE |
| Asthma | LungCancer | rs2951185   | T | C | 0.0293  | 0.0053 | 2.48E-08  | -0.0227 | 0.0131 | 8.15E-02 | TRUE |
| Asthma | LungCancer | rs34381727  | G | C | 0.0300  | 0.0052 | 6.97E-09  | 0.0056  | 0.0123 | 6.52E-01 | TRUE |
| Asthma | LungCancer | rs34712979  | A | G | 0.0471  | 0.0055 | 1.32E-17  | 0.0223  | 0.0155 | 1.51E-01 | TRUE |
| Asthma | LungCancer | rs35441874  | A | T | -0.0663 | 0.0055 | 5.44E-33  | 0.0052  | 0.0134 | 6.96E-01 | TRUE |
| Asthma | LungCancer | rs36068512  | C | T | 0.0488  | 0.0085 | 9.06E-09  | -0.0193 | 0.0225 | 3.91E-01 | TRUE |
| Asthma | LungCancer | rs3784099   | A | G | 0.0473  | 0.0052 | 1.11E-19  | 0.0103  | 0.0128 | 4.22E-01 | TRUE |
| Asthma | LungCancer | rs3824074   | C | G | 0.0330  | 0.0051 | 7.54E-11  | 0.0061  | 0.0145 | 6.73E-01 | TRUE |
| Asthma | LungCancer | rs3843642   | C | T | -0.0460 | 0.0071 | 8.69E-11  | 0.0256  | 0.0170 | 1.32E-01 | TRUE |
| Asthma | LungCancer | rs4099209   | G | T | 0.0565  | 0.0071 | 1.52E-15  | 0.0038  | 0.0153 | 8.04E-01 | TRUE |
| Asthma | LungCancer | rs4308313   | G | A | 0.0435  | 0.0075 | 7.71E-09  | -0.0028 | 0.0188 | 8.83E-01 | TRUE |
| Asthma | LungCancer | rs4664443   | G | A | 0.0271  | 0.0049 | 4.58E-08  | 0.0039  | 0.0120 | 7.47E-01 | TRUE |
| Asthma | LungCancer | rs4787951   | C | T | 0.0480  | 0.0052 | 3.15E-20  | 0.0174  | 0.0130 | 1.82E-01 | TRUE |
| Asthma | LungCancer | rs4895369   | A | G | -0.0335 | 0.0052 | 1.09E-10  | 0.0144  | 0.0127 | 2.56E-01 | TRUE |
| Asthma | LungCancer | rs491087    | A | G | 0.0311  | 0.0050 | 4.09E-10  | -0.0115 | 0.0124 | 3.54E-01 | TRUE |
| Asthma | LungCancer | rs55730955  | A | T | -0.0580 | 0.0104 | 2.58E-08  | -0.0277 | 0.0259 | 2.86E-01 | TRUE |
| Asthma | LungCancer | rs55743914  | T | C | 0.0340  | 0.0055 | 7.51E-10  | -0.0330 | 0.0141 | 1.90E-02 | TRUE |
| Asthma | LungCancer | rs55755011  | G | A | 0.0335  | 0.0059 | 1.42E-08  | -0.0341 | 0.0144 | 1.80E-02 | TRUE |
| Asthma | LungCancer | rs56035021  | A | G | 0.0454  | 0.0051 | 3.38E-19  | -0.0115 | 0.0125 | 3.56E-01 | TRUE |
| Asthma | LungCancer | rs57594613  | A | G | 0.0686  | 0.0123 | 2.35E-08  | -0.0331 | 0.0326 | 3.10E-01 | TRUE |
| Asthma | LungCancer | rs60119330  | C | T | 0.0359  | 0.0057 | 2.34E-10  | -0.0189 | 0.0141 | 1.80E-01 | TRUE |
| Asthma | LungCancer | rs616488    | G | A | -0.0314 | 0.0050 | 3.41E-10  | 0.0194  | 0.0125 | 1.21E-01 | TRUE |
| Asthma | LungCancer | rs61907683  | C | T | -0.0423 | 0.0056 | 5.40E-14  | -0.0025 | 0.0145 | 8.64E-01 | TRUE |
| Asthma | LungCancer | rs61938963  | T | C | 0.0391  | 0.0050 | 5.88E-15  | -0.0409 | 0.0125 | 1.09E-03 | TRUE |
| Asthma | LungCancer | rs62242108  | A | G | -0.0328 | 0.0054 | 1.13E-09  | -0.0317 | 0.0134 | 1.82E-02 | TRUE |
| Asthma | LungCancer | rs62294337  | T | A | -0.0342 | 0.0056 | 8.73E-10  | -0.0227 | 0.0135 | 9.21E-02 | TRUE |
| Asthma | LungCancer | rs62408222  | G | A | -0.0637 | 0.0051 | 4.93E-36  | -0.0089 | 0.0124 | 4.75E-01 | TRUE |
| Asthma | LungCancer | rs62449498  | C | A | 0.0331  | 0.0049 | 8.95E-12  | -0.0193 | 0.0118 | 1.02E-01 | TRUE |
| Asthma | LungCancer | rs6461503   | C | T | -0.0396 | 0.0048 | 2.24E-16  | 0.0251  | 0.0117 | 3.16E-02 | TRUE |
| Asthma | LungCancer | rs6505274   | T | G | -0.0368 | 0.0066 | 2.00E-08  | -0.0089 | 0.0162 | 5.80E-01 | TRUE |
| Asthma | LungCancer | rs6782834   | G | A | 0.0296  | 0.0053 | 1.92E-08  | 0.0024  | 0.0133 | 8.75E-01 | TRUE |
| Asthma | LungCancer | rs6905736   | C | A | -0.0413 | 0.0071 | 6.82E-09  | 0.0137  | 0.0199 | 4.90E-01 | TRUE |
| Asthma | LungCancer | rs708563    | G | A | 0.0301  | 0.0050 | 1.70E-09  | -0.0172 | 0.0119 | 1.49E-01 | TRUE |
| Asthma | LungCancer | rs71368508  | A | C | -0.0999 | 0.0180 | 2.93E-08  | 0.1400  | 0.0590 | 1.77E-02 | TRUE |
| Asthma | LungCancer | rs72668903  | A | G | -0.0417 | 0.0071 | 5.64E-09  | -0.0288 | 0.0177 | 1.03E-01 | TRUE |
| Asthma | LungCancer | rs72699870  | C | T | -0.0360 | 0.0063 | 1.11E-08  | 0.0237  | 0.0150 | 1.15E-01 | TRUE |
| Asthma | LungCancer | rs72823641  | A | T | -0.1268 | 0.0068 | 2.91E-78  | -0.0129 | 0.0167 | 4.37E-01 | TRUE |
| Asthma | LungCancer | rs7555082   | A | G | -0.0627 | 0.0079 | 1.34E-15  | 0.0192  | 0.0188 | 3.09E-01 | TRUE |
| Asthma | LungCancer | rs7562979   | G | C | 0.0449  | 0.0073 | 7.15E-10  | 0.0044  | 0.0190 | 8.17E-01 | TRUE |
| Asthma | LungCancer | rs77791277  | A | G | 0.0428  | 0.0067 | 1.28E-10  | 0.0106  | 0.0148 | 4.74E-01 | TRUE |
| Asthma | LungCancer | rs7918084   | C | T | -0.0298 | 0.0047 | 3.00E-10  | 0.0045  | 0.0118 | 7.00E-01 | TRUE |
| Asthma | LungCancer | rs8002731   | C | A | -0.0338 | 0.0049 | 7.24E-12  | 0.0050  | 0.0124 | 6.90E-01 | TRUE |
| Asthma | LungCancer | rs8100197   | A | G | 0.0376  | 0.0066 | 1.04E-08  | -0.0034 | 0.0138 | 8.04E-01 | TRUE |
| Asthma | LungCancer | rs875023    | T | C | -0.0372 | 0.0056 | 3.12E-11  | 0.0155  | 0.0141 | 2.74E-01 | TRUE |
| Asthma | LungCancer | rs9112131   | A | G | -0.0549 | 0.0051 | 6.02E-27  | -0.0125 | 0.0127 | 3.26E-01 | TRUE |
| Asthma | LungCancer | rs9270911   | C | T | -0.1281 | 0.0053 | 6.15E-128 | -0.0675 | 0.0128 | 1.26E-07 | TRUE |
| Asthma | LungCancer | rs9290877   | C | T | 0.0426  | 0.0053 | 5.88E-16  | 0.0144  | 0.0127 | 2.58E-01 | TRUE |
| Asthma | LungCancer | rs962992    | C | G | -0.0834 | 0.0049 | 3.26E-65  | 0.0083  | 0.0118 | 4.84E-01 | TRUE |
| Asthma | LungCancer | rs981625    | G | C | 0.0634  | 0.0101 | 4.04E-10  | -0.0159 | 0.0251 | 5.27E-01 | TRUE |
| Asthma | LungCancer | rs9828592   | C | T | 0.0446  | 0.0049 | 4.53E-20  | -0.0093 | 0.0117 | 4.24E-01 | TRUE |
| Asthma | LungCancer | rs992969    | A | G | 0.1052  | 0.0055 | 4.40E-81  | -0.0141 | 0.0135 | 2.96E-01 | TRUE |
| Asthma | LungCancer | rs9930506   | G | A | 0.0297  | 0.0047 | 3.33E-10  | -0.0173 | 0.0118 | 1.42E-01 | TRUE |
| Asthma | Snoring    | rs10075764  | G | A | -0.0381 | 0.0049 | 1.35E-14  | -0.0003 | 0.0011 | 8.10E-01 | TRUE |
| Asthma | Snoring    | rs10131571  | T | C | 0.0319  | 0.0050 | 1.50E-10  | 0.0013  | 0.0011 | 2.40E-01 | TRUE |
| Asthma | Snoring    | rs10416530  | C | T | 0.0378  | 0.0053 | 8.67E-13  | 0.0013  | 0.0011 | 2.30E-01 | TRUE |
| Asthma | Snoring    | rs1048665   | G | T | -0.0373 | 0.0056 | 2.18E-11  | -0.0015 | 0.0012 | 2.40E-01 | TRUE |
| Asthma | Snoring    | rs10519067  | A | G | -0.0670 | 0.0068 | 9.30E-23  | -0.0028 | 0.0016 | 6.90E-02 | TRUE |
| Asthma | Snoring    | rs1059513   | C | T | -0.0914 | 0.0083 | 2.80E-28  | -0.0015 | 0.0017 | 3.80E-01 | TRUE |
| Asthma | Snoring    | rs10803511  | T | C | -0.0309 | 0.0052 | 2.56E-09  | 0.0026  | 0.0010 | 1.50E-02 | TRUE |
| Asthma | Snoring    | rs10828248  | G | A | 0.0304  | 0.0053 | 1.05E-08  | 0.0012  | 0.0011 | 3.10E-01 | TRUE |
| Asthma | Snoring    | rs10835369  | A | T | -0.0311 | 0.0057 | 3.70E-08  | -0.0002 | 0.0011 | 8.70E-01 | TRUE |
| Asthma | Snoring    | rs10912564  | T | C | 0.0293  | 0.0052 | 1.76E-08  | 0.0012  | 0.0011 | 3.00E-01 | TRUE |
| Asthma | Snoring    | rs10920569  | C | T | -0.0385 | 0.0050 | 1.90E-14  | -0.0004 | 0.0011 | 7.10E-01 | TRUE |
| Asthma | Snoring    | rs10976923  | A | T | 0.0324  | 0.0056 | 8.05E-09  | 0.0034  | 0.0012 | 4.10E-03 | TRUE |
| Asthma | Snoring    | rs11057204  | T | C | -0.0390 | 0.0059 | 3.62E-11  | -0.0003 | 0.0013 | 8.20E-01 | TRUE |
| Asthma | Snoring    | rs11081564  | G | A | 0.0328  | 0.0056 | 3.58E-09  | -0.0010 | 0.0012 | 4.10E-01 | TRUE |
| Asthma | Snoring    | rs11154803  | T | C | 0.0331  | 0.0049 | 1.96E-11  | 0.0005  | 0.0011 | 6.00E-01 | TRUE |
| Asthma | Snoring    | rs11236791  | A | G | 0.0657  | 0.0047 | 1.57E-43  | -0.0018 | 0.0010 | 7.90E-02 | TRUE |
| Asthma | Snoring    | rs11236813  | C | G | -0.0457 | 0.0078 | 5.43E-09  | 0.0017  | 0.0017 | 2.90E-01 | TRUE |
| Asthma | Snoring    | rs1132645   | C | G | -0.0341 | 0.0055 | 5.09E-10  | 0.0005  | 0.0012 | 6.80E-01 | TRUE |
| Asthma | Snoring    | rs114947103 | C | T | 0.0407  | 0.0061 | 2.33E-11  | 0.0023  | 0.0014 | 9.30E-02 | TRUE |

|        |         |             |   |   |         |        |          |         |        |          |      |
|--------|---------|-------------|---|---|---------|--------|----------|---------|--------|----------|------|
| Asthma | Snoring | rs11602802  | C | A | -0.0378 | 0.0052 | 2.14E-13 | -0.0019 | 0.0011 | 8.90E-02 | TRUE |
| Asthma | Snoring | rs11721     | A | C | 0.0480  | 0.0080 | 1.95E-09 | 0.0012  | 0.0018 | 5.60E-01 | TRUE |
| Asthma | Snoring | rs117710327 | A | C | -0.1117 | 0.0097 | 6.56E-31 | -0.0034 | 0.0021 | 1.10E-01 | TRUE |
| Asthma | Snoring | rs11942410  | T | C | -0.0343 | 0.0058 | 2.83E-09 | 0.0006  | 0.0012 | 5.90E-01 | TRUE |
| Asthma | Snoring | rs12123821  | T | C | 0.0970  | 0.0121 | 8.94E-16 | 0.0018  | 0.0024 | 4.90E-01 | TRUE |
| Asthma | Snoring | rs12379417  | A | G | 0.0318  | 0.0049 | 9.02E-11 | 0.0026  | 0.0011 | 1.90E-02 | TRUE |
| Asthma | Snoring | rs1293202   | A | G | -0.0460 | 0.0070 | 6.49E-11 | -0.0021 | 0.0016 | 1.80E-01 | TRUE |
| Asthma | Snoring | rs13213141  | A | G | -0.0311 | 0.0053 | 3.29E-09 | 0.0008  | 0.0011 | 4.90E-01 | TRUE |
| Asthma | Snoring | rs13232403  | A | G | -0.0372 | 0.0053 | 1.86E-12 | 0.0013  | 0.0012 | 2.80E-01 | TRUE |
| Asthma | Snoring | rs13263709  | T | C | 0.0498  | 0.0050 | 1.26E-23 | -0.0021 | 0.0011 | 4.90E-02 | TRUE |
| Asthma | Snoring | rs13277355  | A | G | 0.0334  | 0.0054 | 4.94E-10 | 0.0010  | 0.0012 | 4.20E-01 | TRUE |
| Asthma | Snoring | rs13296447  | G | C | 0.0326  | 0.0058 | 2.01E-08 | -0.0014 | 0.0012 | 2.20E-01 | TRUE |
| Asthma | Snoring | rs138316828 | T | C | 0.0431  | 0.0078 | 2.79E-08 | 0.0021  | 0.0018 | 2.70E-01 | TRUE |
| Asthma | Snoring | rs144569746 | T | C | 0.0720  | 0.0074 | 3.78E-22 | 0.0067  | 0.0017 | 9.10E-05 | TRUE |
| Asthma | Snoring | rs1489762   | C | T | -0.0395 | 0.0048 | 1.39E-16 | 0.0013  | 0.0011 | 2.00E-01 | TRUE |
| Asthma | Snoring | rs16853094  | A | G | 0.0300  | 0.0054 | 3.15E-08 | 0.0000  | 0.0012 | 9.90E-01 | TRUE |
| Asthma | Snoring | rs16903574  | G | C | 0.0682  | 0.0087 | 5.00E-15 | 0.0006  | 0.0020 | 7.90E-01 | TRUE |
| Asthma | Snoring | rs17227210  | T | C | 0.0493  | 0.0071 | 3.39E-12 | 0.0028  | 0.0015 | 6.10E-02 | TRUE |
| Asthma | Snoring | rs1723016   | C | T | -0.0391 | 0.0049 | 1.66E-15 | 0.0012  | 0.0011 | 2.30E-01 | TRUE |
| Asthma | Snoring | rs17293632  | T | C | 0.0829  | 0.0055 | 1.21E-51 | 0.0004  | 0.0012 | 6.80E-01 | TRUE |
| Asthma | Snoring | rs174568    | T | C | -0.0379 | 0.0049 | 1.52E-14 | 0.0012  | 0.0011 | 2.60E-01 | TRUE |
| Asthma | Snoring | rs178830    | C | T | -0.0298 | 0.0047 | 2.85E-10 | 0.0003  | 0.0010 | 7.70E-01 | TRUE |
| Asthma | Snoring | rs1837253   | T | C | -0.0997 | 0.0054 | 2.45E-76 | -0.0010 | 0.0012 | 4.00E-01 | TRUE |
| Asthma | Snoring | rs1991401   | G | A | -0.0295 | 0.0052 | 1.37E-08 | 0.0002  | 0.0011 | 8.50E-01 | TRUE |
| Asthma | Snoring | rs2025758   | C | T | -0.0428 | 0.0048 | 2.00E-19 | -0.0034 | 0.0011 | 1.20E-03 | TRUE |
| Asthma | Snoring | rs2052692   | A | G | 0.0280  | 0.0050 | 2.33E-08 | 0.0011  | 0.0011 | 3.40E-01 | TRUE |
| Asthma | Snoring | rs2070901   | T | G | 0.0407  | 0.0055 | 1.38E-13 | -0.0012 | 0.0012 | 3.60E-01 | TRUE |
| Asthma | Snoring | rs2111363   | A | G | -0.0291 | 0.0053 | 3.42E-08 | 0.0003  | 0.0011 | 7.70E-01 | TRUE |
| Asthma | Snoring | rs2126202   | C | A | 0.0266  | 0.0049 | 4.32E-08 | 0.0028  | 0.0010 | 6.80E-03 | TRUE |
| Asthma | Snoring | rs2135481   | A | G | -0.0332 | 0.0057 | 5.57E-09 | 0.0012  | 0.0012 | 3.80E-01 | TRUE |
| Asthma | Snoring | rs2188962   | T | C | -0.0661 | 0.0049 | 2.40E-41 | -0.0012 | 0.0011 | 2.80E-01 | TRUE |
| Asthma | Snoring | rs2205049   | T | C | -0.0387 | 0.0049 | 3.26E-15 | -0.0010 | 0.0011 | 3.30E-01 | TRUE |
| Asthma | Snoring | rs2240157   | T | C | 0.0299  | 0.0054 | 2.93E-08 | -0.0019 | 0.0012 | 1.20E-01 | TRUE |
| Asthma | Snoring | rs2276133   | A | G | -0.0370 | 0.0055 | 1.39E-11 | -0.0012 | 0.0012 | 3.50E-01 | TRUE |
| Asthma | Snoring | rs2294878   | T | G | 0.0427  | 0.0049 | 2.29E-18 | -0.0009 | 0.0010 | 3.90E-01 | TRUE |
| Asthma | Snoring | rs249681    | G | C | -0.0450 | 0.0051 | 1.85E-18 | 0.0014  | 0.0011 | 2.20E-01 | TRUE |
| Asthma | Snoring | rs2524084   | G | A | 0.0289  | 0.0050 | 9.39E-09 | -0.0005 | 0.0011 | 5.60E-01 | TRUE |
| Asthma | Snoring | rs2671654   | G | A | -0.0479 | 0.0049 | 1.15E-22 | -0.0032 | 0.0011 | 1.70E-03 | TRUE |
| Asthma | Snoring | rs274949    | G | A | 0.0294  | 0.0049 | 1.49E-09 | -0.0027 | 0.0010 | 9.70E-03 | TRUE |
| Asthma | Snoring | rs2756184   | T | G | 0.0288  | 0.0047 | 1.30E-09 | 0.0014  | 0.0011 | 1.80E-01 | TRUE |
| Asthma | Snoring | rs2811381   | A | G | -0.0415 | 0.0075 | 2.92E-08 | 0.0023  | 0.0016 | 1.30E-01 | TRUE |
| Asthma | Snoring | rs290897    | C | T | -0.1127 | 0.0147 | 1.70E-14 | -0.0062 | 0.0033 | 6.00E-02 | TRUE |
| Asthma | Snoring | rs2921096   | T | C | -0.0292 | 0.0050 | 6.19E-09 | 0.0007  | 0.0011 | 5.30E-01 | TRUE |
| Asthma | Snoring | rs2951185   | T | C | 0.0293  | 0.0053 | 2.48E-08 | -0.0016 | 0.0011 | 1.40E-01 | TRUE |
| Asthma | Snoring | rs34290285  | A | G | -0.0828 | 0.0056 | 3.60E-50 | -0.0010 | 0.0012 | 3.40E-01 | TRUE |
| Asthma | Snoring | rs34381727  | G | C | 0.0300  | 0.0052 | 6.97E-09 | 0.0011  | 0.0011 | 2.90E-01 | TRUE |
| Asthma | Snoring | rs34712979  | A | G | 0.0471  | 0.0055 | 1.32E-17 | -0.0016 | 0.0012 | 1.70E-01 | TRUE |
| Asthma | Snoring | rs35441874  | A | T | -0.0663 | 0.0055 | 5.44E-33 | -0.0031 | 0.0012 | 1.50E-02 | TRUE |
| Asthma | Snoring | rs35668054  | T | C | -0.0610 | 0.0090 | 1.15E-11 | -0.0016 | 0.0020 | 4.10E-01 | TRUE |
| Asthma | Snoring | rs36068512  | C | T | 0.0488  | 0.0085 | 9.06E-09 | 0.0018  | 0.0019 | 3.00E-01 | TRUE |
| Asthma | Snoring | rs3784099   | A | G | 0.0473  | 0.0052 | 1.11E-19 | 0.0001  | 0.0012 | 9.40E-01 | TRUE |
| Asthma | Snoring | rs3824074   | C | G | 0.0330  | 0.0051 | 7.54E-11 | 0.0007  | 0.0011 | 4.80E-01 | TRUE |
| Asthma | Snoring | rs3843642   | C | T | -0.0460 | 0.0071 | 8.69E-11 | -0.0007 | 0.0015 | 6.60E-01 | TRUE |
| Asthma | Snoring | rs3856439   | T | C | -0.0419 | 0.0052 | 8.45E-16 | -0.0026 | 0.0011 | 1.70E-02 | TRUE |
| Asthma | Snoring | rs4099209   | G | T | 0.0565  | 0.0071 | 1.52E-15 | -0.0017 | 0.0014 | 2.50E-01 | TRUE |
| Asthma | Snoring | rs4308313   | G | A | 0.0435  | 0.0075 | 7.71E-09 | -0.0018 | 0.0017 | 2.50E-01 | TRUE |
| Asthma | Snoring | rs4389093   | G | A | 0.0297  | 0.0049 | 1.15E-09 | 0.0019  | 0.0011 | 6.90E-02 | TRUE |
| Asthma | Snoring | rs4664443   | G | A | 0.0271  | 0.0049 | 4.58E-08 | 0.0003  | 0.0011 | 7.40E-01 | TRUE |
| Asthma | Snoring | rs4787951   | C | T | 0.0480  | 0.0052 | 3.15E-20 | 0.0034  | 0.0011 | 2.50E-03 | TRUE |
| Asthma | Snoring | rs4895369   | A | G | -0.0335 | 0.0052 | 1.09E-10 | 0.0009  | 0.0011 | 4.20E-01 | TRUE |
| Asthma | Snoring | rs491087    | A | G | 0.0311  | 0.0050 | 4.09E-10 | 0.0010  | 0.0011 | 3.70E-01 | TRUE |
| Asthma | Snoring | rs55730955  | A | T | -0.0580 | 0.0104 | 2.58E-08 | 0.0006  | 0.0025 | 8.10E-01 | TRUE |
| Asthma | Snoring | rs55743914  | T | C | 0.0340  | 0.0055 | 7.51E-10 | -0.0015 | 0.0012 | 2.00E-01 | TRUE |
| Asthma | Snoring | rs55755011  | G | A | 0.0335  | 0.0059 | 1.42E-08 | -0.0001 | 0.0013 | 9.40E-01 | TRUE |
| Asthma | Snoring | rs56035021  | A | G | 0.0454  | 0.0051 | 3.38E-19 | -0.0004 | 0.0011 | 7.10E-01 | TRUE |
| Asthma | Snoring | rs5743618   | A | C | -0.0562 | 0.0059 | 1.43E-21 | 0.0031  | 0.0013 | 1.40E-02 | TRUE |
| Asthma | Snoring | rs57594613  | A | G | 0.0686  | 0.0123 | 2.35E-08 | -0.0042 | 0.0029 | 1.60E-01 | TRUE |
| Asthma | Snoring | rs60119330  | C | T | 0.0359  | 0.0057 | 2.34E-10 | 0.0019  | 0.0012 | 1.20E-01 | TRUE |
| Asthma | Snoring | rs6087868   | A | G | 0.0457  | 0.0077 | 3.33E-09 | 0.0017  | 0.0014 | 2.30E-01 | TRUE |
| Asthma | Snoring | rs616488    | G | A | -0.0314 | 0.0050 | 3.41E-10 | 0.0000  | 0.0011 | 9.50E-01 | TRUE |
| Asthma | Snoring | rs61907683  | C | T | -0.0423 | 0.0056 | 5.40E-14 | -0.0008 | 0.0013 | 5.20E-01 | TRUE |
| Asthma | Snoring | rs61938963  | T | C | 0.0391  | 0.0050 | 5.88E-15 | -0.0031 | 0.0011 | 4.80E-03 | TRUE |
| Asthma | Snoring | rs62242108  | A | G | -0.0328 | 0.0054 | 1.13E-09 | -0.0026 | 0.0012 | 3.00E-02 | TRUE |
| Asthma | Snoring | rs62294337  | T | A | -0.0342 | 0.0056 | 8.73E-10 | -0.0039 | 0.0012 | 8.00E-04 | TRUE |

|        |            |             |   |   |         |        |           |         |        |          |      |
|--------|------------|-------------|---|---|---------|--------|-----------|---------|--------|----------|------|
| Asthma | Snoring    | rs62408222  | G | A | -0.0637 | 0.0051 | 4.93E-36  | -0.0005 | 0.0011 | 5.70E-01 | TRUE |
| Asthma | Snoring    | rs62449498  | C | A | 0.0331  | 0.0049 | 8.95E-12  | 0.0001  | 0.0011 | 9.50E-01 | TRUE |
| Asthma | Snoring    | rs6461503   | C | T | -0.0396 | 0.0048 | 2.24E-16  | -0.0028 | 0.0010 | 5.70E-03 | TRUE |
| Asthma | Snoring    | rs6505274   | T | G | -0.0368 | 0.0066 | 2.00E-08  | -0.0001 | 0.0014 | 9.60E-01 | TRUE |
| Asthma | Snoring    | rs66632892  | A | G | 0.0350  | 0.0052 | 2.35E-11  | -0.0008 | 0.0012 | 5.30E-01 | TRUE |
| Asthma | Snoring    | rs6782834   | G | A | 0.0296  | 0.0053 | 1.92E-08  | 0.0003  | 0.0011 | 7.60E-01 | TRUE |
| Asthma | Snoring    | rs6905736   | C | A | -0.0413 | 0.0071 | 6.82E-09  | -0.0029 | 0.0015 | 4.40E-02 | TRUE |
| Asthma | Snoring    | rs708563    | G | A | 0.0301  | 0.0050 | 1.70E-09  | -0.0009 | 0.0011 | 4.60E-01 | TRUE |
| Asthma | Snoring    | rs71368508  | A | C | -0.0999 | 0.0180 | 2.93E-08  | 0.0028  | 0.0037 | 3.70E-01 | TRUE |
| Asthma | Snoring    | rs72668903  | A | G | -0.0417 | 0.0071 | 5.64E-09  | -0.0042 | 0.0015 | 6.00E-03 | TRUE |
| Asthma | Snoring    | rs72699870  | C | T | -0.0360 | 0.0063 | 1.11E-08  | -0.0024 | 0.0013 | 5.60E-02 | TRUE |
| Asthma | Snoring    | rs72823641  | A | T | -0.1268 | 0.0068 | 2.91E-78  | -0.0012 | 0.0015 | 4.10E-01 | TRUE |
| Asthma | Snoring    | rs7555082   | A | G | -0.0627 | 0.0079 | 1.34E-15  | 0.0025  | 0.0016 | 1.20E-01 | TRUE |
| Asthma | Snoring    | rs7562979   | G | C | 0.0449  | 0.0073 | 7.15E-10  | -0.0002 | 0.0016 | 8.60E-01 | TRUE |
| Asthma | Snoring    | rs77791277  | A | G | 0.0428  | 0.0067 | 1.28E-10  | 0.0004  | 0.0013 | 7.60E-01 | TRUE |
| Asthma | Snoring    | rs7918084   | C | T | -0.0298 | 0.0047 | 3.00E-10  | 0.0003  | 0.0011 | 7.20E-01 | TRUE |
| Asthma | Snoring    | rs8002731   | C | A | -0.0338 | 0.0049 | 7.24E-12  | -0.0008 | 0.0011 | 4.90E-01 | TRUE |
| Asthma | Snoring    | rs8100197   | A | G | 0.0376  | 0.0066 | 1.04E-08  | 0.0007  | 0.0012 | 5.30E-01 | TRUE |
| Asthma | Snoring    | rs8268844   | T | C | 0.0550  | 0.0095 | 7.00E-09  | -0.0017 | 0.0020 | 4.10E-01 | TRUE |
| Asthma | Snoring    | rs875023    | T | C | -0.0372 | 0.0056 | 3.12E-11  | -0.0008 | 0.0012 | 5.20E-01 | TRUE |
| Asthma | Snoring    | rs912131    | A | G | -0.0549 | 0.0051 | 6.02E-27  | 0.0005  | 0.0011 | 5.80E-01 | TRUE |
| Asthma | Snoring    | rs9270911   | C | T | -0.1281 | 0.0053 | 6.15E-128 | -0.0022 | 0.0011 | 3.80E-02 | TRUE |
| Asthma | Snoring    | rs9272245   | C | G | 0.0726  | 0.0059 | 1.17E-34  | 0.0011  | 0.0011 | 3.40E-01 | TRUE |
| Asthma | Snoring    | rs9290877   | C | T | 0.0426  | 0.0053 | 5.88E-16  | 0.0003  | 0.0011 | 7.20E-01 | TRUE |
| Asthma | Snoring    | rs981625    | G | C | 0.0634  | 0.0101 | 4.04E-10  | -0.0037 | 0.0021 | 8.60E-02 | TRUE |
| Asthma | Snoring    | rs9828592   | C | T | 0.0446  | 0.0049 | 4.53E-20  | 0.0000  | 0.0011 | 9.60E-01 | TRUE |
| Asthma | Snoring    | rs992969    | A | G | 0.1052  | 0.0055 | 4.40E-81  | 0.0006  | 0.0012 | 6.30E-01 | TRUE |
| COPD   | Asthma     | rs11782089  | A | G | -0.0730 | 0.0116 | 2.72E-10  | -0.0185 | 0.0075 | 1.40E-02 | TRUE |
| COPD   | Asthma     | rs11877758  | G | T | 0.0514  | 0.0078 | 3.47E-11  | 0.0129  | 0.0053 | 1.47E-02 | TRUE |
| COPD   | Asthma     | rs12307208  | C | T | -0.0642 | 0.0113 | 1.52E-08  | -0.0255 | 0.0080 | 1.35E-03 | TRUE |
| COPD   | Asthma     | rs13081578  | C | A | 0.0480  | 0.0087 | 3.98E-08  | 0.0310  | 0.0059 | 1.65E-07 | TRUE |
| COPD   | Asthma     | rs1322187   | T | G | 0.0451  | 0.0079 | 1.08E-08  | 0.0134  | 0.0054 | 1.31E-02 | TRUE |
| COPD   | Asthma     | rs147678978 | T | G | 0.2642  | 0.0274 | 5.65E-22  | 0.0772  | 0.0210 | 2.36E-04 | TRUE |
| COPD   | Asthma     | rs17409597  | C | T | 0.0455  | 0.0074 | 8.89E-10  | 0.0029  | 0.0054 | 5.96E-01 | TRUE |
| COPD   | Asthma     | rs200613906 | T | C | 0.0536  | 0.0093 | 1.00E-08  | 0.0182  | 0.0058 | 1.83E-03 | TRUE |
| COPD   | Asthma     | rs28929474  | T | C | 0.2015  | 0.0257 | 4.04E-15  | 0.0347  | 0.0181 | 5.48E-02 | TRUE |
| COPD   | Asthma     | rs323598    | T | C | 0.0397  | 0.0071 | 2.53E-08  | 0.0138  | 0.0050 | 5.90E-03 | TRUE |
| COPD   | Asthma     | rs324789    | T | G | -0.0424 | 0.0077 | 4.49E-08  | -0.0122 | 0.0053 | 2.10E-02 | TRUE |
| COPD   | Asthma     | rs35631117  | G | T | 0.0441  | 0.0067 | 4.54E-11  | 0.0121  | 0.0047 | 1.09E-02 | TRUE |
| COPD   | Asthma     | rs4423631   | T | C | -0.0631 | 0.0114 | 3.44E-08  | -0.0218 | 0.0080 | 6.76E-03 | TRUE |
| COPD   | Asthma     | rs6011779   | C | T | 0.0698  | 0.0083 | 4.83E-17  | 0.0164  | 0.0059 | 5.56E-03 | TRUE |
| COPD   | Asthma     | rs6446731   | A | G | 0.0412  | 0.0073 | 1.58E-08  | 0.0093  | 0.0052 | 7.24E-02 | TRUE |
| COPD   | Asthma     | rs7002282   | A | G | 0.0397  | 0.0070 | 1.34E-08  | 0.0181  | 0.0050 | 3.12E-04 | TRUE |
| COPD   | Asthma     | rs7024396   | C | T | -0.0521 | 0.0078 | 2.60E-11  | -0.0278 | 0.0053 | 1.58E-07 | TRUE |
| COPD   | Asthma     | rs77854845  | C | T | -0.0585 | 0.0100 | 5.88E-09  | -0.0234 | 0.0071 | 9.69E-04 | TRUE |
| COPD   | Asthma     | rs8040868   | C | T | 0.1066  | 0.0068 | 9.00E-55  | 0.0228  | 0.0048 | 2.33E-06 | TRUE |
| COPD   | IPF        | rs1023518   | T | G | 0.0527  | 0.0075 | 1.66E-12  | 0.0634  | 0.0211 | 2.63E-03 | TRUE |
| COPD   | IPF        | rs11782089  | A | G | -0.0730 | 0.0116 | 2.72E-10  | -0.0476 | 0.0314 | 1.30E-01 | TRUE |
| COPD   | IPF        | rs11877758  | G | T | 0.0514  | 0.0078 | 3.47E-11  | 0.0416  | 0.0219 | 5.77E-02 | TRUE |
| COPD   | IPF        | rs12307208  | C | T | -0.0642 | 0.0113 | 1.52E-08  | -0.0379 | 0.0313 | 2.26E-01 | TRUE |
| COPD   | IPF        | rs13081578  | C | A | 0.0480  | 0.0087 | 3.98E-08  | -0.0070 | 0.0227 | 7.59E-01 | TRUE |
| COPD   | IPF        | rs13141641  | C | T | -0.0641 | 0.0068 | 2.92E-21  | 0.0092  | 0.0190 | 6.27E-01 | TRUE |
| COPD   | IPF        | rs1322187   | T | G | 0.0451  | 0.0079 | 1.08E-08  | 0.0125  | 0.0204 | 5.41E-01 | TRUE |
| COPD   | IPF        | rs147678978 | T | G | 0.2642  | 0.0274 | 5.65E-22  | 0.3081  | 0.0744 | 3.42E-05 | TRUE |
| COPD   | IPF        | rs17409597  | C | T | 0.0455  | 0.0074 | 8.89E-10  | -0.0115 | 0.0191 | 5.49E-01 | TRUE |
| COPD   | IPF        | rs17612712  | T | A | 0.0808  | 0.0123 | 5.15E-11  | 0.0713  | 0.0329 | 3.03E-02 | TRUE |
| COPD   | IPF        | rs200613906 | T | C | 0.0536  | 0.0093 | 1.00E-08  | -0.0067 | 0.0264 | 7.98E-01 | TRUE |
| COPD   | IPF        | rs2160203   | G | A | -0.0445 | 0.0077 | 6.18E-09  | -0.0307 | 0.0214 | 1.51E-01 | TRUE |
| COPD   | IPF        | rs28929474  | T | C | 0.2015  | 0.0257 | 4.04E-15  | 0.2831  | 0.0744 | 1.42E-04 | TRUE |
| COPD   | IPF        | rs323598    | T | C | 0.0397  | 0.0071 | 2.53E-08  | 0.0200  | 0.0209 | 3.40E-01 | TRUE |
| COPD   | IPF        | rs324789    | T | G | -0.0424 | 0.0077 | 4.49E-08  | -0.0385 | 0.0234 | 1.00E-01 | TRUE |
| COPD   | IPF        | rs34712979  | A | G | 0.0486  | 0.0078 | 4.73E-10  | -0.0128 | 0.0221 | 5.62E-01 | TRUE |
| COPD   | IPF        | rs35631117  | G | T | 0.0441  | 0.0067 | 4.54E-11  | 0.0296  | 0.0187 | 1.14E-01 | TRUE |
| COPD   | IPF        | rs4423631   | T | C | -0.0631 | 0.0114 | 3.44E-08  | -0.0459 | 0.0309 | 1.38E-01 | TRUE |
| COPD   | IPF        | rs6011779   | C | T | 0.0698  | 0.0083 | 4.83E-17  | 0.0771  | 0.0232 | 9.01E-04 | TRUE |
| COPD   | IPF        | rs62065216  | A | G | 0.0439  | 0.0071 | 7.71E-10  | -0.0015 | 0.0203 | 9.40E-01 | TRUE |
| COPD   | IPF        | rs6446731   | A | G | 0.0412  | 0.0073 | 1.58E-08  | -0.0021 | 0.0206 | 9.18E-01 | TRUE |
| COPD   | IPF        | rs7002282   | A | G | 0.0397  | 0.0070 | 1.34E-08  | 0.0342  | 0.0197 | 8.29E-02 | TRUE |
| COPD   | IPF        | rs7024396   | C | T | -0.0521 | 0.0078 | 2.60E-11  | 0.0075  | 0.0232 | 7.47E-01 | TRUE |
| COPD   | IPF        | rs7130588   | G | A | 0.0385  | 0.0070 | 4.73E-08  | 0.0584  | 0.0196 | 2.91E-03 | TRUE |
| COPD   | IPF        | rs7173826   | G | T | -0.0397 | 0.0071 | 2.32E-08  | -0.0232 | 0.0198 | 2.42E-01 | TRUE |
| COPD   | IPF        | rs77854845  | C | T | -0.0585 | 0.0100 | 5.88E-09  | -0.0468 | 0.0277 | 9.17E-02 | TRUE |
| COPD   | IPF        | rs8040868   | C | T | 0.1066  | 0.0068 | 9.00E-55  | 0.0488  | 0.0191 | 1.04E-02 | TRUE |
| COPD   | LungCancer | rs11877758  | G | T | 0.0514  | 0.0078 | 3.47E-11  | 0.0152  | 0.0126 | 2.29E-01 | TRUE |

|      |            |             |   |   |         |        |           |         |        |          |      |
|------|------------|-------------|---|---|---------|--------|-----------|---------|--------|----------|------|
| COPD | LungCancer | rs12307208  | C | T | -0.0642 | 0.0113 | 1.52E-08  | -0.0207 | 0.0194 | 2.88E-01 | TRUE |
| COPD | LungCancer | rs13081578  | C | A | 0.0480  | 0.0087 | 3.98E-08  | -0.0149 | 0.0140 | 2.89E-01 | TRUE |
| COPD | LungCancer | rs13141641  | C | T | -0.0641 | 0.0068 | 2.92E-21  | -0.0090 | 0.0118 | 4.48E-01 | TRUE |
| COPD | LungCancer | rs1322187   | T | G | 0.0451  | 0.0079 | 1.08E-08  | 0.0205  | 0.0125 | 1.01E-01 | TRUE |
| COPD | LungCancer | rs147678978 | T | G | 0.2642  | 0.0274 | 5.65E-22  | 0.0699  | 0.0383 | 6.84E-02 | TRUE |
| COPD | LungCancer | rs17409597  | C | T | 0.0455  | 0.0074 | 8.89E-10  | 0.0188  | 0.0119 | 1.13E-01 | TRUE |
| COPD | LungCancer | rs2160203   | G | A | -0.0445 | 0.0077 | 6.18E-09  | -0.0100 | 0.0135 | 4.57E-01 | TRUE |
| COPD | LungCancer | rs28929474  | T | C | 0.2015  | 0.0257 | 4.04E-15  | 0.0100  | 0.0480 | 8.35E-01 | TRUE |
| COPD | LungCancer | rs323598    | T | C | 0.0397  | 0.0071 | 2.53E-08  | -0.0037 | 0.0121 | 7.60E-01 | TRUE |
| COPD | LungCancer | rs324789    | T | G | -0.0424 | 0.0077 | 4.49E-08  | -0.0185 | 0.0124 | 1.35E-01 | TRUE |
| COPD | LungCancer | rs34712979  | A | G | 0.0486  | 0.0078 | 4.73E-10  | 0.0223  | 0.0155 | 1.51E-01 | TRUE |
| COPD | LungCancer | rs35631117  | G | T | 0.0441  | 0.0067 | 4.54E-11  | 0.0386  | 0.0117 | 9.52E-04 | TRUE |
| COPD | LungCancer | rs4423631   | T | C | -0.0631 | 0.0114 | 3.44E-08  | -0.0236 | 0.0153 | 1.23E-01 | TRUE |
| COPD | LungCancer | rs6011779   | C | T | 0.0698  | 0.0083 | 4.83E-17  | 0.0734  | 0.0151 | 1.21E-06 | TRUE |
| COPD | LungCancer | rs7002282   | A | G | 0.0397  | 0.0070 | 1.34E-08  | 0.0018  | 0.0119 | 8.82E-01 | TRUE |
| COPD | LungCancer | rs7024396   | C | T | -0.0521 | 0.0078 | 2.60E-11  | -0.0420 | 0.0124 | 6.88E-04 | TRUE |
| COPD | LungCancer | rs7130588   | G | A | 0.0385  | 0.0070 | 4.73E-08  | 0.0133  | 0.0122 | 2.78E-01 | TRUE |
| COPD | LungCancer | rs7173826   | G | T | -0.0397 | 0.0071 | 2.32E-08  | -0.0023 | 0.0125 | 8.54E-01 | TRUE |
| COPD | LungCancer | rs77854845  | C | T | -0.0585 | 0.0100 | 5.88E-09  | -0.0002 | 0.0179 | 9.90E-01 | TRUE |
| COPD | Snoring    | rs1023518   | T | G | 0.0527  | 0.0075 | 1.66E-12  | 0.0026  | 0.0012 | 3.20E-02 | TRUE |
| COPD | Snoring    | rs11782089  | A | G | -0.0730 | 0.0116 | 2.72E-10  | 0.0008  | 0.0014 | 5.70E-01 | TRUE |
| COPD | Snoring    | rs11877758  | G | T | 0.0514  | 0.0078 | 3.47E-11  | 0.0032  | 0.0011 | 5.30E-03 | TRUE |
| COPD | Snoring    | rs12307208  | C | T | -0.0642 | 0.0113 | 1.52E-08  | 0.0018  | 0.0016 | 2.70E-01 | TRUE |
| COPD | Snoring    | rs13081578  | C | A | 0.0480  | 0.0087 | 3.98E-08  | -0.0002 | 0.0012 | 8.70E-01 | TRUE |
| COPD | Snoring    | rs13141641  | C | T | -0.0641 | 0.0068 | 2.92E-21  | 0.0015  | 0.0011 | 1.30E-01 | TRUE |
| COPD | Snoring    | rs1322187   | T | G | 0.0451  | 0.0079 | 1.08E-08  | 0.0020  | 0.0011 | 6.50E-02 | TRUE |
| COPD | Snoring    | rs147678978 | T | G | 0.2642  | 0.0274 | 5.65E-22  | 0.0014  | 0.0040 | 6.50E-01 | TRUE |
| COPD | Snoring    | rs17409597  | C | T | 0.0455  | 0.0074 | 8.89E-10  | -0.0007 | 0.0011 | 5.00E-01 | TRUE |
| COPD | Snoring    | rs200613906 | T | C | 0.0536  | 0.0093 | 1.00E-08  | -0.0004 | 0.0010 | 7.50E-01 | TRUE |
| COPD | Snoring    | rs2160203   | G | A | -0.0445 | 0.0077 | 6.18E-09  | 0.0005  | 0.0012 | 7.30E-01 | TRUE |
| COPD | Snoring    | rs28929474  | T | C | 0.2015  | 0.0257 | 4.04E-15  | 0.0006  | 0.0037 | 8.30E-01 | TRUE |
| COPD | Snoring    | rs323598    | T | C | 0.0397  | 0.0071 | 2.53E-08  | 0.0012  | 0.0011 | 2.60E-01 | TRUE |
| COPD | Snoring    | rs324789    | T | G | -0.0424 | 0.0077 | 4.49E-08  | -0.0007 | 0.0011 | 5.00E-01 | TRUE |
| COPD | Snoring    | rs34712979  | A | G | 0.0486  | 0.0078 | 4.73E-10  | -0.0016 | 0.0012 | 1.70E-01 | TRUE |
| COPD | Snoring    | rs35631117  | G | T | 0.0441  | 0.0067 | 4.54E-11  | 0.0024  | 0.0011 | 3.00E-02 | TRUE |
| COPD | Snoring    | rs4423631   | T | C | -0.0631 | 0.0114 | 3.44E-08  | 0.0008  | 0.0014 | 5.20E-01 | TRUE |
| COPD | Snoring    | rs6011779   | C | T | 0.0698  | 0.0083 | 4.83E-17  | -0.0001 | 0.0013 | 9.30E-01 | TRUE |
| COPD | Snoring    | rs62065216  | A | G | 0.0439  | 0.0071 | 7.71E-10  | -0.0024 | 0.0011 | 2.70E-02 | TRUE |
| COPD | Snoring    | rs6446731   | A | G | 0.0412  | 0.0073 | 1.58E-08  | 0.0003  | 0.0012 | 7.70E-01 | TRUE |
| COPD | Snoring    | rs7002282   | A | G | 0.0397  | 0.0070 | 1.34E-08  | 0.0007  | 0.0011 | 4.30E-01 | TRUE |
| COPD | Snoring    | rs7024396   | C | T | -0.0521 | 0.0078 | 2.60E-11  | -0.0005 | 0.0011 | 6.60E-01 | TRUE |
| COPD | Snoring    | rs7130588   | G | A | 0.0385  | 0.0070 | 4.73E-08  | -0.0016 | 0.0011 | 1.50E-01 | TRUE |
| COPD | Snoring    | rs7173826   | G | T | -0.0397 | 0.0071 | 2.32E-08  | -0.0002 | 0.0011 | 7.80E-01 | TRUE |
| COPD | Snoring    | rs77854845  | C | T | -0.0585 | 0.0100 | 5.88E-09  | -0.0007 | 0.0015 | 6.80E-01 | TRUE |
| COPD | Snoring    | rs8040868   | C | T | 0.1066  | 0.0068 | 9.00E-55  | -0.0008 | 0.0011 | 4.50E-01 | TRUE |
| IPF  | Asthma     | rs10069690  | T | C | -0.1641 | 0.0212 | 1.01E-14  | -0.0065 | 0.0053 | 2.25E-01 | TRUE |
| IPF  | Asthma     | rs13238352  | T | C | 0.1562  | 0.0284 | 3.96E-08  | -0.0224 | 0.0071 | 1.59E-03 | TRUE |
| IPF  | Asthma     | rs145315307 | G | T | 0.4571  | 0.0693 | 4.27E-11  | 0.0101  | 0.0164 | 5.38E-01 | TRUE |
| IPF  | Asthma     | rs1971698   | A | G | 0.1274  | 0.0230 | 2.89E-08  | 0.0052  | 0.0055 | 3.44E-01 | TRUE |
| IPF  | Asthma     | rs2076295   | G | T | 0.1337  | 0.0188 | 1.11E-12  | -0.0056 | 0.0048 | 2.35E-01 | TRUE |
| IPF  | Asthma     | rs35705950  | T | G | 0.8521  | 0.0349 | 2.57E-131 | -0.0018 | 0.0084 | 8.31E-01 | TRUE |
| IPF  | Asthma     | rs56301633  | A | G | -0.1494 | 0.0246 | 1.28E-09  | -0.0030 | 0.0065 | 6.52E-01 | TRUE |
| IPF  | Asthma     | rs57612798  | A | G | 0.3551  | 0.0565 | 3.36E-10  | 0.0012  | 0.0148 | 9.36E-01 | TRUE |
| IPF  | Asthma     | rs59424629  | T | G | 0.1241  | 0.0188 | 3.92E-11  | -0.0021 | 0.0047 | 6.62E-01 | TRUE |
| IPF  | Asthma     | rs6963345   | A | G | 0.1324  | 0.0197 | 1.86E-11  | -0.0088 | 0.0052 | 9.38E-02 | TRUE |
| IPF  | COPD       | rs10069690  | T | C | -0.1641 | 0.0212 | 1.01E-14  | -0.0013 | 0.0075 | 8.67E-01 | TRUE |
| IPF  | COPD       | rs13238352  | T | C | 0.1562  | 0.0284 | 3.96E-08  | 0.0151  | 0.0101 | 1.34E-01 | TRUE |
| IPF  | COPD       | rs145315307 | G | T | 0.4571  | 0.0693 | 4.27E-11  | 0.0303  | 0.0244 | 2.14E-01 | TRUE |
| IPF  | COPD       | rs1971698   | A | G | 0.1274  | 0.0230 | 2.89E-08  | 0.0087  | 0.0080 | 2.78E-01 | TRUE |
| IPF  | COPD       | rs2076295   | G | T | 0.1337  | 0.0188 | 1.11E-12  | -0.0024 | 0.0067 | 7.16E-01 | TRUE |
| IPF  | COPD       | rs35705950  | T | G | 0.8521  | 0.0349 | 2.57E-131 | 0.0239  | 0.0116 | 3.91E-02 | TRUE |
| IPF  | COPD       | rs56301633  | A | G | -0.1494 | 0.0246 | 1.28E-09  | 0.0271  | 0.0094 | 3.99E-03 | TRUE |
| IPF  | COPD       | rs57612798  | A | G | 0.3551  | 0.0565 | 3.36E-10  | 0.0599  | 0.0207 | 3.74E-03 | TRUE |
| IPF  | COPD       | rs59424629  | T | G | 0.1241  | 0.0188 | 3.92E-11  | 0.0039  | 0.0067 | 5.57E-01 | TRUE |
| IPF  | COPD       | rs6963345   | A | G | 0.1324  | 0.0197 | 1.86E-11  | -0.0094 | 0.0077 | 2.21E-01 | TRUE |
| IPF  | LungCancer | rs10069690  | T | C | -0.1641 | 0.0212 | 1.01E-14  | 0.0011  | 0.0150 | 9.39E-01 | TRUE |
| IPF  | LungCancer | rs13238352  | T | C | 0.1562  | 0.0284 | 3.96E-08  | 0.0323  | 0.0182 | 7.56E-02 | TRUE |
| IPF  | LungCancer | rs145315307 | G | T | 0.4571  | 0.0693 | 4.27E-11  | 0.0220  | 0.0475 | 6.44E-01 | TRUE |
| IPF  | LungCancer | rs1971698   | A | G | 0.1274  | 0.0230 | 2.89E-08  | 0.0085  | 0.0135 | 5.28E-01 | TRUE |
| IPF  | LungCancer | rs35705950  | T | G | 0.8521  | 0.0349 | 2.57E-131 | 0.0709  | 0.0252 | 4.96E-03 | TRUE |
| IPF  | LungCancer | rs59424629  | T | G | 0.1241  | 0.0188 | 3.92E-11  | 0.0455  | 0.0118 | 1.11E-04 | TRUE |
| IPF  | LungCancer | rs6963345   | A | G | 0.1324  | 0.0197 | 1.86E-11  | 0.0301  | 0.0120 | 1.24E-02 | TRUE |
| IPF  | Snoring    | rs10069690  | T | C | -0.1641 | 0.0212 | 1.01E-14  | 0.0029  | 0.0012 | 2.00E-02 | TRUE |
| IPF  | Snoring    | rs13238352  | T | C | 0.1562  | 0.0284 | 3.96E-08  | 0.0006  | 0.0017 | 6.10E-01 | TRUE |







|         |            |            |   |   |         |        |          |         |        |          |      |
|---------|------------|------------|---|---|---------|--------|----------|---------|--------|----------|------|
| Snoring | IPF        | rs2115855  | G | T | 0.0064  | 0.0012 | 3.60E-08 | 0.0427  | 0.0440 | 3.32E-01 | TRUE |
| Snoring | IPF        | rs2207944  | C | T | 0.0059  | 0.0011 | 2.00E-08 | -0.0158 | 0.0187 | 3.98E-01 | TRUE |
| Snoring | IPF        | rs2307111  | C | T | -0.0077 | 0.0011 | 4.80E-13 | 0.0237  | 0.0190 | 2.11E-01 | TRUE |
| Snoring | IPF        | rs2664299  | C | T | -0.0075 | 0.0011 | 1.10E-12 | 0.0012  | 0.0203 | 9.54E-01 | TRUE |
| Snoring | IPF        | rs34811474 | A | G | -0.0080 | 0.0012 | 1.30E-10 | 0.0159  | 0.0256 | 5.34E-01 | TRUE |
| Snoring | IPF        | rs4744369  | T | A | -0.0058 | 0.0011 | 4.00E-08 | 0.0169  | 0.0204 | 4.07E-01 | TRUE |
| Snoring | IPF        | rs4976269  | A | G | -0.0068 | 0.0011 | 8.60E-10 | -0.0231 | 0.0199 | 2.46E-01 | TRUE |
| Snoring | IPF        | rs4987719  | T | C | 0.0162  | 0.0029 | 3.50E-08 | -0.0490 | 0.0611 | 4.22E-01 | TRUE |
| Snoring | IPF        | rs57222984 | G | A | 0.0084  | 0.0012 | 5.40E-12 | -0.1182 | 0.0232 | 3.58E-07 | TRUE |
| Snoring | IPF        | rs57292959 | T | G | 0.0069  | 0.0011 | 5.10E-11 | 0.0134  | 0.0255 | 5.98E-01 | TRUE |
| Snoring | IPF        | rs592333   | G | A | 0.0091  | 0.0011 | 1.00E-17 | -0.0101 | 0.0204 | 6.20E-01 | TRUE |
| Snoring | IPF        | rs6054427  | G | A | -0.0063 | 0.0011 | 4.00E-09 | -0.0319 | 0.0195 | 1.01E-01 | TRUE |
| Snoring | IPF        | rs6099273  | T | C | 0.0067  | 0.0012 | 2.60E-08 | -0.0090 | 0.0229 | 6.96E-01 | TRUE |
| Snoring | IPF        | rs61597598 | A | G | 0.0119  | 0.0015 | 5.10E-15 | -0.0393 | 0.0281 | 1.62E-01 | TRUE |
| Snoring | IPF        | rs725861   | G | A | 0.0091  | 0.0013 | 1.00E-11 | -0.0124 | 0.0233 | 5.94E-01 | TRUE |
| Snoring | IPF        | rs8069947  | T | C | -0.0066 | 0.0011 | 2.80E-10 | 0.0336  | 0.0188 | 7.38E-02 | TRUE |
| Snoring | IPF        | rs8108822  | T | C | -0.0109 | 0.0018 | 6.20E-10 | 0.0051  | 0.0323 | 8.74E-01 | TRUE |
| Snoring | IPF        | rs947612   | G | A | 0.0067  | 0.0012 | 1.50E-08 | 0.0214  | 0.0229 | 3.50E-01 | TRUE |
| Snoring | IPF        | rs9583546  | G | C | -0.0059 | 0.0011 | 4.00E-08 | -0.0078 | 0.0195 | 6.90E-01 | TRUE |
| Snoring | LungCancer | rs10878269 | T | C | 0.0089  | 0.0011 | 2.30E-16 | -0.0265 | 0.0121 | 2.79E-02 | TRUE |
| Snoring | LungCancer | rs11018488 | T | A | -0.0068 | 0.0011 | 5.30E-10 | -0.0367 | 0.0134 | 6.32E-03 | TRUE |
| Snoring | LungCancer | rs1108431  | T | C | 0.0066  | 0.0011 | 1.20E-09 | 0.0321  | 0.0122 | 8.39E-03 | TRUE |
| Snoring | LungCancer | rs12119849 | A | G | 0.0123  | 0.0019 | 4.10E-11 | 0.0086  | 0.0213 | 6.87E-01 | TRUE |
| Snoring | LungCancer | rs12429765 | G | A | -0.0068 | 0.0011 | 6.20E-11 | -0.0075 | 0.0119 | 5.26E-01 | TRUE |
| Snoring | LungCancer | rs13156484 | A | G | -0.0058 | 0.0011 | 2.70E-08 | -0.0051 | 0.0119 | 6.68E-01 | TRUE |
| Snoring | LungCancer | rs13251292 | G | A | 0.0074  | 0.0011 | 4.30E-12 | -0.0266 | 0.0123 | 3.06E-02 | TRUE |
| Snoring | LungCancer | rs1374895  | C | T | 0.0065  | 0.0011 | 4.50E-10 | 0.0261  | 0.0118 | 2.62E-02 | TRUE |
| Snoring | LungCancer | rs1416685  | C | G | 0.0062  | 0.0011 | 5.30E-09 | 0.0320  | 0.0119 | 7.25E-03 | TRUE |
| Snoring | LungCancer | rs1609721  | C | T | -0.0061 | 0.0011 | 8.00E-09 | 0.0046  | 0.0120 | 7.00E-01 | TRUE |
| Snoring | LungCancer | rs1641511  | G | A | 0.0071  | 0.0012 | 5.00E-09 | -0.0024 | 0.0142 | 8.63E-01 | TRUE |
| Snoring | LungCancer | rs17060460 | G | A | 0.0071  | 0.0012 | 1.40E-08 | -0.0267 | 0.0140 | 5.57E-02 | TRUE |
| Snoring | LungCancer | rs17151229 | C | G | 0.0065  | 0.0011 | 1.90E-09 | 0.0044  | 0.0123 | 7.21E-01 | TRUE |
| Snoring | LungCancer | rs180110   | G | A | -0.0068 | 0.0011 | 2.10E-10 | -0.0192 | 0.0119 | 1.06E-01 | TRUE |
| Snoring | LungCancer | rs2049045  | C | G | -0.0083 | 0.0013 | 8.80E-10 | -0.0346 | 0.0156 | 2.61E-02 | TRUE |
| Snoring | LungCancer | rs2307111  | C | T | -0.0077 | 0.0011 | 4.80E-13 | -0.0079 | 0.0119 | 5.10E-01 | TRUE |
| Snoring | LungCancer | rs2664299  | C | T | -0.0075 | 0.0011 | 1.10E-12 | -0.0192 | 0.0120 | 1.08E-01 | TRUE |
| Snoring | LungCancer | rs34811474 | A | G | -0.0080 | 0.0012 | 1.30E-10 | -0.0314 | 0.0171 | 6.67E-02 | TRUE |
| Snoring | LungCancer | rs4744369  | T | A | -0.0058 | 0.0011 | 4.00E-08 | -0.0039 | 0.0119 | 7.46E-01 | TRUE |
| Snoring | LungCancer | rs4976269  | A | G | -0.0068 | 0.0011 | 8.60E-10 | -0.0136 | 0.0124 | 2.72E-01 | TRUE |
| Snoring | LungCancer | rs4987719  | T | C | 0.0162  | 0.0029 | 3.50E-08 | -0.0698 | 0.0430 | 1.05E-01 | TRUE |
| Snoring | LungCancer | rs592333   | G | A | 0.0091  | 0.0011 | 1.00E-17 | -0.0178 | 0.0127 | 1.59E-01 | TRUE |
| Snoring | LungCancer | rs6054427  | G | A | -0.0063 | 0.0011 | 4.00E-09 | -0.0086 | 0.0124 | 4.87E-01 | TRUE |
| Snoring | LungCancer | rs6099273  | T | C | 0.0067  | 0.0012 | 2.60E-08 | -0.0074 | 0.0144 | 6.04E-01 | TRUE |
| Snoring | LungCancer | rs61597598 | A | G | 0.0119  | 0.0015 | 5.10E-15 | -0.0180 | 0.0177 | 3.11E-01 | TRUE |
| Snoring | LungCancer | rs725861   | G | A | 0.0091  | 0.0013 | 1.00E-11 | 0.0148  | 0.0148 | 3.19E-01 | TRUE |
| Snoring | LungCancer | rs8108822  | T | C | -0.0109 | 0.0018 | 6.20E-10 | -0.0023 | 0.0194 | 9.06E-01 | TRUE |
| Snoring | LungCancer | rs947612   | G | A | 0.0067  | 0.0012 | 1.50E-08 | 0.0069  | 0.0135 | 6.10E-01 | TRUE |
| Snoring | LungCancer | rs9583546  | G | C | -0.0059 | 0.0011 | 4.00E-08 | 0.0114  | 0.0124 | 3.57E-01 | TRUE |
