# Supplementary material for: Shared genetic aetiology of respiratory diseases: a genome-wide multitraits association analysis
Source: PubMed Central journal article supplement — BMJ Open Respir Res. 2024 Jun 4;11(1):e002148. doi: 10.1136/bmjresp-2023-002148 (PMC11163672; doi:10.1136/bmjresp-2023-002148), 2024-06-04
Supplement: bmjresp-2023-002148supp005.pdf [file bmjresp-2023-002148supp005.pdf]

**eTable 4.** Heritability of five respiratory diseases estimated by univariate LDSC<sup>a</sup>

| Diseases                              | Abbreviations | h <sup>2</sup> | SE     | P.value                 | P. adjusted             |
|---------------------------------------|---------------|----------------|--------|-------------------------|-------------------------|
| Asthma                                | AST           | 0.0251         | 0.0014 | $7.06 \times 10^{-72}$  | $3.53 \times 10^{-71}$  |
| Chronic obstructive pulmonary disease | COPD          | 0.0184         | 0.001  | $1.31 \times 10^{-75}$  | $6.55 \times 10^{-75}$  |
| Idiopathic Pulmonary Fibrosis         | IPF           | 0.003          | 0.0006 | $5.73 \times 10^{-07}$  | $2.87 \times 10^{-06}$  |
| Lung Cancer                           | LC            | 0.0834         | 0.0124 | $1.75 \times 10^{-11}$  | $8.75 \times 10^{-11}$  |
| Snoring                               | SNO           | 0.0608         | 0.0024 | $1.37 \times 10^{-141}$ | $6.85 \times 10^{-141}$ |

Abbreviations: LDSC, linkage disequilibrium score regression; h<sup>2</sup>, heritability; se, standard error.

<sup>a</sup> The heritability was estimated by univariate LDSC using single-trait GWAS summary statistics. A false discovery rate (FDR) was used to correct all P.value. The significance threshold was set at P.adjusted<0.05. As expected, heritability was significant for all traits.
