# Supplementary material for: Shared genetic aetiology of respiratory diseases: a genome-wide multitraits association analysis
Source: PubMed Central journal article supplement — BMJ Open Respir Res. 2024 Jun 4;11(1):e002148. doi: 10.1136/bmjresp-2023-002148 (PMC11163672; doi:10.1136/bmjresp-2023-002148), 2024-06-04
Supplement: bmjresp-2023-002148supp006.pdf [file bmjresp-2023-002148supp006.pdf]

**eTable 5.** Genetic correlations and genetic overlap between the five trait pairs were estimated by bivariate LDSC<sup>a</sup>

| Trait pair | Genetic correlation     |                         |                         | Genetic overlap  |                         |                               |
|------------|-------------------------|-------------------------|-------------------------|------------------|-------------------------|-------------------------------|
|            | Genetic correlation(se) | <i>P</i> .rg            | <i>P</i> .rg(adjusted)  | Intercept(se)    | <i>P</i> .intercept     | <i>P</i> .intercept(adjusted) |
| AST-COPD   | 0.7052(0.0190)          | $1.24 \times 10^{-300}$ | $1.24 \times 10^{-299}$ | 0.3082 (0.0090)  | $5.28 \times 10^{-257}$ | $5.28 \times 10^{-256}$       |
| AST-IPF    | 0.1843(0.0578)          | $1.40 \times 10^{-03}$  | $1.75 \times 10^{-03}$  | 0.0426 (0.0060)  | $1.25 \times 10^{-12}$  | $4.17 \times 10^{-12}$        |
| AST-LC     | 0.1438(0.0419)          | $6.00 \times 10^{-04}$  | $8.57 \times 10^{-04}$  | 0.0024 (0.0065)  | $7.12 \times 10^{-1}$   | $7.91 \times 10^{-1}$         |
| AST-SNO    | 0.1129(0.0240)          | $2.59 \times 10^{-06}$  | $5.18 \times 10^{-06}$  | 0.0232 (0.0060)  | $1.10 \times 10^{-04}$  | $2.75 \times 10^{-04}$        |
| COPD-IPF   | 0.4198(0.0673)          | $4.34 \times 10^{-10}$  | $1.45 \times 10^{-09}$  | 0.1279 (0.0052)  | $1.39 \times 10^{-133}$ | $6.95 \times 10^{-133}$       |
| COPD-LC    | 0.5944(0.0431)          | $2.73 \times 10^{-43}$  | $1.37 \times 10^{-42}$  | 0.0015 (0.0064)  | $8.15 \times 10^{-1}$   | $8.15 \times 10^{-1}$         |
| COPD-SNO   | 0.1522(0.0282)          | $6.70 \times 10^{-08}$  | $1.68 \times 10^{-07}$  | 0.0103 (0.0060)  | $8.60 \times 10^{-2}$   | $1.43 \times 10^{-1}$         |
| IPF-LC     | 0.1788(0.0883)          | $4.30 \times 10^{-02}$  | $4.30 \times 10^{-02}$  | 0.0038 (0.0046)  | $4.09 \times 10^{-1}$   | $5.11 \times 10^{-1}$         |
| IPF-SNO    | 0.2093(0.0566)          | $2.00 \times 10^{-04}$  | $3.33 \times 10^{-04}$  | -0.0109 (0.0053) | $3.97 \times 10^{-02}$  | $7.94 \times 10^{-2}$         |
| LC-SNO     | 0.1100(0.0406)          | $6.80 \times 10^{-03}$  | $7.56 \times 10^{-03}$  | -0.0064 (0.0056) | $2.53 \times 10^{-1}$   | $3.62 \times 10^{-1}$         |

Abbreviations: LDSC, linkage disequilibrium score regression; rg, genetic correlation; se, standard error; AST, Asthma; COPD, Chronic obstructive pulmonary disease; IPF, Idiopathic Pulmonary Fibrosis; LC, Lung Cancer; SNO, Snoring.

<sup>a</sup> Bivariate LDSC was used to estimate the genetic correlation between between the five trait pairs with the intercept indicating potential sample overlap between two GWASs. A false discovery rate (FDR) was used to correct all *P*.value. The significance threshold was set at *P*.adjusted<0.05. Significant genetic associations (*P*.adjusted<0.05) were found for all 10 pairs of traits in five respiratory diseases.
