# Supplementary material for: Shared genetic aetiology of respiratory diseases: a genome-wide multitraits association analysis
Source: PubMed Central journal article supplement — BMJ Open Respir Res. 2024 Jun 4;11(1):e002148. doi: 10.1136/bmjresp-2023-002148 (PMC11163672; doi:10.1136/bmjresp-2023-002148), 2024-06-04
Supplement: bmjresp-2023-002148supp007.pdf [file bmjresp-2023-002148supp007.pdf]

**eTable 6.** Genetic correlations and genetic overlap between the five trait pairs were estimated by HDL<sup>a</sup>

| Trait pair | Genetic correlation | se     | <i>P</i> .HDL          | <i>P</i> .HDL(adjusted) |
|------------|---------------------|--------|------------------------|-------------------------|
| AST-COPD   | 0.7834              | 0.0576 | $4.22 \times 10^{-42}$ | $4.22 \times 10^{-41}$  |
| AST-IPF    | 0.3248              | 0.0889 | $2.59 \times 10^{-04}$ | $4.32 \times 10^{-04}$  |
| AST-LC     | 0.1538              | 0.0463 | $8.86 \times 10^{-04}$ | $1.27 \times 10^{-03}$  |
| AST-SNO    | 0.1561              | 0.0207 | $4.37 \times 10^{-14}$ | $1.46 \times 10^{-13}$  |
| COPD-IPF   | 0.6094              | 0.1474 | $3.54 \times 10^{-05}$ | $7.08 \times 10^{-05}$  |
| COPD-LC    | 0.7097              | 0.0930 | $2.35 \times 10^{-14}$ | $1.18 \times 10^{-13}$  |
| COPD-SNO   | 0.1633              | 0.0271 | $1.58 \times 10^{-09}$ | $3.95 \times 10^{-09}$  |
| IPF-LC     | 0.1083              | 0.1725 | $5.30 \times 10^{-01}$ | $5.30 \times 10^{-1}$   |
| IPF-SNO    | 0.2379              | 0.0948 | $1.21 \times 10^{-02}$ | $1.51 \times 10^{-02}$  |
| LC-SNO     | 0.1250              | 0.0516 | $1.55 \times 10^{-02}$ | $1.72 \times 10^{-02}$  |

Abbreviations: HDL, high-definition likelihood method; rg, genetic correlation; se, standard error; AST, Asthma; COPD, Chronic obstructive pulmonary disease; IPF, Idiopathic Pulmonary Fibrosis; LC, Lung Cancer; SNO, Snoring.

<sup>a</sup> HDL was used to estimate the genetic correlation between two traits. A false discovery rate (FDR) was used to correct all *P*.value. The significance threshold was set at *P*.adjusted<0.05. HDL described nearly identical results to LDSC except that IPF and LC suggested no genetic association in HDL.
