# Supplementary material for: Shared genetic aetiology of respiratory diseases: a genome-wide multitraits association analysis
Source: PubMed Central journal article supplement — BMJ Open Respir Res. 2024 Jun 4;11(1):e002148. doi: 10.1136/bmjresp-2023-002148 (PMC11163672; doi:10.1136/bmjresp-2023-002148), 2024-06-04
Supplement: bmjresp-2023-002148supp008.pdf [file bmjresp-2023-002148supp008.pdf]

|      |    |          |          |            |            |         |         |         |        |        |        |          |          |
|------|----|----------|----------|------------|------------|---------|---------|---------|--------|--------|--------|----------|----------|
| 1038 | 6  | 1.07E+08 | 1.09E+08 | Asthma     | COPD       | 0.6060  | 0.2774  | 0.9310  | 0.3672 | 0.0770 | 0.8668 | 1.71E-03 | 4.42E-02 |
| 1247 | 8  | 8589771  | 9167795  | COPD       | Snoring    | 0.8705  | 0.3654  | 1.0000  | 0.7578 | 0.1335 | 1.0000 | 1.69E-03 | 4.42E-02 |
| 1888 | 13 | 45476447 | 46493236 | LungCancer | Snoring    | -0.8309 | -1.0000 | -0.3420 | 0.6904 | 0.1169 | 1.0000 | 1.71E-03 | 4.42E-02 |
| 2288 | 18 | 59449423 | 60780194 | Asthma     | IPF        | 1.0000  | 0.3629  | 1.0000  | 1.0000 | 0.1340 | 1.0000 | 1.70E-03 | 4.42E-02 |
| 2342 | 19 | 35649344 | 36638122 | Asthma     | COPD       | 0.6012  | 0.2784  | 0.9178  | 0.3614 | 0.0776 | 0.8424 | 1.70E-03 | 4.42E-02 |
| 1727 | 11 | 1.23E+08 | 1.23E+08 | Asthma     | IPF        | 0.7106  | 0.2888  | 1.0000  | 0.5049 | 0.0837 | 1.0000 | 1.72E-03 | 4.43E-02 |
| 2322 | 19 | 14891101 | 15650185 | Asthma     | LungCancer | 0.5928  | 0.2388  | 1.0000  | 0.3514 | 0.0570 | 1.0000 | 1.73E-03 | 4.44E-02 |
| 507  | 3  | 1.01E+08 | 1.02E+08 | COPD       | IPF        | 0.8715  | 0.3986  | 1.0000  | 0.7594 | 0.1589 | 1.0000 | 1.75E-03 | 4.49E-02 |
| 1476 | 9  | 1.33E+08 | 1.34E+08 | IPF        | LungCancer | -0.9132 | -1.0000 | -0.3727 | 0.8339 | 0.1389 | 1.0000 | 1.75E-03 | 4.49E-02 |
| 1015 | 6  | 82388205 | 83571953 | Asthma     | Snoring    | -0.9189 | -1.0000 | -0.3776 | 0.8443 | 0.1426 | 1.0000 | 1.77E-03 | 4.53E-02 |
| 761  | 4  | 1.79E+08 | 1.8E+08  | Asthma     | COPD       | 0.8587  | 0.4546  | 1.0000  | 0.7373 | 0.2067 | 1.0000 | 1.78E-03 | 4.55E-02 |
| 1227 | 7  | 1.54E+08 | 1.55E+08 | IPF        | LungCancer | 0.7324  | 0.2921  | 1.0000  | 0.5364 | 0.0853 | 1.0000 | 1.79E-03 | 4.55E-02 |
| 850  | 5  | 89584467 | 90793804 | Asthma     | Snoring    | 0.6814  | 0.2772  | 1.0000  | 0.4642 | 0.0769 | 1.0000 | 1.80E-03 | 4.55E-02 |
| 1272 | 8  | 26679136 | 27406511 | COPD       | LungCancer | 0.5782  | 0.2326  | 1.0000  | 0.3343 | 0.0541 | 1.0000 | 1.79E-03 | 4.55E-02 |
| 1593 | 10 | 1.2E+08  | 1.21E+08 | LungCancer | Snoring    | -0.6817 | -1.0000 | -0.2780 | 0.4647 | 0.0773 | 1.0000 | 1.80E-03 | 4.55E-02 |
| 2195 | 17 | 25872111 | 27344401 | Asthma     | Snoring    | -0.8505 | -1.0000 | -0.3444 | 0.7234 | 0.1186 | 1.0000 | 1.80E-03 | 4.55E-02 |
| 110  | 1  | 1.51E+08 | 1.53E+08 | COPD       | LungCancer | 1.0000  | 0.2959  | 1.0000  | 0.0902 | 1.0000 | 1.0000 | 1.82E-03 | 4.58E-02 |
| 241  | 2  | 36867390 | 37603360 | IPF        | Snoring    | 0.9794  | 0.4024  | 1.0000  | 0.9592 | 0.1619 | 1.0000 | 1.83E-03 | 4.59E-02 |
| 379  | 2  | 2E+08    | 2.01E+08 | COPD       | LungCancer | 0.7147  | 0.2943  | 1.0000  | 0.5108 | 0.0868 | 1.0000 | 1.83E-03 | 4.59E-02 |
| 1099 | 7  | 4139432  | 4938442  | COPD       | Snoring    | 0.9389  | 0.3899  | 1.0000  | 0.8816 | 0.1520 | 1.0000 | 1.83E-03 | 4.59E-02 |
| 355  | 2  | 1.71E+08 | 1.72E+08 | Asthma     | COPD       | 0.6832  | 0.3251  | 1.0000  | 0.4668 | 0.1060 | 1.0000 | 1.84E-03 | 4.60E-02 |
| 1389 | 9  | 14244748 | 14902924 | COPD       | IPF        | 0.5592  | 0.2448  | 0.9314  | 0.3127 | 0.0599 | 0.8674 | 1.85E-03 | 4.61E-02 |
| 1674 | 11 | 64594823 | 66782661 | Asthma     | COPD       | 0.4776  | 0.2068  | 0.7137  | 0.2281 | 0.0431 | 0.5093 | 1.90E-03 | 4.74E-02 |
| 2466 | 22 | 20969185 | 22404422 | Asthma     | COPD       | 0.6831  | 0.3317  | 1.0000  | 0.4666 | 0.1100 | 1.0000 | 1.91E-03 | 4.74E-02 |
| 1089 | 6  | 1.66E+08 | 1.67E+08 | IPF        | Snoring    | -0.9390 | -1.0000 | -0.3783 | 0.8818 | 0.1431 | 1.0000 | 1.93E-03 | 4.78E-02 |
| 1280 | 8  | 36641175 | 38803980 | Asthma     | IPF        | 0.5667  | 0.2190  | 1.0000  | 0.3212 | 0.0480 | 1.0000 | 1.97E-03 | 4.84E-02 |
| 1315 | 8  | 81340232 | 82878769 | Asthma     | Snoring    | -0.7706 | -1.0000 | -0.2939 | 0.5937 | 0.0864 | 1.0000 | 1.96E-03 | 4.84E-02 |
| 1414 | 9  | 37687113 | 38822977 | Asthma     | IPF        | -0.5826 | -1.0000 | -0.2297 | 0.3394 | 0.0527 | 1.0000 | 1.96E-03 | 4.84E-02 |
| 1869 | 13 | 24818334 | 25977140 | Asthma     | COPD       | 0.7801  | 0.3995  | 1.0000  | 0.6085 | 0.1606 | 1.0000 | 1.97E-03 | 4.84E-02 |
| 2403 | 20 | 38427595 | 40272390 | Asthma     | COPD       | 1.0000  | 0.5090  | 1.0000  | 1.0000 | 0.2591 | 1.0000 | 1.97E-03 | 4.84E-02 |
| 586  | 3  | 1.89E+08 | 1.91E+08 | Asthma     | IPF        | 0.5816  | 0.2309  | 1.0000  | 0.3383 | 0.0533 | 1.0000 | 1.99E-03 | 4.85E-02 |
| 1089 | 6  | 1.66E+08 | 1.67E+08 | Asthma     | Snoring    | 1.0000  | 0.4094  | 1.0000  | 1.0000 | 0.1676 | 1.0000 | 1.99E-03 | 4.85E-02 |
| 1589 | 10 | 1.14E+08 | 1.16E+08 | Asthma     | COPD       | 0.5278  | 0.2361  | 0.7999  | 0.2785 | 0.0557 | 0.6398 | 1.99E-03 | 4.85E-02 |
| 1242 | 8  | 4893121  | 5566269  | Asthma     | LungCancer | 1.0000  | 0.3605  | 1.0000  | 1.0000 | 0.1299 | 1.0000 | 2.02E-03 | 4.89E-02 |
| 1332 | 8  | 1.04E+08 | 1.04E+08 | COPD       | IPF        | 0.6206  | 0.2613  | 1.0000  | 0.3851 | 0.0683 | 1.0000 | 2.02E-03 | 4.89E-02 |
| 2171 | 16 | 88387229 | 89106304 | Asthma     | Snoring    | 0.6567  | 0.2558  | 1.0000  | 0.4313 | 0.0659 | 1.0000 | 2.02E-03 | 4.89E-02 |
| 2222 | 17 | 64438388 | 65582327 | COPD       | IPF        | 0.5420  | 0.2206  | 0.9008  | 0.2938 | 0.0487 | 0.8114 | 2.02E-03 | 4.89E-02 |
| 1798 | 12 | 63055937 | 63764111 | Asthma     | LungCancer | -0.7167 | -1.0000 | -0.2969 | 0.5137 | 0.0884 | 1.0000 | 2.04E-03 | 4.93E-02 |
| 1096 | 7  | 1366973  | 2473749  | Asthma     | Snoring    | 0.7418  | 0.3030  | 1.0000  | 0.5503 | 0.0918 | 1.0000 | 2.06E-03 | 4.96E-02 |
| 2116 | 16 | 11916632 | 12793149 | Asthma     | COPD       | 0.6311  | 0.2917  | 0.9825  | 0.3982 | 0.0851 | 0.9654 | 2.07E-03 | 4.97E-02 |
| 132  | 1  | 1.75E+08 | 1.76E+08 | Asthma     | COPD       | 0.8443  | 0.4317  | 1.0000  | 0.7129 | 0.1864 | 1.0000 | 2.07E-03 | 4.98E-02 |
| 160  | 1  | 2.08E+08 | 2.1E+08  | Asthma     | COPD       | 0.5785  | 0.2575  | 0.9184  | 0.3347 | 0.0665 | 0.8434 | 2.10E-03 | 5.00E-02 |
| 482  | 3  | 69784970 | 71223281 | Asthma     | COPD       | 0.5431  | 0.2358  | 0.8321  | 0.2949 | 0.0557 | 0.6924 | 2.10E-03 | 5.00E-02 |
| 881  | 5  | 1.24E+08 | 1.25E+08 | COPD       | Snoring    | 0.7480  | 0.2916  | 1.0000  | 0.5595 | 0.0850 | 1.0000 | 2.10E-03 | 5.00E-02 |
| 1605 | 10 | 1.32E+08 | 1.33E+08 | Asthma     | COPD       | 0.6683  | 0.3115  | 1.0000  | 0.4466 | 0.0975 | 1.0000 | 2.09E-03 | 5.00E-02 |

CHR, chromosome; Rg, genetic correlation ;  
r<sup>2</sup> represents proportion of genetic variance explained. P.adjusted represents the FDR-corrected P.value.
