# Supplementary material for: Shared genetic aetiology of respiratory diseases: a genome-wide multitraits association analysis
Source: PubMed Central journal article supplement — BMJ Open Respir Res. 2024 Jun 4;11(1):e002148. doi: 10.1136/bmjresp-2023-002148 (PMC11163672; doi:10.1136/bmjresp-2023-002148), 2024-06-04
Supplement: bmjresp-2023-002148supp009.pdf [file bmjresp-2023-002148supp009.pdf]

| <b>eTable8. Cross-trait meta-analysis using CPASSOC</b> |                  |                |
|---------------------------------------------------------|------------------|----------------|
| <b>SNP</b>                                              | <b>Test.shet</b> | <b>P value</b> |
| rs1444783                                               | 114.660935       | 1.80E-26       |
| rs28383201                                              | 113.754028       | 2.95E-26       |
| rs139957660                                             | 113.750502       | 2.95E-26       |
| rs1149914                                               | 108.330655       | 5.59E-25       |
| rs72837826                                              | 108.075060       | 6.42E-25       |
| rs1475187                                               | 108.013949       | 6.64E-25       |
| rs2397336                                               | 107.998597       | 6.69E-25       |
| rs28366359                                              | 106.784934       | 1.29E-24       |
| rs72836346                                              | 106.364302       | 1.62E-24       |
| rs56301252                                              | 106.280338       | 1.70E-24       |
| rs72837816                                              | 105.995393       | 1.98E-24       |
| rs144569746                                             | 105.510951       | 2.58E-24       |
| rs72836348                                              | 105.151752       | 3.14E-24       |
| rs72836344                                              | 105.005516       | 3.39E-24       |
| rs10905507                                              | 104.814506       | 3.76E-24       |
| rs978328                                                | 104.737629       | 3.92E-24       |
| rs72836345                                              | 104.478842       | 4.52E-24       |
| rs17484848                                              | 104.344671       | 4.86E-24       |
| rs72836352                                              | 104.312569       | 4.94E-24       |
| rs113135335                                             | 104.254568       | 5.10E-24       |
| rs1142429                                               | 103.698265       | 6.89E-24       |
| rs2671654                                               | 103.687825       | 6.93E-24       |
| rs2584662                                               | 103.032035       | 9.89E-24       |
| rs11940733                                              | 102.309535       | 1.46E-23       |
| rs1542725                                               | 102.012099       | 1.72E-23       |
| rs13118928                                              | 101.907960       | 1.82E-23       |
| rs2130339                                               | 101.868380       | 1.86E-23       |
| rs167769                                                | 101.765185       | 1.97E-23       |
| rs6842889                                               | 101.715368       | 2.02E-23       |
| rs28746867                                              | 101.708552       | 2.03E-23       |
| rs9273402                                               | 101.651139       | 2.09E-23       |
| rs1980057                                               | 101.633401       | 2.11E-23       |
| rs1980056                                               | 101.533335       | 2.23E-23       |
| rs1565330                                               | 101.521642       | 2.24E-23       |
| rs28626624                                              | 101.518142       | 2.25E-23       |
| rs2671657                                               | 101.297887       | 2.53E-23       |
| rs28746866                                              | 101.285136       | 2.55E-23       |
| rs6831503                                               | 101.223365       | 2.64E-23       |
| rs60842789                                              | 101.179871       | 2.70E-23       |
| rs7655625                                               | 101.167198       | 2.72E-23       |
| rs11256006                                              | 101.161587       | 2.73E-23       |
| rs1828591                                               | 100.863109       | 3.21E-23       |
| rs11100860                                              | 100.836744       | 3.25E-23       |
| rs13405741                                              | 100.827696       | 3.27E-23       |

|            |            |          |
|------------|------------|----------|
| rs6457684  | 100.811619 | 3.30E-23 |
| rs6537296  | 100.803229 | 3.31E-23 |
| rs66859861 | 100.615639 | 3.67E-23 |
| rs6537294  | 100.578574 | 3.74E-23 |
| rs17414748 | 100.556334 | 3.78E-23 |
| rs11568831 | 100.312708 | 4.32E-23 |
| rs3828809  | 100.283222 | 4.39E-23 |
| rs9273502  | 100.043742 | 5.00E-23 |
| rs72844397 | 99.982838  | 5.16E-23 |
| rs2596499  | 99.971111  | 5.20E-23 |
| rs434521   | 99.957441  | 5.24E-23 |
| rs1591045  | 99.929499  | 5.32E-23 |
| rs12594247 | 99.912736  | 5.36E-23 |
| rs743564   | 99.883729  | 5.45E-23 |
| rs453111   | 99.864643  | 5.51E-23 |
| rs9898547  | 99.852288  | 5.54E-23 |
| rs694965   | 99.839141  | 5.58E-23 |
| rs11691721 | 99.836993  | 5.59E-23 |
| rs3001425  | 99.825281  | 5.62E-23 |
| rs7139522  | 99.812646  | 5.66E-23 |
| rs447778   | 99.802828  | 5.69E-23 |
| rs9424038  | 99.793235  | 5.72E-23 |
| rs4739737  | 99.758716  | 5.83E-23 |
| rs10957979 | 99.750789  | 5.86E-23 |
| rs6537293  | 99.737049  | 5.90E-23 |
| rs79235294 | 99.731656  | 5.92E-23 |
| rs4887101  | 99.726672  | 5.93E-23 |
| rs7850770  | 99.723965  | 5.94E-23 |
| rs2509735  | 99.723085  | 5.94E-23 |
| rs7164665  | 99.719141  | 5.96E-23 |
| rs418014   | 99.710165  | 5.99E-23 |
| rs372482   | 99.706286  | 6.00E-23 |
| rs1489759  | 99.686087  | 6.07E-23 |
| rs392148   | 99.617400  | 6.30E-23 |
| rs1892957  | 99.567840  | 6.47E-23 |
| rs1755529  | 99.555758  | 6.51E-23 |
| rs6817273  | 99.548610  | 6.53E-23 |
| rs381486   | 99.524772  | 6.62E-23 |
| rs28746829 | 99.518106  | 6.64E-23 |
| rs2227321  | 99.477283  | 6.79E-23 |
| rs28746830 | 99.438051  | 6.94E-23 |
| rs62404143 | 99.427903  | 6.98E-23 |
| rs952559   | 99.372096  | 7.19E-23 |
| rs4887100  | 99.329658  | 7.36E-23 |
| rs3122929  | 99.303013  | 7.46E-23 |
| rs34972832 | 99.293475  | 7.50E-23 |

|            |           |          |
|------------|-----------|----------|
| rs2508751  | 99.283164 | 7.54E-23 |
| rs1892956  | 99.283059 | 7.55E-23 |
| rs17772583 | 99.262285 | 7.63E-23 |
| rs3828799  | 99.255024 | 7.66E-23 |
| rs7163204  | 99.230057 | 7.76E-23 |
| rs12187537 | 99.216608 | 7.82E-23 |
| rs2305481  | 99.216537 | 7.82E-23 |
| rs11606100 | 99.099358 | 8.33E-23 |
| rs28366286 | 99.078008 | 8.43E-23 |
| rs35238963 | 98.944753 | 9.06E-23 |
| rs9271419  | 98.930712 | 9.13E-23 |
| rs4275648  | 98.873508 | 9.42E-23 |
| rs9269332  | 98.850743 | 9.54E-23 |
| rs37004    | 98.845007 | 9.57E-23 |
| rs381702   | 98.812312 | 9.74E-23 |
| rs74263644 | 98.788112 | 9.87E-23 |
| rs442246   | 98.769646 | 9.96E-23 |
| rs9513587  | 98.761313 | 1.00E-22 |
| rs12789493 | 98.759832 | 1.00E-22 |
| rs25645    | 98.757460 | 1.00E-22 |
| rs3001427  | 98.716210 | 1.03E-22 |
| rs2548992  | 98.712627 | 1.03E-22 |
| rs10815411 | 98.701204 | 1.03E-22 |
| rs2508748  | 98.673530 | 1.05E-22 |
| rs2227319  | 98.631409 | 1.07E-22 |
| rs2508750  | 98.618830 | 1.08E-22 |
| rs35073649 | 98.594141 | 1.10E-22 |
| rs10957978 | 98.572850 | 1.11E-22 |
| rs35300161 | 98.562948 | 1.11E-22 |
| rs930579   | 98.550304 | 1.12E-22 |
| rs35272691 | 98.546125 | 1.12E-22 |
| rs58760622 | 98.543141 | 1.13E-22 |
| rs693838   | 98.515698 | 1.14E-22 |
| rs34443974 | 98.505932 | 1.15E-22 |
| rs2508749  | 98.447803 | 1.19E-22 |
| rs10739105 | 98.426555 | 1.20E-22 |
| rs10217561 | 98.386501 | 1.23E-22 |
| rs8055968  | 98.366541 | 1.24E-22 |
| rs2513518  | 98.323731 | 1.27E-22 |
| rs10114267 | 98.321040 | 1.27E-22 |
| rs9272678  | 98.267841 | 1.31E-22 |
| rs324011   | 98.231309 | 1.33E-22 |
| rs3087852  | 98.178625 | 1.37E-22 |
| rs34933056 | 98.177270 | 1.37E-22 |
| rs6504608  | 98.130545 | 1.41E-22 |
| rs12212737 | 98.073022 | 1.45E-22 |

|             |           |          |
|-------------|-----------|----------|
| rs2227333   | 98.069288 | 1.46E-22 |
| rs2381385   | 98.041395 | 1.48E-22 |
| rs7850497   | 98.036776 | 1.48E-22 |
| rs10795689  | 97.980043 | 1.53E-22 |
| rs703816    | 97.908464 | 1.59E-22 |
| rs7207729   | 97.903425 | 1.59E-22 |
| rs12595350  | 97.886724 | 1.61E-22 |
| rs11754356  | 97.868809 | 1.62E-22 |
| rs707947    | 97.798808 | 1.69E-22 |
| rs72784258  | 97.734976 | 1.75E-22 |
| rs8075668   | 97.659425 | 1.82E-22 |
| rs1512288   | 97.657936 | 1.82E-22 |
| rs10057913  | 97.648900 | 1.83E-22 |
| rs34342173  | 97.582987 | 1.89E-22 |
| rs78712211  | 97.570150 | 1.91E-22 |
| rs10519067  | 97.538151 | 1.94E-22 |
| rs72925947  | 97.522653 | 1.96E-22 |
| rs386880    | 97.517953 | 1.96E-22 |
| rs12501071  | 97.487873 | 2.00E-22 |
| rs414320    | 97.356272 | 2.14E-22 |
| rs4739738   | 97.221829 | 2.30E-22 |
| rs3859189   | 97.188441 | 2.35E-22 |
| rs340897    | 97.161758 | 2.38E-22 |
| rs439190    | 97.154892 | 2.39E-22 |
| rs146459536 | 97.149060 | 2.40E-22 |
| rs393410    | 97.147733 | 2.40E-22 |
| rs405594    | 97.146298 | 2.40E-22 |
| rs391813    | 97.121029 | 2.43E-22 |
| rs2073644   | 97.118313 | 2.44E-22 |
| rs12194007  | 97.118214 | 2.44E-22 |
| rs35353422  | 96.991600 | 2.61E-22 |
| rs6454802   | 96.963064 | 2.65E-22 |
| rs396183    | 96.952157 | 2.67E-22 |
| rs2155226   | 96.932686 | 2.69E-22 |
| rs11753332  | 96.910715 | 2.73E-22 |
| rs9513600   | 96.889448 | 2.76E-22 |
| rs34453912  | 96.870697 | 2.79E-22 |
| rs9266529   | 96.860557 | 2.80E-22 |
| rs9517653   | 96.825403 | 2.86E-22 |
| rs62408204  | 96.822628 | 2.86E-22 |
| rs17637472  | 96.783161 | 2.92E-22 |
| rs11655264  | 96.739191 | 2.99E-22 |
| rs3131640   | 96.730402 | 3.01E-22 |
| rs35975014  | 96.709485 | 3.04E-22 |
| rs2302777   | 96.685135 | 3.08E-22 |
| rs12451897  | 96.605612 | 3.22E-22 |

|             |           |          |
|-------------|-----------|----------|
| rs10795690  | 96.600858 | 3.23E-22 |
| rs17406680  | 96.600779 | 3.23E-22 |
| rs10739097  | 96.542423 | 3.33E-22 |
| rs12202119  | 96.522847 | 3.36E-22 |
| rs12376117  | 96.441280 | 3.52E-22 |
| rs9916158   | 96.323459 | 3.75E-22 |
| rs34230758  | 96.165607 | 4.08E-22 |
| rs9554571   | 96.137467 | 4.15E-22 |
| rs2584663   | 96.102727 | 4.22E-22 |
| rs13164856  | 96.071582 | 4.30E-22 |
| rs9888873   | 95.945289 | 4.60E-22 |
| rs34153824  | 95.908644 | 4.69E-22 |
| rs2182885   | 95.893261 | 4.73E-22 |
| rs2285673   | 95.868953 | 4.79E-22 |
| rs11256004  | 95.851138 | 4.84E-22 |
| rs7865955   | 95.845495 | 4.86E-22 |
| rs12453341  | 95.672265 | 5.33E-22 |
| rs7045097   | 95.646015 | 5.41E-22 |
| rs12453334  | 95.547013 | 5.71E-22 |
| rs7201845   | 95.539626 | 5.73E-22 |
| rs2097731   | 95.522692 | 5.78E-22 |
| rs76749487  | 95.522618 | 5.78E-22 |
| rs9652599   | 95.486637 | 5.90E-22 |
| rs9273289   | 95.464347 | 5.97E-22 |
| rs1064707   | 95.428893 | 6.08E-22 |
| rs951192    | 95.424742 | 6.10E-22 |
| rs10758783  | 95.413961 | 6.13E-22 |
| rs12601929  | 95.374826 | 6.26E-22 |
| rs36231348  | 95.277547 | 6.60E-22 |
| rs9273471   | 95.221373 | 6.81E-22 |
| rs8077456   | 95.213810 | 6.84E-22 |
| rs9916130   | 95.184898 | 6.94E-22 |
| rs76141774  | 95.160320 | 7.04E-22 |
| rs2243297   | 95.147503 | 7.09E-22 |
| rs78496075  | 95.138194 | 7.12E-22 |
| rs116359969 | 95.119350 | 7.19E-22 |
| rs10519068  | 95.110130 | 7.23E-22 |
| rs11078930  | 95.083704 | 7.33E-22 |
| rs380145    | 95.081584 | 7.34E-22 |
| rs12453343  | 95.059215 | 7.43E-22 |
| rs28394864  | 95.042468 | 7.50E-22 |
| rs13170453  | 95.027431 | 7.56E-22 |
| rs3744245   | 95.025685 | 7.57E-22 |
| rs1887704   | 95.011592 | 7.63E-22 |
| rs115632345 | 94.867130 | 8.25E-22 |
| rs34135512  | 94.856724 | 8.29E-22 |

|            |           |          |
|------------|-----------|----------|
| rs4705927  | 94.852206 | 8.31E-22 |
| rs11078931 | 94.832052 | 8.40E-22 |
| rs7857628  | 94.815902 | 8.48E-22 |
| rs2073643  | 94.813448 | 8.49E-22 |
| rs58743367 | 94.785874 | 8.62E-22 |
| rs28633132 | 94.785530 | 8.62E-22 |
| rs28802989 | 94.743754 | 8.82E-22 |
| rs3091308  | 94.742874 | 8.82E-22 |
| rs12451547 | 94.697286 | 9.04E-22 |
| rs1912580  | 94.617333 | 9.44E-22 |
| rs79748582 | 94.575236 | 9.66E-22 |
| rs28397663 | 94.574708 | 9.66E-22 |
| rs2019676  | 94.534730 | 9.87E-22 |
| rs1800925  | 94.516032 | 9.97E-22 |
| rs2706353  | 94.496408 | 1.01E-21 |
| rs2079054  | 94.434735 | 1.04E-21 |
| rs2243677  | 94.412127 | 1.05E-21 |
| rs34648856 | 94.371994 | 1.08E-21 |
| rs73403121 | 94.364288 | 1.08E-21 |
| rs72846303 | 94.318518 | 1.11E-21 |
| rs35982947 | 94.312427 | 1.11E-21 |
| rs2706347  | 94.311990 | 1.11E-21 |
| rs11867302 | 94.305476 | 1.12E-21 |
| rs34003767 | 94.257057 | 1.15E-21 |
| rs34810547 | 94.248119 | 1.15E-21 |
| rs12601333 | 94.237612 | 1.16E-21 |
| rs4742192  | 94.226035 | 1.17E-21 |
| rs9271116  | 94.208047 | 1.18E-21 |
| rs2522414  | 94.157416 | 1.21E-21 |
| rs2706348  | 94.114600 | 1.24E-21 |
| rs2706349  | 94.108236 | 1.24E-21 |
| rs34540281 | 94.041833 | 1.29E-21 |
| rs10758780 | 94.022340 | 1.30E-21 |
| rs9517637  | 94.019863 | 1.30E-21 |
| rs12188917 | 94.010887 | 1.31E-21 |
| rs451360   | 94.001923 | 1.32E-21 |
| rs2102418  | 93.952946 | 1.35E-21 |
| rs28746838 | 93.909848 | 1.38E-21 |
| rs12939682 | 93.907525 | 1.39E-21 |
| rs77464688 | 93.877475 | 1.41E-21 |
| rs3667     | 93.874168 | 1.41E-21 |
| rs7582198  | 93.766026 | 1.50E-21 |
| rs1130446  | 93.729329 | 1.53E-21 |
| rs1986009  | 93.684974 | 1.56E-21 |
| rs41341945 | 93.630325 | 1.61E-21 |
| rs7184491  | 93.586208 | 1.65E-21 |

|             |           |          |
|-------------|-----------|----------|
| rs2096382   | 93.560700 | 1.67E-21 |
| rs3917318   | 93.545260 | 1.69E-21 |
| rs72946301  | 93.490391 | 1.74E-21 |
| rs111280764 | 93.468550 | 1.76E-21 |
| rs10445310  | 93.457655 | 1.77E-21 |
| rs3917279   | 93.450940 | 1.77E-21 |
| rs7588111   | 93.426245 | 1.80E-21 |
| rs7594744   | 93.409948 | 1.81E-21 |
| rs2522394   | 93.399640 | 1.82E-21 |
| rs12444495  | 93.398277 | 1.83E-21 |
| rs4795414   | 93.368921 | 1.86E-21 |
| rs72743459  | 93.365409 | 1.86E-21 |
| rs7602767   | 93.360515 | 1.86E-21 |
| rs66826786  | 93.355203 | 1.87E-21 |
| rs66957194  | 93.318362 | 1.91E-21 |
| rs12368672  | 93.267725 | 1.96E-21 |
| rs10071051  | 93.226966 | 2.00E-21 |
| rs59925331  | 93.143659 | 2.10E-21 |
| rs11883987  | 93.138863 | 2.10E-21 |
| rs10463893  | 93.110976 | 2.13E-21 |
| rs3917304   | 93.053600 | 2.20E-21 |
| rs17825681  | 93.050912 | 2.20E-21 |
| rs112985748 | 93.027498 | 2.23E-21 |
| rs111944102 | 93.013091 | 2.25E-21 |
| rs35919309  | 92.998756 | 2.27E-21 |
| rs6860806   | 92.987523 | 2.28E-21 |
| rs10055177  | 92.981443 | 2.29E-21 |
| rs11654208  | 92.962298 | 2.31E-21 |
| rs10463894  | 92.916080 | 2.37E-21 |
| rs2706345   | 92.906876 | 2.38E-21 |
| rs34753162  | 92.893495 | 2.40E-21 |
| rs4787951   | 92.887383 | 2.41E-21 |
| rs2239701   | 92.876548 | 2.42E-21 |
| rs147678978 | 92.853626 | 2.45E-21 |
| rs114361720 | 92.808873 | 2.51E-21 |
| rs11655655  | 92.762947 | 2.58E-21 |
| rs35230514  | 92.759936 | 2.58E-21 |
| rs79950062  | 92.745598 | 2.60E-21 |
| rs12600856  | 92.702884 | 2.66E-21 |
| rs7947691   | 92.638864 | 2.75E-21 |
| rs115255544 | 92.631679 | 2.77E-21 |
| rs11071559  | 92.560815 | 2.87E-21 |
| rs10520114  | 92.546515 | 2.90E-21 |
| rs11078936  | 92.513972 | 2.95E-21 |
| rs34297496  | 92.404818 | 3.13E-21 |
| rs57614263  | 92.369513 | 3.19E-21 |

|             |           |          |
|-------------|-----------|----------|
| rs72842490  | 92.320020 | 3.27E-21 |
| rs2412099   | 92.314450 | 3.28E-21 |
| rs11749376  | 92.299306 | 3.31E-21 |
| rs113700231 | 92.260705 | 3.38E-21 |
| rs13141641  | 92.240232 | 3.42E-21 |
| rs72842486  | 92.236506 | 3.42E-21 |
| rs11255975  | 92.232867 | 3.43E-21 |
| rs114169440 | 92.231501 | 3.43E-21 |
| rs28451423  | 92.195313 | 3.50E-21 |
| rs2584661   | 92.157962 | 3.57E-21 |
| rs11071557  | 92.137491 | 3.61E-21 |
| rs72842493  | 92.135680 | 3.62E-21 |
| rs13272328  | 92.134368 | 3.62E-21 |
| rs72846316  | 92.122444 | 3.64E-21 |
| rs10490944  | 92.112334 | 3.66E-21 |
| rs12994345  | 92.062482 | 3.76E-21 |
| rs2058612   | 92.060999 | 3.77E-21 |
| rs56169495  | 92.037124 | 3.81E-21 |
| rs9266524   | 92.032758 | 3.82E-21 |
| rs72842489  | 92.027319 | 3.84E-21 |
| rs248831    | 91.999478 | 3.89E-21 |
| rs114948848 | 91.992244 | 3.91E-21 |
| rs145281025 | 91.961604 | 3.97E-21 |
| rs41270921  | 91.959094 | 3.98E-21 |
| rs78855616  | 91.921278 | 4.06E-21 |
| rs72844390  | 91.918789 | 4.07E-21 |
| rs77089552  | 91.901378 | 4.11E-21 |
| rs6719553   | 91.900880 | 4.11E-21 |
| rs112123216 | 91.871339 | 4.17E-21 |
| rs72846309  | 91.865409 | 4.19E-21 |
| rs56668723  | 91.832623 | 4.26E-21 |
| rs6543166   | 91.824112 | 4.28E-21 |
| rs1894406   | 91.809468 | 4.31E-21 |
| rs116176187 | 91.739933 | 4.48E-21 |
| rs2325258   | 91.564284 | 4.93E-21 |
| rs13178997  | 91.540782 | 4.99E-21 |
| rs3785356   | 91.530671 | 5.02E-21 |
| rs36030173  | 91.525924 | 5.03E-21 |
| rs72842485  | 91.493386 | 5.12E-21 |
| rs10072700  | 91.482636 | 5.15E-21 |
| rs4635969   | 91.407177 | 5.36E-21 |
| rs9271731   | 91.389036 | 5.42E-21 |
| rs9667239   | 91.387219 | 5.42E-21 |
| rs9273523   | 91.363161 | 5.49E-21 |
| rs4771332   | 91.341203 | 5.56E-21 |
| rs2192664   | 91.326530 | 5.60E-21 |



|             |           |          |
|-------------|-----------|----------|
| rs11256048  | 91.315861 | 5.64E-21 |
| rs62383710  | 91.304642 | 5.67E-21 |
| rs11784337  | 91.299252 | 5.69E-21 |
| rs2897443   | 91.228803 | 5.91E-21 |
| rs60582557  | 91.221515 | 5.93E-21 |
| rs11256049  | 91.148357 | 6.17E-21 |
| rs1030021   | 91.141823 | 6.19E-21 |
| rs10181869  | 91.127689 | 6.24E-21 |
| rs827631    | 91.118223 | 6.27E-21 |
| rs139052365 | 91.100005 | 6.33E-21 |
| rs1035088   | 91.026047 | 6.59E-21 |
| rs7560368   | 90.985160 | 6.74E-21 |
| rs112891288 | 90.981826 | 6.75E-21 |
| rs7598839   | 90.948008 | 6.88E-21 |
| rs11256008  | 90.914380 | 7.00E-21 |
| rs3828787   | 90.885243 | 7.11E-21 |
| rs4963065   | 90.863218 | 7.20E-21 |
| rs10184597  | 90.851888 | 7.24E-21 |
| rs17027517  | 90.796391 | 7.46E-21 |
| rs7039175   | 90.757178 | 7.62E-21 |
| rs11256054  | 90.670986 | 7.99E-21 |
| rs71381186  | 90.667883 | 8.00E-21 |
| rs3743976   | 90.653994 | 8.06E-21 |
| rs2289278   | 90.613097 | 8.24E-21 |
| rs73401361  | 90.590865 | 8.34E-21 |
| rs6543165   | 90.566690 | 8.45E-21 |
| rs4739736   | 90.565986 | 8.46E-21 |
| rs34033347  | 90.543160 | 8.56E-21 |
| rs11256052  | 90.490774 | 8.81E-21 |
| rs7573372   | 90.415349 | 9.17E-21 |
| rs10905512  | 90.400565 | 9.25E-21 |
| rs4963063   | 90.399128 | 9.25E-21 |
| rs9273794   | 90.386762 | 9.32E-21 |
| rs11672303  | 90.378437 | 9.36E-21 |
| rs28746854  | 90.376116 | 9.37E-21 |
| rs11679512  | 90.339276 | 9.56E-21 |
| rs2706372   | 90.337752 | 9.57E-21 |
| rs67768228  | 90.302785 | 9.75E-21 |
| rs7582956   | 90.295134 | 9.79E-21 |
| rs6543163   | 90.262637 | 9.96E-21 |
| rs11256046  | 90.254969 | 1.00E-20 |
| rs12196749  | 90.234925 | 1.01E-20 |
| rs11634042  | 90.221041 | 1.02E-20 |
| rs28396311  | 90.204034 | 1.03E-20 |
| rs2071465   | 90.203391 | 1.03E-20 |
| rs56290409  | 90.201058 | 1.03E-20 |

|             |           |          |
|-------------|-----------|----------|
| rs11783496  | 90.186677 | 1.04E-20 |
| rs17027547  | 90.185015 | 1.04E-20 |
| rs77062257  | 90.138751 | 1.07E-20 |
| rs2160227   | 90.092867 | 1.09E-20 |
| rs9557177   | 90.089788 | 1.09E-20 |
| rs17027571  | 90.029578 | 1.13E-20 |
| rs11786685  | 90.022645 | 1.13E-20 |
| rs12471422  | 90.019926 | 1.14E-20 |
| rs10905511  | 90.013571 | 1.14E-20 |
| rs75900172  | 90.013569 | 1.14E-20 |
| rs72627435  | 89.992249 | 1.15E-20 |
| rs11256044  | 89.970965 | 1.17E-20 |
| rs7557352   | 89.951843 | 1.18E-20 |
| rs7753008   | 89.922775 | 1.20E-20 |
| rs75349662  | 89.909197 | 1.21E-20 |
| rs28746855  | 89.902389 | 1.21E-20 |
| rs9273698   | 89.895805 | 1.21E-20 |
| rs9273496   | 89.892625 | 1.22E-20 |
| rs114516436 | 89.882684 | 1.22E-20 |
| rs34986765  | 89.872554 | 1.23E-20 |
| rs11078916  | 89.858227 | 1.24E-20 |
| rs2192665   | 89.852391 | 1.24E-20 |
| rs2671659   | 89.836968 | 1.25E-20 |
| rs7573475   | 89.831790 | 1.26E-20 |
| rs72784480  | 89.818105 | 1.27E-20 |
| rs6991991   | 89.772431 | 1.30E-20 |
| rs34582516  | 89.747329 | 1.32E-20 |
| rs10035166  | 89.707116 | 1.35E-20 |
| rs7837153   | 89.669001 | 1.37E-20 |
| rs4795386   | 89.665203 | 1.38E-20 |
| rs9513582   | 89.634293 | 1.40E-20 |
| rs3794712   | 89.607416 | 1.42E-20 |
| rs9517642   | 89.602826 | 1.42E-20 |
| rs12282537  | 89.583290 | 1.44E-20 |
| rs72842479  | 89.576491 | 1.44E-20 |
| rs13011360  | 89.467326 | 1.53E-20 |
| rs2202749   | 89.456074 | 1.54E-20 |
| rs2095043   | 89.449053 | 1.55E-20 |
| rs4851545   | 89.427344 | 1.57E-20 |
| rs114736668 | 89.419691 | 1.57E-20 |
| rs9273503   | 89.414804 | 1.58E-20 |
| rs7837219   | 89.395909 | 1.59E-20 |
| rs55846509  | 89.372848 | 1.61E-20 |
| rs7338177   | 89.364794 | 1.62E-20 |
| rs1469149   | 89.361513 | 1.62E-20 |
| rs72782675  | 89.356507 | 1.63E-20 |

|             |           |          |
|-------------|-----------|----------|
| rs3117572   | 89.338093 | 1.64E-20 |
| rs9267653   | 89.333077 | 1.65E-20 |
| rs114250738 | 89.317317 | 1.66E-20 |
| rs12905602  | 89.295423 | 1.68E-20 |
| rs731955    | 89.273626 | 1.70E-20 |
| rs741257    | 89.242717 | 1.73E-20 |
| rs9517648   | 89.232834 | 1.74E-20 |
| rs7322572   | 89.229810 | 1.74E-20 |
| rs13008334  | 89.225166 | 1.75E-20 |
| rs6543167   | 89.224548 | 1.75E-20 |
| rs13282260  | 89.222269 | 1.75E-20 |
| rs79648921  | 89.202034 | 1.77E-20 |
| rs13253128  | 89.152923 | 1.82E-20 |
| rs7462675   | 89.106631 | 1.86E-20 |
| rs2107354   | 89.093754 | 1.87E-20 |
| rs6992476   | 89.018792 | 1.95E-20 |
| rs57303559  | 88.941185 | 2.04E-20 |
| rs17132762  | 88.901730 | 2.08E-20 |
| rs6543164   | 88.881096 | 2.10E-20 |
| rs13275219  | 88.878324 | 2.11E-20 |
| rs9517650   | 88.876428 | 2.11E-20 |
| rs12937634  | 88.862256 | 2.12E-20 |
| rs12937404  | 88.826274 | 2.17E-20 |
| rs2171247   | 88.823047 | 2.17E-20 |
| rs156109    | 88.804170 | 2.19E-20 |
| rs1010322   | 88.772347 | 2.23E-20 |
| rs1243425   | 88.735069 | 2.28E-20 |
| rs36094971  | 88.663035 | 2.37E-20 |
| rs6473226   | 88.659573 | 2.37E-20 |
| rs6871350   | 88.659571 | 2.37E-20 |
| rs7893722   | 88.647649 | 2.39E-20 |
| rs68081734  | 88.645588 | 2.39E-20 |
| rs654354    | 88.634432 | 2.40E-20 |
| rs17027626  | 88.632952 | 2.41E-20 |
| rs77450473  | 88.628724 | 2.41E-20 |
| rs3024556   | 88.623975 | 2.42E-20 |
| rs6473227   | 88.597372 | 2.45E-20 |
| rs8067459   | 88.578739 | 2.48E-20 |
| rs112300250 | 88.556813 | 2.51E-20 |
| rs9517654   | 88.537282 | 2.53E-20 |
| rs9273488   | 88.509691 | 2.57E-20 |
| rs7824993   | 88.507836 | 2.57E-20 |
| rs12150526  | 88.497559 | 2.59E-20 |
| rs7335046   | 88.487779 | 2.60E-20 |
| rs4705929   | 88.452337 | 2.65E-20 |
| rs13274471  | 88.439777 | 2.67E-20 |

|             |           |          |
|-------------|-----------|----------|
| rs28472559  | 88.434042 | 2.68E-20 |
| rs11994858  | 88.417709 | 2.70E-20 |
| rs34083796  | 88.402369 | 2.72E-20 |
| rs78767260  | 88.348681 | 2.80E-20 |
| rs827618    | 88.338407 | 2.82E-20 |
| rs6863548   | 88.332782 | 2.83E-20 |
| rs28360855  | 88.269514 | 2.93E-20 |
| rs6473223   | 88.163234 | 3.10E-20 |
| rs1044265   | 88.160070 | 3.11E-20 |
| rs4781035   | 88.158700 | 3.11E-20 |
| rs76474922  | 88.128538 | 3.16E-20 |
| rs11639084  | 88.100185 | 3.21E-20 |
| rs35343577  | 88.092733 | 3.22E-20 |
| rs9273541   | 88.065498 | 3.27E-20 |
| rs952558    | 88.059738 | 3.28E-20 |
| rs6867282   | 88.032473 | 3.33E-20 |
| rs2136186   | 88.012287 | 3.36E-20 |
| rs41263830  | 87.985134 | 3.41E-20 |
| rs16943087  | 87.983591 | 3.42E-20 |
| rs2136188   | 87.965333 | 3.45E-20 |
| rs162908    | 87.957570 | 3.47E-20 |
| rs9273542   | 87.940927 | 3.50E-20 |
| rs1009382   | 87.936127 | 3.51E-20 |
| rs7736284   | 87.933379 | 3.51E-20 |
| rs1588263   | 87.923361 | 3.53E-20 |
| rs12903966  | 87.908521 | 3.56E-20 |
| rs78658333  | 87.827953 | 3.72E-20 |
| rs11952099  | 87.759938 | 3.86E-20 |
| rs9513607   | 87.752276 | 3.87E-20 |
| rs2110637   | 87.749302 | 3.88E-20 |
| rs10152595  | 87.741238 | 3.90E-20 |
| rs7209400   | 87.739303 | 3.90E-20 |
| rs2150968   | 87.739011 | 3.90E-20 |
| rs2508738   | 87.721497 | 3.94E-20 |
| rs1911715   | 87.687614 | 4.01E-20 |
| rs2136187   | 87.648412 | 4.10E-20 |
| rs9267654   | 87.625299 | 4.15E-20 |
| rs116603725 | 87.501088 | 4.44E-20 |
| rs4330455   | 87.492135 | 4.46E-20 |
| rs12543811  | 87.460707 | 4.53E-20 |
| rs4705931   | 87.416543 | 4.64E-20 |
| rs334902    | 87.337466 | 4.85E-20 |
| rs13275449  | 87.330044 | 4.87E-20 |
| rs4625500   | 87.300973 | 4.94E-20 |
| rs28693734  | 87.297662 | 4.95E-20 |
| rs2513515   | 87.260997 | 5.05E-20 |

|             |           |          |
|-------------|-----------|----------|
| rs9920560   | 87.253442 | 5.07E-20 |
| rs1888908   | 87.250488 | 5.08E-20 |
| rs850520    | 87.213167 | 5.18E-20 |
| rs35953391  | 87.142268 | 5.39E-20 |
| rs850521    | 87.116165 | 5.46E-20 |
| rs10899219  | 87.100667 | 5.51E-20 |
| rs10899220  | 87.088402 | 5.54E-20 |
| rs694294    | 87.086477 | 5.55E-20 |
| rs36115365  | 87.083652 | 5.56E-20 |
| rs448115    | 87.032348 | 5.71E-20 |
| rs32701     | 87.000463 | 5.81E-20 |
| rs9920577   | 86.936154 | 6.02E-20 |
| rs2025758   | 86.921184 | 6.07E-20 |
| rs72837843  | 86.901740 | 6.13E-20 |
| rs12900122  | 86.871204 | 6.23E-20 |
| rs3763112   | 86.846217 | 6.32E-20 |
| rs78337030  | 86.822410 | 6.40E-20 |
| rs1770      | 86.774032 | 6.57E-20 |
| rs9920593   | 86.772493 | 6.58E-20 |
| rs2508756   | 86.743682 | 6.68E-20 |
| rs17293443  | 86.742221 | 6.69E-20 |
| rs912129    | 86.736185 | 6.71E-20 |
| rs9920592   | 86.731139 | 6.73E-20 |
| rs10899224  | 86.728534 | 6.73E-20 |
| rs28378989  | 86.646970 | 7.04E-20 |
| rs11255938  | 86.612998 | 7.17E-20 |
| rs2202750   | 86.595537 | 7.24E-20 |
| rs34712979  | 86.595393 | 7.24E-20 |
| rs16943070  | 86.564887 | 7.36E-20 |
| rs11606394  | 86.534896 | 7.48E-20 |
| rs9273184   | 86.515846 | 7.56E-20 |
| rs7982347   | 86.504808 | 7.60E-20 |
| rs465076    | 86.489009 | 7.67E-20 |
| rs6989309   | 86.442064 | 7.86E-20 |
| rs118077070 | 86.414916 | 7.98E-20 |
| rs7860427   | 86.409551 | 8.00E-20 |
| rs12253380  | 86.404164 | 8.03E-20 |
| rs7009110   | 86.402998 | 8.03E-20 |
| rs12601665  | 86.401706 | 8.04E-20 |
| rs13267000  | 86.383895 | 8.11E-20 |
| rs1020730   | 86.349763 | 8.26E-20 |
| rs2221641   | 86.320514 | 8.40E-20 |
| rs1981551   | 86.310879 | 8.44E-20 |
| rs75400359  | 86.294848 | 8.51E-20 |
| rs2279293   | 86.240497 | 8.77E-20 |
| rs409038    | 86.215651 | 8.89E-20 |

|             |           |          |
|-------------|-----------|----------|
| rs72837850  | 86.173237 | 9.09E-20 |
| rs7162065   | 86.163322 | 9.14E-20 |
| rs2370615   | 86.076970 | 9.58E-20 |
| rs7940390   | 86.007217 | 9.95E-20 |
| rs72849408  | 85.998010 | 1.00E-19 |
| rs10060511  | 85.916036 | 1.04E-19 |
| rs77490899  | 85.894404 | 1.06E-19 |
| rs4514717   | 85.881550 | 1.06E-19 |
| rs11637301  | 85.842479 | 1.09E-19 |
| rs376382    | 85.829857 | 1.09E-19 |
| rs2070731   | 85.772604 | 1.13E-19 |
| rs10739086  | 85.739525 | 1.15E-19 |
| rs11256050  | 85.720093 | 1.16E-19 |
| rs28483960  | 85.712905 | 1.17E-19 |
| rs2279294   | 85.696063 | 1.18E-19 |
| rs2162893   | 85.693026 | 1.18E-19 |
| rs9273695   | 85.674948 | 1.19E-19 |
| rs9273696   | 85.674948 | 1.19E-19 |
| rs9909827   | 85.667183 | 1.20E-19 |
| rs2279292   | 85.666002 | 1.20E-19 |
| rs10477741  | 85.645066 | 1.21E-19 |
| rs13170412  | 85.642185 | 1.21E-19 |
| rs7039959   | 85.631262 | 1.22E-19 |
| rs116522341 | 85.603255 | 1.24E-19 |
| rs9407324   | 85.600288 | 1.24E-19 |
| rs340909    | 85.578258 | 1.25E-19 |
| rs77335401  | 85.514344 | 1.30E-19 |
| rs7987173   | 85.513571 | 1.30E-19 |
| rs6720394   | 85.494808 | 1.31E-19 |
| rs28618326  | 85.485481 | 1.32E-19 |
| rs12925861  | 85.457691 | 1.34E-19 |
| rs9274152   | 85.419181 | 1.37E-19 |
| rs1049088   | 85.351488 | 1.42E-19 |
| rs7213090   | 85.339880 | 1.43E-19 |
| rs10490945  | 85.319601 | 1.44E-19 |
| rs7190472   | 85.318121 | 1.44E-19 |
| rs619726    | 85.304081 | 1.45E-19 |
| rs1342773   | 85.284316 | 1.47E-19 |
| rs11172086  | 85.256561 | 1.49E-19 |
| rs10752156  | 85.244064 | 1.50E-19 |
| rs646876    | 85.107979 | 1.62E-19 |
| rs72837849  | 85.075449 | 1.65E-19 |
| rs13165038  | 84.996021 | 1.72E-19 |
| rs28746824  | 84.994549 | 1.72E-19 |
| rs10905515  | 84.964887 | 1.75E-19 |
| rs11256063  | 84.963056 | 1.75E-19 |

|             |           |          |
|-------------|-----------|----------|
| rs113705012 | 84.936567 | 1.77E-19 |
| rs1775568   | 84.903349 | 1.81E-19 |
| rs2706370   | 84.864223 | 1.84E-19 |
| rs79696067  | 84.797531 | 1.91E-19 |
| rs7333055   | 84.789203 | 1.92E-19 |
| rs72699     | 84.762322 | 1.95E-19 |
| rs4787948   | 84.744187 | 1.97E-19 |
| rs1130368   | 84.721339 | 1.99E-19 |
| rs1049083   | 84.719121 | 1.99E-19 |
| rs340911    | 84.647286 | 2.07E-19 |
| rs7446461   | 84.633157 | 2.09E-19 |
| rs984477    | 84.606231 | 2.12E-19 |
| rs2155220   | 84.565516 | 2.17E-19 |
| rs6924102   | 84.557314 | 2.18E-19 |
| rs10793166  | 84.465458 | 2.29E-19 |
| rs2735948   | 84.452107 | 2.30E-19 |
| rs12370257  | 84.448815 | 2.31E-19 |
| rs8025324   | 84.447996 | 2.31E-19 |
| rs77000868  | 84.424894 | 2.34E-19 |
| rs74682567  | 84.381340 | 2.39E-19 |
| rs12516092  | 84.378153 | 2.40E-19 |
| rs115362421 | 84.352235 | 2.43E-19 |
| rs17436267  | 84.327652 | 2.46E-19 |
| rs9273138   | 84.326489 | 2.47E-19 |
| rs11256070  | 84.325790 | 2.47E-19 |
| rs11256068  | 84.200735 | 2.64E-19 |
| rs9828592   | 84.175346 | 2.68E-19 |
| rs28746803  | 84.170556 | 2.68E-19 |
| rs28746804  | 84.166896 | 2.69E-19 |
| rs1140310   | 84.156533 | 2.70E-19 |
| rs28746802  | 84.155129 | 2.71E-19 |
| rs62383750  | 84.125008 | 2.75E-19 |
| rs12185242  | 84.124721 | 2.75E-19 |
| rs28746825  | 84.118482 | 2.76E-19 |
| rs2270401   | 84.090269 | 2.80E-19 |
| rs7003011   | 84.085838 | 2.81E-19 |
| rs4963051   | 84.072365 | 2.83E-19 |
| rs386412    | 84.020901 | 2.91E-19 |
| rs9273866   | 83.998077 | 2.95E-19 |
| rs6498013   | 83.988805 | 2.96E-19 |
| rs11256065  | 83.985774 | 2.96E-19 |
| rs11256071  | 83.982062 | 2.97E-19 |
| rs6491500   | 83.943118 | 3.03E-19 |
| rs11256080  | 83.900194 | 3.11E-19 |
| rs1817479   | 83.883290 | 3.13E-19 |
| rs11256073  | 83.845526 | 3.20E-19 |

|             |           |          |
|-------------|-----------|----------|
| rs2523570   | 83.815884 | 3.25E-19 |
| rs28595756  | 83.780859 | 3.31E-19 |
| rs28895056  | 83.752108 | 3.36E-19 |
| rs2251075   | 83.747968 | 3.37E-19 |
| rs28895055  | 83.745462 | 3.38E-19 |
| rs75424998  | 83.738036 | 3.39E-19 |
| rs2069757   | 83.724934 | 3.41E-19 |
| rs1065076   | 83.720152 | 3.42E-19 |
| rs9273723   | 83.710681 | 3.44E-19 |
| rs827637    | 83.652056 | 3.55E-19 |
| rs28437906  | 83.627895 | 3.60E-19 |
| rs2026992   | 83.625172 | 3.60E-19 |
| rs11633029  | 83.612854 | 3.63E-19 |
| rs2071470   | 83.543634 | 3.76E-19 |
| rs960757    | 83.540612 | 3.77E-19 |
| rs2672794   | 83.524734 | 3.80E-19 |
| rs17622991  | 83.507640 | 3.84E-19 |
| rs1049100   | 83.493630 | 3.87E-19 |
| rs663576    | 83.479596 | 3.90E-19 |
| rs2227956   | 83.470498 | 3.92E-19 |
| rs11256061  | 83.445004 | 3.97E-19 |
| rs2549009   | 83.424282 | 4.02E-19 |
| rs115690055 | 83.405416 | 4.06E-19 |
| rs489464    | 83.391876 | 4.09E-19 |
| rs2854260   | 83.385057 | 4.10E-19 |
| rs13274426  | 83.381780 | 4.11E-19 |
| rs11078918  | 83.281579 | 4.34E-19 |
| rs10061842  | 83.280459 | 4.34E-19 |
| rs2549006   | 83.245574 | 4.42E-19 |
| rs72844401  | 83.237634 | 4.44E-19 |
| rs4742181   | 83.222493 | 4.48E-19 |
| rs7209755   | 83.204643 | 4.52E-19 |
| rs2107355   | 83.201984 | 4.53E-19 |
| rs9273539   | 83.184576 | 4.57E-19 |
| rs8025689   | 83.179589 | 4.58E-19 |
| rs4945087   | 83.169653 | 4.61E-19 |
| rs9899665   | 83.150369 | 4.66E-19 |
| rs148630431 | 83.125300 | 4.72E-19 |
| rs10793164  | 83.121723 | 4.73E-19 |
| rs3131635   | 83.100054 | 4.78E-19 |
| rs2549005   | 83.090920 | 4.81E-19 |
| rs2859579   | 82.970915 | 5.13E-19 |
| rs207265    | 82.901821 | 5.32E-19 |
| rs62068176  | 82.898987 | 5.33E-19 |
| rs28729827  | 82.859122 | 5.45E-19 |
| rs9274131   | 82.825162 | 5.55E-19 |



|             |           |          |
|-------------|-----------|----------|
| rs2136016   | 82.779609 | 5.69E-19 |
| rs112841    | 82.776979 | 5.70E-19 |
| rs3132468   | 82.759345 | 5.75E-19 |
| rs116454630 | 82.743349 | 5.80E-19 |
| rs79580861  | 82.736988 | 5.82E-19 |
| rs3130615   | 82.716022 | 5.89E-19 |
| rs2071472   | 82.685721 | 5.98E-19 |
| rs3093952   | 82.669094 | 6.04E-19 |
| rs77334607  | 82.661797 | 6.06E-19 |
| rs1543857   | 82.654809 | 6.08E-19 |
| rs111965262 | 82.630753 | 6.16E-19 |
| rs79487517  | 82.551649 | 6.43E-19 |
| rs11776367  | 82.442956 | 6.82E-19 |
| rs3784099   | 82.400068 | 6.98E-19 |
| rs441107    | 82.379137 | 7.06E-19 |
| rs28605404  | 82.355148 | 7.15E-19 |
| rs17145188  | 82.326044 | 7.27E-19 |
| rs4604305   | 82.322546 | 7.28E-19 |
| rs207264    | 82.315836 | 7.31E-19 |
| rs2071474   | 82.290947 | 7.41E-19 |
| rs72784485  | 82.255380 | 7.55E-19 |
| rs703817    | 82.225894 | 7.67E-19 |
| rs10957975  | 82.200249 | 7.78E-19 |
| rs80223137  | 82.168267 | 7.91E-19 |
| rs7332672   | 82.136447 | 8.05E-19 |
| rs2548997   | 82.110213 | 8.16E-19 |
| rs4713598   | 82.077155 | 8.31E-19 |
| rs9517683   | 82.061552 | 8.38E-19 |
| rs79570477  | 82.050064 | 8.43E-19 |
| rs3763364   | 82.026589 | 8.54E-19 |
| rs113315602 | 81.974011 | 8.79E-19 |
| rs4739735   | 81.931128 | 8.99E-19 |
| rs6473225   | 81.905571 | 9.12E-19 |
| rs8081878   | 81.901329 | 9.14E-19 |
| rs207270    | 81.885600 | 9.22E-19 |
| rs9517711   | 81.866663 | 9.31E-19 |
| rs7148416   | 81.863877 | 9.33E-19 |
| rs28567460  | 81.854274 | 9.37E-19 |
| rs3131636   | 81.851210 | 9.39E-19 |
| rs16943064  | 81.816584 | 9.57E-19 |
| rs80326593  | 81.778106 | 9.77E-19 |
| rs79493873  | 81.740229 | 9.97E-19 |
| rs7173981   | 81.716085 | 1.01E-18 |
| rs7173826   | 81.711427 | 1.01E-18 |
| rs13282455  | 81.707290 | 1.01E-18 |
| rs34289477  | 81.679524 | 1.03E-18 |

|            |           |          |
|------------|-----------|----------|
| rs72847591 | 81.668622 | 1.04E-18 |
| rs4148869  | 81.632921 | 1.06E-18 |
| rs1663693  | 81.617782 | 1.07E-18 |
| rs75814086 | 81.580879 | 1.09E-18 |
| rs17802927 | 81.538034 | 1.11E-18 |
| rs6890009  | 81.528306 | 1.12E-18 |
| rs76063842 | 81.507117 | 1.13E-18 |
| rs9557209  | 81.473929 | 1.15E-18 |
| rs9267659  | 81.426623 | 1.18E-18 |
| rs10815428 | 81.417647 | 1.19E-18 |
| rs2071544  | 81.415027 | 1.19E-18 |
| rs41270875 | 81.389743 | 1.20E-18 |
| rs2071464  | 81.350972 | 1.23E-18 |
| rs28376734 | 81.333163 | 1.24E-18 |
| rs12934193 | 81.327948 | 1.25E-18 |
| rs36202959 | 81.306566 | 1.26E-18 |
| rs6898270  | 81.280738 | 1.28E-18 |
| rs827632   | 81.265687 | 1.29E-18 |
| rs13270496 | 81.264413 | 1.29E-18 |
| rs56035021 | 81.248771 | 1.30E-18 |
| rs3913969  | 81.247487 | 1.30E-18 |
| rs9513614  | 81.213745 | 1.32E-18 |
| rs28498223 | 81.208655 | 1.33E-18 |
| rs10478038 | 81.197797 | 1.34E-18 |
| rs7826521  | 81.171204 | 1.36E-18 |
| rs28638783 | 81.132549 | 1.38E-18 |
| rs9554586  | 81.131644 | 1.38E-18 |
| rs1977254  | 81.068233 | 1.43E-18 |
| rs1927726  | 81.036461 | 1.46E-18 |
| rs9517687  | 81.026628 | 1.47E-18 |
| rs3913968  | 81.015629 | 1.47E-18 |
| rs12708714 | 80.992824 | 1.49E-18 |
| rs2877455  | 80.984578 | 1.50E-18 |
| rs922783   | 80.979130 | 1.50E-18 |
| rs12953014 | 80.975396 | 1.51E-18 |
| rs4772190  | 80.965779 | 1.51E-18 |
| rs9270716  | 80.960312 | 1.52E-18 |
| rs12708713 | 80.945254 | 1.53E-18 |
| rs4382332  | 80.929142 | 1.54E-18 |
| rs4148870  | 80.909145 | 1.56E-18 |
| rs79870380 | 80.904993 | 1.57E-18 |
| rs9517667  | 80.902244 | 1.57E-18 |
| rs72849414 | 80.889732 | 1.58E-18 |
| rs9517668  | 80.879072 | 1.59E-18 |
| rs55771420 | 80.858916 | 1.60E-18 |
| rs9517680  | 80.852785 | 1.61E-18 |

|             |           |          |
|-------------|-----------|----------|
| rs147841808 | 80.844152 | 1.62E-18 |
| rs12428348  | 80.828178 | 1.63E-18 |
| rs1021070   | 80.825238 | 1.63E-18 |
| rs28409699  | 80.819345 | 1.64E-18 |
| rs7735073   | 80.814118 | 1.64E-18 |
| rs28895048  | 80.809535 | 1.65E-18 |
| rs7994398   | 80.806117 | 1.65E-18 |
| rs28895049  | 80.751588 | 1.70E-18 |
| rs2522392   | 80.747009 | 1.70E-18 |
| rs4421856   | 80.729709 | 1.72E-18 |
| rs7734334   | 80.729469 | 1.72E-18 |
| rs13273143  | 80.727408 | 1.72E-18 |
| rs12880842  | 80.725025 | 1.72E-18 |
| rs2395041   | 80.702802 | 1.75E-18 |
| rs9276810   | 80.682021 | 1.77E-18 |
| rs76687830  | 80.676325 | 1.77E-18 |
| rs146003472 | 80.660968 | 1.79E-18 |
| rs1758599   | 80.660105 | 1.79E-18 |
| rs204887    | 80.642685 | 1.80E-18 |
| rs3741578   | 80.638901 | 1.81E-18 |
| rs2549001   | 80.609305 | 1.84E-18 |
| rs3759444   | 80.607172 | 1.84E-18 |
| rs1342774   | 80.598699 | 1.85E-18 |
| rs59186511  | 80.561958 | 1.88E-18 |
| rs7332161   | 80.552344 | 1.89E-18 |
| rs9517672   | 80.542945 | 1.90E-18 |
| rs9513589   | 80.541989 | 1.90E-18 |
| rs6987042   | 80.540722 | 1.91E-18 |
| rs913464    | 80.533194 | 1.91E-18 |
| rs111665670 | 80.517490 | 1.93E-18 |
| rs72837868  | 80.479354 | 1.97E-18 |
| rs4636771   | 80.477941 | 1.97E-18 |
| rs62517193  | 80.477931 | 1.97E-18 |
| rs7318947   | 80.467753 | 1.98E-18 |
| rs9271055   | 80.459006 | 1.99E-18 |
| rs2736109   | 80.453100 | 2.00E-18 |
| rs1977253   | 80.428042 | 2.02E-18 |
| rs75722399  | 80.425650 | 2.03E-18 |
| rs1885013   | 80.425591 | 2.03E-18 |
| rs252709    | 80.409874 | 2.04E-18 |
| rs1663671   | 80.405711 | 2.05E-18 |
| rs2104047   | 80.386075 | 2.07E-18 |
| rs35317317  | 80.347257 | 2.11E-18 |
| rs4772197   | 80.342981 | 2.12E-18 |
| rs752820    | 80.338264 | 2.13E-18 |
| rs1957570   | 80.337590 | 2.13E-18 |

|             |           |          |
|-------------|-----------|----------|
| rs7721882   | 80.332706 | 2.13E-18 |
| rs1911714   | 80.297029 | 2.17E-18 |
| rs13252706  | 80.278462 | 2.19E-18 |
| rs11743851  | 80.273197 | 2.20E-18 |
| rs9517678   | 80.272738 | 2.20E-18 |
| rs9517669   | 80.265493 | 2.21E-18 |
| rs13251923  | 80.263800 | 2.21E-18 |
| rs1911713   | 80.258839 | 2.22E-18 |
| rs12885750  | 80.254247 | 2.22E-18 |
| rs2706374   | 80.248604 | 2.23E-18 |
| rs10905524  | 80.235208 | 2.25E-18 |
| rs3825427   | 80.226329 | 2.26E-18 |
| rs7596680   | 80.226015 | 2.26E-18 |
| rs6473224   | 80.219059 | 2.27E-18 |
| rs72651024  | 80.218202 | 2.27E-18 |
| rs9513608   | 80.212855 | 2.27E-18 |
| rs1149909   | 80.208802 | 2.28E-18 |
| rs75150448  | 80.192356 | 2.30E-18 |
| rs62323898  | 80.175741 | 2.32E-18 |
| rs2289791   | 80.163488 | 2.34E-18 |
| rs6473222   | 80.144462 | 2.36E-18 |
| rs11746289  | 80.137953 | 2.37E-18 |
| rs17551370  | 80.137265 | 2.37E-18 |
| rs7322759   | 80.123151 | 2.39E-18 |
| rs13276888  | 80.121508 | 2.39E-18 |
| rs725956    | 80.101311 | 2.42E-18 |
| rs2230341   | 80.099523 | 2.42E-18 |
| rs4772201   | 80.052425 | 2.48E-18 |
| rs1130390   | 80.045241 | 2.49E-18 |
| rs466806    | 80.037353 | 2.50E-18 |
| rs72648069  | 80.028832 | 2.51E-18 |
| rs115785636 | 80.026517 | 2.51E-18 |
| rs72648100  | 80.021392 | 2.52E-18 |
| rs13274782  | 80.009368 | 2.54E-18 |
| rs72849411  | 79.997003 | 2.56E-18 |
| rs9517676   | 79.993239 | 2.56E-18 |
| rs1108590   | 79.993199 | 2.56E-18 |
| rs115884658 | 79.983002 | 2.57E-18 |
| rs7012968   | 79.976409 | 2.58E-18 |
| rs11078935  | 79.967477 | 2.60E-18 |
| rs417670    | 79.946739 | 2.63E-18 |
| rs3024560   | 79.946424 | 2.63E-18 |
| rs6996407   | 79.944809 | 2.63E-18 |
| rs116259801 | 79.915664 | 2.67E-18 |
| rs464275    | 79.914531 | 2.67E-18 |
| rs9272528   | 79.913363 | 2.67E-18 |

|             |           |          |
|-------------|-----------|----------|
| rs461336    | 79.896308 | 2.70E-18 |
| rs2277549   | 79.891184 | 2.71E-18 |
| rs10957977  | 79.866265 | 2.74E-18 |
| rs4304115   | 79.863617 | 2.75E-18 |
| rs28538060  | 79.857153 | 2.76E-18 |
| rs457541    | 79.829707 | 2.80E-18 |
| rs74945164  | 79.826618 | 2.80E-18 |
| rs2093642   | 79.824764 | 2.80E-18 |
| rs9557199   | 79.819474 | 2.81E-18 |
| rs1351544   | 79.817719 | 2.81E-18 |
| rs13258616  | 79.814923 | 2.82E-18 |
| rs34113780  | 79.779911 | 2.87E-18 |
| rs35899011  | 79.767719 | 2.89E-18 |
| rs9517693   | 79.764306 | 2.90E-18 |
| rs4505848   | 79.759486 | 2.90E-18 |
| rs12941811  | 79.757145 | 2.91E-18 |
| rs917054    | 79.754392 | 2.91E-18 |
| rs61939622  | 79.753792 | 2.91E-18 |
| rs9517640   | 79.750224 | 2.92E-18 |
| rs1998475   | 79.735334 | 2.94E-18 |
| rs12889949  | 79.721989 | 2.96E-18 |
| rs72649510  | 79.717173 | 2.97E-18 |
| rs7181405   | 79.712341 | 2.98E-18 |
| rs36027005  | 79.706920 | 2.99E-18 |
| rs9513575   | 79.593420 | 3.18E-18 |
| rs114386417 | 79.581995 | 3.20E-18 |
| rs3846731   | 79.554056 | 3.25E-18 |
| rs13253385  | 79.541789 | 3.27E-18 |
| rs9973655   | 79.528226 | 3.29E-18 |
| rs9271152   | 79.524119 | 3.30E-18 |
| rs12951873  | 79.502040 | 3.34E-18 |
| rs2180770   | 79.496234 | 3.35E-18 |
| rs146323696 | 79.490310 | 3.36E-18 |
| rs111553658 | 79.485988 | 3.37E-18 |
| rs116303320 | 79.478997 | 3.38E-18 |
| rs113711404 | 79.475488 | 3.39E-18 |
| rs8017304   | 79.473771 | 3.39E-18 |
| rs115074443 | 79.473572 | 3.39E-18 |
| rs144641193 | 79.467157 | 3.40E-18 |
| rs11738827  | 79.446885 | 3.44E-18 |
| rs9973883   | 79.446795 | 3.44E-18 |
| rs4772198   | 79.429521 | 3.47E-18 |
| rs36022997  | 79.424170 | 3.48E-18 |
| rs9517628   | 79.415900 | 3.50E-18 |
| rs56113850  | 79.415403 | 3.50E-18 |
| rs9557179   | 79.413441 | 3.50E-18 |

|             |           |          |
|-------------|-----------|----------|
| rs72850021  | 79.409181 | 3.51E-18 |
| rs113195871 | 79.398101 | 3.53E-18 |
| rs12948660  | 79.396850 | 3.53E-18 |
| rs17709919  | 79.387255 | 3.55E-18 |
| rs11952031  | 79.358875 | 3.61E-18 |
| rs11954400  | 79.343002 | 3.64E-18 |
| rs7604866   | 79.338076 | 3.65E-18 |
| rs12931878  | 79.333096 | 3.66E-18 |
| rs115594945 | 79.328370 | 3.67E-18 |
| rs112270441 | 79.302372 | 3.72E-18 |
| rs11158729  | 79.275160 | 3.77E-18 |
| rs78824971  | 79.270157 | 3.78E-18 |
| rs7148073   | 79.267313 | 3.79E-18 |
| rs11626138  | 79.267078 | 3.79E-18 |
| rs10065633  | 79.255158 | 3.81E-18 |
| rs2057454   | 79.244517 | 3.83E-18 |
| rs12602514  | 79.244292 | 3.84E-18 |
| rs9271155   | 79.244153 | 3.84E-18 |
| rs147804272 | 79.231917 | 3.86E-18 |
| rs3846732   | 79.225844 | 3.87E-18 |
| rs10506348  | 79.219686 | 3.89E-18 |
| rs9270714   | 79.202888 | 3.92E-18 |
| rs1149910   | 79.196301 | 3.94E-18 |
| rs9673499   | 79.191711 | 3.95E-18 |
| rs3118110   | 79.181549 | 3.97E-18 |
| rs3784104   | 79.167386 | 4.00E-18 |
| rs9272458   | 79.162423 | 4.01E-18 |
| rs10141370  | 79.155309 | 4.02E-18 |
| rs9554581   | 79.132670 | 4.07E-18 |
| rs9893777   | 79.127197 | 4.09E-18 |
| rs12901789  | 79.109060 | 4.13E-18 |
| rs10072571  | 79.058185 | 4.24E-18 |
| rs7325747   | 79.035683 | 4.29E-18 |
| rs9517627   | 79.020268 | 4.33E-18 |
| rs1956532   | 79.018395 | 4.33E-18 |
| rs11256078  | 78.979543 | 4.42E-18 |
| rs72784495  | 78.964098 | 4.46E-18 |
| rs1956529   | 78.949809 | 4.50E-18 |
| rs75503615  | 78.948609 | 4.50E-18 |
| rs4238216   | 78.935388 | 4.53E-18 |
| rs12585127  | 78.926948 | 4.55E-18 |
| rs11628954  | 78.909954 | 4.59E-18 |
| rs1813812   | 78.900129 | 4.62E-18 |
| rs4422110   | 78.897194 | 4.63E-18 |
| rs41547417  | 78.890680 | 4.64E-18 |
| rs113979555 | 78.881604 | 4.66E-18 |

|             |           |          |
|-------------|-----------|----------|
| rs7134373   | 78.873617 | 4.68E-18 |
| rs809125    | 78.865169 | 4.71E-18 |
| rs12886238  | 78.861843 | 4.71E-18 |
| rs11628890  | 78.851588 | 4.74E-18 |
| rs2289790   | 78.848834 | 4.75E-18 |
| rs9517698   | 78.845770 | 4.76E-18 |
| rs78486723  | 78.809280 | 4.85E-18 |
| rs9557172   | 78.801027 | 4.87E-18 |
| rs41330048  | 78.795836 | 4.89E-18 |
| rs911263    | 78.782375 | 4.92E-18 |
| rs2960164   | 78.781399 | 4.92E-18 |
| rs9517701   | 78.751471 | 5.00E-18 |
| rs2208397   | 78.745668 | 5.02E-18 |
| rs7150988   | 78.739225 | 5.04E-18 |
| rs115277907 | 78.730149 | 5.06E-18 |
| rs2070722   | 78.720781 | 5.09E-18 |
| rs759338    | 78.682019 | 5.19E-18 |
| rs12878627  | 78.677309 | 5.21E-18 |
| rs77179964  | 78.667776 | 5.23E-18 |
| rs12881502  | 78.666731 | 5.24E-18 |
| rs1956528   | 78.644937 | 5.30E-18 |
| rs2906093   | 78.635838 | 5.33E-18 |
| rs114420104 | 78.625387 | 5.36E-18 |
| rs12890109  | 78.623833 | 5.36E-18 |
| rs4772189   | 78.604325 | 5.42E-18 |
| rs10905518  | 78.594137 | 5.45E-18 |
| rs75779249  | 78.593545 | 5.45E-18 |
| rs7664452   | 78.592055 | 5.45E-18 |
| rs9517716   | 78.588803 | 5.46E-18 |
| rs9517633   | 78.572157 | 5.51E-18 |
| rs17145278  | 78.570755 | 5.52E-18 |
| rs28746798  | 78.561447 | 5.54E-18 |
| rs2011767   | 78.541308 | 5.60E-18 |
| rs961414    | 78.538002 | 5.61E-18 |
| rs12890124  | 78.535032 | 5.62E-18 |
| rs9300536   | 78.514220 | 5.69E-18 |
| rs9271673   | 78.467938 | 5.83E-18 |
| rs73120411  | 78.455656 | 5.87E-18 |
| rs11626195  | 78.433173 | 5.94E-18 |
| rs501942    | 78.405980 | 6.03E-18 |
| rs3001426   | 78.405197 | 6.03E-18 |
| rs9271641   | 78.392176 | 6.07E-18 |
| rs56267605  | 78.375753 | 6.13E-18 |
| rs2004229   | 78.363339 | 6.17E-18 |
| rs3864277   | 78.354483 | 6.20E-18 |
| rs7146850   | 78.336491 | 6.26E-18 |

|             |           |          |
|-------------|-----------|----------|
| rs12923849  | 78.334166 | 6.27E-18 |
| rs10427255  | 78.332150 | 6.27E-18 |
| rs2138448   | 78.312158 | 6.34E-18 |
| rs13009175  | 78.297462 | 6.39E-18 |
| rs7178824   | 78.279408 | 6.46E-18 |
| rs7225606   | 78.278457 | 6.46E-18 |
| rs1030271   | 78.273906 | 6.47E-18 |
| rs2243204   | 78.269946 | 6.49E-18 |
| rs4776922   | 78.269387 | 6.49E-18 |
| rs17105278  | 78.264486 | 6.51E-18 |
| rs9517715   | 78.253145 | 6.55E-18 |
| rs2390239   | 78.234521 | 6.61E-18 |
| rs1149912   | 78.234040 | 6.62E-18 |
| rs28545281  | 78.230328 | 6.63E-18 |
| rs4706020   | 78.210243 | 6.70E-18 |
| rs9287372   | 78.191841 | 6.77E-18 |
| rs3743349   | 78.180958 | 6.81E-18 |
| rs2476175   | 78.164823 | 6.87E-18 |
| rs1474011   | 78.151555 | 6.92E-18 |
| rs12884901  | 78.144503 | 6.94E-18 |
| rs3784108   | 78.124327 | 7.02E-18 |
| rs3784109   | 78.121928 | 7.03E-18 |
| rs12890110  | 78.114732 | 7.05E-18 |
| rs1342767   | 78.108340 | 7.08E-18 |
| rs2549003   | 78.089360 | 7.15E-18 |
| rs8008961   | 78.087852 | 7.16E-18 |
| rs4705885   | 78.082339 | 7.18E-18 |
| rs12878858  | 78.072862 | 7.22E-18 |
| rs1892955   | 78.060749 | 7.26E-18 |
| rs113823725 | 78.055529 | 7.28E-18 |
| rs7705526   | 78.034218 | 7.37E-18 |
| rs36219699  | 78.032248 | 7.38E-18 |
| rs55904957  | 78.029589 | 7.39E-18 |
| rs9272460   | 78.027179 | 7.40E-18 |
| rs2138445   | 78.017019 | 7.44E-18 |
| rs35149731  | 78.009832 | 7.47E-18 |
| rs78999765  | 77.999046 | 7.51E-18 |
| rs1904522   | 77.996854 | 7.52E-18 |
| rs7406234   | 77.984162 | 7.57E-18 |
| rs4452681   | 77.969117 | 7.63E-18 |
| rs2589567   | 77.963030 | 7.66E-18 |
| rs1533426   | 77.939648 | 7.75E-18 |
| rs71388093  | 77.918720 | 7.84E-18 |
| rs809123    | 77.915514 | 7.86E-18 |
| rs139746351 | 77.912087 | 7.87E-18 |
| rs1516135   | 77.911346 | 7.87E-18 |



|            |           |          |
|------------|-----------|----------|
| rs1149911  | 77.905575 | 7.90E-18 |
| rs10793174 | 77.901727 | 7.91E-18 |
| rs1949330  | 77.892389 | 7.95E-18 |
| rs6430080  | 77.880089 | 8.01E-18 |
| rs324014   | 77.865811 | 8.07E-18 |
| rs7181877  | 77.861032 | 8.09E-18 |
| rs727263   | 77.860432 | 8.09E-18 |
| rs17848418 | 77.827056 | 8.24E-18 |
| rs28746840 | 77.820781 | 8.27E-18 |
| rs4793614  | 77.815816 | 8.29E-18 |
| rs10899231 | 77.815399 | 8.29E-18 |
| rs55969942 | 77.808900 | 8.32E-18 |
| rs4794032  | 77.777035 | 8.46E-18 |
| rs2070727  | 77.737591 | 8.65E-18 |
| rs10068129 | 77.725569 | 8.70E-18 |
| rs9268730  | 77.721562 | 8.72E-18 |
| rs76883199 | 77.715123 | 8.75E-18 |
| rs12542017 | 77.713100 | 8.76E-18 |
| rs7109963  | 77.712975 | 8.76E-18 |
| rs1444790  | 77.710956 | 8.77E-18 |
| rs77159790 | 77.697380 | 8.84E-18 |
| rs2259672  | 77.691981 | 8.86E-18 |
| rs6873426  | 77.658503 | 9.02E-18 |
| rs7106745  | 77.658400 | 9.02E-18 |
| rs2070730  | 77.637591 | 9.13E-18 |
| rs1342766  | 77.636455 | 9.13E-18 |
| rs9282763  | 77.602000 | 9.30E-18 |
| rs1822802  | 77.596740 | 9.33E-18 |
| rs2397333  | 77.590364 | 9.36E-18 |
| rs6894655  | 77.586980 | 9.38E-18 |
| rs3131004  | 77.584158 | 9.39E-18 |
| rs2070723  | 77.564473 | 9.49E-18 |
| rs6756212  | 77.564117 | 9.49E-18 |
| rs1996287  | 77.562237 | 9.50E-18 |
| rs7701588  | 77.552158 | 9.56E-18 |
| rs839      | 77.552158 | 9.56E-18 |
| rs35004258 | 77.542850 | 9.60E-18 |
| rs55896948 | 77.515070 | 9.75E-18 |
| rs2381726  | 77.511249 | 9.77E-18 |
| rs11628825 | 77.509860 | 9.78E-18 |
| rs1996286  | 77.500927 | 9.82E-18 |
| rs10214312 | 77.499761 | 9.83E-18 |
| rs10062929 | 77.485084 | 9.91E-18 |
| rs2589568  | 77.484057 | 9.91E-18 |
| rs7106634  | 77.464343 | 1.00E-17 |
| rs9895986  | 77.443875 | 1.01E-17 |

|             |           |          |
|-------------|-----------|----------|
| rs11256103  | 77.432306 | 1.02E-17 |
| rs10051145  | 77.419156 | 1.03E-17 |
| rs1444791   | 77.413571 | 1.03E-17 |
| rs4794031   | 77.402593 | 1.04E-17 |
| rs2012454   | 77.391272 | 1.04E-17 |
| rs2070728   | 77.388877 | 1.04E-17 |
| rs11524050  | 77.377322 | 1.05E-17 |
| rs9271062   | 77.375150 | 1.05E-17 |
| rs56390548  | 77.336942 | 1.07E-17 |
| rs3825730   | 77.330243 | 1.08E-17 |
| rs27068     | 77.329851 | 1.08E-17 |
| rs2589569   | 77.300029 | 1.09E-17 |
| rs7214085   | 77.288137 | 1.10E-17 |
| rs9273504   | 77.287605 | 1.10E-17 |
| rs45599938  | 77.286050 | 1.10E-17 |
| rs3136534   | 77.283318 | 1.10E-17 |
| rs7006626   | 77.246894 | 1.13E-17 |
| rs2960169   | 77.241807 | 1.13E-17 |
| rs2240301   | 77.233802 | 1.13E-17 |
| rs2760193   | 77.220957 | 1.14E-17 |
| rs56360035  | 77.219049 | 1.14E-17 |
| rs13020778  | 77.216905 | 1.15E-17 |
| rs747039    | 77.195364 | 1.16E-17 |
| rs4145717   | 77.187148 | 1.16E-17 |
| rs9940480   | 77.156240 | 1.18E-17 |
| rs9266542   | 77.141054 | 1.19E-17 |
| rs873625    | 77.128633 | 1.20E-17 |
| rs9273595   | 77.127795 | 1.20E-17 |
| rs115602986 | 77.100309 | 1.22E-17 |
| rs1553668   | 77.071068 | 1.24E-17 |
| rs1705326   | 77.060989 | 1.25E-17 |
| rs12602854  | 77.041022 | 1.26E-17 |
| rs56661848  | 77.016024 | 1.28E-17 |
| rs2411977   | 77.006927 | 1.28E-17 |
| rs62076398  | 77.003894 | 1.28E-17 |
| rs9271061   | 77.000505 | 1.29E-17 |
| rs2589570   | 76.986370 | 1.30E-17 |
| rs12499753  | 76.985651 | 1.30E-17 |
| rs2397334   | 76.964380 | 1.31E-17 |
| rs35403253  | 76.946694 | 1.32E-17 |
| rs1950897   | 76.944971 | 1.33E-17 |
| rs56180168  | 76.942216 | 1.33E-17 |
| rs7181556   | 76.903570 | 1.36E-17 |
| rs9269795   | 76.890406 | 1.37E-17 |
| rs4148882   | 76.886409 | 1.37E-17 |
| rs249681    | 76.845701 | 1.40E-17 |

|            |           |          |
|------------|-----------|----------|
| rs2508755  | 76.825846 | 1.41E-17 |
| rs1263695  | 76.810118 | 1.43E-17 |
| rs12940278 | 76.809359 | 1.43E-17 |
| rs2145422  | 76.805431 | 1.43E-17 |
| rs4380538  | 76.800767 | 1.43E-17 |
| rs4794036  | 76.795602 | 1.44E-17 |
| rs7147852  | 76.787113 | 1.44E-17 |
| rs28811643 | 76.784693 | 1.45E-17 |
| rs2069763  | 76.779731 | 1.45E-17 |
| rs4148868  | 76.752149 | 1.47E-17 |
| rs79175537 | 76.749298 | 1.47E-17 |
| rs9271640  | 76.736009 | 1.48E-17 |
| rs7729832  | 76.726684 | 1.49E-17 |
| rs79967157 | 76.719727 | 1.50E-17 |
| rs62322747 | 76.708317 | 1.51E-17 |
| rs7181543  | 76.700071 | 1.51E-17 |
| rs4794034  | 76.699372 | 1.51E-17 |
| rs3763365  | 76.694926 | 1.52E-17 |
| rs4705916  | 76.682539 | 1.53E-17 |
| rs34666042 | 76.680313 | 1.53E-17 |
| rs2107634  | 76.673947 | 1.53E-17 |
| rs1444773  | 76.669980 | 1.54E-17 |
| rs72844196 | 76.606649 | 1.59E-17 |
| rs701564   | 76.569780 | 1.62E-17 |
| rs1149916  | 76.555932 | 1.64E-17 |
| rs2239346  | 76.552260 | 1.64E-17 |
| rs1149917  | 76.551331 | 1.64E-17 |
| rs7671357  | 76.547908 | 1.64E-17 |
| rs67852216 | 76.538681 | 1.65E-17 |
| rs1705327  | 76.532262 | 1.66E-17 |
| rs74434374 | 76.485962 | 1.70E-17 |
| rs76792006 | 76.485461 | 1.70E-17 |
| rs2001628  | 76.469756 | 1.71E-17 |
| rs3179840  | 76.466678 | 1.72E-17 |
| rs10491424 | 76.445805 | 1.74E-17 |
| rs62154727 | 76.439019 | 1.74E-17 |
| rs3130286  | 76.422226 | 1.76E-17 |
| rs74580628 | 76.420529 | 1.76E-17 |
| rs7712015  | 76.405426 | 1.77E-17 |
| rs207272   | 76.395494 | 1.78E-17 |
| rs17825149 | 76.390267 | 1.79E-17 |
| rs11098659 | 76.389479 | 1.79E-17 |
| rs78819855 | 76.381532 | 1.80E-17 |
| rs11079868 | 76.380959 | 1.80E-17 |
| rs11685729 | 76.368974 | 1.81E-17 |
| rs62066853 | 76.345281 | 1.83E-17 |

|             |           |          |
|-------------|-----------|----------|
| rs4438772   | 76.340536 | 1.84E-17 |
| rs41267090  | 76.333828 | 1.84E-17 |
| rs2245460   | 76.306209 | 1.87E-17 |
| rs10060626  | 76.265884 | 1.91E-17 |
| rs62397687  | 76.254345 | 1.92E-17 |
| rs2549007   | 76.253654 | 1.92E-17 |
| rs592333    | 76.252860 | 1.93E-17 |
| rs9271687   | 76.218994 | 1.96E-17 |
| rs207276    | 76.218827 | 1.96E-17 |
| rs11725823  | 76.215239 | 1.97E-17 |
| rs207269    | 76.214264 | 1.97E-17 |
| rs207274    | 76.213040 | 1.97E-17 |
| rs116913822 | 76.196524 | 1.99E-17 |
| rs207268    | 76.189064 | 1.99E-17 |
| rs207267    | 76.187722 | 1.99E-17 |
| rs62404118  | 76.147539 | 2.04E-17 |
| rs2239347   | 76.139849 | 2.05E-17 |
| rs2853677   | 76.132264 | 2.06E-17 |
| rs207273    | 76.114543 | 2.07E-17 |
| rs207271    | 76.110786 | 2.08E-17 |
| rs9270928   | 76.090459 | 2.10E-17 |
| rs207262    | 76.090200 | 2.10E-17 |
| rs72849263  | 76.087701 | 2.11E-17 |
| rs207263    | 76.063936 | 2.13E-17 |
| rs7822328   | 76.062823 | 2.13E-17 |
| rs72669154  | 76.049913 | 2.15E-17 |
| rs2549004   | 76.017474 | 2.19E-17 |
| rs148505069 | 75.978733 | 2.23E-17 |
| rs12324870  | 75.975400 | 2.24E-17 |
| rs3763366   | 75.960242 | 2.25E-17 |
| rs7958413   | 75.948292 | 2.27E-17 |
| rs11172106  | 75.937285 | 2.28E-17 |
| rs11950815  | 75.921590 | 2.30E-17 |
| rs2523504   | 75.897785 | 2.33E-17 |
| rs117832812 | 75.854409 | 2.39E-17 |
| rs71469854  | 75.844351 | 2.40E-17 |
| rs3131378   | 75.843009 | 2.40E-17 |
| rs56264704  | 75.825373 | 2.42E-17 |
| rs7332358   | 75.825302 | 2.43E-17 |
| rs9271775   | 75.821912 | 2.43E-17 |
| rs17843693  | 75.816083 | 2.44E-17 |
| rs9273028   | 75.814418 | 2.44E-17 |
| rs74528051  | 75.797539 | 2.46E-17 |
| rs7934606   | 75.775869 | 2.49E-17 |
| rs1124881   | 75.763384 | 2.51E-17 |
| rs10905526  | 75.754838 | 2.52E-17 |

|             |           |          |
|-------------|-----------|----------|
| rs716501    | 75.750110 | 2.53E-17 |
| rs8025621   | 75.726029 | 2.56E-17 |
| rs1663665   | 75.709431 | 2.58E-17 |
| rs77512426  | 75.689696 | 2.61E-17 |
| rs12443472  | 75.680523 | 2.62E-17 |
| rs2797272   | 75.667950 | 2.64E-17 |
| rs7982416   | 75.657278 | 2.66E-17 |
| rs62405590  | 75.608976 | 2.73E-17 |
| rs3115672   | 75.600595 | 2.74E-17 |
| rs152815    | 75.590435 | 2.75E-17 |
| rs2706384   | 75.580815 | 2.77E-17 |
| rs1149919   | 75.573318 | 2.78E-17 |
| rs3117576   | 75.559363 | 2.80E-17 |
| rs10213701  | 75.552437 | 2.81E-17 |
| rs1055348   | 75.535561 | 2.84E-17 |
| rs9282761   | 75.535265 | 2.84E-17 |
| rs17575643  | 75.533895 | 2.84E-17 |
| rs13210961  | 75.516850 | 2.86E-17 |
| rs11256101  | 75.514938 | 2.87E-17 |
| rs3793965   | 75.512079 | 2.87E-17 |
| rs9270556   | 75.497579 | 2.89E-17 |
| rs2706385   | 75.486566 | 2.91E-17 |
| rs8042237   | 75.484221 | 2.91E-17 |
| rs77213787  | 75.480808 | 2.92E-17 |
| rs12518884  | 75.475301 | 2.93E-17 |
| rs7999077   | 75.471815 | 2.93E-17 |
| rs8038652   | 75.471784 | 2.93E-17 |
| rs2070724   | 75.464075 | 2.95E-17 |
| rs9282762   | 75.451821 | 2.97E-17 |
| rs3117574   | 75.440411 | 2.98E-17 |
| rs1149920   | 75.431022 | 3.00E-17 |
| rs115636853 | 75.428129 | 3.00E-17 |
| rs1008397   | 75.423949 | 3.01E-17 |
| rs6869774   | 75.409282 | 3.03E-17 |
| rs75103235  | 75.394445 | 3.06E-17 |
| rs35129260  | 75.372066 | 3.10E-17 |
| rs9274514   | 75.361651 | 3.11E-17 |
| rs11466754  | 75.338609 | 3.15E-17 |
| rs11722421  | 75.320226 | 3.18E-17 |
| rs3117575   | 75.300711 | 3.22E-17 |
| rs2215942   | 75.299883 | 3.22E-17 |
| rs6498142   | 75.274906 | 3.26E-17 |
| rs115470510 | 75.273464 | 3.27E-17 |
| rs67872952  | 75.230504 | 3.34E-17 |
| rs28752510  | 75.227840 | 3.35E-17 |
| rs72849433  | 75.212214 | 3.37E-17 |

|            |           |          |
|------------|-----------|----------|
| rs2760194  | 75.211376 | 3.38E-17 |
| rs11466750 | 75.190147 | 3.42E-17 |
| rs2070726  | 75.183497 | 3.43E-17 |
| rs2548999  | 75.179292 | 3.44E-17 |
| rs9270050  | 75.171964 | 3.45E-17 |
| rs9271658  | 75.151025 | 3.49E-17 |
| rs12312693 | 75.137837 | 3.51E-17 |
| rs1150757  | 75.135994 | 3.52E-17 |
| rs7699742  | 75.131989 | 3.52E-17 |
| rs3132445  | 75.131368 | 3.53E-17 |
| rs2890696  | 75.120986 | 3.55E-17 |
| rs6986109  | 75.101615 | 3.58E-17 |
| rs3130484  | 75.099322 | 3.59E-17 |
| rs28854492 | 75.079338 | 3.63E-17 |
| rs3168046  | 75.070661 | 3.64E-17 |
| rs11256034 | 75.044926 | 3.69E-17 |
| rs11957838 | 75.041550 | 3.70E-17 |
| rs35524716 | 75.033114 | 3.72E-17 |
| rs4833095  | 75.032753 | 3.72E-17 |
| rs10905523 | 74.994336 | 3.80E-17 |
| rs2501721  | 74.989645 | 3.81E-17 |
| rs72687044 | 74.977796 | 3.83E-17 |
| rs3131379  | 74.963052 | 3.86E-17 |
| rs13147049 | 74.952126 | 3.88E-17 |
| rs3117577  | 74.927299 | 3.94E-17 |
| rs2960170  | 74.893629 | 4.01E-17 |
| rs7705304  | 74.889912 | 4.02E-17 |
| rs2857598  | 74.889735 | 4.02E-17 |
| rs59663729 | 74.880629 | 4.04E-17 |
| rs3024552  | 74.851788 | 4.10E-17 |
| rs12911370 | 74.827186 | 4.15E-17 |
| rs9266541  | 74.824144 | 4.16E-17 |
| rs4776909  | 74.810648 | 4.19E-17 |
| rs12592400 | 74.770040 | 4.28E-17 |
| rs7824394  | 74.764143 | 4.30E-17 |
| rs56167534 | 74.755453 | 4.32E-17 |
| rs58074225 | 74.743288 | 4.35E-17 |
| rs10075801 | 74.740210 | 4.35E-17 |
| rs957404   | 74.739807 | 4.35E-17 |
| rs2192667  | 74.737197 | 4.36E-17 |
| rs2960171  | 74.727159 | 4.38E-17 |
| rs2416257  | 74.698549 | 4.45E-17 |
| rs34221449 | 74.694731 | 4.46E-17 |
| rs12899051 | 74.683805 | 4.49E-17 |
| rs9266269  | 74.682707 | 4.49E-17 |
| rs4776350  | 74.677975 | 4.50E-17 |

|            |           |          |
|------------|-----------|----------|
| rs11673795 | 74.653435 | 4.56E-17 |
| rs28666575 | 74.641780 | 4.59E-17 |
| rs4776348  | 74.624135 | 4.63E-17 |
| rs1150753  | 74.620133 | 4.64E-17 |
| rs3131380  | 74.610767 | 4.67E-17 |
| rs497309   | 74.586204 | 4.73E-17 |
| rs58664169 | 74.583364 | 4.74E-17 |
| rs3131006  | 74.582304 | 4.74E-17 |
| rs9266270  | 74.575765 | 4.76E-17 |
| rs252710   | 74.573015 | 4.76E-17 |
| rs3131381  | 74.568294 | 4.78E-17 |
| rs16950804 | 74.566036 | 4.78E-17 |
| rs78391724 | 74.558318 | 4.80E-17 |
| rs1379299  | 74.547896 | 4.83E-17 |
| rs1150752  | 74.532440 | 4.87E-17 |
| rs55896286 | 74.518526 | 4.91E-17 |
| rs12591495 | 74.517224 | 4.91E-17 |
| rs10056179 | 74.511838 | 4.92E-17 |
| rs10152913 | 74.502126 | 4.95E-17 |
| rs3131383  | 74.500210 | 4.95E-17 |
| rs2034897  | 74.498400 | 4.96E-17 |
| rs1370964  | 74.488110 | 4.99E-17 |
| rs62404112 | 74.472622 | 5.03E-17 |
| rs7182798  | 74.471490 | 5.03E-17 |
| rs4352000  | 74.468105 | 5.04E-17 |
| rs9517707  | 74.468013 | 5.04E-17 |
| rs9517670  | 74.457801 | 5.07E-17 |
| rs10152973 | 74.451412 | 5.09E-17 |
| rs12900708 | 74.435228 | 5.13E-17 |
| rs36216730 | 74.433010 | 5.14E-17 |
| rs12595736 | 74.430723 | 5.14E-17 |
| rs9266266  | 74.420996 | 5.17E-17 |
| rs4776908  | 74.419170 | 5.17E-17 |
| rs3024655  | 74.407779 | 5.21E-17 |
| rs28645602 | 74.395594 | 5.24E-17 |
| rs4776913  | 74.395368 | 5.24E-17 |
| rs9513579  | 74.384282 | 5.27E-17 |
| rs8026870  | 74.370315 | 5.31E-17 |
| rs2289789  | 74.366543 | 5.32E-17 |
| rs72625777 | 74.361776 | 5.34E-17 |
| rs12899067 | 74.358994 | 5.35E-17 |
| rs7701967  | 74.357271 | 5.35E-17 |
| rs8042007  | 74.356750 | 5.35E-17 |
| rs12594229 | 74.353652 | 5.36E-17 |
| rs3887082  | 74.337636 | 5.41E-17 |
| rs72625778 | 74.335168 | 5.41E-17 |

|             |           |          |
|-------------|-----------|----------|
| rs9517646   | 74.330996 | 5.43E-17 |
| rs9271771   | 74.319764 | 5.46E-17 |
| rs16950805  | 74.318007 | 5.46E-17 |
| rs36221399  | 74.317145 | 5.47E-17 |
| rs8038920   | 74.314351 | 5.48E-17 |
| rs12910196  | 74.313418 | 5.48E-17 |
| rs16950776  | 74.313042 | 5.48E-17 |
| rs2192666   | 74.309397 | 5.49E-17 |
| rs10900804  | 74.303371 | 5.51E-17 |
| rs3743347   | 74.289298 | 5.55E-17 |
| rs2199036   | 74.284227 | 5.57E-17 |
| rs4772194   | 74.280009 | 5.58E-17 |
| rs4530809   | 74.279803 | 5.58E-17 |
| rs71400364  | 74.267574 | 5.62E-17 |
| rs35322464  | 74.266160 | 5.62E-17 |
| rs35151633  | 74.263007 | 5.63E-17 |
| rs12594234  | 74.255040 | 5.65E-17 |
| rs17526859  | 74.249621 | 5.67E-17 |
| rs1444935   | 74.243055 | 5.69E-17 |
| rs10905525  | 74.242894 | 5.69E-17 |
| rs7722241   | 74.215206 | 5.78E-17 |
| rs12442171  | 74.195128 | 5.84E-17 |
| rs4238407   | 74.185020 | 5.87E-17 |
| rs3101018   | 74.176901 | 5.90E-17 |
| rs2071293   | 74.176828 | 5.90E-17 |
| rs7225787   | 74.175208 | 5.90E-17 |
| rs16953610  | 74.167876 | 5.93E-17 |
| rs17421624  | 74.165510 | 5.93E-17 |
| rs9557215   | 74.163325 | 5.94E-17 |
| rs145835664 | 74.155578 | 5.96E-17 |
| rs12901312  | 74.152664 | 5.97E-17 |
| rs28592859  | 74.145898 | 6.00E-17 |
| rs17616434  | 74.143823 | 6.00E-17 |
| rs12915601  | 74.127427 | 6.06E-17 |
| rs12324222  | 74.117077 | 6.09E-17 |
| rs72648072  | 74.109261 | 6.12E-17 |
| rs12916403  | 74.071686 | 6.24E-17 |
| rs35008245  | 74.062682 | 6.27E-17 |
| rs877177    | 74.055654 | 6.29E-17 |
| rs67486165  | 74.026890 | 6.39E-17 |
| rs4536412   | 74.024152 | 6.40E-17 |
| rs35997299  | 73.998774 | 6.49E-17 |
| rs34310656  | 73.992923 | 6.51E-17 |
| rs7148882   | 73.989925 | 6.52E-17 |
| rs63749607  | 73.985295 | 6.54E-17 |
| rs2289262   | 73.983295 | 6.55E-17 |



|             |           |          |
|-------------|-----------|----------|
| rs28895050  | 73.977657 | 6.57E-17 |
| rs72648071  | 73.977098 | 6.57E-17 |
| rs11256208  | 73.958382 | 6.63E-17 |
| rs17506027  | 73.955180 | 6.65E-17 |
| rs2033783   | 73.952518 | 6.65E-17 |
| rs74623270  | 73.950201 | 6.66E-17 |
| rs4491456   | 73.934922 | 6.72E-17 |
| rs190231509 | 73.929711 | 6.74E-17 |
| rs12910062  | 73.899057 | 6.85E-17 |
| rs78702533  | 73.898041 | 6.85E-17 |
| rs55684690  | 73.897044 | 6.86E-17 |
| rs12898685  | 73.895594 | 6.86E-17 |
| rs12148134  | 73.883697 | 6.91E-17 |
| rs17485180  | 73.873385 | 6.94E-17 |
| rs6531663   | 73.866914 | 6.97E-17 |
| rs62556407  | 73.839749 | 7.07E-17 |
| rs28746839  | 73.822528 | 7.14E-17 |
| rs12900758  | 73.817701 | 7.16E-17 |
| rs4776917   | 73.783831 | 7.29E-17 |
| rs55956730  | 73.776274 | 7.32E-17 |
| rs72849425  | 73.773997 | 7.33E-17 |
| rs4795402   | 73.767934 | 7.35E-17 |
| rs113203559 | 73.757727 | 7.39E-17 |
| rs34796890  | 73.749890 | 7.42E-17 |
| rs185350680 | 73.739289 | 7.46E-17 |
| rs8030620   | 73.728365 | 7.51E-17 |
| rs11071940  | 73.713325 | 7.57E-17 |
| rs16924144  | 73.681949 | 7.70E-17 |
| rs61938963  | 73.662747 | 7.78E-17 |
| rs4776905   | 73.630384 | 7.92E-17 |
| rs3117573   | 73.626313 | 7.93E-17 |
| rs4776906   | 73.624710 | 7.94E-17 |
| rs899997    | 73.616974 | 7.97E-17 |
| rs8031500   | 73.598379 | 8.05E-17 |
| rs6908626   | 73.581094 | 8.13E-17 |
| rs55982910  | 73.564943 | 8.20E-17 |
| rs61938962  | 73.562438 | 8.21E-17 |
| rs2706386   | 73.554969 | 8.24E-17 |
| rs12917612  | 73.550575 | 8.26E-17 |
| rs10438355  | 73.547440 | 8.28E-17 |
| rs4432221   | 73.528890 | 8.36E-17 |
| rs35722009  | 73.515706 | 8.42E-17 |
| rs9271770   | 73.511143 | 8.44E-17 |
| rs28464365  | 73.504372 | 8.47E-17 |
| rs12476     | 73.488628 | 8.54E-17 |
| rs12594065  | 73.484450 | 8.56E-17 |

|             |           |          |
|-------------|-----------|----------|
| rs72797327  | 73.469388 | 8.63E-17 |
| rs6815814   | 73.454900 | 8.70E-17 |
| rs28696998  | 73.454749 | 8.70E-17 |
| rs8043060   | 73.436948 | 8.79E-17 |
| rs12445568  | 73.435103 | 8.79E-17 |
| rs9806590   | 73.413976 | 8.90E-17 |
| rs67456882  | 73.401384 | 8.96E-17 |
| rs12915659  | 73.396783 | 8.98E-17 |
| rs76507644  | 73.364052 | 9.14E-17 |
| rs12915085  | 73.361427 | 9.15E-17 |
| rs34590589  | 73.359178 | 9.16E-17 |
| rs12442323  | 73.338843 | 9.26E-17 |
| rs3091338   | 73.337514 | 9.27E-17 |
| rs17505882  | 73.336498 | 9.27E-17 |
| rs12148121  | 73.320102 | 9.36E-17 |
| rs13357747  | 73.301408 | 9.45E-17 |
| rs79677293  | 73.283110 | 9.54E-17 |
| rs10518716  | 73.283033 | 9.55E-17 |
| rs17426565  | 73.282149 | 9.55E-17 |
| rs8039943   | 73.267438 | 9.63E-17 |
| rs12915539  | 73.266567 | 9.63E-17 |
| rs11814404  | 73.246712 | 9.73E-17 |
| rs34296414  | 73.246013 | 9.74E-17 |
| rs41316208  | 73.236233 | 9.79E-17 |
| rs34699563  | 73.222802 | 9.86E-17 |
| rs1270942   | 73.197531 | 1.00E-16 |
| rs7480725   | 73.192835 | 1.00E-16 |
| rs686112    | 73.188258 | 1.00E-16 |
| rs16924159  | 73.151015 | 1.02E-16 |
| rs3798129   | 73.095827 | 1.06E-16 |
| rs6011779   | 73.086792 | 1.06E-16 |
| rs3130564   | 73.076987 | 1.07E-16 |
| rs5743604   | 73.066381 | 1.07E-16 |
| rs27071     | 73.051177 | 1.08E-16 |
| rs11948761  | 73.041444 | 1.09E-16 |
| rs7502233   | 73.036313 | 1.09E-16 |
| rs144441217 | 73.028509 | 1.09E-16 |
| rs115675626 | 73.025481 | 1.10E-16 |
| rs7719499   | 73.014335 | 1.10E-16 |
| rs324012    | 72.970641 | 1.13E-16 |
| rs149543464 | 72.956645 | 1.14E-16 |
| rs11958503  | 72.952176 | 1.14E-16 |
| rs9271655   | 72.951289 | 1.14E-16 |
| rs9308859   | 72.931454 | 1.15E-16 |
| rs13267071  | 72.921517 | 1.16E-16 |
| rs3869145   | 72.907226 | 1.17E-16 |

|             |           |          |
|-------------|-----------|----------|
| rs961945    | 72.906127 | 1.17E-16 |
| rs140145058 | 72.885279 | 1.18E-16 |
| rs7203999   | 72.880470 | 1.19E-16 |
| rs402087    | 72.878750 | 1.19E-16 |
| rs11695255  | 72.867336 | 1.19E-16 |
| rs13275909  | 72.841479 | 1.21E-16 |
| rs9271069   | 72.799827 | 1.24E-16 |
| rs9916779   | 72.761946 | 1.26E-16 |
| rs2069803   | 72.759010 | 1.27E-16 |
| rs13265296  | 72.740550 | 1.28E-16 |
| rs12617922  | 72.722386 | 1.29E-16 |
| rs9270101   | 72.684623 | 1.32E-16 |
| rs17166215  | 72.671862 | 1.33E-16 |
| rs3825426   | 72.663949 | 1.33E-16 |
| rs9273529   | 72.651275 | 1.34E-16 |
| rs12901241  | 72.627299 | 1.36E-16 |
| rs5743551   | 72.600421 | 1.38E-16 |
| rs77484451  | 72.551852 | 1.42E-16 |
| rs9300546   | 72.500817 | 1.45E-16 |
| rs4889526   | 72.491231 | 1.46E-16 |
| rs35704045  | 72.477745 | 1.47E-16 |
| rs11629639  | 72.471218 | 1.48E-16 |
| rs4277393   | 72.457963 | 1.49E-16 |
| rs13266153  | 72.454996 | 1.49E-16 |
| rs11745207  | 72.438769 | 1.50E-16 |
| rs75301863  | 72.432367 | 1.51E-16 |
| rs7700687   | 72.411961 | 1.53E-16 |
| rs17505816  | 72.411590 | 1.53E-16 |
| rs11079866  | 72.410984 | 1.53E-16 |
| rs77249403  | 72.396440 | 1.54E-16 |
| rs75184873  | 72.376706 | 1.56E-16 |
| rs12935412  | 72.365297 | 1.56E-16 |
| rs2070725   | 72.361709 | 1.57E-16 |
| rs57896917  | 72.330369 | 1.59E-16 |
| rs72846374  | 72.322511 | 1.60E-16 |
| rs157572    | 72.321744 | 1.60E-16 |
| rs6580229   | 72.309755 | 1.61E-16 |
| rs207261    | 72.288313 | 1.63E-16 |
| rs4543123   | 72.247931 | 1.67E-16 |
| rs56126327  | 72.246210 | 1.67E-16 |
| rs9271413   | 72.239060 | 1.68E-16 |
| rs10040809  | 72.221488 | 1.69E-16 |
| rs116762473 | 72.221414 | 1.69E-16 |
| rs9271423   | 72.170388 | 1.74E-16 |
| rs78267753  | 72.166077 | 1.74E-16 |
| rs28510673  | 72.151522 | 1.76E-16 |

|             |           |          |
|-------------|-----------|----------|
| rs10131490  | 72.151517 | 1.76E-16 |
| rs13266315  | 72.127784 | 1.78E-16 |
| rs4912622   | 72.121636 | 1.78E-16 |
| rs449454    | 72.114177 | 1.79E-16 |
| rs77167348  | 72.098483 | 1.81E-16 |
| rs12656877  | 72.084064 | 1.82E-16 |
| rs249641    | 72.079276 | 1.83E-16 |
| rs12655465  | 72.043120 | 1.86E-16 |
| rs4912807   | 72.034909 | 1.87E-16 |
| rs6985449   | 72.029828 | 1.87E-16 |
| rs12653866  | 72.029441 | 1.88E-16 |
| rs11256045  | 72.015762 | 1.89E-16 |
| rs7718955   | 72.013198 | 1.89E-16 |
| rs10039043  | 72.001782 | 1.90E-16 |
| rs7731821   | 71.980858 | 1.92E-16 |
| rs34255993  | 71.970650 | 1.94E-16 |
| rs12653848  | 71.934266 | 1.97E-16 |
| rs4705959   | 71.933451 | 1.97E-16 |
| rs6580225   | 71.920358 | 1.99E-16 |
| rs3132466   | 71.909976 | 2.00E-16 |
| rs6580223   | 71.905393 | 2.00E-16 |
| rs249642    | 71.901450 | 2.01E-16 |
| rs185241389 | 71.895123 | 2.02E-16 |
| rs71379351  | 71.885827 | 2.03E-16 |
| rs2406411   | 71.881880 | 2.03E-16 |
| rs57576577  | 71.879764 | 2.03E-16 |
| rs181826    | 71.850633 | 2.06E-16 |
| rs6580224   | 71.843356 | 2.07E-16 |
| rs3024665   | 71.841024 | 2.08E-16 |
| rs9673641   | 71.827100 | 2.09E-16 |
| rs2892976   | 71.820869 | 2.10E-16 |
| rs207277    | 71.819966 | 2.10E-16 |
| rs7169223   | 71.809380 | 2.11E-16 |
| rs6887731   | 71.805463 | 2.12E-16 |
| rs6580228   | 71.803726 | 2.12E-16 |
| rs249643    | 71.800437 | 2.12E-16 |
| rs7184567   | 71.753472 | 2.18E-16 |
| rs413214    | 71.753110 | 2.18E-16 |
| rs10041497  | 71.750579 | 2.18E-16 |
| rs7944723   | 71.706354 | 2.23E-16 |
| rs35570272  | 71.702993 | 2.24E-16 |
| rs12515668  | 71.701198 | 2.24E-16 |
| rs4889609   | 71.687824 | 2.25E-16 |
| rs10068717  | 71.681182 | 2.26E-16 |
| rs41267082  | 71.675629 | 2.27E-16 |
| rs7733850   | 71.673943 | 2.27E-16 |

|             |           |          |
|-------------|-----------|----------|
| rs13184323  | 71.662487 | 2.28E-16 |
| rs4391200   | 71.640589 | 2.31E-16 |
| rs7712237   | 71.638458 | 2.31E-16 |
| rs7705547   | 71.632314 | 2.32E-16 |
| rs10876866  | 71.628743 | 2.33E-16 |
| rs2043280   | 71.618446 | 2.34E-16 |
| rs4385236   | 71.615242 | 2.34E-16 |
| rs10875596  | 71.607506 | 2.35E-16 |
| rs11681159  | 71.581142 | 2.39E-16 |
| rs6860138   | 71.580026 | 2.39E-16 |
| rs11739623  | 71.573011 | 2.40E-16 |
| rs7709361   | 71.570158 | 2.40E-16 |
| rs4912804   | 71.569353 | 2.40E-16 |
| rs9266258   | 71.563013 | 2.41E-16 |
| rs34454770  | 71.533253 | 2.45E-16 |
| rs2338821   | 71.529623 | 2.45E-16 |
| rs4912805   | 71.514410 | 2.47E-16 |
| rs1457114   | 71.514066 | 2.48E-16 |
| rs10062349  | 71.500570 | 2.49E-16 |
| rs166079    | 71.460387 | 2.55E-16 |
| rs79851609  | 71.451475 | 2.56E-16 |
| rs114146939 | 71.434294 | 2.58E-16 |
| rs78568738  | 71.420323 | 2.60E-16 |
| rs12949836  | 71.414351 | 2.61E-16 |
| rs13188700  | 71.387518 | 2.65E-16 |
| rs2069616   | 71.381942 | 2.66E-16 |
| rs249638    | 71.380285 | 2.66E-16 |
| rs3024664   | 71.365376 | 2.68E-16 |
| rs9324866   | 71.359573 | 2.69E-16 |
| rs116926501 | 71.357999 | 2.69E-16 |
| rs6863411   | 71.350667 | 2.70E-16 |
| rs2145423   | 71.346399 | 2.71E-16 |
| rs2395042   | 71.345332 | 2.71E-16 |
| rs9270593   | 71.342461 | 2.71E-16 |
| rs13393501  | 71.319768 | 2.75E-16 |
| rs116029711 | 71.290277 | 2.79E-16 |
| rs116667074 | 71.282355 | 2.80E-16 |
| rs1036207   | 71.270110 | 2.82E-16 |
| rs2523573   | 71.226748 | 2.89E-16 |
| rs2370613   | 71.222961 | 2.90E-16 |
| rs3765011   | 71.202321 | 2.93E-16 |
| rs1269852   | 71.187313 | 2.95E-16 |
| rs1036209   | 71.187083 | 2.95E-16 |
| rs2523593   | 71.179636 | 2.96E-16 |
| rs9270592   | 71.176531 | 2.97E-16 |
| rs11695876  | 71.176095 | 2.97E-16 |

|            |           |          |
|------------|-----------|----------|
| rs433061   | 71.153847 | 3.00E-16 |
| rs10011954 | 71.151001 | 3.01E-16 |
| rs2853999  | 71.141661 | 3.02E-16 |
| rs9270529  | 71.132243 | 3.04E-16 |
| rs3891175  | 71.117220 | 3.06E-16 |
| rs1516145  | 71.106478 | 3.08E-16 |
| rs3798132  | 71.103144 | 3.09E-16 |
| rs10204857 | 71.088612 | 3.11E-16 |
| rs11739961 | 71.086281 | 3.12E-16 |
| rs4662420  | 71.063801 | 3.15E-16 |
| rs72928038 | 71.047439 | 3.18E-16 |
| rs9270583  | 71.035596 | 3.20E-16 |
| rs72669169 | 71.010361 | 3.25E-16 |
| rs10175039 | 70.998430 | 3.27E-16 |
| rs6874308  | 70.986634 | 3.29E-16 |
| rs41316544 | 70.985386 | 3.29E-16 |
| rs1032295  | 70.974084 | 3.31E-16 |
| rs34451186 | 70.969111 | 3.32E-16 |
| rs4148878  | 70.962693 | 3.33E-16 |
| rs10201277 | 70.961885 | 3.33E-16 |
| rs207256   | 70.961822 | 3.33E-16 |
| rs1835966  | 70.946472 | 3.36E-16 |
| rs2063862  | 70.946242 | 3.36E-16 |
| rs2237059  | 70.944867 | 3.36E-16 |
| rs10463348 | 70.943019 | 3.37E-16 |
| rs1516141  | 70.923502 | 3.40E-16 |
| rs7302200  | 70.922456 | 3.40E-16 |
| rs4912623  | 70.885425 | 3.47E-16 |
| rs1835965  | 70.880337 | 3.48E-16 |
| rs79134926 | 70.873577 | 3.49E-16 |
| rs6882226  | 70.864173 | 3.51E-16 |
| rs6877864  | 70.857271 | 3.53E-16 |
| rs705704   | 70.850450 | 3.54E-16 |
| rs58726213 | 70.814800 | 3.61E-16 |
| rs2640564  | 70.813767 | 3.61E-16 |
| rs9270559  | 70.808313 | 3.62E-16 |
| rs207259   | 70.800491 | 3.63E-16 |
| rs59568225 | 70.797885 | 3.64E-16 |
| rs11072793 | 70.786583 | 3.66E-16 |
| rs36202958 | 70.786417 | 3.66E-16 |
| rs772921   | 70.785583 | 3.66E-16 |
| rs12929836 | 70.768147 | 3.70E-16 |
| rs55694962 | 70.749552 | 3.74E-16 |
| rs11749731 | 70.748473 | 3.74E-16 |
| rs2299010  | 70.739742 | 3.76E-16 |
| rs35515288 | 70.739331 | 3.76E-16 |

|             |           |          |
|-------------|-----------|----------|
| rs9270505   | 70.737659 | 3.76E-16 |
| rs9554570   | 70.714334 | 3.81E-16 |
| rs2523616   | 70.711460 | 3.81E-16 |
| rs4887074   | 70.705971 | 3.82E-16 |
| rs2299007   | 70.699445 | 3.84E-16 |
| rs2338822   | 70.689937 | 3.86E-16 |
| rs7737631   | 70.683989 | 3.87E-16 |
| rs9270558   | 70.664932 | 3.91E-16 |
| rs141405779 | 70.636968 | 3.97E-16 |
| rs12950511  | 70.609542 | 4.03E-16 |
| rs67719080  | 70.604037 | 4.04E-16 |
| rs2406410   | 70.589447 | 4.07E-16 |
| rs34562262  | 70.588003 | 4.08E-16 |
| rs1131017   | 70.577556 | 4.10E-16 |
| rs2395043   | 70.567492 | 4.12E-16 |
| rs11633152  | 70.566303 | 4.12E-16 |
| rs4794035   | 70.554707 | 4.15E-16 |
| rs4473904   | 70.526865 | 4.21E-16 |
| rs2069614   | 70.524717 | 4.22E-16 |
| rs7735429   | 70.516543 | 4.23E-16 |
| rs41270915  | 70.514046 | 4.24E-16 |
| rs17689550  | 70.495979 | 4.28E-16 |
| rs12912524  | 70.494751 | 4.28E-16 |
| rs72827174  | 70.483028 | 4.31E-16 |
| rs41270887  | 70.480063 | 4.32E-16 |
| rs77481341  | 70.464494 | 4.36E-16 |
| rs10455052  | 70.461905 | 4.36E-16 |
| rs2180769   | 70.460437 | 4.36E-16 |
| rs12447930  | 70.441672 | 4.41E-16 |
| rs6883827   | 70.440788 | 4.41E-16 |
| rs59354656  | 70.428941 | 4.44E-16 |
| rs74725049  | 70.408445 | 4.49E-16 |
| rs9270551   | 70.395437 | 4.52E-16 |
| rs4833093   | 70.386061 | 4.54E-16 |
| rs114609017 | 70.357891 | 4.61E-16 |
| rs149574814 | 70.327395 | 4.69E-16 |
| rs13277346  | 70.309826 | 4.73E-16 |
| rs17132288  | 70.307755 | 4.74E-16 |
| rs6721116   | 70.293536 | 4.78E-16 |
| rs12899940  | 70.270562 | 4.83E-16 |
| rs4566223   | 70.269548 | 4.84E-16 |
| rs2283561   | 70.249429 | 4.89E-16 |
| rs12411907  | 70.202403 | 5.02E-16 |
| rs1814880   | 70.192764 | 5.04E-16 |
| rs75185583  | 70.185080 | 5.06E-16 |
| rs11465732  | 70.177163 | 5.08E-16 |

|             |           |          |
|-------------|-----------|----------|
| rs72842467  | 70.158141 | 5.14E-16 |
| rs9784600   | 70.153947 | 5.15E-16 |
| rs112906665 | 70.143662 | 5.18E-16 |
| rs72800847  | 70.138808 | 5.19E-16 |
| rs1444936   | 70.134730 | 5.20E-16 |
| rs11936050  | 70.125372 | 5.23E-16 |
| rs9888691   | 70.121036 | 5.24E-16 |
| rs1701704   | 70.117552 | 5.25E-16 |
| rs2243208   | 70.114720 | 5.26E-16 |
| rs56284083  | 70.114415 | 5.26E-16 |
| rs72669168  | 70.108548 | 5.28E-16 |
| rs116587947 | 70.081763 | 5.35E-16 |
| rs78400042  | 70.071839 | 5.38E-16 |
| rs11648049  | 70.048541 | 5.45E-16 |
| rs147402766 | 70.046114 | 5.46E-16 |
| rs7500176   | 70.044753 | 5.46E-16 |
| rs4887078   | 70.038712 | 5.48E-16 |
| rs207255    | 70.007098 | 5.57E-16 |
| rs76718063  | 70.001391 | 5.59E-16 |
| rs2456973   | 69.981084 | 5.65E-16 |
| rs12905273  | 69.961498 | 5.71E-16 |
| rs10905522  | 69.957635 | 5.72E-16 |
| rs7658893   | 69.956085 | 5.73E-16 |
| rs8056842   | 69.953964 | 5.73E-16 |
| rs1861228   | 69.946427 | 5.76E-16 |
| rs2549002   | 69.880145 | 5.97E-16 |
| rs28746843  | 69.878289 | 5.97E-16 |
| rs12445650  | 69.871204 | 5.99E-16 |
| rs147285098 | 69.867482 | 6.01E-16 |
| rs12212535  | 69.837908 | 6.10E-16 |
| rs10508372  | 69.824065 | 6.15E-16 |
| rs28694044  | 69.766275 | 6.34E-16 |
| rs11633170  | 69.750927 | 6.39E-16 |
| rs12916717  | 69.743204 | 6.42E-16 |
| rs11634628  | 69.732602 | 6.46E-16 |
| rs4576012   | 69.719777 | 6.50E-16 |
| rs1135430   | 69.704565 | 6.56E-16 |
| rs72669170  | 69.701674 | 6.57E-16 |
| rs9271147   | 69.672252 | 6.67E-16 |
| rs4833835   | 69.663939 | 6.70E-16 |
| rs7670532   | 69.656180 | 6.73E-16 |
| rs17839567  | 69.649083 | 6.75E-16 |
| rs145680698 | 69.645621 | 6.77E-16 |
| rs9806377   | 69.637234 | 6.80E-16 |
| rs78084308  | 69.633311 | 6.81E-16 |
| rs2243291   | 69.631975 | 6.82E-16 |



|             |           |          |
|-------------|-----------|----------|
| rs7166081   | 69.629115 | 6.83E-16 |
| rs10209131  | 69.626042 | 6.84E-16 |
| rs2734325   | 69.622348 | 6.85E-16 |
| rs6837165   | 69.620477 | 6.86E-16 |
| rs12233670  | 69.617388 | 6.87E-16 |
| rs13274067  | 69.609308 | 6.90E-16 |
| rs6829656   | 69.602507 | 6.93E-16 |
| rs4566915   | 69.599771 | 6.94E-16 |
| rs77476954  | 69.596017 | 6.95E-16 |
| rs12602769  | 69.579960 | 7.01E-16 |
| rs6830814   | 69.579748 | 7.01E-16 |
| rs75046941  | 69.573270 | 7.04E-16 |
| rs78539108  | 69.551033 | 7.12E-16 |
| rs12905116  | 69.542938 | 7.15E-16 |
| rs183736834 | 69.526324 | 7.22E-16 |
| rs11862744  | 69.516251 | 7.26E-16 |
| rs28580532  | 69.498815 | 7.32E-16 |
| rs11616509  | 69.473124 | 7.43E-16 |
| rs35468353  | 69.471590 | 7.43E-16 |
| rs13209654  | 69.456955 | 7.49E-16 |
| rs13030994  | 69.448418 | 7.53E-16 |
| rs57345398  | 69.437614 | 7.57E-16 |
| rs6852535   | 69.426726 | 7.61E-16 |
| rs12217609  | 69.423532 | 7.63E-16 |
| rs11072794  | 69.405181 | 7.70E-16 |
| rs72825956  | 69.376071 | 7.82E-16 |
| rs4448132   | 69.368291 | 7.86E-16 |
| rs56245106  | 69.358426 | 7.90E-16 |
| rs9271082   | 69.352804 | 7.92E-16 |
| rs11640957  | 69.332167 | 8.01E-16 |
| rs3743342   | 69.329801 | 8.02E-16 |
| rs2243270   | 69.314823 | 8.09E-16 |
| rs11640767  | 69.304846 | 8.13E-16 |
| rs11079867  | 69.288342 | 8.20E-16 |
| rs12148817  | 69.288241 | 8.20E-16 |
| rs28530648  | 69.284333 | 8.22E-16 |
| rs28361064  | 69.258955 | 8.33E-16 |
| rs2857009   | 69.254576 | 8.35E-16 |
| rs12595334  | 69.250672 | 8.37E-16 |
| rs17005850  | 69.237732 | 8.43E-16 |
| rs7714191   | 69.236346 | 8.43E-16 |
| rs76407406  | 69.221463 | 8.50E-16 |
| rs6473218   | 69.216270 | 8.53E-16 |
| rs6834581   | 69.215284 | 8.53E-16 |
| rs9274408   | 69.207808 | 8.57E-16 |
| rs117317274 | 69.207586 | 8.57E-16 |

|             |           |          |
|-------------|-----------|----------|
| rs1702877   | 69.206460 | 8.57E-16 |
| rs12943264  | 69.205058 | 8.58E-16 |
| rs6893937   | 69.201292 | 8.60E-16 |
| rs11256099  | 69.197543 | 8.61E-16 |
| rs2596500   | 69.196270 | 8.62E-16 |
| rs137893789 | 69.184437 | 8.67E-16 |
| rs3094222   | 69.181316 | 8.69E-16 |
| rs9784675   | 69.169021 | 8.75E-16 |
| rs2233980   | 69.153207 | 8.82E-16 |
| rs7708      | 69.152978 | 8.82E-16 |
| rs11786704  | 69.150238 | 8.84E-16 |
| rs9274623   | 69.149610 | 8.84E-16 |
| rs7158493   | 69.147789 | 8.85E-16 |
| rs61670843  | 69.142049 | 8.87E-16 |
| rs75806674  | 69.129112 | 8.94E-16 |
| rs803137    | 69.115125 | 9.00E-16 |
| rs7172011   | 69.107627 | 9.04E-16 |
| rs721121    | 69.099333 | 9.08E-16 |
| rs74319752  | 69.096536 | 9.09E-16 |
| rs34338764  | 69.094196 | 9.11E-16 |
| rs72669176  | 69.085046 | 9.15E-16 |
| rs10013453  | 69.071969 | 9.22E-16 |
| rs2310313   | 69.066724 | 9.24E-16 |
| rs803139    | 69.063920 | 9.26E-16 |
| rs117694039 | 69.059824 | 9.28E-16 |
| rs192408808 | 69.057479 | 9.29E-16 |
| rs10803511  | 69.057021 | 9.29E-16 |
| rs6818415   | 69.054435 | 9.30E-16 |
| rs249677    | 69.053523 | 9.31E-16 |
| rs9513609   | 69.051986 | 9.31E-16 |
| rs17695075  | 69.040978 | 9.37E-16 |
| rs3130557   | 69.030393 | 9.42E-16 |
| rs12883719  | 69.020654 | 9.47E-16 |
| rs4833836   | 69.018692 | 9.48E-16 |
| rs113505497 | 69.011801 | 9.52E-16 |
| rs1108431   | 69.011334 | 9.52E-16 |
| rs4833251   | 69.008275 | 9.54E-16 |
| rs729482    | 69.003418 | 9.56E-16 |
| rs2087097   | 68.989985 | 9.63E-16 |
| rs75375842  | 68.968672 | 9.74E-16 |
| rs76384286  | 68.966200 | 9.75E-16 |
| rs11642003  | 68.961646 | 9.78E-16 |
| rs7571606   | 68.950912 | 9.84E-16 |
| rs72669180  | 68.944176 | 9.87E-16 |
| rs11627646  | 68.937926 | 9.90E-16 |
| rs3024530   | 68.934023 | 9.93E-16 |

|             |           |          |
|-------------|-----------|----------|
| rs9517722   | 68.929937 | 9.95E-16 |
| rs10163040  | 68.926640 | 9.96E-16 |
| rs17413004  | 68.892657 | 1.01E-15 |
| rs116583816 | 68.892349 | 1.02E-15 |
| rs12915669  | 68.876306 | 1.02E-15 |
| rs207254    | 68.867856 | 1.03E-15 |
| rs17504534  | 68.867183 | 1.03E-15 |
| rs17413266  | 68.861057 | 1.03E-15 |
| rs138501911 | 68.854235 | 1.04E-15 |
| rs6461503   | 68.843720 | 1.04E-15 |
| rs76141549  | 68.835225 | 1.05E-15 |
| rs1809412   | 68.825067 | 1.05E-15 |
| rs73732214  | 68.823151 | 1.05E-15 |
| rs112501534 | 68.822574 | 1.05E-15 |
| rs2523571   | 68.794434 | 1.07E-15 |
| rs11629824  | 68.777397 | 1.08E-15 |
| rs4772195   | 68.760857 | 1.09E-15 |
| rs58265620  | 68.752338 | 1.09E-15 |
| rs6473228   | 68.746494 | 1.10E-15 |
| rs12443279  | 68.746000 | 1.10E-15 |
| rs7732667   | 68.739280 | 1.10E-15 |
| rs1526923   | 68.735457 | 1.10E-15 |
| rs59201425  | 68.715980 | 1.12E-15 |
| rs55979739  | 68.690752 | 1.13E-15 |
| rs4618337   | 68.688060 | 1.13E-15 |
| rs7658651   | 68.685216 | 1.13E-15 |
| rs4833811   | 68.682626 | 1.14E-15 |
| rs4833829   | 68.673372 | 1.14E-15 |
| rs2071295   | 68.660068 | 1.15E-15 |
| rs1956524   | 68.640979 | 1.16E-15 |
| rs79186901  | 68.636453 | 1.16E-15 |
| rs80353671  | 68.632829 | 1.17E-15 |
| rs72669155  | 68.628407 | 1.17E-15 |
| rs6985506   | 68.611832 | 1.18E-15 |
| rs45463791  | 68.611730 | 1.18E-15 |
| rs143439747 | 68.594158 | 1.19E-15 |
| rs11236795  | 68.592357 | 1.19E-15 |
| rs34665982  | 68.591400 | 1.19E-15 |
| rs3132541   | 68.573642 | 1.20E-15 |
| rs3130985   | 68.570958 | 1.21E-15 |
| rs34415530  | 68.562231 | 1.21E-15 |
| rs17005786  | 68.562032 | 1.21E-15 |
| rs2287047   | 68.555369 | 1.22E-15 |
| rs74813816  | 68.554507 | 1.22E-15 |
| rs2278670   | 68.547038 | 1.22E-15 |
| rs10074490  | 68.542871 | 1.22E-15 |

|             |           |          |
|-------------|-----------|----------|
| rs149013447 | 68.533852 | 1.23E-15 |
| rs6827824   | 68.494237 | 1.26E-15 |
| rs6902493   | 68.487073 | 1.26E-15 |
| rs2064912   | 68.485344 | 1.26E-15 |
| rs3130562   | 68.478633 | 1.27E-15 |
| rs10012017  | 68.468159 | 1.28E-15 |
| rs11255979  | 68.445974 | 1.29E-15 |
| rs73142654  | 68.438538 | 1.30E-15 |
| rs7686651   | 68.414319 | 1.31E-15 |
| rs72669161  | 68.401656 | 1.32E-15 |
| rs1263698   | 68.399845 | 1.32E-15 |
| rs7690352   | 68.394286 | 1.33E-15 |
| rs8031627   | 68.388107 | 1.33E-15 |
| rs6922431   | 68.358190 | 1.35E-15 |
| rs112723723 | 68.322433 | 1.38E-15 |
| rs972425    | 68.300209 | 1.40E-15 |
| rs4833832   | 68.299002 | 1.40E-15 |
| rs12295411  | 68.295201 | 1.40E-15 |
| rs45524535  | 68.282445 | 1.41E-15 |
| rs1479923   | 68.278535 | 1.41E-15 |
| rs2069762   | 68.278400 | 1.41E-15 |
| rs9269437   | 68.268470 | 1.42E-15 |
| rs78306420  | 68.260577 | 1.43E-15 |
| rs8031440   | 68.259831 | 1.43E-15 |
| rs28393318  | 68.250137 | 1.43E-15 |
| rs8061047   | 68.245827 | 1.44E-15 |
| rs10899230  | 68.242220 | 1.44E-15 |
| rs146668528 | 68.224887 | 1.45E-15 |
| rs1989195   | 68.217852 | 1.46E-15 |
| rs9306967   | 68.215386 | 1.46E-15 |
| rs9273463   | 68.213403 | 1.46E-15 |
| rs10905488  | 68.213353 | 1.46E-15 |
| rs7692155   | 68.197623 | 1.47E-15 |
| rs35688953  | 68.178486 | 1.49E-15 |
| rs10244416  | 68.139420 | 1.52E-15 |
| rs7177201   | 68.136500 | 1.52E-15 |
| rs669686    | 68.086651 | 1.57E-15 |
| rs7687515   | 68.031813 | 1.61E-15 |
| rs4902567   | 68.028288 | 1.62E-15 |
| rs2013413   | 68.019608 | 1.62E-15 |
| rs35961830  | 68.019579 | 1.62E-15 |
| rs2064911   | 68.007445 | 1.63E-15 |
| rs2233956   | 67.995087 | 1.64E-15 |
| rs150671681 | 67.988476 | 1.65E-15 |
| rs36226286  | 67.980366 | 1.66E-15 |
| rs28441428  | 67.978519 | 1.66E-15 |

|             |           |          |
|-------------|-----------|----------|
| rs17207951  | 67.971543 | 1.67E-15 |
| rs7664239   | 67.968613 | 1.67E-15 |
| rs76388981  | 67.963785 | 1.67E-15 |
| rs78776915  | 67.925055 | 1.71E-15 |
| rs922691    | 67.924891 | 1.71E-15 |
| rs78553942  | 67.914039 | 1.72E-15 |
| rs72684793  | 67.905877 | 1.73E-15 |
| rs8025774   | 67.904278 | 1.73E-15 |
| rs74127604  | 67.897983 | 1.73E-15 |
| rs2287049   | 67.897691 | 1.73E-15 |
| rs6534340   | 67.882720 | 1.75E-15 |
| rs12896939  | 67.874458 | 1.76E-15 |
| rs4491851   | 67.874380 | 1.76E-15 |
| rs2857476   | 67.872878 | 1.76E-15 |
| rs4833248   | 67.868661 | 1.76E-15 |
| rs12880109  | 67.848983 | 1.78E-15 |
| rs9266253   | 67.847371 | 1.78E-15 |
| rs3118113   | 67.834790 | 1.79E-15 |
| rs12910237  | 67.800874 | 1.83E-15 |
| rs6996867   | 67.797321 | 1.83E-15 |
| rs11466749  | 67.768993 | 1.86E-15 |
| rs732173    | 67.768524 | 1.86E-15 |
| rs2239689   | 67.758261 | 1.87E-15 |
| rs71402966  | 67.757995 | 1.87E-15 |
| rs2523577   | 67.750718 | 1.88E-15 |
| rs9266261   | 67.710927 | 1.92E-15 |
| rs1689510   | 67.705057 | 1.92E-15 |
| rs72669140  | 67.674310 | 1.95E-15 |
| rs12907536  | 67.662266 | 1.97E-15 |
| rs143944497 | 67.655741 | 1.97E-15 |
| rs9266260   | 67.654838 | 1.98E-15 |
| rs72669139  | 67.644956 | 1.99E-15 |
| rs2672803   | 67.644728 | 1.99E-15 |
| rs1149927   | 67.644698 | 1.99E-15 |
| rs3130614   | 67.644522 | 1.99E-15 |
| rs11256199  | 67.629643 | 2.00E-15 |
| rs4833826   | 67.613294 | 2.02E-15 |
| rs2234650   | 67.607511 | 2.03E-15 |
| rs410805    | 67.602678 | 2.03E-15 |
| rs115035141 | 67.588422 | 2.05E-15 |
| rs72727425  | 67.586917 | 2.05E-15 |
| rs7688384   | 67.585073 | 2.05E-15 |
| rs6463      | 67.575005 | 2.06E-15 |
| rs2596477   | 67.558239 | 2.08E-15 |
| rs79855058  | 67.553706 | 2.09E-15 |
| rs7681161   | 67.547250 | 2.09E-15 |

|             |           |          |
|-------------|-----------|----------|
| rs1973563   | 67.534662 | 2.11E-15 |
| rs7695313   | 67.521087 | 2.12E-15 |
| rs7675731   | 67.492785 | 2.15E-15 |
| rs7699809   | 67.482542 | 2.17E-15 |
| rs2507954   | 67.473439 | 2.18E-15 |
| rs112604035 | 67.469034 | 2.18E-15 |
| rs149205188 | 67.465781 | 2.19E-15 |
| rs10034903  | 67.462300 | 2.19E-15 |
| rs80343249  | 67.458451 | 2.20E-15 |
| rs11158730  | 67.442263 | 2.21E-15 |
| rs4008366   | 67.440125 | 2.22E-15 |
| rs28746807  | 67.422889 | 2.24E-15 |
| rs10483807  | 67.403345 | 2.26E-15 |
| rs62405593  | 67.396377 | 2.27E-15 |
| rs7143      | 67.392097 | 2.27E-15 |
| rs1956525   | 67.376109 | 2.29E-15 |
| rs3830123   | 67.359659 | 2.31E-15 |
| rs12514976  | 67.339388 | 2.34E-15 |
| rs113568421 | 67.334483 | 2.35E-15 |
| rs7737031   | 67.329005 | 2.35E-15 |
| rs732172    | 67.312059 | 2.37E-15 |
| rs41268896  | 67.306472 | 2.38E-15 |
| rs146848763 | 67.279390 | 2.42E-15 |
| rs11256002  | 67.262070 | 2.44E-15 |
| rs1080001   | 67.235504 | 2.47E-15 |
| rs17005728  | 67.231737 | 2.48E-15 |
| rs73728204  | 67.227766 | 2.49E-15 |
| rs3917238   | 67.222618 | 2.49E-15 |
| rs10004195  | 67.200416 | 2.52E-15 |
| rs141420268 | 67.194969 | 2.53E-15 |
| rs10463516  | 67.193053 | 2.53E-15 |
| rs4887092   | 67.192507 | 2.53E-15 |
| rs72849286  | 67.185736 | 2.54E-15 |
| rs56410675  | 67.168221 | 2.57E-15 |
| rs35305251  | 67.156194 | 2.58E-15 |
| rs116714077 | 67.154884 | 2.58E-15 |
| rs7048482   | 67.154815 | 2.58E-15 |
| rs3750920   | 67.115084 | 2.64E-15 |
| rs7205510   | 67.094140 | 2.67E-15 |
| rs9270590   | 67.083279 | 2.69E-15 |
| rs2014486   | 67.074280 | 2.70E-15 |
| rs68080203  | 67.066138 | 2.71E-15 |
| rs12913779  | 67.058351 | 2.72E-15 |
| rs9274447   | 67.054582 | 2.73E-15 |
| rs12907432  | 67.050957 | 2.73E-15 |
| rs755998    | 67.030983 | 2.76E-15 |

|             |           |          |
|-------------|-----------|----------|
| rs17201588  | 67.029872 | 2.76E-15 |
| rs12907207  | 67.016958 | 2.78E-15 |
| rs34315692  | 67.006320 | 2.80E-15 |
| rs61175929  | 66.992196 | 2.82E-15 |
| rs1570106   | 66.959811 | 2.87E-15 |
| rs62404123  | 66.944505 | 2.89E-15 |
| rs12901228  | 66.942348 | 2.90E-15 |
| rs1632908   | 66.903190 | 2.96E-15 |
| rs72844283  | 66.900939 | 2.96E-15 |
| rs36233208  | 66.857623 | 3.03E-15 |
| rs112627226 | 66.847955 | 3.05E-15 |
| rs11242126  | 66.841306 | 3.06E-15 |
| rs2017091   | 66.830243 | 3.08E-15 |
| rs8003738   | 66.817663 | 3.10E-15 |
| rs75077509  | 66.770811 | 3.18E-15 |
| rs11642192  | 66.732796 | 3.24E-15 |
| rs1033198   | 66.728253 | 3.25E-15 |
| rs45448396  | 66.725810 | 3.25E-15 |
| rs1810623   | 66.710251 | 3.28E-15 |
| rs2067808   | 66.708325 | 3.29E-15 |
| rs11632684  | 66.707792 | 3.29E-15 |
| rs115518187 | 66.683827 | 3.33E-15 |
| rs11852887  | 66.679532 | 3.34E-15 |
| rs28657884  | 66.670145 | 3.35E-15 |
| rs28683540  | 66.647940 | 3.39E-15 |
| rs11602802  | 66.647214 | 3.40E-15 |
| rs7658100   | 66.603076 | 3.48E-15 |
| rs36206696  | 66.585173 | 3.51E-15 |
| rs9266544   | 66.575633 | 3.53E-15 |
| rs273909    | 66.574527 | 3.53E-15 |
| rs2086346   | 66.571799 | 3.54E-15 |
| rs2243284   | 66.565906 | 3.55E-15 |
| rs2219939   | 66.556092 | 3.57E-15 |
| rs67448759  | 66.543291 | 3.59E-15 |
| rs7726159   | 66.540559 | 3.60E-15 |
| rs113147629 | 66.538364 | 3.60E-15 |
| rs11072800  | 66.532669 | 3.61E-15 |
| rs10878269  | 66.477366 | 3.72E-15 |
| rs6745444   | 66.454153 | 3.77E-15 |
| rs6565217   | 66.433410 | 3.81E-15 |
| rs10878271  | 66.426424 | 3.82E-15 |
| rs7822342   | 66.413315 | 3.85E-15 |
| rs7118481   | 66.408393 | 3.86E-15 |
| rs9270530   | 66.401870 | 3.87E-15 |
| rs7656525   | 66.385781 | 3.91E-15 |
| rs7197717   | 66.365296 | 3.95E-15 |

|             |           |          |
|-------------|-----------|----------|
| rs61630816  | 66.361822 | 3.96E-15 |
| rs9270538   | 66.359401 | 3.96E-15 |
| rs207275    | 66.350432 | 3.98E-15 |
| rs4416491   | 66.347520 | 3.99E-15 |
| rs34694149  | 66.336876 | 4.01E-15 |
| rs12910831  | 66.333842 | 4.02E-15 |
| rs9273051   | 66.331846 | 4.02E-15 |
| rs12889206  | 66.326016 | 4.04E-15 |
| rs114475254 | 66.317965 | 4.05E-15 |
| rs2069812   | 66.316327 | 4.06E-15 |
| rs2243217   | 66.315440 | 4.06E-15 |
| rs773114    | 66.307222 | 4.08E-15 |
| rs7766862   | 66.300764 | 4.09E-15 |
| rs4902564   | 66.281633 | 4.13E-15 |
| rs9267576   | 66.256432 | 4.19E-15 |
| rs2305482   | 66.254191 | 4.19E-15 |
| rs1800628   | 66.253208 | 4.20E-15 |
| rs12186803  | 66.248366 | 4.21E-15 |
| rs2640562   | 66.234553 | 4.24E-15 |
| rs2071469   | 66.234238 | 4.24E-15 |
| rs6835946   | 66.225689 | 4.26E-15 |
| rs72853905  | 66.223969 | 4.26E-15 |
| rs340931    | 66.214157 | 4.29E-15 |
| rs61939617  | 66.210463 | 4.29E-15 |
| rs4833813   | 66.199711 | 4.32E-15 |
| rs7656549   | 66.180285 | 4.36E-15 |
| rs1081975   | 66.178082 | 4.37E-15 |
| rs36183131  | 66.164897 | 4.40E-15 |
| rs3971868   | 66.158915 | 4.41E-15 |
| rs11865038  | 66.156123 | 4.42E-15 |
| rs112500757 | 66.150363 | 4.44E-15 |
| rs9920610   | 66.138546 | 4.46E-15 |
| rs35570280  | 66.111104 | 4.53E-15 |
| rs72846402  | 66.107955 | 4.54E-15 |
| rs6573834   | 66.099277 | 4.56E-15 |
| rs72850069  | 66.082139 | 4.60E-15 |
| rs9290877   | 66.055794 | 4.67E-15 |
| rs7182694   | 66.054088 | 4.67E-15 |
| rs12368809  | 66.050717 | 4.68E-15 |
| rs7182993   | 66.048708 | 4.68E-15 |
| rs11864839  | 66.046794 | 4.69E-15 |
| rs8015139   | 66.045580 | 4.69E-15 |
| rs7182567   | 66.043328 | 4.70E-15 |
| rs12906977  | 66.042508 | 4.70E-15 |
| rs112390764 | 66.039010 | 4.71E-15 |
| rs3998182   | 66.030353 | 4.73E-15 |



|             |           |          |
|-------------|-----------|----------|
| rs11727369  | 66.027011 | 4.74E-15 |
| rs7606726   | 66.021101 | 4.75E-15 |
| rs72847586  | 66.015978 | 4.77E-15 |
| rs1389799   | 66.014054 | 4.77E-15 |
| rs3751855   | 66.004481 | 4.80E-15 |
| rs2336713   | 65.998646 | 4.81E-15 |
| rs11647284  | 65.992493 | 4.83E-15 |
| rs10975357  | 65.989348 | 4.84E-15 |
| rs7728912   | 65.982435 | 4.85E-15 |
| rs17839568  | 65.979755 | 4.86E-15 |
| rs4468641   | 65.978002 | 4.87E-15 |
| rs2270547   | 65.956628 | 4.92E-15 |
| rs2442727   | 65.946252 | 4.95E-15 |
| rs115070742 | 65.939345 | 4.97E-15 |
| rs72847588  | 65.938194 | 4.97E-15 |
| rs62641967  | 65.928008 | 5.00E-15 |
| rs9783497   | 65.922728 | 5.01E-15 |
| rs10876864  | 65.917067 | 5.03E-15 |
| rs4065321   | 65.914424 | 5.03E-15 |
| rs2057767   | 65.912709 | 5.04E-15 |
| rs7687313   | 65.910290 | 5.05E-15 |
| rs1956526   | 65.903278 | 5.07E-15 |
| rs4762097   | 65.893583 | 5.09E-15 |
| rs4603782   | 65.891717 | 5.10E-15 |
| rs9920526   | 65.886682 | 5.11E-15 |
| rs11864806  | 65.879687 | 5.13E-15 |
| rs12917502  | 65.875772 | 5.14E-15 |
| rs2310185   | 65.870466 | 5.16E-15 |
| rs6881942   | 65.869654 | 5.16E-15 |
| rs11175761  | 65.867157 | 5.16E-15 |
| rs2336714   | 65.856766 | 5.19E-15 |
| rs2906101   | 65.846137 | 5.22E-15 |
| rs12359396  | 65.839326 | 5.24E-15 |
| rs6827756   | 65.817808 | 5.30E-15 |
| rs7315978   | 65.811069 | 5.32E-15 |
| rs72850016  | 65.810821 | 5.32E-15 |
| rs72669119  | 65.801106 | 5.35E-15 |
| rs274555    | 65.789040 | 5.39E-15 |
| rs11600289  | 65.769393 | 5.44E-15 |
| rs28582842  | 65.762235 | 5.46E-15 |
| rs893475    | 65.757399 | 5.48E-15 |
| rs35406945  | 65.753833 | 5.49E-15 |
| rs61278374  | 65.738073 | 5.54E-15 |
| rs77438700  | 65.727022 | 5.57E-15 |
| rs2442719   | 65.722823 | 5.58E-15 |
| rs4433838   | 65.705745 | 5.63E-15 |

|             |           |          |
|-------------|-----------|----------|
| rs17166203  | 65.704848 | 5.64E-15 |
| rs12712130  | 65.704393 | 5.64E-15 |
| rs3798131   | 65.696644 | 5.66E-15 |
| rs2735946   | 65.677841 | 5.72E-15 |
| rs9815874   | 65.665500 | 5.76E-15 |
| rs10902092  | 65.664794 | 5.76E-15 |
| rs6713468   | 65.656655 | 5.78E-15 |
| rs12905641  | 65.653487 | 5.79E-15 |
| rs72825990  | 65.641898 | 5.83E-15 |
| rs2299011   | 65.640075 | 5.83E-15 |
| rs6534347   | 65.616206 | 5.91E-15 |
| rs7725218   | 65.615567 | 5.91E-15 |
| rs114014905 | 65.606668 | 5.94E-15 |
| rs8066582   | 65.604643 | 5.95E-15 |
| rs10902093  | 65.596155 | 5.97E-15 |
| rs12940405  | 65.589747 | 5.99E-15 |
| rs2157077   | 65.586287 | 6.01E-15 |
| rs34195497  | 65.585548 | 6.01E-15 |
| rs3130560   | 65.581703 | 6.02E-15 |
| rs8070444   | 65.561804 | 6.09E-15 |
| rs10795685  | 65.557513 | 6.10E-15 |
| rs28842820  | 65.551935 | 6.12E-15 |
| rs4887091   | 65.549321 | 6.13E-15 |
| rs12450800  | 65.541049 | 6.15E-15 |
| rs2523580   | 65.526179 | 6.20E-15 |
| rs11632672  | 65.520790 | 6.22E-15 |
| rs67625562  | 65.494487 | 6.31E-15 |
| rs1873914   | 65.480855 | 6.36E-15 |
| rs7155473   | 65.462224 | 6.42E-15 |
| rs28746797  | 65.447798 | 6.47E-15 |
| rs12453249  | 65.445820 | 6.48E-15 |
| rs72782677  | 65.442937 | 6.49E-15 |
| rs11637092  | 65.412577 | 6.59E-15 |
| rs9557175   | 65.409745 | 6.60E-15 |
| rs72645671  | 65.406208 | 6.62E-15 |
| rs11571833  | 65.395987 | 6.65E-15 |
| rs58946838  | 65.378589 | 6.72E-15 |
| rs12791023  | 65.376392 | 6.72E-15 |
| rs1723016   | 65.373730 | 6.73E-15 |
| rs12906022  | 65.373579 | 6.73E-15 |
| rs10069690  | 65.363148 | 6.77E-15 |
| rs3798130   | 65.351190 | 6.81E-15 |
| rs8071037   | 65.323748 | 6.92E-15 |
| rs6814233   | 65.313645 | 6.95E-15 |
| rs12795839  | 65.295732 | 7.02E-15 |
| rs67659077  | 65.287206 | 7.05E-15 |

|             |           |          |
|-------------|-----------|----------|
| rs68107102  | 65.276345 | 7.09E-15 |
| rs7150454   | 65.275896 | 7.10E-15 |
| rs12453764  | 65.275412 | 7.10E-15 |
| rs11658328  | 65.264344 | 7.14E-15 |
| rs11571818  | 65.245155 | 7.21E-15 |
| rs3816472   | 65.245114 | 7.21E-15 |
| rs78443865  | 65.237763 | 7.24E-15 |
| rs9915252   | 65.223783 | 7.30E-15 |
| rs11571815  | 65.222591 | 7.30E-15 |
| rs912128    | 65.217782 | 7.32E-15 |
| rs2243289   | 65.213253 | 7.34E-15 |
| rs10152544  | 65.206652 | 7.37E-15 |
| rs3785550   | 65.203905 | 7.38E-15 |
| rs2249550   | 65.202174 | 7.38E-15 |
| rs9271633   | 65.198386 | 7.40E-15 |
| rs7689750   | 65.194571 | 7.41E-15 |
| rs9300544   | 65.191878 | 7.42E-15 |
| rs2241245   | 65.190875 | 7.43E-15 |
| rs10751641  | 65.189643 | 7.43E-15 |
| rs3763349   | 65.181303 | 7.47E-15 |
| rs115668177 | 65.174496 | 7.49E-15 |
| rs3859187   | 65.160863 | 7.55E-15 |
| rs2299005   | 65.152339 | 7.58E-15 |
| rs2249073   | 65.147097 | 7.60E-15 |
| rs9267488   | 65.137603 | 7.64E-15 |
| rs7178007   | 65.135984 | 7.65E-15 |
| rs12229918  | 65.130627 | 7.67E-15 |
| rs28685766  | 65.125474 | 7.69E-15 |
| rs2243268   | 65.119791 | 7.72E-15 |
| rs1050517   | 65.095728 | 7.82E-15 |
| rs41267086  | 65.078058 | 7.89E-15 |
| rs9266263   | 65.072437 | 7.92E-15 |
| rs72836349  | 65.066078 | 7.94E-15 |
| rs11245979  | 65.060125 | 7.97E-15 |
| rs8073254   | 65.043147 | 8.04E-15 |
| rs2241244   | 65.041602 | 8.05E-15 |
| rs705700    | 65.037546 | 8.07E-15 |
| rs9270602   | 65.035074 | 8.08E-15 |
| rs12906165  | 65.028817 | 8.10E-15 |
| rs1825086   | 65.020402 | 8.14E-15 |
| rs1383635   | 64.998500 | 8.24E-15 |
| rs28814987  | 64.971850 | 8.36E-15 |
| rs1383634   | 64.958627 | 8.42E-15 |
| rs2622821   | 64.938668 | 8.51E-15 |
| rs60168940  | 64.927840 | 8.56E-15 |
| rs6835650   | 64.924865 | 8.57E-15 |

|             |           |          |
|-------------|-----------|----------|
| rs1263697   | 64.885305 | 8.75E-15 |
| rs34736308  | 64.878932 | 8.78E-15 |
| rs12290718  | 64.873006 | 8.81E-15 |
| rs9513572   | 64.869771 | 8.83E-15 |
| rs9271619   | 64.848940 | 8.93E-15 |
| rs12930888  | 64.848577 | 8.93E-15 |
| rs9271528   | 64.844383 | 8.95E-15 |
| rs9271541   | 64.839893 | 8.97E-15 |
| rs7590231   | 64.816724 | 9.08E-15 |
| rs8030335   | 64.807238 | 9.13E-15 |
| rs2243250   | 64.755209 | 9.39E-15 |
| rs2243302   | 64.753841 | 9.39E-15 |
| rs118091978 | 64.747213 | 9.43E-15 |
| rs6706048   | 64.707527 | 9.63E-15 |
| rs2071538   | 64.672042 | 9.82E-15 |
| rs77333852  | 64.668485 | 9.83E-15 |
| rs12123821  | 64.655462 | 9.90E-15 |
| rs6822038   | 64.615758 | 1.01E-14 |
| rs58939053  | 64.612339 | 1.01E-14 |
| rs705699    | 64.608285 | 1.02E-14 |
| rs2110605   | 64.592304 | 1.02E-14 |
| rs9270555   | 64.586336 | 1.03E-14 |
| rs744910    | 64.581725 | 1.03E-14 |
| rs7588201   | 64.570206 | 1.04E-14 |
| rs2243221   | 64.564323 | 1.04E-14 |
| rs111364214 | 64.555703 | 1.04E-14 |
| rs12904489  | 64.555694 | 1.04E-14 |
| rs55978515  | 64.526434 | 1.06E-14 |
| rs1457113   | 64.515635 | 1.07E-14 |
| rs7168915   | 64.511031 | 1.07E-14 |
| rs750952    | 64.504721 | 1.07E-14 |
| rs150592114 | 64.498252 | 1.08E-14 |
| rs9271627   | 64.453588 | 1.10E-14 |
| rs9271626   | 64.452583 | 1.10E-14 |
| rs7296999   | 64.449443 | 1.11E-14 |
| rs3853750   | 64.430414 | 1.12E-14 |
| rs35713203  | 64.426700 | 1.12E-14 |
| rs12292220  | 64.423076 | 1.12E-14 |
| rs78123548  | 64.410286 | 1.13E-14 |
| rs150373264 | 64.404777 | 1.13E-14 |
| rs66909062  | 64.378848 | 1.15E-14 |
| rs55786530  | 64.331961 | 1.18E-14 |
| rs9266265   | 64.323976 | 1.18E-14 |
| rs3891176   | 64.316924 | 1.19E-14 |
| rs72827105  | 64.294000 | 1.20E-14 |
| rs2283562   | 64.293469 | 1.20E-14 |

|            |           |          |
|------------|-----------|----------|
| rs73530203 | 64.277282 | 1.21E-14 |
| rs1773542  | 64.271310 | 1.22E-14 |
| rs7676847  | 64.249153 | 1.23E-14 |
| rs67890920 | 64.235633 | 1.24E-14 |
| rs7658836  | 64.233773 | 1.24E-14 |
| rs7483044  | 64.230300 | 1.24E-14 |
| rs55866704 | 64.217725 | 1.25E-14 |
| rs12417955 | 64.212153 | 1.26E-14 |
| rs28361065 | 64.205176 | 1.26E-14 |
| rs11071553 | 64.161170 | 1.29E-14 |
| rs2243290  | 64.146799 | 1.30E-14 |
| rs10794299 | 64.145856 | 1.30E-14 |
| rs1723018  | 64.143959 | 1.30E-14 |
| rs10210006 | 64.130040 | 1.31E-14 |
| rs773110   | 64.111078 | 1.33E-14 |
| rs10794292 | 64.109039 | 1.33E-14 |
| rs12577756 | 64.100276 | 1.33E-14 |
| rs71402967 | 64.088173 | 1.34E-14 |
| rs11634793 | 64.075363 | 1.35E-14 |
| rs7481640  | 64.071786 | 1.36E-14 |
| rs7663164  | 64.057891 | 1.37E-14 |
| rs12465829 | 64.037685 | 1.38E-14 |
| rs66987389 | 64.013190 | 1.40E-14 |
| rs9271545  | 63.994193 | 1.41E-14 |
| rs773111   | 63.993788 | 1.41E-14 |
| rs2002854  | 63.961842 | 1.44E-14 |
| rs7196726  | 63.954536 | 1.44E-14 |
| rs6597999  | 63.950884 | 1.45E-14 |
| rs2243266  | 63.950789 | 1.45E-14 |
| rs7735355  | 63.933139 | 1.46E-14 |
| rs9271524  | 63.925979 | 1.47E-14 |
| rs9274407  | 63.920988 | 1.47E-14 |
| rs2071627  | 63.912621 | 1.48E-14 |
| rs11242123 | 63.908371 | 1.48E-14 |
| rs256866   | 63.887517 | 1.50E-14 |
| rs11172067 | 63.884880 | 1.50E-14 |
| rs3095233  | 63.875896 | 1.51E-14 |
| rs7735519  | 63.868311 | 1.51E-14 |
| rs12122629 | 63.861175 | 1.52E-14 |
| rs7555082  | 63.848472 | 1.53E-14 |
| rs7656479  | 63.848142 | 1.53E-14 |
| rs324020   | 63.844823 | 1.53E-14 |
| rs10902102 | 63.838818 | 1.54E-14 |
| rs45500303 | 63.833976 | 1.54E-14 |
| rs72645656 | 63.830303 | 1.54E-14 |
| rs2243267  | 63.829620 | 1.54E-14 |

|             |           |          |
|-------------|-----------|----------|
| rs17547610  | 63.809560 | 1.56E-14 |
| rs6854531   | 63.808497 | 1.56E-14 |
| rs35440220  | 63.806344 | 1.56E-14 |
| rs56304346  | 63.795881 | 1.57E-14 |
| rs7108515   | 63.782376 | 1.58E-14 |
| rs3793969   | 63.781465 | 1.58E-14 |
| rs12906835  | 63.779377 | 1.59E-14 |
| rs66475540  | 63.778670 | 1.59E-14 |
| rs28523606  | 63.761998 | 1.60E-14 |
| rs2336712   | 63.759502 | 1.60E-14 |
| rs7693795   | 63.731694 | 1.63E-14 |
| rs773108    | 63.729976 | 1.63E-14 |
| rs10735928  | 63.715650 | 1.64E-14 |
| rs11256095  | 63.709505 | 1.65E-14 |
| rs12313934  | 63.693101 | 1.66E-14 |
| rs2844500   | 63.689610 | 1.66E-14 |
| rs11071942  | 63.688508 | 1.66E-14 |
| rs7199949   | 63.687334 | 1.67E-14 |
| rs1130375   | 63.677163 | 1.68E-14 |
| rs8030090   | 63.646314 | 1.70E-14 |
| rs9267658   | 63.644660 | 1.70E-14 |
| rs72797733  | 63.641956 | 1.71E-14 |
| rs10053046  | 63.637975 | 1.71E-14 |
| rs58835386  | 63.633423 | 1.71E-14 |
| rs4099209   | 63.608213 | 1.74E-14 |
| rs527254    | 63.605934 | 1.74E-14 |
| rs1030022   | 63.594441 | 1.75E-14 |
| rs3130923   | 63.594293 | 1.75E-14 |
| rs11256193  | 63.590298 | 1.76E-14 |
| rs10784447  | 63.574711 | 1.77E-14 |
| rs146341946 | 63.564670 | 1.78E-14 |
| rs7736102   | 63.564233 | 1.78E-14 |
| rs3094005   | 63.546087 | 1.80E-14 |
| rs1344946   | 63.545169 | 1.80E-14 |
| rs4332569   | 63.543808 | 1.80E-14 |
| rs7656246   | 63.526867 | 1.82E-14 |
| rs76181804  | 63.509289 | 1.83E-14 |
| rs61937249  | 63.507750 | 1.83E-14 |
| rs8032552   | 63.507197 | 1.84E-14 |
| rs3917273   | 63.502818 | 1.84E-14 |
| rs803141    | 63.496703 | 1.85E-14 |
| rs67676259  | 63.494552 | 1.85E-14 |
| rs8075803   | 63.491347 | 1.85E-14 |
| rs61937247  | 63.472051 | 1.87E-14 |
| rs2101521   | 63.466312 | 1.88E-14 |
| rs11465576  | 63.459424 | 1.88E-14 |

|             |           |          |
|-------------|-----------|----------|
| rs2508746   | 63.441154 | 1.90E-14 |
| rs74760554  | 63.435807 | 1.91E-14 |
| rs10905521  | 63.429463 | 1.91E-14 |
| rs8034274   | 63.426764 | 1.92E-14 |
| rs2243282   | 63.413176 | 1.93E-14 |
| rs11245962  | 63.411133 | 1.93E-14 |
| rs6897575   | 63.410564 | 1.93E-14 |
| rs2048036   | 63.391287 | 1.95E-14 |
| rs12712161  | 63.376605 | 1.97E-14 |
| rs7973013   | 63.376536 | 1.97E-14 |
| rs11738703  | 63.369132 | 1.98E-14 |
| rs1813337   | 63.349536 | 2.00E-14 |
| rs10878268  | 63.326621 | 2.02E-14 |
| rs3130616   | 63.324119 | 2.02E-14 |
| rs7974799   | 63.322132 | 2.03E-14 |
| rs13142879  | 63.317393 | 2.03E-14 |
| rs1961266   | 63.295214 | 2.06E-14 |
| rs1976271   | 63.294187 | 2.06E-14 |
| rs1976272   | 63.291685 | 2.06E-14 |
| rs7666298   | 63.270642 | 2.08E-14 |
| rs62408223  | 63.264400 | 2.09E-14 |
| rs143548785 | 63.260710 | 2.09E-14 |
| rs4987082   | 63.260414 | 2.10E-14 |
| rs79601710  | 63.246094 | 2.11E-14 |
| rs55697600  | 63.235194 | 2.12E-14 |
| rs61937248  | 63.188822 | 2.18E-14 |
| rs7300522   | 63.183102 | 2.18E-14 |
| rs7964169   | 63.181845 | 2.19E-14 |
| rs11175752  | 63.180027 | 2.19E-14 |
| rs735883    | 63.175383 | 2.19E-14 |
| rs10504716  | 63.139500 | 2.24E-14 |
| rs45574236  | 63.129876 | 2.25E-14 |
| rs10506525  | 63.128659 | 2.25E-14 |
| rs2508747   | 63.116314 | 2.26E-14 |
| rs2070874   | 63.114618 | 2.27E-14 |
| rs11175746  | 63.107365 | 2.27E-14 |
| rs4489795   | 63.105045 | 2.28E-14 |
| rs1908325   | 63.074292 | 2.32E-14 |
| rs880395    | 63.064623 | 2.33E-14 |
| rs4343073   | 63.042833 | 2.35E-14 |
| rs956730    | 63.009381 | 2.40E-14 |
| rs112572874 | 63.003593 | 2.40E-14 |
| rs7297019   | 62.988241 | 2.42E-14 |
| rs12788104  | 62.970199 | 2.45E-14 |
| rs7164030   | 62.969469 | 2.45E-14 |
| rs7315374   | 62.967783 | 2.45E-14 |

|             |           |          |
|-------------|-----------|----------|
| rs16824949  | 62.962397 | 2.46E-14 |
| rs10463892  | 62.937678 | 2.49E-14 |
| rs11175753  | 62.932755 | 2.50E-14 |
| rs705698    | 62.932749 | 2.50E-14 |
| rs10878270  | 62.911917 | 2.53E-14 |
| rs9273480   | 62.896379 | 2.55E-14 |
| rs1263702   | 62.891913 | 2.55E-14 |
| rs11245965  | 62.884612 | 2.56E-14 |
| rs10902094  | 62.869299 | 2.58E-14 |
| rs2243300   | 62.860765 | 2.60E-14 |
| rs10878277  | 62.857748 | 2.60E-14 |
| rs11245964  | 62.855193 | 2.60E-14 |
| rs7973042   | 62.842961 | 2.62E-14 |
| rs8039034   | 62.816246 | 2.66E-14 |
| rs11175762  | 62.809648 | 2.67E-14 |
| rs9668058   | 62.802019 | 2.68E-14 |
| rs3825977   | 62.800462 | 2.68E-14 |
| rs9273873   | 62.799091 | 2.68E-14 |
| rs10878266  | 62.779151 | 2.71E-14 |
| rs13274961  | 62.776016 | 2.72E-14 |
| rs62059005  | 62.759706 | 2.74E-14 |
| rs3024668   | 62.753876 | 2.75E-14 |
| rs7164479   | 62.734370 | 2.78E-14 |
| rs2844458   | 62.715803 | 2.81E-14 |
| rs148233867 | 62.707623 | 2.82E-14 |
| rs75044322  | 62.697259 | 2.83E-14 |
| rs12996225  | 62.694998 | 2.84E-14 |
| rs171770    | 62.683468 | 2.86E-14 |
| rs7976802   | 62.676126 | 2.87E-14 |
| rs140928277 | 62.674689 | 2.87E-14 |
| rs772920    | 62.673918 | 2.87E-14 |
| rs41316196  | 62.671019 | 2.88E-14 |
| rs2242955   | 62.624865 | 2.95E-14 |
| rs12810744  | 62.619284 | 2.96E-14 |
| rs3117189   | 62.602258 | 2.98E-14 |
| rs72825929  | 62.600025 | 2.99E-14 |
| rs115018313 | 62.591834 | 3.00E-14 |
| rs1149921   | 62.585110 | 3.01E-14 |
| rs2336715   | 62.584484 | 3.01E-14 |
| rs3130287   | 62.574941 | 3.03E-14 |
| rs7179953   | 62.559992 | 3.05E-14 |
| rs10902099  | 62.527447 | 3.11E-14 |
| rs10748018  | 62.526688 | 3.11E-14 |
| rs7294      | 62.526493 | 3.11E-14 |
| rs7964344   | 62.507718 | 3.14E-14 |
| rs111676341 | 62.507445 | 3.14E-14 |



|             |           |          |
|-------------|-----------|----------|
| rs2071552   | 62.496945 | 3.16E-14 |
| rs1318321   | 62.487570 | 3.17E-14 |
| rs7295395   | 62.472813 | 3.20E-14 |
| rs2516404   | 62.470382 | 3.20E-14 |
| rs35571839  | 62.460122 | 3.22E-14 |
| rs10467143  | 62.457929 | 3.22E-14 |
| rs10784446  | 62.455869 | 3.23E-14 |
| rs12901971  | 62.454958 | 3.23E-14 |
| rs113520245 | 62.453279 | 3.23E-14 |
| rs147324178 | 62.446764 | 3.24E-14 |
| rs28707773  | 62.417857 | 3.29E-14 |
| rs1976273   | 62.410922 | 3.31E-14 |
| rs17027056  | 62.375843 | 3.37E-14 |
| rs10784450  | 62.372606 | 3.37E-14 |
| rs57048617  | 62.372248 | 3.38E-14 |
| rs75427248  | 62.368465 | 3.38E-14 |
| rs10878272  | 62.367585 | 3.38E-14 |
| rs10784449  | 62.364774 | 3.39E-14 |
| rs3858643   | 62.357108 | 3.40E-14 |
| rs13412022  | 62.330218 | 3.45E-14 |
| rs1976274   | 62.314822 | 3.48E-14 |
| rs1979908   | 62.314579 | 3.48E-14 |
| rs1504548   | 62.289515 | 3.53E-14 |
| rs241436    | 62.286811 | 3.53E-14 |
| rs11856441  | 62.281447 | 3.54E-14 |
| rs7251615   | 62.270944 | 3.56E-14 |
| rs7824278   | 62.267834 | 3.57E-14 |
| rs1826663   | 62.257715 | 3.59E-14 |
| rs936607    | 62.255581 | 3.59E-14 |
| rs79005     | 62.246413 | 3.61E-14 |
| rs113796169 | 62.244186 | 3.62E-14 |
| rs6884380   | 62.234130 | 3.64E-14 |
| rs12907966  | 62.222263 | 3.66E-14 |
| rs72844253  | 62.213437 | 3.68E-14 |
| rs1963497   | 62.195605 | 3.71E-14 |
| rs1049074   | 62.189241 | 3.72E-14 |
| rs12933283  | 62.180281 | 3.74E-14 |
| rs80029685  | 62.177184 | 3.75E-14 |
| rs7165042   | 62.175150 | 3.75E-14 |
| rs1979905   | 62.173344 | 3.76E-14 |
| rs111962225 | 62.171620 | 3.76E-14 |
| rs67143487  | 62.169774 | 3.76E-14 |
| rs1979906   | 62.169390 | 3.76E-14 |
| rs1979907   | 62.166754 | 3.77E-14 |
| rs2513517   | 62.140973 | 3.82E-14 |
| rs11172069  | 62.138539 | 3.83E-14 |

|             |           |          |
|-------------|-----------|----------|
| rs8013078   | 62.138302 | 3.83E-14 |
| rs77740805  | 62.128415 | 3.85E-14 |
| rs7650683   | 62.124744 | 3.85E-14 |
| rs891058    | 62.121165 | 3.86E-14 |
| rs8043123   | 62.111581 | 3.88E-14 |
| rs911254    | 62.108748 | 3.89E-14 |
| rs68145471  | 62.108425 | 3.89E-14 |
| rs2205049   | 62.104461 | 3.90E-14 |
| rs114258010 | 62.077797 | 3.95E-14 |
| rs10784448  | 62.070202 | 3.97E-14 |
| rs7734992   | 62.058871 | 3.99E-14 |
| rs7165733   | 62.054947 | 4.00E-14 |
| rs67916050  | 62.052487 | 4.01E-14 |
| rs45466798  | 62.052115 | 4.01E-14 |
| rs7182529   | 62.051143 | 4.01E-14 |
| rs6884386   | 62.039788 | 4.03E-14 |
| rs202641    | 62.037062 | 4.04E-14 |
| rs2057768   | 62.035396 | 4.04E-14 |
| rs2015349   | 62.035092 | 4.04E-14 |
| rs12907065  | 62.034781 | 4.05E-14 |
| rs28661389  | 62.032517 | 4.05E-14 |
| rs2894221   | 62.020550 | 4.08E-14 |
| rs705702    | 62.011514 | 4.10E-14 |
| rs7181432   | 62.002246 | 4.12E-14 |
| rs7165081   | 61.995473 | 4.13E-14 |
| rs169362    | 61.994538 | 4.13E-14 |
| rs72621835  | 61.978864 | 4.17E-14 |
| rs202650    | 61.973764 | 4.18E-14 |
| rs7824246   | 61.972550 | 4.18E-14 |
| rs7864027   | 61.959140 | 4.21E-14 |
| rs1990572   | 61.937697 | 4.26E-14 |
| rs7182103   | 61.917086 | 4.31E-14 |
| rs66971362  | 61.899869 | 4.35E-14 |
| rs78026984  | 61.878259 | 4.40E-14 |
| rs7182716   | 61.876612 | 4.40E-14 |
| rs72645655  | 61.873907 | 4.41E-14 |
| rs55669501  | 61.873297 | 4.41E-14 |
| rs11870683  | 61.871779 | 4.42E-14 |
| rs143293684 | 61.864396 | 4.43E-14 |
| rs11172068  | 61.861958 | 4.44E-14 |
| rs45520839  | 61.859095 | 4.45E-14 |
| rs112560196 | 61.856107 | 4.45E-14 |
| rs57260218  | 61.836313 | 4.50E-14 |
| rs4468572   | 61.826118 | 4.52E-14 |
| rs7727544   | 61.779696 | 4.64E-14 |
| rs17504213  | 61.767591 | 4.67E-14 |

|             |           |          |
|-------------|-----------|----------|
| rs76563578  | 61.730208 | 4.76E-14 |
| rs74913673  | 61.716853 | 4.80E-14 |
| rs11072787  | 61.711870 | 4.81E-14 |
| rs62054835  | 61.704621 | 4.83E-14 |
| rs150931799 | 61.700912 | 4.84E-14 |
| rs3771200   | 61.693229 | 4.86E-14 |
| rs993951    | 61.688393 | 4.87E-14 |
| rs113661667 | 61.688171 | 4.87E-14 |
| rs28929474  | 61.682640 | 4.89E-14 |
| rs10178845  | 61.681456 | 4.89E-14 |
| rs11072799  | 61.677472 | 4.90E-14 |
| rs1904920   | 61.671015 | 4.92E-14 |
| rs905740    | 61.668570 | 4.92E-14 |
| rs112596352 | 61.667931 | 4.93E-14 |
| rs11755527  | 61.664591 | 4.93E-14 |
| rs62404121  | 61.664136 | 4.94E-14 |
| rs11639295  | 61.660190 | 4.95E-14 |
| rs140311576 | 61.637673 | 5.01E-14 |
| rs62056789  | 61.636107 | 5.01E-14 |
| rs10076701  | 61.635150 | 5.01E-14 |
| rs62056790  | 61.634763 | 5.01E-14 |
| rs7727038   | 61.634637 | 5.01E-14 |
| rs77097907  | 61.630808 | 5.03E-14 |
| rs3024620   | 61.630516 | 5.03E-14 |
| rs13416555  | 61.629559 | 5.03E-14 |
| rs9611591   | 61.628901 | 5.03E-14 |
| rs11167763  | 61.621715 | 5.05E-14 |
| rs79833063  | 61.611137 | 5.08E-14 |
| rs11784307  | 61.605997 | 5.09E-14 |
| rs11750521  | 61.604441 | 5.10E-14 |
| rs111541957 | 61.600263 | 5.11E-14 |
| rs187940579 | 61.599653 | 5.11E-14 |
| rs55686102  | 61.596034 | 5.12E-14 |
| rs112085461 | 61.596015 | 5.12E-14 |
| rs9270704   | 61.595458 | 5.12E-14 |
| rs111415173 | 61.593777 | 5.13E-14 |
| rs112275277 | 61.572006 | 5.19E-14 |
| rs78741571  | 61.570581 | 5.19E-14 |
| rs4899238   | 61.553033 | 5.24E-14 |
| rs74516407  | 61.540618 | 5.27E-14 |
| rs115935870 | 61.535540 | 5.29E-14 |
| rs62126607  | 61.527685 | 5.31E-14 |
| rs420071    | 61.524972 | 5.32E-14 |
| rs2390192   | 61.522942 | 5.32E-14 |
| rs111970616 | 61.497402 | 5.40E-14 |
| rs112073200 | 61.496288 | 5.40E-14 |

|             |           |          |
|-------------|-----------|----------|
| rs118087478 | 61.486991 | 5.43E-14 |
| rs7166764   | 61.477795 | 5.46E-14 |
| rs78476878  | 61.472460 | 5.47E-14 |
| rs12788690  | 61.467066 | 5.49E-14 |
| rs112976176 | 61.465691 | 5.49E-14 |
| rs62010556  | 61.453303 | 5.53E-14 |
| rs4902566   | 61.452603 | 5.53E-14 |
| rs142206761 | 61.448200 | 5.54E-14 |
| rs80143905  | 61.439794 | 5.57E-14 |
| rs112570965 | 61.438411 | 5.57E-14 |
| rs75104593  | 61.414469 | 5.64E-14 |
| rs3024667   | 61.412227 | 5.65E-14 |
| rs10174949  | 61.409913 | 5.66E-14 |
| rs28656344  | 61.404469 | 5.67E-14 |
| rs4795403   | 61.390638 | 5.72E-14 |
| rs41263826  | 61.390362 | 5.72E-14 |
| rs5758324   | 61.389929 | 5.72E-14 |
| rs74814866  | 61.388023 | 5.72E-14 |
| rs111913701 | 61.372158 | 5.77E-14 |
| rs72645668  | 61.362171 | 5.80E-14 |
| rs111519055 | 61.358539 | 5.82E-14 |
| rs62063271  | 61.354696 | 5.83E-14 |
| rs28372104  | 61.349705 | 5.84E-14 |
| rs138965792 | 61.345431 | 5.86E-14 |
| rs77461246  | 61.337932 | 5.88E-14 |
| rs973796    | 61.335736 | 5.89E-14 |
| rs79411018  | 61.334136 | 5.89E-14 |
| rs17005650  | 61.330977 | 5.90E-14 |
| rs79781139  | 61.329370 | 5.91E-14 |
| rs184070214 | 61.329318 | 5.91E-14 |
| rs114683059 | 61.320980 | 5.93E-14 |
| rs112578465 | 61.315889 | 5.95E-14 |
| rs290904    | 61.310207 | 5.97E-14 |
| rs62062278  | 61.302020 | 5.99E-14 |
| rs74998289  | 61.294740 | 6.02E-14 |
| rs62056785  | 61.286482 | 6.04E-14 |
| rs112364920 | 61.282257 | 6.06E-14 |
| rs77004761  | 61.282136 | 6.06E-14 |
| rs9269268   | 61.281323 | 6.06E-14 |
| rs1878399   | 61.280323 | 6.06E-14 |
| rs28383322  | 61.272300 | 6.09E-14 |
| rs111372048 | 61.269813 | 6.10E-14 |
| rs113788190 | 61.269345 | 6.10E-14 |
| rs1960493   | 61.268369 | 6.10E-14 |
| rs16903574  | 61.259893 | 6.13E-14 |
| rs56004070  | 61.255695 | 6.15E-14 |

|             |           |          |
|-------------|-----------|----------|
| rs62056786  | 61.247297 | 6.17E-14 |
| rs62010555  | 61.228511 | 6.24E-14 |
| rs7248385   | 61.215996 | 6.28E-14 |
| rs17575507  | 61.205805 | 6.31E-14 |
| rs79282820  | 61.200116 | 6.33E-14 |
| rs9274155   | 61.197889 | 6.34E-14 |
| rs1512283   | 61.190804 | 6.36E-14 |
| rs35621564  | 61.180934 | 6.40E-14 |
| rs34067845  | 61.180474 | 6.40E-14 |
| rs141890570 | 61.170575 | 6.43E-14 |
| rs113414067 | 61.156034 | 6.48E-14 |
| rs62055869  | 61.150490 | 6.50E-14 |
| rs113790915 | 61.140337 | 6.54E-14 |
| rs10957980  | 61.132759 | 6.56E-14 |
| rs146398018 | 61.123987 | 6.60E-14 |
| rs9263708   | 61.112127 | 6.64E-14 |
| rs3093539   | 61.107063 | 6.66E-14 |
| rs3744246   | 61.106839 | 6.66E-14 |
| rs2995091   | 61.093883 | 6.70E-14 |
| rs8025188   | 61.088703 | 6.72E-14 |
| rs1265047   | 61.082940 | 6.74E-14 |
| rs3134954   | 61.073290 | 6.78E-14 |
| rs113856644 | 61.063576 | 6.81E-14 |
| rs17843661  | 61.057316 | 6.84E-14 |
| rs115707901 | 61.055998 | 6.84E-14 |
| rs117124984 | 61.055752 | 6.84E-14 |
| rs3917265   | 61.035027 | 6.92E-14 |
| rs80247693  | 61.033047 | 6.93E-14 |
| rs35937742  | 61.030432 | 6.93E-14 |
| rs4887064   | 61.029696 | 6.94E-14 |
| rs11655466  | 61.017009 | 6.99E-14 |
| rs3917263   | 61.015472 | 6.99E-14 |
| rs3741499   | 61.013324 | 7.00E-14 |
| rs803140    | 61.012277 | 7.00E-14 |
| rs112385572 | 60.985324 | 7.10E-14 |
| rs2243219   | 60.983831 | 7.11E-14 |
| rs2988277   | 60.978106 | 7.13E-14 |
| rs7694328   | 60.972663 | 7.15E-14 |
| rs7677679   | 60.963749 | 7.19E-14 |
| rs62057073  | 60.960870 | 7.20E-14 |
| rs6002379   | 60.948638 | 7.25E-14 |
| rs4341787   | 60.945949 | 7.26E-14 |
| rs10481598  | 60.931267 | 7.31E-14 |
| rs132901    | 60.921860 | 7.35E-14 |
| rs61937568  | 60.909405 | 7.40E-14 |
| rs3094669   | 60.904788 | 7.42E-14 |

|             |           |          |
|-------------|-----------|----------|
| rs11172111  | 60.903038 | 7.43E-14 |
| rs114064880 | 60.902141 | 7.43E-14 |
| rs7678427   | 60.895494 | 7.46E-14 |
| rs3132566   | 60.882611 | 7.51E-14 |
| rs34099810  | 60.874098 | 7.54E-14 |
| rs1444775   | 60.867591 | 7.57E-14 |
| rs7598305   | 60.856363 | 7.61E-14 |
| rs9790783   | 60.846408 | 7.65E-14 |
| rs3130566   | 60.835634 | 7.70E-14 |
| rs112647192 | 60.822841 | 7.75E-14 |
| rs3095300   | 60.819774 | 7.76E-14 |
| rs55884274  | 60.811861 | 7.80E-14 |
| rs1876828   | 60.807536 | 7.82E-14 |
| rs4238955   | 60.772754 | 7.96E-14 |
| rs13142776  | 60.769187 | 7.98E-14 |
| rs2995089   | 60.760414 | 8.02E-14 |
| rs17426174  | 60.751967 | 8.05E-14 |
| rs4637417   | 60.749635 | 8.06E-14 |
| rs150651425 | 60.748627 | 8.07E-14 |
| rs190796367 | 60.746923 | 8.07E-14 |
| rs10135678  | 60.741279 | 8.10E-14 |
| rs7140939   | 60.740414 | 8.10E-14 |
| rs112431991 | 60.731681 | 8.14E-14 |
| rs4523962   | 60.727552 | 8.16E-14 |
| rs3024548   | 60.714097 | 8.22E-14 |
| rs12700215  | 60.690298 | 8.32E-14 |
| rs34275594  | 60.672022 | 8.41E-14 |
| rs2243288   | 60.656904 | 8.47E-14 |
| rs10515922  | 60.654078 | 8.49E-14 |
| rs12165508  | 60.640207 | 8.55E-14 |
| rs34265962  | 60.635850 | 8.57E-14 |
| rs11171739  | 60.622186 | 8.63E-14 |
| rs28455815  | 60.618921 | 8.65E-14 |
| rs75793795  | 60.606906 | 8.70E-14 |
| rs4277389   | 60.592467 | 8.77E-14 |
| rs1876829   | 60.587923 | 8.79E-14 |
| rs1028577   | 60.581678 | 8.82E-14 |
| rs35701817  | 60.554924 | 8.95E-14 |
| rs1866320   | 60.553695 | 8.96E-14 |
| rs4759229   | 60.542091 | 9.01E-14 |
| rs1705333   | 60.540676 | 9.02E-14 |
| rs10136039  | 60.539395 | 9.02E-14 |
| rs4795404   | 60.532976 | 9.06E-14 |
| rs6835514   | 60.532341 | 9.06E-14 |
| rs9272627   | 60.531530 | 9.06E-14 |
| rs1031161   | 60.519980 | 9.12E-14 |

|             |           |          |
|-------------|-----------|----------|
| rs61597598  | 60.503209 | 9.20E-14 |
| rs927220    | 60.502703 | 9.20E-14 |
| rs2243218   | 60.500726 | 9.21E-14 |
| rs7148322   | 60.491854 | 9.26E-14 |
| rs10054203  | 60.483959 | 9.30E-14 |
| rs9517624   | 60.480801 | 9.31E-14 |
| rs4564621   | 60.478021 | 9.33E-14 |
| rs16940671  | 60.468886 | 9.37E-14 |
| rs11982540  | 60.462367 | 9.41E-14 |
| rs7653908   | 60.460999 | 9.41E-14 |
| rs28364021  | 60.456496 | 9.44E-14 |
| rs78587102  | 60.450395 | 9.47E-14 |
| rs16940676  | 60.449712 | 9.47E-14 |
| rs12901331  | 60.436275 | 9.54E-14 |
| rs55779147  | 60.434880 | 9.55E-14 |
| rs16940672  | 60.430016 | 9.57E-14 |
| rs3885074   | 60.427215 | 9.58E-14 |
| rs72851020  | 60.420076 | 9.62E-14 |
| rs62054802  | 60.409307 | 9.68E-14 |
| rs10445362  | 60.395439 | 9.75E-14 |
| rs1805010   | 60.395149 | 9.75E-14 |
| rs78074121  | 60.382725 | 9.82E-14 |
| rs17763050  | 60.357274 | 9.95E-14 |
| rs16940677  | 60.349630 | 9.99E-14 |
| rs28637452  | 60.342127 | 1.00E-13 |
| rs72902177  | 60.340332 | 1.00E-13 |
| rs62057122  | 60.339710 | 1.00E-13 |
| rs6823809   | 60.339118 | 1.00E-13 |
| rs112583797 | 60.339014 | 1.00E-13 |
| rs4243085   | 60.333792 | 1.01E-13 |
| rs8022860   | 60.326052 | 1.01E-13 |
| rs72902175  | 60.326040 | 1.01E-13 |
| rs9810196   | 60.324566 | 1.01E-13 |
| rs705696    | 60.322508 | 1.01E-13 |
| rs150394154 | 60.320048 | 1.02E-13 |
| rs115196245 | 60.319804 | 1.02E-13 |
| rs6870356   | 60.313930 | 1.02E-13 |
| rs6732887   | 60.312189 | 1.02E-13 |
| rs1876827   | 60.306170 | 1.02E-13 |
| rs9274505   | 60.306005 | 1.02E-13 |
| rs79600142  | 60.295060 | 1.03E-13 |
| rs77152259  | 60.293824 | 1.03E-13 |
| rs16940674  | 60.285643 | 1.03E-13 |
| rs9848114   | 60.282100 | 1.04E-13 |
| rs143669790 | 60.276973 | 1.04E-13 |
| rs16940681  | 60.275912 | 1.04E-13 |

|             |           |          |
|-------------|-----------|----------|
| rs3024658   | 60.269014 | 1.04E-13 |
| rs12914822  | 60.266158 | 1.04E-13 |
| rs12531500  | 60.258042 | 1.05E-13 |
| rs72844273  | 60.251267 | 1.05E-13 |
| rs77632918  | 60.237146 | 1.06E-13 |
| rs12902294  | 60.237072 | 1.06E-13 |
| rs111739681 | 60.234346 | 1.06E-13 |
| rs2064914   | 60.226585 | 1.07E-13 |
| rs73176694  | 60.221585 | 1.07E-13 |
| rs4739739   | 60.221539 | 1.07E-13 |
| rs111541901 | 60.219756 | 1.07E-13 |
| rs4705908   | 60.217743 | 1.07E-13 |
| rs2534658   | 60.211593 | 1.08E-13 |
| rs117646503 | 60.211309 | 1.08E-13 |
| rs62057147  | 60.206590 | 1.08E-13 |
| rs2292239   | 60.205162 | 1.08E-13 |
| rs62057153  | 60.201639 | 1.08E-13 |
| rs17671338  | 60.183080 | 1.09E-13 |
| rs62057146  | 60.180210 | 1.09E-13 |
| rs12298170  | 60.173515 | 1.10E-13 |
| rs997049    | 60.173116 | 1.10E-13 |
| rs56127111  | 60.168720 | 1.10E-13 |
| rs2316763   | 60.163090 | 1.10E-13 |
| rs3117182   | 60.151585 | 1.11E-13 |
| rs7148412   | 60.138608 | 1.12E-13 |
| rs739644    | 60.137765 | 1.12E-13 |
| rs62291267  | 60.134374 | 1.12E-13 |
| rs878886    | 60.132599 | 1.12E-13 |
| rs62054805  | 60.131443 | 1.12E-13 |
| rs62057110  | 60.127069 | 1.13E-13 |
| rs62057116  | 60.122389 | 1.13E-13 |
| rs62054763  | 60.114168 | 1.13E-13 |
| rs1809414   | 60.114005 | 1.13E-13 |
| rs7297175   | 60.102506 | 1.14E-13 |
| rs10445363  | 60.100334 | 1.14E-13 |
| rs56268708  | 60.098427 | 1.14E-13 |
| rs17762912  | 60.097716 | 1.14E-13 |
| rs78917479  | 60.097348 | 1.14E-13 |
| rs10008492  | 60.096736 | 1.14E-13 |
| rs28364025  | 60.096443 | 1.14E-13 |
| rs17689918  | 60.090882 | 1.15E-13 |
| rs41457044  | 60.089624 | 1.15E-13 |
| rs1876830   | 60.086884 | 1.15E-13 |
| rs111763257 | 60.086264 | 1.15E-13 |
| rs2316765   | 60.079116 | 1.16E-13 |
| rs62057158  | 60.068842 | 1.16E-13 |



|             |           |          |
|-------------|-----------|----------|
| rs28357082  | 60.065843 | 1.16E-13 |
| rs62057109  | 60.053142 | 1.17E-13 |
| rs739645    | 60.053019 | 1.17E-13 |
| rs17213749  | 60.051552 | 1.17E-13 |
| rs17689653  | 60.051069 | 1.17E-13 |
| rs62057143  | 60.046051 | 1.18E-13 |
| rs2316764   | 60.044566 | 1.18E-13 |
| rs17689608  | 60.043773 | 1.18E-13 |
| rs17762882  | 60.042328 | 1.18E-13 |
| rs4566211   | 60.038603 | 1.18E-13 |
| rs878888    | 60.027312 | 1.19E-13 |
| rs11072811  | 60.017285 | 1.19E-13 |
| rs41280118  | 60.008618 | 1.20E-13 |
| rs11575838  | 60.002944 | 1.20E-13 |
| rs4482334   | 60.000720 | 1.20E-13 |
| rs62057117  | 60.000482 | 1.20E-13 |
| rs28364023  | 60.000315 | 1.21E-13 |
| rs78506181  | 59.999020 | 1.21E-13 |
| rs73410789  | 59.998804 | 1.21E-13 |
| rs55865707  | 59.997672 | 1.21E-13 |
| rs62057154  | 59.995834 | 1.21E-13 |
| rs13360071  | 59.993120 | 1.21E-13 |
| rs62054804  | 59.990361 | 1.21E-13 |
| rs2273500   | 59.989401 | 1.21E-13 |
| rs17689471  | 59.985520 | 1.21E-13 |
| rs55763795  | 59.982465 | 1.22E-13 |
| rs62057114  | 59.982236 | 1.22E-13 |
| rs17762769  | 59.980964 | 1.22E-13 |
| rs62054803  | 59.979426 | 1.22E-13 |
| rs62057157  | 59.978998 | 1.22E-13 |
| rs17689824  | 59.978058 | 1.22E-13 |
| rs55694701  | 59.975846 | 1.22E-13 |
| rs62057115  | 59.969812 | 1.22E-13 |
| rs117365970 | 59.969274 | 1.23E-13 |
| rs4525537   | 59.966007 | 1.23E-13 |
| rs62057123  | 59.964887 | 1.23E-13 |
| rs79501144  | 59.962184 | 1.23E-13 |
| rs1912151   | 59.954418 | 1.24E-13 |
| rs3862469   | 59.954059 | 1.24E-13 |
| rs57969627  | 59.953885 | 1.24E-13 |
| rs62057156  | 59.946780 | 1.24E-13 |
| rs878887    | 59.943368 | 1.24E-13 |
| rs11242110  | 59.938689 | 1.25E-13 |
| rs4640231   | 59.937419 | 1.25E-13 |
| rs4335809   | 59.934693 | 1.25E-13 |
| rs132902    | 59.934142 | 1.25E-13 |

|             |           |          |
|-------------|-----------|----------|
| rs4833827   | 59.931852 | 1.25E-13 |
| rs9271124   | 59.931675 | 1.25E-13 |
| rs9611570   | 59.930611 | 1.25E-13 |
| rs35755165  | 59.925245 | 1.25E-13 |
| rs17763086  | 59.923240 | 1.26E-13 |
| rs62057113  | 59.920972 | 1.26E-13 |
| rs56357543  | 59.919340 | 1.26E-13 |
| rs9271125   | 59.914655 | 1.26E-13 |
| rs9271126   | 59.913108 | 1.26E-13 |
| rs1396862   | 59.910886 | 1.26E-13 |
| rs62057112  | 59.902017 | 1.27E-13 |
| rs111273167 | 59.892992 | 1.28E-13 |
| rs10832369  | 59.887499 | 1.28E-13 |
| rs56099546  | 59.887414 | 1.28E-13 |
| rs762534    | 59.886354 | 1.28E-13 |
| rs10467124  | 59.880139 | 1.29E-13 |
| rs2854001   | 59.875071 | 1.29E-13 |
| rs28746808  | 59.868458 | 1.29E-13 |
| rs10905491  | 59.858939 | 1.30E-13 |
| rs115360810 | 59.852300 | 1.30E-13 |
| rs12514685  | 59.850833 | 1.31E-13 |
| rs3743075   | 59.839962 | 1.31E-13 |
| rs7705653   | 59.834663 | 1.32E-13 |
| rs4309444   | 59.831631 | 1.32E-13 |
| rs72907878  | 59.830251 | 1.32E-13 |
| rs112819759 | 59.821992 | 1.33E-13 |
| rs174537    | 59.817572 | 1.33E-13 |
| rs10083393  | 59.815198 | 1.33E-13 |
| rs62057150  | 59.814297 | 1.33E-13 |
| rs62057148  | 59.810073 | 1.33E-13 |
| rs16940668  | 59.805110 | 1.34E-13 |
| rs2596495   | 59.804726 | 1.34E-13 |
| rs12912245  | 59.802114 | 1.34E-13 |
| rs62010327  | 59.800306 | 1.34E-13 |
| rs4833821   | 59.796129 | 1.34E-13 |
| rs1876831   | 59.794930 | 1.35E-13 |
| rs55730162  | 59.788327 | 1.35E-13 |
| rs241438    | 59.786299 | 1.35E-13 |
| rs62057155  | 59.783443 | 1.35E-13 |
| rs7591518   | 59.772974 | 1.36E-13 |
| rs4566212   | 59.771261 | 1.36E-13 |
| rs4795385   | 59.757020 | 1.37E-13 |
| rs16940665  | 59.746846 | 1.38E-13 |
| rs10944479  | 59.739253 | 1.39E-13 |
| rs72906130  | 59.736475 | 1.39E-13 |
| rs4820446   | 59.735821 | 1.39E-13 |

|             |           |          |
|-------------|-----------|----------|
| rs79603908  | 59.733713 | 1.39E-13 |
| rs8073146   | 59.732205 | 1.39E-13 |
| rs55986091  | 59.727385 | 1.39E-13 |
| rs17689882  | 59.715806 | 1.40E-13 |
| rs62054760  | 59.715633 | 1.40E-13 |
| rs62010328  | 59.714641 | 1.40E-13 |
| rs2523607   | 59.707281 | 1.41E-13 |
| rs827640    | 59.704556 | 1.41E-13 |
| rs17510339  | 59.701898 | 1.41E-13 |
| rs1505770   | 59.675840 | 1.43E-13 |
| rs2110726   | 59.674464 | 1.44E-13 |
| rs62057119  | 59.672070 | 1.44E-13 |
| rs17762954  | 59.663903 | 1.44E-13 |
| rs62054761  | 59.653715 | 1.45E-13 |
| rs11241101  | 59.650745 | 1.45E-13 |
| rs62057149  | 59.649786 | 1.45E-13 |
| rs62054762  | 59.641707 | 1.46E-13 |
| rs9405085   | 59.635626 | 1.47E-13 |
| rs67712706  | 59.631041 | 1.47E-13 |
| rs3917290   | 59.619715 | 1.48E-13 |
| rs187570181 | 59.605466 | 1.49E-13 |
| rs147718557 | 59.592467 | 1.50E-13 |
| rs2130499   | 59.586623 | 1.50E-13 |
| rs12912045  | 59.575761 | 1.51E-13 |
| rs62334742  | 59.568492 | 1.52E-13 |
| rs139545    | 59.559901 | 1.53E-13 |
| rs1773560   | 59.559298 | 1.53E-13 |
| rs139573    | 59.535580 | 1.55E-13 |
| rs12946393  | 59.529240 | 1.55E-13 |
| rs7497235   | 59.516059 | 1.56E-13 |
| rs117654829 | 59.515774 | 1.56E-13 |
| rs151224679 | 59.504897 | 1.57E-13 |
| rs7424080   | 59.504897 | 1.57E-13 |
| rs78539152  | 59.502505 | 1.57E-13 |
| rs62008193  | 59.497286 | 1.58E-13 |
| rs28650131  | 59.493775 | 1.58E-13 |
| rs911258    | 59.491803 | 1.58E-13 |
| rs62057118  | 59.470982 | 1.60E-13 |
| rs3784106   | 59.465475 | 1.61E-13 |
| rs4820443   | 59.451858 | 1.62E-13 |
| rs72904292  | 59.449622 | 1.62E-13 |
| rs116646885 | 59.449318 | 1.62E-13 |
| rs17425752  | 59.441784 | 1.63E-13 |
| rs140812695 | 59.440318 | 1.63E-13 |
| rs8023822   | 59.417902 | 1.65E-13 |
| rs2569266   | 59.416433 | 1.65E-13 |

|             |           |          |
|-------------|-----------|----------|
| rs3130558   | 59.412662 | 1.65E-13 |
| rs2869868   | 59.411185 | 1.65E-13 |
| rs181355045 | 59.400378 | 1.66E-13 |
| rs8072451   | 59.398668 | 1.66E-13 |
| rs6854230   | 59.392730 | 1.67E-13 |
| rs62057111  | 59.388535 | 1.67E-13 |
| rs11023372  | 59.384567 | 1.68E-13 |
| rs34265426  | 59.376968 | 1.68E-13 |
| rs4822052   | 59.371470 | 1.69E-13 |
| rs3130981   | 59.349344 | 1.71E-13 |
| rs62056851  | 59.339742 | 1.72E-13 |
| rs8060857   | 59.333299 | 1.72E-13 |
| rs274558    | 59.318065 | 1.74E-13 |
| rs10075764  | 59.307738 | 1.75E-13 |
| rs13276142  | 59.298691 | 1.76E-13 |
| rs80099993  | 59.294707 | 1.76E-13 |
| rs12912010  | 59.290406 | 1.76E-13 |
| rs10451095  | 59.289874 | 1.76E-13 |
| rs9270633   | 59.285085 | 1.77E-13 |
| rs1042148   | 59.269504 | 1.78E-13 |
| rs1214598   | 59.267973 | 1.78E-13 |
| rs2949661   | 59.265657 | 1.79E-13 |
| rs10876963  | 59.257158 | 1.79E-13 |
| rs11023590  | 59.249374 | 1.80E-13 |
| rs9271659   | 59.246105 | 1.81E-13 |
| rs8062719   | 59.240151 | 1.81E-13 |
| rs72904209  | 59.227059 | 1.82E-13 |
| rs12910289  | 59.222334 | 1.83E-13 |
| rs11636131  | 59.221323 | 1.83E-13 |
| rs12785018  | 59.211426 | 1.84E-13 |
| rs9323506   | 59.208836 | 1.84E-13 |
| rs3743074   | 59.190564 | 1.86E-13 |
| rs864745    | 59.175121 | 1.88E-13 |
| rs78214806  | 59.173521 | 1.88E-13 |
| rs174536    | 59.170923 | 1.88E-13 |
| rs9607842   | 59.166547 | 1.88E-13 |
| rs871058    | 59.165392 | 1.89E-13 |
| rs4822027   | 59.156295 | 1.89E-13 |
| rs73176687  | 59.153647 | 1.90E-13 |
| rs139561    | 59.149817 | 1.90E-13 |
| rs10520079  | 59.148914 | 1.90E-13 |
| rs72669125  | 59.139393 | 1.91E-13 |
| rs113991678 | 59.129570 | 1.92E-13 |
| rs139560    | 59.120476 | 1.93E-13 |
| rs17763199  | 59.115603 | 1.94E-13 |
| rs9271683   | 59.109766 | 1.94E-13 |

|             |           |          |
|-------------|-----------|----------|
| rs60119330  | 59.107108 | 1.95E-13 |
| rs72904207  | 59.102408 | 1.95E-13 |
| rs146591430 | 59.085355 | 1.97E-13 |
| rs12290143  | 59.078974 | 1.97E-13 |
| rs28463664  | 59.078413 | 1.98E-13 |
| rs174568    | 59.073163 | 1.98E-13 |
| rs2988279   | 59.067646 | 1.99E-13 |
| rs12237914  | 59.067100 | 1.99E-13 |
| rs73176686  | 59.066325 | 1.99E-13 |
| rs1044931   | 59.065763 | 1.99E-13 |
| rs59727727  | 59.053985 | 2.00E-13 |
| rs2243211   | 59.051167 | 2.00E-13 |
| rs290897    | 59.038601 | 2.02E-13 |
| rs79008     | 59.034132 | 2.02E-13 |
| rs202630    | 59.030709 | 2.03E-13 |
| rs33961405  | 59.028865 | 2.03E-13 |
| rs174562    | 59.019256 | 2.04E-13 |
| rs72934321  | 59.015906 | 2.04E-13 |
| rs1874226   | 59.007945 | 2.05E-13 |
| rs1048709   | 59.003250 | 2.06E-13 |
| rs4548048   | 59.000785 | 2.06E-13 |
| rs174547    | 59.000244 | 2.06E-13 |
| rs73163343  | 58.998294 | 2.06E-13 |
| rs10795633  | 58.991851 | 2.07E-13 |
| rs187681    | 58.985203 | 2.08E-13 |
| rs17668272  | 58.982817 | 2.08E-13 |
| rs12903129  | 58.981422 | 2.08E-13 |
| rs12902493  | 58.976323 | 2.09E-13 |
| rs3917267   | 58.971140 | 2.09E-13 |
| rs12913547  | 58.959784 | 2.11E-13 |
| rs9366782   | 58.957078 | 2.11E-13 |
| rs747275    | 58.951487 | 2.11E-13 |
| rs952215    | 58.950574 | 2.12E-13 |
| rs952216    | 58.946713 | 2.12E-13 |
| rs2382720   | 58.944450 | 2.12E-13 |
| rs12899201  | 58.936266 | 2.13E-13 |
| rs2869544   | 58.934139 | 2.13E-13 |
| rs3829787   | 58.930355 | 2.14E-13 |
| rs8053      | 58.927068 | 2.14E-13 |
| rs12915366  | 58.924721 | 2.15E-13 |
| rs274568    | 58.907946 | 2.16E-13 |
| rs4887063   | 58.898494 | 2.18E-13 |
| rs2929155   | 58.893085 | 2.18E-13 |
| rs116309362 | 58.887930 | 2.19E-13 |
| rs3132555   | 58.855707 | 2.23E-13 |
| rs80028338  | 58.846568 | 2.24E-13 |

|             |           |          |
|-------------|-----------|----------|
| rs274557    | 58.822752 | 2.27E-13 |
| rs4959030   | 58.821688 | 2.27E-13 |
| rs2192756   | 58.819339 | 2.27E-13 |
| rs7085028   | 58.810274 | 2.28E-13 |
| rs1847530   | 58.805223 | 2.29E-13 |
| rs4594881   | 58.800310 | 2.29E-13 |
| rs30506     | 58.795071 | 2.30E-13 |
| rs3024614   | 58.794653 | 2.30E-13 |
| rs3743073   | 58.794153 | 2.30E-13 |
| rs1214596   | 58.788013 | 2.31E-13 |
| rs75861713  | 58.778743 | 2.32E-13 |
| rs903507    | 58.778370 | 2.32E-13 |
| rs274566    | 58.772825 | 2.33E-13 |
| rs274565    | 58.754763 | 2.35E-13 |
| rs2857605   | 58.753795 | 2.35E-13 |
| rs1504545   | 58.752520 | 2.35E-13 |
| rs2056626   | 58.736788 | 2.37E-13 |
| rs79187454  | 58.733673 | 2.38E-13 |
| rs139572    | 58.733362 | 2.38E-13 |
| rs10186929  | 58.713713 | 2.40E-13 |
| rs8075737   | 58.709495 | 2.41E-13 |
| rs194395    | 58.700354 | 2.42E-13 |
| rs12697352  | 58.693196 | 2.43E-13 |
| rs10073425  | 58.671179 | 2.46E-13 |
| rs6789732   | 58.641636 | 2.50E-13 |
| rs12322902  | 58.640777 | 2.50E-13 |
| rs10920569  | 58.635078 | 2.51E-13 |
| rs13241235  | 58.612675 | 2.54E-13 |
| rs4275821   | 58.608288 | 2.54E-13 |
| rs10472984  | 58.599253 | 2.55E-13 |
| rs9271631   | 58.598903 | 2.55E-13 |
| rs149902168 | 58.596222 | 2.56E-13 |
| rs9940278   | 58.594441 | 2.56E-13 |
| rs7497171   | 58.593038 | 2.56E-13 |
| rs11072810  | 58.582816 | 2.58E-13 |
| rs10055042  | 58.575201 | 2.59E-13 |
| rs1504546   | 58.571575 | 2.59E-13 |
| rs11630349  | 58.567274 | 2.60E-13 |
| rs7734635   | 58.563761 | 2.60E-13 |
| rs3024648   | 58.562309 | 2.61E-13 |
| rs1961220   | 58.547372 | 2.63E-13 |
| rs174544    | 58.539348 | 2.64E-13 |
| rs28690449  | 58.536926 | 2.64E-13 |
| rs11632963  | 58.525107 | 2.66E-13 |
| rs2672812   | 58.521554 | 2.66E-13 |
| rs8035039   | 58.519757 | 2.67E-13 |

|            |           |          |
|------------|-----------|----------|
| rs28534491 | 58.507551 | 2.68E-13 |
| rs274559   | 58.499221 | 2.69E-13 |
| rs3829223  | 58.498429 | 2.70E-13 |
| rs3971866  | 58.496922 | 2.70E-13 |
| rs734244   | 58.492405 | 2.70E-13 |
| rs7728612  | 58.490789 | 2.71E-13 |
| rs75567729 | 58.488195 | 2.71E-13 |
| rs6885792  | 58.485562 | 2.71E-13 |
| rs8034804  | 58.483962 | 2.72E-13 |
| rs12910100 | 58.475547 | 2.73E-13 |
| rs7173512  | 58.469572 | 2.74E-13 |
| rs11465563 | 58.461400 | 2.75E-13 |
| rs2561999  | 58.458767 | 2.75E-13 |
| rs62408234 | 58.455010 | 2.76E-13 |
| rs8182252  | 58.449347 | 2.77E-13 |
| rs7176070  | 58.446794 | 2.77E-13 |
| rs12915428 | 58.443031 | 2.78E-13 |
| rs3130342  | 58.428106 | 2.80E-13 |
| rs30509    | 58.427697 | 2.80E-13 |
| rs9271702  | 58.426429 | 2.80E-13 |
| rs12594391 | 58.424241 | 2.81E-13 |
| rs3094199  | 58.422437 | 2.81E-13 |
| rs12906284 | 58.420874 | 2.81E-13 |
| rs1149913  | 58.420451 | 2.81E-13 |
| rs12907169 | 58.420416 | 2.81E-13 |
| rs2672806  | 58.418292 | 2.81E-13 |
| rs61615404 | 58.417572 | 2.82E-13 |
| rs17623337 | 58.417319 | 2.82E-13 |
| rs12907425 | 58.415740 | 2.82E-13 |
| rs12906846 | 58.402448 | 2.84E-13 |
| rs72795177 | 58.398321 | 2.84E-13 |
| rs406991   | 58.398283 | 2.84E-13 |
| rs7710963  | 58.396583 | 2.85E-13 |
| rs11632604 | 58.396511 | 2.85E-13 |
| rs12910969 | 58.375590 | 2.88E-13 |
| rs7495616  | 58.373149 | 2.88E-13 |
| rs45500192 | 58.370454 | 2.89E-13 |
| rs3793966  | 58.362546 | 2.90E-13 |
| rs9272644  | 58.356017 | 2.91E-13 |
| rs55813014 | 58.354091 | 2.91E-13 |
| rs256875   | 58.351655 | 2.92E-13 |
| rs55975060 | 58.343055 | 2.93E-13 |
| rs7178270  | 58.339684 | 2.94E-13 |
| rs10920570 | 58.336108 | 2.94E-13 |
| rs4280918  | 58.335936 | 2.94E-13 |
| rs6683383  | 58.335055 | 2.94E-13 |

|             |           |          |
|-------------|-----------|----------|
| rs9989152   | 58.332539 | 2.95E-13 |
| rs30519     | 58.332389 | 2.95E-13 |
| rs56007453  | 58.328618 | 2.95E-13 |
| rs9271664   | 58.327562 | 2.95E-13 |
| rs12910726  | 58.326835 | 2.96E-13 |
| rs145786943 | 58.326786 | 2.96E-13 |
| rs17407257  | 58.326054 | 2.96E-13 |
| rs9939973   | 58.320584 | 2.97E-13 |
| rs324021    | 58.314628 | 2.97E-13 |
| rs12900612  | 58.314282 | 2.98E-13 |
| rs34422348  | 58.313738 | 2.98E-13 |
| rs4759044   | 58.310094 | 2.98E-13 |
| rs17132983  | 58.301183 | 3.00E-13 |
| rs12916999  | 58.300763 | 3.00E-13 |
| rs72687029  | 58.278940 | 3.03E-13 |
| rs2301807   | 58.277596 | 3.03E-13 |
| rs1214595   | 58.270626 | 3.05E-13 |
| rs2243210   | 58.264483 | 3.06E-13 |
| rs6002380   | 58.261810 | 3.06E-13 |
| rs12903668  | 58.256089 | 3.07E-13 |
| rs117368197 | 58.253583 | 3.07E-13 |
| rs6449      | 58.246069 | 3.09E-13 |
| rs139571    | 58.235872 | 3.10E-13 |
| rs849142    | 58.234941 | 3.10E-13 |
| rs5758344   | 58.233457 | 3.11E-13 |
| rs3813571   | 58.227654 | 3.12E-13 |
| rs12915652  | 58.226178 | 3.12E-13 |
| rs5758345   | 58.225069 | 3.12E-13 |
| rs1421086   | 58.221661 | 3.13E-13 |
| rs9513615   | 58.218512 | 3.13E-13 |
| rs9940646   | 58.216995 | 3.13E-13 |
| rs10131654  | 58.215517 | 3.14E-13 |
| rs202613    | 58.214459 | 3.14E-13 |
| rs7183955   | 58.210856 | 3.14E-13 |
| rs202614    | 58.208833 | 3.15E-13 |
| rs12622738  | 58.197806 | 3.17E-13 |
| rs12914694  | 58.195577 | 3.17E-13 |
| rs4713576   | 58.194401 | 3.17E-13 |
| rs5758461   | 58.183214 | 3.19E-13 |
| rs5758347   | 58.167613 | 3.22E-13 |
| rs28874883  | 58.166932 | 3.22E-13 |
| rs202616    | 58.166478 | 3.22E-13 |
| rs2142505   | 58.161579 | 3.23E-13 |
| rs7122936   | 58.161294 | 3.23E-13 |
| rs6002378   | 58.144424 | 3.26E-13 |
| rs6869502   | 58.141643 | 3.26E-13 |



|            |           |          |
|------------|-----------|----------|
| rs7493547  | 58.140909 | 3.27E-13 |
| rs911255   | 58.140625 | 3.27E-13 |
| rs12700214 | 58.106279 | 3.33E-13 |
| rs1558901  | 58.100738 | 3.34E-13 |
| rs1535     | 58.099711 | 3.34E-13 |
| rs2370616  | 58.091089 | 3.35E-13 |
| rs12903613 | 58.090981 | 3.35E-13 |
| rs10065671 | 58.089646 | 3.36E-13 |
| rs2413644  | 58.087103 | 3.36E-13 |
| rs188057   | 58.082713 | 3.37E-13 |
| rs202619   | 58.081732 | 3.37E-13 |
| rs3813572  | 58.079985 | 3.37E-13 |
| rs402959   | 58.069968 | 3.39E-13 |
| rs28532329 | 58.067568 | 3.40E-13 |
| rs1558902  | 58.064676 | 3.40E-13 |
| rs202618   | 58.058700 | 3.41E-13 |
| rs9923147  | 58.058219 | 3.41E-13 |
| rs43170    | 58.052662 | 3.42E-13 |
| rs7285041  | 58.052027 | 3.42E-13 |
| rs202624   | 58.046146 | 3.44E-13 |
| rs4886572  | 58.042406 | 3.44E-13 |
| rs2735709  | 58.040914 | 3.44E-13 |
| rs7828306  | 58.038890 | 3.45E-13 |
| rs2243228  | 58.038339 | 3.45E-13 |
| rs42403    | 58.033345 | 3.46E-13 |
| rs45613035 | 58.024883 | 3.47E-13 |
| rs3766568  | 58.020432 | 3.48E-13 |
| rs62057151 | 58.013753 | 3.50E-13 |
| rs17407498 | 58.011826 | 3.50E-13 |
| rs202617   | 58.011770 | 3.50E-13 |
| rs2413643  | 58.001166 | 3.52E-13 |
| rs6002381  | 57.993638 | 3.53E-13 |
| rs30528    | 57.993186 | 3.53E-13 |
| rs17464408 | 57.992288 | 3.54E-13 |
| rs9940128  | 57.989215 | 3.54E-13 |
| rs2390343  | 57.988753 | 3.54E-13 |
| rs7700507  | 57.985769 | 3.55E-13 |
| rs4822028  | 57.980616 | 3.56E-13 |
| rs11255968 | 57.976670 | 3.57E-13 |
| rs30529    | 57.974081 | 3.57E-13 |
| rs202623   | 57.973451 | 3.57E-13 |
| rs174553   | 57.971749 | 3.57E-13 |
| rs12591557 | 57.968993 | 3.58E-13 |
| rs202625   | 57.968769 | 3.58E-13 |
| rs3131005  | 57.966811 | 3.58E-13 |
| rs9270980  | 57.963854 | 3.59E-13 |

|             |           |          |
|-------------|-----------|----------|
| rs112795930 | 57.961505 | 3.59E-13 |
| rs2890772   | 57.950917 | 3.61E-13 |
| rs5751101   | 57.950116 | 3.62E-13 |
| rs11256051  | 57.950095 | 3.62E-13 |
| rs3843061   | 57.949729 | 3.62E-13 |
| rs12916483  | 57.946611 | 3.62E-13 |
| rs715498    | 57.943636 | 3.63E-13 |
| rs12938099  | 57.922152 | 3.67E-13 |
| rs202657    | 57.921270 | 3.67E-13 |
| rs202664    | 57.918344 | 3.68E-13 |
| rs202620    | 57.917457 | 3.68E-13 |
| rs12900783  | 57.915976 | 3.68E-13 |
| rs30531     | 57.897362 | 3.72E-13 |
| rs30527     | 57.896291 | 3.72E-13 |
| rs5751150   | 57.887529 | 3.74E-13 |
| rs9271466   | 57.887469 | 3.74E-13 |
| rs30524     | 57.883376 | 3.75E-13 |
| rs12023876  | 57.882629 | 3.75E-13 |
| rs9923544   | 57.873303 | 3.77E-13 |
| rs9269911   | 57.873167 | 3.77E-13 |
| rs75503445  | 57.871623 | 3.77E-13 |
| rs30523     | 57.870016 | 3.78E-13 |
| rs1956523   | 57.867460 | 3.78E-13 |
| rs12188656  | 57.866399 | 3.78E-13 |
| rs30520     | 57.866160 | 3.78E-13 |
| rs28398322  | 57.858266 | 3.80E-13 |
| rs174554    | 57.850146 | 3.82E-13 |
| rs30526     | 57.848094 | 3.82E-13 |
| rs5758458   | 57.842535 | 3.83E-13 |
| rs36045869  | 57.841072 | 3.83E-13 |
| rs67797421  | 57.835339 | 3.85E-13 |
| rs115288876 | 57.834360 | 3.85E-13 |
| rs9271719   | 57.830347 | 3.86E-13 |
| rs106860    | 57.828300 | 3.86E-13 |
| rs111886335 | 57.826483 | 3.86E-13 |
| rs11236810  | 57.820930 | 3.88E-13 |
| rs12593207  | 57.817080 | 3.88E-13 |
| rs39588     | 57.815265 | 3.89E-13 |
| rs9607841   | 57.813544 | 3.89E-13 |
| rs202656    | 57.812630 | 3.89E-13 |
| rs8074855   | 57.811258 | 3.90E-13 |
| rs28661610  | 57.808588 | 3.90E-13 |
| rs2292117   | 57.807454 | 3.90E-13 |
| rs4512      | 57.807451 | 3.90E-13 |
| rs8013968   | 57.804769 | 3.91E-13 |
| rs62008174  | 57.801198 | 3.92E-13 |

|             |           |          |
|-------------|-----------|----------|
| rs5758450   | 57.799955 | 3.92E-13 |
| rs8023462   | 57.793493 | 3.93E-13 |
| rs30513     | 57.792577 | 3.93E-13 |
| rs9271085   | 57.779473 | 3.96E-13 |
| rs11642015  | 57.766606 | 3.99E-13 |
| rs202622    | 57.764519 | 3.99E-13 |
| rs495956    | 57.760500 | 4.00E-13 |
| rs12906847  | 57.746555 | 4.03E-13 |
| rs471889    | 57.744246 | 4.04E-13 |
| rs5751160   | 57.743970 | 4.04E-13 |
| rs62291291  | 57.724051 | 4.08E-13 |
| rs1421085   | 57.722701 | 4.09E-13 |
| rs773112    | 57.714381 | 4.10E-13 |
| rs241439    | 57.712591 | 4.11E-13 |
| rs28392948  | 57.707260 | 4.12E-13 |
| rs3094197   | 57.694027 | 4.15E-13 |
| rs10857090  | 57.691740 | 4.15E-13 |
| rs30515     | 57.685497 | 4.17E-13 |
| rs11856909  | 57.679412 | 4.18E-13 |
| rs5758465   | 57.676536 | 4.19E-13 |
| rs55690619  | 57.673561 | 4.19E-13 |
| rs62008194  | 57.669889 | 4.20E-13 |
| rs58526289  | 57.665796 | 4.21E-13 |
| rs30534     | 57.660341 | 4.22E-13 |
| rs241437    | 57.652832 | 4.24E-13 |
| rs11858230  | 57.651143 | 4.24E-13 |
| rs5751147   | 57.643691 | 4.26E-13 |
| rs9611671   | 57.637275 | 4.28E-13 |
| rs4410007   | 57.635743 | 4.28E-13 |
| rs115911400 | 57.634626 | 4.28E-13 |
| rs34570306  | 57.631694 | 4.29E-13 |
| rs42402     | 57.622806 | 4.31E-13 |
| rs4886571   | 57.622596 | 4.31E-13 |
| rs2899347   | 57.621995 | 4.31E-13 |
| rs8025429   | 57.599803 | 4.36E-13 |
| rs11638020  | 57.595724 | 4.37E-13 |
| rs12443627  | 57.593722 | 4.38E-13 |
| rs30518     | 57.585711 | 4.40E-13 |
| rs495090    | 57.585574 | 4.40E-13 |
| rs30507     | 57.581024 | 4.41E-13 |
| rs174550    | 57.577666 | 4.42E-13 |
| rs3821205   | 57.573460 | 4.43E-13 |
| rs4889604   | 57.570991 | 4.43E-13 |
| rs2869055   | 57.569611 | 4.43E-13 |
| rs4551997   | 57.556026 | 4.47E-13 |
| rs112524762 | 57.551856 | 4.48E-13 |

|             |           |          |
|-------------|-----------|----------|
| rs7204459   | 57.551820 | 4.48E-13 |
| rs77460382  | 57.550664 | 4.48E-13 |
| rs30517     | 57.550304 | 4.48E-13 |
| rs4243083   | 57.550008 | 4.48E-13 |
| rs1494486   | 57.547305 | 4.49E-13 |
| rs202666    | 57.545990 | 4.49E-13 |
| rs1807725   | 57.542235 | 4.50E-13 |
| rs6696205   | 57.540331 | 4.50E-13 |
| rs62048402  | 57.530724 | 4.53E-13 |
| rs707939    | 57.528462 | 4.53E-13 |
| rs30512     | 57.515935 | 4.56E-13 |
| rs11590405  | 57.512813 | 4.57E-13 |
| rs7555556   | 57.505233 | 4.59E-13 |
| rs146251853 | 57.504493 | 4.59E-13 |
| rs30508     | 57.489344 | 4.63E-13 |
| rs5751149   | 57.486189 | 4.64E-13 |
| rs11582098  | 57.481950 | 4.65E-13 |
| rs102274    | 57.476953 | 4.66E-13 |
| rs5751148   | 57.471733 | 4.67E-13 |
| rs1877030   | 57.470216 | 4.68E-13 |
| rs9271080   | 57.465453 | 4.69E-13 |
| rs2074572   | 57.459339 | 4.70E-13 |
| rs30514     | 57.441030 | 4.75E-13 |
| rs7538512   | 57.438504 | 4.76E-13 |
| rs5751156   | 57.437000 | 4.76E-13 |
| rs6898145   | 57.427771 | 4.78E-13 |
| rs9271635   | 57.424206 | 4.79E-13 |
| rs57728226  | 57.420133 | 4.80E-13 |
| rs9611667   | 57.415968 | 4.81E-13 |
| rs3860069   | 57.406563 | 4.84E-13 |
| rs28622088  | 57.399064 | 4.86E-13 |
| rs112635299 | 57.396864 | 4.86E-13 |
| rs7403155   | 57.390297 | 4.88E-13 |
| rs12912673  | 57.389338 | 4.88E-13 |
| rs4887085   | 57.378440 | 4.91E-13 |
| rs6519289   | 57.374290 | 4.92E-13 |
| rs13708     | 57.371042 | 4.93E-13 |
| rs61937566  | 57.368995 | 4.94E-13 |
| rs9611572   | 57.361879 | 4.96E-13 |
| rs174546    | 57.361383 | 4.96E-13 |
| rs2899348   | 57.359842 | 4.96E-13 |
| rs80163833  | 57.339744 | 5.02E-13 |
| rs9930506   | 57.337108 | 5.02E-13 |
| rs2305880   | 57.333184 | 5.03E-13 |
| rs4329147   | 57.331552 | 5.04E-13 |
| rs12910978  | 57.319655 | 5.07E-13 |

|             |           |          |
|-------------|-----------|----------|
| rs73176692  | 57.318090 | 5.07E-13 |
| rs9611672   | 57.316207 | 5.08E-13 |
| rs5996062   | 57.311143 | 5.09E-13 |
| rs2050031   | 57.310445 | 5.09E-13 |
| rs9611577   | 57.309212 | 5.10E-13 |
| rs1494487   | 57.309132 | 5.10E-13 |
| rs28604950  | 57.303698 | 5.11E-13 |
| rs1319685   | 57.293455 | 5.14E-13 |
| rs9270643   | 57.289857 | 5.15E-13 |
| rs174545    | 57.288284 | 5.16E-13 |
| rs9611571   | 57.276259 | 5.19E-13 |
| rs139562    | 57.275195 | 5.19E-13 |
| rs12592823  | 57.250391 | 5.26E-13 |
| rs10832442  | 57.249840 | 5.26E-13 |
| rs3024629   | 57.248703 | 5.27E-13 |
| rs2899349   | 57.248663 | 5.27E-13 |
| rs17145213  | 57.240150 | 5.29E-13 |
| rs6609      | 57.239495 | 5.29E-13 |
| rs9271721   | 57.231690 | 5.31E-13 |
| rs1983576   | 57.227228 | 5.33E-13 |
| rs256871    | 57.225409 | 5.33E-13 |
| rs5996063   | 57.220990 | 5.34E-13 |
| rs5758464   | 57.216773 | 5.36E-13 |
| rs4820444   | 57.201294 | 5.40E-13 |
| rs4335039   | 57.195455 | 5.42E-13 |
| rs55872725  | 57.179371 | 5.47E-13 |
| rs3130063   | 57.177816 | 5.47E-13 |
| rs6002474   | 57.173484 | 5.48E-13 |
| rs4889525   | 57.166980 | 5.50E-13 |
| rs6427990   | 57.157851 | 5.53E-13 |
| rs9607800   | 57.140971 | 5.58E-13 |
| rs2014975   | 57.137295 | 5.59E-13 |
| rs181461000 | 57.126208 | 5.62E-13 |
| rs74863864  | 57.121340 | 5.64E-13 |
| rs9273371   | 57.114611 | 5.66E-13 |
| rs174549    | 57.113431 | 5.66E-13 |
| rs1342770   | 57.102025 | 5.70E-13 |
| rs1494488   | 57.101845 | 5.70E-13 |
| rs4822044   | 57.094405 | 5.72E-13 |
| rs139566    | 57.090688 | 5.73E-13 |
| rs1342771   | 57.080719 | 5.76E-13 |
| rs1534932   | 57.077768 | 5.77E-13 |
| rs773109    | 57.077765 | 5.77E-13 |
| rs5022780   | 57.069178 | 5.80E-13 |
| rs12731336  | 57.059190 | 5.83E-13 |
| rs5751145   | 57.058511 | 5.83E-13 |

|             |           |          |
|-------------|-----------|----------|
| rs78727630  | 57.058348 | 5.83E-13 |
| rs763787    | 57.052502 | 5.85E-13 |
| rs12716978  | 57.048953 | 5.86E-13 |
| rs3916997   | 57.041524 | 5.88E-13 |
| rs9271056   | 57.027254 | 5.93E-13 |
| rs9271634   | 57.019021 | 5.96E-13 |
| rs62011004  | 57.017546 | 5.96E-13 |
| rs56146114  | 57.012786 | 5.98E-13 |
| rs2621323   | 57.012446 | 5.98E-13 |
| rs9271161   | 56.995205 | 6.03E-13 |
| rs9922708   | 56.992697 | 6.04E-13 |
| rs2054213   | 56.992303 | 6.04E-13 |
| rs73163354  | 56.984642 | 6.07E-13 |
| rs10201122  | 56.967868 | 6.12E-13 |
| rs12915776  | 56.945922 | 6.19E-13 |
| rs8032842   | 56.908172 | 6.32E-13 |
| rs3971869   | 56.904909 | 6.33E-13 |
| rs6503504   | 56.903593 | 6.33E-13 |
| rs2338799   | 56.899212 | 6.35E-13 |
| rs62010332  | 56.891324 | 6.38E-13 |
| rs3764      | 56.885600 | 6.40E-13 |
| rs8032771   | 56.881288 | 6.41E-13 |
| rs56285448  | 56.880229 | 6.41E-13 |
| rs4287601   | 56.877311 | 6.42E-13 |
| rs897986    | 56.877262 | 6.42E-13 |
| rs113972770 | 56.874694 | 6.43E-13 |
| rs9270994   | 56.841542 | 6.55E-13 |
| rs58801386  | 56.840458 | 6.55E-13 |
| rs2869546   | 56.833936 | 6.58E-13 |
| rs9611573   | 56.831973 | 6.58E-13 |
| rs7178750   | 56.830974 | 6.59E-13 |
| rs28799952  | 56.798406 | 6.70E-13 |
| rs773107    | 56.792804 | 6.72E-13 |
| rs2076200   | 56.789248 | 6.73E-13 |
| rs199525    | 56.783286 | 6.76E-13 |
| rs174535    | 56.781253 | 6.76E-13 |
| rs12047618  | 56.781224 | 6.76E-13 |
| rs6495337   | 56.767280 | 6.81E-13 |
| rs5751153   | 56.767194 | 6.81E-13 |
| rs2456019   | 56.766765 | 6.82E-13 |
| rs74484224  | 56.764989 | 6.82E-13 |
| rs10478026  | 56.763780 | 6.83E-13 |
| rs7208252   | 56.763224 | 6.83E-13 |
| rs148948227 | 56.762804 | 6.83E-13 |
| rs9930397   | 56.755599 | 6.86E-13 |
| rs1342772   | 56.746570 | 6.89E-13 |

|             |           |          |
|-------------|-----------|----------|
| rs2271194   | 56.739208 | 6.92E-13 |
| rs270613    | 56.737880 | 6.92E-13 |
| rs28360557  | 56.733745 | 6.94E-13 |
| rs113316734 | 56.724756 | 6.97E-13 |
| rs2229961   | 56.724520 | 6.97E-13 |
| rs2214244   | 56.722803 | 6.98E-13 |
| rs17132442  | 56.720655 | 6.99E-13 |
| rs241426    | 56.715974 | 7.00E-13 |
| rs9646419   | 56.707151 | 7.04E-13 |
| rs11150601  | 56.704307 | 7.05E-13 |
| rs7783149   | 56.693319 | 7.09E-13 |
| rs202665    | 56.684404 | 7.12E-13 |
| rs4794808   | 56.677589 | 7.15E-13 |
| rs4822049   | 56.665635 | 7.20E-13 |
| rs28654242  | 56.659359 | 7.22E-13 |
| rs7802450   | 56.658666 | 7.22E-13 |
| rs722915    | 56.653820 | 7.24E-13 |
| rs4502227   | 56.639103 | 7.30E-13 |
| rs5026246   | 56.635516 | 7.31E-13 |
| rs9933040   | 56.630117 | 7.33E-13 |
| rs28746809  | 56.626601 | 7.35E-13 |
| rs2631365   | 56.620250 | 7.37E-13 |
| rs340929    | 56.618609 | 7.38E-13 |
| rs4822046   | 56.616066 | 7.39E-13 |
| rs2899346   | 56.611928 | 7.41E-13 |
| rs11649554  | 56.610827 | 7.41E-13 |
| rs5758459   | 56.602490 | 7.44E-13 |
| rs76844415  | 56.590593 | 7.49E-13 |
| rs3899510   | 56.587256 | 7.50E-13 |
| rs10876870  | 56.583864 | 7.52E-13 |
| rs61907683  | 56.576908 | 7.55E-13 |
| rs9513616   | 56.576372 | 7.55E-13 |
| rs55869430  | 56.574468 | 7.56E-13 |
| rs7944761   | 56.564917 | 7.59E-13 |
| rs10192394  | 56.558477 | 7.62E-13 |
| rs5758397   | 56.556089 | 7.63E-13 |
| rs55915917  | 56.548543 | 7.66E-13 |
| rs5758443   | 56.547781 | 7.66E-13 |
| rs11852830  | 56.539150 | 7.70E-13 |
| rs113138968 | 56.533309 | 7.72E-13 |
| rs9906612   | 56.533228 | 7.72E-13 |
| rs174533    | 56.523241 | 7.77E-13 |
| rs7169511   | 56.517648 | 7.79E-13 |
| rs5996058   | 56.517331 | 7.79E-13 |
| rs11742584  | 56.516070 | 7.80E-13 |
| rs4889599   | 56.516045 | 7.80E-13 |

|             |           |          |
|-------------|-----------|----------|
| rs12464251  | 56.507428 | 7.83E-13 |
| rs55668363  | 56.497189 | 7.88E-13 |
| rs9938550   | 56.495725 | 7.88E-13 |
| rs7495518   | 56.495549 | 7.88E-13 |
| rs60946542  | 56.491604 | 7.90E-13 |
| rs12700213  | 56.490184 | 7.90E-13 |
| rs12657787  | 56.490136 | 7.90E-13 |
| rs1940377   | 56.485593 | 7.92E-13 |
| rs1121980   | 56.482218 | 7.94E-13 |
| rs4576025   | 56.478944 | 7.95E-13 |
| rs9271774   | 56.470246 | 7.99E-13 |
| rs9847345   | 56.467213 | 8.00E-13 |
| rs11745706  | 56.467087 | 8.00E-13 |
| rs9271639   | 56.466726 | 8.00E-13 |
| rs143070514 | 56.465391 | 8.01E-13 |
| rs2050033   | 56.455045 | 8.05E-13 |
| rs132906    | 56.451431 | 8.07E-13 |
| rs1870293   | 56.448854 | 8.08E-13 |
| rs147716103 | 56.447603 | 8.09E-13 |
| rs4772199   | 56.443739 | 8.10E-13 |
| rs4887070   | 56.439235 | 8.12E-13 |
| rs895069    | 56.435587 | 8.14E-13 |
| rs6495340   | 56.423210 | 8.19E-13 |
| rs964898    | 56.419923 | 8.21E-13 |
| rs139564    | 56.415240 | 8.23E-13 |
| rs6495339   | 56.410371 | 8.25E-13 |
| rs1883369   | 56.406608 | 8.27E-13 |
| rs10273717  | 56.404550 | 8.28E-13 |
| rs113093579 | 56.403071 | 8.28E-13 |
| rs7523907   | 56.396098 | 8.31E-13 |
| rs4963057   | 56.394197 | 8.32E-13 |
| rs424620    | 56.388993 | 8.34E-13 |
| rs12908341  | 56.387067 | 8.35E-13 |
| rs273914    | 56.386597 | 8.36E-13 |
| rs692780    | 56.378982 | 8.39E-13 |
| rs12908510  | 56.377935 | 8.39E-13 |
| rs17671434  | 56.352855 | 8.51E-13 |
| rs2241131   | 56.351887 | 8.51E-13 |
| rs9660662   | 56.350318 | 8.52E-13 |
| rs1940378   | 56.345135 | 8.54E-13 |
| rs849133    | 56.341623 | 8.56E-13 |
| rs1813814   | 56.340846 | 8.56E-13 |
| rs2305884   | 56.330505 | 8.61E-13 |
| rs4721916   | 56.328823 | 8.62E-13 |
| rs1708302   | 56.325658 | 8.63E-13 |
| rs6602347   | 56.323391 | 8.64E-13 |



|             |           |          |
|-------------|-----------|----------|
| rs1243392   | 56.321025 | 8.65E-13 |
| rs10920567  | 56.320057 | 8.66E-13 |
| rs17510253  | 56.318569 | 8.67E-13 |
| rs4795358   | 56.305527 | 8.73E-13 |
| rs2188875   | 56.296709 | 8.77E-13 |
| rs141181529 | 56.284019 | 8.83E-13 |
| rs1513272   | 56.254777 | 8.97E-13 |
| rs41317090  | 56.254438 | 8.97E-13 |
| rs7823800   | 56.238687 | 9.04E-13 |
| rs494620    | 56.234396 | 9.06E-13 |
| rs56094641  | 56.234192 | 9.07E-13 |
| rs57945453  | 56.229138 | 9.09E-13 |
| rs2631370   | 56.226656 | 9.10E-13 |
| rs8141103   | 56.218599 | 9.14E-13 |
| rs114122909 | 56.201223 | 9.23E-13 |
| rs28750375  | 56.199872 | 9.23E-13 |
| rs11078899  | 56.181389 | 9.33E-13 |
| rs17649451  | 56.180559 | 9.33E-13 |
| rs13225539  | 56.173071 | 9.37E-13 |
| rs768414    | 56.171840 | 9.37E-13 |
| rs2023789   | 56.169744 | 9.38E-13 |
| rs272879    | 56.162232 | 9.42E-13 |
| rs849138    | 56.161646 | 9.42E-13 |
| rs174564    | 56.146952 | 9.50E-13 |
| rs1494490   | 56.140295 | 9.53E-13 |
| rs12411260  | 56.139522 | 9.54E-13 |
| rs3890715   | 56.135059 | 9.56E-13 |
| rs186090629 | 56.132132 | 9.57E-13 |
| rs916789    | 56.130027 | 9.59E-13 |
| rs12907511  | 56.127204 | 9.60E-13 |
| rs7640368   | 56.126776 | 9.60E-13 |
| rs827643    | 56.110181 | 9.69E-13 |
| rs2904130   | 56.099454 | 9.74E-13 |
| rs6965263   | 56.095908 | 9.76E-13 |
| rs174560    | 56.089697 | 9.79E-13 |
| rs2188874   | 56.088176 | 9.80E-13 |
| rs35140931  | 56.076630 | 9.86E-13 |
| rs4539564   | 56.073841 | 9.88E-13 |
| rs2696673   | 56.073360 | 9.88E-13 |
| rs7151629   | 56.073099 | 9.88E-13 |
| rs272886    | 56.072207 | 9.89E-13 |
| rs8024048   | 56.054774 | 9.98E-13 |
| rs964899    | 56.045391 | 1.00E-12 |
| rs6594480   | 56.044059 | 1.00E-12 |
| rs28490880  | 56.016737 | 1.02E-12 |
| rs9937354   | 56.015863 | 1.02E-12 |

|             |           |          |
|-------------|-----------|----------|
| rs9928094   | 56.012019 | 1.02E-12 |
| rs1265097   | 56.009884 | 1.02E-12 |
| rs114463908 | 56.008753 | 1.02E-12 |
| rs61985136  | 56.006891 | 1.02E-12 |
| rs2072130   | 56.006642 | 1.02E-12 |
| rs112010353 | 56.004210 | 1.03E-12 |
| rs73236615  | 55.993261 | 1.03E-12 |
| rs61012457  | 55.990493 | 1.03E-12 |
| rs80195381  | 55.971235 | 1.04E-12 |
| rs739134    | 55.971145 | 1.04E-12 |
| rs12659961  | 55.939835 | 1.06E-12 |
| rs10905509  | 55.936563 | 1.06E-12 |
| rs9611619   | 55.931300 | 1.07E-12 |
| rs73236616  | 55.927166 | 1.07E-12 |
| rs12585522  | 55.926551 | 1.07E-12 |
| rs79697966  | 55.913377 | 1.08E-12 |
| rs7182583   | 55.909663 | 1.08E-12 |
| rs2071479   | 55.908134 | 1.08E-12 |
| rs3024608   | 55.884246 | 1.09E-12 |
| rs148894219 | 55.872024 | 1.10E-12 |
| rs916790    | 55.868351 | 1.10E-12 |
| rs9937053   | 55.865835 | 1.10E-12 |
| rs12150047  | 55.863954 | 1.11E-12 |
| rs7793679   | 55.854768 | 1.11E-12 |
| rs12356840  | 55.852489 | 1.11E-12 |
| rs9273375   | 55.852434 | 1.11E-12 |
| rs1127348   | 55.852328 | 1.11E-12 |
| rs10800899  | 55.846186 | 1.12E-12 |
| rs56389410  | 55.844297 | 1.12E-12 |
| rs13419662  | 55.837116 | 1.12E-12 |
| rs10950814  | 55.812457 | 1.14E-12 |
| rs2023791   | 55.798412 | 1.14E-12 |
| rs272875    | 55.793744 | 1.15E-12 |
| rs916787    | 55.779934 | 1.16E-12 |
| rs8030937   | 55.779078 | 1.16E-12 |
| rs2736428   | 55.768855 | 1.16E-12 |
| rs5029422   | 55.767390 | 1.16E-12 |
| rs13221999  | 55.763036 | 1.17E-12 |
| rs273900    | 55.759719 | 1.17E-12 |
| rs3924112   | 55.752448 | 1.17E-12 |
| rs73236617  | 55.745855 | 1.18E-12 |
| rs10154834  | 55.743415 | 1.18E-12 |
| rs11075985  | 55.738654 | 1.18E-12 |
| rs270605    | 55.724458 | 1.19E-12 |
| rs4444384   | 55.720472 | 1.19E-12 |
| rs9270717   | 55.691244 | 1.21E-12 |

|             |           |          |
|-------------|-----------|----------|
| rs4721917   | 55.690570 | 1.21E-12 |
| rs9271666   | 55.690395 | 1.21E-12 |
| rs272852    | 55.665500 | 1.23E-12 |
| rs30516     | 55.664338 | 1.23E-12 |
| rs16824798  | 55.648296 | 1.24E-12 |
| rs9300549   | 55.647585 | 1.24E-12 |
| rs849135    | 55.638639 | 1.25E-12 |
| rs28712631  | 55.635481 | 1.25E-12 |
| rs11724319  | 55.633479 | 1.25E-12 |
| rs174566    | 55.628471 | 1.25E-12 |
| rs272884    | 55.627962 | 1.25E-12 |
| rs272894    | 55.623573 | 1.26E-12 |
| rs9270815   | 55.620689 | 1.26E-12 |
| rs56313700  | 55.615059 | 1.26E-12 |
| rs55938245  | 55.612612 | 1.26E-12 |
| rs9607799   | 55.611294 | 1.27E-12 |
| rs73018928  | 55.602101 | 1.27E-12 |
| rs6062899   | 55.588514 | 1.28E-12 |
| rs4795367   | 55.584815 | 1.28E-12 |
| rs10259919  | 55.578428 | 1.29E-12 |
| rs272842    | 55.577533 | 1.29E-12 |
| rs2214245   | 55.576489 | 1.29E-12 |
| rs62291294  | 55.568172 | 1.29E-12 |
| rs12903355  | 55.561763 | 1.30E-12 |
| rs272881    | 55.559094 | 1.30E-12 |
| rs202662    | 55.557478 | 1.30E-12 |
| rs13357724  | 55.542600 | 1.31E-12 |
| rs9271093   | 55.539597 | 1.31E-12 |
| rs272860    | 55.533364 | 1.32E-12 |
| rs115104850 | 55.519627 | 1.33E-12 |
| rs9857993   | 55.515195 | 1.33E-12 |
| rs2106759   | 55.514921 | 1.33E-12 |
| rs827645    | 55.504719 | 1.34E-12 |
| rs73018933  | 55.503720 | 1.34E-12 |
| rs72847585  | 55.502542 | 1.34E-12 |
| rs34811813  | 55.500374 | 1.34E-12 |
| rs35243852  | 55.498922 | 1.34E-12 |
| rs2523505   | 55.495954 | 1.35E-12 |
| rs61907678  | 55.495903 | 1.35E-12 |
| rs7215983   | 55.491973 | 1.35E-12 |
| rs1150755   | 55.486356 | 1.35E-12 |
| rs11637890  | 55.485159 | 1.35E-12 |
| rs4705933   | 55.474719 | 1.36E-12 |
| rs72699184  | 55.474566 | 1.36E-12 |
| rs7786951   | 55.466804 | 1.37E-12 |
| rs272867    | 55.462455 | 1.37E-12 |

|             |           |          |
|-------------|-----------|----------|
| rs116991229 | 55.459310 | 1.37E-12 |
| rs10950815  | 55.457716 | 1.37E-12 |
| rs202645    | 55.457182 | 1.37E-12 |
| rs860262    | 55.453275 | 1.38E-12 |
| rs7714869   | 55.449637 | 1.38E-12 |
| rs145945003 | 55.437315 | 1.39E-12 |
| rs3971829   | 55.422245 | 1.40E-12 |
| rs8078599   | 55.419705 | 1.40E-12 |
| rs72837847  | 55.419698 | 1.40E-12 |
| rs12913173  | 55.419615 | 1.40E-12 |
| rs4881748   | 55.404672 | 1.41E-12 |
| rs6677740   | 55.392908 | 1.42E-12 |
| rs7798883   | 55.386605 | 1.43E-12 |
| rs367023    | 55.380586 | 1.43E-12 |
| rs9825149   | 55.377851 | 1.43E-12 |
| rs73731427  | 55.377601 | 1.43E-12 |
| rs174567    | 55.376398 | 1.43E-12 |
| rs3132556   | 55.370256 | 1.44E-12 |
| rs62068169  | 55.364453 | 1.44E-12 |
| rs6002402   | 55.353918 | 1.45E-12 |
| rs12786255  | 55.352430 | 1.45E-12 |
| rs10920563  | 55.351501 | 1.45E-12 |
| rs12309413  | 55.341909 | 1.46E-12 |
| rs9273685   | 55.336407 | 1.47E-12 |
| rs9274351   | 55.322334 | 1.48E-12 |
| rs7779912   | 55.321737 | 1.48E-12 |
| rs1383046   | 55.295268 | 1.50E-12 |
| rs10214273  | 55.293101 | 1.50E-12 |
| rs199445    | 55.283971 | 1.51E-12 |
| rs367364    | 55.275762 | 1.51E-12 |
| rs16943117  | 55.272348 | 1.52E-12 |
| rs28415845  | 55.271410 | 1.52E-12 |
| rs10214237  | 55.259687 | 1.53E-12 |
| rs11633223  | 55.259011 | 1.53E-12 |
| rs9378249   | 55.254982 | 1.53E-12 |
| rs34713977  | 55.228846 | 1.55E-12 |
| rs1243394   | 55.211226 | 1.57E-12 |
| rs2283563   | 55.207469 | 1.57E-12 |
| rs12907739  | 55.205653 | 1.57E-12 |
| rs2013740   | 55.197556 | 1.58E-12 |
| rs34607161  | 55.185732 | 1.59E-12 |
| rs61907718  | 55.161184 | 1.61E-12 |
| rs10273769  | 55.150857 | 1.62E-12 |
| rs9272497   | 55.148632 | 1.62E-12 |
| rs9270715   | 55.148621 | 1.62E-12 |
| rs11637635  | 55.148406 | 1.62E-12 |

|             |           |          |
|-------------|-----------|----------|
| rs55903115  | 55.147096 | 1.62E-12 |
| rs111725959 | 55.145052 | 1.62E-12 |
| rs28506099  | 55.144972 | 1.62E-12 |
| rs17199328  | 55.136121 | 1.63E-12 |
| rs59924013  | 55.129827 | 1.64E-12 |
| rs78730246  | 55.128815 | 1.64E-12 |
| rs916788    | 55.127897 | 1.64E-12 |
| rs8139993   | 55.125339 | 1.64E-12 |
| rs1319132   | 55.118847 | 1.65E-12 |
| rs11871813  | 55.118127 | 1.65E-12 |
| rs199535    | 55.116266 | 1.65E-12 |
| rs9270710   | 55.111565 | 1.65E-12 |
| rs10920564  | 55.106501 | 1.66E-12 |
| rs6871748   | 55.103583 | 1.66E-12 |
| rs28438420  | 55.092562 | 1.67E-12 |
| rs202663    | 55.090032 | 1.67E-12 |
| rs10065045  | 55.090021 | 1.67E-12 |
| rs702814    | 55.086666 | 1.68E-12 |
| rs11041133  | 55.086110 | 1.68E-12 |
| rs7799620   | 55.081123 | 1.68E-12 |
| rs199528    | 55.075379 | 1.69E-12 |
| rs241427    | 55.071092 | 1.69E-12 |
| rs11725309  | 55.066891 | 1.69E-12 |
| rs61907713  | 55.045800 | 1.71E-12 |
| rs9287698   | 55.041784 | 1.72E-12 |
| rs2056625   | 55.032722 | 1.72E-12 |
| rs1295683   | 55.030056 | 1.73E-12 |
| rs35338922  | 55.029974 | 1.73E-12 |
| rs72687036  | 55.027379 | 1.73E-12 |
| rs9825301   | 55.026178 | 1.73E-12 |
| rs111327992 | 55.012468 | 1.74E-12 |
| rs2234052   | 55.011967 | 1.74E-12 |
| rs4822045   | 54.991919 | 1.76E-12 |
| rs9269322   | 54.978232 | 1.78E-12 |
| rs3024612   | 54.975834 | 1.78E-12 |
| rs199439    | 54.964970 | 1.79E-12 |
| rs10751640  | 54.963464 | 1.79E-12 |
| rs132915    | 54.941334 | 1.81E-12 |
| rs6776757   | 54.939748 | 1.81E-12 |
| rs28513584  | 54.930678 | 1.82E-12 |
| rs132918    | 54.918825 | 1.83E-12 |
| rs6843043   | 54.895641 | 1.86E-12 |
| rs12418638  | 54.894099 | 1.86E-12 |
| rs202661    | 54.891519 | 1.86E-12 |
| rs79249676  | 54.890414 | 1.86E-12 |
| rs9930501   | 54.884603 | 1.87E-12 |

|             |           |          |
|-------------|-----------|----------|
| rs1773561   | 54.873810 | 1.88E-12 |
| rs28362033  | 54.865631 | 1.89E-12 |
| rs9825482   | 54.862814 | 1.89E-12 |
| rs1150758   | 54.858159 | 1.89E-12 |
| rs9922619   | 54.850835 | 1.90E-12 |
| rs7224908   | 54.850055 | 1.90E-12 |
| rs76753608  | 54.839831 | 1.91E-12 |
| rs10260836  | 54.839332 | 1.91E-12 |
| rs4975538   | 54.832485 | 1.92E-12 |
| rs132921    | 54.831393 | 1.92E-12 |
| rs369637    | 54.827834 | 1.92E-12 |
| rs4869426   | 54.827807 | 1.92E-12 |
| rs199534    | 54.826279 | 1.93E-12 |
| rs11245969  | 54.818211 | 1.93E-12 |
| rs1006407   | 54.817020 | 1.94E-12 |
| rs132904    | 54.793202 | 1.96E-12 |
| rs2931136   | 54.791013 | 1.96E-12 |
| rs4833097   | 54.788288 | 1.97E-12 |
| rs885946    | 54.781067 | 1.97E-12 |
| rs76782015  | 54.779403 | 1.97E-12 |
| rs885945    | 54.769985 | 1.98E-12 |
| rs79609284  | 54.769250 | 1.99E-12 |
| rs199448    | 54.767976 | 1.99E-12 |
| rs9270589   | 54.761908 | 1.99E-12 |
| rs1143870   | 54.761635 | 1.99E-12 |
| rs72784469  | 54.761331 | 1.99E-12 |
| rs132922    | 54.757387 | 2.00E-12 |
| rs99780     | 54.757045 | 2.00E-12 |
| rs2596496   | 54.755077 | 2.00E-12 |
| rs55969014  | 54.733096 | 2.02E-12 |
| rs538628    | 54.731292 | 2.03E-12 |
| rs1973562   | 54.730693 | 2.03E-12 |
| rs9272410   | 54.719192 | 2.04E-12 |
| rs6851685   | 54.710420 | 2.05E-12 |
| rs112746008 | 54.703991 | 2.06E-12 |
| rs199457    | 54.700867 | 2.06E-12 |
| rs67775542  | 54.681482 | 2.08E-12 |
| rs61181098  | 54.679396 | 2.08E-12 |
| rs112995313 | 54.676580 | 2.09E-12 |
| rs514743    | 54.675080 | 2.09E-12 |
| rs2201395   | 54.669405 | 2.09E-12 |
| rs1378358   | 54.658561 | 2.11E-12 |
| rs9932754   | 54.654162 | 2.11E-12 |
| rs113589236 | 54.648604 | 2.12E-12 |
| rs273913    | 54.647485 | 2.12E-12 |
| rs62126620  | 54.647318 | 2.12E-12 |

|             |           |          |
|-------------|-----------|----------|
| rs75765453  | 54.637423 | 2.13E-12 |
| rs199533    | 54.637075 | 2.13E-12 |
| rs8017831   | 54.636267 | 2.13E-12 |
| rs79357367  | 54.623524 | 2.15E-12 |
| rs2631363   | 54.619207 | 2.15E-12 |
| rs5743614   | 54.606916 | 2.17E-12 |
| rs2631361   | 54.606726 | 2.17E-12 |
| rs202654    | 54.601403 | 2.17E-12 |
| rs169201    | 54.596857 | 2.18E-12 |
| rs132920    | 54.596415 | 2.18E-12 |
| rs202659    | 54.585474 | 2.19E-12 |
| rs45515895  | 54.580516 | 2.20E-12 |
| rs1150754   | 54.580092 | 2.20E-12 |
| rs199447    | 54.566143 | 2.21E-12 |
| rs113029914 | 54.546106 | 2.24E-12 |
| rs7673348   | 54.543864 | 2.24E-12 |
| rs764917    | 54.528453 | 2.26E-12 |
| rs849134    | 54.528390 | 2.26E-12 |
| rs1062158   | 54.518613 | 2.27E-12 |
| rs169364    | 54.513674 | 2.28E-12 |
| rs840012    | 54.512648 | 2.28E-12 |
| rs6969222   | 54.506346 | 2.29E-12 |
| rs1512282   | 54.496798 | 2.30E-12 |
| rs7208487   | 54.487943 | 2.31E-12 |
| rs72774831  | 54.483648 | 2.31E-12 |
| rs5743595   | 54.477639 | 2.32E-12 |
| rs610735    | 54.470206 | 2.33E-12 |
| rs611084    | 54.469611 | 2.33E-12 |
| rs56129466  | 54.466883 | 2.33E-12 |
| rs11256060  | 54.452834 | 2.35E-12 |
| rs132917    | 54.451403 | 2.35E-12 |
| rs10260049  | 54.447454 | 2.36E-12 |
| rs72669153  | 54.443098 | 2.36E-12 |
| rs3095298   | 54.440773 | 2.37E-12 |
| rs199456    | 54.412114 | 2.40E-12 |
| rs1243391   | 54.411817 | 2.40E-12 |
| rs73236618  | 54.411435 | 2.40E-12 |
| rs441969    | 54.408302 | 2.41E-12 |
| rs17408276  | 54.400598 | 2.42E-12 |
| rs12324886  | 54.394768 | 2.43E-12 |
| rs5751094   | 54.392959 | 2.43E-12 |
| rs7797370   | 54.388443 | 2.43E-12 |
| rs34791134  | 54.387444 | 2.44E-12 |
| rs59808848  | 54.376982 | 2.45E-12 |
| rs114202986 | 54.369121 | 2.46E-12 |
| rs10271322  | 54.362438 | 2.47E-12 |

|             |           |          |
|-------------|-----------|----------|
| rs8129030   | 54.353149 | 2.48E-12 |
| rs114081163 | 54.347043 | 2.49E-12 |
| rs16840048  | 54.343938 | 2.49E-12 |
| rs4822038   | 54.326866 | 2.52E-12 |
| rs199513    | 54.322902 | 2.52E-12 |
| rs204883    | 54.313181 | 2.53E-12 |
| rs6963345   | 54.312369 | 2.54E-12 |
| rs10278826  | 54.310455 | 2.54E-12 |
| rs132908    | 54.310315 | 2.54E-12 |
| rs13436926  | 54.310199 | 2.54E-12 |
| rs2214243   | 54.273330 | 2.59E-12 |
| rs79211821  | 54.265381 | 2.60E-12 |
| rs274567    | 54.264574 | 2.60E-12 |
| rs10187072  | 54.263562 | 2.60E-12 |
| rs505533    | 54.258580 | 2.61E-12 |
| rs6002406   | 54.256657 | 2.61E-12 |
| rs139337054 | 54.256156 | 2.61E-12 |
| rs28746818  | 54.235659 | 2.64E-12 |
| rs2233974   | 54.233588 | 2.64E-12 |
| rs12786006  | 54.230050 | 2.65E-12 |
| rs73390208  | 54.225401 | 2.66E-12 |
| rs10193706  | 54.222938 | 2.66E-12 |
| rs4822025   | 54.220887 | 2.66E-12 |
| rs3788584   | 54.219298 | 2.66E-12 |
| rs77719127  | 54.214784 | 2.67E-12 |
| rs2286975   | 54.206713 | 2.68E-12 |
| rs2234058   | 54.204626 | 2.69E-12 |
| rs56402126  | 54.200378 | 2.69E-12 |
| rs9270541   | 54.169789 | 2.74E-12 |
| rs11242120  | 54.169437 | 2.74E-12 |
| rs2234059   | 54.157647 | 2.75E-12 |
| rs17454584  | 54.153864 | 2.76E-12 |
| rs112333322 | 54.142243 | 2.78E-12 |
| rs9912310   | 54.139221 | 2.78E-12 |
| rs2949669   | 54.133198 | 2.79E-12 |
| rs115311791 | 54.125819 | 2.80E-12 |
| rs115435152 | 54.125627 | 2.80E-12 |
| rs112197756 | 54.120848 | 2.81E-12 |
| rs61907712  | 54.107341 | 2.83E-12 |
| rs132914    | 54.096054 | 2.85E-12 |
| rs17227210  | 54.093058 | 2.85E-12 |
| rs11256064  | 54.092554 | 2.85E-12 |
| rs665413    | 54.090657 | 2.85E-12 |
| rs17472526  | 54.086774 | 2.86E-12 |
| rs72651404  | 54.084957 | 2.86E-12 |
| rs9979383   | 54.082260 | 2.87E-12 |



|             |           |          |
|-------------|-----------|----------|
| rs2769      | 54.075670 | 2.88E-12 |
| rs9899069   | 54.072986 | 2.88E-12 |
| rs132907    | 54.064333 | 2.89E-12 |
| rs9908131   | 54.062535 | 2.90E-12 |
| rs6596070   | 54.050001 | 2.92E-12 |
| rs6702345   | 54.049315 | 2.92E-12 |
| rs28383390  | 54.034045 | 2.94E-12 |
| rs112454267 | 54.015606 | 2.97E-12 |
| rs3094220   | 54.003571 | 2.99E-12 |
| rs11636753  | 53.997308 | 3.00E-12 |
| rs11256062  | 53.995737 | 3.00E-12 |
| rs61907710  | 53.993076 | 3.01E-12 |
| rs767593    | 53.991759 | 3.01E-12 |
| rs169365    | 53.984767 | 3.02E-12 |
| rs28746819  | 53.984373 | 3.02E-12 |
| rs767179    | 53.975847 | 3.04E-12 |
| rs132912    | 53.975181 | 3.04E-12 |
| rs132905    | 53.973932 | 3.04E-12 |
| rs7567352   | 53.964363 | 3.05E-12 |
| rs11746643  | 53.957044 | 3.07E-12 |
| rs11770546  | 53.952414 | 3.07E-12 |
| rs2562003   | 53.943907 | 3.09E-12 |
| rs30521     | 53.940765 | 3.09E-12 |
| rs55836957  | 53.939357 | 3.09E-12 |
| rs6503521   | 53.938103 | 3.10E-12 |
| rs274560    | 53.929218 | 3.11E-12 |
| rs5743593   | 53.924487 | 3.12E-12 |
| rs6947837   | 53.913398 | 3.14E-12 |
| rs7801605   | 53.908819 | 3.15E-12 |
| rs9912212   | 53.900861 | 3.16E-12 |
| rs17613347  | 53.887049 | 3.18E-12 |
| rs6947194   | 53.882291 | 3.19E-12 |
| rs472054    | 53.881796 | 3.19E-12 |
| rs1799986   | 53.871372 | 3.21E-12 |
| rs2074404   | 53.856991 | 3.23E-12 |
| rs146905608 | 53.855463 | 3.24E-12 |
| rs877636    | 53.849418 | 3.25E-12 |
| rs9909304   | 53.846501 | 3.25E-12 |
| rs4833099   | 53.843120 | 3.26E-12 |
| rs8032908   | 53.839473 | 3.26E-12 |
| rs66925868  | 53.834198 | 3.27E-12 |
| rs615470    | 53.830342 | 3.28E-12 |
| rs12907178  | 53.825934 | 3.29E-12 |
| rs77839358  | 53.824181 | 3.29E-12 |
| rs3102952   | 53.822741 | 3.29E-12 |
| rs39855     | 53.819651 | 3.30E-12 |

|             |           |          |
|-------------|-----------|----------|
| rs5743557   | 53.816718 | 3.30E-12 |
| rs9272674   | 53.811727 | 3.31E-12 |
| rs7503081   | 53.802527 | 3.33E-12 |
| rs152304    | 53.791859 | 3.35E-12 |
| rs13187922  | 53.784343 | 3.36E-12 |
| rs115255064 | 53.781142 | 3.37E-12 |
| rs30530     | 53.769198 | 3.39E-12 |
| rs9944459   | 53.768818 | 3.39E-12 |
| rs9891892   | 53.756306 | 3.41E-12 |
| rs28482878  | 53.750322 | 3.42E-12 |
| rs7900250   | 53.749945 | 3.42E-12 |
| rs6503500   | 53.749339 | 3.43E-12 |
| rs7047575   | 53.746993 | 3.43E-12 |
| rs75245322  | 53.746070 | 3.43E-12 |
| rs174548    | 53.743517 | 3.44E-12 |
| rs5743584   | 53.741979 | 3.44E-12 |
| rs3094216   | 53.726850 | 3.47E-12 |
| rs10232906  | 53.720630 | 3.48E-12 |
| rs4387568   | 53.703698 | 3.51E-12 |
| rs70600     | 53.699351 | 3.52E-12 |
| rs3784681   | 53.696686 | 3.52E-12 |
| rs394439    | 53.693755 | 3.53E-12 |
| rs7733502   | 53.682332 | 3.55E-12 |
| rs3757247   | 53.681416 | 3.55E-12 |
| rs4707605   | 53.673220 | 3.57E-12 |
| rs28505515  | 53.666854 | 3.58E-12 |
| rs5743556   | 53.664519 | 3.58E-12 |
| rs1458202   | 53.662655 | 3.59E-12 |
| rs5743585   | 53.655740 | 3.60E-12 |
| rs112155389 | 53.654744 | 3.60E-12 |
| rs660652    | 53.653131 | 3.61E-12 |
| rs2516788   | 53.631129 | 3.65E-12 |
| rs72749206  | 53.594920 | 3.72E-12 |
| rs5743592   | 53.588785 | 3.73E-12 |
| rs2075800   | 53.575032 | 3.76E-12 |
| rs590051    | 53.572106 | 3.77E-12 |
| rs2614488   | 53.570219 | 3.77E-12 |
| rs8052245   | 53.568244 | 3.77E-12 |
| rs116704939 | 53.567216 | 3.78E-12 |
| rs4319612   | 53.554253 | 3.80E-12 |
| rs4456363   | 53.549944 | 3.81E-12 |
| rs72782686  | 53.549128 | 3.81E-12 |
| rs132909    | 53.548399 | 3.81E-12 |
| rs7206511   | 53.543971 | 3.82E-12 |
| rs346835    | 53.539007 | 3.83E-12 |
| rs72797364  | 53.520888 | 3.87E-12 |

|             |           |          |
|-------------|-----------|----------|
| rs10272302  | 53.520768 | 3.87E-12 |
| rs584135    | 53.517492 | 3.88E-12 |
| rs1143869   | 53.505921 | 3.90E-12 |
| rs582088    | 53.505609 | 3.90E-12 |
| rs4341710   | 53.504757 | 3.90E-12 |
| rs34064757  | 53.502120 | 3.91E-12 |
| rs7687447   | 53.501987 | 3.91E-12 |
| rs11640534  | 53.500128 | 3.91E-12 |
| rs142420626 | 53.495016 | 3.92E-12 |
| rs35083819  | 53.485214 | 3.95E-12 |
| rs10782002  | 53.483699 | 3.95E-12 |
| rs4141371   | 53.483582 | 3.95E-12 |
| rs62033413  | 53.476799 | 3.96E-12 |
| rs34670005  | 53.471581 | 3.97E-12 |
| rs199443    | 53.453950 | 4.01E-12 |
| rs59867199  | 53.452834 | 4.01E-12 |
| rs594794    | 53.450866 | 4.02E-12 |
| rs2302073   | 53.429275 | 4.07E-12 |
| rs102275    | 53.417303 | 4.09E-12 |
| rs9269256   | 53.416166 | 4.09E-12 |
| rs582176    | 53.414142 | 4.10E-12 |
| rs7569637   | 53.413339 | 4.10E-12 |
| rs57260669  | 53.410140 | 4.11E-12 |
| rs4516267   | 53.398851 | 4.13E-12 |
| rs12149832  | 53.397973 | 4.13E-12 |
| rs11739935  | 53.396796 | 4.14E-12 |
| rs12931046  | 53.378280 | 4.18E-12 |
| rs72702813  | 53.373178 | 4.19E-12 |
| rs34873012  | 53.364092 | 4.21E-12 |
| rs10455169  | 53.362813 | 4.21E-12 |
| rs45610037  | 53.351663 | 4.24E-12 |
| rs5743563   | 53.349359 | 4.24E-12 |
| rs476602    | 53.347837 | 4.25E-12 |
| rs56297233  | 53.347723 | 4.25E-12 |
| rs9270807   | 53.344775 | 4.25E-12 |
| rs4389112   | 53.342611 | 4.26E-12 |
| rs45605540  | 53.340995 | 4.26E-12 |
| rs4742151   | 53.337844 | 4.27E-12 |
| rs202638    | 53.331393 | 4.28E-12 |
| rs139978901 | 53.330682 | 4.29E-12 |
| rs6002372   | 53.329108 | 4.29E-12 |
| rs9806363   | 53.328428 | 4.29E-12 |
| rs2892977   | 53.324709 | 4.30E-12 |
| rs17142961  | 53.320782 | 4.31E-12 |
| rs16970006  | 53.301379 | 4.35E-12 |
| rs3130285   | 53.299710 | 4.36E-12 |

|             |           |          |
|-------------|-----------|----------|
| rs10479009  | 53.295611 | 4.37E-12 |
| rs10068466  | 53.276902 | 4.41E-12 |
| rs13354287  | 53.272344 | 4.42E-12 |
| rs7572436   | 53.271971 | 4.42E-12 |
| rs931555    | 53.266858 | 4.43E-12 |
| rs9517738   | 53.245194 | 4.49E-12 |
| rs667193    | 53.244753 | 4.49E-12 |
| rs10118570  | 53.243973 | 4.49E-12 |
| rs57817449  | 53.220628 | 4.54E-12 |
| rs72650098  | 53.218730 | 4.55E-12 |
| rs35914000  | 53.217062 | 4.55E-12 |
| rs56076311  | 53.213736 | 4.56E-12 |
| rs9893735   | 53.205226 | 4.58E-12 |
| rs12196044  | 53.195433 | 4.61E-12 |
| rs76730373  | 53.188085 | 4.62E-12 |
| rs72805611  | 53.183679 | 4.64E-12 |
| rs112502960 | 53.183127 | 4.64E-12 |
| rs12209546  | 53.180083 | 4.64E-12 |
| rs274561    | 53.179057 | 4.65E-12 |
| rs3885075   | 53.177254 | 4.65E-12 |
| rs7646283   | 53.176524 | 4.65E-12 |
| rs584377    | 53.170038 | 4.67E-12 |
| rs179768    | 53.155511 | 4.71E-12 |
| rs903361    | 53.135566 | 4.76E-12 |
| rs5743562   | 53.129655 | 4.77E-12 |
| rs1265093   | 53.126880 | 4.78E-12 |
| rs1971663   | 53.123351 | 4.79E-12 |
| rs35014055  | 53.123045 | 4.79E-12 |
| rs5743560   | 53.122568 | 4.79E-12 |
| rs7314652   | 53.122316 | 4.79E-12 |
| rs174576    | 53.120247 | 4.80E-12 |
| rs12930545  | 53.113540 | 4.81E-12 |
| rs56316552  | 53.108664 | 4.83E-12 |
| rs11856953  | 53.107444 | 4.83E-12 |
| rs139559    | 53.103722 | 4.84E-12 |
| rs28703037  | 53.103074 | 4.84E-12 |
| rs8028410   | 53.101791 | 4.84E-12 |
| rs8037017   | 53.098201 | 4.85E-12 |
| rs3129063   | 53.095097 | 4.86E-12 |
| rs10806424  | 53.086414 | 4.88E-12 |
| rs55806963  | 53.079554 | 4.90E-12 |
| rs13404344  | 53.079018 | 4.90E-12 |
| rs5743566   | 53.070506 | 4.92E-12 |
| rs4706361   | 53.064046 | 4.94E-12 |
| rs241451    | 53.052973 | 4.97E-12 |
| rs4706358   | 53.046535 | 4.99E-12 |

|             |           |          |
|-------------|-----------|----------|
| rs4705852   | 53.044558 | 4.99E-12 |
| rs59785529  | 53.035775 | 5.02E-12 |
| rs139671781 | 53.032953 | 5.02E-12 |
| rs62381975  | 53.026458 | 5.04E-12 |
| rs1007602   | 53.022583 | 5.05E-12 |
| rs8035783   | 53.007032 | 5.09E-12 |
| rs12924903  | 53.006675 | 5.10E-12 |
| rs649180    | 53.003699 | 5.10E-12 |
| rs72805612  | 53.002896 | 5.11E-12 |
| rs5758307   | 53.002163 | 5.11E-12 |
| rs8027870   | 52.999991 | 5.11E-12 |
| rs597069    | 52.998384 | 5.12E-12 |
| rs8050588   | 52.992092 | 5.14E-12 |
| rs62517192  | 52.991616 | 5.14E-12 |
| rs11743029  | 52.987652 | 5.15E-12 |
| rs4533253   | 52.984098 | 5.16E-12 |
| rs678770    | 52.978523 | 5.17E-12 |
| rs66979032  | 52.972408 | 5.19E-12 |
| rs60216782  | 52.968938 | 5.20E-12 |
| rs12928852  | 52.956708 | 5.23E-12 |
| rs6933289   | 52.951656 | 5.25E-12 |
| rs61043060  | 52.941262 | 5.28E-12 |
| rs3813020   | 52.938505 | 5.28E-12 |
| rs112481526 | 52.934908 | 5.29E-12 |
| rs143928576 | 52.932394 | 5.30E-12 |
| rs5743580   | 52.911346 | 5.36E-12 |
| rs174574    | 52.910641 | 5.36E-12 |
| rs9646187   | 52.902737 | 5.39E-12 |
| rs680244    | 52.900264 | 5.39E-12 |
| rs174577    | 52.898733 | 5.40E-12 |
| rs34372090  | 52.895111 | 5.41E-12 |
| rs4889514   | 52.892698 | 5.42E-12 |
| rs132911    | 52.890811 | 5.42E-12 |
| rs199451    | 52.882632 | 5.44E-12 |
| rs7381977   | 52.882531 | 5.45E-12 |
| rs45454992  | 52.881371 | 5.45E-12 |
| rs12443808  | 52.881229 | 5.45E-12 |
| rs1265888   | 52.879228 | 5.45E-12 |
| rs2069408   | 52.875445 | 5.47E-12 |
| rs3129058   | 52.869763 | 5.48E-12 |
| rs10051379  | 52.867130 | 5.49E-12 |
| rs7403393   | 52.866622 | 5.49E-12 |
| rs7305700   | 52.864649 | 5.50E-12 |
| rs72650099  | 52.855391 | 5.52E-12 |
| rs66819621  | 52.851343 | 5.54E-12 |
| rs2854277   | 52.849354 | 5.54E-12 |

|             |           |          |
|-------------|-----------|----------|
| rs61161997  | 52.833800 | 5.59E-12 |
| rs9269448   | 52.831646 | 5.60E-12 |
| rs45588337  | 52.824695 | 5.62E-12 |
| rs6495341   | 52.822327 | 5.62E-12 |
| rs4637681   | 52.818057 | 5.64E-12 |
| rs12930657  | 52.817719 | 5.64E-12 |
| rs5743565   | 52.806370 | 5.67E-12 |
| rs61352298  | 52.804861 | 5.68E-12 |
| rs59020204  | 52.803809 | 5.68E-12 |
| rs2069772   | 52.793276 | 5.71E-12 |
| rs274563    | 52.788246 | 5.73E-12 |
| rs11072807  | 52.781937 | 5.75E-12 |
| rs2218050   | 52.778404 | 5.76E-12 |
| rs9501380   | 52.769551 | 5.78E-12 |
| rs9790402   | 52.765702 | 5.80E-12 |
| rs113313477 | 52.758689 | 5.82E-12 |
| rs2507991   | 52.754326 | 5.83E-12 |
| rs995523    | 52.725108 | 5.92E-12 |
| rs2050032   | 52.720313 | 5.94E-12 |
| rs4822050   | 52.719758 | 5.94E-12 |
| rs199512    | 52.715002 | 5.96E-12 |
| rs7166723   | 52.705342 | 5.99E-12 |
| rs8029173   | 52.704188 | 5.99E-12 |
| rs9319588   | 52.700184 | 6.00E-12 |
| rs202655    | 52.683308 | 6.06E-12 |
| rs72669172  | 52.682253 | 6.06E-12 |
| rs7403593   | 52.681739 | 6.06E-12 |
| rs202653    | 52.677292 | 6.08E-12 |
| rs2904597   | 52.665072 | 6.12E-12 |
| rs4361510   | 52.645606 | 6.18E-12 |
| rs7149396   | 52.645123 | 6.18E-12 |
| rs7403438   | 52.644461 | 6.18E-12 |
| rs4255564   | 52.643466 | 6.19E-12 |
| rs112439933 | 52.641113 | 6.19E-12 |
| rs7402877   | 52.639349 | 6.20E-12 |
| rs28666868  | 52.619503 | 6.27E-12 |
| rs72805613  | 52.615228 | 6.28E-12 |
| rs34342224  | 52.615070 | 6.28E-12 |
| rs2415186   | 52.609582 | 6.30E-12 |
| rs11633519  | 52.609535 | 6.30E-12 |
| rs28752078  | 52.609403 | 6.30E-12 |
| rs9972653   | 52.606662 | 6.31E-12 |
| rs202635    | 52.599242 | 6.34E-12 |
| rs202652    | 52.596991 | 6.34E-12 |
| rs72651406  | 52.591715 | 6.36E-12 |
| rs4530904   | 52.591386 | 6.36E-12 |

|             |           |          |
|-------------|-----------|----------|
| rs4380028   | 52.580443 | 6.40E-12 |
| rs7631995   | 52.573425 | 6.42E-12 |
| rs1979981   | 52.567622 | 6.44E-12 |
| rs7403442   | 52.563700 | 6.46E-12 |
| rs5758449   | 52.547514 | 6.51E-12 |
| rs77923331  | 52.532111 | 6.57E-12 |
| rs272865    | 52.531240 | 6.57E-12 |
| rs1046276   | 52.529615 | 6.58E-12 |
| rs11088309  | 52.522149 | 6.60E-12 |
| rs9890198   | 52.521150 | 6.61E-12 |
| rs7403728   | 52.515701 | 6.62E-12 |
| rs28456     | 52.515603 | 6.62E-12 |
| rs2562005   | 52.513184 | 6.63E-12 |
| rs6002351   | 52.512948 | 6.63E-12 |
| rs2002150   | 52.511305 | 6.64E-12 |
| rs241443    | 52.498185 | 6.69E-12 |
| rs12149574  | 52.493206 | 6.70E-12 |
| rs11636545  | 52.481844 | 6.75E-12 |
| rs621849    | 52.479070 | 6.76E-12 |
| rs126092    | 52.477603 | 6.76E-12 |
| rs11958561  | 52.467520 | 6.80E-12 |
| rs75908546  | 52.465915 | 6.80E-12 |
| rs11742270  | 52.463104 | 6.81E-12 |
| rs11075993  | 52.458852 | 6.83E-12 |
| rs6877350   | 52.457325 | 6.83E-12 |
| rs5758466   | 52.456296 | 6.84E-12 |
| rs2664299   | 52.450972 | 6.86E-12 |
| rs932019    | 52.439109 | 6.90E-12 |
| rs28475573  | 52.434734 | 6.92E-12 |
| rs5743571   | 52.433867 | 6.92E-12 |
| rs3917324   | 52.432792 | 6.92E-12 |
| rs56357984  | 52.432147 | 6.93E-12 |
| rs5758452   | 52.430493 | 6.93E-12 |
| rs601079    | 52.429910 | 6.94E-12 |
| rs77403874  | 52.415891 | 6.99E-12 |
| rs9269444   | 52.415887 | 6.99E-12 |
| rs1438671   | 52.412720 | 7.00E-12 |
| rs7402376   | 52.409170 | 7.01E-12 |
| rs28376924  | 52.406889 | 7.02E-12 |
| rs28646278  | 52.399396 | 7.05E-12 |
| rs113264677 | 52.390513 | 7.08E-12 |
| rs7403714   | 52.383006 | 7.11E-12 |
| rs139553    | 52.375036 | 7.14E-12 |
| rs58021857  | 52.370930 | 7.16E-12 |
| rs2281333   | 52.370236 | 7.16E-12 |
| rs17817964  | 52.366834 | 7.17E-12 |

|             |           |          |
|-------------|-----------|----------|
| rs411337    | 52.358899 | 7.20E-12 |
| rs9269627   | 52.353739 | 7.22E-12 |
| rs13267098  | 52.351042 | 7.23E-12 |
| rs55870734  | 52.350759 | 7.23E-12 |
| rs2015346   | 52.348499 | 7.24E-12 |
| rs827644    | 52.340698 | 7.27E-12 |
| rs10782001  | 52.339761 | 7.28E-12 |
| rs9846214   | 52.338489 | 7.28E-12 |
| rs428499    | 52.338002 | 7.28E-12 |
| rs72846323  | 52.333099 | 7.30E-12 |
| rs72851022  | 52.324007 | 7.34E-12 |
| rs4608303   | 52.313685 | 7.38E-12 |
| rs8071300   | 52.311025 | 7.39E-12 |
| rs55974252  | 52.309053 | 7.40E-12 |
| rs5758447   | 52.304735 | 7.41E-12 |
| rs2364571   | 52.298963 | 7.44E-12 |
| rs139540    | 52.275975 | 7.53E-12 |
| rs9611636   | 52.257930 | 7.60E-12 |
| rs12909317  | 52.250203 | 7.63E-12 |
| rs10152566  | 52.231879 | 7.71E-12 |
| rs35602248  | 52.225097 | 7.74E-12 |
| rs6950      | 52.219710 | 7.76E-12 |
| rs7178051   | 52.217527 | 7.77E-12 |
| rs116442786 | 52.216033 | 7.77E-12 |
| rs6897932   | 52.202979 | 7.83E-12 |
| rs2338819   | 52.201984 | 7.83E-12 |
| rs7403708   | 52.195634 | 7.86E-12 |
| rs1957569   | 52.190340 | 7.88E-12 |
| rs8050136   | 52.185241 | 7.90E-12 |
| rs139063538 | 52.182285 | 7.92E-12 |
| rs28444683  | 52.177728 | 7.94E-12 |
| rs8041818   | 52.176868 | 7.94E-12 |
| rs35915689  | 52.176448 | 7.94E-12 |
| rs12942391  | 52.173372 | 7.95E-12 |
| rs1883368   | 52.172584 | 7.96E-12 |
| rs17817712  | 52.168162 | 7.98E-12 |
| rs17817497  | 52.168109 | 7.98E-12 |
| rs61907721  | 52.167338 | 7.98E-12 |
| rs58653621  | 52.162002 | 8.00E-12 |
| rs28439027  | 52.161955 | 8.00E-12 |
| rs13251292  | 52.159625 | 8.01E-12 |
| rs5751159   | 52.149810 | 8.05E-12 |
| rs3096695   | 52.128086 | 8.15E-12 |
| rs146717832 | 52.124241 | 8.17E-12 |
| rs11255962  | 52.116643 | 8.20E-12 |
| rs13501     | 52.114838 | 8.21E-12 |



|             |           |          |
|-------------|-----------|----------|
| rs2076199   | 52.113209 | 8.21E-12 |
| rs11236787  | 52.112941 | 8.21E-12 |
| rs9623450   | 52.112012 | 8.22E-12 |
| rs10083697  | 52.111628 | 8.22E-12 |
| rs10058509  | 52.111492 | 8.22E-12 |
| rs12757387  | 52.107719 | 8.24E-12 |
| rs62033408  | 52.106595 | 8.24E-12 |
| rs7290404   | 52.100312 | 8.27E-12 |
| rs202629    | 52.096986 | 8.29E-12 |
| rs4389113   | 52.088333 | 8.32E-12 |
| rs202628    | 52.080423 | 8.36E-12 |
| rs4889685   | 52.076630 | 8.38E-12 |
| rs9715841   | 52.068816 | 8.41E-12 |
| rs7206629   | 52.054199 | 8.48E-12 |
| rs5758389   | 52.050382 | 8.49E-12 |
| rs3751812   | 52.041043 | 8.54E-12 |
| rs11856903  | 52.026290 | 8.60E-12 |
| rs801417    | 52.025291 | 8.61E-12 |
| rs62033405  | 52.022825 | 8.62E-12 |
| rs9846404   | 52.018194 | 8.64E-12 |
| rs12531809  | 52.011370 | 8.67E-12 |
| rs12484074  | 52.009131 | 8.68E-12 |
| rs28624072  | 51.993387 | 8.76E-12 |
| rs419291    | 51.991987 | 8.76E-12 |
| rs7201850   | 51.990784 | 8.77E-12 |
| rs10463891  | 51.990182 | 8.77E-12 |
| rs10083696  | 51.988345 | 8.78E-12 |
| rs72669177  | 51.987550 | 8.78E-12 |
| rs10795696  | 51.983010 | 8.81E-12 |
| rs10468280  | 51.981588 | 8.81E-12 |
| rs7165382   | 51.978090 | 8.83E-12 |
| rs9611566   | 51.962746 | 8.90E-12 |
| rs12912022  | 51.961510 | 8.91E-12 |
| rs4433781   | 51.960019 | 8.91E-12 |
| rs111905143 | 51.957978 | 8.92E-12 |
| rs9937709   | 51.956303 | 8.93E-12 |
| rs6002480   | 51.953176 | 8.95E-12 |
| rs9864066   | 51.944754 | 8.99E-12 |
| rs72832993  | 51.941019 | 9.00E-12 |
| rs114921825 | 51.940543 | 9.01E-12 |
| rs6910310   | 51.940359 | 9.01E-12 |
| rs183257831 | 51.938915 | 9.02E-12 |
| rs67206233  | 51.935442 | 9.03E-12 |
| rs4795379   | 51.908006 | 9.17E-12 |
| rs4401016   | 51.904120 | 9.18E-12 |
| rs60996860  | 51.889684 | 9.26E-12 |

|             |           |          |
|-------------|-----------|----------|
| rs9469027   | 51.883675 | 9.28E-12 |
| rs72651412  | 51.879582 | 9.31E-12 |
| rs7693745   | 51.877450 | 9.32E-12 |
| rs199514    | 51.877273 | 9.32E-12 |
| rs62033399  | 51.850708 | 9.45E-12 |
| rs10776482  | 51.844868 | 9.48E-12 |
| rs67745769  | 51.840956 | 9.50E-12 |
| rs36214155  | 51.839054 | 9.51E-12 |
| rs12937013  | 51.830768 | 9.55E-12 |
| rs9607798   | 51.830622 | 9.55E-12 |
| rs113465719 | 51.826951 | 9.57E-12 |
| rs8043757   | 51.825986 | 9.58E-12 |
| rs111437368 | 51.825161 | 9.58E-12 |
| rs1054488   | 51.814269 | 9.64E-12 |
| rs7504262   | 51.808675 | 9.66E-12 |
| rs9931900   | 51.804846 | 9.68E-12 |
| rs11096956  | 51.799036 | 9.71E-12 |
| rs430685    | 51.795308 | 9.73E-12 |
| rs199505    | 51.790561 | 9.76E-12 |
| rs9933509   | 51.789673 | 9.76E-12 |
| rs9941349   | 51.787163 | 9.78E-12 |
| rs9877192   | 51.784429 | 9.79E-12 |
| rs7000782   | 51.782721 | 9.80E-12 |
| rs4795375   | 51.775800 | 9.84E-12 |
| rs112889978 | 51.765563 | 9.89E-12 |
| rs199515    | 51.764252 | 9.90E-12 |
| rs61176003  | 51.763032 | 9.90E-12 |
| rs7403608   | 51.761465 | 9.91E-12 |
| rs140776878 | 51.760653 | 9.92E-12 |
| rs17881210  | 51.756534 | 9.94E-12 |
| rs11697662  | 51.755116 | 9.94E-12 |
| rs12421917  | 51.741689 | 1.00E-11 |
| rs79011     | 51.739827 | 1.00E-11 |
| rs62011002  | 51.730166 | 1.01E-11 |
| rs439537    | 51.729796 | 1.01E-11 |
| rs113434679 | 51.725815 | 1.01E-11 |
| rs6495306   | 51.724350 | 1.01E-11 |
| rs12461383  | 51.723292 | 1.01E-11 |
| rs12906171  | 51.719158 | 1.01E-11 |
| rs62517191  | 51.712478 | 1.02E-11 |
| rs2664303   | 51.712028 | 1.02E-11 |
| rs2131946   | 51.707080 | 1.02E-11 |
| rs4950920   | 51.703283 | 1.02E-11 |
| rs2064188   | 51.696712 | 1.03E-11 |
| rs415430    | 51.696249 | 1.03E-11 |
| rs7595769   | 51.681117 | 1.03E-11 |

|             |           |          |
|-------------|-----------|----------|
| rs4401299   | 51.677601 | 1.04E-11 |
| rs34708051  | 51.667389 | 1.04E-11 |
| rs11742240  | 51.662737 | 1.04E-11 |
| rs72669165  | 51.653333 | 1.05E-11 |
| rs112621731 | 51.651613 | 1.05E-11 |
| rs11734342  | 51.650771 | 1.05E-11 |
| rs115003989 | 51.641009 | 1.06E-11 |
| rs8069074   | 51.639269 | 1.06E-11 |
| rs56683682  | 51.636328 | 1.06E-11 |
| rs2263317   | 51.634776 | 1.06E-11 |
| rs10899234  | 51.633010 | 1.06E-11 |
| rs8035093   | 51.630522 | 1.06E-11 |
| rs199509    | 51.629966 | 1.06E-11 |
| rs12441344  | 51.626311 | 1.07E-11 |
| rs4822032   | 51.616017 | 1.07E-11 |
| rs45485691  | 51.611935 | 1.07E-11 |
| rs17817449  | 51.597875 | 1.08E-11 |
| rs19573     | 51.591097 | 1.09E-11 |
| rs199506    | 51.590556 | 1.09E-11 |
| rs7127307   | 51.585988 | 1.09E-11 |
| rs12365278  | 51.571329 | 1.10E-11 |
| rs7166501   | 51.563497 | 1.10E-11 |
| rs57837628  | 51.559579 | 1.10E-11 |
| rs2614464   | 51.558955 | 1.10E-11 |
| rs588765    | 51.554432 | 1.11E-11 |
| rs12915192  | 51.547049 | 1.11E-11 |
| rs62126613  | 51.546986 | 1.11E-11 |
| rs1444784   | 51.539107 | 1.12E-11 |
| rs9815758   | 51.528422 | 1.12E-11 |
| rs7193144   | 51.521629 | 1.13E-11 |
| rs1549299   | 51.520747 | 1.13E-11 |
| rs146583707 | 51.516201 | 1.13E-11 |
| rs10010930  | 51.514421 | 1.13E-11 |
| rs12450688  | 51.512316 | 1.13E-11 |
| rs6503520   | 51.511144 | 1.13E-11 |
| rs13428413  | 51.500821 | 1.14E-11 |
| rs4488484   | 51.498973 | 1.14E-11 |
| rs7669329   | 51.498388 | 1.14E-11 |
| rs199516    | 51.496116 | 1.14E-11 |
| rs343473    | 51.494525 | 1.14E-11 |
| rs11729811  | 51.488249 | 1.15E-11 |
| rs274546    | 51.481148 | 1.15E-11 |
| rs12583732  | 51.474031 | 1.16E-11 |
| rs56328339  | 51.471753 | 1.16E-11 |
| rs8041064   | 51.468472 | 1.16E-11 |
| rs174578    | 51.466097 | 1.16E-11 |

|             |           |          |
|-------------|-----------|----------|
| rs5758368   | 51.465772 | 1.16E-11 |
| rs6881270   | 51.459650 | 1.16E-11 |
| rs8133974   | 51.454719 | 1.17E-11 |
| rs7188250   | 51.450085 | 1.17E-11 |
| rs950776    | 51.449528 | 1.17E-11 |
| rs3792894   | 51.444548 | 1.17E-11 |
| rs2630738   | 51.440199 | 1.18E-11 |
| rs199507    | 51.437632 | 1.18E-11 |
| rs7167853   | 51.433636 | 1.18E-11 |
| rs2693672   | 51.424775 | 1.19E-11 |
| rs9611561   | 51.414795 | 1.19E-11 |
| rs72625802  | 51.414219 | 1.19E-11 |
| rs11725783  | 51.401239 | 1.20E-11 |
| rs62010554  | 51.401143 | 1.20E-11 |
| rs12442476  | 51.396784 | 1.20E-11 |
| rs4739741   | 51.391755 | 1.21E-11 |
| rs2413659   | 51.388875 | 1.21E-11 |
| rs9632837   | 51.388620 | 1.21E-11 |
| rs1545156   | 51.383507 | 1.21E-11 |
| rs17670540  | 51.382315 | 1.21E-11 |
| rs72700982  | 51.377389 | 1.22E-11 |
| rs889555    | 51.375783 | 1.22E-11 |
| rs73158411  | 51.366737 | 1.22E-11 |
| rs2307111   | 51.366292 | 1.22E-11 |
| rs5758343   | 51.364732 | 1.23E-11 |
| rs56741530  | 51.363028 | 1.23E-11 |
| rs34462515  | 51.358834 | 1.23E-11 |
| rs203318    | 51.358297 | 1.23E-11 |
| rs4239223   | 51.352535 | 1.23E-11 |
| rs8026598   | 51.350706 | 1.23E-11 |
| rs6495335   | 51.344769 | 1.24E-11 |
| rs56083757  | 51.342849 | 1.24E-11 |
| rs4504265   | 51.340105 | 1.24E-11 |
| rs12941619  | 51.338379 | 1.24E-11 |
| rs112493812 | 51.336555 | 1.24E-11 |
| rs72651415  | 51.329741 | 1.25E-11 |
| rs5758441   | 51.327608 | 1.25E-11 |
| rs202631    | 51.314624 | 1.26E-11 |
| rs10795672  | 51.314294 | 1.26E-11 |
| rs5758442   | 51.307722 | 1.26E-11 |
| rs2857103   | 51.303201 | 1.27E-11 |
| rs62033400  | 51.293573 | 1.27E-11 |
| rs140302846 | 51.288760 | 1.28E-11 |
| rs5758440   | 51.278086 | 1.28E-11 |
| rs76552657  | 51.276592 | 1.28E-11 |
| rs35288961  | 51.272689 | 1.29E-11 |

|             |           |          |
|-------------|-----------|----------|
| rs142674470 | 51.269498 | 1.29E-11 |
| rs35675346  | 51.269313 | 1.29E-11 |
| rs56245262  | 51.258395 | 1.30E-11 |
| rs2523689   | 51.257025 | 1.30E-11 |
| rs9269438   | 51.255370 | 1.30E-11 |
| rs10905516  | 51.252704 | 1.30E-11 |
| rs12934900  | 51.249803 | 1.30E-11 |
| rs67837551  | 51.248597 | 1.30E-11 |
| rs79142022  | 51.242333 | 1.31E-11 |
| rs13188960  | 51.242121 | 1.31E-11 |
| rs9273126   | 51.240195 | 1.31E-11 |
| rs174583    | 51.235334 | 1.31E-11 |
| rs12947506  | 51.232297 | 1.31E-11 |
| rs6495333   | 51.231669 | 1.32E-11 |
| rs150431495 | 51.231637 | 1.32E-11 |
| rs272849    | 51.231331 | 1.32E-11 |
| rs17669032  | 51.230463 | 1.32E-11 |
| rs9920493   | 51.226493 | 1.32E-11 |
| rs9272336   | 51.223532 | 1.32E-11 |
| rs72669185  | 51.220187 | 1.32E-11 |
| rs6531662   | 51.218794 | 1.32E-11 |
| rs73176689  | 51.217225 | 1.33E-11 |
| rs28567725  | 51.215614 | 1.33E-11 |
| rs4246215   | 51.211356 | 1.33E-11 |
| rs11172110  | 51.200992 | 1.34E-11 |
| rs2516454   | 51.192823 | 1.34E-11 |
| rs111321973 | 51.186746 | 1.35E-11 |
| rs273902    | 51.184556 | 1.35E-11 |
| rs2523691   | 51.169591 | 1.36E-11 |
| rs10776483  | 51.168448 | 1.36E-11 |
| rs6011776   | 51.167067 | 1.36E-11 |
| rs73410785  | 51.166949 | 1.36E-11 |
| rs203320    | 51.166840 | 1.36E-11 |
| rs2747429   | 51.153880 | 1.37E-11 |
| rs9936385   | 51.152177 | 1.37E-11 |
| rs74538397  | 51.151920 | 1.37E-11 |
| rs9469084   | 51.148694 | 1.37E-11 |
| rs8027833   | 51.148018 | 1.38E-11 |
| rs4822039   | 51.147206 | 1.38E-11 |
| rs11657153  | 51.144072 | 1.38E-11 |
| rs4887062   | 51.142862 | 1.38E-11 |
| rs183894    | 51.142823 | 1.38E-11 |
| rs11657058  | 51.142342 | 1.38E-11 |
| rs3743077   | 51.138695 | 1.38E-11 |
| rs11727978  | 51.138582 | 1.38E-11 |
| rs11948089  | 51.134461 | 1.39E-11 |

|             |           |          |
|-------------|-----------|----------|
| rs6881706   | 51.132100 | 1.39E-11 |
| rs6519288   | 51.127685 | 1.39E-11 |
| rs10416530  | 51.127046 | 1.39E-11 |
| rs6846348   | 51.126429 | 1.39E-11 |
| rs8073248   | 51.121123 | 1.40E-11 |
| rs11722836  | 51.111979 | 1.40E-11 |
| rs3805683   | 51.098555 | 1.41E-11 |
| rs11084716  | 51.096280 | 1.41E-11 |
| rs9274114   | 51.092642 | 1.42E-11 |
| rs3828675   | 51.086592 | 1.42E-11 |
| rs34463936  | 51.086587 | 1.42E-11 |
| rs191247549 | 51.073636 | 1.43E-11 |
| rs35251008  | 51.068667 | 1.43E-11 |
| rs448380    | 51.063019 | 1.44E-11 |
| rs112318878 | 51.054144 | 1.45E-11 |
| rs11735251  | 51.050787 | 1.45E-11 |
| rs35779873  | 51.042172 | 1.46E-11 |
| rs555018    | 51.038601 | 1.46E-11 |
| rs11076     | 51.033242 | 1.46E-11 |
| rs11725779  | 51.031381 | 1.46E-11 |
| rs7176187   | 51.030612 | 1.46E-11 |
| rs1941955   | 51.029889 | 1.46E-11 |
| rs112003140 | 51.019083 | 1.47E-11 |
| rs28627504  | 51.017006 | 1.47E-11 |
| rs5743789   | 51.012313 | 1.48E-11 |
| rs448489    | 51.004099 | 1.49E-11 |
| rs13238380  | 51.002511 | 1.49E-11 |
| rs1457115   | 50.998929 | 1.49E-11 |
| rs9272665   | 50.993018 | 1.49E-11 |
| rs4073322   | 50.989306 | 1.50E-11 |
| rs1923892   | 50.985942 | 1.50E-11 |
| rs56289835  | 50.985602 | 1.50E-11 |
| rs13010     | 50.983563 | 1.50E-11 |
| rs143012784 | 50.981962 | 1.50E-11 |
| rs12661281  | 50.978146 | 1.51E-11 |
| rs7350849   | 50.966566 | 1.52E-11 |
| rs7206122   | 50.957059 | 1.52E-11 |
| rs11075988  | 50.956700 | 1.52E-11 |
| rs1948      | 50.953912 | 1.53E-11 |
| rs77453301  | 50.952194 | 1.53E-11 |
| rs34831688  | 50.951130 | 1.53E-11 |
| rs6767553   | 50.949517 | 1.53E-11 |
| rs62126619  | 50.943640 | 1.53E-11 |
| rs2897075   | 50.937915 | 1.54E-11 |
| rs7206410   | 50.926669 | 1.55E-11 |
| rs3087562   | 50.924336 | 1.55E-11 |

|            |           |          |
|------------|-----------|----------|
| rs202636   | 50.918692 | 1.55E-11 |
| rs2664304  | 50.917933 | 1.56E-11 |
| rs481134   | 50.917200 | 1.56E-11 |
| rs12309    | 50.916250 | 1.56E-11 |
| rs5743795  | 50.914633 | 1.56E-11 |
| rs374317   | 50.911254 | 1.56E-11 |
| rs376319   | 50.909355 | 1.56E-11 |
| rs3129062  | 50.907319 | 1.56E-11 |
| rs35968147 | 50.898913 | 1.57E-11 |
| rs12515905 | 50.897951 | 1.57E-11 |
| rs35228488 | 50.897271 | 1.57E-11 |
| rs174572   | 50.896809 | 1.57E-11 |
| rs7175271  | 50.889182 | 1.58E-11 |
| rs72803697 | 50.885104 | 1.58E-11 |
| rs73236629 | 50.880014 | 1.59E-11 |
| rs7200879  | 50.879064 | 1.59E-11 |
| rs11722813 | 50.876639 | 1.59E-11 |
| rs4237092  | 50.872754 | 1.59E-11 |
| rs375984   | 50.866328 | 1.60E-11 |
| rs75905358 | 50.865862 | 1.60E-11 |
| rs12678825 | 50.864900 | 1.60E-11 |
| rs11877758 | 50.864051 | 1.60E-11 |
| rs387642   | 50.862525 | 1.60E-11 |
| rs10052046 | 50.861385 | 1.60E-11 |
| rs9923233  | 50.860047 | 1.60E-11 |
| rs137831   | 50.850858 | 1.61E-11 |
| rs7185735  | 50.847216 | 1.61E-11 |
| rs7165902  | 50.835342 | 1.63E-11 |
| rs2888106  | 50.834828 | 1.63E-11 |
| rs56408159 | 50.834793 | 1.63E-11 |
| rs2535238  | 50.832617 | 1.63E-11 |
| rs7701237  | 50.830383 | 1.63E-11 |
| rs11722889 | 50.829406 | 1.63E-11 |
| rs71583465 | 50.823514 | 1.64E-11 |
| rs2949668  | 50.819157 | 1.64E-11 |
| rs11692230 | 50.816972 | 1.64E-11 |
| rs62126617 | 50.815180 | 1.64E-11 |
| rs11245967 | 50.814517 | 1.64E-11 |
| rs62033404 | 50.812335 | 1.65E-11 |
| rs17622517 | 50.801701 | 1.65E-11 |
| rs11722788 | 50.797885 | 1.66E-11 |
| rs7167242  | 50.795460 | 1.66E-11 |
| rs9824218  | 50.793531 | 1.66E-11 |
| rs7165075  | 50.786429 | 1.67E-11 |
| rs11649613 | 50.786169 | 1.67E-11 |
| rs70602    | 50.783993 | 1.67E-11 |

|            |           |          |
|------------|-----------|----------|
| rs62033403 | 50.769253 | 1.68E-11 |
| rs9923312  | 50.767727 | 1.68E-11 |
| rs4332770  | 50.766551 | 1.69E-11 |
| rs73236628 | 50.764705 | 1.69E-11 |
| rs28728088 | 50.763661 | 1.69E-11 |
| rs28490120 | 50.763578 | 1.69E-11 |
| rs56235355 | 50.756182 | 1.70E-11 |
| rs77315098 | 50.751352 | 1.70E-11 |
| rs4238953  | 50.748761 | 1.70E-11 |
| rs12218998 | 50.747596 | 1.70E-11 |
| rs9931494  | 50.746997 | 1.70E-11 |
| rs11075990 | 50.746482 | 1.70E-11 |
| rs9939609  | 50.730700 | 1.72E-11 |
| rs72845703 | 50.730437 | 1.72E-11 |
| rs2523688  | 50.730273 | 1.72E-11 |
| rs9926289  | 50.721248 | 1.73E-11 |
| rs10426510 | 50.714724 | 1.73E-11 |
| rs11671925 | 50.695399 | 1.75E-11 |
| rs1050518  | 50.680077 | 1.77E-11 |
| rs75183956 | 50.667178 | 1.78E-11 |
| rs9274130  | 50.666493 | 1.78E-11 |
| rs10928236 | 50.660762 | 1.78E-11 |
| rs174551   | 50.658213 | 1.79E-11 |
| rs75330746 | 50.657644 | 1.79E-11 |
| rs2748809  | 50.653337 | 1.79E-11 |
| rs4513579  | 50.649912 | 1.79E-11 |
| rs7202116  | 50.648750 | 1.80E-11 |
| rs13427617 | 50.647658 | 1.80E-11 |
| rs270602   | 50.646930 | 1.80E-11 |
| rs10500264 | 50.646746 | 1.80E-11 |
| rs56364401 | 50.646530 | 1.80E-11 |
| rs7503377  | 50.644715 | 1.80E-11 |
| rs13153792 | 50.633215 | 1.81E-11 |
| rs62126615 | 50.632537 | 1.81E-11 |
| rs11074852 | 50.632211 | 1.81E-11 |
| rs11075992 | 50.631032 | 1.81E-11 |
| rs9273494  | 50.623802 | 1.82E-11 |
| rs11172055 | 50.623422 | 1.82E-11 |
| rs56313538 | 50.623245 | 1.82E-11 |
| rs1109151  | 50.621638 | 1.82E-11 |
| rs3751814  | 50.611773 | 1.83E-11 |
| rs6002386  | 50.607556 | 1.84E-11 |
| rs10274928 | 50.603220 | 1.84E-11 |
| rs11075989 | 50.599265 | 1.84E-11 |
| rs11638064 | 50.598375 | 1.84E-11 |
| rs3749756  | 50.598079 | 1.84E-11 |



|             |           |          |
|-------------|-----------|----------|
| rs11075991  | 50.597812 | 1.84E-11 |
| rs4591174   | 50.583499 | 1.86E-11 |
| rs10902095  | 50.578551 | 1.86E-11 |
| rs174541    | 50.577137 | 1.87E-11 |
| rs3130976   | 50.574119 | 1.87E-11 |
| rs6890853   | 50.569382 | 1.87E-11 |
| rs7793850   | 50.567970 | 1.87E-11 |
| rs35705491  | 50.566815 | 1.88E-11 |
| rs10920565  | 50.566807 | 1.88E-11 |
| rs9607816   | 50.563631 | 1.88E-11 |
| rs3900945   | 50.557487 | 1.88E-11 |
| rs17407958  | 50.547562 | 1.89E-11 |
| rs72928026  | 50.543212 | 1.90E-11 |
| rs11606242  | 50.536314 | 1.91E-11 |
| rs10023850  | 50.534844 | 1.91E-11 |
| rs28582689  | 50.525837 | 1.92E-11 |
| rs9964724   | 50.520608 | 1.92E-11 |
| rs10876953  | 50.516657 | 1.93E-11 |
| rs4361509   | 50.513549 | 1.93E-11 |
| rs12483991  | 50.510796 | 1.93E-11 |
| rs59671175  | 50.500402 | 1.94E-11 |
| rs5758365   | 50.487886 | 1.96E-11 |
| rs272857    | 50.486444 | 1.96E-11 |
| rs11567705  | 50.483914 | 1.96E-11 |
| rs4662412   | 50.483347 | 1.96E-11 |
| rs142207772 | 50.478255 | 1.97E-11 |
| rs9920968   | 50.476465 | 1.97E-11 |
| rs10075459  | 50.474652 | 1.97E-11 |
| rs11069365  | 50.471537 | 1.97E-11 |
| rs7242923   | 50.468173 | 1.98E-11 |
| rs2888107   | 50.460825 | 1.98E-11 |
| rs116420479 | 50.456585 | 1.99E-11 |
| rs6495307   | 50.452916 | 1.99E-11 |
| rs66908032  | 50.449753 | 2.00E-11 |
| rs149218    | 50.445007 | 2.00E-11 |
| rs6430085   | 50.444150 | 2.00E-11 |
| rs56336520  | 50.442874 | 2.00E-11 |
| rs113343439 | 50.436400 | 2.01E-11 |
| rs12804137  | 50.431277 | 2.02E-11 |
| rs41506844  | 50.431153 | 2.02E-11 |
| rs340889    | 50.429241 | 2.02E-11 |
| rs3785549   | 50.428429 | 2.02E-11 |
| rs3805681   | 50.424263 | 2.02E-11 |
| rs61867617  | 50.410032 | 2.04E-11 |
| rs183822442 | 50.400031 | 2.05E-11 |
| rs10498965  | 50.386605 | 2.06E-11 |

|             |           |          |
|-------------|-----------|----------|
| rs10076758  | 50.386400 | 2.07E-11 |
| rs9270868   | 50.385929 | 2.07E-11 |
| rs10213865  | 50.382501 | 2.07E-11 |
| rs9611610   | 50.373083 | 2.08E-11 |
| rs272874    | 50.371038 | 2.08E-11 |
| rs10152593  | 50.337677 | 2.12E-11 |
| rs529240    | 50.337267 | 2.12E-11 |
| rs55645596  | 50.334266 | 2.12E-11 |
| rs149930714 | 50.313819 | 2.15E-11 |
| rs17227273  | 50.309856 | 2.15E-11 |
| rs1045929   | 50.308386 | 2.15E-11 |
| rs3093664   | 50.302309 | 2.16E-11 |
| rs3021304   | 50.296981 | 2.17E-11 |
| rs12901300  | 50.292941 | 2.17E-11 |
| rs12150887  | 50.276661 | 2.19E-11 |
| rs8051591   | 50.275485 | 2.19E-11 |
| rs272889    | 50.273810 | 2.19E-11 |
| rs11749300  | 50.272891 | 2.19E-11 |
| rs272893    | 50.271811 | 2.20E-11 |
| rs202639    | 50.271731 | 2.20E-11 |
| rs9935401   | 50.269844 | 2.20E-11 |
| rs73236633  | 50.266205 | 2.20E-11 |
| rs17812899  | 50.264916 | 2.20E-11 |
| rs7971751   | 50.264300 | 2.20E-11 |
| rs162891    | 50.259875 | 2.21E-11 |
| rs272869    | 50.258675 | 2.21E-11 |
| rs11567694  | 50.231692 | 2.24E-11 |
| rs2301579   | 50.225215 | 2.25E-11 |
| rs79009     | 50.222549 | 2.25E-11 |
| rs2747427   | 50.219862 | 2.26E-11 |
| rs2747428   | 50.219862 | 2.26E-11 |
| rs417764    | 50.219862 | 2.26E-11 |
| rs9607815   | 50.216626 | 2.26E-11 |
| rs7703009   | 50.216593 | 2.26E-11 |
| rs9274497   | 50.208501 | 2.27E-11 |
| rs73203092  | 50.193413 | 2.29E-11 |
| rs8073511   | 50.189868 | 2.29E-11 |
| rs9611611   | 50.179171 | 2.31E-11 |
| rs66922907  | 50.177189 | 2.31E-11 |
| rs17812893  | 50.172780 | 2.31E-11 |
| rs9274134   | 50.165469 | 2.32E-11 |
| rs9271650   | 50.163944 | 2.33E-11 |
| rs8081528   | 50.156209 | 2.34E-11 |
| rs17668708  | 50.149557 | 2.34E-11 |
| rs72851017  | 50.142834 | 2.35E-11 |
| rs1000309   | 50.137389 | 2.36E-11 |

|             |           |          |
|-------------|-----------|----------|
| rs4739742   | 50.136380 | 2.36E-11 |
| rs17812911  | 50.129292 | 2.37E-11 |
| rs116846837 | 50.119514 | 2.38E-11 |
| rs7717955   | 50.113981 | 2.39E-11 |
| rs2287040   | 50.110275 | 2.39E-11 |
| rs9353715   | 50.109925 | 2.39E-11 |
| rs174538    | 50.103591 | 2.40E-11 |
| rs7628937   | 50.100082 | 2.41E-11 |
| rs4601989   | 50.095747 | 2.41E-11 |
| rs12804326  | 50.095641 | 2.41E-11 |
| rs2278398   | 50.091493 | 2.42E-11 |
| rs12911602  | 50.081648 | 2.43E-11 |
| rs12653783  | 50.080581 | 2.43E-11 |
| rs9351236   | 50.078484 | 2.43E-11 |
| rs6896703   | 50.077768 | 2.43E-11 |
| rs10905535  | 50.065398 | 2.45E-11 |
| rs12899452  | 50.061990 | 2.46E-11 |
| rs174581    | 50.055154 | 2.46E-11 |
| rs12933581  | 50.055072 | 2.46E-11 |
| rs9272309   | 50.050742 | 2.47E-11 |
| rs199449    | 50.031815 | 2.50E-11 |
| rs76930421  | 50.026082 | 2.50E-11 |
| rs55888430  | 50.022080 | 2.51E-11 |
| rs34839516  | 50.019654 | 2.51E-11 |
| rs72928023  | 50.017079 | 2.52E-11 |
| rs272871    | 50.007082 | 2.53E-11 |
| rs55719595  | 50.004049 | 2.53E-11 |
| rs174573    | 50.004010 | 2.53E-11 |
| rs28638318  | 49.997257 | 2.54E-11 |
| rs7173955   | 49.991106 | 2.55E-11 |
| rs73203077  | 49.987002 | 2.56E-11 |
| rs7906507   | 49.972907 | 2.58E-11 |
| rs270621    | 49.972582 | 2.58E-11 |
| rs12055566  | 49.967239 | 2.58E-11 |
| rs840161    | 49.962712 | 2.59E-11 |
| rs75763833  | 49.962312 | 2.59E-11 |
| rs2735944   | 49.960968 | 2.59E-11 |
| rs2886116   | 49.952029 | 2.60E-11 |
| rs827624    | 49.951109 | 2.61E-11 |
| rs62126608  | 49.946002 | 2.61E-11 |
| rs5751108   | 49.940826 | 2.62E-11 |
| rs17582830  | 49.929887 | 2.63E-11 |
| rs2747421   | 49.929165 | 2.64E-11 |
| rs17227266  | 49.922608 | 2.65E-11 |
| rs4327090   | 49.922462 | 2.65E-11 |
| rs17582921  | 49.918077 | 2.65E-11 |

|             |           |          |
|-------------|-----------|----------|
| rs1018525   | 49.915443 | 2.66E-11 |
| rs140713557 | 49.910596 | 2.66E-11 |
| rs715285    | 49.906497 | 2.67E-11 |
| rs113161176 | 49.903948 | 2.67E-11 |
| rs6473229   | 49.877466 | 2.71E-11 |
| rs404582    | 49.875515 | 2.71E-11 |
| rs9585063   | 49.867713 | 2.72E-11 |
| rs62126611  | 49.862972 | 2.73E-11 |
| rs953233    | 49.852463 | 2.75E-11 |
| rs13426068  | 49.838867 | 2.77E-11 |
| rs138314144 | 49.828517 | 2.78E-11 |
| rs17691077  | 49.826071 | 2.78E-11 |
| rs679243    | 49.817725 | 2.80E-11 |
| rs151027268 | 49.815762 | 2.80E-11 |
| rs1037684   | 49.808211 | 2.81E-11 |
| rs340888    | 49.806787 | 2.81E-11 |
| rs647041    | 49.799128 | 2.83E-11 |
| rs4822024   | 49.797330 | 2.83E-11 |
| rs5751107   | 49.783676 | 2.85E-11 |
| rs62062280  | 49.783110 | 2.85E-11 |
| rs73203090  | 49.782289 | 2.85E-11 |
| rs17843689  | 49.781913 | 2.85E-11 |
| rs8060798   | 49.780678 | 2.85E-11 |
| rs11746729  | 49.779574 | 2.85E-11 |
| rs6002385   | 49.776374 | 2.86E-11 |
| rs35783651  | 49.768797 | 2.87E-11 |
| rs2697046   | 49.768200 | 2.87E-11 |
| rs11602061  | 49.766711 | 2.87E-11 |
| rs4915314   | 49.754877 | 2.89E-11 |
| rs12550844  | 49.750374 | 2.90E-11 |
| rs143741838 | 49.745778 | 2.91E-11 |
| rs12657965  | 49.743986 | 2.91E-11 |
| rs72799341  | 49.741970 | 2.91E-11 |
| rs61939604  | 49.726731 | 2.94E-11 |
| rs181063261 | 49.719082 | 2.95E-11 |
| rs28691231  | 49.709568 | 2.96E-11 |
| rs117813801 | 49.708938 | 2.96E-11 |
| rs72702900  | 49.703852 | 2.97E-11 |
| rs10478998  | 49.696664 | 2.98E-11 |
| rs1114829   | 49.695868 | 2.99E-11 |
| rs8128904   | 49.688969 | 3.00E-11 |
| rs3847419   | 49.681384 | 3.01E-11 |
| rs9272569   | 49.676782 | 3.02E-11 |
| rs4759041   | 49.671635 | 3.02E-11 |
| rs693906    | 49.667172 | 3.03E-11 |
| rs7761522   | 49.663214 | 3.04E-11 |

|             |           |          |
|-------------|-----------|----------|
| rs203319    | 49.661832 | 3.04E-11 |
| rs11865499  | 49.657976 | 3.05E-11 |
| rs11255737  | 49.642850 | 3.07E-11 |
| rs1941954   | 49.633813 | 3.09E-11 |
| rs2523604   | 49.630888 | 3.09E-11 |
| rs13232403  | 49.630191 | 3.09E-11 |
| rs8192733   | 49.626703 | 3.10E-11 |
| rs12514299  | 49.608375 | 3.13E-11 |
| rs12898578  | 49.600854 | 3.14E-11 |
| rs11604075  | 49.598034 | 3.15E-11 |
| rs55817481  | 49.594145 | 3.15E-11 |
| rs11531227  | 49.588668 | 3.16E-11 |
| rs55812315  | 49.582001 | 3.17E-11 |
| rs1858074   | 49.581313 | 3.17E-11 |
| rs7099087   | 49.574435 | 3.18E-11 |
| rs11088308  | 49.554467 | 3.22E-11 |
| rs2768      | 49.545054 | 3.24E-11 |
| rs28653192  | 49.536136 | 3.25E-11 |
| rs1972057   | 49.528882 | 3.26E-11 |
| rs4504266   | 49.528410 | 3.26E-11 |
| rs1406225   | 49.526860 | 3.27E-11 |
| rs169361    | 49.522748 | 3.27E-11 |
| rs183211    | 49.519201 | 3.28E-11 |
| rs17623914  | 49.511655 | 3.29E-11 |
| rs8133245   | 49.509817 | 3.30E-11 |
| rs7185007   | 49.507510 | 3.30E-11 |
| rs17227231  | 49.491788 | 3.33E-11 |
| rs144416125 | 49.487491 | 3.34E-11 |
| rs2242900   | 49.485858 | 3.34E-11 |
| rs73176685  | 49.473428 | 3.36E-11 |
| rs139990267 | 49.471337 | 3.36E-11 |
| rs11256082  | 49.469544 | 3.37E-11 |
| rs17207524  | 49.465689 | 3.38E-11 |
| rs35700114  | 49.450578 | 3.40E-11 |
| rs13359107  | 49.448829 | 3.41E-11 |
| rs12468203  | 49.445303 | 3.41E-11 |
| rs11150600  | 49.440214 | 3.42E-11 |
| rs174584    | 49.433721 | 3.43E-11 |
| rs2854275   | 49.430129 | 3.44E-11 |
| rs35696821  | 49.421529 | 3.46E-11 |
| rs199438    | 49.419417 | 3.46E-11 |
| rs113558549 | 49.413118 | 3.47E-11 |
| rs1557343   | 49.386321 | 3.52E-11 |
| rs73178647  | 49.379298 | 3.53E-11 |
| rs77693147  | 49.376907 | 3.54E-11 |
| rs66539719  | 49.373807 | 3.54E-11 |

|             |           |          |
|-------------|-----------|----------|
| rs62010552  | 49.365080 | 3.56E-11 |
| rs61867619  | 49.359121 | 3.57E-11 |
| rs199437    | 49.353847 | 3.58E-11 |
| rs7410883   | 49.339776 | 3.61E-11 |
| rs8074276   | 49.339309 | 3.61E-11 |
| rs79535452  | 49.337462 | 3.61E-11 |
| rs10905517  | 49.331385 | 3.63E-11 |
| rs147237535 | 49.321001 | 3.65E-11 |
| rs4809541   | 49.316981 | 3.65E-11 |
| rs61867618  | 49.315779 | 3.66E-11 |
| rs114445199 | 49.308622 | 3.67E-11 |
| rs199436    | 49.307732 | 3.67E-11 |
| rs2182419   | 49.300978 | 3.68E-11 |
| rs504653    | 49.294850 | 3.70E-11 |
| rs199453    | 49.293010 | 3.70E-11 |
| rs6062439   | 49.290905 | 3.70E-11 |
| rs2380688   | 49.283503 | 3.72E-11 |
| rs1812326   | 49.278941 | 3.73E-11 |
| rs9270620   | 49.270755 | 3.74E-11 |
| rs3130922   | 49.266479 | 3.75E-11 |
| rs34661125  | 49.264294 | 3.76E-11 |
| rs193763    | 49.260852 | 3.76E-11 |
| rs6495317   | 49.258725 | 3.77E-11 |
| rs4837022   | 49.253196 | 3.78E-11 |
| rs8063057   | 49.252852 | 3.78E-11 |
| rs2943529   | 49.243765 | 3.80E-11 |
| rs112310745 | 49.243507 | 3.80E-11 |
| rs145273408 | 49.238383 | 3.81E-11 |
| rs4759275   | 49.236204 | 3.81E-11 |
| rs7167056   | 49.234155 | 3.82E-11 |
| rs3787138   | 49.228604 | 3.83E-11 |
| rs7312770   | 49.224794 | 3.84E-11 |
| rs4472974   | 49.210392 | 3.87E-11 |
| rs12265609  | 49.208041 | 3.87E-11 |
| rs9611609   | 49.207973 | 3.87E-11 |
| rs9517713   | 49.204483 | 3.88E-11 |
| rs6873747   | 49.204244 | 3.88E-11 |
| rs1050570   | 49.200378 | 3.89E-11 |
| rs11956918  | 49.200338 | 3.89E-11 |
| rs1469442   | 49.200335 | 3.89E-11 |
| rs2229959   | 49.184936 | 3.92E-11 |
| rs199452    | 49.181026 | 3.93E-11 |
| rs12484175  | 49.180540 | 3.93E-11 |
| rs73236625  | 49.179499 | 3.93E-11 |
| rs11072802  | 49.170880 | 3.95E-11 |
| rs8133412   | 49.170842 | 3.95E-11 |

|             |           |          |
|-------------|-----------|----------|
| rs61867620  | 49.165034 | 3.96E-11 |
| rs56137030  | 49.160360 | 3.97E-11 |
| rs4254104   | 49.157403 | 3.98E-11 |
| rs111751251 | 49.153388 | 3.99E-11 |
| rs35163677  | 49.150514 | 3.99E-11 |
| rs1807241   | 49.147933 | 4.00E-11 |
| rs1042116   | 49.147238 | 4.00E-11 |
| rs75424836  | 49.145622 | 4.00E-11 |
| rs78593564  | 49.143473 | 4.01E-11 |
| rs7499292   | 49.140533 | 4.01E-11 |
| rs12954661  | 49.134395 | 4.03E-11 |
| rs7163236   | 49.133084 | 4.03E-11 |
| rs12989255  | 49.132480 | 4.03E-11 |
| rs55979424  | 49.128230 | 4.04E-11 |
| rs187104995 | 49.114791 | 4.07E-11 |
| rs10186746  | 49.109777 | 4.08E-11 |
| rs2888108   | 49.107660 | 4.09E-11 |
| rs185687383 | 49.103410 | 4.09E-11 |
| rs1060506   | 49.102597 | 4.10E-11 |
| rs138039007 | 49.100773 | 4.10E-11 |
| rs3813308   | 49.099571 | 4.10E-11 |
| rs8067511   | 49.099268 | 4.10E-11 |
| rs4341570   | 49.095712 | 4.11E-11 |
| rs454664    | 49.094370 | 4.11E-11 |
| rs885947    | 49.092611 | 4.12E-11 |
| rs113660049 | 49.082527 | 4.14E-11 |
| rs4822037   | 49.077469 | 4.15E-11 |
| rs7170552   | 49.077293 | 4.15E-11 |
| rs7826100   | 49.073382 | 4.16E-11 |
| rs8039600   | 49.068595 | 4.17E-11 |
| rs7959725   | 49.067783 | 4.17E-11 |
| rs3817999   | 49.067547 | 4.17E-11 |
| rs62062279  | 49.064994 | 4.18E-11 |
| rs2614463   | 49.058477 | 4.19E-11 |
| rs12782190  | 49.058235 | 4.19E-11 |
| rs7166770   | 49.048874 | 4.22E-11 |
| rs12995470  | 49.045911 | 4.22E-11 |
| rs4833096   | 49.043477 | 4.23E-11 |
| rs10937361  | 49.041771 | 4.23E-11 |
| rs59735493  | 49.034769 | 4.25E-11 |
| rs17388568  | 49.032472 | 4.25E-11 |
| rs4787957   | 49.031538 | 4.25E-11 |
| rs10783807  | 49.030419 | 4.26E-11 |
| rs4739746   | 49.020020 | 4.28E-11 |
| rs10876941  | 49.015295 | 4.29E-11 |
| rs67998226  | 49.013924 | 4.29E-11 |

|             |           |          |
|-------------|-----------|----------|
| rs4257011   | 49.003643 | 4.32E-11 |
| rs7166340   | 48.994179 | 4.34E-11 |
| rs2075860   | 48.989633 | 4.35E-11 |
| rs1846398   | 48.989580 | 4.35E-11 |
| rs148696809 | 48.988586 | 4.35E-11 |
| rs13029804  | 48.986292 | 4.36E-11 |
| rs11780529  | 48.984928 | 4.36E-11 |
| rs157573    | 48.982225 | 4.37E-11 |
| rs34207169  | 48.979055 | 4.38E-11 |
| rs2735845   | 48.978917 | 4.38E-11 |
| rs56345976  | 48.972578 | 4.39E-11 |
| rs3767745   | 48.970190 | 4.40E-11 |
| rs11679856  | 48.969731 | 4.40E-11 |
| rs1044393   | 48.965260 | 4.41E-11 |
| rs36021067  | 48.964200 | 4.41E-11 |
| rs12898392  | 48.963698 | 4.41E-11 |
| rs12678320  | 48.962135 | 4.41E-11 |
| rs4889571   | 48.961039 | 4.42E-11 |
| rs112082260 | 48.947252 | 4.45E-11 |
| rs11679849  | 48.946170 | 4.45E-11 |
| rs34664315  | 48.941681 | 4.46E-11 |
| rs146305655 | 48.935897 | 4.48E-11 |
| rs9271222   | 48.927440 | 4.50E-11 |
| rs1419696   | 48.924499 | 4.50E-11 |
| rs1405238   | 48.923861 | 4.51E-11 |
| rs10735871  | 48.918875 | 4.52E-11 |
| rs6873269   | 48.916458 | 4.52E-11 |
| rs7956391   | 48.914723 | 4.53E-11 |
| rs7146019   | 48.914676 | 4.53E-11 |
| rs739129    | 48.904869 | 4.55E-11 |
| rs10251386  | 48.903609 | 4.55E-11 |
| rs11978564  | 48.892655 | 4.58E-11 |
| rs4820437   | 48.886550 | 4.60E-11 |
| rs1628578   | 48.886253 | 4.60E-11 |
| rs12987338  | 48.877544 | 4.62E-11 |
| rs4457200   | 48.874352 | 4.63E-11 |
| rs773125    | 48.868329 | 4.64E-11 |
| rs10768602  | 48.855867 | 4.67E-11 |
| rs6988495   | 48.853378 | 4.68E-11 |
| rs11245950  | 48.853195 | 4.68E-11 |
| rs12987741  | 48.848494 | 4.69E-11 |
| rs727241    | 48.840119 | 4.71E-11 |
| rs2471912   | 48.833631 | 4.73E-11 |
| rs111243857 | 48.830132 | 4.74E-11 |
| rs13107325  | 48.826973 | 4.74E-11 |
| rs193764    | 48.824775 | 4.75E-11 |



|             |           |          |
|-------------|-----------|----------|
| rs13019932  | 48.823783 | 4.75E-11 |
| rs4360944   | 48.814002 | 4.78E-11 |
| rs11022612  | 48.807795 | 4.79E-11 |
| rs34950484  | 48.804849 | 4.80E-11 |
| rs2256460   | 48.804016 | 4.80E-11 |
| rs80209523  | 48.803032 | 4.81E-11 |
| rs2302620   | 48.802040 | 4.81E-11 |
| rs55825513  | 48.801762 | 4.81E-11 |
| rs9344996   | 48.799364 | 4.82E-11 |
| rs1550323   | 48.799333 | 4.82E-11 |
| rs76154201  | 48.797548 | 4.82E-11 |
| rs75716787  | 48.796013 | 4.82E-11 |
| rs62397688  | 48.795301 | 4.83E-11 |
| rs4749779   | 48.789860 | 4.84E-11 |
| rs10198860  | 48.777810 | 4.87E-11 |
| rs12674966  | 48.777126 | 4.87E-11 |
| rs67340775  | 48.766186 | 4.90E-11 |
| rs34396849  | 48.764600 | 4.91E-11 |
| rs12531540  | 48.760426 | 4.92E-11 |
| rs6726402   | 48.760179 | 4.92E-11 |
| rs1558624   | 48.759637 | 4.92E-11 |
| rs17843688  | 48.750109 | 4.94E-11 |
| rs12468310  | 48.741634 | 4.97E-11 |
| rs4239894   | 48.739045 | 4.97E-11 |
| rs8041389   | 48.731361 | 4.99E-11 |
| rs112003311 | 48.730235 | 5.00E-11 |
| rs7961602   | 48.726681 | 5.01E-11 |
| rs11172033  | 48.725175 | 5.01E-11 |
| rs1873195   | 48.724751 | 5.01E-11 |
| rs7959253   | 48.722695 | 5.02E-11 |
| rs2501714   | 48.719844 | 5.02E-11 |
| rs5758416   | 48.710686 | 5.05E-11 |
| rs1909328   | 48.706225 | 5.06E-11 |
| rs34130005  | 48.704620 | 5.06E-11 |
| rs34857804  | 48.704485 | 5.06E-11 |
| rs1035131   | 48.700808 | 5.07E-11 |
| rs13262205  | 48.697044 | 5.08E-11 |
| rs34878803  | 48.696584 | 5.09E-11 |
| rs13014284  | 48.683369 | 5.12E-11 |
| rs56054004  | 48.680463 | 5.13E-11 |
| rs10747776  | 48.663997 | 5.18E-11 |
| rs12987095  | 48.661721 | 5.18E-11 |
| rs1843314   | 48.655055 | 5.20E-11 |
| rs12547152  | 48.654426 | 5.20E-11 |
| rs6739281   | 48.641917 | 5.24E-11 |
| rs5758428   | 48.637391 | 5.25E-11 |

|             |           |          |
|-------------|-----------|----------|
| rs68092383  | 48.635429 | 5.25E-11 |
| rs174580    | 48.626187 | 5.28E-11 |
| rs12994127  | 48.625012 | 5.28E-11 |
| rs874953    | 48.619056 | 5.30E-11 |
| rs17367849  | 48.614274 | 5.31E-11 |
| rs9270623   | 48.602280 | 5.35E-11 |
| rs2413653   | 48.598641 | 5.36E-11 |
| rs17435829  | 48.597019 | 5.36E-11 |
| rs7601045   | 48.594002 | 5.37E-11 |
| rs57570472  | 48.586178 | 5.39E-11 |
| rs1558626   | 48.582415 | 5.41E-11 |
| rs4747801   | 48.580651 | 5.41E-11 |
| rs116769883 | 48.579337 | 5.41E-11 |
| rs7752558   | 48.577637 | 5.42E-11 |
| rs7960137   | 48.574082 | 5.43E-11 |
| rs9607813   | 48.571551 | 5.44E-11 |
| rs2174284   | 48.567681 | 5.45E-11 |
| rs13026492  | 48.562425 | 5.46E-11 |
| rs1246642   | 48.542442 | 5.52E-11 |
| rs117746614 | 48.537941 | 5.54E-11 |
| rs17436520  | 48.536905 | 5.54E-11 |
| rs7164529   | 48.533636 | 5.55E-11 |
| rs12484228  | 48.532569 | 5.55E-11 |
| rs8056488   | 48.524750 | 5.57E-11 |
| rs12468355  | 48.522230 | 5.58E-11 |
| rs35544920  | 48.520000 | 5.59E-11 |
| rs4799950   | 48.518845 | 5.59E-11 |
| rs767019    | 48.518449 | 5.59E-11 |
| rs614120    | 48.518372 | 5.59E-11 |
| rs12941418  | 48.509359 | 5.62E-11 |
| rs13211507  | 48.503229 | 5.64E-11 |
| rs61216908  | 48.494707 | 5.66E-11 |
| rs56023460  | 48.493831 | 5.67E-11 |
| rs74801991  | 48.491747 | 5.67E-11 |
| rs7170563   | 48.488809 | 5.68E-11 |
| rs13416449  | 48.484911 | 5.69E-11 |
| rs909334    | 48.476508 | 5.72E-11 |
| rs78924645  | 48.473011 | 5.73E-11 |
| rs55667375  | 48.467923 | 5.75E-11 |
| rs916888    | 48.461590 | 5.76E-11 |
| rs10486392  | 48.458895 | 5.77E-11 |
| rs7979655   | 48.456301 | 5.78E-11 |
| rs13404744  | 48.454092 | 5.79E-11 |
| rs7780222   | 48.449648 | 5.80E-11 |
| rs7831507   | 48.442874 | 5.82E-11 |
| rs7972591   | 48.439553 | 5.83E-11 |

|            |           |          |
|------------|-----------|----------|
| rs2110661  | 48.436126 | 5.84E-11 |
| rs13190888 | 48.431723 | 5.86E-11 |
| rs4759042  | 48.428701 | 5.87E-11 |
| rs10893844 | 48.426137 | 5.87E-11 |
| rs9611602  | 48.423243 | 5.88E-11 |
| rs10893845 | 48.421360 | 5.89E-11 |
| rs10144669 | 48.420266 | 5.89E-11 |
| rs67880537 | 48.413588 | 5.91E-11 |
| rs1736922  | 48.402806 | 5.95E-11 |
| rs13266540 | 48.401248 | 5.95E-11 |
| rs12528645 | 48.400111 | 5.96E-11 |
| rs35616842 | 48.399793 | 5.96E-11 |
| rs56238602 | 48.399167 | 5.96E-11 |
| rs2071593  | 48.393327 | 5.98E-11 |
| rs12994561 | 48.392157 | 5.98E-11 |
| rs12526858 | 48.391780 | 5.98E-11 |
| rs55740958 | 48.380619 | 6.02E-11 |
| rs5758301  | 48.380516 | 6.02E-11 |
| rs801418   | 48.380455 | 6.02E-11 |
| rs28564539 | 48.378620 | 6.03E-11 |
| rs9271703  | 48.362336 | 6.08E-11 |
| rs17689452 | 48.361623 | 6.08E-11 |
| rs10876943 | 48.355421 | 6.10E-11 |
| rs28819191 | 48.354066 | 6.11E-11 |
| rs12484722 | 48.353187 | 6.11E-11 |
| rs1444343  | 48.350196 | 6.12E-11 |
| rs132796   | 48.343229 | 6.14E-11 |
| rs4822036  | 48.343109 | 6.14E-11 |
| rs651827   | 48.341082 | 6.15E-11 |
| rs11649091 | 48.340110 | 6.15E-11 |
| rs3861180  | 48.338518 | 6.16E-11 |
| rs9517719  | 48.336928 | 6.16E-11 |
| rs34691223 | 48.332187 | 6.18E-11 |
| rs55930442 | 48.327795 | 6.19E-11 |
| rs6495318  | 48.326270 | 6.20E-11 |
| rs12678064 | 48.323581 | 6.21E-11 |
| rs3797339  | 48.322302 | 6.21E-11 |
| rs17843569 | 48.319276 | 6.22E-11 |
| rs12655443 | 48.312830 | 6.24E-11 |
| rs73178625 | 48.310051 | 6.25E-11 |
| rs9270574  | 48.305597 | 6.26E-11 |
| rs4822034  | 48.304848 | 6.27E-11 |
| rs644940   | 48.290194 | 6.32E-11 |
| rs35130701 | 48.286000 | 6.33E-11 |
| rs34972504 | 48.279541 | 6.35E-11 |
| rs12365253 | 48.278616 | 6.36E-11 |

|             |           |          |
|-------------|-----------|----------|
| rs9611606   | 48.275439 | 6.37E-11 |
| rs2413647   | 48.274461 | 6.37E-11 |
| rs144527861 | 48.270977 | 6.38E-11 |
| rs62346060  | 48.270409 | 6.38E-11 |
| rs13256093  | 48.269360 | 6.39E-11 |
| rs2269426   | 48.266899 | 6.40E-11 |
| rs8133101   | 48.257837 | 6.43E-11 |
| rs34719517  | 48.256753 | 6.43E-11 |
| rs116959331 | 48.250821 | 6.45E-11 |
| rs137830    | 48.248018 | 6.46E-11 |
| rs61868965  | 48.246875 | 6.46E-11 |
| rs12681588  | 48.246345 | 6.47E-11 |
| rs5758436   | 48.243581 | 6.48E-11 |
| rs11255963  | 48.238847 | 6.49E-11 |
| rs145611070 | 48.235564 | 6.50E-11 |
| rs11621881  | 48.230815 | 6.52E-11 |
| rs2765407   | 48.228721 | 6.53E-11 |
| rs4822033   | 48.225847 | 6.54E-11 |
| rs1723022   | 48.218535 | 6.56E-11 |
| rs9270580   | 48.216820 | 6.57E-11 |
| rs11950415  | 48.208581 | 6.60E-11 |
| rs117504211 | 48.207092 | 6.60E-11 |
| rs1558623   | 48.205765 | 6.61E-11 |
| rs12484694  | 48.199735 | 6.63E-11 |
| rs2464523   | 48.199699 | 6.63E-11 |
| rs909333    | 48.191270 | 6.66E-11 |
| rs56319767  | 48.190050 | 6.66E-11 |
| rs9668259   | 48.186586 | 6.68E-11 |
| rs62449498  | 48.182860 | 6.69E-11 |
| rs12681420  | 48.176870 | 6.71E-11 |
| rs713988    | 48.175581 | 6.71E-11 |
| rs36047866  | 48.175317 | 6.72E-11 |
| rs78657732  | 48.168415 | 6.74E-11 |
| rs72793526  | 48.166386 | 6.75E-11 |
| rs1140546   | 48.164416 | 6.75E-11 |
| rs13000909  | 48.156040 | 6.78E-11 |
| rs6545977   | 48.152889 | 6.80E-11 |
| rs73236644  | 48.152719 | 6.80E-11 |
| rs2869952   | 48.149024 | 6.81E-11 |
| rs35744819  | 48.148882 | 6.81E-11 |
| rs6875225   | 48.148632 | 6.81E-11 |
| rs2609255   | 48.113330 | 6.94E-11 |
| rs739132    | 48.108054 | 6.96E-11 |
| rs6062900   | 48.107859 | 6.96E-11 |
| rs9294458   | 48.105936 | 6.97E-11 |
| rs9269910   | 48.105159 | 6.97E-11 |

|             |           |          |
|-------------|-----------|----------|
| rs12925631  | 48.101382 | 6.99E-11 |
| rs73178621  | 48.101082 | 6.99E-11 |
| rs6764245   | 48.095604 | 7.01E-11 |
| rs13198809  | 48.094982 | 7.01E-11 |
| rs341415    | 48.091291 | 7.02E-11 |
| rs113827944 | 48.090148 | 7.03E-11 |
| rs10806429  | 48.089409 | 7.03E-11 |
| rs114649937 | 48.088665 | 7.03E-11 |
| rs1569516   | 48.083712 | 7.05E-11 |
| rs13214023  | 48.082958 | 7.05E-11 |
| rs7967940   | 48.071103 | 7.10E-11 |
| rs3771184   | 48.067711 | 7.11E-11 |
| rs11172114  | 48.067422 | 7.11E-11 |
| rs1810460   | 48.061914 | 7.13E-11 |
| rs7955865   | 48.052997 | 7.17E-11 |
| rs142530081 | 48.040157 | 7.22E-11 |
| rs9607814   | 48.039091 | 7.22E-11 |
| rs36223157  | 48.035056 | 7.24E-11 |
| rs7844239   | 48.034973 | 7.24E-11 |
| rs1967313   | 48.034502 | 7.24E-11 |
| rs1156955   | 48.034484 | 7.24E-11 |
| rs12483786  | 48.034093 | 7.24E-11 |
| rs7813315   | 48.019377 | 7.30E-11 |
| rs34653907  | 48.019058 | 7.30E-11 |
| rs2334648   | 48.017304 | 7.31E-11 |
| rs4999717   | 48.016241 | 7.31E-11 |
| rs189824532 | 48.010790 | 7.33E-11 |
| rs35062079  | 48.008552 | 7.34E-11 |
| rs28708071  | 48.006579 | 7.35E-11 |
| rs73178632  | 48.005752 | 7.35E-11 |
| rs10477464  | 48.003930 | 7.36E-11 |
| rs7959654   | 47.997422 | 7.38E-11 |
| rs12654522  | 47.997217 | 7.38E-11 |
| rs56173013  | 47.995118 | 7.39E-11 |
| rs11172025  | 47.992187 | 7.40E-11 |
| rs1029489   | 47.988940 | 7.42E-11 |
| rs1810461   | 47.982321 | 7.44E-11 |
| rs7459778   | 47.967775 | 7.50E-11 |
| rs2072632   | 47.959436 | 7.53E-11 |
| rs12325077  | 47.956688 | 7.54E-11 |
| rs79402978  | 47.955922 | 7.55E-11 |
| rs1458201   | 47.950839 | 7.57E-11 |
| rs4247481   | 47.949584 | 7.57E-11 |
| rs1110470   | 47.948504 | 7.58E-11 |
| rs28408315  | 47.940799 | 7.61E-11 |
| rs2279128   | 47.933258 | 7.64E-11 |

|             |           |          |
|-------------|-----------|----------|
| rs1477943   | 47.926767 | 7.67E-11 |
| rs149974480 | 47.925481 | 7.67E-11 |
| rs2496482   | 47.924319 | 7.68E-11 |
| rs1379933   | 47.912632 | 7.72E-11 |
| rs10735869  | 47.911249 | 7.73E-11 |
| rs9273054   | 47.910692 | 7.73E-11 |
| rs11667314  | 47.906999 | 7.75E-11 |
| rs62323889  | 47.901112 | 7.77E-11 |
| rs35353359  | 47.896480 | 7.79E-11 |
| rs207253    | 47.896468 | 7.79E-11 |
| rs2413646   | 47.890617 | 7.82E-11 |
| rs11256069  | 47.889330 | 7.82E-11 |
| rs674313    | 47.886905 | 7.83E-11 |
| rs7831544   | 47.883980 | 7.84E-11 |
| rs2869552   | 47.878129 | 7.87E-11 |
| rs17367716  | 47.877618 | 7.87E-11 |
| rs2704570   | 47.871133 | 7.90E-11 |
| rs4822035   | 47.869319 | 7.90E-11 |
| rs7955918   | 47.866914 | 7.91E-11 |
| rs139760321 | 47.856819 | 7.96E-11 |
| rs4739743   | 47.853749 | 7.97E-11 |
| rs77021177  | 47.853700 | 7.97E-11 |
| rs4477473   | 47.853685 | 7.97E-11 |
| rs73178626  | 47.852180 | 7.98E-11 |
| rs35741852  | 47.848127 | 7.99E-11 |
| rs4820438   | 47.848074 | 7.99E-11 |
| rs62323891  | 47.846767 | 8.00E-11 |
| rs78560100  | 47.838867 | 8.03E-11 |
| rs1458551   | 47.834007 | 8.05E-11 |
| rs9271656   | 47.830363 | 8.07E-11 |
| rs199454    | 47.830351 | 8.07E-11 |
| rs35735140  | 47.826429 | 8.09E-11 |
| rs115482851 | 47.824441 | 8.10E-11 |
| rs2918593   | 47.824138 | 8.10E-11 |
| rs739136    | 47.823840 | 8.10E-11 |
| rs183884374 | 47.816840 | 8.13E-11 |
| rs3024685   | 47.815586 | 8.13E-11 |
| rs13391247  | 47.812120 | 8.15E-11 |
| rs62323890  | 47.811109 | 8.15E-11 |
| rs79088780  | 47.807553 | 8.17E-11 |
| rs12483998  | 47.806615 | 8.17E-11 |
| rs7754251   | 47.799908 | 8.20E-11 |
| rs6519270   | 47.798839 | 8.21E-11 |
| rs9273106   | 47.795685 | 8.22E-11 |
| rs2143695   | 47.784214 | 8.27E-11 |
| rs62065452  | 47.778617 | 8.30E-11 |

|             |           |          |
|-------------|-----------|----------|
| rs9611603   | 47.778179 | 8.30E-11 |
| rs7549561   | 47.776723 | 8.30E-11 |
| rs10800313  | 47.769845 | 8.33E-11 |
| rs55865599  | 47.766950 | 8.35E-11 |
| rs2464522   | 47.764988 | 8.36E-11 |
| rs7167532   | 47.751823 | 8.42E-11 |
| rs61867658  | 47.743252 | 8.45E-11 |
| rs73203093  | 47.734313 | 8.49E-11 |
| rs680061    | 47.729447 | 8.52E-11 |
| rs5758444   | 47.729341 | 8.52E-11 |
| rs2413654   | 47.728946 | 8.52E-11 |
| rs35396393  | 47.722105 | 8.55E-11 |
| rs11987409  | 47.720877 | 8.56E-11 |
| rs11992027  | 47.719071 | 8.56E-11 |
| rs1048665   | 47.717092 | 8.57E-11 |
| rs7017481   | 47.710789 | 8.60E-11 |
| rs36234342  | 47.700640 | 8.65E-11 |
| rs61867654  | 47.700529 | 8.65E-11 |
| rs9611604   | 47.693602 | 8.68E-11 |
| rs6002445   | 47.682104 | 8.73E-11 |
| rs57434408  | 47.677263 | 8.76E-11 |
| rs4959108   | 47.675054 | 8.77E-11 |
| rs6002337   | 47.671193 | 8.78E-11 |
| rs809252    | 47.668766 | 8.80E-11 |
| rs11986334  | 47.664282 | 8.82E-11 |
| rs12989438  | 47.660103 | 8.84E-11 |
| rs5751077   | 47.659860 | 8.84E-11 |
| rs9273265   | 47.659113 | 8.84E-11 |
| rs17760766  | 47.657368 | 8.85E-11 |
| rs8073907   | 47.657140 | 8.85E-11 |
| rs35841748  | 47.655165 | 8.86E-11 |
| rs11987148  | 47.651661 | 8.88E-11 |
| rs145721969 | 47.651596 | 8.88E-11 |
| rs78632183  | 47.650382 | 8.88E-11 |
| rs11637816  | 47.640487 | 8.93E-11 |
| rs786216    | 47.638645 | 8.94E-11 |
| rs34974357  | 47.638163 | 8.94E-11 |
| rs77426698  | 47.636566 | 8.95E-11 |
| rs7705042   | 47.635446 | 8.95E-11 |
| rs5751141   | 47.633284 | 8.96E-11 |
| rs2187795   | 47.630996 | 8.97E-11 |
| rs12898712  | 47.621186 | 9.02E-11 |
| rs2290702   | 47.620180 | 9.03E-11 |
| rs12898452  | 47.615535 | 9.05E-11 |
| rs5758300   | 47.614682 | 9.05E-11 |
| rs9557217   | 47.609599 | 9.08E-11 |

|             |           |          |
|-------------|-----------|----------|
| rs13269410  | 47.609441 | 9.08E-11 |
| rs35011221  | 47.609440 | 9.08E-11 |
| rs7364123   | 47.607840 | 9.09E-11 |
| rs786240    | 47.600568 | 9.12E-11 |
| rs2646396   | 47.599867 | 9.12E-11 |
| rs61867659  | 47.585172 | 9.20E-11 |
| rs840015    | 47.583670 | 9.20E-11 |
| rs2281332   | 47.581643 | 9.21E-11 |
| rs142167    | 47.580198 | 9.22E-11 |
| rs1852654   | 47.574995 | 9.25E-11 |
| rs2092274   | 47.572774 | 9.26E-11 |
| rs59424629  | 47.569343 | 9.27E-11 |
| rs114919178 | 47.566824 | 9.29E-11 |
| rs1528187   | 47.565854 | 9.29E-11 |
| rs2235845   | 47.565668 | 9.29E-11 |
| rs4822053   | 47.557030 | 9.34E-11 |
| rs2857607   | 47.556043 | 9.34E-11 |
| rs9308853   | 47.554001 | 9.35E-11 |
| rs132761    | 47.552794 | 9.36E-11 |
| rs2235846   | 47.551358 | 9.36E-11 |
| rs3846728   | 47.548966 | 9.38E-11 |
| rs4759036   | 47.547605 | 9.38E-11 |
| rs7217240   | 47.539846 | 9.42E-11 |
| rs28824019  | 47.534885 | 9.45E-11 |
| rs61368704  | 47.534314 | 9.45E-11 |
| rs35016036  | 47.532619 | 9.46E-11 |
| rs140049631 | 47.521199 | 9.52E-11 |
| rs7844868   | 47.520399 | 9.52E-11 |
| rs7314567   | 47.516449 | 9.54E-11 |
| rs79932406  | 47.516427 | 9.54E-11 |
| rs9273551   | 47.516210 | 9.54E-11 |
| rs74782366  | 47.512357 | 9.56E-11 |
| rs9272729   | 47.511041 | 9.57E-11 |
| rs6534338   | 47.508560 | 9.58E-11 |
| rs10210406  | 47.508133 | 9.58E-11 |
| rs4963081   | 47.503274 | 9.61E-11 |
| rs8029659   | 47.498852 | 9.63E-11 |
| rs5758408   | 47.496565 | 9.64E-11 |
| rs7212621   | 47.489992 | 9.67E-11 |
| rs1577218   | 47.481912 | 9.72E-11 |
| rs2609279   | 47.480332 | 9.72E-11 |
| rs178830    | 47.480247 | 9.73E-11 |
| rs75456009  | 47.473085 | 9.76E-11 |
| rs5758297   | 47.472501 | 9.77E-11 |
| rs1493199   | 47.471740 | 9.77E-11 |
| rs6990100   | 47.471301 | 9.77E-11 |



|             |           |          |
|-------------|-----------|----------|
| rs13213152  | 47.470705 | 9.77E-11 |
| rs75473603  | 47.470659 | 9.77E-11 |
| rs2165022   | 47.470427 | 9.78E-11 |
| rs5758407   | 47.462059 | 9.82E-11 |
| rs178837    | 47.462034 | 9.82E-11 |
| rs7842091   | 47.462016 | 9.82E-11 |
| rs10851395  | 47.461302 | 9.82E-11 |
| rs2884738   | 47.459225 | 9.83E-11 |
| rs36217730  | 47.457423 | 9.84E-11 |
| rs949438    | 47.456252 | 9.85E-11 |
| rs62532068  | 47.455173 | 9.86E-11 |
| rs111286120 | 47.451818 | 9.87E-11 |
| rs5751139   | 47.451777 | 9.87E-11 |
| rs35621553  | 47.450956 | 9.88E-11 |
| rs7824514   | 47.450106 | 9.88E-11 |
| rs11256072  | 47.450049 | 9.88E-11 |
| rs2033785   | 47.449459 | 9.89E-11 |
| rs62506036  | 47.449295 | 9.89E-11 |
| rs17389644  | 47.440075 | 9.94E-11 |
| rs5758405   | 47.436109 | 9.96E-11 |
| rs7589880   | 47.433384 | 9.97E-11 |
| rs62532069  | 47.426985 | 1.00E-10 |
| rs17582893  | 47.424568 | 1.00E-10 |
| rs9273097   | 47.417975 | 1.01E-10 |
| rs61868964  | 47.413496 | 1.01E-10 |
| rs2269457   | 47.410115 | 1.01E-10 |
| rs1477945   | 47.406897 | 1.01E-10 |
| rs143345034 | 47.406818 | 1.01E-10 |
| rs1988153   | 47.406217 | 1.01E-10 |
| rs6722557   | 47.401358 | 1.01E-10 |
| rs2483926   | 47.400554 | 1.01E-10 |
| rs67574710  | 47.399977 | 1.01E-10 |
| rs13273718  | 47.390291 | 1.02E-10 |
| rs62323880  | 47.390219 | 1.02E-10 |
| rs71536549  | 47.389899 | 1.02E-10 |
| rs34366597  | 47.386781 | 1.02E-10 |
| rs786236    | 47.381778 | 1.02E-10 |
| rs2704604   | 47.380992 | 1.03E-10 |
| rs28783382  | 47.380371 | 1.03E-10 |
| rs132765    | 47.379656 | 1.03E-10 |
| rs7839977   | 47.377214 | 1.03E-10 |
| rs68076830  | 47.376993 | 1.03E-10 |
| rs10950813  | 47.375312 | 1.03E-10 |
| rs62323881  | 47.375129 | 1.03E-10 |
| rs56904812  | 47.373391 | 1.03E-10 |
| rs34552906  | 47.366609 | 1.03E-10 |

|             |           |          |
|-------------|-----------|----------|
| rs132797    | 47.360394 | 1.04E-10 |
| rs5751080   | 47.352546 | 1.04E-10 |
| rs10905402  | 47.351365 | 1.04E-10 |
| rs12679132  | 47.344741 | 1.05E-10 |
| rs72843211  | 47.341651 | 1.05E-10 |
| rs144447022 | 47.340740 | 1.05E-10 |
| rs4822021   | 47.339763 | 1.05E-10 |
| rs4749778   | 47.335290 | 1.05E-10 |
| rs132773    | 47.332611 | 1.05E-10 |
| rs62323894  | 47.331688 | 1.05E-10 |
| rs12678084  | 47.323405 | 1.06E-10 |
| rs132767    | 47.320727 | 1.06E-10 |
| rs17455862  | 47.320245 | 1.06E-10 |
| rs5758412   | 47.316998 | 1.06E-10 |
| rs73480763  | 47.314926 | 1.06E-10 |
| rs132916    | 47.310393 | 1.06E-10 |
| rs62530770  | 47.310344 | 1.06E-10 |
| rs10504487  | 47.306680 | 1.07E-10 |
| rs7953330   | 47.297191 | 1.07E-10 |
| rs786238    | 47.296047 | 1.07E-10 |
| rs132805    | 47.295868 | 1.07E-10 |
| rs7091181   | 47.294400 | 1.07E-10 |
| rs34315217  | 47.279483 | 1.08E-10 |
| rs28725459  | 47.275408 | 1.08E-10 |
| rs827625    | 47.264161 | 1.09E-10 |
| rs13223048  | 47.263398 | 1.09E-10 |
| rs13247636  | 47.256577 | 1.10E-10 |
| rs1800503   | 47.251300 | 1.10E-10 |
| rs12950186  | 47.249822 | 1.10E-10 |
| rs34546986  | 47.243806 | 1.10E-10 |
| rs62126609  | 47.243641 | 1.10E-10 |
| rs34871267  | 47.242513 | 1.10E-10 |
| rs4749785   | 47.235830 | 1.11E-10 |
| rs1243399   | 47.235768 | 1.11E-10 |
| rs13213986  | 47.234756 | 1.11E-10 |
| rs2704587   | 47.232945 | 1.11E-10 |
| rs35883476  | 47.232817 | 1.11E-10 |
| rs17139821  | 47.231964 | 1.11E-10 |
| rs9269511   | 47.231117 | 1.11E-10 |
| rs12681114  | 47.227578 | 1.11E-10 |
| rs10020220  | 47.225643 | 1.11E-10 |
| rs739135    | 47.221981 | 1.12E-10 |
| rs9273268   | 47.220856 | 1.12E-10 |
| rs5751081   | 47.217336 | 1.12E-10 |
| rs712645    | 47.216249 | 1.12E-10 |
| rs11090049  | 47.214063 | 1.12E-10 |

|            |           |          |
|------------|-----------|----------|
| rs2017035  | 47.213554 | 1.12E-10 |
| rs62323896 | 47.212476 | 1.12E-10 |
| rs132803   | 47.209296 | 1.12E-10 |
| rs13236052 | 47.207864 | 1.12E-10 |
| rs5758406  | 47.191650 | 1.13E-10 |
| rs10902089 | 47.191454 | 1.13E-10 |
| rs56173818 | 47.188621 | 1.14E-10 |
| rs4438773  | 47.185969 | 1.14E-10 |
| rs55740254 | 47.185005 | 1.14E-10 |
| rs1054111  | 47.182510 | 1.14E-10 |
| rs5751129  | 47.181144 | 1.14E-10 |
| rs7696107  | 47.180689 | 1.14E-10 |
| rs10262289 | 47.179119 | 1.14E-10 |
| rs10795632 | 47.178665 | 1.14E-10 |
| rs1379932  | 47.177495 | 1.14E-10 |
| rs6531661  | 47.170378 | 1.15E-10 |
| rs7833211  | 47.166720 | 1.15E-10 |
| rs786261   | 47.161632 | 1.15E-10 |
| rs7021260  | 47.160993 | 1.15E-10 |
| rs1824729  | 47.159769 | 1.15E-10 |
| rs10019951 | 47.155473 | 1.16E-10 |
| rs3920174  | 47.152020 | 1.16E-10 |
| rs5758439  | 47.134621 | 1.17E-10 |
| rs77887223 | 47.134285 | 1.17E-10 |
| rs11255753 | 47.131080 | 1.17E-10 |
| rs62508828 | 47.123939 | 1.18E-10 |
| rs12898292 | 47.122313 | 1.18E-10 |
| rs97384    | 47.120080 | 1.18E-10 |
| rs849336   | 47.116123 | 1.18E-10 |
| rs13201681 | 47.109533 | 1.18E-10 |
| rs8137373  | 47.106772 | 1.19E-10 |
| rs4963043  | 47.096573 | 1.19E-10 |
| rs9920324  | 47.096494 | 1.19E-10 |
| rs4662408  | 47.095576 | 1.19E-10 |
| rs79000300 | 47.095050 | 1.19E-10 |
| rs2092275  | 47.090788 | 1.20E-10 |
| rs849335   | 47.086928 | 1.20E-10 |
| rs17689943 | 47.086308 | 1.20E-10 |
| rs77936947 | 47.085000 | 1.20E-10 |
| rs62323895 | 47.078641 | 1.20E-10 |
| rs9273455  | 47.074712 | 1.21E-10 |
| rs10019853 | 47.072210 | 1.21E-10 |
| rs4721912  | 47.072026 | 1.21E-10 |
| rs62533063 | 47.071784 | 1.21E-10 |
| rs929220   | 47.069856 | 1.21E-10 |
| rs247001   | 47.068409 | 1.21E-10 |

|             |           |          |
|-------------|-----------|----------|
| rs3744349   | 47.068321 | 1.21E-10 |
| rs761366    | 47.067367 | 1.21E-10 |
| rs13056262  | 47.059471 | 1.22E-10 |
| rs6982838   | 47.059118 | 1.22E-10 |
| rs67381177  | 47.058645 | 1.22E-10 |
| rs2879259   | 47.058424 | 1.22E-10 |
| rs5758430   | 47.056382 | 1.22E-10 |
| rs62323884  | 47.050594 | 1.22E-10 |
| rs7670673   | 47.049227 | 1.22E-10 |
| rs76629670  | 47.048353 | 1.22E-10 |
| rs111309367 | 47.047686 | 1.22E-10 |
| rs174575    | 47.044329 | 1.23E-10 |
| rs34643336  | 47.042267 | 1.23E-10 |
| rs35318824  | 47.039984 | 1.23E-10 |
| rs2478438   | 47.037500 | 1.23E-10 |
| rs35017208  | 47.036192 | 1.23E-10 |
| rs1807497   | 47.035107 | 1.23E-10 |
| rs75884254  | 47.035064 | 1.23E-10 |
| rs10905469  | 47.033497 | 1.23E-10 |
| rs12449895  | 47.032705 | 1.23E-10 |
| rs1596565   | 47.032199 | 1.23E-10 |
| rs132768    | 47.031372 | 1.24E-10 |
| rs62323893  | 47.029714 | 1.24E-10 |
| rs28724240  | 47.028755 | 1.24E-10 |
| rs34898535  | 47.025605 | 1.24E-10 |
| rs10957532  | 47.023738 | 1.24E-10 |
| rs28530678  | 47.022584 | 1.24E-10 |
| rs55862702  | 47.020584 | 1.24E-10 |
| rs17760532  | 47.019512 | 1.24E-10 |
| rs10410558  | 47.018004 | 1.24E-10 |
| rs112534607 | 47.012907 | 1.25E-10 |
| rs6707100   | 47.010269 | 1.25E-10 |
| rs62508770  | 47.009573 | 1.25E-10 |
| rs5758427   | 47.007104 | 1.25E-10 |
| rs1635852   | 47.004673 | 1.25E-10 |
| rs1811113   | 47.003012 | 1.25E-10 |
| rs2609280   | 47.001030 | 1.26E-10 |
| rs5758431   | 46.999476 | 1.26E-10 |
| rs62323899  | 46.996748 | 1.26E-10 |
| rs34420782  | 46.993524 | 1.26E-10 |
| rs6998989   | 46.992833 | 1.26E-10 |
| rs13250391  | 46.989841 | 1.26E-10 |
| rs56226958  | 46.985719 | 1.27E-10 |
| rs35323776  | 46.980555 | 1.27E-10 |
| rs840016    | 46.978109 | 1.27E-10 |
| rs2239348   | 46.975765 | 1.27E-10 |

|             |           |          |
|-------------|-----------|----------|
| rs35030260  | 46.975647 | 1.27E-10 |
| rs112924608 | 46.974610 | 1.27E-10 |
| rs13233253  | 46.974314 | 1.27E-10 |
| rs62323886  | 46.972589 | 1.27E-10 |
| rs3098858   | 46.970958 | 1.28E-10 |
| rs754846    | 46.970917 | 1.28E-10 |
| rs115510922 | 46.970173 | 1.28E-10 |
| rs34751830  | 46.970112 | 1.28E-10 |
| rs21180     | 46.963303 | 1.28E-10 |
| rs8002731   | 46.962378 | 1.28E-10 |
| rs6990850   | 46.960185 | 1.28E-10 |
| rs12927172  | 46.951992 | 1.29E-10 |
| rs4662407   | 46.950452 | 1.29E-10 |
| rs2609259   | 46.949270 | 1.29E-10 |
| rs10168164  | 46.944182 | 1.29E-10 |
| rs10513456  | 46.940052 | 1.30E-10 |
| rs9266195   | 46.939267 | 1.30E-10 |
| rs12708110  | 46.937770 | 1.30E-10 |
| rs1550324   | 46.933444 | 1.30E-10 |
| rs7311373   | 46.931903 | 1.30E-10 |
| rs1822651   | 46.930112 | 1.30E-10 |
| rs59382353  | 46.929653 | 1.30E-10 |
| rs13261146  | 46.926865 | 1.31E-10 |
| rs13263047  | 46.923435 | 1.31E-10 |
| rs2378416   | 46.915639 | 1.31E-10 |
| rs146891442 | 46.910418 | 1.32E-10 |
| rs7218944   | 46.904706 | 1.32E-10 |
| rs62508827  | 46.903673 | 1.32E-10 |
| rs1420767   | 46.895361 | 1.33E-10 |
| rs13427288  | 46.893632 | 1.33E-10 |
| rs7822474   | 46.893003 | 1.33E-10 |
| rs76120566  | 46.891587 | 1.33E-10 |
| rs2411981   | 46.889437 | 1.33E-10 |
| rs2124958   | 46.878379 | 1.34E-10 |
| rs183380408 | 46.869172 | 1.35E-10 |
| rs55690788  | 46.866006 | 1.35E-10 |
| rs6498011   | 46.865872 | 1.35E-10 |
| rs132804    | 46.865825 | 1.35E-10 |
| rs2157287   | 46.864560 | 1.35E-10 |
| rs436300    | 46.861017 | 1.35E-10 |
| rs1585258   | 46.860411 | 1.35E-10 |
| rs12898293  | 46.859511 | 1.35E-10 |
| rs36092177  | 46.855007 | 1.36E-10 |
| rs2986301   | 46.852925 | 1.36E-10 |
| rs4470638   | 46.843295 | 1.37E-10 |
| rs141020749 | 46.838286 | 1.37E-10 |

|             |           |          |
|-------------|-----------|----------|
| rs66748925  | 46.835783 | 1.37E-10 |
| rs143559543 | 46.835554 | 1.37E-10 |
| rs3016373   | 46.834220 | 1.37E-10 |
| rs35074484  | 46.832065 | 1.37E-10 |
| rs12535759  | 46.825129 | 1.38E-10 |
| rs62323879  | 46.819473 | 1.38E-10 |
| rs639575    | 46.818066 | 1.38E-10 |
| rs10775759  | 46.817951 | 1.38E-10 |
| rs35921782  | 46.817933 | 1.38E-10 |
| rs7014481   | 46.810150 | 1.39E-10 |
| rs11078894  | 46.808857 | 1.39E-10 |
| rs4458462   | 46.806520 | 1.39E-10 |
| rs7015947   | 46.806348 | 1.39E-10 |
| rs62323946  | 46.804980 | 1.39E-10 |
| rs1444339   | 46.798467 | 1.40E-10 |
| rs9771769   | 46.797304 | 1.40E-10 |
| rs2478439   | 46.795338 | 1.40E-10 |
| rs7677168   | 46.788178 | 1.41E-10 |
| rs62323900  | 46.787796 | 1.41E-10 |
| rs12535843  | 46.786307 | 1.41E-10 |
| rs6837838   | 46.785623 | 1.41E-10 |
| rs62323887  | 46.782385 | 1.41E-10 |
| rs174529    | 46.779557 | 1.41E-10 |
| rs9532434   | 46.778724 | 1.41E-10 |
| rs2232426   | 46.776461 | 1.41E-10 |
| rs35380538  | 46.775756 | 1.42E-10 |
| rs6994488   | 46.774479 | 1.42E-10 |
| rs1457198   | 46.765836 | 1.42E-10 |
| rs806292    | 46.761131 | 1.43E-10 |
| rs62323902  | 46.760376 | 1.43E-10 |
| rs56156614  | 46.759035 | 1.43E-10 |
| rs2232423   | 46.755122 | 1.43E-10 |
| rs67981811  | 46.753940 | 1.43E-10 |
| rs2232429   | 46.752653 | 1.43E-10 |
| rs2609262   | 46.752017 | 1.43E-10 |
| rs10795637  | 46.743125 | 1.44E-10 |
| rs59061704  | 46.741656 | 1.44E-10 |
| rs12468673  | 46.739445 | 1.44E-10 |
| rs6981149   | 46.738127 | 1.44E-10 |
| rs9920962   | 46.733774 | 1.45E-10 |
| rs11655972  | 46.731208 | 1.45E-10 |
| rs56094661  | 46.729232 | 1.45E-10 |
| rs10876965  | 46.723056 | 1.46E-10 |
| rs34268361  | 46.719744 | 1.46E-10 |
| rs75448874  | 46.718812 | 1.46E-10 |
| rs62323930  | 46.714616 | 1.46E-10 |

|             |           |          |
|-------------|-----------|----------|
| rs35101150  | 46.713354 | 1.46E-10 |
| rs62323936  | 46.712568 | 1.46E-10 |
| rs62323926  | 46.712220 | 1.46E-10 |
| rs62323932  | 46.710049 | 1.47E-10 |
| rs76681511  | 46.709796 | 1.47E-10 |
| rs1112247   | 46.705655 | 1.47E-10 |
| rs132779    | 46.704816 | 1.47E-10 |
| rs3927      | 46.704589 | 1.47E-10 |
| rs60082402  | 46.702930 | 1.47E-10 |
| rs45499403  | 46.698333 | 1.47E-10 |
| rs4822023   | 46.694675 | 1.48E-10 |
| rs17485264  | 46.694087 | 1.48E-10 |
| rs67781030  | 46.693469 | 1.48E-10 |
| rs115962222 | 46.691737 | 1.48E-10 |
| rs147118969 | 46.683902 | 1.49E-10 |
| rs12154733  | 46.679843 | 1.49E-10 |
| rs6498012   | 46.677933 | 1.49E-10 |
| rs28413898  | 46.677003 | 1.49E-10 |
| rs10944482  | 46.675150 | 1.49E-10 |
| rs801427    | 46.673842 | 1.49E-10 |
| rs62323937  | 46.673188 | 1.49E-10 |
| rs77552566  | 46.672465 | 1.50E-10 |
| rs2390341   | 46.670111 | 1.50E-10 |
| rs7691220   | 46.668604 | 1.50E-10 |
| rs6987515   | 46.666453 | 1.50E-10 |
| rs75906064  | 46.665861 | 1.50E-10 |
| rs7542      | 46.659502 | 1.51E-10 |
| rs62323927  | 46.657926 | 1.51E-10 |
| rs111678999 | 46.656957 | 1.51E-10 |
| rs62323933  | 46.656270 | 1.51E-10 |
| rs10233470  | 46.656165 | 1.51E-10 |
| rs12599631  | 46.654283 | 1.51E-10 |
| rs10819082  | 46.650550 | 1.51E-10 |
| rs587880    | 46.644735 | 1.52E-10 |
| rs13422231  | 46.642864 | 1.52E-10 |
| rs202634    | 46.635286 | 1.53E-10 |
| rs11987260  | 46.634551 | 1.53E-10 |
| rs17699710  | 46.632637 | 1.53E-10 |
| rs62321687  | 46.631857 | 1.53E-10 |
| rs380580    | 46.629454 | 1.53E-10 |
| rs57102627  | 46.627072 | 1.53E-10 |
| rs1563689   | 46.626518 | 1.53E-10 |
| rs7187471   | 46.626098 | 1.53E-10 |
| rs6980835   | 46.624072 | 1.53E-10 |
| rs1985704   | 46.621431 | 1.54E-10 |
| rs2609258   | 46.620956 | 1.54E-10 |

|             |           |          |
|-------------|-----------|----------|
| rs11988792  | 46.620504 | 1.54E-10 |
| rs115333512 | 46.617634 | 1.54E-10 |
| rs8779      | 46.613419 | 1.54E-10 |
| rs62323934  | 46.610778 | 1.55E-10 |
| rs75198077  | 46.609884 | 1.55E-10 |
| rs7205663   | 46.607303 | 1.55E-10 |
| rs10950804  | 46.607177 | 1.55E-10 |
| rs13207345  | 46.603104 | 1.55E-10 |
| rs77574900  | 46.601948 | 1.55E-10 |
| rs62323948  | 46.600813 | 1.55E-10 |
| rs35225972  | 46.600681 | 1.55E-10 |
| rs12156043  | 46.595867 | 1.56E-10 |
| rs1085418   | 46.595051 | 1.56E-10 |
| rs1385526   | 46.594736 | 1.56E-10 |
| rs35130797  | 46.591515 | 1.56E-10 |
| rs77279393  | 46.581035 | 1.57E-10 |
| rs57834782  | 46.579844 | 1.57E-10 |
| rs113948005 | 46.577840 | 1.57E-10 |
| rs113206908 | 46.574098 | 1.58E-10 |
| rs12459249  | 46.570779 | 1.58E-10 |
| rs1723023   | 46.563331 | 1.58E-10 |
| rs111433752 | 46.561226 | 1.59E-10 |
| rs11255748  | 46.560752 | 1.59E-10 |
| rs7024396   | 46.559219 | 1.59E-10 |
| rs62323956  | 46.557264 | 1.59E-10 |
| rs76019839  | 46.554319 | 1.59E-10 |
| rs7849076   | 46.553396 | 1.59E-10 |
| rs13006101  | 46.552752 | 1.59E-10 |
| rs10504492  | 46.551814 | 1.59E-10 |
| rs62323943  | 46.547727 | 1.60E-10 |
| rs132771    | 46.544706 | 1.60E-10 |
| rs10233214  | 46.532076 | 1.61E-10 |
| rs4237805   | 46.529837 | 1.61E-10 |
| rs12708492  | 46.526098 | 1.62E-10 |
| rs4353368   | 46.525821 | 1.62E-10 |
| rs35533195  | 46.522563 | 1.62E-10 |
| rs13055759  | 46.520320 | 1.62E-10 |
| rs1007852   | 46.517576 | 1.62E-10 |
| rs10876964  | 46.513588 | 1.63E-10 |
| rs35931247  | 46.510822 | 1.63E-10 |
| rs6472564   | 46.505796 | 1.63E-10 |
| rs4331786   | 46.505388 | 1.63E-10 |
| rs1881266   | 46.495602 | 1.64E-10 |
| rs62126616  | 46.493964 | 1.64E-10 |
| rs17699685  | 46.493448 | 1.64E-10 |
| rs12962050  | 46.488166 | 1.65E-10 |



|             |           |          |
|-------------|-----------|----------|
| rs7801672   | 46.488074 | 1.65E-10 |
| rs7667951   | 46.486898 | 1.65E-10 |
| rs6478715   | 46.483107 | 1.65E-10 |
| rs132776    | 46.483045 | 1.65E-10 |
| rs45558836  | 46.474692 | 1.66E-10 |
| rs4950922   | 46.470885 | 1.66E-10 |
| rs75034409  | 46.465664 | 1.67E-10 |
| rs112133277 | 46.464800 | 1.67E-10 |
| rs62323954  | 46.464188 | 1.67E-10 |
| rs2296618   | 46.463885 | 1.67E-10 |
| rs61210140  | 46.462516 | 1.67E-10 |
| rs62506037  | 46.460224 | 1.67E-10 |
| rs1894407   | 46.457652 | 1.68E-10 |
| rs4304424   | 46.455739 | 1.68E-10 |
| rs62323931  | 46.450365 | 1.68E-10 |
| rs55766044  | 46.440437 | 1.69E-10 |
| rs10017482  | 46.437719 | 1.69E-10 |
| rs10245237  | 46.430400 | 1.70E-10 |
| rs111841620 | 46.430179 | 1.70E-10 |
| rs62321683  | 46.423571 | 1.71E-10 |
| rs801430    | 46.414782 | 1.72E-10 |
| rs34437781  | 46.414297 | 1.72E-10 |
| rs111664122 | 46.410816 | 1.72E-10 |
| rs7303219   | 46.410390 | 1.72E-10 |
| rs1036377   | 46.393236 | 1.73E-10 |
| rs1466535   | 46.391741 | 1.74E-10 |
| rs10201023  | 46.387970 | 1.74E-10 |
| rs10470854  | 46.384201 | 1.74E-10 |
| rs10508398  | 46.381402 | 1.75E-10 |
| rs6736411   | 46.379077 | 1.75E-10 |
| rs13274981  | 46.371708 | 1.75E-10 |
| rs184745911 | 46.370811 | 1.76E-10 |
| rs62323939  | 46.370589 | 1.76E-10 |
| rs45530034  | 46.370426 | 1.76E-10 |
| rs132807    | 46.369153 | 1.76E-10 |
| rs1509142   | 46.365039 | 1.76E-10 |
| rs62321681  | 46.364160 | 1.76E-10 |
| rs162890    | 46.363930 | 1.76E-10 |
| rs62323903  | 46.357893 | 1.77E-10 |
| rs2026134   | 46.353825 | 1.77E-10 |
| rs62323929  | 46.353311 | 1.77E-10 |
| rs7960618   | 46.349714 | 1.78E-10 |
| rs35658589  | 46.346299 | 1.78E-10 |
| rs6985251   | 46.344555 | 1.78E-10 |
| rs17365098  | 46.344309 | 1.78E-10 |
| rs250298    | 46.341155 | 1.78E-10 |

|            |           |          |
|------------|-----------|----------|
| rs8060025  | 46.338824 | 1.79E-10 |
| rs4759045  | 46.332194 | 1.79E-10 |
| rs1389198  | 46.331893 | 1.79E-10 |
| rs17413906 | 46.329067 | 1.80E-10 |
| rs11078895 | 46.328995 | 1.80E-10 |
| rs10280157 | 46.328686 | 1.80E-10 |
| rs4727443  | 46.327283 | 1.80E-10 |
| rs10957529 | 46.326428 | 1.80E-10 |
| rs9271025  | 46.324727 | 1.80E-10 |
| rs801429   | 46.318439 | 1.81E-10 |
| rs56877785 | 46.317855 | 1.81E-10 |
| rs35767277 | 46.315069 | 1.81E-10 |
| rs35689708 | 46.314985 | 1.81E-10 |
| rs132793   | 46.312144 | 1.81E-10 |
| rs849327   | 46.311883 | 1.81E-10 |
| rs2215945  | 46.306064 | 1.82E-10 |
| rs2697042  | 46.303839 | 1.82E-10 |
| rs597325   | 46.302226 | 1.82E-10 |
| rs12868465 | 46.301006 | 1.82E-10 |
| rs7596337  | 46.300964 | 1.82E-10 |
| rs34301443 | 46.299963 | 1.82E-10 |
| rs62323958 | 46.298590 | 1.82E-10 |
| rs10794291 | 46.294173 | 1.83E-10 |
| rs11985953 | 46.292202 | 1.83E-10 |
| rs4662410  | 46.290508 | 1.83E-10 |
| rs7237475  | 46.290052 | 1.83E-10 |
| rs11993847 | 46.289775 | 1.83E-10 |
| rs786259   | 46.285424 | 1.84E-10 |
| rs4722178  | 46.278864 | 1.84E-10 |
| rs1406118  | 46.278059 | 1.84E-10 |
| rs35072899 | 46.277714 | 1.84E-10 |
| rs56099911 | 46.275541 | 1.85E-10 |
| rs17670865 | 46.274925 | 1.85E-10 |
| rs8134849  | 46.272852 | 1.85E-10 |
| rs62321680 | 46.272137 | 1.85E-10 |
| rs34654194 | 46.262860 | 1.86E-10 |
| rs11976345 | 46.260600 | 1.86E-10 |
| rs34051023 | 46.259295 | 1.86E-10 |
| rs4822047  | 46.257934 | 1.86E-10 |
| rs13281838 | 46.252994 | 1.87E-10 |
| rs9603616  | 46.247489 | 1.87E-10 |
| rs6815970  | 46.243825 | 1.88E-10 |
| rs2483927  | 46.242783 | 1.88E-10 |
| rs74629046 | 46.240868 | 1.88E-10 |
| rs10236242 | 46.240818 | 1.88E-10 |
| rs62570477 | 46.233557 | 1.89E-10 |

|            |           |          |
|------------|-----------|----------|
| rs62321694 | 46.232379 | 1.89E-10 |
| rs7181033  | 46.226960 | 1.90E-10 |
| rs6832466  | 46.226596 | 1.90E-10 |
| rs2292793  | 46.224496 | 1.90E-10 |
| rs10261154 | 46.220763 | 1.90E-10 |
| rs7811804  | 46.215802 | 1.91E-10 |
| rs6974373  | 46.213578 | 1.91E-10 |
| rs6986479  | 46.206828 | 1.92E-10 |
| rs2170083  | 46.204003 | 1.92E-10 |
| rs34768553 | 46.203347 | 1.92E-10 |
| rs55970604 | 46.201973 | 1.92E-10 |
| rs79563328 | 46.201760 | 1.92E-10 |
| rs2609261  | 46.201177 | 1.92E-10 |
| rs6664108  | 46.199903 | 1.92E-10 |
| rs4449583  | 46.197494 | 1.93E-10 |
| rs10487364 | 46.194299 | 1.93E-10 |
| rs61320757 | 46.193865 | 1.93E-10 |
| rs13273773 | 46.192345 | 1.93E-10 |
| rs6002333  | 46.189009 | 1.93E-10 |
| rs34276574 | 46.187835 | 1.94E-10 |
| rs4851541  | 46.184907 | 1.94E-10 |
| rs67817457 | 46.179591 | 1.94E-10 |
| rs2589373  | 46.175516 | 1.95E-10 |
| rs35343840 | 46.172633 | 1.95E-10 |
| rs9274498  | 46.164836 | 1.96E-10 |
| rs62321692 | 46.161295 | 1.96E-10 |
| rs1894408  | 46.155875 | 1.97E-10 |
| rs11994581 | 46.153217 | 1.97E-10 |
| rs56108781 | 46.152241 | 1.97E-10 |
| rs45465893 | 46.152123 | 1.97E-10 |
| rs11730390 | 46.149430 | 1.98E-10 |
| rs72849285 | 46.144285 | 1.98E-10 |
| rs11255744 | 46.142189 | 1.98E-10 |
| rs1965800  | 46.140301 | 1.98E-10 |
| rs2579020  | 46.137159 | 1.99E-10 |
| rs1243397  | 46.137045 | 1.99E-10 |
| rs2704582  | 46.136729 | 1.99E-10 |
| rs7678898  | 46.136628 | 1.99E-10 |
| rs2765762  | 46.134821 | 1.99E-10 |
| rs7306442  | 46.134631 | 1.99E-10 |
| rs34218844 | 46.134476 | 1.99E-10 |
| rs2524005  | 46.132549 | 1.99E-10 |
| rs56075693 | 46.123624 | 2.00E-10 |
| rs45513095 | 46.121461 | 2.00E-10 |
| rs12713494 | 46.120816 | 2.01E-10 |
| rs35115647 | 46.120140 | 2.01E-10 |

|             |           |          |
|-------------|-----------|----------|
| rs80477     | 46.114134 | 2.01E-10 |
| rs13204012  | 46.104769 | 2.02E-10 |
| rs7015825   | 46.099350 | 2.03E-10 |
| rs2084200   | 46.097225 | 2.03E-10 |
| rs2740520   | 46.094976 | 2.03E-10 |
| rs12675094  | 46.094812 | 2.03E-10 |
| rs2446300   | 46.093549 | 2.03E-10 |
| rs62321698  | 46.090269 | 2.04E-10 |
| rs10274582  | 46.085290 | 2.04E-10 |
| rs7664905   | 46.082105 | 2.05E-10 |
| rs13233149  | 46.078677 | 2.05E-10 |
| rs28532217  | 46.075636 | 2.05E-10 |
| rs146644295 | 46.070083 | 2.06E-10 |
| rs4671505   | 46.069848 | 2.06E-10 |
| rs7828481   | 46.065162 | 2.07E-10 |
| rs10250381  | 46.053071 | 2.08E-10 |
| rs11082011  | 46.051531 | 2.08E-10 |
| rs7802924   | 46.046904 | 2.09E-10 |
| rs1575916   | 46.035492 | 2.10E-10 |
| rs62294337  | 46.034818 | 2.10E-10 |
| rs12967741  | 46.015563 | 2.12E-10 |
| rs13205211  | 46.013526 | 2.12E-10 |
| rs7096592   | 46.007077 | 2.13E-10 |
| rs2857472   | 45.998084 | 2.14E-10 |
| rs727563    | 45.996742 | 2.14E-10 |
| rs1908032   | 45.996270 | 2.14E-10 |
| rs2580184   | 45.994655 | 2.14E-10 |
| rs10027161  | 45.993704 | 2.15E-10 |
| rs5996039   | 45.993570 | 2.15E-10 |
| rs250299    | 45.993537 | 2.15E-10 |
| rs12700185  | 45.993515 | 2.15E-10 |
| rs10171223  | 45.982701 | 2.16E-10 |
| rs4325408   | 45.982592 | 2.16E-10 |
| rs9494894   | 45.981424 | 2.16E-10 |
| rs62506898  | 45.981406 | 2.16E-10 |
| rs13263370  | 45.979433 | 2.16E-10 |
| rs112426201 | 45.979244 | 2.16E-10 |
| rs62323888  | 45.978484 | 2.16E-10 |
| rs9637450   | 45.977804 | 2.16E-10 |
| rs34471605  | 45.973819 | 2.17E-10 |
| rs4749764   | 45.973746 | 2.17E-10 |
| rs4481089   | 45.972027 | 2.17E-10 |
| rs62321695  | 45.971492 | 2.17E-10 |
| rs13271286  | 45.970824 | 2.17E-10 |
| rs56366200  | 45.961990 | 2.18E-10 |
| rs1908031   | 45.959198 | 2.19E-10 |

|             |           |          |
|-------------|-----------|----------|
| rs1293202   | 45.958922 | 2.19E-10 |
| rs4547336   | 45.955325 | 2.19E-10 |
| rs7421586   | 45.954535 | 2.19E-10 |
| rs2762049   | 45.947148 | 2.20E-10 |
| rs9986877   | 45.940955 | 2.21E-10 |
| rs62321693  | 45.940124 | 2.21E-10 |
| rs12700184  | 45.939952 | 2.21E-10 |
| rs4705855   | 45.939039 | 2.21E-10 |
| rs34243448  | 45.938696 | 2.21E-10 |
| rs10238339  | 45.938062 | 2.21E-10 |
| rs958605    | 45.937966 | 2.21E-10 |
| rs138597301 | 45.937614 | 2.21E-10 |
| rs55978930  | 45.937534 | 2.21E-10 |
| rs7192633   | 45.934166 | 2.21E-10 |
| rs446522    | 45.934143 | 2.22E-10 |
| rs9637451   | 45.933427 | 2.22E-10 |
| rs17690181  | 45.933207 | 2.22E-10 |
| rs4629903   | 45.929712 | 2.22E-10 |
| rs132770    | 45.925531 | 2.23E-10 |
| rs13273873  | 45.923330 | 2.23E-10 |
| rs10166535  | 45.922193 | 2.23E-10 |
| rs9594366   | 45.921360 | 2.23E-10 |
| rs12484467  | 45.909266 | 2.24E-10 |
| rs1246629   | 45.907432 | 2.25E-10 |
| rs3755286   | 45.904135 | 2.25E-10 |
| rs114301196 | 45.900309 | 2.26E-10 |
| rs202627    | 45.897653 | 2.26E-10 |
| rs67199281  | 45.897437 | 2.26E-10 |
| rs3213734   | 45.889946 | 2.27E-10 |
| rs62508777  | 45.889502 | 2.27E-10 |
| rs35003065  | 45.888403 | 2.27E-10 |
| rs12156041  | 45.885511 | 2.27E-10 |
| rs132774    | 45.882051 | 2.28E-10 |
| rs1291210   | 45.880804 | 2.28E-10 |
| rs2380691   | 45.880598 | 2.28E-10 |
| rs13280740  | 45.879381 | 2.28E-10 |
| rs7007887   | 45.879219 | 2.28E-10 |
| rs1952670   | 45.878904 | 2.28E-10 |
| rs2639911   | 45.878530 | 2.28E-10 |
| rs6998354   | 45.876913 | 2.28E-10 |
| rs35820454  | 45.872077 | 2.29E-10 |
| rs1093      | 45.865368 | 2.30E-10 |
| rs7003688   | 45.864584 | 2.30E-10 |
| rs2609264   | 45.863542 | 2.30E-10 |
| rs62323957  | 45.861667 | 2.30E-10 |
| rs2639910   | 45.858676 | 2.31E-10 |

|             |           |          |
|-------------|-----------|----------|
| rs11618582  | 45.855119 | 2.31E-10 |
| rs9266194   | 45.854982 | 2.31E-10 |
| rs7814774   | 45.854084 | 2.31E-10 |
| rs1356390   | 45.853308 | 2.31E-10 |
| rs9270997   | 45.853080 | 2.31E-10 |
| rs7003788   | 45.850489 | 2.32E-10 |
| rs62294335  | 45.846483 | 2.32E-10 |
| rs10760404  | 45.845384 | 2.32E-10 |
| rs13272343  | 45.841045 | 2.33E-10 |
| rs7841286   | 45.838198 | 2.33E-10 |
| rs13191786  | 45.837830 | 2.33E-10 |
| rs72784292  | 45.834184 | 2.34E-10 |
| rs2464528   | 45.831647 | 2.34E-10 |
| rs55855305  | 45.830055 | 2.34E-10 |
| rs2704581   | 45.829871 | 2.34E-10 |
| rs7932863   | 45.821312 | 2.35E-10 |
| rs10249093  | 45.815063 | 2.36E-10 |
| rs2516497   | 45.814170 | 2.36E-10 |
| rs116753971 | 45.811189 | 2.36E-10 |
| rs17455883  | 45.804637 | 2.37E-10 |
| rs9266193   | 45.803225 | 2.37E-10 |
| rs9270475   | 45.796414 | 2.38E-10 |
| rs806293    | 45.793878 | 2.39E-10 |
| rs1246632   | 45.792096 | 2.39E-10 |
| rs2609265   | 45.786493 | 2.40E-10 |
| rs162892    | 45.786118 | 2.40E-10 |
| rs7798189   | 45.786095 | 2.40E-10 |
| rs4799949   | 45.784771 | 2.40E-10 |
| rs12156377  | 45.781177 | 2.40E-10 |
| rs17699455  | 45.776778 | 2.41E-10 |
| rs2064164   | 45.764681 | 2.42E-10 |
| rs10260395  | 45.762547 | 2.43E-10 |
| rs56189111  | 45.760051 | 2.43E-10 |
| rs56792040  | 45.758921 | 2.43E-10 |
| rs34556056  | 45.758866 | 2.43E-10 |
| rs2464520   | 45.753983 | 2.44E-10 |
| rs12675116  | 45.752655 | 2.44E-10 |
| rs17689989  | 45.751957 | 2.44E-10 |
| rs1049130   | 45.750485 | 2.44E-10 |
| rs7804146   | 45.748669 | 2.44E-10 |
| rs115493740 | 45.747014 | 2.45E-10 |
| rs6996049   | 45.746454 | 2.45E-10 |
| rs17545644  | 45.738981 | 2.46E-10 |
| rs7608470   | 45.734638 | 2.46E-10 |
| rs35762981  | 45.734127 | 2.46E-10 |
| rs78752526  | 45.732754 | 2.47E-10 |

|             |           |          |
|-------------|-----------|----------|
| rs114088589 | 45.729492 | 2.47E-10 |
| rs3111414   | 45.728613 | 2.47E-10 |
| rs6813090   | 45.725949 | 2.47E-10 |
| rs2879258   | 45.723190 | 2.48E-10 |
| rs73172091  | 45.716208 | 2.49E-10 |
| rs17143003  | 45.715295 | 2.49E-10 |
| rs4366683   | 45.714768 | 2.49E-10 |
| rs34716264  | 45.709960 | 2.50E-10 |
| rs9898313   | 45.707196 | 2.50E-10 |
| rs2097413   | 45.706735 | 2.50E-10 |
| rs9652828   | 45.704354 | 2.50E-10 |
| rs35671223  | 45.700232 | 2.51E-10 |
| rs1411352   | 45.693480 | 2.52E-10 |
| rs2446304   | 45.686436 | 2.53E-10 |
| rs79926952  | 45.686285 | 2.53E-10 |
| rs9611565   | 45.685760 | 2.53E-10 |
| rs12817892  | 45.684943 | 2.53E-10 |
| rs79994966  | 45.680413 | 2.54E-10 |
| rs2276133   | 45.678340 | 2.54E-10 |
| rs12437644  | 45.677446 | 2.54E-10 |
| rs6984618   | 45.674892 | 2.54E-10 |
| rs2446303   | 45.667740 | 2.55E-10 |
| rs2893002   | 45.665439 | 2.56E-10 |
| rs34577742  | 45.665126 | 2.56E-10 |
| rs6968646   | 45.663062 | 2.56E-10 |
| rs1040313   | 45.660892 | 2.56E-10 |
| rs56293330  | 45.656788 | 2.57E-10 |
| rs33932084  | 45.654919 | 2.57E-10 |
| rs2812228   | 45.649580 | 2.58E-10 |
| rs7013793   | 45.648558 | 2.58E-10 |
| rs113677559 | 45.647577 | 2.58E-10 |
| rs72854513  | 45.635220 | 2.60E-10 |
| rs162904    | 45.633866 | 2.60E-10 |
| rs112574168 | 45.632220 | 2.60E-10 |
| rs1952669   | 45.632172 | 2.60E-10 |
| rs17768191  | 45.621507 | 2.62E-10 |
| rs12533604  | 45.621320 | 2.62E-10 |
| rs3771186   | 45.612923 | 2.63E-10 |
| rs12422981  | 45.611787 | 2.63E-10 |
| rs886453    | 45.601797 | 2.64E-10 |
| rs806295    | 45.600424 | 2.65E-10 |
| rs7914446   | 45.597892 | 2.65E-10 |
| rs140248787 | 45.597296 | 2.65E-10 |
| rs113775821 | 45.595581 | 2.65E-10 |
| rs62033406  | 45.590643 | 2.66E-10 |
| rs56383608  | 45.590143 | 2.66E-10 |

|             |           |          |
|-------------|-----------|----------|
| rs174530    | 45.582513 | 2.67E-10 |
| rs62321743  | 45.581705 | 2.67E-10 |
| rs2956611   | 45.577650 | 2.68E-10 |
| rs12553980  | 45.575222 | 2.68E-10 |
| rs191785247 | 45.574410 | 2.68E-10 |
| rs10269311  | 45.567210 | 2.69E-10 |
| rs1557341   | 45.562957 | 2.70E-10 |
| rs2646431   | 45.559336 | 2.70E-10 |
| rs12674838  | 45.558921 | 2.70E-10 |
| rs7943728   | 45.558392 | 2.71E-10 |
| rs2765405   | 45.555877 | 2.71E-10 |
| rs4526394   | 45.555707 | 2.71E-10 |
| rs891986    | 45.555541 | 2.71E-10 |
| rs10987006  | 45.553743 | 2.71E-10 |
| rs17778232  | 45.546212 | 2.72E-10 |
| rs2477919   | 45.540655 | 2.73E-10 |
| rs4346089   | 45.536597 | 2.74E-10 |
| rs150163136 | 45.531372 | 2.74E-10 |
| rs149028231 | 45.530912 | 2.75E-10 |
| rs116519115 | 45.530835 | 2.75E-10 |
| rs12533552  | 45.528893 | 2.75E-10 |
| rs2704583   | 45.526470 | 2.75E-10 |
| rs35447532  | 45.522490 | 2.76E-10 |
| rs7749043   | 45.519753 | 2.76E-10 |
| rs12948381  | 45.519681 | 2.76E-10 |
| rs1632957   | 45.518867 | 2.76E-10 |
| rs12351249  | 45.516730 | 2.77E-10 |
| rs35715578  | 45.514237 | 2.77E-10 |
| rs3098859   | 45.510193 | 2.78E-10 |
| rs750111    | 45.505226 | 2.78E-10 |
| rs3814707   | 45.503726 | 2.78E-10 |
| rs1291209   | 45.498604 | 2.79E-10 |
| rs2893003   | 45.498370 | 2.79E-10 |
| rs2609282   | 45.498232 | 2.79E-10 |
| rs2732144   | 45.497491 | 2.79E-10 |
| rs3771181   | 45.495294 | 2.80E-10 |
| rs2639949   | 45.491962 | 2.80E-10 |
| rs12967855  | 45.488766 | 2.81E-10 |
| rs13208096  | 45.488024 | 2.81E-10 |
| rs7243102   | 45.486802 | 2.81E-10 |
| rs7868801   | 45.485500 | 2.81E-10 |
| rs7560478   | 45.483823 | 2.81E-10 |
| rs2277066   | 45.480747 | 2.82E-10 |
| rs117009032 | 45.478335 | 2.82E-10 |
| rs12942295  | 45.476655 | 2.83E-10 |
| rs891985    | 45.474472 | 2.83E-10 |



|             |           |          |
|-------------|-----------|----------|
| rs9607805   | 45.474295 | 2.83E-10 |
| rs10199605  | 45.472992 | 2.83E-10 |
| rs2041943   | 45.470451 | 2.83E-10 |
| rs3110268   | 45.470275 | 2.83E-10 |
| rs2986302   | 45.468253 | 2.84E-10 |
| rs4671509   | 45.467952 | 2.84E-10 |
| rs9650238   | 45.465873 | 2.84E-10 |
| rs9272682   | 45.465432 | 2.84E-10 |
| rs3771188   | 45.463987 | 2.84E-10 |
| rs7825815   | 45.461841 | 2.85E-10 |
| rs13264053  | 45.459051 | 2.85E-10 |
| rs2241130   | 45.458210 | 2.85E-10 |
| rs2639950   | 45.453838 | 2.86E-10 |
| rs45471701  | 45.453578 | 2.86E-10 |
| rs1024791   | 45.453175 | 2.86E-10 |
| rs1117797   | 45.450998 | 2.86E-10 |
| rs34676049  | 45.444056 | 2.87E-10 |
| rs7803714   | 45.439962 | 2.88E-10 |
| rs12414804  | 45.437369 | 2.89E-10 |
| rs62077691  | 45.437234 | 2.89E-10 |
| rs10905468  | 45.435117 | 2.89E-10 |
| rs62322662  | 45.432171 | 2.89E-10 |
| rs25887     | 45.429509 | 2.90E-10 |
| rs9891379   | 45.424809 | 2.90E-10 |
| rs12474373  | 45.420623 | 2.91E-10 |
| rs10074925  | 45.420343 | 2.91E-10 |
| rs2732138   | 45.418336 | 2.91E-10 |
| rs879394    | 45.415181 | 2.92E-10 |
| rs11657381  | 45.410888 | 2.93E-10 |
| rs141063723 | 45.409068 | 2.93E-10 |
| rs3821206   | 45.408940 | 2.93E-10 |
| rs13258368  | 45.408443 | 2.93E-10 |
| rs149866169 | 45.406936 | 2.93E-10 |
| rs2284189   | 45.404945 | 2.94E-10 |
| rs3098862   | 45.404602 | 2.94E-10 |
| rs28423374  | 45.402619 | 2.94E-10 |
| rs17026825  | 45.397028 | 2.95E-10 |
| rs17544734  | 45.394802 | 2.95E-10 |
| rs16957993  | 45.393992 | 2.95E-10 |
| rs67487456  | 45.393753 | 2.95E-10 |
| rs199529    | 45.380636 | 2.97E-10 |
| rs17132825  | 45.374849 | 2.98E-10 |
| rs17667856  | 45.373232 | 2.99E-10 |
| rs35201629  | 45.371876 | 2.99E-10 |
| rs4833834   | 45.365655 | 3.00E-10 |
| rs13013537  | 45.362780 | 3.00E-10 |

|             |           |          |
|-------------|-----------|----------|
| rs17670451  | 45.360642 | 3.01E-10 |
| rs12595538  | 45.357418 | 3.01E-10 |
| rs7759971   | 45.357130 | 3.01E-10 |
| rs8060938   | 45.353487 | 3.02E-10 |
| rs12829456  | 45.352179 | 3.02E-10 |
| rs806296    | 45.348690 | 3.02E-10 |
| rs10080189  | 45.344703 | 3.03E-10 |
| rs8034658   | 45.338587 | 3.04E-10 |
| rs2639916   | 45.337288 | 3.04E-10 |
| rs62077690  | 45.335738 | 3.05E-10 |
| rs2257885   | 45.335533 | 3.05E-10 |
| rs62322727  | 45.334616 | 3.05E-10 |
| rs2080311   | 45.332085 | 3.05E-10 |
| rs45591939  | 45.329374 | 3.06E-10 |
| rs7853472   | 45.328121 | 3.06E-10 |
| rs1723015   | 45.323035 | 3.07E-10 |
| rs10832253  | 45.319449 | 3.07E-10 |
| rs112464499 | 45.315671 | 3.08E-10 |
| rs138551539 | 45.310071 | 3.09E-10 |
| rs78342208  | 45.301285 | 3.10E-10 |
| rs174528    | 45.301140 | 3.10E-10 |
| rs139100794 | 45.299422 | 3.10E-10 |
| rs9272311   | 45.297073 | 3.11E-10 |
| rs1151624   | 45.295439 | 3.11E-10 |
| rs9272658   | 45.292403 | 3.12E-10 |
| rs4072590   | 45.289262 | 3.12E-10 |
| rs7869867   | 45.286497 | 3.13E-10 |
| rs62012588  | 45.281420 | 3.13E-10 |
| rs806297    | 45.275249 | 3.14E-10 |
| rs2023790   | 45.272771 | 3.15E-10 |
| rs2446301   | 45.271523 | 3.15E-10 |
| rs10114213  | 45.271034 | 3.15E-10 |
| rs10045577  | 45.267472 | 3.16E-10 |
| rs2546990   | 45.266667 | 3.16E-10 |
| rs1800797   | 45.264914 | 3.16E-10 |
| rs58592594  | 45.261620 | 3.17E-10 |
| rs2933852   | 45.261598 | 3.17E-10 |
| rs148642300 | 45.258389 | 3.17E-10 |
| rs1045020   | 45.245756 | 3.19E-10 |
| rs72784300  | 45.243549 | 3.20E-10 |
| rs4739740   | 45.241704 | 3.20E-10 |
| rs2869553   | 45.240343 | 3.20E-10 |
| rs13251955  | 45.232570 | 3.22E-10 |
| rs6988053   | 45.228668 | 3.22E-10 |
| rs391063    | 45.227480 | 3.23E-10 |
| rs28633411  | 45.220443 | 3.24E-10 |

|             |           |          |
|-------------|-----------|----------|
| rs71381187  | 45.219364 | 3.24E-10 |
| rs3917225   | 45.217497 | 3.24E-10 |
| rs190854    | 45.214033 | 3.25E-10 |
| rs3098863   | 45.201573 | 3.27E-10 |
| rs614549    | 45.197212 | 3.28E-10 |
| rs10224046  | 45.191897 | 3.29E-10 |
| rs9905429   | 45.189473 | 3.29E-10 |
| rs5758314   | 45.184844 | 3.30E-10 |
| rs9909615   | 45.184501 | 3.30E-10 |
| rs2639918   | 45.172689 | 3.32E-10 |
| rs17818291  | 45.166297 | 3.33E-10 |
| rs9538      | 45.162765 | 3.34E-10 |
| rs5029949   | 45.160135 | 3.34E-10 |
| rs1243400   | 45.160094 | 3.34E-10 |
| rs62242109  | 45.158580 | 3.35E-10 |
| rs34341465  | 45.153268 | 3.36E-10 |
| rs3755287   | 45.149418 | 3.36E-10 |
| rs62242105  | 45.147037 | 3.37E-10 |
| rs11255932  | 45.142734 | 3.37E-10 |
| rs189777036 | 45.142037 | 3.38E-10 |
| rs62055866  | 45.141360 | 3.38E-10 |
| rs10065787  | 45.136933 | 3.38E-10 |
| rs13110699  | 45.134594 | 3.39E-10 |
| rs4151657   | 45.133934 | 3.39E-10 |
| rs17132862  | 45.130192 | 3.40E-10 |
| rs343492    | 45.126462 | 3.40E-10 |
| rs62177774  | 45.124935 | 3.41E-10 |
| rs8052962   | 45.124395 | 3.41E-10 |
| rs35987553  | 45.124212 | 3.41E-10 |
| rs62193068  | 45.118806 | 3.42E-10 |
| rs72788433  | 45.118592 | 3.42E-10 |
| rs4523933   | 45.116277 | 3.42E-10 |
| rs113752715 | 45.113143 | 3.43E-10 |
| rs55774581  | 45.109823 | 3.43E-10 |
| rs1001528   | 45.105468 | 3.44E-10 |
| rs6827784   | 45.096177 | 3.46E-10 |
| rs184906    | 45.092961 | 3.47E-10 |
| rs1007027   | 45.091009 | 3.47E-10 |
| rs162894    | 45.090074 | 3.47E-10 |
| rs7180375   | 45.087781 | 3.47E-10 |
| rs13048344  | 45.084845 | 3.48E-10 |
| rs1861283   | 45.075507 | 3.50E-10 |
| rs9994851   | 45.074211 | 3.50E-10 |
| rs58443172  | 45.073701 | 3.50E-10 |
| rs184375406 | 45.069387 | 3.51E-10 |
| rs58809476  | 45.067121 | 3.51E-10 |

|             |           |          |
|-------------|-----------|----------|
| rs7856095   | 45.065808 | 3.52E-10 |
| rs7068007   | 45.063341 | 3.52E-10 |
| rs17005693  | 45.061060 | 3.52E-10 |
| rs12592283  | 45.055880 | 3.53E-10 |
| rs7014185   | 45.054020 | 3.54E-10 |
| rs7853604   | 45.047212 | 3.55E-10 |
| rs3098860   | 45.047058 | 3.55E-10 |
| rs113787446 | 45.043652 | 3.56E-10 |
| rs1999200   | 45.041521 | 3.56E-10 |
| rs62322723  | 45.040734 | 3.56E-10 |
| rs369300    | 45.040060 | 3.56E-10 |
| rs139052978 | 45.039827 | 3.56E-10 |
| rs72786004  | 45.037611 | 3.57E-10 |
| rs2834908   | 45.036497 | 3.57E-10 |
| rs2035926   | 45.026008 | 3.59E-10 |
| rs12818067  | 45.019914 | 3.60E-10 |
| rs6495346   | 45.017925 | 3.61E-10 |
| rs147420990 | 45.011061 | 3.62E-10 |
| rs17699084  | 44.998338 | 3.64E-10 |
| rs11665070  | 44.993085 | 3.65E-10 |
| rs6461502   | 44.990678 | 3.66E-10 |
| rs62321758  | 44.989089 | 3.66E-10 |
| rs152302    | 44.988874 | 3.66E-10 |
| rs654537    | 44.988468 | 3.66E-10 |
| rs1022461   | 44.983035 | 3.67E-10 |
| rs6062901   | 44.982188 | 3.68E-10 |
| rs12948361  | 44.979334 | 3.68E-10 |
| rs2609260   | 44.978220 | 3.68E-10 |
| rs11655773  | 44.976168 | 3.69E-10 |
| rs75699330  | 44.972149 | 3.69E-10 |
| rs10760405  | 44.971640 | 3.70E-10 |
| rs13135092  | 44.971066 | 3.70E-10 |
| rs3110263   | 44.968266 | 3.70E-10 |
| rs62065444  | 44.955658 | 3.73E-10 |
| rs55642564  | 44.955245 | 3.73E-10 |
| rs34118047  | 44.952109 | 3.73E-10 |
| rs4419720   | 44.950475 | 3.74E-10 |
| rs34050529  | 44.948879 | 3.74E-10 |
| rs13050284  | 44.942622 | 3.75E-10 |
| rs149871892 | 44.941704 | 3.76E-10 |
| rs2904222   | 44.929829 | 3.78E-10 |
| rs34645004  | 44.925039 | 3.79E-10 |
| rs79212788  | 44.924560 | 3.79E-10 |
| rs4851000   | 44.921516 | 3.80E-10 |
| rs9557238   | 44.918332 | 3.80E-10 |
| rs4527505   | 44.917000 | 3.80E-10 |

|             |           |          |
|-------------|-----------|----------|
| rs12947205  | 44.916231 | 3.81E-10 |
| rs2639953   | 44.912884 | 3.81E-10 |
| rs9891646   | 44.912814 | 3.81E-10 |
| rs62322717  | 44.910151 | 3.82E-10 |
| rs72923970  | 44.909317 | 3.82E-10 |
| rs1879586   | 44.908568 | 3.82E-10 |
| rs62322724  | 44.902058 | 3.84E-10 |
| rs7868182   | 44.900244 | 3.84E-10 |
| rs190577398 | 44.897158 | 3.85E-10 |
| rs9899833   | 44.889808 | 3.86E-10 |
| rs9896243   | 44.876334 | 3.89E-10 |
| rs11078330  | 44.867871 | 3.91E-10 |
| rs7207      | 44.867682 | 3.91E-10 |
| rs13388182  | 44.856103 | 3.93E-10 |
| rs11991584  | 44.849134 | 3.94E-10 |
| rs2639946   | 44.845536 | 3.95E-10 |
| rs35656932  | 44.842693 | 3.96E-10 |
| rs2051736   | 44.842133 | 3.96E-10 |
| rs3815038   | 44.841153 | 3.96E-10 |
| rs57933226  | 44.837255 | 3.97E-10 |
| rs3785631   | 44.833229 | 3.98E-10 |
| rs62322715  | 44.832645 | 3.98E-10 |
| rs4749824   | 44.829422 | 3.99E-10 |
| rs2381684   | 44.828799 | 3.99E-10 |
| rs9889822   | 44.825912 | 3.99E-10 |
| rs9494892   | 44.821135 | 4.00E-10 |
| rs17485501  | 44.820555 | 4.01E-10 |
| rs1867087   | 44.818343 | 4.01E-10 |
| rs10795656  | 44.814060 | 4.02E-10 |
| rs35001169  | 44.811425 | 4.02E-10 |
| rs56195275  | 44.806338 | 4.04E-10 |
| rs17408223  | 44.801916 | 4.04E-10 |
| rs11991605  | 44.798264 | 4.05E-10 |
| rs62322713  | 44.795629 | 4.06E-10 |
| rs17455540  | 44.787269 | 4.08E-10 |
| rs13050093  | 44.781605 | 4.09E-10 |
| rs61840207  | 44.779834 | 4.09E-10 |
| rs78081133  | 44.778551 | 4.10E-10 |
| rs28460413  | 44.775292 | 4.10E-10 |
| rs2834907   | 44.774134 | 4.11E-10 |
| rs3129      | 44.773013 | 4.11E-10 |
| rs3110266   | 44.771944 | 4.11E-10 |
| rs11630878  | 44.771200 | 4.11E-10 |
| rs35631117  | 44.769140 | 4.12E-10 |
| rs6546005   | 44.768978 | 4.12E-10 |
| rs10264672  | 44.758616 | 4.14E-10 |

|             |           |          |
|-------------|-----------|----------|
| rs17485347  | 44.756465 | 4.14E-10 |
| rs1978330   | 44.756302 | 4.14E-10 |
| rs45562433  | 44.756111 | 4.14E-10 |
| rs56235255  | 44.752273 | 4.15E-10 |
| rs11172076  | 44.751585 | 4.15E-10 |
| rs9908031   | 44.751517 | 4.15E-10 |
| rs11630850  | 44.740782 | 4.18E-10 |
| rs17818195  | 44.733229 | 4.20E-10 |
| rs7207889   | 44.730026 | 4.20E-10 |
| rs2258056   | 44.729042 | 4.20E-10 |
| rs11070271  | 44.723573 | 4.22E-10 |
| rs62177761  | 44.718706 | 4.23E-10 |
| rs8080706   | 44.716155 | 4.23E-10 |
| rs2544026   | 44.715237 | 4.24E-10 |
| rs1291206   | 44.713509 | 4.24E-10 |
| rs13278019  | 44.712283 | 4.24E-10 |
| rs11057204  | 44.712256 | 4.24E-10 |
| rs11872032  | 44.711962 | 4.24E-10 |
| rs62322720  | 44.707890 | 4.25E-10 |
| rs55915640  | 44.684242 | 4.31E-10 |
| rs62322722  | 44.684098 | 4.31E-10 |
| rs2394986   | 44.682482 | 4.31E-10 |
| rs9494893   | 44.680770 | 4.31E-10 |
| rs7868811   | 44.680004 | 4.32E-10 |
| rs17551153  | 44.679048 | 4.32E-10 |
| rs5743596   | 44.677192 | 4.32E-10 |
| rs11603634  | 44.676583 | 4.32E-10 |
| rs79552152  | 44.676528 | 4.32E-10 |
| rs114947103 | 44.675514 | 4.33E-10 |
| rs11953290  | 44.673748 | 4.33E-10 |
| rs806322    | 44.672502 | 4.33E-10 |
| rs6507210   | 44.670003 | 4.34E-10 |
| rs3134763   | 44.669970 | 4.34E-10 |
| rs28595444  | 44.652955 | 4.38E-10 |
| rs7258329   | 44.649845 | 4.39E-10 |
| rs7313483   | 44.648755 | 4.39E-10 |
| rs7853588   | 44.646093 | 4.39E-10 |
| rs872525    | 44.645210 | 4.40E-10 |
| rs62322716  | 44.644161 | 4.40E-10 |
| rs10846487  | 44.641779 | 4.40E-10 |
| rs62322742  | 44.640963 | 4.41E-10 |
| rs1591299   | 44.640131 | 4.41E-10 |
| rs872524    | 44.633984 | 4.42E-10 |
| rs871376    | 44.633066 | 4.42E-10 |
| rs56212747  | 44.630927 | 4.43E-10 |
| rs4791662   | 44.629606 | 4.43E-10 |

|             |           |          |
|-------------|-----------|----------|
| rs7867968   | 44.628151 | 4.44E-10 |
| rs12150017  | 44.627305 | 4.44E-10 |
| rs9271459   | 44.627093 | 4.44E-10 |
| rs2933859   | 44.626838 | 4.44E-10 |
| rs16872573  | 44.626662 | 4.44E-10 |
| rs2075625   | 44.621594 | 4.45E-10 |
| rs10760406  | 44.618420 | 4.46E-10 |
| rs6122159   | 44.615307 | 4.47E-10 |
| rs2639928   | 44.613311 | 4.47E-10 |
| rs8057585   | 44.612434 | 4.47E-10 |
| rs2933848   | 44.611383 | 4.48E-10 |
| rs2956615   | 44.610865 | 4.48E-10 |
| rs141261718 | 44.610802 | 4.48E-10 |
| rs12656526  | 44.606471 | 4.49E-10 |
| rs202637    | 44.605862 | 4.49E-10 |
| rs12709690  | 44.603334 | 4.50E-10 |
| rs4460267   | 44.600955 | 4.50E-10 |
| rs909341    | 44.599972 | 4.50E-10 |
| rs55726902  | 44.599768 | 4.50E-10 |
| rs2639914   | 44.598488 | 4.51E-10 |
| rs62177793  | 44.595782 | 4.51E-10 |
| rs1291205   | 44.594926 | 4.52E-10 |
| rs45615838  | 44.593544 | 4.52E-10 |
| rs2111359   | 44.590257 | 4.53E-10 |
| rs6828259   | 44.590079 | 4.53E-10 |
| rs1130153   | 44.588663 | 4.53E-10 |
| rs2111358   | 44.585457 | 4.54E-10 |
| rs3152      | 44.583942 | 4.54E-10 |
| rs4822043   | 44.577682 | 4.56E-10 |
| rs10739665  | 44.577646 | 4.56E-10 |
| rs62324162  | 44.576731 | 4.56E-10 |
| rs2732149   | 44.575482 | 4.56E-10 |
| rs2639941   | 44.574921 | 4.56E-10 |
| rs12991050  | 44.574173 | 4.57E-10 |
| rs2757635   | 44.572560 | 4.57E-10 |
| rs11651290  | 44.567707 | 4.58E-10 |
| rs3829098   | 44.566493 | 4.58E-10 |
| rs12658443  | 44.566447 | 4.58E-10 |
| rs143074345 | 44.564513 | 4.59E-10 |
| rs7963025   | 44.559720 | 4.60E-10 |
| rs2732122   | 44.557925 | 4.61E-10 |
| rs79255603  | 44.555393 | 4.61E-10 |
| rs3110258   | 44.554764 | 4.61E-10 |
| rs202626    | 44.553386 | 4.62E-10 |
| rs10477585  | 44.551734 | 4.62E-10 |
| rs10280526  | 44.550659 | 4.62E-10 |

|             |           |          |
|-------------|-----------|----------|
| rs2639926   | 44.544467 | 4.64E-10 |
| rs4792719   | 44.542945 | 4.64E-10 |
| rs56289225  | 44.542128 | 4.64E-10 |
| rs114691438 | 44.532110 | 4.67E-10 |
| rs10878281  | 44.531787 | 4.67E-10 |
| rs17408272  | 44.529793 | 4.67E-10 |
| rs45437792  | 44.526727 | 4.68E-10 |
| rs6834379   | 44.526388 | 4.68E-10 |
| rs28532970  | 44.525001 | 4.69E-10 |
| rs7785273   | 44.523161 | 4.69E-10 |
| rs7026855   | 44.522189 | 4.69E-10 |
| rs2933847   | 44.518650 | 4.70E-10 |
| rs17486623  | 44.518610 | 4.70E-10 |
| rs12112720  | 44.512394 | 4.72E-10 |
| rs56405981  | 44.512211 | 4.72E-10 |
| rs2639940   | 44.510364 | 4.72E-10 |
| rs7763805   | 44.510260 | 4.72E-10 |
| rs62242108  | 44.509648 | 4.72E-10 |
| rs9272359   | 44.506320 | 4.73E-10 |
| rs11575810  | 44.503596 | 4.74E-10 |
| rs2639947   | 44.500903 | 4.75E-10 |
| rs2069779   | 44.499056 | 4.75E-10 |
| rs2732146   | 44.498229 | 4.75E-10 |
| rs35156641  | 44.497200 | 4.76E-10 |
| rs13102956  | 44.497038 | 4.76E-10 |
| rs11154801  | 44.496581 | 4.76E-10 |
| rs73236646  | 44.495512 | 4.76E-10 |
| rs2732145   | 44.494317 | 4.76E-10 |
| rs3843503   | 44.494071 | 4.76E-10 |
| rs11685997  | 44.489867 | 4.77E-10 |
| rs10795634  | 44.488694 | 4.78E-10 |
| rs115530896 | 44.484344 | 4.79E-10 |
| rs45524132  | 44.477301 | 4.81E-10 |
| rs11657912  | 44.476962 | 4.81E-10 |
| rs2046144   | 44.472495 | 4.82E-10 |
| rs9907313   | 44.472448 | 4.82E-10 |
| rs34469358  | 44.465471 | 4.84E-10 |
| rs62322744  | 44.463121 | 4.84E-10 |
| rs10987060  | 44.462449 | 4.84E-10 |
| rs139783571 | 44.461617 | 4.85E-10 |
| rs10772998  | 44.459187 | 4.85E-10 |
| rs2035927   | 44.458825 | 4.85E-10 |
| rs1383044   | 44.458597 | 4.85E-10 |
| rs62322754  | 44.458070 | 4.86E-10 |
| rs2639944   | 44.451211 | 4.87E-10 |
| rs76412132  | 44.450978 | 4.87E-10 |



|             |           |          |
|-------------|-----------|----------|
| rs2732140   | 44.449947 | 4.88E-10 |
| rs12670982  | 44.446262 | 4.89E-10 |
| rs9274442   | 44.445926 | 4.89E-10 |
| rs72833498  | 44.442436 | 4.90E-10 |
| rs11637756  | 44.441917 | 4.90E-10 |
| rs2732141   | 44.441699 | 4.90E-10 |
| rs55909629  | 44.438886 | 4.91E-10 |
| rs62322672  | 44.438884 | 4.91E-10 |
| rs62321756  | 44.437875 | 4.91E-10 |
| rs706606    | 44.437543 | 4.91E-10 |
| rs56067118  | 44.436359 | 4.91E-10 |
| rs56343854  | 44.436358 | 4.91E-10 |
| rs45475795  | 44.430804 | 4.93E-10 |
| rs1845217   | 44.430756 | 4.93E-10 |
| rs112166495 | 44.428011 | 4.93E-10 |
| rs17832351  | 44.424503 | 4.94E-10 |
| rs174599    | 44.422892 | 4.95E-10 |
| rs2732118   | 44.421065 | 4.95E-10 |
| rs9270547   | 44.418661 | 4.96E-10 |
| rs79078433  | 44.417168 | 4.96E-10 |
| rs62321757  | 44.414121 | 4.97E-10 |
| rs178798    | 44.413620 | 4.97E-10 |
| rs1151623   | 44.413311 | 4.97E-10 |
| rs2933858   | 44.407521 | 4.99E-10 |
| rs2639948   | 44.404071 | 5.00E-10 |
| rs4540058   | 44.402781 | 5.00E-10 |
| rs8040128   | 44.401939 | 5.00E-10 |
| rs62322753  | 44.399006 | 5.01E-10 |
| rs189309    | 44.397753 | 5.01E-10 |
| rs10739664  | 44.397330 | 5.02E-10 |
| rs2732123   | 44.396844 | 5.02E-10 |
| rs1861284   | 44.396800 | 5.02E-10 |
| rs2732125   | 44.394339 | 5.02E-10 |
| rs62321702  | 44.393939 | 5.02E-10 |
| rs3024590   | 44.392697 | 5.03E-10 |
| rs2762060   | 44.392641 | 5.03E-10 |
| rs429358    | 44.388077 | 5.04E-10 |
| rs914559    | 44.387998 | 5.04E-10 |
| rs7857456   | 44.387971 | 5.04E-10 |
| rs62321746  | 44.385852 | 5.05E-10 |
| rs11982847  | 44.383673 | 5.05E-10 |
| rs11871961  | 44.382603 | 5.05E-10 |
| rs2750480   | 44.382103 | 5.06E-10 |
| rs45627241  | 44.376743 | 5.07E-10 |
| rs2732105   | 44.374373 | 5.08E-10 |
| rs3024589   | 44.372489 | 5.08E-10 |

|             |           |          |
|-------------|-----------|----------|
| rs7677941   | 44.371843 | 5.08E-10 |
| rs62321744  | 44.371206 | 5.09E-10 |
| rs185533402 | 44.369290 | 5.09E-10 |
| rs2639924   | 44.369224 | 5.09E-10 |
| rs10808842  | 44.368667 | 5.09E-10 |
| rs4426787   | 44.368272 | 5.09E-10 |
| rs10975660  | 44.367956 | 5.09E-10 |
| rs78620508  | 44.367435 | 5.10E-10 |
| rs142827383 | 44.364717 | 5.10E-10 |
| rs1243396   | 44.359201 | 5.12E-10 |
| rs62321745  | 44.359078 | 5.12E-10 |
| rs142455143 | 44.357687 | 5.12E-10 |
| rs2732126   | 44.353841 | 5.13E-10 |
| rs62012628  | 44.352357 | 5.14E-10 |
| rs17457011  | 44.351100 | 5.14E-10 |
| rs45567637  | 44.347970 | 5.15E-10 |
| rs2639945   | 44.341721 | 5.17E-10 |
| rs10240969  | 44.341001 | 5.17E-10 |
| rs62531711  | 44.337539 | 5.18E-10 |
| rs62321686  | 44.337042 | 5.18E-10 |
| rs41359951  | 44.333535 | 5.19E-10 |
| rs62322746  | 44.333472 | 5.19E-10 |
| rs9607819   | 44.332698 | 5.19E-10 |
| rs178659    | 44.331392 | 5.19E-10 |
| rs62321749  | 44.329786 | 5.20E-10 |
| rs77943279  | 44.328801 | 5.20E-10 |
| rs17364659  | 44.327312 | 5.21E-10 |
| rs66707141  | 44.325983 | 5.21E-10 |
| rs62321703  | 44.323770 | 5.22E-10 |
| rs62322757  | 44.318133 | 5.23E-10 |
| rs2069777   | 44.317655 | 5.23E-10 |
| rs76273496  | 44.316072 | 5.24E-10 |
| rs45522038  | 44.311309 | 5.25E-10 |
| rs2732139   | 44.308195 | 5.26E-10 |
| rs2127512   | 44.307617 | 5.26E-10 |
| rs62321752  | 44.303038 | 5.27E-10 |
| rs140015735 | 44.301660 | 5.28E-10 |
| rs62321701  | 44.298834 | 5.29E-10 |
| rs950903    | 44.298462 | 5.29E-10 |
| rs11078332  | 44.294701 | 5.30E-10 |
| rs45582533  | 44.294477 | 5.30E-10 |
| rs2188862   | 44.294004 | 5.30E-10 |
| rs9271684   | 44.292928 | 5.30E-10 |
| rs60946162  | 44.288455 | 5.31E-10 |
| rs67616625  | 44.279995 | 5.34E-10 |
| rs137967223 | 44.276866 | 5.35E-10 |

|             |           |          |
|-------------|-----------|----------|
| rs12658494  | 44.276097 | 5.35E-10 |
| rs28595460  | 44.275591 | 5.35E-10 |
| rs138815026 | 44.273669 | 5.36E-10 |
| rs6546004   | 44.272889 | 5.36E-10 |
| rs178803    | 44.269744 | 5.37E-10 |
| rs143527274 | 44.265983 | 5.38E-10 |
| rs4705915   | 44.263033 | 5.39E-10 |
| rs4436747   | 44.260768 | 5.39E-10 |
| rs3815039   | 44.259895 | 5.40E-10 |
| rs4374642   | 44.255953 | 5.41E-10 |
| rs2034650   | 44.255190 | 5.41E-10 |
| rs2035928   | 44.253636 | 5.41E-10 |
| rs11255933  | 44.252401 | 5.42E-10 |
| rs12451644  | 44.247986 | 5.43E-10 |
| rs9273554   | 44.246648 | 5.43E-10 |
| rs12531784  | 44.243309 | 5.44E-10 |
| rs34449854  | 44.242908 | 5.44E-10 |
| rs10056568  | 44.241481 | 5.45E-10 |
| rs62177762  | 44.240771 | 5.45E-10 |
| rs1619283   | 44.239616 | 5.45E-10 |
| rs1126148   | 44.238991 | 5.46E-10 |
| rs1474348   | 44.233050 | 5.47E-10 |
| rs150826583 | 44.231026 | 5.48E-10 |
| rs62321751  | 44.229904 | 5.48E-10 |
| rs2639913   | 44.228051 | 5.49E-10 |
| rs45479793  | 44.227407 | 5.49E-10 |
| rs181890268 | 44.218397 | 5.52E-10 |
| rs7784850   | 44.215045 | 5.53E-10 |
| rs10878282  | 44.213169 | 5.53E-10 |
| rs2639912   | 44.210030 | 5.54E-10 |
| rs10784459  | 44.208885 | 5.54E-10 |
| rs79645730  | 44.208794 | 5.54E-10 |
| rs62321700  | 44.206241 | 5.55E-10 |
| rs60101051  | 44.204895 | 5.56E-10 |
| rs117827273 | 44.202325 | 5.56E-10 |
| rs2035925   | 44.201383 | 5.57E-10 |
| rs4759409   | 44.198463 | 5.57E-10 |
| rs62321688  | 44.195065 | 5.58E-10 |
| rs2639943   | 44.194647 | 5.59E-10 |
| rs1989856   | 44.194545 | 5.59E-10 |
| rs56266431  | 44.193380 | 5.59E-10 |
| rs2390342   | 44.193106 | 5.59E-10 |
| rs144756851 | 44.192595 | 5.59E-10 |
| rs11175768  | 44.190555 | 5.60E-10 |
| rs2732088   | 44.190531 | 5.60E-10 |
| rs1079533   | 44.190460 | 5.60E-10 |

|            |           |          |
|------------|-----------|----------|
| rs617058   | 44.190370 | 5.60E-10 |
| rs1758205  | 44.188178 | 5.61E-10 |
| rs7940373  | 44.187646 | 5.61E-10 |
| rs2732147  | 44.187245 | 5.61E-10 |
| rs2297441  | 44.186701 | 5.61E-10 |
| rs3110255  | 44.185101 | 5.61E-10 |
| rs62322748 | 44.183471 | 5.62E-10 |
| rs2732089  | 44.183013 | 5.62E-10 |
| rs9532433  | 44.179008 | 5.63E-10 |
| rs6734648  | 44.178737 | 5.63E-10 |
| rs11959067 | 44.178713 | 5.63E-10 |
| rs62321750 | 44.177993 | 5.64E-10 |
| rs45501297 | 44.172915 | 5.65E-10 |
| rs2035929  | 44.171414 | 5.66E-10 |
| rs3782331  | 44.169129 | 5.66E-10 |
| rs45619536 | 44.167949 | 5.67E-10 |
| rs35640344 | 44.162561 | 5.68E-10 |
| rs2732115  | 44.160902 | 5.69E-10 |
| rs178800   | 44.159429 | 5.69E-10 |
| rs7686937  | 44.157808 | 5.70E-10 |
| rs2732106  | 44.156095 | 5.70E-10 |
| rs12700203 | 44.149866 | 5.72E-10 |
| rs62321705 | 44.148810 | 5.72E-10 |
| rs7314262  | 44.146593 | 5.73E-10 |
| rs4390557  | 44.146179 | 5.73E-10 |
| rs3098865  | 44.145575 | 5.73E-10 |
| rs45506692 | 44.145281 | 5.73E-10 |
| rs28383323 | 44.142488 | 5.74E-10 |
| rs17243470 | 44.136495 | 5.76E-10 |
| rs2639956  | 44.132574 | 5.77E-10 |
| rs9532430  | 44.132494 | 5.77E-10 |
| rs2026192  | 44.132151 | 5.77E-10 |
| rs72996520 | 44.126022 | 5.79E-10 |
| rs6808893  | 44.123374 | 5.80E-10 |
| rs10023971 | 44.122239 | 5.81E-10 |
| rs62177821 | 44.121317 | 5.81E-10 |
| rs6581635  | 44.119327 | 5.81E-10 |
| rs45522533 | 44.117292 | 5.82E-10 |
| rs1879380  | 44.116675 | 5.82E-10 |
| rs9344995  | 44.111217 | 5.84E-10 |
| rs3819721  | 44.110626 | 5.84E-10 |
| rs10950808 | 44.110280 | 5.84E-10 |
| rs2023792  | 44.108229 | 5.85E-10 |
| rs28592642 | 44.107128 | 5.85E-10 |
| rs1031162  | 44.106634 | 5.85E-10 |
| rs178805   | 44.106429 | 5.85E-10 |

|             |           |          |
|-------------|-----------|----------|
| rs17881225  | 44.105262 | 5.86E-10 |
| rs17631676  | 44.105130 | 5.86E-10 |
| rs875023    | 44.099865 | 5.87E-10 |
| rs2639937   | 44.097307 | 5.88E-10 |
| rs4791661   | 44.096348 | 5.89E-10 |
| rs79944416  | 44.096309 | 5.89E-10 |
| rs4738105   | 44.095212 | 5.89E-10 |
| rs114383434 | 44.095094 | 5.89E-10 |
| rs62321691  | 44.093942 | 5.89E-10 |
| rs75202488  | 44.091928 | 5.90E-10 |
| rs2750481   | 44.091720 | 5.90E-10 |
| rs12945546  | 44.091069 | 5.90E-10 |
| rs864537    | 44.088973 | 5.91E-10 |
| rs2046143   | 44.083467 | 5.93E-10 |
| rs1160109   | 44.081510 | 5.93E-10 |
| rs656214    | 44.079086 | 5.94E-10 |
| rs2639938   | 44.077616 | 5.94E-10 |
| rs10950809  | 44.074414 | 5.95E-10 |
| rs1138896   | 44.073302 | 5.96E-10 |
| rs34251386  | 44.071807 | 5.96E-10 |
| rs10276280  | 44.071584 | 5.96E-10 |
| rs34022947  | 44.071484 | 5.96E-10 |
| rs10226083  | 44.064492 | 5.99E-10 |
| rs2750482   | 44.061988 | 5.99E-10 |
| rs58235267  | 44.061129 | 6.00E-10 |
| rs3553      | 44.056971 | 6.01E-10 |
| rs3819294   | 44.056751 | 6.01E-10 |
| rs11971231  | 44.056144 | 6.01E-10 |
| rs11030084  | 44.055715 | 6.01E-10 |
| rs178834    | 44.054231 | 6.02E-10 |
| rs12542300  | 44.050191 | 6.03E-10 |
| rs3110250   | 44.048366 | 6.04E-10 |
| rs2427529   | 44.048039 | 6.04E-10 |
| rs174601    | 44.047956 | 6.04E-10 |
| rs71536551  | 44.043392 | 6.05E-10 |
| rs178804    | 44.041788 | 6.06E-10 |
| rs4671448   | 44.041080 | 6.06E-10 |
| rs928393    | 44.036846 | 6.07E-10 |
| rs79921815  | 44.032666 | 6.09E-10 |
| rs62321697  | 44.026738 | 6.11E-10 |
| rs116729028 | 44.023046 | 6.12E-10 |
| rs9912530   | 44.021444 | 6.12E-10 |
| rs71658797  | 44.018956 | 6.13E-10 |
| rs178658    | 44.013394 | 6.15E-10 |
| rs10876940  | 44.012160 | 6.15E-10 |
| rs3110244   | 44.011799 | 6.16E-10 |

|             |           |          |
|-------------|-----------|----------|
| rs11057206  | 44.011399 | 6.16E-10 |
| rs62321696  | 44.010369 | 6.16E-10 |
| rs73172092  | 44.007386 | 6.17E-10 |
| rs3110242   | 44.002876 | 6.19E-10 |
| rs1291213   | 44.001450 | 6.19E-10 |
| rs62177783  | 43.999868 | 6.20E-10 |
| rs3110243   | 43.996811 | 6.21E-10 |
| rs11057210  | 43.995335 | 6.21E-10 |
| rs2639955   | 43.994802 | 6.21E-10 |
| rs178809    | 43.991985 | 6.22E-10 |
| rs4389724   | 43.991105 | 6.22E-10 |
| rs3110241   | 43.989801 | 6.23E-10 |
| rs10950810  | 43.989655 | 6.23E-10 |
| rs1929933   | 43.989235 | 6.23E-10 |
| rs2263805   | 43.980057 | 6.26E-10 |
| rs45483095  | 43.978204 | 6.27E-10 |
| rs12700205  | 43.975942 | 6.27E-10 |
| rs10490571  | 43.974780 | 6.28E-10 |
| rs11974870  | 43.974649 | 6.28E-10 |
| rs7216834   | 43.972783 | 6.28E-10 |
| rs72780326  | 43.972414 | 6.29E-10 |
| rs10170988  | 43.970472 | 6.29E-10 |
| rs17767183  | 43.969208 | 6.30E-10 |
| rs17287162  | 43.968760 | 6.30E-10 |
| rs114785709 | 43.965859 | 6.31E-10 |
| rs17142898  | 43.965567 | 6.31E-10 |
| rs72668903  | 43.964809 | 6.31E-10 |
| rs1716172   | 43.964440 | 6.31E-10 |
| rs10261116  | 43.964255 | 6.31E-10 |
| rs4647195   | 43.963220 | 6.32E-10 |
| rs12379291  | 43.962498 | 6.32E-10 |
| rs141414591 | 43.962402 | 6.32E-10 |
| rs9548932   | 43.960839 | 6.32E-10 |
| rs34851962  | 43.960529 | 6.33E-10 |
| rs4836969   | 43.960273 | 6.33E-10 |
| rs2236510   | 43.956477 | 6.34E-10 |
| rs4532626   | 43.954789 | 6.35E-10 |
| rs9902141   | 43.952438 | 6.35E-10 |
| rs2639952   | 43.949940 | 6.36E-10 |
| rs3098873   | 43.948404 | 6.37E-10 |
| rs5996037   | 43.947169 | 6.37E-10 |
| rs17364645  | 43.946265 | 6.37E-10 |
| rs11175770  | 43.945631 | 6.38E-10 |
| rs112160914 | 43.943507 | 6.38E-10 |
| rs1811649   | 43.940871 | 6.39E-10 |
| rs2872881   | 43.936690 | 6.41E-10 |

|             |           |          |
|-------------|-----------|----------|
| rs3110252   | 43.935434 | 6.41E-10 |
| rs1428644   | 43.932843 | 6.42E-10 |
| rs10987017  | 43.928818 | 6.43E-10 |
| rs10267914  | 43.928153 | 6.44E-10 |
| rs3098877   | 43.924149 | 6.45E-10 |
| rs3110251   | 43.924149 | 6.45E-10 |
| rs3110253   | 43.923640 | 6.45E-10 |
| rs3098870   | 43.922681 | 6.45E-10 |
| rs2263806   | 43.921746 | 6.46E-10 |
| rs3110254   | 43.920802 | 6.46E-10 |
| rs62322750  | 43.918847 | 6.47E-10 |
| rs17142886  | 43.915164 | 6.48E-10 |
| rs5996038   | 43.914973 | 6.48E-10 |
| rs2639954   | 43.913323 | 6.49E-10 |
| rs6507216   | 43.913028 | 6.49E-10 |
| rs3098879   | 43.908487 | 6.50E-10 |
| rs73090465  | 43.907961 | 6.51E-10 |
| rs3110240   | 43.906017 | 6.51E-10 |
| rs17142894  | 43.904310 | 6.52E-10 |
| rs11255983  | 43.900931 | 6.53E-10 |
| rs73685632  | 43.900633 | 6.53E-10 |
| rs9494895   | 43.899634 | 6.53E-10 |
| rs3110257   | 43.899536 | 6.53E-10 |
| rs2732116   | 43.899335 | 6.53E-10 |
| rs3098876   | 43.898889 | 6.54E-10 |
| rs12445247  | 43.898813 | 6.54E-10 |
| rs1617988   | 43.897711 | 6.54E-10 |
| rs2069832   | 43.896235 | 6.55E-10 |
| rs12600968  | 43.894085 | 6.55E-10 |
| rs3098880   | 43.892279 | 6.56E-10 |
| rs7314151   | 43.889381 | 6.57E-10 |
| rs1650791   | 43.887047 | 6.58E-10 |
| rs3110256   | 43.886769 | 6.58E-10 |
| rs12185981  | 43.886066 | 6.58E-10 |
| rs7316024   | 43.885409 | 6.58E-10 |
| rs62375585  | 43.884564 | 6.59E-10 |
| rs3098868   | 43.883915 | 6.59E-10 |
| rs11972203  | 43.876164 | 6.62E-10 |
| rs17142890  | 43.875535 | 6.62E-10 |
| rs11972176  | 43.873080 | 6.63E-10 |
| rs2732103   | 43.870242 | 6.64E-10 |
| rs4671503   | 43.868666 | 6.64E-10 |
| rs10058142  | 43.866516 | 6.65E-10 |
| rs116018601 | 43.861185 | 6.67E-10 |
| rs10905520  | 43.861132 | 6.67E-10 |
| rs1741708   | 43.859496 | 6.67E-10 |

|            |           |          |
|------------|-----------|----------|
| rs61921506 | 43.858948 | 6.68E-10 |
| rs1617333  | 43.857258 | 6.68E-10 |
| rs6122154  | 43.856618 | 6.68E-10 |
| rs12700204 | 43.855881 | 6.69E-10 |
| rs12700206 | 43.855238 | 6.69E-10 |
| rs12151606 | 43.854245 | 6.69E-10 |
| rs7246313  | 43.845808 | 6.72E-10 |
| rs7730971  | 43.844597 | 6.73E-10 |
| rs1317700  | 43.842998 | 6.73E-10 |
| rs6122158  | 43.842040 | 6.74E-10 |
| rs2956610  | 43.838369 | 6.75E-10 |
| rs1389206  | 43.836032 | 6.76E-10 |
| rs1859044  | 43.834706 | 6.76E-10 |
| rs61840209 | 43.834382 | 6.76E-10 |
| rs7916897  | 43.826292 | 6.79E-10 |
| rs1716169  | 43.824441 | 6.80E-10 |
| rs7505519  | 43.824338 | 6.80E-10 |
| rs17142880 | 43.821961 | 6.81E-10 |
| rs2732114  | 43.821347 | 6.81E-10 |
| rs178799   | 43.818632 | 6.82E-10 |
| rs3098871  | 43.816252 | 6.83E-10 |
| rs1151622  | 43.815228 | 6.83E-10 |
| rs2732108  | 43.815126 | 6.83E-10 |
| rs9264533  | 43.812716 | 6.84E-10 |
| rs4739744  | 43.812516 | 6.84E-10 |
| rs2732113  | 43.812109 | 6.84E-10 |
| rs2732112  | 43.810172 | 6.85E-10 |
| rs7599472  | 43.809747 | 6.85E-10 |
| rs4472418  | 43.807917 | 6.86E-10 |
| rs1038984  | 43.803143 | 6.88E-10 |
| rs10024216 | 43.802402 | 6.88E-10 |
| rs751310   | 43.802143 | 6.88E-10 |
| rs66507521 | 43.801977 | 6.88E-10 |
| rs2639951  | 43.799588 | 6.89E-10 |
| rs17656442 | 43.798271 | 6.90E-10 |
| rs1493203  | 43.797277 | 6.90E-10 |
| rs2732109  | 43.796553 | 6.90E-10 |
| rs178801   | 43.790509 | 6.92E-10 |
| rs60493340 | 43.789061 | 6.93E-10 |
| rs2732110  | 43.788678 | 6.93E-10 |
| rs9890012  | 43.786421 | 6.94E-10 |
| rs2732104  | 43.785145 | 6.94E-10 |
| rs2390339  | 43.784619 | 6.95E-10 |
| rs978224   | 43.780464 | 6.96E-10 |
| rs6813193  | 43.780231 | 6.96E-10 |
| rs4268544  | 43.779528 | 6.96E-10 |



|            |           |          |
|------------|-----------|----------|
| rs13208583 | 43.779439 | 6.96E-10 |
| rs12584934 | 43.775413 | 6.98E-10 |
| rs11236766 | 43.773300 | 6.99E-10 |
| rs12956949 | 43.772080 | 6.99E-10 |
| rs2732094  | 43.767117 | 7.01E-10 |
| rs178817   | 43.763109 | 7.03E-10 |
| rs4822040  | 43.762847 | 7.03E-10 |
| rs71381191 | 43.760861 | 7.03E-10 |
| rs67316120 | 43.758255 | 7.04E-10 |
| rs1019296  | 43.757579 | 7.05E-10 |
| rs1063318  | 43.755173 | 7.06E-10 |
| rs7290990  | 43.751329 | 7.07E-10 |
| rs2639957  | 43.749057 | 7.08E-10 |
| rs6854090  | 43.748469 | 7.08E-10 |
| rs7201783  | 43.748393 | 7.08E-10 |
| rs419344   | 43.748260 | 7.08E-10 |
| rs4996789  | 43.744756 | 7.09E-10 |
| rs56193008 | 43.739587 | 7.11E-10 |
| rs9270493  | 43.737781 | 7.12E-10 |
| rs2390340  | 43.735966 | 7.13E-10 |
| rs10905467 | 43.735549 | 7.13E-10 |
| rs4288027  | 43.733288 | 7.14E-10 |
| rs7796906  | 43.732944 | 7.14E-10 |
| rs10249562 | 43.731612 | 7.14E-10 |
| rs11646067 | 43.727908 | 7.16E-10 |
| rs1474347  | 43.727579 | 7.16E-10 |
| rs10226404 | 43.726356 | 7.16E-10 |
| rs2893001  | 43.721397 | 7.18E-10 |
| rs2834905  | 43.721395 | 7.18E-10 |
| rs9271421  | 43.720750 | 7.19E-10 |
| rs2732097  | 43.715931 | 7.20E-10 |
| rs178820   | 43.714803 | 7.21E-10 |
| rs2390338  | 43.714179 | 7.21E-10 |
| rs16924291 | 43.712659 | 7.22E-10 |
| rs11466661 | 43.709588 | 7.23E-10 |
| rs72693791 | 43.707338 | 7.24E-10 |
| rs17142913 | 43.706820 | 7.24E-10 |
| rs9342224  | 43.702696 | 7.25E-10 |
| rs178829   | 43.702682 | 7.25E-10 |
| rs10091471 | 43.702418 | 7.26E-10 |
| rs10241931 | 43.695165 | 7.28E-10 |
| rs6465759  | 43.693522 | 7.29E-10 |
| rs178793   | 43.693187 | 7.29E-10 |
| rs2732129  | 43.692760 | 7.29E-10 |
| rs1481804  | 43.692301 | 7.29E-10 |
| rs178657   | 43.689342 | 7.31E-10 |

|             |           |          |
|-------------|-----------|----------|
| rs148906978 | 43.688170 | 7.31E-10 |
| rs12824685  | 43.687141 | 7.31E-10 |
| rs12189101  | 43.685904 | 7.32E-10 |
| rs11123421  | 43.682130 | 7.33E-10 |
| rs2732099   | 43.678833 | 7.35E-10 |
| rs6472561   | 43.675572 | 7.36E-10 |
| rs17142918  | 43.674877 | 7.36E-10 |
| rs10852833  | 43.669182 | 7.38E-10 |
| rs4851547   | 43.669158 | 7.38E-10 |
| rs11649878  | 43.668952 | 7.39E-10 |
| rs4367982   | 43.665302 | 7.40E-10 |
| rs3110246   | 43.663244 | 7.41E-10 |
| rs57585149  | 43.663046 | 7.41E-10 |
| rs3208008   | 43.661748 | 7.41E-10 |
| rs28707317  | 43.660402 | 7.42E-10 |
| rs2382721   | 43.658924 | 7.43E-10 |
| rs12467251  | 43.656591 | 7.43E-10 |
| rs10241774  | 43.655340 | 7.44E-10 |
| rs4074909   | 43.655202 | 7.44E-10 |
| rs62376852  | 43.653128 | 7.45E-10 |
| rs58009868  | 43.648680 | 7.47E-10 |
| rs901069    | 43.647426 | 7.47E-10 |
| rs4078067   | 43.647102 | 7.47E-10 |
| rs62323942  | 43.642896 | 7.49E-10 |
| rs4759371   | 43.641267 | 7.50E-10 |
| rs7290991   | 43.637146 | 7.51E-10 |
| rs1389204   | 43.635720 | 7.52E-10 |
| rs3098874   | 43.633507 | 7.53E-10 |
| rs180107    | 43.626794 | 7.55E-10 |
| rs10246511  | 43.611209 | 7.62E-10 |
| rs178816    | 43.609128 | 7.62E-10 |
| rs146738303 | 43.607234 | 7.63E-10 |
| rs113414512 | 43.607203 | 7.63E-10 |
| rs28588611  | 43.599516 | 7.66E-10 |
| rs7792720   | 43.598006 | 7.67E-10 |
| rs11023339  | 43.595965 | 7.68E-10 |
| rs806319    | 43.595591 | 7.68E-10 |
| rs10261997  | 43.595373 | 7.68E-10 |
| rs6975827   | 43.593533 | 7.69E-10 |
| rs8134848   | 43.591217 | 7.70E-10 |
| rs12213604  | 43.588165 | 7.71E-10 |
| rs4385375   | 43.585991 | 7.72E-10 |
| rs3110249   | 43.583371 | 7.73E-10 |
| rs10257080  | 43.583225 | 7.73E-10 |
| rs180110    | 43.574844 | 7.76E-10 |
| rs17701489  | 43.571989 | 7.78E-10 |

|             |           |          |
|-------------|-----------|----------|
| rs3110248   | 43.565748 | 7.80E-10 |
| rs11083569  | 43.564701 | 7.81E-10 |
| rs112792621 | 43.561471 | 7.82E-10 |
| rs7012577   | 43.560174 | 7.83E-10 |
| rs3098883   | 43.559943 | 7.83E-10 |
| rs3110247   | 43.559495 | 7.83E-10 |
| rs2253829   | 43.559195 | 7.83E-10 |
| rs12219850  | 43.558934 | 7.83E-10 |
| rs9326826   | 43.555092 | 7.85E-10 |
| rs11647383  | 43.550763 | 7.86E-10 |
| rs4385376   | 43.548883 | 7.87E-10 |
| rs34917985  | 43.547281 | 7.88E-10 |
| rs12483860  | 43.544181 | 7.89E-10 |
| rs34432983  | 43.538508 | 7.92E-10 |
| rs4571761   | 43.538164 | 7.92E-10 |
| rs806316    | 43.538160 | 7.92E-10 |
| rs1650794   | 43.534612 | 7.93E-10 |
| rs178792    | 43.532525 | 7.94E-10 |
| rs35700143  | 43.531547 | 7.94E-10 |
| rs10068224  | 43.530796 | 7.95E-10 |
| rs58825568  | 43.527568 | 7.96E-10 |
| rs4504667   | 43.524428 | 7.97E-10 |
| rs3098881   | 43.521194 | 7.99E-10 |
| rs34391805  | 43.518174 | 8.00E-10 |
| rs10226057  | 43.517859 | 8.00E-10 |
| rs1601405   | 43.513701 | 8.02E-10 |
| rs45495097  | 43.513603 | 8.02E-10 |
| rs10784460  | 43.511488 | 8.03E-10 |
| rs12901440  | 43.507331 | 8.05E-10 |
| rs13102903  | 43.502851 | 8.07E-10 |
| rs7222840   | 43.500277 | 8.08E-10 |
| rs17142906  | 43.500215 | 8.08E-10 |
| rs4565087   | 43.500194 | 8.08E-10 |
| rs1318815   | 43.498534 | 8.09E-10 |
| rs35185289  | 43.489620 | 8.12E-10 |
| rs145315307 | 43.486600 | 8.14E-10 |
| rs1908033   | 43.485845 | 8.14E-10 |
| rs2639897   | 43.485260 | 8.14E-10 |
| rs58717592  | 43.484896 | 8.14E-10 |
| rs2639898   | 43.484259 | 8.15E-10 |
| rs57773794  | 43.480101 | 8.16E-10 |
| rs10261508  | 43.473310 | 8.19E-10 |
| rs2639896   | 43.463358 | 8.24E-10 |
| rs2732096   | 43.462685 | 8.24E-10 |
| rs2735947   | 43.460822 | 8.25E-10 |
| rs7792726   | 43.460698 | 8.25E-10 |

|             |           |          |
|-------------|-----------|----------|
| rs6941112   | 43.460189 | 8.25E-10 |
| rs2732095   | 43.458959 | 8.26E-10 |
| rs62351974  | 43.458774 | 8.26E-10 |
| rs113399372 | 43.454999 | 8.27E-10 |
| rs10741659  | 43.454616 | 8.28E-10 |
| rs76667225  | 43.453022 | 8.28E-10 |
| rs17220157  | 43.445170 | 8.32E-10 |
| rs1908036   | 43.441627 | 8.33E-10 |
| rs2253823   | 43.438055 | 8.35E-10 |
| rs1908035   | 43.437730 | 8.35E-10 |
| rs12943476  | 43.434363 | 8.37E-10 |
| rs9909697   | 43.434140 | 8.37E-10 |
| rs12931920  | 43.421923 | 8.42E-10 |
| rs13292724  | 43.420042 | 8.43E-10 |
| rs72731157  | 43.407026 | 8.49E-10 |
| rs2732102   | 43.401169 | 8.51E-10 |
| rs1859045   | 43.400907 | 8.52E-10 |
| rs1353058   | 43.400092 | 8.52E-10 |
| rs56352991  | 43.399259 | 8.52E-10 |
| rs12119849  | 43.398129 | 8.53E-10 |
| rs1353057   | 43.397932 | 8.53E-10 |
| rs2639960   | 43.397452 | 8.53E-10 |
| rs10273566  | 43.392364 | 8.55E-10 |
| rs12423843  | 43.388857 | 8.57E-10 |
| rs73186318  | 43.387816 | 8.58E-10 |
| rs9272462   | 43.387037 | 8.58E-10 |
| rs410649    | 43.385793 | 8.58E-10 |
| rs2732093   | 43.381916 | 8.60E-10 |
| rs6472563   | 43.379540 | 8.61E-10 |
| rs2639958   | 43.378589 | 8.62E-10 |
| rs115222658 | 43.373986 | 8.64E-10 |
| rs9611615   | 43.373583 | 8.64E-10 |
| rs604912    | 43.369382 | 8.66E-10 |
| rs10905510  | 43.365756 | 8.68E-10 |
| rs7306755   | 43.364028 | 8.68E-10 |
| rs6472562   | 43.363641 | 8.69E-10 |
| rs142273365 | 43.356629 | 8.72E-10 |
| rs57926126  | 43.355943 | 8.72E-10 |
| rs11023334  | 43.354489 | 8.73E-10 |
| rs3219184   | 43.352920 | 8.74E-10 |
| rs27437     | 43.352637 | 8.74E-10 |
| rs10784469  | 43.350616 | 8.75E-10 |
| rs62177797  | 43.347071 | 8.76E-10 |
| rs4247364   | 43.344000 | 8.78E-10 |
| rs12484254  | 43.341817 | 8.79E-10 |
| rs1800795   | 43.336125 | 8.81E-10 |

|             |           |          |
|-------------|-----------|----------|
| rs35667594  | 43.335849 | 8.82E-10 |
| rs1859047   | 43.334790 | 8.82E-10 |
| rs9903464   | 43.330001 | 8.84E-10 |
| rs11018488  | 43.326608 | 8.86E-10 |
| rs41269265  | 43.325562 | 8.86E-10 |
| rs11172072  | 43.324572 | 8.87E-10 |
| rs1908034   | 43.323351 | 8.87E-10 |
| rs7830515   | 43.321729 | 8.88E-10 |
| rs62011001  | 43.318186 | 8.90E-10 |
| rs2011053   | 43.316099 | 8.91E-10 |
| rs111766349 | 43.315913 | 8.91E-10 |
| rs850523    | 43.315001 | 8.91E-10 |
| rs5758311   | 43.313777 | 8.92E-10 |
| rs2568500   | 43.313471 | 8.92E-10 |
| rs9611613   | 43.311863 | 8.93E-10 |
| rs2639899   | 43.311113 | 8.93E-10 |
| rs10228112  | 43.307298 | 8.95E-10 |
| rs3110259   | 43.302891 | 8.97E-10 |
| rs8133843   | 43.298508 | 8.99E-10 |
| rs4410081   | 43.298032 | 8.99E-10 |
| rs12674694  | 43.297016 | 9.00E-10 |
| rs11172071  | 43.295688 | 9.01E-10 |
| rs981625    | 43.293894 | 9.01E-10 |
| rs6993326   | 43.292730 | 9.02E-10 |
| rs75931670  | 43.285768 | 9.05E-10 |
| rs4794044   | 43.279943 | 9.08E-10 |
| rs2746431   | 43.275993 | 9.10E-10 |
| rs34856835  | 43.272259 | 9.12E-10 |
| rs933494    | 43.269554 | 9.13E-10 |
| rs6581640   | 43.269251 | 9.13E-10 |
| rs1317701   | 43.259125 | 9.18E-10 |
| rs1509141   | 43.249488 | 9.23E-10 |
| rs2757647   | 43.244801 | 9.25E-10 |
| rs444826    | 43.241987 | 9.27E-10 |
| rs12509944  | 43.239944 | 9.28E-10 |
| rs13052959  | 43.232101 | 9.31E-10 |
| rs11079869  | 43.231367 | 9.32E-10 |
| rs61921525  | 43.231281 | 9.32E-10 |
| rs7487637   | 43.230255 | 9.32E-10 |
| rs4482773   | 43.229701 | 9.33E-10 |
| rs10878286  | 43.229548 | 9.33E-10 |
| rs10878287  | 43.226301 | 9.34E-10 |
| rs34872811  | 43.224877 | 9.35E-10 |
| rs1969354   | 43.223619 | 9.36E-10 |
| rs8076864   | 43.218548 | 9.38E-10 |
| rs143498544 | 43.215860 | 9.40E-10 |

|             |           |          |
|-------------|-----------|----------|
| rs1859138   | 43.215067 | 9.40E-10 |
| rs115751886 | 43.213828 | 9.41E-10 |
| rs68155163  | 43.209574 | 9.43E-10 |
| rs12449852  | 43.208963 | 9.43E-10 |
| rs13191474  | 43.207716 | 9.44E-10 |
| rs6633      | 43.204512 | 9.45E-10 |
| rs7302024   | 43.199204 | 9.48E-10 |
| rs2951185   | 43.192971 | 9.51E-10 |
| rs4895369   | 43.192318 | 9.51E-10 |
| rs1572198   | 43.190893 | 9.52E-10 |
| rs12945855  | 43.189347 | 9.53E-10 |
| rs2884488   | 43.182923 | 9.56E-10 |
| rs5758434   | 43.180513 | 9.57E-10 |
| rs13195040  | 43.178126 | 9.59E-10 |
| rs7201780   | 43.171485 | 9.62E-10 |
| rs162907    | 43.170827 | 9.62E-10 |
| rs7479201   | 43.169243 | 9.63E-10 |
| rs67468102  | 43.168290 | 9.64E-10 |
| rs10773001  | 43.165824 | 9.65E-10 |
| rs58003764  | 43.162745 | 9.66E-10 |
| rs4851546   | 43.161782 | 9.67E-10 |
| rs5758415   | 43.157583 | 9.69E-10 |
| rs7980687   | 43.155467 | 9.70E-10 |
| rs941305    | 43.143091 | 9.77E-10 |
| rs62076449  | 43.140858 | 9.78E-10 |
| rs12934622  | 43.139880 | 9.78E-10 |
| rs35201382  | 43.139078 | 9.79E-10 |
| rs10920573  | 43.138095 | 9.79E-10 |
| rs10265538  | 43.128873 | 9.84E-10 |
| rs10504497  | 43.125641 | 9.86E-10 |
| rs3758715   | 43.124522 | 9.86E-10 |
| rs4794029   | 43.116864 | 9.90E-10 |
| rs12716981  | 43.114860 | 9.91E-10 |
| rs8133814   | 43.113065 | 9.92E-10 |
| rs13196692  | 43.111205 | 9.93E-10 |
| rs9272328   | 43.107953 | 9.95E-10 |
| rs12509233  | 43.106562 | 9.96E-10 |
| rs71444571  | 43.103631 | 9.97E-10 |
| rs77786718  | 43.100103 | 9.99E-10 |
| rs6994814   | 43.099877 | 9.99E-10 |
| rs2738758   | 43.096703 | 1.00E-09 |
| rs2413656   | 43.090523 | 1.00E-09 |
| rs9325180   | 43.088216 | 1.01E-09 |
| rs4759415   | 43.083415 | 1.01E-09 |
| rs17142992  | 43.083030 | 1.01E-09 |
| rs4762099   | 43.078485 | 1.01E-09 |

|             |           |          |
|-------------|-----------|----------|
| rs11734337  | 43.077572 | 1.01E-09 |
| rs7138942   | 43.076401 | 1.01E-09 |
| rs3758716   | 43.073202 | 1.01E-09 |
| rs4434651   | 43.063402 | 1.02E-09 |
| rs13197384  | 43.060445 | 1.02E-09 |
| rs8138780   | 43.059491 | 1.02E-09 |
| rs62375582  | 43.059396 | 1.02E-09 |
| rs1727334   | 43.058384 | 1.02E-09 |
| rs35046559  | 43.056341 | 1.02E-09 |
| rs9585056   | 43.055840 | 1.02E-09 |
| rs1716171   | 43.051833 | 1.02E-09 |
| rs73236649  | 43.048964 | 1.03E-09 |
| rs4762100   | 43.048499 | 1.03E-09 |
| rs73107993  | 43.046904 | 1.03E-09 |
| rs4851544   | 43.044801 | 1.03E-09 |
| rs35836875  | 43.044090 | 1.03E-09 |
| rs4619206   | 43.039805 | 1.03E-09 |
| rs371709    | 43.038579 | 1.03E-09 |
| rs28660983  | 43.037368 | 1.03E-09 |
| rs1494507   | 43.035510 | 1.03E-09 |
| rs2259858   | 43.034927 | 1.03E-09 |
| rs2890723   | 43.031665 | 1.04E-09 |
| rs9344992   | 43.031581 | 1.04E-09 |
| rs11023369  | 43.026482 | 1.04E-09 |
| rs1807669   | 43.023501 | 1.04E-09 |
| rs35396714  | 43.022007 | 1.04E-09 |
| rs12283565  | 43.018760 | 1.04E-09 |
| rs17005690  | 43.013528 | 1.05E-09 |
| rs6857547   | 43.012522 | 1.05E-09 |
| rs1012870   | 43.011977 | 1.05E-09 |
| rs2750483   | 43.005414 | 1.05E-09 |
| rs6847640   | 43.004807 | 1.05E-09 |
| rs7716474   | 43.001918 | 1.05E-09 |
| rs11096955  | 43.001045 | 1.05E-09 |
| rs667239    | 43.000687 | 1.05E-09 |
| rs7958224   | 42.999665 | 1.05E-09 |
| rs150254595 | 42.998238 | 1.05E-09 |
| rs12910090  | 42.995647 | 1.06E-09 |
| rs652888    | 42.994292 | 1.06E-09 |
| rs661713    | 42.994035 | 1.06E-09 |
| rs62076405  | 42.989351 | 1.06E-09 |
| rs11947612  | 42.986268 | 1.06E-09 |
| rs2157992   | 42.975581 | 1.07E-09 |
| rs12498631  | 42.972813 | 1.07E-09 |
| rs11256086  | 42.968262 | 1.07E-09 |
| rs7734673   | 42.959874 | 1.08E-09 |

|             |           |          |
|-------------|-----------|----------|
| rs941306    | 42.959177 | 1.08E-09 |
| rs4794037   | 42.952164 | 1.08E-09 |
| rs7993214   | 42.949270 | 1.08E-09 |
| rs9306355   | 42.949216 | 1.08E-09 |
| rs4924464   | 42.943699 | 1.09E-09 |
| rs9911690   | 42.940130 | 1.09E-09 |
| rs10273787  | 42.933171 | 1.09E-09 |
| rs1481265   | 42.930177 | 1.09E-09 |
| rs738422    | 42.929789 | 1.09E-09 |
| rs2337934   | 42.925370 | 1.10E-09 |
| rs1969666   | 42.923950 | 1.10E-09 |
| rs147431626 | 42.919027 | 1.10E-09 |
| rs34196306  | 42.918836 | 1.10E-09 |
| rs16872768  | 42.918720 | 1.10E-09 |
| rs9603612   | 42.917302 | 1.10E-09 |
| rs12261421  | 42.912533 | 1.10E-09 |
| rs11175781  | 42.902463 | 1.11E-09 |
| rs146040170 | 42.901697 | 1.11E-09 |
| rs6089961   | 42.901608 | 1.11E-09 |
| rs4857961   | 42.900993 | 1.11E-09 |
| rs132781    | 42.900041 | 1.11E-09 |
| rs11639224  | 42.899679 | 1.11E-09 |
| rs12909921  | 42.895631 | 1.11E-09 |
| rs2655387   | 42.891647 | 1.12E-09 |
| rs2732107   | 42.891235 | 1.12E-09 |
| rs62510667  | 42.890251 | 1.12E-09 |
| rs6461667   | 42.888935 | 1.12E-09 |
| rs62076399  | 42.884880 | 1.12E-09 |
| rs28635831  | 42.884038 | 1.12E-09 |
| rs11987501  | 42.877126 | 1.12E-09 |
| rs12876235  | 42.875419 | 1.13E-09 |
| rs13098877  | 42.870317 | 1.13E-09 |
| rs35863913  | 42.869322 | 1.13E-09 |
| rs12934276  | 42.868434 | 1.13E-09 |
| rs7225083   | 42.867074 | 1.13E-09 |
| rs10504480  | 42.865700 | 1.13E-09 |
| rs7974199   | 42.864459 | 1.13E-09 |
| rs2257440   | 42.862654 | 1.13E-09 |
| rs7954156   | 42.860838 | 1.13E-09 |
| rs4858223   | 42.856892 | 1.14E-09 |
| rs62177820  | 42.856392 | 1.14E-09 |
| rs10732654  | 42.855084 | 1.14E-09 |
| rs34150729  | 42.853978 | 1.14E-09 |
| rs10784464  | 42.853806 | 1.14E-09 |
| rs10784463  | 42.853309 | 1.14E-09 |
| rs61696910  | 42.847828 | 1.14E-09 |



|             |           |          |
|-------------|-----------|----------|
| rs1825514   | 42.846879 | 1.14E-09 |
| rs4858226   | 42.843045 | 1.15E-09 |
| rs944337    | 42.841925 | 1.15E-09 |
| rs2834909   | 42.841658 | 1.15E-09 |
| rs1603067   | 42.840398 | 1.15E-09 |
| rs2687938   | 42.836606 | 1.15E-09 |
| rs59665366  | 42.833887 | 1.15E-09 |
| rs370409    | 42.829385 | 1.15E-09 |
| rs9271724   | 42.828503 | 1.15E-09 |
| rs10519198  | 42.825866 | 1.16E-09 |
| rs12936233  | 42.822320 | 1.16E-09 |
| rs1004548   | 42.818364 | 1.16E-09 |
| rs1494511   | 42.815905 | 1.16E-09 |
| rs28375404  | 42.814449 | 1.16E-09 |
| rs11175783  | 42.814136 | 1.16E-09 |
| rs16947943  | 42.813391 | 1.16E-09 |
| rs9933843   | 42.808351 | 1.17E-09 |
| rs113626350 | 42.807180 | 1.17E-09 |
| rs61894530  | 42.806931 | 1.17E-09 |
| rs2030189   | 42.801770 | 1.17E-09 |
| rs7974027   | 42.799156 | 1.17E-09 |
| rs178790    | 42.798784 | 1.17E-09 |
| rs2614267   | 42.798604 | 1.17E-09 |
| rs7487602   | 42.798055 | 1.17E-09 |
| rs7224548   | 42.797449 | 1.17E-09 |
| rs7717027   | 42.794732 | 1.17E-09 |
| rs908621    | 42.793146 | 1.18E-09 |
| rs7960759   | 42.792015 | 1.18E-09 |
| rs12824957  | 42.788958 | 1.18E-09 |
| rs1809415   | 42.788357 | 1.18E-09 |
| rs1049631   | 42.786083 | 1.18E-09 |
| rs1716170   | 42.781492 | 1.18E-09 |
| rs35243817  | 42.781158 | 1.18E-09 |
| rs535777    | 42.778795 | 1.18E-09 |
| rs3917243   | 42.776811 | 1.19E-09 |
| rs7581630   | 42.775397 | 1.19E-09 |
| rs944338    | 42.771305 | 1.19E-09 |
| rs8040544   | 42.764649 | 1.19E-09 |
| rs7731020   | 42.764179 | 1.19E-09 |
| rs17026654  | 42.763244 | 1.19E-09 |
| rs187161887 | 42.761239 | 1.20E-09 |
| rs6874626   | 42.759786 | 1.20E-09 |
| rs1980252   | 42.758122 | 1.20E-09 |
| rs7835018   | 42.755286 | 1.20E-09 |
| rs4393428   | 42.753664 | 1.20E-09 |
| rs61894509  | 42.753482 | 1.20E-09 |

|             |           |          |
|-------------|-----------|----------|
| rs6725694   | 42.751504 | 1.20E-09 |
| rs2901580   | 42.749778 | 1.20E-09 |
| rs12821431  | 42.749643 | 1.20E-09 |
| rs2614263   | 42.749305 | 1.20E-09 |
| rs114773933 | 42.747473 | 1.20E-09 |
| rs970924    | 42.737005 | 1.21E-09 |
| rs2112347   | 42.735196 | 1.21E-09 |
| rs76712448  | 42.733013 | 1.21E-09 |
| rs35952432  | 42.731245 | 1.22E-09 |
| rs145912914 | 42.728583 | 1.22E-09 |
| rs12716982  | 42.726984 | 1.22E-09 |
| rs11532107  | 42.723211 | 1.22E-09 |
| rs72793543  | 42.721482 | 1.22E-09 |
| rs12937703  | 42.721228 | 1.22E-09 |
| rs3826360   | 42.721199 | 1.22E-09 |
| rs11236775  | 42.720477 | 1.22E-09 |
| rs28474755  | 42.720209 | 1.22E-09 |
| rs10741664  | 42.715089 | 1.23E-09 |
| rs132784    | 42.707894 | 1.23E-09 |
| rs62531713  | 42.702647 | 1.23E-09 |
| rs140545087 | 42.701952 | 1.23E-09 |
| rs8035486   | 42.699792 | 1.24E-09 |
| rs7608513   | 42.698078 | 1.24E-09 |
| rs178795    | 42.695942 | 1.24E-09 |
| rs9270578   | 42.695628 | 1.24E-09 |
| rs11916786  | 42.695008 | 1.24E-09 |
| rs2051809   | 42.694979 | 1.24E-09 |
| rs13191227  | 42.686508 | 1.24E-09 |
| rs7210761   | 42.685666 | 1.24E-09 |
| rs3844059   | 42.678676 | 1.25E-09 |
| rs2030188   | 42.670932 | 1.25E-09 |
| rs6578277   | 42.668202 | 1.26E-09 |
| rs7120886   | 42.664202 | 1.26E-09 |
| rs34613987  | 42.663496 | 1.26E-09 |
| rs2856997   | 42.663355 | 1.26E-09 |
| rs6503503   | 42.654865 | 1.27E-09 |
| rs73178638  | 42.654777 | 1.27E-09 |
| rs2304645   | 42.652719 | 1.27E-09 |
| rs17521024  | 42.652490 | 1.27E-09 |
| rs72615159  | 42.649079 | 1.27E-09 |
| rs9894864   | 42.648944 | 1.27E-09 |
| rs1533703   | 42.648564 | 1.27E-09 |
| rs17612503  | 42.644443 | 1.27E-09 |
| rs12322888  | 42.644060 | 1.27E-09 |
| rs9270965   | 42.642781 | 1.27E-09 |
| rs1072669   | 42.641786 | 1.27E-09 |

|             |           |          |
|-------------|-----------|----------|
| rs35737523  | 42.641607 | 1.27E-09 |
| rs28683528  | 42.637405 | 1.28E-09 |
| rs5751136   | 42.637093 | 1.28E-09 |
| rs9898170   | 42.636961 | 1.28E-09 |
| rs3024634   | 42.631059 | 1.28E-09 |
| rs2427530   | 42.631014 | 1.28E-09 |
| rs3785633   | 42.628681 | 1.28E-09 |
| rs1549293   | 42.627971 | 1.28E-09 |
| rs343474    | 42.627325 | 1.28E-09 |
| rs11072765  | 42.625683 | 1.29E-09 |
| rs11667379  | 42.625276 | 1.29E-09 |
| rs10073038  | 42.623973 | 1.29E-09 |
| rs12230663  | 42.623180 | 1.29E-09 |
| rs6881648   | 42.621476 | 1.29E-09 |
| rs10876960  | 42.620235 | 1.29E-09 |
| rs6896296   | 42.619338 | 1.29E-09 |
| rs116746348 | 42.617988 | 1.29E-09 |
| rs3813309   | 42.616387 | 1.29E-09 |
| rs6595954   | 42.616063 | 1.29E-09 |
| rs2227282   | 42.604639 | 1.30E-09 |
| rs4535443   | 42.601599 | 1.30E-09 |
| rs1996664   | 42.595030 | 1.31E-09 |
| rs3816745   | 42.592726 | 1.31E-09 |
| rs1024255   | 42.588924 | 1.31E-09 |
| rs139285716 | 42.585086 | 1.31E-09 |
| rs4795362   | 42.575532 | 1.32E-09 |
| rs9892675   | 42.574820 | 1.32E-09 |
| rs55954733  | 42.574095 | 1.32E-09 |
| rs111985258 | 42.573417 | 1.32E-09 |
| rs62568155  | 42.572051 | 1.32E-09 |
| rs81598     | 42.566811 | 1.33E-09 |
| rs2639939   | 42.566041 | 1.33E-09 |
| rs12938268  | 42.562939 | 1.33E-09 |
| rs4889619   | 42.560902 | 1.33E-09 |
| rs2227284   | 42.559340 | 1.33E-09 |
| rs2548994   | 42.557137 | 1.33E-09 |
| rs6705322   | 42.556690 | 1.33E-09 |
| rs11096957  | 42.556679 | 1.33E-09 |
| rs2030190   | 42.556522 | 1.33E-09 |
| rs5758409   | 42.551171 | 1.34E-09 |
| rs10068370  | 42.548580 | 1.34E-09 |
| rs17144046  | 42.547606 | 1.34E-09 |
| rs12253707  | 42.546926 | 1.34E-09 |
| rs11168245  | 42.545643 | 1.34E-09 |
| rs178796    | 42.544932 | 1.34E-09 |
| rs6741817   | 42.542680 | 1.34E-09 |

|             |           |          |
|-------------|-----------|----------|
| rs17486987  | 42.542619 | 1.34E-09 |
| rs2292794   | 42.537486 | 1.35E-09 |
| rs4794040   | 42.532847 | 1.35E-09 |
| rs3781094   | 42.532401 | 1.35E-09 |
| rs1821907   | 42.532043 | 1.35E-09 |
| rs113825099 | 42.531354 | 1.35E-09 |
| rs12939831  | 42.527091 | 1.35E-09 |
| rs113476886 | 42.526288 | 1.35E-09 |
| rs11245968  | 42.525857 | 1.36E-09 |
| rs114442993 | 42.525094 | 1.36E-09 |
| rs1860249   | 42.524989 | 1.36E-09 |
| rs62076392  | 42.524455 | 1.36E-09 |
| rs67240003  | 42.522327 | 1.36E-09 |
| rs12872801  | 42.521813 | 1.36E-09 |
| rs2427531   | 42.521797 | 1.36E-09 |
| rs7749305   | 42.521683 | 1.36E-09 |
| rs178791    | 42.520832 | 1.36E-09 |
| rs4671470   | 42.519304 | 1.36E-09 |
| rs7223438   | 42.518557 | 1.36E-09 |
| rs12597511  | 42.516841 | 1.36E-09 |
| rs57676414  | 42.514847 | 1.36E-09 |
| rs4795357   | 42.511763 | 1.37E-09 |
| rs582591    | 42.509044 | 1.37E-09 |
| rs10278110  | 42.506146 | 1.37E-09 |
| rs9264242   | 42.502114 | 1.37E-09 |
| rs12451075  | 42.500640 | 1.37E-09 |
| rs5751144   | 42.499312 | 1.37E-09 |
| rs2064189   | 42.496941 | 1.38E-09 |
| rs7571697   | 42.496507 | 1.38E-09 |
| rs60084385  | 42.494473 | 1.38E-09 |
| rs35406341  | 42.490705 | 1.38E-09 |
| rs76156757  | 42.489959 | 1.38E-09 |
| rs34011920  | 42.485330 | 1.38E-09 |
| rs4671471   | 42.484508 | 1.39E-09 |
| rs6517292   | 42.481722 | 1.39E-09 |
| rs7580384   | 42.466547 | 1.40E-09 |
| rs2413652   | 42.464660 | 1.40E-09 |
| rs4420575   | 42.461209 | 1.40E-09 |
| rs62057121  | 42.459233 | 1.40E-09 |
| rs72784427  | 42.455246 | 1.41E-09 |
| rs2699388   | 42.453121 | 1.41E-09 |
| rs174592    | 42.451059 | 1.41E-09 |
| rs17132909  | 42.448914 | 1.41E-09 |
| rs6736803   | 42.448003 | 1.41E-09 |
| rs1603179   | 42.445077 | 1.41E-09 |
| rs6090007   | 42.440931 | 1.42E-09 |

|             |           |          |
|-------------|-----------|----------|
| rs4649037   | 42.440647 | 1.42E-09 |
| rs1005733   | 42.438559 | 1.42E-09 |
| rs12284920  | 42.436357 | 1.42E-09 |
| rs28617673  | 42.435173 | 1.42E-09 |
| rs13217619  | 42.431341 | 1.42E-09 |
| rs67624109  | 42.430757 | 1.43E-09 |
| rs10478039  | 42.426875 | 1.43E-09 |
| rs12875311  | 42.426158 | 1.43E-09 |
| rs61869689  | 42.424881 | 1.43E-09 |
| rs12600625  | 42.422301 | 1.43E-09 |
| rs10277230  | 42.421897 | 1.43E-09 |
| rs7558796   | 42.418606 | 1.43E-09 |
| rs9899002   | 42.412693 | 1.44E-09 |
| rs340899    | 42.412654 | 1.44E-09 |
| rs34953377  | 42.395219 | 1.45E-09 |
| rs112254607 | 42.390292 | 1.46E-09 |
| rs184941    | 42.390211 | 1.46E-09 |
| rs932172    | 42.387389 | 1.46E-09 |
| rs132792    | 42.385252 | 1.46E-09 |
| rs13011799  | 42.383900 | 1.46E-09 |
| rs733300    | 42.377948 | 1.47E-09 |
| rs117189732 | 42.376644 | 1.47E-09 |
| rs3824074   | 42.372900 | 1.47E-09 |
| rs1978485   | 42.370128 | 1.47E-09 |
| rs10903112  | 42.370047 | 1.47E-09 |
| rs2416984   | 42.369309 | 1.47E-09 |
| rs11684108  | 42.366704 | 1.47E-09 |
| rs7319041   | 42.365042 | 1.48E-09 |
| rs62242075  | 42.362669 | 1.48E-09 |
| rs56314408  | 42.362474 | 1.48E-09 |
| rs9747090   | 42.361515 | 1.48E-09 |
| rs12613301  | 42.361066 | 1.48E-09 |
| rs13377416  | 42.357065 | 1.48E-09 |
| rs12379417  | 42.356390 | 1.48E-09 |
| rs8041628   | 42.342421 | 1.49E-09 |
| rs11868809  | 42.337537 | 1.50E-09 |
| rs6704593   | 42.332621 | 1.50E-09 |
| rs62062277  | 42.329949 | 1.50E-09 |
| rs1847529   | 42.324809 | 1.51E-09 |
| rs199498    | 42.323571 | 1.51E-09 |
| rs35205105  | 42.321346 | 1.51E-09 |
| rs7626218   | 42.320848 | 1.51E-09 |
| rs10987055  | 42.318480 | 1.51E-09 |
| rs6504604   | 42.314708 | 1.52E-09 |
| rs34864796  | 42.313904 | 1.52E-09 |
| rs2121904   | 42.313309 | 1.52E-09 |

|             |           |          |
|-------------|-----------|----------|
| rs12298826  | 42.312989 | 1.52E-09 |
| rs12948560  | 42.310190 | 1.52E-09 |
| rs1535048   | 42.306951 | 1.52E-09 |
| rs7224296   | 42.303274 | 1.52E-09 |
| rs132798    | 42.303147 | 1.53E-09 |
| rs9373131   | 42.299032 | 1.53E-09 |
| rs4794038   | 42.295565 | 1.53E-09 |
| rs11830103  | 42.294973 | 1.53E-09 |
| rs2614266   | 42.292782 | 1.53E-09 |
| rs112480703 | 42.290829 | 1.54E-09 |
| rs62568154  | 42.289984 | 1.54E-09 |
| rs11185551  | 42.289943 | 1.54E-09 |
| rs12713477  | 42.289321 | 1.54E-09 |
| rs17132708  | 42.288189 | 1.54E-09 |
| rs77527755  | 42.286258 | 1.54E-09 |
| rs2066625   | 42.285831 | 1.54E-09 |
| rs2058850   | 42.280095 | 1.54E-09 |
| rs7320598   | 42.279820 | 1.54E-09 |
| rs2157990   | 42.278659 | 1.55E-09 |
| rs2014427   | 42.278189 | 1.55E-09 |
| rs2176416   | 42.273180 | 1.55E-09 |
| rs28582096  | 42.269952 | 1.55E-09 |
| rs2299004   | 42.265979 | 1.56E-09 |
| rs1978487   | 42.264900 | 1.56E-09 |
| rs59709310  | 42.260003 | 1.56E-09 |
| rs55722796  | 42.256745 | 1.56E-09 |
| rs66943836  | 42.255980 | 1.56E-09 |
| rs1939469   | 42.254869 | 1.56E-09 |
| rs10819083  | 42.253339 | 1.57E-09 |
| rs132802    | 42.252264 | 1.57E-09 |
| rs17607619  | 42.251676 | 1.57E-09 |
| rs1597145   | 42.250216 | 1.57E-09 |
| rs4759417   | 42.249729 | 1.57E-09 |
| rs2292795   | 42.248273 | 1.57E-09 |
| rs10987043  | 42.248120 | 1.57E-09 |
| rs2677436   | 42.242588 | 1.57E-09 |
| rs17521129  | 42.242577 | 1.57E-09 |
| rs2672792   | 42.240335 | 1.58E-09 |
| rs881862    | 42.239727 | 1.58E-09 |
| rs7279489   | 42.235668 | 1.58E-09 |
| rs1411350   | 42.235240 | 1.58E-09 |
| rs10950916  | 42.233765 | 1.58E-09 |
| rs9611542   | 42.232605 | 1.58E-09 |
| rs2898858   | 42.232377 | 1.58E-09 |
| rs73107980  | 42.230694 | 1.58E-09 |
| rs6747657   | 42.228494 | 1.59E-09 |

|             |           |          |
|-------------|-----------|----------|
| rs2361357   | 42.224656 | 1.59E-09 |
| rs148269941 | 42.215440 | 1.60E-09 |
| rs4536480   | 42.215357 | 1.60E-09 |
| rs8832      | 42.211305 | 1.60E-09 |
| rs12920271  | 42.210689 | 1.60E-09 |
| rs11168244  | 42.207663 | 1.60E-09 |
| rs178797    | 42.207066 | 1.60E-09 |
| rs13054514  | 42.206113 | 1.61E-09 |
| rs9272413   | 42.205277 | 1.61E-09 |
| rs5758411   | 42.204756 | 1.61E-09 |
| rs1295810   | 42.201597 | 1.61E-09 |
| rs17672016  | 42.201060 | 1.61E-09 |
| rs2003816   | 42.200411 | 1.61E-09 |
| rs10760344  | 42.200210 | 1.61E-09 |
| rs4857960   | 42.199283 | 1.61E-09 |
| rs9747404   | 42.197965 | 1.61E-09 |
| rs12316131  | 42.191290 | 1.62E-09 |
| rs6888726   | 42.190374 | 1.62E-09 |
| rs7221336   | 42.189845 | 1.62E-09 |
| rs62430832  | 42.187791 | 1.62E-09 |
| rs2677438   | 42.187429 | 1.62E-09 |
| rs32658     | 42.182772 | 1.63E-09 |
| rs748741    | 42.181424 | 1.63E-09 |
| rs17134961  | 42.180755 | 1.63E-09 |
| rs360808    | 42.178652 | 1.63E-09 |
| rs73172096  | 42.173898 | 1.63E-09 |
| rs4759277   | 42.173864 | 1.63E-09 |
| rs34997336  | 42.170840 | 1.64E-09 |
| rs10268102  | 42.167499 | 1.64E-09 |
| rs1568175   | 42.166769 | 1.64E-09 |
| rs12990914  | 42.162436 | 1.64E-09 |
| rs11647442  | 42.161455 | 1.64E-09 |
| rs1243402   | 42.157412 | 1.65E-09 |
| rs55634267  | 42.155723 | 1.65E-09 |
| rs4776888   | 42.154447 | 1.65E-09 |
| rs28413626  | 42.154092 | 1.65E-09 |
| rs1106956   | 42.154089 | 1.65E-09 |
| rs2699390   | 42.143881 | 1.66E-09 |
| rs2058851   | 42.138690 | 1.66E-09 |
| rs4239134   | 42.135813 | 1.67E-09 |
| rs2023823   | 42.131524 | 1.67E-09 |
| rs35436671  | 42.130408 | 1.67E-09 |
| rs5758414   | 42.128483 | 1.67E-09 |
| rs6754730   | 42.127460 | 1.67E-09 |
| rs4759416   | 42.127103 | 1.67E-09 |
| rs7584404   | 42.123852 | 1.68E-09 |

|             |           |          |
|-------------|-----------|----------|
| rs1390069   | 42.123794 | 1.68E-09 |
| rs62260723  | 42.123559 | 1.68E-09 |
| rs4704230   | 42.120487 | 1.68E-09 |
| rs1465840   | 42.119940 | 1.68E-09 |
| rs10207356  | 42.119787 | 1.68E-09 |
| rs3934505   | 42.119362 | 1.68E-09 |
| rs619192    | 42.114374 | 1.69E-09 |
| rs178789    | 42.111187 | 1.69E-09 |
| rs10063635  | 42.107152 | 1.69E-09 |
| rs1402275   | 42.105654 | 1.69E-09 |
| rs56010116  | 42.102391 | 1.70E-09 |
| rs673780    | 42.098306 | 1.70E-09 |
| rs2235849   | 42.097297 | 1.70E-09 |
| rs3843642   | 42.095423 | 1.70E-09 |
| rs62076442  | 42.094093 | 1.70E-09 |
| rs11168249  | 42.093173 | 1.70E-09 |
| rs6716091   | 42.091442 | 1.71E-09 |
| rs749767    | 42.091268 | 1.71E-09 |
| rs35716472  | 42.090020 | 1.71E-09 |
| rs73203066  | 42.086888 | 1.71E-09 |
| rs4787956   | 42.083940 | 1.71E-09 |
| rs4996788   | 42.083298 | 1.71E-09 |
| rs2115026   | 42.083055 | 1.71E-09 |
| rs2015353   | 42.082330 | 1.71E-09 |
| rs678455    | 42.082053 | 1.71E-09 |
| rs2066626   | 42.081342 | 1.72E-09 |
| rs12673441  | 42.077319 | 1.72E-09 |
| rs7808457   | 42.073459 | 1.72E-09 |
| rs11090056  | 42.073152 | 1.72E-09 |
| rs732569    | 42.071069 | 1.72E-09 |
| rs1390070   | 42.070744 | 1.73E-09 |
| rs16948042  | 42.069816 | 1.73E-09 |
| rs17098224  | 42.069113 | 1.73E-09 |
| rs10124367  | 42.066826 | 1.73E-09 |
| rs11078337  | 42.065332 | 1.73E-09 |
| rs178794    | 42.056498 | 1.74E-09 |
| rs10506522  | 42.055659 | 1.74E-09 |
| rs827458    | 42.054863 | 1.74E-09 |
| rs2256672   | 42.053935 | 1.74E-09 |
| rs150786584 | 42.053480 | 1.74E-09 |
| rs11792816  | 42.051170 | 1.74E-09 |
| rs10491128  | 42.049719 | 1.74E-09 |
| rs10036208  | 42.047750 | 1.75E-09 |
| rs13051961  | 42.046704 | 1.75E-09 |
| rs998731    | 42.045466 | 1.75E-09 |
| rs1005734   | 42.042418 | 1.75E-09 |



|             |           |          |
|-------------|-----------|----------|
| rs174460    | 42.041734 | 1.75E-09 |
| rs9274107   | 42.039862 | 1.75E-09 |
| rs2735733   | 42.035140 | 1.76E-09 |
| rs11236746  | 42.034798 | 1.76E-09 |
| rs2411979   | 42.033245 | 1.76E-09 |
| rs7815270   | 42.031269 | 1.76E-09 |
| rs17781283  | 42.030959 | 1.76E-09 |
| rs1390071   | 42.029313 | 1.76E-09 |
| rs28458312  | 42.029062 | 1.76E-09 |
| rs13231160  | 42.028941 | 1.76E-09 |
| rs2732111   | 42.025872 | 1.77E-09 |
| rs1860248   | 42.024750 | 1.77E-09 |
| rs5751135   | 42.022886 | 1.77E-09 |
| rs13197633  | 42.018622 | 1.77E-09 |
| rs2148200   | 42.017027 | 1.78E-09 |
| rs2464042   | 42.015470 | 1.78E-09 |
| rs10217579  | 42.011996 | 1.78E-09 |
| rs7394747   | 42.004999 | 1.79E-09 |
| rs72839477  | 42.002924 | 1.79E-09 |
| rs11713935  | 41.997786 | 1.79E-09 |
| rs12174872  | 41.995224 | 1.80E-09 |
| rs10784468  | 41.992585 | 1.80E-09 |
| rs111413387 | 41.991537 | 1.80E-09 |
| rs34517439  | 41.991361 | 1.80E-09 |
| rs9709250   | 41.990455 | 1.80E-09 |
| rs957924    | 41.989075 | 1.80E-09 |
| rs62242077  | 41.988999 | 1.80E-09 |
| rs32652     | 41.984967 | 1.81E-09 |
| rs62322719  | 41.982006 | 1.81E-09 |
| rs1972503   | 41.977701 | 1.81E-09 |
| rs113925422 | 41.976948 | 1.81E-09 |
| rs2090479   | 41.976514 | 1.81E-09 |
| rs10179596  | 41.968221 | 1.82E-09 |
| rs2036532   | 41.968150 | 1.82E-09 |
| rs7577952   | 41.964891 | 1.82E-09 |
| rs61162043  | 41.964668 | 1.83E-09 |
| rs13207689  | 41.964495 | 1.83E-09 |
| rs28576953  | 41.962917 | 1.83E-09 |
| rs1243403   | 41.957206 | 1.83E-09 |
| rs111511018 | 41.956975 | 1.83E-09 |
| rs13062095  | 41.954881 | 1.83E-09 |
| rs62322714  | 41.948320 | 1.84E-09 |
| rs2738778   | 41.948020 | 1.84E-09 |
| rs7585313   | 41.946679 | 1.84E-09 |
| rs11249203  | 41.945635 | 1.84E-09 |
| rs7723767   | 41.944118 | 1.85E-09 |

|             |           |          |
|-------------|-----------|----------|
| rs10760345  | 41.940603 | 1.85E-09 |
| rs78724452  | 41.940481 | 1.85E-09 |
| rs2075859   | 41.938164 | 1.85E-09 |
| rs7712806   | 41.935296 | 1.85E-09 |
| rs7479551   | 41.929335 | 1.86E-09 |
| rs10832955  | 41.928660 | 1.86E-09 |
| rs1060105   | 41.925605 | 1.86E-09 |
| rs7202296   | 41.918793 | 1.87E-09 |
| rs273897    | 41.913995 | 1.87E-09 |
| rs6724160   | 41.913382 | 1.88E-09 |
| rs971891    | 41.913237 | 1.88E-09 |
| rs11175785  | 41.909208 | 1.88E-09 |
| rs2516455   | 41.909185 | 1.88E-09 |
| rs4671065   | 41.904317 | 1.88E-09 |
| rs59488637  | 41.899323 | 1.89E-09 |
| rs11894445  | 41.898012 | 1.89E-09 |
| rs3934898   | 41.897896 | 1.89E-09 |
| rs2516050   | 41.897345 | 1.89E-09 |
| rs72793554  | 41.893030 | 1.90E-09 |
| rs62381978  | 41.889601 | 1.90E-09 |
| rs57708073  | 41.889515 | 1.90E-09 |
| rs72793556  | 41.889201 | 1.90E-09 |
| rs7127117   | 41.889031 | 1.90E-09 |
| rs28406193  | 41.886037 | 1.90E-09 |
| rs2002792   | 41.885009 | 1.90E-09 |
| rs9557170   | 41.884445 | 1.90E-09 |
| rs12700391  | 41.883427 | 1.91E-09 |
| rs1374895   | 41.881613 | 1.91E-09 |
| rs61401018  | 41.880905 | 1.91E-09 |
| rs7571325   | 41.880738 | 1.91E-09 |
| rs3985087   | 41.879758 | 1.91E-09 |
| rs10784466  | 41.879382 | 1.91E-09 |
| rs11883730  | 41.878332 | 1.91E-09 |
| rs116696906 | 41.877295 | 1.91E-09 |
| rs62381979  | 41.872418 | 1.92E-09 |
| rs4671516   | 41.872244 | 1.92E-09 |
| rs12429765  | 41.871294 | 1.92E-09 |
| rs11236747  | 41.871255 | 1.92E-09 |
| rs1829261   | 41.866956 | 1.92E-09 |
| rs6736029   | 41.866273 | 1.92E-09 |
| rs61894534  | 41.862328 | 1.93E-09 |
| rs7752903   | 41.861479 | 1.93E-09 |
| rs4266392   | 41.853698 | 1.94E-09 |
| rs11070712  | 41.851707 | 1.94E-09 |
| rs617182    | 41.850245 | 1.94E-09 |
| rs12345427  | 41.849333 | 1.94E-09 |

|             |           |          |
|-------------|-----------|----------|
| rs13051252  | 41.849332 | 1.94E-09 |
| rs35112839  | 41.845775 | 1.94E-09 |
| rs10477719  | 41.844827 | 1.94E-09 |
| rs5758404   | 41.841974 | 1.95E-09 |
| rs1623866   | 41.836009 | 1.95E-09 |
| rs10833086  | 41.834963 | 1.96E-09 |
| rs6800001   | 41.834255 | 1.96E-09 |
| rs9527725   | 41.833557 | 1.96E-09 |
| rs11642841  | 41.826741 | 1.96E-09 |
| rs12128472  | 41.826307 | 1.96E-09 |
| rs2884489   | 41.825308 | 1.97E-09 |
| rs4722180   | 41.824970 | 1.97E-09 |
| rs72780903  | 41.822950 | 1.97E-09 |
| rs6546016   | 41.811961 | 1.98E-09 |
| rs35120058  | 41.809040 | 1.98E-09 |
| rs12899131  | 41.808452 | 1.98E-09 |
| rs6581639   | 41.807416 | 1.98E-09 |
| rs181332597 | 41.807040 | 1.98E-09 |
| rs796527    | 41.805664 | 1.99E-09 |
| rs9272326   | 41.800559 | 1.99E-09 |
| rs6592650   | 41.796828 | 1.99E-09 |
| rs1892958   | 41.794784 | 2.00E-09 |
| rs1243395   | 41.794548 | 2.00E-09 |
| rs4426908   | 41.792802 | 2.00E-09 |
| rs10784467  | 41.792079 | 2.00E-09 |
| rs34811474  | 41.791858 | 2.00E-09 |
| rs4277638   | 41.791307 | 2.00E-09 |
| rs3757387   | 41.790084 | 2.00E-09 |
| rs6732791   | 41.789217 | 2.00E-09 |
| rs4478449   | 41.788200 | 2.00E-09 |
| rs6848423   | 41.784498 | 2.01E-09 |
| rs10491104  | 41.784103 | 2.01E-09 |
| rs7649428   | 41.782281 | 2.01E-09 |
| rs2243294   | 41.779795 | 2.01E-09 |
| rs11255965  | 41.778312 | 2.01E-09 |
| rs199504    | 41.777325 | 2.02E-09 |
| rs2153927   | 41.777238 | 2.02E-09 |
| rs1155268   | 41.776969 | 2.02E-09 |
| rs7817350   | 41.776576 | 2.02E-09 |
| rs10178095  | 41.774827 | 2.02E-09 |
| rs3797580   | 41.769732 | 2.02E-09 |
| rs7219014   | 41.768845 | 2.02E-09 |
| rs28414828  | 41.768758 | 2.02E-09 |
| rs57790584  | 41.768045 | 2.03E-09 |
| rs7636495   | 41.763580 | 2.03E-09 |
| rs9270576   | 41.761159 | 2.03E-09 |

|            |           |          |
|------------|-----------|----------|
| rs1448160  | 41.759331 | 2.04E-09 |
| rs5758432  | 41.758459 | 2.04E-09 |
| rs3778754  | 41.756572 | 2.04E-09 |
| rs34236618 | 41.754321 | 2.04E-09 |
| rs34071253 | 41.754049 | 2.04E-09 |
| rs28583837 | 41.745585 | 2.05E-09 |
| rs2071473  | 41.745072 | 2.05E-09 |
| rs2501716  | 41.743406 | 2.05E-09 |
| rs34115022 | 41.742749 | 2.05E-09 |
| rs10794666 | 41.740997 | 2.05E-09 |
| rs4597955  | 41.737142 | 2.06E-09 |
| rs806321   | 41.731115 | 2.07E-09 |
| rs3785629  | 41.725385 | 2.07E-09 |
| rs13218537 | 41.724027 | 2.07E-09 |
| rs6830230  | 41.723066 | 2.07E-09 |
| rs6581636  | 41.722144 | 2.08E-09 |
| rs5744002  | 41.721526 | 2.08E-09 |
| rs80325942 | 41.718836 | 2.08E-09 |
| rs62322721 | 41.715105 | 2.08E-09 |
| rs199510   | 41.712113 | 2.09E-09 |
| rs2434723  | 41.709352 | 2.09E-09 |
| rs6714298  | 41.705660 | 2.09E-09 |
| rs9997652  | 41.705067 | 2.09E-09 |
| rs67816163 | 41.705030 | 2.09E-09 |
| rs10519237 | 41.703840 | 2.10E-09 |
| rs72773148 | 41.701544 | 2.10E-09 |
| rs7591708  | 41.701176 | 2.10E-09 |
| rs4671067  | 41.698564 | 2.10E-09 |
| rs12618974 | 41.694419 | 2.11E-09 |
| rs17690965 | 41.693179 | 2.11E-09 |
| rs12779263 | 41.691850 | 2.11E-09 |
| rs1922421  | 41.690412 | 2.11E-09 |
| rs11860191 | 41.687065 | 2.11E-09 |
| rs4637127  | 41.685242 | 2.12E-09 |
| rs6581638  | 41.684458 | 2.12E-09 |
| rs2889896  | 41.684452 | 2.12E-09 |
| rs28472704 | 41.683447 | 2.12E-09 |
| rs4781047  | 41.682006 | 2.12E-09 |
| rs11022939 | 41.681861 | 2.12E-09 |
| rs55676330 | 41.675033 | 2.13E-09 |
| rs4836520  | 41.674736 | 2.13E-09 |
| rs12655675 | 41.673464 | 2.13E-09 |
| rs6545988  | 41.673172 | 2.13E-09 |
| rs7256192  | 41.672633 | 2.13E-09 |
| rs7749323  | 41.671912 | 2.13E-09 |
| rs10986318 | 41.670756 | 2.13E-09 |

|             |           |          |
|-------------|-----------|----------|
| rs7655514   | 41.669642 | 2.13E-09 |
| rs6546001   | 41.668775 | 2.14E-09 |
| rs11709806  | 41.667264 | 2.14E-09 |
| rs12427782  | 41.667090 | 2.14E-09 |
| rs1517404   | 41.665888 | 2.14E-09 |
| rs11078900  | 41.663908 | 2.14E-09 |
| rs73178641  | 41.663437 | 2.14E-09 |
| rs2746438   | 41.662720 | 2.14E-09 |
| rs4671482   | 41.661081 | 2.14E-09 |
| rs1507101   | 41.660608 | 2.14E-09 |
| rs2110104   | 41.659767 | 2.15E-09 |
| rs1470002   | 41.656425 | 2.15E-09 |
| rs2071540   | 41.655331 | 2.15E-09 |
| rs2454065   | 41.653868 | 2.15E-09 |
| rs4705965   | 41.649481 | 2.16E-09 |
| rs954144    | 41.645293 | 2.16E-09 |
| rs4292253   | 41.642027 | 2.17E-09 |
| rs62280667  | 41.640167 | 2.17E-09 |
| rs2434722   | 41.638377 | 2.17E-09 |
| rs7558922   | 41.635325 | 2.17E-09 |
| rs59684465  | 41.633782 | 2.18E-09 |
| rs2244989   | 41.629029 | 2.18E-09 |
| rs12906970  | 41.628511 | 2.18E-09 |
| rs174604    | 41.628337 | 2.18E-09 |
| rs9603608   | 41.627593 | 2.18E-09 |
| rs11691718  | 41.626487 | 2.18E-09 |
| rs6545992   | 41.625926 | 2.18E-09 |
| rs2026190   | 41.618267 | 2.19E-09 |
| rs9611556   | 41.617826 | 2.19E-09 |
| rs12938397  | 41.616178 | 2.20E-09 |
| rs9271629   | 41.613179 | 2.20E-09 |
| rs11236767  | 41.611377 | 2.20E-09 |
| rs152049    | 41.609311 | 2.20E-09 |
| rs78054474  | 41.607492 | 2.21E-09 |
| rs13195291  | 41.607317 | 2.21E-09 |
| rs7223346   | 41.601651 | 2.21E-09 |
| rs73057087  | 41.601589 | 2.21E-09 |
| rs12281800  | 41.600756 | 2.21E-09 |
| rs1446564   | 41.600232 | 2.21E-09 |
| rs113108526 | 41.597289 | 2.22E-09 |
| rs7383287   | 41.596541 | 2.22E-09 |
| rs10073911  | 41.594033 | 2.22E-09 |
| rs392310    | 41.589468 | 2.23E-09 |
| rs6967330   | 41.588224 | 2.23E-09 |
| rs62376853  | 41.587481 | 2.23E-09 |
| rs1400687   | 41.585466 | 2.23E-09 |

|             |           |          |
|-------------|-----------|----------|
| rs56242584  | 41.583502 | 2.23E-09 |
| rs45579240  | 41.581577 | 2.24E-09 |
| rs4671483   | 41.579996 | 2.24E-09 |
| rs11078321  | 41.579495 | 2.24E-09 |
| rs72782617  | 41.578833 | 2.24E-09 |
| rs17670280  | 41.577678 | 2.24E-09 |
| rs6708627   | 41.577066 | 2.24E-09 |
| rs10201254  | 41.575226 | 2.24E-09 |
| rs2098250   | 41.571031 | 2.25E-09 |
| rs6584537   | 41.570666 | 2.25E-09 |
| rs3807307   | 41.568648 | 2.25E-09 |
| rs28429148  | 41.566361 | 2.25E-09 |
| rs9266303   | 41.565951 | 2.25E-09 |
| rs1910030   | 41.564782 | 2.26E-09 |
| rs968567    | 41.564530 | 2.26E-09 |
| rs7219294   | 41.563555 | 2.26E-09 |
| rs28809230  | 41.561792 | 2.26E-09 |
| rs17520975  | 41.561064 | 2.26E-09 |
| rs10878288  | 41.560887 | 2.26E-09 |
| rs4547648   | 41.559639 | 2.26E-09 |
| rs9687749   | 41.554408 | 2.27E-09 |
| rs6904596   | 41.552899 | 2.27E-09 |
| rs1243401   | 41.551502 | 2.27E-09 |
| rs12945463  | 41.551389 | 2.27E-09 |
| rs10044304  | 41.551044 | 2.27E-09 |
| rs12612773  | 41.550568 | 2.27E-09 |
| rs12105140  | 41.550332 | 2.27E-09 |
| rs12700193  | 41.546974 | 2.28E-09 |
| rs2157991   | 41.538290 | 2.29E-09 |
| rs10057967  | 41.536978 | 2.29E-09 |
| rs2421887   | 41.533432 | 2.29E-09 |
| rs10169292  | 41.533259 | 2.29E-09 |
| rs17244648  | 41.533243 | 2.29E-09 |
| rs6737820   | 41.533187 | 2.29E-09 |
| rs11168250  | 41.532616 | 2.30E-09 |
| rs147581729 | 41.532016 | 2.30E-09 |
| rs4671068   | 41.530184 | 2.30E-09 |
| rs2288004   | 41.525495 | 2.30E-09 |
| rs4706017   | 41.524346 | 2.31E-09 |
| rs1400688   | 41.523295 | 2.31E-09 |
| rs206916    | 41.522937 | 2.31E-09 |
| rs2361359   | 41.520958 | 2.31E-09 |
| rs76599963  | 41.520624 | 2.31E-09 |
| rs13062826  | 41.519092 | 2.31E-09 |
| rs12536825  | 41.517973 | 2.31E-09 |
| rs12275758  | 41.517053 | 2.31E-09 |

|             |           |          |
|-------------|-----------|----------|
| rs4648883   | 41.516819 | 2.31E-09 |
| rs9274490   | 41.515835 | 2.32E-09 |
| rs147642589 | 41.513798 | 2.32E-09 |
| rs10903115  | 41.508872 | 2.32E-09 |
| rs12267     | 41.508031 | 2.33E-09 |
| rs9936329   | 41.506125 | 2.33E-09 |
| rs11078331  | 41.506119 | 2.33E-09 |
| rs917051    | 41.503697 | 2.33E-09 |
| rs12420789  | 41.503390 | 2.33E-09 |
| rs6704562   | 41.501478 | 2.33E-09 |
| rs7715806   | 41.501147 | 2.33E-09 |
| rs6545989   | 41.498353 | 2.34E-09 |
| rs76009041  | 41.497053 | 2.34E-09 |
| rs2897442   | 41.491657 | 2.35E-09 |
| rs10250152  | 41.489062 | 2.35E-09 |
| rs138234416 | 41.486468 | 2.35E-09 |
| rs112689589 | 41.484595 | 2.35E-09 |
| rs2066627   | 41.482313 | 2.36E-09 |
| rs6749633   | 41.478530 | 2.36E-09 |
| rs7561802   | 41.476806 | 2.36E-09 |
| rs4671472   | 41.476411 | 2.36E-09 |
| rs12600751  | 41.468958 | 2.37E-09 |
| rs4602212   | 41.466826 | 2.38E-09 |
| rs6755183   | 41.465596 | 2.38E-09 |
| rs244505    | 41.464611 | 2.38E-09 |
| rs4671485   | 41.462196 | 2.38E-09 |
| rs889548    | 41.458481 | 2.39E-09 |
| rs7591562   | 41.457466 | 2.39E-09 |
| rs7349440   | 41.454719 | 2.39E-09 |
| rs7926367   | 41.454178 | 2.39E-09 |
| rs56073665  | 41.453734 | 2.39E-09 |
| rs17208670  | 41.451778 | 2.40E-09 |
| rs7214891   | 41.451477 | 2.40E-09 |
| rs35956754  | 41.450965 | 2.40E-09 |
| rs4671473   | 41.449975 | 2.40E-09 |
| rs56231981  | 41.448884 | 2.40E-09 |
| rs1883825   | 41.447638 | 2.40E-09 |
| rs4671474   | 41.446776 | 2.40E-09 |
| rs9350191   | 41.445641 | 2.40E-09 |
| rs12304248  | 41.444699 | 2.40E-09 |
| rs12743471  | 41.442856 | 2.41E-09 |
| rs6714139   | 41.442846 | 2.41E-09 |
| rs6708804   | 41.431934 | 2.42E-09 |
| rs715199    | 41.430275 | 2.42E-09 |
| rs2668668   | 41.426708 | 2.43E-09 |
| rs9611567   | 41.425383 | 2.43E-09 |

|             |           |          |
|-------------|-----------|----------|
| rs2166497   | 41.424182 | 2.43E-09 |
| rs7955457   | 41.421484 | 2.43E-09 |
| rs4886982   | 41.420945 | 2.44E-09 |
| rs1544380   | 41.420349 | 2.44E-09 |
| rs1517405   | 41.417813 | 2.44E-09 |
| rs10818937  | 41.415161 | 2.44E-09 |
| rs7196161   | 41.408363 | 2.45E-09 |
| rs1843147   | 41.407993 | 2.45E-09 |
| rs10957533  | 41.403843 | 2.46E-09 |
| rs9309771   | 41.399098 | 2.46E-09 |
| rs6545986   | 41.398569 | 2.46E-09 |
| rs4671479   | 41.396854 | 2.47E-09 |
| rs1107342   | 41.394734 | 2.47E-09 |
| rs7906754   | 41.393575 | 2.47E-09 |
| rs3764354   | 41.392894 | 2.47E-09 |
| rs4671484   | 41.392393 | 2.47E-09 |
| rs11973964  | 41.388451 | 2.48E-09 |
| rs77941694  | 41.388142 | 2.48E-09 |
| rs28592876  | 41.386903 | 2.48E-09 |
| rs7559137   | 41.386188 | 2.48E-09 |
| rs4917991   | 41.385381 | 2.48E-09 |
| rs7599736   | 41.385155 | 2.48E-09 |
| rs1544381   | 41.383608 | 2.48E-09 |
| rs2568498   | 41.383031 | 2.48E-09 |
| rs2699399   | 41.381864 | 2.49E-09 |
| rs4632325   | 41.379509 | 2.49E-09 |
| rs34377746  | 41.379499 | 2.49E-09 |
| rs6724044   | 41.379246 | 2.49E-09 |
| rs73025625  | 41.378558 | 2.49E-09 |
| rs2324082   | 41.378492 | 2.49E-09 |
| rs11057270  | 41.375494 | 2.49E-09 |
| rs11242028  | 41.374614 | 2.50E-09 |
| rs6864091   | 41.374453 | 2.50E-09 |
| rs11249204  | 41.373014 | 2.50E-09 |
| rs6755412   | 41.372489 | 2.50E-09 |
| rs66841633  | 41.372201 | 2.50E-09 |
| rs10213840  | 41.371941 | 2.50E-09 |
| rs6545991   | 41.367851 | 2.50E-09 |
| rs72699866  | 41.366858 | 2.51E-09 |
| rs11244     | 41.366775 | 2.51E-09 |
| rs28722627  | 41.362912 | 2.51E-09 |
| rs150765547 | 41.359142 | 2.52E-09 |
| rs1829927   | 41.357384 | 2.52E-09 |
| rs6885996   | 41.356848 | 2.52E-09 |
| rs17461286  | 41.354763 | 2.52E-09 |
| rs9273076   | 41.354338 | 2.52E-09 |



|             |           |          |
|-------------|-----------|----------|
| rs56223946  | 41.351842 | 2.53E-09 |
| rs272866    | 41.348901 | 2.53E-09 |
| rs77791277  | 41.343759 | 2.54E-09 |
| rs12756558  | 41.340401 | 2.54E-09 |
| rs9607818   | 41.340388 | 2.54E-09 |
| rs6728844   | 41.339458 | 2.54E-09 |
| rs2155221   | 41.334567 | 2.55E-09 |
| rs2324084   | 41.334119 | 2.55E-09 |
| rs13155880  | 41.333605 | 2.55E-09 |
| rs151800    | 41.330479 | 2.55E-09 |
| rs12623431  | 41.325108 | 2.56E-09 |
| rs7306113   | 41.324272 | 2.56E-09 |
| rs9652827   | 41.323864 | 2.56E-09 |
| rs249680    | 41.322766 | 2.57E-09 |
| rs9273032   | 41.322126 | 2.57E-09 |
| rs775748    | 41.320992 | 2.57E-09 |
| rs7694115   | 41.315437 | 2.58E-09 |
| rs61894541  | 41.311159 | 2.58E-09 |
| rs9272343   | 41.310642 | 2.58E-09 |
| rs32657     | 41.309383 | 2.58E-09 |
| rs11242127  | 41.309107 | 2.58E-09 |
| rs11125967  | 41.308190 | 2.59E-09 |
| rs2390715   | 41.306124 | 2.59E-09 |
| rs1721188   | 41.305048 | 2.59E-09 |
| rs4792711   | 41.304814 | 2.59E-09 |
| rs4671476   | 41.303832 | 2.59E-09 |
| rs188577982 | 41.303821 | 2.59E-09 |
| rs6874070   | 41.303087 | 2.59E-09 |
| rs17521010  | 41.297655 | 2.60E-09 |
| rs1727310   | 41.290671 | 2.61E-09 |
| rs6874848   | 41.290664 | 2.61E-09 |
| rs6729132   | 41.290470 | 2.61E-09 |
| rs7953000   | 41.289452 | 2.61E-09 |
| rs992153    | 41.289145 | 2.61E-09 |
| rs174594    | 41.288041 | 2.61E-09 |
| rs7953001   | 41.287685 | 2.61E-09 |
| rs72729172  | 41.284417 | 2.62E-09 |
| rs775746    | 41.280934 | 2.62E-09 |
| rs12700390  | 41.280383 | 2.62E-09 |
| rs2639936   | 41.277689 | 2.63E-09 |
| rs1400686   | 41.277645 | 2.63E-09 |
| rs7781534   | 41.276363 | 2.63E-09 |
| rs2639903   | 41.276320 | 2.63E-09 |
| rs12992737  | 41.273137 | 2.63E-09 |
| rs17725614  | 41.270821 | 2.64E-09 |
| rs1370967   | 41.268641 | 2.64E-09 |

|             |           |          |
|-------------|-----------|----------|
| rs4671475   | 41.266887 | 2.64E-09 |
| rs6706424   | 41.264691 | 2.65E-09 |
| rs4648884   | 41.263862 | 2.65E-09 |
| rs8050048   | 41.262673 | 2.65E-09 |
| rs12657589  | 41.261159 | 2.65E-09 |
| rs10209822  | 41.260985 | 2.65E-09 |
| rs6744720   | 41.259893 | 2.65E-09 |
| rs9733635   | 41.257875 | 2.65E-09 |
| rs3999544   | 41.257340 | 2.66E-09 |
| rs9789351   | 41.255458 | 2.66E-09 |
| rs4578846   | 41.250637 | 2.67E-09 |
| rs7898770   | 41.245135 | 2.67E-09 |
| rs2418898   | 41.244322 | 2.67E-09 |
| rs11255992  | 41.243900 | 2.67E-09 |
| rs10878283  | 41.243516 | 2.68E-09 |
| rs28636834  | 41.243137 | 2.68E-09 |
| rs10066660  | 41.240751 | 2.68E-09 |
| rs9266538   | 41.237920 | 2.68E-09 |
| rs3897401   | 41.237201 | 2.68E-09 |
| rs9270700   | 41.234850 | 2.69E-09 |
| rs2901614   | 41.233967 | 2.69E-09 |
| rs989134    | 41.225496 | 2.70E-09 |
| rs11125965  | 41.224981 | 2.70E-09 |
| rs1370966   | 41.224345 | 2.70E-09 |
| rs202658    | 41.219635 | 2.71E-09 |
| rs9273047   | 41.216170 | 2.71E-09 |
| rs2869571   | 41.216065 | 2.71E-09 |
| rs7570031   | 41.209784 | 2.72E-09 |
| rs13217620  | 41.206324 | 2.73E-09 |
| rs45555239  | 41.206315 | 2.73E-09 |
| rs55913294  | 41.204762 | 2.73E-09 |
| rs763439    | 41.204068 | 2.73E-09 |
| rs62012623  | 41.203029 | 2.73E-09 |
| rs9937521   | 41.200021 | 2.74E-09 |
| rs62568088  | 41.194990 | 2.74E-09 |
| rs118097668 | 41.194251 | 2.75E-09 |
| rs12994711  | 41.192719 | 2.75E-09 |
| rs11168257  | 41.192437 | 2.75E-09 |
| rs36045108  | 41.192202 | 2.75E-09 |
| rs4671481   | 41.192197 | 2.75E-09 |
| rs2028883   | 41.192175 | 2.75E-09 |
| rs67859638  | 41.192139 | 2.75E-09 |
| rs9309772   | 41.191681 | 2.75E-09 |
| rs11691357  | 41.190621 | 2.75E-09 |
| rs12713478  | 41.189709 | 2.75E-09 |
| rs3771182   | 41.184705 | 2.76E-09 |

|             |           |          |
|-------------|-----------|----------|
| rs8378      | 41.183721 | 2.76E-09 |
| rs1517402   | 41.183325 | 2.76E-09 |
| rs7607257   | 41.180760 | 2.77E-09 |
| rs165939    | 41.179573 | 2.77E-09 |
| rs2078050   | 41.178992 | 2.77E-09 |
| rs7570649   | 41.178000 | 2.77E-09 |
| rs10846491  | 41.174882 | 2.77E-09 |
| rs10905384  | 41.174351 | 2.78E-09 |
| rs62290013  | 41.172692 | 2.78E-09 |
| rs6709115   | 41.166436 | 2.79E-09 |
| rs57278988  | 41.165624 | 2.79E-09 |
| rs10513454  | 41.165491 | 2.79E-09 |
| rs3916443   | 41.163837 | 2.79E-09 |
| rs1517401   | 41.163482 | 2.79E-09 |
| rs9326830   | 41.161522 | 2.79E-09 |
| rs10883804  | 41.160707 | 2.80E-09 |
| rs11191489  | 41.160617 | 2.80E-09 |
| rs6708847   | 41.160288 | 2.80E-09 |
| rs10055755  | 41.158519 | 2.80E-09 |
| rs7894588   | 41.158481 | 2.80E-09 |
| rs760805    | 41.155288 | 2.80E-09 |
| rs17450482  | 41.154736 | 2.80E-09 |
| rs7218175   | 41.153582 | 2.81E-09 |
| rs6713500   | 41.153452 | 2.81E-09 |
| rs9327573   | 41.152778 | 2.81E-09 |
| rs262476    | 41.152496 | 2.81E-09 |
| rs7929272   | 41.152025 | 2.81E-09 |
| rs1984839   | 41.151202 | 2.81E-09 |
| rs6502491   | 41.149292 | 2.81E-09 |
| rs6847129   | 41.147824 | 2.81E-09 |
| rs9309773   | 41.145570 | 2.82E-09 |
| rs17674015  | 41.144938 | 2.82E-09 |
| rs17026782  | 41.144901 | 2.82E-09 |
| rs811353    | 41.144773 | 2.82E-09 |
| rs2677437   | 41.143573 | 2.82E-09 |
| rs12713496  | 41.143032 | 2.82E-09 |
| rs4671480   | 41.140199 | 2.83E-09 |
| rs9366651   | 41.139559 | 2.83E-09 |
| rs5751086   | 41.138953 | 2.83E-09 |
| rs340898    | 41.138436 | 2.83E-09 |
| rs10795638  | 41.137447 | 2.83E-09 |
| rs76658708  | 41.135687 | 2.83E-09 |
| rs68183503  | 41.135560 | 2.83E-09 |
| rs139804853 | 41.135113 | 2.83E-09 |
| rs932171    | 41.135005 | 2.83E-09 |
| rs2029004   | 41.133366 | 2.84E-09 |

|            |           |          |
|------------|-----------|----------|
| rs9896441  | 41.132395 | 2.84E-09 |
| rs13197176 | 41.132235 | 2.84E-09 |
| rs262475   | 41.130632 | 2.84E-09 |
| rs17607589 | 41.129748 | 2.84E-09 |
| rs1581497  | 41.129082 | 2.84E-09 |
| rs3785628  | 41.128606 | 2.84E-09 |
| rs61557789 | 41.128314 | 2.84E-09 |
| rs35224895 | 41.127640 | 2.84E-09 |
| rs4671488  | 41.127338 | 2.85E-09 |
| rs10918692 | 41.124440 | 2.85E-09 |
| rs1047985  | 41.121532 | 2.85E-09 |
| rs2393593  | 41.118649 | 2.86E-09 |
| rs17607562 | 41.117902 | 2.86E-09 |
| rs6706180  | 41.117190 | 2.86E-09 |
| rs17587    | 41.116199 | 2.86E-09 |
| rs72793539 | 41.114062 | 2.87E-09 |
| rs13252230 | 41.111163 | 2.87E-09 |
| rs1607205  | 41.109887 | 2.87E-09 |
| rs75530705 | 41.108586 | 2.87E-09 |
| rs1859046  | 41.107409 | 2.88E-09 |
| rs36162059 | 41.106065 | 2.88E-09 |
| rs10883818 | 41.105036 | 2.88E-09 |
| rs11652025 | 41.104449 | 2.88E-09 |
| rs72782628 | 41.103211 | 2.88E-09 |
| rs7605113  | 41.102673 | 2.88E-09 |
| rs6734468  | 41.101996 | 2.88E-09 |
| rs775773   | 41.101267 | 2.88E-09 |
| rs10905385 | 41.100210 | 2.89E-09 |
| rs1597091  | 41.097069 | 2.89E-09 |
| rs10478027 | 41.096272 | 2.89E-09 |
| rs11745474 | 41.093141 | 2.90E-09 |
| rs17461314 | 41.091574 | 2.90E-09 |
| rs244517   | 41.088095 | 2.90E-09 |
| rs10883801 | 41.087820 | 2.91E-09 |
| rs1446565  | 41.087120 | 2.91E-09 |
| rs12353435 | 41.083088 | 2.91E-09 |
| rs7089065  | 41.082296 | 2.91E-09 |
| rs28372579 | 41.074648 | 2.93E-09 |
| rs149949   | 41.071684 | 2.93E-09 |
| rs2189151  | 41.070614 | 2.93E-09 |
| rs73229090 | 41.070094 | 2.93E-09 |
| rs67760877 | 41.069287 | 2.93E-09 |
| rs2285582  | 41.068865 | 2.93E-09 |
| rs11191513 | 41.067344 | 2.94E-09 |
| rs1607204  | 41.066832 | 2.94E-09 |
| rs62073587 | 41.066569 | 2.94E-09 |

|             |           |          |
|-------------|-----------|----------|
| rs11686044  | 41.065772 | 2.94E-09 |
| rs13360546  | 41.065201 | 2.94E-09 |
| rs56050582  | 41.064884 | 2.94E-09 |
| rs3760298   | 41.063250 | 2.94E-09 |
| rs8072351   | 41.061885 | 2.95E-09 |
| rs2715554   | 41.059795 | 2.95E-09 |
| rs775774    | 41.058977 | 2.95E-09 |
| rs10865338  | 41.058757 | 2.95E-09 |
| rs13357459  | 41.058230 | 2.95E-09 |
| rs34720542  | 41.053852 | 2.96E-09 |
| rs11168256  | 41.052997 | 2.96E-09 |
| rs11675647  | 41.052861 | 2.96E-09 |
| rs7717615   | 41.051974 | 2.96E-09 |
| rs5758437   | 41.050197 | 2.96E-09 |
| rs5758426   | 41.049705 | 2.96E-09 |
| rs34662244  | 41.047572 | 2.97E-09 |
| rs6002310   | 41.046910 | 2.97E-09 |
| rs10795635  | 41.046753 | 2.97E-09 |
| rs2677440   | 41.046630 | 2.97E-09 |
| rs262495    | 41.040432 | 2.98E-09 |
| rs13358530  | 41.035989 | 2.99E-09 |
| rs72793552  | 41.034663 | 2.99E-09 |
| rs7089061   | 41.031938 | 2.99E-09 |
| rs11242029  | 41.030680 | 2.99E-09 |
| rs11125977  | 41.030215 | 3.00E-09 |
| rs10131571  | 41.029900 | 3.00E-09 |
| rs10241550  | 41.023950 | 3.01E-09 |
| rs28360634  | 41.022589 | 3.01E-09 |
| rs7947858   | 41.022331 | 3.01E-09 |
| rs12518040  | 41.022150 | 3.01E-09 |
| rs340900    | 41.021071 | 3.01E-09 |
| rs1029809   | 41.020536 | 3.01E-09 |
| rs2286795   | 41.017254 | 3.02E-09 |
| rs35562935  | 41.017204 | 3.02E-09 |
| rs10786730  | 41.015799 | 3.02E-09 |
| rs7920692   | 41.014018 | 3.02E-09 |
| rs11656046  | 41.012795 | 3.02E-09 |
| rs5758274   | 41.012656 | 3.02E-09 |
| rs7980920   | 41.009281 | 3.03E-09 |
| rs7953929   | 41.005426 | 3.04E-09 |
| rs17689955  | 41.004697 | 3.04E-09 |
| rs6744815   | 41.003829 | 3.04E-09 |
| rs113422598 | 41.002532 | 3.04E-09 |
| rs2885259   | 41.000756 | 3.04E-09 |
| rs2041459   | 40.997873 | 3.05E-09 |
| rs9272434   | 40.997233 | 3.05E-09 |

|             |           |          |
|-------------|-----------|----------|
| rs2090478   | 40.996932 | 3.05E-09 |
| rs12248123  | 40.996250 | 3.05E-09 |
| rs34394770  | 40.995213 | 3.05E-09 |
| rs13255735  | 40.991539 | 3.06E-09 |
| rs28562191  | 40.991312 | 3.06E-09 |
| rs10445305  | 40.990834 | 3.06E-09 |
| rs68178216  | 40.989111 | 3.06E-09 |
| rs10116520  | 40.988349 | 3.06E-09 |
| rs132786    | 40.987022 | 3.06E-09 |
| rs1716174   | 40.986867 | 3.07E-09 |
| rs3757856   | 40.986684 | 3.07E-09 |
| rs10071052  | 40.986564 | 3.07E-09 |
| rs36064019  | 40.986148 | 3.07E-09 |
| rs876476    | 40.985306 | 3.07E-09 |
| rs7277833   | 40.983000 | 3.07E-09 |
| rs1609520   | 40.981359 | 3.07E-09 |
| rs9272440   | 40.980760 | 3.07E-09 |
| rs6517291   | 40.980665 | 3.08E-09 |
| rs2041460   | 40.978794 | 3.08E-09 |
| rs6736788   | 40.978367 | 3.08E-09 |
| rs57851052  | 40.975545 | 3.08E-09 |
| rs13143549  | 40.974298 | 3.09E-09 |
| rs10819089  | 40.973227 | 3.09E-09 |
| rs2069845   | 40.973179 | 3.09E-09 |
| rs4671519   | 40.972300 | 3.09E-09 |
| rs6717060   | 40.972234 | 3.09E-09 |
| rs142031128 | 40.970612 | 3.09E-09 |
| rs4795364   | 40.970185 | 3.09E-09 |
| rs13242959  | 40.968576 | 3.09E-09 |
| rs35703209  | 40.968505 | 3.09E-09 |
| rs7894959   | 40.967915 | 3.10E-09 |
| rs10744151  | 40.967406 | 3.10E-09 |
| rs989527    | 40.965908 | 3.10E-09 |
| rs34363096  | 40.964954 | 3.10E-09 |
| rs11650427  | 40.963324 | 3.10E-09 |
| rs1554606   | 40.962701 | 3.10E-09 |
| rs11154806  | 40.955989 | 3.12E-09 |
| rs2732087   | 40.952763 | 3.12E-09 |
| rs8065190   | 40.952002 | 3.12E-09 |
| rs11655704  | 40.950244 | 3.13E-09 |
| rs13255152  | 40.949223 | 3.13E-09 |
| rs12719428  | 40.948938 | 3.13E-09 |
| rs10486394  | 40.946002 | 3.13E-09 |
| rs3823536   | 40.941985 | 3.14E-09 |
| rs62381977  | 40.941723 | 3.14E-09 |
| rs7137286   | 40.939664 | 3.14E-09 |

|             |           |          |
|-------------|-----------|----------|
| rs699451    | 40.937988 | 3.15E-09 |
| rs8064702   | 40.935426 | 3.15E-09 |
| rs959195    | 40.933216 | 3.15E-09 |
| rs56248339  | 40.932987 | 3.15E-09 |
| rs13088318  | 40.932837 | 3.15E-09 |
| rs12913643  | 40.932534 | 3.15E-09 |
| rs1045774   | 40.932039 | 3.16E-09 |
| rs2285583   | 40.927817 | 3.16E-09 |
| rs11125978  | 40.927272 | 3.16E-09 |
| rs132787    | 40.927115 | 3.16E-09 |
| rs9916220   | 40.924810 | 3.17E-09 |
| rs1626703   | 40.923226 | 3.17E-09 |
| rs1523757   | 40.923023 | 3.17E-09 |
| rs737522    | 40.922494 | 3.17E-09 |
| rs6503513   | 40.919839 | 3.18E-09 |
| rs4671517   | 40.916381 | 3.18E-09 |
| rs10786732  | 40.914207 | 3.19E-09 |
| rs2409620   | 40.912639 | 3.19E-09 |
| rs648980    | 40.911976 | 3.19E-09 |
| rs12150493  | 40.907816 | 3.20E-09 |
| rs10905383  | 40.907410 | 3.20E-09 |
| rs10131276  | 40.906914 | 3.20E-09 |
| rs8081033   | 40.906764 | 3.20E-09 |
| rs74807476  | 40.906713 | 3.20E-09 |
| rs7567088   | 40.906453 | 3.20E-09 |
| rs2656058   | 40.906414 | 3.20E-09 |
| rs1883827   | 40.900076 | 3.21E-09 |
| rs36114417  | 40.897225 | 3.21E-09 |
| rs7218074   | 40.895846 | 3.22E-09 |
| rs67868394  | 40.893640 | 3.22E-09 |
| rs1523758   | 40.890674 | 3.23E-09 |
| rs407153    | 40.889938 | 3.23E-09 |
| rs28464598  | 40.889484 | 3.23E-09 |
| rs73123659  | 40.888263 | 3.23E-09 |
| rs6534349   | 40.887583 | 3.23E-09 |
| rs32655     | 40.887295 | 3.23E-09 |
| rs2945032   | 40.883890 | 3.24E-09 |
| rs2677439   | 40.881770 | 3.24E-09 |
| rs144085951 | 40.879727 | 3.24E-09 |
| rs1922292   | 40.878806 | 3.25E-09 |
| rs7359658   | 40.877912 | 3.25E-09 |
| rs2176418   | 40.875922 | 3.25E-09 |
| rs10131290  | 40.875645 | 3.25E-09 |
| rs76138634  | 40.875598 | 3.25E-09 |
| rs1727311   | 40.873269 | 3.26E-09 |
| rs10883810  | 40.871958 | 3.26E-09 |

|             |           |          |
|-------------|-----------|----------|
| rs10131588  | 40.867934 | 3.26E-09 |
| rs34832585  | 40.866370 | 3.27E-09 |
| rs28569885  | 40.865561 | 3.27E-09 |
| rs9399148   | 40.864759 | 3.27E-09 |
| rs4613259   | 40.863842 | 3.27E-09 |
| rs144607208 | 40.862104 | 3.27E-09 |
| rs11671524  | 40.860789 | 3.28E-09 |
| rs1517409   | 40.857714 | 3.28E-09 |
| rs7501488   | 40.856839 | 3.28E-09 |
| rs12438758  | 40.855567 | 3.29E-09 |
| rs7582434   | 40.853373 | 3.29E-09 |
| rs174591    | 40.853103 | 3.29E-09 |
| rs34778766  | 40.849370 | 3.30E-09 |
| rs3827780   | 40.849261 | 3.30E-09 |
| rs187843636 | 40.849259 | 3.30E-09 |
| rs7210488   | 40.847884 | 3.30E-09 |
| rs699452    | 40.847230 | 3.30E-09 |
| rs412430    | 40.845713 | 3.30E-09 |
| rs71559024  | 40.845052 | 3.30E-09 |
| rs908622    | 40.840079 | 3.31E-09 |
| rs8079303   | 40.838459 | 3.32E-09 |
| rs10509764  | 40.836736 | 3.32E-09 |
| rs4722171   | 40.836193 | 3.32E-09 |
| rs2189152   | 40.836012 | 3.32E-09 |
| rs7090140   | 40.835609 | 3.32E-09 |
| rs35129566  | 40.833876 | 3.32E-09 |
| rs56389811  | 40.832081 | 3.33E-09 |
| rs1607206   | 40.831208 | 3.33E-09 |
| rs9894500   | 40.830054 | 3.33E-09 |
| rs17689966  | 40.829325 | 3.33E-09 |
| rs10883820  | 40.829226 | 3.33E-09 |
| rs9272601   | 40.827379 | 3.34E-09 |
| rs59414039  | 40.823445 | 3.34E-09 |
| rs4722169   | 40.822467 | 3.34E-09 |
| rs4511574   | 40.821592 | 3.35E-09 |
| rs10176522  | 40.820769 | 3.35E-09 |
| rs7082375   | 40.820659 | 3.35E-09 |
| rs7073295   | 40.819644 | 3.35E-09 |
| rs3827644   | 40.818574 | 3.35E-09 |
| rs9925964   | 40.818550 | 3.35E-09 |
| rs3804329   | 40.818451 | 3.35E-09 |
| rs10883800  | 40.818245 | 3.35E-09 |
| rs9901219   | 40.817893 | 3.35E-09 |
| rs4671514   | 40.817161 | 3.35E-09 |
| rs13200214  | 40.813544 | 3.36E-09 |
| rs7080462   | 40.813537 | 3.36E-09 |



|             |           |          |
|-------------|-----------|----------|
| rs58395458  | 40.808886 | 3.37E-09 |
| rs196125    | 40.808357 | 3.37E-09 |
| rs9878602   | 40.807438 | 3.37E-09 |
| rs10445306  | 40.804737 | 3.38E-09 |
| rs10283320  | 40.803901 | 3.38E-09 |
| rs1082363   | 40.802980 | 3.38E-09 |
| rs7551358   | 40.801708 | 3.38E-09 |
| rs2338797   | 40.801288 | 3.38E-09 |
| rs7208274   | 40.798433 | 3.39E-09 |
| rs3130695   | 40.797941 | 3.39E-09 |
| rs80085654  | 40.795459 | 3.39E-09 |
| rs10883811  | 40.793425 | 3.40E-09 |
| rs10065536  | 40.791762 | 3.40E-09 |
| rs4313961   | 40.790701 | 3.40E-09 |
| rs11057205  | 40.790634 | 3.40E-09 |
| rs1374892   | 40.789830 | 3.40E-09 |
| rs4527034   | 40.788170 | 3.41E-09 |
| rs58905141  | 40.785198 | 3.41E-09 |
| rs4678524   | 40.784937 | 3.41E-09 |
| rs1389202   | 40.784631 | 3.41E-09 |
| rs2421886   | 40.784152 | 3.41E-09 |
| rs2035924   | 40.783766 | 3.41E-09 |
| rs1493198   | 40.783445 | 3.41E-09 |
| rs262488    | 40.783414 | 3.41E-09 |
| rs61358692  | 40.782999 | 3.41E-09 |
| rs1589720   | 40.778491 | 3.42E-09 |
| rs4671494   | 40.777910 | 3.42E-09 |
| rs35098436  | 40.776241 | 3.43E-09 |
| rs7849781   | 40.773179 | 3.43E-09 |
| rs4429457   | 40.772036 | 3.43E-09 |
| rs17208656  | 40.771431 | 3.44E-09 |
| rs34505829  | 40.770839 | 3.44E-09 |
| rs9271694   | 40.768221 | 3.44E-09 |
| rs1721197   | 40.765927 | 3.45E-09 |
| rs1447841   | 40.764839 | 3.45E-09 |
| rs7096452   | 40.763566 | 3.45E-09 |
| rs62218300  | 40.763012 | 3.45E-09 |
| rs2057456   | 40.762973 | 3.45E-09 |
| rs116485583 | 40.760934 | 3.45E-09 |
| rs2409621   | 40.760645 | 3.46E-09 |
| rs2049218   | 40.760149 | 3.46E-09 |
| rs4722179   | 40.759947 | 3.46E-09 |
| rs10458605  | 40.758838 | 3.46E-09 |
| rs742232    | 40.756545 | 3.46E-09 |
| rs12452509  | 40.756171 | 3.46E-09 |
| rs4795359   | 40.755075 | 3.47E-09 |

|             |           |          |
|-------------|-----------|----------|
| rs2152915   | 40.754414 | 3.47E-09 |
| rs12262503  | 40.752659 | 3.47E-09 |
| rs2282085   | 40.752588 | 3.47E-09 |
| rs141154688 | 40.752463 | 3.47E-09 |
| rs61893488  | 40.751585 | 3.47E-09 |
| rs60703442  | 40.751418 | 3.47E-09 |
| rs7250497   | 40.746913 | 3.48E-09 |
| rs34765154  | 40.745634 | 3.48E-09 |
| rs9905432   | 40.745391 | 3.48E-09 |
| rs1447842   | 40.739450 | 3.49E-09 |
| rs1607207   | 40.739229 | 3.49E-09 |
| rs13201308  | 40.739035 | 3.50E-09 |
| rs11789188  | 40.738375 | 3.50E-09 |
| rs10131197  | 40.738104 | 3.50E-09 |
| rs4795384   | 40.735462 | 3.50E-09 |
| rs2740518   | 40.735347 | 3.50E-09 |
| rs11791242  | 40.734715 | 3.50E-09 |
| rs7551431   | 40.734417 | 3.50E-09 |
| rs72846794  | 40.734235 | 3.50E-09 |
| rs7405667   | 40.733218 | 3.51E-09 |
| rs6757463   | 40.731624 | 3.51E-09 |
| rs1721196   | 40.731364 | 3.51E-09 |
| rs13099273  | 40.729945 | 3.51E-09 |
| rs1597093   | 40.728610 | 3.51E-09 |
| rs7704958   | 40.725261 | 3.52E-09 |
| rs62260720  | 40.724478 | 3.52E-09 |
| rs1592608   | 40.721044 | 3.53E-09 |
| rs1790123   | 40.720311 | 3.53E-09 |
| rs55661102  | 40.719964 | 3.53E-09 |
| rs2024566   | 40.715550 | 3.54E-09 |
| rs58616630  | 40.712420 | 3.54E-09 |
| rs1374893   | 40.711676 | 3.55E-09 |
| rs1666115   | 40.709948 | 3.55E-09 |
| rs13081578  | 40.706122 | 3.56E-09 |
| rs72846780  | 40.705216 | 3.56E-09 |
| rs35749575  | 40.703788 | 3.56E-09 |
| rs11082014  | 40.702927 | 3.56E-09 |
| rs9372121   | 40.702636 | 3.56E-09 |
| rs28481863  | 40.701947 | 3.56E-09 |
| rs1374894   | 40.701505 | 3.57E-09 |
| rs7899622   | 40.699530 | 3.57E-09 |
| rs1411354   | 40.699520 | 3.57E-09 |
| rs1666114   | 40.697347 | 3.57E-09 |
| rs111912558 | 40.696511 | 3.57E-09 |
| rs11869323  | 40.695443 | 3.58E-09 |
| rs11651089  | 40.694300 | 3.58E-09 |

|            |           |          |
|------------|-----------|----------|
| rs10950805 | 40.694225 | 3.58E-09 |
| rs1721195  | 40.694166 | 3.58E-09 |
| rs2032915  | 40.690642 | 3.59E-09 |
| rs7637738  | 40.688876 | 3.59E-09 |
| rs10865339 | 40.688129 | 3.59E-09 |
| rs1597092  | 40.685908 | 3.59E-09 |
| rs1721187  | 40.685667 | 3.60E-09 |
| rs2324142  | 40.684970 | 3.60E-09 |
| rs1597090  | 40.683232 | 3.60E-09 |
| rs1597089  | 40.681805 | 3.60E-09 |
| rs4671515  | 40.680838 | 3.60E-09 |
| rs13217984 | 40.680405 | 3.61E-09 |
| rs2303222  | 40.679687 | 3.61E-09 |
| rs4671468  | 40.679068 | 3.61E-09 |
| rs35285898 | 40.678353 | 3.61E-09 |
| rs4435297  | 40.677235 | 3.61E-09 |
| rs62321704 | 40.676387 | 3.61E-09 |
| rs1024794  | 40.675318 | 3.62E-09 |
| rs4353635  | 40.674468 | 3.62E-09 |
| rs1666113  | 40.669878 | 3.63E-09 |
| rs11748773 | 40.668675 | 3.63E-09 |
| rs2109632  | 40.666666 | 3.63E-09 |
| rs775769   | 40.666351 | 3.63E-09 |
| rs8068427  | 40.663826 | 3.64E-09 |
| rs10819094 | 40.661935 | 3.64E-09 |
| rs28435738 | 40.661613 | 3.64E-09 |
| rs7873205  | 40.661242 | 3.64E-09 |
| rs7903190  | 40.658502 | 3.65E-09 |
| rs12330385 | 40.658394 | 3.65E-09 |
| rs3847803  | 40.655159 | 3.65E-09 |
| rs2282084  | 40.650191 | 3.66E-09 |
| rs77764116 | 40.650094 | 3.66E-09 |
| rs1721201  | 40.648174 | 3.67E-09 |
| rs1666130  | 40.647147 | 3.67E-09 |
| rs1050529  | 40.647078 | 3.67E-09 |
| rs1666112  | 40.641995 | 3.68E-09 |
| rs34332556 | 40.641600 | 3.68E-09 |
| rs35781323 | 40.641149 | 3.68E-09 |
| rs7024493  | 40.639238 | 3.68E-09 |
| rs3821737  | 40.639052 | 3.69E-09 |
| rs4851601  | 40.637315 | 3.69E-09 |
| rs1895475  | 40.636485 | 3.69E-09 |
| rs57399933 | 40.636052 | 3.69E-09 |
| rs2875265  | 40.635504 | 3.69E-09 |
| rs56693625 | 40.635176 | 3.69E-09 |
| rs1477147  | 40.634528 | 3.69E-09 |

|             |           |          |
|-------------|-----------|----------|
| rs11255714  | 40.632103 | 3.70E-09 |
| rs2159643   | 40.632046 | 3.70E-09 |
| rs2779208   | 40.630630 | 3.70E-09 |
| rs55997059  | 40.630034 | 3.70E-09 |
| rs188331    | 40.627250 | 3.71E-09 |
| rs4410117   | 40.626603 | 3.71E-09 |
| rs1721200   | 40.626436 | 3.71E-09 |
| rs6783792   | 40.625800 | 3.71E-09 |
| rs6783971   | 40.624935 | 3.71E-09 |
| rs4319546   | 40.624328 | 3.71E-09 |
| rs1556960   | 40.623687 | 3.72E-09 |
| rs149044563 | 40.623148 | 3.72E-09 |
| rs10744150  | 40.622226 | 3.72E-09 |
| rs8076494   | 40.622059 | 3.72E-09 |
| rs10758712  | 40.620691 | 3.72E-09 |
| rs1625316   | 40.620406 | 3.72E-09 |
| rs34573979  | 40.620223 | 3.72E-09 |
| rs11867312  | 40.619926 | 3.72E-09 |
| rs8081667   | 40.619353 | 3.72E-09 |
| rs9909022   | 40.616377 | 3.73E-09 |
| rs11650081  | 40.616234 | 3.73E-09 |
| rs7576316   | 40.614957 | 3.73E-09 |
| rs2421952   | 40.613914 | 3.73E-09 |
| rs9611540   | 40.613151 | 3.74E-09 |
| rs9892055   | 40.613144 | 3.74E-09 |
| rs71388090  | 40.612441 | 3.74E-09 |
| rs9908760   | 40.610411 | 3.74E-09 |
| rs775772    | 40.607547 | 3.75E-09 |
| rs7601576   | 40.604827 | 3.75E-09 |
| rs9111      | 40.604818 | 3.75E-09 |
| rs970278    | 40.603574 | 3.76E-09 |
| rs10147664  | 40.603189 | 3.76E-09 |
| rs73729340  | 40.603161 | 3.76E-09 |
| rs3108155   | 40.601087 | 3.76E-09 |
| rs4671487   | 40.600991 | 3.76E-09 |
| rs3796292   | 40.598992 | 3.76E-09 |
| rs3796291   | 40.597912 | 3.77E-09 |
| rs10772999  | 40.597386 | 3.77E-09 |
| rs56061963  | 40.596844 | 3.77E-09 |
| rs71537559  | 40.596742 | 3.77E-09 |
| rs11718576  | 40.595316 | 3.77E-09 |
| rs113322852 | 40.594831 | 3.77E-09 |
| rs7849481   | 40.593450 | 3.78E-09 |
| rs9603603   | 40.592429 | 3.78E-09 |
| rs3760293   | 40.587350 | 3.79E-09 |
| rs1268866   | 40.587008 | 3.79E-09 |

|             |           |          |
|-------------|-----------|----------|
| rs58011088  | 40.583882 | 3.79E-09 |
| rs2779211   | 40.581765 | 3.80E-09 |
| rs2285580   | 40.578855 | 3.80E-09 |
| rs7864769   | 40.578047 | 3.81E-09 |
| rs2273506   | 40.576192 | 3.81E-09 |
| rs34627893  | 40.574905 | 3.81E-09 |
| rs775750    | 40.572795 | 3.82E-09 |
| rs8079969   | 40.572294 | 3.82E-09 |
| rs17547485  | 40.571479 | 3.82E-09 |
| rs11654     | 40.571262 | 3.82E-09 |
| rs11870608  | 40.566878 | 3.83E-09 |
| rs12414798  | 40.566516 | 3.83E-09 |
| rs11191485  | 40.565344 | 3.83E-09 |
| rs34019568  | 40.565283 | 3.83E-09 |
| rs2765756   | 40.561929 | 3.84E-09 |
| rs2215946   | 40.560607 | 3.84E-09 |
| rs17613465  | 40.560362 | 3.84E-09 |
| rs11898615  | 40.559121 | 3.84E-09 |
| rs2535614   | 40.559115 | 3.84E-09 |
| rs12452880  | 40.557459 | 3.85E-09 |
| rs11650146  | 40.556270 | 3.85E-09 |
| rs115517808 | 40.555805 | 3.85E-09 |
| rs17208684  | 40.555246 | 3.85E-09 |
| rs11868133  | 40.555177 | 3.85E-09 |
| rs62422881  | 40.554848 | 3.85E-09 |
| rs34595903  | 40.550761 | 3.86E-09 |
| rs35711908  | 40.549873 | 3.86E-09 |
| rs9896913   | 40.548998 | 3.87E-09 |
| rs2699389   | 40.548054 | 3.87E-09 |
| rs9749862   | 40.548012 | 3.87E-09 |
| rs995514    | 40.547305 | 3.87E-09 |
| rs11249193  | 40.546307 | 3.87E-09 |
| rs10168545  | 40.545960 | 3.87E-09 |
| rs1812942   | 40.544323 | 3.88E-09 |
| rs2703088   | 40.542677 | 3.88E-09 |
| rs6895466   | 40.541694 | 3.88E-09 |
| rs12943928  | 40.540470 | 3.88E-09 |
| rs3804333   | 40.540469 | 3.88E-09 |
| rs2273505   | 40.539385 | 3.89E-09 |
| rs12214269  | 40.533475 | 3.90E-09 |
| rs1727331   | 40.531454 | 3.90E-09 |
| rs192980829 | 40.531368 | 3.90E-09 |
| rs116783436 | 40.528472 | 3.91E-09 |
| rs6503507   | 40.527817 | 3.91E-09 |
| rs12713476  | 40.524087 | 3.92E-09 |
| rs6757487   | 40.523602 | 3.92E-09 |

|             |           |          |
|-------------|-----------|----------|
| rs2746432   | 40.519351 | 3.93E-09 |
| rs4838290   | 40.515649 | 3.93E-09 |
| rs7716413   | 40.515393 | 3.93E-09 |
| rs7208714   | 40.514340 | 3.94E-09 |
| rs178835    | 40.513358 | 3.94E-09 |
| rs2291657   | 40.509956 | 3.95E-09 |
| rs6905736   | 40.508516 | 3.95E-09 |
| rs71559072  | 40.508083 | 3.95E-09 |
| rs199518    | 40.506865 | 3.95E-09 |
| rs2361358   | 40.506673 | 3.95E-09 |
| rs12438645  | 40.502591 | 3.96E-09 |
| rs7542175   | 40.501788 | 3.96E-09 |
| rs755204    | 40.501204 | 3.96E-09 |
| rs11669073  | 40.500713 | 3.97E-09 |
| rs142373084 | 40.497568 | 3.97E-09 |
| rs35699093  | 40.495422 | 3.98E-09 |
| rs56025023  | 40.495393 | 3.98E-09 |
| rs8040086   | 40.493394 | 3.98E-09 |
| rs6783764   | 40.489848 | 3.99E-09 |
| rs9372120   | 40.489452 | 3.99E-09 |
| rs9972727   | 40.488488 | 3.99E-09 |
| rs9739070   | 40.488076 | 3.99E-09 |
| rs199497    | 40.484322 | 4.00E-09 |
| rs10078677  | 40.484278 | 4.00E-09 |
| rs4792717   | 40.484153 | 4.00E-09 |
| rs6717031   | 40.482697 | 4.00E-09 |
| rs77990078  | 40.482193 | 4.00E-09 |
| rs2239520   | 40.480453 | 4.01E-09 |
| rs10744147  | 40.477553 | 4.01E-09 |
| rs1727309   | 40.476583 | 4.02E-09 |
| rs11679762  | 40.476463 | 4.02E-09 |
| rs466351    | 40.475369 | 4.02E-09 |
| rs13208505  | 40.475213 | 4.02E-09 |
| rs7378375   | 40.474292 | 4.02E-09 |
| rs79638487  | 40.474009 | 4.02E-09 |
| rs17766168  | 40.473890 | 4.02E-09 |
| rs13341996  | 40.472429 | 4.03E-09 |
| rs199517    | 40.465361 | 4.04E-09 |
| rs112991248 | 40.464826 | 4.04E-09 |
| rs7067663   | 40.462657 | 4.05E-09 |
| rs2951186   | 40.461837 | 4.05E-09 |
| rs192225    | 40.458953 | 4.05E-09 |
| rs73088465  | 40.458241 | 4.06E-09 |
| rs4792718   | 40.457183 | 4.06E-09 |
| rs2121351   | 40.456926 | 4.06E-09 |
| rs34764073  | 40.450582 | 4.07E-09 |

|             |           |          |
|-------------|-----------|----------|
| rs62177824  | 40.449679 | 4.07E-09 |
| rs11057202  | 40.449096 | 4.08E-09 |
| rs10987059  | 40.449063 | 4.08E-09 |
| rs13205911  | 40.448954 | 4.08E-09 |
| rs7207463   | 40.447660 | 4.08E-09 |
| rs202906    | 40.446879 | 4.08E-09 |
| rs11658564  | 40.445946 | 4.08E-09 |
| rs10772997  | 40.442797 | 4.09E-09 |
| rs9939558   | 40.438429 | 4.10E-09 |
| rs11659010  | 40.436344 | 4.10E-09 |
| rs35037868  | 40.432727 | 4.11E-09 |
| rs32653     | 40.428913 | 4.12E-09 |
| rs11622930  | 40.427271 | 4.12E-09 |
| rs34091160  | 40.423269 | 4.13E-09 |
| rs5016309   | 40.416369 | 4.15E-09 |
| rs74762609  | 40.414156 | 4.15E-09 |
| rs6738190   | 40.412338 | 4.16E-09 |
| rs57222338  | 40.411914 | 4.16E-09 |
| rs7517302   | 40.411650 | 4.16E-09 |
| rs624177    | 40.409516 | 4.16E-09 |
| rs11150604  | 40.409293 | 4.16E-09 |
| rs7600458   | 40.406688 | 4.17E-09 |
| rs9944411   | 40.405113 | 4.17E-09 |
| rs4794813   | 40.404458 | 4.17E-09 |
| rs143021741 | 40.404308 | 4.17E-09 |
| rs14235     | 40.402918 | 4.18E-09 |
| rs62324212  | 40.402474 | 4.18E-09 |
| rs62566113  | 40.402050 | 4.18E-09 |
| rs2639919   | 40.399731 | 4.18E-09 |
| rs1790097   | 40.398638 | 4.19E-09 |
| rs9557222   | 40.397286 | 4.19E-09 |
| rs12308157  | 40.396184 | 4.19E-09 |
| rs13069567  | 40.396030 | 4.19E-09 |
| rs671095    | 40.394389 | 4.20E-09 |
| rs35345226  | 40.392901 | 4.20E-09 |
| rs1023820   | 40.388984 | 4.21E-09 |
| rs2015333   | 40.388674 | 4.21E-09 |
| rs3787140   | 40.380162 | 4.23E-09 |
| rs931550    | 40.380070 | 4.23E-09 |
| rs11685910  | 40.379219 | 4.23E-09 |
| rs2004039   | 40.377424 | 4.23E-09 |
| rs9926533   | 40.376598 | 4.24E-09 |
| rs1975371   | 40.374734 | 4.24E-09 |
| rs178821    | 40.367798 | 4.25E-09 |
| rs178833    | 40.367157 | 4.26E-09 |
| rs76828682  | 40.366674 | 4.26E-09 |

|             |           |          |
|-------------|-----------|----------|
| rs775771    | 40.364750 | 4.26E-09 |
| rs10484577  | 40.362664 | 4.27E-09 |
| rs2074529   | 40.361556 | 4.27E-09 |
| rs62072528  | 40.359706 | 4.27E-09 |
| rs178828    | 40.359592 | 4.27E-09 |
| rs1570727   | 40.359362 | 4.27E-09 |
| rs17670505  | 40.358885 | 4.27E-09 |
| rs252860    | 40.358859 | 4.28E-09 |
| rs4678523   | 40.358644 | 4.28E-09 |
| rs9327571   | 40.357212 | 4.28E-09 |
| rs696734    | 40.353826 | 4.29E-09 |
| rs56045941  | 40.353799 | 4.29E-09 |
| rs4833246   | 40.353317 | 4.29E-09 |
| rs178838    | 40.353085 | 4.29E-09 |
| rs138522604 | 40.348180 | 4.30E-09 |
| rs12947620  | 40.345448 | 4.31E-09 |
| rs1447843   | 40.345370 | 4.31E-09 |
| rs2286796   | 40.344191 | 4.31E-09 |
| rs2176417   | 40.343450 | 4.31E-09 |
| rs4671510   | 40.343127 | 4.31E-09 |
| rs1588129   | 40.340358 | 4.32E-09 |
| rs113569895 | 40.338802 | 4.32E-09 |
| rs745381    | 40.335458 | 4.33E-09 |
| rs12336219  | 40.334497 | 4.33E-09 |
| rs17709487  | 40.333925 | 4.33E-09 |
| rs7722567   | 40.333295 | 4.33E-09 |
| rs6546009   | 40.332820 | 4.33E-09 |
| rs9386516   | 40.330038 | 4.34E-09 |
| rs190471737 | 40.326543 | 4.35E-09 |
| rs10752126  | 40.326117 | 4.35E-09 |
| rs67641625  | 40.316514 | 4.37E-09 |
| rs174622    | 40.316235 | 4.37E-09 |
| rs6011040   | 40.316235 | 4.37E-09 |
| rs7212715   | 40.312530 | 4.38E-09 |
| rs12499685  | 40.308387 | 4.39E-09 |
| rs2066632   | 40.305963 | 4.40E-09 |
| rs7904468   | 40.302088 | 4.41E-09 |
| rs1589092   | 40.301971 | 4.41E-09 |
| rs7722547   | 40.298314 | 4.41E-09 |
| rs10986311  | 40.296642 | 4.42E-09 |
| rs7222886   | 40.292383 | 4.43E-09 |
| rs12721362  | 40.290520 | 4.43E-09 |
| rs71559067  | 40.290501 | 4.43E-09 |
| rs11869109  | 40.290182 | 4.43E-09 |
| rs12499537  | 40.286850 | 4.44E-09 |
| rs9273270   | 40.284931 | 4.45E-09 |



|             |           |          |
|-------------|-----------|----------|
| rs9373842   | 40.280725 | 4.46E-09 |
| rs10137524  | 40.272147 | 4.48E-09 |
| rs2121350   | 40.269772 | 4.48E-09 |
| rs2261360   | 40.267931 | 4.49E-09 |
| rs16962583  | 40.267930 | 4.49E-09 |
| rs2104241   | 40.267151 | 4.49E-09 |
| rs1031221   | 40.266604 | 4.49E-09 |
| rs6727313   | 40.265134 | 4.49E-09 |
| rs10878285  | 40.265125 | 4.49E-09 |
| rs62109854  | 40.264377 | 4.49E-09 |
| rs12934418  | 40.262330 | 4.50E-09 |
| rs62422886  | 40.261291 | 4.50E-09 |
| rs262501    | 40.258194 | 4.51E-09 |
| rs66496921  | 40.251116 | 4.53E-09 |
| rs7258283   | 40.247759 | 4.53E-09 |
| rs9923175   | 40.246627 | 4.54E-09 |
| rs2639921   | 40.246264 | 4.54E-09 |
| rs7304782   | 40.245622 | 4.54E-09 |
| rs12469743  | 40.244465 | 4.54E-09 |
| rs7157029   | 40.241777 | 4.55E-09 |
| rs178814    | 40.239227 | 4.55E-09 |
| rs2834787   | 40.238210 | 4.56E-09 |
| rs34208295  | 40.237339 | 4.56E-09 |
| rs181268076 | 40.237049 | 4.56E-09 |
| rs4671069   | 40.230851 | 4.57E-09 |
| rs7100369   | 40.229332 | 4.58E-09 |
| rs262503    | 40.229174 | 4.58E-09 |
| rs2639902   | 40.228340 | 4.58E-09 |
| rs3024611   | 40.226156 | 4.59E-09 |
| rs2746433   | 40.225124 | 4.59E-09 |
| rs7708634   | 40.224682 | 4.59E-09 |
| rs56401801  | 40.221849 | 4.60E-09 |
| rs1883826   | 40.219702 | 4.60E-09 |
| rs1607203   | 40.217434 | 4.61E-09 |
| rs2779207   | 40.216923 | 4.61E-09 |
| rs35114617  | 40.215455 | 4.61E-09 |
| rs9907273   | 40.212856 | 4.62E-09 |
| rs4722168   | 40.209497 | 4.63E-09 |
| rs2166494   | 40.208198 | 4.63E-09 |
| rs6477011   | 40.207511 | 4.63E-09 |
| rs13387839  | 40.206073 | 4.64E-09 |
| rs9611549   | 40.199682 | 4.65E-09 |
| rs7917295   | 40.198643 | 4.65E-09 |
| rs7037314   | 40.196844 | 4.66E-09 |
| rs2906095   | 40.195782 | 4.66E-09 |
| rs45473291  | 40.195713 | 4.66E-09 |

|             |           |          |
|-------------|-----------|----------|
| rs16962733  | 40.194958 | 4.66E-09 |
| rs7405770   | 40.192356 | 4.67E-09 |
| rs244508    | 40.191145 | 4.67E-09 |
| rs2056577   | 40.186569 | 4.68E-09 |
| rs10055348  | 40.185725 | 4.69E-09 |
| rs4236793   | 40.185264 | 4.69E-09 |
| rs11691166  | 40.184765 | 4.69E-09 |
| rs2699391   | 40.183797 | 4.69E-09 |
| rs140816071 | 40.183291 | 4.69E-09 |
| rs111811152 | 40.180386 | 4.70E-09 |
| rs17020717  | 40.178905 | 4.70E-09 |
| rs6595186   | 40.178673 | 4.70E-09 |
| rs72502587  | 40.177529 | 4.71E-09 |
| rs2305157   | 40.175623 | 4.71E-09 |
| rs2223365   | 40.175472 | 4.71E-09 |
| rs6503515   | 40.174570 | 4.71E-09 |
| rs6891172   | 40.174258 | 4.71E-09 |
| rs7608966   | 40.173765 | 4.72E-09 |
| rs2929154   | 40.173591 | 4.72E-09 |
| rs9327570   | 40.170706 | 4.72E-09 |
| rs683948    | 40.168937 | 4.73E-09 |
| rs1568427   | 40.166148 | 4.73E-09 |
| rs9913320   | 40.165002 | 4.74E-09 |
| rs55663797  | 40.164892 | 4.74E-09 |
| rs3858608   | 40.164744 | 4.74E-09 |
| rs166384    | 40.164457 | 4.74E-09 |
| rs262487    | 40.162876 | 4.74E-09 |
| rs7956325   | 40.162500 | 4.74E-09 |
| rs2422011   | 40.161359 | 4.75E-09 |
| rs1149950   | 40.157806 | 4.76E-09 |
| rs3787141   | 40.157524 | 4.76E-09 |
| rs1029926   | 40.155682 | 4.76E-09 |
| rs61937853  | 40.155474 | 4.76E-09 |
| rs113830390 | 40.155225 | 4.76E-09 |
| rs1867847   | 40.154880 | 4.76E-09 |
| rs9747342   | 40.154545 | 4.76E-09 |
| rs3208007   | 40.152077 | 4.77E-09 |
| rs9905225   | 40.150515 | 4.77E-09 |
| rs8081406   | 40.149275 | 4.78E-09 |
| rs11706429  | 40.147747 | 4.78E-09 |
| rs3025343   | 40.147628 | 4.78E-09 |
| rs1617434   | 40.147270 | 4.78E-09 |
| rs11653650  | 40.147086 | 4.78E-09 |
| rs62262673  | 40.146144 | 4.78E-09 |
| rs7596446   | 40.145805 | 4.79E-09 |
| rs10157238  | 40.144758 | 4.79E-09 |

|             |           |          |
|-------------|-----------|----------|
| rs11057207  | 40.142916 | 4.79E-09 |
| rs34371502  | 40.142613 | 4.79E-09 |
| rs111883038 | 40.142299 | 4.79E-09 |
| rs4759420   | 40.142019 | 4.80E-09 |
| rs2285579   | 40.140485 | 4.80E-09 |
| rs2267429   | 40.140224 | 4.80E-09 |
| rs13197574  | 40.137857 | 4.81E-09 |
| rs13199649  | 40.137535 | 4.81E-09 |
| rs35779989  | 40.136487 | 4.81E-09 |
| rs115247800 | 40.135747 | 4.81E-09 |
| rs7801406   | 40.134989 | 4.81E-09 |
| rs4239222   | 40.132135 | 4.82E-09 |
| rs34588114  | 40.125969 | 4.84E-09 |
| rs6546007   | 40.125755 | 4.84E-09 |
| rs78406067  | 40.123232 | 4.84E-09 |
| rs7006446   | 40.122587 | 4.84E-09 |
| rs2090847   | 40.120682 | 4.85E-09 |
| rs10445307  | 40.120158 | 4.85E-09 |
| rs56117350  | 40.112726 | 4.87E-09 |
| rs7596580   | 40.107231 | 4.88E-09 |
| rs9272985   | 40.104160 | 4.89E-09 |
| rs10784465  | 40.099383 | 4.90E-09 |
| rs13203816  | 40.099227 | 4.91E-09 |
| rs1879581   | 40.097177 | 4.91E-09 |
| rs2299864   | 40.096065 | 4.91E-09 |
| rs13340780  | 40.093732 | 4.92E-09 |
| rs55743914  | 40.092792 | 4.92E-09 |
| rs72820152  | 40.086217 | 4.94E-09 |
| rs142965311 | 40.086188 | 4.94E-09 |
| rs10173637  | 40.084369 | 4.94E-09 |
| rs11018434  | 40.080393 | 4.95E-09 |
| rs148993644 | 40.079859 | 4.96E-09 |
| rs4566208   | 40.078787 | 4.96E-09 |
| rs10054191  | 40.077516 | 4.96E-09 |
| rs4794807   | 40.076967 | 4.96E-09 |
| rs460501    | 40.075262 | 4.97E-09 |
| rs241429    | 40.070930 | 4.98E-09 |
| rs76487164  | 40.069819 | 4.98E-09 |
| rs75754317  | 40.069222 | 4.98E-09 |
| rs11678722  | 40.068932 | 4.98E-09 |
| rs1550860   | 40.067595 | 4.99E-09 |
| rs55935523  | 40.066243 | 4.99E-09 |
| rs13311155  | 40.066188 | 4.99E-09 |
| rs7095304   | 40.065310 | 4.99E-09 |
| rs7558154   | 40.061728 | 5.00E-09 |
| rs7558268   | 40.060098 | 5.01E-09 |

|            |           |          |
|------------|-----------|----------|
| rs6002323  | 40.059905 | 5.01E-09 |
| rs199526   | 40.059198 | 5.01E-09 |
| rs870684   | 40.059067 | 5.01E-09 |
| rs6469175  | 40.059025 | 5.01E-09 |
| rs2028887  | 40.058462 | 5.01E-09 |
| rs2338798  | 40.058114 | 5.01E-09 |
| rs3787091  | 40.057126 | 5.02E-09 |
| rs8081220  | 40.055903 | 5.02E-09 |
| rs9897388  | 40.052948 | 5.03E-09 |
| rs1922298  | 40.052631 | 5.03E-09 |
| rs3094210  | 40.051718 | 5.03E-09 |
| rs11622871 | 40.050791 | 5.03E-09 |
| rs34991888 | 40.050475 | 5.03E-09 |
| rs62065438 | 40.050204 | 5.03E-09 |
| rs2310236  | 40.049618 | 5.04E-09 |
| rs4742127  | 40.045899 | 5.05E-09 |
| rs4851558  | 40.045887 | 5.05E-09 |
| rs79901634 | 40.045809 | 5.05E-09 |
| rs34166054 | 40.043199 | 5.05E-09 |
| rs4836000  | 40.041908 | 5.06E-09 |
| rs6502490  | 40.039729 | 5.06E-09 |
| rs12639588 | 40.039535 | 5.06E-09 |
| rs11191602 | 40.039325 | 5.06E-09 |
| rs1922299  | 40.039236 | 5.06E-09 |
| rs11057209 | 40.038387 | 5.07E-09 |
| rs1845467  | 40.038169 | 5.07E-09 |
| rs262482   | 40.037976 | 5.07E-09 |
| rs7979584  | 40.036590 | 5.07E-09 |
| rs1922297  | 40.035536 | 5.07E-09 |
| rs7724716  | 40.032145 | 5.08E-09 |
| rs13311199 | 40.025990 | 5.10E-09 |
| rs3827021  | 40.025476 | 5.10E-09 |
| rs4705889  | 40.022274 | 5.11E-09 |
| rs7041923  | 40.018672 | 5.12E-09 |
| rs2310237  | 40.018391 | 5.12E-09 |
| rs2141865  | 40.017505 | 5.12E-09 |
| rs9373843  | 40.014627 | 5.13E-09 |
| rs13020171 | 40.014454 | 5.13E-09 |
| rs36101351 | 40.012704 | 5.14E-09 |
| rs11780184 | 40.011782 | 5.14E-09 |
| rs11657160 | 40.009948 | 5.14E-09 |
| rs34187313 | 40.009519 | 5.14E-09 |
| rs2141864  | 40.006324 | 5.15E-09 |
| rs2324141  | 40.004930 | 5.16E-09 |
| rs9501404  | 40.004139 | 5.16E-09 |
| rs758853   | 40.004021 | 5.16E-09 |

|             |           |          |
|-------------|-----------|----------|
| rs62321741  | 40.002730 | 5.16E-09 |
| rs2273501   | 40.002073 | 5.16E-09 |
| rs3130924   | 39.999173 | 5.17E-09 |
| rs8102876   | 39.998769 | 5.17E-09 |
| rs13216117  | 39.998295 | 5.17E-09 |
| rs11172026  | 39.996668 | 5.18E-09 |
| rs4851557   | 39.994760 | 5.18E-09 |
| rs6011783   | 39.992188 | 5.19E-09 |
| rs67662114  | 39.990595 | 5.20E-09 |
| rs56112655  | 39.990017 | 5.20E-09 |
| rs10852834  | 39.988978 | 5.20E-09 |
| rs4471912   | 39.986805 | 5.21E-09 |
| rs13193295  | 39.986239 | 5.21E-09 |
| rs3207966   | 39.985261 | 5.21E-09 |
| rs1922296   | 39.983731 | 5.21E-09 |
| rs2871457   | 39.983585 | 5.21E-09 |
| rs464779    | 39.979224 | 5.23E-09 |
| rs56183589  | 39.978409 | 5.23E-09 |
| rs2740516   | 39.977625 | 5.23E-09 |
| rs11693909  | 39.977279 | 5.23E-09 |
| rs2080310   | 39.975740 | 5.24E-09 |
| rs2178675   | 39.972938 | 5.24E-09 |
| rs11673864  | 39.972822 | 5.24E-09 |
| rs74597567  | 39.971727 | 5.25E-09 |
| rs262484    | 39.971500 | 5.25E-09 |
| rs7605715   | 39.971446 | 5.25E-09 |
| rs2871458   | 39.970507 | 5.25E-09 |
| rs9398078   | 39.966851 | 5.26E-09 |
| rs55671319  | 39.965750 | 5.26E-09 |
| rs78196355  | 39.965553 | 5.26E-09 |
| rs11657899  | 39.964768 | 5.27E-09 |
| rs6595960   | 39.962876 | 5.27E-09 |
| rs763495    | 39.960850 | 5.28E-09 |
| rs7808122   | 39.959484 | 5.28E-09 |
| rs174465    | 39.959468 | 5.28E-09 |
| rs76842562  | 39.957610 | 5.29E-09 |
| rs2893008   | 39.957114 | 5.29E-09 |
| rs61903389  | 39.954868 | 5.29E-09 |
| rs7223896   | 39.954089 | 5.30E-09 |
| rs10773008  | 39.953320 | 5.30E-09 |
| rs7018617   | 39.952095 | 5.30E-09 |
| rs35902873  | 39.950228 | 5.31E-09 |
| rs151095308 | 39.948587 | 5.31E-09 |
| rs3098866   | 39.948529 | 5.31E-09 |
| rs149366495 | 39.946035 | 5.32E-09 |
| rs6834183   | 39.945479 | 5.32E-09 |

|             |           |          |
|-------------|-----------|----------|
| rs7566395   | 39.944933 | 5.32E-09 |
| rs9877752   | 39.942591 | 5.33E-09 |
| rs801419    | 39.942110 | 5.33E-09 |
| rs3771194   | 39.939999 | 5.34E-09 |
| rs178826    | 39.939875 | 5.34E-09 |
| rs11677606  | 39.938439 | 5.34E-09 |
| rs16853094  | 39.936390 | 5.35E-09 |
| rs244509    | 39.934363 | 5.35E-09 |
| rs1922289   | 39.933264 | 5.36E-09 |
| rs6543110   | 39.933234 | 5.36E-09 |
| rs2310238   | 39.931151 | 5.36E-09 |
| rs1922290   | 39.930126 | 5.36E-09 |
| rs76813038  | 39.929377 | 5.37E-09 |
| rs139569    | 39.926433 | 5.38E-09 |
| rs2639904   | 39.925265 | 5.38E-09 |
| rs6456711   | 39.924109 | 5.38E-09 |
| rs2639901   | 39.923410 | 5.38E-09 |
| rs3098867   | 39.923192 | 5.38E-09 |
| rs3771193   | 39.922309 | 5.39E-09 |
| rs3771196   | 39.922119 | 5.39E-09 |
| rs455831    | 39.922068 | 5.39E-09 |
| rs2639931   | 39.921936 | 5.39E-09 |
| rs2639932   | 39.921936 | 5.39E-09 |
| rs72820147  | 39.921456 | 5.39E-09 |
| rs76145578  | 39.920479 | 5.39E-09 |
| rs7569116   | 39.919431 | 5.40E-09 |
| rs138598988 | 39.919331 | 5.40E-09 |
| rs7089167   | 39.917719 | 5.40E-09 |
| rs11078327  | 39.917656 | 5.40E-09 |
| rs10413947  | 39.915385 | 5.41E-09 |
| rs7945077   | 39.915142 | 5.41E-09 |
| rs964903    | 39.913271 | 5.41E-09 |
| rs17019354  | 39.912586 | 5.41E-09 |
| rs34088260  | 39.912379 | 5.42E-09 |
| rs34870699  | 39.911676 | 5.42E-09 |
| rs11532322  | 39.908532 | 5.43E-09 |
| rs2933853   | 39.907743 | 5.43E-09 |
| rs56046601  | 39.907020 | 5.43E-09 |
| rs2732091   | 39.905596 | 5.43E-09 |
| rs742231    | 39.903602 | 5.44E-09 |
| rs5751074   | 39.903083 | 5.44E-09 |
| rs10263710  | 39.903067 | 5.44E-09 |
| rs174534    | 39.902980 | 5.44E-09 |
| rs149787056 | 39.902088 | 5.44E-09 |
| rs2202713   | 39.901379 | 5.45E-09 |
| rs6719375   | 39.900568 | 5.45E-09 |

|             |           |          |
|-------------|-----------|----------|
| rs1867849   | 39.900452 | 5.45E-09 |
| rs11868029  | 39.900087 | 5.45E-09 |
| rs3110239   | 39.899072 | 5.45E-09 |
| rs13281088  | 39.897796 | 5.46E-09 |
| rs4395078   | 39.896549 | 5.46E-09 |
| rs62262722  | 39.896448 | 5.46E-09 |
| rs244511    | 39.893909 | 5.47E-09 |
| rs9944524   | 39.893275 | 5.47E-09 |
| rs11686153  | 39.891294 | 5.48E-09 |
| rs10846515  | 39.889627 | 5.48E-09 |
| rs55976518  | 39.885105 | 5.49E-09 |
| rs34597616  | 39.884781 | 5.49E-09 |
| rs2732090   | 39.884122 | 5.50E-09 |
| rs7574448   | 39.883018 | 5.50E-09 |
| rs995515    | 39.882389 | 5.50E-09 |
| rs4428008   | 39.881457 | 5.50E-09 |
| rs11654339  | 39.876081 | 5.52E-09 |
| rs1106240   | 39.874551 | 5.52E-09 |
| rs61117627  | 39.873525 | 5.53E-09 |
| rs3845302   | 39.867458 | 5.55E-09 |
| rs4851559   | 39.865700 | 5.55E-09 |
| rs11256003  | 39.865144 | 5.55E-09 |
| rs867770    | 39.860315 | 5.57E-09 |
| rs2041753   | 39.857248 | 5.58E-09 |
| rs13247229  | 39.857100 | 5.58E-09 |
| rs12084568  | 39.852746 | 5.59E-09 |
| rs7961712   | 39.850910 | 5.59E-09 |
| rs178836    | 39.848569 | 5.60E-09 |
| rs2732092   | 39.847050 | 5.61E-09 |
| rs2310239   | 39.844053 | 5.61E-09 |
| rs12938878  | 39.840486 | 5.63E-09 |
| rs2066413   | 39.836240 | 5.64E-09 |
| rs6733727   | 39.836178 | 5.64E-09 |
| rs2421881   | 39.833025 | 5.65E-09 |
| rs12733298  | 39.832987 | 5.65E-09 |
| rs178807    | 39.832741 | 5.65E-09 |
| rs115293482 | 39.830847 | 5.65E-09 |
| rs694235    | 39.829684 | 5.66E-09 |
| rs34771376  | 39.825086 | 5.67E-09 |
| rs58721818  | 39.824201 | 5.67E-09 |
| rs2421884   | 39.823911 | 5.67E-09 |
| rs178827    | 39.823524 | 5.68E-09 |
| rs67984374  | 39.822687 | 5.68E-09 |
| rs9276807   | 39.821677 | 5.68E-09 |
| rs7910900   | 39.821468 | 5.68E-09 |
| rs4851560   | 39.820437 | 5.69E-09 |

|            |           |          |
|------------|-----------|----------|
| rs72949518 | 39.817971 | 5.69E-09 |
| rs3787142  | 39.814607 | 5.70E-09 |
| rs1558646  | 39.813553 | 5.71E-09 |
| rs67040724 | 39.812525 | 5.71E-09 |
| rs1882514  | 39.811711 | 5.71E-09 |
| rs206913   | 39.811587 | 5.71E-09 |
| rs56192752 | 39.810363 | 5.72E-09 |
| rs1446569  | 39.810178 | 5.72E-09 |
| rs2310235  | 39.810090 | 5.72E-09 |
| rs2715555  | 39.807371 | 5.72E-09 |
| rs62262675 | 39.806750 | 5.73E-09 |
| rs174621   | 39.805217 | 5.73E-09 |
| rs262473   | 39.804430 | 5.73E-09 |
| rs4851001  | 39.803361 | 5.74E-09 |
| rs2299003  | 39.803345 | 5.74E-09 |
| rs12537614 | 39.802414 | 5.74E-09 |
| rs3787092  | 39.800745 | 5.74E-09 |
| rs10865337 | 39.800204 | 5.75E-09 |
| rs6845028  | 39.799448 | 5.75E-09 |
| rs4794810  | 39.797944 | 5.75E-09 |
| rs10057047 | 39.797872 | 5.75E-09 |
| rs1882513  | 39.795779 | 5.76E-09 |
| rs3771197  | 39.795089 | 5.76E-09 |
| rs66868086 | 39.795069 | 5.76E-09 |
| rs9273039  | 39.791869 | 5.77E-09 |
| rs80300819 | 39.790906 | 5.77E-09 |
| rs4855885  | 39.790781 | 5.78E-09 |
| rs7563623  | 39.789426 | 5.78E-09 |
| rs9273041  | 39.787612 | 5.79E-09 |
| rs3781280  | 39.777508 | 5.82E-09 |
| rs11709294 | 39.774784 | 5.82E-09 |
| rs1025342  | 39.774231 | 5.83E-09 |
| rs28623192 | 39.772155 | 5.83E-09 |
| rs1075901  | 39.771324 | 5.84E-09 |
| rs13020401 | 39.770582 | 5.84E-09 |
| rs6507215  | 39.769870 | 5.84E-09 |
| rs13109017 | 39.767661 | 5.85E-09 |
| rs11130217 | 39.766585 | 5.85E-09 |
| rs35112372 | 39.764941 | 5.85E-09 |
| rs5019763  | 39.762548 | 5.86E-09 |
| rs1960461  | 39.762110 | 5.86E-09 |
| rs2041752  | 39.761169 | 5.87E-09 |
| rs3729564  | 39.759125 | 5.87E-09 |
| rs3771192  | 39.758165 | 5.88E-09 |
| rs35917382 | 39.757264 | 5.88E-09 |
| rs13020596 | 39.756356 | 5.88E-09 |



|             |           |          |
|-------------|-----------|----------|
| rs3755289   | 39.755495 | 5.88E-09 |
| rs16962673  | 39.753024 | 5.89E-09 |
| rs262504    | 39.752890 | 5.89E-09 |
| rs13020398  | 39.752852 | 5.89E-09 |
| rs71537572  | 39.751041 | 5.90E-09 |
| rs12902098  | 39.749889 | 5.90E-09 |
| rs244514    | 39.749408 | 5.90E-09 |
| rs11687459  | 39.748841 | 5.91E-09 |
| rs2273502   | 39.748465 | 5.91E-09 |
| rs66535408  | 39.748268 | 5.91E-09 |
| rs4238954   | 39.746644 | 5.91E-09 |
| rs12913706  | 39.744818 | 5.92E-09 |
| rs142242725 | 39.743108 | 5.92E-09 |
| rs252859    | 39.742710 | 5.92E-09 |
| rs3020779   | 39.736149 | 5.94E-09 |
| rs71559054  | 39.734559 | 5.95E-09 |
| rs2160226   | 39.734070 | 5.95E-09 |
| rs6780858   | 39.732967 | 5.95E-09 |
| rs3771195   | 39.732713 | 5.96E-09 |
| rs9859077   | 39.730197 | 5.96E-09 |
| rs3821207   | 39.730143 | 5.96E-09 |
| rs2855475   | 39.726635 | 5.97E-09 |
| rs7011827   | 39.725876 | 5.98E-09 |
| rs4761592   | 39.724999 | 5.98E-09 |
| rs4722177   | 39.724732 | 5.98E-09 |
| rs3912397   | 39.724731 | 5.98E-09 |
| rs10469945  | 39.723985 | 5.98E-09 |
| rs9324865   | 39.723759 | 5.98E-09 |
| rs9271688   | 39.723735 | 5.98E-09 |
| rs1255      | 39.723062 | 5.99E-09 |
| rs6456712   | 39.721281 | 5.99E-09 |
| rs34188221  | 39.720178 | 6.00E-09 |
| rs10469944  | 39.717674 | 6.00E-09 |
| rs262485    | 39.716730 | 6.01E-09 |
| rs7637711   | 39.715630 | 6.01E-09 |
| rs2777941   | 39.712474 | 6.02E-09 |
| rs17591848  | 39.711923 | 6.02E-09 |
| rs4855882   | 39.710935 | 6.02E-09 |
| rs72820175  | 39.710520 | 6.03E-09 |
| rs9815073   | 39.709928 | 6.03E-09 |
| rs262470    | 39.708632 | 6.03E-09 |
| rs11678651  | 39.706765 | 6.04E-09 |
| rs262472    | 39.705941 | 6.04E-09 |
| rs7210990   | 39.705800 | 6.04E-09 |
| rs2302623   | 39.703890 | 6.05E-09 |
| rs4759261   | 39.703721 | 6.05E-09 |

|             |           |          |
|-------------|-----------|----------|
| rs7618999   | 39.703252 | 6.05E-09 |
| rs141715528 | 39.702416 | 6.05E-09 |
| rs28625019  | 39.699588 | 6.06E-09 |
| rs117666717 | 39.698953 | 6.06E-09 |
| rs2389015   | 39.698627 | 6.06E-09 |
| rs2890620   | 39.697175 | 6.07E-09 |
| rs7396585   | 39.695772 | 6.07E-09 |
| rs6715919   | 39.692598 | 6.08E-09 |
| rs6705776   | 39.691596 | 6.09E-09 |
| rs2024567   | 39.689830 | 6.09E-09 |
| rs2149993   | 39.689600 | 6.09E-09 |
| rs3025360   | 39.688895 | 6.10E-09 |
| rs6855812   | 39.688551 | 6.10E-09 |
| rs10451230  | 39.687205 | 6.10E-09 |
| rs466545    | 39.686269 | 6.10E-09 |
| rs6502488   | 39.685096 | 6.11E-09 |
| rs3755290   | 39.680280 | 6.12E-09 |
| rs4957934   | 39.679637 | 6.13E-09 |
| rs13015479  | 39.676920 | 6.13E-09 |
| rs500207    | 39.676587 | 6.14E-09 |
| rs11125957  | 39.675671 | 6.14E-09 |
| rs7918084   | 39.675176 | 6.14E-09 |
| rs34822124  | 39.672840 | 6.15E-09 |
| rs4686955   | 39.672370 | 6.15E-09 |
| rs7763652   | 39.671003 | 6.15E-09 |
| rs60748394  | 39.670170 | 6.16E-09 |
| rs262505    | 39.669973 | 6.16E-09 |
| rs178824    | 39.668421 | 6.16E-09 |
| rs2639935   | 39.667709 | 6.16E-09 |
| rs111425486 | 39.666628 | 6.17E-09 |
| rs4304966   | 39.666547 | 6.17E-09 |
| rs458818    | 39.666291 | 6.17E-09 |
| rs72492329  | 39.666010 | 6.17E-09 |
| rs178654    | 39.665250 | 6.17E-09 |
| rs34490121  | 39.664392 | 6.17E-09 |
| rs9939417   | 39.664044 | 6.18E-09 |
| rs6969258   | 39.662676 | 6.18E-09 |
| rs2202712   | 39.660267 | 6.19E-09 |
| rs340916    | 39.658108 | 6.20E-09 |
| rs178815    | 39.658066 | 6.20E-09 |
| rs12989632  | 39.657255 | 6.20E-09 |
| rs112401627 | 39.655848 | 6.20E-09 |
| rs7169183   | 39.655231 | 6.21E-09 |
| rs12737227  | 39.652845 | 6.21E-09 |
| rs2497318   | 39.652704 | 6.21E-09 |
| rs149583087 | 39.652361 | 6.21E-09 |

|             |           |          |
|-------------|-----------|----------|
| rs9967684   | 39.650193 | 6.22E-09 |
| rs3815517   | 39.646312 | 6.23E-09 |
| rs1922293   | 39.645817 | 6.24E-09 |
| rs13315917  | 39.644033 | 6.24E-09 |
| rs1490151   | 39.643962 | 6.24E-09 |
| rs12713491  | 39.643495 | 6.24E-09 |
| rs71559070  | 39.643369 | 6.24E-09 |
| rs12901631  | 39.642770 | 6.25E-09 |
| rs112497003 | 39.642191 | 6.25E-09 |
| rs1812941   | 39.641338 | 6.25E-09 |
| rs72697295  | 39.640193 | 6.25E-09 |
| rs7176870   | 39.639013 | 6.26E-09 |
| rs4792731   | 39.638680 | 6.26E-09 |
| rs10199943  | 39.638454 | 6.26E-09 |
| rs28715490  | 39.638254 | 6.26E-09 |
| rs178810    | 39.637617 | 6.26E-09 |
| rs34951376  | 39.637149 | 6.26E-09 |
| rs9611546   | 39.635504 | 6.27E-09 |
| rs11255967  | 39.632003 | 6.28E-09 |
| rs2284079   | 39.631639 | 6.28E-09 |
| rs6546018   | 39.630071 | 6.29E-09 |
| rs4822020   | 39.627807 | 6.30E-09 |
| rs12448321  | 39.626955 | 6.30E-09 |
| rs116311752 | 39.625401 | 6.30E-09 |
| rs66988543  | 39.625179 | 6.30E-09 |
| rs7631407   | 39.617783 | 6.33E-09 |
| rs754388    | 39.616448 | 6.33E-09 |
| rs618371    | 39.615590 | 6.34E-09 |
| rs9916868   | 39.615554 | 6.34E-09 |
| rs1727313   | 39.615202 | 6.34E-09 |
| rs112194    | 39.614672 | 6.34E-09 |
| rs4611627   | 39.611883 | 6.35E-09 |
| rs10732573  | 39.611183 | 6.35E-09 |
| rs77000060  | 39.608582 | 6.36E-09 |
| rs178662    | 39.608354 | 6.36E-09 |
| rs9904919   | 39.607201 | 6.36E-09 |
| rs72699870  | 39.607115 | 6.37E-09 |
| rs6545985   | 39.607079 | 6.37E-09 |
| rs1594996   | 39.606989 | 6.37E-09 |
| rs57901555  | 39.606247 | 6.37E-09 |
| rs4560098   | 39.603455 | 6.38E-09 |
| rs189005016 | 39.602684 | 6.38E-09 |
| rs35563735  | 39.602503 | 6.38E-09 |
| rs9270548   | 39.600033 | 6.39E-09 |
| rs10052076  | 39.599908 | 6.39E-09 |
| rs7135586   | 39.599662 | 6.39E-09 |

|             |           |          |
|-------------|-----------|----------|
| rs1893887   | 39.599473 | 6.39E-09 |
| rs113496608 | 39.598376 | 6.39E-09 |
| rs7707733   | 39.598133 | 6.40E-09 |
| rs34779255  | 39.598035 | 6.40E-09 |
| rs11639111  | 39.597753 | 6.40E-09 |
| rs71467692  | 39.597081 | 6.40E-09 |
| rs4851002   | 39.592476 | 6.41E-09 |
| rs7773987   | 39.589541 | 6.42E-09 |
| rs12499125  | 39.587330 | 6.43E-09 |
| rs34980263  | 39.586492 | 6.43E-09 |
| rs34531968  | 39.586060 | 6.44E-09 |
| rs4309400   | 39.585738 | 6.44E-09 |
| rs12502923  | 39.585272 | 6.44E-09 |
| rs892834    | 39.581238 | 6.45E-09 |
| rs1727332   | 39.579793 | 6.46E-09 |
| rs153279    | 39.579656 | 6.46E-09 |
| rs57007317  | 39.578582 | 6.46E-09 |
| rs34982209  | 39.578427 | 6.46E-09 |
| rs7254067   | 39.578165 | 6.46E-09 |
| rs2413639   | 39.577957 | 6.46E-09 |
| rs10987049  | 39.576767 | 6.47E-09 |
| rs6062497   | 39.575809 | 6.47E-09 |
| rs9603605   | 39.575630 | 6.47E-09 |
| rs4820435   | 39.575275 | 6.47E-09 |
| rs1423158   | 39.574269 | 6.48E-09 |
| rs13218875  | 39.573585 | 6.48E-09 |
| rs6983169   | 39.573156 | 6.48E-09 |
| rs12257472  | 39.569874 | 6.49E-09 |
| rs2427534   | 39.569329 | 6.49E-09 |
| rs11696062  | 39.569095 | 6.49E-09 |
| rs1955025   | 39.569081 | 6.49E-09 |
| rs6790568   | 39.568608 | 6.50E-09 |
| rs1541213   | 39.565602 | 6.51E-09 |
| rs6010916   | 39.563284 | 6.51E-09 |
| rs7979879   | 39.562709 | 6.52E-09 |
| rs6546019   | 39.556294 | 6.54E-09 |
| rs11168252  | 39.555220 | 6.54E-09 |
| rs9517712   | 39.552862 | 6.55E-09 |
| rs17456204  | 39.552523 | 6.55E-09 |
| rs174458    | 39.552137 | 6.55E-09 |
| rs6833795   | 39.551817 | 6.55E-09 |
| rs9788296   | 39.551233 | 6.56E-09 |
| rs12907986  | 39.549675 | 6.56E-09 |
| rs4502863   | 39.547912 | 6.57E-09 |
| rs2056576   | 39.547440 | 6.57E-09 |
| rs77318058  | 39.546810 | 6.57E-09 |

|             |           |          |
|-------------|-----------|----------|
| rs11241079  | 39.545871 | 6.57E-09 |
| rs897984    | 39.542878 | 6.59E-09 |
| rs809955    | 39.539461 | 6.60E-09 |
| rs1116823   | 39.537656 | 6.60E-09 |
| rs4728142   | 39.536368 | 6.61E-09 |
| rs11830223  | 39.532496 | 6.62E-09 |
| rs10200107  | 39.530844 | 6.63E-09 |
| rs178825    | 39.522203 | 6.66E-09 |
| rs7169630   | 39.521762 | 6.66E-09 |
| rs114881571 | 39.520257 | 6.66E-09 |
| rs2137168   | 39.518345 | 6.67E-09 |
| rs10256849  | 39.515148 | 6.68E-09 |
| rs9851967   | 39.514824 | 6.68E-09 |
| rs4792716   | 39.509608 | 6.70E-09 |
| rs9851651   | 39.509021 | 6.70E-09 |
| rs13298654  | 39.508190 | 6.71E-09 |
| rs61896141  | 39.507227 | 6.71E-09 |
| rs77561985  | 39.506434 | 6.71E-09 |
| rs10734900  | 39.506289 | 6.71E-09 |
| rs13114851  | 39.506114 | 6.71E-09 |
| rs4671512   | 39.505322 | 6.72E-09 |
| rs8047587   | 39.505214 | 6.72E-09 |
| rs13255886  | 39.502498 | 6.73E-09 |
| rs1893886   | 39.502194 | 6.73E-09 |
| rs73390205  | 39.501399 | 6.73E-09 |
| rs2156740   | 39.498159 | 6.74E-09 |
| rs12901023  | 39.495057 | 6.75E-09 |
| rs62260663  | 39.491332 | 6.77E-09 |
| rs262477    | 39.486530 | 6.78E-09 |
| rs6706123   | 39.485044 | 6.79E-09 |
| rs9272408   | 39.484613 | 6.79E-09 |
| rs56160461  | 39.483613 | 6.80E-09 |
| rs13274113  | 39.482319 | 6.80E-09 |
| rs2738785   | 39.479874 | 6.81E-09 |
| rs7599208   | 39.479855 | 6.81E-09 |
| rs7862061   | 39.479312 | 6.81E-09 |
| rs11948739  | 39.479050 | 6.81E-09 |
| rs6545984   | 39.478975 | 6.81E-09 |
| rs1926036   | 39.478838 | 6.81E-09 |
| rs28706696  | 39.478458 | 6.81E-09 |
| rs2024309   | 39.478142 | 6.81E-09 |
| rs3785626   | 39.474736 | 6.83E-09 |
| rs7842724   | 39.472237 | 6.84E-09 |
| rs9373846   | 39.472147 | 6.84E-09 |
| rs12936529  | 39.469264 | 6.85E-09 |
| rs12238134  | 39.469085 | 6.85E-09 |

|             |           |          |
|-------------|-----------|----------|
| rs2891058   | 39.468422 | 6.85E-09 |
| rs11715716  | 39.466537 | 6.86E-09 |
| rs7285944   | 39.464769 | 6.86E-09 |
| rs12920259  | 39.463455 | 6.87E-09 |
| rs244513    | 39.462724 | 6.87E-09 |
| rs6594481   | 39.462689 | 6.87E-09 |
| rs68072554  | 39.462299 | 6.87E-09 |
| rs1980251   | 39.460804 | 6.88E-09 |
| rs35160872  | 39.458431 | 6.89E-09 |
| rs171522    | 39.456781 | 6.89E-09 |
| rs10883834  | 39.454728 | 6.90E-09 |
| rs143334143 | 39.453807 | 6.90E-09 |
| rs11899999  | 39.453044 | 6.91E-09 |
| rs1893888   | 39.452849 | 6.91E-09 |
| rs6751119   | 39.452756 | 6.91E-09 |
| rs9851930   | 39.451813 | 6.91E-09 |
| rs7606045   | 39.451294 | 6.91E-09 |
| rs964880    | 39.449780 | 6.92E-09 |
| rs262489    | 39.449312 | 6.92E-09 |
| rs7830550   | 39.449029 | 6.92E-09 |
| rs7814274   | 39.448946 | 6.92E-09 |
| rs78763027  | 39.444908 | 6.94E-09 |
| rs2235852   | 39.443636 | 6.94E-09 |
| rs3761757   | 39.443512 | 6.94E-09 |
| rs2235850   | 39.442377 | 6.94E-09 |
| rs35580034  | 39.436014 | 6.97E-09 |
| rs12355120  | 39.435680 | 6.97E-09 |
| rs3781282   | 39.433723 | 6.98E-09 |
| rs10108399  | 39.433567 | 6.98E-09 |
| rs140538749 | 39.429139 | 6.99E-09 |
| rs1359613   | 39.428050 | 7.00E-09 |
| rs10786742  | 39.427365 | 7.00E-09 |
| rs10987054  | 39.426994 | 7.00E-09 |
| rs80213143  | 39.426577 | 7.00E-09 |
| rs1491985   | 39.426284 | 7.00E-09 |
| rs616488    | 39.424672 | 7.01E-09 |
| rs9824435   | 39.421809 | 7.02E-09 |
| rs78399358  | 39.420039 | 7.03E-09 |
| rs2416983   | 39.418822 | 7.03E-09 |
| rs28676499  | 39.418029 | 7.03E-09 |
| rs4357971   | 39.413941 | 7.05E-09 |
| rs7092029   | 39.412409 | 7.06E-09 |
| rs1922295   | 39.410123 | 7.06E-09 |
| rs13142439  | 39.409671 | 7.07E-09 |
| rs12150564  | 39.406775 | 7.08E-09 |
| rs11191586  | 39.406060 | 7.08E-09 |

|             |           |          |
|-------------|-----------|----------|
| rs7556900   | 39.402262 | 7.09E-09 |
| rs4305299   | 39.401633 | 7.10E-09 |
| rs262481    | 39.395040 | 7.12E-09 |
| rs72699855  | 39.394755 | 7.12E-09 |
| rs943039    | 39.393030 | 7.13E-09 |
| rs2148198   | 39.391541 | 7.13E-09 |
| rs7811612   | 39.390412 | 7.14E-09 |
| rs28360499  | 39.387823 | 7.15E-09 |
| rs4671499   | 39.383793 | 7.16E-09 |
| rs9644951   | 39.382894 | 7.17E-09 |
| rs62262672  | 39.380438 | 7.18E-09 |
| rs7221536   | 39.379891 | 7.18E-09 |
| rs10039056  | 39.379800 | 7.18E-09 |
| rs2092564   | 39.377017 | 7.19E-09 |
| rs114188606 | 39.373470 | 7.20E-09 |
| rs7017473   | 39.371819 | 7.21E-09 |
| rs4425499   | 39.369842 | 7.22E-09 |
| rs10786741  | 39.368935 | 7.22E-09 |
| rs2153774   | 39.367437 | 7.23E-09 |
| rs4363174   | 39.367081 | 7.23E-09 |
| rs11688596  | 39.364422 | 7.24E-09 |
| rs12775302  | 39.363376 | 7.24E-09 |
| rs12414232  | 39.362141 | 7.25E-09 |
| rs12939078  | 39.360828 | 7.25E-09 |
| rs10427219  | 39.360701 | 7.25E-09 |
| rs11654658  | 39.359999 | 7.25E-09 |
| rs7812466   | 39.359808 | 7.26E-09 |
| rs7485502   | 39.358755 | 7.26E-09 |
| rs12713490  | 39.353932 | 7.28E-09 |
| rs890546    | 39.353661 | 7.28E-09 |
| rs10795630  | 39.353640 | 7.28E-09 |
| rs13275153  | 39.353465 | 7.28E-09 |
| rs7603476   | 39.351248 | 7.29E-09 |
| rs9836756   | 39.349527 | 7.29E-09 |
| rs9366649   | 39.348954 | 7.30E-09 |
| rs6893084   | 39.347115 | 7.30E-09 |
| rs3781281   | 39.346577 | 7.31E-09 |
| rs6756883   | 39.344961 | 7.31E-09 |
| rs11191591  | 39.341453 | 7.33E-09 |
| rs10509766  | 39.334362 | 7.35E-09 |
| rs7559982   | 39.331701 | 7.36E-09 |
| rs62290016  | 39.330377 | 7.37E-09 |
| rs11715549  | 39.330191 | 7.37E-09 |
| rs6578295   | 39.329922 | 7.37E-09 |
| rs6916289   | 39.329884 | 7.37E-09 |
| rs7915816   | 39.329063 | 7.37E-09 |

|             |           |          |
|-------------|-----------|----------|
| rs116706159 | 39.328872 | 7.37E-09 |
| rs11191573  | 39.327906 | 7.38E-09 |
| rs11782363  | 39.327882 | 7.38E-09 |
| rs11709734  | 39.327737 | 7.38E-09 |
| rs34798694  | 39.326366 | 7.38E-09 |
| rs7859110   | 39.326284 | 7.38E-09 |
| rs1807298   | 39.325818 | 7.39E-09 |
| rs71654480  | 39.324270 | 7.39E-09 |
| rs11191544  | 39.324111 | 7.39E-09 |
| rs364989    | 39.319596 | 7.41E-09 |
| rs9611555   | 39.319324 | 7.41E-09 |
| rs4945084   | 39.318309 | 7.42E-09 |
| rs12513476  | 39.317203 | 7.42E-09 |
| rs10218853  | 39.312650 | 7.44E-09 |
| rs62321685  | 39.310276 | 7.45E-09 |
| rs10900664  | 39.309797 | 7.45E-09 |
| rs1619021   | 39.309262 | 7.45E-09 |
| rs11191589  | 39.307772 | 7.46E-09 |
| rs6883435   | 39.305412 | 7.47E-09 |
| rs34104646  | 39.304879 | 7.47E-09 |
| rs10745679  | 39.303991 | 7.47E-09 |
| rs11191540  | 39.303933 | 7.47E-09 |
| rs7897663   | 39.301476 | 7.48E-09 |
| rs10055333  | 39.300801 | 7.49E-09 |
| rs8065879   | 39.299784 | 7.49E-09 |
| rs9835157   | 39.298383 | 7.49E-09 |
| rs6842843   | 39.292581 | 7.52E-09 |
| rs9910148   | 39.288345 | 7.53E-09 |
| rs58339610  | 39.287738 | 7.54E-09 |
| rs7712464   | 39.285754 | 7.55E-09 |
| rs72668919  | 39.284182 | 7.55E-09 |
| rs2604613   | 39.281836 | 7.56E-09 |
| rs10883836  | 39.281739 | 7.56E-09 |
| rs55865281  | 39.281186 | 7.56E-09 |
| rs12563029  | 39.280476 | 7.57E-09 |
| rs77434238  | 39.275087 | 7.59E-09 |
| rs2682433   | 39.274503 | 7.59E-09 |
| rs112975146 | 39.273879 | 7.59E-09 |
| rs73293051  | 39.271977 | 7.60E-09 |
| rs2023107   | 39.271135 | 7.60E-09 |
| rs35168566  | 39.270473 | 7.61E-09 |
| rs80126770  | 39.265719 | 7.63E-09 |
| rs13028443  | 39.255751 | 7.67E-09 |
| rs2023104   | 39.255568 | 7.67E-09 |
| rs7325960   | 39.255490 | 7.67E-09 |
| rs2735727   | 39.251650 | 7.68E-09 |



|            |           |          |
|------------|-----------|----------|
| rs66906591 | 39.250585 | 7.69E-09 |
| rs4478547  | 39.250531 | 7.69E-09 |
| rs4326027  | 39.249780 | 7.69E-09 |
| rs34882924 | 39.247669 | 7.70E-09 |
| rs56299437 | 39.247285 | 7.70E-09 |
| rs3792881  | 39.246724 | 7.70E-09 |
| rs11719821 | 39.246222 | 7.70E-09 |
| rs9420589  | 39.245833 | 7.71E-09 |
| rs45568836 | 39.245749 | 7.71E-09 |
| rs9266533  | 39.245523 | 7.71E-09 |
| rs12133254 | 39.245264 | 7.71E-09 |
| rs2138795  | 39.243824 | 7.71E-09 |
| rs56240565 | 39.243118 | 7.72E-09 |
| rs7831792  | 39.242924 | 7.72E-09 |
| rs3861984  | 39.241957 | 7.72E-09 |
| rs9373839  | 39.240113 | 7.73E-09 |
| rs7073323  | 39.239703 | 7.73E-09 |
| rs6697340  | 39.237965 | 7.74E-09 |
| rs6809879  | 39.236496 | 7.74E-09 |
| rs908228   | 39.233836 | 7.76E-09 |
| rs8059713  | 39.232970 | 7.76E-09 |
| rs56349152 | 39.230687 | 7.77E-09 |
| rs742230   | 39.227920 | 7.78E-09 |
| rs9611607  | 39.227541 | 7.78E-09 |
| rs10051679 | 39.226286 | 7.79E-09 |
| rs10786738 | 39.225195 | 7.79E-09 |
| rs45509595 | 39.224290 | 7.79E-09 |
| rs1902607  | 39.223349 | 7.80E-09 |
| rs11637659 | 39.223280 | 7.80E-09 |
| rs11191578 | 39.222761 | 7.80E-09 |
| rs45441794 | 39.221292 | 7.81E-09 |
| rs1572578  | 39.215421 | 7.83E-09 |
| rs11692304 | 39.214751 | 7.83E-09 |
| rs1423155  | 39.213896 | 7.84E-09 |
| rs62324205 | 39.213824 | 7.84E-09 |
| rs12415388 | 39.213705 | 7.84E-09 |
| rs4855833  | 39.211834 | 7.85E-09 |
| rs1799844  | 39.211589 | 7.85E-09 |
| rs6987313  | 39.209047 | 7.86E-09 |
| rs34130454 | 39.208105 | 7.86E-09 |
| rs258494   | 39.207965 | 7.86E-09 |
| rs9829155  | 39.205609 | 7.87E-09 |
| rs78780360 | 39.204542 | 7.88E-09 |
| rs11697152 | 39.204273 | 7.88E-09 |
| rs75817769 | 39.204036 | 7.88E-09 |
| rs45505795 | 39.200152 | 7.89E-09 |

|            |           |          |
|------------|-----------|----------|
| rs2182348  | 39.199066 | 7.90E-09 |
| rs2695478  | 39.197809 | 7.90E-09 |
| rs7920868  | 39.197571 | 7.91E-09 |
| rs3819290  | 39.195413 | 7.91E-09 |
| rs262480   | 39.194400 | 7.92E-09 |
| rs1363800  | 39.191762 | 7.93E-09 |
| rs185499   | 39.191629 | 7.93E-09 |
| rs4671496  | 39.190140 | 7.94E-09 |
| rs12926295 | 39.188483 | 7.94E-09 |
| rs1926037  | 39.187101 | 7.95E-09 |
| rs28372841 | 39.186819 | 7.95E-09 |
| rs262506   | 39.186593 | 7.95E-09 |
| rs13430788 | 39.184249 | 7.96E-09 |
| rs6584539  | 39.180099 | 7.98E-09 |
| rs6888588  | 39.179698 | 7.98E-09 |
| rs1470001  | 39.176793 | 7.99E-09 |
| rs75539158 | 39.174146 | 8.00E-09 |
| rs1474275  | 39.169596 | 8.02E-09 |
| rs62324206 | 39.165147 | 8.04E-09 |
| rs6928977  | 39.162521 | 8.05E-09 |
| rs12522275 | 39.162039 | 8.06E-09 |
| rs12036775 | 39.161606 | 8.06E-09 |
| rs7613192  | 39.161022 | 8.06E-09 |
| rs72782698 | 39.160804 | 8.06E-09 |
| rs4502862  | 39.159364 | 8.07E-09 |
| rs2066634  | 39.158658 | 8.07E-09 |
| rs6828795  | 39.158361 | 8.07E-09 |
| rs2281877  | 39.156770 | 8.08E-09 |
| rs73255060 | 39.156762 | 8.08E-09 |
| rs67111717 | 39.156640 | 8.08E-09 |
| rs1078341  | 39.155909 | 8.08E-09 |
| rs262493   | 39.155062 | 8.09E-09 |
| rs4671495  | 39.155057 | 8.09E-09 |
| rs1591915  | 39.149495 | 8.11E-09 |
| rs6871301  | 39.149410 | 8.11E-09 |
| rs13096480 | 39.148866 | 8.11E-09 |
| rs199531   | 39.148227 | 8.11E-09 |
| rs9870858  | 39.145168 | 8.13E-09 |
| rs1352889  | 39.144776 | 8.13E-09 |
| rs17880969 | 39.142330 | 8.14E-09 |
| rs242951   | 39.142090 | 8.14E-09 |
| rs2275806  | 39.141913 | 8.14E-09 |
| rs6594482  | 39.140432 | 8.15E-09 |
| rs5996054  | 39.139994 | 8.15E-09 |
| rs10110676 | 39.139631 | 8.15E-09 |
| rs5751084  | 39.139277 | 8.15E-09 |

|            |           |          |
|------------|-----------|----------|
| rs62324202 | 39.138938 | 8.15E-09 |
| rs7088200  | 39.138667 | 8.16E-09 |
| rs10734901 | 39.138569 | 8.16E-09 |
| rs11859690 | 39.138527 | 8.16E-09 |
| rs1607202  | 39.133513 | 8.18E-09 |
| rs60934439 | 39.133450 | 8.18E-09 |
| rs34741321 | 39.132277 | 8.18E-09 |
| rs455997   | 39.130604 | 8.19E-09 |
| rs2405522  | 39.129965 | 8.19E-09 |
| rs8064862  | 39.129642 | 8.19E-09 |
| rs80006116 | 39.124884 | 8.22E-09 |
| rs1645172  | 39.123761 | 8.22E-09 |
| rs67566769 | 39.123310 | 8.22E-09 |
| rs3785622  | 39.122424 | 8.23E-09 |
| rs12548048 | 39.121362 | 8.23E-09 |
| rs2695479  | 39.119549 | 8.24E-09 |
| rs6421028  | 39.116061 | 8.25E-09 |
| rs12715437 | 39.115777 | 8.26E-09 |
| rs6502498  | 39.111071 | 8.28E-09 |
| rs10054976 | 39.109303 | 8.28E-09 |
| rs7395835  | 39.107029 | 8.29E-09 |
| rs4930718  | 39.106890 | 8.29E-09 |
| rs2474619  | 39.105882 | 8.30E-09 |
| rs3740386  | 39.105599 | 8.30E-09 |
| rs10851911 | 39.099216 | 8.33E-09 |
| rs17760050 | 39.098412 | 8.33E-09 |
| rs56813533 | 39.098355 | 8.33E-09 |
| rs76138249 | 39.097519 | 8.34E-09 |
| rs72773179 | 39.096685 | 8.34E-09 |
| rs2057455  | 39.096599 | 8.34E-09 |
| rs62324203 | 39.095786 | 8.34E-09 |
| rs9270567  | 39.093434 | 8.35E-09 |
| rs3824660  | 39.093360 | 8.35E-09 |
| rs888230   | 39.092340 | 8.36E-09 |
| rs62404124 | 39.090833 | 8.36E-09 |
| rs178831   | 39.089970 | 8.37E-09 |
| rs11167764 | 39.089286 | 8.37E-09 |
| rs34443321 | 39.087105 | 8.38E-09 |
| rs4855849  | 39.086340 | 8.38E-09 |
| rs7871599  | 39.086062 | 8.39E-09 |
| rs13271442 | 39.085590 | 8.39E-09 |
| rs258495   | 39.085148 | 8.39E-09 |
| rs4855848  | 39.085073 | 8.39E-09 |
| rs2109262  | 39.082326 | 8.40E-09 |
| rs7087040  | 39.081291 | 8.41E-09 |
| rs1105727  | 39.081060 | 8.41E-09 |

|             |           |          |
|-------------|-----------|----------|
| rs272863    | 39.075591 | 8.43E-09 |
| rs7628207   | 39.070896 | 8.45E-09 |
| rs491087    | 39.070666 | 8.45E-09 |
| rs7691363   | 39.069815 | 8.46E-09 |
| rs8077104   | 39.067268 | 8.47E-09 |
| rs9358919   | 39.067033 | 8.47E-09 |
| rs1664847   | 39.066403 | 8.47E-09 |
| rs11740584  | 39.066373 | 8.47E-09 |
| rs1496402   | 39.062938 | 8.49E-09 |
| rs2338825   | 39.061102 | 8.50E-09 |
| rs7085598   | 39.056748 | 8.52E-09 |
| rs6446286   | 39.054207 | 8.53E-09 |
| rs1829259   | 39.051969 | 8.54E-09 |
| rs9808385   | 39.051219 | 8.54E-09 |
| rs35304226  | 39.051139 | 8.54E-09 |
| rs1291207   | 39.050602 | 8.54E-09 |
| rs7087459   | 39.050273 | 8.55E-09 |
| rs9791170   | 39.049482 | 8.55E-09 |
| rs13105210  | 39.048777 | 8.55E-09 |
| rs2075624   | 39.047260 | 8.56E-09 |
| rs9761637   | 39.044134 | 8.57E-09 |
| rs6472539   | 39.041271 | 8.59E-09 |
| rs7912517   | 39.038854 | 8.60E-09 |
| rs35214141  | 39.036624 | 8.61E-09 |
| rs4792728   | 39.036066 | 8.61E-09 |
| rs9607812   | 39.034780 | 8.62E-09 |
| rs6805766   | 39.034693 | 8.62E-09 |
| rs1416685   | 39.034210 | 8.62E-09 |
| rs769658    | 39.032866 | 8.63E-09 |
| rs113896715 | 39.032580 | 8.63E-09 |
| rs1118016   | 39.031289 | 8.63E-09 |
| rs72799903  | 39.027998 | 8.65E-09 |
| rs12120432  | 39.027630 | 8.65E-09 |
| rs9273037   | 39.023183 | 8.67E-09 |
| rs2071592   | 39.022741 | 8.67E-09 |
| rs13269513  | 39.022666 | 8.67E-09 |
| rs2131108   | 39.019937 | 8.68E-09 |
| rs4759276   | 39.019920 | 8.68E-09 |
| rs17688313  | 39.018950 | 8.69E-09 |
| rs73012738  | 39.014875 | 8.71E-09 |
| rs2738774   | 39.011923 | 8.72E-09 |
| rs10905277  | 39.006725 | 8.75E-09 |
| rs56946876  | 39.004653 | 8.75E-09 |
| rs4855845   | 39.003940 | 8.76E-09 |
| rs4855846   | 39.003771 | 8.76E-09 |
| rs16962414  | 39.002070 | 8.77E-09 |

|             |           |          |
|-------------|-----------|----------|
| rs35654771  | 39.000406 | 8.77E-09 |
| rs138148985 | 38.999552 | 8.78E-09 |
| rs9393692   | 38.999269 | 8.78E-09 |
| rs9808380   | 38.998758 | 8.78E-09 |
| rs10499197  | 38.998304 | 8.78E-09 |
| rs7132082   | 38.994193 | 8.80E-09 |
| rs71510796  | 38.993592 | 8.81E-09 |
| rs5411115   | 38.993421 | 8.81E-09 |
| rs34515576  | 38.991688 | 8.82E-09 |
| rs1964562   | 38.989124 | 8.83E-09 |
| rs9358917   | 38.987617 | 8.83E-09 |
| rs10452032  | 38.987100 | 8.84E-09 |
| rs9548884   | 38.981529 | 8.86E-09 |
| rs62324170  | 38.976861 | 8.88E-09 |
| rs74137208  | 38.974052 | 8.90E-09 |
| rs10515456  | 38.971338 | 8.91E-09 |
| rs9883000   | 38.970248 | 8.92E-09 |
| rs10786719  | 38.968174 | 8.93E-09 |
| rs1864119   | 38.968100 | 8.93E-09 |
| rs4455974   | 38.966261 | 8.93E-09 |
| rs1404006   | 38.966044 | 8.94E-09 |
| rs3792884   | 38.964751 | 8.94E-09 |
| rs10036968  | 38.962440 | 8.95E-09 |
| rs73729339  | 38.960339 | 8.96E-09 |
| rs6011778   | 38.959715 | 8.97E-09 |
| rs144660294 | 38.958748 | 8.97E-09 |
| rs76825937  | 38.957030 | 8.98E-09 |
| rs9270189   | 38.955175 | 8.99E-09 |
| rs6774202   | 38.950954 | 9.01E-09 |
| rs17733719  | 38.945976 | 9.03E-09 |
| rs10057309  | 38.942658 | 9.05E-09 |
| rs11078915  | 38.939741 | 9.06E-09 |
| rs190519    | 38.938823 | 9.07E-09 |
| rs113761887 | 38.937831 | 9.07E-09 |
| rs28504415  | 38.936846 | 9.07E-09 |
| rs10883839  | 38.936665 | 9.08E-09 |
| rs12907535  | 38.934782 | 9.08E-09 |
| rs9270707   | 38.930927 | 9.10E-09 |
| rs9326811   | 38.927433 | 9.12E-09 |
| rs28688207  | 38.927311 | 9.12E-09 |
| rs74985076  | 38.925828 | 9.13E-09 |
| rs10477463  | 38.925417 | 9.13E-09 |
| rs112560164 | 38.920337 | 9.15E-09 |
| rs11741341  | 38.910262 | 9.20E-09 |
| rs250303    | 38.907349 | 9.22E-09 |
| rs13357752  | 38.903881 | 9.23E-09 |

|            |           |          |
|------------|-----------|----------|
| rs12680103 | 38.902875 | 9.24E-09 |
| rs11191438 | 38.899937 | 9.25E-09 |
| rs10203763 | 38.899887 | 9.25E-09 |
| rs1423157  | 38.896139 | 9.27E-09 |
| rs12717899 | 38.895086 | 9.28E-09 |
| rs62324194 | 38.892354 | 9.29E-09 |
| rs343494   | 38.891152 | 9.30E-09 |
| rs35455030 | 38.890813 | 9.30E-09 |
| rs7549987  | 38.886337 | 9.32E-09 |
| rs9326810  | 38.885566 | 9.32E-09 |
| rs9398075  | 38.881889 | 9.34E-09 |
| rs6062490  | 38.881057 | 9.35E-09 |
| rs17019340 | 38.879904 | 9.35E-09 |
| rs932173   | 38.876676 | 9.37E-09 |
| rs62324192 | 38.876644 | 9.37E-09 |
| rs11078898 | 38.876233 | 9.37E-09 |
| rs10073131 | 38.875735 | 9.37E-09 |
| rs1835967  | 38.875639 | 9.37E-09 |
| rs2276448  | 38.871705 | 9.39E-09 |
| rs2421941  | 38.871354 | 9.39E-09 |
| rs35109143 | 38.871012 | 9.40E-09 |
| rs45443194 | 38.870536 | 9.40E-09 |
| rs61897793 | 38.867979 | 9.41E-09 |
| rs10976923 | 38.867343 | 9.41E-09 |
| rs62324193 | 38.866104 | 9.42E-09 |
| rs156029   | 38.864497 | 9.43E-09 |
| rs775740   | 38.863857 | 9.43E-09 |
| rs2066322  | 38.863650 | 9.43E-09 |
| rs11191553 | 38.861770 | 9.44E-09 |
| rs2329021  | 38.861120 | 9.45E-09 |
| rs2090480  | 38.860602 | 9.45E-09 |
| rs12680166 | 38.860174 | 9.45E-09 |
| rs28535523 | 38.859937 | 9.45E-09 |
| rs72773183 | 38.858878 | 9.46E-09 |
| rs78541112 | 38.856014 | 9.47E-09 |
| rs4247366  | 38.855510 | 9.47E-09 |
| rs7759677  | 38.854920 | 9.48E-09 |
| rs7361098  | 38.854629 | 9.48E-09 |
| rs61894512 | 38.852950 | 9.49E-09 |
| rs58784699 | 38.851355 | 9.49E-09 |
| rs7917650  | 38.850885 | 9.50E-09 |
| rs9393693  | 38.848883 | 9.51E-09 |
| rs10883830 | 38.848213 | 9.51E-09 |
| rs3755282  | 38.847564 | 9.51E-09 |
| rs4795356  | 38.839589 | 9.55E-09 |
| rs9393694  | 38.838504 | 9.56E-09 |

|             |           |          |
|-------------|-----------|----------|
| rs62384603  | 38.837417 | 9.56E-09 |
| rs7730511   | 38.833481 | 9.58E-09 |
| rs1724390   | 38.832421 | 9.59E-09 |
| rs7814542   | 38.830350 | 9.60E-09 |
| rs6584541   | 38.830283 | 9.60E-09 |
| rs9358915   | 38.828696 | 9.61E-09 |
| rs1044977   | 38.828677 | 9.61E-09 |
| rs9923231   | 38.828465 | 9.61E-09 |
| rs10486391  | 38.827118 | 9.62E-09 |
| rs12763665  | 38.827062 | 9.62E-09 |
| rs9745586   | 38.825681 | 9.62E-09 |
| rs7566896   | 38.825577 | 9.62E-09 |
| rs10976922  | 38.823348 | 9.64E-09 |
| rs7761298   | 38.821505 | 9.65E-09 |
| rs9379838   | 38.821260 | 9.65E-09 |
| rs10214391  | 38.820902 | 9.65E-09 |
| rs9272659   | 38.818577 | 9.66E-09 |
| rs7092522   | 38.817564 | 9.67E-09 |
| rs6580220   | 38.814190 | 9.68E-09 |
| rs7729203   | 38.811151 | 9.70E-09 |
| rs1993862   | 38.808486 | 9.71E-09 |
| rs440970    | 38.801309 | 9.75E-09 |
| rs72773184  | 38.799651 | 9.76E-09 |
| rs17879298  | 38.799008 | 9.76E-09 |
| rs568727    | 38.794036 | 9.79E-09 |
| rs35320439  | 38.793481 | 9.79E-09 |
| rs4453499   | 38.792871 | 9.79E-09 |
| rs17446534  | 38.788699 | 9.81E-09 |
| rs13248271  | 38.786696 | 9.82E-09 |
| rs753788    | 38.786496 | 9.83E-09 |
| rs62384601  | 38.786374 | 9.83E-09 |
| rs9272495   | 38.784240 | 9.84E-09 |
| rs6893782   | 38.782533 | 9.85E-09 |
| rs9830730   | 38.780763 | 9.86E-09 |
| rs62324169  | 38.780413 | 9.86E-09 |
| rs7617480   | 38.776930 | 9.88E-09 |
| rs112869008 | 38.776879 | 9.88E-09 |
| rs10504479  | 38.775822 | 9.88E-09 |
| rs2287041   | 38.775633 | 9.88E-09 |
| rs10062446  | 38.770486 | 9.91E-09 |
| rs148383796 | 38.770159 | 9.91E-09 |
| rs10515419  | 38.769825 | 9.91E-09 |
| rs9272660   | 38.768519 | 9.92E-09 |
| rs891991    | 38.767395 | 9.93E-09 |
| rs4432941   | 38.765423 | 9.94E-09 |
| rs6865485   | 38.763016 | 9.95E-09 |

|             |           |          |
|-------------|-----------|----------|
| rs4290852   | 38.761865 | 9.95E-09 |
| rs343497    | 38.761614 | 9.96E-09 |
| rs7895154   | 38.761410 | 9.96E-09 |
| rs3853749   | 38.757310 | 9.98E-09 |
| rs274550    | 38.757157 | 9.98E-09 |
| rs7594087   | 38.754232 | 9.99E-09 |
| rs775713    | 38.753854 | 1.00E-08 |
| rs2151825   | 38.752221 | 1.00E-08 |
| rs62290008  | 38.751066 | 1.00E-08 |
| rs1045599   | 38.749408 | 1.00E-08 |
| rs1862647   | 38.748068 | 1.00E-08 |
| rs881929    | 38.746120 | 1.00E-08 |
| rs4377748   | 38.745820 | 1.00E-08 |
| rs6988596   | 38.744567 | 1.00E-08 |
| rs7217614   | 38.744275 | 1.00E-08 |
| rs11150599  | 38.743202 | 1.01E-08 |
| rs55673000  | 38.742478 | 1.01E-08 |
| rs115700483 | 38.741960 | 1.01E-08 |
| rs9889745   | 38.735998 | 1.01E-08 |
| rs73306870  | 38.732654 | 1.01E-08 |
| rs2380687   | 38.731680 | 1.01E-08 |
| rs1350294   | 38.728372 | 1.01E-08 |
| rs1935323   | 38.728211 | 1.01E-08 |
| rs7218484   | 38.726022 | 1.01E-08 |
| rs62324167  | 38.725638 | 1.01E-08 |
| rs140365013 | 38.723810 | 1.02E-08 |
| rs1057412   | 38.723550 | 1.02E-08 |
| rs9357004   | 38.723484 | 1.02E-08 |
| rs34354079  | 38.720546 | 1.02E-08 |
| rs9903363   | 38.720465 | 1.02E-08 |
| rs749671    | 38.717321 | 1.02E-08 |
| rs700172    | 38.717222 | 1.02E-08 |
| rs8079560   | 38.716545 | 1.02E-08 |
| rs2237057   | 38.715222 | 1.02E-08 |
| rs6864396   | 38.714966 | 1.02E-08 |
| rs3785625   | 38.714523 | 1.02E-08 |
| rs2081083   | 38.714458 | 1.02E-08 |
| rs8067884   | 38.713496 | 1.02E-08 |
| rs9997448   | 38.712721 | 1.02E-08 |
| rs11682642  | 38.711058 | 1.02E-08 |
| rs35335692  | 38.709926 | 1.02E-08 |
| rs11868284  | 38.709005 | 1.02E-08 |
| rs9548881   | 38.708047 | 1.02E-08 |
| rs62324166  | 38.707397 | 1.02E-08 |
| rs2695476   | 38.705904 | 1.03E-08 |
| rs1003699   | 38.705580 | 1.03E-08 |



|             |           |          |
|-------------|-----------|----------|
| rs62262730  | 38.704058 | 1.03E-08 |
| rs13277355  | 38.703777 | 1.03E-08 |
| rs10736069  | 38.703097 | 1.03E-08 |
| rs12615652  | 38.703063 | 1.03E-08 |
| rs75546626  | 38.703034 | 1.03E-08 |
| rs2735719   | 38.701470 | 1.03E-08 |
| rs4705964   | 38.696574 | 1.03E-08 |
| rs11707807  | 38.694730 | 1.03E-08 |
| rs7856570   | 38.693016 | 1.03E-08 |
| rs1423153   | 38.692199 | 1.03E-08 |
| rs1983631   | 38.692090 | 1.03E-08 |
| rs7717713   | 38.691204 | 1.03E-08 |
| rs59811752  | 38.685418 | 1.04E-08 |
| rs11895059  | 38.684389 | 1.04E-08 |
| rs16947546  | 38.683515 | 1.04E-08 |
| rs1727317   | 38.682795 | 1.04E-08 |
| rs6503502   | 38.681080 | 1.04E-08 |
| rs6892351   | 38.679103 | 1.04E-08 |
| rs7585664   | 38.675513 | 1.04E-08 |
| rs17886348  | 38.674559 | 1.04E-08 |
| rs34042354  | 38.673994 | 1.04E-08 |
| rs34394173  | 38.672800 | 1.04E-08 |
| rs11984478  | 38.672741 | 1.04E-08 |
| rs11656811  | 38.672412 | 1.04E-08 |
| rs62324197  | 38.671727 | 1.04E-08 |
| rs2338800   | 38.671067 | 1.04E-08 |
| rs10871454  | 38.668642 | 1.05E-08 |
| rs35505579  | 38.668598 | 1.05E-08 |
| rs775739    | 38.667141 | 1.05E-08 |
| rs4739748   | 38.666406 | 1.05E-08 |
| rs17251686  | 38.665135 | 1.05E-08 |
| rs2049045   | 38.662726 | 1.05E-08 |
| rs2068165   | 38.660824 | 1.05E-08 |
| rs7651859   | 38.660477 | 1.05E-08 |
| rs797090    | 38.652703 | 1.05E-08 |
| rs67483405  | 38.652464 | 1.05E-08 |
| rs190008454 | 38.651878 | 1.06E-08 |
| rs1132645   | 38.642262 | 1.06E-08 |
| rs9611528   | 38.641621 | 1.06E-08 |
| rs1113315   | 38.641181 | 1.06E-08 |
| rs4383570   | 38.640327 | 1.06E-08 |
| rs1963811   | 38.638036 | 1.06E-08 |
| rs7529585   | 38.636413 | 1.06E-08 |
| rs35351013  | 38.635757 | 1.06E-08 |
| rs6265      | 38.635518 | 1.06E-08 |
| rs9894586   | 38.634533 | 1.06E-08 |

|             |           |          |
|-------------|-----------|----------|
| rs45589038  | 38.634458 | 1.06E-08 |
| rs775743    | 38.634135 | 1.07E-08 |
| rs9961847   | 38.633845 | 1.07E-08 |
| rs2103392   | 38.633072 | 1.07E-08 |
| rs7396228   | 38.631353 | 1.07E-08 |
| rs74877722  | 38.628989 | 1.07E-08 |
| rs7705826   | 38.627856 | 1.07E-08 |
| rs73195680  | 38.626924 | 1.07E-08 |
| rs3106209   | 38.626010 | 1.07E-08 |
| rs1334297   | 38.624103 | 1.07E-08 |
| rs62023562  | 38.623588 | 1.07E-08 |
| rs62324201  | 38.622132 | 1.07E-08 |
| rs55940702  | 38.621021 | 1.07E-08 |
| rs178808    | 38.617986 | 1.07E-08 |
| rs1465841   | 38.616747 | 1.07E-08 |
| rs72773181  | 38.615716 | 1.08E-08 |
| rs7502539   | 38.613069 | 1.08E-08 |
| rs6537284   | 38.612920 | 1.08E-08 |
| rs769660    | 38.612661 | 1.08E-08 |
| rs11842899  | 38.609289 | 1.08E-08 |
| rs7443311   | 38.609095 | 1.08E-08 |
| rs860413    | 38.608496 | 1.08E-08 |
| rs72773195  | 38.608479 | 1.08E-08 |
| rs7734638   | 38.607388 | 1.08E-08 |
| rs9272721   | 38.607329 | 1.08E-08 |
| rs2028258   | 38.607041 | 1.08E-08 |
| rs7722517   | 38.606738 | 1.08E-08 |
| rs7544414   | 38.605818 | 1.08E-08 |
| rs12442353  | 38.605173 | 1.08E-08 |
| rs12713489  | 38.604855 | 1.08E-08 |
| rs73207491  | 38.604570 | 1.08E-08 |
| rs12941465  | 38.601714 | 1.08E-08 |
| rs11720705  | 38.601151 | 1.08E-08 |
| rs7075552   | 38.600801 | 1.08E-08 |
| rs34638253  | 38.600185 | 1.08E-08 |
| rs4889606   | 38.600095 | 1.08E-08 |
| rs11191549  | 38.598282 | 1.09E-08 |
| rs10773002  | 38.593747 | 1.09E-08 |
| rs2682431   | 38.592978 | 1.09E-08 |
| rs6918792   | 38.589232 | 1.09E-08 |
| rs769663    | 38.587676 | 1.09E-08 |
| rs112827102 | 38.586860 | 1.09E-08 |
| rs11651578  | 38.583042 | 1.09E-08 |
| rs13207475  | 38.582676 | 1.09E-08 |
| rs7089680   | 38.582309 | 1.09E-08 |
| rs6990504   | 38.577838 | 1.10E-08 |

|             |           |          |
|-------------|-----------|----------|
| rs2274339   | 38.577255 | 1.10E-08 |
| rs4792729   | 38.575871 | 1.10E-08 |
| rs2921080   | 38.575359 | 1.10E-08 |
| rs62324191  | 38.574729 | 1.10E-08 |
| rs73786803  | 38.574159 | 1.10E-08 |
| rs7613603   | 38.572723 | 1.10E-08 |
| rs6879672   | 38.572405 | 1.10E-08 |
| rs2921090   | 38.571869 | 1.10E-08 |
| rs10245867  | 38.569878 | 1.10E-08 |
| rs113387455 | 38.567726 | 1.10E-08 |
| rs7355671   | 38.567108 | 1.10E-08 |
| rs9611527   | 38.562601 | 1.11E-08 |
| rs8074727   | 38.562169 | 1.11E-08 |
| rs769665    | 38.558553 | 1.11E-08 |
| rs67196042  | 38.557488 | 1.11E-08 |
| rs6864565   | 38.557259 | 1.11E-08 |
| rs9537797   | 38.556473 | 1.11E-08 |
| rs10463878  | 38.556308 | 1.11E-08 |
| rs59357103  | 38.556239 | 1.11E-08 |
| rs12593066  | 38.555355 | 1.11E-08 |
| rs6488868   | 38.554013 | 1.11E-08 |
| rs10830204  | 38.549957 | 1.11E-08 |
| rs7709594   | 38.549845 | 1.11E-08 |
| rs7252363   | 38.549730 | 1.11E-08 |
| rs74079954  | 38.549481 | 1.11E-08 |
| rs812888    | 38.549328 | 1.11E-08 |
| rs187801    | 38.549039 | 1.11E-08 |
| rs7681655   | 38.546431 | 1.12E-08 |
| rs1989089   | 38.545878 | 1.12E-08 |
| rs10515424  | 38.545183 | 1.12E-08 |
| rs62234991  | 38.545098 | 1.12E-08 |
| rs3853751   | 38.543469 | 1.12E-08 |
| rs7334317   | 38.542286 | 1.12E-08 |
| rs2246852   | 38.541080 | 1.12E-08 |
| rs796528    | 38.539313 | 1.12E-08 |
| rs9537796   | 38.538310 | 1.12E-08 |
| rs6840012   | 38.537591 | 1.12E-08 |
| rs4933734   | 38.537148 | 1.12E-08 |
| rs35848276  | 38.535699 | 1.12E-08 |
| rs3130552   | 38.530943 | 1.12E-08 |
| rs4809323   | 38.525115 | 1.13E-08 |
| rs12324203  | 38.519173 | 1.13E-08 |
| rs13354528  | 38.518489 | 1.13E-08 |
| rs4469023   | 38.517442 | 1.13E-08 |
| rs17404727  | 38.516739 | 1.13E-08 |
| rs4400170   | 38.516644 | 1.13E-08 |

|             |           |          |
|-------------|-----------|----------|
| rs4370082   | 38.514614 | 1.13E-08 |
| rs10918695  | 38.513841 | 1.13E-08 |
| rs10000502  | 38.512167 | 1.14E-08 |
| rs1586827   | 38.511582 | 1.14E-08 |
| rs9398073   | 38.511442 | 1.14E-08 |
| rs115700874 | 38.511169 | 1.14E-08 |
| rs11794655  | 38.510817 | 1.14E-08 |
| rs7364264   | 38.510349 | 1.14E-08 |
| rs726010    | 38.506661 | 1.14E-08 |
| rs12051846  | 38.505291 | 1.14E-08 |
| rs2028259   | 38.504346 | 1.14E-08 |
| rs2324306   | 38.502918 | 1.14E-08 |
| rs35140375  | 38.502594 | 1.14E-08 |
| rs13172894  | 38.501468 | 1.14E-08 |
| rs12904824  | 38.500506 | 1.14E-08 |
| rs4664206   | 38.499675 | 1.14E-08 |
| rs7665807   | 38.499529 | 1.14E-08 |
| rs2682426   | 38.494574 | 1.15E-08 |
| rs9309774   | 38.494526 | 1.15E-08 |
| rs10043177  | 38.494468 | 1.15E-08 |
| rs7864299   | 38.494334 | 1.15E-08 |
| rs11078910  | 38.489666 | 1.15E-08 |
| rs812328    | 38.489598 | 1.15E-08 |
| rs13256250  | 38.489582 | 1.15E-08 |
| rs7503705   | 38.488845 | 1.15E-08 |
| rs262479    | 38.488746 | 1.15E-08 |
| rs12510916  | 38.487350 | 1.15E-08 |
| rs4318599   | 38.486772 | 1.15E-08 |
| rs343493    | 38.486352 | 1.15E-08 |
| rs12554865  | 38.484615 | 1.15E-08 |
| rs7900689   | 38.483450 | 1.15E-08 |
| rs17766287  | 38.481390 | 1.15E-08 |
| rs12374256  | 38.480005 | 1.16E-08 |
| rs7221875   | 38.475218 | 1.16E-08 |
| rs4412192   | 38.472591 | 1.16E-08 |
| rs138454167 | 38.472446 | 1.16E-08 |
| rs2100908   | 38.471232 | 1.16E-08 |
| rs1607201   | 38.470244 | 1.16E-08 |
| rs1397440   | 38.470163 | 1.16E-08 |
| rs12349571  | 38.470047 | 1.16E-08 |
| rs2066623   | 38.469622 | 1.16E-08 |
| rs35564237  | 38.469241 | 1.16E-08 |
| rs7071373   | 38.466938 | 1.16E-08 |
| rs4917990   | 38.466554 | 1.16E-08 |
| rs56115633  | 38.466231 | 1.16E-08 |
| rs1468215   | 38.465708 | 1.16E-08 |

|             |           |          |
|-------------|-----------|----------|
| rs2416248   | 38.465026 | 1.16E-08 |
| rs9909064   | 38.464075 | 1.17E-08 |
| rs17178205  | 38.460280 | 1.17E-08 |
| rs35451130  | 38.460266 | 1.17E-08 |
| rs7620848   | 38.459413 | 1.17E-08 |
| rs12645910  | 38.459068 | 1.17E-08 |
| rs12264415  | 38.458943 | 1.17E-08 |
| rs7901197   | 38.458120 | 1.17E-08 |
| rs13007748  | 38.457883 | 1.17E-08 |
| rs12255047  | 38.454681 | 1.17E-08 |
| rs78721012  | 38.454019 | 1.17E-08 |
| rs6887599   | 38.453760 | 1.17E-08 |
| rs10986936  | 38.453470 | 1.17E-08 |
| rs10258293  | 38.452238 | 1.17E-08 |
| rs11554327  | 38.451116 | 1.17E-08 |
| rs62324196  | 38.447284 | 1.18E-08 |
| rs12952384  | 38.447006 | 1.18E-08 |
| rs7376541   | 38.446162 | 1.18E-08 |
| rs7716180   | 38.445556 | 1.18E-08 |
| rs1505766   | 38.442094 | 1.18E-08 |
| rs116109251 | 38.441635 | 1.18E-08 |
| rs7406928   | 38.441556 | 1.18E-08 |
| rs6724915   | 38.441007 | 1.18E-08 |
| rs56235770  | 38.440422 | 1.18E-08 |
| rs7216086   | 38.436800 | 1.18E-08 |
| rs56129308  | 38.435865 | 1.18E-08 |
| rs74634068  | 38.432891 | 1.18E-08 |
| rs73216931  | 38.432148 | 1.19E-08 |
| rs13084037  | 38.431709 | 1.19E-08 |
| rs117629202 | 38.430980 | 1.19E-08 |
| rs9272423   | 38.430514 | 1.19E-08 |
| rs71514255  | 38.430383 | 1.19E-08 |
| rs6583827   | 38.429466 | 1.19E-08 |
| rs11191547  | 38.428871 | 1.19E-08 |
| rs4794039   | 38.428400 | 1.19E-08 |
| rs71565362  | 38.425032 | 1.19E-08 |
| rs59843584  | 38.423940 | 1.19E-08 |
| rs3213639   | 38.422297 | 1.19E-08 |
| rs4795377   | 38.420454 | 1.19E-08 |
| rs10876942  | 38.419697 | 1.19E-08 |
| rs8069451   | 38.418672 | 1.19E-08 |
| rs60557452  | 38.417015 | 1.19E-08 |
| rs73729452  | 38.412021 | 1.20E-08 |
| rs34282253  | 38.411567 | 1.20E-08 |
| rs8033249   | 38.410637 | 1.20E-08 |
| rs11752888  | 38.409133 | 1.20E-08 |

|             |           |          |
|-------------|-----------|----------|
| rs13261712  | 38.407328 | 1.20E-08 |
| rs12107696  | 38.407070 | 1.20E-08 |
| rs11747814  | 38.406047 | 1.20E-08 |
| rs1870447   | 38.404359 | 1.20E-08 |
| rs34071757  | 38.404269 | 1.20E-08 |
| rs912355    | 38.404131 | 1.20E-08 |
| rs11654935  | 38.402280 | 1.20E-08 |
| rs2167733   | 38.401681 | 1.20E-08 |
| rs7001162   | 38.401282 | 1.20E-08 |
| rs34570277  | 38.400463 | 1.21E-08 |
| rs1926029   | 38.398935 | 1.21E-08 |
| rs2324307   | 38.396964 | 1.21E-08 |
| rs10029931  | 38.395712 | 1.21E-08 |
| rs41285280  | 38.395510 | 1.21E-08 |
| rs6545997   | 38.393239 | 1.21E-08 |
| rs2167734   | 38.392341 | 1.21E-08 |
| rs35293062  | 38.391582 | 1.21E-08 |
| rs12675271  | 38.391506 | 1.21E-08 |
| rs3933376   | 38.389186 | 1.21E-08 |
| rs11991273  | 38.388974 | 1.21E-08 |
| rs55660616  | 38.388077 | 1.21E-08 |
| rs113869252 | 38.386823 | 1.21E-08 |
| rs10883843  | 38.386694 | 1.21E-08 |
| rs6852749   | 38.384693 | 1.22E-08 |
| rs9611548   | 38.383201 | 1.22E-08 |
| rs990790    | 38.381691 | 1.22E-08 |
| rs7225096   | 38.378471 | 1.22E-08 |
| rs852239    | 38.378394 | 1.22E-08 |
| rs11107457  | 38.377854 | 1.22E-08 |
| rs62530772  | 38.376864 | 1.22E-08 |
| rs12988058  | 38.372187 | 1.22E-08 |
| rs10819096  | 38.369397 | 1.23E-08 |
| rs9537798   | 38.369016 | 1.23E-08 |
| rs11605482  | 38.365241 | 1.23E-08 |
| rs34816637  | 38.365165 | 1.23E-08 |
| rs2631369   | 38.363805 | 1.23E-08 |
| rs5016308   | 38.359796 | 1.23E-08 |
| rs7693416   | 38.358802 | 1.23E-08 |
| rs7355552   | 38.358683 | 1.23E-08 |
| rs7324317   | 38.355797 | 1.23E-08 |
| rs3087617   | 38.355567 | 1.23E-08 |
| rs35716097  | 38.355255 | 1.23E-08 |
| rs13209332  | 38.354804 | 1.23E-08 |
| rs2302415   | 38.354268 | 1.23E-08 |
| rs10036532  | 38.353863 | 1.24E-08 |
| rs10846489  | 38.351774 | 1.24E-08 |

|            |           |          |
|------------|-----------|----------|
| rs13014079 | 38.350562 | 1.24E-08 |
| rs62075056 | 38.349400 | 1.24E-08 |
| rs35518360 | 38.349122 | 1.24E-08 |
| rs13065541 | 38.347747 | 1.24E-08 |
| rs62334702 | 38.345878 | 1.24E-08 |
| rs35497503 | 38.345500 | 1.24E-08 |
| rs10902100 | 38.345228 | 1.24E-08 |
| rs80095680 | 38.345195 | 1.24E-08 |
| rs6583824  | 38.340453 | 1.24E-08 |
| rs10186743 | 38.337998 | 1.25E-08 |
| rs12936996 | 38.337422 | 1.25E-08 |
| rs2416249  | 38.336514 | 1.25E-08 |
| rs1355334  | 38.335020 | 1.25E-08 |
| rs13195636 | 38.332564 | 1.25E-08 |
| rs7787893  | 38.332237 | 1.25E-08 |
| rs56124263 | 38.331284 | 1.25E-08 |
| rs35503206 | 38.329378 | 1.25E-08 |
| rs11748165 | 38.328868 | 1.25E-08 |
| rs9870755  | 38.328614 | 1.25E-08 |
| rs66785117 | 38.327361 | 1.25E-08 |
| rs11245978 | 38.325268 | 1.25E-08 |
| rs2614276  | 38.323657 | 1.25E-08 |
| rs4917380  | 38.322789 | 1.26E-08 |
| rs61742093 | 38.322355 | 1.26E-08 |
| rs34788973 | 38.322244 | 1.26E-08 |
| rs2523586  | 38.321227 | 1.26E-08 |
| rs4416442  | 38.320402 | 1.26E-08 |
| rs12500355 | 38.320329 | 1.26E-08 |
| rs10167200 | 38.320303 | 1.26E-08 |
| rs6988746  | 38.318367 | 1.26E-08 |
| rs13359426 | 38.314922 | 1.26E-08 |
| rs12785223 | 38.314237 | 1.26E-08 |
| rs262490   | 38.314157 | 1.26E-08 |
| rs9934438  | 38.313213 | 1.26E-08 |
| rs7112954  | 38.312099 | 1.26E-08 |
| rs11078907 | 38.311507 | 1.26E-08 |
| rs10986320 | 38.310247 | 1.26E-08 |
| rs11987511 | 38.304135 | 1.27E-08 |
| rs11654018 | 38.303503 | 1.27E-08 |
| rs12780843 | 38.300373 | 1.27E-08 |
| rs1870079  | 38.299168 | 1.27E-08 |
| rs132919   | 38.294954 | 1.27E-08 |
| rs2416247  | 38.293829 | 1.27E-08 |
| rs5996050  | 38.293032 | 1.28E-08 |
| rs9831648  | 38.292358 | 1.28E-08 |
| rs7660534  | 38.291824 | 1.28E-08 |

|            |           |          |
|------------|-----------|----------|
| rs6472538  | 38.291747 | 1.28E-08 |
| rs34965299 | 38.291174 | 1.28E-08 |
| rs2921086  | 38.288893 | 1.28E-08 |
| rs763914   | 38.288494 | 1.28E-08 |
| rs7233417  | 38.287775 | 1.28E-08 |
| rs4240362  | 38.285045 | 1.28E-08 |
| rs6583830  | 38.283601 | 1.28E-08 |
| rs1418741  | 38.282287 | 1.28E-08 |
| rs2303223  | 38.282020 | 1.28E-08 |
| rs7816445  | 38.280591 | 1.28E-08 |
| rs13293109 | 38.278769 | 1.29E-08 |
| rs10976925 | 38.277650 | 1.29E-08 |
| rs10852933 | 38.277529 | 1.29E-08 |
| rs12203875 | 38.276427 | 1.29E-08 |
| rs35085163 | 38.276058 | 1.29E-08 |
| rs244518   | 38.275103 | 1.29E-08 |
| rs1423156  | 38.274047 | 1.29E-08 |
| rs71373536 | 38.272596 | 1.29E-08 |
| rs1790108  | 38.271546 | 1.29E-08 |
| rs4857964  | 38.271442 | 1.29E-08 |
| rs12950666 | 38.270287 | 1.29E-08 |
| rs9494883  | 38.263074 | 1.30E-08 |
| rs17132905 | 38.263005 | 1.30E-08 |
| rs7017914  | 38.261892 | 1.30E-08 |
| rs11624512 | 38.261396 | 1.30E-08 |
| rs7583863  | 38.260376 | 1.30E-08 |
| rs12777726 | 38.259528 | 1.30E-08 |
| rs9272713  | 38.258511 | 1.30E-08 |
| rs11078905 | 38.254055 | 1.30E-08 |
| rs8047395  | 38.253885 | 1.30E-08 |
| rs6727588  | 38.252355 | 1.30E-08 |
| rs6914831  | 38.252217 | 1.30E-08 |
| rs72773149 | 38.250693 | 1.30E-08 |
| rs41414549 | 38.250425 | 1.30E-08 |
| rs2236506  | 38.248786 | 1.31E-08 |
| rs2024307  | 38.248371 | 1.31E-08 |
| rs10986319 | 38.247524 | 1.31E-08 |
| rs6536588  | 38.247098 | 1.31E-08 |
| rs864541   | 38.246971 | 1.31E-08 |
| rs343488   | 38.243465 | 1.31E-08 |
| rs3771199  | 38.241417 | 1.31E-08 |
| rs4836973  | 38.241392 | 1.31E-08 |
| rs6991329  | 38.241182 | 1.31E-08 |
| rs10167849 | 38.237139 | 1.31E-08 |
| rs72773186 | 38.237079 | 1.31E-08 |
| rs993337   | 38.236481 | 1.31E-08 |



|             |           |          |
|-------------|-----------|----------|
| rs7707588   | 38.235315 | 1.31E-08 |
| rs11090045  | 38.232509 | 1.32E-08 |
| rs6536603   | 38.232335 | 1.32E-08 |
| rs4390625   | 38.230468 | 1.32E-08 |
| rs4321584   | 38.228404 | 1.32E-08 |
| rs74388271  | 38.228356 | 1.32E-08 |
| rs10077974  | 38.226469 | 1.32E-08 |
| rs6812520   | 38.225813 | 1.32E-08 |
| rs10902104  | 38.224071 | 1.32E-08 |
| rs4259213   | 38.223552 | 1.32E-08 |
| rs2297786   | 38.223299 | 1.32E-08 |
| rs11078912  | 38.221815 | 1.32E-08 |
| rs2710641   | 38.217023 | 1.33E-08 |
| rs6011033   | 38.216367 | 1.33E-08 |
| rs1263762   | 38.215992 | 1.33E-08 |
| rs9451365   | 38.214283 | 1.33E-08 |
| rs66569213  | 38.212505 | 1.33E-08 |
| rs6537287   | 38.211367 | 1.33E-08 |
| rs13272530  | 38.210264 | 1.33E-08 |
| rs72697350  | 38.209506 | 1.33E-08 |
| rs775745    | 38.209323 | 1.33E-08 |
| rs1403848   | 38.207573 | 1.33E-08 |
| rs34558600  | 38.206982 | 1.33E-08 |
| rs34350610  | 38.204242 | 1.34E-08 |
| rs4382205   | 38.201624 | 1.34E-08 |
| rs860412    | 38.201298 | 1.34E-08 |
| rs769662    | 38.199533 | 1.34E-08 |
| rs115237266 | 38.198059 | 1.34E-08 |
| rs17714209  | 38.194654 | 1.34E-08 |
| rs7551570   | 38.191881 | 1.35E-08 |
| rs700170    | 38.188285 | 1.35E-08 |
| rs10786744  | 38.185611 | 1.35E-08 |
| rs11191518  | 38.185150 | 1.35E-08 |
| rs10441758  | 38.184984 | 1.35E-08 |
| rs113693373 | 38.183158 | 1.35E-08 |
| rs4240361   | 38.182988 | 1.35E-08 |
| rs59992214  | 38.180842 | 1.35E-08 |
| rs6841661   | 38.180088 | 1.35E-08 |
| rs56112621  | 38.177494 | 1.36E-08 |
| rs67110214  | 38.175924 | 1.36E-08 |
| rs114121446 | 38.173922 | 1.36E-08 |
| rs11658219  | 38.173226 | 1.36E-08 |
| rs763342    | 38.172869 | 1.36E-08 |
| rs108499    | 38.169999 | 1.36E-08 |
| rs769661    | 38.168788 | 1.36E-08 |
| rs61172648  | 38.168365 | 1.36E-08 |

|             |           |          |
|-------------|-----------|----------|
| rs1125000   | 38.167631 | 1.36E-08 |
| rs1626899   | 38.166994 | 1.36E-08 |
| rs56304903  | 38.164798 | 1.36E-08 |
| rs62234992  | 38.164032 | 1.37E-08 |
| rs10818936  | 38.163289 | 1.37E-08 |
| rs9272728   | 38.163273 | 1.37E-08 |
| rs696732    | 38.162653 | 1.37E-08 |
| rs10477742  | 38.161779 | 1.37E-08 |
| rs62237468  | 38.160113 | 1.37E-08 |
| rs4795381   | 38.159993 | 1.37E-08 |
| rs6932056   | 38.158671 | 1.37E-08 |
| rs2851435   | 38.156400 | 1.37E-08 |
| rs6594479   | 38.156124 | 1.37E-08 |
| rs749670    | 38.154844 | 1.37E-08 |
| rs7730817   | 38.154841 | 1.37E-08 |
| rs12202667  | 38.154646 | 1.37E-08 |
| rs2779210   | 38.153615 | 1.37E-08 |
| rs10902105  | 38.151281 | 1.37E-08 |
| rs2302612   | 38.150139 | 1.38E-08 |
| rs6830970   | 38.148163 | 1.38E-08 |
| rs35225200  | 38.141238 | 1.38E-08 |
| rs1999199   | 38.141050 | 1.38E-08 |
| rs11613937  | 38.139777 | 1.38E-08 |
| rs10986292  | 38.138906 | 1.38E-08 |
| rs1394998   | 38.136507 | 1.39E-08 |
| rs9326831   | 38.136002 | 1.39E-08 |
| rs11658678  | 38.135414 | 1.39E-08 |
| rs11869450  | 38.133113 | 1.39E-08 |
| rs1270594   | 38.132131 | 1.39E-08 |
| rs2081082   | 38.131288 | 1.39E-08 |
| rs7676032   | 38.130431 | 1.39E-08 |
| rs1663670   | 38.126308 | 1.39E-08 |
| rs34582442  | 38.124267 | 1.39E-08 |
| rs7726932   | 38.123724 | 1.39E-08 |
| rs4794030   | 38.120296 | 1.40E-08 |
| rs76030196  | 38.119124 | 1.40E-08 |
| rs9942416   | 38.119008 | 1.40E-08 |
| rs7394830   | 38.117216 | 1.40E-08 |
| rs11078904  | 38.113791 | 1.40E-08 |
| rs955754    | 38.113654 | 1.40E-08 |
| rs3924113   | 38.112395 | 1.40E-08 |
| rs112420503 | 38.109995 | 1.41E-08 |
| rs2011768   | 38.109478 | 1.41E-08 |
| rs11078911  | 38.109271 | 1.41E-08 |
| rs28786708  | 38.109090 | 1.41E-08 |
| rs12071849  | 38.107092 | 1.41E-08 |

|            |           |          |
|------------|-----------|----------|
| rs10052548 | 38.105357 | 1.41E-08 |
| rs4420930  | 38.101627 | 1.41E-08 |
| rs11985375 | 38.099202 | 1.41E-08 |
| rs12552782 | 38.098952 | 1.41E-08 |
| rs2416250  | 38.094960 | 1.42E-08 |
| rs7814648  | 38.094700 | 1.42E-08 |
| rs11870631 | 38.093068 | 1.42E-08 |
| rs4324452  | 38.092492 | 1.42E-08 |
| rs28410896 | 38.090014 | 1.42E-08 |
| rs12259244 | 38.089626 | 1.42E-08 |
| rs4532960  | 38.088309 | 1.42E-08 |
| rs17409597 | 38.085613 | 1.42E-08 |
| rs10786724 | 38.084840 | 1.42E-08 |
| rs4376087  | 38.084037 | 1.42E-08 |
| rs6987007  | 38.083493 | 1.42E-08 |
| rs11255709 | 38.082456 | 1.43E-08 |
| rs3190930  | 38.082324 | 1.43E-08 |
| rs6890114  | 38.080754 | 1.43E-08 |
| rs6868547  | 38.080513 | 1.43E-08 |
| rs34922454 | 38.080102 | 1.43E-08 |
| rs10852315 | 38.079907 | 1.43E-08 |
| rs10818943 | 38.078957 | 1.43E-08 |
| rs6657823  | 38.077885 | 1.43E-08 |
| rs10846486 | 38.073152 | 1.43E-08 |
| rs2297440  | 38.072413 | 1.43E-08 |
| rs3024666  | 38.071624 | 1.43E-08 |
| rs11078913 | 38.071296 | 1.43E-08 |
| rs34599047 | 38.070896 | 1.43E-08 |
| rs66494224 | 38.065673 | 1.44E-08 |
| rs12450559 | 38.060913 | 1.44E-08 |
| rs4272413  | 38.059041 | 1.44E-08 |
| rs10987058 | 38.058274 | 1.44E-08 |
| rs10484399 | 38.057884 | 1.44E-08 |
| rs993338   | 38.057282 | 1.44E-08 |
| rs12479680 | 38.056816 | 1.45E-08 |
| rs3736922  | 38.055353 | 1.45E-08 |
| rs7503514  | 38.053736 | 1.45E-08 |
| rs7074395  | 38.053607 | 1.45E-08 |
| rs13298715 | 38.052035 | 1.45E-08 |
| rs1125156  | 38.051040 | 1.45E-08 |
| rs71480157 | 38.050143 | 1.45E-08 |
| rs11255710 | 38.048472 | 1.45E-08 |
| rs7973956  | 38.046068 | 1.45E-08 |
| rs3889368  | 38.042265 | 1.46E-08 |
| rs8065963  | 38.041889 | 1.46E-08 |
| rs72773177 | 38.035929 | 1.46E-08 |

|             |           |          |
|-------------|-----------|----------|
| rs72731572  | 38.034085 | 1.46E-08 |
| rs16843807  | 38.031619 | 1.46E-08 |
| rs9402715   | 38.031374 | 1.46E-08 |
| rs2066644   | 38.030249 | 1.47E-08 |
| rs56114371  | 38.029956 | 1.47E-08 |
| rs10986291  | 38.028233 | 1.47E-08 |
| rs3024644   | 38.027534 | 1.47E-08 |
| rs1727322   | 38.027281 | 1.47E-08 |
| rs9272663   | 38.027140 | 1.47E-08 |
| rs2018026   | 38.023796 | 1.47E-08 |
| rs34764936  | 38.023529 | 1.47E-08 |
| rs10123227  | 38.022489 | 1.47E-08 |
| rs180062    | 38.022116 | 1.47E-08 |
| rs12472231  | 38.018966 | 1.47E-08 |
| rs62076383  | 38.017065 | 1.48E-08 |
| rs17465108  | 38.016358 | 1.48E-08 |
| rs10029738  | 38.016037 | 1.48E-08 |
| rs35954749  | 38.015611 | 1.48E-08 |
| rs10748835  | 38.012947 | 1.48E-08 |
| rs7071905   | 38.012530 | 1.48E-08 |
| rs35949109  | 38.009824 | 1.48E-08 |
| rs1568428   | 38.007596 | 1.48E-08 |
| rs7873499   | 38.004301 | 1.49E-08 |
| rs11655531  | 38.004215 | 1.49E-08 |
| rs34940145  | 37.998747 | 1.49E-08 |
| rs78515370  | 37.995858 | 1.49E-08 |
| rs55913526  | 37.993986 | 1.49E-08 |
| rs8038189   | 37.993412 | 1.49E-08 |
| rs71405231  | 37.992871 | 1.49E-08 |
| rs7655235   | 37.992579 | 1.49E-08 |
| rs4795376   | 37.991278 | 1.50E-08 |
| rs113462175 | 37.991166 | 1.50E-08 |
| rs7914558   | 37.990634 | 1.50E-08 |
| rs178788    | 37.987660 | 1.50E-08 |
| rs4722173   | 37.986721 | 1.50E-08 |
| rs10882094  | 37.985246 | 1.50E-08 |
| rs7682317   | 37.984513 | 1.50E-08 |
| rs10819090  | 37.984010 | 1.50E-08 |
| rs2066415   | 37.982680 | 1.50E-08 |
| rs13327339  | 37.979041 | 1.51E-08 |
| rs7562979   | 37.977725 | 1.51E-08 |
| rs6472542   | 37.977007 | 1.51E-08 |
| rs2243293   | 37.976521 | 1.51E-08 |
| rs247000    | 37.976093 | 1.51E-08 |
| rs3116869   | 37.975034 | 1.51E-08 |
| rs113864525 | 37.972304 | 1.51E-08 |

|             |           |          |
|-------------|-----------|----------|
| rs4572828   | 37.968940 | 1.51E-08 |
| rs9402703   | 37.967497 | 1.51E-08 |
| rs4794814   | 37.967032 | 1.52E-08 |
| rs1471114   | 37.963685 | 1.52E-08 |
| rs7977516   | 37.963618 | 1.52E-08 |
| rs10434248  | 37.962723 | 1.52E-08 |
| rs3780204   | 37.961115 | 1.52E-08 |
| rs2760995   | 37.960277 | 1.52E-08 |
| rs3793622   | 37.959396 | 1.52E-08 |
| rs1887703   | 37.957747 | 1.52E-08 |
| rs17364861  | 37.954538 | 1.53E-08 |
| rs12082344  | 37.954178 | 1.53E-08 |
| rs1263764   | 37.953713 | 1.53E-08 |
| rs7081075   | 37.953093 | 1.53E-08 |
| rs2139890   | 37.944896 | 1.53E-08 |
| rs7911789   | 37.943782 | 1.53E-08 |
| rs4735766   | 37.943632 | 1.53E-08 |
| rs2518872   | 37.943103 | 1.53E-08 |
| rs1860643   | 37.942835 | 1.53E-08 |
| rs7914814   | 37.941782 | 1.54E-08 |
| rs3758212   | 37.941645 | 1.54E-08 |
| rs199444    | 37.940996 | 1.54E-08 |
| rs12420940  | 37.940386 | 1.54E-08 |
| rs2474618   | 37.938463 | 1.54E-08 |
| rs9264232   | 37.937481 | 1.54E-08 |
| rs1630693   | 37.937055 | 1.54E-08 |
| rs34914000  | 37.935626 | 1.54E-08 |
| rs67538026  | 37.933338 | 1.54E-08 |
| rs150971244 | 37.933300 | 1.54E-08 |
| rs11078906  | 37.932433 | 1.54E-08 |
| rs6941396   | 37.930707 | 1.54E-08 |
| rs58353209  | 37.929303 | 1.55E-08 |
| rs3902934   | 37.929081 | 1.55E-08 |
| rs1452815   | 37.928216 | 1.55E-08 |
| rs10100388  | 37.927303 | 1.55E-08 |
| rs1356388   | 37.927139 | 1.55E-08 |
| rs2303316   | 37.926604 | 1.55E-08 |
| rs13254801  | 37.925406 | 1.55E-08 |
| rs7000647   | 37.923372 | 1.55E-08 |
| rs7009297   | 37.923058 | 1.55E-08 |
| rs12700392  | 37.922436 | 1.55E-08 |
| rs1790120   | 37.920777 | 1.55E-08 |
| rs7014012   | 37.918570 | 1.55E-08 |
| rs34905858  | 37.918180 | 1.55E-08 |
| rs3954897   | 37.917488 | 1.56E-08 |
| rs7629322   | 37.916061 | 1.56E-08 |

|             |           |          |
|-------------|-----------|----------|
| rs6561943   | 37.915923 | 1.56E-08 |
| rs10211099  | 37.914591 | 1.56E-08 |
| rs11868030  | 37.914452 | 1.56E-08 |
| rs6985299   | 37.914359 | 1.56E-08 |
| rs6754556   | 37.913482 | 1.56E-08 |
| rs188015    | 37.912777 | 1.56E-08 |
| rs1902614   | 37.912040 | 1.56E-08 |
| rs6002408   | 37.909605 | 1.56E-08 |
| rs1077715   | 37.909424 | 1.56E-08 |
| rs11242122  | 37.906678 | 1.56E-08 |
| rs174579    | 37.905869 | 1.57E-08 |
| rs2091115   | 37.903938 | 1.57E-08 |
| rs178787    | 37.903721 | 1.57E-08 |
| rs9389300   | 37.902483 | 1.57E-08 |
| rs9270187   | 37.900278 | 1.57E-08 |
| rs9563526   | 37.899601 | 1.57E-08 |
| rs11650678  | 37.899594 | 1.57E-08 |
| rs13034670  | 37.899189 | 1.57E-08 |
| rs6758443   | 37.897878 | 1.57E-08 |
| rs10786050  | 37.897496 | 1.57E-08 |
| rs7018381   | 37.896890 | 1.57E-08 |
| rs840160    | 37.894832 | 1.57E-08 |
| rs10461165  | 37.893573 | 1.58E-08 |
| rs11783247  | 37.891206 | 1.58E-08 |
| rs112243618 | 37.890570 | 1.58E-08 |
| rs1040173   | 37.890451 | 1.58E-08 |
| rs7015035   | 37.888740 | 1.58E-08 |
| rs10066662  | 37.888528 | 1.58E-08 |
| rs7727226   | 37.888383 | 1.58E-08 |
| rs10448014  | 37.884104 | 1.58E-08 |
| rs10775391  | 37.882874 | 1.58E-08 |
| rs191605295 | 37.881701 | 1.59E-08 |
| rs12450388  | 37.881355 | 1.59E-08 |
| rs12088287  | 37.880690 | 1.59E-08 |
| rs1062140   | 37.879806 | 1.59E-08 |
| rs8102900   | 37.879779 | 1.59E-08 |
| rs4507808   | 37.879249 | 1.59E-08 |
| rs6709635   | 37.877910 | 1.59E-08 |
| rs6503518   | 37.875933 | 1.59E-08 |
| rs7513064   | 37.873609 | 1.59E-08 |
| rs12347682  | 37.873479 | 1.59E-08 |
| rs6998024   | 37.872558 | 1.59E-08 |
| rs4019656   | 37.868867 | 1.60E-08 |
| rs1716160   | 37.868716 | 1.60E-08 |
| rs3844182   | 37.868216 | 1.60E-08 |
| rs12452682  | 37.867014 | 1.60E-08 |

|            |           |          |
|------------|-----------|----------|
| rs4895451  | 37.866567 | 1.60E-08 |
| rs545755   | 37.865543 | 1.60E-08 |
| rs35081016 | 37.862118 | 1.60E-08 |
| rs35115527 | 37.857724 | 1.61E-08 |
| rs35295900 | 37.857433 | 1.61E-08 |
| rs6503519  | 37.856129 | 1.61E-08 |
| rs11677125 | 37.855751 | 1.61E-08 |
| rs2123397  | 37.854251 | 1.61E-08 |
| rs34890793 | 37.854218 | 1.61E-08 |
| rs36064646 | 37.853748 | 1.61E-08 |
| rs1949331  | 37.853112 | 1.61E-08 |
| rs1334299  | 37.852986 | 1.61E-08 |
| rs35233766 | 37.852331 | 1.61E-08 |
| rs2667736  | 37.851145 | 1.61E-08 |
| rs11205768 | 37.850257 | 1.61E-08 |
| rs7096101  | 37.849429 | 1.61E-08 |
| rs3981391  | 37.845360 | 1.62E-08 |
| rs17364847 | 37.845063 | 1.62E-08 |
| rs17380376 | 37.841927 | 1.62E-08 |
| rs6062302  | 37.841365 | 1.62E-08 |
| rs6981435  | 37.840905 | 1.62E-08 |
| rs262474   | 37.839072 | 1.62E-08 |
| rs6999739  | 37.835292 | 1.62E-08 |
| rs13273010 | 37.832300 | 1.63E-08 |
| rs67277942 | 37.832194 | 1.63E-08 |
| rs5751071  | 37.831885 | 1.63E-08 |
| rs7513066  | 37.831735 | 1.63E-08 |
| rs10103623 | 37.830744 | 1.63E-08 |
| rs13272523 | 37.829792 | 1.63E-08 |
| rs12904876 | 37.826060 | 1.63E-08 |
| rs11989553 | 37.825985 | 1.63E-08 |
| rs213954   | 37.825085 | 1.63E-08 |
| rs17380516 | 37.824028 | 1.63E-08 |
| rs4240673  | 37.823097 | 1.64E-08 |
| rs7007450  | 37.822789 | 1.64E-08 |
| rs13251768 | 37.820928 | 1.64E-08 |
| rs4735761  | 37.819688 | 1.64E-08 |
| rs7558398  | 37.819136 | 1.64E-08 |
| rs73018941 | 37.817448 | 1.64E-08 |
| rs71519637 | 37.817306 | 1.64E-08 |
| rs7003123  | 37.817148 | 1.64E-08 |
| rs9389301  | 37.816977 | 1.64E-08 |
| rs4735767  | 37.812312 | 1.64E-08 |
| rs1820126  | 37.811811 | 1.64E-08 |
| rs2030518  | 37.809357 | 1.65E-08 |
| rs2010752  | 37.809346 | 1.65E-08 |

|             |           |          |
|-------------|-----------|----------|
| rs140820592 | 37.809158 | 1.65E-08 |
| rs6502482   | 37.807857 | 1.65E-08 |
| rs7013657   | 37.806590 | 1.65E-08 |
| rs1452816   | 37.803384 | 1.65E-08 |
| rs10506346  | 37.802833 | 1.65E-08 |
| rs1790102   | 37.802702 | 1.65E-08 |
| rs73729588  | 37.802436 | 1.65E-08 |
| rs28574664  | 37.800401 | 1.65E-08 |
| rs1477944   | 37.797862 | 1.66E-08 |
| rs62530826  | 37.797690 | 1.66E-08 |
| rs113899460 | 37.795957 | 1.66E-08 |
| rs10096619  | 37.790581 | 1.66E-08 |
| rs11862962  | 37.786359 | 1.67E-08 |
| rs17379249  | 37.785409 | 1.67E-08 |
| rs1890185   | 37.784339 | 1.67E-08 |
| rs7929744   | 37.784287 | 1.67E-08 |
| rs7211770   | 37.782903 | 1.67E-08 |
| rs10883829  | 37.781385 | 1.67E-08 |
| rs4492227   | 37.779103 | 1.67E-08 |
| rs1727325   | 37.778689 | 1.67E-08 |
| rs8075345   | 37.777784 | 1.67E-08 |
| rs34409123  | 37.776303 | 1.68E-08 |
| rs213972    | 37.772871 | 1.68E-08 |
| rs12088284  | 37.771005 | 1.68E-08 |
| rs73014070  | 37.768680 | 1.68E-08 |
| rs4792715   | 37.765432 | 1.69E-08 |
| rs2167731   | 37.764027 | 1.69E-08 |
| rs10986931  | 37.763202 | 1.69E-08 |
| rs6594483   | 37.761951 | 1.69E-08 |
| rs4963074   | 37.761896 | 1.69E-08 |
| rs12948906  | 37.761658 | 1.69E-08 |
| rs4809319   | 37.760663 | 1.69E-08 |
| rs72773143  | 37.760400 | 1.69E-08 |
| rs12195665  | 37.759239 | 1.69E-08 |
| rs1807668   | 37.757021 | 1.69E-08 |
| rs12080622  | 37.756063 | 1.69E-08 |
| rs10107588  | 37.751594 | 1.70E-08 |
| rs12187932  | 37.749469 | 1.70E-08 |
| rs72673689  | 37.747878 | 1.70E-08 |
| rs10504649  | 37.742794 | 1.71E-08 |
| rs62422878  | 37.742003 | 1.71E-08 |
| rs11781571  | 37.741053 | 1.71E-08 |
| rs7101143   | 37.740186 | 1.71E-08 |
| rs1737890   | 37.740161 | 1.71E-08 |
| rs35207116  | 37.738834 | 1.71E-08 |
| rs3851453   | 37.738771 | 1.71E-08 |



|             |           |          |
|-------------|-----------|----------|
| rs2525041   | 37.738283 | 1.71E-08 |
| rs6868066   | 37.735580 | 1.71E-08 |
| rs7712459   | 37.735146 | 1.71E-08 |
| rs17379354  | 37.735108 | 1.71E-08 |
| rs1047158   | 37.735078 | 1.71E-08 |
| rs4976269   | 37.733780 | 1.71E-08 |
| rs1051431   | 37.733152 | 1.71E-08 |
| rs112790372 | 37.728965 | 1.72E-08 |
| rs16830141  | 37.727442 | 1.72E-08 |
| rs6453143   | 37.726034 | 1.72E-08 |
| rs2315009   | 37.725478 | 1.72E-08 |
| rs114394166 | 37.721219 | 1.73E-08 |
| rs10077003  | 37.720740 | 1.73E-08 |
| rs10122790  | 37.720297 | 1.73E-08 |
| rs60623527  | 37.719847 | 1.73E-08 |
| rs1617156   | 37.718205 | 1.73E-08 |
| rs3748522   | 37.717242 | 1.73E-08 |
| rs146588764 | 37.717091 | 1.73E-08 |
| rs4705869   | 37.716479 | 1.73E-08 |
| rs67908413  | 37.714621 | 1.73E-08 |
| rs72663709  | 37.714519 | 1.73E-08 |
| rs1630905   | 37.714013 | 1.73E-08 |
| rs2682430   | 37.713902 | 1.73E-08 |
| rs10744148  | 37.711493 | 1.73E-08 |
| rs62147667  | 37.710732 | 1.74E-08 |
| rs6982406   | 37.709150 | 1.74E-08 |
| rs6668519   | 37.709126 | 1.74E-08 |
| rs1348535   | 37.708315 | 1.74E-08 |
| rs17262885  | 37.707857 | 1.74E-08 |
| rs73086541  | 37.707327 | 1.74E-08 |
| rs35960437  | 37.706621 | 1.74E-08 |
| rs1993195   | 37.704655 | 1.74E-08 |
| rs1727323   | 37.702813 | 1.74E-08 |
| rs12713488  | 37.699044 | 1.75E-08 |
| rs4735769   | 37.698492 | 1.75E-08 |
| rs7006615   | 37.697933 | 1.75E-08 |
| rs12077931  | 37.695729 | 1.75E-08 |
| rs4074134   | 37.695295 | 1.75E-08 |
| rs2851450   | 37.693169 | 1.75E-08 |
| rs1790096   | 37.692067 | 1.75E-08 |
| rs11739614  | 37.691937 | 1.75E-08 |
| rs4976268   | 37.691923 | 1.75E-08 |
| rs6973059   | 37.690990 | 1.75E-08 |
| rs72771448  | 37.690558 | 1.75E-08 |
| rs11869259  | 37.689005 | 1.76E-08 |
| rs9438855   | 37.688897 | 1.76E-08 |

|             |           |          |
|-------------|-----------|----------|
| rs111702517 | 37.685891 | 1.76E-08 |
| rs7712947   | 37.685636 | 1.76E-08 |
| rs199523    | 37.684867 | 1.76E-08 |
| rs17464353  | 37.683187 | 1.76E-08 |
| rs17464255  | 37.683103 | 1.76E-08 |
| rs11778981  | 37.682068 | 1.76E-08 |
| rs10902101  | 37.681477 | 1.76E-08 |
| rs34158769  | 37.680942 | 1.76E-08 |
| rs2167732   | 37.680271 | 1.76E-08 |
| rs9527691   | 37.679853 | 1.76E-08 |
| rs62508826  | 37.677596 | 1.77E-08 |
| rs6446285   | 37.676866 | 1.77E-08 |
| rs10748836  | 37.676155 | 1.77E-08 |
| rs2123403   | 37.675387 | 1.77E-08 |
| rs10777586  | 37.674276 | 1.77E-08 |
| rs6011788   | 37.669608 | 1.77E-08 |
| rs6473011   | 37.665325 | 1.78E-08 |
| rs2234900   | 37.663291 | 1.78E-08 |
| rs2389017   | 37.662700 | 1.78E-08 |
| rs2904596   | 37.661251 | 1.78E-08 |
| rs7728605   | 37.661066 | 1.78E-08 |
| rs5751072   | 37.659035 | 1.78E-08 |
| rs11781651  | 37.657300 | 1.78E-08 |
| rs1790101   | 37.654847 | 1.79E-08 |
| rs7842851   | 37.653245 | 1.79E-08 |
| rs41338944  | 37.652052 | 1.79E-08 |
| rs34436326  | 37.651967 | 1.79E-08 |
| rs12073845  | 37.650991 | 1.79E-08 |
| rs1322178   | 37.650214 | 1.79E-08 |
| rs6883714   | 37.650070 | 1.79E-08 |
| rs13212562  | 37.650017 | 1.79E-08 |
| rs2030517   | 37.649268 | 1.79E-08 |
| rs11250093  | 37.647751 | 1.79E-08 |
| rs10786725  | 37.647065 | 1.79E-08 |
| rs2682429   | 37.641246 | 1.80E-08 |
| rs1716185   | 37.640352 | 1.80E-08 |
| rs4795382   | 37.639121 | 1.80E-08 |
| rs62324207  | 37.636617 | 1.80E-08 |
| rs35715914  | 37.635756 | 1.81E-08 |
| rs12253731  | 37.635538 | 1.81E-08 |
| rs6472543   | 37.632938 | 1.81E-08 |
| rs7825446   | 37.632938 | 1.81E-08 |
| rs11162974  | 37.632407 | 1.81E-08 |
| rs1491983   | 37.632092 | 1.81E-08 |
| rs116826930 | 37.629938 | 1.81E-08 |
| rs10928246  | 37.629251 | 1.81E-08 |

|             |           |          |
|-------------|-----------|----------|
| rs7519472   | 37.627488 | 1.81E-08 |
| rs2230926   | 37.625673 | 1.81E-08 |
| rs1373480   | 37.624994 | 1.82E-08 |
| rs76398050  | 37.622679 | 1.82E-08 |
| rs67674827  | 37.622313 | 1.82E-08 |
| rs11602160  | 37.620866 | 1.82E-08 |
| rs112186939 | 37.616177 | 1.82E-08 |
| rs12945959  | 37.615977 | 1.82E-08 |
| rs112842054 | 37.615431 | 1.82E-08 |
| rs72615157  | 37.615083 | 1.82E-08 |
| rs7012404   | 37.614793 | 1.83E-08 |
| rs7819332   | 37.614346 | 1.83E-08 |
| rs34270993  | 37.612832 | 1.83E-08 |
| rs7303754   | 37.611661 | 1.83E-08 |
| rs1569068   | 37.611478 | 1.83E-08 |
| rs76282174  | 37.611360 | 1.83E-08 |
| rs34508469  | 37.611109 | 1.83E-08 |
| rs2285700   | 37.610871 | 1.83E-08 |
| rs10883814  | 37.610662 | 1.83E-08 |
| rs1592915   | 37.607088 | 1.83E-08 |
| rs1998323   | 37.605855 | 1.83E-08 |
| rs113744451 | 37.605059 | 1.83E-08 |
| rs66857876  | 37.604181 | 1.84E-08 |
| rs1790125   | 37.603064 | 1.84E-08 |
| rs59911846  | 37.602875 | 1.84E-08 |
| rs1516136   | 37.602092 | 1.84E-08 |
| rs2851436   | 37.601372 | 1.84E-08 |
| rs17760497  | 37.599693 | 1.84E-08 |
| rs61409971  | 37.598892 | 1.84E-08 |
| rs12068293  | 37.598722 | 1.84E-08 |
| rs9537818   | 37.598231 | 1.84E-08 |
| rs9527702   | 37.598041 | 1.84E-08 |
| rs12074207  | 37.597939 | 1.84E-08 |
| rs2851451   | 37.594648 | 1.84E-08 |
| rs62324208  | 37.593365 | 1.85E-08 |
| rs77163824  | 37.592069 | 1.85E-08 |
| rs28533432  | 37.590861 | 1.85E-08 |
| rs2149992   | 37.589830 | 1.85E-08 |
| rs9271526   | 37.585998 | 1.85E-08 |
| rs2069840   | 37.584713 | 1.85E-08 |
| rs10057929  | 37.581308 | 1.86E-08 |
| rs719750    | 37.580800 | 1.86E-08 |
| rs11785239  | 37.579108 | 1.86E-08 |
| rs72731571  | 37.577968 | 1.86E-08 |
| rs2695481   | 37.575574 | 1.86E-08 |
| rs6584533   | 37.574502 | 1.86E-08 |

|             |           |          |
|-------------|-----------|----------|
| rs2389014   | 37.574492 | 1.86E-08 |
| rs17104684  | 37.574418 | 1.86E-08 |
| rs3024660   | 37.573205 | 1.87E-08 |
| rs62169570  | 37.573025 | 1.87E-08 |
| rs56043721  | 37.570319 | 1.87E-08 |
| rs7713084   | 37.570215 | 1.87E-08 |
| rs17380738  | 37.569387 | 1.87E-08 |
| rs272862    | 37.569021 | 1.87E-08 |
| rs5005507   | 37.568049 | 1.87E-08 |
| rs9869256   | 37.567296 | 1.87E-08 |
| rs1937800   | 37.566574 | 1.87E-08 |
| rs62375554  | 37.566023 | 1.87E-08 |
| rs67084262  | 37.564803 | 1.87E-08 |
| rs12517265  | 37.562783 | 1.88E-08 |
| rs111596452 | 37.561624 | 1.88E-08 |
| rs73192661  | 37.560119 | 1.88E-08 |
| rs68188794  | 37.559203 | 1.88E-08 |
| rs1716175   | 37.558793 | 1.88E-08 |
| rs5029924   | 37.557252 | 1.88E-08 |
| rs1790104   | 37.555136 | 1.88E-08 |
| rs62323952  | 37.553415 | 1.89E-08 |
| rs2416246   | 37.550885 | 1.89E-08 |
| rs6998397   | 37.549085 | 1.89E-08 |
| rs10078021  | 37.548605 | 1.89E-08 |
| rs10199356  | 37.547598 | 1.89E-08 |
| rs2049114   | 37.545166 | 1.89E-08 |
| rs12948905  | 37.544117 | 1.89E-08 |
| rs5029939   | 37.541031 | 1.90E-08 |
| rs12910139  | 37.539706 | 1.90E-08 |
| rs199524    | 37.538675 | 1.90E-08 |
| rs13274062  | 37.535672 | 1.90E-08 |
| rs72648094  | 37.533349 | 1.91E-08 |
| rs1901706   | 37.532520 | 1.91E-08 |
| rs7608337   | 37.530883 | 1.91E-08 |
| rs28450974  | 37.529908 | 1.91E-08 |
| rs10786727  | 37.529371 | 1.91E-08 |
| rs8002014   | 37.528547 | 1.91E-08 |
| rs28455964  | 37.526624 | 1.91E-08 |
| rs769670    | 37.524733 | 1.91E-08 |
| rs7134784   | 37.524078 | 1.91E-08 |
| rs1790130   | 37.522179 | 1.92E-08 |
| rs150696510 | 37.520313 | 1.92E-08 |
| rs10178231  | 37.518934 | 1.92E-08 |
| rs1727314   | 37.517751 | 1.92E-08 |
| rs1159724   | 37.517684 | 1.92E-08 |
| rs117068593 | 37.517452 | 1.92E-08 |

|             |           |          |
|-------------|-----------|----------|
| rs10976921  | 37.514176 | 1.92E-08 |
| rs1790109   | 37.513672 | 1.93E-08 |
| rs62510668  | 37.513539 | 1.93E-08 |
| rs72773140  | 37.513366 | 1.93E-08 |
| rs2310315   | 37.511011 | 1.93E-08 |
| rs10509757  | 37.510762 | 1.93E-08 |
| rs9537815   | 37.509571 | 1.93E-08 |
| rs7111408   | 37.507346 | 1.93E-08 |
| rs7522223   | 37.507303 | 1.93E-08 |
| rs7115331   | 37.506388 | 1.93E-08 |
| rs34105070  | 37.506312 | 1.93E-08 |
| rs1937801   | 37.503977 | 1.94E-08 |
| rs1727306   | 37.503780 | 1.94E-08 |
| rs2359612   | 37.501620 | 1.94E-08 |
| rs4822022   | 37.501370 | 1.94E-08 |
| rs2631368   | 37.501265 | 1.94E-08 |
| rs10211081  | 37.501129 | 1.94E-08 |
| rs1716165   | 37.500936 | 1.94E-08 |
| rs13254908  | 37.500275 | 1.94E-08 |
| rs13253842  | 37.500250 | 1.94E-08 |
| rs4749860   | 37.498938 | 1.94E-08 |
| rs10803512  | 37.498723 | 1.94E-08 |
| rs148033495 | 37.497794 | 1.94E-08 |
| rs806794    | 37.496994 | 1.94E-08 |
| rs6996877   | 37.496764 | 1.94E-08 |
| rs13264669  | 37.495519 | 1.94E-08 |
| rs4524254   | 37.492940 | 1.95E-08 |
| rs13172520  | 37.491096 | 1.95E-08 |
| rs183740218 | 37.490150 | 1.95E-08 |
| rs3131524   | 37.489995 | 1.95E-08 |
| rs58127265  | 37.489600 | 1.95E-08 |
| rs4456838   | 37.488735 | 1.95E-08 |
| rs12565379  | 37.486519 | 1.95E-08 |
| rs12713766  | 37.484761 | 1.95E-08 |
| rs11205761  | 37.484172 | 1.96E-08 |
| rs111373731 | 37.484048 | 1.96E-08 |
| rs62126614  | 37.481289 | 1.96E-08 |
| rs1716173   | 37.480175 | 1.96E-08 |
| rs6680846   | 37.479142 | 1.96E-08 |
| rs17749927  | 37.478090 | 1.96E-08 |
| rs1790131   | 37.477700 | 1.96E-08 |
| rs6693790   | 37.477634 | 1.96E-08 |
| rs2921079   | 37.476988 | 1.96E-08 |
| rs72773175  | 37.476940 | 1.96E-08 |
| rs254557    | 37.475765 | 1.96E-08 |
| rs11130211  | 37.472369 | 1.97E-08 |

|             |           |          |
|-------------|-----------|----------|
| rs12299125  | 37.469816 | 1.97E-08 |
| rs62530792  | 37.469268 | 1.97E-08 |
| rs1790105   | 37.468345 | 1.97E-08 |
| rs1727315   | 37.467988 | 1.97E-08 |
| rs12087638  | 37.467227 | 1.97E-08 |
| rs1618679   | 37.464205 | 1.98E-08 |
| rs58052182  | 37.464108 | 1.98E-08 |
| rs2945858   | 37.461468 | 1.98E-08 |
| rs12520423  | 37.461447 | 1.98E-08 |
| rs2544029   | 37.461407 | 1.98E-08 |
| rs150260796 | 37.460432 | 1.98E-08 |
| rs3024647   | 37.458241 | 1.98E-08 |
| rs11721148  | 37.457968 | 1.98E-08 |
| rs10883805  | 37.454976 | 1.99E-08 |
| rs11948444  | 37.453693 | 1.99E-08 |
| rs28598587  | 37.453542 | 1.99E-08 |
| rs1937799   | 37.450175 | 1.99E-08 |
| rs35020936  | 37.447844 | 1.99E-08 |
| rs2614265   | 37.447318 | 1.99E-08 |
| rs4244578   | 37.446889 | 1.99E-08 |
| rs863459    | 37.446179 | 2.00E-08 |
| rs6477006   | 37.445380 | 2.00E-08 |
| rs61256039  | 37.444621 | 2.00E-08 |
| rs180061    | 37.444376 | 2.00E-08 |
| rs2747431   | 37.443462 | 2.00E-08 |
| rs804389    | 37.443292 | 2.00E-08 |
| rs11679843  | 37.442999 | 2.00E-08 |
| rs11657325  | 37.441694 | 2.00E-08 |
| rs7092200   | 37.439816 | 2.00E-08 |
| rs56057809  | 37.439274 | 2.00E-08 |
| rs254556    | 37.438501 | 2.00E-08 |
| rs72626215  | 37.437960 | 2.00E-08 |
| rs11057276  | 37.437020 | 2.00E-08 |
| rs10786729  | 37.436365 | 2.01E-08 |
| rs11205769  | 37.432476 | 2.01E-08 |
| rs12655815  | 37.429730 | 2.01E-08 |
| rs12969294  | 37.428732 | 2.01E-08 |
| rs7096269   | 37.427090 | 2.02E-08 |
| rs10207381  | 37.426943 | 2.02E-08 |
| rs78275004  | 37.426496 | 2.02E-08 |
| rs73109811  | 37.426110 | 2.02E-08 |
| rs13212093  | 37.426013 | 2.02E-08 |
| rs62508771  | 37.425836 | 2.02E-08 |
| rs142522597 | 37.425627 | 2.02E-08 |
| rs12637313  | 37.425382 | 2.02E-08 |
| rs9321508   | 37.424818 | 2.02E-08 |

|             |           |          |
|-------------|-----------|----------|
| rs149968904 | 37.424376 | 2.02E-08 |
| rs55964255  | 37.424223 | 2.02E-08 |
| rs62077464  | 37.422713 | 2.02E-08 |
| rs12065553  | 37.422626 | 2.02E-08 |
| rs7974099   | 37.419947 | 2.02E-08 |
| rs1916289   | 37.417981 | 2.03E-08 |
| rs4671492   | 37.414173 | 2.03E-08 |
| rs59355246  | 37.414128 | 2.03E-08 |
| rs2066648   | 37.414001 | 2.03E-08 |
| rs35893260  | 37.413857 | 2.03E-08 |
| rs6546723   | 37.413177 | 2.03E-08 |
| rs111535660 | 37.411259 | 2.03E-08 |
| rs9438856   | 37.410669 | 2.03E-08 |
| rs62234988  | 37.410211 | 2.03E-08 |
| rs1790090   | 37.409691 | 2.03E-08 |
| rs13192965  | 37.407622 | 2.04E-08 |
| rs9271550   | 37.404357 | 2.04E-08 |
| rs8001011   | 37.404036 | 2.04E-08 |
| rs10127531  | 37.403916 | 2.04E-08 |
| rs12087722  | 37.403179 | 2.04E-08 |
| rs2976856   | 37.400489 | 2.04E-08 |
| rs75772970  | 37.400474 | 2.04E-08 |
| rs25890     | 37.399612 | 2.04E-08 |
| rs116391620 | 37.398554 | 2.05E-08 |
| rs1452822   | 37.398542 | 2.05E-08 |
| rs1994676   | 37.396464 | 2.05E-08 |
| rs10830220  | 37.395979 | 2.05E-08 |
| rs2228098   | 37.394010 | 2.05E-08 |
| rs4792712   | 37.393953 | 2.05E-08 |
| rs884548    | 37.393912 | 2.05E-08 |
| rs62508819  | 37.390416 | 2.05E-08 |
| rs2621326   | 37.390016 | 2.06E-08 |
| rs2851438   | 37.389993 | 2.06E-08 |
| rs113448632 | 37.389750 | 2.06E-08 |
| rs879048    | 37.389732 | 2.06E-08 |
| rs6897429   | 37.386887 | 2.06E-08 |
| rs4889622   | 37.384322 | 2.06E-08 |
| rs10198737  | 37.384104 | 2.06E-08 |
| rs2246943   | 37.382870 | 2.06E-08 |
| rs72773163  | 37.382664 | 2.06E-08 |
| rs12053882  | 37.379461 | 2.07E-08 |
| rs4408914   | 37.379399 | 2.07E-08 |
| rs2621322   | 37.379377 | 2.07E-08 |
| rs8139770   | 37.378411 | 2.07E-08 |
| rs34038546  | 37.377572 | 2.07E-08 |
| rs297589    | 37.377411 | 2.07E-08 |

|             |           |          |
|-------------|-----------|----------|
| rs34543938  | 37.376930 | 2.07E-08 |
| rs6993170   | 37.376094 | 2.07E-08 |
| rs1838393   | 37.375215 | 2.07E-08 |
| rs7826483   | 37.375215 | 2.07E-08 |
| rs144969912 | 37.375200 | 2.07E-08 |
| rs35064785  | 37.375037 | 2.07E-08 |
| rs10815241  | 37.374754 | 2.07E-08 |
| rs6877493   | 37.373936 | 2.07E-08 |
| rs66579741  | 37.369385 | 2.08E-08 |
| rs17488710  | 37.367097 | 2.08E-08 |
| rs12680988  | 37.367011 | 2.08E-08 |
| rs9603693   | 37.364794 | 2.08E-08 |
| rs1596566   | 37.364290 | 2.08E-08 |
| rs249678    | 37.363933 | 2.08E-08 |
| rs4759268   | 37.363128 | 2.08E-08 |
| rs72793561  | 37.361327 | 2.09E-08 |
| rs2240157   | 37.361315 | 2.09E-08 |
| rs3797743   | 37.361307 | 2.09E-08 |
| rs2029591   | 37.360955 | 2.09E-08 |
| rs3893710   | 37.359902 | 2.09E-08 |
| rs10765191  | 37.359400 | 2.09E-08 |
| rs1716167   | 37.357466 | 2.09E-08 |
| rs28419092  | 37.357037 | 2.09E-08 |
| rs493161    | 37.356424 | 2.09E-08 |
| rs17132273  | 37.355544 | 2.09E-08 |
| rs1463728   | 37.354860 | 2.09E-08 |
| rs4241405   | 37.354839 | 2.09E-08 |
| rs11057284  | 37.354475 | 2.09E-08 |
| rs2668713   | 37.352252 | 2.10E-08 |
| rs2534674   | 37.351377 | 2.10E-08 |
| rs1994673   | 37.350650 | 2.10E-08 |
| rs67148358  | 37.350555 | 2.10E-08 |
| rs2429440   | 37.349910 | 2.10E-08 |
| rs1538204   | 37.349275 | 2.10E-08 |
| rs72675704  | 37.348648 | 2.10E-08 |
| rs10815286  | 37.348140 | 2.10E-08 |
| rs1621194   | 37.346457 | 2.10E-08 |
| rs35818434  | 37.344736 | 2.11E-08 |
| rs9389295   | 37.344165 | 2.11E-08 |
| rs7844306   | 37.342404 | 2.11E-08 |
| rs9860547   | 37.342165 | 2.11E-08 |
| rs112458284 | 37.338353 | 2.11E-08 |
| rs112270518 | 37.336991 | 2.11E-08 |
| rs4761593   | 37.336718 | 2.11E-08 |
| rs3018098   | 37.336504 | 2.11E-08 |
| rs2614279   | 37.333820 | 2.12E-08 |



|             |           |          |
|-------------|-----------|----------|
| rs1994675   | 37.332755 | 2.12E-08 |
| rs13202775  | 37.331656 | 2.12E-08 |
| rs769669    | 37.330505 | 2.12E-08 |
| rs2682434   | 37.330448 | 2.12E-08 |
| rs10767654  | 37.330438 | 2.12E-08 |
| rs62449491  | 37.329702 | 2.12E-08 |
| rs13257800  | 37.329476 | 2.12E-08 |
| rs13252719  | 37.326693 | 2.13E-08 |
| rs6546722   | 37.325295 | 2.13E-08 |
| rs2189149   | 37.323474 | 2.13E-08 |
| rs72673699  | 37.321955 | 2.13E-08 |
| rs6416868   | 37.321358 | 2.13E-08 |
| rs17132268  | 37.319159 | 2.13E-08 |
| rs4886031   | 37.316764 | 2.14E-08 |
| rs77468143  | 37.316280 | 2.14E-08 |
| rs16962755  | 37.313790 | 2.14E-08 |
| rs4735677   | 37.311639 | 2.14E-08 |
| rs77097561  | 37.311439 | 2.14E-08 |
| rs2065977   | 37.308487 | 2.15E-08 |
| rs1994674   | 37.308423 | 2.15E-08 |
| rs949142    | 37.307094 | 2.15E-08 |
| rs59086229  | 37.306987 | 2.15E-08 |
| rs1627724   | 37.306692 | 2.15E-08 |
| rs7511700   | 37.306683 | 2.15E-08 |
| rs10745680  | 37.306525 | 2.15E-08 |
| rs1716177   | 37.303969 | 2.15E-08 |
| rs199442    | 37.303422 | 2.15E-08 |
| rs7206790   | 37.300022 | 2.16E-08 |
| rs139489293 | 37.299978 | 2.16E-08 |
| rs73209220  | 37.298114 | 2.16E-08 |
| rs17488724  | 37.294142 | 2.16E-08 |
| rs6955157   | 37.293695 | 2.16E-08 |
| rs12087646  | 37.293219 | 2.16E-08 |
| rs1790100   | 37.289785 | 2.17E-08 |
| rs10504481  | 37.287690 | 2.17E-08 |
| rs2945861   | 37.287464 | 2.17E-08 |
| rs8047803   | 37.287434 | 2.17E-08 |
| rs61388686  | 37.284863 | 2.17E-08 |
| rs10181419  | 37.284639 | 2.17E-08 |
| rs11653500  | 37.284119 | 2.17E-08 |
| rs1716178   | 37.283201 | 2.17E-08 |
| rs11608305  | 37.282976 | 2.17E-08 |
| rs12569617  | 37.282873 | 2.17E-08 |
| rs7846385   | 37.282597 | 2.18E-08 |
| rs13274381  | 37.282211 | 2.18E-08 |
| rs7791032   | 37.281441 | 2.18E-08 |

|             |           |          |
|-------------|-----------|----------|
| rs3751813   | 37.280492 | 2.18E-08 |
| rs12946619  | 37.279112 | 2.18E-08 |
| rs4657661   | 37.275407 | 2.18E-08 |
| rs7699291   | 37.274179 | 2.18E-08 |
| rs6992879   | 37.273967 | 2.19E-08 |
| rs9537804   | 37.271268 | 2.19E-08 |
| rs365052    | 37.270573 | 2.19E-08 |
| rs57198995  | 37.269846 | 2.19E-08 |
| rs3847811   | 37.269291 | 2.19E-08 |
| rs11174501  | 37.268215 | 2.19E-08 |
| rs4792709   | 37.267868 | 2.19E-08 |
| rs8081780   | 37.267261 | 2.19E-08 |
| rs34496649  | 37.264920 | 2.20E-08 |
| rs10846478  | 37.264030 | 2.20E-08 |
| rs4514202   | 37.263597 | 2.20E-08 |
| rs6710254   | 37.263538 | 2.20E-08 |
| rs9869120   | 37.261715 | 2.20E-08 |
| rs6944997   | 37.261361 | 2.20E-08 |
| rs6446284   | 37.258291 | 2.20E-08 |
| rs4919695   | 37.258206 | 2.20E-08 |
| rs416568    | 37.256851 | 2.21E-08 |
| rs11130208  | 37.255451 | 2.21E-08 |
| rs1716168   | 37.254171 | 2.21E-08 |
| rs665063    | 37.253889 | 2.21E-08 |
| rs1006135   | 37.251525 | 2.21E-08 |
| rs7988551   | 37.249974 | 2.21E-08 |
| rs1716164   | 37.248159 | 2.22E-08 |
| rs908225    | 37.247105 | 2.22E-08 |
| rs6889886   | 37.245145 | 2.22E-08 |
| rs113225456 | 37.243722 | 2.22E-08 |
| rs11677298  | 37.242834 | 2.22E-08 |
| rs62449489  | 37.242648 | 2.22E-08 |
| rs17689585  | 37.241638 | 2.22E-08 |
| rs4475093   | 37.238249 | 2.23E-08 |
| rs11249200  | 37.234233 | 2.23E-08 |
| rs6993115   | 37.233970 | 2.23E-08 |
| rs1727300   | 37.233809 | 2.23E-08 |
| rs35225842  | 37.232245 | 2.23E-08 |
| rs13195728  | 37.232164 | 2.23E-08 |
| rs12586002  | 37.231356 | 2.23E-08 |
| rs115096560 | 37.229729 | 2.24E-08 |
| rs141342723 | 37.229276 | 2.24E-08 |
| rs9272489   | 37.228908 | 2.24E-08 |
| rs4148856   | 37.225250 | 2.24E-08 |
| rs8070859   | 37.224840 | 2.24E-08 |
| rs1006134   | 37.224092 | 2.24E-08 |

|             |           |          |
|-------------|-----------|----------|
| rs5029937   | 37.223465 | 2.24E-08 |
| rs1488830   | 37.222483 | 2.25E-08 |
| rs1716159   | 37.221553 | 2.25E-08 |
| rs13210634  | 37.221046 | 2.25E-08 |
| rs13215275  | 37.220470 | 2.25E-08 |
| rs10986284  | 37.220417 | 2.25E-08 |
| rs2249048   | 37.220306 | 2.25E-08 |
| rs2534676   | 37.217441 | 2.25E-08 |
| rs11869563  | 37.217011 | 2.25E-08 |
| rs3098878   | 37.215738 | 2.25E-08 |
| rs1922422   | 37.213614 | 2.26E-08 |
| rs6502479   | 37.213424 | 2.26E-08 |
| rs7824232   | 37.213268 | 2.26E-08 |
| rs11677207  | 37.207722 | 2.26E-08 |
| rs7339301   | 37.206488 | 2.26E-08 |
| rs10450373  | 37.206248 | 2.26E-08 |
| rs9517679   | 37.206086 | 2.26E-08 |
| rs11078328  | 37.205457 | 2.27E-08 |
| rs739447    | 37.203360 | 2.27E-08 |
| rs6797299   | 37.202611 | 2.27E-08 |
| rs10057548  | 37.202453 | 2.27E-08 |
| rs6714258   | 37.202326 | 2.27E-08 |
| rs116553115 | 37.200653 | 2.27E-08 |
| rs7824723   | 37.200361 | 2.27E-08 |
| rs7842996   | 37.199674 | 2.27E-08 |
| rs8108822   | 37.198839 | 2.27E-08 |
| rs2887887   | 37.198560 | 2.27E-08 |
| rs1716158   | 37.198046 | 2.27E-08 |
| rs7223428   | 37.197878 | 2.27E-08 |
| rs11191471  | 37.196876 | 2.28E-08 |
| rs6984496   | 37.195601 | 2.28E-08 |
| rs9853081   | 37.195466 | 2.28E-08 |
| rs6731042   | 37.195381 | 2.28E-08 |
| rs1532204   | 37.195230 | 2.28E-08 |
| rs3098872   | 37.194845 | 2.28E-08 |
| rs6594477   | 37.194364 | 2.28E-08 |
| rs11611680  | 37.193652 | 2.28E-08 |
| rs28825193  | 37.191736 | 2.28E-08 |
| rs10458603  | 37.189671 | 2.28E-08 |
| rs3971708   | 37.186630 | 2.29E-08 |
| rs6502480   | 37.186396 | 2.29E-08 |
| rs10876955  | 37.185049 | 2.29E-08 |
| rs1050379   | 37.184869 | 2.29E-08 |
| rs62126610  | 37.180367 | 2.30E-08 |
| rs11611677  | 37.179857 | 2.30E-08 |
| rs6537285   | 37.176149 | 2.30E-08 |

|             |           |          |
|-------------|-----------|----------|
| rs9537803   | 37.176071 | 2.30E-08 |
| rs4519092   | 37.175987 | 2.30E-08 |
| rs56405707  | 37.175384 | 2.30E-08 |
| rs11057238  | 37.175113 | 2.30E-08 |
| rs72928017  | 37.174819 | 2.30E-08 |
| rs9920722   | 37.174174 | 2.30E-08 |
| rs12583270  | 37.171861 | 2.31E-08 |
| rs115117407 | 37.171817 | 2.31E-08 |
| rs11057261  | 37.171604 | 2.31E-08 |
| rs2631372   | 37.171589 | 2.31E-08 |
| rs1918877   | 37.170820 | 2.31E-08 |
| rs2406539   | 37.170804 | 2.31E-08 |
| rs1880243   | 37.170106 | 2.31E-08 |
| rs10111935  | 37.168129 | 2.31E-08 |
| rs7903944   | 37.167110 | 2.31E-08 |
| rs72833417  | 37.165932 | 2.31E-08 |
| rs15739     | 37.165201 | 2.31E-08 |
| rs10070903  | 37.164087 | 2.32E-08 |
| rs13202295  | 37.163848 | 2.32E-08 |
| rs12522532  | 37.162664 | 2.32E-08 |
| rs1790124   | 37.162358 | 2.32E-08 |
| rs11608297  | 37.161848 | 2.32E-08 |
| rs262478    | 37.161374 | 2.32E-08 |
| rs2950537   | 37.160029 | 2.32E-08 |
| rs13109980  | 37.159767 | 2.32E-08 |
| rs719749    | 37.159607 | 2.32E-08 |
| rs1008127   | 37.156642 | 2.32E-08 |
| rs11172065  | 37.155783 | 2.33E-08 |
| rs28631104  | 37.155152 | 2.33E-08 |
| rs9271733   | 37.154985 | 2.33E-08 |
| rs11743947  | 37.154725 | 2.33E-08 |
| rs4917987   | 37.150887 | 2.33E-08 |
| rs12085479  | 37.150632 | 2.33E-08 |
| rs3025316   | 37.148029 | 2.34E-08 |
| rs11057254  | 37.146011 | 2.34E-08 |
| rs2024035   | 37.144394 | 2.34E-08 |
| rs12187004  | 37.140737 | 2.34E-08 |
| rs11191572  | 37.139913 | 2.35E-08 |
| rs11018511  | 37.137252 | 2.35E-08 |
| rs11742110  | 37.136073 | 2.35E-08 |
| rs4706008   | 37.134959 | 2.35E-08 |
| rs4749862   | 37.134600 | 2.35E-08 |
| rs67117025  | 37.130391 | 2.36E-08 |
| rs3098882   | 37.128970 | 2.36E-08 |
| rs9273175   | 37.126742 | 2.36E-08 |
| rs4289865   | 37.125048 | 2.36E-08 |

|            |           |          |
|------------|-----------|----------|
| rs9549003  | 37.122342 | 2.37E-08 |
| rs72845046 | 37.121922 | 2.37E-08 |
| rs76858845 | 37.121834 | 2.37E-08 |
| rs2901578  | 37.115655 | 2.38E-08 |
| rs10758711 | 37.114040 | 2.38E-08 |
| rs11715828 | 37.111725 | 2.38E-08 |
| rs72773160 | 37.108109 | 2.39E-08 |
| rs6998786  | 37.105845 | 2.39E-08 |
| rs73030263 | 37.105301 | 2.39E-08 |
| rs199530   | 37.104917 | 2.39E-08 |
| rs2111365  | 37.104902 | 2.39E-08 |
| rs11172064 | 37.103866 | 2.39E-08 |
| rs12258884 | 37.102665 | 2.39E-08 |
| rs72670002 | 37.102265 | 2.39E-08 |
| rs6537275  | 37.102148 | 2.39E-08 |
| rs7571520  | 37.100730 | 2.39E-08 |
| rs4963059  | 37.100083 | 2.40E-08 |
| rs196123   | 37.093976 | 2.40E-08 |
| rs6916141  | 37.092436 | 2.40E-08 |
| rs12056347 | 37.088043 | 2.41E-08 |
| rs2614287  | 37.086978 | 2.41E-08 |
| rs34718920 | 37.085117 | 2.41E-08 |
| rs2569265  | 37.083465 | 2.42E-08 |
| rs72771406 | 37.080864 | 2.42E-08 |
| rs12461705 | 37.079955 | 2.42E-08 |
| rs2389024  | 37.079762 | 2.42E-08 |
| rs10772995 | 37.078431 | 2.42E-08 |
| rs1890184  | 37.076787 | 2.42E-08 |
| rs3098869  | 37.073027 | 2.43E-08 |
| rs2921096  | 37.071919 | 2.43E-08 |
| rs3817836  | 37.071713 | 2.43E-08 |
| rs7706612  | 37.071033 | 2.43E-08 |
| rs34706883 | 37.070953 | 2.43E-08 |
| rs12679261 | 37.070678 | 2.43E-08 |
| rs388891   | 37.068449 | 2.44E-08 |
| rs2243967  | 37.067994 | 2.44E-08 |
| rs56197170 | 37.065603 | 2.44E-08 |
| rs3110261  | 37.063789 | 2.44E-08 |
| rs72682295 | 37.063741 | 2.44E-08 |
| rs3130977  | 37.063728 | 2.44E-08 |
| rs557042   | 37.062988 | 2.44E-08 |
| rs1716157  | 37.062470 | 2.44E-08 |
| rs7863638  | 37.062221 | 2.44E-08 |
| rs10089583 | 37.061709 | 2.44E-08 |
| rs35819751 | 37.060609 | 2.45E-08 |
| rs12582153 | 37.060195 | 2.45E-08 |

|            |           |          |
|------------|-----------|----------|
| rs3110262  | 37.059998 | 2.45E-08 |
| rs12936646 | 37.055568 | 2.45E-08 |
| rs13212651 | 37.054287 | 2.45E-08 |
| rs72731149 | 37.052207 | 2.46E-08 |
| rs11078320 | 37.050192 | 2.46E-08 |
| rs2921082  | 37.050088 | 2.46E-08 |
| rs28787109 | 37.047831 | 2.46E-08 |
| rs11721    | 37.043463 | 2.47E-08 |
| rs4075279  | 37.036227 | 2.48E-08 |
| rs6664550  | 37.034768 | 2.48E-08 |
| rs67101035 | 37.034080 | 2.48E-08 |
| rs1075472  | 37.031629 | 2.48E-08 |
| rs199508   | 37.030723 | 2.48E-08 |
| rs60950736 | 37.030249 | 2.49E-08 |
| rs9272648  | 37.029960 | 2.49E-08 |
| rs1727294  | 37.029697 | 2.49E-08 |
| rs2005263  | 37.028631 | 2.49E-08 |
| rs200837   | 37.026054 | 2.49E-08 |
| rs1716156  | 37.023611 | 2.49E-08 |
| rs17715902 | 37.023523 | 2.49E-08 |
| rs149990   | 37.022642 | 2.50E-08 |
| rs11018510 | 37.022352 | 2.50E-08 |
| rs35399295 | 37.021918 | 2.50E-08 |
| rs6472551  | 37.020546 | 2.50E-08 |
| rs13160230 | 37.019642 | 2.50E-08 |
| rs12460608 | 37.013892 | 2.51E-08 |
| rs10422107 | 37.011248 | 2.51E-08 |
| rs11057251 | 37.008425 | 2.51E-08 |
| rs3130975  | 37.007900 | 2.51E-08 |
| rs930931   | 37.003975 | 2.52E-08 |
| rs9603691  | 37.003892 | 2.52E-08 |
| rs1727320  | 37.002159 | 2.52E-08 |
| rs11669374 | 37.002100 | 2.52E-08 |
| rs9986779  | 37.000660 | 2.52E-08 |
| rs7350950  | 36.996138 | 2.53E-08 |
| rs4518719  | 36.992929 | 2.53E-08 |
| rs35501037 | 36.990758 | 2.54E-08 |
| rs10516529 | 36.989314 | 2.54E-08 |
| rs7731400  | 36.988242 | 2.54E-08 |
| rs7483762  | 36.986983 | 2.54E-08 |
| rs73209242 | 36.986933 | 2.54E-08 |
| rs12971302 | 36.985003 | 2.55E-08 |
| rs28496545 | 36.981596 | 2.55E-08 |
| rs17751184 | 36.981347 | 2.55E-08 |
| rs3110264  | 36.979964 | 2.55E-08 |
| rs9527716  | 36.979231 | 2.55E-08 |

|             |           |          |
|-------------|-----------|----------|
| rs56912706  | 36.978596 | 2.55E-08 |
| rs4581234   | 36.975983 | 2.56E-08 |
| rs9603649   | 36.974472 | 2.56E-08 |
| rs73196739  | 36.974261 | 2.56E-08 |
| rs12150285  | 36.973540 | 2.56E-08 |
| rs72839445  | 36.972910 | 2.56E-08 |
| rs36001065  | 36.972775 | 2.56E-08 |
| rs58471266  | 36.972383 | 2.56E-08 |
| rs148428140 | 36.971520 | 2.56E-08 |
| rs4303039   | 36.969299 | 2.57E-08 |
| rs114982260 | 36.969095 | 2.57E-08 |
| rs28451004  | 36.968766 | 2.57E-08 |
| rs1006258   | 36.966384 | 2.57E-08 |
| rs56357916  | 36.964517 | 2.57E-08 |
| rs4749830   | 36.960469 | 2.58E-08 |
| rs10939140  | 36.958549 | 2.58E-08 |
| rs1438670   | 36.957156 | 2.58E-08 |
| rs56289931  | 36.954636 | 2.59E-08 |
| rs9438873   | 36.951905 | 2.59E-08 |
| rs1915930   | 36.951858 | 2.59E-08 |
| rs13154667  | 36.951729 | 2.59E-08 |
| rs4425550   | 36.951076 | 2.59E-08 |
| rs8043105   | 36.950820 | 2.59E-08 |
| rs10239311  | 36.950803 | 2.59E-08 |
| rs7735184   | 36.950022 | 2.59E-08 |
| rs1927728   | 36.949228 | 2.59E-08 |
| rs72773131  | 36.947820 | 2.60E-08 |
| rs17488752  | 36.947742 | 2.60E-08 |
| rs11245973  | 36.945856 | 2.60E-08 |
| rs199527    | 36.942534 | 2.60E-08 |
| rs1790116   | 36.941387 | 2.60E-08 |
| rs2277343   | 36.940182 | 2.61E-08 |
| rs112852633 | 36.938158 | 2.61E-08 |
| rs11730660  | 36.937939 | 2.61E-08 |
| rs2179781   | 36.937679 | 2.61E-08 |
| rs9517673   | 36.937236 | 2.61E-08 |
| rs7298918   | 36.936957 | 2.61E-08 |
| rs9527715   | 36.932429 | 2.62E-08 |
| rs10819087  | 36.931705 | 2.62E-08 |
| rs13193480  | 36.931596 | 2.62E-08 |
| rs12229700  | 36.931517 | 2.62E-08 |
| rs13262350  | 36.931095 | 2.62E-08 |
| rs9438872   | 36.930968 | 2.62E-08 |
| rs11948459  | 36.930514 | 2.62E-08 |
| rs6997695   | 36.930122 | 2.62E-08 |
| rs4282760   | 36.928702 | 2.62E-08 |

|             |           |          |
|-------------|-----------|----------|
| rs7935063   | 36.928422 | 2.62E-08 |
| rs2629413   | 36.927919 | 2.62E-08 |
| rs2277065   | 36.927642 | 2.62E-08 |
| rs13193542  | 36.926436 | 2.63E-08 |
| rs77688632  | 36.926258 | 2.63E-08 |
| rs2947099   | 36.924731 | 2.63E-08 |
| rs7216949   | 36.922658 | 2.63E-08 |
| rs11655456  | 36.922536 | 2.63E-08 |
| rs62077463  | 36.922156 | 2.63E-08 |
| rs149943    | 36.920198 | 2.63E-08 |
| rs7998894   | 36.919297 | 2.64E-08 |
| rs757554    | 36.918315 | 2.64E-08 |
| rs62072527  | 36.917479 | 2.64E-08 |
| rs72649512  | 36.916155 | 2.64E-08 |
| rs775726    | 36.915948 | 2.64E-08 |
| rs11168049  | 36.912817 | 2.64E-08 |
| rs4430281   | 36.912784 | 2.64E-08 |
| rs78455769  | 36.912242 | 2.64E-08 |
| rs28376121  | 36.911024 | 2.65E-08 |
| rs10463406  | 36.910914 | 2.65E-08 |
| rs6998163   | 36.910078 | 2.65E-08 |
| rs3110260   | 36.909176 | 2.65E-08 |
| rs12280230  | 36.908641 | 2.65E-08 |
| rs10955486  | 36.906325 | 2.65E-08 |
| rs12603115  | 36.905806 | 2.65E-08 |
| rs7209094   | 36.903635 | 2.66E-08 |
| rs4465995   | 36.902581 | 2.66E-08 |
| rs4735063   | 36.898541 | 2.66E-08 |
| rs12942360  | 36.897963 | 2.66E-08 |
| rs34677078  | 36.896413 | 2.67E-08 |
| rs10098022  | 36.895876 | 2.67E-08 |
| rs10493662  | 36.895665 | 2.67E-08 |
| rs115599607 | 36.895234 | 2.67E-08 |
| rs7849174   | 36.893150 | 2.67E-08 |
| rs150288382 | 36.893041 | 2.67E-08 |
| rs4976646   | 36.892658 | 2.67E-08 |
| rs17750424  | 36.890852 | 2.68E-08 |
| rs12518350  | 36.889395 | 2.68E-08 |
| rs28690326  | 36.888816 | 2.68E-08 |
| rs10902098  | 36.887777 | 2.68E-08 |
| rs112466811 | 36.887610 | 2.68E-08 |
| rs4923458   | 36.887433 | 2.68E-08 |
| rs2945860   | 36.886742 | 2.68E-08 |
| rs1727318   | 36.885659 | 2.68E-08 |
| rs10830223  | 36.885579 | 2.68E-08 |
| rs17750747  | 36.883766 | 2.69E-08 |



|             |           |          |
|-------------|-----------|----------|
| rs72847313  | 36.881475 | 2.69E-08 |
| rs10035919  | 36.879643 | 2.69E-08 |
| rs1955032   | 36.878768 | 2.69E-08 |
| rs6941411   | 36.878457 | 2.69E-08 |
| rs10876956  | 36.878125 | 2.69E-08 |
| rs4735062   | 36.876852 | 2.69E-08 |
| rs7555345   | 36.875938 | 2.70E-08 |
| rs9864529   | 36.875333 | 2.70E-08 |
| rs11057275  | 36.875066 | 2.70E-08 |
| rs73842249  | 36.874057 | 2.70E-08 |
| rs17809565  | 36.873351 | 2.70E-08 |
| rs2001797   | 36.873149 | 2.70E-08 |
| rs117051189 | 36.872064 | 2.70E-08 |
| rs13293667  | 36.871716 | 2.70E-08 |
| rs4821981   | 36.870771 | 2.70E-08 |
| rs1106241   | 36.870440 | 2.70E-08 |
| rs28855757  | 36.868770 | 2.71E-08 |
| rs1036448   | 36.864219 | 2.71E-08 |
| rs4963040   | 36.863126 | 2.71E-08 |
| rs6885085   | 36.862298 | 2.72E-08 |
| rs2317745   | 36.861858 | 2.72E-08 |
| rs11245972  | 36.861087 | 2.72E-08 |
| rs13260628  | 36.860832 | 2.72E-08 |
| rs775720    | 36.859812 | 2.72E-08 |
| rs10153553  | 36.857298 | 2.72E-08 |
| rs1615694   | 36.856710 | 2.72E-08 |
| rs10197437  | 36.856621 | 2.72E-08 |
| rs7603126   | 36.856199 | 2.72E-08 |
| rs11489163  | 36.856061 | 2.72E-08 |
| rs151317012 | 36.855718 | 2.73E-08 |
| rs73209239  | 36.853844 | 2.73E-08 |
| rs73119451  | 36.853437 | 2.73E-08 |
| rs72651421  | 36.849616 | 2.73E-08 |
| rs7733093   | 36.849453 | 2.73E-08 |
| rs4671486   | 36.848797 | 2.74E-08 |
| rs6594475   | 36.848406 | 2.74E-08 |
| rs36029218  | 36.847721 | 2.74E-08 |
| rs7113714   | 36.847187 | 2.74E-08 |
| rs1041646   | 36.842590 | 2.74E-08 |
| rs73209237  | 36.839064 | 2.75E-08 |
| rs76775848  | 36.838184 | 2.75E-08 |
| rs17263198  | 36.837491 | 2.75E-08 |
| rs12595533  | 36.832434 | 2.76E-08 |
| rs10508394  | 36.832278 | 2.76E-08 |
| rs17036341  | 36.831271 | 2.76E-08 |
| rs2687939   | 36.830379 | 2.76E-08 |

|             |           |          |
|-------------|-----------|----------|
| rs73030289  | 36.829956 | 2.76E-08 |
| rs2687940   | 36.829689 | 2.76E-08 |
| rs9611612   | 36.829036 | 2.76E-08 |
| rs72815379  | 36.827815 | 2.77E-08 |
| rs41286560  | 36.826307 | 2.77E-08 |
| rs2740515   | 36.826124 | 2.77E-08 |
| rs7820094   | 36.825838 | 2.77E-08 |
| rs1573118   | 36.825628 | 2.77E-08 |
| rs72773173  | 36.824507 | 2.77E-08 |
| rs3802604   | 36.824114 | 2.77E-08 |
| rs35202262  | 36.823546 | 2.77E-08 |
| rs7515597   | 36.823156 | 2.77E-08 |
| rs11256204  | 36.823134 | 2.77E-08 |
| rs34159932  | 36.822195 | 2.77E-08 |
| rs4792708   | 36.822034 | 2.77E-08 |
| rs2389023   | 36.821109 | 2.78E-08 |
| rs6759774   | 36.819597 | 2.78E-08 |
| rs34331598  | 36.819304 | 2.78E-08 |
| rs4923457   | 36.817801 | 2.78E-08 |
| rs811041    | 36.813383 | 2.79E-08 |
| rs9272988   | 36.813297 | 2.79E-08 |
| rs4889627   | 36.812988 | 2.79E-08 |
| rs5758335   | 36.812784 | 2.79E-08 |
| rs10415992  | 36.812609 | 2.79E-08 |
| rs7319102   | 36.812363 | 2.79E-08 |
| rs143685014 | 36.810897 | 2.79E-08 |
| rs2945862   | 36.809596 | 2.79E-08 |
| rs7120670   | 36.807454 | 2.80E-08 |
| rs2756184   | 36.807391 | 2.80E-08 |
| rs11663050  | 36.807271 | 2.80E-08 |
| rs111644875 | 36.806845 | 2.80E-08 |
| rs13057349  | 36.805354 | 2.80E-08 |
| rs483143    | 36.804320 | 2.80E-08 |
| rs28664894  | 36.802588 | 2.80E-08 |
| rs519973    | 36.802507 | 2.80E-08 |
| rs7623765   | 36.802425 | 2.80E-08 |
| rs7210655   | 36.799065 | 2.81E-08 |
| rs9272686   | 36.798184 | 2.81E-08 |
| rs113382419 | 36.797326 | 2.81E-08 |
| rs6827753   | 36.794422 | 2.81E-08 |
| rs1898278   | 36.794053 | 2.82E-08 |
| rs2030516   | 36.792903 | 2.82E-08 |
| rs60835840  | 36.792714 | 2.82E-08 |
| rs11599222  | 36.790901 | 2.82E-08 |
| rs8138349   | 36.789563 | 2.82E-08 |
| rs2236508   | 36.789090 | 2.82E-08 |

|             |           |          |
|-------------|-----------|----------|
| rs60849871  | 36.788413 | 2.82E-08 |
| rs72673889  | 36.787803 | 2.82E-08 |
| rs7139654   | 36.787121 | 2.83E-08 |
| rs262494    | 36.785137 | 2.83E-08 |
| rs7996419   | 36.784335 | 2.83E-08 |
| rs244923    | 36.783179 | 2.83E-08 |
| rs10818940  | 36.782114 | 2.83E-08 |
| rs9537826   | 36.779054 | 2.84E-08 |
| rs1790087   | 36.777155 | 2.84E-08 |
| rs115031819 | 36.775329 | 2.84E-08 |
| rs61955125  | 36.775295 | 2.84E-08 |
| rs1380476   | 36.774946 | 2.84E-08 |
| rs66995194  | 36.774512 | 2.84E-08 |
| rs72492333  | 36.774001 | 2.85E-08 |
| rs34957982  | 36.771227 | 2.85E-08 |
| rs4622152   | 36.770718 | 2.85E-08 |
| rs72773187  | 36.769859 | 2.85E-08 |
| rs262507    | 36.769837 | 2.85E-08 |
| rs17019400  | 36.769668 | 2.85E-08 |
| rs7766641   | 36.764561 | 2.86E-08 |
| rs11727583  | 36.764010 | 2.86E-08 |
| rs57669341  | 36.763566 | 2.86E-08 |
| rs1334290   | 36.763197 | 2.86E-08 |
| rs9273120   | 36.761203 | 2.86E-08 |
| rs7041526   | 36.761173 | 2.86E-08 |
| rs2122692   | 36.760439 | 2.87E-08 |
| rs61810480  | 36.759970 | 2.87E-08 |
| rs343478    | 36.759619 | 2.87E-08 |
| rs242948    | 36.759079 | 2.87E-08 |
| rs2976853   | 36.758705 | 2.87E-08 |
| rs1360805   | 36.758261 | 2.87E-08 |
| rs7894791   | 36.755844 | 2.87E-08 |
| rs11245970  | 36.755448 | 2.87E-08 |
| rs10508037  | 36.754845 | 2.87E-08 |
| rs28677108  | 36.751796 | 2.88E-08 |
| rs13249775  | 36.749196 | 2.88E-08 |
| rs6933124   | 36.745741 | 2.89E-08 |
| rs78006396  | 36.744963 | 2.89E-08 |
| rs11172066  | 36.742330 | 2.89E-08 |
| rs3098875   | 36.742095 | 2.89E-08 |
| rs2353397   | 36.741269 | 2.89E-08 |
| rs4470185   | 36.740821 | 2.90E-08 |
| rs75596189  | 36.740791 | 2.90E-08 |
| rs9527690   | 36.740357 | 2.90E-08 |
| rs10830208  | 36.738002 | 2.90E-08 |
| rs1727290   | 36.736052 | 2.90E-08 |

|             |           |          |
|-------------|-----------|----------|
| rs2614257   | 36.735689 | 2.90E-08 |
| rs11082013  | 36.735574 | 2.90E-08 |
| rs13213141  | 36.734711 | 2.90E-08 |
| rs9899995   | 36.733701 | 2.91E-08 |
| rs68173807  | 36.732152 | 2.91E-08 |
| rs8138917   | 36.731980 | 2.91E-08 |
| rs6872201   | 36.731767 | 2.91E-08 |
| rs1625138   | 36.731641 | 2.91E-08 |
| rs11245971  | 36.731372 | 2.91E-08 |
| rs10905556  | 36.730162 | 2.91E-08 |
| rs7503069   | 36.727488 | 2.92E-08 |
| rs7338185   | 36.724115 | 2.92E-08 |
| rs11724689  | 36.723751 | 2.92E-08 |
| rs2389022   | 36.722025 | 2.92E-08 |
| rs6955431   | 36.720432 | 2.93E-08 |
| rs2841666   | 36.718506 | 2.93E-08 |
| rs62375550  | 36.718333 | 2.93E-08 |
| rs1109559   | 36.716457 | 2.93E-08 |
| rs1616484   | 36.716091 | 2.93E-08 |
| rs2056544   | 36.714010 | 2.94E-08 |
| rs4370319   | 36.713345 | 2.94E-08 |
| rs9611457   | 36.712245 | 2.94E-08 |
| rs149409109 | 36.710432 | 2.94E-08 |
| rs17478694  | 36.709460 | 2.94E-08 |
| rs10040398  | 36.705359 | 2.95E-08 |
| rs2889906   | 36.703692 | 2.95E-08 |
| rs250308    | 36.703570 | 2.95E-08 |
| rs114173373 | 36.702889 | 2.95E-08 |
| rs9269693   | 36.702703 | 2.95E-08 |
| rs12940193  | 36.702591 | 2.95E-08 |
| rs13191445  | 36.701446 | 2.96E-08 |
| rs13386606  | 36.698662 | 2.96E-08 |
| rs199521    | 36.698251 | 2.96E-08 |
| rs10075211  | 36.698115 | 2.96E-08 |
| rs262492    | 36.697419 | 2.96E-08 |
| rs143746924 | 36.694956 | 2.97E-08 |
| rs1790095   | 36.694045 | 2.97E-08 |
| rs7985056   | 36.691345 | 2.97E-08 |
| rs2695482   | 36.690376 | 2.97E-08 |
| rs4976689   | 36.689827 | 2.97E-08 |
| rs34527992  | 36.688008 | 2.98E-08 |
| rs1727293   | 36.687523 | 2.98E-08 |
| rs11895277  | 36.686253 | 2.98E-08 |
| rs3761124   | 36.684671 | 2.98E-08 |
| rs10795716  | 36.684602 | 2.98E-08 |
| rs9527714   | 36.681570 | 2.99E-08 |

|             |           |          |
|-------------|-----------|----------|
| rs10096290  | 36.680498 | 2.99E-08 |
| rs1616181   | 36.679750 | 2.99E-08 |
| rs3812036   | 36.677038 | 2.99E-08 |
| rs28694586  | 36.677032 | 2.99E-08 |
| rs4397857   | 36.676409 | 3.00E-08 |
| rs12118987  | 36.674192 | 3.00E-08 |
| rs1616131   | 36.673432 | 3.00E-08 |
| rs9272975   | 36.671557 | 3.00E-08 |
| rs262533    | 36.670941 | 3.00E-08 |
| rs11652044  | 36.670275 | 3.01E-08 |
| rs12455348  | 36.668486 | 3.01E-08 |
| rs10905558  | 36.668324 | 3.01E-08 |
| rs13202291  | 36.665464 | 3.01E-08 |
| rs2221298   | 36.664526 | 3.01E-08 |
| rs9272414   | 36.661851 | 3.02E-08 |
| rs28819483  | 36.661718 | 3.02E-08 |
| rs2320925   | 36.661378 | 3.02E-08 |
| rs1985031   | 36.660240 | 3.02E-08 |
| rs79275904  | 36.659411 | 3.02E-08 |
| rs10207297  | 36.659135 | 3.02E-08 |
| rs7323873   | 36.658128 | 3.02E-08 |
| rs813915    | 36.657989 | 3.02E-08 |
| rs112174832 | 36.657887 | 3.02E-08 |
| rs707962    | 36.656800 | 3.03E-08 |
| rs114276434 | 36.655399 | 3.03E-08 |
| rs262538    | 36.652226 | 3.03E-08 |
| rs11241082  | 36.650998 | 3.04E-08 |
| rs7010652   | 36.649441 | 3.04E-08 |
| rs2900220   | 36.649192 | 3.04E-08 |
| rs449915    | 36.647719 | 3.04E-08 |
| rs2297433   | 36.645452 | 3.04E-08 |
| rs10830209  | 36.641080 | 3.05E-08 |
| rs73209228  | 36.641035 | 3.05E-08 |
| rs8138520   | 36.639095 | 3.06E-08 |
| rs4716084   | 36.638302 | 3.06E-08 |
| rs9517649   | 36.637864 | 3.06E-08 |
| rs1051434   | 36.637456 | 3.06E-08 |
| rs247002    | 36.636389 | 3.06E-08 |
| rs9586      | 36.634034 | 3.06E-08 |
| rs6881177   | 36.633290 | 3.06E-08 |
| rs4642189   | 36.632573 | 3.07E-08 |
| rs13055804  | 36.632329 | 3.07E-08 |
| rs190263387 | 36.629011 | 3.07E-08 |
| rs72845070  | 36.627116 | 3.07E-08 |
| rs1046411   | 36.626342 | 3.08E-08 |
| rs6811667   | 36.625635 | 3.08E-08 |

|            |           |          |
|------------|-----------|----------|
| rs3755284  | 36.625219 | 3.08E-08 |
| rs13224507 | 36.625040 | 3.08E-08 |
| rs9856435  | 36.624073 | 3.08E-08 |
| rs56369689 | 36.624030 | 3.08E-08 |
| rs2976860  | 36.623640 | 3.08E-08 |
| rs247011   | 36.622524 | 3.08E-08 |
| rs324013   | 36.616997 | 3.09E-08 |
| rs10215046 | 36.613282 | 3.10E-08 |
| rs885293   | 36.613203 | 3.10E-08 |
| rs13297140 | 36.612454 | 3.10E-08 |
| rs72651032 | 36.609288 | 3.10E-08 |
| rs72771412 | 36.608755 | 3.10E-08 |
| rs12186893 | 36.608661 | 3.10E-08 |
| rs4821980  | 36.607348 | 3.11E-08 |
| rs34409918 | 36.603271 | 3.11E-08 |
| rs1988004  | 36.599019 | 3.12E-08 |
| rs4923460  | 36.597228 | 3.12E-08 |
| rs9537821  | 36.596968 | 3.12E-08 |
| rs11890276 | 36.596240 | 3.12E-08 |
| rs10928228 | 36.594196 | 3.13E-08 |
| rs272850   | 36.590165 | 3.14E-08 |
| rs7692044  | 36.588486 | 3.14E-08 |
| rs67819360 | 36.587694 | 3.14E-08 |
| rs1045130  | 36.587372 | 3.14E-08 |
| rs17365306 | 36.587331 | 3.14E-08 |
| rs13412382 | 36.581200 | 3.15E-08 |
| rs4732724  | 36.578261 | 3.15E-08 |
| rs61239537 | 36.577760 | 3.16E-08 |
| rs10518017 | 36.577314 | 3.16E-08 |
| rs9344993  | 36.577313 | 3.16E-08 |
| rs7579799  | 36.575994 | 3.16E-08 |
| rs12583989 | 36.575473 | 3.16E-08 |
| rs2510885  | 36.575001 | 3.16E-08 |
| rs6010621  | 36.574844 | 3.16E-08 |
| rs9517684  | 36.574791 | 3.16E-08 |
| rs1989153  | 36.574231 | 3.16E-08 |
| rs2281926  | 36.573896 | 3.16E-08 |
| rs17036090 | 36.573839 | 3.16E-08 |
| rs9897542  | 36.571189 | 3.17E-08 |
| rs12344218 | 36.567915 | 3.17E-08 |
| rs6089953  | 36.561283 | 3.18E-08 |
| rs6895063  | 36.560765 | 3.18E-08 |
| rs2851441  | 36.559631 | 3.19E-08 |
| rs12583331 | 36.559403 | 3.19E-08 |
| rs199536   | 36.557674 | 3.19E-08 |
| rs2330552  | 36.557656 | 3.19E-08 |

|             |           |          |
|-------------|-----------|----------|
| rs4511954   | 36.556145 | 3.19E-08 |
| rs35019968  | 36.555689 | 3.19E-08 |
| rs7570930   | 36.555051 | 3.19E-08 |
| rs2631362   | 36.554433 | 3.19E-08 |
| rs11610710  | 36.550839 | 3.20E-08 |
| rs6002328   | 36.550589 | 3.20E-08 |
| rs13128377  | 36.545298 | 3.21E-08 |
| rs9848016   | 36.542965 | 3.21E-08 |
| rs12669602  | 36.541390 | 3.22E-08 |
| rs1481801   | 36.540297 | 3.22E-08 |
| rs4976647   | 36.540162 | 3.22E-08 |
| rs72669997  | 36.540086 | 3.22E-08 |
| rs73209227  | 36.536727 | 3.22E-08 |
| rs7305511   | 36.535465 | 3.23E-08 |
| rs4339155   | 36.534815 | 3.23E-08 |
| rs1727305   | 36.534545 | 3.23E-08 |
| rs4838296   | 36.534158 | 3.23E-08 |
| rs35548551  | 36.533859 | 3.23E-08 |
| rs148583745 | 36.532436 | 3.23E-08 |
| rs12430866  | 36.532418 | 3.23E-08 |
| rs199520    | 36.525354 | 3.24E-08 |
| rs11256131  | 36.525346 | 3.24E-08 |
| rs6473230   | 36.525082 | 3.24E-08 |
| rs35050608  | 36.523081 | 3.25E-08 |
| rs2921084   | 36.520937 | 3.25E-08 |
| rs6673543   | 36.520621 | 3.25E-08 |
| rs2188865   | 36.520049 | 3.25E-08 |
| rs9848000   | 36.517984 | 3.26E-08 |
| rs635619    | 36.516771 | 3.26E-08 |
| rs17659312  | 36.515546 | 3.26E-08 |
| rs10107041  | 36.511764 | 3.27E-08 |
| rs11843427  | 36.511440 | 3.27E-08 |
| rs58775257  | 36.509591 | 3.27E-08 |
| rs775718    | 36.508961 | 3.27E-08 |
| rs7040215   | 36.507501 | 3.27E-08 |
| rs12428841  | 36.502892 | 3.28E-08 |
| rs12214893  | 36.499181 | 3.29E-08 |
| rs731052    | 36.497910 | 3.29E-08 |
| rs113039499 | 36.497566 | 3.29E-08 |
| rs10204769  | 36.496788 | 3.29E-08 |
| rs7536526   | 36.495150 | 3.30E-08 |
| rs157577    | 36.494310 | 3.30E-08 |
| rs112477657 | 36.494174 | 3.30E-08 |
| rs13212318  | 36.493707 | 3.30E-08 |
| rs4749857   | 36.490536 | 3.30E-08 |
| rs62396185  | 36.488566 | 3.31E-08 |

|             |           |          |
|-------------|-----------|----------|
| rs1817762   | 36.488392 | 3.31E-08 |
| rs6697039   | 36.487802 | 3.31E-08 |
| rs1872436   | 36.484417 | 3.31E-08 |
| rs3778753   | 36.482146 | 3.32E-08 |
| rs1927730   | 36.481857 | 3.32E-08 |
| rs2200943   | 36.480263 | 3.32E-08 |
| rs13207082  | 36.479531 | 3.32E-08 |
| rs6441610   | 36.478107 | 3.33E-08 |
| rs598905    | 36.472311 | 3.34E-08 |
| rs138724045 | 36.471640 | 3.34E-08 |
| rs8071267   | 36.470960 | 3.34E-08 |
| rs62343639  | 36.469021 | 3.34E-08 |
| rs2299078   | 36.468722 | 3.34E-08 |
| rs9836630   | 36.468434 | 3.34E-08 |
| rs2202711   | 36.468101 | 3.34E-08 |
| rs10041517  | 36.465704 | 3.35E-08 |
| rs11135015  | 36.464728 | 3.35E-08 |
| rs262536    | 36.464574 | 3.35E-08 |
| rs56858603  | 36.464572 | 3.35E-08 |
| rs10905557  | 36.463886 | 3.35E-08 |
| rs10919572  | 36.461149 | 3.36E-08 |
| rs2892661   | 36.460711 | 3.36E-08 |
| rs34064842  | 36.460651 | 3.36E-08 |
| rs166635    | 36.458138 | 3.36E-08 |
| rs16966171  | 36.457396 | 3.36E-08 |
| rs1911617   | 36.455793 | 3.37E-08 |
| rs3778752   | 36.454479 | 3.37E-08 |
| rs273899    | 36.452802 | 3.37E-08 |
| rs635620    | 36.451577 | 3.37E-08 |
| rs73842248  | 36.451555 | 3.37E-08 |
| rs72731580  | 36.447340 | 3.38E-08 |
| rs2534666   | 36.444300 | 3.39E-08 |
| rs200977    | 36.440952 | 3.39E-08 |
| rs11658582  | 36.440684 | 3.39E-08 |
| rs56219480  | 36.439895 | 3.39E-08 |
| rs1737889   | 36.439842 | 3.39E-08 |
| rs2378351   | 36.439437 | 3.39E-08 |
| rs35506517  | 36.439004 | 3.40E-08 |
| rs2856448   | 36.438265 | 3.40E-08 |
| rs17019336  | 36.437364 | 3.40E-08 |
| rs3131526   | 36.435931 | 3.40E-08 |
| rs247003    | 36.435877 | 3.40E-08 |
| rs56005713  | 36.434878 | 3.40E-08 |
| rs34432857  | 36.434444 | 3.40E-08 |
| rs3025327   | 36.429564 | 3.41E-08 |
| rs36096333  | 36.427189 | 3.42E-08 |



|            |           |          |
|------------|-----------|----------|
| rs17659254 | 36.426728 | 3.42E-08 |
| rs10760400 | 36.426461 | 3.42E-08 |
| rs6954667  | 36.423753 | 3.42E-08 |
| rs4553407  | 36.423703 | 3.42E-08 |
| rs6477007  | 36.422516 | 3.42E-08 |
| rs906420   | 36.422363 | 3.43E-08 |
| rs36109883 | 36.420689 | 3.43E-08 |
| rs62064954 | 36.419860 | 3.43E-08 |
| rs9891938  | 36.414453 | 3.44E-08 |
| rs11241083 | 36.413958 | 3.44E-08 |
| rs73057032 | 36.413177 | 3.44E-08 |
| rs4889651  | 36.412421 | 3.44E-08 |
| rs6010998  | 36.411642 | 3.44E-08 |
| rs72799330 | 36.411537 | 3.44E-08 |
| rs11639326 | 36.411365 | 3.45E-08 |
| rs9933895  | 36.409350 | 3.45E-08 |
| rs164081   | 36.408933 | 3.45E-08 |
| rs10786739 | 36.408030 | 3.45E-08 |
| rs273901   | 36.406647 | 3.45E-08 |
| rs10777585 | 36.403122 | 3.46E-08 |
| rs12478556 | 36.401906 | 3.46E-08 |
| rs11172046 | 36.400865 | 3.46E-08 |
| rs9292907  | 36.399958 | 3.47E-08 |
| rs34107459 | 36.399303 | 3.47E-08 |
| rs272882   | 36.399288 | 3.47E-08 |
| rs11789020 | 36.398800 | 3.47E-08 |
| rs775725   | 36.398532 | 3.47E-08 |
| rs62334724 | 36.396942 | 3.47E-08 |
| rs6010620  | 36.392060 | 3.48E-08 |
| rs80296299 | 36.391475 | 3.48E-08 |
| rs12603380 | 36.387588 | 3.49E-08 |
| rs10066035 | 36.387249 | 3.49E-08 |
| rs4244531  | 36.383721 | 3.50E-08 |
| rs7567098  | 36.382787 | 3.50E-08 |
| rs34264449 | 36.380868 | 3.50E-08 |
| rs12496260 | 36.380605 | 3.50E-08 |
| rs12942352 | 36.380353 | 3.50E-08 |
| rs11779364 | 36.380020 | 3.50E-08 |
| rs6935146  | 36.380009 | 3.50E-08 |
| rs272851   | 36.376109 | 3.51E-08 |
| rs10418433 | 36.375913 | 3.51E-08 |
| rs67890928 | 36.375324 | 3.51E-08 |
| rs17152480 | 36.369182 | 3.52E-08 |
| rs6931635  | 36.369124 | 3.52E-08 |
| rs4836522  | 36.367995 | 3.52E-08 |
| rs10795715 | 36.367035 | 3.53E-08 |

|            |           |          |
|------------|-----------|----------|
| rs274572   | 36.365996 | 3.53E-08 |
| rs4838155  | 36.364607 | 3.53E-08 |
| rs67727847 | 36.363652 | 3.53E-08 |
| rs775741   | 36.363636 | 3.53E-08 |
| rs247006   | 36.362783 | 3.53E-08 |
| rs10888707 | 36.362687 | 3.53E-08 |
| rs2979230  | 36.362482 | 3.54E-08 |
| rs775721   | 36.358241 | 3.54E-08 |
| rs7719125  | 36.357242 | 3.54E-08 |
| rs1570654  | 36.356180 | 3.55E-08 |
| rs4623462  | 36.355160 | 3.55E-08 |
| rs156322   | 36.354987 | 3.55E-08 |
| rs2631359  | 36.354463 | 3.55E-08 |
| rs9469012  | 36.350770 | 3.56E-08 |
| rs4074908  | 36.350769 | 3.56E-08 |
| rs196124   | 36.349522 | 3.56E-08 |
| rs6563739  | 36.349085 | 3.56E-08 |
| rs9667825  | 36.348985 | 3.56E-08 |
| rs4421664  | 36.347908 | 3.56E-08 |
| rs4759262  | 36.347588 | 3.56E-08 |
| rs1716184  | 36.346489 | 3.57E-08 |
| rs10751642 | 36.345662 | 3.57E-08 |
| rs6734135  | 36.344771 | 3.57E-08 |
| rs28583881 | 36.343306 | 3.57E-08 |
| rs8102732  | 36.342906 | 3.57E-08 |
| rs7805218  | 36.340799 | 3.58E-08 |
| rs2855809  | 36.339180 | 3.58E-08 |
| rs775728   | 36.338690 | 3.58E-08 |
| rs10752163 | 36.338323 | 3.58E-08 |
| rs11730365 | 36.336983 | 3.58E-08 |
| rs6863240  | 36.336496 | 3.58E-08 |
| rs180058   | 36.334990 | 3.59E-08 |
| rs6884604  | 36.334305 | 3.59E-08 |
| rs9513588  | 36.333639 | 3.59E-08 |
| rs7752448  | 36.333438 | 3.59E-08 |
| rs4809219  | 36.332896 | 3.59E-08 |
| rs10460289 | 36.331725 | 3.59E-08 |
| rs7325354  | 36.328781 | 3.60E-08 |
| rs9902593  | 36.328250 | 3.60E-08 |
| rs13076504 | 36.327980 | 3.60E-08 |
| rs3819717  | 36.327646 | 3.60E-08 |
| rs6840871  | 36.327362 | 3.60E-08 |
| rs1618689  | 36.324202 | 3.61E-08 |
| rs1858330  | 36.323026 | 3.61E-08 |
| rs13256368 | 36.321774 | 3.61E-08 |
| rs775719   | 36.321632 | 3.61E-08 |

|            |           |          |
|------------|-----------|----------|
| rs272888   | 36.321532 | 3.61E-08 |
| rs270606   | 36.319885 | 3.62E-08 |
| rs72773196 | 36.319504 | 3.62E-08 |
| rs6696828  | 36.319008 | 3.62E-08 |
| rs77141869 | 36.318634 | 3.62E-08 |
| rs12427974 | 36.317701 | 3.62E-08 |
| rs17528178 | 36.314898 | 3.62E-08 |
| rs35120688 | 36.314245 | 3.63E-08 |
| rs12882464 | 36.314055 | 3.63E-08 |
| rs775723   | 36.312741 | 3.63E-08 |
| rs6809680  | 36.312339 | 3.63E-08 |
| rs1775575  | 36.312333 | 3.63E-08 |
| rs11023856 | 36.311066 | 3.63E-08 |
| rs2924257  | 36.310380 | 3.63E-08 |
| rs2093656  | 36.307224 | 3.64E-08 |
| rs2646436  | 36.307183 | 3.64E-08 |
| rs17488871 | 36.306537 | 3.64E-08 |
| rs4485233  | 36.306172 | 3.64E-08 |
| rs827626   | 36.305558 | 3.64E-08 |
| rs991035   | 36.305347 | 3.64E-08 |
| rs2855807  | 36.304985 | 3.64E-08 |
| rs6718198  | 36.304304 | 3.65E-08 |
| rs35624684 | 36.300412 | 3.65E-08 |
| rs6011018  | 36.299394 | 3.65E-08 |
| rs7654571  | 36.293258 | 3.67E-08 |
| rs1811197  | 36.293201 | 3.67E-08 |
| rs708563   | 36.292618 | 3.67E-08 |
| rs3848669  | 36.292142 | 3.67E-08 |
| rs62334726 | 36.291954 | 3.67E-08 |
| rs35246612 | 36.289283 | 3.67E-08 |
| rs2855810  | 36.286833 | 3.68E-08 |
| rs9517645  | 36.285808 | 3.68E-08 |
| rs1037776  | 36.284811 | 3.68E-08 |
| rs2141179  | 36.282190 | 3.69E-08 |
| rs1056429  | 36.281441 | 3.69E-08 |
| rs12952670 | 36.280231 | 3.69E-08 |
| rs2878304  | 36.280225 | 3.69E-08 |
| rs581968   | 36.277180 | 3.70E-08 |
| rs10052838 | 36.276150 | 3.70E-08 |
| rs28767239 | 36.275729 | 3.70E-08 |
| rs17019341 | 36.275273 | 3.70E-08 |
| rs9272351  | 36.274786 | 3.70E-08 |
| rs62176646 | 36.274242 | 3.70E-08 |
| rs13067609 | 36.274134 | 3.70E-08 |
| rs61161659 | 36.273100 | 3.71E-08 |
| rs71557312 | 36.270450 | 3.71E-08 |

|             |           |          |
|-------------|-----------|----------|
| rs272856    | 36.268916 | 3.71E-08 |
| rs582490    | 36.266905 | 3.72E-08 |
| rs56071345  | 36.266601 | 3.72E-08 |
| rs6441602   | 36.266339 | 3.72E-08 |
| rs13079741  | 36.266059 | 3.72E-08 |
| rs10192685  | 36.265889 | 3.72E-08 |
| rs6890396   | 36.265472 | 3.72E-08 |
| rs10174728  | 36.264390 | 3.72E-08 |
| rs4260703   | 36.264146 | 3.72E-08 |
| rs11172038  | 36.259883 | 3.73E-08 |
| rs72793529  | 36.259451 | 3.73E-08 |
| rs4515655   | 36.259063 | 3.73E-08 |
| rs17435926  | 36.257699 | 3.74E-08 |
| rs6062301   | 36.255985 | 3.74E-08 |
| rs199499    | 36.254147 | 3.74E-08 |
| rs12417297  | 36.253080 | 3.75E-08 |
| rs6421966   | 36.251621 | 3.75E-08 |
| rs3743057   | 36.248765 | 3.75E-08 |
| rs2525051   | 36.248647 | 3.75E-08 |
| rs706773    | 36.247250 | 3.76E-08 |
| rs4334152   | 36.246220 | 3.76E-08 |
| rs4360908   | 36.242550 | 3.77E-08 |
| rs7171347   | 36.241832 | 3.77E-08 |
| rs34849062  | 36.241589 | 3.77E-08 |
| rs34194357  | 36.239434 | 3.77E-08 |
| rs36116761  | 36.239434 | 3.77E-08 |
| rs827634    | 36.239047 | 3.77E-08 |
| rs8073259   | 36.238959 | 3.77E-08 |
| rs10206877  | 36.236601 | 3.78E-08 |
| rs2614264   | 36.236173 | 3.78E-08 |
| rs114832186 | 36.235860 | 3.78E-08 |
| rs2631371   | 36.234290 | 3.78E-08 |
| rs4485247   | 36.229731 | 3.79E-08 |
| rs844469    | 36.228883 | 3.79E-08 |
| rs272885    | 36.228273 | 3.79E-08 |
| rs4477472   | 36.228049 | 3.79E-08 |
| rs10232988  | 36.225682 | 3.80E-08 |
| rs34197618  | 36.224663 | 3.80E-08 |
| rs2857106   | 36.223981 | 3.80E-08 |
| rs61661087  | 36.222756 | 3.81E-08 |
| rs4237807   | 36.222171 | 3.81E-08 |
| rs34146550  | 36.219851 | 3.81E-08 |
| rs6867679   | 36.218643 | 3.81E-08 |
| rs12245918  | 36.217382 | 3.82E-08 |
| rs12485704  | 36.214503 | 3.82E-08 |
| rs2297438   | 36.213974 | 3.82E-08 |

|             |           |          |
|-------------|-----------|----------|
| rs247005    | 36.213575 | 3.82E-08 |
| rs2317751   | 36.212676 | 3.83E-08 |
| rs169256    | 36.208838 | 3.83E-08 |
| rs6563740   | 36.208381 | 3.83E-08 |
| rs8050107   | 36.208280 | 3.83E-08 |
| rs6504135   | 36.207597 | 3.84E-08 |
| rs7215889   | 36.204779 | 3.84E-08 |
| rs114600011 | 36.204022 | 3.84E-08 |
| rs62376847  | 36.204001 | 3.84E-08 |
| rs2135481   | 36.203887 | 3.84E-08 |
| rs11732987  | 36.203669 | 3.84E-08 |
| rs10168400  | 36.203089 | 3.85E-08 |
| rs147310575 | 36.202753 | 3.85E-08 |
| rs9272991   | 36.202525 | 3.85E-08 |
| rs13116963  | 36.202036 | 3.85E-08 |
| rs36023599  | 36.200523 | 3.85E-08 |
| rs272883    | 36.198311 | 3.85E-08 |
| rs35489312  | 36.197891 | 3.86E-08 |
| rs57300461  | 36.197439 | 3.86E-08 |
| rs60539540  | 36.191714 | 3.87E-08 |
| rs272870    | 36.190027 | 3.87E-08 |
| rs6860089   | 36.189525 | 3.87E-08 |
| rs2921081   | 36.188277 | 3.88E-08 |
| rs262529    | 36.187494 | 3.88E-08 |
| rs11613486  | 36.181931 | 3.89E-08 |
| rs272878    | 36.181809 | 3.89E-08 |
| rs1790088   | 36.178093 | 3.90E-08 |
| rs12634152  | 36.177806 | 3.90E-08 |
| rs479844    | 36.177583 | 3.90E-08 |
| rs1994017   | 36.175849 | 3.90E-08 |
| rs2071427   | 36.175391 | 3.90E-08 |
| rs12615570  | 36.174385 | 3.90E-08 |
| rs11661878  | 36.172868 | 3.91E-08 |
| rs1987667   | 36.171368 | 3.91E-08 |
| rs270603    | 36.168853 | 3.92E-08 |
| rs6010994   | 36.168548 | 3.92E-08 |
| rs114387109 | 36.165021 | 3.92E-08 |
| rs6737412   | 36.164024 | 3.93E-08 |
| rs1727316   | 36.163816 | 3.93E-08 |
| rs1119132   | 36.163444 | 3.93E-08 |
| rs422090    | 36.162853 | 3.93E-08 |
| rs274571    | 36.161917 | 3.93E-08 |
| rs1790129   | 36.161523 | 3.93E-08 |
| rs4809321   | 36.160558 | 3.93E-08 |
| rs9517652   | 36.160551 | 3.93E-08 |
| rs4415812   | 36.160357 | 3.93E-08 |

|             |           |          |
|-------------|-----------|----------|
| rs2389026   | 36.160027 | 3.93E-08 |
| rs6898586   | 36.159471 | 3.93E-08 |
| rs7599190   | 36.159024 | 3.94E-08 |
| rs272877    | 36.158688 | 3.94E-08 |
| rs41268899  | 36.157350 | 3.94E-08 |
| rs2544030   | 36.155205 | 3.94E-08 |
| rs2072441   | 36.154555 | 3.94E-08 |
| rs71609539  | 36.153579 | 3.95E-08 |
| rs12195401  | 36.152734 | 3.95E-08 |
| rs13236645  | 36.151252 | 3.95E-08 |
| rs6970420   | 36.149011 | 3.96E-08 |
| rs4580527   | 36.148138 | 3.96E-08 |
| rs274556    | 36.147707 | 3.96E-08 |
| rs10772996  | 36.147663 | 3.96E-08 |
| rs35200241  | 36.147420 | 3.96E-08 |
| rs156743    | 36.147003 | 3.96E-08 |
| rs6556313   | 36.146743 | 3.96E-08 |
| rs7005884   | 36.146033 | 3.96E-08 |
| rs12929754  | 36.145564 | 3.96E-08 |
| rs8135524   | 36.145044 | 3.96E-08 |
| rs10520084  | 36.137280 | 3.98E-08 |
| rs262530    | 36.136852 | 3.98E-08 |
| rs10051765  | 36.135053 | 3.99E-08 |
| rs183898    | 36.134792 | 3.99E-08 |
| rs145414283 | 36.134487 | 3.99E-08 |
| rs679995    | 36.134121 | 3.99E-08 |
| rs35828931  | 36.132979 | 3.99E-08 |
| rs1564499   | 36.132401 | 3.99E-08 |
| rs114723682 | 36.127760 | 4.00E-08 |
| rs111762561 | 36.127734 | 4.00E-08 |
| rs270601    | 36.126397 | 4.00E-08 |
| rs11256132  | 36.125235 | 4.01E-08 |
| rs272868    | 36.124818 | 4.01E-08 |
| rs10748839  | 36.123903 | 4.01E-08 |
| rs9548877   | 36.123526 | 4.01E-08 |
| rs6691061   | 36.121359 | 4.01E-08 |
| rs10402822  | 36.121351 | 4.01E-08 |
| rs1987668   | 36.118055 | 4.02E-08 |
| rs13427905  | 36.114916 | 4.03E-08 |
| rs12639777  | 36.113354 | 4.03E-08 |
| rs4886032   | 36.112960 | 4.03E-08 |
| rs13156542  | 36.112386 | 4.03E-08 |
| rs1408395   | 36.112296 | 4.03E-08 |
| rs79784290  | 36.111647 | 4.04E-08 |
| rs4889620   | 36.111128 | 4.04E-08 |
| rs11256133  | 36.107836 | 4.04E-08 |

|            |           |          |
|------------|-----------|----------|
| rs62324195 | 36.107551 | 4.04E-08 |
| rs10502675 | 36.106701 | 4.05E-08 |
| rs9548876  | 36.105584 | 4.05E-08 |
| rs35445111 | 36.105279 | 4.05E-08 |
| rs587343   | 36.103933 | 4.05E-08 |
| rs272887   | 36.101529 | 4.06E-08 |
| rs4787424  | 36.100023 | 4.06E-08 |
| rs775734   | 36.097066 | 4.07E-08 |
| rs6010986  | 36.097046 | 4.07E-08 |
| rs9537777  | 36.096722 | 4.07E-08 |
| rs7875710  | 36.096517 | 4.07E-08 |
| rs13238352 | 36.096412 | 4.07E-08 |
| rs12903654 | 36.096074 | 4.07E-08 |
| rs35319653 | 36.095826 | 4.07E-08 |
| rs7330016  | 36.092914 | 4.08E-08 |
| rs272855   | 36.091660 | 4.08E-08 |
| rs1727307  | 36.091411 | 4.08E-08 |
| rs272892   | 36.087970 | 4.09E-08 |
| rs11012    | 36.087937 | 4.09E-08 |
| rs6860087  | 36.086931 | 4.09E-08 |
| rs12425850 | 36.086899 | 4.09E-08 |
| rs4889653  | 36.085111 | 4.09E-08 |
| rs4941940  | 36.083877 | 4.09E-08 |
| rs13268251 | 36.081076 | 4.10E-08 |
| rs7572871  | 36.081012 | 4.10E-08 |
| rs11736238 | 36.080425 | 4.10E-08 |
| rs13202688 | 36.077686 | 4.11E-08 |
| rs6563737  | 36.075960 | 4.11E-08 |
| rs1402274  | 36.075289 | 4.11E-08 |
| rs4923461  | 36.073615 | 4.12E-08 |
| rs6671962  | 36.071973 | 4.12E-08 |
| rs4340757  | 36.070961 | 4.12E-08 |
| rs10458606 | 36.070805 | 4.12E-08 |
| rs4691     | 36.067528 | 4.13E-08 |
| rs7423358  | 36.065766 | 4.13E-08 |
| rs10039731 | 36.064072 | 4.14E-08 |
| rs4598779  | 36.063501 | 4.14E-08 |
| rs7522611  | 36.063106 | 4.14E-08 |
| rs17019408 | 36.062430 | 4.14E-08 |
| rs9730     | 36.062273 | 4.14E-08 |
| rs9532417  | 36.062038 | 4.14E-08 |
| rs515876   | 36.061967 | 4.14E-08 |
| rs10888709 | 36.061674 | 4.14E-08 |
| rs272853   | 36.061514 | 4.14E-08 |
| rs7586012  | 36.060027 | 4.15E-08 |
| rs1727296  | 36.055377 | 4.16E-08 |

|             |           |          |
|-------------|-----------|----------|
| rs34182525  | 36.054932 | 4.16E-08 |
| rs1363797   | 36.054868 | 4.16E-08 |
| rs2378442   | 36.054204 | 4.16E-08 |
| rs274570    | 36.053297 | 4.16E-08 |
| rs755500    | 36.052297 | 4.16E-08 |
| rs274564    | 36.049997 | 4.17E-08 |
| rs35051342  | 36.049724 | 4.17E-08 |
| rs10819064  | 36.049531 | 4.17E-08 |
| rs2004640   | 36.046831 | 4.18E-08 |
| rs8076546   | 36.045775 | 4.18E-08 |
| rs2945914   | 36.043362 | 4.18E-08 |
| rs17331332  | 36.043325 | 4.18E-08 |
| rs62065378  | 36.042297 | 4.19E-08 |
| rs35141759  | 36.039349 | 4.19E-08 |
| rs13320918  | 36.038477 | 4.19E-08 |
| rs10852521  | 36.035861 | 4.20E-08 |
| rs7793125   | 36.035317 | 4.20E-08 |
| rs116044057 | 36.034235 | 4.20E-08 |
| rs801420    | 36.030178 | 4.21E-08 |
| rs272859    | 36.029106 | 4.21E-08 |
| rs7715901   | 36.028427 | 4.22E-08 |
| rs1996401   | 36.028139 | 4.22E-08 |
| rs4943688   | 36.028050 | 4.22E-08 |
| rs7664805   | 36.027399 | 4.22E-08 |
| rs6822064   | 36.026869 | 4.22E-08 |
| rs3793964   | 36.025992 | 4.22E-08 |
| rs272891    | 36.023304 | 4.23E-08 |
| rs4255949   | 36.023056 | 4.23E-08 |
| rs4342151   | 36.022778 | 4.23E-08 |
| rs10732197  | 36.022466 | 4.23E-08 |
| rs56083427  | 36.021271 | 4.23E-08 |
| rs769672    | 36.021096 | 4.23E-08 |
| rs180089    | 36.020536 | 4.23E-08 |
| rs1438263   | 36.019695 | 4.24E-08 |
| rs199500    | 36.019570 | 4.24E-08 |
| rs4400566   | 36.019368 | 4.24E-08 |
| rs2317749   | 36.017601 | 4.24E-08 |
| rs10905560  | 36.015490 | 4.25E-08 |
| rs4493485   | 36.015431 | 4.25E-08 |
| rs2146677   | 36.013251 | 4.25E-08 |
| rs2317699   | 36.011111 | 4.25E-08 |
| rs4569133   | 36.010952 | 4.26E-08 |
| rs7171045   | 36.010791 | 4.26E-08 |
| rs61774728  | 36.006744 | 4.26E-08 |
| rs1265089   | 36.006616 | 4.26E-08 |
| rs34198632  | 36.006429 | 4.27E-08 |



|             |           |          |
|-------------|-----------|----------|
| rs10040556  | 36.006171 | 4.27E-08 |
| rs2381712   | 36.004634 | 4.27E-08 |
| rs4996786   | 36.003430 | 4.27E-08 |
| rs1727295   | 36.003167 | 4.27E-08 |
| rs7636493   | 36.001864 | 4.28E-08 |
| rs13199906  | 36.000566 | 4.28E-08 |
| rs17763089  | 35.997734 | 4.28E-08 |
| rs62242112  | 35.996145 | 4.29E-08 |
| rs4277227   | 35.995612 | 4.29E-08 |
| rs775736    | 35.993461 | 4.29E-08 |
| rs1800440   | 35.993194 | 4.30E-08 |
| rs74816836  | 35.992568 | 4.30E-08 |
| rs12221507  | 35.992521 | 4.30E-08 |
| rs9537842   | 35.992188 | 4.30E-08 |
| rs11085182  | 35.992029 | 4.30E-08 |
| rs9563527   | 35.991914 | 4.30E-08 |
| rs9344994   | 35.991409 | 4.30E-08 |
| rs12057358  | 35.990850 | 4.30E-08 |
| rs28768122  | 35.988960 | 4.30E-08 |
| rs997878    | 35.985421 | 4.31E-08 |
| rs1966      | 35.982889 | 4.32E-08 |
| rs2757642   | 35.982627 | 4.32E-08 |
| rs142594301 | 35.979390 | 4.33E-08 |
| rs997879    | 35.979058 | 4.33E-08 |
| rs34888489  | 35.978692 | 4.33E-08 |
| rs775735    | 35.977531 | 4.33E-08 |
| rs273912    | 35.976400 | 4.33E-08 |
| rs10888708  | 35.972324 | 4.34E-08 |
| rs7210932   | 35.971943 | 4.34E-08 |
| rs61467551  | 35.970273 | 4.35E-08 |
| rs61903387  | 35.970047 | 4.35E-08 |
| rs55791720  | 35.969347 | 4.35E-08 |
| rs9537843   | 35.967946 | 4.35E-08 |
| rs1855679   | 35.967565 | 4.35E-08 |
| rs13194781  | 35.967151 | 4.35E-08 |
| rs75810954  | 35.966300 | 4.36E-08 |
| rs115238300 | 35.963310 | 4.36E-08 |
| rs17480587  | 35.961752 | 4.37E-08 |
| rs17695758  | 35.961496 | 4.37E-08 |
| rs62376851  | 35.960188 | 4.37E-08 |
| rs7651892   | 35.959622 | 4.37E-08 |
| rs7295197   | 35.959559 | 4.37E-08 |
| rs1716176   | 35.956999 | 4.38E-08 |
| rs272854    | 35.956593 | 4.38E-08 |
| rs7991151   | 35.956412 | 4.38E-08 |
| rs4996787   | 35.956195 | 4.38E-08 |

|             |           |          |
|-------------|-----------|----------|
| rs2763981   | 35.956041 | 4.38E-08 |
| rs79879183  | 35.954708 | 4.38E-08 |
| rs191090046 | 35.952078 | 4.39E-08 |
| rs7844965   | 35.951104 | 4.39E-08 |
| rs10204352  | 35.950824 | 4.39E-08 |
| rs12988024  | 35.950009 | 4.39E-08 |
| rs55790407  | 35.949285 | 4.40E-08 |
| rs769674    | 35.948939 | 4.40E-08 |
| rs115487693 | 35.948477 | 4.40E-08 |
| rs2893843   | 35.947300 | 4.40E-08 |
| rs13355772  | 35.947208 | 4.40E-08 |
| rs4555333   | 35.946992 | 4.40E-08 |
| rs1570653   | 35.946274 | 4.40E-08 |
| rs4142428   | 35.946059 | 4.40E-08 |
| rs17180471  | 35.944288 | 4.41E-08 |
| rs3131522   | 35.943811 | 4.41E-08 |
| rs775737    | 35.943609 | 4.41E-08 |
| rs200481    | 35.941738 | 4.41E-08 |
| rs9548872   | 35.939810 | 4.42E-08 |
| rs2209288   | 35.939731 | 4.42E-08 |
| rs12430965  | 35.938474 | 4.42E-08 |
| rs7286603   | 35.935503 | 4.43E-08 |
| rs7865802   | 35.934321 | 4.43E-08 |
| rs9527706   | 35.932385 | 4.44E-08 |
| rs10732361  | 35.931192 | 4.44E-08 |
| rs10905561  | 35.927855 | 4.45E-08 |
| rs883263    | 35.927729 | 4.45E-08 |
| rs6011016   | 35.926999 | 4.45E-08 |
| rs1551565   | 35.925609 | 4.45E-08 |
| rs4637094   | 35.924979 | 4.45E-08 |
| rs4566029   | 35.924169 | 4.45E-08 |
| rs12295166  | 35.923641 | 4.46E-08 |
| rs6563738   | 35.923575 | 4.46E-08 |
| rs9866135   | 35.921875 | 4.46E-08 |
| rs10765186  | 35.921580 | 4.46E-08 |
| rs13076312  | 35.921376 | 4.46E-08 |
| rs4943689   | 35.920508 | 4.46E-08 |
| rs12947600  | 35.920228 | 4.46E-08 |
| rs12199781  | 35.919744 | 4.46E-08 |
| rs661881    | 35.914627 | 4.48E-08 |
| rs12084257  | 35.914485 | 4.48E-08 |
| rs4514547   | 35.912411 | 4.48E-08 |
| rs4683899   | 35.909484 | 4.49E-08 |
| rs4074995   | 35.909349 | 4.49E-08 |
| rs9843186   | 35.907831 | 4.49E-08 |
| rs78720707  | 35.906913 | 4.50E-08 |

|            |           |          |
|------------|-----------|----------|
| rs17019365 | 35.904208 | 4.50E-08 |
| rs4547335  | 35.902686 | 4.51E-08 |
| rs199503   | 35.902194 | 4.51E-08 |
| rs11886134 | 35.900006 | 4.51E-08 |
| rs10905559 | 35.898262 | 4.52E-08 |
| rs6495338  | 35.895516 | 4.52E-08 |
| rs72669992 | 35.895301 | 4.52E-08 |
| rs3846091  | 35.895100 | 4.52E-08 |
| rs34490194 | 35.894453 | 4.52E-08 |
| rs4275735  | 35.892323 | 4.53E-08 |
| rs28386786 | 35.891710 | 4.53E-08 |
| rs3742131  | 35.891522 | 4.53E-08 |
| rs7572853  | 35.891357 | 4.53E-08 |
| rs4747824  | 35.887553 | 4.54E-08 |
| rs6972297  | 35.887196 | 4.54E-08 |
| rs12946900 | 35.886768 | 4.54E-08 |
| rs769675   | 35.885959 | 4.55E-08 |
| rs13390333 | 35.884990 | 4.55E-08 |
| rs9527720  | 35.884916 | 4.55E-08 |
| rs3116861  | 35.882843 | 4.55E-08 |
| rs7733088  | 35.882489 | 4.55E-08 |
| rs9548871  | 35.881772 | 4.56E-08 |
| rs17631303 | 35.881530 | 4.56E-08 |
| rs152125   | 35.880064 | 4.56E-08 |
| rs62064654 | 35.873027 | 4.58E-08 |
| rs1498446  | 35.872006 | 4.58E-08 |
| rs10099619 | 35.870956 | 4.58E-08 |
| rs17483319 | 35.869852 | 4.58E-08 |
| rs4432137  | 35.869614 | 4.58E-08 |
| rs9537846  | 35.869308 | 4.59E-08 |
| rs4727445  | 35.868648 | 4.59E-08 |
| rs7539777  | 35.866686 | 4.59E-08 |
| rs72673821 | 35.864976 | 4.60E-08 |
| rs2389025  | 35.864748 | 4.60E-08 |
| rs17617053 | 35.864678 | 4.60E-08 |
| rs4996785  | 35.863300 | 4.60E-08 |
| rs9368531  | 35.863267 | 4.60E-08 |
| rs3828802  | 35.862664 | 4.60E-08 |
| rs12345366 | 35.861979 | 4.60E-08 |
| rs17007417 | 35.860793 | 4.61E-08 |
| rs7864529  | 35.860444 | 4.61E-08 |
| rs62242111 | 35.859624 | 4.61E-08 |
| rs17019368 | 35.857981 | 4.61E-08 |
| rs10221223 | 35.856455 | 4.62E-08 |
| rs174485   | 35.853493 | 4.62E-08 |
| rs1611973  | 35.853182 | 4.62E-08 |

|             |           |          |
|-------------|-----------|----------|
| rs199502    | 35.851788 | 4.63E-08 |
| rs813979    | 35.851141 | 4.63E-08 |
| rs200493    | 35.848269 | 4.64E-08 |
| rs76277587  | 35.846675 | 4.64E-08 |
| rs6771561   | 35.845276 | 4.64E-08 |
| rs34465449  | 35.844666 | 4.65E-08 |
| rs1790098   | 35.843156 | 4.65E-08 |
| rs6866381   | 35.841672 | 4.65E-08 |
| rs273911    | 35.841128 | 4.65E-08 |
| rs116383515 | 35.841116 | 4.65E-08 |
| rs200483    | 35.838596 | 4.66E-08 |
| rs6679677   | 35.836937 | 4.66E-08 |
| rs10936642  | 35.836583 | 4.66E-08 |
| rs9358927   | 35.834680 | 4.67E-08 |
| rs972701    | 35.833136 | 4.67E-08 |
| rs11733975  | 35.831567 | 4.68E-08 |
| rs4636783   | 35.827944 | 4.69E-08 |
| rs9834159   | 35.827378 | 4.69E-08 |
| rs7733287   | 35.823343 | 4.70E-08 |
| rs1775574   | 35.823152 | 4.70E-08 |
| rs2747054   | 35.821488 | 4.70E-08 |
| rs9357005   | 35.820895 | 4.70E-08 |
| rs8063565   | 35.819575 | 4.71E-08 |
| rs73410764  | 35.818425 | 4.71E-08 |
| rs11665567  | 35.815975 | 4.72E-08 |
| rs72731556  | 35.814585 | 4.72E-08 |
| rs62556405  | 35.814424 | 4.72E-08 |
| rs3971703   | 35.814268 | 4.72E-08 |
| rs7718121   | 35.812164 | 4.73E-08 |
| rs174448    | 35.812120 | 4.73E-08 |
| rs41266779  | 35.811117 | 4.73E-08 |
| rs4833100   | 35.808490 | 4.73E-08 |
| rs390764    | 35.807880 | 4.74E-08 |
| rs401754    | 35.807880 | 4.74E-08 |
| rs168681    | 35.803128 | 4.75E-08 |
| rs4739733   | 35.797900 | 4.76E-08 |
| rs10905534  | 35.796411 | 4.76E-08 |
| rs4266245   | 35.796252 | 4.77E-08 |
| rs4435043   | 35.795345 | 4.77E-08 |
| rs1663691   | 35.794485 | 4.77E-08 |
| rs10037063  | 35.793908 | 4.77E-08 |
| rs7330515   | 35.793804 | 4.77E-08 |
| rs2651206   | 35.792664 | 4.77E-08 |
| rs7678445   | 35.792379 | 4.77E-08 |
| rs4615796   | 35.791742 | 4.78E-08 |
| rs987246    | 35.791224 | 4.78E-08 |

|            |           |          |
|------------|-----------|----------|
| rs17267744 | 35.789302 | 4.78E-08 |
| rs4492929  | 35.788814 | 4.78E-08 |
| rs60268710 | 35.788546 | 4.78E-08 |
| rs6790260  | 35.787900 | 4.79E-08 |
| rs7253302  | 35.787521 | 4.79E-08 |
| rs173365   | 35.787004 | 4.79E-08 |
| rs2141180  | 35.785503 | 4.79E-08 |
| rs72771436 | 35.785297 | 4.79E-08 |
| rs12596049 | 35.784462 | 4.79E-08 |
| rs13104615 | 35.783950 | 4.80E-08 |
| rs72771433 | 35.781377 | 4.80E-08 |
| rs56293203 | 35.778121 | 4.81E-08 |
| rs10478931 | 35.778045 | 4.81E-08 |
| rs7311658  | 35.777130 | 4.81E-08 |
| rs11735249 | 35.776390 | 4.82E-08 |
| rs17019390 | 35.775930 | 4.82E-08 |
| rs3813201  | 35.772413 | 4.83E-08 |
| rs9912001  | 35.770521 | 4.83E-08 |
| rs13136239 | 35.770203 | 4.83E-08 |
| rs34032470 | 35.767044 | 4.84E-08 |
| rs3808868  | 35.767005 | 4.84E-08 |
| rs9513598  | 35.766337 | 4.84E-08 |
| rs6930616  | 35.765698 | 4.84E-08 |
| rs6537280  | 35.763119 | 4.85E-08 |
| rs1040174  | 35.761585 | 4.85E-08 |
| rs62022700 | 35.761153 | 4.85E-08 |
| rs9517692  | 35.760586 | 4.86E-08 |
| rs2149140  | 35.760474 | 4.86E-08 |
| rs13240836 | 35.759258 | 4.86E-08 |
| rs460271   | 35.757981 | 4.86E-08 |
| rs9900496  | 35.757955 | 4.86E-08 |
| rs10058741 | 35.755792 | 4.87E-08 |
| rs2419065  | 35.754200 | 4.87E-08 |
| rs9922047  | 35.752784 | 4.88E-08 |
| rs62397245 | 35.749241 | 4.88E-08 |
| rs769657   | 35.748377 | 4.89E-08 |
| rs1029749  | 35.747264 | 4.89E-08 |
| rs3890382  | 35.746635 | 4.89E-08 |
| rs12442635 | 35.746485 | 4.89E-08 |
| rs180087   | 35.746088 | 4.89E-08 |
| rs9548873  | 35.745744 | 4.89E-08 |
| rs1073833  | 35.744176 | 4.90E-08 |
| rs3995090  | 35.743205 | 4.90E-08 |
| rs10450536 | 35.741766 | 4.90E-08 |
| rs9272369  | 35.741128 | 4.91E-08 |
| rs10777584 | 35.740587 | 4.91E-08 |

|                                                                  |           |          |
|------------------------------------------------------------------|-----------|----------|
| rs2120793                                                        | 35.739749 | 4.91E-08 |
| rs2003968                                                        | 35.738295 | 4.91E-08 |
| rs2677442                                                        | 35.737115 | 4.92E-08 |
| rs749316                                                         | 35.736982 | 4.92E-08 |
| rs2732098                                                        | 35.734671 | 4.92E-08 |
| rs34743674                                                       | 35.734198 | 4.92E-08 |
| rs7378179                                                        | 35.733568 | 4.93E-08 |
| rs72712556                                                       | 35.732733 | 4.93E-08 |
| rs7219909                                                        | 35.731743 | 4.93E-08 |
| rs898230                                                         | 35.731236 | 4.93E-08 |
| rs4385002                                                        | 35.730790 | 4.93E-08 |
| rs2146678                                                        | 35.729272 | 4.94E-08 |
| rs78242887                                                       | 35.727223 | 4.94E-08 |
| rs2100651                                                        | 35.725456 | 4.95E-08 |
| rs4683918                                                        | 35.724346 | 4.95E-08 |
| rs12525187                                                       | 35.721727 | 4.96E-08 |
| rs73030290                                                       | 35.720637 | 4.96E-08 |
| rs2667735                                                        | 35.718519 | 4.96E-08 |
| rs272880                                                         | 35.718006 | 4.97E-08 |
| rs12569177                                                       | 35.717900 | 4.97E-08 |
| rs1056441                                                        | 35.715701 | 4.97E-08 |
| rs114683528                                                      | 35.714373 | 4.98E-08 |
| rs4761466                                                        | 35.713616 | 4.98E-08 |
| rs12505942                                                       | 35.710744 | 4.98E-08 |
| rs273917                                                         | 35.710523 | 4.99E-08 |
| rs1463877                                                        | 35.709621 | 4.99E-08 |
| rs2921078                                                        | 35.709229 | 4.99E-08 |
| rs7581051                                                        | 35.706852 | 5.00E-08 |
|                                                                  |           |          |
| Test.shet represents the test statistic for CPASSOC (shet model) |           |          |
