# Supplementary material for: Shared genetic aetiology of respiratory diseases: a genome-wide multitraits association analysis
Source: PubMed Central journal article supplement — BMJ Open Respir Res. 2024 Jun 4;11(1):e002148. doi: 10.1136/bmjresp-2023-002148 (PMC11163672; doi:10.1136/bmjresp-2023-002148), 2024-06-04
Supplement: bmjresp-2023-002148supp010.pdf [file bmjresp-2023-002148supp010.pdf]

eTable 9. Pleiotropic genomic loci Identified by FUMA using CPASSOC results

| Locus No. | Index SNP  | CHR | POS      | P value  | START    | STOP     | nSNPs | nGWASSNPs | nIndSigSNPs | IndSigSNPs                                                                                                                                                                                                                                                                                                          | nLeadSNPs | LeadSNPs                                                                                                                       | nearestGene   | Functional     | CADD   | RDB |
|-----------|------------|-----|----------|----------|----------|----------|-------|-----------|-------------|---------------------------------------------------------------------------------------------------------------------------------------------------------------------------------------------------------------------------------------------------------------------------------------------------------------------|-----------|--------------------------------------------------------------------------------------------------------------------------------|---------------|----------------|--------|-----|
| 1         | rs3813201  | 1   | 1151232  | 4.83E-08 | 1123434  | 1186502  | 17    | 1         | 1           | rs3813201                                                                                                                                                                                                                                                                                                           | 1         | rs3813201                                                                                                                      | SDF4          | intergenic     | 1.444  | NA  |
| 2         | rs616488   | 1   | 10566215 | 7.01E-09 | 10525914 | 10637709 | 63    | 1         | 1           | rs616488                                                                                                                                                                                                                                                                                                            | 1         | rs616488                                                                                                                       | PEX14         | intronic       | 1.685  | NA  |
| 3         | rs1293202  | 1   | 25263997 | 2.19E-10 | 25197685 | 25263997 | 76    | 51        | 4           | rs1293202;rs10903112;rs6697340;rs4649037                                                                                                                                                                                                                                                                            | 1         | rs1293202                                                                                                                      | RUNX3         | intronic       | 0.943  | NA  |
| 4         | rs1416685  | 1   | 51243374 | 8.62E-09 | 50839740 | 51480258 | 147   | 20        | 1           | rs1416685                                                                                                                                                                                                                                                                                                           | 1         | rs1416685                                                                                                                      | FAF1          | intronic       | 0.367  | 6   |
| 5         | rs71658797 | 1   | 77967507 | 6.13E-10 | 77967507 | 78450517 | 3     | 2         | 1           | rs71658797                                                                                                                                                                                                                                                                                                          | 1         | rs71658797                                                                                                                     | AK5           | intronic       | 10.960 | 5   |
| 6         | rs12084568 | 1   | 80800862 | 5.59E-09 | 80784642 | 80871734 | 251   | 76        | 1           | rs12084568                                                                                                                                                                                                                                                                                                          | 1         | rs12084568                                                                                                                     | AL606519.1    | intergenic     | 4.463  | 7   |
| 7         | rs12119849 | 1   | 96878072 | 8.53E-10 | 96621739 | 97028456 | 16    | 11        | 1           | rs12119849                                                                                                                                                                                                                                                                                                          | 1         | rs12119849                                                                                                                     | UBE2WP1       | intergenic     | 2.252  | 6   |
| 8         | rs6679677  | 1   | 1.14E+08 | 4.66E-08 | 1.14E+08 | 1.14E+08 | 2     | 1         | 1           | rs6679677                                                                                                                                                                                                                                                                                                           | 1         | rs6679677                                                                                                                      | RSBN1         | downstream     | 1.651  | 5   |
| 9         | rs12123821 | 1   | 1.52E+08 | 9.90E-15 | 1.52E+08 | 1.53E+08 | 11    | 10        | 2           | rs12123821;rs72702813                                                                                                                                                                                                                                                                                               | 1         | rs12123821                                                                                                                     | FLG-ASI;RP11- | ncRNA_intronic | 1.720  | 5   |
| 10        | rs1723016  | 1   | 1.67E+08 | 6.73E-15 | 1.67E+08 | 1.67E+08 | 40    | 36        | 4           | rs1723016;rs61810480;rs1723022;rs1080031                                                                                                                                                                                                                                                                            | 1         | rs1723016                                                                                                                      | CD247         | intronic       | 1.325  | 4   |
| 11        | rs7555082  | 1   | 1.99E+08 | 1.53E-14 | 1.99E+08 | 1.99E+08 | 78    | 24        | 3           | rs7555082;rs140015735;rs12563029                                                                                                                                                                                                                                                                                    | 1         | rs7555082                                                                                                                      | PTPRC         | intergenic     | 2.585  | 7   |
| 12        | rs10920569 | 1   | 2.03E+08 | 2.51E-13 | 2.03E+08 | 2.03E+08 | 52    | 43        | 1           | rs10920569                                                                                                                                                                                                                                                                                                          | 1         | rs10920569                                                                                                                     | ADORA1        | intronic       | 7.467  | 5   |
| 13        | rs10210006 | 2   | 8466486  | 1.31E-14 | 8438693  | 8496062  | 53    | 43        | 4           | rs10210006;rs750111;rs346835;rs3111414                                                                                                                                                                                                                                                                              | 1         | rs10210006                                                                                                                     | LINC00299     | ncRNA_intronic | 2.754  | 5   |
| 14        | rs751310   | 2   | 15889419 | 6.88E-10 | 15889419 | 15890920 | 2     | 2         | 1           | rs751310                                                                                                                                                                                                                                                                                                            | 1         | rs751310                                                                                                                       | AC008271.1    | intergenic     | 0.404  | NA  |
| 15        | rs6545977  | 2   | 63301164 | 6.80E-11 | 62903461 | 63913711 | 610   | 363       | 5           | rs6545977;rs149044563;rs12713491;rs6736411;rs4671448                                                                                                                                                                                                                                                                | 1         | rs6545977                                                                                                                      | RP11-511111.2 | intergenic     | 3.630  | 7   |
| 16        | rs11679762 | 2   | 72038219 | 4.02E-09 | 72035671 | 72093666 | 42    | 29        | 1           | rs11679762                                                                                                                                                                                                                                                                                                          | 1         | rs11679762                                                                                                                     | DYSF          | intergenic     | 0.057  | 6   |
| 17        | rs11691721 | 2   | 1.03E+08 | 5.59E-23 | 1.02E+08 | 1.03E+08 | 473   | 332       | 29          | rs7601576;rs74538397;rs12468203;rs11883987;rs3917265;rs3771200;rs17026782;rs3821205;rs17818291;rs4851541;rs951192;rs2302620;rs2287047;rs13020778;rs2302612;rs144641193;rs11691721;rs72627435;rs11465732;rs11465563;rs4851601;rs72825929;rs11692304;rs72825956;rs12994345;rs9308859;rs114301196;rs74263644;rs7588111 | 10        | rs7601576;rs11883987;rs951192;rs2302612;rs11691721;rs11465732;rs4851601;rs72825956;rs12994345;rs9308859;rs114301196;rs74263644 | AC007248.6    | intergenic     | 1.832  | 7   |
| 18        | rs72837826 | 2   | 1.12E+08 | 6.42E-25 | 1.12E+08 | 1.12E+08 | 58    | 40        | 3           | rs72837826;rs11123421;rs68155163                                                                                                                                                                                                                                                                                    | 1         | rs72837826                                                                                                                     | BCL2L11       | intergenic     | 1.585  | 6   |
| 19        | rs7596680  | 2   | 1.46E+08 | 2.26E-18 | 1.45E+08 | 1.46E+08 | 295   | 129       | 6           | rs28372104;rs1406225;rs6756883;rs10928228;rs7596680;rs16824949                                                                                                                                                                                                                                                      | 2         | rs28372104;rs7596680                                                                                                           | RPL6P5        | intergenic     | 0.305  | 7   |
| 20        | rs61597598 | 2   | 1.57E+08 | 9.20E-14 | 1.57E+08 | 1.57E+08 | 130   | 22        | 2           | rs61597598;rs17251686                                                                                                                                                                                                                                                                                               | 2         | rs61597598;rs17251686                                                                                                          | AC073551.1    | intergenic     | 0.002  | 6   |
| 21        | rs2135481  | 2   | 2.29E+08 | 3.84E-08 | 2.29E+08 | 2.29E+08 | 24    | 2         | 1           | rs2135481                                                                                                                                                                                                                                                                                                           | 1         | rs2135481                                                                                                                      | CCL20         | intergenic     | 2.271  | 6   |
| 22        | rs60946542 | 2   | 2.43E+08 | 7.90E-13 | 2.43E+08 | 2.43E+08 | 33    | 7         | 4           | rs60946542;rs62193068;rs35320439;rs73014070                                                                                                                                                                                                                                                                         | 3         | rs60946542;rs35320439;rs73014070                                                                                               | D2HGDH        | intronic       | 0.009  | 7   |
| 23        | rs62242109 | 3   | 20636866 | 3.35E-10 | 20578543 | 20750951 | 88    | 22        | 3           | rs62242109;rs62234991;rs62242105                                                                                                                                                                                                                                                                                    | 1         | rs62242109                                                                                                                     | RNU6-815P     | intergenic     | 5.358  | 6   |
| 24        | rs9828592  | 3   | 33044339 | 2.68E-19 | 33015289 | 33084861 | 56    | 23        | 5           | rs9828592;rs6805766;rs4491851;rs6764245;rs9824218                                                                                                                                                                                                                                                                   | 1         | rs9828592                                                                                                                      | GLB1          | intronic       | 2.840  | 5   |
| 25        | rs1996664  | 3   | 49878395 | 1.31E-09 | 49109919 | 49890967 | 280   | 77        | 2           | rs1996664;rs7617480                                                                                                                                                                                                                                                                                                 | 1         | rs1996664                                                                                                                      | TRAIP         | intronic       | 3.870  | 1f  |
| 26        | rs9878602  | 3   | 71535338 | 3.37E-09 | 71498561 | 71611630 | 83    | 7         | 1           | rs9878602                                                                                                                                                                                                                                                                                                           | 1         | rs9878602                                                                                                                      | FOXP1         | intronic       | 13.700 | 5   |
| 27        | rs1374895  | 3   | 77615539 | 1.91E-09 | 77573433 | 77655818 | 103   | 76        | 1           | rs1374895                                                                                                                                                                                                                                                                                                           | 1         | rs1374895                                                                                                                      | ROBO2         | intronic       | 4.660  | NA  |
| 28        | rs13062095 | 3   | 1.01E+08 | 1.83E-09 | 1.01E+08 | 1.01E+08 | 86    | 24        | 1           | rs13062095                                                                                                                                                                                                                                                                                                          | 1         | rs13062095                                                                                                                     | TRMT10C       | intergenic     | 12.990 | 5   |
| 29        | rs62294337 | 3   | 1.69E+08 | 2.10E-10 | 1.69E+08 | 1.69E+08 | 85    | 30        | 3           | rs879394;rs61467551;rs62294337                                                                                                                                                                                                                                                                                      | 2         | rs879394;rs62294337                                                                                                            | MECOM         | intronic       | 3.486  | 7   |
| 30        | rs7626218  | 3   | 1.77E+08 | 1.51E-09 | 1.77E+08 | 1.77E+08 | 13    | 1         | 1           | rs7626218                                                                                                                                                                                                                                                                                                           | 1         | rs7626218                                                                                                                      | TBL1XR1       | intronic       | 1.708  | 5   |
| 31        | rs9290877  | 3   | 1.88E+08 | 4.67E-15 | 1.88E+08 | 1.88E+08 | 241   | 98        | 7           | rs491087;rs79879183;rs2378416;rs9290877;rs6767553;rs56328339;rs11916786                                                                                                                                                                                                                                             | 4         | rs491087;rs79879183;rs2378416;rs9290877                                                                                        | LPP           | intronic       | 7.173  | 6   |
| 32        | rs11185551 | 3   | 1.96E+08 | 1.54E-09 | 1.96E+08 | 1.96E+08 | 4     | 3         | 1           | rs11185551                                                                                                                                                                                                                                                                                                          | 1         | rs11185551                                                                                                                     | NRROS:PIGX    | intronic       | 0.765  | 5   |
| 33        | rs34811474 | 4   | 25408838 | 2.00E-09 | 25342606 | 25408838 | 5     | 1         | 1           | rs34811474                                                                                                                                                                                                                                                                                                          | 1         | rs34811474                                                                                                                     | ANAPC4        | exonic         | 23.700 | 6   |
| 34        | rs4833095  | 4   | 38799710 | 3.72E-17 | 38731632 | 38906951 | 256   | 151       | 6           | rs4833095;rs55938245;rs4072590;rs11724689;rs10008492;rs28532329                                                                                                                                                                                                                                                     | 1         | rs4833095                                                                                                                      | TLR1          | exonic         | 0.319  | 5   |

|    |             |   |          |          |          |          |      |     |    |                                                                                                                                                                                                                                                                                                                                                                                                                                                                                   |    |                                                                                                             |               |            |        |    |
|----|-------------|---|----------|----------|----------|----------|------|-----|----|-----------------------------------------------------------------------------------------------------------------------------------------------------------------------------------------------------------------------------------------------------------------------------------------------------------------------------------------------------------------------------------------------------------------------------------------------------------------------------------|----|-------------------------------------------------------------------------------------------------------------|---------------|------------|--------|----|
| 35 | rs35631117  | 4 | 67804304 | 4.12E-10 | 67801134 | 67906728 | 136  | 21  | 1  | rs35631117                                                                                                                                                                                                                                                                                                                                                                                                                                                                        | 1  | rs35631117                                                                                                  | RNU6-699P     | intergenic | 8.507  | 7  |
| 36 | rs1246642   | 4 | 89864446 | 5.52E-11 | 89745856 | 90059434 | 136  | 46  | 4  | rs1246642;rs4416442;rs7691363;rs73842249                                                                                                                                                                                                                                                                                                                                                                                                                                          | 1  | rs1246642                                                                                                   | FAM13A        | intronic   | 0.137  | 7  |
| 37 | rs13135092  | 4 | 1.03E+08 | 3.70E-10 | 1.03E+08 | 1.03E+08 | 6    | 3   | 1  | rs13135092                                                                                                                                                                                                                                                                                                                                                                                                                                                                        | 1  | rs13135092                                                                                                  | SLC39A8       | intronic   | 10.310 | 6  |
| 38 | rs34712979  | 4 | 1.07E+08 | 7.24E-20 | 1.07E+08 | 1.07E+08 | 285  | 28  | 5  | rs12374256;rs112819759;rs7664805;rs114723682;rs34712979                                                                                                                                                                                                                                                                                                                                                                                                                           | 3  | rs12374256;rs112819759;rs34712979                                                                           | NPNT          | intronic   | 22.800 | 5  |
| 39 | rs56035021  | 4 | 1.23E+08 | 1.30E-18 | 1.23E+08 | 1.24E+08 | 560  | 401 | 7  | rs56035021;rs1127348;rs62324212;rs6534338;rs10011954;rs45613035;rs4438773                                                                                                                                                                                                                                                                                                                                                                                                         | 3  | rs56035021;rs45613035;rs4438773                                                                             | KIAA1109      | intergenic | 0.046  | 7  |
| 40 | rs809955    | 4 | 1.41E+08 | 6.60E-09 | 1.41E+08 | 1.41E+08 | 77   | 29  | 1  | rs809955                                                                                                                                                                                                                                                                                                                                                                                                                                                                          | 1  | rs809955                                                                                                    | MAML3         | intronic   | 0.201  | NA |
| 41 | rs11940733  | 4 | 1.45E+08 | 1.46E-23 | 1.45E+08 | 1.46E+08 | 277  | 143 | 7  | rs11940733;rs11724319;rs2353397;rs4383570;rs56268708;rs1032295;rs62346060                                                                                                                                                                                                                                                                                                                                                                                                         | 1  | rs11940733                                                                                                  | KRT18P51      | intergenic | 20.600 | 7  |
| 42 | rs37004     | 5 | 1356684  | 9.57E-23 | 1276769  | 1364439  | 64   | 32  | 15 | rs7705526;rs2853677;rs33961405;rs10069690;rs7734992;rs2735946;rs2735944;rs2736109;rs2735948;rs410805;rs112401627;rs37004;rs6889886;rs56345976;rs4635969                                                                                                                                                                                                                                                                                                                           | 4  | rs7705526;rs2735946;rs410805;rs37004                                                                        | RP11-325I22.2 | intergenic | 2.023  | NA |
| 43 | rs16903574  | 5 | 14610309 | 6.13E-14 | 14572453 | 14701003 | 5    | 1   | 1  | rs16903574                                                                                                                                                                                                                                                                                                                                                                                                                                                                        | 1  | rs16903574                                                                                                  | FAM105A       | exonic     | 22.600 | 5  |
| 44 | rs10075764  | 5 | 35841449 | 1.75E-13 | 35803577 | 35985395 | 58   | 35  | 2  | rs10075764;rs696734                                                                                                                                                                                                                                                                                                                                                                                                                                                               | 1  | rs10075764                                                                                                  | IL7R          | intergenic | 4.118  | 7  |
| 45 | rs2330552   | 5 | 44415578 | 3.19E-08 | 44406517 | 44565635 | 44   | 2   | 1  | rs2330552                                                                                                                                                                                                                                                                                                                                                                                                                                                                         | 1  | rs2330552                                                                                                   | FGF10-AS1     | intergenic | 1.164  | 6  |
| 46 | rs16872768  | 5 | 74982207 | 1.10E-09 | 74952861 | 75038901 | 101  | 16  | 2  | rs16872768;rs258494                                                                                                                                                                                                                                                                                                                                                                                                                                                               | 1  | rs16872768                                                                                                  | POC5          | intronic   | 3.730  | 5  |
| 47 | rs72784258  | 5 | 1.1E+08  | 1.75E-22 | 1.1E+08  | 1.11E+08 | 848  | 370 | 35 | rs7728912;rs72774831;rs72788433;rs4389724;rs75810954;rs62375554;rs10061842;rs17623337;rs10055177;rs458818;rs1037684;rs252709;rs10478038;rs28362033;rs12515905;rs2289278;rs150431495;rs17132862;rs10058509;rs138815026;rs17132983;rs149205188;rs72784258;rs10515419;rs654354;rs1457115;rs2546990;rs58743367;rs764917;rs17132825;rs10052548;rs10054191;rs75503445;rs76825937;rs2115026                                                                                              | 10 | rs7728912;rs75810954;rs62375554;rs10061842;rs2289278;rs149205188;rs72784258;rs17132825;rs75503445;rs2115026 | WDR36         | intergenic | 0.947  | 7  |
| 48 | rs3813308   | 5 | 1.19E+08 | 4.10E-11 | 1.19E+08 | 1.19E+08 | 40   | 22  | 2  | rs3813308;rs1509142                                                                                                                                                                                                                                                                                                                                                                                                                                                               | 1  | rs3813308                                                                                                   | TNFAIP8       | UTR5       | 10.670 | 2a |
| 49 | rs743564    | 5 | 1.31E+08 | 5.45E-23 | 1.3E+08  | 1.32E+08 | 1242 | 621 | 46 | rs7701967;rs1910030;rs971891;rs10077003;rs7731020;rs4836522;rs743564;rs152049;rs157577;rs4705852;rs157573;rs2667736;rs156109;rs272863;rs274555;rs2073644;rs11242110;rs72795177;rs2548992;rs13164856;rs2243302;rs11746729;rs34914000;rs247001;rs3916443;rs10071051;rs77450473;rs145721969;rs2405522;rs17622517;rs2548994;rs12187537;rs75765453;rs56877785;rs2069757;rs2243297;rs116018601;rs17772583;rs11242120;rs1295683;rs1859138;rs3798129;rs809125;rs803140;rs809123;rs2277066 | 9  | rs7701967;rs743564;rs10071051;rs17622517;rs72583;rs1295683;rs809125                                         | CSF2          | intronic   | 3.144  | 5  |
| 50 | rs4976269   | 5 | 1.34E+08 | 1.71E-08 | 1.34E+08 | 1.34E+08 | 22   | 14  | 1  | rs4976269                                                                                                                                                                                                                                                                                                                                                                                                                                                                         | 1  | rs4976269                                                                                                   | C5orf66       | intronic   | 4.737  | 4  |
| 51 | rs249681    | 5 | 1.42E+08 | 1.40E-17 | 1.41E+08 | 1.42E+08 | 194  | 137 | 8  | rs164081;rs249681;rs3764;rs13153792;rs12654522;rs13187922;rs891986;rs62381978                                                                                                                                                                                                                                                                                                                                                                                                     | 2  | rs164081;rs249681                                                                                           | NDFIP1        | intergenic | 1.339  | 6  |
| 52 | rs7730971   | 5 | 1.48E+08 | 6.73E-10 | 1.48E+08 | 1.48E+08 | 38   | 15  | 2  | rs7730971;rs11742110                                                                                                                                                                                                                                                                                                                                                                                                                                                              | 1  | rs7730971                                                                                                   | FBXO38        | intronic   | 11.640 | 7  |
| 53 | rs145315307 | 5 | 1.69E+08 | 8.14E-10 | 1.69E+08 | 1.69E+08 | 1    | 1   | 1  | rs145315307                                                                                                                                                                                                                                                                                                                                                                                                                                                                       | 1  | rs145315307                                                                                                 | RNU6-477P     | intergenic | 2.639  | 7  |
| 54 | rs67111717  | 5 | 1.77E+08 | 8.08E-09 | 1.77E+08 | 1.77E+08 | 84   | 17  | 4  | rs67111717;rs3812036;rs12187932;rs623972                                                                                                                                                                                                                                                                                                                                                                                                                                          | 1  | rs67111717                                                                                                  | RGS14         | intronic   | 4.998  | 2b |
| 55 | rs1998323   | 6 | 7546404  | 1.83E-08 | 7546404  | 7553121  | 5    | 1   | 1  | rs1998323                                                                                                                                                                                                                                                                                                                                                                                                                                                                         | 1  | rs1998323                                                                                                   | DSP           | intronic   | 2.897  | 3a |
| 56 | rs3817836   | 6 | 16596594 | 2.43E-08 | 16588294 | 16601081 | 22   | 6   | 1  | rs3817836                                                                                                                                                                                                                                                                                                                                                                                                                                                                         | 1  | rs3817836                                                                                                   | ATXN1         | intronic   | 2.405  | 7  |
| 57 | rs9350191   | 6 | 19842661 | 2.40E-09 | 19837774 | 19844117 | 6    | 2   | 1  | rs9350191                                                                                                                                                                                                                                                                                                                                                                                                                                                                         | 1  | rs9350191                                                                                                   | ID4           | intergenic | 12.570 | 3a |
| 58 | rs34661125  | 6 | 28281894 | 3.76E-11 | 25450026 | 29558364 | 1127 | 236 | 8  | rs13191445;rs3999544;rs2893843;rs806794;rs56114371;rs34661125;rs150254595;rs114383434                                                                                                                                                                                                                                                                                                                                                                                             | 5  | rs13191445;rs3999544;rs56114371;rs34661125;rs114383434                                                      | RP5-874C20.6  | intergenic | 2.072  | 7  |

|    |             |   |          |          |          |          |     |     |    |                                                                                                                                                                                                                                                                                                                                                   |    |                                                                                                                               |                   |              |        |    |
|----|-------------|---|----------|----------|----------|----------|-----|-----|----|---------------------------------------------------------------------------------------------------------------------------------------------------------------------------------------------------------------------------------------------------------------------------------------------------------------------------------------------------|----|-------------------------------------------------------------------------------------------------------------------------------|-------------------|--------------|--------|----|
| 59 | rs6916141   | 6 | 43107744 | 2.40E-08 | 43107744 | 43244714 | 47  | 6   | 2  | rs6916141;rs2756184                                                                                                                                                                                                                                                                                                                               | 2  | rs6916141;rs2756184                                                                                                           | PTK7              | intronic     | 1.112  | 6  |
| 60 | rs13213141  | 6 | 64295122 | 2.90E-08 | 64139255 | 64491200 | 58  | 1   | 1  | rs13213141                                                                                                                                                                                                                                                                                                                                        | 1  | rs13213141                                                                                                                    | PTP4A1            | intergenic   | 2.179  | 5  |
| 61 | rs12212737  | 6 | 90838675 | 1.45E-22 | 90808352 | 91026990 | 201 | 103 | 11 | rs12212737;rs2474618;rs2501714;rs62408223;rs11755527;rs6908626;rs9782224;rs10806429;rs207253;rs207265;rs72928026                                                                                                                                                                                                                                  | 2  | rs12212737;rs72928026                                                                                                         | BACH2             | intronic     | 3.109  | 7  |
| 62 | rs77791277  | 6 | 1.07E+08 | 2.54E-09 | 1.07E+08 | 1.07E+08 | 47  | 24  | 1  | rs77791277                                                                                                                                                                                                                                                                                                                                        | 1  | rs77791277                                                                                                                    | ATG5              | intronic     | 0.158  | 6  |
| 63 | rs55743914  | 6 | 1.28E+08 | 4.92E-09 | 1.28E+08 | 1.28E+08 | 16  | 5   | 1  | rs55743914                                                                                                                                                                                                                                                                                                                                        | 1  | rs55743914                                                                                                                    | PTPRK             | intronic     | 9.244  | 4  |
| 64 | rs7759971   | 6 | 1.36E+08 | 3.01E-10 | 1.36E+08 | 1.36E+08 | 155 | 41  | 2  | rs7759971;rs6914831                                                                                                                                                                                                                                                                                                                               | 1  | rs7759971                                                                                                                     | AHI1              | intronic     | 0.254  | 1f |
| 65 | rs75424836  | 6 | 1.38E+08 | 4.00E-11 | 1.38E+08 | 1.38E+08 | 43  | 30  | 4  | rs75424836;rs17781283;rs77990078;rs15069                                                                                                                                                                                                                                                                                                          | 1  | rs75424836                                                                                                                    | TNFAIP3           | intergenic   | 11.600 | 7  |
| 66 | rs12199781  | 6 | 1.55E+08 | 4.46E-08 | 1.55E+08 | 1.55E+08 | 90  | 1   | 1  | rs12199781                                                                                                                                                                                                                                                                                                                                        | 1  | rs12199781                                                                                                                    | TIAM2             | intronic     | 0.103  | 7  |
| 67 | rs3824074   | 7 | 966926   | 1.47E-09 | 957722   | 968469   | 9   | 4   | 2  | rs3824074;rs13231160                                                                                                                                                                                                                                                                                                                              | 1  | rs3824074                                                                                                                     | ADAP1;COX1        | intronic     | 0.722  | 4  |
| 68 | rs6461503   | 7 | 20560996 | 1.04E-15 | 20372191 | 20636508 | 363 | 240 | 10 | rs13232403;rs17365306;rs10486391;rs6461503;rs16872573;rs35621564;rs10241550;rs6955157;rs11978564;rs13223048                                                                                                                                                                                                                                       | 2  | rs13232403;rs6461503                                                                                                          | EEF1A1P27         | intergenic   | 0.668  | 7  |
| 69 | rs62449498  | 7 | 22778528 | 6.69E-11 | 22719409 | 22811384 | 109 | 61  | 6  | rs62449498;rs68072554;rs35140375;rs2056577;rs2069840;rs2069845                                                                                                                                                                                                                                                                                    | 1  | rs62449498                                                                                                                    | IL6               | intergenic   | 10.420 | 6  |
| 70 | rs864745    | 7 | 28180556 | 1.88E-13 | 28142088 | 28256240 | 25  | 17  | 2  | rs864745;rs849336                                                                                                                                                                                                                                                                                                                                 | 1  | rs864745                                                                                                                      | JAZF1             | intronic     | 0.121  | NA |
| 71 | rs6963345   | 7 | 99618606 | 2.54E-12 | 99557217 | 99765662 | 75  | 20  | 3  | rs6963345;rs72615159;rs6465759                                                                                                                                                                                                                                                                                                                    | 1  | rs6963345                                                                                                                     | ZKSCAN1           | intronic     | 3.375  | 5  |
| 72 | rs114947103 | 7 | 1.06E+08 | 4.33E-10 | 1.06E+08 | 1.06E+08 | 24  | 6   | 1  | rs114947103                                                                                                                                                                                                                                                                                                                                       | 1  | rs114947103                                                                                                                   | CDHR3             | intronic     | 0.159  | 5  |
| 73 | rs147678978 | 7 | 1.17E+08 | 2.45E-21 | 1.17E+08 | 1.17E+08 | 45  | 30  | 5  | rs147678978;rs112477657;rs111811152;rs113827944;rs73480763                                                                                                                                                                                                                                                                                        | 2  | rs147678978;rs73480763                                                                                                        | AC006326.3        | intergenic   | 5.336  | 2b |
| 74 | rs3757387   | 7 | 1.29E+08 | 2.00E-09 | 1.29E+08 | 1.29E+08 | 58  | 9   | 2  | rs3757387;rs13238352                                                                                                                                                                                                                                                                                                                              | 1  | rs3757387                                                                                                                     | IRF5              | intergenic   | 1.106  | NA |
| 75 | rs6990504   | 8 | 8205816  | 1.10E-08 | 8168474  | 8306241  | 46  | 20  | 2  | rs6990504;rs2921080                                                                                                                                                                                                                                                                                                                               | 1  | rs6990504                                                                                                                     | SGK223            | intronic     | 2.127  | 7  |
| 76 | rs11783247  | 8 | 10788875 | 1.58E-08 | 10606219 | 11450422 | 134 | 5   | 1  | rs11783247                                                                                                                                                                                                                                                                                                                                        | 1  | rs11783247                                                                                                                    | XKR6              | intronic     | 2.201  | 7  |
| 77 | rs56223946  | 8 | 27413986 | 2.53E-09 | 27319847 | 27442127 | 23  | 6   | 4  | rs35505579;rs56223946;rs4732724;rs7844965                                                                                                                                                                                                                                                                                                         | 2  | rs35505579;rs56223946                                                                                                         | GULOP             | intergenic   | 1.227  | 6  |
| 78 | rs13267098  | 8 | 71811886 | 7.23E-12 | 71464551 | 72014069 | 787 | 516 | 4  | rs13267098;rs3110259;rs1159724;rs1324827                                                                                                                                                                                                                                                                                                          | 1  | rs13267098                                                                                                                    | XKR9              | intergenic   | 3.690  | 5  |
| 79 | rs13272530  | 8 | 74560448 | 1.33E-08 | 74502909 | 74642586 | 21  | 5   | 1  | rs13272530                                                                                                                                                                                                                                                                                                                                        | 1  | rs13272530                                                                                                                    | STAU2             | intronic     | 8.499  | 7  |
| 80 | rs2167733   | 8 | 78110734 | 1.20E-08 | 78093837 | 78257162 | 81  | 43  | 1  | rs2167733                                                                                                                                                                                                                                                                                                                                         | 1  | rs2167733                                                                                                                     | AC105242.1        | intergenic   | 2.749  | NA |
| 81 | rs4739737   | 8 | 81289625 | 5.83E-23 | 81091521 | 81329123 | 305 | 138 | 7  | rs4739737;rs7000782;rs7814542;rs5292402;rs998731;rs12708110;rs13277346                                                                                                                                                                                                                                                                            | 1  | rs4739737                                                                                                                     | RP11-775E10.1     | intergenic   | 5.651  | 4  |
| 82 | rs72668903  | 8 | 1.09E+08 | 6.31E-10 | 1.09E+08 | 1.1E+08  | 363 | 42  | 3  | rs72668903;rs72682295;rs2121904                                                                                                                                                                                                                                                                                                                   | 1  | rs72668903                                                                                                                    | EIF3E             | intergenic   | 1.358  | 7  |
| 83 | rs13277355  | 8 | 1.29E+08 | 1.03E-08 | 1.29E+08 | 1.29E+08 | 5   | 1   | 1  | rs13277355                                                                                                                                                                                                                                                                                                                                        | 1  | rs13277355                                                                                                                    | MYC               | intergenic   | 3.894  | 5  |
| 84 | rs60842789  | 9 | 6387076  | 2.70E-23 | 5530017  | 6648728  | 550 | 149 | 32 | rs10815241;rs7047575;rs10217579;rs2066415;rs2066413;rs2093656;rs10815286;rs12379291;rs143293684;rs79535452;rs148642300;rs191605295;rs4742151;rs380580;rs9407324;rs10975357;rs62556405;rs62556407;rs434521;rs55645596;rs77632918;rs7048482;rs112574168;rs10975660;rs60842789;rs10739105;rs928393;rs16924144;rs993951;rs2228098;rs1929933;rs2890723 | 12 | rs10815241;rs7047575;rs143293684;rs191605295;rs4742151;rs434521;rs77632918;rs7048482;rs60842789;rs2228098;rs1929933;rs2890723 | UHRF2             | intergenic   | 0.462  | 7  |
| 85 | rs10976923  | 9 | 8291665  | 9.41E-09 | 8278669  | 8361957  | 69  | 7   | 1  | rs10976923                                                                                                                                                                                                                                                                                                                                        | 1  | rs10976923                                                                                                                    | PTPRD             | intergenic   | 4.047  | 5  |
| 86 | rs3808868   | 9 | 34654142 | 4.84E-08 | 34581819 | 34698396 | 51  | 1   | 1  | rs3808868                                                                                                                                                                                                                                                                                                                                         | 1  | rs3808868                                                                                                                     | GALT;IL11RA       | intronic     | 5.099  | NA |
| 87 | rs7853472   | 9 | 1.27E+08 | 3.06E-10 | 1.27E+08 | 1.27E+08 | 129 | 41  | 3  | rs7853472;rs13298654;rs2026192                                                                                                                                                                                                                                                                                                                    | 1  | rs7853472                                                                                                                     | NEK6              | intronic     | 1.142  | 5  |
| 88 | rs10118570  | 9 | 1.28E+08 | 4.49E-12 | 1.28E+08 | 1.29E+08 | 383 | 112 | 3  | rs10118570;rs2111365;rs13297140                                                                                                                                                                                                                                                                                                                   | 1  | rs10118570                                                                                                                    | MAPKAP1           | intergenic   | 2.030  | 7  |
| 89 | rs3025343   | 9 | 1.36E+08 | 4.78E-09 | 1.36E+08 | 1.36E+08 | 16  | 12  | 1  | rs3025343                                                                                                                                                                                                                                                                                                                                         | 1  | rs3025343                                                                                                                     | LL09NC01-254D11.1 | ncRNA_exonic | 3.854  | 5  |

|     |            |    |          |          |          |          |     |     |    |                                                                                                                                                                                                                                                                                                                                                                                                                                                                                                                                                                       |                                                                   |                                                                                                                                                                                                                                                                   |                |            |       |    |
|-----|------------|----|----------|----------|----------|----------|-----|-----|----|-----------------------------------------------------------------------------------------------------------------------------------------------------------------------------------------------------------------------------------------------------------------------------------------------------------------------------------------------------------------------------------------------------------------------------------------------------------------------------------------------------------------------------------------------------------------------|-------------------------------------------------------------------|-------------------------------------------------------------------------------------------------------------------------------------------------------------------------------------------------------------------------------------------------------------------|----------------|------------|-------|----|
| 90  | rs1444783  | 10 | 9057956  | 1.80E-26 | 8095340  | 9585398  | 872 | 403 | 52 | rs3781094;rs12785018;rs4749764;rs10795637;rs34839516;rs7894791;rs2025758;rs1577218;rs10795672;rs72780903;rs17414748;rs11255975;rs12261421;rs11255983;rs10905491;rs72782675;rs290904;rs827640;rs11255992;rs2120793;rs827637;rs10795685;rs11256003;rs11256002;rs11256006;rs17406680;rs78084308;rs827631;rs118077070;rs77000868;rs17485264;rs79926952;rs1444783;rs1031161;rs1342773;rs1149914;rs2397336;rs1705333;rs61840207;rs3118110;rs76775848;rs10490944;rs1243402;rs74127604;rs72782686;rs17145188;rs117746614;rs1143870;rs35205105;rs10508398;rs4749860;rs11256208 | 19                                                                | rs3781094;rs12785018;rs34839516;rs2025758;rs72780903;rs11255975;rs827640;rs2120793;rs11256003;rs11256006;rs118077070;rs77000868;rs17485264;rs79926952;rs1444783;rs1031161;rs4783;rs61840207;rs76775848;rs10490944;rs1143870;rs35205105;rs398;rs4749860;rs11256208 | RP11-428L9.2   | intergenic | 1.566 | NA |
| 91  | rs4691     | 10 | 75561916 | 4.13E-08 | 75431981 | 75695724 | 99  | 1   | 1  | rs4691                                                                                                                                                                                                                                                                                                                                                                                                                                                                                                                                                                | rs4691                                                            | RP11-574K11.31:NDST2                                                                                                                                                                                                                                              | UTR3           | 0.459      | NA    |    |
| 92  | rs7918084  | 10 | 94429467 | 6.14E-09 | 94248310 | 94495241 | 73  | 15  | 1  | rs7918084                                                                                                                                                                                                                                                                                                                                                                                                                                                                                                                                                             | rs7918084                                                         | EIF2S2P3                                                                                                                                                                                                                                                          | ncRNA_exonic   | 4.484      | 5     |    |
| 93  | rs2148200  | 10 | 1.05E+08 | 1.78E-09 | 1.05E+08 | 1.05E+08 | 332 | 162 | 2  | rs2148200;rs3736922                                                                                                                                                                                                                                                                                                                                                                                                                                                                                                                                                   | rs2148200                                                         | NT5C2                                                                                                                                                                                                                                                             | intronic       | 0.247      | NA    |    |
| 94  | rs72846303 | 11 | 1133795  | 1.11E-21 | 1079746  | 1780061  | 479 | 229 | 34 | rs41359951;rs113948005;rs7934606;rs7396585;rs12365253;rs34666042;rs35671223;rs7127117;rs72846303;rs11603634;rs139052365;rs12280230;rs11602802;rs2672794;rs7120886;rs56293203;rs2857472;rs3793965;rs908225;rs66496921;rs4963074;rs10832369;rs7944761;rs4963065;rs72849408;rs11023856;rs7394747;rs4881748;rs61867617;rs55771420;rs72849433;rs11602061;rs74760554;rs117666717                                                                                                                                                                                            | 11                                                                | rs41359951;rs7934606;rs72846303;rs2672794;rs56293203;rs2857472;rs4963065;rs72849408;rs11023856;rs7394747;rs4881748;rs61867617;rs55771420;rs72849433;rs11602061;rs74760554;rs117666717                                                                             | MUC5AC         | intergenic | 0.325 | 5  |
| 95  | rs2049045  | 11 | 27694241 | 1.05E-08 | 27581265 | 27742447 | 49  | 15  | 1  | rs2049045                                                                                                                                                                                                                                                                                                                                                                                                                                                                                                                                                             | rs2049045                                                         | BDNF-AS:BDNF                                                                                                                                                                                                                                                      | ncRNA_intronic | 5.212      | 5     |    |
| 96  | rs174537   | 11 | 61552680 | 1.33E-13 | 61542006 | 61659296 | 130 | 59  | 6  | rs174537;rs174573;rs174604;rs174622;rs174460;rs7943728                                                                                                                                                                                                                                                                                                                                                                                                                                                                                                                | rs174537                                                          | MYRF:TMEM258                                                                                                                                                                                                                                                      | intronic       | 0.323      | 5     |    |
| 97  | rs2276133  | 11 | 65562257 | 2.54E-10 | 65547333 | 65562257 | 6   | 3   | 2  | rs2276133;rs479844                                                                                                                                                                                                                                                                                                                                                                                                                                                                                                                                                    | rs2276133                                                         | OVOL1                                                                                                                                                                                                                                                             | intronic       | 1.133      | NA    |    |
| 98  | rs2509735  | 11 | 76273148 | 5.94E-23 | 75983514 | 76381814 | 226 | 89  | 16 | rs55684690;rs12221507;rs4945084;rs59382353;rs72934321;rs141420268;rs11236810;rs76282174;rs60748394;rs2509735;rs6592650;rs11236787;rs61894512;rs11236795;rs12283565;rs117051189                                                                                                                                                                                                                                                                                                                                                                                        | rs55684690;rs60748394;rs2509735;rs11236795;rs12283565;rs117051189 | C11orf30                                                                                                                                                                                                                                                          | intergenic     | 1.044      | 6     |    |
| 99  | rs11018488 | 11 | 88861590 | 8.86E-10 | 88480235 | 88978545 | 154 | 17  | 2  | rs11018488;rs11018434                                                                                                                                                                                                                                                                                                                                                                                                                                                                                                                                                 | rs11018488                                                        | AP001482.1                                                                                                                                                                                                                                                        | intergenic     | 0.150      | 6     |    |
| 100 | rs61907683 | 11 | 1.28E+08 | 7.55E-13 | 1.28E+08 | 1.28E+08 | 39  | 25  | 3  | rs61907683;rs73018941;rs7127307                                                                                                                                                                                                                                                                                                                                                                                                                                                                                                                                       | rs61907683                                                        | RP11-702B10.1                                                                                                                                                                                                                                                     | intergenic     | 3.748      | 7     |    |
| 101 | rs7953330  | 12 | 998819   | 1.07E-10 | 998819   | 1066834  | 18  | 4   | 2  | rs7953330;rs3748522                                                                                                                                                                                                                                                                                                                                                                                                                                                                                                                                                   | rs7953330                                                         | WNK1                                                                                                                                                                                                                                                              | intronic       | 0.112      | 6     |    |
| 102 | rs12308157 | 12 | 39421767 | 4.19E-09 | 39421767 | 39440421 | 2   | 1   | 1  | rs12308157                                                                                                                                                                                                                                                                                                                                                                                                                                                                                                                                                            | rs12308157                                                        | RP11-554L12.2                                                                                                                                                                                                                                                     | intergenic     | 2.158      | 7     |    |
| 103 | rs2544026  | 12 | 48186563 | 4.24E-10 | 48184793 | 48225742 | 37  | 26  | 4  | rs2544026;rs11168249;rs7487637;rs2525041                                                                                                                                                                                                                                                                                                                                                                                                                                                                                                                              | rs2544026                                                         | HDAC7                                                                                                                                                                                                                                                             | intronic       | 1.818      | 5     |    |
| 104 | rs61938963 | 12 | 56446804 | 7.78E-17 | 56358712 | 56482180 | 62  | 46  | 3  | rs61938963;rs7312770;rs2069408                                                                                                                                                                                                                                                                                                                                                                                                                                                                                                                                        | rs61938963                                                        | RPS26                                                                                                                                                                                                                                                             | intergenic     | 3.187      | 7     |    |
| 105 | rs167769   | 12 | 57503775 | 1.97E-23 | 57242217 | 57535266 | 240 | 155 | 18 | rs11172055;rs4319546;rs4759042;rs703817;rs4759044;rs7314652;rs11172026;rs11172086;rs61937568;rs35140931;rs17547610;rs61937853;rs844469;rs10506346;rs11172076;rs167769;rs11172111;rs4257011                                                                                                                                                                                                                                                                                                                                                                            | rs11172055;rs11172086;rs167769                                    | STAT6                                                                                                                                                                                                                                                             | UTR5           | 7.855      | 5     |    |
| 106 | rs11174501 | 12 | 62871862 | 2.19E-08 | 62658228 | 63055729 | 46  | 2   | 1  | rs11174501                                                                                                                                                                                                                                                                                                                                                                                                                                                                                                                                                            | rs11174501                                                        | MON2                                                                                                                                                                                                                                                              | intronic       | 1.588      | 7     |    |

|     |            |    |          |          |          |          |     |     |    |                                                                                                                                                                                                                                                                                                                      |   |                                                                              |                     |                |        |    |
|-----|------------|----|----------|----------|----------|----------|-----|-----|----|----------------------------------------------------------------------------------------------------------------------------------------------------------------------------------------------------------------------------------------------------------------------------------------------------------------------|---|------------------------------------------------------------------------------|---------------------|----------------|--------|----|
| 107 | rs10878269 | 12 | 65791463 | 3.72E-15 | 65761089 | 65891257 | 142 | 116 | 3  | rs10878269;rs6581639;rs73119451                                                                                                                                                                                                                                                                                      | 1 | rs10878269                                                                   | MSRB3               | intronic       | 0.699  | 6  |
| 108 | rs10732654 | 12 | 94562420 | 1.14E-09 | 94544545 | 94615120 | 57  | 28  | 4  | rs10732654;rs7961712;rs11107457;rs7953000                                                                                                                                                                                                                                                                            | 2 | rs10732654;rs7953000                                                         | PLXNC1:RP11-74K11.2 | ncRNA_intronic | 5.533  | 4  |
| 109 | rs12817892 | 12 | 1.24E+08 | 2.53E-10 | 1.23E+08 | 1.24E+08 | 418 | 254 | 2  | rs12817892;rs73216931                                                                                                                                                                                                                                                                                                | 1 | rs12817892                                                                   | C12orf65            | intronic       | 0.982  | 1f |
| 110 | rs11571833 | 13 | 32972626 | 6.65E-15 | 32866927 | 33239130 | 9   | 3   | 1  | rs11571833                                                                                                                                                                                                                                                                                                           | 1 | rs11571833                                                                   | BRCA2               | exonic         | 36.000 | 6  |
| 111 | rs8002731  | 13 | 40362229 | 1.28E-10 | 40233181 | 40746149 | 139 | 61  | 3  | rs8002731;rs9549003;rs12429765                                                                                                                                                                                                                                                                                       | 3 | rs8002731;rs9549003;rs12429765                                               | COG6                | intronic       | 5.477  | 3a |
| 112 | rs592333   | 13 | 51340315 | 1.93E-17 | 50753772 | 51356435 | 61  | 38  | 5  | rs806292;rs2066623;rs2740518;rs592333;rs73186318                                                                                                                                                                                                                                                                     | 3 | rs806292;rs592333;rs73186318                                                 | DLEU7               | intronic       | 13.470 | NA |
| 113 | rs9527725  | 13 | 58459146 | 1.96E-09 | 58252801 | 58717504 | 197 | 67  | 1  | rs9527725                                                                                                                                                                                                                                                                                                            | 1 | rs9527725                                                                    | RNA5SP30            | intergenic     | 1.450  | 7  |
| 114 | rs981625   | 13 | 74039935 | 9.01E-10 | 74039935 | 74039935 | 1   | 1   | 1  | rs981625                                                                                                                                                                                                                                                                                                             | 1 | rs981625                                                                     | LINC00393           | ncRNA_intronic | 20.700 | 4  |
| 115 | rs7139522  | 13 | 99975661 | 5.66E-23 | 99769973 | 1E+08    | 392 | 196 | 19 | rs7139522;rs9513600;rs7335046;rs4772194;rs4319612;rs4771332;rs7987173;rs912128;rs9585056;rs11616509;rs4772201;rs9513616;rs17656442;rs9517738;rs1887703;rs9517683;rs9517713;rs9557170;rs150786584                                                                                                                     | 2 | rs7139522;rs9517713                                                          | UBAC2               | intronic       | 6.097  | 3a |
| 116 | rs3784099  | 14 | 68749927 | 6.98E-19 | 68727506 | 68815513 | 135 | 107 | 3  | rs3784099;rs7140939;rs4902567                                                                                                                                                                                                                                                                                        | 1 | rs3784099                                                                    | RAD51B              | intronic       | 14.860 | 3a |
| 117 | rs2887887  | 14 | 79502019 | 2.27E-08 | 79453862 | 79614043 | 201 | 3   | 1  | rs2887887                                                                                                                                                                                                                                                                                                            | 1 | rs2887887                                                                    | NRXN3               | intronic       | 0.273  | 7  |
| 118 | rs72699866 | 14 | 93114787 | 2.51E-09 | 93010967 | 93118229 | 58  | 31  | 2  | rs10131571;rs72699866                                                                                                                                                                                                                                                                                                | 2 | rs10131571;rs72699866                                                        | RIN3                | intronic       | 1.590  | 5  |
| 119 | rs28929474 | 14 | 94844947 | 4.89E-14 | 94672731 | 94844947 | 5   | 3   | 2  | rs28929474;rs112458284                                                                                                                                                                                                                                                                                               | 1 | rs28929474                                                                   | SERPINA1            | exonic         | 20.200 | NA |
| 120 | rs2614488  | 14 | 99751588 | 3.77E-12 | 99733954 | 99751588 | 14  | 11  | 2  | rs2614488;rs2664299                                                                                                                                                                                                                                                                                                  | 1 | rs2614488                                                                    | BCL11B              | intergenic     | 0.005  | 7  |
| 121 | rs41286560 | 14 | 1.01E+08 | 2.77E-08 | 1.01E+08 | 1.01E+08 | 1   | 1   | 1  | rs41286560                                                                                                                                                                                                                                                                                                           | 1 | rs41286560                                                                   | RTL1                | exonic         | 14.440 | 5  |
| 122 | rs59424629 | 15 | 40720542 | 9.27E-11 | 40655873 | 40729400 | 47  | 23  | 2  | rs59424629;rs4924464                                                                                                                                                                                                                                                                                                 | 1 | rs59424629                                                                   | IVD                 | intronic       | 1.601  | 3a |
| 123 | rs67487456 | 15 | 50006577 | 2.95E-10 | 49285001 | 50007261 | 255 | 68  | 4  | rs11639111;rs77468143;rs9920722;rs67487456                                                                                                                                                                                                                                                                           | 2 | rs11639111;rs67487456                                                        | RP11-353B9.1        | intergenic     | 0.801  | 7  |
| 124 | rs10519067 | 15 | 61068347 | 1.94E-22 | 61032054 | 61079377 | 48  | 42  | 3  | rs10519067;rs1963497;rs11071553                                                                                                                                                                                                                                                                                      | 1 | rs10519067                                                                   | RORA                | intronic       | 2.915  | 5  |
| 125 | rs72743459 | 15 | 67439023 | 1.86E-21 | 67307227 | 67661784 | 249 | 162 | 15 | rs35200241;rs12592283;rs11856909;rs72743459;rs28360855;rs117009032;rs11637659;rs56336520;rs10152595;rs7173826;rs12595533;rs11639295;rs35251008;rs1470002;rs893475                                                                                                                                                    | 7 | rs35200241;rs12592283;rs11856909;rs72743459;rs11637659;rs56336520;rs10152595 | SMAD3:RP11-342M21.2 | intronic       | 0.125  | 4  |
| 126 | rs71405231 | 15 | 77212403 | 1.49E-08 | 76473955 | 77256130 | 444 | 3   | 2  | rs71405231;rs2056544                                                                                                                                                                                                                                                                                                 | 1 | rs71405231                                                                   | RCN2                | intergenic     | 0.499  | 5  |
| 127 | rs12594247 | 15 | 78946633 | 5.36E-23 | 78714008 | 79215568 | 880 | 482 | 29 | rs12591557;rs2067808;rs36045869;rs1021070;rs11072802;rs4390557;rs56219480;rs2229961;rs117189732;rs76474922;rs12324203;rs12594247;rs143527274;rs12593207;rs899997;rs3861180;rs62012628;rs12901971;rs4887101;rs12907535;rs10851911;rs12907065;rs77719127;rs6495338;rs7403155;rs28694044;rs4341710;rs28408315;rs2277540 | 6 | rs12591557;rs56219480;rs2229961;rs76474922;rs12594247;rs4887101              | CHRN4               | intronic       | 2.901  | 5  |
| 128 | rs4360908  | 15 | 85109718 | 3.77E-08 | 84703470 | 85190780 | 231 | 1   | 1  | rs4360908                                                                                                                                                                                                                                                                                                            | 1 | rs4360908                                                                    | UBE2Q2P1            | ncRNA_intronic | 0.852  | 6  |
| 129 | rs34972832 | 16 | 11198938 | 7.50E-23 | 11031741 | 11324571 | 214 | 64  | 11 | rs34972832;rs139337054;rs9923175;rs767019;rs248831;rs1990572;rs10451095;rs9888873;rs3862469;rs62023562;rs152304                                                                                                                                                                                                      | 3 | rs34972832;rs62023562;rs152304                                               | CLEC16A             | intronic       | 16.200 | 2a |
| 130 | rs4787951  | 16 | 27343963 | 2.41E-21 | 27217239 | 27429642 | 255 | 118 | 19 | rs11074852;rs2283563;rs9940480;rs7192633;rs7201783;rs71388090;rs4787951;rs3024590;rs1029489;rs8050048;rs3024655;rs2234900;rs77315098;rs140049631;rs4787957;rs3024634;rs1988004;rs179768;rs12596049                                                                                                                   | 5 | rs11074852;rs4787951;rs3024655;rs1988004;rs179768                            | IL4R                | intronic       | 3.997  | 5  |
| 131 | rs2199036  | 16 | 31006972 | 5.57E-17 | 30097630 | 31155458 | 344 | 168 | 8  | rs7542;rs12929754;rs56369689;rs2199036;rs34898535;rs60996860;rs80095680;rs124436                                                                                                                                                                                                                                     | 2 | rs7542;rs2199036                                                             | STX1B               | intronic       | 0.585  | 7  |
| 132 | rs9940278  | 16 | 53800200 | 2.56E-13 | 53797908 | 53845487 | 116 | 94  | 1  | rs9940278                                                                                                                                                                                                                                                                                                            | 1 | rs9940278                                                                    | FTO                 | intronic       | 0.187  | 6  |

|                                                                                                                                                                                                                                 |             |    |          |          |          |          |      |     |    |                                                                                                                                                                                                                                                                                                        |   |                                                                                                   |                       |                |        |    |
|---------------------------------------------------------------------------------------------------------------------------------------------------------------------------------------------------------------------------------|-------------|----|----------|----------|----------|----------|------|-----|----|--------------------------------------------------------------------------------------------------------------------------------------------------------------------------------------------------------------------------------------------------------------------------------------------------------|---|---------------------------------------------------------------------------------------------------|-----------------------|----------------|--------|----|
| 133                                                                                                                                                                                                                             | rs28451004  | 16 | 75518129 | 2.57E-08 | 75303987 | 75518129 | 102  | 1   | 1  | rs28451004                                                                                                                                                                                                                                                                                             | 1 | rs28451004                                                                                        | RP11-77K12.4:CHST     | ncRNA_intronic | 3.986  | 5  |
| 134                                                                                                                                                                                                                             | rs7210932   | 17 | 2272024  | 4.34E-08 | 2253441  | 2272024  | 42   | 1   | 1  | rs7210932                                                                                                                                                                                                                                                                                              | 1 | rs7210932                                                                                         | SGSM2                 | intronic       | 8.803  | 2b |
| 135                                                                                                                                                                                                                             | rs9912001   | 17 | 7445372  | 4.83E-08 | 7437958  | 7538785  | 16   | 2   | 1  | rs9912001                                                                                                                                                                                                                                                                                              | 1 | rs9912001                                                                                         | Y_RNA                 | intergenic     | 4.617  | 7  |
| 136                                                                                                                                                                                                                             | rs178830    | 17 | 16081958 | 9.73E-11 | 15868291 | 16251016 | 458  | 242 | 2  | rs178830;rs8073259                                                                                                                                                                                                                                                                                     | 1 | rs178830                                                                                          | NCOR1                 | intronic       | 0.389  | NA |
| 137                                                                                                                                                                                                                             | rs56301252  | 17 | 38109155 | 1.70E-24 | 37390863 | 38577416 | 823  | 402 | 27 | rs4795385;rs11078916;rs3794712;rs116846837;rs117504211;rs145835664;rs146459536;rs143669790;rs62068169;rs62066853;rs190577398;rs4795402;rs3764354;rs56301252;rs9898547;rs4795414;rs12451644;rs12601929;rs7217240;rs72832993;rs12450388;rs2269457;rs117827273;rs2071427;rs75905358;rs190471737;rs4247366 | 9 | rs4795385;rs116846837;rs146459536;rs4795402;rs56301252;rs72832993;rs12450388;rs2071427;rs75905358 | LRRC3C                | intergenic     | 4.302  | 2b |
| 138                                                                                                                                                                                                                             | rs150592114 | 17 | 44333331 | 1.08E-14 | 43208121 | 44874453 | 3938 | 334 | 8  | rs1044977;rs708563;rs4247364;rs150592114;rs199500;rs199497;rs17689966;rs9899833                                                                                                                                                                                                                        | 3 | rs1044977;rs4247364;rs150592114                                                                   | RP11-259G18.3         | intergenic     | 3.040  | 6  |
| 139                                                                                                                                                                                                                             | rs34822124  | 17 | 46648679 | 6.15E-09 | 45805811 | 46687752 | 191  | 15  | 4  | rs72833417;rs12603115;rs34822124;rs7350950                                                                                                                                                                                                                                                             | 3 | rs72833417;rs12603115;rs34822124                                                                  | HOXB3:HOXB-AS3        | ncRNA_intronic | 2.744  | 2b |
| 140                                                                                                                                                                                                                             | rs2671654   | 17 | 47468011 | 6.93E-24 | 47260130 | 47481374 | 218  | 153 | 8  | rs2671654;rs4987082;rs55978930;rs669686;rs1010322;rs112792621;rs2411981;rs3507364                                                                                                                                                                                                                      | 1 | rs2671654                                                                                         | RP11-81K2.1           | intronic       | 13.920 | 4  |
| 141                                                                                                                                                                                                                             | rs180107    | 17 | 67930772 | 7.55E-10 | 67881015 | 67963779 | 99   | 8   | 1  | rs180107                                                                                                                                                                                                                                                                                               | 1 | rs180107                                                                                          | AC002539.2            | intergenic     | 0.164  | 6  |
| 142                                                                                                                                                                                                                             | rs7504262   | 18 | 35160143 | 9.66E-12 | 35127427 | 35204858 | 51   | 35  | 1  | rs7504262                                                                                                                                                                                                                                                                                              | 1 | rs7504262                                                                                         | CELF4                 | intergenic     | 0.188  | 6  |
| 143                                                                                                                                                                                                                             | rs11665567  | 18 | 77563334 | 4.72E-08 | 77551586 | 77580712 | 13   | 1   | 1  | rs11665567                                                                                                                                                                                                                                                                                             | 1 | rs11665567                                                                                        | RP11-                 | ncRNA_intronic | 0.143  | 5  |
| 144                                                                                                                                                                                                                             | rs67538026  | 19 | 1031438  | 1.54E-08 | 1004740  | 1031658  | 15   | 3   | 2  | rs67538026;rs2240157                                                                                                                                                                                                                                                                                   | 1 | rs67538026                                                                                        | CNN2                  | intronic       | 7.362  | 2b |
| 145                                                                                                                                                                                                                             | rs12971302  | 19 | 6595460  | 2.55E-08 | 6580892  | 6597962  | 16   | 2   | 2  | rs12971302;rs11085182                                                                                                                                                                                                                                                                                  | 1 | rs12971302                                                                                        | CD70                  | intronic       | 0.425  | 6  |
| 146                                                                                                                                                                                                                             | rs10416530  | 19 | 9129660  | 1.39E-11 | 9125547  | 9141159  | 17   | 12  | 2  | rs10416530;rs34872811                                                                                                                                                                                                                                                                                  | 1 | rs10416530                                                                                        | CTD-                  | upstream       | 0.667  | 7  |
| 147                                                                                                                                                                                                                             | rs8108822   | 19 | 32183171 | 2.27E-08 | 32167803 | 32215431 | 68   | 15  | 1  | rs8108822                                                                                                                                                                                                                                                                                              | 1 | rs8108822                                                                                         | RNA5SP471             | intergenic     | 0.007  | 6  |
| 148                                                                                                                                                                                                                             | rs11672303  | 19 | 33726375 | 9.36E-21 | 33718053 | 33753320 | 27   | 23  | 5  | rs11672303;rs11671925;rs7251615;rs12150887;rs7248385                                                                                                                                                                                                                                                   | 2 | rs11672303;rs7251615                                                                              | SLC7A10               | intergenic     | 0.334  | 2b |
| 149                                                                                                                                                                                                                             | rs56113850  | 19 | 41353107 | 3.50E-18 | 41336950 | 41370338 | 29   | 10  | 3  | rs56113850;rs11667314;rs8192733                                                                                                                                                                                                                                                                        | 1 | rs56113850                                                                                        | CTC-490E21.12:CY P2A6 | intronic       | 1.127  | 5  |
| 150                                                                                                                                                                                                                             | rs429358    | 19 | 45411941 | 5.04E-10 | 45392254 | 45424351 | 14   | 1   | 1  | rs429358                                                                                                                                                                                                                                                                                               | 1 | rs429358                                                                                          | APOE                  | exonic         | 12.640 | 5  |
| 151                                                                                                                                                                                                                             | rs11671524  | 19 | 46327166 | 3.28E-09 | 46219145 | 46374916 | 53   | 12  | 2  | rs11671524;rs1132645                                                                                                                                                                                                                                                                                   | 1 | rs11671524                                                                                        | SYMPK                 | intronic       | 8.085  | 4  |
| 152                                                                                                                                                                                                                             | rs11697152  | 20 | 21467208 | 7.88E-09 | 21380772 | 21478776 | 36   | 4   | 1  | rs11697152                                                                                                                                                                                                                                                                                             | 1 | rs11697152                                                                                        | RP5-984P4.1           | intergenic     | 0.159  | 7  |
| 153                                                                                                                                                                                                                             | rs1737890   | 20 | 31042595 | 1.71E-08 | 30854756 | 31042595 | 57   | 2   | 1  | rs1737890                                                                                                                                                                                                                                                                                              | 1 | rs1737890                                                                                         | C20orf112             | intronic       | 0.363  | 5  |
| 154                                                                                                                                                                                                                             | rs6011779   | 20 | 61984317 | 1.06E-16 | 61979224 | 62470104 | 240  | 111 | 11 | rs6011779;rs2273506;rs11697662;rs6011776;rs148583745;rs909334;rs1291210;rs1056441;rs2281926;rs2738774;rs6090007                                                                                                                                                                                        | 4 | rs6011779;rs148583745;rs909334;rs6090007                                                          | CHRNA4                | intronic       | 0.694  | 5  |
| 155                                                                                                                                                                                                                             | rs2205049   | 21 | 36695909 | 3.90E-14 | 36421331 | 36745167 | 80   | 50  | 3  | rs17227210;rs2205049;rs13048344                                                                                                                                                                                                                                                                        | 2 | rs17227210;rs2205049                                                                              | RUNX1                 | intronic       | 4.831  | NA |
| 156                                                                                                                                                                                                                             | rs79005     | 22 | 41835544 | 3.61E-14 | 41408754 | 42216326 | 748  | 461 | 3  | rs79005;rs8139770;rs1969666                                                                                                                                                                                                                                                                            | 1 | rs79005                                                                                           | TOB2                  | intronic       | 2.399  | 7  |
| Locus No., the numerical order of pleiotropic genomic risk locus;PP,posterior probability;RP,Regional probability;CHR, chromosome; BP, base pair; CADD, Combined Annotation-Dependent depletion scores; RDB, RegulomeDB scores. |             |    |          |          |          |          |      |     |    |                                                                                                                                                                                                                                                                                                        |   |                                                                                                   |                       |                |        |    |
