# Supplementary material for: Shared genetic aetiology of respiratory diseases: a genome-wide multitraits association analysis
Source: PubMed Central journal article supplement — BMJ Open Respir Res. 2024 Jun 4;11(1):e002148. doi: 10.1136/bmjresp-2023-002148 (PMC11163672; doi:10.1136/bmjresp-2023-002148), 2024-06-04
Supplement: bmjresp-2023-002148supp011.pdf [file bmjresp-2023-002148supp011.pdf]

**eTable 10.** Identification of new pleiotropic loci among respiratory diseases<sup>a</sup>

| Locus No. | CHR | Start     | Stop      | Triat  |      |     |    |     | Sum |
|-----------|-----|-----------|-----------|--------|------|-----|----|-----|-----|
|           |     |           |           | Asthma | COPD | IPF | LC | SNO |     |
| 1         | 1   | 1123434   | 1186502   | 0      | 0    | 0   | 0  | 0   | 0   |
| 2         | 1   | 10525914  | 10637709  | 0      | 0    | 0   | 0  | 0   | 0   |
| 3         | 1   | 25197685  | 25263997  | 0      | 0    | 0   | 0  | 0   | 0   |
| 4         | 1   | 50839740  | 51480258  | 0      | 0    | 0   | 0  | 1   | 1   |
| 5         | 1   | 77967507  | 78450517  | 0      | 0    | 0   | 1  | 0   | 1   |
| 6         | 1   | 80784642  | 80871734  | 0      | 0    | 0   | 0  | 0   | 0   |
| 7         | 1   | 96621739  | 97028456  | 0      | 0    | 0   | 0  | 1   | 1   |
| 8         | 1   | 114303808 | 114377568 | 0      | 0    | 0   | 0  | 0   | 0   |
| 9         | 1   | 151908055 | 152780522 | 0      | 0    | 0   | 0  | 0   | 0   |
| 10        | 1   | 167405132 | 167439010 | 0      | 0    | 0   | 0  | 0   | 0   |
| 11        | 1   | 198598389 | 198746704 | 0      | 0    | 0   | 0  | 0   | 0   |
| 12        | 1   | 203058476 | 203108508 | 0      | 0    | 0   | 0  | 0   | 0   |
| 13        | 2   | 8438693   | 8496062   | 0      | 0    | 0   | 0  | 0   | 0   |
| 14        | 2   | 15889419  | 15890920  | 0      | 0    | 0   | 0  | 0   | 0   |
| 15        | 2   | 62903461  | 63913711  | 0      | 0    | 0   | 0  | 0   | 0   |
| 16        | 2   | 72035671  | 72093666  | 0      | 0    | 0   | 0  | 0   | 0   |
| 17        | 2   | 102287835 | 103262053 | 0      | 0    | 0   | 0  | 0   | 0   |
| 18        | 2   | 111861838 | 112024305 | 0      | 0    | 0   | 0  | 0   | 0   |
| 19        | 2   | 145467189 | 146316319 | 0      | 0    | 0   | 0  | 0   | 0   |
| 20        | 2   | 156991269 | 157477952 | 0      | 0    | 0   | 0  | 1   | 1   |
| 21        | 2   | 228692411 | 228751874 | 0      | 0    | 0   | 0  | 0   | 0   |

|    |   |           |           |   |   |   |   |   |   |
|----|---|-----------|-----------|---|---|---|---|---|---|
| 22 | 2 | 242680229 | 242820763 | 0 | 0 | 0 | 0 | 0 | 0 |
| 23 | 3 | 20578543  | 20750951  | 0 | 0 | 0 | 0 | 0 | 0 |
| 24 | 3 | 33015289  | 33084861  | 0 | 0 | 0 | 0 | 0 | 0 |
| 25 | 3 | 49109919  | 49890967  | 0 | 0 | 0 | 0 | 0 | 0 |
| 26 | 3 | 71498561  | 71611630  | 0 | 0 | 0 | 0 | 0 | 0 |
| 27 | 3 | 77573433  | 77655818  | 0 | 0 | 0 | 0 | 1 | 1 |
| 28 | 3 | 101011537 | 101306098 | 0 | 0 | 0 | 0 | 0 | 0 |
| 29 | 3 | 168647860 | 169164828 | 0 | 0 | 0 | 0 | 0 | 0 |
| 30 | 3 | 176813282 | 176852038 | 0 | 0 | 0 | 0 | 0 | 0 |
| 31 | 3 | 187632584 | 188473657 | 0 | 0 | 0 | 0 | 0 | 0 |
| 32 | 3 | 196367930 | 196369375 | 0 | 0 | 0 | 0 | 0 | 0 |
| 33 | 4 | 25342606  | 25408838  | 0 | 0 | 0 | 0 | 1 | 1 |
| 34 | 4 | 38731632  | 38906951  | 0 | 0 | 0 | 0 | 0 | 0 |
| 35 | 4 | 67801134  | 67906728  | 0 | 0 | 0 | 0 | 0 | 0 |
| 36 | 4 | 89745856  | 90059434  | 0 | 0 | 0 | 0 | 0 | 0 |
| 37 | 4 | 103001649 | 103198082 | 0 | 0 | 0 | 0 | 0 | 0 |
| 38 | 4 | 106513974 | 107246190 | 0 | 0 | 0 | 0 | 0 | 0 |
| 39 | 4 | 123013266 | 123560939 | 1 | 0 | 0 | 0 | 0 | 1 |
| 40 | 4 | 140856533 | 140948095 | 0 | 0 | 0 | 0 | 0 | 0 |
| 41 | 4 | 145227879 | 145517578 | 0 | 0 | 0 | 0 | 0 | 0 |
| 42 | 5 | 1276769   | 1364439   | 0 | 0 | 0 | 1 | 0 | 1 |
| 43 | 5 | 14572453  | 14701003  | 0 | 0 | 0 | 0 | 0 | 0 |
| 44 | 5 | 35803577  | 35985395  | 0 | 0 | 0 | 0 | 0 | 0 |
| 45 | 5 | 44406517  | 44565635  | 0 | 0 | 0 | 0 | 0 | 0 |
| 46 | 5 | 74952861  | 75038901  | 0 | 0 | 0 | 0 | 1 | 1 |

|    |   |           |           |   |   |   |   |   |   |
|----|---|-----------|-----------|---|---|---|---|---|---|
| 47 | 5 | 109739071 | 110773457 | 0 | 0 | 0 | 0 | 0 | 0 |
| 48 | 5 | 118676921 | 118741776 | 0 | 0 | 0 | 0 | 0 | 0 |
| 49 | 5 | 129573666 | 132138164 | 1 | 0 | 0 | 0 | 0 | 1 |
| 50 | 5 | 134436352 | 134453390 | 0 | 0 | 0 | 0 | 1 | 1 |
| 51 | 5 | 141394714 | 141567415 | 0 | 0 | 0 | 0 | 0 | 0 |
| 52 | 5 | 147790860 | 147856522 | 0 | 0 | 0 | 0 | 0 | 0 |
| 53 | 5 | 168904005 | 168904005 | 0 | 0 | 0 | 0 | 0 | 0 |
| 54 | 5 | 176536402 | 176824137 | 0 | 0 | 0 | 0 | 0 | 0 |
| 55 | 6 | 7546404   | 7553121   | 0 | 0 | 0 | 0 | 0 | 0 |
| 56 | 6 | 16588294  | 16601081  | 0 | 0 | 0 | 0 | 0 | 0 |
| 56 | 6 | 16588294  | 16601081  | 0 | 0 | 0 | 0 | 0 | 0 |
| 58 | 6 | 25450026  | 29558364  | 0 | 0 | 0 | 1 | 0 | 1 |
| 59 | 6 | 43107744  | 43244714  | 1 | 0 | 0 | 0 | 0 | 1 |
| 60 | 6 | 64139255  | 64491200  | 0 | 0 | 0 | 0 | 0 | 0 |
| 61 | 6 | 90808352  | 91026990  | 1 | 0 | 0 | 0 | 0 | 1 |
| 62 | 6 | 106629690 | 106803325 | 0 | 0 | 0 | 0 | 0 | 0 |
| 63 | 6 | 128269180 | 128294709 | 0 | 0 | 0 | 0 | 0 | 0 |
| 64 | 6 | 135624811 | 135956803 | 0 | 0 | 0 | 0 | 0 | 0 |
| 65 | 6 | 138125881 | 138262773 | 0 | 0 | 0 | 0 | 0 | 0 |
| 66 | 6 | 155028910 | 155162163 | 0 | 0 | 0 | 0 | 0 | 0 |
| 67 | 7 | 957722    | 968469    | 0 | 0 | 0 | 0 | 0 | 0 |
| 68 | 7 | 20372191  | 20636508  | 0 | 0 | 0 | 0 | 0 | 0 |
| 69 | 7 | 22719409  | 22811384  | 0 | 0 | 0 | 0 | 0 | 0 |
| 70 | 7 | 28142088  | 28256240  | 0 | 0 | 0 | 0 | 0 | 0 |
| 71 | 7 | 99557217  | 99765662  | 0 | 0 | 0 | 0 | 0 | 0 |

|    |    |           |           |   |   |   |   |   |   |
|----|----|-----------|-----------|---|---|---|---|---|---|
| 72 | 7  | 105658451 | 105678920 | 0 | 0 | 0 | 0 | 0 | 0 |
| 73 | 7  | 116909572 | 117357607 | 0 | 0 | 0 | 0 | 0 | 0 |
| 74 | 7  | 128567032 | 128711874 | 0 | 0 | 0 | 0 | 0 | 0 |
| 75 | 8  | 8168474   | 8306241   | 0 | 0 | 0 | 0 | 0 | 0 |
| 76 | 8  | 10606219  | 11450422  | 0 | 0 | 0 | 0 | 0 | 0 |
| 77 | 8  | 27319847  | 27442127  | 0 | 0 | 0 | 1 | 0 | 1 |
| 78 | 8  | 71464551  | 72014069  | 0 | 0 | 0 | 0 | 1 | 1 |
| 79 | 8  | 74502909  | 74642586  | 0 | 0 | 0 | 0 | 0 | 0 |
| 80 | 8  | 78093837  | 78257162  | 0 | 0 | 0 | 0 | 1 | 1 |
| 81 | 8  | 81091521  | 81329123  | 0 | 0 | 0 | 0 | 0 | 0 |
| 82 | 8  | 109080504 | 109588327 | 0 | 0 | 0 | 0 | 0 | 0 |
| 83 | 8  | 128777719 | 128815029 | 0 | 0 | 0 | 0 | 0 | 0 |
| 84 | 9  | 5530017   | 6648728   | 1 | 0 | 0 | 0 | 0 | 1 |
| 85 | 9  | 8278669   | 8361957   | 1 | 0 | 0 | 0 | 0 | 1 |
| 86 | 9  | 34581819  | 34698396  | 0 | 0 | 0 | 0 | 0 | 0 |
| 87 | 9  | 126994321 | 127182293 | 0 | 0 | 0 | 0 | 0 | 0 |
| 88 | 9  | 128153244 | 128748180 | 0 | 0 | 0 | 0 | 0 | 0 |
| 89 | 9  | 136459454 | 136485294 | 0 | 0 | 0 | 0 | 0 | 0 |
| 90 | 10 | 8095340   | 9585398   | 1 | 0 | 0 | 0 | 1 | 2 |
| 91 | 10 | 75431981  | 75695724  | 0 | 0 | 0 | 0 | 0 | 0 |
| 92 | 10 | 94248310  | 94495241  | 0 | 0 | 0 | 0 | 0 | 0 |
| 93 | 10 | 104611764 | 104963051 | 0 | 0 | 0 | 0 | 0 | 0 |
| 94 | 11 | 1079746   | 1780061   | 0 | 0 | 1 | 0 | 0 | 1 |
| 95 | 11 | 27581265  | 27742447  | 0 | 0 | 0 | 0 | 1 | 1 |
| 96 | 11 | 61542006  | 61659296  | 0 | 0 | 0 | 0 | 0 | 0 |

|     |    |           |           |   |   |   |   |   |   |
|-----|----|-----------|-----------|---|---|---|---|---|---|
| 97  | 11 | 65547333  | 65562257  | 0 | 0 | 0 | 0 | 0 | 0 |
| 98  | 11 | 75983514  | 76381814  | 0 | 0 | 0 | 0 | 0 | 0 |
| 99  | 11 | 88480235  | 88978545  | 0 | 0 | 0 | 0 | 1 | 1 |
| 100 | 11 | 128131013 | 128188042 | 0 | 0 | 0 | 0 | 0 | 0 |
| 101 | 12 | 998819    | 1066834   | 0 | 0 | 0 | 1 | 0 | 1 |
| 102 | 12 | 39421767  | 39440421  | 0 | 0 | 0 | 0 | 0 | 0 |
| 103 | 12 | 48184793  | 48225742  | 0 | 0 | 0 | 0 | 0 | 0 |
| 104 | 12 | 56358712  | 56482180  | 0 | 0 | 0 | 0 | 0 | 0 |
| 105 | 12 | 57242217  | 57535266  | 0 | 0 | 0 | 0 | 0 | 0 |
| 106 | 12 | 62658228  | 63055729  | 0 | 0 | 0 | 0 | 0 | 0 |
| 107 | 12 | 65761089  | 65891257  | 0 | 0 | 0 | 0 | 1 | 1 |
| 108 | 12 | 94544545  | 94615120  | 0 | 0 | 0 | 0 | 0 | 0 |
| 109 | 12 | 123447928 | 123913433 | 0 | 0 | 0 | 0 | 0 | 0 |
| 110 | 13 | 32866927  | 33239130  | 0 | 0 | 0 | 1 | 0 | 1 |
| 111 | 13 | 40233181  | 40746149  | 0 | 0 | 0 | 0 | 1 | 1 |
| 112 | 13 | 50753772  | 51356435  | 0 | 0 | 0 | 0 | 1 | 1 |
| 113 | 13 | 58252801  | 58717504  | 0 | 0 | 0 | 0 | 0 | 0 |
| 114 | 13 | 74039935  | 74039935  | 0 | 0 | 0 | 0 | 0 | 0 |
| 115 | 13 | 99769973  | 100204845 | 0 | 0 | 0 | 0 | 0 | 0 |
| 116 | 14 | 68727506  | 68815513  | 1 | 0 | 0 | 0 | 0 | 1 |
| 117 | 14 | 79453862  | 79614043  | 0 | 0 | 0 | 0 | 0 | 0 |
| 118 | 14 | 93010967  | 93118229  | 0 | 0 | 0 | 0 | 0 | 0 |
| 119 | 14 | 94672731  | 94844947  | 0 | 0 | 0 | 0 | 0 | 0 |
| 120 | 14 | 99733954  | 99751588  | 0 | 0 | 0 | 0 | 1 | 1 |
| 121 | 14 | 101349454 | 101349454 | 0 | 0 | 0 | 0 | 0 | 0 |

|     |    |          |          |   |   |   |   |   |   |
|-----|----|----------|----------|---|---|---|---|---|---|
| 122 | 15 | 40655873 | 40729400 | 0 | 0 | 0 | 0 | 0 | 0 |
| 123 | 15 | 49285001 | 50007261 | 0 | 0 | 0 | 1 | 0 | 1 |
| 124 | 15 | 61032054 | 61079377 | 0 | 0 | 0 | 0 | 0 | 0 |
| 125 | 15 | 67307227 | 67661784 | 0 | 0 | 0 | 0 | 0 | 0 |
| 126 | 15 | 76473955 | 77256130 | 0 | 0 | 0 | 0 | 0 | 0 |
| 127 | 15 | 78714008 | 79215568 | 0 | 1 | 0 | 1 | 0 | 2 |
| 128 | 15 | 84703470 | 85190780 | 0 | 0 | 0 | 0 | 0 | 0 |
| 129 | 16 | 11031741 | 11324571 | 1 | 0 | 0 | 0 | 0 | 1 |
| 130 | 16 | 27217239 | 27429642 | 1 | 0 | 0 | 0 | 0 | 1 |
| 131 | 16 | 30097630 | 31155458 | 1 | 0 | 0 | 0 | 1 | 2 |
| 132 | 16 | 53797908 | 53845487 | 0 | 0 | 0 | 0 | 1 | 1 |
| 133 | 16 | 75303987 | 75518129 | 0 | 0 | 0 | 0 | 0 | 0 |
| 134 | 17 | 2253441  | 2272024  | 0 | 0 | 0 | 0 | 0 | 0 |
| 135 | 17 | 7437958  | 7538785  | 0 | 0 | 0 | 0 | 1 | 1 |
| 136 | 17 | 15868291 | 16251016 | 1 | 0 | 0 | 0 | 0 | 1 |
| 137 | 17 | 37390863 | 38577416 | 0 | 0 | 0 | 0 | 0 | 0 |
| 138 | 17 | 43208121 | 44874453 | 0 | 0 | 0 | 0 | 1 | 1 |
| 139 | 17 | 45805811 | 46687752 | 0 | 0 | 1 | 0 | 1 | 2 |
| 140 | 17 | 47260130 | 47481374 | 0 | 0 | 0 | 0 | 0 | 0 |
| 141 | 17 | 67881015 | 67963779 | 0 | 0 | 0 | 0 | 1 | 1 |
| 142 | 18 | 35127427 | 35204858 | 0 | 0 | 0 | 0 | 0 | 0 |
| 143 | 18 | 77551586 | 77580712 | 0 | 0 | 0 | 0 | 0 | 0 |
| 144 | 19 | 1004740  | 1031658  | 0 | 0 | 0 | 0 | 0 | 0 |
| 145 | 19 | 6580892  | 6597962  | 0 | 0 | 0 | 0 | 0 | 0 |
| 146 | 19 | 9125547  | 9141159  | 0 | 0 | 0 | 0 | 0 | 0 |

|     |    |          |          |   |   |   |   |   |   |
|-----|----|----------|----------|---|---|---|---|---|---|
| 147 | 19 | 32167803 | 32215431 | 0 | 0 | 0 | 0 | 1 | 1 |
| 148 | 19 | 33718053 | 33753320 | 0 | 0 | 0 | 0 | 0 | 0 |
| 149 | 19 | 41336950 | 41370338 | 0 | 0 | 0 | 1 | 0 | 1 |
| 150 | 19 | 45392254 | 45424351 | 0 | 0 | 0 | 0 | 0 | 0 |
| 151 | 19 | 46219145 | 46374916 | 0 | 0 | 0 | 0 | 0 | 0 |
| 152 | 20 | 21380772 | 21478776 | 0 | 0 | 0 | 0 | 0 | 0 |
| 153 | 20 | 30854756 | 31042595 | 0 | 0 | 0 | 0 | 0 | 0 |
| 154 | 20 | 61979224 | 62470104 | 0 | 0 | 0 | 0 | 0 | 0 |
| 155 | 21 | 36421331 | 36745167 | 0 | 0 | 0 | 0 | 0 | 0 |
| 156 | 22 | 41408754 | 42216326 | 1 | 0 | 0 | 0 | 0 | 1 |

Abbreviations: Locus No., the numerical order of pleiotropic genomic risk locus; AST, Asthma; COPD, Chronic obstructive pulmonary disease; IPF, Idiopathic Pulmonary Fibrosis; LC, Lung Cancer; SNO, Snoring.

<sup>a</sup> We annotated SNPs with  $P < 5 \times 10^{-8}$  in each single-trait GWAS by FUMA for comparison. 0 indicates that the genomic risk locus annotated by FUMA for a single GWAS does not overlap with the locus annotated by CPASSCO results, and 1 indicates that the locus overlaps with the locus annotated by CPASSCO results
