# Supplementary material for: Shared genetic aetiology of respiratory diseases: a genome-wide multitraits association analysis
Source: PubMed Central journal article supplement — BMJ Open Respir Res. 2024 Jun 4;11(1):e002148. doi: 10.1136/bmjresp-2023-002148 (PMC11163672; doi:10.1136/bmjresp-2023-002148), 2024-06-04
Supplement: bmjresp-2023-002148supp012.pdf [file bmjresp-2023-002148supp012.pdf]

**eTable 11.** Identification of colocalized loci by multi-trait colocalization using HyPrColoc

| Locus | Trait          | PP     | RP     | Candidate SNP | PP.SNP | Nearest gene  | CHR | POS       | A1 | A2 | Functional annotation | CADD  | RDB    |
|-------|----------------|--------|--------|---------------|--------|---------------|-----|-----------|----|----|-----------------------|-------|--------|
| 123   | AST, COPD      | 0.8795 | 0.9792 | rs10519237    | 0.0875 | RP11-353B9.1  | 15  | 49956672  | T  | C  | intergenic            | 0.836 | 7      |
| 17    | AST, COPD      | 0.8803 | 0.9905 | rs11679146    | 0.5024 | IL18R1        | 2   | 103009412 | G  | A  | intronic              | 6.566 | 6      |
| 152   | AST, COPD      | 0.8296 | 0.9075 | rs11697152    | 0.5447 | RP5-984P4.1   | 20  | 21467208  | G  | A  | intergenic            | 0.159 | 7      |
| 73    | AST, COPD, IPF | 0.7547 | 0.7705 | rs147678978   | 1      | AC006326.3    | 7   | 116909572 | T  | G  | intergenic            | 5.336 | 2b     |
| 139   | IPF, SNO       | 0.8976 | 0.9997 | rs150592114   | 0.8497 | RP11-259G18.3 | 17  | 44333331  | G  | A  | intergenic            | 3.04  | 6      |
| 135   | AST, SNO       | 0.7869 | 0.8502 | rs1641512     | 0.3948 | ATP1B2        | 17  | 7559462   | G  | A  | 3PRIME_UTR            | 0.717 | 0.5139 |
| 90    | AST, COPD      | 0.7508 | 0.9363 | rs1775554     | 0.1891 | RP11-428L9.2  | 10  | 9054340   | C  | A  | intergenic            | 5.711 | 3a     |
| 131   | AST, SNO       | 0.859  | 0.9999 | rs2199036     | 0.0876 | STX1B         | 16  | 31006972  | T  | C  | intronic              | 0.585 | 7      |
| 119   | COPD, IPF      | 0.7106 | 0.7501 | rs28929474    | 0.945  | SERPINA1      | 14  | 94844947  | T  | C  | exonic                | 20.2  | NA     |
| 5     | AST, COPD, LC  | 0.8111 | 0.8424 | rs34517439    | 0.997  | DNAJB4:GIPC2  | 1   | 78450517  | A  | C  | intronic              | 8.996 | 6      |
| 86    | AST, COPD      | 0.7026 | 0.8262 | rs3808868     | 0.1227 | GALT:IL11RA   | 9   | 34654142  | G  | T  | intronic              | 5.099 | NA     |
| 77    | COPD, LC       | 0.8069 | 0.9971 | rs56223946    | 0.4368 | GULOP         | 8   | 27413986  | T  | C  | intergenic            | 1.227 | 6      |
| 45    | AST, COPD      | 0.864  | 0.9736 | rs9292907     | 0.1985 | FGF10-AS1     | 5   | 44428516  | G  | A  | intergenic            | 5.311 | 6      |
| 57    | AST, COPD      | 0.9687 | 0.9803 | rs9350191     | 0.9487 | ID4           | 6   | 19842661  | T  | C  | intergenic            | 12.57 | 3a     |
| 132   | AST, SNO       | 0.8761 | 1      | rs9940278     | 0.0766 | FTO           | 16  | 53800200  | T  | C  | intronic              | 0.187 | 6      |

Abbreviations: HyPrColoc, Hypothesis Prioritisation for multi-trait Colocalization; Locus No., the numerical order of pleiotropic genomic risk locus; A1, effect allele; A2, non effect allele; PP, posterior probability; RP, Regional probability; CHR, chromosome; BP, base pair; CADD, Combined Annotation-Dependent depletion scores; RDB, RegulomeDB scores; AST, Asthma; COPD, Chronic obstructive pulmonary disease; IPF, Idiopathic Pulmonary Fibrosis; LC, Lung Cancer; SNO, Snoring.

**\*\*Sensitivity analysis of the colocalization loci**

We performed sensitivity analysis on colocalized loci using heat-maps and similarity matrices generated from two different prior probabilities.

①Heat-map (A: prior probability= $1 \times 10^{-4}$ ; B: prior probability= $1 \times 10^{-5}$ )

Loci 5:

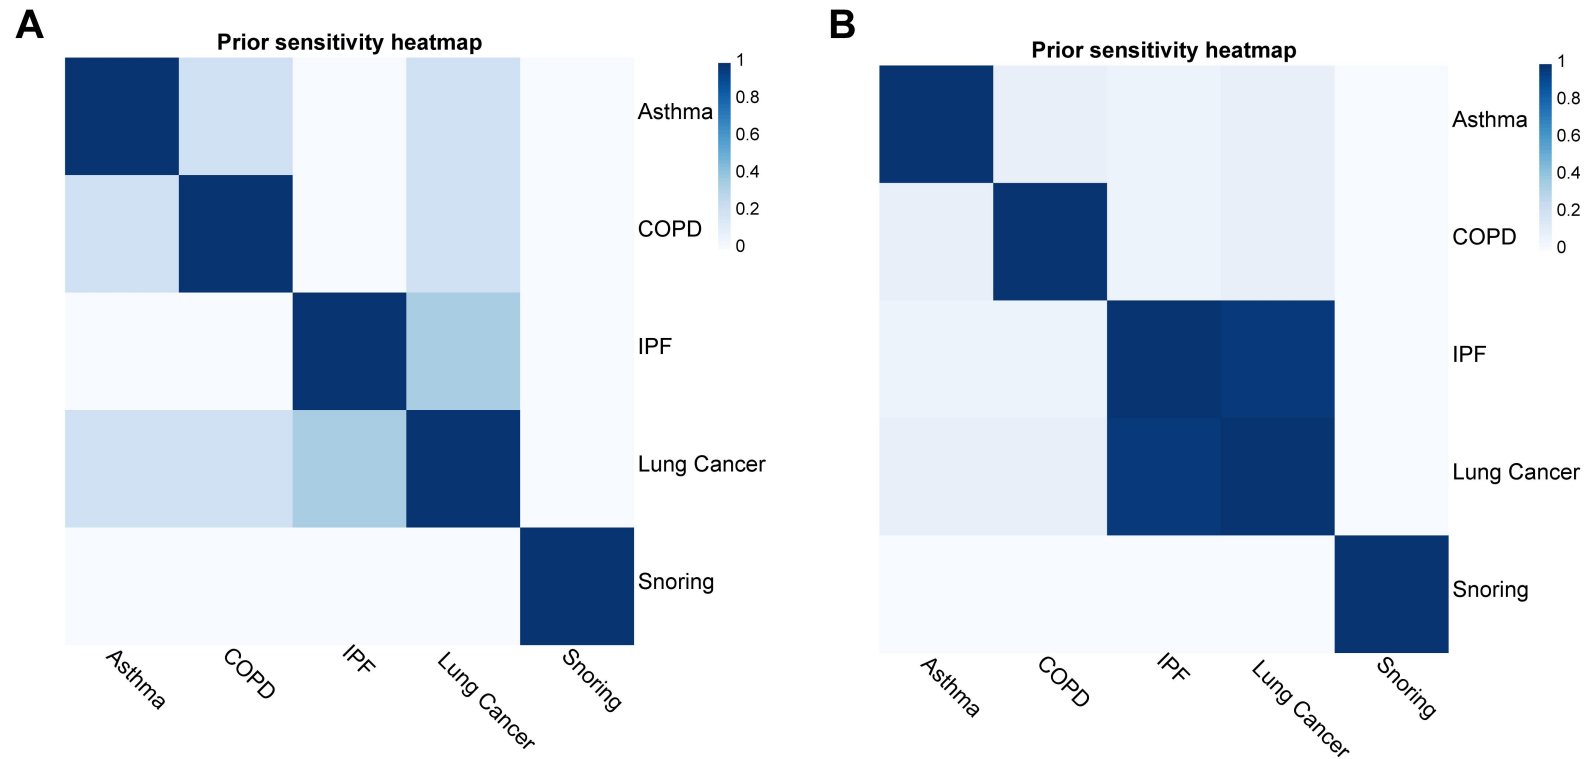

Loci 17:

**A**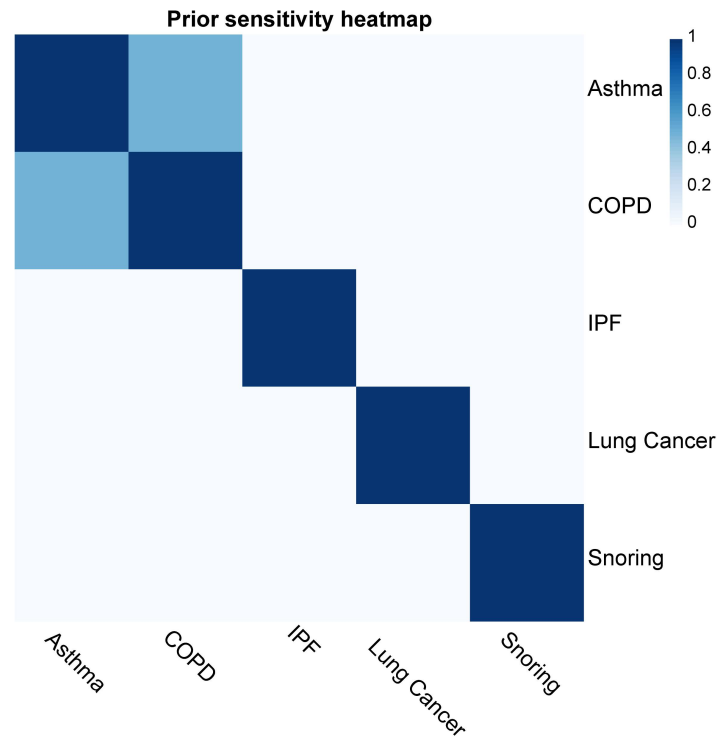**B**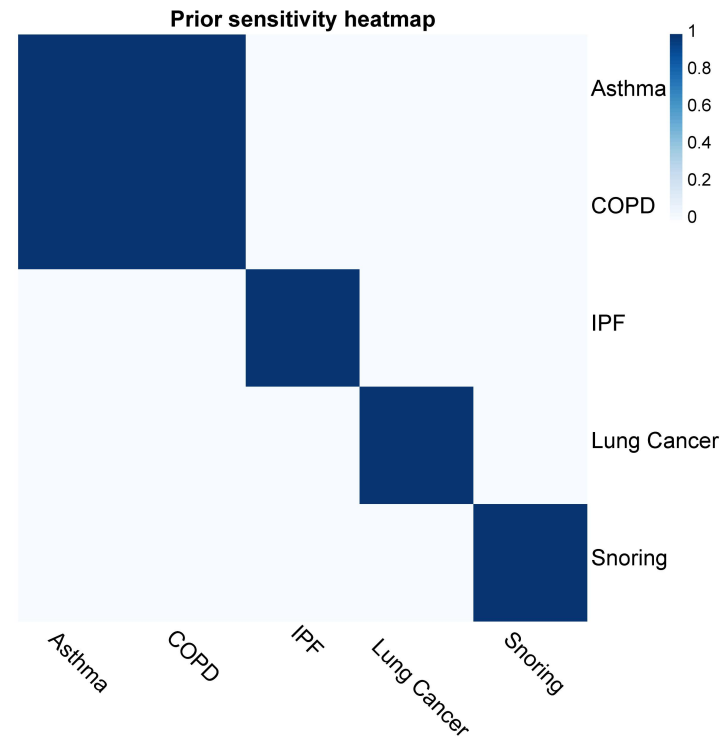

Loci 45:

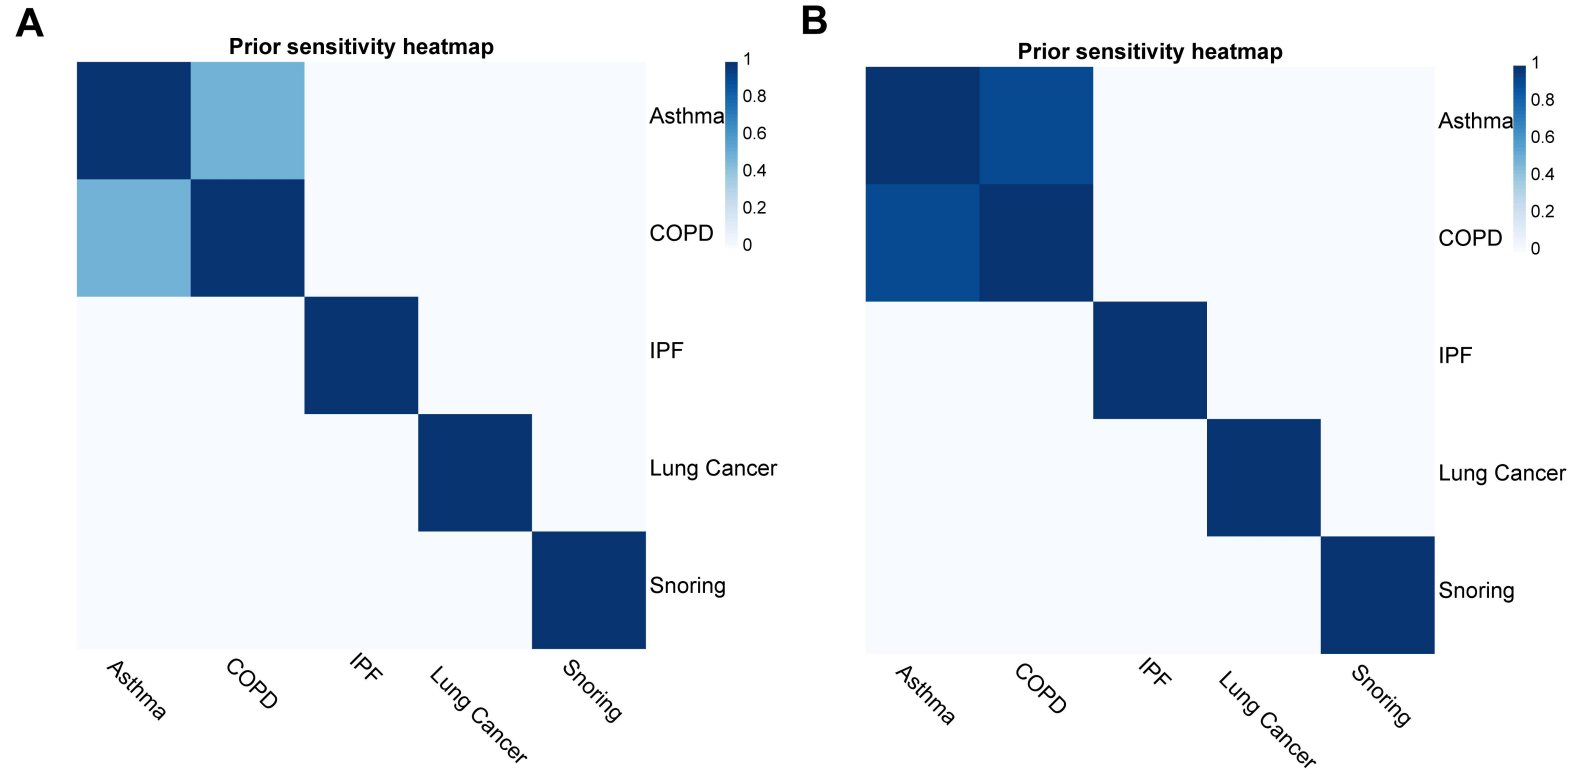

Loci 57:

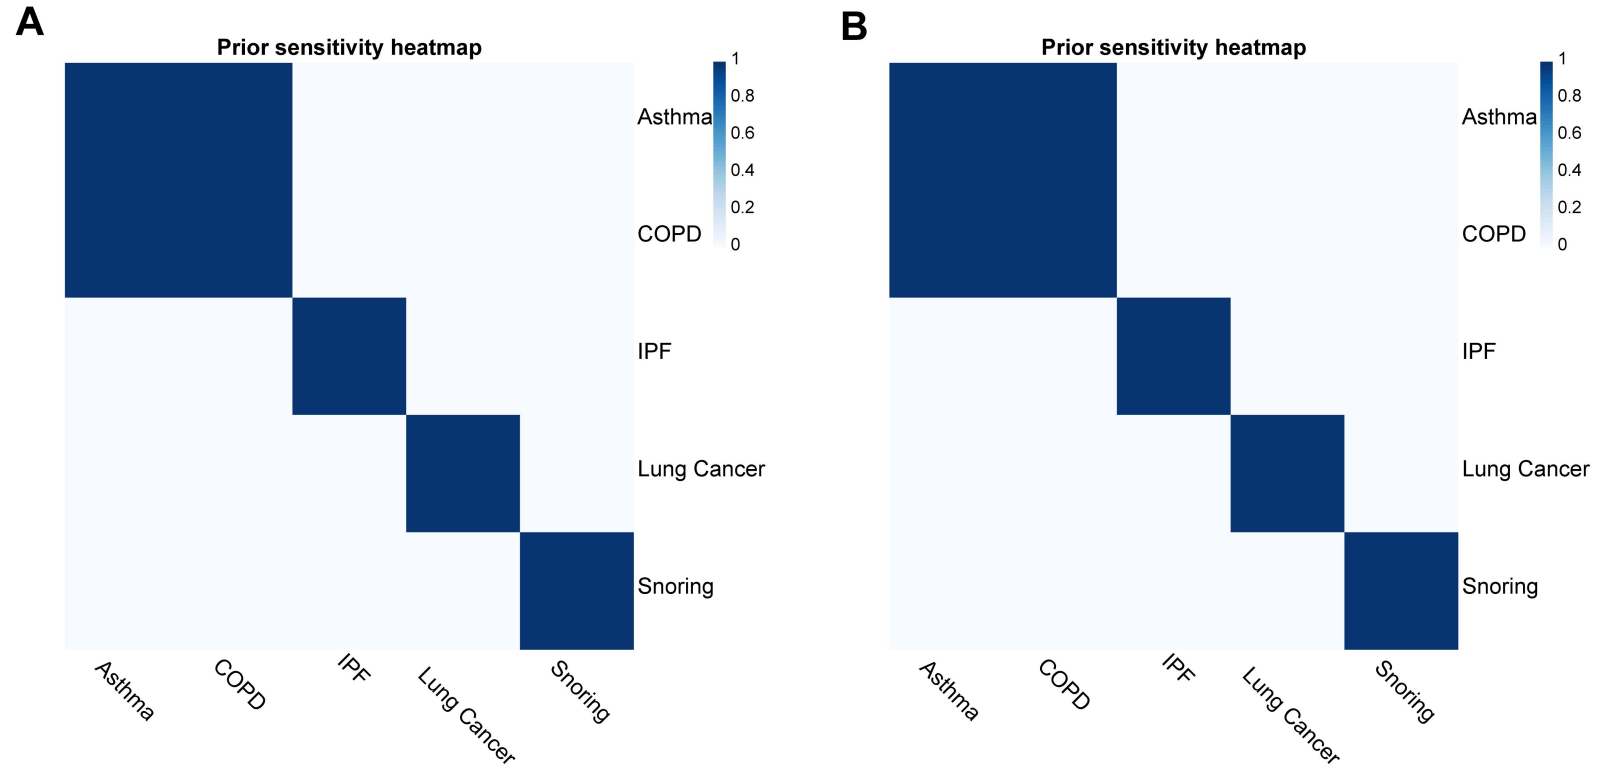

Loci 73:

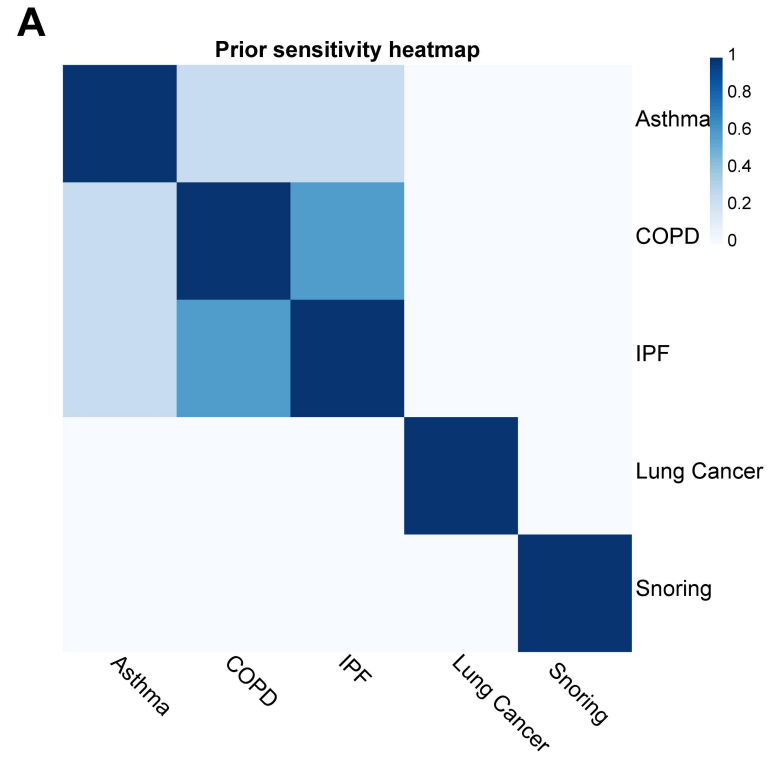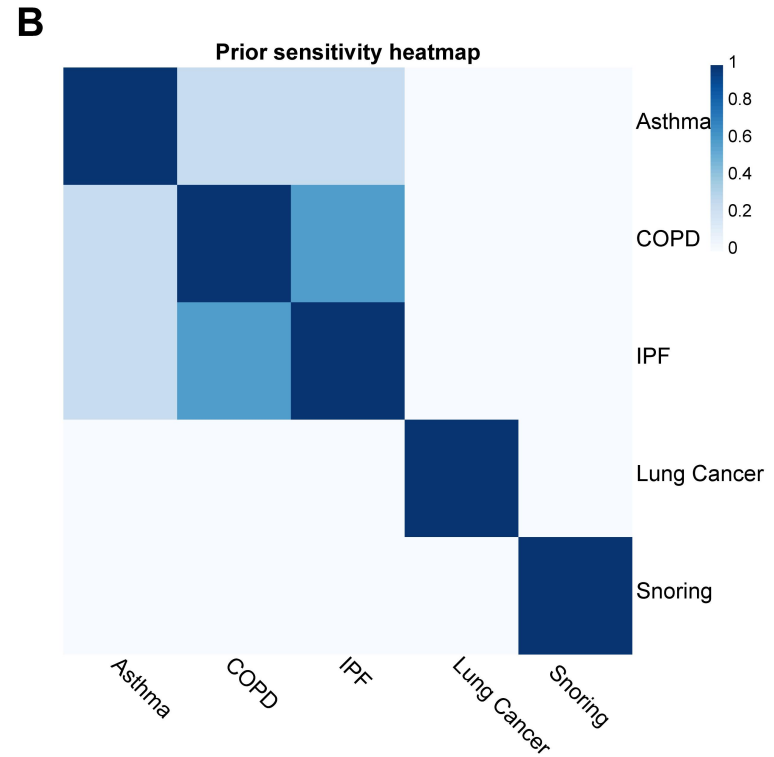

Loci 77:

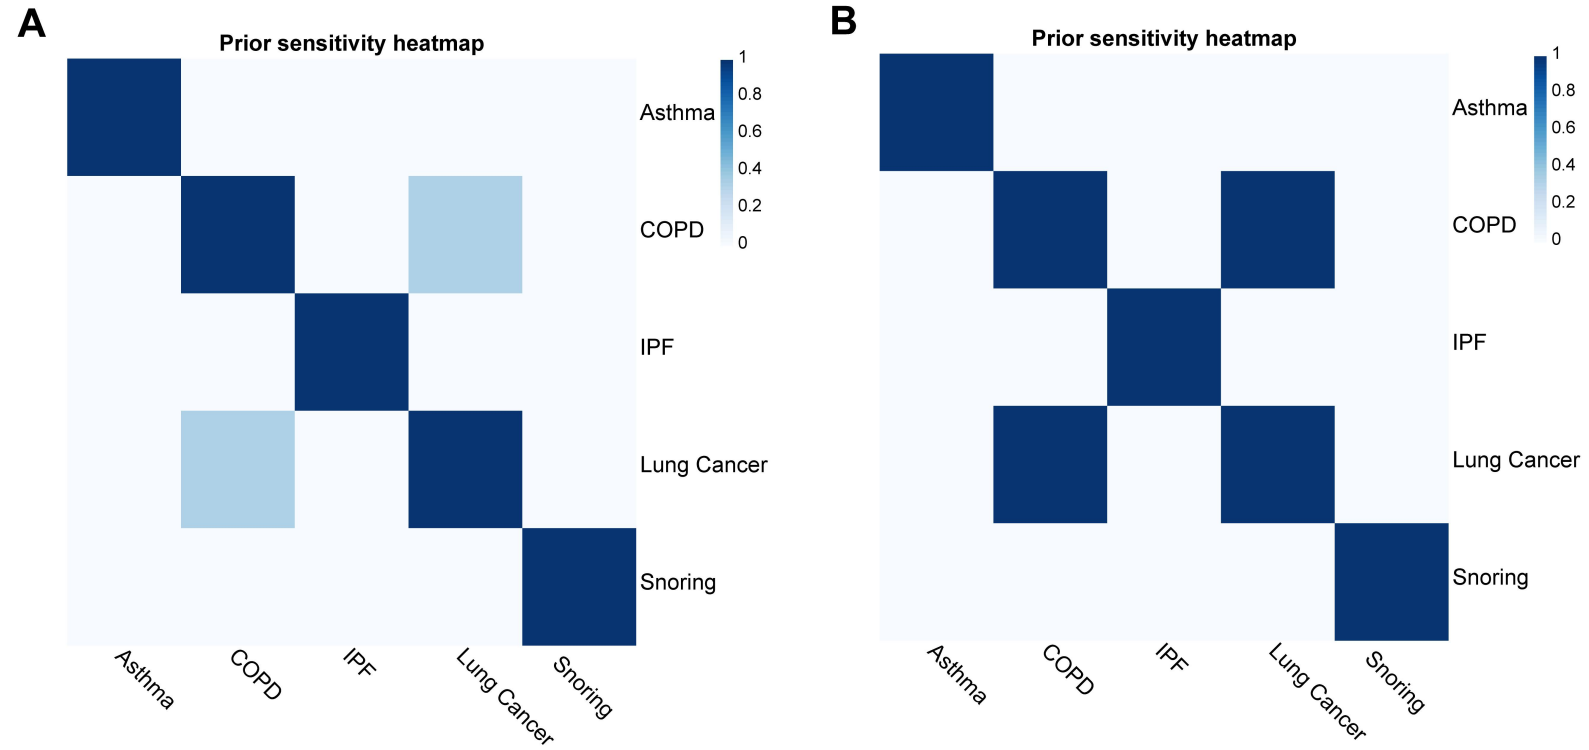

Loci 86:

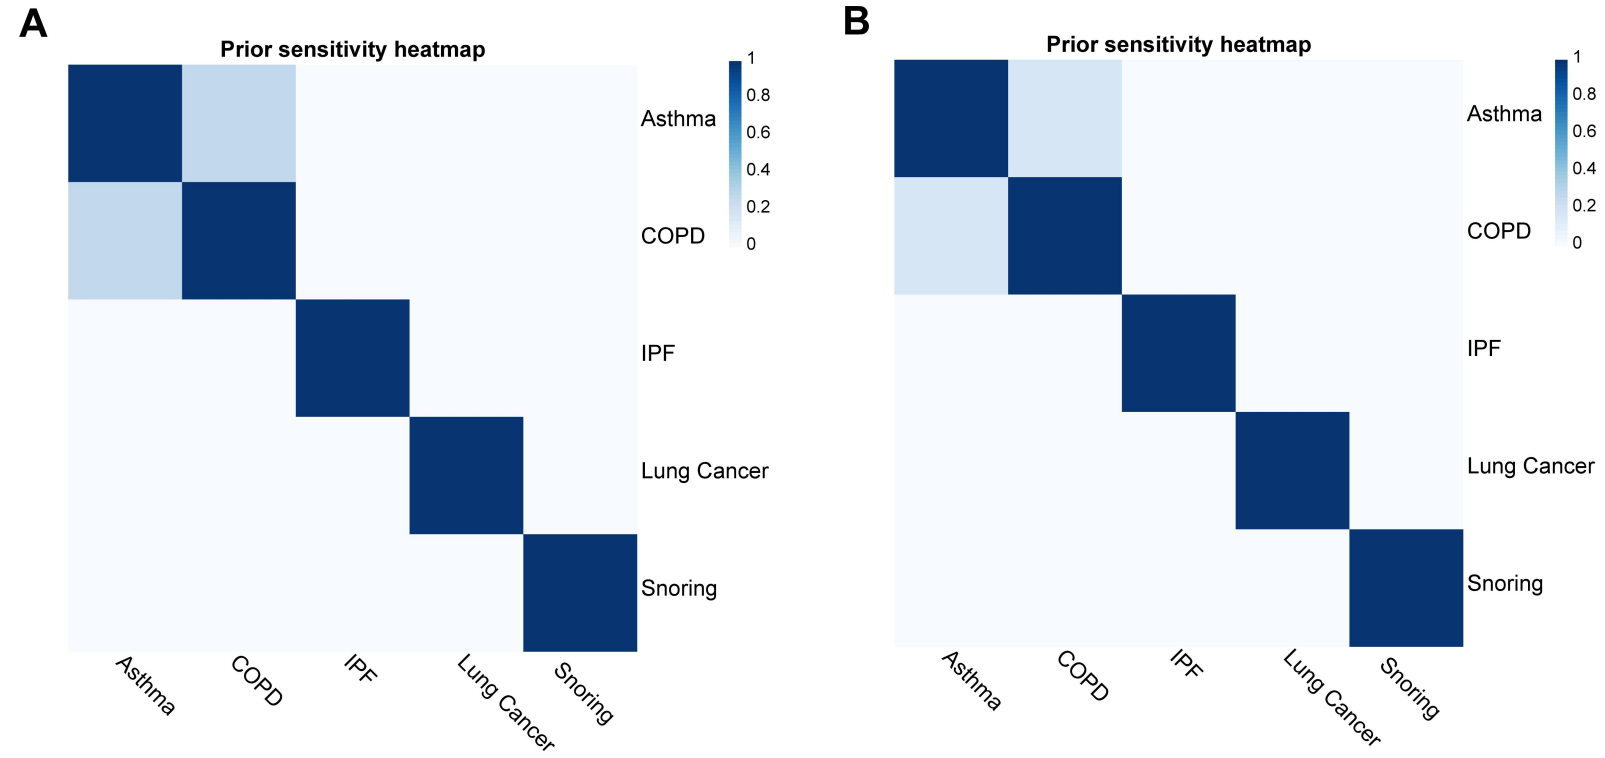



Loci 90:

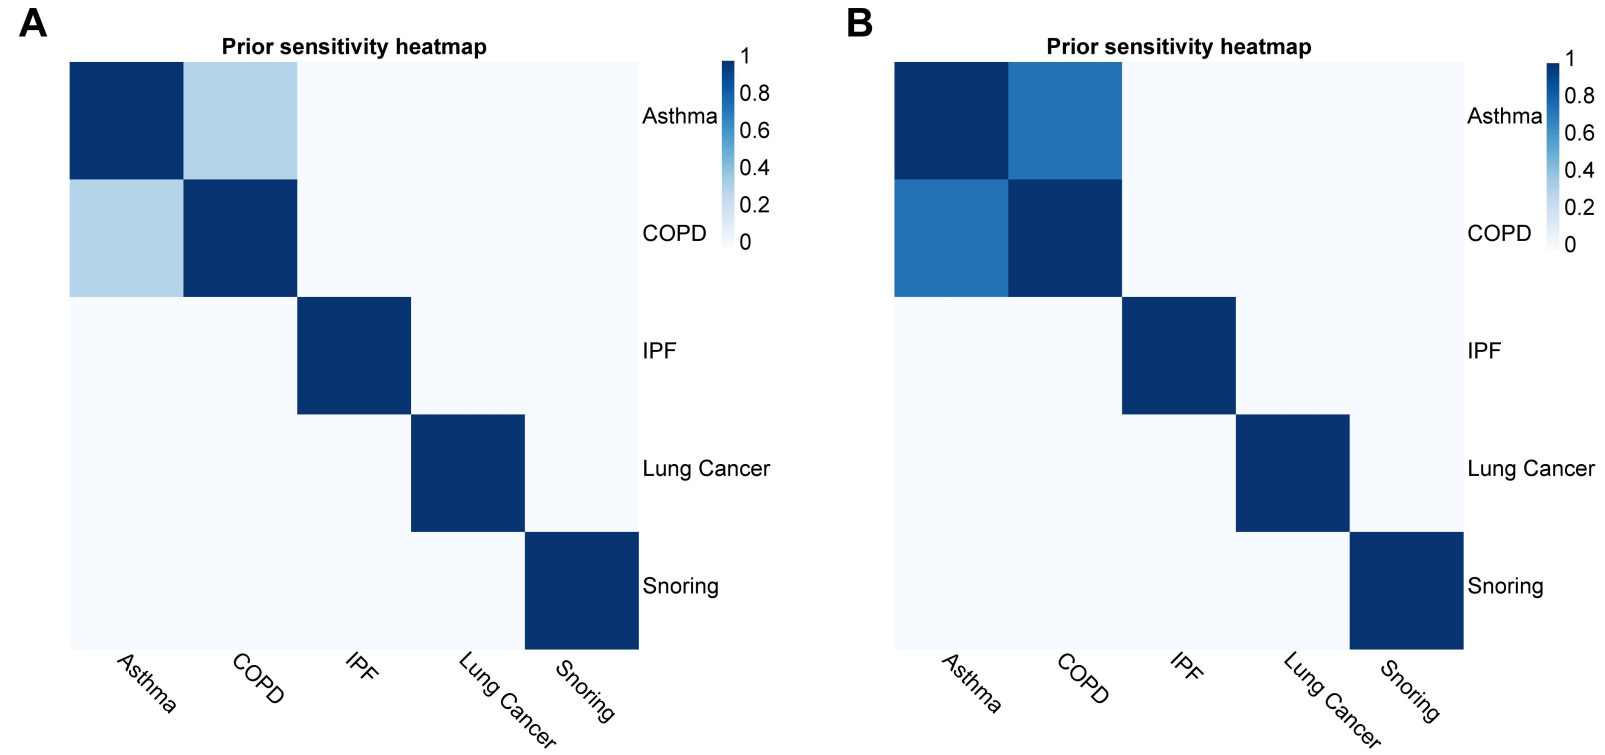

Loci 119:

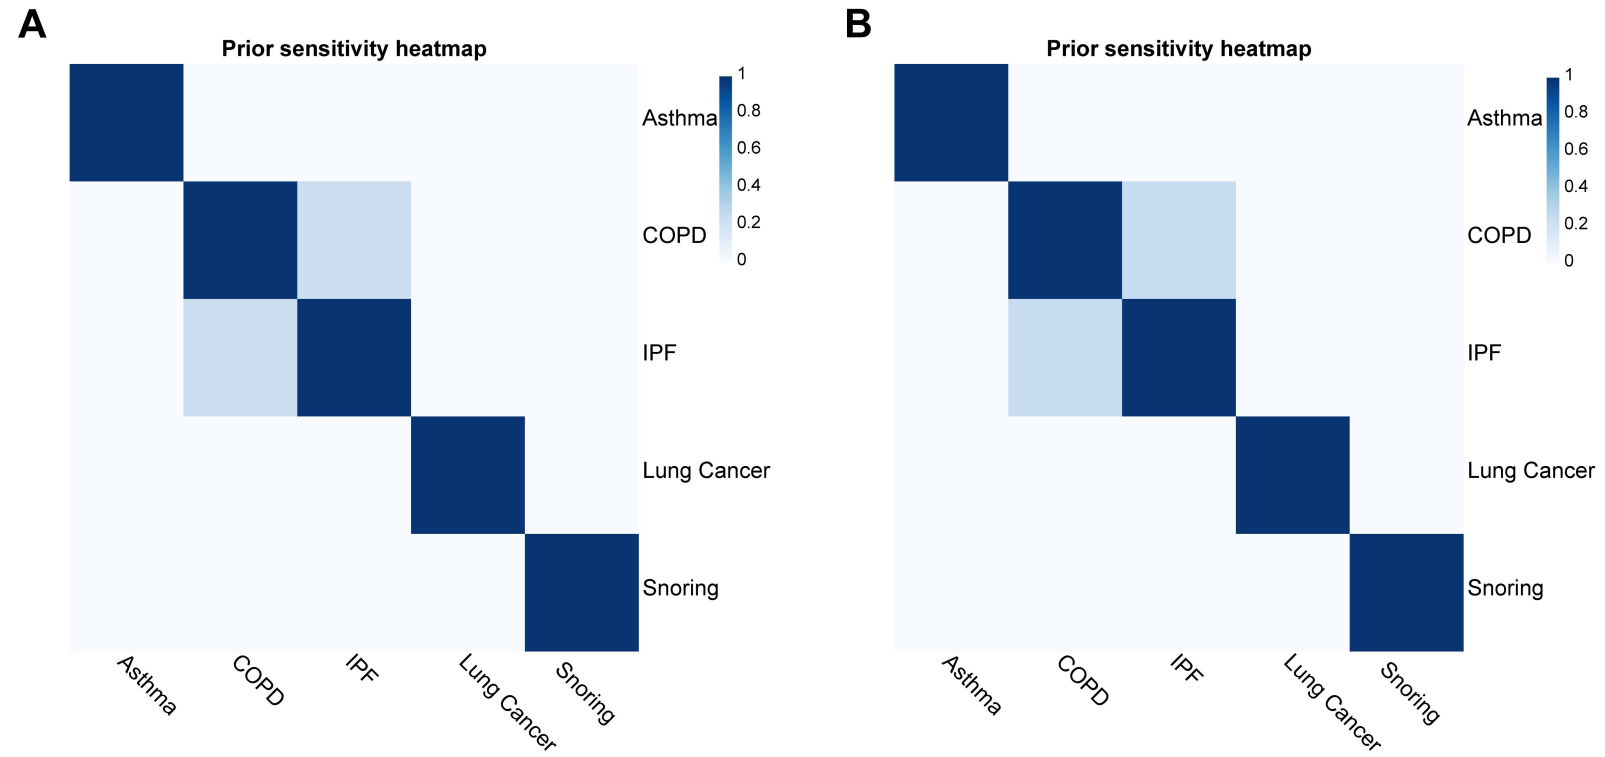

Loci 123:

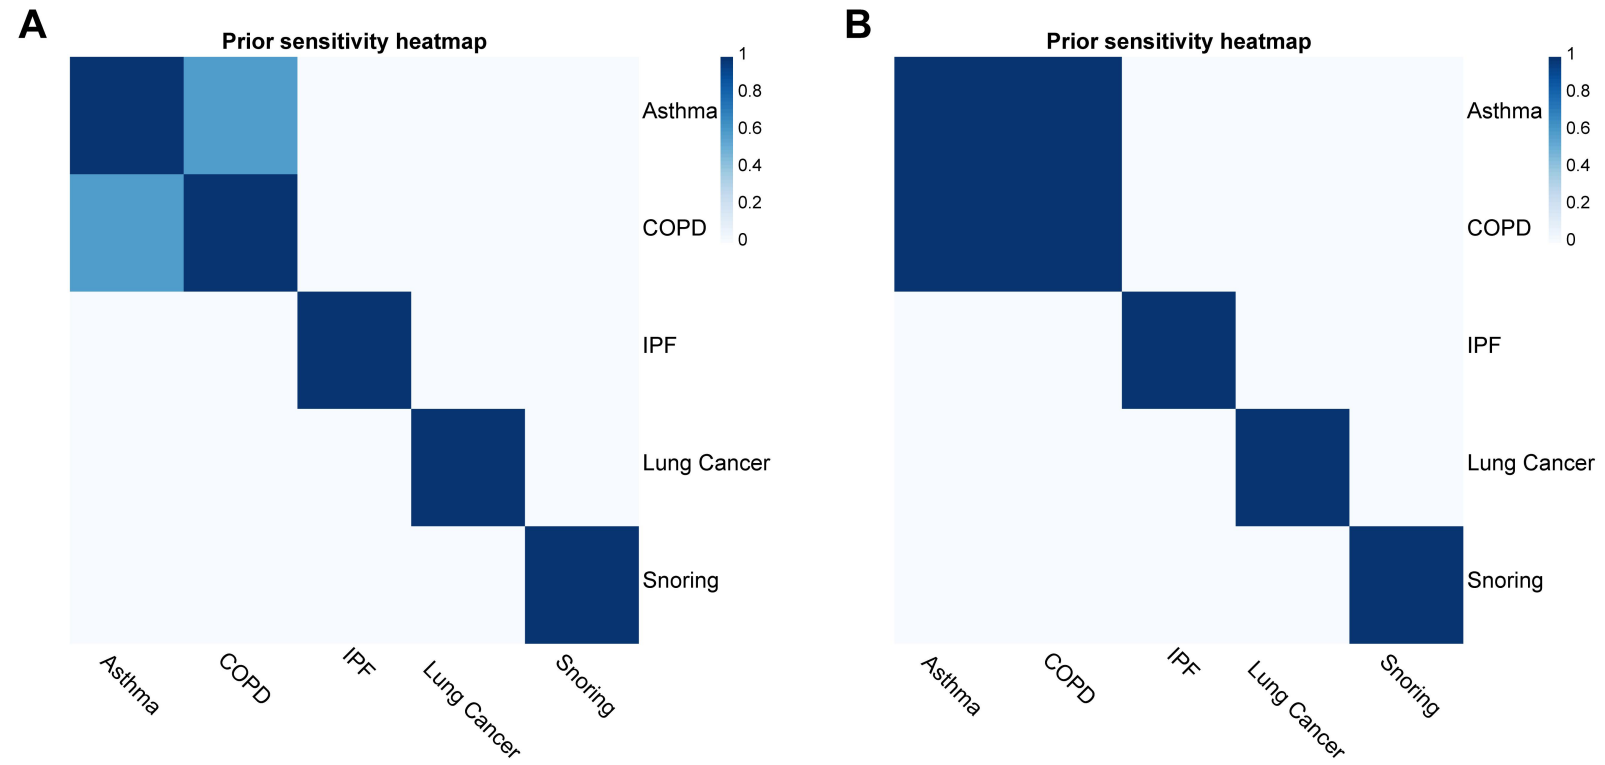

Loci 131:

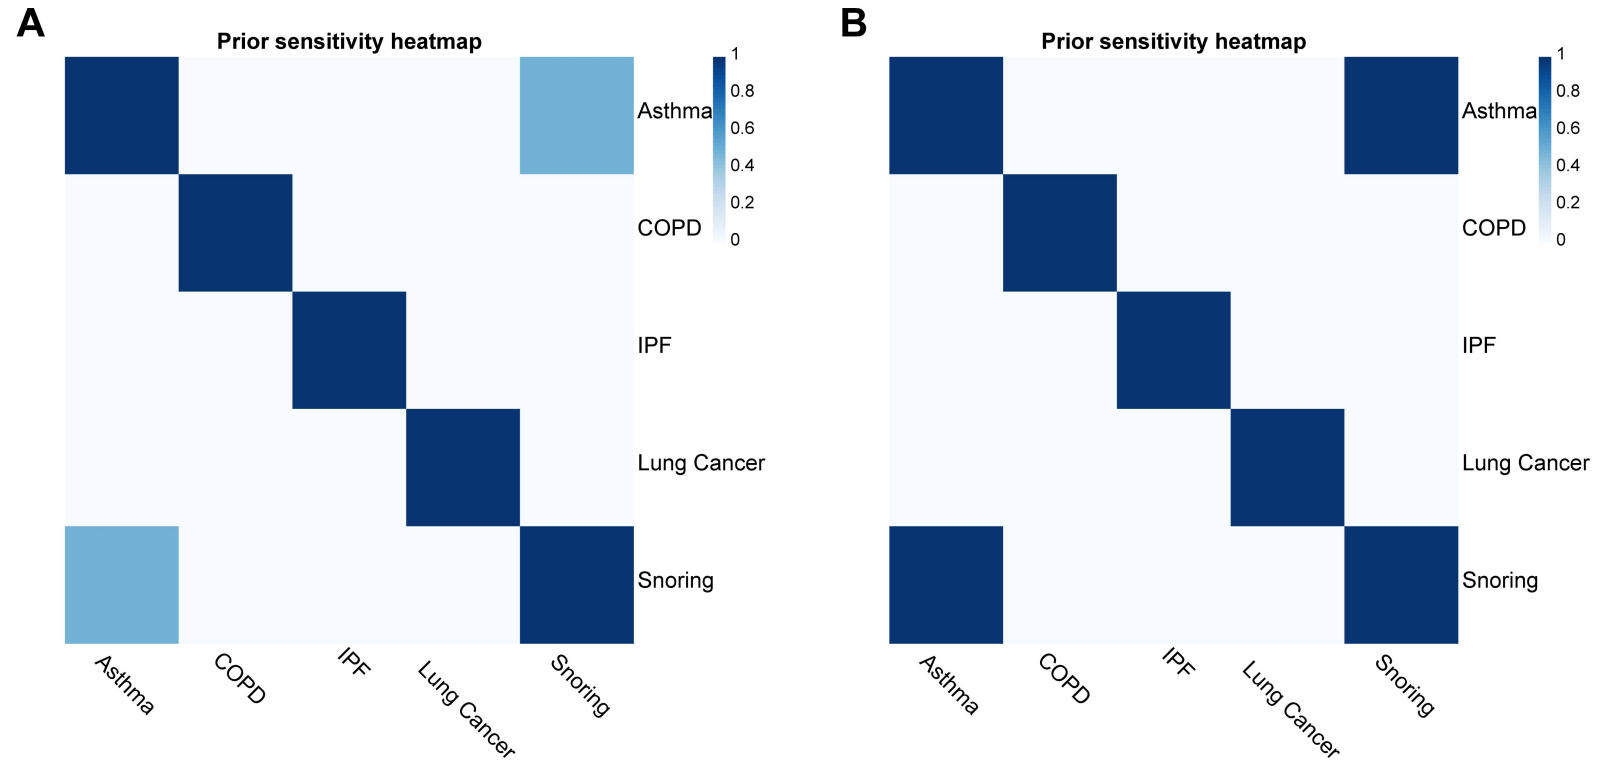

Loci 132:

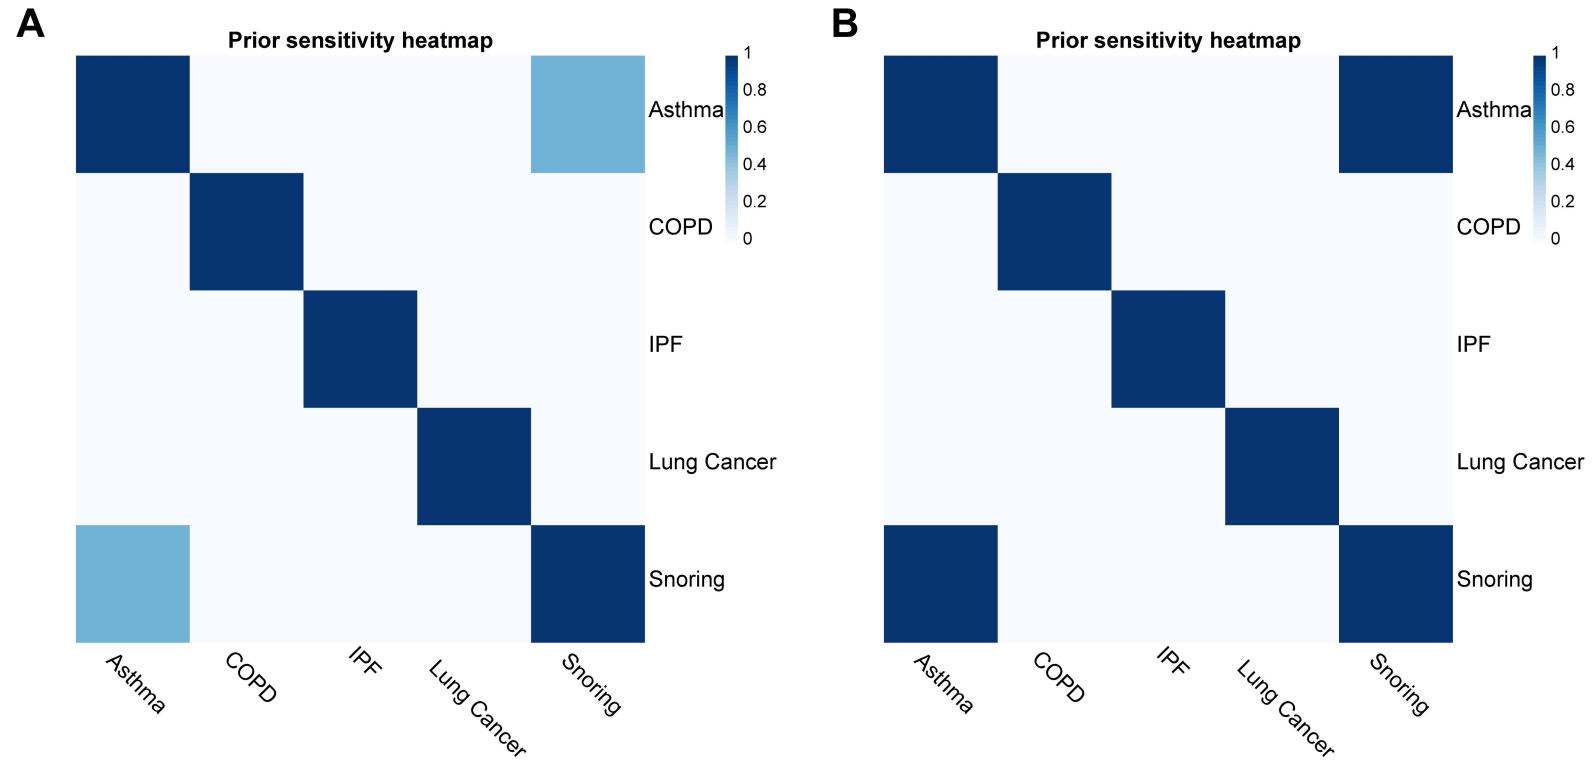

Loci 135:

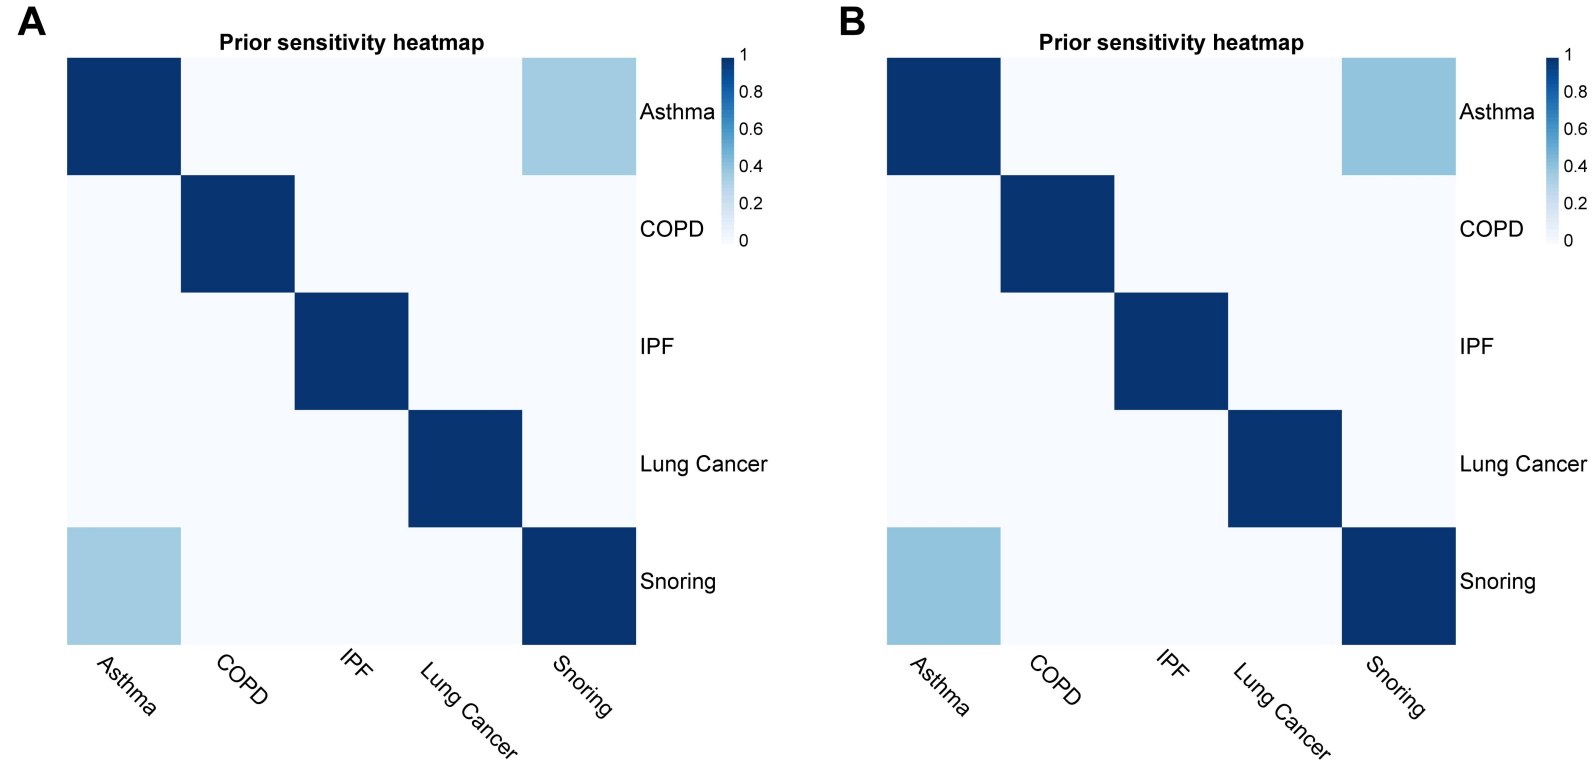

Loci 139:

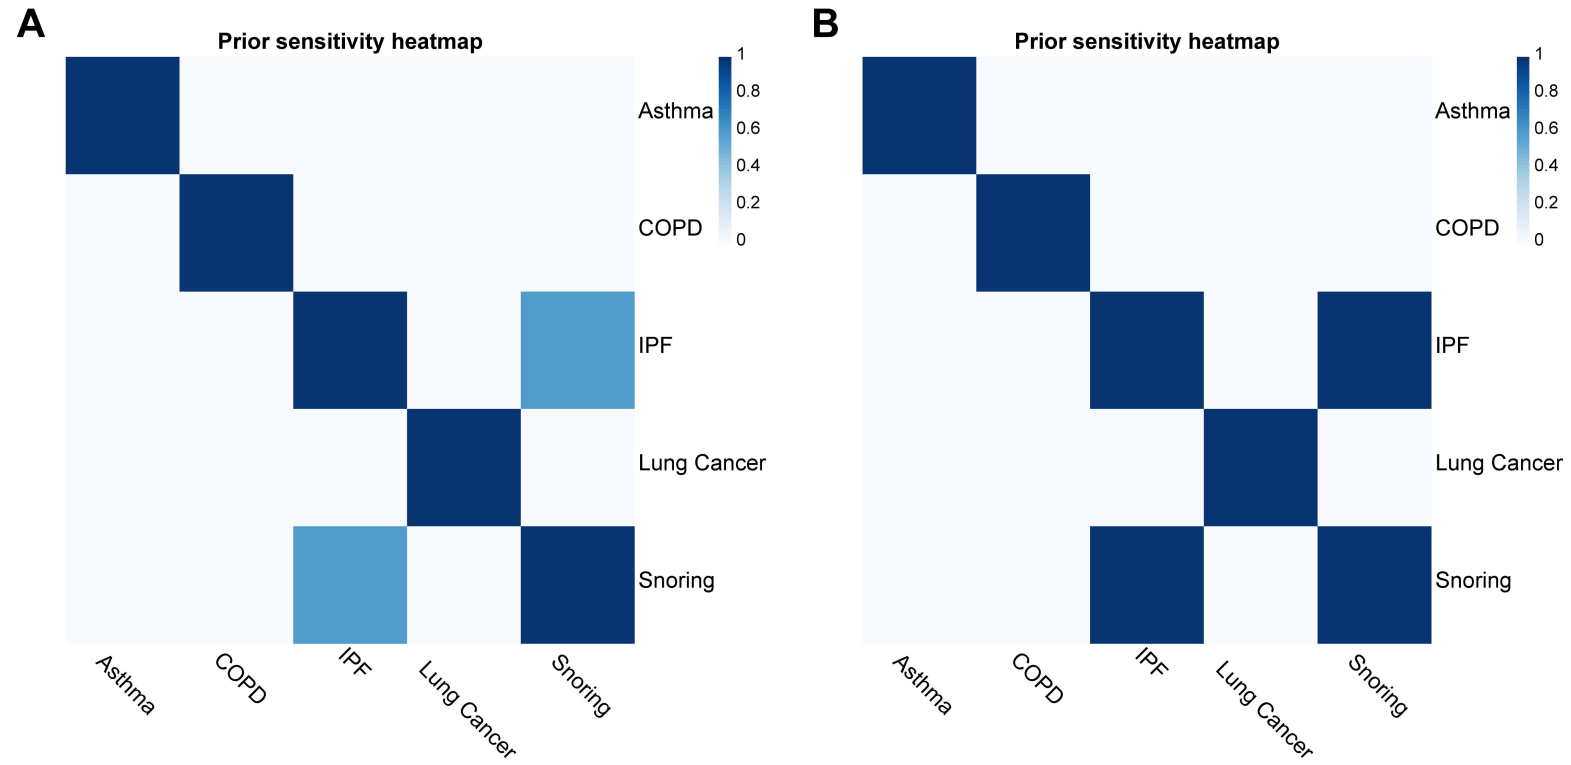

Loci 152:





② Similarity matrix (A: prior probability= $1 \times 10^{-4}$ ; B: prior probability= $1 \times 10^{-5}$ )

Loci 5:

A:

|    | T1   | T2   | T3   | T4   | T5   |
|----|------|------|------|------|------|
| T1 | 1.00 | 0.21 | 0.00 | 0.21 | 0.00 |
| T2 | 0.21 | 1.00 | 0.00 | 0.21 | 0.00 |
| T3 | 0.00 | 0.00 | 1.00 | 0.35 | 0.00 |
| T4 | 0.21 | 0.21 | 0.35 | 1.00 | 0.00 |
| T5 | 0.00 | 0.00 | 0.00 | 1.00 | 1.00 |

B:

|    | T1   | T2   | T3   | T4   | T5   |
|----|------|------|------|------|------|
| T1 | 1.00 | 0.08 | 0.06 | 0.08 | 0.00 |
| T2 | 0.08 | 1.00 | 0.06 | 0.08 | 0.00 |
| T3 | 0.06 | 0.06 | 1.00 | 0.98 | 0.00 |
| T4 | 0.08 | 0.08 | 0.98 | 1.00 | 0.00 |
| T5 | 0.00 | 0.00 | 0.00 | 0.00 | 1.00 |

Loci 17:

A:

|    | T1   | T2   | T3   | T4   | T5   |
|----|------|------|------|------|------|
| T1 | 1.00 | 0.50 | 0.00 | 0.00 | 0.00 |
| T2 | 0.50 | 1.00 | 0.00 | 0.00 | 0.00 |
| T3 | 0.00 | 0.00 | 1.00 | 0.00 | 0.00 |
| T4 | 0.00 | 0.00 | 0.00 | 1.00 | 0.00 |
| T5 | 0.00 | 0.00 | 0.00 | 0.00 | 1.00 |

B:

|    | T1   | T2   | T3   | T4   | T5   |
|----|------|------|------|------|------|
| T1 | 1.00 | 1.00 | 0.00 | 0.00 | 0.00 |
| T2 | 1.00 | 1.00 | 0.00 | 0.00 | 0.00 |
| T3 | 0.00 | 0.00 | 1.00 | 0.00 | 0.00 |
| T4 | 0.00 | 0.00 | 0.00 | 1.00 | 0.00 |
| T5 | 0.00 | 0.00 | 0.00 | 0.00 | 1.00 |

Loci 45:

A:

|    | T1   | T2   | T3   | T4   | T5   |
|----|------|------|------|------|------|
| T1 | 1.00 | 0.50 | 0.00 | 0.00 | 0.00 |
| T2 | 0.50 | 1.00 | 0.00 | 0.00 | 0.00 |
| T3 | 0.00 | 0.00 | 1.00 | 0.00 | 0.00 |
| T4 | 0.00 | 0.00 | 0.00 | 1.00 | 0.00 |
| T5 | 0.00 | 0.00 | 0.00 | 0.00 | 1.00 |

B:

|    | T1   | T2   | T3   | T4   | T5   |
|----|------|------|------|------|------|
| T1 | 1.00 | 0.92 | 0.00 | 0.00 | 0.00 |
| T2 | 0.92 | 1.00 | 0.00 | 0.00 | 0.00 |
| T3 | 0.00 | 0.00 | 1.00 | 0.00 | 0.00 |
| T4 | 0.00 | 0.00 | 0.00 | 1.00 | 0.00 |
| T5 | 0.00 | 0.00 | 0.00 | 0.00 | 1.00 |

Loci 57:

A:

|    | T1   | T2   | T3   | T4   | T5   |
|----|------|------|------|------|------|
| T1 | 1.00 | 1.00 | 0.00 | 0.00 | 0.00 |
| T2 | 1.00 | 1.00 | 0.00 | 0.00 | 0.00 |
| T3 | 0.00 | 0.00 | 1.00 | 0.00 | 0.00 |
| T4 | 0.00 | 0.00 | 0.00 | 1.00 | 0.00 |
| T5 | 0.00 | 0.00 | 0.00 | 0.00 | 1.00 |

B:

|    | T1   | T2   | T3   | T4   | T5   |
|----|------|------|------|------|------|
| T1 | 1.00 | 1.00 | 0.00 | 0.00 | 0.00 |
| T2 | 1.00 | 1.00 | 0.00 | 0.00 | 0.00 |
| T3 | 0.00 | 0.00 | 1.00 | 0.00 | 0.00 |
| T4 | 0.00 | 0.00 | 0.00 | 1.00 | 0.00 |
| T5 | 0.00 | 0.00 | 0.00 | 0.00 | 1.00 |

Loci 73:

A:

|    | T1   | T2   | T3   | T4   | T5   |
|----|------|------|------|------|------|
| T1 | 1.00 | 0.25 | 0.25 | 0.00 | 0.00 |
| T2 | 0.25 | 1.00 | 0.58 | 0.00 | 0.00 |
| T3 | 0.25 | 0.58 | 1.00 | 0.00 | 0.00 |
| T4 | 0.00 | 0.00 | 0.00 | 1.00 | 0.00 |
| T5 | 0.00 | 0.00 | 0.00 | 0.00 | 1.00 |

B:

|    | T1   | T2   | T3   | T4   | T5   |
|----|------|------|------|------|------|
| T1 | 1.00 | 0.25 | 0.25 | 0.00 | 0.00 |
| T2 | 0.25 | 1.00 | 0.58 | 0.00 | 0.00 |
| T3 | 0.25 | 0.58 | 1.00 | 0.00 | 0.00 |
| T4 | 0.00 | 0.00 | 0.00 | 1.00 | 0.00 |
| T5 | 0.00 | 0.00 | 0.00 | 0.00 | 1.00 |

Loci 77:

A:

|    | T1   | T2   | T3   | T4   | T5   |
|----|------|------|------|------|------|
| T1 | 1.00 | 0.00 | 0.00 | 0.00 | 0.00 |
| T2 | 0.00 | 1.00 | 0.00 | 0.33 | 0.00 |
| T3 | 0.00 | 0.00 | 1.00 | 0.00 | 0.00 |
| T4 | 0.00 | 0.33 | 0.00 | 1.00 | 0.00 |
| T5 | 0.00 | 0.00 | 0.00 | 0.00 | 1.00 |

B:

|    | T1   | T2   | T3   | T4   | T5   |
|----|------|------|------|------|------|
| T1 | 1.00 | 0.00 | 0.00 | 0.00 | 0.00 |
| T2 | 0.00 | 1.00 | 0.00 | 1.00 | 0.00 |
| T3 | 0.00 | 0.00 | 1.00 | 0.00 | 0.00 |
| T4 | 0.00 | 1.00 | 0.00 | 1.00 | 0.00 |
| T5 | 0.00 | 0.00 | 0.00 | 0.00 | 1.00 |

Loci 86:

A:

|    | T1   | T2   | T3   | T4   | T5   |
|----|------|------|------|------|------|
| T1 | 1.00 | 0.27 | 0.00 | 0.00 | 0.00 |
| T2 | 0.27 | 1.00 | 0.00 | 0.00 | 0.00 |
| T3 | 0.00 | 0.00 | 1.00 | 0.00 | 0.00 |
| T4 | 0.00 | 0.00 | 0.00 | 1.00 | 0.00 |
| T5 | 0.00 | 0.00 | 0.00 | 0.00 | 1.00 |

B:

|    | T1   | T2   | T3   | T4   | T5   |
|----|------|------|------|------|------|
| T1 | 1.00 | 0.17 | 0.00 | 0.00 | 0.00 |
| T2 | 0.17 | 1.00 | 0.00 | 0.00 | 0.00 |
| T3 | 0.00 | 0.00 | 1.00 | 0.00 | 0.00 |
| T4 | 0.00 | 0.00 | 0.00 | 1.00 | 0.00 |
| T5 | 0.00 | 0.00 | 0.00 | 0.00 | 1.00 |

Loci 90:

A:

|    | T1   | T2   | T3   | T4   | T5   |
|----|------|------|------|------|------|
| T1 | 1.00 | 0.31 | 0.00 | 0.00 | 0.00 |
| T2 | 0.31 | 1.00 | 0.00 | 0.00 | 0.00 |
| T3 | 0.00 | 0.00 | 1.00 | 0.00 | 0.00 |
| T4 | 0.00 | 0.00 | 0.00 | 1.00 | 0.00 |
| T5 | 0.00 | 0.00 | 0.00 | 0.00 | 1.00 |

B:

|    | T1   | T2   | T3   | T4   | T5   |
|----|------|------|------|------|------|
| T1 | 1.00 | 0.75 | 0.00 | 0.00 | 0.00 |
| T2 | 0.75 | 1.00 | 0.00 | 0.00 | 0.00 |
| T3 | 0.00 | 0.00 | 1.00 | 0.00 | 0.00 |
| T4 | 0.00 | 0.00 | 0.00 | 1.00 | 0.00 |
| T5 | 0.00 | 0.00 | 0.00 | 0.00 | 1.00 |



Loci 119:

A:

|    | T1   | T2   | T3   | T4   | T5   |
|----|------|------|------|------|------|
| T1 | 1.00 | 0.00 | 0.00 | 0.00 | 0.00 |
| T2 | 0.00 | 1.00 | 0.23 | 0.00 | 0.00 |
| T3 | 0.00 | 0.23 | 1.00 | 0.00 | 0.00 |
| T4 | 0.00 | 0.00 | 0.00 | 1.00 | 0.00 |
| T5 | 0.00 | 0.00 | 0.00 | 0.00 | 1.00 |

B:

|    | T1   | T2   | T3   | T4   | T5   |
|----|------|------|------|------|------|
| T1 | 1.00 | 0.00 | 0.00 | 0.00 | 0.00 |
| T2 | 0.00 | 1.00 | 0.25 | 0.00 | 0.00 |
| T3 | 0.00 | 0.25 | 1.00 | 0.00 | 0.00 |
| T4 | 0.00 | 0.00 | 0.00 | 1.00 | 0.00 |
| T5 | 0.00 | 0.00 | 0.00 | 0.00 | 1.00 |

Loci 123:

A:

|    | T1   | T2   | T3   | T4   | T5   |
|----|------|------|------|------|------|
| T1 | 1.00 | 0.58 | 0.00 | 0.00 | 0.00 |
| T2 | 0.58 | 1.00 | 0.00 | 0.00 | 0.00 |
| T3 | 0.00 | 0.00 | 1.00 | 0.00 | 0.00 |
| T4 | 0.00 | 0.00 | 0.00 | 1.00 | 0.00 |
| T5 | 0.00 | 0.00 | 0.00 | 0.00 | 1.00 |

B:

|    | T1   | T2   | T3   | T4   | T5   |
|----|------|------|------|------|------|
| T1 | 1.00 | 1.00 | 0.00 | 0.00 | 0.00 |
| T2 | 1.00 | 1.00 | 0.00 | 0.00 | 0.00 |
| T3 | 0.00 | 0.00 | 1.00 | 0.00 | 0.00 |
| T4 | 0.00 | 0.00 | 0.00 | 1.00 | 0.00 |
| T5 | 0.00 | 0.00 | 0.00 | 0.00 | 1.00 |

Loci 131:

A:

|    | T1   | T2   | T3   | T4   | T5   |
|----|------|------|------|------|------|
| T1 | 1.00 | 0.00 | 0.00 | 0.00 | 0.50 |
| T2 | 0.00 | 1.00 | 0.00 | 0.00 | 0.00 |
| T3 | 0.00 | 0.00 | 1.00 | 0.00 | 0.00 |
| T4 | 0.00 | 0.00 | 0.00 | 1.00 | 0.00 |
| T5 | 0.50 | 0.00 | 0.00 | 0.00 | 1.00 |

B:

|    | T1   | T2   | T3   | T4   | T5   |
|----|------|------|------|------|------|
| T1 | 1.00 | 0.00 | 0.00 | 0.00 | 1.00 |
| T2 | 0.00 | 1.00 | 0.00 | 0.00 | 0.00 |
| T3 | 0.00 | 0.00 | 1.00 | 0.00 | 0.00 |
| T4 | 0.00 | 0.00 | 0.00 | 1.00 | 0.00 |
| T5 | 1.00 | 0.00 | 0.00 | 0.00 | 1.00 |

Loci 132:

A:

|    | T1   | T2   | T3   | T4   | T5   |
|----|------|------|------|------|------|
| T1 | 1.00 | 0.00 | 0.00 | 0.00 | 0.50 |
| T2 | 0.00 | 1.00 | 0.00 | 0.00 | 0.00 |
| T3 | 0.00 | 0.00 | 1.00 | 0.00 | 0.00 |
| T4 | 0.00 | 0.00 | 0.00 | 1.00 | 0.00 |
| T5 | 0.50 | 0.00 | 0.00 | 0.00 | 1.00 |

B:

|    | T1   | T2   | T3   | T4   | T5   |
|----|------|------|------|------|------|
| T1 | 1.00 | 0.00 | 0.00 | 0.00 | 1.00 |
| T2 | 0.00 | 1.00 | 0.00 | 0.00 | 0.00 |
| T3 | 0.00 | 0.00 | 1.00 | 0.00 | 0.00 |
| T4 | 0.00 | 0.00 | 0.00 | 1.00 | 0.00 |
| T5 | 1.00 | 0.00 | 0.00 | 0.00 | 1.00 |

Loci 135:

A:

|    | T1   | T2   | T3   | T4   | T5   |
|----|------|------|------|------|------|
| T1 | 1.00 | 0.00 | 0.00 | 0.00 | 0.38 |
| T2 | 0.00 | 1.00 | 0.00 | 0.00 | 0.00 |
| T3 | 0.00 | 0.00 | 1.00 | 0.00 | 0.00 |
| T4 | 0.00 | 0.00 | 0.00 | 1.00 | 0.00 |
| T5 | 0.38 | 0.00 | 0.00 | 0.00 | 1.00 |

B:

|    | T1   | T2   | T3   | T4   | T5   |
|----|------|------|------|------|------|
| T1 | 1.00 | 0.00 | 0.00 | 0.00 | 0.42 |
| T2 | 0.00 | 1.00 | 0.00 | 0.00 | 0.00 |
| T3 | 0.00 | 0.00 | 1.00 | 0.00 | 0.00 |
| T4 | 0.00 | 0.00 | 0.00 | 1.00 | 0.00 |
| T5 | 0.42 | 0.00 | 0.00 | 0.00 | 1.00 |

Loci 139:

A:

|    | T1   | T2   | T3   | T4   | T5   |
|----|------|------|------|------|------|
| T1 | 1.00 | 0.00 | 0.00 | 0.00 | 0.00 |
| T2 | 0.00 | 1.00 | 0.00 | 0.00 | 0.00 |
| T3 | 0.00 | 0.00 | 1.00 | 0.00 | 0.58 |
| T4 | 0.00 | 0.00 | 0.00 | 1.00 | 0.00 |
| T5 | 0.00 | 0.00 | 0.58 | 0.00 | 1.00 |

B:

|    | T1   | T2   | T3   | T4   | T5   |
|----|------|------|------|------|------|
| T1 | 1.00 | 0.00 | 0.00 | 0.00 | 0.00 |
| T2 | 0.00 | 1.00 | 0.00 | 0.00 | 0.00 |
| T3 | 0.00 | 0.00 | 1.00 | 0.00 | 1.00 |
| T4 | 0.00 | 0.00 | 0.00 | 1.00 | 0.00 |
| T5 | 0.00 | 0.00 | 1.00 | 0.00 | 1.00 |

Loci 152:

A:

|    | T1   | T2   | T3   | T4   | T5   |
|----|------|------|------|------|------|
| T1 | 1.00 | 0.60 | 0.00 | 0.00 | 0.00 |
| T2 | 0.60 | 1.00 | 0.00 | 0.00 | 0.00 |
| T3 | 0.00 | 0.00 | 1.00 | 0.00 | 0.00 |
| T4 | 0.00 | 0.00 | 0.00 | 1.00 | 0.00 |
| T5 | 0.00 | 0.00 | 0.00 | 0.00 | 1.00 |

B:

|    | T1   | T2   | T3   | T4   | T5   |
|----|------|------|------|------|------|
| T1 | 1.00 | 0.50 | 0.00 | 0.00 | 0.00 |
| T2 | 0.50 | 1.00 | 0.00 | 0.00 | 0.00 |
| T3 | 0.00 | 0.00 | 1.00 | 0.00 | 0.00 |
| T4 | 0.00 | 0.00 | 0.00 | 1.00 | 0.00 |
| T5 | 0.00 | 0.00 | 0.00 | 0.00 | 1.00 |
