# Supplementary material for: Shared genetic aetiology of respiratory diseases: a genome-wide multitraits association analysis
Source: PubMed Central journal article supplement — BMJ Open Respir Res. 2024 Jun 4;11(1):e002148. doi: 10.1136/bmjresp-2023-002148 (PMC11163672; doi:10.1136/bmjresp-2023-002148), 2024-06-04
Supplement: bmjresp-2023-002148supp013.pdf [file bmjresp-2023-002148supp013.pdf]

eTable 12. Information on all SNPs contained within the colocalized loci.

| SNP        | CHR | BP       | A1 | A2 | BETA.Asthma | SE.Asthma | BETA.COPD | SE.COPD | BETA.IPF | SE.IPF | ETA.LungCancer | SE.LungCancer | BETA.Snoring | SE.Snoring | loci |
|------------|-----|----------|----|----|-------------|-----------|-----------|---------|----------|--------|----------------|---------------|--------------|------------|------|
| rs1001070  | 1   | 78052748 | T  | A  | -0.0172     | 0.0082    | -0.0159   | 0.0116  | -0.0042  | 0.0322 | -0.0280        | 0.0216        | 0.0064       | 0.0019     | 5    |
| rs1001103  | 1   | 78054205 | T  | C  | -0.0166     | 0.0082    | -0.0165   | 0.0116  | -0.0064  | 0.0322 | -0.0270        | 0.0213        | 0.0063       | 0.0019     | 5    |
| rs1001104  | 1   | 78054191 | G  | C  | -0.0171     | 0.0082    | -0.0160   | 0.0116  | -0.0052  | 0.0323 | -0.0249        | 0.0214        | 0.0064       | 0.0019     | 5    |
| rs1007335  | 1   | 77956423 | C  | T  | -0.0245     | 0.0222    | -0.0320   | 0.0311  | -0.0940  | 0.0846 | -0.1011        | 0.0505        | -0.0031      | 0.0049     | 5    |
| rs10082040 | 1   | 78461328 | C  | T  | 0.0065      | 0.0048    | 0.0135    | 0.0068  | 0.0635   | 0.0191 | 0.0225         | 0.0121        | -0.0010      | 0.0011     | 5    |
| rs1013399  | 1   | 77529308 | C  | T  | -0.0136     | 0.0055    | -0.0115   | 0.0078  | -0.0160  | 0.0215 | -0.0411        | 0.0136        | 0.0010       | 0.0012     | 5    |
| rs1022103  | 1   | 78123914 | C  | T  | -0.0004     | 0.0071    | -0.0006   | 0.0100  | -0.0131  | 0.0274 | -0.0209        | 0.0168        | -0.0022      | 0.0016     | 5    |
| rs1034186  | 1   | 78370783 | T  | A  | 0.0111      | 0.0109    | -0.0260   | 0.0161  | -0.0030  | 0.0448 | 0.0155         | 0.0256        | -0.0017      | 0.0023     | 5    |
| rs1039863  | 1   | 78015956 | G  | A  | -0.0135     | 0.0061    | -0.0104   | 0.0087  | -0.0669  | 0.0241 | -0.0289        | 0.0152        | 0.0015       | 0.0014     | 5    |
| rs1039865  | 1   | 78137595 | A  | G  | 0.0031      | 0.0049    | -0.0138   | 0.0069  | -0.0765  | 0.0192 | -0.0384        | 0.0120        | -0.0011      | 0.0011     | 5    |
| rs10437022 | 1   | 77989663 | G  | A  | -0.0158     | 0.0086    | -0.0124   | 0.0121  | 0.0003   | 0.0335 | -0.0315        | 0.0222        | 0.0062       | 0.0021     | 5    |
| rs10489785 | 1   | 78441798 | G  | A  | 0.0043      | 0.0053    | 0.0154    | 0.0076  | 0.0828   | 0.0213 | 0.0350         | 0.0137        | -0.0001      | 0.0012     | 5    |
| rs10493607 | 1   | 78176789 | T  | C  | 0.0012      | 0.0091    | -0.0030   | 0.0130  | 0.0012   | 0.0360 | -0.0433        | 0.0237        | 0.0031       | 0.0020     | 5    |
| rs10493608 | 1   | 78229569 | A  | T  | 0.0082      | 0.0050    | -0.0097   | 0.0071  | -0.0348  | 0.0199 | -0.0241        | 0.0124        | -0.0018      | 0.0011     | 5    |
| rs10735751 | 1   | 78041964 | T  | C  | -0.0141     | 0.0077    | -0.0033   | 0.0111  | -0.0734  | 0.0285 | -0.0305        | 0.0156        | 0.0020       | 0.0015     | 5    |
| rs10782651 | 1   | 77468650 | C  | T  | -0.0032     | 0.0049    | -0.0098   | 0.0071  | -0.0373  | 0.0202 | -0.0513        | 0.0117        | -0.0015      | 0.0011     | 5    |
| rs10782654 | 1   | 77546826 | C  | T  | -0.0134     | 0.0055    | -0.0146   | 0.0080  | -0.0115  | 0.0225 | -0.0403        | 0.0133        | 0.0006       | 0.0012     | 5    |
| rs10782656 | 1   | 77852032 | G  | C  | -0.0160     | 0.0060    | -0.0064   | 0.0087  | -0.0367  | 0.0247 | -0.0282        | 0.0149        | 0.0012       | 0.0014     | 5    |
| rs10782658 | 1   | 78029393 | G  | A  | -0.0136     | 0.0061    | -0.0107   | 0.0087  | -0.0655  | 0.0242 | -0.0286        | 0.0152        | 0.0015       | 0.0014     | 5    |
| rs10782661 | 1   | 78302961 | A  | G  | -0.0053     | 0.0053    | 0.0127    | 0.0078  | -0.0016  | 0.0235 | 0.0026         | 0.0122        | 0.0024       | 0.0011     | 5    |
| rs10782662 | 1   | 78302962 | G  | A  | -0.0053     | 0.0053    | 0.0127    | 0.0078  | -0.0016  | 0.0235 | 0.0026         | 0.0122        | 0.0024       | 0.0011     | 5    |
| rs10782663 | 1   | 78327214 | T  | C  | 0.0000      | 0.0047    | -0.0169   | 0.0067  | -0.0675  | 0.0187 | 0.0001         | 0.0117        | -0.0017      | 0.0010     | 5    |
| rs10782664 | 1   | 78367912 | A  | G  | 0.0071      | 0.0052    | 0.0144    | 0.0076  | 0.0662   | 0.0219 | 0.0260         | 0.0131        | -0.0004      | 0.0011     | 5    |
| rs10782665 | 1   | 78456175 | T  | G  | 0.0075      | 0.0048    | 0.0135    | 0.0068  | 0.0602   | 0.0190 | 0.0220         | 0.0121        | -0.0011      | 0.0011     | 5    |
| rs10873944 | 1   | 77497249 | G  | A  | 0.0011      | 0.0050    | 0.0072    | 0.0070  | 0.0441   | 0.0196 | 0.0469         | 0.0123        | -0.0001      | 0.0011     | 5    |
| rs10873945 | 1   | 77497256 | T  | C  | 0.0011      | 0.0050    | 0.0072    | 0.0070  | 0.0437   | 0.0196 | 0.0472         | 0.0123        | -0.0001      | 0.0011     | 5    |
| rs10873946 | 1   | 77517552 | G  | A  | -0.0013     | 0.0049    | -0.0048   | 0.0069  | 0.0018   | 0.0193 | -0.0006        | 0.0121        | 0.0027       | 0.0011     | 5    |
| rs10873947 | 1   | 77520831 | A  | G  | -0.0023     | 0.0048    | -0.0085   | 0.0068  | -0.0552  | 0.0190 | -0.0386        | 0.0118        | -0.0017      | 0.0011     | 5    |
| rs10873949 | 1   | 77542419 | T  | C  | -0.0134     | 0.0055    | -0.0149   | 0.0080  | -0.0117  | 0.0225 | -0.0407        | 0.0133        | 0.0006       | 0.0012     | 5    |
| rs10873950 | 1   | 77558917 | A  | G  | -0.0149     | 0.0060    | -0.0141   | 0.0087  | 0.0078   | 0.0240 | -0.0357        | 0.0142        | 0.0010       | 0.0013     | 5    |
| rs10873951 | 1   | 77610081 | C  | T  | -0.0125     | 0.0062    | -0.0029   | 0.0089  | -0.0069  | 0.0254 | -0.0244        | 0.0133        | 0.0006       | 0.0012     | 5    |
| rs10873953 | 1   | 77726805 | C  | T  | -0.0141     | 0.0052    | -0.0113   | 0.0074  | -0.0283  | 0.0204 | -0.0238        | 0.0128        | 0.0003       | 0.0012     | 5    |
| rs10873954 | 1   | 77818344 | A  | G  | -0.0133     | 0.0053    | -0.0089   | 0.0074  | -0.0240  | 0.0206 | -0.0247        | 0.0129        | 0.0002       | 0.0012     | 5    |
| rs10873955 | 1   | 77818526 | A  | G  | -0.0121     | 0.0054    | -0.0114   | 0.0077  | -0.0184  | 0.0211 | -0.0297        | 0.0133        | 0.0008       | 0.0012     | 5    |
| rs10873956 | 1   | 77847809 | G  | A  | -0.0178     | 0.0078    | -0.0075   | 0.0114  | 0.0241   | 0.0320 | -0.0274        | 0.0202        | 0.0045       | 0.0019     | 5    |
| rs10873960 | 1   | 77988764 | G  | A  | -0.0159     | 0.0086    | -0.0125   | 0.0121  | 0.0004   | 0.0335 | -0.0315        | 0.0222        | 0.0062       | 0.0021     | 5    |
| rs10873961 | 1   | 78018730 | C  | T  | -0.0032     | 0.0106    | 0.0064    | 0.0145  | -0.0476  | 0.0406 | -0.0259        | 0.0171        | 0.0028       | 0.0016     | 5    |
| rs10873963 | 1   | 78036669 | G  | A  | -0.0112     | 0.0076    | -0.0120   | 0.0108  | -0.0287  | 0.0301 | -0.0334        | 0.0195        | 0.0048       | 0.0018     | 5    |
| rs10873964 | 1   | 78049991 | T  | G  | 0.0004      | 0.0048    | -0.0117   | 0.0068  | -0.0382  | 0.0189 | -0.0335        | 0.0119        | 0.0000       | 0.0011     | 5    |
| rs10873966 | 1   | 78172632 | G  | A  | 0.0023      | 0.0049    | -0.0113   | 0.0070  | -0.0586  | 0.0195 | -0.0386        | 0.0122        | -0.0011      | 0.0011     | 5    |
| rs10873967 | 1   | 78237166 | G  | A  | 0.0082      | 0.0050    | -0.0099   | 0.0071  | -0.0326  | 0.0199 | -0.0213        | 0.0124        | -0.0016      | 0.0011     | 5    |
| rs10873968 | 1   | 78260566 | T  | C  | -0.0026     | 0.0052    | 0.0150    | 0.0076  | 0.0191   | 0.0216 | 0.0222         | 0.0126        | 0.0018       | 0.0011     | 5    |
| rs10873969 | 1   | 78267544 | A  | G  | 0.0019      | 0.0050    | 0.0123    | 0.0074  | 0.0056   | 0.0209 | 0.0211         | 0.0122        | 0.0017       | 0.0011     | 5    |
| rs10873972 | 1   | 78293945 | T  | G  | -0.0084     | 0.0069    | -0.0132   | 0.0097  | -0.0255  | 0.0272 | -0.0264        | 0.0166        | 0.0020       | 0.0015     | 5    |

|             |   |          |   |   |         |        |         |        |         |        |         |        |         |        |   |
|-------------|---|----------|---|---|---------|--------|---------|--------|---------|--------|---------|--------|---------|--------|---|
| rs10873973  | 1 | 78302129 | A | G | -0.0025 | 0.0048 | 0.0130  | 0.0067 | 0.0133  | 0.0188 | 0.0052  | 0.0117 | 0.0020  | 0.0010 | 5 |
| rs10873974  | 1 | 78308939 | G | A | 0.0004  | 0.0059 | -0.0204 | 0.0084 | -0.0764 | 0.0235 | -0.0079 | 0.0144 | -0.0013 | 0.0014 | 5 |
| rs10873975  | 1 | 78317632 | T | C | -0.0004 | 0.0047 | -0.0164 | 0.0067 | -0.0660 | 0.0187 | -0.0018 | 0.0117 | -0.0017 | 0.0010 | 5 |
| rs10873977  | 1 | 78336836 | A | C | -0.0011 | 0.0053 | -0.0038 | 0.0075 | -0.0187 | 0.0211 | 0.0052  | 0.0131 | -0.0013 | 0.0012 | 5 |
| rs10873979  | 1 | 78371223 | T | C | 0.0064  | 0.0053 | 0.0149  | 0.0077 | 0.0651  | 0.0222 | 0.0304  | 0.0133 | -0.0006 | 0.0012 | 5 |
| rs10873980  | 1 | 78385383 | T | C | 0.0073  | 0.0053 | 0.0163  | 0.0077 | 0.0629  | 0.0222 | 0.0297  | 0.0133 | -0.0006 | 0.0012 | 5 |
| rs10873983  | 1 | 78416802 | C | T | 0.0080  | 0.0052 | 0.0166  | 0.0075 | 0.0601  | 0.0216 | 0.0251  | 0.0128 | -0.0005 | 0.0011 | 5 |
| rs10873984  | 1 | 78423130 | T | C | 0.0073  | 0.0052 | 0.0176  | 0.0073 | 0.0911  | 0.0206 | 0.0323  | 0.0132 | -0.0005 | 0.0012 | 5 |
| rs111261181 | 1 | 78015706 | A | C | 0.0029  | 0.0094 | -0.0035 | 0.0135 | 0.0461  | 0.0374 | -0.0269 | 0.0247 | 0.0025  | 0.0021 | 5 |
| rs111270331 | 1 | 77607059 | C | T | -0.0157 | 0.0142 | 0.0114  | 0.0202 | -0.0497 | 0.0554 | 0.0176  | 0.0320 | -0.0029 | 0.0031 | 5 |
| rs111282850 | 1 | 78068502 | C | T | -0.0177 | 0.0152 | 0.0174  | 0.0215 | -0.0674 | 0.0595 | -0.0068 | 0.0337 | -0.0045 | 0.0033 | 5 |
| rs111305518 | 1 | 78198535 | C | T | -0.0160 | 0.0160 | -0.0067 | 0.0231 | -0.1476 | 0.0637 | 0.0270  | 0.0402 | 0.0003  | 0.0036 | 5 |
| rs111314109 | 1 | 77529382 | A | G | -0.0131 | 0.0153 | -0.0020 | 0.0218 | 0.0649  | 0.0602 | 0.0011  | 0.0417 | -0.0006 | 0.0038 | 5 |
| rs111323761 | 1 | 78128461 | G | A | -0.0312 | 0.0162 | 0.0101  | 0.0234 | -0.0581 | 0.0650 | -0.0010 | 0.0433 | -0.0025 | 0.0045 | 5 |
| rs111345734 | 1 | 77524099 | A | G | 0.0123  | 0.0113 | 0.0097  | 0.0159 | -0.0054 | 0.0468 | -0.0241 | 0.0311 | -0.0029 | 0.0024 | 5 |
| rs111357417 | 1 | 77927123 | G | A | -0.0140 | 0.0153 | 0.0131  | 0.0215 | -0.0711 | 0.0589 | -0.0012 | 0.0333 | -0.0039 | 0.0033 | 5 |
| rs111426163 | 1 | 77509404 | A | G | -0.0160 | 0.0122 | -0.0102 | 0.0176 | 0.0267  | 0.0489 | -0.0114 | 0.0330 | 0.0000  | 0.0032 | 5 |
| rs111443366 | 1 | 77860873 | G | A | -0.0122 | 0.0152 | 0.0131  | 0.0215 | -0.0568 | 0.0592 | 0.0110  | 0.0333 | -0.0039 | 0.0033 | 5 |
| rs111457616 | 1 | 77909440 | T | A | 0.0293  | 0.0164 | -0.0084 | 0.0255 | 0.0212  | 0.0704 | 0.0076  | 0.0388 | -0.0010 | 0.0035 | 5 |
| rs111481813 | 1 | 77742036 | T | C | -0.0097 | 0.0158 | 0.0009  | 0.0232 | -0.0457 | 0.0588 | 0.0119  | 0.0324 | -0.0043 | 0.0032 | 5 |
| rs111487627 | 1 | 77880186 | G | A | -0.0141 | 0.0155 | 0.0137  | 0.0219 | -0.0749 | 0.0601 | 0.0077  | 0.0345 | -0.0046 | 0.0033 | 5 |
| rs111488671 | 1 | 78033699 | A | G | -0.0111 | 0.0153 | 0.0207  | 0.0217 | -0.0730 | 0.0598 | -0.0016 | 0.0334 | -0.0038 | 0.0033 | 5 |
| rs111503531 | 1 | 77771162 | G | C | -0.0145 | 0.0121 | -0.0052 | 0.0169 | -0.0569 | 0.0475 | 0.0138  | 0.0282 | -0.0047 | 0.0027 | 5 |
| rs111514833 | 1 | 77864400 | A | G | -0.0143 | 0.0153 | 0.0131  | 0.0216 | -0.0576 | 0.0592 | 0.0085  | 0.0333 | -0.0039 | 0.0033 | 5 |
| rs111527485 | 1 | 77785236 | C | T | -0.0161 | 0.0146 | 0.0086  | 0.0206 | -0.0521 | 0.0574 | 0.0139  | 0.0324 | -0.0041 | 0.0032 | 5 |
| rs111529017 | 1 | 78210618 | A | G | -0.0225 | 0.0118 | 0.0150  | 0.0169 | -0.0714 | 0.0471 | 0.0092  | 0.0278 | 0.0002  | 0.0029 | 5 |
| rs111529582 | 1 | 78345705 | T | G | -0.0127 | 0.0094 | -0.0017 | 0.0134 | 0.0103  | 0.0377 | 0.0003  | 0.0252 | 0.0000  | 0.0022 | 5 |
| rs111552557 | 1 | 77532005 | A | G | -0.0014 | 0.0266 | -0.0156 | 0.0388 | -0.0231 | 0.1031 | 0.0448  | 0.0522 | -0.0040 | 0.0045 | 5 |
| rs111556899 | 1 | 77712621 | C | G | -0.0043 | 0.0167 | 0.0156  | 0.0243 | -0.0302 | 0.0617 | 0.0137  | 0.0324 | -0.0044 | 0.0032 | 5 |
| rs111564203 | 1 | 78380835 | G | T | 0.0170  | 0.0212 | -0.0009 | 0.0293 | 0.0419  | 0.0798 | -0.0684 | 0.0536 | 0.0023  | 0.0042 | 5 |
| rs111583688 | 1 | 78012542 | T | G | -0.0035 | 0.0169 | -0.0083 | 0.0241 | 0.0527  | 0.0698 | 0.1026  | 0.0564 | -0.0046 | 0.0034 | 5 |
| rs111603283 | 1 | 78354286 | C | T | -0.0122 | 0.0094 | -0.0136 | 0.0138 | -0.0131 | 0.0377 | -0.0250 | 0.0228 | 0.0001  | 0.0019 | 5 |
| rs111617190 | 1 | 77698295 | A | G | -0.0267 | 0.0234 | -0.0228 | 0.0325 | 0.0209  | 0.0813 | -0.0757 | 0.0475 | -0.0031 | 0.0050 | 5 |
| rs111617490 | 1 | 78175936 | C | A | -0.0102 | 0.0069 | 0.0029  | 0.0098 | -0.0566 | 0.0273 | -0.0099 | 0.0175 | 0.0021  | 0.0016 | 5 |
| rs11162351  | 1 | 77479047 | G | C | 0.0075  | 0.0049 | 0.0178  | 0.0069 | 0.0830  | 0.0193 | 0.0468  | 0.0123 | 0.0008  | 0.0011 | 5 |
| rs11162355  | 1 | 77495389 | G | T | 0.0011  | 0.0050 | 0.0070  | 0.0070 | 0.0449  | 0.0196 | 0.0476  | 0.0123 | -0.0001 | 0.0011 | 5 |
| rs11162356  | 1 | 77496152 | A | G | 0.0011  | 0.0050 | 0.0069  | 0.0070 | 0.0450  | 0.0196 | 0.0479  | 0.0123 | -0.0001 | 0.0011 | 5 |
| rs11162357  | 1 | 77496282 | G | A | 0.0010  | 0.0050 | 0.0070  | 0.0070 | 0.0448  | 0.0196 | 0.0480  | 0.0123 | -0.0001 | 0.0011 | 5 |
| rs11162362  | 1 | 77549027 | C | T | -0.0133 | 0.0055 | -0.0139 | 0.0080 | -0.0104 | 0.0225 | -0.0421 | 0.0133 | 0.0007  | 0.0012 | 5 |
| rs11162363  | 1 | 77549964 | T | A | -0.0187 | 0.0069 | -0.0148 | 0.0103 | -0.0087 | 0.0267 | -0.0375 | 0.0136 | 0.0006  | 0.0012 | 5 |
| rs11162364  | 1 | 77550056 | C | T | -0.0133 | 0.0055 | -0.0143 | 0.0080 | -0.0112 | 0.0225 | -0.0402 | 0.0132 | 0.0006  | 0.0012 | 5 |
| rs11162365  | 1 | 77569949 | C | T | -0.0138 | 0.0057 | -0.0171 | 0.0082 | -0.0084 | 0.0229 | -0.0287 | 0.0136 | 0.0010  | 0.0012 | 5 |
| rs11162366  | 1 | 77570681 | T | A | -0.0144 | 0.0067 | -0.0076 | 0.0100 | -0.0106 | 0.0260 | -0.0319 | 0.0132 | 0.0009  | 0.0012 | 5 |
| rs11162368  | 1 | 77608977 | G | T | -0.0154 | 0.0055 | -0.0116 | 0.0074 | -0.0287 | 0.0204 | -0.0258 | 0.0128 | 0.0003  | 0.0012 | 5 |
| rs11162369  | 1 | 77614677 | A | T | -0.0137 | 0.0056 | -0.0152 | 0.0079 | -0.0128 | 0.0216 | -0.0252 | 0.0137 | 0.0010  | 0.0012 | 5 |
| rs11162370  | 1 | 77618508 | C | T | -0.0143 | 0.0052 | -0.0123 | 0.0074 | -0.0341 | 0.0204 | -0.0241 | 0.0127 | 0.0004  | 0.0012 | 5 |

|            |   |          |   |   |         |        |         |        |         |        |         |        |         |        |   |
|------------|---|----------|---|---|---------|--------|---------|--------|---------|--------|---------|--------|---------|--------|---|
| rs11162372 | 1 | 77625608 | T | C | -0.0139 | 0.0057 | -0.0177 | 0.0083 | -0.0071 | 0.0229 | -0.0252 | 0.0136 | 0.0010  | 0.0012 | 5 |
| rs11162373 | 1 | 77635897 | C | T | -0.0145 | 0.0052 | -0.0121 | 0.0074 | -0.0296 | 0.0204 | -0.0241 | 0.0128 | 0.0003  | 0.0012 | 5 |
| rs11162374 | 1 | 77635899 | C | T | -0.0145 | 0.0052 | -0.0120 | 0.0074 | -0.0300 | 0.0204 | -0.0246 | 0.0128 | 0.0003  | 0.0012 | 5 |
| rs11162378 | 1 | 77718176 | A | G | -0.0142 | 0.0052 | -0.0116 | 0.0074 | -0.0288 | 0.0204 | -0.0234 | 0.0128 | 0.0004  | 0.0012 | 5 |
| rs11162380 | 1 | 77737056 | C | A | -0.0142 | 0.0065 | -0.0064 | 0.0093 | -0.0194 | 0.0239 | -0.0275 | 0.0132 | 0.0010  | 0.0012 | 5 |
| rs11162383 | 1 | 77805259 | A | T | -0.0113 | 0.0054 | -0.0118 | 0.0076 | -0.0176 | 0.0211 | -0.0281 | 0.0132 | 0.0007  | 0.0012 | 5 |
| rs11162384 | 1 | 77812196 | T | G | -0.0134 | 0.0053 | -0.0097 | 0.0074 | -0.0237 | 0.0206 | -0.0262 | 0.0128 | 0.0002  | 0.0012 | 5 |
| rs11162386 | 1 | 77815317 | T | C | -0.0123 | 0.0054 | -0.0116 | 0.0077 | -0.0175 | 0.0212 | -0.0285 | 0.0132 | 0.0008  | 0.0012 | 5 |
| rs11162387 | 1 | 77822123 | C | T | -0.0113 | 0.0054 | -0.0118 | 0.0076 | -0.0172 | 0.0211 | -0.0298 | 0.0132 | 0.0007  | 0.0012 | 5 |
| rs11162388 | 1 | 77841772 | C | A | -0.0182 | 0.0075 | -0.0023 | 0.0112 | -0.0537 | 0.0292 | -0.0258 | 0.0149 | 0.0011  | 0.0014 | 5 |
| rs11162390 | 1 | 77852495 | G | A | -0.0176 | 0.0078 | -0.0065 | 0.0114 | 0.0249  | 0.0320 | -0.0281 | 0.0202 | 0.0045  | 0.0019 | 5 |
| rs11162400 | 1 | 77950577 | A | G | -0.0197 | 0.0083 | -0.0083 | 0.0117 | 0.0105  | 0.0324 | -0.0314 | 0.0215 | 0.0052  | 0.0020 | 5 |
| rs11162401 | 1 | 77953884 | G | A | -0.0160 | 0.0060 | -0.0099 | 0.0085 | -0.0598 | 0.0238 | -0.0286 | 0.0150 | 0.0012  | 0.0014 | 5 |
| rs11162403 | 1 | 77987355 | T | C | -0.0163 | 0.0086 | -0.0131 | 0.0121 | -0.0012 | 0.0335 | -0.0295 | 0.0221 | 0.0061  | 0.0021 | 5 |
| rs11162405 | 1 | 78003976 | G | A | 0.0041  | 0.0048 | -0.0111 | 0.0068 | -0.0294 | 0.0191 | -0.0207 | 0.0118 | -0.0013 | 0.0011 | 5 |
| rs11162406 | 1 | 78023132 | T | G | -0.0160 | 0.0086 | -0.0131 | 0.0121 | -0.0035 | 0.0335 | -0.0328 | 0.0221 | 0.0060  | 0.0021 | 5 |
| rs11162408 | 1 | 78029491 | A | G | 0.0098  | 0.0059 | -0.0103 | 0.0083 | -0.0458 | 0.0235 | -0.0161 | 0.0147 | -0.0027 | 0.0013 | 5 |
| rs11162409 | 1 | 78041286 | A | C | 0.0064  | 0.0070 | 0.0199  | 0.0097 | 0.1297  | 0.0275 | 0.0306  | 0.0135 | -0.0004 | 0.0011 | 5 |
| rs11162410 | 1 | 78056247 | T | C | -0.0090 | 0.0073 | -0.0077 | 0.0103 | -0.0336 | 0.0280 | -0.0075 | 0.0169 | -0.0002 | 0.0016 | 5 |
| rs11162411 | 1 | 78065661 | A | T | 0.0031  | 0.0049 | -0.0101 | 0.0069 | -0.0441 | 0.0192 | -0.0289 | 0.0120 | 0.0003  | 0.0011 | 5 |
| rs11162412 | 1 | 78070800 | T | C | 0.0144  | 0.0055 | -0.0099 | 0.0077 | -0.0282 | 0.0217 | -0.0238 | 0.0134 | -0.0015 | 0.0012 | 5 |
| rs11162413 | 1 | 78081414 | T | A | -0.0069 | 0.0074 | -0.0074 | 0.0104 | -0.0458 | 0.0282 | -0.0111 | 0.0170 | -0.0005 | 0.0016 | 5 |
| rs11162414 | 1 | 78109928 | A | G | 0.0076  | 0.0056 | -0.0133 | 0.0079 | -0.0706 | 0.0221 | -0.0261 | 0.0139 | -0.0018 | 0.0012 | 5 |
| rs11162415 | 1 | 78147250 | G | A | 0.0012  | 0.0048 | -0.0147 | 0.0068 | -0.0802 | 0.0190 | -0.0374 | 0.0119 | -0.0014 | 0.0011 | 5 |
| rs11162417 | 1 | 78153354 | C | T | 0.0047  | 0.0050 | -0.0130 | 0.0072 | -0.0644 | 0.0205 | -0.0504 | 0.0122 | -0.0011 | 0.0011 | 5 |
| rs11162418 | 1 | 78157207 | G | C | 0.0027  | 0.0051 | -0.0104 | 0.0072 | -0.0427 | 0.0202 | -0.0330 | 0.0127 | -0.0011 | 0.0011 | 5 |
| rs11162420 | 1 | 78161401 | C | T | 0.0034  | 0.0056 | -0.0158 | 0.0081 | -0.0346 | 0.0244 | -0.0305 | 0.0127 | -0.0011 | 0.0011 | 5 |
| rs11162421 | 1 | 78161412 | G | A | 0.0024  | 0.0051 | -0.0101 | 0.0072 | -0.0438 | 0.0202 | -0.0329 | 0.0127 | -0.0012 | 0.0011 | 5 |
| rs11162422 | 1 | 78161601 | G | A | 0.0039  | 0.0056 | -0.0155 | 0.0081 | -0.0344 | 0.0244 | -0.0265 | 0.0127 | -0.0012 | 0.0011 | 5 |
| rs11162423 | 1 | 78161651 | C | A | 0.0031  | 0.0061 | -0.0215 | 0.0093 | -0.0472 | 0.0252 | -0.0343 | 0.0127 | -0.0012 | 0.0011 | 5 |
| rs11162425 | 1 | 78170291 | T | G | 0.0017  | 0.0049 | -0.0113 | 0.0070 | -0.0599 | 0.0195 | -0.0387 | 0.0122 | -0.0011 | 0.0011 | 5 |
| rs11162432 | 1 | 78208119 | A | C | 0.0108  | 0.0152 | -0.0097 | 0.0220 | -0.0613 | 0.0606 | -0.1062 | 0.0387 | -0.0005 | 0.0035 | 5 |
| rs11162433 | 1 | 78222989 | T | G | 0.0141  | 0.0061 | -0.0108 | 0.0086 | -0.0319 | 0.0241 | -0.0150 | 0.0152 | -0.0033 | 0.0014 | 5 |
| rs11162437 | 1 | 78240338 | A | G | 0.0098  | 0.0049 | -0.0118 | 0.0072 | -0.0264 | 0.0204 | -0.0298 | 0.0120 | -0.0005 | 0.0011 | 5 |
| rs11162442 | 1 | 78260735 | A | G | -0.0030 | 0.0052 | 0.0149  | 0.0076 | 0.0184  | 0.0216 | 0.0250  | 0.0127 | 0.0021  | 0.0011 | 5 |
| rs11162451 | 1 | 78294921 | A | C | -0.0068 | 0.0075 | -0.0134 | 0.0108 | -0.0219 | 0.0278 | -0.0253 | 0.0166 | 0.0020  | 0.0015 | 5 |
| rs11162456 | 1 | 78306362 | A | G | -0.0002 | 0.0051 | 0.0174  | 0.0072 | 0.0337  | 0.0199 | 0.0147  | 0.0125 | 0.0021  | 0.0011 | 5 |
| rs11162463 | 1 | 78316239 | A | G | 0.0068  | 0.0068 | -0.0286 | 0.0095 | -0.0707 | 0.0265 | 0.0093  | 0.0163 | -0.0025 | 0.0016 | 5 |
| rs11162465 | 1 | 78321321 | G | A | -0.0013 | 0.0053 | -0.0038 | 0.0075 | -0.0206 | 0.0211 | 0.0043  | 0.0131 | -0.0013 | 0.0012 | 5 |
| rs11162466 | 1 | 78323312 | T | A | 0.0016  | 0.0059 | -0.0219 | 0.0084 | -0.0773 | 0.0234 | -0.0070 | 0.0144 | -0.0010 | 0.0014 | 5 |
| rs11162468 | 1 | 78329261 | C | T | 0.0015  | 0.0059 | -0.0221 | 0.0084 | -0.0781 | 0.0234 | -0.0069 | 0.0144 | -0.0011 | 0.0014 | 5 |
| rs11162469 | 1 | 78329348 | T | C | 0.0016  | 0.0059 | -0.0221 | 0.0084 | -0.0785 | 0.0234 | -0.0068 | 0.0144 | -0.0011 | 0.0014 | 5 |
| rs11162470 | 1 | 78329582 | G | T | 0.0015  | 0.0059 | -0.0221 | 0.0084 | -0.0769 | 0.0234 | -0.0068 | 0.0144 | -0.0010 | 0.0014 | 5 |
| rs11162471 | 1 | 78332643 | T | C | -0.0013 | 0.0053 | -0.0037 | 0.0075 | -0.0202 | 0.0211 | 0.0058  | 0.0131 | -0.0013 | 0.0012 | 5 |
| rs11162474 | 1 | 78344874 | T | C | -0.0012 | 0.0052 | 0.0121  | 0.0076 | 0.0207  | 0.0215 | 0.0068  | 0.0125 | 0.0016  | 0.0011 | 5 |
| rs11162475 | 1 | 78349388 | G | A | -0.0041 | 0.0050 | -0.0027 | 0.0071 | -0.0330 | 0.0200 | -0.0055 | 0.0124 | -0.0005 | 0.0011 | 5 |

|             |   |          |   |   |         |        |         |        |         |        |         |        |         |        |   |
|-------------|---|----------|---|---|---------|--------|---------|--------|---------|--------|---------|--------|---------|--------|---|
| rs11162476  | 1 | 78356262 | G | A | 0.0027  | 0.0048 | 0.0202  | 0.0068 | 0.0701  | 0.0191 | 0.0075  | 0.0123 | 0.0004  | 0.0011 | 5 |
| rs11162477  | 1 | 78362427 | C | T | 0.0075  | 0.0052 | 0.0149  | 0.0076 | 0.0675  | 0.0219 | 0.0258  | 0.0131 | -0.0005 | 0.0011 | 5 |
| rs11162478  | 1 | 78374006 | T | C | 0.0065  | 0.0052 | 0.0163  | 0.0076 | 0.0635  | 0.0218 | 0.0264  | 0.0130 | -0.0005 | 0.0011 | 5 |
| rs11162479  | 1 | 78385016 | T | G | 0.0075  | 0.0053 | 0.0163  | 0.0077 | 0.0631  | 0.0222 | 0.0299  | 0.0133 | -0.0006 | 0.0012 | 5 |
| rs11162487  | 1 | 78413552 | C | T | -0.0057 | 0.0095 | -0.0107 | 0.0134 | -0.0671 | 0.0378 | -0.0495 | 0.0259 | 0.0022  | 0.0022 | 5 |
| rs11162488  | 1 | 78428677 | C | A | 0.0039  | 0.0057 | 0.0145  | 0.0078 | 0.0961  | 0.0226 | 0.0329  | 0.0131 | -0.0005 | 0.0012 | 5 |
| rs11162489  | 1 | 78430235 | T | C | 0.0067  | 0.0051 | 0.0174  | 0.0073 | 0.0896  | 0.0205 | 0.0330  | 0.0131 | -0.0005 | 0.0012 | 5 |
| rs11162490  | 1 | 78437406 | G | A | 0.0067  | 0.0051 | 0.0176  | 0.0073 | 0.0890  | 0.0205 | 0.0325  | 0.0130 | -0.0005 | 0.0012 | 5 |
| rs11162492  | 1 | 78455138 | A | G | 0.0035  | 0.0049 | 0.0127  | 0.0070 | 0.0689  | 0.0195 | 0.0243  | 0.0124 | -0.0001 | 0.0011 | 5 |
| rs11162493  | 1 | 78459659 | T | A | 0.0034  | 0.0049 | 0.0127  | 0.0070 | 0.0690  | 0.0195 | 0.0243  | 0.0123 | -0.0001 | 0.0011 | 5 |
| rs111667090 | 1 | 78049253 | G | C | -0.0176 | 0.0151 | 0.0160  | 0.0215 | -0.0672 | 0.0595 | 0.0012  | 0.0337 | -0.0041 | 0.0033 | 5 |
| rs111678909 | 1 | 77646185 | T | C | -0.0162 | 0.0146 | 0.0094  | 0.0206 | -0.0523 | 0.0573 | 0.0144  | 0.0324 | -0.0044 | 0.0032 | 5 |
| rs111737848 | 1 | 77682418 | A | G | -0.0165 | 0.0146 | 0.0089  | 0.0206 | -0.0524 | 0.0573 | 0.0139  | 0.0324 | -0.0044 | 0.0032 | 5 |
| rs111773700 | 1 | 78120872 | T | G | -0.0178 | 0.0149 | 0.0063  | 0.0211 | -0.0810 | 0.0590 | 0.0082  | 0.0333 | -0.0058 | 0.0032 | 5 |
| rs111832155 | 1 | 77668196 | C | T | -0.0164 | 0.0146 | 0.0095  | 0.0206 | -0.0520 | 0.0573 | 0.0134  | 0.0324 | -0.0044 | 0.0032 | 5 |
| rs111846770 | 1 | 78230487 | A | G | 0.0113  | 0.0126 | 0.0226  | 0.0179 | 0.0402  | 0.0529 | -0.0082 | 0.0378 | -0.0041 | 0.0026 | 5 |
| rs111864630 | 1 | 78054882 | T | G | -0.0177 | 0.0152 | 0.0171  | 0.0215 | -0.0675 | 0.0595 | -0.0044 | 0.0338 | -0.0041 | 0.0033 | 5 |
| rs111921550 | 1 | 77761088 | T | C | -0.0147 | 0.0146 | 0.0083  | 0.0206 | -0.0561 | 0.0572 | 0.0146  | 0.0322 | -0.0043 | 0.0032 | 5 |
| rs111926207 | 1 | 78213989 | T | C | -0.0123 | 0.0156 | 0.0179  | 0.0218 | -0.0472 | 0.0610 | 0.0077  | 0.0353 | -0.0005 | 0.0035 | 5 |
| rs111935292 | 1 | 77510611 | A | G | -0.0183 | 0.0148 | 0.0212  | 0.0208 | -0.0696 | 0.0583 | 0.0178  | 0.0324 | -0.0043 | 0.0033 | 5 |
| rs111940000 | 1 | 77723805 | T | C | -0.0155 | 0.0146 | 0.0086  | 0.0206 | -0.0562 | 0.0572 | 0.0133  | 0.0323 | -0.0044 | 0.0032 | 5 |
| rs112011056 | 1 | 78172011 | G | C | 0.0126  | 0.0185 | -0.0110 | 0.0271 | -0.0918 | 0.0753 | -0.0733 | 0.0448 | -0.0042 | 0.0046 | 5 |
| rs112079752 | 1 | 78008113 | C | G | -0.0144 | 0.0153 | 0.0166  | 0.0216 | -0.0672 | 0.0591 | -0.0041 | 0.0332 | -0.0038 | 0.0033 | 5 |
| rs112089582 | 1 | 77628452 | A | G | -0.0162 | 0.0146 | 0.0092  | 0.0206 | -0.0518 | 0.0573 | 0.0148  | 0.0324 | -0.0045 | 0.0032 | 5 |
| rs112136040 | 1 | 77471645 | C | T | -0.0062 | 0.0110 | -0.0096 | 0.0157 | 0.0147  | 0.0438 | 0.0055  | 0.0286 | 0.0000  | 0.0022 | 5 |
| rs112203296 | 1 | 78175969 | G | C | -0.0238 | 0.0119 | 0.0159  | 0.0168 | -0.0860 | 0.0470 | 0.0106  | 0.0276 | 0.0005  | 0.0029 | 5 |
| rs112205007 | 1 | 77653697 | A | G | -0.0161 | 0.0146 | 0.0104  | 0.0206 | -0.0523 | 0.0573 | 0.0144  | 0.0324 | -0.0044 | 0.0032 | 5 |
| rs112210832 | 1 | 77773665 | G | C | -0.0164 | 0.0146 | 0.0075  | 0.0207 | -0.0494 | 0.0574 | 0.0148  | 0.0324 | -0.0042 | 0.0032 | 5 |
| rs112230236 | 1 | 77959337 | C | T | -0.0140 | 0.0151 | 0.0140  | 0.0213 | -0.0660 | 0.0587 | -0.0003 | 0.0332 | -0.0043 | 0.0032 | 5 |
| rs112238770 | 1 | 78073512 | C | G | -0.0179 | 0.0151 | 0.0170  | 0.0215 | -0.0682 | 0.0595 | -0.0070 | 0.0337 | -0.0045 | 0.0033 | 5 |
| rs112241876 | 1 | 77733177 | C | T | -0.0152 | 0.0146 | 0.0074  | 0.0206 | -0.0499 | 0.0573 | 0.0119  | 0.0324 | -0.0044 | 0.0032 | 5 |
| rs112321747 | 1 | 77828196 | A | G | -0.0167 | 0.0146 | 0.0106  | 0.0207 | -0.0566 | 0.0575 | 0.0145  | 0.0330 | -0.0044 | 0.0033 | 5 |
| rs112381567 | 1 | 77980584 | G | A | -0.0145 | 0.0153 | 0.0163  | 0.0216 | -0.0649 | 0.0590 | -0.0038 | 0.0332 | -0.0039 | 0.0033 | 5 |
| rs112433858 | 1 | 77624169 | G | A | 0.0199  | 0.0122 | 0.0137  | 0.0174 | 0.0254  | 0.0504 | 0.0149  | 0.0336 | -0.0026 | 0.0023 | 5 |
| rs112442762 | 1 | 77787151 | C | A | -0.0156 | 0.0146 | 0.0084  | 0.0206 | -0.0552 | 0.0573 | 0.0140  | 0.0324 | -0.0042 | 0.0032 | 5 |
| rs112465180 | 1 | 77530104 | A | G | -0.0082 | 0.0155 | 0.0025  | 0.0221 | 0.0794  | 0.0612 | -0.0046 | 0.0420 | -0.0006 | 0.0038 | 5 |
| rs112483435 | 1 | 77592012 | T | G | -0.0174 | 0.0146 | 0.0106  | 0.0207 | -0.0492 | 0.0575 | 0.0119  | 0.0325 | -0.0045 | 0.0033 | 5 |
| rs112510045 | 1 | 77765201 | A | G | -0.0155 | 0.0146 | 0.0077  | 0.0207 | -0.0508 | 0.0574 | 0.0132  | 0.0324 | -0.0043 | 0.0032 | 5 |
| rs112514037 | 1 | 77624150 | C | A | -0.0163 | 0.0146 | 0.0091  | 0.0206 | -0.0524 | 0.0573 | 0.0149  | 0.0324 | -0.0044 | 0.0032 | 5 |
| rs112665009 | 1 | 78197627 | A | G | -0.0158 | 0.0159 | 0.0154  | 0.0222 | -0.0692 | 0.0622 | 0.0151  | 0.0355 | -0.0007 | 0.0036 | 5 |
| rs112676964 | 1 | 77693275 | C | G | -0.0161 | 0.0146 | 0.0084  | 0.0207 | -0.0521 | 0.0574 | 0.0137  | 0.0324 | -0.0044 | 0.0032 | 5 |
| rs112701842 | 1 | 77784773 | G | T | -0.0162 | 0.0146 | 0.0084  | 0.0206 | -0.0522 | 0.0573 | 0.0139  | 0.0324 | -0.0041 | 0.0032 | 5 |
| rs112731282 | 1 | 77840632 | G | C | -0.0170 | 0.0153 | 0.0131  | 0.0216 | -0.0526 | 0.0588 | 0.0036  | 0.0332 | -0.0045 | 0.0033 | 5 |
| rs112733712 | 1 | 77985287 | T | G | -0.0129 | 0.0154 | 0.0164  | 0.0217 | -0.0630 | 0.0593 | -0.0033 | 0.0332 | -0.0038 | 0.0033 | 5 |
| rs112736433 | 1 | 78296720 | A | G | 0.0097  | 0.0150 | 0.0113  | 0.0211 | 0.0313  | 0.0587 | 0.0245  | 0.0423 | -0.0039 | 0.0030 | 5 |
| rs112751121 | 1 | 77949737 | C | G | -0.0140 | 0.0153 | 0.0146  | 0.0215 | -0.0654 | 0.0589 | -0.0005 | 0.0333 | -0.0038 | 0.0033 | 5 |

|             |   |          |   |   |         |        |         |        |         |        |         |        |         |        |   |
|-------------|---|----------|---|---|---------|--------|---------|--------|---------|--------|---------|--------|---------|--------|---|
| rs112791991 | 1 | 78194396 | A | T | -0.0161 | 0.0159 | 0.0152  | 0.0222 | -0.0756 | 0.0624 | 0.0101  | 0.0353 | -0.0007 | 0.0036 | 5 |
| rs112792481 | 1 | 78212187 | T | C | -0.0163 | 0.0160 | -0.0086 | 0.0231 | -0.1501 | 0.0639 | 0.0254  | 0.0405 | 0.0003  | 0.0036 | 5 |
| rs112797400 | 1 | 77998835 | A | C | -0.0034 | 0.0121 | 0.0026  | 0.0178 | -0.0432 | 0.0614 | -0.0283 | 0.0247 | 0.0024  | 0.0021 | 5 |
| rs112826431 | 1 | 78041566 | A | C | -0.0145 | 0.0153 | 0.0185  | 0.0217 | -0.0614 | 0.0596 | -0.0011 | 0.0335 | -0.0039 | 0.0033 | 5 |
| rs112831058 | 1 | 77975744 | A | G | -0.0123 | 0.0152 | 0.0156  | 0.0215 | -0.0643 | 0.0590 | -0.0031 | 0.0332 | -0.0040 | 0.0033 | 5 |
| rs112851919 | 1 | 77804065 | A | C | -0.0161 | 0.0146 | 0.0096  | 0.0207 | -0.0490 | 0.0574 | 0.0124  | 0.0324 | -0.0041 | 0.0032 | 5 |
| rs112869470 | 1 | 78384688 | T | C | -0.0125 | 0.0169 | 0.0182  | 0.0236 | -0.0567 | 0.0652 | -0.0448 | 0.0480 | 0.0067  | 0.0037 | 5 |
| rs112872716 | 1 | 77583236 | C | A | -0.0051 | 0.0163 | 0.0086  | 0.0236 | -0.0483 | 0.0635 | 0.0166  | 0.0347 | -0.0057 | 0.0034 | 5 |
| rs112877618 | 1 | 77858708 | C | T | -0.0140 | 0.0153 | 0.0132  | 0.0216 | -0.0557 | 0.0592 | 0.0098  | 0.0333 | -0.0039 | 0.0033 | 5 |
| rs112888582 | 1 | 77783908 | G | C | -0.0169 | 0.0146 | 0.0081  | 0.0207 | -0.0496 | 0.0574 | 0.0144  | 0.0325 | -0.0042 | 0.0032 | 5 |
| rs112905577 | 1 | 77692793 | T | C | -0.0154 | 0.0146 | 0.0099  | 0.0206 | -0.0581 | 0.0572 | 0.0131  | 0.0323 | -0.0044 | 0.0032 | 5 |
| rs112924481 | 1 | 77580811 | C | T | -0.0010 | 0.0098 | 0.0216  | 0.0143 | 0.0439  | 0.0405 | 0.0468  | 0.0246 | 0.0010  | 0.0020 | 5 |
| rs112961770 | 1 | 78089177 | C | G | -0.0070 | 0.0157 | -0.0038 | 0.0220 | 0.0885  | 0.0571 | -0.0015 | 0.0383 | 0.0018  | 0.0035 | 5 |
| rs113013968 | 1 | 77879902 | A | T | -0.0136 | 0.0153 | 0.0121  | 0.0216 | -0.0585 | 0.0592 | 0.0113  | 0.0327 | -0.0039 | 0.0033 | 5 |
| rs113029136 | 1 | 77520263 | C | T | -0.0174 | 0.0148 | 0.0227  | 0.0208 | -0.0681 | 0.0582 | 0.0177  | 0.0324 | -0.0042 | 0.0033 | 5 |
| rs113036195 | 1 | 77895125 | T | A | -0.0208 | 0.0139 | -0.0288 | 0.0190 | -0.1192 | 0.0550 | -0.0027 | 0.0335 | -0.0018 | 0.0028 | 5 |
| rs113075447 | 1 | 77907032 | G | A | -0.0159 | 0.0159 | 0.0055  | 0.0227 | 0.0826  | 0.0631 | -0.0001 | 0.0423 | -0.0018 | 0.0041 | 5 |
| rs113092500 | 1 | 78200114 | T | C | -0.0233 | 0.0119 | 0.0165  | 0.0169 | -0.0829 | 0.0471 | 0.0105  | 0.0277 | 0.0004  | 0.0029 | 5 |
| rs113144262 | 1 | 78199829 | C | T | -0.0168 | 0.0160 | -0.0080 | 0.0231 | -0.1509 | 0.0638 | 0.0266  | 0.0402 | 0.0003  | 0.0036 | 5 |
| rs113156176 | 1 | 77652684 | A | G | -0.0165 | 0.0146 | 0.0092  | 0.0206 | -0.0515 | 0.0573 | 0.0146  | 0.0324 | -0.0044 | 0.0032 | 5 |
| rs113171637 | 1 | 77695201 | A | G | 0.0061  | 0.0129 | 0.0085  | 0.0184 | -0.0382 | 0.0539 | -0.0185 | 0.0368 | -0.0045 | 0.0029 | 5 |
| rs113191182 | 1 | 77905352 | C | A | -0.0134 | 0.0152 | 0.0147  | 0.0214 | -0.0685 | 0.0589 | 0.0004  | 0.0333 | -0.0038 | 0.0033 | 5 |
| rs113208041 | 1 | 77914074 | C | T | -0.0119 | 0.0152 | 0.0137  | 0.0214 | -0.0717 | 0.0589 | -0.0004 | 0.0333 | -0.0039 | 0.0033 | 5 |
| rs113239001 | 1 | 77768832 | G | T | -0.0152 | 0.0146 | 0.0080  | 0.0206 | -0.0528 | 0.0573 | 0.0136  | 0.0324 | -0.0043 | 0.0032 | 5 |
| rs113263617 | 1 | 77756172 | C | G | 0.0024  | 0.0182 | -0.0018 | 0.0259 | 0.0580  | 0.0728 | 0.0177  | 0.0454 | -0.0055 | 0.0035 | 5 |
| rs113280262 | 1 | 77963530 | G | A | -0.0114 | 0.0151 | 0.0151  | 0.0213 | -0.0660 | 0.0588 | -0.0017 | 0.0332 | -0.0042 | 0.0033 | 5 |
| rs113293667 | 1 | 78012896 | G | T | -0.0146 | 0.0153 | 0.0179  | 0.0215 | -0.0622 | 0.0589 | -0.0029 | 0.0332 | -0.0040 | 0.0033 | 5 |
| rs113300435 | 1 | 77887868 | G | A | -0.0148 | 0.0154 | 0.0120  | 0.0217 | -0.0577 | 0.0591 | 0.0085  | 0.0334 | -0.0038 | 0.0033 | 5 |
| rs113309846 | 1 | 77793446 | G | T | -0.0057 | 0.0167 | 0.0148  | 0.0244 | -0.0242 | 0.0619 | 0.0140  | 0.0325 | -0.0041 | 0.0032 | 5 |
| rs113333442 | 1 | 77706775 | G | A | -0.0163 | 0.0146 | 0.0081  | 0.0206 | -0.0497 | 0.0572 | 0.0138  | 0.0324 | -0.0044 | 0.0032 | 5 |
| rs113359980 | 1 | 78047669 | G | C | -0.0148 | 0.0153 | 0.0174  | 0.0217 | -0.0896 | 0.0603 | -0.0007 | 0.0351 | -0.0047 | 0.0033 | 5 |
| rs113370194 | 1 | 78175950 | C | G | -0.0163 | 0.0160 | -0.0083 | 0.0231 | -0.1533 | 0.0637 | 0.0232  | 0.0400 | 0.0004  | 0.0036 | 5 |
| rs113416678 | 1 | 77743623 | T | C | -0.0156 | 0.0146 | 0.0076  | 0.0206 | -0.0537 | 0.0573 | 0.0119  | 0.0324 | -0.0044 | 0.0032 | 5 |
| rs113435702 | 1 | 78198584 | T | C | -0.0169 | 0.0160 | -0.0076 | 0.0231 | -0.1512 | 0.0638 | 0.0225  | 0.0402 | 0.0003  | 0.0036 | 5 |
| rs113454416 | 1 | 77794311 | G | T | -0.0163 | 0.0146 | 0.0097  | 0.0207 | -0.0490 | 0.0574 | 0.0135  | 0.0324 | -0.0041 | 0.0032 | 5 |
| rs113497633 | 1 | 78183390 | T | C | -0.0167 | 0.0160 | -0.0080 | 0.0231 | -0.1521 | 0.0637 | 0.0251  | 0.0401 | 0.0004  | 0.0036 | 5 |
| rs113554534 | 1 | 78166842 | T | C | 0.0100  | 0.0185 | -0.0092 | 0.0271 | -0.0882 | 0.0754 | -0.0716 | 0.0450 | -0.0044 | 0.0046 | 5 |
| rs113564975 | 1 | 78221603 | G | T | -0.0129 | 0.0158 | 0.0167  | 0.0221 | -0.0512 | 0.0616 | 0.0081  | 0.0352 | -0.0011 | 0.0035 | 5 |
| rs113597115 | 1 | 78248307 | T | C | -0.0124 | 0.0117 | -0.0078 | 0.0173 | -0.0059 | 0.0497 | 0.0035  | 0.0311 | 0.0055  | 0.0024 | 5 |
| rs113620238 | 1 | 77657315 | T | C | -0.0161 | 0.0146 | 0.0094  | 0.0206 | -0.0533 | 0.0573 | 0.0143  | 0.0324 | -0.0043 | 0.0032 | 5 |
| rs113657607 | 1 | 77883253 | C | A | -0.0125 | 0.0152 | 0.0130  | 0.0215 | -0.0575 | 0.0591 | 0.0138  | 0.0335 | -0.0040 | 0.0033 | 5 |
| rs113679514 | 1 | 77950810 | C | T | -0.0138 | 0.0153 | 0.0149  | 0.0215 | -0.0658 | 0.0589 | -0.0006 | 0.0332 | -0.0038 | 0.0033 | 5 |
| rs113679568 | 1 | 78352855 | T | A | 0.0123  | 0.0153 | 0.0160  | 0.0214 | 0.0560  | 0.0596 | 0.0193  | 0.0424 | -0.0033 | 0.0030 | 5 |
| rs113690314 | 1 | 78216522 | C | T | -0.0178 | 0.0160 | -0.0083 | 0.0231 | -0.1526 | 0.0639 | 0.0270  | 0.0405 | 0.0005  | 0.0036 | 5 |
| rs113721825 | 1 | 77663908 | T | C | -0.0165 | 0.0146 | 0.0099  | 0.0206 | -0.0551 | 0.0573 | 0.0231  | 0.0322 | -0.0044 | 0.0032 | 5 |
| rs113769933 | 1 | 77623982 | G | A | 0.0187  | 0.0124 | 0.0129  | 0.0177 | 0.0251  | 0.0511 | 0.0148  | 0.0335 | -0.0033 | 0.0024 | 5 |

|             |   |          |   |   |         |        |         |        |         |        |         |        |         |        |   |
|-------------|---|----------|---|---|---------|--------|---------|--------|---------|--------|---------|--------|---------|--------|---|
| rs113825798 | 1 | 77874446 | G | A | -0.0149 | 0.0154 | 0.0136  | 0.0217 | -0.0586 | 0.0593 | 0.0106  | 0.0333 | -0.0037 | 0.0033 | 5 |
| rs113841628 | 1 | 77771440 | A | G | -0.0150 | 0.0146 | 0.0080  | 0.0206 | -0.0558 | 0.0572 | 0.0129  | 0.0323 | -0.0043 | 0.0032 | 5 |
| rs113841785 | 1 | 77771523 | G | T | -0.0145 | 0.0121 | -0.0046 | 0.0169 | -0.0574 | 0.0475 | 0.0141  | 0.0282 | -0.0047 | 0.0027 | 5 |
| rs113855291 | 1 | 77978273 | C | T | -0.0116 | 0.0151 | 0.0162  | 0.0214 | -0.0665 | 0.0588 | -0.0031 | 0.0332 | -0.0043 | 0.0033 | 5 |
| rs113862408 | 1 | 78294591 | G | A | 0.0002  | 0.0056 | 0.0024  | 0.0079 | -0.0181 | 0.0223 | 0.0067  | 0.0140 | -0.0017 | 0.0012 | 5 |
| rs113919380 | 1 | 78183256 | A | G | -0.0159 | 0.0159 | -0.0088 | 0.0230 | -0.1512 | 0.0636 | 0.0365  | 0.0399 | 0.0001  | 0.0035 | 5 |
| rs113975729 | 1 | 78185871 | G | T | 0.0147  | 0.0231 | -0.0196 | 0.0336 | -0.0809 | 0.1045 | -0.0728 | 0.0439 | -0.0038 | 0.0046 | 5 |
| rs113985876 | 1 | 77988015 | G | A | -0.0124 | 0.0190 | 0.0240  | 0.0253 | -0.0546 | 0.0635 | -0.0088 | 0.0329 | -0.0036 | 0.0033 | 5 |
| rs114014897 | 1 | 78399548 | G | A | 0.0254  | 0.0139 | 0.0047  | 0.0196 | -0.0174 | 0.0540 | 0.0022  | 0.0325 | -0.0070 | 0.0029 | 5 |
| rs114040979 | 1 | 78191892 | C | T | 0.0054  | 0.0166 | 0.0212  | 0.0232 | 0.0020  | 0.0677 | -0.0274 | 0.0443 | -0.0011 | 0.0036 | 5 |
| rs114094692 | 1 | 77912718 | C | T | -0.0116 | 0.0166 | -0.0184 | 0.0246 | -0.0392 | 0.0677 | 0.0012  | 0.0399 | -0.0083 | 0.0038 | 5 |
| rs114103398 | 1 | 78197083 | A | G | -0.0159 | 0.0160 | -0.0090 | 0.0231 | -0.1511 | 0.0640 | 0.0232  | 0.0403 | 0.0004  | 0.0036 | 5 |
| rs114109478 | 1 | 77700930 | A | G | -0.0004 | 0.0096 | -0.0113 | 0.0134 | 0.0186  | 0.0387 | 0.0029  | 0.0270 | -0.0026 | 0.0021 | 5 |
| rs114112491 | 1 | 77762744 | A | G | -0.0337 | 0.0226 | -0.0179 | 0.0313 | -0.1093 | 0.0942 | -0.0026 | 0.0573 | -0.0034 | 0.0048 | 5 |
| rs114113740 | 1 | 78134698 | A | G | 0.0025  | 0.0177 | 0.0194  | 0.0232 | 0.0380  | 0.0675 | -0.0315 | 0.0450 | -0.0014 | 0.0036 | 5 |
| rs114191610 | 1 | 77706743 | A | G | 0.0004  | 0.0113 | -0.0126 | 0.0163 | -0.0180 | 0.0450 | -0.0155 | 0.0287 | -0.0004 | 0.0024 | 5 |
| rs114232819 | 1 | 77816414 | G | A | 0.0057  | 0.0182 | -0.0047 | 0.0253 | 0.0610  | 0.0688 | 0.0186  | 0.0467 | 0.0020  | 0.0042 | 5 |
| rs114359073 | 1 | 78172682 | A | G | 0.0178  | 0.0166 | -0.0173 | 0.0249 | -0.0119 | 0.0683 | -0.0010 | 0.0375 | -0.0036 | 0.0034 | 5 |
| rs114362558 | 1 | 77555542 | A | T | 0.0083  | 0.0154 | 0.0043  | 0.0213 | -0.1481 | 0.0629 | -0.0410 | 0.0381 | 0.0007  | 0.0036 | 5 |
| rs114372994 | 1 | 77820662 | G | A | -0.0267 | 0.0221 | -0.0234 | 0.0307 | -0.1205 | 0.0923 | 0.0270  | 0.0608 | -0.0015 | 0.0047 | 5 |
| rs114526921 | 1 | 77541591 | A | G | 0.0002  | 0.0169 | 0.0198  | 0.0249 | -0.0741 | 0.0719 | -0.0561 | 0.0441 | 0.0002  | 0.0040 | 5 |
| rs114556460 | 1 | 77957367 | T | G | -0.0084 | 0.0160 | -0.0218 | 0.0240 | 0.0307  | 0.0680 | -0.0200 | 0.0479 | 0.0027  | 0.0030 | 5 |
| rs114608578 | 1 | 77998727 | G | A | -0.0042 | 0.0097 | -0.0108 | 0.0138 | -0.1196 | 0.0395 | -0.0161 | 0.0251 | -0.0007 | 0.0022 | 5 |
| rs114614710 | 1 | 77938230 | G | A | -0.0100 | 0.0127 | -0.0145 | 0.0178 | -0.1198 | 0.0502 | 0.0010  | 0.0330 | -0.0016 | 0.0028 | 5 |
| rs114619951 | 1 | 77500802 | T | C | 0.0339  | 0.0189 | -0.0155 | 0.0266 | -0.0802 | 0.0733 | -0.0850 | 0.0482 | 0.0086  | 0.0038 | 5 |
| rs114621734 | 1 | 77554169 | T | C | 0.0027  | 0.0115 | -0.0079 | 0.0165 | -0.0070 | 0.0454 | -0.0147 | 0.0293 | -0.0006 | 0.0025 | 5 |
| rs114626062 | 1 | 78455706 | C | T | 0.0249  | 0.0137 | 0.0101  | 0.0192 | -0.0188 | 0.0527 | 0.0023  | 0.0327 | -0.0062 | 0.0028 | 5 |
| rs114627235 | 1 | 78213264 | A | T | 0.0127  | 0.0186 | -0.0123 | 0.0273 | -0.1100 | 0.0765 | -0.0629 | 0.0458 | -0.0042 | 0.0046 | 5 |
| rs114632361 | 1 | 78239299 | G | A | 0.0153  | 0.0133 | 0.0011  | 0.0192 | 0.0729  | 0.0524 | -0.0382 | 0.0340 | 0.0014  | 0.0029 | 5 |
| rs114661098 | 1 | 77603831 | G | A | 0.0013  | 0.0162 | -0.0141 | 0.0227 | -0.0308 | 0.0618 | -0.0232 | 0.0414 | -0.0003 | 0.0041 | 5 |
| rs114686124 | 1 | 77999227 | T | C | -0.0194 | 0.0110 | -0.0036 | 0.0156 | -0.0040 | 0.0473 | -0.0312 | 0.0337 | -0.0014 | 0.0027 | 5 |
| rs114693226 | 1 | 77608194 | C | T | -0.0060 | 0.0157 | -0.0006 | 0.0219 | -0.0022 | 0.0647 | -0.0002 | 0.0508 | -0.0018 | 0.0032 | 5 |
| rs114768254 | 1 | 78309338 | G | T | -0.0130 | 0.0106 | 0.0019  | 0.0148 | -0.0646 | 0.0422 | -0.0478 | 0.0255 | 0.0023  | 0.0024 | 5 |
| rs114787067 | 1 | 77826637 | T | A | -0.0268 | 0.0161 | -0.0159 | 0.0229 | -0.0553 | 0.0627 | 0.0121  | 0.0488 | -0.0040 | 0.0052 | 5 |
| rs114787911 | 1 | 78134876 | A | G | 0.0074  | 0.0166 | 0.0194  | 0.0232 | 0.0310  | 0.0674 | -0.0315 | 0.0450 | -0.0013 | 0.0036 | 5 |
| rs114803006 | 1 | 77601315 | T | C | 0.0334  | 0.0166 | -0.0093 | 0.0248 | 0.0081  | 0.0668 | 0.0078  | 0.0397 | -0.0034 | 0.0034 | 5 |
| rs114860733 | 1 | 77507311 | C | G | 0.0424  | 0.0255 | 0.0420  | 0.0373 | 0.2581  | 0.1155 | 0.2573  | 0.0602 | -0.0077 | 0.0052 | 5 |
| rs114861579 | 1 | 77542196 | C | A | 0.0008  | 0.0169 | 0.0199  | 0.0249 | -0.0678 | 0.0717 | -0.0582 | 0.0442 | 0.0000  | 0.0040 | 5 |
| rs114868665 | 1 | 78096515 | A | T | -0.0308 | 0.0180 | -0.0243 | 0.0253 | -0.1637 | 0.0719 | 0.0097  | 0.0412 | -0.0002 | 0.0036 | 5 |
| rs114868904 | 1 | 78343270 | C | T | -0.0121 | 0.0101 | 0.0063  | 0.0143 | -0.0653 | 0.0408 | -0.0454 | 0.0251 | 0.0026  | 0.0023 | 5 |
| rs114874323 | 1 | 77638874 | T | G | 0.0007  | 0.0114 | -0.0126 | 0.0164 | -0.0023 | 0.0451 | -0.0099 | 0.0287 | -0.0010 | 0.0025 | 5 |
| rs114875991 | 1 | 77736502 | C | T | -0.0101 | 0.0177 | -0.0146 | 0.0248 | -0.0890 | 0.0682 | -0.0053 | 0.0449 | -0.0049 | 0.0048 | 5 |
| rs114898412 | 1 | 77546742 | T | C | -0.0151 | 0.0086 | -0.0093 | 0.0123 | -0.0422 | 0.0334 | -0.0454 | 0.0203 | 0.0000  | 0.0018 | 5 |
| rs114898989 | 1 | 78232005 | G | A | -0.0035 | 0.0122 | 0.0068  | 0.0172 | 0.0259  | 0.0529 | -0.0250 | 0.0346 | -0.0008 | 0.0031 | 5 |
| rs114900699 | 1 | 77726760 | C | G | 0.0079  | 0.0157 | -0.0162 | 0.0232 | -0.0952 | 0.0682 | -0.0160 | 0.0444 | 0.0074  | 0.0032 | 5 |
| rs114902412 | 1 | 77582347 | T | C | -0.0007 | 0.0104 | -0.0139 | 0.0151 | -0.0247 | 0.0418 | -0.0099 | 0.0265 | -0.0005 | 0.0023 | 5 |

|             |   |          |   |   |         |        |         |        |         |        |         |        |         |        |   |
|-------------|---|----------|---|---|---------|--------|---------|--------|---------|--------|---------|--------|---------|--------|---|
| rs114934210 | 1 | 78300497 | A | G | 0.0084  | 0.0110 | -0.0122 | 0.0156 | -0.0431 | 0.0435 | 0.0022  | 0.0277 | -0.0024 | 0.0028 | 5 |
| rs115007809 | 1 | 77701293 | T | C | -0.0054 | 0.0096 | -0.0063 | 0.0136 | 0.0158  | 0.0373 | 0.0037  | 0.0249 | 0.0000  | 0.0023 | 5 |
| rs115050899 | 1 | 77534749 | A | G | 0.0171  | 0.0170 | -0.0063 | 0.0235 | 0.0312  | 0.0635 | 0.0185  | 0.0431 | 0.0049  | 0.0037 | 5 |
| rs115064284 | 1 | 77928944 | T | G | 0.0022  | 0.0145 | -0.0119 | 0.0211 | -0.1087 | 0.0615 | -0.0399 | 0.0375 | 0.0008  | 0.0035 | 5 |
| rs115067240 | 1 | 78197994 | G | A | 0.0165  | 0.0132 | -0.0100 | 0.0184 | -0.1120 | 0.0536 | -0.0139 | 0.0312 | 0.0004  | 0.0030 | 5 |
| rs115112059 | 1 | 78405808 | A | G | 0.0099  | 0.0119 | 0.0113  | 0.0178 | 0.0164  | 0.0518 | -0.0436 | 0.0322 | -0.0029 | 0.0027 | 5 |
| rs115112126 | 1 | 78450558 | T | C | 0.0200  | 0.0215 | -0.0052 | 0.0297 | 0.0395  | 0.0812 | -0.0697 | 0.0542 | 0.0018  | 0.0042 | 5 |
| rs115173545 | 1 | 78264867 | C | T | 0.0175  | 0.0135 | -0.0269 | 0.0194 | -0.0468 | 0.0497 | -0.0074 | 0.0270 | -0.0019 | 0.0026 | 5 |
| rs115177056 | 1 | 77993822 | T | G | 0.0048  | 0.0145 | -0.0049 | 0.0212 | -0.1078 | 0.0614 | -0.0364 | 0.0375 | 0.0010  | 0.0035 | 5 |
| rs115177104 | 1 | 78410012 | T | C | -0.0012 | 0.0148 | -0.0128 | 0.0213 | 0.0223  | 0.0579 | -0.0567 | 0.0365 | 0.0026  | 0.0029 | 5 |
| rs115232076 | 1 | 78250564 | A | T | 0.0023  | 0.0182 | -0.0411 | 0.0261 | -0.0419 | 0.0733 | -0.0009 | 0.0426 | -0.0042 | 0.0043 | 5 |
| rs115272195 | 1 | 77706023 | T | C | 0.0081  | 0.0158 | -0.0182 | 0.0233 | -0.0593 | 0.0700 | 0.0426  | 0.0415 | -0.0022 | 0.0030 | 5 |
| rs115281275 | 1 | 77525444 | A | T | 0.0117  | 0.0135 | 0.0340  | 0.0201 | 0.1242  | 0.0588 | 0.1329  | 0.0440 | -0.0069 | 0.0031 | 5 |
| rs115363824 | 1 | 78375694 | C | T | 0.0189  | 0.0213 | -0.0006 | 0.0294 | 0.0404  | 0.0798 | -0.0678 | 0.0536 | 0.0023  | 0.0042 | 5 |
| rs115385700 | 1 | 78419339 | A | T | 0.0183  | 0.0215 | -0.0051 | 0.0297 | 0.0481  | 0.0811 | -0.0697 | 0.0539 | 0.0020  | 0.0042 | 5 |
| rs115400708 | 1 | 78018883 | T | G | 0.0045  | 0.0145 | -0.0045 | 0.0212 | -0.1074 | 0.0614 | -0.0336 | 0.0375 | 0.0009  | 0.0035 | 5 |
| rs115407197 | 1 | 77647154 | T | C | 0.0005  | 0.0114 | -0.0131 | 0.0164 | -0.0018 | 0.0451 | -0.0097 | 0.0288 | -0.0009 | 0.0025 | 5 |
| rs115465149 | 1 | 77927186 | G | A | 0.0025  | 0.0145 | -0.0099 | 0.0211 | -0.1061 | 0.0614 | -0.0390 | 0.0375 | 0.0008  | 0.0035 | 5 |
| rs115494062 | 1 | 77855866 | A | G | -0.0136 | 0.0152 | 0.0127  | 0.0215 | -0.0584 | 0.0591 | 0.0099  | 0.0333 | -0.0038 | 0.0033 | 5 |
| rs115525402 | 1 | 77977363 | C | A | -0.0258 | 0.0115 | -0.0368 | 0.0169 | -0.0901 | 0.0454 | -0.0081 | 0.0253 | -0.0011 | 0.0021 | 5 |
| rs115561329 | 1 | 78203578 | C | G | -0.0328 | 0.0176 | 0.0192  | 0.0256 | -0.0842 | 0.0713 | 0.0121  | 0.0441 | 0.0030  | 0.0051 | 5 |
| rs115596936 | 1 | 78259707 | T | C | 0.0148  | 0.0109 | -0.0086 | 0.0154 | -0.0415 | 0.0429 | -0.0043 | 0.0272 | -0.0019 | 0.0026 | 5 |
| rs1156031   | 1 | 78385587 | A | G | 0.0082  | 0.0052 | 0.0156  | 0.0076 | 0.0634  | 0.0219 | 0.0243  | 0.0130 | -0.0004 | 0.0011 | 5 |
| rs115608114 | 1 | 77641094 | T | C | -0.0057 | 0.0188 | -0.0032 | 0.0275 | 0.0289  | 0.0809 | 0.0212  | 0.0523 | -0.0021 | 0.0044 | 5 |
| rs115620232 | 1 | 77727461 | C | A | -0.0036 | 0.0204 | -0.0065 | 0.0290 | -0.0931 | 0.0832 | 0.0304  | 0.0473 | 0.0050  | 0.0045 | 5 |
| rs115621296 | 1 | 77659870 | G | T | -0.0040 | 0.0153 | 0.0039  | 0.0221 | -0.0954 | 0.0644 | -0.0372 | 0.0389 | -0.0003 | 0.0036 | 5 |
| rs115654008 | 1 | 78023855 | G | A | -0.0185 | 0.0224 | -0.0343 | 0.0314 | -0.0923 | 0.0855 | -0.0797 | 0.0522 | -0.0043 | 0.0050 | 5 |
| rs115681945 | 1 | 77680070 | T | A | 0.0119  | 0.0183 | -0.0032 | 0.0254 | 0.0479  | 0.0690 | 0.0182  | 0.0471 | 0.0035  | 0.0041 | 5 |
| rs115729770 | 1 | 77855778 | G | C | -0.0117 | 0.0128 | -0.0134 | 0.0180 | -0.1137 | 0.0508 | -0.0098 | 0.0343 | -0.0018 | 0.0028 | 5 |
| rs11577481  | 1 | 78306083 | T | C | 0.0090  | 0.0110 | -0.0128 | 0.0155 | -0.0437 | 0.0434 | 0.0119  | 0.0274 | -0.0023 | 0.0028 | 5 |
| rs115775405 | 1 | 77631544 | G | A | -0.0024 | 0.0190 | -0.0118 | 0.0285 | 0.0466  | 0.0845 | 0.0057  | 0.0530 | -0.0022 | 0.0044 | 5 |
| rs115778101 | 1 | 77732869 | C | T | 0.0182  | 0.0113 | 0.0153  | 0.0160 | -0.0160 | 0.0473 | -0.0110 | 0.0321 | -0.0029 | 0.0025 | 5 |
| rs11578243  | 1 | 77677815 | C | T | 0.0119  | 0.0163 | 0.0081  | 0.0223 | -0.0761 | 0.0626 | -0.0162 | 0.0391 | 0.0047  | 0.0036 | 5 |
| rs11578805  | 1 | 77731435 | C | T | -0.0130 | 0.0054 | -0.0129 | 0.0076 | -0.0222 | 0.0210 | -0.0273 | 0.0132 | 0.0010  | 0.0012 | 5 |
| rs115793521 | 1 | 77544450 | G | T | -0.0011 | 0.0107 | -0.0091 | 0.0155 | -0.0254 | 0.0431 | -0.0117 | 0.0278 | 0.0003  | 0.0024 | 5 |
| rs11579434  | 1 | 78144338 | T | C | 0.0014  | 0.0048 | -0.0151 | 0.0068 | -0.0826 | 0.0190 | -0.0369 | 0.0118 | -0.0010 | 0.0011 | 5 |
| rs11579517  | 1 | 78270298 | G | A | -0.0233 | 0.0173 | -0.0570 | 0.0240 | -0.1210 | 0.0686 | 0.0037  | 0.0375 | -0.0003 | 0.0032 | 5 |
| rs115797237 | 1 | 78106277 | T | C | 0.0156  | 0.0248 | -0.0042 | 0.0356 | -0.1329 | 0.1061 | -0.0628 | 0.0536 | -0.0015 | 0.0040 | 5 |
| rs115798565 | 1 | 78333628 | A | G | 0.0096  | 0.0109 | -0.0128 | 0.0155 | -0.0494 | 0.0433 | 0.0080  | 0.0273 | -0.0023 | 0.0027 | 5 |
| rs11579906  | 1 | 78276091 | C | T | 0.0128  | 0.0114 | -0.0144 | 0.0161 | -0.0607 | 0.0450 | 0.0005  | 0.0282 | -0.0025 | 0.0028 | 5 |
| rs115822798 | 1 | 77511222 | G | A | -0.0035 | 0.0131 | -0.0048 | 0.0185 | -0.0465 | 0.0518 | 0.0166  | 0.0368 | 0.0051  | 0.0030 | 5 |
| rs11584032  | 1 | 78153850 | A | G | 0.0061  | 0.0051 | -0.0110 | 0.0074 | -0.0469 | 0.0210 | -0.0336 | 0.0123 | -0.0011 | 0.0011 | 5 |
| rs11585359  | 1 | 78271059 | T | C | 0.0139  | 0.0115 | -0.0157 | 0.0163 | -0.0593 | 0.0455 | 0.0032  | 0.0284 | -0.0021 | 0.0028 | 5 |
| rs11585641  | 1 | 77506282 | A | T | -0.0073 | 0.0092 | -0.0256 | 0.0131 | -0.0455 | 0.0341 | -0.0005 | 0.0190 | 0.0016  | 0.0017 | 5 |
| rs11586613  | 1 | 78299611 | A | T | -0.0043 | 0.0049 | 0.0153  | 0.0069 | 0.0231  | 0.0192 | 0.0037  | 0.0120 | 0.0024  | 0.0011 | 5 |
| rs11587478  | 1 | 78306058 | C | T | 0.0081  | 0.0110 | -0.0133 | 0.0156 | -0.0420 | 0.0434 | 0.0119  | 0.0274 | -0.0022 | 0.0028 | 5 |

|             |   |          |   |   |         |        |         |        |         |        |         |        |         |        |   |
|-------------|---|----------|---|---|---------|--------|---------|--------|---------|--------|---------|--------|---------|--------|---|
| rs11587560  | 1 | 78285521 | T | C | -0.0059 | 0.0071 | -0.0146 | 0.0099 | -0.0243 | 0.0279 | -0.0249 | 0.0171 | 0.0024  | 0.0016 | 5 |
| rs115889531 | 1 | 78455440 | G | A | 0.0248  | 0.0137 | 0.0101  | 0.0192 | -0.0188 | 0.0527 | 0.0023  | 0.0327 | -0.0062 | 0.0028 | 5 |
| rs11589034  | 1 | 78309303 | C | A | 0.0010  | 0.0060 | -0.0214 | 0.0084 | -0.0777 | 0.0235 | -0.0083 | 0.0144 | -0.0011 | 0.0014 | 5 |
| rs11589106  | 1 | 78309706 | G | A | 0.0087  | 0.0110 | -0.0109 | 0.0155 | -0.0441 | 0.0433 | 0.0093  | 0.0273 | -0.0021 | 0.0027 | 5 |
| rs11589864  | 1 | 78110165 | C | A | 0.0044  | 0.0054 | -0.0118 | 0.0076 | -0.0761 | 0.0214 | -0.0258 | 0.0132 | -0.0024 | 0.0012 | 5 |
| rs115904674 | 1 | 77512526 | C | A | 0.0053  | 0.0185 | -0.0096 | 0.0255 | -0.1025 | 0.0703 | 0.0233  | 0.0429 | 0.0048  | 0.0038 | 5 |
| rs115906623 | 1 | 78310333 | A | C | 0.0087  | 0.0115 | -0.0105 | 0.0155 | -0.0441 | 0.0433 | 0.0095  | 0.0273 | -0.0021 | 0.0027 | 5 |
| rs11590864  | 1 | 78453099 | A | T | 0.0048  | 0.0157 | 0.0042  | 0.0221 | -0.0565 | 0.0644 | -0.0578 | 0.0409 | -0.0015 | 0.0039 | 5 |
| rs11590908  | 1 | 78388631 | T | A | 0.0106  | 0.0154 | 0.0037  | 0.0218 | -0.0499 | 0.0635 | -0.0470 | 0.0402 | -0.0019 | 0.0038 | 5 |
| rs115920620 | 1 | 77705155 | C | A | -0.0029 | 0.0219 | 0.0410  | 0.0349 | -0.0236 | 0.0990 | -0.0361 | 0.0389 | -0.0026 | 0.0038 | 5 |
| rs115925400 | 1 | 77906188 | A | G | -0.0133 | 0.0229 | -0.0262 | 0.0322 | -0.1099 | 0.0885 | -0.0864 | 0.0534 | -0.0038 | 0.0050 | 5 |
| rs115954681 | 1 | 78446133 | G | A | 0.0205  | 0.0215 | -0.0032 | 0.0297 | 0.0399  | 0.0811 | -0.0587 | 0.0555 | 0.0021  | 0.0042 | 5 |
| rs115954722 | 1 | 78327824 | G | A | -0.0414 | 0.0221 | -0.0718 | 0.0317 | -0.0854 | 0.0910 | 0.0081  | 0.0457 | -0.0051 | 0.0046 | 5 |
| rs115964622 | 1 | 78459795 | T | C | 0.0249  | 0.0137 | 0.0100  | 0.0192 | -0.0177 | 0.0528 | 0.0032  | 0.0327 | -0.0061 | 0.0028 | 5 |
| rs116034016 | 1 | 77598548 | G | A | -0.0126 | 0.0177 | 0.0287  | 0.0256 | 0.1217  | 0.0820 | -0.0917 | 0.0476 | 0.0005  | 0.0044 | 5 |
| rs116034285 | 1 | 77613070 | C | T | -0.0165 | 0.0146 | 0.0099  | 0.0206 | -0.0526 | 0.0573 | 0.0127  | 0.0325 | -0.0045 | 0.0032 | 5 |
| rs116045895 | 1 | 78356727 | C | T | 0.0217  | 0.0211 | -0.0003 | 0.0292 | 0.0553  | 0.0803 | -0.0708 | 0.0543 | 0.0012  | 0.0042 | 5 |
| rs116050397 | 1 | 78371189 | T | C | 0.0184  | 0.0212 | 0.0024  | 0.0293 | 0.0483  | 0.0795 | -0.0639 | 0.0530 | 0.0023  | 0.0042 | 5 |
| rs116061056 | 1 | 78001400 | T | C | 0.0045  | 0.0145 | -0.0048 | 0.0212 | -0.1088 | 0.0614 | -0.0361 | 0.0375 | 0.0010  | 0.0035 | 5 |
| rs116069454 | 1 | 77529952 | T | C | -0.0155 | 0.0157 | -0.0131 | 0.0228 | -0.0176 | 0.0626 | -0.0136 | 0.0414 | 0.0034  | 0.0030 | 5 |
| rs116094542 | 1 | 78199030 | T | A | -0.0168 | 0.0160 | -0.0070 | 0.0231 | -0.1510 | 0.0638 | 0.0267  | 0.0402 | 0.0003  | 0.0036 | 5 |
| rs116103836 | 1 | 77553850 | A | G | -0.0017 | 0.0169 | 0.0176  | 0.0249 | -0.0778 | 0.0720 | -0.0570 | 0.0440 | 0.0004  | 0.0040 | 5 |
| rs116122762 | 1 | 78317618 | C | A | -0.0130 | 0.0106 | 0.0013  | 0.0148 | -0.0723 | 0.0419 | -0.0483 | 0.0255 | 0.0024  | 0.0024 | 5 |
| rs116164420 | 1 | 78159881 | T | C | 0.0110  | 0.0185 | -0.0072 | 0.0271 | -0.0873 | 0.0754 | -0.0774 | 0.0453 | -0.0045 | 0.0046 | 5 |
| rs116176716 | 1 | 78309331 | G | A | -0.0132 | 0.0106 | 0.0023  | 0.0148 | -0.0647 | 0.0422 | -0.0477 | 0.0255 | 0.0023  | 0.0024 | 5 |
| rs116234311 | 1 | 77768230 | A | G | -0.0263 | 0.0261 | -0.0365 | 0.0374 | -0.0507 | 0.1001 | -0.0755 | 0.0559 | -0.0051 | 0.0053 | 5 |
| rs116239067 | 1 | 77706011 | A | C | 0.0077  | 0.0157 | -0.0181 | 0.0232 | -0.0619 | 0.0699 | 0.0371  | 0.0417 | -0.0028 | 0.0030 | 5 |
| rs116244564 | 1 | 78009049 | G | T | -0.0090 | 0.0158 | -0.0135 | 0.0238 | 0.0273  | 0.0664 | -0.0375 | 0.0406 | 0.0025  | 0.0030 | 5 |
| rs116252806 | 1 | 77513287 | T | C | -0.0004 | 0.0143 | 0.0108  | 0.0202 | 0.0586  | 0.0590 | -0.0583 | 0.0408 | -0.0014 | 0.0036 | 5 |
| rs116292439 | 1 | 77906592 | C | T | 0.0026  | 0.0145 | -0.0109 | 0.0211 | -0.1068 | 0.0614 | -0.0380 | 0.0375 | 0.0009  | 0.0035 | 5 |
| rs116311468 | 1 | 78451116 | C | T | 0.0204  | 0.0215 | -0.0048 | 0.0297 | 0.0399  | 0.0812 | -0.0698 | 0.0542 | 0.0018  | 0.0042 | 5 |
| rs116335966 | 1 | 78217260 | C | T | -0.0068 | 0.0208 | -0.0063 | 0.0310 | -0.0918 | 0.0839 | 0.0417  | 0.0510 | 0.0042  | 0.0058 | 5 |
| rs116362880 | 1 | 78365623 | A | G | 0.0181  | 0.0212 | -0.0020 | 0.0293 | 0.0418  | 0.0797 | -0.0670 | 0.0536 | 0.0024  | 0.0042 | 5 |
| rs116373918 | 1 | 78381145 | A | G | 0.0047  | 0.0106 | -0.0241 | 0.0157 | -0.0126 | 0.0437 | 0.0194  | 0.0251 | -0.0020 | 0.0022 | 5 |
| rs116375448 | 1 | 78393800 | A | G | -0.0030 | 0.0153 | -0.0156 | 0.0222 | 0.0238  | 0.0605 | -0.0461 | 0.0401 | 0.0025  | 0.0030 | 5 |
| rs116399924 | 1 | 78049412 | T | C | 0.0030  | 0.0092 | -0.0081 | 0.0133 | -0.0251 | 0.0384 | -0.0212 | 0.0247 | -0.0015 | 0.0020 | 5 |
| rs116431933 | 1 | 78105835 | A | G | 0.0112  | 0.0157 | 0.0242  | 0.0219 | 0.0413  | 0.0637 | -0.0417 | 0.0462 | -0.0014 | 0.0033 | 5 |
| rs116476395 | 1 | 77768449 | T | C | 0.0159  | 0.0188 | -0.0050 | 0.0262 | -0.1138 | 0.0769 | -0.0296 | 0.0460 | -0.0013 | 0.0039 | 5 |
| rs116517533 | 1 | 77972546 | A | C | -0.0068 | 0.0163 | 0.0011  | 0.0232 | -0.0701 | 0.0702 | -0.0368 | 0.0374 | 0.0009  | 0.0035 | 5 |
| rs116524141 | 1 | 78195266 | G | A | -0.0247 | 0.0169 | -0.0239 | 0.0236 | -0.0254 | 0.0673 | -0.0259 | 0.0517 | -0.0045 | 0.0039 | 5 |
| rs116531835 | 1 | 78296896 | T | C | 0.0025  | 0.0186 | -0.0048 | 0.0260 | -0.0120 | 0.0749 | -0.0078 | 0.0558 | 0.0073  | 0.0037 | 5 |
| rs116589977 | 1 | 78075508 | T | C | 0.0108  | 0.0158 | 0.0008  | 0.0213 | 0.0937  | 0.0576 | 0.0052  | 0.0386 | 0.0029  | 0.0029 | 5 |
| rs116592044 | 1 | 78313900 | C | A | -0.0132 | 0.0105 | 0.0010  | 0.0147 | -0.0742 | 0.0419 | -0.0480 | 0.0255 | 0.0024  | 0.0024 | 5 |
| rs116646263 | 1 | 78233139 | G | T | -0.0026 | 0.0126 | 0.0096  | 0.0177 | 0.0152  | 0.0551 | -0.0315 | 0.0353 | -0.0030 | 0.0032 | 5 |
| rs1166584   | 1 | 77796140 | G | A | -0.0104 | 0.0062 | -0.0042 | 0.0086 | -0.0078 | 0.0240 | -0.0269 | 0.0137 | 0.0008  | 0.0013 | 5 |
| rs1166585   | 1 | 77794036 | A | G | -0.0114 | 0.0059 | -0.0065 | 0.0082 | 0.0033  | 0.0226 | -0.0245 | 0.0142 | 0.0016  | 0.0013 | 5 |



|             |   |          |   |   |         |        |         |        |         |        |         |        |         |        |   |
|-------------|---|----------|---|---|---------|--------|---------|--------|---------|--------|---------|--------|---------|--------|---|
| rs1166586   | 1 | 77791419 | A | G | -0.0117 | 0.0055 | -0.0091 | 0.0078 | -0.0142 | 0.0215 | -0.0318 | 0.0134 | 0.0013  | 0.0012 | 5 |
| rs1166588   | 1 | 77788573 | T | C | -0.0116 | 0.0059 | -0.0068 | 0.0082 | 0.0028  | 0.0226 | -0.0246 | 0.0142 | 0.0017  | 0.0013 | 5 |
| rs1166589   | 1 | 77787546 | G | A | -0.0133 | 0.0053 | -0.0091 | 0.0074 | -0.0248 | 0.0205 | -0.0249 | 0.0128 | 0.0002  | 0.0012 | 5 |
| rs1166696   | 1 | 77924705 | A | C | -0.0152 | 0.0066 | -0.0118 | 0.0093 | -0.0482 | 0.0261 | -0.0260 | 0.0169 | 0.0027  | 0.0015 | 5 |
| rs1166697   | 1 | 77924744 | G | T | -0.0200 | 0.0083 | -0.0089 | 0.0117 | 0.0093  | 0.0324 | -0.0310 | 0.0216 | 0.0052  | 0.0020 | 5 |
| rs1166698   | 1 | 77926761 | A | G | 0.0106  | 0.0059 | -0.0108 | 0.0082 | -0.0427 | 0.0234 | -0.0139 | 0.0147 | -0.0028 | 0.0013 | 5 |
| rs1166699   | 1 | 77927182 | C | T | -0.0164 | 0.0060 | -0.0099 | 0.0085 | -0.0605 | 0.0238 | -0.0290 | 0.0150 | 0.0013  | 0.0014 | 5 |
| rs1166700   | 1 | 77927936 | T | C | -0.0151 | 0.0066 | -0.0115 | 0.0093 | -0.0485 | 0.0261 | -0.0257 | 0.0169 | 0.0028  | 0.0015 | 5 |
| rs1166701   | 1 | 77928708 | A | C | -0.0203 | 0.0083 | -0.0098 | 0.0117 | 0.0073  | 0.0323 | -0.0295 | 0.0215 | 0.0051  | 0.0020 | 5 |
| rs1166702   | 1 | 77929877 | C | T | -0.0206 | 0.0083 | -0.0096 | 0.0117 | 0.0081  | 0.0323 | -0.0294 | 0.0215 | 0.0051  | 0.0020 | 5 |
| rs1166703   | 1 | 77874354 | A | T | -0.0177 | 0.0075 | -0.0027 | 0.0112 | -0.0503 | 0.0292 | -0.0290 | 0.0148 | 0.0012  | 0.0014 | 5 |
| rs1166704   | 1 | 77901209 | A | G | -0.0206 | 0.0075 | -0.0066 | 0.0106 | 0.0257  | 0.0294 | -0.0233 | 0.0199 | 0.0040  | 0.0018 | 5 |
| rs1166705   | 1 | 77892062 | A | G | -0.0183 | 0.0077 | -0.0066 | 0.0112 | 0.0228  | 0.0313 | -0.0243 | 0.0197 | 0.0039  | 0.0018 | 5 |
| rs1166706   | 1 | 77893344 | T | C | -0.0202 | 0.0075 | -0.0064 | 0.0106 | 0.0243  | 0.0294 | -0.0222 | 0.0196 | 0.0041  | 0.0018 | 5 |
| rs1166707   | 1 | 77905159 | T | C | -0.0205 | 0.0075 | -0.0070 | 0.0106 | 0.0253  | 0.0294 | -0.0230 | 0.0196 | 0.0039  | 0.0018 | 5 |
| rs1166708   | 1 | 77865541 | T | C | 0.0092  | 0.0072 | -0.0080 | 0.0107 | -0.0143 | 0.0283 | -0.0127 | 0.0149 | -0.0029 | 0.0013 | 5 |
| rs1166709   | 1 | 77868570 | A | G | -0.0176 | 0.0078 | -0.0065 | 0.0114 | 0.0261  | 0.0320 | -0.0280 | 0.0202 | 0.0045  | 0.0019 | 5 |
| rs1166710   | 1 | 77868944 | A | T | 0.0039  | 0.0077 | -0.0260 | 0.0117 | -0.0769 | 0.0364 | -0.0131 | 0.0146 | -0.0026 | 0.0012 | 5 |
| rs116672312 | 1 | 77514267 | G | A | -0.0455 | 0.0180 | -0.0031 | 0.0258 | -0.0093 | 0.0744 | -0.0633 | 0.0465 | 0.0041  | 0.0037 | 5 |
| rs116733683 | 1 | 78332808 | G | T | 0.0143  | 0.0153 | -0.0288 | 0.0202 | -0.0575 | 0.0517 | 0.0112  | 0.0268 | -0.0023 | 0.0027 | 5 |
| rs116759924 | 1 | 77480368 | A | C | -0.0030 | 0.0220 | -0.0226 | 0.0295 | -0.0955 | 0.0841 | 0.0444  | 0.0493 | 0.0048  | 0.0044 | 5 |
| rs116799349 | 1 | 77972220 | A | G | -0.0429 | 0.0183 | -0.0225 | 0.0268 | 0.0357  | 0.0766 | -0.0362 | 0.0423 | 0.0014  | 0.0037 | 5 |
| rs116804178 | 1 | 78199637 | G | A | 0.0087  | 0.0166 | 0.0207  | 0.0232 | 0.0034  | 0.0680 | -0.0352 | 0.0454 | -0.0016 | 0.0036 | 5 |
| rs116809156 | 1 | 77485463 | C | T | -0.0047 | 0.0142 | 0.0011  | 0.0199 | -0.0104 | 0.0560 | 0.0302  | 0.0410 | 0.0058  | 0.0034 | 5 |
| rs117137711 | 1 | 78253170 | G | A | 0.0329  | 0.0225 | -0.0177 | 0.0314 | 0.0507  | 0.0829 | -0.1134 | 0.0537 | 0.0033  | 0.0048 | 5 |
| rs117422444 | 1 | 78262315 | G | A | 0.0182  | 0.0135 | -0.0259 | 0.0194 | -0.0467 | 0.0497 | -0.0058 | 0.0271 | -0.0018 | 0.0026 | 5 |
| rs117426802 | 1 | 78252072 | C | T | 0.0350  | 0.0224 | -0.0132 | 0.0313 | 0.0381  | 0.0828 | -0.1143 | 0.0532 | 0.0043  | 0.0048 | 5 |
| rs117780051 | 1 | 77912168 | C | T | 0.0010  | 0.0146 | -0.0095 | 0.0212 | -0.1052 | 0.0618 | -0.0302 | 0.0377 | 0.0009  | 0.0036 | 5 |
| rs117841930 | 1 | 77749485 | A | G | -0.0019 | 0.0144 | -0.0085 | 0.0210 | -0.0951 | 0.0610 | -0.0444 | 0.0381 | -0.0002 | 0.0035 | 5 |
| rs11799753  | 1 | 78168369 | T | C | -0.0084 | 0.0074 | 0.0048  | 0.0105 | -0.0339 | 0.0293 | -0.0213 | 0.0184 | 0.0024  | 0.0017 | 5 |
| rs11801375  | 1 | 78390597 | A | G | 0.0191  | 0.0213 | -0.0047 | 0.0295 | 0.0438  | 0.0805 | -0.0650 | 0.0547 | 0.0017  | 0.0042 | 5 |
| rs11801808  | 1 | 77588538 | T | C | -0.0049 | 0.0096 | 0.0172  | 0.0140 | 0.0394  | 0.0396 | 0.0480  | 0.0240 | 0.0008  | 0.0020 | 5 |
| rs11801836  | 1 | 77713846 | T | C | -0.0045 | 0.0095 | 0.0156  | 0.0140 | 0.0300  | 0.0395 | 0.0379  | 0.0243 | 0.0006  | 0.0019 | 5 |
| rs11804237  | 1 | 78154291 | C | T | -0.0079 | 0.0314 | -0.0123 | 0.0426 | -0.1084 | 0.1173 | 0.0150  | 0.0438 | 0.0022  | 0.0050 | 5 |
| rs11804627  | 1 | 78335772 | T | C | -0.0122 | 0.0105 | 0.0011  | 0.0147 | -0.0713 | 0.0419 | -0.0457 | 0.0254 | 0.0024  | 0.0024 | 5 |
| rs11805735  | 1 | 77952802 | G | A | -0.0202 | 0.0083 | -0.0093 | 0.0117 | 0.0083  | 0.0323 | -0.0301 | 0.0215 | 0.0051  | 0.0020 | 5 |
| rs11805942  | 1 | 77957778 | G | T | -0.0160 | 0.0060 | -0.0094 | 0.0085 | -0.0593 | 0.0238 | -0.0277 | 0.0150 | 0.0012  | 0.0014 | 5 |
| rs11806130  | 1 | 77953218 | G | A | -0.0167 | 0.0060 | -0.0099 | 0.0086 | -0.0592 | 0.0238 | -0.0286 | 0.0150 | 0.0013  | 0.0014 | 5 |
| rs11806197  | 1 | 77499170 | G | A | 0.0086  | 0.0059 | 0.0161  | 0.0083 | 0.0957  | 0.0231 | 0.0635  | 0.0151 | -0.0007 | 0.0013 | 5 |
| rs11806307  | 1 | 78344836 | T | C | -0.0201 | 0.0134 | -0.0072 | 0.0188 | -0.0696 | 0.0541 | -0.0889 | 0.0367 | 0.0048  | 0.0030 | 5 |
| rs11806671  | 1 | 78222186 | A | G | -0.0060 | 0.0208 | -0.0042 | 0.0309 | -0.0774 | 0.0838 | 0.0454  | 0.0512 | 0.0039  | 0.0058 | 5 |
| rs11807240  | 1 | 77953091 | A | G | -0.0204 | 0.0083 | -0.0093 | 0.0117 | 0.0097  | 0.0323 | -0.0301 | 0.0215 | 0.0051  | 0.0020 | 5 |
| rs11807462  | 1 | 78167932 | G | A | -0.0080 | 0.0074 | 0.0046  | 0.0105 | -0.0322 | 0.0293 | -0.0235 | 0.0186 | 0.0025  | 0.0017 | 5 |
| rs11807476  | 1 | 78168005 | T | A | -0.0001 | 0.0095 | -0.0041 | 0.0136 | -0.0196 | 0.0367 | -0.0226 | 0.0185 | 0.0025  | 0.0017 | 5 |
| rs11808942  | 1 | 78167953 | A | G | -0.0082 | 0.0074 | 0.0050  | 0.0106 | -0.0345 | 0.0294 | -0.0211 | 0.0184 | 0.0025  | 0.0017 | 5 |
| rs11809101  | 1 | 78170453 | C | T | -0.0082 | 0.0074 | 0.0049  | 0.0106 | -0.0341 | 0.0294 | -0.0210 | 0.0185 | 0.0024  | 0.0017 | 5 |

|             |   |          |   |   |         |        |         |        |         |        |         |        |         |        |   |
|-------------|---|----------|---|---|---------|--------|---------|--------|---------|--------|---------|--------|---------|--------|---|
| rs11809460  | 1 | 78369179 | A | G | 0.0180  | 0.0212 | 0.0029  | 0.0292 | 0.0552  | 0.0792 | -0.0635 | 0.0530 | 0.0022  | 0.0042 | 5 |
| rs11809462  | 1 | 78369213 | T | G | 0.0183  | 0.0212 | 0.0050  | 0.0292 | 0.0609  | 0.0792 | -0.0653 | 0.0530 | 0.0023  | 0.0042 | 5 |
| rs11811611  | 1 | 77516332 | T | C | 0.0087  | 0.0059 | 0.0175  | 0.0083 | 0.0949  | 0.0232 | 0.0625  | 0.0151 | -0.0010 | 0.0013 | 5 |
| rs11811709  | 1 | 78249150 | A | G | -0.0002 | 0.0061 | -0.0016 | 0.0087 | -0.0115 | 0.0242 | -0.0086 | 0.0152 | 0.0023  | 0.0014 | 5 |
| rs11811805  | 1 | 77973219 | C | G | -0.0149 | 0.0066 | -0.0114 | 0.0093 | -0.0485 | 0.0261 | -0.0261 | 0.0168 | 0.0027  | 0.0015 | 5 |
| rs118127371 | 1 | 78014890 | T | C | 0.0034  | 0.0146 | -0.0039 | 0.0213 | -0.1073 | 0.0618 | -0.0280 | 0.0377 | 0.0010  | 0.0035 | 5 |
| rs12021502  | 1 | 77703073 | A | C | -0.0115 | 0.0088 | -0.0204 | 0.0125 | 0.0245  | 0.0342 | -0.0106 | 0.0228 | 0.0019  | 0.0021 | 5 |
| rs12021616  | 1 | 78321107 | A | G | 0.0058  | 0.0081 | -0.0349 | 0.0114 | -0.0755 | 0.0315 | 0.0080  | 0.0192 | -0.0024 | 0.0018 | 5 |
| rs12022986  | 1 | 77532055 | C | G | 0.0010  | 0.0110 | 0.0082  | 0.0160 | -0.0713 | 0.0464 | -0.0292 | 0.0268 | -0.0002 | 0.0025 | 5 |
| rs12024041  | 1 | 78300152 | C | T | -0.0043 | 0.0049 | 0.0154  | 0.0069 | 0.0216  | 0.0192 | 0.0033  | 0.0120 | 0.0023  | 0.0011 | 5 |
| rs12024239  | 1 | 78329131 | A | G | 0.0075  | 0.0068 | -0.0279 | 0.0095 | -0.0710 | 0.0265 | 0.0093  | 0.0163 | -0.0025 | 0.0016 | 5 |
| rs12024476  | 1 | 78464683 | A | G | 0.0035  | 0.0049 | 0.0125  | 0.0070 | 0.0674  | 0.0195 | 0.0242  | 0.0123 | -0.0001 | 0.0011 | 5 |
| rs12025691  | 1 | 78317658 | T | C | 0.0070  | 0.0067 | -0.0284 | 0.0095 | -0.0707 | 0.0265 | 0.0090  | 0.0163 | -0.0025 | 0.0016 | 5 |
| rs12026939  | 1 | 77609317 | A | G | -0.0134 | 0.0054 | -0.0136 | 0.0076 | -0.0218 | 0.0210 | -0.0294 | 0.0132 | 0.0009  | 0.0012 | 5 |
| rs12027636  | 1 | 77944555 | T | A | -0.0236 | 0.0222 | -0.0317 | 0.0311 | -0.0956 | 0.0845 | -0.0930 | 0.0504 | -0.0032 | 0.0049 | 5 |
| rs12029753  | 1 | 78321590 | T | C | 0.0015  | 0.0059 | -0.0216 | 0.0084 | -0.0774 | 0.0234 | -0.0071 | 0.0144 | -0.0011 | 0.0014 | 5 |
| rs12031857  | 1 | 78464542 | T | C | 0.0075  | 0.0048 | 0.0135  | 0.0068 | 0.0594  | 0.0190 | 0.0218  | 0.0121 | -0.0011 | 0.0011 | 5 |
| rs12034334  | 1 | 77488712 | C | G | 0.0077  | 0.0060 | 0.0156  | 0.0084 | 0.1005  | 0.0233 | 0.0701  | 0.0152 | -0.0008 | 0.0013 | 5 |
| rs12036318  | 1 | 78012407 | T | C | -0.0159 | 0.0086 | -0.0133 | 0.0121 | -0.0009 | 0.0335 | -0.0322 | 0.0210 | 0.0061  | 0.0021 | 5 |
| rs12038908  | 1 | 77626429 | T | C | 0.0036  | 0.0101 | -0.0088 | 0.0141 | -0.0737 | 0.0397 | -0.0246 | 0.0242 | 0.0002  | 0.0024 | 5 |
| rs12039708  | 1 | 77481324 | T | C | 0.0061  | 0.0059 | 0.0151  | 0.0084 | 0.0939  | 0.0234 | 0.0771  | 0.0153 | -0.0010 | 0.0013 | 5 |
| rs12040471  | 1 | 77502716 | A | T | 0.0084  | 0.0059 | 0.0177  | 0.0083 | 0.0947  | 0.0232 | 0.0638  | 0.0151 | -0.0009 | 0.0013 | 5 |
| rs12041509  | 1 | 77503936 | G | T | 0.0085  | 0.0059 | 0.0179  | 0.0083 | 0.0947  | 0.0232 | 0.0659  | 0.0150 | -0.0009 | 0.0013 | 5 |
| rs12042177  | 1 | 77520953 | G | A | 0.0084  | 0.0059 | 0.0173  | 0.0083 | 0.0953  | 0.0232 | 0.0621  | 0.0151 | -0.0009 | 0.0013 | 5 |
| rs12042881  | 1 | 77502758 | A | G | 0.0083  | 0.0059 | 0.0177  | 0.0083 | 0.0947  | 0.0232 | 0.0637  | 0.0151 | -0.0009 | 0.0013 | 5 |
| rs12044050  | 1 | 78317477 | A | T | 0.0069  | 0.0067 | -0.0286 | 0.0095 | -0.0707 | 0.0265 | 0.0090  | 0.0163 | -0.0025 | 0.0016 | 5 |
| rs12045981  | 1 | 78379165 | A | T | -0.0018 | 0.0081 | -0.0385 | 0.0116 | -0.0655 | 0.0324 | 0.0112  | 0.0202 | -0.0024 | 0.0019 | 5 |
| rs12047144  | 1 | 78049932 | T | C | -0.0008 | 0.0048 | -0.0120 | 0.0067 | -0.0501 | 0.0188 | -0.0329 | 0.0118 | 0.0000  | 0.0011 | 5 |
| rs12049202  | 1 | 77501838 | T | C | 0.0075  | 0.0058 | 0.0162  | 0.0082 | 0.0883  | 0.0229 | 0.0632  | 0.0148 | -0.0004 | 0.0013 | 5 |
| rs12049259  | 1 | 78450632 | A | G | 0.0077  | 0.0051 | 0.0177  | 0.0072 | 0.0882  | 0.0204 | 0.0316  | 0.0130 | -0.0006 | 0.0011 | 5 |
| rs12063386  | 1 | 78335159 | T | G | -0.0011 | 0.0053 | -0.0039 | 0.0075 | -0.0205 | 0.0210 | 0.0059  | 0.0131 | -0.0013 | 0.0012 | 5 |
| rs12064888  | 1 | 78339827 | G | A | -0.0011 | 0.0053 | -0.0038 | 0.0075 | -0.0187 | 0.0211 | 0.0052  | 0.0131 | -0.0013 | 0.0012 | 5 |
| rs12067638  | 1 | 78055138 | T | C | 0.0095  | 0.0052 | -0.0081 | 0.0074 | -0.0314 | 0.0209 | -0.0231 | 0.0130 | -0.0014 | 0.0012 | 5 |
| rs12071212  | 1 | 77538079 | C | T | -0.0137 | 0.0055 | -0.0149 | 0.0080 | -0.0118 | 0.0225 | -0.0416 | 0.0133 | 0.0007  | 0.0012 | 5 |
| rs12073895  | 1 | 78465846 | T | C | 0.0035  | 0.0049 | 0.0121  | 0.0070 | 0.0679  | 0.0195 | 0.0248  | 0.0123 | -0.0001 | 0.0011 | 5 |
| rs12074409  | 1 | 77552499 | G | C | -0.0132 | 0.0055 | -0.0144 | 0.0080 | -0.0115 | 0.0225 | -0.0397 | 0.0133 | 0.0007  | 0.0012 | 5 |
| rs12080346  | 1 | 78412302 | C | G | 0.0082  | 0.0051 | 0.0171  | 0.0072 | 0.0908  | 0.0203 | 0.0277  | 0.0130 | -0.0004 | 0.0011 | 5 |
| rs12081426  | 1 | 77570171 | T | C | -0.0136 | 0.0057 | -0.0169 | 0.0082 | -0.0081 | 0.0229 | -0.0304 | 0.0136 | 0.0010  | 0.0012 | 5 |
| rs12082228  | 1 | 78161533 | A | G | 0.0039  | 0.0056 | -0.0154 | 0.0081 | -0.0343 | 0.0244 | -0.0278 | 0.0127 | -0.0012 | 0.0011 | 5 |
| rs12083265  | 1 | 78154114 | G | A | 0.0025  | 0.0051 | -0.0102 | 0.0072 | -0.0422 | 0.0201 | -0.0327 | 0.0127 | -0.0014 | 0.0011 | 5 |
| rs12085106  | 1 | 78202372 | G | C | 0.0133  | 0.0151 | -0.0106 | 0.0219 | -0.0554 | 0.0603 | -0.1004 | 0.0381 | -0.0004 | 0.0035 | 5 |
| rs12085120  | 1 | 78315069 | T | A | -0.0017 | 0.0058 | 0.0030  | 0.0083 | -0.0225 | 0.0236 | -0.0010 | 0.0148 | -0.0024 | 0.0013 | 5 |
| rs12085547  | 1 | 77829821 | A | G | 0.0049  | 0.0055 | 0.0045  | 0.0081 | 0.0348  | 0.0230 | 0.0262  | 0.0140 | 0.0011  | 0.0012 | 5 |
| rs12090729  | 1 | 77820989 | C | G | -0.0124 | 0.0053 | -0.0099 | 0.0074 | -0.0244 | 0.0205 | -0.0259 | 0.0128 | 0.0001  | 0.0012 | 5 |
| rs12093121  | 1 | 78325466 | T | A | -0.0013 | 0.0053 | -0.0039 | 0.0075 | -0.0203 | 0.0211 | 0.0056  | 0.0131 | -0.0013 | 0.0012 | 5 |
| rs12093263  | 1 | 77498654 | T | C | -0.0029 | 0.0048 | -0.0104 | 0.0068 | -0.0565 | 0.0190 | -0.0459 | 0.0118 | -0.0016 | 0.0011 | 5 |

|            |   |          |   |   |         |        |         |        |         |        |         |        |         |        |   |
|------------|---|----------|---|---|---------|--------|---------|--------|---------|--------|---------|--------|---------|--------|---|
| rs12094707 | 1 | 78326899 | G | A | -0.0126 | 0.0105 | 0.0020  | 0.0147 | -0.0693 | 0.0418 | -0.0431 | 0.0254 | 0.0024  | 0.0024 | 5 |
| rs12095064 | 1 | 77536262 | A | G | -0.0133 | 0.0056 | -0.0140 | 0.0082 | -0.0094 | 0.0229 | -0.0426 | 0.0135 | 0.0010  | 0.0012 | 5 |
| rs12095545 | 1 | 78165610 | C | T | 0.0034  | 0.0050 | -0.0109 | 0.0071 | -0.0470 | 0.0198 | -0.0425 | 0.0124 | -0.0012 | 0.0011 | 5 |
| rs12118523 | 1 | 78257649 | A | G | -0.0023 | 0.0052 | 0.0141  | 0.0077 | 0.0164  | 0.0217 | 0.0225  | 0.0128 | 0.0021  | 0.0011 | 5 |
| rs12119550 | 1 | 78191402 | G | A | -0.0097 | 0.0087 | -0.0155 | 0.0129 | -0.0239 | 0.0353 | -0.0329 | 0.0204 | -0.0011 | 0.0019 | 5 |
| rs12120236 | 1 | 77788056 | A | G | -0.0104 | 0.0083 | -0.0051 | 0.0111 | -0.0153 | 0.0301 | -0.0343 | 0.0184 | 0.0005  | 0.0017 | 5 |
| rs12120452 | 1 | 78194439 | A | G | -0.0099 | 0.0087 | -0.0154 | 0.0129 | -0.0235 | 0.0353 | -0.0355 | 0.0204 | -0.0011 | 0.0019 | 5 |
| rs12121287 | 1 | 77736204 | A | T | -0.0096 | 0.0081 | -0.0128 | 0.0119 | -0.0147 | 0.0325 | -0.0288 | 0.0189 | 0.0008  | 0.0017 | 5 |
| rs12121914 | 1 | 78047931 | G | C | -0.0089 | 0.0073 | -0.0096 | 0.0103 | -0.0350 | 0.0281 | -0.0077 | 0.0169 | -0.0001 | 0.0016 | 5 |
| rs12122075 | 1 | 78248191 | C | T | 0.0020  | 0.0060 | -0.0028 | 0.0085 | -0.0061 | 0.0235 | -0.0199 | 0.0148 | 0.0024  | 0.0013 | 5 |
| rs12122274 | 1 | 78391568 | A | G | 0.0077  | 0.0053 | 0.0169  | 0.0077 | 0.0617  | 0.0223 | 0.0304  | 0.0133 | -0.0003 | 0.0012 | 5 |
| rs12122500 | 1 | 78014609 | T | A | 0.0005  | 0.0133 | 0.0081  | 0.0194 | -0.0928 | 0.0563 | -0.0804 | 0.0368 | 0.0080  | 0.0030 | 5 |
| rs12122686 | 1 | 77798574 | G | A | -0.0094 | 0.0077 | -0.0032 | 0.0110 | -0.0048 | 0.0297 | -0.0344 | 0.0182 | 0.0002  | 0.0016 | 5 |
| rs12123953 | 1 | 78049463 | T | C | -0.0090 | 0.0073 | -0.0080 | 0.0103 | -0.0322 | 0.0280 | -0.0061 | 0.0168 | -0.0001 | 0.0016 | 5 |
| rs12124780 | 1 | 78344143 | C | G | 0.0045  | 0.0057 | 0.0196  | 0.0083 | 0.0319  | 0.0237 | 0.0271  | 0.0142 | 0.0020  | 0.0012 | 5 |
| rs12125026 | 1 | 78321385 | T | C | -0.0174 | 0.0095 | -0.0105 | 0.0133 | -0.0151 | 0.0363 | -0.0384 | 0.0217 | -0.0002 | 0.0019 | 5 |
| rs12125903 | 1 | 78056941 | G | C | -0.0089 | 0.0073 | -0.0082 | 0.0103 | -0.0334 | 0.0280 | -0.0075 | 0.0169 | -0.0002 | 0.0016 | 5 |
| rs12126604 | 1 | 77592700 | T | C | -0.0115 | 0.0086 | -0.0145 | 0.0127 | -0.0226 | 0.0347 | -0.0360 | 0.0199 | 0.0002  | 0.0018 | 5 |
| rs12126871 | 1 | 78140215 | G | A | 0.0034  | 0.0049 | -0.0132 | 0.0069 | -0.0751 | 0.0192 | -0.0403 | 0.0119 | -0.0011 | 0.0011 | 5 |
| rs12127829 | 1 | 78264171 | G | C | -0.0015 | 0.0052 | 0.0159  | 0.0077 | 0.0190  | 0.0217 | 0.0228  | 0.0127 | 0.0021  | 0.0011 | 5 |
| rs12128041 | 1 | 77743520 | G | A | -0.0110 | 0.0058 | -0.0116 | 0.0082 | -0.0095 | 0.0224 | -0.0216 | 0.0142 | 0.0017  | 0.0013 | 5 |
| rs12128056 | 1 | 77870952 | A | G | -0.0123 | 0.0096 | -0.0004 | 0.0147 | -0.0317 | 0.0410 | -0.0557 | 0.0250 | 0.0007  | 0.0019 | 5 |
| rs12128334 | 1 | 78420620 | C | T | 0.0072  | 0.0051 | 0.0178  | 0.0073 | 0.0901  | 0.0205 | 0.0327  | 0.0131 | -0.0005 | 0.0012 | 5 |
| rs12129404 | 1 | 78343293 | A | G | -0.0011 | 0.0052 | 0.0121  | 0.0076 | 0.0209  | 0.0215 | 0.0072  | 0.0125 | 0.0016  | 0.0011 | 5 |
| rs12131414 | 1 | 78158737 | A | G | 0.0025  | 0.0051 | -0.0094 | 0.0072 | -0.0415 | 0.0201 | -0.0332 | 0.0127 | -0.0015 | 0.0011 | 5 |
| rs12131936 | 1 | 78289168 | G | A | -0.0001 | 0.0051 | 0.0167  | 0.0072 | 0.0364  | 0.0199 | 0.0176  | 0.0125 | 0.0019  | 0.0011 | 5 |
| rs12132664 | 1 | 78366106 | C | A | 0.0066  | 0.0053 | 0.0153  | 0.0077 | 0.0655  | 0.0222 | 0.0310  | 0.0133 | -0.0006 | 0.0012 | 5 |
| rs12132838 | 1 | 77755246 | T | G | -0.0140 | 0.0052 | -0.0105 | 0.0074 | -0.0271 | 0.0204 | -0.0242 | 0.0128 | 0.0003  | 0.0012 | 5 |
| rs12133075 | 1 | 78151962 | G | A | 0.0019  | 0.0048 | -0.0149 | 0.0068 | -0.0838 | 0.0191 | -0.0325 | 0.0119 | -0.0008 | 0.0011 | 5 |
| rs12133202 | 1 | 77505520 | T | A | 0.0029  | 0.0051 | -0.0095 | 0.0072 | -0.0467 | 0.0204 | -0.0320 | 0.0127 | -0.0023 | 0.0011 | 5 |
| rs12135104 | 1 | 77699217 | A | G | -0.0141 | 0.0052 | -0.0117 | 0.0074 | -0.0286 | 0.0204 | -0.0241 | 0.0128 | 0.0003  | 0.0012 | 5 |
| rs12138287 | 1 | 78209332 | C | T | 0.0021  | 0.0049 | -0.0110 | 0.0070 | -0.0587 | 0.0196 | -0.0380 | 0.0123 | -0.0011 | 0.0011 | 5 |
| rs12138313 | 1 | 78315858 | C | T | 0.0008  | 0.0051 | 0.0149  | 0.0072 | 0.0389  | 0.0200 | 0.0099  | 0.0125 | 0.0017  | 0.0011 | 5 |
| rs12139745 | 1 | 78307498 | T | A | 0.0049  | 0.0059 | 0.0140  | 0.0085 | 0.0441  | 0.0221 | 0.0107  | 0.0128 | 0.0019  | 0.0011 | 5 |
| rs12140633 | 1 | 78047940 | G | A | -0.0088 | 0.0073 | -0.0095 | 0.0103 | -0.0349 | 0.0281 | -0.0068 | 0.0169 | -0.0002 | 0.0016 | 5 |
| rs12140765 | 1 | 78308088 | C | T | 0.0013  | 0.0051 | 0.0144  | 0.0072 | 0.0390  | 0.0199 | 0.0115  | 0.0125 | 0.0019  | 0.0011 | 5 |
| rs12141234 | 1 | 78371013 | A | G | 0.0062  | 0.0053 | 0.0149  | 0.0077 | 0.0649  | 0.0222 | 0.0303  | 0.0133 | -0.0006 | 0.0012 | 5 |
| rs12142416 | 1 | 78364361 | T | C | 0.0279  | 0.0088 | 0.0378  | 0.0131 | 0.1121  | 0.0378 | 0.0913  | 0.0232 | -0.0016 | 0.0018 | 5 |
| rs12142441 | 1 | 77777862 | C | T | -0.0141 | 0.0052 | -0.0100 | 0.0074 | -0.0270 | 0.0204 | -0.0236 | 0.0128 | 0.0002  | 0.0012 | 5 |
| rs12142502 | 1 | 78319624 | A | T | 0.0031  | 0.0191 | -0.0093 | 0.0266 | 0.0647  | 0.0706 | -0.0268 | 0.0541 | 0.0023  | 0.0042 | 5 |
| rs12142671 | 1 | 77718640 | G | A | -0.0135 | 0.0056 | -0.0150 | 0.0078 | -0.0127 | 0.0215 | -0.0248 | 0.0136 | 0.0010  | 0.0012 | 5 |
| rs12144203 | 1 | 78290918 | A | C | 0.0005  | 0.0049 | 0.0127  | 0.0069 | 0.0217  | 0.0193 | 0.0170  | 0.0120 | 0.0014  | 0.0011 | 5 |
| rs12144616 | 1 | 78321735 | G | T | -0.0005 | 0.0052 | 0.0126  | 0.0076 | 0.0255  | 0.0215 | 0.0088  | 0.0125 | 0.0017  | 0.0011 | 5 |
| rs12145949 | 1 | 77665819 | A | G | -0.0020 | 0.0205 | -0.0779 | 0.0300 | -0.0722 | 0.0903 | 0.0909  | 0.0549 | -0.0018 | 0.0042 | 5 |
| rs12146104 | 1 | 77982616 | A | G | -0.0163 | 0.0086 | -0.0132 | 0.0121 | -0.0014 | 0.0335 | -0.0298 | 0.0221 | 0.0061  | 0.0021 | 5 |
| rs12184300 | 1 | 78166406 | C | T | -0.0013 | 0.0062 | -0.0091 | 0.0087 | -0.0516 | 0.0241 | -0.0187 | 0.0147 | -0.0011 | 0.0013 | 5 |

|            |   |          |   |   |         |        |         |        |         |        |         |        |         |        |   |
|------------|---|----------|---|---|---------|--------|---------|--------|---------|--------|---------|--------|---------|--------|---|
| rs12239098 | 1 | 78337071 | C | T | 0.0058  | 0.0081 | -0.0351 | 0.0115 | -0.0760 | 0.0316 | 0.0098  | 0.0192 | -0.0023 | 0.0018 | 5 |
| rs12239524 | 1 | 78336401 | T | C | 0.0059  | 0.0081 | -0.0351 | 0.0115 | -0.0758 | 0.0316 | 0.0105  | 0.0192 | -0.0023 | 0.0018 | 5 |
| rs12401377 | 1 | 78389343 | A | G | 0.0083  | 0.0052 | 0.0160  | 0.0076 | 0.0636  | 0.0219 | 0.0239  | 0.0130 | -0.0002 | 0.0011 | 5 |
| rs12401738 | 1 | 77981077 | A | G | 0.0076  | 0.0049 | 0.0200  | 0.0069 | 0.1033  | 0.0195 | 0.0483  | 0.0124 | 0.0005  | 0.0011 | 5 |
| rs12402928 | 1 | 77587543 | T | C | 0.0052  | 0.0048 | 0.0241  | 0.0068 | 0.0778  | 0.0192 | 0.0446  | 0.0121 | 0.0019  | 0.0011 | 5 |
| rs12403178 | 1 | 78339986 | T | A | -0.0039 | 0.0115 | 0.0007  | 0.0166 | -0.0816 | 0.0513 | -0.0496 | 0.0263 | 0.0024  | 0.0024 | 5 |
| rs12403399 | 1 | 78193937 | C | T | 0.0013  | 0.0091 | -0.0028 | 0.0130 | -0.0008 | 0.0360 | -0.0435 | 0.0236 | 0.0031  | 0.0020 | 5 |
| rs12403442 | 1 | 78339985 | C | T | -0.0037 | 0.0115 | 0.0011  | 0.0166 | -0.0819 | 0.0513 | -0.0494 | 0.0263 | 0.0024  | 0.0024 | 5 |
| rs12403493 | 1 | 78173849 | T | C | 0.0012  | 0.0091 | -0.0028 | 0.0130 | 0.0010  | 0.0360 | -0.0428 | 0.0237 | 0.0031  | 0.0020 | 5 |
| rs12404245 | 1 | 77486614 | C | T | -0.0122 | 0.0080 | -0.0041 | 0.0112 | -0.0455 | 0.0324 | -0.0379 | 0.0218 | 0.0015  | 0.0019 | 5 |
| rs12404342 | 1 | 77481503 | C | T | -0.0117 | 0.0077 | -0.0070 | 0.0108 | -0.0285 | 0.0306 | -0.0508 | 0.0206 | 0.0011  | 0.0018 | 5 |
| rs12404652 | 1 | 77939256 | A | G | -0.0255 | 0.0165 | -0.0156 | 0.0238 | -0.0914 | 0.0659 | -0.0356 | 0.0412 | 0.0132  | 0.0037 | 5 |
| rs12404838 | 1 | 77805018 | A | G | 0.0006  | 0.0063 | 0.0123  | 0.0094 | 0.0753  | 0.0323 | 0.0371  | 0.0132 | 0.0018  | 0.0011 | 5 |
| rs12405212 | 1 | 77949586 | G | A | -0.0141 | 0.0107 | 0.0069  | 0.0152 | -0.0155 | 0.0386 | -0.0292 | 0.0215 | 0.0051  | 0.0020 | 5 |
| rs12405751 | 1 | 78065874 | T | C | 0.0042  | 0.0048 | 0.0176  | 0.0067 | 0.0910  | 0.0190 | 0.0442  | 0.0121 | 0.0003  | 0.0011 | 5 |
| rs12406019 | 1 | 78212446 | G | A | -0.0012 | 0.0047 | 0.0156  | 0.0067 | 0.0873  | 0.0188 | 0.0489  | 0.0118 | 0.0015  | 0.0010 | 5 |
| rs12406044 | 1 | 78191406 | T | C | 0.0010  | 0.0091 | -0.0030 | 0.0130 | -0.0001 | 0.0360 | -0.0414 | 0.0236 | 0.0031  | 0.0020 | 5 |
| rs12406527 | 1 | 78351231 | A | G | -0.0114 | 0.0106 | -0.0006 | 0.0148 | -0.0747 | 0.0420 | -0.0505 | 0.0255 | 0.0022  | 0.0024 | 5 |
| rs12407256 | 1 | 78166699 | G | A | 0.0012  | 0.0091 | -0.0033 | 0.0130 | 0.0014  | 0.0360 | -0.0434 | 0.0237 | 0.0031  | 0.0020 | 5 |
| rs12408096 | 1 | 78348746 | A | C | -0.0110 | 0.0106 | 0.0002  | 0.0149 | -0.0684 | 0.0423 | -0.0485 | 0.0254 | 0.0023  | 0.0024 | 5 |
| rs12408350 | 1 | 78315893 | G | A | -0.0134 | 0.0105 | 0.0013  | 0.0147 | -0.0728 | 0.0419 | -0.0481 | 0.0255 | 0.0024  | 0.0024 | 5 |
| rs12408591 | 1 | 78315822 | G | T | -0.0131 | 0.0105 | 0.0012  | 0.0148 | -0.0722 | 0.0419 | -0.0480 | 0.0255 | 0.0024  | 0.0024 | 5 |
| rs12408626 | 1 | 78316097 | C | T | -0.0136 | 0.0105 | 0.0025  | 0.0147 | -0.0683 | 0.0418 | -0.0415 | 0.0254 | 0.0025  | 0.0024 | 5 |
| rs12408967 | 1 | 78238630 | T | G | -0.0113 | 0.0117 | -0.0107 | 0.0173 | -0.0030 | 0.0498 | 0.0060  | 0.0310 | 0.0058  | 0.0024 | 5 |
| rs12409081 | 1 | 78101561 | T | A | -0.0155 | 0.0149 | -0.0083 | 0.0214 | -0.0716 | 0.0592 | -0.0471 | 0.0394 | 0.0082  | 0.0034 | 5 |
| rs12409142 | 1 | 77691290 | T | C | 0.0041  | 0.0052 | 0.0183  | 0.0075 | 0.0629  | 0.0217 | 0.0366  | 0.0128 | 0.0017  | 0.0011 | 5 |
| rs12409525 | 1 | 78242709 | C | T | -0.0037 | 0.0079 | -0.0027 | 0.0112 | -0.0292 | 0.0312 | -0.0285 | 0.0205 | 0.0030  | 0.0018 | 5 |
| rs12409561 | 1 | 77974785 | A | G | -0.0204 | 0.0083 | -0.0096 | 0.0117 | 0.0078  | 0.0323 | -0.0312 | 0.0216 | 0.0051  | 0.0020 | 5 |
| rs12409958 | 1 | 77848793 | G | A | 0.0094  | 0.0050 | 0.0204  | 0.0074 | 0.0803  | 0.0212 | 0.0515  | 0.0126 | 0.0005  | 0.0011 | 5 |
| rs12410030 | 1 | 78173956 | C | T | -0.0100 | 0.0069 | 0.0029  | 0.0098 | -0.0566 | 0.0273 | -0.0164 | 0.0170 | 0.0021  | 0.0016 | 5 |
| rs12410974 | 1 | 78252816 | G | A | -0.0035 | 0.0081 | -0.0034 | 0.0118 | -0.0506 | 0.0337 | -0.0288 | 0.0205 | 0.0031  | 0.0018 | 5 |
| rs12411130 | 1 | 78036836 | A | C | 0.0069  | 0.0049 | 0.0186  | 0.0069 | 0.0947  | 0.0194 | 0.0488  | 0.0123 | 0.0003  | 0.0011 | 5 |
| rs12564401 | 1 | 78349296 | G | A | -0.0125 | 0.0101 | 0.0054  | 0.0143 | -0.0622 | 0.0407 | -0.0444 | 0.0250 | 0.0027  | 0.0023 | 5 |
| rs12564592 | 1 | 77489210 | G | A | -0.0292 | 0.0203 | -0.0301 | 0.0275 | -0.0202 | 0.0751 | 0.0223  | 0.0436 | -0.0042 | 0.0046 | 5 |
| rs12564604 | 1 | 77489420 | G | A | -0.0287 | 0.0203 | -0.0283 | 0.0275 | -0.0181 | 0.0752 | 0.0229  | 0.0436 | -0.0039 | 0.0046 | 5 |
| rs12565503 | 1 | 78267241 | G | C | -0.0036 | 0.0049 | -0.0038 | 0.0070 | -0.0256 | 0.0196 | -0.0073 | 0.0123 | -0.0003 | 0.0011 | 5 |
| rs12566056 | 1 | 78269563 | G | C | -0.0035 | 0.0049 | -0.0039 | 0.0070 | -0.0260 | 0.0196 | -0.0067 | 0.0122 | -0.0003 | 0.0011 | 5 |
| rs12567103 | 1 | 78314752 | C | T | -0.0136 | 0.0105 | 0.0025  | 0.0147 | -0.0683 | 0.0418 | -0.0444 | 0.0255 | 0.0025  | 0.0024 | 5 |
| rs12568492 | 1 | 78309737 | C | T | -0.0137 | 0.0105 | 0.0011  | 0.0147 | -0.0705 | 0.0419 | -0.0477 | 0.0255 | 0.0024  | 0.0024 | 5 |
| rs12568528 | 1 | 77493989 | T | C | -0.0177 | 0.0129 | 0.0136  | 0.0186 | -0.0726 | 0.0523 | 0.0220  | 0.0286 | -0.0009 | 0.0029 | 5 |
| rs12568630 | 1 | 78325804 | A | T | -0.0124 | 0.0106 | 0.0010  | 0.0148 | -0.0732 | 0.0420 | -0.0473 | 0.0255 | 0.0023  | 0.0024 | 5 |
| rs12717767 | 1 | 77569478 | C | T | -0.0134 | 0.0057 | -0.0167 | 0.0082 | -0.0073 | 0.0229 | -0.0288 | 0.0136 | 0.0010  | 0.0012 | 5 |
| rs12717768 | 1 | 77594411 | G | C | -0.0143 | 0.0052 | -0.0117 | 0.0074 | -0.0304 | 0.0204 | -0.0256 | 0.0128 | 0.0003  | 0.0012 | 5 |
| rs12717769 | 1 | 78405630 | C | T | 0.0063  | 0.0054 | 0.0187  | 0.0073 | 0.0910  | 0.0205 | 0.0318  | 0.0131 | -0.0006 | 0.0012 | 5 |
| rs12723748 | 1 | 77932028 | C | A | -0.0201 | 0.0083 | -0.0091 | 0.0117 | 0.0110  | 0.0323 | -0.0302 | 0.0213 | 0.0052  | 0.0020 | 5 |
| rs12724560 | 1 | 77542967 | C | A | -0.0139 | 0.0058 | -0.0171 | 0.0084 | -0.0035 | 0.0234 | -0.0381 | 0.0139 | 0.0010  | 0.0013 | 5 |

|            |   |          |   |   |         |        |         |        |         |        |         |        |         |        |   |
|------------|---|----------|---|---|---------|--------|---------|--------|---------|--------|---------|--------|---------|--------|---|
| rs12728967 | 1 | 77669249 | C | T | 0.0038  | 0.0052 | 0.0185  | 0.0075 | 0.0626  | 0.0217 | 0.0371  | 0.0128 | 0.0018  | 0.0011 | 5 |
| rs12729914 | 1 | 77514550 | C | T | 0.0085  | 0.0059 | 0.0176  | 0.0083 | 0.0948  | 0.0232 | 0.0607  | 0.0151 | -0.0009 | 0.0013 | 5 |
| rs12730346 | 1 | 78221472 | T | C | -0.0019 | 0.0048 | 0.0145  | 0.0067 | 0.0782  | 0.0189 | 0.0446  | 0.0119 | 0.0015  | 0.0011 | 5 |
| rs12731121 | 1 | 77484155 | A | G | 0.0018  | 0.0082 | 0.0103  | 0.0129 | 0.0350  | 0.0398 | -0.0069 | 0.0155 | 0.0014  | 0.0013 | 5 |
| rs12731886 | 1 | 77516016 | G | A | 0.0051  | 0.0056 | 0.0191  | 0.0080 | 0.0760  | 0.0221 | 0.0590  | 0.0141 | -0.0015 | 0.0013 | 5 |
| rs12732514 | 1 | 78174655 | T | C | -0.0009 | 0.0047 | 0.0158  | 0.0067 | 0.0879  | 0.0188 | 0.0490  | 0.0118 | 0.0016  | 0.0010 | 5 |
| rs12732561 | 1 | 77512852 | G | A | 0.0058  | 0.0062 | 0.0094  | 0.0088 | 0.0361  | 0.0245 | -0.0062 | 0.0155 | 0.0014  | 0.0013 | 5 |
| rs12733301 | 1 | 78373353 | G | A | 0.0059  | 0.0053 | 0.0169  | 0.0077 | 0.0641  | 0.0221 | 0.0313  | 0.0132 | -0.0006 | 0.0012 | 5 |
| rs12734182 | 1 | 78248686 | G | A | 0.0103  | 0.0100 | -0.0056 | 0.0143 | 0.0330  | 0.0396 | 0.0078  | 0.0249 | 0.0020  | 0.0022 | 5 |
| rs12740373 | 1 | 78376858 | T | C | 0.0068  | 0.0053 | 0.0161  | 0.0077 | 0.0645  | 0.0222 | 0.0307  | 0.0132 | -0.0006 | 0.0012 | 5 |
| rs12740982 | 1 | 77533559 | A | G | 0.0351  | 0.0172 | 0.0143  | 0.0251 | 0.1713  | 0.0695 | -0.0262 | 0.0427 | 0.0020  | 0.0034 | 5 |
| rs12741347 | 1 | 77687107 | G | C | 0.0026  | 0.0060 | 0.0160  | 0.0087 | 0.0965  | 0.0303 | 0.0424  | 0.0121 | 0.0018  | 0.0011 | 5 |
| rs12742293 | 1 | 78389673 | T | G | 0.0085  | 0.0052 | 0.0158  | 0.0076 | 0.0606  | 0.0220 | 0.0248  | 0.0131 | -0.0002 | 0.0011 | 5 |
| rs12742653 | 1 | 77873796 | T | A | 0.0103  | 0.0051 | 0.0216  | 0.0074 | 0.0852  | 0.0213 | 0.0518  | 0.0127 | 0.0007  | 0.0011 | 5 |
| rs12744863 | 1 | 77708295 | G | A | 0.0160  | 0.0143 | 0.0083  | 0.0210 | 0.1233  | 0.0569 | -0.0062 | 0.0403 | 0.0025  | 0.0029 | 5 |
| rs12746354 | 1 | 77474857 | G | C | 0.0073  | 0.0062 | 0.0116  | 0.0088 | 0.0330  | 0.0245 | -0.0077 | 0.0155 | 0.0014  | 0.0013 | 5 |
| rs12749252 | 1 | 78165403 | G | A | 0.0025  | 0.0051 | -0.0099 | 0.0072 | -0.0432 | 0.0202 | -0.0329 | 0.0126 | -0.0011 | 0.0011 | 5 |
| rs12751064 | 1 | 77540439 | T | C | 0.0054  | 0.0052 | 0.0151  | 0.0076 | 0.0459  | 0.0218 | 0.0369  | 0.0130 | 0.0016  | 0.0011 | 5 |
| rs12752029 | 1 | 78131021 | T | G | 0.0160  | 0.0195 | 0.0123  | 0.0287 | 0.1173  | 0.0803 | -0.0034 | 0.0492 | 0.0066  | 0.0041 | 5 |
| rs12752083 | 1 | 78387513 | G | A | 0.0069  | 0.0053 | 0.0182  | 0.0077 | 0.0605  | 0.0221 | 0.0312  | 0.0132 | -0.0003 | 0.0012 | 5 |
| rs12752254 | 1 | 78042625 | G | C | 0.0080  | 0.0049 | 0.0195  | 0.0069 | 0.0957  | 0.0194 | 0.0488  | 0.0123 | 0.0003  | 0.0011 | 5 |
| rs12752456 | 1 | 78248460 | G | C | -0.0024 | 0.0068 | 0.0001  | 0.0094 | -0.0058 | 0.0266 | -0.0115 | 0.0152 | 0.0023  | 0.0014 | 5 |
| rs12753797 | 1 | 77516274 | A | G | 0.0087  | 0.0059 | 0.0178  | 0.0083 | 0.0955  | 0.0232 | 0.0625  | 0.0151 | -0.0010 | 0.0013 | 5 |
| rs12754071 | 1 | 78148411 | G | C | 0.0221  | 0.0152 | 0.0117  | 0.0218 | 0.1099  | 0.0595 | -0.0176 | 0.0413 | 0.0059  | 0.0030 | 5 |
| rs12754926 | 1 | 77473696 | C | T | 0.0064  | 0.0047 | 0.0128  | 0.0067 | 0.0678  | 0.0188 | 0.0423  | 0.0118 | 0.0014  | 0.0010 | 5 |
| rs12754946 | 1 | 77524238 | C | T | 0.0047  | 0.0049 | 0.0180  | 0.0071 | 0.0455  | 0.0204 | 0.0451  | 0.0123 | 0.0017  | 0.0010 | 5 |
| rs12756133 | 1 | 77484139 | A | G | 0.0014  | 0.0064 | 0.0121  | 0.0095 | 0.0275  | 0.0246 | -0.0072 | 0.0152 | 0.0021  | 0.0013 | 5 |
| rs12756296 | 1 | 78415239 | C | T | 0.0082  | 0.0051 | 0.0172  | 0.0072 | 0.0914  | 0.0203 | 0.0278  | 0.0129 | -0.0004 | 0.0011 | 5 |
| rs12758374 | 1 | 78124571 | C | A | 0.0027  | 0.0048 | -0.0112 | 0.0068 | -0.0677 | 0.0191 | -0.0407 | 0.0119 | -0.0012 | 0.0011 | 5 |
| rs12759796 | 1 | 77562200 | C | T | 0.0213  | 0.0181 | 0.0268  | 0.0266 | 0.1572  | 0.0729 | -0.0228 | 0.0455 | 0.0023  | 0.0039 | 5 |
| rs12760098 | 1 | 78106085 | G | A | 0.0198  | 0.0150 | 0.0053  | 0.0216 | 0.0980  | 0.0586 | 0.0030  | 0.0398 | 0.0048  | 0.0030 | 5 |
| rs12760589 | 1 | 77507401 | T | G | 0.0061  | 0.0062 | 0.0097  | 0.0088 | 0.0378  | 0.0245 | -0.0044 | 0.0155 | 0.0015  | 0.0013 | 5 |
| rs1323094  | 1 | 78180017 | G | A | 0.0017  | 0.0049 | -0.0115 | 0.0070 | -0.0598 | 0.0195 | -0.0384 | 0.0122 | -0.0011 | 0.0011 | 5 |
| rs1323096  | 1 | 78236496 | T | A | 0.0083  | 0.0050 | -0.0099 | 0.0071 | -0.0326 | 0.0199 | -0.0213 | 0.0124 | -0.0016 | 0.0011 | 5 |
| rs1323098  | 1 | 78235081 | G | C | 0.0082  | 0.0050 | -0.0097 | 0.0071 | -0.0343 | 0.0199 | -0.0237 | 0.0124 | -0.0017 | 0.0011 | 5 |
| rs1323099  | 1 | 78230256 | T | A | 0.0090  | 0.0052 | -0.0087 | 0.0073 | -0.0213 | 0.0205 | -0.0171 | 0.0127 | -0.0018 | 0.0012 | 5 |
| rs1328437  | 1 | 78338847 | C | T | 0.0058  | 0.0081 | -0.0351 | 0.0115 | -0.0760 | 0.0316 | 0.0102  | 0.0192 | -0.0023 | 0.0018 | 5 |
| rs1328439  | 1 | 78332183 | G | A | -0.0004 | 0.0056 | -0.0038 | 0.0075 | -0.0203 | 0.0211 | 0.0058  | 0.0131 | -0.0013 | 0.0012 | 5 |
| rs1328441  | 1 | 78332100 | T | C | -0.0001 | 0.0047 | -0.0171 | 0.0067 | -0.0663 | 0.0187 | 0.0002  | 0.0116 | -0.0017 | 0.0010 | 5 |
| rs1328442  | 1 | 78330065 | A | C | 0.0016  | 0.0059 | -0.0221 | 0.0084 | -0.0781 | 0.0234 | -0.0067 | 0.0144 | -0.0011 | 0.0014 | 5 |
| rs1328447  | 1 | 78365166 | C | T | 0.0074  | 0.0052 | 0.0147  | 0.0076 | 0.0668  | 0.0219 | 0.0262  | 0.0131 | -0.0004 | 0.0011 | 5 |
| rs1328448  | 1 | 78366452 | A | T | 0.0083  | 0.0052 | 0.0144  | 0.0076 | 0.0635  | 0.0218 | 0.0239  | 0.0130 | -0.0005 | 0.0011 | 5 |
| rs1328449  | 1 | 78324713 | G | A | 0.0094  | 0.0084 | -0.0384 | 0.0119 | -0.0769 | 0.0327 | 0.0088  | 0.0200 | -0.0025 | 0.0019 | 5 |
| rs1328450  | 1 | 78322972 | T | G | -0.0144 | 0.0105 | 0.0027  | 0.0147 | -0.0690 | 0.0418 | -0.0445 | 0.0254 | 0.0023  | 0.0024 | 5 |
| rs1328451  | 1 | 78322810 | C | A | 0.0015  | 0.0059 | -0.0217 | 0.0084 | -0.0774 | 0.0234 | -0.0070 | 0.0144 | -0.0011 | 0.0014 | 5 |
| rs1328452  | 1 | 78309498 | A | G | 0.0065  | 0.0067 | -0.0272 | 0.0096 | -0.0703 | 0.0266 | 0.0092  | 0.0163 | -0.0025 | 0.0016 | 5 |

|             |   |          |   |   |         |        |         |        |         |        |         |        |         |        |   |
|-------------|---|----------|---|---|---------|--------|---------|--------|---------|--------|---------|--------|---------|--------|---|
| rs1332254   | 1 | 78467266 | T | C | 0.0083  | 0.0048 | 0.0124  | 0.0068 | 0.0630  | 0.0189 | 0.0188  | 0.0120 | -0.0010 | 0.0011 | 5 |
| rs1333068   | 1 | 78335682 | G | A | -0.0012 | 0.0053 | -0.0038 | 0.0075 | -0.0188 | 0.0211 | 0.0048  | 0.0131 | -0.0013 | 0.0012 | 5 |
| rs1333069   | 1 | 78401856 | T | C | 0.0075  | 0.0052 | 0.0176  | 0.0076 | 0.0596  | 0.0218 | 0.0262  | 0.0130 | -0.0004 | 0.0011 | 5 |
| rs1333070   | 1 | 78370982 | A | G | 0.0064  | 0.0053 | 0.0149  | 0.0077 | 0.0649  | 0.0222 | 0.0305  | 0.0133 | -0.0006 | 0.0012 | 5 |
| rs1333071   | 1 | 78370956 | A | C | 0.0063  | 0.0053 | 0.0149  | 0.0077 | 0.0652  | 0.0222 | 0.0304  | 0.0133 | -0.0006 | 0.0012 | 5 |
| rs1335481   | 1 | 78031848 | C | T | -0.0157 | 0.0086 | -0.0122 | 0.0121 | -0.0053 | 0.0335 | -0.0329 | 0.0223 | 0.0057  | 0.0020 | 5 |
| rs1335482   | 1 | 78137779 | C | T | -0.0029 | 0.0048 | 0.0114  | 0.0070 | 0.0715  | 0.0201 | 0.0466  | 0.0119 | 0.0017  | 0.0010 | 5 |
| rs13375172  | 1 | 78358643 | T | A | 0.0284  | 0.0225 | 0.0009  | 0.0305 | 0.0758  | 0.0846 | -0.0676 | 0.0542 | 0.0013  | 0.0042 | 5 |
| rs13376422  | 1 | 77504319 | T | C | 0.0062  | 0.0062 | 0.0100  | 0.0088 | 0.0374  | 0.0245 | -0.0043 | 0.0155 | 0.0014  | 0.0013 | 5 |
| rs1340154   | 1 | 78268367 | G | C | -0.0047 | 0.0049 | -0.0037 | 0.0069 | -0.0258 | 0.0195 | -0.0060 | 0.0122 | -0.0004 | 0.0011 | 5 |
| rs1340155   | 1 | 78274609 | A | T | 0.0029  | 0.0105 | -0.0112 | 0.0148 | -0.0568 | 0.0417 | 0.0021  | 0.0257 | -0.0026 | 0.0025 | 5 |
| rs1340161   | 1 | 78335031 | T | C | -0.0124 | 0.0105 | 0.0000  | 0.0148 | -0.0735 | 0.0420 | -0.0464 | 0.0254 | 0.0025  | 0.0024 | 5 |
| rs1340163   | 1 | 78181323 | G | T | 0.0055  | 0.0109 | -0.0005 | 0.0152 | -0.0558 | 0.0496 | -0.0457 | 0.0147 | 0.0004  | 0.0013 | 5 |
| rs1359043   | 1 | 78158225 | A | G | 0.0025  | 0.0051 | -0.0094 | 0.0072 | -0.0411 | 0.0201 | -0.0331 | 0.0127 | -0.0015 | 0.0011 | 5 |
| rs137878264 | 1 | 77858262 | A | G | -0.0115 | 0.0128 | -0.0138 | 0.0180 | -0.1142 | 0.0508 | -0.0091 | 0.0343 | -0.0018 | 0.0028 | 5 |
| rs137906365 | 1 | 78311174 | T | C | -0.0134 | 0.0105 | 0.0011  | 0.0147 | -0.0727 | 0.0419 | -0.0479 | 0.0256 | 0.0024  | 0.0024 | 5 |
| rs137911013 | 1 | 77855455 | A | G | 0.0029  | 0.0145 | -0.0083 | 0.0212 | -0.1055 | 0.0616 | -0.0427 | 0.0379 | 0.0012  | 0.0036 | 5 |
| rs137978105 | 1 | 77534190 | T | C | -0.0002 | 0.0169 | 0.0193  | 0.0250 | -0.0836 | 0.0722 | -0.0540 | 0.0447 | 0.0000  | 0.0040 | 5 |
| rs137989711 | 1 | 77912052 | T | C | -0.0103 | 0.0127 | -0.0142 | 0.0178 | -0.1188 | 0.0502 | 0.0014  | 0.0331 | -0.0016 | 0.0028 | 5 |
| rs138106681 | 1 | 77793744 | T | C | -0.0234 | 0.0250 | -0.0378 | 0.0352 | -0.0637 | 0.0934 | -0.0722 | 0.0560 | -0.0052 | 0.0052 | 5 |
| rs138158605 | 1 | 77635099 | G | A | 0.0287  | 0.0166 | -0.0084 | 0.0247 | -0.0012 | 0.0666 | 0.0064  | 0.0396 | -0.0038 | 0.0034 | 5 |
| rs138208488 | 1 | 77937452 | A | G | -0.0103 | 0.0127 | -0.0143 | 0.0178 | -0.1204 | 0.0502 | 0.0010  | 0.0330 | -0.0016 | 0.0028 | 5 |
| rs138256085 | 1 | 78200055 | T | C | -0.0157 | 0.0160 | -0.0091 | 0.0231 | -0.1471 | 0.0639 | 0.0228  | 0.0403 | 0.0003  | 0.0036 | 5 |
| rs138277199 | 1 | 77734870 | C | T | 0.0304  | 0.0172 | -0.0189 | 0.0257 | -0.0081 | 0.0701 | -0.0090 | 0.0381 | -0.0035 | 0.0035 | 5 |
| rs138278912 | 1 | 77996762 | G | A | -0.0186 | 0.0110 | -0.0052 | 0.0157 | -0.0029 | 0.0474 | -0.0314 | 0.0337 | -0.0011 | 0.0027 | 5 |
| rs138284320 | 1 | 78314733 | A | G | 0.0054  | 0.0118 | -0.0020 | 0.0171 | -0.0246 | 0.0511 | 0.0089  | 0.0273 | -0.0020 | 0.0027 | 5 |
| rs138311875 | 1 | 77701824 | T | C | 0.0007  | 0.0113 | -0.0125 | 0.0163 | -0.0171 | 0.0450 | -0.0166 | 0.0288 | -0.0003 | 0.0024 | 5 |
| rs138437142 | 1 | 77542395 | T | G | -0.0004 | 0.0169 | 0.0201  | 0.0250 | -0.0730 | 0.0720 | -0.0566 | 0.0446 | -0.0001 | 0.0040 | 5 |
| rs138483161 | 1 | 77772990 | G | A | -0.0261 | 0.0350 | -0.0569 | 0.0484 | -0.0568 | 0.1291 | -0.0806 | 0.0560 | -0.0048 | 0.0054 | 5 |
| rs138527067 | 1 | 77911691 | T | A | -0.0227 | 0.0222 | -0.0311 | 0.0311 | -0.0988 | 0.0846 | -0.1003 | 0.0506 | -0.0032 | 0.0049 | 5 |
| rs138726201 | 1 | 77788146 | A | G | -0.0157 | 0.0152 | -0.0168 | 0.0216 | -0.0579 | 0.0588 | 0.0195  | 0.0424 | -0.0045 | 0.0047 | 5 |
| rs138775196 | 1 | 78389464 | G | A | 0.0216  | 0.0208 | 0.0024  | 0.0297 | -0.0113 | 0.0891 | -0.0562 | 0.0453 | -0.0011 | 0.0050 | 5 |
| rs138775894 | 1 | 77763310 | A | G | 0.0005  | 0.0144 | -0.0115 | 0.0209 | -0.1082 | 0.0607 | -0.0426 | 0.0379 | 0.0001  | 0.0035 | 5 |
| rs138825806 | 1 | 78002093 | G | A | 0.0230  | 0.0166 | -0.0246 | 0.0246 | -0.0060 | 0.0668 | 0.0128  | 0.0378 | -0.0035 | 0.0035 | 5 |
| rs1389789   | 1 | 77629094 | C | T | -0.0147 | 0.0052 | -0.0121 | 0.0074 | -0.0297 | 0.0204 | -0.0244 | 0.0128 | 0.0003  | 0.0012 | 5 |
| rs1389790   | 1 | 77623714 | T | C | -0.0145 | 0.0052 | -0.0118 | 0.0074 | -0.0295 | 0.0204 | -0.0242 | 0.0128 | 0.0003  | 0.0012 | 5 |
| rs139096587 | 1 | 78060378 | A | C | -0.0170 | 0.0101 | -0.0248 | 0.0144 | 0.0239  | 0.0396 | 0.0026  | 0.0270 | 0.0065  | 0.0025 | 5 |
| rs139135406 | 1 | 78401612 | C | G | -0.0354 | 0.0226 | -0.0175 | 0.0325 | 0.0422  | 0.1009 | 0.0180  | 0.0605 | -0.0025 | 0.0057 | 5 |
| rs139268902 | 1 | 78041436 | T | C | 0.0042  | 0.0145 | -0.0052 | 0.0212 | -0.1048 | 0.0616 | -0.0392 | 0.0377 | 0.0006  | 0.0035 | 5 |
| rs139439796 | 1 | 77938523 | G | T | -0.0144 | 0.0122 | -0.0095 | 0.0172 | -0.0148 | 0.0531 | -0.0260 | 0.0368 | -0.0005 | 0.0030 | 5 |
| rs139650989 | 1 | 78312622 | G | T | 0.0182  | 0.0142 | 0.0195  | 0.0202 | 0.0345  | 0.0617 | 0.0242  | 0.0315 | -0.0045 | 0.0026 | 5 |
| rs139667308 | 1 | 78162333 | C | T | -0.0037 | 0.0153 | -0.0070 | 0.0232 | -0.0303 | 0.0641 | -0.0374 | 0.0329 | 0.0049  | 0.0028 | 5 |
| rs140117722 | 1 | 78421317 | T | G | 0.0096  | 0.0100 | 0.0088  | 0.0141 | 0.0175  | 0.0417 | 0.0226  | 0.0270 | -0.0040 | 0.0022 | 5 |
| rs140174102 | 1 | 77531542 | C | T | -0.0002 | 0.0161 | 0.0120  | 0.0239 | -0.0880 | 0.0691 | -0.0616 | 0.0445 | -0.0005 | 0.0038 | 5 |
| rs140261118 | 1 | 77993502 | C | G | -0.0106 | 0.0127 | -0.0149 | 0.0178 | -0.1189 | 0.0502 | 0.0009  | 0.0329 | -0.0017 | 0.0028 | 5 |
| rs140388227 | 1 | 77467519 | G | A | 0.0022  | 0.0262 | 0.0131  | 0.0411 | 0.1195  | 0.1140 | 0.0514  | 0.0879 | -0.0011 | 0.0056 | 5 |

|             |   |          |   |   |         |        |         |        |         |        |         |        |         |        |   |
|-------------|---|----------|---|---|---------|--------|---------|--------|---------|--------|---------|--------|---------|--------|---|
| rs140410538 | 1 | 78206505 | A | G | -0.0243 | 0.0128 | 0.0092  | 0.0188 | -0.0195 | 0.0558 | 0.0112  | 0.0278 | 0.0004  | 0.0029 | 5 |
| rs140440749 | 1 | 77694681 | C | T | -0.0117 | 0.0128 | -0.0068 | 0.0186 | 0.0312  | 0.0512 | 0.0053  | 0.0331 | -0.0008 | 0.0034 | 5 |
| rs140620489 | 1 | 77771296 | A | G | -0.0164 | 0.0146 | 0.0076  | 0.0207 | -0.0499 | 0.0574 | 0.0137  | 0.0324 | -0.0043 | 0.0032 | 5 |
| rs140696985 | 1 | 77746307 | G | A | -0.0149 | 0.0148 | 0.0075  | 0.0211 | -0.0642 | 0.0619 | 0.0110  | 0.0321 | -0.0043 | 0.0032 | 5 |
| rs140720408 | 1 | 77896787 | G | A | -0.0240 | 0.0231 | -0.0245 | 0.0325 | -0.0741 | 0.0893 | -0.0931 | 0.0540 | -0.0039 | 0.0052 | 5 |
| rs1407747   | 1 | 78157646 | A | G | 0.0087  | 0.0060 | -0.0169 | 0.0084 | -0.0371 | 0.0236 | -0.0317 | 0.0148 | -0.0030 | 0.0013 | 5 |
| rs1407748   | 1 | 78169367 | A | T | 0.0087  | 0.0060 | -0.0166 | 0.0084 | -0.0372 | 0.0236 | -0.0315 | 0.0148 | -0.0031 | 0.0013 | 5 |
| rs1407749   | 1 | 78169475 | C | T | -0.0082 | 0.0074 | 0.0048  | 0.0105 | -0.0334 | 0.0294 | -0.0215 | 0.0185 | 0.0024  | 0.0017 | 5 |
| rs140822508 | 1 | 77468264 | T | G | 0.0279  | 0.0133 | 0.0234  | 0.0193 | 0.0010  | 0.0530 | -0.0192 | 0.0356 | 0.0009  | 0.0029 | 5 |
| rs1408955   | 1 | 77918833 | T | C | -0.0101 | 0.0126 | -0.0145 | 0.0177 | -0.1219 | 0.0501 | 0.0009  | 0.0331 | -0.0016 | 0.0028 | 5 |
| rs140906008 | 1 | 77544433 | A | G | -0.0006 | 0.0169 | 0.0187  | 0.0250 | -0.0776 | 0.0722 | -0.0584 | 0.0445 | -0.0001 | 0.0040 | 5 |
| rs140987991 | 1 | 78394615 | A | C | -0.0024 | 0.0066 | 0.0036  | 0.0094 | 0.0046  | 0.0267 | 0.0020  | 0.0175 | -0.0033 | 0.0015 | 5 |
| rs1410504   | 1 | 78350021 | G | T | -0.0010 | 0.0052 | 0.0122  | 0.0076 | 0.0206  | 0.0215 | 0.0066  | 0.0126 | 0.0016  | 0.0011 | 5 |
| rs1410505   | 1 | 78350115 | G | C | -0.0011 | 0.0052 | 0.0123  | 0.0076 | 0.0205  | 0.0215 | 0.0075  | 0.0126 | 0.0016  | 0.0011 | 5 |
| rs1410507   | 1 | 78322898 | G | A | 0.0007  | 0.0051 | 0.0146  | 0.0072 | 0.0390  | 0.0200 | 0.0087  | 0.0125 | 0.0017  | 0.0011 | 5 |
| rs1410508   | 1 | 78318156 | T | C | 0.0008  | 0.0051 | 0.0149  | 0.0072 | 0.0389  | 0.0200 | 0.0097  | 0.0125 | 0.0017  | 0.0011 | 5 |
| rs141120162 | 1 | 77679537 | A | C | -0.0104 | 0.0128 | -0.0072 | 0.0185 | 0.0243  | 0.0513 | 0.0204  | 0.0385 | -0.0005 | 0.0034 | 5 |
| rs141123607 | 1 | 77485875 | A | G | 0.0015  | 0.0143 | 0.0088  | 0.0203 | 0.0669  | 0.0592 | -0.0676 | 0.0417 | -0.0002 | 0.0037 | 5 |
| rs141145698 | 1 | 77652371 | A | G | 0.0316  | 0.0167 | -0.0108 | 0.0249 | -0.0017 | 0.0674 | 0.0105  | 0.0403 | -0.0043 | 0.0034 | 5 |
| rs1412845   | 1 | 78321074 | A | C | -0.0002 | 0.0047 | -0.0168 | 0.0067 | -0.0665 | 0.0187 | -0.0013 | 0.0117 | -0.0017 | 0.0010 | 5 |
| rs1412847   | 1 | 78348424 | A | G | 0.0190  | 0.0103 | -0.0230 | 0.0147 | -0.0099 | 0.0394 | 0.0106  | 0.0193 | -0.0024 | 0.0018 | 5 |
| rs1417100   | 1 | 78257585 | G | A | -0.0021 | 0.0053 | 0.0113  | 0.0073 | 0.0037  | 0.0208 | 0.0223  | 0.0122 | 0.0016  | 0.0011 | 5 |
| rs1417101   | 1 | 78263299 | T | G | -0.0013 | 0.0052 | 0.0159  | 0.0077 | 0.0191  | 0.0217 | 0.0227  | 0.0127 | 0.0021  | 0.0011 | 5 |
| rs1417103   | 1 | 78333607 | G | A | 0.0168  | 0.0101 | 0.0157  | 0.0143 | 0.0321  | 0.0393 | 0.0043  | 0.0254 | -0.0028 | 0.0021 | 5 |
| rs141722349 | 1 | 77924144 | C | T | -0.0104 | 0.0127 | -0.0138 | 0.0178 | -0.1197 | 0.0502 | 0.0004  | 0.0330 | -0.0016 | 0.0028 | 5 |
| rs141759151 | 1 | 77486630 | G | A | -0.0010 | 0.0083 | -0.0205 | 0.0119 | -0.0526 | 0.0342 | 0.0058  | 0.0206 | 0.0019  | 0.0018 | 5 |
| rs142019320 | 1 | 77688579 | T | C | 0.0352  | 0.0361 | -0.0286 | 0.0587 | -0.0971 | 0.1682 | 0.0726  | 0.0593 | -0.0147 | 0.0063 | 5 |
| rs142125479 | 1 | 77555170 | T | C | -0.0022 | 0.0168 | 0.0203  | 0.0248 | -0.0757 | 0.0717 | -0.0535 | 0.0439 | 0.0008  | 0.0040 | 5 |
| rs142212684 | 1 | 78022295 | C | G | -0.0108 | 0.0127 | -0.0143 | 0.0178 | -0.1179 | 0.0503 | -0.0001 | 0.0330 | -0.0017 | 0.0028 | 5 |
| rs142372807 | 1 | 78206201 | A | G | -0.0222 | 0.0176 | -0.0114 | 0.0264 | -0.1673 | 0.0771 | 0.0197  | 0.0401 | 0.0003  | 0.0036 | 5 |
| rs142373477 | 1 | 77857006 | T | C | -0.0449 | 0.0226 | 0.0158  | 0.0324 | -0.0589 | 0.0907 | -0.0849 | 0.0594 | -0.0056 | 0.0055 | 5 |
| rs142416925 | 1 | 77999618 | C | A | 0.0001  | 0.0179 | -0.0040 | 0.0249 | 0.0770  | 0.0679 | 0.0098  | 0.0408 | 0.0019  | 0.0041 | 5 |
| rs142438787 | 1 | 77854382 | T | C | 0.0002  | 0.0145 | -0.0065 | 0.0211 | -0.0888 | 0.0614 | -0.0344 | 0.0379 | 0.0015  | 0.0035 | 5 |
| rs142438922 | 1 | 78419608 | G | A | 0.0209  | 0.0201 | -0.0013 | 0.0297 | -0.0345 | 0.0824 | -0.0502 | 0.0508 | -0.0028 | 0.0042 | 5 |
| rs142791830 | 1 | 77937460 | A | T | -0.0062 | 0.0216 | -0.0151 | 0.0298 | -0.0534 | 0.0849 | 0.0409  | 0.0488 | 0.0037  | 0.0047 | 5 |
| rs143011873 | 1 | 77734958 | T | C | 0.0020  | 0.0130 | 0.0258  | 0.0191 | 0.0152  | 0.0542 | 0.0518  | 0.0344 | 0.0006  | 0.0027 | 5 |
| rs143194053 | 1 | 77822212 | G | T | 0.0039  | 0.0159 | 0.0031  | 0.0236 | -0.0936 | 0.0688 | -0.0511 | 0.0441 | 0.0008  | 0.0039 | 5 |
| rs143348908 | 1 | 77826828 | A | G | 0.0008  | 0.0157 | -0.0040 | 0.0239 | -0.1084 | 0.0628 | -0.0382 | 0.0381 | 0.0003  | 0.0035 | 5 |
| rs143423832 | 1 | 77570303 | T | C | -0.0121 | 0.0128 | -0.0100 | 0.0185 | 0.0206  | 0.0513 | 0.0045  | 0.0345 | -0.0005 | 0.0034 | 5 |
| rs143463878 | 1 | 77983156 | G | A | -0.0099 | 0.0084 | -0.0041 | 0.0120 | -0.0316 | 0.0328 | -0.0319 | 0.0205 | -0.0005 | 0.0018 | 5 |
| rs143467581 | 1 | 77679538 | A | G | -0.0105 | 0.0128 | -0.0080 | 0.0185 | 0.0243  | 0.0513 | 0.0037  | 0.0377 | -0.0004 | 0.0034 | 5 |
| rs143468047 | 1 | 78087335 | T | C | -0.0179 | 0.0151 | 0.0152  | 0.0216 | -0.0836 | 0.0600 | -0.0063 | 0.0338 | -0.0047 | 0.0033 | 5 |
| rs143635914 | 1 | 77897099 | G | A | -0.0130 | 0.0152 | 0.0134  | 0.0215 | -0.0660 | 0.0590 | 0.0064  | 0.0335 | -0.0039 | 0.0033 | 5 |
| rs143791392 | 1 | 77587303 | T | C | -0.0072 | 0.0170 | 0.0066  | 0.0240 | -0.0673 | 0.0726 | -0.0412 | 0.0388 | -0.0004 | 0.0036 | 5 |
| rs143804792 | 1 | 77882858 | A | T | 0.0031  | 0.0145 | -0.0086 | 0.0212 | -0.1065 | 0.0616 | -0.0390 | 0.0378 | 0.0011  | 0.0036 | 5 |
| rs143821819 | 1 | 77746398 | T | C | -0.0013 | 0.0178 | -0.0001 | 0.0271 | -0.0943 | 0.0910 | -0.0326 | 0.0391 | -0.0003 | 0.0036 | 5 |

|             |   |          |   |   |         |        |         |        |         |        |         |        |         |        |   |
|-------------|---|----------|---|---|---------|--------|---------|--------|---------|--------|---------|--------|---------|--------|---|
| rs143930681 | 1 | 77531974 | T | C | 0.0092  | 0.0094 | -0.0105 | 0.0135 | 0.0404  | 0.0425 | -0.0182 | 0.0217 | -0.0034 | 0.0017 | 5 |
| rs143960992 | 1 | 77496230 | G | C | 0.0196  | 0.0139 | 0.0146  | 0.0205 | 0.0211  | 0.0562 | -0.0120 | 0.0360 | 0.0003  | 0.0031 | 5 |
| rs143975732 | 1 | 77855597 | A | G | 0.0030  | 0.0145 | -0.0083 | 0.0212 | -0.1054 | 0.0616 | -0.0380 | 0.0376 | 0.0012  | 0.0036 | 5 |
| rs144081862 | 1 | 77719133 | A | G | 0.0119  | 0.0142 | 0.0071  | 0.0218 | 0.0010  | 0.0610 | -0.0069 | 0.0347 | 0.0008  | 0.0031 | 5 |
| rs144249445 | 1 | 78205952 | T | G | -0.0159 | 0.0160 | -0.0091 | 0.0231 | -0.1506 | 0.0640 | 0.0229  | 0.0404 | 0.0003  | 0.0036 | 5 |
| rs144332779 | 1 | 78018760 | C | T | -0.0087 | 0.0160 | 0.0306  | 0.0223 | -0.0520 | 0.0617 | -0.0023 | 0.0332 | -0.0038 | 0.0033 | 5 |
| rs144438756 | 1 | 78188111 | G | A | -0.0027 | 0.0205 | -0.0010 | 0.0334 | -0.1585 | 0.0983 | 0.0269  | 0.0399 | 0.0004  | 0.0036 | 5 |
| rs144503755 | 1 | 78054398 | A | G | 0.0585  | 0.0354 | -0.0139 | 0.0576 | -0.0023 | 0.1675 | 0.0556  | 0.0691 | -0.0113 | 0.0062 | 5 |
| rs144570927 | 1 | 77908008 | A | G | 0.0025  | 0.0145 | -0.0108 | 0.0211 | -0.1067 | 0.0614 | -0.0379 | 0.0375 | 0.0009  | 0.0035 | 5 |
| rs144607214 | 1 | 77971226 | T | C | -0.0055 | 0.0189 | -0.0016 | 0.0283 | 0.0541  | 0.0844 | -0.0115 | 0.0595 | -0.0015 | 0.0044 | 5 |
| rs144634942 | 1 | 77541669 | A | G | 0.0034  | 0.0189 | 0.0012  | 0.0263 | -0.0967 | 0.0844 | -0.0502 | 0.0562 | 0.0007  | 0.0039 | 5 |
| rs144679830 | 1 | 78207579 | A | G | -0.0174 | 0.0173 | -0.0032 | 0.0246 | 0.0861  | 0.0748 | -0.0595 | 0.0553 | -0.0011 | 0.0047 | 5 |
| rs144747954 | 1 | 78124254 | C | T | -0.0442 | 0.0225 | 0.0289  | 0.0326 | -0.0796 | 0.0909 | -0.0207 | 0.0498 | 0.0026  | 0.0052 | 5 |
| rs144823259 | 1 | 78026234 | A | G | -0.0102 | 0.0228 | -0.0366 | 0.0351 | -0.0400 | 0.0984 | 0.0309  | 0.0617 | 0.0049  | 0.0071 | 5 |
| rs144843214 | 1 | 78187679 | A | G | 0.0434  | 0.0259 | 0.0071  | 0.0401 | 0.0533  | 0.1522 | -0.0554 | 0.0435 | -0.0067 | 0.0045 | 5 |
| rs144917525 | 1 | 77484046 | C | T | -0.0159 | 0.0198 | -0.0210 | 0.0268 | 0.0017  | 0.0725 | 0.0059  | 0.0444 | -0.0039 | 0.0044 | 5 |
| rs145001183 | 1 | 77786239 | T | C | 0.0161  | 0.0113 | 0.0164  | 0.0159 | -0.0214 | 0.0470 | -0.0063 | 0.0307 | -0.0033 | 0.0024 | 5 |
| rs145012408 | 1 | 77778879 | C | T | 0.0063  | 0.0115 | 0.0248  | 0.0169 | 0.0776  | 0.0483 | 0.0715  | 0.0305 | 0.0006  | 0.0023 | 5 |
| rs145039110 | 1 | 78191108 | A | G | -0.0153 | 0.0169 | -0.0170 | 0.0248 | 0.0640  | 0.0699 | -0.0115 | 0.0469 | 0.0015  | 0.0045 | 5 |
| rs145063706 | 1 | 78186903 | G | T | 0.0078  | 0.0216 | -0.0335 | 0.0317 | 0.0011  | 0.1040 | -0.0418 | 0.0561 | -0.0067 | 0.0045 | 5 |
| rs145161038 | 1 | 77735023 | C | T | 0.0027  | 0.0162 | -0.0181 | 0.0226 | -0.0615 | 0.0619 | -0.0185 | 0.0432 | 0.0002  | 0.0041 | 5 |
| rs145194941 | 1 | 78314180 | G | A | 0.0045  | 0.0056 | -0.0161 | 0.0087 | -0.0350 | 0.0236 | -0.0015 | 0.0118 | -0.0017 | 0.0010 | 5 |
| rs145328018 | 1 | 77911965 | A | G | 0.0028  | 0.0145 | -0.0108 | 0.0211 | -0.1059 | 0.0614 | -0.0376 | 0.0376 | 0.0009  | 0.0035 | 5 |
| rs145366123 | 1 | 78020806 | T | G | 0.0397  | 0.0206 | 0.0885  | 0.0316 | 0.0426  | 0.0862 | 0.1003  | 0.0531 | -0.0043 | 0.0038 | 5 |
| rs145368034 | 1 | 77592396 | A | G | -0.0050 | 0.0153 | 0.0029  | 0.0221 | -0.0934 | 0.0644 | -0.0442 | 0.0387 | -0.0004 | 0.0036 | 5 |
| rs145479249 | 1 | 78162478 | G | A | -0.0067 | 0.0131 | 0.0018  | 0.0184 | 0.0215  | 0.0576 | -0.0167 | 0.0416 | -0.0025 | 0.0034 | 5 |
| rs145489981 | 1 | 78037239 | A | G | -0.0082 | 0.0227 | -0.0351 | 0.0350 | -0.0355 | 0.0986 | 0.0347  | 0.0618 | 0.0047  | 0.0070 | 5 |
| rs145674975 | 1 | 78376343 | G | C | 0.0147  | 0.0192 | 0.0443  | 0.0308 | 0.1505  | 0.0924 | 0.1139  | 0.0594 | 0.0050  | 0.0047 | 5 |
| rs145717573 | 1 | 77486471 | G | A | 0.0149  | 0.0122 | 0.0111  | 0.0173 | -0.0856 | 0.0508 | -0.0480 | 0.0325 | -0.0002 | 0.0028 | 5 |
| rs145916563 | 1 | 77937427 | A | G | -0.0049 | 0.0097 | -0.0125 | 0.0138 | -0.1197 | 0.0395 | -0.0206 | 0.0251 | -0.0007 | 0.0022 | 5 |
| rs146085208 | 1 | 77777389 | C | T | -0.0278 | 0.0260 | -0.0371 | 0.0375 | -0.0537 | 0.1003 | -0.0773 | 0.0559 | -0.0054 | 0.0053 | 5 |
| rs146138787 | 1 | 77504819 | A | C | 0.0207  | 0.0140 | 0.0155  | 0.0206 | 0.0254  | 0.0566 | -0.0097 | 0.0361 | 0.0000  | 0.0031 | 5 |
| rs146209368 | 1 | 77852934 | A | G | -0.0320 | 0.0226 | -0.0295 | 0.0316 | -0.0518 | 0.0855 | -0.1025 | 0.0510 | -0.0028 | 0.0051 | 5 |
| rs146222288 | 1 | 78012572 | T | G | 0.0046  | 0.0145 | -0.0053 | 0.0212 | -0.1080 | 0.0614 | -0.0362 | 0.0375 | 0.0010  | 0.0035 | 5 |
| rs146241410 | 1 | 78102233 | G | A | -0.0190 | 0.0163 | -0.0104 | 0.0234 | -0.1440 | 0.0649 | 0.0131  | 0.0412 | -0.0002 | 0.0036 | 5 |
| rs146465659 | 1 | 77795168 | G | T | -0.0154 | 0.0152 | -0.0170 | 0.0216 | -0.0600 | 0.0591 | 0.0179  | 0.0423 | -0.0036 | 0.0047 | 5 |
| rs146476930 | 1 | 78310283 | T | C | -0.0189 | 0.0130 | -0.0046 | 0.0182 | -0.0773 | 0.0525 | -0.0858 | 0.0350 | 0.0041  | 0.0029 | 5 |
| rs146607879 | 1 | 77790722 | C | G | -0.0083 | 0.0161 | 0.0046  | 0.0233 | -0.0437 | 0.0622 | 0.0135  | 0.0324 | -0.0046 | 0.0034 | 5 |
| rs146834067 | 1 | 77687783 | A | G | -0.0053 | 0.0096 | -0.0071 | 0.0137 | 0.0161  | 0.0374 | 0.0052  | 0.0250 | 0.0000  | 0.0023 | 5 |
| rs146834284 | 1 | 77587286 | G | A | 0.0030  | 0.0212 | 0.0147  | 0.0281 | -0.0236 | 0.1009 | -0.0379 | 0.0388 | -0.0003 | 0.0036 | 5 |
| rs146853137 | 1 | 77746259 | T | C | -0.0137 | 0.0088 | -0.0184 | 0.0125 | 0.0273  | 0.0343 | -0.0066 | 0.0229 | 0.0019  | 0.0021 | 5 |
| rs146942462 | 1 | 78351425 | T | C | 0.0049  | 0.0110 | 0.0043  | 0.0155 | 0.0432  | 0.0461 | -0.0527 | 0.0326 | -0.0004 | 0.0034 | 5 |
| rs146973616 | 1 | 77854584 | G | T | -0.0109 | 0.0115 | -0.0130 | 0.0164 | -0.0194 | 0.0500 | -0.0030 | 0.0323 | 0.0011  | 0.0027 | 5 |
| rs146985115 | 1 | 78015049 | C | T | 0.0041  | 0.0160 | 0.0068  | 0.0237 | -0.0814 | 0.0690 | -0.0419 | 0.0425 | 0.0014  | 0.0039 | 5 |
| rs147034821 | 1 | 78218441 | G | A | -0.0398 | 0.0267 | -0.0160 | 0.0358 | 0.1348  | 0.1087 | -0.0401 | 0.0625 | 0.0047  | 0.0057 | 5 |
| rs147154582 | 1 | 78113585 | T | C | -0.0190 | 0.0161 | -0.0128 | 0.0233 | -0.1512 | 0.0644 | 0.0096  | 0.0408 | -0.0002 | 0.0036 | 5 |



|             |   |          |   |   |         |        |         |        |         |        |         |        |         |        |   |
|-------------|---|----------|---|---|---------|--------|---------|--------|---------|--------|---------|--------|---------|--------|---|
| rs147172678 | 1 | 78188776 | T | C | -0.0034 | 0.0088 | -0.0017 | 0.0135 | -0.0191 | 0.0365 | -0.0335 | 0.0204 | 0.0022  | 0.0017 | 5 |
| rs147319213 | 1 | 78344347 | C | T | -0.0043 | 0.0109 | 0.0008  | 0.0159 | -0.0830 | 0.0495 | -0.0458 | 0.0249 | 0.0026  | 0.0023 | 5 |
| rs147397719 | 1 | 77543691 | A | G | -0.0044 | 0.0172 | 0.0084  | 0.0255 | -0.0908 | 0.0766 | -0.0469 | 0.0451 | 0.0004  | 0.0040 | 5 |
| rs147565287 | 1 | 77886183 | A | G | 0.0093  | 0.0156 | 0.0058  | 0.0235 | -0.0693 | 0.0723 | -0.0379 | 0.0378 | 0.0022  | 0.0036 | 5 |
| rs147668855 | 1 | 78337375 | C | A | -0.0591 | 0.0308 | 0.0053  | 0.0503 | -0.1543 | 0.1335 | -0.0890 | 0.0588 | 0.0034  | 0.0055 | 5 |
| rs147785284 | 1 | 77993536 | A | G | -0.0043 | 0.0097 | -0.0108 | 0.0139 | -0.1193 | 0.0395 | -0.0161 | 0.0251 | -0.0007 | 0.0022 | 5 |
| rs147803337 | 1 | 78097962 | T | C | -0.0182 | 0.0163 | -0.0099 | 0.0234 | -0.1444 | 0.0649 | 0.0113  | 0.0412 | -0.0002 | 0.0036 | 5 |
| rs147817982 | 1 | 78010867 | G | A | 0.0004  | 0.0177 | -0.0344 | 0.0265 | -0.0126 | 0.0748 | -0.0752 | 0.0573 | -0.0005 | 0.0040 | 5 |
| rs147905737 | 1 | 77539705 | T | C | -0.0004 | 0.0169 | 0.0207  | 0.0250 | -0.0784 | 0.0720 | -0.0570 | 0.0446 | -0.0001 | 0.0040 | 5 |
| rs147953675 | 1 | 77654018 | T | C | -0.0164 | 0.0146 | 0.0097  | 0.0206 | -0.0514 | 0.0573 | 0.0146  | 0.0324 | -0.0044 | 0.0032 | 5 |
| rs148075125 | 1 | 77639156 | T | C | 0.0162  | 0.0138 | 0.0023  | 0.0204 | 0.0224  | 0.0554 | -0.0118 | 0.0348 | -0.0011 | 0.0031 | 5 |
| rs148164951 | 1 | 77587357 | T | C | -0.0060 | 0.0153 | 0.0037  | 0.0221 | -0.0984 | 0.0646 | -0.0409 | 0.0391 | -0.0003 | 0.0036 | 5 |
| rs148174418 | 1 | 78354080 | A | T | 0.0095  | 0.0170 | 0.0047  | 0.0249 | -0.0287 | 0.0696 | -0.0445 | 0.0464 | -0.0002 | 0.0039 | 5 |
| rs148521516 | 1 | 78344784 | T | C | -0.0030 | 0.0115 | -0.0014 | 0.0166 | -0.0851 | 0.0514 | -0.0483 | 0.0255 | 0.0023  | 0.0024 | 5 |
| rs148556393 | 1 | 78382207 | A | G | 0.0169  | 0.0199 | -0.0703 | 0.0278 | -0.0854 | 0.0777 | -0.0032 | 0.0520 | -0.0010 | 0.0049 | 5 |
| rs148632287 | 1 | 77554854 | A | G | -0.0026 | 0.0169 | 0.0150  | 0.0249 | -0.0776 | 0.0721 | -0.0596 | 0.0440 | 0.0004  | 0.0040 | 5 |
| rs148644337 | 1 | 77842022 | G | A | -0.0118 | 0.0129 | -0.0131 | 0.0180 | -0.1136 | 0.0508 | -0.0110 | 0.0343 | -0.0020 | 0.0028 | 5 |
| rs148766407 | 1 | 78336648 | G | A | 0.0376  | 0.0244 | 0.0237  | 0.0327 | 0.0308  | 0.0910 | 0.0824  | 0.0582 | -0.0039 | 0.0051 | 5 |
| rs148829545 | 1 | 78204212 | A | G | -0.0174 | 0.0197 | -0.0085 | 0.0283 | -0.0709 | 0.0816 | 0.0202  | 0.0508 | 0.0003  | 0.0043 | 5 |
| rs148843238 | 1 | 78316360 | G | A | 0.0129  | 0.0266 | -0.0983 | 0.0392 | -0.1532 | 0.1135 | 0.0646  | 0.0663 | 0.0048  | 0.0068 | 5 |
| rs149049023 | 1 | 77787154 | G | A | 0.0086  | 0.0134 | 0.0330  | 0.0200 | 0.0879  | 0.0584 | 0.1301  | 0.0384 | -0.0057 | 0.0031 | 5 |
| rs149135195 | 1 | 78456804 | A | T | 0.0269  | 0.0209 | -0.0138 | 0.0289 | 0.0493  | 0.0781 | -0.0744 | 0.0540 | 0.0013  | 0.0041 | 5 |
| rs149206867 | 1 | 77692816 | C | G | -0.0165 | 0.0146 | 0.0090  | 0.0206 | -0.0526 | 0.0573 | 0.0137  | 0.0324 | -0.0044 | 0.0032 | 5 |
| rs149622995 | 1 | 77974423 | T | C | 0.0040  | 0.0145 | -0.0089 | 0.0211 | -0.1069 | 0.0614 | -0.0359 | 0.0374 | 0.0010  | 0.0035 | 5 |
| rs149720446 | 1 | 78259684 | A | G | 0.0118  | 0.0119 | 0.0035  | 0.0169 | 0.0737  | 0.0502 | 0.0167  | 0.0333 | -0.0051 | 0.0028 | 5 |
| rs1498399   | 1 | 77481554 | G | A | 0.0081  | 0.0049 | 0.0174  | 0.0069 | 0.0824  | 0.0193 | 0.0449  | 0.0122 | 0.0008  | 0.0011 | 5 |
| rs149854527 | 1 | 78233760 | T | C | 0.0087  | 0.0188 | 0.0186  | 0.0269 | 0.1449  | 0.0745 | -0.0313 | 0.0441 | 0.0044  | 0.0038 | 5 |
| rs149857511 | 1 | 78333471 | A | G | 0.0052  | 0.0180 | 0.0122  | 0.0254 | -0.0603 | 0.0708 | 0.0010  | 0.0387 | -0.0013 | 0.0041 | 5 |
| rs149872802 | 1 | 77685540 | A | G | -0.0057 | 0.0221 | -0.0083 | 0.0321 | 0.0287  | 0.0926 | -0.0163 | 0.0511 | 0.0051  | 0.0075 | 5 |
| rs149907589 | 1 | 78265300 | T | C | 0.0145  | 0.0109 | -0.0082 | 0.0154 | -0.0418 | 0.0428 | -0.0065 | 0.0270 | -0.0019 | 0.0026 | 5 |
| rs150061478 | 1 | 77902556 | C | T | 0.0638  | 0.0354 | -0.0152 | 0.0574 | 0.0279  | 0.1665 | 0.0562  | 0.0699 | -0.0159 | 0.0063 | 5 |
| rs150205126 | 1 | 78324234 | A | C | 0.0139  | 0.0193 | 0.0438  | 0.0289 | -0.0291 | 0.0834 | -0.0094 | 0.0540 | 0.0017  | 0.0044 | 5 |
| rs150334586 | 1 | 77866166 | T | C | 0.0105  | 0.0189 | 0.0031  | 0.0262 | -0.1184 | 0.0784 | -0.0499 | 0.0486 | -0.0001 | 0.0038 | 5 |
| rs150409193 | 1 | 77893141 | G | A | -0.0094 | 0.0168 | 0.0211  | 0.0241 | -0.0947 | 0.0701 | 0.0080  | 0.0334 | -0.0038 | 0.0033 | 5 |
| rs150452586 | 1 | 77592385 | T | C | -0.0068 | 0.0173 | -0.0149 | 0.0243 | -0.0427 | 0.0661 | -0.0279 | 0.0450 | 0.0011  | 0.0044 | 5 |
| rs150735786 | 1 | 77953453 | T | C | -0.0236 | 0.0222 | -0.0321 | 0.0311 | -0.0943 | 0.0846 | -0.1005 | 0.0505 | -0.0032 | 0.0049 | 5 |
| rs150740140 | 1 | 77813071 | T | C | -0.0162 | 0.0146 | 0.0097  | 0.0207 | -0.0480 | 0.0574 | 0.0139  | 0.0325 | -0.0041 | 0.0032 | 5 |
| rs150814320 | 1 | 78253217 | T | A | 0.0107  | 0.0125 | 0.0237  | 0.0178 | 0.0441  | 0.0526 | 0.0038  | 0.0364 | -0.0039 | 0.0026 | 5 |
| rs150915090 | 1 | 77878224 | C | T | 0.0028  | 0.0145 | -0.0087 | 0.0212 | -0.1085 | 0.0616 | -0.0390 | 0.0378 | 0.0010  | 0.0036 | 5 |
| rs1510244   | 1 | 78032118 | A | T | -0.0119 | 0.0067 | -0.0135 | 0.0095 | -0.0582 | 0.0267 | -0.0264 | 0.0172 | 0.0030  | 0.0016 | 5 |
| rs1510245   | 1 | 78112944 | A | G | 0.0113  | 0.0058 | -0.0124 | 0.0082 | -0.0561 | 0.0232 | -0.0260 | 0.0142 | -0.0017 | 0.0013 | 5 |
| rs151034482 | 1 | 77898142 | T | C | 0.0081  | 0.0156 | 0.0042  | 0.0235 | -0.0756 | 0.0722 | -0.0376 | 0.0377 | 0.0013  | 0.0036 | 5 |
| rs151176116 | 1 | 77887122 | T | C | 0.0034  | 0.0145 | -0.0087 | 0.0212 | -0.1066 | 0.0616 | -0.0385 | 0.0378 | 0.0011  | 0.0035 | 5 |
| rs151181972 | 1 | 77787347 | T | A | 0.0196  | 0.0175 | -0.0189 | 0.0261 | -0.0617 | 0.0721 | 0.0013  | 0.0404 | -0.0041 | 0.0035 | 5 |
| rs151221704 | 1 | 78310826 | G | A | -0.0136 | 0.0105 | 0.0011  | 0.0147 | -0.0704 | 0.0419 | -0.0479 | 0.0255 | 0.0024  | 0.0024 | 5 |
| rs151277917 | 1 | 78246330 | G | A | 0.0364  | 0.0222 | -0.0181 | 0.0310 | 0.0458  | 0.0816 | -0.1186 | 0.0521 | 0.0036  | 0.0047 | 5 |

|            |   |          |   |   |         |        |         |        |         |        |         |        |         |        |   |
|------------|---|----------|---|---|---------|--------|---------|--------|---------|--------|---------|--------|---------|--------|---|
| rs1532508  | 1 | 77475839 | T | C | 0.0045  | 0.0047 | 0.0093  | 0.0067 | 0.0611  | 0.0188 | 0.0493  | 0.0117 | 0.0022  | 0.0010 | 5 |
| rs1536160  | 1 | 77967263 | A | G | -0.0204 | 0.0083 | -0.0091 | 0.0117 | 0.0073  | 0.0323 | -0.0305 | 0.0215 | 0.0051  | 0.0020 | 5 |
| rs1538764  | 1 | 78276790 | T | A | -0.0063 | 0.0072 | -0.0142 | 0.0099 | -0.0373 | 0.0278 | -0.0042 | 0.0119 | -0.0006 | 0.0011 | 5 |
| rs1539737  | 1 | 77839686 | C | A | -0.0149 | 0.0080 | -0.0065 | 0.0115 | 0.0157  | 0.0324 | -0.0299 | 0.0204 | 0.0043  | 0.0019 | 5 |
| rs1539738  | 1 | 77839807 | G | A | 0.0091  | 0.0051 | 0.0216  | 0.0074 | 0.0869  | 0.0212 | 0.0496  | 0.0126 | 0.0009  | 0.0011 | 5 |
| rs1539739  | 1 | 77800732 | T | C | -0.0127 | 0.0052 | -0.0097 | 0.0074 | -0.0242 | 0.0205 | -0.0259 | 0.0128 | 0.0001  | 0.0012 | 5 |
| rs1555798  | 1 | 77959504 | C | T | -0.0185 | 0.0084 | -0.0086 | 0.0122 | 0.0045  | 0.0344 | -0.0313 | 0.0215 | 0.0053  | 0.0020 | 5 |
| rs1565850  | 1 | 77550369 | A | G | -0.0132 | 0.0055 | -0.0143 | 0.0080 | -0.0111 | 0.0225 | -0.0400 | 0.0132 | 0.0006  | 0.0012 | 5 |
| rs1565851  | 1 | 77556532 | A | G | -0.0141 | 0.0056 | -0.0123 | 0.0082 | -0.0007 | 0.0229 | -0.0385 | 0.0135 | 0.0006  | 0.0013 | 5 |
| rs1565852  | 1 | 77579684 | G | A | -0.0136 | 0.0057 | -0.0169 | 0.0082 | -0.0079 | 0.0229 | -0.0281 | 0.0136 | 0.0010  | 0.0012 | 5 |
| rs1570443  | 1 | 78201929 | T | C | -0.0163 | 0.0160 | -0.0071 | 0.0231 | -0.1510 | 0.0638 | 0.0250  | 0.0401 | 0.0004  | 0.0036 | 5 |
| rs1570444  | 1 | 78201787 | A | G | -0.0165 | 0.0160 | -0.0072 | 0.0231 | -0.1511 | 0.0638 | 0.0264  | 0.0402 | 0.0003  | 0.0036 | 5 |
| rs1571365  | 1 | 78268096 | A | C | -0.0014 | 0.0052 | 0.0155  | 0.0077 | 0.0187  | 0.0217 | 0.0225  | 0.0127 | 0.0021  | 0.0011 | 5 |
| rs1571366  | 1 | 78429915 | G | A | 0.0085  | 0.0051 | 0.0161  | 0.0072 | 0.0882  | 0.0201 | 0.0256  | 0.0128 | -0.0005 | 0.0011 | 5 |
| rs1576202  | 1 | 78266899 | A | T | 0.0020  | 0.0050 | 0.0120  | 0.0074 | 0.0049  | 0.0208 | 0.0201  | 0.0122 | 0.0015  | 0.0011 | 5 |
| rs1576806  | 1 | 78463160 | A | T | 0.0034  | 0.0049 | 0.0125  | 0.0070 | 0.0680  | 0.0195 | 0.0246  | 0.0123 | 0.0000  | 0.0011 | 5 |
| rs1581749  | 1 | 78461673 | G | A | 0.0084  | 0.0048 | 0.0125  | 0.0068 | 0.0625  | 0.0189 | 0.0177  | 0.0120 | -0.0010 | 0.0011 | 5 |
| rs1581918  | 1 | 78326433 | T | C | 0.0016  | 0.0059 | -0.0217 | 0.0084 | -0.0775 | 0.0234 | -0.0044 | 0.0144 | -0.0011 | 0.0014 | 5 |
| rs1581919  | 1 | 78326405 | A | G | 0.0016  | 0.0059 | -0.0217 | 0.0084 | -0.0775 | 0.0234 | -0.0051 | 0.0144 | -0.0011 | 0.0014 | 5 |
| rs1590312  | 1 | 78460661 | T | C | 0.0064  | 0.0048 | 0.0135  | 0.0068 | 0.0635  | 0.0191 | 0.0224  | 0.0121 | -0.0010 | 0.0011 | 5 |
| rs1590313  | 1 | 78454389 | G | C | 0.0041  | 0.0049 | 0.0129  | 0.0070 | 0.0694  | 0.0195 | 0.0244  | 0.0124 | 0.0000  | 0.0011 | 5 |
| rs1616949  | 1 | 77936966 | A | G | -0.0188 | 0.0078 | -0.0096 | 0.0117 | 0.0081  | 0.0323 | -0.0297 | 0.0215 | 0.0051  | 0.0020 | 5 |
| rs1621088  | 1 | 78170655 | C | T | 0.0027  | 0.0051 | -0.0100 | 0.0072 | -0.0428 | 0.0202 | -0.0327 | 0.0126 | -0.0011 | 0.0011 | 5 |
| rs1625234  | 1 | 78170189 | T | A | 0.0087  | 0.0060 | -0.0166 | 0.0084 | -0.0368 | 0.0236 | -0.0312 | 0.0148 | -0.0031 | 0.0013 | 5 |
| rs1626757  | 1 | 77884587 | T | A | -0.0186 | 0.0077 | -0.0066 | 0.0112 | 0.0221  | 0.0314 | -0.0239 | 0.0199 | 0.0039  | 0.0018 | 5 |
| rs166770   | 1 | 77645468 | G | A | -0.0144 | 0.0052 | -0.0116 | 0.0074 | -0.0298 | 0.0204 | -0.0243 | 0.0128 | 0.0003  | 0.0012 | 5 |
| rs17100646 | 1 | 77499604 | T | C | -0.0048 | 0.0076 | -0.0150 | 0.0107 | -0.0270 | 0.0300 | 0.0009  | 0.0188 | 0.0016  | 0.0017 | 5 |
| rs17100672 | 1 | 77522686 | T | G | -0.0050 | 0.0065 | -0.0126 | 0.0092 | 0.0010  | 0.0255 | -0.0269 | 0.0169 | 0.0025  | 0.0015 | 5 |
| rs17100674 | 1 | 77522787 | C | T | -0.0016 | 0.0064 | -0.0127 | 0.0090 | -0.0058 | 0.0252 | -0.0226 | 0.0167 | 0.0031  | 0.0015 | 5 |
| rs17100677 | 1 | 77529203 | G | C | -0.0001 | 0.0091 | -0.0033 | 0.0131 | -0.0854 | 0.0377 | -0.0228 | 0.0220 | -0.0008 | 0.0021 | 5 |
| rs17100692 | 1 | 77539759 | T | C | 0.0037  | 0.0171 | 0.0198  | 0.0260 | -0.0717 | 0.0751 | -0.0696 | 0.0439 | 0.0000  | 0.0040 | 5 |
| rs17100758 | 1 | 77567927 | T | C | 0.0103  | 0.0055 | -0.0154 | 0.0077 | -0.0368 | 0.0217 | -0.0147 | 0.0135 | -0.0029 | 0.0012 | 5 |
| rs17100774 | 1 | 77573531 | A | G | -0.0029 | 0.0150 | 0.0010  | 0.0216 | -0.1032 | 0.0629 | -0.0126 | 0.0367 | -0.0008 | 0.0036 | 5 |
| rs17100791 | 1 | 77600756 | G | A | -0.0050 | 0.0153 | 0.0037  | 0.0221 | -0.0943 | 0.0644 | -0.0433 | 0.0387 | -0.0004 | 0.0036 | 5 |
| rs17100817 | 1 | 77630140 | A | G | -0.0119 | 0.0144 | 0.0112  | 0.0204 | -0.0599 | 0.0565 | 0.0117  | 0.0322 | -0.0045 | 0.0032 | 5 |
| rs17100819 | 1 | 77631146 | G | T | -0.0157 | 0.0146 | 0.0098  | 0.0206 | -0.0551 | 0.0572 | 0.0142  | 0.0324 | -0.0044 | 0.0032 | 5 |
| rs17100848 | 1 | 77640858 | C | T | 0.0024  | 0.0162 | -0.0150 | 0.0226 | -0.0347 | 0.0616 | -0.0177 | 0.0420 | -0.0006 | 0.0041 | 5 |
| rs17100850 | 1 | 77641180 | G | A | -0.0060 | 0.0153 | 0.0025  | 0.0220 | -0.0914 | 0.0643 | -0.0360 | 0.0374 | -0.0005 | 0.0036 | 5 |
| rs17100986 | 1 | 77766740 | G | T | -0.0144 | 0.0121 | -0.0047 | 0.0169 | -0.0572 | 0.0475 | 0.0140  | 0.0282 | -0.0047 | 0.0027 | 5 |
| rs17101048 | 1 | 77903100 | T | A | 0.0035  | 0.0145 | -0.0099 | 0.0211 | -0.1095 | 0.0615 | -0.0325 | 0.0377 | 0.0011  | 0.0035 | 5 |
| rs17101052 | 1 | 77905306 | T | C | 0.0028  | 0.0145 | -0.0105 | 0.0211 | -0.1129 | 0.0613 | -0.0385 | 0.0376 | 0.0012  | 0.0035 | 5 |
| rs17101082 | 1 | 77935522 | C | T | -0.0048 | 0.0097 | -0.0132 | 0.0138 | -0.1201 | 0.0395 | -0.0173 | 0.0251 | -0.0007 | 0.0022 | 5 |
| rs17101101 | 1 | 77973649 | G | A | -0.0159 | 0.0060 | -0.0098 | 0.0085 | -0.0596 | 0.0238 | -0.0291 | 0.0150 | 0.0012  | 0.0014 | 5 |
| rs17101109 | 1 | 77979784 | C | T | 0.0048  | 0.0145 | -0.0052 | 0.0212 | -0.1078 | 0.0614 | -0.0366 | 0.0375 | 0.0009  | 0.0035 | 5 |
| rs17101311 | 1 | 78119236 | G | T | -0.0324 | 0.0156 | 0.0106  | 0.0225 | -0.0587 | 0.0624 | -0.0321 | 0.0417 | -0.0053 | 0.0042 | 5 |
| rs17101412 | 1 | 78157974 | C | G | -0.0164 | 0.0160 | -0.0078 | 0.0231 | -0.1554 | 0.0639 | 0.0237  | 0.0402 | 0.0003  | 0.0036 | 5 |

|            |   |          |   |   |         |        |         |        |         |        |         |        |         |        |   |
|------------|---|----------|---|---|---------|--------|---------|--------|---------|--------|---------|--------|---------|--------|---|
| rs17101413 | 1 | 78165972 | A | C | 0.0014  | 0.0091 | -0.0027 | 0.0130 | 0.0016  | 0.0360 | -0.0431 | 0.0237 | 0.0031  | 0.0020 | 5 |
| rs17101414 | 1 | 78166015 | C | T | -0.0081 | 0.0074 | 0.0054  | 0.0106 | -0.0332 | 0.0294 | -0.0218 | 0.0185 | 0.0024  | 0.0017 | 5 |
| rs17101416 | 1 | 78166050 | A | G | 0.0013  | 0.0091 | -0.0026 | 0.0130 | 0.0017  | 0.0360 | -0.0430 | 0.0237 | 0.0031  | 0.0020 | 5 |
| rs17101426 | 1 | 78168173 | A | G | 0.0015  | 0.0091 | -0.0028 | 0.0130 | 0.0010  | 0.0360 | -0.0433 | 0.0237 | 0.0032  | 0.0020 | 5 |
| rs17101469 | 1 | 78177801 | G | A | -0.0103 | 0.0069 | 0.0027  | 0.0098 | -0.0570 | 0.0273 | -0.0142 | 0.0171 | 0.0021  | 0.0016 | 5 |
| rs17101472 | 1 | 78177926 | A | C | -0.0087 | 0.0074 | 0.0045  | 0.0106 | -0.0341 | 0.0294 | -0.0226 | 0.0184 | 0.0023  | 0.0017 | 5 |
| rs17101475 | 1 | 78177990 | T | C | -0.0105 | 0.0069 | 0.0024  | 0.0098 | -0.0572 | 0.0272 | -0.0141 | 0.0171 | 0.0021  | 0.0016 | 5 |
| rs17101479 | 1 | 78178115 | A | G | -0.0166 | 0.0160 | -0.0086 | 0.0231 | -0.1537 | 0.0637 | 0.0273  | 0.0397 | 0.0004  | 0.0036 | 5 |
| rs17101491 | 1 | 78180151 | G | A | -0.0167 | 0.0160 | -0.0083 | 0.0231 | -0.1521 | 0.0637 | 0.0234  | 0.0400 | 0.0003  | 0.0036 | 5 |
| rs17101546 | 1 | 78236995 | T | C | -0.0109 | 0.0125 | -0.0053 | 0.0176 | -0.0569 | 0.0498 | -0.0469 | 0.0334 | 0.0051  | 0.0028 | 5 |
| rs17101573 | 1 | 78250330 | T | C | 0.0010  | 0.0076 | -0.0051 | 0.0107 | -0.0238 | 0.0296 | -0.0359 | 0.0192 | 0.0033  | 0.0017 | 5 |
| rs17101575 | 1 | 78250362 | A | G | 0.0006  | 0.0075 | -0.0051 | 0.0107 | -0.0237 | 0.0296 | -0.0391 | 0.0193 | 0.0033  | 0.0017 | 5 |
| rs17101646 | 1 | 78292255 | G | A | -0.0204 | 0.0125 | -0.0083 | 0.0175 | -0.0449 | 0.0501 | -0.0819 | 0.0347 | 0.0045  | 0.0030 | 5 |
| rs17101675 | 1 | 78350218 | C | T | 0.0093  | 0.0110 | -0.0129 | 0.0155 | -0.0498 | 0.0434 | 0.0034  | 0.0276 | -0.0023 | 0.0027 | 5 |
| rs17101678 | 1 | 78354819 | C | G | -0.0007 | 0.0075 | -0.0088 | 0.0109 | -0.0452 | 0.0310 | -0.0152 | 0.0178 | 0.0027  | 0.0016 | 5 |
| rs17380544 | 1 | 77493027 | A | G | 0.0050  | 0.0052 | 0.0044  | 0.0076 | 0.0417  | 0.0217 | 0.0476  | 0.0129 | 0.0000  | 0.0011 | 5 |
| rs17380592 | 1 | 77496234 | A | G | 0.0188  | 0.0079 | -0.0018 | 0.0115 | -0.0149 | 0.0324 | -0.0138 | 0.0194 | -0.0037 | 0.0016 | 5 |
| rs17380796 | 1 | 77510432 | G | A | 0.0050  | 0.0056 | 0.0193  | 0.0079 | 0.0761  | 0.0221 | 0.0592  | 0.0141 | -0.0015 | 0.0013 | 5 |
| rs17380852 | 1 | 77514362 | A | G | 0.0060  | 0.0062 | 0.0095  | 0.0088 | 0.0369  | 0.0246 | -0.0044 | 0.0155 | 0.0014  | 0.0013 | 5 |
| rs17381664 | 1 | 77582646 | C | T | 0.0061  | 0.0053 | 0.0189  | 0.0073 | 0.0706  | 0.0210 | 0.0445  | 0.0122 | 0.0018  | 0.0011 | 5 |
| rs17382879 | 1 | 77935367 | T | C | -0.0139 | 0.0114 | -0.0104 | 0.0163 | 0.0221  | 0.0440 | 0.0216  | 0.0302 | 0.0018  | 0.0028 | 5 |
| rs17382996 | 1 | 77947094 | A | C | -0.0145 | 0.0114 | -0.0108 | 0.0163 | 0.0211  | 0.0441 | 0.0188  | 0.0302 | 0.0019  | 0.0028 | 5 |
| rs17383213 | 1 | 77967847 | C | T | -0.0197 | 0.0083 | -0.0087 | 0.0117 | 0.0108  | 0.0324 | -0.0318 | 0.0215 | 0.0054  | 0.0020 | 5 |
| rs17384102 | 1 | 78349788 | A | T | 0.0065  | 0.0088 | 0.0089  | 0.0124 | -0.0091 | 0.0362 | 0.0219  | 0.0231 | -0.0052 | 0.0019 | 5 |
| rs17384946 | 1 | 77512520 | A | G | 0.0086  | 0.0059 | 0.0177  | 0.0083 | 0.0944  | 0.0232 | 0.0633  | 0.0151 | -0.0009 | 0.0013 | 5 |
| rs17385141 | 1 | 77532600 | T | C | 0.0086  | 0.0121 | -0.0012 | 0.0169 | -0.0718 | 0.0477 | -0.0447 | 0.0310 | -0.0018 | 0.0027 | 5 |
| rs17385707 | 1 | 77569904 | A | G | 0.0114  | 0.0067 | -0.0145 | 0.0091 | -0.0288 | 0.0261 | -0.0051 | 0.0157 | -0.0030 | 0.0013 | 5 |
| rs17385754 | 1 | 77580945 | A | G | -0.0120 | 0.0086 | -0.0138 | 0.0127 | -0.0224 | 0.0347 | -0.0366 | 0.0198 | 0.0001  | 0.0018 | 5 |
| rs17387351 | 1 | 77971681 | T | A | -0.0129 | 0.0119 | -0.0132 | 0.0173 | 0.0004  | 0.0509 | 0.0108  | 0.0293 | 0.0034  | 0.0022 | 5 |
| rs17387365 | 1 | 77972454 | T | G | -0.0199 | 0.0083 | -0.0083 | 0.0117 | 0.0094  | 0.0324 | -0.0299 | 0.0217 | 0.0052  | 0.0020 | 5 |
| rs17387740 | 1 | 78047042 | G | C | -0.0087 | 0.0073 | -0.0096 | 0.0103 | -0.0344 | 0.0280 | -0.0078 | 0.0169 | -0.0002 | 0.0016 | 5 |
| rs17388032 | 1 | 78335845 | A | G | -0.0012 | 0.0053 | -0.0038 | 0.0075 | -0.0188 | 0.0211 | 0.0051  | 0.0131 | -0.0013 | 0.0012 | 5 |
| rs17388283 | 1 | 78350170 | T | C | -0.0021 | 0.0058 | 0.0052  | 0.0082 | -0.0209 | 0.0233 | -0.0005 | 0.0147 | -0.0024 | 0.0013 | 5 |
| rs17389676 | 1 | 78167600 | T | C | -0.0167 | 0.0160 | -0.0100 | 0.0231 | -0.1494 | 0.0638 | 0.0218  | 0.0401 | 0.0004  | 0.0036 | 5 |
| rs17390321 | 1 | 78235752 | A | G | -0.0185 | 0.0164 | -0.0097 | 0.0236 | -0.1500 | 0.0653 | 0.0087  | 0.0416 | -0.0007 | 0.0036 | 5 |
| rs17391004 | 1 | 78279326 | A | G | 0.0082  | 0.0172 | -0.0461 | 0.0258 | -0.0144 | 0.0687 | 0.0292  | 0.0394 | -0.0062 | 0.0035 | 5 |
| rs17391694 | 1 | 78157942 | T | C | 0.0283  | 0.0071 | 0.0390  | 0.0105 | 0.0997  | 0.0302 | 0.1063  | 0.0191 | -0.0012 | 0.0015 | 5 |
| rs17391994 | 1 | 78169771 | A | G | 0.0010  | 0.0091 | -0.0024 | 0.0130 | 0.0039  | 0.0361 | -0.0381 | 0.0238 | 0.0032  | 0.0020 | 5 |
| rs17392688 | 1 | 78243235 | C | G | -0.0204 | 0.0164 | -0.0136 | 0.0236 | -0.1403 | 0.0652 | 0.0077  | 0.0418 | -0.0004 | 0.0036 | 5 |
| rs17392771 | 1 | 78249087 | C | T | 0.0033  | 0.0105 | -0.0038 | 0.0151 | -0.0120 | 0.0415 | -0.0233 | 0.0265 | 0.0007  | 0.0023 | 5 |
| rs1745624  | 1 | 78225606 | G | C | 0.0097  | 0.0052 | -0.0099 | 0.0074 | -0.0197 | 0.0206 | -0.0369 | 0.0130 | -0.0011 | 0.0012 | 5 |
| rs1749911  | 1 | 77937259 | G | A | -0.0150 | 0.0066 | -0.0118 | 0.0093 | -0.0476 | 0.0261 | -0.0242 | 0.0169 | 0.0027  | 0.0015 | 5 |
| rs1749912  | 1 | 77936970 | C | T | -0.0118 | 0.0143 | 0.0036  | 0.0203 | -0.0680 | 0.0590 | -0.0662 | 0.0373 | 0.0077  | 0.0032 | 5 |
| rs1749913  | 1 | 77917782 | G | A | -0.0151 | 0.0066 | -0.0117 | 0.0093 | -0.0484 | 0.0261 | -0.0258 | 0.0169 | 0.0027  | 0.0015 | 5 |
| rs1770303  | 1 | 78219894 | T | C | 0.0075  | 0.0050 | -0.0086 | 0.0071 | -0.0301 | 0.0198 | -0.0359 | 0.0125 | -0.0009 | 0.0011 | 5 |
| rs1770306  | 1 | 78174538 | A | C | 0.0007  | 0.0050 | -0.0101 | 0.0071 | -0.0565 | 0.0199 | -0.0295 | 0.0124 | -0.0011 | 0.0011 | 5 |

|             |   |          |   |   |         |        |         |        |         |        |         |        |         |        |   |
|-------------|---|----------|---|---|---------|--------|---------|--------|---------|--------|---------|--------|---------|--------|---|
| rs1770307   | 1 | 78174625 | G | A | 0.0086  | 0.0060 | -0.0164 | 0.0084 | -0.0367 | 0.0236 | -0.0307 | 0.0148 | -0.0030 | 0.0013 | 5 |
| rs1770311   | 1 | 78216667 | A | T | 0.0077  | 0.0050 | -0.0087 | 0.0071 | -0.0305 | 0.0198 | -0.0368 | 0.0125 | -0.0009 | 0.0011 | 5 |
| rs1770313   | 1 | 78217746 | A | T | 0.0035  | 0.0054 | -0.0067 | 0.0075 | -0.0411 | 0.0216 | -0.0322 | 0.0123 | -0.0008 | 0.0011 | 5 |
| rs1780044   | 1 | 77908861 | T | C | -0.0164 | 0.0060 | -0.0096 | 0.0085 | -0.0599 | 0.0238 | -0.0282 | 0.0151 | 0.0013  | 0.0014 | 5 |
| rs1780045   | 1 | 77908716 | A | G | -0.0165 | 0.0060 | -0.0097 | 0.0085 | -0.0601 | 0.0238 | -0.0284 | 0.0151 | 0.0013  | 0.0014 | 5 |
| rs1780047   | 1 | 77938171 | T | A | -0.0161 | 0.0060 | -0.0096 | 0.0085 | -0.0595 | 0.0238 | -0.0287 | 0.0150 | 0.0012  | 0.0014 | 5 |
| rs1780048   | 1 | 77937693 | A | C | -0.0166 | 0.0082 | -0.0073 | 0.0118 | -0.0644 | 0.0305 | -0.0278 | 0.0168 | 0.0027  | 0.0015 | 5 |
| rs1780049   | 1 | 77937154 | G | A | 0.0128  | 0.0133 | -0.0357 | 0.0189 | -0.0346 | 0.0525 | 0.0324  | 0.0411 | -0.0040 | 0.0027 | 5 |
| rs1780050   | 1 | 77934855 | C | A | 0.0046  | 0.0048 | -0.0105 | 0.0068 | -0.0295 | 0.0191 | -0.0214 | 0.0119 | -0.0015 | 0.0011 | 5 |
| rs1780052   | 1 | 77934190 | G | A | -0.0151 | 0.0066 | -0.0119 | 0.0093 | -0.0471 | 0.0261 | -0.0269 | 0.0169 | 0.0027  | 0.0015 | 5 |
| rs181687209 | 1 | 78389015 | C | T | 0.0038  | 0.0205 | -0.0283 | 0.0282 | -0.1246 | 0.0807 | 0.0152  | 0.0440 | 0.0081  | 0.0047 | 5 |
| rs181789370 | 1 | 77717039 | T | G | 0.0200  | 0.0193 | -0.0014 | 0.0269 | -0.1303 | 0.0796 | -0.0305 | 0.0459 | -0.0006 | 0.0040 | 5 |
| rs181845216 | 1 | 77952261 | A | T | -0.0107 | 0.0166 | -0.0545 | 0.0239 | -0.1362 | 0.0670 | 0.0075  | 0.0361 | -0.0021 | 0.0028 | 5 |
| rs1819257   | 1 | 78088737 | T | A | -0.0068 | 0.0074 | -0.0097 | 0.0104 | -0.0483 | 0.0283 | -0.0136 | 0.0172 | -0.0007 | 0.0016 | 5 |
| rs1819258   | 1 | 78088565 | A | G | 0.0028  | 0.0048 | -0.0108 | 0.0069 | -0.0462 | 0.0192 | -0.0335 | 0.0121 | 0.0001  | 0.0011 | 5 |
| rs1831168   | 1 | 78379726 | G | C | 0.0075  | 0.0052 | 0.0159  | 0.0076 | 0.0647  | 0.0219 | 0.0253  | 0.0130 | -0.0004 | 0.0011 | 5 |
| rs183330469 | 1 | 77771293 | A | G | -0.0044 | 0.0188 | 0.0006  | 0.0256 | -0.1499 | 0.0764 | -0.0247 | 0.0448 | -0.0013 | 0.0049 | 5 |
| rs183470977 | 1 | 77729791 | C | A | -0.0044 | 0.0229 | 0.0026  | 0.0338 | -0.1334 | 0.0984 | 0.0015  | 0.0610 | -0.0014 | 0.0050 | 5 |
| rs184289859 | 1 | 77923147 | T | C | -0.0114 | 0.0173 | -0.0346 | 0.0257 | -0.1280 | 0.0728 | 0.0010  | 0.0330 | -0.0017 | 0.0028 | 5 |
| rs1848837   | 1 | 78112866 | G | A | 0.0002  | 0.0052 | -0.0107 | 0.0074 | -0.0795 | 0.0207 | -0.0273 | 0.0128 | -0.0027 | 0.0012 | 5 |
| rs185273587 | 1 | 77593779 | G | A | -0.0133 | 0.0168 | -0.0158 | 0.0242 | 0.0441  | 0.0699 | 0.0057  | 0.0543 | 0.0027  | 0.0043 | 5 |
| rs1853397   | 1 | 78213912 | C | T | 0.0007  | 0.0092 | -0.0026 | 0.0130 | 0.0006  | 0.0361 | -0.0376 | 0.0238 | 0.0032  | 0.0020 | 5 |
| rs185547831 | 1 | 78188692 | A | G | -0.0249 | 0.0128 | 0.0110  | 0.0189 | -0.0294 | 0.0559 | 0.0091  | 0.0285 | 0.0005  | 0.0030 | 5 |
| rs1855704   | 1 | 78052984 | A | G | -0.0167 | 0.0082 | -0.0164 | 0.0116 | -0.0055 | 0.0322 | -0.0282 | 0.0212 | 0.0064  | 0.0019 | 5 |
| rs185861371 | 1 | 77475220 | G | A | 0.0048  | 0.0190 | 0.0108  | 0.0300 | -0.0776 | 0.0835 | -0.0204 | 0.0365 | -0.0007 | 0.0031 | 5 |
| rs185965755 | 1 | 77667023 | A | G | 0.0293  | 0.0200 | -0.0051 | 0.0301 | 0.0394  | 0.0844 | 0.0926  | 0.0552 | -0.0040 | 0.0042 | 5 |
| rs186629560 | 1 | 77794031 | C | T | -0.0111 | 0.0212 | -0.0278 | 0.0285 | -0.0555 | 0.0828 | -0.0016 | 0.0554 | -0.0060 | 0.0045 | 5 |
| rs186844854 | 1 | 78428940 | T | C | -0.0297 | 0.0227 | -0.0107 | 0.0327 | 0.0482  | 0.1014 | 0.0270  | 0.0613 | -0.0024 | 0.0057 | 5 |
| rs187006674 | 1 | 78014612 | A | T | -0.0242 | 0.0216 | -0.0501 | 0.0314 | 0.0590  | 0.0960 | -0.0361 | 0.0576 | -0.0030 | 0.0046 | 5 |
| rs187092912 | 1 | 78193111 | T | C | -0.0181 | 0.0197 | -0.0080 | 0.0283 | -0.0709 | 0.0816 | 0.0066  | 0.0469 | 0.0002  | 0.0043 | 5 |
| rs187176672 | 1 | 78358711 | T | G | 0.0014  | 0.0199 | 0.0005  | 0.0288 | -0.0141 | 0.0926 | 0.0299  | 0.0372 | -0.0035 | 0.0037 | 5 |
| rs1874816   | 1 | 77520728 | A | G | -0.0177 | 0.0148 | 0.0226  | 0.0208 | -0.0680 | 0.0582 | 0.0177  | 0.0324 | -0.0043 | 0.0033 | 5 |
| rs187646587 | 1 | 78407382 | G | T | -0.0062 | 0.0242 | -0.0268 | 0.0344 | -0.0692 | 0.0960 | 0.0454  | 0.0595 | 0.0018  | 0.0045 | 5 |
| rs187925521 | 1 | 78435576 | T | C | -0.0043 | 0.0283 | -0.0416 | 0.0427 | -0.1054 | 0.1270 | 0.0330  | 0.0813 | -0.0028 | 0.0068 | 5 |
| rs1887538   | 1 | 78306013 | T | C | -0.0043 | 0.0049 | 0.0161  | 0.0069 | 0.0211  | 0.0191 | 0.0016  | 0.0120 | 0.0024  | 0.0011 | 5 |
| rs189470263 | 1 | 77751751 | T | C | -0.0211 | 0.0283 | -0.0375 | 0.0414 | 0.0054  | 0.1161 | -0.0766 | 0.0526 | -0.0054 | 0.0053 | 5 |
| rs190216518 | 1 | 78066409 | G | A | -0.0129 | 0.0156 | -0.0206 | 0.0234 | 0.0207  | 0.0650 | -0.0530 | 0.0397 | 0.0022  | 0.0029 | 5 |
| rs190624342 | 1 | 78031262 | G | A | -0.0084 | 0.0193 | -0.0031 | 0.0275 | -0.0731 | 0.0798 | 0.0033  | 0.0489 | 0.0004  | 0.0042 | 5 |
| rs1909202   | 1 | 77487071 | A | G | 0.0036  | 0.0058 | 0.0138  | 0.0083 | 0.0138  | 0.0231 | -0.0059 | 0.0143 | 0.0005  | 0.0012 | 5 |
| rs1909203   | 1 | 77486984 | T | C | 0.0041  | 0.0057 | 0.0104  | 0.0081 | 0.0330  | 0.0226 | -0.0061 | 0.0143 | 0.0014  | 0.0012 | 5 |
| rs1909204   | 1 | 77476316 | C | G | 0.0062  | 0.0047 | 0.0124  | 0.0067 | 0.0666  | 0.0188 | 0.0417  | 0.0118 | 0.0014  | 0.0010 | 5 |
| rs191256983 | 1 | 77887169 | T | C | -0.0097 | 0.0129 | -0.0125 | 0.0181 | -0.1190 | 0.0533 | -0.0040 | 0.0337 | -0.0019 | 0.0028 | 5 |
| rs192109681 | 1 | 78188691 | C | G | -0.0249 | 0.0128 | 0.0110  | 0.0189 | -0.0294 | 0.0559 | 0.0101  | 0.0285 | 0.0005  | 0.0030 | 5 |
| rs192592676 | 1 | 77911867 | A | G | -0.0033 | 0.0143 | 0.0001  | 0.0203 | 0.0338  | 0.0595 | -0.0684 | 0.0440 | 0.0005  | 0.0036 | 5 |
| rs1927326   | 1 | 78387823 | G | A | 0.0186  | 0.0213 | -0.0039 | 0.0295 | 0.0502  | 0.0805 | -0.0761 | 0.0530 | 0.0018  | 0.0042 | 5 |
| rs1927780   | 1 | 78341944 | G | A | 0.0058  | 0.0081 | -0.0349 | 0.0115 | -0.0744 | 0.0316 | 0.0095  | 0.0192 | -0.0024 | 0.0018 | 5 |

|             |   |          |   |   |         |        |         |        |         |        |         |        |         |        |   |
|-------------|---|----------|---|---|---------|--------|---------|--------|---------|--------|---------|--------|---------|--------|---|
| rs192982367 | 1 | 77773331 | A | G | 0.0081  | 0.0137 | 0.0277  | 0.0201 | 0.0189  | 0.0607 | 0.0573  | 0.0340 | 0.0012  | 0.0026 | 5 |
| rs1929982   | 1 | 78444036 | G | A | 0.0068  | 0.0051 | 0.0173  | 0.0073 | 0.0907  | 0.0205 | 0.0328  | 0.0131 | -0.0006 | 0.0012 | 5 |
| rs193122407 | 1 | 77790509 | C | G | 0.0052  | 0.0159 | 0.0029  | 0.0236 | -0.0931 | 0.0686 | -0.0574 | 0.0446 | 0.0007  | 0.0038 | 5 |
| rs1960060   | 1 | 77607205 | A | C | -0.0101 | 0.0093 | -0.0137 | 0.0132 | 0.0143  | 0.0363 | 0.0022  | 0.0247 | 0.0001  | 0.0023 | 5 |
| rs1961315   | 1 | 78300521 | T | G | -0.0044 | 0.0049 | 0.0157  | 0.0069 | 0.0220  | 0.0191 | 0.0015  | 0.0120 | 0.0023  | 0.0011 | 5 |
| rs1962523   | 1 | 77564220 | T | A | -0.0144 | 0.0058 | -0.0166 | 0.0085 | -0.0004 | 0.0236 | -0.0348 | 0.0140 | 0.0004  | 0.0013 | 5 |
| rs1963170   | 1 | 77718748 | A | G | 0.0043  | 0.0052 | 0.0183  | 0.0075 | 0.0608  | 0.0217 | 0.0352  | 0.0128 | 0.0018  | 0.0011 | 5 |
| rs1964711   | 1 | 78015827 | A | G | -0.0097 | 0.0075 | -0.0124 | 0.0109 | -0.0109 | 0.0299 | -0.0060 | 0.0170 | 0.0003  | 0.0016 | 5 |
| rs1968027   | 1 | 77726042 | T | C | 0.0121  | 0.0059 | -0.0114 | 0.0083 | -0.0413 | 0.0235 | -0.0127 | 0.0145 | -0.0031 | 0.0013 | 5 |
| rs1970210   | 1 | 78015644 | A | G | -0.0158 | 0.0086 | -0.0137 | 0.0121 | -0.0016 | 0.0336 | -0.0430 | 0.0217 | 0.0061  | 0.0021 | 5 |
| rs1971368   | 1 | 78024978 | G | A | -0.0142 | 0.0087 | -0.0120 | 0.0126 | -0.0004 | 0.0354 | -0.0324 | 0.0223 | 0.0064  | 0.0020 | 5 |
| rs1976334   | 1 | 77527787 | C | T | -0.0142 | 0.0056 | -0.0136 | 0.0080 | -0.0054 | 0.0219 | -0.0409 | 0.0139 | 0.0011  | 0.0013 | 5 |
| rs1977770   | 1 | 78200042 | T | G | 0.0092  | 0.0186 | -0.0097 | 0.0273 | -0.1018 | 0.0760 | -0.0727 | 0.0450 | -0.0040 | 0.0046 | 5 |
| rs1977900   | 1 | 77816056 | A | G | -0.0135 | 0.0057 | -0.0112 | 0.0079 | -0.0041 | 0.0218 | -0.0253 | 0.0137 | 0.0009  | 0.0013 | 5 |
| rs1984298   | 1 | 77830597 | A | C | -0.0043 | 0.0151 | 0.0088  | 0.0219 | -0.0933 | 0.0660 | -0.0734 | 0.0404 | 0.0080  | 0.0034 | 5 |
| rs1994924   | 1 | 77594820 | T | C | -0.0078 | 0.0241 | 0.0030  | 0.0328 | -0.1895 | 0.0997 | 0.0407  | 0.0594 | 0.0113  | 0.0047 | 5 |
| rs1999012   | 1 | 78427016 | G | C | -0.0100 | 0.0066 | 0.0002  | 0.0093 | -0.0399 | 0.0257 | 0.0101  | 0.0165 | 0.0016  | 0.0014 | 5 |
| rs2018593   | 1 | 77816132 | C | T | -0.0165 | 0.0146 | 0.0090  | 0.0207 | -0.0539 | 0.0573 | 0.0047  | 0.0323 | -0.0040 | 0.0033 | 5 |
| rs2025292   | 1 | 78248851 | T | C | 0.0075  | 0.0125 | 0.0232  | 0.0179 | 0.0326  | 0.0526 | -0.0010 | 0.0358 | -0.0040 | 0.0026 | 5 |
| rs2025610   | 1 | 78158373 | T | A | 0.0025  | 0.0051 | -0.0094 | 0.0072 | -0.0412 | 0.0201 | -0.0331 | 0.0127 | -0.0015 | 0.0011 | 5 |
| rs2025611   | 1 | 78158289 | T | C | 0.0025  | 0.0051 | -0.0094 | 0.0072 | -0.0412 | 0.0201 | -0.0332 | 0.0127 | -0.0015 | 0.0011 | 5 |
| rs2025612   | 1 | 78152801 | A | G | 0.0024  | 0.0050 | -0.0124 | 0.0072 | -0.0657 | 0.0205 | -0.0315 | 0.0120 | -0.0008 | 0.0011 | 5 |
| rs2025613   | 1 | 78152507 | C | G | 0.0030  | 0.0049 | -0.0126 | 0.0072 | -0.0693 | 0.0204 | -0.0326 | 0.0119 | -0.0008 | 0.0011 | 5 |
| rs2025614   | 1 | 78152467 | G | A | 0.0035  | 0.0049 | -0.0123 | 0.0072 | -0.0693 | 0.0204 | -0.0327 | 0.0119 | -0.0008 | 0.0011 | 5 |
| rs2029768   | 1 | 77548357 | A | G | -0.0143 | 0.0059 | -0.0165 | 0.0085 | 0.0036  | 0.0237 | -0.0358 | 0.0140 | 0.0007  | 0.0013 | 5 |
| rs2031342   | 1 | 77774432 | C | T | -0.0141 | 0.0052 | -0.0105 | 0.0074 | -0.0270 | 0.0204 | -0.0238 | 0.0128 | 0.0002  | 0.0012 | 5 |
| rs2031496   | 1 | 78062228 | C | T | 0.0044  | 0.0048 | 0.0173  | 0.0068 | 0.0914  | 0.0190 | 0.0453  | 0.0120 | 0.0004  | 0.0011 | 5 |
| rs2032056   | 1 | 77881104 | A | T | -0.0111 | 0.0127 | -0.0142 | 0.0178 | -0.1182 | 0.0502 | -0.0081 | 0.0337 | -0.0019 | 0.0028 | 5 |
| rs203229    | 1 | 77684256 | G | A | -0.0142 | 0.0052 | -0.0113 | 0.0074 | -0.0292 | 0.0204 | -0.0241 | 0.0128 | 0.0003  | 0.0012 | 5 |
| rs2050804   | 1 | 78336387 | A | T | -0.0012 | 0.0053 | -0.0038 | 0.0075 | -0.0187 | 0.0211 | 0.0050  | 0.0131 | -0.0013 | 0.0012 | 5 |
| rs2050805   | 1 | 78336080 | C | T | -0.0011 | 0.0053 | -0.0037 | 0.0075 | -0.0188 | 0.0211 | 0.0051  | 0.0131 | -0.0013 | 0.0012 | 5 |
| rs2088058   | 1 | 77617763 | C | A | -0.0110 | 0.0065 | 0.0017  | 0.0092 | -0.0082 | 0.0289 | -0.0244 | 0.0129 | 0.0002  | 0.0012 | 5 |
| rs2088518   | 1 | 77485645 | T | A | 0.0060  | 0.0059 | 0.0154  | 0.0084 | 0.0932  | 0.0234 | 0.0757  | 0.0153 | -0.0009 | 0.0013 | 5 |
| rs2104621   | 1 | 78306325 | C | G | 0.0012  | 0.0052 | -0.0060 | 0.0073 | -0.0182 | 0.0205 | 0.0016  | 0.0129 | -0.0011 | 0.0011 | 5 |
| rs2133202   | 1 | 77529356 | C | T | -0.0135 | 0.0072 | 0.0018  | 0.0096 | -0.0194 | 0.0300 | -0.0405 | 0.0135 | 0.0008  | 0.0012 | 5 |
| rs2133203   | 1 | 77508845 | T | C | -0.0091 | 0.0056 | -0.0127 | 0.0076 | -0.0395 | 0.0230 | -0.0458 | 0.0118 | -0.0016 | 0.0011 | 5 |
| rs2133204   | 1 | 77508799 | A | G | -0.0031 | 0.0048 | -0.0105 | 0.0067 | -0.0561 | 0.0190 | -0.0449 | 0.0118 | -0.0016 | 0.0011 | 5 |
| rs2136682   | 1 | 78026537 | T | C | -0.0155 | 0.0086 | -0.0124 | 0.0121 | -0.0011 | 0.0335 | -0.0302 | 0.0223 | 0.0061  | 0.0021 | 5 |
| rs2146612   | 1 | 78155453 | G | A | 0.0021  | 0.0049 | -0.0111 | 0.0070 | -0.0575 | 0.0195 | -0.0393 | 0.0122 | -0.0014 | 0.0011 | 5 |
| rs2147318   | 1 | 77776953 | G | A | -0.0138 | 0.0056 | -0.0113 | 0.0079 | -0.0079 | 0.0216 | -0.0239 | 0.0137 | 0.0009  | 0.0013 | 5 |
| rs2149277   | 1 | 78270039 | T | G | -0.0013 | 0.0053 | 0.0147  | 0.0077 | 0.0174  | 0.0217 | 0.0225  | 0.0127 | 0.0021  | 0.0011 | 5 |
| rs2154138   | 1 | 77865119 | G | A | -0.0175 | 0.0078 | -0.0071 | 0.0114 | 0.0257  | 0.0320 | -0.0270 | 0.0202 | 0.0044  | 0.0019 | 5 |
| rs2172727   | 1 | 77550832 | T | C | -0.0138 | 0.0058 | -0.0165 | 0.0084 | -0.0018 | 0.0234 | -0.0373 | 0.0138 | 0.0010  | 0.0013 | 5 |
| rs2181453   | 1 | 78230838 | T | C | 0.0091  | 0.0052 | -0.0086 | 0.0073 | -0.0210 | 0.0205 | -0.0172 | 0.0127 | -0.0019 | 0.0012 | 5 |
| rs2208897   | 1 | 78456523 | T | A | 0.0074  | 0.0048 | 0.0134  | 0.0068 | 0.0602  | 0.0190 | 0.0213  | 0.0121 | -0.0011 | 0.0011 | 5 |
| rs2208966   | 1 | 78167382 | G | A | 0.0018  | 0.0049 | -0.0115 | 0.0070 | -0.0605 | 0.0195 | -0.0390 | 0.0122 | -0.0010 | 0.0011 | 5 |

|           |   |          |   |   |         |        |         |        |         |        |         |        |         |        |   |
|-----------|---|----------|---|---|---------|--------|---------|--------|---------|--------|---------|--------|---------|--------|---|
| rs2208967 | 1 | 78192402 | A | G | 0.0010  | 0.0091 | -0.0022 | 0.0130 | 0.0009  | 0.0361 | -0.0392 | 0.0237 | 0.0031  | 0.0020 | 5 |
| rs2208968 | 1 | 78192226 | A | G | -0.0235 | 0.0119 | 0.0164  | 0.0168 | -0.0828 | 0.0470 | 0.0102  | 0.0277 | 0.0004  | 0.0029 | 5 |
| rs2209472 | 1 | 78162427 | T | C | 0.0025  | 0.0051 | -0.0101 | 0.0072 | -0.0437 | 0.0202 | -0.0331 | 0.0127 | -0.0012 | 0.0011 | 5 |
| rs2209473 | 1 | 78162338 | A | G | 0.0039  | 0.0056 | -0.0155 | 0.0081 | -0.0339 | 0.0244 | -0.0287 | 0.0128 | -0.0012 | 0.0011 | 5 |
| rs2211191 | 1 | 78258957 | C | T | -0.0029 | 0.0052 | 0.0149  | 0.0076 | 0.0181  | 0.0216 | 0.0222  | 0.0126 | 0.0019  | 0.0011 | 5 |
| rs2224674 | 1 | 78437037 | G | A | 0.0067  | 0.0051 | 0.0178  | 0.0073 | 0.0899  | 0.0205 | 0.0329  | 0.0130 | -0.0005 | 0.0012 | 5 |
| rs2245189 | 1 | 77481002 | T | C | -0.0161 | 0.0202 | -0.0209 | 0.0273 | -0.0091 | 0.0775 | 0.0189  | 0.0440 | -0.0035 | 0.0044 | 5 |
| rs2270539 | 1 | 77581943 | G | T | -0.0051 | 0.0153 | 0.0025  | 0.0221 | -0.0943 | 0.0644 | -0.0396 | 0.0388 | -0.0004 | 0.0036 | 5 |
| rs2274123 | 1 | 77740997 | C | A | -0.0105 | 0.0058 | -0.0108 | 0.0081 | -0.0064 | 0.0223 | -0.0222 | 0.0141 | 0.0017  | 0.0013 | 5 |
| rs2274124 | 1 | 77741218 | G | C | -0.0116 | 0.0087 | -0.0177 | 0.0124 | 0.0368  | 0.0341 | -0.0131 | 0.0228 | 0.0020  | 0.0021 | 5 |
| rs2274257 | 1 | 77963723 | C | G | -0.0200 | 0.0083 | -0.0093 | 0.0117 | 0.0115  | 0.0323 | -0.0294 | 0.0215 | 0.0049  | 0.0020 | 5 |
| rs2291689 | 1 | 77566005 | A | G | -0.0059 | 0.0153 | 0.0031  | 0.0221 | -0.0973 | 0.0646 | -0.0389 | 0.0391 | -0.0005 | 0.0036 | 5 |
| rs2291690 | 1 | 77566500 | G | A | -0.0046 | 0.0153 | 0.0019  | 0.0220 | -0.0971 | 0.0643 | -0.0386 | 0.0388 | -0.0004 | 0.0036 | 5 |
| rs2296227 | 1 | 77736060 | T | C | -0.0142 | 0.0052 | -0.0110 | 0.0074 | -0.0292 | 0.0204 | -0.0242 | 0.0128 | 0.0003  | 0.0012 | 5 |
| rs2296452 | 1 | 77960798 | A | G | -0.0148 | 0.0066 | -0.0112 | 0.0093 | -0.0477 | 0.0261 | -0.0260 | 0.0168 | 0.0027  | 0.0015 | 5 |
| rs2296453 | 1 | 77960770 | A | G | -0.0199 | 0.0083 | -0.0078 | 0.0117 | 0.0118  | 0.0324 | -0.0313 | 0.0215 | 0.0052  | 0.0020 | 5 |
| rs2296454 | 1 | 77960599 | C | T | -0.0159 | 0.0060 | -0.0093 | 0.0085 | -0.0593 | 0.0238 | -0.0285 | 0.0150 | 0.0012  | 0.0014 | 5 |
| rs2296455 | 1 | 77960546 | G | A | -0.0046 | 0.0097 | -0.0128 | 0.0138 | -0.1216 | 0.0395 | -0.0164 | 0.0251 | -0.0007 | 0.0022 | 5 |
| rs2351034 | 1 | 77502145 | C | A | -0.0027 | 0.0049 | -0.0007 | 0.0069 | -0.0063 | 0.0192 | 0.0067  | 0.0120 | 0.0022  | 0.0011 | 5 |
| rs2351907 | 1 | 78159745 | T | A | 0.0035  | 0.0056 | -0.0147 | 0.0081 | -0.0327 | 0.0244 | -0.0318 | 0.0127 | -0.0014 | 0.0011 | 5 |
| rs2351909 | 1 | 78165206 | C | A | 0.0026  | 0.0051 | -0.0100 | 0.0072 | -0.0433 | 0.0202 | -0.0330 | 0.0126 | -0.0011 | 0.0011 | 5 |
| rs2351910 | 1 | 78165292 | G | A | 0.0025  | 0.0051 | -0.0100 | 0.0072 | -0.0439 | 0.0202 | -0.0330 | 0.0126 | -0.0011 | 0.0011 | 5 |
| rs2351911 | 1 | 78178992 | G | A | -0.0159 | 0.0160 | -0.0094 | 0.0231 | -0.1489 | 0.0638 | 0.0195  | 0.0401 | 0.0003  | 0.0036 | 5 |
| rs2351912 | 1 | 78232331 | T | A | 0.0091  | 0.0052 | -0.0089 | 0.0073 | -0.0218 | 0.0205 | -0.0172 | 0.0127 | -0.0018 | 0.0012 | 5 |
| rs2352037 | 1 | 78325056 | A | C | 0.0016  | 0.0059 | -0.0217 | 0.0084 | -0.0777 | 0.0234 | -0.0067 | 0.0144 | -0.0011 | 0.0014 | 5 |
| rs2352038 | 1 | 78345551 | A | G | 0.0003  | 0.0047 | -0.0175 | 0.0067 | -0.0644 | 0.0188 | -0.0001 | 0.0117 | -0.0017 | 0.0011 | 5 |
| rs2352039 | 1 | 78354261 | T | G | -0.0004 | 0.0066 | -0.0184 | 0.0094 | -0.0757 | 0.0261 | -0.0086 | 0.0159 | -0.0009 | 0.0015 | 5 |
| rs2454328 | 1 | 77491551 | A | G | 0.0072  | 0.0061 | 0.0106  | 0.0087 | 0.0298  | 0.0243 | -0.0116 | 0.0153 | 0.0013  | 0.0013 | 5 |
| rs2454329 | 1 | 77491487 | C | A | -0.0193 | 0.0151 | 0.0233  | 0.0213 | -0.0721 | 0.0632 | 0.0140  | 0.0291 | -0.0042 | 0.0033 | 5 |
| rs2647486 | 1 | 77533786 | A | G | -0.0132 | 0.0056 | -0.0137 | 0.0082 | -0.0085 | 0.0229 | -0.0425 | 0.0136 | 0.0010  | 0.0012 | 5 |
| rs2647487 | 1 | 77531093 | A | G | -0.0132 | 0.0056 | -0.0139 | 0.0082 | -0.0064 | 0.0229 | -0.0420 | 0.0136 | 0.0011  | 0.0012 | 5 |
| rs2647492 | 1 | 77523737 | T | A | -0.0001 | 0.0069 | 0.0127  | 0.0101 | -0.0020 | 0.0283 | 0.0185  | 0.0166 | 0.0011  | 0.0014 | 5 |
| rs2647493 | 1 | 77521166 | A | G | 0.0096  | 0.0062 | 0.0173  | 0.0083 | 0.0950  | 0.0232 | 0.0620  | 0.0152 | -0.0009 | 0.0013 | 5 |
| rs2647496 | 1 | 77492420 | G | A | 0.0043  | 0.0059 | 0.0078  | 0.0085 | 0.0245  | 0.0235 | -0.0090 | 0.0148 | 0.0009  | 0.0013 | 5 |
| rs2647497 | 1 | 77489871 | G | A | 0.0073  | 0.0061 | 0.0106  | 0.0087 | 0.0301  | 0.0243 | -0.0119 | 0.0153 | 0.0013  | 0.0013 | 5 |
| rs2647499 | 1 | 77484121 | C | T | 0.0064  | 0.0048 | 0.0164  | 0.0068 | 0.0791  | 0.0191 | 0.0442  | 0.0121 | 0.0006  | 0.0011 | 5 |
| rs2647503 | 1 | 77473733 | A | G | 0.0053  | 0.0047 | 0.0114  | 0.0067 | 0.0670  | 0.0187 | 0.0411  | 0.0118 | 0.0012  | 0.0010 | 5 |
| rs2647504 | 1 | 77472737 | T | A | 0.0043  | 0.0054 | 0.0125  | 0.0077 | 0.0421  | 0.0227 | 0.0400  | 0.0118 | 0.0016  | 0.0011 | 5 |
| rs278832  | 1 | 77691178 | G | A | -0.0140 | 0.0052 | -0.0116 | 0.0074 | -0.0292 | 0.0204 | -0.0243 | 0.0129 | 0.0003  | 0.0012 | 5 |
| rs278833  | 1 | 77692264 | A | G | -0.0130 | 0.0054 | -0.0135 | 0.0076 | -0.0221 | 0.0210 | -0.0282 | 0.0132 | 0.0010  | 0.0012 | 5 |
| rs278834  | 1 | 77653622 | G | A | -0.0143 | 0.0052 | -0.0116 | 0.0074 | -0.0296 | 0.0204 | -0.0243 | 0.0128 | 0.0003  | 0.0012 | 5 |
| rs278835  | 1 | 77653328 | G | A | 0.0000  | 0.0247 | -0.0783 | 0.0363 | -0.1653 | 0.1094 | -0.0465 | 0.0675 | -0.0019 | 0.0059 | 5 |
| rs278836  | 1 | 77651126 | A | G | -0.0130 | 0.0054 | -0.0135 | 0.0076 | -0.0217 | 0.0210 | -0.0281 | 0.0132 | 0.0009  | 0.0012 | 5 |
| rs278837  | 1 | 77650718 | G | A | -0.0144 | 0.0052 | -0.0117 | 0.0074 | -0.0298 | 0.0204 | -0.0242 | 0.0128 | 0.0003  | 0.0012 | 5 |
| rs278838  | 1 | 77644087 | T | C | -0.0104 | 0.0072 | -0.0036 | 0.0107 | -0.0018 | 0.0277 | -0.0238 | 0.0141 | 0.0015  | 0.0013 | 5 |
| rs278839  | 1 | 77642189 | C | T | 0.0218  | 0.0075 | -0.0035 | 0.0108 | -0.0298 | 0.0308 | -0.0073 | 0.0178 | -0.0029 | 0.0016 | 5 |

|            |   |          |   |   |         |        |         |        |         |        |         |        |         |        |   |
|------------|---|----------|---|---|---------|--------|---------|--------|---------|--------|---------|--------|---------|--------|---|
| rs278840   | 1 | 77705605 | C | A | -0.0146 | 0.0056 | -0.0142 | 0.0081 | -0.0290 | 0.0209 | -0.0240 | 0.0128 | 0.0003  | 0.0012 | 5 |
| rs278841   | 1 | 77705340 | G | A | -0.0146 | 0.0055 | -0.0111 | 0.0074 | -0.0291 | 0.0204 | -0.0236 | 0.0128 | 0.0003  | 0.0012 | 5 |
| rs278842   | 1 | 77704889 | G | A | -0.0141 | 0.0052 | -0.0115 | 0.0074 | -0.0290 | 0.0204 | -0.0242 | 0.0128 | 0.0003  | 0.0012 | 5 |
| rs278843   | 1 | 77684949 | T | C | -0.0130 | 0.0054 | -0.0133 | 0.0076 | -0.0224 | 0.0210 | -0.0280 | 0.0132 | 0.0009  | 0.0012 | 5 |
| rs278844   | 1 | 77686983 | T | C | -0.0136 | 0.0061 | -0.0031 | 0.0080 | -0.0253 | 0.0226 | -0.0261 | 0.0128 | 0.0003  | 0.0012 | 5 |
| rs278845   | 1 | 77687120 | T | C | -0.0110 | 0.0093 | 0.0043  | 0.0148 | -0.0499 | 0.0478 | -0.0251 | 0.0138 | 0.0014  | 0.0013 | 5 |
| rs278846   | 1 | 77687816 | C | T | 0.0096  | 0.0054 | -0.0135 | 0.0077 | -0.0426 | 0.0216 | -0.0194 | 0.0134 | -0.0027 | 0.0012 | 5 |
| rs278847   | 1 | 77688136 | A | G | -0.0133 | 0.0056 | -0.0146 | 0.0079 | -0.0120 | 0.0216 | -0.0259 | 0.0137 | 0.0010  | 0.0012 | 5 |
| rs278848   | 1 | 77677724 | C | T | -0.0142 | 0.0052 | -0.0117 | 0.0074 | -0.0295 | 0.0204 | -0.0244 | 0.0128 | 0.0003  | 0.0012 | 5 |
| rs278849   | 1 | 77677898 | A | G | 0.0039  | 0.0251 | -0.0870 | 0.0366 | -0.1732 | 0.1103 | -0.0319 | 0.0675 | -0.0013 | 0.0060 | 5 |
| rs278850   | 1 | 77660359 | A | G | -0.0141 | 0.0052 | -0.0112 | 0.0074 | -0.0305 | 0.0204 | -0.0243 | 0.0128 | 0.0003  | 0.0012 | 5 |
| rs278851   | 1 | 77661197 | C | T | -0.0142 | 0.0052 | -0.0117 | 0.0074 | -0.0298 | 0.0204 | -0.0244 | 0.0128 | 0.0003  | 0.0012 | 5 |
| rs278852   | 1 | 77661869 | C | T | -0.0111 | 0.0059 | -0.0148 | 0.0086 | -0.0041 | 0.0237 | -0.0232 | 0.0141 | 0.0014  | 0.0013 | 5 |
| rs278853   | 1 | 77664558 | T | C | 0.0090  | 0.0054 | -0.0135 | 0.0077 | -0.0421 | 0.0215 | -0.0164 | 0.0134 | -0.0026 | 0.0012 | 5 |
| rs278854   | 1 | 77666849 | A | C | -0.0133 | 0.0056 | -0.0147 | 0.0078 | -0.0133 | 0.0216 | -0.0252 | 0.0136 | 0.0011  | 0.0012 | 5 |
| rs278855   | 1 | 77667395 | C | G | -0.0142 | 0.0052 | -0.0117 | 0.0074 | -0.0297 | 0.0204 | -0.0244 | 0.0128 | 0.0003  | 0.0012 | 5 |
| rs278856   | 1 | 77669250 | T | C | -0.0142 | 0.0052 | -0.0116 | 0.0074 | -0.0298 | 0.0204 | -0.0243 | 0.0128 | 0.0003  | 0.0012 | 5 |
| rs278857   | 1 | 77670049 | T | C | -0.0130 | 0.0054 | -0.0135 | 0.0076 | -0.0229 | 0.0210 | -0.0281 | 0.0132 | 0.0010  | 0.0012 | 5 |
| rs278858   | 1 | 77670907 | A | G | -0.0130 | 0.0054 | -0.0135 | 0.0076 | -0.0229 | 0.0210 | -0.0281 | 0.0132 | 0.0010  | 0.0012 | 5 |
| rs278859   | 1 | 77671195 | T | C | -0.0130 | 0.0054 | -0.0136 | 0.0076 | -0.0228 | 0.0210 | -0.0283 | 0.0132 | 0.0010  | 0.0012 | 5 |
| rs278860   | 1 | 77673270 | G | A | -0.0142 | 0.0052 | -0.0118 | 0.0074 | -0.0296 | 0.0204 | -0.0245 | 0.0128 | 0.0003  | 0.0012 | 5 |
| rs278862   | 1 | 77674810 | T | C | -0.0104 | 0.0058 | -0.0128 | 0.0081 | -0.0108 | 0.0223 | -0.0234 | 0.0141 | 0.0015  | 0.0013 | 5 |
| rs278863   | 1 | 77676507 | G | A | -0.0142 | 0.0052 | -0.0117 | 0.0074 | -0.0295 | 0.0204 | -0.0244 | 0.0128 | 0.0003  | 0.0012 | 5 |
| rs278864   | 1 | 77676882 | A | G | -0.0130 | 0.0054 | -0.0136 | 0.0076 | -0.0228 | 0.0210 | -0.0283 | 0.0132 | 0.0010  | 0.0012 | 5 |
| rs2791586  | 1 | 78239291 | A | G | 0.0140  | 0.0064 | -0.0128 | 0.0093 | -0.0058 | 0.0265 | -0.0038 | 0.0161 | -0.0037 | 0.0014 | 5 |
| rs2803136  | 1 | 77527010 | A | G | -0.0142 | 0.0056 | -0.0143 | 0.0080 | -0.0047 | 0.0218 | -0.0395 | 0.0139 | 0.0012  | 0.0013 | 5 |
| rs2803138  | 1 | 77523716 | T | C | 0.0002  | 0.0069 | 0.0130  | 0.0101 | -0.0022 | 0.0283 | 0.0186  | 0.0166 | 0.0011  | 0.0014 | 5 |
| rs2803152  | 1 | 77501071 | C | T | 0.0014  | 0.0050 | 0.0079  | 0.0070 | 0.0442  | 0.0196 | 0.0460  | 0.0123 | -0.0001 | 0.0011 | 5 |
| rs2803155  | 1 | 77493152 | A | C | 0.0009  | 0.0050 | 0.0070  | 0.0070 | 0.0453  | 0.0196 | 0.0472  | 0.0124 | -0.0001 | 0.0011 | 5 |
| rs2803160  | 1 | 77472784 | G | T | 0.0159  | 0.0065 | 0.0190  | 0.0087 | 0.0574  | 0.0300 | 0.0382  | 0.0123 | 0.0014  | 0.0010 | 5 |
| rs2803168  | 1 | 77534261 | C | T | -0.0133 | 0.0056 | -0.0142 | 0.0082 | -0.0090 | 0.0229 | -0.0426 | 0.0136 | 0.0010  | 0.0012 | 5 |
| rs28362659 | 1 | 78004435 | A | G | 0.0044  | 0.0145 | -0.0048 | 0.0212 | -0.1077 | 0.0614 | -0.0361 | 0.0375 | 0.0011  | 0.0035 | 5 |
| rs28362660 | 1 | 78004562 | G | A | 0.0043  | 0.0145 | -0.0045 | 0.0211 | -0.1027 | 0.0613 | -0.0316 | 0.0369 | 0.0010  | 0.0035 | 5 |
| rs2882796  | 1 | 78159387 | A | C | 0.0025  | 0.0051 | -0.0094 | 0.0072 | -0.0412 | 0.0201 | -0.0334 | 0.0127 | -0.0015 | 0.0011 | 5 |
| rs2882797  | 1 | 78159804 | G | A | 0.0032  | 0.0056 | -0.0150 | 0.0081 | -0.0316 | 0.0244 | -0.0263 | 0.0127 | -0.0014 | 0.0011 | 5 |
| rs2882798  | 1 | 78165234 | C | T | 0.0025  | 0.0051 | -0.0100 | 0.0072 | -0.0439 | 0.0202 | -0.0332 | 0.0127 | -0.0011 | 0.0011 | 5 |
| rs2882801  | 1 | 78252166 | A | G | -0.0051 | 0.0049 | 0.0157  | 0.0072 | 0.0599  | 0.0206 | 0.0424  | 0.0123 | 0.0012  | 0.0011 | 5 |
| rs2882802  | 1 | 78297314 | A | G | -0.0028 | 0.0061 | -0.0141 | 0.0086 | -0.0371 | 0.0242 | -0.0191 | 0.0149 | 0.0010  | 0.0014 | 5 |
| rs2990698  | 1 | 78445590 | A | G | 0.0068  | 0.0051 | 0.0176  | 0.0073 | 0.0919  | 0.0205 | 0.0319  | 0.0130 | -0.0005 | 0.0012 | 5 |
| rs3104464  | 1 | 77500545 | A | G | 0.0045  | 0.0056 | 0.0179  | 0.0079 | 0.0706  | 0.0219 | 0.0596  | 0.0139 | -0.0010 | 0.0012 | 5 |
| rs3104467  | 1 | 77505362 | A | G | -0.0008 | 0.0049 | -0.0036 | 0.0070 | 0.0013  | 0.0194 | 0.0040  | 0.0122 | 0.0027  | 0.0011 | 5 |
| rs34040409 | 1 | 78232702 | A | G | 0.0027  | 0.0085 | 0.0023  | 0.0121 | -0.0040 | 0.0334 | 0.0115  | 0.0203 | 0.0016  | 0.0019 | 5 |
| rs34125922 | 1 | 78259064 | C | T | -0.0029 | 0.0052 | 0.0150  | 0.0076 | 0.0177  | 0.0216 | 0.0223  | 0.0126 | 0.0019  | 0.0011 | 5 |
| rs34128192 | 1 | 77980755 | A | G | 0.0050  | 0.0145 | -0.0049 | 0.0212 | -0.1079 | 0.0614 | -0.0365 | 0.0375 | 0.0010  | 0.0035 | 5 |
| rs34140909 | 1 | 77494927 | A | G | 0.0011  | 0.0050 | 0.0070  | 0.0070 | 0.0451  | 0.0196 | 0.0489  | 0.0124 | -0.0001 | 0.0011 | 5 |
| rs34351666 | 1 | 77697395 | T | C | -0.0154 | 0.0146 | 0.0091  | 0.0206 | -0.0591 | 0.0571 | 0.0129  | 0.0323 | -0.0044 | 0.0032 | 5 |

|            |   |          |   |   |         |        |         |        |         |        |         |        |         |        |   |
|------------|---|----------|---|---|---------|--------|---------|--------|---------|--------|---------|--------|---------|--------|---|
| rs34475536 | 1 | 78342708 | T | G | -0.0134 | 0.0101 | 0.0050  | 0.0142 | -0.0672 | 0.0404 | -0.0402 | 0.0245 | 0.0028  | 0.0023 | 5 |
| rs34513554 | 1 | 77742229 | C | T | 0.0182  | 0.0179 | 0.0237  | 0.0262 | 0.1180  | 0.0724 | -0.0106 | 0.0456 | 0.0020  | 0.0038 | 5 |
| rs34517439 | 1 | 77984833 | A | C | 0.0331  | 0.0074 | 0.0436  | 0.0109 | 0.1259  | 0.0315 | 0.1271  | 0.0201 | -0.0023 | 0.0016 | 5 |
| rs34535037 | 1 | 77632718 | C | T | -0.0125 | 0.0177 | -0.0131 | 0.0247 | -0.0572 | 0.0675 | 0.0101  | 0.0454 | -0.0066 | 0.0047 | 5 |
| rs34605360 | 1 | 78342460 | A | C | -0.0120 | 0.0105 | 0.0017  | 0.0148 | -0.0701 | 0.0418 | -0.0452 | 0.0254 | 0.0025  | 0.0024 | 5 |
| rs34651709 | 1 | 78247718 | T | C | 0.0102  | 0.0101 | -0.0075 | 0.0144 | 0.0374  | 0.0398 | 0.0076  | 0.0249 | 0.0020  | 0.0022 | 5 |
| rs34716754 | 1 | 77903633 | T | C | 0.0198  | 0.0153 | 0.0045  | 0.0224 | 0.1024  | 0.0613 | -0.0009 | 0.0422 | 0.0035  | 0.0031 | 5 |
| rs34727511 | 1 | 77773481 | G | A | 0.0151  | 0.0145 | 0.0012  | 0.0214 | 0.1092  | 0.0581 | -0.0083 | 0.0413 | 0.0022  | 0.0030 | 5 |
| rs34855794 | 1 | 77495077 | T | C | 0.0011  | 0.0050 | 0.0071  | 0.0070 | 0.0454  | 0.0196 | 0.0475  | 0.0123 | -0.0001 | 0.0011 | 5 |
| rs34952371 | 1 | 78285971 | C | G | -0.0059 | 0.0071 | -0.0147 | 0.0099 | -0.0249 | 0.0279 | -0.0247 | 0.0171 | 0.0024  | 0.0016 | 5 |
| rs35038885 | 1 | 77495104 | G | A | 0.0083  | 0.0059 | 0.0164  | 0.0083 | 0.0954  | 0.0231 | 0.0637  | 0.0151 | -0.0009 | 0.0013 | 5 |
| rs35042189 | 1 | 78340464 | A | G | -0.0117 | 0.0106 | 0.0015  | 0.0148 | -0.0719 | 0.0420 | -0.0476 | 0.0255 | 0.0023  | 0.0024 | 5 |
| rs3509     | 1 | 77559866 | C | T | -0.0144 | 0.0058 | -0.0156 | 0.0084 | 0.0022  | 0.0234 | -0.0355 | 0.0139 | 0.0007  | 0.0013 | 5 |
| rs35254623 | 1 | 77476958 | G | A | 0.0066  | 0.0066 | 0.0130  | 0.0093 | 0.0401  | 0.0262 | -0.0062 | 0.0155 | 0.0014  | 0.0013 | 5 |
| rs35524314 | 1 | 78229200 | G | A | 0.0079  | 0.0099 | -0.0084 | 0.0141 | 0.0214  | 0.0391 | 0.0087  | 0.0241 | 0.0026  | 0.0022 | 5 |
| rs35535570 | 1 | 77794071 | A | G | 0.0292  | 0.0090 | 0.0460  | 0.0131 | 0.1632  | 0.0380 | 0.1276  | 0.0277 | -0.0001 | 0.0020 | 5 |
| rs35542208 | 1 | 77670750 | A | C | 0.0113  | 0.0210 | 0.0410  | 0.0340 | 0.2151  | 0.0927 | -0.0121 | 0.0395 | 0.0027  | 0.0038 | 5 |
| rs35635429 | 1 | 77478034 | C | A | 0.0065  | 0.0062 | 0.0117  | 0.0088 | 0.0370  | 0.0245 | -0.0070 | 0.0155 | 0.0014  | 0.0013 | 5 |
| rs35789311 | 1 | 77765214 | G | C | 0.0178  | 0.0181 | 0.0218  | 0.0267 | 0.1310  | 0.0736 | -0.0165 | 0.0455 | 0.0024  | 0.0038 | 5 |
| rs35883964 | 1 | 77476874 | C | T | 0.0073  | 0.0062 | 0.0119  | 0.0088 | 0.0334  | 0.0245 | -0.0062 | 0.0155 | 0.0014  | 0.0013 | 5 |
| rs35988099 | 1 | 78064000 | G | C | 0.0349  | 0.0120 | 0.0501  | 0.0174 | 0.2187  | 0.0507 | 0.1687  | 0.0382 | -0.0020 | 0.0024 | 5 |
| rs36003200 | 1 | 77581818 | T | C | 0.0189  | 0.0181 | 0.0244  | 0.0265 | 0.1461  | 0.0727 | -0.0193 | 0.0458 | 0.0029  | 0.0039 | 5 |
| rs366467   | 1 | 77657100 | G | C | -0.0130 | 0.0054 | -0.0136 | 0.0076 | -0.0230 | 0.0210 | -0.0281 | 0.0132 | 0.0009  | 0.0012 | 5 |
| rs370335   | 1 | 77657001 | C | G | -0.0130 | 0.0054 | -0.0136 | 0.0076 | -0.0231 | 0.0210 | -0.0281 | 0.0132 | 0.0009  | 0.0012 | 5 |
| rs371076   | 1 | 77656816 | A | G | -0.0134 | 0.0056 | -0.0149 | 0.0078 | -0.0133 | 0.0216 | -0.0249 | 0.0136 | 0.0010  | 0.0012 | 5 |
| rs3736313  | 1 | 77576437 | G | A | 0.0076  | 0.0054 | -0.0152 | 0.0077 | -0.0390 | 0.0216 | -0.0156 | 0.0133 | -0.0029 | 0.0012 | 5 |
| rs3736909  | 1 | 77966819 | C | G | -0.0162 | 0.0067 | -0.0057 | 0.0093 | -0.0692 | 0.0265 | -0.0286 | 0.0150 | 0.0012  | 0.0014 | 5 |
| rs3738079  | 1 | 77535602 | T | G | -0.0131 | 0.0056 | -0.0140 | 0.0082 | -0.0088 | 0.0229 | -0.0425 | 0.0136 | 0.0010  | 0.0012 | 5 |
| rs3767024  | 1 | 77963399 | A | C | -0.0159 | 0.0060 | -0.0093 | 0.0085 | -0.0592 | 0.0238 | -0.0282 | 0.0150 | 0.0012  | 0.0014 | 5 |
| rs3767025  | 1 | 77963166 | C | A | -0.0151 | 0.0066 | -0.0116 | 0.0093 | -0.0461 | 0.0261 | -0.0247 | 0.0168 | 0.0025  | 0.0015 | 5 |
| rs3767026  | 1 | 77959248 | G | A | 0.0041  | 0.0145 | -0.0093 | 0.0212 | -0.1099 | 0.0614 | -0.0378 | 0.0368 | 0.0009  | 0.0035 | 5 |
| rs3767027  | 1 | 77950984 | G | A | 0.0017  | 0.0146 | -0.0089 | 0.0212 | -0.1026 | 0.0617 | -0.0314 | 0.0377 | 0.0010  | 0.0035 | 5 |
| rs3767028  | 1 | 77942851 | G | C | -0.0200 | 0.0083 | -0.0091 | 0.0117 | 0.0083  | 0.0323 | -0.0298 | 0.0215 | 0.0051  | 0.0020 | 5 |
| rs3767030  | 1 | 77559364 | C | T | -0.0136 | 0.0059 | -0.0145 | 0.0086 | 0.0064  | 0.0240 | -0.0359 | 0.0141 | 0.0010  | 0.0013 | 5 |
| rs3767031  | 1 | 77559362 | G | A | -0.0138 | 0.0059 | -0.0146 | 0.0086 | 0.0056  | 0.0239 | -0.0359 | 0.0142 | 0.0011  | 0.0013 | 5 |
| rs3767032  | 1 | 77530416 | T | C | -0.0138 | 0.0055 | -0.0150 | 0.0080 | -0.0099 | 0.0225 | -0.0415 | 0.0133 | 0.0008  | 0.0012 | 5 |
| rs3767033  | 1 | 77530121 | T | C | -0.0131 | 0.0056 | -0.0140 | 0.0082 | -0.0076 | 0.0229 | -0.0424 | 0.0135 | 0.0011  | 0.0012 | 5 |
| rs3767035  | 1 | 77528584 | T | C | 0.0012  | 0.0108 | -0.0032 | 0.0153 | -0.0812 | 0.0437 | -0.0295 | 0.0267 | -0.0004 | 0.0025 | 5 |
| rs3767037  | 1 | 77734320 | C | T | -0.0141 | 0.0052 | -0.0112 | 0.0074 | -0.0283 | 0.0204 | -0.0237 | 0.0128 | 0.0003  | 0.0012 | 5 |
| rs3767038  | 1 | 77759973 | G | A | -0.0125 | 0.0058 | -0.0020 | 0.0080 | -0.0219 | 0.0226 | -0.0232 | 0.0128 | 0.0003  | 0.0012 | 5 |
| rs3790586  | 1 | 78012991 | G | A | -0.0136 | 0.0061 | -0.0105 | 0.0087 | -0.0667 | 0.0241 | -0.0348 | 0.0151 | 0.0015  | 0.0014 | 5 |
| rs3790592  | 1 | 78092735 | C | T | 0.0155  | 0.0055 | -0.0084 | 0.0077 | -0.0301 | 0.0218 | -0.0276 | 0.0135 | -0.0016 | 0.0012 | 5 |
| rs3811442  | 1 | 78175068 | G | A | -0.0234 | 0.0119 | 0.0163  | 0.0168 | -0.0860 | 0.0470 | 0.0104  | 0.0276 | 0.0005  | 0.0029 | 5 |
| rs3845364  | 1 | 78291341 | A | C | -0.0044 | 0.0068 | 0.0032  | 0.0097 | -0.0459 | 0.0256 | 0.0068  | 0.0140 | -0.0017 | 0.0012 | 5 |
| rs3908576  | 1 | 78350250 | G | A | -0.0010 | 0.0052 | 0.0122  | 0.0076 | 0.0205  | 0.0215 | 0.0067  | 0.0126 | 0.0016  | 0.0011 | 5 |
| rs4083559  | 1 | 77919644 | C | T | -0.0161 | 0.0060 | -0.0098 | 0.0085 | -0.0605 | 0.0238 | -0.0286 | 0.0151 | 0.0013  | 0.0014 | 5 |



|            |   |          |   |   |         |        |         |        |         |        |         |        |         |        |   |
|------------|---|----------|---|---|---------|--------|---------|--------|---------|--------|---------|--------|---------|--------|---|
| rs4107671  | 1 | 78029398 | G | A | -0.0116 | 0.0067 | -0.0136 | 0.0095 | -0.0565 | 0.0266 | -0.0263 | 0.0172 | 0.0030  | 0.0016 | 5 |
| rs4121165  | 1 | 77811292 | A | G | 0.0133  | 0.0060 | -0.0111 | 0.0087 | -0.0262 | 0.0250 | -0.0128 | 0.0144 | -0.0030 | 0.0013 | 5 |
| rs41292270 | 1 | 77632318 | T | A | 0.0119  | 0.0145 | -0.0051 | 0.0202 | -0.1294 | 0.0584 | -0.0336 | 0.0364 | -0.0005 | 0.0033 | 5 |
| rs41292954 | 1 | 78250680 | A | G | 0.0327  | 0.0224 | -0.0164 | 0.0313 | 0.0419  | 0.0821 | -0.1154 | 0.0529 | 0.0040  | 0.0048 | 5 |
| rs41292958 | 1 | 78303991 | T | A | -0.0126 | 0.0102 | -0.0001 | 0.0144 | -0.0464 | 0.0407 | -0.0447 | 0.0254 | 0.0026  | 0.0024 | 5 |
| rs4130548  | 1 | 77998184 | C | T | 0.0076  | 0.0049 | 0.0208  | 0.0069 | 0.1042  | 0.0195 | 0.0492  | 0.0123 | 0.0006  | 0.0011 | 5 |
| rs41305872 | 1 | 77925436 | T | C | -0.0045 | 0.0099 | -0.0047 | 0.0140 | 0.0150  | 0.0406 | -0.0191 | 0.0288 | -0.0013 | 0.0022 | 5 |
| rs41309165 | 1 | 78004950 | T | C | -0.0199 | 0.0222 | -0.0332 | 0.0311 | -0.0976 | 0.0845 | -0.0974 | 0.0505 | -0.0037 | 0.0049 | 5 |
| rs41311176 | 1 | 78004822 | T | C | -0.0065 | 0.0154 | 0.0079  | 0.0219 | 0.0719  | 0.0649 | -0.0956 | 0.0517 | -0.0001 | 0.0039 | 5 |
| rs41312643 | 1 | 77859937 | A | T | -0.0137 | 0.0153 | 0.0131  | 0.0216 | -0.0563 | 0.0592 | 0.0110  | 0.0333 | -0.0039 | 0.0033 | 5 |
| rs41312654 | 1 | 77933527 | C | T | -0.0133 | 0.0129 | 0.0010  | 0.0187 | -0.0747 | 0.0516 | -0.0274 | 0.0278 | -0.0030 | 0.0027 | 5 |
| rs41313399 | 1 | 77717985 | T | G | -0.0166 | 0.0146 | 0.0082  | 0.0206 | -0.0528 | 0.0572 | 0.0137  | 0.0324 | -0.0044 | 0.0032 | 5 |
| rs41428146 | 1 | 78285889 | C | T | -0.0060 | 0.0071 | -0.0147 | 0.0099 | -0.0248 | 0.0279 | -0.0246 | 0.0171 | 0.0024  | 0.0016 | 5 |
| rs41440645 | 1 | 78112582 | T | C | -0.0204 | 0.0105 | -0.0068 | 0.0147 | -0.1058 | 0.0407 | -0.0080 | 0.0243 | -0.0034 | 0.0023 | 5 |
| rs4245658  | 1 | 77557166 | T | C | -0.0138 | 0.0058 | -0.0101 | 0.0084 | 0.0063  | 0.0234 | -0.0409 | 0.0138 | 0.0010  | 0.0013 | 5 |
| rs4245660  | 1 | 78075049 | C | T | 0.0022  | 0.0048 | -0.0108 | 0.0068 | -0.0442 | 0.0191 | -0.0344 | 0.0119 | 0.0002  | 0.0011 | 5 |
| rs4258183  | 1 | 78158833 | A | G | 0.0036  | 0.0056 | -0.0145 | 0.0081 | -0.0331 | 0.0244 | -0.0337 | 0.0127 | -0.0015 | 0.0011 | 5 |
| rs4258184  | 1 | 78158858 | A | G | 0.0086  | 0.0060 | -0.0170 | 0.0084 | -0.0370 | 0.0236 | -0.0307 | 0.0148 | -0.0030 | 0.0013 | 5 |
| rs4258185  | 1 | 78158884 | A | C | 0.0025  | 0.0051 | -0.0095 | 0.0072 | -0.0413 | 0.0201 | -0.0348 | 0.0127 | -0.0015 | 0.0011 | 5 |
| rs4268312  | 1 | 78159154 | C | G | 0.0025  | 0.0051 | -0.0104 | 0.0072 | -0.0433 | 0.0202 | -0.0322 | 0.0127 | -0.0012 | 0.0011 | 5 |
| rs4285658  | 1 | 78159089 | G | C | 0.0087  | 0.0060 | -0.0170 | 0.0084 | -0.0371 | 0.0236 | -0.0323 | 0.0148 | -0.0030 | 0.0013 | 5 |
| rs4316319  | 1 | 78344916 | G | T | 0.0003  | 0.0047 | -0.0175 | 0.0067 | -0.0645 | 0.0188 | 0.0000  | 0.0117 | -0.0017 | 0.0011 | 5 |
| rs4341404  | 1 | 77934307 | G | A | -0.0164 | 0.0060 | -0.0101 | 0.0085 | -0.0585 | 0.0238 | -0.0281 | 0.0150 | 0.0012  | 0.0014 | 5 |
| rs4370803  | 1 | 78004467 | A | G | -0.0163 | 0.0085 | -0.0115 | 0.0120 | 0.0132  | 0.0333 | -0.0311 | 0.0221 | 0.0062  | 0.0020 | 5 |
| rs4372306  | 1 | 77995255 | G | C | -0.0164 | 0.0086 | -0.0124 | 0.0121 | -0.0006 | 0.0335 | -0.0303 | 0.0222 | 0.0061  | 0.0021 | 5 |
| rs4396076  | 1 | 78162843 | C | G | 0.0039  | 0.0056 | -0.0154 | 0.0081 | -0.0344 | 0.0244 | -0.0273 | 0.0127 | -0.0012 | 0.0011 | 5 |
| rs4431892  | 1 | 77482757 | T | C | 0.0093  | 0.0075 | 0.0317  | 0.0106 | 0.0928  | 0.0341 | 0.0770  | 0.0153 | -0.0009 | 0.0013 | 5 |
| rs4456057  | 1 | 78345279 | A | C | 0.0062  | 0.0081 | -0.0346 | 0.0115 | -0.0720 | 0.0316 | 0.0105  | 0.0193 | -0.0024 | 0.0018 | 5 |
| rs4483454  | 1 | 77933522 | C | G | -0.0164 | 0.0060 | -0.0099 | 0.0085 | -0.0590 | 0.0238 | -0.0285 | 0.0150 | 0.0013  | 0.0014 | 5 |
| rs4488068  | 1 | 77777152 | G | A | -0.0140 | 0.0052 | -0.0101 | 0.0074 | -0.0272 | 0.0204 | -0.0236 | 0.0128 | 0.0002  | 0.0012 | 5 |
| rs4507967  | 1 | 78396142 | A | G | 0.0075  | 0.0053 | 0.0168  | 0.0077 | 0.0603  | 0.0223 | 0.0311  | 0.0132 | -0.0003 | 0.0012 | 5 |
| rs4529663  | 1 | 78159030 | T | C | 0.0025  | 0.0051 | -0.0105 | 0.0072 | -0.0429 | 0.0202 | -0.0330 | 0.0127 | -0.0011 | 0.0011 | 5 |
| rs4542173  | 1 | 78390768 | G | A | 0.0074  | 0.0052 | 0.0175  | 0.0076 | 0.0623  | 0.0218 | 0.0232  | 0.0130 | -0.0002 | 0.0011 | 5 |
| rs4543852  | 1 | 78026932 | A | G | -0.0116 | 0.0067 | -0.0132 | 0.0095 | -0.0562 | 0.0266 | -0.0265 | 0.0172 | 0.0031  | 0.0016 | 5 |
| rs4553137  | 1 | 78260767 | A | C | -0.0013 | 0.0052 | 0.0152  | 0.0077 | 0.0189  | 0.0217 | 0.0218  | 0.0127 | 0.0019  | 0.0011 | 5 |
| rs4587522  | 1 | 78162753 | A | T | 0.0025  | 0.0051 | -0.0101 | 0.0072 | -0.0437 | 0.0202 | -0.0331 | 0.0127 | -0.0012 | 0.0011 | 5 |
| rs4587523  | 1 | 78397431 | G | A | 0.0068  | 0.0053 | 0.0185  | 0.0077 | 0.0603  | 0.0221 | 0.0323  | 0.0132 | -0.0003 | 0.0012 | 5 |
| rs4589153  | 1 | 77544179 | A | G | -0.0134 | 0.0055 | -0.0147 | 0.0080 | -0.0118 | 0.0225 | -0.0404 | 0.0133 | 0.0006  | 0.0012 | 5 |
| rs4600093  | 1 | 77547616 | T | C | -0.0134 | 0.0055 | -0.0144 | 0.0080 | -0.0120 | 0.0225 | -0.0402 | 0.0132 | 0.0005  | 0.0012 | 5 |
| rs4603081  | 1 | 78163061 | A | C | 0.0070  | 0.0065 | -0.0243 | 0.0094 | -0.0346 | 0.0284 | -0.0309 | 0.0146 | -0.0031 | 0.0013 | 5 |
| rs4612587  | 1 | 78380854 | A | C | 0.0076  | 0.0052 | 0.0160  | 0.0076 | 0.0639  | 0.0219 | 0.0245  | 0.0131 | -0.0004 | 0.0011 | 5 |
| rs4615798  | 1 | 78310793 | G | A | 0.0047  | 0.0065 | -0.0143 | 0.0094 | -0.0355 | 0.0283 | -0.0075 | 0.0145 | -0.0011 | 0.0014 | 5 |
| rs4618920  | 1 | 78343716 | C | T | 0.0062  | 0.0081 | -0.0349 | 0.0115 | -0.0722 | 0.0316 | 0.0103  | 0.0193 | -0.0024 | 0.0018 | 5 |
| rs4631748  | 1 | 78042917 | C | G | -0.0121 | 0.0076 | -0.0127 | 0.0108 | -0.0279 | 0.0301 | -0.0317 | 0.0195 | 0.0048  | 0.0018 | 5 |
| rs4650313  | 1 | 78160686 | C | T | 0.0025  | 0.0051 | -0.0104 | 0.0072 | -0.0433 | 0.0202 | -0.0277 | 0.0127 | -0.0012 | 0.0011 | 5 |
| rs4650315  | 1 | 78160807 | A | G | 0.0025  | 0.0051 | -0.0106 | 0.0072 | -0.0426 | 0.0202 | -0.0321 | 0.0127 | -0.0012 | 0.0011 | 5 |

|           |   |          |   |   |         |        |         |        |         |        |         |        |         |        |   |
|-----------|---|----------|---|---|---------|--------|---------|--------|---------|--------|---------|--------|---------|--------|---|
| rs4650348 | 1 | 78384712 | A | G | 0.0084  | 0.0053 | 0.0166  | 0.0077 | 0.0624  | 0.0220 | 0.0283  | 0.0132 | -0.0007 | 0.0012 | 5 |
| rs4650379 | 1 | 78155432 | A | G | -0.0170 | 0.0160 | -0.0080 | 0.0231 | -0.1516 | 0.0638 | 0.0234  | 0.0402 | 0.0003  | 0.0036 | 5 |
| rs4650382 | 1 | 78228512 | A | G | 0.0061  | 0.0049 | -0.0096 | 0.0070 | -0.0377 | 0.0196 | -0.0324 | 0.0123 | -0.0009 | 0.0011 | 5 |
| rs4650383 | 1 | 78233446 | T | C | -0.0030 | 0.0131 | -0.0085 | 0.0186 | -0.0869 | 0.0501 | -0.0514 | 0.0321 | -0.0003 | 0.0028 | 5 |
| rs4650400 | 1 | 78259453 | A | G | -0.0038 | 0.0049 | -0.0040 | 0.0070 | -0.0266 | 0.0196 | -0.0062 | 0.0123 | -0.0004 | 0.0011 | 5 |
| rs4650404 | 1 | 78261099 | T | C | -0.0038 | 0.0049 | -0.0041 | 0.0070 | -0.0267 | 0.0196 | -0.0062 | 0.0123 | -0.0003 | 0.0011 | 5 |
| rs4650408 | 1 | 78267117 | G | C | 0.0019  | 0.0050 | 0.0117  | 0.0074 | 0.0060  | 0.0208 | 0.0199  | 0.0122 | 0.0015  | 0.0011 | 5 |
| rs4650413 | 1 | 78281802 | C | A | -0.0002 | 0.0051 | 0.0168  | 0.0072 | 0.0349  | 0.0199 | 0.0184  | 0.0125 | 0.0019  | 0.0011 | 5 |
| rs4650436 | 1 | 78314914 | C | T | 0.0009  | 0.0051 | 0.0149  | 0.0072 | 0.0388  | 0.0200 | 0.0100  | 0.0125 | 0.0017  | 0.0011 | 5 |
| rs4650448 | 1 | 78337436 | A | G | -0.0011 | 0.0052 | 0.0124  | 0.0076 | 0.0219  | 0.0215 | 0.0075  | 0.0125 | 0.0016  | 0.0011 | 5 |
| rs4650449 | 1 | 78338536 | C | T | -0.0011 | 0.0053 | -0.0036 | 0.0075 | -0.0185 | 0.0211 | 0.0052  | 0.0131 | -0.0013 | 0.0012 | 5 |
| rs4650453 | 1 | 78170527 | A | G | -0.0166 | 0.0160 | -0.0078 | 0.0231 | -0.1533 | 0.0637 | 0.0230  | 0.0400 | 0.0004  | 0.0036 | 5 |
| rs4650471 | 1 | 78173293 | A | G | -0.0102 | 0.0069 | 0.0028  | 0.0098 | -0.0569 | 0.0273 | -0.0145 | 0.0171 | 0.0021  | 0.0016 | 5 |
| rs4650476 | 1 | 78173846 | G | A | 0.0140  | 0.0154 | -0.0169 | 0.0215 | -0.1666 | 0.0641 | -0.0166 | 0.0330 | 0.0011  | 0.0036 | 5 |
| rs4650481 | 1 | 78174784 | G | T | -0.0102 | 0.0069 | 0.0027  | 0.0098 | -0.0568 | 0.0273 | -0.0145 | 0.0171 | 0.0021  | 0.0016 | 5 |
| rs4650514 | 1 | 78179621 | G | A | -0.0161 | 0.0160 | -0.0085 | 0.0231 | -0.1526 | 0.0637 | 0.0245  | 0.0400 | 0.0004  | 0.0036 | 5 |
| rs4650515 | 1 | 78456111 | T | C | -0.0013 | 0.0066 | 0.0040  | 0.0094 | -0.0316 | 0.0258 | -0.0492 | 0.0170 | 0.0026  | 0.0014 | 5 |
| rs4650584 | 1 | 78191907 | C | A | -0.0163 | 0.0160 | -0.0076 | 0.0231 | -0.1509 | 0.0638 | 0.0274  | 0.0402 | 0.0003  | 0.0036 | 5 |
| rs4650585 | 1 | 78191914 | T | C | -0.0163 | 0.0160 | -0.0075 | 0.0231 | -0.1512 | 0.0638 | 0.0230  | 0.0401 | 0.0003  | 0.0036 | 5 |
| rs4650588 | 1 | 78192951 | G | A | -0.0162 | 0.0160 | -0.0076 | 0.0231 | -0.1525 | 0.0638 | 0.0273  | 0.0402 | 0.0003  | 0.0036 | 5 |
| rs4650602 | 1 | 78208369 | A | G | -0.0164 | 0.0160 | -0.0066 | 0.0231 | -0.1504 | 0.0638 | 0.0268  | 0.0404 | 0.0003  | 0.0036 | 5 |
| rs4650607 | 1 | 78155656 | C | G | 0.0086  | 0.0060 | -0.0172 | 0.0084 | -0.0370 | 0.0236 | -0.0315 | 0.0148 | -0.0030 | 0.0013 | 5 |
| rs4650609 | 1 | 78212739 | A | G | -0.0174 | 0.0160 | -0.0071 | 0.0231 | -0.1541 | 0.0638 | 0.0283  | 0.0404 | 0.0003  | 0.0036 | 5 |
| rs4650619 | 1 | 78228872 | C | T | 0.0080  | 0.0051 | -0.0097 | 0.0074 | -0.0359 | 0.0209 | -0.0294 | 0.0123 | -0.0006 | 0.0011 | 5 |
| rs4650620 | 1 | 78229021 | C | T | 0.0078  | 0.0050 | -0.0129 | 0.0073 | -0.0391 | 0.0207 | -0.0286 | 0.0122 | -0.0009 | 0.0011 | 5 |
| rs4650624 | 1 | 78233907 | T | C | -0.0180 | 0.0164 | -0.0106 | 0.0236 | -0.1577 | 0.0653 | 0.0086  | 0.0416 | -0.0004 | 0.0036 | 5 |
| rs4650639 | 1 | 78242197 | C | T | 0.0101  | 0.0058 | -0.0153 | 0.0085 | -0.0117 | 0.0240 | -0.0265 | 0.0143 | -0.0031 | 0.0013 | 5 |
| rs473910  | 1 | 78398418 | T | C | 0.0086  | 0.0052 | 0.0175  | 0.0075 | 0.0582  | 0.0217 | 0.0248  | 0.0129 | -0.0003 | 0.0011 | 5 |
| rs478308  | 1 | 78128030 | C | G | 0.0065  | 0.0056 | -0.0118 | 0.0080 | -0.0616 | 0.0224 | -0.0240 | 0.0138 | -0.0015 | 0.0013 | 5 |
| rs479113  | 1 | 78144426 | C | G | 0.0021  | 0.0071 | -0.0064 | 0.0101 | -0.0589 | 0.0281 | -0.0252 | 0.0177 | 0.0020  | 0.0016 | 5 |
| rs481199  | 1 | 78092227 | A | G | 0.0155  | 0.0055 | -0.0084 | 0.0077 | -0.0301 | 0.0218 | -0.0275 | 0.0135 | -0.0016 | 0.0012 | 5 |
| rs482493  | 1 | 78432281 | T | A | 0.0067  | 0.0051 | 0.0172  | 0.0073 | 0.0905  | 0.0205 | 0.0315  | 0.0130 | -0.0005 | 0.0011 | 5 |
| rs483760  | 1 | 78082139 | C | T | 0.0145  | 0.0055 | -0.0096 | 0.0077 | -0.0289 | 0.0217 | -0.0263 | 0.0134 | -0.0015 | 0.0012 | 5 |
| rs485005  | 1 | 78091802 | G | A | 0.0155  | 0.0055 | -0.0083 | 0.0077 | -0.0301 | 0.0218 | -0.0275 | 0.0135 | -0.0016 | 0.0012 | 5 |
| rs487316  | 1 | 78124220 | G | T | 0.0064  | 0.0057 | -0.0113 | 0.0080 | -0.0624 | 0.0223 | -0.0275 | 0.0138 | -0.0017 | 0.0012 | 5 |
| rs489129  | 1 | 78409421 | T | C | 0.0013  | 0.0085 | -0.0377 | 0.0121 | -0.0595 | 0.0337 | 0.0059  | 0.0211 | -0.0027 | 0.0019 | 5 |
| rs490938  | 1 | 78409613 | G | A | 0.0085  | 0.0052 | 0.0170  | 0.0075 | 0.0606  | 0.0216 | 0.0248  | 0.0128 | -0.0005 | 0.0011 | 5 |
| rs494496  | 1 | 78140894 | A | G | 0.0085  | 0.0057 | -0.0141 | 0.0080 | -0.0480 | 0.0225 | -0.0320 | 0.0139 | -0.0015 | 0.0013 | 5 |
| rs4949657 | 1 | 77525823 | C | T | -0.0153 | 0.0056 | -0.0166 | 0.0082 | -0.0017 | 0.0228 | -0.0387 | 0.0137 | 0.0009  | 0.0012 | 5 |
| rs4949658 | 1 | 77548086 | T | C | -0.0134 | 0.0055 | -0.0144 | 0.0080 | -0.0114 | 0.0225 | -0.0380 | 0.0133 | 0.0006  | 0.0012 | 5 |
| rs4949659 | 1 | 77551886 | G | A | -0.0131 | 0.0055 | -0.0142 | 0.0080 | -0.0114 | 0.0224 | -0.0402 | 0.0132 | 0.0007  | 0.0012 | 5 |
| rs4949660 | 1 | 77559774 | C | T | 0.0054  | 0.0048 | 0.0213  | 0.0068 | 0.0712  | 0.0191 | 0.0457  | 0.0121 | 0.0020  | 0.0011 | 5 |
| rs4949661 | 1 | 77576838 | T | A | -0.0133 | 0.0055 | -0.0155 | 0.0080 | -0.0166 | 0.0223 | -0.0315 | 0.0132 | 0.0009  | 0.0012 | 5 |
| rs4949662 | 1 | 77614590 | G | A | 0.0028  | 0.0049 | 0.0199  | 0.0071 | 0.0620  | 0.0205 | 0.0429  | 0.0121 | 0.0017  | 0.0011 | 5 |
| rs4949803 | 1 | 77485398 | T | C | 0.0065  | 0.0062 | 0.0127  | 0.0088 | 0.0306  | 0.0245 | -0.0066 | 0.0155 | 0.0014  | 0.0013 | 5 |
| rs4949805 | 1 | 77525344 | G | A | -0.0156 | 0.0053 | -0.0155 | 0.0077 | -0.0186 | 0.0217 | -0.0322 | 0.0129 | 0.0001  | 0.0012 | 5 |

|           |   |          |   |   |         |        |         |        |         |        |         |        |         |        |   |
|-----------|---|----------|---|---|---------|--------|---------|--------|---------|--------|---------|--------|---------|--------|---|
| rs4949806 | 1 | 77525352 | A | G | -0.0153 | 0.0053 | -0.0156 | 0.0077 | -0.0176 | 0.0217 | -0.0322 | 0.0129 | 0.0001  | 0.0012 | 5 |
| rs4949807 | 1 | 77542274 | T | C | -0.0140 | 0.0058 | -0.0173 | 0.0084 | -0.0035 | 0.0234 | -0.0388 | 0.0138 | 0.0010  | 0.0013 | 5 |
| rs4949808 | 1 | 77543179 | G | A | -0.0134 | 0.0055 | -0.0147 | 0.0080 | -0.0117 | 0.0225 | -0.0405 | 0.0133 | 0.0006  | 0.0012 | 5 |
| rs4949809 | 1 | 77555994 | G | C | -0.0148 | 0.0060 | -0.0146 | 0.0087 | 0.0095  | 0.0240 | -0.0374 | 0.0142 | 0.0010  | 0.0013 | 5 |
| rs494981  | 1 | 78402973 | C | T | 0.0065  | 0.0053 | 0.0187  | 0.0077 | 0.0626  | 0.0221 | 0.0303  | 0.0131 | -0.0005 | 0.0011 | 5 |
| rs4949811 | 1 | 77559769 | G | T | -0.0140 | 0.0059 | -0.0147 | 0.0086 | 0.0068  | 0.0239 | -0.0362 | 0.0141 | 0.0010  | 0.0013 | 5 |
| rs4949813 | 1 | 77562040 | C | T | -0.0140 | 0.0059 | -0.0145 | 0.0086 | 0.0070  | 0.0239 | -0.0367 | 0.0141 | 0.0010  | 0.0013 | 5 |
| rs4949814 | 1 | 77571003 | T | A | -0.0131 | 0.0055 | -0.0154 | 0.0080 | -0.0169 | 0.0223 | -0.0315 | 0.0132 | 0.0009  | 0.0012 | 5 |
| rs4949816 | 1 | 77580212 | T | C | -0.0139 | 0.0057 | -0.0167 | 0.0082 | -0.0075 | 0.0229 | -0.0284 | 0.0136 | 0.0011  | 0.0012 | 5 |
| rs4949817 | 1 | 77604926 | G | T | -0.0143 | 0.0053 | -0.0137 | 0.0078 | -0.0216 | 0.0217 | -0.0254 | 0.0128 | 0.0003  | 0.0012 | 5 |
| rs4949818 | 1 | 77612961 | G | A | -0.0147 | 0.0052 | -0.0116 | 0.0074 | -0.0293 | 0.0204 | -0.0257 | 0.0128 | 0.0003  | 0.0012 | 5 |
| rs4949820 | 1 | 77723880 | A | G | 0.0052  | 0.0252 | -0.0812 | 0.0366 | -0.1585 | 0.1105 | -0.0401 | 0.0673 | -0.0011 | 0.0061 | 5 |
| rs4949822 | 1 | 77807217 | G | A | -0.0114 | 0.0054 | -0.0120 | 0.0076 | -0.0175 | 0.0211 | -0.0297 | 0.0132 | 0.0007  | 0.0012 | 5 |
| rs4949823 | 1 | 77837557 | T | C | -0.0166 | 0.0060 | -0.0072 | 0.0087 | -0.0348 | 0.0246 | -0.0294 | 0.0148 | 0.0012  | 0.0014 | 5 |
| rs4949824 | 1 | 77934048 | T | C | -0.0182 | 0.0091 | -0.0061 | 0.0133 | 0.0314  | 0.0419 | -0.0245 | 0.0201 | 0.0051  | 0.0020 | 5 |
| rs4949828 | 1 | 77975781 | C | G | -0.0204 | 0.0083 | -0.0095 | 0.0117 | 0.0077  | 0.0323 | -0.0313 | 0.0216 | 0.0051  | 0.0020 | 5 |
| rs4949829 | 1 | 77975827 | G | A | -0.0203 | 0.0083 | -0.0094 | 0.0117 | 0.0078  | 0.0323 | -0.0313 | 0.0216 | 0.0051  | 0.0020 | 5 |
| rs4949830 | 1 | 78032398 | T | C | -0.0159 | 0.0086 | -0.0124 | 0.0121 | -0.0042 | 0.0336 | -0.0201 | 0.0212 | 0.0060  | 0.0021 | 5 |
| rs4949831 | 1 | 78032466 | T | A | -0.0419 | 0.0201 | -0.0401 | 0.0321 | 0.0559  | 0.1060 | -0.0287 | 0.0353 | -0.0013 | 0.0029 | 5 |
| rs4949835 | 1 | 78071717 | G | A | 0.0022  | 0.0048 | -0.0111 | 0.0068 | -0.0445 | 0.0191 | -0.0338 | 0.0119 | 0.0002  | 0.0011 | 5 |
| rs496442  | 1 | 78394073 | A | G | -0.0021 | 0.0081 | -0.0387 | 0.0116 | -0.0606 | 0.0324 | 0.0110  | 0.0201 | -0.0027 | 0.0019 | 5 |
| rs498301  | 1 | 78394275 | C | T | 0.0073  | 0.0052 | 0.0175  | 0.0076 | 0.0621  | 0.0218 | 0.0248  | 0.0129 | -0.0002 | 0.0011 | 5 |
| rs5001389 | 1 | 78073353 | G | C | -0.0173 | 0.0086 | -0.0100 | 0.0121 | 0.0000  | 0.0336 | -0.0272 | 0.0223 | 0.0068  | 0.0020 | 5 |
| rs5001390 | 1 | 78073324 | A | G | 0.0144  | 0.0055 | -0.0099 | 0.0077 | -0.0282 | 0.0217 | -0.0265 | 0.0134 | -0.0015 | 0.0012 | 5 |
| rs501774  | 1 | 78147115 | T | G | 0.0079  | 0.0056 | -0.0174 | 0.0079 | -0.0525 | 0.0223 | -0.0293 | 0.0139 | -0.0016 | 0.0013 | 5 |
| rs501935  | 1 | 78077069 | C | T | 0.0143  | 0.0055 | -0.0104 | 0.0077 | -0.0283 | 0.0217 | -0.0260 | 0.0134 | -0.0015 | 0.0012 | 5 |
| rs5025902 | 1 | 77767733 | A | G | -0.0122 | 0.0058 | -0.0080 | 0.0082 | 0.0003  | 0.0224 | -0.0214 | 0.0142 | 0.0017  | 0.0013 | 5 |
| rs504388  | 1 | 78074267 | T | C | -0.0174 | 0.0086 | -0.0098 | 0.0121 | -0.0009 | 0.0336 | -0.0273 | 0.0223 | 0.0069  | 0.0020 | 5 |
| rs505301  | 1 | 78068932 | C | T | 0.0144  | 0.0055 | -0.0100 | 0.0077 | -0.0282 | 0.0217 | -0.0254 | 0.0134 | -0.0015 | 0.0012 | 5 |
| rs507045  | 1 | 78118041 | G | A | 0.0112  | 0.0058 | -0.0126 | 0.0082 | -0.0553 | 0.0232 | -0.0260 | 0.0142 | -0.0017 | 0.0013 | 5 |
| rs508404  | 1 | 78415853 | A | G | 0.0079  | 0.0063 | 0.0200  | 0.0095 | 0.0650  | 0.0252 | 0.0264  | 0.0130 | -0.0004 | 0.0011 | 5 |
| rs513245  | 1 | 78143013 | A | C | 0.0080  | 0.0056 | -0.0177 | 0.0079 | -0.0525 | 0.0223 | -0.0284 | 0.0139 | -0.0015 | 0.0013 | 5 |
| rs513977  | 1 | 78150910 | A | G | 0.0077  | 0.0056 | -0.0170 | 0.0079 | -0.0521 | 0.0224 | -0.0297 | 0.0140 | -0.0016 | 0.0013 | 5 |
| rs515662  | 1 | 78064934 | G | A | 0.0140  | 0.0055 | -0.0101 | 0.0077 | -0.0282 | 0.0217 | -0.0257 | 0.0134 | -0.0015 | 0.0012 | 5 |
| rs518341  | 1 | 78430807 | G | A | -0.0010 | 0.0080 | -0.0350 | 0.0115 | -0.0596 | 0.0322 | 0.0108  | 0.0202 | -0.0023 | 0.0019 | 5 |
| rs518834  | 1 | 78407302 | C | T | 0.0209  | 0.0199 | -0.0759 | 0.0279 | -0.0940 | 0.0784 | -0.0055 | 0.0519 | -0.0008 | 0.0049 | 5 |
| rs520229  | 1 | 78410524 | C | T | 0.0084  | 0.0052 | 0.0174  | 0.0075 | 0.0621  | 0.0216 | 0.0229  | 0.0129 | -0.0005 | 0.0011 | 5 |
| rs521029  | 1 | 78140285 | A | G | 0.0084  | 0.0057 | -0.0142 | 0.0080 | -0.0484 | 0.0225 | -0.0321 | 0.0139 | -0.0015 | 0.0013 | 5 |
| rs521636  | 1 | 78407616 | A | G | 0.0073  | 0.0052 | 0.0177  | 0.0076 | 0.0630  | 0.0218 | 0.0247  | 0.0129 | -0.0004 | 0.0011 | 5 |
| rs522952  | 1 | 78122676 | A | G | 0.0114  | 0.0058 | -0.0122 | 0.0082 | -0.0553 | 0.0232 | -0.0261 | 0.0142 | -0.0017 | 0.0013 | 5 |
| rs523464  | 1 | 78407823 | A | C | 0.0073  | 0.0052 | 0.0177  | 0.0076 | 0.0631  | 0.0218 | 0.0247  | 0.0129 | -0.0004 | 0.0011 | 5 |
| rs523751  | 1 | 78139995 | A | T | 0.0083  | 0.0057 | -0.0137 | 0.0080 | -0.0482 | 0.0225 | -0.0321 | 0.0139 | -0.0015 | 0.0013 | 5 |
| rs524031  | 1 | 78110933 | C | G | 0.0075  | 0.0056 | -0.0134 | 0.0079 | -0.0706 | 0.0221 | -0.0294 | 0.0136 | -0.0018 | 0.0012 | 5 |
| rs524757  | 1 | 78139865 | A | G | 0.0066  | 0.0062 | -0.0133 | 0.0085 | -0.0314 | 0.0246 | -0.0300 | 0.0141 | -0.0015 | 0.0013 | 5 |
| rs525351  | 1 | 78436557 | G | A | 0.0078  | 0.0051 | 0.0171  | 0.0072 | 0.0858  | 0.0203 | 0.0301  | 0.0130 | -0.0006 | 0.0011 | 5 |
| rs526723  | 1 | 78139629 | T | C | 0.0083  | 0.0057 | -0.0141 | 0.0080 | -0.0485 | 0.0225 | -0.0322 | 0.0139 | -0.0015 | 0.0013 | 5 |

|            |   |          |   |   |         |        |         |        |         |        |         |        |         |        |   |
|------------|---|----------|---|---|---------|--------|---------|--------|---------|--------|---------|--------|---------|--------|---|
| rs529172   | 1 | 78146418 | A | G | 0.0095  | 0.0061 | -0.0136 | 0.0086 | -0.0523 | 0.0242 | -0.0273 | 0.0150 | -0.0039 | 0.0013 | 5 |
| rs530042   | 1 | 78146325 | G | A | -0.0062 | 0.0062 | -0.0023 | 0.0088 | -0.0684 | 0.0247 | -0.0171 | 0.0154 | 0.0002  | 0.0014 | 5 |
| rs531841   | 1 | 78129703 | A | G | 0.0080  | 0.0057 | -0.0141 | 0.0080 | -0.0467 | 0.0226 | -0.0330 | 0.0139 | -0.0012 | 0.0013 | 5 |
| rs534283   | 1 | 78118686 | A | G | 0.0112  | 0.0058 | -0.0125 | 0.0082 | -0.0551 | 0.0232 | -0.0260 | 0.0142 | -0.0017 | 0.0013 | 5 |
| rs537086   | 1 | 78433774 | T | C | 0.0078  | 0.0051 | 0.0170  | 0.0072 | 0.0860  | 0.0203 | 0.0309  | 0.0129 | -0.0006 | 0.0011 | 5 |
| rs538855   | 1 | 78407377 | C | T | 0.0074  | 0.0052 | 0.0178  | 0.0076 | 0.0633  | 0.0218 | 0.0246  | 0.0129 | -0.0004 | 0.0011 | 5 |
| rs539228   | 1 | 78090493 | T | C | 0.0157  | 0.0055 | -0.0083 | 0.0077 | -0.0301 | 0.0218 | -0.0275 | 0.0135 | -0.0016 | 0.0012 | 5 |
| rs540742   | 1 | 78119402 | C | T | 0.0106  | 0.0058 | -0.0128 | 0.0082 | -0.0561 | 0.0230 | -0.0284 | 0.0141 | -0.0020 | 0.0013 | 5 |
| rs540903   | 1 | 78413965 | T | A | 0.0072  | 0.0052 | 0.0170  | 0.0076 | 0.0648  | 0.0218 | 0.0262  | 0.0129 | -0.0004 | 0.0011 | 5 |
| rs551514   | 1 | 78411653 | A | T | 0.0072  | 0.0052 | 0.0170  | 0.0076 | 0.0648  | 0.0218 | 0.0262  | 0.0129 | -0.0004 | 0.0011 | 5 |
| rs554298   | 1 | 78138930 | A | G | 0.0085  | 0.0057 | -0.0142 | 0.0080 | -0.0484 | 0.0225 | -0.0330 | 0.0139 | -0.0015 | 0.0013 | 5 |
| rs555475   | 1 | 78426313 | A | G | 0.0068  | 0.0051 | 0.0171  | 0.0073 | 0.0909  | 0.0205 | 0.0313  | 0.0130 | -0.0006 | 0.0012 | 5 |
| rs556170   | 1 | 78113107 | C | T | 0.0062  | 0.0056 | -0.0106 | 0.0079 | -0.0603 | 0.0223 | -0.0283 | 0.0138 | -0.0021 | 0.0012 | 5 |
| rs55672379 | 1 | 78177166 | C | T | -0.0102 | 0.0069 | 0.0029  | 0.0098 | -0.0566 | 0.0273 | -0.0146 | 0.0171 | 0.0021  | 0.0016 | 5 |
| rs55709611 | 1 | 78461732 | G | A | -0.0024 | 0.0066 | 0.0030  | 0.0094 | 0.0016  | 0.0268 | -0.0001 | 0.0177 | -0.0033 | 0.0015 | 5 |
| rs55748728 | 1 | 77883810 | A | G | -0.0282 | 0.0235 | -0.0294 | 0.0327 | -0.0991 | 0.0894 | -0.1049 | 0.0510 | -0.0035 | 0.0051 | 5 |
| rs557688   | 1 | 78138585 | A | G | 0.0085  | 0.0057 | -0.0141 | 0.0080 | -0.0482 | 0.0225 | -0.0323 | 0.0139 | -0.0015 | 0.0013 | 5 |
| rs558643   | 1 | 78145451 | T | G | 0.0080  | 0.0056 | -0.0173 | 0.0079 | -0.0522 | 0.0223 | -0.0289 | 0.0139 | -0.0016 | 0.0013 | 5 |
| rs55901018 | 1 | 78120418 | G | A | -0.0046 | 0.0143 | -0.0206 | 0.0210 | -0.0431 | 0.0614 | 0.0560  | 0.0404 | 0.0066  | 0.0030 | 5 |
| rs55909103 | 1 | 78182828 | C | T | 0.0016  | 0.0091 | -0.0028 | 0.0130 | 0.0012  | 0.0360 | -0.0426 | 0.0237 | 0.0030  | 0.0020 | 5 |
| rs55947434 | 1 | 77715969 | C | T | -0.0122 | 0.0127 | -0.0100 | 0.0183 | 0.0227  | 0.0507 | 0.0002  | 0.0335 | -0.0002 | 0.0033 | 5 |
| rs55971702 | 1 | 77726793 | C | T | 0.0008  | 0.0113 | -0.0122 | 0.0163 | -0.0142 | 0.0450 | -0.0167 | 0.0287 | -0.0002 | 0.0024 | 5 |
| rs56010467 | 1 | 77517604 | A | G | -0.0039 | 0.0075 | -0.0187 | 0.0108 | -0.0377 | 0.0307 | -0.0116 | 0.0179 | 0.0016  | 0.0016 | 5 |
| rs56013426 | 1 | 78183095 | T | C | 0.0166  | 0.0141 | -0.0033 | 0.0213 | 0.0154  | 0.0597 | -0.0246 | 0.0340 | 0.0011  | 0.0030 | 5 |
| rs56027754 | 1 | 78292490 | G | T | -0.0086 | 0.0069 | -0.0130 | 0.0097 | -0.0237 | 0.0272 | -0.0231 | 0.0166 | 0.0020  | 0.0015 | 5 |
| rs56031030 | 1 | 78183102 | G | A | 0.0013  | 0.0091 | -0.0019 | 0.0130 | 0.0015  | 0.0361 | -0.0385 | 0.0237 | 0.0031  | 0.0020 | 5 |
| rs561289   | 1 | 78145185 | A | T | 0.0079  | 0.0056 | -0.0175 | 0.0079 | -0.0518 | 0.0223 | -0.0292 | 0.0139 | -0.0016 | 0.0013 | 5 |
| rs561300   | 1 | 78116398 | C | A | 0.0112  | 0.0058 | -0.0125 | 0.0082 | -0.0558 | 0.0232 | -0.0258 | 0.0142 | -0.0017 | 0.0013 | 5 |
| rs56136178 | 1 | 77983921 | G | A | -0.0189 | 0.0222 | -0.0323 | 0.0312 | -0.0999 | 0.0846 | -0.0997 | 0.0505 | -0.0038 | 0.0049 | 5 |
| rs56187216 | 1 | 78022710 | C | T | 0.0030  | 0.0094 | -0.0022 | 0.0135 | 0.0477  | 0.0374 | -0.0271 | 0.0247 | 0.0025  | 0.0021 | 5 |
| rs56236539 | 1 | 78058791 | G | A | -0.0160 | 0.0221 | -0.0351 | 0.0307 | -0.0739 | 0.0828 | -0.1096 | 0.0512 | -0.0035 | 0.0049 | 5 |
| rs56259955 | 1 | 77702220 | T | C | -0.0156 | 0.0139 | -0.0107 | 0.0191 | -0.0421 | 0.0574 | -0.0146 | 0.0321 | -0.0019 | 0.0029 | 5 |
| rs56267314 | 1 | 78321764 | A | G | 0.0015  | 0.0059 | -0.0216 | 0.0084 | -0.0774 | 0.0234 | -0.0071 | 0.0144 | -0.0011 | 0.0014 | 5 |
| rs56325960 | 1 | 77877302 | T | A | 0.0017  | 0.0146 | -0.0080 | 0.0212 | -0.0988 | 0.0618 | -0.0327 | 0.0379 | 0.0010  | 0.0036 | 5 |
| rs56341422 | 1 | 77973752 | G | T | 0.0022  | 0.0153 | -0.0188 | 0.0225 | -0.0697 | 0.0660 | 0.0304  | 0.0429 | 0.0073  | 0.0030 | 5 |
| rs56345482 | 1 | 78439451 | G | A | 0.0032  | 0.0093 | -0.0188 | 0.0133 | -0.0070 | 0.0367 | 0.0114  | 0.0231 | 0.0030  | 0.0020 | 5 |
| rs56397743 | 1 | 77765275 | C | T | 0.0056  | 0.0109 | -0.0168 | 0.0156 | -0.0131 | 0.0432 | -0.0283 | 0.0280 | 0.0009  | 0.0024 | 5 |
| rs56406938 | 1 | 78326463 | A | G | -0.0013 | 0.0053 | -0.0040 | 0.0075 | -0.0204 | 0.0211 | 0.0060  | 0.0131 | -0.0013 | 0.0012 | 5 |
| rs565164   | 1 | 78094899 | A | G | 0.0153  | 0.0055 | -0.0089 | 0.0077 | -0.0308 | 0.0218 | -0.0272 | 0.0136 | -0.0016 | 0.0012 | 5 |
| rs566236   | 1 | 78125409 | C | T | 0.0114  | 0.0058 | -0.0124 | 0.0082 | -0.0555 | 0.0232 | -0.0272 | 0.0142 | -0.0017 | 0.0013 | 5 |
| rs56688304 | 1 | 77767814 | C | T | -0.0124 | 0.0055 | -0.0108 | 0.0078 | -0.0168 | 0.0214 | -0.0293 | 0.0134 | 0.0013  | 0.0012 | 5 |
| rs56708272 | 1 | 78026113 | C | T | -0.0206 | 0.0223 | -0.0352 | 0.0312 | -0.0927 | 0.0847 | -0.0967 | 0.0507 | -0.0037 | 0.0050 | 5 |
| rs56728070 | 1 | 78039325 | T | C | -0.0166 | 0.0221 | -0.0456 | 0.0310 | -0.1084 | 0.0844 | -0.1056 | 0.0508 | -0.0052 | 0.0049 | 5 |
| rs56830324 | 1 | 77858098 | T | C | -0.0167 | 0.0113 | -0.0177 | 0.0158 | -0.1024 | 0.0440 | -0.0388 | 0.0287 | -0.0022 | 0.0025 | 5 |
| rs568497   | 1 | 78089617 | G | A | -0.0172 | 0.0086 | -0.0107 | 0.0121 | 0.0000  | 0.0337 | -0.0238 | 0.0226 | 0.0066  | 0.0020 | 5 |
| rs571255   | 1 | 78082364 | C | T | 0.0145  | 0.0055 | -0.0096 | 0.0077 | -0.0284 | 0.0217 | -0.0264 | 0.0134 | -0.0015 | 0.0012 | 5 |

|            |   |          |   |   |         |        |         |        |         |        |         |        |         |        |   |
|------------|---|----------|---|---|---------|--------|---------|--------|---------|--------|---------|--------|---------|--------|---|
| rs571456   | 1 | 78423133 | T | G | 0.0071  | 0.0052 | 0.0173  | 0.0073 | 0.0905  | 0.0205 | 0.0310  | 0.0131 | -0.0005 | 0.0012 | 5 |
| rs571988   | 1 | 78089278 | T | C | 0.0156  | 0.0055 | -0.0083 | 0.0077 | -0.0300 | 0.0218 | -0.0278 | 0.0135 | -0.0016 | 0.0012 | 5 |
| rs57205467 | 1 | 78435426 | C | T | 0.0191  | 0.0215 | -0.0056 | 0.0297 | 0.0400  | 0.0811 | -0.0724 | 0.0541 | 0.0021  | 0.0042 | 5 |
| rs57245756 | 1 | 78289726 | T | A | -0.0001 | 0.0056 | 0.0027  | 0.0079 | -0.0192 | 0.0223 | 0.0067  | 0.0140 | -0.0017 | 0.0012 | 5 |
| rs57314531 | 1 | 77858070 | C | G | -0.0308 | 0.0226 | -0.0286 | 0.0316 | -0.0545 | 0.0853 | -0.1018 | 0.0510 | -0.0033 | 0.0051 | 5 |
| rs57315528 | 1 | 77789383 | A | T | 0.0015  | 0.0119 | -0.0162 | 0.0168 | -0.0256 | 0.0473 | -0.0304 | 0.0279 | 0.0011  | 0.0024 | 5 |
| rs573952   | 1 | 78124520 | C | A | -0.0031 | 0.0066 | -0.0050 | 0.0094 | -0.0418 | 0.0262 | -0.0280 | 0.0164 | 0.0010  | 0.0015 | 5 |
| rs57421725 | 1 | 77971961 | T | C | -0.0204 | 0.0083 | -0.0092 | 0.0117 | 0.0076  | 0.0323 | -0.0308 | 0.0215 | 0.0051  | 0.0020 | 5 |
| rs57444992 | 1 | 77924476 | A | G | -0.0163 | 0.0126 | -0.0018 | 0.0178 | -0.0841 | 0.0488 | -0.0278 | 0.0279 | -0.0037 | 0.0027 | 5 |
| rs574973   | 1 | 77654496 | C | A | -0.0144 | 0.0052 | -0.0117 | 0.0074 | -0.0298 | 0.0204 | -0.0243 | 0.0128 | 0.0003  | 0.0012 | 5 |
| rs575007   | 1 | 78415364 | C | A | -0.0007 | 0.0080 | -0.0349 | 0.0115 | -0.0576 | 0.0322 | 0.0090  | 0.0197 | -0.0024 | 0.0019 | 5 |
| rs57604233 | 1 | 77989801 | C | A | -0.0191 | 0.0222 | -0.0331 | 0.0312 | -0.1059 | 0.0846 | -0.0995 | 0.0505 | -0.0037 | 0.0049 | 5 |
| rs576045   | 1 | 78441184 | G | T | 0.0106  | 0.0061 | 0.0176  | 0.0087 | 0.0969  | 0.0227 | 0.0237  | 0.0128 | -0.0005 | 0.0011 | 5 |
| rs577978   | 1 | 78132091 | A | G | 0.0083  | 0.0057 | -0.0134 | 0.0080 | -0.0478 | 0.0226 | -0.0324 | 0.0139 | -0.0013 | 0.0013 | 5 |
| rs580426   | 1 | 78138412 | T | C | 0.0086  | 0.0057 | -0.0141 | 0.0080 | -0.0489 | 0.0225 | -0.0324 | 0.0139 | -0.0014 | 0.0013 | 5 |
| rs58073982 | 1 | 77808132 | C | T | -0.0068 | 0.0108 | -0.0241 | 0.0174 | -0.1988 | 0.0534 | -0.0173 | 0.0179 | -0.0012 | 0.0019 | 5 |
| rs58143971 | 1 | 77491392 | T | C | -0.0280 | 0.0203 | -0.0275 | 0.0275 | -0.0188 | 0.0752 | 0.0258  | 0.0434 | -0.0040 | 0.0046 | 5 |
| rs581926   | 1 | 78179251 | C | T | 0.0006  | 0.0050 | -0.0101 | 0.0071 | -0.0569 | 0.0199 | -0.0298 | 0.0124 | -0.0011 | 0.0011 | 5 |
| rs582012   | 1 | 78209548 | C | T | 0.0023  | 0.0049 | -0.0109 | 0.0070 | -0.0591 | 0.0196 | -0.0358 | 0.0124 | -0.0011 | 0.0011 | 5 |
| rs582281   | 1 | 78140979 | C | A | 0.0085  | 0.0057 | -0.0141 | 0.0080 | -0.0489 | 0.0225 | -0.0320 | 0.0139 | -0.0015 | 0.0013 | 5 |
| rs582395   | 1 | 78140900 | C | T | 0.0085  | 0.0057 | -0.0141 | 0.0080 | -0.0481 | 0.0225 | -0.0320 | 0.0139 | -0.0015 | 0.0013 | 5 |
| rs582795   | 1 | 78179111 | T | G | 0.0085  | 0.0060 | -0.0166 | 0.0084 | -0.0377 | 0.0236 | -0.0306 | 0.0148 | -0.0030 | 0.0013 | 5 |
| rs58391568 | 1 | 78009021 | T | G | -0.0137 | 0.0241 | -0.0531 | 0.0350 | -0.1099 | 0.0882 | -0.0940 | 0.0496 | -0.0036 | 0.0049 | 5 |
| rs58397190 | 1 | 77488724 | T | C | -0.0286 | 0.0203 | -0.0282 | 0.0275 | -0.0185 | 0.0752 | 0.0214  | 0.0437 | -0.0039 | 0.0046 | 5 |
| rs58404594 | 1 | 77887382 | A | G | -0.0163 | 0.0112 | -0.0182 | 0.0157 | -0.1075 | 0.0437 | -0.0366 | 0.0284 | -0.0023 | 0.0025 | 5 |
| rs584660   | 1 | 78138105 | T | C | 0.0084  | 0.0057 | -0.0141 | 0.0080 | -0.0485 | 0.0225 | -0.0327 | 0.0139 | -0.0014 | 0.0013 | 5 |
| rs584868   | 1 | 78127605 | C | T | 0.0061  | 0.0057 | -0.0116 | 0.0079 | -0.0620 | 0.0223 | -0.0272 | 0.0138 | -0.0018 | 0.0012 | 5 |
| rs585072   | 1 | 78115586 | C | T | 0.0113  | 0.0058 | -0.0126 | 0.0082 | -0.0558 | 0.0232 | -0.0256 | 0.0142 | -0.0017 | 0.0013 | 5 |
| rs585100   | 1 | 78138024 | C | T | 0.0086  | 0.0057 | -0.0139 | 0.0080 | -0.0490 | 0.0225 | -0.0324 | 0.0139 | -0.0015 | 0.0013 | 5 |
| rs585237   | 1 | 78249520 | A | G | 0.0023  | 0.0060 | -0.0032 | 0.0085 | -0.0071 | 0.0235 | -0.0203 | 0.0148 | 0.0025  | 0.0013 | 5 |
| rs585252   | 1 | 78249511 | A | C | 0.0024  | 0.0060 | -0.0034 | 0.0085 | -0.0067 | 0.0235 | -0.0201 | 0.0148 | 0.0025  | 0.0013 | 5 |
| rs585677   | 1 | 78251170 | C | T | 0.0086  | 0.0060 | -0.0148 | 0.0088 | -0.0078 | 0.0249 | -0.0183 | 0.0149 | -0.0031 | 0.0013 | 5 |
| rs585795   | 1 | 78424679 | T | C | 0.0068  | 0.0051 | 0.0173  | 0.0073 | 0.0909  | 0.0205 | 0.0313  | 0.0130 | -0.0005 | 0.0012 | 5 |
| rs58611517 | 1 | 78165593 | A | T | 0.0023  | 0.0051 | -0.0102 | 0.0072 | -0.0444 | 0.0202 | -0.0331 | 0.0127 | -0.0012 | 0.0011 | 5 |
| rs586300   | 1 | 78141584 | T | G | 0.0122  | 0.0063 | -0.0092 | 0.0089 | -0.0461 | 0.0250 | -0.0202 | 0.0154 | -0.0034 | 0.0014 | 5 |
| rs586333   | 1 | 78115319 | A | G | 0.0111  | 0.0058 | -0.0123 | 0.0082 | -0.0561 | 0.0232 | -0.0256 | 0.0142 | -0.0017 | 0.0013 | 5 |
| rs586680   | 1 | 78093465 | T | C | 0.0117  | 0.0062 | -0.0110 | 0.0085 | -0.0352 | 0.0223 | -0.0269 | 0.0136 | -0.0016 | 0.0012 | 5 |
| rs587143   | 1 | 78093360 | C | T | 0.0155  | 0.0055 | -0.0084 | 0.0077 | -0.0298 | 0.0218 | -0.0276 | 0.0136 | -0.0016 | 0.0012 | 5 |
| rs587433   | 1 | 78121562 | G | C | 0.0112  | 0.0061 | -0.0123 | 0.0082 | -0.0561 | 0.0231 | -0.0291 | 0.0141 | -0.0020 | 0.0013 | 5 |
| rs587574   | 1 | 78128219 | C | A | -0.0069 | 0.0062 | -0.0078 | 0.0087 | -0.0615 | 0.0244 | -0.0365 | 0.0152 | 0.0003  | 0.0014 | 5 |
| rs587996   | 1 | 78443074 | T | C | 0.0067  | 0.0051 | 0.0174  | 0.0073 | 0.0914  | 0.0205 | 0.0315  | 0.0130 | -0.0006 | 0.0012 | 5 |
| rs58958142 | 1 | 77489649 | T | C | -0.0290 | 0.0203 | -0.0282 | 0.0275 | -0.0181 | 0.0752 | 0.0233  | 0.0436 | -0.0039 | 0.0046 | 5 |
| rs589683   | 1 | 78234526 | G | A | 0.0099  | 0.0058 | -0.0121 | 0.0082 | -0.0232 | 0.0230 | -0.0240 | 0.0144 | -0.0030 | 0.0013 | 5 |
| rs58994981 | 1 | 77774074 | T | C | -0.0292 | 0.0250 | -0.0440 | 0.0351 | -0.0585 | 0.0918 | -0.0798 | 0.0536 | -0.0044 | 0.0052 | 5 |
| rs59076612 | 1 | 77472206 | T | A | -0.0190 | 0.0199 | -0.0203 | 0.0268 | -0.0055 | 0.0725 | -0.0088 | 0.0451 | -0.0041 | 0.0045 | 5 |
| rs59087988 | 1 | 77903527 | G | T | -0.0050 | 0.0097 | -0.0124 | 0.0138 | -0.1232 | 0.0395 | -0.0175 | 0.0252 | -0.0006 | 0.0022 | 5 |

|            |   |          |   |   |         |        |         |        |         |        |         |        |         |        |   |
|------------|---|----------|---|---|---------|--------|---------|--------|---------|--------|---------|--------|---------|--------|---|
| rs591206   | 1 | 78235843 | A | G | 0.0097  | 0.0058 | -0.0118 | 0.0082 | -0.0218 | 0.0230 | -0.0240 | 0.0144 | -0.0030 | 0.0013 | 5 |
| rs591343   | 1 | 78200003 | C | A | 0.0089  | 0.0060 | -0.0156 | 0.0084 | -0.0357 | 0.0236 | -0.0290 | 0.0148 | -0.0031 | 0.0013 | 5 |
| rs591448   | 1 | 78114537 | T | C | 0.0008  | 0.0072 | -0.0065 | 0.0102 | -0.0284 | 0.0286 | -0.0343 | 0.0182 | 0.0027  | 0.0016 | 5 |
| rs591889   | 1 | 78444862 | G | A | 0.0068  | 0.0051 | 0.0177  | 0.0073 | 0.0920  | 0.0205 | 0.0318  | 0.0130 | -0.0005 | 0.0012 | 5 |
| rs592848   | 1 | 78209495 | T | C | 0.0092  | 0.0060 | -0.0156 | 0.0084 | -0.0381 | 0.0236 | -0.0285 | 0.0148 | -0.0031 | 0.0013 | 5 |
| rs593113   | 1 | 78219918 | G | A | 0.0075  | 0.0050 | -0.0087 | 0.0071 | -0.0301 | 0.0198 | -0.0351 | 0.0126 | -0.0009 | 0.0011 | 5 |
| rs593652   | 1 | 78131828 | C | G | 0.0082  | 0.0057 | -0.0135 | 0.0080 | -0.0477 | 0.0226 | -0.0322 | 0.0139 | -0.0013 | 0.0013 | 5 |
| rs59419083 | 1 | 78453592 | G | A | -0.0062 | 0.0080 | 0.0100  | 0.0114 | -0.0340 | 0.0305 | 0.0018  | 0.0175 | -0.0033 | 0.0015 | 5 |
| rs59447555 | 1 | 77525114 | A | G | -0.0120 | 0.0146 | -0.0230 | 0.0206 | 0.0114  | 0.0565 | -0.0557 | 0.0344 | 0.0004  | 0.0031 | 5 |
| rs594852   | 1 | 78065223 | C | T | 0.0142  | 0.0055 | -0.0099 | 0.0077 | -0.0285 | 0.0217 | -0.0255 | 0.0134 | -0.0015 | 0.0012 | 5 |
| rs595384   | 1 | 78115409 | C | T | 0.0114  | 0.0058 | -0.0122 | 0.0082 | -0.0554 | 0.0232 | -0.0256 | 0.0142 | -0.0017 | 0.0013 | 5 |
| rs595489   | 1 | 78397606 | C | T | 0.0083  | 0.0052 | 0.0172  | 0.0075 | 0.0579  | 0.0217 | 0.0244  | 0.0129 | -0.0003 | 0.0011 | 5 |
| rs59584643 | 1 | 78356298 | A | G | 0.0242  | 0.0212 | 0.0022  | 0.0292 | 0.0472  | 0.0805 | -0.0708 | 0.0543 | 0.0014  | 0.0042 | 5 |
| rs59623467 | 1 | 77489936 | G | A | -0.0278 | 0.0203 | -0.0283 | 0.0275 | -0.0179 | 0.0752 | 0.0083  | 0.0438 | -0.0039 | 0.0046 | 5 |
| rs596803   | 1 | 78178334 | T | G | 0.0006  | 0.0050 | -0.0102 | 0.0071 | -0.0571 | 0.0199 | -0.0282 | 0.0124 | -0.0011 | 0.0011 | 5 |
| rs597063   | 1 | 78205247 | T | C | 0.0092  | 0.0060 | -0.0156 | 0.0084 | -0.0381 | 0.0236 | -0.0288 | 0.0148 | -0.0031 | 0.0013 | 5 |
| rs597272   | 1 | 78178229 | C | T | 0.0086  | 0.0060 | -0.0164 | 0.0084 | -0.0375 | 0.0236 | -0.0309 | 0.0148 | -0.0030 | 0.0013 | 5 |
| rs59791571 | 1 | 78022371 | G | T | -0.0106 | 0.0099 | -0.0090 | 0.0135 | -0.0186 | 0.0384 | -0.0318 | 0.0220 | 0.0060  | 0.0021 | 5 |
| rs598988   | 1 | 78086422 | G | A | 0.0120  | 0.0053 | -0.0105 | 0.0075 | -0.0444 | 0.0210 | -0.0305 | 0.0130 | -0.0016 | 0.0012 | 5 |
| rs599293   | 1 | 78128532 | G | T | 0.0066  | 0.0056 | -0.0117 | 0.0080 | -0.0616 | 0.0224 | -0.0244 | 0.0138 | -0.0015 | 0.0013 | 5 |
| rs59929409 | 1 | 78288590 | T | G | -0.0029 | 0.0060 | 0.0046  | 0.0088 | -0.0243 | 0.0228 | 0.0073  | 0.0140 | -0.0016 | 0.0012 | 5 |
| rs599386   | 1 | 78172762 | C | G | 0.0008  | 0.0050 | -0.0102 | 0.0071 | -0.0567 | 0.0199 | -0.0295 | 0.0124 | -0.0011 | 0.0011 | 5 |
| rs599417   | 1 | 78114719 | A | G | 0.0112  | 0.0058 | -0.0123 | 0.0082 | -0.0558 | 0.0232 | -0.0265 | 0.0142 | -0.0017 | 0.0013 | 5 |
| rs599730   | 1 | 78128602 | T | C | 0.0066  | 0.0057 | -0.0117 | 0.0080 | -0.0615 | 0.0224 | -0.0246 | 0.0138 | -0.0015 | 0.0013 | 5 |
| rs599987   | 1 | 78130644 | G | A | -0.0038 | 0.0064 | -0.0063 | 0.0091 | -0.0719 | 0.0254 | -0.0261 | 0.0157 | 0.0001  | 0.0014 | 5 |
| rs600237   | 1 | 78216870 | G | A | 0.0076  | 0.0050 | -0.0091 | 0.0071 | -0.0314 | 0.0198 | -0.0371 | 0.0125 | -0.0009 | 0.0011 | 5 |
| rs600742   | 1 | 78092616 | T | C | 0.0155  | 0.0055 | -0.0084 | 0.0077 | -0.0301 | 0.0218 | -0.0276 | 0.0135 | -0.0016 | 0.0012 | 5 |
| rs600781   | 1 | 78140664 | A | G | 0.0084  | 0.0057 | -0.0143 | 0.0080 | -0.0480 | 0.0225 | -0.0320 | 0.0139 | -0.0015 | 0.0013 | 5 |
| rs60207382 | 1 | 77489830 | A | G | -0.0239 | 0.0200 | -0.0280 | 0.0275 | -0.0186 | 0.0752 | 0.0235  | 0.0436 | -0.0039 | 0.0046 | 5 |
| rs60234511 | 1 | 77953397 | A | C | -0.0161 | 0.0060 | -0.0096 | 0.0085 | -0.0594 | 0.0238 | -0.0239 | 0.0151 | 0.0012  | 0.0014 | 5 |
| rs60290283 | 1 | 77834667 | A | C | -0.0181 | 0.0113 | -0.0176 | 0.0158 | -0.1042 | 0.0440 | -0.0334 | 0.0288 | -0.0022 | 0.0025 | 5 |
| rs604097   | 1 | 78409641 | C | T | 0.0072  | 0.0052 | 0.0169  | 0.0076 | 0.0648  | 0.0218 | 0.0263  | 0.0129 | -0.0004 | 0.0011 | 5 |
| rs60470980 | 1 | 78001293 | C | T | -0.0203 | 0.0222 | -0.0347 | 0.0312 | -0.0958 | 0.0846 | -0.0978 | 0.0505 | -0.0037 | 0.0049 | 5 |
| rs60539656 | 1 | 78181493 | T | C | 0.0119  | 0.0185 | -0.0140 | 0.0271 | -0.0972 | 0.0751 | -0.0720 | 0.0446 | -0.0037 | 0.0046 | 5 |
| rs605659   | 1 | 78132160 | G | A | 0.0082  | 0.0057 | -0.0136 | 0.0080 | -0.0482 | 0.0225 | -0.0319 | 0.0139 | -0.0013 | 0.0013 | 5 |
| rs60571060 | 1 | 78399564 | C | T | -0.0065 | 0.0073 | 0.0061  | 0.0104 | -0.0196 | 0.0284 | -0.0471 | 0.0187 | 0.0031  | 0.0016 | 5 |
| rs60708769 | 1 | 77506271 | G | T | 0.0142  | 0.0077 | 0.0271  | 0.0112 | 0.1030  | 0.0301 | 0.0590  | 0.0146 | -0.0015 | 0.0013 | 5 |
| rs60768314 | 1 | 77953265 | T | C | -0.0157 | 0.0126 | -0.0007 | 0.0178 | -0.0798 | 0.0487 | -0.0341 | 0.0272 | -0.0038 | 0.0027 | 5 |
| rs60824360 | 1 | 78288827 | C | T | -0.0001 | 0.0056 | 0.0023  | 0.0079 | -0.0185 | 0.0223 | 0.0073  | 0.0140 | -0.0016 | 0.0012 | 5 |
| rs609359   | 1 | 78139523 | A | T | 0.0084  | 0.0057 | -0.0142 | 0.0080 | -0.0485 | 0.0225 | -0.0322 | 0.0139 | -0.0015 | 0.0013 | 5 |
| rs609390   | 1 | 78130628 | C | T | 0.0083  | 0.0057 | -0.0136 | 0.0080 | -0.0478 | 0.0225 | -0.0323 | 0.0139 | -0.0013 | 0.0013 | 5 |
| rs610501   | 1 | 78066370 | G | A | 0.0143  | 0.0055 | -0.0101 | 0.0077 | -0.0285 | 0.0217 | -0.0254 | 0.0134 | -0.0015 | 0.0012 | 5 |
| rs610508   | 1 | 78179127 | A | T | 0.0085  | 0.0060 | -0.0167 | 0.0084 | -0.0377 | 0.0236 | -0.0306 | 0.0148 | -0.0030 | 0.0013 | 5 |
| rs61080952 | 1 | 77474054 | A | T | -0.0200 | 0.0199 | -0.0195 | 0.0268 | -0.0045 | 0.0725 | -0.0082 | 0.0450 | -0.0041 | 0.0044 | 5 |
| rs61145372 | 1 | 77856284 | T | A | -0.0169 | 0.0113 | -0.0177 | 0.0158 | -0.1023 | 0.0440 | -0.0390 | 0.0287 | -0.0022 | 0.0025 | 5 |
| rs611820   | 1 | 78085623 | T | C | 0.0155  | 0.0055 | -0.0087 | 0.0077 | -0.0300 | 0.0218 | -0.0275 | 0.0135 | -0.0016 | 0.0012 | 5 |

|            |   |          |   |   |         |        |         |        |         |        |         |        |         |        |   |
|------------|---|----------|---|---|---------|--------|---------|--------|---------|--------|---------|--------|---------|--------|---|
| rs612486   | 1 | 78138800 | G | T | 0.0084  | 0.0057 | -0.0141 | 0.0080 | -0.0483 | 0.0225 | -0.0324 | 0.0139 | -0.0015 | 0.0013 | 5 |
| rs61360507 | 1 | 77471932 | G | A | -0.0151 | 0.0161 | -0.0137 | 0.0228 | -0.0428 | 0.0623 | -0.0098 | 0.0369 | 0.0030  | 0.0038 | 5 |
| rs61388935 | 1 | 78399817 | T | A | 0.0195  | 0.0214 | -0.0057 | 0.0296 | 0.0337  | 0.0808 | -0.0763 | 0.0532 | 0.0016  | 0.0042 | 5 |
| rs614380   | 1 | 78247616 | C | G | 0.0023  | 0.0060 | -0.0030 | 0.0085 | -0.0073 | 0.0235 | -0.0202 | 0.0148 | 0.0025  | 0.0013 | 5 |
| rs614836   | 1 | 78129678 | T | A | 0.0081  | 0.0061 | -0.0114 | 0.0086 | -0.0352 | 0.0242 | -0.0296 | 0.0149 | -0.0027 | 0.0013 | 5 |
| rs614963   | 1 | 78137383 | G | A | 0.0083  | 0.0057 | -0.0136 | 0.0080 | -0.0474 | 0.0225 | -0.0288 | 0.0140 | -0.0013 | 0.0013 | 5 |
| rs61524266 | 1 | 78041288 | C | A | -0.0057 | 0.0113 | -0.0145 | 0.0147 | -0.1481 | 0.0516 | -0.0259 | 0.0191 | 0.0001  | 0.0021 | 5 |
| rs615681   | 1 | 78441595 | C | T | 0.0016  | 0.0085 | -0.0362 | 0.0121 | -0.0576 | 0.0338 | 0.0007  | 0.0212 | -0.0028 | 0.0019 | 5 |
| rs616332   | 1 | 78121172 | A | G | 0.0107  | 0.0058 | -0.0123 | 0.0082 | -0.0561 | 0.0231 | -0.0286 | 0.0141 | -0.0020 | 0.0013 | 5 |
| rs616518   | 1 | 78192408 | G | C | 0.0019  | 0.0049 | -0.0108 | 0.0070 | -0.0578 | 0.0195 | -0.0375 | 0.0122 | -0.0011 | 0.0011 | 5 |
| rs617195   | 1 | 78121000 | T | C | 0.0107  | 0.0058 | -0.0124 | 0.0082 | -0.0561 | 0.0231 | -0.0298 | 0.0142 | -0.0020 | 0.0013 | 5 |
| rs61777063 | 1 | 77505209 | A | G | -0.0186 | 0.0148 | 0.0206  | 0.0208 | -0.0699 | 0.0583 | 0.0183  | 0.0324 | -0.0043 | 0.0033 | 5 |
| rs61777064 | 1 | 77506796 | T | C | -0.0187 | 0.0148 | 0.0204  | 0.0208 | -0.0700 | 0.0583 | 0.0182  | 0.0324 | -0.0043 | 0.0033 | 5 |
| rs61777065 | 1 | 77507300 | A | G | -0.0185 | 0.0148 | 0.0204  | 0.0208 | -0.0700 | 0.0583 | 0.0182  | 0.0324 | -0.0043 | 0.0033 | 5 |
| rs61777066 | 1 | 77508977 | A | G | -0.0187 | 0.0148 | 0.0202  | 0.0208 | -0.0696 | 0.0583 | 0.0179  | 0.0324 | -0.0043 | 0.0033 | 5 |
| rs61777068 | 1 | 77516283 | C | T | -0.0180 | 0.0148 | 0.0190  | 0.0208 | -0.0744 | 0.0582 | 0.0177  | 0.0324 | -0.0042 | 0.0033 | 5 |
| rs61777069 | 1 | 77516361 | G | A | -0.0190 | 0.0148 | 0.0200  | 0.0208 | -0.0710 | 0.0583 | 0.0176  | 0.0324 | -0.0042 | 0.0033 | 5 |
| rs61777070 | 1 | 77520044 | A | C | -0.0183 | 0.0148 | 0.0220  | 0.0208 | -0.0691 | 0.0583 | 0.0171  | 0.0324 | -0.0042 | 0.0033 | 5 |
| rs61777071 | 1 | 77522129 | A | G | -0.0194 | 0.0148 | 0.0192  | 0.0208 | -0.0650 | 0.0583 | 0.0126  | 0.0327 | -0.0041 | 0.0033 | 5 |
| rs61777072 | 1 | 77523274 | C | G | 0.0191  | 0.0080 | -0.0038 | 0.0116 | -0.0039 | 0.0327 | -0.0038 | 0.0197 | -0.0036 | 0.0017 | 5 |
| rs61777073 | 1 | 77532399 | A | G | -0.0063 | 0.0197 | -0.0056 | 0.0299 | -0.0306 | 0.0814 | -0.0208 | 0.0511 | -0.0075 | 0.0039 | 5 |
| rs61777118 | 1 | 77640056 | A | C | 0.0108  | 0.0164 | 0.0066  | 0.0224 | -0.0665 | 0.0631 | -0.0021 | 0.0359 | 0.0045  | 0.0036 | 5 |
| rs61777120 | 1 | 77656635 | T | C | 0.0037  | 0.0201 | 0.0186  | 0.0287 | -0.0066 | 0.0817 | 0.0589  | 0.0633 | -0.0018 | 0.0038 | 5 |
| rs61777121 | 1 | 77665088 | T | C | 0.0195  | 0.0167 | -0.0058 | 0.0237 | -0.0201 | 0.0648 | 0.0459  | 0.0491 | -0.0030 | 0.0033 | 5 |
| rs61777122 | 1 | 77683032 | T | C | 0.0209  | 0.0179 | 0.0121  | 0.0251 | -0.0828 | 0.0762 | -0.0124 | 0.0390 | 0.0045  | 0.0036 | 5 |
| rs61777140 | 1 | 77771206 | G | A | 0.0118  | 0.0056 | -0.0134 | 0.0081 | -0.0277 | 0.0231 | -0.0178 | 0.0134 | -0.0023 | 0.0012 | 5 |
| rs61777142 | 1 | 77807440 | G | A | 0.0105  | 0.0163 | 0.0092  | 0.0222 | -0.0706 | 0.0623 | -0.0129 | 0.0392 | 0.0049  | 0.0036 | 5 |
| rs61777265 | 1 | 78064794 | G | A | -0.0037 | 0.0079 | -0.0039 | 0.0110 | -0.0530 | 0.0303 | -0.0096 | 0.0170 | -0.0005 | 0.0016 | 5 |
| rs61777287 | 1 | 78100921 | A | C | 0.0330  | 0.0266 | -0.0091 | 0.0385 | -0.1181 | 0.1059 | -0.0062 | 0.0461 | 0.0070  | 0.0041 | 5 |
| rs61777324 | 1 | 78136325 | C | T | -0.0043 | 0.0160 | -0.0201 | 0.0221 | -0.0474 | 0.0615 | -0.0448 | 0.0408 | 0.0087  | 0.0033 | 5 |
| rs61777350 | 1 | 78175940 | C | T | 0.0007  | 0.0050 | -0.0102 | 0.0071 | -0.0574 | 0.0199 | -0.0268 | 0.0125 | -0.0010 | 0.0011 | 5 |
| rs617780   | 1 | 78434060 | A | T | 0.0055  | 0.0056 | 0.0194  | 0.0082 | 0.0603  | 0.0250 | 0.0345  | 0.0130 | -0.0004 | 0.0012 | 5 |
| rs61778171 | 1 | 78282909 | G | A | 0.0013  | 0.0102 | -0.0365 | 0.0161 | -0.0427 | 0.0479 | -0.0276 | 0.0177 | 0.0023  | 0.0016 | 5 |
| rs61778176 | 1 | 78293441 | T | G | -0.0085 | 0.0069 | -0.0127 | 0.0097 | -0.0250 | 0.0272 | -0.0230 | 0.0166 | 0.0020  | 0.0015 | 5 |
| rs61778177 | 1 | 78294900 | T | A | -0.0056 | 0.0071 | -0.0138 | 0.0099 | -0.0249 | 0.0279 | -0.0246 | 0.0171 | 0.0023  | 0.0016 | 5 |
| rs61778202 | 1 | 78319448 | G | C | 0.0058  | 0.0081 | -0.0347 | 0.0114 | -0.0750 | 0.0315 | 0.0086  | 0.0192 | -0.0025 | 0.0018 | 5 |
| rs61778203 | 1 | 78320050 | T | C | 0.0073  | 0.0067 | -0.0289 | 0.0095 | -0.0710 | 0.0265 | 0.0093  | 0.0163 | -0.0025 | 0.0016 | 5 |
| rs61778215 | 1 | 78347993 | C | A | 0.0110  | 0.0090 | -0.0301 | 0.0134 | -0.0028 | 0.0386 | 0.0109  | 0.0193 | -0.0024 | 0.0018 | 5 |
| rs61778216 | 1 | 78383241 | C | G | 0.0139  | 0.0086 | -0.0114 | 0.0127 | -0.0003 | 0.0352 | 0.0080  | 0.0201 | -0.0004 | 0.0018 | 5 |
| rs61778233 | 1 | 78404294 | A | G | -0.0110 | 0.0066 | -0.0008 | 0.0092 | -0.0438 | 0.0257 | 0.0089  | 0.0166 | 0.0016  | 0.0014 | 5 |
| rs61778235 | 1 | 78412463 | G | T | -0.0101 | 0.0066 | -0.0005 | 0.0093 | -0.0434 | 0.0257 | 0.0087  | 0.0166 | 0.0016  | 0.0014 | 5 |
| rs61778697 | 1 | 77492143 | G | A | -0.0188 | 0.0148 | 0.0215  | 0.0208 | -0.0735 | 0.0582 | 0.0174  | 0.0322 | -0.0043 | 0.0033 | 5 |
| rs61778699 | 1 | 77496059 | A | C | -0.0191 | 0.0148 | 0.0214  | 0.0208 | -0.0660 | 0.0583 | 0.0195  | 0.0326 | -0.0043 | 0.0033 | 5 |
| rs61778700 | 1 | 77496695 | C | G | -0.0191 | 0.0148 | 0.0207  | 0.0208 | -0.0693 | 0.0583 | 0.0197  | 0.0324 | -0.0043 | 0.0033 | 5 |
| rs61778702 | 1 | 77503051 | A | C | -0.0184 | 0.0148 | 0.0207  | 0.0208 | -0.0699 | 0.0583 | 0.0187  | 0.0324 | -0.0043 | 0.0033 | 5 |
| rs61778703 | 1 | 77503704 | G | C | -0.0186 | 0.0148 | 0.0205  | 0.0208 | -0.0700 | 0.0583 | 0.0187  | 0.0324 | -0.0043 | 0.0033 | 5 |

|            |   |          |   |   |         |        |         |        |         |        |         |        |         |        |   |
|------------|---|----------|---|---|---------|--------|---------|--------|---------|--------|---------|--------|---------|--------|---|
| rs61778704 | 1 | 77503996 | A | G | -0.0186 | 0.0148 | 0.0206  | 0.0208 | -0.0701 | 0.0583 | 0.0187  | 0.0324 | -0.0043 | 0.0033 | 5 |
| rs61778705 | 1 | 77504153 | T | G | -0.0186 | 0.0148 | 0.0206  | 0.0208 | -0.0700 | 0.0583 | 0.0187  | 0.0324 | -0.0043 | 0.0033 | 5 |
| rs61778706 | 1 | 77504255 | C | T | 0.0114  | 0.0137 | -0.0179 | 0.0197 | -0.0462 | 0.0549 | 0.0108  | 0.0395 | -0.0038 | 0.0029 | 5 |
| rs61778707 | 1 | 77504337 | T | C | -0.0187 | 0.0148 | 0.0205  | 0.0208 | -0.0701 | 0.0583 | 0.0183  | 0.0324 | -0.0043 | 0.0033 | 5 |
| rs61778708 | 1 | 77505127 | T | C | -0.0180 | 0.0148 | 0.0205  | 0.0208 | -0.0700 | 0.0583 | 0.0180  | 0.0324 | -0.0043 | 0.0033 | 5 |
| rs61778868 | 1 | 77908065 | C | A | 0.0298  | 0.0170 | -0.0165 | 0.0249 | 0.0000  | 0.0679 | 0.0773  | 0.0485 | -0.0058 | 0.0033 | 5 |
| rs61778870 | 1 | 77919930 | T | C | -0.0108 | 0.0076 | -0.0129 | 0.0111 | -0.0184 | 0.0303 | -0.0151 | 0.0175 | -0.0001 | 0.0016 | 5 |
| rs61778875 | 1 | 77935582 | C | T | 0.0040  | 0.0184 | -0.0098 | 0.0252 | -0.0647 | 0.0686 | 0.0326  | 0.0428 | 0.0063  | 0.0038 | 5 |
| rs61778901 | 1 | 77984031 | C | T | 0.0175  | 0.0074 | -0.0089 | 0.0107 | -0.0255 | 0.0304 | 0.0017  | 0.0182 | -0.0033 | 0.0015 | 5 |
| rs61778902 | 1 | 77984578 | A | G | -0.0021 | 0.0199 | -0.0127 | 0.0273 | -0.0453 | 0.0763 | 0.0414  | 0.0464 | 0.0064  | 0.0041 | 5 |
| rs61778903 | 1 | 77996235 | A | C | 0.0226  | 0.0164 | -0.0142 | 0.0232 | -0.0171 | 0.0635 | 0.0723  | 0.0495 | -0.0049 | 0.0032 | 5 |
| rs61779483 | 1 | 78228668 | G | A | -0.0222 | 0.0191 | -0.0424 | 0.0260 | -0.1347 | 0.0728 | 0.0130  | 0.0457 | 0.0055  | 0.0040 | 5 |
| rs61784767 | 1 | 77469093 | A | G | -0.0142 | 0.0166 | 0.0054  | 0.0240 | -0.0372 | 0.0645 | 0.0237  | 0.0351 | -0.0075 | 0.0035 | 5 |
| rs61784770 | 1 | 77486530 | A | G | -0.0179 | 0.0148 | 0.0216  | 0.0209 | -0.0695 | 0.0585 | 0.0209  | 0.0323 | -0.0043 | 0.0033 | 5 |
| rs61784771 | 1 | 77487216 | C | A | -0.0199 | 0.0148 | 0.0199  | 0.0208 | -0.0723 | 0.0583 | 0.0216  | 0.0323 | -0.0045 | 0.0033 | 5 |
| rs61784772 | 1 | 77487242 | T | C | -0.0189 | 0.0148 | 0.0226  | 0.0208 | -0.0742 | 0.0583 | 0.0211  | 0.0323 | -0.0044 | 0.0033 | 5 |
| rs618063   | 1 | 78211964 | T | G | 0.0095  | 0.0060 | -0.0152 | 0.0084 | -0.0380 | 0.0236 | -0.0274 | 0.0148 | -0.0030 | 0.0013 | 5 |
| rs618581   | 1 | 78212104 | T | C | 0.0095  | 0.0060 | -0.0152 | 0.0084 | -0.0380 | 0.0236 | -0.0276 | 0.0148 | -0.0030 | 0.0013 | 5 |
| rs618593   | 1 | 78143173 | C | T | 0.0086  | 0.0056 | -0.0172 | 0.0079 | -0.0529 | 0.0223 | -0.0284 | 0.0139 | -0.0016 | 0.0013 | 5 |
| rs619749   | 1 | 78191711 | C | T | 0.0008  | 0.0050 | -0.0099 | 0.0071 | -0.0548 | 0.0199 | -0.0271 | 0.0125 | -0.0011 | 0.0011 | 5 |
| rs621178   | 1 | 78121657 | C | T | -0.0039 | 0.0065 | -0.0064 | 0.0092 | -0.0418 | 0.0257 | -0.0353 | 0.0160 | 0.0008  | 0.0015 | 5 |
| rs621524   | 1 | 78121637 | T | C | 0.0107  | 0.0058 | -0.0124 | 0.0082 | -0.0561 | 0.0231 | -0.0290 | 0.0141 | -0.0020 | 0.0013 | 5 |
| rs624223   | 1 | 78123075 | C | T | 0.0064  | 0.0057 | -0.0113 | 0.0079 | -0.0624 | 0.0223 | -0.0277 | 0.0137 | -0.0017 | 0.0012 | 5 |
| rs624766   | 1 | 78146046 | G | T | 0.0080  | 0.0056 | -0.0175 | 0.0079 | -0.0520 | 0.0223 | -0.0293 | 0.0139 | -0.0016 | 0.0013 | 5 |
| rs626063   | 1 | 78399782 | G | T | 0.0074  | 0.0052 | 0.0175  | 0.0076 | 0.0617  | 0.0218 | 0.0262  | 0.0129 | -0.0002 | 0.0011 | 5 |
| rs627493   | 1 | 78177691 | A | G | 0.0007  | 0.0050 | -0.0101 | 0.0071 | -0.0569 | 0.0199 | -0.0293 | 0.0124 | -0.0011 | 0.0011 | 5 |
| rs627549   | 1 | 78174425 | T | G | -0.0022 | 0.0060 | -0.0104 | 0.0086 | -0.0595 | 0.0225 | -0.0294 | 0.0124 | -0.0011 | 0.0011 | 5 |
| rs627654   | 1 | 78112999 | G | A | 0.0062  | 0.0056 | -0.0103 | 0.0079 | -0.0598 | 0.0223 | -0.0280 | 0.0138 | -0.0021 | 0.0012 | 5 |
| rs627661   | 1 | 78136807 | T | A | 0.0083  | 0.0057 | -0.0136 | 0.0080 | -0.0478 | 0.0225 | -0.0290 | 0.0141 | -0.0013 | 0.0013 | 5 |
| rs628451   | 1 | 78081019 | G | A | -0.0176 | 0.0086 | -0.0102 | 0.0121 | -0.0013 | 0.0336 | -0.0249 | 0.0223 | 0.0067  | 0.0020 | 5 |
| rs629827   | 1 | 78427610 | T | C | 0.0025  | 0.0049 | -0.0147 | 0.0070 | -0.0473 | 0.0195 | -0.0204 | 0.0122 | 0.0006  | 0.0011 | 5 |
| rs629947   | 1 | 78138703 | C | T | 0.0084  | 0.0057 | -0.0140 | 0.0080 | -0.0487 | 0.0225 | -0.0319 | 0.0140 | -0.0015 | 0.0013 | 5 |
| rs630245   | 1 | 78091980 | C | A | 0.0154  | 0.0055 | -0.0084 | 0.0077 | -0.0301 | 0.0218 | -0.0275 | 0.0135 | -0.0016 | 0.0012 | 5 |
| rs630640   | 1 | 78091924 | G | A | 0.0154  | 0.0055 | -0.0087 | 0.0077 | -0.0297 | 0.0217 | -0.0273 | 0.0135 | -0.0016 | 0.0012 | 5 |
| rs631045   | 1 | 78091830 | A | G | 0.0153  | 0.0055 | -0.0086 | 0.0077 | -0.0301 | 0.0218 | -0.0275 | 0.0135 | -0.0016 | 0.0012 | 5 |
| rs631280   | 1 | 78442733 | T | G | 0.0067  | 0.0051 | 0.0173  | 0.0073 | 0.0914  | 0.0205 | 0.0311  | 0.0130 | -0.0006 | 0.0012 | 5 |
| rs632184   | 1 | 78442952 | T | C | 0.0064  | 0.0051 | 0.0174  | 0.0073 | 0.0917  | 0.0205 | 0.0312  | 0.0130 | -0.0006 | 0.0012 | 5 |
| rs633227   | 1 | 78133685 | T | G | 0.0082  | 0.0057 | -0.0137 | 0.0080 | -0.0476 | 0.0225 | -0.0327 | 0.0139 | -0.0013 | 0.0013 | 5 |
| rs633580   | 1 | 78097856 | G | A | 0.0022  | 0.0077 | -0.0030 | 0.0112 | -0.0361 | 0.0319 | -0.0378 | 0.0191 | 0.0028  | 0.0017 | 5 |
| rs633664   | 1 | 78213183 | A | G | 0.0096  | 0.0060 | -0.0151 | 0.0084 | -0.0375 | 0.0236 | -0.0275 | 0.0148 | -0.0030 | 0.0013 | 5 |
| rs633769   | 1 | 78141690 | T | C | 0.0084  | 0.0057 | -0.0146 | 0.0080 | -0.0478 | 0.0226 | -0.0306 | 0.0142 | -0.0015 | 0.0013 | 5 |
| rs634741   | 1 | 78190615 | T | C | 0.0089  | 0.0060 | -0.0162 | 0.0084 | -0.0351 | 0.0236 | -0.0295 | 0.0148 | -0.0031 | 0.0013 | 5 |
| rs637650   | 1 | 78221819 | A | G | 0.0098  | 0.0052 | -0.0109 | 0.0074 | -0.0230 | 0.0206 | -0.0377 | 0.0130 | -0.0011 | 0.0012 | 5 |
| rs637943   | 1 | 78145383 | G | C | 0.0080  | 0.0056 | -0.0173 | 0.0079 | -0.0526 | 0.0223 | -0.0292 | 0.0139 | -0.0016 | 0.0013 | 5 |
| rs638232   | 1 | 78222003 | T | C | 0.0059  | 0.0049 | -0.0098 | 0.0070 | -0.0452 | 0.0195 | -0.0320 | 0.0122 | -0.0008 | 0.0011 | 5 |
| rs638335   | 1 | 78062192 | G | T | -0.0180 | 0.0076 | -0.0038 | 0.0107 | -0.0182 | 0.0298 | -0.0235 | 0.0190 | 0.0038  | 0.0017 | 5 |



|           |   |          |   |   |         |        |         |        |         |        |         |        |         |        |   |
|-----------|---|----------|---|---|---------|--------|---------|--------|---------|--------|---------|--------|---------|--------|---|
| rs638546  | 1 | 78190057 | G | T | 0.0040  | 0.0054 | -0.0151 | 0.0079 | -0.0507 | 0.0236 | -0.0372 | 0.0123 | -0.0011 | 0.0011 | 5 |
| rs638668  | 1 | 78068156 | C | T | 0.0142  | 0.0055 | -0.0103 | 0.0077 | -0.0285 | 0.0217 | -0.0254 | 0.0134 | -0.0015 | 0.0012 | 5 |
| rs639594  | 1 | 78434049 | T | G | 0.0066  | 0.0051 | 0.0172  | 0.0073 | 0.0901  | 0.0205 | 0.0308  | 0.0130 | -0.0006 | 0.0012 | 5 |
| rs639677  | 1 | 78084196 | C | G | 0.0156  | 0.0055 | -0.0088 | 0.0077 | -0.0294 | 0.0218 | -0.0277 | 0.0135 | -0.0015 | 0.0012 | 5 |
| rs640044  | 1 | 78434164 | G | A | 0.0078  | 0.0106 | -0.0294 | 0.0153 | -0.0082 | 0.0423 | 0.0149  | 0.0250 | -0.0024 | 0.0023 | 5 |
| rs640124  | 1 | 78167888 | G | A | 0.0018  | 0.0049 | -0.0116 | 0.0070 | -0.0609 | 0.0195 | -0.0390 | 0.0122 | -0.0010 | 0.0011 | 5 |
| rs640134  | 1 | 78128385 | A | G | 0.0065  | 0.0056 | -0.0118 | 0.0080 | -0.0617 | 0.0224 | -0.0240 | 0.0138 | -0.0015 | 0.0013 | 5 |
| rs640935  | 1 | 78083962 | C | T | 0.0154  | 0.0056 | -0.0090 | 0.0079 | -0.0212 | 0.0223 | -0.0249 | 0.0139 | -0.0014 | 0.0012 | 5 |
| rs642248  | 1 | 78138162 | A | G | 0.0085  | 0.0057 | -0.0141 | 0.0080 | -0.0485 | 0.0225 | -0.0326 | 0.0139 | -0.0014 | 0.0013 | 5 |
| rs642275  | 1 | 78181639 | A | T | 0.0008  | 0.0050 | -0.0107 | 0.0071 | -0.0573 | 0.0199 | -0.0290 | 0.0124 | -0.0011 | 0.0011 | 5 |
| rs6424640 | 1 | 78000960 | A | T | -0.0175 | 0.0093 | -0.0091 | 0.0136 | -0.0058 | 0.0343 | -0.0315 | 0.0222 | 0.0061  | 0.0021 | 5 |
| rs6424648 | 1 | 78009515 | A | G | -0.0116 | 0.0067 | -0.0131 | 0.0095 | -0.0564 | 0.0266 | -0.0267 | 0.0171 | 0.0031  | 0.0016 | 5 |
| rs6424650 | 1 | 78014003 | C | T | -0.0146 | 0.0087 | -0.0132 | 0.0126 | -0.0018 | 0.0353 | -0.0304 | 0.0223 | 0.0062  | 0.0020 | 5 |
| rs6424653 | 1 | 78017738 | T | A | -0.0135 | 0.0061 | -0.0106 | 0.0087 | -0.0668 | 0.0242 | -0.0281 | 0.0152 | 0.0015  | 0.0014 | 5 |
| rs6424659 | 1 | 78035531 | C | T | 0.0097  | 0.0053 | -0.0084 | 0.0075 | -0.0211 | 0.0211 | -0.0209 | 0.0132 | -0.0012 | 0.0012 | 5 |
| rs6424660 | 1 | 78035920 | C | G | -0.0161 | 0.0086 | -0.0139 | 0.0121 | -0.0034 | 0.0335 | -0.0297 | 0.0223 | 0.0059  | 0.0021 | 5 |
| rs6424664 | 1 | 78047092 | T | G | -0.0175 | 0.0086 | -0.0163 | 0.0122 | -0.0003 | 0.0337 | -0.0284 | 0.0223 | 0.0064  | 0.0021 | 5 |
| rs6424666 | 1 | 78049187 | T | A | -0.0120 | 0.0142 | -0.0063 | 0.0202 | -0.0652 | 0.0588 | -0.0624 | 0.0372 | 0.0077  | 0.0032 | 5 |
| rs6424668 | 1 | 78050768 | A | G | -0.0168 | 0.0082 | -0.0164 | 0.0116 | -0.0053 | 0.0322 | -0.0286 | 0.0210 | 0.0063  | 0.0019 | 5 |
| rs6424716 | 1 | 78160358 | G | A | 0.0040  | 0.0056 | -0.0154 | 0.0081 | -0.0348 | 0.0244 | -0.0321 | 0.0127 | -0.0012 | 0.0011 | 5 |
| rs6424717 | 1 | 78160366 | T | C | 0.0040  | 0.0056 | -0.0154 | 0.0081 | -0.0347 | 0.0244 | -0.0307 | 0.0127 | -0.0012 | 0.0011 | 5 |
| rs6424761 | 1 | 78270386 | A | G | -0.0008 | 0.0056 | 0.0035  | 0.0080 | -0.0262 | 0.0226 | 0.0088  | 0.0142 | -0.0019 | 0.0013 | 5 |
| rs6424763 | 1 | 78305021 | C | A | -0.0044 | 0.0049 | 0.0161  | 0.0069 | 0.0208  | 0.0192 | 0.0022  | 0.0120 | 0.0024  | 0.0011 | 5 |
| rs6424764 | 1 | 78313583 | C | T | -0.0006 | 0.0047 | -0.0163 | 0.0067 | -0.0658 | 0.0187 | -0.0021 | 0.0117 | -0.0017 | 0.0010 | 5 |
| rs6424765 | 1 | 78340510 | G | A | -0.0011 | 0.0053 | -0.0038 | 0.0075 | -0.0189 | 0.0211 | 0.0053  | 0.0131 | -0.0014 | 0.0012 | 5 |
| rs6424770 | 1 | 78374241 | A | G | -0.0080 | 0.0050 | -0.0007 | 0.0073 | -0.0323 | 0.0209 | -0.0066 | 0.0124 | -0.0002 | 0.0011 | 5 |
| rs6424771 | 1 | 78379901 | C | T | 0.0066  | 0.0052 | 0.0172  | 0.0076 | 0.0633  | 0.0218 | 0.0259  | 0.0130 | -0.0005 | 0.0011 | 5 |
| rs643512  | 1 | 78088596 | C | A | 0.0157  | 0.0055 | -0.0083 | 0.0077 | -0.0302 | 0.0218 | -0.0277 | 0.0135 | -0.0016 | 0.0012 | 5 |
| rs644224  | 1 | 78248813 | C | T | 0.0025  | 0.0060 | -0.0027 | 0.0085 | -0.0066 | 0.0234 | -0.0199 | 0.0148 | 0.0024  | 0.0013 | 5 |
| rs644332  | 1 | 78169314 | G | A | 0.0085  | 0.0060 | -0.0166 | 0.0084 | -0.0358 | 0.0236 | -0.0317 | 0.0148 | -0.0030 | 0.0013 | 5 |
| rs644359  | 1 | 78141667 | C | G | 0.0085  | 0.0057 | -0.0147 | 0.0080 | -0.0479 | 0.0226 | -0.0309 | 0.0140 | -0.0015 | 0.0013 | 5 |
| rs644643  | 1 | 78184099 | G | C | 0.0083  | 0.0083 | -0.0029 | 0.0128 | -0.0184 | 0.0358 | -0.0322 | 0.0148 | -0.0028 | 0.0013 | 5 |
| rs646012  | 1 | 78446521 | A | C | 0.0065  | 0.0051 | 0.0177  | 0.0073 | 0.0915  | 0.0205 | 0.0311  | 0.0130 | -0.0006 | 0.0012 | 5 |
| rs646971  | 1 | 78231137 | T | C | 0.0101  | 0.0058 | -0.0118 | 0.0082 | -0.0233 | 0.0230 | -0.0272 | 0.0144 | -0.0030 | 0.0013 | 5 |
| rs647400  | 1 | 78183462 | A | G | 0.0077  | 0.0060 | -0.0179 | 0.0086 | -0.0472 | 0.0251 | -0.0301 | 0.0148 | -0.0030 | 0.0013 | 5 |
| rs647809  | 1 | 78195787 | T | G | 0.0075  | 0.0065 | -0.0235 | 0.0095 | -0.0319 | 0.0284 | -0.0288 | 0.0150 | -0.0030 | 0.0013 | 5 |
| rs648315  | 1 | 78224005 | T | G | 0.0115  | 0.0057 | -0.0114 | 0.0081 | -0.0270 | 0.0227 | -0.0270 | 0.0142 | -0.0029 | 0.0013 | 5 |
| rs648572  | 1 | 78436345 | A | G | 0.0067  | 0.0051 | 0.0172  | 0.0073 | 0.0908  | 0.0205 | 0.0314  | 0.0130 | -0.0005 | 0.0011 | 5 |
| rs649502  | 1 | 78196099 | G | A | 0.0025  | 0.0051 | -0.0103 | 0.0075 | -0.0459 | 0.0212 | -0.0280 | 0.0124 | -0.0011 | 0.0011 | 5 |
| rs650495  | 1 | 78125074 | A | G | 0.0114  | 0.0058 | -0.0124 | 0.0082 | -0.0556 | 0.0231 | -0.0261 | 0.0142 | -0.0017 | 0.0013 | 5 |
| rs651313  | 1 | 78436931 | T | G | 0.0069  | 0.0056 | 0.0133  | 0.0077 | 0.0937  | 0.0221 | 0.0254  | 0.0128 | -0.0005 | 0.0011 | 5 |
| rs651413  | 1 | 78129697 | G | T | 0.0039  | 0.0055 | -0.0121 | 0.0078 | -0.0509 | 0.0219 | -0.0311 | 0.0136 | -0.0014 | 0.0012 | 5 |
| rs651426  | 1 | 78195786 | G | C | 0.0020  | 0.0055 | -0.0153 | 0.0080 | -0.0480 | 0.0240 | -0.0276 | 0.0125 | -0.0011 | 0.0011 | 5 |
| rs651897  | 1 | 78118793 | G | C | 0.0111  | 0.0058 | -0.0126 | 0.0082 | -0.0551 | 0.0232 | -0.0260 | 0.0142 | -0.0017 | 0.0013 | 5 |
| rs653899  | 1 | 78191011 | A | G | 0.0020  | 0.0049 | -0.0109 | 0.0070 | -0.0578 | 0.0195 | -0.0375 | 0.0122 | -0.0010 | 0.0011 | 5 |
| rs654185  | 1 | 78060973 | T | A | 0.0133  | 0.0054 | -0.0097 | 0.0077 | -0.0317 | 0.0217 | -0.0256 | 0.0134 | -0.0016 | 0.0012 | 5 |

|            |   |          |   |   |         |        |         |        |         |        |         |        |         |        |   |
|------------|---|----------|---|---|---------|--------|---------|--------|---------|--------|---------|--------|---------|--------|---|
| rs656372   | 1 | 78145861 | A | T | 0.0079  | 0.0056 | -0.0173 | 0.0079 | -0.0528 | 0.0223 | -0.0292 | 0.0139 | -0.0016 | 0.0013 | 5 |
| rs657954   | 1 | 78082727 | G | A | 0.0146  | 0.0055 | -0.0095 | 0.0077 | -0.0285 | 0.0217 | -0.0262 | 0.0134 | -0.0015 | 0.0012 | 5 |
| rs658212   | 1 | 78146321 | A | C | 0.0079  | 0.0056 | -0.0174 | 0.0079 | -0.0528 | 0.0223 | -0.0295 | 0.0139 | -0.0016 | 0.0013 | 5 |
| rs658377   | 1 | 78222499 | A | G | 0.0076  | 0.0050 | -0.0085 | 0.0071 | -0.0286 | 0.0198 | -0.0356 | 0.0125 | -0.0010 | 0.0011 | 5 |
| rs658780   | 1 | 78090244 | G | T | 0.0156  | 0.0055 | -0.0082 | 0.0077 | -0.0301 | 0.0218 | -0.0284 | 0.0136 | -0.0016 | 0.0012 | 5 |
| rs659251   | 1 | 78140992 | T | C | 0.0085  | 0.0057 | -0.0141 | 0.0080 | -0.0484 | 0.0225 | -0.0320 | 0.0139 | -0.0015 | 0.0013 | 5 |
| rs659902   | 1 | 78179952 | C | A | 0.0086  | 0.0060 | -0.0165 | 0.0084 | -0.0375 | 0.0236 | -0.0306 | 0.0148 | -0.0030 | 0.0013 | 5 |
| rs6603950  | 1 | 77472402 | G | A | 0.0042  | 0.0048 | 0.0091  | 0.0071 | 0.0387  | 0.0201 | 0.0487  | 0.0117 | 0.0021  | 0.0010 | 5 |
| rs6603951  | 1 | 77523200 | T | C | -0.0060 | 0.0051 | -0.0055 | 0.0074 | -0.0176 | 0.0208 | -0.0057 | 0.0124 | 0.0020  | 0.0011 | 5 |
| rs6603952  | 1 | 77526676 | C | T | -0.0154 | 0.0056 | -0.0171 | 0.0082 | -0.0019 | 0.0228 | -0.0341 | 0.0136 | 0.0009  | 0.0012 | 5 |
| rs6603953  | 1 | 77540946 | A | G | -0.0141 | 0.0058 | -0.0173 | 0.0084 | -0.0034 | 0.0234 | -0.0406 | 0.0139 | 0.0010  | 0.0013 | 5 |
| rs6603955  | 1 | 77571289 | T | A | -0.0140 | 0.0062 | -0.0145 | 0.0093 | -0.0026 | 0.0239 | -0.0305 | 0.0138 | 0.0014  | 0.0013 | 5 |
| rs6603956  | 1 | 77617450 | C | T | -0.0134 | 0.0054 | -0.0138 | 0.0076 | -0.0230 | 0.0210 | -0.0287 | 0.0132 | 0.0009  | 0.0012 | 5 |
| rs6603957  | 1 | 77672197 | T | C | -0.0156 | 0.0146 | 0.0094  | 0.0206 | -0.0583 | 0.0571 | 0.0121  | 0.0319 | -0.0044 | 0.0032 | 5 |
| rs6603958  | 1 | 77713291 | A | T | -0.0141 | 0.0052 | -0.0116 | 0.0074 | -0.0287 | 0.0204 | -0.0239 | 0.0128 | 0.0003  | 0.0012 | 5 |
| rs6603960  | 1 | 77747749 | T | A | -0.0137 | 0.0052 | -0.0110 | 0.0074 | -0.0276 | 0.0204 | -0.0246 | 0.0128 | 0.0004  | 0.0012 | 5 |
| rs6604877  | 1 | 77823360 | A | G | -0.0113 | 0.0158 | -0.0003 | 0.0232 | -0.0490 | 0.0588 | 0.0138  | 0.0324 | -0.0042 | 0.0032 | 5 |
| rs6604878  | 1 | 77840098 | T | G | -0.0152 | 0.0060 | -0.0068 | 0.0088 | -0.0439 | 0.0248 | -0.0296 | 0.0149 | 0.0011  | 0.0014 | 5 |
| rs661038   | 1 | 78077147 | A | C | -0.0173 | 0.0086 | -0.0104 | 0.0121 | -0.0001 | 0.0336 | -0.0271 | 0.0223 | 0.0069  | 0.0020 | 5 |
| rs661136   | 1 | 78137699 | G | A | -0.0050 | 0.0064 | -0.0063 | 0.0091 | -0.0713 | 0.0253 | -0.0295 | 0.0157 | -0.0003 | 0.0014 | 5 |
| rs661630   | 1 | 78247300 | A | G | 0.0100  | 0.0058 | -0.0159 | 0.0085 | -0.0154 | 0.0241 | -0.0245 | 0.0143 | -0.0031 | 0.0013 | 5 |
| rs661844   | 1 | 78117944 | G | T | 0.0067  | 0.0069 | -0.0134 | 0.0098 | -0.0450 | 0.0257 | -0.0258 | 0.0142 | -0.0017 | 0.0013 | 5 |
| rs662330   | 1 | 78089422 | T | A | -0.0170 | 0.0086 | -0.0104 | 0.0121 | 0.0006  | 0.0337 | -0.0238 | 0.0226 | 0.0066  | 0.0020 | 5 |
| rs663254   | 1 | 78137257 | T | C | 0.0083  | 0.0057 | -0.0136 | 0.0080 | -0.0477 | 0.0225 | -0.0288 | 0.0140 | -0.0013 | 0.0013 | 5 |
| rs663934   | 1 | 78416042 | C | A | 0.0071  | 0.0052 | 0.0170  | 0.0076 | 0.0637  | 0.0218 | 0.0253  | 0.0129 | -0.0004 | 0.0011 | 5 |
| rs664448   | 1 | 78094041 | C | G | 0.0155  | 0.0055 | -0.0084 | 0.0077 | -0.0310 | 0.0218 | -0.0275 | 0.0136 | -0.0016 | 0.0012 | 5 |
| rs664818   | 1 | 78061813 | T | C | -0.0177 | 0.0086 | -0.0103 | 0.0121 | -0.0015 | 0.0337 | -0.0268 | 0.0223 | 0.0068  | 0.0020 | 5 |
| rs66538606 | 1 | 77482045 | A | G | 0.0067  | 0.0062 | 0.0124  | 0.0088 | 0.0357  | 0.0245 | -0.0068 | 0.0155 | 0.0014  | 0.0013 | 5 |
| rs6656584  | 1 | 78255554 | G | A | -0.0044 | 0.0049 | -0.0044 | 0.0069 | -0.0352 | 0.0195 | -0.0041 | 0.0122 | -0.0003 | 0.0011 | 5 |
| rs6656888  | 1 | 78015361 | A | G | -0.0161 | 0.0086 | -0.0141 | 0.0121 | -0.0030 | 0.0335 | -0.0313 | 0.0222 | 0.0060  | 0.0021 | 5 |
| rs6657253  | 1 | 78346651 | G | A | 0.0021  | 0.0051 | 0.0150  | 0.0074 | 0.0279  | 0.0210 | 0.0116  | 0.0124 | 0.0008  | 0.0011 | 5 |
| rs6657290  | 1 | 77620269 | C | G | -0.0132 | 0.0054 | -0.0135 | 0.0076 | -0.0225 | 0.0210 | -0.0286 | 0.0132 | 0.0010  | 0.0012 | 5 |
| rs6658252  | 1 | 78280892 | C | T | -0.0004 | 0.0056 | 0.0022  | 0.0079 | -0.0236 | 0.0223 | 0.0083  | 0.0141 | -0.0017 | 0.0012 | 5 |
| rs6659045  | 1 | 77862390 | A | T | -0.0161 | 0.0080 | -0.0067 | 0.0114 | 0.0258  | 0.0320 | -0.0283 | 0.0202 | 0.0045  | 0.0019 | 5 |
| rs6659285  | 1 | 77674127 | G | A | -0.0159 | 0.0146 | 0.0095  | 0.0206 | -0.0553 | 0.0572 | 0.0141  | 0.0324 | -0.0044 | 0.0032 | 5 |
| rs6661656  | 1 | 77649299 | C | T | -0.0143 | 0.0052 | -0.0116 | 0.0074 | -0.0296 | 0.0204 | -0.0243 | 0.0128 | 0.0003  | 0.0012 | 5 |
| rs6662245  | 1 | 77619754 | C | T | -0.0164 | 0.0146 | 0.0092  | 0.0206 | -0.0526 | 0.0573 | 0.0149  | 0.0324 | -0.0044 | 0.0032 | 5 |
| rs6664497  | 1 | 77480620 | C | A | -0.0164 | 0.0199 | -0.0190 | 0.0268 | 0.0027  | 0.0724 | 0.0086  | 0.0445 | -0.0038 | 0.0044 | 5 |
| rs6665090  | 1 | 78222972 | A | G | 0.0110  | 0.0059 | -0.0115 | 0.0083 | -0.0197 | 0.0234 | -0.0222 | 0.0147 | -0.0027 | 0.0013 | 5 |
| rs6665476  | 1 | 78313235 | G | T | 0.0069  | 0.0068 | -0.0285 | 0.0095 | -0.0704 | 0.0265 | 0.0091  | 0.0164 | -0.0025 | 0.0016 | 5 |
| rs6666107  | 1 | 77837990 | T | C | -0.0156 | 0.0153 | 0.0143  | 0.0215 | -0.0488 | 0.0588 | 0.0044  | 0.0332 | -0.0042 | 0.0033 | 5 |
| rs6666647  | 1 | 78115106 | T | C | -0.0008 | 0.0049 | 0.0101  | 0.0071 | 0.0730  | 0.0202 | 0.0487  | 0.0119 | 0.0017  | 0.0011 | 5 |
| rs6666954  | 1 | 78112493 | C | T | 0.0039  | 0.0054 | -0.0118 | 0.0076 | -0.0763 | 0.0213 | -0.0242 | 0.0131 | -0.0024 | 0.0012 | 5 |
| rs6667519  | 1 | 77558068 | C | T | -0.0140 | 0.0058 | -0.0113 | 0.0084 | 0.0025  | 0.0234 | -0.0392 | 0.0138 | 0.0009  | 0.0013 | 5 |
| rs6667733  | 1 | 77849220 | C | T | -0.0179 | 0.0078 | -0.0072 | 0.0114 | 0.0243  | 0.0320 | -0.0270 | 0.0199 | 0.0044  | 0.0019 | 5 |
| rs6667803  | 1 | 77546431 | A | G | -0.0129 | 0.0056 | -0.0139 | 0.0082 | -0.0084 | 0.0228 | -0.0418 | 0.0135 | 0.0009  | 0.0012 | 5 |

|           |   |          |   |   |         |        |         |        |         |        |         |        |         |        |   |
|-----------|---|----------|---|---|---------|--------|---------|--------|---------|--------|---------|--------|---------|--------|---|
| rs666897  | 1 | 78236744 | T | C | 0.0100  | 0.0058 | -0.0119 | 0.0082 | -0.0231 | 0.0230 | -0.0269 | 0.0144 | -0.0031 | 0.0013 | 5 |
| rs6669039 | 1 | 78056081 | A | C | 0.0099  | 0.0052 | -0.0073 | 0.0074 | -0.0328 | 0.0208 | -0.0237 | 0.0130 | -0.0014 | 0.0012 | 5 |
| rs666995  | 1 | 78069515 | T | C | 0.0145  | 0.0055 | -0.0100 | 0.0077 | -0.0281 | 0.0217 | -0.0254 | 0.0134 | -0.0015 | 0.0012 | 5 |
| rs6670364 | 1 | 78295769 | A | G | -0.0085 | 0.0069 | -0.0130 | 0.0096 | -0.0257 | 0.0271 | -0.0253 | 0.0166 | 0.0020  | 0.0015 | 5 |
| rs6670660 | 1 | 77583013 | A | G | -0.0130 | 0.0054 | -0.0136 | 0.0076 | -0.0243 | 0.0210 | -0.0311 | 0.0132 | 0.0009  | 0.0012 | 5 |
| rs6672200 | 1 | 77760195 | T | C | -0.0127 | 0.0054 | -0.0125 | 0.0076 | -0.0206 | 0.0210 | -0.0276 | 0.0132 | 0.0009  | 0.0012 | 5 |
| rs6672484 | 1 | 78327963 | T | C | -0.0013 | 0.0053 | -0.0039 | 0.0075 | -0.0204 | 0.0211 | 0.0056  | 0.0131 | -0.0013 | 0.0012 | 5 |
| rs6674539 | 1 | 78351767 | G | A | -0.0005 | 0.0053 | -0.0037 | 0.0075 | -0.0183 | 0.0212 | 0.0059  | 0.0133 | -0.0013 | 0.0012 | 5 |
| rs6674638 | 1 | 77629138 | A | T | -0.0135 | 0.0054 | -0.0140 | 0.0076 | -0.0231 | 0.0210 | -0.0287 | 0.0132 | 0.0010  | 0.0012 | 5 |
| rs6674790 | 1 | 77508713 | A | G | 0.0049  | 0.0056 | 0.0194  | 0.0079 | 0.0762  | 0.0221 | 0.0596  | 0.0141 | -0.0015 | 0.0013 | 5 |
| rs6675105 | 1 | 78044860 | T | G | -0.0138 | 0.0065 | -0.0068 | 0.0092 | -0.0548 | 0.0258 | -0.0229 | 0.0162 | 0.0026  | 0.0015 | 5 |
| rs6675743 | 1 | 77558599 | T | C | -0.0147 | 0.0060 | -0.0145 | 0.0087 | 0.0089  | 0.0240 | -0.0360 | 0.0142 | 0.0009  | 0.0013 | 5 |
| rs6677011 | 1 | 77661408 | A | C | -0.0044 | 0.0167 | 0.0175  | 0.0243 | -0.0328 | 0.0617 | 0.0146  | 0.0324 | -0.0044 | 0.0032 | 5 |
| rs6677734 | 1 | 78351759 | C | T | -0.0005 | 0.0053 | -0.0040 | 0.0075 | -0.0182 | 0.0212 | 0.0059  | 0.0133 | -0.0013 | 0.0012 | 5 |
| rs6677890 | 1 | 78051091 | T | G | -0.0173 | 0.0082 | -0.0158 | 0.0116 | -0.0042 | 0.0322 | -0.0255 | 0.0213 | 0.0064  | 0.0019 | 5 |
| rs6678173 | 1 | 77561398 | T | C | -0.0174 | 0.0149 | 0.0140  | 0.0210 | -0.0537 | 0.0585 | 0.0152  | 0.0326 | -0.0047 | 0.0033 | 5 |
| rs6678622 | 1 | 77626794 | T | C | 0.0040  | 0.0048 | 0.0227  | 0.0068 | 0.0768  | 0.0192 | 0.0419  | 0.0121 | 0.0018  | 0.0011 | 5 |
| rs6679026 | 1 | 78153828 | T | C | 0.0070  | 0.0077 | -0.0056 | 0.0109 | -0.0374 | 0.0305 | -0.0354 | 0.0193 | 0.0025  | 0.0017 | 5 |
| rs6679645 | 1 | 77838089 | G | A | -0.0162 | 0.0153 | 0.0141  | 0.0215 | -0.0534 | 0.0588 | 0.0047  | 0.0332 | -0.0043 | 0.0033 | 5 |
| rs6679941 | 1 | 78272495 | C | G | 0.0010  | 0.0057 | 0.0022  | 0.0080 | -0.0225 | 0.0227 | 0.0016  | 0.0143 | -0.0017 | 0.0013 | 5 |
| rs6680447 | 1 | 78027105 | T | C | -0.0135 | 0.0061 | -0.0104 | 0.0087 | -0.0658 | 0.0242 | -0.0285 | 0.0152 | 0.0014  | 0.0014 | 5 |
| rs6680677 | 1 | 77489892 | T | G | 0.0011  | 0.0057 | 0.0105  | 0.0081 | 0.0106  | 0.0224 | -0.0040 | 0.0139 | 0.0003  | 0.0012 | 5 |
| rs6681088 | 1 | 78322591 | C | T | -0.0002 | 0.0047 | -0.0168 | 0.0067 | -0.0669 | 0.0187 | -0.0012 | 0.0117 | -0.0017 | 0.0010 | 5 |
| rs6682319 | 1 | 78158382 | G | A | -0.0223 | 0.0115 | 0.0195  | 0.0163 | -0.0723 | 0.0456 | 0.0133  | 0.0276 | -0.0017 | 0.0028 | 5 |
| rs6684022 | 1 | 77487775 | C | T | 0.0035  | 0.0058 | 0.0137  | 0.0083 | 0.0143  | 0.0231 | -0.0059 | 0.0143 | 0.0005  | 0.0012 | 5 |
| rs6684364 | 1 | 78108445 | A | G | 0.0073  | 0.0056 | -0.0110 | 0.0078 | -0.0636 | 0.0220 | -0.0280 | 0.0134 | -0.0025 | 0.0012 | 5 |
| rs6685021 | 1 | 78276501 | T | C | -0.0004 | 0.0056 | 0.0020  | 0.0079 | -0.0220 | 0.0223 | 0.0071  | 0.0141 | -0.0016 | 0.0012 | 5 |
| rs6685682 | 1 | 78331344 | T | C | -0.0042 | 0.0060 | -0.0091 | 0.0085 | -0.0094 | 0.0250 | 0.0052  | 0.0131 | -0.0014 | 0.0012 | 5 |
| rs6686230 | 1 | 78031012 | C | T | -0.0161 | 0.0086 | -0.0137 | 0.0121 | -0.0062 | 0.0335 | -0.0315 | 0.0213 | 0.0059  | 0.0021 | 5 |
| rs6686829 | 1 | 78033922 | A | G | -0.0118 | 0.0152 | 0.0185  | 0.0214 | -0.0687 | 0.0590 | -0.0014 | 0.0334 | -0.0039 | 0.0033 | 5 |
| rs6687501 | 1 | 77737834 | A | G | -0.0141 | 0.0052 | -0.0111 | 0.0074 | -0.0283 | 0.0204 | -0.0240 | 0.0128 | 0.0003  | 0.0012 | 5 |
| rs6687596 | 1 | 77768009 | A | G | -0.0124 | 0.0055 | -0.0108 | 0.0078 | -0.0169 | 0.0214 | -0.0292 | 0.0134 | 0.0013  | 0.0012 | 5 |
| rs668766  | 1 | 78120284 | G | A | 0.0064  | 0.0056 | -0.0103 | 0.0079 | -0.0599 | 0.0223 | -0.0280 | 0.0138 | -0.0021 | 0.0012 | 5 |
| rs6688346 | 1 | 78071634 | T | C | 0.0145  | 0.0055 | -0.0100 | 0.0077 | -0.0280 | 0.0217 | -0.0255 | 0.0134 | -0.0015 | 0.0012 | 5 |
| rs6689365 | 1 | 78336291 | G | A | -0.0011 | 0.0052 | 0.0124  | 0.0076 | 0.0219  | 0.0215 | 0.0076  | 0.0125 | 0.0016  | 0.0011 | 5 |
| rs6689438 | 1 | 77962509 | C | T | -0.0151 | 0.0220 | -0.0326 | 0.0309 | -0.1026 | 0.0846 | -0.1000 | 0.0510 | -0.0048 | 0.0049 | 5 |
| rs6690132 | 1 | 78205344 | C | T | -0.0154 | 0.0159 | 0.0139  | 0.0222 | -0.0644 | 0.0623 | 0.0092  | 0.0353 | -0.0008 | 0.0036 | 5 |
| rs6691317 | 1 | 77573213 | G | A | -0.0132 | 0.0055 | -0.0155 | 0.0080 | -0.0168 | 0.0223 | -0.0307 | 0.0132 | 0.0009  | 0.0012 | 5 |
| rs6692369 | 1 | 77539494 | A | G | -0.0139 | 0.0055 | -0.0151 | 0.0080 | -0.0116 | 0.0225 | -0.0415 | 0.0133 | 0.0006  | 0.0012 | 5 |
| rs6692552 | 1 | 78311573 | A | G | -0.0015 | 0.0053 | -0.0037 | 0.0075 | -0.0187 | 0.0211 | 0.0028  | 0.0131 | -0.0013 | 0.0012 | 5 |
| rs6692779 | 1 | 78311816 | A | G | -0.0013 | 0.0058 | -0.0082 | 0.0085 | -0.0118 | 0.0255 | 0.0029  | 0.0131 | -0.0013 | 0.0012 | 5 |
| rs6693100 | 1 | 77709337 | C | T | -0.0120 | 0.0057 | -0.0129 | 0.0080 | -0.0087 | 0.0220 | -0.0273 | 0.0138 | 0.0014  | 0.0013 | 5 |
| rs669357  | 1 | 78225925 | A | T | 0.0074  | 0.0050 | -0.0077 | 0.0071 | -0.0269 | 0.0198 | -0.0358 | 0.0124 | -0.0009 | 0.0011 | 5 |
| rs6694656 | 1 | 78174156 | A | C | -0.0132 | 0.0162 | 0.0116  | 0.0234 | -0.0520 | 0.0655 | 0.0102  | 0.0353 | -0.0006 | 0.0036 | 5 |
| rs6695572 | 1 | 77479950 | A | G | 0.0057  | 0.0059 | 0.0155  | 0.0084 | 0.0945  | 0.0234 | 0.0806  | 0.0154 | -0.0010 | 0.0013 | 5 |
| rs6695986 | 1 | 77848395 | A | G | -0.0161 | 0.0060 | -0.0066 | 0.0087 | -0.0361 | 0.0247 | -0.0293 | 0.0149 | 0.0013  | 0.0014 | 5 |

|            |   |          |   |   |         |        |         |        |         |        |         |        |         |        |   |
|------------|---|----------|---|---|---------|--------|---------|--------|---------|--------|---------|--------|---------|--------|---|
| rs6695989  | 1 | 77540655 | A | G | -0.0135 | 0.0055 | -0.0149 | 0.0080 | -0.0116 | 0.0225 | -0.0408 | 0.0133 | 0.0006  | 0.0012 | 5 |
| rs6696083  | 1 | 77540805 | A | G | -0.0144 | 0.0057 | -0.0177 | 0.0082 | -0.0066 | 0.0229 | -0.0368 | 0.0136 | 0.0007  | 0.0012 | 5 |
| rs6696390  | 1 | 78308394 | G | A | -0.0016 | 0.0053 | -0.0040 | 0.0075 | -0.0203 | 0.0211 | 0.0022  | 0.0131 | -0.0013 | 0.0012 | 5 |
| rs6697214  | 1 | 78309165 | G | A | 0.0011  | 0.0051 | 0.0147  | 0.0072 | 0.0394  | 0.0200 | 0.0111  | 0.0125 | 0.0017  | 0.0011 | 5 |
| rs6697255  | 1 | 77494455 | C | T | -0.0027 | 0.0048 | -0.0102 | 0.0068 | -0.0564 | 0.0190 | -0.0456 | 0.0118 | -0.0016 | 0.0011 | 5 |
| rs669764   | 1 | 78225976 | T | C | 0.0078  | 0.0050 | -0.0076 | 0.0071 | -0.0277 | 0.0198 | -0.0370 | 0.0124 | -0.0009 | 0.0011 | 5 |
| rs6698151  | 1 | 77572924 | C | T | -0.0132 | 0.0055 | -0.0157 | 0.0080 | -0.0166 | 0.0223 | -0.0316 | 0.0132 | 0.0009  | 0.0012 | 5 |
| rs6698295  | 1 | 77480280 | A | G | 0.0057  | 0.0059 | 0.0157  | 0.0084 | 0.0947  | 0.0234 | 0.0805  | 0.0154 | -0.0010 | 0.0013 | 5 |
| rs6699205  | 1 | 77636648 | A | G | -0.0146 | 0.0052 | -0.0120 | 0.0074 | -0.0303 | 0.0204 | -0.0226 | 0.0128 | 0.0003  | 0.0012 | 5 |
| rs6699311  | 1 | 77636741 | A | G | -0.0144 | 0.0052 | -0.0119 | 0.0074 | -0.0298 | 0.0204 | -0.0252 | 0.0128 | 0.0003  | 0.0012 | 5 |
| rs6699513  | 1 | 78034708 | C | T | -0.0132 | 0.0063 | -0.0086 | 0.0089 | -0.0594 | 0.0249 | -0.0313 | 0.0156 | 0.0019  | 0.0015 | 5 |
| rs6699769  | 1 | 78038580 | G | A | 0.0124  | 0.0060 | -0.0085 | 0.0087 | -0.0232 | 0.0250 | -0.0148 | 0.0146 | -0.0023 | 0.0013 | 5 |
| rs6700924  | 1 | 77817298 | A | G | -0.0098 | 0.0078 | -0.0061 | 0.0112 | -0.0144 | 0.0301 | -0.0308 | 0.0188 | 0.0005  | 0.0017 | 5 |
| rs6701361  | 1 | 77737427 | G | A | -0.0148 | 0.0146 | 0.0083  | 0.0206 | -0.0519 | 0.0572 | 0.0118  | 0.0324 | -0.0043 | 0.0032 | 5 |
| rs6702465  | 1 | 78011059 | C | A | -0.0117 | 0.0067 | -0.0126 | 0.0095 | -0.0552 | 0.0266 | -0.0273 | 0.0171 | 0.0032  | 0.0016 | 5 |
| rs6702939  | 1 | 78038727 | G | T | 0.0094  | 0.0053 | -0.0074 | 0.0075 | -0.0203 | 0.0211 | -0.0201 | 0.0131 | -0.0012 | 0.0012 | 5 |
| rs67045981 | 1 | 77475153 | C | A | 0.0062  | 0.0067 | 0.0146  | 0.0095 | 0.0580  | 0.0280 | -0.0086 | 0.0155 | 0.0014  | 0.0013 | 5 |
| rs671229   | 1 | 78221897 | G | T | 0.0076  | 0.0050 | -0.0085 | 0.0071 | -0.0297 | 0.0198 | -0.0361 | 0.0125 | -0.0009 | 0.0011 | 5 |
| rs672391   | 1 | 78143627 | C | T | 0.0082  | 0.0056 | -0.0173 | 0.0079 | -0.0513 | 0.0223 | -0.0295 | 0.0139 | -0.0016 | 0.0013 | 5 |
| rs672620   | 1 | 78218474 | A | G | 0.0074  | 0.0050 | -0.0087 | 0.0071 | -0.0317 | 0.0198 | -0.0364 | 0.0125 | -0.0009 | 0.0011 | 5 |
| rs674271   | 1 | 78246718 | C | A | 0.0014  | 0.0060 | -0.0030 | 0.0085 | -0.0060 | 0.0235 | -0.0206 | 0.0148 | 0.0025  | 0.0013 | 5 |
| rs674345   | 1 | 78429249 | T | C | 0.0023  | 0.0049 | -0.0150 | 0.0070 | -0.0476 | 0.0195 | -0.0196 | 0.0122 | 0.0006  | 0.0011 | 5 |
| rs674933   | 1 | 78139733 | G | A | 0.0067  | 0.0062 | -0.0132 | 0.0085 | -0.0318 | 0.0246 | -0.0312 | 0.0139 | -0.0015 | 0.0013 | 5 |
| rs675799   | 1 | 78172857 | G | C | 0.0087  | 0.0060 | -0.0165 | 0.0084 | -0.0372 | 0.0236 | -0.0308 | 0.0148 | -0.0030 | 0.0013 | 5 |
| rs677640   | 1 | 78088283 | G | A | 0.0156  | 0.0055 | -0.0083 | 0.0077 | -0.0299 | 0.0218 | -0.0277 | 0.0135 | -0.0016 | 0.0012 | 5 |
| rs677875   | 1 | 78204602 | C | G | 0.0091  | 0.0060 | -0.0157 | 0.0084 | -0.0379 | 0.0236 | -0.0288 | 0.0148 | -0.0031 | 0.0013 | 5 |
| rs678443   | 1 | 78423573 | C | A | 0.0069  | 0.0051 | 0.0175  | 0.0073 | 0.0902  | 0.0205 | 0.0314  | 0.0130 | -0.0005 | 0.0011 | 5 |
| rs679843   | 1 | 78241809 | T | C | 0.0053  | 0.0057 | -0.0143 | 0.0083 | -0.0220 | 0.0237 | -0.0216 | 0.0141 | -0.0026 | 0.0013 | 5 |
| rs680143   | 1 | 78198376 | G | C | 0.0022  | 0.0051 | -0.0110 | 0.0075 | -0.0469 | 0.0212 | -0.0280 | 0.0124 | -0.0011 | 0.0011 | 5 |
| rs680971   | 1 | 78198512 | A | G | 0.0090  | 0.0060 | -0.0156 | 0.0084 | -0.0357 | 0.0236 | -0.0290 | 0.0148 | -0.0031 | 0.0013 | 5 |
| rs68190628 | 1 | 78418981 | G | A | -0.0020 | 0.0066 | 0.0041  | 0.0094 | 0.0040  | 0.0267 | 0.0020  | 0.0176 | -0.0032 | 0.0015 | 5 |
| rs681907   | 1 | 78226329 | C | T | 0.0108  | 0.0058 | -0.0113 | 0.0082 | -0.0240 | 0.0231 | -0.0249 | 0.0145 | -0.0028 | 0.0013 | 5 |
| rs683097   | 1 | 78201306 | G | T | 0.0089  | 0.0060 | -0.0156 | 0.0084 | -0.0358 | 0.0236 | -0.0287 | 0.0148 | -0.0031 | 0.0013 | 5 |
| rs684236   | 1 | 78209547 | G | A | 0.0021  | 0.0049 | -0.0109 | 0.0070 | -0.0589 | 0.0196 | -0.0356 | 0.0124 | -0.0011 | 0.0011 | 5 |
| rs684579   | 1 | 78074554 | G | A | -0.0173 | 0.0086 | -0.0101 | 0.0121 | 0.0000  | 0.0336 | -0.0275 | 0.0223 | 0.0068  | 0.0020 | 5 |
| rs684657   | 1 | 78148496 | G | A | 0.0014  | 0.0053 | -0.0133 | 0.0075 | -0.0627 | 0.0210 | -0.0239 | 0.0131 | -0.0025 | 0.0012 | 5 |
| rs684996   | 1 | 78200870 | C | T | 0.0090  | 0.0060 | -0.0156 | 0.0084 | -0.0356 | 0.0236 | -0.0287 | 0.0148 | -0.0031 | 0.0013 | 5 |
| rs685393   | 1 | 78113677 | C | T | 0.0112  | 0.0058 | -0.0123 | 0.0082 | -0.0558 | 0.0232 | -0.0258 | 0.0142 | -0.0017 | 0.0013 | 5 |
| rs685848   | 1 | 78113798 | C | T | 0.0112  | 0.0058 | -0.0123 | 0.0082 | -0.0558 | 0.0232 | -0.0233 | 0.0141 | -0.0017 | 0.0013 | 5 |
| rs686716   | 1 | 78081984 | G | T | 0.0145  | 0.0055 | -0.0097 | 0.0077 | -0.0285 | 0.0217 | -0.0263 | 0.0134 | -0.0015 | 0.0012 | 5 |
| rs687708   | 1 | 78134122 | A | C | 0.0083  | 0.0057 | -0.0136 | 0.0080 | -0.0476 | 0.0225 | -0.0326 | 0.0139 | -0.0013 | 0.0013 | 5 |
| rs688570   | 1 | 78179572 | G | A | 0.0007  | 0.0050 | -0.0103 | 0.0071 | -0.0576 | 0.0199 | -0.0293 | 0.0124 | -0.0010 | 0.0011 | 5 |
| rs689294   | 1 | 78430284 | C | T | 0.0087  | 0.0051 | 0.0159  | 0.0072 | 0.0876  | 0.0201 | 0.0264  | 0.0128 | -0.0005 | 0.0011 | 5 |
| rs689374   | 1 | 78173560 | C | T | 0.0020  | 0.0049 | -0.0111 | 0.0070 | -0.0597 | 0.0195 | -0.0386 | 0.0122 | -0.0011 | 0.0011 | 5 |
| rs693127   | 1 | 78076730 | T | G | -0.0113 | 0.0138 | 0.0009  | 0.0195 | -0.0885 | 0.0564 | -0.0671 | 0.0372 | 0.0079  | 0.0032 | 5 |
| rs699009   | 1 | 78149230 | G | A | 0.0079  | 0.0056 | -0.0176 | 0.0079 | -0.0515 | 0.0223 | -0.0292 | 0.0139 | -0.0016 | 0.0013 | 5 |

|            |   |          |   |   |         |        |         |        |         |        |         |        |         |        |   |
|------------|---|----------|---|---|---------|--------|---------|--------|---------|--------|---------|--------|---------|--------|---|
| rs699010   | 1 | 78149202 | T | C | -0.0063 | 0.0062 | -0.0045 | 0.0087 | -0.0705 | 0.0244 | -0.0235 | 0.0151 | 0.0006  | 0.0014 | 5 |
| rs71641308 | 1 | 77621033 | T | C | 0.0280  | 0.0090 | 0.0478  | 0.0131 | 0.1613  | 0.0380 | 0.1302  | 0.0262 | -0.0010 | 0.0020 | 5 |
| rs71641319 | 1 | 78037135 | T | C | 0.0136  | 0.0184 | 0.0159  | 0.0272 | 0.1193  | 0.0758 | -0.0098 | 0.0454 | 0.0054  | 0.0039 | 5 |
| rs71641320 | 1 | 78055629 | C | T | 0.0128  | 0.0186 | 0.0201  | 0.0272 | 0.1372  | 0.0750 | -0.0064 | 0.0472 | 0.0052  | 0.0039 | 5 |
| rs71641321 | 1 | 78074802 | G | T | 0.0131  | 0.0182 | 0.0177  | 0.0265 | 0.1281  | 0.0734 | -0.0055 | 0.0465 | 0.0040  | 0.0038 | 5 |
| rs71641331 | 1 | 78250137 | C | T | 0.0106  | 0.0101 | -0.0058 | 0.0144 | 0.0346  | 0.0396 | 0.0081  | 0.0249 | 0.0020  | 0.0022 | 5 |
| rs71641333 | 1 | 78277321 | A | T | 0.0320  | 0.0099 | 0.0429  | 0.0146 | 0.1328  | 0.0426 | 0.1346  | 0.0267 | -0.0021 | 0.0020 | 5 |
| rs71658797 | 1 | 77501822 | A | T | 0.0197  | 0.0073 | 0.0372  | 0.0103 | 0.1349  | 0.0289 | 0.1278  | 0.0193 | -0.0022 | 0.0016 | 5 |
| rs717333   | 1 | 77753505 | T | G | -0.0140 | 0.0052 | -0.0106 | 0.0074 | -0.0274 | 0.0204 | -0.0245 | 0.0128 | 0.0003  | 0.0012 | 5 |
| rs720579   | 1 | 78238221 | T | C | 0.0107  | 0.0059 | -0.0139 | 0.0086 | -0.0045 | 0.0245 | -0.0256 | 0.0145 | -0.0031 | 0.0013 | 5 |
| rs720887   | 1 | 78300696 | C | A | -0.0025 | 0.0048 | 0.0127  | 0.0067 | 0.0144  | 0.0188 | 0.0057  | 0.0117 | 0.0019  | 0.0011 | 5 |
| rs721179   | 1 | 78323890 | G | C | 0.0096  | 0.0109 | -0.0125 | 0.0154 | -0.0457 | 0.0431 | 0.0011  | 0.0272 | -0.0022 | 0.0027 | 5 |
| rs724159   | 1 | 78333730 | C | T | 0.0007  | 0.0051 | 0.0140  | 0.0072 | 0.0360  | 0.0200 | 0.0076  | 0.0125 | 0.0017  | 0.0011 | 5 |
| rs72672152 | 1 | 78319287 | C | G | -0.0119 | 0.0180 | 0.0248  | 0.0256 | 0.1142  | 0.0739 | 0.1005  | 0.0500 | 0.0014  | 0.0038 | 5 |
| rs72672180 | 1 | 78370415 | A | G | -0.0098 | 0.0067 | 0.0000  | 0.0093 | -0.0402 | 0.0257 | 0.0123  | 0.0168 | 0.0017  | 0.0014 | 5 |
| rs72672190 | 1 | 78399746 | A | T | -0.0057 | 0.0183 | -0.0232 | 0.0258 | 0.0178  | 0.0770 | -0.0302 | 0.0501 | -0.0062 | 0.0042 | 5 |
| rs72672199 | 1 | 78416433 | C | T | -0.0026 | 0.0106 | 0.0116  | 0.0150 | -0.0044 | 0.0423 | 0.0712  | 0.0267 | 0.0010  | 0.0022 | 5 |
| rs72681684 | 1 | 77495071 | T | C | -0.0048 | 0.0076 | -0.0141 | 0.0107 | -0.0272 | 0.0300 | 0.0012  | 0.0188 | 0.0016  | 0.0017 | 5 |
| rs72681697 | 1 | 77505397 | G | C | 0.0062  | 0.0062 | 0.0099  | 0.0088 | 0.0375  | 0.0245 | -0.0044 | 0.0156 | 0.0014  | 0.0013 | 5 |
| rs72683606 | 1 | 77524343 | C | T | -0.0021 | 0.0065 | -0.0113 | 0.0092 | -0.0109 | 0.0256 | -0.0177 | 0.0171 | 0.0023  | 0.0015 | 5 |
| rs72683613 | 1 | 77536357 | T | C | 0.0094  | 0.0182 | -0.0174 | 0.0252 | -0.1279 | 0.0732 | -0.0214 | 0.0441 | 0.0004  | 0.0037 | 5 |
| rs72683646 | 1 | 77593487 | T | A | 0.0047  | 0.0182 | -0.0180 | 0.0252 | -0.1425 | 0.0736 | -0.0241 | 0.0452 | 0.0006  | 0.0037 | 5 |
| rs72683652 | 1 | 77608672 | T | C | 0.0121  | 0.0182 | -0.0138 | 0.0252 | -0.1410 | 0.0735 | -0.0239 | 0.0452 | 0.0004  | 0.0037 | 5 |
| rs72683667 | 1 | 77640722 | T | C | -0.0038 | 0.0097 | 0.0217  | 0.0143 | 0.0291  | 0.0403 | 0.0387  | 0.0245 | 0.0003  | 0.0020 | 5 |
| rs72683670 | 1 | 77646885 | A | G | 0.0108  | 0.0183 | -0.0088 | 0.0254 | -0.1450 | 0.0738 | -0.0319 | 0.0451 | 0.0003  | 0.0037 | 5 |
| rs72683677 | 1 | 77671206 | G | A | 0.0012  | 0.0113 | -0.0123 | 0.0163 | -0.0150 | 0.0449 | -0.0164 | 0.0290 | -0.0005 | 0.0024 | 5 |
| rs72683682 | 1 | 77706984 | A | G | -0.0036 | 0.0096 | 0.0193  | 0.0142 | 0.0307  | 0.0399 | 0.0375  | 0.0246 | 0.0007  | 0.0020 | 5 |
| rs72683687 | 1 | 77726968 | C | T | -0.0053 | 0.0095 | 0.0160  | 0.0140 | 0.0313  | 0.0395 | 0.0531  | 0.0250 | 0.0006  | 0.0019 | 5 |
| rs72683688 | 1 | 77729681 | G | T | 0.0016  | 0.0103 | -0.0049 | 0.0145 | -0.0021 | 0.0388 | -0.0014 | 0.0240 | -0.0023 | 0.0019 | 5 |
| rs72683689 | 1 | 77751492 | A | C | 0.0017  | 0.0088 | -0.0180 | 0.0123 | -0.0122 | 0.0350 | 0.0006  | 0.0240 | -0.0022 | 0.0019 | 5 |
| rs72683694 | 1 | 77768607 | T | C | -0.0143 | 0.0121 | -0.0046 | 0.0169 | -0.0571 | 0.0475 | 0.0139  | 0.0282 | -0.0047 | 0.0027 | 5 |
| rs72683699 | 1 | 77777865 | G | A | -0.0146 | 0.0121 | -0.0041 | 0.0169 | -0.0569 | 0.0475 | 0.0132  | 0.0283 | -0.0048 | 0.0027 | 5 |
| rs72683701 | 1 | 77779957 | T | G | 0.0024  | 0.0123 | -0.0318 | 0.0179 | 0.0375  | 0.0522 | 0.0046  | 0.0357 | -0.0025 | 0.0027 | 5 |
| rs72685303 | 1 | 77789544 | C | A | 0.0158  | 0.0135 | -0.0032 | 0.0200 | 0.0034  | 0.0546 | -0.0065 | 0.0347 | 0.0003  | 0.0030 | 5 |
| rs72685316 | 1 | 77834001 | G | A | -0.0178 | 0.0113 | -0.0176 | 0.0158 | -0.1048 | 0.0440 | -0.0401 | 0.0287 | -0.0023 | 0.0025 | 5 |
| rs72685317 | 1 | 77840174 | T | G | -0.0110 | 0.0091 | -0.0148 | 0.0129 | -0.1101 | 0.0364 | -0.0378 | 0.0233 | -0.0012 | 0.0021 | 5 |
| rs72685329 | 1 | 77857705 | T | C | -0.0152 | 0.0175 | -0.0360 | 0.0259 | -0.1255 | 0.0737 | -0.0019 | 0.0329 | -0.0018 | 0.0028 | 5 |
| rs72685330 | 1 | 77867947 | T | C | -0.0128 | 0.0127 | -0.0142 | 0.0178 | -0.1153 | 0.0500 | -0.0092 | 0.0340 | -0.0018 | 0.0028 | 5 |
| rs72685332 | 1 | 77876294 | T | C | -0.0107 | 0.0127 | -0.0147 | 0.0178 | -0.1195 | 0.0502 | -0.0087 | 0.0337 | -0.0020 | 0.0028 | 5 |
| rs72685333 | 1 | 77876881 | G | A | -0.0112 | 0.0127 | -0.0140 | 0.0178 | -0.1178 | 0.0502 | -0.0089 | 0.0337 | -0.0019 | 0.0028 | 5 |
| rs72685335 | 1 | 77883407 | T | C | -0.0115 | 0.0127 | -0.0144 | 0.0178 | -0.1160 | 0.0502 | -0.0054 | 0.0335 | -0.0019 | 0.0028 | 5 |
| rs72685338 | 1 | 77892778 | G | A | -0.0110 | 0.0127 | -0.0147 | 0.0178 | -0.1179 | 0.0502 | -0.0037 | 0.0335 | -0.0018 | 0.0028 | 5 |
| rs72685344 | 1 | 77907369 | A | G | -0.0102 | 0.0127 | -0.0141 | 0.0178 | -0.1189 | 0.0502 | 0.0004  | 0.0331 | -0.0016 | 0.0028 | 5 |
| rs72685346 | 1 | 77916907 | T | C | -0.0104 | 0.0127 | -0.0139 | 0.0178 | -0.1197 | 0.0502 | 0.0008  | 0.0331 | -0.0016 | 0.0028 | 5 |
| rs72685349 | 1 | 77921242 | C | T | -0.0104 | 0.0127 | -0.0141 | 0.0178 | -0.1195 | 0.0502 | -0.0053 | 0.0326 | -0.0016 | 0.0028 | 5 |
| rs72685355 | 1 | 77931109 | T | C | -0.0087 | 0.0128 | -0.0129 | 0.0181 | -0.1207 | 0.0533 | 0.0008  | 0.0330 | -0.0016 | 0.0028 | 5 |

|            |   |          |   |   |         |        |         |        |         |        |         |        |         |        |   |
|------------|---|----------|---|---|---------|--------|---------|--------|---------|--------|---------|--------|---------|--------|---|
| rs72685362 | 1 | 77966407 | G | A | -0.0100 | 0.0126 | -0.0156 | 0.0177 | -0.1179 | 0.0501 | 0.0025  | 0.0329 | -0.0019 | 0.0028 | 5 |
| rs72685363 | 1 | 77970208 | G | A | -0.0149 | 0.0066 | -0.0118 | 0.0093 | -0.0477 | 0.0261 | -0.0259 | 0.0168 | 0.0027  | 0.0015 | 5 |
| rs72685364 | 1 | 77971031 | A | A | -0.0146 | 0.0071 | -0.0097 | 0.0104 | -0.0545 | 0.0267 | -0.0259 | 0.0168 | 0.0028  | 0.0015 | 5 |
| rs72685366 | 1 | 77975891 | T | C | -0.0106 | 0.0127 | -0.0154 | 0.0178 | -0.1207 | 0.0502 | 0.0029  | 0.0333 | -0.0016 | 0.0028 | 5 |
| rs72685367 | 1 | 77977002 | G | C | 0.0002  | 0.0090 | -0.0081 | 0.0126 | -0.0213 | 0.0360 | -0.0216 | 0.0253 | -0.0012 | 0.0019 | 5 |
| rs72685368 | 1 | 77977804 | G | A | -0.0149 | 0.0066 | -0.0118 | 0.0093 | -0.0483 | 0.0261 | -0.0234 | 0.0170 | 0.0027  | 0.0015 | 5 |
| rs72685370 | 1 | 77986502 | G | T | -0.0109 | 0.0127 | -0.0150 | 0.0178 | -0.1185 | 0.0502 | 0.0014  | 0.0329 | -0.0018 | 0.0028 | 5 |
| rs72685371 | 1 | 77986885 | T | C | -0.0108 | 0.0127 | -0.0147 | 0.0178 | -0.1185 | 0.0502 | 0.0013  | 0.0329 | -0.0017 | 0.0028 | 5 |
| rs72685373 | 1 | 77988992 | A | G | -0.0107 | 0.0127 | -0.0149 | 0.0178 | -0.1186 | 0.0502 | 0.0011  | 0.0329 | -0.0018 | 0.0028 | 5 |
| rs72685374 | 1 | 77991364 | T | C | -0.0106 | 0.0127 | -0.0149 | 0.0178 | -0.1186 | 0.0502 | 0.0009  | 0.0329 | -0.0017 | 0.0028 | 5 |
| rs72685376 | 1 | 77993274 | T | G | -0.0108 | 0.0127 | -0.0148 | 0.0178 | -0.1189 | 0.0502 | 0.0009  | 0.0329 | -0.0017 | 0.0028 | 5 |
| rs72685378 | 1 | 77993823 | C | A | -0.0110 | 0.0127 | -0.0146 | 0.0178 | -0.1181 | 0.0502 | 0.0009  | 0.0329 | -0.0017 | 0.0028 | 5 |
| rs72685382 | 1 | 78000451 | A | G | -0.0108 | 0.0127 | -0.0148 | 0.0178 | -0.1193 | 0.0502 | 0.0007  | 0.0329 | -0.0017 | 0.0028 | 5 |
| rs72685386 | 1 | 78007684 | A | G | -0.0109 | 0.0127 | -0.0134 | 0.0178 | -0.1171 | 0.0502 | 0.0003  | 0.0330 | -0.0019 | 0.0028 | 5 |
| rs72685390 | 1 | 78018128 | T | C | 0.0022  | 0.0093 | -0.0023 | 0.0135 | 0.0518  | 0.0374 | -0.0269 | 0.0247 | 0.0023  | 0.0021 | 5 |
| rs72685391 | 1 | 78021931 | T | C | -0.0041 | 0.0097 | -0.0106 | 0.0138 | -0.1195 | 0.0396 | -0.0152 | 0.0252 | -0.0008 | 0.0022 | 5 |
| rs72685398 | 1 | 78028339 | C | T | -0.0112 | 0.0127 | -0.0150 | 0.0178 | -0.1187 | 0.0503 | -0.0004 | 0.0330 | -0.0017 | 0.0028 | 5 |
| rs72685399 | 1 | 78028368 | A | T | 0.0144  | 0.0159 | 0.0236  | 0.0244 | 0.0467  | 0.0688 | -0.0604 | 0.0445 | 0.0057  | 0.0037 | 5 |
| rs72687103 | 1 | 78030748 | G | A | -0.0106 | 0.0127 | -0.0160 | 0.0178 | -0.1176 | 0.0503 | -0.0001 | 0.0331 | -0.0019 | 0.0028 | 5 |
| rs72687112 | 1 | 78051368 | G | A | -0.0090 | 0.0126 | -0.0228 | 0.0183 | -0.0160 | 0.0519 | -0.0286 | 0.0328 | -0.0002 | 0.0025 | 5 |
| rs72687114 | 1 | 78053026 | T | C | -0.0273 | 0.0211 | -0.0478 | 0.0308 | 0.0727  | 0.0939 | -0.0371 | 0.0576 | -0.0038 | 0.0044 | 5 |
| rs72687127 | 1 | 78090710 | T | C | 0.0189  | 0.0137 | -0.0060 | 0.0209 | 0.0031  | 0.0577 | -0.0454 | 0.0375 | 0.0010  | 0.0029 | 5 |
| rs72687149 | 1 | 78138329 | G | T | 0.0015  | 0.0131 | -0.0103 | 0.0190 | 0.0183  | 0.0552 | -0.0370 | 0.0394 | -0.0024 | 0.0029 | 5 |
| rs72687182 | 1 | 78166520 | T | A | -0.0026 | 0.0081 | 0.0061  | 0.0120 | -0.0196 | 0.0358 | -0.0233 | 0.0193 | 0.0020  | 0.0017 | 5 |
| rs72687184 | 1 | 78166521 | A | T | -0.0026 | 0.0081 | 0.0061  | 0.0120 | -0.0196 | 0.0358 | -0.0230 | 0.0193 | 0.0020  | 0.0017 | 5 |
| rs72687185 | 1 | 78167254 | T | G | -0.0082 | 0.0074 | 0.0053  | 0.0106 | -0.0331 | 0.0294 | -0.0211 | 0.0185 | 0.0024  | 0.0017 | 5 |
| rs72687186 | 1 | 78167432 | T | C | -0.0081 | 0.0074 | 0.0051  | 0.0106 | -0.0333 | 0.0294 | -0.0212 | 0.0184 | 0.0024  | 0.0017 | 5 |
| rs72687187 | 1 | 78167434 | C | T | -0.0081 | 0.0074 | 0.0052  | 0.0106 | -0.0333 | 0.0294 | -0.0211 | 0.0184 | 0.0024  | 0.0017 | 5 |
| rs72687190 | 1 | 78167829 | T | G | -0.0082 | 0.0074 | 0.0050  | 0.0106 | -0.0340 | 0.0293 | -0.0211 | 0.0184 | 0.0025  | 0.0017 | 5 |
| rs72687195 | 1 | 78168462 | C | G | 0.0014  | 0.0091 | -0.0030 | 0.0130 | 0.0018  | 0.0360 | -0.0433 | 0.0237 | 0.0031  | 0.0020 | 5 |
| rs72687200 | 1 | 78169975 | A | T | -0.0078 | 0.0074 | 0.0051  | 0.0106 | -0.0347 | 0.0293 | -0.0206 | 0.0184 | 0.0024  | 0.0017 | 5 |
| rs72688706 | 1 | 78173002 | A | C | 0.0014  | 0.0091 | -0.0029 | 0.0130 | 0.0014  | 0.0360 | -0.0428 | 0.0237 | 0.0031  | 0.0020 | 5 |
| rs72688712 | 1 | 78175851 | T | A | -0.0023 | 0.0060 | -0.0106 | 0.0086 | -0.0602 | 0.0225 | -0.0298 | 0.0124 | -0.0011 | 0.0011 | 5 |
| rs72688716 | 1 | 78181531 | G | A | 0.0013  | 0.0091 | -0.0026 | 0.0130 | 0.0007  | 0.0360 | -0.0426 | 0.0237 | 0.0031  | 0.0020 | 5 |
| rs72688718 | 1 | 78193131 | C | T | -0.0083 | 0.0074 | 0.0050  | 0.0106 | -0.0330 | 0.0294 | -0.0216 | 0.0185 | 0.0023  | 0.0017 | 5 |
| rs72688719 | 1 | 78196512 | T | G | 0.0011  | 0.0091 | -0.0031 | 0.0130 | -0.0017 | 0.0360 | -0.0430 | 0.0237 | 0.0031  | 0.0020 | 5 |
| rs72688726 | 1 | 78209692 | T | C | 0.0006  | 0.0091 | -0.0029 | 0.0130 | -0.0009 | 0.0360 | -0.0440 | 0.0237 | 0.0032  | 0.0020 | 5 |
| rs72688731 | 1 | 78213494 | G | A | -0.0105 | 0.0143 | 0.0262  | 0.0204 | 0.0636  | 0.0591 | 0.0792  | 0.0450 | -0.0010 | 0.0029 | 5 |
| rs72688735 | 1 | 78223034 | C | T | 0.0013  | 0.0091 | -0.0035 | 0.0130 | 0.0015  | 0.0360 | -0.0470 | 0.0237 | 0.0034  | 0.0020 | 5 |
| rs72688742 | 1 | 78241367 | T | C | 0.0189  | 0.0134 | -0.0001 | 0.0193 | 0.0747  | 0.0527 | -0.0412 | 0.0341 | 0.0015  | 0.0029 | 5 |
| rs72688745 | 1 | 78249885 | A | G | -0.0032 | 0.0079 | -0.0047 | 0.0112 | -0.0315 | 0.0313 | -0.0352 | 0.0204 | 0.0031  | 0.0018 | 5 |
| rs72688746 | 1 | 78249950 | C | T | -0.0037 | 0.0079 | -0.0038 | 0.0112 | -0.0309 | 0.0313 | -0.0284 | 0.0204 | 0.0031  | 0.0018 | 5 |
| rs72688747 | 1 | 78253074 | A | G | -0.0037 | 0.0081 | -0.0035 | 0.0118 | -0.0494 | 0.0337 | -0.0291 | 0.0205 | 0.0031  | 0.0018 | 5 |
| rs72688749 | 1 | 78253877 | T | G | 0.0245  | 0.0140 | 0.0019  | 0.0204 | 0.0622  | 0.0559 | -0.0301 | 0.0355 | 0.0029  | 0.0030 | 5 |
| rs72688750 | 1 | 78256144 | G | C | 0.0250  | 0.0148 | 0.0016  | 0.0218 | 0.0474  | 0.0594 | -0.0268 | 0.0396 | 0.0041  | 0.0032 | 5 |
| rs72688756 | 1 | 78266925 | G | A | 0.0014  | 0.0083 | -0.0147 | 0.0116 | -0.0128 | 0.0323 | -0.0086 | 0.0194 | 0.0014  | 0.0018 | 5 |

|            |   |          |   |   |         |        |         |        |         |        |         |        |         |        |   |
|------------|---|----------|---|---|---------|--------|---------|--------|---------|--------|---------|--------|---------|--------|---|
| rs728741   | 1 | 77563680 | A | G | -0.0142 | 0.0058 | -0.0166 | 0.0085 | 0.0009  | 0.0236 | -0.0361 | 0.0140 | 0.0004  | 0.0013 | 5 |
| rs72931556 | 1 | 78382508 | A | T | -0.0021 | 0.0067 | 0.0046  | 0.0095 | 0.0010  | 0.0269 | 0.0013  | 0.0175 | -0.0028 | 0.0015 | 5 |
| rs72934382 | 1 | 77544197 | G | C | -0.0238 | 0.0236 | -0.0322 | 0.0329 | 0.0215  | 0.0839 | -0.0824 | 0.0491 | -0.0022 | 0.0050 | 5 |
| rs72936202 | 1 | 77659975 | A | G | -0.0280 | 0.0234 | -0.0282 | 0.0324 | -0.0177 | 0.0829 | -0.0707 | 0.0488 | -0.0026 | 0.0050 | 5 |
| rs72938007 | 1 | 77661424 | C | A | -0.0287 | 0.0252 | -0.0165 | 0.0346 | -0.0304 | 0.0876 | -0.0896 | 0.0538 | -0.0010 | 0.0049 | 5 |
| rs7364565  | 1 | 78118160 | T | C | -0.0190 | 0.0162 | -0.0130 | 0.0233 | -0.1503 | 0.0645 | 0.0098  | 0.0407 | -0.0003 | 0.0036 | 5 |
| rs7365402  | 1 | 78120600 | T | C | -0.0187 | 0.0161 | -0.0138 | 0.0233 | -0.1514 | 0.0644 | 0.0104  | 0.0407 | -0.0002 | 0.0036 | 5 |
| rs7367149  | 1 | 78135460 | G | A | -0.0197 | 0.0162 | -0.0125 | 0.0233 | -0.1503 | 0.0645 | 0.0111  | 0.0407 | -0.0001 | 0.0036 | 5 |
| rs7367729  | 1 | 78163991 | C | T | 0.0040  | 0.0056 | -0.0156 | 0.0081 | -0.0341 | 0.0244 | -0.0251 | 0.0127 | -0.0011 | 0.0011 | 5 |
| rs7367884  | 1 | 78117475 | G | A | 0.0057  | 0.0049 | -0.0122 | 0.0069 | -0.0625 | 0.0194 | -0.0385 | 0.0120 | -0.0009 | 0.0011 | 5 |
| rs7367922  | 1 | 78117771 | A | G | -0.0192 | 0.0162 | -0.0128 | 0.0233 | -0.1508 | 0.0645 | 0.0077  | 0.0406 | -0.0002 | 0.0036 | 5 |
| rs737347   | 1 | 78250826 | A | T | 0.0028  | 0.0060 | -0.0035 | 0.0085 | -0.0102 | 0.0235 | -0.0203 | 0.0148 | 0.0025  | 0.0013 | 5 |
| rs74090603 | 1 | 77477745 | G | A | -0.0159 | 0.0199 | -0.0194 | 0.0268 | -0.0031 | 0.0726 | 0.0082  | 0.0446 | -0.0037 | 0.0044 | 5 |
| rs74090608 | 1 | 77489220 | C | G | -0.0287 | 0.0203 | -0.0283 | 0.0275 | -0.0180 | 0.0752 | 0.0226  | 0.0436 | -0.0039 | 0.0046 | 5 |
| rs74090614 | 1 | 77490699 | T | G | -0.0279 | 0.0203 | -0.0277 | 0.0275 | -0.0188 | 0.0752 | 0.0111  | 0.0439 | -0.0040 | 0.0046 | 5 |
| rs74090615 | 1 | 77490798 | T | A | -0.0033 | 0.0292 | -0.0178 | 0.0404 | -0.0923 | 0.1102 | -0.0212 | 0.0376 | -0.0032 | 0.0046 | 5 |
| rs74090617 | 1 | 77491038 | A | T | -0.0280 | 0.0203 | -0.0276 | 0.0275 | -0.0189 | 0.0752 | 0.0116  | 0.0439 | -0.0040 | 0.0046 | 5 |
| rs74090618 | 1 | 77491048 | A | G | -0.0280 | 0.0203 | -0.0276 | 0.0275 | -0.0189 | 0.0752 | 0.0132  | 0.0433 | -0.0040 | 0.0046 | 5 |
| rs74090619 | 1 | 77491820 | C | T | -0.0283 | 0.0203 | -0.0275 | 0.0275 | -0.0189 | 0.0752 | 0.0146  | 0.0439 | -0.0040 | 0.0046 | 5 |
| rs74090634 | 1 | 77538655 | T | A | -0.0357 | 0.0263 | -0.0826 | 0.0347 | -0.0441 | 0.0922 | -0.0282 | 0.0518 | -0.0034 | 0.0045 | 5 |
| rs74090644 | 1 | 77550801 | A | G | 0.0001  | 0.0169 | 0.0195  | 0.0249 | -0.0770 | 0.0717 | -0.0541 | 0.0439 | 0.0002  | 0.0040 | 5 |
| rs74090645 | 1 | 77553159 | C | T | -0.0019 | 0.0169 | 0.0189  | 0.0249 | -0.0793 | 0.0719 | -0.0511 | 0.0439 | 0.0004  | 0.0040 | 5 |
| rs74090701 | 1 | 77802363 | G | A | -0.0310 | 0.0251 | -0.0428 | 0.0350 | -0.0631 | 0.0917 | -0.0763 | 0.0537 | -0.0046 | 0.0052 | 5 |
| rs74091412 | 1 | 78332831 | T | C | 0.0102  | 0.0087 | -0.0330 | 0.0126 | -0.0796 | 0.0322 | 0.0098  | 0.0192 | -0.0024 | 0.0018 | 5 |
| rs74092308 | 1 | 77845360 | T | C | -0.0364 | 0.0226 | -0.0340 | 0.0316 | -0.0637 | 0.0854 | -0.0822 | 0.0517 | -0.0031 | 0.0051 | 5 |
| rs74092324 | 1 | 77888019 | A | C | -0.0174 | 0.0302 | -0.0199 | 0.0444 | -0.0721 | 0.1688 | -0.1109 | 0.0510 | -0.0036 | 0.0051 | 5 |
| rs74092328 | 1 | 77904558 | A | G | -0.0161 | 0.0127 | 0.0010  | 0.0178 | -0.0768 | 0.0487 | -0.0348 | 0.0279 | -0.0034 | 0.0028 | 5 |
| rs74092331 | 1 | 77916353 | C | A | -0.0138 | 0.0153 | 0.0153  | 0.0215 | -0.0731 | 0.0589 | 0.0067  | 0.0332 | -0.0038 | 0.0033 | 5 |
| rs74092339 | 1 | 77965508 | T | C | -0.0205 | 0.0222 | -0.0331 | 0.0312 | -0.1001 | 0.0846 | -0.1002 | 0.0509 | -0.0038 | 0.0049 | 5 |
| rs74092340 | 1 | 77968117 | C | T | -0.0151 | 0.0127 | -0.0011 | 0.0178 | -0.0795 | 0.0487 | -0.0269 | 0.0277 | -0.0040 | 0.0027 | 5 |
| rs74092341 | 1 | 77988353 | A | G | -0.0193 | 0.0222 | -0.0324 | 0.0312 | -0.0998 | 0.0846 | -0.0996 | 0.0505 | -0.0037 | 0.0049 | 5 |
| rs74092343 | 1 | 77991847 | C | T | -0.0142 | 0.0126 | 0.0028  | 0.0178 | -0.0810 | 0.0488 | -0.0282 | 0.0278 | -0.0038 | 0.0027 | 5 |
| rs74092348 | 1 | 78026260 | C | T | -0.0195 | 0.0222 | -0.0384 | 0.0311 | -0.0992 | 0.0844 | -0.0930 | 0.0505 | -0.0041 | 0.0049 | 5 |
| rs74092662 | 1 | 77469720 | G | A | -0.0191 | 0.0199 | -0.0197 | 0.0268 | -0.0046 | 0.0725 | -0.0092 | 0.0451 | -0.0038 | 0.0045 | 5 |
| rs7417073  | 1 | 78160278 | T | C | 0.0025  | 0.0051 | -0.0105 | 0.0072 | -0.0437 | 0.0202 | -0.0329 | 0.0127 | -0.0012 | 0.0011 | 5 |
| rs7417104  | 1 | 77847103 | A | G | -0.0177 | 0.0078 | -0.0067 | 0.0114 | 0.0253  | 0.0320 | -0.0280 | 0.0202 | 0.0046  | 0.0019 | 5 |
| rs74225875 | 1 | 77830252 | C | A | -0.0283 | 0.0167 | -0.0093 | 0.0236 | -0.0595 | 0.0633 | 0.0106  | 0.0469 | -0.0042 | 0.0049 | 5 |
| rs74225876 | 1 | 77991410 | T | G | -0.0280 | 0.0166 | -0.0056 | 0.0241 | -0.0764 | 0.0655 | -0.0265 | 0.0454 | -0.0011 | 0.0051 | 5 |
| rs74315689 | 1 | 77836813 | T | A | -0.0175 | 0.0153 | 0.0148  | 0.0216 | -0.0501 | 0.0588 | 0.0022  | 0.0331 | -0.0040 | 0.0033 | 5 |
| rs74330204 | 1 | 77984743 | T | C | 0.0162  | 0.0191 | -0.0007 | 0.0266 | -0.1165 | 0.0793 | -0.0479 | 0.0473 | 0.0001  | 0.0039 | 5 |
| rs74342526 | 1 | 78048734 | C | T | 0.0109  | 0.0179 | -0.0006 | 0.0264 | -0.1436 | 0.0772 | -0.0385 | 0.0465 | -0.0037 | 0.0048 | 5 |
| rs74361408 | 1 | 78415221 | G | C | 0.0195  | 0.0213 | -0.0055 | 0.0295 | 0.0465  | 0.0804 | -0.0762 | 0.0530 | 0.0018  | 0.0042 | 5 |
| rs74395757 | 1 | 78316788 | G | C | 0.0084  | 0.0110 | -0.0107 | 0.0155 | -0.0446 | 0.0433 | 0.0097  | 0.0273 | -0.0021 | 0.0027 | 5 |
| rs74423504 | 1 | 78212390 | A | G | -0.0163 | 0.0160 | -0.0087 | 0.0231 | -0.1501 | 0.0639 | 0.0255  | 0.0405 | 0.0003  | 0.0036 | 5 |
| rs74568553 | 1 | 78254660 | A | G | 0.0136  | 0.0108 | 0.0071  | 0.0160 | 0.0146  | 0.0456 | -0.0335 | 0.0319 | -0.0036 | 0.0023 | 5 |
| rs74587940 | 1 | 78300978 | T | G | 0.0117  | 0.0120 | -0.0236 | 0.0177 | -0.0400 | 0.0447 | 0.0098  | 0.0274 | -0.0024 | 0.0028 | 5 |

|            |   |          |   |   |         |        |         |        |         |        |         |        |         |        |   |
|------------|---|----------|---|---|---------|--------|---------|--------|---------|--------|---------|--------|---------|--------|---|
| rs74724999 | 1 | 78393046 | G | A | -0.0243 | 0.0134 | -0.0157 | 0.0187 | -0.0884 | 0.0538 | -0.0913 | 0.0365 | 0.0049  | 0.0030 | 5 |
| rs74734761 | 1 | 78032608 | G | A | -0.0131 | 0.0165 | -0.0126 | 0.0242 | -0.0719 | 0.0829 | 0.0026  | 0.0332 | -0.0017 | 0.0029 | 5 |
| rs74745650 | 1 | 77598781 | G | A | -0.0051 | 0.0153 | 0.0023  | 0.0221 | -0.0933 | 0.0644 | -0.0391 | 0.0388 | -0.0005 | 0.0036 | 5 |
| rs74800923 | 1 | 78307125 | C | T | 0.0086  | 0.0110 | -0.0116 | 0.0155 | -0.0449 | 0.0432 | 0.0089  | 0.0273 | -0.0020 | 0.0027 | 5 |
| rs74848424 | 1 | 77588192 | T | C | -0.0175 | 0.0146 | 0.0104  | 0.0207 | -0.0507 | 0.0576 | 0.0114  | 0.0325 | -0.0046 | 0.0033 | 5 |
| rs74883545 | 1 | 78464430 | A | C | 0.0249  | 0.0137 | 0.0100  | 0.0192 | -0.0170 | 0.0528 | 0.0035  | 0.0327 | -0.0061 | 0.0028 | 5 |
| rs74888882 | 1 | 77525568 | G | A | -0.0109 | 0.0078 | -0.0218 | 0.0113 | -0.0017 | 0.0313 | -0.0109 | 0.0196 | 0.0010  | 0.0018 | 5 |
| rs74942344 | 1 | 77951260 | C | T | -0.0075 | 0.0153 | 0.0075  | 0.0218 | 0.0733  | 0.0645 | -0.0772 | 0.0459 | -0.0008 | 0.0039 | 5 |
| rs74959191 | 1 | 78200549 | A | G | -0.0229 | 0.0119 | 0.0176  | 0.0168 | -0.0784 | 0.0470 | 0.0109  | 0.0277 | 0.0000  | 0.0029 | 5 |
| rs75025688 | 1 | 78302032 | G | A | 0.0112  | 0.0151 | 0.0163  | 0.0212 | 0.0501  | 0.0590 | 0.0244  | 0.0422 | -0.0039 | 0.0030 | 5 |
| rs75033348 | 1 | 77477677 | G | A | -0.0151 | 0.0201 | -0.0121 | 0.0271 | -0.0133 | 0.0737 | -0.0082 | 0.0458 | -0.0038 | 0.0045 | 5 |
| rs75054962 | 1 | 77934413 | A | G | -0.0295 | 0.0166 | -0.0084 | 0.0241 | -0.0808 | 0.0657 | -0.0235 | 0.0457 | -0.0007 | 0.0051 | 5 |
| rs750720   | 1 | 77956100 | A | G | -0.0204 | 0.0083 | -0.0086 | 0.0117 | 0.0099  | 0.0323 | -0.0299 | 0.0214 | 0.0051  | 0.0020 | 5 |
| rs7511802  | 1 | 78065148 | A | T | 0.0051  | 0.0053 | -0.0117 | 0.0077 | -0.0341 | 0.0232 | -0.0334 | 0.0119 | 0.0002  | 0.0011 | 5 |
| rs7512732  | 1 | 78195887 | A | G | 0.0143  | 0.0167 | -0.0125 | 0.0252 | -0.0278 | 0.0682 | -0.0036 | 0.0372 | -0.0042 | 0.0034 | 5 |
| rs75136187 | 1 | 78023666 | G | T | -0.0142 | 0.0153 | 0.0173  | 0.0215 | -0.0658 | 0.0588 | 0.0027  | 0.0331 | -0.0038 | 0.0033 | 5 |
| rs7513619  | 1 | 77618086 | T | C | -0.0119 | 0.0059 | -0.0145 | 0.0086 | -0.0028 | 0.0239 | -0.0219 | 0.0142 | 0.0016  | 0.0013 | 5 |
| rs7514007  | 1 | 78055299 | G | A | -0.0173 | 0.0082 | -0.0162 | 0.0116 | -0.0062 | 0.0323 | -0.0233 | 0.0214 | 0.0064  | 0.0019 | 5 |
| rs7514041  | 1 | 77498584 | G | A | 0.0013  | 0.0050 | 0.0071  | 0.0070 | 0.0444  | 0.0196 | 0.0470  | 0.0123 | -0.0001 | 0.0011 | 5 |
| rs7514180  | 1 | 77995251 | A | G | 0.0115  | 0.0060 | -0.0107 | 0.0087 | -0.0271 | 0.0249 | -0.0152 | 0.0146 | -0.0028 | 0.0013 | 5 |
| rs75142713 | 1 | 77487045 | T | A | -0.0186 | 0.0148 | 0.0228  | 0.0208 | -0.0741 | 0.0583 | 0.0206  | 0.0323 | -0.0044 | 0.0033 | 5 |
| rs7514937  | 1 | 77515414 | A | C | -0.0032 | 0.0048 | -0.0108 | 0.0067 | -0.0563 | 0.0190 | -0.0446 | 0.0118 | -0.0016 | 0.0011 | 5 |
| rs7515450  | 1 | 78117161 | A | T | 0.0037  | 0.0049 | -0.0131 | 0.0069 | -0.0754 | 0.0192 | -0.0364 | 0.0119 | -0.0009 | 0.0011 | 5 |
| rs7515509  | 1 | 77483438 | A | G | 0.0076  | 0.0049 | 0.0181  | 0.0069 | 0.0827  | 0.0193 | 0.0460  | 0.0123 | 0.0008  | 0.0011 | 5 |
| rs7516182  | 1 | 78167083 | A | G | -0.0082 | 0.0074 | 0.0050  | 0.0106 | -0.0333 | 0.0294 | -0.0212 | 0.0185 | 0.0024  | 0.0017 | 5 |
| rs7518152  | 1 | 78141341 | C | T | 0.0042  | 0.0070 | -0.0173 | 0.0100 | -0.0151 | 0.0316 | -0.0306 | 0.0139 | -0.0020 | 0.0013 | 5 |
| rs75189238 | 1 | 78209760 | A | G | 0.0097  | 0.0186 | -0.0106 | 0.0272 | -0.1033 | 0.0757 | -0.0720 | 0.0449 | -0.0043 | 0.0046 | 5 |
| rs7519476  | 1 | 77544965 | T | C | -0.0140 | 0.0058 | -0.0172 | 0.0084 | -0.0024 | 0.0234 | -0.0378 | 0.0138 | 0.0010  | 0.0013 | 5 |
| rs7519946  | 1 | 77751834 | G | A | -0.0131 | 0.0060 | -0.0097 | 0.0083 | -0.0170 | 0.0247 | -0.0270 | 0.0128 | 0.0002  | 0.0012 | 5 |
| rs75200340 | 1 | 78212247 | T | C | 0.0085  | 0.0186 | -0.0101 | 0.0273 | -0.0998 | 0.0760 | -0.0753 | 0.0451 | -0.0043 | 0.0046 | 5 |
| rs7520255  | 1 | 77982138 | T | C | -0.0119 | 0.0067 | -0.0130 | 0.0095 | -0.0555 | 0.0266 | -0.0249 | 0.0171 | 0.0032  | 0.0016 | 5 |
| rs7520356  | 1 | 78325739 | T | C | 0.0001  | 0.0094 | -0.0196 | 0.0132 | -0.0062 | 0.0363 | 0.0172  | 0.0225 | 0.0017  | 0.0020 | 5 |
| rs7521042  | 1 | 77698654 | G | C | -0.0132 | 0.0056 | -0.0149 | 0.0078 | -0.0124 | 0.0216 | -0.0243 | 0.0136 | 0.0010  | 0.0012 | 5 |
| rs7521129  | 1 | 78320524 | T | C | -0.0014 | 0.0053 | -0.0037 | 0.0075 | -0.0202 | 0.0211 | 0.0042  | 0.0131 | -0.0013 | 0.0012 | 5 |
| rs75218604 | 1 | 77602505 | A | T | -0.0051 | 0.0153 | 0.0027  | 0.0221 | -0.0926 | 0.0644 | -0.0396 | 0.0388 | -0.0004 | 0.0036 | 5 |
| rs7522356  | 1 | 77485775 | T | G | 0.0001  | 0.0048 | -0.0116 | 0.0067 | -0.0566 | 0.0188 | -0.0482 | 0.0117 | -0.0015 | 0.0011 | 5 |
| rs7523258  | 1 | 77827233 | A | G | -0.0275 | 0.0157 | 0.0100  | 0.0207 | -0.0623 | 0.0574 | 0.0134  | 0.0329 | -0.0045 | 0.0033 | 5 |
| rs7523874  | 1 | 78014173 | A | T | -0.0118 | 0.0067 | -0.0133 | 0.0095 | -0.0570 | 0.0266 | -0.0251 | 0.0172 | 0.0031  | 0.0016 | 5 |
| rs75238833 | 1 | 77994474 | C | T | -0.0247 | 0.0164 | -0.0165 | 0.0237 | -0.0948 | 0.0660 | -0.0434 | 0.0405 | 0.0129  | 0.0037 | 5 |
| rs7524147  | 1 | 77553988 | C | A | -0.0162 | 0.0064 | -0.0109 | 0.0093 | -0.0059 | 0.0272 | -0.0381 | 0.0142 | 0.0010  | 0.0013 | 5 |
| rs7524504  | 1 | 78029048 | G | T | -0.0117 | 0.0067 | -0.0137 | 0.0095 | -0.0566 | 0.0266 | -0.0262 | 0.0172 | 0.0031  | 0.0016 | 5 |
| rs7524711  | 1 | 77999147 | C | G | -0.0156 | 0.0127 | 0.0004  | 0.0179 | -0.0825 | 0.0489 | -0.0290 | 0.0277 | -0.0039 | 0.0027 | 5 |
| rs7524866  | 1 | 77557036 | G | C | -0.0151 | 0.0058 | -0.0152 | 0.0084 | 0.0048  | 0.0235 | -0.0345 | 0.0139 | 0.0006  | 0.0013 | 5 |
| rs7524877  | 1 | 78149961 | A | G | 0.0014  | 0.0048 | -0.0156 | 0.0068 | -0.0825 | 0.0190 | -0.0380 | 0.0119 | -0.0011 | 0.0011 | 5 |
| rs7525151  | 1 | 78319364 | C | T | 0.0116  | 0.0072 | -0.0315 | 0.0106 | -0.0730 | 0.0271 | 0.0090  | 0.0163 | -0.0025 | 0.0016 | 5 |
| rs7525538  | 1 | 77589213 | T | C | -0.0163 | 0.0148 | 0.0109  | 0.0209 | -0.0659 | 0.0584 | 0.0122  | 0.0335 | -0.0050 | 0.0033 | 5 |



|            |   |          |   |   |         |        |         |        |         |        |         |        |         |        |   |
|------------|---|----------|---|---|---------|--------|---------|--------|---------|--------|---------|--------|---------|--------|---|
| rs7525558  | 1 | 78260066 | A | G | -0.0037 | 0.0049 | -0.0040 | 0.0070 | -0.0270 | 0.0196 | -0.0068 | 0.0123 | -0.0004 | 0.0011 | 5 |
| rs75258169 | 1 | 78144060 | A | G | -0.0052 | 0.0132 | 0.0079  | 0.0192 | -0.0526 | 0.0549 | -0.0388 | 0.0346 | 0.0054  | 0.0029 | 5 |
| rs7525870  | 1 | 77803522 | A | G | 0.0118  | 0.0056 | -0.0135 | 0.0081 | -0.0279 | 0.0231 | -0.0186 | 0.0133 | -0.0022 | 0.0012 | 5 |
| rs75264310 | 1 | 78195888 | C | A | -0.0165 | 0.0160 | -0.0075 | 0.0231 | -0.1522 | 0.0638 | 0.0272  | 0.0402 | 0.0003  | 0.0036 | 5 |
| rs7527150  | 1 | 77557193 | C | G | 0.0063  | 0.0155 | 0.0285  | 0.0231 | -0.0725 | 0.0680 | -0.0936 | 0.0410 | 0.0001  | 0.0038 | 5 |
| rs7528552  | 1 | 77553987 | A | G | -0.0162 | 0.0064 | -0.0109 | 0.0093 | -0.0059 | 0.0272 | -0.0426 | 0.0144 | 0.0010  | 0.0013 | 5 |
| rs7528932  | 1 | 77483444 | T | A | 0.0078  | 0.0049 | 0.0176  | 0.0069 | 0.0821  | 0.0193 | 0.0444  | 0.0122 | 0.0008  | 0.0011 | 5 |
| rs7529494  | 1 | 78197057 | G | A | -0.0232 | 0.0119 | 0.0166  | 0.0169 | -0.0811 | 0.0470 | 0.0104  | 0.0277 | 0.0004  | 0.0029 | 5 |
| rs75307897 | 1 | 77920489 | T | C | -0.0104 | 0.0127 | -0.0141 | 0.0178 | -0.1195 | 0.0502 | 0.0009  | 0.0331 | -0.0016 | 0.0028 | 5 |
| rs7531286  | 1 | 77553867 | T | C | -0.0136 | 0.0058 | -0.0162 | 0.0084 | -0.0001 | 0.0234 | -0.0387 | 0.0139 | 0.0010  | 0.0013 | 5 |
| rs7531525  | 1 | 78051274 | A | G | -0.0130 | 0.0144 | -0.0056 | 0.0203 | -0.0597 | 0.0588 | -0.0681 | 0.0375 | 0.0078  | 0.0032 | 5 |
| rs7532039  | 1 | 78166686 | C | T | -0.0082 | 0.0074 | 0.0051  | 0.0106 | -0.0333 | 0.0294 | -0.0211 | 0.0185 | 0.0024  | 0.0017 | 5 |
| rs7532135  | 1 | 78166796 | A | T | -0.0082 | 0.0074 | 0.0052  | 0.0106 | -0.0333 | 0.0294 | -0.0212 | 0.0185 | 0.0024  | 0.0017 | 5 |
| rs7532455  | 1 | 77594099 | A | G | -0.0169 | 0.0146 | 0.0110  | 0.0207 | -0.0464 | 0.0575 | 0.0148  | 0.0324 | -0.0045 | 0.0032 | 5 |
| rs7532752  | 1 | 78157245 | A | T | 0.0026  | 0.0051 | -0.0104 | 0.0072 | -0.0432 | 0.0202 | -0.0331 | 0.0127 | -0.0012 | 0.0011 | 5 |
| rs7533564  | 1 | 78360228 | C | T | 0.0146  | 0.0180 | -0.0081 | 0.0248 | 0.0250  | 0.0715 | -0.0544 | 0.0431 | 0.0009  | 0.0036 | 5 |
| rs7533823  | 1 | 78362754 | G | T | 0.0140  | 0.0180 | -0.0064 | 0.0248 | 0.0220  | 0.0717 | -0.0541 | 0.0431 | 0.0009  | 0.0036 | 5 |
| rs7534345  | 1 | 78229826 | G | C | -0.0102 | 0.0159 | 0.0229  | 0.0223 | -0.0679 | 0.0617 | 0.0121  | 0.0349 | -0.0013 | 0.0035 | 5 |
| rs7534847  | 1 | 78224345 | G | C | -0.0273 | 0.0195 | -0.0155 | 0.0274 | 0.0927  | 0.0805 | -0.1103 | 0.0576 | 0.0076  | 0.0055 | 5 |
| rs7535444  | 1 | 78173067 | A | G | -0.0101 | 0.0069 | 0.0028  | 0.0098 | -0.0571 | 0.0273 | -0.0144 | 0.0171 | 0.0021  | 0.0016 | 5 |
| rs75356793 | 1 | 77628992 | T | C | -0.0045 | 0.0153 | 0.0017  | 0.0221 | -0.0961 | 0.0644 | -0.0388 | 0.0388 | -0.0003 | 0.0036 | 5 |
| rs7535781  | 1 | 77755994 | C | T | -0.0142 | 0.0052 | -0.0121 | 0.0074 | -0.0256 | 0.0204 | -0.0288 | 0.0127 | 0.0003  | 0.0012 | 5 |
| rs7535841  | 1 | 78401083 | C | T | 0.0074  | 0.0052 | 0.0177  | 0.0076 | 0.0618  | 0.0218 | 0.0252  | 0.0130 | -0.0004 | 0.0011 | 5 |
| rs7536206  | 1 | 77818070 | C | T | -0.0120 | 0.0058 | -0.0092 | 0.0084 | -0.0142 | 0.0250 | -0.0261 | 0.0128 | 0.0001  | 0.0012 | 5 |
| rs7536307  | 1 | 77492363 | C | T | 0.0001  | 0.0051 | 0.0036  | 0.0072 | -0.0025 | 0.0201 | -0.0019 | 0.0125 | 0.0011  | 0.0011 | 5 |
| rs7536433  | 1 | 77557488 | T | C | 0.0128  | 0.0059 | -0.0132 | 0.0083 | -0.0474 | 0.0234 | -0.0132 | 0.0145 | -0.0031 | 0.0013 | 5 |
| rs7536898  | 1 | 78301155 | C | G | -0.0026 | 0.0048 | 0.0129  | 0.0067 | 0.0135  | 0.0188 | 0.0054  | 0.0117 | 0.0020  | 0.0010 | 5 |
| rs7537418  | 1 | 78329473 | G | A | 0.0008  | 0.0051 | 0.0145  | 0.0072 | 0.0383  | 0.0200 | 0.0081  | 0.0125 | 0.0017  | 0.0011 | 5 |
| rs7537442  | 1 | 78170568 | G | C | -0.0082 | 0.0074 | 0.0049  | 0.0106 | -0.0341 | 0.0294 | -0.0210 | 0.0185 | 0.0024  | 0.0017 | 5 |
| rs75376401 | 1 | 78319577 | C | T | 0.0098  | 0.0110 | -0.0117 | 0.0154 | -0.0450 | 0.0432 | 0.0091  | 0.0273 | -0.0023 | 0.0027 | 5 |
| rs7537720  | 1 | 78203276 | A | G | -0.0227 | 0.0119 | 0.0161  | 0.0169 | -0.0775 | 0.0471 | 0.0103  | 0.0277 | 0.0004  | 0.0029 | 5 |
| rs7537908  | 1 | 78053255 | G | A | 0.0094  | 0.0060 | -0.0099 | 0.0087 | -0.0259 | 0.0249 | -0.0121 | 0.0147 | -0.0024 | 0.0013 | 5 |
| rs7538210  | 1 | 78023475 | A | G | -0.0159 | 0.0086 | -0.0125 | 0.0122 | -0.0018 | 0.0336 | -0.0279 | 0.0224 | 0.0061  | 0.0021 | 5 |
| rs75396139 | 1 | 78163352 | A | G | 0.0039  | 0.0056 | -0.0154 | 0.0081 | -0.0344 | 0.0244 | -0.0265 | 0.0127 | -0.0012 | 0.0011 | 5 |
| rs7539956  | 1 | 78058510 | A | T | 0.0103  | 0.0052 | -0.0065 | 0.0074 | -0.0285 | 0.0208 | -0.0233 | 0.0130 | -0.0016 | 0.0012 | 5 |
| rs7540033  | 1 | 78239470 | G | A | 0.0107  | 0.0059 | -0.0141 | 0.0086 | -0.0048 | 0.0245 | -0.0250 | 0.0145 | -0.0031 | 0.0013 | 5 |
| rs7540686  | 1 | 78076589 | C | A | 0.0023  | 0.0048 | -0.0111 | 0.0068 | -0.0448 | 0.0191 | -0.0344 | 0.0119 | 0.0002  | 0.0011 | 5 |
| rs75407441 | 1 | 77832515 | G | C | 0.0038  | 0.0145 | -0.0088 | 0.0212 | -0.1060 | 0.0616 | -0.0420 | 0.0378 | 0.0010  | 0.0036 | 5 |
| rs7540887  | 1 | 78106927 | T | C | 0.0113  | 0.0059 | -0.0120 | 0.0082 | -0.0566 | 0.0232 | -0.0229 | 0.0146 | -0.0018 | 0.0013 | 5 |
| rs7541577  | 1 | 78372376 | T | C | 0.0067  | 0.0053 | 0.0157  | 0.0077 | 0.0652  | 0.0222 | 0.0298  | 0.0133 | -0.0006 | 0.0012 | 5 |
| rs7541886  | 1 | 78337828 | T | C | -0.0012 | 0.0053 | -0.0038 | 0.0075 | -0.0187 | 0.0211 | 0.0052  | 0.0131 | -0.0013 | 0.0012 | 5 |
| rs7542588  | 1 | 77472480 | G | T | 0.0046  | 0.0047 | 0.0097  | 0.0067 | 0.0604  | 0.0188 | 0.0479  | 0.0117 | 0.0021  | 0.0010 | 5 |
| rs7542998  | 1 | 78124343 | G | T | 0.0009  | 0.0072 | -0.0063 | 0.0102 | -0.0284 | 0.0286 | -0.0360 | 0.0182 | 0.0027  | 0.0016 | 5 |
| rs7543037  | 1 | 77817915 | T | C | -0.0135 | 0.0053 | -0.0095 | 0.0074 | -0.0248 | 0.0206 | -0.0229 | 0.0128 | 0.0002  | 0.0012 | 5 |
| rs7543125  | 1 | 77818029 | T | C | -0.0125 | 0.0054 | -0.0116 | 0.0077 | -0.0189 | 0.0212 | -0.0289 | 0.0133 | 0.0007  | 0.0012 | 5 |
| rs7543860  | 1 | 78206435 | G | A | 0.0044  | 0.0054 | -0.0153 | 0.0079 | -0.0511 | 0.0236 | -0.0346 | 0.0124 | -0.0011 | 0.0011 | 5 |

|            |   |          |   |   |         |        |         |        |         |        |         |        |         |        |   |
|------------|---|----------|---|---|---------|--------|---------|--------|---------|--------|---------|--------|---------|--------|---|
| rs7544389  | 1 | 78379025 | T | C | -0.0020 | 0.0067 | 0.0048  | 0.0095 | 0.0000  | 0.0269 | 0.0013  | 0.0175 | -0.0029 | 0.0015 | 5 |
| rs75447952 | 1 | 77788641 | G | T | 0.0011  | 0.0144 | -0.0088 | 0.0209 | -0.1085 | 0.0607 | -0.0427 | 0.0378 | -0.0001 | 0.0035 | 5 |
| rs7544892  | 1 | 77846673 | A | C | -0.0180 | 0.0078 | -0.0074 | 0.0114 | 0.0242  | 0.0320 | -0.0263 | 0.0201 | 0.0045  | 0.0019 | 5 |
| rs7545175  | 1 | 77574052 | G | A | -0.0127 | 0.0061 | -0.0076 | 0.0087 | -0.0115 | 0.0252 | -0.0315 | 0.0132 | 0.0009  | 0.0012 | 5 |
| rs7545376  | 1 | 78106956 | G | A | 0.0108  | 0.0059 | -0.0082 | 0.0086 | -0.0267 | 0.0243 | -0.0294 | 0.0144 | -0.0019 | 0.0013 | 5 |
| rs7545544  | 1 | 77533079 | T | C | -0.0139 | 0.0055 | -0.0149 | 0.0080 | -0.0113 | 0.0225 | -0.0414 | 0.0133 | 0.0008  | 0.0012 | 5 |
| rs7545762  | 1 | 78306601 | T | A | -0.0036 | 0.0049 | 0.0158  | 0.0069 | 0.0209  | 0.0193 | 0.0006  | 0.0121 | 0.0024  | 0.0011 | 5 |
| rs7546155  | 1 | 77649658 | A | G | -0.0148 | 0.0144 | 0.0074  | 0.0203 | -0.0517 | 0.0562 | 0.0142  | 0.0324 | -0.0038 | 0.0032 | 5 |
| rs75461748 | 1 | 77861698 | G | T | 0.0019  | 0.0146 | -0.0082 | 0.0212 | -0.1011 | 0.0617 | -0.0379 | 0.0378 | 0.0010  | 0.0036 | 5 |
| rs7546365  | 1 | 77594771 | A | G | -0.0143 | 0.0052 | -0.0116 | 0.0074 | -0.0305 | 0.0204 | -0.0256 | 0.0128 | 0.0003  | 0.0012 | 5 |
| rs7546605  | 1 | 77614105 | A | G | -0.0159 | 0.0146 | 0.0095  | 0.0206 | -0.0590 | 0.0571 | 0.0117  | 0.0324 | -0.0045 | 0.0032 | 5 |
| rs7547287  | 1 | 78204064 | T | C | -0.0227 | 0.0118 | 0.0159  | 0.0169 | -0.0775 | 0.0471 | 0.0105  | 0.0277 | 0.0004  | 0.0029 | 5 |
| rs7547599  | 1 | 77853195 | A | G | -0.0161 | 0.0060 | -0.0067 | 0.0087 | -0.0365 | 0.0247 | -0.0292 | 0.0149 | 0.0013  | 0.0014 | 5 |
| rs7547820  | 1 | 77857095 | C | A | -0.0161 | 0.0063 | -0.0098 | 0.0092 | -0.0341 | 0.0260 | -0.0365 | 0.0159 | 0.0021  | 0.0014 | 5 |
| rs7548467  | 1 | 77979050 | T | C | -0.0131 | 0.0153 | 0.0164  | 0.0216 | -0.0638 | 0.0590 | -0.0031 | 0.0332 | -0.0037 | 0.0033 | 5 |
| rs7549028  | 1 | 77982044 | A | G | -0.0123 | 0.0152 | 0.0163  | 0.0214 | -0.0653 | 0.0589 | -0.0032 | 0.0332 | -0.0040 | 0.0033 | 5 |
| rs7550428  | 1 | 78273794 | G | A | -0.0004 | 0.0056 | 0.0023  | 0.0079 | -0.0227 | 0.0223 | 0.0074  | 0.0141 | -0.0016 | 0.0012 | 5 |
| rs7550587  | 1 | 77718432 | T | C | -0.0165 | 0.0146 | 0.0085  | 0.0206 | -0.0527 | 0.0573 | 0.0141  | 0.0324 | -0.0044 | 0.0032 | 5 |
| rs7551211  | 1 | 77537400 | C | G | -0.0132 | 0.0056 | -0.0141 | 0.0082 | -0.0091 | 0.0229 | -0.0428 | 0.0136 | 0.0010  | 0.0012 | 5 |
| rs7551729  | 1 | 77537899 | C | G | -0.0132 | 0.0056 | -0.0143 | 0.0082 | -0.0089 | 0.0229 | -0.0427 | 0.0136 | 0.0010  | 0.0012 | 5 |
| rs75517562 | 1 | 78307751 | G | A | 0.0086  | 0.0110 | -0.0117 | 0.0155 | -0.0447 | 0.0432 | 0.0087  | 0.0273 | -0.0019 | 0.0027 | 5 |
| rs7552291  | 1 | 77566309 | A | G | -0.0134 | 0.0055 | -0.0158 | 0.0080 | -0.0156 | 0.0223 | -0.0318 | 0.0132 | 0.0009  | 0.0012 | 5 |
| rs7552859  | 1 | 78303482 | A | T | 0.0012  | 0.0057 | 0.0013  | 0.0080 | -0.0204 | 0.0227 | 0.0026  | 0.0143 | -0.0019 | 0.0013 | 5 |
| rs7554427  | 1 | 78203965 | C | T | -0.0228 | 0.0118 | 0.0158  | 0.0169 | -0.0776 | 0.0471 | 0.0101  | 0.0277 | 0.0003  | 0.0029 | 5 |
| rs7555421  | 1 | 77718660 | C | A | -0.0165 | 0.0146 | 0.0084  | 0.0206 | -0.0529 | 0.0572 | 0.0136  | 0.0324 | -0.0044 | 0.0032 | 5 |
| rs7555504  | 1 | 78164224 | T | G | 0.0026  | 0.0051 | -0.0101 | 0.0072 | -0.0435 | 0.0201 | -0.0322 | 0.0126 | -0.0012 | 0.0011 | 5 |
| rs7555864  | 1 | 77618057 | G | A | -0.0164 | 0.0146 | 0.0092  | 0.0206 | -0.0538 | 0.0573 | 0.0149  | 0.0324 | -0.0044 | 0.0032 | 5 |
| rs75560871 | 1 | 78170018 | T | C | -0.0109 | 0.0164 | 0.0102  | 0.0236 | -0.0684 | 0.0663 | 0.0161  | 0.0366 | -0.0015 | 0.0036 | 5 |
| rs7556227  | 1 | 77818036 | G | A | -0.0120 | 0.0057 | -0.0115 | 0.0077 | -0.0182 | 0.0212 | -0.0286 | 0.0132 | 0.0007  | 0.0012 | 5 |
| rs7556523  | 1 | 77648883 | C | A | -0.0144 | 0.0052 | -0.0117 | 0.0074 | -0.0297 | 0.0204 | -0.0243 | 0.0128 | 0.0003  | 0.0012 | 5 |
| rs75589056 | 1 | 78365999 | A | G | 0.0212  | 0.0140 | 0.0022  | 0.0197 | -0.0142 | 0.0545 | -0.0045 | 0.0330 | -0.0079 | 0.0029 | 5 |
| rs75635555 | 1 | 78179747 | A | G | -0.0239 | 0.0118 | 0.0158  | 0.0168 | -0.0872 | 0.0470 | 0.0046  | 0.0272 | 0.0004  | 0.0029 | 5 |
| rs75642410 | 1 | 78164209 | C | G | -0.0160 | 0.0160 | -0.0088 | 0.0231 | -0.1523 | 0.0637 | 0.0222  | 0.0401 | 0.0004  | 0.0036 | 5 |
| rs75657796 | 1 | 77739944 | G | A | -0.0145 | 0.0146 | 0.0077  | 0.0206 | -0.0557 | 0.0572 | 0.0112  | 0.0323 | -0.0044 | 0.0032 | 5 |
| rs75657972 | 1 | 78455550 | T | C | 0.0249  | 0.0137 | 0.0101  | 0.0192 | -0.0187 | 0.0528 | 0.0025  | 0.0327 | -0.0062 | 0.0028 | 5 |
| rs75672213 | 1 | 78253841 | C | T | -0.0165 | 0.0118 | 0.0151  | 0.0167 | -0.0864 | 0.0456 | 0.0223  | 0.0282 | -0.0017 | 0.0026 | 5 |
| rs75795994 | 1 | 78320442 | G | A | 0.0117  | 0.0133 | -0.0155 | 0.0187 | -0.0756 | 0.0526 | -0.0152 | 0.0331 | -0.0029 | 0.0031 | 5 |
| rs75798281 | 1 | 77559785 | A | G | -0.0028 | 0.0169 | 0.0185  | 0.0249 | -0.0746 | 0.0722 | -0.0573 | 0.0440 | 0.0005  | 0.0040 | 5 |
| rs75807854 | 1 | 77533503 | A | T | -0.0057 | 0.0106 | -0.0095 | 0.0151 | -0.1040 | 0.0490 | -0.0225 | 0.0220 | -0.0006 | 0.0021 | 5 |
| rs75814662 | 1 | 77615804 | G | A | -0.0067 | 0.0154 | 0.0055  | 0.0222 | -0.0917 | 0.0649 | -0.0329 | 0.0392 | -0.0004 | 0.0036 | 5 |
| rs75835795 | 1 | 78134411 | T | A | -0.0080 | 0.0166 | -0.0125 | 0.0248 | 0.0675  | 0.0693 | -0.0367 | 0.0462 | 0.0048  | 0.0032 | 5 |
| rs75844518 | 1 | 78270036 | A | G | 0.0151  | 0.0109 | -0.0075 | 0.0154 | -0.0387 | 0.0429 | -0.0070 | 0.0269 | -0.0020 | 0.0026 | 5 |
| rs75860682 | 1 | 78454632 | A | C | 0.0248  | 0.0137 | 0.0102  | 0.0192 | -0.0187 | 0.0527 | 0.0027  | 0.0327 | -0.0062 | 0.0028 | 5 |
| rs75864717 | 1 | 78221560 | T | C | -0.0181 | 0.0163 | -0.0058 | 0.0235 | -0.1524 | 0.0647 | 0.0185  | 0.0411 | 0.0005  | 0.0036 | 5 |
| rs75865325 | 1 | 77525483 | T | C | -0.0056 | 0.0149 | -0.0188 | 0.0208 | -0.0473 | 0.0574 | -0.0104 | 0.0375 | -0.0021 | 0.0038 | 5 |
| rs75910090 | 1 | 78101628 | G | A | -0.0191 | 0.0163 | -0.0109 | 0.0234 | -0.1478 | 0.0649 | 0.0129  | 0.0412 | -0.0002 | 0.0036 | 5 |

|            |   |          |   |   |         |        |         |        |         |        |         |        |         |        |   |
|------------|---|----------|---|---|---------|--------|---------|--------|---------|--------|---------|--------|---------|--------|---|
| rs75946517 | 1 | 78308511 | T | C | 0.0077  | 0.0109 | -0.0124 | 0.0154 | -0.0498 | 0.0430 | 0.0102  | 0.0274 | -0.0024 | 0.0027 | 5 |
| rs75963771 | 1 | 78197729 | G | T | -0.0167 | 0.0160 | -0.0072 | 0.0231 | -0.1510 | 0.0638 | 0.0269  | 0.0402 | 0.0004  | 0.0036 | 5 |
| rs75971991 | 1 | 77922344 | A | T | -0.0153 | 0.0126 | -0.0006 | 0.0178 | -0.0836 | 0.0487 | -0.0274 | 0.0279 | -0.0037 | 0.0027 | 5 |
| rs76038246 | 1 | 78046785 | G | A | -0.0236 | 0.0107 | -0.0080 | 0.0138 | -0.0459 | 0.0397 | -0.0046 | 0.0225 | 0.0032  | 0.0022 | 5 |
| rs76040536 | 1 | 77652082 | A | C | -0.0101 | 0.0153 | 0.0215  | 0.0213 | -0.0431 | 0.0598 | 0.0155  | 0.0321 | -0.0045 | 0.0032 | 5 |
| rs76052563 | 1 | 78268588 | A | G | 0.0148  | 0.0108 | -0.0078 | 0.0154 | -0.0419 | 0.0428 | -0.0103 | 0.0269 | -0.0019 | 0.0026 | 5 |
| rs76085691 | 1 | 77986209 | A | G | 0.0038  | 0.0146 | -0.0039 | 0.0212 | -0.1061 | 0.0617 | -0.0287 | 0.0376 | 0.0010  | 0.0035 | 5 |
| rs76089914 | 1 | 77560175 | C | T | -0.0025 | 0.0169 | 0.0170  | 0.0249 | -0.0741 | 0.0719 | -0.0573 | 0.0440 | 0.0005  | 0.0040 | 5 |
| rs76106270 | 1 | 77591643 | T | C | -0.0050 | 0.0153 | 0.0032  | 0.0221 | -0.0934 | 0.0644 | -0.0404 | 0.0388 | -0.0004 | 0.0036 | 5 |
| rs76118238 | 1 | 77668494 | C | G | 0.0204  | 0.0167 | -0.0050 | 0.0237 | -0.0197 | 0.0648 | 0.0439  | 0.0489 | -0.0029 | 0.0033 | 5 |
| rs76150938 | 1 | 77886110 | C | G | -0.0319 | 0.0226 | -0.0330 | 0.0316 | -0.0655 | 0.0858 | -0.1055 | 0.0510 | -0.0036 | 0.0051 | 5 |
| rs76178260 | 1 | 78227390 | C | T | -0.0098 | 0.0127 | 0.0091  | 0.0180 | -0.0743 | 0.0497 | 0.0237  | 0.0298 | -0.0003 | 0.0031 | 5 |
| rs76183934 | 1 | 78252136 | G | A | 0.0342  | 0.0225 | -0.0168 | 0.0314 | 0.0439  | 0.0828 | -0.1149 | 0.0532 | 0.0036  | 0.0048 | 5 |
| rs76196312 | 1 | 77991126 | A | G | 0.0029  | 0.0146 | -0.0038 | 0.0212 | -0.1039 | 0.0617 | -0.0279 | 0.0376 | 0.0011  | 0.0035 | 5 |
| rs76217078 | 1 | 78054927 | G | C | 0.0106  | 0.0179 | -0.0014 | 0.0265 | -0.1409 | 0.0774 | -0.0450 | 0.0459 | -0.0035 | 0.0049 | 5 |
| rs76317353 | 1 | 78342850 | A | G | 0.0109  | 0.0109 | -0.0103 | 0.0154 | -0.0543 | 0.0433 | 0.0080  | 0.0272 | -0.0020 | 0.0027 | 5 |
| rs76320690 | 1 | 77548778 | G | A | -0.0026 | 0.0173 | 0.0242  | 0.0254 | -0.0637 | 0.0734 | -0.0591 | 0.0440 | 0.0003  | 0.0041 | 5 |
| rs76351303 | 1 | 78459094 | C | A | 0.0251  | 0.0137 | 0.0100  | 0.0192 | -0.0184 | 0.0528 | 0.0023  | 0.0328 | -0.0062 | 0.0028 | 5 |
| rs76352156 | 1 | 77872790 | C | T | 0.0129  | 0.0113 | 0.0122  | 0.0160 | -0.0142 | 0.0477 | 0.0036  | 0.0324 | -0.0033 | 0.0025 | 5 |
| rs76359089 | 1 | 78349799 | G | T | 0.0093  | 0.0110 | -0.0127 | 0.0155 | -0.0516 | 0.0434 | 0.0055  | 0.0275 | -0.0023 | 0.0027 | 5 |
| rs76413215 | 1 | 77809050 | G | A | -0.0108 | 0.0128 | -0.0081 | 0.0185 | 0.0220  | 0.0513 | 0.0032  | 0.0339 | -0.0005 | 0.0034 | 5 |
| rs76464907 | 1 | 77721759 | T | C | -0.0156 | 0.0146 | 0.0088  | 0.0206 | -0.0567 | 0.0572 | 0.0133  | 0.0323 | -0.0044 | 0.0032 | 5 |
| rs76494121 | 1 | 78049683 | A | G | -0.0489 | 0.0243 | 0.0058  | 0.0363 | -0.1970 | 0.1134 | -0.0630 | 0.0596 | -0.0031 | 0.0058 | 5 |
| rs76501535 | 1 | 77941016 | T | C | -0.0110 | 0.0212 | -0.0228 | 0.0288 | -0.1009 | 0.0843 | 0.0045  | 0.0494 | -0.0037 | 0.0045 | 5 |
| rs76555631 | 1 | 78354713 | C | T | 0.0035  | 0.0116 | -0.0130 | 0.0164 | -0.0497 | 0.0461 | -0.0089 | 0.0305 | -0.0023 | 0.0029 | 5 |
| rs76559776 | 1 | 78433768 | A | C | -0.0255 | 0.0133 | -0.0174 | 0.0185 | -0.0728 | 0.0531 | -0.0758 | 0.0350 | 0.0053  | 0.0030 | 5 |
| rs76576474 | 1 | 77977815 | C | A | 0.0037  | 0.0145 | -0.0094 | 0.0211 | -0.1065 | 0.0614 | -0.0370 | 0.0375 | 0.0010  | 0.0035 | 5 |
| rs76592019 | 1 | 78228326 | T | C | -0.0192 | 0.0163 | -0.0093 | 0.0235 | -0.1489 | 0.0648 | 0.0072  | 0.0402 | 0.0004  | 0.0036 | 5 |
| rs76597893 | 1 | 77945330 | C | T | 0.0028  | 0.0145 | -0.0098 | 0.0211 | -0.1063 | 0.0614 | -0.0397 | 0.0374 | 0.0010  | 0.0035 | 5 |
| rs76603148 | 1 | 77800423 | T | A | -0.0151 | 0.0146 | 0.0097  | 0.0206 | -0.0551 | 0.0573 | 0.0132  | 0.0324 | -0.0041 | 0.0032 | 5 |
| rs76618935 | 1 | 78456418 | G | A | 0.0250  | 0.0137 | 0.0101  | 0.0192 | -0.0188 | 0.0527 | 0.0040  | 0.0326 | -0.0062 | 0.0028 | 5 |
| rs76636149 | 1 | 78135847 | A | T | -0.0339 | 0.0171 | 0.0055  | 0.0248 | -0.0889 | 0.0686 | -0.0012 | 0.0434 | 0.0034  | 0.0049 | 5 |
| rs76684082 | 1 | 77925335 | C | T | -0.0304 | 0.0166 | -0.0086 | 0.0241 | -0.0805 | 0.0658 | -0.0226 | 0.0457 | -0.0005 | 0.0051 | 5 |
| rs76756653 | 1 | 77797047 | A | G | -0.0150 | 0.0146 | 0.0096  | 0.0206 | -0.0526 | 0.0573 | 0.0157  | 0.0322 | -0.0041 | 0.0032 | 5 |
| rs76761099 | 1 | 78166000 | C | T | -0.0141 | 0.0163 | 0.0114  | 0.0235 | -0.0545 | 0.0655 | 0.0122  | 0.0353 | -0.0006 | 0.0036 | 5 |
| rs76806963 | 1 | 78021953 | G | A | -0.0209 | 0.0222 | -0.0322 | 0.0311 | -0.0969 | 0.0846 | -0.0961 | 0.0506 | -0.0036 | 0.0049 | 5 |
| rs76868746 | 1 | 78466763 | T | G | 0.0249  | 0.0137 | 0.0099  | 0.0192 | -0.0169 | 0.0528 | 0.0055  | 0.0327 | -0.0061 | 0.0028 | 5 |
| rs76926973 | 1 | 77801743 | T | C | 0.0174  | 0.0113 | 0.0167  | 0.0159 | -0.0201 | 0.0471 | -0.0078 | 0.0319 | -0.0032 | 0.0024 | 5 |
| rs76950937 | 1 | 78321639 | A | C | -0.0128 | 0.0105 | 0.0011  | 0.0147 | -0.0702 | 0.0419 | -0.0475 | 0.0255 | 0.0025  | 0.0024 | 5 |
| rs76971459 | 1 | 77742799 | C | T | -0.0069 | 0.0154 | 0.0040  | 0.0222 | -0.0969 | 0.0649 | -0.0329 | 0.0391 | -0.0002 | 0.0036 | 5 |
| rs76979177 | 1 | 78328293 | C | A | 0.0096  | 0.0109 | -0.0118 | 0.0154 | -0.0461 | 0.0431 | 0.0080  | 0.0272 | -0.0024 | 0.0027 | 5 |
| rs76984446 | 1 | 78459110 | A | G | 0.0251  | 0.0137 | 0.0102  | 0.0192 | -0.0187 | 0.0528 | 0.0034  | 0.0328 | -0.0062 | 0.0028 | 5 |
| rs77007953 | 1 | 78196064 | T | C | -0.0317 | 0.0176 | 0.0139  | 0.0256 | -0.0867 | 0.0712 | 0.0117  | 0.0441 | 0.0028  | 0.0051 | 5 |
| rs77015705 | 1 | 77486425 | A | G | -0.0169 | 0.0149 | 0.0151  | 0.0209 | -0.0753 | 0.0585 | 0.0231  | 0.0323 | -0.0052 | 0.0033 | 5 |
| rs77127038 | 1 | 77541938 | C | T | 0.0008  | 0.0091 | -0.0027 | 0.0131 | -0.0833 | 0.0377 | -0.0216 | 0.0218 | -0.0007 | 0.0021 | 5 |
| rs77162585 | 1 | 78043677 | A | C | 0.0004  | 0.0154 | -0.0201 | 0.0226 | -0.0694 | 0.0662 | 0.0513  | 0.0436 | 0.0071  | 0.0031 | 5 |

|            |   |          |   |   |         |        |         |        |         |        |         |        |         |        |   |
|------------|---|----------|---|---|---------|--------|---------|--------|---------|--------|---------|--------|---------|--------|---|
| rs77206442 | 1 | 78409943 | A | G | -0.0181 | 0.0196 | -0.0563 | 0.0278 | -0.1325 | 0.0782 | 0.0362  | 0.0430 | -0.0017 | 0.0039 | 5 |
| rs77227261 | 1 | 77940428 | C | G | 0.0029  | 0.0145 | -0.0100 | 0.0211 | -0.1065 | 0.0614 | -0.0372 | 0.0375 | 0.0010  | 0.0035 | 5 |
| rs77239455 | 1 | 78222967 | A | G | -0.0175 | 0.0163 | -0.0069 | 0.0235 | -0.1558 | 0.0648 | 0.0194  | 0.0410 | 0.0005  | 0.0036 | 5 |
| rs77304719 | 1 | 78183653 | A | G | -0.0278 | 0.0127 | 0.0181  | 0.0183 | -0.1286 | 0.0542 | 0.0103  | 0.0275 | 0.0004  | 0.0029 | 5 |
| rs77365667 | 1 | 78154955 | A | G | -0.0164 | 0.0160 | -0.0089 | 0.0231 | -0.1524 | 0.0638 | 0.0234  | 0.0402 | 0.0003  | 0.0036 | 5 |
| rs77396337 | 1 | 78346696 | T | G | 0.0095  | 0.0110 | -0.0121 | 0.0155 | -0.0534 | 0.0434 | 0.0070  | 0.0273 | -0.0023 | 0.0027 | 5 |
| rs77431680 | 1 | 78374756 | G | A | 0.0186  | 0.0211 | 0.0041  | 0.0291 | 0.0749  | 0.0787 | -0.0597 | 0.0524 | 0.0022  | 0.0042 | 5 |
| rs77441127 | 1 | 78194072 | T | C | -0.0235 | 0.0119 | 0.0162  | 0.0168 | -0.0846 | 0.0471 | 0.0106  | 0.0277 | 0.0004  | 0.0029 | 5 |
| rs77475495 | 1 | 78153585 | T | C | -0.0153 | 0.0163 | -0.0078 | 0.0236 | -0.1300 | 0.0650 | 0.0199  | 0.0404 | 0.0009  | 0.0037 | 5 |
| rs77506741 | 1 | 78284343 | A | G | 0.0126  | 0.0114 | -0.0141 | 0.0161 | -0.0606 | 0.0450 | 0.0010  | 0.0281 | -0.0026 | 0.0028 | 5 |
| rs77526141 | 1 | 77707594 | A | C | -0.0154 | 0.0146 | 0.0091  | 0.0206 | -0.0584 | 0.0571 | 0.0130  | 0.0323 | -0.0044 | 0.0032 | 5 |
| rs77584520 | 1 | 78029133 | T | A | -0.0157 | 0.0127 | 0.0015  | 0.0178 | -0.0763 | 0.0487 | -0.0264 | 0.0279 | -0.0039 | 0.0027 | 5 |
| rs77589019 | 1 | 77985068 | C | A | 0.0047  | 0.0145 | -0.0053 | 0.0212 | -0.1078 | 0.0614 | -0.0364 | 0.0375 | 0.0008  | 0.0035 | 5 |
| rs77595732 | 1 | 77975685 | A | G | 0.0038  | 0.0145 | -0.0092 | 0.0211 | -0.1065 | 0.0614 | -0.0370 | 0.0374 | 0.0009  | 0.0035 | 5 |
| rs77608940 | 1 | 78096125 | G | A | -0.0187 | 0.0163 | -0.0112 | 0.0234 | -0.1450 | 0.0649 | 0.0088  | 0.0413 | -0.0003 | 0.0036 | 5 |
| rs77611954 | 1 | 78045439 | A | G | -0.0108 | 0.0157 | -0.0161 | 0.0235 | 0.0342  | 0.0657 | -0.0349 | 0.0408 | 0.0029  | 0.0030 | 5 |
| rs77702727 | 1 | 77780585 | G | C | -0.0155 | 0.0146 | 0.0085  | 0.0206 | -0.0551 | 0.0573 | 0.0131  | 0.0323 | -0.0042 | 0.0032 | 5 |
| rs77706475 | 1 | 78461393 | T | G | 0.0250  | 0.0137 | 0.0102  | 0.0192 | -0.0201 | 0.0527 | 0.0033  | 0.0327 | -0.0061 | 0.0028 | 5 |
| rs77707631 | 1 | 78026303 | G | T | 0.0067  | 0.0148 | -0.0015 | 0.0221 | -0.0947 | 0.0647 | -0.0368 | 0.0376 | 0.0008  | 0.0035 | 5 |
| rs7771501  | 1 | 77828301 | T | C | 0.0032  | 0.0145 | -0.0041 | 0.0211 | -0.1045 | 0.0613 | -0.0378 | 0.0380 | 0.0007  | 0.0036 | 5 |
| rs77747426 | 1 | 78325043 | C | T | -0.0001 | 0.0094 | -0.0197 | 0.0132 | -0.0063 | 0.0363 | 0.0171  | 0.0225 | 0.0017  | 0.0020 | 5 |
| rs77803049 | 1 | 77885488 | T | C | -0.0288 | 0.0165 | -0.0087 | 0.0239 | -0.0737 | 0.0653 | -0.0251 | 0.0501 | -0.0013 | 0.0051 | 5 |
| rs77853395 | 1 | 78018010 | T | C | 0.0052  | 0.0145 | -0.0050 | 0.0212 | -0.1104 | 0.0615 | -0.0334 | 0.0375 | 0.0006  | 0.0035 | 5 |
| rs77872605 | 1 | 78225352 | T | A | -0.0182 | 0.0163 | -0.0095 | 0.0236 | -0.1551 | 0.0650 | 0.0156  | 0.0412 | 0.0005  | 0.0036 | 5 |
| rs77954067 | 1 | 78302041 | A | G | 0.0081  | 0.0110 | -0.0125 | 0.0156 | -0.0422 | 0.0435 | 0.0122  | 0.0277 | -0.0024 | 0.0028 | 5 |
| rs78008462 | 1 | 78354024 | A | G | 0.0088  | 0.0175 | 0.0180  | 0.0246 | -0.0729 | 0.0684 | -0.0079 | 0.0372 | -0.0020 | 0.0039 | 5 |
| rs78025423 | 1 | 78275334 | T | C | 0.0058  | 0.0149 | -0.0153 | 0.0209 | -0.0663 | 0.0605 | -0.0306 | 0.0395 | -0.0049 | 0.0037 | 5 |
| rs78079110 | 1 | 78402223 | A | G | -0.0025 | 0.0106 | -0.0065 | 0.0151 | -0.0608 | 0.0448 | -0.0568 | 0.0247 | 0.0020  | 0.0021 | 5 |
| rs78109089 | 1 | 78364123 | A | T | 0.0163  | 0.0246 | 0.0175  | 0.0328 | 0.0612  | 0.0851 | -0.0640 | 0.0531 | 0.0023  | 0.0042 | 5 |
| rs78143558 | 1 | 78231456 | A | G | -0.0023 | 0.0130 | -0.0085 | 0.0186 | -0.0873 | 0.0502 | -0.0560 | 0.0324 | -0.0002 | 0.0028 | 5 |
| rs78151298 | 1 | 77904554 | A | T | 0.0027  | 0.0145 | -0.0102 | 0.0211 | -0.1094 | 0.0615 | -0.0386 | 0.0376 | 0.0011  | 0.0035 | 5 |
| rs78176462 | 1 | 77706531 | C | T | -0.0152 | 0.0146 | 0.0087  | 0.0206 | -0.0555 | 0.0571 | 0.0130  | 0.0323 | -0.0044 | 0.0032 | 5 |
| rs78223713 | 1 | 77592853 | A | C | -0.0050 | 0.0153 | 0.0038  | 0.0221 | -0.0951 | 0.0643 | -0.0421 | 0.0387 | -0.0004 | 0.0036 | 5 |
| rs78249673 | 1 | 77671034 | A | T | -0.0055 | 0.0145 | -0.0018 | 0.0201 | 0.0387  | 0.0558 | 0.0077  | 0.0230 | -0.0029 | 0.0022 | 5 |
| rs78296518 | 1 | 78135364 | A | G | -0.0182 | 0.0149 | 0.0071  | 0.0211 | -0.0870 | 0.0589 | 0.0068  | 0.0333 | -0.0057 | 0.0032 | 5 |
| rs78310126 | 1 | 78237562 | G | A | -0.0082 | 0.0122 | -0.0047 | 0.0171 | -0.0577 | 0.0484 | -0.0437 | 0.0327 | 0.0054  | 0.0028 | 5 |
| rs78349184 | 1 | 77849480 | A | G | 0.0024  | 0.0146 | -0.0076 | 0.0212 | -0.0970 | 0.0619 | -0.0348 | 0.0379 | 0.0009  | 0.0036 | 5 |
| rs78391465 | 1 | 78166137 | G | A | -0.0229 | 0.0126 | 0.0212  | 0.0171 | -0.1036 | 0.0502 | 0.0123  | 0.0276 | 0.0005  | 0.0029 | 5 |
| rs78482603 | 1 | 77985539 | C | T | 0.0049  | 0.0145 | -0.0054 | 0.0212 | -0.1078 | 0.0614 | -0.0359 | 0.0375 | 0.0008  | 0.0035 | 5 |
| rs78538601 | 1 | 78281383 | G | C | 0.0125  | 0.0115 | -0.0136 | 0.0161 | -0.0618 | 0.0450 | 0.0009  | 0.0281 | -0.0025 | 0.0028 | 5 |
| rs78568029 | 1 | 78309296 | G | A | -0.0139 | 0.0106 | 0.0013  | 0.0148 | -0.0700 | 0.0419 | -0.0478 | 0.0255 | 0.0024  | 0.0024 | 5 |
| rs78569231 | 1 | 78235516 | T | C | -0.0284 | 0.0200 | -0.0171 | 0.0284 | 0.1148  | 0.0842 | -0.1388 | 0.0595 | 0.0080  | 0.0055 | 5 |
| rs78624477 | 1 | 78339679 | C | T | 0.0098  | 0.0109 | -0.0124 | 0.0155 | -0.0503 | 0.0434 | 0.0085  | 0.0272 | -0.0024 | 0.0027 | 5 |
| rs78666255 | 1 | 78172631 | T | C | -0.0164 | 0.0160 | -0.0122 | 0.0232 | -0.1532 | 0.0641 | 0.0234  | 0.0400 | 0.0004  | 0.0036 | 5 |
| rs78679929 | 1 | 77559281 | T | C | -0.0030 | 0.0169 | 0.0170  | 0.0249 | -0.0749 | 0.0719 | -0.0572 | 0.0440 | 0.0005  | 0.0040 | 5 |
| rs78683457 | 1 | 78420888 | T | G | 0.0114  | 0.0079 | 0.0307  | 0.0128 | 0.0718  | 0.0415 | 0.0292  | 0.0128 | -0.0006 | 0.0011 | 5 |

|            |   |          |   |   |         |        |         |        |         |        |         |        |         |        |   |
|------------|---|----------|---|---|---------|--------|---------|--------|---------|--------|---------|--------|---------|--------|---|
| rs78699850 | 1 | 77886599 | G | T | 0.0018  | 0.0146 | -0.0080 | 0.0212 | -0.0998 | 0.0618 | -0.0328 | 0.0379 | 0.0010  | 0.0036 | 5 |
| rs78719804 | 1 | 77598602 | A | C | -0.0057 | 0.0153 | 0.0025  | 0.0221 | -0.0968 | 0.0646 | -0.0397 | 0.0391 | -0.0005 | 0.0036 | 5 |
| rs78743996 | 1 | 78170053 | A | C | -0.0302 | 0.0178 | 0.0109  | 0.0267 | -0.1032 | 0.0747 | 0.0109  | 0.0436 | 0.0028  | 0.0051 | 5 |
| rs78771835 | 1 | 77776494 | A | G | -0.0013 | 0.0145 | -0.0088 | 0.0210 | -0.1050 | 0.0611 | -0.0397 | 0.0381 | -0.0001 | 0.0035 | 5 |
| rs78876907 | 1 | 78456195 | C | T | 0.0250  | 0.0137 | 0.0101  | 0.0192 | -0.0188 | 0.0527 | 0.0025  | 0.0327 | -0.0062 | 0.0028 | 5 |
| rs78879253 | 1 | 78241054 | G | C | 0.0118  | 0.0168 | -0.0242 | 0.0254 | 0.0077  | 0.0677 | -0.0044 | 0.0374 | -0.0054 | 0.0035 | 5 |
| rs78908045 | 1 | 78255104 | C | A | 0.0158  | 0.0111 | -0.0117 | 0.0156 | -0.0552 | 0.0439 | -0.0062 | 0.0289 | -0.0016 | 0.0026 | 5 |
| rs789283   | 1 | 78405849 | C | T | 0.0085  | 0.0052 | 0.0178  | 0.0075 | 0.0599  | 0.0217 | 0.0245  | 0.0129 | -0.0005 | 0.0011 | 5 |
| rs78977867 | 1 | 77903615 | G | T | 0.0127  | 0.0184 | 0.0004  | 0.0256 | -0.1362 | 0.0763 | -0.0547 | 0.0476 | 0.0004  | 0.0037 | 5 |
| rs78983311 | 1 | 78420413 | A | C | -0.0239 | 0.0134 | -0.0151 | 0.0186 | -0.0839 | 0.0535 | -0.0800 | 0.0356 | 0.0049  | 0.0030 | 5 |
| rs78984070 | 1 | 78354197 | C | T | -0.0119 | 0.0101 | 0.0053  | 0.0142 | -0.0707 | 0.0406 | -0.0480 | 0.0245 | 0.0022  | 0.0023 | 5 |
| rs78993137 | 1 | 77797500 | C | A | -0.0147 | 0.0146 | 0.0098  | 0.0206 | -0.0529 | 0.0573 | 0.0132  | 0.0324 | -0.0041 | 0.0032 | 5 |
| rs79075889 | 1 | 78089197 | T | C | -0.0187 | 0.0107 | -0.0172 | 0.0151 | 0.0426  | 0.0416 | 0.0011  | 0.0282 | 0.0056  | 0.0025 | 5 |
| rs79094534 | 1 | 78305619 | G | C | 0.0083  | 0.0110 | -0.0131 | 0.0156 | -0.0419 | 0.0435 | 0.0120  | 0.0274 | -0.0023 | 0.0028 | 5 |
| rs79122809 | 1 | 78367319 | G | A | 0.0198  | 0.0214 | -0.0040 | 0.0297 | -0.0338 | 0.0811 | -0.0685 | 0.0537 | 0.0017  | 0.0042 | 5 |
| rs79187964 | 1 | 77851834 | C | T | 0.0032  | 0.0145 | -0.0088 | 0.0212 | -0.1060 | 0.0616 | -0.0416 | 0.0378 | 0.0011  | 0.0036 | 5 |
| rs79190372 | 1 | 77986906 | T | C | 0.0033  | 0.0146 | -0.0041 | 0.0212 | -0.1042 | 0.0617 | -0.0288 | 0.0376 | 0.0010  | 0.0035 | 5 |
| rs79214614 | 1 | 77669695 | T | C | 0.0040  | 0.0101 | -0.0083 | 0.0141 | -0.0736 | 0.0397 | -0.0263 | 0.0244 | 0.0001  | 0.0024 | 5 |
| rs79301258 | 1 | 78464650 | G | A | 0.0249  | 0.0137 | 0.0099  | 0.0192 | -0.0171 | 0.0528 | 0.0035  | 0.0327 | -0.0061 | 0.0028 | 5 |
| rs79302605 | 1 | 77707169 | G | A | -0.0157 | 0.0146 | 0.0087  | 0.0206 | -0.0524 | 0.0571 | 0.0137  | 0.0324 | -0.0043 | 0.0032 | 5 |
| rs79357513 | 1 | 78091617 | G | C | -0.0193 | 0.0153 | 0.0149  | 0.0215 | -0.0830 | 0.0600 | -0.0056 | 0.0338 | -0.0046 | 0.0033 | 5 |
| rs79368937 | 1 | 78211547 | T | G | -0.0161 | 0.0160 | -0.0086 | 0.0231 | -0.1499 | 0.0640 | 0.0238  | 0.0405 | 0.0003  | 0.0036 | 5 |
| rs79401340 | 1 | 77548312 | C | T | 0.0009  | 0.0168 | 0.0203  | 0.0249 | -0.0773 | 0.0717 | -0.0564 | 0.0439 | 0.0000  | 0.0040 | 5 |
| rs79434595 | 1 | 78347122 | G | C | 0.0094  | 0.0110 | -0.0125 | 0.0155 | -0.0535 | 0.0434 | 0.0070  | 0.0274 | -0.0024 | 0.0027 | 5 |
| rs79499398 | 1 | 78163121 | G | C | 0.0039  | 0.0056 | -0.0150 | 0.0081 | -0.0335 | 0.0244 | -0.0253 | 0.0128 | -0.0011 | 0.0011 | 5 |
| rs79516854 | 1 | 77866291 | A | G | -0.0007 | 0.0180 | 0.0000  | 0.0250 | 0.0611  | 0.0681 | 0.0235  | 0.0459 | 0.0020  | 0.0041 | 5 |
| rs79557263 | 1 | 78123690 | G | A | -0.0195 | 0.0162 | -0.0127 | 0.0233 | -0.1504 | 0.0645 | 0.0110  | 0.0407 | -0.0002 | 0.0036 | 5 |
| rs79557452 | 1 | 78031844 | G | A | 0.0020  | 0.0153 | -0.0190 | 0.0225 | -0.0745 | 0.0659 | 0.0321  | 0.0428 | 0.0073  | 0.0030 | 5 |
| rs79567815 | 1 | 78444764 | G | A | 0.0186  | 0.0214 | -0.0081 | 0.0296 | 0.0546  | 0.0807 | -0.0753 | 0.0561 | 0.0020  | 0.0042 | 5 |
| rs79574016 | 1 | 78385599 | G | A | 0.0189  | 0.0214 | -0.0019 | 0.0296 | 0.0349  | 0.0808 | -0.0775 | 0.0531 | 0.0017  | 0.0042 | 5 |
| rs79616258 | 1 | 77705865 | T | C | -0.0060 | 0.0154 | 0.0057  | 0.0222 | -0.0909 | 0.0649 | -0.0328 | 0.0391 | -0.0003 | 0.0036 | 5 |
| rs79619359 | 1 | 78196616 | G | A | -0.0166 | 0.0160 | -0.0071 | 0.0231 | -0.1509 | 0.0638 | 0.0272  | 0.0402 | 0.0003  | 0.0036 | 5 |
| rs79631755 | 1 | 77744432 | G | T | -0.0040 | 0.0153 | 0.0000  | 0.0221 | -0.1011 | 0.0644 | -0.0410 | 0.0386 | 0.0002  | 0.0037 | 5 |
| rs79661125 | 1 | 77805825 | A | G | -0.0153 | 0.0146 | 0.0101  | 0.0206 | -0.0546 | 0.0573 | 0.0135  | 0.0324 | -0.0042 | 0.0032 | 5 |
| rs79679254 | 1 | 78459670 | G | A | 0.0249  | 0.0137 | 0.0099  | 0.0192 | -0.0177 | 0.0527 | 0.0031  | 0.0327 | -0.0061 | 0.0028 | 5 |
| rs79723547 | 1 | 77802095 | C | T | -0.0154 | 0.0146 | 0.0100  | 0.0206 | -0.0516 | 0.0574 | 0.0141  | 0.0324 | -0.0041 | 0.0032 | 5 |
| rs79727468 | 1 | 78464914 | T | C | 0.0243  | 0.0137 | 0.0091  | 0.0192 | -0.0164 | 0.0527 | 0.0035  | 0.0327 | -0.0061 | 0.0028 | 5 |
| rs79772206 | 1 | 78228284 | T | C | -0.0193 | 0.0163 | -0.0081 | 0.0235 | -0.1588 | 0.0648 | 0.0134  | 0.0414 | 0.0003  | 0.0036 | 5 |
| rs79781720 | 1 | 78313919 | T | A | 0.0009  | 0.0051 | 0.0151  | 0.0072 | 0.0390  | 0.0200 | 0.0098  | 0.0125 | 0.0017  | 0.0011 | 5 |
| rs79842431 | 1 | 78371749 | A | G | 0.0206  | 0.0215 | -0.0033 | 0.0297 | 0.0474  | 0.0811 | -0.0702 | 0.0537 | 0.0020  | 0.0042 | 5 |
| rs79898767 | 1 | 77548660 | T | A | 0.0010  | 0.0169 | 0.0092  | 0.0249 | -0.0755 | 0.0717 | -0.0592 | 0.0440 | 0.0000  | 0.0040 | 5 |
| rs79922266 | 1 | 78334734 | C | T | -0.0120 | 0.0106 | 0.0008  | 0.0148 | -0.0741 | 0.0420 | -0.0470 | 0.0255 | 0.0023  | 0.0024 | 5 |
| rs79928675 | 1 | 77674549 | A | G | -0.0035 | 0.0153 | 0.0034  | 0.0221 | -0.0946 | 0.0644 | -0.0369 | 0.0389 | -0.0002 | 0.0036 | 5 |
| rs79972342 | 1 | 77888397 | A | C | -0.0113 | 0.0127 | -0.0133 | 0.0178 | -0.1193 | 0.0502 | -0.0033 | 0.0336 | -0.0019 | 0.0028 | 5 |
| rs79979190 | 1 | 78432169 | T | C | -0.0228 | 0.0134 | -0.0148 | 0.0187 | -0.0822 | 0.0538 | -0.0875 | 0.0364 | 0.0054  | 0.0030 | 5 |
| rs79986614 | 1 | 78054496 | A | G | 0.0112  | 0.0179 | -0.0005 | 0.0265 | -0.1423 | 0.0773 | -0.0444 | 0.0459 | -0.0033 | 0.0049 | 5 |

|            |   |          |   |   |         |        |         |        |         |        |         |        |         |        |   |
|------------|---|----------|---|---|---------|--------|---------|--------|---------|--------|---------|--------|---------|--------|---|
| rs80015359 | 1 | 78108914 | T | C | -0.0181 | 0.0162 | -0.0115 | 0.0233 | -0.1519 | 0.0646 | 0.0113  | 0.0409 | -0.0001 | 0.0036 | 5 |
| rs80077063 | 1 | 77970415 | C | T | 0.0029  | 0.0145 | -0.0101 | 0.0211 | -0.1104 | 0.0615 | -0.0372 | 0.0374 | 0.0008  | 0.0035 | 5 |
| rs80107066 | 1 | 78335219 | G | A | 0.0103  | 0.0109 | -0.0115 | 0.0155 | -0.0511 | 0.0433 | 0.0077  | 0.0273 | -0.0023 | 0.0027 | 5 |
| rs80113363 | 1 | 78081637 | G | T | -0.0183 | 0.0152 | 0.0161  | 0.0215 | -0.0780 | 0.0597 | -0.0068 | 0.0337 | -0.0045 | 0.0033 | 5 |
| rs80133943 | 1 | 78422579 | G | A | 0.0048  | 0.0264 | 0.0137  | 0.0371 | 0.1036  | 0.1152 | -0.0760 | 0.0659 | 0.0068  | 0.0054 | 5 |
| rs80166107 | 1 | 77597458 | C | G | -0.0049 | 0.0153 | 0.0023  | 0.0221 | -0.0928 | 0.0644 | -0.0397 | 0.0388 | -0.0004 | 0.0036 | 5 |
| rs80175687 | 1 | 77836548 | C | T | -0.0150 | 0.0152 | 0.0142  | 0.0215 | -0.0527 | 0.0588 | 0.0054  | 0.0332 | -0.0044 | 0.0033 | 5 |
| rs80191619 | 1 | 78374207 | G | A | 0.0179  | 0.0212 | -0.0017 | 0.0293 | 0.0373  | 0.0797 | -0.0677 | 0.0536 | 0.0023  | 0.0042 | 5 |
| rs80234666 | 1 | 77634848 | C | G | -0.0151 | 0.0146 | 0.0094  | 0.0206 | -0.0577 | 0.0572 | 0.0135  | 0.0323 | -0.0045 | 0.0032 | 5 |
| rs80286030 | 1 | 78350658 | A | T | 0.0091  | 0.0110 | -0.0129 | 0.0155 | -0.0514 | 0.0434 | 0.0026  | 0.0276 | -0.0023 | 0.0027 | 5 |
| rs80346684 | 1 | 78434110 | A | G | -0.0231 | 0.0134 | -0.0157 | 0.0186 | -0.0813 | 0.0536 | -0.0828 | 0.0356 | 0.0053  | 0.0030 | 5 |
| rs80352215 | 1 | 77769072 | T | A | -0.0149 | 0.0146 | 0.0083  | 0.0206 | -0.0564 | 0.0572 | 0.0129  | 0.0323 | -0.0043 | 0.0032 | 5 |
| rs80355711 | 1 | 78316261 | A | G | 0.0026  | 0.0155 | -0.0155 | 0.0233 | 0.0673  | 0.0637 | -0.0483 | 0.0354 | 0.0022  | 0.0030 | 5 |
| rs809911   | 1 | 78116820 | A | G | 0.0118  | 0.0070 | -0.0175 | 0.0104 | -0.0283 | 0.0309 | -0.0251 | 0.0150 | -0.0033 | 0.0014 | 5 |
| rs812097   | 1 | 78100550 | G | A | 0.0112  | 0.0058 | -0.0115 | 0.0082 | -0.0451 | 0.0231 | -0.0235 | 0.0143 | -0.0017 | 0.0013 | 5 |
| rs8179272  | 1 | 77809617 | T | C | -0.0126 | 0.0052 | -0.0099 | 0.0074 | -0.0239 | 0.0205 | -0.0276 | 0.0128 | 0.0001  | 0.0012 | 5 |
| rs872342   | 1 | 77598604 | C | T | -0.0145 | 0.0052 | -0.0118 | 0.0074 | -0.0304 | 0.0204 | -0.0256 | 0.0128 | 0.0003  | 0.0012 | 5 |
| rs9324162  | 1 | 77489119 | G | A | 0.0080  | 0.0059 | 0.0154  | 0.0084 | 0.1003  | 0.0233 | 0.0683  | 0.0152 | -0.0008 | 0.0013 | 5 |
| rs9324166  | 1 | 77922584 | C | T | -0.0210 | 0.0083 | -0.0077 | 0.0118 | 0.0120  | 0.0325 | -0.0296 | 0.0214 | 0.0051  | 0.0020 | 5 |
| rs942099   | 1 | 78171195 | T | A | -0.0082 | 0.0074 | 0.0048  | 0.0105 | -0.0338 | 0.0294 | -0.0209 | 0.0185 | 0.0024  | 0.0017 | 5 |
| rs942100   | 1 | 78233710 | A | G | 0.0096  | 0.0058 | -0.0120 | 0.0082 | -0.0225 | 0.0230 | -0.0241 | 0.0144 | -0.0030 | 0.0013 | 5 |
| rs9425188  | 1 | 78175410 | T | C | 0.0086  | 0.0060 | -0.0165 | 0.0084 | -0.0375 | 0.0236 | -0.0307 | 0.0148 | -0.0030 | 0.0013 | 5 |
| rs9425220  | 1 | 78187901 | A | G | 0.0024  | 0.0081 | -0.0108 | 0.0118 | -0.0337 | 0.0448 | -0.0336 | 0.0148 | -0.0022 | 0.0013 | 5 |
| rs950733   | 1 | 77637794 | C | A | 0.0019  | 0.0162 | -0.0154 | 0.0227 | -0.0351 | 0.0616 | -0.0177 | 0.0420 | -0.0008 | 0.0041 | 5 |
| rs958188   | 1 | 78253347 | G | C | -0.0039 | 0.0082 | -0.0031 | 0.0119 | -0.0521 | 0.0338 | -0.0299 | 0.0207 | 0.0031  | 0.0018 | 5 |
| rs962388   | 1 | 77563417 | G | A | -0.0143 | 0.0058 | -0.0164 | 0.0085 | 0.0009  | 0.0236 | -0.0366 | 0.0140 | 0.0004  | 0.0013 | 5 |
| rs9659817  | 1 | 77790197 | G | A | -0.0156 | 0.0146 | 0.0097  | 0.0206 | -0.0523 | 0.0573 | 0.0134  | 0.0324 | -0.0041 | 0.0032 | 5 |
| rs9659938  | 1 | 77930941 | T | C | -0.0206 | 0.0083 | -0.0096 | 0.0117 | 0.0083  | 0.0323 | -0.0294 | 0.0215 | 0.0051  | 0.0020 | 5 |
| rs9661193  | 1 | 77915367 | T | C | -0.0206 | 0.0083 | -0.0094 | 0.0117 | 0.0091  | 0.0323 | -0.0297 | 0.0216 | 0.0051  | 0.0020 | 5 |
| rs9661421  | 1 | 77920938 | T | C | -0.0130 | 0.0154 | 0.0161  | 0.0217 | -0.0898 | 0.0598 | -0.0032 | 0.0344 | -0.0046 | 0.0033 | 5 |
| rs9661687  | 1 | 77921585 | C | T | -0.0147 | 0.0066 | -0.0118 | 0.0093 | -0.0485 | 0.0261 | -0.0255 | 0.0168 | 0.0027  | 0.0015 | 5 |
| rs9662129  | 1 | 77908231 | C | T | -0.0164 | 0.0060 | -0.0096 | 0.0085 | -0.0600 | 0.0238 | -0.0284 | 0.0151 | 0.0013  | 0.0014 | 5 |
| rs9662527  | 1 | 77713528 | A | G | -0.0129 | 0.0054 | -0.0134 | 0.0076 | -0.0224 | 0.0210 | -0.0274 | 0.0132 | 0.0009  | 0.0012 | 5 |
| rs9663066  | 1 | 77873969 | T | G | -0.0316 | 0.0226 | -0.0322 | 0.0316 | -0.0658 | 0.0858 | -0.1039 | 0.0509 | -0.0035 | 0.0051 | 5 |
| rs9700606  | 1 | 78205389 | A | T | 0.0019  | 0.0049 | -0.0109 | 0.0070 | -0.0582 | 0.0196 | -0.0375 | 0.0122 | -0.0011 | 0.0011 | 5 |
| rs9726525  | 1 | 77888900 | T | G | 0.0059  | 0.0056 | -0.0127 | 0.0082 | -0.0488 | 0.0233 | -0.0232 | 0.0143 | -0.0029 | 0.0012 | 5 |
| rs9728416  | 1 | 77785269 | T | C | 0.0085  | 0.0129 | -0.0042 | 0.0178 | -0.1214 | 0.0517 | -0.0178 | 0.0314 | 0.0004  | 0.0030 | 5 |
| rs9729146  | 1 | 77922420 | C | T | -0.0148 | 0.0066 | -0.0113 | 0.0093 | -0.0490 | 0.0261 | -0.0259 | 0.0169 | 0.0026  | 0.0015 | 5 |
| rs9729667  | 1 | 77883529 | T | C | 0.0100  | 0.0051 | 0.0214  | 0.0074 | 0.0857  | 0.0213 | 0.0517  | 0.0126 | 0.0007  | 0.0011 | 5 |
| rs9730688  | 1 | 78012678 | A | G | -0.0136 | 0.0094 | -0.0081 | 0.0138 | 0.0228  | 0.0436 | -0.0351 | 0.0221 | 0.0062  | 0.0021 | 5 |
| rs9787003  | 1 | 77987303 | A | G | 0.0040  | 0.0048 | -0.0108 | 0.0068 | -0.0312 | 0.0191 | -0.0208 | 0.0119 | -0.0013 | 0.0011 | 5 |
| rs9787060  | 1 | 77502671 | G | A | -0.0003 | 0.0050 | -0.0028 | 0.0070 | 0.0051  | 0.0196 | 0.0035  | 0.0123 | 0.0024  | 0.0011 | 5 |
| rs9787153  | 1 | 77534373 | C | T | -0.0138 | 0.0055 | -0.0148 | 0.0080 | -0.0114 | 0.0225 | -0.0415 | 0.0133 | 0.0007  | 0.0012 | 5 |
| rs9787306  | 1 | 77604773 | T | C | 0.0118  | 0.0059 | -0.0147 | 0.0083 | -0.0417 | 0.0235 | -0.0135 | 0.0145 | -0.0031 | 0.0013 | 5 |
| rs9970181  | 1 | 78396555 | A | T | 0.0075  | 0.0052 | 0.0173  | 0.0076 | 0.0593  | 0.0218 | 0.0264  | 0.0130 | -0.0002 | 0.0011 | 5 |
| rs9988619  | 1 | 77591606 | A | C | -0.0145 | 0.0052 | -0.0116 | 0.0074 | -0.0302 | 0.0204 | -0.0272 | 0.0128 | 0.0003  | 0.0012 | 5 |
