# Supplementary material for: Shared genetic aetiology of respiratory diseases: a genome-wide multitraits association analysis
Source: PubMed Central journal article supplement — BMJ Open Respir Res. 2024 Jun 4;11(1):e002148. doi: 10.1136/bmjresp-2023-002148 (PMC11163672; doi:10.1136/bmjresp-2023-002148), 2024-06-04
Supplement: bmjresp-2023-002148supp014.pdf [file bmjresp-2023-002148supp014.pdf]

| <b>eTable 13. LD relationship between the causal SNP and nearby SNPs within 1000 kb</b> |              |             |                   |              |             |              |           |
|-----------------------------------------------------------------------------------------|--------------|-------------|-------------------|--------------|-------------|--------------|-----------|
| <b>loci</b>                                                                             | <b>CHR_A</b> | <b>BP_A</b> | <b>causal_SNP</b> | <b>CHR_B</b> | <b>BP_B</b> | <b>SNP_B</b> | <b>R2</b> |
| 5                                                                                       | 1            | 78450517    | rs34517439        | NA           | NA          | NA           | NA        |
| 17                                                                                      | 2            | 103009412   | rs11679146        | 2            | 103009894   | rs3771158    | 0.8029    |
| 45                                                                                      | 5            | 44428516    | rs9292907         | NA           | NA          | NA           | NA        |
| 57                                                                                      | 6            | 19842661    | rs9350191         | 6            | 19842497    | rs6917605    | 0.2766    |
| 73                                                                                      | 7            | 116909572   | rs147678978       | NA           | NA          | NA           | NA        |
| 77                                                                                      | 8            | 27413986    | rs56223946        | NA           | NA          | NA           | NA        |
| 86                                                                                      | 9            | 34654142    | rs3808868         | 9            | 34652330    | rs1061758    | 0.2283    |
| 90                                                                                      | 10           | 9054340     | rs1775554         | 10           | 9053672     | rs2589562    | 0.2413    |
| 90                                                                                      | 10           | 9054340     | rs1775554         | 10           | 9054325     | rs1775553    | 0.9874    |
| 90                                                                                      | 10           | 9054340     | rs1775554         | 10           | 9054367     | rs72782687   | 0.2046    |
| 90                                                                                      | 10           | 9054340     | rs1775554         | 10           | 9054646     | rs1775555    | 1.0000    |
| 90                                                                                      | 10           | 9054340     | rs1775554         | 10           | 9054689     | rs11256026   | 0.4124    |
| 90                                                                                      | 10           | 9054340     | rs1775554         | 10           | 9054787     | rs1663687    | 0.9916    |
| 119                                                                                     | 14           | 94844947    | rs28929474        | NA           | NA          | NA           | NA        |
| 123                                                                                     | 15           | 49956672    | rs10519237        | 15           | 49955360    | rs12902098   | 0.9640    |
| 123                                                                                     | 15           | 49956672    | rs10519237        | 15           | 49955738    | rs12906970   | 1.0000    |
| 123                                                                                     | 15           | 49956672    | rs10519237        | 15           | 49956996    | rs1911617    | 0.7947    |
| 123                                                                                     | 15           | 49956672    | rs10519237        | 15           | 49957299    | rs731052     | 0.7947    |
| 123                                                                                     | 15           | 49956672    | rs10519237        | 15           | 49957834    | rs2202711    | 0.7947    |
| 123                                                                                     | 15           | 49956672    | rs10519237        | 15           | 49957860    | rs2202712    | 0.9640    |
| 131                                                                                     | 16           | 31006972    | rs2199036         | NA           | NA          | NA           | NA        |
| 132                                                                                     | 16           | 53800200    | rs9940278         | 16           | 53799279    | rs57292959   | 0.9930    |
| 132                                                                                     | 16           | 53800200    | rs9940278         | 16           | 53799296    | rs9937521    | 0.9930    |
| 132                                                                                     | 16           | 53800200    | rs9940278         | 16           | 53799303    | rs28562191   | 0.9930    |
| 132                                                                                     | 16           | 53800200    | rs9940278         | 16           | 53799507    | rs9937053    | 0.9930    |
| 132                                                                                     | 16           | 53800200    | rs9940278         | 16           | 53799847    | rs9937354    | 0.9965    |
| 132                                                                                     | 16           | 53800200    | rs9940278         | 16           | 53799905    | rs9928094    | 0.9965    |
| 132                                                                                     | 16           | 53800200    | rs9940278         | 16           | 53799985    | rs9930397    | 0.9965    |
| 132                                                                                     | 16           | 53800200    | rs9940278         | 16           | 53800272    | rs9932600    | 0.4072    |
| 132                                                                                     | 16           | 53800200    | rs9940278         | 16           | 53800387    | rs12446228   | 0.4825    |
| 132                                                                                     | 16           | 53800200    | rs9940278         | 16           | 53800568    | rs9939973    | 1.0000    |
| 135                                                                                     | 17           | 7559462     | rs1641512         | 17           | 7559677     | rs1641511    | 0.9892    |
| 139                                                                                     | 17           | 44333331    | rs150592114       | 17           | 44332970    | rs2532364    | 0.9892    |
| 139                                                                                     | 17           | 44333331    | rs150592114       | 17           | 44333121    | rs62073155   | 0.9892    |
| 139                                                                                     | 17           | 44333331    | rs150592114       | 17           | 44333293    | rs190796367  | 0.9892    |
| 139                                                                                     | 17           | 44333331    | rs150592114       | 17           | 44333412    | rs111920741  | 0.9782    |
| 139                                                                                     | 17           | 44333331    | rs150592114       | 17           | 44333423    | rs2532363    | 0.9837    |
| 139                                                                                     | 17           | 44333331    | rs150592114       | 17           | 44333532    | rs113343751  | 0.9837    |
| 139                                                                                     | 17           | 44333331    | rs150592114       | 17           | 44333568    | rs62073156   | 0.9891    |
| 139                                                                                     | 17           | 44333331    | rs150592114       | 17           | 44333889    | rs2696422    | 0.8684    |
| 152                                                                                     | 20           | 21467208    | rs11697152        | 20           | 21466795    | rs13041756   | 0.2638    |
| 152                                                                                     | 20           | 21467208    | rs11697152        | 20           | 21468189    | rs113200445  | 0.4247    |
