# Supplementary material for: Shared genetic aetiology of respiratory diseases: a genome-wide multitraits association analysis
Source: PubMed Central journal article supplement — BMJ Open Respir Res. 2024 Jun 4;11(1):e002148. doi: 10.1136/bmjresp-2023-002148 (PMC11163672; doi:10.1136/bmjresp-2023-002148), 2024-06-04
Supplement: bmjresp-2023-002148supp015.pdf [file bmjresp-2023-002148supp015.pdf]

**eTable 14. Candidate Pleiotropic Genes Identified by MAGMA**

| Locus No. | CHR | START     | STOP      | GENE EntrezID | Gene symbol | P. value | P.adjusted |
|-----------|-----|-----------|-----------|---------------|-------------|----------|------------|
| 31        | 3   | 187866097 | 188613460 | 4026          | LPP         | 8.49E-23 | 6.27E-20   |
| 17        | 2   | 102681836 | 102801334 | 3554          | IL1R1       | 2.30E-16 | 8.50E-14   |
| 137       | 17  | 38072294  | 38088884  | 94103         | ORMDL3      | 3.89E-16 | 9.58E-14   |
| 61        | 6   | 90631247  | 91011627  | 60468         | BACH2       | 5.69E-16 | 1.05E-13   |
| 47        | 5   | 110400778 | 110418722 | 85480         | TSLP        | 8.88E-16 | 1.31E-13   |
| 49        | 5   | 131988865 | 132001801 | 3596          | IL13        | 1.17E-15 | 1.35E-13   |
| 49        | 5   | 131887616 | 131985313 | 10111         | RAD50       | 1.28E-15 | 1.35E-13   |
| 115       | 13  | 99901967  | 99915682  | 2841          | GPR18       | 1.61E-15 | 1.49E-13   |
| 39        | 4   | 123367625 | 123382650 | 3558          | IL2         | 1.83E-15 | 1.50E-13   |
| 127       | 15  | 79046545  | 79108805  | 11173         | ADAMTS7     | 2.16E-15 | 1.60E-13   |
| 17        | 2   | 102798433 | 102861462 | 8808          | IL1RL2      | 6.73E-13 | 9.04E-12   |
| 17        | 2   | 103231166 | 103332809 | 6549          | SLC9A2      | 2.98E-10 | 2.10E-09   |
| 127       | 15  | 78911636  | 78938587  | 1143          | CHRN4       | 3.39E-15 | 1.91E-13   |
| 137       | 17  | 38114226  | 38139019  | 284110        | GSDMA       | 3.61E-15 | 1.91E-13   |
| 49        | 5   | 131700396 | 131736306 | 6584          | SLC22A5     | 4.11E-15 | 2.02E-13   |
| 105       | 12  | 57484187  | 57510196  | 6778          | STAT6       | 4.77E-15 | 2.20E-13   |
| 115       | 13  | 99941789  | 99964749  | 1880          | GPR183      | 6.44E-15 | 2.69E-13   |
| 137       | 17  | 38166614  | 38179066  | 1440          | CSF3        | 6.55E-15 | 2.69E-13   |
| 125       | 15  | 67353036  | 67492533  | 4088          | SMAD3       | 6.92E-15 | 2.69E-13   |
| 73        | 7   | 117115017 | 117313719 | 1080          | CFTR        | 6.54E-06 | 1.46E-05   |
| 118       | 14  | 92975125  | 93160339  | 79890         | RIN3        | 8.13E-15 | 2.86E-13   |
| 105       | 12  | 57311938  | 57333189  | 121214        | SDR9C7      | 1.33E-14 | 4.47E-13   |
| 49        | 5   | 131404485 | 131416863 | 1437          | CSF2        | 1.55E-14 | 4.94E-13   |
| 49        | 5   | 132004678 | 132023370 | 3565          | IL4         | 1.63E-14 | 4.94E-13   |
| 115       | 13  | 99847679  | 100043753 | 337867        | UBAC2       | 1.67E-14 | 4.94E-13   |
| 104       | 12  | 56362697  | 56395467  | 5869          | RAB5B       | 1.99E-14 | 5.66E-13   |
| 77        | 8   | 27343519  | 27407439  | 2053          | EPHX2       | 4.49E-06 | 1.02E-05   |
| 104       | 12  | 56386043  | 56404309  | 6821          | SUOX        | 2.40E-14 | 6.33E-13   |
| 49        | 5   | 131872136 | 131897555 | 3567          | IL5         | 3.13E-14 | 7.98E-13   |
| 140       | 17  | 47361568  | 47444835  | 22834         | ZNF652      | 4.06E-14 | 1.00E-12   |
| 49        | 5   | 131588351 | 131614147 | 8572          | PDLIM4      | 4.82E-14 | 1.15E-12   |
| 49        | 5   | 131625145 | 131684899 | 6583          | SLC22A4     | 6.55E-14 | 1.51E-12   |
| 47        | 5   | 110554947 | 110835584 | 814           | CAMK4       | 6.93E-14 | 1.55E-12   |
| 10        | 1   | 167394877 | 167492847 | 919           | CD247       | 9.08E-14 | 1.97E-12   |
| 107       | 12  | 65667423  | 65865687  | 253827        | MSRB3       | 1.17E-13 | 2.42E-12   |
| 127       | 15  | 78880394  | 78918637  | 1136          | CHRNA3      | 1.18E-13 | 2.42E-12   |
| 127       | 15  | 78794906  | 78834715  | 123688        | HYKK        | 1.27E-13 | 2.54E-12   |
| 138       | 17  | 43692710  | 43918194  | 1394          | CRHR1       | 1.33E-13 | 2.59E-12   |
| 127       | 15  | 78827747  | 78846562  | 5685          | PSMA4       | 1.38E-13 | 2.61E-12   |
| 124       | 15  | 60775483  | 61526502  | 6095          | RORA        | 1.46E-13 | 2.70E-12   |
| 86        | 9   | 34656893  | 34667689  | 10850         | CCL27       | 2.69E-06 | 6.45E-06   |
| 94        | 11  | 1137474   | 1167465   | 4586          | MUC5AC      | 1.93E-13 | 3.40E-12   |
| 137       | 17  | 38213446  | 38255120  | 7067          | THRA        | 2.31E-13 | 3.97E-12   |
| 49        | 5   | 131523299 | 131568556 | 8974          | P4HA2       | 2.66E-13 | 4.47E-12   |
| 39        | 4   | 123528783 | 123547212 | 59067         | IL21        | 2.85E-13 | 4.68E-12   |
| 49        | 5   | 132023323 | 132078265 | 11127         | KIF3A       | 3.18E-13 | 5.11E-12   |
| 34        | 4   | 38792876  | 38811814  | 7096          | TLR1        | 3.34E-13 | 5.16E-12   |
| 96        | 11  | 61562097  | 61589529  | 3992          | FADS1       | 3.40E-13 | 5.16E-12   |
| 138       | 17  | 44102282  | 44307740  | 284058        | KANSL1      | 3.42E-13 | 5.16E-12   |
| 47        | 5   | 110422870 | 110471200 | 134430        | WDR36       | 3.73E-13 | 5.51E-12   |
| 154       | 20  | 61969662  | 62014487  | 1137          | CHRNA4      | 4.64E-13 | 6.72E-12   |
| 138       | 17  | 43966702  | 44110700  | 4137          | MAPT        | 4.76E-13 | 6.76E-12   |
| 96        | 11  | 61551602  | 61565085  | 746           | TMEM258     | 5.34E-13 | 7.45E-12   |
| 156       | 22  | 41824492  | 41849234  | 10766         | TOB2        | 5.87E-13 | 8.03E-12   |
| 86        | 9   | 34641586  | 34655595  | 2592          | GALT        | 1.42E-05 | 2.92E-05   |

|     |    |           |           |           |              |          |          |
|-----|----|-----------|-----------|-----------|--------------|----------|----------|
| 96  | 11 | 61555109  | 61569716  | 2237      | FEN1         | 1.01E-12 | 1.33E-11 |
| 39  | 4  | 123295121 | 123355957 | 132612    | ADAD1        | 1.03E-12 | 1.34E-11 |
| 86  | 9  | 34546425  | 34595713  | 1271      | CNTFR        | 1.48E-05 | 3.03E-05 |
| 129 | 16 | 11033345  | 11281046  | 23274     | CLEC16A      | 1.77E-12 | 2.22E-11 |
| 137 | 17 | 38078156  | 38100953  | 101928947 | LOC101928947 | 2.12E-12 | 2.57E-11 |
| 49  | 5  | 131391347 | 131403896 | 3562      | IL3          | 2.14E-12 | 2.57E-11 |
| 29  | 3  | 168796287 | 169386563 | 2122      | MECOM        | 2.16E-12 | 2.57E-11 |
| 156 | 22 | 41758337  | 41800332  | 7008      | TEF          | 2.74E-12 | 3.21E-11 |
| 24  | 3  | 33033100  | 33143694  | 2720      | GLB1         | 4.06E-12 | 4.62E-11 |
| 24  | 3  | 33033219  | 33143689  | 643853    | TMPPE        | 4.06E-12 | 4.62E-11 |
| 34  | 4  | 38768860  | 38789611  | 81793     | TLR10        | 5.03E-12 | 5.63E-11 |
| 138 | 17 | 44663035  | 44839830  | 4905      | NSF          | 5.21E-12 | 5.75E-11 |
| 86  | 9  | 34684567  | 34696274  | 6363      | CCL19        | 2.14E-05 | 4.18E-05 |
| 104 | 12 | 56468809  | 56502291  | 2065      | ERBB3        | 6.51E-12 | 6.97E-11 |
| 156 | 22 | 42090518  | 42200459  | 150365    | MEI1         | 1.07E-11 | 1.13E-10 |
| 86  | 9  | 34608542  | 34625520  | 11258     | DCTN3        | 2.37E-05 | 4.58E-05 |
| 137 | 17 | 38055848  | 38079903  | 55876     | GSDMB        | 1.26E-11 | 1.29E-10 |
| 125 | 15 | 67542138  | 67799142  | 64799     | IQCH         | 1.28E-11 | 1.30E-10 |
| 96  | 11 | 61578675  | 61639826  | 9415      | FADS2        | 1.34E-11 | 1.34E-10 |
| 49  | 5  | 132081509 | 132118976 | 23176     | SEPT8        | 1.38E-11 | 1.36E-10 |
| 156 | 22 | 41850721  | 41869708  | 84844     | PHF5A        | 1.55E-11 | 1.50E-10 |
| 86  | 9  | 34647182  | 34666899  | 3590      | IL11RA       | 5.29E-05 | 9.18E-05 |
| 138 | 17 | 44834872  | 44901126  | 7473      | WNT3         | 1.65E-11 | 1.56E-10 |
| 154 | 20 | 62366211  | 62380403  | 56731     | SLC2A4RG     | 1.81E-11 | 1.69E-10 |
| 129 | 16 | 11017748  | 11041257  | 28955     | DEXI         | 1.97E-11 | 1.82E-10 |
| 156 | 22 | 41860099  | 41929993  | 50        | ACO2         | 2.30E-11 | 2.10E-10 |
| 156 | 22 | 41967890  | 41990871  | 5372      | PMM1         | 2.65E-11 | 2.39E-10 |
| 90  | 10 | 8082294   | 8122164   | 2625      | GATA3        | 1.25E-08 | 5.34E-08 |
| 69  | 7  | 22761766  | 22776621  | 3569      | IL6          | 3.10E-11 | 2.73E-10 |
| 123 | 15 | 49613822  | 49918128  | 196951    | FAM227B      | 5.27E-07 | 1.45E-06 |
| 123 | 15 | 49710375  | 49784523  | 2252      | FGF7         | 3.77E-06 | 8.76E-06 |
| 98  | 11 | 76150967  | 76268943  | 56946     | C11orf30     | 3.82E-11 | 3.24E-10 |
| 156 | 22 | 42191636  | 42233175  | 79879     | CCDC134      | 4.97E-11 | 4.17E-10 |
| 156 | 22 | 41989032  | 42022079  | 27351     | DES1         | 5.36E-11 | 4.45E-10 |
| 154 | 20 | 62323004  | 62335051  | 8771      | TNFRSF6B     | 5.88E-11 | 4.83E-10 |
| 137 | 17 | 37403897  | 37563530  | 84961     | FBXL20       | 6.00E-11 | 4.87E-10 |
| 156 | 22 | 41916803  | 41945479  | 171568    | POLR3H       | 6.78E-11 | 5.45E-10 |
| 156 | 22 | 41952014  | 41977670  | 27254     | CSDC2        | 8.47E-11 | 6.73E-10 |
| 15  | 2  | 63343518  | 63820867  | 51057     | WDPCP        | 8.66E-11 | 6.81E-10 |
| 156 | 22 | 41692507  | 41761151  | 23264     | ZC3H7B       | 1.00E-10 | 7.78E-10 |
| 131 | 16 | 31089745  | 31105289  | 339105    | PRSS53       | 3.11E-15 | 1.91E-13 |
| 154 | 20 | 62324995  | 62344365  | 10139     | ARFRP1       | 1.28E-10 | 9.75E-10 |
| 138 | 17 | 44311744  | 44420160  | 9884      | LRRC37A      | 1.47E-10 | 1.11E-09 |
| 131 | 16 | 31080581  | 31099833  | 9726      | ZNF646       | 3.33E-15 | 1.91E-13 |
| 137 | 17 | 38244037  | 38261978  | 9572      | NR1D1        | 1.70E-10 | 1.26E-09 |
| 71  | 7  | 99608204  | 99647803  | 7586      | ZKSCAN1      | 2.07E-10 | 1.51E-09 |
| 39  | 4  | 123068488 | 123288914 | 84162     | KIAA1109     | 2.10E-10 | 1.52E-09 |
| 131 | 16 | 31067164  | 31090641  | 79759     | ZNF668       | 7.83E-15 | 2.86E-13 |
| 137 | 17 | 37555538  | 37612527  | 5469      | MED1         | 2.87E-10 | 2.04E-09 |
| 131 | 16 | 31097175  | 31111699  | 79001     | VKORC1       | 2.20E-14 | 6.02E-13 |
| 88  | 9  | 128504617 | 128734656 | 5090      | PBX3         | 3.10E-10 | 2.16E-09 |
| 156 | 22 | 42012250  | 42065052  | 2547      | XRCC6        | 3.49E-10 | 2.40E-09 |
| 18  | 2  | 111998803 | 112011256 | 101927260 | LOC101927260 | 3.51E-10 | 2.40E-09 |
| 25  | 3  | 49823165  | 49842254  | 389118    | CDHR4        | 3.80E-10 | 2.58E-09 |
| 156 | 22 | 42064937  | 42090296  | 4809      | NHP2L1       | 3.93E-10 | 2.64E-09 |
| 58  | 6  | 27793952  | 27804305  | 8362      | HIST1H4K     | 4.38E-10 | 2.92E-09 |
| 154 | 20 | 62333727  | 62372494  | 84619     | ZGPAT        | 4.58E-10 | 2.98E-09 |

|     |    |           |           |           |              |          |          |
|-----|----|-----------|-----------|-----------|--------------|----------|----------|
| 12  | 1  | 203091833 | 203141533 | 134       | ADORA1       | 4.58E-10 | 2.98E-09 |
| 138 | 17 | 44071616  | 44082060  | 246744    | STH          | 4.66E-10 | 2.98E-09 |
| 42  | 5  | 1248282   | 1300178   | 7015      | TERT         | 5.00E-10 | 2.98E-09 |
| 49  | 5  | 131812301 | 131831465 | 3659      | IRF1         | 5.00E-10 | 2.98E-09 |
| 49  | 5  | 132078137 | 132094856 | 645121    | CCNI2        | 5.00E-10 | 2.98E-09 |
| 51  | 5  | 141483324 | 141539008 | 80762     | NDFIP1       | 5.00E-10 | 2.98E-09 |
| 125 | 15 | 67488013  | 67552536  | 79719     | AAGAB        | 5.00E-10 | 2.98E-09 |
| 127 | 15 | 78852862  | 78892611  | 1138      | CHRNA5       | 5.00E-10 | 2.98E-09 |
| 130 | 16 | 27320161  | 27381099  | 3566      | IL4R         | 5.00E-10 | 2.98E-09 |
| 131 | 16 | 30990949  | 31005473  | 80270     | HSD3B7       | 1.68E-13 | 3.03E-12 |
| 137 | 17 | 38132021  | 38159213  | 5709      | PSMD3        | 5.00E-10 | 2.98E-09 |
| 137 | 17 | 38170350  | 38215889  | 9862      | MED24        | 5.00E-10 | 2.98E-09 |
| 156 | 22 | 41760086  | 41771400  | 100996598 | LOC100996598 | 5.07E-10 | 2.98E-09 |
| 96  | 11 | 61515121  | 61560990  | 745       | MYRF         | 5.08E-10 | 2.98E-09 |
| 94  | 11 | 1406129   | 1488919   | 9024      | BRSK2        | 5.95E-10 | 3.46E-09 |
| 105 | 12 | 57517282  | 57612142  | 4035      | LRP1         | 7.62E-10 | 4.40E-09 |
| 105 | 12 | 57340215  | 57358158  | 8608      | RDH16        | 8.51E-10 | 4.88E-09 |
| 156 | 22 | 42081547  | 42099140  | 79640     | C22orf46     | 8.75E-10 | 4.97E-09 |
| 137 | 17 | 37612739  | 37726398  | 51755     | CDK12        | 9.52E-10 | 5.37E-09 |
| 109 | 12 | 123712844 | 123747651 | 91574     | C12orf65     | 1.17E-09 | 6.55E-09 |
| 25  | 3  | 49837638  | 49856391  | 7318      | UBA7         | 1.21E-09 | 6.72E-09 |
| 94  | 11 | 1290598   | 1335892   | 54472     | TOLLIP       | 1.23E-09 | 6.78E-09 |
| 78  | 8  | 71576600  | 71653177  | 389668    | XKR9         | 1.24E-09 | 6.79E-09 |
| 36  | 4  | 89642105  | 90037549  | 10144     | FAM13A       | 1.30E-09 | 7.06E-09 |
| 3   | 1  | 25221002  | 25296648  | 864       | RUNX3        | 1.33E-09 | 7.17E-09 |
| 122 | 15 | 40692686  | 40733146  | 3712      | IVD          | 1.40E-09 | 7.50E-09 |
| 15  | 2  | 63810743  | 63839331  | 4190      | MDH1         | 1.60E-09 | 8.51E-09 |
| 154 | 20 | 62362480  | 62375460  | 54923     | LIME1        | 1.63E-09 | 8.60E-09 |
| 136 | 17 | 15928408  | 16123874  | 9611      | NCOR1        | 1.66E-09 | 8.70E-09 |
| 103 | 12 | 48171505  | 48218763  | 51564     | HDAC7        | 1.86E-09 | 9.66E-09 |
| 108 | 12 | 94537499  | 94706451  | 10154     | PLXNC1       | 1.87E-09 | 9.66E-09 |
| 93  | 10 | 104842774 | 104958063 | 22978     | NT5C2        | 2.15E-09 | 1.10E-08 |
| 95  | 11 | 27671440  | 27748605  | 627       | BDNF         | 2.38E-09 | 1.21E-08 |
| 138 | 17 | 44346550  | 44444416  | 100506084 | ARL17B       | 3.01E-09 | 1.52E-08 |
| 97  | 11 | 65549505  | 65569690  | 5017      | OVOL1        | 3.04E-09 | 1.53E-08 |
| 78  | 8  | 71544501  | 71586447  | 51110     | LACTB2       | 3.07E-09 | 1.53E-08 |
| 149 | 19 | 41344441  | 41361360  | 1548      | CYP2A6       | 3.29E-09 | 1.63E-08 |
| 58  | 6  | 28188029  | 28206265  | 7746      | ZSCAN9       | 3.31E-09 | 1.63E-08 |
| 42  | 5  | 1312869   | 1350180   | 81037     | CLPTM1L      | 3.40E-09 | 1.66E-08 |
| 138 | 17 | 43508266  | 43573146  | 9842      | PLEKHM1      | 3.46E-09 | 1.68E-08 |
| 58  | 6  | 26276278  | 26290844  | 8365      | HIST1H4H     | 3.85E-09 | 1.86E-08 |
| 130 | 16 | 27231315  | 27285113  | 197370    | NSMCE1       | 4.75E-09 | 2.28E-08 |
| 154 | 20 | 62184439  | 62210592  | 85441     | HELZ2        | 5.17E-09 | 2.46E-08 |
| 131 | 16 | 30929392  | 30965104  | 54620     | FBXL19       | 1.53E-12 | 1.95E-11 |
| 32  | 3  | 196361656 | 196393875 | 375387    | NRROS        | 5.51E-09 | 2.59E-08 |
| 127 | 15 | 79127903  | 79195081  | 10933     | MORF4L1      | 6.11E-09 | 2.86E-08 |
| 20  | 2  | 157286965 | 157447915 | 2820      | GPD2         | 6.50E-09 | 3.00E-08 |
| 154 | 20 | 62284163  | 62332606  | 51750     | RTEL1        | 6.51E-09 | 3.00E-08 |
| 93  | 10 | 104673075 | 104843344 | 54805     | CNNM2        | 6.56E-09 | 3.00E-08 |
| 137 | 17 | 37755021  | 37769175  | 4761      | NEUROD2      | 6.57E-09 | 3.00E-08 |
| 138 | 17 | 43326760  | 43344479  | 124783    | SPATA32      | 6.65E-09 | 3.01E-08 |
| 136 | 17 | 15874874  | 15908006  | 125150    | ZSWIM7       | 6.67E-09 | 3.01E-08 |
| 109 | 12 | 123635943 | 123722785 | 10198     | MPHOSPH9     | 7.03E-09 | 3.15E-08 |
| 58  | 6  | 27828107  | 27838576  | 8332      | HIST1H2AL    | 8.54E-09 | 3.80E-08 |
| 58  | 6  | 27800544  | 27826533  | 8341      | HIST1H2BN    | 8.99E-09 | 3.98E-08 |
| 87  | 9  | 127014885 | 127119721 | 10783     | NEK6         | 1.05E-08 | 4.62E-08 |
| 131 | 16 | 30963615  | 31000985  | 9739      | SETD1A       | 5.67E-12 | 6.16E-11 |

|     |    |           |           |           |              |          |          |
|-----|----|-----------|-----------|-----------|--------------|----------|----------|
| 137 | 17 | 37389040  | 37407043  | 101929578 | LOC101929578 | 1.08E-08 | 4.69E-08 |
| 109 | 12 | 123740517 | 123761863 | 8099      | CDK2AP1      | 1.17E-08 | 5.06E-08 |
| 131 | 16 | 31145244  | 31166415  | 146547    | PRSS36       | 1.15E-11 | 1.20E-10 |
| 131 | 16 | 31123985  | 31147714  | 84148     | KAT8         | 1.56E-11 | 1.50E-10 |
| 109 | 12 | 123463027 | 123640376 | 57605     | PITPNM2      | 1.27E-08 | 5.39E-08 |
| 131 | 16 | 30955405  | 30971259  | 93129     | ORAI3        | 3.16E-11 | 2.75E-10 |
| 58  | 6  | 27829570  | 27840359  | 3009      | HIST1H1B     | 1.35E-08 | 5.67E-08 |
| 68  | 7  | 20365345  | 20460382  | 3696      | ITGB8        | 1.39E-08 | 5.80E-08 |
| 137 | 17 | 37816599  | 37827807  | 8557      | TCAP         | 1.49E-08 | 6.19E-08 |
| 58  | 6  | 27786903  | 27797258  | 8363      | HIST1H4J     | 1.53E-08 | 6.32E-08 |
| 12  | 1  | 203047257 | 203060166 | 4656      | MYOG         | 1.55E-08 | 6.36E-08 |
| 71  | 7  | 99656470  | 99685171  | 7551      | ZNF3         | 1.56E-08 | 6.37E-08 |
| 58  | 6  | 27835926  | 27846289  | 8368      | HIST1H4L     | 1.73E-08 | 7.02E-08 |
| 109 | 12 | 123863704 | 123898900 | 387893    | SETD8        | 1.83E-08 | 7.39E-08 |
| 58  | 6  | 27834623  | 27845099  | 8354      | HIST1H3I     | 1.96E-08 | 7.83E-08 |
| 116 | 14 | 68281496  | 69154889  | 5890      | RAD51B       | 1.96E-08 | 7.83E-08 |
| 96  | 11 | 61635998  | 61664006  | 3995      | FADS3        | 2.01E-08 | 7.99E-08 |
| 54  | 5  | 176779704 | 176804599 | 10636     | RGS14        | 2.04E-08 | 8.06E-08 |
| 136 | 17 | 16115509  | 16235098  | 9487      | PIGL         | 2.08E-08 | 8.18E-08 |
| 58  | 6  | 26012260  | 26023040  | 3024      | HIST1H1A     | 2.35E-08 | 9.19E-08 |
| 131 | 16 | 31039416  | 31056489  | 6810      | STX4         | 3.22E-11 | 2.77E-10 |
| 138 | 17 | 43917256  | 43929438  | 162540    | SPPL2C       | 2.51E-08 | 9.70E-08 |
| 58  | 6  | 27800658  | 27811117  | 8330      | HIST1H2AK    | 2.52E-08 | 9.70E-08 |
| 25  | 3  | 49756728  | 49828973  | 9807      | IP6K1        | 2.65E-08 | 1.01E-07 |
| 140 | 17 | 47476410  | 47497267  | 5245      | PHB          | 2.69E-08 | 1.02E-07 |
| 94  | 11 | 1069875   | 1109417   | 4583      | MUC2         | 2.70E-08 | 1.02E-07 |
| 127 | 15 | 78725518  | 78798798  | 3658      | IREB2        | 2.78E-08 | 1.05E-07 |
| 131 | 16 | 31114615  | 31129112  | 10295     | BCKDK        | 1.25E-10 | 9.62E-10 |
| 154 | 20 | 62370021  | 62468731  | 140685    | ZBTB46       | 2.88E-08 | 1.07E-07 |
| 82  | 8  | 109450853 | 109504136 | 9694      | EMC2         | 2.88E-08 | 1.07E-07 |
| 58  | 6  | 26099176  | 26109565  | 8364      | HIST1H4C     | 3.14E-08 | 1.16E-07 |
| 137 | 17 | 37788333  | 37825454  | 10948     | STARD3       | 3.36E-08 | 1.24E-07 |
| 98  | 11 | 76087307  | 76130663  | 100506127 | LOC100506127 | 3.72E-08 | 1.36E-07 |
| 18  | 2  | 111873491 | 111931022 | 10018     | BCL2L11      | 3.85E-08 | 1.40E-07 |
| 130 | 16 | 27209807  | 27238089  | 79831     | KDM8         | 3.87E-08 | 1.40E-07 |
| 58  | 6  | 27770977  | 27781445  | 8329      | HIST1H2AI    | 3.97E-08 | 1.42E-07 |
| 109 | 12 | 123459607 | 123472460 | 51329     | ARL6IP4      | 3.97E-08 | 1.42E-07 |
| 25  | 3  | 49861028  | 49898992  | 10293     | TRAIP        | 4.03E-08 | 1.44E-07 |
| 25  | 3  | 49586922  | 49713982  | 8927      | BSN          | 4.47E-08 | 1.59E-07 |
| 58  | 6  | 27772842  | 27783314  | 8357      | HIST1H3H     | 4.52E-08 | 1.60E-07 |
| 25  | 3  | 49749267  | 49762238  | 386724    | AMIGO3       | 4.65E-08 | 1.63E-07 |
| 131 | 16 | 30902928  | 30919881  | 1489      | CTF1         | 2.64E-10 | 1.89E-09 |
| 70  | 7  | 27865192  | 28225437  | 221895    | JAZF1        | 4.84E-08 | 1.69E-07 |
| 104 | 12 | 56396268  | 56437219  | 64375     | IKZF4        | 5.21E-08 | 1.81E-07 |
| 131 | 16 | 30995577  | 31026829  | 112755    | STX1B        | 5.00E-10 | 2.98E-09 |
| 138 | 17 | 43466268  | 43515282  | 201176    | ARHGAP27     | 6.32E-08 | 2.17E-07 |
| 58  | 6  | 27873963  | 27885174  | 81697     | OR2B2        | 6.47E-08 | 2.21E-07 |
| 25  | 3  | 49835687  | 49847463  | 389119    | FAM212A      | 6.81E-08 | 2.32E-07 |
| 109 | 12 | 123454354 | 123469588 | 79676     | OGFOD2       | 7.42E-08 | 2.52E-07 |
| 58  | 6  | 27770257  | 27780709  | 8340      | HIST1H2BL    | 7.61E-08 | 2.57E-07 |
| 25  | 3  | 49721950  | 49763962  | 63891     | RNF123       | 8.20E-08 | 2.74E-07 |
| 56  | 6  | 16294343  | 16766721  | 6310      | ATXN1        | 8.20E-08 | 2.74E-07 |
| 137 | 17 | 37819234  | 37831728  | 5409      | PNMT         | 8.34E-08 | 2.78E-07 |
| 98  | 11 | 76056004  | 76096880  | 5612      | PRKRIR       | 8.45E-08 | 2.80E-07 |
| 58  | 6  | 26028320  | 26038796  | 8335      | HIST1H2AB    | 8.59E-08 | 2.83E-07 |
| 40  | 4  | 140632545 | 141080233 | 55534     | MAML3        | 8.81E-08 | 2.89E-07 |
| 58  | 6  | 29548818  | 29561745  | 7932      | OR2H2        | 1.11E-07 | 3.63E-07 |

|     |    |           |           |        |           |          |          |
|-----|----|-----------|-----------|--------|-----------|----------|----------|
| 134 | 17 | 2235806   | 2289353   | 9905   | SGSM2     | 1.26E-07 | 4.10E-07 |
| 58  | 6  | 26151559  | 26162343  | 3008   | HIST1H1E  | 1.27E-07 | 4.12E-07 |
| 88  | 9  | 128194673 | 128474513 | 79109  | MAPKAP1   | 1.30E-07 | 4.20E-07 |
| 75  | 8  | 8170258   | 8248941   | 157285 | SGK223    | 1.40E-07 | 4.50E-07 |
| 58  | 6  | 28207404  | 28232030  | 387032 | ZKSCAN4   | 1.42E-07 | 4.54E-07 |
| 93  | 10 | 104624183 | 104666656 | 57412  | AS3MT     | 1.43E-07 | 4.56E-07 |
| 58  | 6  | 26015718  | 26026186  | 8350   | HIST1H3A  | 1.47E-07 | 4.66E-07 |
| 156 | 22 | 41635781  | 41687255  | 5905   | RANGAP1   | 1.49E-07 | 4.69E-07 |
| 58  | 6  | 27856203  | 27931100  | 8348   | HIST1H2BO | 1.49E-07 | 4.69E-07 |
| 131 | 16 | 30840373  | 30910852  | 9274   | BCL7C     | 1.32E-08 | 5.57E-08 |
| 74  | 7  | 128572976 | 128595089 | 3663   | IRF5      | 1.56E-07 | 4.84E-07 |
| 154 | 20 | 62266058  | 62289963  | 50861  | STMN3     | 1.56E-07 | 4.84E-07 |
| 54  | 5  | 176753563 | 176783885 | 10960  | LMAN2     | 1.58E-07 | 4.89E-07 |
| 138 | 17 | 43335488  | 43399414  | 9020   | MAP3K14   | 1.66E-07 | 5.11E-07 |
| 58  | 6  | 26102640  | 26113364  | 3010   | HIST1H1T  | 1.74E-07 | 5.34E-07 |
| 34  | 4  | 38820325  | 38863438  | 10333  | TLR6      | 1.75E-07 | 5.34E-07 |
| 67  | 7  | 932537    | 1000208   | 11033  | ADAP1     | 1.76E-07 | 5.35E-07 |
| 58  | 6  | 26022124  | 26032480  | 8366   | HIST1H4B  | 1.88E-07 | 5.69E-07 |
| 58  | 6  | 28229788  | 28251001  | 7741   | ZSCAN26   | 1.95E-07 | 5.86E-07 |
| 71  | 7  | 99642390  | 99667663  | 7589   | ZSCAN21   | 1.95E-07 | 5.86E-07 |
| 46  | 5  | 74965023  | 75018313  | 134359 | POC5      | 2.30E-07 | 6.88E-07 |
| 58  | 6  | 28222075  | 28233736  | 222698 | NKAPL     | 2.31E-07 | 6.88E-07 |
| 101 | 12 | 1016255   | 1104774   | 5893   | RAD52     | 2.37E-07 | 7.03E-07 |
| 58  | 6  | 28287514  | 28326972  | 64288  | ZSCAN31   | 2.52E-07 | 7.45E-07 |
| 94  | 11 | 1239295   | 1288406   | 727897 | MUC5B     | 2.64E-07 | 7.77E-07 |
| 58  | 6  | 27777080  | 27787518  | 8331   | HIST1H2AJ | 2.69E-07 | 7.89E-07 |
| 138 | 17 | 43219684  | 43234468  | 10614  | HEXIM1    | 3.07E-07 | 8.97E-07 |
| 58  | 6  | 26038455  | 26048885  | 3018   | HIST1H2BB | 3.20E-07 | 9.31E-07 |
| 59  | 6  | 43206222  | 43260997  | 84630  | TTBK1     | 3.71E-07 | 1.08E-06 |
| 93  | 10 | 104608967 | 104629718 | 119032 | C10orf32  | 3.81E-07 | 1.10E-06 |
| 58  | 6  | 26152419  | 26176577  | 3017   | HIST1H2BD | 3.92E-07 | 1.13E-06 |
| 25  | 3  | 49753909  | 49766407  | 29925  | GMPPB     | 4.01E-07 | 1.15E-06 |
| 1   | 1  | 1141706   | 1154703   | 7293   | TNFRSF4   | 4.10E-07 | 1.17E-06 |
| 58  | 6  | 27777822  | 27788267  | 8342   | HIST1H2BM | 4.10E-07 | 1.17E-06 |
| 131 | 16 | 31137754  | 31152151  | 5652   | PRSS8     | 4.65E-08 | 1.63E-07 |
| 131 | 16 | 30110977  | 30130264  | 79153  | GDPD3     | 4.26E-07 | 1.20E-06 |
| 131 | 16 | 30478983  | 30539506  | 3683   | ITGAL     | 2.48E-06 | 6.01E-06 |
| 84  | 9  | 5624031   | 5781557   | 57589  | RIC1      | 4.77E-07 | 1.33E-06 |
| 25  | 3  | 49890414  | 49912655  | 79012  | CAMKV     | 4.78E-07 | 1.33E-06 |
| 120 | 14 | 99630624  | 99743514  | 64919  | BCL11B    | 4.79E-07 | 1.33E-06 |
| 126 | 15 | 76635526  | 77202796  | 49855  | SCAPER    | 5.04E-07 | 1.39E-06 |
| 84  | 9  | 5779572   | 5838081   | 79956  | ERMP1     | 5.08E-07 | 1.40E-06 |
| 131 | 16 | 30120426  | 30139630  | 5595   | MAPK3     | 4.20E-06 | 9.55E-06 |
| 136 | 17 | 15897694  | 15937723  | 54902  | TTC19     | 5.48E-07 | 1.50E-06 |
| 47  | 5  | 110068837 | 110105857 | 91137  | SLC25A46  | 5.65E-07 | 1.54E-06 |
| 131 | 16 | 30092114  | 30108258  | 6911   | TBX6      | 1.64E-05 | 3.31E-05 |
| 138 | 17 | 43232502  | 43252406  | 124790 | HEXIM2    | 7.10E-07 | 1.92E-06 |
| 58  | 6  | 26268204  | 26278640  | 8346   | HIST1H2BI | 7.13E-07 | 1.92E-06 |
| 66  | 6  | 155049512 | 155287708 | 22828  | SCAF8     | 8.06E-07 | 2.17E-06 |
| 111 | 13 | 40224764  | 40370802  | 57511  | COG6      | 8.21E-07 | 2.20E-06 |
| 136 | 17 | 15843231  | 15884210  | 136    | ADORA2B   | 8.35E-07 | 2.22E-06 |
| 84  | 9  | 6527464   | 6650692   | 2731   | GLDC      | 8.36E-07 | 2.22E-06 |
| 98  | 11 | 76363568  | 76386990  | 2615   | LRRC32    | 8.52E-07 | 2.26E-06 |
| 58  | 6  | 28244314  | 28275326  | 84547  | PGBD1     | 8.66E-07 | 2.29E-06 |
| 58  | 6  | 26016907  | 26027278  | 8359   | HIST1H4A  | 9.16E-07 | 2.41E-06 |
| 58  | 6  | 29048985  | 29060090  | 442184 | OR2B3     | 9.47E-07 | 2.48E-06 |
| 130 | 16 | 27408483  | 27468363  | 50615  | IL21R     | 9.95E-07 | 2.60E-06 |

|     |    |           |           |        |                 |          |          |
|-----|----|-----------|-----------|--------|-----------------|----------|----------|
| 138 | 17 | 43204967  | 43226548  | 79777  | ACBD4           | 1.01E-06 | 2.63E-06 |
| 131 | 16 | 30754574  | 30777497  | 5261   | PHKG2           | 1.84E-05 | 3.66E-05 |
| 104 | 12 | 56355556  | 56371573  | 1017   | CDK2            | 1.05E-06 | 2.71E-06 |
| 58  | 6  | 26108389  | 26129266  | 8347   | HIST1H2BC       | 1.06E-06 | 2.73E-06 |
| 58  | 6  | 25957917  | 25992557  | 10475  | TRIM38          | 1.10E-06 | 2.82E-06 |
| 38  | 4  | 106468704 | 106607070 | 54848  | ARHGEF38        | 1.35E-06 | 3.45E-06 |
| 25  | 3  | 49203987  | 49218919  | 200942 | KLHDC8B         | 1.42E-06 | 3.62E-06 |
| 64  | 6  | 135599670 | 135823903 | 54806  | AHI1            | 1.44E-06 | 3.66E-06 |
| 58  | 6  | 26119370  | 26144337  | 8334   | HIST1H2AC       | 1.52E-06 | 3.85E-06 |
| 58  | 6  | 26026817  | 26037288  | 8358   | HIST1H3B        | 1.57E-06 | 3.95E-06 |
| 101 | 12 | 856759    | 1025618   | 65125  | WNK1            | 1.57E-06 | 3.95E-06 |
| 58  | 6  | 26082422  | 26101438  | 3077   | HFE             | 1.59E-06 | 3.98E-06 |
| 117 | 14 | 78631716  | 80339633  | 9369   | NRXN3           | 1.60E-06 | 3.99E-06 |
| 25  | 3  | 49210069  | 49234291  | 646498 | C3orf84         | 1.65E-06 | 4.11E-06 |
| 151 | 19 | 46293968  | 46323605  | 81492  | RSPH6A          | 1.87E-06 | 4.64E-06 |
| 150 | 19 | 45412577  | 45427606  | 341    | APOC1           | 1.91E-06 | 4.72E-06 |
| 25  | 3  | 49454766  | 49471777  | 84276  | NICN1           | 2.10E-06 | 5.17E-06 |
| 94  | 11 | 1637188   | 1648368   | 387267 | KRTAP5-4        | 2.25E-06 | 5.52E-06 |
| 26  | 3  | 70998865  | 71638140  | 27086  | FOXP1           | 2.26E-06 | 5.53E-06 |
| 144 | 19 | 1004650   | 1026173   | 91304  | TMEM259         | 2.28E-06 | 5.56E-06 |
| 4   | 1  | 50878223  | 50894119  | 63950  | DMRTA2          | 2.39E-06 | 5.81E-06 |
| 131 | 16 | 30189731  | 30205397  | 11151  | CORO1A          | 2.94E-05 | 5.49E-05 |
| 145 | 19 | 6577969   | 6596163   | 970    | CD70            | 2.58E-06 | 6.23E-06 |
| 131 | 16 | 30763733  | 30778598  | 90835  | C16orf93        | 3.35E-05 | 6.11E-05 |
| 131 | 16 | 30098635  | 30113248  | 83719  | YPEL3           | 3.82E-05 | 6.80E-05 |
| 132 | 16 | 53732875  | 54153379  | 79068  | FTO             | 2.82E-11 | 2.51E-10 |
| 71  | 7  | 99559350  | 99578735  | 563    | AZGP1           | 2.92E-06 | 6.96E-06 |
| 76  | 8  | 10748654  | 11063875  | 286046 | XKR6            | 2.95E-06 | 7.01E-06 |
| 25  | 3  | 49501136  | 49578051  | 1605   | DAG1            | 3.06E-06 | 7.25E-06 |
| 87  | 9  | 127110744 | 127182752 | 5695   | PSMB7           | 3.21E-06 | 7.58E-06 |
| 59  | 6  | 43133920  | 43154244  | 6722   | SRF             | 3.48E-06 | 8.19E-06 |
| 25  | 3  | 49449211  | 49465111  | 275    | AMT             | 3.50E-06 | 8.21E-06 |
| 109 | 12 | 123894936 | 123926264 | 196383 | RILPL2          | 3.51E-06 | 8.21E-06 |
| 59  | 6  | 43039006  | 43134458  | 5754   | PTK7            | 3.73E-06 | 8.70E-06 |
| 135 | 17 | 7447375   | 7469925   | 407977 | TNFSF12-TNFSF13 | 4.21E-07 | 1.19E-06 |
| 104 | 12 | 56430686  | 56443007  | 6231   | RPS26           | 3.82E-06 | 8.84E-06 |
| 135 | 17 | 7447375   | 7466207   | 8742   | TNFSF12         | 1.02E-06 | 2.64E-06 |
| 58  | 6  | 25840328  | 25879471  | 10786  | SLC17A3         | 3.87E-06 | 8.91E-06 |
| 105 | 12 | 57477677  | 57494259  | 4665   | NAB2            | 3.91E-06 | 8.97E-06 |
| 49  | 5  | 131280666 | 131352761 | 23305  | ACSL6           | 3.94E-06 | 9.01E-06 |
| 25  | 3  | 49391569  | 49454526  | 387    | RHOA            | 4.16E-06 | 9.49E-06 |
| 135 | 17 | 7486496   | 7499037   | 6665   | SOX15           | 2.64E-06 | 6.35E-06 |
| 135 | 17 | 7460309   | 7480287   | 26168  | SENP3           | 3.83E-06 | 8.84E-06 |
| 28  | 3  | 101287997 | 101318281 | 57092  | PCNP            | 4.71E-06 | 1.06E-05 |
| 25  | 3  | 49444639  | 49458909  | 6988   | TCTA            | 4.71E-06 | 1.06E-05 |
| 60  | 6  | 64424876  | 66422118  | 346007 | EYS             | 4.82E-06 | 1.08E-05 |
| 140 | 17 | 47295728  | 47314009  | 162466 | PHOSPHO1        | 5.91E-06 | 1.32E-05 |
| 126 | 15 | 76624065  | 76639817  | 64843  | ISL2            | 6.27E-06 | 1.40E-05 |
| 135 | 17 | 7512382   | 7541700   | 6462   | SHBG            | 1.43E-05 | 2.94E-05 |
| 135 | 17 | 7481965   | 7496530   | 9526   | MPDU1           | 1.50E-05 | 3.06E-05 |
| 59  | 6  | 43188367  | 43202211  | 10591  | DNPH1           | 7.73E-06 | 1.71E-05 |
| 79  | 8  | 74327604  | 74664943  | 27067  | STAU2           | 7.74E-06 | 1.71E-05 |
| 58  | 6  | 26050968  | 26061699  | 3006   | HIST1H1C        | 7.94E-06 | 1.75E-05 |
| 112 | 13 | 51281759  | 51422885  | 220107 | DLEU7           | 8.10E-06 | 1.78E-05 |
| 59  | 6  | 43144913  | 43197325  | 23113  | CUL9            | 8.27E-06 | 1.81E-05 |
| 25  | 3  | 49389609  | 49400791  | 2876   | GPX1            | 8.30E-06 | 1.81E-05 |
| 52  | 5  | 147758498 | 147827399 | 81545  | FBXO38          | 8.32E-06 | 1.81E-05 |

|     |    |           |           |           |           |          |          |
|-----|----|-----------|-----------|-----------|-----------|----------|----------|
| 84  | 9  | 6210149   | 6262983   | 90865     | IL33      | 8.42E-06 | 1.82E-05 |
| 137 | 17 | 37908968  | 38025441  | 22806     | IKZF3     | 8.49E-06 | 1.83E-05 |
| 25  | 3  | 49309577  | 49382536  | 7375      | USP4      | 8.78E-06 | 1.89E-05 |
| 92  | 10 | 94444681  | 94460408  | 3087      | HHEX      | 9.44E-06 | 2.03E-05 |
| 58  | 6  | 28312691  | 28341954  | 80317     | ZKSCAN3   | 9.48E-06 | 2.03E-05 |
| 22  | 2  | 242669030 | 242713231 | 728294    | D2HGDH    | 9.68E-06 | 2.07E-05 |
| 58  | 6  | 26040639  | 26051097  | 8352      | HIST1H3C  | 1.02E-05 | 2.17E-05 |
| 34  | 4  | 38864354  | 38952365  | 92689     | FAM114A1  | 1.06E-05 | 2.25E-05 |
| 28  | 3  | 101275680 | 101290290 | 54931     | TRMT10C   | 1.09E-05 | 2.31E-05 |
| 133 | 16 | 75322608  | 75472387  | 10428     | CFDP1     | 1.20E-05 | 2.53E-05 |
| 58  | 6  | 26360387  | 26383548  | 11118     | BTN3A2    | 1.22E-05 | 2.57E-05 |
| 151 | 19 | 46281205  | 46301060  | 1762      | DMWD      | 1.23E-05 | 2.58E-05 |
| 38  | 4  | 106811588 | 106897828 | 255743    | NPNT      | 1.24E-05 | 2.60E-05 |
| 2   | 1  | 10530003  | 10695815  | 5195      | PEX14     | 1.36E-05 | 2.83E-05 |
| 82  | 8  | 109208972 | 109265959 | 3646      | EIF3E     | 1.36E-05 | 2.83E-05 |
| 137 | 17 | 38092727  | 38105987  | 100505591 | LRRC3C    | 1.37E-05 | 2.84E-05 |
| 54  | 5  | 176725763 | 176738960 | 27166     | PRELID1   | 1.37E-05 | 2.84E-05 |
| 54  | 5  | 176806432 | 176830849 | 6569      | SLC34A1   | 1.38E-05 | 2.85E-05 |
| 135 | 17 | 7524552   | 7536194   | 112483    | SAT2      | 3.30E-05 | 6.05E-05 |
| 135 | 17 | 7471024   | 7487324   | 1973      | EIF4A1    | 4.74E-05 | 8.26E-05 |
| 139 | 17 | 46621232  | 46672634  | 3213      | HOXB3     | 1.69E-10 | 1.26E-09 |
| 139 | 17 | 46647869  | 46660743  | 3214      | HOXB4     | 5.23E-09 | 2.48E-08 |
| 92  | 10 | 94206441  | 94338852  | 3416      | IDE       | 1.55E-05 | 3.16E-05 |
| 30  | 3  | 176733542 | 176920048 | 79718     | TBL1XR1   | 1.62E-05 | 3.29E-05 |
| 139 | 17 | 46601807  | 46613272  | 3211      | HOXB1     | 1.08E-08 | 4.69E-08 |
| 76  | 8  | 11346521  | 11427108  | 640       | BLK       | 1.64E-05 | 3.31E-05 |
| 58  | 6  | 29269467  | 29280432  | 442191    | OR14J1    | 1.70E-05 | 3.42E-05 |
| 65  | 6  | 138183325 | 138209451 | 7128      | TNFAIP3   | 1.74E-05 | 3.49E-05 |
| 44  | 5  | 35851977  | 35884705  | 3575      | IL7R      | 1.79E-05 | 3.58E-05 |
| 54  | 5  | 176723199 | 176735744 | 53917     | RAB24     | 1.79E-05 | 3.58E-05 |
| 139 | 17 | 46615017  | 46627393  | 3212      | HOXB2     | 1.24E-08 | 5.33E-08 |
| 122 | 15 | 40669922  | 40691489  | 90417     | KNSTRN    | 1.84E-05 | 3.66E-05 |
| 1   | 1  | 1162629   | 1175421   | 126792    | B3GALT6   | 1.91E-05 | 3.78E-05 |
| 126 | 15 | 77218962  | 77247601  | 5955      | RCN2      | 1.99E-05 | 3.93E-05 |
| 47  | 5  | 109750197 | 110067507 | 642987    | TMEM232   | 2.01E-05 | 3.96E-05 |
| 1   | 1  | 1172826   | 1187102   | 388581    | FAM132A   | 2.11E-05 | 4.15E-05 |
| 133 | 16 | 75472136  | 75503584  | 124491    | TMEM170A  | 2.12E-05 | 4.16E-05 |
| 139 | 17 | 46205802  | 46512596  | 8631      | SKAP1     | 2.46E-08 | 9.57E-08 |
| 105 | 12 | 57383355  | 57395469  | 11318     | GPR182    | 2.25E-05 | 4.39E-05 |
| 113 | 13 | 58199238  | 58308445  | 27253     | PCDH17    | 2.26E-05 | 4.40E-05 |
| 58  | 6  | 28341598  | 28372544  | 9753      | ZSCAN12   | 2.29E-05 | 4.44E-05 |
| 139 | 17 | 46663619  | 46676103  | 3215      | HOXB5     | 2.82E-08 | 1.06E-07 |
| 8   | 1  | 114234824 | 114307165 | 10745     | PHTF1     | 2.38E-05 | 4.59E-05 |
| 58  | 6  | 27088912  | 27105743  | 8970      | HIST1H2BJ | 2.42E-05 | 4.66E-05 |
| 137 | 17 | 38019417  | 38039149  | 124626    | ZBP2      | 2.48E-05 | 4.75E-05 |
| 58  | 6  | 28104688  | 28132250  | 7745      | ZKSCAN8   | 2.49E-05 | 4.75E-05 |
| 76  | 8  | 10617473  | 10702394  | 54984     | PINX1     | 2.49E-05 | 4.75E-05 |
| 91  | 10 | 75556669  | 75576589  | 8509      | NDST2     | 2.58E-05 | 4.91E-05 |
| 58  | 6  | 27109861  | 27120341  | 85235     | HIST1H2AH | 2.59E-05 | 4.92E-05 |
| 137 | 17 | 37778177  | 37797878  | 84152     | PPP1R1B   | 2.69E-05 | 5.08E-05 |
| 8   | 1  | 114299454 | 114360070 | 54665     | RSBN1     | 2.69E-05 | 5.08E-05 |
| 58  | 6  | 27855477  | 27865963  | 8336      | HIST1H2AM | 2.72E-05 | 5.13E-05 |
| 71  | 7  | 99762229  | 99779990  | 221914    | GPC2      | 2.74E-05 | 5.15E-05 |
| 140 | 17 | 47282589  | 47305587  | 51225     | ABI3      | 2.81E-05 | 5.27E-05 |
| 139 | 17 | 45805610  | 45828485  | 30009     | TBX21     | 5.25E-08 | 1.81E-07 |
| 139 | 17 | 46684708  | 46697474  | 3218      | HOXB8     | 1.50E-07 | 4.70E-07 |
| 38  | 4  | 106624935 | 106773882 | 79807     | GSTCD     | 2.99E-05 | 5.57E-05 |

|     |    |           |           |           |              |          |          |
|-----|----|-----------|-----------|-----------|--------------|----------|----------|
| 58  | 6  | 28043482  | 28062341  | 7718      | ZNF165       | 3.09E-05 | 5.74E-05 |
| 1   | 1  | 1147288   | 1172447   | 51150     | SDF4         | 3.12E-05 | 5.78E-05 |
| 94  | 11 | 1613407   | 1624524   | 440021    | KRTAP5-2     | 3.13E-05 | 5.78E-05 |
| 151 | 19 | 46362518  | 46382055  | 3171      | FOXA3        | 3.17E-05 | 5.84E-05 |
| 150 | 19 | 45404039  | 45417650  | 348       | APOE         | 3.30E-05 | 6.05E-05 |
| 139 | 17 | 46668099  | 46687343  | 3216      | HOXB6        | 4.32E-07 | 1.21E-06 |
| 58  | 6  | 25778125  | 25837287  | 6568      | SLC17A1      | 3.33E-05 | 6.09E-05 |
| 139 | 17 | 46679594  | 46693383  | 3217      | HOXB7        | 6.23E-07 | 1.69E-06 |
| 58  | 6  | 27101924  | 27113258  | 8294      | HIST1H4I     | 3.43E-05 | 6.24E-05 |
| 58  | 6  | 26453132  | 26481849  | 11120     | BTN2A1       | 3.45E-05 | 6.26E-05 |
| 139 | 17 | 46042894  | 46064152  | 80279     | CDK5RAP3     | 2.89E-06 | 6.91E-06 |
| 58  | 6  | 27101072  | 27119637  | 85236     | HIST1H2BK    | 3.63E-05 | 6.56E-05 |
| 48  | 5  | 118599418 | 118735294 | 25816     | TNFAIP8      | 3.65E-05 | 6.58E-05 |
| 99  | 11 | 88232256  | 88801846  | 2915      | GRM5         | 3.66E-05 | 6.58E-05 |
| 58  | 6  | 28087334  | 28102864  | 80345     | ZSCAN16      | 3.67E-05 | 6.58E-05 |
| 27  | 3  | 75950845  | 77704115  | 6092      | ROBO2        | 3.78E-05 | 6.76E-05 |
| 137 | 17 | 37880409  | 37891792  | 84299     | MIEN1        | 3.80E-05 | 6.78E-05 |
| 139 | 17 | 45879733  | 45904169  | 114881    | OSBPL7       | 7.61E-06 | 1.69E-05 |
| 154 | 20 | 62213955  | 62263381  | 26205     | GMEB2        | 4.12E-05 | 7.32E-05 |
| 1   | 1  | 1104286   | 1138315   | 254173    | TTL10        | 4.18E-05 | 7.41E-05 |
| 140 | 17 | 47278596  | 47292936  | 2793      | GNGT2        | 4.23E-05 | 7.48E-05 |
| 71  | 7  | 99719317  | 99731121  | 255374    | MBLAC1       | 4.25E-05 | 7.50E-05 |
| 58  | 6  | 26592171  | 26605278  | 29777     | ABT1         | 4.58E-05 | 8.06E-05 |
| 128 | 15 | 84317838  | 84713594  | 57188     | ADAMTSL3     | 4.59E-05 | 8.06E-05 |
| 91  | 10 | 75540334  | 75566556  | 23053     | ZSWIM8       | 4.60E-05 | 8.06E-05 |
| 84  | 9  | 5505512   | 5576282   | 80380     | PDCD1LG2     | 4.63E-05 | 8.09E-05 |
| 139 | 17 | 46179911  | 46205109  | 29916     | SNX11        | 2.90E-05 | 5.43E-05 |
| 148 | 19 | 33694570  | 33721756  | 56301     | SLC7A10      | 5.14E-05 | 8.94E-05 |
| 139 | 17 | 45910047  | 45923699  | 90507     | SCRN2        | 3.53E-05 | 6.39E-05 |
| 115 | 13 | 100148628 | 100221302 | 9375      | TM9SF2       | 5.51E-05 | 9.54E-05 |
| 137 | 17 | 38329242  | 38356906  | 51195     | RAPGEFL1     | 5.53E-05 | 9.55E-05 |
| 25  | 3  | 49140479  | 49163371  | 10869     | USP19        | 5.64E-05 | 9.72E-05 |
| 97  | 11 | 65536369  | 65553062  | 91056     | AP5B1        | 6.18E-05 | 1.06E-04 |
| 1   | 1  | 1133888   | 1147163   | 8784      | TNFRSF18     | 6.28E-05 | 1.08E-04 |
| 84  | 9  | 6408151   | 6512054   | 115426    | UHRF2        | 6.47E-05 | 1.11E-04 |
| 126 | 15 | 76503628  | 76608810  | 2108      | ETFA         | 6.83E-05 | 1.17E-04 |
| 54  | 5  | 176727501 | 176746096 | 83463     | MXD3         | 6.98E-05 | 1.19E-04 |
| 135 | 17 | 7477805   | 7490429   | 968       | CD68         | 7.15E-05 | 1.21E-04 |
| 74  | 7  | 128589234 | 128700227 | 23534     | TNPO3        | 7.23E-05 | 1.22E-04 |
| 17  | 2  | 102922962 | 102973497 | 9173      | IL1RL1       | 7.24E-05 | 1.22E-04 |
| 25  | 3  | 49230861  | 49300636  | 339834    | CCDC36       | 7.28E-05 | 1.23E-04 |
| 144 | 19 | 1021274   | 1044064   | 1265      | CNN2         | 7.86E-05 | 1.32E-04 |
| 135 | 17 | 7456609   | 7469925   | 8741      | TNFSF13      | 8.23E-05 | 1.38E-04 |
| 5   | 1  | 77742662  | 78030654  | 26289     | AK5          | 8.29E-05 | 1.39E-04 |
| 89  | 9  | 136437141 | 136479472 | 642968    | FAM163B      | 8.36E-05 | 1.40E-04 |
| 142 | 18 | 34818003  | 35151000  | 56853     | CELF4        | 8.89E-05 | 1.48E-04 |
| 44  | 5  | 35899397  | 35943881  | 133690    | CAPSL        | 8.96E-05 | 1.49E-04 |
| 2   | 1  | 10515588  | 10537613  | 1676      | DFFA         | 9.64E-05 | 1.60E-04 |
| 151 | 19 | 46267975  | 46290815  | 1760      | DMPK         | 9.72E-05 | 1.61E-04 |
| 139 | 17 | 46024333  | 46040252  | 79170     | PRR15L       | 9.73E-05 | 1.61E-04 |
| 86  | 9  | 34629719  | 34642805  | 10280     | SIGMAR1      | 9.86E-05 | 1.63E-04 |
| 86  | 9  | 34616455  | 34633011  | 138715    | ARID3C       | 1.03E-04 | 1.70E-04 |
| 139 | 17 | 46142414  | 46183883  | 10951     | CBX1         | 1.04E-04 | 1.71E-04 |
| 46  | 5  | 74902301  | 74972671  | 728780    | ANKDD1B      | 1.05E-04 | 1.72E-04 |
| 94  | 11 | 1570746   | 1582687   | 101927562 | LOC101927562 | 1.06E-04 | 1.73E-04 |
| 94  | 11 | 1600572   | 1611513   | 387264    | KRTAP5-1     | 1.06E-04 | 1.74E-04 |
| 76  | 8  | 11273972  | 11329276  | 83648     | FAM167A      | 1.09E-04 | 1.77E-04 |



|     |    |           |           |           |              |          |          |
|-----|----|-----------|-----------|-----------|--------------|----------|----------|
| 58  | 6  | 28534407  | 28560112  | 114821    | ZBED9        | 1.13E-04 | 1.83E-04 |
| 153 | 20 | 30860443  | 30927814  | 9371      | KIF3B        | 1.14E-04 | 1.84E-04 |
| 49  | 5  | 130594702 | 130735383 | 56990     | CDC42SE2     | 1.16E-04 | 1.88E-04 |
| 58  | 6  | 25749927  | 25786403  | 10050     | SLC17A4      | 1.17E-04 | 1.89E-04 |
| 77  | 8  | 27312278  | 27341813  | 1135      | CHRNA2       | 1.21E-04 | 1.95E-04 |
| 131 | 16 | 30430019  | 30446373  | 79077     | DCTPP1       | 1.25E-04 | 2.01E-04 |
| 131 | 16 | 30575998  | 30590243  | 146542    | ZNF688       | 1.28E-04 | 2.05E-04 |
| 137 | 17 | 37889162  | 37908538  | 2886      | GRB7         | 1.28E-04 | 2.05E-04 |
| 58  | 6  | 28394373  | 28416279  | 222696    | ZSCAN23      | 1.31E-04 | 2.08E-04 |
| 137 | 17 | 38370556  | 38443944  | 147179    | WIPF2        | 1.31E-04 | 2.09E-04 |
| 4   | 1  | 50901935  | 51430936  | 11124     | FAF1         | 1.31E-04 | 2.09E-04 |
| 77  | 8  | 27163999  | 27321908  | 2185      | PTK2B        | 1.35E-04 | 2.13E-04 |
| 72  | 7  | 105512251 | 105681877 | 222256    | CDHR3        | 1.41E-04 | 2.23E-04 |
| 94  | 11 | 1623795   | 1634693   | 387266    | KRTAP5-3     | 1.42E-04 | 2.24E-04 |
| 11  | 1  | 198603098 | 198731605 | 5788      | PTPRC        | 1.47E-04 | 2.31E-04 |
| 139 | 17 | 45968516  | 46011323  | 6668      | SP2          | 1.47E-04 | 2.31E-04 |
| 126 | 15 | 76347299  | 76502304  | 123591    | C15orf27     | 1.49E-04 | 2.34E-04 |
| 139 | 17 | 46013889  | 46031674  | 55163     | PNPO         | 1.50E-04 | 2.36E-04 |
| 28  | 3  | 100936390 | 101044419 | 50939     | IMP2         | 1.52E-04 | 2.37E-04 |
| 91  | 10 | 75536808  | 75548406  | 118487    | CHCHD1       | 1.57E-04 | 2.44E-04 |
| 144 | 19 | 995437    | 1014723   | 116444    | GRIN3B       | 1.63E-04 | 2.53E-04 |
| 38  | 4  | 106598784 | 106634881 | 57117     | INTS12       | 1.64E-04 | 2.55E-04 |
| 139 | 17 | 45903993  | 45920079  | 90506     | LRRC46       | 1.69E-04 | 2.61E-04 |
| 123 | 15 | 49275835  | 49343760  | 9728      | SECISBP2L    | 1.72E-04 | 2.65E-04 |
| 139 | 17 | 45917280  | 45938240  | 80320     | SP6          | 1.76E-04 | 2.71E-04 |
| 58  | 6  | 25907982  | 25935954  | 10246     | SLC17A2      | 1.79E-04 | 2.75E-04 |
| 52  | 5  | 147825595 | 148039090 | 3360      | HTR4         | 1.84E-04 | 2.83E-04 |
| 25  | 3  | 49706427  | 49725936  | 327       | APEH         | 1.86E-04 | 2.85E-04 |
| 82  | 8  | 108906544 | 109100913 | 340419    | RSPO2        | 1.89E-04 | 2.89E-04 |
| 28  | 3  | 101038049 | 101237085 | 57337     | SEN7         | 1.92E-04 | 2.94E-04 |
| 22  | 2  | 242711240 | 242748702 | 64090     | GAL3ST2      | 1.95E-04 | 2.97E-04 |
| 122 | 15 | 40645434  | 40668256  | 85455     | DISP2        | 2.01E-04 | 3.06E-04 |
| 43  | 5  | 14659783  | 14704842  | 90268     | OTULIN       | 2.06E-04 | 3.13E-04 |
| 15  | 2  | 63272192  | 63289966  | 5013      | OTX1         | 2.17E-04 | 3.28E-04 |
| 9   | 1  | 152376719 | 152391750 | 49860     | CRNN         | 2.29E-04 | 3.46E-04 |
| 94  | 11 | 1485685   | 1512948   | 81532     | MOB2         | 2.30E-04 | 3.47E-04 |
| 8   | 1  | 114351433 | 114419375 | 26191     | PTPN22       | 2.33E-04 | 3.50E-04 |
| 58  | 6  | 28466073  | 28488570  | 257202    | GPX6         | 2.35E-04 | 3.53E-04 |
| 55  | 6  | 7536808   | 7591946   | 1832      | DSP          | 2.36E-04 | 3.54E-04 |
| 58  | 6  | 27853093  | 27863570  | 8356      | HIST1H3J     | 2.58E-04 | 3.87E-04 |
| 44  | 5  | 35948191  | 36071639  | 133688    | UGT3A1       | 2.67E-04 | 3.99E-04 |
| 137 | 17 | 38273235  | 38298047  | 339287    | MSL1         | 2.70E-04 | 4.02E-04 |
| 50  | 5  | 134363970 | 134685370 | 100996485 | C5orf66      | 2.73E-04 | 4.06E-04 |
| 92  | 10 | 94347825  | 94420152  | 3832      | KIF11        | 2.77E-04 | 4.11E-04 |
| 131 | 16 | 30608879  | 30627096  | 115509    | ZNF689       | 2.81E-04 | 4.17E-04 |
| 136 | 17 | 16240831  | 16261812  | 201161    | CENPV        | 2.88E-04 | 4.25E-04 |
| 58  | 6  | 26495577  | 26515653  | 696       | BTN1A1       | 2.90E-04 | 4.27E-04 |
| 131 | 16 | 30082297  | 30101698  | 5531      | PPP4C        | 2.91E-04 | 4.29E-04 |
| 139 | 17 | 45895638  | 45913907  | 124995    | MRPL10       | 3.01E-04 | 4.43E-04 |
| 54  | 5  | 176527822 | 176553835 | 101928726 | LOC101928726 | 3.09E-04 | 4.53E-04 |
| 151 | 19 | 46313700  | 46371548  | 8189      | SYMPK        | 3.14E-04 | 4.59E-04 |
| 94  | 11 | 1570281   | 1598150   | 1850      | DUSP8        | 3.14E-04 | 4.59E-04 |
| 131 | 16 | 30363422  | 30386522  | 26000     | TBC1D10B     | 3.26E-04 | 4.75E-04 |
| 133 | 16 | 75502022  | 75533926  | 4166      | CHST6        | 3.29E-04 | 4.79E-04 |
| 25  | 3  | 49153547  | 49175599  | 3913      | LAMB2        | 3.52E-04 | 5.12E-04 |
| 15  | 2  | 62895986  | 63278622  | 23301     | EHBP1        | 3.58E-04 | 5.18E-04 |
| 86  | 9  | 34605482  | 34617110  | 138716    | RPP25L       | 3.68E-04 | 5.32E-04 |

|     |    |           |           |           |           |          |          |
|-----|----|-----------|-----------|-----------|-----------|----------|----------|
| 99  | 11 | 88906040  | 89033927  | 7299      | TYR       | 4.01E-04 | 5.79E-04 |
| 137 | 17 | 37839167  | 37889915  | 2064      | ERBB2     | 4.10E-04 | 5.91E-04 |
| 150 | 19 | 45389477  | 45411946  | 10452     | TOMM40    | 4.11E-04 | 5.91E-04 |
| 105 | 12 | 57444426  | 57477574  | 23306     | TMEM194A  | 4.18E-04 | 5.99E-04 |
| 131 | 16 | 30384454  | 30399171  | 1731      | SEPT1     | 4.28E-04 | 6.13E-04 |
| 131 | 16 | 30560085  | 30574642  | 92595     | ZNF764    | 4.37E-04 | 6.25E-04 |
| 36  | 4  | 90027651  | 90041734  | 166815    | TIGD2     | 4.39E-04 | 6.26E-04 |
| 109 | 12 | 123768656 | 123854756 | 55206     | SBNO1     | 4.48E-04 | 6.37E-04 |
| 131 | 16 | 30530322  | 30543821  | 79724     | ZNF768    | 4.75E-04 | 6.75E-04 |
| 71  | 7  | 99741530  | 99756833  | 389541    | LAMTOR4   | 4.80E-04 | 6.81E-04 |
| 131 | 16 | 30381123  | 30394310  | 29895     | MYLPF     | 4.84E-04 | 6.85E-04 |
| 91  | 10 | 75567259  | 75639349  | 818       | CAMK2G    | 4.91E-04 | 6.93E-04 |
| 44  | 5  | 35612900  | 35819713  | 79925     | SPEF2     | 5.12E-04 | 7.23E-04 |
| 151 | 19 | 46263043  | 46277497  | 147912    | SIX5      | 5.21E-04 | 7.33E-04 |
| 131 | 16 | 30784770  | 30803564  | 23361     | ZNF629    | 5.41E-04 | 7.60E-04 |
| 137 | 17 | 37822375  | 37849310  | 93210     | PGAP3     | 5.72E-04 | 8.03E-04 |
| 22  | 2  | 242744920 | 242763742 | 129807    | NEU4      | 5.76E-04 | 8.06E-04 |
| 58  | 6  | 27920019  | 27930960  | 26212     | OR2B6     | 5.86E-04 | 8.18E-04 |
| 71  | 7  | 99712265  | 99728131  | 245812    | CNPY4     | 5.96E-04 | 8.31E-04 |
| 139 | 17 | 46120686  | 46143907  | 4779      | NFE2L1    | 5.98E-04 | 8.33E-04 |
| 150 | 19 | 45344393  | 45397485  | 5819      | PVRL2     | 6.37E-04 | 8.85E-04 |
| 62  | 6  | 106627351 | 106778695 | 9474      | ATG5      | 6.82E-04 | 9.46E-04 |
| 131 | 16 | 30357087  | 30371682  | 10421     | CD2BP2    | 7.26E-04 | 1.00E-03 |
| 131 | 16 | 30704571  | 30756450  | 10847     | SRCAP     | 7.26E-04 | 1.00E-03 |
| 57  | 6  | 19832579  | 19847431  | 3400      | ID4       | 7.59E-04 | 1.05E-03 |
| 152 | 20 | 21371005  | 21383047  | 644524    | NKX2-4    | 8.36E-04 | 1.15E-03 |
| 49  | 5  | 130754614 | 130975929 | 51735     | RAPGEF6   | 8.37E-04 | 1.15E-03 |
| 58  | 6  | 26378111  | 26400102  | 10385     | BTN2A2    | 8.47E-04 | 1.16E-03 |
| 135 | 17 | 7489548   | 7523215   | 9513      | FXR2      | 8.54E-04 | 1.17E-03 |
| 123 | 15 | 49412471  | 49452854  | 9318      | COPS2     | 8.56E-04 | 1.17E-03 |
| 137 | 17 | 38460423  | 38518895  | 5914      | RARA      | 8.79E-04 | 1.20E-03 |
| 25  | 3  | 49128365  | 49147562  | 5859      | QARS      | 8.89E-04 | 1.21E-03 |
| 110 | 13 | 32884617  | 32978809  | 675       | BRCA2     | 9.02E-04 | 1.23E-03 |
| 91  | 10 | 75499039  | 75536933  | 9632      | SEC24C    | 9.16E-04 | 1.24E-03 |
| 73  | 7  | 116998276 | 117072577 | 136991    | ASZ1      | 9.41E-04 | 1.27E-03 |
| 17  | 2  | 103084173 | 103155433 | 389015    | SLC9A4    | 9.46E-04 | 1.28E-03 |
| 22  | 2  | 242787033 | 242806058 | 5133      | PDCD1     | 9.83E-04 | 1.33E-03 |
| 131 | 16 | 30746512  | 30761517  | 100862671 | TMEM265   | 1.05E-03 | 1.42E-03 |
| 25  | 3  | 49301030  | 49319864  | 375341    | C3orf62   | 1.10E-03 | 1.47E-03 |
| 131 | 16 | 30384633  | 30416429  | 197407    | ZNF48     | 1.15E-03 | 1.54E-03 |
| 84  | 9  | 6006019   | 6020640   | 26953     | RANBP6    | 1.29E-03 | 1.73E-03 |
| 94  | 11 | 1646033   | 1657160   | 439915    | KRTAP5-5  | 1.31E-03 | 1.76E-03 |
| 9   | 1  | 152073793 | 152092930 | 7062      | TCHH      | 1.34E-03 | 1.79E-03 |
| 122 | 15 | 40728411  | 40765441  | 22893     | BAHD1     | 1.36E-03 | 1.81E-03 |
| 71  | 7  | 99685351  | 99704563  | 4176      | MCM7      | 1.41E-03 | 1.88E-03 |
| 131 | 16 | 30536688  | 30551345  | 65988     | ZNF747    | 1.42E-03 | 1.88E-03 |
| 137 | 17 | 38439146  | 38464413  | 990       | CDC6      | 1.46E-03 | 1.93E-03 |
| 104 | 12 | 56342889  | 56365523  | 6490      | PMEL      | 1.49E-03 | 1.97E-03 |
| 58  | 6  | 25722137  | 25732573  | 255626    | HIST1H2BA | 1.49E-03 | 1.97E-03 |
| 91  | 10 | 75429033  | 75469357  | 729092    | AGAP5     | 1.57E-03 | 2.07E-03 |
| 154 | 20 | 62167163  | 62183857  | 6725      | SRMS      | 1.63E-03 | 2.15E-03 |
| 9   | 1  | 152533175 | 152544229 | 353145    | LCE3E     | 1.67E-03 | 2.19E-03 |
| 138 | 17 | 43184008  | 43214891  | 113026    | PLCD3     | 1.69E-03 | 2.22E-03 |
| 58  | 6  | 25721291  | 25731790  | 221613    | HIST1H2AA | 1.72E-03 | 2.24E-03 |
| 85  | 9  | 8309246   | 10617723  | 5789      | PTPRD     | 1.74E-03 | 2.27E-03 |
| 58  | 6  | 26246848  | 26266783  | 8345      | HIST1H2BH | 1.75E-03 | 2.28E-03 |
| 58  | 6  | 29359416  | 29370448  | 26529     | OR12D2    | 1.76E-03 | 2.29E-03 |

|     |    |           |           |        |           |          |          |
|-----|----|-----------|-----------|--------|-----------|----------|----------|
| 154 | 20 | 62154766  | 62173723  | 5753   | PTK6      | 1.79E-03 | 2.32E-03 |
| 151 | 19 | 46231515  | 46272376  | 388553 | BHMG1     | 1.87E-03 | 2.42E-03 |
| 25  | 3  | 49062140  | 49136504  | 54870  | QRICH1    | 1.87E-03 | 2.42E-03 |
| 4   | 1  | 51437129  | 51618754  | 284546 | C1orf185  | 1.88E-03 | 2.43E-03 |
| 18  | 2  | 111485150 | 111880799 | 55289  | ACOXL     | 1.89E-03 | 2.43E-03 |
| 131 | 16 | 30704025  | 30714810  | 730183 | LOC730183 | 1.91E-03 | 2.46E-03 |
| 153 | 20 | 30941147  | 31032122  | 171023 | ASXL1     | 1.93E-03 | 2.48E-03 |
| 123 | 15 | 49442974  | 49664955  | 2585   | GALK2     | 1.95E-03 | 2.50E-03 |
| 84  | 9  | 6323349   | 6336900   | 89882  | TPD52L3   | 1.97E-03 | 2.52E-03 |
| 131 | 16 | 30413735  | 30434916  | 51333  | ZNF771    | 2.02E-03 | 2.58E-03 |
| 1   | 1  | 1184292   | 1214234   | 118424 | UBE2J2    | 2.03E-03 | 2.60E-03 |
| 17  | 2  | 103030254 | 103074025 | 8807   | IL18RAP   | 2.17E-03 | 2.77E-03 |
| 43  | 5  | 14576891  | 14621289  | 54491  | FAM105A   | 2.26E-03 | 2.87E-03 |
| 156 | 22 | 41483614  | 41581081  | 2033   | EP300     | 2.35E-03 | 2.98E-03 |
| 76  | 8  | 11137000  | 11190655  | 66036  | MTMR9     | 2.35E-03 | 2.98E-03 |
| 25  | 3  | 49194968  | 49208785  | 64925  | CCDC71    | 2.41E-03 | 3.04E-03 |
| 58  | 6  | 26266146  | 26276612  | 8355   | HIST1H3G  | 2.43E-03 | 3.07E-03 |
| 71  | 7  | 99751865  | 99771373  | 79690  | GAL3ST4   | 2.52E-03 | 3.18E-03 |
| 63  | 6  | 128284924 | 128846870 | 5796   | PTPRK     | 2.53E-03 | 3.18E-03 |
| 71  | 7  | 99699693  | 99722481  | 6878   | TAF6      | 2.67E-03 | 3.36E-03 |
| 91  | 10 | 75664727  | 75687535  | 414236 | C10orf55  | 2.75E-03 | 3.45E-03 |
| 71  | 7  | 99694130  | 99709803  | 9179   | AP4M1     | 2.78E-03 | 3.48E-03 |
| 9   | 1  | 151999982 | 152014511 | 6282   | S100A11   | 2.88E-03 | 3.60E-03 |
| 25  | 3  | 49716380  | 49731196  | 4485   | MST1      | 2.90E-03 | 3.62E-03 |
| 127 | 15 | 79209092  | 79242436  | 1512   | CTSH      | 2.95E-03 | 3.68E-03 |
| 151 | 19 | 46208887  | 46239151  | 23403  | FBXO46    | 2.97E-03 | 3.69E-03 |
| 156 | 22 | 41600861  | 41641935  | 150356 | CHADL     | 2.98E-03 | 3.70E-03 |
| 58  | 6  | 27210480  | 27229399  | 10279  | PRSS16    | 3.05E-03 | 3.78E-03 |
| 131 | 16 | 30670778  | 30687131  | 64319  | FBRS      | 3.06E-03 | 3.79E-03 |
| 58  | 6  | 26435700  | 26458643  | 10384  | BTN3A3    | 3.08E-03 | 3.81E-03 |
| 9   | 1  | 152779447 | 152790585 | 353132 | LCE1B     | 3.15E-03 | 3.89E-03 |
| 84  | 9  | 5885895   | 5914822   | 2315   | MLANA     | 3.29E-03 | 4.05E-03 |
| 17  | 2  | 102974093 | 103020230 | 8809   | IL18R1    | 3.57E-03 | 4.39E-03 |
| 54  | 5  | 176555026 | 176732214 | 64324  | NSD1      | 3.67E-03 | 4.51E-03 |
| 17  | 2  | 102309165 | 102516152 | 9448   | MAP4K4    | 3.74E-03 | 4.58E-03 |
| 138 | 17 | 43294192  | 43329685  | 752    | FMNL1     | 3.83E-03 | 4.69E-03 |
| 137 | 17 | 38539773  | 38579202  | 7153   | TOP2A     | 3.92E-03 | 4.79E-03 |
| 58  | 6  | 26179024  | 26189458  | 8344   | HIST1H2BE | 4.02E-03 | 4.90E-03 |
| 109 | 12 | 123400498 | 123456056 | 23457  | ABCB9     | 4.13E-03 | 5.03E-03 |
| 156 | 22 | 41596312  | 41632276  | 83746  | L3MBTL2   | 4.28E-03 | 5.20E-03 |
| 153 | 20 | 31025862  | 31177875  | 140688 | NOL4L     | 4.34E-03 | 5.26E-03 |
| 139 | 17 | 46098533  | 46125908  | 51226  | COPZ2     | 4.44E-03 | 5.38E-03 |
| 43  | 5  | 14699909  | 14876887  | 56172  | ANKH      | 4.52E-03 | 5.46E-03 |
| 58  | 6  | 26533572  | 26552165  | 10473  | HMG4      | 4.53E-03 | 5.47E-03 |
| 91  | 10 | 75665862  | 75682259  | 5328   | PLAU      | 4.58E-03 | 5.53E-03 |
| 154 | 20 | 62146426  | 62158524  | 79144  | PPDPF     | 4.60E-03 | 5.54E-03 |
| 49  | 5  | 131137683 | 131286391 | 728637 | MEIKIN    | 4.79E-03 | 5.76E-03 |
| 105 | 12 | 57387617  | 57405297  | 9880   | ZBTB39    | 4.89E-03 | 5.87E-03 |
| 128 | 15 | 85180607  | 85202521  | 84942  | WDR73     | 4.98E-03 | 5.96E-03 |
| 105 | 12 | 57417301  | 57449549  | 4640   | MYO1A     | 4.99E-03 | 5.96E-03 |
| 49  | 5  | 130972407 | 131137756 | 96459  | FNIP1     | 5.01E-03 | 5.98E-03 |
| 78  | 8  | 71480453  | 71525694  | 23471  | TRAM1     | 5.49E-03 | 6.54E-03 |
| 58  | 6  | 28865779  | 28896768  | 5987   | TRIM27    | 5.53E-03 | 6.58E-03 |
| 58  | 6  | 26629611  | 26664980  | 79692  | ZNF322    | 5.63E-03 | 6.68E-03 |
| 58  | 6  | 27413521  | 27445897  | 7738   | ZNF184    | 5.64E-03 | 6.68E-03 |
| 155 | 21 | 36155098  | 36426595  | 861    | RUNX1     | 5.65E-03 | 6.69E-03 |
| 131 | 16 | 30657038  | 30672734  | 78994  | PRR14     | 5.79E-03 | 6.84E-03 |

|     |    |           |           |           |              |          |          |
|-----|----|-----------|-----------|-----------|--------------|----------|----------|
| 58  | 6  | 25647429  | 25707011  | 10590     | SCGN         | 5.83E-03 | 6.88E-03 |
| 123 | 15 | 49908226  | 49942333  | 56986     | DTWD1        | 5.85E-03 | 6.89E-03 |
| 154 | 20 | 62114365  | 62135668  | 1917      | EEF1A2       | 5.88E-03 | 6.92E-03 |
| 5   | 1  | 78439847  | 78488648  | 11080     | DNAJB4       | 6.03E-03 | 7.08E-03 |
| 58  | 6  | 26194787  | 26205216  | 8343      | HIST1H2BF    | 6.04E-03 | 7.08E-03 |
| 121 | 14 | 101341569 | 101364826 | 388015    | RTL1         | 6.11E-03 | 7.16E-03 |
| 128 | 15 | 85139249  | 85171947  | 54993     | ZSCAN2       | 6.26E-03 | 7.32E-03 |
| 154 | 20 | 62179373  | 62193061  | 79025     | C20orf195    | 6.36E-03 | 7.42E-03 |
| 106 | 12 | 62855597  | 62996363  | 23041     | MON2         | 6.46E-03 | 7.53E-03 |
| 21  | 2  | 228731325 | 228794131 | 164781    | DAW1         | 7.02E-03 | 8.17E-03 |
| 71  | 7  | 99747043  | 99761338  | 55262     | C7orf43      | 7.30E-03 | 8.48E-03 |
| 71  | 7  | 99681583  | 99694823  | 10980     | COPS6        | 7.41E-03 | 8.60E-03 |
| 5   | 1  | 78404740  | 78449839  | 8880      | FUBP1        | 7.44E-03 | 8.62E-03 |
| 84  | 9  | 5914008   | 6013479   | 158358    | KIAA2026     | 8.11E-03 | 9.38E-03 |
| 58  | 6  | 27271842  | 27285011  | 94026     | POM121L2     | 8.18E-03 | 9.45E-03 |
| 76  | 8  | 11183495  | 11194695  | 83650     | SLC35G5      | 8.25E-03 | 9.52E-03 |
| 60  | 6  | 64340707  | 64429407  | 23469     | PHF3         | 9.39E-03 | 1.08E-02 |
| 58  | 6  | 26194012  | 26204521  | 3013      | HIST1H2AD    | 9.55E-03 | 1.10E-02 |
| 110 | 13 | 32969860  | 33007490  | 90634     | N4BP2L1      | 1.03E-02 | 1.18E-02 |
| 91  | 10 | 75526830  | 75540977  | 170384    | FUT11        | 1.05E-02 | 1.21E-02 |
| 131 | 16 | 30767933  | 30792628  | 9810      | RNF40        | 1.06E-02 | 1.21E-02 |
| 58  | 6  | 26183938  | 26194304  | 8360      | HIST1H4D     | 1.08E-02 | 1.23E-02 |
| 131 | 16 | 30449952  | 30462224  | 22928     | SEPHS2       | 1.09E-02 | 1.24E-02 |
| 5   | 1  | 78349200  | 78417009  | 91624     | NEXN         | 1.12E-02 | 1.28E-02 |
| 106 | 12 | 62649121  | 62808501  | 9958      | USP15        | 1.12E-02 | 1.28E-02 |
| 58  | 6  | 27095817  | 27106314  | 8969      | HIST1H2AG    | 1.15E-02 | 1.31E-02 |
| 137 | 17 | 38511904  | 38525945  | 125111    | GJD3         | 1.19E-02 | 1.35E-02 |
| 4   | 1  | 51429367  | 51445309  | 1031      | CDKN2C       | 1.25E-02 | 1.41E-02 |
| 58  | 6  | 26191982  | 26204521  | 8351      | HIST1H3D     | 1.25E-02 | 1.41E-02 |
| 58  | 6  | 26199873  | 26210249  | 8367      | HIST1H4E     | 1.25E-02 | 1.41E-02 |
| 58  | 6  | 26397465  | 26420444  | 11119     | BTN3A1       | 1.29E-02 | 1.45E-02 |
| 128 | 15 | 84899525  | 84919120  | 643707    | GOLGA6L4     | 1.38E-02 | 1.55E-02 |
| 9   | 1  | 152051620 | 152066540 | 126637    | TCHHL1       | 1.40E-02 | 1.57E-02 |
| 109 | 12 | 123843046 | 123855336 | 100293704 | LOC100293704 | 1.40E-02 | 1.57E-02 |
| 60  | 6  | 64276917  | 64298493  | 7803      | PTP4A1       | 1.66E-02 | 1.86E-02 |
| 37  | 4  | 103167198 | 103271655 | 64116     | SLC39A8      | 1.94E-02 | 2.17E-02 |
| 9   | 1  | 152481978 | 152493481 | 54544     | CRCT1        | 2.33E-02 | 2.60E-02 |
| 5   | 1  | 78023160  | 78154119  | 26009     | ZZZ3         | 2.35E-02 | 2.62E-02 |
| 131 | 16 | 30199256  | 30210627  | 654483    | BOLA2B       | 2.43E-02 | 2.71E-02 |
| 33  | 4  | 25309396  | 25379190  | 29063     | ZCCHC4       | 2.45E-02 | 2.72E-02 |
| 49  | 5  | 130501641 | 130546119 | 90624     | LYRM7        | 2.51E-02 | 2.78E-02 |
| 73  | 7  | 116911685 | 116968343 | 7472      | WNT2         | 2.54E-02 | 2.81E-02 |
| 58  | 6  | 29336200  | 29348068  | 81797     | OR12D3       | 2.64E-02 | 2.92E-02 |
| 58  | 6  | 26245370  | 26255835  | 8968      | HIST1H3F     | 2.66E-02 | 2.94E-02 |
| 5   | 1  | 78240309  | 78350225  | 374986    | FAM73A       | 2.88E-02 | 3.18E-02 |
| 38  | 4  | 107231767 | 107275382 | 9255      | AIMP1        | 3.05E-02 | 3.36E-02 |
| 9   | 1  | 152764227 | 152775657 | 353134    | LCE1D        | 3.36E-02 | 3.70E-02 |
| 94  | 11 | 1768982   | 1790222   | 1509      | CTSD         | 3.49E-02 | 3.83E-02 |
| 137 | 17 | 38291507  | 38333431  | 22794     | CASC3        | 3.54E-02 | 3.88E-02 |
| 131 | 16 | 30586994  | 30602092  | 146540    | ZNF785       | 3.81E-02 | 4.18E-02 |
| 58  | 6  | 26229440  | 26240216  | 3007      | HIST1H1D     | 3.83E-02 | 4.19E-02 |
| 17  | 2  | 102603306 | 102649885 | 7850      | IL1R2        | 4.11E-02 | 4.49E-02 |
| 110 | 13 | 33155564  | 33357158  | 23047     | PDS5B        | 4.32E-02 | 4.71E-02 |
| 154 | 20 | 62026561  | 62108993  | 3785      | KCNQ2        | 4.90E-02 | 5.33E-02 |
| 94  | 11 | 1704527   | 1715286   | 100505570 | LOC100505570 | 4.91E-02 | 5.33E-02 |
| 33  | 4  | 25373848  | 25425120  | 29945     | ANAPC4       | 5.05E-02 | 5.48E-02 |
| 119 | 14 | 94744648  | 94764608  | 51156     | SERPINA10    | 5.15E-02 | 5.58E-02 |

|     |    |           |           |           |              |          |          |
|-----|----|-----------|-----------|-----------|--------------|----------|----------|
| 58  | 6  | 25274656  | 25625758  | 55604     | LRRRC16A     | 5.58E-02 | 6.03E-02 |
| 58  | 6  | 27351524  | 27376683  | 346157    | ZNF391       | 5.90E-02 | 6.38E-02 |
| 9   | 1  | 152478320 | 152489653 | 254910    | LCE5A        | 6.12E-02 | 6.60E-02 |
| 110 | 13 | 33001625  | 33121839  | 10443     | N4BP2L2      | 6.22E-02 | 6.70E-02 |
| 94  | 11 | 1713425   | 1723985   | 440023    | KRTAP5-6     | 6.49E-02 | 6.98E-02 |
| 9   | 1  | 152581287 | 152591574 | 353143    | LCE3B        | 6.65E-02 | 7.14E-02 |
| 9   | 1  | 152590310 | 152600579 | 353142    | LCE3A        | 6.75E-02 | 7.24E-02 |
| 54  | 5  | 176822108 | 176832637 | 345456    | PFN3         | 7.25E-02 | 7.77E-02 |
| 133 | 16 | 75257928  | 75306951  | 9564      | BCAR1        | 7.58E-02 | 8.11E-02 |
| 119 | 14 | 94838084  | 94862029  | 5265      | SERPINA1     | 7.74E-02 | 8.27E-02 |
| 22  | 2  | 242806886 | 242820482 | 285093    | RTP5         | 7.98E-02 | 8.51E-02 |
| 110 | 13 | 32600269  | 32875794  | 10129     | FRY          | 8.10E-02 | 8.63E-02 |
| 58  | 6  | 28957562  | 28978037  | 282890    | ZNF311       | 8.99E-02 | 9.56E-02 |
| 58  | 6  | 29419947  | 29437099  | 26716     | OR2H1        | 9.99E-02 | 1.06E-01 |
| 58  | 6  | 26235654  | 26246021  | 8361      | HIST1H4F     | 1.00E-01 | 1.06E-01 |
| 119 | 14 | 94765585  | 94794688  | 866       | SERPINA6     | 1.00E-01 | 1.06E-01 |
| 9   | 1  | 152772311 | 152784107 | 353133    | LCE1C        | 1.01E-01 | 1.07E-01 |
| 49  | 5  | 130489976 | 130506041 | 3094      | HINT1        | 1.01E-01 | 1.07E-01 |
| 106 | 12 | 63032762  | 63333665  | 57460     | PPM1H        | 1.13E-01 | 1.19E-01 |
| 58  | 6  | 26219427  | 26232706  | 8353      | HIST1H3E     | 1.14E-01 | 1.20E-01 |
| 73  | 7  | 117345702 | 117518561 | 83992     | CTTNBP2      | 1.18E-01 | 1.24E-01 |
| 58  | 6  | 26211428  | 26221872  | 8339      | HIST1H2BG    | 1.25E-01 | 1.31E-01 |
| 5   | 1  | 78156672  | 78230564  | 23032     | USP33        | 1.26E-01 | 1.32E-01 |
| 58  | 6  | 26212148  | 26222711  | 3012      | HIST1H2AE    | 1.43E-01 | 1.50E-01 |
| 58  | 6  | 29136311  | 29147351  | 26707     | OR2J2        | 1.47E-01 | 1.54E-01 |
| 20  | 2  | 157175944 | 157194287 | 4929      | NR4A2        | 1.61E-01 | 1.68E-01 |
| 110 | 13 | 32872908  | 32891091  | 646799    | ZAR1L        | 1.66E-01 | 1.73E-01 |
| 119 | 14 | 94825651  | 94838039  | 390502    | SERPINA2     | 1.71E-01 | 1.78E-01 |
| 9   | 1  | 152546860 | 152557980 | 84648     | LCE3D        | 1.73E-01 | 1.79E-01 |
| 105 | 12 | 57398781  | 57415344  | 6866      | TAC3         | 1.73E-01 | 1.79E-01 |
| 58  | 6  | 29518389  | 29532702  | 10537     | UBD          | 1.76E-01 | 1.83E-01 |
| 38  | 4  | 106962233 | 107242861 | 93627     | TBCK         | 1.82E-01 | 1.88E-01 |
| 119 | 14 | 94635649  | 94751092  | 57718     | PPP4R4       | 1.89E-01 | 1.95E-01 |
| 9   | 1  | 152316213 | 152337482 | 388698    | FLG2         | 2.23E-01 | 2.30E-01 |
| 51  | 5  | 141375234 | 141397620 | 10007     | GNPDA1       | 2.71E-01 | 2.79E-01 |
| 9   | 1  | 152686998 | 152697905 | 100129271 | C1orf68      | 2.72E-01 | 2.80E-01 |
| 9   | 1  | 152743848 | 152754445 | 353137    | LCE1F        | 2.77E-01 | 2.84E-01 |
| 9   | 1  | 152725506 | 152739529 | 448834    | KPRP         | 2.84E-01 | 2.91E-01 |
| 94  | 11 | 1748640   | 1776824   | 402778    | IFITM10      | 2.88E-01 | 2.95E-01 |
| 9   | 1  | 152047033 | 152058058 | 100131107 | LOC100131107 | 3.24E-01 | 3.31E-01 |
| 58  | 6  | 28488789  | 28507728  | 2880      | GPX5         | 3.43E-01 | 3.51E-01 |
| 58  | 6  | 29074587  | 29085661  | 442186    | OR2J3        | 3.59E-01 | 3.66E-01 |
| 9   | 1  | 152269651 | 152302679 | 2312      | FLG          | 3.70E-01 | 3.78E-01 |
| 58  | 6  | 29006990  | 29017952  | 26692     | OR2W1        | 3.95E-01 | 4.02E-01 |
| 9   | 1  | 152179552 | 152201672 | 388697    | HRNR         | 3.97E-01 | 4.04E-01 |
| 9   | 1  | 152753753 | 152765902 | 353135    | LCE1E        | 4.09E-01 | 4.15E-01 |
| 58  | 6  | 29388281  | 29429848  | 26531     | OR11A1       | 4.61E-01 | 4.67E-01 |
| 9   | 1  | 152121071 | 152136704 | 126638    | RPTN         | 4.61E-01 | 4.67E-01 |
| 58  | 6  | 29318007  | 29329054  | 81696     | OR5V1        | 5.58E-01 | 5.64E-01 |
| 9   | 1  | 151950386 | 151971714 | 6281      | S100A10      | 5.90E-01 | 5.96E-01 |
| 58  | 6  | 26241839  | 26252205  | 8369      | HIST1H4G     | 6.85E-01 | 6.90E-01 |
| 9   | 1  | 152676523 | 152686910 | 199834    | LCE4A        | 7.26E-01 | 7.31E-01 |
| 9   | 1  | 152630887 | 152642135 | 353141    | LCE2D        | 7.53E-01 | 7.57E-01 |
| 58  | 6  | 29402716  | 29413754  | 442194    | OR10C1       | 8.15E-01 | 8.18E-01 |
| 9   | 1  | 152665840 | 152676918 | 353139    | LCE2A        | 8.43E-01 | 8.45E-01 |
| 9   | 1  | 152642791 | 152654050 | 353140    | LCE2C        | 8.46E-01 | 8.47E-01 |
| 9   | 1  | 152653599 | 152664877 | 26239     | LCE2B        | 9.74E-01 | 9.74E-01 |

|                                                                                                  |  |  |  |  |  |  |  |
|--------------------------------------------------------------------------------------------------|--|--|--|--|--|--|--|
|                                                                                                  |  |  |  |  |  |  |  |
| Locus No., the numerical order of pleiotropic genomic risk locus; CHR, chromosome; BP, base pair |  |  |  |  |  |  |  |
| P.adjusted represents the Bonferroni-corrected P.value.                                          |  |  |  |  |  |  |  |
