# Supplementary material for: Shared genetic aetiology of respiratory diseases: a genome-wide multitraits association analysis
Source: PubMed Central journal article supplement — BMJ Open Respir Res. 2024 Jun 4;11(1):e002148. doi: 10.1136/bmjresp-2023-002148 (PMC11163672; doi:10.1136/bmjresp-2023-002148), 2024-06-04
Supplement: bmjresp-2023-002148supp016.pdf [file bmjresp-2023-002148supp016.pdf]

**eTable 15. Transcriptome-wide association study identifies pleiotropic genes with tissue specificity**

| Locus | Gene    | GENE   | CHR | Start     | Stop      | P.magma  | Tissue | Trait      | TWAS.Z  | TWAS.P   | P. adjusted |
|-------|---------|--------|-----|-----------|-----------|----------|--------|------------|---------|----------|-------------|
| 73    | CFTR    | 1080   | 7   | 117115017 | 117313719 | 6.54E-06 | blood  | Asthma     | 0.1539  | 8.78E-01 | 9.56E-01    |
| 73    | CFTR    | 1080   | 7   | 117115017 | 117313719 | 6.54E-06 | Lung   | Asthma     | -0.6989 | 4.85E-01 | 7.30E-01    |
| 73    | CFTR    | 1080   | 7   | 117115017 | 117313719 | 6.54E-06 | blood  | COPD       | 0.1539  | 8.78E-01 | 9.56E-01    |
| 73    | CFTR    | 1080   | 7   | 117115017 | 117313719 | 6.54E-06 | Lung   | COPD       | 0.6270  | 5.31E-01 | 7.56E-01    |
| 73    | CFTR    | 1080   | 7   | 117115017 | 117313719 | 6.54E-06 | blood  | IPF        | 0.1539  | 8.78E-01 | 9.56E-01    |
| 73    | CFTR    | 1080   | 7   | 117115017 | 117313719 | 6.54E-06 | Lung   | IPF        | 0.1758  | 8.60E-01 | 9.55E-01    |
| 73    | CFTR    | 1080   | 7   | 117115017 | 117313719 | 6.54E-06 | blood  | LungCancer | 0.1539  | 8.78E-01 | 9.56E-01    |
| 73    | CFTR    | 1080   | 7   | 117115017 | 117313719 | 6.54E-06 | Lung   | LungCancer | 0.3023  | 7.62E-01 | 9.20E-01    |
| 73    | CFTR    | 1080   | 7   | 117115017 | 117313719 | 6.54E-06 | blood  | Snoring    | 0.1539  | 8.78E-01 | 9.56E-01    |
| 73    | CFTR    | 1080   | 7   | 117115017 | 117313719 | 6.54E-06 | Lung   | Snoring    | 0.1539  | 8.78E-01 | 9.56E-01    |
| 101   | RAD52   | 5893   | 12  | 1016255   | 1104774   | 2.37E-07 | blood  | Asthma     | 0.6836  | 4.94E-01 | 7.36E-01    |
| 101   | RAD52   | 5893   | 12  | 1016255   | 1104774   | 2.37E-07 | Lung   | Asthma     | -1.2194 | 2.23E-01 | 4.65E-01    |
| 101   | RAD52   | 5893   | 12  | 1016255   | 1104774   | 2.37E-07 | blood  | COPD       | 0.6836  | 4.94E-01 | 7.36E-01    |
| 101   | RAD52   | 5893   | 12  | 1016255   | 1104774   | 2.37E-07 | Lung   | COPD       | -1.4253 | 1.54E-01 | 3.82E-01    |
| 101   | RAD52   | 5893   | 12  | 1016255   | 1104774   | 2.37E-07 | blood  | IPF        | 0.6836  | 4.94E-01 | 7.36E-01    |
| 101   | RAD52   | 5893   | 12  | 1016255   | 1104774   | 2.37E-07 | Lung   | IPF        | 0.1032  | 9.18E-01 | 9.68E-01    |
| 101   | RAD52   | 5893   | 12  | 1016255   | 1104774   | 2.37E-07 | blood  | LungCancer | 0.6836  | 4.94E-01 | 7.36E-01    |
| 101   | RAD52   | 5893   | 12  | 1016255   | 1104774   | 2.37E-07 | Lung   | LungCancer | 5.4983  | 3.84E-08 | 9.32E-07    |
| 101   | RAD52   | 5893   | 12  | 1016255   | 1104774   | 2.37E-07 | blood  | Snoring    | 0.6836  | 4.94E-01 | 7.36E-01    |
| 101   | RAD52   | 5893   | 12  | 1016255   | 1104774   | 2.37E-07 | Lung   | Snoring    | 0.6836  | 4.94E-01 | 7.36E-01    |
| 139   | SNX11   | 29916  | 17  | 46179911  | 46205109  | 2.90E-05 | blood  | Asthma     | -3.1870 | 1.44E-03 | 9.82E-03    |
| 139   | SNX11   | 29916  | 17  | 46179911  | 46205109  | 2.90E-05 | Lung   | Asthma     | -0.1892 | 8.50E-01 | 9.55E-01    |
| 139   | SNX11   | 29916  | 17  | 46179911  | 46205109  | 2.90E-05 | blood  | COPD       | -3.1870 | 1.44E-03 | 9.82E-03    |
| 139   | SNX11   | 29916  | 17  | 46179911  | 46205109  | 2.90E-05 | Lung   | COPD       | -1.3567 | 1.75E-01 | 4.11E-01    |
| 139   | SNX11   | 29916  | 17  | 46179911  | 46205109  | 2.90E-05 | blood  | IPF        | -3.1870 | 1.44E-03 | 9.82E-03    |
| 139   | SNX11   | 29916  | 17  | 46179911  | 46205109  | 2.90E-05 | Lung   | IPF        | 0.0172  | 9.86E-01 | 9.93E-01    |
| 139   | SNX11   | 29916  | 17  | 46179911  | 46205109  | 2.90E-05 | blood  | LungCancer | -3.1870 | 1.44E-03 | 9.82E-03    |
| 139   | SNX11   | 29916  | 17  | 46179911  | 46205109  | 2.90E-05 | Lung   | LungCancer | -0.1946 | 8.46E-01 | 9.54E-01    |
| 139   | SNX11   | 29916  | 17  | 46179911  | 46205109  | 2.90E-05 | blood  | Snoring    | -3.1870 | 1.44E-03 | 9.82E-03    |
| 139   | SNX11   | 29916  | 17  | 46179911  | 46205109  | 2.90E-05 | Lung   | Snoring    | -3.1870 | 1.44E-03 | 9.82E-03    |
| 131   | ITGAL   | 3683   | 16  | 30478983  | 30539506  | 2.48E-06 | blood  | Asthma     | -2.7426 | 6.10E-03 | 3.46E-02    |
| 131   | ITGAL   | 3683   | 16  | 30478983  | 30539506  | 2.48E-06 | Lung   | Asthma     | 0.2651  | 7.91E-01 | 9.29E-01    |
| 131   | ITGAL   | 3683   | 16  | 30478983  | 30539506  | 2.48E-06 | blood  | COPD       | -2.7426 | 6.10E-03 | 3.46E-02    |
| 131   | ITGAL   | 3683   | 16  | 30478983  | 30539506  | 2.48E-06 | Lung   | COPD       | -1.6937 | 9.03E-02 | 2.66E-01    |
| 131   | ITGAL   | 3683   | 16  | 30478983  | 30539506  | 2.48E-06 | blood  | IPF        | -2.7426 | 6.10E-03 | 3.46E-02    |
| 131   | ITGAL   | 3683   | 16  | 30478983  | 30539506  | 2.48E-06 | Lung   | IPF        | -0.5510 | 5.82E-01 | 7.94E-01    |
| 131   | ITGAL   | 3683   | 16  | 30478983  | 30539506  | 2.48E-06 | blood  | LungCancer | -2.7426 | 6.10E-03 | 3.46E-02    |
| 131   | ITGAL   | 3683   | 16  | 30478983  | 30539506  | 2.48E-06 | Lung   | LungCancer | -1.9800 | 4.80E-02 | 1.79E-01    |
| 131   | ITGAL   | 3683   | 16  | 30478983  | 30539506  | 2.48E-06 | blood  | Snoring    | -2.7426 | 6.10E-03 | 3.46E-02    |
| 131   | ITGAL   | 3683   | 16  | 30478983  | 30539506  | 2.48E-06 | Lung   | Snoring    | -2.7426 | 6.10E-03 | 3.46E-02    |
| 139   | OSBPL7  | 114881 | 17  | 45879733  | 45904169  | 7.61E-06 | blood  | Asthma     | 5.9034  | 3.56E-09 | 1.57E-07    |
| 139   | OSBPL7  | 114881 | 17  | 45879733  | 45904169  | 7.61E-06 | Lung   | Asthma     | -1.0114 | 3.12E-01 | 5.68E-01    |
| 139   | OSBPL7  | 114881 | 17  | 45879733  | 45904169  | 7.61E-06 | blood  | COPD       | 5.9034  | 3.56E-09 | 1.57E-07    |
| 139   | OSBPL7  | 114881 | 17  | 45879733  | 45904169  | 7.61E-06 | Lung   | COPD       | 1.1547  | 2.48E-01 | 4.97E-01    |
| 139   | OSBPL7  | 114881 | 17  | 45879733  | 45904169  | 7.61E-06 | blood  | IPF        | 5.9034  | 3.56E-09 | 1.57E-07    |
| 139   | OSBPL7  | 114881 | 17  | 45879733  | 45904169  | 7.61E-06 | Lung   | IPF        | -0.4865 | 6.27E-01 | 8.27E-01    |
| 139   | OSBPL7  | 114881 | 17  | 45879733  | 45904169  | 7.61E-06 | blood  | LungCancer | 5.9034  | 3.56E-09 | 1.57E-07    |
| 139   | OSBPL7  | 114881 | 17  | 45879733  | 45904169  | 7.61E-06 | Lung   | LungCancer | 1.5033  | 1.33E-01 | 3.48E-01    |
| 139   | OSBPL7  | 114881 | 17  | 45879733  | 45904169  | 7.61E-06 | blood  | Snoring    | 5.9034  | 3.56E-09 | 1.57E-07    |
| 139   | OSBPL7  | 114881 | 17  | 45879733  | 45904169  | 7.61E-06 | Lung   | Snoring    | 5.9034  | 3.56E-09 | 1.57E-07    |
| 138   | MAP3K14 | 9020   | 17  | 43335488  | 43399414  | 1.66E-07 | blood  | Asthma     | -1.2354 | 2.17E-01 | 4.56E-01    |
| 138   | MAP3K14 | 9020   | 17  | 43335488  | 43399414  | 1.66E-07 | Lung   | Asthma     | 1.3793  | 1.68E-01 | 4.04E-01    |
| 138   | MAP3K14 | 9020   | 17  | 43335488  | 43399414  | 1.66E-07 | blood  | COPD       | -1.2354 | 2.17E-01 | 4.56E-01    |
| 138   | MAP3K14 | 9020   | 17  | 43335488  | 43399414  | 1.66E-07 | Lung   | COPD       | 1.0382  | 2.99E-01 | 5.53E-01    |
| 138   | MAP3K14 | 9020   | 17  | 43335488  | 43399414  | 1.66E-07 | blood  | IPF        | -1.2354 | 2.17E-01 | 4.56E-01    |
| 138   | MAP3K14 | 9020   | 17  | 43335488  | 43399414  | 1.66E-07 | Lung   | IPF        | 0.4094  | 6.82E-01 | 8.64E-01    |
| 138   | MAP3K14 | 9020   | 17  | 43335488  | 43399414  | 1.66E-07 | blood  | LungCancer | -1.2354 | 2.17E-01 | 4.56E-01    |
| 138   | MAP3K14 | 9020   | 17  | 43335488  | 43399414  | 1.66E-07 | Lung   | LungCancer | 0.8092  | 4.18E-01 | 6.70E-01    |
| 138   | MAP3K14 | 9020   | 17  | 43335488  | 43399414  | 1.66E-07 | blood  | Snoring    | -1.2354 | 2.17E-01 | 4.56E-01    |
| 138   | MAP3K14 | 9020   | 17  | 43335488  | 43399414  | 1.66E-07 | Lung   | Snoring    | -1.2354 | 2.17E-01 | 4.56E-01    |
| 137   | MED24   | 9862   | 17  | 38170350  | 38215889  | 5.00E-10 | blood  | Asthma     | 1.4399  | 1.50E-01 | 3.74E-01    |
| 137   | MED24   | 9862   | 17  | 38170350  | 38215889  | 5.00E-10 | Lung   | Asthma     | -5.3310 | 9.77E-08 | 2.17E-06    |
| 137   | MED24   | 9862   | 17  | 38170350  | 38215889  | 5.00E-10 | blood  | COPD       | 1.4399  | 1.50E-01 | 3.74E-01    |
| 137   | MED24   | 9862   | 17  | 38170350  | 38215889  | 5.00E-10 | Lung   | COPD       | -2.7615 | 5.75E-03 | 3.32E-02    |
| 137   | MED24   | 9862   | 17  | 38170350  | 38215889  | 5.00E-10 | blood  | IPF        | 1.4399  | 1.50E-01 | 3.74E-01    |
| 137   | MED24   | 9862   | 17  | 38170350  | 38215889  | 5.00E-10 | Lung   | IPF        | 1.0396  | 2.99E-01 | 5.53E-01    |
| 137   | MED24   | 9862   | 17  | 38170350  | 38215889  | 5.00E-10 | blood  | LungCancer | 1.4399  | 1.50E-01 | 3.74E-01    |
| 137   | MED24   | 9862   | 17  | 38170350  | 38215889  | 5.00E-10 | Lung   | LungCancer | 0.1229  | 9.02E-01 | 9.64E-01    |
| 137   | MED24   | 9862   | 17  | 38170350  | 38215889  | 5.00E-10 | blood  | Snoring    | 1.4399  | 1.50E-01 | 3.74E-01    |
| 137   | MED24   | 9862   | 17  | 38170350  | 38215889  | 5.00E-10 | Lung   | Snoring    | 1.4399  | 1.50E-01 | 3.74E-01    |
| 58    | HFE     | 3077   | 6   | 26082422  | 26101438  | 1.59E-06 | blood  | Asthma     | 2.9115  | 3.60E-03 | 2.17E-02    |

|     |         |       |    |          |          |          |       |            |         |          |          |
|-----|---------|-------|----|----------|----------|----------|-------|------------|---------|----------|----------|
| 58  | HFE     | 3077  | 6  | 26082422 | 26101438 | 1.59E-06 | Lung  | Asthma     | -3.6607 | 2.52E-04 | 2.20E-03 |
| 58  | HFE     | 3077  | 6  | 26082422 | 26101438 | 1.59E-06 | blood | COPD       | 2.9115  | 3.60E-03 | 2.17E-02 |
| 58  | HFE     | 3077  | 6  | 26082422 | 26101438 | 1.59E-06 | Lung  | COPD       | -0.6145 | 5.39E-01 | 7.62E-01 |
| 58  | HFE     | 3077  | 6  | 26082422 | 26101438 | 1.59E-06 | blood | IPF        | 2.9115  | 3.60E-03 | 2.17E-02 |
| 58  | HFE     | 3077  | 6  | 26082422 | 26101438 | 1.59E-06 | Lung  | IPF        | -2.3064 | 2.11E-02 | 9.63E-02 |
| 58  | HFE     | 3077  | 6  | 26082422 | 26101438 | 1.59E-06 | blood | LungCancer | 2.9115  | 3.60E-03 | 2.17E-02 |
| 58  | HFE     | 3077  | 6  | 26082422 | 26101438 | 1.59E-06 | Lung  | LungCancer | -2.6592 | 7.83E-03 | 4.33E-02 |
| 58  | HFE     | 3077  | 6  | 26082422 | 26101438 | 1.59E-06 | blood | Snoring    | 2.9115  | 3.60E-03 | 2.17E-02 |
| 58  | HFE     | 3077  | 6  | 26082422 | 26101438 | 1.59E-06 | Lung  | Snoring    | 2.9115  | 3.60E-03 | 2.17E-02 |
| 136 | TTC19   | 54902 | 17 | 15897694 | 15937723 | 5.48E-07 | blood | Asthma     | -0.3000 | 7.64E-01 | 9.20E-01 |
| 136 | TTC19   | 54902 | 17 | 15897694 | 15937723 | 5.48E-07 | Lung  | Asthma     | 5.8927  | 3.80E-09 | 1.59E-07 |
| 136 | TTC19   | 54902 | 17 | 15897694 | 15937723 | 5.48E-07 | blood | COPD       | -0.3000 | 7.64E-01 | 9.20E-01 |
| 136 | TTC19   | 54902 | 17 | 15897694 | 15937723 | 5.48E-07 | Lung  | COPD       | 2.2991  | 2.15E-02 | 9.75E-02 |
| 136 | TTC19   | 54902 | 17 | 15897694 | 15937723 | 5.48E-07 | blood | IPF        | -0.3000 | 7.64E-01 | 9.20E-01 |
| 136 | TTC19   | 54902 | 17 | 15897694 | 15937723 | 5.48E-07 | Lung  | IPF        | 3.2701  | 1.08E-03 | 8.13E-03 |
| 136 | TTC19   | 54902 | 17 | 15897694 | 15937723 | 5.48E-07 | blood | LungCancer | -0.3000 | 7.64E-01 | 9.20E-01 |
| 136 | TTC19   | 54902 | 17 | 15897694 | 15937723 | 5.48E-07 | Lung  | LungCancer | 0.0233  | 9.81E-01 | 9.93E-01 |
| 136 | TTC19   | 54902 | 17 | 15897694 | 15937723 | 5.48E-07 | blood | Snoring    | -0.3000 | 7.64E-01 | 9.20E-01 |
| 136 | TTC19   | 54902 | 17 | 15897694 | 15937723 | 5.48E-07 | Lung  | Snoring    | -0.3000 | 7.64E-01 | 9.20E-01 |
| 15  | MDH1    | 4190  | 2  | 63810743 | 63839331 | 1.60E-09 | blood | Asthma     | -2.1501 | 3.15E-02 | 1.32E-01 |
| 15  | MDH1    | 4190  | 2  | 63810743 | 63839331 | 1.60E-09 | Lung  | Asthma     | 4.6915  | 2.71E-06 | 4.10E-05 |
| 15  | MDH1    | 4190  | 2  | 63810743 | 63839331 | 1.60E-09 | blood | COPD       | -2.1501 | 3.15E-02 | 1.32E-01 |
| 15  | MDH1    | 4190  | 2  | 63810743 | 63839331 | 1.60E-09 | Lung  | COPD       | -1.2197 | 2.23E-01 | 4.65E-01 |
| 15  | MDH1    | 4190  | 2  | 63810743 | 63839331 | 1.60E-09 | blood | IPF        | -2.1501 | 3.15E-02 | 1.32E-01 |
| 15  | MDH1    | 4190  | 2  | 63810743 | 63839331 | 1.60E-09 | Lung  | IPF        | 1.2312  | 2.18E-01 | 4.58E-01 |
| 15  | MDH1    | 4190  | 2  | 63810743 | 63839331 | 1.60E-09 | blood | LungCancer | -2.1501 | 3.15E-02 | 1.32E-01 |
| 15  | MDH1    | 4190  | 2  | 63810743 | 63839331 | 1.60E-09 | Lung  | LungCancer | -0.6525 | 5.14E-01 | 7.52E-01 |
| 15  | MDH1    | 4190  | 2  | 63810743 | 63839331 | 1.60E-09 | blood | Snoring    | -2.1501 | 3.15E-02 | 1.32E-01 |
| 15  | MDH1    | 4190  | 2  | 63810743 | 63839331 | 1.60E-09 | Lung  | Snoring    | -2.1501 | 3.15E-02 | 1.32E-01 |
| 3   | RUNX3   | 864   | 1  | 25221002 | 25296648 | 1.33E-09 | blood | Asthma     | -0.0765 | 9.39E-01 | 9.77E-01 |
| 3   | RUNX3   | 864   | 1  | 25221002 | 25296648 | 1.33E-09 | Lung  | Asthma     | 0.5783  | 5.63E-01 | 7.80E-01 |
| 3   | RUNX3   | 864   | 1  | 25221002 | 25296648 | 1.33E-09 | blood | COPD       | -0.0765 | 9.39E-01 | 9.77E-01 |
| 3   | RUNX3   | 864   | 1  | 25221002 | 25296648 | 1.33E-09 | Lung  | COPD       | 0.2352  | 8.14E-01 | 9.40E-01 |
| 3   | RUNX3   | 864   | 1  | 25221002 | 25296648 | 1.33E-09 | blood | IPF        | -0.0765 | 9.39E-01 | 9.77E-01 |
| 3   | RUNX3   | 864   | 1  | 25221002 | 25296648 | 1.33E-09 | Lung  | IPF        | -0.8220 | 4.11E-01 | 6.60E-01 |
| 3   | RUNX3   | 864   | 1  | 25221002 | 25296648 | 1.33E-09 | blood | LungCancer | -0.0765 | 9.39E-01 | 9.77E-01 |
| 3   | RUNX3   | 864   | 1  | 25221002 | 25296648 | 1.33E-09 | Lung  | LungCancer | 0.3178  | 7.51E-01 | 9.12E-01 |
| 3   | RUNX3   | 864   | 1  | 25221002 | 25296648 | 1.33E-09 | blood | Snoring    | -0.0765 | 9.39E-01 | 9.77E-01 |
| 3   | RUNX3   | 864   | 1  | 25221002 | 25296648 | 1.33E-09 | Lung  | Snoring    | -0.0765 | 9.39E-01 | 9.77E-01 |
| 117 | NRXN3   | 9369  | 14 | 78631716 | 80339633 | 1.60E-06 | blood | Asthma     | NA      | NA       | NA       |
| 117 | NRXN3   | 9369  | 14 | 78631716 | 80339633 | 1.60E-06 | Lung  | Asthma     | NA      | NA       | NA       |
| 117 | NRXN3   | 9369  | 14 | 78631716 | 80339633 | 1.60E-06 | blood | COPD       | NA      | NA       | NA       |
| 117 | NRXN3   | 9369  | 14 | 78631716 | 80339633 | 1.60E-06 | Lung  | COPD       | NA      | NA       | NA       |
| 117 | NRXN3   | 9369  | 14 | 78631716 | 80339633 | 1.60E-06 | blood | IPF        | NA      | NA       | NA       |
| 117 | NRXN3   | 9369  | 14 | 78631716 | 80339633 | 1.60E-06 | Lung  | IPF        | NA      | NA       | NA       |
| 117 | NRXN3   | 9369  | 14 | 78631716 | 80339633 | 1.60E-06 | blood | LungCancer | NA      | NA       | NA       |
| 117 | NRXN3   | 9369  | 14 | 78631716 | 80339633 | 1.60E-06 | Lung  | LungCancer | NA      | NA       | NA       |
| 117 | NRXN3   | 9369  | 14 | 78631716 | 80339633 | 1.60E-06 | blood | Snoring    | NA      | NA       | NA       |
| 117 | NRXN3   | 9369  | 14 | 78631716 | 80339633 | 1.60E-06 | Lung  | Snoring    | NA      | NA       | NA       |
| 129 | CLEC16A | 23274 | 16 | 11033345 | 11281046 | 1.77E-12 | blood | Asthma     | 1.9144  | 5.56E-02 | 1.95E-01 |
| 129 | CLEC16A | 23274 | 16 | 11033345 | 11281046 | 1.77E-12 | Lung  | Asthma     | 10.2395 | 1.32E-24 | 3.00E-22 |
| 129 | CLEC16A | 23274 | 16 | 11033345 | 11281046 | 1.77E-12 | blood | COPD       | 1.9144  | 5.56E-02 | 1.95E-01 |
| 129 | CLEC16A | 23274 | 16 | 11033345 | 11281046 | 1.77E-12 | Lung  | COPD       | 2.6868  | 7.21E-03 | 4.02E-02 |
| 129 | CLEC16A | 23274 | 16 | 11033345 | 11281046 | 1.77E-12 | blood | IPF        | 1.9144  | 5.56E-02 | 1.95E-01 |
| 129 | CLEC16A | 23274 | 16 | 11033345 | 11281046 | 1.77E-12 | Lung  | IPF        | -1.6300 | 1.02E-01 | 2.90E-01 |
| 129 | CLEC16A | 23274 | 16 | 11033345 | 11281046 | 1.77E-12 | blood | LungCancer | 1.9144  | 5.56E-02 | 1.95E-01 |
| 129 | CLEC16A | 23274 | 16 | 11033345 | 11281046 | 1.77E-12 | Lung  | LungCancer | -1.2300 | 2.19E-01 | 4.58E-01 |
| 129 | CLEC16A | 23274 | 16 | 11033345 | 11281046 | 1.77E-12 | blood | Snoring    | 1.9144  | 5.56E-02 | 1.95E-01 |
| 129 | CLEC16A | 23274 | 16 | 11033345 | 11281046 | 1.77E-12 | Lung  | Snoring    | 1.9144  | 5.56E-02 | 1.95E-01 |
| 127 | PSMA4   | 5685  | 15 | 78827747 | 78846562 | 1.38E-13 | blood | Asthma     | -0.7345 | 4.63E-01 | 7.13E-01 |
| 127 | PSMA4   | 5685  | 15 | 78827747 | 78846562 | 1.38E-13 | Lung  | Asthma     | 3.9752  | 7.03E-05 | 6.92E-04 |
| 127 | PSMA4   | 5685  | 15 | 78827747 | 78846562 | 1.38E-13 | blood | COPD       | -0.7345 | 4.63E-01 | 7.13E-01 |
| 127 | PSMA4   | 5685  | 15 | 78827747 | 78846562 | 1.38E-13 | Lung  | COPD       | 10.4995 | 8.69E-26 | 2.12E-23 |
| 127 | PSMA4   | 5685  | 15 | 78827747 | 78846562 | 1.38E-13 | blood | IPF        | -0.7345 | 4.63E-01 | 7.13E-01 |
| 127 | PSMA4   | 5685  | 15 | 78827747 | 78846562 | 1.38E-13 | Lung  | IPF        | 2.9863  | 2.82E-03 | 1.77E-02 |
| 127 | PSMA4   | 5685  | 15 | 78827747 | 78846562 | 1.38E-13 | blood | LungCancer | -0.7345 | 4.63E-01 | 7.13E-01 |
| 127 | PSMA4   | 5685  | 15 | 78827747 | 78846562 | 1.38E-13 | Lung  | LungCancer | 14.7000 | 6.99E-49 | 6.99E-46 |
| 127 | PSMA4   | 5685  | 15 | 78827747 | 78846562 | 1.38E-13 | blood | Snoring    | -0.7345 | 4.63E-01 | 7.13E-01 |
| 127 | PSMA4   | 5685  | 15 | 78827747 | 78846562 | 1.38E-13 | Lung  | Snoring    | -0.7345 | 4.63E-01 | 7.13E-01 |
| 42  | CLPTMIL | 81037 | 5  | 1312869  | 1350180  | 3.40E-09 | blood | Asthma     | -1.1124 | 2.66E-01 | 5.17E-01 |
| 42  | CLPTMIL | 81037 | 5  | 1312869  | 1350180  | 3.40E-09 | Lung  | Asthma     | -0.1270 | 8.99E-01 | 9.64E-01 |
| 42  | CLPTMIL | 81037 | 5  | 1312869  | 1350180  | 3.40E-09 | blood | COPD       | -1.1124 | 2.66E-01 | 5.17E-01 |
| 42  | CLPTMIL | 81037 | 5  | 1312869  | 1350180  | 3.40E-09 | Lung  | COPD       | -0.4047 | 6.86E-01 | 8.66E-01 |

|     |          |       |    |           |           |          |       |            |         |          |          |
|-----|----------|-------|----|-----------|-----------|----------|-------|------------|---------|----------|----------|
| 42  | CLPTMIL  | 81037 | 5  | 1312869   | 1350180   | 3.40E-09 | blood | IPF        | -1.1124 | 2.66E-01 | 5.17E-01 |
| 42  | CLPTMIL  | 81037 | 5  | 1312869   | 1350180   | 3.40E-09 | Lung  | IPF        | -1.0103 | 3.12E-01 | 5.68E-01 |
| 42  | CLPTMIL  | 81037 | 5  | 1312869   | 1350180   | 3.40E-09 | blood | LungCancer | -1.1124 | 2.66E-01 | 5.17E-01 |
| 42  | CLPTMIL  | 81037 | 5  | 1312869   | 1350180   | 3.40E-09 | Lung  | LungCancer | 7.5349  | 4.89E-14 | 4.44E-12 |
| 42  | CLPTMIL  | 81037 | 5  | 1312869   | 1350180   | 3.40E-09 | blood | Snoring    | -1.1124 | 2.66E-01 | 5.17E-01 |
| 42  | CLPTMIL  | 81037 | 5  | 1312869   | 1350180   | 3.40E-09 | Lung  | Snoring    | -1.1124 | 2.66E-01 | 5.17E-01 |
| 109 | MPHOSPH9 | 10198 | 12 | 123635943 | 123722785 | 7.03E-09 | blood | Asthma     | -0.5419 | 5.88E-01 | 7.95E-01 |
| 109 | MPHOSPH9 | 10198 | 12 | 123635943 | 123722785 | 7.03E-09 | Lung  | Asthma     | -5.6349 | 1.75E-08 | 4.71E-07 |
| 109 | MPHOSPH9 | 10198 | 12 | 123635943 | 123722785 | 7.03E-09 | blood | COPD       | -0.5419 | 5.88E-01 | 7.95E-01 |
| 109 | MPHOSPH9 | 10198 | 12 | 123635943 | 123722785 | 7.03E-09 | Lung  | COPD       | 0.4794  | 6.32E-01 | 8.30E-01 |
| 109 | MPHOSPH9 | 10198 | 12 | 123635943 | 123722785 | 7.03E-09 | blood | IPF        | -0.5419 | 5.88E-01 | 7.95E-01 |
| 109 | MPHOSPH9 | 10198 | 12 | 123635943 | 123722785 | 7.03E-09 | Lung  | IPF        | -0.4739 | 6.36E-01 | 8.32E-01 |
| 109 | MPHOSPH9 | 10198 | 12 | 123635943 | 123722785 | 7.03E-09 | blood | LungCancer | -0.5419 | 5.88E-01 | 7.95E-01 |
| 109 | MPHOSPH9 | 10198 | 12 | 123635943 | 123722785 | 7.03E-09 | Lung  | LungCancer | -1.1899 | 2.34E-01 | 4.79E-01 |
| 109 | MPHOSPH9 | 10198 | 12 | 123635943 | 123722785 | 7.03E-09 | blood | Snoring    | -0.5419 | 5.88E-01 | 7.95E-01 |
| 109 | MPHOSPH9 | 10198 | 12 | 123635943 | 123722785 | 7.03E-09 | Lung  | Snoring    | -0.5419 | 5.88E-01 | 7.95E-01 |
| 131 | PRSS8    | 5652  | 16 | 31137754  | 31152151  | 4.65E-08 | blood | Asthma     | -3.3798 | 7.25E-04 | 5.76E-03 |
| 131 | PRSS8    | 5652  | 16 | 31137754  | 31152151  | 4.65E-08 | Lung  | Asthma     | -3.8317 | 1.27E-04 | 1.14E-03 |
| 131 | PRSS8    | 5652  | 16 | 31137754  | 31152151  | 4.65E-08 | blood | COPD       | -3.3798 | 7.25E-04 | 5.76E-03 |
| 131 | PRSS8    | 5652  | 16 | 31137754  | 31152151  | 4.65E-08 | Lung  | COPD       | -2.7424 | 6.10E-03 | 5.76E-02 |
| 131 | PRSS8    | 5652  | 16 | 31137754  | 31152151  | 4.65E-08 | blood | IPF        | -3.3798 | 7.25E-04 | 5.76E-03 |
| 131 | PRSS8    | 5652  | 16 | 31137754  | 31152151  | 4.65E-08 | Lung  | IPF        | -0.7690 | 4.42E-01 | 6.91E-01 |
| 131 | PRSS8    | 5652  | 16 | 31137754  | 31152151  | 4.65E-08 | blood | LungCancer | -3.3798 | 7.25E-04 | 5.76E-03 |
| 131 | PRSS8    | 5652  | 16 | 31137754  | 31152151  | 4.65E-08 | Lung  | LungCancer | -2.0800 | 3.78E-02 | 1.50E-01 |
| 131 | PRSS8    | 5652  | 16 | 31137754  | 31152151  | 4.65E-08 | blood | Snoring    | -3.3798 | 7.25E-04 | 5.76E-03 |
| 131 | PRSS8    | 5652  | 16 | 31137754  | 31152151  | 4.65E-08 | Lung  | Snoring    | -3.3798 | 7.25E-04 | 5.76E-03 |
| 101 | WNK1     | 65125 | 12 | 856759    | 1025618   | 1.57E-06 | blood | Asthma     | -0.4510 | 6.52E-01 | 8.44E-01 |
| 101 | WNK1     | 65125 | 12 | 856759    | 1025618   | 1.57E-06 | Lung  | Asthma     | 0.9612  | 3.36E-01 | 5.92E-01 |
| 101 | WNK1     | 65125 | 12 | 856759    | 1025618   | 1.57E-06 | blood | COPD       | -0.4510 | 6.52E-01 | 8.44E-01 |
| 101 | WNK1     | 65125 | 12 | 856759    | 1025618   | 1.57E-06 | Lung  | COPD       | -1.3480 | 1.78E-01 | 4.15E-01 |
| 101 | WNK1     | 65125 | 12 | 856759    | 1025618   | 1.57E-06 | blood | IPF        | -0.4510 | 6.52E-01 | 8.44E-01 |
| 101 | WNK1     | 65125 | 12 | 856759    | 1025618   | 1.57E-06 | Lung  | IPF        | -1.4884 | 1.37E-01 | 3.55E-01 |
| 101 | WNK1     | 65125 | 12 | 856759    | 1025618   | 1.57E-06 | blood | LungCancer | -0.4510 | 6.52E-01 | 8.44E-01 |
| 101 | WNK1     | 65125 | 12 | 856759    | 1025618   | 1.57E-06 | Lung  | LungCancer | -2.4979 | 1.25E-02 | 6.42E-02 |
| 101 | WNK1     | 65125 | 12 | 856759    | 1025618   | 1.57E-06 | blood | Snoring    | -0.4510 | 6.52E-01 | 8.44E-01 |
| 101 | WNK1     | 65125 | 12 | 856759    | 1025618   | 1.57E-06 | Lung  | Snoring    | -0.4510 | 6.52E-01 | 8.44E-01 |
| 103 | HDAC7    | 51564 | 12 | 48171505  | 48218763  | 1.86E-09 | blood | Asthma     | -0.4929 | 6.22E-01 | 8.23E-01 |
| 103 | HDAC7    | 51564 | 12 | 48171505  | 48218763  | 1.86E-09 | Lung  | Asthma     | -4.7580 | 1.96E-06 | 3.08E-05 |
| 103 | HDAC7    | 51564 | 12 | 48171505  | 48218763  | 1.86E-09 | blood | COPD       | -0.4929 | 6.22E-01 | 8.23E-01 |
| 103 | HDAC7    | 51564 | 12 | 48171505  | 48218763  | 1.86E-09 | Lung  | COPD       | -1.0372 | 3.00E-01 | 5.53E-01 |
| 103 | HDAC7    | 51564 | 12 | 48171505  | 48218763  | 1.86E-09 | blood | IPF        | -0.4929 | 6.22E-01 | 8.23E-01 |
| 103 | HDAC7    | 51564 | 12 | 48171505  | 48218763  | 1.86E-09 | Lung  | IPF        | -0.6893 | 4.91E-01 | 7.34E-01 |
| 103 | HDAC7    | 51564 | 12 | 48171505  | 48218763  | 1.86E-09 | blood | LungCancer | -0.4929 | 6.22E-01 | 8.23E-01 |
| 103 | HDAC7    | 51564 | 12 | 48171505  | 48218763  | 1.86E-09 | Lung  | LungCancer | 1.6399  | 1.01E-01 | 2.87E-01 |
| 103 | HDAC7    | 51564 | 12 | 48171505  | 48218763  | 1.86E-09 | blood | Snoring    | -0.4929 | 6.22E-01 | 8.23E-01 |
| 103 | HDAC7    | 51564 | 12 | 48171505  | 48218763  | 1.86E-09 | Lung  | Snoring    | -0.4929 | 6.22E-01 | 8.23E-01 |
| 104 | ERBB3    | 2065  | 12 | 56468809  | 56502291  | 6.51E-12 | blood | Asthma     | 0.8960  | 3.70E-01 | 6.23E-01 |
| 104 | ERBB3    | 2065  | 12 | 56468809  | 56502291  | 6.51E-12 | Lung  | Asthma     | -1.7549 | 7.93E-02 | 2.43E-01 |
| 104 | ERBB3    | 2065  | 12 | 56468809  | 56502291  | 6.51E-12 | blood | COPD       | 0.8960  | 3.70E-01 | 6.23E-01 |
| 104 | ERBB3    | 2065  | 12 | 56468809  | 56502291  | 6.51E-12 | Lung  | COPD       | -2.9668 | 3.01E-03 | 1.88E-02 |
| 104 | ERBB3    | 2065  | 12 | 56468809  | 56502291  | 6.51E-12 | blood | IPF        | 0.8960  | 3.70E-01 | 6.23E-01 |
| 104 | ERBB3    | 2065  | 12 | 56468809  | 56502291  | 6.51E-12 | Lung  | IPF        | -0.1638 | 8.70E-01 | 9.56E-01 |
| 104 | ERBB3    | 2065  | 12 | 56468809  | 56502291  | 6.51E-12 | blood | LungCancer | 0.8960  | 3.70E-01 | 6.23E-01 |
| 104 | ERBB3    | 2065  | 12 | 56468809  | 56502291  | 6.51E-12 | Lung  | LungCancer | -0.3215 | 7.48E-01 | 9.09E-01 |
| 104 | ERBB3    | 2065  | 12 | 56468809  | 56502291  | 6.51E-12 | blood | Snoring    | 0.8960  | 3.70E-01 | 6.23E-01 |
| 104 | ERBB3    | 2065  | 12 | 56468809  | 56502291  | 6.51E-12 | Lung  | Snoring    | 0.8960  | 3.70E-01 | 6.23E-01 |
| 25  | RHOA     | 387   | 3  | 49391569  | 49454526  | 4.16E-06 | blood | Asthma     | NA      | NA       | NA       |
| 25  | RHOA     | 387   | 3  | 49391569  | 49454526  | 4.16E-06 | Lung  | Asthma     | NA      | NA       | NA       |
| 25  | RHOA     | 387   | 3  | 49391569  | 49454526  | 4.16E-06 | blood | COPD       | NA      | NA       | NA       |
| 25  | RHOA     | 387   | 3  | 49391569  | 49454526  | 4.16E-06 | Lung  | COPD       | NA      | NA       | NA       |
| 25  | RHOA     | 387   | 3  | 49391569  | 49454526  | 4.16E-06 | blood | IPF        | NA      | NA       | NA       |
| 25  | RHOA     | 387   | 3  | 49391569  | 49454526  | 4.16E-06 | Lung  | IPF        | NA      | NA       | NA       |
| 25  | RHOA     | 387   | 3  | 49391569  | 49454526  | 4.16E-06 | blood | LungCancer | NA      | NA       | NA       |
| 25  | RHOA     | 387   | 3  | 49391569  | 49454526  | 4.16E-06 | Lung  | LungCancer | NA      | NA       | NA       |
| 25  | RHOA     | 387   | 3  | 49391569  | 49454526  | 4.16E-06 | blood | Snoring    | NA      | NA       | NA       |
| 25  | RHOA     | 387   | 3  | 49391569  | 49454526  | 4.16E-06 | Lung  | Snoring    | NA      | NA       | NA       |
| 49  | P4HA2    | 8974  | 5  | 131523299 | 131568556 | 2.66E-13 | blood | Asthma     | 1.7934  | 7.29E-02 | 2.30E-01 |
| 49  | P4HA2    | 8974  | 5  | 131523299 | 131568556 | 2.66E-13 | Lung  | Asthma     | -1.7200 | 8.52E-02 | 2.56E-01 |
| 49  | P4HA2    | 8974  | 5  | 131523299 | 131568556 | 2.66E-13 | blood | COPD       | 1.7934  | 7.29E-02 | 2.30E-01 |
| 49  | P4HA2    | 8974  | 5  | 131523299 | 131568556 | 2.66E-13 | Lung  | COPD       | 0.7600  | 4.47E-01 | 6.96E-01 |
| 49  | P4HA2    | 8974  | 5  | 131523299 | 131568556 | 2.66E-13 | blood | IPF        | 1.7934  | 7.29E-02 | 2.30E-01 |
| 49  | P4HA2    | 8974  | 5  | 131523299 | 131568556 | 2.66E-13 | Lung  | IPF        | 1.6080  | 1.08E-01 | 2.97E-01 |
| 49  | P4HA2    | 8974  | 5  | 131523299 | 131568556 | 2.66E-13 | blood | LungCancer | 1.7934  | 7.29E-02 | 2.30E-01 |

|     |        |       |    |           |           |          |       |            |         |          |          |
|-----|--------|-------|----|-----------|-----------|----------|-------|------------|---------|----------|----------|
| 49  | P4HA2  | 8974  | 5  | 131523299 | 131568556 | 2.66E-13 | Lung  | LungCancer | 1.1075  | 2.68E-01 | 5.19E-01 |
| 49  | P4HA2  | 8974  | 5  | 131523299 | 131568556 | 2.66E-13 | blood | Snoring    | 1.7934  | 7.29E-02 | 2.30E-01 |
| 49  | P4HA2  | 8974  | 5  | 131523299 | 131568556 | 2.66E-13 | Lung  | Snoring    | 1.7934  | 7.29E-02 | 2.30E-01 |
| 137 | GSDMB  | 55876 | 17 | 38055848  | 38079903  | 1.26E-11 | blood | Asthma     | -0.6404 | 5.22E-01 | 7.55E-01 |
| 137 | GSDMB  | 55876 | 17 | 38055848  | 38079903  | 1.26E-11 | Lung  | Asthma     | 18.8533 | 2.76E-79 | 4.39E-76 |
| 137 | GSDMB  | 55876 | 17 | 38055848  | 38079903  | 1.26E-11 | blood | COPD       | -0.6404 | 5.22E-01 | 7.55E-01 |
| 137 | GSDMB  | 55876 | 17 | 38055848  | 38079903  | 1.26E-11 | Lung  | COPD       | 4.9142  | 8.91E-07 | 1.50E-05 |
| 137 | GSDMB  | 55876 | 17 | 38055848  | 38079903  | 1.26E-11 | blood | IPF        | -0.6404 | 5.22E-01 | 7.55E-01 |
| 137 | GSDMB  | 55876 | 17 | 38055848  | 38079903  | 1.26E-11 | Lung  | IPF        | -0.3342 | 7.38E-01 | 9.02E-01 |
| 137 | GSDMB  | 55876 | 17 | 38055848  | 38079903  | 1.26E-11 | blood | LungCancer | -0.6404 | 5.22E-01 | 7.55E-01 |
| 137 | GSDMB  | 55876 | 17 | 38055848  | 38079903  | 1.26E-11 | Lung  | LungCancer | -0.2181 | 8.27E-01 | 9.43E-01 |
| 137 | GSDMB  | 55876 | 17 | 38055848  | 38079903  | 1.26E-11 | blood | Snoring    | -0.6404 | 5.22E-01 | 7.55E-01 |
| 137 | GSDMB  | 55876 | 17 | 38055848  | 38079903  | 1.26E-11 | Lung  | Snoring    | -0.6404 | 5.22E-01 | 7.55E-01 |
| 139 | TBX21  | 30009 | 17 | 45805610  | 45828485  | 5.25E-08 | blood | Asthma     | -1.4042 | 1.60E-01 | 3.94E-01 |
| 139 | TBX21  | 30009 | 17 | 45805610  | 45828485  | 5.25E-08 | Lung  | Asthma     | -2.2947 | 2.18E-02 | 9.81E-02 |
| 139 | TBX21  | 30009 | 17 | 45805610  | 45828485  | 5.25E-08 | blood | COPD       | -1.4042 | 1.60E-01 | 3.94E-01 |
| 139 | TBX21  | 30009 | 17 | 45805610  | 45828485  | 5.25E-08 | Lung  | COPD       | -1.7269 | 8.42E-02 | 2.54E-01 |
| 139 | TBX21  | 30009 | 17 | 45805610  | 45828485  | 5.25E-08 | blood | IPF        | -1.4042 | 1.60E-01 | 3.94E-01 |
| 139 | TBX21  | 30009 | 17 | 45805610  | 45828485  | 5.25E-08 | Lung  | IPF        | 1.3455  | 1.78E-01 | 4.15E-01 |
| 139 | TBX21  | 30009 | 17 | 45805610  | 45828485  | 5.25E-08 | blood | LungCancer | -1.4042 | 1.60E-01 | 3.94E-01 |
| 139 | TBX21  | 30009 | 17 | 45805610  | 45828485  | 5.25E-08 | Lung  | LungCancer | -0.1059 | 9.16E-01 | 9.68E-01 |
| 139 | TBX21  | 30009 | 17 | 45805610  | 45828485  | 5.25E-08 | blood | Snoring    | -1.4042 | 1.60E-01 | 3.94E-01 |
| 139 | TBX21  | 30009 | 17 | 45805610  | 45828485  | 5.25E-08 | Lung  | Snoring    | -1.4042 | 1.60E-01 | 3.94E-01 |
| 138 | NSF    | 4905  | 17 | 44663035  | 44839830  | 5.21E-12 | blood | Asthma     | -4.7894 | 1.67E-06 | 2.67E-05 |
| 138 | NSF    | 4905  | 17 | 44663035  | 44839830  | 5.21E-12 | Lung  | Asthma     | 1.8170  | 6.92E-02 | 2.26E-01 |
| 138 | NSF    | 4905  | 17 | 44663035  | 44839830  | 5.21E-12 | blood | COPD       | -4.7894 | 1.67E-06 | 2.67E-05 |
| 138 | NSF    | 4905  | 17 | 44663035  | 44839830  | 5.21E-12 | Lung  | COPD       | 0.7029  | 4.82E-01 | 7.30E-01 |
| 138 | NSF    | 4905  | 17 | 44663035  | 44839830  | 5.21E-12 | blood | IPF        | -4.7894 | 1.67E-06 | 2.67E-05 |
| 138 | NSF    | 4905  | 17 | 44663035  | 44839830  | 5.21E-12 | Lung  | IPF        | 2.0045  | 4.50E-02 | 1.70E-01 |
| 138 | NSF    | 4905  | 17 | 44663035  | 44839830  | 5.21E-12 | blood | LungCancer | -4.7894 | 1.67E-06 | 2.67E-05 |
| 138 | NSF    | 4905  | 17 | 44663035  | 44839830  | 5.21E-12 | Lung  | LungCancer | 1.2819  | 2.00E-01 | 4.39E-01 |
| 138 | NSF    | 4905  | 17 | 44663035  | 44839830  | 5.21E-12 | blood | Snoring    | -4.7894 | 1.67E-06 | 2.67E-05 |
| 138 | NSF    | 4905  | 17 | 44663035  | 44839830  | 5.21E-12 | Lung  | Snoring    | -4.7894 | 1.67E-06 | 2.67E-05 |
| 93  | NT5C2  | 22978 | 10 | 104842774 | 104958063 | 2.15E-09 | blood | Asthma     | -0.1364 | 8.91E-01 | 9.61E-01 |
| 93  | NT5C2  | 22978 | 10 | 104842774 | 104958063 | 2.15E-09 | Lung  | Asthma     | 1.3754  | 1.69E-01 | 4.04E-01 |
| 93  | NT5C2  | 22978 | 10 | 104842774 | 104958063 | 2.15E-09 | blood | COPD       | -0.1364 | 8.91E-01 | 9.61E-01 |
| 93  | NT5C2  | 22978 | 10 | 104842774 | 104958063 | 2.15E-09 | Lung  | COPD       | -0.9413 | 3.47E-01 | 6.06E-01 |
| 93  | NT5C2  | 22978 | 10 | 104842774 | 104958063 | 2.15E-09 | blood | IPF        | -0.1364 | 8.91E-01 | 9.61E-01 |
| 93  | NT5C2  | 22978 | 10 | 104842774 | 104958063 | 2.15E-09 | Lung  | IPF        | 0.0730  | 9.42E-01 | 9.79E-01 |
| 93  | NT5C2  | 22978 | 10 | 104842774 | 104958063 | 2.15E-09 | blood | LungCancer | -0.1364 | 8.91E-01 | 9.61E-01 |
| 93  | NT5C2  | 22978 | 10 | 104842774 | 104958063 | 2.15E-09 | Lung  | LungCancer | -0.3092 | 7.57E-01 | 9.17E-01 |
| 93  | NT5C2  | 22978 | 10 | 104842774 | 104958063 | 2.15E-09 | blood | Snoring    | -0.1364 | 8.91E-01 | 9.61E-01 |
| 93  | NT5C2  | 22978 | 10 | 104842774 | 104958063 | 2.15E-09 | Lung  | Snoring    | -0.1364 | 8.91E-01 | 9.61E-01 |
| 130 | IL4R   | 3566  | 16 | 27320161  | 27381099  | 5.00E-10 | blood | Asthma     | -1.7629 | 7.79E-02 | 2.39E-01 |
| 130 | IL4R   | 3566  | 16 | 27320161  | 27381099  | 5.00E-10 | Lung  | Asthma     | -6.0756 | 1.24E-09 | 7.30E-08 |
| 130 | IL4R   | 3566  | 16 | 27320161  | 27381099  | 5.00E-10 | blood | COPD       | -1.7629 | 7.79E-02 | 2.39E-01 |
| 130 | IL4R   | 3566  | 16 | 27320161  | 27381099  | 5.00E-10 | Lung  | COPD       | -1.1243 | 2.61E-01 | 5.16E-01 |
| 130 | IL4R   | 3566  | 16 | 27320161  | 27381099  | 5.00E-10 | blood | IPF        | -1.7629 | 7.79E-02 | 2.39E-01 |
| 130 | IL4R   | 3566  | 16 | 27320161  | 27381099  | 5.00E-10 | Lung  | IPF        | -0.0675 | 9.46E-01 | 9.82E-01 |
| 130 | IL4R   | 3566  | 16 | 27320161  | 27381099  | 5.00E-10 | blood | LungCancer | -1.7629 | 7.79E-02 | 2.39E-01 |
| 130 | IL4R   | 3566  | 16 | 27320161  | 27381099  | 5.00E-10 | Lung  | LungCancer | 0.8080  | 4.19E-01 | 6.70E-01 |
| 130 | IL4R   | 3566  | 16 | 27320161  | 27381099  | 5.00E-10 | blood | Snoring    | -1.7629 | 7.79E-02 | 2.39E-01 |
| 130 | IL4R   | 3566  | 16 | 27320161  | 27381099  | 5.00E-10 | Lung  | Snoring    | -1.7629 | 7.79E-02 | 2.39E-01 |
| 1   | SDF4   | 51150 | 1  | 1147288   | 1172447   | 3.12E-05 | blood | Asthma     | -1.2366 | 2.16E-01 | 4.56E-01 |
| 1   | SDF4   | 51150 | 1  | 1147288   | 1172447   | 3.12E-05 | Lung  | Asthma     | -2.7965 | 5.17E-03 | 3.03E-02 |
| 1   | SDF4   | 51150 | 1  | 1147288   | 1172447   | 3.12E-05 | blood | COPD       | -1.2366 | 2.16E-01 | 4.56E-01 |
| 1   | SDF4   | 51150 | 1  | 1147288   | 1172447   | 3.12E-05 | Lung  | COPD       | -2.0797 | 3.76E-02 | 1.50E-01 |
| 1   | SDF4   | 51150 | 1  | 1147288   | 1172447   | 3.12E-05 | blood | IPF        | -1.2366 | 2.16E-01 | 4.56E-01 |
| 1   | SDF4   | 51150 | 1  | 1147288   | 1172447   | 3.12E-05 | Lung  | IPF        | -0.5088 | 6.11E-01 | 8.16E-01 |
| 1   | SDF4   | 51150 | 1  | 1147288   | 1172447   | 3.12E-05 | blood | LungCancer | -1.2366 | 2.16E-01 | 4.56E-01 |
| 1   | SDF4   | 51150 | 1  | 1147288   | 1172447   | 3.12E-05 | Lung  | LungCancer | -0.1273 | 8.99E-01 | 9.64E-01 |
| 1   | SDF4   | 51150 | 1  | 1147288   | 1172447   | 3.12E-05 | blood | Snoring    | -1.2366 | 2.16E-01 | 4.56E-01 |
| 1   | SDF4   | 51150 | 1  | 1147288   | 1172447   | 3.12E-05 | Lung  | Snoring    | -1.2366 | 2.16E-01 | 4.56E-01 |
| 94  | TOLLIP | 54472 | 11 | 1290598   | 1335892   | 1.23E-09 | blood | Asthma     | -1.7124 | 8.68E-02 | 2.59E-01 |
| 94  | TOLLIP | 54472 | 11 | 1290598   | 1335892   | 1.23E-09 | Lung  | Asthma     | -1.3895 | 1.65E-01 | 4.01E-01 |
| 94  | TOLLIP | 54472 | 11 | 1290598   | 1335892   | 1.23E-09 | blood | COPD       | -1.7124 | 8.68E-02 | 2.59E-01 |
| 94  | TOLLIP | 54472 | 11 | 1290598   | 1335892   | 1.23E-09 | Lung  | COPD       | 0.0971  | 9.23E-01 | 9.69E-01 |
| 94  | TOLLIP | 54472 | 11 | 1290598   | 1335892   | 1.23E-09 | blood | IPF        | -1.7124 | 8.68E-02 | 2.59E-01 |
| 94  | TOLLIP | 54472 | 11 | 1290598   | 1335892   | 1.23E-09 | Lung  | IPF        | 2.4100  | 1.59E-02 | 7.74E-02 |
| 94  | TOLLIP | 54472 | 11 | 1290598   | 1335892   | 1.23E-09 | blood | LungCancer | -1.7124 | 8.68E-02 | 2.59E-01 |
| 94  | TOLLIP | 54472 | 11 | 1290598   | 1335892   | 1.23E-09 | Lung  | LungCancer | -0.1630 | 8.70E-01 | 9.56E-01 |
| 94  | TOLLIP | 54472 | 11 | 1290598   | 1335892   | 1.23E-09 | blood | Snoring    | -1.7124 | 8.68E-02 | 2.59E-01 |
| 94  | TOLLIP | 54472 | 11 | 1290598   | 1335892   | 1.23E-09 | Lung  | Snoring    | -1.7124 | 8.68E-02 | 2.59E-01 |

|     |         |       |    |           |           |          |       |            |          |          |          |
|-----|---------|-------|----|-----------|-----------|----------|-------|------------|----------|----------|----------|
| 127 | CHRNA3  | 1136  | 15 | 78880394  | 78918637  | 1.18E-13 | blood | Asthma     | 0.6656   | 5.06E-01 | 7.44E-01 |
| 127 | CHRNA3  | 1136  | 15 | 78880394  | 78918637  | 1.18E-13 | Lung  | Asthma     | -2.2689  | 2.33E-02 | 1.04E-01 |
| 127 | CHRNA3  | 1136  | 15 | 78880394  | 78918637  | 1.18E-13 | blood | COPD       | 0.6656   | 5.06E-01 | 7.44E-01 |
| 127 | CHRNA3  | 1136  | 15 | 78880394  | 78918637  | 1.18E-13 | Lung  | COPD       | -6.3501  | 2.15E-10 | 1.59E-08 |
| 127 | CHRNA3  | 1136  | 15 | 78880394  | 78918637  | 1.18E-13 | blood | IPF        | 0.6656   | 5.06E-01 | 7.44E-01 |
| 127 | CHRNA3  | 1136  | 15 | 78880394  | 78918637  | 1.18E-13 | Lung  | IPF        | -2.5455  | 1.09E-02 | 5.67E-02 |
| 127 | CHRNA3  | 1136  | 15 | 78880394  | 78918637  | 1.18E-13 | blood | LungCancer | 0.6656   | 5.06E-01 | 7.44E-01 |
| 127 | CHRNA3  | 1136  | 15 | 78880394  | 78918637  | 1.18E-13 | Lung  | LungCancer | -10.8000 | 4.93E-27 | 1.31E-24 |
| 127 | CHRNA3  | 1136  | 15 | 78880394  | 78918637  | 1.18E-13 | blood | Snoring    | 0.6656   | 5.06E-01 | 7.44E-01 |
| 127 | CHRNA3  | 1136  | 15 | 78880394  | 78918637  | 1.18E-13 | Lung  | Snoring    | 0.6656   | 5.06E-01 | 7.44E-01 |
| 8   | RSBN1   | 54665 | 1  | 114299454 | 114360070 | 2.69E-05 | blood | Asthma     | -2.2407  | 2.50E-02 | 1.10E-01 |
| 8   | RSBN1   | 54665 | 1  | 114299454 | 114360070 | 2.69E-05 | Lung  | Asthma     | 0.4949   | 6.21E-01 | 8.23E-01 |
| 8   | RSBN1   | 54665 | 1  | 114299454 | 114360070 | 2.69E-05 | blood | COPD       | -2.2407  | 2.50E-02 | 1.10E-01 |
| 8   | RSBN1   | 54665 | 1  | 114299454 | 114360070 | 2.69E-05 | Lung  | COPD       | 0.3714   | 7.10E-01 | 8.86E-01 |
| 8   | RSBN1   | 54665 | 1  | 114299454 | 114360070 | 2.69E-05 | blood | IPF        | -2.2407  | 2.50E-02 | 1.10E-01 |
| 8   | RSBN1   | 54665 | 1  | 114299454 | 114360070 | 2.69E-05 | Lung  | IPF        | -0.2696  | 7.87E-01 | 9.29E-01 |
| 8   | RSBN1   | 54665 | 1  | 114299454 | 114360070 | 2.69E-05 | blood | LungCancer | -2.2407  | 2.50E-02 | 1.10E-01 |
| 8   | RSBN1   | 54665 | 1  | 114299454 | 114360070 | 2.69E-05 | Lung  | LungCancer | -1.8903  | 5.87E-02 | 2.03E-01 |
| 8   | RSBN1   | 54665 | 1  | 114299454 | 114360070 | 2.69E-05 | blood | Snoring    | -2.2407  | 2.50E-02 | 1.10E-01 |
| 8   | RSBN1   | 54665 | 1  | 114299454 | 114360070 | 2.69E-05 | Lung  | Snoring    | -2.2407  | 2.50E-02 | 1.10E-01 |
| 28  | PCNP    | 57092 | 3  | 101287997 | 101318281 | 4.71E-06 | blood | Asthma     | -0.0970  | 9.23E-01 | 9.69E-01 |
| 28  | PCNP    | 57092 | 3  | 101287997 | 101318281 | 4.71E-06 | Lung  | Asthma     | -3.7928  | 1.49E-04 | 1.33E-03 |
| 28  | PCNP    | 57092 | 3  | 101287997 | 101318281 | 4.71E-06 | blood | COPD       | -0.0970  | 9.23E-01 | 9.69E-01 |
| 28  | PCNP    | 57092 | 3  | 101287997 | 101318281 | 4.71E-06 | Lung  | COPD       | -1.3337  | 1.82E-01 | 4.21E-01 |
| 28  | PCNP    | 57092 | 3  | 101287997 | 101318281 | 4.71E-06 | blood | IPF        | -0.0970  | 9.23E-01 | 9.69E-01 |
| 28  | PCNP    | 57092 | 3  | 101287997 | 101318281 | 4.71E-06 | Lung  | IPF        | -2.0987  | 3.58E-02 | 1.43E-01 |
| 28  | PCNP    | 57092 | 3  | 101287997 | 101318281 | 4.71E-06 | blood | LungCancer | -0.0970  | 9.23E-01 | 9.69E-01 |
| 28  | PCNP    | 57092 | 3  | 101287997 | 101318281 | 4.71E-06 | Lung  | LungCancer | 0.7946   | 4.27E-01 | 6.80E-01 |
| 28  | PCNP    | 57092 | 3  | 101287997 | 101318281 | 4.71E-06 | blood | Snoring    | -0.0970  | 9.23E-01 | 9.69E-01 |
| 28  | PCNP    | 57092 | 3  | 101287997 | 101318281 | 4.71E-06 | Lung  | Snoring    | -0.0970  | 9.23E-01 | 9.69E-01 |
| 29  | MECOM   | 2122  | 3  | 168796287 | 169386563 | 2.16E-12 | blood | Asthma     | NA       | NA       | NA       |
| 29  | MECOM   | 2122  | 3  | 168796287 | 169386563 | 2.16E-12 | Lung  | Asthma     | NA       | NA       | NA       |
| 29  | MECOM   | 2122  | 3  | 168796287 | 169386563 | 2.16E-12 | blood | COPD       | NA       | NA       | NA       |
| 29  | MECOM   | 2122  | 3  | 168796287 | 169386563 | 2.16E-12 | Lung  | COPD       | NA       | NA       | NA       |
| 29  | MECOM   | 2122  | 3  | 168796287 | 169386563 | 2.16E-12 | blood | IPF        | NA       | NA       | NA       |
| 29  | MECOM   | 2122  | 3  | 168796287 | 169386563 | 2.16E-12 | Lung  | IPF        | NA       | NA       | NA       |
| 29  | MECOM   | 2122  | 3  | 168796287 | 169386563 | 2.16E-12 | blood | LungCancer | NA       | NA       | NA       |
| 29  | MECOM   | 2122  | 3  | 168796287 | 169386563 | 2.16E-12 | Lung  | LungCancer | NA       | NA       | NA       |
| 29  | MECOM   | 2122  | 3  | 168796287 | 169386563 | 2.16E-12 | blood | Snoring    | NA       | NA       | NA       |
| 29  | MECOM   | 2122  | 3  | 168796287 | 169386563 | 2.16E-12 | Lung  | Snoring    | NA       | NA       | NA       |
| 131 | YPEL3   | 83719 | 16 | 30098635  | 30113248  | 3.82E-05 | blood | Asthma     | 1.5342   | 1.25E-01 | 3.32E-01 |
| 131 | YPEL3   | 83719 | 16 | 30098635  | 30113248  | 3.82E-05 | Lung  | Asthma     | 3.9892   | 6.63E-05 | 6.67E-04 |
| 131 | YPEL3   | 83719 | 16 | 30098635  | 30113248  | 3.82E-05 | blood | COPD       | 1.5342   | 1.25E-01 | 3.32E-01 |
| 131 | YPEL3   | 83719 | 16 | 30098635  | 30113248  | 3.82E-05 | Lung  | COPD       | 2.6886   | 7.17E-03 | 4.00E-02 |
| 131 | YPEL3   | 83719 | 16 | 30098635  | 30113248  | 3.82E-05 | blood | IPF        | 1.5342   | 1.25E-01 | 3.32E-01 |
| 131 | YPEL3   | 83719 | 16 | 30098635  | 30113248  | 3.82E-05 | Lung  | IPF        | -0.2210  | 8.25E-01 | 9.43E-01 |
| 131 | YPEL3   | 83719 | 16 | 30098635  | 30113248  | 3.82E-05 | blood | LungCancer | 1.5342   | 1.25E-01 | 3.32E-01 |
| 131 | YPEL3   | 83719 | 16 | 30098635  | 30113248  | 3.82E-05 | Lung  | LungCancer | -0.1520  | 8.79E-01 | 9.56E-01 |
| 131 | YPEL3   | 83719 | 16 | 30098635  | 30113248  | 3.82E-05 | blood | Snoring    | 1.5342   | 1.25E-01 | 3.32E-01 |
| 131 | YPEL3   | 83719 | 16 | 30098635  | 30113248  | 3.82E-05 | Lung  | Snoring    | 1.5342   | 1.25E-01 | 3.32E-01 |
| 109 | PITPNM2 | 57605 | 12 | 123463027 | 123640376 | 1.27E-08 | blood | Asthma     | 0.1938   | 8.46E-01 | 9.54E-01 |
| 109 | PITPNM2 | 57605 | 12 | 123463027 | 123640376 | 1.27E-08 | Lung  | Asthma     | -5.3321  | 9.71E-08 | 2.17E-06 |
| 109 | PITPNM2 | 57605 | 12 | 123463027 | 123640376 | 1.27E-08 | blood | COPD       | 0.1938   | 8.46E-01 | 9.54E-01 |
| 109 | PITPNM2 | 57605 | 12 | 123463027 | 123640376 | 1.27E-08 | Lung  | COPD       | -0.4106  | 6.81E-01 | 8.64E-01 |
| 109 | PITPNM2 | 57605 | 12 | 123463027 | 123640376 | 1.27E-08 | blood | IPF        | 0.1938   | 8.46E-01 | 9.54E-01 |
| 109 | PITPNM2 | 57605 | 12 | 123463027 | 123640376 | 1.27E-08 | Lung  | IPF        | -0.1744  | 8.62E-01 | 9.55E-01 |
| 109 | PITPNM2 | 57605 | 12 | 123463027 | 123640376 | 1.27E-08 | blood | LungCancer | 0.1938   | 8.46E-01 | 9.54E-01 |
| 109 | PITPNM2 | 57605 | 12 | 123463027 | 123640376 | 1.27E-08 | Lung  | LungCancer | -1.5120  | 1.31E-01 | 3.44E-01 |
| 109 | PITPNM2 | 57605 | 12 | 123463027 | 123640376 | 1.27E-08 | blood | Snoring    | 0.1938   | 8.46E-01 | 9.54E-01 |
| 109 | PITPNM2 | 57605 | 12 | 123463027 | 123640376 | 1.27E-08 | Lung  | Snoring    | 0.1938   | 8.46E-01 | 9.54E-01 |
| 84  | ERMP1   | 79956 | 9  | 5779572   | 5838081   | 5.08E-07 | blood | Asthma     | -0.7650  | 4.44E-01 | 6.92E-01 |
| 84  | ERMP1   | 79956 | 9  | 5779572   | 5838081   | 5.08E-07 | Lung  | Asthma     | 0.3137   | 7.54E-01 | 9.15E-01 |
| 84  | ERMP1   | 79956 | 9  | 5779572   | 5838081   | 5.08E-07 | blood | COPD       | -0.7650  | 4.44E-01 | 6.92E-01 |
| 84  | ERMP1   | 79956 | 9  | 5779572   | 5838081   | 5.08E-07 | Lung  | COPD       | -1.0548  | 2.92E-01 | 5.47E-01 |
| 84  | ERMP1   | 79956 | 9  | 5779572   | 5838081   | 5.08E-07 | blood | IPF        | -0.7650  | 4.44E-01 | 6.92E-01 |
| 84  | ERMP1   | 79956 | 9  | 5779572   | 5838081   | 5.08E-07 | Lung  | IPF        | 0.4139   | 6.79E-01 | 8.64E-01 |
| 84  | ERMP1   | 79956 | 9  | 5779572   | 5838081   | 5.08E-07 | blood | LungCancer | -0.7650  | 4.44E-01 | 6.92E-01 |
| 84  | ERMP1   | 79956 | 9  | 5779572   | 5838081   | 5.08E-07 | Lung  | LungCancer | -1.0812  | 2.80E-01 | 5.34E-01 |
| 84  | ERMP1   | 79956 | 9  | 5779572   | 5838081   | 5.08E-07 | blood | Snoring    | -0.7650  | 4.44E-01 | 6.92E-01 |
| 84  | ERMP1   | 79956 | 9  | 5779572   | 5838081   | 5.08E-07 | Lung  | Snoring    | -0.7650  | 4.44E-01 | 6.92E-01 |
| 131 | FBXL19  | 54620 | 16 | 30929392  | 30965104  | 1.53E-12 | blood | Asthma     | 0.2008   | 8.41E-01 | 9.53E-01 |
| 131 | FBXL19  | 54620 | 16 | 30929392  | 30965104  | 1.53E-12 | Lung  | Asthma     | 0.0896   | 9.29E-01 | 9.72E-01 |
| 131 | FBXL19  | 54620 | 16 | 30929392  | 30965104  | 1.53E-12 | blood | COPD       | 0.2008   | 8.41E-01 | 9.53E-01 |



|     |         |        |    |          |          |          |       |            |         |          |          |
|-----|---------|--------|----|----------|----------|----------|-------|------------|---------|----------|----------|
| 131 | FBXL19  | 54620  | 16 | 30929392 | 30965104 | 1.53E-12 | Lung  | COPD       | -0.1421 | 8.87E-01 | 9.59E-01 |
| 131 | FBXL19  | 54620  | 16 | 30929392 | 30965104 | 1.53E-12 | blood | IPF        | 0.2008  | 8.41E-01 | 9.53E-01 |
| 131 | FBXL19  | 54620  | 16 | 30929392 | 30965104 | 1.53E-12 | Lung  | IPF        | -0.0506 | 9.60E-01 | 9.86E-01 |
| 131 | FBXL19  | 54620  | 16 | 30929392 | 30965104 | 1.53E-12 | blood | LungCancer | 0.2008  | 8.41E-01 | 9.53E-01 |
| 131 | FBXL19  | 54620  | 16 | 30929392 | 30965104 | 1.53E-12 | Lung  | LungCancer | -1.0300 | 3.05E-01 | 5.60E-01 |
| 131 | FBXL19  | 54620  | 16 | 30929392 | 30965104 | 1.53E-12 | blood | Snoring    | 0.2008  | 8.41E-01 | 9.53E-01 |
| 131 | FBXL19  | 54620  | 16 | 30929392 | 30965104 | 1.53E-12 | Lung  | Snoring    | 0.2008  | 8.41E-01 | 9.53E-01 |
| 131 | STX1B   | 112755 | 16 | 30995577 | 31026829 | 5.00E-10 | blood | Asthma     | 1.3204  | 1.87E-01 | 4.21E-01 |
| 131 | STX1B   | 112755 | 16 | 30995577 | 31026829 | 5.00E-10 | Lung  | Asthma     | 4.1111  | 3.94E-05 | 4.54E-04 |
| 131 | STX1B   | 112755 | 16 | 30995577 | 31026829 | 5.00E-10 | blood | COPD       | 1.3204  | 1.87E-01 | 4.21E-01 |
| 131 | STX1B   | 112755 | 16 | 30995577 | 31026829 | 5.00E-10 | Lung  | COPD       | -1.3064 | 1.91E-01 | 4.28E-01 |
| 131 | STX1B   | 112755 | 16 | 30995577 | 31026829 | 5.00E-10 | blood | IPF        | 1.3204  | 1.87E-01 | 4.21E-01 |
| 131 | STX1B   | 112755 | 16 | 30995577 | 31026829 | 5.00E-10 | Lung  | IPF        | 0.6630  | 5.07E-01 | 7.45E-01 |
| 131 | STX1B   | 112755 | 16 | 30995577 | 31026829 | 5.00E-10 | blood | LungCancer | 1.3204  | 1.87E-01 | 4.21E-01 |
| 131 | STX1B   | 112755 | 16 | 30995577 | 31026829 | 5.00E-10 | Lung  | LungCancer | 1.0200  | 3.07E-01 | 5.63E-01 |
| 131 | STX1B   | 112755 | 16 | 30995577 | 31026829 | 5.00E-10 | blood | Snoring    | 1.3204  | 1.87E-01 | 4.21E-01 |
| 131 | STX1B   | 112755 | 16 | 30995577 | 31026829 | 5.00E-10 | Lung  | Snoring    | 1.3204  | 1.87E-01 | 4.21E-01 |
| 131 | HSD3B7  | 80270  | 16 | 30990949 | 31005473 | 1.68E-13 | blood | Asthma     | 1.3683  | 1.71E-01 | 4.04E-01 |
| 131 | HSD3B7  | 80270  | 16 | 30990949 | 31005473 | 1.68E-13 | Lung  | Asthma     | 3.1998  | 1.38E-03 | 9.70E-03 |
| 131 | HSD3B7  | 80270  | 16 | 30990949 | 31005473 | 1.68E-13 | blood | COPD       | 1.3683  | 1.71E-01 | 4.04E-01 |
| 131 | HSD3B7  | 80270  | 16 | 30990949 | 31005473 | 1.68E-13 | Lung  | COPD       | -2.3202 | 2.03E-02 | 9.49E-02 |
| 131 | HSD3B7  | 80270  | 16 | 30990949 | 31005473 | 1.68E-13 | blood | IPF        | 1.3683  | 1.71E-01 | 4.04E-01 |
| 131 | HSD3B7  | 80270  | 16 | 30990949 | 31005473 | 1.68E-13 | Lung  | IPF        | 0.1540  | 8.77E-01 | 9.56E-01 |
| 131 | HSD3B7  | 80270  | 16 | 30990949 | 31005473 | 1.68E-13 | blood | LungCancer | 1.3683  | 1.71E-01 | 4.04E-01 |
| 131 | HSD3B7  | 80270  | 16 | 30990949 | 31005473 | 1.68E-13 | Lung  | LungCancer | 0.8870  | 3.75E-01 | 6.27E-01 |
| 131 | HSD3B7  | 80270  | 16 | 30990949 | 31005473 | 1.68E-13 | blood | Snoring    | 1.3683  | 1.71E-01 | 4.04E-01 |
| 131 | HSD3B7  | 80270  | 16 | 30990949 | 31005473 | 1.68E-13 | Lung  | Snoring    | 1.3683  | 1.71E-01 | 4.04E-01 |
| 131 | SETD1A  | 9739   | 16 | 30963615 | 31000985 | 5.67E-12 | blood | Asthma     | 4.4979  | 6.86E-06 | 9.05E-05 |
| 131 | SETD1A  | 9739   | 16 | 30963615 | 31000985 | 5.67E-12 | Lung  | Asthma     | 3.0468  | 2.31E-03 | 1.47E-02 |
| 131 | SETD1A  | 9739   | 16 | 30963615 | 31000985 | 5.67E-12 | blood | COPD       | 4.4979  | 6.86E-06 | 9.05E-05 |
| 131 | SETD1A  | 9739   | 16 | 30963615 | 31000985 | 5.67E-12 | Lung  | COPD       | 4.6365  | 3.54E-06 | 5.04E-05 |
| 131 | SETD1A  | 9739   | 16 | 30963615 | 31000985 | 5.67E-12 | blood | IPF        | 4.4979  | 6.86E-06 | 9.05E-05 |
| 131 | SETD1A  | 9739   | 16 | 30963615 | 31000985 | 5.67E-12 | Lung  | IPF        | 0.0842  | 9.33E-01 | 9.75E-01 |
| 131 | SETD1A  | 9739   | 16 | 30963615 | 31000985 | 5.67E-12 | blood | LungCancer | 4.4979  | 6.86E-06 | 9.05E-05 |
| 131 | SETD1A  | 9739   | 16 | 30963615 | 31000985 | 5.67E-12 | Lung  | LungCancer | 1.4900  | 1.35E-01 | 3.53E-01 |
| 131 | SETD1A  | 9739   | 16 | 30963615 | 31000985 | 5.67E-12 | blood | Snoring    | 4.4979  | 6.86E-06 | 9.05E-05 |
| 131 | SETD1A  | 9739   | 16 | 30963615 | 31000985 | 5.67E-12 | Lung  | Snoring    | 4.4979  | 6.86E-06 | 9.05E-05 |
| 131 | BCL7C   | 9274   | 16 | 30840373 | 30910852 | 1.32E-08 | blood | Asthma     | 1.9577  | 5.03E-02 | 1.81E-01 |
| 131 | BCL7C   | 9274   | 16 | 30840373 | 30910852 | 1.32E-08 | Lung  | Asthma     | 0.6066  | 5.44E-01 | 7.64E-01 |
| 131 | BCL7C   | 9274   | 16 | 30840373 | 30910852 | 1.32E-08 | blood | COPD       | 1.9577  | 5.03E-02 | 1.81E-01 |
| 131 | BCL7C   | 9274   | 16 | 30840373 | 30910852 | 1.32E-08 | Lung  | COPD       | 1.0546  | 2.92E-01 | 5.47E-01 |
| 131 | BCL7C   | 9274   | 16 | 30840373 | 30910852 | 1.32E-08 | blood | IPF        | 1.9577  | 5.03E-02 | 1.81E-01 |
| 131 | BCL7C   | 9274   | 16 | 30840373 | 30910852 | 1.32E-08 | Lung  | IPF        | -0.4510 | 6.52E-01 | 8.44E-01 |
| 131 | BCL7C   | 9274   | 16 | 30840373 | 30910852 | 1.32E-08 | blood | LungCancer | 1.9577  | 5.03E-02 | 1.81E-01 |
| 131 | BCL7C   | 9274   | 16 | 30840373 | 30910852 | 1.32E-08 | Lung  | LungCancer | 0.8140  | 4.16E-01 | 6.67E-01 |
| 131 | BCL7C   | 9274   | 16 | 30840373 | 30910852 | 1.32E-08 | blood | Snoring    | 1.9577  | 5.03E-02 | 1.81E-01 |
| 131 | BCL7C   | 9274   | 16 | 30840373 | 30910852 | 1.32E-08 | Lung  | Snoring    | 1.9577  | 5.03E-02 | 1.81E-01 |
| 156 | CCDC134 | 79879  | 22 | 42191636 | 42233175 | 4.97E-11 | blood | Asthma     | 1.7424  | 8.14E-02 | 2.47E-01 |
| 156 | CCDC134 | 79879  | 22 | 42191636 | 42233175 | 4.97E-11 | Lung  | Asthma     | 3.0858  | 2.03E-03 | 1.32E-02 |
| 156 | CCDC134 | 79879  | 22 | 42191636 | 42233175 | 4.97E-11 | blood | COPD       | 1.7424  | 8.14E-02 | 2.47E-01 |
| 156 | CCDC134 | 79879  | 22 | 42191636 | 42233175 | 4.97E-11 | Lung  | COPD       | 0.1564  | 8.76E-01 | 9.56E-01 |
| 156 | CCDC134 | 79879  | 22 | 42191636 | 42233175 | 4.97E-11 | blood | IPF        | 1.7424  | 8.14E-02 | 2.47E-01 |
| 156 | CCDC134 | 79879  | 22 | 42191636 | 42233175 | 4.97E-11 | Lung  | IPF        | 1.4290  | 1.53E-01 | 3.80E-01 |
| 156 | CCDC134 | 79879  | 22 | 42191636 | 42233175 | 4.97E-11 | blood | LungCancer | 1.7424  | 8.14E-02 | 2.47E-01 |
| 156 | CCDC134 | 79879  | 22 | 42191636 | 42233175 | 4.97E-11 | Lung  | LungCancer | 0.2851  | 7.76E-01 | 9.28E-01 |
| 156 | CCDC134 | 79879  | 22 | 42191636 | 42233175 | 4.97E-11 | blood | Snoring    | 1.7424  | 8.14E-02 | 2.47E-01 |
| 156 | CCDC134 | 79879  | 22 | 42191636 | 42233175 | 4.97E-11 | Lung  | Snoring    | 1.7424  | 8.14E-02 | 2.47E-01 |
| 156 | RANGAP1 | 5905   | 22 | 41635781 | 41687255 | 1.49E-07 | blood | Asthma     | -1.5932 | 1.11E-01 | 3.03E-01 |
| 156 | RANGAP1 | 5905   | 22 | 41635781 | 41687255 | 1.49E-07 | Lung  | Asthma     | -0.5924 | 5.54E-01 | 7.72E-01 |
| 156 | RANGAP1 | 5905   | 22 | 41635781 | 41687255 | 1.49E-07 | blood | COPD       | -1.5932 | 1.11E-01 | 3.03E-01 |
| 156 | RANGAP1 | 5905   | 22 | 41635781 | 41687255 | 1.49E-07 | Lung  | COPD       | 0.7915  | 4.29E-01 | 6.82E-01 |
| 156 | RANGAP1 | 5905   | 22 | 41635781 | 41687255 | 1.49E-07 | blood | IPF        | -1.5932 | 1.11E-01 | 3.03E-01 |
| 156 | RANGAP1 | 5905   | 22 | 41635781 | 41687255 | 1.49E-07 | Lung  | IPF        | -0.1219 | 9.03E-01 | 9.64E-01 |
| 156 | RANGAP1 | 5905   | 22 | 41635781 | 41687255 | 1.49E-07 | blood | LungCancer | -1.5932 | 1.11E-01 | 3.03E-01 |
| 156 | RANGAP1 | 5905   | 22 | 41635781 | 41687255 | 1.49E-07 | Lung  | LungCancer | 2.3725  | 1.77E-02 | 8.48E-02 |
| 156 | RANGAP1 | 5905   | 22 | 41635781 | 41687255 | 1.49E-07 | blood | Snoring    | -1.5932 | 1.11E-01 | 3.03E-01 |
| 156 | RANGAP1 | 5905   | 22 | 41635781 | 41687255 | 1.49E-07 | Lung  | Snoring    | -1.5932 | 1.11E-01 | 3.03E-01 |
| 156 | ZC3H7B  | 23264  | 22 | 41692507 | 41761151 | 1.00E-10 | blood | Asthma     | NA      | NA       | NA       |
| 156 | ZC3H7B  | 23264  | 22 | 41692507 | 41761151 | 1.00E-10 | Lung  | Asthma     | NA      | NA       | NA       |
| 156 | ZC3H7B  | 23264  | 22 | 41692507 | 41761151 | 1.00E-10 | blood | COPD       | NA      | NA       | NA       |
| 156 | ZC3H7B  | 23264  | 22 | 41692507 | 41761151 | 1.00E-10 | Lung  | COPD       | NA      | NA       | NA       |
| 156 | ZC3H7B  | 23264  | 22 | 41692507 | 41761151 | 1.00E-10 | blood | IPF        | NA      | NA       | NA       |
| 156 | ZC3H7B  | 23264  | 22 | 41692507 | 41761151 | 1.00E-10 | Lung  | IPF        | NA      | NA       | NA       |

|     |        |        |    |          |          |          |       |            |         |          |          |
|-----|--------|--------|----|----------|----------|----------|-------|------------|---------|----------|----------|
| 156 | ZC3H7B | 23264  | 22 | 41692507 | 41761151 | 1.00E-10 | blood | LungCancer | NA      | NA       | NA       |
| 156 | ZC3H7B | 23264  | 22 | 41692507 | 41761151 | 1.00E-10 | Lung  | LungCancer | NA      | NA       | NA       |
| 156 | ZC3H7B | 23264  | 22 | 41692507 | 41761151 | 1.00E-10 | blood | Snoring    | NA      | NA       | NA       |
| 156 | ZC3H7B | 23264  | 22 | 41692507 | 41761151 | 1.00E-10 | Lung  | Snoring    | NA      | NA       | NA       |
| 156 | PHF5A  | 84844  | 22 | 41850721 | 41869708 | 1.55E-11 | blood | Asthma     | 0.2646  | 7.91E-01 | 9.29E-01 |
| 156 | PHF5A  | 84844  | 22 | 41850721 | 41869708 | 1.55E-11 | Lung  | Asthma     | -0.0309 | 9.75E-01 | 9.92E-01 |
| 156 | PHF5A  | 84844  | 22 | 41850721 | 41869708 | 1.55E-11 | blood | COPD       | 0.2646  | 7.91E-01 | 9.29E-01 |
| 156 | PHF5A  | 84844  | 22 | 41850721 | 41869708 | 1.55E-11 | Lung  | COPD       | -0.0439 | 9.65E-01 | 9.89E-01 |
| 156 | PHF5A  | 84844  | 22 | 41850721 | 41869708 | 1.55E-11 | blood | IPF        | 0.2646  | 7.91E-01 | 9.29E-01 |
| 156 | PHF5A  | 84844  | 22 | 41850721 | 41869708 | 1.55E-11 | Lung  | IPF        | 0.5490  | 5.83E-01 | 7.94E-01 |
| 156 | PHF5A  | 84844  | 22 | 41850721 | 41869708 | 1.55E-11 | blood | LungCancer | 0.2646  | 7.91E-01 | 9.29E-01 |
| 156 | PHF5A  | 84844  | 22 | 41850721 | 41869708 | 1.55E-11 | Lung  | LungCancer | 1.7503  | 8.01E-02 | 2.45E-01 |
| 156 | PHF5A  | 84844  | 22 | 41850721 | 41869708 | 1.55E-11 | blood | Snoring    | 0.2646  | 7.91E-01 | 9.29E-01 |
| 156 | PHF5A  | 84844  | 22 | 41850721 | 41869708 | 1.55E-11 | Lung  | Snoring    | 0.2646  | 7.91E-01 | 9.29E-01 |
| 156 | ACO2   | 50     | 22 | 41860099 | 41929993 | 2.30E-11 | blood | Asthma     | 1.6499  | 9.90E-02 | 2.84E-01 |
| 156 | ACO2   | 50     | 22 | 41860099 | 41929993 | 2.30E-11 | Lung  | Asthma     | 5.5898  | 2.27E-08 | 6.01E-07 |
| 156 | ACO2   | 50     | 22 | 41860099 | 41929993 | 2.30E-11 | blood | COPD       | 1.6499  | 9.90E-02 | 2.84E-01 |
| 156 | ACO2   | 50     | 22 | 41860099 | 41929993 | 2.30E-11 | Lung  | COPD       | -2.0603 | 3.94E-02 | 1.55E-01 |
| 156 | ACO2   | 50     | 22 | 41860099 | 41929993 | 2.30E-11 | blood | IPF        | 1.6499  | 9.90E-02 | 2.84E-01 |
| 156 | ACO2   | 50     | 22 | 41860099 | 41929993 | 2.30E-11 | Lung  | IPF        | 1.6277  | 1.04E-01 | 2.82E-01 |
| 156 | ACO2   | 50     | 22 | 41860099 | 41929993 | 2.30E-11 | blood | LungCancer | 1.6499  | 9.90E-02 | 2.84E-01 |
| 156 | ACO2   | 50     | 22 | 41860099 | 41929993 | 2.30E-11 | Lung  | LungCancer | -1.1796 | 2.38E-01 | 4.85E-01 |
| 156 | ACO2   | 50     | 22 | 41860099 | 41929993 | 2.30E-11 | blood | Snoring    | 1.6499  | 9.90E-02 | 2.84E-01 |
| 156 | ACO2   | 50     | 22 | 41860099 | 41929993 | 2.30E-11 | Lung  | Snoring    | 1.6499  | 9.90E-02 | 2.84E-01 |
| 156 | POLR3H | 171568 | 22 | 41916803 | 41945479 | 6.78E-11 | blood | Asthma     | NA      | NA       | NA       |
| 156 | POLR3H | 171568 | 22 | 41916803 | 41945479 | 6.78E-11 | Lung  | Asthma     | NA      | NA       | NA       |
| 156 | POLR3H | 171568 | 22 | 41916803 | 41945479 | 6.78E-11 | blood | COPD       | NA      | NA       | NA       |
| 156 | POLR3H | 171568 | 22 | 41916803 | 41945479 | 6.78E-11 | Lung  | COPD       | NA      | NA       | NA       |
| 156 | POLR3H | 171568 | 22 | 41916803 | 41945479 | 6.78E-11 | blood | IPF        | NA      | NA       | NA       |
| 156 | POLR3H | 171568 | 22 | 41916803 | 41945479 | 6.78E-11 | Lung  | IPF        | NA      | NA       | NA       |
| 156 | POLR3H | 171568 | 22 | 41916803 | 41945479 | 6.78E-11 | blood | LungCancer | NA      | NA       | NA       |
| 156 | POLR3H | 171568 | 22 | 41916803 | 41945479 | 6.78E-11 | Lung  | LungCancer | NA      | NA       | NA       |
| 156 | POLR3H | 171568 | 22 | 41916803 | 41945479 | 6.78E-11 | blood | Snoring    | NA      | NA       | NA       |
| 156 | POLR3H | 171568 | 22 | 41916803 | 41945479 | 6.78E-11 | Lung  | Snoring    | NA      | NA       | NA       |
| 156 | PMM1   | 5372   | 22 | 41967890 | 41990871 | 2.65E-11 | blood | Asthma     | 0.1686  | 8.66E-01 | 9.55E-01 |
| 156 | PMM1   | 5372   | 22 | 41967890 | 41990871 | 2.65E-11 | Lung  | Asthma     | -2.1352 | 3.27E-02 | 1.35E-01 |
| 156 | PMM1   | 5372   | 22 | 41967890 | 41990871 | 2.65E-11 | blood | COPD       | 0.1686  | 8.66E-01 | 9.55E-01 |
| 156 | PMM1   | 5372   | 22 | 41967890 | 41990871 | 2.65E-11 | Lung  | COPD       | 2.4329  | 1.50E-02 | 7.41E-02 |
| 156 | PMM1   | 5372   | 22 | 41967890 | 41990871 | 2.65E-11 | blood | IPF        | 0.1686  | 8.66E-01 | 9.55E-01 |
| 156 | PMM1   | 5372   | 22 | 41967890 | 41990871 | 2.65E-11 | Lung  | IPF        | 0.2085  | 8.35E-01 | 9.49E-01 |
| 156 | PMM1   | 5372   | 22 | 41967890 | 41990871 | 2.65E-11 | blood | LungCancer | 0.1686  | 8.66E-01 | 9.55E-01 |
| 156 | PMM1   | 5372   | 22 | 41967890 | 41990871 | 2.65E-11 | Lung  | LungCancer | 2.1692  | 3.01E-02 | 1.28E-01 |
| 156 | PMM1   | 5372   | 22 | 41967890 | 41990871 | 2.65E-11 | blood | Snoring    | 0.1686  | 8.66E-01 | 9.55E-01 |
| 156 | PMM1   | 5372   | 22 | 41967890 | 41990871 | 2.65E-11 | Lung  | Snoring    | 0.1686  | 8.66E-01 | 9.55E-01 |
| 156 | DES11  | 27351  | 22 | 41989032 | 42022079 | 5.36E-11 | blood | Asthma     | 1.1910  | 2.34E-01 | 4.79E-01 |
| 156 | DES11  | 27351  | 22 | 41989032 | 42022079 | 5.36E-11 | Lung  | Asthma     | 2.2377  | 2.52E-02 | 1.11E-01 |
| 156 | DES11  | 27351  | 22 | 41989032 | 42022079 | 5.36E-11 | blood | COPD       | 1.1910  | 2.34E-01 | 4.79E-01 |
| 156 | DES11  | 27351  | 22 | 41989032 | 42022079 | 5.36E-11 | Lung  | COPD       | -1.4699 | 1.42E-01 | 3.63E-01 |
| 156 | DES11  | 27351  | 22 | 41989032 | 42022079 | 5.36E-11 | blood | IPF        | 1.1910  | 2.34E-01 | 4.79E-01 |
| 156 | DES11  | 27351  | 22 | 41989032 | 42022079 | 5.36E-11 | Lung  | IPF        | 1.1068  | 2.68E-01 | 5.19E-01 |
| 156 | DES11  | 27351  | 22 | 41989032 | 42022079 | 5.36E-11 | blood | LungCancer | 1.1910  | 2.34E-01 | 4.79E-01 |
| 156 | DES11  | 27351  | 22 | 41989032 | 42022079 | 5.36E-11 | Lung  | LungCancer | 0.2306  | 8.18E-01 | 9.42E-01 |
| 156 | DES11  | 27351  | 22 | 41989032 | 42022079 | 5.36E-11 | blood | Snoring    | 1.1910  | 2.34E-01 | 4.79E-01 |
| 156 | DES11  | 27351  | 22 | 41989032 | 42022079 | 5.36E-11 | Lung  | Snoring    | 1.1910  | 2.34E-01 | 4.79E-01 |
| 118 | RIN3   | 79890  | 14 | 92975125 | 93160339 | 8.13E-15 | blood | Asthma     | 0.8802  | 3.79E-01 | 6.29E-01 |
| 118 | RIN3   | 79890  | 14 | 92975125 | 93160339 | 8.13E-15 | Lung  | Asthma     | 5.2179  | 1.81E-07 | 3.41E-06 |
| 118 | RIN3   | 79890  | 14 | 92975125 | 93160339 | 8.13E-15 | blood | COPD       | 0.8802  | 3.79E-01 | 6.29E-01 |
| 118 | RIN3   | 79890  | 14 | 92975125 | 93160339 | 8.13E-15 | Lung  | COPD       | 2.3152  | 2.06E-02 | 9.54E-02 |
| 118 | RIN3   | 79890  | 14 | 92975125 | 93160339 | 8.13E-15 | blood | IPF        | 0.8802  | 3.79E-01 | 6.29E-01 |
| 118 | RIN3   | 79890  | 14 | 92975125 | 93160339 | 8.13E-15 | Lung  | IPF        | 0.1444  | 8.85E-01 | 9.59E-01 |
| 118 | RIN3   | 79890  | 14 | 92975125 | 93160339 | 8.13E-15 | blood | LungCancer | 0.8802  | 3.79E-01 | 6.29E-01 |
| 118 | RIN3   | 79890  | 14 | 92975125 | 93160339 | 8.13E-15 | Lung  | LungCancer | -0.6179 | 5.37E-01 | 7.62E-01 |
| 118 | RIN3   | 79890  | 14 | 92975125 | 93160339 | 8.13E-15 | blood | Snoring    | 0.8802  | 3.79E-01 | 6.29E-01 |
| 118 | RIN3   | 79890  | 14 | 92975125 | 93160339 | 8.13E-15 | Lung  | Snoring    | 0.8802  | 3.79E-01 | 6.29E-01 |
| 154 | CHRNA4 | 1137   | 20 | 61969662 | 62014487 | 4.64E-13 | blood | Asthma     | -1.8069 | 7.08E-02 | 2.27E-01 |
| 154 | CHRNA4 | 1137   | 20 | 61969662 | 62014487 | 4.64E-13 | Lung  | Asthma     | -0.5884 | 5.56E-01 | 7.75E-01 |
| 154 | CHRNA4 | 1137   | 20 | 61969662 | 62014487 | 4.64E-13 | blood | COPD       | -1.8069 | 7.08E-02 | 2.27E-01 |
| 154 | CHRNA4 | 1137   | 20 | 61969662 | 62014487 | 4.64E-13 | Lung  | COPD       | -0.3149 | 7.53E-01 | 9.14E-01 |
| 154 | CHRNA4 | 1137   | 20 | 61969662 | 62014487 | 4.64E-13 | blood | IPF        | -1.8069 | 7.08E-02 | 2.27E-01 |
| 154 | CHRNA4 | 1137   | 20 | 61969662 | 62014487 | 4.64E-13 | Lung  | IPF        | 1.3214  | 1.86E-01 | 4.21E-01 |
| 154 | CHRNA4 | 1137   | 20 | 61969662 | 62014487 | 4.64E-13 | blood | LungCancer | -1.8069 | 7.08E-02 | 2.27E-01 |
| 154 | CHRNA4 | 1137   | 20 | 61969662 | 62014487 | 4.64E-13 | Lung  | LungCancer | -2.5896 | 9.61E-03 | 5.08E-02 |
| 154 | CHRNA4 | 1137   | 20 | 61969662 | 62014487 | 4.64E-13 | blood | Snoring    | -1.8069 | 7.08E-02 | 2.27E-01 |

|     |        |       |    |          |          |          |       |            |         |          |          |
|-----|--------|-------|----|----------|----------|----------|-------|------------|---------|----------|----------|
| 154 | CHRNA4 | 1137  | 20 | 61969662 | 62014487 | 4.64E-13 | Lung  | Snoring    | -1.8069 | 7.08E-02 | 2.27E-01 |
| 154 | GMEB2  | 26205 | 20 | 62213955 | 62263381 | 4.12E-05 | blood | Asthma     | -1.6287 | 1.03E-01 | 2.90E-01 |
| 154 | GMEB2  | 26205 | 20 | 62213955 | 62263381 | 4.12E-05 | Lung  | Asthma     | -3.3889 | 7.02E-04 | 5.66E-03 |
| 154 | GMEB2  | 26205 | 20 | 62213955 | 62263381 | 4.12E-05 | blood | COPD       | -1.6287 | 1.03E-01 | 2.90E-01 |
| 154 | GMEB2  | 26205 | 20 | 62213955 | 62263381 | 4.12E-05 | Lung  | COPD       | -1.3685 | 1.71E-01 | 4.04E-01 |
| 154 | GMEB2  | 26205 | 20 | 62213955 | 62263381 | 4.12E-05 | blood | IPF        | -1.6287 | 1.03E-01 | 2.90E-01 |
| 154 | GMEB2  | 26205 | 20 | 62213955 | 62263381 | 4.12E-05 | Lung  | IPF        | -1.2623 | 2.07E-01 | 4.47E-01 |
| 154 | GMEB2  | 26205 | 20 | 62213955 | 62263381 | 4.12E-05 | blood | LungCancer | -1.6287 | 1.03E-01 | 2.90E-01 |
| 154 | GMEB2  | 26205 | 20 | 62213955 | 62263381 | 4.12E-05 | Lung  | LungCancer | -2.1672 | 3.02E-02 | 1.28E-01 |
| 154 | GMEB2  | 26205 | 20 | 62213955 | 62263381 | 4.12E-05 | blood | Snoring    | -1.6287 | 1.03E-01 | 2.90E-01 |
| 154 | GMEB2  | 26205 | 20 | 62213955 | 62263381 | 4.12E-05 | Lung  | Snoring    | -1.6287 | 1.03E-01 | 2.90E-01 |
| 154 | ARFRP1 | 10139 | 20 | 62324995 | 62344365 | 1.28E-10 | blood | Asthma     | 2.0659  | 3.88E-02 | 1.53E-01 |
| 154 | ARFRP1 | 10139 | 20 | 62324995 | 62344365 | 1.28E-10 | Lung  | Asthma     | 2.4045  | 1.62E-02 | 7.85E-02 |
| 154 | ARFRP1 | 10139 | 20 | 62324995 | 62344365 | 1.28E-10 | blood | COPD       | 2.0659  | 3.88E-02 | 1.53E-01 |
| 154 | ARFRP1 | 10139 | 20 | 62324995 | 62344365 | 1.28E-10 | Lung  | COPD       | 2.2260  | 2.60E-02 | 1.14E-01 |
| 154 | ARFRP1 | 10139 | 20 | 62324995 | 62344365 | 1.28E-10 | blood | IPF        | 2.0659  | 3.88E-02 | 1.53E-01 |
| 154 | ARFRP1 | 10139 | 20 | 62324995 | 62344365 | 1.28E-10 | Lung  | IPF        | 0.1568  | 8.75E-01 | 9.56E-01 |
| 154 | ARFRP1 | 10139 | 20 | 62324995 | 62344365 | 1.28E-10 | blood | LungCancer | 2.0659  | 3.88E-02 | 1.53E-01 |
| 154 | ARFRP1 | 10139 | 20 | 62324995 | 62344365 | 1.28E-10 | Lung  | LungCancer | 1.4616  | 1.44E-01 | 3.66E-01 |
| 154 | ARFRP1 | 10139 | 20 | 62324995 | 62344365 | 1.28E-10 | blood | Snoring    | 2.0659  | 3.88E-02 | 1.53E-01 |
| 154 | ARFRP1 | 10139 | 20 | 62324995 | 62344365 | 1.28E-10 | Lung  | Snoring    | 2.0659  | 3.88E-02 | 1.53E-01 |
| 131 | CORO1A | 11151 | 16 | 30189731 | 30205397 | 2.94E-05 | blood | Asthma     | -4.4673 | 7.92E-06 | 1.02E-04 |
| 131 | CORO1A | 11151 | 16 | 30189731 | 30205397 | 2.94E-05 | Lung  | Asthma     | -3.8973 | 9.73E-05 | 9.26E-04 |
| 131 | CORO1A | 11151 | 16 | 30189731 | 30205397 | 2.94E-05 | blood | COPD       | -4.4673 | 7.92E-06 | 1.02E-04 |
| 131 | CORO1A | 11151 | 16 | 30189731 | 30205397 | 2.94E-05 | Lung  | COPD       | -5.1659 | 2.39E-07 | 4.27E-06 |
| 131 | CORO1A | 11151 | 16 | 30189731 | 30205397 | 2.94E-05 | blood | IPF        | -4.4673 | 7.92E-06 | 1.02E-04 |
| 131 | CORO1A | 11151 | 16 | 30189731 | 30205397 | 2.94E-05 | Lung  | IPF        | 0.0872  | 9.30E-01 | 9.73E-01 |
| 131 | CORO1A | 11151 | 16 | 30189731 | 30205397 | 2.94E-05 | blood | LungCancer | -4.4673 | 7.92E-06 | 1.02E-04 |
| 131 | CORO1A | 11151 | 16 | 30189731 | 30205397 | 2.94E-05 | Lung  | LungCancer | -1.5800 | 1.14E-01 | 3.08E-01 |
| 131 | CORO1A | 11151 | 16 | 30189731 | 30205397 | 2.94E-05 | blood | Snoring    | -4.4673 | 7.92E-06 | 1.02E-04 |
| 131 | CORO1A | 11151 | 16 | 30189731 | 30205397 | 2.94E-05 | Lung  | Snoring    | -4.4673 | 7.92E-06 | 1.02E-04 |
| 131 | MAPK3  | 5595  | 16 | 30120426 | 30139630 | 4.20E-06 | blood | Asthma     | -3.1078 | 1.89E-03 | 1.24E-02 |
| 131 | MAPK3  | 5595  | 16 | 30120426 | 30139630 | 4.20E-06 | Lung  | Asthma     | -3.7773 | 1.59E-04 | 1.41E-03 |
| 131 | MAPK3  | 5595  | 16 | 30120426 | 30139630 | 4.20E-06 | blood | COPD       | -3.1078 | 1.89E-03 | 1.24E-02 |
| 131 | MAPK3  | 5595  | 16 | 30120426 | 30139630 | 4.20E-06 | Lung  | COPD       | -4.5632 | 5.04E-06 | 6.87E-05 |
| 131 | MAPK3  | 5595  | 16 | 30120426 | 30139630 | 4.20E-06 | blood | IPF        | -3.1078 | 1.89E-03 | 1.24E-02 |
| 131 | MAPK3  | 5595  | 16 | 30120426 | 30139630 | 4.20E-06 | Lung  | IPF        | 0.0620  | 9.51E-01 | 9.84E-01 |
| 131 | MAPK3  | 5595  | 16 | 30120426 | 30139630 | 4.20E-06 | blood | LungCancer | -3.1078 | 1.89E-03 | 1.24E-02 |
| 131 | MAPK3  | 5595  | 16 | 30120426 | 30139630 | 4.20E-06 | Lung  | LungCancer | -1.0400 | 2.98E-01 | 5.53E-01 |
| 131 | MAPK3  | 5595  | 16 | 30120426 | 30139630 | 4.20E-06 | blood | Snoring    | -3.1078 | 1.89E-03 | 1.24E-02 |
| 131 | MAPK3  | 5595  | 16 | 30120426 | 30139630 | 4.20E-06 | Lung  | Snoring    | -3.1078 | 1.89E-03 | 1.24E-02 |
| 131 | GDPD3  | 79153 | 16 | 30110977 | 30130264 | 4.26E-07 | blood | Asthma     | -2.4766 | 1.33E-02 | 6.69E-02 |
| 131 | GDPD3  | 79153 | 16 | 30110977 | 30130264 | 4.26E-07 | Lung  | Asthma     | -4.3842 | 1.16E-05 | 1.47E-04 |
| 131 | GDPD3  | 79153 | 16 | 30110977 | 30130264 | 4.26E-07 | blood | COPD       | -2.4766 | 1.33E-02 | 6.69E-02 |
| 131 | GDPD3  | 79153 | 16 | 30110977 | 30130264 | 4.26E-07 | Lung  | COPD       | -3.4187 | 6.29E-04 | 5.19E-03 |
| 131 | GDPD3  | 79153 | 16 | 30110977 | 30130264 | 4.26E-07 | blood | IPF        | -2.4766 | 1.33E-02 | 6.69E-02 |
| 131 | GDPD3  | 79153 | 16 | 30110977 | 30130264 | 4.26E-07 | Lung  | IPF        | -0.1920 | 8.47E-01 | 9.54E-01 |
| 131 | GDPD3  | 79153 | 16 | 30110977 | 30130264 | 4.26E-07 | blood | LungCancer | -2.4766 | 1.33E-02 | 6.69E-02 |
| 131 | GDPD3  | 79153 | 16 | 30110977 | 30130264 | 4.26E-07 | Lung  | LungCancer | -1.0300 | 3.02E-01 | 5.57E-01 |
| 131 | GDPD3  | 79153 | 16 | 30110977 | 30130264 | 4.26E-07 | blood | Snoring    | -2.4766 | 1.33E-02 | 6.69E-02 |
| 131 | GDPD3  | 79153 | 16 | 30110977 | 30130264 | 4.26E-07 | Lung  | Snoring    | -2.4766 | 1.33E-02 | 6.69E-02 |
| 131 | STX4   | 6810  | 16 | 31039416 | 31056489 | 3.22E-11 | blood | Asthma     | 1.3683  | 1.71E-01 | 4.04E-01 |
| 131 | STX4   | 6810  | 16 | 31039416 | 31056489 | 3.22E-11 | Lung  | Asthma     | 3.1998  | 1.38E-03 | 9.70E-03 |
| 131 | STX4   | 6810  | 16 | 31039416 | 31056489 | 3.22E-11 | blood | COPD       | 1.3683  | 1.71E-01 | 4.04E-01 |
| 131 | STX4   | 6810  | 16 | 31039416 | 31056489 | 3.22E-11 | Lung  | COPD       | -2.3202 | 2.03E-02 | 9.49E-02 |
| 131 | STX4   | 6810  | 16 | 31039416 | 31056489 | 3.22E-11 | blood | IPF        | 1.3683  | 1.71E-01 | 4.04E-01 |
| 131 | STX4   | 6810  | 16 | 31039416 | 31056489 | 3.22E-11 | Lung  | IPF        | 0.1540  | 8.77E-01 | 9.56E-01 |
| 131 | STX4   | 6810  | 16 | 31039416 | 31056489 | 3.22E-11 | blood | LungCancer | 1.3683  | 1.71E-01 | 4.04E-01 |
| 131 | STX4   | 6810  | 16 | 31039416 | 31056489 | 3.22E-11 | Lung  | LungCancer | 0.8870  | 3.75E-01 | 6.27E-01 |
| 131 | STX4   | 6810  | 16 | 31039416 | 31056489 | 3.22E-11 | blood | Snoring    | 1.3683  | 1.71E-01 | 4.04E-01 |
| 131 | STX4   | 6810  | 16 | 31039416 | 31056489 | 3.22E-11 | Lung  | Snoring    | 1.3683  | 1.71E-01 | 4.04E-01 |
| 131 | BCKDK  | 10295 | 16 | 31114615 | 31129112 | 1.25E-10 | blood | Asthma     | -4.5743 | 4.78E-06 | 6.58E-05 |
| 131 | BCKDK  | 10295 | 16 | 31114615 | 31129112 | 1.25E-10 | Lung  | Asthma     | -4.0944 | 4.23E-05 | 4.82E-04 |
| 131 | BCKDK  | 10295 | 16 | 31114615 | 31129112 | 1.25E-10 | blood | COPD       | -4.5743 | 4.78E-06 | 6.58E-05 |
| 131 | BCKDK  | 10295 | 16 | 31114615 | 31129112 | 1.25E-10 | Lung  | COPD       | -3.6384 | 2.74E-04 | 2.39E-03 |
| 131 | BCKDK  | 10295 | 16 | 31114615 | 31129112 | 1.25E-10 | blood | IPF        | -4.5743 | 4.78E-06 | 6.58E-05 |
| 131 | BCKDK  | 10295 | 16 | 31114615 | 31129112 | 1.25E-10 | Lung  | IPF        | 0.4800  | 6.31E-01 | 8.29E-01 |
| 131 | BCKDK  | 10295 | 16 | 31114615 | 31129112 | 1.25E-10 | blood | LungCancer | -4.5743 | 4.78E-06 | 6.58E-05 |
| 131 | BCKDK  | 10295 | 16 | 31114615 | 31129112 | 1.25E-10 | Lung  | LungCancer | -2.6000 | 9.23E-03 | 4.96E-02 |
| 131 | BCKDK  | 10295 | 16 | 31114615 | 31129112 | 1.25E-10 | blood | Snoring    | -4.5743 | 4.78E-06 | 6.58E-05 |
| 131 | BCKDK  | 10295 | 16 | 31114615 | 31129112 | 1.25E-10 | Lung  | Snoring    | -4.5743 | 4.78E-06 | 6.58E-05 |
| 131 | KAT8   | 84148 | 16 | 31123985 | 31147714 | 1.56E-11 | blood | Asthma     | 5.7891  | 7.07E-09 | 2.39E-07 |
| 131 | KAT8   | 84148 | 16 | 31123985 | 31147714 | 1.56E-11 | Lung  | Asthma     | 4.7779  | 1.77E-06 | 2.81E-05 |



|     |       |       |    |           |           |          |       |            |         |          |          |
|-----|-------|-------|----|-----------|-----------|----------|-------|------------|---------|----------|----------|
| 131 | KAT8  | 84148 | 16 | 31123985  | 31147714  | 1.56E-11 | blood | COPD       | 5.7891  | 7.07E-09 | 2.39E-07 |
| 131 | KAT8  | 84148 | 16 | 31123985  | 31147714  | 1.56E-11 | Lung  | COPD       | 5.3027  | 1.14E-07 | 2.40E-06 |
| 131 | KAT8  | 84148 | 16 | 31123985  | 31147714  | 1.56E-11 | blood | IPF        | 5.7891  | 7.07E-09 | 2.39E-07 |
| 131 | KAT8  | 84148 | 16 | 31123985  | 31147714  | 1.56E-11 | Lung  | IPF        | 0.6100  | 5.42E-01 | 7.62E-01 |
| 131 | KAT8  | 84148 | 16 | 31123985  | 31147714  | 1.56E-11 | blood | LungCancer | 5.7891  | 7.07E-09 | 2.39E-07 |
| 131 | KAT8  | 84148 | 16 | 31123985  | 31147714  | 1.56E-11 | Lung  | LungCancer | 2.2400  | 2.54E-02 | 1.11E-01 |
| 131 | KAT8  | 84148 | 16 | 31123985  | 31147714  | 1.56E-11 | blood | Snoring    | 5.7891  | 7.07E-09 | 2.39E-07 |
| 131 | KAT8  | 84148 | 16 | 31123985  | 31147714  | 1.56E-11 | Lung  | Snoring    | 5.7891  | 7.07E-09 | 2.39E-07 |
| 130 | IL21R | 50615 | 16 | 27408483  | 27468363  | 9.95E-07 | blood | Asthma     | -0.3430 | 7.32E-01 | 8.98E-01 |
| 130 | IL21R | 50615 | 16 | 27408483  | 27468363  | 9.95E-07 | Lung  | Asthma     | -4.5682 | 4.92E-06 | 6.74E-05 |
| 130 | IL21R | 50615 | 16 | 27408483  | 27468363  | 9.95E-07 | blood | COPD       | -0.3430 | 7.32E-01 | 8.98E-01 |
| 130 | IL21R | 50615 | 16 | 27408483  | 27468363  | 9.95E-07 | Lung  | COPD       | -0.9320 | 3.51E-01 | 6.08E-01 |
| 130 | IL21R | 50615 | 16 | 27408483  | 27468363  | 9.95E-07 | blood | IPF        | -0.3430 | 7.32E-01 | 8.98E-01 |
| 130 | IL21R | 50615 | 16 | 27408483  | 27468363  | 9.95E-07 | Lung  | IPF        | -0.0711 | 9.43E-01 | 9.80E-01 |
| 130 | IL21R | 50615 | 16 | 27408483  | 27468363  | 9.95E-07 | blood | LungCancer | -0.3430 | 7.32E-01 | 8.98E-01 |
| 130 | IL21R | 50615 | 16 | 27408483  | 27468363  | 9.95E-07 | Lung  | LungCancer | -0.7340 | 4.63E-01 | 7.13E-01 |
| 130 | IL21R | 50615 | 16 | 27408483  | 27468363  | 9.95E-07 | blood | Snoring    | -0.3430 | 7.32E-01 | 8.98E-01 |
| 130 | IL21R | 50615 | 16 | 27408483  | 27468363  | 9.95E-07 | Lung  | Snoring    | -0.3430 | 7.32E-01 | 8.98E-01 |
| 125 | AAGAB | 79719 | 15 | 67488013  | 67552536  | 5.00E-10 | blood | Asthma     | -0.2643 | 7.92E-01 | 9.29E-01 |
| 125 | AAGAB | 79719 | 15 | 67488013  | 67552536  | 5.00E-10 | Lung  | Asthma     | -8.1830 | 2.77E-16 | 3.39E-14 |
| 125 | AAGAB | 79719 | 15 | 67488013  | 67552536  | 5.00E-10 | blood | COPD       | -0.2643 | 7.92E-01 | 9.29E-01 |
| 125 | AAGAB | 79719 | 15 | 67488013  | 67552536  | 5.00E-10 | Lung  | COPD       | -4.7908 | 1.66E-06 | 2.67E-05 |
| 125 | AAGAB | 79719 | 15 | 67488013  | 67552536  | 5.00E-10 | blood | IPF        | -0.2643 | 7.92E-01 | 9.29E-01 |
| 125 | AAGAB | 79719 | 15 | 67488013  | 67552536  | 5.00E-10 | Lung  | IPF        | -1.5347 | 1.25E-01 | 3.32E-01 |
| 125 | AAGAB | 79719 | 15 | 67488013  | 67552536  | 5.00E-10 | blood | LungCancer | -0.2643 | 7.92E-01 | 9.29E-01 |
| 125 | AAGAB | 79719 | 15 | 67488013  | 67552536  | 5.00E-10 | Lung  | LungCancer | -0.3770 | 7.06E-01 | 8.84E-01 |
| 125 | AAGAB | 79719 | 15 | 67488013  | 67552536  | 5.00E-10 | blood | Snoring    | -0.2643 | 7.92E-01 | 9.29E-01 |
| 125 | AAGAB | 79719 | 15 | 67488013  | 67552536  | 5.00E-10 | Lung  | Snoring    | -0.2643 | 7.92E-01 | 9.29E-01 |
| 125 | IQCH  | 64799 | 15 | 67542138  | 67799142  | 1.28E-11 | blood | Asthma     | 1.1090  | 2.67E-01 | 5.17E-01 |
| 125 | IQCH  | 64799 | 15 | 67542138  | 67799142  | 1.28E-11 | Lung  | Asthma     | 3.2144  | 1.31E-03 | 9.25E-03 |
| 125 | IQCH  | 64799 | 15 | 67542138  | 67799142  | 1.28E-11 | blood | COPD       | 1.1090  | 2.67E-01 | 5.17E-01 |
| 125 | IQCH  | 64799 | 15 | 67542138  | 67799142  | 1.28E-11 | Lung  | COPD       | 2.1381  | 3.25E-02 | 1.35E-01 |
| 125 | IQCH  | 64799 | 15 | 67542138  | 67799142  | 1.28E-11 | blood | IPF        | 1.1090  | 2.67E-01 | 5.17E-01 |
| 125 | IQCH  | 64799 | 15 | 67542138  | 67799142  | 1.28E-11 | Lung  | IPF        | 1.6738  | 9.42E-02 | 2.76E-01 |
| 125 | IQCH  | 64799 | 15 | 67542138  | 67799142  | 1.28E-11 | blood | LungCancer | 1.1090  | 2.67E-01 | 5.17E-01 |
| 125 | IQCH  | 64799 | 15 | 67542138  | 67799142  | 1.28E-11 | Lung  | LungCancer | 0.5090  | 6.11E-01 | 8.16E-01 |
| 125 | IQCH  | 64799 | 15 | 67542138  | 67799142  | 1.28E-11 | blood | Snoring    | 1.1090  | 2.67E-01 | 5.17E-01 |
| 125 | IQCH  | 64799 | 15 | 67542138  | 67799142  | 1.28E-11 | Lung  | Snoring    | 1.1090  | 2.67E-01 | 5.17E-01 |
| 82  | EIF3E | 3646  | 8  | 109208972 | 109265959 | 1.36E-05 | blood | Asthma     | -2.3126 | 2.07E-02 | 9.54E-02 |
| 82  | EIF3E | 3646  | 8  | 109208972 | 109265959 | 1.36E-05 | Lung  | Asthma     | -4.3551 | 1.33E-05 | 1.68E-04 |
| 82  | EIF3E | 3646  | 8  | 109208972 | 109265959 | 1.36E-05 | blood | COPD       | -2.3126 | 2.07E-02 | 9.54E-02 |
| 82  | EIF3E | 3646  | 8  | 109208972 | 109265959 | 1.36E-05 | Lung  | COPD       | -3.8108 | 1.39E-04 | 1.24E-03 |
| 82  | EIF3E | 3646  | 8  | 109208972 | 109265959 | 1.36E-05 | blood | IPF        | -2.3126 | 2.07E-02 | 9.54E-02 |
| 82  | EIF3E | 3646  | 8  | 109208972 | 109265959 | 1.36E-05 | Lung  | IPF        | -0.7537 | 4.51E-01 | 6.99E-01 |
| 82  | EIF3E | 3646  | 8  | 109208972 | 109265959 | 1.36E-05 | blood | LungCancer | -2.3126 | 2.07E-02 | 9.54E-02 |
| 82  | EIF3E | 3646  | 8  | 109208972 | 109265959 | 1.36E-05 | Lung  | LungCancer | -0.6248 | 5.32E-01 | 7.58E-01 |
| 82  | EIF3E | 3646  | 8  | 109208972 | 109265959 | 1.36E-05 | blood | Snoring    | -2.3126 | 2.07E-02 | 9.54E-02 |
| 82  | EIF3E | 3646  | 8  | 109208972 | 109265959 | 1.36E-05 | Lung  | Snoring    | -2.3126 | 2.07E-02 | 9.54E-02 |
| 82  | EMC2  | 9694  | 8  | 109450853 | 109504136 | 2.88E-08 | blood | Asthma     | -1.6535 | 9.82E-02 | 2.83E-01 |
| 82  | EMC2  | 9694  | 8  | 109450853 | 109504136 | 2.88E-08 | Lung  | Asthma     | -0.5013 | 6.16E-01 | 8.22E-01 |
| 82  | EMC2  | 9694  | 8  | 109450853 | 109504136 | 2.88E-08 | blood | COPD       | -1.6535 | 9.82E-02 | 2.83E-01 |
| 82  | EMC2  | 9694  | 8  | 109450853 | 109504136 | 2.88E-08 | Lung  | COPD       | -2.1992 | 2.79E-02 | 1.21E-01 |
| 82  | EMC2  | 9694  | 8  | 109450853 | 109504136 | 2.88E-08 | blood | IPF        | -1.6535 | 9.82E-02 | 2.83E-01 |
| 82  | EMC2  | 9694  | 8  | 109450853 | 109504136 | 2.88E-08 | Lung  | IPF        | -2.3879 | 1.69E-02 | 8.16E-02 |
| 82  | EMC2  | 9694  | 8  | 109450853 | 109504136 | 2.88E-08 | blood | LungCancer | -1.6535 | 9.82E-02 | 2.83E-01 |
| 82  | EMC2  | 9694  | 8  | 109450853 | 109504136 | 2.88E-08 | Lung  | LungCancer | 0.2787  | 7.80E-01 | 9.29E-01 |
| 82  | EMC2  | 9694  | 8  | 109450853 | 109504136 | 2.88E-08 | blood | Snoring    | -1.6535 | 9.82E-02 | 2.83E-01 |
| 82  | EMC2  | 9694  | 8  | 109450853 | 109504136 | 2.88E-08 | Lung  | Snoring    | -1.6535 | 9.82E-02 | 2.83E-01 |
| 68  | ITGB8 | 3696  | 7  | 20365345  | 20460382  | 1.39E-08 | blood | Asthma     | 0.8272  | 4.08E-01 | 6.57E-01 |
| 68  | ITGB8 | 3696  | 7  | 20365345  | 20460382  | 1.39E-08 | Lung  | Asthma     | 1.7211  | 8.52E-02 | 2.56E-01 |
| 68  | ITGB8 | 3696  | 7  | 20365345  | 20460382  | 1.39E-08 | blood | COPD       | 0.8272  | 4.08E-01 | 6.57E-01 |
| 68  | ITGB8 | 3696  | 7  | 20365345  | 20460382  | 1.39E-08 | Lung  | COPD       | 0.1376  | 8.91E-01 | 9.61E-01 |
| 68  | ITGB8 | 3696  | 7  | 20365345  | 20460382  | 1.39E-08 | blood | IPF        | 0.8272  | 4.08E-01 | 6.57E-01 |
| 68  | ITGB8 | 3696  | 7  | 20365345  | 20460382  | 1.39E-08 | Lung  | IPF        | 0.8439  | 3.99E-01 | 6.51E-01 |
| 68  | ITGB8 | 3696  | 7  | 20365345  | 20460382  | 1.39E-08 | blood | LungCancer | 0.8272  | 4.08E-01 | 6.57E-01 |
| 68  | ITGB8 | 3696  | 7  | 20365345  | 20460382  | 1.39E-08 | Lung  | LungCancer | -1.9390 | 5.25E-02 | 1.88E-01 |
| 68  | ITGB8 | 3696  | 7  | 20365345  | 20460382  | 1.39E-08 | blood | Snoring    | 0.8272  | 4.08E-01 | 6.57E-01 |
| 68  | ITGB8 | 3696  | 7  | 20365345  | 20460382  | 1.39E-08 | Lung  | Snoring    | 0.8272  | 4.08E-01 | 6.57E-01 |
| 67  | ADAP1 | 11033 | 7  | 932537    | 1000208   | 1.76E-07 | blood | Asthma     | 0.0580  | 9.54E-01 | 9.84E-01 |
| 67  | ADAP1 | 11033 | 7  | 932537    | 1000208   | 1.76E-07 | Lung  | Asthma     | 2.9653  | 3.02E-03 | 1.88E-02 |
| 67  | ADAP1 | 11033 | 7  | 932537    | 1000208   | 1.76E-07 | blood | COPD       | 0.0580  | 9.54E-01 | 9.84E-01 |
| 67  | ADAP1 | 11033 | 7  | 932537    | 1000208   | 1.76E-07 | Lung  | COPD       | 1.6435  | 1.00E-01 | 2.87E-01 |
| 67  | ADAP1 | 11033 | 7  | 932537    | 1000208   | 1.76E-07 | blood | IPF        | 0.0580  | 9.54E-01 | 9.84E-01 |

|     |          |       |    |          |          |          |       |            |         |          |          |
|-----|----------|-------|----|----------|----------|----------|-------|------------|---------|----------|----------|
| 67  | ADAP1    | 11033 | 7  | 932537   | 1000208  | 1.76E-07 | Lung  | IPF        | 1.2244  | 2.21E-01 | 4.61E-01 |
| 67  | ADAP1    | 11033 | 7  | 932537   | 1000208  | 1.76E-07 | blood | LungCancer | 0.0580  | 9.54E-01 | 9.84E-01 |
| 67  | ADAP1    | 11033 | 7  | 932537   | 1000208  | 1.76E-07 | Lung  | LungCancer | 3.2411  | 1.19E-03 | 8.84E-03 |
| 67  | ADAP1    | 11033 | 7  | 932537   | 1000208  | 1.76E-07 | blood | Snoring    | 0.0580  | 9.54E-01 | 9.84E-01 |
| 67  | ADAP1    | 11033 | 7  | 932537   | 1000208  | 1.76E-07 | Lung  | Snoring    | 0.0580  | 9.54E-01 | 9.84E-01 |
| 71  | ZKSCAN1  | 7586  | 7  | 99608204 | 99647803 | 2.07E-10 | blood | Asthma     | NA      | NA       | NA       |
| 71  | ZKSCAN1  | 7586  | 7  | 99608204 | 99647803 | 2.07E-10 | Lung  | Asthma     | NA      | NA       | NA       |
| 71  | ZKSCAN1  | 7586  | 7  | 99608204 | 99647803 | 2.07E-10 | blood | COPD       | NA      | NA       | NA       |
| 71  | ZKSCAN1  | 7586  | 7  | 99608204 | 99647803 | 2.07E-10 | Lung  | COPD       | NA      | NA       | NA       |
| 71  | ZKSCAN1  | 7586  | 7  | 99608204 | 99647803 | 2.07E-10 | blood | IPF        | NA      | NA       | NA       |
| 71  | ZKSCAN1  | 7586  | 7  | 99608204 | 99647803 | 2.07E-10 | Lung  | IPF        | NA      | NA       | NA       |
| 71  | ZKSCAN1  | 7586  | 7  | 99608204 | 99647803 | 2.07E-10 | blood | LungCancer | NA      | NA       | NA       |
| 71  | ZKSCAN1  | 7586  | 7  | 99608204 | 99647803 | 2.07E-10 | Lung  | LungCancer | NA      | NA       | NA       |
| 71  | ZKSCAN1  | 7586  | 7  | 99608204 | 99647803 | 2.07E-10 | blood | Snoring    | NA      | NA       | NA       |
| 71  | ZKSCAN1  | 7586  | 7  | 99608204 | 99647803 | 2.07E-10 | Lung  | Snoring    | NA      | NA       | NA       |
| 84  | RIC1     | 57589 | 9  | 5624031  | 5781557  | 4.77E-07 | blood | Asthma     | -1.8100 | 7.00E-02 | 2.26E-01 |
| 84  | RIC1     | 57589 | 9  | 5624031  | 5781557  | 4.77E-07 | Lung  | Asthma     | 3.9991  | 6.36E-05 | 6.48E-04 |
| 84  | RIC1     | 57589 | 9  | 5624031  | 5781557  | 4.77E-07 | blood | COPD       | -1.8100 | 7.00E-02 | 2.26E-01 |
| 84  | RIC1     | 57589 | 9  | 5624031  | 5781557  | 4.77E-07 | Lung  | COPD       | 1.7480  | 8.05E-02 | 2.46E-01 |
| 84  | RIC1     | 57589 | 9  | 5624031  | 5781557  | 4.77E-07 | blood | IPF        | -1.8100 | 7.00E-02 | 2.26E-01 |
| 84  | RIC1     | 57589 | 9  | 5624031  | 5781557  | 4.77E-07 | Lung  | IPF        | 0.6083  | 5.43E-01 | 7.64E-01 |
| 84  | RIC1     | 57589 | 9  | 5624031  | 5781557  | 4.77E-07 | blood | LungCancer | -1.8100 | 7.00E-02 | 2.26E-01 |
| 84  | RIC1     | 57589 | 9  | 5624031  | 5781557  | 4.77E-07 | Lung  | LungCancer | 0.4588  | 6.46E-01 | 8.42E-01 |
| 84  | RIC1     | 57589 | 9  | 5624031  | 5781557  | 4.77E-07 | blood | Snoring    | -1.8100 | 7.00E-02 | 2.26E-01 |
| 84  | RIC1     | 57589 | 9  | 5624031  | 5781557  | 4.77E-07 | Lung  | Snoring    | -1.8100 | 7.00E-02 | 2.26E-01 |
| 90  | GATA3    | 2625  | 10 | 8082294  | 8122164  | 1.25E-08 | blood | Asthma     | NA      | NA       | NA       |
| 90  | GATA3    | 2625  | 10 | 8082294  | 8122164  | 1.25E-08 | Lung  | Asthma     | NA      | NA       | NA       |
| 90  | GATA3    | 2625  | 10 | 8082294  | 8122164  | 1.25E-08 | blood | COPD       | NA      | NA       | NA       |
| 90  | GATA3    | 2625  | 10 | 8082294  | 8122164  | 1.25E-08 | Lung  | COPD       | NA      | NA       | NA       |
| 90  | GATA3    | 2625  | 10 | 8082294  | 8122164  | 1.25E-08 | blood | IPF        | NA      | NA       | NA       |
| 90  | GATA3    | 2625  | 10 | 8082294  | 8122164  | 1.25E-08 | Lung  | IPF        | NA      | NA       | NA       |
| 90  | GATA3    | 2625  | 10 | 8082294  | 8122164  | 1.25E-08 | blood | LungCancer | NA      | NA       | NA       |
| 90  | GATA3    | 2625  | 10 | 8082294  | 8122164  | 1.25E-08 | Lung  | LungCancer | NA      | NA       | NA       |
| 90  | GATA3    | 2625  | 10 | 8082294  | 8122164  | 1.25E-08 | blood | Snoring    | NA      | NA       | NA       |
| 90  | GATA3    | 2625  | 10 | 8082294  | 8122164  | 1.25E-08 | Lung  | Snoring    | NA      | NA       | NA       |
| 137 | FBXL20   | 84961 | 17 | 37403897 | 37563530 | 6.00E-11 | blood | Asthma     | 0.0265  | 9.79E-01 | 9.92E-01 |
| 137 | FBXL20   | 84961 | 17 | 37403897 | 37563530 | 6.00E-11 | Lung  | Asthma     | -7.1577 | 8.20E-13 | 7.24E-11 |
| 137 | FBXL20   | 84961 | 17 | 37403897 | 37563530 | 6.00E-11 | blood | COPD       | 0.0265  | 9.79E-01 | 9.92E-01 |
| 137 | FBXL20   | 84961 | 17 | 37403897 | 37563530 | 6.00E-11 | Lung  | COPD       | -2.6185 | 8.83E-03 | 4.81E-02 |
| 137 | FBXL20   | 84961 | 17 | 37403897 | 37563530 | 6.00E-11 | blood | IPF        | 0.0265  | 9.79E-01 | 9.92E-01 |
| 137 | FBXL20   | 84961 | 17 | 37403897 | 37563530 | 6.00E-11 | Lung  | IPF        | -1.7266 | 8.42E-02 | 2.54E-01 |
| 137 | FBXL20   | 84961 | 17 | 37403897 | 37563530 | 6.00E-11 | blood | LungCancer | 0.0265  | 9.79E-01 | 9.92E-01 |
| 137 | FBXL20   | 84961 | 17 | 37403897 | 37563530 | 6.00E-11 | Lung  | LungCancer | 0.5276  | 5.98E-01 | 8.04E-01 |
| 137 | FBXL20   | 84961 | 17 | 37403897 | 37563530 | 6.00E-11 | blood | Snoring    | 0.0265  | 9.79E-01 | 9.92E-01 |
| 137 | FBXL20   | 84961 | 17 | 37403897 | 37563530 | 6.00E-11 | Lung  | Snoring    | 0.0265  | 9.79E-01 | 9.92E-01 |
| 137 | CSF3     | 1440  | 17 | 38166614 | 38179066 | 6.55E-15 | blood | Asthma     | -1.1709 | 2.42E-01 | 4.89E-01 |
| 137 | CSF3     | 1440  | 17 | 38166614 | 38179066 | 6.55E-15 | Lung  | Asthma     | 8.2809  | 1.22E-16 | 1.55E-14 |
| 137 | CSF3     | 1440  | 17 | 38166614 | 38179066 | 6.55E-15 | blood | COPD       | -1.1709 | 2.42E-01 | 4.89E-01 |
| 137 | CSF3     | 1440  | 17 | 38166614 | 38179066 | 6.55E-15 | Lung  | COPD       | 4.8133  | 1.48E-06 | 2.45E-05 |
| 137 | CSF3     | 1440  | 17 | 38166614 | 38179066 | 6.55E-15 | blood | IPF        | -1.1709 | 2.42E-01 | 4.89E-01 |
| 137 | CSF3     | 1440  | 17 | 38166614 | 38179066 | 6.55E-15 | Lung  | IPF        | 0.0287  | 9.77E-01 | 9.92E-01 |
| 137 | CSF3     | 1440  | 17 | 38166614 | 38179066 | 6.55E-15 | blood | LungCancer | -1.1709 | 2.42E-01 | 4.89E-01 |
| 137 | CSF3     | 1440  | 17 | 38166614 | 38179066 | 6.55E-15 | Lung  | LungCancer | -0.8854 | 3.76E-01 | 6.28E-01 |
| 137 | CSF3     | 1440  | 17 | 38166614 | 38179066 | 6.55E-15 | blood | Snoring    | -1.1709 | 2.42E-01 | 4.89E-01 |
| 137 | CSF3     | 1440  | 17 | 38166614 | 38179066 | 6.55E-15 | Lung  | Snoring    | -1.1709 | 2.42E-01 | 4.89E-01 |
| 137 | PSMD3    | 5709  | 17 | 38132021 | 38159213 | 5.00E-10 | blood | Asthma     | NA      | NA       | NA       |
| 137 | PSMD3    | 5709  | 17 | 38132021 | 38159213 | 5.00E-10 | Lung  | Asthma     | NA      | NA       | NA       |
| 137 | PSMD3    | 5709  | 17 | 38132021 | 38159213 | 5.00E-10 | blood | COPD       | NA      | NA       | NA       |
| 137 | PSMD3    | 5709  | 17 | 38132021 | 38159213 | 5.00E-10 | Lung  | COPD       | NA      | NA       | NA       |
| 137 | PSMD3    | 5709  | 17 | 38132021 | 38159213 | 5.00E-10 | blood | IPF        | NA      | NA       | NA       |
| 137 | PSMD3    | 5709  | 17 | 38132021 | 38159213 | 5.00E-10 | Lung  | IPF        | NA      | NA       | NA       |
| 137 | PSMD3    | 5709  | 17 | 38132021 | 38159213 | 5.00E-10 | blood | LungCancer | NA      | NA       | NA       |
| 137 | PSMD3    | 5709  | 17 | 38132021 | 38159213 | 5.00E-10 | Lung  | LungCancer | NA      | NA       | NA       |
| 137 | PSMD3    | 5709  | 17 | 38132021 | 38159213 | 5.00E-10 | blood | Snoring    | NA      | NA       | NA       |
| 137 | PSMD3    | 5709  | 17 | 38132021 | 38159213 | 5.00E-10 | Lung  | Snoring    | NA      | NA       | NA       |
| 137 | RAPGEFL1 | 51195 | 17 | 38329242 | 38356906 | 5.53E-05 | blood | Asthma     | -1.6104 | 1.07E-01 | 2.97E-01 |
| 137 | RAPGEFL1 | 51195 | 17 | 38329242 | 38356906 | 5.53E-05 | Lung  | Asthma     | -0.5146 | 6.07E-01 | 8.12E-01 |
| 137 | RAPGEFL1 | 51195 | 17 | 38329242 | 38356906 | 5.53E-05 | blood | COPD       | -1.6104 | 1.07E-01 | 2.97E-01 |
| 137 | RAPGEFL1 | 51195 | 17 | 38329242 | 38356906 | 5.53E-05 | Lung  | COPD       | -1.9106 | 5.61E-02 | 1.96E-01 |
| 137 | RAPGEFL1 | 51195 | 17 | 38329242 | 38356906 | 5.53E-05 | blood | IPF        | -1.6104 | 1.07E-01 | 2.97E-01 |
| 137 | RAPGEFL1 | 51195 | 17 | 38329242 | 38356906 | 5.53E-05 | Lung  | IPF        | 1.1185  | 2.63E-01 | 5.17E-01 |
| 137 | RAPGEFL1 | 51195 | 17 | 38329242 | 38356906 | 5.53E-05 | blood | LungCancer | -1.6104 | 1.07E-01 | 2.97E-01 |
| 137 | RAPGEFL1 | 51195 | 17 | 38329242 | 38356906 | 5.53E-05 | Lung  | LungCancer | 0.1807  | 8.57E-01 | 9.55E-01 |

|     |          |       |    |           |           |          |       |            |         |          |          |
|-----|----------|-------|----|-----------|-----------|----------|-------|------------|---------|----------|----------|
| 137 | RAPGEFL1 | 51195 | 17 | 38329242  | 38356906  | 5.53E-05 | blood | Snoring    | -1.6104 | 1.07E-01 | 2.97E-01 |
| 137 | RAPGEFL1 | 51195 | 17 | 38329242  | 38356906  | 5.53E-05 | Lung  | Snoring    | -1.6104 | 1.07E-01 | 2.97E-01 |
| 138 | WNT3     | 7473  | 17 | 44834872  | 44901126  | 1.65E-11 | blood | Asthma     | 5.2632  | 1.42E-07 | 2.84E-06 |
| 138 | WNT3     | 7473  | 17 | 44834872  | 44901126  | 1.65E-11 | Lung  | Asthma     | -1.0752 | 2.82E-01 | 5.38E-01 |
| 138 | WNT3     | 7473  | 17 | 44834872  | 44901126  | 1.65E-11 | blood | COPD       | 5.2632  | 1.42E-07 | 2.84E-06 |
| 138 | WNT3     | 7473  | 17 | 44834872  | 44901126  | 1.65E-11 | Lung  | COPD       | 2.3470  | 1.89E-02 | 8.96E-02 |
| 138 | WNT3     | 7473  | 17 | 44834872  | 44901126  | 1.65E-11 | blood | IPF        | 5.2632  | 1.42E-07 | 2.84E-06 |
| 138 | WNT3     | 7473  | 17 | 44834872  | 44901126  | 1.65E-11 | Lung  | IPF        | -5.4366 | 5.43E-08 | 1.24E-06 |
| 138 | WNT3     | 7473  | 17 | 44834872  | 44901126  | 1.65E-11 | blood | LungCancer | 5.2632  | 1.42E-07 | 2.84E-06 |
| 138 | WNT3     | 7473  | 17 | 44834872  | 44901126  | 1.65E-11 | Lung  | LungCancer | -1.5726 | 1.16E-01 | 3.13E-01 |
| 138 | WNT3     | 7473  | 17 | 44834872  | 44901126  | 1.65E-11 | blood | Snoring    | 5.2632  | 1.42E-07 | 2.84E-06 |
| 138 | WNT3     | 7473  | 17 | 44834872  | 44901126  | 1.65E-11 | Lung  | Snoring    | 5.2632  | 1.42E-07 | 2.84E-06 |
| 139 | CDK5RAP3 | 80279 | 17 | 46042894  | 46064152  | 2.89E-06 | blood | Asthma     | -1.8619 | 6.26E-02 | 2.09E-01 |
| 139 | CDK5RAP3 | 80279 | 17 | 46042894  | 46064152  | 2.89E-06 | Lung  | Asthma     | 1.4640  | 1.43E-01 | 3.63E-01 |
| 139 | CDK5RAP3 | 80279 | 17 | 46042894  | 46064152  | 2.89E-06 | blood | COPD       | -1.8619 | 6.26E-02 | 2.09E-01 |
| 139 | CDK5RAP3 | 80279 | 17 | 46042894  | 46064152  | 2.89E-06 | Lung  | COPD       | -1.2879 | 1.98E-01 | 4.38E-01 |
| 139 | CDK5RAP3 | 80279 | 17 | 46042894  | 46064152  | 2.89E-06 | blood | IPF        | -1.8619 | 6.26E-02 | 2.09E-01 |
| 139 | CDK5RAP3 | 80279 | 17 | 46042894  | 46064152  | 2.89E-06 | Lung  | IPF        | 2.0054  | 4.49E-02 | 1.70E-01 |
| 139 | CDK5RAP3 | 80279 | 17 | 46042894  | 46064152  | 2.89E-06 | blood | LungCancer | -1.8619 | 6.26E-02 | 2.09E-01 |
| 139 | CDK5RAP3 | 80279 | 17 | 46042894  | 46064152  | 2.89E-06 | Lung  | LungCancer | -0.6452 | 5.19E-01 | 7.54E-01 |
| 139 | CDK5RAP3 | 80279 | 17 | 46042894  | 46064152  | 2.89E-06 | blood | Snoring    | -1.8619 | 6.26E-02 | 2.09E-01 |
| 139 | CDK5RAP3 | 80279 | 17 | 46042894  | 46064152  | 2.89E-06 | Lung  | Snoring    | -1.8619 | 6.26E-02 | 2.09E-01 |
| 136 | PIGL     | 9487  | 17 | 16115509  | 16235098  | 2.08E-08 | blood | Asthma     | -1.3628 | 1.73E-01 | 4.06E-01 |
| 136 | PIGL     | 9487  | 17 | 16115509  | 16235098  | 2.08E-08 | Lung  | Asthma     | -4.9725 | 6.61E-07 | 1.14E-05 |
| 136 | PIGL     | 9487  | 17 | 16115509  | 16235098  | 2.08E-08 | blood | COPD       | -1.3628 | 1.73E-01 | 4.06E-01 |
| 136 | PIGL     | 9487  | 17 | 16115509  | 16235098  | 2.08E-08 | Lung  | COPD       | -2.8894 | 3.86E-03 | 2.31E-02 |
| 136 | PIGL     | 9487  | 17 | 16115509  | 16235098  | 2.08E-08 | blood | IPF        | -1.3628 | 1.73E-01 | 4.06E-01 |
| 136 | PIGL     | 9487  | 17 | 16115509  | 16235098  | 2.08E-08 | Lung  | IPF        | -0.2959 | 7.67E-01 | 9.22E-01 |
| 136 | PIGL     | 9487  | 17 | 16115509  | 16235098  | 2.08E-08 | blood | LungCancer | -1.3628 | 1.73E-01 | 4.06E-01 |
| 136 | PIGL     | 9487  | 17 | 16115509  | 16235098  | 2.08E-08 | Lung  | LungCancer | -0.6681 | 5.04E-01 | 7.44E-01 |
| 136 | PIGL     | 9487  | 17 | 16115509  | 16235098  | 2.08E-08 | blood | Snoring    | -1.3628 | 1.73E-01 | 4.06E-01 |
| 136 | PIGL     | 9487  | 17 | 16115509  | 16235098  | 2.08E-08 | Lung  | Snoring    | -1.3628 | 1.73E-01 | 4.06E-01 |
| 139 | HOXB6    | 3216  | 17 | 46668099  | 46687343  | 4.32E-07 | blood | Asthma     | -0.0127 | 9.90E-01 | 9.94E-01 |
| 139 | HOXB6    | 3216  | 17 | 46668099  | 46687343  | 4.32E-07 | Lung  | Asthma     | -2.9433 | 3.25E-03 | 1.99E-02 |
| 139 | HOXB6    | 3216  | 17 | 46668099  | 46687343  | 4.32E-07 | blood | COPD       | -0.0127 | 9.90E-01 | 9.94E-01 |
| 139 | HOXB6    | 3216  | 17 | 46668099  | 46687343  | 4.32E-07 | Lung  | COPD       | -0.8156 | 4.15E-01 | 6.66E-01 |
| 139 | HOXB6    | 3216  | 17 | 46668099  | 46687343  | 4.32E-07 | blood | IPF        | -0.0127 | 9.90E-01 | 9.94E-01 |
| 139 | HOXB6    | 3216  | 17 | 46668099  | 46687343  | 4.32E-07 | Lung  | IPF        | -0.0276 | 9.78E-01 | 9.92E-01 |
| 139 | HOXB6    | 3216  | 17 | 46668099  | 46687343  | 4.32E-07 | blood | LungCancer | -0.0127 | 9.90E-01 | 9.94E-01 |
| 139 | HOXB6    | 3216  | 17 | 46668099  | 46687343  | 4.32E-07 | Lung  | LungCancer | -1.0013 | 3.17E-01 | 5.72E-01 |
| 139 | HOXB6    | 3216  | 17 | 46668099  | 46687343  | 4.32E-07 | blood | Snoring    | -0.0127 | 9.90E-01 | 9.94E-01 |
| 139 | HOXB6    | 3216  | 17 | 46668099  | 46687343  | 4.32E-07 | Lung  | Snoring    | -0.0127 | 9.90E-01 | 9.94E-01 |
| 140 | ABI3     | 51225 | 17 | 47282589  | 47305587  | 2.81E-05 | blood | Asthma     | 0.2164  | 8.29E-01 | 9.43E-01 |
| 140 | ABI3     | 51225 | 17 | 47282589  | 47305587  | 2.81E-05 | Lung  | Asthma     | -0.6149 | 5.39E-01 | 7.62E-01 |
| 140 | ABI3     | 51225 | 17 | 47282589  | 47305587  | 2.81E-05 | blood | COPD       | 0.2164  | 8.29E-01 | 9.43E-01 |
| 140 | ABI3     | 51225 | 17 | 47282589  | 47305587  | 2.81E-05 | Lung  | COPD       | -0.1417 | 8.87E-01 | 9.59E-01 |
| 140 | ABI3     | 51225 | 17 | 47282589  | 47305587  | 2.81E-05 | blood | IPF        | 0.2164  | 8.29E-01 | 9.43E-01 |
| 140 | ABI3     | 51225 | 17 | 47282589  | 47305587  | 2.81E-05 | Lung  | IPF        | -1.7740 | 7.61E-02 | 2.35E-01 |
| 140 | ABI3     | 51225 | 17 | 47282589  | 47305587  | 2.81E-05 | blood | LungCancer | 0.2164  | 8.29E-01 | 9.43E-01 |
| 140 | ABI3     | 51225 | 17 | 47282589  | 47305587  | 2.81E-05 | Lung  | LungCancer | 0.4806  | 6.31E-01 | 8.29E-01 |
| 140 | ABI3     | 51225 | 17 | 47282589  | 47305587  | 2.81E-05 | blood | Snoring    | 0.2164  | 8.29E-01 | 9.43E-01 |
| 140 | ABI3     | 51225 | 17 | 47282589  | 47305587  | 2.81E-05 | Lung  | Snoring    | 0.2164  | 8.29E-01 | 9.43E-01 |
| 39  | IL2      | 3558  | 4  | 123367625 | 123382650 | 1.83E-15 | blood | Asthma     | 0.2534  | 8.00E-01 | 9.32E-01 |
| 39  | IL2      | 3558  | 4  | 123367625 | 123382650 | 1.83E-15 | Lung  | Asthma     | -3.0725 | 2.12E-03 | 1.36E-02 |
| 39  | IL2      | 3558  | 4  | 123367625 | 123382650 | 1.83E-15 | blood | COPD       | 0.2534  | 8.00E-01 | 9.32E-01 |
| 39  | IL2      | 3558  | 4  | 123367625 | 123382650 | 1.83E-15 | Lung  | COPD       | 0.4674  | 6.40E-01 | 8.35E-01 |
| 39  | IL2      | 3558  | 4  | 123367625 | 123382650 | 1.83E-15 | blood | IPF        | 0.2534  | 8.00E-01 | 9.32E-01 |
| 39  | IL2      | 3558  | 4  | 123367625 | 123382650 | 1.83E-15 | Lung  | IPF        | -0.8869 | 3.75E-01 | 6.27E-01 |
| 39  | IL2      | 3558  | 4  | 123367625 | 123382650 | 1.83E-15 | blood | LungCancer | 0.2534  | 8.00E-01 | 9.32E-01 |
| 39  | IL2      | 3558  | 4  | 123367625 | 123382650 | 1.83E-15 | Lung  | LungCancer | -0.2225 | 8.24E-01 | 9.43E-01 |
| 39  | IL2      | 3558  | 4  | 123367625 | 123382650 | 1.83E-15 | blood | Snoring    | 0.2534  | 8.00E-01 | 9.32E-01 |
| 39  | IL2      | 3558  | 4  | 123367625 | 123382650 | 1.83E-15 | Lung  | Snoring    | 0.2534  | 8.00E-01 | 9.32E-01 |
| 109 | OGFOD2   | 79676 | 12 | 123454354 | 123469588 | 7.42E-08 | blood | Asthma     | NA      | NA       | NA       |
| 109 | OGFOD2   | 79676 | 12 | 123454354 | 123469588 | 7.42E-08 | Lung  | Asthma     | NA      | NA       | NA       |
| 109 | OGFOD2   | 79676 | 12 | 123454354 | 123469588 | 7.42E-08 | blood | COPD       | NA      | NA       | NA       |
| 109 | OGFOD2   | 79676 | 12 | 123454354 | 123469588 | 7.42E-08 | Lung  | COPD       | NA      | NA       | NA       |
| 109 | OGFOD2   | 79676 | 12 | 123454354 | 123469588 | 7.42E-08 | blood | IPF        | NA      | NA       | NA       |
| 109 | OGFOD2   | 79676 | 12 | 123454354 | 123469588 | 7.42E-08 | Lung  | IPF        | NA      | NA       | NA       |
| 109 | OGFOD2   | 79676 | 12 | 123454354 | 123469588 | 7.42E-08 | blood | LungCancer | NA      | NA       | NA       |
| 109 | OGFOD2   | 79676 | 12 | 123454354 | 123469588 | 7.42E-08 | Lung  | LungCancer | NA      | NA       | NA       |
| 109 | OGFOD2   | 79676 | 12 | 123454354 | 123469588 | 7.42E-08 | blood | Snoring    | NA      | NA       | NA       |
| 109 | OGFOD2   | 79676 | 12 | 123454354 | 123469588 | 7.42E-08 | Lung  | Snoring    | NA      | NA       | NA       |
| 109 | CDK2AP1  | 8099  | 12 | 123740517 | 123761863 | 1.17E-08 | blood | Asthma     | 0.4837  | 6.29E-01 | 8.27E-01 |

|     |         |       |    |           |           |          |       |            |         |          |          |
|-----|---------|-------|----|-----------|-----------|----------|-------|------------|---------|----------|----------|
| 109 | CDK2AP1 | 8099  | 12 | 123740517 | 123761863 | 1.17E-08 | Lung  | Asthma     | 5.8892  | 3.88E-09 | 1.59E-07 |
| 109 | CDK2AP1 | 8099  | 12 | 123740517 | 123761863 | 1.17E-08 | blood | COPD       | 0.4837  | 6.29E-01 | 8.27E-01 |
| 109 | CDK2AP1 | 8099  | 12 | 123740517 | 123761863 | 1.17E-08 | Lung  | COPD       | -0.8072 | 4.20E-01 | 6.71E-01 |
| 109 | CDK2AP1 | 8099  | 12 | 123740517 | 123761863 | 1.17E-08 | blood | IPF        | 0.4837  | 6.29E-01 | 8.27E-01 |
| 109 | CDK2AP1 | 8099  | 12 | 123740517 | 123761863 | 1.17E-08 | Lung  | IPF        | 0.4045  | 6.86E-01 | 8.66E-01 |
| 109 | CDK2AP1 | 8099  | 12 | 123740517 | 123761863 | 1.17E-08 | blood | LungCancer | 0.4837  | 6.29E-01 | 8.27E-01 |
| 109 | CDK2AP1 | 8099  | 12 | 123740517 | 123761863 | 1.17E-08 | Lung  | LungCancer | 1.4021  | 1.61E-01 | 3.94E-01 |
| 109 | CDK2AP1 | 8099  | 12 | 123740517 | 123761863 | 1.17E-08 | blood | Snoring    | 0.4837  | 6.29E-01 | 8.27E-01 |
| 109 | CDK2AP1 | 8099  | 12 | 123740517 | 123761863 | 1.17E-08 | Lung  | Snoring    | 0.4837  | 6.29E-01 | 8.27E-01 |
| 104 | RAB5B   | 5869  | 12 | 56362697  | 56395467  | 1.99E-14 | blood | Asthma     | 1.9603  | 5.00E-02 | 1.81E-01 |
| 104 | RAB5B   | 5869  | 12 | 56362697  | 56395467  | 1.99E-14 | Lung  | Asthma     | 0.1268  | 8.99E-01 | 9.64E-01 |
| 104 | RAB5B   | 5869  | 12 | 56362697  | 56395467  | 1.99E-14 | blood | COPD       | 1.9603  | 5.00E-02 | 1.81E-01 |
| 104 | RAB5B   | 5869  | 12 | 56362697  | 56395467  | 1.99E-14 | Lung  | COPD       | -0.0266 | 9.79E-01 | 9.92E-01 |
| 104 | RAB5B   | 5869  | 12 | 56362697  | 56395467  | 1.99E-14 | blood | IPF        | 1.9603  | 5.00E-02 | 1.81E-01 |
| 104 | RAB5B   | 5869  | 12 | 56362697  | 56395467  | 1.99E-14 | Lung  | IPF        | 1.5931  | 1.11E-01 | 3.03E-01 |
| 104 | RAB5B   | 5869  | 12 | 56362697  | 56395467  | 1.99E-14 | blood | LungCancer | 1.9603  | 5.00E-02 | 1.81E-01 |
| 104 | RAB5B   | 5869  | 12 | 56362697  | 56395467  | 1.99E-14 | Lung  | LungCancer | 0.3001  | 7.64E-01 | 9.20E-01 |
| 104 | RAB5B   | 5869  | 12 | 56362697  | 56395467  | 1.99E-14 | blood | Snoring    | 1.9603  | 5.00E-02 | 1.81E-01 |
| 104 | RAB5B   | 5869  | 12 | 56362697  | 56395467  | 1.99E-14 | Lung  | Snoring    | 1.9603  | 5.00E-02 | 1.81E-01 |
| 61  | BACH2   | 60468 | 6  | 90631247  | 91011627  | 5.69E-16 | blood | Asthma     | NA      | NA       | NA       |
| 61  | BACH2   | 60468 | 6  | 90631247  | 91011627  | 5.69E-16 | Lung  | Asthma     | NA      | NA       | NA       |
| 61  | BACH2   | 60468 | 6  | 90631247  | 91011627  | 5.69E-16 | blood | COPD       | NA      | NA       | NA       |
| 61  | BACH2   | 60468 | 6  | 90631247  | 91011627  | 5.69E-16 | Lung  | COPD       | NA      | NA       | NA       |
| 61  | BACH2   | 60468 | 6  | 90631247  | 91011627  | 5.69E-16 | blood | IPF        | NA      | NA       | NA       |
| 61  | BACH2   | 60468 | 6  | 90631247  | 91011627  | 5.69E-16 | Lung  | IPF        | NA      | NA       | NA       |
| 61  | BACH2   | 60468 | 6  | 90631247  | 91011627  | 5.69E-16 | blood | LungCancer | NA      | NA       | NA       |
| 61  | BACH2   | 60468 | 6  | 90631247  | 91011627  | 5.69E-16 | Lung  | LungCancer | NA      | NA       | NA       |
| 61  | BACH2   | 60468 | 6  | 90631247  | 91011627  | 5.69E-16 | blood | Snoring    | NA      | NA       | NA       |
| 61  | BACH2   | 60468 | 6  | 90631247  | 91011627  | 5.69E-16 | Lung  | Snoring    | NA      | NA       | NA       |
| 58  | TRIM38  | 10475 | 6  | 25957917  | 25992557  | 1.10E-06 | blood | Asthma     | 1.2110  | 2.26E-01 | 4.67E-01 |
| 58  | TRIM38  | 10475 | 6  | 25957917  | 25992557  | 1.10E-06 | Lung  | Asthma     | -4.1442 | 3.41E-05 | 3.98E-04 |
| 58  | TRIM38  | 10475 | 6  | 25957917  | 25992557  | 1.10E-06 | blood | COPD       | 1.2110  | 2.26E-01 | 4.67E-01 |
| 58  | TRIM38  | 10475 | 6  | 25957917  | 25992557  | 1.10E-06 | Lung  | COPD       | -0.1564 | 8.76E-01 | 9.56E-01 |
| 58  | TRIM38  | 10475 | 6  | 25957917  | 25992557  | 1.10E-06 | blood | IPF        | 1.2110  | 2.26E-01 | 4.67E-01 |
| 58  | TRIM38  | 10475 | 6  | 25957917  | 25992557  | 1.10E-06 | Lung  | IPF        | -0.4555 | 6.49E-01 | 8.44E-01 |
| 58  | TRIM38  | 10475 | 6  | 25957917  | 25992557  | 1.10E-06 | blood | LungCancer | 1.2110  | 2.26E-01 | 4.67E-01 |
| 58  | TRIM38  | 10475 | 6  | 25957917  | 25992557  | 1.10E-06 | Lung  | LungCancer | 1.6843  | 9.21E-02 | 2.71E-01 |
| 58  | TRIM38  | 10475 | 6  | 25957917  | 25992557  | 1.10E-06 | blood | Snoring    | 1.2110  | 2.26E-01 | 4.67E-01 |
| 58  | TRIM38  | 10475 | 6  | 25957917  | 25992557  | 1.10E-06 | Lung  | Snoring    | 1.2110  | 2.26E-01 | 4.67E-01 |
| 59  | PTK7    | 5754  | 6  | 43039006  | 43134458  | 3.73E-06 | blood | Asthma     | 0.4979  | 6.19E-01 | 8.22E-01 |
| 59  | PTK7    | 5754  | 6  | 43039006  | 43134458  | 3.73E-06 | Lung  | Asthma     | 0.1020  | 9.19E-01 | 9.68E-01 |
| 59  | PTK7    | 5754  | 6  | 43039006  | 43134458  | 3.73E-06 | blood | COPD       | 0.4979  | 6.19E-01 | 8.22E-01 |
| 59  | PTK7    | 5754  | 6  | 43039006  | 43134458  | 3.73E-06 | Lung  | COPD       | -1.0706 | 2.84E-01 | 5.39E-01 |
| 59  | PTK7    | 5754  | 6  | 43039006  | 43134458  | 3.73E-06 | blood | IPF        | 0.4979  | 6.19E-01 | 8.22E-01 |
| 59  | PTK7    | 5754  | 6  | 43039006  | 43134458  | 3.73E-06 | Lung  | IPF        | -0.6317 | 5.28E-01 | 7.55E-01 |
| 59  | PTK7    | 5754  | 6  | 43039006  | 43134458  | 3.73E-06 | blood | LungCancer | 0.4979  | 6.19E-01 | 8.22E-01 |
| 59  | PTK7    | 5754  | 6  | 43039006  | 43134458  | 3.73E-06 | Lung  | LungCancer | 0.0355  | 9.72E-01 | 9.92E-01 |
| 59  | PTK7    | 5754  | 6  | 43039006  | 43134458  | 3.73E-06 | blood | Snoring    | 0.4979  | 6.19E-01 | 8.22E-01 |
| 59  | PTK7    | 5754  | 6  | 43039006  | 43134458  | 3.73E-06 | Lung  | Snoring    | 0.4979  | 6.19E-01 | 8.22E-01 |
| 59  | SRF     | 6722  | 6  | 43133920  | 43154244  | 3.48E-06 | blood | Asthma     | NA      | NA       | NA       |
| 59  | SRF     | 6722  | 6  | 43133920  | 43154244  | 3.48E-06 | Lung  | Asthma     | NA      | NA       | NA       |
| 59  | SRF     | 6722  | 6  | 43133920  | 43154244  | 3.48E-06 | blood | COPD       | NA      | NA       | NA       |
| 59  | SRF     | 6722  | 6  | 43133920  | 43154244  | 3.48E-06 | Lung  | COPD       | NA      | NA       | NA       |
| 59  | SRF     | 6722  | 6  | 43133920  | 43154244  | 3.48E-06 | blood | IPF        | NA      | NA       | NA       |
| 59  | SRF     | 6722  | 6  | 43133920  | 43154244  | 3.48E-06 | Lung  | IPF        | NA      | NA       | NA       |
| 59  | SRF     | 6722  | 6  | 43133920  | 43154244  | 3.48E-06 | blood | LungCancer | NA      | NA       | NA       |
| 59  | SRF     | 6722  | 6  | 43133920  | 43154244  | 3.48E-06 | Lung  | LungCancer | NA      | NA       | NA       |
| 59  | SRF     | 6722  | 6  | 43133920  | 43154244  | 3.48E-06 | blood | Snoring    | NA      | NA       | NA       |
| 59  | SRF     | 6722  | 6  | 43133920  | 43154244  | 3.48E-06 | Lung  | Snoring    | NA      | NA       | NA       |
| 59  | CUL9    | 23113 | 6  | 43144913  | 43197325  | 8.27E-06 | blood | Asthma     | 1.3253  | 1.85E-01 | 4.21E-01 |
| 59  | CUL9    | 23113 | 6  | 43144913  | 43197325  | 8.27E-06 | Lung  | Asthma     | 3.0800  | 2.04E-03 | 1.32E-02 |
| 59  | CUL9    | 23113 | 6  | 43144913  | 43197325  | 8.27E-06 | blood | COPD       | 1.3253  | 1.85E-01 | 4.21E-01 |
| 59  | CUL9    | 23113 | 6  | 43144913  | 43197325  | 8.27E-06 | Lung  | COPD       | 0.3199  | 7.49E-01 | 9.10E-01 |
| 59  | CUL9    | 23113 | 6  | 43144913  | 43197325  | 8.27E-06 | blood | IPF        | 1.3253  | 1.85E-01 | 4.21E-01 |
| 59  | CUL9    | 23113 | 6  | 43144913  | 43197325  | 8.27E-06 | Lung  | IPF        | -1.0400 | 2.98E-01 | 5.53E-01 |
| 59  | CUL9    | 23113 | 6  | 43144913  | 43197325  | 8.27E-06 | blood | LungCancer | 1.3253  | 1.85E-01 | 4.21E-01 |
| 59  | CUL9    | 23113 | 6  | 43144913  | 43197325  | 8.27E-06 | Lung  | LungCancer | 1.3294  | 1.84E-01 | 4.21E-01 |
| 59  | CUL9    | 23113 | 6  | 43144913  | 43197325  | 8.27E-06 | blood | Snoring    | 1.3253  | 1.85E-01 | 4.21E-01 |
| 59  | CUL9    | 23113 | 6  | 43144913  | 43197325  | 8.27E-06 | Lung  | Snoring    | 1.3253  | 1.85E-01 | 4.21E-01 |
| 59  | DNPH1   | 10591 | 6  | 43188367  | 43202211  | 7.73E-06 | blood | Asthma     | -0.8831 | 3.77E-01 | 6.28E-01 |
| 59  | DNPH1   | 10591 | 6  | 43188367  | 43202211  | 7.73E-06 | Lung  | Asthma     | -3.1700 | 1.54E-03 | 1.04E-02 |
| 59  | DNPH1   | 10591 | 6  | 43188367  | 43202211  | 7.73E-06 | blood | COPD       | -0.8831 | 3.77E-01 | 6.28E-01 |
| 59  | DNPH1   | 10591 | 6  | 43188367  | 43202211  | 7.73E-06 | Lung  | COPD       | -3.1893 | 1.43E-03 | 9.82E-03 |

|    |        |       |   |           |           |          |       |            |         |          |          |
|----|--------|-------|---|-----------|-----------|----------|-------|------------|---------|----------|----------|
| 59 | DNPH1  | 10591 | 6 | 43188367  | 43202211  | 7.73E-06 | blood | IPF        | -0.8831 | 3.77E-01 | 6.28E-01 |
| 59 | DNPH1  | 10591 | 6 | 43188367  | 43202211  | 7.73E-06 | Lung  | IPF        | -2.3257 | 2.00E-02 | 9.37E-02 |
| 59 | DNPH1  | 10591 | 6 | 43188367  | 43202211  | 7.73E-06 | blood | LungCancer | -0.8831 | 3.77E-01 | 6.28E-01 |
| 59 | DNPH1  | 10591 | 6 | 43188367  | 43202211  | 7.73E-06 | Lung  | LungCancer | -0.8111 | 4.17E-01 | 6.68E-01 |
| 59 | DNPH1  | 10591 | 6 | 43188367  | 43202211  | 7.73E-06 | blood | Snoring    | -0.8831 | 3.77E-01 | 6.28E-01 |
| 59 | DNPH1  | 10591 | 6 | 43188367  | 43202211  | 7.73E-06 | Lung  | Snoring    | -0.8831 | 3.77E-01 | 6.28E-01 |
| 58 | BTN2A1 | 11120 | 6 | 26453132  | 26481849  | 3.45E-05 | blood | Asthma     | -0.4148 | 6.78E-01 | 8.63E-01 |
| 58 | BTN2A1 | 11120 | 6 | 26453132  | 26481849  | 3.45E-05 | Lung  | Asthma     | 0.3490  | 7.27E-01 | 8.98E-01 |
| 58 | BTN2A1 | 11120 | 6 | 26453132  | 26481849  | 3.45E-05 | blood | COPD       | -0.4148 | 6.78E-01 | 8.63E-01 |
| 58 | BTN2A1 | 11120 | 6 | 26453132  | 26481849  | 3.45E-05 | Lung  | COPD       | -0.4210 | 6.74E-01 | 8.60E-01 |
| 58 | BTN2A1 | 11120 | 6 | 26453132  | 26481849  | 3.45E-05 | blood | IPF        | -0.4148 | 6.78E-01 | 8.63E-01 |
| 58 | BTN2A1 | 11120 | 6 | 26453132  | 26481849  | 3.45E-05 | Lung  | IPF        | 2.1757  | 2.96E-02 | 1.28E-01 |
| 58 | BTN2A1 | 11120 | 6 | 26453132  | 26481849  | 3.45E-05 | blood | LungCancer | -0.4148 | 6.78E-01 | 8.63E-01 |
| 58 | BTN2A1 | 11120 | 6 | 26453132  | 26481849  | 3.45E-05 | Lung  | LungCancer | 2.1511  | 3.15E-02 | 1.32E-01 |
| 58 | BTN2A1 | 11120 | 6 | 26453132  | 26481849  | 3.45E-05 | blood | Snoring    | -0.4148 | 6.78E-01 | 8.63E-01 |
| 58 | BTN2A1 | 11120 | 6 | 26453132  | 26481849  | 3.45E-05 | Lung  | Snoring    | -0.4148 | 6.78E-01 | 8.63E-01 |
| 49 | IL4    | 3565  | 5 | 132004678 | 132023370 | 1.63E-14 | blood | Asthma     | -1.1244 | 2.61E-01 | 5.16E-01 |
| 49 | IL4    | 3565  | 5 | 132004678 | 132023370 | 1.63E-14 | Lung  | Asthma     | -7.9800 | 1.42E-15 | 1.56E-13 |
| 49 | IL4    | 3565  | 5 | 132004678 | 132023370 | 1.63E-14 | blood | COPD       | -1.1244 | 2.61E-01 | 5.16E-01 |
| 49 | IL4    | 3565  | 5 | 132004678 | 132023370 | 1.63E-14 | Lung  | COPD       | -1.5874 | 1.12E-01 | 3.05E-01 |
| 49 | IL4    | 3565  | 5 | 132004678 | 132023370 | 1.63E-14 | blood | IPF        | -1.1244 | 2.61E-01 | 5.16E-01 |
| 49 | IL4    | 3565  | 5 | 132004678 | 132023370 | 1.63E-14 | Lung  | IPF        | -0.2466 | 8.05E-01 | 9.34E-01 |
| 49 | IL4    | 3565  | 5 | 132004678 | 132023370 | 1.63E-14 | blood | LungCancer | -1.1244 | 2.61E-01 | 5.16E-01 |
| 49 | IL4    | 3565  | 5 | 132004678 | 132023370 | 1.63E-14 | Lung  | LungCancer | 2.0740  | 3.81E-02 | 1.51E-01 |
| 49 | IL4    | 3565  | 5 | 132004678 | 132023370 | 1.63E-14 | blood | Snoring    | -1.1244 | 2.61E-01 | 5.16E-01 |
| 49 | IL4    | 3565  | 5 | 132004678 | 132023370 | 1.63E-14 | Lung  | Snoring    | -1.1244 | 2.61E-01 | 5.16E-01 |
| 49 | RAD50  | 10111 | 5 | 131887616 | 131985313 | 1.28E-15 | blood | Asthma     | 0.1781  | 8.59E-01 | 9.55E-01 |
| 49 | RAD50  | 10111 | 5 | 131887616 | 131985313 | 1.28E-15 | Lung  | Asthma     | 8.8400  | 9.85E-19 | 1.57E-16 |
| 49 | RAD50  | 10111 | 5 | 131887616 | 131985313 | 1.28E-15 | blood | COPD       | 0.1781  | 8.59E-01 | 9.55E-01 |
| 49 | RAD50  | 10111 | 5 | 131887616 | 131985313 | 1.28E-15 | Lung  | COPD       | 2.2752  | 2.29E-02 | 1.03E-01 |
| 49 | RAD50  | 10111 | 5 | 131887616 | 131985313 | 1.28E-15 | blood | IPF        | 0.1781  | 8.59E-01 | 9.55E-01 |
| 49 | RAD50  | 10111 | 5 | 131887616 | 131985313 | 1.28E-15 | Lung  | IPF        | -0.3431 | 7.32E-01 | 8.98E-01 |
| 49 | RAD50  | 10111 | 5 | 131887616 | 131985313 | 1.28E-15 | blood | LungCancer | 0.1781  | 8.59E-01 | 9.55E-01 |
| 49 | RAD50  | 10111 | 5 | 131887616 | 131985313 | 1.28E-15 | Lung  | LungCancer | -0.8268 | 4.08E-01 | 6.57E-01 |
| 49 | RAD50  | 10111 | 5 | 131887616 | 131985313 | 1.28E-15 | blood | Snoring    | 0.1781  | 8.59E-01 | 9.55E-01 |
| 49 | RAD50  | 10111 | 5 | 131887616 | 131985313 | 1.28E-15 | Lung  | Snoring    | 0.1781  | 8.59E-01 | 9.55E-01 |
| 25 | USP4   | 7375  | 3 | 49309577  | 49382536  | 8.78E-06 | blood | Asthma     | 3.8997  | 9.63E-05 | 9.22E-04 |
| 25 | USP4   | 7375  | 3 | 49309577  | 49382536  | 8.78E-06 | Lung  | Asthma     | 1.9000  | 5.74E-02 | 2.00E-01 |
| 25 | USP4   | 7375  | 3 | 49309577  | 49382536  | 8.78E-06 | blood | COPD       | 3.8997  | 9.63E-05 | 9.22E-04 |
| 25 | USP4   | 7375  | 3 | 49309577  | 49382536  | 8.78E-06 | Lung  | COPD       | 5.9540  | 2.62E-09 | 1.46E-07 |
| 25 | USP4   | 7375  | 3 | 49309577  | 49382536  | 8.78E-06 | blood | IPF        | 3.8997  | 9.63E-05 | 9.22E-04 |
| 25 | USP4   | 7375  | 3 | 49309577  | 49382536  | 8.78E-06 | Lung  | IPF        | 0.1904  | 8.49E-01 | 9.55E-01 |
| 25 | USP4   | 7375  | 3 | 49309577  | 49382536  | 8.78E-06 | blood | LungCancer | 3.8997  | 9.63E-05 | 9.22E-04 |
| 25 | USP4   | 7375  | 3 | 49309577  | 49382536  | 8.78E-06 | Lung  | LungCancer | 3.0430  | 2.34E-03 | 1.49E-02 |
| 25 | USP4   | 7375  | 3 | 49309577  | 49382536  | 8.78E-06 | blood | Snoring    | 3.8997  | 9.63E-05 | 9.22E-04 |
| 25 | USP4   | 7375  | 3 | 49309577  | 49382536  | 8.78E-06 | Lung  | Snoring    | 3.8997  | 9.63E-05 | 9.22E-04 |
| 26 | FOXP1  | 27086 | 3 | 70998865  | 71638140  | 2.26E-06 | blood | Asthma     | -1.3201 | 1.87E-01 | 4.21E-01 |
| 26 | FOXP1  | 27086 | 3 | 70998865  | 71638140  | 2.26E-06 | Lung  | Asthma     | 3.2136  | 1.31E-03 | 9.25E-03 |
| 26 | FOXP1  | 27086 | 3 | 70998865  | 71638140  | 2.26E-06 | blood | COPD       | -1.3201 | 1.87E-01 | 4.21E-01 |
| 26 | FOXP1  | 27086 | 3 | 70998865  | 71638140  | 2.26E-06 | Lung  | COPD       | 1.2458  | 2.13E-01 | 4.56E-01 |
| 26 | FOXP1  | 27086 | 3 | 70998865  | 71638140  | 2.26E-06 | blood | IPF        | -1.3201 | 1.87E-01 | 4.21E-01 |
| 26 | FOXP1  | 27086 | 3 | 70998865  | 71638140  | 2.26E-06 | Lung  | IPF        | 0.6548  | 5.13E-01 | 7.52E-01 |
| 26 | FOXP1  | 27086 | 3 | 70998865  | 71638140  | 2.26E-06 | blood | LungCancer | -1.3201 | 1.87E-01 | 4.21E-01 |
| 26 | FOXP1  | 27086 | 3 | 70998865  | 71638140  | 2.26E-06 | Lung  | LungCancer | 0.8054  | 4.21E-01 | 6.72E-01 |
| 26 | FOXP1  | 27086 | 3 | 70998865  | 71638140  | 2.26E-06 | blood | Snoring    | -1.3201 | 1.87E-01 | 4.21E-01 |
| 26 | FOXP1  | 27086 | 3 | 70998865  | 71638140  | 2.26E-06 | Lung  | Snoring    | -1.3201 | 1.87E-01 | 4.21E-01 |
| 20 | GPD2   | 2820  | 2 | 157286965 | 157447915 | 6.50E-09 | blood | Asthma     | -5.6600 | 1.51E-08 | 4.32E-07 |
| 20 | GPD2   | 2820  | 2 | 157286965 | 157447915 | 6.50E-09 | Lung  | Asthma     | -0.9344 | 3.50E-01 | 6.08E-01 |
| 20 | GPD2   | 2820  | 2 | 157286965 | 157447915 | 6.50E-09 | blood | COPD       | -5.6600 | 1.51E-08 | 4.32E-07 |
| 20 | GPD2   | 2820  | 2 | 157286965 | 157447915 | 6.50E-09 | Lung  | COPD       | -4.0105 | 6.06E-05 | 6.25E-04 |
| 20 | GPD2   | 2820  | 2 | 157286965 | 157447915 | 6.50E-09 | blood | IPF        | -5.6600 | 1.51E-08 | 4.32E-07 |
| 20 | GPD2   | 2820  | 2 | 157286965 | 157447915 | 6.50E-09 | Lung  | IPF        | -0.2300 | 8.18E-01 | 9.42E-01 |
| 20 | GPD2   | 2820  | 2 | 157286965 | 157447915 | 6.50E-09 | blood | LungCancer | -5.6600 | 1.51E-08 | 4.32E-07 |
| 20 | GPD2   | 2820  | 2 | 157286965 | 157447915 | 6.50E-09 | Lung  | LungCancer | 2.1123  | 3.47E-02 | 1.42E-01 |
| 20 | GPD2   | 2820  | 2 | 157286965 | 157447915 | 6.50E-09 | blood | Snoring    | -5.6600 | 1.51E-08 | 4.32E-07 |
| 20 | GPD2   | 2820  | 2 | 157286965 | 157447915 | 6.50E-09 | Lung  | Snoring    | -5.6600 | 1.51E-08 | 4.32E-07 |
| 17 | IL1R1  | 3554  | 2 | 102681836 | 102801334 | 2.30E-16 | blood | Asthma     | -0.7760 | 4.38E-01 | 6.90E-01 |
| 17 | IL1R1  | 3554  | 2 | 102681836 | 102801334 | 2.30E-16 | Lung  | Asthma     | 11.3935 | 4.50E-30 | 1.59E-27 |
| 17 | IL1R1  | 3554  | 2 | 102681836 | 102801334 | 2.30E-16 | blood | COPD       | -0.7760 | 4.38E-01 | 6.90E-01 |
| 17 | IL1R1  | 3554  | 2 | 102681836 | 102801334 | 2.30E-16 | Lung  | COPD       | 2.3336  | 1.96E-02 | 9.20E-02 |
| 17 | IL1R1  | 3554  | 2 | 102681836 | 102801334 | 2.30E-16 | blood | IPF        | -0.7760 | 4.38E-01 | 6.90E-01 |
| 17 | IL1R1  | 3554  | 2 | 102681836 | 102801334 | 2.30E-16 | Lung  | IPF        | 0.1785  | 8.58E-01 | 9.55E-01 |
| 17 | IL1R1  | 3554  | 2 | 102681836 | 102801334 | 2.30E-16 | blood | LungCancer | -0.7760 | 4.38E-01 | 6.90E-01 |



|     |        |        |    |           |           |          |       |            |         |          |          |
|-----|--------|--------|----|-----------|-----------|----------|-------|------------|---------|----------|----------|
| 17  | IL1R1  | 3554   | 2  | 102681836 | 102801334 | 2.30E-16 | Lung  | LungCancer | 3.0731  | 2.12E-03 | 1.36E-02 |
| 17  | IL1R1  | 3554   | 2  | 102681836 | 102801334 | 2.30E-16 | blood | Snoring    | -0.7760 | 4.38E-01 | 6.90E-01 |
| 17  | IL1R1  | 3554   | 2  | 102681836 | 102801334 | 2.30E-16 | Lung  | Snoring    | -0.7760 | 4.38E-01 | 6.90E-01 |
| 17  | IL1RL2 | 8808   | 2  | 102798433 | 102861462 | 6.73E-13 | blood | Asthma     | -2.1079 | 3.50E-02 | 1.42E-01 |
| 17  | IL1RL2 | 8808   | 2  | 102798433 | 102861462 | 6.73E-13 | Lung  | Asthma     | 1.3394  | 1.80E-01 | 4.19E-01 |
| 17  | IL1RL2 | 8808   | 2  | 102798433 | 102861462 | 6.73E-13 | blood | COPD       | -2.1079 | 3.50E-02 | 1.42E-01 |
| 17  | IL1RL2 | 8808   | 2  | 102798433 | 102861462 | 6.73E-13 | Lung  | COPD       | -1.0527 | 2.92E-01 | 5.47E-01 |
| 17  | IL1RL2 | 8808   | 2  | 102798433 | 102861462 | 6.73E-13 | blood | IPF        | -2.1079 | 3.50E-02 | 1.42E-01 |
| 17  | IL1RL2 | 8808   | 2  | 102798433 | 102861462 | 6.73E-13 | Lung  | IPF        | -0.5868 | 5.57E-01 | 7.76E-01 |
| 17  | IL1RL2 | 8808   | 2  | 102798433 | 102861462 | 6.73E-13 | blood | LungCancer | -2.1079 | 3.50E-02 | 1.42E-01 |
| 17  | IL1RL2 | 8808   | 2  | 102798433 | 102861462 | 6.73E-13 | Lung  | LungCancer | -0.2898 | 7.72E-01 | 9.25E-01 |
| 17  | IL1RL2 | 8808   | 2  | 102798433 | 102861462 | 6.73E-13 | blood | Snoring    | -2.1079 | 3.50E-02 | 1.42E-01 |
| 17  | IL1RL2 | 8808   | 2  | 102798433 | 102861462 | 6.73E-13 | Lung  | Snoring    | -2.1079 | 3.50E-02 | 1.42E-01 |
| 17  | SLC9A2 | 6549   | 2  | 103231166 | 103332809 | 2.98E-10 | blood | Asthma     | 0.5693  | 5.69E-01 | 7.86E-01 |
| 17  | SLC9A2 | 6549   | 2  | 103231166 | 103332809 | 2.98E-10 | Lung  | Asthma     | 9.4780  | 2.59E-21 | 5.14E-19 |
| 17  | SLC9A2 | 6549   | 2  | 103231166 | 103332809 | 2.98E-10 | blood | COPD       | 0.5693  | 5.69E-01 | 7.86E-01 |
| 17  | SLC9A2 | 6549   | 2  | 103231166 | 103332809 | 2.98E-10 | Lung  | COPD       | 2.5369  | 1.12E-02 | 5.82E-02 |
| 17  | SLC9A2 | 6549   | 2  | 103231166 | 103332809 | 2.98E-10 | blood | IPF        | 0.5693  | 5.69E-01 | 7.86E-01 |
| 17  | SLC9A2 | 6549   | 2  | 103231166 | 103332809 | 2.98E-10 | Lung  | IPF        | 1.0503  | 2.94E-01 | 5.49E-01 |
| 17  | SLC9A2 | 6549   | 2  | 103231166 | 103332809 | 2.98E-10 | blood | LungCancer | 0.5693  | 5.69E-01 | 7.86E-01 |
| 17  | SLC9A2 | 6549   | 2  | 103231166 | 103332809 | 2.98E-10 | Lung  | LungCancer | 1.3885  | 1.65E-01 | 4.01E-01 |
| 17  | SLC9A2 | 6549   | 2  | 103231166 | 103332809 | 2.98E-10 | blood | Snoring    | 0.5693  | 5.69E-01 | 7.86E-01 |
| 17  | SLC9A2 | 6549   | 2  | 103231166 | 103332809 | 2.98E-10 | Lung  | Snoring    | 0.5693  | 5.69E-01 | 7.86E-01 |
| 8   | PHTF1  | 10745  | 1  | 114234824 | 114307165 | 2.38E-05 | blood | Asthma     | -1.8739 | 6.09E-02 | 2.05E-01 |
| 8   | PHTF1  | 10745  | 1  | 114234824 | 114307165 | 2.38E-05 | Lung  | Asthma     | -2.7379 | 6.18E-03 | 3.49E-02 |
| 8   | PHTF1  | 10745  | 1  | 114234824 | 114307165 | 2.38E-05 | blood | COPD       | -1.8739 | 6.09E-02 | 2.05E-01 |
| 8   | PHTF1  | 10745  | 1  | 114234824 | 114307165 | 2.38E-05 | Lung  | COPD       | -2.1405 | 3.23E-02 | 1.34E-01 |
| 8   | PHTF1  | 10745  | 1  | 114234824 | 114307165 | 2.38E-05 | blood | IPF        | -1.8739 | 6.09E-02 | 2.05E-01 |
| 8   | PHTF1  | 10745  | 1  | 114234824 | 114307165 | 2.38E-05 | Lung  | IPF        | -1.3652 | 1.72E-01 | 4.06E-01 |
| 8   | PHTF1  | 10745  | 1  | 114234824 | 114307165 | 2.38E-05 | blood | LungCancer | -1.8739 | 6.09E-02 | 2.05E-01 |
| 8   | PHTF1  | 10745  | 1  | 114234824 | 114307165 | 2.38E-05 | Lung  | LungCancer | 1.3984  | 1.62E-01 | 3.96E-01 |
| 8   | PHTF1  | 10745  | 1  | 114234824 | 114307165 | 2.38E-05 | blood | Snoring    | -1.8739 | 6.09E-02 | 2.05E-01 |
| 8   | PHTF1  | 10745  | 1  | 114234824 | 114307165 | 2.38E-05 | Lung  | Snoring    | -1.8739 | 6.09E-02 | 2.05E-01 |
| 126 | RCN2   | 5955   | 15 | 77218962  | 77247601  | 1.99E-05 | blood | Asthma     | 0.4725  | 6.37E-01 | 8.32E-01 |
| 126 | RCN2   | 5955   | 15 | 77218962  | 77247601  | 1.99E-05 | Lung  | Asthma     | -2.4923 | 1.27E-02 | 6.51E-02 |
| 126 | RCN2   | 5955   | 15 | 77218962  | 77247601  | 1.99E-05 | blood | COPD       | 0.4725  | 6.37E-01 | 8.32E-01 |
| 126 | RCN2   | 5955   | 15 | 77218962  | 77247601  | 1.99E-05 | Lung  | COPD       | -1.4447 | 1.49E-01 | 3.73E-01 |
| 126 | RCN2   | 5955   | 15 | 77218962  | 77247601  | 1.99E-05 | blood | IPF        | 0.4725  | 6.37E-01 | 8.32E-01 |
| 126 | RCN2   | 5955   | 15 | 77218962  | 77247601  | 1.99E-05 | Lung  | IPF        | 0.2748  | 7.83E-01 | 9.29E-01 |
| 126 | RCN2   | 5955   | 15 | 77218962  | 77247601  | 1.99E-05 | blood | LungCancer | 0.4725  | 6.37E-01 | 8.32E-01 |
| 126 | RCN2   | 5955   | 15 | 77218962  | 77247601  | 1.99E-05 | Lung  | LungCancer | -0.7520 | 4.52E-01 | 7.00E-01 |
| 126 | RCN2   | 5955   | 15 | 77218962  | 77247601  | 1.99E-05 | blood | Snoring    | 0.4725  | 6.37E-01 | 8.32E-01 |
| 126 | RCN2   | 5955   | 15 | 77218962  | 77247601  | 1.99E-05 | Lung  | Snoring    | 0.4725  | 6.37E-01 | 8.32E-01 |
| 94  | MUC5B  | 727897 | 11 | 1239295   | 1288406   | 2.64E-07 | blood | Asthma     | 1.2368  | 2.16E-01 | 4.56E-01 |
| 94  | MUC5B  | 727897 | 11 | 1239295   | 1288406   | 2.64E-07 | Lung  | Asthma     | 1.7012  | 8.89E-02 | 2.64E-01 |
| 94  | MUC5B  | 727897 | 11 | 1239295   | 1288406   | 2.64E-07 | blood | COPD       | 1.2368  | 2.16E-01 | 4.56E-01 |
| 94  | MUC5B  | 727897 | 11 | 1239295   | 1288406   | 2.64E-07 | Lung  | COPD       | 1.9110  | 5.60E-02 | 1.96E-01 |
| 94  | MUC5B  | 727897 | 11 | 1239295   | 1288406   | 2.64E-07 | blood | IPF        | 1.2368  | 2.16E-01 | 4.56E-01 |
| 94  | MUC5B  | 727897 | 11 | 1239295   | 1288406   | 2.64E-07 | Lung  | IPF        | 8.6600  | 4.54E-18 | 6.56E-16 |
| 94  | MUC5B  | 727897 | 11 | 1239295   | 1288406   | 2.64E-07 | blood | LungCancer | 1.2368  | 2.16E-01 | 4.56E-01 |
| 94  | MUC5B  | 727897 | 11 | 1239295   | 1288406   | 2.64E-07 | Lung  | LungCancer | 1.4853  | 1.37E-01 | 3.55E-01 |
| 94  | MUC5B  | 727897 | 11 | 1239295   | 1288406   | 2.64E-07 | blood | Snoring    | 1.2368  | 2.16E-01 | 4.56E-01 |
| 94  | MUC5B  | 727897 | 11 | 1239295   | 1288406   | 2.64E-07 | Lung  | Snoring    | 1.2368  | 2.16E-01 | 4.56E-01 |
| 113 | PCDH17 | 27253  | 13 | 58199238  | 58308445  | 2.26E-05 | blood | Asthma     | -0.9784 | 3.28E-01 | 5.84E-01 |
| 113 | PCDH17 | 27253  | 13 | 58199238  | 58308445  | 2.26E-05 | Lung  | Asthma     | -0.0273 | 9.78E-01 | 9.92E-01 |
| 113 | PCDH17 | 27253  | 13 | 58199238  | 58308445  | 2.26E-05 | blood | COPD       | -0.9784 | 3.28E-01 | 5.84E-01 |
| 113 | PCDH17 | 27253  | 13 | 58199238  | 58308445  | 2.26E-05 | Lung  | COPD       | -1.0737 | 2.83E-01 | 5.38E-01 |
| 113 | PCDH17 | 27253  | 13 | 58199238  | 58308445  | 2.26E-05 | blood | IPF        | -0.9784 | 3.28E-01 | 5.84E-01 |
| 113 | PCDH17 | 27253  | 13 | 58199238  | 58308445  | 2.26E-05 | Lung  | IPF        | -0.6286 | 5.30E-01 | 7.55E-01 |
| 113 | PCDH17 | 27253  | 13 | 58199238  | 58308445  | 2.26E-05 | blood | LungCancer | -0.9784 | 3.28E-01 | 5.84E-01 |
| 113 | PCDH17 | 27253  | 13 | 58199238  | 58308445  | 2.26E-05 | Lung  | LungCancer | -2.2730 | 2.30E-02 | 1.03E-01 |
| 113 | PCDH17 | 27253  | 13 | 58199238  | 58308445  | 2.26E-05 | blood | Snoring    | -0.9784 | 3.28E-01 | 5.84E-01 |
| 113 | PCDH17 | 27253  | 13 | 58199238  | 58308445  | 2.26E-05 | Lung  | Snoring    | -0.9784 | 3.28E-01 | 5.84E-01 |
| 87  | NEK6   | 10783  | 9  | 127014885 | 127119721 | 1.05E-08 | blood | Asthma     | -2.4200 | 1.57E-02 | 7.66E-02 |
| 87  | NEK6   | 10783  | 9  | 127014885 | 127119721 | 1.05E-08 | Lung  | Asthma     | -6.4827 | 9.01E-11 | 6.82E-09 |
| 87  | NEK6   | 10783  | 9  | 127014885 | 127119721 | 1.05E-08 | blood | COPD       | -2.4200 | 1.57E-02 | 7.66E-02 |
| 87  | NEK6   | 10783  | 9  | 127014885 | 127119721 | 1.05E-08 | Lung  | COPD       | -2.6353 | 8.41E-03 | 4.58E-02 |
| 87  | NEK6   | 10783  | 9  | 127014885 | 127119721 | 1.05E-08 | blood | IPF        | -2.4200 | 1.57E-02 | 7.66E-02 |
| 87  | NEK6   | 10783  | 9  | 127014885 | 127119721 | 1.05E-08 | Lung  | IPF        | -1.1434 | 2.53E-01 | 5.05E-01 |
| 87  | NEK6   | 10783  | 9  | 127014885 | 127119721 | 1.05E-08 | blood | LungCancer | -2.4200 | 1.57E-02 | 7.66E-02 |
| 87  | NEK6   | 10783  | 9  | 127014885 | 127119721 | 1.05E-08 | Lung  | LungCancer | -0.7006 | 4.84E-01 | 7.30E-01 |
| 87  | NEK6   | 10783  | 9  | 127014885 | 127119721 | 1.05E-08 | blood | Snoring    | -2.4200 | 1.57E-02 | 7.66E-02 |
| 87  | NEK6   | 10783  | 9  | 127014885 | 127119721 | 1.05E-08 | Lung  | Snoring    | -2.4200 | 1.57E-02 | 7.66E-02 |

|     |         |        |    |           |           |          |       |            |         |          |          |
|-----|---------|--------|----|-----------|-----------|----------|-------|------------|---------|----------|----------|
| 88  | MAPKAP1 | 79109  | 9  | 128194673 | 128474513 | 1.30E-07 | blood | Asthma     | -4.1800 | 2.93E-05 | 3.53E-04 |
| 88  | MAPKAP1 | 79109  | 9  | 128194673 | 128474513 | 1.30E-07 | Lung  | Asthma     | 0.6384  | 5.23E-01 | 7.55E-01 |
| 88  | MAPKAP1 | 79109  | 9  | 128194673 | 128474513 | 1.30E-07 | blood | COPD       | -4.1800 | 2.93E-05 | 3.53E-04 |
| 88  | MAPKAP1 | 79109  | 9  | 128194673 | 128474513 | 1.30E-07 | Lung  | COPD       | 4.1373  | 3.51E-05 | 4.09E-04 |
| 88  | MAPKAP1 | 79109  | 9  | 128194673 | 128474513 | 1.30E-07 | blood | IPF        | -4.1800 | 2.93E-05 | 3.53E-04 |
| 88  | MAPKAP1 | 79109  | 9  | 128194673 | 128474513 | 1.30E-07 | Lung  | IPF        | 0.0525  | 9.58E-01 | 9.86E-01 |
| 88  | MAPKAP1 | 79109  | 9  | 128194673 | 128474513 | 1.30E-07 | blood | LungCancer | -4.1800 | 2.93E-05 | 3.53E-04 |
| 88  | MAPKAP1 | 79109  | 9  | 128194673 | 128474513 | 1.30E-07 | Lung  | LungCancer | 3.8576  | 1.15E-04 | 1.04E-03 |
| 88  | MAPKAP1 | 79109  | 9  | 128194673 | 128474513 | 1.30E-07 | blood | Snoring    | -4.1800 | 2.93E-05 | 3.53E-04 |
| 88  | MAPKAP1 | 79109  | 9  | 128194673 | 128474513 | 1.30E-07 | Lung  | Snoring    | -4.1800 | 2.93E-05 | 3.53E-04 |
| 92  | IDE     | 3416   | 10 | 94206441  | 94338852  | 1.55E-05 | blood | Asthma     | NA      | NA       | NA       |
| 92  | IDE     | 3416   | 10 | 94206441  | 94338852  | 1.55E-05 | Lung  | Asthma     | NA      | NA       | NA       |
| 92  | IDE     | 3416   | 10 | 94206441  | 94338852  | 1.55E-05 | blood | COPD       | NA      | NA       | NA       |
| 92  | IDE     | 3416   | 10 | 94206441  | 94338852  | 1.55E-05 | Lung  | COPD       | NA      | NA       | NA       |
| 92  | IDE     | 3416   | 10 | 94206441  | 94338852  | 1.55E-05 | blood | IPF        | NA      | NA       | NA       |
| 92  | IDE     | 3416   | 10 | 94206441  | 94338852  | 1.55E-05 | Lung  | IPF        | NA      | NA       | NA       |
| 92  | IDE     | 3416   | 10 | 94206441  | 94338852  | 1.55E-05 | blood | LungCancer | NA      | NA       | NA       |
| 92  | IDE     | 3416   | 10 | 94206441  | 94338852  | 1.55E-05 | Lung  | LungCancer | NA      | NA       | NA       |
| 92  | IDE     | 3416   | 10 | 94206441  | 94338852  | 1.55E-05 | blood | Snoring    | NA      | NA       | NA       |
| 92  | IDE     | 3416   | 10 | 94206441  | 94338852  | 1.55E-05 | Lung  | Snoring    | NA      | NA       | NA       |
| 139 | HOXB8   | 3218   | 17 | 46684708  | 46697474  | 1.50E-07 | blood | Asthma     | 3.3934  | 6.90E-04 | 5.61E-03 |
| 139 | HOXB8   | 3218   | 17 | 46684708  | 46697474  | 1.50E-07 | Lung  | Asthma     | -0.7873 | 4.31E-01 | 6.83E-01 |
| 139 | HOXB8   | 3218   | 17 | 46684708  | 46697474  | 1.50E-07 | blood | COPD       | 3.3934  | 6.90E-04 | 5.61E-03 |
| 139 | HOXB8   | 3218   | 17 | 46684708  | 46697474  | 1.50E-07 | Lung  | COPD       | -0.2304 | 8.18E-01 | 9.42E-01 |
| 139 | HOXB8   | 3218   | 17 | 46684708  | 46697474  | 1.50E-07 | blood | IPF        | 3.3934  | 6.90E-04 | 5.61E-03 |
| 139 | HOXB8   | 3218   | 17 | 46684708  | 46697474  | 1.50E-07 | Lung  | IPF        | -0.4346 | 6.64E-01 | 8.52E-01 |
| 139 | HOXB8   | 3218   | 17 | 46684708  | 46697474  | 1.50E-07 | blood | LungCancer | 3.3934  | 6.90E-04 | 5.61E-03 |
| 139 | HOXB8   | 3218   | 17 | 46684708  | 46697474  | 1.50E-07 | Lung  | LungCancer | 1.3034  | 1.92E-01 | 4.31E-01 |
| 139 | HOXB8   | 3218   | 17 | 46684708  | 46697474  | 1.50E-07 | blood | Snoring    | 3.3934  | 6.90E-04 | 5.61E-03 |
| 139 | HOXB8   | 3218   | 17 | 46684708  | 46697474  | 1.50E-07 | Lung  | Snoring    | 3.3934  | 6.90E-04 | 5.61E-03 |
| 138 | KANSL1  | 284058 | 17 | 44102282  | 44307740  | 3.42E-13 | blood | Asthma     | 5.4349  | 5.48E-08 | 1.24E-06 |
| 138 | KANSL1  | 284058 | 17 | 44102282  | 44307740  | 3.42E-13 | Lung  | Asthma     | 0.1418  | 8.87E-01 | 9.59E-01 |
| 138 | KANSL1  | 284058 | 17 | 44102282  | 44307740  | 3.42E-13 | blood | COPD       | 5.4349  | 5.48E-08 | 1.24E-06 |
| 138 | KANSL1  | 284058 | 17 | 44102282  | 44307740  | 3.42E-13 | Lung  | COPD       | 0.4663  | 6.41E-01 | 8.36E-01 |
| 138 | KANSL1  | 284058 | 17 | 44102282  | 44307740  | 3.42E-13 | blood | IPF        | 5.4349  | 5.48E-08 | 1.24E-06 |
| 138 | KANSL1  | 284058 | 17 | 44102282  | 44307740  | 3.42E-13 | Lung  | IPF        | -2.1052 | 3.53E-02 | 1.43E-01 |
| 138 | KANSL1  | 284058 | 17 | 44102282  | 44307740  | 3.42E-13 | blood | LungCancer | 5.4349  | 5.48E-08 | 1.24E-06 |
| 138 | KANSL1  | 284058 | 17 | 44102282  | 44307740  | 3.42E-13 | Lung  | LungCancer | -1.5860 | 1.13E-01 | 3.06E-01 |
| 138 | KANSL1  | 284058 | 17 | 44102282  | 44307740  | 3.42E-13 | blood | Snoring    | 5.4349  | 5.48E-08 | 1.24E-06 |
| 138 | KANSL1  | 284058 | 17 | 44102282  | 44307740  | 3.42E-13 | Lung  | Snoring    | 5.4349  | 5.48E-08 | 1.24E-06 |
| 139 | HOXB5   | 3215   | 17 | 46663619  | 46676103  | 2.82E-08 | blood | Asthma     | -5.8043 | 6.46E-09 | 2.33E-07 |
| 139 | HOXB5   | 3215   | 17 | 46663619  | 46676103  | 2.82E-08 | Lung  | Asthma     | -2.2923 | 2.19E-02 | 9.84E-02 |
| 139 | HOXB5   | 3215   | 17 | 46663619  | 46676103  | 2.82E-08 | blood | COPD       | -5.8043 | 6.46E-09 | 2.33E-07 |
| 139 | HOXB5   | 3215   | 17 | 46663619  | 46676103  | 2.82E-08 | Lung  | COPD       | -0.8452 | 3.98E-01 | 6.50E-01 |
| 139 | HOXB5   | 3215   | 17 | 46663619  | 46676103  | 2.82E-08 | blood | IPF        | -5.8043 | 6.46E-09 | 2.33E-07 |
| 139 | HOXB5   | 3215   | 17 | 46663619  | 46676103  | 2.82E-08 | Lung  | IPF        | -1.2926 | 1.96E-01 | 4.34E-01 |
| 139 | HOXB5   | 3215   | 17 | 46663619  | 46676103  | 2.82E-08 | blood | LungCancer | -5.8043 | 6.46E-09 | 2.33E-07 |
| 139 | HOXB5   | 3215   | 17 | 46663619  | 46676103  | 2.82E-08 | Lung  | LungCancer | -2.6153 | 8.91E-03 | 4.84E-02 |
| 139 | HOXB5   | 3215   | 17 | 46663619  | 46676103  | 2.82E-08 | blood | Snoring    | -5.8043 | 6.46E-09 | 2.33E-07 |
| 139 | HOXB5   | 3215   | 17 | 46663619  | 46676103  | 2.82E-08 | Lung  | Snoring    | -5.8043 | 6.46E-09 | 2.33E-07 |
| 139 | HOXB3   | 3213   | 17 | 46621232  | 46672634  | 1.69E-10 | blood | Asthma     | 1.3792  | 1.68E-01 | 4.04E-01 |
| 139 | HOXB3   | 3213   | 17 | 46621232  | 46672634  | 1.69E-10 | Lung  | Asthma     | 5.1941  | 2.06E-07 | 3.72E-06 |
| 139 | HOXB3   | 3213   | 17 | 46621232  | 46672634  | 1.69E-10 | blood | COPD       | 1.3792  | 1.68E-01 | 4.04E-01 |
| 139 | HOXB3   | 3213   | 17 | 46621232  | 46672634  | 1.69E-10 | Lung  | COPD       | 0.8326  | 4.05E-01 | 6.57E-01 |
| 139 | HOXB3   | 3213   | 17 | 46621232  | 46672634  | 1.69E-10 | blood | IPF        | 1.3792  | 1.68E-01 | 4.04E-01 |
| 139 | HOXB3   | 3213   | 17 | 46621232  | 46672634  | 1.69E-10 | Lung  | IPF        | 0.5786  | 5.63E-01 | 7.80E-01 |
| 139 | HOXB3   | 3213   | 17 | 46621232  | 46672634  | 1.69E-10 | blood | LungCancer | 1.3792  | 1.68E-01 | 4.04E-01 |
| 139 | HOXB3   | 3213   | 17 | 46621232  | 46672634  | 1.69E-10 | Lung  | LungCancer | 0.3668  | 7.14E-01 | 8.90E-01 |
| 139 | HOXB3   | 3213   | 17 | 46621232  | 46672634  | 1.69E-10 | blood | Snoring    | 1.3792  | 1.68E-01 | 4.04E-01 |
| 139 | HOXB3   | 3213   | 17 | 46621232  | 46672634  | 1.69E-10 | Lung  | Snoring    | 1.3792  | 1.68E-01 | 4.04E-01 |
| 77  | EPHX2   | 2053   | 8  | 27343519  | 27407439  | 4.49E-06 | blood | Asthma     | 1.1133  | 2.66E-01 | 5.17E-01 |
| 77  | EPHX2   | 2053   | 8  | 27343519  | 27407439  | 4.49E-06 | Lung  | Asthma     | -1.7880 | 7.38E-02 | 2.31E-01 |
| 77  | EPHX2   | 2053   | 8  | 27343519  | 27407439  | 4.49E-06 | blood | COPD       | 1.1133  | 2.66E-01 | 5.17E-01 |
| 77  | EPHX2   | 2053   | 8  | 27343519  | 27407439  | 4.49E-06 | Lung  | COPD       | -3.1179 | 1.82E-03 | 1.21E-02 |
| 77  | EPHX2   | 2053   | 8  | 27343519  | 27407439  | 4.49E-06 | blood | IPF        | 1.1133  | 2.66E-01 | 5.17E-01 |
| 77  | EPHX2   | 2053   | 8  | 27343519  | 27407439  | 4.49E-06 | Lung  | IPF        | -0.4753 | 6.35E-01 | 8.32E-01 |
| 77  | EPHX2   | 2053   | 8  | 27343519  | 27407439  | 4.49E-06 | blood | LungCancer | 1.1133  | 2.66E-01 | 5.17E-01 |
| 77  | EPHX2   | 2053   | 8  | 27343519  | 27407439  | 4.49E-06 | Lung  | LungCancer | -0.3239 | 7.46E-01 | 9.07E-01 |
| 77  | EPHX2   | 2053   | 8  | 27343519  | 27407439  | 4.49E-06 | blood | Snoring    | 1.1133  | 2.66E-01 | 5.17E-01 |
| 77  | EPHX2   | 2053   | 8  | 27343519  | 27407439  | 4.49E-06 | Lung  | Snoring    | 1.1133  | 2.66E-01 | 5.17E-01 |
| 86  | CNTFR   | 1271   | 9  | 34546425  | 34595713  | 1.48E-05 | blood | Asthma     | -0.4240 | 6.72E-01 | 8.59E-01 |
| 86  | CNTFR   | 1271   | 9  | 34546425  | 34595713  | 1.48E-05 | Lung  | Asthma     | 1.3926  | 1.64E-01 | 4.00E-01 |
| 86  | CNTFR   | 1271   | 9  | 34546425  | 34595713  | 1.48E-05 | blood | COPD       | -0.4240 | 6.72E-01 | 8.59E-01 |

|     |         |       |    |          |          |          |       |            |         |          |          |
|-----|---------|-------|----|----------|----------|----------|-------|------------|---------|----------|----------|
| 86  | CNTFR   | 1271  | 9  | 34546425 | 34595713 | 1.48E-05 | Lung  | COPD       | 2.1351  | 3.28E-02 | 1.36E-01 |
| 86  | CNTFR   | 1271  | 9  | 34546425 | 34595713 | 1.48E-05 | blood | IPF        | -0.4240 | 6.72E-01 | 8.59E-01 |
| 86  | CNTFR   | 1271  | 9  | 34546425 | 34595713 | 1.48E-05 | Lung  | IPF        | 1.6916  | 9.07E-02 | 2.67E-01 |
| 86  | CNTFR   | 1271  | 9  | 34546425 | 34595713 | 1.48E-05 | blood | LungCancer | -0.4240 | 6.72E-01 | 8.59E-01 |
| 86  | CNTFR   | 1271  | 9  | 34546425 | 34595713 | 1.48E-05 | Lung  | LungCancer | -1.5043 | 1.33E-01 | 3.47E-01 |
| 86  | CNTFR   | 1271  | 9  | 34546425 | 34595713 | 1.48E-05 | blood | Snoring    | -0.4240 | 6.72E-01 | 8.59E-01 |
| 86  | CNTFR   | 1271  | 9  | 34546425 | 34595713 | 1.48E-05 | Lung  | Snoring    | -0.4240 | 6.72E-01 | 8.59E-01 |
| 104 | CDK2    | 1017  | 12 | 56355556 | 56371573 | 1.05E-06 | blood | Asthma     | -0.0928 | 9.26E-01 | 9.70E-01 |
| 104 | CDK2    | 1017  | 12 | 56355556 | 56371573 | 1.05E-06 | Lung  | Asthma     | -1.5361 | 1.25E-01 | 3.32E-01 |
| 104 | CDK2    | 1017  | 12 | 56355556 | 56371573 | 1.05E-06 | blood | COPD       | -0.0928 | 9.26E-01 | 9.70E-01 |
| 104 | CDK2    | 1017  | 12 | 56355556 | 56371573 | 1.05E-06 | Lung  | COPD       | -1.2872 | 1.98E-01 | 4.38E-01 |
| 104 | CDK2    | 1017  | 12 | 56355556 | 56371573 | 1.05E-06 | blood | IPF        | -0.0928 | 9.26E-01 | 9.70E-01 |
| 104 | CDK2    | 1017  | 12 | 56355556 | 56371573 | 1.05E-06 | Lung  | IPF        | 1.8023  | 7.15E-02 | 2.28E-01 |
| 104 | CDK2    | 1017  | 12 | 56355556 | 56371573 | 1.05E-06 | blood | LungCancer | -0.0928 | 9.26E-01 | 9.70E-01 |
| 104 | CDK2    | 1017  | 12 | 56355556 | 56371573 | 1.05E-06 | Lung  | LungCancer | -0.4963 | 6.20E-01 | 8.23E-01 |
| 104 | CDK2    | 1017  | 12 | 56355556 | 56371573 | 1.05E-06 | blood | Snoring    | -0.0928 | 9.26E-01 | 9.70E-01 |
| 104 | CDK2    | 1017  | 12 | 56355556 | 56371573 | 1.05E-06 | Lung  | Snoring    | -0.0928 | 9.26E-01 | 9.70E-01 |
| 105 | LRP1    | 4035  | 12 | 57517282 | 57612142 | 7.62E-10 | blood | Asthma     | -1.0160 | 3.10E-01 | 5.64E-01 |
| 105 | LRP1    | 4035  | 12 | 57517282 | 57612142 | 7.62E-10 | Lung  | Asthma     | -4.6278 | 3.70E-06 | 5.25E-05 |
| 105 | LRP1    | 4035  | 12 | 57517282 | 57612142 | 7.62E-10 | blood | COPD       | -1.0160 | 3.10E-01 | 5.64E-01 |
| 105 | LRP1    | 4035  | 12 | 57517282 | 57612142 | 7.62E-10 | Lung  | COPD       | -0.9945 | 3.20E-01 | 5.77E-01 |
| 105 | LRP1    | 4035  | 12 | 57517282 | 57612142 | 7.62E-10 | blood | IPF        | -1.0160 | 3.10E-01 | 5.64E-01 |
| 105 | LRP1    | 4035  | 12 | 57517282 | 57612142 | 7.62E-10 | Lung  | IPF        | -0.6176 | 5.37E-01 | 7.62E-01 |
| 105 | LRP1    | 4035  | 12 | 57517282 | 57612142 | 7.62E-10 | blood | LungCancer | -1.0160 | 3.10E-01 | 5.64E-01 |
| 105 | LRP1    | 4035  | 12 | 57517282 | 57612142 | 7.62E-10 | Lung  | LungCancer | 1.7772  | 7.55E-02 | 2.34E-01 |
| 105 | LRP1    | 4035  | 12 | 57517282 | 57612142 | 7.62E-10 | blood | Snoring    | -1.0160 | 3.10E-01 | 5.64E-01 |
| 105 | LRP1    | 4035  | 12 | 57517282 | 57612142 | 7.62E-10 | Lung  | Snoring    | -1.0160 | 3.10E-01 | 5.64E-01 |
| 104 | IKZF4   | 64375 | 12 | 56396268 | 56437219 | 5.21E-08 | blood | Asthma     | -0.6880 | 4.91E-01 | 7.34E-01 |
| 104 | IKZF4   | 64375 | 12 | 56396268 | 56437219 | 5.21E-08 | Lung  | Asthma     | 0.6205  | 5.35E-01 | 7.61E-01 |
| 104 | IKZF4   | 64375 | 12 | 56396268 | 56437219 | 5.21E-08 | blood | COPD       | -0.6880 | 4.91E-01 | 7.34E-01 |
| 104 | IKZF4   | 64375 | 12 | 56396268 | 56437219 | 5.21E-08 | Lung  | COPD       | 0.1437  | 8.86E-01 | 9.59E-01 |
| 104 | IKZF4   | 64375 | 12 | 56396268 | 56437219 | 5.21E-08 | blood | IPF        | -0.6880 | 4.91E-01 | 7.34E-01 |
| 104 | IKZF4   | 64375 | 12 | 56396268 | 56437219 | 5.21E-08 | Lung  | IPF        | -0.9003 | 3.68E-01 | 6.23E-01 |
| 104 | IKZF4   | 64375 | 12 | 56396268 | 56437219 | 5.21E-08 | blood | LungCancer | -0.6880 | 4.91E-01 | 7.34E-01 |
| 104 | IKZF4   | 64375 | 12 | 56396268 | 56437219 | 5.21E-08 | Lung  | LungCancer | 0.9182  | 3.59E-01 | 6.15E-01 |
| 104 | IKZF4   | 64375 | 12 | 56396268 | 56437219 | 5.21E-08 | blood | Snoring    | -0.6880 | 4.91E-01 | 7.34E-01 |
| 104 | IKZF4   | 64375 | 12 | 56396268 | 56437219 | 5.21E-08 | Lung  | Snoring    | -0.6880 | 4.91E-01 | 7.34E-01 |
| 58  | SLC17A3 | 10786 | 6  | 25840328 | 25879471 | 3.87E-06 | blood | Asthma     | -0.4466 | 6.55E-01 | 8.44E-01 |
| 58  | SLC17A3 | 10786 | 6  | 25840328 | 25879471 | 3.87E-06 | Lung  | Asthma     | 2.4516  | 1.42E-02 | 7.11E-02 |
| 58  | SLC17A3 | 10786 | 6  | 25840328 | 25879471 | 3.87E-06 | blood | COPD       | -0.4466 | 6.55E-01 | 8.44E-01 |
| 58  | SLC17A3 | 10786 | 6  | 25840328 | 25879471 | 3.87E-06 | Lung  | COPD       | -0.2670 | 7.89E-01 | 9.29E-01 |
| 58  | SLC17A3 | 10786 | 6  | 25840328 | 25879471 | 3.87E-06 | blood | IPF        | -0.4466 | 6.55E-01 | 8.44E-01 |
| 58  | SLC17A3 | 10786 | 6  | 25840328 | 25879471 | 3.87E-06 | Lung  | IPF        | -0.2826 | 7.77E-01 | 9.28E-01 |
| 58  | SLC17A3 | 10786 | 6  | 25840328 | 25879471 | 3.87E-06 | blood | LungCancer | -0.4466 | 6.55E-01 | 8.44E-01 |
| 58  | SLC17A3 | 10786 | 6  | 25840328 | 25879471 | 3.87E-06 | Lung  | LungCancer | -0.0265 | 9.79E-01 | 9.92E-01 |
| 58  | SLC17A3 | 10786 | 6  | 25840328 | 25879471 | 3.87E-06 | blood | Snoring    | -0.4466 | 6.55E-01 | 8.44E-01 |
| 58  | SLC17A3 | 10786 | 6  | 25840328 | 25879471 | 3.87E-06 | Lung  | Snoring    | -0.4466 | 6.55E-01 | 8.44E-01 |
| 56  | ATXN1   | 6310  | 6  | 16294343 | 16766721 | 8.20E-08 | blood | Asthma     | 0.2479  | 8.04E-01 | 9.34E-01 |
| 56  | ATXN1   | 6310  | 6  | 16294343 | 16766721 | 8.20E-08 | Lung  | Asthma     | 1.3800  | 1.69E-01 | 4.04E-01 |
| 56  | ATXN1   | 6310  | 6  | 16294343 | 16766721 | 8.20E-08 | blood | COPD       | 0.2479  | 8.04E-01 | 9.34E-01 |
| 56  | ATXN1   | 6310  | 6  | 16294343 | 16766721 | 8.20E-08 | Lung  | COPD       | 2.0817  | 3.74E-02 | 1.49E-01 |
| 56  | ATXN1   | 6310  | 6  | 16294343 | 16766721 | 8.20E-08 | blood | IPF        | 0.2479  | 8.04E-01 | 9.34E-01 |
| 56  | ATXN1   | 6310  | 6  | 16294343 | 16766721 | 8.20E-08 | Lung  | IPF        | 1.3913  | 1.64E-01 | 4.00E-01 |
| 56  | ATXN1   | 6310  | 6  | 16294343 | 16766721 | 8.20E-08 | blood | LungCancer | 0.2479  | 8.04E-01 | 9.34E-01 |
| 56  | ATXN1   | 6310  | 6  | 16294343 | 16766721 | 8.20E-08 | Lung  | LungCancer | 0.3122  | 7.55E-01 | 9.15E-01 |
| 56  | ATXN1   | 6310  | 6  | 16294343 | 16766721 | 8.20E-08 | blood | Snoring    | 0.2479  | 8.04E-01 | 9.34E-01 |
| 56  | ATXN1   | 6310  | 6  | 16294343 | 16766721 | 8.20E-08 | Lung  | Snoring    | 0.2479  | 8.04E-01 | 9.34E-01 |
| 96  | MYRF    | 745   | 11 | 61515121 | 61560990 | 5.08E-10 | blood | Asthma     | NA      | NA       | NA       |
| 96  | MYRF    | 745   | 11 | 61515121 | 61560990 | 5.08E-10 | Lung  | Asthma     | NA      | NA       | NA       |
| 96  | MYRF    | 745   | 11 | 61515121 | 61560990 | 5.08E-10 | blood | COPD       | NA      | NA       | NA       |
| 96  | MYRF    | 745   | 11 | 61515121 | 61560990 | 5.08E-10 | Lung  | COPD       | NA      | NA       | NA       |
| 96  | MYRF    | 745   | 11 | 61515121 | 61560990 | 5.08E-10 | blood | IPF        | NA      | NA       | NA       |
| 96  | MYRF    | 745   | 11 | 61515121 | 61560990 | 5.08E-10 | Lung  | IPF        | NA      | NA       | NA       |
| 96  | MYRF    | 745   | 11 | 61515121 | 61560990 | 5.08E-10 | blood | LungCancer | NA      | NA       | NA       |
| 96  | MYRF    | 745   | 11 | 61515121 | 61560990 | 5.08E-10 | Lung  | LungCancer | NA      | NA       | NA       |
| 96  | MYRF    | 745   | 11 | 61515121 | 61560990 | 5.08E-10 | blood | Snoring    | NA      | NA       | NA       |
| 96  | MYRF    | 745   | 11 | 61515121 | 61560990 | 5.08E-10 | Lung  | Snoring    | NA      | NA       | NA       |
| 115 | GPR18   | 2841  | 13 | 99901967 | 99915682 | 1.61E-15 | blood | Asthma     | 1.5839  | 1.13E-01 | 3.06E-01 |
| 115 | GPR18   | 2841  | 13 | 99901967 | 99915682 | 1.61E-15 | Lung  | Asthma     | -9.3132 | 1.24E-20 | 2.19E-18 |
| 115 | GPR18   | 2841  | 13 | 99901967 | 99915682 | 1.61E-15 | blood | COPD       | 1.5839  | 1.13E-01 | 3.06E-01 |
| 115 | GPR18   | 2841  | 13 | 99901967 | 99915682 | 1.61E-15 | Lung  | COPD       | -3.5898 | 3.31E-04 | 2.86E-03 |
| 115 | GPR18   | 2841  | 13 | 99901967 | 99915682 | 1.61E-15 | blood | IPF        | 1.5839  | 1.13E-01 | 3.06E-01 |
| 115 | GPR18   | 2841  | 13 | 99901967 | 99915682 | 1.61E-15 | Lung  | IPF        | 0.5568  | 5.78E-01 | 7.91E-01 |

|     |          |       |    |           |           |          |       |            |         |          |          |
|-----|----------|-------|----|-----------|-----------|----------|-------|------------|---------|----------|----------|
| 115 | GPR18    | 2841  | 13 | 99901967  | 99915682  | 1.61E-15 | blood | LungCancer | 1.5839  | 1.13E-01 | 3.06E-01 |
| 115 | GPR18    | 2841  | 13 | 99901967  | 99915682  | 1.61E-15 | Lung  | LungCancer | 0.0244  | 9.81E-01 | 9.93E-01 |
| 115 | GPR18    | 2841  | 13 | 99901967  | 99915682  | 1.61E-15 | blood | Snoring    | 1.5839  | 1.13E-01 | 3.06E-01 |
| 115 | GPR18    | 2841  | 13 | 99901967  | 99915682  | 1.61E-15 | Lung  | Snoring    | 1.5839  | 1.13E-01 | 3.06E-01 |
| 154 | SLC2A4RG | 56731 | 20 | 62366211  | 62380403  | 1.81E-11 | blood | Asthma     | -0.6293 | 5.29E-01 | 7.55E-01 |
| 154 | SLC2A4RG | 56731 | 20 | 62366211  | 62380403  | 1.81E-11 | Lung  | Asthma     | 1.0775  | 2.81E-01 | 5.36E-01 |
| 154 | SLC2A4RG | 56731 | 20 | 62366211  | 62380403  | 1.81E-11 | blood | COPD       | -0.6293 | 5.29E-01 | 7.55E-01 |
| 154 | SLC2A4RG | 56731 | 20 | 62366211  | 62380403  | 1.81E-11 | Lung  | COPD       | -0.9381 | 3.48E-01 | 6.07E-01 |
| 154 | SLC2A4RG | 56731 | 20 | 62366211  | 62380403  | 1.81E-11 | blood | IPF        | -0.6293 | 5.29E-01 | 7.55E-01 |
| 154 | SLC2A4RG | 56731 | 20 | 62366211  | 62380403  | 1.81E-11 | Lung  | IPF        | -0.6418 | 5.21E-01 | 7.55E-01 |
| 154 | SLC2A4RG | 56731 | 20 | 62366211  | 62380403  | 1.81E-11 | blood | LungCancer | -0.6293 | 5.29E-01 | 7.55E-01 |
| 154 | SLC2A4RG | 56731 | 20 | 62366211  | 62380403  | 1.81E-11 | Lung  | LungCancer | 0.8930  | 3.72E-01 | 6.25E-01 |
| 154 | SLC2A4RG | 56731 | 20 | 62366211  | 62380403  | 1.81E-11 | blood | Snoring    | -0.6293 | 5.29E-01 | 7.55E-01 |
| 154 | SLC2A4RG | 56731 | 20 | 62366211  | 62380403  | 1.81E-11 | Lung  | Snoring    | -0.6293 | 5.29E-01 | 7.55E-01 |
| 137 | MED1     | 5469  | 17 | 37555538  | 37612527  | 2.87E-10 | blood | Asthma     | 0.7919  | 4.28E-01 | 6.80E-01 |
| 137 | MED1     | 5469  | 17 | 37555538  | 37612527  | 2.87E-10 | Lung  | Asthma     | 8.0072  | 1.17E-15 | 1.33E-13 |
| 137 | MED1     | 5469  | 17 | 37555538  | 37612527  | 2.87E-10 | blood | COPD       | 0.7919  | 4.28E-01 | 6.80E-01 |
| 137 | MED1     | 5469  | 17 | 37555538  | 37612527  | 2.87E-10 | Lung  | COPD       | 2.6751  | 7.47E-03 | 4.15E-02 |
| 137 | MED1     | 5469  | 17 | 37555538  | 37612527  | 2.87E-10 | blood | IPF        | 0.7919  | 4.28E-01 | 6.80E-01 |
| 137 | MED1     | 5469  | 17 | 37555538  | 37612527  | 2.87E-10 | Lung  | IPF        | 0.7791  | 4.36E-01 | 6.80E-01 |
| 137 | MED1     | 5469  | 17 | 37555538  | 37612527  | 2.87E-10 | blood | LungCancer | 0.7919  | 4.28E-01 | 6.80E-01 |
| 137 | MED1     | 5469  | 17 | 37555538  | 37612527  | 2.87E-10 | Lung  | LungCancer | -0.8945 | 3.71E-01 | 6.24E-01 |
| 137 | MED1     | 5469  | 17 | 37555538  | 37612527  | 2.87E-10 | blood | Snoring    | 0.7919  | 4.28E-01 | 6.80E-01 |
| 137 | MED1     | 5469  | 17 | 37555538  | 37612527  | 2.87E-10 | Lung  | Snoring    | 0.7919  | 4.28E-01 | 6.80E-01 |
| 145 | CD70     | 970   | 19 | 6577969   | 6596163   | 2.58E-06 | blood | Asthma     | -0.1703 | 8.65E-01 | 9.55E-01 |
| 145 | CD70     | 970   | 19 | 6577969   | 6596163   | 2.58E-06 | Lung  | Asthma     | -5.6681 | 1.44E-08 | 4.32E-07 |
| 145 | CD70     | 970   | 19 | 6577969   | 6596163   | 2.58E-06 | blood | COPD       | -0.1703 | 8.65E-01 | 9.55E-01 |
| 145 | CD70     | 970   | 19 | 6577969   | 6596163   | 2.58E-06 | Lung  | COPD       | -1.2347 | 2.17E-01 | 4.56E-01 |
| 145 | CD70     | 970   | 19 | 6577969   | 6596163   | 2.58E-06 | blood | IPF        | -0.1703 | 8.65E-01 | 9.55E-01 |
| 145 | CD70     | 970   | 19 | 6577969   | 6596163   | 2.58E-06 | Lung  | IPF        | 0.5973  | 5.50E-01 | 7.70E-01 |
| 145 | CD70     | 970   | 19 | 6577969   | 6596163   | 2.58E-06 | blood | LungCancer | -0.1703 | 8.65E-01 | 9.55E-01 |
| 145 | CD70     | 970   | 19 | 6577969   | 6596163   | 2.58E-06 | Lung  | LungCancer | 0.0621  | 9.50E-01 | 9.84E-01 |
| 145 | CD70     | 970   | 19 | 6577969   | 6596163   | 2.58E-06 | blood | Snoring    | -0.1703 | 8.65E-01 | 9.55E-01 |
| 145 | CD70     | 970   | 19 | 6577969   | 6596163   | 2.58E-06 | Lung  | Snoring    | -0.1703 | 8.65E-01 | 9.55E-01 |
| 137 | THRA     | 7067  | 17 | 38213446  | 38255120  | 2.31E-13 | blood | Asthma     | NA      | NA       | NA       |
| 137 | THRA     | 7067  | 17 | 38213446  | 38255120  | 2.31E-13 | Lung  | Asthma     | NA      | NA       | NA       |
| 137 | THRA     | 7067  | 17 | 38213446  | 38255120  | 2.31E-13 | blood | COPD       | NA      | NA       | NA       |
| 137 | THRA     | 7067  | 17 | 38213446  | 38255120  | 2.31E-13 | Lung  | COPD       | NA      | NA       | NA       |
| 137 | THRA     | 7067  | 17 | 38213446  | 38255120  | 2.31E-13 | blood | IPF        | NA      | NA       | NA       |
| 137 | THRA     | 7067  | 17 | 38213446  | 38255120  | 2.31E-13 | Lung  | IPF        | NA      | NA       | NA       |
| 137 | THRA     | 7067  | 17 | 38213446  | 38255120  | 2.31E-13 | blood | LungCancer | NA      | NA       | NA       |
| 137 | THRA     | 7067  | 17 | 38213446  | 38255120  | 2.31E-13 | Lung  | LungCancer | NA      | NA       | NA       |
| 137 | THRA     | 7067  | 17 | 38213446  | 38255120  | 2.31E-13 | blood | Snoring    | NA      | NA       | NA       |
| 137 | THRA     | 7067  | 17 | 38213446  | 38255120  | 2.31E-13 | Lung  | Snoring    | NA      | NA       | NA       |
| 137 | NR1D1    | 9572  | 17 | 38244037  | 38261978  | 1.70E-10 | blood | Asthma     | NA      | NA       | NA       |
| 137 | NR1D1    | 9572  | 17 | 38244037  | 38261978  | 1.70E-10 | Lung  | Asthma     | NA      | NA       | NA       |
| 137 | NR1D1    | 9572  | 17 | 38244037  | 38261978  | 1.70E-10 | blood | COPD       | NA      | NA       | NA       |
| 137 | NR1D1    | 9572  | 17 | 38244037  | 38261978  | 1.70E-10 | Lung  | COPD       | NA      | NA       | NA       |
| 137 | NR1D1    | 9572  | 17 | 38244037  | 38261978  | 1.70E-10 | blood | IPF        | NA      | NA       | NA       |
| 137 | NR1D1    | 9572  | 17 | 38244037  | 38261978  | 1.70E-10 | Lung  | IPF        | NA      | NA       | NA       |
| 137 | NR1D1    | 9572  | 17 | 38244037  | 38261978  | 1.70E-10 | blood | LungCancer | NA      | NA       | NA       |
| 137 | NR1D1    | 9572  | 17 | 38244037  | 38261978  | 1.70E-10 | Lung  | LungCancer | NA      | NA       | NA       |
| 137 | NR1D1    | 9572  | 17 | 38244037  | 38261978  | 1.70E-10 | blood | Snoring    | NA      | NA       | NA       |
| 137 | NR1D1    | 9572  | 17 | 38244037  | 38261978  | 1.70E-10 | Lung  | Snoring    | NA      | NA       | NA       |
| 74  | IRF5     | 3663  | 7  | 128572976 | 128595089 | 1.56E-07 | blood | Asthma     | -0.2729 | 7.85E-01 | 9.29E-01 |
| 74  | IRF5     | 3663  | 7  | 128572976 | 128595089 | 1.56E-07 | Lung  | Asthma     | -3.0584 | 2.23E-03 | 1.42E-02 |
| 74  | IRF5     | 3663  | 7  | 128572976 | 128595089 | 1.56E-07 | blood | COPD       | -0.2729 | 7.85E-01 | 9.29E-01 |
| 74  | IRF5     | 3663  | 7  | 128572976 | 128595089 | 1.56E-07 | Lung  | COPD       | 2.1376  | 3.26E-02 | 1.35E-01 |
| 74  | IRF5     | 3663  | 7  | 128572976 | 128595089 | 1.56E-07 | blood | IPF        | -0.2729 | 7.85E-01 | 9.29E-01 |
| 74  | IRF5     | 3663  | 7  | 128572976 | 128595089 | 1.56E-07 | Lung  | IPF        | 3.1710  | 1.52E-03 | 1.03E-02 |
| 74  | IRF5     | 3663  | 7  | 128572976 | 128595089 | 1.56E-07 | blood | LungCancer | -0.2729 | 7.85E-01 | 9.29E-01 |
| 74  | IRF5     | 3663  | 7  | 128572976 | 128595089 | 1.56E-07 | Lung  | LungCancer | 1.6030  | 1.09E-01 | 3.00E-01 |
| 74  | IRF5     | 3663  | 7  | 128572976 | 128595089 | 1.56E-07 | blood | Snoring    | -0.2729 | 7.85E-01 | 9.29E-01 |
| 74  | IRF5     | 3663  | 7  | 128572976 | 128595089 | 1.56E-07 | Lung  | Snoring    | -0.2729 | 7.85E-01 | 9.29E-01 |
| 122 | IVD      | 3712  | 15 | 40692686  | 40733146  | 1.40E-09 | blood | Asthma     | 0.4026  | 6.87E-01 | 8.66E-01 |
| 122 | IVD      | 3712  | 15 | 40692686  | 40733146  | 1.40E-09 | Lung  | Asthma     | 1.9680  | 4.91E-02 | 1.81E-01 |
| 122 | IVD      | 3712  | 15 | 40692686  | 40733146  | 1.40E-09 | blood | COPD       | 0.4026  | 6.87E-01 | 8.66E-01 |
| 122 | IVD      | 3712  | 15 | 40692686  | 40733146  | 1.40E-09 | Lung  | COPD       | 1.9839  | 4.73E-02 | 1.77E-01 |
| 122 | IVD      | 3712  | 15 | 40692686  | 40733146  | 1.40E-09 | blood | IPF        | 0.4026  | 6.87E-01 | 8.66E-01 |
| 122 | IVD      | 3712  | 15 | 40692686  | 40733146  | 1.40E-09 | Lung  | IPF        | -1.7164 | 8.61E-02 | 2.59E-01 |
| 122 | IVD      | 3712  | 15 | 40692686  | 40733146  | 1.40E-09 | blood | LungCancer | 0.4026  | 6.87E-01 | 8.66E-01 |
| 122 | IVD      | 3712  | 15 | 40692686  | 40733146  | 1.40E-09 | Lung  | LungCancer | -0.0005 | 1.00E+00 | 1.00E+00 |
| 122 | IVD      | 3712  | 15 | 40692686  | 40733146  | 1.40E-09 | blood | Snoring    | 0.4026  | 6.87E-01 | 8.66E-01 |

|     |        |        |    |          |          |          |       |            |         |          |          |
|-----|--------|--------|----|----------|----------|----------|-------|------------|---------|----------|----------|
| 122 | IVD    | 3712   | 15 | 40692686 | 40733146 | 1.40E-09 | Lung  | Snoring    | 0.4026  | 6.87E-01 | 8.66E-01 |
| 122 | KNSTRN | 90417  | 15 | 40669922 | 40691489 | 1.84E-05 | blood | Asthma     | -1.0927 | 2.75E-01 | 5.26E-01 |
| 122 | KNSTRN | 90417  | 15 | 40669922 | 40691489 | 1.84E-05 | Lung  | Asthma     | -2.2461 | 2.47E-02 | 1.10E-01 |
| 122 | KNSTRN | 90417  | 15 | 40669922 | 40691489 | 1.84E-05 | blood | COPD       | -1.0927 | 2.75E-01 | 5.26E-01 |
| 122 | KNSTRN | 90417  | 15 | 40669922 | 40691489 | 1.84E-05 | Lung  | COPD       | -1.7895 | 7.35E-02 | 2.31E-01 |
| 122 | KNSTRN | 90417  | 15 | 40669922 | 40691489 | 1.84E-05 | blood | IPF        | -1.0927 | 2.75E-01 | 5.26E-01 |
| 122 | KNSTRN | 90417  | 15 | 40669922 | 40691489 | 1.84E-05 | Lung  | IPF        | 1.5216  | 1.28E-01 | 3.37E-01 |
| 122 | KNSTRN | 90417  | 15 | 40669922 | 40691489 | 1.84E-05 | blood | LungCancer | -1.0927 | 2.75E-01 | 5.26E-01 |
| 122 | KNSTRN | 90417  | 15 | 40669922 | 40691489 | 1.84E-05 | Lung  | LungCancer | 0.0535  | 9.57E-01 | 9.86E-01 |
| 122 | KNSTRN | 90417  | 15 | 40669922 | 40691489 | 1.84E-05 | blood | Snoring    | -1.0927 | 2.75E-01 | 5.26E-01 |
| 122 | KNSTRN | 90417  | 15 | 40669922 | 40691489 | 1.84E-05 | Lung  | Snoring    | -1.0927 | 2.75E-01 | 5.26E-01 |
| 135 | SOX15  | 6665   | 17 | 7486496  | 7499037  | 2.64E-06 | blood | Asthma     | 1.2737  | 2.03E-01 | 4.39E-01 |
| 135 | SOX15  | 6665   | 17 | 7486496  | 7499037  | 2.64E-06 | Lung  | Asthma     | 1.5293  | 1.26E-01 | 3.34E-01 |
| 135 | SOX15  | 6665   | 17 | 7486496  | 7499037  | 2.64E-06 | blood | COPD       | 1.2737  | 2.03E-01 | 4.39E-01 |
| 135 | SOX15  | 6665   | 17 | 7486496  | 7499037  | 2.64E-06 | Lung  | COPD       | 0.2639  | 7.92E-01 | 9.29E-01 |
| 135 | SOX15  | 6665   | 17 | 7486496  | 7499037  | 2.64E-06 | blood | IPF        | 1.2737  | 2.03E-01 | 4.39E-01 |
| 135 | SOX15  | 6665   | 17 | 7486496  | 7499037  | 2.64E-06 | Lung  | IPF        | 1.1151  | 2.65E-01 | 5.17E-01 |
| 135 | SOX15  | 6665   | 17 | 7486496  | 7499037  | 2.64E-06 | blood | LungCancer | 1.2737  | 2.03E-01 | 4.39E-01 |
| 135 | SOX15  | 6665   | 17 | 7486496  | 7499037  | 2.64E-06 | Lung  | LungCancer | 1.6257  | 1.04E-01 | 2.93E-01 |
| 135 | SOX15  | 6665   | 17 | 7486496  | 7499037  | 2.64E-06 | blood | Snoring    | 1.2737  | 2.03E-01 | 4.39E-01 |
| 135 | SOX15  | 6665   | 17 | 7486496  | 7499037  | 2.64E-06 | Lung  | Snoring    | 1.2737  | 2.03E-01 | 4.39E-01 |
| 135 | SHBG   | 6462   | 17 | 7512382  | 7541700  | 1.43E-05 | blood | Asthma     | -3.8710 | 1.08E-04 | 9.78E-04 |
| 135 | SHBG   | 6462   | 17 | 7512382  | 7541700  | 1.43E-05 | Lung  | Asthma     | -3.8651 | 1.11E-04 | 1.00E-03 |
| 135 | SHBG   | 6462   | 17 | 7512382  | 7541700  | 1.43E-05 | blood | COPD       | -3.8710 | 1.08E-04 | 9.78E-04 |
| 135 | SHBG   | 6462   | 17 | 7512382  | 7541700  | 1.43E-05 | Lung  | COPD       | -1.4976 | 1.34E-01 | 3.50E-01 |
| 135 | SHBG   | 6462   | 17 | 7512382  | 7541700  | 1.43E-05 | blood | IPF        | -3.8710 | 1.08E-04 | 9.78E-04 |
| 135 | SHBG   | 6462   | 17 | 7512382  | 7541700  | 1.43E-05 | Lung  | IPF        | -0.8869 | 3.75E-01 | 6.27E-01 |
| 135 | SHBG   | 6462   | 17 | 7512382  | 7541700  | 1.43E-05 | blood | LungCancer | -3.8710 | 1.08E-04 | 9.78E-04 |
| 135 | SHBG   | 6462   | 17 | 7512382  | 7541700  | 1.43E-05 | Lung  | LungCancer | -0.7934 | 4.28E-01 | 6.80E-01 |
| 135 | SHBG   | 6462   | 17 | 7512382  | 7541700  | 1.43E-05 | blood | Snoring    | -3.8710 | 1.08E-04 | 9.78E-04 |
| 135 | SHBG   | 6462   | 17 | 7512382  | 7541700  | 1.43E-05 | Lung  | Snoring    | -3.8710 | 1.08E-04 | 9.78E-04 |
| 135 | MPDU1  | 9526   | 17 | 7481965  | 7496530  | 1.50E-05 | blood | Asthma     | 3.0274  | 2.47E-03 | 1.55E-02 |
| 135 | MPDU1  | 9526   | 17 | 7481965  | 7496530  | 1.50E-05 | Lung  | Asthma     | 2.8023  | 5.07E-03 | 2.98E-02 |
| 135 | MPDU1  | 9526   | 17 | 7481965  | 7496530  | 1.50E-05 | blood | COPD       | 3.0274  | 2.47E-03 | 1.55E-02 |
| 135 | MPDU1  | 9526   | 17 | 7481965  | 7496530  | 1.50E-05 | Lung  | COPD       | -1.0245 | 3.06E-01 | 5.61E-01 |
| 135 | MPDU1  | 9526   | 17 | 7481965  | 7496530  | 1.50E-05 | blood | IPF        | 3.0274  | 2.47E-03 | 1.55E-02 |
| 135 | MPDU1  | 9526   | 17 | 7481965  | 7496530  | 1.50E-05 | Lung  | IPF        | 0.8621  | 3.89E-01 | 6.39E-01 |
| 135 | MPDU1  | 9526   | 17 | 7481965  | 7496530  | 1.50E-05 | blood | LungCancer | 3.0274  | 2.47E-03 | 1.55E-02 |
| 135 | MPDU1  | 9526   | 17 | 7481965  | 7496530  | 1.50E-05 | Lung  | LungCancer | 1.9645  | 4.95E-02 | 1.81E-01 |
| 135 | MPDU1  | 9526   | 17 | 7481965  | 7496530  | 1.50E-05 | blood | Snoring    | 3.0274  | 2.47E-03 | 1.55E-02 |
| 135 | MPDU1  | 9526   | 17 | 7481965  | 7496530  | 1.50E-05 | Lung  | Snoring    | 3.0274  | 2.47E-03 | 1.55E-02 |
| 150 | APOE   | 348    | 19 | 45404039 | 45417650 | 3.30E-05 | blood | Asthma     | -1.0359 | 3.00E-01 | 5.53E-01 |
| 150 | APOE   | 348    | 19 | 45404039 | 45417650 | 3.30E-05 | Lung  | Asthma     | -0.8562 | 3.92E-01 | 6.41E-01 |
| 150 | APOE   | 348    | 19 | 45404039 | 45417650 | 3.30E-05 | blood | COPD       | -1.0359 | 3.00E-01 | 5.53E-01 |
| 150 | APOE   | 348    | 19 | 45404039 | 45417650 | 3.30E-05 | Lung  | COPD       | -0.8654 | 3.87E-01 | 6.36E-01 |
| 150 | APOE   | 348    | 19 | 45404039 | 45417650 | 3.30E-05 | blood | IPF        | -1.0359 | 3.00E-01 | 5.53E-01 |
| 150 | APOE   | 348    | 19 | 45404039 | 45417650 | 3.30E-05 | Lung  | IPF        | -1.1326 | 2.57E-01 | 5.13E-01 |
| 150 | APOE   | 348    | 19 | 45404039 | 45417650 | 3.30E-05 | blood | LungCancer | -1.0359 | 3.00E-01 | 5.53E-01 |
| 150 | APOE   | 348    | 19 | 45404039 | 45417650 | 3.30E-05 | Lung  | LungCancer | -0.9413 | 3.47E-01 | 6.06E-01 |
| 150 | APOE   | 348    | 19 | 45404039 | 45417650 | 3.30E-05 | blood | Snoring    | -1.0359 | 3.00E-01 | 5.53E-01 |
| 150 | APOE   | 348    | 19 | 45404039 | 45417650 | 3.30E-05 | Lung  | Snoring    | -1.0359 | 3.00E-01 | 5.53E-01 |
| 150 | APOC1  | 341    | 19 | 45412577 | 45427606 | 1.91E-06 | blood | Asthma     | -1.0359 | 3.00E-01 | 5.53E-01 |
| 150 | APOC1  | 341    | 19 | 45412577 | 45427606 | 1.91E-06 | Lung  | Asthma     | -0.8562 | 3.92E-01 | 6.41E-01 |
| 150 | APOC1  | 341    | 19 | 45412577 | 45427606 | 1.91E-06 | blood | COPD       | -1.0359 | 3.00E-01 | 5.53E-01 |
| 150 | APOC1  | 341    | 19 | 45412577 | 45427606 | 1.91E-06 | Lung  | COPD       | -0.8654 | 3.87E-01 | 6.36E-01 |
| 150 | APOC1  | 341    | 19 | 45412577 | 45427606 | 1.91E-06 | blood | IPF        | -1.0359 | 3.00E-01 | 5.53E-01 |
| 150 | APOC1  | 341    | 19 | 45412577 | 45427606 | 1.91E-06 | Lung  | IPF        | -1.1326 | 2.57E-01 | 5.13E-01 |
| 150 | APOC1  | 341    | 19 | 45412577 | 45427606 | 1.91E-06 | blood | LungCancer | -1.0359 | 3.00E-01 | 5.53E-01 |
| 150 | APOC1  | 341    | 19 | 45412577 | 45427606 | 1.91E-06 | Lung  | LungCancer | -0.9413 | 3.47E-01 | 6.06E-01 |
| 150 | APOC1  | 341    | 19 | 45412577 | 45427606 | 1.91E-06 | blood | Snoring    | -1.0359 | 3.00E-01 | 5.53E-01 |
| 150 | APOC1  | 341    | 19 | 45412577 | 45427606 | 1.91E-06 | Lung  | Snoring    | -1.0359 | 3.00E-01 | 5.53E-01 |
| 154 | ZBTB46 | 140685 | 20 | 62370021 | 62468731 | 2.88E-08 | blood | Asthma     | 0.9134  | 3.61E-01 | 6.15E-01 |
| 154 | ZBTB46 | 140685 | 20 | 62370021 | 62468731 | 2.88E-08 | Lung  | Asthma     | 5.2535  | 1.49E-07 | 2.96E-06 |
| 154 | ZBTB46 | 140685 | 20 | 62370021 | 62468731 | 2.88E-08 | blood | COPD       | 0.9134  | 3.61E-01 | 6.15E-01 |
| 154 | ZBTB46 | 140685 | 20 | 62370021 | 62468731 | 2.88E-08 | Lung  | COPD       | 4.1852  | 2.85E-05 | 3.51E-04 |
| 154 | ZBTB46 | 140685 | 20 | 62370021 | 62468731 | 2.88E-08 | blood | IPF        | 0.9134  | 3.61E-01 | 6.15E-01 |
| 154 | ZBTB46 | 140685 | 20 | 62370021 | 62468731 | 2.88E-08 | Lung  | IPF        | 1.0402  | 2.98E-01 | 5.53E-01 |
| 154 | ZBTB46 | 140685 | 20 | 62370021 | 62468731 | 2.88E-08 | blood | LungCancer | 0.9134  | 3.61E-01 | 6.15E-01 |
| 154 | ZBTB46 | 140685 | 20 | 62370021 | 62468731 | 2.88E-08 | Lung  | LungCancer | 0.9915  | 3.21E-01 | 5.79E-01 |
| 154 | ZBTB46 | 140685 | 20 | 62370021 | 62468731 | 2.88E-08 | blood | Snoring    | 0.9134  | 3.61E-01 | 6.15E-01 |
| 154 | ZBTB46 | 140685 | 20 | 62370021 | 62468731 | 2.88E-08 | Lung  | Snoring    | 0.9134  | 3.61E-01 | 6.15E-01 |
| 154 | HELZ2  | 85441  | 20 | 62184439 | 62210592 | 5.17E-09 | blood | Asthma     | -0.2715 | 7.86E-01 | 9.29E-01 |
| 154 | HELZ2  | 85441  | 20 | 62184439 | 62210592 | 5.17E-09 | Lung  | Asthma     | -0.1838 | 8.54E-01 | 9.55E-01 |



|     |          |       |    |           |           |          |       |            |          |          |          |
|-----|----------|-------|----|-----------|-----------|----------|-------|------------|----------|----------|----------|
| 154 | HELZ2    | 85441 | 20 | 62184439  | 62210592  | 5.17E-09 | blood | COPD       | -0.2715  | 7.86E-01 | 9.29E-01 |
| 154 | HELZ2    | 85441 | 20 | 62184439  | 62210592  | 5.17E-09 | Lung  | COPD       | 0.9463   | 3.44E-01 | 6.04E-01 |
| 154 | HELZ2    | 85441 | 20 | 62184439  | 62210592  | 5.17E-09 | blood | IPF        | -0.2715  | 7.86E-01 | 9.29E-01 |
| 154 | HELZ2    | 85441 | 20 | 62184439  | 62210592  | 5.17E-09 | Lung  | IPF        | -0.2451  | 8.06E-01 | 9.35E-01 |
| 154 | HELZ2    | 85441 | 20 | 62184439  | 62210592  | 5.17E-09 | blood | LungCancer | -0.2715  | 7.86E-01 | 9.29E-01 |
| 154 | HELZ2    | 85441 | 20 | 62184439  | 62210592  | 5.17E-09 | Lung  | LungCancer | -2.4342  | 1.49E-02 | 7.38E-02 |
| 154 | HELZ2    | 85441 | 20 | 62184439  | 62210592  | 5.17E-09 | blood | Snoring    | -0.2715  | 7.86E-01 | 9.29E-01 |
| 154 | HELZ2    | 85441 | 20 | 62184439  | 62210592  | 5.17E-09 | Lung  | Snoring    | -0.2715  | 7.86E-01 | 9.29E-01 |
| 148 | SLC7A10  | 56301 | 19 | 33694570  | 33721756  | 5.14E-05 | blood | Asthma     | -1.4515  | 1.47E-01 | 3.71E-01 |
| 148 | SLC7A10  | 56301 | 19 | 33694570  | 33721756  | 5.14E-05 | Lung  | Asthma     | 1.7804   | 7.50E-02 | 2.33E-01 |
| 148 | SLC7A10  | 56301 | 19 | 33694570  | 33721756  | 5.14E-05 | blood | COPD       | -1.4515  | 1.47E-01 | 3.71E-01 |
| 148 | SLC7A10  | 56301 | 19 | 33694570  | 33721756  | 5.14E-05 | Lung  | COPD       | -0.5330  | 5.94E-01 | 8.00E-01 |
| 148 | SLC7A10  | 56301 | 19 | 33694570  | 33721756  | 5.14E-05 | blood | IPF        | -1.4515  | 1.47E-01 | 3.71E-01 |
| 148 | SLC7A10  | 56301 | 19 | 33694570  | 33721756  | 5.14E-05 | Lung  | IPF        | 0.9667   | 3.34E-01 | 5.89E-01 |
| 148 | SLC7A10  | 56301 | 19 | 33694570  | 33721756  | 5.14E-05 | blood | LungCancer | -1.4515  | 1.47E-01 | 3.71E-01 |
| 148 | SLC7A10  | 56301 | 19 | 33694570  | 33721756  | 5.14E-05 | Lung  | LungCancer | 0.1495   | 8.81E-01 | 9.56E-01 |
| 148 | SLC7A10  | 56301 | 19 | 33694570  | 33721756  | 5.14E-05 | blood | Snoring    | -1.4515  | 1.47E-01 | 3.71E-01 |
| 148 | SLC7A10  | 56301 | 19 | 33694570  | 33721756  | 5.14E-05 | Lung  | Snoring    | -1.4515  | 1.47E-01 | 3.71E-01 |
| 109 | C12orf65 | 91574 | 12 | 123712844 | 123747651 | 1.17E-09 | blood | Asthma     | -0.3827  | 7.02E-01 | 8.81E-01 |
| 109 | C12orf65 | 91574 | 12 | 123712844 | 123747651 | 1.17E-09 | Lung  | Asthma     | 4.7376   | 2.16E-06 | 3.38E-05 |
| 109 | C12orf65 | 91574 | 12 | 123712844 | 123747651 | 1.17E-09 | blood | COPD       | -0.3827  | 7.02E-01 | 8.81E-01 |
| 109 | C12orf65 | 91574 | 12 | 123712844 | 123747651 | 1.17E-09 | Lung  | COPD       | 0.2354   | 8.14E-01 | 9.40E-01 |
| 109 | C12orf65 | 91574 | 12 | 123712844 | 123747651 | 1.17E-09 | blood | IPF        | -0.3827  | 7.02E-01 | 8.81E-01 |
| 109 | C12orf65 | 91574 | 12 | 123712844 | 123747651 | 1.17E-09 | Lung  | IPF        | 0.6724   | 5.01E-01 | 7.42E-01 |
| 109 | C12orf65 | 91574 | 12 | 123712844 | 123747651 | 1.17E-09 | blood | LungCancer | -0.3827  | 7.02E-01 | 8.81E-01 |
| 109 | C12orf65 | 91574 | 12 | 123712844 | 123747651 | 1.17E-09 | Lung  | LungCancer | 0.5667   | 5.71E-01 | 7.87E-01 |
| 109 | C12orf65 | 91574 | 12 | 123712844 | 123747651 | 1.17E-09 | blood | Snoring    | -0.3827  | 7.02E-01 | 8.81E-01 |
| 109 | C12orf65 | 91574 | 12 | 123712844 | 123747651 | 1.17E-09 | Lung  | Snoring    | -0.3827  | 7.02E-01 | 8.81E-01 |
| 49  | PDLIM4   | 8572  | 5  | 131588351 | 131614147 | 4.82E-14 | blood | Asthma     | 1.0950   | 2.74E-01 | 5.26E-01 |
| 49  | PDLIM4   | 8572  | 5  | 131588351 | 131614147 | 4.82E-14 | Lung  | Asthma     | 7.7500   | 9.20E-15 | 9.75E-13 |
| 49  | PDLIM4   | 8572  | 5  | 131588351 | 131614147 | 4.82E-14 | blood | COPD       | 1.0950   | 2.74E-01 | 5.26E-01 |
| 49  | PDLIM4   | 8572  | 5  | 131588351 | 131614147 | 4.82E-14 | Lung  | COPD       | 2.9140   | 3.57E-03 | 2.17E-02 |
| 49  | PDLIM4   | 8572  | 5  | 131588351 | 131614147 | 4.82E-14 | blood | IPF        | 1.0950   | 2.74E-01 | 5.26E-01 |
| 49  | PDLIM4   | 8572  | 5  | 131588351 | 131614147 | 4.82E-14 | Lung  | IPF        | -0.5337  | 5.94E-01 | 8.00E-01 |
| 49  | PDLIM4   | 8572  | 5  | 131588351 | 131614147 | 4.82E-14 | blood | LungCancer | 1.0950   | 2.74E-01 | 5.26E-01 |
| 49  | PDLIM4   | 8572  | 5  | 131588351 | 131614147 | 4.82E-14 | Lung  | LungCancer | -2.6069  | 9.14E-03 | 4.96E-02 |
| 49  | PDLIM4   | 8572  | 5  | 131588351 | 131614147 | 4.82E-14 | blood | Snoring    | 1.0950   | 2.74E-01 | 5.26E-01 |
| 49  | PDLIM4   | 8572  | 5  | 131588351 | 131614147 | 4.82E-14 | Lung  | Snoring    | 1.0950   | 2.74E-01 | 5.26E-01 |
| 49  | KIF3A    | 11127 | 5  | 132023323 | 132078265 | 3.18E-13 | blood | Asthma     | -0.6034  | 5.46E-01 | 7.64E-01 |
| 49  | KIF3A    | 11127 | 5  | 132023323 | 132078265 | 3.18E-13 | Lung  | Asthma     | -8.0200  | 1.05E-15 | 1.24E-13 |
| 49  | KIF3A    | 11127 | 5  | 132023323 | 132078265 | 3.18E-13 | blood | COPD       | -0.6034  | 5.46E-01 | 7.64E-01 |
| 49  | KIF3A    | 11127 | 5  | 132023323 | 132078265 | 3.18E-13 | Lung  | COPD       | -2.8982  | 3.75E-03 | 2.24E-02 |
| 49  | KIF3A    | 11127 | 5  | 132023323 | 132078265 | 3.18E-13 | blood | IPF        | -0.6034  | 5.46E-01 | 7.64E-01 |
| 49  | KIF3A    | 11127 | 5  | 132023323 | 132078265 | 3.18E-13 | Lung  | IPF        | 0.2343   | 8.15E-01 | 9.40E-01 |
| 49  | KIF3A    | 11127 | 5  | 132023323 | 132078265 | 3.18E-13 | blood | LungCancer | -0.6034  | 5.46E-01 | 7.64E-01 |
| 49  | KIF3A    | 11127 | 5  | 132023323 | 132078265 | 3.18E-13 | Lung  | LungCancer | 1.7720   | 7.64E-02 | 2.36E-01 |
| 49  | KIF3A    | 11127 | 5  | 132023323 | 132078265 | 3.18E-13 | blood | Snoring    | -0.6034  | 5.46E-01 | 7.64E-01 |
| 49  | KIF3A    | 11127 | 5  | 132023323 | 132078265 | 3.18E-13 | Lung  | Snoring    | -0.6034  | 5.46E-01 | 7.64E-01 |
| 51  | NDFIP1   | 80762 | 5  | 141483324 | 141539008 | 5.00E-10 | blood | Asthma     | -0.7203  | 4.71E-01 | 7.16E-01 |
| 51  | NDFIP1   | 80762 | 5  | 141483324 | 141539008 | 5.00E-10 | Lung  | Asthma     | -1.2800  | 2.00E-01 | 4.39E-01 |
| 51  | NDFIP1   | 80762 | 5  | 141483324 | 141539008 | 5.00E-10 | blood | COPD       | -0.7203  | 4.71E-01 | 7.16E-01 |
| 51  | NDFIP1   | 80762 | 5  | 141483324 | 141539008 | 5.00E-10 | Lung  | COPD       | -1.0359  | 3.00E-01 | 5.53E-01 |
| 51  | NDFIP1   | 80762 | 5  | 141483324 | 141539008 | 5.00E-10 | blood | IPF        | -0.7203  | 4.71E-01 | 7.16E-01 |
| 51  | NDFIP1   | 80762 | 5  | 141483324 | 141539008 | 5.00E-10 | Lung  | IPF        | -0.8968  | 3.70E-01 | 6.23E-01 |
| 51  | NDFIP1   | 80762 | 5  | 141483324 | 141539008 | 5.00E-10 | blood | LungCancer | -0.7203  | 4.71E-01 | 7.16E-01 |
| 51  | NDFIP1   | 80762 | 5  | 141483324 | 141539008 | 5.00E-10 | Lung  | LungCancer | 0.2786   | 7.81E-01 | 9.29E-01 |
| 51  | NDFIP1   | 80762 | 5  | 141483324 | 141539008 | 5.00E-10 | blood | Snoring    | -0.7203  | 4.71E-01 | 7.16E-01 |
| 51  | NDFIP1   | 80762 | 5  | 141483324 | 141539008 | 5.00E-10 | Lung  | Snoring    | -0.7203  | 4.71E-01 | 7.16E-01 |
| 137 | STARD3   | 10948 | 17 | 37788333  | 37825454  | 3.36E-08 | blood | Asthma     | 0.4088   | 6.83E-01 | 8.64E-01 |
| 137 | STARD3   | 10948 | 17 | 37788333  | 37825454  | 3.36E-08 | Lung  | Asthma     | -6.0264  | 1.68E-09 | 9.53E-08 |
| 137 | STARD3   | 10948 | 17 | 37788333  | 37825454  | 3.36E-08 | blood | COPD       | 0.4088   | 6.83E-01 | 8.64E-01 |
| 137 | STARD3   | 10948 | 17 | 37788333  | 37825454  | 3.36E-08 | Lung  | COPD       | -1.0860  | 2.77E-01 | 5.29E-01 |
| 137 | STARD3   | 10948 | 17 | 37788333  | 37825454  | 3.36E-08 | blood | IPF        | 0.4088   | 6.83E-01 | 8.64E-01 |
| 137 | STARD3   | 10948 | 17 | 37788333  | 37825454  | 3.36E-08 | Lung  | IPF        | -0.4381  | 6.61E-01 | 8.49E-01 |
| 137 | STARD3   | 10948 | 17 | 37788333  | 37825454  | 3.36E-08 | blood | LungCancer | 0.4088   | 6.83E-01 | 8.64E-01 |
| 137 | STARD3   | 10948 | 17 | 37788333  | 37825454  | 3.36E-08 | Lung  | LungCancer | -0.0792  | 9.37E-01 | 9.77E-01 |
| 137 | STARD3   | 10948 | 17 | 37788333  | 37825454  | 3.36E-08 | blood | Snoring    | 0.4088   | 6.83E-01 | 8.64E-01 |
| 137 | STARD3   | 10948 | 17 | 37788333  | 37825454  | 3.36E-08 | Lung  | Snoring    | 0.4088   | 6.83E-01 | 8.64E-01 |
| 137 | PPP1R1B  | 84152 | 17 | 37778177  | 37797878  | 2.69E-05 | blood | Asthma     | 0.6954   | 4.87E-01 | 7.30E-01 |
| 137 | PPP1R1B  | 84152 | 17 | 37778177  | 37797878  | 2.69E-05 | Lung  | Asthma     | -10.9172 | 9.54E-28 | 3.03E-25 |
| 137 | PPP1R1B  | 84152 | 17 | 37778177  | 37797878  | 2.69E-05 | blood | COPD       | 0.6954   | 4.87E-01 | 7.30E-01 |
| 137 | PPP1R1B  | 84152 | 17 | 37778177  | 37797878  | 2.69E-05 | Lung  | COPD       | -4.0857  | 4.39E-05 | 4.91E-04 |
| 137 | PPP1R1B  | 84152 | 17 | 37778177  | 37797878  | 2.69E-05 | blood | IPF        | 0.6954   | 4.87E-01 | 7.30E-01 |

|     |         |        |    |           |           |          |       |            |         |          |          |
|-----|---------|--------|----|-----------|-----------|----------|-------|------------|---------|----------|----------|
| 137 | PPPIR1B | 84152  | 17 | 37778177  | 37797878  | 2.69E-05 | Lung  | IPF        | -1.7282 | 8.40E-02 | 2.54E-01 |
| 137 | PPPIR1B | 84152  | 17 | 37778177  | 37797878  | 2.69E-05 | blood | LungCancer | 0.6954  | 4.87E-01 | 7.30E-01 |
| 137 | PPPIR1B | 84152  | 17 | 37778177  | 37797878  | 2.69E-05 | Lung  | LungCancer | 0.7777  | 4.37E-01 | 6.90E-01 |
| 137 | PPPIR1B | 84152  | 17 | 37778177  | 37797878  | 2.69E-05 | blood | Snoring    | 0.6954  | 4.87E-01 | 7.30E-01 |
| 137 | PPPIR1B | 84152  | 17 | 37778177  | 37797878  | 2.69E-05 | Lung  | Snoring    | 0.6954  | 4.87E-01 | 7.30E-01 |
| 111 | COG6    | 57511  | 13 | 40224764  | 40370802  | 8.21E-07 | blood | Asthma     | 0.7592  | 4.48E-01 | 6.96E-01 |
| 111 | COG6    | 57511  | 13 | 40224764  | 40370802  | 8.21E-07 | Lung  | Asthma     | 4.0181  | 5.87E-05 | 6.20E-04 |
| 111 | COG6    | 57511  | 13 | 40224764  | 40370802  | 8.21E-07 | blood | COPD       | 0.7592  | 4.48E-01 | 6.96E-01 |
| 111 | COG6    | 57511  | 13 | 40224764  | 40370802  | 8.21E-07 | Lung  | COPD       | 0.0622  | 9.50E-01 | 9.84E-01 |
| 111 | COG6    | 57511  | 13 | 40224764  | 40370802  | 8.21E-07 | blood | IPF        | 0.7592  | 4.48E-01 | 6.96E-01 |
| 111 | COG6    | 57511  | 13 | 40224764  | 40370802  | 8.21E-07 | Lung  | IPF        | 0.6736  | 5.01E-01 | 7.42E-01 |
| 111 | COG6    | 57511  | 13 | 40224764  | 40370802  | 8.21E-07 | blood | LungCancer | 0.7592  | 4.48E-01 | 6.96E-01 |
| 111 | COG6    | 57511  | 13 | 40224764  | 40370802  | 8.21E-07 | Lung  | LungCancer | -1.6690 | 9.51E-02 | 2.79E-01 |
| 111 | COG6    | 57511  | 13 | 40224764  | 40370802  | 8.21E-07 | blood | Snoring    | 0.7592  | 4.48E-01 | 6.96E-01 |
| 111 | COG6    | 57511  | 13 | 40224764  | 40370802  | 8.21E-07 | Lung  | Snoring    | 0.7592  | 4.48E-01 | 6.96E-01 |
| 96  | FADS2   | 9415   | 11 | 61578675  | 61639826  | 1.34E-11 | blood | Asthma     | 1.8453  | 6.50E-02 | 2.15E-01 |
| 96  | FADS2   | 9415   | 11 | 61578675  | 61639826  | 1.34E-11 | Lung  | Asthma     | -6.2675 | 3.67E-10 | 2.54E-08 |
| 96  | FADS2   | 9415   | 11 | 61578675  | 61639826  | 1.34E-11 | blood | COPD       | 1.8453  | 6.50E-02 | 2.15E-01 |
| 96  | FADS2   | 9415   | 11 | 61578675  | 61639826  | 1.34E-11 | Lung  | COPD       | -2.3583 | 1.84E-02 | 8.77E-02 |
| 96  | FADS2   | 9415   | 11 | 61578675  | 61639826  | 1.34E-11 | blood | IPF        | 1.8453  | 6.50E-02 | 2.15E-01 |
| 96  | FADS2   | 9415   | 11 | 61578675  | 61639826  | 1.34E-11 | Lung  | IPF        | -2.2000 | 2.82E-02 | 1.23E-01 |
| 96  | FADS2   | 9415   | 11 | 61578675  | 61639826  | 1.34E-11 | blood | LungCancer | 1.8453  | 6.50E-02 | 2.15E-01 |
| 96  | FADS2   | 9415   | 11 | 61578675  | 61639826  | 1.34E-11 | Lung  | LungCancer | 1.0695  | 2.85E-01 | 5.40E-01 |
| 96  | FADS2   | 9415   | 11 | 61578675  | 61639826  | 1.34E-11 | blood | Snoring    | 1.8453  | 6.50E-02 | 2.15E-01 |
| 96  | FADS2   | 9415   | 11 | 61578675  | 61639826  | 1.34E-11 | Lung  | Snoring    | 1.8453  | 6.50E-02 | 2.15E-01 |
| 96  | TMEM258 | 746    | 11 | 61551602  | 61565085  | 5.34E-13 | blood | Asthma     | 1.1265  | 2.60E-01 | 5.16E-01 |
| 96  | TMEM258 | 746    | 11 | 61551602  | 61565085  | 5.34E-13 | Lung  | Asthma     | -7.0288 | 2.08E-12 | 1.79E-10 |
| 96  | TMEM258 | 746    | 11 | 61551602  | 61565085  | 5.34E-13 | blood | COPD       | 1.1265  | 2.60E-01 | 5.16E-01 |
| 96  | TMEM258 | 746    | 11 | 61551602  | 61565085  | 5.34E-13 | Lung  | COPD       | -2.1724 | 2.98E-02 | 1.28E-01 |
| 96  | TMEM258 | 746    | 11 | 61551602  | 61565085  | 5.34E-13 | blood | IPF        | 1.1265  | 2.60E-01 | 5.16E-01 |
| 96  | TMEM258 | 746    | 11 | 61551602  | 61565085  | 5.34E-13 | Lung  | IPF        | -1.0500 | 2.93E-01 | 5.48E-01 |
| 96  | TMEM258 | 746    | 11 | 61551602  | 61565085  | 5.34E-13 | blood | LungCancer | 1.1265  | 2.60E-01 | 5.16E-01 |
| 96  | TMEM258 | 746    | 11 | 61551602  | 61565085  | 5.34E-13 | Lung  | LungCancer | -3.1599 | 1.58E-03 | 1.07E-02 |
| 96  | TMEM258 | 746    | 11 | 61551602  | 61565085  | 5.34E-13 | blood | Snoring    | 1.1265  | 2.60E-01 | 5.16E-01 |
| 96  | TMEM258 | 746    | 11 | 61551602  | 61565085  | 5.34E-13 | Lung  | Snoring    | 1.1265  | 2.60E-01 | 5.16E-01 |
| 115 | UBAC2   | 337867 | 13 | 99847679  | 100043753 | 1.67E-14 | blood | Asthma     | -0.3030 | 7.62E-01 | 9.20E-01 |
| 115 | UBAC2   | 337867 | 13 | 99847679  | 100043753 | 1.67E-14 | Lung  | Asthma     | -8.4123 | 4.02E-17 | 5.32E-15 |
| 115 | UBAC2   | 337867 | 13 | 99847679  | 100043753 | 1.67E-14 | blood | COPD       | -0.3030 | 7.62E-01 | 9.20E-01 |
| 115 | UBAC2   | 337867 | 13 | 99847679  | 100043753 | 1.67E-14 | Lung  | COPD       | -3.4942 | 4.76E-04 | 3.97E-03 |
| 115 | UBAC2   | 337867 | 13 | 99847679  | 100043753 | 1.67E-14 | blood | IPF        | -0.3030 | 7.62E-01 | 9.20E-01 |
| 115 | UBAC2   | 337867 | 13 | 99847679  | 100043753 | 1.67E-14 | Lung  | IPF        | -0.6462 | 5.18E-01 | 7.53E-01 |
| 115 | UBAC2   | 337867 | 13 | 99847679  | 100043753 | 1.67E-14 | blood | LungCancer | -0.3030 | 7.62E-01 | 9.20E-01 |
| 115 | UBAC2   | 337867 | 13 | 99847679  | 100043753 | 1.67E-14 | Lung  | LungCancer | -2.0955 | 3.61E-02 | 1.44E-01 |
| 115 | UBAC2   | 337867 | 13 | 99847679  | 100043753 | 1.67E-14 | blood | Snoring    | -0.3030 | 7.62E-01 | 9.20E-01 |
| 115 | UBAC2   | 337867 | 13 | 99847679  | 100043753 | 1.67E-14 | Lung  | Snoring    | -0.3030 | 7.62E-01 | 9.20E-01 |
| 47  | WDR36   | 134430 | 5  | 110422870 | 110471200 | 3.73E-13 | blood | Asthma     | 1.4683  | 1.42E-01 | 3.63E-01 |
| 47  | WDR36   | 134430 | 5  | 110422870 | 110471200 | 3.73E-13 | Lung  | Asthma     | -8.6700 | 4.27E-18 | 6.46E-16 |
| 47  | WDR36   | 134430 | 5  | 110422870 | 110471200 | 3.73E-13 | blood | COPD       | 1.4683  | 1.42E-01 | 3.63E-01 |
| 47  | WDR36   | 134430 | 5  | 110422870 | 110471200 | 3.73E-13 | Lung  | COPD       | -2.5276 | 1.15E-02 | 5.96E-02 |
| 47  | WDR36   | 134430 | 5  | 110422870 | 110471200 | 3.73E-13 | blood | IPF        | 1.4683  | 1.42E-01 | 3.63E-01 |
| 47  | WDR36   | 134430 | 5  | 110422870 | 110471200 | 3.73E-13 | Lung  | IPF        | 1.4467  | 1.48E-01 | 3.73E-01 |
| 47  | WDR36   | 134430 | 5  | 110422870 | 110471200 | 3.73E-13 | blood | LungCancer | 1.4683  | 1.42E-01 | 3.63E-01 |
| 47  | WDR36   | 134430 | 5  | 110422870 | 110471200 | 3.73E-13 | Lung  | LungCancer | 0.0215  | 9.83E-01 | 9.93E-01 |
| 47  | WDR36   | 134430 | 5  | 110422870 | 110471200 | 3.73E-13 | blood | Snoring    | 1.4683  | 1.42E-01 | 3.63E-01 |
| 47  | WDR36   | 134430 | 5  | 110422870 | 110471200 | 3.73E-13 | Lung  | Snoring    | 1.4683  | 1.42E-01 | 3.63E-01 |
| 64  | AHI1    | 54806  | 6  | 135599670 | 135823903 | 1.44E-06 | blood | Asthma     | -0.8784 | 3.80E-01 | 6.29E-01 |
| 64  | AHI1    | 54806  | 6  | 135599670 | 135823903 | 1.44E-06 | Lung  | Asthma     | -2.5000 | 1.24E-02 | 6.38E-02 |
| 64  | AHI1    | 54806  | 6  | 135599670 | 135823903 | 1.44E-06 | blood | COPD       | -0.8784 | 3.80E-01 | 6.29E-01 |
| 64  | AHI1    | 54806  | 6  | 135599670 | 135823903 | 1.44E-06 | Lung  | COPD       | -0.5335 | 5.94E-01 | 8.00E-01 |
| 64  | AHI1    | 54806  | 6  | 135599670 | 135823903 | 1.44E-06 | blood | IPF        | -0.8784 | 3.80E-01 | 6.29E-01 |
| 64  | AHI1    | 54806  | 6  | 135599670 | 135823903 | 1.44E-06 | Lung  | IPF        | -1.8767 | 6.06E-02 | 2.05E-01 |
| 64  | AHI1    | 54806  | 6  | 135599670 | 135823903 | 1.44E-06 | blood | LungCancer | -0.8784 | 3.80E-01 | 6.29E-01 |
| 64  | AHI1    | 54806  | 6  | 135599670 | 135823903 | 1.44E-06 | Lung  | LungCancer | 0.0176  | 9.86E-01 | 9.93E-01 |
| 64  | AHI1    | 54806  | 6  | 135599670 | 135823903 | 1.44E-06 | blood | Snoring    | -0.8784 | 3.80E-01 | 6.29E-01 |
| 64  | AHI1    | 54806  | 6  | 135599670 | 135823903 | 1.44E-06 | Lung  | Snoring    | -0.8784 | 3.80E-01 | 6.29E-01 |
| 108 | PLXNC1  | 10154  | 12 | 94537499  | 94706451  | 1.87E-09 | blood | Asthma     | NA      | NA       | NA       |
| 108 | PLXNC1  | 10154  | 12 | 94537499  | 94706451  | 1.87E-09 | Lung  | Asthma     | NA      | NA       | NA       |
| 108 | PLXNC1  | 10154  | 12 | 94537499  | 94706451  | 1.87E-09 | blood | COPD       | NA      | NA       | NA       |
| 108 | PLXNC1  | 10154  | 12 | 94537499  | 94706451  | 1.87E-09 | Lung  | COPD       | NA      | NA       | NA       |
| 108 | PLXNC1  | 10154  | 12 | 94537499  | 94706451  | 1.87E-09 | blood | IPF        | NA      | NA       | NA       |
| 108 | PLXNC1  | 10154  | 12 | 94537499  | 94706451  | 1.87E-09 | Lung  | IPF        | NA      | NA       | NA       |
| 108 | PLXNC1  | 10154  | 12 | 94537499  | 94706451  | 1.87E-09 | blood | LungCancer | NA      | NA       | NA       |
| 108 | PLXNC1  | 10154  | 12 | 94537499  | 94706451  | 1.87E-09 | Lung  | LungCancer | NA      | NA       | NA       |

|     |         |       |    |           |           |          |       |            |          |          |          |
|-----|---------|-------|----|-----------|-----------|----------|-------|------------|----------|----------|----------|
| 108 | PLXNC1  | 10154 | 12 | 94537499  | 94706451  | 1.87E-09 | blood | Snoring    | NA       | NA       | NA       |
| 108 | PLXNC1  | 10154 | 12 | 94537499  | 94706451  | 1.87E-09 | Lung  | Snoring    | NA       | NA       | NA       |
| 69  | IL6     | 3569  | 7  | 22761766  | 22776621  | 3.10E-11 | blood | Asthma     | NA       | NA       | NA       |
| 69  | IL6     | 3569  | 7  | 22761766  | 22776621  | 3.10E-11 | Lung  | Asthma     | NA       | NA       | NA       |
| 69  | IL6     | 3569  | 7  | 22761766  | 22776621  | 3.10E-11 | blood | COPD       | NA       | NA       | NA       |
| 69  | IL6     | 3569  | 7  | 22761766  | 22776621  | 3.10E-11 | Lung  | COPD       | NA       | NA       | NA       |
| 69  | IL6     | 3569  | 7  | 22761766  | 22776621  | 3.10E-11 | blood | IPF        | NA       | NA       | NA       |
| 69  | IL6     | 3569  | 7  | 22761766  | 22776621  | 3.10E-11 | Lung  | IPF        | NA       | NA       | NA       |
| 69  | IL6     | 3569  | 7  | 22761766  | 22776621  | 3.10E-11 | blood | LungCancer | NA       | NA       | NA       |
| 69  | IL6     | 3569  | 7  | 22761766  | 22776621  | 3.10E-11 | Lung  | LungCancer | NA       | NA       | NA       |
| 69  | IL6     | 3569  | 7  | 22761766  | 22776621  | 3.10E-11 | blood | Snoring    | NA       | NA       | NA       |
| 69  | IL6     | 3569  | 7  | 22761766  | 22776621  | 3.10E-11 | Lung  | Snoring    | NA       | NA       | NA       |
| 127 | ADAMTS7 | 11173 | 15 | 79046545  | 79108805  | 2.16E-15 | blood | Asthma     | 0.5476   | 5.84E-01 | 7.94E-01 |
| 127 | ADAMTS7 | 11173 | 15 | 79046545  | 79108805  | 2.16E-15 | Lung  | Asthma     | -1.1130  | 2.66E-01 | 5.17E-01 |
| 127 | ADAMTS7 | 11173 | 15 | 79046545  | 79108805  | 2.16E-15 | blood | COPD       | 0.5476   | 5.84E-01 | 7.94E-01 |
| 127 | ADAMTS7 | 11173 | 15 | 79046545  | 79108805  | 2.16E-15 | Lung  | COPD       | 0.9381   | 3.48E-01 | 6.07E-01 |
| 127 | ADAMTS7 | 11173 | 15 | 79046545  | 79108805  | 2.16E-15 | blood | IPF        | 0.5476   | 5.84E-01 | 7.94E-01 |
| 127 | ADAMTS7 | 11173 | 15 | 79046545  | 79108805  | 2.16E-15 | Lung  | IPF        | -0.9593  | 3.37E-01 | 5.94E-01 |
| 127 | ADAMTS7 | 11173 | 15 | 79046545  | 79108805  | 2.16E-15 | blood | LungCancer | 0.5476   | 5.84E-01 | 7.94E-01 |
| 127 | ADAMTS7 | 11173 | 15 | 79046545  | 79108805  | 2.16E-15 | Lung  | LungCancer | -0.1260  | 9.00E-01 | 9.64E-01 |
| 127 | ADAMTS7 | 11173 | 15 | 79046545  | 79108805  | 2.16E-15 | blood | Snoring    | 0.5476   | 5.84E-01 | 7.94E-01 |
| 127 | ADAMTS7 | 11173 | 15 | 79046545  | 79108805  | 2.16E-15 | Lung  | Snoring    | 0.5476   | 5.84E-01 | 7.94E-01 |
| 127 | IREB2   | 3658  | 15 | 78725518  | 78798798  | 2.78E-08 | blood | Asthma     | 0.1000   | 9.20E-01 | 9.68E-01 |
| 127 | IREB2   | 3658  | 15 | 78725518  | 78798798  | 2.78E-08 | Lung  | Asthma     | -1.9077  | 5.64E-02 | 1.97E-01 |
| 127 | IREB2   | 3658  | 15 | 78725518  | 78798798  | 2.78E-08 | blood | COPD       | 0.1000   | 9.20E-01 | 9.68E-01 |
| 127 | IREB2   | 3658  | 15 | 78725518  | 78798798  | 2.78E-08 | Lung  | COPD       | -12.4472 | 1.45E-35 | 7.68E-33 |
| 127 | IREB2   | 3658  | 15 | 78725518  | 78798798  | 2.78E-08 | blood | IPF        | 0.1000   | 9.20E-01 | 9.68E-01 |
| 127 | IREB2   | 3658  | 15 | 78725518  | 78798798  | 2.78E-08 | Lung  | IPF        | -1.5072  | 1.32E-01 | 3.46E-01 |
| 127 | IREB2   | 3658  | 15 | 78725518  | 78798798  | 2.78E-08 | blood | LungCancer | 0.1000   | 9.20E-01 | 9.68E-01 |
| 127 | IREB2   | 3658  | 15 | 78725518  | 78798798  | 2.78E-08 | Lung  | LungCancer | -16.4000 | 2.17E-60 | 2.30E-57 |
| 127 | IREB2   | 3658  | 15 | 78725518  | 78798798  | 2.78E-08 | blood | Snoring    | 0.1000   | 9.20E-01 | 9.68E-01 |
| 127 | IREB2   | 3658  | 15 | 78725518  | 78798798  | 2.78E-08 | Lung  | Snoring    | 0.1000   | 9.20E-01 | 9.68E-01 |
| 76  | BLK     | 640   | 8  | 11346521  | 11427108  | 1.64E-05 | blood | Asthma     | -1.2805  | 2.00E-01 | 4.39E-01 |
| 76  | BLK     | 640   | 8  | 11346521  | 11427108  | 1.64E-05 | Lung  | Asthma     | -3.2574  | 1.12E-03 | 8.34E-03 |
| 76  | BLK     | 640   | 8  | 11346521  | 11427108  | 1.64E-05 | blood | COPD       | -1.2805  | 2.00E-01 | 4.39E-01 |
| 76  | BLK     | 640   | 8  | 11346521  | 11427108  | 1.64E-05 | Lung  | COPD       | -2.5720  | 1.01E-02 | 5.30E-02 |
| 76  | BLK     | 640   | 8  | 11346521  | 11427108  | 1.64E-05 | blood | IPF        | -1.2805  | 2.00E-01 | 4.39E-01 |
| 76  | BLK     | 640   | 8  | 11346521  | 11427108  | 1.64E-05 | Lung  | IPF        | -1.1478  | 2.51E-01 | 5.03E-01 |
| 76  | BLK     | 640   | 8  | 11346521  | 11427108  | 1.64E-05 | blood | LungCancer | -1.2805  | 2.00E-01 | 4.39E-01 |
| 76  | BLK     | 640   | 8  | 11346521  | 11427108  | 1.64E-05 | Lung  | LungCancer | -1.0729  | 2.83E-01 | 5.38E-01 |
| 76  | BLK     | 640   | 8  | 11346521  | 11427108  | 1.64E-05 | blood | Snoring    | -1.2805  | 2.00E-01 | 4.39E-01 |
| 76  | BLK     | 640   | 8  | 11346521  | 11427108  | 1.64E-05 | Lung  | Snoring    | -1.2805  | 2.00E-01 | 4.39E-01 |
| 87  | PSMB7   | 5695  | 9  | 127110744 | 127182752 | 3.21E-06 | blood | Asthma     | -1.9200  | 5.49E-02 | 1.94E-01 |
| 87  | PSMB7   | 5695  | 9  | 127110744 | 127182752 | 3.21E-06 | Lung  | Asthma     | -4.9043  | 9.38E-07 | 1.57E-05 |
| 87  | PSMB7   | 5695  | 9  | 127110744 | 127182752 | 3.21E-06 | blood | COPD       | -1.9200  | 5.49E-02 | 1.94E-01 |
| 87  | PSMB7   | 5695  | 9  | 127110744 | 127182752 | 3.21E-06 | Lung  | COPD       | -2.0309  | 4.23E-02 | 1.62E-01 |
| 87  | PSMB7   | 5695  | 9  | 127110744 | 127182752 | 3.21E-06 | blood | IPF        | -1.9200  | 5.49E-02 | 1.94E-01 |
| 87  | PSMB7   | 5695  | 9  | 127110744 | 127182752 | 3.21E-06 | Lung  | IPF        | -1.1456  | 2.52E-01 | 5.04E-01 |
| 87  | PSMB7   | 5695  | 9  | 127110744 | 127182752 | 3.21E-06 | blood | LungCancer | -1.9200  | 5.49E-02 | 1.94E-01 |
| 87  | PSMB7   | 5695  | 9  | 127110744 | 127182752 | 3.21E-06 | Lung  | LungCancer | -0.4610  | 6.45E-01 | 8.40E-01 |
| 87  | PSMB7   | 5695  | 9  | 127110744 | 127182752 | 3.21E-06 | blood | Snoring    | -1.9200  | 5.49E-02 | 1.94E-01 |
| 87  | PSMB7   | 5695  | 9  | 127110744 | 127182752 | 3.21E-06 | Lung  | Snoring    | -1.9200  | 5.49E-02 | 1.94E-01 |
| 84  | IL33    | 90865 | 9  | 6210149   | 6262983   | 8.42E-06 | blood | Asthma     | -0.5540  | 5.80E-01 | 7.92E-01 |
| 84  | IL33    | 90865 | 9  | 6210149   | 6262983   | 8.42E-06 | Lung  | Asthma     | 1.7267   | 8.42E-02 | 2.54E-01 |
| 84  | IL33    | 90865 | 9  | 6210149   | 6262983   | 8.42E-06 | blood | COPD       | -0.5540  | 5.80E-01 | 7.92E-01 |
| 84  | IL33    | 90865 | 9  | 6210149   | 6262983   | 8.42E-06 | Lung  | COPD       | 1.4248   | 1.54E-01 | 3.82E-01 |
| 84  | IL33    | 90865 | 9  | 6210149   | 6262983   | 8.42E-06 | blood | IPF        | -0.5540  | 5.80E-01 | 7.92E-01 |
| 84  | IL33    | 90865 | 9  | 6210149   | 6262983   | 8.42E-06 | Lung  | IPF        | -0.9328  | 3.51E-01 | 6.08E-01 |
| 84  | IL33    | 90865 | 9  | 6210149   | 6262983   | 8.42E-06 | blood | LungCancer | -0.5540  | 5.80E-01 | 7.92E-01 |
| 84  | IL33    | 90865 | 9  | 6210149   | 6262983   | 8.42E-06 | Lung  | LungCancer | 0.2576   | 7.97E-01 | 9.32E-01 |
| 84  | IL33    | 90865 | 9  | 6210149   | 6262983   | 8.42E-06 | blood | Snoring    | -0.5540  | 5.80E-01 | 7.92E-01 |
| 84  | IL33    | 90865 | 9  | 6210149   | 6262983   | 8.42E-06 | Lung  | Snoring    | -0.5540  | 5.80E-01 | 7.92E-01 |
| 86  | IL11RA  | 3590  | 9  | 34647182  | 34666899  | 5.29E-05 | blood | Asthma     | 0.0301   | 9.76E-01 | 9.92E-01 |
| 86  | IL11RA  | 3590  | 9  | 34647182  | 34666899  | 5.29E-05 | Lung  | Asthma     | -2.3104  | 2.09E-02 | 9.57E-02 |
| 86  | IL11RA  | 3590  | 9  | 34647182  | 34666899  | 5.29E-05 | blood | COPD       | 0.0301   | 9.76E-01 | 9.92E-01 |
| 86  | IL11RA  | 3590  | 9  | 34647182  | 34666899  | 5.29E-05 | Lung  | COPD       | -2.4005  | 1.64E-02 | 7.92E-02 |
| 86  | IL11RA  | 3590  | 9  | 34647182  | 34666899  | 5.29E-05 | blood | IPF        | 0.0301   | 9.76E-01 | 9.92E-01 |
| 86  | IL11RA  | 3590  | 9  | 34647182  | 34666899  | 5.29E-05 | Lung  | IPF        | -1.0590  | 2.90E-01 | 5.46E-01 |
| 86  | IL11RA  | 3590  | 9  | 34647182  | 34666899  | 5.29E-05 | blood | LungCancer | 0.0301   | 9.76E-01 | 9.92E-01 |
| 86  | IL11RA  | 3590  | 9  | 34647182  | 34666899  | 5.29E-05 | Lung  | LungCancer | 1.1151   | 2.65E-01 | 5.17E-01 |
| 86  | IL11RA  | 3590  | 9  | 34647182  | 34666899  | 5.29E-05 | blood | Snoring    | 0.0301   | 9.76E-01 | 9.92E-01 |
| 86  | IL11RA  | 3590  | 9  | 34647182  | 34666899  | 5.29E-05 | Lung  | Snoring    | 0.0301   | 9.76E-01 | 9.92E-01 |
| 86  | DCTN3   | 11258 | 9  | 34608542  | 34625520  | 2.37E-05 | blood | Asthma     | -0.1820  | 8.55E-01 | 9.55E-01 |

|     |          |       |    |           |           |          |       |            |         |          |          |
|-----|----------|-------|----|-----------|-----------|----------|-------|------------|---------|----------|----------|
| 86  | DCTN3    | 11258 | 9  | 34608542  | 34625520  | 2.37E-05 | Lung  | Asthma     | 1.3136  | 1.89E-01 | 4.25E-01 |
| 86  | DCTN3    | 11258 | 9  | 34608542  | 34625520  | 2.37E-05 | blood | COPD       | -0.1820 | 8.55E-01 | 9.55E-01 |
| 86  | DCTN3    | 11258 | 9  | 34608542  | 34625520  | 2.37E-05 | Lung  | COPD       | 0.1000  | 9.20E-01 | 9.68E-01 |
| 86  | DCTN3    | 11258 | 9  | 34608542  | 34625520  | 2.37E-05 | blood | IPF        | -0.1820 | 8.55E-01 | 9.55E-01 |
| 86  | DCTN3    | 11258 | 9  | 34608542  | 34625520  | 2.37E-05 | Lung  | IPF        | -0.1928 | 8.47E-01 | 9.54E-01 |
| 86  | DCTN3    | 11258 | 9  | 34608542  | 34625520  | 2.37E-05 | blood | LungCancer | -0.1820 | 8.55E-01 | 9.55E-01 |
| 86  | DCTN3    | 11258 | 9  | 34608542  | 34625520  | 2.37E-05 | Lung  | LungCancer | -1.5035 | 1.33E-01 | 3.48E-01 |
| 86  | DCTN3    | 11258 | 9  | 34608542  | 34625520  | 2.37E-05 | blood | Snoring    | -0.1820 | 8.55E-01 | 9.55E-01 |
| 86  | DCTN3    | 11258 | 9  | 34608542  | 34625520  | 2.37E-05 | Lung  | Snoring    | -0.1820 | 8.55E-01 | 9.55E-01 |
| 58  | ZSCAN9   | 7746  | 6  | 28188029  | 28206265  | 3.31E-09 | blood | Asthma     | -0.5414 | 5.88E-01 | 7.95E-01 |
| 58  | ZSCAN9   | 7746  | 6  | 28188029  | 28206265  | 3.31E-09 | Lung  | Asthma     | -1.1157 | 2.65E-01 | 5.17E-01 |
| 58  | ZSCAN9   | 7746  | 6  | 28188029  | 28206265  | 3.31E-09 | blood | COPD       | -0.5414 | 5.88E-01 | 7.95E-01 |
| 58  | ZSCAN9   | 7746  | 6  | 28188029  | 28206265  | 3.31E-09 | Lung  | COPD       | -0.9292 | 3.53E-01 | 6.08E-01 |
| 58  | ZSCAN9   | 7746  | 6  | 28188029  | 28206265  | 3.31E-09 | blood | IPF        | -0.5414 | 5.88E-01 | 7.95E-01 |
| 58  | ZSCAN9   | 7746  | 6  | 28188029  | 28206265  | 3.31E-09 | Lung  | IPF        | -1.1675 | 2.43E-01 | 4.90E-01 |
| 58  | ZSCAN9   | 7746  | 6  | 28188029  | 28206265  | 3.31E-09 | blood | LungCancer | -0.5414 | 5.88E-01 | 7.95E-01 |
| 58  | ZSCAN9   | 7746  | 6  | 28188029  | 28206265  | 3.31E-09 | Lung  | LungCancer | -0.0014 | 9.99E-01 | 9.99E-01 |
| 58  | ZSCAN9   | 7746  | 6  | 28188029  | 28206265  | 3.31E-09 | blood | Snoring    | -0.5414 | 5.88E-01 | 7.95E-01 |
| 58  | ZSCAN9   | 7746  | 6  | 28188029  | 28206265  | 3.31E-09 | Lung  | Snoring    | -0.5414 | 5.88E-01 | 7.95E-01 |
| 58  | PGBD1    | 84547 | 6  | 28244314  | 28275326  | 8.66E-07 | blood | Asthma     | 1.2418  | 2.14E-01 | 4.56E-01 |
| 58  | PGBD1    | 84547 | 6  | 28244314  | 28275326  | 8.66E-07 | Lung  | Asthma     | -0.1750 | 8.61E-01 | 9.55E-01 |
| 58  | PGBD1    | 84547 | 6  | 28244314  | 28275326  | 8.66E-07 | blood | COPD       | 1.2418  | 2.14E-01 | 4.56E-01 |
| 58  | PGBD1    | 84547 | 6  | 28244314  | 28275326  | 8.66E-07 | Lung  | COPD       | 1.2821  | 2.00E-01 | 4.39E-01 |
| 58  | PGBD1    | 84547 | 6  | 28244314  | 28275326  | 8.66E-07 | blood | IPF        | 1.2418  | 2.14E-01 | 4.56E-01 |
| 58  | PGBD1    | 84547 | 6  | 28244314  | 28275326  | 8.66E-07 | Lung  | IPF        | -0.5675 | 5.70E-01 | 7.87E-01 |
| 58  | PGBD1    | 84547 | 6  | 28244314  | 28275326  | 8.66E-07 | blood | LungCancer | 1.2418  | 2.14E-01 | 4.56E-01 |
| 58  | PGBD1    | 84547 | 6  | 28244314  | 28275326  | 8.66E-07 | Lung  | LungCancer | -0.6619 | 5.08E-01 | 7.46E-01 |
| 58  | PGBD1    | 84547 | 6  | 28244314  | 28275326  | 8.66E-07 | blood | Snoring    | 1.2418  | 2.14E-01 | 4.56E-01 |
| 58  | PGBD1    | 84547 | 6  | 28244314  | 28275326  | 8.66E-07 | Lung  | Snoring    | 1.2418  | 2.14E-01 | 4.56E-01 |
| 98  | LRRC32   | 2615  | 11 | 76363568  | 76386990  | 8.52E-07 | blood | Asthma     | NA      | NA       | NA       |
| 98  | LRRC32   | 2615  | 11 | 76363568  | 76386990  | 8.52E-07 | Lung  | Asthma     | NA      | NA       | NA       |
| 98  | LRRC32   | 2615  | 11 | 76363568  | 76386990  | 8.52E-07 | blood | COPD       | NA      | NA       | NA       |
| 98  | LRRC32   | 2615  | 11 | 76363568  | 76386990  | 8.52E-07 | Lung  | COPD       | NA      | NA       | NA       |
| 98  | LRRC32   | 2615  | 11 | 76363568  | 76386990  | 8.52E-07 | blood | IPF        | NA      | NA       | NA       |
| 98  | LRRC32   | 2615  | 11 | 76363568  | 76386990  | 8.52E-07 | Lung  | IPF        | NA      | NA       | NA       |
| 98  | LRRC32   | 2615  | 11 | 76363568  | 76386990  | 8.52E-07 | blood | LungCancer | NA      | NA       | NA       |
| 98  | LRRC32   | 2615  | 11 | 76363568  | 76386990  | 8.52E-07 | Lung  | LungCancer | NA      | NA       | NA       |
| 98  | LRRC32   | 2615  | 11 | 76363568  | 76386990  | 8.52E-07 | blood | Snoring    | NA      | NA       | NA       |
| 98  | LRRC32   | 2615  | 11 | 76363568  | 76386990  | 8.52E-07 | Lung  | Snoring    | NA      | NA       | NA       |
| 36  | FAM13A   | 10144 | 4  | 89642105  | 90037549  | 1.30E-09 | blood | Asthma     | 1.0921  | 2.75E-01 | 5.26E-01 |
| 36  | FAM13A   | 10144 | 4  | 89642105  | 90037549  | 1.30E-09 | Lung  | Asthma     | 0.3443  | 7.31E-01 | 8.98E-01 |
| 36  | FAM13A   | 10144 | 4  | 89642105  | 90037549  | 1.30E-09 | blood | COPD       | 1.0921  | 2.75E-01 | 5.26E-01 |
| 36  | FAM13A   | 10144 | 4  | 89642105  | 90037549  | 1.30E-09 | Lung  | COPD       | 2.5740  | 1.01E-02 | 5.30E-02 |
| 36  | FAM13A   | 10144 | 4  | 89642105  | 90037549  | 1.30E-09 | blood | IPF        | 1.0921  | 2.75E-01 | 5.26E-01 |
| 36  | FAM13A   | 10144 | 4  | 89642105  | 90037549  | 1.30E-09 | Lung  | IPF        | -2.0584 | 3.96E-02 | 1.55E-01 |
| 36  | FAM13A   | 10144 | 4  | 89642105  | 90037549  | 1.30E-09 | blood | LungCancer | 1.0921  | 2.75E-01 | 5.26E-01 |
| 36  | FAM13A   | 10144 | 4  | 89642105  | 90037549  | 1.30E-09 | Lung  | LungCancer | -0.9441 | 3.45E-01 | 6.05E-01 |
| 36  | FAM13A   | 10144 | 4  | 89642105  | 90037549  | 1.30E-09 | blood | Snoring    | 1.0921  | 2.75E-01 | 5.26E-01 |
| 36  | FAM13A   | 10144 | 4  | 89642105  | 90037549  | 1.30E-09 | Lung  | Snoring    | 1.0921  | 2.75E-01 | 5.26E-01 |
| 39  | KIAA1109 | 84162 | 4  | 123068488 | 123288914 | 2.10E-10 | blood | Asthma     | 0.0113  | 9.91E-01 | 9.94E-01 |
| 39  | KIAA1109 | 84162 | 4  | 123068488 | 123288914 | 2.10E-10 | Lung  | Asthma     | 3.2151  | 1.30E-03 | 9.22E-03 |
| 39  | KIAA1109 | 84162 | 4  | 123068488 | 123288914 | 2.10E-10 | blood | COPD       | 0.0113  | 9.91E-01 | 9.94E-01 |
| 39  | KIAA1109 | 84162 | 4  | 123068488 | 123288914 | 2.10E-10 | Lung  | COPD       | 1.3700  | 1.71E-01 | 4.04E-01 |
| 39  | KIAA1109 | 84162 | 4  | 123068488 | 123288914 | 2.10E-10 | blood | IPF        | 0.0113  | 9.91E-01 | 9.94E-01 |
| 39  | KIAA1109 | 84162 | 4  | 123068488 | 123288914 | 2.10E-10 | Lung  | IPF        | 1.2387  | 2.15E-01 | 4.56E-01 |
| 39  | KIAA1109 | 84162 | 4  | 123068488 | 123288914 | 2.10E-10 | blood | LungCancer | 0.0113  | 9.91E-01 | 9.94E-01 |
| 39  | KIAA1109 | 84162 | 4  | 123068488 | 123288914 | 2.10E-10 | Lung  | LungCancer | 0.3768  | 7.06E-01 | 8.84E-01 |
| 39  | KIAA1109 | 84162 | 4  | 123068488 | 123288914 | 2.10E-10 | blood | Snoring    | 0.0113  | 9.91E-01 | 9.94E-01 |
| 39  | KIAA1109 | 84162 | 4  | 123068488 | 123288914 | 2.10E-10 | Lung  | Snoring    | 0.0113  | 9.91E-01 | 9.94E-01 |
| 38  | GSTCD    | 79807 | 4  | 106624935 | 106773882 | 2.99E-05 | blood | Asthma     | 0.4466  | 6.55E-01 | 8.44E-01 |
| 38  | GSTCD    | 79807 | 4  | 106624935 | 106773882 | 2.99E-05 | Lung  | Asthma     | -3.2757 | 1.05E-03 | 7.98E-03 |
| 38  | GSTCD    | 79807 | 4  | 106624935 | 106773882 | 2.99E-05 | blood | COPD       | 0.4466  | 6.55E-01 | 8.44E-01 |
| 38  | GSTCD    | 79807 | 4  | 106624935 | 106773882 | 2.99E-05 | Lung  | COPD       | -1.9231 | 5.45E-02 | 1.94E-01 |
| 38  | GSTCD    | 79807 | 4  | 106624935 | 106773882 | 2.99E-05 | blood | IPF        | 0.4466  | 6.55E-01 | 8.44E-01 |
| 38  | GSTCD    | 79807 | 4  | 106624935 | 106773882 | 2.99E-05 | Lung  | IPF        | 0.9326  | 3.51E-01 | 6.08E-01 |
| 38  | GSTCD    | 79807 | 4  | 106624935 | 106773882 | 2.99E-05 | blood | LungCancer | 0.4466  | 6.55E-01 | 8.44E-01 |
| 38  | GSTCD    | 79807 | 4  | 106624935 | 106773882 | 2.99E-05 | Lung  | LungCancer | -0.3779 | 7.06E-01 | 8.84E-01 |
| 38  | GSTCD    | 79807 | 4  | 106624935 | 106773882 | 2.99E-05 | blood | Snoring    | 0.4466  | 6.55E-01 | 8.44E-01 |
| 38  | GSTCD    | 79807 | 4  | 106624935 | 106773882 | 2.99E-05 | Lung  | Snoring    | 0.4466  | 6.55E-01 | 8.44E-01 |
| 104 | SUOX     | 6821  | 12 | 56386043  | 56404309  | 2.40E-14 | blood | Asthma     | 3.5595  | 3.72E-04 | 3.14E-03 |
| 104 | SUOX     | 6821  | 12 | 56386043  | 56404309  | 2.40E-14 | Lung  | Asthma     | -6.7670 | 1.31E-11 | 1.07E-09 |
| 104 | SUOX     | 6821  | 12 | 56386043  | 56404309  | 2.40E-14 | blood | COPD       | 3.5595  | 3.72E-04 | 3.14E-03 |
| 104 | SUOX     | 6821  | 12 | 56386043  | 56404309  | 2.40E-14 | Lung  | COPD       | -0.7172 | 4.73E-01 | 7.18E-01 |

|     |        |       |    |          |          |          |       |            |         |          |          |
|-----|--------|-------|----|----------|----------|----------|-------|------------|---------|----------|----------|
| 104 | SUOX   | 6821  | 12 | 56386043 | 56404309 | 2.40E-14 | blood | IPF        | 3.5595  | 3.72E-04 | 3.14E-03 |
| 104 | SUOX   | 6821  | 12 | 56386043 | 56404309 | 2.40E-14 | Lung  | IPF        | -0.3802 | 7.04E-01 | 8.84E-01 |
| 104 | SUOX   | 6821  | 12 | 56386043 | 56404309 | 2.40E-14 | blood | LungCancer | 3.5595  | 3.72E-04 | 3.14E-03 |
| 104 | SUOX   | 6821  | 12 | 56386043 | 56404309 | 2.40E-14 | Lung  | LungCancer | 2.4094  | 1.60E-02 | 7.77E-02 |
| 104 | SUOX   | 6821  | 12 | 56386043 | 56404309 | 2.40E-14 | blood | Snoring    | 3.5595  | 3.72E-04 | 3.14E-03 |
| 104 | SUOX   | 6821  | 12 | 56386043 | 56404309 | 2.40E-14 | Lung  | Snoring    | 3.5595  | 3.72E-04 | 3.14E-03 |
| 105 | RDH16  | 8608  | 12 | 57340215 | 57358158 | 8.51E-10 | blood | Asthma     | 1.9599  | 5.00E-02 | 1.81E-01 |
| 105 | RDH16  | 8608  | 12 | 57340215 | 57358158 | 8.51E-10 | Lung  | Asthma     | 6.3106  | 2.78E-10 | 2.01E-08 |
| 105 | RDH16  | 8608  | 12 | 57340215 | 57358158 | 8.51E-10 | blood | COPD       | 1.9599  | 5.00E-02 | 1.81E-01 |
| 105 | RDH16  | 8608  | 12 | 57340215 | 57358158 | 8.51E-10 | Lung  | COPD       | -0.9288 | 3.53E-01 | 6.08E-01 |
| 105 | RDH16  | 8608  | 12 | 57340215 | 57358158 | 8.51E-10 | blood | IPF        | 1.9599  | 5.00E-02 | 1.81E-01 |
| 105 | RDH16  | 8608  | 12 | 57340215 | 57358158 | 8.51E-10 | Lung  | IPF        | 0.1132  | 9.10E-01 | 9.66E-01 |
| 105 | RDH16  | 8608  | 12 | 57340215 | 57358158 | 8.51E-10 | blood | LungCancer | 1.9599  | 5.00E-02 | 1.81E-01 |
| 105 | RDH16  | 8608  | 12 | 57340215 | 57358158 | 8.51E-10 | Lung  | LungCancer | -1.0687 | 2.85E-01 | 5.40E-01 |
| 105 | RDH16  | 8608  | 12 | 57340215 | 57358158 | 8.51E-10 | blood | Snoring    | 1.9599  | 5.00E-02 | 1.81E-01 |
| 105 | RDH16  | 8608  | 12 | 57340215 | 57358158 | 8.51E-10 | Lung  | Snoring    | 1.9599  | 5.00E-02 | 1.81E-01 |
| 126 | SCAPER | 49855 | 15 | 76635526 | 77202796 | 5.04E-07 | blood | Asthma     | -3.9970 | 6.42E-05 | 6.48E-04 |
| 126 | SCAPER | 49855 | 15 | 76635526 | 77202796 | 5.04E-07 | Lung  | Asthma     | 3.8383  | 1.24E-04 | 1.11E-03 |
| 126 | SCAPER | 49855 | 15 | 76635526 | 77202796 | 5.04E-07 | blood | COPD       | -3.9970 | 6.42E-05 | 6.48E-04 |
| 126 | SCAPER | 49855 | 15 | 76635526 | 77202796 | 5.04E-07 | Lung  | COPD       | 2.8743  | 4.05E-03 | 2.41E-02 |
| 126 | SCAPER | 49855 | 15 | 76635526 | 77202796 | 5.04E-07 | blood | IPF        | -3.9970 | 6.42E-05 | 6.48E-04 |
| 126 | SCAPER | 49855 | 15 | 76635526 | 77202796 | 5.04E-07 | Lung  | IPF        | 1.3527  | 1.76E-01 | 4.12E-01 |
| 126 | SCAPER | 49855 | 15 | 76635526 | 77202796 | 5.04E-07 | blood | LungCancer | -3.9970 | 6.42E-05 | 6.48E-04 |
| 126 | SCAPER | 49855 | 15 | 76635526 | 77202796 | 5.04E-07 | Lung  | LungCancer | 0.0699  | 9.44E-01 | 9.80E-01 |
| 126 | SCAPER | 49855 | 15 | 76635526 | 77202796 | 5.04E-07 | blood | Snoring    | -3.9970 | 6.42E-05 | 6.48E-04 |
| 126 | SCAPER | 49855 | 15 | 76635526 | 77202796 | 5.04E-07 | Lung  | Snoring    | -3.9970 | 6.42E-05 | 6.48E-04 |
| 132 | FTO    | 79068 | 16 | 53732875 | 54153379 | 2.82E-11 | blood | Asthma     | 1.3352  | 1.82E-01 | 4.21E-01 |
| 132 | FTO    | 79068 | 16 | 53732875 | 54153379 | 2.82E-11 | Lung  | Asthma     | -0.2986 | 7.65E-01 | 9.21E-01 |
| 132 | FTO    | 79068 | 16 | 53732875 | 54153379 | 2.82E-11 | blood | COPD       | 1.3352  | 1.82E-01 | 4.21E-01 |
| 132 | FTO    | 79068 | 16 | 53732875 | 54153379 | 2.82E-11 | Lung  | COPD       | 1.0072  | 3.14E-01 | 5.70E-01 |
| 132 | FTO    | 79068 | 16 | 53732875 | 54153379 | 2.82E-11 | blood | IPF        | 1.3352  | 1.82E-01 | 4.21E-01 |
| 132 | FTO    | 79068 | 16 | 53732875 | 54153379 | 2.82E-11 | Lung  | IPF        | -0.7730 | 4.40E-01 | 6.91E-01 |
| 132 | FTO    | 79068 | 16 | 53732875 | 54153379 | 2.82E-11 | blood | LungCancer | 1.3352  | 1.82E-01 | 4.21E-01 |
| 132 | FTO    | 79068 | 16 | 53732875 | 54153379 | 2.82E-11 | Lung  | LungCancer | 0.3670  | 7.13E-01 | 8.90E-01 |
| 132 | FTO    | 79068 | 16 | 53732875 | 54153379 | 2.82E-11 | blood | Snoring    | 1.3352  | 1.82E-01 | 4.21E-01 |
| 132 | FTO    | 79068 | 16 | 53732875 | 54153379 | 2.82E-11 | Lung  | Snoring    | 1.3352  | 1.82E-01 | 4.21E-01 |
| 136 | NCOR1  | 9611  | 17 | 15928408 | 16123874 | 1.66E-09 | blood | Asthma     | 0.2532  | 8.00E-01 | 9.32E-01 |
| 136 | NCOR1  | 9611  | 17 | 15928408 | 16123874 | 1.66E-09 | Lung  | Asthma     | -6.2886 | 3.20E-10 | 2.26E-08 |
| 136 | NCOR1  | 9611  | 17 | 15928408 | 16123874 | 1.66E-09 | blood | COPD       | 0.2532  | 8.00E-01 | 9.32E-01 |
| 136 | NCOR1  | 9611  | 17 | 15928408 | 16123874 | 1.66E-09 | Lung  | COPD       | -1.9796 | 4.78E-02 | 1.79E-01 |
| 136 | NCOR1  | 9611  | 17 | 15928408 | 16123874 | 1.66E-09 | blood | IPF        | 0.2532  | 8.00E-01 | 9.32E-01 |
| 136 | NCOR1  | 9611  | 17 | 15928408 | 16123874 | 1.66E-09 | Lung  | IPF        | -3.2697 | 1.08E-03 | 8.13E-03 |
| 136 | NCOR1  | 9611  | 17 | 15928408 | 16123874 | 1.66E-09 | blood | LungCancer | 0.2532  | 8.00E-01 | 9.32E-01 |
| 136 | NCOR1  | 9611  | 17 | 15928408 | 16123874 | 1.66E-09 | Lung  | LungCancer | -0.5168 | 6.05E-01 | 8.10E-01 |
| 136 | NCOR1  | 9611  | 17 | 15928408 | 16123874 | 1.66E-09 | blood | Snoring    | 0.2532  | 8.00E-01 | 9.32E-01 |
| 136 | NCOR1  | 9611  | 17 | 15928408 | 16123874 | 1.66E-09 | Lung  | Snoring    | 0.2532  | 8.00E-01 | 9.32E-01 |
| 134 | SGSM2  | 9905  | 17 | 2235806  | 2289353  | 1.26E-07 | blood | Asthma     | 1.4420  | 1.49E-01 | 3.73E-01 |
| 134 | SGSM2  | 9905  | 17 | 2235806  | 2289353  | 1.26E-07 | Lung  | Asthma     | 0.6108  | 5.41E-01 | 7.62E-01 |
| 134 | SGSM2  | 9905  | 17 | 2235806  | 2289353  | 1.26E-07 | blood | COPD       | 1.4420  | 1.49E-01 | 3.73E-01 |
| 134 | SGSM2  | 9905  | 17 | 2235806  | 2289353  | 1.26E-07 | Lung  | COPD       | -0.6317 | 5.28E-01 | 7.55E-01 |
| 134 | SGSM2  | 9905  | 17 | 2235806  | 2289353  | 1.26E-07 | blood | IPF        | 1.4420  | 1.49E-01 | 3.73E-01 |
| 134 | SGSM2  | 9905  | 17 | 2235806  | 2289353  | 1.26E-07 | Lung  | IPF        | -1.0067 | 3.14E-01 | 5.70E-01 |
| 134 | SGSM2  | 9905  | 17 | 2235806  | 2289353  | 1.26E-07 | blood | LungCancer | 1.4420  | 1.49E-01 | 3.73E-01 |
| 134 | SGSM2  | 9905  | 17 | 2235806  | 2289353  | 1.26E-07 | Lung  | LungCancer | -1.0198 | 3.08E-01 | 5.63E-01 |
| 134 | SGSM2  | 9905  | 17 | 2235806  | 2289353  | 1.26E-07 | blood | Snoring    | 1.4420  | 1.49E-01 | 3.73E-01 |
| 134 | SGSM2  | 9905  | 17 | 2235806  | 2289353  | 1.26E-07 | Lung  | Snoring    | 1.4420  | 1.49E-01 | 3.73E-01 |
| 139 | SKAP1  | 8631  | 17 | 46205802 | 46512596 | 2.46E-08 | blood | Asthma     | 1.7800  | 7.51E-02 | 2.33E-01 |
| 139 | SKAP1  | 8631  | 17 | 46205802 | 46512596 | 2.46E-08 | Lung  | Asthma     | 2.1067  | 3.51E-02 | 1.42E-01 |
| 139 | SKAP1  | 8631  | 17 | 46205802 | 46512596 | 2.46E-08 | blood | COPD       | 1.7800  | 7.51E-02 | 2.33E-01 |
| 139 | SKAP1  | 8631  | 17 | 46205802 | 46512596 | 2.46E-08 | Lung  | COPD       | -1.1698 | 2.42E-01 | 4.89E-01 |
| 139 | SKAP1  | 8631  | 17 | 46205802 | 46512596 | 2.46E-08 | blood | IPF        | 1.7800  | 7.51E-02 | 2.33E-01 |
| 139 | SKAP1  | 8631  | 17 | 46205802 | 46512596 | 2.46E-08 | Lung  | IPF        | -0.2540 | 7.99E-01 | 9.32E-01 |
| 139 | SKAP1  | 8631  | 17 | 46205802 | 46512596 | 2.46E-08 | blood | LungCancer | 1.7800  | 7.51E-02 | 2.33E-01 |
| 139 | SKAP1  | 8631  | 17 | 46205802 | 46512596 | 2.46E-08 | Lung  | LungCancer | 0.9307  | 3.52E-01 | 6.08E-01 |
| 139 | SKAP1  | 8631  | 17 | 46205802 | 46512596 | 2.46E-08 | blood | Snoring    | 1.7800  | 7.51E-02 | 2.33E-01 |
| 139 | SKAP1  | 8631  | 17 | 46205802 | 46512596 | 2.46E-08 | Lung  | Snoring    | 1.7800  | 7.51E-02 | 2.33E-01 |
| 139 | SCRN2  | 90507 | 17 | 45910047 | 45923699 | 3.53E-05 | blood | Asthma     | 3.1876  | 1.43E-03 | 9.82E-03 |
| 139 | SCRN2  | 90507 | 17 | 45910047 | 45923699 | 3.53E-05 | Lung  | Asthma     | -3.1958 | 1.39E-03 | 9.75E-03 |
| 139 | SCRN2  | 90507 | 17 | 45910047 | 45923699 | 3.53E-05 | blood | COPD       | 3.1876  | 1.43E-03 | 9.82E-03 |
| 139 | SCRN2  | 90507 | 17 | 45910047 | 45923699 | 3.53E-05 | Lung  | COPD       | -0.7580 | 4.48E-01 | 6.96E-01 |
| 139 | SCRN2  | 90507 | 17 | 45910047 | 45923699 | 3.53E-05 | blood | IPF        | 3.1876  | 1.43E-03 | 9.82E-03 |
| 139 | SCRN2  | 90507 | 17 | 45910047 | 45923699 | 3.53E-05 | Lung  | IPF        | -0.5869 | 5.57E-01 | 7.76E-01 |
| 139 | SCRN2  | 90507 | 17 | 45910047 | 45923699 | 3.53E-05 | blood | LungCancer | 3.1876  | 1.43E-03 | 9.82E-03 |



|     |       |        |    |           |           |          |       |            |         |          |          |
|-----|-------|--------|----|-----------|-----------|----------|-------|------------|---------|----------|----------|
| 139 | SCRN2 | 90507  | 17 | 45910047  | 45923699  | 3.53E-05 | Lung  | LungCancer | 1.3458  | 1.78E-01 | 4.16E-01 |
| 139 | SCRN2 | 90507  | 17 | 45910047  | 45923699  | 3.53E-05 | blood | Snoring    | 3.1876  | 1.43E-03 | 9.82E-03 |
| 139 | SCRN2 | 90507  | 17 | 45910047  | 45923699  | 3.53E-05 | Lung  | Snoring    | 3.1876  | 1.43E-03 | 9.82E-03 |
| 135 | SAT2  | 112483 | 17 | 7524552   | 7536194   | 3.30E-05 | blood | Asthma     | -2.1468 | 3.18E-02 | 1.32E-01 |
| 135 | SAT2  | 112483 | 17 | 7524552   | 7536194   | 3.30E-05 | Lung  | Asthma     | -1.2294 | 2.19E-01 | 4.58E-01 |
| 135 | SAT2  | 112483 | 17 | 7524552   | 7536194   | 3.30E-05 | blood | COPD       | -2.1468 | 3.18E-02 | 1.32E-01 |
| 135 | SAT2  | 112483 | 17 | 7524552   | 7536194   | 3.30E-05 | Lung  | COPD       | -2.1107 | 3.48E-02 | 1.42E-01 |
| 135 | SAT2  | 112483 | 17 | 7524552   | 7536194   | 3.30E-05 | blood | IPF        | -2.1468 | 3.18E-02 | 1.32E-01 |
| 135 | SAT2  | 112483 | 17 | 7524552   | 7536194   | 3.30E-05 | Lung  | IPF        | -0.2365 | 8.13E-01 | 9.39E-01 |
| 135 | SAT2  | 112483 | 17 | 7524552   | 7536194   | 3.30E-05 | blood | LungCancer | -2.1468 | 3.18E-02 | 1.32E-01 |
| 135 | SAT2  | 112483 | 17 | 7524552   | 7536194   | 3.30E-05 | Lung  | LungCancer | 1.1761  | 2.40E-01 | 4.86E-01 |
| 135 | SAT2  | 112483 | 17 | 7524552   | 7536194   | 3.30E-05 | blood | Snoring    | -2.1468 | 3.18E-02 | 1.32E-01 |
| 135 | SAT2  | 112483 | 17 | 7524552   | 7536194   | 3.30E-05 | Lung  | Snoring    | -2.1468 | 3.18E-02 | 1.32E-01 |
| 137 | MIEN1 | 84299  | 17 | 37880409  | 37891792  | 3.80E-05 | blood | Asthma     | 1.2404  | 2.15E-01 | 4.56E-01 |
| 137 | MIEN1 | 84299  | 17 | 37880409  | 37891792  | 3.80E-05 | Lung  | Asthma     | 2.8263  | 4.71E-03 | 2.78E-02 |
| 137 | MIEN1 | 84299  | 17 | 37880409  | 37891792  | 3.80E-05 | blood | COPD       | 1.2404  | 2.15E-01 | 4.56E-01 |
| 137 | MIEN1 | 84299  | 17 | 37880409  | 37891792  | 3.80E-05 | Lung  | COPD       | 0.7557  | 4.50E-01 | 6.98E-01 |
| 137 | MIEN1 | 84299  | 17 | 37880409  | 37891792  | 3.80E-05 | blood | IPF        | 1.2404  | 2.15E-01 | 4.56E-01 |
| 137 | MIEN1 | 84299  | 17 | 37880409  | 37891792  | 3.80E-05 | Lung  | IPF        | 0.5117  | 6.09E-01 | 8.14E-01 |
| 137 | MIEN1 | 84299  | 17 | 37880409  | 37891792  | 3.80E-05 | blood | LungCancer | 1.2404  | 2.15E-01 | 4.56E-01 |
| 137 | MIEN1 | 84299  | 17 | 37880409  | 37891792  | 3.80E-05 | Lung  | LungCancer | -0.9635 | 3.35E-01 | 5.91E-01 |
| 137 | MIEN1 | 84299  | 17 | 37880409  | 37891792  | 3.80E-05 | blood | Snoring    | 1.2404  | 2.15E-01 | 4.56E-01 |
| 137 | MIEN1 | 84299  | 17 | 37880409  | 37891792  | 3.80E-05 | Lung  | Snoring    | 1.2404  | 2.15E-01 | 4.56E-01 |
| 137 | PNMT  | 5409   | 17 | 37819234  | 37831728  | 8.34E-08 | blood | Asthma     | 0.1327  | 8.94E-01 | 9.62E-01 |
| 137 | PNMT  | 5409   | 17 | 37819234  | 37831728  | 8.34E-08 | Lung  | Asthma     | 12.8084 | 1.47E-37 | 9.34E-35 |
| 137 | PNMT  | 5409   | 17 | 37819234  | 37831728  | 8.34E-08 | blood | COPD       | 0.1327  | 8.94E-01 | 9.62E-01 |
| 137 | PNMT  | 5409   | 17 | 37819234  | 37831728  | 8.34E-08 | Lung  | COPD       | 3.4788  | 5.04E-04 | 4.19E-03 |
| 137 | PNMT  | 5409   | 17 | 37819234  | 37831728  | 8.34E-08 | blood | IPF        | 0.1327  | 8.94E-01 | 9.62E-01 |
| 137 | PNMT  | 5409   | 17 | 37819234  | 37831728  | 8.34E-08 | Lung  | IPF        | 0.9537  | 3.40E-01 | 5.98E-01 |
| 137 | PNMT  | 5409   | 17 | 37819234  | 37831728  | 8.34E-08 | blood | LungCancer | 0.1327  | 8.94E-01 | 9.62E-01 |
| 137 | PNMT  | 5409   | 17 | 37819234  | 37831728  | 8.34E-08 | Lung  | LungCancer | -1.2136 | 2.25E-01 | 4.67E-01 |
| 137 | PNMT  | 5409   | 17 | 37819234  | 37831728  | 8.34E-08 | blood | Snoring    | 0.1327  | 8.94E-01 | 9.62E-01 |
| 137 | PNMT  | 5409   | 17 | 37819234  | 37831728  | 8.34E-08 | Lung  | Snoring    | 0.1327  | 8.94E-01 | 9.62E-01 |
| 2   | PEX14 | 5195   | 1  | 10530003  | 10695815  | 1.36E-05 | blood | Asthma     | -1.1143 | 2.65E-01 | 5.17E-01 |
| 2   | PEX14 | 5195   | 1  | 10530003  | 10695815  | 1.36E-05 | Lung  | Asthma     | 4.3934  | 1.12E-05 | 1.42E-04 |
| 2   | PEX14 | 5195   | 1  | 10530003  | 10695815  | 1.36E-05 | blood | COPD       | -1.1143 | 2.65E-01 | 5.17E-01 |
| 2   | PEX14 | 5195   | 1  | 10530003  | 10695815  | 1.36E-05 | Lung  | COPD       | 1.0643  | 2.87E-01 | 5.43E-01 |
| 2   | PEX14 | 5195   | 1  | 10530003  | 10695815  | 1.36E-05 | blood | IPF        | -1.1143 | 2.65E-01 | 5.17E-01 |
| 2   | PEX14 | 5195   | 1  | 10530003  | 10695815  | 1.36E-05 | Lung  | IPF        | -0.2972 | 7.66E-01 | 9.22E-01 |
| 2   | PEX14 | 5195   | 1  | 10530003  | 10695815  | 1.36E-05 | blood | LungCancer | -1.1143 | 2.65E-01 | 5.17E-01 |
| 2   | PEX14 | 5195   | 1  | 10530003  | 10695815  | 1.36E-05 | Lung  | LungCancer | -2.0528 | 4.01E-02 | 1.57E-01 |
| 2   | PEX14 | 5195   | 1  | 10530003  | 10695815  | 1.36E-05 | blood | Snoring    | -1.1143 | 2.65E-01 | 5.17E-01 |
| 2   | PEX14 | 5195   | 1  | 10530003  | 10695815  | 1.36E-05 | Lung  | Snoring    | -1.1143 | 2.65E-01 | 5.17E-01 |
| 15  | WDPCP | 51057  | 2  | 63343518  | 63820867  | 8.66E-11 | blood | Asthma     | -1.9656 | 4.93E-02 | 1.81E-01 |
| 15  | WDPCP | 51057  | 2  | 63343518  | 63820867  | 8.66E-11 | Lung  | Asthma     | 3.9170  | 8.97E-05 | 8.77E-04 |
| 15  | WDPCP | 51057  | 2  | 63343518  | 63820867  | 8.66E-11 | blood | COPD       | -1.9656 | 4.93E-02 | 1.81E-01 |
| 15  | WDPCP | 51057  | 2  | 63343518  | 63820867  | 8.66E-11 | Lung  | COPD       | -2.2253 | 2.61E-02 | 1.14E-01 |
| 15  | WDPCP | 51057  | 2  | 63343518  | 63820867  | 8.66E-11 | blood | IPF        | -1.9656 | 4.93E-02 | 1.81E-01 |
| 15  | WDPCP | 51057  | 2  | 63343518  | 63820867  | 8.66E-11 | Lung  | IPF        | 2.2638  | 2.36E-02 | 1.05E-01 |
| 15  | WDPCP | 51057  | 2  | 63343518  | 63820867  | 8.66E-11 | blood | LungCancer | -1.9656 | 4.93E-02 | 1.81E-01 |
| 15  | WDPCP | 51057  | 2  | 63343518  | 63820867  | 8.66E-11 | Lung  | LungCancer | -0.6650 | 5.06E-01 | 7.44E-01 |
| 15  | WDPCP | 51057  | 2  | 63343518  | 63820867  | 8.66E-11 | blood | Snoring    | -1.9656 | 4.93E-02 | 1.81E-01 |
| 15  | WDPCP | 51057  | 2  | 63343518  | 63820867  | 8.66E-11 | Lung  | Snoring    | -1.9656 | 4.93E-02 | 1.81E-01 |
| 31  | LPP   | 4026   | 3  | 187866097 | 188613460 | 8.49E-23 | blood | Asthma     | 0.6325  | 5.27E-01 | 7.55E-01 |
| 31  | LPP   | 4026   | 3  | 187866097 | 188613460 | 8.49E-23 | Lung  | Asthma     | -5.5684 | 2.57E-08 | 6.69E-07 |
| 31  | LPP   | 4026   | 3  | 187866097 | 188613460 | 8.49E-23 | blood | COPD       | 0.6325  | 5.27E-01 | 7.55E-01 |
| 31  | LPP   | 4026   | 3  | 187866097 | 188613460 | 8.49E-23 | Lung  | COPD       | -1.1810 | 2.38E-01 | 4.85E-01 |
| 31  | LPP   | 4026   | 3  | 187866097 | 188613460 | 8.49E-23 | blood | IPF        | 0.6325  | 5.27E-01 | 7.55E-01 |
| 31  | LPP   | 4026   | 3  | 187866097 | 188613460 | 8.49E-23 | Lung  | IPF        | -1.2242 | 2.21E-01 | 4.61E-01 |
| 31  | LPP   | 4026   | 3  | 187866097 | 188613460 | 8.49E-23 | blood | LungCancer | 0.6325  | 5.27E-01 | 7.55E-01 |
| 31  | LPP   | 4026   | 3  | 187866097 | 188613460 | 8.49E-23 | Lung  | LungCancer | 1.2398  | 2.15E-01 | 4.56E-01 |
| 31  | LPP   | 4026   | 3  | 187866097 | 188613460 | 8.49E-23 | blood | Snoring    | 0.6325  | 5.27E-01 | 7.55E-01 |
| 31  | LPP   | 4026   | 3  | 187866097 | 188613460 | 8.49E-23 | Lung  | Snoring    | 0.6325  | 5.27E-01 | 7.55E-01 |
| 25  | AMT   | 275    | 3  | 49449211  | 49465111  | 3.50E-06 | blood | Asthma     | -3.8807 | 1.04E-04 | 9.64E-04 |
| 25  | AMT   | 275    | 3  | 49449211  | 49465111  | 3.50E-06 | Lung  | Asthma     | 0.4314  | 6.66E-01 | 8.54E-01 |
| 25  | AMT   | 275    | 3  | 49449211  | 49465111  | 3.50E-06 | blood | COPD       | -3.8807 | 1.04E-04 | 9.64E-04 |
| 25  | AMT   | 275    | 3  | 49449211  | 49465111  | 3.50E-06 | Lung  | COPD       | -4.1044 | 4.05E-05 | 4.64E-04 |
| 25  | AMT   | 275    | 3  | 49449211  | 49465111  | 3.50E-06 | blood | IPF        | -3.8807 | 1.04E-04 | 9.64E-04 |
| 25  | AMT   | 275    | 3  | 49449211  | 49465111  | 3.50E-06 | Lung  | IPF        | 0.9303  | 3.52E-01 | 6.08E-01 |
| 25  | AMT   | 275    | 3  | 49449211  | 49465111  | 3.50E-06 | blood | LungCancer | -3.8807 | 1.04E-04 | 9.64E-04 |
| 25  | AMT   | 275    | 3  | 49449211  | 49465111  | 3.50E-06 | Lung  | LungCancer | -2.6492 | 8.07E-03 | 4.41E-02 |
| 25  | AMT   | 275    | 3  | 49449211  | 49465111  | 3.50E-06 | blood | Snoring    | -3.8807 | 1.04E-04 | 9.64E-04 |
| 25  | AMT   | 275    | 3  | 49449211  | 49465111  | 3.50E-06 | Lung  | Snoring    | -3.8807 | 1.04E-04 | 9.64E-04 |

|    |         |       |   |           |           |          |       |            |         |          |          |
|----|---------|-------|---|-----------|-----------|----------|-------|------------|---------|----------|----------|
| 25 | TCTA    | 6988  | 3 | 49444639  | 49458909  | 4.71E-06 | blood | Asthma     | -3.9781 | 6.95E-05 | 6.86E-04 |
| 25 | TCTA    | 6988  | 3 | 49444639  | 49458909  | 4.71E-06 | Lung  | Asthma     | -0.1648 | 8.69E-01 | 9.56E-01 |
| 25 | TCTA    | 6988  | 3 | 49444639  | 49458909  | 4.71E-06 | blood | COPD       | -3.9781 | 6.95E-05 | 6.86E-04 |
| 25 | TCTA    | 6988  | 3 | 49444639  | 49458909  | 4.71E-06 | Lung  | COPD       | -4.7632 | 1.91E-06 | 3.02E-05 |
| 25 | TCTA    | 6988  | 3 | 49444639  | 49458909  | 4.71E-06 | blood | IPF        | -3.9781 | 6.95E-05 | 6.86E-04 |
| 25 | TCTA    | 6988  | 3 | 49444639  | 49458909  | 4.71E-06 | Lung  | IPF        | 0.5710  | 5.68E-01 | 7.86E-01 |
| 25 | TCTA    | 6988  | 3 | 49444639  | 49458909  | 4.71E-06 | blood | LungCancer | -3.9781 | 6.95E-05 | 6.86E-04 |
| 25 | TCTA    | 6988  | 3 | 49444639  | 49458909  | 4.71E-06 | Lung  | LungCancer | -2.5790 | 9.91E-03 | 5.23E-02 |
| 25 | TCTA    | 6988  | 3 | 49444639  | 49458909  | 4.71E-06 | blood | Snoring    | -3.9781 | 6.95E-05 | 6.86E-04 |
| 25 | TCTA    | 6988  | 3 | 49444639  | 49458909  | 4.71E-06 | Lung  | Snoring    | -3.9781 | 6.95E-05 | 6.86E-04 |
| 25 | NICN1   | 84276 | 3 | 49454766  | 49471777  | 2.10E-06 | blood | Asthma     | -4.0684 | 4.73E-05 | 5.15E-04 |
| 25 | NICN1   | 84276 | 3 | 49454766  | 49471777  | 2.10E-06 | Lung  | Asthma     | -0.0616 | 9.51E-01 | 9.84E-01 |
| 25 | NICN1   | 84276 | 3 | 49454766  | 49471777  | 2.10E-06 | blood | COPD       | -4.0684 | 4.73E-05 | 5.15E-04 |
| 25 | NICN1   | 84276 | 3 | 49454766  | 49471777  | 2.10E-06 | Lung  | COPD       | -4.6220 | 3.80E-06 | 5.37E-05 |
| 25 | NICN1   | 84276 | 3 | 49454766  | 49471777  | 2.10E-06 | blood | IPF        | -4.0684 | 4.73E-05 | 5.15E-04 |
| 25 | NICN1   | 84276 | 3 | 49454766  | 49471777  | 2.10E-06 | Lung  | IPF        | 0.8707  | 3.84E-01 | 6.32E-01 |
| 25 | NICN1   | 84276 | 3 | 49454766  | 49471777  | 2.10E-06 | blood | LungCancer | -4.0684 | 4.73E-05 | 5.15E-04 |
| 25 | NICN1   | 84276 | 3 | 49454766  | 49471777  | 2.10E-06 | Lung  | LungCancer | -2.8297 | 4.66E-03 | 2.76E-02 |
| 25 | NICN1   | 84276 | 3 | 49454766  | 49471777  | 2.10E-06 | blood | Snoring    | -4.0684 | 4.73E-05 | 5.15E-04 |
| 25 | NICN1   | 84276 | 3 | 49454766  | 49471777  | 2.10E-06 | Lung  | Snoring    | -4.0684 | 4.73E-05 | 5.15E-04 |
| 47 | TSLP    | 85480 | 5 | 110400778 | 110418722 | 8.88E-16 | blood | Asthma     | -0.1167 | 9.07E-01 | 9.64E-01 |
| 47 | TSLP    | 85480 | 5 | 110400778 | 110418722 | 8.88E-16 | Lung  | Asthma     | 10.9000 | 1.74E-27 | 5.03E-25 |
| 47 | TSLP    | 85480 | 5 | 110400778 | 110418722 | 8.88E-16 | blood | COPD       | -0.1167 | 9.07E-01 | 9.64E-01 |
| 47 | TSLP    | 85480 | 5 | 110400778 | 110418722 | 8.88E-16 | Lung  | COPD       | 1.6393  | 1.01E-01 | 2.87E-01 |
| 47 | TSLP    | 85480 | 5 | 110400778 | 110418722 | 8.88E-16 | blood | IPF        | -0.1167 | 9.07E-01 | 9.64E-01 |
| 47 | TSLP    | 85480 | 5 | 110400778 | 110418722 | 8.88E-16 | Lung  | IPF        | -0.9340 | 3.50E-01 | 6.08E-01 |
| 47 | TSLP    | 85480 | 5 | 110400778 | 110418722 | 8.88E-16 | blood | LungCancer | -0.1167 | 9.07E-01 | 9.64E-01 |
| 47 | TSLP    | 85480 | 5 | 110400778 | 110418722 | 8.88E-16 | Lung  | LungCancer | -1.3160 | 1.88E-01 | 4.23E-01 |
| 47 | TSLP    | 85480 | 5 | 110400778 | 110418722 | 8.88E-16 | blood | Snoring    | -0.1167 | 9.07E-01 | 9.64E-01 |
| 47 | TSLP    | 85480 | 5 | 110400778 | 110418722 | 8.88E-16 | Lung  | Snoring    | -0.1167 | 9.07E-01 | 9.64E-01 |
| 48 | TNFAIP8 | 25816 | 5 | 118599418 | 118735294 | 3.65E-05 | blood | Asthma     | 0.6194  | 5.36E-01 | 7.61E-01 |
| 48 | TNFAIP8 | 25816 | 5 | 118599418 | 118735294 | 3.65E-05 | Lung  | Asthma     | 6.8000  | 1.02E-11 | 8.53E-10 |
| 48 | TNFAIP8 | 25816 | 5 | 118599418 | 118735294 | 3.65E-05 | blood | COPD       | 0.6194  | 5.36E-01 | 7.61E-01 |
| 48 | TNFAIP8 | 25816 | 5 | 118599418 | 118735294 | 3.65E-05 | Lung  | COPD       | 3.0677  | 2.16E-03 | 1.38E-02 |
| 48 | TNFAIP8 | 25816 | 5 | 118599418 | 118735294 | 3.65E-05 | blood | IPF        | 0.6194  | 5.36E-01 | 7.61E-01 |
| 48 | TNFAIP8 | 25816 | 5 | 118599418 | 118735294 | 3.65E-05 | Lung  | IPF        | 0.3736  | 7.09E-01 | 8.85E-01 |
| 48 | TNFAIP8 | 25816 | 5 | 118599418 | 118735294 | 3.65E-05 | blood | LungCancer | 0.6194  | 5.36E-01 | 7.61E-01 |
| 48 | TNFAIP8 | 25816 | 5 | 118599418 | 118735294 | 3.65E-05 | Lung  | LungCancer | 0.0509  | 9.59E-01 | 9.86E-01 |
| 48 | TNFAIP8 | 25816 | 5 | 118599418 | 118735294 | 3.65E-05 | blood | Snoring    | 0.6194  | 5.36E-01 | 7.61E-01 |
| 48 | TNFAIP8 | 25816 | 5 | 118599418 | 118735294 | 3.65E-05 | Lung  | Snoring    | 0.6194  | 5.36E-01 | 7.61E-01 |
| 52 | FBXO38  | 81545 | 5 | 147758498 | 147827399 | 8.32E-06 | blood | Asthma     | -0.5236 | 6.01E-01 | 8.06E-01 |
| 52 | FBXO38  | 81545 | 5 | 147758498 | 147827399 | 8.32E-06 | Lung  | Asthma     | 0.8280  | 4.08E-01 | 6.57E-01 |
| 52 | FBXO38  | 81545 | 5 | 147758498 | 147827399 | 8.32E-06 | blood | COPD       | -0.5236 | 6.01E-01 | 8.06E-01 |
| 52 | FBXO38  | 81545 | 5 | 147758498 | 147827399 | 8.32E-06 | Lung  | COPD       | 0.9063  | 3.65E-01 | 6.20E-01 |
| 52 | FBXO38  | 81545 | 5 | 147758498 | 147827399 | 8.32E-06 | blood | IPF        | -0.5236 | 6.01E-01 | 8.06E-01 |
| 52 | FBXO38  | 81545 | 5 | 147758498 | 147827399 | 8.32E-06 | Lung  | IPF        | -0.4487 | 6.54E-01 | 8.44E-01 |
| 52 | FBXO38  | 81545 | 5 | 147758498 | 147827399 | 8.32E-06 | blood | LungCancer | -0.5236 | 6.01E-01 | 8.06E-01 |
| 52 | FBXO38  | 81545 | 5 | 147758498 | 147827399 | 8.32E-06 | Lung  | LungCancer | -0.6057 | 5.45E-01 | 7.64E-01 |
| 52 | FBXO38  | 81545 | 5 | 147758498 | 147827399 | 8.32E-06 | blood | Snoring    | -0.5236 | 6.01E-01 | 8.06E-01 |
| 52 | FBXO38  | 81545 | 5 | 147758498 | 147827399 | 8.32E-06 | Lung  | Snoring    | -0.5236 | 6.01E-01 | 8.06E-01 |
| 58 | ABT1    | 29777 | 6 | 26592171  | 26605278  | 4.58E-05 | blood | Asthma     | 0.1561  | 8.76E-01 | 9.56E-01 |
| 58 | ABT1    | 29777 | 6 | 26592171  | 26605278  | 4.58E-05 | Lung  | Asthma     | -1.7837 | 7.45E-02 | 2.33E-01 |
| 58 | ABT1    | 29777 | 6 | 26592171  | 26605278  | 4.58E-05 | blood | COPD       | 0.1561  | 8.76E-01 | 9.56E-01 |
| 58 | ABT1    | 29777 | 6 | 26592171  | 26605278  | 4.58E-05 | Lung  | COPD       | 2.4016  | 1.63E-02 | 7.90E-02 |
| 58 | ABT1    | 29777 | 6 | 26592171  | 26605278  | 4.58E-05 | blood | IPF        | 0.1561  | 8.76E-01 | 9.56E-01 |
| 58 | ABT1    | 29777 | 6 | 26592171  | 26605278  | 4.58E-05 | Lung  | IPF        | -0.1274 | 8.99E-01 | 9.64E-01 |
| 58 | ABT1    | 29777 | 6 | 26592171  | 26605278  | 4.58E-05 | blood | LungCancer | 0.1561  | 8.76E-01 | 9.56E-01 |
| 58 | ABT1    | 29777 | 6 | 26592171  | 26605278  | 4.58E-05 | Lung  | LungCancer | 2.7460  | 6.03E-03 | 3.46E-02 |
| 58 | ABT1    | 29777 | 6 | 26592171  | 26605278  | 4.58E-05 | blood | Snoring    | 0.1561  | 8.76E-01 | 9.56E-01 |
| 58 | ABT1    | 29777 | 6 | 26592171  | 26605278  | 4.58E-05 | Lung  | Snoring    | 0.1561  | 8.76E-01 | 9.56E-01 |
| 59 | TTBK1   | 84630 | 6 | 43206222  | 43260997  | 3.71E-07 | blood | Asthma     | -2.3360 | 1.95E-02 | 9.17E-02 |
| 59 | TTBK1   | 84630 | 6 | 43206222  | 43260997  | 3.71E-07 | Lung  | Asthma     | -0.1910 | 8.48E-01 | 9.55E-01 |
| 59 | TTBK1   | 84630 | 6 | 43206222  | 43260997  | 3.71E-07 | blood | COPD       | -2.3360 | 1.95E-02 | 9.17E-02 |
| 59 | TTBK1   | 84630 | 6 | 43206222  | 43260997  | 3.71E-07 | Lung  | COPD       | -1.1115 | 2.66E-01 | 5.17E-01 |
| 59 | TTBK1   | 84630 | 6 | 43206222  | 43260997  | 3.71E-07 | blood | IPF        | -2.3360 | 1.95E-02 | 9.17E-02 |
| 59 | TTBK1   | 84630 | 6 | 43206222  | 43260997  | 3.71E-07 | Lung  | IPF        | -1.1240 | 2.61E-01 | 5.16E-01 |
| 59 | TTBK1   | 84630 | 6 | 43206222  | 43260997  | 3.71E-07 | blood | LungCancer | -2.3360 | 1.95E-02 | 9.17E-02 |
| 59 | TTBK1   | 84630 | 6 | 43206222  | 43260997  | 3.71E-07 | Lung  | LungCancer | -1.8735 | 6.10E-02 | 2.05E-01 |
| 59 | TTBK1   | 84630 | 6 | 43206222  | 43260997  | 3.71E-07 | blood | Snoring    | -2.3360 | 1.95E-02 | 9.17E-02 |
| 59 | TTBK1   | 84630 | 6 | 43206222  | 43260997  | 3.71E-07 | Lung  | Snoring    | -2.3360 | 1.95E-02 | 9.17E-02 |
| 78 | LACTB2  | 51110 | 8 | 71544501  | 71586447  | 3.07E-09 | blood | Asthma     | 5.8839  | 4.01E-09 | 1.59E-07 |
| 78 | LACTB2  | 51110 | 8 | 71544501  | 71586447  | 3.07E-09 | Lung  | Asthma     | -0.4632 | 6.43E-01 | 8.39E-01 |
| 78 | LACTB2  | 51110 | 8 | 71544501  | 71586447  | 3.07E-09 | blood | COPD       | 5.8839  | 4.01E-09 | 1.59E-07 |

|     |        |        |    |           |           |          |       |            |         |          |          |
|-----|--------|--------|----|-----------|-----------|----------|-------|------------|---------|----------|----------|
| 78  | LACTB2 | 51110  | 8  | 71544501  | 71586447  | 3.07E-09 | Lung  | COPD       | 1.4320  | 1.52E-01 | 3.78E-01 |
| 78  | LACTB2 | 51110  | 8  | 71544501  | 71586447  | 3.07E-09 | blood | IPF        | 5.8839  | 4.01E-09 | 1.59E-07 |
| 78  | LACTB2 | 51110  | 8  | 71544501  | 71586447  | 3.07E-09 | Lung  | IPF        | 0.8123  | 4.17E-01 | 6.68E-01 |
| 78  | LACTB2 | 51110  | 8  | 71544501  | 71586447  | 3.07E-09 | blood | LungCancer | 5.8839  | 4.01E-09 | 1.59E-07 |
| 78  | LACTB2 | 51110  | 8  | 71544501  | 71586447  | 3.07E-09 | Lung  | LungCancer | -2.7308 | 6.32E-03 | 3.56E-02 |
| 78  | LACTB2 | 51110  | 8  | 71544501  | 71586447  | 3.07E-09 | blood | Snoring    | 5.8839  | 4.01E-09 | 1.59E-07 |
| 78  | LACTB2 | 51110  | 8  | 71544501  | 71586447  | 3.07E-09 | Lung  | Snoring    | 5.8839  | 4.01E-09 | 1.59E-07 |
| 84  | UHRF2  | 115426 | 9  | 6408151   | 6512054   | 6.47E-05 | blood | Asthma     | -0.6820 | 4.96E-01 | 7.36E-01 |
| 84  | UHRF2  | 115426 | 9  | 6408151   | 6512054   | 6.47E-05 | Lung  | Asthma     | -0.4475 | 6.55E-01 | 8.44E-01 |
| 84  | UHRF2  | 115426 | 9  | 6408151   | 6512054   | 6.47E-05 | blood | COPD       | -0.6820 | 4.96E-01 | 7.36E-01 |
| 84  | UHRF2  | 115426 | 9  | 6408151   | 6512054   | 6.47E-05 | Lung  | COPD       | -1.9573 | 5.03E-02 | 1.81E-01 |
| 84  | UHRF2  | 115426 | 9  | 6408151   | 6512054   | 6.47E-05 | blood | IPF        | -0.6820 | 4.96E-01 | 7.36E-01 |
| 84  | UHRF2  | 115426 | 9  | 6408151   | 6512054   | 6.47E-05 | Lung  | IPF        | -0.6485 | 5.17E-01 | 7.53E-01 |
| 84  | UHRF2  | 115426 | 9  | 6408151   | 6512054   | 6.47E-05 | blood | LungCancer | -0.6820 | 4.96E-01 | 7.36E-01 |
| 84  | UHRF2  | 115426 | 9  | 6408151   | 6512054   | 6.47E-05 | Lung  | LungCancer | -2.9403 | 3.28E-03 | 2.00E-02 |
| 84  | UHRF2  | 115426 | 9  | 6408151   | 6512054   | 6.47E-05 | blood | Snoring    | -0.6820 | 4.96E-01 | 7.36E-01 |
| 84  | UHRF2  | 115426 | 9  | 6408151   | 6512054   | 6.47E-05 | Lung  | Snoring    | -0.6820 | 4.96E-01 | 7.36E-01 |
| 93  | CNNM2  | 54805  | 10 | 104673075 | 104843344 | 6.56E-09 | blood | Asthma     | NA      | NA       | NA       |
| 93  | CNNM2  | 54805  | 10 | 104673075 | 104843344 | 6.56E-09 | Lung  | Asthma     | NA      | NA       | NA       |
| 93  | CNNM2  | 54805  | 10 | 104673075 | 104843344 | 6.56E-09 | blood | COPD       | NA      | NA       | NA       |
| 93  | CNNM2  | 54805  | 10 | 104673075 | 104843344 | 6.56E-09 | Lung  | COPD       | NA      | NA       | NA       |
| 93  | CNNM2  | 54805  | 10 | 104673075 | 104843344 | 6.56E-09 | blood | IPF        | NA      | NA       | NA       |
| 93  | CNNM2  | 54805  | 10 | 104673075 | 104843344 | 6.56E-09 | Lung  | IPF        | NA      | NA       | NA       |
| 93  | CNNM2  | 54805  | 10 | 104673075 | 104843344 | 6.56E-09 | blood | LungCancer | NA      | NA       | NA       |
| 93  | CNNM2  | 54805  | 10 | 104673075 | 104843344 | 6.56E-09 | Lung  | LungCancer | NA      | NA       | NA       |
| 93  | CNNM2  | 54805  | 10 | 104673075 | 104843344 | 6.56E-09 | blood | Snoring    | NA      | NA       | NA       |
| 93  | CNNM2  | 54805  | 10 | 104673075 | 104843344 | 6.56E-09 | Lung  | Snoring    | NA      | NA       | NA       |
| 96  | FADS1  | 3992   | 11 | 61562097  | 61589529  | 3.40E-13 | blood | Asthma     | -0.9763 | 3.29E-01 | 5.84E-01 |
| 96  | FADS1  | 3992   | 11 | 61562097  | 61589529  | 3.40E-13 | Lung  | Asthma     | 7.6483  | 2.04E-14 | 1.96E-12 |
| 96  | FADS1  | 3992   | 11 | 61562097  | 61589529  | 3.40E-13 | blood | COPD       | -0.9763 | 3.29E-01 | 5.84E-01 |
| 96  | FADS1  | 3992   | 11 | 61562097  | 61589529  | 3.40E-13 | Lung  | COPD       | 2.7563  | 5.85E-03 | 3.37E-02 |
| 96  | FADS1  | 3992   | 11 | 61562097  | 61589529  | 3.40E-13 | blood | IPF        | -0.9763 | 3.29E-01 | 5.84E-01 |
| 96  | FADS1  | 3992   | 11 | 61562097  | 61589529  | 3.40E-13 | Lung  | IPF        | 1.2400  | 2.14E-01 | 4.56E-01 |
| 96  | FADS1  | 3992   | 11 | 61562097  | 61589529  | 3.40E-13 | blood | LungCancer | -0.9763 | 3.29E-01 | 5.84E-01 |
| 96  | FADS1  | 3992   | 11 | 61562097  | 61589529  | 3.40E-13 | Lung  | LungCancer | 2.6856  | 7.24E-03 | 4.03E-02 |
| 96  | FADS1  | 3992   | 11 | 61562097  | 61589529  | 3.40E-13 | blood | Snoring    | -0.9763 | 3.29E-01 | 5.84E-01 |
| 96  | FADS1  | 3992   | 11 | 61562097  | 61589529  | 3.40E-13 | Lung  | Snoring    | -0.9763 | 3.29E-01 | 5.84E-01 |
| 131 | TBX6   | 6911   | 16 | 30092114  | 30108258  | 1.64E-05 | blood | Asthma     | 2.9611  | 3.07E-03 | 1.89E-02 |
| 131 | TBX6   | 6911   | 16 | 30092114  | 30108258  | 1.64E-05 | Lung  | Asthma     | 5.6688  | 1.44E-08 | 4.32E-07 |
| 131 | TBX6   | 6911   | 16 | 30092114  | 30108258  | 1.64E-05 | blood | COPD       | 2.9611  | 3.07E-03 | 1.89E-02 |
| 131 | TBX6   | 6911   | 16 | 30092114  | 30108258  | 1.64E-05 | Lung  | COPD       | 4.5134  | 6.38E-06 | 8.63E-05 |
| 131 | TBX6   | 6911   | 16 | 30092114  | 30108258  | 1.64E-05 | blood | IPF        | 2.9611  | 3.07E-03 | 1.89E-02 |
| 131 | TBX6   | 6911   | 16 | 30092114  | 30108258  | 1.64E-05 | Lung  | IPF        | -0.1300 | 8.96E-01 | 9.63E-01 |
| 131 | TBX6   | 6911   | 16 | 30092114  | 30108258  | 1.64E-05 | blood | LungCancer | 2.9611  | 3.07E-03 | 1.89E-02 |
| 131 | TBX6   | 6911   | 16 | 30092114  | 30108258  | 1.64E-05 | Lung  | LungCancer | -0.1430 | 8.86E-01 | 9.59E-01 |
| 131 | TBX6   | 6911   | 16 | 30092114  | 30108258  | 1.64E-05 | blood | Snoring    | 2.9611  | 3.07E-03 | 1.89E-02 |
| 131 | TBX6   | 6911   | 16 | 30092114  | 30108258  | 1.64E-05 | Lung  | Snoring    | 2.9611  | 3.07E-03 | 1.89E-02 |
| 131 | CTF1   | 1489   | 16 | 30902928  | 30919881  | 2.64E-10 | blood | Asthma     | 0.8910  | 3.73E-01 | 6.25E-01 |
| 131 | CTF1   | 1489   | 16 | 30902928  | 30919881  | 2.64E-10 | Lung  | Asthma     | 0.6815  | 4.96E-01 | 7.36E-01 |
| 131 | CTF1   | 1489   | 16 | 30902928  | 30919881  | 2.64E-10 | blood | COPD       | 0.8910  | 3.73E-01 | 6.25E-01 |
| 131 | CTF1   | 1489   | 16 | 30902928  | 30919881  | 2.64E-10 | Lung  | COPD       | 0.7555  | 4.50E-01 | 6.98E-01 |
| 131 | CTF1   | 1489   | 16 | 30902928  | 30919881  | 2.64E-10 | blood | IPF        | 0.8910  | 3.73E-01 | 6.25E-01 |
| 131 | CTF1   | 1489   | 16 | 30902928  | 30919881  | 2.64E-10 | Lung  | IPF        | 2.0400  | 4.15E-02 | 1.60E-01 |
| 131 | CTF1   | 1489   | 16 | 30902928  | 30919881  | 2.64E-10 | blood | LungCancer | 0.8910  | 3.73E-01 | 6.25E-01 |
| 131 | CTF1   | 1489   | 16 | 30902928  | 30919881  | 2.64E-10 | Lung  | LungCancer | 1.7100  | 8.67E-02 | 2.59E-01 |
| 131 | CTF1   | 1489   | 16 | 30902928  | 30919881  | 2.64E-10 | blood | Snoring    | 0.8910  | 3.73E-01 | 6.25E-01 |
| 131 | CTF1   | 1489   | 16 | 30902928  | 30919881  | 2.64E-10 | Lung  | Snoring    | 0.8910  | 3.73E-01 | 6.25E-01 |
| 109 | RILPL2 | 196383 | 12 | 123894936 | 123926264 | 3.51E-06 | blood | Asthma     | NA      | NA       | NA       |
| 109 | RILPL2 | 196383 | 12 | 123894936 | 123926264 | 3.51E-06 | Lung  | Asthma     | NA      | NA       | NA       |
| 109 | RILPL2 | 196383 | 12 | 123894936 | 123926264 | 3.51E-06 | blood | COPD       | NA      | NA       | NA       |
| 109 | RILPL2 | 196383 | 12 | 123894936 | 123926264 | 3.51E-06 | Lung  | COPD       | NA      | NA       | NA       |
| 109 | RILPL2 | 196383 | 12 | 123894936 | 123926264 | 3.51E-06 | blood | IPF        | NA      | NA       | NA       |
| 109 | RILPL2 | 196383 | 12 | 123894936 | 123926264 | 3.51E-06 | Lung  | IPF        | NA      | NA       | NA       |
| 109 | RILPL2 | 196383 | 12 | 123894936 | 123926264 | 3.51E-06 | blood | LungCancer | NA      | NA       | NA       |
| 109 | RILPL2 | 196383 | 12 | 123894936 | 123926264 | 3.51E-06 | Lung  | LungCancer | NA      | NA       | NA       |
| 109 | RILPL2 | 196383 | 12 | 123894936 | 123926264 | 3.51E-06 | blood | Snoring    | NA      | NA       | NA       |
| 109 | RILPL2 | 196383 | 12 | 123894936 | 123926264 | 3.51E-06 | Lung  | Snoring    | NA      | NA       | NA       |
| 131 | PRSS53 | 339105 | 16 | 31089745  | 31105289  | 3.11E-15 | blood | Asthma     | -5.6474 | 1.63E-08 | 4.43E-07 |
| 131 | PRSS53 | 339105 | 16 | 31089745  | 31105289  | 3.11E-15 | Lung  | Asthma     | -5.1713 | 2.33E-07 | 4.18E-06 |
| 131 | PRSS53 | 339105 | 16 | 31089745  | 31105289  | 3.11E-15 | blood | COPD       | -5.6474 | 1.63E-08 | 4.43E-07 |
| 131 | PRSS53 | 339105 | 16 | 31089745  | 31105289  | 3.11E-15 | Lung  | COPD       | -4.0493 | 5.14E-05 | 5.58E-04 |
| 131 | PRSS53 | 339105 | 16 | 31089745  | 31105289  | 3.11E-15 | blood | IPF        | -5.6474 | 1.63E-08 | 4.43E-07 |
| 131 | PRSS53 | 339105 | 16 | 31089745  | 31105289  | 3.11E-15 | Lung  | IPF        | -0.6000 | 5.49E-01 | 7.68E-01 |

|     |         |        |    |           |           |          |       |            |         |          |          |
|-----|---------|--------|----|-----------|-----------|----------|-------|------------|---------|----------|----------|
| 131 | PRSS53  | 339105 | 16 | 31089745  | 31105289  | 3.11E-15 | blood | LungCancer | -5.6474 | 1.63E-08 | 4.43E-07 |
| 131 | PRSS53  | 339105 | 16 | 31089745  | 31105289  | 3.11E-15 | Lung  | LungCancer | -2.4000 | 1.62E-02 | 7.85E-02 |
| 131 | PRSS53  | 339105 | 16 | 31089745  | 31105289  | 3.11E-15 | blood | Snoring    | -5.6474 | 1.63E-08 | 4.43E-07 |
| 131 | PRSS53  | 339105 | 16 | 31089745  | 31105289  | 3.11E-15 | Lung  | Snoring    | -5.6474 | 1.63E-08 | 4.43E-07 |
| 46  | POC5    | 134359 | 5  | 74965023  | 75018313  | 2.30E-07 | blood | Asthma     | -3.3709 | 7.49E-04 | 5.85E-03 |
| 46  | POC5    | 134359 | 5  | 74965023  | 75018313  | 2.30E-07 | Lung  | Asthma     | -0.1770 | 8.60E-01 | 9.55E-01 |
| 46  | POC5    | 134359 | 5  | 74965023  | 75018313  | 2.30E-07 | blood | COPD       | -3.3709 | 7.49E-04 | 5.85E-03 |
| 46  | POC5    | 134359 | 5  | 74965023  | 75018313  | 2.30E-07 | Lung  | COPD       | 1.0611  | 2.89E-01 | 5.46E-01 |
| 46  | POC5    | 134359 | 5  | 74965023  | 75018313  | 2.30E-07 | blood | IPF        | -3.3709 | 7.49E-04 | 5.85E-03 |
| 46  | POC5    | 134359 | 5  | 74965023  | 75018313  | 2.30E-07 | Lung  | IPF        | 1.0520  | 2.93E-01 | 5.48E-01 |
| 46  | POC5    | 134359 | 5  | 74965023  | 75018313  | 2.30E-07 | blood | LungCancer | -3.3709 | 7.49E-04 | 5.85E-03 |
| 46  | POC5    | 134359 | 5  | 74965023  | 75018313  | 2.30E-07 | Lung  | LungCancer | -0.2340 | 8.15E-01 | 9.40E-01 |
| 46  | POC5    | 134359 | 5  | 74965023  | 75018313  | 2.30E-07 | blood | Snoring    | -3.3709 | 7.49E-04 | 5.85E-03 |
| 46  | POC5    | 134359 | 5  | 74965023  | 75018313  | 2.30E-07 | Lung  | Snoring    | -3.3709 | 7.49E-04 | 5.85E-03 |
| 47  | CAMK4   | 814    | 5  | 110554947 | 110835584 | 6.93E-14 | blood | Asthma     | -1.3181 | 1.87E-01 | 4.21E-01 |
| 47  | CAMK4   | 814    | 5  | 110554947 | 110835584 | 6.93E-14 | Lung  | Asthma     | 5.8500  | 4.92E-09 | 1.91E-07 |
| 47  | CAMK4   | 814    | 5  | 110554947 | 110835584 | 6.93E-14 | blood | COPD       | -1.3181 | 1.87E-01 | 4.21E-01 |
| 47  | CAMK4   | 814    | 5  | 110554947 | 110835584 | 6.93E-14 | Lung  | COPD       | 2.0436  | 4.10E-02 | 1.58E-01 |
| 47  | CAMK4   | 814    | 5  | 110554947 | 110835584 | 6.93E-14 | blood | IPF        | -1.3181 | 1.87E-01 | 4.21E-01 |
| 47  | CAMK4   | 814    | 5  | 110554947 | 110835584 | 6.93E-14 | Lung  | IPF        | -0.1438 | 8.86E-01 | 9.59E-01 |
| 47  | CAMK4   | 814    | 5  | 110554947 | 110835584 | 6.93E-14 | blood | LungCancer | -1.3181 | 1.87E-01 | 4.21E-01 |
| 47  | CAMK4   | 814    | 5  | 110554947 | 110835584 | 6.93E-14 | Lung  | LungCancer | -0.7106 | 4.77E-01 | 7.24E-01 |
| 47  | CAMK4   | 814    | 5  | 110554947 | 110835584 | 6.93E-14 | blood | Snoring    | -1.3181 | 1.87E-01 | 4.21E-01 |
| 47  | CAMK4   | 814    | 5  | 110554947 | 110835584 | 6.93E-14 | Lung  | Snoring    | -1.3181 | 1.87E-01 | 4.21E-01 |
| 92  | HHEX    | 3087   | 10 | 94444681  | 94460408  | 9.44E-06 | blood | Asthma     | 1.9476  | 5.15E-02 | 1.84E-01 |
| 92  | HHEX    | 3087   | 10 | 94444681  | 94460408  | 9.44E-06 | Lung  | Asthma     | -0.9861 | 3.24E-01 | 5.81E-01 |
| 92  | HHEX    | 3087   | 10 | 94444681  | 94460408  | 9.44E-06 | blood | COPD       | 1.9476  | 5.15E-02 | 1.84E-01 |
| 92  | HHEX    | 3087   | 10 | 94444681  | 94460408  | 9.44E-06 | Lung  | COPD       | -0.6824 | 4.95E-01 | 7.36E-01 |
| 92  | HHEX    | 3087   | 10 | 94444681  | 94460408  | 9.44E-06 | blood | IPF        | 1.9476  | 5.15E-02 | 1.84E-01 |
| 92  | HHEX    | 3087   | 10 | 94444681  | 94460408  | 9.44E-06 | Lung  | IPF        | -0.9978 | 3.18E-01 | 5.74E-01 |
| 92  | HHEX    | 3087   | 10 | 94444681  | 94460408  | 9.44E-06 | blood | LungCancer | 1.9476  | 5.15E-02 | 1.84E-01 |
| 92  | HHEX    | 3087   | 10 | 94444681  | 94460408  | 9.44E-06 | Lung  | LungCancer | -1.2976 | 1.94E-01 | 4.33E-01 |
| 92  | HHEX    | 3087   | 10 | 94444681  | 94460408  | 9.44E-06 | blood | Snoring    | 1.9476  | 5.15E-02 | 1.84E-01 |
| 92  | HHEX    | 3087   | 10 | 94444681  | 94460408  | 9.44E-06 | Lung  | Snoring    | 1.9476  | 5.15E-02 | 1.84E-01 |
| 18  | BCL2L11 | 10018  | 2  | 111873491 | 111931022 | 3.85E-08 | blood | Asthma     | 1.5261  | 1.27E-01 | 3.35E-01 |
| 18  | BCL2L11 | 10018  | 2  | 111873491 | 111931022 | 3.85E-08 | Lung  | Asthma     | 1.4640  | 1.43E-01 | 3.63E-01 |
| 18  | BCL2L11 | 10018  | 2  | 111873491 | 111931022 | 3.85E-08 | blood | COPD       | 1.5261  | 1.27E-01 | 3.35E-01 |
| 18  | BCL2L11 | 10018  | 2  | 111873491 | 111931022 | 3.85E-08 | Lung  | COPD       | 0.4851  | 6.28E-01 | 8.27E-01 |
| 18  | BCL2L11 | 10018  | 2  | 111873491 | 111931022 | 3.85E-08 | blood | IPF        | 1.5261  | 1.27E-01 | 3.35E-01 |
| 18  | BCL2L11 | 10018  | 2  | 111873491 | 111931022 | 3.85E-08 | Lung  | IPF        | 1.3494  | 1.77E-01 | 4.15E-01 |
| 18  | BCL2L11 | 10018  | 2  | 111873491 | 111931022 | 3.85E-08 | blood | LungCancer | 1.5261  | 1.27E-01 | 3.35E-01 |
| 18  | BCL2L11 | 10018  | 2  | 111873491 | 111931022 | 3.85E-08 | Lung  | LungCancer | -1.7816 | 7.48E-02 | 2.33E-01 |
| 18  | BCL2L11 | 10018  | 2  | 111873491 | 111931022 | 3.85E-08 | blood | Snoring    | 1.5261  | 1.27E-01 | 3.35E-01 |
| 18  | BCL2L11 | 10018  | 2  | 111873491 | 111931022 | 3.85E-08 | Lung  | Snoring    | 1.5261  | 1.27E-01 | 3.35E-01 |
| 133 | CFDP1   | 10428  | 16 | 75322608  | 75472387  | 1.20E-05 | blood | Asthma     | -1.2172 | 2.24E-01 | 4.65E-01 |
| 133 | CFDP1   | 10428  | 16 | 75322608  | 75472387  | 1.20E-05 | Lung  | Asthma     | -1.2736 | 2.03E-01 | 4.39E-01 |
| 133 | CFDP1   | 10428  | 16 | 75322608  | 75472387  | 1.20E-05 | blood | COPD       | -1.2172 | 2.24E-01 | 4.65E-01 |
| 133 | CFDP1   | 10428  | 16 | 75322608  | 75472387  | 1.20E-05 | Lung  | COPD       | -0.8542 | 3.93E-01 | 6.42E-01 |
| 133 | CFDP1   | 10428  | 16 | 75322608  | 75472387  | 1.20E-05 | blood | IPF        | -1.2172 | 2.24E-01 | 4.65E-01 |
| 133 | CFDP1   | 10428  | 16 | 75322608  | 75472387  | 1.20E-05 | Lung  | IPF        | -0.0454 | 9.64E-01 | 9.88E-01 |
| 133 | CFDP1   | 10428  | 16 | 75322608  | 75472387  | 1.20E-05 | blood | LungCancer | -1.2172 | 2.24E-01 | 4.65E-01 |
| 133 | CFDP1   | 10428  | 16 | 75322608  | 75472387  | 1.20E-05 | Lung  | LungCancer | 2.0200  | 4.30E-02 | 1.64E-01 |
| 133 | CFDP1   | 10428  | 16 | 75322608  | 75472387  | 1.20E-05 | blood | Snoring    | -1.2172 | 2.24E-01 | 4.65E-01 |
| 133 | CFDP1   | 10428  | 16 | 75322608  | 75472387  | 1.20E-05 | Lung  | Snoring    | -1.2172 | 2.24E-01 | 4.65E-01 |
| 70  | JAZF1   | 221895 | 7  | 27865192  | 28225437  | 4.84E-08 | blood | Asthma     | 2.0498  | 4.04E-02 | 1.57E-01 |
| 70  | JAZF1   | 221895 | 7  | 27865192  | 28225437  | 4.84E-08 | Lung  | Asthma     | -2.4271 | 1.52E-02 | 7.50E-02 |
| 70  | JAZF1   | 221895 | 7  | 27865192  | 28225437  | 4.84E-08 | blood | COPD       | 2.0498  | 4.04E-02 | 1.57E-01 |
| 70  | JAZF1   | 221895 | 7  | 27865192  | 28225437  | 4.84E-08 | Lung  | COPD       | -0.5145 | 6.07E-01 | 8.12E-01 |
| 70  | JAZF1   | 221895 | 7  | 27865192  | 28225437  | 4.84E-08 | blood | IPF        | 2.0498  | 4.04E-02 | 1.57E-01 |
| 70  | JAZF1   | 221895 | 7  | 27865192  | 28225437  | 4.84E-08 | Lung  | IPF        | 0.7247  | 4.69E-01 | 7.16E-01 |
| 70  | JAZF1   | 221895 | 7  | 27865192  | 28225437  | 4.84E-08 | blood | LungCancer | 2.0498  | 4.04E-02 | 1.57E-01 |
| 70  | JAZF1   | 221895 | 7  | 27865192  | 28225437  | 4.84E-08 | Lung  | LungCancer | 0.2457  | 8.06E-01 | 9.35E-01 |
| 70  | JAZF1   | 221895 | 7  | 27865192  | 28225437  | 4.84E-08 | blood | Snoring    | 2.0498  | 4.04E-02 | 1.57E-01 |
| 70  | JAZF1   | 221895 | 7  | 27865192  | 28225437  | 4.84E-08 | Lung  | Snoring    | 2.0498  | 4.04E-02 | 1.57E-01 |
| 130 | KDM8    | 79831  | 16 | 27209807  | 27238089  | 3.87E-08 | blood | Asthma     | -2.2972 | 2.16E-02 | 9.75E-02 |
| 130 | KDM8    | 79831  | 16 | 27209807  | 27238089  | 3.87E-08 | Lung  | Asthma     | -0.3782 | 7.05E-01 | 8.84E-01 |
| 130 | KDM8    | 79831  | 16 | 27209807  | 27238089  | 3.87E-08 | blood | COPD       | -2.2972 | 2.16E-02 | 9.75E-02 |
| 130 | KDM8    | 79831  | 16 | 27209807  | 27238089  | 3.87E-08 | Lung  | COPD       | 0.9532  | 3.40E-01 | 5.98E-01 |
| 130 | KDM8    | 79831  | 16 | 27209807  | 27238089  | 3.87E-08 | blood | IPF        | -2.2972 | 2.16E-02 | 9.75E-02 |
| 130 | KDM8    | 79831  | 16 | 27209807  | 27238089  | 3.87E-08 | Lung  | IPF        | -0.0183 | 9.85E-01 | 9.93E-01 |
| 130 | KDM8    | 79831  | 16 | 27209807  | 27238089  | 3.87E-08 | blood | LungCancer | -2.2972 | 2.16E-02 | 9.75E-02 |
| 130 | KDM8    | 79831  | 16 | 27209807  | 27238089  | 3.87E-08 | Lung  | LungCancer | 1.4500  | 1.46E-01 | 3.70E-01 |
| 130 | KDM8    | 79831  | 16 | 27209807  | 27238089  | 3.87E-08 | blood | Snoring    | -2.2972 | 2.16E-02 | 9.75E-02 |

|     |           |        |    |          |          |          |       |            |         |          |          |
|-----|-----------|--------|----|----------|----------|----------|-------|------------|---------|----------|----------|
| 130 | KDM8      | 79831  | 16 | 27209807 | 27238089 | 3.87E-08 | Lung  | Snoring    | -2.2972 | 2.16E-02 | 9.75E-02 |
| 128 | ADAMTSL3  | 57188  | 15 | 84317838 | 84713594 | 4.59E-05 | blood | Asthma     | -1.8951 | 5.81E-02 | 2.01E-01 |
| 128 | ADAMTSL3  | 57188  | 15 | 84317838 | 84713594 | 4.59E-05 | Lung  | Asthma     | -2.2933 | 2.18E-02 | 9.81E-02 |
| 128 | ADAMTSL3  | 57188  | 15 | 84317838 | 84713594 | 4.59E-05 | blood | COPD       | -1.8951 | 5.81E-02 | 2.01E-01 |
| 128 | ADAMTSL3  | 57188  | 15 | 84317838 | 84713594 | 4.59E-05 | Lung  | COPD       | -1.7075 | 8.77E-02 | 2.61E-01 |
| 128 | ADAMTSL3  | 57188  | 15 | 84317838 | 84713594 | 4.59E-05 | blood | IPF        | -1.8951 | 5.81E-02 | 2.01E-01 |
| 128 | ADAMTSL3  | 57188  | 15 | 84317838 | 84713594 | 4.59E-05 | Lung  | IPF        | 0.7291  | 4.66E-01 | 7.16E-01 |
| 128 | ADAMTSL3  | 57188  | 15 | 84317838 | 84713594 | 4.59E-05 | blood | LungCancer | -1.8951 | 5.81E-02 | 2.01E-01 |
| 128 | ADAMTSL3  | 57188  | 15 | 84317838 | 84713594 | 4.59E-05 | Lung  | LungCancer | 2.0500  | 4.04E-02 | 1.57E-01 |
| 128 | ADAMTSL3  | 57188  | 15 | 84317838 | 84713594 | 4.59E-05 | blood | Snoring    | -1.8951 | 5.81E-02 | 2.01E-01 |
| 128 | ADAMTSL3  | 57188  | 15 | 84317838 | 84713594 | 4.59E-05 | Lung  | Snoring    | -1.8951 | 5.81E-02 | 2.01E-01 |
| 131 | PHKG2     | 5261   | 16 | 30754574 | 30777497 | 1.84E-05 | blood | Asthma     | 0.6460  | 5.18E-01 | 7.53E-01 |
| 131 | PHKG2     | 5261   | 16 | 30754574 | 30777497 | 1.84E-05 | Lung  | Asthma     | 0.4470  | 6.55E-01 | 8.44E-01 |
| 131 | PHKG2     | 5261   | 16 | 30754574 | 30777497 | 1.84E-05 | blood | COPD       | 0.6460  | 5.18E-01 | 7.53E-01 |
| 131 | PHKG2     | 5261   | 16 | 30754574 | 30777497 | 1.84E-05 | Lung  | COPD       | 0.8405  | 4.01E-01 | 6.53E-01 |
| 131 | PHKG2     | 5261   | 16 | 30754574 | 30777497 | 1.84E-05 | blood | IPF        | 0.6460  | 5.18E-01 | 7.53E-01 |
| 131 | PHKG2     | 5261   | 16 | 30754574 | 30777497 | 1.84E-05 | Lung  | IPF        | 1.5500  | 1.21E-01 | 3.25E-01 |
| 131 | PHKG2     | 5261   | 16 | 30754574 | 30777497 | 1.84E-05 | blood | LungCancer | 0.6460  | 5.18E-01 | 7.53E-01 |
| 131 | PHKG2     | 5261   | 16 | 30754574 | 30777497 | 1.84E-05 | Lung  | LungCancer | -0.1550 | 8.77E-01 | 9.56E-01 |
| 131 | PHKG2     | 5261   | 16 | 30754574 | 30777497 | 1.84E-05 | blood | Snoring    | 0.6460  | 5.18E-01 | 7.53E-01 |
| 131 | PHKG2     | 5261   | 16 | 30754574 | 30777497 | 1.84E-05 | Lung  | Snoring    | 0.6460  | 5.18E-01 | 7.53E-01 |
| 58  | HIST1H2BD | 3017   | 6  | 26152419 | 26176577 | 3.92E-07 | blood | Asthma     | -0.2555 | 7.98E-01 | 9.32E-01 |
| 58  | HIST1H2BD | 3017   | 6  | 26152419 | 26176577 | 3.92E-07 | Lung  | Asthma     | -2.0309 | 4.23E-02 | 1.62E-01 |
| 58  | HIST1H2BD | 3017   | 6  | 26152419 | 26176577 | 3.92E-07 | blood | COPD       | -0.2555 | 7.98E-01 | 9.32E-01 |
| 58  | HIST1H2BD | 3017   | 6  | 26152419 | 26176577 | 3.92E-07 | Lung  | COPD       | 1.4484  | 1.48E-01 | 3.72E-01 |
| 58  | HIST1H2BD | 3017   | 6  | 26152419 | 26176577 | 3.92E-07 | blood | IPF        | -0.2555 | 7.98E-01 | 9.32E-01 |
| 58  | HIST1H2BD | 3017   | 6  | 26152419 | 26176577 | 3.92E-07 | Lung  | IPF        | 2.5739  | 1.01E-02 | 5.30E-02 |
| 58  | HIST1H2BD | 3017   | 6  | 26152419 | 26176577 | 3.92E-07 | blood | LungCancer | -0.2555 | 7.98E-01 | 9.32E-01 |
| 58  | HIST1H2BD | 3017   | 6  | 26152419 | 26176577 | 3.92E-07 | Lung  | LungCancer | 4.4115  | 1.03E-05 | 1.31E-04 |
| 58  | HIST1H2BD | 3017   | 6  | 26152419 | 26176577 | 3.92E-07 | blood | Snoring    | -0.2555 | 7.98E-01 | 9.32E-01 |
| 58  | HIST1H2BD | 3017   | 6  | 26152419 | 26176577 | 3.92E-07 | Lung  | Snoring    | -0.2555 | 7.98E-01 | 9.32E-01 |
| 58  | HIST1H4H  | 8365   | 6  | 26276278 | 26290844 | 3.85E-09 | blood | Asthma     | NA      | NA       | NA       |
| 58  | HIST1H4H  | 8365   | 6  | 26276278 | 26290844 | 3.85E-09 | Lung  | Asthma     | NA      | NA       | NA       |
| 58  | HIST1H4H  | 8365   | 6  | 26276278 | 26290844 | 3.85E-09 | blood | COPD       | NA      | NA       | NA       |
| 58  | HIST1H4H  | 8365   | 6  | 26276278 | 26290844 | 3.85E-09 | Lung  | COPD       | NA      | NA       | NA       |
| 58  | HIST1H4H  | 8365   | 6  | 26276278 | 26290844 | 3.85E-09 | blood | IPF        | NA      | NA       | NA       |
| 58  | HIST1H4H  | 8365   | 6  | 26276278 | 26290844 | 3.85E-09 | Lung  | IPF        | NA      | NA       | NA       |
| 58  | HIST1H4H  | 8365   | 6  | 26276278 | 26290844 | 3.85E-09 | blood | LungCancer | NA      | NA       | NA       |
| 58  | HIST1H4H  | 8365   | 6  | 26276278 | 26290844 | 3.85E-09 | Lung  | LungCancer | NA      | NA       | NA       |
| 58  | HIST1H4H  | 8365   | 6  | 26276278 | 26290844 | 3.85E-09 | blood | Snoring    | NA      | NA       | NA       |
| 58  | HIST1H4H  | 8365   | 6  | 26276278 | 26290844 | 3.85E-09 | Lung  | Snoring    | NA      | NA       | NA       |
| 58  | ZSCAN12   | 9753   | 6  | 28341598 | 28372544 | 2.29E-05 | blood | Asthma     | 0.1669  | 8.67E-01 | 9.55E-01 |
| 58  | ZSCAN12   | 9753   | 6  | 28341598 | 28372544 | 2.29E-05 | Lung  | Asthma     | -2.8603 | 4.23E-03 | 2.52E-02 |
| 58  | ZSCAN12   | 9753   | 6  | 28341598 | 28372544 | 2.29E-05 | blood | COPD       | 0.1669  | 8.67E-01 | 9.55E-01 |
| 58  | ZSCAN12   | 9753   | 6  | 28341598 | 28372544 | 2.29E-05 | Lung  | COPD       | 0.1115  | 9.11E-01 | 9.67E-01 |
| 58  | ZSCAN12   | 9753   | 6  | 28341598 | 28372544 | 2.29E-05 | blood | IPF        | 0.1669  | 8.67E-01 | 9.55E-01 |
| 58  | ZSCAN12   | 9753   | 6  | 28341598 | 28372544 | 2.29E-05 | Lung  | IPF        | -2.9231 | 3.47E-03 | 2.12E-02 |
| 58  | ZSCAN12   | 9753   | 6  | 28341598 | 28372544 | 2.29E-05 | blood | LungCancer | 0.1669  | 8.67E-01 | 9.55E-01 |
| 58  | ZSCAN12   | 9753   | 6  | 28341598 | 28372544 | 2.29E-05 | Lung  | LungCancer | -3.5380 | 4.03E-04 | 3.38E-03 |
| 58  | ZSCAN12   | 9753   | 6  | 28341598 | 28372544 | 2.29E-05 | blood | Snoring    | 0.1669  | 8.67E-01 | 9.55E-01 |
| 58  | ZSCAN12   | 9753   | 6  | 28341598 | 28372544 | 2.29E-05 | Lung  | Snoring    | 0.1669  | 8.67E-01 | 9.55E-01 |
| 138 | ARHGAP27  | 201176 | 17 | 43466268 | 43515282 | 6.32E-08 | blood | Asthma     | NA      | NA       | NA       |
| 138 | ARHGAP27  | 201176 | 17 | 43466268 | 43515282 | 6.32E-08 | Lung  | Asthma     | NA      | NA       | NA       |
| 138 | ARHGAP27  | 201176 | 17 | 43466268 | 43515282 | 6.32E-08 | blood | COPD       | NA      | NA       | NA       |
| 138 | ARHGAP27  | 201176 | 17 | 43466268 | 43515282 | 6.32E-08 | Lung  | COPD       | NA      | NA       | NA       |
| 138 | ARHGAP27  | 201176 | 17 | 43466268 | 43515282 | 6.32E-08 | blood | IPF        | NA      | NA       | NA       |
| 138 | ARHGAP27  | 201176 | 17 | 43466268 | 43515282 | 6.32E-08 | Lung  | IPF        | NA      | NA       | NA       |
| 138 | ARHGAP27  | 201176 | 17 | 43466268 | 43515282 | 6.32E-08 | blood | LungCancer | NA      | NA       | NA       |
| 138 | ARHGAP27  | 201176 | 17 | 43466268 | 43515282 | 6.32E-08 | Lung  | LungCancer | NA      | NA       | NA       |
| 138 | ARHGAP27  | 201176 | 17 | 43466268 | 43515282 | 6.32E-08 | blood | Snoring    | NA      | NA       | NA       |
| 138 | ARHGAP27  | 201176 | 17 | 43466268 | 43515282 | 6.32E-08 | Lung  | Snoring    | NA      | NA       | NA       |
| 126 | ISL2      | 64843  | 15 | 76624065 | 76639817 | 6.27E-06 | blood | Asthma     | -2.3120 | 2.08E-02 | 9.54E-02 |
| 126 | ISL2      | 64843  | 15 | 76624065 | 76639817 | 6.27E-06 | Lung  | Asthma     | 1.0016  | 3.17E-01 | 5.73E-01 |
| 126 | ISL2      | 64843  | 15 | 76624065 | 76639817 | 6.27E-06 | blood | COPD       | -2.3120 | 2.08E-02 | 9.54E-02 |
| 126 | ISL2      | 64843  | 15 | 76624065 | 76639817 | 6.27E-06 | Lung  | COPD       | 2.1249  | 3.36E-02 | 1.38E-01 |
| 126 | ISL2      | 64843  | 15 | 76624065 | 76639817 | 6.27E-06 | blood | IPF        | -2.3120 | 2.08E-02 | 9.54E-02 |
| 126 | ISL2      | 64843  | 15 | 76624065 | 76639817 | 6.27E-06 | Lung  | IPF        | 1.8769  | 6.05E-02 | 2.05E-01 |
| 126 | ISL2      | 64843  | 15 | 76624065 | 76639817 | 6.27E-06 | blood | LungCancer | -2.3120 | 2.08E-02 | 9.54E-02 |
| 126 | ISL2      | 64843  | 15 | 76624065 | 76639817 | 6.27E-06 | Lung  | LungCancer | 1.5500  | 1.21E-01 | 3.25E-01 |
| 126 | ISL2      | 64843  | 15 | 76624065 | 76639817 | 6.27E-06 | blood | Snoring    | -2.3120 | 2.08E-02 | 9.54E-02 |
| 126 | ISL2      | 64843  | 15 | 76624065 | 76639817 | 6.27E-06 | Lung  | Snoring    | -2.3120 | 2.08E-02 | 9.54E-02 |
| 71  | AZGP1     | 563    | 7  | 99559350 | 99578735 | 2.92E-06 | blood | Asthma     | 0.5811  | 5.61E-01 | 7.78E-01 |
| 71  | AZGP1     | 563    | 7  | 99559350 | 99578735 | 2.92E-06 | Lung  | Asthma     | -0.0035 | 9.97E-01 | 9.99E-01 |



|     |        |        |    |           |           |          |       |            |         |          |          |
|-----|--------|--------|----|-----------|-----------|----------|-------|------------|---------|----------|----------|
| 71  | AZGP1  | 563    | 7  | 99559350  | 99578735  | 2.92E-06 | blood | COPD       | 0.5811  | 5.61E-01 | 7.78E-01 |
| 71  | AZGP1  | 563    | 7  | 99559350  | 99578735  | 2.92E-06 | Lung  | COPD       | -1.6815 | 9.27E-02 | 2.72E-01 |
| 71  | AZGP1  | 563    | 7  | 99559350  | 99578735  | 2.92E-06 | blood | IPF        | 0.5811  | 5.61E-01 | 7.78E-01 |
| 71  | AZGP1  | 563    | 7  | 99559350  | 99578735  | 2.92E-06 | Lung  | IPF        | 1.4931  | 1.35E-01 | 3.53E-01 |
| 71  | AZGP1  | 563    | 7  | 99559350  | 99578735  | 2.92E-06 | blood | LungCancer | 0.5811  | 5.61E-01 | 7.78E-01 |
| 71  | AZGP1  | 563    | 7  | 99559350  | 99578735  | 2.92E-06 | Lung  | LungCancer | -0.0496 | 9.60E-01 | 9.86E-01 |
| 71  | AZGP1  | 563    | 7  | 99559350  | 99578735  | 2.92E-06 | blood | Snoring    | 0.5811  | 5.61E-01 | 7.78E-01 |
| 71  | AZGP1  | 563    | 7  | 99559350  | 99578735  | 2.92E-06 | Lung  | Snoring    | 0.5811  | 5.61E-01 | 7.78E-01 |
| 137 | IKZF3  | 22806  | 17 | 37908968  | 38025441  | 8.49E-06 | blood | Asthma     | 0.0314  | 9.75E-01 | 9.92E-01 |
| 137 | IKZF3  | 22806  | 17 | 37908968  | 38025441  | 8.49E-06 | Lung  | Asthma     | -7.7353 | 1.03E-14 | 1.06E-12 |
| 137 | IKZF3  | 22806  | 17 | 37908968  | 38025441  | 8.49E-06 | blood | COPD       | 0.0314  | 9.75E-01 | 9.92E-01 |
| 137 | IKZF3  | 22806  | 17 | 37908968  | 38025441  | 8.49E-06 | Lung  | COPD       | -2.5183 | 1.18E-02 | 6.08E-02 |
| 137 | IKZF3  | 22806  | 17 | 37908968  | 38025441  | 8.49E-06 | blood | IPF        | 0.0314  | 9.75E-01 | 9.92E-01 |
| 137 | IKZF3  | 22806  | 17 | 37908968  | 38025441  | 8.49E-06 | Lung  | IPF        | -0.9555 | 3.39E-01 | 5.97E-01 |
| 137 | IKZF3  | 22806  | 17 | 37908968  | 38025441  | 8.49E-06 | blood | LungCancer | 0.0314  | 9.75E-01 | 9.92E-01 |
| 137 | IKZF3  | 22806  | 17 | 37908968  | 38025441  | 8.49E-06 | Lung  | LungCancer | 0.2444  | 8.07E-01 | 9.35E-01 |
| 137 | IKZF3  | 22806  | 17 | 37908968  | 38025441  | 8.49E-06 | blood | Snoring    | 0.0314  | 9.75E-01 | 9.92E-01 |
| 137 | IKZF3  | 22806  | 17 | 37908968  | 38025441  | 8.49E-06 | Lung  | Snoring    | 0.0314  | 9.75E-01 | 9.92E-01 |
| 135 | SEN3   | 26168  | 17 | 7460309   | 7480287   | 3.83E-06 | blood | Asthma     | 5.2324  | 1.67E-07 | 3.18E-06 |
| 135 | SEN3   | 26168  | 17 | 7460309   | 7480287   | 3.83E-06 | Lung  | Asthma     | 2.9633  | 3.04E-03 | 1.98E-02 |
| 135 | SEN3   | 26168  | 17 | 7460309   | 7480287   | 3.83E-06 | blood | COPD       | 5.2324  | 1.67E-07 | 3.18E-06 |
| 135 | SEN3   | 26168  | 17 | 7460309   | 7480287   | 3.83E-06 | Lung  | COPD       | 0.2315  | 8.17E-01 | 9.42E-01 |
| 135 | SEN3   | 26168  | 17 | 7460309   | 7480287   | 3.83E-06 | blood | IPF        | 5.2324  | 1.67E-07 | 3.18E-06 |
| 135 | SEN3   | 26168  | 17 | 7460309   | 7480287   | 3.83E-06 | Lung  | IPF        | 0.1805  | 8.57E-01 | 9.55E-01 |
| 135 | SEN3   | 26168  | 17 | 7460309   | 7480287   | 3.83E-06 | blood | LungCancer | 5.2324  | 1.67E-07 | 3.18E-06 |
| 135 | SEN3   | 26168  | 17 | 7460309   | 7480287   | 3.83E-06 | Lung  | LungCancer | 0.3516  | 7.25E-01 | 8.97E-01 |
| 135 | SEN3   | 26168  | 17 | 7460309   | 7480287   | 3.83E-06 | blood | Snoring    | 5.2324  | 1.67E-07 | 3.18E-06 |
| 135 | SEN3   | 26168  | 17 | 7460309   | 7480287   | 3.83E-06 | Lung  | Snoring    | 5.2324  | 1.67E-07 | 3.18E-06 |
| 1   | TTLL10 | 254173 | 1  | 1104286   | 1138315   | 4.18E-05 | blood | Asthma     | -1.1774 | 2.39E-01 | 4.85E-01 |
| 1   | TTLL10 | 254173 | 1  | 1104286   | 1138315   | 4.18E-05 | Lung  | Asthma     | -5.0434 | 4.57E-07 | 8.02E-06 |
| 1   | TTLL10 | 254173 | 1  | 1104286   | 1138315   | 4.18E-05 | blood | COPD       | -1.1774 | 2.39E-01 | 4.85E-01 |
| 1   | TTLL10 | 254173 | 1  | 1104286   | 1138315   | 4.18E-05 | Lung  | COPD       | -1.8029 | 7.14E-02 | 2.28E-01 |
| 1   | TTLL10 | 254173 | 1  | 1104286   | 1138315   | 4.18E-05 | blood | IPF        | -1.1774 | 2.39E-01 | 4.85E-01 |
| 1   | TTLL10 | 254173 | 1  | 1104286   | 1138315   | 4.18E-05 | Lung  | IPF        | -1.0652 | 2.87E-01 | 5.43E-01 |
| 1   | TTLL10 | 254173 | 1  | 1104286   | 1138315   | 4.18E-05 | blood | LungCancer | -1.1774 | 2.39E-01 | 4.85E-01 |
| 1   | TTLL10 | 254173 | 1  | 1104286   | 1138315   | 4.18E-05 | Lung  | LungCancer | 0.8714  | 3.84E-01 | 6.32E-01 |
| 1   | TTLL10 | 254173 | 1  | 1104286   | 1138315   | 4.18E-05 | blood | Snoring    | -1.1774 | 2.39E-01 | 4.85E-01 |
| 1   | TTLL10 | 254173 | 1  | 1104286   | 1138315   | 4.18E-05 | Lung  | Snoring    | -1.1774 | 2.39E-01 | 4.85E-01 |
| 12  | ADORA1 | 134    | 1  | 203091833 | 203141533 | 4.58E-10 | blood | Asthma     | -0.1686 | 8.66E-01 | 9.55E-01 |
| 12  | ADORA1 | 134    | 1  | 203091833 | 203141533 | 4.58E-10 | Lung  | Asthma     | -0.1343 | 8.93E-01 | 9.62E-01 |
| 12  | ADORA1 | 134    | 1  | 203091833 | 203141533 | 4.58E-10 | blood | COPD       | -0.1686 | 8.66E-01 | 9.55E-01 |
| 12  | ADORA1 | 134    | 1  | 203091833 | 203141533 | 4.58E-10 | Lung  | COPD       | 0.4927  | 6.22E-01 | 8.23E-01 |
| 12  | ADORA1 | 134    | 1  | 203091833 | 203141533 | 4.58E-10 | blood | IPF        | -0.1686 | 8.66E-01 | 9.55E-01 |
| 12  | ADORA1 | 134    | 1  | 203091833 | 203141533 | 4.58E-10 | Lung  | IPF        | -0.2721 | 7.86E-01 | 9.29E-01 |
| 12  | ADORA1 | 134    | 1  | 203091833 | 203141533 | 4.58E-10 | blood | LungCancer | -0.1686 | 8.66E-01 | 9.55E-01 |
| 12  | ADORA1 | 134    | 1  | 203091833 | 203141533 | 4.58E-10 | Lung  | LungCancer | 0.2761  | 7.82E-01 | 9.29E-01 |
| 12  | ADORA1 | 134    | 1  | 203091833 | 203141533 | 4.58E-10 | blood | Snoring    | -0.1686 | 8.66E-01 | 9.55E-01 |
| 12  | ADORA1 | 134    | 1  | 203091833 | 203141533 | 4.58E-10 | Lung  | Snoring    | -0.1686 | 8.66E-01 | 9.55E-01 |
| 25  | BSN    | 8927   | 3  | 49586922  | 49713982  | 4.47E-08 | blood | Asthma     | 1.6609  | 9.67E-02 | 2.81E-01 |
| 25  | BSN    | 8927   | 3  | 49586922  | 49713982  | 4.47E-08 | Lung  | Asthma     | 1.6289  | 1.03E-01 | 2.90E-01 |
| 25  | BSN    | 8927   | 3  | 49586922  | 49713982  | 4.47E-08 | blood | COPD       | 1.6609  | 9.67E-02 | 2.81E-01 |
| 25  | BSN    | 8927   | 3  | 49586922  | 49713982  | 4.47E-08 | Lung  | COPD       | 4.0264  | 5.66E-05 | 6.00E-04 |
| 25  | BSN    | 8927   | 3  | 49586922  | 49713982  | 4.47E-08 | blood | IPF        | 1.6609  | 9.67E-02 | 2.81E-01 |
| 25  | BSN    | 8927   | 3  | 49586922  | 49713982  | 4.47E-08 | Lung  | IPF        | -0.5320 | 5.95E-01 | 8.01E-01 |
| 25  | BSN    | 8927   | 3  | 49586922  | 49713982  | 4.47E-08 | blood | LungCancer | 1.6609  | 9.67E-02 | 2.81E-01 |
| 25  | BSN    | 8927   | 3  | 49586922  | 49713982  | 4.47E-08 | Lung  | LungCancer | 0.8750  | 3.82E-01 | 6.31E-01 |
| 25  | BSN    | 8927   | 3  | 49586922  | 49713982  | 4.47E-08 | blood | Snoring    | 1.6609  | 9.67E-02 | 2.81E-01 |
| 25  | BSN    | 8927   | 3  | 49586922  | 49713982  | 4.47E-08 | Lung  | Snoring    | 1.6609  | 9.67E-02 | 2.81E-01 |
| 25  | RNF123 | 63891  | 3  | 49721950  | 49763962  | 8.20E-08 | blood | Asthma     | 3.2341  | 1.22E-03 | 8.93E-03 |
| 25  | RNF123 | 63891  | 3  | 49721950  | 49763962  | 8.20E-08 | Lung  | Asthma     | 3.8788  | 1.05E-04 | 9.67E-04 |
| 25  | RNF123 | 63891  | 3  | 49721950  | 49763962  | 8.20E-08 | blood | COPD       | 3.2341  | 1.22E-03 | 8.93E-03 |
| 25  | RNF123 | 63891  | 3  | 49721950  | 49763962  | 8.20E-08 | Lung  | COPD       | 5.4564  | 4.86E-08 | 1.16E-06 |
| 25  | RNF123 | 63891  | 3  | 49721950  | 49763962  | 8.20E-08 | blood | IPF        | 3.2341  | 1.22E-03 | 8.93E-03 |
| 25  | RNF123 | 63891  | 3  | 49721950  | 49763962  | 8.20E-08 | Lung  | IPF        | 0.6432  | 5.20E-01 | 7.55E-01 |
| 25  | RNF123 | 63891  | 3  | 49721950  | 49763962  | 8.20E-08 | blood | LungCancer | 3.2341  | 1.22E-03 | 8.93E-03 |
| 25  | RNF123 | 63891  | 3  | 49721950  | 49763962  | 8.20E-08 | Lung  | LungCancer | 2.8380  | 4.54E-03 | 2.70E-02 |
| 25  | RNF123 | 63891  | 3  | 49721950  | 49763962  | 8.20E-08 | blood | Snoring    | 3.2341  | 1.22E-03 | 8.93E-03 |
| 25  | RNF123 | 63891  | 3  | 49721950  | 49763962  | 8.20E-08 | Lung  | Snoring    | 3.2341  | 1.22E-03 | 8.93E-03 |
| 25  | CAMKV  | 79012  | 3  | 49890414  | 49912655  | 4.78E-07 | blood | Asthma     | NA      | NA       | NA       |
| 25  | CAMKV  | 79012  | 3  | 49890414  | 49912655  | 4.78E-07 | Lung  | Asthma     | NA      | NA       | NA       |
| 25  | CAMKV  | 79012  | 3  | 49890414  | 49912655  | 4.78E-07 | blood | COPD       | NA      | NA       | NA       |
| 25  | CAMKV  | 79012  | 3  | 49890414  | 49912655  | 4.78E-07 | Lung  | COPD       | NA      | NA       | NA       |
| 25  | CAMKV  | 79012  | 3  | 49890414  | 49912655  | 4.78E-07 | blood | IPF        | NA      | NA       | NA       |

|     |          |        |    |           |           |          |       |            |         |          |          |
|-----|----------|--------|----|-----------|-----------|----------|-------|------------|---------|----------|----------|
| 25  | CAMKV    | 79012  | 3  | 49890414  | 49912655  | 4.78E-07 | Lung  | IPF        | NA      | NA       | NA       |
| 25  | CAMKV    | 79012  | 3  | 49890414  | 49912655  | 4.78E-07 | blood | LungCancer | NA      | NA       | NA       |
| 25  | CAMKV    | 79012  | 3  | 49890414  | 49912655  | 4.78E-07 | Lung  | LungCancer | NA      | NA       | NA       |
| 25  | CAMKV    | 79012  | 3  | 49890414  | 49912655  | 4.78E-07 | blood | Snoring    | NA      | NA       | NA       |
| 25  | CAMKV    | 79012  | 3  | 49890414  | 49912655  | 4.78E-07 | Lung  | Snoring    | NA      | NA       | NA       |
| 47  | SLC25A46 | 91137  | 5  | 110068837 | 110105857 | 5.65E-07 | blood | Asthma     | -0.6962 | 4.86E-01 | 7.30E-01 |
| 47  | SLC25A46 | 91137  | 5  | 110068837 | 110105857 | 5.65E-07 | Lung  | Asthma     | -3.5700 | 3.56E-04 | 3.06E-03 |
| 47  | SLC25A46 | 91137  | 5  | 110068837 | 110105857 | 5.65E-07 | blood | COPD       | -0.6962 | 4.86E-01 | 7.30E-01 |
| 47  | SLC25A46 | 91137  | 5  | 110068837 | 110105857 | 5.65E-07 | Lung  | COPD       | -1.3521 | 1.76E-01 | 4.12E-01 |
| 47  | SLC25A46 | 91137  | 5  | 110068837 | 110105857 | 5.65E-07 | blood | IPF        | -0.6962 | 4.86E-01 | 7.30E-01 |
| 47  | SLC25A46 | 91137  | 5  | 110068837 | 110105857 | 5.65E-07 | Lung  | IPF        | 0.7969  | 4.26E-01 | 6.79E-01 |
| 47  | SLC25A46 | 91137  | 5  | 110068837 | 110105857 | 5.65E-07 | blood | LungCancer | -0.6962 | 4.86E-01 | 7.30E-01 |
| 47  | SLC25A46 | 91137  | 5  | 110068837 | 110105857 | 5.65E-07 | Lung  | LungCancer | -1.3875 | 1.65E-01 | 4.01E-01 |
| 47  | SLC25A46 | 91137  | 5  | 110068837 | 110105857 | 5.65E-07 | blood | Snoring    | -0.6962 | 4.86E-01 | 7.30E-01 |
| 47  | SLC25A46 | 91137  | 5  | 110068837 | 110105857 | 5.65E-07 | Lung  | Snoring    | -0.6962 | 4.86E-01 | 7.30E-01 |
| 49  | ACSL6    | 23305  | 5  | 131280666 | 131352761 | 3.94E-06 | blood | Asthma     | -2.4765 | 1.33E-02 | 6.69E-02 |
| 49  | ACSL6    | 23305  | 5  | 131280666 | 131352761 | 3.94E-06 | Lung  | Asthma     | 0.0460  | 9.63E-01 | 9.88E-01 |
| 49  | ACSL6    | 23305  | 5  | 131280666 | 131352761 | 3.94E-06 | blood | COPD       | -2.4765 | 1.33E-02 | 6.69E-02 |
| 49  | ACSL6    | 23305  | 5  | 131280666 | 131352761 | 3.94E-06 | Lung  | COPD       | -0.4782 | 6.33E-01 | 8.30E-01 |
| 49  | ACSL6    | 23305  | 5  | 131280666 | 131352761 | 3.94E-06 | blood | IPF        | -2.4765 | 1.33E-02 | 6.69E-02 |
| 49  | ACSL6    | 23305  | 5  | 131280666 | 131352761 | 3.94E-06 | Lung  | IPF        | 0.4580  | 6.47E-01 | 8.42E-01 |
| 49  | ACSL6    | 23305  | 5  | 131280666 | 131352761 | 3.94E-06 | blood | LungCancer | -2.4765 | 1.33E-02 | 6.69E-02 |
| 49  | ACSL6    | 23305  | 5  | 131280666 | 131352761 | 3.94E-06 | Lung  | LungCancer | -1.1813 | 2.37E-01 | 4.85E-01 |
| 49  | ACSL6    | 23305  | 5  | 131280666 | 131352761 | 3.94E-06 | blood | Snoring    | -2.4765 | 1.33E-02 | 6.69E-02 |
| 49  | ACSL6    | 23305  | 5  | 131280666 | 131352761 | 3.94E-06 | Lung  | Snoring    | -2.4765 | 1.33E-02 | 6.69E-02 |
| 49  | CSF2     | 1437   | 5  | 131404485 | 131416863 | 1.55E-14 | blood | Asthma     | 2.1725  | 2.98E-02 | 1.28E-01 |
| 49  | CSF2     | 1437   | 5  | 131404485 | 131416863 | 1.55E-14 | Lung  | Asthma     | 9.4600  | 3.14E-21 | 5.87E-19 |
| 49  | CSF2     | 1437   | 5  | 131404485 | 131416863 | 1.55E-14 | blood | COPD       | 2.1725  | 2.98E-02 | 1.28E-01 |
| 49  | CSF2     | 1437   | 5  | 131404485 | 131416863 | 1.55E-14 | Lung  | COPD       | 5.9137  | 3.35E-09 | 1.57E-07 |
| 49  | CSF2     | 1437   | 5  | 131404485 | 131416863 | 1.55E-14 | blood | IPF        | 2.1725  | 2.98E-02 | 1.28E-01 |
| 49  | CSF2     | 1437   | 5  | 131404485 | 131416863 | 1.55E-14 | Lung  | IPF        | 2.2364  | 2.53E-02 | 1.11E-01 |
| 49  | CSF2     | 1437   | 5  | 131404485 | 131416863 | 1.55E-14 | blood | LungCancer | 2.1725  | 2.98E-02 | 1.28E-01 |
| 49  | CSF2     | 1437   | 5  | 131404485 | 131416863 | 1.55E-14 | Lung  | LungCancer | 0.1202  | 9.04E-01 | 9.64E-01 |
| 49  | CSF2     | 1437   | 5  | 131404485 | 131416863 | 1.55E-14 | blood | Snoring    | 2.1725  | 2.98E-02 | 1.28E-01 |
| 49  | CSF2     | 1437   | 5  | 131404485 | 131416863 | 1.55E-14 | Lung  | Snoring    | 2.1725  | 2.98E-02 | 1.28E-01 |
| 49  | SEPT8    | 23176  | 5  | 132081509 | 132118976 | 1.38E-11 | blood | Asthma     | NA      | NA       | NA       |
| 49  | SEPT8    | 23176  | 5  | 132081509 | 132118976 | 1.38E-11 | Lung  | Asthma     | NA      | NA       | NA       |
| 49  | SEPT8    | 23176  | 5  | 132081509 | 132118976 | 1.38E-11 | blood | COPD       | NA      | NA       | NA       |
| 49  | SEPT8    | 23176  | 5  | 132081509 | 132118976 | 1.38E-11 | Lung  | COPD       | NA      | NA       | NA       |
| 49  | SEPT8    | 23176  | 5  | 132081509 | 132118976 | 1.38E-11 | blood | IPF        | NA      | NA       | NA       |
| 49  | SEPT8    | 23176  | 5  | 132081509 | 132118976 | 1.38E-11 | Lung  | IPF        | NA      | NA       | NA       |
| 49  | SEPT8    | 23176  | 5  | 132081509 | 132118976 | 1.38E-11 | blood | LungCancer | NA      | NA       | NA       |
| 49  | SEPT8    | 23176  | 5  | 132081509 | 132118976 | 1.38E-11 | Lung  | LungCancer | NA      | NA       | NA       |
| 49  | SEPT8    | 23176  | 5  | 132081509 | 132118976 | 1.38E-11 | blood | Snoring    | NA      | NA       | NA       |
| 49  | SEPT8    | 23176  | 5  | 132081509 | 132118976 | 1.38E-11 | Lung  | Snoring    | NA      | NA       | NA       |
| 123 | FAM227B  | 196951 | 15 | 49613822  | 49918128  | 5.27E-07 | blood | Asthma     | 0.6703  | 5.03E-01 | 7.43E-01 |
| 123 | FAM227B  | 196951 | 15 | 49613822  | 49918128  | 5.27E-07 | Lung  | Asthma     | -0.8116 | 4.17E-01 | 6.68E-01 |
| 123 | FAM227B  | 196951 | 15 | 49613822  | 49918128  | 5.27E-07 | blood | COPD       | 0.6703  | 5.03E-01 | 7.43E-01 |
| 123 | FAM227B  | 196951 | 15 | 49613822  | 49918128  | 5.27E-07 | Lung  | COPD       | -1.4742 | 1.40E-01 | 3.60E-01 |
| 123 | FAM227B  | 196951 | 15 | 49613822  | 49918128  | 5.27E-07 | blood | IPF        | 0.6703  | 5.03E-01 | 7.43E-01 |
| 123 | FAM227B  | 196951 | 15 | 49613822  | 49918128  | 5.27E-07 | Lung  | IPF        | 1.7601  | 7.84E-02 | 2.40E-01 |
| 123 | FAM227B  | 196951 | 15 | 49613822  | 49918128  | 5.27E-07 | blood | LungCancer | 0.6703  | 5.03E-01 | 7.43E-01 |
| 123 | FAM227B  | 196951 | 15 | 49613822  | 49918128  | 5.27E-07 | Lung  | LungCancer | 2.1300  | 3.33E-02 | 1.37E-01 |
| 123 | FAM227B  | 196951 | 15 | 49613822  | 49918128  | 5.27E-07 | blood | Snoring    | 0.6703  | 5.03E-01 | 7.43E-01 |
| 123 | FAM227B  | 196951 | 15 | 49613822  | 49918128  | 5.27E-07 | Lung  | Snoring    | 0.6703  | 5.03E-01 | 7.43E-01 |
| 91  | NDST2    | 8509   | 10 | 75556669  | 75576589  | 2.58E-05 | blood | Asthma     | -0.0218 | 9.83E-01 | 9.93E-01 |
| 91  | NDST2    | 8509   | 10 | 75556669  | 75576589  | 2.58E-05 | Lung  | Asthma     | 5.2168  | 1.82E-07 | 3.41E-06 |
| 91  | NDST2    | 8509   | 10 | 75556669  | 75576589  | 2.58E-05 | blood | COPD       | -0.0218 | 9.83E-01 | 9.93E-01 |
| 91  | NDST2    | 8509   | 10 | 75556669  | 75576589  | 2.58E-05 | Lung  | COPD       | 1.7134  | 8.66E-02 | 2.59E-01 |
| 91  | NDST2    | 8509   | 10 | 75556669  | 75576589  | 2.58E-05 | blood | IPF        | -0.0218 | 9.83E-01 | 9.93E-01 |
| 91  | NDST2    | 8509   | 10 | 75556669  | 75576589  | 2.58E-05 | Lung  | IPF        | -2.0448 | 4.09E-02 | 1.58E-01 |
| 91  | NDST2    | 8509   | 10 | 75556669  | 75576589  | 2.58E-05 | blood | LungCancer | -0.0218 | 9.83E-01 | 9.93E-01 |
| 91  | NDST2    | 8509   | 10 | 75556669  | 75576589  | 2.58E-05 | Lung  | LungCancer | 0.7008  | 4.83E-01 | 7.30E-01 |
| 91  | NDST2    | 8509   | 10 | 75556669  | 75576589  | 2.58E-05 | blood | Snoring    | -0.0218 | 9.83E-01 | 9.93E-01 |
| 91  | NDST2    | 8509   | 10 | 75556669  | 75576589  | 2.58E-05 | Lung  | Snoring    | -0.0218 | 9.83E-01 | 9.93E-01 |
| 71  | ZNF3     | 7551   | 7  | 99656470  | 99685171  | 1.56E-08 | blood | Asthma     | -2.6022 | 9.26E-03 | 4.96E-02 |
| 71  | ZNF3     | 7551   | 7  | 99656470  | 99685171  | 1.56E-08 | Lung  | Asthma     | 0.8563  | 3.92E-01 | 6.41E-01 |
| 71  | ZNF3     | 7551   | 7  | 99656470  | 99685171  | 1.56E-08 | blood | COPD       | -2.6022 | 9.26E-03 | 4.96E-02 |
| 71  | ZNF3     | 7551   | 7  | 99656470  | 99685171  | 1.56E-08 | Lung  | COPD       | 0.7398  | 4.59E-01 | 7.10E-01 |
| 71  | ZNF3     | 7551   | 7  | 99656470  | 99685171  | 1.56E-08 | blood | IPF        | -2.6022 | 9.26E-03 | 4.96E-02 |
| 71  | ZNF3     | 7551   | 7  | 99656470  | 99685171  | 1.56E-08 | Lung  | IPF        | -5.2930 | 1.20E-07 | 2.51E-06 |
| 71  | ZNF3     | 7551   | 7  | 99656470  | 99685171  | 1.56E-08 | blood | LungCancer | -2.6022 | 9.26E-03 | 4.96E-02 |
| 71  | ZNF3     | 7551   | 7  | 99656470  | 99685171  | 1.56E-08 | Lung  | LungCancer | -1.8735 | 6.10E-02 | 2.05E-01 |

|     |          |        |    |          |          |          |       |            |         |          |          |
|-----|----------|--------|----|----------|----------|----------|-------|------------|---------|----------|----------|
| 71  | ZNF3     | 7551   | 7  | 99656470 | 99685171 | 1.56E-08 | blood | Snoring    | -2.6022 | 9.26E-03 | 4.96E-02 |
| 71  | ZNF3     | 7551   | 7  | 99656470 | 99685171 | 1.56E-08 | Lung  | Snoring    | -2.6022 | 9.26E-03 | 4.96E-02 |
| 71  | ZSCAN21  | 7589   | 7  | 99642390 | 99667663 | 1.95E-07 | blood | Asthma     | -1.4919 | 1.36E-01 | 3.53E-01 |
| 71  | ZSCAN21  | 7589   | 7  | 99642390 | 99667663 | 1.95E-07 | Lung  | Asthma     | 0.2638  | 7.92E-01 | 9.29E-01 |
| 71  | ZSCAN21  | 7589   | 7  | 99642390 | 99667663 | 1.95E-07 | blood | COPD       | -1.4919 | 1.36E-01 | 3.53E-01 |
| 71  | ZSCAN21  | 7589   | 7  | 99642390 | 99667663 | 1.95E-07 | Lung  | COPD       | -0.4115 | 6.81E-01 | 8.64E-01 |
| 71  | ZSCAN21  | 7589   | 7  | 99642390 | 99667663 | 1.95E-07 | blood | IPF        | -1.4919 | 1.36E-01 | 3.53E-01 |
| 71  | ZSCAN21  | 7589   | 7  | 99642390 | 99667663 | 1.95E-07 | Lung  | IPF        | -3.3190 | 9.03E-04 | 6.96E-03 |
| 71  | ZSCAN21  | 7589   | 7  | 99642390 | 99667663 | 1.95E-07 | blood | LungCancer | -1.4919 | 1.36E-01 | 3.53E-01 |
| 71  | ZSCAN21  | 7589   | 7  | 99642390 | 99667663 | 1.95E-07 | Lung  | LungCancer | -1.6810 | 9.28E-02 | 2.72E-01 |
| 71  | ZSCAN21  | 7589   | 7  | 99642390 | 99667663 | 1.95E-07 | blood | Snoring    | -1.4919 | 1.36E-01 | 3.53E-01 |
| 71  | ZSCAN21  | 7589   | 7  | 99642390 | 99667663 | 1.95E-07 | Lung  | Snoring    | -1.4919 | 1.36E-01 | 3.53E-01 |
| 133 | TMEM170A | 124491 | 16 | 75472136 | 75503584 | 2.12E-05 | blood | Asthma     | 0.7687  | 4.42E-01 | 6.91E-01 |
| 133 | TMEM170A | 124491 | 16 | 75472136 | 75503584 | 2.12E-05 | Lung  | Asthma     | -0.6098 | 5.42E-01 | 7.62E-01 |
| 133 | TMEM170A | 124491 | 16 | 75472136 | 75503584 | 2.12E-05 | blood | COPD       | 0.7687  | 4.42E-01 | 6.91E-01 |
| 133 | TMEM170A | 124491 | 16 | 75472136 | 75503584 | 2.12E-05 | Lung  | COPD       | 0.0481  | 9.62E-01 | 9.87E-01 |
| 133 | TMEM170A | 124491 | 16 | 75472136 | 75503584 | 2.12E-05 | blood | IPF        | 0.7687  | 4.42E-01 | 6.91E-01 |
| 133 | TMEM170A | 124491 | 16 | 75472136 | 75503584 | 2.12E-05 | Lung  | IPF        | 0.5740  | 5.66E-01 | 7.83E-01 |
| 133 | TMEM170A | 124491 | 16 | 75472136 | 75503584 | 2.12E-05 | blood | LungCancer | 0.7687  | 4.42E-01 | 6.91E-01 |
| 133 | TMEM170A | 124491 | 16 | 75472136 | 75503584 | 2.12E-05 | Lung  | LungCancer | -2.7200 | 6.55E-03 | 3.68E-02 |
| 133 | TMEM170A | 124491 | 16 | 75472136 | 75503584 | 2.12E-05 | blood | Snoring    | 0.7687  | 4.42E-01 | 6.91E-01 |
| 133 | TMEM170A | 124491 | 16 | 75472136 | 75503584 | 2.12E-05 | Lung  | Snoring    | 0.7687  | 4.42E-01 | 6.91E-01 |
| 105 | GPR182   | 11318  | 12 | 57383355 | 57395469 | 2.25E-05 | blood | Asthma     | 1.9912  | 4.65E-02 | 1.75E-01 |
| 105 | GPR182   | 11318  | 12 | 57383355 | 57395469 | 2.25E-05 | Lung  | Asthma     | 0.5638  | 5.73E-01 | 7.89E-01 |
| 105 | GPR182   | 11318  | 12 | 57383355 | 57395469 | 2.25E-05 | blood | COPD       | 1.9912  | 4.65E-02 | 1.75E-01 |
| 105 | GPR182   | 11318  | 12 | 57383355 | 57395469 | 2.25E-05 | Lung  | COPD       | 0.5927  | 5.53E-01 | 7.71E-01 |
| 105 | GPR182   | 11318  | 12 | 57383355 | 57395469 | 2.25E-05 | blood | IPF        | 1.9912  | 4.65E-02 | 1.75E-01 |
| 105 | GPR182   | 11318  | 12 | 57383355 | 57395469 | 2.25E-05 | Lung  | IPF        | 0.9018  | 3.67E-01 | 6.23E-01 |
| 105 | GPR182   | 11318  | 12 | 57383355 | 57395469 | 2.25E-05 | blood | LungCancer | 1.9912  | 4.65E-02 | 1.75E-01 |
| 105 | GPR182   | 11318  | 12 | 57383355 | 57395469 | 2.25E-05 | Lung  | LungCancer | -0.6370 | 5.24E-01 | 7.55E-01 |
| 105 | GPR182   | 11318  | 12 | 57383355 | 57395469 | 2.25E-05 | blood | Snoring    | 1.9912  | 4.65E-02 | 1.75E-01 |
| 105 | GPR182   | 11318  | 12 | 57383355 | 57395469 | 2.25E-05 | Lung  | Snoring    | 1.9912  | 4.65E-02 | 1.75E-01 |
| 105 | NAB2     | 4665   | 12 | 57477677 | 57494259 | 3.91E-06 | blood | Asthma     | 0.4100  | 6.82E-01 | 8.64E-01 |
| 105 | NAB2     | 4665   | 12 | 57477677 | 57494259 | 3.91E-06 | Lung  | Asthma     | 0.4407  | 6.59E-01 | 8.48E-01 |
| 105 | NAB2     | 4665   | 12 | 57477677 | 57494259 | 3.91E-06 | blood | COPD       | 0.4100  | 6.82E-01 | 8.64E-01 |
| 105 | NAB2     | 4665   | 12 | 57477677 | 57494259 | 3.91E-06 | Lung  | COPD       | 1.3883  | 1.65E-01 | 4.01E-01 |
| 105 | NAB2     | 4665   | 12 | 57477677 | 57494259 | 3.91E-06 | blood | IPF        | 0.4100  | 6.82E-01 | 8.64E-01 |
| 105 | NAB2     | 4665   | 12 | 57477677 | 57494259 | 3.91E-06 | Lung  | IPF        | 0.5421  | 5.88E-01 | 7.95E-01 |
| 105 | NAB2     | 4665   | 12 | 57477677 | 57494259 | 3.91E-06 | blood | LungCancer | 0.4100  | 6.82E-01 | 8.64E-01 |
| 105 | NAB2     | 4665   | 12 | 57477677 | 57494259 | 3.91E-06 | Lung  | LungCancer | 0.7597  | 4.47E-01 | 6.96E-01 |
| 105 | NAB2     | 4665   | 12 | 57477677 | 57494259 | 3.91E-06 | blood | Snoring    | 0.4100  | 6.82E-01 | 8.64E-01 |
| 105 | NAB2     | 4665   | 12 | 57477677 | 57494259 | 3.91E-06 | Lung  | Snoring    | 0.4100  | 6.82E-01 | 8.64E-01 |
| 105 | STAT6    | 6778   | 12 | 57484187 | 57510196 | 4.77E-15 | blood | Asthma     | -2.7755 | 5.51E-03 | 3.19E-02 |
| 105 | STAT6    | 6778   | 12 | 57484187 | 57510196 | 4.77E-15 | Lung  | Asthma     | -0.0547 | 9.56E-01 | 9.85E-01 |
| 105 | STAT6    | 6778   | 12 | 57484187 | 57510196 | 4.77E-15 | blood | COPD       | -2.7755 | 5.51E-03 | 3.19E-02 |
| 105 | STAT6    | 6778   | 12 | 57484187 | 57510196 | 4.77E-15 | Lung  | COPD       | -1.0569 | 2.91E-01 | 5.47E-01 |
| 105 | STAT6    | 6778   | 12 | 57484187 | 57510196 | 4.77E-15 | blood | IPF        | -2.7755 | 5.51E-03 | 3.19E-02 |
| 105 | STAT6    | 6778   | 12 | 57484187 | 57510196 | 4.77E-15 | Lung  | IPF        | -1.4563 | 1.45E-01 | 3.68E-01 |
| 105 | STAT6    | 6778   | 12 | 57484187 | 57510196 | 4.77E-15 | blood | LungCancer | -2.7755 | 5.51E-03 | 3.19E-02 |
| 105 | STAT6    | 6778   | 12 | 57484187 | 57510196 | 4.77E-15 | Lung  | LungCancer | 0.9862  | 3.24E-01 | 5.81E-01 |
| 105 | STAT6    | 6778   | 12 | 57484187 | 57510196 | 4.77E-15 | blood | Snoring    | -2.7755 | 5.51E-03 | 3.19E-02 |
| 105 | STAT6    | 6778   | 12 | 57484187 | 57510196 | 4.77E-15 | Lung  | Snoring    | -2.7755 | 5.51E-03 | 3.19E-02 |
| 125 | SMAD3    | 4088   | 15 | 67353036 | 67492533 | 6.92E-15 | blood | Asthma     | 0.6111  | 5.41E-01 | 7.62E-01 |
| 125 | SMAD3    | 4088   | 15 | 67353036 | 67492533 | 6.92E-15 | Lung  | Asthma     | -9.2736 | 1.80E-20 | 3.01E-18 |
| 125 | SMAD3    | 4088   | 15 | 67353036 | 67492533 | 6.92E-15 | blood | COPD       | 0.6111  | 5.41E-01 | 7.62E-01 |
| 125 | SMAD3    | 4088   | 15 | 67353036 | 67492533 | 6.92E-15 | Lung  | COPD       | -3.8988 | 9.67E-05 | 9.23E-04 |
| 125 | SMAD3    | 4088   | 15 | 67353036 | 67492533 | 6.92E-15 | blood | IPF        | 0.6111  | 5.41E-01 | 7.62E-01 |
| 125 | SMAD3    | 4088   | 15 | 67353036 | 67492533 | 6.92E-15 | Lung  | IPF        | -0.1216 | 9.03E-01 | 9.64E-01 |
| 125 | SMAD3    | 4088   | 15 | 67353036 | 67492533 | 6.92E-15 | blood | LungCancer | 0.6111  | 5.41E-01 | 7.62E-01 |
| 125 | SMAD3    | 4088   | 15 | 67353036 | 67492533 | 6.92E-15 | Lung  | LungCancer | 0.1130  | 9.10E-01 | 9.66E-01 |
| 125 | SMAD3    | 4088   | 15 | 67353036 | 67492533 | 6.92E-15 | blood | Snoring    | 0.6111  | 5.41E-01 | 7.62E-01 |
| 125 | SMAD3    | 4088   | 15 | 67353036 | 67492533 | 6.92E-15 | Lung  | Snoring    | 0.6111  | 5.41E-01 | 7.62E-01 |
| 156 | TEF      | 7008   | 22 | 41758337 | 41800332 | 2.74E-12 | blood | Asthma     | 1.2965  | 1.95E-01 | 4.33E-01 |
| 156 | TEF      | 7008   | 22 | 41758337 | 41800332 | 2.74E-12 | Lung  | Asthma     | 1.7770  | 7.56E-02 | 2.34E-01 |
| 156 | TEF      | 7008   | 22 | 41758337 | 41800332 | 2.74E-12 | blood | COPD       | 1.2965  | 1.95E-01 | 4.33E-01 |
| 156 | TEF      | 7008   | 22 | 41758337 | 41800332 | 2.74E-12 | Lung  | COPD       | 0.0725  | 9.42E-01 | 9.79E-01 |
| 156 | TEF      | 7008   | 22 | 41758337 | 41800332 | 2.74E-12 | blood | IPF        | 1.2965  | 1.95E-01 | 4.33E-01 |
| 156 | TEF      | 7008   | 22 | 41758337 | 41800332 | 2.74E-12 | Lung  | IPF        | 1.7360  | 8.26E-02 | 2.50E-01 |
| 156 | TEF      | 7008   | 22 | 41758337 | 41800332 | 2.74E-12 | blood | LungCancer | 1.2965  | 1.95E-01 | 4.33E-01 |
| 156 | TEF      | 7008   | 22 | 41758337 | 41800332 | 2.74E-12 | Lung  | LungCancer | -0.9195 | 3.58E-01 | 6.14E-01 |
| 156 | TEF      | 7008   | 22 | 41758337 | 41800332 | 2.74E-12 | blood | Snoring    | 1.2965  | 1.95E-01 | 4.33E-01 |
| 156 | TEF      | 7008   | 22 | 41758337 | 41800332 | 2.74E-12 | Lung  | Snoring    | 1.2965  | 1.95E-01 | 4.33E-01 |
| 156 | MEI1     | 150365 | 22 | 42090518 | 42200459 | 1.07E-11 | blood | Asthma     | 1.1913  | 2.34E-01 | 4.79E-01 |

|     |        |        |    |           |           |          |       |            |         |          |          |
|-----|--------|--------|----|-----------|-----------|----------|-------|------------|---------|----------|----------|
| 156 | MEI1   | 150365 | 22 | 42090518  | 42200459  | 1.07E-11 | Lung  | Asthma     | 5.7162  | 1.09E-08 | 3.57E-07 |
| 156 | MEI1   | 150365 | 22 | 42090518  | 42200459  | 1.07E-11 | blood | COPD       | 1.1913  | 2.34E-01 | 4.79E-01 |
| 156 | MEI1   | 150365 | 22 | 42090518  | 42200459  | 1.07E-11 | Lung  | COPD       | -2.3925 | 1.67E-02 | 8.05E-02 |
| 156 | MEI1   | 150365 | 22 | 42090518  | 42200459  | 1.07E-11 | blood | IPF        | 1.1913  | 2.34E-01 | 4.79E-01 |
| 156 | MEI1   | 150365 | 22 | 42090518  | 42200459  | 1.07E-11 | Lung  | IPF        | 1.3479  | 1.78E-01 | 4.15E-01 |
| 156 | MEI1   | 150365 | 22 | 42090518  | 42200459  | 1.07E-11 | blood | LungCancer | 1.1913  | 2.34E-01 | 4.79E-01 |
| 156 | MEI1   | 150365 | 22 | 42090518  | 42200459  | 1.07E-11 | Lung  | LungCancer | -0.9028 | 3.67E-01 | 6.23E-01 |
| 156 | MEI1   | 150365 | 22 | 42090518  | 42200459  | 1.07E-11 | blood | Snoring    | 1.1913  | 2.34E-01 | 4.79E-01 |
| 156 | MEI1   | 150365 | 22 | 42090518  | 42200459  | 1.07E-11 | Lung  | Snoring    | 1.1913  | 2.34E-01 | 4.79E-01 |
| 88  | PBX3   | 5090   | 9  | 128504617 | 128734656 | 3.10E-10 | blood | Asthma     | 0.7000  | 4.84E-01 | 7.30E-01 |
| 88  | PBX3   | 5090   | 9  | 128504617 | 128734656 | 3.10E-10 | Lung  | Asthma     | -4.2861 | 1.82E-05 | 2.29E-04 |
| 88  | PBX3   | 5090   | 9  | 128504617 | 128734656 | 3.10E-10 | blood | COPD       | 0.7000  | 4.84E-01 | 7.30E-01 |
| 88  | PBX3   | 5090   | 9  | 128504617 | 128734656 | 3.10E-10 | Lung  | COPD       | -5.5775 | 2.44E-08 | 6.41E-07 |
| 88  | PBX3   | 5090   | 9  | 128504617 | 128734656 | 3.10E-10 | blood | IPF        | 0.7000  | 4.84E-01 | 7.30E-01 |
| 88  | PBX3   | 5090   | 9  | 128504617 | 128734656 | 3.10E-10 | Lung  | IPF        | 0.2896  | 7.72E-01 | 9.25E-01 |
| 88  | PBX3   | 5090   | 9  | 128504617 | 128734656 | 3.10E-10 | blood | LungCancer | 0.7000  | 4.84E-01 | 7.30E-01 |
| 88  | PBX3   | 5090   | 9  | 128504617 | 128734656 | 3.10E-10 | Lung  | LungCancer | -3.1143 | 1.84E-03 | 1.22E-02 |
| 88  | PBX3   | 5090   | 9  | 128504617 | 128734656 | 3.10E-10 | blood | Snoring    | 0.7000  | 4.84E-01 | 7.30E-01 |
| 88  | PBX3   | 5090   | 9  | 128504617 | 128734656 | 3.10E-10 | Lung  | Snoring    | 0.7000  | 4.84E-01 | 7.30E-01 |
| 140 | GNGT2  | 2793   | 17 | 47278596  | 47292936  | 4.23E-05 | blood | Asthma     | 2.0997  | 3.58E-02 | 1.43E-01 |
| 140 | GNGT2  | 2793   | 17 | 47278596  | 47292936  | 4.23E-05 | Lung  | Asthma     | 6.6175  | 3.65E-11 | 2.90E-09 |
| 140 | GNGT2  | 2793   | 17 | 47278596  | 47292936  | 4.23E-05 | blood | COPD       | 2.0997  | 3.58E-02 | 1.43E-01 |
| 140 | GNGT2  | 2793   | 17 | 47278596  | 47292936  | 4.23E-05 | Lung  | COPD       | 2.0253  | 4.28E-02 | 1.64E-01 |
| 140 | GNGT2  | 2793   | 17 | 47278596  | 47292936  | 4.23E-05 | blood | IPF        | 2.0997  | 3.58E-02 | 1.43E-01 |
| 140 | GNGT2  | 2793   | 17 | 47278596  | 47292936  | 4.23E-05 | Lung  | IPF        | -2.3664 | 1.80E-02 | 8.60E-02 |
| 140 | GNGT2  | 2793   | 17 | 47278596  | 47292936  | 4.23E-05 | blood | LungCancer | 2.0997  | 3.58E-02 | 1.43E-01 |
| 140 | GNGT2  | 2793   | 17 | 47278596  | 47292936  | 4.23E-05 | Lung  | LungCancer | 0.8331  | 4.05E-01 | 6.57E-01 |
| 140 | GNGT2  | 2793   | 17 | 47278596  | 47292936  | 4.23E-05 | blood | Snoring    | 2.0997  | 3.58E-02 | 1.43E-01 |
| 140 | GNGT2  | 2793   | 17 | 47278596  | 47292936  | 4.23E-05 | Lung  | Snoring    | 2.0997  | 3.58E-02 | 1.43E-01 |
| 140 | PHB    | 5245   | 17 | 47476410  | 47497267  | 2.69E-08 | blood | Asthma     | 0.7237  | 4.69E-01 | 7.16E-01 |
| 140 | PHB    | 5245   | 17 | 47476410  | 47497267  | 2.69E-08 | Lung  | Asthma     | -0.8352 | 4.04E-01 | 6.56E-01 |
| 140 | PHB    | 5245   | 17 | 47476410  | 47497267  | 2.69E-08 | blood | COPD       | 0.7237  | 4.69E-01 | 7.16E-01 |
| 140 | PHB    | 5245   | 17 | 47476410  | 47497267  | 2.69E-08 | Lung  | COPD       | -0.1061 | 9.16E-01 | 9.68E-01 |
| 140 | PHB    | 5245   | 17 | 47476410  | 47497267  | 2.69E-08 | blood | IPF        | 0.7237  | 4.69E-01 | 7.16E-01 |
| 140 | PHB    | 5245   | 17 | 47476410  | 47497267  | 2.69E-08 | Lung  | IPF        | 0.1023  | 9.19E-01 | 9.68E-01 |
| 140 | PHB    | 5245   | 17 | 47476410  | 47497267  | 2.69E-08 | blood | LungCancer | 0.7237  | 4.69E-01 | 7.16E-01 |
| 140 | PHB    | 5245   | 17 | 47476410  | 47497267  | 2.69E-08 | Lung  | LungCancer | -1.3039 | 1.92E-01 | 4.31E-01 |
| 140 | PHB    | 5245   | 17 | 47476410  | 47497267  | 2.69E-08 | blood | Snoring    | 0.7237  | 4.69E-01 | 7.16E-01 |
| 140 | PHB    | 5245   | 17 | 47476410  | 47497267  | 2.69E-08 | Lung  | Snoring    | 0.7237  | 4.69E-01 | 7.16E-01 |
| 137 | CDK12  | 51755  | 17 | 37612739  | 37726398  | 9.52E-10 | blood | Asthma     | 0.7856  | 4.32E-01 | 6.83E-01 |
| 137 | CDK12  | 51755  | 17 | 37612739  | 37726398  | 9.52E-10 | Lung  | Asthma     | 0.2301  | 8.18E-01 | 9.42E-01 |
| 137 | CDK12  | 51755  | 17 | 37612739  | 37726398  | 9.52E-10 | blood | COPD       | 0.7856  | 4.32E-01 | 6.83E-01 |
| 137 | CDK12  | 51755  | 17 | 37612739  | 37726398  | 9.52E-10 | Lung  | COPD       | -2.7855 | 5.35E-03 | 3.13E-02 |
| 137 | CDK12  | 51755  | 17 | 37612739  | 37726398  | 9.52E-10 | blood | IPF        | 0.7856  | 4.32E-01 | 6.83E-01 |
| 137 | CDK12  | 51755  | 17 | 37612739  | 37726398  | 9.52E-10 | Lung  | IPF        | -2.9472 | 3.21E-03 | 1.97E-02 |
| 137 | CDK12  | 51755  | 17 | 37612739  | 37726398  | 9.52E-10 | blood | LungCancer | 0.7856  | 4.32E-01 | 6.83E-01 |
| 137 | CDK12  | 51755  | 17 | 37612739  | 37726398  | 9.52E-10 | Lung  | LungCancer | -0.8997 | 3.68E-01 | 6.23E-01 |
| 137 | CDK12  | 51755  | 17 | 37612739  | 37726398  | 9.52E-10 | blood | Snoring    | 0.7856  | 4.32E-01 | 6.83E-01 |
| 137 | CDK12  | 51755  | 17 | 37612739  | 37726398  | 9.52E-10 | Lung  | Snoring    | 0.7856  | 4.32E-01 | 6.83E-01 |
| 131 | ZNF668 | 79759  | 16 | 31067164  | 31090641  | 7.83E-15 | blood | Asthma     | -5.2109 | 1.88E-07 | 3.41E-06 |
| 131 | ZNF668 | 79759  | 16 | 31067164  | 31090641  | 7.83E-15 | Lung  | Asthma     | -2.7461 | 6.03E-03 | 3.46E-02 |
| 131 | ZNF668 | 79759  | 16 | 31067164  | 31090641  | 7.83E-15 | blood | COPD       | -5.2109 | 1.88E-07 | 3.41E-06 |
| 131 | ZNF668 | 79759  | 16 | 31067164  | 31090641  | 7.83E-15 | Lung  | COPD       | -5.1161 | 3.12E-07 | 5.51E-06 |
| 131 | ZNF668 | 79759  | 16 | 31067164  | 31090641  | 7.83E-15 | blood | IPF        | -5.2109 | 1.88E-07 | 3.41E-06 |
| 131 | ZNF668 | 79759  | 16 | 31067164  | 31090641  | 7.83E-15 | Lung  | IPF        | -0.0838 | 9.33E-01 | 9.75E-01 |
| 131 | ZNF668 | 79759  | 16 | 31067164  | 31090641  | 7.83E-15 | blood | LungCancer | -5.2109 | 1.88E-07 | 3.41E-06 |
| 131 | ZNF668 | 79759  | 16 | 31067164  | 31090641  | 7.83E-15 | Lung  | LungCancer | -1.6200 | 1.04E-01 | 2.93E-01 |
| 131 | ZNF668 | 79759  | 16 | 31067164  | 31090641  | 7.83E-15 | blood | Snoring    | -5.2109 | 1.88E-07 | 3.41E-06 |
| 131 | ZNF668 | 79759  | 16 | 31067164  | 31090641  | 7.83E-15 | Lung  | Snoring    | -5.2109 | 1.88E-07 | 3.41E-06 |
| 131 | ZNF646 | 9726   | 16 | 31080581  | 31099833  | 3.33E-15 | blood | Asthma     | 5.9314  | 3.00E-09 | 1.51E-07 |
| 131 | ZNF646 | 9726   | 16 | 31080581  | 31099833  | 3.33E-15 | Lung  | Asthma     | 6.5506  | 5.73E-11 | 4.44E-09 |
| 131 | ZNF646 | 9726   | 16 | 31080581  | 31099833  | 3.33E-15 | blood | COPD       | 5.9314  | 3.00E-09 | 1.51E-07 |
| 131 | ZNF646 | 9726   | 16 | 31080581  | 31099833  | 3.33E-15 | Lung  | COPD       | 3.8907  | 1.00E-04 | 9.49E-04 |
| 131 | ZNF646 | 9726   | 16 | 31080581  | 31099833  | 3.33E-15 | blood | IPF        | 5.9314  | 3.00E-09 | 1.51E-07 |
| 131 | ZNF646 | 9726   | 16 | 31080581  | 31099833  | 3.33E-15 | Lung  | IPF        | 1.2900  | 1.97E-01 | 4.36E-01 |
| 131 | ZNF646 | 9726   | 16 | 31080581  | 31099833  | 3.33E-15 | blood | LungCancer | 5.9314  | 3.00E-09 | 1.51E-07 |
| 131 | ZNF646 | 9726   | 16 | 31080581  | 31099833  | 3.33E-15 | Lung  | LungCancer | 2.5900  | 9.57E-03 | 5.07E-02 |
| 131 | ZNF646 | 9726   | 16 | 31080581  | 31099833  | 3.33E-15 | blood | Snoring    | 5.9314  | 3.00E-09 | 1.51E-07 |
| 131 | ZNF646 | 9726   | 16 | 31080581  | 31099833  | 3.33E-15 | Lung  | Snoring    | 5.9314  | 3.00E-09 | 1.51E-07 |
| 131 | VKORC1 | 79001  | 16 | 31097175  | 31111699  | 2.20E-14 | blood | Asthma     | -4.7006 | 2.59E-06 | 3.94E-05 |
| 131 | VKORC1 | 79001  | 16 | 31097175  | 31111699  | 2.20E-14 | Lung  | Asthma     | -2.7336 | 6.26E-03 | 3.53E-02 |
| 131 | VKORC1 | 79001  | 16 | 31097175  | 31111699  | 2.20E-14 | blood | COPD       | -4.7006 | 2.59E-06 | 3.94E-05 |
| 131 | VKORC1 | 79001  | 16 | 31097175  | 31111699  | 2.20E-14 | Lung  | COPD       | -4.1639 | 3.13E-05 | 3.71E-04 |

|     |          |        |    |           |           |          |       |            |          |          |          |
|-----|----------|--------|----|-----------|-----------|----------|-------|------------|----------|----------|----------|
| 131 | VKORC1   | 79001  | 16 | 31097175  | 31111699  | 2.20E-14 | blood | IPF        | -4.7006  | 2.59E-06 | 3.94E-05 |
| 131 | VKORC1   | 79001  | 16 | 31097175  | 31111699  | 2.20E-14 | Lung  | IPF        | 0.6790   | 4.97E-01 | 7.37E-01 |
| 131 | VKORC1   | 79001  | 16 | 31097175  | 31111699  | 2.20E-14 | blood | LungCancer | -4.7006  | 2.59E-06 | 3.94E-05 |
| 131 | VKORC1   | 79001  | 16 | 31097175  | 31111699  | 2.20E-14 | Lung  | LungCancer | -1.8900  | 5.92E-02 | 2.04E-01 |
| 131 | VKORC1   | 79001  | 16 | 31097175  | 31111699  | 2.20E-14 | blood | Snoring    | -4.7006  | 2.59E-06 | 3.94E-05 |
| 131 | VKORC1   | 79001  | 16 | 31097175  | 31111699  | 2.20E-14 | Lung  | Snoring    | -4.7006  | 2.59E-06 | 3.94E-05 |
| 137 | GSDMA    | 284110 | 17 | 38114226  | 38139019  | 3.61E-15 | blood | Asthma     | 3.2280   | 1.25E-03 | 9.03E-03 |
| 137 | GSDMA    | 284110 | 17 | 38114226  | 38139019  | 3.61E-15 | Lung  | Asthma     | -11.7979 | 4.00E-32 | 1.59E-29 |
| 137 | GSDMA    | 284110 | 17 | 38114226  | 38139019  | 3.61E-15 | blood | COPD       | 3.2280   | 1.25E-03 | 9.03E-03 |
| 137 | GSDMA    | 284110 | 17 | 38114226  | 38139019  | 3.61E-15 | Lung  | COPD       | -3.9201  | 8.85E-05 | 8.68E-04 |
| 137 | GSDMA    | 284110 | 17 | 38114226  | 38139019  | 3.61E-15 | blood | IPF        | 3.2280   | 1.25E-03 | 9.03E-03 |
| 137 | GSDMA    | 284110 | 17 | 38114226  | 38139019  | 3.61E-15 | Lung  | IPF        | 2.1618   | 3.06E-02 | 1.30E-01 |
| 137 | GSDMA    | 284110 | 17 | 38114226  | 38139019  | 3.61E-15 | blood | LungCancer | 3.2280   | 1.25E-03 | 9.03E-03 |
| 137 | GSDMA    | 284110 | 17 | 38114226  | 38139019  | 3.61E-15 | Lung  | LungCancer | -0.0480  | 9.62E-01 | 9.87E-01 |
| 137 | GSDMA    | 284110 | 17 | 38114226  | 38139019  | 3.61E-15 | blood | Snoring    | 3.2280   | 1.25E-03 | 9.03E-03 |
| 137 | GSDMA    | 284110 | 17 | 38114226  | 38139019  | 3.61E-15 | Lung  | Snoring    | 3.2280   | 1.25E-03 | 9.03E-03 |
| 58  | HIST1H1E | 3008   | 6  | 26151559  | 26162343  | 1.27E-07 | blood | Asthma     | 1.0025   | 3.16E-01 | 5.72E-01 |
| 58  | HIST1H1E | 3008   | 6  | 26151559  | 26162343  | 1.27E-07 | Lung  | Asthma     | -1.5070  | 1.32E-01 | 3.46E-01 |
| 58  | HIST1H1E | 3008   | 6  | 26151559  | 26162343  | 1.27E-07 | blood | COPD       | 1.0025   | 3.16E-01 | 5.72E-01 |
| 58  | HIST1H1E | 3008   | 6  | 26151559  | 26162343  | 1.27E-07 | Lung  | COPD       | 0.4055   | 6.85E-01 | 8.66E-01 |
| 58  | HIST1H1E | 3008   | 6  | 26151559  | 26162343  | 1.27E-07 | blood | IPF        | 1.0025   | 3.16E-01 | 5.72E-01 |
| 58  | HIST1H1E | 3008   | 6  | 26151559  | 26162343  | 1.27E-07 | Lung  | IPF        | 1.7287   | 8.39E-02 | 2.54E-01 |
| 58  | HIST1H1E | 3008   | 6  | 26151559  | 26162343  | 1.27E-07 | blood | LungCancer | 1.0025   | 3.16E-01 | 5.72E-01 |
| 58  | HIST1H1E | 3008   | 6  | 26151559  | 26162343  | 1.27E-07 | Lung  | LungCancer | -0.0717  | 9.43E-01 | 9.80E-01 |
| 58  | HIST1H1E | 3008   | 6  | 26151559  | 26162343  | 1.27E-07 | blood | Snoring    | 1.0025   | 3.16E-01 | 5.72E-01 |
| 58  | HIST1H1E | 3008   | 6  | 26151559  | 26162343  | 1.27E-07 | Lung  | Snoring    | 1.0025   | 3.16E-01 | 5.72E-01 |
| 96  | FEN1     | 2237   | 11 | 61555109  | 61569716  | 1.01E-12 | blood | Asthma     | -1.6135  | 1.07E-01 | 2.97E-01 |
| 96  | FEN1     | 2237   | 11 | 61555109  | 61569716  | 1.01E-12 | Lung  | Asthma     | 4.9686   | 6.74E-07 | 1.16E-05 |
| 96  | FEN1     | 2237   | 11 | 61555109  | 61569716  | 1.01E-12 | blood | COPD       | -1.6135  | 1.07E-01 | 2.97E-01 |
| 96  | FEN1     | 2237   | 11 | 61555109  | 61569716  | 1.01E-12 | Lung  | COPD       | 1.2644   | 2.06E-01 | 4.45E-01 |
| 96  | FEN1     | 2237   | 11 | 61555109  | 61569716  | 1.01E-12 | blood | IPF        | -1.6135  | 1.07E-01 | 2.97E-01 |
| 96  | FEN1     | 2237   | 11 | 61555109  | 61569716  | 1.01E-12 | Lung  | IPF        | 1.2200   | 2.23E-01 | 4.65E-01 |
| 96  | FEN1     | 2237   | 11 | 61555109  | 61569716  | 1.01E-12 | blood | LungCancer | -1.6135  | 1.07E-01 | 2.97E-01 |
| 96  | FEN1     | 2237   | 11 | 61555109  | 61569716  | 1.01E-12 | Lung  | LungCancer | 2.6973   | 6.99E-03 | 3.91E-02 |
| 96  | FEN1     | 2237   | 11 | 61555109  | 61569716  | 1.01E-12 | blood | Snoring    | -1.6135  | 1.07E-01 | 2.97E-01 |
| 96  | FEN1     | 2237   | 11 | 61555109  | 61569716  | 1.01E-12 | Lung  | Snoring    | -1.6135  | 1.07E-01 | 2.97E-01 |
| 138 | HEXIM2   | 124790 | 17 | 43232502  | 43252406  | 7.10E-07 | blood | Asthma     | -0.1003  | 9.20E-01 | 9.68E-01 |
| 138 | HEXIM2   | 124790 | 17 | 43232502  | 43252406  | 7.10E-07 | Lung  | Asthma     | 1.1200   | 2.63E-01 | 5.17E-01 |
| 138 | HEXIM2   | 124790 | 17 | 43232502  | 43252406  | 7.10E-07 | blood | COPD       | -0.1003  | 9.20E-01 | 9.68E-01 |
| 138 | HEXIM2   | 124790 | 17 | 43232502  | 43252406  | 7.10E-07 | Lung  | COPD       | 0.8286   | 4.07E-01 | 6.57E-01 |
| 138 | HEXIM2   | 124790 | 17 | 43232502  | 43252406  | 7.10E-07 | blood | IPF        | -0.1003  | 9.20E-01 | 9.68E-01 |
| 138 | HEXIM2   | 124790 | 17 | 43232502  | 43252406  | 7.10E-07 | Lung  | IPF        | -1.1765  | 2.39E-01 | 4.85E-01 |
| 138 | HEXIM2   | 124790 | 17 | 43232502  | 43252406  | 7.10E-07 | blood | LungCancer | -0.1003  | 9.20E-01 | 9.68E-01 |
| 138 | HEXIM2   | 124790 | 17 | 43232502  | 43252406  | 7.10E-07 | Lung  | LungCancer | 1.0279   | 3.04E-01 | 5.58E-01 |
| 138 | HEXIM2   | 124790 | 17 | 43232502  | 43252406  | 7.10E-07 | blood | Snoring    | -0.1003  | 9.20E-01 | 9.68E-01 |
| 138 | HEXIM2   | 124790 | 17 | 43232502  | 43252406  | 7.10E-07 | Lung  | Snoring    | -0.1003  | 9.20E-01 | 9.68E-01 |
| 44  | IL7R     | 3575   | 5  | 35851977  | 35884705  | 1.79E-05 | blood | Asthma     | 0.1824   | 8.55E-01 | 9.55E-01 |
| 44  | IL7R     | 3575   | 5  | 35851977  | 35884705  | 1.79E-05 | Lung  | Asthma     | -2.7500  | 5.92E-03 | 3.41E-02 |
| 44  | IL7R     | 3575   | 5  | 35851977  | 35884705  | 1.79E-05 | blood | COPD       | 0.1824   | 8.55E-01 | 9.55E-01 |
| 44  | IL7R     | 3575   | 5  | 35851977  | 35884705  | 1.79E-05 | Lung  | COPD       | -1.6540  | 9.81E-02 | 2.83E-01 |
| 44  | IL7R     | 3575   | 5  | 35851977  | 35884705  | 1.79E-05 | blood | IPF        | 0.1824   | 8.55E-01 | 9.55E-01 |
| 44  | IL7R     | 3575   | 5  | 35851977  | 35884705  | 1.79E-05 | Lung  | IPF        | -0.7761  | 4.38E-01 | 6.90E-01 |
| 44  | IL7R     | 3575   | 5  | 35851977  | 35884705  | 1.79E-05 | blood | LungCancer | 0.1824   | 8.55E-01 | 9.55E-01 |
| 44  | IL7R     | 3575   | 5  | 35851977  | 35884705  | 1.79E-05 | Lung  | LungCancer | 0.2864   | 7.75E-01 | 9.28E-01 |
| 44  | IL7R     | 3575   | 5  | 35851977  | 35884705  | 1.79E-05 | blood | Snoring    | 0.1824   | 8.55E-01 | 9.55E-01 |
| 44  | IL7R     | 3575   | 5  | 35851977  | 35884705  | 1.79E-05 | Lung  | Snoring    | 0.1824   | 8.55E-01 | 9.55E-01 |
| 38  | NPNT     | 255743 | 4  | 106811588 | 106897828 | 1.24E-05 | blood | Asthma     | -0.6318  | 5.28E-01 | 7.55E-01 |
| 38  | NPNT     | 255743 | 4  | 106811588 | 106897828 | 1.24E-05 | Lung  | Asthma     | 6.0504   | 1.44E-09 | 8.32E-08 |
| 38  | NPNT     | 255743 | 4  | 106811588 | 106897828 | 1.24E-05 | blood | COPD       | -0.6318  | 5.28E-01 | 7.55E-01 |
| 38  | NPNT     | 255743 | 4  | 106811588 | 106897828 | 1.24E-05 | Lung  | COPD       | 3.3184   | 9.05E-04 | 6.96E-03 |
| 38  | NPNT     | 255743 | 4  | 106811588 | 106897828 | 1.24E-05 | blood | IPF        | -0.6318  | 5.28E-01 | 7.55E-01 |
| 38  | NPNT     | 255743 | 4  | 106811588 | 106897828 | 1.24E-05 | Lung  | IPF        | -0.3900  | 6.97E-01 | 8.77E-01 |
| 38  | NPNT     | 255743 | 4  | 106811588 | 106897828 | 1.24E-05 | blood | LungCancer | -0.6318  | 5.28E-01 | 7.55E-01 |
| 38  | NPNT     | 255743 | 4  | 106811588 | 106897828 | 1.24E-05 | Lung  | LungCancer | 3.3572   | 7.87E-04 | 6.13E-03 |
| 38  | NPNT     | 255743 | 4  | 106811588 | 106897828 | 1.24E-05 | blood | Snoring    | -0.6318  | 5.28E-01 | 7.55E-01 |
| 38  | NPNT     | 255743 | 4  | 106811588 | 106897828 | 1.24E-05 | Lung  | Snoring    | -0.6318  | 5.28E-01 | 7.55E-01 |
| 130 | NSMCE1   | 197370 | 16 | 27231315  | 27285113  | 4.75E-09 | blood | Asthma     | NA       | NA       | NA       |
| 130 | NSMCE1   | 197370 | 16 | 27231315  | 27285113  | 4.75E-09 | Lung  | Asthma     | NA       | NA       | NA       |
| 130 | NSMCE1   | 197370 | 16 | 27231315  | 27285113  | 4.75E-09 | blood | COPD       | NA       | NA       | NA       |
| 130 | NSMCE1   | 197370 | 16 | 27231315  | 27285113  | 4.75E-09 | Lung  | COPD       | NA       | NA       | NA       |
| 130 | NSMCE1   | 197370 | 16 | 27231315  | 27285113  | 4.75E-09 | blood | IPF        | NA       | NA       | NA       |
| 130 | NSMCE1   | 197370 | 16 | 27231315  | 27285113  | 4.75E-09 | Lung  | IPF        | NA       | NA       | NA       |
| 130 | NSMCE1   | 197370 | 16 | 27231315  | 27285113  | 4.75E-09 | blood | LungCancer | NA       | NA       | NA       |



|     |         |        |    |           |           |          |       |            |         |          |          |
|-----|---------|--------|----|-----------|-----------|----------|-------|------------|---------|----------|----------|
| 130 | NSMCE1  | 197370 | 16 | 27231315  | 27285113  | 4.75E-09 | Lung  | LungCancer | NA      | NA       | NA       |
| 130 | NSMCE1  | 197370 | 16 | 27231315  | 27285113  | 4.75E-09 | blood | Snoring    | NA      | NA       | NA       |
| 130 | NSMCE1  | 197370 | 16 | 27231315  | 27285113  | 4.75E-09 | Lung  | Snoring    | NA      | NA       | NA       |
| 49  | IL13    | 3596   | 5  | 131988865 | 132001801 | 1.17E-15 | blood | Asthma     | NA      | NA       | NA       |
| 49  | IL13    | 3596   | 5  | 131988865 | 132001801 | 1.17E-15 | Lung  | Asthma     | NA      | NA       | NA       |
| 49  | IL13    | 3596   | 5  | 131988865 | 132001801 | 1.17E-15 | blood | COPD       | NA      | NA       | NA       |
| 49  | IL13    | 3596   | 5  | 131988865 | 132001801 | 1.17E-15 | Lung  | COPD       | NA      | NA       | NA       |
| 49  | IL13    | 3596   | 5  | 131988865 | 132001801 | 1.17E-15 | blood | IPF        | NA      | NA       | NA       |
| 49  | IL13    | 3596   | 5  | 131988865 | 132001801 | 1.17E-15 | Lung  | IPF        | NA      | NA       | NA       |
| 49  | IL13    | 3596   | 5  | 131988865 | 132001801 | 1.17E-15 | blood | LungCancer | NA      | NA       | NA       |
| 49  | IL13    | 3596   | 5  | 131988865 | 132001801 | 1.17E-15 | Lung  | LungCancer | NA      | NA       | NA       |
| 49  | IL13    | 3596   | 5  | 131988865 | 132001801 | 1.17E-15 | blood | Snoring    | NA      | NA       | NA       |
| 49  | IL13    | 3596   | 5  | 131988865 | 132001801 | 1.17E-15 | Lung  | Snoring    | NA      | NA       | NA       |
| 54  | RGS14   | 10636  | 5  | 176779704 | 176804599 | 2.04E-08 | blood | Asthma     | -1.6395 | 1.01E-01 | 2.87E-01 |
| 54  | RGS14   | 10636  | 5  | 176779704 | 176804599 | 2.04E-08 | Lung  | Asthma     | -5.3100 | 1.09E-07 | 2.31E-06 |
| 54  | RGS14   | 10636  | 5  | 176779704 | 176804599 | 2.04E-08 | blood | COPD       | -1.6395 | 1.01E-01 | 2.87E-01 |
| 54  | RGS14   | 10636  | 5  | 176779704 | 176804599 | 2.04E-08 | Lung  | COPD       | -3.1304 | 1.75E-03 | 1.17E-02 |
| 54  | RGS14   | 10636  | 5  | 176779704 | 176804599 | 2.04E-08 | blood | IPF        | -1.6395 | 1.01E-01 | 2.87E-01 |
| 54  | RGS14   | 10636  | 5  | 176779704 | 176804599 | 2.04E-08 | Lung  | IPF        | -3.3904 | 6.98E-04 | 5.66E-03 |
| 54  | RGS14   | 10636  | 5  | 176779704 | 176804599 | 2.04E-08 | blood | LungCancer | -1.6395 | 1.01E-01 | 2.87E-01 |
| 54  | RGS14   | 10636  | 5  | 176779704 | 176804599 | 2.04E-08 | Lung  | LungCancer | -0.1697 | 8.65E-01 | 9.55E-01 |
| 54  | RGS14   | 10636  | 5  | 176779704 | 176804599 | 2.04E-08 | blood | Snoring    | -1.6395 | 1.01E-01 | 2.87E-01 |
| 54  | RGS14   | 10636  | 5  | 176779704 | 176804599 | 2.04E-08 | Lung  | Snoring    | -1.6395 | 1.01E-01 | 2.87E-01 |
| 54  | LMAN2   | 10960  | 5  | 176753563 | 176783885 | 1.58E-07 | blood | Asthma     | 0.1182  | 9.06E-01 | 9.64E-01 |
| 54  | LMAN2   | 10960  | 5  | 176753563 | 176783885 | 1.58E-07 | Lung  | Asthma     | -0.0656 | 9.48E-01 | 9.83E-01 |
| 54  | LMAN2   | 10960  | 5  | 176753563 | 176783885 | 1.58E-07 | blood | COPD       | 0.1182  | 9.06E-01 | 9.64E-01 |
| 54  | LMAN2   | 10960  | 5  | 176753563 | 176783885 | 1.58E-07 | Lung  | COPD       | -1.4895 | 1.36E-01 | 3.53E-01 |
| 54  | LMAN2   | 10960  | 5  | 176753563 | 176783885 | 1.58E-07 | blood | IPF        | 0.1182  | 9.06E-01 | 9.64E-01 |
| 54  | LMAN2   | 10960  | 5  | 176753563 | 176783885 | 1.58E-07 | Lung  | IPF        | -0.2124 | 8.32E-01 | 9.46E-01 |
| 54  | LMAN2   | 10960  | 5  | 176753563 | 176783885 | 1.58E-07 | blood | LungCancer | 0.1182  | 9.06E-01 | 9.64E-01 |
| 54  | LMAN2   | 10960  | 5  | 176753563 | 176783885 | 1.58E-07 | Lung  | LungCancer | -0.7532 | 4.51E-01 | 6.99E-01 |
| 54  | LMAN2   | 10960  | 5  | 176753563 | 176783885 | 1.58E-07 | blood | Snoring    | 0.1182  | 9.06E-01 | 9.64E-01 |
| 54  | LMAN2   | 10960  | 5  | 176753563 | 176783885 | 1.58E-07 | Lung  | Snoring    | 0.1182  | 9.06E-01 | 9.64E-01 |
| 54  | RAB24   | 53917  | 5  | 176723199 | 176735744 | 1.79E-05 | blood | Asthma     | 0.4398  | 6.60E-01 | 8.48E-01 |
| 54  | RAB24   | 53917  | 5  | 176723199 | 176735744 | 1.79E-05 | Lung  | Asthma     | -0.2220 | 8.25E-01 | 9.43E-01 |
| 54  | RAB24   | 53917  | 5  | 176723199 | 176735744 | 1.79E-05 | blood | COPD       | 0.4398  | 6.60E-01 | 8.48E-01 |
| 54  | RAB24   | 53917  | 5  | 176723199 | 176735744 | 1.79E-05 | Lung  | COPD       | 0.4726  | 6.36E-01 | 8.32E-01 |
| 54  | RAB24   | 53917  | 5  | 176723199 | 176735744 | 1.79E-05 | blood | IPF        | 0.4398  | 6.60E-01 | 8.48E-01 |
| 54  | RAB24   | 53917  | 5  | 176723199 | 176735744 | 1.79E-05 | Lung  | IPF        | 1.6911  | 9.08E-02 | 2.67E-01 |
| 54  | RAB24   | 53917  | 5  | 176723199 | 176735744 | 1.79E-05 | blood | LungCancer | 0.4398  | 6.60E-01 | 8.48E-01 |
| 54  | RAB24   | 53917  | 5  | 176723199 | 176735744 | 1.79E-05 | Lung  | LungCancer | 0.2767  | 7.82E-01 | 9.29E-01 |
| 54  | RAB24   | 53917  | 5  | 176723199 | 176735744 | 1.79E-05 | blood | Snoring    | 0.4398  | 6.60E-01 | 8.48E-01 |
| 54  | RAB24   | 53917  | 5  | 176723199 | 176735744 | 1.79E-05 | Lung  | Snoring    | 0.4398  | 6.60E-01 | 8.48E-01 |
| 54  | PRELID1 | 27166  | 5  | 176725763 | 176738960 | 1.37E-05 | blood | Asthma     | -0.5585 | 5.77E-01 | 7.91E-01 |
| 54  | PRELID1 | 27166  | 5  | 176725763 | 176738960 | 1.37E-05 | Lung  | Asthma     | -1.1600 | 2.47E-01 | 4.96E-01 |
| 54  | PRELID1 | 27166  | 5  | 176725763 | 176738960 | 1.37E-05 | blood | COPD       | -0.5585 | 5.77E-01 | 7.91E-01 |
| 54  | PRELID1 | 27166  | 5  | 176725763 | 176738960 | 1.37E-05 | Lung  | COPD       | 1.3283  | 1.84E-01 | 4.21E-01 |
| 54  | PRELID1 | 27166  | 5  | 176725763 | 176738960 | 1.37E-05 | blood | IPF        | -0.5585 | 5.77E-01 | 7.91E-01 |
| 54  | PRELID1 | 27166  | 5  | 176725763 | 176738960 | 1.37E-05 | Lung  | IPF        | 1.3118  | 1.90E-01 | 4.26E-01 |
| 54  | PRELID1 | 27166  | 5  | 176725763 | 176738960 | 1.37E-05 | blood | LungCancer | -0.5585 | 5.77E-01 | 7.91E-01 |
| 54  | PRELID1 | 27166  | 5  | 176725763 | 176738960 | 1.37E-05 | Lung  | LungCancer | -1.1725 | 2.41E-01 | 4.89E-01 |
| 54  | PRELID1 | 27166  | 5  | 176725763 | 176738960 | 1.37E-05 | blood | Snoring    | -0.5585 | 5.77E-01 | 7.91E-01 |
| 54  | PRELID1 | 27166  | 5  | 176725763 | 176738960 | 1.37E-05 | Lung  | Snoring    | -0.5585 | 5.77E-01 | 7.91E-01 |
| 115 | GPR183  | 1880   | 13 | 99941789  | 99964749  | 6.44E-15 | blood | Asthma     | 0.3422  | 7.32E-01 | 8.98E-01 |
| 115 | GPR183  | 1880   | 13 | 99941789  | 99964749  | 6.44E-15 | Lung  | Asthma     | 10.2047 | 1.89E-24 | 4.00E-22 |
| 115 | GPR183  | 1880   | 13 | 99941789  | 99964749  | 6.44E-15 | blood | COPD       | 0.3422  | 7.32E-01 | 8.98E-01 |
| 115 | GPR183  | 1880   | 13 | 99941789  | 99964749  | 6.44E-15 | Lung  | COPD       | 4.2779  | 1.89E-05 | 2.36E-04 |
| 115 | GPR183  | 1880   | 13 | 99941789  | 99964749  | 6.44E-15 | blood | IPF        | 0.3422  | 7.32E-01 | 8.98E-01 |
| 115 | GPR183  | 1880   | 13 | 99941789  | 99964749  | 6.44E-15 | Lung  | IPF        | -0.5241 | 6.00E-01 | 8.06E-01 |
| 115 | GPR183  | 1880   | 13 | 99941789  | 99964749  | 6.44E-15 | blood | LungCancer | 0.3422  | 7.32E-01 | 8.98E-01 |
| 115 | GPR183  | 1880   | 13 | 99941789  | 99964749  | 6.44E-15 | Lung  | LungCancer | 0.9739  | 3.30E-01 | 5.85E-01 |
| 115 | GPR183  | 1880   | 13 | 99941789  | 99964749  | 6.44E-15 | blood | Snoring    | 0.3422  | 7.32E-01 | 8.98E-01 |
| 115 | GPR183  | 1880   | 13 | 99941789  | 99964749  | 6.44E-15 | Lung  | Snoring    | 0.3422  | 7.32E-01 | 8.98E-01 |
| 127 | CHRNA5  | 1138   | 15 | 78852862  | 78892611  | 5.00E-10 | blood | Asthma     | 0.8285  | 4.07E-01 | 6.57E-01 |
| 127 | CHRNA5  | 1138   | 15 | 78852862  | 78892611  | 5.00E-10 | Lung  | Asthma     | -2.4409 | 1.46E-02 | 7.25E-02 |
| 127 | CHRNA5  | 1138   | 15 | 78852862  | 78892611  | 5.00E-10 | blood | COPD       | 0.8285  | 4.07E-01 | 6.57E-01 |
| 127 | CHRNA5  | 1138   | 15 | 78852862  | 78892611  | 5.00E-10 | Lung  | COPD       | -3.9100 | 9.23E-05 | 9.00E-04 |
| 127 | CHRNA5  | 1138   | 15 | 78852862  | 78892611  | 5.00E-10 | blood | IPF        | 0.8285  | 4.07E-01 | 6.57E-01 |
| 127 | CHRNA5  | 1138   | 15 | 78852862  | 78892611  | 5.00E-10 | Lung  | IPF        | -1.5524 | 1.21E-01 | 3.25E-01 |
| 127 | CHRNA5  | 1138   | 15 | 78852862  | 78892611  | 5.00E-10 | blood | LungCancer | 0.8285  | 4.07E-01 | 6.57E-01 |
| 127 | CHRNA5  | 1138   | 15 | 78852862  | 78892611  | 5.00E-10 | Lung  | LungCancer | -7.6300 | 2.37E-14 | 2.22E-12 |
| 127 | CHRNA5  | 1138   | 15 | 78852862  | 78892611  | 5.00E-10 | blood | Snoring    | 0.8285  | 4.07E-01 | 6.57E-01 |
| 127 | CHRNA5  | 1138   | 15 | 78852862  | 78892611  | 5.00E-10 | Lung  | Snoring    | 0.8285  | 4.07E-01 | 6.57E-01 |

|     |         |        |    |          |          |          |       |            |         |          |          |
|-----|---------|--------|----|----------|----------|----------|-------|------------|---------|----------|----------|
| 24  | GLB1    | 2720   | 3  | 33033100 | 33143694 | 4.06E-12 | blood | Asthma     | -0.0605 | 9.52E-01 | 9.84E-01 |
| 24  | GLB1    | 2720   | 3  | 33033100 | 33143694 | 4.06E-12 | Lung  | Asthma     | -3.5591 | 3.72E-04 | 3.14E-03 |
| 24  | GLB1    | 2720   | 3  | 33033100 | 33143694 | 4.06E-12 | blood | COPD       | -0.0605 | 9.52E-01 | 9.84E-01 |
| 24  | GLB1    | 2720   | 3  | 33033100 | 33143694 | 4.06E-12 | Lung  | COPD       | -1.6370 | 1.02E-01 | 2.90E-01 |
| 24  | GLB1    | 2720   | 3  | 33033100 | 33143694 | 4.06E-12 | blood | IPF        | -0.0605 | 9.52E-01 | 9.84E-01 |
| 24  | GLB1    | 2720   | 3  | 33033100 | 33143694 | 4.06E-12 | Lung  | IPF        | -1.4959 | 1.35E-01 | 3.53E-01 |
| 24  | GLB1    | 2720   | 3  | 33033100 | 33143694 | 4.06E-12 | blood | LungCancer | -0.0605 | 9.52E-01 | 9.84E-01 |
| 24  | GLB1    | 2720   | 3  | 33033100 | 33143694 | 4.06E-12 | Lung  | LungCancer | 0.1939  | 8.46E-01 | 9.54E-01 |
| 24  | GLB1    | 2720   | 3  | 33033100 | 33143694 | 4.06E-12 | blood | Snoring    | -0.0605 | 9.52E-01 | 9.84E-01 |
| 24  | GLB1    | 2720   | 3  | 33033100 | 33143694 | 4.06E-12 | Lung  | Snoring    | -0.0605 | 9.52E-01 | 9.84E-01 |
| 136 | ADORA2B | 136    | 17 | 15843231 | 15884210 | 8.35E-07 | blood | Asthma     | 0.4853  | 6.27E-01 | 8.27E-01 |
| 136 | ADORA2B | 136    | 17 | 15843231 | 15884210 | 8.35E-07 | Lung  | Asthma     | -5.5394 | 3.03E-08 | 7.46E-07 |
| 136 | ADORA2B | 136    | 17 | 15843231 | 15884210 | 8.35E-07 | blood | COPD       | 0.4853  | 6.27E-01 | 8.27E-01 |
| 136 | ADORA2B | 136    | 17 | 15843231 | 15884210 | 8.35E-07 | Lung  | COPD       | -2.3663 | 1.80E-02 | 8.60E-02 |
| 136 | ADORA2B | 136    | 17 | 15843231 | 15884210 | 8.35E-07 | blood | IPF        | 0.4853  | 6.27E-01 | 8.27E-01 |
| 136 | ADORA2B | 136    | 17 | 15843231 | 15884210 | 8.35E-07 | Lung  | IPF        | -3.1686 | 1.53E-03 | 1.04E-02 |
| 136 | ADORA2B | 136    | 17 | 15843231 | 15884210 | 8.35E-07 | blood | LungCancer | 0.4853  | 6.27E-01 | 8.27E-01 |
| 136 | ADORA2B | 136    | 17 | 15843231 | 15884210 | 8.35E-07 | Lung  | LungCancer | -0.0250 | 9.80E-01 | 9.93E-01 |
| 136 | ADORA2B | 136    | 17 | 15843231 | 15884210 | 8.35E-07 | blood | Snoring    | 0.4853  | 6.27E-01 | 8.27E-01 |
| 136 | ADORA2B | 136    | 17 | 15843231 | 15884210 | 8.35E-07 | Lung  | Snoring    | 0.4853  | 6.27E-01 | 8.27E-01 |
| 105 | SDR9C7  | 121214 | 12 | 57311938 | 57333189 | 1.33E-14 | blood | Asthma     | 0.7256  | 4.68E-01 | 7.16E-01 |
| 105 | SDR9C7  | 121214 | 12 | 57311938 | 57333189 | 1.33E-14 | Lung  | Asthma     | -0.3307 | 7.41E-01 | 9.04E-01 |
| 105 | SDR9C7  | 121214 | 12 | 57311938 | 57333189 | 1.33E-14 | blood | COPD       | 0.7256  | 4.68E-01 | 7.16E-01 |
| 105 | SDR9C7  | 121214 | 12 | 57311938 | 57333189 | 1.33E-14 | Lung  | COPD       | -0.9229 | 3.56E-01 | 6.11E-01 |
| 105 | SDR9C7  | 121214 | 12 | 57311938 | 57333189 | 1.33E-14 | blood | IPF        | 0.7256  | 4.68E-01 | 7.16E-01 |
| 105 | SDR9C7  | 121214 | 12 | 57311938 | 57333189 | 1.33E-14 | Lung  | IPF        | 0.5172  | 6.05E-01 | 8.10E-01 |
| 105 | SDR9C7  | 121214 | 12 | 57311938 | 57333189 | 1.33E-14 | blood | LungCancer | 0.7256  | 4.68E-01 | 7.16E-01 |
| 105 | SDR9C7  | 121214 | 12 | 57311938 | 57333189 | 1.33E-14 | Lung  | LungCancer | -1.7887 | 7.37E-02 | 2.31E-01 |
| 105 | SDR9C7  | 121214 | 12 | 57311938 | 57333189 | 1.33E-14 | blood | Snoring    | 0.7256  | 4.68E-01 | 7.16E-01 |
| 105 | SDR9C7  | 121214 | 12 | 57311938 | 57333189 | 1.33E-14 | Lung  | Snoring    | 0.7256  | 4.68E-01 | 7.16E-01 |
| 151 | FOXA3   | 3171   | 19 | 46362518 | 46382055 | 3.17E-05 | blood | Asthma     | -0.6325 | 5.27E-01 | 7.55E-01 |
| 151 | FOXA3   | 3171   | 19 | 46362518 | 46382055 | 3.17E-05 | Lung  | Asthma     | -1.9096 | 5.62E-02 | 1.96E-01 |
| 151 | FOXA3   | 3171   | 19 | 46362518 | 46382055 | 3.17E-05 | blood | COPD       | -0.6325 | 5.27E-01 | 7.55E-01 |
| 151 | FOXA3   | 3171   | 19 | 46362518 | 46382055 | 3.17E-05 | Lung  | COPD       | -0.1728 | 8.63E-01 | 9.55E-01 |
| 151 | FOXA3   | 3171   | 19 | 46362518 | 46382055 | 3.17E-05 | blood | IPF        | -0.6325 | 5.27E-01 | 7.55E-01 |
| 151 | FOXA3   | 3171   | 19 | 46362518 | 46382055 | 3.17E-05 | Lung  | IPF        | -0.6167 | 5.37E-01 | 7.62E-01 |
| 151 | FOXA3   | 3171   | 19 | 46362518 | 46382055 | 3.17E-05 | blood | LungCancer | -0.6325 | 5.27E-01 | 7.55E-01 |
| 151 | FOXA3   | 3171   | 19 | 46362518 | 46382055 | 3.17E-05 | Lung  | LungCancer | -1.2574 | 2.09E-01 | 4.50E-01 |
| 151 | FOXA3   | 3171   | 19 | 46362518 | 46382055 | 3.17E-05 | blood | Snoring    | -0.6325 | 5.27E-01 | 7.55E-01 |
| 151 | FOXA3   | 3171   | 19 | 46362518 | 46382055 | 3.17E-05 | Lung  | Snoring    | -0.6325 | 5.27E-01 | 7.55E-01 |
| 76  | XKR6    | 286046 | 8  | 10748654 | 11063875 | 2.95E-06 | blood | Asthma     | 1.2782  | 2.01E-01 | 4.39E-01 |
| 76  | XKR6    | 286046 | 8  | 10748654 | 11063875 | 2.95E-06 | Lung  | Asthma     | 1.4025  | 1.61E-01 | 3.94E-01 |
| 76  | XKR6    | 286046 | 8  | 10748654 | 11063875 | 2.95E-06 | blood | COPD       | 1.2782  | 2.01E-01 | 4.39E-01 |
| 76  | XKR6    | 286046 | 8  | 10748654 | 11063875 | 2.95E-06 | Lung  | COPD       | 1.3877  | 1.65E-01 | 4.01E-01 |
| 76  | XKR6    | 286046 | 8  | 10748654 | 11063875 | 2.95E-06 | blood | IPF        | 1.2782  | 2.01E-01 | 4.39E-01 |
| 76  | XKR6    | 286046 | 8  | 10748654 | 11063875 | 2.95E-06 | Lung  | IPF        | -1.3467 | 1.78E-01 | 4.15E-01 |
| 76  | XKR6    | 286046 | 8  | 10748654 | 11063875 | 2.95E-06 | blood | LungCancer | 1.2782  | 2.01E-01 | 4.39E-01 |
| 76  | XKR6    | 286046 | 8  | 10748654 | 11063875 | 2.95E-06 | Lung  | LungCancer | 0.6594  | 5.10E-01 | 7.48E-01 |
| 76  | XKR6    | 286046 | 8  | 10748654 | 11063875 | 2.95E-06 | blood | Snoring    | 1.2782  | 2.01E-01 | 4.39E-01 |
| 76  | XKR6    | 286046 | 8  | 10748654 | 11063875 | 2.95E-06 | Lung  | Snoring    | 1.2782  | 2.01E-01 | 4.39E-01 |
| 137 | ORMDL3  | 94103  | 17 | 38072294 | 38088884 | 3.89E-16 | blood | Asthma     | -0.6114 | 5.41E-01 | 7.62E-01 |
| 137 | ORMDL3  | 94103  | 17 | 38072294 | 38088884 | 3.89E-16 | Lung  | Asthma     | 18.8909 | 1.35E-79 | 4.29E-76 |
| 137 | ORMDL3  | 94103  | 17 | 38072294 | 38088884 | 3.89E-16 | blood | COPD       | -0.6114 | 5.41E-01 | 7.62E-01 |
| 137 | ORMDL3  | 94103  | 17 | 38072294 | 38088884 | 3.89E-16 | Lung  | COPD       | 5.0322  | 4.85E-07 | 8.47E-06 |
| 137 | ORMDL3  | 94103  | 17 | 38072294 | 38088884 | 3.89E-16 | blood | IPF        | -0.6114 | 5.41E-01 | 7.62E-01 |
| 137 | ORMDL3  | 94103  | 17 | 38072294 | 38088884 | 3.89E-16 | Lung  | IPF        | -0.4347 | 6.64E-01 | 8.52E-01 |
| 137 | ORMDL3  | 94103  | 17 | 38072294 | 38088884 | 3.89E-16 | blood | LungCancer | -0.6114 | 5.41E-01 | 7.62E-01 |
| 137 | ORMDL3  | 94103  | 17 | 38072294 | 38088884 | 3.89E-16 | Lung  | LungCancer | -0.1887 | 8.50E-01 | 9.55E-01 |
| 137 | ORMDL3  | 94103  | 17 | 38072294 | 38088884 | 3.89E-16 | blood | Snoring    | -0.6114 | 5.41E-01 | 7.62E-01 |
| 137 | ORMDL3  | 94103  | 17 | 38072294 | 38088884 | 3.89E-16 | Lung  | Snoring    | -0.6114 | 5.41E-01 | 7.62E-01 |
| 156 | CSDC2   | 27254  | 22 | 41952014 | 41977670 | 8.47E-11 | blood | Asthma     | -2.5936 | 9.50E-03 | 5.04E-02 |
| 156 | CSDC2   | 27254  | 22 | 41952014 | 41977670 | 8.47E-11 | Lung  | Asthma     | 0.4068  | 6.84E-01 | 8.65E-01 |
| 156 | CSDC2   | 27254  | 22 | 41952014 | 41977670 | 8.47E-11 | blood | COPD       | -2.5936 | 9.50E-03 | 5.04E-02 |
| 156 | CSDC2   | 27254  | 22 | 41952014 | 41977670 | 8.47E-11 | Lung  | COPD       | -1.7446 | 8.10E-02 | 2.47E-01 |
| 156 | CSDC2   | 27254  | 22 | 41952014 | 41977670 | 8.47E-11 | blood | IPF        | -2.5936 | 9.50E-03 | 5.04E-02 |
| 156 | CSDC2   | 27254  | 22 | 41952014 | 41977670 | 8.47E-11 | Lung  | IPF        | -0.4698 | 6.39E-01 | 8.34E-01 |
| 156 | CSDC2   | 27254  | 22 | 41952014 | 41977670 | 8.47E-11 | blood | LungCancer | -2.5936 | 9.50E-03 | 5.04E-02 |
| 156 | CSDC2   | 27254  | 22 | 41952014 | 41977670 | 8.47E-11 | Lung  | LungCancer | -0.3591 | 7.20E-01 | 8.95E-01 |
| 156 | CSDC2   | 27254  | 22 | 41952014 | 41977670 | 8.47E-11 | blood | Snoring    | -2.5936 | 9.50E-03 | 5.04E-02 |
| 156 | CSDC2   | 27254  | 22 | 41952014 | 41977670 | 8.47E-11 | Lung  | Snoring    | -2.5936 | 9.50E-03 | 5.04E-02 |
| 86  | CCL19   | 6363   | 9  | 34684567 | 34696274 | 2.14E-05 | blood | Asthma     | 0.1490  | 8.82E-01 | 9.56E-01 |
| 86  | CCL19   | 6363   | 9  | 34684567 | 34696274 | 2.14E-05 | Lung  | Asthma     | -2.2174 | 2.66E-02 | 1.16E-01 |
| 86  | CCL19   | 6363   | 9  | 34684567 | 34696274 | 2.14E-05 | blood | COPD       | 0.1490  | 8.82E-01 | 9.56E-01 |

|     |          |        |    |           |           |          |       |            |         |          |          |
|-----|----------|--------|----|-----------|-----------|----------|-------|------------|---------|----------|----------|
| 86  | CCL19    | 6363   | 9  | 34684567  | 34696274  | 2.14E-05 | Lung  | COPD       | -2.2010 | 2.77E-02 | 1.21E-01 |
| 86  | CCL19    | 6363   | 9  | 34684567  | 34696274  | 2.14E-05 | blood | IPF        | 0.1490  | 8.82E-01 | 9.56E-01 |
| 86  | CCL19    | 6363   | 9  | 34684567  | 34696274  | 2.14E-05 | Lung  | IPF        | -0.8639 | 3.88E-01 | 6.37E-01 |
| 86  | CCL19    | 6363   | 9  | 34684567  | 34696274  | 2.14E-05 | blood | LungCancer | 0.1490  | 8.82E-01 | 9.56E-01 |
| 86  | CCL19    | 6363   | 9  | 34684567  | 34696274  | 2.14E-05 | Lung  | LungCancer | 0.6044  | 5.46E-01 | 7.64E-01 |
| 86  | CCL19    | 6363   | 9  | 34684567  | 34696274  | 2.14E-05 | blood | Snoring    | 0.1490  | 8.82E-01 | 9.56E-01 |
| 86  | CCL19    | 6363   | 9  | 34684567  | 34696274  | 2.14E-05 | Lung  | Snoring    | 0.1490  | 8.82E-01 | 9.56E-01 |
| 97  | OVOL1    | 5017   | 11 | 65549505  | 65569690  | 3.04E-09 | blood | Asthma     | 0.6492  | 5.16E-01 | 7.53E-01 |
| 97  | OVOL1    | 5017   | 11 | 65549505  | 65569690  | 3.04E-09 | Lung  | Asthma     | -1.0200 | 3.08E-01 | 5.63E-01 |
| 97  | OVOL1    | 5017   | 11 | 65549505  | 65569690  | 3.04E-09 | blood | COPD       | 0.6492  | 5.16E-01 | 7.53E-01 |
| 97  | OVOL1    | 5017   | 11 | 65549505  | 65569690  | 3.04E-09 | Lung  | COPD       | -3.0600 | 2.21E-03 | 1.41E-02 |
| 97  | OVOL1    | 5017   | 11 | 65549505  | 65569690  | 3.04E-09 | blood | IPF        | 0.6492  | 5.16E-01 | 7.53E-01 |
| 97  | OVOL1    | 5017   | 11 | 65549505  | 65569690  | 3.04E-09 | Lung  | IPF        | 0.7080  | 4.79E-01 | 7.27E-01 |
| 97  | OVOL1    | 5017   | 11 | 65549505  | 65569690  | 3.04E-09 | blood | LungCancer | 0.6492  | 5.16E-01 | 7.53E-01 |
| 97  | OVOL1    | 5017   | 11 | 65549505  | 65569690  | 3.04E-09 | Lung  | LungCancer | -1.9239 | 5.44E-02 | 1.94E-01 |
| 97  | OVOL1    | 5017   | 11 | 65549505  | 65569690  | 3.04E-09 | blood | Snoring    | 0.6492  | 5.16E-01 | 7.53E-01 |
| 97  | OVOL1    | 5017   | 11 | 65549505  | 65569690  | 3.04E-09 | Lung  | Snoring    | 0.6492  | 5.16E-01 | 7.53E-01 |
| 25  | DAG1     | 1605   | 3  | 49501136  | 49578051  | 3.06E-06 | blood | Asthma     | -3.2152 | 1.30E-03 | 9.22E-03 |
| 25  | DAG1     | 1605   | 3  | 49501136  | 49578051  | 3.06E-06 | Lung  | Asthma     | -3.0690 | 2.15E-03 | 1.38E-02 |
| 25  | DAG1     | 1605   | 3  | 49501136  | 49578051  | 3.06E-06 | blood | COPD       | -3.2152 | 1.30E-03 | 9.22E-03 |
| 25  | DAG1     | 1605   | 3  | 49501136  | 49578051  | 3.06E-06 | Lung  | COPD       | -4.8252 | 1.40E-06 | 2.33E-05 |
| 25  | DAG1     | 1605   | 3  | 49501136  | 49578051  | 3.06E-06 | blood | IPF        | -3.2152 | 1.30E-03 | 9.22E-03 |
| 25  | DAG1     | 1605   | 3  | 49501136  | 49578051  | 3.06E-06 | Lung  | IPF        | -0.9543 | 3.40E-01 | 5.98E-01 |
| 25  | DAG1     | 1605   | 3  | 49501136  | 49578051  | 3.06E-06 | blood | LungCancer | -3.2152 | 1.30E-03 | 9.22E-03 |
| 25  | DAG1     | 1605   | 3  | 49501136  | 49578051  | 3.06E-06 | Lung  | LungCancer | -2.5217 | 1.17E-02 | 6.04E-02 |
| 25  | DAG1     | 1605   | 3  | 49501136  | 49578051  | 3.06E-06 | blood | Snoring    | -3.2152 | 1.30E-03 | 9.22E-03 |
| 25  | DAG1     | 1605   | 3  | 49501136  | 49578051  | 3.06E-06 | Lung  | Snoring    | -3.2152 | 1.30E-03 | 9.22E-03 |
| 25  | GMPPB    | 29925  | 3  | 49753909  | 49766407  | 4.01E-07 | blood | Asthma     | 4.1618  | 3.16E-05 | 3.71E-04 |
| 25  | GMPPB    | 29925  | 3  | 49753909  | 49766407  | 4.01E-07 | Lung  | Asthma     | 2.0638  | 3.90E-02 | 1.53E-01 |
| 25  | GMPPB    | 29925  | 3  | 49753909  | 49766407  | 4.01E-07 | blood | COPD       | 4.1618  | 3.16E-05 | 3.71E-04 |
| 25  | GMPPB    | 29925  | 3  | 49753909  | 49766407  | 4.01E-07 | Lung  | COPD       | 5.1327  | 2.86E-07 | 5.08E-06 |
| 25  | GMPPB    | 29925  | 3  | 49753909  | 49766407  | 4.01E-07 | blood | IPF        | 4.1618  | 3.16E-05 | 3.71E-04 |
| 25  | GMPPB    | 29925  | 3  | 49753909  | 49766407  | 4.01E-07 | Lung  | IPF        | -0.3520 | 7.25E-01 | 8.97E-01 |
| 25  | GMPPB    | 29925  | 3  | 49753909  | 49766407  | 4.01E-07 | blood | LungCancer | 4.1618  | 3.16E-05 | 3.71E-04 |
| 25  | GMPPB    | 29925  | 3  | 49753909  | 49766407  | 4.01E-07 | Lung  | LungCancer | 2.4344  | 1.49E-02 | 7.38E-02 |
| 25  | GMPPB    | 29925  | 3  | 49753909  | 49766407  | 4.01E-07 | blood | Snoring    | 4.1618  | 3.16E-05 | 3.71E-04 |
| 25  | GMPPB    | 29925  | 3  | 49753909  | 49766407  | 4.01E-07 | Lung  | Snoring    | 4.1618  | 3.16E-05 | 3.71E-04 |
| 140 | PHOSPHO1 | 162466 | 17 | 47295728  | 47314009  | 5.91E-06 | blood | Asthma     | NA      | NA       | NA       |
| 140 | PHOSPHO1 | 162466 | 17 | 47295728  | 47314009  | 5.91E-06 | Lung  | Asthma     | NA      | NA       | NA       |
| 140 | PHOSPHO1 | 162466 | 17 | 47295728  | 47314009  | 5.91E-06 | blood | COPD       | NA      | NA       | NA       |
| 140 | PHOSPHO1 | 162466 | 17 | 47295728  | 47314009  | 5.91E-06 | Lung  | COPD       | NA      | NA       | NA       |
| 140 | PHOSPHO1 | 162466 | 17 | 47295728  | 47314009  | 5.91E-06 | blood | IPF        | NA      | NA       | NA       |
| 140 | PHOSPHO1 | 162466 | 17 | 47295728  | 47314009  | 5.91E-06 | Lung  | IPF        | NA      | NA       | NA       |
| 140 | PHOSPHO1 | 162466 | 17 | 47295728  | 47314009  | 5.91E-06 | blood | LungCancer | NA      | NA       | NA       |
| 140 | PHOSPHO1 | 162466 | 17 | 47295728  | 47314009  | 5.91E-06 | Lung  | LungCancer | NA      | NA       | NA       |
| 140 | PHOSPHO1 | 162466 | 17 | 47295728  | 47314009  | 5.91E-06 | blood | Snoring    | NA      | NA       | NA       |
| 140 | PHOSPHO1 | 162466 | 17 | 47295728  | 47314009  | 5.91E-06 | Lung  | Snoring    | NA      | NA       | NA       |
| 139 | HOXB2    | 3212   | 17 | 46615017  | 46627393  | 1.24E-08 | blood | Asthma     | 5.5501  | 2.85E-08 | 7.08E-07 |
| 139 | HOXB2    | 3212   | 17 | 46615017  | 46627393  | 1.24E-08 | Lung  | Asthma     | 2.5510  | 1.07E-02 | 5.57E-02 |
| 139 | HOXB2    | 3212   | 17 | 46615017  | 46627393  | 1.24E-08 | blood | COPD       | 5.5501  | 2.85E-08 | 7.08E-07 |
| 139 | HOXB2    | 3212   | 17 | 46615017  | 46627393  | 1.24E-08 | Lung  | COPD       | 1.1821  | 2.37E-01 | 4.85E-01 |
| 139 | HOXB2    | 3212   | 17 | 46615017  | 46627393  | 1.24E-08 | blood | IPF        | 5.5501  | 2.85E-08 | 7.08E-07 |
| 139 | HOXB2    | 3212   | 17 | 46615017  | 46627393  | 1.24E-08 | Lung  | IPF        | 0.9177  | 3.59E-01 | 6.15E-01 |
| 139 | HOXB2    | 3212   | 17 | 46615017  | 46627393  | 1.24E-08 | blood | LungCancer | 5.5501  | 2.85E-08 | 7.08E-07 |
| 139 | HOXB2    | 3212   | 17 | 46615017  | 46627393  | 1.24E-08 | Lung  | LungCancer | 2.8992  | 3.74E-03 | 2.24E-02 |
| 139 | HOXB2    | 3212   | 17 | 46615017  | 46627393  | 1.24E-08 | blood | Snoring    | 5.5501  | 2.85E-08 | 7.08E-07 |
| 139 | HOXB2    | 3212   | 17 | 46615017  | 46627393  | 1.24E-08 | Lung  | Snoring    | 5.5501  | 2.85E-08 | 7.08E-07 |
| 137 | TCAP     | 8557   | 17 | 37816599  | 37827807  | 1.49E-08 | blood | Asthma     | -1.1637 | 2.45E-01 | 4.92E-01 |
| 137 | TCAP     | 8557   | 17 | 37816599  | 37827807  | 1.49E-08 | Lung  | Asthma     | 3.3173  | 9.09E-04 | 6.98E-03 |
| 137 | TCAP     | 8557   | 17 | 37816599  | 37827807  | 1.49E-08 | blood | COPD       | -1.1637 | 2.45E-01 | 4.92E-01 |
| 137 | TCAP     | 8557   | 17 | 37816599  | 37827807  | 1.49E-08 | Lung  | COPD       | -0.0132 | 9.90E-01 | 9.94E-01 |
| 137 | TCAP     | 8557   | 17 | 37816599  | 37827807  | 1.49E-08 | blood | IPF        | -1.1637 | 2.45E-01 | 4.92E-01 |
| 137 | TCAP     | 8557   | 17 | 37816599  | 37827807  | 1.49E-08 | Lung  | IPF        | 0.3571  | 7.21E-01 | 8.96E-01 |
| 137 | TCAP     | 8557   | 17 | 37816599  | 37827807  | 1.49E-08 | blood | LungCancer | -1.1637 | 2.45E-01 | 4.92E-01 |
| 137 | TCAP     | 8557   | 17 | 37816599  | 37827807  | 1.49E-08 | Lung  | LungCancer | 0.3283  | 7.43E-01 | 9.05E-01 |
| 137 | TCAP     | 8557   | 17 | 37816599  | 37827807  | 1.49E-08 | blood | Snoring    | -1.1637 | 2.45E-01 | 4.92E-01 |
| 137 | TCAP     | 8557   | 17 | 37816599  | 37827807  | 1.49E-08 | Lung  | Snoring    | -1.1637 | 2.45E-01 | 4.92E-01 |
| 32  | NRROS    | 375387 | 3  | 196361656 | 196393875 | 5.51E-09 | blood | Asthma     | -0.3318 | 7.40E-01 | 9.03E-01 |
| 32  | NRROS    | 375387 | 3  | 196361656 | 196393875 | 5.51E-09 | Lung  | Asthma     | -3.3888 | 7.02E-04 | 5.66E-03 |
| 32  | NRROS    | 375387 | 3  | 196361656 | 196393875 | 5.51E-09 | blood | COPD       | -0.3318 | 7.40E-01 | 9.03E-01 |
| 32  | NRROS    | 375387 | 3  | 196361656 | 196393875 | 5.51E-09 | Lung  | COPD       | -0.8090 | 4.19E-01 | 6.70E-01 |
| 32  | NRROS    | 375387 | 3  | 196361656 | 196393875 | 5.51E-09 | blood | IPF        | -0.3318 | 7.40E-01 | 9.03E-01 |
| 32  | NRROS    | 375387 | 3  | 196361656 | 196393875 | 5.51E-09 | Lung  | IPF        | -0.2707 | 7.87E-01 | 9.29E-01 |

|     |         |        |    |           |           |          |       |            |         |          |          |
|-----|---------|--------|----|-----------|-----------|----------|-------|------------|---------|----------|----------|
| 32  | NRROS   | 375387 | 3  | 196361656 | 196393875 | 5.51E-09 | blood | LungCancer | -0.3318 | 7.40E-01 | 9.03E-01 |
| 32  | NRROS   | 375387 | 3  | 196361656 | 196393875 | 5.51E-09 | Lung  | LungCancer | -0.1139 | 9.09E-01 | 9.66E-01 |
| 32  | NRROS   | 375387 | 3  | 196361656 | 196393875 | 5.51E-09 | blood | Snoring    | -0.3318 | 7.40E-01 | 9.03E-01 |
| 32  | NRROS   | 375387 | 3  | 196361656 | 196393875 | 5.51E-09 | Lung  | Snoring    | -0.3318 | 7.40E-01 | 9.03E-01 |
| 107 | MSRB3   | 253827 | 12 | 65667423  | 65865687  | 1.17E-13 | blood | Asthma     | 0.1300  | 8.97E-01 | 9.63E-01 |
| 107 | MSRB3   | 253827 | 12 | 65667423  | 65865687  | 1.17E-13 | Lung  | Asthma     | 1.0592  | 2.90E-01 | 5.47E-01 |
| 107 | MSRB3   | 253827 | 12 | 65667423  | 65865687  | 1.17E-13 | blood | COPD       | 0.1300  | 8.97E-01 | 9.63E-01 |
| 107 | MSRB3   | 253827 | 12 | 65667423  | 65865687  | 1.17E-13 | Lung  | COPD       | 2.1787  | 2.94E-02 | 1.27E-01 |
| 107 | MSRB3   | 253827 | 12 | 65667423  | 65865687  | 1.17E-13 | blood | IPF        | 0.1300  | 8.97E-01 | 9.63E-01 |
| 107 | MSRB3   | 253827 | 12 | 65667423  | 65865687  | 1.17E-13 | Lung  | IPF        | 0.6292  | 5.29E-01 | 7.55E-01 |
| 107 | MSRB3   | 253827 | 12 | 65667423  | 65865687  | 1.17E-13 | blood | LungCancer | 0.1300  | 8.97E-01 | 9.63E-01 |
| 107 | MSRB3   | 253827 | 12 | 65667423  | 65865687  | 1.17E-13 | Lung  | LungCancer | 0.0226  | 9.82E-01 | 9.93E-01 |
| 107 | MSRB3   | 253827 | 12 | 65667423  | 65865687  | 1.17E-13 | blood | Snoring    | 0.1300  | 8.97E-01 | 9.63E-01 |
| 107 | MSRB3   | 253827 | 12 | 65667423  | 65865687  | 1.17E-13 | Lung  | Snoring    | 0.1300  | 8.97E-01 | 9.63E-01 |
| 34  | TLR10   | 81793  | 4  | 38768860  | 38789611  | 5.03E-12 | blood | Asthma     | NA      | NA       | NA       |
| 34  | TLR10   | 81793  | 4  | 38768860  | 38789611  | 5.03E-12 | Lung  | Asthma     | NA      | NA       | NA       |
| 34  | TLR10   | 81793  | 4  | 38768860  | 38789611  | 5.03E-12 | blood | COPD       | NA      | NA       | NA       |
| 34  | TLR10   | 81793  | 4  | 38768860  | 38789611  | 5.03E-12 | Lung  | COPD       | NA      | NA       | NA       |
| 34  | TLR10   | 81793  | 4  | 38768860  | 38789611  | 5.03E-12 | blood | IPF        | NA      | NA       | NA       |
| 34  | TLR10   | 81793  | 4  | 38768860  | 38789611  | 5.03E-12 | Lung  | IPF        | NA      | NA       | NA       |
| 34  | TLR10   | 81793  | 4  | 38768860  | 38789611  | 5.03E-12 | blood | LungCancer | NA      | NA       | NA       |
| 34  | TLR10   | 81793  | 4  | 38768860  | 38789611  | 5.03E-12 | Lung  | LungCancer | NA      | NA       | NA       |
| 34  | TLR10   | 81793  | 4  | 38768860  | 38789611  | 5.03E-12 | blood | Snoring    | NA      | NA       | NA       |
| 34  | TLR10   | 81793  | 4  | 38768860  | 38789611  | 5.03E-12 | Lung  | Snoring    | NA      | NA       | NA       |
| 34  | TLR1    | 7096   | 4  | 38792876  | 38811814  | 3.34E-13 | blood | Asthma     | -0.2829 | 7.77E-01 | 9.28E-01 |
| 34  | TLR1    | 7096   | 4  | 38792876  | 38811814  | 3.34E-13 | Lung  | Asthma     | -3.1018 | 1.92E-03 | 1.25E-02 |
| 34  | TLR1    | 7096   | 4  | 38792876  | 38811814  | 3.34E-13 | blood | COPD       | -0.2829 | 7.77E-01 | 9.28E-01 |
| 34  | TLR1    | 7096   | 4  | 38792876  | 38811814  | 3.34E-13 | Lung  | COPD       | 0.2121  | 8.32E-01 | 9.46E-01 |
| 34  | TLR1    | 7096   | 4  | 38792876  | 38811814  | 3.34E-13 | blood | IPF        | -0.2829 | 7.77E-01 | 9.28E-01 |
| 34  | TLR1    | 7096   | 4  | 38792876  | 38811814  | 3.34E-13 | Lung  | IPF        | 0.6998  | 4.84E-01 | 7.30E-01 |
| 34  | TLR1    | 7096   | 4  | 38792876  | 38811814  | 3.34E-13 | blood | LungCancer | -0.2829 | 7.77E-01 | 9.28E-01 |
| 34  | TLR1    | 7096   | 4  | 38792876  | 38811814  | 3.34E-13 | Lung  | LungCancer | -0.5277 | 5.98E-01 | 8.04E-01 |
| 34  | TLR1    | 7096   | 4  | 38792876  | 38811814  | 3.34E-13 | blood | Snoring    | -0.2829 | 7.77E-01 | 9.28E-01 |
| 34  | TLR1    | 7096   | 4  | 38792876  | 38811814  | 3.34E-13 | Lung  | Snoring    | -0.2829 | 7.77E-01 | 9.28E-01 |
| 34  | TLR6    | 10333  | 4  | 38820325  | 38863438  | 1.75E-07 | blood | Asthma     | -1.8326 | 6.69E-02 | 2.19E-01 |
| 34  | TLR6    | 10333  | 4  | 38820325  | 38863438  | 1.75E-07 | Lung  | Asthma     | -3.3738 | 7.41E-04 | 5.85E-03 |
| 34  | TLR6    | 10333  | 4  | 38820325  | 38863438  | 1.75E-07 | blood | COPD       | -1.8326 | 6.69E-02 | 2.19E-01 |
| 34  | TLR6    | 10333  | 4  | 38820325  | 38863438  | 1.75E-07 | Lung  | COPD       | 0.3778  | 7.06E-01 | 8.84E-01 |
| 34  | TLR6    | 10333  | 4  | 38820325  | 38863438  | 1.75E-07 | blood | IPF        | -1.8326 | 6.69E-02 | 2.19E-01 |
| 34  | TLR6    | 10333  | 4  | 38820325  | 38863438  | 1.75E-07 | Lung  | IPF        | 1.5123  | 1.30E-01 | 3.43E-01 |
| 34  | TLR6    | 10333  | 4  | 38820325  | 38863438  | 1.75E-07 | blood | LungCancer | -1.8326 | 6.69E-02 | 2.19E-01 |
| 34  | TLR6    | 10333  | 4  | 38820325  | 38863438  | 1.75E-07 | Lung  | LungCancer | -0.7833 | 4.60E-01 | 7.11E-01 |
| 34  | TLR6    | 10333  | 4  | 38820325  | 38863438  | 1.75E-07 | blood | Snoring    | -1.8326 | 6.69E-02 | 2.19E-01 |
| 34  | TLR6    | 10333  | 4  | 38820325  | 38863438  | 1.75E-07 | Lung  | Snoring    | -1.8326 | 6.69E-02 | 2.19E-01 |
| 28  | TRMT10C | 54931  | 3  | 101275680 | 101290290 | 1.09E-05 | blood | Asthma     | -0.3471 | 7.29E-01 | 8.98E-01 |
| 28  | TRMT10C | 54931  | 3  | 101275680 | 101290290 | 1.09E-05 | Lung  | Asthma     | -0.7068 | 4.80E-01 | 7.28E-01 |
| 28  | TRMT10C | 54931  | 3  | 101275680 | 101290290 | 1.09E-05 | blood | COPD       | -0.3471 | 7.29E-01 | 8.98E-01 |
| 28  | TRMT10C | 54931  | 3  | 101275680 | 101290290 | 1.09E-05 | Lung  | COPD       | -1.0909 | 2.75E-01 | 5.26E-01 |
| 28  | TRMT10C | 54931  | 3  | 101275680 | 101290290 | 1.09E-05 | blood | IPF        | -0.3471 | 7.29E-01 | 8.98E-01 |
| 28  | TRMT10C | 54931  | 3  | 101275680 | 101290290 | 1.09E-05 | Lung  | IPF        | -1.5691 | 1.17E-01 | 3.16E-01 |
| 28  | TRMT10C | 54931  | 3  | 101275680 | 101290290 | 1.09E-05 | blood | LungCancer | -0.3471 | 7.29E-01 | 8.98E-01 |
| 28  | TRMT10C | 54931  | 3  | 101275680 | 101290290 | 1.09E-05 | Lung  | LungCancer | 0.5473  | 5.84E-01 | 7.94E-01 |
| 28  | TRMT10C | 54931  | 3  | 101275680 | 101290290 | 1.09E-05 | blood | Snoring    | -0.3471 | 7.29E-01 | 8.98E-01 |
| 28  | TRMT10C | 54931  | 3  | 101275680 | 101290290 | 1.09E-05 | Lung  | Snoring    | -0.3471 | 7.29E-01 | 8.98E-01 |
| 94  | BRSK2   | 9024   | 11 | 1406129   | 1488919   | 5.95E-10 | blood | Asthma     | -0.9119 | 3.62E-01 | 6.15E-01 |
| 94  | BRSK2   | 9024   | 11 | 1406129   | 1488919   | 5.95E-10 | Lung  | Asthma     | -0.8716 | 3.83E-01 | 6.31E-01 |
| 94  | BRSK2   | 9024   | 11 | 1406129   | 1488919   | 5.95E-10 | blood | COPD       | -0.9119 | 3.62E-01 | 6.15E-01 |
| 94  | BRSK2   | 9024   | 11 | 1406129   | 1488919   | 5.95E-10 | Lung  | COPD       | 0.3124  | 7.55E-01 | 9.15E-01 |
| 94  | BRSK2   | 9024   | 11 | 1406129   | 1488919   | 5.95E-10 | blood | IPF        | -0.9119 | 3.62E-01 | 6.15E-01 |
| 94  | BRSK2   | 9024   | 11 | 1406129   | 1488919   | 5.95E-10 | Lung  | IPF        | 6.1800  | 6.24E-10 | 4.22E-08 |
| 94  | BRSK2   | 9024   | 11 | 1406129   | 1488919   | 5.95E-10 | blood | LungCancer | -0.9119 | 3.62E-01 | 6.15E-01 |
| 94  | BRSK2   | 9024   | 11 | 1406129   | 1488919   | 5.95E-10 | Lung  | LungCancer | 1.1479  | 2.51E-01 | 5.03E-01 |
| 94  | BRSK2   | 9024   | 11 | 1406129   | 1488919   | 5.95E-10 | blood | Snoring    | -0.9119 | 3.62E-01 | 6.15E-01 |
| 94  | BRSK2   | 9024   | 11 | 1406129   | 1488919   | 5.95E-10 | Lung  | Snoring    | -0.9119 | 3.62E-01 | 6.15E-01 |
| 131 | ORA13   | 93129  | 16 | 30955405  | 30971259  | 3.16E-11 | blood | Asthma     | -0.0012 | 9.99E-01 | 9.99E-01 |
| 131 | ORA13   | 93129  | 16 | 30955405  | 30971259  | 3.16E-11 | Lung  | Asthma     | -1.5634 | 1.18E-01 | 3.18E-01 |
| 131 | ORA13   | 93129  | 16 | 30955405  | 30971259  | 3.16E-11 | blood | COPD       | -0.0012 | 9.99E-01 | 9.99E-01 |
| 131 | ORA13   | 93129  | 16 | 30955405  | 30971259  | 3.16E-11 | Lung  | COPD       | -0.2781 | 7.81E-01 | 9.29E-01 |
| 131 | ORA13   | 93129  | 16 | 30955405  | 30971259  | 3.16E-11 | blood | IPF        | -0.0012 | 9.99E-01 | 9.99E-01 |
| 131 | ORA13   | 93129  | 16 | 30955405  | 30971259  | 3.16E-11 | Lung  | IPF        | -1.7100 | 8.66E-02 | 2.59E-01 |
| 131 | ORA13   | 93129  | 16 | 30955405  | 30971259  | 3.16E-11 | blood | LungCancer | -0.0012 | 9.99E-01 | 9.99E-01 |
| 131 | ORA13   | 93129  | 16 | 30955405  | 30971259  | 3.16E-11 | Lung  | LungCancer | -0.1540 | 8.78E-01 | 9.56E-01 |
| 131 | ORA13   | 93129  | 16 | 30955405  | 30971259  | 3.16E-11 | blood | Snoring    | -0.0012 | 9.99E-01 | 9.99E-01 |

|     |           |        |    |           |           |          |       |            |         |          |          |
|-----|-----------|--------|----|-----------|-----------|----------|-------|------------|---------|----------|----------|
| 131 | ORA13     | 93129  | 16 | 30955405  | 30971259  | 3.16E-11 | Lung  | Snoring    | -0.0012 | 9.99E-01 | 9.99E-01 |
| 1   | B3GALT6   | 126792 | 1  | 1162629   | 1175421   | 1.91E-05 | blood | Asthma     | -2.1308 | 3.31E-02 | 1.36E-01 |
| 1   | B3GALT6   | 126792 | 1  | 1162629   | 1175421   | 1.91E-05 | Lung  | Asthma     | -3.7609 | 1.69E-04 | 1.49E-03 |
| 1   | B3GALT6   | 126792 | 1  | 1162629   | 1175421   | 1.91E-05 | blood | COPD       | -2.1308 | 3.31E-02 | 1.36E-01 |
| 1   | B3GALT6   | 126792 | 1  | 1162629   | 1175421   | 1.91E-05 | Lung  | COPD       | 0.3737  | 7.09E-01 | 8.85E-01 |
| 1   | B3GALT6   | 126792 | 1  | 1162629   | 1175421   | 1.91E-05 | blood | IPF        | -2.1308 | 3.31E-02 | 1.36E-01 |
| 1   | B3GALT6   | 126792 | 1  | 1162629   | 1175421   | 1.91E-05 | Lung  | IPF        | -1.0159 | 3.10E-01 | 5.64E-01 |
| 1   | B3GALT6   | 126792 | 1  | 1162629   | 1175421   | 1.91E-05 | blood | LungCancer | -2.1308 | 3.31E-02 | 1.36E-01 |
| 1   | B3GALT6   | 126792 | 1  | 1162629   | 1175421   | 1.91E-05 | Lung  | LungCancer | 0.0419  | 9.67E-01 | 9.91E-01 |
| 1   | B3GALT6   | 126792 | 1  | 1162629   | 1175421   | 1.91E-05 | blood | Snoring    | -2.1308 | 3.31E-02 | 1.36E-01 |
| 1   | B3GALT6   | 126792 | 1  | 1162629   | 1175421   | 1.91E-05 | Lung  | Snoring    | -2.1308 | 3.31E-02 | 1.36E-01 |
| 25  | IP6K1     | 9807   | 3  | 49756728  | 49828973  | 2.65E-08 | blood | Asthma     | 4.0111  | 6.04E-05 | 6.25E-04 |
| 25  | IP6K1     | 9807   | 3  | 49756728  | 49828973  | 2.65E-08 | Lung  | Asthma     | 2.0520  | 4.02E-02 | 1.57E-01 |
| 25  | IP6K1     | 9807   | 3  | 49756728  | 49828973  | 2.65E-08 | blood | COPD       | 4.0111  | 6.04E-05 | 6.25E-04 |
| 25  | IP6K1     | 9807   | 3  | 49756728  | 49828973  | 2.65E-08 | Lung  | COPD       | 4.9856  | 6.18E-07 | 1.07E-05 |
| 25  | IP6K1     | 9807   | 3  | 49756728  | 49828973  | 2.65E-08 | blood | IPF        | 4.0111  | 6.04E-05 | 6.25E-04 |
| 25  | IP6K1     | 9807   | 3  | 49756728  | 49828973  | 2.65E-08 | Lung  | IPF        | -0.2745 | 7.84E-01 | 9.29E-01 |
| 25  | IP6K1     | 9807   | 3  | 49756728  | 49828973  | 2.65E-08 | blood | LungCancer | 4.0111  | 6.04E-05 | 6.25E-04 |
| 25  | IP6K1     | 9807   | 3  | 49756728  | 49828973  | 2.65E-08 | Lung  | LungCancer | 2.8371  | 4.55E-03 | 2.70E-02 |
| 25  | IP6K1     | 9807   | 3  | 49756728  | 49828973  | 2.65E-08 | blood | Snoring    | 4.0111  | 6.04E-05 | 6.25E-04 |
| 25  | IP6K1     | 9807   | 3  | 49756728  | 49828973  | 2.65E-08 | Lung  | Snoring    | 4.0111  | 6.04E-05 | 6.25E-04 |
| 138 | LRRC37A   | 9884   | 17 | 44311744  | 44420160  | 1.47E-10 | blood | Asthma     | 0.3374  | 7.36E-01 | 9.00E-01 |
| 138 | LRRC37A   | 9884   | 17 | 44311744  | 44420160  | 1.47E-10 | Lung  | Asthma     | 0.1140  | 9.09E-01 | 9.66E-01 |
| 138 | LRRC37A   | 9884   | 17 | 44311744  | 44420160  | 1.47E-10 | blood | COPD       | 0.3374  | 7.36E-01 | 9.00E-01 |
| 138 | LRRC37A   | 9884   | 17 | 44311744  | 44420160  | 1.47E-10 | Lung  | COPD       | 1.6557  | 9.78E-02 | 2.83E-01 |
| 138 | LRRC37A   | 9884   | 17 | 44311744  | 44420160  | 1.47E-10 | blood | IPF        | 0.3374  | 7.36E-01 | 9.00E-01 |
| 138 | LRRC37A   | 9884   | 17 | 44311744  | 44420160  | 1.47E-10 | Lung  | IPF        | -3.2183 | 1.29E-03 | 9.22E-03 |
| 138 | LRRC37A   | 9884   | 17 | 44311744  | 44420160  | 1.47E-10 | blood | LungCancer | 0.3374  | 7.36E-01 | 9.00E-01 |
| 138 | LRRC37A   | 9884   | 17 | 44311744  | 44420160  | 1.47E-10 | Lung  | LungCancer | -0.8426 | 3.99E-01 | 6.51E-01 |
| 138 | LRRC37A   | 9884   | 17 | 44311744  | 44420160  | 1.47E-10 | blood | Snoring    | 0.3374  | 7.36E-01 | 9.00E-01 |
| 138 | LRRC37A   | 9884   | 17 | 44311744  | 44420160  | 1.47E-10 | Lung  | Snoring    | 0.3374  | 7.36E-01 | 9.00E-01 |
| 95  | BDNF      | 627    | 11 | 27671440  | 27748605  | 2.38E-09 | blood | Asthma     | NA      | NA       | NA       |
| 95  | BDNF      | 627    | 11 | 27671440  | 27748605  | 2.38E-09 | Lung  | Asthma     | NA      | NA       | NA       |
| 95  | BDNF      | 627    | 11 | 27671440  | 27748605  | 2.38E-09 | blood | COPD       | NA      | NA       | NA       |
| 95  | BDNF      | 627    | 11 | 27671440  | 27748605  | 2.38E-09 | Lung  | COPD       | NA      | NA       | NA       |
| 95  | BDNF      | 627    | 11 | 27671440  | 27748605  | 2.38E-09 | blood | IPF        | NA      | NA       | NA       |
| 95  | BDNF      | 627    | 11 | 27671440  | 27748605  | 2.38E-09 | Lung  | IPF        | NA      | NA       | NA       |
| 95  | BDNF      | 627    | 11 | 27671440  | 27748605  | 2.38E-09 | blood | LungCancer | NA      | NA       | NA       |
| 95  | BDNF      | 627    | 11 | 27671440  | 27748605  | 2.38E-09 | Lung  | LungCancer | NA      | NA       | NA       |
| 95  | BDNF      | 627    | 11 | 27671440  | 27748605  | 2.38E-09 | blood | Snoring    | NA      | NA       | NA       |
| 95  | BDNF      | 627    | 11 | 27671440  | 27748605  | 2.38E-09 | Lung  | Snoring    | NA      | NA       | NA       |
| 30  | TBL1XR1   | 79718  | 3  | 176733542 | 176920048 | 1.62E-05 | blood | Asthma     | -1.5425 | 1.23E-01 | 3.29E-01 |
| 30  | TBL1XR1   | 79718  | 3  | 176733542 | 176920048 | 1.62E-05 | Lung  | Asthma     | 0.8891  | 3.74E-01 | 6.27E-01 |
| 30  | TBL1XR1   | 79718  | 3  | 176733542 | 176920048 | 1.62E-05 | blood | COPD       | -1.5425 | 1.23E-01 | 3.29E-01 |
| 30  | TBL1XR1   | 79718  | 3  | 176733542 | 176920048 | 1.62E-05 | Lung  | COPD       | -0.2158 | 8.29E-01 | 9.43E-01 |
| 30  | TBL1XR1   | 79718  | 3  | 176733542 | 176920048 | 1.62E-05 | blood | IPF        | -1.5425 | 1.23E-01 | 3.29E-01 |
| 30  | TBL1XR1   | 79718  | 3  | 176733542 | 176920048 | 1.62E-05 | Lung  | IPF        | 1.0546  | 2.92E-01 | 5.47E-01 |
| 30  | TBL1XR1   | 79718  | 3  | 176733542 | 176920048 | 1.62E-05 | blood | LungCancer | -1.5425 | 1.23E-01 | 3.29E-01 |
| 30  | TBL1XR1   | 79718  | 3  | 176733542 | 176920048 | 1.62E-05 | Lung  | LungCancer | 0.0915  | 9.27E-01 | 9.70E-01 |
| 30  | TBL1XR1   | 79718  | 3  | 176733542 | 176920048 | 1.62E-05 | blood | Snoring    | -1.5425 | 1.23E-01 | 3.29E-01 |
| 30  | TBL1XR1   | 79718  | 3  | 176733542 | 176920048 | 1.62E-05 | Lung  | Snoring    | -1.5425 | 1.23E-01 | 3.29E-01 |
| 131 | PRSS36    | 146547 | 16 | 31145244  | 31166415  | 1.15E-11 | blood | Asthma     | -4.0841 | 4.42E-05 | 4.91E-04 |
| 131 | PRSS36    | 146547 | 16 | 31145244  | 31166415  | 1.15E-11 | Lung  | Asthma     | -2.5710 | 1.01E-02 | 5.30E-02 |
| 131 | PRSS36    | 146547 | 16 | 31145244  | 31166415  | 1.15E-11 | blood | COPD       | -4.0841 | 4.42E-05 | 4.91E-04 |
| 131 | PRSS36    | 146547 | 16 | 31145244  | 31166415  | 1.15E-11 | Lung  | COPD       | -1.3696 | 1.71E-01 | 4.04E-01 |
| 131 | PRSS36    | 146547 | 16 | 31145244  | 31166415  | 1.15E-11 | blood | IPF        | -4.0841 | 4.42E-05 | 4.91E-04 |
| 131 | PRSS36    | 146547 | 16 | 31145244  | 31166415  | 1.15E-11 | Lung  | IPF        | 0.4430  | 6.58E-01 | 8.48E-01 |
| 131 | PRSS36    | 146547 | 16 | 31145244  | 31166415  | 1.15E-11 | blood | LungCancer | -4.0841 | 4.42E-05 | 4.91E-04 |
| 131 | PRSS36    | 146547 | 16 | 31145244  | 31166415  | 1.15E-11 | Lung  | LungCancer | -2.2300 | 2.60E-02 | 1.14E-01 |
| 131 | PRSS36    | 146547 | 16 | 31145244  | 31166415  | 1.15E-11 | blood | Snoring    | -4.0841 | 4.42E-05 | 4.91E-04 |
| 131 | PRSS36    | 146547 | 16 | 31145244  | 31166415  | 1.15E-11 | Lung  | Snoring    | -4.0841 | 4.42E-05 | 4.91E-04 |
| 84  | GLDC      | 2731   | 9  | 6527464   | 6650692   | 8.36E-07 | blood | Asthma     | 1.3700  | 1.71E-01 | 4.04E-01 |
| 84  | GLDC      | 2731   | 9  | 6527464   | 6650692   | 8.36E-07 | Lung  | Asthma     | 2.2053  | 2.74E-02 | 1.20E-01 |
| 84  | GLDC      | 2731   | 9  | 6527464   | 6650692   | 8.36E-07 | blood | COPD       | 1.3700  | 1.71E-01 | 4.04E-01 |
| 84  | GLDC      | 2731   | 9  | 6527464   | 6650692   | 8.36E-07 | Lung  | COPD       | 0.0738  | 9.41E-01 | 9.79E-01 |
| 84  | GLDC      | 2731   | 9  | 6527464   | 6650692   | 8.36E-07 | blood | IPF        | 1.3700  | 1.71E-01 | 4.04E-01 |
| 84  | GLDC      | 2731   | 9  | 6527464   | 6650692   | 8.36E-07 | Lung  | IPF        | 2.4271  | 1.52E-02 | 7.50E-02 |
| 84  | GLDC      | 2731   | 9  | 6527464   | 6650692   | 8.36E-07 | blood | LungCancer | 1.3700  | 1.71E-01 | 4.04E-01 |
| 84  | GLDC      | 2731   | 9  | 6527464   | 6650692   | 8.36E-07 | Lung  | LungCancer | -0.1726 | 8.63E-01 | 9.55E-01 |
| 84  | GLDC      | 2731   | 9  | 6527464   | 6650692   | 8.36E-07 | blood | Snoring    | 1.3700  | 1.71E-01 | 4.04E-01 |
| 84  | GLDC      | 2731   | 9  | 6527464   | 6650692   | 8.36E-07 | Lung  | Snoring    | 1.3700  | 1.71E-01 | 4.04E-01 |
| 58  | HIST1H2AC | 8334   | 6  | 26119370  | 26144337  | 1.52E-06 | blood | Asthma     | NA      | NA       | NA       |
| 58  | HIST1H2AC | 8334   | 6  | 26119370  | 26144337  | 1.52E-06 | Lung  | Asthma     | NA      | NA       | NA       |



|     |           |        |    |           |           |          |       |            |         |          |          |
|-----|-----------|--------|----|-----------|-----------|----------|-------|------------|---------|----------|----------|
| 58  | HIST1H2AC | 8334   | 6  | 26119370  | 26144337  | 1.52E-06 | blood | COPD       | NA      | NA       | NA       |
| 58  | HIST1H2AC | 8334   | 6  | 26119370  | 26144337  | 1.52E-06 | Lung  | COPD       | NA      | NA       | NA       |
| 58  | HIST1H2AC | 8334   | 6  | 26119370  | 26144337  | 1.52E-06 | blood | IPF        | NA      | NA       | NA       |
| 58  | HIST1H2AC | 8334   | 6  | 26119370  | 26144337  | 1.52E-06 | Lung  | IPF        | NA      | NA       | NA       |
| 58  | HIST1H2AC | 8334   | 6  | 26119370  | 26144337  | 1.52E-06 | blood | LungCancer | NA      | NA       | NA       |
| 58  | HIST1H2AC | 8334   | 6  | 26119370  | 26144337  | 1.52E-06 | Lung  | LungCancer | NA      | NA       | NA       |
| 58  | HIST1H2AC | 8334   | 6  | 26119370  | 26144337  | 1.52E-06 | blood | Snoring    | NA      | NA       | NA       |
| 58  | HIST1H2AC | 8334   | 6  | 26119370  | 26144337  | 1.52E-06 | Lung  | Snoring    | NA      | NA       | NA       |
| 58  | HIST1H2BC | 8347   | 6  | 26108389  | 26129266  | 1.06E-06 | blood | Asthma     | 0.0301  | 9.76E-01 | 9.92E-01 |
| 58  | HIST1H2BC | 8347   | 6  | 26108389  | 26129266  | 1.06E-06 | Lung  | Asthma     | 0.9205  | 3.57E-01 | 6.12E-01 |
| 58  | HIST1H2BC | 8347   | 6  | 26108389  | 26129266  | 1.06E-06 | blood | COPD       | 0.0301  | 9.76E-01 | 9.92E-01 |
| 58  | HIST1H2BC | 8347   | 6  | 26108389  | 26129266  | 1.06E-06 | Lung  | COPD       | 1.5973  | 1.10E-01 | 3.03E-01 |
| 58  | HIST1H2BC | 8347   | 6  | 26108389  | 26129266  | 1.06E-06 | blood | IPF        | 0.0301  | 9.76E-01 | 9.92E-01 |
| 58  | HIST1H2BC | 8347   | 6  | 26108389  | 26129266  | 1.06E-06 | Lung  | IPF        | 0.3853  | 7.00E-01 | 8.81E-01 |
| 58  | HIST1H2BC | 8347   | 6  | 26108389  | 26129266  | 1.06E-06 | blood | LungCancer | 0.0301  | 9.76E-01 | 9.92E-01 |
| 58  | HIST1H2BC | 8347   | 6  | 26108389  | 26129266  | 1.06E-06 | Lung  | LungCancer | 1.6263  | 1.04E-01 | 2.93E-01 |
| 58  | HIST1H2BC | 8347   | 6  | 26108389  | 26129266  | 1.06E-06 | blood | Snoring    | 0.0301  | 9.76E-01 | 9.92E-01 |
| 58  | HIST1H2BC | 8347   | 6  | 26108389  | 26129266  | 1.06E-06 | Lung  | Snoring    | 0.0301  | 9.76E-01 | 9.92E-01 |
| 22  | D2HGDH    | 728294 | 2  | 242669030 | 242713231 | 9.68E-06 | blood | Asthma     | 1.6085  | 1.08E-01 | 2.97E-01 |
| 22  | D2HGDH    | 728294 | 2  | 242669030 | 242713231 | 9.68E-06 | Lung  | Asthma     | 8.6489  | 5.20E-18 | 7.19E-16 |
| 22  | D2HGDH    | 728294 | 2  | 242669030 | 242713231 | 9.68E-06 | blood | COPD       | 1.6085  | 1.08E-01 | 2.97E-01 |
| 22  | D2HGDH    | 728294 | 2  | 242669030 | 242713231 | 9.68E-06 | Lung  | COPD       | 2.6532  | 7.97E-03 | 4.36E-02 |
| 22  | D2HGDH    | 728294 | 2  | 242669030 | 242713231 | 9.68E-06 | blood | IPF        | 1.6085  | 1.08E-01 | 2.97E-01 |
| 22  | D2HGDH    | 728294 | 2  | 242669030 | 242713231 | 9.68E-06 | Lung  | IPF        | -3.2995 | 9.68E-04 | 7.38E-03 |
| 22  | D2HGDH    | 728294 | 2  | 242669030 | 242713231 | 9.68E-06 | blood | LungCancer | 1.6085  | 1.08E-01 | 2.97E-01 |
| 22  | D2HGDH    | 728294 | 2  | 242669030 | 242713231 | 9.68E-06 | Lung  | LungCancer | -0.4553 | 6.49E-01 | 8.44E-01 |
| 22  | D2HGDH    | 728294 | 2  | 242669030 | 242713231 | 9.68E-06 | blood | Snoring    | 1.6085  | 1.08E-01 | 2.97E-01 |
| 22  | D2HGDH    | 728294 | 2  | 242669030 | 242713231 | 9.68E-06 | Lung  | Snoring    | 1.6085  | 1.08E-01 | 2.97E-01 |
| 138 | ACBD4     | 79777  | 17 | 43204967  | 43226548  | 1.01E-06 | blood | Asthma     | -0.3526 | 7.24E-01 | 8.97E-01 |
| 138 | ACBD4     | 79777  | 17 | 43204967  | 43226548  | 1.01E-06 | Lung  | Asthma     | 2.0608  | 3.93E-02 | 1.54E-01 |
| 138 | ACBD4     | 79777  | 17 | 43204967  | 43226548  | 1.01E-06 | blood | COPD       | -0.3526 | 7.24E-01 | 8.97E-01 |
| 138 | ACBD4     | 79777  | 17 | 43204967  | 43226548  | 1.01E-06 | Lung  | COPD       | 1.9594  | 5.01E-02 | 1.81E-01 |
| 138 | ACBD4     | 79777  | 17 | 43204967  | 43226548  | 1.01E-06 | blood | IPF        | -0.3526 | 7.24E-01 | 8.97E-01 |
| 138 | ACBD4     | 79777  | 17 | 43204967  | 43226548  | 1.01E-06 | Lung  | IPF        | -0.3284 | 7.43E-01 | 9.05E-01 |
| 138 | ACBD4     | 79777  | 17 | 43204967  | 43226548  | 1.01E-06 | blood | LungCancer | -0.3526 | 7.24E-01 | 8.97E-01 |
| 138 | ACBD4     | 79777  | 17 | 43204967  | 43226548  | 1.01E-06 | Lung  | LungCancer | 1.7839  | 7.44E-02 | 2.33E-01 |
| 138 | ACBD4     | 79777  | 17 | 43204967  | 43226548  | 1.01E-06 | blood | Snoring    | -0.3526 | 7.24E-01 | 8.97E-01 |
| 138 | ACBD4     | 79777  | 17 | 43204967  | 43226548  | 1.01E-06 | Lung  | Snoring    | -0.3526 | 7.24E-01 | 8.97E-01 |
| 144 | TMEM259   | 91304  | 19 | 1004650   | 1026173   | 2.28E-06 | blood | Asthma     | -2.0211 | 4.33E-02 | 1.64E-01 |
| 144 | TMEM259   | 91304  | 19 | 1004650   | 1026173   | 2.28E-06 | Lung  | Asthma     | 5.2360  | 1.64E-07 | 3.18E-06 |
| 144 | TMEM259   | 91304  | 19 | 1004650   | 1026173   | 2.28E-06 | blood | COPD       | -2.0211 | 4.33E-02 | 1.64E-01 |
| 144 | TMEM259   | 91304  | 19 | 1004650   | 1026173   | 2.28E-06 | Lung  | COPD       | 3.3065  | 9.45E-04 | 7.24E-03 |
| 144 | TMEM259   | 91304  | 19 | 1004650   | 1026173   | 2.28E-06 | blood | IPF        | -2.0211 | 4.33E-02 | 1.64E-01 |
| 144 | TMEM259   | 91304  | 19 | 1004650   | 1026173   | 2.28E-06 | Lung  | IPF        | -0.1203 | 9.04E-01 | 9.64E-01 |
| 144 | TMEM259   | 91304  | 19 | 1004650   | 1026173   | 2.28E-06 | blood | LungCancer | -2.0211 | 4.33E-02 | 1.64E-01 |
| 144 | TMEM259   | 91304  | 19 | 1004650   | 1026173   | 2.28E-06 | Lung  | LungCancer | -1.6040 | 1.09E-01 | 3.00E-01 |
| 144 | TMEM259   | 91304  | 19 | 1004650   | 1026173   | 2.28E-06 | blood | Snoring    | -2.0211 | 4.33E-02 | 1.64E-01 |
| 144 | TMEM259   | 91304  | 19 | 1004650   | 1026173   | 2.28E-06 | Lung  | Snoring    | -2.0211 | 4.33E-02 | 1.64E-01 |
| 129 | DEXI      | 28955  | 16 | 11017748  | 11041257  | 1.97E-11 | blood | Asthma     | -2.6571 | 7.88E-03 | 4.33E-02 |
| 129 | DEXI      | 28955  | 16 | 11017748  | 11041257  | 1.97E-11 | Lung  | Asthma     | -3.6752 | 2.38E-04 | 2.09E-03 |
| 129 | DEXI      | 28955  | 16 | 11017748  | 11041257  | 1.97E-11 | blood | COPD       | -2.6571 | 7.88E-03 | 4.33E-02 |
| 129 | DEXI      | 28955  | 16 | 11017748  | 11041257  | 1.97E-11 | Lung  | COPD       | -1.9788 | 4.78E-02 | 1.79E-01 |
| 129 | DEXI      | 28955  | 16 | 11017748  | 11041257  | 1.97E-11 | blood | IPF        | -2.6571 | 7.88E-03 | 4.33E-02 |
| 129 | DEXI      | 28955  | 16 | 11017748  | 11041257  | 1.97E-11 | Lung  | IPF        | 2.1000  | 3.61E-02 | 1.44E-01 |
| 129 | DEXI      | 28955  | 16 | 11017748  | 11041257  | 1.97E-11 | blood | LungCancer | -2.6571 | 7.88E-03 | 4.33E-02 |
| 129 | DEXI      | 28955  | 16 | 11017748  | 11041257  | 1.97E-11 | Lung  | LungCancer | 0.2640  | 7.92E-01 | 9.29E-01 |
| 129 | DEXI      | 28955  | 16 | 11017748  | 11041257  | 1.97E-11 | blood | Snoring    | -2.6571 | 7.88E-03 | 4.33E-02 |
| 129 | DEXI      | 28955  | 16 | 11017748  | 11041257  | 1.97E-11 | Lung  | Snoring    | -2.6571 | 7.88E-03 | 4.33E-02 |
| 25  | UBA7      | 7318   | 3  | 49837638  | 49856391  | 1.21E-09 | blood | Asthma     | -1.8125 | 6.99E-02 | 2.26E-01 |
| 25  | UBA7      | 7318   | 3  | 49837638  | 49856391  | 1.21E-09 | Lung  | Asthma     | -4.2648 | 2.00E-05 | 2.49E-04 |
| 25  | UBA7      | 7318   | 3  | 49837638  | 49856391  | 1.21E-09 | blood | COPD       | -1.8125 | 6.99E-02 | 2.26E-01 |
| 25  | UBA7      | 7318   | 3  | 49837638  | 49856391  | 1.21E-09 | Lung  | COPD       | -4.2571 | 2.07E-05 | 2.57E-04 |
| 25  | UBA7      | 7318   | 3  | 49837638  | 49856391  | 1.21E-09 | blood | IPF        | -1.8125 | 6.99E-02 | 2.26E-01 |
| 25  | UBA7      | 7318   | 3  | 49837638  | 49856391  | 1.21E-09 | Lung  | IPF        | -1.1763 | 2.39E-01 | 4.85E-01 |
| 25  | UBA7      | 7318   | 3  | 49837638  | 49856391  | 1.21E-09 | blood | LungCancer | -1.8125 | 6.99E-02 | 2.26E-01 |
| 25  | UBA7      | 7318   | 3  | 49837638  | 49856391  | 1.21E-09 | Lung  | LungCancer | -2.3491 | 1.88E-02 | 8.93E-02 |
| 25  | UBA7      | 7318   | 3  | 49837638  | 49856391  | 1.21E-09 | blood | Snoring    | -1.8125 | 6.99E-02 | 2.26E-01 |
| 25  | UBA7      | 7318   | 3  | 49837638  | 49856391  | 1.21E-09 | Lung  | Snoring    | -1.8125 | 6.99E-02 | 2.26E-01 |
| 116 | RAD51B    | 5890   | 14 | 68281496  | 69154889  | 1.96E-08 | blood | Asthma     | -1.0733 | 2.83E-01 | 5.38E-01 |
| 116 | RAD51B    | 5890   | 14 | 68281496  | 69154889  | 1.96E-08 | Lung  | Asthma     | -0.3412 | 7.33E-01 | 8.99E-01 |
| 116 | RAD51B    | 5890   | 14 | 68281496  | 69154889  | 1.96E-08 | blood | COPD       | -1.0733 | 2.83E-01 | 5.38E-01 |
| 116 | RAD51B    | 5890   | 14 | 68281496  | 69154889  | 1.96E-08 | Lung  | COPD       | 1.9638  | 4.96E-02 | 1.81E-01 |
| 116 | RAD51B    | 5890   | 14 | 68281496  | 69154889  | 1.96E-08 | blood | IPF        | -1.0733 | 2.83E-01 | 5.38E-01 |

|     |          |        |    |           |           |          |       |            |         |          |          |
|-----|----------|--------|----|-----------|-----------|----------|-------|------------|---------|----------|----------|
| 116 | RAD51B   | 5890   | 14 | 68281496  | 69154889  | 1.96E-08 | Lung  | IPF        | 1.5157  | 1.30E-01 | 3.41E-01 |
| 116 | RAD51B   | 5890   | 14 | 68281496  | 69154889  | 1.96E-08 | blood | LungCancer | -1.0733 | 2.83E-01 | 5.38E-01 |
| 116 | RAD51B   | 5890   | 14 | 68281496  | 69154889  | 1.96E-08 | Lung  | LungCancer | 1.5626  | 1.18E-01 | 3.18E-01 |
| 116 | RAD51B   | 5890   | 14 | 68281496  | 69154889  | 1.96E-08 | blood | Snoring    | -1.0733 | 2.83E-01 | 5.38E-01 |
| 116 | RAD51B   | 5890   | 14 | 68281496  | 69154889  | 1.96E-08 | Lung  | Snoring    | -1.0733 | 2.83E-01 | 5.38E-01 |
| 109 | ARL6IP4  | 51329  | 12 | 123459607 | 123472460 | 3.97E-08 | blood | Asthma     | -0.7730 | 4.40E-01 | 6.91E-01 |
| 109 | ARL6IP4  | 51329  | 12 | 123459607 | 123472460 | 3.97E-08 | Lung  | Asthma     | 5.9237  | 3.15E-09 | 1.56E-07 |
| 109 | ARL6IP4  | 51329  | 12 | 123459607 | 123472460 | 3.97E-08 | blood | COPD       | -0.7730 | 4.40E-01 | 6.91E-01 |
| 109 | ARL6IP4  | 51329  | 12 | 123459607 | 123472460 | 3.97E-08 | Lung  | COPD       | 0.9129  | 3.61E-01 | 6.15E-01 |
| 109 | ARL6IP4  | 51329  | 12 | 123459607 | 123472460 | 3.97E-08 | blood | IPF        | -0.7730 | 4.40E-01 | 6.91E-01 |
| 109 | ARL6IP4  | 51329  | 12 | 123459607 | 123472460 | 3.97E-08 | Lung  | IPF        | -0.3526 | 7.24E-01 | 8.97E-01 |
| 109 | ARL6IP4  | 51329  | 12 | 123459607 | 123472460 | 3.97E-08 | blood | LungCancer | -0.7730 | 4.40E-01 | 6.91E-01 |
| 109 | ARL6IP4  | 51329  | 12 | 123459607 | 123472460 | 3.97E-08 | Lung  | LungCancer | 1.2937  | 1.96E-01 | 4.34E-01 |
| 109 | ARL6IP4  | 51329  | 12 | 123459607 | 123472460 | 3.97E-08 | blood | Snoring    | -0.7730 | 4.40E-01 | 6.91E-01 |
| 109 | ARL6IP4  | 51329  | 12 | 123459607 | 123472460 | 3.97E-08 | Lung  | Snoring    | -0.7730 | 4.40E-01 | 6.91E-01 |
| 139 | HOXB4    | 3214   | 17 | 46647869  | 46660743  | 5.23E-09 | blood | Asthma     | 0.6533  | 5.14E-01 | 7.52E-01 |
| 139 | HOXB4    | 3214   | 17 | 46647869  | 46660743  | 5.23E-09 | Lung  | Asthma     | 0.5420  | 5.88E-01 | 7.95E-01 |
| 139 | HOXB4    | 3214   | 17 | 46647869  | 46660743  | 5.23E-09 | blood | COPD       | 0.6533  | 5.14E-01 | 7.52E-01 |
| 139 | HOXB4    | 3214   | 17 | 46647869  | 46660743  | 5.23E-09 | Lung  | COPD       | -0.2569 | 7.97E-01 | 9.32E-01 |
| 139 | HOXB4    | 3214   | 17 | 46647869  | 46660743  | 5.23E-09 | blood | IPF        | 0.6533  | 5.14E-01 | 7.52E-01 |
| 139 | HOXB4    | 3214   | 17 | 46647869  | 46660743  | 5.23E-09 | Lung  | IPF        | 0.0234  | 9.81E-01 | 9.93E-01 |
| 139 | HOXB4    | 3214   | 17 | 46647869  | 46660743  | 5.23E-09 | blood | LungCancer | 0.6533  | 5.14E-01 | 7.52E-01 |
| 139 | HOXB4    | 3214   | 17 | 46647869  | 46660743  | 5.23E-09 | Lung  | LungCancer | -0.2530 | 8.00E-01 | 9.32E-01 |
| 139 | HOXB4    | 3214   | 17 | 46647869  | 46660743  | 5.23E-09 | blood | Snoring    | 0.6533  | 5.14E-01 | 7.52E-01 |
| 139 | HOXB4    | 3214   | 17 | 46647869  | 46660743  | 5.23E-09 | Lung  | Snoring    | 0.6533  | 5.14E-01 | 7.52E-01 |
| 25  | TRAI     | 10293  | 3  | 49861028  | 49898992  | 4.03E-08 | blood | Asthma     | NA      | NA       | NA       |
| 25  | TRAI     | 10293  | 3  | 49861028  | 49898992  | 4.03E-08 | Lung  | Asthma     | NA      | NA       | NA       |
| 25  | TRAI     | 10293  | 3  | 49861028  | 49898992  | 4.03E-08 | blood | COPD       | NA      | NA       | NA       |
| 25  | TRAI     | 10293  | 3  | 49861028  | 49898992  | 4.03E-08 | Lung  | COPD       | NA      | NA       | NA       |
| 25  | TRAI     | 10293  | 3  | 49861028  | 49898992  | 4.03E-08 | blood | IPF        | NA      | NA       | NA       |
| 25  | TRAI     | 10293  | 3  | 49861028  | 49898992  | 4.03E-08 | Lung  | IPF        | NA      | NA       | NA       |
| 25  | TRAI     | 10293  | 3  | 49861028  | 49898992  | 4.03E-08 | blood | LungCancer | NA      | NA       | NA       |
| 25  | TRAI     | 10293  | 3  | 49861028  | 49898992  | 4.03E-08 | Lung  | LungCancer | NA      | NA       | NA       |
| 25  | TRAI     | 10293  | 3  | 49861028  | 49898992  | 4.03E-08 | blood | Snoring    | NA      | NA       | NA       |
| 25  | TRAI     | 10293  | 3  | 49861028  | 49898992  | 4.03E-08 | Lung  | Snoring    | NA      | NA       | NA       |
| 156 | TOB2     | 10766  | 22 | 41824492  | 41849234  | 5.87E-13 | blood | Asthma     | 1.4646  | 1.43E-01 | 3.63E-01 |
| 156 | TOB2     | 10766  | 22 | 41824492  | 41849234  | 5.87E-13 | Lung  | Asthma     | 2.5585  | 1.05E-02 | 5.48E-02 |
| 156 | TOB2     | 10766  | 22 | 41824492  | 41849234  | 5.87E-13 | blood | COPD       | 1.4646  | 1.43E-01 | 3.63E-01 |
| 156 | TOB2     | 10766  | 22 | 41824492  | 41849234  | 5.87E-13 | Lung  | COPD       | 1.4647  | 1.43E-01 | 3.63E-01 |
| 156 | TOB2     | 10766  | 22 | 41824492  | 41849234  | 5.87E-13 | blood | IPF        | 1.4646  | 1.43E-01 | 3.63E-01 |
| 156 | TOB2     | 10766  | 22 | 41824492  | 41849234  | 5.87E-13 | Lung  | IPF        | 1.4351  | 1.51E-01 | 3.77E-01 |
| 156 | TOB2     | 10766  | 22 | 41824492  | 41849234  | 5.87E-13 | blood | LungCancer | 1.4646  | 1.43E-01 | 3.63E-01 |
| 156 | TOB2     | 10766  | 22 | 41824492  | 41849234  | 5.87E-13 | Lung  | LungCancer | 0.4237  | 6.72E-01 | 8.59E-01 |
| 156 | TOB2     | 10766  | 22 | 41824492  | 41849234  | 5.87E-13 | blood | Snoring    | 1.4646  | 1.43E-01 | 3.63E-01 |
| 156 | TOB2     | 10766  | 22 | 41824492  | 41849234  | 5.87E-13 | Lung  | Snoring    | 1.4646  | 1.43E-01 | 3.63E-01 |
| 156 | C22orf46 | 79640  | 22 | 42081547  | 42099140  | 8.75E-10 | blood | Asthma     | NA      | NA       | NA       |
| 156 | C22orf46 | 79640  | 22 | 42081547  | 42099140  | 8.75E-10 | Lung  | Asthma     | NA      | NA       | NA       |
| 156 | C22orf46 | 79640  | 22 | 42081547  | 42099140  | 8.75E-10 | blood | COPD       | NA      | NA       | NA       |
| 156 | C22orf46 | 79640  | 22 | 42081547  | 42099140  | 8.75E-10 | Lung  | COPD       | NA      | NA       | NA       |
| 156 | C22orf46 | 79640  | 22 | 42081547  | 42099140  | 8.75E-10 | blood | IPF        | NA      | NA       | NA       |
| 156 | C22orf46 | 79640  | 22 | 42081547  | 42099140  | 8.75E-10 | Lung  | IPF        | NA      | NA       | NA       |
| 156 | C22orf46 | 79640  | 22 | 42081547  | 42099140  | 8.75E-10 | blood | LungCancer | NA      | NA       | NA       |
| 156 | C22orf46 | 79640  | 22 | 42081547  | 42099140  | 8.75E-10 | Lung  | LungCancer | NA      | NA       | NA       |
| 156 | C22orf46 | 79640  | 22 | 42081547  | 42099140  | 8.75E-10 | blood | Snoring    | NA      | NA       | NA       |
| 156 | C22orf46 | 79640  | 22 | 42081547  | 42099140  | 8.75E-10 | Lung  | Snoring    | NA      | NA       | NA       |
| 58  | HIST1H1B | 3009   | 6  | 27829570  | 27840359  | 1.35E-08 | blood | Asthma     | NA      | NA       | NA       |
| 58  | HIST1H1B | 3009   | 6  | 27829570  | 27840359  | 1.35E-08 | Lung  | Asthma     | NA      | NA       | NA       |
| 58  | HIST1H1B | 3009   | 6  | 27829570  | 27840359  | 1.35E-08 | blood | COPD       | NA      | NA       | NA       |
| 58  | HIST1H1B | 3009   | 6  | 27829570  | 27840359  | 1.35E-08 | Lung  | COPD       | NA      | NA       | NA       |
| 58  | HIST1H1B | 3009   | 6  | 27829570  | 27840359  | 1.35E-08 | blood | IPF        | NA      | NA       | NA       |
| 58  | HIST1H1B | 3009   | 6  | 27829570  | 27840359  | 1.35E-08 | Lung  | IPF        | NA      | NA       | NA       |
| 58  | HIST1H1B | 3009   | 6  | 27829570  | 27840359  | 1.35E-08 | blood | LungCancer | NA      | NA       | NA       |
| 58  | HIST1H1B | 3009   | 6  | 27829570  | 27840359  | 1.35E-08 | Lung  | LungCancer | NA      | NA       | NA       |
| 58  | HIST1H1B | 3009   | 6  | 27829570  | 27840359  | 1.35E-08 | blood | Snoring    | NA      | NA       | NA       |
| 58  | HIST1H1B | 3009   | 6  | 27829570  | 27840359  | 1.35E-08 | Lung  | Snoring    | NA      | NA       | NA       |
| 138 | SPATA32  | 124783 | 17 | 43326760  | 43344479  | 6.65E-09 | blood | Asthma     | -0.8565 | 3.92E-01 | 6.41E-01 |
| 138 | SPATA32  | 124783 | 17 | 43326760  | 43344479  | 6.65E-09 | Lung  | Asthma     | 3.8790  | 1.05E-04 | 9.67E-04 |
| 138 | SPATA32  | 124783 | 17 | 43326760  | 43344479  | 6.65E-09 | blood | COPD       | -0.8565 | 3.92E-01 | 6.41E-01 |
| 138 | SPATA32  | 124783 | 17 | 43326760  | 43344479  | 6.65E-09 | Lung  | COPD       | 2.2732  | 2.30E-02 | 1.03E-01 |
| 138 | SPATA32  | 124783 | 17 | 43326760  | 43344479  | 6.65E-09 | blood | IPF        | -0.8565 | 3.92E-01 | 6.41E-01 |
| 138 | SPATA32  | 124783 | 17 | 43326760  | 43344479  | 6.65E-09 | Lung  | IPF        | 2.5210  | 1.17E-02 | 6.04E-02 |
| 138 | SPATA32  | 124783 | 17 | 43326760  | 43344479  | 6.65E-09 | blood | LungCancer | -0.8565 | 3.92E-01 | 6.41E-01 |
| 138 | SPATA32  | 124783 | 17 | 43326760  | 43344479  | 6.65E-09 | Lung  | LungCancer | -1.7091 | 8.74E-02 | 2.60E-01 |

|     |           |        |    |          |          |          |       |            |         |          |          |
|-----|-----------|--------|----|----------|----------|----------|-------|------------|---------|----------|----------|
| 138 | SPATA32   | 124783 | 17 | 43326760 | 43344479 | 6.65E-09 | blood | Snoring    | -0.8565 | 3.92E-01 | 6.41E-01 |
| 138 | SPATA32   | 124783 | 17 | 43326760 | 43344479 | 6.65E-09 | Lung  | Snoring    | -0.8565 | 3.92E-01 | 6.41E-01 |
| 58  | HIST1H2BL | 8340   | 6  | 27770257 | 27780709 | 7.61E-08 | blood | Asthma     | 1.8769  | 6.05E-02 | 2.05E-01 |
| 58  | HIST1H2BL | 8340   | 6  | 27770257 | 27780709 | 7.61E-08 | Lung  | Asthma     | -1.2574 | 2.09E-01 | 4.50E-01 |
| 58  | HIST1H2BL | 8340   | 6  | 27770257 | 27780709 | 7.61E-08 | blood | COPD       | 1.8769  | 6.05E-02 | 2.05E-01 |
| 58  | HIST1H2BL | 8340   | 6  | 27770257 | 27780709 | 7.61E-08 | Lung  | COPD       | 0.4863  | 6.27E-01 | 8.27E-01 |
| 58  | HIST1H2BL | 8340   | 6  | 27770257 | 27780709 | 7.61E-08 | blood | IPF        | 1.8769  | 6.05E-02 | 2.05E-01 |
| 58  | HIST1H2BL | 8340   | 6  | 27770257 | 27780709 | 7.61E-08 | Lung  | IPF        | 0.2211  | 8.25E-01 | 9.43E-01 |
| 58  | HIST1H2BL | 8340   | 6  | 27770257 | 27780709 | 7.61E-08 | blood | LungCancer | 1.8769  | 6.05E-02 | 2.05E-01 |
| 58  | HIST1H2BL | 8340   | 6  | 27770257 | 27780709 | 7.61E-08 | Lung  | LungCancer | -4.9149 | 8.88E-07 | 1.50E-05 |
| 58  | HIST1H2BL | 8340   | 6  | 27770257 | 27780709 | 7.61E-08 | blood | Snoring    | 1.8769  | 6.05E-02 | 2.05E-01 |
| 58  | HIST1H2BL | 8340   | 6  | 27770257 | 27780709 | 7.61E-08 | Lung  | Snoring    | 1.8769  | 6.05E-02 | 2.05E-01 |
| 127 | MORF4L1   | 10933  | 15 | 79127903 | 79195081 | 6.11E-09 | blood | Asthma     | -0.2183 | 8.27E-01 | 9.43E-01 |
| 127 | MORF4L1   | 10933  | 15 | 79127903 | 79195081 | 6.11E-09 | Lung  | Asthma     | -0.2051 | 8.38E-01 | 9.52E-01 |
| 127 | MORF4L1   | 10933  | 15 | 79127903 | 79195081 | 6.11E-09 | blood | COPD       | -0.2183 | 8.27E-01 | 9.43E-01 |
| 127 | MORF4L1   | 10933  | 15 | 79127903 | 79195081 | 6.11E-09 | Lung  | COPD       | -0.8638 | 3.88E-01 | 6.37E-01 |
| 127 | MORF4L1   | 10933  | 15 | 79127903 | 79195081 | 6.11E-09 | blood | IPF        | -0.2183 | 8.27E-01 | 9.43E-01 |
| 127 | MORF4L1   | 10933  | 15 | 79127903 | 79195081 | 6.11E-09 | Lung  | IPF        | -0.2115 | 8.33E-01 | 9.47E-01 |
| 127 | MORF4L1   | 10933  | 15 | 79127903 | 79195081 | 6.11E-09 | blood | LungCancer | -0.2183 | 8.27E-01 | 9.43E-01 |
| 127 | MORF4L1   | 10933  | 15 | 79127903 | 79195081 | 6.11E-09 | Lung  | LungCancer | 0.2940  | 7.69E-01 | 9.23E-01 |
| 127 | MORF4L1   | 10933  | 15 | 79127903 | 79195081 | 6.11E-09 | blood | Snoring    | -0.2183 | 8.27E-01 | 9.43E-01 |
| 127 | MORF4L1   | 10933  | 15 | 79127903 | 79195081 | 6.11E-09 | Lung  | Snoring    | -0.2183 | 8.27E-01 | 9.43E-01 |
| 151 | DMWD      | 1762   | 19 | 46281205 | 46301060 | 1.23E-05 | blood | Asthma     | -0.8986 | 3.69E-01 | 6.23E-01 |
| 151 | DMWD      | 1762   | 19 | 46281205 | 46301060 | 1.23E-05 | Lung  | Asthma     | 0.7562  | 4.50E-01 | 6.98E-01 |
| 151 | DMWD      | 1762   | 19 | 46281205 | 46301060 | 1.23E-05 | blood | COPD       | -0.8986 | 3.69E-01 | 6.23E-01 |
| 151 | DMWD      | 1762   | 19 | 46281205 | 46301060 | 1.23E-05 | Lung  | COPD       | -0.4745 | 6.35E-01 | 8.32E-01 |
| 151 | DMWD      | 1762   | 19 | 46281205 | 46301060 | 1.23E-05 | blood | IPF        | -0.8986 | 3.69E-01 | 6.23E-01 |
| 151 | DMWD      | 1762   | 19 | 46281205 | 46301060 | 1.23E-05 | Lung  | IPF        | -1.0910 | 2.75E-01 | 5.26E-01 |
| 151 | DMWD      | 1762   | 19 | 46281205 | 46301060 | 1.23E-05 | blood | LungCancer | -0.8986 | 3.69E-01 | 6.23E-01 |
| 151 | DMWD      | 1762   | 19 | 46281205 | 46301060 | 1.23E-05 | Lung  | LungCancer | -0.3620 | 7.17E-01 | 8.94E-01 |
| 151 | DMWD      | 1762   | 19 | 46281205 | 46301060 | 1.23E-05 | blood | Snoring    | -0.8986 | 3.69E-01 | 6.23E-01 |
| 151 | DMWD      | 1762   | 19 | 46281205 | 46301060 | 1.23E-05 | Lung  | Snoring    | -0.8986 | 3.69E-01 | 6.23E-01 |
| 25  | KLHDC8B   | 200942 | 3  | 49203987 | 49218919 | 1.42E-06 | blood | Asthma     | 4.0401  | 5.34E-05 | 5.68E-04 |
| 25  | KLHDC8B   | 200942 | 3  | 49203987 | 49218919 | 1.42E-06 | Lung  | Asthma     | -0.5661 | 5.71E-01 | 7.87E-01 |
| 25  | KLHDC8B   | 200942 | 3  | 49203987 | 49218919 | 1.42E-06 | blood | COPD       | 4.0401  | 5.34E-05 | 5.68E-04 |
| 25  | KLHDC8B   | 200942 | 3  | 49203987 | 49218919 | 1.42E-06 | Lung  | COPD       | 3.5249  | 4.24E-04 | 3.55E-03 |
| 25  | KLHDC8B   | 200942 | 3  | 49203987 | 49218919 | 1.42E-06 | blood | IPF        | 4.0401  | 5.34E-05 | 5.68E-04 |
| 25  | KLHDC8B   | 200942 | 3  | 49203987 | 49218919 | 1.42E-06 | Lung  | IPF        | -1.2556 | 2.09E-01 | 4.50E-01 |
| 25  | KLHDC8B   | 200942 | 3  | 49203987 | 49218919 | 1.42E-06 | blood | LungCancer | 4.0401  | 5.34E-05 | 5.68E-04 |
| 25  | KLHDC8B   | 200942 | 3  | 49203987 | 49218919 | 1.42E-06 | Lung  | LungCancer | 2.7138  | 6.65E-03 | 3.73E-02 |
| 25  | KLHDC8B   | 200942 | 3  | 49203987 | 49218919 | 1.42E-06 | blood | Snoring    | 4.0401  | 5.34E-05 | 5.68E-04 |
| 25  | KLHDC8B   | 200942 | 3  | 49203987 | 49218919 | 1.42E-06 | Lung  | Snoring    | 4.0401  | 5.34E-05 | 5.68E-04 |
| 112 | DLEU7     | 220107 | 13 | 51281759 | 51422885 | 8.10E-06 | blood | Asthma     | 4.6741  | 2.95E-06 | 4.34E-05 |
| 112 | DLEU7     | 220107 | 13 | 51281759 | 51422885 | 8.10E-06 | Lung  | Asthma     | -0.5850 | 5.59E-01 | 7.77E-01 |
| 112 | DLEU7     | 220107 | 13 | 51281759 | 51422885 | 8.10E-06 | blood | COPD       | 4.6741  | 2.95E-06 | 4.34E-05 |
| 112 | DLEU7     | 220107 | 13 | 51281759 | 51422885 | 8.10E-06 | Lung  | COPD       | -1.3789 | 1.68E-01 | 4.04E-01 |
| 112 | DLEU7     | 220107 | 13 | 51281759 | 51422885 | 8.10E-06 | blood | IPF        | 4.6741  | 2.95E-06 | 4.34E-05 |
| 112 | DLEU7     | 220107 | 13 | 51281759 | 51422885 | 8.10E-06 | Lung  | IPF        | -1.7671 | 7.72E-02 | 2.38E-01 |
| 112 | DLEU7     | 220107 | 13 | 51281759 | 51422885 | 8.10E-06 | blood | LungCancer | 4.6741  | 2.95E-06 | 4.34E-05 |
| 112 | DLEU7     | 220107 | 13 | 51281759 | 51422885 | 8.10E-06 | Lung  | LungCancer | -2.0364 | 4.17E-02 | 1.60E-01 |
| 112 | DLEU7     | 220107 | 13 | 51281759 | 51422885 | 8.10E-06 | blood | Snoring    | 4.6741  | 2.95E-06 | 4.34E-05 |
| 112 | DLEU7     | 220107 | 13 | 51281759 | 51422885 | 8.10E-06 | Lung  | Snoring    | 4.6741  | 2.95E-06 | 4.34E-05 |
| 58  | BTN3A2    | 11118  | 6  | 26360387 | 26383548 | 1.22E-05 | blood | Asthma     | 1.3200  | 1.87E-01 | 4.21E-01 |
| 58  | BTN3A2    | 11118  | 6  | 26360387 | 26383548 | 1.22E-05 | Lung  | Asthma     | -3.3457 | 8.21E-04 | 6.38E-03 |
| 58  | BTN3A2    | 11118  | 6  | 26360387 | 26383548 | 1.22E-05 | blood | COPD       | 1.3200  | 1.87E-01 | 4.21E-01 |
| 58  | BTN3A2    | 11118  | 6  | 26360387 | 26383548 | 1.22E-05 | Lung  | COPD       | -1.0380 | 2.99E-01 | 5.53E-01 |
| 58  | BTN3A2    | 11118  | 6  | 26360387 | 26383548 | 1.22E-05 | blood | IPF        | 1.3200  | 1.87E-01 | 4.21E-01 |
| 58  | BTN3A2    | 11118  | 6  | 26360387 | 26383548 | 1.22E-05 | Lung  | IPF        | -3.3280 | 8.75E-04 | 6.77E-03 |
| 58  | BTN3A2    | 11118  | 6  | 26360387 | 26383548 | 1.22E-05 | blood | LungCancer | 1.3200  | 1.87E-01 | 4.21E-01 |
| 58  | BTN3A2    | 11118  | 6  | 26360387 | 26383548 | 1.22E-05 | Lung  | LungCancer | -3.8825 | 1.03E-04 | 9.64E-04 |
| 58  | BTN3A2    | 11118  | 6  | 26360387 | 26383548 | 1.22E-05 | blood | Snoring    | 1.3200  | 1.87E-01 | 4.21E-01 |
| 58  | BTN3A2    | 11118  | 6  | 26360387 | 26383548 | 1.22E-05 | Lung  | Snoring    | 1.3200  | 1.87E-01 | 4.21E-01 |
| 1   | TNFRSF4   | 7293   | 1  | 1141706  | 1154703  | 4.10E-07 | blood | Asthma     | -0.1928 | 8.47E-01 | 9.54E-01 |
| 1   | TNFRSF4   | 7293   | 1  | 1141706  | 1154703  | 4.10E-07 | Lung  | Asthma     | -0.1941 | 8.46E-01 | 9.54E-01 |
| 1   | TNFRSF4   | 7293   | 1  | 1141706  | 1154703  | 4.10E-07 | blood | COPD       | -0.1928 | 8.47E-01 | 9.54E-01 |
| 1   | TNFRSF4   | 7293   | 1  | 1141706  | 1154703  | 4.10E-07 | Lung  | COPD       | -1.9732 | 4.85E-02 | 1.81E-01 |
| 1   | TNFRSF4   | 7293   | 1  | 1141706  | 1154703  | 4.10E-07 | blood | IPF        | -0.1928 | 8.47E-01 | 9.54E-01 |
| 1   | TNFRSF4   | 7293   | 1  | 1141706  | 1154703  | 4.10E-07 | Lung  | IPF        | -0.2998 | 7.64E-01 | 9.20E-01 |
| 1   | TNFRSF4   | 7293   | 1  | 1141706  | 1154703  | 4.10E-07 | blood | LungCancer | -0.1928 | 8.47E-01 | 9.54E-01 |
| 1   | TNFRSF4   | 7293   | 1  | 1141706  | 1154703  | 4.10E-07 | Lung  | LungCancer | -0.8407 | 4.01E-01 | 6.53E-01 |
| 1   | TNFRSF4   | 7293   | 1  | 1141706  | 1154703  | 4.10E-07 | blood | Snoring    | -0.1928 | 8.47E-01 | 9.54E-01 |
| 1   | TNFRSF4   | 7293   | 1  | 1141706  | 1154703  | 4.10E-07 | Lung  | Snoring    | -0.1928 | 8.47E-01 | 9.54E-01 |
| 138 | HEXIM1    | 10614  | 17 | 43219684 | 43234468 | 3.07E-07 | blood | Asthma     | 0.9845  | 3.25E-01 | 5.81E-01 |

|     |          |        |    |           |           |          |       |            |         |          |          |
|-----|----------|--------|----|-----------|-----------|----------|-------|------------|---------|----------|----------|
| 138 | HEXIM1   | 10614  | 17 | 43219684  | 43234468  | 3.07E-07 | Lung  | Asthma     | -5.8619 | 4.58E-09 | 1.80E-07 |
| 138 | HEXIM1   | 10614  | 17 | 43219684  | 43234468  | 3.07E-07 | blood | COPD       | 0.9845  | 3.25E-01 | 5.81E-01 |
| 138 | HEXIM1   | 10614  | 17 | 43219684  | 43234468  | 3.07E-07 | Lung  | COPD       | -3.5885 | 3.33E-04 | 2.87E-03 |
| 138 | HEXIM1   | 10614  | 17 | 43219684  | 43234468  | 3.07E-07 | blood | IPF        | 0.9845  | 3.25E-01 | 5.81E-01 |
| 138 | HEXIM1   | 10614  | 17 | 43219684  | 43234468  | 3.07E-07 | Lung  | IPF        | -0.3477 | 7.28E-01 | 8.98E-01 |
| 138 | HEXIM1   | 10614  | 17 | 43219684  | 43234468  | 3.07E-07 | blood | LungCancer | 0.9845  | 3.25E-01 | 5.81E-01 |
| 138 | HEXIM1   | 10614  | 17 | 43219684  | 43234468  | 3.07E-07 | Lung  | LungCancer | 0.0291  | 9.77E-01 | 9.92E-01 |
| 138 | HEXIM1   | 10614  | 17 | 43219684  | 43234468  | 3.07E-07 | blood | Snoring    | 0.9845  | 3.25E-01 | 5.81E-01 |
| 138 | HEXIM1   | 10614  | 17 | 43219684  | 43234468  | 3.07E-07 | Lung  | Snoring    | 0.9845  | 3.25E-01 | 5.81E-01 |
| 138 | MAPT     | 4137   | 17 | 43966702  | 44110700  | 4.76E-13 | blood | Asthma     | 6.1256  | 9.04E-10 | 5.42E-08 |
| 138 | MAPT     | 4137   | 17 | 43966702  | 44110700  | 4.76E-13 | Lung  | Asthma     | -1.1357 | 2.56E-01 | 5.11E-01 |
| 138 | MAPT     | 4137   | 17 | 43966702  | 44110700  | 4.76E-13 | blood | COPD       | 6.1256  | 9.04E-10 | 5.42E-08 |
| 138 | MAPT     | 4137   | 17 | 43966702  | 44110700  | 4.76E-13 | Lung  | COPD       | 2.8238  | 4.75E-03 | 2.80E-02 |
| 138 | MAPT     | 4137   | 17 | 43966702  | 44110700  | 4.76E-13 | blood | IPF        | 6.1256  | 9.04E-10 | 5.42E-08 |
| 138 | MAPT     | 4137   | 17 | 43966702  | 44110700  | 4.76E-13 | Lung  | IPF        | -5.4711 | 4.47E-08 | 1.08E-06 |
| 138 | MAPT     | 4137   | 17 | 43966702  | 44110700  | 4.76E-13 | blood | LungCancer | 6.1256  | 9.04E-10 | 5.42E-08 |
| 138 | MAPT     | 4137   | 17 | 43966702  | 44110700  | 4.76E-13 | Lung  | LungCancer | -1.8902 | 5.87E-02 | 2.03E-01 |
| 138 | MAPT     | 4137   | 17 | 43966702  | 44110700  | 4.76E-13 | blood | Snoring    | 6.1256  | 9.04E-10 | 5.42E-08 |
| 138 | MAPT     | 4137   | 17 | 43966702  | 44110700  | 4.76E-13 | Lung  | Snoring    | 6.1256  | 9.04E-10 | 5.42E-08 |
| 1   | TNFRSF18 | 8784   | 1  | 1133888   | 1147163   | 6.28E-05 | blood | Asthma     | -1.3684 | 1.71E-01 | 4.04E-01 |
| 1   | TNFRSF18 | 8784   | 1  | 1133888   | 1147163   | 6.28E-05 | Lung  | Asthma     | -3.5542 | 3.79E-04 | 3.19E-03 |
| 1   | TNFRSF18 | 8784   | 1  | 1133888   | 1147163   | 6.28E-05 | blood | COPD       | -1.3684 | 1.71E-01 | 4.04E-01 |
| 1   | TNFRSF18 | 8784   | 1  | 1133888   | 1147163   | 6.28E-05 | Lung  | COPD       | -1.2571 | 2.09E-01 | 4.50E-01 |
| 1   | TNFRSF18 | 8784   | 1  | 1133888   | 1147163   | 6.28E-05 | blood | IPF        | -1.3684 | 1.71E-01 | 4.04E-01 |
| 1   | TNFRSF18 | 8784   | 1  | 1133888   | 1147163   | 6.28E-05 | Lung  | IPF        | -1.8089 | 7.05E-02 | 2.27E-01 |
| 1   | TNFRSF18 | 8784   | 1  | 1133888   | 1147163   | 6.28E-05 | blood | LungCancer | -1.3684 | 1.71E-01 | 4.04E-01 |
| 1   | TNFRSF18 | 8784   | 1  | 1133888   | 1147163   | 6.28E-05 | Lung  | LungCancer | 0.7369  | 4.61E-01 | 7.12E-01 |
| 1   | TNFRSF18 | 8784   | 1  | 1133888   | 1147163   | 6.28E-05 | blood | Snoring    | -1.3684 | 1.71E-01 | 4.04E-01 |
| 1   | TNFRSF18 | 8784   | 1  | 1133888   | 1147163   | 6.28E-05 | Lung  | Snoring    | -1.3684 | 1.71E-01 | 4.04E-01 |
| 47  | TMEM232  | 642987 | 5  | 109750197 | 110067507 | 2.01E-05 | blood | Asthma     | -0.1483 | 8.82E-01 | 9.56E-01 |
| 47  | TMEM232  | 642987 | 5  | 109750197 | 110067507 | 2.01E-05 | Lung  | Asthma     | 3.7900  | 1.51E-04 | 1.34E-03 |
| 47  | TMEM232  | 642987 | 5  | 109750197 | 110067507 | 2.01E-05 | blood | COPD       | -0.1483 | 8.82E-01 | 9.56E-01 |
| 47  | TMEM232  | 642987 | 5  | 109750197 | 110067507 | 2.01E-05 | Lung  | COPD       | 0.5209  | 6.02E-01 | 8.07E-01 |
| 47  | TMEM232  | 642987 | 5  | 109750197 | 110067507 | 2.01E-05 | blood | IPF        | -0.1483 | 8.82E-01 | 9.56E-01 |
| 47  | TMEM232  | 642987 | 5  | 109750197 | 110067507 | 2.01E-05 | Lung  | IPF        | 1.7169  | 8.60E-02 | 2.59E-01 |
| 47  | TMEM232  | 642987 | 5  | 109750197 | 110067507 | 2.01E-05 | blood | LungCancer | -0.1483 | 8.82E-01 | 9.56E-01 |
| 47  | TMEM232  | 642987 | 5  | 109750197 | 110067507 | 2.01E-05 | Lung  | LungCancer | -0.1873 | 8.51E-01 | 9.55E-01 |
| 47  | TMEM232  | 642987 | 5  | 109750197 | 110067507 | 2.01E-05 | blood | Snoring    | -0.1483 | 8.82E-01 | 9.56E-01 |
| 47  | TMEM232  | 642987 | 5  | 109750197 | 110067507 | 2.01E-05 | Lung  | Snoring    | -0.1483 | 8.82E-01 | 9.56E-01 |
| 25  | CDHR4    | 389118 | 3  | 49823165  | 49842254  | 3.80E-10 | blood | Asthma     | -1.4009 | 1.61E-01 | 3.94E-01 |
| 25  | CDHR4    | 389118 | 3  | 49823165  | 49842254  | 3.80E-10 | Lung  | Asthma     | -0.9473 | 3.44E-01 | 6.04E-01 |
| 25  | CDHR4    | 389118 | 3  | 49823165  | 49842254  | 3.80E-10 | blood | COPD       | -1.4009 | 1.61E-01 | 3.94E-01 |
| 25  | CDHR4    | 389118 | 3  | 49823165  | 49842254  | 3.80E-10 | Lung  | COPD       | -3.6026 | 3.15E-04 | 2.73E-03 |
| 25  | CDHR4    | 389118 | 3  | 49823165  | 49842254  | 3.80E-10 | blood | IPF        | -1.4009 | 1.61E-01 | 3.94E-01 |
| 25  | CDHR4    | 389118 | 3  | 49823165  | 49842254  | 3.80E-10 | Lung  | IPF        | -1.4004 | 1.61E-01 | 3.94E-01 |
| 25  | CDHR4    | 389118 | 3  | 49823165  | 49842254  | 3.80E-10 | blood | LungCancer | -1.4009 | 1.61E-01 | 3.94E-01 |
| 25  | CDHR4    | 389118 | 3  | 49823165  | 49842254  | 3.80E-10 | Lung  | LungCancer | -0.5171 | 6.05E-01 | 8.10E-01 |
| 25  | CDHR4    | 389118 | 3  | 49823165  | 49842254  | 3.80E-10 | blood | Snoring    | -1.4009 | 1.61E-01 | 3.94E-01 |
| 25  | CDHR4    | 389118 | 3  | 49823165  | 49842254  | 3.80E-10 | Lung  | Snoring    | -1.4009 | 1.61E-01 | 3.94E-01 |
| 58  | ZKSCAN4  | 387032 | 6  | 28207404  | 28232030  | 1.42E-07 | blood | Asthma     | -0.9848 | 3.25E-01 | 5.81E-01 |
| 58  | ZKSCAN4  | 387032 | 6  | 28207404  | 28232030  | 1.42E-07 | Lung  | Asthma     | 2.5665  | 1.03E-02 | 5.39E-02 |
| 58  | ZKSCAN4  | 387032 | 6  | 28207404  | 28232030  | 1.42E-07 | blood | COPD       | -0.9848 | 3.25E-01 | 5.81E-01 |
| 58  | ZKSCAN4  | 387032 | 6  | 28207404  | 28232030  | 1.42E-07 | Lung  | COPD       | 0.7234  | 4.69E-01 | 7.16E-01 |
| 58  | ZKSCAN4  | 387032 | 6  | 28207404  | 28232030  | 1.42E-07 | blood | IPF        | -0.9848 | 3.25E-01 | 5.81E-01 |
| 58  | ZKSCAN4  | 387032 | 6  | 28207404  | 28232030  | 1.42E-07 | Lung  | IPF        | 3.0812  | 2.06E-03 | 1.33E-02 |
| 58  | ZKSCAN4  | 387032 | 6  | 28207404  | 28232030  | 1.42E-07 | blood | LungCancer | -0.9848 | 3.25E-01 | 5.81E-01 |
| 58  | ZKSCAN4  | 387032 | 6  | 28207404  | 28232030  | 1.42E-07 | Lung  | LungCancer | 4.9470  | 7.54E-07 | 1.28E-05 |
| 58  | ZKSCAN4  | 387032 | 6  | 28207404  | 28232030  | 1.42E-07 | blood | Snoring    | -0.9848 | 3.25E-01 | 5.81E-01 |
| 58  | ZKSCAN4  | 387032 | 6  | 28207404  | 28232030  | 1.42E-07 | Lung  | Snoring    | -0.9848 | 3.25E-01 | 5.81E-01 |
| 58  | HIST1H1C | 3006   | 6  | 26050968  | 26061699  | 7.94E-06 | blood | Asthma     | 0.0784  | 9.37E-01 | 9.77E-01 |
| 58  | HIST1H1C | 3006   | 6  | 26050968  | 26061699  | 7.94E-06 | Lung  | Asthma     | 0.5639  | 5.73E-01 | 7.89E-01 |
| 58  | HIST1H1C | 3006   | 6  | 26050968  | 26061699  | 7.94E-06 | blood | COPD       | 0.0784  | 9.37E-01 | 9.77E-01 |
| 58  | HIST1H1C | 3006   | 6  | 26050968  | 26061699  | 7.94E-06 | Lung  | COPD       | -0.2464 | 8.05E-01 | 9.34E-01 |
| 58  | HIST1H1C | 3006   | 6  | 26050968  | 26061699  | 7.94E-06 | blood | IPF        | 0.0784  | 9.37E-01 | 9.77E-01 |
| 58  | HIST1H1C | 3006   | 6  | 26050968  | 26061699  | 7.94E-06 | Lung  | IPF        | 1.6195  | 1.05E-01 | 2.95E-01 |
| 58  | HIST1H1C | 3006   | 6  | 26050968  | 26061699  | 7.94E-06 | blood | LungCancer | 0.0784  | 9.37E-01 | 9.77E-01 |
| 58  | HIST1H1C | 3006   | 6  | 26050968  | 26061699  | 7.94E-06 | Lung  | LungCancer | 1.8003  | 7.18E-02 | 2.28E-01 |
| 58  | HIST1H1C | 3006   | 6  | 26050968  | 26061699  | 7.94E-06 | blood | Snoring    | 0.0784  | 9.37E-01 | 9.77E-01 |
| 58  | HIST1H1C | 3006   | 6  | 26050968  | 26061699  | 7.94E-06 | Lung  | Snoring    | 0.0784  | 9.37E-01 | 9.77E-01 |
| 60  | EYS      | 346007 | 6  | 64424876  | 66422118  | 4.82E-06 | blood | Asthma     | -1.8471 | 6.47E-02 | 2.15E-01 |
| 60  | EYS      | 346007 | 6  | 64424876  | 66422118  | 4.82E-06 | Lung  | Asthma     | -1.0400 | 2.97E-01 | 5.53E-01 |
| 60  | EYS      | 346007 | 6  | 64424876  | 66422118  | 4.82E-06 | blood | COPD       | -1.8471 | 6.47E-02 | 2.15E-01 |
| 60  | EYS      | 346007 | 6  | 64424876  | 66422118  | 4.82E-06 | Lung  | COPD       | 0.5862  | 5.58E-01 | 7.76E-01 |

|     |           |        |    |           |           |          |       |            |         |          |          |
|-----|-----------|--------|----|-----------|-----------|----------|-------|------------|---------|----------|----------|
| 60  | EYS       | 346007 | 6  | 64424876  | 66422118  | 4.82E-06 | blood | IPF        | -1.8471 | 6.47E-02 | 2.15E-01 |
| 60  | EYS       | 346007 | 6  | 64424876  | 66422118  | 4.82E-06 | Lung  | IPF        | 1.1574  | 2.47E-01 | 4.96E-01 |
| 60  | EYS       | 346007 | 6  | 64424876  | 66422118  | 4.82E-06 | blood | LungCancer | -1.8471 | 6.47E-02 | 2.15E-01 |
| 60  | EYS       | 346007 | 6  | 64424876  | 66422118  | 4.82E-06 | Lung  | LungCancer | 0.6101  | 5.42E-01 | 7.62E-01 |
| 60  | EYS       | 346007 | 6  | 64424876  | 66422118  | 4.82E-06 | blood | Snoring    | -1.8471 | 6.47E-02 | 2.15E-01 |
| 60  | EYS       | 346007 | 6  | 64424876  | 66422118  | 4.82E-06 | Lung  | Snoring    | -1.8471 | 6.47E-02 | 2.15E-01 |
| 24  | TMPPE     | 643853 | 3  | 33033219  | 33143689  | 4.06E-12 | blood | Asthma     | 1.0271  | 3.04E-01 | 5.58E-01 |
| 24  | TMPPE     | 643853 | 3  | 33033219  | 33143689  | 4.06E-12 | Lung  | Asthma     | 1.6058  | 1.08E-01 | 2.97E-01 |
| 24  | TMPPE     | 643853 | 3  | 33033219  | 33143689  | 4.06E-12 | blood | COPD       | 1.0271  | 3.04E-01 | 5.58E-01 |
| 24  | TMPPE     | 643853 | 3  | 33033219  | 33143689  | 4.06E-12 | Lung  | COPD       | 0.6564  | 5.12E-01 | 7.52E-01 |
| 24  | TMPPE     | 643853 | 3  | 33033219  | 33143689  | 4.06E-12 | blood | IPF        | 1.0271  | 3.04E-01 | 5.58E-01 |
| 24  | TMPPE     | 643853 | 3  | 33033219  | 33143689  | 4.06E-12 | Lung  | IPF        | 1.8869  | 5.92E-02 | 2.04E-01 |
| 24  | TMPPE     | 643853 | 3  | 33033219  | 33143689  | 4.06E-12 | blood | LungCancer | 1.0271  | 3.04E-01 | 5.58E-01 |
| 24  | TMPPE     | 643853 | 3  | 33033219  | 33143689  | 4.06E-12 | Lung  | LungCancer | 1.9313  | 5.34E-02 | 1.91E-01 |
| 24  | TMPPE     | 643853 | 3  | 33033219  | 33143689  | 4.06E-12 | blood | Snoring    | 1.0271  | 3.04E-01 | 5.58E-01 |
| 24  | TMPPE     | 643853 | 3  | 33033219  | 33143689  | 4.06E-12 | Lung  | Snoring    | 1.0271  | 3.04E-01 | 5.58E-01 |
| 127 | HYKK      | 123688 | 15 | 78794906  | 78834715  | 1.27E-13 | blood | Asthma     | NA      | NA       | NA       |
| 127 | HYKK      | 123688 | 15 | 78794906  | 78834715  | 1.27E-13 | Lung  | Asthma     | NA      | NA       | NA       |
| 127 | HYKK      | 123688 | 15 | 78794906  | 78834715  | 1.27E-13 | blood | COPD       | NA      | NA       | NA       |
| 127 | HYKK      | 123688 | 15 | 78794906  | 78834715  | 1.27E-13 | Lung  | COPD       | NA      | NA       | NA       |
| 127 | HYKK      | 123688 | 15 | 78794906  | 78834715  | 1.27E-13 | blood | IPF        | NA      | NA       | NA       |
| 127 | HYKK      | 123688 | 15 | 78794906  | 78834715  | 1.27E-13 | Lung  | IPF        | NA      | NA       | NA       |
| 127 | HYKK      | 123688 | 15 | 78794906  | 78834715  | 1.27E-13 | blood | LungCancer | NA      | NA       | NA       |
| 127 | HYKK      | 123688 | 15 | 78794906  | 78834715  | 1.27E-13 | Lung  | LungCancer | NA      | NA       | NA       |
| 127 | HYKK      | 123688 | 15 | 78794906  | 78834715  | 1.27E-13 | blood | Snoring    | NA      | NA       | NA       |
| 127 | HYKK      | 123688 | 15 | 78794906  | 78834715  | 1.27E-13 | Lung  | Snoring    | NA      | NA       | NA       |
| 58  | NKAPL     | 222698 | 6  | 28222075  | 28233736  | 2.31E-07 | blood | Asthma     | 0.1692  | 8.66E-01 | 9.55E-01 |
| 58  | NKAPL     | 222698 | 6  | 28222075  | 28233736  | 2.31E-07 | Lung  | Asthma     | 1.6658  | 9.58E-02 | 2.80E-01 |
| 58  | NKAPL     | 222698 | 6  | 28222075  | 28233736  | 2.31E-07 | blood | COPD       | 0.1692  | 8.66E-01 | 9.55E-01 |
| 58  | NKAPL     | 222698 | 6  | 28222075  | 28233736  | 2.31E-07 | Lung  | COPD       | -1.2741 | 2.03E-01 | 4.39E-01 |
| 58  | NKAPL     | 222698 | 6  | 28222075  | 28233736  | 2.31E-07 | blood | IPF        | 0.1692  | 8.66E-01 | 9.55E-01 |
| 58  | NKAPL     | 222698 | 6  | 28222075  | 28233736  | 2.31E-07 | Lung  | IPF        | -2.1845 | 2.89E-02 | 1.25E-01 |
| 58  | NKAPL     | 222698 | 6  | 28222075  | 28233736  | 2.31E-07 | blood | LungCancer | 0.1692  | 8.66E-01 | 9.55E-01 |
| 58  | NKAPL     | 222698 | 6  | 28222075  | 28233736  | 2.31E-07 | Lung  | LungCancer | -0.1516 | 8.79E-01 | 9.56E-01 |
| 58  | NKAPL     | 222698 | 6  | 28222075  | 28233736  | 2.31E-07 | blood | Snoring    | 0.1692  | 8.66E-01 | 9.55E-01 |
| 58  | NKAPL     | 222698 | 6  | 28222075  | 28233736  | 2.31E-07 | Lung  | Snoring    | 0.1692  | 8.66E-01 | 9.55E-01 |
| 58  | ZKSCAN3   | 80317  | 6  | 28312691  | 28341954  | 9.48E-06 | blood | Asthma     | -0.1225 | 9.02E-01 | 9.64E-01 |
| 58  | ZKSCAN3   | 80317  | 6  | 28312691  | 28341954  | 9.48E-06 | Lung  | Asthma     | -2.4129 | 1.58E-02 | 7.70E-02 |
| 58  | ZKSCAN3   | 80317  | 6  | 28312691  | 28341954  | 9.48E-06 | blood | COPD       | -0.1225 | 9.02E-01 | 9.64E-01 |
| 58  | ZKSCAN3   | 80317  | 6  | 28312691  | 28341954  | 9.48E-06 | Lung  | COPD       | -0.2430 | 8.08E-01 | 9.35E-01 |
| 58  | ZKSCAN3   | 80317  | 6  | 28312691  | 28341954  | 9.48E-06 | blood | IPF        | -0.1225 | 9.02E-01 | 9.64E-01 |
| 58  | ZKSCAN3   | 80317  | 6  | 28312691  | 28341954  | 9.48E-06 | Lung  | IPF        | -3.6689 | 2.44E-04 | 2.14E-03 |
| 58  | ZKSCAN3   | 80317  | 6  | 28312691  | 28341954  | 9.48E-06 | blood | LungCancer | -0.1225 | 9.02E-01 | 9.64E-01 |
| 58  | ZKSCAN3   | 80317  | 6  | 28312691  | 28341954  | 9.48E-06 | Lung  | LungCancer | -4.1135 | 3.90E-05 | 4.52E-04 |
| 58  | ZKSCAN3   | 80317  | 6  | 28312691  | 28341954  | 9.48E-06 | blood | Snoring    | -0.1225 | 9.02E-01 | 9.64E-01 |
| 58  | ZKSCAN3   | 80317  | 6  | 28312691  | 28341954  | 9.48E-06 | Lung  | Snoring    | -0.1225 | 9.02E-01 | 9.64E-01 |
| 156 | XRCC6     | 2547   | 22 | 42012250  | 42065052  | 3.49E-10 | blood | Asthma     | -0.9262 | 3.54E-01 | 6.08E-01 |
| 156 | XRCC6     | 2547   | 22 | 42012250  | 42065052  | 3.49E-10 | Lung  | Asthma     | -3.3027 | 9.58E-04 | 7.32E-03 |
| 156 | XRCC6     | 2547   | 22 | 42012250  | 42065052  | 3.49E-10 | blood | COPD       | -0.9262 | 3.54E-01 | 6.08E-01 |
| 156 | XRCC6     | 2547   | 22 | 42012250  | 42065052  | 3.49E-10 | Lung  | COPD       | 0.8773  | 3.80E-01 | 6.29E-01 |
| 156 | XRCC6     | 2547   | 22 | 42012250  | 42065052  | 3.49E-10 | blood | IPF        | -0.9262 | 3.54E-01 | 6.08E-01 |
| 156 | XRCC6     | 2547   | 22 | 42012250  | 42065052  | 3.49E-10 | Lung  | IPF        | -2.0460 | 4.08E-02 | 1.58E-01 |
| 156 | XRCC6     | 2547   | 22 | 42012250  | 42065052  | 3.49E-10 | blood | LungCancer | -0.9262 | 3.54E-01 | 6.08E-01 |
| 156 | XRCC6     | 2547   | 22 | 42012250  | 42065052  | 3.49E-10 | Lung  | LungCancer | 0.1252  | 9.00E-01 | 9.64E-01 |
| 156 | XRCC6     | 2547   | 22 | 42012250  | 42065052  | 3.49E-10 | blood | Snoring    | -0.9262 | 3.54E-01 | 6.08E-01 |
| 156 | XRCC6     | 2547   | 22 | 42012250  | 42065052  | 3.49E-10 | Lung  | Snoring    | -0.9262 | 3.54E-01 | 6.08E-01 |
| 58  | HIST1H2AI | 8329   | 6  | 27770977  | 27781445  | 3.97E-08 | blood | Asthma     | -0.1480 | 8.82E-01 | 9.56E-01 |
| 58  | HIST1H2AI | 8329   | 6  | 27770977  | 27781445  | 3.97E-08 | Lung  | Asthma     | -0.5533 | 5.80E-01 | 7.92E-01 |
| 58  | HIST1H2AI | 8329   | 6  | 27770977  | 27781445  | 3.97E-08 | blood | COPD       | -0.1480 | 8.82E-01 | 9.56E-01 |
| 58  | HIST1H2AI | 8329   | 6  | 27770977  | 27781445  | 3.97E-08 | Lung  | COPD       | 0.4614  | 6.44E-01 | 8.40E-01 |
| 58  | HIST1H2AI | 8329   | 6  | 27770977  | 27781445  | 3.97E-08 | blood | IPF        | -0.1480 | 8.82E-01 | 9.56E-01 |
| 58  | HIST1H2AI | 8329   | 6  | 27770977  | 27781445  | 3.97E-08 | Lung  | IPF        | 1.6908  | 9.09E-02 | 2.67E-01 |
| 58  | HIST1H2AI | 8329   | 6  | 27770977  | 27781445  | 3.97E-08 | blood | LungCancer | -0.1480 | 8.82E-01 | 9.56E-01 |
| 58  | HIST1H2AI | 8329   | 6  | 27770977  | 27781445  | 3.97E-08 | Lung  | LungCancer | -0.2368 | 8.13E-01 | 9.39E-01 |
| 58  | HIST1H2AI | 8329   | 6  | 27770977  | 27781445  | 3.97E-08 | blood | Snoring    | -0.1480 | 8.82E-01 | 9.56E-01 |
| 58  | HIST1H2AI | 8329   | 6  | 27770977  | 27781445  | 3.97E-08 | Lung  | Snoring    | -0.1480 | 8.82E-01 | 9.56E-01 |
| 40  | MAML3     | 55534  | 4  | 140632545 | 141080233 | 8.81E-08 | blood | Asthma     | NA      | NA       | NA       |
| 40  | MAML3     | 55534  | 4  | 140632545 | 141080233 | 8.81E-08 | Lung  | Asthma     | NA      | NA       | NA       |
| 40  | MAML3     | 55534  | 4  | 140632545 | 141080233 | 8.81E-08 | blood | COPD       | NA      | NA       | NA       |
| 40  | MAML3     | 55534  | 4  | 140632545 | 141080233 | 8.81E-08 | Lung  | COPD       | NA      | NA       | NA       |
| 40  | MAML3     | 55534  | 4  | 140632545 | 141080233 | 8.81E-08 | blood | IPF        | NA      | NA       | NA       |
| 40  | MAML3     | 55534  | 4  | 140632545 | 141080233 | 8.81E-08 | Lung  | IPF        | NA      | NA       | NA       |
| 40  | MAML3     | 55534  | 4  | 140632545 | 141080233 | 8.81E-08 | blood | LungCancer | NA      | NA       | NA       |



|     |         |       |    |           |           |          |       |            |         |          |          |
|-----|---------|-------|----|-----------|-----------|----------|-------|------------|---------|----------|----------|
| 40  | MAML3   | 55534 | 4  | 140632545 | 141080233 | 8.81E-08 | Lung  | LungCancer | NA      | NA       | NA       |
| 40  | MAML3   | 55534 | 4  | 140632545 | 141080233 | 8.81E-08 | blood | Snoring    | NA      | NA       | NA       |
| 40  | MAML3   | 55534 | 4  | 140632545 | 141080233 | 8.81E-08 | Lung  | Snoring    | NA      | NA       | NA       |
| 58  | ZSCAN16 | 80345 | 6  | 28087334  | 28102864  | 3.67E-05 | blood | Asthma     | -2.4491 | 1.43E-02 | 7.11E-02 |
| 58  | ZSCAN16 | 80345 | 6  | 28087334  | 28102864  | 3.67E-05 | Lung  | Asthma     | -0.4777 | 6.33E-01 | 8.30E-01 |
| 58  | ZSCAN16 | 80345 | 6  | 28087334  | 28102864  | 3.67E-05 | blood | COPD       | -2.4491 | 1.43E-02 | 7.11E-02 |
| 58  | ZSCAN16 | 80345 | 6  | 28087334  | 28102864  | 3.67E-05 | Lung  | COPD       | 1.1347  | 2.56E-01 | 5.12E-01 |
| 58  | ZSCAN16 | 80345 | 6  | 28087334  | 28102864  | 3.67E-05 | blood | IPF        | -2.4491 | 1.43E-02 | 7.11E-02 |
| 58  | ZSCAN16 | 80345 | 6  | 28087334  | 28102864  | 3.67E-05 | Lung  | IPF        | -1.6600 | 9.69E-02 | 2.82E-01 |
| 58  | ZSCAN16 | 80345 | 6  | 28087334  | 28102864  | 3.67E-05 | blood | LungCancer | -2.4491 | 1.43E-02 | 7.11E-02 |
| 58  | ZSCAN16 | 80345 | 6  | 28087334  | 28102864  | 3.67E-05 | Lung  | LungCancer | 3.8822  | 1.04E-04 | 9.64E-04 |
| 58  | ZSCAN16 | 80345 | 6  | 28087334  | 28102864  | 3.67E-05 | blood | Snoring    | -2.4491 | 1.43E-02 | 7.11E-02 |
| 58  | ZSCAN16 | 80345 | 6  | 28087334  | 28102864  | 3.67E-05 | Lung  | Snoring    | -2.4491 | 1.43E-02 | 7.11E-02 |
| 58  | ZSCAN26 | 7741  | 6  | 28229788  | 28251001  | 1.95E-07 | blood | Asthma     | -0.9343 | 3.50E-01 | 6.08E-01 |
| 58  | ZSCAN26 | 7741  | 6  | 28229788  | 28251001  | 1.95E-07 | Lung  | Asthma     | -3.3316 | 8.63E-04 | 6.69E-03 |
| 58  | ZSCAN26 | 7741  | 6  | 28229788  | 28251001  | 1.95E-07 | blood | COPD       | -0.9343 | 3.50E-01 | 6.08E-01 |
| 58  | ZSCAN26 | 7741  | 6  | 28229788  | 28251001  | 1.95E-07 | Lung  | COPD       | 1.1468  | 2.51E-01 | 5.03E-01 |
| 58  | ZSCAN26 | 7741  | 6  | 28229788  | 28251001  | 1.95E-07 | blood | IPF        | -0.9343 | 3.50E-01 | 6.08E-01 |
| 58  | ZSCAN26 | 7741  | 6  | 28229788  | 28251001  | 1.95E-07 | Lung  | IPF        | -1.6573 | 9.75E-02 | 2.83E-01 |
| 58  | ZSCAN26 | 7741  | 6  | 28229788  | 28251001  | 1.95E-07 | blood | LungCancer | -0.9343 | 3.50E-01 | 6.08E-01 |
| 58  | ZSCAN26 | 7741  | 6  | 28229788  | 28251001  | 1.95E-07 | Lung  | LungCancer | -1.2905 | 1.97E-01 | 4.36E-01 |
| 58  | ZSCAN26 | 7741  | 6  | 28229788  | 28251001  | 1.95E-07 | blood | Snoring    | -0.9343 | 3.50E-01 | 6.08E-01 |
| 58  | ZSCAN26 | 7741  | 6  | 28229788  | 28251001  | 1.95E-07 | Lung  | Snoring    | -0.9343 | 3.50E-01 | 6.08E-01 |
| 154 | ZGPAT   | 84619 | 20 | 62333727  | 62372494  | 4.58E-10 | blood | Asthma     | 0.8355  | 4.03E-01 | 6.54E-01 |
| 154 | ZGPAT   | 84619 | 20 | 62333727  | 62372494  | 4.58E-10 | Lung  | Asthma     | 5.6017  | 2.12E-08 | 5.66E-07 |
| 154 | ZGPAT   | 84619 | 20 | 62333727  | 62372494  | 4.58E-10 | blood | COPD       | 0.8355  | 4.03E-01 | 6.54E-01 |
| 154 | ZGPAT   | 84619 | 20 | 62333727  | 62372494  | 4.58E-10 | Lung  | COPD       | 3.4424  | 5.77E-04 | 6.48E-03 |
| 154 | ZGPAT   | 84619 | 20 | 62333727  | 62372494  | 4.58E-10 | blood | IPF        | 0.8355  | 4.03E-01 | 6.54E-01 |
| 154 | ZGPAT   | 84619 | 20 | 62333727  | 62372494  | 4.58E-10 | Lung  | IPF        | 1.1670  | 2.43E-01 | 4.90E-01 |
| 154 | ZGPAT   | 84619 | 20 | 62333727  | 62372494  | 4.58E-10 | blood | LungCancer | 0.8355  | 4.03E-01 | 6.54E-01 |
| 154 | ZGPAT   | 84619 | 20 | 62333727  | 62372494  | 4.58E-10 | Lung  | LungCancer | 1.6074  | 1.08E-01 | 2.97E-01 |
| 154 | ZGPAT   | 84619 | 20 | 62333727  | 62372494  | 4.58E-10 | blood | Snoring    | 0.8355  | 4.03E-01 | 6.54E-01 |
| 154 | ZGPAT   | 84619 | 20 | 62333727  | 62372494  | 4.58E-10 | Lung  | Snoring    | 0.8355  | 4.03E-01 | 6.54E-01 |
| 49  | SLC22A4 | 6583  | 5  | 131625145 | 131684899 | 6.55E-14 | blood | Asthma     | -0.5936 | 5.53E-01 | 7.71E-01 |
| 49  | SLC22A4 | 6583  | 5  | 131625145 | 131684899 | 6.55E-14 | Lung  | Asthma     | -7.6500 | 2.03E-14 | 1.96E-12 |
| 49  | SLC22A4 | 6583  | 5  | 131625145 | 131684899 | 6.55E-14 | blood | COPD       | -0.5936 | 5.53E-01 | 7.71E-01 |
| 49  | SLC22A4 | 6583  | 5  | 131625145 | 131684899 | 6.55E-14 | Lung  | COPD       | -2.3067 | 2.11E-02 | 9.63E-02 |
| 49  | SLC22A4 | 6583  | 5  | 131625145 | 131684899 | 6.55E-14 | blood | IPF        | -0.5936 | 5.53E-01 | 7.71E-01 |
| 49  | SLC22A4 | 6583  | 5  | 131625145 | 131684899 | 6.55E-14 | Lung  | IPF        | -1.4171 | 1.56E-01 | 3.88E-01 |
| 49  | SLC22A4 | 6583  | 5  | 131625145 | 131684899 | 6.55E-14 | blood | LungCancer | -0.5936 | 5.53E-01 | 7.71E-01 |
| 49  | SLC22A4 | 6583  | 5  | 131625145 | 131684899 | 6.55E-14 | Lung  | LungCancer | 1.5714  | 1.16E-01 | 3.13E-01 |
| 49  | SLC22A4 | 6583  | 5  | 131625145 | 131684899 | 6.55E-14 | blood | Snoring    | -0.5936 | 5.53E-01 | 7.71E-01 |
| 49  | SLC22A4 | 6583  | 5  | 131625145 | 131684899 | 6.55E-14 | Lung  | Snoring    | -0.5936 | 5.53E-01 | 7.71E-01 |
| 58  | ZNF165  | 7718  | 6  | 28043482  | 28062341  | 3.09E-05 | blood | Asthma     | NA      | NA       | NA       |
| 58  | ZNF165  | 7718  | 6  | 28043482  | 28062341  | 3.09E-05 | Lung  | Asthma     | NA      | NA       | NA       |
| 58  | ZNF165  | 7718  | 6  | 28043482  | 28062341  | 3.09E-05 | blood | COPD       | NA      | NA       | NA       |
| 58  | ZNF165  | 7718  | 6  | 28043482  | 28062341  | 3.09E-05 | Lung  | COPD       | NA      | NA       | NA       |
| 58  | ZNF165  | 7718  | 6  | 28043482  | 28062341  | 3.09E-05 | blood | IPF        | NA      | NA       | NA       |
| 58  | ZNF165  | 7718  | 6  | 28043482  | 28062341  | 3.09E-05 | Lung  | IPF        | NA      | NA       | NA       |
| 58  | ZNF165  | 7718  | 6  | 28043482  | 28062341  | 3.09E-05 | blood | LungCancer | NA      | NA       | NA       |
| 58  | ZNF165  | 7718  | 6  | 28043482  | 28062341  | 3.09E-05 | Lung  | LungCancer | NA      | NA       | NA       |
| 58  | ZNF165  | 7718  | 6  | 28043482  | 28062341  | 3.09E-05 | blood | Snoring    | NA      | NA       | NA       |
| 58  | ZNF165  | 7718  | 6  | 28043482  | 28062341  | 3.09E-05 | Lung  | Snoring    | NA      | NA       | NA       |
| 49  | SLC22A5 | 6584  | 5  | 131700396 | 131736306 | 4.11E-15 | blood | Asthma     | 0.2954  | 7.68E-01 | 9.22E-01 |
| 49  | SLC22A5 | 6584  | 5  | 131700396 | 131736306 | 4.11E-15 | Lung  | Asthma     | 12.0000 | 2.95E-33 | 1.34E-30 |
| 49  | SLC22A5 | 6584  | 5  | 131700396 | 131736306 | 4.11E-15 | blood | COPD       | 0.2954  | 7.68E-01 | 9.22E-01 |
| 49  | SLC22A5 | 6584  | 5  | 131700396 | 131736306 | 4.11E-15 | Lung  | COPD       | 5.2692  | 1.37E-07 | 2.84E-06 |
| 49  | SLC22A5 | 6584  | 5  | 131700396 | 131736306 | 4.11E-15 | blood | IPF        | 0.2954  | 7.68E-01 | 9.22E-01 |
| 49  | SLC22A5 | 6584  | 5  | 131700396 | 131736306 | 4.11E-15 | Lung  | IPF        | 1.5630  | 1.18E-01 | 3.18E-01 |
| 49  | SLC22A5 | 6584  | 5  | 131700396 | 131736306 | 4.11E-15 | blood | LungCancer | 0.2954  | 7.68E-01 | 9.22E-01 |
| 49  | SLC22A5 | 6584  | 5  | 131700396 | 131736306 | 4.11E-15 | Lung  | LungCancer | -2.3559 | 1.85E-02 | 8.80E-02 |
| 49  | SLC22A5 | 6584  | 5  | 131700396 | 131736306 | 4.11E-15 | blood | Snoring    | 0.2954  | 7.68E-01 | 9.22E-01 |
| 49  | SLC22A5 | 6584  | 5  | 131700396 | 131736306 | 4.11E-15 | Lung  | Snoring    | 0.2954  | 7.68E-01 | 9.22E-01 |
| 154 | STMN3   | 50861 | 20 | 62266058  | 62289963  | 1.56E-07 | blood | Asthma     | -0.8719 | 3.83E-01 | 6.31E-01 |
| 154 | STMN3   | 50861 | 20 | 62266058  | 62289963  | 1.56E-07 | Lung  | Asthma     | -3.6926 | 2.22E-04 | 1.95E-03 |
| 154 | STMN3   | 50861 | 20 | 62266058  | 62289963  | 1.56E-07 | blood | COPD       | -0.8719 | 3.83E-01 | 6.31E-01 |
| 154 | STMN3   | 50861 | 20 | 62266058  | 62289963  | 1.56E-07 | Lung  | COPD       | -1.9106 | 5.61E-02 | 1.96E-01 |
| 154 | STMN3   | 50861 | 20 | 62266058  | 62289963  | 1.56E-07 | blood | IPF        | -0.8719 | 3.83E-01 | 6.31E-01 |
| 154 | STMN3   | 50861 | 20 | 62266058  | 62289963  | 1.56E-07 | Lung  | IPF        | -0.9957 | 3.19E-01 | 5.76E-01 |
| 154 | STMN3   | 50861 | 20 | 62266058  | 62289963  | 1.56E-07 | blood | LungCancer | -0.8719 | 3.83E-01 | 6.31E-01 |
| 154 | STMN3   | 50861 | 20 | 62266058  | 62289963  | 1.56E-07 | Lung  | LungCancer | -1.3143 | 1.89E-01 | 4.25E-01 |
| 154 | STMN3   | 50861 | 20 | 62266058  | 62289963  | 1.56E-07 | blood | Snoring    | -0.8719 | 3.83E-01 | 6.31E-01 |
| 154 | STMN3   | 50861 | 20 | 62266058  | 62289963  | 1.56E-07 | Lung  | Snoring    | -0.8719 | 3.83E-01 | 6.31E-01 |

|     |           |       |    |           |           |          |       |            |         |          |          |
|-----|-----------|-------|----|-----------|-----------|----------|-------|------------|---------|----------|----------|
| 84  | PDCD1LG2  | 80380 | 9  | 5505512   | 5576282   | 4.63E-05 | blood | Asthma     | -1.3200 | 1.86E-01 | 4.21E-01 |
| 84  | PDCD1LG2  | 80380 | 9  | 5505512   | 5576282   | 4.63E-05 | Lung  | Asthma     | 2.5634  | 1.04E-02 | 5.44E-02 |
| 84  | PDCD1LG2  | 80380 | 9  | 5505512   | 5576282   | 4.63E-05 | blood | COPD       | -1.3200 | 1.86E-01 | 4.21E-01 |
| 84  | PDCD1LG2  | 80380 | 9  | 5505512   | 5576282   | 4.63E-05 | Lung  | COPD       | 1.0639  | 2.87E-01 | 5.43E-01 |
| 84  | PDCD1LG2  | 80380 | 9  | 5505512   | 5576282   | 4.63E-05 | blood | IPF        | -1.3200 | 1.86E-01 | 4.21E-01 |
| 84  | PDCD1LG2  | 80380 | 9  | 5505512   | 5576282   | 4.63E-05 | Lung  | IPF        | 0.9326  | 3.51E-01 | 6.08E-01 |
| 84  | PDCD1LG2  | 80380 | 9  | 5505512   | 5576282   | 4.63E-05 | blood | LungCancer | -1.3200 | 1.86E-01 | 4.21E-01 |
| 84  | PDCD1LG2  | 80380 | 9  | 5505512   | 5576282   | 4.63E-05 | Lung  | LungCancer | NA      | NA       | NA       |
| 84  | PDCD1LG2  | 80380 | 9  | 5505512   | 5576282   | 4.63E-05 | blood | Snoring    | -1.3200 | 1.86E-01 | 4.21E-01 |
| 84  | PDCD1LG2  | 80380 | 9  | 5505512   | 5576282   | 4.63E-05 | Lung  | Snoring    | -1.3200 | 1.86E-01 | 4.21E-01 |
| 34  | FAM114A1  | 92689 | 4  | 38864354  | 38952365  | 1.06E-05 | blood | Asthma     | 1.4842  | 1.38E-01 | 3.55E-01 |
| 34  | FAM114A1  | 92689 | 4  | 38864354  | 38952365  | 1.06E-05 | Lung  | Asthma     | -4.9606 | 7.03E-07 | 1.20E-05 |
| 34  | FAM114A1  | 92689 | 4  | 38864354  | 38952365  | 1.06E-05 | blood | COPD       | 1.4842  | 1.38E-01 | 3.55E-01 |
| 34  | FAM114A1  | 92689 | 4  | 38864354  | 38952365  | 1.06E-05 | Lung  | COPD       | -1.7679 | 7.71E-02 | 2.38E-01 |
| 34  | FAM114A1  | 92689 | 4  | 38864354  | 38952365  | 1.06E-05 | blood | IPF        | 1.4842  | 1.38E-01 | 3.55E-01 |
| 34  | FAM114A1  | 92689 | 4  | 38864354  | 38952365  | 1.06E-05 | Lung  | IPF        | 0.0669  | 9.47E-01 | 9.82E-01 |
| 34  | FAM114A1  | 92689 | 4  | 38864354  | 38952365  | 1.06E-05 | blood | LungCancer | 1.4842  | 1.38E-01 | 3.55E-01 |
| 34  | FAM114A1  | 92689 | 4  | 38864354  | 38952365  | 1.06E-05 | Lung  | LungCancer | -1.0356 | 3.00E-01 | 5.53E-01 |
| 34  | FAM114A1  | 92689 | 4  | 38864354  | 38952365  | 1.06E-05 | blood | Snoring    | 1.4842  | 1.38E-01 | 3.55E-01 |
| 34  | FAM114A1  | 92689 | 4  | 38864354  | 38952365  | 1.06E-05 | Lung  | Snoring    | 1.4842  | 1.38E-01 | 3.55E-01 |
| 58  | HIST1H2BK | 85236 | 6  | 27101072  | 27119637  | 3.63E-05 | blood | Asthma     | -2.1704 | 3.00E-02 | 1.28E-01 |
| 58  | HIST1H2BK | 85236 | 6  | 27101072  | 27119637  | 3.63E-05 | Lung  | Asthma     | 4.4125  | 1.02E-05 | 1.31E-04 |
| 58  | HIST1H2BK | 85236 | 6  | 27101072  | 27119637  | 3.63E-05 | blood | COPD       | -2.1704 | 3.00E-02 | 1.28E-01 |
| 58  | HIST1H2BK | 85236 | 6  | 27101072  | 27119637  | 3.63E-05 | Lung  | COPD       | 1.0194  | 3.08E-01 | 5.63E-01 |
| 58  | HIST1H2BK | 85236 | 6  | 27101072  | 27119637  | 3.63E-05 | blood | IPF        | -2.1704 | 3.00E-02 | 1.28E-01 |
| 58  | HIST1H2BK | 85236 | 6  | 27101072  | 27119637  | 3.63E-05 | Lung  | IPF        | 2.8998  | 3.73E-03 | 2.24E-02 |
| 58  | HIST1H2BK | 85236 | 6  | 27101072  | 27119637  | 3.63E-05 | blood | LungCancer | -2.1704 | 3.00E-02 | 1.28E-01 |
| 58  | HIST1H2BK | 85236 | 6  | 27101072  | 27119637  | 3.63E-05 | Lung  | LungCancer | 5.5114  | 3.56E-08 | 8.70E-07 |
| 58  | HIST1H2BK | 85236 | 6  | 27101072  | 27119637  | 3.63E-05 | blood | Snoring    | -2.1704 | 3.00E-02 | 1.28E-01 |
| 58  | HIST1H2BK | 85236 | 6  | 27101072  | 27119637  | 3.63E-05 | Lung  | Snoring    | -2.1704 | 3.00E-02 | 1.28E-01 |
| 58  | ZKSCAN8   | 7745  | 6  | 28104688  | 28132250  | 2.49E-05 | blood | Asthma     | 0.2192  | 8.26E-01 | 9.43E-01 |
| 58  | ZKSCAN8   | 7745  | 6  | 28104688  | 28132250  | 2.49E-05 | Lung  | Asthma     | 1.0334  | 3.01E-01 | 5.55E-01 |
| 58  | ZKSCAN8   | 7745  | 6  | 28104688  | 28132250  | 2.49E-05 | blood | COPD       | 0.2192  | 8.26E-01 | 9.43E-01 |
| 58  | ZKSCAN8   | 7745  | 6  | 28104688  | 28132250  | 2.49E-05 | Lung  | COPD       | -1.3475 | 1.78E-01 | 4.15E-01 |
| 58  | ZKSCAN8   | 7745  | 6  | 28104688  | 28132250  | 2.49E-05 | blood | IPF        | 0.2192  | 8.26E-01 | 9.43E-01 |
| 58  | ZKSCAN8   | 7745  | 6  | 28104688  | 28132250  | 2.49E-05 | Lung  | IPF        | -0.4794 | 6.32E-01 | 8.30E-01 |
| 58  | ZKSCAN8   | 7745  | 6  | 28104688  | 28132250  | 2.49E-05 | blood | LungCancer | 0.2192  | 8.26E-01 | 9.43E-01 |
| 58  | ZKSCAN8   | 7745  | 6  | 28104688  | 28132250  | 2.49E-05 | Lung  | LungCancer | 0.0709  | 9.44E-01 | 9.80E-01 |
| 58  | ZKSCAN8   | 7745  | 6  | 28104688  | 28132250  | 2.49E-05 | blood | Snoring    | 0.2192  | 8.26E-01 | 9.43E-01 |
| 58  | ZKSCAN8   | 7745  | 6  | 28104688  | 28132250  | 2.49E-05 | Lung  | Snoring    | 0.2192  | 8.26E-01 | 9.43E-01 |
| 140 | ZNF652    | 22834 | 17 | 47361568  | 47444835  | 4.06E-14 | blood | Asthma     | -1.2285 | 2.19E-01 | 4.58E-01 |
| 140 | ZNF652    | 22834 | 17 | 47361568  | 47444835  | 4.06E-14 | Lung  | Asthma     | 4.5590  | 5.14E-06 | 6.98E-05 |
| 140 | ZNF652    | 22834 | 17 | 47361568  | 47444835  | 4.06E-14 | blood | COPD       | -1.2285 | 2.19E-01 | 4.58E-01 |
| 140 | ZNF652    | 22834 | 17 | 47361568  | 47444835  | 4.06E-14 | Lung  | COPD       | 1.9903  | 4.66E-02 | 1.75E-01 |
| 140 | ZNF652    | 22834 | 17 | 47361568  | 47444835  | 4.06E-14 | blood | IPF        | -1.2285 | 2.19E-01 | 4.58E-01 |
| 140 | ZNF652    | 22834 | 17 | 47361568  | 47444835  | 4.06E-14 | Lung  | IPF        | -0.9906 | 3.22E-01 | 5.80E-01 |
| 140 | ZNF652    | 22834 | 17 | 47361568  | 47444835  | 4.06E-14 | blood | LungCancer | -1.2285 | 2.19E-01 | 4.58E-01 |
| 140 | ZNF652    | 22834 | 17 | 47361568  | 47444835  | 4.06E-14 | Lung  | LungCancer | -1.2394 | 2.15E-01 | 4.56E-01 |
| 140 | ZNF652    | 22834 | 17 | 47361568  | 47444835  | 4.06E-14 | blood | Snoring    | -1.2285 | 2.19E-01 | 4.58E-01 |
| 140 | ZNF652    | 22834 | 17 | 47361568  | 47444835  | 4.06E-14 | Lung  | Snoring    | -1.2285 | 2.19E-01 | 4.58E-01 |
| 10  | CD247     | 919   | 1  | 167394877 | 167492847 | 9.08E-14 | blood | Asthma     | 0.7203  | 4.71E-01 | 7.16E-01 |
| 10  | CD247     | 919   | 1  | 167394877 | 167492847 | 9.08E-14 | Lung  | Asthma     | 0.6664  | 5.05E-01 | 7.44E-01 |
| 10  | CD247     | 919   | 1  | 167394877 | 167492847 | 9.08E-14 | blood | COPD       | 0.7203  | 4.71E-01 | 7.16E-01 |
| 10  | CD247     | 919   | 1  | 167394877 | 167492847 | 9.08E-14 | Lung  | COPD       | 1.0529  | 2.92E-01 | 5.47E-01 |
| 10  | CD247     | 919   | 1  | 167394877 | 167492847 | 9.08E-14 | blood | IPF        | 0.7203  | 4.71E-01 | 7.16E-01 |
| 10  | CD247     | 919   | 1  | 167394877 | 167492847 | 9.08E-14 | Lung  | IPF        | 0.2270  | 8.20E-01 | 9.43E-01 |
| 10  | CD247     | 919   | 1  | 167394877 | 167492847 | 9.08E-14 | blood | LungCancer | 0.7203  | 4.71E-01 | 7.16E-01 |
| 10  | CD247     | 919   | 1  | 167394877 | 167492847 | 9.08E-14 | Lung  | LungCancer | 0.7493  | 4.54E-01 | 7.02E-01 |
| 10  | CD247     | 919   | 1  | 167394877 | 167492847 | 9.08E-14 | blood | Snoring    | 0.7203  | 4.71E-01 | 7.16E-01 |
| 10  | CD247     | 919   | 1  | 167394877 | 167492847 | 9.08E-14 | Lung  | Snoring    | 0.7203  | 4.71E-01 | 7.16E-01 |
| 154 | LIME1     | 54923 | 20 | 62362480  | 62375460  | 1.63E-09 | blood | Asthma     | -0.4987 | 6.18E-01 | 8.22E-01 |
| 154 | LIME1     | 54923 | 20 | 62362480  | 62375460  | 1.63E-09 | Lung  | Asthma     | 1.3620  | 1.73E-01 | 4.06E-01 |
| 154 | LIME1     | 54923 | 20 | 62362480  | 62375460  | 1.63E-09 | blood | COPD       | -0.4987 | 6.18E-01 | 8.22E-01 |
| 154 | LIME1     | 54923 | 20 | 62362480  | 62375460  | 1.63E-09 | Lung  | COPD       | -0.4182 | 6.76E-01 | 8.63E-01 |
| 154 | LIME1     | 54923 | 20 | 62362480  | 62375460  | 1.63E-09 | blood | IPF        | -0.4987 | 6.18E-01 | 8.22E-01 |
| 154 | LIME1     | 54923 | 20 | 62362480  | 62375460  | 1.63E-09 | Lung  | IPF        | -0.2176 | 8.28E-01 | 9.43E-01 |
| 154 | LIME1     | 54923 | 20 | 62362480  | 62375460  | 1.63E-09 | blood | LungCancer | -0.4987 | 6.18E-01 | 8.22E-01 |
| 154 | LIME1     | 54923 | 20 | 62362480  | 62375460  | 1.63E-09 | Lung  | LungCancer | 1.3729  | 1.70E-01 | 4.04E-01 |
| 154 | LIME1     | 54923 | 20 | 62362480  | 62375460  | 1.63E-09 | blood | Snoring    | -0.4987 | 6.18E-01 | 8.22E-01 |
| 154 | LIME1     | 54923 | 20 | 62362480  | 62375460  | 1.63E-09 | Lung  | Snoring    | -0.4987 | 6.18E-01 | 8.22E-01 |
| 58  | OR2H2     | 7932  | 6  | 29548818  | 29561745  | 1.11E-07 | blood | Asthma     | -1.2945 | 1.95E-01 | 4.33E-01 |
| 58  | OR2H2     | 7932  | 6  | 29548818  | 29561745  | 1.11E-07 | Lung  | Asthma     | 1.4090  | 1.59E-01 | 3.94E-01 |
| 58  | OR2H2     | 7932  | 6  | 29548818  | 29561745  | 1.11E-07 | blood | COPD       | -1.2945 | 1.95E-01 | 4.33E-01 |

|    |        |        |    |           |           |          |       |            |         |          |          |
|----|--------|--------|----|-----------|-----------|----------|-------|------------|---------|----------|----------|
| 58 | OR2H2  | 7932   | 6  | 29548818  | 29561745  | 1.11E-07 | Lung  | COPD       | -2.7237 | 6.46E-03 | 3.63E-02 |
| 58 | OR2H2  | 7932   | 6  | 29548818  | 29561745  | 1.11E-07 | blood | IPF        | -1.2945 | 1.95E-01 | 4.33E-01 |
| 58 | OR2H2  | 7932   | 6  | 29548818  | 29561745  | 1.11E-07 | Lung  | IPF        | 1.7605  | 7.83E-02 | 2.40E-01 |
| 58 | OR2H2  | 7932   | 6  | 29548818  | 29561745  | 1.11E-07 | blood | LungCancer | -1.2945 | 1.95E-01 | 4.33E-01 |
| 58 | OR2H2  | 7932   | 6  | 29548818  | 29561745  | 1.11E-07 | Lung  | LungCancer | 2.0861  | 3.70E-02 | 1.48E-01 |
| 58 | OR2H2  | 7932   | 6  | 29548818  | 29561745  | 1.11E-07 | blood | Snoring    | -1.2945 | 1.95E-01 | 4.33E-01 |
| 58 | OR2H2  | 7932   | 6  | 29548818  | 29561745  | 1.11E-07 | Lung  | Snoring    | -1.2945 | 1.95E-01 | 4.33E-01 |
| 49 | CCNI2  | 645121 | 5  | 132078137 | 132094856 | 5.00E-10 | blood | Asthma     | NA      | NA       | NA       |
| 49 | CCNI2  | 645121 | 5  | 132078137 | 132094856 | 5.00E-10 | Lung  | Asthma     | NA      | NA       | NA       |
| 49 | CCNI2  | 645121 | 5  | 132078137 | 132094856 | 5.00E-10 | blood | COPD       | NA      | NA       | NA       |
| 49 | CCNI2  | 645121 | 5  | 132078137 | 132094856 | 5.00E-10 | Lung  | COPD       | NA      | NA       | NA       |
| 49 | CCNI2  | 645121 | 5  | 132078137 | 132094856 | 5.00E-10 | blood | IPF        | NA      | NA       | NA       |
| 49 | CCNI2  | 645121 | 5  | 132078137 | 132094856 | 5.00E-10 | Lung  | IPF        | NA      | NA       | NA       |
| 49 | CCNI2  | 645121 | 5  | 132078137 | 132094856 | 5.00E-10 | blood | LungCancer | NA      | NA       | NA       |
| 49 | CCNI2  | 645121 | 5  | 132078137 | 132094856 | 5.00E-10 | Lung  | LungCancer | NA      | NA       | NA       |
| 49 | CCNI2  | 645121 | 5  | 132078137 | 132094856 | 5.00E-10 | blood | Snoring    | NA      | NA       | NA       |
| 49 | CCNI2  | 645121 | 5  | 132078137 | 132094856 | 5.00E-10 | Lung  | Snoring    | NA      | NA       | NA       |
| 66 | SCAF8  | 22828  | 6  | 155049512 | 155287708 | 8.06E-07 | blood | Asthma     | NA      | NA       | NA       |
| 66 | SCAF8  | 22828  | 6  | 155049512 | 155287708 | 8.06E-07 | Lung  | Asthma     | NA      | NA       | NA       |
| 66 | SCAF8  | 22828  | 6  | 155049512 | 155287708 | 8.06E-07 | blood | COPD       | NA      | NA       | NA       |
| 66 | SCAF8  | 22828  | 6  | 155049512 | 155287708 | 8.06E-07 | Lung  | COPD       | NA      | NA       | NA       |
| 66 | SCAF8  | 22828  | 6  | 155049512 | 155287708 | 8.06E-07 | blood | IPF        | NA      | NA       | NA       |
| 66 | SCAF8  | 22828  | 6  | 155049512 | 155287708 | 8.06E-07 | Lung  | IPF        | NA      | NA       | NA       |
| 66 | SCAF8  | 22828  | 6  | 155049512 | 155287708 | 8.06E-07 | blood | LungCancer | NA      | NA       | NA       |
| 66 | SCAF8  | 22828  | 6  | 155049512 | 155287708 | 8.06E-07 | Lung  | LungCancer | NA      | NA       | NA       |
| 66 | SCAF8  | 22828  | 6  | 155049512 | 155287708 | 8.06E-07 | blood | Snoring    | NA      | NA       | NA       |
| 66 | SCAF8  | 22828  | 6  | 155049512 | 155287708 | 8.06E-07 | Lung  | Snoring    | NA      | NA       | NA       |
| 71 | GPC2   | 221914 | 7  | 99762229  | 99779990  | 2.74E-05 | blood | Asthma     | -1.6936 | 9.03E-02 | 2.66E-01 |
| 71 | GPC2   | 221914 | 7  | 99762229  | 99779990  | 2.74E-05 | Lung  | Asthma     | -1.8430 | 6.53E-02 | 2.15E-01 |
| 71 | GPC2   | 221914 | 7  | 99762229  | 99779990  | 2.74E-05 | blood | COPD       | -1.6936 | 9.03E-02 | 2.66E-01 |
| 71 | GPC2   | 221914 | 7  | 99762229  | 99779990  | 2.74E-05 | Lung  | COPD       | -0.5425 | 5.87E-01 | 7.95E-01 |
| 71 | GPC2   | 221914 | 7  | 99762229  | 99779990  | 2.74E-05 | blood | IPF        | -1.6936 | 9.03E-02 | 2.66E-01 |
| 71 | GPC2   | 221914 | 7  | 99762229  | 99779990  | 2.74E-05 | Lung  | IPF        | -0.2730 | 7.85E-01 | 9.29E-01 |
| 71 | GPC2   | 221914 | 7  | 99762229  | 99779990  | 2.74E-05 | blood | LungCancer | -1.6936 | 9.03E-02 | 2.66E-01 |
| 71 | GPC2   | 221914 | 7  | 99762229  | 99779990  | 2.74E-05 | Lung  | LungCancer | -0.3709 | 7.11E-01 | 8.87E-01 |
| 71 | GPC2   | 221914 | 7  | 99762229  | 99779990  | 2.74E-05 | blood | Snoring    | -1.6936 | 9.03E-02 | 2.66E-01 |
| 71 | GPC2   | 221914 | 7  | 99762229  | 99779990  | 2.74E-05 | Lung  | Snoring    | -1.6936 | 9.03E-02 | 2.66E-01 |
| 86 | CCL27  | 10850  | 9  | 34656893  | 34667689  | 2.69E-06 | blood | Asthma     | -0.0493 | 9.61E-01 | 9.86E-01 |
| 86 | CCL27  | 10850  | 9  | 34656893  | 34667689  | 2.69E-06 | Lung  | Asthma     | -0.6407 | 5.22E-01 | 7.55E-01 |
| 86 | CCL27  | 10850  | 9  | 34656893  | 34667689  | 2.69E-06 | blood | COPD       | -0.0493 | 9.61E-01 | 9.86E-01 |
| 86 | CCL27  | 10850  | 9  | 34656893  | 34667689  | 2.69E-06 | Lung  | COPD       | -1.1767 | 2.39E-01 | 4.85E-01 |
| 86 | CCL27  | 10850  | 9  | 34656893  | 34667689  | 2.69E-06 | blood | IPF        | -0.0493 | 9.61E-01 | 9.86E-01 |
| 86 | CCL27  | 10850  | 9  | 34656893  | 34667689  | 2.69E-06 | Lung  | IPF        | -2.2985 | 2.15E-02 | 9.75E-02 |
| 86 | CCL27  | 10850  | 9  | 34656893  | 34667689  | 2.69E-06 | blood | LungCancer | -0.0493 | 9.61E-01 | 9.86E-01 |
| 86 | CCL27  | 10850  | 9  | 34656893  | 34667689  | 2.69E-06 | Lung  | LungCancer | 1.4060  | 1.60E-01 | 3.94E-01 |
| 86 | CCL27  | 10850  | 9  | 34656893  | 34667689  | 2.69E-06 | blood | Snoring    | -0.0493 | 9.61E-01 | 9.86E-01 |
| 86 | CCL27  | 10850  | 9  | 34656893  | 34667689  | 2.69E-06 | Lung  | Snoring    | -0.0493 | 9.61E-01 | 9.86E-01 |
| 86 | GALT   | 2592   | 9  | 34641586  | 34655595  | 1.42E-05 | blood | Asthma     | 1.0500  | 2.92E-01 | 5.47E-01 |
| 86 | GALT   | 2592   | 9  | 34641586  | 34655595  | 1.42E-05 | Lung  | Asthma     | 2.3603  | 1.83E-02 | 8.73E-02 |
| 86 | GALT   | 2592   | 9  | 34641586  | 34655595  | 1.42E-05 | blood | COPD       | 1.0500  | 2.92E-01 | 5.47E-01 |
| 86 | GALT   | 2592   | 9  | 34641586  | 34655595  | 1.42E-05 | Lung  | COPD       | 0.7241  | 4.69E-01 | 7.16E-01 |
| 86 | GALT   | 2592   | 9  | 34641586  | 34655595  | 1.42E-05 | blood | IPF        | 1.0500  | 2.92E-01 | 5.47E-01 |
| 86 | GALT   | 2592   | 9  | 34641586  | 34655595  | 1.42E-05 | Lung  | IPF        | 0.5814  | 5.61E-01 | 7.78E-01 |
| 86 | GALT   | 2592   | 9  | 34641586  | 34655595  | 1.42E-05 | blood | LungCancer | 1.0500  | 2.92E-01 | 5.47E-01 |
| 86 | GALT   | 2592   | 9  | 34641586  | 34655595  | 1.42E-05 | Lung  | LungCancer | -3.4763 | 5.08E-04 | 4.22E-03 |
| 86 | GALT   | 2592   | 9  | 34641586  | 34655595  | 1.42E-05 | blood | Snoring    | 1.0500  | 2.92E-01 | 5.47E-01 |
| 86 | GALT   | 2592   | 9  | 34641586  | 34655595  | 1.42E-05 | Lung  | Snoring    | 1.0500  | 2.92E-01 | 5.47E-01 |
| 71 | MBLAC1 | 255374 | 7  | 99719317  | 99731121  | 4.25E-05 | blood | Asthma     | -1.7914 | 7.32E-02 | 2.30E-01 |
| 71 | MBLAC1 | 255374 | 7  | 99719317  | 99731121  | 4.25E-05 | Lung  | Asthma     | -1.3105 | 1.90E-01 | 4.26E-01 |
| 71 | MBLAC1 | 255374 | 7  | 99719317  | 99731121  | 4.25E-05 | blood | COPD       | -1.7914 | 7.32E-02 | 2.30E-01 |
| 71 | MBLAC1 | 255374 | 7  | 99719317  | 99731121  | 4.25E-05 | Lung  | COPD       | -1.0360 | 3.00E-01 | 5.53E-01 |
| 71 | MBLAC1 | 255374 | 7  | 99719317  | 99731121  | 4.25E-05 | blood | IPF        | -1.7914 | 7.32E-02 | 2.30E-01 |
| 71 | MBLAC1 | 255374 | 7  | 99719317  | 99731121  | 4.25E-05 | Lung  | IPF        | 0.0508  | 9.60E-01 | 9.86E-01 |
| 71 | MBLAC1 | 255374 | 7  | 99719317  | 99731121  | 4.25E-05 | blood | LungCancer | -1.7914 | 7.32E-02 | 2.30E-01 |
| 71 | MBLAC1 | 255374 | 7  | 99719317  | 99731121  | 4.25E-05 | Lung  | LungCancer | -0.8225 | 4.11E-01 | 6.60E-01 |
| 71 | MBLAC1 | 255374 | 7  | 99719317  | 99731121  | 4.25E-05 | blood | Snoring    | -1.7914 | 7.32E-02 | 2.30E-01 |
| 71 | MBLAC1 | 255374 | 7  | 99719317  | 99731121  | 4.25E-05 | Lung  | Snoring    | -1.7914 | 7.32E-02 | 2.30E-01 |
| 93 | AS3MT  | 57412  | 10 | 104624183 | 104666656 | 1.43E-07 | blood | Asthma     | -3.1333 | 1.73E-03 | 1.16E-02 |
| 93 | AS3MT  | 57412  | 10 | 104624183 | 104666656 | 1.43E-07 | Lung  | Asthma     | 4.1109  | 3.94E-05 | 4.54E-04 |
| 93 | AS3MT  | 57412  | 10 | 104624183 | 104666656 | 1.43E-07 | blood | COPD       | -3.1333 | 1.73E-03 | 1.16E-02 |
| 93 | AS3MT  | 57412  | 10 | 104624183 | 104666656 | 1.43E-07 | Lung  | COPD       | 0.4259  | 6.70E-01 | 8.59E-01 |
| 93 | AS3MT  | 57412  | 10 | 104624183 | 104666656 | 1.43E-07 | blood | IPF        | -3.1333 | 1.73E-03 | 1.16E-02 |
| 93 | AS3MT  | 57412  | 10 | 104624183 | 104666656 | 1.43E-07 | Lung  | IPF        | -2.9793 | 2.89E-03 | 1.81E-02 |

|     |         |           |    |           |           |          |       |            |         |          |          |
|-----|---------|-----------|----|-----------|-----------|----------|-------|------------|---------|----------|----------|
| 93  | AS3MT   | 57412     | 10 | 104624183 | 104666656 | 1.43E-07 | blood | LungCancer | -3.1333 | 1.73E-03 | 1.16E-02 |
| 93  | AS3MT   | 57412     | 10 | 104624183 | 104666656 | 1.43E-07 | Lung  | LungCancer | -0.2499 | 8.03E-01 | 9.34E-01 |
| 93  | AS3MT   | 57412     | 10 | 104624183 | 104666656 | 1.43E-07 | blood | Snoring    | -3.1333 | 1.73E-03 | 1.16E-02 |
| 93  | AS3MT   | 57412     | 10 | 104624183 | 104666656 | 1.43E-07 | Lung  | Snoring    | -3.1333 | 1.73E-03 | 1.16E-02 |
| 91  | ZSWIM8  | 23053     | 10 | 75540334  | 75566556  | 4.60E-05 | blood | Asthma     | 0.2418  | 8.09E-01 | 9.35E-01 |
| 91  | ZSWIM8  | 23053     | 10 | 75540334  | 75566556  | 4.60E-05 | Lung  | Asthma     | -3.6374 | 2.75E-04 | 2.39E-03 |
| 91  | ZSWIM8  | 23053     | 10 | 75540334  | 75566556  | 4.60E-05 | blood | COPD       | 0.2418  | 8.09E-01 | 9.35E-01 |
| 91  | ZSWIM8  | 23053     | 10 | 75540334  | 75566556  | 4.60E-05 | Lung  | COPD       | -1.9185 | 5.50E-02 | 1.94E-01 |
| 91  | ZSWIM8  | 23053     | 10 | 75540334  | 75566556  | 4.60E-05 | blood | IPF        | 0.2418  | 8.09E-01 | 9.35E-01 |
| 91  | ZSWIM8  | 23053     | 10 | 75540334  | 75566556  | 4.60E-05 | Lung  | IPF        | 0.6818  | 4.95E-01 | 7.36E-01 |
| 91  | ZSWIM8  | 23053     | 10 | 75540334  | 75566556  | 4.60E-05 | blood | LungCancer | 0.2418  | 8.09E-01 | 9.35E-01 |
| 91  | ZSWIM8  | 23053     | 10 | 75540334  | 75566556  | 4.60E-05 | Lung  | LungCancer | -0.6429 | 5.20E-01 | 7.55E-01 |
| 91  | ZSWIM8  | 23053     | 10 | 75540334  | 75566556  | 4.60E-05 | blood | Snoring    | 0.2418  | 8.09E-01 | 9.35E-01 |
| 91  | ZSWIM8  | 23053     | 10 | 75540334  | 75566556  | 4.60E-05 | Lung  | Snoring    | 0.2418  | 8.09E-01 | 9.35E-01 |
| 136 | ZSWIM7  | 125150    | 17 | 15874874  | 15908006  | 6.67E-09 | blood | Asthma     | -0.3596 | 7.19E-01 | 8.94E-01 |
| 136 | ZSWIM7  | 125150    | 17 | 15874874  | 15908006  | 6.67E-09 | Lung  | Asthma     | 5.7847  | 7.26E-09 | 2.43E-07 |
| 136 | ZSWIM7  | 125150    | 17 | 15874874  | 15908006  | 6.67E-09 | blood | COPD       | -0.3596 | 7.19E-01 | 8.94E-01 |
| 136 | ZSWIM7  | 125150    | 17 | 15874874  | 15908006  | 6.67E-09 | Lung  | COPD       | 2.3725  | 1.77E-02 | 8.48E-02 |
| 136 | ZSWIM7  | 125150    | 17 | 15874874  | 15908006  | 6.67E-09 | blood | IPF        | -0.3596 | 7.19E-01 | 8.94E-01 |
| 136 | ZSWIM7  | 125150    | 17 | 15874874  | 15908006  | 6.67E-09 | Lung  | IPF        | 3.0923  | 1.99E-03 | 1.30E-02 |
| 136 | ZSWIM7  | 125150    | 17 | 15874874  | 15908006  | 6.67E-09 | blood | LungCancer | -0.3596 | 7.19E-01 | 8.94E-01 |
| 136 | ZSWIM7  | 125150    | 17 | 15874874  | 15908006  | 6.67E-09 | Lung  | LungCancer | 0.0603  | 9.52E-01 | 9.84E-01 |
| 136 | ZSWIM7  | 125150    | 17 | 15874874  | 15908006  | 6.67E-09 | blood | Snoring    | -0.3596 | 7.19E-01 | 8.94E-01 |
| 136 | ZSWIM7  | 125150    | 17 | 15874874  | 15908006  | 6.67E-09 | Lung  | Snoring    | -0.3596 | 7.19E-01 | 8.94E-01 |
| 94  | MUC5AC  | 4586      | 11 | 1137474   | 1167465   | 1.93E-13 | blood | Asthma     | -0.2777 | 7.81E-01 | 9.29E-01 |
| 94  | MUC5AC  | 4586      | 11 | 1137474   | 1167465   | 1.93E-13 | Lung  | Asthma     | 1.2667  | 2.05E-01 | 4.43E-01 |
| 94  | MUC5AC  | 4586      | 11 | 1137474   | 1167465   | 1.93E-13 | blood | COPD       | -0.2777 | 7.81E-01 | 9.29E-01 |
| 94  | MUC5AC  | 4586      | 11 | 1137474   | 1167465   | 1.93E-13 | Lung  | COPD       | 0.1605  | 8.72E-01 | 9.56E-01 |
| 94  | MUC5AC  | 4586      | 11 | 1137474   | 1167465   | 1.93E-13 | blood | IPF        | -0.2777 | 7.81E-01 | 9.29E-01 |
| 94  | MUC5AC  | 4586      | 11 | 1137474   | 1167465   | 1.93E-13 | Lung  | IPF        | -0.1090 | 9.13E-01 | 9.68E-01 |
| 94  | MUC5AC  | 4586      | 11 | 1137474   | 1167465   | 1.93E-13 | blood | LungCancer | -0.2777 | 7.81E-01 | 9.29E-01 |
| 94  | MUC5AC  | 4586      | 11 | 1137474   | 1167465   | 1.93E-13 | Lung  | LungCancer | 0.0370  | 9.70E-01 | 9.92E-01 |
| 94  | MUC5AC  | 4586      | 11 | 1137474   | 1167465   | 1.93E-13 | blood | Snoring    | -0.2777 | 7.81E-01 | 9.29E-01 |
| 94  | MUC5AC  | 4586      | 11 | 1137474   | 1167465   | 1.93E-13 | Lung  | Snoring    | -0.2777 | 7.81E-01 | 9.29E-01 |
| 78  | XKR9    | 389668    | 8  | 71576600  | 71653177  | 1.24E-09 | blood | Asthma     | 5.6968  | 1.22E-08 | 3.76E-07 |
| 78  | XKR9    | 389668    | 8  | 71576600  | 71653177  | 1.24E-09 | Lung  | Asthma     | -0.2694 | 7.88E-01 | 9.29E-01 |
| 78  | XKR9    | 389668    | 8  | 71576600  | 71653177  | 1.24E-09 | blood | COPD       | 5.6968  | 1.22E-08 | 3.76E-07 |
| 78  | XKR9    | 389668    | 8  | 71576600  | 71653177  | 1.24E-09 | Lung  | COPD       | 1.3915  | 1.64E-01 | 4.00E-01 |
| 78  | XKR9    | 389668    | 8  | 71576600  | 71653177  | 1.24E-09 | blood | IPF        | 5.6968  | 1.22E-08 | 3.76E-07 |
| 78  | XKR9    | 389668    | 8  | 71576600  | 71653177  | 1.24E-09 | Lung  | IPF        | 0.7890  | 4.30E-01 | 6.83E-01 |
| 78  | XKR9    | 389668    | 8  | 71576600  | 71653177  | 1.24E-09 | blood | LungCancer | 5.6968  | 1.22E-08 | 3.76E-07 |
| 78  | XKR9    | 389668    | 8  | 71576600  | 71653177  | 1.24E-09 | Lung  | LungCancer | -2.8096 | 4.96E-03 | 2.92E-02 |
| 78  | XKR9    | 389668    | 8  | 71576600  | 71653177  | 1.24E-09 | blood | Snoring    | 5.6968  | 1.22E-08 | 3.76E-07 |
| 78  | XKR9    | 389668    | 8  | 71576600  | 71653177  | 1.24E-09 | Lung  | Snoring    | 5.6968  | 1.22E-08 | 3.76E-07 |
| 96  | FADS3   | 3995      | 11 | 61635998  | 61664006  | 2.01E-08 | blood | Asthma     | NA      | NA       | NA       |
| 96  | FADS3   | 3995      | 11 | 61635998  | 61664006  | 2.01E-08 | Lung  | Asthma     | NA      | NA       | NA       |
| 96  | FADS3   | 3995      | 11 | 61635998  | 61664006  | 2.01E-08 | blood | COPD       | NA      | NA       | NA       |
| 96  | FADS3   | 3995      | 11 | 61635998  | 61664006  | 2.01E-08 | Lung  | COPD       | NA      | NA       | NA       |
| 96  | FADS3   | 3995      | 11 | 61635998  | 61664006  | 2.01E-08 | blood | IPF        | NA      | NA       | NA       |
| 96  | FADS3   | 3995      | 11 | 61635998  | 61664006  | 2.01E-08 | Lung  | IPF        | NA      | NA       | NA       |
| 96  | FADS3   | 3995      | 11 | 61635998  | 61664006  | 2.01E-08 | blood | LungCancer | NA      | NA       | NA       |
| 96  | FADS3   | 3995      | 11 | 61635998  | 61664006  | 2.01E-08 | Lung  | LungCancer | NA      | NA       | NA       |
| 96  | FADS3   | 3995      | 11 | 61635998  | 61664006  | 2.01E-08 | blood | Snoring    | NA      | NA       | NA       |
| 96  | FADS3   | 3995      | 11 | 61635998  | 61664006  | 2.01E-08 | Lung  | Snoring    | NA      | NA       | NA       |
| 138 | PLEKHM1 | 9842      | 17 | 43508266  | 43573146  | 3.46E-09 | blood | Asthma     | 5.3213  | 1.03E-07 | 2.20E-06 |
| 138 | PLEKHM1 | 9842      | 17 | 43508266  | 43573146  | 3.46E-09 | Lung  | Asthma     | -0.0979 | 9.22E-01 | 9.69E-01 |
| 138 | PLEKHM1 | 9842      | 17 | 43508266  | 43573146  | 3.46E-09 | blood | COPD       | 5.3213  | 1.03E-07 | 2.20E-06 |
| 138 | PLEKHM1 | 9842      | 17 | 43508266  | 43573146  | 3.46E-09 | Lung  | COPD       | 1.5898  | 1.12E-01 | 3.05E-01 |
| 138 | PLEKHM1 | 9842      | 17 | 43508266  | 43573146  | 3.46E-09 | blood | IPF        | 5.3213  | 1.03E-07 | 2.20E-06 |
| 138 | PLEKHM1 | 9842      | 17 | 43508266  | 43573146  | 3.46E-09 | Lung  | IPF        | -4.2206 | 2.44E-05 | 3.02E-04 |
| 138 | PLEKHM1 | 9842      | 17 | 43508266  | 43573146  | 3.46E-09 | blood | LungCancer | 5.3213  | 1.03E-07 | 2.20E-06 |
| 138 | PLEKHM1 | 9842      | 17 | 43508266  | 43573146  | 3.46E-09 | Lung  | LungCancer | -1.3497 | 1.77E-01 | 4.15E-01 |
| 138 | PLEKHM1 | 9842      | 17 | 43508266  | 43573146  | 3.46E-09 | blood | Snoring    | 5.3213  | 1.03E-07 | 2.20E-06 |
| 138 | PLEKHM1 | 9842      | 17 | 43508266  | 43573146  | 3.46E-09 | Lung  | Snoring    | 5.3213  | 1.03E-07 | 2.20E-06 |
| 138 | ARL17B  | 100506084 | 17 | 44346550  | 44444416  | 3.01E-09 | blood | Asthma     | -1.8023 | 7.15E-02 | 2.28E-01 |
| 138 | ARL17B  | 100506084 | 17 | 44346550  | 44444416  | 3.01E-09 | Lung  | Asthma     | 0.9830  | 3.26E-01 | 5.82E-01 |
| 138 | ARL17B  | 100506084 | 17 | 44346550  | 44444416  | 3.01E-09 | blood | COPD       | -1.8023 | 7.15E-02 | 2.28E-01 |
| 138 | ARL17B  | 100506084 | 17 | 44346550  | 44444416  | 3.01E-09 | Lung  | COPD       | -1.1195 | 2.63E-01 | 5.17E-01 |
| 138 | ARL17B  | 100506084 | 17 | 44346550  | 44444416  | 3.01E-09 | blood | IPF        | -1.8023 | 7.15E-02 | 2.28E-01 |
| 138 | ARL17B  | 100506084 | 17 | 44346550  | 44444416  | 3.01E-09 | Lung  | IPF        | 0.6841  | 4.94E-01 | 7.36E-01 |
| 138 | ARL17B  | 100506084 | 17 | 44346550  | 44444416  | 3.01E-09 | blood | LungCancer | -1.8023 | 7.15E-02 | 2.28E-01 |
| 138 | ARL17B  | 100506084 | 17 | 44346550  | 44444416  | 3.01E-09 | Lung  | LungCancer | -0.0632 | 9.50E-01 | 9.84E-01 |
| 138 | ARL17B  | 100506084 | 17 | 44346550  | 44444416  | 3.01E-09 | blood | Snoring    | -1.8023 | 7.15E-02 | 2.28E-01 |

|     |           |           |    |           |           |          |       |            |         |          |          |
|-----|-----------|-----------|----|-----------|-----------|----------|-------|------------|---------|----------|----------|
| 138 | ARL17B    | 100506084 | 17 | 44346550  | 44444416  | 3.01E-09 | Lung  | Snoring    | -1.8023 | 7.15E-02 | 2.28E-01 |
| 25  | GPX1      | 2876      | 3  | 49389609  | 49400791  | 8.30E-06 | blood | Asthma     | 3.2669  | 1.09E-03 | 8.13E-03 |
| 25  | GPX1      | 2876      | 3  | 49389609  | 49400791  | 8.30E-06 | Lung  | Asthma     | -0.9666 | 3.34E-01 | 5.89E-01 |
| 25  | GPX1      | 2876      | 3  | 49389609  | 49400791  | 8.30E-06 | blood | COPD       | 3.2669  | 1.09E-03 | 8.13E-03 |
| 25  | GPX1      | 2876      | 3  | 49389609  | 49400791  | 8.30E-06 | Lung  | COPD       | 1.6081  | 1.08E-01 | 2.97E-01 |
| 25  | GPX1      | 2876      | 3  | 49389609  | 49400791  | 8.30E-06 | blood | IPF        | 3.2669  | 1.09E-03 | 8.13E-03 |
| 25  | GPX1      | 2876      | 3  | 49389609  | 49400791  | 8.30E-06 | Lung  | IPF        | -1.0597 | 2.89E-01 | 5.46E-01 |
| 25  | GPX1      | 2876      | 3  | 49389609  | 49400791  | 8.30E-06 | blood | LungCancer | 3.2669  | 1.09E-03 | 8.13E-03 |
| 25  | GPX1      | 2876      | 3  | 49389609  | 49400791  | 8.30E-06 | Lung  | LungCancer | 1.8846  | 5.95E-02 | 2.05E-01 |
| 25  | GPX1      | 2876      | 3  | 49389609  | 49400791  | 8.30E-06 | blood | Snoring    | 3.2669  | 1.09E-03 | 8.13E-03 |
| 25  | GPX1      | 2876      | 3  | 49389609  | 49400791  | 8.30E-06 | Lung  | Snoring    | 3.2669  | 1.09E-03 | 8.13E-03 |
| 58  | HIST1H2BN | 8341      | 6  | 27800544  | 27826533  | 8.99E-09 | blood | Asthma     | 0.0185  | 9.85E-01 | 9.93E-01 |
| 58  | HIST1H2BN | 8341      | 6  | 27800544  | 27826533  | 8.99E-09 | Lung  | Asthma     | 1.9567  | 5.04E-02 | 1.82E-01 |
| 58  | HIST1H2BN | 8341      | 6  | 27800544  | 27826533  | 8.99E-09 | blood | COPD       | 0.0185  | 9.85E-01 | 9.93E-01 |
| 58  | HIST1H2BN | 8341      | 6  | 27800544  | 27826533  | 8.99E-09 | Lung  | COPD       | -1.5265 | 1.27E-01 | 3.35E-01 |
| 58  | HIST1H2BN | 8341      | 6  | 27800544  | 27826533  | 8.99E-09 | blood | IPF        | 0.0185  | 9.85E-01 | 9.93E-01 |
| 58  | HIST1H2BN | 8341      | 6  | 27800544  | 27826533  | 8.99E-09 | Lung  | IPF        | -2.0370 | 4.17E-02 | 1.60E-01 |
| 58  | HIST1H2BN | 8341      | 6  | 27800544  | 27826533  | 8.99E-09 | blood | LungCancer | 0.0185  | 9.85E-01 | 9.93E-01 |
| 58  | HIST1H2BN | 8341      | 6  | 27800544  | 27826533  | 8.99E-09 | Lung  | LungCancer | -0.1591 | 8.74E-01 | 9.56E-01 |
| 58  | HIST1H2BN | 8341      | 6  | 27800544  | 27826533  | 8.99E-09 | blood | Snoring    | 0.0185  | 9.85E-01 | 9.93E-01 |
| 58  | HIST1H2BN | 8341      | 6  | 27800544  | 27826533  | 8.99E-09 | Lung  | Snoring    | 0.0185  | 9.85E-01 | 9.93E-01 |
| 58  | ZSCAN31   | 64288     | 6  | 28287514  | 28326972  | 2.52E-07 | blood | Asthma     | 0.9282  | 3.53E-01 | 6.08E-01 |
| 58  | ZSCAN31   | 64288     | 6  | 28287514  | 28326972  | 2.52E-07 | Lung  | Asthma     | 3.1184  | 1.82E-03 | 1.21E-02 |
| 58  | ZSCAN31   | 64288     | 6  | 28287514  | 28326972  | 2.52E-07 | blood | COPD       | 0.9282  | 3.53E-01 | 6.08E-01 |
| 58  | ZSCAN31   | 64288     | 6  | 28287514  | 28326972  | 2.52E-07 | Lung  | COPD       | -0.8069 | 4.20E-01 | 6.71E-01 |
| 58  | ZSCAN31   | 64288     | 6  | 28287514  | 28326972  | 2.52E-07 | blood | IPF        | 0.9282  | 3.53E-01 | 6.08E-01 |
| 58  | ZSCAN31   | 64288     | 6  | 28287514  | 28326972  | 2.52E-07 | Lung  | IPF        | 2.0231  | 4.31E-02 | 1.64E-01 |
| 58  | ZSCAN31   | 64288     | 6  | 28287514  | 28326972  | 2.52E-07 | blood | LungCancer | 0.9282  | 3.53E-01 | 6.08E-01 |
| 58  | ZSCAN31   | 64288     | 6  | 28287514  | 28326972  | 2.52E-07 | Lung  | LungCancer | 2.0027  | 4.52E-02 | 1.71E-01 |
| 58  | ZSCAN31   | 64288     | 6  | 28287514  | 28326972  | 2.52E-07 | blood | Snoring    | 0.9282  | 3.53E-01 | 6.08E-01 |
| 58  | ZSCAN31   | 64288     | 6  | 28287514  | 28326972  | 2.52E-07 | Lung  | Snoring    | 0.9282  | 3.53E-01 | 6.08E-01 |
| 38  | ARHGEF38  | 54848     | 4  | 106468704 | 106607070 | 1.35E-06 | blood | Asthma     | -0.3260 | 7.44E-01 | 9.05E-01 |
| 38  | ARHGEF38  | 54848     | 4  | 106468704 | 106607070 | 1.35E-06 | Lung  | Asthma     | -5.7543 | 8.70E-09 | 2.88E-07 |
| 38  | ARHGEF38  | 54848     | 4  | 106468704 | 106607070 | 1.35E-06 | blood | COPD       | -0.3260 | 7.44E-01 | 9.05E-01 |
| 38  | ARHGEF38  | 54848     | 4  | 106468704 | 106607070 | 1.35E-06 | Lung  | COPD       | -3.0845 | 2.04E-03 | 1.32E-02 |
| 38  | ARHGEF38  | 54848     | 4  | 106468704 | 106607070 | 1.35E-06 | blood | IPF        | -0.3260 | 7.44E-01 | 9.05E-01 |
| 38  | ARHGEF38  | 54848     | 4  | 106468704 | 106607070 | 1.35E-06 | Lung  | IPF        | 0.2278  | 8.20E-01 | 9.43E-01 |
| 38  | ARHGEF38  | 54848     | 4  | 106468704 | 106607070 | 1.35E-06 | blood | LungCancer | -0.3260 | 7.44E-01 | 9.05E-01 |
| 38  | ARHGEF38  | 54848     | 4  | 106468704 | 106607070 | 1.35E-06 | Lung  | LungCancer | -0.8121 | 4.17E-01 | 6.68E-01 |
| 38  | ARHGEF38  | 54848     | 4  | 106468704 | 106607070 | 1.35E-06 | blood | Snoring    | -0.3260 | 7.44E-01 | 9.05E-01 |
| 38  | ARHGEF38  | 54848     | 4  | 106468704 | 106607070 | 1.35E-06 | Lung  | Snoring    | -0.3260 | 7.44E-01 | 9.05E-01 |
| 135 | TNFSF12   | 8742      | 17 | 7447375   | 7466207   | 1.02E-06 | blood | Asthma     | -0.9684 | 3.33E-01 | 5.88E-01 |
| 135 | TNFSF12   | 8742      | 17 | 7447375   | 7466207   | 1.02E-06 | Lung  | Asthma     | -1.8241 | 6.81E-02 | 2.23E-01 |
| 135 | TNFSF12   | 8742      | 17 | 7447375   | 7466207   | 1.02E-06 | blood | COPD       | -0.9684 | 3.33E-01 | 5.88E-01 |
| 135 | TNFSF12   | 8742      | 17 | 7447375   | 7466207   | 1.02E-06 | Lung  | COPD       | 0.0517  | 9.59E-01 | 9.86E-01 |
| 135 | TNFSF12   | 8742      | 17 | 7447375   | 7466207   | 1.02E-06 | blood | IPF        | -0.9684 | 3.33E-01 | 5.88E-01 |
| 135 | TNFSF12   | 8742      | 17 | 7447375   | 7466207   | 1.02E-06 | Lung  | IPF        | -0.3442 | 7.31E-01 | 8.98E-01 |
| 135 | TNFSF12   | 8742      | 17 | 7447375   | 7466207   | 1.02E-06 | blood | LungCancer | -0.9684 | 3.33E-01 | 5.88E-01 |
| 135 | TNFSF12   | 8742      | 17 | 7447375   | 7466207   | 1.02E-06 | Lung  | LungCancer | -0.1575 | 8.75E-01 | 9.56E-01 |
| 135 | TNFSF12   | 8742      | 17 | 7447375   | 7466207   | 1.02E-06 | blood | Snoring    | -0.9684 | 3.33E-01 | 5.88E-01 |
| 135 | TNFSF12   | 8742      | 17 | 7447375   | 7466207   | 1.02E-06 | Lung  | Snoring    | -0.9684 | 3.33E-01 | 5.88E-01 |
| 154 | TNFRSF6B  | 8771      | 20 | 62323004  | 62335051  | 5.88E-11 | blood | Asthma     | -1.2731 | 2.03E-01 | 4.39E-01 |
| 154 | TNFRSF6B  | 8771      | 20 | 62323004  | 62335051  | 5.88E-11 | Lung  | Asthma     | -5.4417 | 5.28E-08 | 1.24E-06 |
| 154 | TNFRSF6B  | 8771      | 20 | 62323004  | 62335051  | 5.88E-11 | blood | COPD       | -1.2731 | 2.03E-01 | 4.39E-01 |
| 154 | TNFRSF6B  | 8771      | 20 | 62323004  | 62335051  | 5.88E-11 | Lung  | COPD       | -4.1041 | 4.06E-05 | 4.64E-04 |
| 154 | TNFRSF6B  | 8771      | 20 | 62323004  | 62335051  | 5.88E-11 | blood | IPF        | -1.2731 | 2.03E-01 | 4.39E-01 |
| 154 | TNFRSF6B  | 8771      | 20 | 62323004  | 62335051  | 5.88E-11 | Lung  | IPF        | -1.1116 | 2.66E-01 | 5.17E-01 |
| 154 | TNFRSF6B  | 8771      | 20 | 62323004  | 62335051  | 5.88E-11 | blood | LungCancer | -1.2731 | 2.03E-01 | 4.39E-01 |
| 154 | TNFRSF6B  | 8771      | 20 | 62323004  | 62335051  | 5.88E-11 | Lung  | LungCancer | -1.0032 | 3.16E-01 | 5.72E-01 |
| 154 | TNFRSF6B  | 8771      | 20 | 62323004  | 62335051  | 5.88E-11 | blood | Snoring    | -1.2731 | 2.03E-01 | 4.39E-01 |
| 154 | TNFRSF6B  | 8771      | 20 | 62323004  | 62335051  | 5.88E-11 | Lung  | Snoring    | -1.2731 | 2.03E-01 | 4.39E-01 |
| 76  | PINX1     | 54984     | 8  | 10617473  | 10702394  | 2.49E-05 | blood | Asthma     | -0.5628 | 5.74E-01 | 7.89E-01 |
| 76  | PINX1     | 54984     | 8  | 10617473  | 10702394  | 2.49E-05 | Lung  | Asthma     | 2.2726  | 2.30E-02 | 1.03E-01 |
| 76  | PINX1     | 54984     | 8  | 10617473  | 10702394  | 2.49E-05 | blood | COPD       | -0.5628 | 5.74E-01 | 7.89E-01 |
| 76  | PINX1     | 54984     | 8  | 10617473  | 10702394  | 2.49E-05 | Lung  | COPD       | 0.9120  | 3.62E-01 | 6.15E-01 |
| 76  | PINX1     | 54984     | 8  | 10617473  | 10702394  | 2.49E-05 | blood | IPF        | -0.5628 | 5.74E-01 | 7.89E-01 |
| 76  | PINX1     | 54984     | 8  | 10617473  | 10702394  | 2.49E-05 | Lung  | IPF        | 2.5262  | 1.15E-02 | 5.97E-02 |
| 76  | PINX1     | 54984     | 8  | 10617473  | 10702394  | 2.49E-05 | blood | LungCancer | -0.5628 | 5.74E-01 | 7.89E-01 |
| 76  | PINX1     | 54984     | 8  | 10617473  | 10702394  | 2.49E-05 | Lung  | LungCancer | -0.6400 | 5.22E-01 | 7.55E-01 |
| 76  | PINX1     | 54984     | 8  | 10617473  | 10702394  | 2.49E-05 | blood | Snoring    | -0.5628 | 5.74E-01 | 7.89E-01 |
| 76  | PINX1     | 54984     | 8  | 10617473  | 10702394  | 2.49E-05 | Lung  | Snoring    | -0.5628 | 5.74E-01 | 7.89E-01 |
| 97  | AP5B1     | 91056     | 11 | 65536369  | 65553062  | 6.18E-05 | blood | Asthma     | NA      | NA       | NA       |
| 97  | AP5B1     | 91056     | 11 | 65536369  | 65553062  | 6.18E-05 | Lung  | Asthma     | NA      | NA       | NA       |



|     |           |       |    |          |          |          |       |            |         |          |          |
|-----|-----------|-------|----|----------|----------|----------|-------|------------|---------|----------|----------|
| 97  | AP5B1     | 91056 | 11 | 65536369 | 65553062 | 6.18E-05 | blood | COPD       | NA      | NA       | NA       |
| 97  | AP5B1     | 91056 | 11 | 65536369 | 65553062 | 6.18E-05 | Lung  | COPD       | NA      | NA       | NA       |
| 97  | AP5B1     | 91056 | 11 | 65536369 | 65553062 | 6.18E-05 | blood | IPF        | NA      | NA       | NA       |
| 97  | AP5B1     | 91056 | 11 | 65536369 | 65553062 | 6.18E-05 | Lung  | IPF        | NA      | NA       | NA       |
| 97  | AP5B1     | 91056 | 11 | 65536369 | 65553062 | 6.18E-05 | blood | LungCancer | NA      | NA       | NA       |
| 97  | AP5B1     | 91056 | 11 | 65536369 | 65553062 | 6.18E-05 | Lung  | LungCancer | NA      | NA       | NA       |
| 97  | AP5B1     | 91056 | 11 | 65536369 | 65553062 | 6.18E-05 | blood | Snoring    | NA      | NA       | NA       |
| 97  | AP5B1     | 91056 | 11 | 65536369 | 65553062 | 6.18E-05 | Lung  | Snoring    | NA      | NA       | NA       |
| 149 | CYP2A6    | 1548  | 19 | 41344441 | 41361360 | 3.29E-09 | blood | Asthma     | 0.3733  | 7.09E-01 | 8.85E-01 |
| 149 | CYP2A6    | 1548  | 19 | 41344441 | 41361360 | 3.29E-09 | Lung  | Asthma     | 0.3527  | 7.24E-01 | 8.97E-01 |
| 149 | CYP2A6    | 1548  | 19 | 41344441 | 41361360 | 3.29E-09 | blood | COPD       | 0.3733  | 7.09E-01 | 8.85E-01 |
| 149 | CYP2A6    | 1548  | 19 | 41344441 | 41361360 | 3.29E-09 | Lung  | COPD       | 1.4904  | 1.36E-01 | 3.53E-01 |
| 149 | CYP2A6    | 1548  | 19 | 41344441 | 41361360 | 3.29E-09 | blood | IPF        | 0.3733  | 7.09E-01 | 8.85E-01 |
| 149 | CYP2A6    | 1548  | 19 | 41344441 | 41361360 | 3.29E-09 | Lung  | IPF        | -0.7009 | 4.83E-01 | 7.30E-01 |
| 149 | CYP2A6    | 1548  | 19 | 41344441 | 41361360 | 3.29E-09 | blood | LungCancer | 0.3733  | 7.09E-01 | 8.85E-01 |
| 149 | CYP2A6    | 1548  | 19 | 41344441 | 41361360 | 3.29E-09 | Lung  | LungCancer | 5.9083  | 3.46E-09 | 1.57E-07 |
| 149 | CYP2A6    | 1548  | 19 | 41344441 | 41361360 | 3.29E-09 | blood | Snoring    | 0.3733  | 7.09E-01 | 8.85E-01 |
| 149 | CYP2A6    | 1548  | 19 | 41344441 | 41361360 | 3.29E-09 | Lung  | Snoring    | 0.3733  | 7.09E-01 | 8.85E-01 |
| 154 | RTEL1     | 51750 | 20 | 62284163 | 62332606 | 6.51E-09 | blood | Asthma     | 0.1048  | 9.17E-01 | 9.68E-01 |
| 154 | RTEL1     | 51750 | 20 | 62284163 | 62332606 | 6.51E-09 | Lung  | Asthma     | 1.6592  | 9.17E-02 | 2.82E-01 |
| 154 | RTEL1     | 51750 | 20 | 62284163 | 62332606 | 6.51E-09 | blood | COPD       | 0.1048  | 9.17E-01 | 9.68E-01 |
| 154 | RTEL1     | 51750 | 20 | 62284163 | 62332606 | 6.51E-09 | Lung  | COPD       | 2.0810  | 3.74E-02 | 1.49E-01 |
| 154 | RTEL1     | 51750 | 20 | 62284163 | 62332606 | 6.51E-09 | blood | IPF        | 0.1048  | 9.17E-01 | 9.68E-01 |
| 154 | RTEL1     | 51750 | 20 | 62284163 | 62332606 | 6.51E-09 | Lung  | IPF        | -0.1337 | 8.94E-01 | 9.62E-01 |
| 154 | RTEL1     | 51750 | 20 | 62284163 | 62332606 | 6.51E-09 | blood | LungCancer | 0.1048  | 9.17E-01 | 9.68E-01 |
| 154 | RTEL1     | 51750 | 20 | 62284163 | 62332606 | 6.51E-09 | Lung  | LungCancer | 0.0872  | 9.31E-01 | 9.74E-01 |
| 154 | RTEL1     | 51750 | 20 | 62284163 | 62332606 | 6.51E-09 | blood | Snoring    | 0.1048  | 9.17E-01 | 9.68E-01 |
| 154 | RTEL1     | 51750 | 20 | 62284163 | 62332606 | 6.51E-09 | Lung  | Snoring    | 0.1048  | 9.17E-01 | 9.68E-01 |
| 139 | HOXB7     | 3217  | 17 | 46679594 | 46693383 | 6.23E-07 | blood | Asthma     | 4.6633  | 3.11E-06 | 4.45E-05 |
| 139 | HOXB7     | 3217  | 17 | 46679594 | 46693383 | 6.23E-07 | Lung  | Asthma     | 2.3824  | 1.72E-02 | 8.27E-02 |
| 139 | HOXB7     | 3217  | 17 | 46679594 | 46693383 | 6.23E-07 | blood | COPD       | 4.6633  | 3.11E-06 | 4.45E-05 |
| 139 | HOXB7     | 3217  | 17 | 46679594 | 46693383 | 6.23E-07 | Lung  | COPD       | 0.5519  | 5.81E-01 | 7.93E-01 |
| 139 | HOXB7     | 3217  | 17 | 46679594 | 46693383 | 6.23E-07 | blood | IPF        | 4.6633  | 3.11E-06 | 4.45E-05 |
| 139 | HOXB7     | 3217  | 17 | 46679594 | 46693383 | 6.23E-07 | Lung  | IPF        | 0.7877  | 4.31E-01 | 6.83E-01 |
| 139 | HOXB7     | 3217  | 17 | 46679594 | 46693383 | 6.23E-07 | blood | LungCancer | 4.6633  | 3.11E-06 | 4.45E-05 |
| 139 | HOXB7     | 3217  | 17 | 46679594 | 46693383 | 6.23E-07 | Lung  | LungCancer | 2.6559  | 7.91E-03 | 4.33E-02 |
| 139 | HOXB7     | 3217  | 17 | 46679594 | 46693383 | 6.23E-07 | blood | Snoring    | 4.6633  | 3.11E-06 | 4.45E-05 |
| 139 | HOXB7     | 3217  | 17 | 46679594 | 46693383 | 6.23E-07 | Lung  | Snoring    | 4.6633  | 3.11E-06 | 4.45E-05 |
| 58  | HIST1H2BM | 8342  | 6  | 27777822 | 27788267 | 4.10E-07 | blood | Asthma     | NA      | NA       | NA       |
| 58  | HIST1H2BM | 8342  | 6  | 27777822 | 27788267 | 4.10E-07 | Lung  | Asthma     | NA      | NA       | NA       |
| 58  | HIST1H2BM | 8342  | 6  | 27777822 | 27788267 | 4.10E-07 | blood | COPD       | NA      | NA       | NA       |
| 58  | HIST1H2BM | 8342  | 6  | 27777822 | 27788267 | 4.10E-07 | Lung  | COPD       | NA      | NA       | NA       |
| 58  | HIST1H2BM | 8342  | 6  | 27777822 | 27788267 | 4.10E-07 | blood | IPF        | NA      | NA       | NA       |
| 58  | HIST1H2BM | 8342  | 6  | 27777822 | 27788267 | 4.10E-07 | Lung  | IPF        | NA      | NA       | NA       |
| 58  | HIST1H2BM | 8342  | 6  | 27777822 | 27788267 | 4.10E-07 | blood | LungCancer | NA      | NA       | NA       |
| 58  | HIST1H2BM | 8342  | 6  | 27777822 | 27788267 | 4.10E-07 | Lung  | LungCancer | NA      | NA       | NA       |
| 58  | HIST1H2BM | 8342  | 6  | 27777822 | 27788267 | 4.10E-07 | blood | Snoring    | NA      | NA       | NA       |
| 58  | HIST1H2BM | 8342  | 6  | 27777822 | 27788267 | 4.10E-07 | Lung  | Snoring    | NA      | NA       | NA       |
| 58  | HIST1H2BO | 8348  | 6  | 27856203 | 27931100 | 1.49E-07 | blood | Asthma     | -0.9405 | 3.47E-01 | 6.06E-01 |
| 58  | HIST1H2BO | 8348  | 6  | 27856203 | 27931100 | 1.49E-07 | Lung  | Asthma     | 0.4351  | 6.63E-01 | 8.51E-01 |
| 58  | HIST1H2BO | 8348  | 6  | 27856203 | 27931100 | 1.49E-07 | blood | COPD       | -0.9405 | 3.47E-01 | 6.06E-01 |
| 58  | HIST1H2BO | 8348  | 6  | 27856203 | 27931100 | 1.49E-07 | Lung  | COPD       | -0.9732 | 3.30E-01 | 5.86E-01 |
| 58  | HIST1H2BO | 8348  | 6  | 27856203 | 27931100 | 1.49E-07 | blood | IPF        | -0.9405 | 3.47E-01 | 6.06E-01 |
| 58  | HIST1H2BO | 8348  | 6  | 27856203 | 27931100 | 1.49E-07 | Lung  | IPF        | -0.3922 | 6.95E-01 | 8.75E-01 |
| 58  | HIST1H2BO | 8348  | 6  | 27856203 | 27931100 | 1.49E-07 | blood | LungCancer | -0.9405 | 3.47E-01 | 6.06E-01 |
| 58  | HIST1H2BO | 8348  | 6  | 27856203 | 27931100 | 1.49E-07 | Lung  | LungCancer | 0.9367  | 3.49E-01 | 6.08E-01 |
| 58  | HIST1H2BO | 8348  | 6  | 27856203 | 27931100 | 1.49E-07 | blood | Snoring    | -0.9405 | 3.47E-01 | 6.06E-01 |
| 58  | HIST1H2BO | 8348  | 6  | 27856203 | 27931100 | 1.49E-07 | Lung  | Snoring    | -0.9405 | 3.47E-01 | 6.06E-01 |
| 58  | HIST1H4I  | 8294  | 6  | 27101924 | 27113258 | 3.43E-05 | blood | Asthma     | 1.8747  | 6.08E-02 | 2.05E-01 |
| 58  | HIST1H4I  | 8294  | 6  | 27101924 | 27113258 | 3.43E-05 | Lung  | Asthma     | -0.4280 | 6.69E-01 | 8.58E-01 |
| 58  | HIST1H4I  | 8294  | 6  | 27101924 | 27113258 | 3.43E-05 | blood | COPD       | 1.8747  | 6.08E-02 | 2.05E-01 |
| 58  | HIST1H4I  | 8294  | 6  | 27101924 | 27113258 | 3.43E-05 | Lung  | COPD       | -0.4227 | 6.73E-01 | 8.59E-01 |
| 58  | HIST1H4I  | 8294  | 6  | 27101924 | 27113258 | 3.43E-05 | blood | IPF        | 1.8747  | 6.08E-02 | 2.05E-01 |
| 58  | HIST1H4I  | 8294  | 6  | 27101924 | 27113258 | 3.43E-05 | Lung  | IPF        | -0.3097 | 7.57E-01 | 9.17E-01 |
| 58  | HIST1H4I  | 8294  | 6  | 27101924 | 27113258 | 3.43E-05 | blood | LungCancer | 1.8747  | 6.08E-02 | 2.05E-01 |
| 58  | HIST1H4I  | 8294  | 6  | 27101924 | 27113258 | 3.43E-05 | Lung  | LungCancer | NA      | NA       | NA       |
| 58  | HIST1H4I  | 8294  | 6  | 27101924 | 27113258 | 3.43E-05 | blood | Snoring    | 1.8747  | 6.08E-02 | 2.05E-01 |
| 58  | HIST1H4I  | 8294  | 6  | 27101924 | 27113258 | 3.43E-05 | Lung  | Snoring    | 1.8747  | 6.08E-02 | 2.05E-01 |
| 58  | HIST1H2AL | 8332  | 6  | 27828107 | 27838576 | 8.54E-09 | blood | Asthma     | NA      | NA       | NA       |
| 58  | HIST1H2AL | 8332  | 6  | 27828107 | 27838576 | 8.54E-09 | Lung  | Asthma     | NA      | NA       | NA       |
| 58  | HIST1H2AL | 8332  | 6  | 27828107 | 27838576 | 8.54E-09 | blood | COPD       | NA      | NA       | NA       |
| 58  | HIST1H2AL | 8332  | 6  | 27828107 | 27838576 | 8.54E-09 | Lung  | COPD       | NA      | NA       | NA       |
| 58  | HIST1H2AL | 8332  | 6  | 27828107 | 27838576 | 8.54E-09 | blood | IPF        | NA      | NA       | NA       |

|    |           |      |   |          |          |          |       |            |         |          |          |
|----|-----------|------|---|----------|----------|----------|-------|------------|---------|----------|----------|
| 58 | HIST1H2AL | 8332 | 6 | 27828107 | 27838576 | 8.54E-09 | Lung  | IPF        | NA      | NA       | NA       |
| 58 | HIST1H2AL | 8332 | 6 | 27828107 | 27838576 | 8.54E-09 | blood | LungCancer | NA      | NA       | NA       |
| 58 | HIST1H2AL | 8332 | 6 | 27828107 | 27838576 | 8.54E-09 | Lung  | LungCancer | NA      | NA       | NA       |
| 58 | HIST1H2AL | 8332 | 6 | 27828107 | 27838576 | 8.54E-09 | blood | Snoring    | NA      | NA       | NA       |
| 58 | HIST1H2AL | 8332 | 6 | 27828107 | 27838576 | 8.54E-09 | Lung  | Snoring    | NA      | NA       | NA       |
| 58 | HIST1H2BI | 8346 | 6 | 26268204 | 26278640 | 7.13E-07 | blood | Asthma     | -0.5362 | 5.92E-01 | 7.98E-01 |
| 58 | HIST1H2BI | 8346 | 6 | 26268204 | 26278640 | 7.13E-07 | Lung  | Asthma     | 1.0416  | 2.98E-01 | 5.53E-01 |
| 58 | HIST1H2BI | 8346 | 6 | 26268204 | 26278640 | 7.13E-07 | blood | COPD       | -0.5362 | 5.92E-01 | 7.98E-01 |
| 58 | HIST1H2BI | 8346 | 6 | 26268204 | 26278640 | 7.13E-07 | Lung  | COPD       | -1.2014 | 2.30E-01 | 4.74E-01 |
| 58 | HIST1H2BI | 8346 | 6 | 26268204 | 26278640 | 7.13E-07 | blood | IPF        | -0.5362 | 5.92E-01 | 7.98E-01 |
| 58 | HIST1H2BI | 8346 | 6 | 26268204 | 26278640 | 7.13E-07 | Lung  | IPF        | -0.8258 | 4.09E-01 | 6.58E-01 |
| 58 | HIST1H2BI | 8346 | 6 | 26268204 | 26278640 | 7.13E-07 | blood | LungCancer | -0.5362 | 5.92E-01 | 7.98E-01 |
| 58 | HIST1H2BI | 8346 | 6 | 26268204 | 26278640 | 7.13E-07 | Lung  | LungCancer | -0.1927 | 8.47E-01 | 9.54E-01 |
| 58 | HIST1H2BI | 8346 | 6 | 26268204 | 26278640 | 7.13E-07 | blood | Snoring    | -0.5362 | 5.92E-01 | 7.98E-01 |
| 58 | HIST1H2BI | 8346 | 6 | 26268204 | 26278640 | 7.13E-07 | Lung  | Snoring    | -0.5362 | 5.92E-01 | 7.98E-01 |
| 58 | HIST1H3H  | 8357 | 6 | 27772842 | 27783314 | 4.52E-08 | blood | Asthma     | 0.2219  | 8.24E-01 | 9.43E-01 |
| 58 | HIST1H3H  | 8357 | 6 | 27772842 | 27783314 | 4.52E-08 | Lung  | Asthma     | -0.2925 | 7.70E-01 | 9.23E-01 |
| 58 | HIST1H3H  | 8357 | 6 | 27772842 | 27783314 | 4.52E-08 | blood | COPD       | 0.2219  | 8.24E-01 | 9.43E-01 |
| 58 | HIST1H3H  | 8357 | 6 | 27772842 | 27783314 | 4.52E-08 | Lung  | COPD       | 0.0926  | 9.26E-01 | 9.70E-01 |
| 58 | HIST1H3H  | 8357 | 6 | 27772842 | 27783314 | 4.52E-08 | blood | IPF        | 0.2219  | 8.24E-01 | 9.43E-01 |
| 58 | HIST1H3H  | 8357 | 6 | 27772842 | 27783314 | 4.52E-08 | Lung  | IPF        | 1.2719  | 2.03E-01 | 4.39E-01 |
| 58 | HIST1H3H  | 8357 | 6 | 27772842 | 27783314 | 4.52E-08 | blood | LungCancer | 0.2219  | 8.24E-01 | 9.43E-01 |
| 58 | HIST1H3H  | 8357 | 6 | 27772842 | 27783314 | 4.52E-08 | Lung  | LungCancer | -0.6065 | 5.44E-01 | 7.64E-01 |
| 58 | HIST1H3H  | 8357 | 6 | 27772842 | 27783314 | 4.52E-08 | blood | Snoring    | 0.2219  | 8.24E-01 | 9.43E-01 |
| 58 | HIST1H3H  | 8357 | 6 | 27772842 | 27783314 | 4.52E-08 | Lung  | Snoring    | 0.2219  | 8.24E-01 | 9.43E-01 |
