# Supplementary material for: Shared genetic aetiology of respiratory diseases: a genome-wide multitraits association analysis
Source: PubMed Central journal article supplement — BMJ Open Respir Res. 2024 Jun 4;11(1):e002148. doi: 10.1136/bmjresp-2023-002148 (PMC11163672; doi:10.1136/bmjresp-2023-002148), 2024-06-04
Supplement: bmjresp-2023-002148supp017.pdf [file bmjresp-2023-002148supp017.pdf]

Table 16. Identification of pleiotropic genes using proteome-wide association studies

| Locus No. | Gene    | GENE  | CHR | START    | STOP     | P.magma  | Trait      | PWAS.Z  | PWAS.P   | P.adjusted |
|-----------|---------|-------|-----|----------|----------|----------|------------|---------|----------|------------|
| 150       | APOC1   | 341   | 19  | 45412577 | 45427606 | 1.91E-06 | Asthma     | -1.4620 | 1.44E-01 | 3.10E-01   |
| 150       | APOC1   | 341   | 19  | 45412577 | 45427606 | 1.91E-06 | COPD       | -1.6306 | 1.03E-01 | 2.55E-01   |
| 150       | APOC1   | 341   | 19  | 45412577 | 45427606 | 1.91E-06 | IPF        | 1.0344  | 3.01E-01 | 5.47E-01   |
| 150       | APOC1   | 341   | 19  | 45412577 | 45427606 | 1.91E-06 | LungCancer | 0.9865  | 3.24E-01 | 5.65E-01   |
| 150       | APOC1   | 341   | 19  | 45412577 | 45427606 | 1.91E-06 | Snoring    | -3.9882 | 6.66E-05 | 6.61E-04   |
| 150       | APOE    | 348   | 19  | 45404039 | 45417650 | 3.30E-05 | Asthma     | -2.0147 | 4.39E-02 | 1.44E-01   |
| 150       | APOE    | 348   | 19  | 45404039 | 45417650 | 3.30E-05 | COPD       | -1.7577 | 7.88E-02 | 2.08E-01   |
| 150       | APOE    | 348   | 19  | 45404039 | 45417650 | 3.30E-05 | IPF        | -0.7665 | 4.43E-01 | 6.57E-01   |
| 150       | APOE    | 348   | 19  | 45404039 | 45417650 | 3.30E-05 | LungCancer | -0.4392 | 6.61E-01 | 8.20E-01   |
| 150       | APOE    | 348   | 19  | 45404039 | 45417650 | 3.30E-05 | Snoring    | -2.9244 | 3.45E-03 | 1.94E-02   |
| 71        | AZGP1   | 563   | 7   | 99559350 | 99578735 | 2.92E-06 | Asthma     | 0.6883  | 4.91E-01 | 7.08E-01   |
| 71        | AZGP1   | 563   | 7   | 99559350 | 99578735 | 2.92E-06 | COPD       | -1.5559 | 1.20E-01 | 2.89E-01   |
| 71        | AZGP1   | 563   | 7   | 99559350 | 99578735 | 2.92E-06 | IPF        | 0.8534  | 3.93E-01 | 6.19E-01   |
| 71        | AZGP1   | 563   | 7   | 99559350 | 99578735 | 2.92E-06 | LungCancer | -0.3362 | 7.37E-01 | 8.69E-01   |
| 71        | AZGP1   | 563   | 7   | 99559350 | 99578735 | 2.92E-06 | Snoring    | 0.4138  | 6.79E-01 | 8.34E-01   |
| 156       | CCDC134 | 79879 | 22  | 42191636 | 42233175 | 4.97E-11 | Asthma     | 0.1944  | 8.46E-01 | 9.20E-01   |
| 156       | CCDC134 | 79879 | 22  | 42191636 | 42233175 | 4.97E-11 | COPD       | 0.7956  | 4.26E-01 | 6.39E-01   |
| 156       | CCDC134 | 79879 | 22  | 42191636 | 42233175 | 4.97E-11 | IPF        | 0.5182  | 6.04E-01 | 7.80E-01   |
| 156       | CCDC134 | 79879 | 22  | 42191636 | 42233175 | 4.97E-11 | LungCancer | -0.1527 | 8.79E-01 | 9.34E-01   |
| 156       | CCDC134 | 79879 | 22  | 42191636 | 42233175 | 4.97E-11 | Snoring    | 1.4109  | 1.58E-01 | 3.35E-01   |
| 86        | CNTFR   | 1271  | 9   | 34546425 | 34595713 | 1.48E-05 | Asthma     | 3.5130  | 4.43E-04 | 3.17E-03   |
| 86        | CNTFR   | 1271  | 9   | 34546425 | 34595713 | 1.48E-05 | COPD       | 2.5458  | 1.09E-02 | 4.69E-02   |
| 86        | CNTFR   | 1271  | 9   | 34546425 | 34595713 | 1.48E-05 | IPF        | 1.4745  | 1.40E-01 | 3.10E-01   |
| 86        | CNTFR   | 1271  | 9   | 34546425 | 34595713 | 1.48E-05 | LungCancer | -1.0717 | 2.84E-01 | 5.23E-01   |
| 86        | CNTFR   | 1271  | 9   | 34546425 | 34595713 | 1.48E-05 | Snoring    | -2.1866 | 2.88E-02 | 1.09E-01   |
| 104       | ERBB3   | 2065  | 12  | 56468809 | 56502291 | 6.51E-12 | Asthma     | -3.4645 | 5.31E-04 | 3.61E-03   |
| 104       | ERBB3   | 2065  | 12  | 56468809 | 56502291 | 6.51E-12 | COPD       | -0.3310 | 7.41E-01 | 8.69E-01   |
| 104       | ERBB3   | 2065  | 12  | 56468809 | 56502291 | 6.51E-12 | IPF        | 0.6099  | 5.42E-01 | 7.28E-01   |
| 104       | ERBB3   | 2065  | 12  | 56468809 | 56502291 | 6.51E-12 | LungCancer | NA      | NA       | NA         |
| 104       | ERBB3   | 2065  | 12  | 56468809 | 56502291 | 6.51E-12 | Snoring    | 1.5136  | 1.30E-01 | 2.99E-01   |
| 123       | FGF7    | 2252  | 15  | 49710375 | 49784523 | 3.77E-06 | Asthma     | -4.6997 | 2.60E-06 | 3.73E-05   |
| 123       | FGF7    | 2252  | 15  | 49710375 | 49784523 | 3.77E-06 | COPD       | -2.0838 | 3.72E-02 | 1.33E-01   |
| 123       | FGF7    | 2252  | 15  | 49710375 | 49784523 | 3.77E-06 | IPF        | -1.8685 | 6.17E-02 | 1.77E-01   |
| 123       | FGF7    | 2252  | 15  | 49710375 | 49784523 | 3.77E-06 | LungCancer | -0.1908 | 8.49E-01 | 9.20E-01   |
| 123       | FGF7    | 2252  | 15  | 49710375 | 49784523 | 3.77E-06 | Snoring    | -2.0025 | 4.52E-02 | 1.44E-01   |
| 138       | HEXIM1  | 10614 | 17  | 43219684 | 43234468 | 3.07E-07 | Asthma     | 5.2235  | 1.76E-07 | 3.24E-06   |
| 138       | HEXIM1  | 10614 | 17  | 43219684 | 43234468 | 3.07E-07 | COPD       | 3.4465  | 5.68E-04 | 3.66E-03   |
| 138       | HEXIM1  | 10614 | 17  | 43219684 | 43234468 | 3.07E-07 | IPF        | 0.2283  | 8.19E-01 | 9.03E-01   |
| 138       | HEXIM1  | 10614 | 17  | 43219684 | 43234468 | 3.07E-07 | LungCancer | 0.0450  | 9.64E-01 | 9.72E-01   |
| 138       | HEXIM1  | 10614 | 17  | 43219684 | 43234468 | 3.07E-07 | Snoring    | -1.5297 | 1.26E-01 | 2.96E-01   |
| 86        | IL11RA  | 3590  | 9   | 34647182 | 34666899 | 5.29E-05 | Asthma     | -2.7105 | 6.72E-03 | 3.33E-02   |
| 86        | IL11RA  | 3590  | 9   | 34647182 | 34666899 | 5.29E-05 | COPD       | -2.7763 | 5.50E-03 | 2.96E-02   |
| 86        | IL11RA  | 3590  | 9   | 34647182 | 34666899 | 5.29E-05 | IPF        | -1.2097 | 2.26E-01 | 4.36E-01   |
| 86        | IL11RA  | 3590  | 9   | 34647182 | 34666899 | 5.29E-05 | LungCancer | 0.8258  | 4.09E-01 | 6.36E-01   |
| 86        | IL11RA  | 3590  | 9   | 34647182 | 34666899 | 5.29E-05 | Snoring    | -0.2955 | 7.68E-01 | 8.72E-01   |
| 17        | IL1R1   | 3554  | 2   | 1.03E+08 | 1.03E+08 | 2.30E-16 | Asthma     | 4.3086  | 1.64E-05 | 1.76E-04   |
| 17        | IL1R1   | 3554  | 2   | 1.03E+08 | 1.03E+08 | 2.30E-16 | COPD       | 0.6247  | 5.32E-01 | 7.23E-01   |
| 17        | IL1R1   | 3554  | 2   | 1.03E+08 | 1.03E+08 | 2.30E-16 | IPF        | -0.3112 | 7.56E-01 | 8.72E-01   |
| 17        | IL1R1   | 3554  | 2   | 1.03E+08 | 1.03E+08 | 2.30E-16 | LungCancer | 1.7559  | 7.91E-02 | 2.08E-01   |
| 17        | IL1R1   | 3554  | 2   | 1.03E+08 | 1.03E+08 | 2.30E-16 | Snoring    | 1.9928  | 4.63E-02 | 1.44E-01   |
| 17        | IL1RL2  | 8808  | 2   | 1.03E+08 | 1.03E+08 | 6.73E-13 | Asthma     | -6.0683 | 1.29E-09 | 5.55E-08   |
| 17        | IL1RL2  | 8808  | 2   | 1.03E+08 | 1.03E+08 | 6.73E-13 | COPD       | 2.0986  | 3.59E-02 | 1.32E-01   |
| 17        | IL1RL2  | 8808  | 2   | 1.03E+08 | 1.03E+08 | 6.73E-13 | IPF        | -0.2917 | 7.71E-01 | 8.72E-01   |
| 17        | IL1RL2  | 8808  | 2   | 1.03E+08 | 1.03E+08 | 6.73E-13 | LungCancer | -1.3679 | 1.71E-01 | 3.47E-01   |
| 17        | IL1RL2  | 8808  | 2   | 1.03E+08 | 1.03E+08 | 6.73E-13 | Snoring    | -2.6968 | 7.00E-03 | 3.34E-02   |
| 44        | IL7R    | 3575  | 5   | 35851977 | 35884705 | 1.79E-05 | Asthma     | 5.0306  | 4.89E-07 | 7.89E-06   |
| 44        | IL7R    | 3575  | 5   | 35851977 | 35884705 | 1.79E-05 | COPD       | 1.9927  | 4.63E-02 | 1.44E-01   |
| 44        | IL7R    | 3575  | 5   | 35851977 | 35884705 | 1.79E-05 | IPF        | -0.3642 | 7.16E-01 | 8.55E-01   |

|     |         |        |    |          |          |          |            |         |          |          |
|-----|---------|--------|----|----------|----------|----------|------------|---------|----------|----------|
| 44  | IL7R    | 3575   | 5  | 35851977 | 35884705 | 1.79E-05 | LungCancer | -0.9241 | 3.55E-01 | 6.03E-01 |
| 44  | IL7R    | 3575   | 5  | 35851977 | 35884705 | 1.79E-05 | Snoring    | 1.0075  | 3.14E-01 | 5.62E-01 |
| 54  | LMAN2   | 10960  | 5  | 1.77E+08 | 1.77E+08 | 1.58E-07 | Asthma     | 2.7182  | 6.56E-03 | 3.33E-02 |
| 54  | LMAN2   | 10960  | 5  | 1.77E+08 | 1.77E+08 | 1.58E-07 | COPD       | 3.5322  | 4.12E-04 | 3.13E-03 |
| 54  | LMAN2   | 10960  | 5  | 1.77E+08 | 1.77E+08 | 1.58E-07 | IPF        | 0.9908  | 3.22E-01 | 5.65E-01 |
| 54  | LMAN2   | 10960  | 5  | 1.77E+08 | 1.77E+08 | 1.58E-07 | LungCancer | -1.3962 | 1.63E-01 | 3.38E-01 |
| 54  | LMAN2   | 10960  | 5  | 1.77E+08 | 1.77E+08 | 1.58E-07 | Snoring    | -0.0064 | 9.95E-01 | 9.95E-01 |
| 98  | LRRC32  | 2615   | 11 | 76363568 | 76386990 | 8.52E-07 | Asthma     | 0.4950  | 6.21E-01 | 7.83E-01 |
| 98  | LRRC32  | 2615   | 11 | 76363568 | 76386990 | 8.52E-07 | COPD       | 0.3643  | 7.16E-01 | 8.55E-01 |
| 98  | LRRC32  | 2615   | 11 | 76363568 | 76386990 | 8.52E-07 | IPF        | 0.0910  | 9.27E-01 | 9.42E-01 |
| 98  | LRRC32  | 2615   | 11 | 76363568 | 76386990 | 8.52E-07 | LungCancer | 0.8863  | 3.75E-01 | 6.12E-01 |
| 98  | LRRC32  | 2615   | 11 | 76363568 | 76386990 | 8.52E-07 | Snoring    | -0.6502 | 5.16E-01 | 7.20E-01 |
| 131 | MAPK3   | 5595   | 16 | 30120426 | 30139630 | 4.20E-06 | Asthma     | -4.6432 | 3.43E-06 | 4.42E-05 |
| 131 | MAPK3   | 5595   | 16 | 30120426 | 30139630 | 4.20E-06 | COPD       | -4.4527 | 8.48E-06 | 9.94E-05 |
| 131 | MAPK3   | 5595   | 16 | 30120426 | 30139630 | 4.20E-06 | IPF        | -0.6756 | 4.99E-01 | 7.08E-01 |
| 131 | MAPK3   | 5595   | 16 | 30120426 | 30139630 | 4.20E-06 | LungCancer | -0.5614 | 5.75E-01 | 7.64E-01 |
| 131 | MAPK3   | 5595   | 16 | 30120426 | 30139630 | 4.20E-06 | Snoring    | -3.5773 | 3.47E-04 | 2.80E-03 |
| 38  | NPNT    | 255743 | 4  | 1.07E+08 | 1.07E+08 | 1.24E-05 | Asthma     | -7.4928 | 6.74E-14 | 7.35E-12 |
| 38  | NPNT    | 255743 | 4  | 1.07E+08 | 1.07E+08 | 1.24E-05 | COPD       | -5.6500 | 1.60E-08 | 5.16E-07 |
| 38  | NPNT    | 255743 | 4  | 1.07E+08 | 1.07E+08 | 1.24E-05 | IPF        | 0.3065  | 7.59E-01 | 8.72E-01 |
| 38  | NPNT    | 255743 | 4  | 1.07E+08 | 1.07E+08 | 1.24E-05 | LungCancer | -1.2385 | 2.16E-01 | 4.21E-01 |
| 38  | NPNT    | 255743 | 4  | 1.07E+08 | 1.07E+08 | 1.24E-05 | Snoring    | 0.8019  | 4.23E-01 | 6.39E-01 |
| 84  | PCD1LG2 | 80380  | 9  | 5505512  | 5576282  | 4.63E-05 | Asthma     | 2.4326  | 1.50E-02 | 6.24E-02 |
| 84  | PCD1LG2 | 80380  | 9  | 5505512  | 5576282  | 4.63E-05 | COPD       | 1.4781  | 1.39E-01 | 3.10E-01 |
| 84  | PCD1LG2 | 80380  | 9  | 5505512  | 5576282  | 4.63E-05 | IPF        | 0.6778  | 4.98E-01 | 7.08E-01 |
| 84  | PCD1LG2 | 80380  | 9  | 5505512  | 5576282  | 4.63E-05 | LungCancer | 0.6310  | 5.28E-01 | 7.23E-01 |
| 84  | PCD1LG2 | 80380  | 9  | 5505512  | 5576282  | 4.63E-05 | Snoring    | -0.9134 | 3.61E-01 | 6.05E-01 |
| 2   | PEX14   | 5195   | 1  | 10530003 | 10695815 | 1.36E-05 | Asthma     | 2.6352  | 8.41E-03 | 3.87E-02 |
| 2   | PEX14   | 5195   | 1  | 10530003 | 10695815 | 1.36E-05 | COPD       | -1.6432 | 1.00E-01 | 2.53E-01 |
| 2   | PEX14   | 5195   | 1  | 10530003 | 10695815 | 1.36E-05 | IPF        | 0.2523  | 8.01E-01 | 8.98E-01 |
| 2   | PEX14   | 5195   | 1  | 10530003 | 10695815 | 1.36E-05 | LungCancer | -1.9863 | 4.70E-02 | 1.44E-01 |
| 2   | PEX14   | 5195   | 1  | 10530003 | 10695815 | 1.36E-05 | Snoring    | -1.8681 | 6.18E-02 | 1.77E-01 |
| 108 | PLXNC1  | 10154  | 12 | 94537499 | 94706451 | 1.87E-09 | Asthma     | 0.1549  | 8.77E-01 | 9.34E-01 |
| 108 | PLXNC1  | 10154  | 12 | 94537499 | 94706451 | 1.87E-09 | COPD       | 0.8735  | 3.82E-01 | 6.12E-01 |
| 108 | PLXNC1  | 10154  | 12 | 94537499 | 94706451 | 1.87E-09 | IPF        | -0.3941 | 6.93E-01 | 8.44E-01 |
| 108 | PLXNC1  | 10154  | 12 | 94537499 | 94706451 | 1.87E-09 | LungCancer | 0.8005  | 4.23E-01 | 6.39E-01 |
| 108 | PLXNC1  | 10154  | 12 | 94537499 | 94706451 | 1.87E-09 | Snoring    | 1.4611  | 1.44E-01 | 3.10E-01 |
| 131 | PRSS8   | 5652   | 16 | 31137754 | 31152151 | 4.65E-08 | Asthma     | 5.6020  | 2.12E-08 | 5.47E-07 |
| 131 | PRSS8   | 5652   | 16 | 31137754 | 31152151 | 4.65E-08 | COPD       | 3.8268  | 1.30E-04 | 1.12E-03 |
| 131 | PRSS8   | 5652   | 16 | 31137754 | 31152151 | 4.65E-08 | IPF        | 0.4881  | 6.25E-01 | 7.83E-01 |
| 131 | PRSS8   | 5652   | 16 | 31137754 | 31152151 | 4.65E-08 | LungCancer | 1.9669  | 4.92E-02 | 1.48E-01 |
| 131 | PRSS8   | 5652   | 16 | 31137754 | 31152151 | 4.65E-08 | Snoring    | 5.3477  | 8.91E-08 | 1.92E-06 |
| 59  | PTK7    | 5754   | 6  | 43039006 | 43134458 | 3.73E-06 | Asthma     | 3.1530  | 1.62E-03 | 9.95E-03 |
| 59  | PTK7    | 5754   | 6  | 43039006 | 43134458 | 3.73E-06 | COPD       | 1.8436  | 6.52E-02 | 1.83E-01 |
| 59  | PTK7    | 5754   | 6  | 43039006 | 43134458 | 3.73E-06 | IPF        | 0.2437  | 8.07E-01 | 8.98E-01 |
| 59  | PTK7    | 5754   | 6  | 43039006 | 43134458 | 3.73E-06 | LungCancer | -0.6452 | 5.19E-01 | 7.20E-01 |
| 59  | PTK7    | 5754   | 6  | 43039006 | 43134458 | 3.73E-06 | Snoring    | 0.1245  | 9.01E-01 | 9.37E-01 |
| 135 | SAT2    | 112483 | 17 | 7524552  | 7536194  | 3.30E-05 | Asthma     | 1.1057  | 2.69E-01 | 5.03E-01 |
| 135 | SAT2    | 112483 | 17 | 7524552  | 7536194  | 3.30E-05 | COPD       | 2.0145  | 4.40E-02 | 1.44E-01 |
| 135 | SAT2    | 112483 | 17 | 7524552  | 7536194  | 3.30E-05 | IPF        | -0.0991 | 9.21E-01 | 9.42E-01 |
| 135 | SAT2    | 112483 | 17 | 7524552  | 7536194  | 3.30E-05 | LungCancer | -2.5997 | 9.33E-03 | 4.15E-02 |
| 135 | SAT2    | 112483 | 17 | 7524552  | 7536194  | 3.30E-05 | Snoring    | 1.1840  | 2.36E-01 | 4.48E-01 |
| 135 | SHBG    | 6462   | 17 | 7512382  | 7541700  | 1.43E-05 | Asthma     | -0.8831 | 3.77E-01 | 6.12E-01 |
| 135 | SHBG    | 6462   | 17 | 7512382  | 7541700  | 1.43E-05 | COPD       | -0.1464 | 8.84E-01 | 9.34E-01 |
| 135 | SHBG    | 6462   | 17 | 7512382  | 7541700  | 1.43E-05 | IPF        | -0.5037 | 6.14E-01 | 7.83E-01 |
| 135 | SHBG    | 6462   | 17 | 7512382  | 7541700  | 1.43E-05 | LungCancer | -1.7711 | 7.65E-02 | 2.08E-01 |
| 135 | SHBG    | 6462   | 17 | 7512382  | 7541700  | 1.43E-05 | Snoring    | -2.2434 | 2.49E-02 | 9.73E-02 |
| 34  | TLR1    | 7096   | 4  | 38792876 | 38811814 | 3.34E-13 | Asthma     | -7.4238 | 1.14E-13 | 7.35E-12 |
| 34  | TLR1    | 7096   | 4  | 38792876 | 38811814 | 3.34E-13 | COPD       | -0.6825 | 4.95E-01 | 7.08E-01 |
| 34  | TLR1    | 7096   | 4  | 38792876 | 38811814 | 3.34E-13 | IPF        | 0.9722  | 3.31E-01 | 5.69E-01 |

|     |         |       |    |          |          |          |            |         |          |          |
|-----|---------|-------|----|----------|----------|----------|------------|---------|----------|----------|
| 34  | TLR1    | 7096  | 4  | 38792876 | 38811814 | 3.34E-13 | LungCancer | -1.5511 | 1.21E-01 | 2.89E-01 |
| 34  | TLR1    | 7096  | 4  | 38792876 | 38811814 | 3.34E-13 | Snoring    | 0.5524  | 5.81E-01 | 7.64E-01 |
| 48  | TNFAIP8 | 25816 | 5  | 1.19E+08 | 1.19E+08 | 3.65E-05 | Asthma     | -1.2950 | 1.95E-01 | 3.87E-01 |
| 48  | TNFAIP8 | 25816 | 5  | 1.19E+08 | 1.19E+08 | 3.65E-05 | COPD       | -0.8700 | 3.84E-01 | 6.12E-01 |
| 48  | TNFAIP8 | 25816 | 5  | 1.19E+08 | 1.19E+08 | 3.65E-05 | IPF        | 2.3042  | 2.12E-02 | 8.55E-02 |
| 48  | TNFAIP8 | 25816 | 5  | 1.19E+08 | 1.19E+08 | 3.65E-05 | LungCancer | -0.1194 | 9.05E-01 | 9.37E-01 |
| 48  | TNFAIP8 | 25816 | 5  | 1.19E+08 | 1.19E+08 | 3.65E-05 | Snoring    | -1.7250 | 8.45E-02 | 2.18E-01 |
| 135 | TNFSF12 | 8742  | 17 | 7447375  | 7466207  | 1.02E-06 | Asthma     | -3.8770 | 1.06E-04 | 9.77E-04 |
| 135 | TNFSF12 | 8742  | 17 | 7447375  | 7466207  | 1.02E-06 | COPD       | 0.1158  | 9.08E-01 | 9.37E-01 |
| 135 | TNFSF12 | 8742  | 17 | 7447375  | 7466207  | 1.02E-06 | IPF        | -0.5344 | 5.93E-01 | 7.73E-01 |
| 135 | TNFSF12 | 8742  | 17 | 7447375  | 7466207  | 1.02E-06 | LungCancer | -1.3650 | 1.72E-01 | 3.47E-01 |
| 135 | TNFSF12 | 8742  | 17 | 7447375  | 7466207  | 1.02E-06 | Snoring    | -3.1083 | 1.88E-03 | 1.10E-02 |
