# Supplementary material for: Shared genetic aetiology of respiratory diseases: a genome-wide multitraits association analysis
Source: PubMed Central journal article supplement — BMJ Open Respir Res. 2024 Jun 4;11(1):e002148. doi: 10.1136/bmjresp-2023-002148 (PMC11163672; doi:10.1136/bmjresp-2023-002148), 2024-06-04
Supplement: bmjresp-2023-002148supp018.pdf [file bmjresp-2023-002148supp018.pdf]

| eTable 17. Significantly Enriched GO and KEGG Pathways in MAGMA gene-set analysis                                               |         |          |         |          |             |
|---------------------------------------------------------------------------------------------------------------------------------|---------|----------|---------|----------|-------------|
| Pathway                                                                                                                         | BETA    | BETA STD | SE      | P. value | P. adjusted |
| KEGG_GRAFT_VERSUS_HOST_DISEASE                                                                                                  | 0.80421 | 0.03620  | 0.18227 | 5.15E-06 | 5.34E-04    |
| KEGG_ALLOGRAFT_REJECTION                                                                                                        | 0.87341 | 0.03769  | 0.19902 | 5.74E-06 | 5.34E-04    |
| KEGG_ASTHMA                                                                                                                     | 0.79213 | 0.03046  | 0.19299 | 2.04E-05 | 1.06E-03    |
| KEGG_CYTOKINE_CYTOKINE_RECEPTOR_INTERACTION                                                                                     | 0.29747 | 0.03460  | 0.07293 | 2.27E-05 | 1.06E-03    |
| KEGG_INTESTINAL_IMMUNE_NETWORK_FOR_IGA_PRODUCT                                                                                  | 0.58064 | 0.02881  | 0.15609 | 1.00E-04 | 3.21E-03    |
| KEGG_AUTOIMMUNE_THYROID_DISEASE                                                                                                 | 0.65235 | 0.03378  | 0.17578 | 1.04E-04 | 3.21E-03    |
| KEGG_HEMATOPOIETIC_CELL_LINEAGE                                                                                                 | 0.40452 | 0.02707  | 0.11551 | 2.32E-04 | 6.11E-03    |
| KEGG_JAK_STAT_SIGNALING_PATHWAY                                                                                                 | 0.30169 | 0.02698  | 0.08725 | 2.73E-04 | 6.11E-03    |
| KEGG_T_CELL_RECEPTOR_SIGNALING_PATHWAY                                                                                          | 0.32799 | 0.02482  | 0.09550 | 2.98E-04 | 6.11E-03    |
| KEGG_CELL_ADHESION_MOLECULES_CAMS                                                                                               | 0.32685 | 0.02697  | 0.09592 | 3.28E-04 | 6.11E-03    |
| KEGG_ANTIGEN_PROCESSING_AND_PRESENTATION                                                                                        | 0.41921 | 0.02771  | 0.12764 | 5.12E-04 | 8.66E-03    |
| KEGG_VIRAL_MYOCARDITIS                                                                                                          | 0.43679 | 0.02624  | 0.13510 | 6.14E-04 | 9.51E-03    |
| KEGG_NATURAL_KILLER_CELL_MEDIATED_CYTOTOXICITY                                                                                  | 0.27640 | 0.02326  | 0.09094 | 1.19E-03 | 1.70E-02    |
| KEGG_PATHWAYS_IN_CANCER                                                                                                         | 0.16279 | 0.02125  | 0.05630 | 1.92E-03 | 2.55E-02    |
| KEGG_TYPE_I_DIABETES_MELLITUS                                                                                                   | 0.47645 | 0.02257  | 0.17217 | 2.83E-03 | 3.51E-02    |
| GOBP_ADAPTIVE_IMMUNE_RESPONSE_BASED_ON_SOMATIC_RECOMBINATION_OF_IMMUNE_RECEPTORS_BUILT_FROM_I_MMUNOGLOBULIN_SUPERFAMILY_DOMAINS | 0.25068 | 0.02863  | 0.06494 | 5.69E-05 | 9.51E-03    |
| GOBP_ADAPTIVE_IMMUNE_RESPONSE                                                                                                   | 0.26839 | 0.03908  | 0.05294 | 2.01E-07 | 1.57E-04    |
| GOBP_ADRENAL_GLAND_DEVELOPMENT                                                                                                  | 0.90934 | 0.03010  | 0.22835 | 3.43E-05 | 6.98E-03    |
| GOBP_ALPHA_BETA_T_CELL_ACTIVATION                                                                                               | 0.45471 | 0.03970  | 0.08783 | 1.14E-07 | 9.68E-05    |
| GOBP_ALPHA_BETA_T_CELL_DIFFERENTIATION                                                                                          | 0.58094 | 0.04312  | 0.10614 | 2.24E-08 | 3.26E-05    |
| GOBP_ANTIGEN_PROCESSING_AND_PRESENTATION_OF_ENDOGENOUS_ANTIGEN                                                                  | 0.79750 | 0.02951  | 0.22606 | 2.10E-04 | 2.64E-02    |
| GOBP_ANTIGEN_PROCESSING_AND_PRESENTATION_OF_ENDOGENOUS_PEPTIDE_ANTIGEN                                                          | 0.97561 | 0.03064  | 0.25190 | 5.40E-05 | 9.33E-03    |
| GOBP_ANTIGEN_PROCESSING_AND_PRESENTATION_OF_ENDOGENOUS_PEPTIDE_ANTIGEN_VIA_MHC_CLASS_I_VIA_ER_PATHWAY                           | 1.43680 | 0.02815  | 0.42177 | 3.30E-04 | 3.50E-02    |
| GOBP_B_CELL_ACTIVATION                                                                                                          | 0.22397 | 0.02548  | 0.06528 | 3.02E-04 | 3.27E-02    |
| GOBP_CD4_POSITIVE_ALPHA_BETA_T_CELL_ACTIVATION                                                                                  | 0.45331 | 0.03230  | 0.11058 | 2.08E-05 | 4.71E-03    |
| GOBP_CD4_POSITIVE_ALPHA_BETA_T_CELL_DIFFERENTIATION                                                                             | 0.63943 | 0.04120  | 0.12319 | 1.06E-07 | 9.68E-05    |
| GOBP_CD8_POSITIVE_ALPHA_BETA_T_CELL_DIFFERENTIATION                                                                             | 1.18740 | 0.03289  | 0.27949 | 1.08E-05 | 3.06E-03    |
| GOBP_CELL_ACTIVATION                                                                                                            | 0.10000 | 0.02592  | 0.02873 | 2.50E-04 | 2.90E-02    |
| GOBP_CELL_CELL_ADHESION_MEDIATED_BY_INTEGRIN                                                                                    | 1.07900 | 0.03294  | 0.28132 | 6.29E-05 | 1.00E-02    |
| GOBP_CELL_FATE_COMMITMENT                                                                                                       | 0.28034 | 0.03189  | 0.06713 | 1.49E-05 | 3.73E-03    |
| GOBP_CELL_FATE_SPECIFICATION                                                                                                    | 0.37314 | 0.02542  | 0.11129 | 4.01E-04 | 4.08E-02    |
| GOBP_CELLULAR_RESPONSE_TO_X_RAY                                                                                                 | 1.00220 | 0.02571  | 0.28718 | 2.42E-04 | 2.87E-02    |
| GOBP_CYTOKINE_MEDIATED_SIGNALING_PATHWAY                                                                                        | 0.17903 | 0.03554  | 0.03816 | 1.37E-06 | 6.80E-04    |
| GOBP_CYTOKINE_PRODUCTION                                                                                                        | 0.17265 | 0.03322  | 0.03892 | 4.60E-06 | 1.80E-03    |
| GOBP_DEFENSE_RESPONSE                                                                                                           | 0.10370 | 0.02903  | 0.02730 | 7.31E-05 | 1.10E-02    |
| GOBP_DEMETHYLATION                                                                                                              | 0.49701 | 0.02985  | 0.12979 | 6.45E-05 | 1.01E-02    |
| GOBP_DNA_METABOLIC_PROCESS                                                                                                      | 0.13184 | 0.02844  | 0.03389 | 5.04E-05 | 9.01E-03    |
| GOBP_EXTRINSIC_APOPTOTIC_SIGNALING_PATHWAY                                                                                      | 0.24864 | 0.02647  | 0.06963 | 1.78E-04 | 2.33E-02    |
| GOBP_FOCAL_ADHESION_ASSEMBLY                                                                                                    | 0.36902 | 0.02484  | 0.11306 | 5.51E-04 | 4.92E-02    |
| GOBP_GENE_SILENCING                                                                                                             | 0.22116 | 0.02597  | 0.06412 | 2.82E-04 | 3.16E-02    |
| GOBP_IMMUNE_SYSTEM_DEVELOPMENT                                                                                                  | 0.13964 | 0.03098  | 0.03326 | 1.35E-05 | 3.62E-03    |
| GOBP_INTERLEUKIN_10_PRODUCTION                                                                                                  | 0.48983 | 0.02662  | 0.14613 | 4.02E-04 | 4.08E-02    |
| GOBP_INTERLEUKIN_21_PRODUCTION                                                                                                  | 4.54330 | 0.04759  | 0.84863 | 4.37E-08 | 5.57E-05    |
| GOBP_ISOTYPE_SWITCHING_TO_IGG_ISOTYPES                                                                                          | 1.27300 | 0.03398  | 0.31140 | 2.19E-05 | 4.85E-03    |
| GOBP_LEUKOCYTE_DIFFERENTIATION                                                                                                  | 0.22122 | 0.03606  | 0.04602 | 7.74E-07 | 4.64E-04    |
| GOBP_LUNG_EPITHELIUM_DEVELOPMENT                                                                                                | 0.61704 | 0.02662  | 0.16942 | 1.36E-04 | 1.82E-02    |
| GOBP_LUNG_SACCULE_DEVELOPMENT                                                                                                   | 1.27630 | 0.02673  | 0.32901 | 5.26E-05 | 9.24E-03    |
| GOBP_LYMPHOCYTE_ACTIVATION                                                                                                      | 0.17335 | 0.03198  | 0.04037 | 8.82E-06 | 2.64E-03    |
| GOBP_MACROPHAGE_ACTIVATION                                                                                                      | 0.36991 | 0.02650  | 0.10546 | 2.27E-04 | 2.73E-02    |
| GOBP_MACROPHAGE_COLONY_STIMULATING_FACTOR_PRODUCTION                                                                            | 1.72440 | 0.02856  | 0.47290 | 1.33E-04 | 1.81E-02    |
| GOBP_MONONUCLEAR_CELL_DIFFERENTIATION                                                                                           | 0.22998 | 0.03324  | 0.05199 | 4.89E-06 | 1.81E-03    |
| GOBP_MYELOID_CELL_DIFFERENTIATION                                                                                               | 0.17211 | 0.02512  | 0.05015 | 3.00E-04 | 3.27E-02    |
| GOBP_MYELOID_LEUKOCYTE_DIFFERENTIATION                                                                                          | 0.24746 | 0.02539  | 0.07304 | 3.53E-04 | 3.71E-02    |
| GOBP_NEGATIVE_REGULATION_OF_DEVELOPMENTAL_PROCESS                                                                               | 0.11904 | 0.02440  | 0.03641 | 5.41E-04 | 4.92E-02    |
| GOBP_NEGATIVE_REGULATION_OF_NUCLEOBASE_CONTAINING_COMPOUND_METABOLIC_PROCESS                                                    | 0.16060 | 0.04271  | 0.02774 | 3.59E-09 | 1.22E-05    |
| GOBP_NEGATIVE_REGULATION_OF_BIOSYNTHETIC_PROCESS                                                                                | 0.15944 | 0.04367  | 0.02691 | 1.58E-09 | 8.05E-06    |
| GOBP_NEGATIVE_REGULATION_OF_POSTTRANSCRIPTIONAL_GENE_SILENCING                                                                  | 0.72823 | 0.02411  | 0.20769 | 2.28E-04 | 2.73E-02    |
| GOBP_NEGATIVE_REGULATION_OF_PRODUCTION_OF_MIRNAS_INVOLVED_IN_GENE_SILENCING_BY_MIRNAS                                           | 0.89838 | 0.02576  | 0.25242 | 1.87E-04 | 2.39E-02    |
| GOBP_NEGATIVE_REGULATION_OF_TRANSCRIPTION_BY_RNA_POLYMERASE_II                                                                  | 0.17528 | 0.03644  | 0.03540 | 3.71E-07 | 2.52E-04    |
| GOBP_PEPTIDYL_SERINE_MODIFICATION                                                                                               | 0.19471 | 0.02537  | 0.05626 | 2.70E-04 | 3.09E-02    |

|                                                                              |         |         |         |          |          |
|------------------------------------------------------------------------------|---------|---------|---------|----------|----------|
| GOBP_PHENYLPROPANOID_METABOLIC_PROCESS                                       | 1.10870 | 0.02322 | 0.32127 | 2.80E-04 | 3.16E-02 |
| GOBP_POSITIVE_REGULATION_OF_CELL_ACTIVATION                                  | 0.22929 | 0.03007 | 0.05716 | 3.03E-05 | 6.30E-03 |
| GOBP_POSITIVE_REGULATION_OF_CELL_CELL_ADHESION                               | 0.24329 | 0.02901 | 0.06376 | 6.82E-05 | 1.05E-02 |
| GOBP_POSITIVE_REGULATION_OF_ADAPTIVE_IMMUNE_RESPONSE                         | 0.34826 | 0.02534 | 0.10471 | 4.41E-04 | 4.33E-02 |
| GOBP_POSITIVE_REGULATION_OF_CYTOKINE_PRODUCTION                              | 0.20760 | 0.03078 | 0.04988 | 1.58E-05 | 3.77E-03 |
| GOBP_POSITIVE_REGULATION_OF_GENE_EXPRESSION                                  | 0.11043 | 0.02496 | 0.03264 | 3.58E-04 | 3.73E-02 |
| GOBP_POSITIVE_REGULATION_OF_IMMUNE_SYSTEM_PROCESS                            | 0.11589 | 0.02499 | 0.03480 | 4.35E-04 | 4.30E-02 |
| GOBP_POSITIVE_REGULATION_OF_INTERLEUKIN_10_PRODUCTION                        | 0.63172 | 0.02766 | 0.17925 | 2.13E-04 | 2.65E-02 |
| GOBP_POSITIVE_REGULATION_OF_INTERLEUKIN_13_PRODUCTION                        | 1.50500 | 0.03696 | 0.34996 | 8.58E-06 | 2.64E-03 |
| GOBP_POSITIVE_REGULATION_OF_INTERLEUKIN_5_PRODUCTION                         | 1.63800 | 0.03639 | 0.37063 | 4.98E-06 | 1.81E-03 |
| GOBP_POSITIVE_REGULATION_OF_ISOTYPE_SWITCHING_TO_IGG_ISOTYPES                | 1.50570 | 0.03345 | 0.40609 | 1.05E-04 | 1.49E-02 |
| GOBP_POSITIVE_REGULATION_OF_LEUKOCYTE_CELL_CELL_ADHESION                     | 0.28638 | 0.03134 | 0.06843 | 1.44E-05 | 3.73E-03 |
| GOBP_POSITIVE_REGULATION_OF_MAST_CELL_ACTIVATION                             | 1.04280 | 0.03183 | 0.26475 | 4.11E-05 | 7.62E-03 |
| GOBP_POSITIVE_REGULATION_OF_MULTICELLULAR_ORGANISMAL_PROCESS                 | 0.12376 | 0.03167 | 0.02939 | 1.28E-05 | 3.53E-03 |
| GOBP_POSITIVE_REGULATION_OF_NUCLEOBASE_CONTAINING_COMPOUND_METABOLIC_PROCESS | 0.12834 | 0.03802 | 0.02451 | 8.34E-08 | 8.50E-05 |
| GOBP_POSITIVE_REGULATION_OF_BIOSYNTHETIC_PROCESS                             | 0.10770 | 0.03248 | 0.02400 | 3.64E-06 | 1.48E-03 |
| GOBP_POSITIVE_REGULATION_OF_PEPTIDYL_TYROSINE_PHOSPHORYLATION                | 0.30179 | 0.03041 | 0.07588 | 3.50E-05 | 6.98E-03 |
| GOBP_POSITIVE_REGULATION_OF_PRI_MIRNA_TRANSCRIPTION_BY_RNA_POLYMERASE_II     | 0.56860 | 0.02627 | 0.16174 | 2.20E-04 | 2.70E-02 |
| GOBP_POSITIVE_REGULATION_OF_RECEPTOR_SIGNALING_PATHWAY_VIA_STAT              | 0.56704 | 0.02845 | 0.15551 | 1.33E-04 | 1.81E-02 |
| GOBP_POSITIVE_REGULATION_OF_TRANSCRIPTION_BY_RNA_POLYMERASE_II               | 0.13147 | 0.03162 | 0.03056 | 8.53E-06 | 2.64E-03 |
| GOBP_POSITIVE_T_CELL_SELECTION                                               | 0.78411 | 0.03433 | 0.18781 | 1.50E-05 | 3.73E-03 |
| GOBP_PRI_MIRNA_TRANSCRIPTION_BY_RNA_POLYMERASE_I                             | 0.50530 | 0.02669 | 0.14203 | 1.88E-04 | 2.39E-02 |
| GOBP_PRIMARY_MIRNA_PROCESSING                                                | 0.98200 | 0.02622 | 0.29885 | 5.09E-04 | 4.76E-02 |
| GOBP_PROTEIN_PHOSPHORYLATION                                                 | 0.10307 | 0.02854 | 0.02667 | 5.60E-05 | 9.51E-03 |
| GOBP_RECEPTOR_SIGNALING_PATHWAY_VIA_STAT                                     | 0.27073 | 0.02541 | 0.08304 | 5.58E-04 | 4.95E-02 |
| GOBP_REGULATION_OF_ACTIN_CYTOSKELETON_REORGANIZATION                         | 0.52023 | 0.02373 | 0.15788 | 4.93E-04 | 4.67E-02 |
| GOBP_REGULATION_OF_ALPHA_BETA_T_CELL_ACTIVATION                              | 0.34529 | 0.02486 | 0.10569 | 5.45E-04 | 4.92E-02 |
| GOBP_REGULATION_OF_CD40_SIGNALING_PATHWAY                                    | 1.95860 | 0.03553 | 0.51884 | 8.03E-05 | 1.19E-02 |
| GOBP_REGULATION_OF_CELL_CELL_ADHESION_MEDIATED_BY_INTEGRIN                   | 1.39610 | 0.03429 | 0.36701 | 7.15E-05 | 1.09E-02 |
| GOBP_REGULATION_OF_IMMUNE_SYSTEM_PROCESS                                     | 0.11119 | 0.02954 | 0.02798 | 3.56E-05 | 6.98E-03 |
| GOBP_REGULATION_OF_IMMUNOGLOBULIN_PRODUCTION                                 | 0.42513 | 0.02475 | 0.12368 | 2.95E-04 | 3.26E-02 |
| GOBP_REGULATION_OF_INTERLEUKIN_1_MEDIATED_SIGNALING_PATHWAY                  | 1.44410 | 0.03025 | 0.36794 | 4.36E-05 | 7.94E-03 |
| GOBP_REGULATION_OF_MULTICELLULAR_ORGANISMAL_DEVELOPMENT                      | 0.09804 | 0.02484 | 0.02961 | 4.66E-04 | 4.48E-02 |
| GOBP_REGULATION_OF_PRODUCTION_OF_SMALL_RNA_INVOLVED_IN_GENE_SILENCING_BY_RNA | 0.72307 | 0.02676 | 0.20747 | 2.47E-04 | 2.89E-02 |
| GOBP_REGULATION_OF_RESPONSE_TO_STRESS                                        | 0.09564 | 0.02450 | 0.02866 | 4.24E-04 | 4.24E-02 |
| GOBP_REGULATORY_T_CELL_DIFFERENTIATION                                       | 0.75850 | 0.03175 | 0.19679 | 5.82E-05 | 9.57E-03 |
| GOBP_RESPONSE_TO_CYTOKINE                                                    | 0.12921 | 0.03087 | 0.03136 | 1.90E-05 | 4.40E-03 |
| GOBP_RESPONSE_TO_INTERLEUKIN_2                                               | 1.23910 | 0.03178 | 0.33791 | 1.23E-04 | 1.72E-02 |
| GOBP_SIGNAL_TRANSDUCTION_IN_ABSENCE_OF_LIGAND                                | 0.41190 | 0.02436 | 0.12293 | 4.04E-04 | 4.08E-02 |
| GOBP_T_CELL_ACTIVATION                                                       | 0.20634 | 0.03212 | 0.04831 | 9.77E-06 | 2.85E-03 |
| GOBP_T_CELL_DIFFERENTIATION                                                  | 0.31408 | 0.03558 | 0.06687 | 1.33E-06 | 6.80E-04 |
| GOBP_T_CELL_DIFFERENTIATION_INVOLVED_IN_IMMUNE_RESPONSE                      | 0.55191 | 0.03414 | 0.12660 | 6.56E-06 | 2.21E-03 |
| GOBP_T_CELL_SELECTION                                                        | 0.77151 | 0.03913 | 0.15964 | 6.80E-07 | 4.33E-04 |
| GOBP_T_HELPER_17_TYPE_IMMUNE_RESPONSE                                        | 0.72671 | 0.02994 | 0.19516 | 9.85E-05 | 1.43E-02 |
| GOBP_TRANSFORMING_GROWTH_FACTOR_BETA3_PRODUCT                                | 2.05580 | 0.02637 | 0.52173 | 4.09E-05 | 7.62E-03 |
| GOBP_TRANSFORMING_GROWTH_FACTOR_BETA_ACTIVATION                              | 1.01810 | 0.02500 | 0.29833 | 3.22E-04 | 3.46E-02 |
| GOBP_TRANSFORMING_GROWTH_FACTOR_BETA_PRODUCT                                 | 0.57390 | 0.02618 | 0.15913 | 1.56E-04 | 2.06E-02 |
| GOCC_CHROMATIN                                                               | 0.17923 | 0.04333 | 0.03216 | 1.27E-08 | 2.16E-05 |
| GOCC_CHROMOSOME                                                              | 0.12032 | 0.03467 | 0.02607 | 1.97E-06 | 8.37E-04 |
| GOCC_LUMENAL_SIDE_OF_ENDOPLASMIC_RETICULUM_MEMBRANE                          | 1.38980 | 0.05144 | 0.23130 | 9.56E-10 | 8.05E-06 |
| GOCC_LUMENAL_SIDE_OF_MEMBRANE                                                | 1.16940 | 0.04895 | 0.20939 | 1.19E-08 | 2.16E-05 |
| GOCC_MHC_CLASS_II_PROTEIN_COMPLEX                                            | 1.66870 | 0.04623 | 0.35184 | 1.06E-06 | 6.00E-04 |
| GOCC_MHC_PROTEIN_COMPLEX                                                     | 1.36080 | 0.04725 | 0.26914 | 2.16E-07 | 1.57E-04 |
| GOCC_SMAD_PROTEIN_COMPLEX                                                    | 1.18730 | 0.02638 | 0.30848 | 5.96E-05 | 9.64E-03 |

|                                                                                                                                                                                            |         |         |         |          |          |
|--------------------------------------------------------------------------------------------------------------------------------------------------------------------------------------------|---------|---------|---------|----------|----------|
| GOMF_CHROMATIN_BINDING                                                                                                                                                                     | 0.14575 | 0.02406 | 0.04425 | 4.95E-04 | 4.67E-02 |
| GOMF_CIS_REGULATORY_REGION_SEQUENCE_SPECIFIC_DNA_BINDING                                                                                                                                   | 0.12877 | 0.03124 | 0.03269 | 4.10E-05 | 7.62E-03 |
| GOMF_CYTOKINE_RECEPTOR_BINDING                                                                                                                                                             | 0.28993 | 0.03392 | 0.06967 | 1.59E-05 | 3.77E-03 |
| GOMF_DEMETHYLASE_ACTIVITY                                                                                                                                                                  | 0.56374 | 0.02432 | 0.17023 | 4.65E-04 | 4.48E-02 |
| GOMF_DNA_BINDING_TRANSCRIPTION_FACTOR_ACTIVITY                                                                                                                                             | 0.14712 | 0.03841 | 0.03140 | 1.40E-06 | 6.80E-04 |
| GOMF_ENZYME_BINDING                                                                                                                                                                        | 0.09838 | 0.02975 | 0.02451 | 3.01E-05 | 6.30E-03 |
| GOMF_INTERLEUKIN_1_RECEPTOR_ACTIVITY                                                                                                                                                       | 2.06840 | 0.03752 | 0.44690 | 1.86E-06 | 8.24E-04 |
| GOMF_INTERLEUKIN_2_RECEPTOR_BINDING                                                                                                                                                        | 2.31340 | 0.03831 | 0.53129 | 6.72E-06 | 2.21E-03 |
| GOMF_KINASE_ACTIVITY                                                                                                                                                                       | 0.12658 | 0.02407 | 0.03873 | 5.42E-04 | 4.92E-02 |
| GOMF_MHC_CLASS_II_RECEPTOR_ACTIVITY                                                                                                                                                        | 2.06980 | 0.04598 | 0.38876 | 5.14E-08 | 5.82E-05 |
| GOMF_NADPLUS_NUCLEOSIDASE_ACTIVITY                                                                                                                                                         | 1.50280 | 0.04163 | 0.34152 | 5.44E-06 | 1.91E-03 |
| GOMF_SEQUENCE_SPECIFIC_DNA_BINDING                                                                                                                                                         | 0.13196 | 0.03704 | 0.02844 | 1.76E-06 | 8.16E-04 |
| GOMF_TAU_PROTEIN_KINASE_ACTIVITY                                                                                                                                                           | 0.91823 | 0.03188 | 0.22846 | 2.93E-05 | 6.30E-03 |
| GOMF_TRANSCRIPTION_FACTOR_BINDING                                                                                                                                                          | 0.15474 | 0.02754 | 0.04159 | 9.95E-05 | 1.43E-02 |
| GOMF_TRANSCRIPTION_REGULATOR_ACTIVITY                                                                                                                                                      | 0.14704 | 0.04375 | 0.02638 | 1.27E-08 | 2.16E-05 |
| GOMF_TRANSFERASE_ACTIVITY_TRANSFERRING_PHOSPHORUS_CONTAINING_GROUPS                                                                                                                        | 0.11548 | 0.02396 | 0.03536 | 5.46E-04 | 4.92E-02 |
|                                                                                                                                                                                            |         |         |         |          |          |
| GOBP, Gene Ontology biological process; GOCC, Gene Ontology cellular component; GOMF, Gene Ontology molecular function; KEGG, Kyoto Encyclopedia of Genes and Genomes; SE, standard error; |         |         |         |          |          |
| P.adjusted represents the FDR-corrected P value.                                                                                                                                           |         |         |         |          |          |
