# Supplementary material for: Shared genetic aetiology of respiratory diseases: a genome-wide multitraits association analysis
Source: PubMed Central journal article supplement — BMJ Open Respir Res. 2024 Jun 4;11(1):e002148. doi: 10.1136/bmjresp-2023-002148 (PMC11163672; doi:10.1136/bmjresp-2023-002148), 2024-06-04
Supplement: bmjresp-2023-002148supp019.pdf [file bmjresp-2023-002148supp019.pdf]

**eTable 18.** Estimation of causal effects among five genetically predicted respiratory diseases

| Exposure | Outcome | Method   | nIV | OR   | OR.95%CI    | P.value  | P.adjusted | MR Steiger test | R <sup>2</sup> | F      |
|----------|---------|----------|-----|------|-------------|----------|------------|-----------------|----------------|--------|
| Asthma   | COPD    | IVW(MRE) | 120 | 1.49 | (1.43-1.55) | 3.10E-78 | 6.20E-77   | TRUE            | 0.0064         | 73.86  |
| Asthma   | IPF     | IVW(MRE) | 123 | 1.13 | (1.03-1.24) | 8.70E-03 | 1.93E-02   | TRUE            | 0.0066         | 74.32  |
| Asthma   | LC      | IVW(MRE) | 105 | 1.01 | (0.94-1.10) | 0.71     | 8.35E-01   | TRUE            | 0.0056         | 73.80  |
| Asthma   | Snoring | IVW(MRE) | 120 | 1.01 | (1.00-1.02) | 1.70E-03 | 5.43E-03   | TRUE            | 0.0063         | 72.70  |
| COPD     | Asthma  | IVW(MRE) | 19  | 1.33 | (1.26-1.41) | 5.90E-26 | 5.90E-25   | TRUE            | 0.0011         | 57.72  |
| COPD     | IPF     | IVW(MRE) | 19  | 1.21 | (1.07-1.37) | 1.60E-08 | 1.07E-07   | TRUE            | 0.0015         | 78.74  |
| COPD     | LC      | IVW(MRE) | 19  | 1.29 | (1.21-1.37) | 5.40E-06 | 2.70E-05   | TRUE            | 0.0010         | 52.47  |
| COPD     | Snoring | IVW(MRE) | 27  | 1.75 | (1.44-2.12) | 0.91     | 9.60E-01   | TRUE            | 0.0014         | 51.71  |
| IPF      | Asthma  | IVW(MRE) | 10  | 0.99 | (0.97-1.02) | 0.61     | 7.63E-01   | TRUE            | 0.0011         | 105.04 |
| IPF      | COPD    | IVW(MRE) | 10  | 1.03 | (0.99-1.06) | 0.16     | 2.67E-01   | TRUE            | 0.0011         | 105.04 |
| IPF      | LC      | IVW(MRE) | 7   | 1.11 | (1.04-1.19) | 1.90E-03 | 5.43E-03   | TRUE            | 0.0009         | 122.75 |
| IPF      | Snoring | IVW(MRE) | 9   | 1    | (1.00-1.00) | 0.95     | 9.60E-01   | TRUE            | 0.0010         | 106.09 |
| LC       | Asthma  | IVW(MRE) | 14  | 1.04 | (0.99-1.09) | 0.13     | 2.36E-01   | TRUE            | 0.0134         | 83.14  |
| LC       | COPD    | IVW(MRE) | 14  | 1.11 | (1.01-1.21) | 2.20E-02 | 4.40E-02   | TRUE            | 0.0089         | 54.97  |
| LC       | IPF     | IVW(MRE) | 14  | 1.23 | (1.06-1.43) | 6.70E-03 | 1.68E-02   | TRUE            | 0.0134         | 83.14  |
| LC       | Snoring | IVW(MRE) | 15  | 1    | (0.99-1.01) | 0.96     | 9.60E-01   | TRUE            | 0.0143         | 82.89  |
| Snoring  | Asthma  | IVW(MRE) | 33  | 1.13 | (0.78-1.65) | 0.51     | 6.80E-01   | TRUE            | 0.0032         | 39.72  |
| Snoring  | COPD    | IVW(MRE) | 35  | 2.48 | (1.45-4.23) | 8.90E-04 | 3.56E-03   | TRUE            | 0.0034         | 39.80  |
| Snoring  | IPF     | IVW(MRE) | 35  | 0.51 | (0.13-1.94) | 0.32     | 4.57E-01   | TRUE            | 0.0034         | 39.80  |
| Snoring  | LC      | IVW(MRE) | 29  | 1.91 | (0.72-5.03) | 0.19     | 2.92E-01   | TRUE            | 0.0029         | 40.95  |
| Asthma   | COPD    | MR Egger | 120 | 1.33 | (1.20-1.47) | 2.00E-07 | NA         | TRUE            | NA             | NA     |
| Asthma   | IPF     | MR Egger | 123 | 1.05 | (0.84-1.32) | 0.66     | NA         | TRUE            | NA             | NA     |

|        |        |                 |     |       |               |          |    |      |    |    |
|--------|--------|-----------------|-----|-------|---------------|----------|----|------|----|----|
| Asthma | LC     | MR Egger        | 105 | 1.29  | (1.07-1.54)   | 8.30E-03 | NA | TRUE | NA | NA |
| Asthma | SNO    | MR Egger        | 120 | 1.01  | (1.00-1.03)   | 0.09     | NA | TRUE | NA | NA |
| COPD   | Asthma | MR Egger        | 27  | 2.66  | (1.64-4.32)   | 8.40E-03 | NA | TRUE | NA | NA |
| COPD   | IPF    | MR Egger        | 27  | 1.67  | (1.27-2.19)   | 5.30E-04 | NA | TRUE | NA | NA |
| COPD   | LC     | MR Egger        | 20  | 1.4   | (1.21-1.61)   | 0.13     | NA | TRUE | NA | NA |
| COPD   | SNO    | MR Egger        | 20  | 1.35  | (0.93-1.95)   | 0.58     | NA | TRUE | NA | NA |
| IPF    | Asthma | MR Egger        | 10  | 1     | (0.97-1.04)   | 0.83     | NA | TRUE | NA | NA |
| IPF    | COPD   | MR Egger        | 10  | 1.04  | (0.99-1.10)   | 0.14     | NA | TRUE | NA | NA |
| IPF    | LC     | MR Egger        | 7   | 1.06  | (0.96-1.16)   | 0.29     | NA | TRUE | NA | NA |
| IPF    | SNO    | MR Egger        | 9   | 1     | (0.99-1.01)   | 0.74     | NA | TRUE | NA | NA |
| LC     | Asthma | MR Egger        | 14  | 1.06  | (0.95-1.17)   | 0.31     | NA | TRUE | NA | NA |
| LC     | COPD   | MR Egger        | 14  | 1.06  | (0.83-1.35)   | 0.64     | NA | TRUE | NA | NA |
| LC     | IPF    | MR Egger        | 14  | 1.33  | (0.96-1.84)   | 0.12     | NA | TRUE | NA | NA |
| LC     | SNO    | MR Egger        | 15  | 1     | (0.98-1.01)   | 0.52     | NA | TRUE | NA | NA |
| SNO    | Asthma | MR Egger        | 33  | 3.81  | (0.60-24.24)  | 0.17     | NA | TRUE | NA | NA |
| SNO    | COPD   | MR Egger        | 35  | 10.98 | (0.74-163.60) | 0.09     | NA | TRUE | NA | NA |
| SNO    | IPF    | MR Egger        | 35  | 0.29  | (0.00-274.24) | 0.73     | NA | TRUE | NA | NA |
| SNO    | LC     | MR Egger        | 29  | 0.02  | (0.00-2.44)   | 0.12     | NA | TRUE | NA | NA |
| Asthma | COPD   | Weighted median | 120 | 1.44  | (1.36-1.52)   | 1.40E-39 | NA | TRUE | NA | NA |
| Asthma | IPF    | Weighted median | 123 | 1.13  | (0.99-1.30)   | 0.08     | NA | TRUE | NA | NA |
| Asthma | LC     | Weighted median | 105 | 1.05  | (0.95-1.17)   | 0.35     | NA | TRUE | NA | NA |
| Asthma | SNO    | Weighted median | 120 | 1.01  | (1.00-1.02)   | 1.80E-02 | NA | TRUE | NA | NA |
| COPD   | Asthma | Weighted median | 20  | 1.32  | (1.12-1.56)   | 2.70E-14 | NA | TRUE | NA | NA |
| COPD   | IPF    | Weighted median | 26  | 1     | (0.99-1.01)   | 2.20E-04 | NA | TRUE | NA | NA |
| COPD   | LC     | Weighted median | 26  | 0.99  | (0.97-1.02)   | 9.90E-04 | NA | TRUE | NA | NA |

|      |        |                 |    |      |             |          |    |      |    |    |
|------|--------|-----------------|----|------|-------------|----------|----|------|----|----|
| COPD | SNO    | Weighted median | 26 | 0.99 | (0.98-1.01) | 0.39     | NA | TRUE | NA | NA |
| IPF  | Asthma | Weighted median | 10 | 1    | (0.98-1.02) | 0.86     | NA | TRUE | NA | NA |
| IPF  | COPD   | Weighted median | 10 | 1.03 | (1.00-1.05) | 2.80E-02 | NA | TRUE | NA | NA |
| IPF  | LC     | Weighted median | 7  | 1.09 | (1.03-1.15) | 2.60E-03 | NA | TRUE | NA | NA |
| IPF  | SNO    | Weighted median | 9  | 1    | (1.00-1.00) | 0.65     | NA | TRUE | NA | NA |
| LC   | Asthma | Weighted median | 14 | 1.08 | (1.03-1.12) | 5.20E-04 | NA | TRUE | NA | NA |
| LC   | COPD   | Weighted median | 14 | 1.06 | (0.98-1.16) | 0.14     | NA | TRUE | NA | NA |
| LC   | IPF    | Weighted median | 14 | 1.24 | (1.09-1.42) | 1.50E-03 | NA | TRUE | NA | NA |
| LC   | SNO    | Weighted median | 15 | 1    | (0.99-1.01) | 0.79     | NA | TRUE | NA | NA |
| SNO  | Asthma | Weighted median | 33 | 1.02 | (0.70-1.49) | 0.93     | NA | TRUE | NA | NA |
| SNO  | COPD   | Weighted median | 35 | 2.66 | (1.55-4.56) | 3.90E-04 | NA | TRUE | NA | NA |
| SNO  | IPF    | Weighted median | 35 | 0.38 | (0.09-1.70) | 0.21     | NA | TRUE | NA | NA |
| SNO  | LC     | Weighted median | 29 | 2.23 | (0.79-6.28) | 0.13     | NA | TRUE | NA | NA |

Abbreviations: nIV, the number of instrumental SNPs selected for Mendelian randomization analysis; R<sup>2</sup>, proportion of variance of phenotype explained by variants; OR, odds ratio; IVW(MRE), Multiplicative Random Effects Inverse variance weighted; AST, Asthma; COPD, Chronic obstructive pulmonary disease; IPF, Idiopathic Pulmonary Fibrosis; LC, Lung Cancer; SNO, Snoring.

<sup>a</sup> P.adjusted represents the FDR-corrected P.value.
