# Supplementary material for: Shared genetic aetiology of respiratory diseases: a genome-wide multitraits association analysis
Source: PubMed Central journal article supplement — BMJ Open Respir Res. 2024 Jun 4;11(1):e002148. doi: 10.1136/bmjresp-2023-002148 (PMC11163672; doi:10.1136/bmjresp-2023-002148), 2024-06-04
Supplement: bmjresp-2023-002148supp020.pdf [file bmjresp-2023-002148supp020.pdf]

**eTable 19.** Tests of horizontal Pleiotropy and heterogeneity of IVs

| Exposure | Outcome | Method   | Q        | Q_df | P.Q      | MR egger intercept | SE          | P.intercept |
|----------|---------|----------|----------|------|----------|--------------------|-------------|-------------|
| Asthma   | COPD    | IVW(MRE) | 212.5927 | 118  | 2.17E-07 | NA                 | NA          | NA          |
| Asthma   | COPD    | MR Egger | 223.2974 | 119  | 2.34E-08 | 0.005954252        | 0.002442715 | 0.016278754 |
| Asthma   | IPF     | IVW(MRE) | 144.0864 | 121  | 0.0748   | NA                 | NA          | NA          |
| Asthma   | IPF     | MR Egger | 144.6367 | 122  | 0.0792   | 0.003743058        | 0.005505858 | 0.497909505 |
| Asthma   | LC      | IVW(MRE) | 183.8482 | 103  | 1.70E-06 | NA                 | NA          | NA          |
| Asthma   | LC      | MR Egger | 197.6448 | 104  | 8.62E-08 | -0.012261959       | 0.004410476 | 0.006459982 |
| Asthma   | SNO     | IVW(MRE) | 223.4304 | 118  | 1.63E-08 | NA                 | NA          | NA          |
| Asthma   | SNO     | MR Egger | 223.8871 | 119  | 2.03E-08 | -0.000187019       | 0.000380797 | 0.624249704 |
| COPD     | Asthma  | IVW(MRE) | 23.1014  | 17   | 0.1460   | NA                 | NA          | NA          |
| COPD     | Asthma  | MR Egger | 27.1190  | 18   | 0.0768   | 0.006655385        | 0.003870658 | 0.103686119 |
| COPD     | IPF     | IVW(MRE) | 38.8561  | 25   | 0.0381   | NA                 | NA          | NA          |
| COPD     | IPF     | MR Egger | 44.1662  | 26   | 0.0145   | -0.026505802       | 0.014340043 | 0.076410719 |
| COPD     | LC      | IVW(MRE) | 32.1752  | 18   | 0.0210   | NA                 | NA          | NA          |
| COPD     | LC      | MR Egger | 32.2510  | 19   | 0.0293   | 0.00214387         | 0.010405714 | 0.839081281 |
| COPD     | SNO     | IVW(MRE) | 37.7594  | 24   | 0.0367   | NA                 | NA          | NA          |
| COPD     | SNO     | MR Egger | 38.4393  | 25   | 0.0419   | 0.000511456        | 0.000777986 | 0.517173097 |
| IPF      | Asthma  | IVW(MRE) | 15.7944  | 8    | 0.0454   | NA                 | NA          | NA          |
| IPF      | Asthma  | MR Egger | 16.8857  | 9    | 0.0505   | -0.003068554       | 0.004127462 | 0.478473051 |
| IPF      | COPD    | IVW(MRE) | 20.6878  | 8    | 0.0080   | NA                 | NA          | NA          |
| IPF      | COPD    | MR Egger | 22.8183  | 9    | 0.0066   | -0.006066768       | 0.006683946 | 0.390578049 |
| IPF      | LC      | IVW(MRE) | 8.6117   | 5    | 0.1256   | NA                 | NA          | NA          |
| IPF      | LC      | MR Egger | 12.6405  | 6    | 0.0491   | 0.017385947        | 0.011367728 | 0.186711348 |

|     |        |          |         |    |          |              |             |             |
|-----|--------|----------|---------|----|----------|--------------|-------------|-------------|
| IPF | SNO    | IVW(MRE) | 16.8006 | 7  | 0.0187   | NA           | NA          | NA          |
| IPF | SNO    | MR Egger | 17.2354 | 8  | 0.0277   | -0.000428761 | 0.001007413 | 0.68317449  |
| LC  | Asthma | IVW(MRE) | 54.7909 | 12 | 1.97E-07 | NA           | NA          | NA          |
| LC  | Asthma | MR Egger | 55.5251 | 13 | 3.27E-07 | -0.002730905 | 0.00681035  | 0.695473301 |
| LC  | COPD   | IVW(MRE) | 61.7510 | 12 | 1.08E-08 | NA           | NA          | NA          |
| LC  | COPD   | MR Egger | 62.5443 | 13 | 1.83E-08 | 0.005229011  | 0.013317546 | 0.701470087 |
| LC  | IPF    | IVW(MRE) | 34.0145 | 12 | 0.0007   | NA           | NA          | NA          |
| LC  | IPF    | MR Egger | 34.7098 | 13 | 0.0009   | -0.010863751 | 0.021933902 | 0.629337059 |
| LC  | SNO    | IVW(MRE) | 15.8707 | 13 | 0.2562   | NA           | NA          | NA          |
| LC  | SNO    | MR Egger | 16.6202 | 14 | 0.2770   | 0.00060185   | 0.000768073 | 0.447325518 |
| SNO | Asthma | IVW(MRE) | 66.6340 | 31 | 0.0002   | NA           | NA          | NA          |
| SNO | Asthma | MR Egger | 70.3195 | 32 | 0.0001   | -0.009142047 | 0.0069817   | 0.200011231 |
| SNO | COPD   | IVW(MRE) | 77.2614 | 33 | 2.07E-05 | NA           | NA          | NA          |
| SNO | COPD   | MR Egger | 80.1033 | 34 | 1.37E-05 | -0.011240951 | 0.01020292  | 0.278546301 |
| SNO | IPF    | IVW(MRE) | 62.4088 | 33 | 0.0015   | NA           | NA          | NA          |
| SNO | IPF    | MR Egger | 62.4595 | 34 | 0.0021   | 0.004232841  | 0.025847276 | 0.870916179 |
| SNO | LC     | IVW(MRE) | 53.6829 | 27 | 0.0017   | NA           | NA          | NA          |
| SNO | LC     | MR Egger | 60.8256 | 28 | 0.0003   | 0.033486238  | 0.017667254 | 0.068794565 |

Abbreviations: Q, Cochran's Q statistic; SE, standard error; IVW(MRE), Multiplicative Random Effects Inverse variance weighted; AST, Asthma; COPD, Chronic obstructive pulmonary disease; IPF, Idiopathic Pulmonary Fibrosis; LC, Lung Cancer; SNO, Snoring.
